# Supplementary material for: Global, regional, and national incidence, prevalence, and years lived with disability for 328 diseases and injuries for 195 countries, 1990–2016: a systematic analysis for the Global Burden of Disease Study 2016
Source: PubMed Central journal article supplement (PMC5605509; doi:10.1016/s0140-6736(17)32154-2), 2017-09-16
Supplement: mmc2.pdf [file mmc2.pdf]

# THE LANCET

## Supplementary appendix 2

This appendix formed part of the original submission and has been peer reviewed. We post it as supplied by the authors.

Supplement to: GBD 2016 Disease and Injury Incidence and Prevalence Collaborators. Global, regional, and national incidence, prevalence, and years lived with disability for 328 diseases and injuries for 195 countries, 1990–2016: a systematic analysis for the Global Burden of Disease Study 2016. *Lancet* 2017; **390**: 1211–59.

## Supplementary Results to “Global, regional, and national incidence, prevalence, and years lived with disability for 328 diseases and injuries for 195 countries, 1990–2016: a systematic analysis for the Global Burden of Disease Study 2016”

This component of the appendix provides supplementary results for incidence, prevalence, and years of life lived with disability (YLDs).



## Supplementary Results: Tables & Figures

SR Figure 1: All-cause years lived with disability (YLD) rate per capita by location and sex, 1990, 1995, 2000, 2005, 2010 and 2016, pg. 1

SR Figure 2: Co-evolution of age-standardised YLD rates per 100,000 for top-ten level 4 causes and the socio-demographic index (SDI), by GBD region, pg. 4

Figure 3: Leading 30 Level 4 causes of YLDs, by SDI quintile for 1990, 2006, and 2016, with mean percentage change in number of YLDs, and all-age and age-standardised YLD rates, pg. 14

SR Table 1: Global prevalence and incidence for 2016, percentage change in prevalence and incidence counts and age-standardized prevalence and incidence rates between 2006 and 2016 for all causes and nine impairments, pg. 19

SR Table 2: Global sequela-level prevalence, incidence and YLDs, all ages, 2006, 2016, pg. 25

SR Table 3: Global prevalence and years lived with disability (YLDs) for 2016, percentage change of YLD counts and percentage change of age-standardised YLD rates between 2006 and 2016 of anemia by cause, all ages and both sexes combined, pg. 64

SR Table 4: Global prevalence and years lived with disability (YLDs) for 2016, percentage change of YLD counts and percentage change of age-standardised YLD rates between 2006 and 2016 of developmental intellectual disability by cause, all ages and both sexes combined, pg. 65

SR Table 5: Global prevalence and years lived with disability (YLDs) for 2016, percentage change of YLD counts and percentage change of age-standardised YLD rates between 2006 and 2016 of epilepsy by cause, all ages and both sexes combined, pg. 66

SR Table 6: Global prevalence and years lived with disability (YLDs) for 2016, percent change in counts, and percent change in age-standardised rates between 2005 and 2016 of Guillain-Barré syndrome by cause, all ages and both sexes, combined, pg. 67

SR Table 7: Global prevalence and years lived with disability (YLDs) for 2016, percentage change of YLD counts and percentage change of age-standardised YLD rates between 2006 and 2016 of hearing loss by cause, all ages and both sexes combined, pg. 68

SR Table 8: Global prevalence and years lived with disability (YLDs) for 2016, percentage change of YLD counts and percentage change of age-standardised YLD rates between 2006 and 2016 of heart failure by cause, all ages and both sexes combined, pg. 69

SR Table 9: Global prevalence and years lived with disability (YLDs) for 2016, percentage change of YLD counts and percentage change of age-standardised YLD rates between 2006 and 2016 of infertility by cause, all ages and both sexes combined, pg. 70

SR Table 10: Global prevalence and years lived with disability (YLDs) for 2016, percentage change of YLD counts and percentage change of age-standardised YLD rates between 2006 and 2016 of pelvic inflammatory disease by cause, all ages and both sexes combined, pg. 71

SR Table 11: Global prevalence and years lived with disability (YLDs) for 2016, percentage change of YLD counts and percentage change of age-standardised YLD rates between 2006 and 2016 of vision loss by cause, all ages and both sexes combined, pg. 72

SR Table 12: Global prevalence, incidence, and YLDs for 2016, percentage change of YLD counts and percentage change of YLD rates between 2006 and 2016 by cause, for each age group, separately, pg. 73

SR Table 13a-i: Global prevalence and YLDs for 2016, percentage change of YLD counts and percentage change of YLD rates between 2006 and 2016 by impairment and for each age group, separately, pg. 234

SR Table 14: Prevalence, incidence and YLDs for 2016, percentage change of YLD counts and percentage change of age-standardised YLD rates between 2006 and 2016 by cause and impairments, for all ages, for each location, separately, pg. 435

SR Table 15: Comparison of GBD 2016 and GLOBOCAN estimated cancer incidence by cause and sex, 2012, pg. 1800

SR Figure 1: Age-standardised all-cause years lived with disability (YLD) rate per capita by location and sex, 1990, 1995, 2000, 2005, 2010, and 2016

|                                                         | Males |       |       |       |       |       | Females |       |       |       |       |       |
|---------------------------------------------------------|-------|-------|-------|-------|-------|-------|---------|-------|-------|-------|-------|-------|
|                                                         | 1990  | 1995  | 2000  | 2005  | 2010  | 2016  | 1990    | 1995  | 2000  | 2005  | 2010  | 2016  |
| <b>Global</b>                                           | 10.8% | 10.8% | 10.8% | 10.7% | 10.6% | 10.5% | 12.0%   | 11.9% | 11.8% | 11.7% | 11.7% | 11.6% |
| High SDI                                                | 10.4% | 10.4% | 10.3% | 10.3% | 10.3% | 10.3% | 11.6%   | 11.5% | 11.5% | 11.5% | 11.5% | 11.5% |
| High-middle SDI                                         | 10.7% | 10.5% | 10.4% | 10.3% | 10.2% | 10.1% | 11.6%   | 11.4% | 11.3% | 11.2% | 11.2% | 11.1% |
| Middle SDI                                              | 9.9%  | 9.8%  | 9.8%  | 9.7%  | 9.7%  | 9.7%  | 11.1%   | 11.0% | 10.9% | 10.9% | 10.9% | 10.8% |
| Low-middle SDI                                          | 12.0% | 12.0% | 12.0% | 11.9% | 11.6% | 11.5% | 13.4%   | 13.4% | 13.2% | 13.1% | 12.9% | 12.8% |
| Low SDI                                                 | 12.9% | 13.0% | 12.9% | 12.6% | 12.3% | 11.9% | 13.7%   | 13.7% | 13.6% | 13.3% | 13.0% | 12.7% |
| <b>High-income</b>                                      | 10.3% | 10.3% | 10.3% | 10.2% | 10.2% | 10.2% | 11.6%   | 11.6% | 11.5% | 11.5% | 11.5% | 11.5% |
| <b>High-income North America</b>                        | 10.9% | 11.0% | 11.0% | 10.9% | 10.9% | 10.9% | 12.2%   | 12.2% | 12.2% | 12.2% | 12.3% | 12.3% |
| Canada                                                  | 10.0% | 10.0% | 10.0% | 9.8%  | 9.9%  | 10.0% | 11.3%   | 11.3% | 11.3% | 11.2% | 11.3% | 11.2% |
| Greenland                                               | 11.2% | 11.1% | 11.0% | 10.9% | 10.9% | 10.8% | 12.7%   | 12.7% | 12.7% | 12.7% | 12.6% | 12.4% |
| USA                                                     | 11.0% | 11.1% | 11.1% | 11.0% | 11.1% | 11.0% | 12.3%   | 12.3% | 12.3% | 12.4% | 12.4% | 12.4% |
| <b>Australasia</b>                                      | 10.5% | 10.7% | 10.4% | 10.3% | 10.3% | 10.3% | 11.7%   | 11.7% | 11.6% | 11.6% | 11.6% | 11.5% |
| Australia                                               | 10.6% | 10.7% | 10.4% | 10.3% | 10.4% | 10.3% | 11.7%   | 11.7% | 11.6% | 11.6% | 11.7% | 11.5% |
| New Zealand                                             | 10.4% | 10.3% | 10.3% | 10.2% | 10.2% | 10.2% | 11.7%   | 11.6% | 11.7% | 11.6% | 11.5% | 11.5% |
| <b>High-income Asia Pacific</b>                         | 9.6%  | 9.6%  | 9.5%  | 9.5%  | 9.5%  | 9.5%  | 10.6%   | 10.6% | 10.5% | 10.5% | 10.6% | 10.6% |
| Brunei                                                  | 10.3% | 10.2% | 10.0% | 10.0% | 9.9%  | 9.9%  | 11.2%   | 11.0% | 10.9% | 10.8% | 10.7% | 10.6% |
| Japan                                                   | 9.3%  | 9.4%  | 9.4%  | 9.4%  | 9.4%  | 9.5%  | 10.5%   | 10.4% | 10.4% | 10.4% | 10.5% | 10.6% |
| Singapore                                               | 9.4%  | 9.2%  | 9.1%  | 8.9%  | 8.9%  | 8.9%  | 10.5%   | 10.3% | 10.2% | 9.9%  | 9.9%  | 9.9%  |
| South Korea                                             | 10.3% | 10.1% | 9.9%  | 9.9%  | 9.9%  | 9.7%  | 11.1%   | 10.9% | 10.8% | 10.8% | 10.8% | 10.7% |
| <b>Western Europe</b>                                   | 10.2% | 10.2% | 10.0% | 10.0% | 9.9%  | 9.9%  | 11.6%   | 11.6% | 11.4% | 11.4% | 11.4% | 11.4% |
| Andorra                                                 | 10.5% | 10.4% | 10.3% | 10.3% | 10.3% | 10.3% | 12.0%   | 11.9% | 11.9% | 11.8% | 11.9% | 11.8% |
| Austria                                                 | 10.1% | 10.2% | 10.1% | 10.0% | 10.0% | 9.9%  | 11.4%   | 11.4% | 11.2% | 11.1% | 11.2% | 11.2% |
| Belgium                                                 | 10.2% | 10.2% | 10.3% | 10.3% | 10.2% | 10.1% | 11.5%   | 11.6% | 11.6% | 11.7% | 11.6% | 11.5% |
| Cyprus                                                  | 9.9%  | 9.9%  | 9.9%  | 9.8%  | 9.8%  | 9.7%  | 11.6%   | 11.5% | 11.4% | 11.3% | 11.3% | 11.2% |
| Denmark                                                 | 10.3% | 10.5% | 10.3% | 10.4% | 10.5% | 10.4% | 11.8%   | 11.9% | 11.7% | 11.8% | 11.8% | 11.9% |
| Finland                                                 | 11.0% | 10.9% | 10.9% | 10.9% | 10.7% | 10.5% | 12.1%   | 12.1% | 11.9% | 11.9% | 11.7% | 11.7% |
| France                                                  | 9.8%  | 9.7%  | 9.6%  | 9.5%  | 9.7%  | 9.5%  | 11.5%   | 11.3% | 11.2% | 11.1% | 11.2% | 11.2% |
| Germany                                                 | 10.4% | 10.4% | 10.3% | 10.2% | 10.2% | 10.1% | 11.8%   | 11.8% | 11.6% | 11.6% | 11.5% | 11.5% |
| Greece                                                  | 9.8%  | 9.7%  | 9.6%  | 9.6%  | 9.7%  | 9.7%  | 11.4%   | 11.3% | 11.3% | 11.3% | 11.3% | 11.2% |
| Iceland                                                 | 10.1% | 10.0% | 9.9%  | 9.9%  | 9.9%  | 9.8%  | 11.7%   | 11.7% | 11.6% | 11.5% | 11.5% | 11.4% |
| Ireland                                                 | 10.3% | 10.3% | 10.2% | 10.2% | 10.2% | 10.2% | 11.7%   | 11.7% | 11.6% | 11.6% | 11.6% | 11.5% |
| Israel                                                  | 9.9%  | 9.9%  | 9.9%  | 9.8%  | 9.8%  | 9.8%  | 11.3%   | 11.3% | 11.2% | 11.2% | 11.2% | 11.1% |
| Italy                                                   | 10.0% | 10.0% | 9.8%  | 9.7%  | 9.6%  | 9.6%  | 11.5%   | 11.3% | 11.1% | 11.1% | 11.1% | 11.1% |
| Luxembourg                                              | 10.8% | 10.8% | 10.7% | 10.6% | 10.4% | 10.2% | 12.1%   | 12.1% | 12.0% | 11.9% | 11.8% | 11.7% |
| Malta                                                   | 10.0% | 9.9%  | 9.9%  | 9.9%  | 9.9%  | 9.7%  | 11.5%   | 11.4% | 11.3% | 11.3% | 11.3% | 11.3% |
| Netherlands                                             | 10.2% | 10.3% | 10.3% | 10.2% | 10.1% | 10.0% | 11.9%   | 12.0% | 12.0% | 11.9% | 11.8% | 11.7% |
| Norway                                                  | 10.2% | 10.2% | 10.2% | 10.1% | 10.0% | 9.9%  | 11.2%   | 11.3% | 11.1% | 11.0% | 11.0% | 10.9% |
| Portugal                                                | 10.2% | 10.2% | 10.0% | 9.9%  | 9.9%  | 9.8%  | 11.7%   | 11.6% | 11.5% | 11.4% | 11.5% | 11.4% |
| Spain                                                   | 9.6%  | 9.6%  | 9.4%  | 9.4%  | 9.3%  | 9.2%  | 11.1%   | 11.0% | 10.8% | 10.7% | 10.8% | 10.8% |
| Sweden                                                  | 10.2% | 10.3% | 10.1% | 10.1% | 10.2% | 10.2% | 11.9%   | 12.0% | 11.9% | 11.9% | 11.8% | 11.8% |
| Switzerland                                             | 10.5% | 10.6% | 10.7% | 10.5% | 10.4% | 10.0% | 12.0%   | 12.2% | 12.4% | 12.3% | 12.2% | 11.7% |
| UK                                                      | 10.6% | 10.6% | 10.5% | 10.4% | 10.4% | 10.3% | 12.0%   | 11.9% | 11.8% | 11.8% | 11.7% | 11.7% |
| England                                                 | 10.6% | 10.6% | 10.5% | 10.5% | 10.4% | 10.3% | 12.0%   | 12.0% | 11.8% | 11.8% | 11.8% | 11.8% |
| Northern Ireland                                        | 10.2% | 10.2% | 10.2% | 10.2% | 10.2% | 10.1% | 11.7%   | 11.7% | 11.7% | 11.6% | 11.6% | 11.5% |
| Scotland                                                | 10.6% | 10.6% | 10.5% | 10.4% | 10.5% | 10.4% | 11.8%   | 11.8% | 11.6% | 11.6% | 11.6% | 11.7% |
| Wales                                                   | 10.3% | 10.3% | 10.2% | 10.2% | 10.2% | 10.2% | 11.7%   | 11.6% | 11.5% | 11.4% | 11.4% | 11.5% |
| <b>Southern Latin America</b>                           | 10.2% | 10.2% | 10.2% | 10.1% | 10.1% | 10.1% | 11.3%   | 11.2% | 11.2% | 11.2% | 11.2% | 11.1% |
| Argentina                                               | 10.2% | 10.2% | 10.2% | 10.1% | 10.1% | 10.0% | 11.2%   | 11.1% | 11.1% | 11.1% | 11.1% | 11.1% |
| Chile                                                   | 10.4% | 10.3% | 10.4% | 10.3% | 10.3% | 10.2% | 11.7%   | 11.5% | 11.7% | 11.5% | 11.5% | 11.3% |
| Uruguay                                                 | 9.7%  | 9.7%  | 9.6%  | 9.6%  | 9.7%  | 9.7%  | 10.8%   | 10.8% | 10.7% | 10.7% | 10.8% | 10.8% |
| <b>Central Europe, Eastern Europe, and Central Asia</b> | 11.4% | 11.4% | 11.3% | 11.2% | 11.1% | 11.0% | 11.6%   | 11.5% | 11.4% | 11.3% | 11.3% | 11.2% |
| <b>Eastern Europe</b>                                   | 11.6% | 11.6% | 11.7% | 11.4% | 11.3% | 11.1% | 11.7%   | 11.7% | 11.6% | 11.5% | 11.4% | 11.4% |
| Belarus                                                 | 11.1% | 11.1% | 11.1% | 11.1% | 11.2% | 11.0% | 11.6%   | 11.5% | 11.5% | 11.4% | 11.5% | 11.4% |
| Estonia                                                 | 11.6% | 11.5% | 11.3% | 11.1% | 11.1% | 10.9% | 12.1%   | 11.9% | 11.8% | 11.6% | 11.5% | 11.4% |
| Latvia                                                  | 11.8% | 11.5% | 11.4% | 11.1% | 11.2% | 10.9% | 12.0%   | 11.9% | 11.7% | 11.5% | 11.5% | 11.4% |
| Lithuania                                               | 11.5% | 11.3% | 11.2% | 11.1% | 11.2% | 11.0% | 11.8%   | 11.7% | 11.6% | 11.5% | 11.5% | 11.3% |
| Moldova                                                 | 11.3% | 11.1% | 10.8% | 10.7% | 10.7% | 10.6% | 12.1%   | 11.9% | 11.7% | 11.5% | 11.5% | 11.3% |
| Russia                                                  | 11.7% | 11.8% | 11.9% | 11.6% | 11.5% | 11.2% | 11.7%   | 11.7% | 11.7% | 11.5% | 11.4% | 11.4% |
| Ukraine                                                 | 11.3% | 11.2% | 11.2% | 11.1% | 11.0% | 10.9% | 11.7%   | 11.6% | 11.5% | 11.4% | 11.4% | 11.3% |
| <b>Central Europe</b>                                   | 11.3% | 11.1% | 11.0% | 10.9% | 11.0% | 10.9% | 11.3%   | 11.2% | 11.0% | 10.9% | 10.9% | 10.8% |
| Albania                                                 | 10.5% | 10.4% | 10.4% | 10.3% | 10.2% | 10.2% | 10.8%   | 10.7% | 10.7% | 10.5% | 10.5% | 10.5% |
| Bosnia and Herzegovina                                  | 10.9% | 11.0% | 10.9% | 10.9% | 11.0% | 11.0% | 11.2%   | 11.1% | 10.8% | 10.8% | 10.9% | 10.9% |
| Bulgaria                                                | 11.2% | 11.0% | 10.8% | 10.7% | 10.7% | 10.7% | 11.0%   | 10.9% | 10.8% | 10.7% | 10.7% | 10.7% |
| Croatia                                                 | 11.0% | 10.8% | 10.7% | 10.7% | 10.7% | 10.6% | 10.9%   | 10.7% | 10.6% | 10.6% | 10.6% | 10.5% |
| Czech Republic                                          | 11.4% | 11.2% | 11.1% | 11.2% | 11.3% | 11.2% | 11.6%   | 11.3% | 11.1% | 11.2% | 11.3% | 11.2% |
| Hungary                                                 | 11.6% | 11.4% | 11.2% | 11.0% | 11.0% | 10.9% | 11.7%   | 11.5% | 11.2% | 11.1% | 11.1% | 11.1% |
| Macedonia                                               | 10.6% | 10.5% | 10.4% | 10.4% | 10.5% | 10.5% | 10.9%   | 10.8% | 10.7% | 10.7% | 10.7% | 10.7% |
| Montenegro                                              | 10.8% | 10.7% | 10.7% | 10.6% | 10.6% | 10.6% | 10.8%   | 10.7% | 10.7% | 10.7% | 10.7% | 10.7% |
| Poland                                                  | 11.3% | 11.1% | 11.0% | 11.0% | 11.0% | 10.9% | 11.2%   | 11.0% | 10.8% | 10.8% | 10.8% | 10.7% |
| Romania                                                 | 11.5% | 11.3% | 11.1% | 11.0% | 10.9% | 10.9% | 11.4%   | 11.4% | 11.2% | 11.1% | 11.1% | 11.0% |
| Serbia                                                  | 10.9% | 10.8% | 10.8% | 10.8% | 10.9% | 10.8% | 11.1%   | 11.1% | 11.1% | 11.0% | 11.0% | 10.9% |
| Slovakia                                                | 11.4% | 11.2% | 11.2% | 11.1% | 11.1% | 11.0% | 11.1%   | 11.0% | 10.9% | 10.8% | 10.9% | 10.8% |
| Slovenia                                                | 11.5% | 11.3% | 11.3% | 11.4% | 11.4% | 11.1% | 11.5%   | 11.3% | 11.2% | 11.3% | 11.2% | 11.2% |
| <b>Central Asia</b>                                     | 10.8% | 10.7% | 10.6% | 10.5% | 10.5% | 10.5% | 11.4%   | 11.3% | 11.2% | 11.2% | 11.2% | 11.1% |
| Armenia                                                 | 10.7% | 10.5% | 10.4% | 10.3% | 10.3% | 10.2% | 10.9%   | 10.7% | 10.6% | 10.7% | 10.6% | 10.5% |
| Azerbaijan                                              | 10.3% | 10.3% | 10.1% | 10.1% | 10.1% | 10.1% | 10.9%   | 10.8% | 10.7% | 10.7% | 10.7% | 10.6% |
| Georgia                                                 | 10.3% | 10.1% | 9.9%  | 9.9%  | 10.1% | 10.2% | 10.5%   | 10.3% | 10.2% | 10.3% | 10.4% | 10.4% |
| Kazakhstan                                              | 11.2% | 11.3% | 11.2% | 11.2% | 11.2% | 11.1% | 11.5%   | 11.5% | 11.4% | 11.4% | 11.4% | 11.3% |

|                                               |       |       |       |       |       |       |       |       |       |       |       |       |
|-----------------------------------------------|-------|-------|-------|-------|-------|-------|-------|-------|-------|-------|-------|-------|
| Kyrgyzstan                                    | 11.2% | 11.1% | 11.0% | 10.7% | 10.6% | 10.6% | 11.6% | 11.5% | 11.4% | 11.3% | 11.3% | 11.2% |
| Mongolia                                      | 10.7% | 10.7% | 10.8% | 10.9% | 11.1% | 11.1% | 11.3% | 11.2% | 11.1% | 11.1% | 11.2% | 11.1% |
| Tajikistan                                    | 10.6% | 10.6% | 10.5% | 10.4% | 10.3% | 10.2% | 11.2% | 11.1% | 11.1% | 11.0% | 10.9% | 10.7% |
| Turkmenistan                                  | 10.3% | 10.2% | 10.2% | 10.1% | 10.1% | 9.9%  | 11.1% | 10.9% | 10.7% | 10.6% | 10.6% | 10.5% |
| Uzbekistan                                    | 10.7% | 10.6% | 10.5% | 10.4% | 10.4% | 10.3% | 11.9% | 11.8% | 11.6% | 11.5% | 11.5% | 11.3% |
| <b>Latin America and Caribbean</b>            | 10.3% | 10.2% | 10.2% | 10.1% | 10.0% | 10.0% | 11.2% | 11.1% | 11.1% | 11.0% | 10.9% | 10.8% |
| <b>Central Latin America</b>                  | 9.8%  | 9.7%  | 9.6%  | 9.5%  | 9.5%  | 9.5%  | 10.5% | 10.4% | 10.3% | 10.2% | 10.2% | 10.2% |
| Colombia                                      | 9.5%  | 9.4%  | 9.4%  | 9.3%  | 9.2%  | 9.1%  | 10.3% | 10.2% | 10.1% | 10.1% | 10.0% | 9.8%  |
| Costa Rica                                    | 9.2%  | 9.2%  | 9.2%  | 9.1%  | 9.1%  | 9.1%  | 10.1% | 10.1% | 10.0% | 10.0% | 10.0% | 9.9%  |
| El Salvador                                   | 10.1% | 9.9%  | 9.8%  | 9.8%  | 9.7%  | 9.6%  | 10.5% | 10.3% | 10.2% | 10.2% | 10.2% | 10.1% |
| Guatemala                                     | 10.8% | 10.7% | 10.7% | 10.5% | 10.3% | 10.1% | 11.4% | 11.2% | 11.2% | 11.1% | 10.9% | 10.7% |
| Honduras                                      | 9.8%  | 9.8%  | 9.7%  | 9.6%  | 9.6%  | 9.6%  | 10.9% | 10.8% | 10.8% | 10.7% | 10.7% | 10.6% |
| Mexico                                        | 10.0% | 9.8%  | 9.7%  | 9.6%  | 9.6%  | 9.7%  | 10.6% | 10.5% | 10.3% | 10.2% | 10.3% | 10.3% |
| Nicaragua                                     | 9.6%  | 9.4%  | 9.4%  | 9.3%  | 9.3%  | 9.2%  | 10.3% | 10.2% | 10.1% | 10.0% | 10.1% | 10.0% |
| Panama                                        | 9.3%  | 9.2%  | 9.2%  | 9.2%  | 9.2%  | 9.3%  | 10.2% | 10.0% | 10.0% | 9.9%  | 10.0% | 10.0% |
| Venezuela                                     | 9.5%  | 9.4%  | 9.4%  | 9.4%  | 9.4%  | 9.5%  | 10.3% | 10.2% | 10.1% | 10.0% | 10.0% | 10.0% |
| <b>Andean Latin America</b>                   | 10.4% | 10.2% | 10.1% | 10.0% | 9.9%  | 9.8%  | 11.2% | 11.0% | 10.8% | 10.7% | 10.6% | 10.6% |
| Bolivia                                       | 11.3% | 11.1% | 10.8% | 10.7% | 10.6% | 10.5% | 12.1% | 11.9% | 11.6% | 11.5% | 11.4% | 11.3% |
| Ecuador                                       | 10.1% | 10.1% | 10.0% | 9.9%  | 9.8%  | 9.7%  | 10.8% | 10.7% | 10.5% | 10.4% | 10.4% | 10.4% |
| Peru                                          | 10.2% | 10.0% | 9.9%  | 9.8%  | 9.7%  | 9.7%  | 11.0% | 10.8% | 10.7% | 10.6% | 10.5% | 10.5% |
| <b>Caribbean</b>                              | 10.4% | 10.5% | 10.5% | 10.5% | 10.6% | 10.3% | 11.6% | 11.5% | 11.4% | 11.4% | 11.5% | 11.3% |
| Antigua and Barbuda                           | 10.5% | 10.5% | 10.5% | 10.5% | 10.4% | 10.4% | 11.0% | 11.1% | 11.0% | 11.0% | 11.0% | 11.0% |
| The Bahamas                                   | 10.3% | 10.3% | 10.2% | 10.1% | 10.0% | 10.1% | 11.2% | 11.1% | 11.1% | 11.1% | 11.0% | 11.1% |
| Barbados                                      | 10.1% | 10.2% | 10.2% | 10.1% | 10.1% | 10.1% | 11.1% | 11.1% | 11.1% | 11.1% | 11.2% | 11.2% |
| Belize                                        | 10.2% | 10.3% | 10.5% | 10.5% | 10.5% | 10.4% | 11.4% | 11.3% | 11.4% | 11.4% | 11.5% | 11.4% |
| Bermuda                                       | 10.4% | 10.3% | 10.1% | 10.0% | 9.9%  | 9.9%  | 11.1% | 11.0% | 10.9% | 10.8% | 10.7% | 10.6% |
| Cuba                                          | 9.9%  | 9.8%  | 9.7%  | 9.7%  | 9.7%  | 9.8%  | 11.3% | 11.1% | 10.9% | 10.7% | 10.7% | 10.7% |
| Dominica                                      | 10.3% | 10.3% | 10.3% | 10.3% | 10.3% | 10.4% | 10.9% | 10.9% | 10.8% | 10.8% | 10.9% | 10.9% |
| Dominican Republic                            | 9.8%  | 9.8%  | 10.0% | 10.0% | 9.9%  | 9.8%  | 10.8% | 10.9% | 10.8% | 10.8% | 10.9% | 10.7% |
| Grenada                                       | 11.0% | 10.6% | 10.6% | 10.6% | 10.7% | 10.7% | 12.0% | 11.6% | 11.5% | 11.5% | 11.5% | 11.5% |
| Guyana                                        | 11.3% | 11.4% | 11.5% | 11.5% | 11.4% | 11.2% | 12.1% | 12.2% | 12.3% | 12.3% | 12.3% | 12.1% |
| Haiti                                         | 12.1% | 12.1% | 12.1% | 11.9% | 12.5% | 11.4% | 13.1% | 13.1% | 13.1% | 13.0% | 13.2% | 12.5% |
| Jamaica                                       | 10.2% | 10.3% | 10.3% | 10.3% | 10.3% | 10.4% | 11.5% | 11.5% | 11.5% | 11.5% | 11.5% | 11.5% |
| Puerto Rico                                   | 10.3% | 10.6% | 10.7% | 10.7% | 10.5% | 10.4% | 10.8% | 10.8% | 10.9% | 10.9% | 10.9% | 10.8% |
| Saint Lucia                                   | 11.3% | 10.7% | 10.6% | 10.5% | 10.4% | 10.4% | 12.2% | 11.6% | 11.3% | 11.2% | 11.3% | 11.2% |
| Saint Vincent and the Grenadines              | 10.6% | 10.6% | 10.7% | 10.7% | 10.8% | 10.8% | 11.5% | 11.5% | 11.6% | 11.5% | 11.5% | 11.4% |
| Suriname                                      | 10.5% | 10.6% | 10.6% | 10.7% | 10.8% | 10.8% | 11.6% | 11.7% | 11.7% | 11.8% | 11.8% | 11.7% |
| Trinidad and Tobago                           | 10.7% | 10.8% | 10.8% | 11.0% | 11.0% | 11.0% | 11.7% | 11.7% | 11.7% | 11.6% | 11.6% | 11.5% |
| Virgin Islands                                | 10.1% | 10.1% | 10.1% | 10.1% | 10.2% | 10.2% | 10.7% | 10.7% | 10.7% | 10.7% | 10.8% | 10.8% |
| <b>Tropical Latin America</b>                 | 10.7% | 10.6% | 10.7% | 10.7% | 10.6% | 10.5% | 12.0% | 11.9% | 12.0% | 11.9% | 11.6% | 11.5% |
| Brazil                                        | 10.7% | 10.6% | 10.7% | 10.7% | 10.6% | 10.5% | 12.0% | 11.9% | 12.0% | 11.9% | 11.6% | 11.5% |
| Paraguay                                      | 10.1% | 10.1% | 10.3% | 10.4% | 10.3% | 10.4% | 11.6% | 11.6% | 11.5% | 11.6% | 11.7% | 11.7% |
| <b>Southeast Asia, East Asia, and Oceania</b> | 9.4%  | 9.2%  | 9.2%  | 9.1%  | 9.1%  | 9.1%  | 10.7% | 10.5% | 10.4% | 10.3% | 10.3% | 10.2% |
| <b>East Asia</b>                              | 8.9%  | 8.8%  | 8.7%  | 8.6%  | 8.6%  | 8.6%  | 10.4% | 10.2% | 10.0% | 9.9%  | 10.0% | 9.9%  |
| China                                         | 8.9%  | 8.8%  | 8.7%  | 8.6%  | 8.6%  | 8.6%  | 10.4% | 10.2% | 10.0% | 9.9%  | 9.9%  | 9.8%  |
| North Korea                                   | 8.7%  | 9.0%  | 8.9%  | 8.9%  | 8.9%  | 9.0%  | 10.5% | 11.2% | 11.5% | 11.1% | 10.9% | 10.5% |
| Taiwan (Province of China)                    | 9.3%  | 9.0%  | 8.9%  | 8.8%  | 8.8%  | 8.9%  | 10.8% | 10.5% | 10.4% | 10.3% | 10.3% | 10.2% |
| <b>Southeast Asia</b>                         | 10.6% | 10.5% | 10.5% | 10.3% | 10.2% | 10.1% | 11.3% | 11.2% | 11.1% | 11.0% | 10.9% | 10.8% |
| Cambodia                                      | 12.2% | 12.1% | 12.2% | 11.9% | 11.4% | 11.0% | 13.1% | 13.0% | 13.0% | 12.5% | 12.0% | 11.6% |
| Indonesia                                     | 10.3% | 10.2% | 10.2% | 10.2% | 10.2% | 10.1% | 11.2% | 11.1% | 11.1% | 10.9% | 11.0% | 11.0% |
| Laos                                          | 11.3% | 11.2% | 11.1% | 10.9% | 10.7% | 10.5% | 12.3% | 12.1% | 11.9% | 11.7% | 11.4% | 11.2% |
| Malaysia                                      | 10.0% | 10.0% | 9.9%  | 9.9%  | 10.0% | 10.0% | 11.0% | 10.8% | 10.6% | 10.6% | 10.7% | 10.6% |
| Maldives                                      | 11.3% | 11.1% | 10.7% | 10.3% | 10.2% | 10.0% | 12.6% | 12.3% | 11.9% | 11.5% | 11.2% | 11.0% |
| Mauritius                                     | 10.9% | 10.7% | 10.8% | 10.8% | 10.8% | 10.8% | 11.8% | 11.6% | 11.4% | 11.5% | 11.5% | 11.5% |
| Myanmar                                       | 11.7% | 11.5% | 11.3% | 11.1% | 11.0% | 10.6% | 12.3% | 11.9% | 11.7% | 11.5% | 11.3% | 10.9% |
| Philippines                                   | 11.3% | 11.2% | 11.3% | 11.1% | 10.8% | 10.6% | 11.3% | 11.2% | 11.4% | 11.4% | 11.1% | 10.9% |
| Sri Lanka                                     | 10.5% | 10.5% | 10.4% | 10.3% | 10.3% | 10.1% | 11.0% | 10.9% | 10.8% | 10.7% | 10.7% | 10.5% |
| Seychelles                                    | 10.1% | 10.1% | 10.1% | 10.0% | 10.0% | 10.0% | 10.5% | 10.4% | 10.4% | 10.5% | 10.4% | 10.4% |
| Thailand                                      | 10.3% | 10.3% | 10.3% | 10.1% | 9.9%  | 9.9%  | 11.1% | 11.0% | 10.9% | 10.7% | 10.6% | 10.5% |
| Timor-Leste                                   | 12.2% | 12.0% | 12.1% | 11.8% | 11.6% | 11.2% | 12.2% | 11.8% | 11.6% | 11.5% | 11.3% | 10.9% |
| Vietnam                                       | 10.1% | 10.0% | 9.9%  | 9.8%  | 9.6%  | 9.4%  | 11.1% | 10.9% | 10.8% | 10.6% | 10.3% | 10.1% |
| <b>Oceania</b>                                | 11.6% | 11.6% | 11.6% | 11.6% | 11.7% | 11.6% | 12.9% | 12.8% | 12.9% | 12.9% | 12.9% | 12.9% |
| American Samoa                                | 11.5% | 11.5% | 11.5% | 11.4% | 11.4% | 11.4% | 12.0% | 11.9% | 12.1% | 12.1% | 12.0% | 12.1% |
| Federated States of Micronesia                | 11.1% | 11.1% | 11.1% | 11.1% | 10.9% | 11.2% | 12.2% | 12.1% | 12.1% | 12.1% | 12.0% | 12.1% |
| Fiji                                          | 11.6% | 11.7% | 11.8% | 11.5% | 11.5% | 11.2% | 12.3% | 12.4% | 12.5% | 12.5% | 12.4% | 12.3% |
| Guam                                          | 9.8%  | 9.8%  | 9.8%  | 10.0% | 10.2% | 10.3% | 11.2% | 11.1% | 11.1% | 11.2% | 11.2% | 11.5% |
| Kiribati                                      | 11.3% | 11.5% | 11.7% | 11.8% | 11.8% | 11.7% | 12.8% | 12.7% | 12.7% | 12.7% | 12.6% | 12.6% |
| Marshall Islands                              | 11.5% | 11.6% | 11.7% | 11.9% | 11.9% | 12.0% | 12.6% | 12.7% | 13.0% | 13.1% | 13.1% | 13.0% |
| Northern Mariana Islands                      | 10.1% | 10.0% | 10.0% | 10.1% | 10.2% | 10.3% | 11.3% | 11.1% | 11.1% | 11.1% | 11.2% | 11.4% |
| Papua New Guinea                              | 11.8% | 11.8% | 11.8% | 11.8% | 11.8% | 11.8% | 13.1% | 13.1% | 13.1% | 13.2% | 13.1% | 13.1% |
| Samoa                                         | 10.9% | 10.9% | 10.7% | 10.6% | 10.6% | 10.5% | 11.5% | 11.5% | 11.5% | 11.6% | 11.6% | 11.6% |
| Solomon Islands                               | 11.1% | 11.2% | 11.1% | 11.3% | 11.2% | 11.3% | 12.7% | 12.7% | 12.7% | 12.9% | 12.8% | 12.7% |
| Tonga                                         | 10.8% | 10.7% | 10.8% | 10.8% | 10.9% | 11.0% | 12.4% | 12.2% | 12.3% | 12.3% | 12.3% | 12.3% |
| Vanuatu                                       | 11.2% | 11.1% | 11.1% | 11.0% | 11.2% | 11.0% | 12.9% | 12.7% | 12.7% | 12.8% | 12.9% | 12.9% |
| <b>North Africa and Middle East</b>           | 12.4% | 12.2% | 12.0% | 11.9% | 11.8% | 11.8% | 14.0% | 13.8% | 13.7% | 13.6% | 13.5% | 13.4% |
| <b>North Africa and Middle East</b>           | 12.4% | 12.2% | 12.0% | 11.9% | 11.8% | 11.8% | 14.0% | 13.8% | 13.7% | 13.6% | 13.5% | 13.4% |
| Afghanistan                                   | 14.9% | 14.7% | 14.5% | 14.1% | 13.9% | 13.6% | 16.5% | 16.3% | 16.2% | 15.8% | 15.6% | 15.4% |
| Algeria                                       | 11.9% | 11.7% | 11.5% | 11.3% | 11.3% | 11.3% | 13.7% | 13.4% | 13.2% | 13.1% | 13.1% | 13.0% |
| Bahrain                                       | 12.2% | 12.2% | 12.2% | 12.0% | 11.8% | 11.7% | 14.4% | 14.5% | 14.4% | 14.2% | 14.0% | 13.9% |
| Egypt                                         | 12.2% | 12.0% | 11.8% | 11.8% | 11.7% | 11.5% | 13.8% | 13.6% | 13.4% | 13.5% | 13.4% | 13.1% |
| Iran                                          | 12.3% | 12.2% | 12.0% | 11.8% | 11.8% | 11.8% | 13.6% | 13.4% | 13.4% | 13.3% | 13.3% | 13.2% |

|                                    |       |       |       |       |       |       |       |       |       |       |       |       |
|------------------------------------|-------|-------|-------|-------|-------|-------|-------|-------|-------|-------|-------|-------|
| Iraq                               | 13.8% | 13.7% | 13.4% | 13.3% | 13.3% | 13.2% | 14.9% | 14.8% | 14.5% | 14.3% | 14.4% | 14.3% |
| Jordan                             | 12.2% | 11.9% | 11.7% | 11.6% | 11.6% | 11.5% | 14.0% | 13.7% | 13.5% | 13.4% | 13.3% | 13.1% |
| Kuwait                             | 11.2% | 11.2% | 11.2% | 11.2% | 11.2% | 11.0% | 13.0% | 13.0% | 13.0% | 12.9% | 12.9% | 12.7% |
| Lebanon                            | 12.6% | 12.2% | 11.7% | 11.5% | 11.4% | 11.3% | 13.6% | 13.3% | 13.1% | 13.0% | 12.9% | 12.8% |
| Libya                              | 11.6% | 11.5% | 11.4% | 11.4% | 11.5% | 11.6% | 13.3% | 13.2% | 13.1% | 13.1% | 13.1% | 13.1% |
| Morocco                            | 12.3% | 12.1% | 12.0% | 11.9% | 11.8% | 11.7% | 14.2% | 13.8% | 13.7% | 13.6% | 13.7% | 13.4% |
| Palestine                          | 11.9% | 11.8% | 11.8% | 11.8% | 11.9% | 11.9% | 13.3% | 13.1% | 13.0% | 13.0% | 13.2% | 13.2% |
| Oman                               | 12.1% | 11.7% | 11.5% | 11.3% | 11.4% | 11.3% | 13.6% | 13.3% | 12.9% | 12.7% | 12.6% | 12.6% |
| Qatar                              | 11.9% | 11.8% | 11.8% | 11.6% | 11.5% | 11.3% | 13.4% | 13.4% | 13.3% | 13.2% | 13.1% | 12.9% |
| Saudi Arabia                       | 11.6% | 11.4% | 11.2% | 11.0% | 11.0% | 10.9% | 14.1% | 13.8% | 13.7% | 13.4% | 13.2% | 13.0% |
| Sudan                              | 13.4% | 13.2% | 13.0% | 12.8% | 12.7% | 12.5% | 15.0% | 14.8% | 14.6% | 14.3% | 14.2% | 14.0% |
| Syria                              | 11.7% | 11.5% | 11.3% | 11.1% | 11.1% | 11.4% | 13.5% | 13.3% | 13.0% | 12.9% | 12.8% | 12.8% |
| Tunisia                            | 11.4% | 11.2% | 11.2% | 11.2% | 11.1% | 11.0% | 12.8% | 12.7% | 12.4% | 12.3% | 12.4% | 12.3% |
| Turkey                             | 12.0% | 11.6% | 11.4% | 11.2% | 11.1% | 10.9% | 13.6% | 13.2% | 13.0% | 12.8% | 12.7% | 12.7% |
| United Arab Emirates               | 12.1% | 11.9% | 11.7% | 11.6% | 11.5% | 11.5% | 13.7% | 13.3% | 13.2% | 13.0% | 13.0% | 12.8% |
| Yemen                              | 14.9% | 14.7% | 14.4% | 14.1% | 14.0% | 13.7% | 17.1% | 16.9% | 16.7% | 16.3% | 16.2% | 15.8% |
| <b>South Asia</b>                  | 12.3% | 12.3% | 12.3% | 12.2% | 11.9% | 11.8% | 14.0% | 13.9% | 13.6% | 13.5% | 13.3% | 13.3% |
| <b>South Asia</b>                  | 12.3% | 12.3% | 12.3% | 12.2% | 11.9% | 11.8% | 14.0% | 13.9% | 13.6% | 13.5% | 13.3% | 13.3% |
| Bangladesh                         | 12.4% | 12.1% | 11.8% | 11.7% | 11.3% | 11.0% | 13.9% | 13.7% | 13.5% | 13.2% | 12.7% | 12.4% |
| Bhutan                             | 12.4% | 12.1% | 12.0% | 11.8% | 11.7% | 11.6% | 14.3% | 14.0% | 13.8% | 13.5% | 13.4% | 13.2% |
| India                              | 12.4% | 12.4% | 12.5% | 12.3% | 12.0% | 12.0% | 14.1% | 14.0% | 13.8% | 13.7% | 13.5% | 13.5% |
| Nepal                              | 12.4% | 12.1% | 12.0% | 11.8% | 11.5% | 11.3% | 13.2% | 13.0% | 12.9% | 12.8% | 12.5% | 12.3% |
| Pakistan                           | 11.5% | 11.3% | 11.2% | 11.4% | 11.4% | 11.3% | 13.1% | 13.0% | 12.9% | 13.0% | 12.9% | 12.7% |
| <b>Sub-Saharan Africa</b>          | 12.5% | 12.6% | 12.7% | 12.5% | 12.1% | 11.7% | 13.0% | 13.1% | 13.1% | 13.0% | 12.7% | 12.2% |
| <b>Southern Sub-Saharan Africa</b> | 11.8% | 12.2% | 13.0% | 13.2% | 13.0% | 12.5% | 12.0% | 12.3% | 13.2% | 13.7% | 13.5% | 12.9% |
| Botswana                           | 11.9% | 13.2% | 14.4% | 14.3% | 13.5% | 12.6% | 11.9% | 12.9% | 14.2% | 14.5% | 13.5% | 12.8% |
| Lesotho                            | 12.0% | 12.5% | 13.5% | 14.3% | 14.0% | 13.6% | 12.6% | 12.9% | 13.9% | 14.8% | 14.5% | 14.1% |
| Namibia                            | 11.8% | 12.2% | 12.8% | 13.0% | 12.4% | 12.0% | 11.9% | 12.2% | 12.7% | 13.1% | 12.6% | 12.0% |
| South Africa                       | 11.8% | 12.1% | 12.9% | 13.2% | 13.1% | 12.7% | 12.1% | 12.2% | 13.0% | 13.6% | 13.6% | 13.0% |
| Swaziland                          | 11.9% | 12.6% | 14.1% | 14.9% | 14.8% | 13.7% | 12.0% | 12.6% | 14.1% | 15.1% | 14.9% | 13.7% |
| Zimbabwe                           | 11.6% | 12.8% | 13.4% | 13.2% | 12.5% | 11.6% | 11.7% | 12.7% | 13.4% | 13.6% | 13.0% | 12.1% |
| <b>Western Sub-Saharan Africa</b>  | 12.6% | 12.5% | 12.5% | 12.3% | 12.0% | 11.5% | 13.4% | 13.3% | 13.3% | 13.1% | 12.8% | 12.3% |
| Benin                              | 13.2% | 12.9% | 12.6% | 12.3% | 12.1% | 11.7% | 14.0% | 13.7% | 13.5% | 13.2% | 13.0% | 12.6% |
| Burkina Faso                       | 14.4% | 14.2% | 13.8% | 13.0% | 12.3% | 11.7% | 14.5% | 14.4% | 14.0% | 13.6% | 13.1% | 12.7% |
| Cameroon                           | 12.7% | 12.8% | 12.9% | 12.8% | 12.3% | 11.7% | 13.5% | 13.6% | 13.6% | 13.5% | 13.0% | 12.5% |
| Cape Verde                         | 11.5% | 11.5% | 11.5% | 11.3% | 11.2% | 10.9% | 12.1% | 12.0% | 11.9% | 11.7% | 11.6% | 11.4% |
| Chad                               | 12.7% | 12.8% | 13.0% | 13.0% | 12.6% | 12.4% | 13.6% | 13.6% | 13.8% | 13.7% | 13.4% | 13.1% |
| Cote d'Ivoire                      | 13.2% | 13.1% | 12.9% | 12.5% | 12.3% | 12.0% | 14.1% | 13.8% | 13.6% | 13.3% | 13.1% | 12.8% |
| The Gambia                         | 11.9% | 11.9% | 12.0% | 12.0% | 12.0% | 11.7% | 13.5% | 13.4% | 13.3% | 13.3% | 13.1% | 12.9% |
| Ghana                              | 11.8% | 11.6% | 11.5% | 11.4% | 11.3% | 10.9% | 12.8% | 12.5% | 12.4% | 12.2% | 12.1% | 11.6% |
| Guinea                             | 12.3% | 12.1% | 12.0% | 11.8% | 11.7% | 11.6% | 13.6% | 13.3% | 13.2% | 13.0% | 12.9% | 12.7% |
| Guinea-Bissau                      | 12.5% | 12.5% | 12.4% | 12.4% | 12.3% | 12.1% | 13.3% | 13.2% | 13.1% | 13.1% | 13.0% | 12.7% |
| Liberia                            | 14.2% | 14.6% | 14.1% | 13.9% | 13.5% | 12.8% | 14.8% | 15.0% | 14.6% | 14.5% | 14.1% | 13.6% |
| Mali                               | 13.4% | 13.3% | 13.0% | 12.8% | 12.3% | 11.8% | 13.8% | 13.6% | 13.4% | 13.1% | 12.8% | 12.5% |
| Mauritania                         | 12.1% | 11.9% | 11.8% | 11.6% | 11.3% | 11.2% | 13.1% | 12.8% | 12.5% | 12.3% | 12.2% | 12.0% |
| Niger                              | 11.9% | 11.8% | 11.7% | 11.6% | 11.3% | 11.1% | 12.7% | 12.7% | 12.6% | 12.5% | 12.2% | 12.0% |
| Nigeria                            | 12.5% | 12.5% | 12.6% | 12.3% | 12.0% | 11.5% | 13.3% | 13.3% | 13.4% | 13.2% | 12.9% | 12.3% |
| Sao Tome and Principe              | 11.7% | 11.7% | 11.7% | 11.6% | 11.5% | 11.3% | 11.9% | 11.9% | 11.8% | 11.7% | 11.6% | 11.4% |
| Senegal                            | 11.8% | 11.8% | 11.6% | 11.6% | 11.6% | 11.3% | 12.7% | 12.6% | 12.4% | 12.4% | 12.3% | 12.0% |
| Sierra Leone                       | 12.7% | 12.8% | 13.0% | 12.8% | 12.2% | 11.7% | 13.0% | 13.1% | 13.3% | 13.2% | 12.9% | 12.4% |
| Togo                               | 12.0% | 12.1% | 12.3% | 12.1% | 11.7% | 11.2% | 13.1% | 13.1% | 13.2% | 13.1% | 12.7% | 12.1% |
| <b>Eastern Sub-Saharan Africa</b>  | 12.2% | 12.4% | 12.4% | 12.1% | 11.7% | 11.3% | 12.5% | 12.6% | 12.7% | 12.4% | 12.0% | 11.6% |
| Burundi                            | 11.8% | 12.1% | 12.0% | 11.7% | 11.2% | 10.9% | 12.0% | 12.2% | 12.2% | 11.9% | 11.3% | 11.0% |
| Comoros                            | 12.1% | 11.9% | 11.9% | 11.4% | 11.1% | 11.0% | 12.2% | 12.0% | 11.9% | 11.6% | 11.4% | 11.3% |
| Djibouti                           | 11.1% | 11.1% | 11.2% | 11.2% | 11.1% | 11.0% | 11.5% | 11.4% | 11.6% | 11.6% | 11.5% | 11.3% |
| Eritrea                            | 11.9% | 11.7% | 11.5% | 11.4% | 11.3% | 11.1% | 12.5% | 12.1% | 11.8% | 11.6% | 11.6% | 11.4% |
| Ethiopia                           | 12.1% | 11.9% | 11.8% | 11.5% | 11.2% | 11.0% | 12.5% | 12.2% | 12.1% | 11.8% | 11.4% | 11.1% |
| Kenya                              | 11.0% | 11.6% | 11.9% | 11.6% | 11.3% | 11.2% | 11.3% | 11.7% | 12.0% | 11.8% | 11.5% | 11.4% |
| Madagascar                         | 11.9% | 11.8% | 11.7% | 11.7% | 11.4% | 11.2% | 12.3% | 12.1% | 12.0% | 11.9% | 11.7% | 11.3% |
| Malawi                             | 12.7% | 13.4% | 13.6% | 13.4% | 12.6% | 11.8% | 12.5% | 13.1% | 13.5% | 13.4% | 12.7% | 12.0% |
| Mozambique                         | 12.7% | 12.9% | 13.1% | 13.1% | 13.1% | 12.5% | 13.0% | 13.1% | 13.2% | 13.4% | 13.3% | 12.7% |
| Rwanda                             | 11.8% | 13.0% | 12.6% | 11.9% | 11.3% | 11.0% | 12.2% | 13.1% | 12.7% | 12.1% | 11.4% | 11.1% |
| Somalia                            | 11.7% | 11.6% | 11.8% | 11.6% | 11.7% | 11.4% | 12.5% | 12.4% | 12.5% | 12.3% | 12.3% | 12.1% |
| South Sudan                        | 14.7% | 14.9% | 14.3% | 13.9% | 13.2% | 12.7% | 15.3% | 15.3% | 14.9% | 14.4% | 13.6% | 13.2% |
| Tanzania                           | 12.1% | 12.4% | 12.3% | 12.0% | 11.6% | 11.0% | 12.5% | 12.8% | 12.8% | 12.6% | 12.2% | 11.6% |
| Uganda                             | 13.8% | 14.1% | 13.7% | 13.1% | 12.4% | 11.8% | 13.8% | 13.9% | 13.9% | 13.4% | 12.9% | 12.2% |
| Zambia                             | 11.7% | 12.6% | 13.1% | 12.9% | 12.4% | 12.0% | 12.1% | 12.9% | 13.4% | 13.3% | 12.8% | 12.3% |
| <b>Central Sub-Saharan Africa</b>  | 14.0% | 14.0% | 13.9% | 13.6% | 13.2% | 12.7% | 14.2% | 14.2% | 14.2% | 13.9% | 13.5% | 13.0% |
| Angola                             | 12.9% | 12.8% | 12.6% | 12.4% | 12.2% | 12.0% | 13.3% | 13.2% | 13.1% | 12.8% | 12.6% | 12.3% |
| Central African Republic           | 14.4% | 14.6% | 14.6% | 14.4% | 13.8% | 13.5% | 14.3% | 14.4% | 14.6% | 14.4% | 14.0% | 13.7% |
| Congo (Brazzaville)                | 13.5% | 13.5% | 13.4% | 12.9% | 12.6% | 12.1% | 13.9% | 14.0% | 14.0% | 13.7% | 13.4% | 13.0% |
| DR Congo                           | 14.4% | 14.3% | 14.3% | 14.0% | 13.5% | 12.9% | 14.6% | 14.5% | 14.5% | 14.3% | 13.8% | 13.2% |
| Equatorial Guinea                  | 13.3% | 13.1% | 12.8% | 12.6% | 12.4% | 12.2% | 13.8% | 13.6% | 13.3% | 13.2% | 12.9% | 12.6% |
| Gabon                              | 12.6% | 12.5% | 12.5% | 12.3% | 12.1% | 11.9% | 13.2% | 13.2% | 13.4% | 13.4% | 13.3% | 12.9% |

SR Figure 2: Co-evolution of age-standardised YLD rates per 100,000 for top ten YLD Level 4 causes and the socio-demographic index (SDI), by GBD region

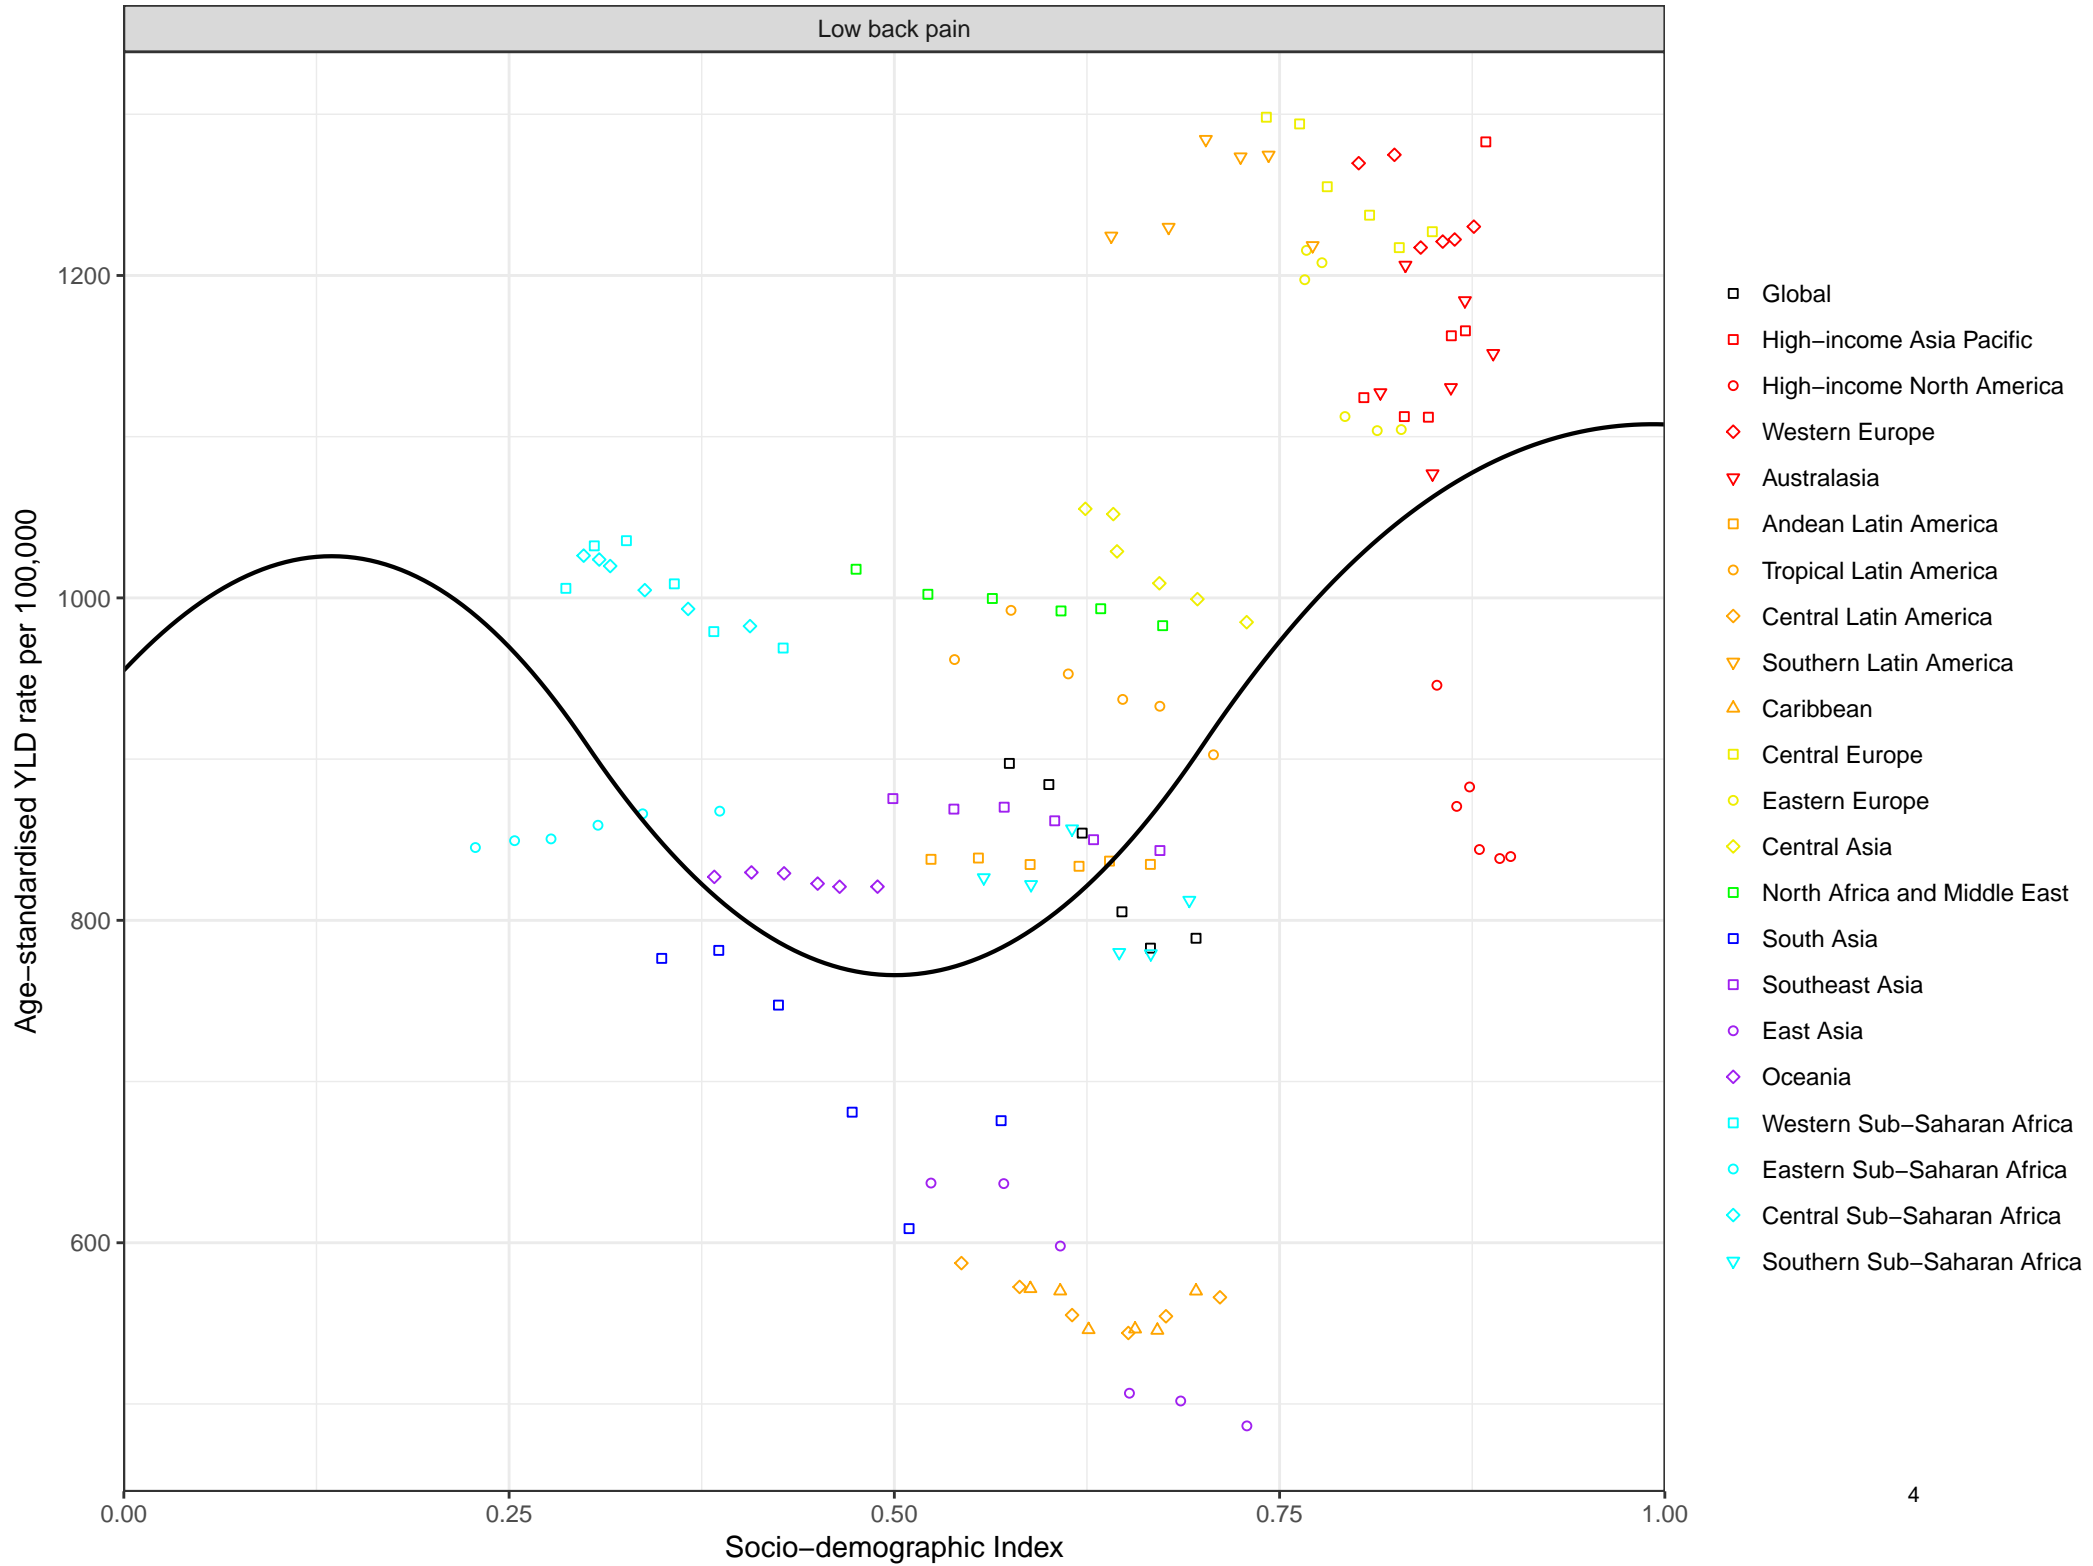

SR Figure 2: Co-evolution of age-standardised YLD rates per 100,000 for top ten YLD Level 4 causes and the socio-demographic index (SDI), by GBD region

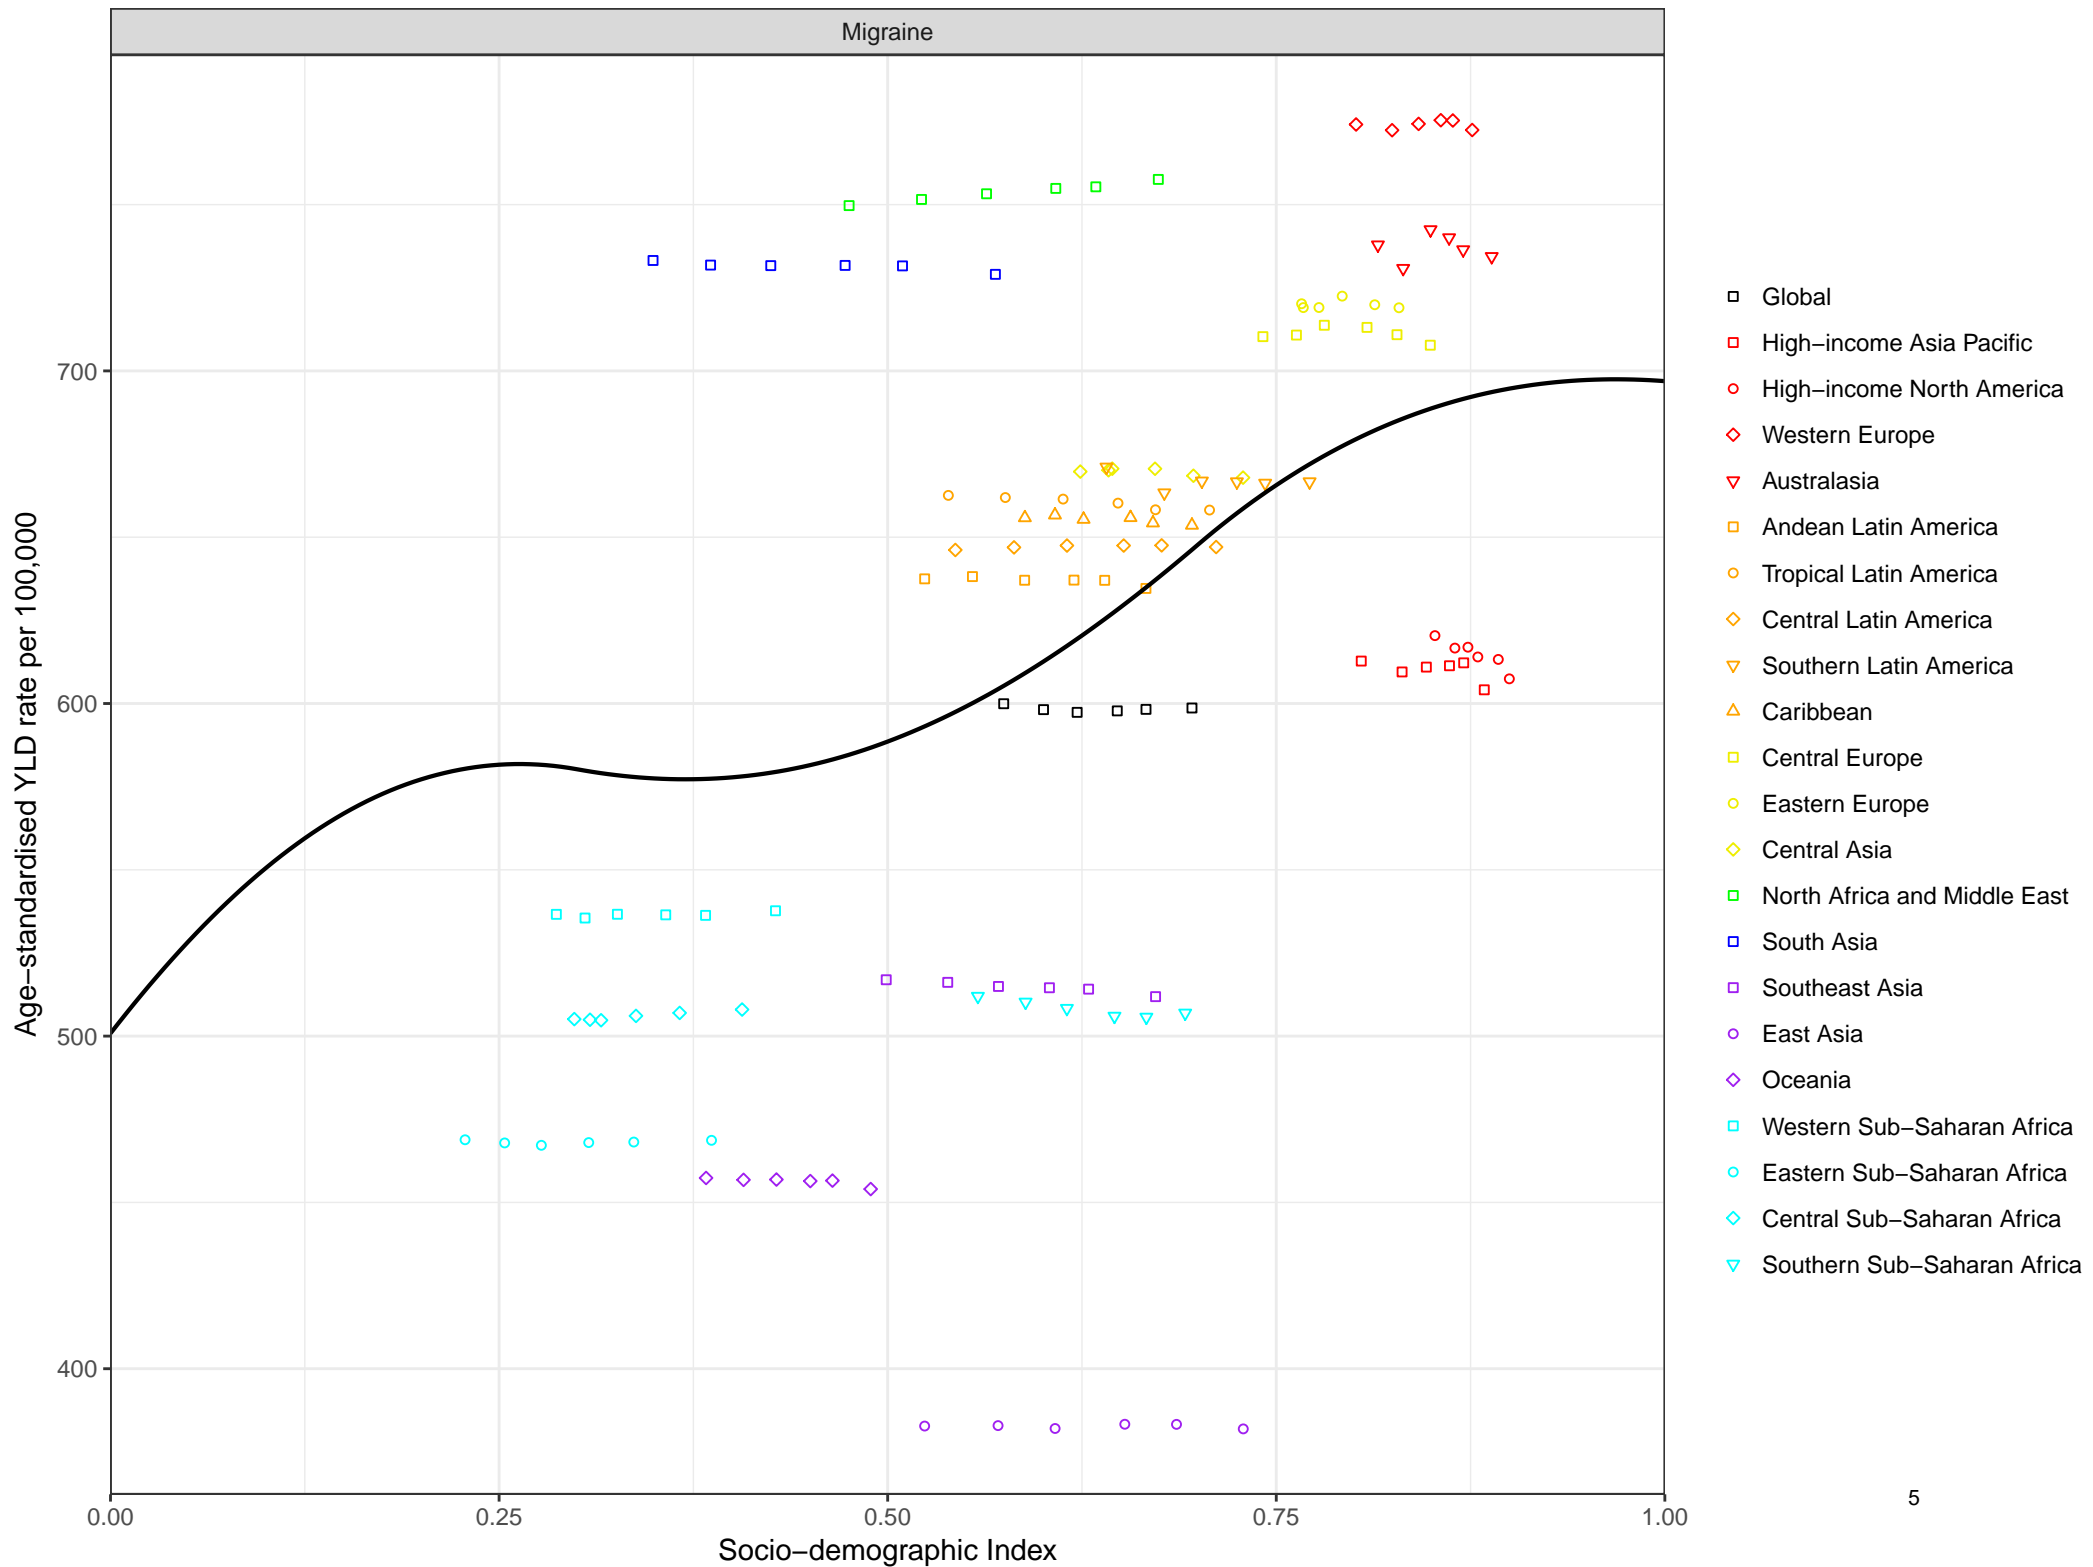



SR Figure 2: Co-evolution of age-standardised YLD rates per 100,000 for top ten YLD Level 4 causes and the socio-demographic index (SDI), by GBD region

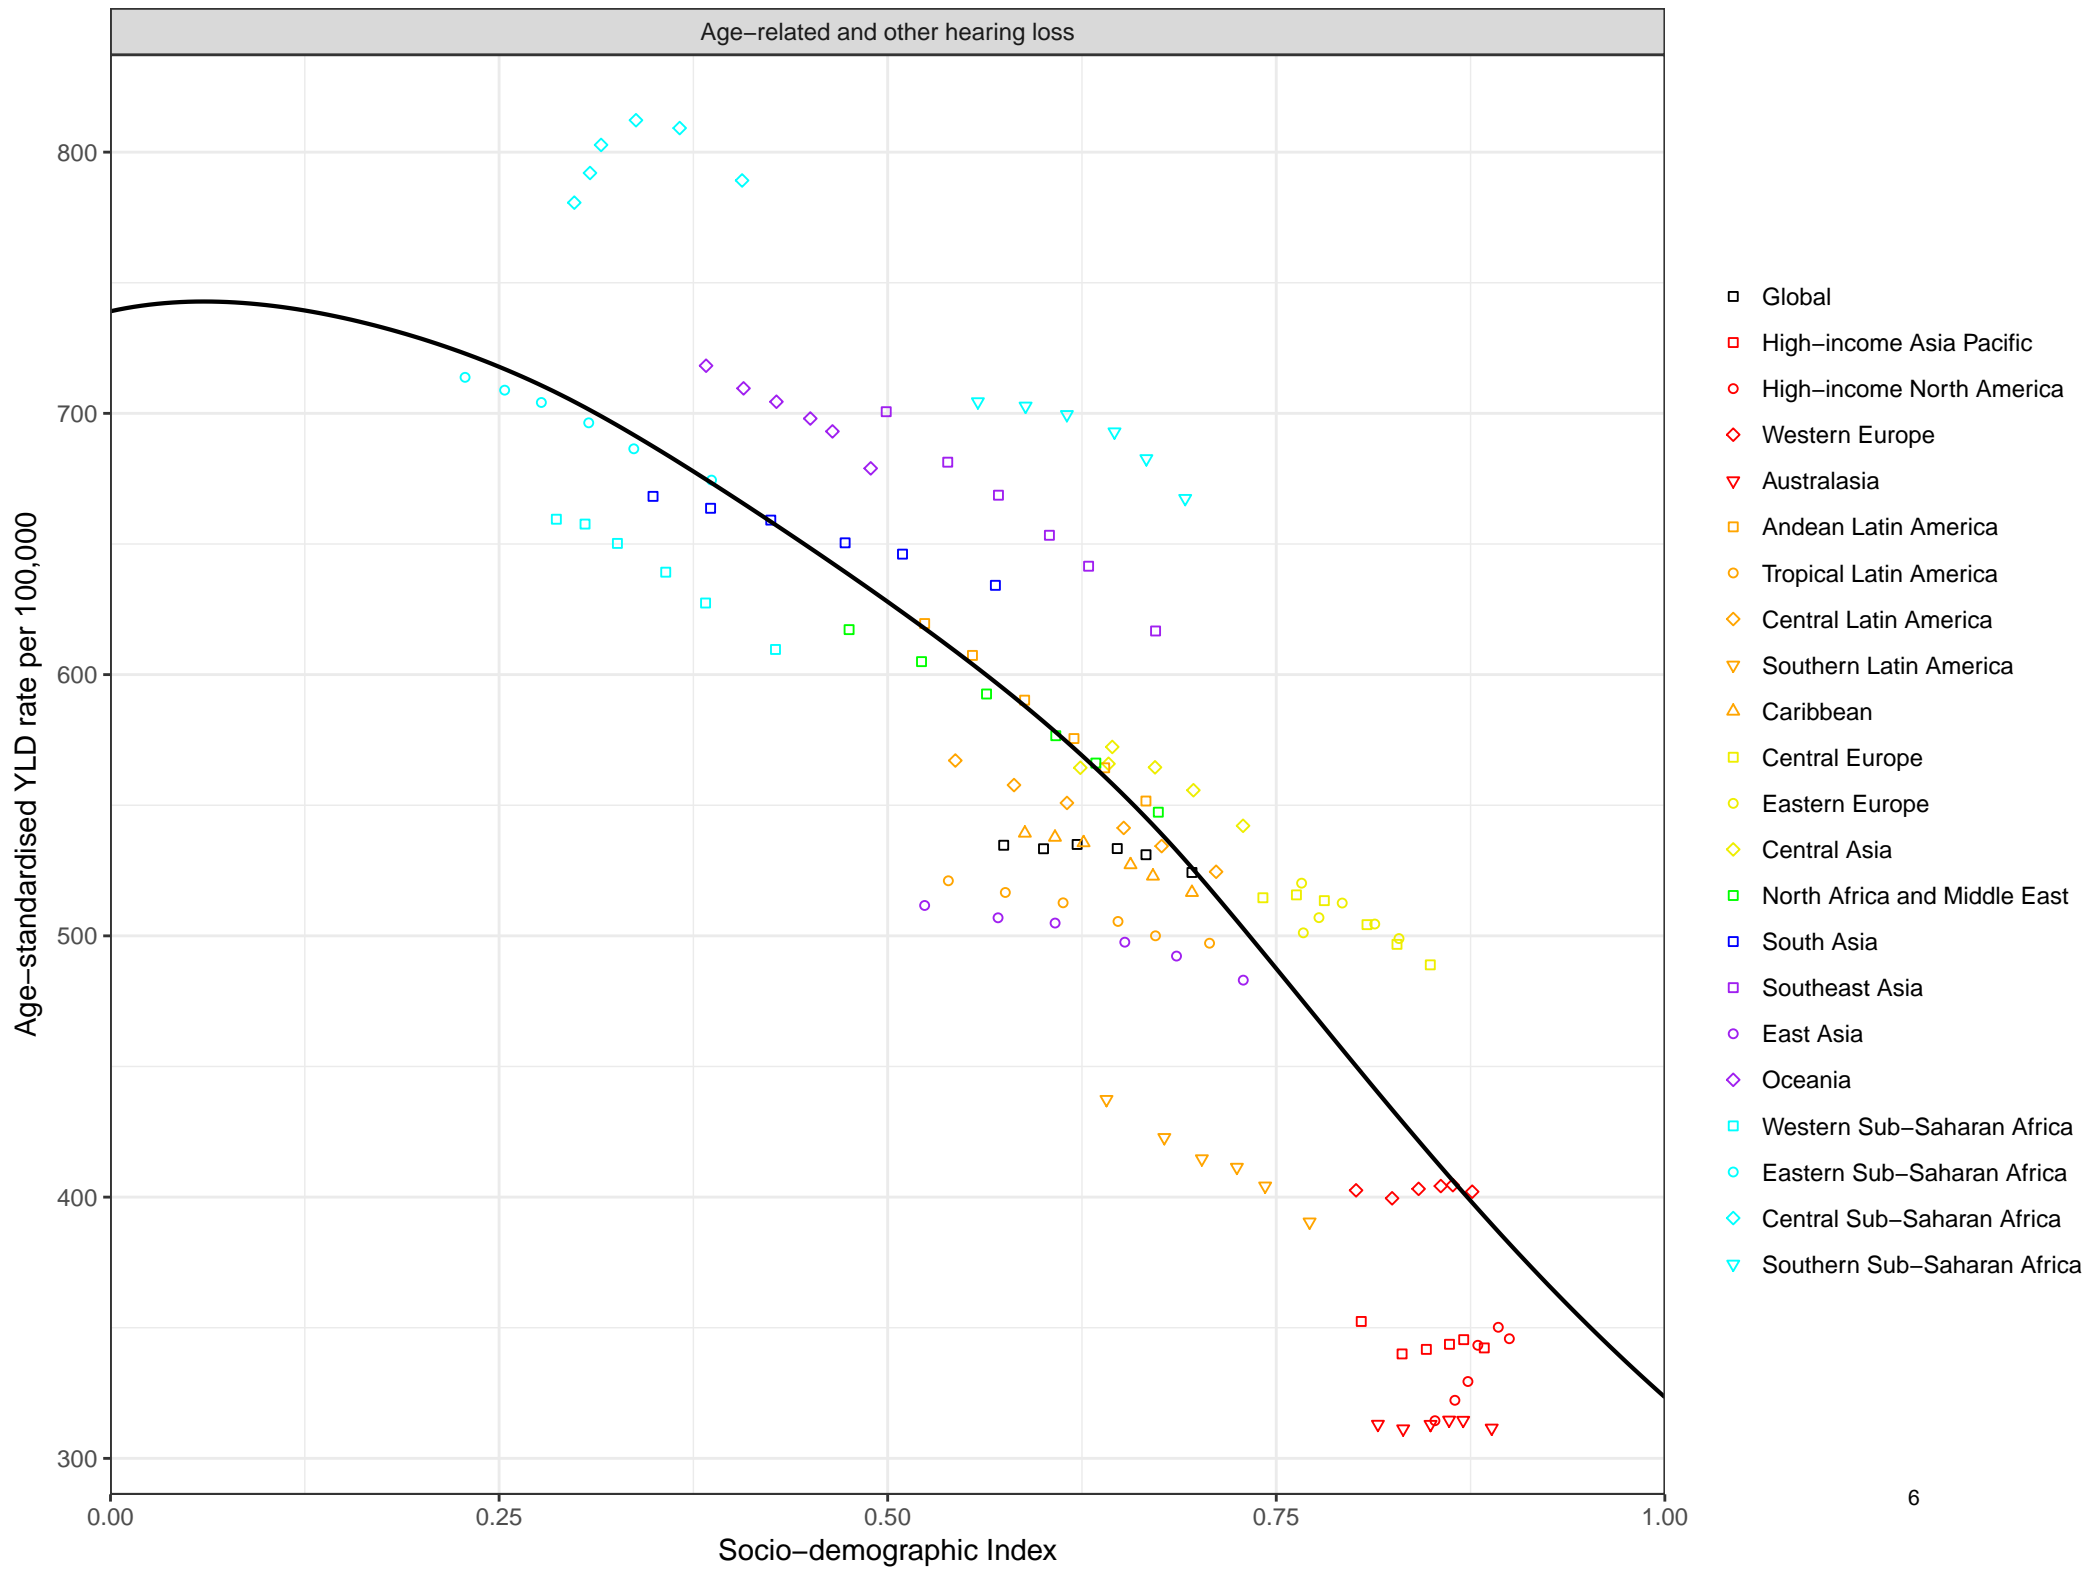



SR Figure 2: Co-evolution of age-standardised YLD rates per 100,000 for top ten YLD Level 4 causes and the socio-demographic index (SDI), by GBD region

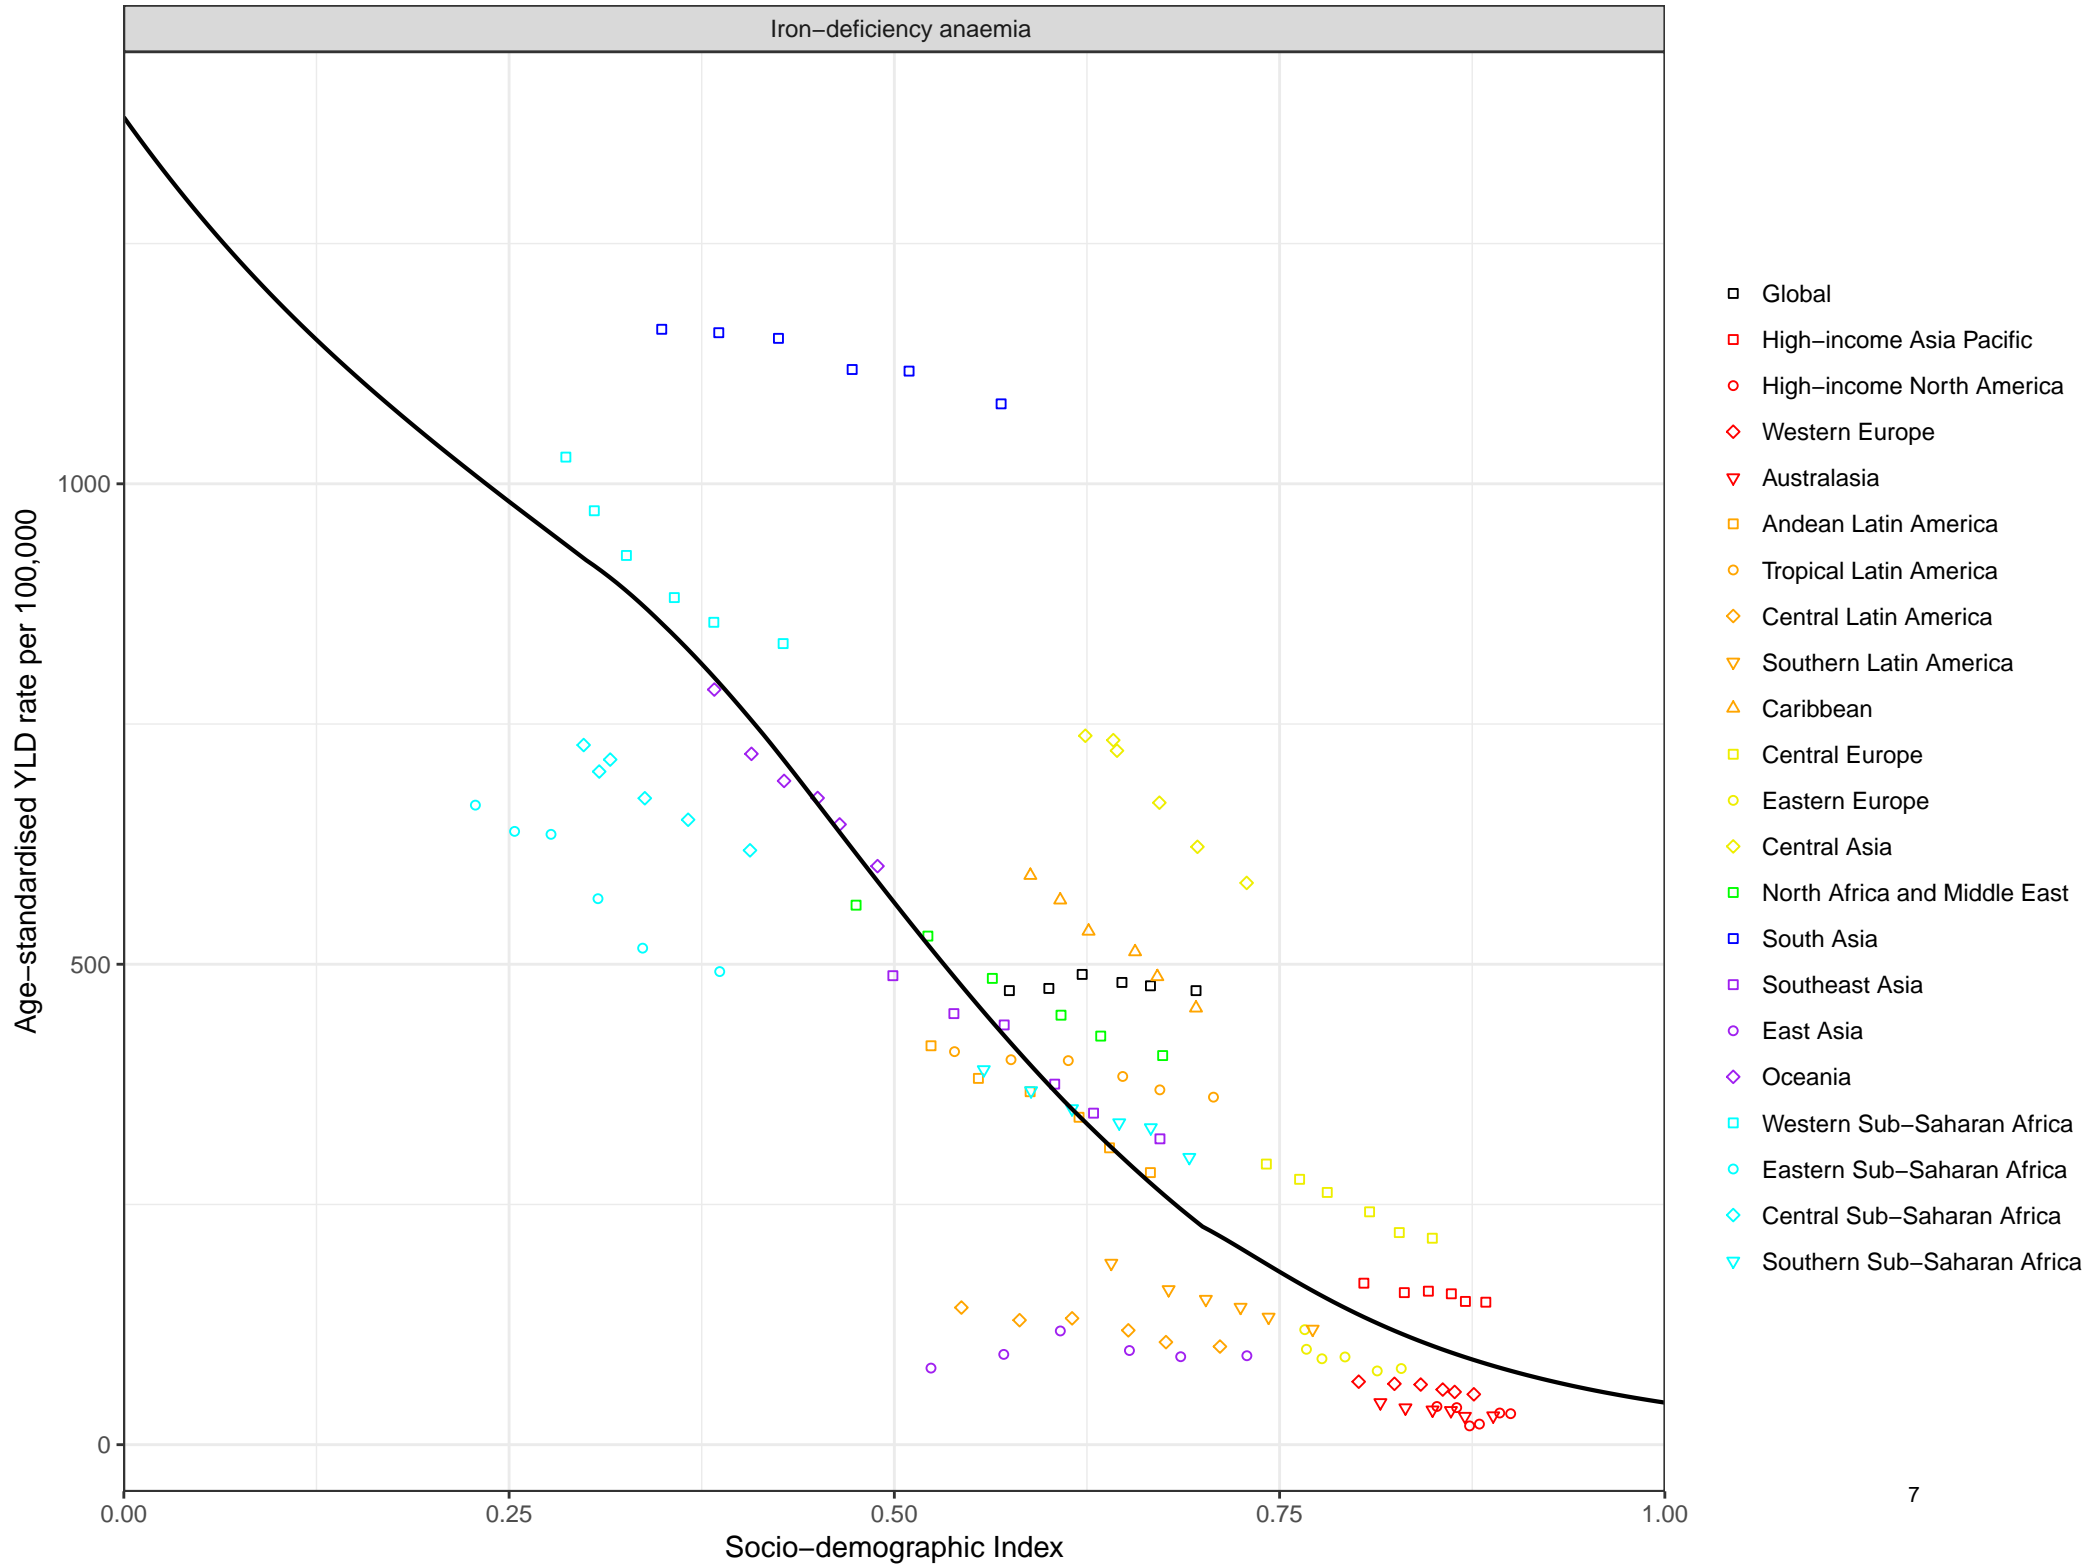

SR Figure 2: Co-evolution of age-standardised YLD rates per 100,000 for top ten YLD Level 4 causes and the socio-demographic index (SDI), by GBD region

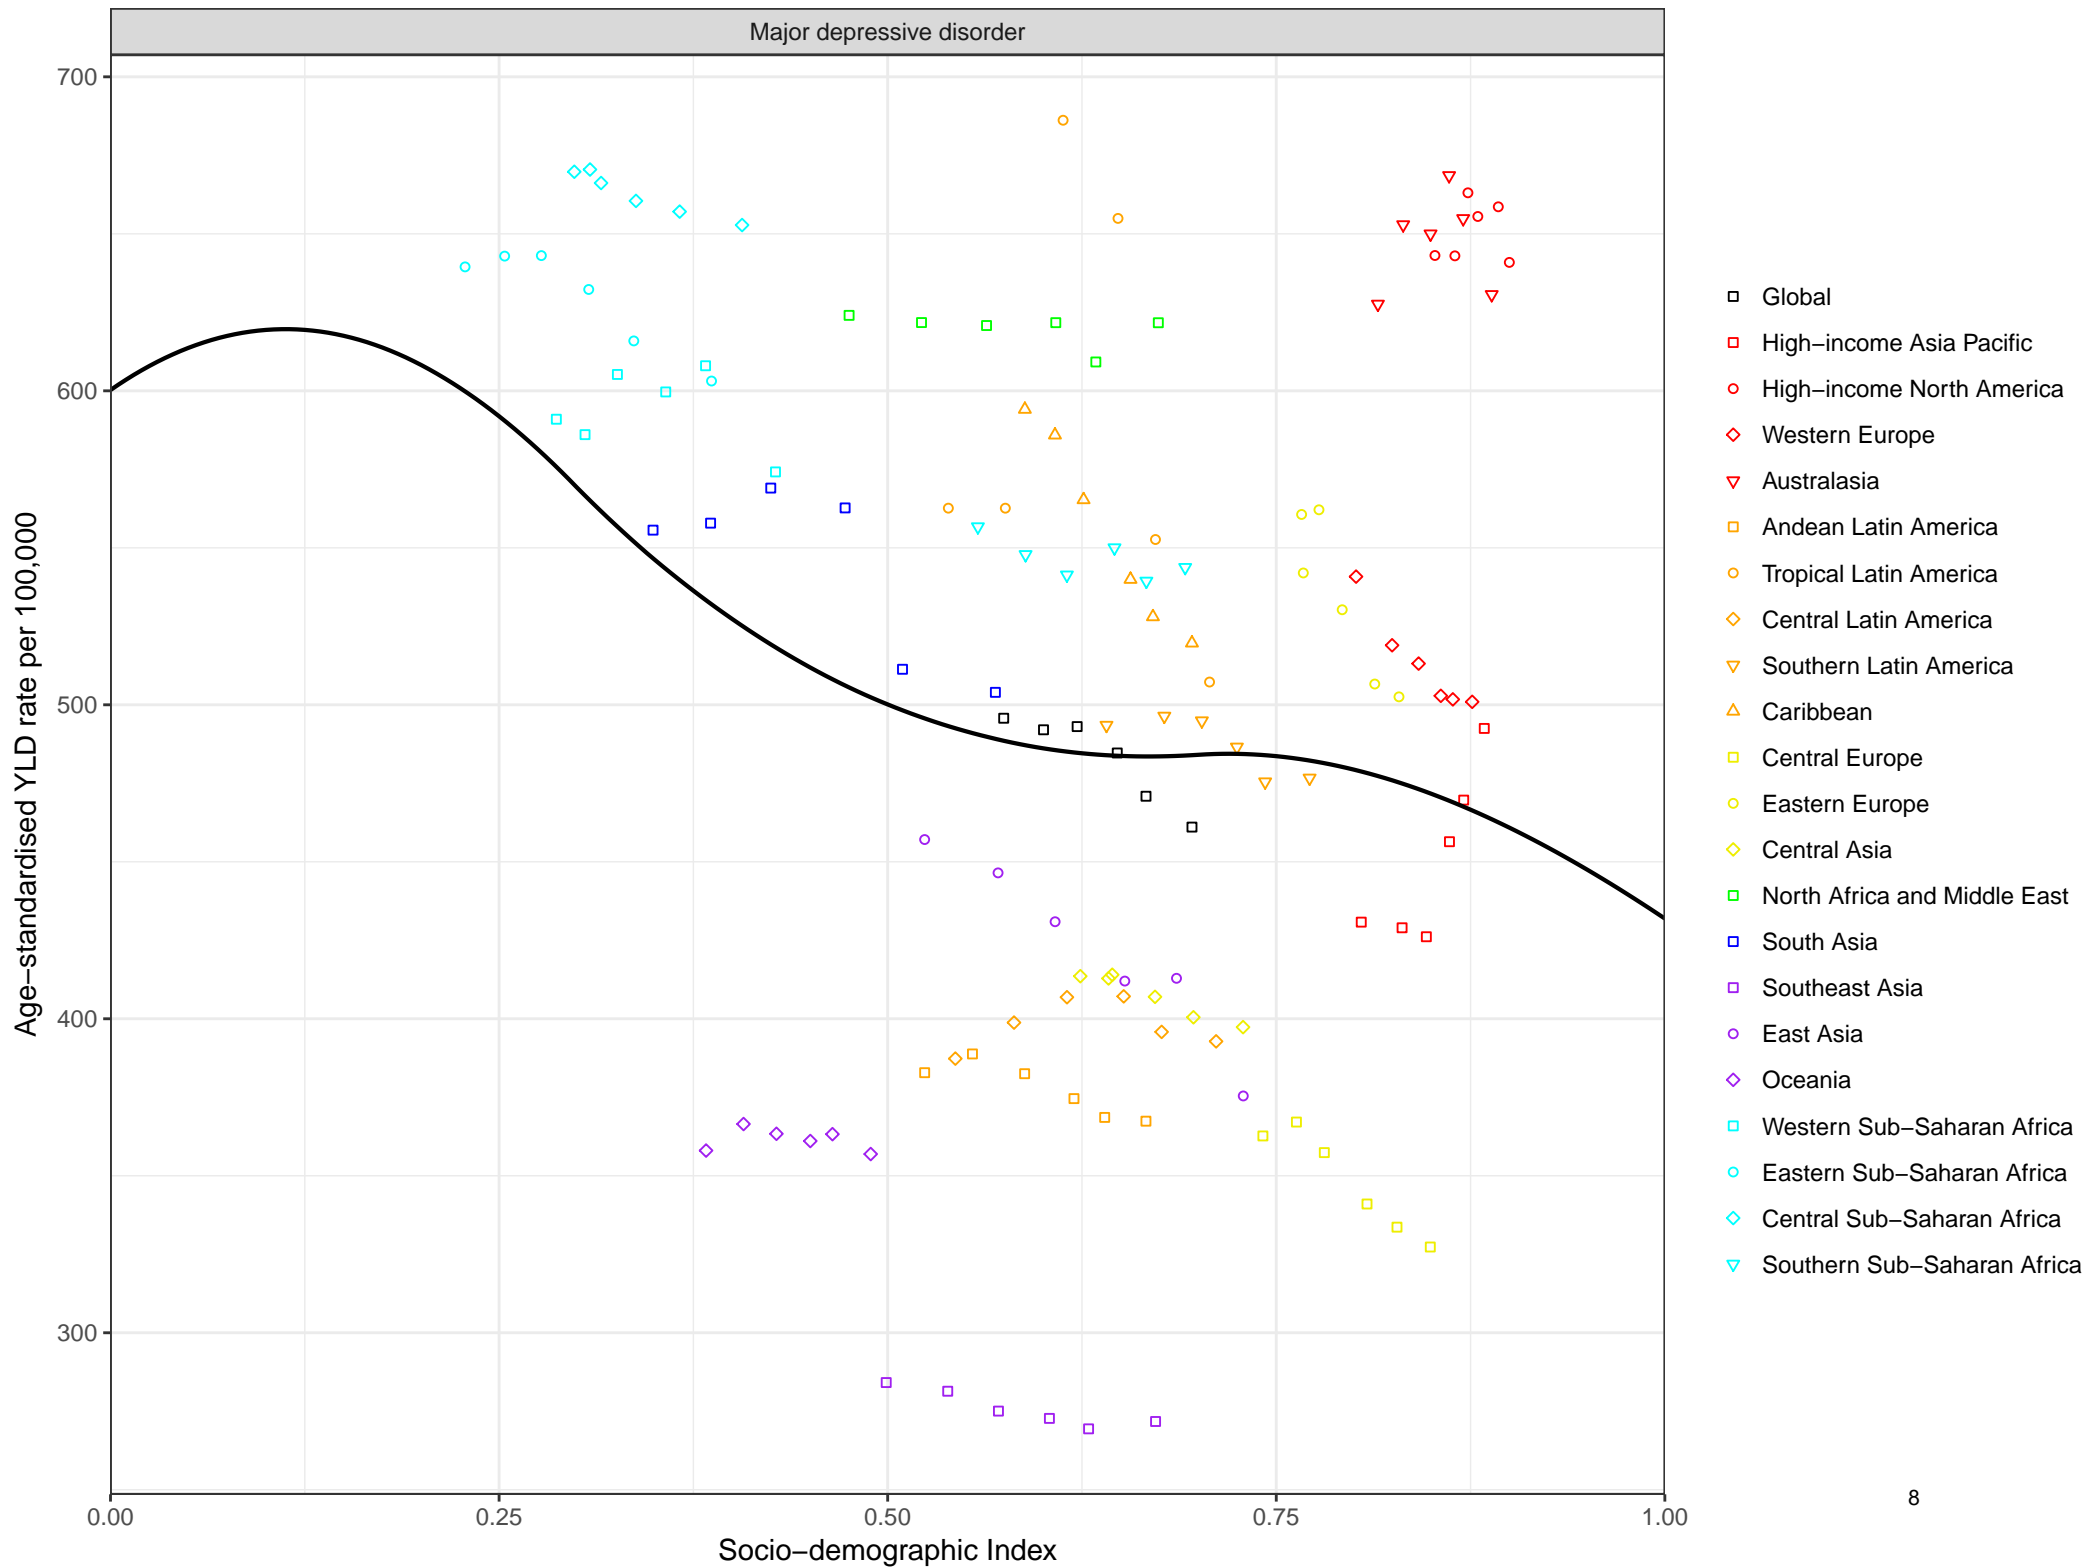

SR Figure 2: Co-evolution of age-standardised YLD rates per 100,000 for top ten YLD Level 4 causes and the socio-demographic index (SDI), by GBD region

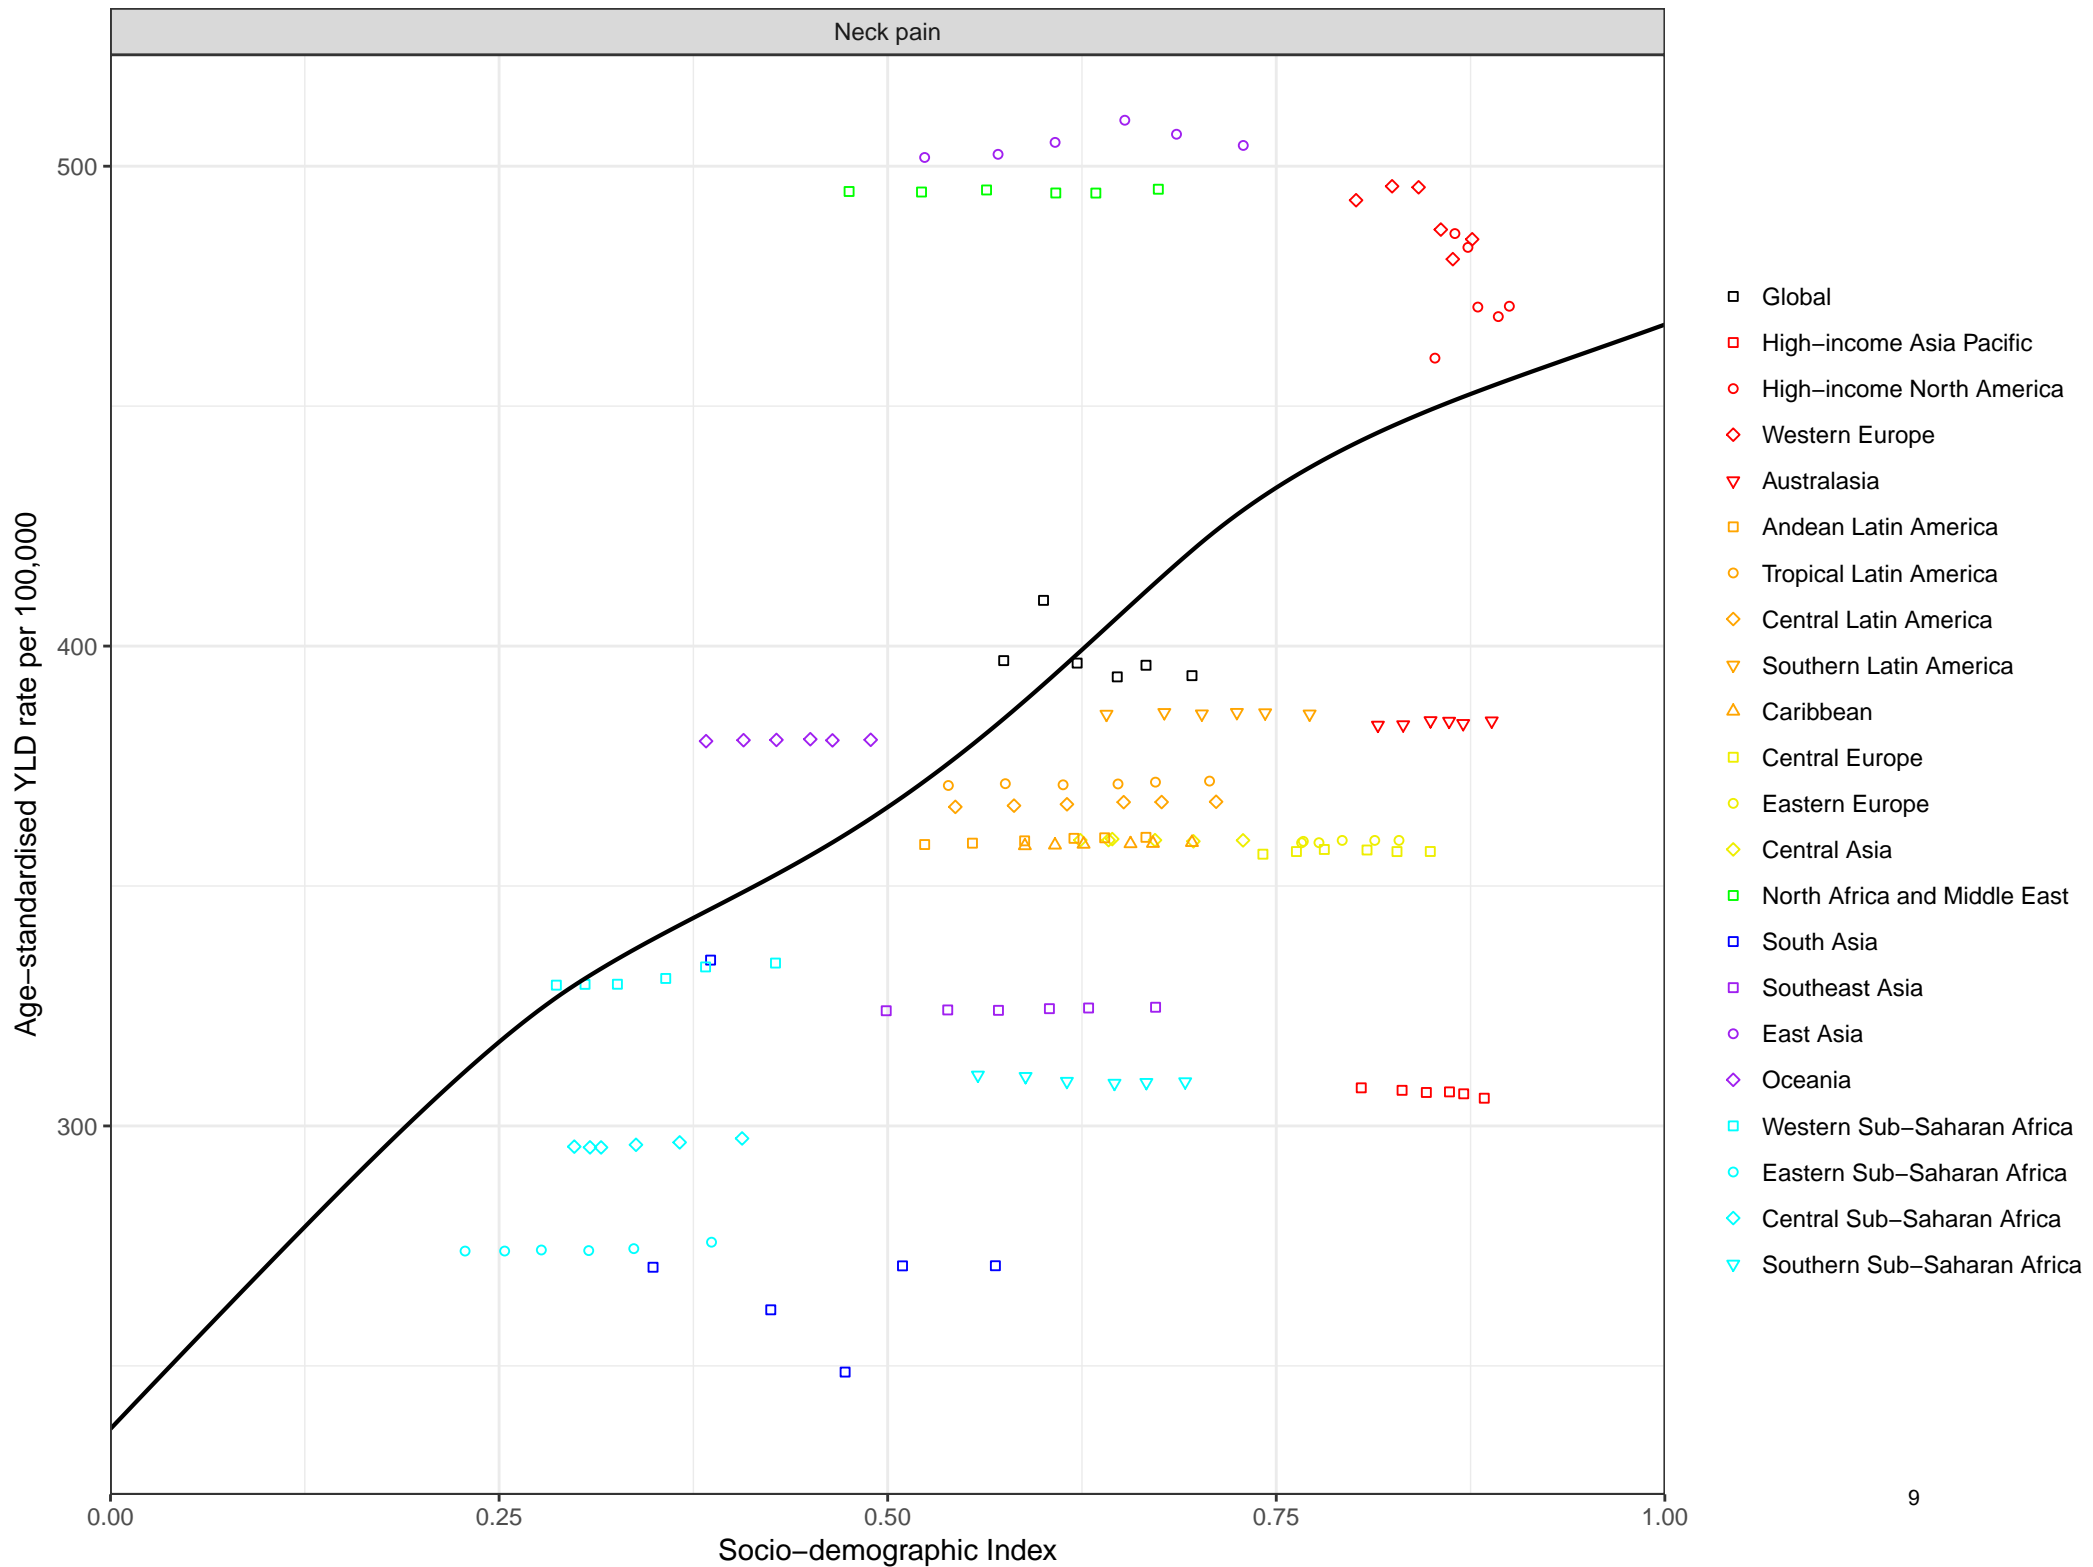

SR Figure 2: Co-evolution of age-standardised YLD rates per 100,000 for top ten YLD Level 4 causes and the socio-demographic index (SDI), by GBD region

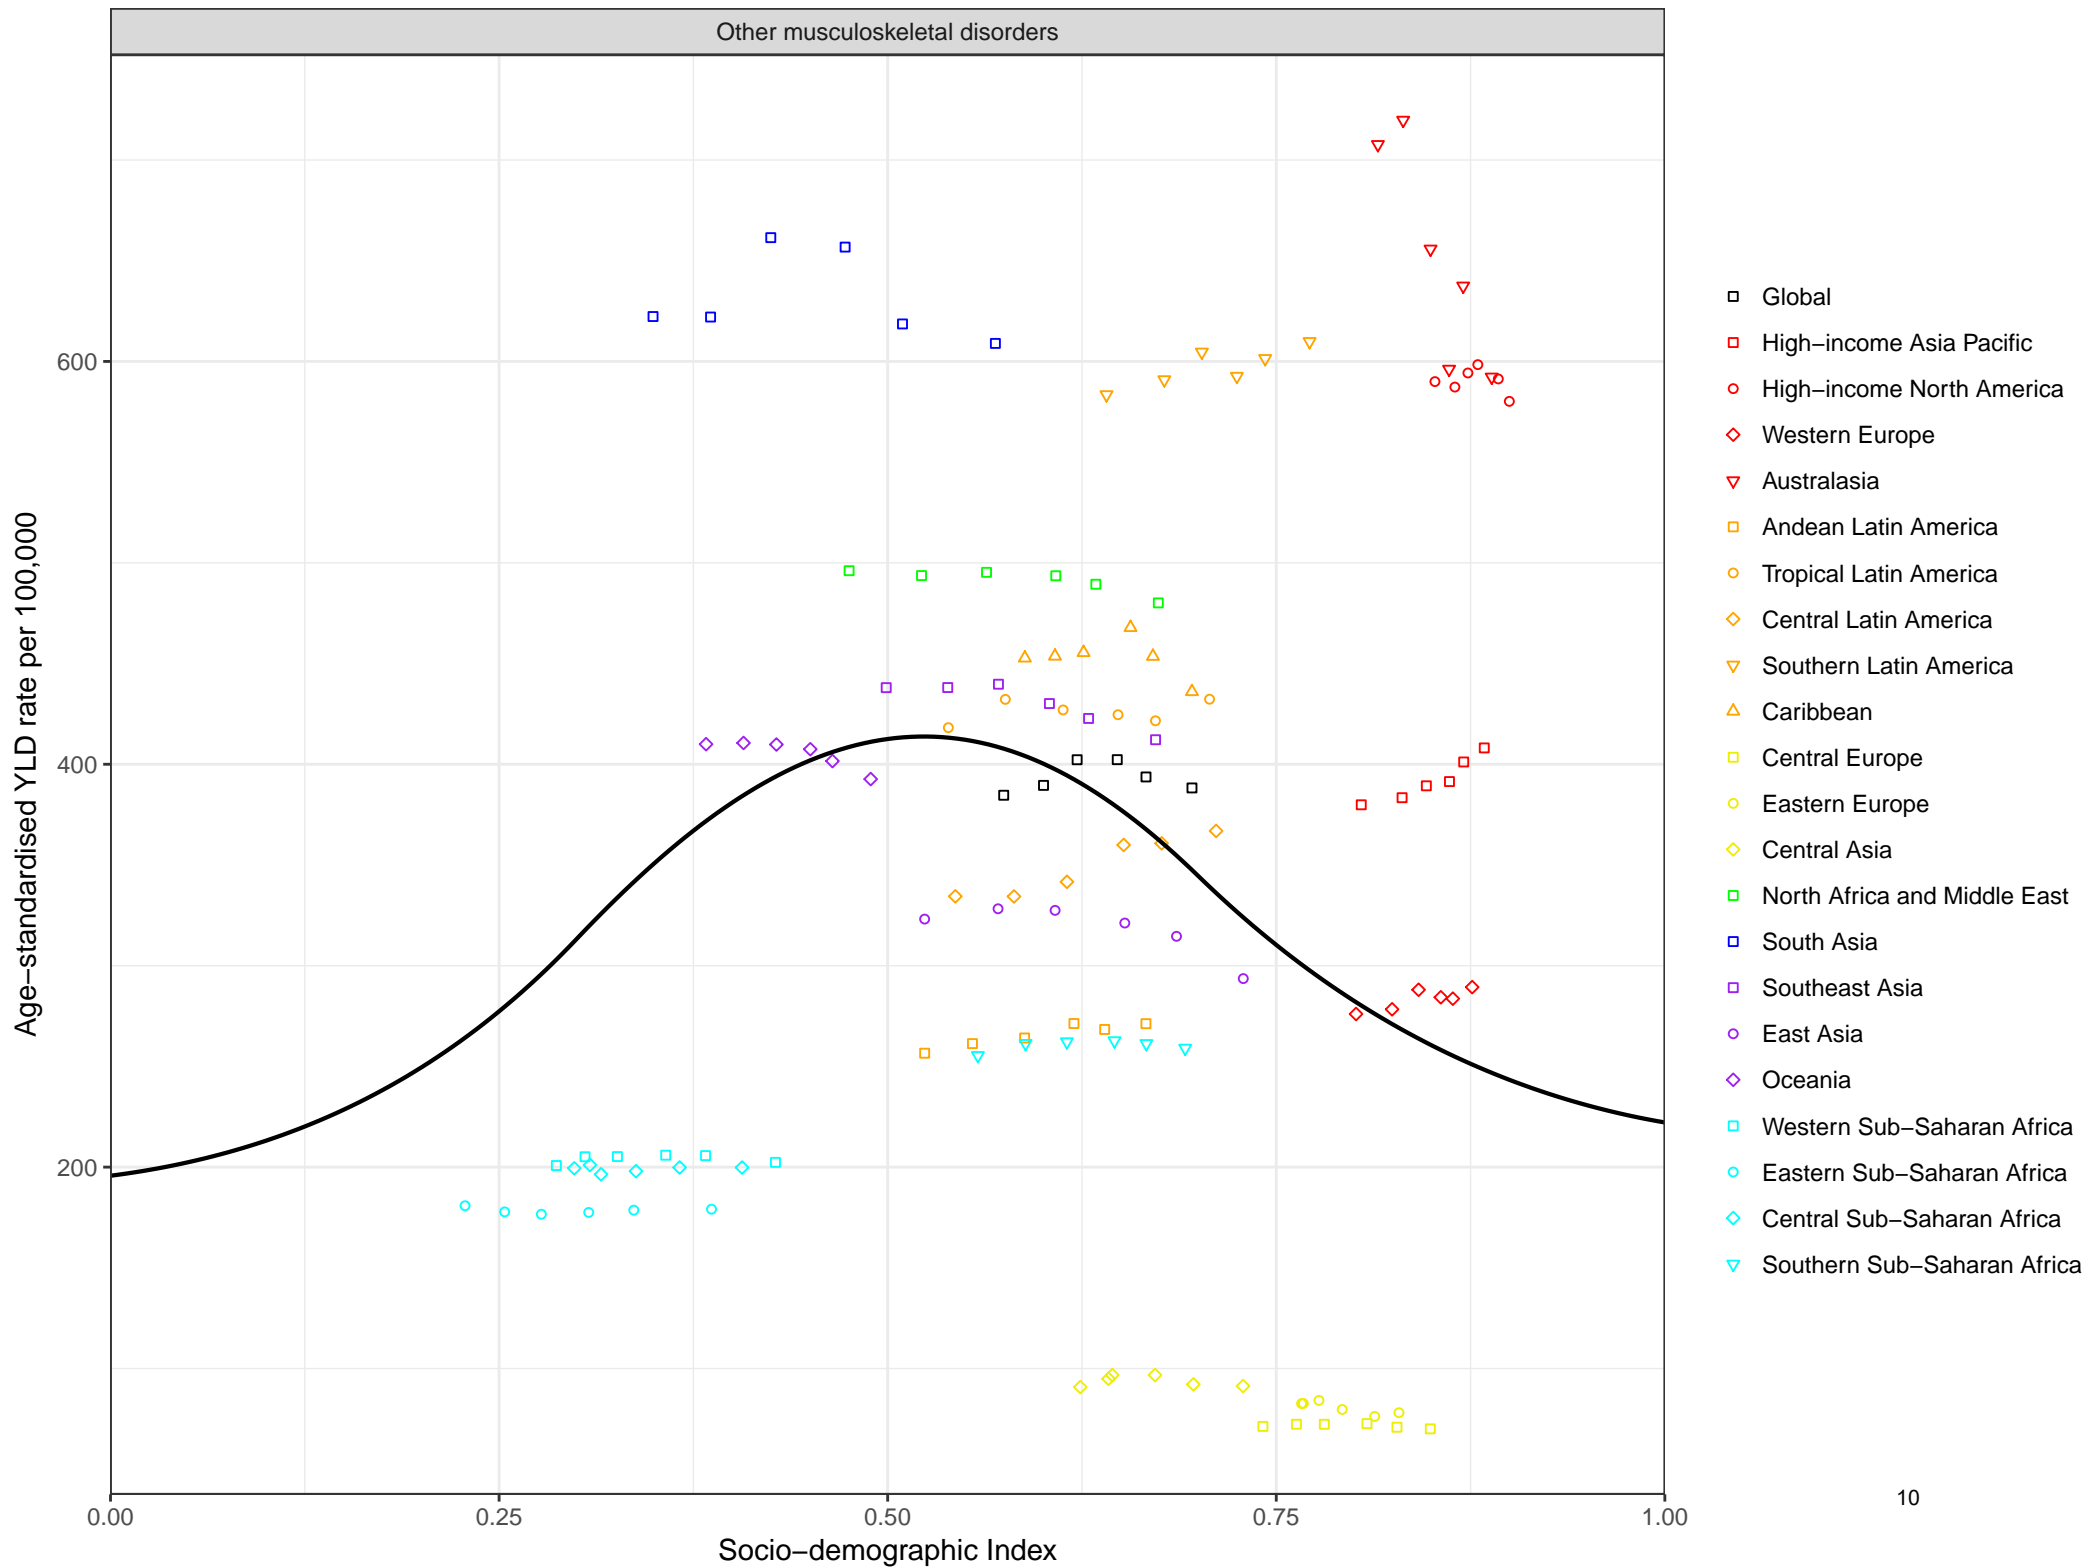

SR Figure 2: Co-evolution of age-standardised YLD rates per 100,000 for top ten YLD Level 4 causes and the socio-demographic index (SDI), by GBD region

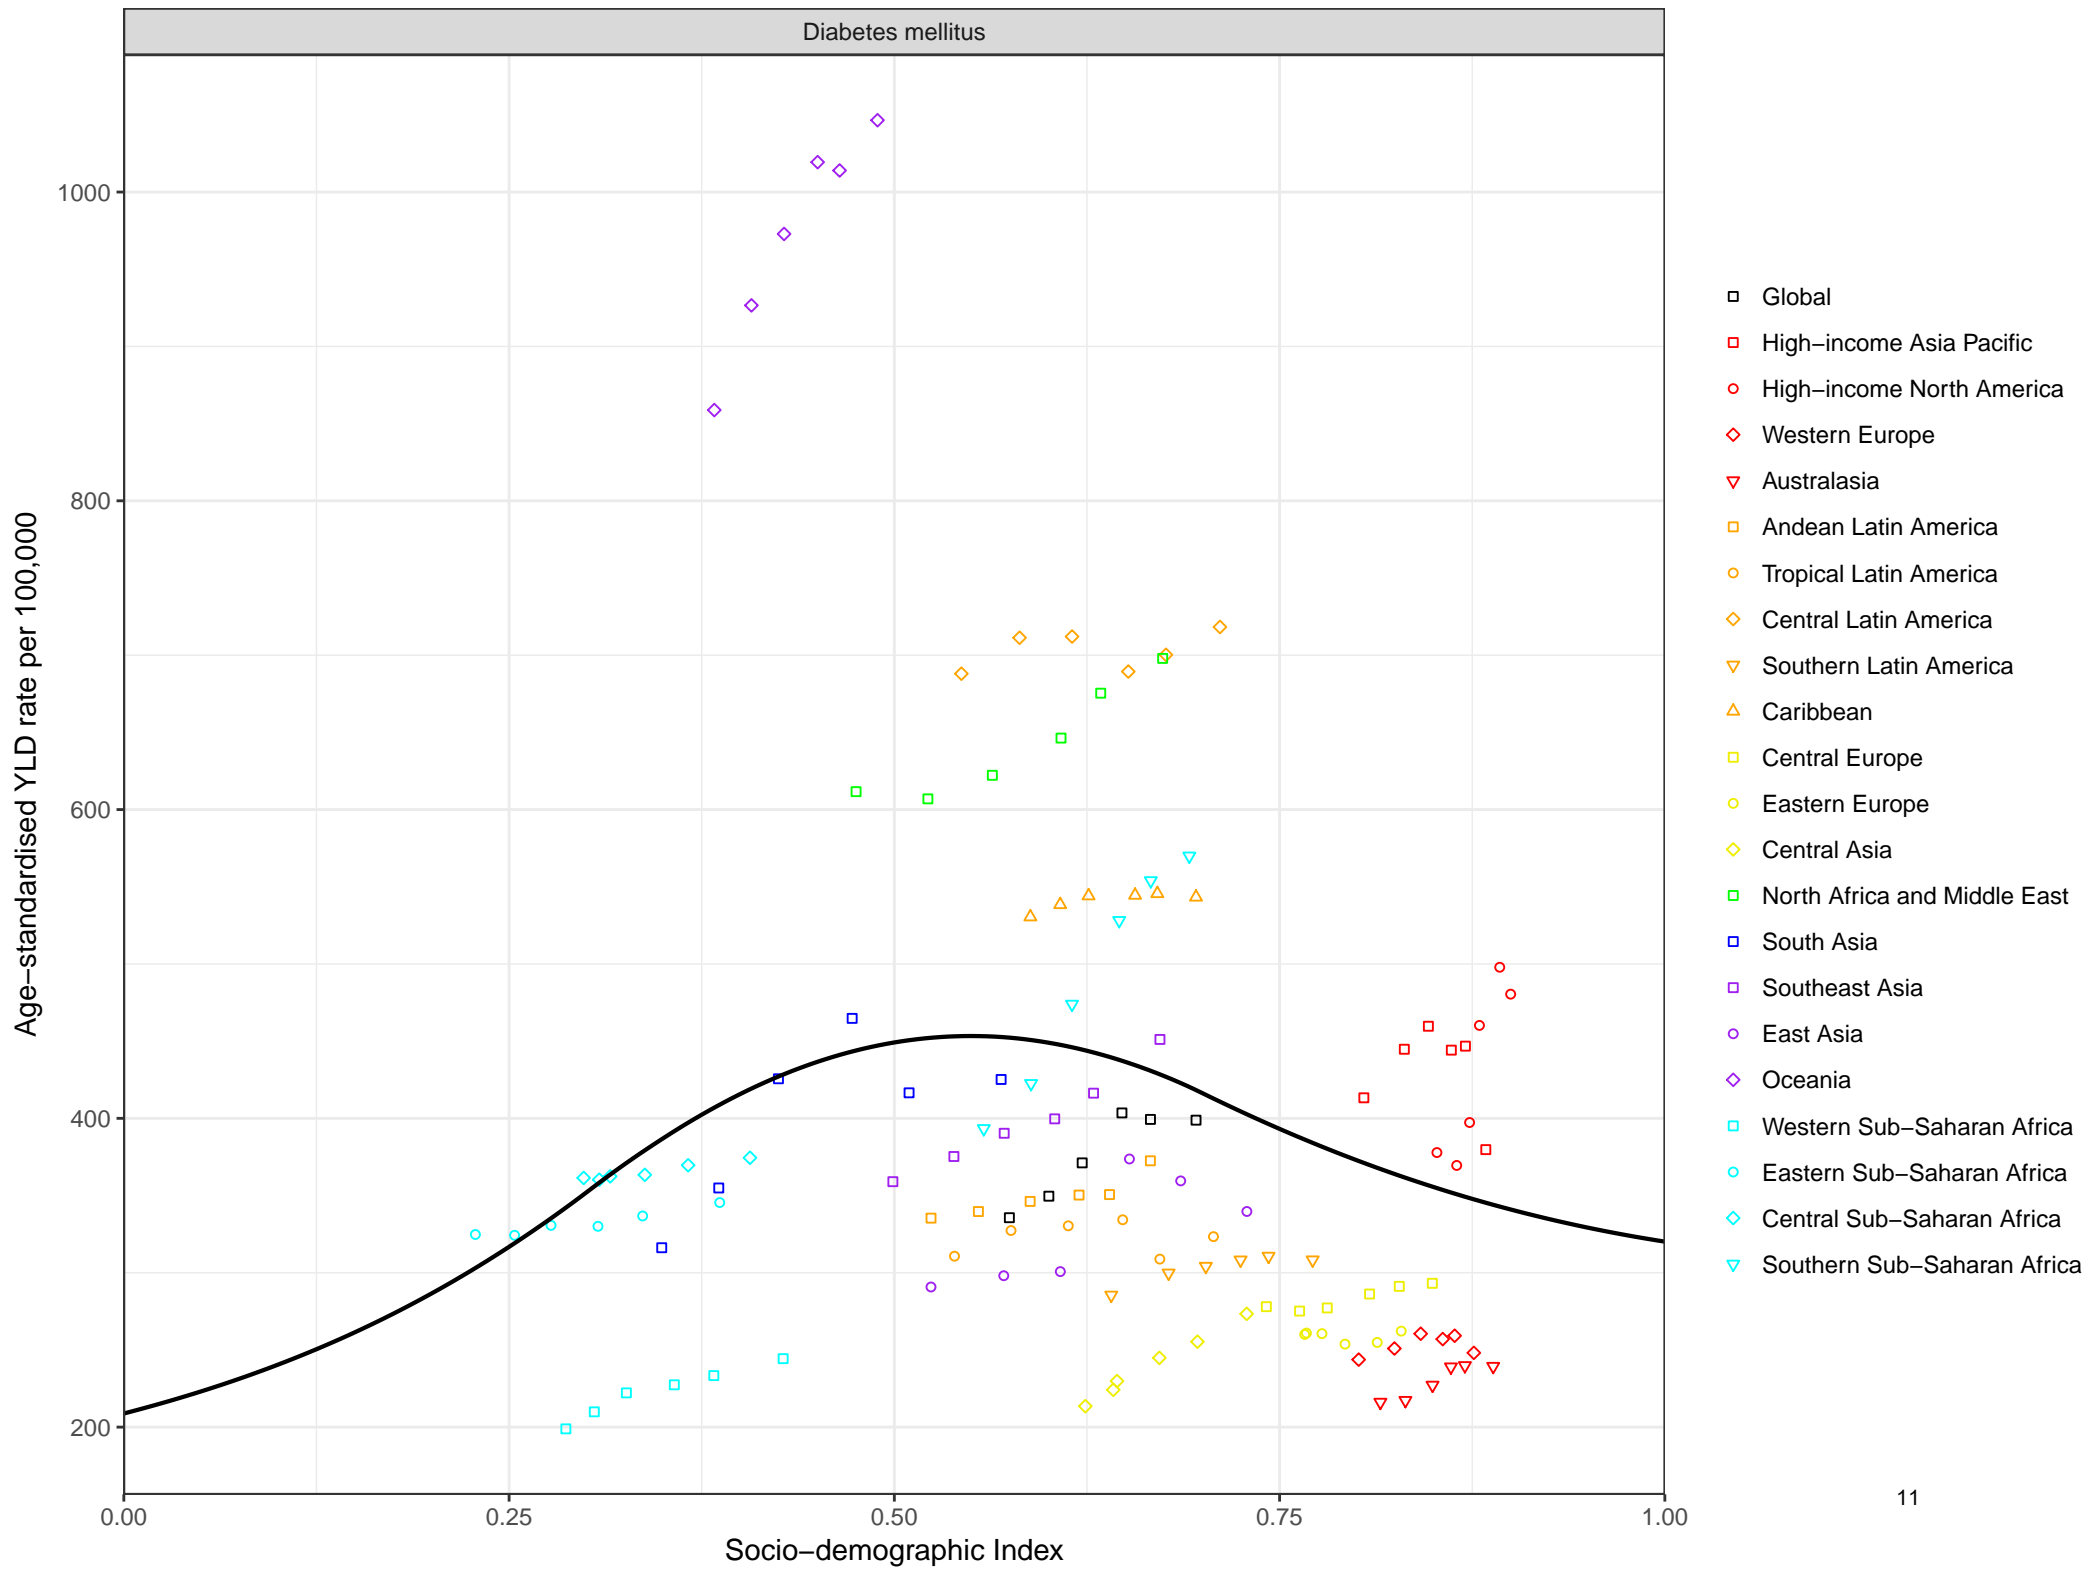

SR Figure 2: Co-evolution of age-standardised YLD rates per 100,000 for top ten YLD Level 4 causes and the socio-demographic index (SDI), by GBD region

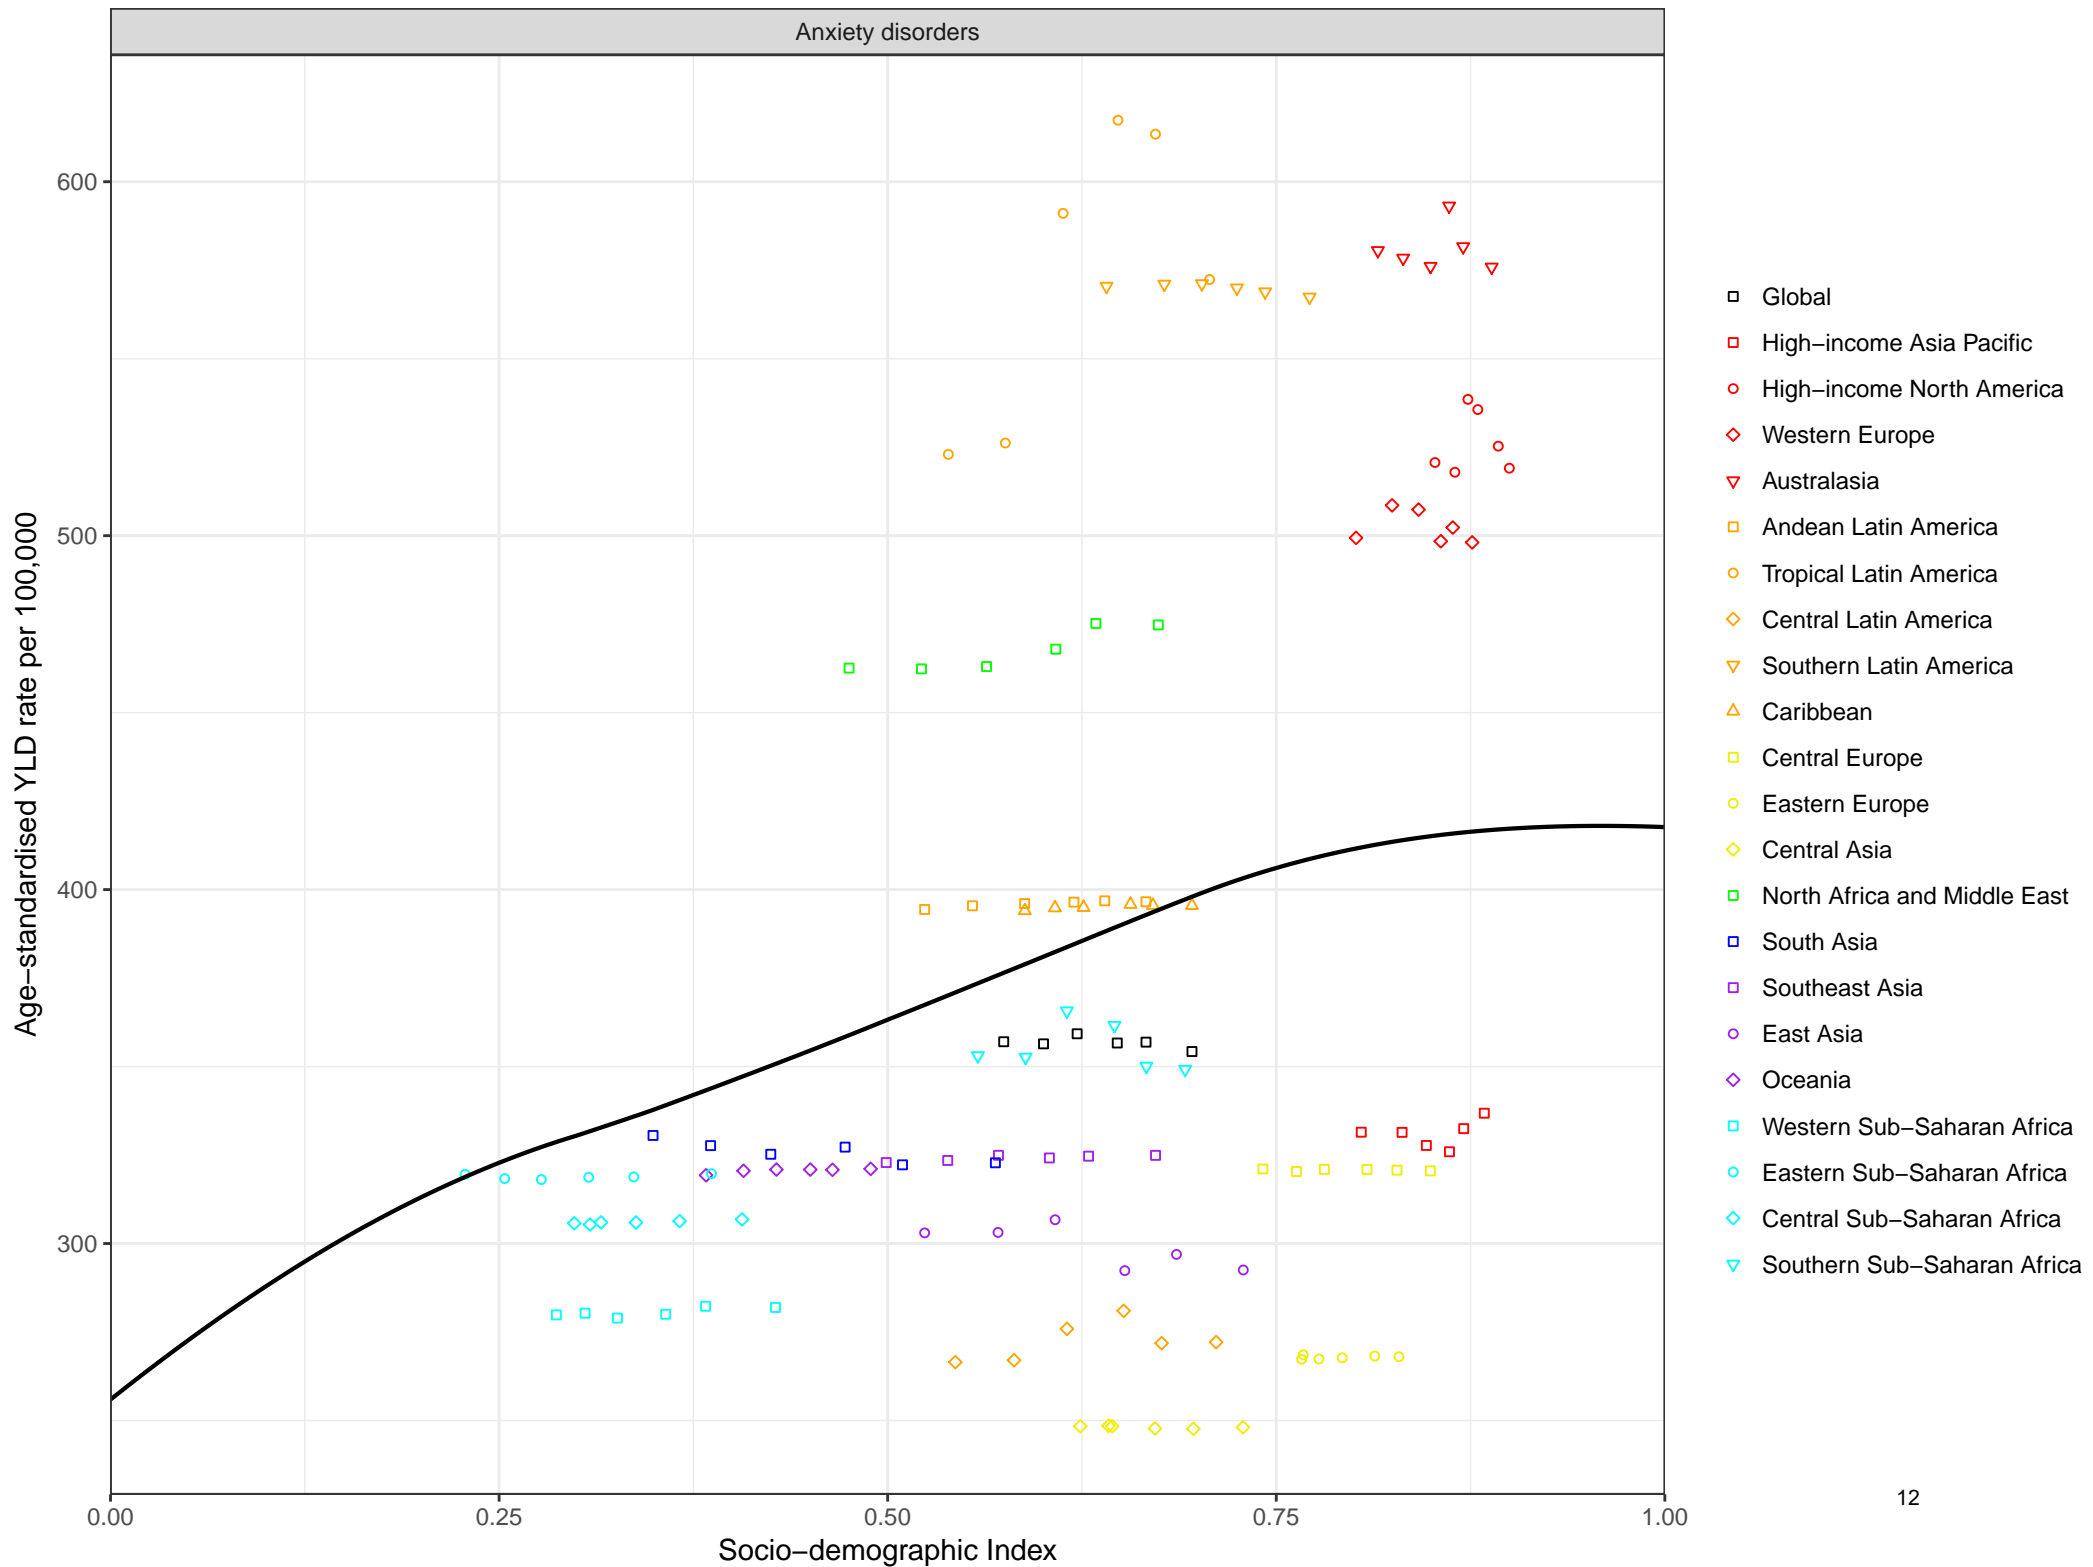

SR Figure 2: Co-evolution of age-standardised YLD rates per 100,000 for top ten YLD Level 4 causes and the socio-demographic index (SDI), by GBD region

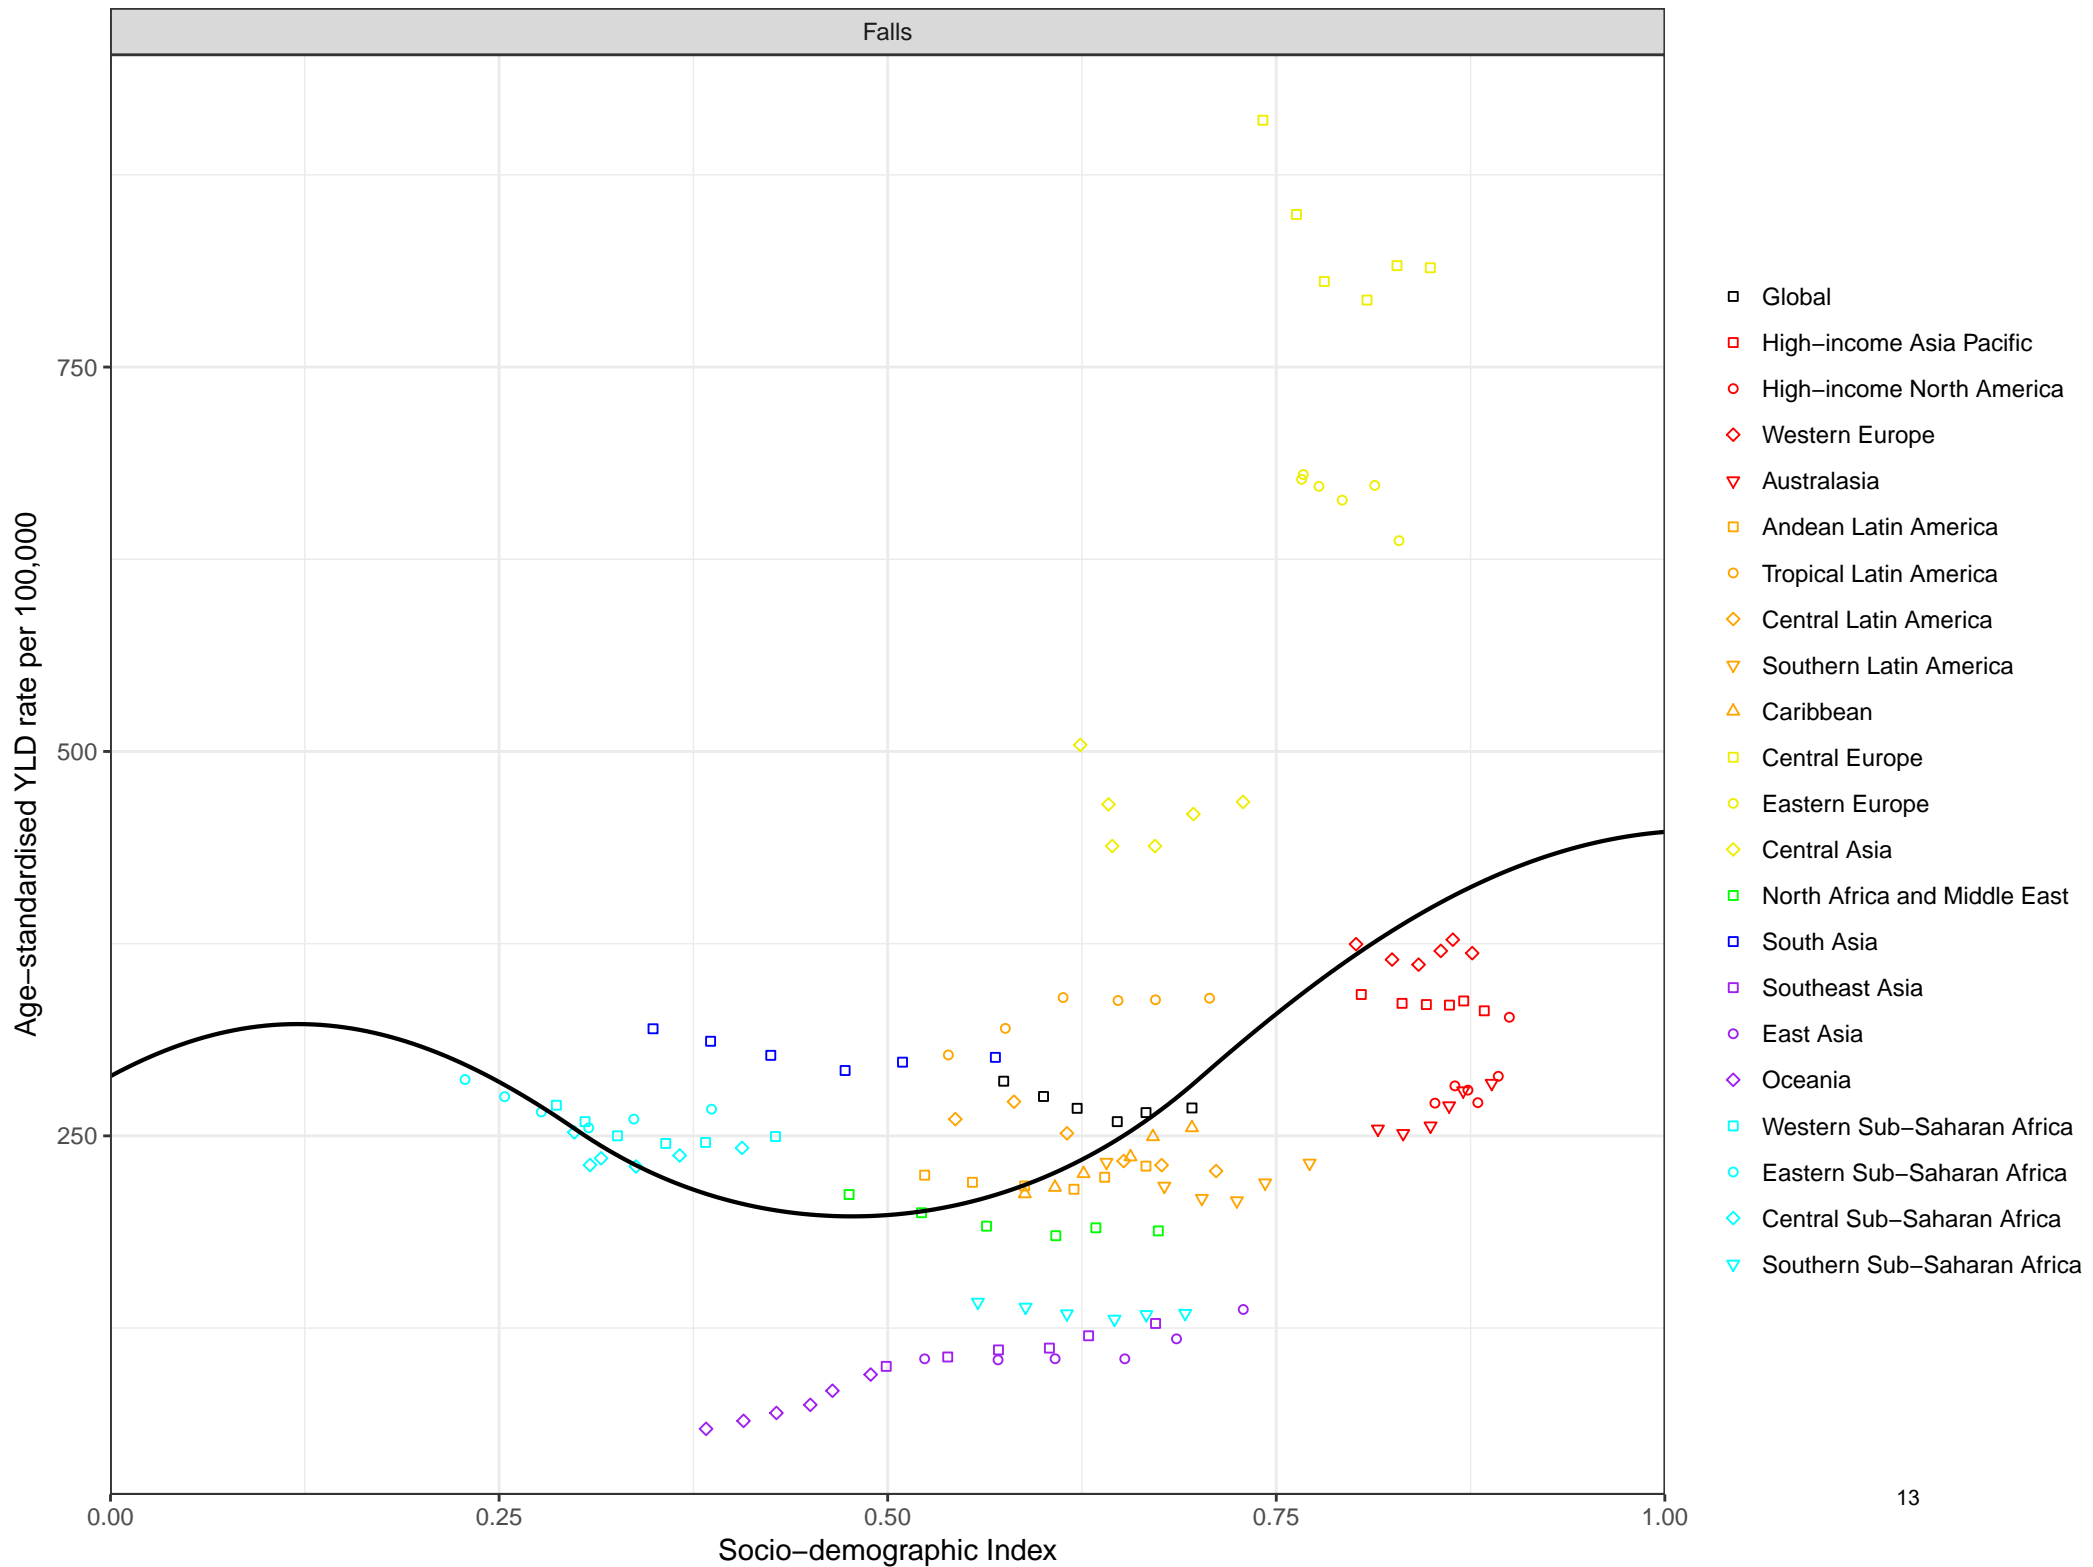

**SR Figure 3: Leading 30 Level 4 causes of YLDs, high SDI quintile for 1990, 2006, and 2016, with mean percentage change in number of YLDs, and all-age and age-standardised YLD rates**

Causes are connected by arrows between time periods; solid lines are increases and dashed lines are decreases. For the time period 1990 to 2006 and for 2006 to 2016, three measures of change are shown: percentage change in the number of YLDs, percentage change in the all-age YLD rate, and percentage change in the age-standardised YLD rate. Communicable, maternal, neonatal, and nutritional disorders are shown in red, non-communicable causes in blue, and injuries in green.

Statistically significant changes are shown in bold. COPD=chronic obstructive pulmonary disease. YLDs=years lived with disability.

| Leading causes 1990           | Leading causes 2006           | Mean % change number of YLDs 1990-2006 | Mean % change all-age YLD rate 1990-2006 | Mean % change age-standardised YLD rate 1990-2006 | Leading causes 2016           | Mean % change number of YLDs 2006-2016 | Mean % change all-age YLD rate 2006-2016 | Mean % change age-standardised YLD rate 2006-2016 |
|-------------------------------|-------------------------------|----------------------------------------|------------------------------------------|---------------------------------------------------|-------------------------------|----------------------------------------|------------------------------------------|---------------------------------------------------|
| 1 Low back pain               | 1 Low back pain               | 13.3                                   | 3.1                                      | -4.8                                              | 1 Low back pain               | 11.3                                   | 5.6                                      | 1.3                                               |
| 2 Migraine                    | 2 Migraine                    | 10.4                                   | 0.5                                      | -0.8                                              | 2 Migraine                    | 2.8                                    | -2.4                                     | -0.9                                              |
| 3 Major depression            | 3 Major depression            | 12.0                                   | 2.0                                      | 0.7                                               | 3 Age-related hearing loss    | 19.6                                   | 13.6                                     | -0.6                                              |
| 4 Neck pain                   | 4 Neck pain                   | 22.9                                   | 11.9                                     | 0.2                                               | 4 Major depression            | 5.4                                    | 0.1                                      | 0.4                                               |
| 5 Anxiety disorders           | 5 Age-related hearing loss    | 33.0                                   | 21.1                                     | 1.5                                               | 5 Neck pain                   | 10.8                                   | 5.2                                      | -0.2                                              |
| 6 Age-related hearing loss    | 6 Anxiety disorders           | 12.6                                   | 2.5                                      | 1.4                                               | 6 Diabetes                    | 15.1                                   | 9.2                                      | -1.4                                              |
| 7 Other musculoskeletal       | 7 Diabetes                    | 43.7                                   | 30.8                                     | 12.4                                              | 7 Falls                       | 22.2                                   | 16.0                                     | 5.5                                               |
| 8 Falls                       | 8 Other musculoskeletal       | 21.2                                   | 10.3                                     | 4.9                                               | 8 Anxiety disorders           | 4.0                                    | -1.2                                     | -0.3                                              |
| 9 Diabetes                    | 9 Falls                       | 18.8                                   | 8.2                                      | -4.7                                              | 9 Other musculoskeletal       | 7.5                                    | 2.1                                      | 0.6                                               |
| 10 Acne vulgaris              | 10 Acne vulgaris              | 3.4                                    | -5.9                                     | 4.3                                               | 10 Osteoarthritis             | 19.6                                   | 13.5                                     | 1.1                                               |
| 11 Asthma                     | 11 Osteoarthritis             | 37.5                                   | 25.2                                     | 5.3                                               | 11 Acne vulgaris              | -2.9                                   | -7.8                                     | -0.2                                              |
| 12 Dermatitis                 | 12 Asthma                     | 1.9                                    | -7.2                                     | -6.7                                              | 12 Opioid use disorders       | 12.2                                   | 6.5                                      | 9.7                                               |
| 13 Opioid use disorders       | 13 Opioid use disorders       | 11.2                                   | 1.3                                      | 7.6                                               | 13 Edentulism                 | 20.0                                   | 13.9                                     | 0.7                                               |
| 14 Osteoarthritis             | 14 Dermatitis                 | 7.6                                    | -2.1                                     | 2.0                                               | 14 Ischemic stroke            | 13.6                                   | 7.9                                      | -6.8                                              |
| 15 Schizophrenia              | 15 Ischemic stroke            | 28.1                                   | 16.6                                     | -5.6                                              | 15 COPD                       | 15.6                                   | 9.7                                      | -2.4                                              |
| 16 Edentulism                 | 16 Edentulism                 | 26.2                                   | 14.9                                     | -2.6                                              | 16 Asthma                     | 1.5                                    | -3.6                                     | -3.7                                              |
| 17 Ischemic stroke            | 17 COPD                       | 36.2                                   | 24.0                                     | 5.3                                               | 17 Alzheimer disease          | 31.8                                   | 25.1                                     | 0.1                                               |
| 18 COPD                       | 18 Schizophrenia              | 17.2                                   | 6.7                                      | 1.7                                               | 18 Dermatitis                 | 4.7                                    | -0.6                                     | 0.8                                               |
| 19 Bipolar disorder           | 19 Alzheimer disease          | 48.8                                   | 35.5                                     | 0.7                                               | 19 Schizophrenia              | 6.6                                    | 1.2                                      | 0.7                                               |
| 20 Other mental & substance   | 20 Other mental & substance   | 15.5                                   | 5.2                                      | 0.5                                               | 20 Other mental & substance   | 7.5                                    | 2.0                                      | 0.4                                               |
| 21 Alcohol use disorders      | 21 Bipolar disorder           | 11.7                                   | 1.7                                      | 0.6                                               | 21 Bipolar disorder           | 4.9                                    | -0.5                                     | 0.3                                               |
| 22 Other cardiovascular       | 22 Alcohol use disorders      | 4.7                                    | -4.7                                     | -2.8                                              | 22 Dysthymia                  | 9.1                                    | 3.6                                      | 1.2                                               |
| 23 Ischemic heart disease     | 23 Dysthymia                  | 15.0                                   | 4.7                                      | -0.4                                              | 23 Alcohol use disorders      | 3.5                                    | -1.7                                     | 0.5                                               |
| 24 Dysthymia                  | 24 Refraction & accommodation | 14.0                                   | 3.8                                      | -5.0                                              | 24 Refraction & accommodation | 9.3                                    | 3.7                                      | -3.4                                              |
| 25 Refraction & accommodation | 25 Other cardiovascular       | -2.0                                   | -10.8                                    | -24.1                                             | 25 Other cardiovascular       | 10.2                                   | 4.6                                      | -7.0                                              |
| 26 Alzheimer disease          | 26 Psoriasis                  | 20.1                                   | 9.3                                      | 4.8                                               | 26 Psoriasis                  | 10.4                                   | 4.8                                      | 2.5                                               |
| 27 Psoriasis                  | 27 Ischemic heart disease     | 0.0                                    | -9.0                                     | -24.8                                             | 27 Ischemic heart disease     | 12.3                                   | 6.6                                      | -7.7                                              |
| 28 Upper respiratory infect   | 28 Rheumatoid arthritis       | 27.8                                   | 16.3                                     | 2.7                                               | 28 Rheumatoid arthritis       | 16.0                                   | 10.1                                     | 2.0                                               |
| 29 Rheumatoid arthritis       | 29 Other sense organ          | 24.9                                   | 13.7                                     | 0.8                                               | 29 Other sense organ          | 15.7                                   | 9.9                                      | 0.5                                               |
| 30 Other sense organ          | 30 Atrial fibrillation        | 32.3                                   | 20.4                                     | -3.1                                              | 30 Atrial fibrillation        | 22.3                                   | 16.1                                     | -1.2                                              |
| 34 Atrial fibrillation        | 32 Upper respiratory infect   |                                        |                                          |                                                   | 32 Upper respiratory infect   |                                        |                                          |                                                   |

**Legend:**  
 Communicable, maternal, neonatal, and nutritional  
 Non-communicable  
 Injuries



**SR Figure 3: Leading 30 Level 4 causes of YLDs, high-middle SDI quintile for 1990, 2006, and 2016, with mean percentage change in number of YLDs, and all-age and age-standardised YLD rates**

Causes are connected by arrows between time periods; solid lines are increases and dashed lines are decreases. For the time period 1990 to 2006 and for 2006 to 2016, three measures of change are shown: percentage change in the number of YLDs, percentage change in the all-age YLD rate, and percentage change in the age-standardised YLD rate. Communicable, maternal, neonatal, and nutritional disorders are shown in red, non-communicable causes in blue, and injuries in green.

Statistically significant changes are shown in bold. COPD=chronic obstructive pulmonary disease. YLDs=years lived with disability.

| Leading causes 1990           | Leading causes 2006           | Mean % change number of YLDs 1990-2006 | Mean % change all-age YLD rate 1990-2006 | Mean % change age-standardised YLD rate 1990-2006 | Leading causes 2016           | Mean % change number of YLDs 2006-2016 | Mean % change all-age YLD rate 2006-2016 | Mean % change age-standardised YLD rate 2006-2016 |
|-------------------------------|-------------------------------|----------------------------------------|------------------------------------------|---------------------------------------------------|-------------------------------|----------------------------------------|------------------------------------------|---------------------------------------------------|
| 1 Low back pain               | 1 Low back pain               | 18.2                                   | -0.5                                     | -11.9                                             | 1 Low back pain               | 15.4                                   | 3.9                                      | -3.8                                              |
| 2 Migraine                    | 2 Migraine                    | 26.2                                   | 6.2                                      | -2.3                                              | 2 Migraine                    | 11.5                                   | 0.3                                      | -1.2                                              |
| 3 Major depression            | 3 Major depression            | 27.9                                   | 7.7                                      | -2.1                                              | 3 Major depression            | 9.1                                    | -1.8                                     | -5.0                                              |
| 4 Age-related hearing loss    | 4 Age-related hearing loss    | 32.7                                   | 11.7                                     | -2.1                                              | 4 Age-related hearing loss    | 19.8                                   | 7.8                                      | -3.7                                              |
| 5 Falls                       | 5 Neck pain                   | 41.5                                   | 19.1                                     | 2.8                                               | 5 Neck pain                   | 22.3                                   | 10.1                                     | 1.0                                               |
| 6 Neck pain                   | 6 Anxiety disorders           | 30.1                                   | 9.5                                      | 3.5                                               | 6 Diabetes                    | 27.5                                   | 14.8                                     | 2.1                                               |
| 7 Anxiety disorders           | 7 Falls                       | 13.1                                   | -4.8                                     | -14.2                                             | 7 Falls                       | 14.5                                   | 3.1                                      | -5.2                                              |
| 8 Diabetes                    | 8 Diabetes                    | 54.5                                   | 30.1                                     | 12.3                                              | 8 Anxiety disorders           | 11.9                                   | 0.7                                      | 0.7                                               |
| 9 Other musculoskeletal       | 9 Other musculoskeletal       | 44.3                                   | 21.5                                     | 9.1                                               | 9 Other musculoskeletal       | 21.0                                   | 8.9                                      | 3.3                                               |
| 10 Iron-deficiency anemia     | 10 Osteoarthritis             | 45.4                                   | 22.4                                     | 4.6                                               | 10 Osteoarthritis             | 30.0                                   | 17.0                                     | 1.8                                               |
| 11 Acne vulgaris              | 11 Ischemic stroke            | 31.6                                   | 10.8                                     | -5.8                                              | 11 Ischemic stroke            | 30.9                                   | 17.8                                     | 2.1                                               |
| 12 Ischemic stroke            | 12 Acne vulgaris              | 22.8                                   | 3.4                                      | 5.0                                               | 12 Schizophrenia              | 21.6                                   | 9.4                                      | 3.3                                               |
| 13 Alcohol use disorders      | 13 Alcohol use disorders      | 20.4                                   | 1.4                                      | -8.0                                              | 13 Refraction & accommodation | 14.0                                   | 2.6                                      | -5.1                                              |
| 14 Osteoarthritis             | 14 Schizophrenia              | 38.2                                   | 16.4                                     | 4.2                                               | 14 Acne vulgaris              | -3.5                                   | -13.1                                    | 3.2                                               |
| 15 Asthma                     | 15 Refraction & accommodation | 19.7                                   | 0.8                                      | -6.8                                              | 15 Alcohol use disorders      | 2.2                                    | -8.0                                     | -11.1                                             |
| 16 Refraction & accommodation | 16 Iron-deficiency anemia     | -5.3                                   | -20.3                                    | -14.5                                             | 16 Opioid use disorders       | 10.4                                   | -0.6                                     | -3.9                                              |
| 17 Schizophrenia              | 17 Opioid use disorders       | 27.9                                   | 7.6                                      | 0.5                                               | 17 Asthma                     | 12.8                                   | 1.6                                      | 2.3                                               |
| 18 Opioid use disorders       | 18 Asthma                     | 6.3                                    | -10.5                                    | -8.9                                              | 18 Iron-deficiency anemia     | 0.7                                    | -9.4                                     | -6.9                                              |
| 19 Dermatitis                 | 19 Other mental & substance   | 32.7                                   | 11.7                                     | 0.2                                               | 19 Other mental & substance   | 17.4                                   | 5.6                                      | 0.1                                               |
| 20 Other mental & substance   | 20 Dysthymia                  | 33.4                                   | 12.3                                     | 0.4                                               | 20 Edentulism                 | 24.2                                   | 11.8                                     | -2.1                                              |
| 21 Bipolar disorder           | 21 Edentulism                 | 34.7                                   | 13.4                                     | -2.6                                              | 21 Dysthymia                  | 19.9                                   | 7.9                                      | 0.7                                               |
| 22 Dysthymia                  | 22 Bipolar disorder           | 27.6                                   | 7.4                                      | -1.0                                              | 22 COPD                       | 25.8                                   | 13.3                                     | 0.3                                               |
| 23 Edentulism                 | 23 Dermatitis                 | 10.7                                   | -6.8                                     | 0.3                                               | 23 Bipolar disorder           | 10.4                                   | -0.7                                     | -0.4                                              |
| 24 COPD                       | 24 COPD                       | 29.4                                   | 8.9                                      | -5.3                                              | 24 Ischemic heart disease     | 25.3                                   | 12.8                                     | -1.3                                              |
| 25 Ischemic heart disease     | 25 Ischemic heart disease     | 30.6                                   | 9.9                                      | -6.9                                              | 25 Dermatitis                 | 9.8                                    | -1.2                                     | 1.1                                               |
| 26 Tension headache           | 26 Tension headache           | 27.4                                   | 7.2                                      | -2.0                                              | 26 Tension headache           | 13.3                                   | 2.0                                      | -0.5                                              |
| 27 Epilepsy                   | 27 Epilepsy                   | 8.2                                    | -8.9                                     | -6.4                                              | 27 Alzheimer disease          | 38.3                                   | 24.5                                     | 1.5                                               |
| 28 Upper respiratory infect   | 28 Other sense organ          | 33.6                                   | 12.5                                     | 1.2                                               | 28 Other sense organ          | 22.9                                   | 10.6                                     | 0.9                                               |
| 29 Neonatal preterm birth     | 29 Upper respiratory infect   | 11.0                                   | -6.6                                     | -3.1                                              | 29 Psoriasis                  | 21.0                                   | 8.9                                      | 5.2                                               |
| 30 Conduct disorder           | 30 Alzheimer disease          | 58.6                                   | 33.6                                     | 6.9                                               | 30 Upper respiratory infect   | 6.5                                    | -4.1                                     | -2.0                                              |
| 34 Other sense organ          | 31 Neonatal preterm birth     |                                        |                                          |                                                   | 32 Epilepsy                   |                                        |                                          |                                                   |
| 35 Psoriasis                  | 32 Psoriasis                  |                                        |                                          |                                                   | 34 Neonatal preterm birth     |                                        |                                          |                                                   |
| 38 Alzheimer disease          | 35 Conduct disorder           |                                        |                                          |                                                   | 44 Conduct disorder           |                                        |                                          |                                                   |

**Legend:**  
 Communicable, maternal, neonatal, and nutritional  
 Non-communicable  
 Injuries

**SR Figure 3: Leading 30 Level 4 causes of YLDs, middle SDI quintile for 1990, 2006, and 2016, with mean percentage change in number of YLDs, and all-age and age-standardised YLD rates**

Causes are connected by arrows between time periods; solid lines are increases and dashed lines are decreases. For the time period 1990 to 2006 and for 2006 to 2016, three measures of change are shown: percentage change in the number of YLDs, percentage change in the all-age YLD rate, and percentage change in the age-standardised YLD rate. Communicable, maternal, neonatal, and nutritional disorders are shown in red, non-communicable causes in blue, and injuries in green.

Statistically significant changes are shown in bold. COPD=chronic obstructive pulmonary disease. YLDs=years lived with disability.

| Leading causes 1990           | Leading causes 2006           | Mean % change number of YLDs 1990-2006 | Mean % change all-age YLD rate 1990-2006 | Mean % change age-standardised YLD rate 1990-2006 | Leading causes 2016           | Mean % change number of YLDs 2006-2016 | Mean % change all-age YLD rate 2006-2016 | Mean % change age-standardised YLD rate 2006-2016 |
|-------------------------------|-------------------------------|----------------------------------------|------------------------------------------|---------------------------------------------------|-------------------------------|----------------------------------------|------------------------------------------|---------------------------------------------------|
| 1 Low back pain               | 1 Low back pain               | 26.0                                   | 4.8                                      | -12.1                                             | 1 Low back pain               | 17.8                                   | 9.7                                      | -1.2                                              |
| 2 Migraine                    | 2 Migraine                    | 35.5                                   | 12.7                                     | 2.3                                               | 2 Migraine                    | 12.1                                   | 4.4                                      | 2.2                                               |
| 3 Major depression            | 3 Age-related hearing loss    | 42.0                                   | 18.1                                     | -3.4                                              | 3 Age-related hearing loss    | 22.4                                   | 14.0                                     | -3.0                                              |
| 4 Age-related hearing loss    | 4 Major depression            | 27.3                                   | 5.9                                      | -4.5                                              | 4 Neck pain                   | 20.8                                   | 12.6                                     | -0.8                                              |
| 5 Other musculoskeletal       | 5 Neck pain                   | 49.3                                   | 24.1                                     | -0.9                                              | 5 Diabetes                    | 24.3                                   | 15.8                                     | -1.6                                              |
| 6 Neck pain                   | 6 Other musculoskeletal       | 43.1                                   | 19.0                                     | 2.6                                               | 6 Major depression            | 8.1                                    | 0.7                                      | -6.6                                              |
| 7 Anxiety disorders           | 7 Diabetes                    | 84.5                                   | 53.4                                     | 21.3                                              | 7 Other musculoskeletal       | 11.6                                   | 4.0                                      | -4.8                                              |
| 8 Iron-deficiency anemia      | 8 Anxiety disorders           | 29.6                                   | 7.8                                      | 0.7                                               | 8 Anxiety disorders           | 9.8                                    | 2.3                                      | 0.1                                               |
| 9 Diabetes                    | 9 Iron-deficiency anemia      | 16.5                                   | -3.1                                     | 3.4                                               | 9 Iron-deficiency anemia      | 3.3                                    | -3.8                                     | -1.7                                              |
| 10 Acne vulgaris              | 10 Acne vulgaris              | 17.7                                   | -2.1                                     | 5.4                                               | 10 Osteoarthritis             | 34.7                                   | 25.4                                     | 1.8                                               |
| 11 Refraction & accommodation | 11 Schizophrenia              | 36.0                                   | 13.1                                     | -2.2                                              | 11 COPD                       | 28.9                                   | 20.1                                     | -1.4                                              |
| 12 Schizophrenia              | 12 Refraction & accommodation | 27.9                                   | 6.4                                      | -6.6                                              | 12 Schizophrenia              | 12.3                                   | 4.6                                      | -2.1                                              |
| 13 Asthma                     | 13 Osteoarthritis             | 71.6                                   | 42.7                                     | 7.2                                               | 13 Refraction & accommodation | 15.8                                   | 7.9                                      | -5.0                                              |
| 14 COPD                       | 14 COPD                       | 43.6                                   | 19.5                                     | -5.8                                              | 14 Acne vulgaris              | -4.5                                   | -11.0                                    | 3.3                                               |
| 15 Osteoarthritis             | 15 Asthma                     | 11.9                                   | -7.0                                     | -4.3                                              | 15 Ischemic stroke            | 50.1                                   | 39.8                                     | 12.2                                              |
| 16 Dermatitis                 | 16 Ischemic stroke            | 63.7                                   | 36.1                                     | 6.9                                               | 16 Falls                      | 38.8                                   | 29.3                                     | 15.4                                              |
| 17 Opioid use disorders       | 17 Dysthymia                  | 43.3                                   | 19.1                                     | -0.2                                              | 17 Asthma                     | 12.6                                   | 4.9                                      | 5.3                                               |
| 18 Epilepsy                   | 18 Other mental & substance   | 39.0                                   | 15.6                                     | 0.1                                               | 18 Dysthymia                  | 20.0                                   | 11.8                                     | 0.0                                               |
| 19 Other mental & substance   | 19 Dermatitis                 | 12.5                                   | -6.5                                     | 1.1                                               | 19 Other mental & substance   | 15.3                                   | 7.4                                      | 0.1                                               |
| 20 Dysthymia                  | 20 Falls                      | 39.8                                   | 16.2                                     | -0.1                                              | 20 Opioid use disorders       | 10.4                                   | 2.8                                      | -0.8                                              |
| 21 Falls                      | 21 Opioid use disorders       | 11.9                                   | -6.9                                     | -12.5                                             | 21 Dermatitis                 | 5.3                                    | -1.9                                     | 1.3                                               |
| 22 Diarrheal diseases         | 22 Alcohol use disorders      | 41.5                                   | 17.7                                     | 6.0                                               | 22 Alcohol use disorders      | 8.3                                    | 0.9                                      | -3.1                                              |
| 23 Neonatal preterm birth     | 23 Epilepsy                   | 13.4                                   | -5.7                                     | -3.8                                              | 23 Neonatal preterm birth     | 11.5                                   | 3.9                                      | 8.6                                               |
| 24 Ascariasis                 | 24 Neonatal preterm birth     | 22.1                                   | 1.6                                      | 8.1                                               | 24 Bipolar disorder           | 13.3                                   | 5.6                                      | 3.7                                               |
| 25 Alcohol use disorders      | 25 Bipolar disorder           | 36.5                                   | 13.5                                     | 4.0                                               | 25 Epilepsy                   | 1.3                                    | -5.6                                     | -4.5                                              |
| 26 Ischemic stroke            | 26 Tension headache           | 34.9                                   | 12.2                                     | 0.9                                               | 26 Edentulism                 | 34.1                                   | 25.0                                     | 1.2                                               |
| 27 Conduct disorder           | 27 Diarrheal diseases         | -3.9                                   | -20.1                                    | -13.4                                             | 27 Tension headache           | 13.0                                   | 5.3                                      | 1.9                                               |
| 28 Scabies                    | 28 Conduct disorder           | 4.2                                    | -13.4                                    | 0.1                                               | 28 Other sense organ          | 24.3                                   | 15.8                                     | 1.1                                               |
| 29 Bipolar disorder           | 29 Viral skin diseases        | 12.6                                   | -6.3                                     | 0.2                                               | 29 Ischemic heart disease     | 39.3                                   | 29.7                                     | 6.0                                               |
| 30 Viral skin diseases        | 30 Edentulism                 | 61.5                                   | 34.3                                     | 2.4                                               | 30 Diarrheal diseases         | 1.5                                    | -5.5                                     | -4.2                                              |
| 32 Tension headache           | 31 Other sense organ          |                                        |                                          |                                                   | 33 Viral skin diseases        |                                        |                                          |                                                   |
| 34 Other sense organ          | 32 Scabies                    |                                        |                                          |                                                   | 35 Conduct disorder           |                                        |                                          |                                                   |
| 40 Edentulism                 | 34 Ischemic heart disease     |                                        |                                          |                                                   | 36 Scabies                    |                                        |                                          |                                                   |
| 49 Ischemic heart disease     | 76 Ascariasis                 |                                        |                                          |                                                   | 98 Ascariasis                 |                                        |                                          |                                                   |

**Legend:**  
 Communicable, maternal, neonatal, and nutritional  
 Non-communicable  
 Injuries

**SR Figure 3: Leading 30 Level 4 causes of YLDs, low-middle SDI quintile for 1990, 2006, and 2016, with mean percentage change in number of YLDs, and all-age and age-standardised YLD rates**

Causes are connected by arrows between time periods; solid lines are increases and dashed lines are decreases. For the time period 1990 to 2006 and for 2006 to 2016, three measures of change are shown: percentage change in the number of YLDs, percentage change in the all-age YLD rate, and percentage change in the age-standardised YLD rate. Communicable, maternal, neonatal, and nutritional disorders are shown in red, non-communicable causes in blue, and injuries in green.

Statistically significant changes are shown in bold. COPD=chronic obstructive pulmonary disease. YLDs=years lived with disability.

| Leading causes 1990            | Leading causes 2006            | Mean % change number of YLDs 1990-2006 | Mean % change all-age YLD rate 1990-2006 | Mean % change age-standardised YLD rate 1990-2006 | Leading causes 2016            | Mean % change number of YLDs 2006-2016 | Mean % change all-age YLD rate 2006-2016 | Mean % change age-standardised YLD rate 2006-2016 |
|--------------------------------|--------------------------------|----------------------------------------|------------------------------------------|---------------------------------------------------|--------------------------------|----------------------------------------|------------------------------------------|---------------------------------------------------|
| 1 Iron-deficiency anemia       | 1 Iron-deficiency anemia       | 21.5                                   | -10.6                                    | -7.2                                              | 1 Iron-deficiency anemia       | 6.4                                    | -8.8                                     | -6.7                                              |
| 2 Migraine                     | 2 Migraine                     | 45.4                                   | 7.0                                      | 0.1                                               | 2 Migraine                     | 20.7                                   | 3.5                                      | -0.1                                              |
| 3 Low back pain                | 3 Low back pain                | 40.3                                   | 3.2                                      | -7.3                                              | 3 Low back pain                | 23.3                                   | 5.7                                      | -1.6                                              |
| 4 Major depression             | 4 Major depression             | 47.9                                   | 8.8                                      | 1.5                                               | 4 Age-related hearing loss     | 23.5                                   | 5.9                                      | -3.1                                              |
| 5 Age-related hearing loss     | 5 Other musculoskeletal        | 54.9                                   | 14.0                                     | 4.3                                               | 5 Major depression             | 13.8                                   | -2.4                                     | -8.5                                              |
| 6 Other musculoskeletal        | 6 Age-related hearing loss     | 43.9                                   | 5.9                                      | -3.2                                              | 6 Other musculoskeletal        | 16.4                                   | -0.2                                     | -6.7                                              |
| 7 Anxiety disorders            | 7 Anxiety disorders            | 43.6                                   | 5.6                                      | 0.6                                               | 7 Anxiety disorders            | 19.2                                   | 2.2                                      | -0.8                                              |
| 8 COPD                         | 8 Diabetes                     | 109.9                                  | 54.5                                     | 37.4                                              | 8 Diabetes                     | 24.8                                   | 7.0                                      | -3.6                                              |
| 9 Refraction & accommodation   | 9 COPD                         | 38.8                                   | 2.1                                      | -9.2                                              | 9 COPD                         | 35.2                                   | 16.0                                     | 2.7                                               |
| 10 Neck pain                   | 10 Neck pain                   | 48.0                                   | 8.9                                      | -3.2                                              | 10 Neck pain                   | 33.2                                   | 14.2                                     | 3.9                                               |
| 11 Acne vulgaris               | 11 Refraction & accommodation  | 34.1                                   | -1.3                                     | -8.5                                              | 11 Refraction & accommodation  | 14.4                                   | -1.9                                     | -10.0                                             |
| 12 Diarrheal diseases          | 12 Acne vulgaris               | 43.5                                   | 5.6                                      | 5.6                                               | 12 Acne vulgaris               | 16.8                                   | 0.2                                      | 5.1                                               |
| 13 Diabetes                    | 13 Falls                       | 37.4                                   | 1.1                                      | -6.4                                              | 13 Falls                       | 34.2                                   | 15.1                                     | 5.5                                               |
| 14 Falls                       | 14 Diarrheal diseases          | 12.9                                   | -17.0                                    | -15.8                                             | 14 Neonatal preterm birth      | 28.8                                   | 10.4                                     | 14.9                                              |
| 15 Iodine deficiency           | 15 Neonatal preterm birth      | 73.7                                   | 27.8                                     | 34.9                                              | 15 Osteoarthritis              | 38.0                                   | 18.3                                     | 3.2                                               |
| 16 Dermatitis                  | 16 Dermatitis                  | 30.5                                   | -4.0                                     | 0.4                                               | 16 Asthma                      | 30.5                                   | 11.9                                     | 10.0                                              |
| 17 Asthma                      | 17 Asthma                      | 33.1                                   | -2.1                                     | -3.2                                              | 17 Diarrheal diseases          | 7.4                                    | -7.9                                     | -8.4                                              |
| 18 Epilepsy                    | 18 Osteoarthritis              | 62.6                                   | 19.6                                     | 4.3                                               | 18 Dermatitis                  | 16.0                                   | -0.5                                     | 2.3                                               |
| 19 Schizophrenia               | 19 Schizophrenia               | 49.1                                   | 9.7                                      | -0.7                                              | 19 Schizophrenia               | 25.1                                   | 7.2                                      | -0.4                                              |
| 20 Neonatal preterm birth      | 20 Alcohol use disorders       | 49.7                                   | 10.2                                     | 1.6                                               | 20 Opioid use disorders        | 34.5                                   | 15.3                                     | 10.0                                              |
| 21 Osteoarthritis              | 21 Opioid use disorders        | 53.1                                   | 12.7                                     | 4.8                                               | 21 Other mental & substance    | 24.8                                   | 7.0                                      | 0.3                                               |
| 22 Alcohol use disorders       | 22 Other mental & substance    | 49.6                                   | 10.1                                     | 0.2                                               | 22 Alcohol use disorders       | 14.3                                   | -2.0                                     | -7.2                                              |
| 23 Conduct disorder            | 23 Epilepsy                    | 21.5                                   | -10.6                                    | -10.0                                             | 23 Dysthymia                   | 26.2                                   | 8.2                                      | 1.0                                               |
| 24 Other mental & substance    | 24 Dysthymia                   | 49.8                                   | 10.3                                     | 0.7                                               | 24 Cataract                    | 34.1                                   | 15.0                                     | -0.9                                              |
| 25 Intellectual disability     | 25 Conduct disorder            | 29.2                                   | -5.0                                     | 0.5                                               | 25 Bipolar disorder            | 22.0                                   | 4.6                                      | 1.0                                               |
| 26 Opioid use disorders        | 26 Bipolar disorder            | 47.8                                   | 8.8                                      | 1.3                                               | 26 Epilepsy                    | 14.7                                   | -1.6                                     | -1.5                                              |
| 27 Protein-energy malnutrition | 27 Intellectual disability     | 26.5                                   | -6.9                                     | -7.6                                              | 27 Tension headache            | 21.1                                   | 3.8                                      | -0.3                                              |
| 28 Other congenital            | 28 Cataract                    | 64.5                                   | 21.1                                     | 3.3                                               | 28 Conduct disorder            | 9.3                                    | -6.3                                     | 1.7                                               |
| 29 Dysthymia                   | 29 Tension headache            | 44.7                                   | 6.5                                      | -0.6                                              | 29 Intellectual disability     | 3.0                                    | -11.7                                    | -11.2                                             |
| 30 Bipolar disorder            | 30 Other congenital            | 22.5                                   | -9.8                                     | -8.9                                              | 30 Protein-energy malnutrition | 11.2                                   | -4.6                                     | 7.0                                               |
| 31 Tension headache            | 31 Protein-energy malnutrition |                                        |                                          |                                                   | 31 Other congenital            |                                        |                                          |                                                   |
| 33 Cataract                    | 34 Iodine deficiency           |                                        |                                          |                                                   | 48 Iodine deficiency           |                                        |                                          |                                                   |

**Legend:**  
 Communicable, maternal, neonatal, and nutritional  
 Non-communicable  
 Injuries

**SR Figure 3: Leading 30 Level 4 causes of YLDs, low SDI quintile for 1990, 2006, and 2016, with mean percentage change in number of YLDs, and all-age and age-standardised YLD rates**

Causes are connected by arrows between time periods; solid lines are increases and dashed lines are decreases. For the time period 1990 to 2006 and for 2006 to 2016, three measures of change are shown: percentage change in the number of YLDs, percentage change in the all-age YLD rate, and percentage change in the age-standardised YLD rate. Communicable, maternal, neonatal, and nutritional disorders are shown in red, non-communicable causes in blue, and injuries in green.

Statistically significant changes are shown in bold. COPD=chronic obstructive pulmonary disease. YLDs=years lived with disability.

| Leading causes 1990            | Leading causes 2006            | Mean % change number of YLDs 1990-2006 | Mean % change all-age YLD rate 1990-2006 | Mean % change age-standardised YLD rate 1990-2006 | Leading causes 2016            | Mean % change number of YLDs 2006-2016 | Mean % change all-age YLD rate 2006-2016 | Mean % change age-standardised YLD rate 2006-2016 |
|--------------------------------|--------------------------------|----------------------------------------|------------------------------------------|---------------------------------------------------|--------------------------------|----------------------------------------|------------------------------------------|---------------------------------------------------|
| 1 Iron-deficiency anemia       | 1 Iron-deficiency anemia       | 42.5                                   | -9.9                                     | -9.6                                              | 1 Iron-deficiency anemia       | 21.2                                   | -8.4                                     | -7.7                                              |
| 2 Low back pain                | 2 Low back pain                | 53.5                                   | -2.9                                     | -2.7                                              | 2 Low back pain                | 36.2                                   | 3.0                                      | 0.9                                               |
| 3 Migraine                     | 3 Migraine                     | 60.2                                   | 1.3                                      | 0.5                                               | 3 Migraine                     | 33.8                                   | 1.2                                      | -0.5                                              |
| 4 Major depression             | 4 Major depression             | 57.7                                   | -0.3                                     | -0.5                                              | 4 Major depression             | 31.8                                   | -0.4                                     | -3.0                                              |
| 5 Age-related hearing loss     | 5 Age-related hearing loss     | 55.5                                   | -1.7                                     | -0.9                                              | 5 Age-related hearing loss     | 29.8                                   | -1.9                                     | -2.8                                              |
| 6 Anxiety disorders            | 6 Anxiety disorders            | 60.6                                   | 1.6                                      | 0.4                                               | 6 Anxiety disorders            | 34.2                                   | 1.4                                      | 0.1                                               |
| 7 Onchocerciasis               | 7 Acne vulgaris                | 72.5                                   | 9.1                                      | 5.6                                               | 7 Acne vulgaris                | 39.3                                   | 5.3                                      | 4.7                                               |
| 8 Iodine deficiency            | 8 Diarrheal diseases           | 48.9                                   | -5.8                                     | -3.9                                              | 8 Asthma                       | 39.6                                   | 5.5                                      | 6.0                                               |
| 9 Diarrheal diseases           | 9 HIV/AIDS other               | 255.7                                  | 125.0                                    | 129.5                                             | 9 Other musculoskeletal        | 31.1                                   | -0.9                                     | -3.4                                              |
| 10 Asthma                      | 10 Asthma                      | 53.1                                   | -3.2                                     | -3.5                                              | 10 Dermatitis                  | 32.4                                   | 0.0                                      | 1.0                                               |
| 11 Malaria                     | 11 Other musculoskeletal       | 64.5                                   | 4.1                                      | 4.3                                               | 11 Diarrheal diseases          | 18.4                                   | -10.5                                    | -9.2                                              |
| 12 Refraction & accommodation  | 12 Dermatitis                  | 57.8                                   | -0.2                                     | 0.2                                               | 12 Diabetes                    | 36.0                                   | 2.8                                      | 1.1                                               |
| 13 Acne vulgaris               | 13 Malaria                     | 51.3                                   | -4.3                                     | -3.2                                              | 13 Neck pain                   | 38.7                                   | 4.9                                      | 2.4                                               |
| 14 Dermatitis                  | 14 Refraction & accommodation  | 50.9                                   | -4.6                                     | -3.0                                              | 14 Refraction & accommodation  | 21.7                                   | -8.0                                     | -9.4                                              |
| 15 Other musculoskeletal       | 15 Diabetes                    | 74.6                                   | 10.4                                     | 12.3                                              | 15 Falls                       | 36.7                                   | 3.3                                      | 1.4                                               |
| 16 Schistosomiasis             | 16 Neck pain                   | 55.8                                   | -1.5                                     | -0.6                                              | 16 HIV/AIDS other              | -16.5                                  | -36.9                                    | -40.0                                             |
| 17 Neck pain                   | 17 Schistosomiasis             | 48.0                                   | -6.4                                     | -8.2                                              | 17 Malaria                     | -14.0                                  | -35.0                                    | -34.5                                             |
| 18 Falls                       | 18 Onchocerciasis              | -5.5                                   | -40.2                                    | -42.4                                             | 18 Epilepsy                    | 35.2                                   | 2.2                                      | 2.0                                               |
| 19 Diabetes                    | 19 Falls                       | 37.5                                   | -13.0                                    | -11.5                                             | 19 Conduct disorder            | 32.1                                   | -0.2                                     | 1.0                                               |
| 20 Epilepsy                    | 20 Conduct disorder            | 62.4                                   | 2.7                                      | 0.5                                               | 20 Alcohol use disorders       | 37.7                                   | 4.1                                      | 1.1                                               |
| 21 COPD                        | 21 Epilepsy                    | 48.8                                   | -5.9                                     | -6.6                                              | 21 COPD                        | 36.1                                   | 2.9                                      | 1.7                                               |
| 22 Conduct disorder            | 22 Iodine deficiency           | -27.2                                  | -53.9                                    | -54.0                                             | 22 Schistosomiasis             | -17.3                                  | -37.5                                    | -38.5                                             |
| 23 Intellectual disability     | 23 Intellectual disability     | 62.0                                   | 2.5                                      | 1.5                                               | 23 Intellectual disability     | 18.8                                   | -10.2                                    | -10.5                                             |
| 24 Alcohol use disorders       | 24 Alcohol use disorders       | 57.9                                   | -0.1                                     | -1.9                                              | 24 Bipolar disorder            | 36.0                                   | 2.8                                      | 0.9                                               |
| 25 Other congenital            | 25 COPD                        | 41.3                                   | -10.6                                    | -9.5                                              | 25 Other mental & substance    | 36.4                                   | 3.1                                      | 0.5                                               |
| 26 Bipolar disorder            | 26 Bipolar disorder            | 62.0                                   | 2.5                                      | 0.8                                               | 26 Opioid use disorders        | 44.5                                   | 9.2                                      | 6.2                                               |
| 27 Lymphatic filariasis        | 27 Other congenital            | 56.0                                   | -1.4                                     | -1.3                                              | 27 Osteoarthritis              | 38.9                                   | 5.0                                      | 2.4                                               |
| 28 Protein-energy malnutrition | 28 Other mental & substance    | 59.9                                   | 1.1                                      | 0.5                                               | 28 Viral skin diseases         | 31.6                                   | -0.5                                     | 0.4                                               |
| 29 Other mental & substance    | 29 Viral skin diseases         | 59.4                                   | 0.8                                      | 0.2                                               | 29 Onchocerciasis              | -21.2                                  | -40.4                                    | -40.0                                             |
| 30 Viral skin diseases         | 30 Protein-energy malnutrition | 52.0                                   | -3.9                                     | 1.4                                               | 30 Other congenital            | 22.6                                   | -7.3                                     | -7.3                                              |
| 32 HIV/AIDS other              | 31 Osteoarthritis              |                                        |                                          |                                                   | 35 Protein-energy malnutrition |                                        |                                          |                                                   |
| 33 Osteoarthritis              | 33 Opioid use disorders        |                                        |                                          |                                                   | 37 Iodine deficiency           |                                        |                                          |                                                   |
| 36 Opioid use disorders        | 34 Lymphatic filariasis        |                                        |                                          |                                                   | 48 Lymphatic filariasis        |                                        |                                          |                                                   |

**Legend:**  
 Communicable, maternal, neonatal, and nutritional  
 Non-communicable  
 Injuries



SR Table 1: Global prevalence and incidence for 2016, percentage change in prevalence and incidence counts and age-standardized prevalence and incidence rates between 2006 and 2016 for all causes and nine impairments

| Cause                                                                                | Prevalence in thousands (95% UI)             |                                                   |                                                                   | Incidence in thousands (95% UI)                  |                                                   |                                                                   |
|--------------------------------------------------------------------------------------|----------------------------------------------|---------------------------------------------------|-------------------------------------------------------------------|--------------------------------------------------|---------------------------------------------------|-------------------------------------------------------------------|
|                                                                                      | 2016 counts                                  | Percentage change in counts between 2006 and 2016 | Percentage change in age-standardised rates between 2006 and 2016 | 2016 counts                                      | Percentage change in counts between 2006 and 2016 | Percentage change in age-standardised rates between 2006 and 2016 |
| <b>All causes</b>                                                                    | <b>7,122,683</b><br>(7,115,742 to 7,129,084) | <b>12.4</b><br>(12.2 to 12.6)                     | <b>-0.2</b><br>(-0.4 to -0.1)                                     | <b>44,245,182†</b><br>(42,139,690 to 46,565,213) | <b>9.8</b><br>(8.7 to 10.9)                       | <b>-2.0</b><br>(-2.9 to -1.1)                                     |
| <b>Communicable, maternal, neonatal, and nutritional disorders</b>                   | <b>4,943,086</b><br>(4,920,138 to 4,967,417) | <b>10.2</b><br>(9.7 to 10.7)                      | <b>-2.1</b><br>(-2.6 to -1.7)                                     | <b>25,266,823†</b><br>(23,366,307 to 27,404,017) | <b>7.5</b><br>(5.7 to 9.4)                        | <b>-3.0</b><br>(-4.5 to -1.4)                                     |
| <b>HIV/AIDS and tuberculosis</b>                                                     | <b>2,051,462</b><br>(1,904,878 to 2,137,104) | <b>12.4</b><br>(11.6 to 13.3)                     | <b>-1.8</b><br>(-2.5 to -1.2)                                     | <b>10,885†</b><br>(9,882 to 12,069)              | <b>-3.5</b><br>(-6.3 to -0.1)                     | <b>-15.7</b><br>(-18.1 to -12.8)                                  |
| Tuberculosis                                                                         | 1,918,597<br>(1,797,774 to 2,043,357)        | 12.6<br>(11.7 to 13.4)                            | -1.7<br>(-2.2 to -1.2)                                            | 9,019†<br>(8,052 to 10,157)                      | 1.2<br>(-0.4 to 2.8)                              | -12.4<br>(-13.8 to -11.0)                                         |
| Drug-susceptible tuberculosis                                                        | 9,036<br>(8,134 to 10,108)                   | 6.5<br>(4.7 to 8.5)                               | -10.7<br>(-12.1 to -9.3)                                          | 8,705<br>(7,755 to 9,818)                        | 1.3<br>(-0.3 to 3.0)                              | -12.3<br>(-13.7 to -10.9)                                         |
| Multidrug-resistant tuberculosis without extensive drug resistance                   | 313<br>(279 to 353)                          | -1.4<br>(-10.3 to 7.7)                            | -17.6<br>(-25.0 to -10.2)                                         | 296<br>(261 to 336)                              | -5.5<br>(-13.2 to 2.0)                            | -18.5<br>(-25.1 to -11.9)                                         |
| Extensively drug-resistant tuberculosis                                              | 19<br>(17 to 22)                             | 182.1<br>(147.5 to 218.2)                         | 136.1<br>(107.6 to 166.1)                                         | 18<br>(16 to 21)                                 | 155.6<br>(124.1 to 189.1)                         | 119.5<br>(92.8 to 147.9)                                          |
| Latent tuberculosis infection                                                        | 1,909,229<br>(1,788,353 to 2,034,184)        | 12.6<br>(11.7 to 13.4)                            | -1.7<br>(-2.2 to -1.1)                                            | --                                               | --                                                | --                                                                |
| HIV/AIDS                                                                             | 36,369<br>(34,215 to 39,122)                 | 19.1<br>(16.5 to 22.0)                            | 5.1<br>(2.9 to 7.5)                                               | 1,865^<br>(1,690 to 2,129)                       | -21.2<br>(-29.4 to -8.5)                          | -28.8<br>(-36.4 to -17.2)                                         |
| Drug-susceptible HIV/AIDS - Tuberculosis                                             | 1,076<br>(760 to 1,467)                      | -21.4<br>(-24.9 to -18.3)                         | -30.5<br>(-33.7 to -27.8)                                         | 1,365<br>(981 to 1,847)                          | -24.4<br>(-27.8 to -21.5)                         | -33.2<br>(-36.3 to -30.7)                                         |
| Multidrug-resistant HIV/AIDS - Tuberculosis without extensive drug resistance        | 28<br>(18 to 41)                             | -28.6<br>(-40.3 to -16.4)                         | -36.9<br>(-47.2 to -26.2)                                         | 36<br>(24 to 52)                                 | -28.5<br>(-41.4 to -13.8)                         | -36.9<br>(-48.2 to -23.9)                                         |
| Extensively drug-resistant HIV/AIDS - Tuberculosis                                   | 1<br>(1 to 2)                                | 147.4<br>(107.7 to 195.0)                         | 118.7<br>(83.6 to 160.7)                                          | 1<br>(1 to 2)                                    | 131.1<br>(94.2 to 171.3)                          | 104.5<br>(72.0 to 139.8)                                          |
| HIV/AIDS resulting in other diseases                                                 | 35,264<br>(33,138 to 38,026)                 | 21.0<br>(18.3 to 24.2)                            | 6.8<br>(4.5 to 9.5)                                               | 1,865<br>(1,690 to 2,129)                        | -21.2<br>(-29.4 to -8.5)                          | -28.8<br>(-36.4 to -17.2)                                         |
| <b>Diarrhoea, lower respiratory infections, and other common infectious diseases</b> | <b>434,596</b><br>(422,500 to 442,782)       | <b>7.7</b><br>(7.0 to 8.4)                        | <b>-2.8</b><br>(-3.4 to -2.2)                                     | <b>23,240,453†</b><br>(21,377,295 to 25,359,204) | <b>9.1</b><br>(8.2 to 10.1)                       | <b>-1.7</b><br>(-2.2 to -1.2)                                     |
| Diarrhoeal diseases                                                                  | 66,972<br>(63,500 to 70,778)                 | 7.7<br>(6.9 to 8.6)                               | -3.6<br>(-4.4 to -2.9)                                            | 4,480,401<br>(4,246,997 to 4,737,769)            | 8.1<br>(7.3 to 9.0)                               | -3.5<br>(-4.2 to -2.7)                                            |
| Intestinal infectious diseases                                                       | 810<br>(730 to 906)                          | -18.8<br>(-24.2 to -13.4)                         | -24.3<br>(-29.3 to -19.2)                                         | 15,532†<br>(13,599 to 17,777)                    | -15.6<br>(-17.1 to -13.7)                         | -21.7<br>(-23.1 to -20.0)                                         |
| Typhoid fever                                                                        | 746<br>(641 to 863)                          | -16.8<br>(-22.6 to -10.0)                         | -22.4<br>(-27.9 to -16.0)                                         | 11,774<br>(10,227 to 13,622)                     | -16.9<br>(-18.5 to -14.9)                         | -22.6<br>(-24.2 to -20.8)                                         |
| Paratyphoid fever                                                                    | 165<br>(145 to 187)                          | -11.1<br>(-16.2 to -5.5)                          | -18.7<br>(-23.2 to -13.7)                                         | 3,758<br>(3,328 to 4,257)                        | -11.0<br>(-14.4 to -7.6)                          | -18.6<br>(-21.8 to -15.6)                                         |
| Other intestinal infectious diseases                                                 | --                                           | --                                                | --                                                                | --                                               | --                                                | --                                                                |
| Lower respiratory infections                                                         | 8,030<br>(7,582 to 8,548)                    | 23.1<br>(21.1 to 25.5)                            | 7.4<br>(5.9 to 9.1)                                               | 336,462<br>(313,085 to 361,622)                  | 22.3<br>(20.0 to 24.6)                            | 6.1<br>(4.4 to 7.7)                                               |
| Upper respiratory infections                                                         | 235,768<br>(211,381 to 262,904)              | 9.5<br>(8.4 to 10.7)                              | -1.3<br>(-1.9 to -0.6)                                            | 17,778,134<br>(15,853,332 to 19,905,351)         | 9.3<br>(8.2 to 10.6)                              | -1.4<br>(-2.0 to -0.7)                                            |
| Otitis media                                                                         | 106,062<br>(95,502 to 117,009)               | 4.0<br>(3.0 to 5.1)                               | -4.4<br>(-5.3 to -3.5)                                            | 451,730<br>(365,179 to 564,104)                  | 8.0<br>(6.6 to 9.6)                               | 1.4<br>(0.0 to 2.9)                                               |
| Meningitis                                                                           | 14,423<br>(12,441 to 16,722)                 | 5.8<br>(1.2 to 10.5)                              | -5.4<br>(-9.6 to -1.3)                                            | 2,821<br>(2,464 to 3,310)                        | 12.0<br>(9.5 to 14.4)                             | 4.8<br>(2.5 to 7.2)                                               |
| Pneumococcal meningitis                                                              | 6,180<br>(5,170 to 7,365)                    | -2.9<br>(-6.4 to 0.6)                             | -13.6<br>(-16.7 to -10.4)                                         | 612<br>(498 to 756)                              | -15.1<br>(-19.7 to -10.6)                         | -20.7<br>(-24.9 to -16.4)                                         |
| H influenzae type B meningitis                                                       | 2,012<br>(1,592 to 2,545)                    | -32.3<br>(-36.9 to -26.8)                         | -38.9<br>(-43.2 to -33.8)                                         | 397<br>(291 to 534)                              | -41.1<br>(-46.7 to -35.1)                         | -43.9<br>(-49.5 to -38.1)                                         |
| Meningococcal infection                                                              | 1,661<br>(1,207 to 2,270)                    | 16.7<br>(11.0 to 40.0)                            | 4.8<br>(-0.8 to 31.5)                                             | 561<br>(442 to 707)                              | 19.8<br>(13.3 to 26.3)                            | 12.5<br>(6.2 to 18.6)                                             |
| Other meningitis                                                                     | 4,571<br>(3,446 to 5,833)                    | 58.9<br>(51.1 to 66.5)                            | 41.4<br>(34.6 to 48.0)                                            | 1,250<br>(1,056 to 1,487)                        | 90.6<br>(80.3 to 101.1)                           | 75.5<br>(66.2 to 85.3)                                            |
| Encephalitis                                                                         | 14,908<br>(9,877 to 21,755)                  | 6.3<br>(4.7 to 8.2)                               | -7.8<br>(-9.3 to -5.8)                                            | 6,534<br>(5,957 to 7,165)                        | 12.4<br>(10.9 to 14.1)                            | 0.0<br>(-1.0 to 1.1)                                              |
| Diphtheria                                                                           | 0<br>(0 to 0)                                | -58.0<br>(-69.3 to -44.4)                         | -61.0<br>(-71.5 to -47.9)                                         | 4<br>(3 to 6)                                    | -58.0<br>(-69.3 to -44.4)                         | -61.0<br>(-71.5 to -47.9)                                         |
| Whooping cough                                                                       | 1,593<br>(1,242 to 2,001)                    | -25.6<br>(-24.4 to -20.8)                         | -25.2<br>(-27.0 to -23.5)                                         | 11,627<br>(9,069 to 14,610)                      | -22.6<br>(-24.4 to -20.8)                         | -25.2<br>(-27.0 to -23.5)                                         |
| Tetanus                                                                              | 160<br>(157 to 163)                          | 9.3<br>(7.3 to 12.1)                              | -1.1<br>(-3.1 to 1.3)                                             | 90<br>(51 to 121)                                | -60.2<br>(-66.0 to -52.5)                         | -63.2<br>(-68.7 to -56.5)                                         |
| Measles                                                                              | 245<br>(89 to 532)                           | -62.6<br>(-66.6 to -58.2)                         | -64.3<br>(-68.1 to -60.0)                                         | 8,955<br>(3,251 to 19,426)                       | -62.6<br>(-66.6 to -58.2)                         | -64.3<br>(-68.1 to -60.0)                                         |
| Varicella and herpes zoster                                                          | 7,602<br>(6,996 to 8,221)                    | 16.8<br>(14.9 to 18.8)                            | 1.0<br>(-0.2 to 2.5)                                              | 148,162<br>(144,145 to 152,728)                  | 8.4<br>(7.6 to 9.2)                               | 0.0<br>(-0.4 to 0.4)                                              |
| <b>Neglected tropical diseases and malaria</b>                                       | <b>1,821,783</b><br>(1,778,850 to 1,853,279) | <b>-0.4</b><br>(-2.6 to 1.8)                      | <b>-10.6</b><br>(-12.6 to -8.7)                                   | <b>440,947†</b><br>(378,282 to 512,509)          | <b>3.8</b><br>(-4.9 to 14.3)                      | <b>-5.2</b><br>(-13.0 to 4.2)                                     |
| Malaria                                                                              | 128,947<br>(113,638 to 145,601)              | -23.3<br>(-28.8 to -17.0)                         | -28.8<br>(-34.1 to -22.8)                                         | 213,098<br>(172,037 to 265,778)                  | -12.7<br>(-23.9 to -3.1)                          | -18.3<br>(-28.7 to -9.2)                                          |
| Chagas disease                                                                       | 7,201<br>(6,065 to 8,514)                    | 1.3<br>(-1.9 to 4.1)                              | -13.3<br>(-15.9 to -10.9)                                         | 180<br>(150 to 214)                              | -7.5<br>(-10.3 to -4.5)                           | -15.2<br>(-17.7 to -12.5)                                         |
| Leishmaniasis                                                                        | 4,835<br>(4,147 to 5,523)                    | 22.9<br>(5.0 to 44.8)                             | 6.9<br>(-9.0 to 26.9)                                             | 799<br>(618 to 1,021)                            | -19.8<br>(-38.1 to 3.5)                           | -28.1<br>(-44.6 to -7.2)                                          |
| Visceral leishmaniasis                                                               | 30<br>(28 to 32)                             | -54.5<br>(-58.5 to -50.4)                         | -59.4<br>(-62.9 to -55.8)                                         | 120<br>(112 to 129)                              | -54.5<br>(-58.5 to -50.4)                         | -59.4<br>(-62.9 to -55.8)                                         |
| Cutaneous and mucocutaneous leishmaniasis                                            | 4,320<br>(3,650 to 5,238)                    | 28.4<br>(17.2 to 42.7)                            | 11.9<br>(1.8 to 25.4)                                             | 679<br>(497 to 902)                              | -7.3<br>(-32.8 to 25.7)                           | -16.3<br>(-39.3 to 13.4)                                          |
| African trypanosomiasis                                                              | 7<br>(4 to 12)                               | -74.4<br>(-79.9 to -67.4)                         | -77.1<br>(-82.1 to -70.5)                                         | 5<br>(4 to 6)                                    | -80.1<br>(-82.7 to -76.8)                         | -82.2<br>(-84.7 to -79.3)                                         |
| Schistosomiasis                                                                      | 189,774<br>(179,771 to 200,083)              | -26.6<br>(-27.9 to -25.3)                         | -35.3<br>(-36.6 to -34.1)                                         | 71,385<br>(67,342 to 76,073)                     | -15.3<br>(-19.8 to -10.4)                         | -23.7<br>(-27.7 to -19.4)                                         |
| Cysticercosis                                                                        | 2,675<br>(2,232 to 3,149)                    | 1.5<br>(-4.8 to 7.6)                              | -15.1<br>(-20.4 to -9.9)                                          | --                                               | --                                                | --                                                                |
| Cystic echinococcosis                                                                | 974<br>(674 to 1,426)                        | -38.7<br>(-59.4 to -2.2)                          | -46.1<br>(-64.2 to -14.3)                                         | 204<br>(151 to 304)                              | -38.4<br>(-59.7 to -2.2)                          | -45.6<br>(-64.7 to -14.1)                                         |
| Lymphatic filariasis                                                                 | 29,382<br>(24,770 to 36,117)                 | -42.4<br>(-47.4 to -39.5)                         | -48.8<br>(-53.3 to -46.3)                                         | 7,604<br>(6,561 to 8,750)                        | 7.1<br>(-11.0 to 27.5)                            | -3.7<br>(-19.8 to 13.9)                                           |
| Onchocerciasis                                                                       | 14,650<br>(9,474 to 24,168)                  | -26.9<br>(-38.6 to -15.7)                         | -34.6<br>(-45.1 to -24.6)                                         | 3,839<br>(1,747 to 7,518)                        | 39.9<br>(-8.5 to 94.7)                            | 27.1<br>(-16.7 to 76.7)                                           |
| Trachoma                                                                             | 3,338<br>(2,439 to 4,492)                    | 0.5<br>(-8.5 to 8.0)                              | -23.2<br>(-30.0 to -17.3)                                         | --                                               | --                                                | --                                                                |
| Dengue                                                                               | 6,046<br>(3,292 to 10,244)                   | 75.1<br>(43.7 to 294.2)                           | 58.4<br>(30.0 to 256.6)                                           | 101,064<br>(61,458 to 153,334)                   | 75.2<br>(43.8 to 290.0)                           | 58.5<br>(30.1 to 252.9)                                           |
| Yellow fever                                                                         | 3<br>(1 to 8)                                | -18.0<br>(-30.1 to -3.5)                          | -24.1<br>(-35.0 to -10.9)                                         | 112<br>(32 to 283)                               | -18.0<br>(-30.1 to -3.5)                          | -24.1<br>(-35.0 to -10.9)                                         |
| Rabies                                                                               | 1<br>(0 to 1)                                | -46.7<br>(-56.0 to -33.4)                         | -52.8<br>(-61.1 to -40.9)                                         | 13<br>(7 to 19)                                  | -46.7<br>(-56.0 to -33.4)                         | -52.8<br>(-61.1 to -40.9)                                         |
| Intestinal nematode infections                                                       | 1,507,853<br>(1,450,985 to 1,542,581)        | 2.2<br>(-0.8 to 5.2)                              | -8.2<br>(-10.9 to -5.5)                                           | --                                               | --                                                | --                                                                |
| Ascariasis                                                                           | 799,683<br>(737,609 to 872,087)              | -5.2<br>(-14.7 to 5.7)                            | -14.9<br>(-23.4 to -5.1)                                          | --                                               | --                                                | --                                                                |
| Trichuriasis                                                                         | 435,095<br>(410,564 to 464,463)              | 0.4<br>(-7.6 to 9.2)                              | -9.6<br>(-16.9 to -1.6)                                           | --                                               | --                                                | --                                                                |
| Hookworm disease                                                                     | 450,683<br>(424,863 to 479,224)              | -0.7<br>(-8.3 to 7.9)                             | -10.8<br>(-17.7 to -3.1)                                          | --                                               | --                                                | --                                                                |
| Food-borne trematodiasis                                                             | 74,725<br>(70,800 to 78,800)                 | 6.1<br>(3.9 to 8.3)                               | -7.3<br>(-9.3 to -5.4)                                            | 34,989<br>(23,063 to 45,803)                     | 29.8<br>(18.6 to 49.0)                            | 3.7<br>(-4.3 to 20.6)                                             |
| Leprosy                                                                              | 523<br>(499 to 547)                          | 0.9<br>(0.6 to 1.2)                               | -18.4<br>(-18.7 to -17.9)                                         | 55<br>(53 to 58)                                 | -3.7<br>(-4.4 to -3.1)                            | -18.9<br>(-19.3 to -18.4)                                         |
| Ebola virus disease                                                                  | 1<br>(0 to 4)                                | --                                                | --                                                                | 0<br>(0 to 0)                                    | --                                                | --                                                                |
| Zika virus disease                                                                   | 129<br>(97 to 179)                           | --                                                | --                                                                | 7,598<br>(5,696 to 10,664)                       | --                                                | --                                                                |
| Guinea worm disease                                                                  | 0<br>(0 to 0)                                | -99.6<br>(-99.7 to -99.4)                         | -99.6<br>(-99.7 to -99.5)                                         | 0<br>(0 to 0)                                    | -99.6<br>(-99.7 to -99.4)                         | -99.6<br>(-99.7 to -99.5)                                         |

|                                                                         |                                                     |                                      |                                      |                                                         |                                        |                                         |
|-------------------------------------------------------------------------|-----------------------------------------------------|--------------------------------------|--------------------------------------|---------------------------------------------------------|----------------------------------------|-----------------------------------------|
| Other neglected tropical diseases                                       | 49,493<br>(47,574 to 51,781)                        | 7.2<br>(5.9 to 8.5)                  | -0.8<br>(-2.0 to 0.4)                | --                                                      | --                                     | --                                      |
| <b>Maternal disorders</b>                                               | <b>8,730</b><br><b>(8,105 to 9,255)</b>             | <b>1.8</b><br><b>(-7.3 to 12.3)</b>  | <b>-7.3</b><br><b>(-15.6 to 2.0)</b> | <b>118,297†</b><br><b>(104,358 to 137,177)</b>          | <b>-1.2</b><br><b>(-3.3 to 0.9)</b>    | <b>-9.6</b><br><b>(-11.5 to -7.9)</b>   |
| Maternal haemorrhage                                                    | 1,403<br>(1,155 to 1,706)                           | 6.1<br>(-2.5 to 16.1)                | -3.3<br>(-11.1 to 5.7)               | 9,626<br>(7,835 to 11,884)                              | 2.0<br>(-0.9 to 5.3)                   | -7.0<br>(-9.5 to -4.1)                  |
| Maternal sepsis and other pregnancy related infections                  | 1,662<br>(1,256 to 2,201)                           | 7.2<br>(-25.7 to 56.8)               | -3.7<br>(-32.9 to 40.2)              | 10,377<br>(8,385 to 13,151)                             | 0.6<br>(-2.1 to 3.5)                   | -7.1<br>(-9.3 to -4.9)                  |
| Maternal hypertensive disorders                                         | 4,449<br>(2,947 to 6,101)                           | 7.7<br>(-32.1 to 75.0)               | -1.0<br>(-37.5 to 60.4)              | 20,811<br>(18,217 to 23,245)                            | 6.8<br>(3.7 to 9.4)                    | -1.8<br>(-4.4 to 0.3)                   |
| Maternal obstructed labour and uterine rupture                          | 1,041<br>(867 to 1,229)                             | -14.0<br>(-19.0 to -8.9)             | -22.9<br>(-27.2 to -18.3)            | 7,238<br>(5,821 to 9,042)                               | 0.3<br>(-2.6 to 3.7)                   | -8.3<br>(-10.6 to -5.4)                 |
| Maternal abortion, miscarriage, and ectopic pregnancy                   | 576<br>(371 to 820)                                 | -4.6<br>(-40.1 to 49.0)              | -13.0<br>(-45.5 to 36.6)             | 70,245<br>(56,320 to 88,126)                            | -4.1<br>(-7.0 to -1.2)                 | -12.5<br>(-14.8 to -10.2)               |
| Other maternal disorders                                                | --                                                  | --                                   | --                                   | --                                                      | --                                     | --                                      |
| <b>Neonatal disorders</b>                                               | <b>80,244</b><br><b>(73,591 to 86,593)</b>          | <b>13.1</b><br><b>(8.9 to 18.5)</b>  | <b>3.4</b><br><b>(-0.3 to 8.4)</b>   | --                                                      | --                                     | --                                      |
| Neonatal preterm birth complications                                    | 66,092<br>(55,818 to 78,007)                        | 11.3<br>(2.5 to 21.9)                | 1.7<br>(-6.2 to 11.4)                | --                                                      | --                                     | --                                      |
| Neonatal encephalopathy due to birth asphyxia and trauma                | 12,134<br>(7,668 to 19,247)                         | 18.6<br>(8.7 to 27.6)                | 7.8<br>(-1.3 to 16.0)                | --                                                      | --                                     | --                                      |
| Neonatal sepsis and other neonatal infections                           | 6,653<br>(2,713 to 15,058)                          | 28.9<br>(21.9 to 36.6)               | 18.6<br>(12.4 to 25.2)               | --                                                      | --                                     | --                                      |
| Haemolytic disease and other neonatal jaundice                          | 2,093<br>(1,861 to 2,337)                           | 22.7<br>(20.1 to 25.5)               | 12.4<br>(10.0 to 15.0)               | --                                                      | --                                     | --                                      |
| Other neonatal disorders                                                | --                                                  | --                                   | --                                   | --                                                      | --                                     | --                                      |
| <b>Nutritional deficiencies</b>                                         | <b>1,673,391</b><br><b>(1,633,390 to 1,689,822)</b> | <b>6.2</b><br><b>(5.5 to 6.9)</b>    | <b>-3.7</b><br><b>(-4.4 to -3.1)</b> | <b>598,813†</b><br><b>(516,074 to 717,722)</b>          | <b>-5.9</b><br><b>(-8.6 to -2.7)</b>   | <b>-13.2</b><br><b>(-15.7 to -10.1)</b> |
| Protein-energy malnutrition                                             | 63,135<br>(62,102 to 64,197)                        | 0.7<br>(-2.1 to 3.4)                 | -3.5<br>(-6.2 to -0.9)               | 43,590<br>(42,935 to 44,253)                            | -3.2<br>(-5.6 to -0.8)                 | -6.5<br>(-8.9 to -4.3)                  |
| Iodine deficiency                                                       | 119,214<br>(105,725 to 133,961)                     | -5.9<br>(-7.0 to -4.6)               | -17.0<br>(-17.9 to -15.9)            | 3,043<br>(2,708 to 3,411)                               | -18.3<br>(-19.3 to -17.0)              | -21.8<br>(-22.8 to -20.6)               |
| Vitamin A deficiency                                                    | 508,801<br>(445,148 to 601,630)                     | -2.7<br>(-4.7 to -0.5)               | -10.7<br>(-12.6 to -8.5)             | 552,180<br>(469,061 to 671,144)                         | -6.0<br>(-8.9 to -2.6)                 | -13.6<br>(-16.4 to -10.3)               |
| Iron-deficiency anaemia                                                 | 1,244,781<br>(1,205,796 to 1,284,426)               | 9.5<br>(8.6 to 10.6)                 | -0.9<br>(-1.7 to 0.0)                | --                                                      | --                                     | --                                      |
| Other nutritional deficiencies                                          | --                                                  | --                                   | --                                   | --                                                      | --                                     | --                                      |
| <b>Other communicable, maternal, neonatal, and nutritional diseases</b> | <b>1,728,266</b><br><b>(1,680,548 to 1,764,134)</b> | <b>14.1</b><br><b>(12.3 to 15.9)</b> | <b>-1.2</b><br><b>(-2.7 to 0.2)</b>  | <b>857,430</b><br><b>(713,393 to 1,035,257)</b>         | <b>-14.1</b><br><b>(-38.9 to 25.6)</b> | <b>-21.5</b><br><b>(-44.3 to 16.5)</b>  |
| Sexually transmitted diseases excluding HIV                             | 1,175,931<br>(1,131,754 to 1,217,694)               | 16.9<br>(15.8 to 18.0)               | -0.3<br>(-1.2 to 0.6)                | 552,776<br>(499,026 to 612,824)                         | 13.8<br>(11.0 to 16.5)                 | 2.4<br>(0.0 to 5.0)                     |
| Syphilis                                                                | 56,092<br>(44,184 to 70,172)                        | 10.8<br>(6.7 to 14.7)                | -1.5<br>(-5.4 to 1.7)                | 38,838<br>(29,431 to 50,913)                            | 9.5<br>(4.4 to 13.7)                   | -1.8<br>(-6.5 to 1.8)                   |
| Chlamydial infection                                                    | 93,574<br>(75,600 to 114,406)                       | 7.1<br>(5.8 to 8.4)                  | -3.4<br>(-4.4 to -2.4)               | 73,667<br>(59,690 to 90,359)                            | 5.0<br>(3.7 to 6.4)                    | -4.8<br>(-5.6 to -3.9)                  |
| Gonococcal infection                                                    | 57,124<br>(46,375 to 70,820)                        | 20.9<br>(14.0 to 27.4)               | 9.1<br>(2.7 to 14.7)                 | 190,766<br>(147,718 to 242,152)                         | 21.2<br>(13.3 to 27.5)                 | 9.6<br>(2.6 to 15.3)                    |
| Trichomoniasis                                                          | 171,779<br>(148,048 to 196,705)                     | 15.8<br>(14.9 to 16.6)               | 1.4<br>(0.8 to 1.9)                  | 148,908<br>(126,821 to 171,971)                         | 15.1<br>(14.1 to 16.1)                 | 1.7<br>(1.1 to 2.4)                     |
| Genital herpes                                                          | 859,580<br>(748,108 to 991,917)                     | 18.7<br>(16.9 to 20.5)               | -0.4<br>(-1.8 to 1.1)                | 57,156<br>(49,205 to 67,554)                            | 8.3<br>(6.1 to 10.3)                   | 2.4<br>(0.6 to 4.2)                     |
| Other sexually transmitted diseases                                     | 36,588<br>(31,753 to 40,490)                        | 10.8<br>(8.3 to 13.2)                | -1.0<br>(-3.1 to 0.9)                | 43,441<br>(37,364 to 50,632)                            | 6.7<br>(4.6 to 8.8)                    | -6.6<br>(-8.3 to -4.9)                  |
| Hepatitis                                                               | 640,226<br>(566,219 to 731,671)                     | 11.0<br>(5.7 to 16.4)                | -2.3<br>(-6.8 to 2.0)                | 304,644<br>(182,678 to 477,007)                         | -40.6<br>(-71.0 to 44.0)               | -43.7<br>(-72.9 to 38.5)                |
| Acute hepatitis A                                                       | 12,270<br>(3,159 to 25,111)                         | -50.5<br>(-88.9 to 205.7)            | -51.8<br>(-89.3 to 197.0)            | 159,516<br>(41,071 to 326,448)                          | -50.5<br>(-88.9 to 205.7)              | -51.8<br>(-89.3 to 197.0)               |
| Hepatitis B                                                             | 468,435<br>(396,824 to 554,418)                     | 10.9<br>(9.7 to 12.2)                | -2.2<br>(-3.1 to -1.2)               | 118,976<br>(92,788 to 152,775)                          | -23.1<br>(-32.7 to -11.9)              | -29.8<br>(-37.9 to -20.2)               |
| Hepatitis C                                                             | 158,055<br>(141,445 to 175,144)                     | 24.0<br>(23.3 to 24.6)               | 6.7<br>(6.5 to 7.0)                  | 7,094<br>(6,474 to 7,724)                               | 5.1<br>(3.7 to 6.6)                    | -5.2<br>(-6.9 to -3.6)                  |
| Acute hepatitis E                                                       | 1,466<br>(1,308 to 1,645)                           | -33.5<br>(-35.6 to -31.4)            | -37.8<br>(-39.7 to -36.0)            | 19,058<br>(17,003 to 21,385)                            | -33.5<br>(-35.6 to -31.4)              | -37.8<br>(-39.7 to -36.0)               |
| Other infectious diseases                                               | 44,426<br>(42,785 to 46,296)                        | 7.4<br>(6.2 to 8.6)                  | -1.4<br>(-2.5 to -0.3)               | 9<br>(6 to 13)                                          | 16.7<br>(14.3 to 19.2)                 | 0.7<br>(-0.3 to 1.6)                    |
| <b>Non-communicable diseases</b>                                        | <b>6,681,939</b><br><b>(6,668,902 to 6,695,003)</b> | <b>13.1</b><br><b>(13.0 to 13.2)</b> | <b>0.0</b><br><b>(-0.1 to 0.1)</b>   | <b>18,358,708†</b><br><b>(17,561,181 to 19,263,162)</b> | <b>12.8</b><br><b>(12.4 to 13.3)</b>   | <b>-0.9</b><br><b>(-1.2 to -0.6)</b>    |
| <b>Neoplasms</b>                                                        | <b>42,986</b><br><b>(42,692 to 43,241)</b>          | <b>41.3</b><br><b>(40.3 to 42.4)</b> | <b>8.9</b><br><b>(8.1 to 9.7)</b>    | <b>17,228</b><br><b>(16,713 to 17,803)</b>              | <b>28.4</b><br><b>(26.3 to 31.3)</b>   | <b>-0.8</b><br><b>(-2.5 to 1.3)</b>     |
| Lip and oral cavity cancer                                              | 1,387<br>(1,346 to 1,425)                           | 34.8<br>(30.2 to 38.7)               | 5.4<br>(1.9 to 8.3)                  | 382<br>(371 to 392)                                     | 33.1<br>(28.3 to 36.9)                 | 3.7<br>(0.1 to 6.5)                     |
| Nasopharynx cancer                                                      | 332<br>(314 to 352)                                 | 8.4<br>(0.8 to 15.6)                 | -10.9<br>(-17.0 to -5.1)             | 96<br>(91 to 101)                                       | 8.4<br>(1.2 to 15.2)                   | -11.2<br>(-16.9 to -5.8)                |
| Other pharynx cancer                                                    | 478<br>(452 to 494)                                 | 42.4<br>(34.0 to 47.6)               | 10.3<br>(3.8 to 14.3)                | 170<br>(159 to 176)                                     | 36.5<br>(27.3 to 42.3)                 | 5.6<br>(-1.4 to 10.2)                   |
| Oesophageal cancer                                                      | 556<br>(539 to 577)                                 | 13.5<br>(10.2 to 18.0)               | -12.7<br>(-15.2 to -9.2)             | 443<br>(433 to 456)                                     | 7.1<br>(4.7 to 10.6)                   | -17.8<br>(-19.7 to -15.2)               |
| Stomach cancer                                                          | 2,199<br>(2,144 to 2,255)                           | 25.3<br>(21.9 to 28.5)               | -3.5<br>(-6.1 to -1.0)               | 1,157<br>(1,134 to 1,180)                               | 15.4<br>(12.9 to 17.8)                 | -11.3<br>(-13.2 to -9.4)                |
| Colon and rectum cancer                                                 | 6,323<br>(6,112 to 6,632)                           | 38.0<br>(32.5 to 45.8)               | 5.1<br>(1.0 to 10.9)                 | 1,716<br>(1,658 to 1,795)                               | 33.8<br>(28.2 to 41.0)                 | 1.4<br>(-2.7 to 6.7)                    |
| Liver cancer                                                            | 1,027<br>(974 to 1,076)                             | 86.5<br>(77.1 to 96.6)               | 45.1<br>(38.2 to 52.4)               | 1,008<br>(953 to 1,042)                                 | 37.6<br>(32.4 to 43.1)                 | 7.2<br>(3.2 to 11.4)                    |
| Liver cancer due to hepatitis B                                         | 599<br>(516 to 675)                                 | 70.0<br>(60.1 to 81.5)               | 34.1<br>(26.5 to 42.9)               | 437<br>(380 to 489)                                     | 35.0<br>(29.6 to 42.1)                 | 6.4<br>(2.3 to 11.8)                    |
| Liver cancer due to hepatitis C                                         | 261<br>(236 to 286)                                 | 60.8<br>(53.2 to 67.7)               | 22.8<br>(16.9 to 28.1)               | 189<br>(170 to 207)                                     | 37.7<br>(32.3 to 42.1)                 | 4.8<br>(0.8 to 8.3)                     |
| Liver cancer due to alcohol use                                         | 186<br>(157 to 216)                                 | 70.2<br>(56.2 to 85.8)               | 31.0<br>(20.2 to 42.8)               | 148<br>(125 to 171)                                     | 44.3<br>(33.1 to 57.1)                 | 10.8<br>(2.2 to 20.5)                   |
| Liver cancer due to other causes                                        | 326<br>(288 to 371)                                 | 71.7<br>(60.0 to 82.3)               | 34.9<br>(25.9 to 43.3)               | 235<br>(210 to 264)                                     | 38.3<br>(31.1 to 44.1)                 | 8.6<br>(2.9 to 13.2)                    |
| Gallbladder and biliary tract cancer                                    | 169<br>(152 to 179)                                 | 24.4<br>(18.5 to 30.9)               | -5.7<br>(-10.2 to -0.7)              | 184<br>(169 to 193)                                     | 20.7<br>(15.9 to 25.7)                 | -8.6<br>(-12.2 to -4.8)                 |
| Pancreatic cancer                                                       | 364<br>(349 to 375)                                 | 38.7<br>(33.6 to 42.3)               | 5.5<br>(1.6 to 8.3)                  | 418<br>(406 to 425)                                     | 33.6<br>(29.6 to 36.2)                 | 1.4<br>(-1.7 to 3.5)                    |
| Larynx cancer                                                           | 638<br>(627 to 653)                                 | 25.3<br>(22.4 to 28.9)               | -3.5<br>(-5.7 to -0.8)               | 187<br>(184 to 191)                                     | 21.9<br>(19.1 to 25.4)                 | -6.4<br>(-8.5 to -3.8)                  |
| Tracheal, bronchus, and lung cancer                                     | 2,836<br>(2,750 to 2,920)                           | 39.3<br>(35.7 to 42.9)               | 7.0<br>(4.3 to 9.8)                  | 2,008<br>(1,958 to 2,055)                               | 28.4<br>(25.3 to 31.5)                 | -1.4<br>(-3.7 to 0.9)                   |
| Malignant skin melanoma                                                 | 1,347<br>(1,156 to 1,506)                           | 39.7<br>(33.6 to 44.0)               | 10.6<br>(5.9 to 14.0)                | 282<br>(243 to 314)                                     | 38.7<br>(32.7 to 42.9)                 | 9.3<br>(4.5 to 12.6)                    |
| Non-melanoma skin cancer                                                | 853<br>(682 to 1,066)                               | 5.3<br>(-2.4 to 14.1)                | -21.8<br>(-27.6 to -15.3)            | 1,521<br>(1,109 to 2,008)                               | 12.4<br>(6.3 to 18.9)                  | -15.3<br>(-20.3 to -10.1)               |
| Non-melanoma skin cancer (squamous-cell carcinoma)                      | 690<br>(415 to 996)                                 | 4.2<br>(-4.8 to 19.3)                | -22.8<br>(-29.3 to -11.8)            | 635<br>(386 to 922)                                     | 4.7<br>(-3.7 to 19.0)                  | -21.8<br>(-28.2 to -11.1)               |
| Non-melanoma skin cancer (basal-cell carcinoma)                         | 103<br>(65 to 167)                                  | 23.7<br>(17.1 to 31.1)               | -5.9<br>(-10.6 to -0.5)              | 886<br>(574 to 1,262)                                   | 18.6<br>(13.2 to 23.2)                 | -9.7<br>(-13.8 to -6.1)                 |
| Breast cancer                                                           | 8,151<br>(7,808 to 8,610)                           | 30.6<br>(23.5 to 39.5)               | 1.9<br>(-3.4 to 8.6)                 | 1,702<br>(1,629 to 1,801)                               | 29.0<br>(21.8 to 38.0)                 | 0.4<br>(-5.0 to 7.2)                    |
| Cervical cancer                                                         | 1,939<br>(1,544 to 2,082)                           | 10.6<br>(3.8 to 19.5)                | -10.4<br>(-15.7 to -3.3)             | 511<br>(414 to 542)                                     | 8.9<br>(2.3 to 17.7)                   | -11.9<br>(-17.1 to -4.9)                |
| Uterine cancer                                                          | 1,959<br>(1,882 to 2,076)                           | 41.8<br>(35.6 to 51.7)               | 9.0<br>(4.3 to 16.4)                 | 417<br>(401 to 442)                                     | 40.4<br>(34.2 to 50.1)                 | 7.6<br>(3.0 to 15.0)                    |
| Ovarian cancer                                                          | 786<br>(743 to 809)                                 | 25.3<br>(19.0 to 29.1)               | -1.9<br>(-6.6 to 1.1)                | 254<br>(242 to 260)                                     | 24.1<br>(18.0 to 27.9)                 | -3.0<br>(-7.6 to -0.1)                  |
| Prostate cancer                                                         | 5,697<br>(5,098 to 6,714)                           | 44.8<br>(37.5 to 55.6)               | 9.6<br>(4.1 to 18.1)                 | 1,436<br>(1,293 to 1,619)                               | 40.1<br>(34.2 to 49.2)                 | 5.7<br>(1.2 to 12.9)                    |
| Testicular cancer                                                       | 340<br>(328 to 355)                                 | 32.2<br>(27.2 to 38.2)               | 15.4<br>(11.0 to 20.7)               | 67<br>(64 to 70)                                        | 30.5<br>(25.6 to 36.3)                 | 13.7<br>(9.5 to 18.7)                   |
| Kidney cancer                                                           | 1,289<br>(1,226 to 1,329)                           | 28.7<br>(24.8 to 32.1)               | 1.1<br>(-2.0 to 3.7)                 | 342<br>(331 to 350)                                     | 27.7<br>(24.1 to 30.7)                 | -0.3<br>(-3.0 to 2.0)                   |



|                                                                |                                               |                                |                                |                                               |                                |                                |
|----------------------------------------------------------------|-----------------------------------------------|--------------------------------|--------------------------------|-----------------------------------------------|--------------------------------|--------------------------------|
| Bladder cancer                                                 | 1,767<br>(1,721 to 1,813)                     | 33.7<br>(29.7 to 37.6)         | 1.6<br>(-1.4 to 4.6)           | 437<br>(427 to 448)                           | 31.0<br>(27.1 to 34.8)         | -0.9<br>(-3.9 to 1.9)          |
| Brain and nervous system cancer                                | 781<br>(693 to 818)                           | 42.6<br>(37.2 to 47.3)         | 17.5<br>(13.1 to 21.3)         | 330<br>(299 to 349)                           | 36.9<br>(32.3 to 42.2)         | 11.9<br>(8.1 to 16.2)          |
| Thyroid cancer                                                 | 1,234<br>(1,187 to 1,313)                     | 51.2<br>(44.7 to 61.1)         | 20.9<br>(15.8 to 28.8)         | 238<br>(229 to 253)                           | 49.7<br>(43.3 to 59.4)         | 19.4<br>(14.3 to 27.2)         |
| Mesothelioma                                                   | 53<br>(49 to 56)                              | 28.9<br>(23.0 to 33.2)         | 0.1<br>(-4.5 to 3.4)           | 35<br>(33 to 36)                              | 27.6<br>(21.7 to 31.9)         | -1.1<br>(-5.7 to 2.1)          |
| Hodgkin lymphoma                                               | 291<br>(264 to 322)                           | 16.1<br>(13.6 to 18.5)         | -1.2<br>(-3.3 to 0.8)          | 73<br>(66 to 82)                              | 10.3<br>(8.0 to 12.6)          | -6.3<br>(-8.4 to -4.5)         |
| Non-Hodgkin's lymphoma                                         | 1,669<br>(1,545 to 1,746)                     | 50.8<br>(43.6 to 54.2)         | 18.2<br>(12.6 to 20.8)         | 461<br>(428 to 482)                           | 44.5<br>(37.8 to 47.5)         | 13.1<br>(7.8 to 15.5)          |
| Multiple myeloma                                               | 358<br>(305 to 398)                           | 48.1<br>(42.6 to 54.9)         | 12.7<br>(8.6 to 18.0)          | 139<br>(121 to 155)                           | 38.0<br>(33.2 to 43.0)         | 5.0<br>(1.3 to 8.7)            |
| Leukaemia                                                      | 1,675<br>(1,511 to 1,765)                     | 25.3<br>(18.0 to 33.2)         | 3.2<br>(-2.6 to 9.5)           | 467<br>(423 to 489)                           | 26.0<br>(19.3 to 32.4)         | 2.9<br>(-2.4 to 7.9)           |
| Acute lymphoid leukaemia                                       | 292<br>(256 to 310)                           | 32.1<br>(12.1 to 43.4)         | 18.3<br>(0.8 to 28.3)          | 76<br>(66 to 80)                              | 30.8<br>(12.6 to 40.8)         | 16.2<br>(0.4 to 25.1)          |
| Chronic lymphoid leukaemia                                     | 460<br>(430 to 496)                           | 38.6<br>(33.4 to 45.7)         | 6.0<br>(2.2 to 11.3)           | 105<br>(98 to 113)                            | 38.1<br>(33.0 to 44.9)         | 5.0<br>(1.3 to 10.0)           |
| Acute myeloid leukaemia                                        | 159<br>(141 to 169)                           | 32.3<br>(20.2 to 39.4)         | 10.3<br>(0.9 to 15.7)          | 103<br>(91 to 108)                            | 33.3<br>(25.4 to 37.9)         | 8.7<br>(2.6 to 12.3)           |
| Chronic myeloid leukaemia                                      | 92<br>(84 to 99)                              | 7.3<br>(2.7 to 11.8)           | -14.6<br>(-18.2 to -11.3)      | 32<br>(29 to 34)                              | 6.3<br>(1.9 to 10.9)           | -15.7<br>(-19.0 to -12.5)      |
| Other leukaemia                                                | 672<br>(565 to 723)                           | 16.4<br>(8.1 to 26.4)          | -2.5<br>(-9.0 to 5.5)          | 150<br>(127 to 161)                           | 16.9<br>(9.0 to 26.4)          | -2.8<br>(-9.0 to 4.8)          |
| Other neoplasms                                                | 2,632<br>(2,377 to 2,719)                     | 60.0<br>(53.0 to 64.7)         | 28.5<br>(22.8 to 32.3)         | 750<br>(682 to 772)                           | 51.6<br>(45.1 to 55.7)         | 21.2<br>(15.8 to 24.5)         |
| <b>Cardiovascular diseases</b>                                 | <b>469,454<br/>(462,582 to 474,872)</b>       | <b>26.7<br/>(26.0 to 27.3)</b> | <b>-0.8<br/>(-1.3 to -0.3)</b> | <b>54,120†<br/>(51,965 to 56,447)</b>         | <b>23.1<br/>(21.8 to 24.5)</b> | <b>-5.1<br/>(-6.0 to -4.0)</b> |
| Rheumatic heart disease                                        | 29,677<br>(26,737 to 32,927)                  | 16.7<br>(12.9 to 20.1)         | 3.2<br>(-0.1 to 6.3)           | 1,196<br>(1,095 to 1,308)                     | 8.7<br>(5.6 to 11.5)           | -0.5<br>(-3.4 to 2.3)          |
| Ischaemic heart disease                                        | 153,533<br>(145,992 to 160,779)               | 24.5<br>(22.2 to 26.7)         | -3.8<br>(-5.6 to -2.0)         | 20,731<br>(19,530 to 22,073)                  | 15.6<br>(14.0 to 17.2)         | -11.7<br>(-13.0 to -10.5)      |
| Cerebrovascular disease                                        | 79,574<br>(77,057 to 82,118)                  | 32.3<br>(29.9 to 35.0)         | 2.0<br>(0.0 to 4.1)            | 13,677†<br>(12,713 to 14,692)                 | 31.9<br>(27.0 to 36.8)         | 0.7<br>(-2.9 to 4.5)           |
| Ischaemic stroke                                               | 67,595<br>(60,812 to 74,572)                  | 33.5<br>(26.3 to 40.2)         | 2.7<br>(-2.9 to 8.1)           | 9,556†<br>(8,655 to 10,513)                   | 37.5<br>(31.1 to 44.0)         | 4.6<br>(-0.2 to 9.7)           |
| Haemorrhagic stroke                                            | 15,310<br>(13,857 to 16,954)                  | 25.8<br>(19.5 to 32.2)         | -1.7<br>(-6.7 to 3.3)          | 4,120†<br>(3,764 to 4,508)                    | 20.7<br>(14.7 to 26.7)         | -7.4<br>(-11.9 to -2.9)        |
| Hypertensive heart disease                                     | 17,190<br>(14,948 to 19,774)                  | 31.7<br>(29.9 to 33.6)         | 0.3<br>(-0.7 to 1.4)           | --                                            | --                             | --                             |
| Cardiomyopathy and myocarditis                                 | 6,118<br>(5,779 to 6,416)                     | 19.8<br>(17.8 to 21.9)         | -4.7<br>(-6.5 to -3.0)         | 2,483†<br>(2,217 to 2,784)                    | 19.1<br>(17.7 to 20.8)         | -0.7<br>(-1.2 to -0.3)         |
| Myocarditis                                                    | 1,786<br>(1,607 to 1,977)                     | 14.1<br>(12.9 to 15.3)         | -1.4<br>(-1.9 to -0.9)         | 2,483<br>(2,217 to 2,784)                     | 19.1<br>(17.7 to 20.8)         | -0.7<br>(-1.2 to -0.3)         |
| Alcoholic cardiomyopathy                                       | 1,165<br>(994 to 1,359)                       | 20.5<br>(16.7 to 24.3)         | -5.5<br>(-8.3 to -2.8)         | --                                            | --                             | --                             |
| Other cardiomyopathy                                           | 4,005<br>(3,534 to 4,525)                     | 21.0<br>(18.9 to 23.0)         | -4.7<br>(-6.0 to -3.4)         | --                                            | --                             | --                             |
| Atrial fibrillation and flutter                                | 46,311<br>(41,441 to 52,014)                  | 32.0<br>(31.2 to 32.9)         | 0.2<br>(-0.4 to 0.7)           | 3,841<br>(3,379 to 4,388)                     | 30.9<br>(29.7 to 32.0)         | 0.3<br>(-0.4 to 0.9)           |
| Peripheral vascular disease                                    | 120,145<br>(105,640 to 137,704)               | 30.0<br>(29.0 to 31.0)         | -1.6<br>(-2.3 to -0.9)         | 11,020<br>(9,557 to 12,778)                   | 28.4<br>(26.9 to 30.1)         | -2.0<br>(-2.7 to -1.4)         |
| Endocarditis                                                   | 500<br>(448 to 568)                           | 23.2<br>(21.6 to 25.0)         | -3.6<br>(-4.7 to -2.5)         | 1,172<br>(1,068 to 1,280)                     | 24.3<br>(22.2 to 26.6)         | 3.5<br>(2.1 to 5.0)            |
| Other cardiovascular and circulatory diseases                  | 87,122<br>(76,311 to 98,866)                  | 20.7<br>(18.9 to 22.6)         | -2.4<br>(-3.5 to -1.3)         | --                                            | --                             | --                             |
| <b>Chronic respiratory diseases</b>                            | <b>571,426<br/>(560,139 to 582,621)</b>       | <b>20.9<br/>(20.3 to 21.5)</b> | <b>1.7<br/>(1.2 to 2.3)</b>    | <b>94,696†<br/>(90,108 to 99,441)</b>         | <b>19.6<br/>(18.7 to 20.6)</b> | <b>2.9<br/>(2.2 to 3.6)</b>    |
| Chronic obstructive pulmonary disease                          | 251,631<br>(241,958 to 261,129)               | 26.7<br>(25.6 to 27.9)         | -0.6<br>(-1.6 to 0.3)          | 18,721<br>(18,004 to 19,457)                  | 23.1<br>(21.8 to 24.5)         | -3.1<br>(-4.0 to -2.1)         |
| Pneumoconiosis                                                 | 1,111<br>(1,043 to 1,184)                     | 32.4<br>(31.1 to 33.7)         | 1.7<br>(0.8 to 2.6)            | 99<br>(93 to 105)                             | 29.0<br>(27.6 to 30.6)         | -1.4<br>(-2.3 to -0.4)         |
| Silicosis                                                      | 421<br>(380 to 464)                           | 32.3<br>(30.2 to 34.9)         | 1.3<br>(-0.2 to 3.1)           | 45<br>(41 to 49)                              | 28.8<br>(26.4 to 31.3)         | -3.0<br>(-4.4 to -1.6)         |
| Asbestosis                                                     | 153<br>(138 to 170)                           | 27.1<br>(25.8 to 28.6)         | -1.1<br>(-2.1 to 0.0)          | 12<br>(11 to 13)                              | 31.0<br>(29.4 to 32.9)         | 2.8<br>(1.5 to 4.1)            |
| Coal workers pneumoconiosis                                    | 294<br>(256 to 340)                           | 35.0<br>(32.0 to 38.1)         | 2.9<br>(0.7 to 5.2)            | 21<br>(19 to 25)                              | 28.6<br>(25.2 to 31.8)         | -1.4<br>(-3.7 to 1.2)          |
| Other pneumoconiosis                                           | 243<br>(210 to 277)                           | 32.6<br>(30.2 to 35.3)         | 2.8<br>(1.0 to 4.6)            | 21<br>(18 to 24)                              | 28.8<br>(25.7 to 32.2)         | -0.1<br>(-2.0 to 1.9)          |
| Asthma                                                         | 339,440<br>(319,582 to 360,796)               | 17.5<br>(16.3 to 18.6)         | 3.5<br>(2.5 to 4.5)            | 75,496<br>(71,071 to 80,177)                  | 18.7<br>(17.5 to 19.8)         | 4.5<br>(3.6 to 5.4)            |
| Interstitial lung disease and pulmonary sarcoidosis            | 3,978<br>(3,632 to 4,351)                     | 29.6<br>(28.2 to 30.9)         | 2.0<br>(1.2 to 2.7)            | 379<br>(348 to 412)                           | 34.7<br>(33.0 to 36.5)         | 4.6<br>(3.9 to 5.5)            |
| Other chronic respiratory diseases                             | --                                            | --                             | --                             | --                                            | --                             | --                             |
| <b>Cirrhosis and other chronic liver diseases</b>              | <b>45,783<br/>(43,781 to 47,831)</b>          | <b>27.8<br/>(26.6 to 29.0)</b> | <b>5.0<br/>(4.0 to 5.9)</b>    | <b>1,638<br/>(1,575 to 1,708)</b>             | <b>19.6<br/>(18.3 to 20.9)</b> | <b>-4.0<br/>(-4.9 to -3.1)</b> |
| Cirrhosis and other chronic liver diseases due to hepatitis B  | 12,482<br>(11,611 to 13,474)                  | 29.7<br>(28.1 to 31.4)         | 5.7<br>(4.6 to 6.8)            | 457<br>(421 to 500)                           | 21.0<br>(19.3 to 22.6)         | -3.9<br>(-5.2 to -2.8)         |
| Cirrhosis and other chronic liver diseases due to hepatitis C  | 10,903<br>(9,925 to 11,984)                   | 30.5<br>(28.8 to 32.2)         | 5.9<br>(4.7 to 7.1)            | 387<br>(353 to 426)                           | 22.2<br>(20.6 to 23.9)         | -3.7<br>(-4.9 to -2.5)         |
| Cirrhosis and other chronic liver diseases due to alcohol use  | 11,392<br>(10,521 to 12,386)                  | 29.5<br>(27.7 to 31.2)         | 4.2<br>(3.0 to 5.4)            | 404<br>(373 to 439)                           | 21.0<br>(19.2 to 22.7)         | -5.0<br>(-6.3 to -3.7)         |
| Cirrhosis and other chronic liver diseases due to other causes | 11,007<br>(10,105 to 11,958)                  | 21.6<br>(20.0 to 23.2)         | 4.2<br>(3.3 to 5.2)            | 391<br>(363 to 421)                           | 14.2<br>(13.0 to 15.7)         | -3.2<br>(-4.1 to -2.3)         |
| <b>Digestive diseases</b>                                      | <b>262,283<br/>(257,495 to 266,222)</b>       | <b>29.1<br/>(28.0 to 30.2)</b> | <b>6.6<br/>(5.7 to 7.5)</b>    | <b>211,761†<br/>(201,555 to 223,065)</b>      | <b>26.5<br/>(25.3 to 27.7)</b> | <b>4.9<br/>(4.3 to 5.6)</b>    |
| Peptic ulcer disease                                           | 74,335<br>(69,108 to 80,393)                  | 34.1<br>(31.6 to 36.9)         | 9.9<br>(8.1 to 12.0)           | 10,329<br>(9,391 to 11,368)                   | 13.5<br>(11.4 to 15.4)         | -5.1<br>(-6.9 to -3.5)         |
| Gastritis and duodenitis                                       | 123,619<br>(112,199 to 135,163)               | 34.0<br>(31.3 to 36.6)         | 9.7<br>(7.9 to 11.5)           | 77,140<br>(70,073 to 85,452)                  | 27.1<br>(24.7 to 29.6)         | 4.8<br>(3.4 to 6.1)            |
| Appendicitis                                                   | 857<br>(796 to 922)                           | 9.9<br>(9.1 to 10.8)           | 0.0<br>(-0.5 to 0.5)           | 22,580<br>(20,993 to 24,258)                  | 9.9<br>(9.1 to 10.8)           | 0.0<br>(-0.5 to 0.5)           |
| Paralytic ileus and intestinal obstruction                     | 170<br>(155 to 186)                           | 25.7<br>(23.9 to 27.6)         | 5.1<br>(4.1 to 6.1)            | 4,651<br>(4,265 to 5,080)                     | 26.1<br>(24.3 to 27.9)         | 4.9<br>(3.8 to 5.8)            |
| Inguinal, femoral, and abdominal hernia                        | 51,239<br>(46,088 to 56,543)                  | 17.0<br>(14.3 to 19.9)         | -0.8<br>(-2.5 to 1.2)          | 36,241<br>(31,967 to 40,531)                  | 41.6<br>(39.3 to 44.5)         | 14.4<br>(13.0 to 15.9)         |
| Inflammatory bowel disease                                     | 6,007<br>(5,622 to 6,446)                     | 27.4<br>(25.1 to 29.8)         | 4.0<br>(2.4 to 5.7)            | 3,518<br>(3,275 to 3,779)                     | 9.0<br>(8.0 to 10.0)           | -5.5<br>(-6.1 to -4.9)         |
| Vascular intestinal disorders                                  | 104<br>(93 to 115)                            | 26.0<br>(23.4 to 28.7)         | -0.1<br>(-1.8 to 1.9)          | 583<br>(527 to 645)                           | 23.9<br>(21.3 to 26.5)         | -1.9<br>(-4.0 to 0.1)          |
| Gallbladder and biliary diseases                               | 17,269<br>(15,618 to 19,012)                  | 25.4<br>(22.9 to 28.0)         | 3.6<br>(2.1 to 5.2)            | 51,509<br>(46,439 to 56,953)                  | 28.7<br>(26.1 to 31.2)         | 4.1<br>(2.7 to 5.6)            |
| Pancreatitis                                                   | 584<br>(532 to 639)                           | 30.5<br>(27.2 to 33.9)         | 6.6<br>(4.2 to 9.1)            | 5,210<br>(4,769 to 5,703)                     | 29.9<br>(26.6 to 33.3)         | 6.1<br>(3.7 to 8.6)            |
| Other digestive diseases                                       | --                                            | --                             | --                             | --                                            | --                             | --                             |
| <b>Neurological disorders</b>                                  | <b>2,595,647<br/>(2,542,097 to 2,651,997)</b> | <b>12.0<br/>(11.4 to 12.5)</b> | <b>-1.4<br/>(-1.9 to -0.9)</b> | <b>1,183,726<br/>(1,021,730 to 1,362,193)</b> | <b>8.5<br/>(7.1 to 9.7)</b>    | <b>-3.0<br/>(-3.5 to -2.5)</b> |
| Alzheimer's disease and other dementias                        | 43,836<br>(37,756 to 51,028)                  | 37.5<br>(35.9 to 39.0)         | 0.7<br>(-0.3 to 1.5)           | 7,779<br>(6,620 to 9,135)                     | 37.7<br>(35.4 to 40.3)         | 0.6<br>(-0.5 to 1.5)           |
| Parkinson's disease                                            | 6,063<br>(4,971 to 7,325)                     | 36.3<br>(34.2 to 38.2)         | 3.2<br>(1.8 to 4.4)            | 696<br>(564 to 850)                           | 34.8<br>(32.9 to 37.0)         | 3.0<br>(1.7 to 4.1)            |
| Epilepsy                                                       | 23,962<br>(20,402 to 27,737)                  | 15.1<br>(4.9 to 26.6)          | 2.3<br>(-6.6 to 12.5)          | 2,761<br>(2,308 to 3,268)                     | 11.7<br>(1.4 to 23.1)          | 2.6<br>(-6.8 to 13.2)          |
| Multiple sclerosis                                             | 2,221<br>(2,034 to 2,437)                     | 24.8<br>(23.4 to 26.4)         | 3.1<br>(1.9 to 4.4)            | 69<br>(63 to 76)                              | 16.8<br>(15.2 to 18.5)         | 4.5<br>(3.4 to 5.6)            |
| Motor neuron disease                                           | 331<br>(300 to 367)                           | 21.2<br>(19.5 to 23.1)         | 1.1<br>(0.2 to 2.2)            | 57<br>(53 to 63)                              | 27.2<br>(25.3 to 29.1)         | 2.0<br>(0.8 to 3.1)            |

|                                                            |                                               |                                |                                |                                          |                                |                                |
|------------------------------------------------------------|-----------------------------------------------|--------------------------------|--------------------------------|------------------------------------------|--------------------------------|--------------------------------|
| Migraine                                                   | 1,044,771<br>(999,535 to 1,087,969)           | 13.3<br>(12.9 to 13.7)         | -0.5<br>(-0.7 to -0.2)         | 110,317<br>(105,270 to 115,834)          | 10.7<br>(10.1 to 11.2)         | 0.0<br>(-0.2 to 0.3)           |
| Tension-type headache                                      | 1,890,670<br>(1,707,786 to 2,097,762)         | 10.5<br>(9.5 to 11.5)          | -2.3<br>(-2.7 to -1.9)         | 1,061,998<br>(899,411 to 1,241,310)      | 8.1<br>(6.5 to 9.4)            | -3.3<br>(-3.9 to -2.8)         |
| Other neurological disorders                               | 24<br>(16 to 33)                              | 16.8<br>(14.1 to 19.6)         | 0.5<br>(-0.4 to 1.2)           | 49<br>(32 to 66)                         | 16.9<br>(14.5 to 19.6)         | 0.7<br>(-0.3 to 1.6)           |
| <b>Mental and substance use disorders</b>                  | <b>1,111,147<br/>(1,095,612 to 1,128,948)</b> | <b>12.1<br/>(11.6 to 12.6)</b> | <b>-1.5<br/>(-1.9 to -1.0)</b> | <b>410,091†<br/>(385,617 to 437,586)</b> | <b>10.8<br/>(9.9 to 11.5)</b>  | <b>-3.5<br/>(-4.1 to -3.0)</b> |
| Schizophrenia                                              | 20,883<br>(18,497 to 23,422)                  | 16.9<br>(16.0 to 18.0)         | -0.9<br>(-1.5 to -0.4)         | 1,139<br>(1,006 to 1,287)                | 8.0<br>(6.0 to 9.8)            | -2.4<br>(-3.2 to -1.8)         |
| Alcohol use disorders                                      | 100,389<br>(89,592 to 111,659)                | 9.7<br>(7.8 to 11.8)           | -4.9<br>(-6.7 to -3.2)         | 50,432<br>(44,249 to 56,797)             | 10.1<br>(7.8 to 12.4)          | -3.5<br>(-5.4 to -1.7)         |
| Drug use disorders                                         | 61,968<br>(60,342 to 63,579)                  | 10.8<br>(9.5 to 11.9)          | -0.9<br>(-2.0 to 0.1)          | 7,460<br>(6,810 to 8,140)                | 4.7<br>(3.2 to 6.1)            | -1.6<br>(-2.6 to -0.7)         |
| Opioid use disorders                                       | 26,834<br>(23,563 to 30,952)                  | 18.1<br>(16.0 to 20.1)         | 2.6<br>(0.7 to 4.3)            | 2,795<br>(2,443 to 3,226)                | 12.1<br>(10.0 to 14.1)         | 1.0<br>(-0.6 to 2.5)           |
| Cocaine use disorders                                      | 5,840<br>(5,322 to 6,473)                     | 12.0<br>(11.0 to 13.0)         | -1.4<br>(-2.4 to -0.5)         | 347<br>(304 to 391)                      | 3.3<br>(2.0 to 4.5)            | 1.7<br>(0.7 to 2.7)            |
| Amphetamine use disorders                                  | 4,955<br>(3,693 to 6,490)                     | 3.6<br>(1.1 to 6.2)            | -4.1<br>(-6.6 to -1.7)         | 440<br>(330 to 577)                      | -5.7<br>(-8.3 to -2.7)         | -7.1<br>(-8.9 to -5.0)         |
| Cannabis use disorders                                     | 22,095<br>(18,965 to 25,855)                  | 3.6<br>(1.8 to 5.4)            | -4.3<br>(-5.5 to -3.1)         | 3,183<br>(2,706 to 3,776)                | -1.2<br>(-3.1 to 1.0)          | -3.9<br>(-5.3 to -2.2)         |
| Other drug use disorders                                   | 3,944<br>(3,537 to 4,362)                     | 17.2<br>(15.9 to 18.5)         | 1.0<br>(-0.1 to 2.0)           | 695<br>(624 to 770)                      | 14.3<br>(12.8 to 15.8)         | 0.6<br>(-0.3 to 1.4)           |
| Depressive disorders                                       | 268,172<br>(260,480 to 274,697)               | 14.8<br>(13.9 to 15.8)         | -2.7<br>(-3.5 to -2.0)         | 274,704<br>(251,855 to 300,436)          | 11.5<br>(10.4 to 12.5)         | -4.8<br>(-5.5 to -4.1)         |
| Major depressive disorder                                  | 167,836<br>(153,908 to 183,754)               | 11.4<br>(10.3 to 12.5)         | -5.0<br>(-5.7 to -4.3)         | 257,768<br>(234,546 to 284,665)          | 11.1<br>(9.9 to 12.2)          | -5.1<br>(-5.9 to -4.4)         |
| Dysthymia                                                  | 105,580<br>(92,588 to 120,440)                | 20.8<br>(18.5 to 23.3)         | 1.0<br>(-0.5 to 2.6)           | 16,935<br>(14,981 to 19,313)             | 17.9<br>(15.7 to 20.2)         | 0.9<br>(-0.5 to 2.3)           |
| Bipolar disorder                                           | 43,908<br>(38,383 to 50,196)                  | 15.0<br>(14.1 to 16.0)         | 0.6<br>(0.3 to 0.9)            | 3,777<br>(3,313 to 4,331)                | 10.5<br>(9.4 to 11.8)          | 2.2<br>(1.8 to 2.5)            |
| Anxiety disorders                                          | 274,615<br>(255,323 to 294,796)               | 13.3<br>(12.2 to 14.5)         | -0.8<br>(-1.7 to 0.1)          | 42,407<br>(39,560 to 45,513)             | 11.6<br>(10.5 to 12.7)         | 0.0<br>(-0.9 to 0.9)           |
| Eating disorders                                           | 10,523<br>(9,368 to 11,716)                   | 17.5<br>(14.7 to 20.1)         | 9.3<br>(6.7 to 11.7)           | 5,440<br>(4,039 to 7,186)                | 10.5<br>(8.7 to 12.3)          | 7.4<br>(6.8 to 8.1)            |
| Anorexia nervosa                                           | 2,606<br>(1,932 to 3,450)                     | 12.2<br>(10.7 to 13.8)         | 6.2<br>(4.9 to 7.5)            | 897<br>(665 to 1,183)                    | 11.0<br>(9.5 to 12.4)          | 7.0<br>(6.0 to 7.9)            |
| Bulimia nervosa                                            | 7,559<br>(5,765 to 9,931)                     | 19.2<br>(17.2 to 20.8)         | 10.1<br>(9.1 to 11.1)          | 4,543<br>(3,169 to 6,257)                | 10.5<br>(8.4 to 12.6)          | 7.5<br>(6.8 to 8.3)            |
| Autistic spectrum disorders                                | 62,174<br>(59,625 to 64,557)                  | 11.6<br>(10.1 to 13.1)         | 0.4<br>(-0.9 to 1.7)           | 450<br>(307 to 624)                      | 5.0<br>(4.3 to 5.6)            | -0.3<br>(-0.6 to 0.0)          |
| Autism                                                     | 18,302<br>(15,766 to 21,177)                  | 11.5<br>(10.9 to 12.0)         | -0.1<br>(-0.6 to 0.4)          | 51<br>(26 to 86)                         | 6.1<br>(5.1 to 7.0)            | 0.9<br>(0.2 to 1.7)            |
| Asperger syndrome and other autistic spectrum disorders    | 43,798<br>(36,425 to 52,403)                  | 11.6<br>(11.3 to 11.9)         | 0.6<br>(0.5 to 0.7)            | 399<br>(258 to 572)                      | 4.8<br>(4.1 to 5.5)            | -0.4<br>(-0.8 to -0.1)         |
| Attention-deficit/hyperactivity disorder                   | 62,624<br>(57,564 to 68,597)                  | 6.1<br>(5.4 to 6.8)            | -0.5<br>(-1.0 to 0.1)          | 2,873<br>(2,562 to 3,294)                | 9.0<br>(8.1 to 9.8)            | 2.3<br>(1.4 to 3.0)            |
| Conduct disorder                                           | 49,005<br>(40,946 to 57,034)                  | 2.1<br>(1.1 to 3.1)            | 2.2<br>(1.3 to 3.2)            | 16,887<br>(13,566 to 20,196)             | 4.1<br>(2.9 to 5.4)            | 1.8<br>(0.9 to 2.8)            |
| Idiopathic developmental intellectual disability           | 114,797<br>(69,506 to 161,353)                | 3.9<br>(1.9 to 5.2)            | -5.2<br>(-7.0 to -4.0)         | --                                       | --                             | --                             |
| Other mental and substance use disorders                   | 139,505<br>(122,047 to 160,430)               | 18.0<br>(17.7 to 18.4)         | 0.0<br>(-0.1 to 0.1)           | 4,523<br>(4,003 to 5,122)                | 5.6<br>(4.8 to 6.7)            | 0.3<br>(0.0 to 0.5)            |
| <b>Diabetes, urogenital, blood, and endocrine diseases</b> | <b>2,927,330<br/>(2,909,185 to 2,949,337)</b> | <b>15.1<br/>(14.3 to 16.0)</b> | <b>0.2<br/>(-0.6 to 0.9)</b>   | <b>811,323†<br/>(769,165 to 854,588)</b> | <b>13.2<br/>(12.3 to 14.1)</b> | <b>-0.6<br/>(-1.2 to -0.1)</b> |
| Diabetes mellitus                                          | 383,453<br>(352,588 to 414,576)               | 22.0<br>(19.3 to 24.8)         | -1.9<br>(-4.1 to 0.3)          | 20,828<br>(19,161 to 22,734)             | 18.5<br>(15.2 to 22.2)         | -0.7<br>(-3.3 to 2.0)          |
| Acute glomerulonephritis                                   | 104<br>(90 to 117)                            | 4.4<br>(2.3 to 6.5)            | -10.8<br>(-12.0 to -9.6)       | 1,530<br>(1,357 to 1,729)                | 5.2<br>(3.1 to 7.3)            | -10.1<br>(-11.2 to -9.0)       |
| Chronic kidney disease                                     | 275,930<br>(252,442 to 300,414)               | 30.8<br>(28.2 to 33.2)         | 2.1<br>(0.2 to 3.9)            | 21,329<br>(19,100 to 23,599)             | 30.8<br>(27.3 to 33.9)         | 2.8<br>(0.2 to 5.3)            |
| Chronic kidney disease due to diabetes mellitus            | 115,356<br>(101,848 to 130,636)               | 34.4<br>(31.6 to 37.2)         | 4.0<br>(2.0 to 6.1)            | 8,979<br>(7,742 to 10,377)               | 35.3<br>(31.6 to 39.1)         | 4.5<br>(1.4 to 7.3)            |
| Chronic kidney disease due to hypertension                 | 50,097<br>(44,151 to 55,693)                  | 27.5<br>(24.2 to 30.7)         | -0.2<br>(-2.5 to 2.2)          | 3,626<br>(3,131 to 4,163)                | 17.5<br>(13.5 to 21.1)         | -4.2<br>(-7.3 to -1.4)         |
| Chronic kidney disease due to glomerulonephritis           | 49,615<br>(43,695 to 55,597)                  | 27.8<br>(24.7 to 30.8)         | -0.7<br>(-3.0 to 1.5)          | 3,893<br>(3,261 to 4,529)                | 37.4<br>(33.0 to 41.7)         | 4.4<br>(1.0 to 7.5)            |
| Chronic kidney disease due to other causes                 | 60,862<br>(52,601 to 69,124)                  | 29.4<br>(26.4 to 32.2)         | 2.7<br>(0.5 to 4.8)            | 4,831<br>(4,135 to 5,526)                | 28.6<br>(24.9 to 32.0)         | 3.7<br>(0.9 to 6.2)            |
| Urinary diseases and male infertility                      | 146,155<br>(135,457 to 155,774)               | 26.1<br>(24.8 to 27.4)         | 0.5<br>(-0.5 to 1.6)           | 449,242†<br>(412,808 to 488,929)         | 15.8<br>(14.5 to 17.1)         | 0.9<br>(0.3 to 1.5)            |
| Interstitial nephritis and urinary tract infections        | 6,913<br>(6,201 to 7,660)                     | 14.3<br>(12.8 to 15.8)         | 1.0<br>(0.2 to 1.7)            | 360,815<br>(325,242 to 399,931)          | 14.3<br>(12.8 to 15.8)         | 1.1<br>(0.3 to 1.8)            |
| Urolithiasis                                               | 2,839<br>(2,556 to 3,162)                     | 22.1<br>(20.5 to 23.7)         | 0.5<br>(-0.3 to 1.4)           | 75,218<br>(67,725 to 83,689)             | 22.0<br>(20.4 to 23.6)         | 0.5<br>(-0.3 to 1.4)           |
| Benign prostatic hyperplasia                               | 103,655<br>(91,930 to 115,236)                | 28.9<br>(27.6 to 30.3)         | -1.3<br>(-2.2 to -0.3)         | 13,208<br>(11,393 to 15,199)             | 27.2<br>(25.7 to 28.6)         | -1.5<br>(-2.4 to -0.5)         |
| Male infertility                                           | 28,044<br>(22,703 to 35,076)                  | 18.8<br>(15.4 to 22.1)         | 7.2<br>(4.4 to 9.8)            | --                                       | --                             | --                             |
| Other urinary diseases                                     | --                                            | --                             | --                             | --                                       | --                             | --                             |
| Gynecological diseases                                     | 837,557<br>(822,589 to 852,391)               | 12.8<br>(12.1 to 13.4)         | -3.4<br>(-4.0 to -2.8)         | 300,826†<br>(284,093 to 317,864)         | 7.6<br>(6.4 to 9.0)            | -3.1<br>(-4.3 to -1.9)         |
| Uterine fibroids                                           | 91,012<br>(82,090 to 100,488)                 | 20.9<br>(20.2 to 21.7)         | 0.1<br>(-0.2 to 0.4)           | 9,395<br>(8,303 to 10,601)               | 11.0<br>(9.6 to 12.5)          | -2.3<br>(-3.0 to -1.7)         |
| Polycystic ovarian syndrome                                | 10,642<br>(8,653 to 12,885)                   | 7.7<br>(6.7 to 8.6)            | -2.3<br>(-3.1 to -1.4)         | 7,651<br>(5,518 to 10,179)               | 18.2<br>(16.0 to 20.2)         | 9.6<br>(8.0 to 11.2)           |
| Female infertility                                         | 31,477<br>(19,472 to 49,304)                  | 38.3<br>(29.3 to 50.4)         | 25.1<br>(17.2 to 35.5)         | --                                       | --                             | --                             |
| Endometriosis                                              | 3,554<br>(3,197 to 3,935)                     | 8.0<br>(6.5 to 9.6)            | -3.8<br>(-4.9 to -2.6)         | 9,262<br>(7,894 to 10,960)               | -6.4<br>(-8.3 to -4.4)         | -11.0<br>(-12.6 to -9.5)       |
| Genital prolapse                                           | 250,418<br>(222,236 to 278,690)               | 14.8<br>(13.7 to 15.8)         | -9.5<br>(-10.3 to -8.8)        | 16,608<br>(14,433 to 19,185)             | 6.6<br>(5.3 to 7.8)            | -8.6<br>(-9.8 to -7.5)         |
| Premenstrual syndrome                                      | 454,296<br>(432,912 to 474,453)               | 9.3<br>(7.9 to 10.5)           | -2.1<br>(-3.3 to -1.0)         | 162,435<br>(153,441 to 171,301)          | 6.5<br>(5.0 to 7.9)            | -2.3<br>(-3.6 to -1.3)         |
| Other gynecological diseases                               | 104,692<br>(93,190 to 116,476)                | 11.2<br>(8.9 to 14.2)          | -2.4<br>(-4.3 to 0.2)          | 95,475<br>(82,017 to 109,553)            | 10.2<br>(7.2 to 14.2)          | -3.7<br>(-6.1 to -0.1)         |
| Haemoglobinopathies and haemolytic anaemias                | 1,804,470<br>(1,782,496 to 1,828,051)         | 13.3<br>(11.7 to 14.9)         | 1.3<br>(0.0 to 2.7)            | --                                       | --                             | --                             |
| Thalassemias                                               | 366<br>(343 to 394)                           | -3.4<br>(-5.0 to -1.7)         | -7.6<br>(-9.2 to -6.0)         | --                                       | --                             | --                             |
| Thalassaemia trait                                         | 287,107<br>(276,495 to 298,645)               | 11.3<br>(10.6 to 12.1)         | -1.1<br>(-1.8 to -0.4)         | --                                       | --                             | --                             |
| Sickle cell disorders                                      | 3,888<br>(3,571 to 4,469)                     | 20.1<br>(17.2 to 23.2)         | 14.9<br>(12.1 to 17.8)         | --                                       | --                             | --                             |
| Sickle cell trait                                          | 461,124<br>(418,742 to 516,943)               | 17.5<br>(16.7 to 18.8)         | 6.2<br>(5.5 to 7.5)            | --                                       | --                             | --                             |
| G6PD deficiency                                            | 331,513<br>(319,093 to 346,326)               | 13.1<br>(12.6 to 13.7)         | 1.8<br>(1.3 to 2.3)            | --                                       | --                             | --                             |
| G6PD trait                                                 | 865,927<br>(851,718 to 882,248)               | 12.5<br>(12.3 to 12.7)         | 0.3<br>(0.1 to 0.5)            | --                                       | --                             | --                             |
| Other haemoglobinopathies and hemolytic anaemias           | 61,625<br>(59,671 to 63,634)                  | 12.0<br>(10.9 to 13.1)         | -1.4<br>(-2.3 to -0.5)         | --                                       | --                             | --                             |
| Endocrine, metabolic, blood, and immune disorders          | 127,493<br>(119,899 to 135,715)               | 18.8<br>(17.5 to 20.1)         | -0.6<br>(-1.4 to 0.3)          | 17,569<br>(15,815 to 19,457)             | 24.9<br>(22.9 to 26.9)         | 0.3<br>(-0.9 to 1.7)           |
| <b>Musculoskeletal disorders</b>                           | <b>1,270,630<br/>(1,248,968 to 1,294,805)</b> | <b>19.9<br/>(19.2 to 20.6)</b> | <b>-1.2<br/>(-1.7 to -0.7)</b> | <b>652,005<br/>(591,746 to 719,811)</b>  | <b>17.7<br/>(16.3 to 19.3)</b> | <b>-2.3<br/>(-3.3 to -1.3)</b> |
| Rheumatoid arthritis                                       | 21,337<br>(19,466 to 23,612)                  | 29.2<br>(27.1 to 31.1)         | 3.7<br>(2.3 to 5.0)            | 1,174<br>(1,065 to 1,298)                | 25.2<br>(22.8 to 27.5)         | 4.3<br>(2.9 to 5.7)            |
| Osteoarthritis                                             | 301,567<br>(285,064 to 318,844)               | 30.0<br>(29.5 to 30.5)         | 0.9<br>(0.6 to 1.2)            | 14,696<br>(13,728 to 15,682)             | 25.6<br>(24.7 to 26.5)         | 0.8<br>(0.4 to 1.1)            |



|                                               |                                               |                                |                                |                                                   |                                |                                |
|-----------------------------------------------|-----------------------------------------------|--------------------------------|--------------------------------|---------------------------------------------------|--------------------------------|--------------------------------|
| Low back and neck pain                        | 748,081<br>(721,756 to 766,729)               | 19.3<br>(18.3 to 20.4)         | -1.2<br>(-2.0 to -0.4)         | 313,434<br>(281,503 to 347,952)                   | 18.2<br>(16.6 to 19.7)         | -1.7<br>(-2.7 to -0.9)         |
| Low back pain                                 | 511,048<br>(457,208 to 572,056)               | 18.0<br>(16.1 to 19.9)         | -2.1<br>(-3.6 to -1.0)         | 250,277<br>(220,585 to 283,681)                   | 17.9<br>(15.9 to 19.8)         | -2.2<br>(-3.4 to -1.1)         |
| Neck pain                                     | 290,524<br>(254,815 to 332,009)               | 22.1<br>(20.1 to 24.2)         | 0.0<br>(-1.4 to 1.3)           | 63,157<br>(55,205 to 74,075)                      | 19.7<br>(17.5 to 21.9)         | 0.2<br>(-1.0 to 1.3)           |
| Gout                                          | 33,977<br>(30,617 to 37,923)                  | 26.5<br>(25.4 to 27.7)         | -0.1<br>(-0.6 to 0.5)          | 6,435<br>(5,666 to 7,248)                         | 26.0<br>(24.7 to 27.3)         | 0.2<br>(-0.4 to 0.8)           |
| Other musculoskeletal disorders               | 337,859<br>(289,444 to 390,647)               | 14.6<br>(11.6 to 17.4)         | -3.6<br>(-5.7 to -1.6)         | 316,267<br>(266,448 to 375,370)                   | 16.7<br>(13.8 to 19.7)         | -3.1<br>(-5.1 to -1.3)         |
| <b>Other non-communicable diseases</b>        | <b>5,292,032<br/>(5,257,502 to 5,326,591)</b> | <b>13.4<br/>(13.2 to 13.7)</b> | <b>-0.3<br/>(-0.5 to -0.1)</b> | <b>14,922,120†<br/>(14,136,832 to 15,793,314)</b> | <b>12.8<br/>(12.2 to 13.3)</b> | <b>-0.7<br/>(-1.0 to -0.3)</b> |
| Congenital anomalies                          | 82,890<br>(78,027 to 87,071)                  | 7.9<br>(5.7 to 10.1)           | -2.2<br>(-4.1 to -0.2)         | --                                                | --                             | --                             |
| Neural tube defects                           | 5,782<br>(5,232 to 6,393)                     | 14.5<br>(12.5 to 17.0)         | 2.9<br>(1.1 to 5.2)            | --                                                | --                             | --                             |
| Congenital heart anomalies                    | 15,377<br>(13,711 to 17,128)                  | 7.4<br>(5.9 to 8.8)            | -1.4<br>(-2.8 to -0.1)         | --                                                | --                             | --                             |
| Orofacial clefts                              | 3,590<br>(3,229 to 3,967)                     | 10.9<br>(8.6 to 12.8)          | -1.2<br>(-3.2 to 0.6)          | --                                                | --                             | --                             |
| Down's syndrome                               | 2,031<br>(1,775 to 2,315)                     | 7.2<br>(4.9 to 9.4)            | -1.2<br>(-3.4 to 1.0)          | --                                                | --                             | --                             |
| Turner syndrome                               | 2,719<br>(2,378 to 3,089)                     | 6.5<br>(5.0 to 7.9)            | -1.3<br>(-2.7 to 0.0)          | --                                                | --                             | --                             |
| Klinefelter syndrome                          | 3,043<br>(2,641 to 3,482)                     | 7.0<br>(5.7 to 8.4)            | 0.6<br>(-0.7 to 1.9)           | --                                                | --                             | --                             |
| Other chromosomal abnormalities               | 4,310<br>(3,734 to 4,977)                     | 3.7<br>(1.8 to 5.4)            | 1.5<br>(-0.3 to 3.2)           | --                                                | --                             | --                             |
| Congenital musculoskeletal and limb anomalies | 10,812<br>(9,960 to 11,711)                   | 12.5<br>(10.6 to 14.3)         | -0.6<br>(-2.3 to 1.1)          | --                                                | --                             | --                             |
| Urogenital congenital anomalies               | 7,172<br>(6,493 to 7,894)                     | 4.0<br>(3.2 to 4.8)            | -2.9<br>(-3.7 to -2.2)         | --                                                | --                             | --                             |
| Digestive congenital anomalies                | 9,711<br>(8,741 to 10,731)                    | 9.5<br>(7.1 to 11.9)           | -3.1<br>(-5.3 to -0.9)         | --                                                | --                             | --                             |
| Other congenital anomalies                    | 34,984<br>(24,584 to 49,402)                  | 7.9<br>(5.1 to 10.9)           | -3.2<br>(-5.7 to -0.6)         | --                                                | --                             | --                             |
| Skin and subcutaneous diseases                | 2,266,315<br>(2,242,994 to 2,285,332)         | 13.6<br>(13.2 to 14.0)         | 1.5<br>(1.2 to 1.9)            | 5,074,605<br>(4,838,566 to 5,335,844)             | 16.0<br>(15.4 to 16.7)         | 1.3<br>(1.1 to 1.5)            |
| Dermatitis                                    | 306,359<br>(290,041 to 324,193)               | 12.2<br>(11.6 to 12.8)         | 0.7<br>(0.1 to 1.2)            | 430,376<br>(398,274 to 462,932)                   | 14.0<br>(13.2 to 14.8)         | -0.3<br>(-0.5 to -0.2)         |
| Psoriasis                                     | 65,135<br>(62,708 to 67,812)                  | 22.0<br>(21.5 to 22.4)         | 4.1<br>(3.9 to 4.4)            | 8,170<br>(7,861 to 8,478)                         | 21.3<br>(20.8 to 21.8)         | 5.1<br>(4.9 to 5.3)            |
| Cellulitis                                    | 3,018<br>(2,842 to 3,210)                     | 14.4<br>(13.6 to 15.1)         | -0.5<br>(-0.8 to -0.1)         | 61,333<br>(58,280 to 64,556)                      | 14.5<br>(13.8 to 15.2)         | -1.5<br>(-1.8 to -1.1)         |
| Pyoderma                                      | 21,020<br>(20,491 to 21,564)                  | 22.9<br>(22.5 to 23.3)         | 5.0<br>(4.7 to 5.3)            | 474,385<br>(461,024 to 488,663)                   | 22.9<br>(22.5 to 23.3)         | 3.8<br>(3.5 to 4.1)            |
| Scabies                                       | 146,785<br>(127,773 to 170,009)               | 3.3<br>(1.9 to 4.7)            | -5.4<br>(-6.1 to -4.9)         | 454,671<br>(392,690 to 529,184)                   | 2.7<br>(1.3 to 4.2)            | -5.8<br>(-6.5 to -5.2)         |
| Fungal skin diseases                          | 626,700<br>(568,967 to 690,267)               | 18.2<br>(17.2 to 19.3)         | 2.4<br>(2.1 to 2.7)            | 2,098,743<br>(1,884,346 to 2,337,325)             | 19.3<br>(18.0 to 20.6)         | 1.7<br>(1.4 to 1.9)            |
| Viral skin diseases                           | 193,171<br>(184,773 to 201,619)               | 9.1<br>(8.8 to 9.5)            | -0.2<br>(-0.4 to 0.0)          | 276,755<br>(263,471 to 290,018)                   | 9.5<br>(9.1 to 10.0)           | -0.2<br>(-0.4 to 0.0)          |
| Acne vulgaris                                 | 614,771<br>(560,634 to 672,878)               | 5.1<br>(4.5 to 5.8)            | 2.0<br>(1.6 to 2.5)            | 429,822<br>(361,790 to 521,114)                   | 4.5<br>(3.5 to 5.7)            | 2.8<br>(1.7 to 4.1)            |
| Alopecia areata                               | 15,415<br>(14,906 to 15,948)                  | 12.9<br>(12.6 to 13.2)         | -1.3<br>(-1.5 to -1.2)         | 27,247<br>(26,347 to 28,203)                      | 12.7<br>(12.4 to 13.0)         | -1.3<br>(-1.5 to -1.2)         |
| Puritus                                       | 66,780<br>(59,262 to 74,868)                  | 18.4<br>(16.9 to 19.9)         | 1.2<br>(0.9 to 1.6)            | 53,046<br>(47,751 to 59,503)                      | 18.1<br>(16.6 to 19.7)         | 1.2<br>(0.9 to 1.5)            |
| Urticaria                                     | 67,060<br>(59,299 to 77,018)                  | 9.5<br>(8.6 to 10.5)           | -0.3<br>(-0.4 to -0.2)         | 119,403<br>(105,497 to 135,993)                   | 9.2<br>(8.3 to 10.2)           | -0.3<br>(-0.5 to -0.2)         |
| Decubitus ulcer                               | 1,836<br>(1,660 to 2,017)                     | 27.9<br>(25.7 to 30.0)         | -0.9<br>(-2.3 to 0.4)          | 6,722<br>(6,040 to 7,456)                         | 28.3<br>(25.9 to 30.4)         | -0.8<br>(-2.2 to 0.5)          |
| Other skin and subcutaneous diseases          | 532,790<br>(519,540 to 545,725)               | 25.5<br>(25.1 to 25.9)         | 4.4<br>(4.3 to 4.6)            | 633,932<br>(616,730 to 651,837)                   | 26.9<br>(26.4 to 27.4)         | 4.9<br>(4.7 to 5.1)            |
| Sense organ diseases                          | 1,843,201<br>(1,825,393 to 1,861,436)         | 21.5<br>(21.1 to 21.9)         | -0.7<br>(-1.0 to -0.4)         | 708,004†<br>(667,844 to 753,886)                  | 15.9<br>(15.5 to 16.3)         | 0.8<br>(0.7 to 1.0)            |
| Glaucoma                                      | 4,761<br>(3,973 to 5,573)                     | 34.4<br>(32.3 to 36.2)         | 1.2<br>(-0.2 to 2.4)           | --                                                | --                             | --                             |
| Cataract                                      | 83,628<br>(73,800 to 93,905)                  | 32.3<br>(29.4 to 34.8)         | 0.8<br>(-1.3 to 2.6)           | --                                                | --                             | --                             |
| Macular degeneration                          | 6,147<br>(5,111 to 7,401)                     | 43.0<br>(39.9 to 45.8)         | 7.2<br>(5.0 to 9.3)            | --                                                | --                             | --                             |
| Refraction and accommodation disorders        | 854,299<br>(822,109 to 885,545)               | 17.3<br>(16.6 to 17.9)         | -3.8<br>(-4.2 to -3.4)         | --                                                | --                             | --                             |
| Age-related and other hearing loss            | 1,271,675<br>(1,210,237 to 1,337,731)         | 26.0<br>(25.2 to 26.8)         | 0.3<br>(-0.1 to 0.7)           | --                                                | --                             | --                             |
| Other vision loss                             | 29,249<br>(25,873 to 32,927)                  | 26.0<br>(23.7 to 28.3)         | 0.8<br>(-0.5 to 2.1)           | --                                                | --                             | --                             |
| Other sense organ diseases                    | 210,697<br>(195,303 to 225,565)               | 23.5<br>(23.1 to 24.0)         | 0.8<br>(0.6 to 1.0)            | 708,004<br>(667,844 to 753,886)                   | 15.9<br>(15.5 to 16.3)         | 0.8<br>(0.7 to 1.0)            |
| Oral disorders                                | 3,583,600<br>(3,475,812 to 3,657,885)         | 12.2<br>(11.7 to 12.8)         | -1.4<br>(-1.8 to -1.0)         | 9,139,511†<br>(8,388,756 to 9,926,991)            | 10.8<br>(10.0 to 11.5)         | -1.9<br>(-2.5 to -1.3)         |
| Caries of deciduous teeth                     | 486,095<br>(398,110 to 573,474)               | 7.3<br>(5.4 to 8.5)            | 0.7<br>(-1.1 to 1.8)           | 1,762,264<br>(1,264,051 to 2,391,119)             | 8.2<br>(5.3 to 10.0)           | 1.3<br>(-1.4 to 3.1)           |
| Caries of permanent teeth                     | 2,435,850<br>(2,288,064 to 2,586,461)         | 9.4<br>(8.7 to 10.1)           | -3.4<br>(-3.8 to -3.0)         | 7,263,992<br>(6,715,107 to 7,835,458)             | 11.3<br>(10.4 to 12.2)         | -2.7<br>(-3.1 to -2.3)         |
| Periodontal disease                           | 750,847<br>(633,975 to 874,077)               | 25.9<br>(24.8 to 26.9)         | 2.2<br>(1.7 to 2.8)            | 89,841<br>(74,128 to 106,716)                     | 24.2<br>(22.1 to 25.8)         | 2.3<br>(1.6 to 2.9)            |
| Edentulism and severe tooth loss              | 302,342<br>(263,801 to 339,035)               | 27.3<br>(26.2 to 28.5)         | -0.9<br>(-1.6 to -0.3)         | 23,414<br>(19,894 to 27,222)                      | 26.8<br>(24.8 to 29.0)         | -1.2<br>(-2.0 to -0.4)         |
| Other oral disorders                          | 134,457<br>(128,968 to 140,248)               | 15.4<br>(14.8 to 15.9)         | 0.0<br>(-0.2 to 0.1)           | --                                                | --                             | --                             |
| <b>Injuries</b>                               | <b>1,492,784<br/>(1,413,602 to 1,584,568)</b> | <b>24.7<br/>(24.2 to 25.1)</b> | <b>3.7<br/>(3.4 to 4.0)</b>    | <b>619,651†<br/>(592,467 to 648,150)</b>          | <b>17.5<br/>(16.5 to 18.5)</b> | <b>2.9<br/>(2.1 to 3.8)</b>    |
| <b>Transport injuries</b>                     | <b>241,195<br/>(225,137 to 258,446)</b>       | <b>27.7<br/>(26.9 to 28.5)</b> | <b>5.1<br/>(4.7 to 5.6)</b>    | <b>75,419<br/>(68,548 to 82,688)</b>              | <b>20.3<br/>(17.5 to 23.5)</b> | <b>6.5<br/>(4.0 to 9.2)</b>    |
| Road injuries                                 | 194,515<br>(182,106 to 208,390)               | 29.1<br>(28.2 to 30.1)         | 5.7<br>(5.1 to 6.3)            | 65,536<br>(58,945 to 72,433)                      | 21.6<br>(18.4 to 25.2)         | 7.5<br>(4.7 to 10.5)           |
| Pedestrian road injuries                      | 43,124<br>(38,450 to 48,872)                  | 31.4<br>(29.5 to 33.3)         | 7.5<br>(6.5 to 8.5)            | 11,343<br>(9,709 to 13,303)                       | 23.2<br>(18.7 to 27.8)         | 8.4<br>(4.6 to 12.1)           |
| Cyclist road injuries                         | 38,983<br>(33,088 to 45,660)                  | 30.5<br>(28.4 to 32.7)         | 7.1<br>(5.9 to 8.2)            | 15,288<br>(12,715 to 17,993)                      | 22.2<br>(17.9 to 27.1)         | 8.3<br>(4.7 to 12.1)           |
| Motorcyclist road injuries                    | 46,084<br>(39,635 to 55,732)                  | 31.1<br>(29.9 to 32.7)         | 7.9<br>(7.2 to 8.8)            | 11,347<br>(9,534 to 13,518)                       | 22.3<br>(17.6 to 27.1)         | 9.5<br>(5.7 to 13.3)           |
| Motor vehicle road injuries                   | 51,784<br>(43,776 to 59,354)                  | 20.5<br>(18.9 to 22.2)         | -2.1<br>(-3.1 to -1.1)         | 20,993<br>(18,157 to 23,790)                      | 15.6<br>(11.4 to 19.8)         | 1.5<br>(-2.1 to 4.9)           |
| Other road injuries                           | 14,539<br>(12,463 to 17,017)                  | 47.8<br>(45.1 to 50.3)         | 21.9<br>(20.5 to 23.3)         | 6,566<br>(5,217 to 8,267)                         | 38.8<br>(33.3 to 44.7)         | 23.3<br>(19.7 to 27.5)         |
| Other transport injuries                      | 46,680<br>(39,471 to 54,858)                  | 22.1<br>(21.4 to 22.9)         | 2.9<br>(2.3 to 3.4)            | 9,883<br>(8,552 to 11,480)                        | 11.9<br>(10.1 to 14.2)         | 0.5<br>(-0.8 to 2.0)           |
| <b>Unintentional injuries</b>                 | <b>1,127,878<br/>(1,053,751 to 1,211,481)</b> | <b>24.7<br/>(24.2 to 25.1)</b> | <b>3.7<br/>(3.4 to 4.0)</b>    | <b>510,685<br/>(484,967 to 539,046)</b>           | <b>18.1<br/>(17.0 to 19.3)</b> | <b>3.2<br/>(2.2 to 4.2)</b>    |
| Falls                                         | 474,230<br>(419,318 to 528,012)               | 27.6<br>(26.6 to 28.5)         | 4.7<br>(4.2 to 5.1)            | 208,272<br>(189,203 to 229,948)                   | 22.8<br>(20.4 to 25.6)         | 5.0<br>(2.9 to 7.0)            |
| Drowning                                      | 4,684<br>(4,129 to 5,324)                     | 12.4<br>(11.3 to 13.4)         | -6.9<br>(-7.5 to -6.4)         | 846<br>(763 to 938)                               | 2.9<br>(0.7 to 5.2)            | -11.0<br>(-13.2 to -8.9)       |
| Fire, heat, and hot substances                | 102,124<br>(87,477 to 121,846)                | 20.9<br>(19.6 to 22.1)         | 1.4<br>(0.3 to 2.4)            | 10,997<br>(9,148 to 12,675)                       | 12.6<br>(9.7 to 15.2)          | 1.9<br>(-0.9 to 4.5)           |
| Poisonings                                    | 3,526<br>(2,984 to 4,133)                     | 28.3<br>(26.6 to 29.8)         | 9.0<br>(7.8 to 10.2)           | 4,697<br>(3,858 to 5,639)                         | 21.4<br>(18.1 to 24.4)         | 9.5<br>(6.6 to 11.9)           |

|                                                                                     |                                               |                                      |                                      |                                             |                                         |                                         |
|-------------------------------------------------------------------------------------|-----------------------------------------------|--------------------------------------|--------------------------------------|---------------------------------------------|-----------------------------------------|-----------------------------------------|
| Exposure to mechanical forces                                                       | 197,786<br>(168,555 to 241,945)               | 26.0<br>(24.9 to 27.1)               | 4.7<br>(4.1 to 5.3)                  | 67,906<br>(59,032 to 76,818)                | 19.1<br>(16.6 to 21.7)                  | 6.4<br>(4.3 to 8.5)                     |
| Unintentional firearm injuries                                                      | 7,091<br>(5,867 to 8,629)                     | 24.0<br>(22.9 to 25.2)               | 2.9<br>(2.1 to 3.6)                  | 1,429<br>(1,052 to 1,893)                   | 17.7<br>(13.4 to 21.9)                  | 6.7<br>(3.1 to 10.0)                    |
| Unintentional suffocation                                                           | 9,395<br>(7,248 to 12,049)                    | 12.8<br>(7.2 to 17.9)                | -2.2<br>(-6.6 to 2.0)                | 1,804<br>(1,347 to 2,370)                   | 7.6<br>(2.4 to 12.3)                    | -0.5<br>(-5.2 to 3.8)                   |
| Other exposure to mechanical forces                                                 | 181,300<br>(153,213 to 224,295)               | 26.9<br>(25.7 to 27.9)               | 5.2<br>(4.6 to 5.7)                  | 64,673<br>(56,323 to 73,039)                | 19.5<br>(16.9 to 22.2)                  | 6.6<br>(4.5 to 8.7)                     |
| Adverse effects of medical treatment                                                | 2,924<br>(2,328 to 3,567)                     | 11.8<br>(10.2 to 13.4)               | -4.4<br>(-6.0 to -2.8)               | 38,245<br>(34,405 to 42,385)                | 11.8<br>(10.2 to 13.5)                  | -4.5<br>(-6.1 to -2.9)                  |
| Animal contact                                                                      | 53,654<br>(47,673 to 61,282)                  | 15.8<br>(15.0 to 16.6)               | -2.3<br>(-2.8 to -1.9)               | 65,550<br>(56,597 to 74,579)                | 10.0<br>(7.5 to 12.3)                   | -1.4<br>(-3.6 to 0.4)                   |
| Venomous animal contact                                                             | 24,759<br>(20,818 to 29,310)                  | 18.0<br>(17.1 to 19.0)               | 0.2<br>(-0.3 to 0.8)                 | 31,691<br>(25,886 to 38,600)                | 10.9<br>(7.9 to 13.5)                   | -0.5<br>(-3.1 to 1.6)                   |
| Non-venomous animal contact                                                         | 28,895<br>(24,541 to 34,730)                  | 14.0<br>(13.1 to 14.9)               | -4.4<br>(-5.0 to -3.8)               | 33,859<br>(27,953 to 40,468)                | 9.2<br>(6.8 to 11.3)                    | -2.2<br>(-4.2 to -0.4)                  |
| Foreign body                                                                        | 54,797<br>(45,419 to 63,613)                  | 22.5<br>(20.7 to 24.7)               | 4.9<br>(3.6 to 6.5)                  | 35,172<br>(30,752 to 40,749)                | 20.1<br>(18.2 to 22.6)                  | 6.4<br>(4.8 to 7.9)                     |
| Pulmonary aspiration and foreign body in airway                                     | 26,682<br>(20,450 to 35,018)                  | 18.5<br>(15.8 to 21.6)               | 2.2<br>(0.2 to 4.7)                  | 10,801<br>(9,348 to 12,717)                 | 13.6<br>(11.7 to 15.7)                  | 0.4<br>(-1.5 to 2.5)                    |
| Foreign body in eyes                                                                | 3,168<br>(1,880 to 4,640)                     | 27.5<br>(24.8 to 31.4)               | 9.2<br>(7.4 to 11.1)                 | 15,443<br>(11,951 to 20,505)                | 24.5<br>(20.9 to 29.5)                  | 9.9<br>(7.0 to 12.8)                    |
| Foreign body in other body part                                                     | 24,947<br>(20,403 to 31,426)                  | 26.5<br>(24.7 to 27.9)               | 7.5<br>(6.4 to 8.7)                  | 8,929<br>(7,508 to 10,562)                  | 21.3<br>(19.5 to 23.2)                  | 8.7<br>(7.2 to 10.4)                    |
| Environmental heat and cold exposure                                                | 74,104<br>(63,212 to 86,149)                  | 24.3<br>(22.9 to 25.3)               | 5.1<br>(4.3 to 5.9)                  | 19,591<br>(16,473 to 23,143)                | 15.5<br>(13.2 to 17.7)                  | 2.6<br>(0.9 to 4.1)                     |
| Other unintentional injuries                                                        | 160,048<br>(131,378 to 191,818)               | 21.9<br>(20.9 to 23.0)               | 2.7<br>(2.0 to 3.5)                  | 59,409<br>(51,227 to 68,804)                | 15.4<br>(13.0 to 17.4)                  | 2.3<br>(0.3 to 4.1)                     |
| <b>Self-harm and interpersonal violence</b>                                         | <b>230,043</b><br><b>(210,093 to 252,561)</b> | <b>7.7</b><br><b>(6.6 to 8.7)</b>    | <b>-5.1</b><br><b>(-5.5 to -4.7)</b> | <b>32,470†</b><br><b>(28,739 to 36,265)</b> | <b>6.0</b><br><b>(3.8 to 8.0)</b>       | <b>-6.0</b><br><b>(-8.0 to -4.2)</b>    |
| Self-harm                                                                           | 11,924<br>(10,160 to 13,744)                  | 14.4<br>(13.7 to 15.0)               | -7.5<br>(-8.3 to -6.6)               | 6,893<br>(6,130 to 7,759)                   | 1.6<br>(-1.0 to 4.1)                    | -13.6<br>(-15.8 to -11.3)               |
| Self-harm by firearm                                                                | 380<br>(326 to 439)                           | 11.1<br>(9.6 to 12.8)                | -7.0<br>(-8.8 to -5.0)               | 98<br>(61 to 149)                           | -0.6<br>(-6.4 to 4.9)                   | -11.5<br>(-17.5 to -5.7)                |
| Self-harm by other specified means                                                  | 11,544<br>(9,770 to 13,356)                   | 14.5<br>(13.8 to 15.1)               | -7.5<br>(-8.3 to -6.6)               | 6,795<br>(6,037 to 7,607)                   | 1.6<br>(-1.0 to 4.2)                    | -13.6<br>(-15.8 to -11.3)               |
| Interpersonal violence                                                              | 218,118<br>(197,726 to 240,339)               | 7.3<br>(6.2 to 8.4)                  | -4.9<br>(-5.4 to -4.6)               | 25,577†<br>(22,086 to 29,230)               | 7.2<br>(4.6 to 9.6)                     | -3.6<br>(-6.0 to -1.6)                  |
| Assault by firearm                                                                  | 2,899<br>(2,387 to 3,485)                     | 15.7<br>(13.7 to 17.6)               | -4.3<br>(-5.6 to -2.9)               | 711<br>(560 to 897)                         | 8.8<br>(4.5 to 13.0)                    | -1.3<br>(-5.3 to 2.3)                   |
| Assault by sharp object                                                             | 15,012<br>(12,272 to 17,936)                  | 11.1<br>(14.3 to 16.7)               | -3.7<br>(-4.7 to -2.7)               | 5,603<br>(4,397 to 6,946)                   | 5.8<br>(2.0 to 9.3)                     | -3.8<br>(-7.3 to -0.8)                  |
| Sexual violence                                                                     | 160,421<br>(141,228 to 181,452)               | 4.4<br>(3.2 to 5.7)                  | -5.4<br>(-6.0 to -4.9)               | --                                          | --                                      | --                                      |
| Assault by other means                                                              | 39,786<br>(33,335 to 48,036)                  | 16.7<br>(16.0 to 17.3)               | -3.5<br>(-4.0 to -3.1)               | 19,263<br>(16,510 to 22,244)                | 7.6<br>(5.0 to 10.2)                    | -3.6<br>(-6.0 to -1.4)                  |
| <b>Forces of nature, conflict and terrorism, and executions and police conflict</b> | <b>54,091</b><br><b>(34,969 to 76,753)</b>    | <b>23.8</b><br><b>(18.5 to 30.1)</b> | <b>8.9</b><br><b>(3.9 to 14.8)</b>   | <b>1,077†</b><br><b>(759 to 1,328)</b>      | <b>-30.1</b><br><b>(-36.7 to -22.4)</b> | <b>-37.0</b><br><b>(-43.0 to -29.8)</b> |
| Exposure to forces of nature                                                        | 7,571<br>(4,293 to 11,602)                    | 37.8<br>(21.3 to 52.6)               | 21.3<br>(6.9 to 33.7)                | 377<br>(231 to 534)                         | -35.4<br>(-49.1 to -21.2)               | -41.3<br>(-53.9 to -28.5)               |
| Conflict and terrorism                                                              | 40,684<br>(24,541 to 61,725)                  | 24.7<br>(18.0 to 33.3)               | 10.2<br>(3.8 to 18.4)                | --                                          | --                                      | --                                      |
| Executions and police conflict                                                      | 5,836<br>(1,906 to 9,042)                     | 4.7<br>(2.1 to 18.5)                 | -10.5<br>(-13.1 to 1.8)              | 700<br>(411 to 883)                         | -26.9<br>(-33.9 to -17.5)               | -34.4<br>(-40.5 to -26.2)               |
| <b>Impairments</b>                                                                  | <b>--</b>                                     | <b>--</b>                            | <b>--</b>                            | <b>--</b>                                   | <b>--</b>                               | <b>--</b>                               |
| Anaemia                                                                             | 2,042,728<br>(1,979,003 to 2,110,037)         | 12.6<br>(11.5 to 13.7)               | 0.5<br>(-0.4 to 1.4)                 | --                                          | --                                      | --                                      |
| Developmental intellectual disability                                               | 196,243<br>(150,264 to 242,144)               | 6.5<br>(5.9 to 7.2)                  | -3.2<br>(-3.7 to -2.5)               | --                                          | --                                      | --                                      |
| Epilepsy                                                                            | 45,926<br>(39,942 to 54,564)                  | 16.8<br>(10.4 to 23.6)               | 4.5<br>(-1.3 to 10.7)                | --                                          | --                                      | --                                      |
| Guillain-Barre syndrome                                                             | 65<br>(52 to 82)                              | 18.4<br>(15.6 to 21.4)               | 1.9<br>(1.2 to 2.7)                  | --                                          | --                                      | --                                      |
| Hearing loss                                                                        | 1,390,482<br>(1,329,902 to 1,455,762)         | 23.8<br>(23.1 to 24.5)               | -0.2<br>(-0.5 to 0.2)                | --                                          | --                                      | --                                      |
| Heart failure                                                                       | 63,609<br>(56,944 to 71,388)                  | 29.3<br>(28.1 to 30.5)               | -1.3<br>(-2.0 to -0.6)               | --                                          | --                                      | --                                      |
| Infertility                                                                         | 117,207<br>(94,952 to 145,048)                | 20.1<br>(16.6 to 23.5)               | 8.0<br>(5.1 to 10.6)                 | --                                          | --                                      | --                                      |
| Pelvic inflammatory disease                                                         | 4,099<br>(3,533 to 4,740)                     | 7.7<br>(6.0 to 9.5)                  | -5.6<br>(-7.0 to -4.2)               | --                                          | --                                      | --                                      |
| Vision loss                                                                         | 1,009,472<br>(969,235 to 1,047,829)           | 18.8<br>(18.0 to 19.5)               | -3.1<br>(-3.6 to -2.6)               | --                                          | --                                      | --                                      |

We did not calculate incidence for the nine impairments, certain NTDs, and causes with only birth prevalence. YLDs for residual categories do not have prevalence estimates.

† Incidence for aggregate causes represents the sum of the incidence of the causes below the aggregate.

‡ Incidence estimates for stroke represent first-ever stroke only.

^ Incidence of HIV/AIDS represents new infections of HIV only and does not include new infections of Tuberculosis in HIV positive cases.

SR Table 2: Global sequela-level prevalence, incidence, and YLDs, all ages, 2006 and 2016

| Cause                                                                         | Sequela                                                                                             | Prevalent cases in thousands (95% uncertainty interval) |                                             | Incident cases in thousands (95% uncertainty interval) |                                             | YLDs in thousands (95% uncertainty interval) |                                 |
|-------------------------------------------------------------------------------|-----------------------------------------------------------------------------------------------------|---------------------------------------------------------|---------------------------------------------|--------------------------------------------------------|---------------------------------------------|----------------------------------------------|---------------------------------|
|                                                                               |                                                                                                     | 2006                                                    | 2016                                        | 2006                                                   | 2016                                        | 2006                                         | 2016                            |
| Drug-susceptible tuberculosis                                                 | Drug-susceptible tuberculosis                                                                       | 8,482.5<br>(7,576.9 to 9,570.5)                         | 9,035.7<br>(8,134.5 to 10,107.5)            | 8,593.3<br>(7,637.4 to 9,770.9)                        | 8,705.2<br>(7,754.6 to 9,817.7)             | 2,570.0<br>(1,703.7 to 3,481.7)              | 2,735.0<br>(1,814.8 to 3,696.5) |
| Multidrug-resistant tuberculosis without extensive drug resistance            | Multidrug-resistant tuberculosis without extensive drug resistance                                  | 317.4<br>(281.0 to 360.1)                               | 312.9<br>(279.1 to 352.9)                   | 312.8<br>(277.5 to 355.6)                              | 295.6<br>(261.4 to 335.6)                   | 98.8<br>(65.5 to 136.0)                      | 97.8<br>(65.6 to 136.4)         |
| Extensively drug-resistant tuberculosis                                       | Extensively drug-resistant tuberculosis                                                             | 6.8<br>(6.0 to 7.8)                                     | 19.2<br>(16.9 to 22.1)                      | 7.2<br>(6.3 to 8.3)                                    | 18.5<br>(16.1 to 21.2)                      | 2.3<br>(1.5 to 3.2)                          | 6.4<br>(4.2 to 9.0)             |
| Latent tuberculosis infection                                                 | Latent tuberculosis infection                                                                       | 1,695,755.7<br>(1,582,887.5 to 1,808,835.0)             | 1,909,229.2<br>(1,788,353.5 to 2,034,184.5) | --                                                     | --                                          | < 0.05<br>(0.0 to < 0.05)                    | < 0.05<br>(0.0 to < 0.05)       |
| Drug-susceptible HIV/AIDS - Tuberculosis                                      | Drug-susceptible HIV/AIDS - Tuberculosis with severe anaemia                                        | 14.4<br>(9.9 to 20.5)                                   | 11.4<br>(7.9 to 16.4)                       | 15.6<br>(11.1 to 22.0)                                 | 11.9<br>(8.3 to 16.7)                       | 7.0<br>(4.2 to 10.8)                         | 5.6<br>(3.4 to 8.6)             |
| Drug-susceptible HIV/AIDS - Tuberculosis                                      | Drug-susceptible HIV/AIDS - Tuberculosis without anaemia                                            | 1,097.5<br>(786.2 to 1,463.4)                           | 835.4<br>(591.9 to 1,131.8)                 | 1,444.1<br>(1,058.9 to 1,926.8)                        | 1,056.7<br>(757.5 to 1,433.9)               | 415.8<br>(250.8 to 634.8)                    | 317.9<br>(190.8 to 486.8)       |
| Drug-susceptible HIV/AIDS - Tuberculosis                                      | Drug-susceptible HIV/AIDS - Tuberculosis with moderate anaemia                                      | 101.7<br>(74.3 to 138.8)                                | 85.6<br>(60.9 to 119.6)                     | 133.2<br>(98.5 to 178.1)                               | 105.2<br>(76.5 to 142.6)                    | 42.4<br>(26.2 to 63.2)                       | 36.0<br>(22.0 to 54.8)          |
| Drug-susceptible HIV/AIDS - Tuberculosis                                      | Drug-susceptible HIV/AIDS - Tuberculosis with mild anaemia                                          | 154.4<br>(112.6 to 207.6)                               | 143.5<br>(101.6 to 198.4)                   | 212.1<br>(156.7 to 281.4)                              | 190.9<br>(138.0 to 260.7)                   | 59.5<br>(36.2 to 90.0)                       | 55.8<br>(33.5 to 85.2)          |
| Multidrug-resistant HIV/AIDS - Tuberculosis without extensive drug resistance | Multidrug-resistant HIV/AIDS - Tuberculosis without extensive drug resistance with mild anaemia     | 4.6<br>(3.1 to 6.5)                                     | 4.0<br>(2.7 to 6.0)                         | 6.1<br>(4.2 to 8.7)                                    | 5.5<br>(3.6 to 8.1)                         | 1.9<br>(1.1 to 2.9)                          | 1.7<br>(1.0 to 2.7)             |
| Multidrug-resistant HIV/AIDS - Tuberculosis without extensive drug resistance | Multidrug-resistant HIV/AIDS - Tuberculosis without extensive drug resistance with severe anaemia   | 0.4<br>(0.2 to 0.6)                                     | 0.3<br>(0.2 to 0.5)                         | 0.4<br>(0.3 to 0.6)                                    | 0.3<br>(0.2 to 0.5)                         | 0.2<br>(0.1 to 0.3)                          | 0.1<br>(0.1 to 0.2)             |
| Multidrug-resistant HIV/AIDS - Tuberculosis without extensive drug resistance | Multidrug-resistant HIV/AIDS - Tuberculosis without extensive drug resistance without anaemia       | 31.1<br>(20.6 to 44.6)                                  | 21.1<br>(13.9 to 31.2)                      | 39.9<br>(26.8 to 56.7)                                 | 27.1<br>(17.8 to 39.2)                      | 12.4<br>(7.2 to 19.6)                        | 8.5<br>(4.9 to 14.0)            |
| Multidrug-resistant HIV/AIDS - Tuberculosis without extensive drug resistance | Multidrug-resistant HIV/AIDS - Tuberculosis without extensive drug resistance with moderate anaemia | 2.9<br>(2.0 to 4.2)                                     | 2.4<br>(1.6 to 3.5)                         | 3.7<br>(2.5 to 5.2)                                    | 2.9<br>(1.9 to 4.2)                         | 1.3<br>(0.8 to 2.0)                          | 1.0<br>(0.6 to 1.7)             |
| Extensively drug-resistant HIV/AIDS - Tuberculosis                            | Extensively drug-resistant HIV/AIDS - Tuberculosis with moderate anaemia                            | < 0.05<br>(< 0.05 to < 0.1)                             | 0.1<br>(0.1 to 0.2)                         | < 0.05<br>(< 0.05 to 0.1)                              | 0.1<br>(0.1 to 0.2)                         | < 0.05<br>(< 0.05 to < 0.05)                 | < 0.05<br>(< 0.05 to < 0.05)    |
| Extensively drug-resistant HIV/AIDS - Tuberculosis                            | Extensively drug-resistant HIV/AIDS - Tuberculosis with severe anaemia                              | < 0.05<br>(< 0.05 to < 0.05)                            | < 0.05<br>(< 0.05 to < 0.05)                | < 0.05<br>(< 0.05 to < 0.05)                           | < 0.05<br>(< 0.05 to < 0.05)                | < 0.05<br>(< 0.05 to < 0.05)                 | < 0.05<br>(< 0.05 to < 0.05)    |
| Extensively drug-resistant HIV/AIDS - Tuberculosis                            | Extensively drug-resistant HIV/AIDS - Tuberculosis without anaemia                                  | 0.4<br>(0.2 to 0.6)                                     | 0.9<br>(0.5 to 1.3)                         | 0.4<br>(0.3 to 0.7)                                    | 0.4<br>(0.6 to 1.4)                         | 0.2<br>(0.1 to 0.3)                          | 0.4<br>(0.2 to 0.6)             |
| Extensively drug-resistant HIV/AIDS - Tuberculosis                            | Extensively drug-resistant HIV/AIDS - Tuberculosis with mild anaemia                                | 0.1<br>(< 0.05 to 0.1)                                  | 0.2<br>(0.1 to 0.3)                         | 0.1<br>(< 0.05 to 0.1)                                 | 0.3<br>(0.2 to 0.4)                         | < 0.05<br>(< 0.05 to < 0.05)                 | 0.1<br>(< 0.05 to 0.1)          |
| HIV/AIDS resulting in other diseases                                          | Early HIV without anaemia                                                                           | 13,236.9<br>(11,643.8 to 14,306.3)                      | 8,688.1<br>(8,118.7 to 9,206.3)             | 1,423.1<br>(1,528.4 to 2,299.3)                        | 1,864.1<br>(1,276.2 to 1,634.9)             | 160.0<br>(80.6 to 289.5)                     | 105.2<br>(52.0 to 190.7)        |
| HIV/AIDS resulting in other diseases                                          | AIDS without antiretroviral treatment with severe anaemia                                           | 16.0<br>(6.4 to 33.4)                                   | 9.5<br>(5.1 to 18.4)                        | --                                                     | --                                          | 9.7<br>(3.7 to 21.5)                         | 6.1<br>(2.9 to 12.5)            |
| HIV/AIDS resulting in other diseases                                          | Symptomatic HIV without anaemia                                                                     | 4,629.9<br>(4,110.5 to 4,952.1)                         | 2,982.5<br>(2,795.9 to 3,148.8)             | --                                                     | --                                          | 1,183.0<br>(801.1 to 1,619.2)                | 766.5<br>(514.7 to 1,038.8)     |
| HIV/AIDS resulting in other diseases                                          | AIDS with antiretroviral treatment with severe anaemia                                              | 10.0<br>(7.3 to 13.8)                                   | 97.2<br>(88.5 to 108.0)                     | --                                                     | --                                          | 2.1<br>(1.3 to 3.4)                          | 19.8<br>(13.6 to 27.0)          |
| HIV/AIDS resulting in other diseases                                          | Early HIV with severe anaemia                                                                       | 90.0<br>(81.6 to 98.2)                                  | 70.4<br>(62.1 to 81.1)                      | 17.3<br>(15.3 to 19.8)                                 | 15.1<br>(12.6 to 18.2)                      | 13.7<br>(9.5 to 18.9)                        | 11.0<br>(7.3 to 15.4)           |
| HIV/AIDS resulting in other diseases                                          | Early HIV with moderate anaemia                                                                     | 1,235.6<br>(1,086.2 to 1,351.0)                         | 858.7<br>(795.1 to 927.0)                   | 187.1<br>(159.6 to 227.2)                              | 146.4<br>(131.1 to 167.3)                   | 74.8<br>(47.4 to 111.7)                      | 52.3<br>(33.8 to 78.1)          |
| HIV/AIDS resulting in other diseases                                          | AIDS without antiretroviral treatment with mild anaemia                                             | 454.4<br>(184.6 to 964.7)                               | 254.9<br>(131.1 to 518.3)                   | --                                                     | --                                          | 240.3<br>(89.7 to 548.9)                     | 138.7<br>(61.8 to 308.6)        |
| HIV/AIDS resulting in other diseases                                          | AIDS with antiretroviral treatment with moderate anaemia                                            | 129.9<br>(99.0 to 168.5)                                | 1,380.5<br>(1,283.7 to 1,490.4)             | --                                                     | --                                          | 15.6<br>(9.4 to 23.5)                        | 162.5<br>(109.1 to 225.9)       |
| HIV/AIDS resulting in other diseases                                          | Early HIV with mild anaemia                                                                         | 2,090.4<br>(1,827.7 to 2,282.4)                         | 1,671.6<br>(1,549.5 to 1,808.9)             | 297.9<br>(243.9 to 371.3)                              | 280.6<br>(254.0 to 316.6)                   | 32.6<br>(15.6 to 61.7)                       | 26.1<br>(12.4 to 49.5)          |
| HIV/AIDS resulting in other diseases                                          | AIDS with antiretroviral treatment without anaemia                                                  | 2,518.6<br>(1,748.9 to 3,436.4)                         | 14,045.0<br>(12,899.5 to 15,247.6)          | --                                                     | --                                          | 187.1<br>(106.2 to 301.2)                    | 1,036.1<br>(686.5 to 1,471.5)   |
| HIV/AIDS resulting in other diseases                                          | Symptomatic HIV with mild anaemia                                                                   | 731.7<br>(644.6 to 791.1)                               | 574.0<br>(531.0 to 622.4)                   | --                                                     | --                                          | 189.1<br>(128.7 to 256.8)                    | 149.8<br>(100.9 to 202.8)       |
| HIV/AIDS resulting in other diseases                                          | AIDS without antiretroviral treatment with moderate anaemia                                         | 255.3<br>(119.3 to 508.6)                               | 136.3<br>(79.5 to 253.2)                    | --                                                     | --                                          | 140.7<br>(60.6 to 300.7)                     | 77.8<br>(39.6 to 157.0)         |
| HIV/AIDS resulting in other diseases                                          | Symptomatic HIV with moderate anaemia                                                               | 430.6<br>(380.9 to 467.0)                               | 293.5<br>(272.7 to 317.8)                   | --                                                     | --                                          | 125.2<br>(87.1 to 166.4)                     | 86.5<br>(59.7 to 114.9)         |
| HIV/AIDS resulting in other diseases                                          | Symptomatic HIV with severe anaemia                                                                 | 31.2<br>(28.4 to 34.0)                                  | 24.0<br>(21.2 to 27.6)                      | --                                                     | --                                          | 11.5<br>(8.0 to 15.3)                        | 9.0<br>(6.3 to 12.2)            |
| HIV/AIDS resulting in other diseases                                          | AIDS without antiretroviral treatment without anaemia                                               | 2,840.5<br>(1,221.2 to 5,841.6)                         | 1,384.8<br>(796.4 to 2,601.1)               | --                                                     | --                                          | 1,497.9<br>(591.5 to 3,304.2)                | 742.3<br>(366.3 to 1,511.9)     |
| HIV/AIDS resulting in other diseases                                          | AIDS with antiretroviral treatment with mild anaemia                                                | 433.0<br>(301.1 to 588.4)                               | 2,793.5<br>(2,542.1 to 3,103.4)             | --                                                     | --                                          | 238.6<br>(18.7 to 53.4)                      | 215.0<br>(141.4 to 303.6)       |
| Diarrhoeal diseases                                                           | Guillain-Barre syndrome due to diarrhoeal diseases                                                  | 6.0<br>(4.1 to 8.3)                                     | 7.0<br>(4.7 to 9.7)                         | 12.3<br>(8.8 to 17.1)                                  | 14.4<br>(10.2 to 20.0)                      | 1.8<br>(1.0 to 2.8)                          | 2.1<br>(1.2 to 3.2)             |
| Diarrhoeal diseases                                                           | Mild diarrhoeal diseases                                                                            | 39,904.9<br>(37,815.9 to 42,114.1)                      | 42,991.8<br>(40,762.5 to 45,436.2)          | 2,660,079.9<br>(2,523,310.9 to 2,806,465.4)            | 2,876,408.0<br>(2,726,564.8 to 3,041,638.0) | 2,807.2<br>(1,888.0 to 3,938.5)              | 3,018.2<br>(2,025.4 to 4,239.3) |
| Diarrhoeal diseases                                                           | Moderate diarrhoeal diseases                                                                        | 17,963.4<br>(17,023.1 to 18,957.9)                      | 19,353.0<br>(18,349.5 to 20,453.4)          | 1,197,450.3<br>(1,135,882.9 to 1,263,346.6)            | 1,294,831.6<br>(1,227,378.9 to 1,369,210.9) | 3,181.0<br>(2,148.5 to 4,405.0)              | 3,417.7<br>(2,315.6 to 4,729.2) |
| Diarrhoeal diseases                                                           | Severe diarrhoeal diseases                                                                          | 4,288.8<br>(4,064.3 to 4,526.3)                         | 4,620.6<br>(4,381.0 to 4,883.3)             | 285,896.4<br>(271,197.0 to 301,629.5)                  | 309,146.7<br>(293,042.0 to 326,905.0)       | 993.9<br>(676.3 to 1,396.3)                  | 1,067.9<br>(721.7 to 1,484.4)   |
| Typhoid fever                                                                 | Intestinal perforation due to typhoid                                                               | 184.3<br>(155.7 to 220.0)                               | 153.5<br>(129.8 to 182.0)                   | 2,403.9<br>(2,065.2 to 2,810.1)                        | 1,998.8<br>(1,719.2 to 2,313.8)             | 58.3<br>(37.6 to 83.9)                       | 49.0<br>(31.7 to 69.8)          |
| Typhoid fever                                                                 | Acute typhoid infection                                                                             | 190.2<br>(161.5 to 222.6)                               | 157.9<br>(135.2 to 185.9)                   | 4,962.5<br>(4,275.9 to 5,754.9)                        | 4,117.4<br>(3,573.4 to 4,767.4)             | 9.5<br>(5.8 to 14.2)                         | 7.9<br>(4.7 to 12.0)            |
| Typhoid fever                                                                 | Gastrointestinal bleeding due to typhoid                                                            | 2.6<br>(1.6 to 4.1)                                     | 2.1<br>(1.3 to 3.6)                         | 33.7<br>(21.1 to 53.6)                                 | 28.0<br>(17.2 to 45.7)                      | 0.8<br>(0.4 to 1.5)                          | 0.7<br>(0.4 to 1.3)             |
| Typhoid fever                                                                 | Severe typhoid fever                                                                                | 518.7<br>(440.5 to 614.7)                               | 432.1<br>(366.2 to 501.6)                   | 6,769.4<br>(5,835.8 to 7,879.8)                        | 5,629.7<br>(4,890.0 to 6,539.4)             | 66.8<br>(42.2 to 98.5)                       | 55.9<br>(36.2 to 82.4)          |
| Paratyphoid fever                                                             | Intestinal perforation due to paratyphoid                                                           | 8.3<br>(7.2 to 9.6)                                     | 7.4<br>(6.3 to 8.6)                         | 215.7<br>(188.8 to 248.8)                              | 192.1<br>(167.6 to 221.4)                   | 0.9<br>(0.6 to 1.3)                          | 0.8<br>(0.6 to 1.2)             |
| Paratyphoid fever                                                             | Moderate paratyphoid fever                                                                          | 83.9<br>(72.8 to 97.0)                                  | 74.4<br>(65.0 to 86.0)                      | 2,184.6<br>(1,914.3 to 2,480.9)                        | 1,944.3<br>(1,712.6 to 2,205.9)             | 4.2<br>(2.6 to 6.4)                          | 3.8<br>(2.3 to 5.7)             |



|                                      |                                                                            |                                      |                                       |                                              |                                              |                                 |                                 |
|--------------------------------------|----------------------------------------------------------------------------|--------------------------------------|---------------------------------------|----------------------------------------------|----------------------------------------------|---------------------------------|---------------------------------|
| Paratyphoid fever                    | Acute paratyphoid infection                                                | 46.4<br>(40.2 to 53.9)               | 41.3<br>(35.8 to 48.1)                | 1,211.8<br>(1,066.3 to 1,391.3)              | 1,078.1<br>(945.6 to 1,233.2)                | 0.3<br>(0.1 to 0.6)             | 0.2<br>(0.1 to 0.5)             |
| Paratyphoid fever                    | Severe paratyphoid fever                                                   | 46.9<br>(40.6 to 54.5)               | 41.7<br>(36.1 to 49.0)                | 611.1<br>(535.8 to 701.0)                    | 543.8<br>(477.3 to 624.3)                    | 6.3<br>(4.0 to 9.2)             | 5.6<br>(3.7 to 8.2)             |
| Other intestinal infectious diseases | Other intestinal infectious diseases                                       | --                                   | --                                    | --                                           | --                                           | 2.3<br>(1.5 to 3.3)             | 1.4<br>(0.9 to 1.9)             |
| Lower respiratory infections         | Severe lower respiratory infections                                        | 981.3<br>(871.5 to 1,107.6)          | 1,208.0<br>(1,077.2 to 1,355.6)       | 41,528.8<br>(36,409.6 to 46,915.4)           | 50,789.6<br>(44,807.7 to 57,044.2)           | 124.4<br>(80.2 to 175.9)        | 151.9<br>(98.1 to 215.2)        |
| Lower respiratory infections         | Moderate lower respiratory infections                                      | 5,535.2<br>(5,161.0 to 5,931.1)      | 6,814.1<br>(6,418.7 to 7,237.2)       | 233,571.1<br>(216,537.8 to 252,668.3)        | 285,656.0<br>(265,647.9 to 308,203.8)        | 267.5<br>(171.3 to 391.4)       | 327.4<br>(209.5 to 477.3)       |
| Lower respiratory infections         | Guillain-Barre syndrome due to lower respiratory infections                | 6.5<br>(3.5 to 10.0)                 | 7.6<br>(4.1 to 11.7)                  | 13.7<br>(7.4 to 21.7)                        | 16.0<br>(8.6 to 25.3)                        | 1.9<br>(0.9 to 3.3)             | 2.3<br>(1.1 to 3.9)             |
| Upper respiratory infections         | Moderate upper respiratory infections                                      | 95,773.5<br>(74,187.4 to 118,652.7)  | 104,829.0<br>(81,221.1 to 129,836.8)  | 7,184,285.8<br>(5,631,965.6 to 8,362,619.9)  | 7,850,917.3<br>(6,174,851.1 to 9,787,950.4)  | 4,680.9<br>(2,788.8 to 7,206.4) | 5,118.0<br>(3,045.0 to 7,867.7) |
| Upper respiratory infections         | Guillain-Barre syndrome due to upper respiratory infections                | 17.7<br>(12.8 to 23.8)               | 20.6<br>(14.9 to 27.7)                | 36.1<br>(26.8 to 48.5)                       | 42.1<br>(31.2 to 56.7)                       | 5.2<br>(3.1 to 8.2)             | 6.1<br>(3.6 to 9.5)             |
| Upper respiratory infections         | Mild upper respiratory infections                                          | 119,616.0<br>(96,309.7 to 145,441.9) | 130,918.1<br>(105,505.3 to 158,738.8) | 9,084,167.2<br>(7,436,092.8 to 11,062,677.4) | 9,927,174.6<br>(8,087,532.6 to 12,032,598.1) | 677.0<br>(268.1 to 1,379.1)     | 740.4<br>(293.6 to 1,505.7)     |
| Otitis media                         | Vertigo with mild hearing loss due to chronic otitis media                 | 3,400.8<br>(2,664.8 to 4,374.4)      | 3,405.3<br>(2,671.2 to 4,375.9)       | < 0.05<br>(0.0 to < 0.05)                    | < 0.05<br>(0.0 to < 0.05)                    | 398.7<br>(237.9 to 609.7)       | 398.9<br>(240.1 to 609.8)       |
| Otitis media                         | Vertigo with moderate hearing loss due to chronic otitis media             | 3,387.1<br>(2,661.8 to 4,334.3)      | 3,393.8<br>(2,670.7 to 4,339.5)       | < 0.05<br>(0.0 to < 0.05)                    | < 0.05<br>(0.0 to < 0.05)                    | 445.3<br>(267.6 to 679.0)       | 445.9<br>(269.2 to 680.9)       |
| Otitis media                         | Acute otitis media                                                         | 22,624.9<br>(18,208.2 to 28,109.0)   | 24,489.7<br>(19,683.7 to 30,283.7)    | 418,083.8<br>(337,904.6 to 518,062.5)        | 451,706.3<br>(365,132.6 to 564,096.9)        | 296.5<br>(147.9 to 526.4)       | 320.9<br>(159.4 to 569.1)       |
| Otitis media                         | Moderate hearing loss due to chronic otitis media                          | 7,943.4<br>(6,452.8 to 9,613.5)      | 8,158.5<br>(6,573.0 to 9,835.4)       | < 0.05<br>(0.0 to < 0.05)                    | < 0.05<br>(0.0 to < 0.05)                    | 205.2<br>(112.2 to 342.0)       | 210.6<br>(118.8 to 351.4)       |
| Otitis media                         | Vertigo with moderate hearing loss and ringing due to chronic otitis media | 3,118.7<br>(2,528.0 to 3,809.1)      | 3,135.3<br>(2,540.5 to 3,820.7)       | < 0.05<br>(0.0 to < 0.05)                    | < 0.05<br>(0.0 to < 0.05)                    | 532.6<br>(340.5 to 779.2)       | 534.9<br>(344.8 to 778.3)       |
| Otitis media                         | Mild hearing loss due to chronic otitis media                              | 46,447.9<br>(40,904.2 to 52,906.1)   | 47,960.9<br>(42,269.8 to 54,406.7)    | < 0.05<br>(0.0 to < 0.05)                    | < 0.05<br>(0.0 to < 0.05)                    | 434.0<br>(204.2 to 839.0)       | 448.0<br>(210.1 to 860.1)       |
| Otitis media                         | Vertigo with mild hearing loss and ringing due to chronic otitis media     | 3,398.5<br>(2,664.8 to 4,359.2)      | 3,403.8<br>(2,671.2 to 4,371.4)       | < 0.05<br>(0.0 to < 0.05)                    | < 0.05<br>(0.0 to < 0.05)                    | 432.2<br>(259.8 to 655.7)       | 432.6<br>(260.3 to 655.8)       |
| Otitis media                         | Severe infectious complications due to chronic otitis media                | 54.2<br>(1.6 to 188.0)               | 54.2<br>(1.6 to 187.7)                | 22.9<br>(0.7 to 86.9)                        | 23.2<br>(0.8 to 87.7)                        | 0.7<br>(< 0.05 to 2.8)          | 0.7<br>(< 0.05 to 2.8)          |
| Otitis media                         | Moderate hearing loss with ringing due to chronic otitis media             | 1,787.6<br>(1,144.4 to 2,509.4)      | 1,868.0<br>(1,180.2 to 2,600.1)       | < 0.05<br>(0.0 to < 0.05)                    | < 0.05<br>(0.0 to < 0.05)                    | 126.6<br>(67.8 to 208.1)        | 132.3<br>(71.7 to 223.1)        |
| Otitis media                         | Mild hearing loss with ringing due to chronic otitis media                 | 9,795.8<br>(8,322.4 to 11,398.2)     | 10,192.2<br>(8,623.7 to 11,780.3)     | < 0.05<br>(0.0 to < 0.05)                    | < 0.05<br>(0.0 to < 0.05)                    | 204.2<br>(110.7 to 338.2)       | 212.3<br>(115.7 to 353.4)       |
| Pneumococcal meningitis              | Mild hearing loss with ringing due to pneumococcal meningitis              | 124.8<br>(77.0 to 180.5)             | 111.6<br>(68.6 to 161.2)              | --                                           | --                                           | 2.7<br>(1.2 to 5.0)             | 2.4<br>(1.1 to 4.5)             |
| Pneumococcal meningitis              | Profound hearing loss with ringing due to pneumococcal meningitis          | 16.6<br>(1.3 to 26.7)                | 12.9<br>(1.1 to 21.1)                 | --                                           | --                                           | 4.6<br>(0.4 to 8.0)             | 3.6<br>(0.3 to 6.3)             |
| Pneumococcal meningitis              | Profound hearing loss due to pneumococcal meningitis                       | 9.3<br>(0.7 to 15.8)                 | 7.3<br>(0.6 to 11.9)                  | --                                           | --                                           | 1.9<br>(0.1 to 3.5)             | 1.5<br>(0.1 to 2.7)             |
| Pneumococcal meningitis              | Mild motor impairment due to long term due to pneumococcal meningitis      | 831.0<br>(507.2 to 1,304.7)          | 726.5<br>(438.1 to 1,148.4)           | --                                           | --                                           | 8.2<br>(3.4 to 17.5)            | 7.1<br>(3.0 to 15.4)            |
| Pneumococcal meningitis              | Blindness due to pneumococcal meningitis                                   | 9.4<br>(6.7 to 12.5)                 | 8.1<br>(5.8 to 10.8)                  | --                                           | --                                           | 1.8<br>(1.0 to 2.7)             | 1.5<br>(0.9 to 2.4)             |
| Pneumococcal meningitis              | Moderate hearing loss with ringing due to pneumococcal meningitis          | 91.6<br>(7.5 to 132.6)               | 78.4<br>(6.5 to 115.4)                | --                                           | --                                           | 6.7<br>(0.5 to 11.4)            | 5.8<br>(0.4 to 9.9)             |
| Pneumococcal meningitis              | Complete hearing loss due to pneumococcal meningitis                       | 11.5<br>(0.9 to 17.7)                | 9.1<br>(0.7 to 14.2)                  | --                                           | --                                           | 2.5<br>(0.2 to 4.4)             | 2.0<br>(0.2 to 3.4)             |
| Pneumococcal meningitis              | Epilepsy due to pneumococcal meningitis                                    | 241.5<br>(209.3 to 277.4)            | 262.4<br>(224.4 to 305.8)             | --                                           | --                                           | 45.2<br>(31.5 to 62.0)          | 46.7<br>(31.5 to 65.4)          |
| Pneumococcal meningitis              | Mild hearing loss due to pneumococcal meningitis                           | 471.4<br>(291.9 to 678.1)            | 421.6<br>(256.7 to 610.6)             | --                                           | --                                           | 4.4<br>(1.7 to 9.3)             | 3.9<br>(1.5 to 8.3)             |
| Pneumococcal meningitis              | Severe hearing loss with ringing due to pneumococcal meningitis            | 20.2<br>(1.7 to 31.1)                | 16.0<br>(1.4 to 25.2)                 | --                                           | --                                           | 5.3<br>(0.4 to 9.1)             | 4.2<br>(0.3 to 7.2)             |
| Pneumococcal meningitis              | Severe motor impairment due to pneumococcal meningitis                     | 491.9<br>(381.7 to 631.7)            | 592.9<br>(462.2 to 763.4)             | --                                           | --                                           | 188.1<br>(115.5 to 271.4)       | 226.5<br>(142.4 to 329.2)       |
| Pneumococcal meningitis              | Severe motor plus cognitive impairments due to pneumococcal meningitis     | 217.3<br>(106.8 to 315.8)            | 226.0<br>(102.5 to 334.8)             | --                                           | --                                           | 115.5<br>(53.0 to 182.4)        | 120.6<br>(51.5 to 193.1)        |
| Pneumococcal meningitis              | Mild motor plus cognitive impairments due to pneumococcal meningitis       | 503.8<br>(290.8 to 780.3)            | 437.2<br>(246.9 to 680.9)             | --                                           | --                                           | 15.2<br>(7.2 to 27.8)           | 13.2<br>(6.2 to 24.2)           |
| Pneumococcal meningitis              | Mild intellectual disability due to pneumococcal meningitis                | 563.1<br>(430.5 to 706.6)            | 649.8<br>(493.2 to 818.5)             | --                                           | --                                           | 23.3<br>(13.4 to 36.9)          | 26.9<br>(15.5 to 42.4)          |
| Pneumococcal meningitis              | Severe vision impairment due to pneumococcal meningitis                    | 17.2<br>(12.7 to 23.2)               | 15.5<br>(11.4 to 21.1)                | --                                           | --                                           | 3.2<br>(1.9 to 4.9)             | 2.9<br>(1.7 to 4.5)             |
| Pneumococcal meningitis              | Moderate motor impairment due to pneumococcal meningitis                   | 390.5<br>(312.8 to 486.7)            | 467.9<br>(369.6 to 591.0)             | --                                           | --                                           | 23.3<br>(14.3 to 35.3)          | 27.9<br>(16.8 to 42.9)          |
| Pneumococcal meningitis              | Severe hearing loss due to pneumococcal meningitis                         | 11.5<br>(0.9 to 18.1)                | 9.1<br>(0.7 to 14.7)                  | --                                           | --                                           | 1.8<br>(0.1 to 3.2)             | 1.4<br>(0.1 to 2.5)             |
| Pneumococcal meningitis              | Acute pneumococcal meningitis                                              | 36.3<br>(30.4 to 43.0)               | 31.0<br>(25.7 to 37.1)                | 720.5<br>(591.5 to 888.5)                    | 611.7<br>(498.3 to 755.5)                    | 4.8<br>(3.0 to 7.2)             | 4.1<br>(2.6 to 6.1)             |
| Pneumococcal meningitis              | Moderately severe hearing loss with ringing due to pneumococcal meningitis | 49.2<br>(4.1 to 72.7)                | 40.6<br>(3.4 to 59.7)                 | --                                           | --                                           | 8.2<br>(0.7 to 13.7)            | 6.8<br>(0.5 to 11.4)            |
| Pneumococcal meningitis              | Borderline intellectual disability due to pneumococcal meningitis          | 620.3<br>(367.6 to 961.4)            | 540.5<br>(317.9 to 855.5)             | --                                           | --                                           | 6.5<br>(2.7 to 14.2)            | 5.7<br>(2.3 to 12.5)            |
| Pneumococcal meningitis              | Moderate motor plus cognitive impairments due to pneumococcal meningitis   | 370.5<br>(277.4 to 476.9)            | 420.3<br>(306.6 to 545.9)             | --                                           | --                                           | 72.5<br>(43.4 to 109.4)         | 82.3<br>(48.8 to 125.8)         |
| Pneumococcal meningitis              | Monocular distance vision loss due to pneumococcal meningitis              | 548.0<br>(323.4 to 868.3)            | 477.7<br>(281.0 to 769.4)             | --                                           | --                                           | 8.8<br>(3.8 to 16.8)            | 7.7<br>(3.3 to 14.8)            |
| Pneumococcal meningitis              | Complete hearing loss with ringing due to pneumococcal meningitis          | 13.9<br>(1.1 to 21.4)                | 11.0<br>(0.9 to 17.1)                 | --                                           | --                                           | 4.4<br>(0.4 to 7.7)             | 3.5<br>(0.3 to 6.0)             |
| Pneumococcal meningitis              | Mild behavioral problems due to pneumococcal meningitis                    | 305.0<br>(177.5 to 487.7)            | 265.9<br>(157.8 to 426.0)             | --                                           | --                                           | 13.2<br>(6.7 to 23.7)           | 11.6<br>(5.8 to 20.9)           |

|                                |                                                                                   |                           |                           |                           |                           |                           |                           |
|--------------------------------|-----------------------------------------------------------------------------------|---------------------------|---------------------------|---------------------------|---------------------------|---------------------------|---------------------------|
| Pneumococcal meningitis        | Moderate hearing loss due to pneumococcal meningitis                              | 211.4<br>(17.4 to 304.0)  | 181.2<br>(15.0 to 267.1)  | --                        | --                        | 5.5<br>(0.4 to 10.2)      | 4.7<br>(0.4 to 9.0)       |
| Pneumococcal meningitis        | Moderately severe hearing loss due to pneumococcal meningitis                     | 102.1<br>(8.5 to 150.6)   | 84.5<br>(7.2 to 124.0)    | --                        | --                        | 9.3<br>(0.8 to 15.7)      | 7.7<br>(0.6 to 13.2)      |
| Pneumococcal meningitis        | Moderate vision impairment due to pneumococcal meningitis                         | 87.3<br>(65.8 to 116.9)   | 75.5<br>(55.3 to 102.3)   | --                        | --                        | 2.7<br>(1.5 to 4.6)       | 2.3<br>(1.3 to 3.9)       |
| H influenzae type B meningitis | Moderate motor impairment due to H influenzae type B meningitis                   | 167.0<br>(128.0 to 213.6) | 160.3<br>(121.2 to 208.7) | --                        | --                        | 10.2<br>(6.1 to 16.0)     | 9.8<br>(5.8 to 15.3)      |
| H influenzae type B meningitis | Severe hearing loss due to H influenzae type B meningitis                         | 5.7<br>(0.5 to 9.2)       | 3.2<br>(0.3 to 5.3)       | --                        | --                        | 0.9<br>(0.1 to 1.6)       | 0.5<br>( $< 0.05$ to 1.0) |
| H influenzae type B meningitis | Severe motor impairment due to H influenzae type B meningitis                     | 233.8<br>(177.4 to 303.4) | 227.9<br>(171.3 to 293.2) | --                        | --                        | 93.7<br>(55.3 to 138.2)   | 91.2<br>(53.9 to 135.1)   |
| H influenzae type B meningitis | Borderline intellectual disability due to H influenzae type B meningitis          | 554.0<br>(234.3 to 910.8) | 301.2<br>(123.3 to 506.1) | --                        | --                        | 5.8<br>(1.9 to 13.1)      | 3.2<br>(1.0 to 7.4)       |
| H influenzae type B meningitis | Mild hearing loss due to H influenzae type B meningitis                           | 202.1<br>(112.2 to 295.0) | 111.1<br>(59.5 to 166.1)  | --                        | --                        | 1.9<br>(0.7 to 4.1)       | 1.1<br>(0.4 to 2.4)       |
| H influenzae type B meningitis | Mild hearing loss with ringing due to H influenzae type B meningitis              | 53.5<br>(29.7 to 78.0)    | 29.4<br>(15.7 to 44.0)    | --                        | --                        | 1.2<br>(0.5 to 2.3)       | 0.6<br>(0.3 to 1.3)       |
| H influenzae type B meningitis | Moderately severe hearing loss with ringing due to H influenzae type B meningitis | 22.7<br>(1.9 to 33.8)     | 11.9<br>(1.0 to 19.0)     | --                        | --                        | 3.8<br>(0.3 to 6.6)       | 2.0<br>(0.2 to 3.5)       |
| H influenzae type B meningitis | Moderate hearing loss with ringing due to H influenzae type B meningitis          | 40.9<br>(3.4 to 60.6)     | 22.2<br>(1.8 to 34.5)     | --                        | --                        | 3.0<br>(0.2 to 5.4)       | 1.6<br>(0.1 to 3.0)       |
| H influenzae type B meningitis | Complete hearing loss due to H influenzae type B meningitis                       | 5.3<br>(0.4 to 8.4)       | 2.8<br>(0.2 to 4.6)       | --                        | --                        | 1.1<br>(0.1 to 2.0)       | 0.6<br>( $< 0.05$ to 1.1) |
| H influenzae type B meningitis | Severe motor plus cognitive impairments due to H influenzae type B meningitis     | 112.6<br>(54.7 to 167.6)  | 98.0<br>(43.3 to 147.6)   | --                        | --                        | 60.9<br>(27.7 to 97.6)    | 53.0<br>(23.1 to 85.6)    |
| H influenzae type B meningitis | Profound hearing loss due to H influenzae type B meningitis                       | 4.5<br>(0.4 to 7.4)       | 2.5<br>(0.2 to 4.2)       | --                        | --                        | 0.9<br>(0.1 to 1.7)       | 0.5<br>( $< 0.05$ to 1.0) |
| H influenzae type B meningitis | Mild motor impairment due to long term due to H influenzae type B meningitis      | 306.9<br>(135.4 to 506.7) | 167.3<br>(75.5 to 285.4)  | --                        | --                        | 3.1<br>(1.0 to 6.9)       | 1.7<br>(0.5 to 3.8)       |
| H influenzae type B meningitis | Monocular distance vision loss due to H influenzae type B meningitis              | 331.6<br>(140.3 to 552.0) | 180.3<br>(76.5 to 320.2)  | --                        | --                        | 5.4<br>(1.9 to 10.7)      | 2.9<br>(1.0 to 6.2)       |
| H influenzae type B meningitis | Complete hearing loss with ringing due to H influenzae type B meningitis          | 6.4<br>(0.5 to 9.9)       | 3.3<br>(0.3 to 5.4)       | --                        | --                        | 2.0<br>(0.2 to 3.5)       | 1.1<br>(0.1 to 1.9)       |
| H influenzae type B meningitis | Severe hearing loss with ringing due to H influenzae type B meningitis            | 10.0<br>(0.8 to 15.9)     | 5.6<br>(0.5 to 9.4)       | --                        | --                        | 2.6<br>(0.2 to 4.6)       | 1.5<br>(0.1 to 2.7)       |
| H influenzae type B meningitis | Profound hearing loss with ringing due to H influenzae type B meningitis          | 8.0<br>(0.6 to 13.2)      | 4.4<br>(0.3 to 7.5)       | --                        | --                        | 2.2<br>(0.2 to 4.1)       | 1.2<br>(0.1 to 2.4)       |
| H influenzae type B meningitis | Mild behavioral problems due to H influenzae type B meningitis                    | 83.1<br>(38.4 to 141.6)   | 45.2<br>(20.6 to 78.8)    | --                        | --                        | 3.7<br>(1.4 to 7.0)       | 2.0<br>(0.8 to 3.9)       |
| H influenzae type B meningitis | Moderately severe hearing loss due to H influenzae type B meningitis              | 47.2<br>(4.0 to 70.3)     | 24.7<br>(2.1 to 39.0)     | --                        | --                        | 4.4<br>(0.4 to 7.5)       | 2.3<br>(0.2 to 4.0)       |
| H influenzae type B meningitis | Mild intellectual disability due to H influenzae type B meningitis                | 142.1<br>(106.4 to 184.6) | 133.2<br>(99.1 to 173.4)  | --                        | --                        | 6.0<br>(3.5 to 9.6)       | 5.7<br>(3.2 to 9.1)       |
| H influenzae type B meningitis | Blindness due to H influenzae type B meningitis                                   | 0.6<br>(0.4 to 0.9)       | 0.3<br>(0.2 to 0.5)       | --                        | --                        | 0.1<br>(0.1 to 0.2)       | 0.1<br>( $< 0.05$ to 0.1) |
| H influenzae type B meningitis | Moderate vision impairment due to H influenzae type B meningitis                  | 6.3<br>(4.5 to 8.5)       | 3.5<br>(2.3 to 5.0)       | --                        | --                        | 0.2<br>(0.1 to 0.3)       | 0.1<br>(0.1 to 0.2)       |
| H influenzae type B meningitis | Severe vision impairment due to H influenzae type B meningitis                    | 1.1<br>(0.8 to 1.5)       | 0.7<br>(0.4 to 1.0)       | --                        | --                        | 0.2<br>(0.1 to 0.3)       | 0.1<br>(0.1 to 0.2)       |
| H influenzae type B meningitis | Moderate motor plus cognitive impairments due to H influenzae type B meningitis   | 197.1<br>(147.6 to 251.3) | 180.3<br>(132.2 to 231.2) | --                        | --                        | 39.8<br>(24.3 to 59.5)    | 36.3<br>(22.1 to 54.4)    |
| H influenzae type B meningitis | Acute H influenzae type B meningitis                                              | 30.9<br>(24.8 to 38.1)    | 18.0<br>(13.5 to 23.6)    | 674.6<br>(528.4 to 853.3) | 397.3<br>(291.1 to 533.7) | 4.1<br>(2.6 to 6.3)       | 2.4<br>(1.5 to 3.7)       |
| H influenzae type B meningitis | Epilepsy due to H influenzae type B meningitis                                    | 118.6<br>(98.4 to 141.4)  | 122.8<br>(102.3 to 148.5) | --                        | --                        | 22.8<br>(15.3 to 32.0)    | 22.6<br>(14.9 to 32.4)    |
| H influenzae type B meningitis | Mild motor plus cognitive impairments due to H influenzae type B meningitis       | 185.0<br>(83.1 to 314.4)  | 100.2<br>(42.6 to 173.0)  | --                        | --                        | 5.7<br>(2.2 to 11.2)      | 3.1<br>(1.2 to 6.1)       |
| H influenzae type B meningitis | Moderate hearing loss due to H influenzae type B meningitis                       | 94.4<br>(8.0 to 139.8)    | 51.2<br>(4.3 to 79.0)     | --                        | --                        | 2.5<br>(0.2 to 4.8)       | 1.4<br>(0.1 to 2.6)       |
| Meningococcal infection        | Mild hearing loss with ringing due to meningococcal meningitis                    | 27.9<br>(16.4 to 41.3)    | 32.3<br>(18.5 to 48.2)    | --                        | --                        | 0.6<br>(0.3 to 1.1)       | 0.7<br>(0.3 to 1.3)       |
| Meningococcal infection        | Severe hearing loss due to meningococcal meningitis                               | 2.7<br>(0.2 to 4.2)       | 2.9<br>(0.2 to 4.6)       | --                        | --                        | 0.4<br>( $< 0.05$ to 0.7) | 0.5<br>( $< 0.05$ to 0.8) |
| Meningococcal infection        | Epilepsy due to meningococcal meningitis                                          | 32.0<br>(32.0 to 48.2)    | 46.5<br>(38.3 to 57.3)    | --                        | --                        | 7.6<br>(5.0 to 10.6)      | 8.6<br>(5.5 to 12.3)      |
| Meningococcal infection        | Mild intellectual disability due to meningococcal meningitis                      | 64.6<br>(47.6 to 85.4)    | 77.6<br>(56.2 to 107.1)   | --                        | --                        | 2.8<br>(1.6 to 4.5)       | 3.3<br>(1.8 to 5.6)       |
| Meningococcal infection        | Moderate hearing loss with ringing due to meningococcal meningitis                | 20.6<br>(1.8 to 29.8)     | 22.6<br>(1.9 to 33.2)     | --                        | --                        | 1.5<br>(0.1 to 2.6)       | 1.7<br>(0.1 to 2.8)       |
| Meningococcal infection        | Mild motor plus cognitive impairments due to meningococcal meningitis             | 73.4<br>(21.3 to 132.6)   | 83.6<br>(24.4 to 150.4)   | --                        | --                        | 2.3<br>(0.6 to 4.8)       | 2.6<br>(0.7 to 5.4)       |
| Meningococcal infection        | Moderately severe hearing loss due to meningococcal meningitis                    | 23.8<br>(2.0 to 36.2)     | 25.9<br>(2.1 to 39.0)     | --                        | --                        | 2.2<br>(0.2 to 3.7)       | 2.4<br>(0.2 to 4.1)       |
| Meningococcal infection        | Acute meningococcal meningitis                                                    | 22.4<br>(18.2 to 27.8)    | 26.8<br>(21.6 to 33.0)    | 468.4<br>(371.1 to 587.5) | 561.4<br>(442.1 to 706.7) | 3.0<br>(1.9 to 4.4)       | 3.5<br>(2.2 to 5.2)       |
| Meningococcal infection        | Profound hearing loss due to meningococcal meningitis                             | 2.5<br>(0.2 to 4.2)       | 2.8<br>(0.2 to 4.6)       | --                        | --                        | 0.5<br>( $< 0.05$ to 1.0) | 0.6<br>( $< 0.05$ to 1.1) |
| Meningococcal infection        | Mild hearing loss due to meningococcal meningitis                                 | 105.5<br>(62.0 to 155.8)  | 122.0<br>(70.4 to 182.5)  | --                        | --                        | 1.0<br>(0.4 to 2.1)       | 1.2<br>(0.4 to 2.5)       |
| Meningococcal infection        | Mild behavioral problems due to meningococcal meningitis                          | 32.7<br>(10.0 to 58.8)    | 37.2<br>(11.6 to 66.4)    | --                        | --                        | 1.4<br>(0.4 to 2.9)       | 1.6<br>(0.5 to 3.3)       |
| Meningococcal infection        | Profound hearing loss with ringing due to meningococcal meningitis                | 4.5<br>(0.4 to 7.3)       | 4.9<br>(0.4 to 8.0)       | --                        | --                        | 1.2<br>(0.1 to 2.3)       | 1.4<br>(0.1 to 2.5)       |
| Meningococcal infection        | Moderate hearing loss due to meningococcal meningitis                             | 47.6<br>(4.0 to 69.3)     | 52.3<br>(4.4 to 76.7)     | --                        | --                        | 1.3<br>(0.1 to 2.3)       | 1.4<br>(0.1 to 2.6)       |

|                         |                                                                               |                               |                               |                           |                                 |                         |                          |
|-------------------------|-------------------------------------------------------------------------------|-------------------------------|-------------------------------|---------------------------|---------------------------------|-------------------------|--------------------------|
| Meningococcal infection | Blindness due to meningococcal meningitis                                     | 11.1<br>(7.9 to 15.6)         | 12.5<br>(8.7 to 17.9)         | --                        | --                              | 2.1<br>(1.2 to 3.2)     | 2.3<br>(1.4 to 3.6)      |
| Meningococcal infection | Moderately severe hearing loss with ringing due to meningococcal meningitis   | 11.4<br>(0.9 to 17.5)         | 12.5<br>(1.0 to 18.8)         | --                        | --                              | 1.9<br>(0.2 to 3.2)     | 2.1<br>(0.2 to 3.5)      |
| Meningococcal infection | Complete hearing loss due to meningococcal meningitis                         | 2.7<br>(0.2 to 4.3)           | 2.8<br>(0.2 to 4.5)           | --                        | --                              | 0.6<br>(< 0.05 to 1.0)  | 0.6<br>(< 0.05 to 1.1)   |
| Meningococcal infection | Moderate vision impairment due to meningococcal meningitis                    | 106.1<br>(76.8 to 143.7)      | 117.0<br>(83.1 to 158.7)      | --                        | --                              | 3.2<br>(1.8 to 5.4)     | 3.6<br>(2.0 to 6.0)      |
| Meningococcal infection | Severe motor impairment due to meningococcal meningitis                       | 105.4<br>(79.6 to 139.2)      | 138.7<br>(97.2 to 256.8)      | --                        | --                              | 42.3<br>(25.8 to 63.7)  | 55.0<br>(31.4 to 98.7)   |
| Meningococcal infection | Mild motor impairment due to long term due to meningococcal meningitis        | 121.0<br>(36.6 to 213.9)      | 137.9<br>(43.8 to 249.4)      | --                        | --                              | 1.2<br>(0.3 to 2.9)     | 1.4<br>(0.3 to 3.3)      |
| Meningococcal infection | Severe hearing loss with ringing due to meningococcal meningitis              | 4.7<br>(0.4 to 7.5)           | 5.0<br>(0.4 to 8.0)           | --                        | --                              | 1.2<br>(0.1 to 2.1)     | 1.3<br>(0.1 to 2.3)      |
| Meningococcal infection | Monocular distance vision loss due to meningococcal meningitis                | 129.7<br>(39.1 to 238.1)      | 147.7<br>(44.9 to 270.8)      | --                        | --                              | 2.1<br>(0.5 to 4.6)     | 2.4<br>(0.7 to 5.2)      |
| Meningococcal infection | Complete hearing loss with ringing due to meningococcal meningitis            | 3.3<br>(0.3 to 5.1)           | 3.4<br>(0.3 to 5.4)           | --                        | --                              | 1.0<br>(0.1 to 1.8)     | 1.1<br>(0.1 to 1.9)      |
| Meningococcal infection | Borderline intellectual disability due to meningococcal meningitis            | 217.6<br>(65.5 to 388.7)      | 247.8<br>(74.7 to 449.9)      | --                        | --                              | 2.3<br>(0.6 to 5.2)     | 2.6<br>(0.6 to 5.9)      |
| Meningococcal infection | Moderate motor plus cognitive impairments due to meningococcal meningitis     | 89.1<br>(66.5 to 118.8)       | 105.1<br>(76.6 to 142.5)      | --                        | --                              | 18.0<br>(10.8 to 27.7)  | 21.3<br>(12.5 to 33.9)   |
| Meningococcal infection | Severe motor plus cognitive impairments due to meningococcal meningitis       | 54.9<br>(26.9 to 79.4)        | 61.1<br>(27.7 to 95.5)        | --                        | --                              | 29.7<br>(14.1 to 47.4)  | 33.0<br>(14.3 to 55.4)   |
| Meningococcal infection | Severe vision impairment due to meningococcal meningitis                      | 24.0<br>(16.9 to 32.8)        | 29.6<br>(21.2 to 40.4)        | --                        | --                              | 4.4<br>(2.6 to 6.8)     | 5.4<br>(3.3 to 8.4)      |
| Meningococcal infection | Moderate motor impairment due to meningococcal meningitis                     | 74.1<br>(55.6 to 96.0)        | 101.9<br>(67.5 to 257.0)      | --                        | --                              | 4.5<br>(2.6 to 7.0)     | 6.1<br>(3.2 to 13.8)     |
| Other meningitis        | Severe motor plus cognitive impairments due to other bacterial meningitis     | 123.8<br>(59.1 to 182.5)      | 142.9<br>(63.8 to 217.0)      | --                        | --                              | 67.0<br>(29.0 to 107.9) | 77.2<br>(31.4 to 127.4)  |
| Other meningitis        | Borderline intellectual disability due to other bacterial meningitis          | 414.8<br>(165.2 to 692.8)     | 758.2<br>(297.7 to 1,268.2)   | --                        | --                              | 4.4<br>(1.4 to 9.5)     | 8.0<br>(2.6 to 17.2)     |
| Other meningitis        | Mild intellectual disability due to other bacterial meningitis                | 148.3<br>(108.3 to 191.3)     | 194.0<br>(141.9 to 248.6)     | --                        | --                              | 6.3<br>(3.5 to 10.1)    | 8.3<br>(4.6 to 13.1)     |
| Other meningitis        | Severe hearing loss with ringing due to other bacterial meningitis            | 7.7<br>(0.6 to 11.8)          | 13.6<br>(1.1 to 20.7)         | --                        | --                              | 2.0<br>(0.2 to 3.5)     | 3.5<br>(0.3 to 6.2)      |
| Other meningitis        | Severe motor impairment due to other bacterial meningitis                     | 238.0<br>(179.8 to 310.3)     | 330.7<br>(253.1 to 424.7)     | --                        | --                              | 95.2<br>(57.3 to 143.9) | 131.5<br>(79.3 to 197.5) |
| Other meningitis        | Profound hearing loss with ringing due to other bacterial meningitis          | 5.6<br>(0.4 to 9.0)           | 10.7<br>(0.9 to 16.9)         | --                        | --                              | 1.5<br>(0.1 to 2.8)     | 3.0<br>(0.2 to 5.2)      |
| Other meningitis        | Mild hearing loss due with ringing to other bacterial meningitis              | 47.0<br>(28.8 to 68.2)        | 86.3<br>(52.9 to 123.4)       | --                        | --                              | 1.0<br>(0.5 to 1.9)     | 1.8<br>(0.9 to 3.5)      |
| Other meningitis        | Other acute bacterial meningitis                                              | 33.5<br>(28.4 to 39.6)        | 61.8<br>(53.1 to 72.8)        | 655.9<br>(547.7 to 781.0) | 1,250.4<br>(1,055.7 to 1,486.8) | 4.5<br>(2.9 to 6.5)     | 8.2<br>(5.4 to 11.9)     |
| Other meningitis        | Monocular distance vision loss due to other bacterial meningitis              | 248.3<br>(96.4 to 425.9)      | 453.9<br>(176.0 to 772.5)     | --                        | --                              | 4.0<br>(1.3 to 8.8)     | 7.3<br>(2.3 to 15.7)     |
| Other meningitis        | Profound hearing loss due to other bacterial meningitis                       | 3.1<br>(0.2 to 5.1)           | 6.0<br>(0.5 to 9.8)           | --                        | --                              | 0.6<br>(< 0.05 to 1.2)  | 1.2<br>(0.1 to 2.3)      |
| Other meningitis        | Acute viral meningitis                                                        | 235.7<br>(206.9 to 270.8)     | 262.9<br>(229.0 to 307.0)     | --                        | --                              | 31.0<br>(20.5 to 44.8)  | 34.5<br>(22.6 to 50.1)   |
| Other meningitis        | Blindness due to other bacterial meningitis                                   | 9.1<br>(6.6 to 12.1)          | 15.8<br>(11.5 to 21.0)        | --                        | --                              | 1.7<br>(1.0 to 2.6)     | 3.0<br>(1.8 to 4.6)      |
| Other meningitis        | Complete hearing loss due to other bacterial meningitis                       | 4.0<br>(0.3 to 6.1)           | 7.0<br>(0.6 to 10.6)          | --                        | --                              | 0.9<br>(0.1 to 1.5)     | 1.5<br>(0.1 to 2.6)      |
| Other meningitis        | Epilepsy due to other meningitis                                              | 106.6<br>(91.3 to 122.6)      | 131.3<br>(111.5 to 152.5)     | --                        | --                              | 20.0<br>(13.5 to 27.6)  | 23.5<br>(15.6 to 33.1)   |
| Other meningitis        | Mild motor plus cognitive impairments due to other bacterial meningitis       | 138.6<br>(54.7 to 235.7)      | 253.3<br>(99.7 to 430.2)      | --                        | --                              | 4.3<br>(1.4 to 8.8)     | 7.8<br>(2.4 to 16.2)     |
| Other meningitis        | Moderate motor plus cognitive impairments due to other bacterial meningitis   | 204.3<br>(153.6 to 262.4)     | 262.3<br>(191.8 to 338.2)     | --                        | --                              | 41.3<br>(25.1 to 62.1)  | 52.9<br>(31.9 to 80.5)   |
| Other meningitis        | Moderate motor impairment due to other bacterial meningitis                   | 169.1<br>(130.8 to 214.6)     | 227.8<br>(174.0 to 295.0)     | --                        | --                              | 10.3<br>(6.3 to 16.1)   | 13.8<br>(8.4 to 21.6)    |
| Other meningitis        | Mild behavioral problems due to other bacterial meningitis                    | 62.7<br>(24.5 to 108.0)       | 114.6<br>(44.6 to 196.5)      | --                        | --                              | 2.8<br>(1.0 to 5.3)     | 5.1<br>(1.8 to 9.6)      |
| Other meningitis        | Mild motor impairment due to long term due to other bacterial meningitis      | 232.8<br>(92.4 to 394.0)      | 425.9<br>(171.3 to 717.6)     | --                        | --                              | 2.3<br>(0.6 to 5.4)     | 4.2<br>(1.1 to 9.8)      |
| Other meningitis        | Moderate hearing loss with ringing due to other bacterial meningitis          | 33.2<br>(2.8 to 47.4)         | 60.0<br>(5.0 to 86.1)         | --                        | --                              | 2.5<br>(0.2 to 4.2)     | 4.4<br>(0.3 to 7.5)      |
| Other meningitis        | Mild hearing loss due to other bacterial meningitis                           | 177.5<br>(108.4 to 257.0)     | 325.6<br>(200.4 to 465.1)     | --                        | --                              | 1.7<br>(0.7 to 3.6)     | 3.1<br>(1.2 to 6.5)      |
| Other meningitis        | Moderate hearing loss due to other bacterial meningitis                       | 76.8<br>(6.4 to 109.6)        | 138.8<br>(11.4 to 198.0)      | --                        | --                              | 2.0<br>(0.1 to 3.8)     | 3.6<br>(0.3 to 6.9)      |
| Other meningitis        | Moderately severe hearing loss with ringing due to other bacterial meningitis | 17.3<br>(1.4 to 25.6)         | 31.4<br>(2.6 to 45.9)         | --                        | --                              | 2.9<br>(0.2 to 4.9)     | 5.2<br>(0.4 to 8.8)      |
| Other meningitis        | Moderately severe hearing loss due to other bacterial meningitis              | 36.0<br>(3.0 to 53.3)         | 65.3<br>(5.4 to 95.0)         | --                        | --                              | 3.3<br>(0.3 to 5.6)     | 6.0<br>(0.5 to 10.0)     |
| Other meningitis        | Moderate vision impairment due to other bacterial meningitis                  | 79.6<br>(60.4 to 103.7)       | 145.7<br>(112.4 to 188.3)     | --                        | --                              | 2.4<br>(1.4 to 4.2)     | 4.5<br>(2.6 to 7.5)      |
| Other meningitis        | Complete hearing loss with ringing due to other bacterial meningitis          | 4.8<br>(0.4 to 7.3)           | 8.3<br>(0.7 to 12.8)          | --                        | --                              | 1.5<br>(0.1 to 2.6)     | 2.6<br>(0.2 to 4.4)      |
| Other meningitis        | Severe vision impairment due to other bacterial meningitis                    | 13.7<br>(10.2 to 18.5)        | 29.2<br>(21.6 to 39.4)        | --                        | --                              | 2.5<br>(1.6 to 3.9)     | 5.4<br>(3.3 to 8.3)      |
| Other meningitis        | Severe hearing loss due to other bacterial meningitis                         | 4.4<br>(0.4 to 6.7)           | 7.7<br>(0.6 to 11.8)          | --                        | --                              | 0.7<br>(0.1 to 1.2)     | 1.2<br>(0.1 to 2.1)      |
| Encephalitis            | Mild motor impairment due to long term due to encephalitis                    | 1,462.9<br>(282.2 to 3,249.2) | 1,535.0<br>(300.4 to 3,394.4) | --                        | --                              | 14.2<br>(2.6 to 40.1)   | 14.9<br>(2.7 to 41.3)    |

|                             |                                                                                              |                                       |                                     |                                       |                                       |                              |                              |
|-----------------------------|----------------------------------------------------------------------------------------------|---------------------------------------|-------------------------------------|---------------------------------------|---------------------------------------|------------------------------|------------------------------|
| Encephalitis                | Mild behavioral problems due to encephalitis                                                 | 392.5<br>(71.4 to 886.2)              | 410.6<br>(75.1 to 917.6)            | --                                    | --                                    | 16.9<br>(2.9 to 41.0)        | 17.7<br>(3.0 to 43.0)        |
| Encephalitis                | Severe motor impairment due to encephalitis                                                  | 1,373.4<br>(1,030.1 to 1,795.7)       | 1,564.3<br>(1,172.1 to 2,035.0)     | --                                    | --                                    | 515.7<br>(317.7 to 755.0)    | 585.4<br>(357.0 to 859.9)    |
| Encephalitis                | Epilepsy due to encephalitis                                                                 | 804.5<br>(706.4 to 912.4)             | 871.7<br>(775.2 to 981.5)           | --                                    | --                                    | 137.4<br>(93.8 to 182.5)     | 140.0<br>(95.2 to 187.3)     |
| Encephalitis                | Monocular distance vision loss due to encephalitis                                           | 1,551.3<br>(307.8 to 3,458.6)         | 1,622.7<br>(322.1 to 3,617.8)       | --                                    | --                                    | 24.7<br>(4.1 to 63.2)        | 25.9<br>(4.3 to 66.3)        |
| Encephalitis                | Acute encephalitis                                                                           | 323.3<br>(291.8 to 358.5)             | 362.9<br>(329.8 to 399.4)           | 5,813.5<br>(5,248.8 to 6,427.7)       | 6,534.3<br>(5,956.6 to 7,165.2)       | 42.4<br>(28.2 to 60.4)       | 47.6<br>(32.1 to 67.6)       |
| Encephalitis                | Severe motor plus cognitive impairments due to encephalitis                                  | 735.8<br>(388.8 to 1,043.9)           | 708.7<br>(330.3 to 1,042.6)         | --                                    | --                                    | 370.7<br>(181.6 to 558.0)    | 357.1<br>(163.6 to 557.1)    |
| Encephalitis                | Mild intellectual disability due to encephalitis                                             | 860.5<br>(660.1 to 1,094.5)           | 924.2<br>(712.8 to 1,188.0)         | --                                    | --                                    | 35.5<br>(19.8 to 57.0)       | 38.1<br>(21.3 to 61.9)       |
| Encephalitis                | Blindness due to encephalitis                                                                | 94.0<br>(72.8 to 117.9)               | 99.9<br>(77.8 to 125.1)             | --                                    | --                                    | 17.3<br>(10.7 to 25.0)       | 18.4<br>(11.5 to 26.5)       |
| Encephalitis                | Moderate motor impairment due to encephalitis                                                | 897.8<br>(694.5 to 1,145.7)           | 1,001.6<br>(764.4 to 1,299.1)       | --                                    | --                                    | 52.8<br>(32.4 to 80.1)       | 58.8<br>(35.4 to 90.2)       |
| Encephalitis                | Borderline intellectual disability due to encephalitis                                       | 2,588.8<br>(489.1 to 5,609.8)         | 2,707.3<br>(510.6 to 5,881.5)       | --                                    | --                                    | 27.0<br>(4.4 to 72.1)        | 28.2<br>(4.7 to 75.4)        |
| Encephalitis                | Moderate motor plus cognitive impairments due to encephalitis                                | 1,218.9<br>(936.8 to 1,524.6)         | 1,282.4<br>(958.8 to 1,631.2)       | --                                    | --                                    | 233.4<br>(144.9 to 337.8)    | 244.9<br>(151.3 to 360.9)    |
| Encephalitis                | Moderate vision impairment due to encephalitis                                               | 729.4<br>(597.8 to 875.5)             | 779.6<br>(633.1 to 930.9)           | --                                    | --                                    | 21.6<br>(12.7 to 35.2)       | 23.1<br>(13.4 to 37.2)       |
| Encephalitis                | Mild motor plus cognitive impairments due to encephalitis                                    | 867.7<br>(162.5 to 1,908.6)           | 903.7<br>(170.4 to 1,975.7)         | --                                    | --                                    | 25.9<br>(4.4 to 61.9)        | 27.0<br>(4.7 to 64.0)        |
| Encephalitis                | Severe vision impairment due to encephalitis                                                 | 121.4<br>(97.4 to 148.3)              | 133.8<br>(106.4 to 165.9)           | --                                    | --                                    | 21.4<br>(13.9 to 31.2)       | 23.8<br>(15.4 to 34.3)       |
| Diphtheria                  | Moderate diphtheria                                                                          | 0.5<br>(0.4 to 0.7)                   | 0.2<br>(0.2 to 0.3)                 | 7.1<br>(5.6 to 9.4)                   | 3.0<br>(2.4 to 3.9)                   | < 0.05<br>(< 0.05 to < 0.05) | < 0.05<br>(< 0.05 to < 0.05) |
| Diphtheria                  | Severe diphtheria                                                                            | 0.2<br>(0.2 to 0.3)                   | 0.1<br>(0.1 to 0.1)                 | 3.1<br>(2.4 to 4.1)                   | 1.3<br>(1.0 to 1.6)                   | < 0.05<br>(< 0.05 to < 0.05) | < 0.05<br>(< 0.05 to < 0.05) |
| Whooping cough              | Whooping cough                                                                               | 2,057.2<br>(1,591.1 to 2,596.1)       | 1,592.8<br>(1,242.4 to 2,001.4)     | 15,017.7<br>(11,615.3 to 18,951.6)    | 11,627.4<br>(9,069.2 to 14,610.5)     | 101.9<br>(60.3 to 158.8)     | 79.0<br>(46.9 to 124.5)      |
| Tetanus                     | Moderate motor plus cognitive impairment with epilepsy due to neonatal tetanus               | < 0.05<br>(< 0.05 to < 0.05)          | < 0.05<br>(< 0.05 to < 0.05)        | --                                    | --                                    | < 0.05<br>(< 0.05 to < 0.05) | < 0.05<br>(< 0.05 to < 0.05) |
| Tetanus                     | Severe tetanus                                                                               | 12.5<br>(7.1 to 16.2)                 | 5.0<br>(2.9 to 6.8)                 | 225.4<br>(130.4 to 281.5)             | 90.2<br>(51.3 to 120.8)               | 1.7<br>(0.9 to 2.5)          | 0.7<br>(0.3 to 1.1)          |
| Tetanus                     | Moderate motor plus cognitive impairment with blindness and epilepsy due to neonatal tetanus | < 0.05<br>(< 0.05 to < 0.05)          | < 0.05<br>(< 0.05 to < 0.05)        | --                                    | --                                    | < 0.05<br>(< 0.05 to < 0.05) | < 0.05<br>(< 0.05 to < 0.05) |
| Tetanus                     | Moderate motor impairment due to neonatal tetanus                                            | 0.1<br>(0.1 to 0.1)                   | 0.1<br>(0.1 to 0.1)                 | --                                    | --                                    | < 0.05<br>(< 0.05 to < 0.05) | < 0.05<br>(< 0.05 to < 0.05) |
| Tetanus                     | Severe motor plus cognitive impairment with blindness due to neonatal tetanus                | < 0.05<br>(< 0.05 to < 0.05)          | < 0.05<br>(< 0.05 to < 0.05)        | --                                    | --                                    | < 0.05<br>(< 0.05 to < 0.05) | < 0.05<br>(< 0.05 to < 0.05) |
| Tetanus                     | Moderate motor plus cognitive impairment with blindness due to neonatal tetanus              | < 0.05<br>(< 0.05 to < 0.05)          | < 0.05<br>(< 0.05 to < 0.05)        | --                                    | --                                    | < 0.05<br>(< 0.05 to < 0.05) | < 0.05<br>(< 0.05 to < 0.05) |
| Tetanus                     | Moderate motor impairment with blindness due to neonatal tetanus                             | < 0.05<br>(< 0.05 to < 0.05)          | < 0.05<br>(< 0.05 to < 0.05)        | --                                    | --                                    | < 0.05<br>(< 0.05 to < 0.05) | < 0.05<br>(< 0.05 to < 0.05) |
| Tetanus                     | Severe motor impairment with epilepsy due to neonatal tetanus                                | < 0.05<br>(< 0.05 to < 0.05)          | < 0.05<br>(< 0.05 to < 0.05)        | --                                    | --                                    | < 0.05<br>(< 0.05 to < 0.05) | < 0.05<br>(< 0.05 to < 0.05) |
| Tetanus                     | Severe motor plus cognitive impairment with epilepsy due to neonatal tetanus                 | < 0.05<br>(< 0.05 to < 0.05)          | < 0.05<br>(< 0.05 to < 0.05)        | --                                    | --                                    | < 0.05<br>(< 0.05 to < 0.05) | < 0.05<br>(< 0.05 to < 0.05) |
| Tetanus                     | Moderate motor impairment with blindness and epilepsy due to neonatal tetanus                | < 0.05<br>(< 0.05 to < 0.05)          | < 0.05<br>(< 0.05 to < 0.05)        | --                                    | --                                    | < 0.05<br>(< 0.05 to < 0.05) | < 0.05<br>(< 0.05 to < 0.05) |
| Tetanus                     | Mild motor plus cognitive impairments due to neonatal tetanus                                | 65.2<br>(41.4 to 88.8)                | 75.5<br>(47.8 to 102.7)             | --                                    | --                                    | 2.0<br>(1.0 to 3.5)          | 2.3<br>(1.2 to 4.0)          |
| Tetanus                     | Severe motor impairment with blindness due to neonatal tetanus                               | < 0.05<br>(< 0.05 to < 0.05)          | < 0.05<br>(< 0.05 to < 0.05)        | --                                    | --                                    | < 0.05<br>(< 0.05 to < 0.05) | < 0.05<br>(< 0.05 to < 0.05) |
| Tetanus                     | Moderate motor impairment with epilepsy due to neonatal tetanus                              | < 0.05<br>(< 0.05 to < 0.05)          | < 0.05<br>(< 0.05 to < 0.05)        | --                                    | --                                    | < 0.05<br>(< 0.05 to < 0.05) | < 0.05<br>(< 0.05 to < 0.05) |
| Tetanus                     | Severe motor plus cognitive impairment with blindness and epilepsy due to neonatal tetanus   | < 0.05<br>(< 0.05 to < 0.05)          | < 0.05<br>(< 0.05 to < 0.05)        | --                                    | --                                    | < 0.05<br>(< 0.05 to < 0.05) | < 0.05<br>(< 0.05 to < 0.05) |
| Tetanus                     | Severe motor impairment with blindness and epilepsy due to neonatal tetanus                  | < 0.05<br>(< 0.05 to < 0.05)          | < 0.05<br>(< 0.05 to < 0.05)        | --                                    | --                                    | < 0.05<br>(< 0.05 to < 0.05) | < 0.05<br>(< 0.05 to < 0.05) |
| Tetanus                     | Severe motor impairment due to neonatal tetanus                                              | 0.1<br>(0.1 to 0.1)                   | 0.1<br>(0.1 to 0.1)                 | --                                    | --                                    | < 0.05<br>(< 0.05 to 0.1)    | < 0.05<br>(< 0.05 to < 0.05) |
| Tetanus                     | Mild motor impairment due to neonatal tetanus                                                | 68.2<br>(45.2 to 92.0)                | 79.2<br>(52.5 to 106.7)             | --                                    | --                                    | 0.7<br>(0.3 to 1.4)          | 0.8<br>(0.3 to 1.6)          |
| Measles                     | Severe measles                                                                               | 329.0<br>(116.8 to 734.9)             | 123.0<br>(44.8 to 274.4)            | 11,985.4<br>(4,179.5 to 26,690.7)     | 4,478.6<br>(1,587.5 to 9,921.2)       | 42.6<br>(13.9 to 101.2)      | 16.1<br>(5.2 to 37.4)        |
| Measles                     | Moderate measles                                                                             | 327.6<br>(115.5 to 705.1)             | 122.4<br>(43.8 to 262.5)            | 11,981.7<br>(4,332.0 to 26,088.3)     | 4,476.7<br>(1,595.1 to 9,705.9)       | 16.2<br>(5.0 to 36.2)        | 6.1<br>(1.9 to 13.8)         |
| Varicella and herpes zoster | Herpes zoster                                                                                | 4,358.1<br>(3,888.8 to 4,828.9)       | 5,338.1<br>(4,727.8 to 5,964.6)     | 24,472.4<br>(21,988.5 to 27,099.9)    | 30,196.2<br>(26,953.1 to 33,652.5)    | 237.8<br>(146.9 to 361.9)    | 290.5<br>(179.6 to 446.3)    |
| Varicella and herpes zoster | Chickenpox                                                                                   | 2,151.8<br>(2,101.7 to 2,207.8)       | 2,263.7<br>(2,215.9 to 2,322.8)     | 112,193.6<br>(109,629.2 to 114,909.1) | 117,966.2<br>(115,537.8 to 120,901.8) | 12.3<br>(5.0 to 25.8)        | 13.0<br>(5.2 to 27.3)        |
| Malaria                     | Severe motor impairment with blindness due to malaria                                        | 2.8<br>(1.8 to 4.0)                   | 3.2<br>(2.0 to 4.7)                 | --                                    | --                                    | 1.4<br>(0.8 to 2.2)          | 1.6<br>(0.9 to 2.6)          |
| Malaria                     | Asymptomatic malaria parasitemia (PPR)                                                       | 130,459.8<br>(121,272.2 to 142,301.2) | 98,612.5<br>(85,935.1 to 112,039.6) | < 0.05<br>(0.0 to < 0.05)             | < 0.05<br>(0.0 to < 0.05)             | < 0.05<br>(0.0 to < 0.05)    | < 0.05<br>(0.0 to < 0.05)    |
| Malaria                     | Moderate motor plus cognitive impairment with blindness due to malaria                       | 46.1<br>(39.2 to 53.6)                | 56.8<br>(47.8 to 66.5)              | --                                    | --                                    | 16.1<br>(10.7 to 22.2)       | 19.8<br>(13.2 to 27.5)       |
| Malaria                     | Moderate motor impairment due to malaria                                                     | 291.0<br>(252.5 to 333.3)             | 370.9<br>(318.4 to 431.2)           | --                                    | --                                    | 17.2<br>(11.1 to 25.0)       | 22.0<br>(14.0 to 32.3)       |
| Malaria                     | Mild malaria                                                                                 | 1,376.7<br>(617.6 to 2,560.5)         | 1,098.6<br>(339.7 to 2,653.0)       | 161,858.3<br>(139,089.0 to 192,317.7) | 141,279.0<br>(113,842.8 to 176,265.2) | 7.7<br>(2.2 to 19.0)         | 6.1<br>(1.4 to 17.4)         |

|                                           |                                                                                     |                                    |                                    |                                    |                                    |                              |                              |
|-------------------------------------------|-------------------------------------------------------------------------------------|------------------------------------|------------------------------------|------------------------------------|------------------------------------|------------------------------|------------------------------|
| Malaria                                   | Moderate malaria                                                                    | 689.3<br>(309.8 to 1,282.7)        | 550.0<br>(171.0 to 1,322.2)        | 81,072.3<br>(69,364.2 to 96,608.7) | 70,764.1<br>(56,880.3 to 88,162.6) | 33.7<br>(13.2 to 65.3)       | 26.9<br>(7.7 to 61.4)        |
| Malaria                                   | Severe anaemia due to malaria parasitemia (PfPR)                                    | 853.4<br>(634.6 to 1,078.5)        | 536.0<br>(350.6 to 737.8)          | < 0.05<br>(0.0 to < 0.05)          | < 0.05<br>(0.0 to < 0.05)          | 120.0<br>(75.2 to 178.2)     | 75.6<br>(44.0 to 119.9)      |
| Malaria                                   | Mild malaria with mild anaemia                                                      | 3,115.2<br>(2,115.5 to 4,167.2)    | 3,076.7<br>(2,040.8 to 4,126.4)    | < 0.05<br>(0.0 to < 0.05)          | < 0.05<br>(0.0 to < 0.05)          | 28.8<br>(10.8 to 63.1)       | 28.4<br>(10.3 to 62.3)       |
| Malaria                                   | Moderate motor plus cognitive impairment with epilepsy due to malaria               | 260.4<br>(225.4 to 301.6)          | 320.3<br>(276.9 to 372.1)          | --                                 | --                                 | 89.6<br>(61.6 to 122.0)      | 108.4<br>(72.4 to 148.9)     |
| Malaria                                   | Severe malaria with severe anaemia                                                  | 2.6<br>(0.3 to 8.1)                | 2.1<br>(0.2 to 6.2)                | < 0.05<br>(0.0 to < 0.05)          | < 0.05<br>(0.0 to < 0.05)          | 0.7<br>(0.1 to 2.0)          | 0.5<br>(0.1 to 1.6)          |
| Malaria                                   | Moderate motor plus cognitive impairment with blindness and epilepsy due to malaria | 24.6<br>(20.7 to 29.2)             | 30.3<br>(25.3 to 36.0)             | --                                 | --                                 | 11.8<br>(8.3 to 15.7)        | 14.4<br>(10.0 to 19.2)       |
| Malaria                                   | Moderate motor impairment with epilepsy due to malaria                              | 140.1<br>(121.9 to 161.1)          | 172.5<br>(149.2 to 197.9)          | --                                 | --                                 | 33.5<br>(24.1 to 44.9)       | 40.1<br>(28.2 to 54.3)       |
| Malaria                                   | Severe malaria with moderate anaemia                                                | 32.4<br>(3.6 to 99.3)              | 27.4<br>(3.0 to 83.3)              | < 0.05<br>(0.0 to < 0.05)          | < 0.05<br>(0.0 to < 0.05)          | 5.6<br>(0.6 to 16.6)         | 4.8<br>(0.5 to 14.5)         |
| Malaria                                   | Severe malaria with mild anaemia                                                    | 22.9<br>(2.6 to 70.3)              | 22.6<br>(2.5 to 68.1)              | < 0.05<br>(0.0 to < 0.05)          | < 0.05<br>(0.0 to < 0.05)          | 3.1<br>(0.4 to 9.1)          | 3.1<br>(0.3 to 9.2)          |
| Malaria                                   | Mild malaria with severe anaemia                                                    | 360.8<br>(240.7 to 494.6)          | 282.8<br>(184.7 to 398.7)          | < 0.05<br>(0.0 to < 0.05)          | < 0.05<br>(0.0 to < 0.05)          | 53.1<br>(30.5 to 80.9)       | 41.7<br>(23.9 to 64.5)       |
| Malaria                                   | Severe motor impairment with epilepsy due to malaria                                | 46.8<br>(40.4 to 54.4)             | 57.6<br>(49.8 to 67.0)             | --                                 | --                                 | 24.1<br>(16.5 to 32.7)       | 29.4<br>(20.3 to 40.1)       |
| Malaria                                   | Severe malaria                                                                      | 10.2<br>(0.9 to 35.0)              | 8.0<br>(0.7 to 29.1)               | 1,210.4<br>(138.8 to 3,372.3)      | 1,055.0<br>(124.7 to 2,929.7)      | 1.3<br>(0.1 to 4.5)          | 1.1<br>(0.1 to 3.9)          |
| Malaria                                   | Moderate anaemia due to malaria parasitemia (PfPR)                                  | 11,874.1<br>(8,788.6 to 14,932.2)  | 8,217.1<br>(5,374.6 to 11,248.5)   | < 0.05<br>(0.0 to < 0.05)          | < 0.05<br>(0.0 to < 0.05)          | 590.7<br>(364.4 to 923.3)    | 410.4<br>(225.4 to 676.6)    |
| Malaria                                   | Moderate motor impairment with blindness and epilepsy due to malaria                | 13.1<br>(11.0 to 15.4)             | 16.1<br>(13.6 to 19.1)             | --                                 | --                                 | 5.1<br>(3.6 to 6.8)          | 6.2<br>(4.4 to 8.4)          |
| Malaria                                   | Severe motor plus cognitive impairment with blindness due to malaria                | 38.0<br>(22.8 to 49.6)             | 42.8<br>(24.2 to 58.2)             | --                                 | --                                 | 23.5<br>(13.4 to 33.2)       | 26.7<br>(14.2 to 39.1)       |
| Malaria                                   | Severe motor plus cognitive impairment with epilepsy due to malaria                 | 215.4<br>(132.7 to 281.4)          | 243.0<br>(138.9 to 329.2)          | --                                 | --                                 | 127.9<br>(73.2 to 179.8)     | 144.0<br>(76.4 to 208.4)     |
| Malaria                                   | Moderate motor impairment with blindness due to malaria                             | 8.3<br>(5.4 to 12.1)               | 9.5<br>(5.9 to 14.3)               | --                                 | --                                 | 2.0<br>(1.1 to 3.2)          | 2.3<br>(1.3 to 3.8)          |
| Malaria                                   | Severe motor impairment due to malaria                                              | 370.2<br>(290.7 to 489.7)          | 494.0<br>(381.5 to 646.3)          | --                                 | --                                 | 141.9<br>(87.8 to 208.1)     | 189.3<br>(116.4 to 275.7)    |
| Malaria                                   | Severe motor plus cognitive impairment with blindness and epilepsy due to malaria   | 20.2<br>(12.6 to 26.8)             | 22.8<br>(12.8 to 31.6)             | --                                 | --                                 | 14.1<br>(8.1 to 19.9)        | 15.8<br>(8.6 to 23.3)        |
| Malaria                                   | Moderate malaria with severe anaemia                                                | 180.2<br>(119.9 to 247.0)          | 141.6<br>(93.1 to 200.1)           | < 0.05<br>(0.0 to < 0.05)          | < 0.05<br>(0.0 to < 0.05)          | 33.2<br>(19.2 to 51.5)       | 26.2<br>(14.8 to 40.3)       |
| Malaria                                   | Mild anaemia due to malaria parasitemia (PfPR)                                      | 9,514.2<br>(7,571.5 to 11,530.0)   | 7,396.1<br>(5,180.6 to 9,721.1)    | < 0.05<br>(0.0 to < 0.05)          | < 0.05<br>(0.0 to < 0.05)          | 34.4<br>(11.8 to 78.4)       | 26.9<br>(8.9 to 63.1)        |
| Malaria                                   | Severe motor impairment with blindness and epilepsy due to malaria                  | 4.4<br>(3.7 to 5.1)                | 5.4<br>(4.6 to 6.3)                | --                                 | --                                 | 2.7<br>(1.9 to 3.5)          | 3.3<br>(2.4 to 4.3)          |
| Malaria                                   | Moderate malaria with moderate anaemia                                              | 2,204.4<br>(1,481.6 to 3,038.1)    | 1,865.1<br>(1,238.4 to 2,614.2)    | < 0.05<br>(0.0 to < 0.05)          | < 0.05<br>(0.0 to < 0.05)          | 211.1<br>(117.6 to 338.6)    | 178.9<br>(100.5 to 282.9)    |
| Malaria                                   | Mild malaria with moderate anaemia                                                  | 4,402.6<br>(2,968.0 to 6,065.4)    | 3,725.0<br>(2,461.8 to 5,213.6)    | < 0.05<br>(0.0 to < 0.05)          | < 0.05<br>(0.0 to < 0.05)          | 243.5<br>(132.5 to 400.4)    | 206.2<br>(112.9 to 329.9)    |
| Malaria                                   | Moderate malaria with mild anaemia                                                  | 1,559.8<br>(1,061.3 to 2,089.4)    | 1,540.5<br>(1,026.4 to 2,066.5)    | < 0.05<br>(0.0 to < 0.05)          | < 0.05<br>(0.0 to < 0.05)          | 81.4<br>(44.8 to 131.5)      | 80.5<br>(44.8 to 129.6)      |
| Chagas disease                            | Asymptomatic and mild heart failure due to Chagas disease                           | 250.7<br>(162.4 to 365.9)          | 283.2<br>(185.1 to 408.6)          | --                                 | --                                 | 9.8<br>(5.1 to 16.9)         | 11.0<br>(5.8 to 18.8)        |
| Chagas disease                            | Asymptomatic Chagas disease                                                         | 6,137.5<br>(5,237.1 to 7,163.9)    | 6,154.6<br>(5,154.1 to 7,307.0)    | --                                 | --                                 | < 0.05<br>(0.0 to < 0.05)    | < 0.05<br>(0.0 to < 0.05)    |
| Chagas disease                            | Moderate chronic digestive disease due to Chagas disease                            | 248.2<br>(191.9 to 314.6)          | 257.0<br>(196.9 to 325.4)          | --                                 | --                                 | 26.8<br>(16.9 to 39.3)       | 27.7<br>(17.5 to 40.4)       |
| Chagas disease                            | Severe heart failure due to Chagas disease                                          | 18.6<br>(12.1 to 27.2)             | 21.0<br>(13.7 to 30.3)             | --                                 | --                                 | 3.1<br>(1.7 to 5.1)          | 3.6<br>(2.0 to 5.7)          |
| Chagas disease                            | Moderate heart failure due to Chagas disease                                        | 21.5<br>(13.9 to 31.4)             | 24.3<br>(15.9 to 35.1)             | --                                 | --                                 | 1.5<br>(0.8 to 2.4)          | 1.7<br>(0.9 to 2.8)          |
| Chagas disease                            | Mild chronic digestive disease due to Chagas disease                                | 372.3<br>(287.9 to 471.9)          | 385.5<br>(295.3 to 488.2)          | --                                 | --                                 | 4.0<br>(1.9 to 7.5)          | 4.1<br>(1.9 to 7.9)          |
| Chagas disease                            | Atrial fibrillation and flutter due to Chagas disease                               | 61.8<br>(46.0 to 81.3)             | 74.1<br>(54.7 to 97.8)             | --                                 | --                                 | 12.4<br>(7.8 to 18.2)        | 14.8<br>(9.4 to 21.9)        |
| Chagas disease                            | Acute Chagas disease                                                                | 1.1<br>(0.5 to 1.9)                | 1.0<br>(0.5 to 1.8)                | 194.5<br>(164.2 to 228.5)          | 179.9<br>(150.1 to 214.0)          | 0.1<br>(< 0.05 to 0.1)       | 0.1<br>(< 0.05 to 0.1)       |
| Visceral leishmaniasis                    | Moderate visceral leishmaniasis                                                     | 49.5<br>(46.7 to 52.6)             | 22.6<br>(21.0 to 24.1)             | 264.2<br>(248.9 to 280.7)          | 120.3<br>(111.9 to 128.6)          | 2.4<br>(1.5 to 3.5)          | 1.1<br>(0.7 to 1.6)          |
| Visceral leishmaniasis                    | Severe visceral leishmaniasis                                                       | 16.5<br>(15.6 to 17.5)             | 7.5<br>(7.0 to 8.0)                | --                                 | --                                 | 2.1<br>(1.4 to 3.0)          | 1.0<br>(0.6 to 1.4)          |
| Cutaneous and mucocutaneous leishmaniasis | Cutaneous and mucocutaneous leishmaniasis                                           | 3,364.6<br>(2,612.2 to 4,371.5)    | 4,320.2<br>(3,650.3 to 5,237.6)    | 731.6<br>(636.3 to 842.6)          | 678.5<br>(496.7 to 902.1)          | 212.4<br>(131.6 to 329.3)    | 273.1<br>(177.2 to 398.8)    |
| African trypanosomiasis                   | Skin disfigurement due to Trypanosoma brucei gambiense                              | 14.1<br>(8.7 to 22.2)              | 3.6<br>(2.1 to 6.2)                | 5.9<br>(4.5 to 7.6)                | 1.2<br>(0.9 to 1.6)                | 0.4<br>(0.2 to 0.7)          | 0.1<br>(< 0.05 to 0.2)       |
| African trypanosomiasis                   | Sleeping sickness due to Trypanosoma brucei gambiense                               | 12.5<br>(7.0 to 20.6)              | 3.3<br>(1.7 to 5.9)                | 17.1<br>(13.4 to 22.0)             | 3.5<br>(2.8 to 4.5)                | 6.3<br>(3.0 to 11.1)         | 1.8<br>(0.8 to 3.4)          |
| African trypanosomiasis                   | Sleeping sickness due to Trypanosoma brucei rhodesiense                             | 0.4<br>(0.2 to 0.7)                | < 0.05<br>(< 0.05 to 0.1)          | 1.5<br>(0.8 to 2.7)                | 0.2<br>(0.1 to 0.4)                | < 0.05<br>(< 0.05 to < 0.05) | < 0.05<br>(< 0.05 to < 0.05) |
| African trypanosomiasis                   | Skin disfigurement due to Trypanosoma brucei rhodesiense                            | 0.6<br>(0.3 to 1.1)                | 0.1<br>(< 0.05 to 0.2)             | 0.5<br>(0.3 to 0.9)                | 0.1<br>(< 0.05 to 0.1)             | 0.3<br>(0.2 to 0.6)          | < 0.05<br>(< 0.05 to 0.1)    |
| Schistosomiasis                           | Bladder pathology due to schistosomiasis                                            | 19,687.0<br>(17,857.2 to 21,670.7) | 9,000.7<br>(7,732.6 to 10,388.0)   | --                                 | --                                 | 96.5<br>(104.1 to 399.6)     | 210.6<br>(46.9 to 184.5)     |
| Schistosomiasis                           | Hepatomegaly due to schistosomiasis                                                 | 13,500.9<br>(12,616.0 to 14,333.7) | 17,849.7<br>(16,665.4 to 19,005.4) | --                                 | --                                 | 144.3<br>(71.6 to 267.1)     | 191.2<br>(95.1 to 356.8)     |
| Schistosomiasis                           | Hematemesis due to schistosomiasis                                                  | 6.6<br>(6.3 to 6.9)                | 8.8<br>(8.4 to 9.2)                | --                                 | --                                 | 2.1<br>(1.4 to 3.1)          | 2.9<br>(1.9 to 4.1)          |



|                       |                                                                   |                                       |                                       |                                    |                                     |                               |                             |
|-----------------------|-------------------------------------------------------------------|---------------------------------------|---------------------------------------|------------------------------------|-------------------------------------|-------------------------------|-----------------------------|
| Schistosomiasis       | Moderate anaemia due to schistosomiasis                           | 5,641.9<br>(5,304.6 to 6,008.8)       | 4,117.0<br>(3,832.2 to 4,421.8)       | --                                 | --                                  | 277.5<br>(185.1 to 397.8)     | 203.3<br>(136.4 to 291.5)   |
| Schistosomiasis       | Severe anaemia due to schistosomiasis                             | 440.6<br>(405.6 to 477.5)             | 345.9<br>(316.6 to 381.1)             | --                                 | --                                  | 61.0<br>(41.9 to 84.7)        | 48.1<br>(32.6 to 66.5)      |
| Schistosomiasis       | Dysuria due to schistosomiasis                                    | 151.4<br>(107.2 to 219.0)             | 60.3<br>(16.4 to 131.9)               | --                                 | --                                  | 1.6<br>(0.7 to 3.3)           | 0.6<br>(0.1 to 1.8)         |
| Schistosomiasis       | Mild anaemia due to schistosomiasis                               | 10,170.9<br>(9,565.8 to 10,789.7)     | 8,904.4<br>(8,330.8 to 9,517.0)       | --                                 | --                                  | 36.4<br>(13.0 to 78.7)        | 31.9<br>(11.4 to 68.9)      |
| Schistosomiasis       | Ascites due to schistosomiasis                                    | 469.5<br>(449.8 to 489.1)             | 627.2<br>(599.6 to 653.6)             | --                                 | --                                  | 50.5<br>(34.8 to 69.8)        | 67.6<br>(46.8 to 93.6)      |
| Schistosomiasis       | Hydronephrosis due to schistosomiasis                             | 5,357.1<br>(4,970.9 to 5,770.9)       | 3,224.3<br>(2,922.7 to 3,548.3)       | --                                 | --                                  | 57.2<br>(28.5 to 108.4)       | 34.5<br>(17.0 to 65.0)      |
| Schistosomiasis       | Mild diarrhoea due to schistosomiasis                             | 5.2<br>(3.6 to 7.0)                   | 0.6<br>(0.3 to 0.9)                   | --                                 | --                                  | 0.4<br>(0.2 to 0.6)           | < 0.05<br>(< 0.05 to 0.1)   |
| Schistosomiasis       | Mild schistosomiasis                                              | 203,133.9<br>(195,079.5 to 210,972.7) | 145,634.7<br>(138,464.7 to 152,882.3) | 84,306.3<br>(81,061.0 to 87,841.8) | 71,385.4<br>(67,341.7 to 76,073.3)  | 1,140.7<br>(458.7 to 2,393.0) | 819.6<br>(329.8 to 1,697.7) |
| Cysticercosis         | Neurocysticercosis with epilepsy                                  | 2,636.5<br>(2,273.0 to 3,027.4)       | 2,675.5<br>(2,231.9 to 3,148.7)       | --                                 | --                                  | 441.1<br>(299.6 to 598.5)     | 420.9<br>(274.1 to 580.8)   |
| Cystic echinococcosis | Abdominal problems due to cystic echinococcosis                   | 1,283.4<br>(899.5 to 1,864.9)         | 787.2<br>(542.5 to 1,169.3)           | 270.1<br>(206.3 to 376.9)          | 166.5<br>(122.0 to 247.2)           | 138.5<br>(80.0 to 221.2)      | 85.5<br>(48.4 to 137.0)     |
| Cystic echinococcosis | Chronic respiratory disease due to cystic echinococcosis          | 290.9<br>(195.9 to 435.5)             | 178.4<br>(117.9 to 262.8)             | 61.2<br>(44.1 to 87.9)             | 37.7<br>(26.7 to 55.0)              | 5.5<br>(2.6 to 10.4)          | 3.4<br>(1.6 to 6.3)         |
| Cystic echinococcosis | Epilepsy due to echinococcosis                                    | 13.2<br>(3.7 to 30.6)                 | 8.1<br>(2.0 to 18.3)                  | --                                 | --                                  | 2.7<br>(0.7 to 6.2)           | 1.6<br>(0.4 to 3.7)         |
| Lymphatic filariasis  | Hydrocele due to lymphatic filariasis                             | 10,975.1<br>(3,483.3 to 22,742.3)     | 6,043.5<br>(2,050.7 to 12,663.9)      | --                                 | --                                  | 1,321.9<br>(402.0 to 2,841.2) | 729.4<br>(235.5 to 1,621.1) |
| Lymphatic filariasis  | Lymphedema due to lymphatic filariasis                            | 5,443.5<br>(3,673.1 to 7,513.2)       | 4,366.5<br>(2,941.9 to 6,021.5)       | 7,102.1<br>(6,285.0 to 8,062.1)    | 7,604.4<br>(6,561.1 to 8,749.7)     | 556.6<br>(313.4 to 876.0)     | 446.2<br>(250.8 to 703.4)   |
| Lymphatic filariasis  | Prevalence of detectable microfilaria due to lymphatic filariasis | 34,211.0<br>(32,616.3 to 35,967.3)    | 18,697.7<br>(17,847.0 to 19,595.0)    | --                                 | --                                  | < 0.05<br>(0.0 to < 0.05)     | < 0.05<br>(0.0 to < 0.05)   |
| Lymphatic filariasis  | Acute adenolymphangitis due to lymphatic filariasis               | 396.1<br>(253.3 to 583.7)             | 274.6<br>(181.2 to 388.0)             | --                                 | --                                  | 19.2<br>(10.2 to 32.6)        | 13.3<br>(7.2 to 21.7)       |
| Onchocerciasis        | Mild skin disease without itch due to onchocerciasis              | 6,024.3<br>(3,326.8 to 9,346.3)       | 5,010.5<br>(1,990.2 to 9,600.0)       | --                                 | --                                  | 64.1<br>(25.1 to 134.9)       | 53.4<br>(15.1 to 127.9)     |
| Onchocerciasis        | Severe skin disease due to onchocerciasis                         | 2,097.1<br>(766.3 to 3,564.9)         | 1,644.2<br>(365.9 to 3,224.7)         | --                                 | --                                  | 365.9<br>(129.6 to 676.2)     | 287.7<br>(61.7 to 603.4)    |
| Onchocerciasis        | Blindness due to onchocerciasis                                   | 91.6<br>(58.9 to 135.4)               | 73.0<br>(35.8 to 132.4)               | --                                 | --                                  | 15.4<br>(8.8 to 25.1)         | 12.3<br>(5.4 to 23.8)       |
| Onchocerciasis        | Asymptomatic onchocerciasis                                       | 5,489.2<br>(353.7 to 14,579.9)        | 2,741.5<br>(5.3 to 10,644.9)          | --                                 | --                                  | < 0.05<br>(0.0 to < 0.05)     | < 0.05<br>(0.0 to < 0.05)   |
| Onchocerciasis        | Severe vision impairment due to onchocerciasis                    | 170.5<br>(109.2 to 251.6)             | 165.0<br>(77.3 to 300.8)              | --                                 | --                                  | 28.2<br>(16.1 to 43.1)        | 27.7<br>(12.2 to 51.1)      |
| Onchocerciasis        | Moderate vision impairment due to onchocerciasis                  | 542.1<br>(322.3 to 829.0)             | 543.6<br>(230.3 to 1,021.1)           | --                                 | --                                  | 15.6<br>(7.4 to 28.0)         | 15.7<br>(5.4 to 34.0)       |
| Onchocerciasis        | Severe skin disease without itch due to onchocerciasis            | 52.0<br>(5.6 to 114.2)                | 42.4<br>(3.8 to 97.2)                 | --                                 | --                                  | 18.7<br>(1.8 to 44.1)         | 15.4<br>(1.3 to 37.0)       |
| Onchocerciasis        | Mild skin disease due to onchocerciasis                           | 1,456.8<br>(532.1 to 2,456.8)         | 1,496.4<br>(399.3 to 2,741.5)         | 2,743.0<br>(1,872.2 to 3,981.0)    | 3,838.6<br>(1,746.6 to 7,517.7)     | 37.3<br>(11.7 to 75.3)        | 38.5<br>(9.2 to 84.7)       |
| Onchocerciasis        | Moderate skin disease due to onchocerciasis                       | 4,129.1<br>(2,070.4 to 6,714.0)       | 2,933.2<br>(997.4 to 5,634.6)         | --                                 | --                                  | 721.2<br>(332.8 to 1,258.9)   | 512.4<br>(172.7 to 1,038.6) |
| Trachoma              | Blindness due to trachoma                                         | 566.3<br>(473.1 to 684.2)             | 534.3<br>(442.9 to 643.4)             | --                                 | --                                  | 93.4<br>(61.0 to 130.1)       | 88.2<br>(58.2 to 122.9)     |
| Trachoma              | Moderate vision impairment due to trachoma                        | 2,173.2<br>(1,524.7 to 2,942.4)       | 2,202.8<br>(1,443.2 to 3,164.5)       | --                                 | --                                  | 60.8<br>(34.2 to 103.7)       | 61.7<br>(33.2 to 108.4)     |
| Trachoma              | Severe vision impairment due to trachoma                          | 583.1<br>(420.2 to 764.0)             | 600.4<br>(415.7 to 813.6)             | --                                 | --                                  | 92.3<br>(56.5 to 137.6)       | 95.2<br>(57.0 to 144.2)     |
| Dengue                | Severe dengue                                                     | 122.3<br>(47.4 to 220.9)              | 214.4<br>(116.4 to 368.3)             | 3,189.0<br>(1,236.4 to 5,760.5)    | 5,589.9<br>(3,036.0 to 9,602.4)     | 16.1<br>(5.6 to 30.2)         | 28.2<br>(13.4 to 51.8)      |
| Dengue                | Moderate dengue                                                   | 895.9<br>(367.0 to 1,449.3)           | 1,569.4<br>(957.3 to 2,368.0)         | 54,499.3<br>(22,323.7 to 88,163.0) | 95,474.3<br>(58,236.9 to 144,052.8) | 43.8<br>(16.6 to 78.6)        | 76.6<br>(39.2 to 136.1)     |
| Dengue                | Post-dengue chronic fatigue syndrome                              | 2,434.2<br>(890.8 to 4,684.0)         | 4,262.1<br>(1,990.2 to 7,793.6)       | --                                 | --                                  | 502.1<br>(173.8 to 1,012.1)   | 877.0<br>(365.9 to 1,662.0) |
| Yellow fever          | Asymptomatic yellow fever                                         | 2.1<br>(0.5 to 6.0)                   | 1.7<br>(0.4 to 4.8)                   | 76.5<br>(19.8 to 212.0)            | 62.7<br>(16.0 to 174.7)             | 15.6<br>(0.0 to < 0.05)       | < 0.05<br>(0.0 to < 0.05)   |
| Yellow fever          | Severe yellow fever                                               | 0.5<br>(0.1 to 1.4)                   | 0.4<br>(0.1 to 1.1)                   | 17.5<br>(3.9 to 50.0)              | 14.3<br>(3.2 to 40.2)               | 0.1<br>(< 0.05 to 0.2)        | 0.1<br>(< 0.05 to 0.2)      |
| Yellow fever          | Moderate yellow fever                                             | 1.2<br>(0.3 to 3.3)                   | 1.0<br>(0.2 to 2.7)                   | 43.2<br>(10.9 to 115.7)            | 35.4<br>(9.1 to 92.6)               | 0.1<br>(< 0.05 to 0.2)        | < 0.05<br>(< 0.05 to 0.1)   |
| Rabies                | Rabies                                                            | 1.0<br>(0.6 to 1.2)                   | 0.5<br>(0.3 to 0.7)                   | 25.0<br>(15.3 to 32.4)             | 13.3<br>(7.2 to 19.1)               | 0.1<br>(0.1 to 0.2)           | 0.1<br>(< 0.05 to 0.1)      |
| Ascariasis            | Mild abdominopelvic problems due to ascariasis                    | 32,045.1<br>(30,426.5 to 33,867.0)    | 25,500.8<br>(23,968.4 to 27,345.6)    | --                                 | --                                  | 344.1<br>(170.3 to 647.9)     | 273.6<br>(132.0 to 521.4)   |
| Ascariasis            | Severe wasting due to ascariasis                                  | 94.7<br>(70.9 to 119.4)               | 76.8<br>(57.6 to 100.4)               | --                                 | --                                  | 11.7<br>(6.9 to 18.6)         | 9.5<br>(5.5 to 14.8)        |
| Ascariasis            | Asymptomatic ascariasis                                           | 776,030.7<br>(729,377.0 to 830,201.6) | 749,226.7<br>(687,300.7 to 822,583.7) | --                                 | --                                  | < 0.05<br>(0.0 to < 0.05)     | < 0.05<br>(0.0 to < 0.05)   |
| Ascariasis            | Heavy infestation of ascariasis                                   | 35,069.7<br>(32,120.7 to 38,158.0)    | 24,878.3<br>(22,945.2 to 27,006.2)    | --                                 | --                                  | 903.5<br>(501.8 to 1,455.0)   | 640.4<br>(345.3 to 1,047.1) |
| Trichuriasis          | Asymptomatic trichuriasis                                         | 409,844.4<br>(386,534.6 to 433,735.6) | 415,634.6<br>(390,790.5 to 444,430.7) | --                                 | --                                  | < 0.05<br>(0.0 to < 0.05)     | < 0.05<br>(0.0 to < 0.05)   |
| Trichuriasis          | Heavy infestation of trichuriasis                                 | 11,013.3<br>(9,904.2 to 12,418.8)     | 8,407.4<br>(7,657.7 to 9,424.3)       | --                                 | --                                  | 283.8<br>(154.3 to 467.2)     | 216.7<br>(118.8 to 352.9)   |
| Trichuriasis          | Mild abdominopelvic problems due to trichuriasis                  | 12,587.9<br>(11,910.4 to 13,318.4)    | 11,039.6<br>(10,412.6 to 11,781.1)    | --                                 | --                                  | 135.3<br>(66.7 to 254.6)      | 118.7<br>(58.0 to 226.7)    |
| Trichuriasis          | Severe wasting due to trichuriasis                                | 19.4<br>(14.4 to 25.3)                | 13.0<br>(9.6 to 17.3)                 | --                                 | --                                  | 2.4<br>(1.4 to 3.8)           | 1.6<br>(0.9 to 2.6)         |

|                                                        |                                                                  |                                       |                                       |                                    |                                    |                               |                               |
|--------------------------------------------------------|------------------------------------------------------------------|---------------------------------------|---------------------------------------|------------------------------------|------------------------------------|-------------------------------|-------------------------------|
| Hookworm disease                                       | Heavy infestation of hookworm                                    | 37,980.0<br>(35,745.6 to 40,406.5)    | 34,965.4<br>(32,862.0 to 37,060.8)    | --                                 | --                                 | 976.1<br>(536.7 to 1,554.2)   | 897.5<br>(503.7 to 1,446.3)   |
| Hookworm disease                                       | Severe anaemia due to hookworm disease                           | 514.6<br>(465.1 to 570.5)             | 541.9<br>(487.8 to 609.1)             | --                                 | --                                 | 72.6<br>(49.2 to 99.2)        | 76.5<br>(50.9 to 108.1)       |
| Hookworm disease                                       | Mild anaemia due to hookworm disease                             | 15,991.9<br>(14,980.4 to 17,102.5)    | 18,052.7<br>(16,831.0 to 19,359.3)    | --                                 | --                                 | 57.7<br>(20.3 to 128.3)       | 65.0<br>(22.9 to 142.3)       |
| Hookworm disease                                       | Mild abdominopelvic problems due to hookworm disease             | 19,233.8<br>(18,538.3 to 20,032.3)    | 18,892.0<br>(18,175.6 to 19,660.3)    | --                                 | --                                 | 206.1<br>(102.0 to 390.6)     | 202.4<br>(99.0 to 386.5)      |
| Hookworm disease                                       | Severe wasting due to hookworm disease                           | 64.7<br>(49.3 to 83.1)                | 58.7<br>(44.1 to 77.6)                | --                                 | --                                 | 8.0<br>(4.7 to 12.6)          | 7.3<br>(4.3 to 11.7)          |
| Hookworm disease                                       | Moderate anaemia due to hookworm disease                         | 8,822.1<br>(8,208.9 to 9,493.0)       | 8,776.0<br>(8,164.3 to 9,480.5)       | --                                 | --                                 | 439.2<br>(288.1 to 644.2)     | 436.7<br>(287.4 to 630.3)     |
| Hookworm disease                                       | Asymptomatic hookworm disease                                    | 371,194.8<br>(348,494.1 to 397,256.7) | 369,396.1<br>(344,627.2 to 395,452.4) | --                                 | --                                 | < 0.05<br>(0.0 to < 0.05)     | < 0.05<br>(0.0 to < 0.05)     |
| Food-borne trematodiasis                               | Heavy fascioliasis due to food-borne trematodiasis               | 184.0<br>(45.1 to 398.3)              | 219.1<br>(52.9 to 475.5)              | --                                 | --                                 | 19.6<br>(4.7 to 45.0)         | 23.4<br>(5.5 to 53.6)         |
| Food-borne trematodiasis                               | Cerebral paragonimiasis                                          | 261.5<br>(76.8 to 543.5)              | 249.1<br>(75.4 to 504.4)              | --                                 | --                                 | 43.3<br>(11.4 to 95.4)        | 37.3<br>(10.5 to 81.7)        |
| Food-borne trematodiasis                               | Asymptomatic paragonimiasis                                      | 22,927.8<br>(12,974.8 to 30,013.1)    | 22,567.9<br>(12,833.2 to 29,094.2)    | 910.5<br>(513.6 to 1,231.9)        | 730.9<br>(411.9 to 972.7)          | < 0.05<br>(0.0 to < 0.05)     | < 0.05<br>(0.0 to < 0.05)     |
| Food-borne trematodiasis                               | Asymptomatic intestinal fluke infection                          | 1,414.9<br>(1,169.8 to 1,681.7)       | 1,817.5<br>(1,490.1 to 2,182.5)       | 142.6<br>(120.9 to 167.9)          | 179.9<br>(150.5 to 214.9)          | < 0.05<br>(0.0 to < 0.05)     | < 0.05<br>(0.0 to < 0.05)     |
| Food-borne trematodiasis                               | Heavy intestinal fluke infection due to food-borne trematodiasis | 193.8<br>(110.2 to 313.4)             | 280.9<br>(153.5 to 465.7)             | --                                 | --                                 | 20.9<br>(10.4 to 36.6)        | 30.1<br>(14.4 to 54.0)        |
| Food-borne trematodiasis                               | Mild paragonimiasis due to food-borne trematodiasis              | 4,775.3<br>(663.2 to 11,415.5)        | 4,701.4<br>(652.5 to 11,218.1)        | 189.7<br>(25.8 to 446.6)           | 152.3<br>(20.8 to 365.9)           | 89.2<br>(11.6 to 226.0)       | 87.6<br>(11.7 to 220.3)       |
| Food-borne trematodiasis                               | Asymptomatic fascioliasis                                        | 709.4<br>(500.8 to 933.9)             | 824.1<br>(599.8 to 1,043.7)           | 78.6<br>(55.2 to 101.8)            | 91.2<br>(65.9 to 115.2)            | < 0.05<br>(0.0 to < 0.05)     | < 0.05<br>(0.0 to < 0.05)     |
| Food-borne trematodiasis                               | Moderate paragonimiasis due to food-borne trematodiasis          | 1,120.5<br>(153.4 to 2,664.2)         | 1,103.2<br>(151.2 to 2,599.2)         | 44.6<br>(6.4 to 104.8)             | 35.8<br>(4.9 to 84.5)              | 239.2<br>(32.5 to 606.8)      | 234.2<br>(31.2 to 587.8)      |
| Food-borne trematodiasis                               | Asymptomatic clonorchiasis                                       | 28,051.0<br>(25,725.4 to 30,842.3)    | 29,789.6<br>(27,379.7 to 32,815.6)    | 1,863.2<br>(1,665.1 to 2,102.8)    | 1,846.7<br>(1,647.6 to 2,086.4)    | < 0.05<br>(0.0 to < 0.05)     | < 0.05<br>(0.0 to < 0.05)     |
| Food-borne trematodiasis                               | Severe paragonimiasis due to food-borne trematodiasis            | 1,360.3<br>(185.9 to 3,226.5)         | 1,339.3<br>(182.1 to 3,186.0)         | 54.0<br>(7.6 to 128.1)             | 43.4<br>(5.9 to 104.2)             | 522.4<br>(71.3 to 1,343.6)    | 511.1<br>(69.2 to 1,300.8)    |
| Food-borne trematodiasis                               | Heavy opisthorchiasis due to food-borne trematodiasis            | 787.9<br>(202.4 to 1,717.0)           | 1,223.1<br>(289.7 to 2,668.0)         | --                                 | --                                 | 80.5<br>(20.7 to 182.6)       | 124.7<br>(29.8 to 288.8)      |
| Food-borne trematodiasis                               | Heavy clonorchiasis due to food-borne trematodiasis              | 5,875.8<br>(5,117.4 to 6,681.8)       | 6,605.4<br>(5,697.8 to 7,603.4)       | --                                 | --                                 | 644.4<br>(420.4 to 903.7)     | 722.8<br>(467.4 to 1,003.1)   |
| Food-borne trematodiasis                               | Asymptomatic opisthorchiasis                                     | 2,766.5<br>(1,688.6 to 3,669.8)       | 4,004.0<br>(2,361.7 to 5,207.2)       | 23,683.3<br>(15,329.7 to 30,919.3) | 31,909.0<br>(20,054.2 to 42,650.3) | < 0.05<br>(0.0 to < 0.05)     | < 0.05<br>(0.0 to < 0.05)     |
| Leprosy                                                | Disfigurement level 1 due to leprosy                             | 21.7<br>(20.5 to 23.1)                | 19.7<br>(18.7 to 21.0)                | 43.4<br>(41.0 to 46.2)             | 39.5<br>(37.3 to 41.9)             | 0.2<br>(0.1 to 0.4)           | 0.2<br>(0.1 to 0.4)           |
| Leprosy                                                | Disfigurement level 2 due to leprosy                             | 496.9<br>(473.8 to 519.5)             | 503.5<br>(479.5 to 527.3)             | 14.0<br>(13.5 to 14.6)             | 15.8<br>(15.2 to 16.4)             | 31.1<br>(21.1 to 43.5)        | 31.4<br>(21.2 to 43.7)        |
| Ebola virus disease                                    | Ebola cases                                                      | < 0.05<br>(0.0 to < 0.05)             | < 0.05<br>(< 0.05 to < 0.05)          | < 0.05<br>(0.0 to < 0.05)          | < 0.05<br>(< 0.05 to < 0.05)       | < 0.05<br>(0.0 to < 0.05)     | < 0.05<br>(< 0.05 to < 0.05)  |
| Ebola virus disease                                    | Post-Ebola chronic fatigue syndrome                              | < 0.05<br>(0.0 to < 0.05)             | 0.6<br>(< 0.05 to 4.0)                | < 0.05<br>(0.0 to < 0.05)          | < 0.05<br>(< 0.05 to < 0.05)       | < 0.05<br>(0.0 to < 0.05)     | 0.1<br>(< 0.05 to 0.9)        |
| Zika virus disease                                     | Congenital Zika syndrome                                         | < 0.05<br>(0.0 to < 0.05)             | 2.8<br>(1.9 to 5.4)                   | < 0.05<br>(0.0 to < 0.05)          | 2.4<br>(1.6 to 5.1)                | < 0.05<br>(0.0 to < 0.05)     | 1.7<br>(1.0 to 2.8)           |
| Zika virus disease                                     | Acute Zika infection                                             | < 0.05<br>(0.0 to < 0.05)             | 44.5<br>(34.1 to 62.0)                | < 0.05<br>(0.0 to < 0.05)          | 2,704.2<br>(2,072.0 to 3,769.0)    | < 0.05<br>(0.0 to < 0.05)     | 2.2<br>(1.3 to 3.5)           |
| Zika virus disease                                     | Asymptomatic Zika infection                                      | < 0.05<br>(0.0 to < 0.05)             | 80.4<br>(57.9 to 116.5)               | < 0.05<br>(0.0 to < 0.05)          | 4,891.5<br>(3,521.3 to 7,087.7)    | < 0.05<br>(0.0 to < 0.05)     | < 0.05<br>(0.0 to < 0.05)     |
| Zika virus disease                                     | Guillain-Barre syndrome due to Zika infection                    | < 0.05<br>(0.0 to < 0.05)             | 0.9<br>(0.7 to 1.3)                   | --                                 | --                                 | < 0.05<br>(0.0 to < 0.05)     | 0.3<br>(0.2 to 0.5)           |
| Guinea worm disease                                    | Mild pain due to Guinea worm emergence                           | 2.4<br>(2.3 to 2.4)                   | < 0.05<br>(< 0.05 to < 0.05)          | --                                 | --                                 | 0.1<br>(< 0.05 to 0.1)        | < 0.05<br>(< 0.05 to < 0.05)  |
| Guinea worm disease                                    | Moderate mobility reduced due to guinea worm emergence           | 0.5<br>(0.5 to 0.5)                   | < 0.05<br>(< 0.05 to < 0.05)          | --                                 | --                                 | < 0.05<br>(< 0.05 to 0.1)     | < 0.05<br>(< 0.05 to < 0.05)  |
| Guinea worm disease                                    | Moderate pain due to Guinea worm emergence                       | 0.5<br>(0.5 to 0.5)                   | < 0.05<br>(< 0.05 to < 0.05)          | 6.0<br>(5.9 to 6.2)                | < 0.05<br>(< 0.05 to < 0.05)       | 0.1<br>(0.1 to 0.1)           | < 0.05<br>(< 0.05 to < 0.05)  |
| Other neglected tropical diseases                      | Mild anaemia due to other neglected tropical diseases            | 23,341.7<br>(22,679.7 to 24,022.0)    | 25,517.3<br>(24,682.4 to 26,455.0)    | --                                 | --                                 | 84.7<br>(30.3 to 186.1)       | 92.5<br>(33.0 to 202.2)       |
| Other neglected tropical diseases                      | Moderate anaemia due to other neglected tropical diseases        | 21,533.8<br>(20,331.6 to 22,836.0)    | 22,628.8<br>(21,281.6 to 24,159.5)    | --                                 | --                                 | 1,081.2<br>(704.4 to 1,582.2) | 1,136.2<br>(736.0 to 1,649.4) |
| Other neglected tropical diseases                      | Acute infection due to other neglected tropical diseases         | --                                    | --                                    | --                                 | --                                 | 12.5<br>(5.5 to 21.7)         | 24.6<br>(13.0 to 42.5)        |
| Other neglected tropical diseases                      | Severe anaemia due to other neglected tropical diseases          | 1,296.4<br>(1,118.3 to 1,528.1)       | 1,346.7<br>(1,131.1 to 1,697.9)       | --                                 | --                                 | 184.8<br>(120.1 to 257.0)     | 191.9<br>(125.1 to 273.6)     |
| Maternal haemorrhage                                   | Maternal haemorrhage (< 1L blood lost)                           | 153.6<br>(86.4 to 232.1)              | 158.2<br>(93.5 to 247.5)              | 8,028.0<br>(6,381.9 to 10,096.2)   | 8,193.0<br>(6,612.1 to 10,132.8)   | 17.0<br>(8.8 to 29.8)         | 17.5<br>(9.1 to 30.5)         |
| Maternal haemorrhage                                   | Severe anaemia due to maternal haemorrhage                       | 21.7<br>(17.3 to 26.8)                | 26.9<br>(21.5 to 33.5)                | --                                 | --                                 | 3.2<br>(2.0 to 4.6)           | 4.0<br>(2.5 to 5.8)           |
| Maternal haemorrhage                                   | Mild anaemia due to maternal haemorrhage                         | 737.6<br>(581.3 to 924.6)             | 806.5<br>(654.9 to 993.2)             | --                                 | --                                 | 2.7<br>(0.9 to 5.8)           | 2.9<br>(1.0 to 6.4)           |
| Maternal haemorrhage                                   | Moderate anaemia due to maternal haemorrhage                     | 354.9<br>(270.3 to 461.6)             | 356.4<br>(280.8 to 456.2)             | --                                 | --                                 | 17.7<br>(10.8 to 27.0)        | 17.8<br>(10.8 to 27.0)        |
| Maternal haemorrhage                                   | Maternal haemorrhage (> 1L blood lost)                           | 54.1<br>(33.0 to 83.9)                | 55.2<br>(34.0 to 83.4)                | 1,408.7<br>(949.4 to 1,984.2)      | 1,432.7<br>(982.9 to 1,977.2)      | 17.3<br>(9.1 to 29.5)         | 17.7<br>(9.6 to 30.1)         |
| Maternal sepsis and other pregnancy related infections | Infertility due to puerperal sepsis                              | 712.5<br>(628.2 to 803.1)             | 812.2<br>(717.8 to 910.7)             | 35.5<br>(31.5 to 39.8)             | 39.5<br>(35.1 to 44.2)             | 3.6<br>(1.4 to 7.7)           | 4.1<br>(1.6 to 8.8)           |
| Maternal sepsis and other pregnancy related infections | Puerperal sepsis                                                 | 2.2<br>(1.4 to 3.3)                   | 2.3<br>(1.4 to 3.4)                   | 115.0<br>(87.0 to 144.3)           | 117.5<br>(89.8 to 147.7)           | 0.3<br>(0.2 to 0.5)           | 0.3<br>(0.2 to 0.5)           |
| Maternal sepsis and other pregnancy related infections | Other maternal infections                                        | 834.9<br>(451.1 to 1,380.8)           | 847.4<br>(448.7 to 1,355.4)           | 10,169.4<br>(8,089.8 to 13,104.3)  | 10,219.7<br>(8,222.7 to 13,002.2)  | 40.7<br>(19.5 to 73.8)        | 41.4<br>(19.8 to 77.2)        |

|                                                       |                                                                                                                           |                                  |                                  |                                    |                                    |                               |                               |
|-------------------------------------------------------|---------------------------------------------------------------------------------------------------------------------------|----------------------------------|----------------------------------|------------------------------------|------------------------------------|-------------------------------|-------------------------------|
| Maternal hypertensive disorders                       | Eclampsia                                                                                                                 | 5.4<br>(2.1 to 10.2)             | 5.3<br>(1.8 to 10.4)             | 1,987.7<br>(1,602.7 to 2,458.9)    | 1,951.4<br>(1,576.3 to 2,400.1)    | 3.3<br>(1.2 to 6.5)           | 3.2<br>(1.1 to 6.6)           |
| Maternal hypertensive disorders                       | Long term sequelae of severe pre-eclampsia                                                                                | 21.8<br>(20.9 to 22.9)           | 24.7<br>(23.5 to 26.0)           | 325.4<br>(311.1 to 341.2)          | 369.0<br>(352.0 to 387.9)          | 1.5<br>(0.9 to 2.3)           | 1.6<br>(1.0 to 2.5)           |
| Maternal hypertensive disorders                       | Long term sequelae of eclampsia                                                                                           | 12.2<br>(11.5 to 13.0)           | 13.9<br>(13.1 to 14.7)           | 186.6<br>(176.8 to 197.0)          | 212.2<br>(201.4 to 224.2)          | 0.8<br>(0.5 to 1.3)           | 0.9<br>(0.6 to 1.4)           |
| Maternal hypertensive disorders                       | Other hypertensive disorders of pregnancy                                                                                 | 4,080.5<br>(2,740.1 to 5,719.5)  | 4,390.5<br>(2,886.0 to 6,042.8)  | 16,362.5<br>(14,198.2 to 18,458.2) | 17,514.2<br>(14,981.7 to 19,982.7) | 192.7<br>(110.3 to 313.0)     | 207.8<br>(113.8 to 340.0)     |
| Maternal hypertensive disorders                       | Severe pre-eclampsia                                                                                                      | 11.7<br>(7.0 to 17.9)            | 14.3<br>(8.6 to 22.7)            | 632.6<br>(445.7 to 898.1)          | 764.2<br>(526.6 to 1,112.1)        | 2.0<br>(1.1 to 3.4)           | 2.5<br>(1.3 to 4.5)           |
| Maternal obstructed labour and uterine rupture        | Vesicovaginal fistula                                                                                                     | 1,060.2<br>(882.4 to 1,264.5)    | 897.9<br>(745.5 to 1,082.1)      | 196.2<br>(160.9 to 240.3)          | 189.3<br>(151.5 to 232.9)          | 333.9<br>(215.8 to 472.0)     | 283.8<br>(185.8 to 407.5)     |
| Maternal obstructed labour and uterine rupture        | Obstructed labor, acute event                                                                                             | 95.9<br>(58.2 to 145.6)          | 97.1<br>(57.3 to 146.9)          | 7,007.0<br>(5,485.9 to 8,965.3)    | 7,039.4<br>(5,611.8 to 8,839.8)    | 30.1<br>(15.9 to 50.0)        | 30.5<br>(16.2 to 51.0)        |
| Maternal obstructed labour and uterine rupture        | Rectovaginal fistula                                                                                                      | 55.1<br>(14.8 to 112.3)          | 46.4<br>(12.7 to 92.6)           | 10.2<br>(2.8 to 21.2)              | 9.8<br>(2.8 to 19.5)               | 261.5<br>(6.8 to 56.4)        | 22.2<br>(5.9 to 46.1)         |
| Maternal abortion, miscarriage, and ectopic pregnancy | Maternal abortive outcome                                                                                                 | 581.2<br>(370.3 to 842.6)        | 552.0<br>(343.7 to 795.1)        | 70,440.8<br>(55,263.7 to 89,943.9) | 67,299.2<br>(53,502.3 to 85,164.8) | 63.5<br>(34.3 to 102.6)       | 60.4<br>(33.3 to 98.2)        |
| Maternal abortion, miscarriage, and ectopic pregnancy | Ectopic Pregnancy                                                                                                         | 23.0<br>(14.7 to 34.4)           | 24.2<br>(15.5 to 35.8)           | 2,805.4<br>(2,151.1 to 3,657.0)    | 2,945.5<br>(2,276.4 to 3,846.6)    | 2.6<br>(1.4 to 4.3)           | 2.8<br>(1.5 to 4.6)           |
| Other maternal disorders                              | Other maternal disorders                                                                                                  | --                               | --                               | --                                 | --                                 | 170.9<br>(121.1 to 232.7)     | 145.0<br>(101.2 to 198.5)     |
| Neonatal preterm birth complications                  | Severe motor plus cognitive impairment with blindness and epilepsy due to neonatal preterm birth complications 28-32wks   | 74.4<br>(31.7 to 110.6)          | 81.4<br>(32.1 to 131.0)          | --                                 | --                                 | 51.1<br>(21.8 to 79.7)        | 55.6<br>(22.1 to 92.2)        |
| Neonatal preterm birth complications                  | Mild motor impairment due to neonatal preterm birth complications 32-36wks                                                | 3,410.9<br>(2,296.6 to 4,640.8)  | 3,394.6<br>(2,313.2 to 4,691.1)  | --                                 | --                                 | 33.7<br>(15.0 to 66.1)        | 33.4<br>(14.8 to 67.9)        |
| Neonatal preterm birth complications                  | Moderate motor plus cognitive impairment with blindness due to neonatal preterm birth complications 32-36wks              | 128.6<br>(83.6 to 185.3)         | 160.0<br>(70.3 to 318.1)         | --                                 | --                                 | 45.1<br>(25.9 to 72.5)        | 56.1<br>(22.5 to 116.5)       |
| Neonatal preterm birth complications                  | Severe motor impairment with epilepsy due to neonatal preterm birth complications 28-32wks                                | 242.5<br>(186.4 to 309.6)        | 276.5<br>(187.8 to 405.1)        | --                                 | --                                 | 120.6<br>(79.5 to 169.6)      | 135.2<br>(80.6 to 210.3)      |
| Neonatal preterm birth complications                  | Severe motor impairment due to neonatal preterm birth complications <28wks                                                | 1,802.8<br>(1,008.4 to 2,962.4)  | 2,283.1<br>(921.1 to 4,809.0)    | --                                 | --                                 | 686.4<br>(346.9 to 1,199.1)   | 865.7<br>(305.4 to 1,877.6)   |
| Neonatal preterm birth complications                  | Severe motor impairment with blindness and epilepsy due to neonatal preterm birth complications <28wks                    | 15.7<br>(9.5 to 24.6)            | 18.4<br>(8.2 to 35.1)            | --                                 | --                                 | 9.3<br>(5.2 to 15.2)          | 10.8<br>(4.5 to 21.8)         |
| Neonatal preterm birth complications                  | Moderate motor impairment with epilepsy due to neonatal preterm birth complications <28wks                                | 503.5<br>(299.6 to 776.5)        | 589.8<br>(262.0 to 1,118.4)      | --                                 | --                                 | 109.9<br>(59.9 to 175.8)      | 122.7<br>(50.7 to 241.1)      |
| Neonatal preterm birth complications                  | Severe motor impairment due to neonatal preterm birth complications 28-32wks                                              | 2,779.0<br>(2,048.6 to 3,781.7)  | 3,453.1<br>(2,143.3 to 5,186.2)  | --                                 | --                                 | 1,058.4<br>(631.1 to 1,607.8) | 1,310.9<br>(697.9 to 2,224.5) |
| Neonatal preterm birth complications                  | Moderate motor plus cognitive impairment with blindness due to neonatal preterm birth complications 28-32wks              | 223.3<br>(166.3 to 289.7)        | 267.8<br>(178.5 to 386.9)        | --                                 | --                                 | 77.1<br>(47.4 to 112.5)       | 91.7<br>(50.8 to 144.6)       |
| Neonatal preterm birth complications                  | Moderate motor impairment with blindness due to neonatal preterm birth complications 28-32wks                             | 85.3<br>(57.7 to 120.4)          | 103.1<br>(62.4 to 158.8)         | --                                 | --                                 | 20.1<br>(11.4 to 31.7)        | 24.2<br>(13.0 to 41.6)        |
| Neonatal preterm birth complications                  | Asymptomatic neonatal preterm birth <28wks                                                                                | 143.9<br>(84.5 to 227.4)         | 156.3<br>(88.9 to 255.0)         | --                                 | --                                 | < 0.05<br>(0.0 to < 0.05)     | < 0.05<br>(0.0 to < 0.05)     |
| Neonatal preterm birth complications                  | Blindness due to retinopathy of prematurity                                                                               | 1,107.2<br>(554.3 to 1,580.2)    | 1,269.6<br>(676.9 to 1,797.0)    | --                                 | --                                 | 195.3<br>(91.4 to 316.9)      | 223.3<br>(109.8 to 357.0)     |
| Neonatal preterm birth complications                  | Severe motor impairment with blindness due to neonatal preterm birth complications <28wks                                 | 19.3<br>(11.3 to 30.7)           | 23.9<br>(10.8 to 45.8)           | --                                 | --                                 | 9.9<br>(5.6 to 17.1)          | 12.2<br>(5.1 to 25.4)         |
| Neonatal preterm birth complications                  | Mild motor plus cognitive impairments due to neonatal preterm birth complications <28wks                                  | 1,237.4<br>(656.4 to 2,192.3)    | 1,393.0<br>(724.2 to 2,472.4)    | --                                 | --                                 | 37.3<br>(16.0 to 74.8)        | 42.0<br>(17.9 to 85.8)        |
| Neonatal preterm birth complications                  | Moderate motor impairment with blindness and epilepsy due to neonatal preterm birth complications 32-36wks                | 41.2<br>(28.2 to 58.4)           | 48.8<br>(21.8 to 100.0)          | --                                 | --                                 | 15.1<br>(9.3 to 23.7)         | 17.5<br>(7.4 to 38.4)         |
| Neonatal preterm birth complications                  | Severe motor impairment with blindness due to neonatal preterm birth complications 28-32wks                               | 28.4<br>(19.2 to 41.2)           | 34.3<br>(21.0 to 52.8)           | --                                 | --                                 | 14.5<br>(8.7 to 22.5)         | 17.6<br>(9.6 to 29.6)         |
| Neonatal preterm birth complications                  | Moderate motor impairment with blindness due to neonatal preterm birth complications <28wks                               | 58.0<br>(34.0 to 93.6)           | 71.9<br>(33.0 to 138.9)          | --                                 | --                                 | 13.7<br>(7.3 to 24.7)         | 17.0<br>(7.0 to 34.8)         |
| Neonatal preterm birth complications                  | Severe motor impairment due to neonatal preterm birth complications 32-36wks                                              | 1,606.3<br>(1,033.0 to 2,434.4)  | 2,106.3<br>(871.5 to 4,562.9)    | --                                 | --                                 | 612.5<br>(343.0 to 1,007.8)   | 802.5<br>(311.1 to 1,867.5)   |
| Neonatal preterm birth complications                  | Moderate motor plus cognitive impairment with blindness and epilepsy due to neonatal preterm birth complications 28-32wks | 119.0<br>(87.3 to 156.2)         | 142.6<br>(94.3 to 210.6)         | --                                 | --                                 | 54.9<br>(36.0 to 77.9)        | 64.7<br>(37.4 to 100.1)       |
| Neonatal preterm birth complications                  | Severe motor plus cognitive impairment with epilepsy due to neonatal preterm birth complications 28-32wks                 | 792.6<br>(336.7 to 1,153.3)      | 867.8<br>(334.5 to 1,366.9)      | --                                 | --                                 | 465.9<br>(185.4 to 728.6)     | 504.5<br>(201.1 to 834.7)     |
| Neonatal preterm birth complications                  | Severe motor impairment with blindness and epilepsy due to neonatal preterm birth complications 32-36wks                  | 13.7<br>(9.2 to 19.9)            | 16.3<br>(7.3 to 33.3)            | --                                 | --                                 | 8.2<br>(5.0 to 12.5)          | 9.6<br>(3.9 to 20.9)          |
| Neonatal preterm birth complications                  | Asymptomatic retinopathy of prematurity                                                                                   | 3,729.4<br>(2,606.9 to 5,188.9)  | 3,995.4<br>(2,776.4 to 5,566.6)  | --                                 | --                                 | < 0.05<br>(0.0 to < 0.05)     | < 0.05<br>(0.0 to < 0.05)     |
| Neonatal preterm birth complications                  | Severe motor plus cognitive impairment with epilepsy due to neonatal preterm birth complications <28wks                   | 502.2<br>(183.2 to 834.3)        | 559.7<br>(177.0 to 1,136.5)      | --                                 | --                                 | 300.4<br>(105.4 to 526.1)     | 330.9<br>(92.4 to 698.4)      |
| Neonatal preterm birth complications                  | Moderate motor impairment with blindness and epilepsy due to neonatal preterm birth complications 28-32wks                | 68.9<br>(52.4 to 87.8)           | 73.6<br>(48.9 to 107.4)          | --                                 | --                                 | 25.3<br>(16.6 to 36.3)        | 26.4<br>(15.4 to 41.2)        |
| Neonatal preterm birth complications                  | Severe motor impairment with epilepsy due to neonatal preterm birth complications 32-36wks                                | 146.9<br>(99.8 to 208.1)         | 173.9<br>(76.1 to 349.9)         | --                                 | --                                 | 73.8<br>(45.2 to 115.8)       | 86.5<br>(35.6 to 180.0)       |
| Neonatal preterm birth complications                  | Mild motor impairment due to neonatal preterm birth complications 28-32wks                                                | 6,738.1<br>(3,959.4 to 10,365.9) | 7,309.2<br>(4,246.4 to 11,319.4) | --                                 | --                                 | 66.6<br>(26.4 to 144.0)       | 72.2<br>(28.0 to 155.1)       |
| Neonatal preterm birth complications                  | Moderate motor impairment with blindness due to neonatal preterm birth complications 32-36wks                             | 50.6<br>(30.8 to 77.2)           | 64.1<br>(27.1 to 134.6)          | --                                 | --                                 | 12.0<br>(6.4 to 19.8)         | 15.2<br>(6.1 to 32.9)         |
| Neonatal preterm birth complications                  | Moderate motor plus cognitive impairment with epilepsy due to neonatal preterm birth complications 32-36wks               | 726.1<br>(459.9 to 1,032.6)      | 904.4<br>(391.6 to 1,928.8)      | --                                 | --                                 | 236.9<br>(136.8 to 373.8)     | 286.6<br>(114.3 to 627.9)     |
| Neonatal preterm birth complications                  | Mild motor impairment due to neonatal preterm birth complications <28wks                                                  | 1,379.2<br>(739.7 to 2,345.4)    | 1,564.5<br>(805.4 to 2,673.6)    | --                                 | --                                 | 13.6<br>(5.1 to 30.0)         | 15.4<br>(5.6 to 33.6)         |
| Neonatal preterm birth complications                  | Severe motor plus cognitive impairment with blindness due to neonatal preterm birth complications <28wks                  | 88.6<br>(33.3 to 149.5)          | 98.8<br>(31.3 to 200.8)          | --                                 | --                                 | 55.3<br>(19.9 to 96.2)        | 61.6<br>(19.3 to 129.7)       |
| Neonatal preterm birth complications                  | Mild motor plus cognitive impairments due to neonatal preterm birth complications 32-36wks                                | 2,912.7<br>(1,921.7 to 4,102.4)  | 2,875.2<br>(1,810.3 to 4,043.7)  | --                                 | --                                 | 87.9<br>(44.5 to 154.1)       | 86.6<br>(43.0 to 150.7)       |
| Neonatal preterm birth complications                  | Moderate motor impairment due to neonatal preterm birth complications 32-36wks                                            | 1,249.7<br>(813.5 to 1,826.3)    | 1,607.2<br>(670.6 to 3,554.1)    | --                                 | --                                 | 74.0<br>(41.0 to 124.3)       | 94.9<br>(36.2 to 232.2)       |

|                                                          |                                                                                                                                      |                                 |                                  |    |    |                             |                             |
|----------------------------------------------------------|--------------------------------------------------------------------------------------------------------------------------------------|---------------------------------|----------------------------------|----|----|-----------------------------|-----------------------------|
| Neonatal preterm birth complications                     | Severe motor plus cognitive impairment with blindness due to neonatal preterm birth complications 28-32wks                           | 139.8<br>(61.9 to 208.0)        | 153.1<br>(62.1 to 250.9)         | -- | -- | 87.3<br>(38.6 to 137.4)     | 95.6<br>(39.3 to 164.2)     |
| Neonatal preterm birth complications                     | Moderate motor plus cognitive impairment with epilepsy due to neonatal preterm birth complications 28-32wks                          | 1,259.5<br>(944.3 to 1,627.8)   | 1,509.8<br>(1,020.5 to 2,166.2)  | -- | -- | 407.1<br>(263.0 to 577.2)   | 473.1<br>(268.9 to 732.7)   |
| Neonatal preterm birth complications                     | Moderate motor impairment with epilepsy due to neonatal preterm birth complications 32-36wks                                         | 440.4<br>(299.5 to 624.6)       | 521.2<br>(232.6 to 1,062.8)      | -- | -- | 96.1<br>(59.2 to 148.4)     | 108.5<br>(45.5 to 235.5)    |
| Neonatal preterm birth complications                     | Mild motor plus cognitive impairments due to neonatal preterm birth complications 28-32wks                                           | 6,099.2<br>(3,592.3 to 9,223.0) | 6,595.9<br>(3,821.1 to 10,055.1) | -- | -- | 184.1<br>(84.2 to 332.0)    | 199.0<br>(89.9 to 361.9)    |
| Neonatal preterm birth complications                     | Moderate motor impairment with epilepsy due to neonatal preterm birth complications 28-32wks                                         | 727.1<br>(553.1 to 940.3)       | 829.1<br>(555.7 to 1,188.5)      | -- | -- | 156.5<br>(104.6 to 223.8)   | 169.8<br>(101.5 to 267.2)   |
| Neonatal preterm birth complications                     | Moderate motor plus cognitive impairment with blindness and epilepsy due to neonatal preterm birth complications 32-36wks            | 68.5<br>(43.9 to 100.0)         | 85.3<br>(37.2 to 171.1)          | -- | -- | 31.7<br>(19.0 to 49.7)      | 38.9<br>(15.7 to 82.7)      |
| Neonatal preterm birth complications                     | Asymptomatic neonatal preterm birth 28-32 wks                                                                                        | 678.2<br>(453.2 to 953.5)       | 683.9<br>(447.4 to 983.9)        | -- | -- | < 0.05<br>(0.0 to < 0.05)   | < 0.05<br>(0.0 to < 0.05)   |
| Neonatal preterm birth complications                     | Severe motor plus cognitive impairment with blindness and epilepsy due to neonatal preterm birth complications <28wks                | 47.1<br>(16.8 to 79.4)          | 52.5<br>(16.5 to 106.5)          | -- | -- | 32.4<br>(11.4 to 57.5)      | 35.9<br>(10.2 to 75.3)      |
| Neonatal preterm birth complications                     | Severe motor plus cognitive impairment with blindness and epilepsy due to neonatal preterm birth complications 32-36wks              | 44.4<br>(17.8 to 70.2)          | 49.7<br>(16.0 to 106.7)          | -- | -- | 30.5<br>(11.7 to 50.8)      | 34.0<br>(10.6 to 74.7)      |
| Neonatal preterm birth complications                     | Mild vision impairment due to retinopathy of prematurity                                                                             | 834.6<br>(280.5 to 1,797.9)     | 894.2<br>(300.6 to 1,938.0)      | -- | -- | 2.5<br>(0.6 to 7.8)         | 2.6<br>(0.6 to 8.4)         |
| Neonatal preterm birth complications                     | Moderate motor impairment with blindness and epilepsy due to neonatal preterm birth complications <28wks                             | 47.1<br>(28.2 to 72.5)          | 55.2<br>(23.6 to 106.5)          | -- | -- | 17.3<br>(9.4 to 27.8)       | 19.8<br>(7.9 to 39.7)       |
| Neonatal preterm birth complications                     | Moderate motor plus cognitive impairment with epilepsy due to neonatal preterm birth complications <28wks                            | 779.5<br>(446.6 to 1,219.7)     | 948.2<br>(396.6 to 1,953.6)      | -- | -- | 253.9<br>(130.9 to 427.3)   | 299.3<br>(118.6 to 622.3)   |
| Neonatal preterm birth complications                     | Severe motor impairment with blindness and epilepsy due to neonatal preterm birth complications 28-32wks                             | 22.7<br>(16.8 to 30.2)          | 25.9<br>(17.0 to 37.9)           | -- | -- | 13.5<br>(9.1 to 19.0)       | 15.2<br>(9.1 to 23.8)       |
| Neonatal preterm birth complications                     | Severe motor plus cognitive impairment with blindness due to neonatal preterm birth complications 32-36wks                           | 83.5<br>(34.4 to 131.3)         | 93.5<br>(29.8 to 197.5)          | -- | -- | 52.2<br>(19.5 to 88.7)      | 58.4<br>(18.0 to 123.5)     |
| Neonatal preterm birth complications                     | Moderate motor impairment due to neonatal preterm birth complications <28wks                                                         | 1,398.7<br>(812.6 to 2,189.0)   | 1,746.2<br>(708.2 to 3,687.3)    | -- | -- | 82.7<br>(43.2 to 145.9)     | 102.9<br>(37.1 to 234.5)    |
| Neonatal preterm birth complications                     | Moderate motor impairment due to neonatal preterm birth complications 28-32wks                                                       | 2,145.6<br>(1,577.3 to 2,847.0) | 2,618.1<br>(1,628.4 to 3,998.5)  | -- | -- | 126.8<br>(75.4 to 195.2)    | 154.6<br>(80.4 to 260.8)    |
| Neonatal preterm birth complications                     | Asymptomatic neonatal preterm birth 32-<37wks                                                                                        | 6,682.1<br>(5,559.0 to 7,905.0) | 6,219.8<br>(5,099.6 to 7,423.7)  | -- | -- | < 0.05<br>(0.0 to < 0.05)   | < 0.05<br>(0.0 to < 0.05)   |
| Neonatal preterm birth complications                     | Severe motor impairment with blindness due to neonatal preterm birth complications 32-36wks                                          | 16.9<br>(10.3 to 25.4)          | 21.4<br>(9.1 to 43.6)            | -- | -- | 8.6<br>(4.9 to 14.2)        | 10.9<br>(4.5 to 23.4)       |
| Neonatal preterm birth complications                     | Severe motor impairment with epilepsy due to neonatal preterm birth complications <28wks                                             | 168.0<br>(100.7 to 258.2)       | 196.7<br>(83.7 to 376.6)         | -- | -- | 84.5<br>(45.1 to 137.8)     | 97.6<br>(39.6 to 198.0)     |
| Neonatal preterm birth complications                     | Severe vision impairment due to retinopathy of prematurity                                                                           | 1,864.2<br>(1,287.4 to 2,573.8) | 2,269.4<br>(1,569.2 to 3,153.5)  | -- | -- | 323.7<br>(192.3 to 503.8)   | 393.5<br>(231.3 to 615.8)   |
| Neonatal preterm birth complications                     | Moderate vision impairment due to retinopathy of prematurity                                                                         | 3,139.5<br>(1,694.4 to 4,773.4) | 3,750.3<br>(2,019.1 to 5,753.7)  | -- | -- | 93.7<br>(42.3 to 171.6)     | 111.8<br>(50.0 to 205.1)    |
| Neonatal preterm birth complications                     | Severe motor plus cognitive impairment with epilepsy due to neonatal preterm birth complications 32-36wks                            | 473.3<br>(192.1 to 745.7)       | 530.1<br>(171.6 to 1,119.7)      | -- | -- | 282.8<br>(110.3 to 475.2)   | 313.7<br>(91.6 to 688.4)    |
| Neonatal preterm birth complications                     | Moderate motor plus cognitive impairment with blindness and epilepsy due to neonatal preterm birth complications <28wks              | 73.6<br>(41.7 to 116.8)         | 89.5<br>(37.7 to 180.0)          | -- | -- | 34.1<br>(18.3 to 57.1)      | 40.7<br>(15.9 to 83.5)      |
| Neonatal preterm birth complications                     | Moderate motor plus cognitive impairment with blindness due to neonatal preterm birth complications <28wks                           | 138.2<br>(80.2 to 218.4)        | 168.1<br>(69.5 to 334.2)         | -- | -- | 48.5<br>(26.2 to 81.3)      | 58.9<br>(22.5 to 121.4)     |
| Neonatal encephalopathy due to birth asphyxia and trauma | Asymptomatic neonatal encephalopathy due to birth asphyxia and trauma                                                                | 477.6<br>(333.2 to 675.6)       | 497.8<br>(343.3 to 702.5)        | -- | -- | < 0.05<br>(0.0 to < 0.05)   | < 0.05<br>(0.0 to < 0.05)   |
| Neonatal encephalopathy due to birth asphyxia and trauma | Severe motor impairment with blindness due to neonatal encephalopathy due to birth asphyxia and trauma                               | 11.2<br>(3.8 to 25.6)           | 15.8<br>(6.0 to 33.9)            | -- | -- | 5.7<br>(1.8 to 13.5)        | 8.1<br>(2.8 to 18.0)        |
| Neonatal encephalopathy due to birth asphyxia and trauma | Moderate motor plus cognitive impairment with blindness due to neonatal encephalopathy due to birth asphyxia and trauma              | 78.7<br>(22.1 to 196.3)         | 107.1<br>(31.7 to 257.7)         | -- | -- | 27.8<br>(6.8 to 71.1)       | 37.7<br>(9.7 to 91.1)       |
| Neonatal encephalopathy due to birth asphyxia and trauma | Moderate motor plus cognitive impairment with epilepsy due to neonatal encephalopathy due to birth asphyxia and trauma               | 444.4<br>(124.8 to 1,124.1)     | 604.5<br>(178.0 to 1,477.9)      | -- | -- | 145.6<br>(36.7 to 394.0)    | 194.5<br>(53.0 to 500.3)    |
| Neonatal encephalopathy due to birth asphyxia and trauma | Severe motor plus cognitive impairment with epilepsy due to neonatal encephalopathy due to birth asphyxia and trauma                 | 273.1<br>(45.3 to 727.8)        | 357.7<br>(73.1 to 887.2)         | -- | -- | 164.7<br>(28.6 to 462.0)    | 214.1<br>(44.0 to 552.8)    |
| Neonatal encephalopathy due to birth asphyxia and trauma | Moderate motor impairment due to neonatal encephalopathy due to birth asphyxia and trauma                                            | 996.3<br>(343.1 to 2,342.4)     | 1,326.5<br>(482.2 to 3,033.4)    | -- | -- | 59.2<br>(18.2 to 149.2)     | 78.7<br>(24.2 to 197.6)     |
| Neonatal encephalopathy due to birth asphyxia and trauma | Moderate motor plus cognitive impairment with blindness and epilepsy due to neonatal encephalopathy due to birth asphyxia and trauma | 41.9<br>(11.7 to 105.6)         | 57.0<br>(16.8 to 140.5)          | -- | -- | 19.3<br>(5.1 to 52.1)       | 26.1<br>(7.1 to 67.8)       |
| Neonatal encephalopathy due to birth asphyxia and trauma | Severe motor plus cognitive impairment with blindness due to neonatal encephalopathy due to birth asphyxia and trauma                | 48.2<br>(7.8 to 125.6)          | 63.1<br>(12.8 to 152.5)          | -- | -- | 30.2<br>(4.9 to 79.5)       | 39.6<br>(7.7 to 98.0)       |
| Neonatal encephalopathy due to birth asphyxia and trauma | Mild motor plus cognitive impairments due to neonatal encephalopathy due to birth asphyxia and trauma                                | 2,851.2<br>(1,516.5 to 4,491.3) | 3,135.0<br>(1,677.3 to 4,945.0)  | -- | -- | 86.0<br>(37.8 to 158.5)     | 94.7<br>(42.1 to 176.5)     |
| Neonatal encephalopathy due to birth asphyxia and trauma | Mild motor impairment due to neonatal encephalopathy due to birth asphyxia and trauma                                                | 3,212.3<br>(1,928.7 to 4,802.7) | 3,550.2<br>(2,072.7 to 5,287.7)  | -- | -- | 31.9<br>(12.5 to 64.5)      | 35.2<br>(14.0 to 72.4)      |
| Neonatal encephalopathy due to birth asphyxia and trauma | Severe motor plus cognitive impairment with blindness and epilepsy due to neonatal encephalopathy due to birth asphyxia and trauma   | 25.6<br>(4.5 to 67.4)           | 33.5<br>(6.7 to 82.3)            | -- | -- | 17.6<br>(3.1 to 47.3)       | 22.9<br>(4.7 to 58.8)       |
| Neonatal encephalopathy due to birth asphyxia and trauma | Moderate motor impairment with epilepsy due to neonatal encephalopathy due to birth asphyxia and trauma                              | 334.8<br>(108.9 to 780.9)       | 447.3<br>(163.6 to 987.2)        | -- | -- | 71.1<br>(21.7 to 182.9)     | 92.5<br>(31.0 to 222.4)     |
| Neonatal encephalopathy due to birth asphyxia and trauma | Moderate motor impairment with blindness due to neonatal encephalopathy due to birth asphyxia and trauma                             | 32.5<br>(10.9 to 76.2)          | 46.2<br>(17.4 to 98.7)           | -- | -- | 7.7<br>(2.3 to 18.6)        | 10.9<br>(3.6 to 25.0)       |
| Neonatal encephalopathy due to birth asphyxia and trauma | Severe motor impairment with blindness and epilepsy due to neonatal encephalopathy due to birth asphyxia and trauma                  | 10.5<br>(3.5 to 26.1)           | 14.0<br>(5.2 to 32.5)            | -- | -- | 6.2<br>(2.0 to 15.8)        | 8.2<br>(2.9 to 20.1)        |
| Neonatal encephalopathy due to birth asphyxia and trauma | Moderate motor impairment with blindness and epilepsy due to neonatal encephalopathy due to birth asphyxia and trauma                | 31.3<br>(10.5 to 72.9)          | 41.8<br>(15.6 to 90.8)           | -- | -- | 11.3<br>(3.6 to 28.5)       | 15.0<br>(5.2 to 35.3)       |
| Neonatal encephalopathy due to birth asphyxia and trauma | Severe motor impairment due to neonatal encephalopathy due to birth asphyxia and trauma                                              | 1,249.6<br>(427.3 to 3,076.9)   | 1,687.4<br>(620.9 to 3,951.0)    | -- | -- | 479.9<br>(139.0 to 1,239.4) | 645.1<br>(197.2 to 1,634.2) |
| Neonatal encephalopathy due to birth asphyxia and trauma | Severe motor impairment with epilepsy due to neonatal encephalopathy due to birth asphyxia and trauma                                | 111.6<br>(36.8 to 262.3)        | 149.1<br>(54.4 to 331.4)         | -- | -- | 55.4<br>(17.6 to 138.6)     | 73.2<br>(25.4 to 174.7)     |
| Neonatal sepsis and other neonatal infections            | Severe motor impairment with blindness due to neonatal sepsis and other neonatal infections ?                                        | 37.5<br>(13.1 to 93.2)          | 48.9<br>(17.8 to 120.1)          | -- | -- | 19.2<br>(6.2 to 48.7)       | 25.0<br>(8.6 to 61.9)       |
| Neonatal sepsis and other neonatal infections            | Moderate motor impairment with blindness and epilepsy due to neonatal sepsis and other neonatal infections                           | 60.3<br>(13.0 to 158.2)         | 78.7<br>(18.6 to 201.0)          | -- | -- | 22.4<br>(4.6 to 55.4)       | 28.8<br>(6.6 to 70.5)       |

|                                               |                                                                                                                           |                                       |                                      |                                    |                                    |                                 |                                 |
|-----------------------------------------------|---------------------------------------------------------------------------------------------------------------------------|---------------------------------------|--------------------------------------|------------------------------------|------------------------------------|---------------------------------|---------------------------------|
| Neonatal sepsis and other neonatal infections | Moderate motor impairment with blindness due to neonatal sepsis and other neonatal infections                             | 54.5<br>(15.3 to 137.7)               | 73.7<br>(23.2 to 178.8)              | --                                 | --                                 | 12.9<br>(3.4 to 33.6)           | 17.4<br>(5.1 to 43.5)           |
| Neonatal sepsis and other neonatal infections | Severe motor plus cognitive impairment with blindness and epilepsy due to neonatal sepsis and other neonatal infections   | 133.2<br>(45.4 to 322.0)              | 173.6<br>(62.7 to 408.6)             | --                                 | --                                 | 91.0<br>(29.3 to 221.7)         | 118.2<br>(39.7 to 287.9)        |
| Neonatal sepsis and other neonatal infections | Severe infection due to neonatal sepsis and other neonatal infections                                                     | 124.3<br>(67.2 to 215.9)              | 120.5<br>(65.3 to 208.9)             | --                                 | --                                 | 16.2<br>(7.6 to 30.5)           | 15.7<br>(7.4 to 29.4)           |
| Neonatal sepsis and other neonatal infections | Severe motor impairment with blindness and epilepsy due to neonatal sepsis and other neonatal infections                  | 1,522.5<br>(512.5 to 4,090.1)         | 2,016.4<br>(697.6 to 5,313.4)        | --                                 | --                                 | 855.9<br>(266.0 to 2,337.9)     | 1,123.6<br>(367.2 to 2,989.9)   |
| Neonatal sepsis and other neonatal infections | Moderate motor plus cognitive impairment with blindness due to neonatal sepsis and other neonatal infections              | 32.0<br>(6.8 to 84.6)                 | 41.8<br>(10.2 to 107.0)              | --                                 | --                                 | 11.3<br>(2.5 to 30.8)           | 14.7<br>(3.5 to 39.9)           |
| Neonatal sepsis and other neonatal infections | Moderate motor plus cognitive impairment with blindness and epilepsy due to neonatal sepsis and other neonatal infections | 1,188.0<br>(410.9 to 3,048.1)         | 1,549.2<br>(550.4 to 3,794.3)        | --                                 | --                                 | 525.8<br>(166.6 to 1,387.9)     | 676.1<br>(219.0 to 1,764.7)     |
| Neonatal sepsis and other neonatal infections | Severe motor impairment due to neonatal sepsis and other neonatal infections                                              | 42.1<br>(14.5 to 100.7)               | 55.3<br>(20.9 to 126.3)              | --                                 | --                                 | 16.9<br>(5.5 to 42.0)           | 22.2<br>(7.9 to 54.2)           |
| Neonatal sepsis and other neonatal infections | Severe motor plus cognitive impairment with epilepsy due to neonatal sepsis and other neonatal infections                 | 12.5<br>(4.2 to 31.0)                 | 16.3<br>(5.8 to 40.1)                | --                                 | --                                 | 7.8<br>(2.5 to 19.8)            | 10.1<br>(3.5 to 25.5)           |
| Neonatal sepsis and other neonatal infections | Moderate motor plus cognitive impairment with epilepsy due to neonatal sepsis and other neonatal infections               | 340.0<br>(73.1 to 902.0)              | 444.1<br>(106.6 to 1,116.7)          | --                                 | --                                 | 114.7<br>(23.4 to 296.7)        | 146.3<br>(33.0 to 364.7)        |
| Neonatal sepsis and other neonatal infections | Mild motor impairment due to neonatal sepsis and other neonatal infections                                                | 226.8<br>(106.7 to 428.5)             | 254.2<br>(120.8 to 473.2)            | --                                 | --                                 | 2.3<br>(0.7 to 5.9)             | 2.6<br>(0.8 to 6.5)             |
| Neonatal sepsis and other neonatal infections | Moderate motor impairment with epilepsy due to neonatal sepsis and other neonatal infections                              | 579.0<br>(163.8 to 1,395.4)           | 783.7<br>(242.8 to 1,931.6)          | --                                 | --                                 | 126.9<br>(31.7 to 323.6)        | 165.8<br>(44.9 to 412.7)        |
| Neonatal sepsis and other neonatal infections | Severe motor plus cognitive impairment with blindness due to neonatal sepsis and other neonatal infections                | 14.0<br>(4.6 to 33.4)                 | 18.4<br>(6.9 to 42.8)                | --                                 | --                                 | 8.7<br>(2.9 to 21.0)            | 11.5<br>(4.2 to 27.2)           |
| Neonatal sepsis and other neonatal infections | Asymptomatic neonatal sepsis and other neonatal infections                                                                | 89.4<br>(47.8 to 157.1)               | 92.5<br>(49.3 to 161.4)              | --                                 | --                                 | < 0.05<br>(0.0 to < 0.05)       | < 0.05<br>(0.0 to < 0.05)       |
| Neonatal sepsis and other neonatal infections | Mild motor plus cognitive impairments due to neonatal sepsis and other neonatal infections                                | 203.0<br>(92.7 to 380.0)              | 227.2<br>(103.1 to 416.2)            | --                                 | --                                 | 6.3<br>(2.3 to 14.2)            | 7.1<br>(2.7 to 15.7)            |
| Neonatal sepsis and other neonatal infections | Moderate motor impairment due to neonatal sepsis and other neonatal infections                                            | 102.2<br>(30.3 to 244.2)              | 138.4<br>(44.6 to 332.3)             | --                                 | --                                 | 6.2<br>(1.6 to 15.9)            | 8.4<br>(2.3 to 21.8)            |
| Neonatal sepsis and other neonatal infections | Severe motor impairment with epilepsy due to neonatal sepsis and other neonatal infections                                | 399.0<br>(136.1 to 974.8)             | 520.1<br>(190.1 to 1,243.2)          | --                                 | --                                 | 196.6<br>(61.3 to 503.9)        | 253.3<br>(84.1 to 637.5)        |
| Hemolytic disease and other neonatal jaundice | Severe motor plus cognitive impairment with blindness and epilepsy due to hemolytic disease and other neonatal jaundice   | 15.7<br>(6.6 to 22.7)                 | 17.8<br>(6.9 to 26.0)                | --                                 | --                                 | 10.8<br>(4.4 to 16.6)           | 12.2<br>(4.6 to 19.0)           |
| Hemolytic disease and other neonatal jaundice | Moderate motor impairment with epilepsy due to hemolytic disease and other neonatal jaundice                              | 157.6<br>(133.4 to 183.9)             | 187.9<br>(158.4 to 219.7)            | --                                 | --                                 | 36.2<br>(25.7 to 49.2)          | 41.4<br>(29.2 to 56.7)          |
| Hemolytic disease and other neonatal jaundice | Severe motor impairment severe due to hemolytic disease and other neonatal jaundice                                       | 530.5<br>(429.7 to 661.7)             | 673.3<br>(549.3 to 829.1)            | --                                 | --                                 | 206.3<br>(126.8 to 293.6)       | 260.5<br>(164.4 to 366.5)       |
| Hemolytic disease and other neonatal jaundice | Moderate motor impairment with blindness and epilepsy due to hemolytic disease and other neonatal jaundice                | 14.8<br>(12.4 to 17.4)                | 17.6<br>(14.7 to 20.8)               | --                                 | --                                 | 5.5<br>(3.8 to 7.4)             | 6.4<br>(4.4 to 8.8)             |
| Hemolytic disease and other neonatal jaundice | Moderate motor plus cognitive impairment with blindness due to hemolytic disease and other neonatal jaundice              | 44.1<br>(34.7 to 54.0)                | 53.6<br>(41.4 to 65.5)               | --                                 | --                                 | 15.5<br>(10.2 to 21.8)          | 18.8<br>(12.3 to 26.2)          |
| Hemolytic disease and other neonatal jaundice | Severe motor impairment with blindness and epilepsy due to hemolytic disease and other neonatal jaundice                  | 4.9<br>(4.1 to 5.8)                   | 5.9<br>(4.9 to 6.9)                  | --                                 | --                                 | 2.9<br>(2.1 to 3.9)             | 3.5<br>(2.5 to 4.5)             |
| Hemolytic disease and other neonatal jaundice | Severe motor impairment with blindness due to hemolytic disease and other neonatal jaundice                               | 6.0<br>(4.2 to 8.2)                   | 7.6<br>(5.3 to 10.3)                 | --                                 | --                                 | 3.0<br>(1.9 to 4.6)             | 3.9<br>(2.4 to 5.7)             |
| Hemolytic disease and other neonatal jaundice | Moderate motor plus cognitive impairment with blindness and epilepsy due to hemolytic disease and other neonatal jaundice | 23.5<br>(18.6 to 28.8)                | 28.6<br>(22.5 to 35.1)               | --                                 | --                                 | 11.0<br>(7.5 to 15.0)           | 13.2<br>(8.7 to 18.0)           |
| Hemolytic disease and other neonatal jaundice | Severe motor plus cognitive impairment with epilepsy due to hemolytic disease and other neonatal jaundice                 | 152.3<br>(65.2 to 214.9)              | 169.4<br>(67.0 to 246.7)             | --                                 | --                                 | 94.8<br>(37.7 to 144.8)         | 104.5<br>(38.6 to 165.4)        |
| Hemolytic disease and other neonatal jaundice | Moderate motor impairment with blindness due to hemolytic disease and other neonatal jaundice                             | 17.9<br>(12.7 to 24.5)                | 22.7<br>(16.0 to 30.9)               | --                                 | --                                 | 4.2<br>(2.5 to 6.5)             | 5.4<br>(3.3 to 8.1)             |
| Hemolytic disease and other neonatal jaundice | Moderate motor impairment due to hemolytic disease and other neonatal jaundice                                            | 408.1<br>(338.5 to 488.5)             | 510.2<br>(423.4 to 618.6)            | --                                 | --                                 | 24.5<br>(15.2 to 37.2)          | 30.6<br>(19.2 to 46.0)          |
| Hemolytic disease and other neonatal jaundice | Severe motor impairment with epilepsy due to hemolytic disease and other neonatal jaundice                                | 52.6<br>(44.6 to 61.8)                | 62.7<br>(52.8 to 74.9)               | --                                 | --                                 | 26.7<br>(18.5 to 36.3)          | 31.4<br>(21.5 to 43.3)          |
| Hemolytic disease and other neonatal jaundice | Severe motor plus cognitive impairment with blindness due to hemolytic disease and other neonatal jaundice                | 29.5<br>(13.1 to 42.1)                | 33.4<br>(13.1 to 48.5)               | --                                 | --                                 | 18.4<br>(7.5 to 27.8)           | 20.8<br>(8.4 to 32.5)           |
| Hemolytic disease and other neonatal jaundice | Moderate motor plus cognitive impairment with epilepsy due to hemolytic disease and other neonatal jaundice               | 248.8<br>(198.6 to 299.4)             | 302.4<br>(234.6 to 361.9)            | --                                 | --                                 | 85.9<br>(57.5 to 120.5)         | 101.7<br>(66.2 to 142.6)        |
| Other neonatal disorders                      | Other neonatal disorders                                                                                                  | --                                    | --                                   | --                                 | --                                 | 478.1<br>(345.4 to 685.2)       | 511.6<br>(350.7 to 766.7)       |
| Protein-energy malnutrition                   | Severe wasting without edema                                                                                              | 23,784.7<br>(22,829.2 to 24,775.3)    | 25,747.8<br>(25,228.3 to 26,347.4)   | 17,719.5<br>(17,083.9 to 18,392.9) | 18,131.9<br>(17,810.7 to 18,489.2) | 2,954.8<br>(1,911.3 to 4,167.7) | 3,199.5<br>(2,062.9 to 4,480.2) |
| Protein-energy malnutrition                   | Moderate wasting without edema                                                                                            | 38,871.3<br>(37,180.2 to 40,599.4)    | 37,349.0<br>(36,159.9 to 38,623.0)   | < 0.05<br>(26,142.1 to 28,439.4)   | < 0.05<br>(24,713.7 to 26,216.7)   | < 0.05<br>(0.0 to < 0.05)       | < 0.05<br>(0.0 to < 0.05)       |
| Protein-energy malnutrition                   | Moderate wasting with edema                                                                                               | 2.8<br>(0.3 to 14.2)                  | 7.7<br>(0.8 to 25.3)                 | --                                 | --                                 | 0.1<br>(< 0.05 to 0.7)          | 0.4<br>(< 0.05 to 1.3)          |
| Protein-energy malnutrition                   | Severe wasting with edema                                                                                                 | 28.5<br>(17.9 to 45.9)                | 30.5<br>(18.1 to 51.4)               | 22.2<br>(14.3 to 34.4)             | 22.9<br>(13.8 to 37.6)             | 4.8<br>(2.5 to 8.2)             | 5.1<br>(2.5 to 8.7)             |
| Iodine deficiency                             | Visible goiter with profound intellectual disability with severe heart failure due to iodine deficiency                   | < 0.05<br>(< 0.05 to 0.1)             | 0.1<br>(< 0.05 to 0.1)               | --                                 | --                                 | < 0.05<br>(< 0.05 to < 0.05)    | < 0.05<br>(< 0.05 to < 0.05)    |
| Iodine deficiency                             | Visible goiter with severe intellectual disability due to iodine deficiency                                               | 1,204.8<br>(720.5 to 1,676.6)         | 1,098.2<br>(618.2 to 1,566.5)        | --                                 | --                                 | 366.7<br>(195.4 to 554.6)       | 334.2<br>(170.2 to 520.5)       |
| Iodine deficiency                             | Visible goiter with profound intellectual disability and mild heart failure due to iodine deficiency                      | 0.1<br>(0.1 to 0.1)                   | 0.1<br>(0.1 to 0.1)                  | --                                 | --                                 | < 0.05<br>(< 0.05 to < 0.05)    | < 0.05<br>(< 0.05 to 0.1)       |
| Iodine deficiency                             | Visible goiter without symptoms                                                                                           | 117,228.2<br>(103,899.1 to 131,946.1) | 110,421.4<br>(97,965.5 to 124,262.9) | 3,407.4<br>(3,038.3 to 3,820.6)    | 2,784.5<br>(2,477.6 to 3,124.2)    | 1,251.3<br>(580.3 to 2,291.8)   | 1,177.6<br>(547.1 to 2,163.1)   |
| Iodine deficiency                             | Visible goiter with profound intellectual disability and moderate heart failure due to iodine deficiency                  | < 0.05<br>(< 0.05 to < 0.05)          | < 0.05<br>(< 0.05 to < 0.05)         | --                                 | --                                 | < 0.05<br>(< 0.05 to < 0.05)    | < 0.05<br>(< 0.05 to < 0.05)    |
| Iodine deficiency                             | Visible goiter with profound intellectual disability due to iodine deficiency                                             | 1,361.1<br>(710.1 to 1,848.5)         | 1,415.7<br>(728.7 to 1,916.0)        | --                                 | --                                 | 455.6<br>(215.7 to 704.8)       | 473.8<br>(221.7 to 733.1)       |
| Iodine deficiency                             | Visible goiter with symptoms without intellectual disability or heart failure                                             | 6,891.5<br>(5,867.3 to 8,036.6)       | 6,278.7<br>(5,319.5 to 7,334.3)      | 316.4<br>(281.8 to 354.2)          | 258.5<br>(230.4 to 289.6)          | 1,267.6<br>(846.9 to 1,793.5)   | 1,152.4<br>(766.2 to 1,622.0)   |
| Vitamin A deficiency                          | Blindness due to vitamin A deficiency                                                                                     | 104.6<br>(62.8 to 164.7)              | 109.6<br>(67.4 to 168.8)             | --                                 | --                                 | 19.5<br>(9.9 to 34.4)           | 20.4<br>(10.7 to 35.7)          |

|                                     |                                                                                                              |                                       |                                       |                                       |                                       |                                    |                                    |
|-------------------------------------|--------------------------------------------------------------------------------------------------------------|---------------------------------------|---------------------------------------|---------------------------------------|---------------------------------------|------------------------------------|------------------------------------|
| Vitamin A deficiency                | Moderate vision impairment loss due to vitamin A deficiency                                                  | 4,177.2<br>(3,103.3 to 5,652.2)       | 4,616.0<br>(3,435.6 to 6,208.1)       | --                                    | --                                    | 125.7<br>(68.5 to 211.6)           | 138.8<br>(77.2 to 230.8)           |
| Vitamin A deficiency                | Severe vision impairment loss due to vitamin A deficiency                                                    | 453.4<br>(298.5 to 630.5)             | 527.3<br>(341.3 to 734.2)             | --                                    | --                                    | 80.2<br>(44.9 to 129.0)            | 93.2<br>(51.4 to 150.2)            |
| Vitamin A deficiency                | Asymptomatic vitamin A deficiency                                                                            | 518,107.4<br>(457,821.4 to 601,202.9) | 503,548.6<br>(439,987.5 to 597,169.7) | 587,473.7<br>(504,061.9 to 696,250.3) | 552,179.9<br>(469,061.5 to 671,143.9) | < 0.05<br>(0.0 to < 0.05)          | < 0.05<br>(0.0 to < 0.05)          |
| Iron-deficiency anaemia             | Severe heart failure due to iron-deficiency anaemia                                                          | 1.4<br>(1.2 to 1.7)                   | 1.9<br>(1.5 to 2.2)                   | --                                    | --                                    | 0.2<br>(0.2 to 0.4)                | 0.3<br>(0.2 to 0.5)                |
| Iron-deficiency anaemia             | Severe iron-deficiency anaemia                                                                               | 35,441.6<br>(33,057.9 to 38,532.4)    | 37,673.4<br>(34,717.1 to 41,911.6)    | --                                    | --                                    | 4,978.0<br>(3,363.0 to 6,836.8)    | 5,282.4<br>(3,582.0 to 7,206.2)    |
| Iron-deficiency anaemia             | Moderate iron-deficiency anaemia                                                                             | 503,993.5<br>(484,869.6 to 524,071.9) | 541,805.9<br>(521,064.0 to 565,349.5) | --                                    | --                                    | 25,179.9<br>(16,571.5 to 36,565.2) | 27,042.4<br>(17,848.8 to 38,997.1) |
| Iron-deficiency anaemia             | Asymptomatic and mild heart failure due to iron-deficiency anaemia                                           | 2.4<br>(2.0 to 2.8)                   | 3.2<br>(2.7 to 3.7)                   | --                                    | --                                    | 0.1<br>(0.1 to 0.2)                | 0.1<br>(0.1 to 0.2)                |
| Iron-deficiency anaemia             | Moderate heart failure due to iron-deficiency anaemia                                                        | 0.5<br>(0.4 to 0.7)                   | 0.7<br>(0.5 to 0.9)                   | --                                    | --                                    | < 0.05<br>(< 0.05 to 0.1)          | < 0.05<br>(< 0.05 to 0.1)          |
| Iron-deficiency anaemia             | Mild iron-deficiency anaemia                                                                                 | 596,849.1<br>(581,476.3 to 612,526.3) | 665,295.7<br>(646,870.7 to 684,901.7) | --                                    | --                                    | 2,156.2<br>(761.1 to 4,704.9)      | 2,402.0<br>(846.8 to 5,243.8)      |
| Other nutritional deficiencies      | Other nutritional deficiencies                                                                               | --                                    | --                                    | --                                    | --                                    | 100.2<br>(64.9 to 141.4)           | 108.6<br>(70.1 to 152.1)           |
| Syphilis                            | Neurological problems due to adult tertiary syphilis                                                         | 23.0<br>(15.0 to 34.1)                | 30.2<br>(19.4 to 45.1)                | 1.3<br>(0.8 to 2.0)                   | 1.7<br>(1.0 to 2.6)                   | 4.7<br>(2.6 to 7.5)                | 6.1<br>(3.4 to 9.9)                |
| Syphilis                            | Mild early syphilis infection                                                                                | 2,149.4<br>(984.0 to 3,935.5)         | 2,374.8<br>(1,062.3 to 4,365.6)       | 1,515.2<br>(694.7 to 2,616.9)         | 1,657.8<br>(758.3 to 2,858.2)         | 12.1<br>(3.4 to 30.2)              | 13.4<br>(3.7 to 34.1)              |
| Syphilis                            | Asymptomatic early syphilis infection                                                                        | 47,578.7<br>(38,528.9 to 58,624.8)    | 52,572.4<br>(41,128.2 to 66,105.2)    | 33,899.5<br>(26,461.9 to 43,562.4)    | 37,115.1<br>(27,812.9 to 48,903.8)    | < 0.05<br>(0.0 to < 0.05)          | < 0.05<br>(0.0 to < 0.05)          |
| Syphilis                            | Neurological problems and cardiovascular complications due to adult tertiary syphilis                        | 39.9<br>(27.1 to 55.6)                | 52.3<br>(35.5 to 73.4)                | 2.4<br>(1.6 to 3.4)                   | 3.1<br>(2.0 to 4.4)                   | 9.5<br>(5.4 to 14.9)               | 12.5<br>(7.1 to 19.6)              |
| Syphilis                            | Asymptomatic adult tertiary syphilis                                                                         | 469.3<br>(411.4 to 537.6)             | 614.6<br>(531.6 to 711.8)             | 27.3<br>(23.6 to 31.6)                | 34.5<br>(29.3 to 40.6)                | < 0.05<br>(0.0 to < 0.05)          | < 0.05<br>(0.0 to < 0.05)          |
| Syphilis                            | Severe disfigurement and cardiovascular complications due to adult tertiary syphilis                         | 73.8<br>(56.4 to 94.6)                | 96.8<br>(73.9 to 124.3)               | 4.4<br>(3.4 to 5.8)                   | 5.7<br>(4.3 to 7.4)                   | 30.7<br>(19.7 to 44.1)             | 40.2<br>(25.6 to 58.4)             |
| Syphilis                            | Severe disfigurement due to adult tertiary syphilis                                                          | 135.8<br>(112.7 to 162.4)             | 177.9<br>(147.1 to 214.4)             | 8.0<br>(6.5 to 9.6)                   | 10.1<br>(8.1 to 12.3)                 | 52.2<br>(34.4 to 72.6)             | 68.2<br>(44.0 to 93.9)             |
| Syphilis                            | Cardiovascular complications due to adult tertiary syphilis                                                  | 69.7<br>(51.7 to 90.3)                | 91.3<br>(67.7 to 118.0)               | 4.1<br>(3.1 to 5.3)                   | 5.3<br>(3.9 to 6.8)                   | 3.5<br>(2.0 to 5.3)                | 4.6<br>(2.6 to 7.1)                |
| Syphilis                            | Severe disfigurement and neurological problems due to adult tertiary syphilis                                | 46.6<br>(32.8 to 63.4)                | 61.1<br>(42.9 to 83.5)                | 2.8<br>(2.0 to 3.8)                   | 3.6<br>(2.5 to 4.9)                   | 23.8<br>(19.1 to 35.2)             | 31.2<br>(19.1 to 46.4)             |
| Syphilis                            | Severe disfigurement, neurological problems, and cardiovascular complications due to adult tertiary syphilis | 15.9<br>(8.1 to 27.1)                 | 20.8<br>(10.4 to 35.1)                | 1.0<br>(0.4 to 1.6)                   | 1.2<br>(0.6 to 2.0)                   | 8.7<br>(4.0 to 15.4)               | 11.4<br>(5.2 to 20.4)              |
| Chlamydial infection                | Moderate pelvic inflammatory diseases due to chlamydial infection                                            | 744.3<br>(636.1 to 872.3)             | 816.9<br>(700.6 to 955.1)             | 11,337.3<br>(9,661.7 to 13,369.2)     | 12,414.6<br>(10,647.1 to 14,549.0)    | 80.6<br>(53.4 to 114.9)            | 88.6<br>(59.4 to 125.2)            |
| Chlamydial infection                | Asymptomatic chlamydial infection                                                                            | 52,850.4<br>(41,422.5 to 66,462.0)    | 55,472.1<br>(43,155.6 to 69,859.2)    | 40,351.6<br>(30,984.9 to 51,240.7)    | 41,643.0<br>(31,817.5 to 53,253.1)    | < 0.05<br>(0.0 to < 0.05)          | < 0.05<br>(0.0 to < 0.05)          |
| Chlamydial infection                | Severe pelvic inflammatory diseases due to chlamydial infection                                              | 92.4<br>(75.6 to 112.9)               | 101.4<br>(83.3 to 123.3)              | 1,399.3<br>(1,140.9 to 1,702.8)       | 1,532.3<br>(1,249.0 to 1,861.1)       | 29.5<br>(19.0 to 43.1)             | 32.4<br>(20.9 to 46.7)             |
| Chlamydial infection                | Secondary infertility due to chlamydial infection                                                            | 8,485.6<br>(7,048.8 to 9,844.8)       | 9,946.1<br>(8,076.0 to 11,679.3)      | --                                    | --                                    | 42.6<br>(16.8 to 88.9)             | 50.0<br>(19.2 to 104.9)            |
| Chlamydial infection                | Mild chlamydial infection                                                                                    | 21,242.8<br>(16,566.5 to 26,746.1)    | 22,745.0<br>(17,515.2 to 28,610.2)    | 16,035.5<br>(12,337.4 to 20,278.4)    | 16,927.6<br>(13,029.5 to 21,503.3)    | 120.7<br>(44.9 to 265.9)           | 129.2<br>(47.7 to 287.1)           |
| Chlamydial infection                | Epididymo-orchitis due to chlamydial infection                                                               | 1,420.4<br>(984.9 to 1,965.2)         | 1,567.0<br>(1,092.9 to 2,161.4)       | 1,052.0<br>(739.4 to 1,440.8)         | 1,149.2<br>(808.4 to 1,572.4)         | 175.6<br>(104.5 to 280.9)          | 193.8<br>(114.8 to 312.9)          |
| Chlamydial infection                | Primary infertility due to chlamydial infection                                                              | 2,574.0<br>(2,073.8 to 3,148.1)       | 2,925.4<br>(2,273.4 to 3,653.0)       | --                                    | --                                    | 19.0<br>(8.2 to 37.3)              | 21.6<br>(9.2 to 42.4)              |
| Gonococcal infection                | Moderate pelvic inflammatory diseases due to gonococcal infection                                            | 253.2<br>(211.3 to 303.0)             | 275.9<br>(231.2 to 329.2)             | 3,881.4<br>(3,228.7 to 4,684.2)       | 4,222.9<br>(3,511.7 to 5,066.0)       | 27.8<br>(17.9 to 40.0)             | 30.3<br>(19.9 to 43.4)             |
| Gonococcal infection                | Mild gonococcal infection                                                                                    | 20,569.0<br>(17,017.1 to 24,997.5)    | 25,174.9<br>(19,891.9 to 31,718.4)    | 73,542.2<br>(58,693.3 to 90,189.4)    | 89,967.1<br>(68,842.7 to 114,298.8)   | 116.5<br>(45.0 to 247.0)           | 142.7<br>(55.0 to 309.6)           |
| Gonococcal infection                | Secondary infertility due to gonococcal infection                                                            | 3,186.7<br>(2,692.5 to 3,694.3)       | 3,697.8<br>(3,046.2 to 4,397.1)       | --                                    | --                                    | 16.0<br>(6.2 to 32.7)              | 18.5<br>(7.1 to 38.9)              |
| Gonococcal infection                | Primary infertility due to gonococcal infection                                                              | 906.5<br>(719.7 to 1,124.2)           | 1,024.6<br>(790.6 to 1,302.1)         | --                                    | --                                    | 6.7<br>(2.9 to 13.1)               | 7.6<br>(3.3 to 14.9)               |
| Gonococcal infection                | Asymptomatic gonococcal infection                                                                            | 20,097.1<br>(16,591.5 to 24,327.5)    | 24,147.3<br>(18,879.9 to 30,536.8)    | 71,544.9<br>(57,832.4 to 87,328.7)    | 86,005.1<br>(65,475.1 to 109,822.2)   | < 0.05<br>(0.0 to < 0.05)          | < 0.05<br>(0.0 to < 0.05)          |
| Gonococcal infection                | Epididymo-orchitis due to gonococcal infection                                                               | 2,186.4<br>(1,575.4 to 2,951.8)       | 2,769.9<br>(1,959.2 to 3,794.9)       | 7,960.4<br>(5,480.4 to 10,988.5)      | 10,049.6<br>(6,785.0 to 13,940.1)     | 266.4<br>(160.6 to 407.2)          | 337.6<br>(202.7 to 521.9)          |
| Gonococcal infection                | Severe pelvic inflammatory diseases due to gonococcal infection                                              | 31.4<br>(25.3 to 39.2)                | 34.2<br>(27.6 to 42.5)                | 479.0<br>(384.8 to 591.3)             | 521.2<br>(418.2 to 640.9)             | 11.1<br>(6.4 to 15.0)              | 11.1<br>(6.9 to 16.3)              |
| Trichomoniasis                      | Acute trichomoniasis infection                                                                               | 30,406.7<br>(25,509.3 to 35,419.9)    | 35,256.9<br>(29,495.7 to 41,083.0)    | 26,896.0<br>(22,274.5 to 31,834.7)    | 31,026.7<br>(25,631.0 to 36,816.5)    | 171.0<br>(65.1 to 362.0)           | 198.2<br>(75.9 to 420.8)           |
| Trichomoniasis                      | Asymptomatic trichomoniasis infection                                                                        | 117,997.1<br>(101,525.9 to 135,055.9) | 136,522.0<br>(117,931.9 to 156,948.4) | 102,501.6<br>(87,738.6 to 118,057.7)  | 117,881.8<br>(100,416.7 to 135,904.8) | < 0.05<br>(0.0 to < 0.05)          | < 0.05<br>(0.0 to < 0.05)          |
| Genital herpes                      | Symptomatic genital herpes                                                                                   | 31,429.6<br>(14,572.9 to 52,277.2)    | 37,294.5<br>(17,313.1 to 61,984.1)    | 1,149.5<br>(551.6 to 1,993.0)         | 1,244.8<br>(594.5 to 2,151.2)         | 174.6<br>(50.5 to 402.0)           | 207.0<br>(60.1 to 476.8)           |
| Genital herpes                      | Asymptomatic genital herpes                                                                                  | 692,666.9<br>(605,077.5 to 798,124.2) | 821,996.9<br>(716,759.4 to 951,546.1) | 25,239.0<br>(21,716.8 to 29,806.9)    | 27,333.3<br>(23,421.2 to 32,385.2)    | < 0.05<br>(0.0 to < 0.05)          | < 0.05<br>(0.0 to < 0.05)          |
| Genital herpes                      | Moderate infection due to initial genital herpes episode                                                     | 266.9<br>(60.4 to 619.2)              | 289.1<br>(65.4 to 674.3)              | 26,388.5<br>(22,822.9 to 30,915.2)    | 28,578.1<br>(24,602.3 to 33,776.9)    | 13.3<br>(2.9 to 33.2)              | 14.4<br>(3.1 to 35.7)              |
| Other sexually transmitted diseases | Other sexually transmitted diseases                                                                          | --                                    | --                                    | --                                    | --                                    | 270.3<br>(170.0 to 419.9)          | 317.6<br>(200.3 to 497.3)          |
| Other sexually transmitted diseases | Moderate pelvic inflammatory diseases due to other sexually transmitted diseases                             | 2,387.7<br>(2,021.9 to 2,782.8)       | 2,554.1<br>(2,188.7 to 2,959.3)       | 36,237.8<br>(30,908.5 to 42,815.2)    | 38,668.6<br>(33,345.2 to 45,152.0)    | 258.2<br>(169.8 to 365.0)          | 276.3<br>(183.7 to 390.0)          |
| Other sexually transmitted diseases | Secondary infertility due to other sexually transmitted diseases                                             | 24,427.6<br>(20,377.4 to 28,076.8)    | 27,150.3<br>(22,268.1 to 31,649.1)    | --                                    | --                                    | 122.7<br>(47.6 to 256.2)           | 136.3<br>(52.8 to 284.4)           |
| Other sexually transmitted diseases | Primary infertility due to other sexually transmitted diseases                                               | 5,913.3<br>(4,684.9 to 7,344.9)       | 6,567.2<br>(5,072.8 to 8,306.6)       | --                                    | --                                    | 43.7<br>(18.5 to 84.5)             | 48.5<br>(20.6 to 95.4)             |

|                                     |                                                                                |                                       |                                       |                                      |                                      |                             |                             |
|-------------------------------------|--------------------------------------------------------------------------------|---------------------------------------|---------------------------------------|--------------------------------------|--------------------------------------|-----------------------------|-----------------------------|
| Other sexually transmitted diseases | Severe pelvic inflammatory diseases due to other sexually transmitted diseases | 296.3<br>(240.5 to 361.4)             | 317.0<br>(260.1 to 386.3)             | 4,472.6<br>(3,653.1 to 5,465.5)      | 4,772.6<br>(3,915.1 to 5,784.8)      | 90.1<br>(58.2 to 128.5)     | 96.6<br>(62.4 to 137.5)     |
| Acute hepatitis A                   | Moderate acute hepatitis A                                                     | 2,031.7<br>(1,273.9 to 2,915.4)       | 1,440.0<br>(954.3 to 2,029.8)         | 26,412.1<br>(16,560.7 to 37,899.8)   | 18,720.3<br>(12,406.4 to 26,387.6)   | 99.2<br>(51.4 to 159.1)     | 70.4<br>(38.2 to 116.9)     |
| Acute hepatitis A                   | Asymptomatic acute hepatitis A                                                 | 22,760.8<br>(3,433.6 to 49,402.1)     | 10,820.0<br>(1,783.1 to 23,652.1)     | 295,890.7<br>(44,637.3 to 642,227.6) | 140,660.6<br>(23,180.7 to 307,477.7) | < 0.05<br>(0.0 to < 0.05)   | < 0.05<br>(0.0 to < 0.05)   |
| Acute hepatitis A                   | Severe acute hepatitis A                                                       | 14.6<br>(9.2 to 21.5)                 | 10.4<br>(6.8 to 14.8)                 | 190.0<br>(119.8 to 279.5)            | 134.9<br>(88.0 to 192.1)             | 2.0<br>(1.0 to 3.2)         | 1.4<br>(0.7 to 2.3)         |
| Hepatitis B                         | Chronic hepatitis B                                                            | 405,838.6<br>(343,919.9 to 481,407.4) | 456,224.0<br>(385,512.4 to 541,076.2) | 12,300.2<br>(9,806.9 to 15,582.2)    | 13,150.0<br>(10,458.7 to 16,557.3)   | < 0.05<br>(0.0 to < 0.05)   | < 0.05<br>(0.0 to < 0.05)   |
| Hepatitis B                         | Moderate acute hepatitis B                                                     | 2,075.9<br>(1,458.8 to 2,789.9)       | 1,740.8<br>(1,232.7 to 2,341.2)       | 17,991.3<br>(12,643.0 to 24,178.9)   | 15,086.8<br>(10,683.0 to 20,290.7)   | 100.4<br>(56.9 to 158.2)    | 83.9<br>(47.2 to 134.0)     |
| Hepatitis B                         | Asymptomatic acute hepatitis B                                                 | 13,583.6<br>(10,437.4 to 17,405.3)    | 9,822.7<br>(7,624.9 to 12,813.2)      | 117,724.1<br>(90,457.2 to 150,846.1) | 85,130.4<br>(66,082.5 to 111,047.5)  | < 0.05<br>(0.0 to < 0.05)   | < 0.05<br>(0.0 to < 0.05)   |
| Hepatitis B                         | Severe acute hepatitis B                                                       | 769.1<br>(344.3 to 1,341.1)           | 647.2<br>(287.0 to 1,144.7)           | 6,665.7<br>(2,983.8 to 11,622.7)     | 5,609.2<br>(2,487.7 to 9,920.7)      | 97.2<br>(37.4 to 183.4)     | 81.5<br>(31.1 to 155.7)     |
| Hepatitis C                         | Severe acute hepatitis C                                                       | 4.7<br>(2.3 to 9.2)                   | 4.9<br>(2.5 to 9.7)                   | 40.8<br>(20.3 to 79.8)               | 42.9<br>(21.3 to 83.7)               | 0.6<br>(0.3 to 1.4)         | 0.7<br>(0.3 to 1.5)         |
| Hepatitis C                         | Asymptomatic acute hepatitis C                                                 | 328.8<br>(233.5 to 387.1)             | 345.7<br>(244.8 to 407.9)             | 2,849.7<br>(2,023.8 to 3,355.3)      | 2,995.9<br>(2,121.8 to 3,535.3)      | < 0.05<br>(0.0 to < 0.05)   | < 0.05<br>(0.0 to < 0.05)   |
| Hepatitis C                         | Moderate acute hepatitis C                                                     | 110.9<br>(59.8 to 201.9)              | 116.6<br>(61.9 to 212.5)              | 961.3<br>(518.1 to 1,749.4)          | 1,010.8<br>(536.8 to 1,841.8)        | 5.6<br>(2.6 to 10.7)        | 5.8<br>(2.7 to 11.4)        |
| Hepatitis C                         | Chronic hepatitis C                                                            | 127,058.6<br>(113,280.5 to 141,321.0) | 157,587.7<br>(140,996.3 to 174,642.5) | 2,895.8<br>(2,585.6 to 3,215.3)      | 3,044.6<br>(2,719.2 to 3,384.5)      | < 0.05<br>(0.0 to < 0.05)   | < 0.05<br>(0.0 to < 0.05)   |
| Acute hepatitis E                   | Asymptomatic acute hepatitis E                                                 | 1,262.3<br>(1,129.9 to 1,403.3)       | 765.2<br>(685.6 to 853.5)             | 16,410.5<br>(14,689.2 to 18,242.7)   | 9,947.8<br>(8,913.1 to 11,095.2)     | < 0.05<br>(0.0 to < 0.05)   | < 0.05<br>(0.0 to < 0.05)   |
| Acute hepatitis E                   | Severe acute hepatitis E                                                       | 31.4<br>(25.6 to 37.9)                | 23.4<br>(19.5 to 28.3)                | 408.1<br>(332.2 to 492.6)            | 304.2<br>(254.0 to 368.1)            | 4.2<br>(2.6 to 6.2)         | 3.1<br>(2.0 to 4.6)         |
| Acute hepatitis E                   | Moderate acute hepatitis E                                                     | 910.3<br>(785.2 to 1,051.7)           | 677.4<br>(579.4 to 783.8)             | 11,833.8<br>(10,207.5 to 13,671.5)   | 8,805.8<br>(7,532.4 to 10,189.5)     | 44.5<br>(27.7 to 66.8)      | 33.1<br>(20.8 to 50.1)      |
| Other infectious diseases           | Moderate anaemia due to other infectious diseases                              | 16,519.0<br>(15,671.4 to 17,445.2)    | 18,379.3<br>(17,359.2 to 19,569.9)    | --                                   | --                                   | 828.1<br>(541.9 to 1,211.8) | 921.6<br>(598.8 to 1,334.7) |
| Other infectious diseases           | Severe anaemia due to other infectious diseases                                | 923.0<br>(820.7 to 1,056.4)           | 1,109.3<br>(953.5 to 1,358.8)         | --                                   | --                                   | 130.9<br>(85.6 to 180.1)    | 157.2<br>(103.1 to 221.3)   |
| Other infectious diseases           | Gullain-Barre syndrome due to other infectious diseases                        | 3.9<br>(2.6 to 5.6)                   | 4.5<br>(3.0 to 6.6)                   | 8.0<br>(5.2 to 11.2)                 | 9.3<br>(6.1 to 13.2)                 | 1.2<br>(0.7 to 1.8)         | 1.3<br>(0.8 to 2.2)         |
| Other infectious diseases           | Mild anaemia due to other infectious diseases                                  | 23,926.3<br>(23,248.7 to 24,597.5)    | 24,932.9<br>(24,149.3 to 25,753.0)    | --                                   | --                                   | 86.7<br>(80.8 to 190.5)     | 90.2<br>(82.0 to 197.4)     |
| Other infectious diseases           | Other infectious diseases                                                      | --                                    | --                                    | --                                   | --                                   | 155.0<br>(94.3 to 237.2)    | 169.3<br>(103.1 to 260.3)   |
| Lip and oral cavity cancer          | Terminal phase of mouth cancer                                                 | 11.6<br>(11.4 to 11.8)                | 15.1<br>(14.6 to 15.5)                | --                                   | --                                   | 6.3<br>(4.4 to 8.0)         | 8.1<br>(5.6 to 10.4)        |
| Lip and oral cavity cancer          | Diagnosis and primary therapy phase of mouth cancer                            | 98.4<br>(97.1 to 99.9)                | 132.0<br>(128.2 to 135.6)             | 287.0<br>(283.3 to 291.1)            | 382.0<br>(370.7 to 392.1)            | 26.8<br>(17.9 to 36.7)      | 35.8<br>(24.3 to 49.1)      |
| Lip and oral cavity cancer          | Metastatic phase of mouth cancer                                               | 85.1<br>(83.7 to 86.3)                | 110.7<br>(107.2 to 113.9)             | --                                   | --                                   | 36.0<br>(24.5 to 47.2)      | 46.8<br>(31.7 to 61.6)      |
| Lip and oral cavity cancer          | Controlled phase of mouth cancer                                               | 833.8<br>(821.8 to 847.1)             | 1,129.0<br>(1,095.8 to 1,160.7)       | --                                   | --                                   | 38.0<br>(24.7 to 55.5)      | 51.4<br>(33.4 to 73.8)      |
| Nasopharynx cancer                  | Controlled phase of nasopharynx cancer                                         | 240.9<br>(232.4 to 249.4)             | 261.1<br>(246.7 to 277.3)             | --                                   | --                                   | 11.5<br>(7.3 to 16.8)       | 12.4<br>(7.9 to 18.4)       |
| Nasopharynx cancer                  | Terminal phase of nasopharynx cancer                                           | 3.7<br>(3.6 to 3.8)                   | 4.0<br>(3.8 to 4.2)                   | --                                   | --                                   | 2.0<br>(1.4 to 2.5)         | 2.2<br>(1.5 to 2.8)         |
| Nasopharynx cancer                  | Diagnosis and primary therapy phase of nasopharynx cancer                      | 28.0<br>(27.0 to 28.9)                | 30.3<br>(28.7 to 32.1)                | 88.2<br>(85.3 to 91.0)               | 95.6<br>(90.8 to 101.1)              | 8.0<br>(5.3 to 11.1)        | 8.7<br>(5.8 to 12.2)        |
| Nasopharynx cancer                  | Metastatic phase of nasopharynx cancer                                         | 33.8<br>(32.8 to 34.8)                | 36.6<br>(34.9 to 38.6)                | --                                   | --                                   | 15.1<br>(10.3 to 20.2)      | 16.4<br>(11.0 to 22.1)      |
| Other pharynx cancer                | Terminal phase of other pharynx cancer                                         | 6.7<br>(6.5 to 6.9)                   | 8.8<br>(8.2 to 9.2)                   | --                                   | --                                   | 3.6<br>(2.5 to 4.6)         | 4.8<br>(3.3 to 6.2)         |
| Other pharynx cancer                | Diagnosis and primary therapy phase of other pharynx cancer                    | 32.6<br>(32.0 to 33.3)                | 46.2<br>(43.6 to 47.7)                | 124.2<br>(121.7 to 127.0)            | 169.6<br>(159.4 to 175.5)            | 9.2<br>(6.2 to 12.8)        | 12.9<br>(8.7 to 18.0)       |
| Other pharynx cancer                | Controlled phase of other pharynx cancer                                       | 255.7<br>(250.8 to 261.4)             | 369.5<br>(349.2 to 381.4)             | --                                   | --                                   | 11.8<br>(7.6 to 16.9)       | 17.0<br>(10.9 to 25.0)      |
| Other pharynx cancer                | Metastatic phase of other pharynx cancer                                       | 40.9<br>(39.9 to 41.9)                | 54.0<br>(50.4 to 56.1)                | --                                   | --                                   | 17.7<br>(11.9 to 23.6)      | 23.2<br>(15.8 to 30.8)      |
| Oesophageal cancer                  | Terminal phase of oesophageal cancer                                           | 31.6<br>(31.2 to 32.0)                | 33.4<br>(32.7 to 34.4)                | --                                   | --                                   | 16.3<br>(11.4 to 20.8)      | 17.5<br>(12.1 to 22.2)      |
| Oesophageal cancer                  | Diagnosis and primary therapy phase of oesophageal cancer                      | 53.9<br>(52.7 to 55.0)                | 61.1<br>(59.2 to 63.5)                | 413.1<br>(407.5 to 418.8)            | 442.6<br>(433.3 to 456.2)            | 14.7<br>(10.0 to 20.3)      | 16.7<br>(11.4 to 23.0)      |
| Oesophageal cancer                  | Controlled phase of oesophageal cancer                                         | 259.4<br>(252.1 to 267.4)             | 307.9<br>(295.9 to 321.7)             | --                                   | --                                   | 11.9<br>(7.7 to 17.3)       | 14.1<br>(9.1 to 20.6)       |
| Oesophageal cancer                  | Metastatic phase of oesophageal cancer                                         | 145.3<br>(143.3 to 147.2)             | 153.7<br>(150.6 to 158.4)             | --                                   | --                                   | 59.3<br>(41.0 to 77.6)      | 63.2<br>(43.4 to 83.5)      |
| Stomach cancer                      | Metastatic phase of stomach cancer                                             | 266.0<br>(263.3 to 268.8)             | 297.3<br>(291.8 to 302.8)             | --                                   | --                                   | 106.9<br>(74.0 to 139.5)    | 119.6<br>(82.2 to 156.4)    |
| Stomach cancer                      | Terminal phase of stomach cancer                                               | 68.6<br>(67.9 to 69.3)                | 76.6<br>(75.2 to 78.0)                | --                                   | --                                   | 34.7<br>(24.5 to 43.6)      | 38.9<br>(27.1 to 49.5)      |
| Stomach cancer                      | Controlled phase of stomach cancer                                             | 1,194.2<br>(1,177.8 to 1,211.9)       | 1,549.1<br>(1,508.9 to 1,592.1)       | --                                   | --                                   | 54.2<br>(35.4 to 78.6)      | 70.1<br>(45.8 to 101.2)     |
| Stomach cancer                      | Diagnosis and primary therapy phase of stomach cancer                          | 226.3<br>(223.5 to 229.1)             | 275.7<br>(269.1 to 282.4)             | 1,002.5<br>(991.9 to 1,013.4)        | 1,156.6<br>(1,134.4 to 1,179.8)      | 58.9<br>(40.6 to 79.7)      | 71.6<br>(48.7 to 97.6)      |
| Colon and rectum cancer             | Metastatic phase of colon and rectum cancers                                   | 367.4<br>(363.1 to 372.0)             | 471.7<br>(455.7 to 491.7)             | --                                   | --                                   | 144.8<br>(99.7 to 187.1)    | 185.5<br>(128.1 to 243.2)   |
| Colon and rectum cancer             | Stoma due to colon and rectum cancer                                           | 268.0<br>(258.6 to 277.5)             | 341.5<br>(329.0 to 354.2)             | 57.8<br>(55.9 to 59.7)               | 73.2<br>(70.6 to 75.8)               | 33.8<br>(23.7 to 45.6)      | 43.0<br>(29.8 to 58.0)      |
| Colon and rectum cancer             | Controlled phase of colon and rectum cancers                                   | 3,574.8<br>(3,526.9 to 3,623.1)       | 5,006.4<br>(4,828.6 to 5,272.6)       | --                                   | --                                   | 161.2<br>(104.3 to 230.9)   | 225.8<br>(148.1 to 325.1)   |



|                                                    |                                                                             |                                 |                                 |                                 |                                 |                           |                           |
|----------------------------------------------------|-----------------------------------------------------------------------------|---------------------------------|---------------------------------|---------------------------------|---------------------------------|---------------------------|---------------------------|
| Colon and rectum cancer                            | Diagnosis and primary therapy phase of colon and rectum cancers             | 319.3<br>(315.6 to 323.1)       | 438.3<br>(423.7 to 459.4)       | 1,224.5<br>(1,210.1 to 1,239.5) | 1,642.3<br>(1,584.7 to 1,721.6) | 81.7<br>(56.3 to 110.5)   | 111.9<br>(76.5 to 152.1)  |
| Colon and rectum cancer                            | Terminal phase of colon and rectum cancers                                  | 51.0<br>(50.4 to 51.6)          | 64.8<br>(62.6 to 67.6)          | --                              | --                              | 25.9<br>(18.2 to 32.8)    | 33.0<br>(23.2 to 42.2)    |
| Liver cancer due to hepatitis B                    | Metastatic phase of liver cancer due to hepatitis B                         | 62.5<br>(55.5 to 69.3)          | 80.9<br>(70.5 to 90.4)          | --                              | --                              | 26.9<br>(17.9 to 35.9)    | 34.6<br>(22.4 to 46.9)    |
| Liver cancer due to hepatitis B                    | Terminal phase of liver cancer due to hepatitis B                           | 24.9<br>(22.1 to 27.6)          | 32.2<br>(28.1 to 36.0)          | --                              | --                              | 13.4<br>(8.9 to 17.5)     | 17.2<br>(11.4 to 22.7)    |
| Liver cancer due to hepatitis B                    | Controlled phase of liver cancer due to hepatitis B                         | 189.9<br>(168.0 to 211.7)       | 379.8<br>(326.9 to 429.6)       | --                              | --                              | 8.9<br>(5.6 to 13.0)      | 17.7<br>(11.1 to 26.0)    |
| Liver cancer due to hepatitis B                    | Diagnosis and primary therapy phase of liver cancer due to hepatitis B      | 74.9<br>(66.5 to 82.7)          | 105.9<br>(91.8 to 118.6)        | 323.3<br>(287.1 to 357.7)       | 436.5<br>(380.1 to 488.5)       | 20.5<br>(13.5 to 28.3)    | 28.7<br>(18.8 to 39.8)    |
| Liver cancer due to hepatitis C                    | Metastatic phase of liver cancer due to hepatitis C                         | 26.1<br>(23.6 to 28.6)          | 34.7<br>(31.3 to 38.2)          | --                              | --                              | 11.3<br>(7.7 to 15.3)     | 15.1<br>(10.3 to 20.5)    |
| Liver cancer due to hepatitis C                    | Terminal phase of liver cancer due to hepatitis C                           | 10.4<br>(9.4 to 11.4)           | 13.8<br>(12.5 to 15.2)          | --                              | --                              | 5.6<br>(3.9 to 7.3)       | 7.4<br>(5.1 to 9.7)       |
| Liver cancer due to hepatitis C                    | Diagnosis and primary therapy phase of liver cancer due to hepatitis C      | 32.2<br>(29.2 to 35.3)          | 45.7<br>(41.2 to 50.2)          | 137.1<br>(124.3 to 150.1)       | 188.7<br>(170.2 to 207.4)       | 8.9<br>(5.9 to 12.4)      | 12.5<br>(8.4 to 17.7)     |
| Liver cancer due to hepatitis C                    | Controlled phase of liver cancer due to hepatitis C                         | 93.9<br>(85.8 to 102.2)         | 167.0<br>(150.0 to 182.9)       | --                              | --                              | 4.3<br>(2.8 to 6.4)       | 7.7<br>(4.9 to 11.2)      |
| Liver cancer due to alcohol use                    | Metastatic phase of liver cancer due to alcohol use                         | 19.8<br>(16.6 to 23.3)          | 27.8<br>(23.4 to 32.3)          | --                              | --                              | 8.9<br>(5.9 to 12.2)      | 12.4<br>(8.3 to 17.0)     |
| Liver cancer due to alcohol use                    | Controlled phase of liver cancer due to alcohol use                         | 58.1<br>(48.8 to 67.9)          | 112.3<br>(94.2 to 131.1)        | --                              | --                              | 2.7<br>(1.7 to 4.1)       | 5.2<br>(3.3 to 7.8)       |
| Liver cancer due to alcohol use                    | Diagnosis and primary therapy phase of liver cancer due to alcohol use      | 23.6<br>(19.8 to 27.7)          | 35.1<br>(29.6 to 40.7)          | 102.3<br>(85.8 to 120.2)        | 147.7<br>(124.6 to 171.3)       | 6.7<br>(4.3 to 9.5)       | 9.9<br>(6.6 to 14.3)      |
| Liver cancer due to alcohol use                    | Terminal phase of liver cancer due to alcohol use                           | 7.9<br>(6.6 to 9.3)             | 11.1<br>(9.3 to 12.9)           | --                              | --                              | 4.3<br>(2.9 to 5.6)       | 6.0<br>(4.1 to 7.9)       |
| Liver cancer due to other causes                   | Diagnosis and primary therapy phase of liver cancer due to other causes     | 39.5<br>(35.4 to 44.3)          | 57.1<br>(51.2 to 64.3)          | 169.7<br>(152.3 to 190.4)       | 234.8<br>(210.3 to 264.1)       | 11.0<br>(7.3 to 15.2)     | 15.7<br>(10.4 to 21.5)    |
| Liver cancer due to other causes                   | Terminal phase of liver cancer due to other causes                          | 13.0<br>(11.7 to 14.6)          | 17.3<br>(15.5 to 19.4)          | --                              | --                              | 7.0<br>(4.8 to 9.2)       | 9.3<br>(6.3 to 12.2)      |
| Liver cancer due to other causes                   | Metastatic phase of liver cancer due to other causes                        | 32.7<br>(29.3 to 36.6)          | 43.4<br>(38.8 to 48.8)          | --                              | --                              | 14.3<br>(9.6 to 19.2)     | 18.9<br>(12.5 to 25.8)    |
| Liver cancer due to other causes                   | Controlled phase of liver cancer due to other causes                        | 104.8<br>(93.1 to 118.0)        | 208.4<br>(182.8 to 239.4)       | --                              | --                              | 4.9<br>(3.1 to 7.3)       | 9.7<br>(6.1 to 14.4)      |
| Gallbladder and biliary tract cancer               | Controlled phase of gallbladder and biliary tract cancer                    | 57.7<br>(51.7 to 60.6)          | 74.6<br>(65.4 to 80.8)          | --                              | --                              | 2.7<br>(1.7 to 4.0)       | 3.5<br>(2.2 to 5.1)       |
| Gallbladder and biliary tract cancer               | Metastatic phase of gallbladder and biliary tract cancer                    | 42.2<br>(39.3 to 44.2)          | 50.7<br>(46.5 to 53.3)          | --                              | --                              | 18.2<br>(12.5 to 24.0)    | 21.9<br>(14.8 to 29.5)    |
| Gallbladder and biliary tract cancer               | Terminal phase of gallbladder and biliary tract cancer                      | 12.1<br>(11.3 to 12.7)          | 14.6<br>(13.4 to 15.4)          | --                              | --                              | 6.5<br>(4.5 to 8.3)       | 7.8<br>(5.4 to 10.1)      |
| Gallbladder and biliary tract cancer               | Diagnosis and primary therapy phase of gallbladder and biliary tract cancer | 23.9<br>(22.2 to 24.9)          | 29.2<br>(26.6 to 30.7)          | 152.2<br>(141.5 to 159.5)       | 183.7<br>(168.5 to 193.2)       | 6.7<br>(4.5 to 9.2)       | 8.2<br>(5.4 to 11.4)      |
| Pancreatic cancer                                  | Metastatic phase of pancreatic cancer                                       | 63.8<br>(63.4 to 64.3)          | 85.0<br>(82.6 to 86.6)          | --                              | --                              | 27.0<br>(18.5 to 35.4)    | 35.7<br>(24.6 to 47.0)    |
| Pancreatic cancer                                  | Terminal phase of pancreatic cancer                                         | 25.1<br>(24.9 to 25.3)          | 33.5<br>(32.5 to 34.1)          | --                              | --                              | 13.4<br>(9.3 to 17.0)     | 17.7<br>(12.3 to 22.6)    |
| Pancreatic cancer                                  | Controlled phase of pancreatic cancer                                       | 102.9<br>(97.9 to 107.7)        | 150.5<br>(140.5 to 159.2)       | --                              | --                              | 4.7<br>(3.0 to 6.9)       | 6.9<br>(4.5 to 10.0)      |
| Pancreatic cancer                                  | Diagnosis and primary therapy phase of pancreatic cancer                    | 70.3<br>(69.7 to 70.9)          | 94.6<br>(91.8 to 96.5)          | 312.5<br>(310.2 to 314.9)       | 417.7<br>(405.7 to 425.4)       | 18.9<br>(12.9 to 25.9)    | 25.4<br>(17.1 to 34.5)    |
| Larynx cancer                                      | Diagnosis and primary therapy phase of larynx cancer                        | 50.6<br>(49.9 to 51.4)          | 62.8<br>(61.7 to 64.3)          | 168.4<br>(136.3 to 141.0)       | 138.5<br>(165.2 to 172.9)       | 13.9<br>(9.3 to 19.1)     | 17.4<br>(11.7 to 24.1)    |
| Larynx cancer                                      | Controlled phase of larynx cancer                                           | 325.6<br>(319.5 to 332.2)       | 412.5<br>(403.0 to 425.7)       | --                              | --                              | 15.0<br>(9.7 to 21.6)     | 18.9<br>(12.3 to 27.3)    |
| Larynx cancer                                      | Terminal phase of larynx cancer                                             | 7.1<br>(7.0 to 7.2)             | 8.3<br>(8.2 to 8.5)             | --                              | --                              | 3.8<br>(2.7 to 4.9)       | 4.5<br>(3.1 to 5.8)       |
| Larynx cancer                                      | Laryngectomy due to larynx cancer                                           | 75.2<br>(72.8 to 77.6)          | 94.9<br>(91.8 to 97.9)          | 14.9<br>(14.4 to 15.3)          | 18.6<br>(18.0 to 19.2)          | 7.0<br>(4.5 to 10.1)      | 8.8<br>(5.7 to 12.8)      |
| Larynx cancer                                      | Metastatic phase of larynx cancer                                           | 50.4<br>(49.6 to 51.2)          | 59.2<br>(58.2 to 60.6)          | --                              | --                              | 21.5<br>(14.8 to 28.5)    | 25.6<br>(17.7 to 33.8)    |
| Tracheal, bronchus, and lung cancer                | Controlled phase of lung, bronchus, and trachea cancer                      | 1,222.0<br>(1,194.3 to 1,252.0) | 1,790.1<br>(1,728.4 to 1,850.7) | --                              | --                              | 55.2<br>(36.1 to 79.4)    | 80.7<br>(53.2 to 116.6)   |
| Tracheal, bronchus, and lung cancer                | Metastatic phase of lung, bronchus, and trachea cancer                      | 539.0<br>(523.2 to 534.5)       | 666.9<br>(650.9 to 682.0)       | --                              | --                              | 208.4<br>(145.1 to 269.8) | 261.9<br>(180.5 to 339.5) |
| Tracheal, bronchus, and lung cancer                | Terminal phase of lung, bronchus, and trachea cancer                        | 117.3<br>(116.0 to 118.5)       | 147.9<br>(144.3 to 151.2)       | --                              | --                              | 57.1<br>(40.3 to 72.0)    | 71.8<br>(50.7 to 90.3)    |
| Tracheal, bronchus, and lung cancer                | Diagnosis and primary therapy phase of lung, bronchus, and trachea cancer   | 168.3<br>(165.5 to 170.9)       | 231.1<br>(224.2 to 237.8)       | 1,563.3<br>(1,545.6 to 1,579.3) | 2,007.8<br>(1,958.4 to 2,055.3) | 43.6<br>(29.7 to 58.9)    | 59.7<br>(41.3 to 80.4)    |
| Malignant skin melanoma                            | Diagnosis and primary therapy phase of malignant skin melanoma              | 45.5<br>(39.9 to 50.9)          | 63.4<br>(54.5 to 70.7)          | 203.0<br>(178.7 to 226.9)       | 281.5<br>(243.1 to 314.2)       | 12.6<br>(8.3 to 17.5)     | 17.3<br>(11.6 to 24.3)    |
| Malignant skin melanoma                            | Terminal phase of malignant skin melanoma                                   | 3.5<br>(3.2 to 3.9)             | 4.7<br>(4.1 to 5.1)             | --                              | --                              | 1.9<br>(1.3 to 2.5)       | 2.5<br>(1.7 to 3.2)       |
| Malignant skin melanoma                            | Controlled phase of malignant skin melanoma                                 | 893.1<br>(782.7 to 999.7)       | 1,249.3<br>(1,070.5 to 1,397.5) | --                              | --                              | 41.0<br>(25.9 to 59.4)    | 57.2<br>(35.9 to 83.9)    |
| Malignant skin melanoma                            | Metastatic phase of malignant skin melanoma                                 | 22.4<br>(20.2 to 24.7)          | 30.1<br>(26.4 to 32.9)          | --                              | --                              | 9.7<br>(6.5 to 13.1)      | 12.9<br>(8.6 to 17.2)     |
| Non-melanoma skin cancer (squamous-cell carcinoma) | Mild disfigurement due to squamous cell carcinoma                           | 529.5<br>(327.6 to 788.0)       | 551.5<br>(332.7 to 789.7)       | 485.7<br>(304.2 to 745.4)       | 508.4<br>(307.7 to 752.4)       | 5.4<br>(2.3 to 11.2)      | 5.6<br>(2.4 to 11.7)      |
| Non-melanoma skin cancer (squamous-cell carcinoma) | Moderate disfigurement due to squamous cell carcinoma                       | 98.9<br>(56.2 to 158.7)         | 103.0<br>(58.2 to 165.6)        | 90.8<br>(51.4 to 145.2)         | 95.0<br>(53.8 to 149.3)         | 6.0<br>(3.1 to 10.4)      | 6.3<br>(3.1 to 11.1)      |
| Non-melanoma skin cancer (squamous-cell carcinoma) | Severe disfigurement due to squamous cell carcinoma                         | 33.7<br>(16.3 to 62.6)          | 35.1<br>(16.7 to 64.1)          | 30.3<br>(14.5 to 53.7)          | 31.7<br>(15.3 to 55.1)          | 16.9<br>(7.9 to 31.4)     | 17.9<br>(8.1 to 33.5)     |
| Non-melanoma skin cancer (basal-cell carcinoma)    | Disfigurement due to basal cell carcinoma                                   | 82.9<br>(54.0 to 129.0)         | 102.6<br>(65.0 to 166.8)        | 747.2<br>(500.1 to 1,055.7)     | 886.1<br>(574.1 to 1,261.5)     | 0.9<br>(0.4 to 1.8)       | 1.1<br>(0.4 to 2.2)       |



|                                 |                                                                         |                                 |                                 |                           |                                 |                           |                           |
|---------------------------------|-------------------------------------------------------------------------|---------------------------------|---------------------------------|---------------------------|---------------------------------|---------------------------|---------------------------|
| Breast cancer                   | Terminal phase of breast cancer                                         | 26.0<br>(25.0 to 27.7)          | 31.5<br>(30.1 to 33.9)          | --                        | --                              | 13.7<br>(9.5 to 17.5)     | 16.6<br>(11.4 to 21.3)    |
| Breast cancer                   | Metastatic phase of breast cancer                                       | 364.0<br>(350.9 to 386.8)       | 442.8<br>(423.7 to 474.5)       | --                        | --                              | 144.3<br>(100.5 to 187.7) | 175.3<br>(119.3 to 228.1) |
| Breast cancer                   | Mastectomy due to breast cancer                                         | 3,093.2<br>(3,023.2 to 3,163.1) | 3,780.2<br>(3,683.9 to 3,867.3) | 529.4<br>(517.9 to 541.3) | 642.3<br>(627.0 to 658.8)       | 235.0<br>(150.8 to 341.7) | 286.9<br>(184.5 to 416.5) |
| Breast cancer                   | Controlled phase of breast cancer                                       | 2,469.5<br>(2,276.3 to 2,624.2) | 3,518.8<br>(3,179.2 to 3,941.3) | --                        | --                              | 113.9<br>(72.2 to 165.1)  | 162.1<br>(104.1 to 237.8) |
| Breast cancer                   | Diagnosis and primary therapy phase of breast cancer                    | 289.9<br>(280.8 to 296.6)       | 377.8<br>(361.1 to 400.2)       | 789.9<br>(752.4 to 827.8) | 1,059.9<br>(979.5 to 1,163.2)   | 75.3<br>(51.8 to 102.0)   | 98.0<br>(66.9 to 134.2)   |
| Cervical cancer                 | Metastatic phase of cervical cancer                                     | 123.8<br>(103.8 to 132.1)       | 130.7<br>(107.9 to 138.7)       | --                        | --                              | 52.7<br>(35.7 to 69.7)    | 56.3<br>(37.4 to 74.6)    |
| Cervical cancer                 | Diagnosis and primary therapy phase of cervical cancer                  | 148.6<br>(122.2 to 156.2)       | 163.3<br>(130.7 to 175.0)       | 469.4<br>(388.9 to 492.1) | 511.2<br>(414.0 to 542.3)       | 40.4<br>(26.8 to 56.4)    | 44.7<br>(29.4 to 62.7)    |
| Cervical cancer                 | Terminal phase of cervical cancer                                       | 17.2<br>(14.4 to 18.4)          | 18.1<br>(15.0 to 19.2)          | --                        | --                              | 9.3<br>(6.4 to 11.9)      | 9.8<br>(6.7 to 12.6)      |
| Cervical cancer                 | Controlled phase of cervical cancer                                     | 1,464.3<br>(1,192.8 to 1,543.3) | 1,626.7<br>(1,289.4 to 1,751.9) | --                        | --                              | 67.6<br>(42.1 to 99.2)    | 75.2<br>(46.2 to 110.2)   |
| Uterine cancer                  | Controlled phase of uterine cancer                                      | 1,222.9<br>(1,194.3 to 1,250.6) | 1,739.1<br>(1,670.4 to 1,843.6) | --                        | --                              | 55.8<br>(36.4 to 81.8)    | 79.3<br>(51.3 to 116.0)   |
| Uterine cancer                  | Metastatic phase of uterine cancer                                      | 49.6<br>(48.3 to 50.7)          | 66.1<br>(63.7 to 69.6)          | --                        | --                              | 20.9<br>(14.1 to 27.4)    | 27.6<br>(18.7 to 36.7)    |
| Uterine cancer                  | Diagnosis and primary therapy phase of uterine cancer                   | 103.5<br>(101.0 to 105.8)       | 146.1<br>(140.4 to 154.8)       | 297.3<br>(290.5 to 304.0) | 417.4<br>(400.8 to 441.7)       | 27.4<br>(18.7 to 37.3)    | 38.6<br>(26.3 to 53.7)    |
| Uterine cancer                  | Terminal phase of uterine cancer                                        | 5.6<br>(5.4 to 5.7)             | 7.4<br>(7.1 to 7.8)             | --                        | --                              | 3.0<br>(2.1 to 3.8)       | 4.0<br>(2.8 to 5.2)       |
| Ovarian cancer                  | Diagnosis and primary therapy phase of ovarian cancer                   | 31.1<br>(30.1 to 31.6)          | 39.0<br>(36.8 to 40.2)          | 204.3<br>(199.8 to 208.8) | 253.5<br>(242.4 to 260.2)       | 8.9<br>(6.0 to 12.2)      | 11.1<br>(7.4 to 15.5)     |
| Ovarian cancer                  | Controlled phase of ovarian cancer                                      | 443.4<br>(427.0 to 450.7)       | 558.2<br>(524.8 to 575.9)       | --                        | --                              | 20.3<br>(13.2 to 29.3)    | 25.5<br>(16.5 to 37.3)    |
| Ovarian cancer                  | Terminal phase of ovarian cancer                                        | 10.4<br>(10.2 to 10.7)          | 12.8<br>(12.3 to 13.1)          | --                        | --                              | 5.6<br>(3.9 to 7.2)       | 6.9<br>(4.8 to 8.9)       |
| Ovarian cancer                  | Metastatic phase of ovarian cancer                                      | 142.2<br>(139.3 to 145.8)       | 175.6<br>(168.5 to 180.0)       | --                        | --                              | 58.8<br>(40.9 to 77.1)    | 72.6<br>(49.5 to 95.4)    |
| Prostate cancer                 | Metastatic phase of prostate cancer                                     | 360.2<br>(319.2 to 387.2)       | 471.9<br>(407.8 to 521.5)       | --                        | --                              | 136.4<br>(94.0 to 177.5)  | 178.5<br>(122.0 to 235.2) |
| Prostate cancer                 | Incontinence due to prostate cancer                                     | 195.7<br>(111.0 to 286.5)       | 255.7<br>(145.0 to 374.7)       | 39.8<br>(23.7 to 60.9)    | 51.8<br>(31.0 to 79.4)          | 31.3<br>(16.1 to 50.8)    | 40.8<br>(21.3 to 65.5)    |
| Prostate cancer                 | Impotence due to prostate cancer                                        | 591.3<br>(495.5 to 688.8)       | 772.7<br>(646.4 to 903.0)       | 123.7<br>(103.6 to 143.3) | 161.1<br>(134.7 to 187.4)       | 35.0<br>(21.8 to 51.9)    | 45.7<br>(28.5 to 68.2)    |
| Prostate cancer                 | Terminal phase of prostate cancer                                       | 19.1<br>(16.8 to 20.6)          | 24.8<br>(21.3 to 27.1)          | --                        | --                              | 9.3<br>(6.4 to 11.8)      | 12.1<br>(8.2 to 15.5)     |
| Prostate cancer                 | Diagnosis and primary therapy phase of prostate cancer                  | 230.7<br>(212.3 to 260.3)       | 335.3<br>(302.3 to 396.5)       | 861.3<br>(794.4 to 962.0) | 1,222.8<br>(1,092.5 to 1,412.2) | 57.7<br>(38.1 to 78.1)    | 83.9<br>(55.9 to 115.4)   |
| Prostate cancer                 | Controlled phase of prostate cancer                                     | 2,537.6<br>(2,251.6 to 2,971.6) | 3,836.7<br>(3,346.0 to 4,749.5) | --                        | --                              | 113.8<br>(71.2 to 169.4)  | 172.1<br>(107.4 to 259.2) |
| Testicular cancer               | Diagnosis and primary therapy phase of testicular cancer                | 14.4<br>(14.0 to 14.7)          | 19.0<br>(18.3 to 19.9)          | 51.2<br>(50.1 to 52.4)    | 66.8<br>(64.5 to 69.7)          | 4.1<br>(2.8 to 5.7)       | 5.5<br>(3.6 to 7.6)       |
| Testicular cancer               | Metastatic phase of testicular cancer                                   | 5.8<br>(5.6 to 5.9)             | 6.7<br>(6.5 to 6.9)             | --                        | --                              | 2.6<br>(1.8 to 3.5)       | 3.0<br>(2.0 to 4.0)       |
| Testicular cancer               | Controlled phase of testicular cancer                                   | 236.4<br>(230.9 to 242.0)       | 313.6<br>(302.3 to 327.7)       | --                        | --                              | 11.3<br>(7.3 to 16.5)     | 15.0<br>(9.6 to 22.2)     |
| Testicular cancer               | Terminal phase of testicular cancer                                     | 0.5<br>(0.5 to 0.5)             | 0.6<br>(0.6 to 0.6)             | --                        | --                              | 0.3<br>(0.2 to 0.3)       | 0.3<br>(0.2 to 0.4)       |
| Kidney cancer                   | Controlled phase of kidney cancer                                       | 856.5<br>(820.6 to 874.0)       | 1,104.5<br>(1,046.3 to 1,140.6) | --                        | --                              | 39.3<br>(25.4 to 56.9)    | 50.6<br>(32.7 to 73.0)    |
| Kidney cancer                   | Metastatic phase of kidney cancer                                       | 48.1<br>(47.1 to 49.3)          | 60.4<br>(59.1 to 61.9)          | --                        | --                              | 20.8<br>(14.0 to 27.6)    | 26.1<br>(17.7 to 34.4)    |
| Kidney cancer                   | Diagnosis and primary therapy phase of kidney cancer                    | 87.7<br>(84.5 to 89.4)          | 112.7<br>(107.4 to 116.1)       | 268.0<br>(263.9 to 271.7) | 342.1<br>(330.8 to 349.9)       | 23.8<br>(16.0 to 32.3)    | 30.5<br>(20.4 to 41.9)    |
| Kidney cancer                   | Terminal phase of kidney cancer                                         | 9.3<br>(9.2 to 9.6)             | 11.7<br>(11.5 to 12.0)          | --                        | --                              | 5.0<br>(3.5 to 6.4)       | 6.3<br>(4.4 to 8.1)       |
| Bladder cancer                  | Metastatic phase of bladder cancer                                      | 59.1<br>(58.3 to 60.0)          | 74.0<br>(72.1 to 75.7)          | --                        | --                              | 24.3<br>(16.7 to 31.9)    | 30.4<br>(20.9 to 40.1)    |
| Bladder cancer                  | Terminal phase of bladder cancer                                        | 10.9<br>(10.8 to 11.1)          | 13.6<br>(13.3 to 14.0)          | --                        | --                              | 7.2<br>(4.0 to 7.4)       | 7.2<br>(5.0 to 9.1)       |
| Bladder cancer                  | Controlled phase of bladder cancer                                      | 1,014.7<br>(1,000.4 to 1,028.6) | 1,367.8<br>(1,327.1 to 1,408.7) | --                        | --                              | 45.6<br>(29.7 to 65.4)    | 61.5<br>(40.4 to 88.2)    |
| Bladder cancer                  | Diagnosis and primary therapy phase of bladder cancer                   | 115.0<br>(113.6 to 116.3)       | 152.9<br>(149.0 to 156.7)       | 307.6<br>(303.5 to 311.6) | 403.4<br>(392.5 to 414.1)       | 29.9<br>(20.5 to 40.6)    | 39.6<br>(26.8 to 53.7)    |
| Bladder cancer                  | Urinary incontinence due to bladder cancer                              | 122.6<br>(118.6 to 126.6)       | 159.1<br>(153.9 to 164.4)       | 26.3<br>(25.5 to 27.1)    | 34.0<br>(32.9 to 35.1)          | 20.3<br>(14.2 to 27.2)    | 26.3<br>(18.3 to 35.5)    |
| Brain and nervous system cancer | Controlled phase of brain and nervous system cancers                    | 404.3<br>(356.5 to 420.3)       | 584.8<br>(515.0 to 613.7)       | --                        | --                              | 19.1<br>(11.9 to 28.1)    | 27.5<br>(17.3 to 40.4)    |
| Brain and nervous system cancer | Diagnosis and primary therapy phase of brain and nervous system cancers | 49.5<br>(44.0 to 51.4)          | 70.7<br>(62.7 to 74.1)          | 240.7<br>(218.3 to 250.1) | 329.7<br>(298.9 to 348.8)       | 14.2<br>(9.4 to 20.0)     | 20.3<br>(13.6 to 28.4)    |
| Brain and nervous system cancer | Metastatic phase of brain and nervous system cancers                    | 79.5<br>(72.7 to 83.7)          | 106.6<br>(97.3 to 113.4)        | --                        | --                              | 35.7<br>(23.7 to 48.0)    | 47.8<br>(32.1 to 64.0)    |
| Brain and nervous system cancer | Terminal phase of brain and nervous system cancers                      | 14.3<br>(13.1 to 15.1)          | 19.1<br>(17.5 to 20.3)          | --                        | --                              | 7.7<br>(5.4 to 10.0)      | 10.3<br>(7.1 to 13.3)     |
| Thyroid cancer                  | Diagnosis and primary therapy phase of thyroid cancer                   | 37.3<br>(36.5 to 38.0)          | 56.3<br>(54.2 to 59.9)          | 159.2<br>(155.8 to 162.1) | 238.2<br>(229.3 to 252.9)       | 10.7<br>(7.1 to 15.0)     | 16.2<br>(10.8 to 22.6)    |
| Thyroid cancer                  | Metastatic phase of thyroid cancer                                      | 15.4<br>(15.0 to 15.7)          | 20.2<br>(19.6 to 21.1)          | --                        | --                              | 6.9<br>(4.7 to 9.1)       | 9.0<br>(6.1 to 12.1)      |
| Thyroid cancer                  | Terminal phase of thyroid cancer                                        | 1.3<br>(1.3 to 1.3)             | 1.7<br>(1.6 to 1.7)             | --                        | --                              | 0.7<br>(0.5 to 0.9)       | 0.9<br>(0.6 to 1.2)       |

|                            |                                                                    |                                 |                                 |                           |                           |                        |                          |
|----------------------------|--------------------------------------------------------------------|---------------------------------|---------------------------------|---------------------------|---------------------------|------------------------|--------------------------|
| Thyroid cancer             | Controlled phase of thyroid cancer                                 | 762.7<br>(746.2 to 776.4)       | 1,156.2<br>(1,111.8 to 1,230.0) | --                        | --                        | 35.4<br>(23.0 to 51.3) | 53.6<br>(34.6 to 78.1)   |
| Mesothelioma               | Terminal phase of mesothelioma                                     | 2.1<br>(2.0 to 2.2)             | 2.6<br>(2.4 to 2.7)             | --                        | --                        | 1.1<br>(0.8 to 1.4)    | 1.4<br>(1.0 to 1.8)      |
| Mesothelioma               | Controlled phase of mesothelioma                                   | 22.6<br>(21.7 to 23.8)          | 29.4<br>(27.5 to 30.9)          | --                        | --                        | 1.1<br>(0.7 to 1.6)    | 1.4<br>(0.9 to 2.1)      |
| Mesothelioma               | Diagnosis and primary therapy phase of mesothelioma                | 3.9<br>(3.7 to 4.1)             | 5.0<br>(4.7 to 5.3)             | 27.2<br>(26.1 to 28.6)    | 34.8<br>(32.5 to 36.5)    | 1.1<br>(0.7 to 1.6)    | 1.4<br>(1.0 to 2.0)      |
| Mesothelioma               | Metastatic phase of mesothelioma                                   | 12.4<br>(11.9 to 13.0)          | 15.8<br>(14.7 to 16.6)          | --                        | --                        | 5.5<br>(3.7 to 7.3)    | 7.0<br>(4.7 to 9.3)      |
| Hodgkin lymphoma           | Metastatic phase of Hodgkin disease                                | 24.8<br>(22.1 to 28.6)          | 25.4<br>(22.7 to 29.3)          | --                        | --                        | 11.2<br>(7.5 to 15.3)  | 11.5<br>(7.7 to 15.5)    |
| Hodgkin lymphoma           | Controlled phase of Hodgkin disease                                | 210.2<br>(190.9 to 228.7)       | 247.8<br>(225.0 to 273.0)       | --                        | --                        | 10.1<br>(6.2 to 14.6)  | 11.9<br>(7.5 to 17.4)    |
| Hodgkin lymphoma           | Diagnosis and primary therapy phase of Hodgkin disease             | 13.8<br>(12.5 to 15.0)          | 16.1<br>(14.6 to 17.8)          | 66.5<br>(59.6 to 73.8)    | 73.3<br>(66.0 to 82.3)    | 4.0<br>(2.6 to 5.6)    | 4.6<br>(3.1 to 6.5)      |
| Hodgkin lymphoma           | Terminal phase of Hodgkin disease                                  | 2.2<br>(2.0 to 2.6)             | 2.2<br>(2.0 to 2.6)             | --                        | --                        | 1.2<br>(0.8 to 1.6)    | 1.2<br>(0.8 to 1.6)      |
| Non-Hodgkin's lymphoma     | Metastatic phase of non-Hodgkin lymphoma                           | 75.2<br>(71.7 to 78.6)          | 102.6<br>(95.1 to 106.6)        | --                        | --                        | 32.4<br>(22.2 to 42.9) | 44.0<br>(29.8 to 58.6)   |
| Non-Hodgkin's lymphoma     | Controlled phase of non-Hodgkin lymphoma                           | 951.1<br>(895.6 to 994.8)       | 1,447.4<br>(1,339.0 to 1,515.7) | --                        | --                        | 43.6<br>(28.1 to 63.9) | 66.1<br>(41.8 to 95.8)   |
| Non-Hodgkin's lymphoma     | Diagnosis and primary therapy phase of non-Hodgkin lymphoma        | 68.0<br>(64.2 to 71.0)          | 102.3<br>(94.7 to 107.0)        | 319.1<br>(304.4 to 333.8) | 461.2<br>(427.6 to 482.0) | 18.5<br>(12.6 to 25.4) | 27.7<br>(18.8 to 38.2)   |
| Non-Hodgkin's lymphoma     | Terminal phase of non-Hodgkin lymphoma                             | 12.6<br>(12.1 to 13.2)          | 17.1<br>(15.9 to 17.7)          | --                        | --                        | 6.8<br>(4.7 to 8.8)    | 9.2<br>(6.4 to 11.8)     |
| Multiple myeloma           | Terminal phase of multiple myeloma                                 | 6.1<br>(5.5 to 6.9)             | 8.1<br>(7.3 to 9.2)             | --                        | --                        | 3.3<br>(2.3 to 4.3)    | 4.4<br>(3.0 to 5.7)      |
| Multiple myeloma           | Diagnosis and primary therapy phase of multiple myeloma            | 20.0<br>(16.7 to 21.6)          | 30.4<br>(25.7 to 33.8)          | 100.3<br>(88.2 to 111.4)  | 138.5<br>(121.0 to 155.5) | 5.6<br>(3.6 to 7.8)    | 8.4<br>(5.5 to 11.8)     |
| Multiple myeloma           | Controlled phase of multiple myeloma                               | 134.9<br>(112.7 to 144.9)       | 205.7<br>(173.7 to 228.6)       | --                        | --                        | 6.2<br>(3.9 to 9.0)    | 9.4<br>(5.9 to 13.8)     |
| Multiple myeloma           | Metastatic phase of multiple myeloma                               | 80.8<br>(70.4 to 89.4)          | 113.8<br>(98.9 to 128.2)        | --                        | --                        | 33.7<br>(22.8 to 44.4) | 47.4<br>(31.9 to 62.8)   |
| Acute lymphoid leukaemia   | Controlled phase of acute lymphoid leukaemia                       | 162.7<br>(153.7 to 188.4)       | 215.4<br>(188.5 to 229.6)       | --                        | --                        | 7.9<br>(5.0 to 11.8)   | 10.5<br>(6.6 to 15.6)    |
| Acute lymphoid leukaemia   | Diagnosis and primary therapy phase of acute lymphoid leukaemia    | 44.6<br>(42.3 to 51.2)          | 58.8<br>(51.7 to 62.5)          | 58.1<br>(55.3 to 65.9)    | 76.0<br>(66.5 to 80.3)    | 12.8<br>(8.6 to 18.2)  | 16.9<br>(11.2 to 23.7)   |
| Acute lymphoid leukaemia   | Terminal phase of acute lymphoid leukaemia                         | 2.0<br>(1.8 to 2.2)             | 2.6<br>(2.2 to 2.7)             | --                        | --                        | 1.1<br>(0.7 to 1.4)    | 1.4<br>(0.9 to 1.8)      |
| Acute lymphoid leukaemia   | Metastatic phase of acute lymphoid leukaemia                       | 11.9<br>(11.0 to 13.2)          | 15.2<br>(13.3 to 16.0)          | --                        | --                        | 5.4<br>(3.6 to 7.2)    | 6.9<br>(4.6 to 9.3)      |
| Chronic lymphoid leukaemia | Controlled phase of chronic lymphoid leukaemia                     | 251.0<br>(238.7 to 275.2)       | 348.8<br>(325.3 to 376.1)       | --                        | --                        | 11.5<br>(7.4 to 16.9)  | 16.0<br>(10.4 to 23.4)   |
| Chronic lymphoid leukaemia | Terminal phase of chronic lymphoid leukaemia                       | 2.2<br>(2.1 to 2.4)             | 3.0<br>(2.8 to 3.2)             | --                        | --                        | 1.2<br>(0.8 to 1.5)    | 1.6<br>(1.1 to 2.1)      |
| Chronic lymphoid leukaemia | Diagnosis and primary therapy phase of chronic lymphoid leukaemia  | 26.8<br>(25.5 to 29.4)          | 37.2<br>(34.7 to 40.2)          | 76.3<br>(72.5 to 83.1)    | 105.3<br>(98.3 to 113.3)  | 7.5<br>(5.0 to 10.3)   | 10.3<br>(6.9 to 14.2)    |
| Chronic lymphoid leukaemia | Metastatic phase of chronic lymphoid leukaemia                     | 51.8<br>(49.0 to 56.6)          | 70.8<br>(66.1 to 76.4)          | --                        | --                        | 21.4<br>(14.8 to 28.1) | 29.2<br>(20.0 to 38.5)   |
| Acute myeloid leukaemia    | Terminal phase of acute myeloid leukaemia                          | 5.4<br>(4.9 to 5.7)             | 7.2<br>(6.4 to 7.6)             | --                        | --                        | 2.9<br>(2.0 to 3.8)    | 3.9<br>(2.7 to 5.0)      |
| Acute myeloid leukaemia    | Diagnosis and primary therapy phase of acute myeloid leukaemia     | 14.3<br>(13.3 to 15.3)          | 19.0<br>(16.8 to 20.1)          | 77.3<br>(71.1 to 82.1)    | 103.0<br>(91.1 to 107.6)  | 4.1<br>(2.7 to 5.8)    | 5.4<br>(3.6 to 7.7)      |
| Acute myeloid leukaemia    | Metastatic phase of acute myeloid leukaemia                        | 24.9<br>(22.7 to 26.3)          | 33.3<br>(29.6 to 34.8)          | --                        | --                        | 11.1<br>(7.5 to 15.0)  | 14.8<br>(9.9 to 20.1)    |
| Acute myeloid leukaemia    | Controlled phase of acute myeloid leukaemia                        | 76.0<br>(70.6 to 82.7)          | 100.0<br>(87.8 to 107.7)        | --                        | --                        | 3.7<br>(2.3 to 5.4)    | 4.8<br>(3.0 to 7.2)      |
| Chronic myeloid leukaemia  | Controlled phase of chronic myeloid leukaemia                      | 65.3<br>(60.9 to 69.1)          | 70.3<br>(64.3 to 75.2)          | --                        | --                        | 3.1<br>(2.0 to 4.7)    | 3.4<br>(2.1 to 5.1)      |
| Chronic myeloid leukaemia  | Metastatic phase of chronic myeloid leukaemia                      | 8.2<br>(7.4 to 8.8)             | 8.6<br>(7.7 to 9.2)             | --                        | --                        | 3.7<br>(2.5 to 5.0)    | 3.9<br>(2.6 to 5.2)      |
| Chronic myeloid leukaemia  | Terminal phase of chronic myeloid leukaemia                        | 1.8<br>(1.6 to 1.9)             | 1.9<br>(1.7 to 2.0)             | --                        | --                        | 1.0<br>(0.7 to 1.2)    | 1.0<br>(0.7 to 1.3)      |
| Chronic myeloid leukaemia  | Diagnosis and primary therapy phase of chronic myeloid leukaemia   | 10.8<br>(10.0 to 11.4)          | 11.6<br>(10.5 to 12.3)          | 30.4<br>(27.8 to 32.3)    | 32.4<br>(29.3 to 34.3)    | 3.1<br>(2.0 to 4.4)    | 3.3<br>(2.2 to 4.6)      |
| Other leukaemia            | Metastatic phase of other leukaemia                                | 76.0<br>(65.1 to 79.4)          | 90.5<br>(77.9 to 96.6)          | --                        | --                        | 32.9<br>(22.0 to 43.9) | 38.6<br>(26.1 to 51.9)   |
| Other leukaemia            | Diagnosis and primary therapy phase of other leukaemia             | 47.6<br>(40.1 to 50.3)          | 55.2<br>(46.2 to 59.5)          | 128.4<br>(109.0 to 135.2) | 150.1<br>(127.1 to 161.3) | 13.6<br>(9.0 to 19.3)  | 15.7<br>(10.1 to 22.3)   |
| Other leukaemia            | Terminal phase of other leukaemia                                  | 3.2<br>(2.7 to 3.3)             | 3.8<br>(3.3 to 4.1)             | --                        | --                        | 1.7<br>(1.2 to 2.2)    | 2.1<br>(1.4 to 2.7)      |
| Other leukaemia            | Controlled phase of other leukaemia                                | 450.3<br>(378.8 to 476.5)       | 522.0<br>(436.2 to 562.6)       | --                        | --                        | 21.2<br>(13.4 to 31.1) | 24.4<br>(15.4 to 36.4)   |
| Other neoplasms            | Terminal phase of other neoplasms                                  | 20.7<br>(19.8 to 21.1)          | 29.1<br>(26.7 to 29.9)          | --                        | --                        | 11.1<br>(7.8 to 14.2)  | 15.6<br>(10.8 to 20.0)   |
| Other neoplasms            | Controlled phase of other neoplasms                                | 1,447.9<br>(1,341.8 to 1,475.3) | 2,343.0<br>(2,115.0 to 2,423.1) | --                        | --                        | 66.7<br>(42.7 to 96.5) | 107.6<br>(69.1 to 157.6) |
| Other neoplasms            | Metastatic phase of other neoplasms                                | 121.4<br>(115.8 to 123.6)       | 171.8<br>(157.1 to 176.5)       | --                        | --                        | 52.4<br>(36.1 to 69.4) | 73.5<br>(50.4 to 97.1)   |
| Other neoplasms            | Diagnosis and primary therapy phase of other neoplasms             | 55.2<br>(51.6 to 56.2)          | 88.0<br>(79.5 to 90.9)          | 495.0<br>(468.8 to 503.0) | 750.3<br>(681.9 to 772.5) | 15.6<br>(10.4 to 21.7) | 24.7<br>(16.5 to 34.2)   |
| Rheumatic heart disease    | Asymptomatic and mild heart failure due to rheumatic heart disease | 700.7<br>(599.6 to 816.1)       | 924.6<br>(797.2 to 1,074.7)     | < 0.05<br>(0.0 to < 0.05) | < 0.05<br>(0.0 to < 0.05) | 27.0<br>(17.0 to 40.2) | 35.6<br>(22.4 to 52.8)   |
| Rheumatic heart disease    | Severe heart failure due to rheumatic heart disease                | 410.3<br>(344.3 to 485.5)       | 541.5<br>(454.9 to 643.4)       | < 0.05<br>(0.0 to < 0.05) | < 0.05<br>(0.0 to < 0.05) | 66.6<br>(43.7 to 94.1) | 87.8<br>(57.3 to 124.5)  |

|                            |                                                                       |                                    |                                    |                                    |                                    |                                 |                                 |
|----------------------------|-----------------------------------------------------------------------|------------------------------------|------------------------------------|------------------------------------|------------------------------------|---------------------------------|---------------------------------|
| Rheumatic heart disease    | Rheumatic heart disease, without heart failure                        | 24,162.5<br>(21,982.4 to 26,548.7) | 28,007.9<br>(25,119.7 to 31,316.5) | 1,100.2<br>(1,023.5 to 1,186.3)    | 1,195.9<br>(1,095.4 to 1,307.5)    | 1,136.4<br>(717.9 to 1,680.3)   | 1,318.4<br>(826.0 to 1,961.6)   |
| Rheumatic heart disease    | Moderate heart failure due to rheumatic heart disease                 | 153.8<br>(109.0 to 206.2)          | 203.0<br>(144.0 to 273.1)          | < 0.05<br>(0.0 to < 0.05)          | < 0.05<br>(0.0 to < 0.05)          | 10.4<br>(6.2 to 16.2)           | 13.7<br>(8.2 to 21.3)           |
| Ischaemic heart disease    | Asymptomatic angina due to ischaemic heart disease                    | 29,880.7<br>(26,895.3 to 33,029.8) | 38,656.5<br>(34,737.0 to 42,727.4) | 2,732.0<br>(2,460.5 to 3,012.4)    | 3,439.6<br>(3,100.0 to 3,798.8)    | < 0.05<br>(0.0 to < 0.05)       | < 0.05<br>(0.0 to < 0.05)       |
| Ischaemic heart disease    | Acute myocardial infarction first 2 days                              | 46.7<br>(42.2 to 51.5)             | 51.3<br>(45.6 to 57.5)             | 11,773.3<br>(10,988.1 to 12,650.4) | 12,967.2<br>(11,920.7 to 14,225.9) | 19.4<br>(13.0 to 26.4)          | 21.5<br>(14.2 to 29.2)          |
| Ischaemic heart disease    | Severe heart failure due to ischaemic heart disease                   | 6,524.5<br>(5,511.8 to 7,699.7)    | 8,497.2<br>(7,151.1 to 10,085.3)   | --                                 | --                                 | 1,024.6<br>(689.0 to 1,427.1)   | 1,333.2<br>(900.8 to 1,852.9)   |
| Ischaemic heart disease    | Acute myocardial infarction 3 to 28 days                              | 607.3<br>(562.4 to 658.0)          | 667.2<br>(608.1 to 734.8)          | < 0.05<br>(0.0 to < 0.05)          | < 0.05<br>(0.0 to < 0.05)          | 40.9<br>(27.8 to 57.7)          | 45.0<br>(30.7 to 63.6)          |
| Ischaemic heart disease    | Severe angina due to ischaemic heart disease                          | 18,734.6<br>(16,096.0 to 21,462.5) | 24,236.9<br>(20,794.0 to 27,788.7) | 1,704.8<br>(1,472.4 to 1,948.5)    | 2,146.4<br>(1,850.6 to 2,461.0)    | 2,815.3<br>(1,819.3 to 4,055.0) | 3,639.0<br>(2,355.9 to 5,247.1) |
| Ischaemic heart disease    | Mild angina due to ischaemic heart disease                            | 12,357.7<br>(9,588.9 to 15,500.7)  | 15,984.6<br>(12,395.5 to 20,059.0) | 1,122.4<br>(866.2 to 1,392.8)      | 1,413.2<br>(1,085.5 to 1,745.0)    | 382.6<br>(218.9 to 603.0)       | 494.6<br>(284.3 to 776.8)       |
| Ischaemic heart disease    | Moderate heart failure due to ischaemic heart disease                 | 2,446.6<br>(1,726.0 to 3,260.1)    | 3,186.3<br>(2,254.7 to 4,239.4)    | --                                 | --                                 | 158.1<br>(93.9 to 246.6)        | 205.7<br>(121.8 to 319.0)       |
| Ischaemic heart disease    | Asymptomatic and mild heart failure due to ischaemic heart disease    | 11,140.4<br>(9,624.1 to 12,836.1)  | 14,508.7<br>(12,455.5 to 16,786.2) | --                                 | --                                 | 420.4<br>(263.7 to 617.4)       | 547.2<br>(347.4 to 803.1)       |
| Ischaemic heart disease    | Asymptomatic ischaemic heart disease following myocardial infarction  | 34,956.8<br>(31,677.6 to 38,056.7) | 39,114.6<br>(33,792.3 to 44,501.4) | --                                 | --                                 | < 0.05<br>(0.0 to < 0.05)       | < 0.05<br>(0.0 to < 0.05)       |
| Ischaemic heart disease    | Moderate angina due to ischaemic heart disease                        | 6,670.8<br>(5,008.4 to 8,551.8)    | 8,629.9<br>(6,486.6 to 11,069.6)   | 607.1<br>(456.0 to 771.7)          | 764.4<br>(572.6 to 971.8)          | 487.1<br>(303.7 to 716.2)       | 629.7<br>(393.5 to 925.3)       |
| Ischaemic stroke           | Asymptomatic chronic ischaemic stroke                                 | 9,404.0<br>(8,738.6 to 10,092.5)   | 12,471.1<br>(11,189.8 to 13,771.5) | < 0.05<br>(0.0 to < 0.05)          | < 0.05<br>(0.0 to < 0.05)          | < 0.05<br>(0.0 to < 0.05)       | < 0.05<br>(0.0 to < 0.05)       |
| Ischaemic stroke           | Chronic ischaemic stroke severity level 2                             | 7,829.4<br>(7,244.2 to 8,426.7)    | 10,354.6<br>(9,316.3 to 11,459.6)  | < 0.05<br>(0.0 to < 0.05)          | < 0.05<br>(0.0 to < 0.05)          | 499.6<br>(337.1 to 690.9)       | 661.2<br>(441.8 to 911.6)       |
| Ischaemic stroke           | Chronic ischaemic stroke severity level 4                             | 4,834.7<br>(4,474.6 to 5,222.8)    | 6,519.6<br>(5,869.2 to 7,235.9)    | < 0.05<br>(0.0 to < 0.05)          | < 0.05<br>(0.0 to < 0.05)          | 2,275.4<br>(1,566.5 to 2,894.4) | 3,069.6<br>(2,082.3 to 3,955.8) |
| Ischaemic stroke           | Acute ischaemic stroke severity level 5                               | 84.0<br>(76.4 to 92.0)             | 115.8<br>(103.2 to 128.9)          | 1,140.8<br>(1,035.9 to 1,246.0)    | 1,561.1<br>(1,391.3 to 1,724.7)    | 45.9<br>(32.0 to 58.4)          | 63.2<br>(44.1 to 81.6)          |
| Ischaemic stroke           | Acute ischaemic stroke severity level 2                               | 75.9<br>(69.0 to 83.5)             | 105.4<br>(93.4 to 118.2)           | 1,014.1<br>(923.1 to 1,115.6)      | 1,398.6<br>(1,243.6 to 1,569.1)    | 5.2<br>(3.4 to 7.5)             | 7.2<br>(4.7 to 10.4)            |
| Ischaemic stroke           | Acute ischaemic stroke severity level 1                               | 177.4<br>(162.5 to 193.3)          | 246.3<br>(220.8 to 273.3)          | 2,399.5<br>(2,211.5 to 2,602.1)    | 3,306.4<br>(2,969.1 to 3,657.2)    | 3.2<br>(1.7 to 5.4)             | 4.4<br>(2.4 to 7.6)             |
| Ischaemic stroke           | Acute ischaemic stroke severity level 4                               | 84.7<br>(76.9 to 93.2)             | 117.6<br>(104.3 to 131.4)          | 1,140.4<br>(1,036.5 to 1,260.9)    | 1,572.0<br>(1,395.2 to 1,749.4)    | 44.2<br>(30.5 to 57.4)          | 61.3<br>(41.8 to 80.4)          |
| Ischaemic stroke           | Acute ischaemic stroke severity level 3                               | 92.5<br>(84.5 to 101.2)            | 127.4<br>(113.5 to 142.2)          | 1,256.2<br>(1,143.4 to 1,376.5)    | 1,718.3<br>(1,538.3 to 1,903.9)    | 27.2<br>(17.9 to 38.0)          | 37.5<br>(25.0 to 53.0)          |
| Ischaemic stroke           | Chronic ischaemic stroke severity level 5                             | 5,744.2<br>(5,310.0 to 6,188.5)    | 7,778.3<br>(6,999.5 to 8,622.7)    | < 0.05<br>(0.0 to < 0.05)          | < 0.05<br>(0.0 to < 0.05)          | 2,875.8<br>(2,043.5 to 3,566.8) | 3,897.1<br>(2,733.4 to 4,935.6) |
| Ischaemic stroke           | Chronic ischaemic stroke severity level 3                             | 9,883.1<br>(9,130.9 to 10,651.2)   | 13,419.1<br>(12,061.2 to 14,882.0) | < 0.05<br>(0.0 to < 0.05)          | < 0.05<br>(0.0 to < 0.05)          | 2,729.8<br>(1,827.0 to 3,691.8) | 3,709.3<br>(2,463.8 to 5,069.1) |
| Ischaemic stroke           | Chronic ischaemic stroke severity level 1                             | 12,438.0<br>(11,585.8 to 13,343.9) | 16,340.0<br>(14,656.7 to 18,041.3) | < 0.05<br>(0.0 to < 0.05)          | < 0.05<br>(0.0 to < 0.05)          | 221.7<br>(120.4 to 377.1)       | 291.5<br>(154.5 to 494.2)       |
| Hemorrhagic stroke         | Chronic hemorrhagic stroke severity level 3                           | 2,333.1<br>(2,159.9 to 2,531.9)    | 2,973.0<br>(2,679.9 to 3,301.2)    | < 0.05<br>(0.0 to < 0.05)          | < 0.05<br>(0.0 to < 0.05)          | 653.0<br>(438.9 to 897.0)       | 830.0<br>(554.5 to 1,133.7)     |
| Hemorrhagic stroke         | Acute hemorrhagic stroke severity level 5                             | 32.9<br>(30.3 to 35.9)             | 40.8<br>(36.5 to 45.2)             | 560.6<br>(519.5 to 605.0)          | 672.9<br>(608.2 to 742.8)          | 19.1<br>(13.2 to 24.7)          | 23.8<br>(16.3 to 31.1)          |
| Hemorrhagic stroke         | Acute hemorrhagic stroke severity level 2                             | 30.5<br>(27.9 to 33.3)             | 37.9<br>(33.9 to 42.3)             | 506.9<br>(468.3 to 550.1)          | 610.8<br>(547.3 to 678.5)          | 2.1<br>(1.4 to 3.1)             | 2.7<br>(1.7 to 3.8)             |
| Hemorrhagic stroke         | Chronic hemorrhagic stroke severity level 1                           | 3,056.5<br>(2,852.1 to 3,305.9)    | 3,806.1<br>(3,442.3 to 4,216.8)    | < 0.05<br>(0.0 to < 0.05)          | < 0.05<br>(0.0 to < 0.05)          | 55.0<br>(29.3 to 92.3)          | 68.4<br>(35.9 to 116.3)         |
| Hemorrhagic stroke         | Chronic hemorrhagic stroke severity level 5                           | 1,327.7<br>(1,233.1 to 1,439.6)    | 1,687.5<br>(1,522.4 to 1,874.5)    | < 0.05<br>(0.0 to < 0.05)          | < 0.05<br>(0.0 to < 0.05)          | 677.4<br>(484.2 to 843.2)       | 858.5<br>(610.1 to 1,084.1)     |
| Hemorrhagic stroke         | Asymptomatic chronic hemorrhagic stroke                               | 2,307.8<br>(2,152.1 to 2,499.8)    | 2,878.5<br>(2,596.4 to 3,194.6)    | < 0.05<br>(0.0 to < 0.05)          | < 0.05<br>(0.0 to < 0.05)          | < 0.05<br>(0.0 to < 0.05)       | < 0.05<br>(0.0 to < 0.05)       |
| Hemorrhagic stroke         | Chronic hemorrhagic stroke severity level 4                           | 1,120.2<br>(1,039.8 to 1,216.4)    | 1,419.6<br>(1,278.3 to 1,574.6)    | < 0.05<br>(0.0 to < 0.05)          | < 0.05<br>(0.0 to < 0.05)          | 538.1<br>(372.7 to 684.1)       | 679.7<br>(464.4 to 868.0)       |
| Hemorrhagic stroke         | Chronic hemorrhagic stroke severity level 2                           | 1,819.7<br>(1,687.3 to 1,974.2)    | 2,293.9<br>(2,072.0 to 2,541.3)    | < 0.05<br>(0.0 to < 0.05)          | < 0.05<br>(0.0 to < 0.05)          | 117.4<br>(78.7 to 163.5)        | 147.7<br>(99.5 to 202.0)        |
| Hemorrhagic stroke         | Acute hemorrhagic stroke severity level 4                             | 36.1<br>(33.0 to 39.3)             | 44.8<br>(40.2 to 49.8)             | 615.3<br>(570.0 to 662.6)          | 739.2<br>(667.5 to 811.5)          | 19.6<br>(13.4 to 25.8)          | 24.5<br>(16.8 to 32.1)          |
| Hemorrhagic stroke         | Acute hemorrhagic stroke severity level 3                             | 33.6<br>(30.8 to 36.7)             | 41.9<br>(37.6 to 46.8)             | 564.3<br>(520.3 to 609.9)          | 682.1<br>(617.1 to 762.2)          | 10.6<br>(6.9 to 14.9)           | 13.2<br>(8.7 to 18.6)           |
| Hemorrhagic stroke         | Acute hemorrhagic stroke severity level 1                             | 68.8<br>(63.5 to 74.0)             | 86.3<br>(78.0 to 95.1)             | 1,167.7<br>(1,089.4 to 1,251.8)    | 1,415.3<br>(1,277.2 to 1,557.5)    | 1.3<br>(0.7 to 2.2)             | 1.6<br>(0.9 to 2.7)             |
| Hypertensive heart disease | Asymptomatic and mild heart failure due to hypertensive heart disease | 7,228.0<br>(6,111.8 to 8,589.8)    | 9,522.7<br>(8,036.9 to 11,292.0)   | --                                 | --                                 | 274.8<br>(173.4 to 411.6)       | 361.6<br>(226.9 to 541.8)       |
| Hypertensive heart disease | Moderate heart failure due to hypertensive heart disease              | 1,587.3<br>(1,133.5 to 2,147.3)    | 2,091.2<br>(1,497.2 to 2,834.8)    | --                                 | --                                 | 103.4<br>(61.2 to 161.8)        | 136.1<br>(80.9 to 212.8)        |
| Hypertensive heart disease | Severe heart failure due to hypertensive heart disease                | 4,232.4<br>(3,518.3 to 5,022.7)    | 5,576.1<br>(4,622.1 to 6,638.6)    | --                                 | --                                 | 670.4<br>(456.6 to 941.6)       | 882.4<br>(596.3 to 1,240.9)     |
| Myocarditis                | Severe heart failure due to myocarditis                               | 345.8<br>(287.1 to 415.6)          | 386.0<br>(319.9 to 464.3)          | --                                 | --                                 | 60.4<br>(39.4 to 89.2)          | 67.4<br>(43.6 to 99.2)          |
| Myocarditis                | Moderate heart failure due to myocarditis                             | 129.6<br>(90.9 to 174.0)           | 144.7<br>(101.4 to 194.2)          | --                                 | --                                 | 9.2<br>(5.2 to 15.1)            | 10.3<br>(5.8 to 16.7)           |
| Myocarditis                | Asymptomatic and mild heart failure due to myocarditis                | 590.3<br>(495.1 to 693.3)          | 658.9<br>(554.2 to 771.3)          | --                                 | --                                 | 23.8<br>(14.4 to 36.3)          | 26.6<br>(16.2 to 40.6)          |
| Myocarditis                | Acute myocarditis                                                     | 498.8<br>(447.9 to 557.8)          | 596.1<br>(533.4 to 670.5)          | 2,084.7<br>(1,867.4 to 2,338.0)    | 2,482.7<br>(2,216.6 to 2,784.2)    | 24.3<br>(15.4 to 35.6)          | 28.9<br>(18.3 to 42.7)          |
| Alcoholic cardiomyopathy   | Moderate heart failure due to alcoholic cardiomyopathy                | 117.6<br>(82.0 to 157.1)           | 141.7<br>(98.3 to 189.3)           | --                                 | --                                 | 8.0<br>(4.7 to 12.7)            | 9.6<br>(5.6 to 15.3)            |
| Alcoholic cardiomyopathy   | Severe heart failure due to alcoholic cardiomyopathy                  | 313.7<br>(257.9 to 380.7)          | 378.1<br>(309.8 to 461.9)          | --                                 | --                                 | 51.5<br>(32.9 to 75.8)          | 62.2<br>(40.4 to 90.7)          |

|                                               |                                                                                         |                                      |                                       |                                 |                                   |                                 |                                 |
|-----------------------------------------------|-----------------------------------------------------------------------------------------|--------------------------------------|---------------------------------------|---------------------------------|-----------------------------------|---------------------------------|---------------------------------|
| Alcoholic cardiomyopathy                      | Asymptomatic and mild heart failure due to alcoholic cardiomyopathy                     | 535.4<br>(454.5 to 635.0)            | 645.4<br>(540.8 to 768.2)             | --                              | --                                | 20.8<br>(12.9 to 31.0)          | 25.1<br>(15.5 to 37.5)          |
| Other cardiomyopathy                          | Moderate heart failure due to other cardiomyopathy                                      | 402.7<br>(283.2 to 533.0)            | 487.2<br>(342.9 to 646.5)             | --                              | --                                | 27.1<br>(15.8 to 42.6)          | 32.7<br>(19.0 to 51.5)          |
| Other cardiomyopathy                          | Asymptomatic and mild heart failure due to other cardiomyopathy                         | 1,833.9<br>(1,592.7 to 2,120.0)      | 2,218.5<br>(1,926.4 to 2,566.3)       | --                              | --                                | 70.9<br>(44.2 to 104.6)         | 85.5<br>(53.4 to 126.6)         |
| Other cardiomyopathy                          | Severe heart failure due to other cardiomyopathy                                        | 1,074.3<br>(901.2 to 1,280.4)        | 1,299.6<br>(1,084.8 to 1,549.7)       | --                              | --                                | 175.0<br>(114.9 to 252.7)       | 210.9<br>(138.2 to 304.1)       |
| Atrial fibrillation and flutter               | Symptomatic atrial fibrillation and flutter                                             | 14,025.3<br>(12,498.8 to 15,800.2)   | 18,519.3<br>(16,465.7 to 20,927.3)    | 1,173.1<br>(1,027.6 to 1,342.4) | 1,536.1<br>(1,345.0 to 1,758.4)   | 2,739.0<br>(1,859.9 to 3,800.8) | 3,614.4<br>(2,439.1 to 5,023.8) |
| Atrial fibrillation and flutter               | Asymptomatic atrial fibrillation and flutter                                            | 21,047.4<br>(18,821.1 to 23,708.7)   | 27,791.3<br>(24,849.1 to 31,270.4)    | 1,760.3<br>(1,543.3 to 2,012.1) | 2,305.0<br>(2,022.6 to 2,638.1)   | < 0.05<br>(0.0 to < 0.05)       | < 0.05<br>(0.0 to < 0.05)       |
| Peripheral vascular disease                   | Asymptomatic peripheral vascular disease                                                | 60,685.4<br>(51,889.2 to 70,723.2)   | 80,346.9<br>(68,890.6 to 93,584.2)    | 8,579.6<br>(7,452.6 to 9,901.5) | 11,020.3<br>(9,557.3 to 12,777.9) | < 0.05<br>(0.0 to < 0.05)       | < 0.05<br>(0.0 to < 0.05)       |
| Peripheral vascular disease                   | Symptomatic claudication due to peripheral vascular disease                             | 31,716.5<br>(25,798.2 to 38,967.5)   | 39,797.7<br>(32,281.0 to 48,503.0)    | --                              | --                                | 414.1<br>(194.7 to 751.7)       | 539.6<br>(244.4 to 940.9)       |
| Endocarditis                                  | Moderate endocarditis                                                                   | 63.2<br>(57.3 to 69.4)               | 78.9<br>(71.6 to 86.5)                | 877.0<br>(800.5 to 952.1)       | 1,091.4<br>(993.8 to 1,191.7)     | 3.2<br>(2.0 to 4.7)             | 4.0<br>(2.5 to 5.9)             |
| Endocarditis                                  | Asymptomatic and mild heart failure due to endocarditis                                 | 387.1<br>(158.9 to 219.6)            | 230.0<br>(194.9 to 269.3)             | --                              | --                                | 7.3<br>(4.5 to 11.0)            | 9.0<br>(5.5 to 13.6)            |
| Endocarditis                                  | Severe heart failure due to endocarditis                                                | 109.6<br>(91.2 to 131.4)             | 134.7<br>(112.1 to 162.0)             | --                              | --                                | 18.2<br>(11.9 to 26.3)          | 22.4<br>(14.6 to 32.5)          |
| Endocarditis                                  | Severe endocarditis                                                                     | 4.8<br>(4.3 to 5.3)                  | 5.8<br>(5.3 to 6.5)                   | 66.2<br>(60.3 to 72.6)          | 81.0<br>(73.5 to 89.1)            | 0.6<br>(0.4 to 0.9)             | 0.8<br>(0.5 to 1.1)             |
| Endocarditis                                  | Moderate heart failure due to endocarditis                                              | 41.1<br>(29.1 to 55.3)               | 50.5<br>(36.0 to 68.1)                | --                              | --                                | 2.8<br>(1.6 to 4.6)             | 3.5<br>(2.0 to 5.7)             |
| Other cardiovascular and circulatory diseases | Asymptomatic and mild heart failure due to other cardiovascular diseases                | 877.7<br>(735.0 to 1,041.9)          | 1,103.4<br>(919.7 to 1,315.4)         | --                              | --                                | 33.1<br>(20.9 to 50.4)          | 41.6<br>(26.2 to 63.0)          |
| Other cardiovascular and circulatory diseases | Moderate heart failure due to other cardiovascular diseases                             | 192.8<br>(137.5 to 260.9)            | 242.3<br>(170.0 to 325.2)             | --                              | --                                | 12.6<br>(7.4 to 20.0)           | 15.8<br>(9.3 to 25.4)           |
| Other cardiovascular and circulatory diseases | Asymptomatic other cardiovascular diseases                                              | 27,512.9<br>(23,251.6 to 31,799.3)   | 33,163.1<br>(27,992.1 to 38,275.5)    | --                              | --                                | < 0.05<br>(0.0 to < 0.05)       | < 0.05<br>(0.0 to < 0.05)       |
| Other cardiovascular and circulatory diseases | Mild other cardiovascular diseases                                                      | 21,262.3<br>(17,093.6 to 25,893.9)   | 25,629.5<br>(20,549.0 to 31,369.3)    | --                              | --                                | 828.3<br>(501.5 to 1,255.1)     | 997.5<br>(606.1 to 1,514.2)     |
| Other cardiovascular and circulatory diseases | Severe heart failure due to other cardiovascular diseases                               | 514.0<br>(419.2 to 629.6)            | 646.2<br>(526.4 to 791.4)             | --                              | --                                | 81.1<br>(53.3 to 116.1)         | 101.8<br>(66.4 to 145.4)        |
| Other cardiovascular and circulatory diseases | Moderate other cardiovascular diseases                                                  | 7,761.3<br>(5,314.7 to 10,313.1)     | 9,355.4<br>(6,371.3 to 12,368.3)      | --                              | --                                | 517.1<br>(298.9 to 790.8)       | 622.8<br>(360.4 to 949.8)       |
| Other cardiovascular and circulatory diseases | Severe other cardiovascular diseases                                                    | 14,088.9<br>(11,365.3 to 17,180.2)   | 16,982.1<br>(13,658.5 to 20,704.5)    | --                              | --                                | 2,297.2<br>(1,480.5 to 3,338.0) | 2,766.1<br>(1,803.3 to 4,014.2) |
| Chronic obstructive pulmonary disease         | Moderate heart failure due to severe chronic obstructive pulmonary disease              | 791.6<br>(549.6 to 1,109.7)          | 1,044.5<br>(729.9 to 1,467.9)         | < 0.05<br>(0.0 to < 0.05)       | < 0.05<br>(0.0 to < 0.05)         | 296.5<br>(202.4 to 407.0)       | 390.5<br>(268.3 to 535.2)       |
| Chronic obstructive pulmonary disease         | Mild chronic obstructive pulmonary disease                                              | 58,770.3<br>(49,861.7 to 67,585.3)   | 73,901.6<br>(62,014.4 to 84,844.7)    | 4,679.3<br>(3,982.7 to 5,369.2) | 5,726.3<br>(4,813.0 to 6,606.4)   | 1,068.5<br>(576.2 to 1,811.5)   | 1,341.9<br>(728.8 to 2,265.9)   |
| Chronic obstructive pulmonary disease         | Moderate chronic obstructive pulmonary disease                                          | 14,432.0<br>(11,354.3 to 17,169.8)   | 18,146.1<br>(14,294.0 to 21,622.6)    | 1,149.0<br>(904.4 to 1,368.0)   | 1,406.0<br>(1,100.1 to 1,675.3)   | 2,929.2<br>(1,706.8 to 4,370.8) | 3,676.7<br>(2,135.9 to 5,480.0) |
| Chronic obstructive pulmonary disease         | Asymptomatic and mild heart failure due to severe chronic obstructive pulmonary disease | 3,603.2<br>(2,950.9 to 4,396.5)      | 4,754.4<br>(3,911.4 to 5,771.3)       | < 0.05<br>(0.0 to < 0.05)       | < 0.05<br>(0.0 to < 0.05)         | 1,296.3<br>(990.7 to 1,585.2)   | 1,707.6<br>(1,310.3 to 2,089.9) |
| Chronic obstructive pulmonary disease         | Asymptomatic chronic obstructive pulmonary disease                                      | 101,255.8<br>(91,231.7 to 111,354.0) | 128,131.5<br>(114,800.0 to 141,671.8) | 7,485.5<br>(6,763.0 to 8,218.1) | 9,188.6<br>(8,279.6 to 10,175.6)  | < 0.05<br>(0.0 to < 0.05)       | < 0.05<br>(0.0 to < 0.05)       |
| Chronic obstructive pulmonary disease         | Severe heart failure due to severe chronic obstructive pulmonary disease                | 2,110.2<br>(1,690.7 to 2,585.3)      | 2,784.3<br>(2,234.4 to 3,418.3)       | < 0.05<br>(0.0 to < 0.05)       | < 0.05<br>(0.0 to < 0.05)         | 894.1<br>(681.6 to 1,101.9)     | 1,177.4<br>(898.4 to 1,454.6)   |
| Chronic obstructive pulmonary disease         | Severe chronic obstructive pulmonary disease without heart failure                      | 17,602.9<br>(10,551.1 to 26,250.1)   | 22,868.2<br>(13,432.8 to 34,504.8)    | 1,895.2<br>(1,267.6 to 2,605.5) | 2,400.4<br>(1,592.1 to 3,321.2)   | 6,164.4<br>(4,819.3 to 7,313.3) | 7,994.0<br>(6,232.8 to 9,496.8) |
| Silicosis                                     | Moderate silicosis                                                                      | 42.6<br>(28.1 to 58.5)               | 56.4<br>(37.3 to 77.2)                | 4.6<br>(3.2 to 6.4)             | 6.0<br>(4.2 to 8.3)               | 8.9<br>(5.0 to 13.9)            | 11.7<br>(6.5 to 18.3)           |
| Silicosis                                     | Mild silicosis                                                                          | 108.8<br>(90.5 to 126.7)             | 144.0<br>(119.1 to 168.0)             | 11.8<br>(9.9 to 13.8)           | 15.2<br>(12.8 to 17.8)            | 2.0<br>(1.1 to 3.3)             | 2.6<br>(1.4 to 4.4)             |
| Silicosis                                     | Severe heart failure due to severe silicosis                                            | 2.2<br>(1.8 to 2.7)                  | 2.7<br>(2.2 to 3.2)                   | < 0.05<br>(0.0 to < 0.05)       | < 0.05<br>(0.0 to < 0.05)         | 1.1<br>(0.8 to 1.6)             | 1.4<br>(0.9 to 1.9)             |
| Silicosis                                     | Severe silicosis without heart failure                                                  | 86.8<br>(68.0 to 105.9)              | 115.8<br>(90.6 to 141.4)              | 10.2<br>(8.1 to 12.3)           | 13.1<br>(10.5 to 16.0)            | 31.9<br>(20.4 to 46.8)          | 42.4<br>(26.9 to 62.5)          |
| Silicosis                                     | Asymptomatic silicosis                                                                  | 72.8<br>(61.9 to 84.9)               | 96.4<br>(81.5 to 112.3)               | 7.9<br>(6.8 to 9.2)             | 10.2<br>(8.7 to 11.9)             | < 0.05<br>(0.0 to < 0.05)       | < 0.05<br>(0.0 to < 0.05)       |
| Silicosis                                     | Asymptomatic and mild heart failure due to severe silicosis                             | 3.8<br>(3.2 to 4.5)                  | 4.6<br>(3.9 to 5.4)                   | < 0.05<br>(0.0 to < 0.05)       | < 0.05<br>(0.0 to < 0.05)         | 1.6<br>(1.1 to 2.2)             | 1.9<br>(1.3 to 2.7)             |
| Silicosis                                     | Moderate heart failure due to severe silicosis                                          | 0.8<br>(0.6 to 1.1)                  | 1.0<br>(0.7 to 1.4)                   | < 0.05<br>(0.0 to < 0.05)       | < 0.05<br>(0.0 to < 0.05)         | 0.4<br>(0.2 to 0.6)             | 0.4<br>(0.3 to 0.7)             |
| Asbestosis                                    | Moderate heart failure due to severe asbestosis                                         | 0.4<br>(0.3 to 0.5)                  | 0.5<br>(0.3 to 0.6)                   | < 0.05<br>(0.0 to < 0.05)       | < 0.05<br>(0.0 to < 0.05)         | 0.2<br>(0.1 to 0.2)             | 0.2<br>(0.1 to 0.3)             |
| Asbestosis                                    | Severe asbestosis without heart failure                                                 | 32.3<br>(25.3 to 40.1)               | 41.2<br>(32.2 to 51.0)                | 2.7<br>(2.1 to 3.3)             | 3.5<br>(2.7 to 4.3)               | 12.4<br>(8.0 to 18.2)           | 15.8<br>(10.1 to 23.1)          |
| Asbestosis                                    | Mild asbestosis                                                                         | 41.1<br>(33.8 to 48.7)               | 52.2<br>(43.0 to 61.9)                | 3.1<br>(2.6 to 3.6)             | 4.0<br>(3.4 to 4.8)               | 0.8<br>(0.4 to 1.3)             | 1.0<br>(0.5 to 1.7)             |
| Asbestosis                                    | Moderate asbestosis                                                                     | 16.1<br>(11.0 to 21.9)               | 20.4<br>(14.0 to 28.0)                | 1.2<br>(0.8 to 1.7)             | 1.6<br>(1.1 to 2.2)               | 3.5<br>(2.0 to 5.4)             | 4.4<br>(2.5 to 6.8)             |
| Asbestosis                                    | Asymptomatic asbestosis                                                                 | 27.5<br>(23.2 to 32.4)               | 34.9<br>(29.4 to 41.2)                | 2.1<br>(1.7 to 2.4)             | 2.7<br>(2.3 to 3.2)               | < 0.05<br>(0.0 to < 0.05)       | < 0.05<br>(0.0 to < 0.05)       |
| Asbestosis                                    | Severe heart failure due to severe asbestosis                                           | 1.0<br>(0.8 to 1.2)                  | 1.2<br>(1.0 to 1.4)                   | < 0.05<br>(0.0 to < 0.05)       | < 0.05<br>(0.0 to < 0.05)         | 0.5<br>(0.3 to 0.7)             | 0.6<br>(0.4 to 0.8)             |
| Asbestosis                                    | Asymptomatic and mild heart failure due to severe asbestosis                            | 1.7<br>(1.5 to 2.0)                  | 2.1<br>(1.8 to 2.4)                   | < 0.05<br>(0.0 to < 0.05)       | < 0.05<br>(0.0 to < 0.05)         | 0.7<br>(0.5 to 1.0)             | 0.9<br>(0.6 to 1.2)             |
| Coal workers pneumoconiosis                   | Severe heart failure due to severe coal workers pneumoconiosis                          | 1.1<br>(0.9 to 1.3)                  | 1.3<br>(1.1 to 1.6)                   | < 0.05<br>(0.0 to < 0.05)       | < 0.05<br>(0.0 to < 0.05)         | 0.5<br>(0.4 to 0.7)             | 0.7<br>(0.5 to 0.9)             |
| Coal workers pneumoconiosis                   | Severe coal workers pneumoconiosis without heart failure                                | 60.9<br>(46.9 to 76.5)               | 82.6<br>(63.4 to 104.5)               | 4.9<br>(3.8 to 6.1)             | 6.3<br>(4.8 to 7.9)               | 22.6<br>(14.4 to 33.4)          | 30.5<br>(19.6 to 44.8)          |

|                                                                |                                                                                                       |                                      |                                       |                                    |                                    |                                  |                                  |
|----------------------------------------------------------------|-------------------------------------------------------------------------------------------------------|--------------------------------------|---------------------------------------|------------------------------------|------------------------------------|----------------------------------|----------------------------------|
| Coal workers pneumoconiosis                                    | Asymptomatic coal workers pneumoconiosis                                                              | 49.9<br>(41.8 to 59.7)               | 67.4<br>(55.9 to 80.9)                | 3.8<br>(3.2 to 4.5)                | 4.9<br>(4.0 to 5.9)                | < 0.05<br>(0.0 to < 0.05)        | < 0.05<br>(0.0 to < 0.05)        |
| Coal workers pneumoconiosis                                    | Moderate coal workers pneumoconiosis                                                                  | 29.2<br>(19.6 to 39.5)               | 39.4<br>(26.4 to 53.9)                | 2.2<br>(1.5 to 3.1)                | 2.9<br>(1.9 to 4.0)                | 6.1<br>(3.4 to 9.4)              | 8.3<br>(4.6 to 12.7)             |
| Coal workers pneumoconiosis                                    | Mild coal workers pneumoconiosis                                                                      | 74.6<br>(60.8 to 90.8)               | 100.7<br>(82.0 to 123.5)              | 5.7<br>(4.6 to 6.8)                | 7.3<br>(5.9 to 8.8)                | 1.4<br>(0.8 to 2.3)              | 1.9<br>(1.0 to 3.2)              |
| Coal workers pneumoconiosis                                    | Asymptomatic and mild heart failure due to severe coal workers pneumoconiosis                         | 1.9<br>(1.6 to 2.2)                  | 2.3<br>(1.9 to 2.7)                   | < 0.05<br>(0.0 to < 0.05)          | < 0.05<br>(0.0 to < 0.05)          | < 0.05<br>(0.5 to 1.0)           | 0.8<br>(0.7 to 1.3)              |
| Coal workers pneumoconiosis                                    | Moderate heart failure due to severe coal workers pneumoconiosis                                      | 0.4<br>(0.3 to 0.6)                  | 0.5<br>(0.4 to 0.7)                   | < 0.05<br>(0.0 to < 0.05)          | < 0.05<br>(0.0 to < 0.05)          | < 0.05<br>(0.1 to 0.3)           | 0.2<br>(0.1 to 0.3)              |
| Other pneumoconiosis                                           | Mild other pneumoconiosis                                                                             | 62.8<br>(51.4 to 75.2)               | 83.3<br>(67.9 to 100.5)               | 5.6<br>(4.6 to 6.7)                | 7.2<br>(5.8 to 8.7)                | 1.2<br>(0.6 to 2.0)              | 1.6<br>(0.8 to 2.7)              |
| Other pneumoconiosis                                           | Asymptomatic other pneumoconiosis                                                                     | 42.0<br>(34.9 to 50.0)               | 55.8<br>(45.8 to 66.5)                | 3.8<br>(3.1 to 4.5)                | 4.8<br>(4.0 to 5.9)                | < 0.05<br>(0.0 to < 0.05)        | < 0.05<br>(0.0 to < 0.05)        |
| Other pneumoconiosis                                           | Severe heart failure due to severe other pneumoconiosis                                               | 0.7<br>(0.5 to 0.8)                  | 0.9<br>(0.7 to 1.0)                   | < 0.05<br>(0.0 to < 0.05)          | < 0.05<br>(0.0 to < 0.05)          | 0.3<br>(0.2 to 0.5)              | 0.4<br>(0.3 to 0.6)              |
| Other pneumoconiosis                                           | Moderate heart failure due to severe other pneumoconiosis                                             | 0.2<br>(0.2 to 0.3)                  | 0.3<br>(0.2 to 0.4)                   | < 0.05<br>(0.0 to < 0.05)          | < 0.05<br>(0.0 to < 0.05)          | 0.1<br>(0.1 to 0.2)              | 0.1<br>(0.1 to 0.2)              |
| Other pneumoconiosis                                           | Severe other pneumoconiosis without heart failure                                                     | 52.0<br>(40.6 to 64.9)               | 69.1<br>(54.0 to 86.9)                | 4.8<br>(3.8 to 6.0)                | 6.2<br>(4.8 to 7.8)                | 19.9<br>(12.8 to 29.1)           | 26.4<br>(16.9 to 38.5)           |
| Other pneumoconiosis                                           | Moderate other pneumoconiosis                                                                         | 24.6<br>(16.4 to 33.8)               | 32.6<br>(21.7 to 44.8)                | 2.2<br>(1.5 to 3.0)                | 2.8<br>(1.9 to 3.9)                | 5.4<br>(3.1 to 8.3)              | 7.2<br>(4.1 to 11.2)             |
| Other pneumoconiosis                                           | Asymptomatic and mild heart failure due to severe other pneumoconiosis                                | 1.1<br>(1.0 to 1.3)                  | 1.5<br>(1.2 to 1.7)                   | < 0.05<br>(0.0 to < 0.05)          | < 0.05<br>(0.0 to < 0.05)          | 0.5<br>(0.3 to 0.7)              | 0.6<br>(0.4 to 0.9)              |
| Asthma                                                         | Controlled asthma                                                                                     | 57,567.6<br>(41,176.5 to 76,156.7)   | 67,619.0<br>(48,320.9 to 89,379.7)    | 12,611.5<br>(9,060.2 to 16,451.9)  | 14,968.7<br>(10,766.5 to 19,557.2) | 812.9<br>(394.4 to 1,481.1)      | 953.2<br>(462.7 to 1,739.9)      |
| Asthma                                                         | Asymptomatic asthma                                                                                   | 104,618.8<br>(92,222.9 to 117,191.8) | 122,882.9<br>(108,108.2 to 137,972.4) | 23,091.0<br>(20,348.6 to 26,003.4) | 27,405.1<br>(24,070.8 to 30,840.0) | < 0.05<br>(0.0 to < 0.05)        | < 0.05<br>(0.0 to < 0.05)        |
| Asthma                                                         | Uncontrolled asthma                                                                                   | 67,117.0<br>(53,853.9 to 81,400.9)   | 78,835.5<br>(63,445.9 to 96,002.5)    | 14,786.2<br>(11,670.3 to 18,147.0) | 17,548.6<br>(13,818.5 to 21,501.6) | 8,426.6<br>(5,261.7 to 12,664.8) | 9,874.5<br>(6,136.7 to 14,826.0) |
| Asthma                                                         | Partially controlled asthma                                                                           | 59,684.0<br>(45,853.4 to 73,613.2)   | 70,102.5<br>(53,689.6 to 86,822.5)    | 13,122.1<br>(10,176.9 to 16,385.0) | 15,573.7<br>(12,139.7 to 19,467.2) | 2,041.5<br>(1,163.4 to 3,248.6)  | 2,393.5<br>(1,354.1 to 3,834.8)  |
| Interstitial lung disease and pulmonary sarcoidosis            | Severe heart failure due to severe interstitial lung disease and pulmonary sarcoidosis                | 54.4<br>(40.3 to 69.6)               | 71.3<br>(52.7 to 91.1)                | < 0.05<br>(0.0 to < 0.05)          | < 0.05<br>(0.0 to < 0.05)          | 25.5<br>(16.8 to 36.5)           | 33.2<br>(21.8 to 47.7)           |
| Interstitial lung disease and pulmonary sarcoidosis            | Severe interstitial lung disease and pulmonary sarcoidosis without heart failure                      | 349.2<br>(200.7 to 518.4)            | 450.4<br>(258.7 to 671.0)             | 47.9<br>(31.0 to 68.1)             | 64.5<br>(41.8 to 91.8)             | 129.9<br>(66.2 to 213.1)         | 166.2<br>(84.7 to 277.6)         |
| Interstitial lung disease and pulmonary sarcoidosis            | Asymptomatic interstitial lung disease and pulmonary sarcoidosis                                      | 939.3<br>(820.7 to 1,072.1)          | 1,217.5<br>(1,057.6 to 1,394.9)       | 86.2<br>(74.8 to 98.5)             | 116.0<br>(100.4 to 132.7)          | < 0.05<br>(0.0 to < 0.05)        | < 0.05<br>(0.0 to < 0.05)        |
| Interstitial lung disease and pulmonary sarcoidosis            | Asymptomatic and mild heart failure due to severe interstitial lung disease and pulmonary sarcoidosis | 92.8<br>(68.8 to 116.6)              | 121.7<br>(90.3 to 152.7)              | < 0.05<br>(0.0 to < 0.05)          | < 0.05<br>(0.0 to < 0.05)          | 35.8<br>(23.9 to 51.4)           | 46.7<br>(31.1 to 66.8)           |
| Interstitial lung disease and pulmonary sarcoidosis            | Moderate heart failure due to severe interstitial lung disease and pulmonary sarcoidosis              | 20.4<br>(13.5 to 29.0)               | 26.7<br>(17.6 to 38.1)                | < 0.05<br>(0.0 to < 0.05)          | < 0.05<br>(0.0 to < 0.05)          | 9.0<br>(5.2 to 14.1)             | 11.7<br>(6.8 to 18.4)            |
| Interstitial lung disease and pulmonary sarcoidosis            | Moderate interstitial lung disease and pulmonary sarcoidosis                                          | 502.9<br>(396.0 to 617.7)            | 651.8<br>(514.3 to 803.4)             | 45.9<br>(35.8 to 56.4)             | 61.9<br>(48.1 to 76.2)             | 102.6<br>(65.4 to 145.6)         | 132.5<br>(84.2 to 187.6)         |
| Interstitial lung disease and pulmonary sarcoidosis            | Mild interstitial lung disease and pulmonary sarcoidosis                                              | 1,109.5<br>(956.3 to 1,273.5)        | 1,438.1<br>(1,232.5 to 1,653.0)       | 101.7<br>(86.9 to 116.7)           | 137.0<br>(116.8 to 157.4)          | 20.2<br>(10.9 to 34.0)           | 26.1<br>(14.1 to 43.4)           |
| Other chronic respiratory diseases                             | Other chronic respiratory diseases                                                                    | --                                   | --                                    | --                                 | --                                 | 578.9<br>(504.5 to 639.0)        | 866.4<br>(752.1 to 954.8)        |
| Cirrhosis and other chronic liver diseases due to hepatitis B  | Cirrhosis and other chronic liver diseases due to hepatitis B, decompensated                          | 1,898.4<br>(1,760.8 to 2,061.3)      | 2,407.0<br>(2,223.3 to 2,616.9)       | 377.3<br>(350.1 to 411.0)          | 456.6<br>(421.3 to 499.8)          | 311.3<br>(216.8 to 434.3)        | 394.2<br>(274.1 to 544.6)        |
| Cirrhosis and other chronic liver diseases due to hepatitis B  | Cirrhosis and other chronic liver diseases due to hepatitis B, compensated                            | 7,723.8<br>(7,108.7 to 8,367.3)      | 10,075.3<br>(9,276.4 to 10,933.2)     | --                                 | --                                 | < 0.05<br>(0.0 to < 0.05)        | < 0.05<br>(0.0 to < 0.05)        |
| Cirrhosis and other chronic liver diseases due to hepatitis C  | Cirrhosis and other chronic liver diseases due to hepatitis C, decompensated                          | 1,515.9<br>(1,391.6 to 1,657.9)      | 1,918.8<br>(1,751.7 to 2,108.7)       | 316.6<br>(289.2 to 347.3)          | 386.9<br>(353.0 to 425.5)          | 248.1<br>(170.6 to 342.6)        | 313.6<br>(215.3 to 432.7)        |
| Cirrhosis and other chronic liver diseases due to hepatitis C  | Cirrhosis and other chronic liver diseases due to hepatitis C, compensated                            | 6,838.0<br>(6,209.8 to 7,544.2)      | 8,983.9<br>(8,154.5 to 9,924.8)       | --                                 | --                                 | < 0.05<br>(0.0 to < 0.05)        | < 0.05<br>(0.0 to < 0.05)        |
| Cirrhosis and other chronic liver diseases due to alcohol use  | Cirrhosis and other chronic liver diseases due to alcohol, compensated                                | 7,266.0<br>(6,661.0 to 7,906.1)      | 9,460.4<br>(8,651.1 to 10,332.3)      | --                                 | --                                 | < 0.05<br>(0.0 to < 0.05)        | < 0.05<br>(0.0 to < 0.05)        |
| Cirrhosis and other chronic liver diseases due to alcohol use  | Cirrhosis and other chronic liver diseases due to alcohol, decompensated                              | 1,533.2<br>(1,415.1 to 1,664.7)      | 1,931.2<br>(1,783.7 to 2,109.7)       | 333.7<br>(310.1 to 360.6)          | 403.7<br>(373.2 to 439.0)          | 249.4<br>(172.5 to 342.0)        | 313.7<br>(219.5 to 431.0)        |
| Cirrhosis and other chronic liver diseases due to other causes | Cirrhosis and other chronic liver diseases due to other cause, compensated                            | 6,138.9<br>(5,522.6 to 6,844.0)      | 7,724.4<br>(6,904.6 to 8,614.2)       | --                                 | --                                 | < 0.05<br>(0.0 to < 0.05)        | < 0.05<br>(0.0 to < 0.05)        |
| Cirrhosis and other chronic liver diseases due to other causes | Cirrhosis and other chronic liver diseases due to other cause, decompensated                          | 2,915.7<br>(2,735.5 to 3,109.5)      | 3,282.2<br>(3,067.0 to 3,513.5)       | 341.9<br>(318.4 to 366.0)          | 390.6<br>(362.6 to 420.7)          | 491.8<br>(335.2 to 693.5)        | 552.0<br>(375.8 to 771.8)        |
| Peptic ulcer disease                                           | Severe anaemia due to peptic ulcer disease                                                            | 362.8<br>(328.4 to 403.2)            | 542.2<br>(485.5 to 612.8)             | --                                 | --                                 | 49.5<br>(33.1 to 68.9)           | 73.9<br>(50.2 to 103.1)          |
| Peptic ulcer disease                                           | Moderate anaemia due to peptic ulcer disease                                                          | 7,984.1<br>(7,233.8 to 8,874.8)      | 11,044.5<br>(9,867.2 to 12,429.6)     | --                                 | --                                 | 388.1<br>(250.5 to 568.5)        | 536.3<br>(349.6 to 790.1)        |
| Peptic ulcer disease                                           | Mild symptomatic peptic ulcer disease with severe anaemia                                             | 2.9<br>(2.2 to 3.8)                  | 3.8<br>(2.9 to 4.8)                   | --                                 | --                                 | 0.5<br>(0.3 to 0.7)              | 0.6<br>(0.4 to 0.9)              |
| Peptic ulcer disease                                           | Asymptomatic peptic ulcer disease with mild anaemia                                                   | 9,890.5<br>(9,029.0 to 10,874.0)     | 13,870.8<br>(12,541.5 to 15,431.6)    | --                                 | --                                 | 35.2<br>(12.6 to 77.2)           | 49.3<br>(17.4 to 109.2)          |
| Peptic ulcer disease                                           | Mild anaemia due to peptic ulcer disease                                                              | 10,074.5<br>(9,202.8 to 11,079.8)    | 14,089.1<br>(12,733.5 to 15,684.4)    | --                                 | --                                 | 35.9<br>(12.7 to 78.3)           | 50.1<br>(17.8 to 111.0)          |
| Peptic ulcer disease                                           | Mild symptomatic peptic ulcer disease with no anaemia                                                 | 85.0<br>(60.5 to 111.1)              | 93.8<br>(68.1 to 122.6)               | 3,897.9<br>(3,225.8 to 4,665.7)    | 4,422.4<br>(3,658.3 to 5,291.2)    | 0.9<br>(0.4 to 1.8)              | 1.0<br>(0.5 to 2.0)              |
| Peptic ulcer disease                                           | Moderate symptomatic peptic ulcer disease with moderate anaemia                                       | 86.1<br>(69.4 to 106.2)              | 106.0<br>(85.5 to 130.5)              | --                                 | --                                 | 13.7<br>(8.9 to 19.9)            | 16.7<br>(10.9 to 24.2)           |
| Peptic ulcer disease                                           | Asymptomatic peptic ulcer disease with moderate anaemia                                               | 7,826.9<br>(7,095.4 to 8,695.0)      | 10,859.7<br>(9,683.6 to 12,224.8)     | --                                 | --                                 | 380.4<br>(245.2 to 557.8)        | 527.1<br>(343.3 to 774.9)        |
| Peptic ulcer disease                                           | Asymptomatic peptic ulcer disease with severe anaemia                                                 | 355.6<br>(321.8 to 394.9)            | 533.3<br>(477.3 to 602.6)             | --                                 | --                                 | 48.4<br>(32.5 to 69.1)           | 72.6<br>(49.7 to 103.0)          |
| Peptic ulcer disease                                           | Mild symptomatic peptic ulcer disease with moderate anaemia                                           | 64.0<br>(49.0 to 80.7)               | 78.8<br>(60.3 to 99.7)                | --                                 | --                                 | 4.0<br>(2.3 to 6.2)              | 4.9<br>(2.8 to 7.6)              |
| Peptic ulcer disease                                           | Asymptomatic peptic ulcer disease with no anaemia                                                     | 18,389.0<br>(15,132.1 to 21,854.7)   | 22,763.3<br>(18,055.0 to 27,551.2)    | < 0.05<br>(0.0 to < 0.05)          | < 0.05<br>(0.0 to < 0.05)          | < 0.05<br>(0.0 to < 0.05)        | < 0.05<br>(0.0 to < 0.05)        |

|                                            |                                                                     |                                    |                                    |                                    |                                    |                                 |                                 |
|--------------------------------------------|---------------------------------------------------------------------|------------------------------------|------------------------------------|------------------------------------|------------------------------------|---------------------------------|---------------------------------|
| Peptic ulcer disease                       | Moderate symptomatic peptic ulcer disease with no anaemia           | 114.3<br>(86.7 to 144.6)           | 126.2<br>(95.4 to 161.9)           | 5,206.2<br>(4,370.3 to 6,042.4)    | 5,906.7<br>(4,967.9 to 6,885.1)    | 13.0<br>(7.8 to 20.4)           | 14.4<br>(8.5 to 22.0)           |
| Peptic ulcer disease                       | Moderate symptomatic peptic ulcer disease with mild anaemia         | 100.6<br>(81.3 to 123.8)           | 125.2<br>(101.4 to 154.6)          | --                                 | --                                 | 11.8<br>(7.5 to 17.2)           | 14.6<br>(9.3 to 21.3)           |
| Peptic ulcer disease                       | Mild symptomatic peptic ulcer disease with mild anaemia             | 74.8<br>(57.4 to 94.7)             | 93.1<br>(71.2 to 117.1)            | --                                 | --                                 | 1.1<br>(0.5 to 2.2)             | 1.4<br>(0.6 to 2.7)             |
| Peptic ulcer disease                       | Moderate symptomatic peptic ulcer disease with severe anaemia       | 3.9<br>(3.1 to 4.9)                | 5.1<br>(4.0 to 6.3)                | --                                 | --                                 | 0.6<br>(0.4 to 0.9)             | 0.8<br>(0.5 to 1.2)             |
| Gastritis and duodenitis                   | Mild symptomatic gastritis and duodenitis with moderate anaemia     | 109.8<br>(86.0 to 142.1)           | 152.7<br>(118.7 to 197.9)          | --                                 | --                                 | 6.7<br>(4.1 to 10.7)            | 9.3<br>(5.6 to 14.9)            |
| Gastritis and duodenitis                   | Mild anaemia due to gastritis and duodenitis                        | 16,661.8<br>(15,045.5 to 18,353.4) | 23,845.8<br>(21,417.2 to 26,185.6) | --                                 | --                                 | 59.1<br>(20.9 to 132.6)         | 84.4<br>(30.0 to 188.4)         |
| Gastritis and duodenitis                   | Asymptomatic gastritis and duodenitis with severe anaemia           | 353.2<br>(319.5 to 392.8)          | 527.5<br>(472.5 to 596.4)          | --                                 | --                                 | 48.2<br>(32.5 to 68.1)          | 71.9<br>(48.9 to 102.4)         |
| Gastritis and duodenitis                   | Moderate symptomatic gastritis and duodenitis with severe anaemia   | 4.5<br>(3.4 to 5.7)                | 6.9<br>(5.2 to 8.8)                | --                                 | --                                 | 1.1<br>(0.7 to 1.6)             | 1.7<br>(1.1 to 2.5)             |
| Gastritis and duodenitis                   | Mild symptomatic gastritis and duodenitis with severe anaemia       | 5.0<br>(3.9 to 6.4)                | 7.7<br>(6.1 to 10.0)               | --                                 | --                                 | 0.8<br>(0.5 to 1.2)             | 1.2<br>(0.8 to 1.8)             |
| Gastritis and duodenitis                   | Severe anaemia due to gastritis and duodenitis                      | 560.6<br>(499.4 to 621.6)          | 824.4<br>(731.2 to 919.8)          | --                                 | --                                 | 76.6<br>(52.5 to 106.4)         | 112.2<br>(77.1 to 156.3)        |
| Gastritis and duodenitis                   | Moderate symptomatic gastritis and duodenitis with mild anaemia     | 116.9<br>(88.5 to 148.4)           | 165.2<br>(125.5 to 211.0)          | --                                 | --                                 | 13.6<br>(8.3 to 20.4)           | 19.1<br>(11.7 to 28.1)          |
| Gastritis and duodenitis                   | Asymptomatic gastritis and duodenitis with moderate anaemia         | 7,775.4<br>(7,049.8 to 8,634.7)    | 10,755.0<br>(9,609.6 to 12,103.7)  | --                                 | --                                 | 378.0<br>(244.2 to 555.4)       | 522.1<br>(339.1 to 767.3)       |
| Gastritis and duodenitis                   | Asymptomatic gastritis and duodenitis with mild anaemia             | 9,826.5<br>(8,973.3 to 10,809.7)   | 13,739.5<br>(12,432.7 to 15,286.9) | --                                 | --                                 | 35.0<br>(12.5 to 76.6)          | 48.8<br>(17.3 to 108.6)         |
| Gastritis and duodenitis                   | Asymptomatic gastritis and duodenitis with no anaemia               | 44,963.2<br>(39,216.8 to 51,367.7) | 57,332.4<br>(50,043.3 to 65,129.6) | < 0.05<br>(0.0 to < 0.05)          | < 0.05<br>(0.0 to < 0.05)          | < 0.05<br>(0.0 to < 0.05)       | < 0.05<br>(0.0 to < 0.05)       |
| Gastritis and duodenitis                   | Mild symptomatic gastritis and duodenitis with no anaemia           | 198.0<br>(151.7 to 252.7)          | 256.5<br>(200.0 to 323.9)          | 32,196.9<br>(26,808.8 to 38,014.1) | 40,906.1<br>(34,056.4 to 48,509.4) | 2.1<br>(1.0 to 4.1)             | 2.7<br>(1.3 to 5.3)             |
| Gastritis and duodenitis                   | Moderate anaemia due to gastritis and duodenitis                    | 11,271.2<br>(10,093.9 to 12,456.6) | 15,454.4<br>(13,877.3 to 17,118.1) | --                                 | --                                 | 548.2<br>(351.5 to 786.1)       | 749.5<br>(479.8 to 1,083.4)     |
| Gastritis and duodenitis                   | Moderate symptomatic gastritis and duodenitis with no anaemia       | 177.5<br>(129.0 to 229.2)          | 229.9<br>(173.5 to 294.2)          | 28,517.5<br>(23,111.0 to 34,071.9) | 36,233.8<br>(29,532.6 to 43,264.3) | 19.6<br>(12.0 to 29.6)          | 25.1<br>(15.8 to 36.9)          |
| Gastritis and duodenitis                   | Moderate symptomatic gastritis and duodenitis with moderate anaemia | 98.4<br>(74.1 to 126.6)            | 136.8<br>(103.2 to 175.5)          | --                                 | --                                 | 15.6<br>(9.5 to 23.2)           | 21.5<br>(13.1 to 31.8)          |
| Gastritis and duodenitis                   | Mild symptomatic gastritis and duodenitis with mild anaemia         | 130.5<br>(103.4 to 166.1)          | 184.4<br>(145.7 to 235.6)          | --                                 | --                                 | 1.9<br>(0.8 to 3.8)             | 2.7<br>(1.2 to 5.5)             |
| Appendicitis                               | Appendicitis                                                        | 779.8<br>(722.3 to 839.5)          | 857.1<br>(795.6 to 921.6)          | 20,541.1<br>(19,030.3 to 22,107.5) | 22,580.2<br>(20,992.8 to 24,257.6) | 239.9<br>(158.8 to 328.0)       | 263.4<br>(176.3 to 360.2)       |
| Paralytic ileus and intestinal obstruction | Paralytic ileus and intestinal obstruction                          | 135.0<br>(123.6 to 147.7)          | 169.7<br>(155.2 to 185.7)          | 3,689.3<br>(3,385.4 to 4,021.5)    | 4,651.4<br>(4,265.0 to 5,079.5)    | 43.1<br>(28.8 to 59.2)          | 54.0<br>(36.4 to 74.5)          |
| Inguinal, femoral, and abdominal hernia    | Inguinal, femoral, and abdominal hernia, asymptomatic               | 24,457.8<br>(20,319.1 to 28,958.3) | 28,863.7<br>(24,230.3 to 33,871.7) | --                                 | --                                 | < 0.05<br>(0.0 to < 0.05)       | < 0.05<br>(0.0 to < 0.05)       |
| Inguinal, femoral, and abdominal hernia    | Severe symptomatic inguinal, femoral and abdominal hernia           | 4,195.9<br>(3,307.6 to 5,241.4)    | 4,850.8<br>(3,831.2 to 6,051.8)    | 5,577.4<br>(4,328.9 to 7,018.1)    | 7,898.5<br>(6,124.9 to 9,926.4)    | 1,243.9<br>(791.0 to 1,784.5)   | 1,433.6<br>(913.5 to 2,054.5)   |
| Inguinal, femoral, and abdominal hernia    | Moderate symptomatic inguinal, femoral and abdominal hernia         | 4,782.4<br>(3,586.1 to 6,038.2)    | 5,529.3<br>(4,129.2 to 6,975.8)    | 6,302.6<br>(4,748.0 to 8,030.6)    | 8,925.1<br>(6,693.6 to 11,434.3)   | 512.5<br>(310.5 to 767.5)       | 591.0<br>(356.2 to 891.5)       |
| Inguinal, femoral, and abdominal hernia    | Mild symptomatic inguinal, femoral and abdominal hernia             | 10,374.7<br>(8,800.8 to 12,010.1)  | 11,995.3<br>(10,145.7 to 13,960.7) | 13,710.5<br>(11,563.6 to 16,088.0) | 19,416.9<br>(16,379.3 to 22,937.5) | 109.9<br>(53.4 to 204.4)        | 126.9<br>(61.1 to 235.5)        |
| Inflammatory bowel disease                 | Asymptomatic Crohn's disease                                        | 491.4<br>(454.7 to 530.3)          | 555.5<br>(512.4 to 602.3)          | 373.2<br>(339.0 to 413.1)          | 385.6<br>(351.3 to 425.0)          | < 0.05<br>(0.0 to < 0.05)       | < 0.05<br>(0.0 to < 0.05)       |
| Inflammatory bowel disease                 | Asymptomatic Ulcerative colitis                                     | 1,020.8<br>(937.0 to 1,109.9)      | 1,379.2<br>(1,247.8 to 1,524.5)    | 658.0<br>(593.3 to 726.3)          | 740.8<br>(664.6 to 822.1)          | < 0.05<br>(0.0 to < 0.05)       | < 0.05<br>(0.0 to < 0.05)       |
| Inflammatory bowel disease                 | Ulcerative colitis                                                  | 2,040.7<br>(1,884.0 to 2,215.7)    | 2,757.3<br>(2,509.2 to 3,045.8)    | 1,314.1<br>(1,184.9 to 1,439.8)    | 1,479.5<br>(1,325.5 to 1,630.8)    | 431.4<br>(296.3 to 587.0)       | 581.7<br>(396.6 to 793.8)       |
| Inflammatory bowel disease                 | Crohn's disease                                                     | 1,163.2<br>(1,083.5 to 1,251.1)    | 1,315.1<br>(1,219.8 to 1,420.5)    | 882.5<br>(805.8 to 969.5)          | 911.9<br>(831.7 to 1,000.0)        | 249.2<br>(170.6 to 337.5)       | 281.0<br>(192.5 to 381.3)       |
| Vascular intestinal disorders              | Vascular intestinal disorders                                       | 82.3<br>(74.3 to 90.7)             | 103.7<br>(92.8 to 114.9)           | 470.7<br>(429.1 to 518.2)          | 582.9<br>(527.4 to 644.5)          | 25.1<br>(16.8 to 34.4)          | 31.6<br>(20.9 to 43.3)          |
| Gallbladder and biliary diseases           | Mild symptomatic episodes gallbladder and biliary diseases          | 1,273.8<br>(1,069.1 to 1,472.7)    | 1,652.6<br>(1,381.1 to 1,919.4)    | 23,605.4<br>(19,858.4 to 27,614.4) | 30,368.1<br>(25,648.9 to 35,416.6) | 13.4<br>(6.4 to 25.0)           | 17.4<br>(8.3 to 32.2)           |
| Gallbladder and biliary diseases           | Gallbladder and biliary diseases, asymptomatic                      | 11,604.5<br>(10,308.6 to 13,029.8) | 14,452.7<br>(12,781.5 to 16,258.6) | --                                 | --                                 | < 0.05<br>(0.0 to < 0.05)       | < 0.05<br>(0.0 to < 0.05)       |
| Gallbladder and biliary diseases           | Severe symptomatic episodes gallbladder and biliary diseases        | 357.9<br>(268.1 to 456.6)          | 464.4<br>(347.2 to 594.7)          | 6,615.1<br>(4,914.6 to 8,665.2)    | 8,510.7<br>(6,315.8 to 11,215.2)   | 108.0<br>(67.9 to 164.4)        | 139.3<br>(86.8 to 214.0)        |
| Gallbladder and biliary diseases           | Moderate symptomatic episodes gallbladder and biliary diseases      | 538.6<br>(383.5 to 707.8)          | 698.8<br>(494.7 to 918.3)          | 9,817.2<br>(7,253.0 to 12,931.6)   | 12,629.9<br>(9,299.4 to 16,577.1)  | 57.6<br>(34.1 to 85.6)          | 74.6<br>(44.4 to 110.8)         |
| Pancreatitis                               | Severe pancreatitis episodes                                        | 132.7<br>(108.1 to 162.1)          | 173.1<br>(139.8 to 212.5)          | 1,194.1<br>(962.5 to 1,448.9)      | 1,551.4<br>(1,245.3 to 1,890.7)    | 41.4<br>(27.2 to 60.1)          | 53.5<br>(34.5 to 78.0)          |
| Pancreatitis                               | Moderate pancreatitis episodes                                      | 113.6<br>(88.4 to 142.9)           | 148.2<br>(115.0 to 187.2)          | 1,014.0<br>(811.6 to 1,244.1)      | 1,317.4<br>(1,053.7 to 1,623.1)    | 12.7<br>(7.9 to 18.8)           | 16.5<br>(10.3 to 24.4)          |
| Pancreatitis                               | Mild pancreatitis episodes                                          | 201.5<br>(165.6 to 238.6)          | 262.9<br>(215.9 to 313.9)          | 1,802.2<br>(1,498.7 to 2,114.4)    | 2,341.6<br>(1,930.2 to 2,777.4)    | 2.2<br>(1.0 to 4.1)             | 2.8<br>(1.3 to 5.3)             |
| Other digestive diseases                   | Other digestive diseases                                            | --                                 | --                                 | --                                 | --                                 | 440.8<br>(313.0 to 590.3)       | 583.6<br>(413.1 to 784.4)       |
| Alzheimer's disease and other dementias    | Severe Alzheimer disease and other dementias                        | 2,995.4<br>(2,198.9 to 4,039.9)    | 4,160.9<br>(3,046.5 to 5,679.2)    | 534.6<br>(372.7 to 727.4)          | 744.2<br>(513.9 to 1,019.5)        | 1,099.9<br>(695.0 to 1,585.1)   | 1,525.8<br>(965.6 to 2,219.5)   |
| Alzheimer's disease and other dementias    | Moderate Alzheimer disease and other dementias                      | 6,997.8<br>(5,706.5 to 8,389.4)    | 9,728.2<br>(7,918.7 to 11,740.0)   | 1,244.1<br>(1,017.9 to 1,523.7)    | 1,731.7<br>(1,410.6 to 2,127.5)    | 2,191.6<br>(1,456.5 to 2,962.7) | 3,043.9<br>(2,013.1 to 4,138.3) |
| Alzheimer's disease and other dementias    | Mild Alzheimer disease and other dementias                          | 21,896.3<br>(18,714.7 to 25,405.1) | 29,946.6<br>(25,545.5 to 34,963.7) | 3,870.6<br>(3,291.4 to 4,567.5)    | 5,303.4<br>(4,497.2 to 6,264.3)    | 1,350.4<br>(894.2 to 1,903.3)   | 1,845.7<br>(1,221.0 to 2,606.1) |
| Parkinson's disease                        | Severe Parkinson disease                                            | 154.1<br>(78.2 to 256.8)           | 210.1<br>(107.5 to 351.0)          | 17.6<br>(9.0 to 30.3)              | 23.8<br>(12.1 to 40.9)             | 76.8<br>(36.4 to 135.5)         | 104.7<br>(49.6 to 183.2)        |
| Parkinson's disease                        | Mild Parkinson disease                                              | 2,477.9<br>(2,038.7 to 3,033.3)    | 3,378.2<br>(2,762.4 to 4,156.9)    | 287.0<br>(230.8 to 353.8)          | 387.0<br>(311.2 to 479.0)          | 22.8<br>(10.5 to 45.4)          | 31.0<br>(14.4 to 61.1)          |

|                      |                                                                                                           |                                       |                                       |                                    |                                    |                                    |                                    |
|----------------------|-----------------------------------------------------------------------------------------------------------|---------------------------------------|---------------------------------------|------------------------------------|------------------------------------|------------------------------------|------------------------------------|
| Parkinson's disease  | Moderate Parkinson disease                                                                                | 1,815.1<br>(1,453.0 to 2,226.9)       | 2,474.6<br>(1,979.8 to 3,059.4)       | 211.4<br>(168.8 to 262.9)          | 285.0<br>(227.0 to 356.6)          | 418.8<br>(266.3 to 590.3)          | 570.7<br>(363.3 to 805.5)          |
| Epilepsy             | Severe epilepsy                                                                                           | 9,399.7<br>(7,231.8 to 11,653.2)      | 9,935.8<br>(7,585.3 to 12,520.9)      | 1,140.3<br>(870.1 to 1,446.0)      | 1,174.2<br>(895.8 to 1,520.2)      | 4,797.8<br>(3,132.7 to 6,758.8)    | 5,057.1<br>(3,297.6 to 7,203.0)    |
| Epilepsy             | Seizure-free, treated epilepsy                                                                            | 3,352.4<br>(2,563.4 to 4,330.2)       | 4,794.7<br>(3,679.6 to 6,037.1)       | 361.1<br>(272.9 to 465.5)          | 509.2<br>(387.2 to 645.0)          | 157.6<br>(92.2 to 247.5)           | 224.9<br>(133.4 to 351.1)          |
| Epilepsy             | Less severe epilepsy                                                                                      | 8,057.7<br>(6,310.1 to 10,182.3)      | 9,231.9<br>(7,225.8 to 11,400.4)      | 970.9<br>(754.5 to 1,231.8)        | 1,077.9<br>(846.2 to 1,356.4)      | 1,983.0<br>(1,234.5 to 2,936.0)    | 2,264.8<br>(1,427.9 to 3,302.4)    |
| Multiple sclerosis   | Asymptomatic multiple sclerosis                                                                           | 405.6<br>(354.1 to 456.6)             | 506.4<br>(440.1 to 575.2)             | 13.5<br>(11.8 to 15.2)             | 15.7<br>(13.7 to 17.8)             | < 0.05<br>(0.0 to < 0.05)          | < 0.05<br>(0.0 to < 0.05)          |
| Multiple sclerosis   | Severe multiple sclerosis                                                                                 | 224.0<br>(176.7 to 279.7)             | 279.7<br>(221.1 to 350.3)             | 7.4<br>(5.8 to 9.1)                | 8.6<br>(6.7 to 10.7)               | 149.3<br>(103.9 to 200.7)          | 185.9<br>(129.7 to 247.9)          |
| Multiple sclerosis   | Moderate multiple sclerosis                                                                               | 488.3<br>(417.9 to 565.9)             | 609.7<br>(518.2 to 709.7)             | 16.1<br>(13.6 to 18.9)             | 18.9<br>(15.8 to 22.2)             | 207.6<br>(134.6 to 280.9)          | 258.2<br>(166.3 to 349.6)          |
| Multiple sclerosis   | Mild multiple sclerosis                                                                                   | 661.2<br>(583.3 to 744.3)             | 825.5<br>(722.4 to 935.3)             | 21.9<br>(19.4 to 24.6)             | 25.6<br>(22.4 to 28.9)             | 112.4<br>(74.8 to 156.7)           | 140.0<br>(92.6 to 196.0)           |
| Motor neuron disease | Moderate motor impairment, severe respiratory problems, and speech problems due to motor neuron disease   | 0.8<br>(0.6 to 0.9)                   | 1.0<br>(0.8 to 1.2)                   | 0.1<br>(0.1 to 0.2)                | 0.2<br>(0.1 to 0.2)                | 0.4<br>(0.3 to 0.5)                | 0.4<br>(0.3 to 0.6)                |
| Motor neuron disease | Severe respiratory problems due to motor neuron disease                                                   | < 0.05<br>(< 0.05 to < 0.05)          | < 0.05<br>(< 0.05 to < 0.05)          | < 0.05<br>(< 0.05 to < 0.05)       | < 0.05<br>(< 0.05 to < 0.05)       | < 0.05<br>(< 0.05 to < 0.05)       | < 0.05<br>(< 0.05 to < 0.05)       |
| Motor neuron disease | Speech problems due to motor neuron disease                                                               | 6.7<br>(5.9 to 7.6)                   | 8.2<br>(7.2 to 9.2)                   | 1.1<br>(1.0 to 1.2)                | 1.4<br>(1.3 to 1.6)                | 0.3<br>(0.2 to 0.5)                | 0.4<br>(0.3 to 0.6)                |
| Motor neuron disease | Severe motor impairment and mild respiratory problems due to motor neuron disease                         | 18.9<br>(17.1 to 21.1)                | 22.9<br>(20.7 to 25.6)                | 3.1<br>(2.9 to 3.4)                | 4.0<br>(3.6 to 4.4)                | 7.8<br>(5.3 to 10.6)               | 9.5<br>(6.4 to 12.9)               |
| Motor neuron disease | Mild motor impairment, moderate respiratory problems, and speech problems due to motor neuron disease     | 0.7<br>(0.6 to 0.9)                   | 0.9<br>(0.7 to 1.1)                   | 0.1<br>(0.1 to 0.1)                | 0.2<br>(0.1 to 0.2)                | 0.2<br>(0.1 to 0.3)                | 0.2<br>(0.2 to 0.3)                |
| Motor neuron disease | Moderate motor impairment and mild respiratory problems due to motor neuron disease                       | 18.5<br>(16.6 to 20.6)                | 22.4<br>(20.2 to 25.0)                | 3.1<br>(2.8 to 3.3)                | 3.9<br>(3.5 to 4.3)                | 0.5<br>(0.3 to 1.0)                | 0.7<br>(0.3 to 1.2)                |
| Motor neuron disease | Moderate motor impairment, moderate respiratory problems, and speech problems due to motor neuron disease | 2.0<br>(1.7 to 2.3)                   | 2.4<br>(2.0 to 2.7)                   | 0.3<br>(0.3 to 0.4)                | 0.4<br>(0.4 to 0.5)                | 0.6<br>(0.4 to 0.8)                | 0.7<br>(0.5 to 1.0)                |
| Motor neuron disease | Moderate motor impairment and speech problems due to motor neuron disease                                 | 8.3<br>(7.4 to 9.4)                   | 10.1<br>(9.0 to 11.4)                 | 1.4<br>(1.3 to 1.5)                | 1.8<br>(1.6 to 1.9)                | 0.9<br>(0.6 to 1.3)                | 1.1<br>(0.7 to 1.6)                |
| Motor neuron disease | Severe motor impairment, moderate respiratory problems, and speech problems due to motor neuron disease   | 6.1<br>(5.5 to 6.9)                   | 7.4<br>(6.6 to 8.4)                   | 1.0<br>(0.9 to 1.1)                | 1.3<br>(1.2 to 1.4)                | 3.4<br>(2.5 to 4.5)                | 4.1<br>(3.0 to 5.4)                |
| Motor neuron disease | Severe motor impairment and speech problems due to motor neuron disease                                   | 13.0<br>(11.7 to 14.6)                | 15.8<br>(14.1 to 17.8)                | 2.2<br>(2.0 to 2.4)                | 2.7<br>(2.5 to 3.0)                | 5.6<br>(3.9 to 7.6)                | 6.8<br>(4.7 to 9.2)                |
| Motor neuron disease | Severe motor impairment, mild respiratory problems, and speech problems due to motor neuron disease       | 14.4<br>(12.9 to 15.9)                | 17.4<br>(15.7 to 19.4)                | 2.4<br>(2.2 to 2.6)                | 3.0<br>(2.7 to 3.3)                | 6.4<br>(4.4 to 8.5)                | 7.7<br>(5.4 to 10.3)               |
| Motor neuron disease | Mild motor impairment and severe respiratory problems due to motor neuron disease                         | 0.2<br>(0.1 to 0.3)                   | 0.2<br>(0.1 to 0.3)                   | < 0.05<br>(< 0.05 to < 0.05)       | < 0.05<br>(< 0.05 to 0.1)          | 0.1<br>(< 0.05 to 0.1)             | 0.1<br>(0.1 to 0.2)                |
| Motor neuron disease | Moderate motor impairment due to motor neuron disease                                                     | 55.1<br>(49.8 to 61.4)                | 66.8<br>(60.3 to 74.4)                | 9.1<br>(8.4 to 10.0)               | 11.6<br>(10.6 to 12.8)             | 3.3<br>(2.2 to 5.0)                | 4.0<br>(2.6 to 6.0)                |
| Motor neuron disease | Mild respiratory problems due to motor neuron disease                                                     | 1.8<br>(1.5 to 2.0)                   | 2.1<br>(1.8 to 2.5)                   | 0.4<br>(0.3 to 0.3)                | < 0.05<br>(0.3 to 0.4)             | < 0.05<br>(< 0.05 to 0.1)          | < 0.05<br>(< 0.05 to 0.1)          |
| Motor neuron disease | Mild motor impairment and mild respiratory problems due to motor neuron disease                           | 6.1<br>(5.4 to 6.9)                   | 7.4<br>(6.6 to 8.4)                   | 1.0<br>(0.9 to 1.1)                | 1.3<br>(1.2 to 1.5)                | 0.5<br>(0.3 to 0.7)                | 0.6<br>(0.4 to 0.9)                |
| Motor neuron disease | Mild motor impairment and speech problems due to motor neuron disease                                     | 5.6<br>(5.0 to 6.4)                   | 6.8<br>(6.0 to 7.7)                   | 0.9<br>(0.8 to 1.0)                | 1.2<br>(1.1 to 1.3)                | 0.3<br>(0.2 to 0.5)                | 0.4<br>(0.3 to 0.7)                |
| Motor neuron disease | Severe motor impairment, severe respiratory problems, and speech problems due to motor neuron disease     | 3.7<br>(3.3 to 4.3)                   | 4.5<br>(4.0 to 5.2)                   | 0.6<br>(0.5 to 0.7)                | 0.8<br>(0.7 to 0.9)                | 2.5<br>(1.8 to 3.2)                | 3.0<br>(2.2 to 3.8)                |
| Motor neuron disease | Moderate motor impairment and moderate respiratory problems due to motor neuron disease                   | 3.6<br>(3.1 to 4.1)                   | 4.3<br>(3.8 to 4.9)                   | 0.6<br>(0.5 to 0.7)                | 0.7<br>(0.7 to 0.8)                | 0.8<br>(0.6 to 1.2)                | 1.0<br>(0.7 to 1.4)                |
| Motor neuron disease | Moderate motor impairment, mild respiratory problems, and speech problems due to motor neuron disease     | 9.2<br>(8.2 to 10.3)                  | 11.2<br>(9.9 to 12.5)                 | 1.5<br>(1.4 to 1.7)                | 1.9<br>(1.8 to 2.2)                | 1.2<br>(0.7 to 1.7)                | 1.4<br>(0.9 to 2.1)                |
| Motor neuron disease | Severe motor impairment and moderate respiratory problems due to motor neuron disease                     | 5.5<br>(4.9 to 6.2)                   | 6.7<br>(5.9 to 7.5)                   | 0.9<br>(0.8 to 1.0)                | 1.2<br>(1.0 to 1.3)                | 2.9<br>(2.0 to 3.9)                | 3.6<br>(2.5 to 4.7)                |
| Motor neuron disease | Moderate respiratory problems and speech problems due to motor neuron disease                             | 0.4<br>(0.3 to 0.5)                   | 0.5<br>(0.4 to 0.6)                   | 0.1<br>(< 0.05 to 0.1)             | 0.1<br>(0.1 to 0.1)                | 0.1<br>(0.1 to 0.2)                | 0.1<br>(0.1 to 0.2)                |
| Motor neuron disease | Moderate respiratory problems due to motor neuron disease                                                 | 0.1<br>(0.1 to 0.2)                   | 0.1<br>(0.1 to 0.2)                   | < 0.05<br>(< 0.05 to < 0.05)       | < 0.05<br>(< 0.05 to < 0.05)       | < 0.05<br>(< 0.05 to < 0.05)       | < 0.05<br>(< 0.05 to 0.1)          |
| Motor neuron disease | Mild motor impairment, mild respiratory problems, and speech problems due to motor neuron disease         | 4.9<br>(4.3 to 5.5)                   | 5.9<br>(5.2 to 6.7)                   | 0.8<br>(0.7 to 0.9)                | 1.0<br>(0.9 to 1.1)                | 0.4<br>(0.2 to 0.6)                | 0.5<br>(0.3 to 0.7)                |
| Motor neuron disease | Diagnosis of motor neuron disease                                                                         | 10.2<br>(9.2 to 11.5)                 | 12.4<br>(11.1 to 13.9)                | 1.7<br>(1.5 to 1.9)                | 2.2<br>(1.9 to 2.4)                | 0.1<br>(0.1 to 0.2)                | 0.2<br>(0.1 to 0.3)                |
| Motor neuron disease | Severe motor impairment due to motor neuron disease                                                       | 41.1<br>(37.3 to 45.9)                | 49.9<br>(45.2 to 55.6)                | 6.8<br>(6.2 to 7.4)                | 8.7<br>(7.9 to 9.5)                | 16.5<br>(11.0 to 22.6)             | 19.9<br>(13.3 to 27.3)             |
| Motor neuron disease | Mild motor impairment due to motor neuron disease                                                         | 28.4<br>(25.8 to 31.8)                | 34.5<br>(31.3 to 38.3)                | 4.7<br>(4.3 to 5.1)                | 6.0<br>(5.5 to 6.6)                | 0.3<br>(0.1 to 0.5)                | 0.3<br>(0.2 to 0.7)                |
| Motor neuron disease | Mild respiratory problems and speech problems due to motor neuron disease                                 | 3.2<br>(2.8 to 3.6)                   | 3.8<br>(3.4 to 4.4)                   | 0.5<br>(0.5 to 0.6)                | 0.7<br>(0.6 to 0.8)                | 0.2<br>(0.1 to 0.3)                | 0.3<br>(0.2 to 0.4)                |
| Motor neuron disease | Mild motor impairment, severe respiratory problems and speech problems due to motor neuron disease        | 0.2<br>(0.2 to 0.3)                   | 0.3<br>(0.2 to 0.4)                   | < 0.05<br>(< 0.05 to 0.1)          | < 0.05<br>(< 0.05 to 0.1)          | 0.1<br>(0.1 to 0.2)                | 0.1<br>(0.1 to 0.2)                |
| Motor neuron disease | Severe respiratory problems and speech problems due to motor neuron disease                               | 0.1<br>(< 0.05 to 0.1)                | 0.1<br>(< 0.05 to 0.1)                | < 0.05<br>(< 0.05 to < 0.05)       | < 0.05<br>(< 0.05 to < 0.05)       | < 0.05<br>(< 0.05 to 0.1)          | < 0.05<br>(< 0.05 to 0.1)          |
| Motor neuron disease | Severe motor impairment and severe respiratory problems due to motor neuron disease                       | 2.9<br>(2.5 to 3.3)                   | 3.5<br>(3.1 to 4.0)                   | 0.5<br>(0.4 to 0.5)                | 0.6<br>(0.5 to 0.7)                | 1.9<br>(1.3 to 2.4)                | 2.3<br>(1.6 to 2.9)                |
| Motor neuron disease | Moderate motor impairment and severe respiratory problems due to motor neuron disease                     | 1.1<br>(0.9 to 1.3)                   | 1.4<br>(1.1 to 1.6)                   | 0.2<br>(0.2 to 0.2)                | 0.2<br>(0.2 to 0.3)                | 0.5<br>(0.3 to 0.7)                | 0.6<br>(0.4 to 0.8)                |
| Migraine             | Asymptomatic migraine                                                                                     | 786,465.0<br>(745,040.4 to 828,780.8) | 887,754.7<br>(840,969.9 to 934,893.9) | 73,480.3<br>(69,030.6 to 78,103.7) | 80,165.6<br>(75,409.0 to 85,215.1) | < 0.05<br>(0.0 to < 0.05)          | < 0.05<br>(0.0 to < 0.05)          |
| Migraine             | Symptomatic medication overuse due to migraine                                                            | 47,774.4<br>(41,695.4 to 53,963.7)    | 56,915.4<br>(49,703.1 to 64,176.9)    | 14,712.7<br>(12,999.3 to 16,514.9) | 17,243.0<br>(15,276.9 to 19,331.0) | 9,883.1<br>(6,600.2 to 13,768.4)   | 11,755.2<br>(7,858.5 to 16,344.4)  |
| Migraine             | Symptomatic migraine                                                                                      | 72,681.5<br>(53,238.2 to 95,422.9)    | 82,042.7<br>(60,082.2 to 107,639.4)   | 6,820.8<br>(4,906.9 to 8,841.5)    | 7,441.3<br>(5,367.1 to 9,648.3)    | 29,602.2<br>(18,156.8 to 43,262.7) | 33,366.7<br>(20,434.2 to 48,835.7) |
| Migraine             | Asymptomatic medication overuse headache due to migraine                                                  | 15,158.1<br>(12,367.0 to 18,250.9)    | 18,058.6<br>(14,759.9 to 21,767.8)    | 4,664.4<br>(3,797.3 to 5,556.2)    | 5,466.6<br>(4,445.0 to 6,504.4)    | < 0.05<br>(0.0 to < 0.05)          | < 0.05<br>(0.0 to < 0.05)          |



|                              |                                                                       |                                             |                                             |                                         |                                           |                                   |                                    |
|------------------------------|-----------------------------------------------------------------------|---------------------------------------------|---------------------------------------------|-----------------------------------------|-------------------------------------------|-----------------------------------|------------------------------------|
| Tension-type headache        | Asymptomatic tension-type headache                                    | 1,615,192.2<br>(1,447,943.4 to 1,802,664.5) | 1,783,528.3<br>(1,599,157.7 to 1,984,194.6) | 934,851.9<br>(783,440.0 to 1,097,320.0) | 1,009,705.1<br>(849,626.5 to 1,182,936.3) | < 0.05<br>(0.0 to < 0.05)         | < 0.05<br>(0.0 to < 0.05)          |
| Tension-type headache        | Symptomatic tension-type headache                                     | 71,883.7<br>(42,262.5 to 109,583.2)         | 79,379.3<br>(47,020.0 to 121,269.9)         | 40,687.7<br>(22,219.2 to 65,220.6)      | 43,945.5<br>(24,058.0 to 70,380.4)        | 2,579.8<br>(1,210.7 to 4,787.2)   | 2,846.4<br>(1,340.2 to 5,273.2)    |
| Tension-type headache        | Symptomatic medication overuse due to tension-type headache           | 17,678.1<br>(12,833.0 to 23,035.3)          | 21,061.1<br>(15,311.1 to 27,506.5)          | 5,402.9<br>(3,877.4 to 6,999.2)         | 6,332.3<br>(4,543.6 to 8,207.8)           | 3,656.4<br>(2,194.1 to 5,589.8)   | 4,348.7<br>(2,616.2 to 6,624.7)    |
| Tension-type headache        | Asymptomatic medication overuse headache due to tension-type headache | 5,625.5<br>(3,851.3 to 7,699.9)             | 6,701.7<br>(4,581.0 to 9,144.4)             | 1,719.7<br>(1,165.0 to 2,412.7)         | 2,015.4<br>(1,365.5 to 2,824.1)           | < 0.05<br>(0.0 to < 0.05)         | < 0.05<br>(0.0 to < 0.05)          |
| Other neurological disorders | Other neurological disorders                                          | --                                          | --                                          | --                                      | --                                        | 1,367.0<br>(925.7 to 1,862.2)     | 1,778.6<br>(1,208.1 to 2,423.8)    |
| Other neurological disorders | Guillain-Barre syndrome due to other neurological disorders           | 20.6<br>(13.5 to 28.4)                      | 24.0<br>(15.6 to 33.2)                      | 41.5<br>(27.2 to 57.0)                  | 48.5<br>(31.8 to 66.5)                    | 6.1<br>(3.2 to 10.0)              | 7.1<br>(3.8 to 11.5)               |
| Schizophrenia                | Schizophrenia residual state                                          | 6,563.6<br>(2,719.0 to 10,808.4)            | 7,676.4<br>(3,197.7 to 12,676.8)            | 387.4<br>(158.5 to 647.2)               | 418.6<br>(170.7 to 700.6)                 | 3,520.9<br>(1,383.7 to 6,149.2)   | 4,109.9<br>(1,624.2 to 7,209.6)    |
| Schizophrenia                | Schizophrenia acute state                                             | 11,293.2<br>(6,962.7 to 15,675.0)           | 13,206.6<br>(8,205.2 to 18,302.8)           | 666.7<br>(407.4 to 907.0)               | 720.3<br>(438.5 to 980.4)                 | 7,571.7<br>(4,604.6 to 11,500.7)  | 9,304.4<br>(5,400.0 to 13,360.2)   |
| Alcohol use disorders        | Very mild alcohol dependence                                          | 42,786.8<br>(38,125.1 to 47,444.6)          | 46,952.7<br>(41,570.6 to 52,590.6)          | 21,426.9<br>(18,744.5 to 24,337.0)      | 23,586.4<br>(20,573.2 to 26,850.3)        | 4,974.8<br>(3,323.4 to 7,049.8)   | 5,455.9<br>(3,628.2 to 7,764.5)    |
| Alcohol use disorders        | Moderate alcohol dependence                                           | 3,084.8<br>(2,142.4 to 4,201.7)             | 3,385.2<br>(2,353.0 to 4,606.3)             | 1,553.3<br>(1,082.0 to 2,111.2)         | 1,709.9<br>(1,184.8 to 2,316.6)           | 1,066.9<br>(646.4 to 1,623.6)     | 1,169.5<br>(710.5 to 1,787.9)      |
| Alcohol use disorders        | Mild fetal alcohol syndrome                                           | 98.6<br>(73.4 to 122.9)                     | 109.2<br>(81.5 to 136.4)                    | --                                      | --                                        | 1.6<br>(0.7 to 3.0)               | 1.8<br>(0.8 to 3.4)                |
| Alcohol use disorders        | Asymptomatic fetal alcohol syndrome                                   | 43.3<br>(31.3 to 57.8)                      | 48.0<br>(34.6 to 63.9)                      | < 0.05<br>(0.0 to < 0.05)               | < 0.05<br>(0.0 to < 0.05)                 | < 0.05<br>(0.0 to < 0.05)         | < 0.05<br>(0.0 to < 0.05)          |
| Alcohol use disorders        | Mild alcohol dependence                                               | 3,630.5<br>(2,038.7 to 5,771.7)             | 3,983.7<br>(2,240.7 to 6,350.6)             | 1,846.2<br>(1,025.6 to 2,865.5)         | 2,031.8<br>(1,138.3 to 3,169.7)           | 799.0<br>(387.0 to 1,413.3)       | 876.6<br>(432.8 to 1,547.6)        |
| Alcohol use disorders        | Severe alcohol dependence                                             | 4,368.4<br>(2,713.7 to 6,280.9)             | 4,794.4<br>(2,992.8 to 6,901.2)             | 2,228.4<br>(1,405.2 to 3,231.3)         | 2,453.2<br>(1,543.4 to 3,570.6)           | 2,285.5<br>(1,264.6 to 3,462.5)   | 2,508.0<br>(1,373.1 to 3,789.1)    |
| Alcohol use disorders        | Asymptomatic alcohol dependence                                       | 37,247.2<br>(33,064.4 to 41,958.9)          | 40,872.9<br>(35,924.0 to 46,103.2)          | 18,759.9<br>(16,310.5 to 21,212.7)      | 20,650.9<br>(17,846.2 to 23,467.7)        | < 0.05<br>(0.0 to < 0.05)         | < 0.05<br>(0.0 to < 0.05)          |
| Alcohol use disorders        | Severe fetal alcohol syndrome                                         | 41.1<br>(28.0 to 55.7)                      | 44.2<br>(29.6 to 60.6)                      | --                                      | --                                        | 7.4<br>(4.1 to 11.7)              | 7.9<br>(4.4 to 12.6)               |
| Alcohol use disorders        | Moderate fetal alcohol syndrome                                       | 178.9<br>(145.9 to 211.3)                   | 199.0<br>(162.0 to 234.5)                   | --                                      | --                                        | 9.9<br>(6.1 to 15.1)              | 11.0<br>(6.9 to 16.8)              |
| Opioid use disorders         | Mild opioid dependence                                                | 8,260.2<br>(5,388.1 to 11,347.2)            | 9,757.3<br>(6,352.0 to 13,414.7)            | 905.4<br>(550.7 to 1,270.7)             | 1,014.8<br>(620.5 to 1,431.7)             | 2,570.7<br>(1,425.9 to 3,970.3)   | 3,032.0<br>(1,694.4 to 4,657.2)    |
| Opioid use disorders         | Severe opioid dependence                                              | 10,769.1<br>(7,754.1 to 13,872.7)           | 12,721.0<br>(9,238.6 to 16,412.6)           | 1,188.1<br>(847.5 to 1,547.9)           | 1,331.7<br>(950.6 to 1,740.1)             | 6,865.3<br>(4,401.2 to 9,539.2)   | 8,099.9<br>(5,193.9 to 11,253.9)   |
| Opioid use disorders         | Asymptomatic opioid dependence                                        | 3,687.7<br>(2,695.8 to 5,037.9)             | 4,356.1<br>(3,174.4 to 5,961.4)             | 400.4<br>(289.1 to 548.5)               | 448.8<br>(324.2 to 610.5)                 | < 0.05<br>(0.0 to < 0.05)         | < 0.05<br>(0.0 to < 0.05)          |
| Cocaine use disorders        | Asymptomatic cocaine dependence                                       | 2,623.5<br>(2,121.4 to 3,160.9)             | 2,938.2<br>(2,373.3 to 3,548.7)             | 168.7<br>(134.3 to 205.3)               | 174.2<br>(138.6 to 210.9)                 | < 0.05<br>(0.0 to < 0.05)         | < 0.05<br>(0.0 to < 0.05)          |
| Cocaine use disorders        | Mild cocaine dependence                                               | 1,317.1<br>(972.2 to 1,717.3)               | 1,475.2<br>(1,089.1 to 1,930.6)             | 87.8<br>(62.3 to 111.4)                 | 85.0<br>(64.4 to 115.4)                   | 145.4<br>(84.1 to 226.8)          | 162.7<br>(94.6 to 254.0)           |
| Cocaine use disorders        | Severe cocaine dependence                                             | 1,274.1<br>(900.9 to 1,690.8)               | 1,426.9<br>(1,009.5 to 1,900.8)             | 82.2<br>(59.7 to 111.6)                 | 84.9<br>(61.9 to 114.8)                   | 567.6<br>(335.5 to 836.0)         | 634.5<br>(377.5 to 936.4)          |
| Amphetamine use disorders    | Severe amphetamine dependence                                         | 1,223.2<br>(797.2 to 1,785.1)               | 1,267.5<br>(811.7 to 1,855.8)               | 118.3<br>(75.0 to 178.4)                | 111.6<br>(71.5 to 166.0)                  | 562.3<br>(316.4 to 904.2)         | 583.1<br>(329.6 to 938.6)          |
| Amphetamine use disorders    | Asymptomatic amphetamine dependence                                   | 2,624.8<br>(1,811.0 to 3,608.9)             | 2,720.2<br>(1,856.2 to 3,756.9)             | 257.6<br>(183.2 to 351.3)               | 243.1<br>(173.1 to 329.8)                 | < 0.05<br>(0.0 to < 0.05)         | < 0.05<br>(0.0 to < 0.05)          |
| Amphetamine use disorders    | Mild amphetamine dependence                                           | 933.6<br>(588.4 to 1,446.3)                 | 967.4<br>(606.8 to 1,502.2)                 | 90.3<br>(57.7 to 130.2)                 | 85.2<br>(54.5 to 123.3)                   | 71.8<br>(36.5 to 123.3)           | 74.4<br>(37.7 to 128.1)            |
| Cannabis use disorders       | Severe cannabis dependence                                            | 1,300.4<br>(798.9 to 1,924.2)               | 1,347.9<br>(830.7 to 2,009.2)               | 194.5<br>(122.6 to 282.4)               | 192.2<br>(120.5 to 278.3)                 | 329.2<br>(179.1 to 535.5)         | 341.5<br>(184.3 to 550.1)          |
| Cannabis use disorders       | Mild cannabis dependence                                              | 7,689.2<br>(6,303.0 to 9,207.2)             | 7,969.7<br>(6,562.6 to 9,543.4)             | 1,159.7<br>(931.1 to 1,439.6)           | 1,146.2<br>(934.3 to 1,423.5)             | 294.7<br>(168.7 to 468.7)         | 305.4<br>(174.8 to 485.2)          |
| Cannabis use disorders       | Asymptomatic cannabis dependence                                      | 12,327.1<br>(10,298.4 to 14,673.6)          | 12,776.9<br>(10,689.4 to 15,191.7)          | 1,866.5<br>(1,536.7 to 2,232.1)         | 1,844.6<br>(1,532.4 to 2,196.7)           | < 0.05<br>(0.0 to < 0.05)         | < 0.05<br>(0.0 to < 0.05)          |
| Other drug use disorders     | Other drug use disorders                                              | 3,365.5<br>(3,029.6 to 3,705.6)             | 3,944.0<br>(3,336.6 to 4,361.6)             | 607.9<br>(546.2 to 674.4)               | 694.9<br>(624.4 to 769.6)                 | 367.5<br>(237.8 to 518.1)         | 429.9<br>(277.0 to 609.6)          |
| Major depressive disorder    | Mild major depressive disorder                                        | 89,755.5<br>(76,511.2 to 103,967.5)         | 99,992.2<br>(85,488.7 to 115,717.5)         | 137,965.6<br>(119,433.9 to 160,873.1)   | 153,275.8<br>(132,133.0 to 178,557.7)     | 12,185.8<br>(8,055.3 to 17,459.6) | 13,553.4<br>(8,971.0 to 19,504.8)  |
| Major depressive disorder    | Severe major depressive disorder                                      | 15,391.6<br>(6,083.9 to 27,676.5)           | 17,148.8<br>(6,757.7 to 31,130.7)           | 23,396.5<br>(8,140.8 to 42,888.7)       | 25,995.1<br>(9,030.7 to 47,828.1)         | 9,101.9<br>(3,674.0 to 16,835.7)  | 10,118.3<br>(4,063.2 to 18,783.7)  |
| Major depressive disorder    | Moderate major depressive disorder                                    | 25,013.3<br>(19,353.0 to 33,314.4)          | 28,987.6<br>(21,489.5 to 37,214.7)          | 40,303.0<br>(29,835.5 to 52,153.2)      | 44,775.3<br>(33,152.4 to 58,156.1)        | 9,382.6<br>(5,871.7 to 13,355.2)  | 10,433.0<br>(6,511.1 to 14,918.4)  |
| Major depressive disorder    | Major depressive disorder, currently without symptoms                 | 19,485.2<br>(14,651.4 to 25,103.4)          | 21,707.8<br>(16,284.4 to 28,014.0)          | 30,352.1<br>(22,420.0 to 39,256.1)      | 33,721.0<br>(24,898.9 to 43,513.6)        | < 0.05<br>(0.0 to < 0.05)         | < 0.05<br>(0.0 to < 0.05)          |
| Dysthymia                    | Symptomatic dysthymia                                                 | 61,889.0<br>(53,478.0 to 71,388.7)          | 74,732.6<br>(64,676.2 to 86,618.5)          | 10,176.4<br>(8,866.3 to 11,773.8)       | 11,996.0<br>(10,420.7 to 13,859.7)        | 8,382.0<br>(5,676.3 to 12,123.1)  | 10,103.8<br>(6,860.6 to 14,611.5)  |
| Dysthymia                    | Dysthymia, currently without symptoms                                 | 25,545.9<br>(20,488.3 to 31,587.4)          | 30,847.7<br>(24,649.6 to 38,256.9)          | 4,190.1<br>(3,328.0 to 5,111.6)         | 4,939.4<br>(3,937.4 to 6,027.2)           | < 0.05<br>(0.0 to < 0.05)         | < 0.05<br>(0.0 to < 0.05)          |
| Bipolar disorder             | Bipolar disorder residual state                                       | 20,535.5<br>(14,177.6 to 27,046.9)          | 23,617.7<br>(16,317.5 to 30,991.7)          | 1,847.9<br>(1,263.0 to 2,436.5)         | 2,042.6<br>(1,396.5 to 2,691.4)           | 630.2<br>(346.9 to 1,035.0)       | 724.1<br>(401.6 to 1,185.5)        |
| Bipolar disorder             | Bipolar disorder manic state                                          | 8,355.9<br>(4,686.3 to 13,373.0)            | 9,610.7<br>(5,365.3 to 15,373.2)            | 753.0<br>(420.0 to 1,200.7)             | 832.3<br>(465.5 to 1,233.5)               | 3,769.6<br>(1,926.9 to 6,421.3)   | 4,329.5<br>(2,220.3 to 7,379.7)    |
| Bipolar disorder             | Bipolar disorder depressive state                                     | 9,285.4<br>(4,667.5 to 15,358.6)            | 10,679.3<br>(5,362.5 to 17,693.8)           | 815.8<br>(409.8 to 1,293.0)             | 901.8<br>(450.9 to 1,425.2)               | 3,395.3<br>(1,541.5 to 6,138.7)   | 3,900.4<br>(1,762.4 to 7,047.4)    |
| Anxiety disorders            | Moderate anxiety disorders                                            | 46,436.7<br>(38,744.1 to 54,784.2)          | 52,609.6<br>(43,933.8 to 62,198.5)          | 7,268.8<br>(5,978.8 to 8,606.7)         | 8,111.1<br>(6,676.4 to 9,622.0)           | 5,846.1<br>(3,765.0 to 8,341.7)   | 6,611.7<br>(4,251.2 to 9,437.3)    |
| Anxiety disorders            | Severe anxiety disorders                                              | 30,813.1<br>(22,693.9 to 39,625.5)          | 34,910.4<br>(25,710.7 to 44,894.8)          | 4,820.0<br>(3,575.8 to 6,135.9)         | 5,378.6<br>(3,983.6 to 6,846.8)           | 14,805.1<br>(9,241.1 to 21,303.1) | 16,735.7<br>(10,437.8 to 24,040.0) |
| Anxiety disorders            | Anxiety disorders, currently without symptoms                         | 69,999.4<br>(63,063.2 to 77,350.1)          | 79,305.9<br>(71,309.4 to 87,486.0)          | 10,992.7<br>(9,912.3 to 12,241.5)       | 12,266.7<br>(11,081.0 to 13,665.7)        | < 0.05<br>(0.0 to < 0.05)         | < 0.05<br>(0.0 to < 0.05)          |
| Anxiety disorders            | Mild anxiety disorders                                                | 95,140.8<br>(83,424.0 to 107,047.7)         | 107,789.4<br>(94,710.7 to 120,866.2)        | 14,921.7<br>(13,145.1 to 16,786.5)      | 16,651.0<br>(14,597.4 to 18,759.5)        | 2,713.3<br>(1,631.5 to 4,220.9)   | 3,070.0<br>(1,826.1 to 4,779.3)    |



|                                                         |                                                                                         |                                       |                                       |                                    |                                    |                                   |                                   |
|---------------------------------------------------------|-----------------------------------------------------------------------------------------|---------------------------------------|---------------------------------------|------------------------------------|------------------------------------|-----------------------------------|-----------------------------------|
| Anorexia nervosa                                        | Anorexia nervosa                                                                        | 2,322.8<br>(1,724.9 to 3,049.9)       | 2,606.1<br>(1,931.7 to 3,450.1)       | 808.6<br>(594.6 to 1,074.4)        | 897.1<br>(665.0 to 1,182.9)        | 495.1<br>(303.1 to 745.4)         | 555.5<br>(337.9 to 829.5)         |
| Bulimia nervosa                                         | Bulimia nervosa                                                                         | 6,341.2<br>(4,818.2 to 8,340.8)       | 7,558.8<br>(5,764.9 to 9,931.0)       | 4,112.3<br>(2,851.2 to 5,750.5)    | 4,542.7<br>(3,168.7 to 6,256.5)    | 1,335.4<br>(815.8 to 1,994.0)     | 1,592.2<br>(971.6 to 2,391.5)     |
| Autism                                                  | Autism with moderate intellectual disability                                            | 3,301.5<br>(1,950.7 to 4,844.3)       | 3,679.9<br>(2,178.2 to 5,401.5)       | --                                 | --                                 | 1,015.0<br>(539.3 to 1,612.1)     | 1,128.8<br>(599.8 to 1,787.0)     |
| Autism                                                  | Autism without intellectual disability                                                  | 2,767.4<br>(1,615.4 to 4,241.5)       | 3,084.6<br>(1,793.6 to 4,728.9)       | 48.0<br>(24.9 to 81.1)             | 50.9<br>(26.4 to 85.8)             | 554.4<br>(264.1 to 951.2)         | 616.6<br>(294.3 to 1,055.4)       |
| Autism                                                  | Autism with mild intellectual disability                                                | 6,437.6<br>(4,152.3 to 8,650.3)       | 7,175.3<br>(4,617.2 to 9,654.7)       | --                                 | --                                 | 1,538.3<br>(854.0 to 2,331.9)     | 1,711.5<br>(957.8 to 2,591.4)     |
| Autism                                                  | Autism with severe intellectual disability                                              | 987.1<br>(0.1 to 4,875.4)             | 1,100.5<br>(0.1 to 5,418.9)           | --                                 | --                                 | 404.6<br>(< 0.05 to 1,889.1)      | 450.7<br>(< 0.05 to 2,117.9)      |
| Autism                                                  | Autism with profound intellectual disability                                            | 177.0<br>(< 0.05 to 2,014.4)          | 197.3<br>(< 0.05 to 2,264.9)          | --                                 | --                                 | 94.5<br>(< 0.05 to 1,071.1)       | 105.4<br>(< 0.05 to 1,192.5)      |
| Autism                                                  | Autism with borderline intellectual disability                                          | 2,749.5<br>(1,521.6 to 4,145.4)       | 3,064.5<br>(1,700.7 to 4,632.5)       | --                                 | --                                 | 571.4<br>(272.7 to 958.9)         | 636.0<br>(307.2 to 1,068.2)       |
| Asperger syndrome and other autistic spectrum disorders | Asperger syndrome and other autistic spectrum disorders                                 | 39,237.1<br>(32,582.9 to 46,974.0)    | 43,797.9<br>(36,424.2 to 52,402.6)    | 381.0<br>(246.4 to 543.7)          | 399.4<br>(257.6 to 572.3)          | 3,926.4<br>(2,574.5 to 5,735.4)   | 4,376.7<br>(2,864.1 to 6,392.9)   |
| Attention-deficit/hyperactivity disorder                | Attention-deficit/hyperactivity disorder, currently without symptoms                    | 42,606.8<br>(37,701.6 to 47,656.2)    | 45,221.9<br>(40,136.3 to 50,646.4)    | 1,900.3<br>(1,654.4 to 2,226.8)    | 2,072.1<br>(1,808.1 to 2,415.8)    | < 0.05<br>(0.0 to < 0.05)         | < 0.05<br>(0.0 to < 0.05)         |
| Attention-deficit/hyperactivity disorder                | Symptomatic attention-deficit/hyperactivity disorder                                    | 16,395.9<br>(13,045.2 to 20,043.5)    | 17,402.3<br>(13,847.1 to 21,281.0)    | 734.0<br>(573.9 to 905.0)          | 800.4<br>(625.8 to 986.6)          | 711.9<br>(426.0 to 1,134.5)       | 755.2<br>(452.2 to 1,196.6)       |
| Conduct disorder                                        | Conduct disorder, currently without symptoms                                            | 22,898.3<br>(17,449.6 to 28,738.9)    | 23,383.8<br>(17,818.0 to 29,452.5)    | 7,770.6<br>(5,660.8 to 10,115.9)   | 8,091.4<br>(5,906.7 to 10,552.3)   | < 0.05<br>(0.0 to < 0.05)         | < 0.05<br>(0.0 to < 0.05)         |
| Conduct disorder                                        | Symptomatic conduct disorder                                                            | 25,089.2<br>(19,612.2 to 31,427.0)    | 25,621.2<br>(19,987.0 to 32,004.9)    | 8,446.4<br>(6,315.7 to 10,897.9)   | 8,795.2<br>(6,588.2 to 11,350.7)   | 5,820.5<br>(3,615.8 to 8,803.8)   | 5,947.3<br>(3,701.9 to 8,998.5)   |
| Idiopathic developmental intellectual disability        | Severe idiopathic developmental intellectual disability                                 | 724.0<br>(317.8 to 1,344.1)           | 664.2<br>(331.0 to 1,232.7)           | --                                 | --                                 | 110.3<br>(43.9 to 214.3)          | 101.6<br>(44.4 to 198.8)          |
| Idiopathic developmental intellectual disability        | Mild idiopathic developmental intellectual disability                                   | 67,421.9<br>(24,202.5 to 110,002.3)   | 71,212.7<br>(25,590.2 to 116,100.0)   | --                                 | --                                 | 2,788.1<br>(836.9 to 5,261.6)     | 2,942.8<br>(880.7 to 5,536.1)     |
| Idiopathic developmental intellectual disability        | Profound idiopathic developmental intellectual disability                               | 3,160.5<br>(979.2 to 5,857.6)         | 3,347.1<br>(1,019.5 to 6,186.3)       | --                                 | --                                 | 599.3<br>(161.4 to 1,238.3)       | 633.6<br>(168.4 to 1,312.5)       |
| Idiopathic developmental intellectual disability        | Borderline idiopathic developmental intellectual disability                             | 32,193.1<br>(23,557.6 to 40,492.5)    | 33,477.2<br>(24,405.0 to 42,145.0)    | --                                 | --                                 | 339.5<br>(154.5 to 635.3)         | 352.7<br>(159.5 to 653.3)         |
| Idiopathic developmental intellectual disability        | Moderate idiopathic developmental intellectual disability                               | 6,964.3<br>(3,150.4 to 11,564.1)      | 6,096.0<br>(2,329.7 to 10,914.2)      | --                                 | --                                 | 663.2<br>(270.4 to 1,230.8)       | 580.2<br>(193.9 to 1,137.1)       |
| Other mental and substance use disorders                | Other mental disorders, currently without symptoms                                      | 16,282.1<br>(12,437.5 to 20,571.1)    | 19,213.1<br>(14,674.2 to 24,268.0)    | 587.0<br>(449.5 to 743.9)          | 620.1<br>(473.6 to 784.9)          | < 0.05<br>(0.0 to < 0.05)         | < 0.05<br>(0.0 to < 0.05)         |
| Other mental and substance use disorders                | Mild other mental disorders                                                             | 74,542.1<br>(63,917.3 to 86,383.7)    | 87,959.3<br>(75,498.6 to 101,889.2)   | 2,702.9<br>(2,327.0 to 3,110.5)    | 2,855.4<br>(2,469.1 to 3,280.4)    | 2,120.1<br>(1,237.4 to 3,311.6)   | 2,498.8<br>(1,459.5 to 3,897.6)   |
| Other mental and substance use disorders                | Severe other mental disorders                                                           | 9,238.2<br>(5,591.0 to 13,786.3)      | 10,901.1<br>(6,608.7 to 16,272.1)     | 336.4<br>(201.0 to 500.9)          | 355.4<br>(212.7 to 530.0)          | 4,399.7<br>(2,439.4 to 7,353.6)   | 5,180.7<br>(2,891.6 to 8,633.2)   |
| Other mental and substance use disorders                | Moderate other mental disorders                                                         | 18,162.3<br>(13,976.0 to 22,938.1)    | 21,431.4<br>(16,480.2 to 27,035.8)    | 655.5<br>(509.8 to 821.2)          | 692.5<br>(538.5 to 862.1)          | 2,272.6<br>(1,463.8 to 3,302.6)   | 2,677.6<br>(1,729.3 to 3,873.8)   |
| Diabetes mellitus                                       | Diabetic neuropathy and amputation without treatment                                    | 3,456.4<br>(3,022.7 to 3,939.1)       | 4,259.3<br>(3,693.7 to 4,869.8)       | < 0.05<br>(0.0 to < 0.05)          | < 0.05<br>(0.0 to < 0.05)          | 866.4<br>(606.5 to 1,168.9)       | 1,066.6<br>(753.2 to 1,436.6)     |
| Diabetes mellitus                                       | Moderate vision impairment due to diabetes mellitus                                     | 1,430.1<br>(1,153.6 to 1,751.1)       | 1,852.1<br>(1,474.9 to 2,297.9)       | --                                 | --                                 | 41.3<br>(25.0 to 67.0)            | 53.4<br>(32.3 to 86.9)            |
| Diabetes mellitus                                       | Diabetic neuropathy                                                                     | 83,054.0<br>(67,570.0 to 100,466.6)   | 105,576.3<br>(85,515.4 to 127,846.9)  | < 0.05<br>(0.0 to < 0.05)          | < 0.05<br>(0.0 to < 0.05)          | 10,143.2<br>(6,498.9 to 14,756.1) | 12,880.5<br>(8,300.7 to 18,842.7) |
| Diabetes mellitus                                       | Diabetic neuropathy and amputation with treatment                                       | 2,001.6<br>(1,652.5 to 2,398.5)       | 2,533.6<br>(2,089.4 to 3,035.6)       | < 0.05<br>(0.0 to < 0.05)          | < 0.05<br>(0.0 to < 0.05)          | 300.8<br>(203.3 to 416.3)         | 380.1<br>(255.7 to 529.0)         |
| Diabetes mellitus                                       | Diabetic foot due to neuropathy                                                         | 14,670.6<br>(11,894.3 to 17,989.3)    | 18,582.6<br>(14,983.9 to 22,879.5)    | < 0.05<br>(0.0 to < 0.05)          | < 0.05<br>(0.0 to < 0.05)          | 1,984.9<br>(1,316.1 to 2,827.6)   | 2,510.3<br>(1,655.3 to 3,562.8)   |
| Diabetes mellitus                                       | Blindness due to diabetes mellitus                                                      | 329.8<br>(254.0 to 415.3)             | 494.2<br>(378.6 to 626.9)             | --                                 | --                                 | 56.5<br>(35.5 to 82.4)            | 84.2<br>(52.3 to 122.3)           |
| Diabetes mellitus                                       | Severe vision impairment due to diabetes mellitus                                       | 290.8<br>(223.5 to 376.5)             | 384.1<br>(294.3 to 493.6)             | --                                 | --                                 | 48.8<br>(30.7 to 71.3)            | 64.4<br>(40.4 to 95.2)            |
| Diabetes mellitus                                       | Uncomplicated diabetes mellitus                                                         | 209,093.1<br>(186,354.5 to 231,010.2) | 249,770.8<br>(220,977.0 to 277,814.1) | 17,571.8<br>(16,272.3 to 18,967.2) | 20,827.8<br>(19,160.5 to 22,734.0) | 9,680.1<br>(6,139.6 to 14,322.5)  | 11,544.1<br>(7,349.6 to 16,900.6) |
| Acute glomerulonephritis                                | Acute glomerulonephritis                                                                | 99.2<br>(86.5 to 113.3)               | 103.5<br>(90.1 to 117.3)              | 1,454.9<br>(1,281.4 to 1,661.1)    | 1,530.2<br>(1,356.6 to 1,728.8)    | 5.0<br>(3.1 to 7.5)               | 5.2<br>(3.2 to 7.8)               |
| Chronic kidney disease due to diabetes mellitus         | Stage IV chronic kidney disease untreated without anaemia due to diabetes mellitus      | 1,586.4<br>(1,250.7 to 1,972.9)       | 1,754.8<br>(1,382.5 to 2,214.5)       | < 0.05<br>(0.0 to < 0.05)          | < 0.05<br>(0.0 to < 0.05)          | 150.9<br>(97.6 to 221.6)          | 166.7<br>(107.5 to 244.3)         |
| Chronic kidney disease due to diabetes mellitus         | Stage IV chronic kidney disease untreated and mild anaemia due to diabetes mellitus     | 311.8<br>(252.5 to 378.2)             | 399.9<br>(320.6 to 485.8)             | < 0.05<br>(0.0 to < 0.05)          | < 0.05<br>(0.0 to < 0.05)          | 30.3<br>(19.9 to 43.7)            | 38.9<br>(25.8 to 55.7)            |
| Chronic kidney disease due to diabetes mellitus         | End-stage renal disease after transplant due to diabetes mellitus                       | 292.0<br>(261.0 to 323.3)             | 365.6<br>(324.0 to 410.6)             | --                                 | --                                 | 6.9<br>(3.9 to 11.1)              | 8.6<br>(4.8 to 14.0)              |
| Chronic kidney disease due to diabetes mellitus         | Stage V chronic kidney disease untreated and moderate anaemia due to diabetes mellitus  | 1,303.2<br>(1,103.4 to 1,544.9)       | 1,642.7<br>(1,379.8 to 1,950.9)       | < 0.05<br>(0.0 to < 0.05)          | < 0.05<br>(0.0 to < 0.05)          | 673.7<br>(476.6 to 880.6)         | 848.0<br>(600.3 to 1,113.1)       |
| Chronic kidney disease due to diabetes mellitus         | Stage V chronic kidney disease untreated without anaemia due to diabetes mellitus       | 447.5<br>(340.2 to 578.6)             | 509.5<br>(388.2 to 666.4)             | < 0.05<br>(0.0 to < 0.05)          | < 0.05<br>(0.0 to < 0.05)          | 227.7<br>(145.7 to 320.5)         | 258.6<br>(165.3 to 368.0)         |
| Chronic kidney disease due to diabetes mellitus         | Stage IV chronic kidney disease untreated and moderate anaemia due to diabetes mellitus | 2,171.8<br>(1,780.6 to 2,633.9)       | 2,777.2<br>(2,256.3 to 3,352.7)       | < 0.05<br>(0.0 to < 0.05)          | < 0.05<br>(0.0 to < 0.05)          | 292.6<br>(196.9 to 412.6)         | 374.0<br>(251.8 to 532.7)         |
| Chronic kidney disease due to diabetes mellitus         | Stage III chronic kidney disease and mild anaemia due to diabetes mellitus              | 17,483.4<br>(15,483.2 to 19,704.7)    | 26,779.4<br>(23,508.0 to 30,581.3)    | < 0.05<br>(0.0 to < 0.05)          | < 0.05<br>(0.0 to < 0.05)          | 60.6<br>(21.6 to 133.5)           | 92.8<br>(32.6 to 204.1)           |
| Chronic kidney disease due to diabetes mellitus         | Stage III chronic kidney disease and severe anaemia due to diabetes mellitus            | 422.0<br>(368.2 to 481.7)             | 678.1<br>(590.1 to 774.9)             | < 0.05<br>(0.0 to < 0.05)          | < 0.05<br>(0.0 to < 0.05)          | 56.4<br>(38.4 to 78.2)            | 90.6<br>(61.3 to 126.1)           |
| Chronic kidney disease due to diabetes mellitus         | Stage III chronic kidney disease and moderate anaemia due to diabetes mellitus          | 11,104.8<br>(9,677.9 to 12,697.3)     | 15,333.3<br>(13,282.8 to 17,585.2)    | < 0.05<br>(0.0 to < 0.05)          | < 0.05<br>(0.0 to < 0.05)          | 528.5<br>(344.0 to 768.8)         | 729.7<br>(470.9 to 1,058.3)       |
| Chronic kidney disease due to diabetes mellitus         | Stage V chronic kidney disease untreated and mild anaemia due to diabetes mellitus      | 48.3<br>(40.3 to 56.9)                | 67.5<br>(56.7 to 79.6)                | < 0.05<br>(0.0 to < 0.05)          | < 0.05<br>(0.0 to < 0.05)          | 25.7<br>(17.6 to 34.6)            | 36.0<br>(24.2 to 48.4)            |
| Chronic kidney disease due to diabetes mellitus         | Stage V chronic kidney disease untreated and severe anaemia due to diabetes mellitus    | 226.9<br>(189.3 to 270.5)             | 400.5<br>(334.8 to 478.9)             | < 0.05<br>(0.0 to < 0.05)          | < 0.05<br>(0.0 to < 0.05)          | 125.9<br>(90.0 to 164.0)          | 223.2<br>(158.9 to 291.4)         |
| Chronic kidney disease due to diabetes mellitus         | End-stage renal disease on dialysis due to diabetes mellitus                            | 1,114.0<br>(999.3 to 1,229.5)         | 1,535.1<br>(1,367.6 to 1,710.9)       | --                                 | --                                 | 555.8<br>(388.5 to 710.6)         | 764.6<br>(536.3 to 982.7)         |

|                                                  |                                                                                          |                                    |                                    |                                 |                                  |                           |                           |
|--------------------------------------------------|------------------------------------------------------------------------------------------|------------------------------------|------------------------------------|---------------------------------|----------------------------------|---------------------------|---------------------------|
| Chronic kidney disease due to diabetes mellitus  | Stage IV chronic kidney disease untreated and severe anaemia due to diabetes mellitus    | 167.6<br>(137.9 to 204.1)          | 299.0<br>(242.0 to 367.4)          | < 0.05<br>(0.0 to < 0.05)       | < 0.05<br>(0.0 to < 0.05)        | 35.8<br>(24.4 to 50.0)    | 63.8<br>(42.9 to 89.3)    |
| Chronic kidney disease due to diabetes mellitus  | Stage III chronic kidney disease without anaemia due to diabetes mellitus                | 49,147.8<br>(43,058.6 to 55,630.6) | 62,813.4<br>(54,835.4 to 71,956.3) | 6,635.3<br>(5,795.1 to 7,610.6) | 8,978.8<br>(7,741.6 to 10,376.8) | < 0.05<br>(0.0 to < 0.05) | < 0.05<br>(0.0 to < 0.05) |
| Chronic kidney disease due to hypertension       | Stage V chronic kidney disease untreated and severe anaemia due to hypertension          | 122.7<br>(102.0 to 144.2)          | 205.0<br>(169.1 to 243.3)          | < 0.05<br>(0.0 to < 0.05)       | < 0.05<br>(0.0 to < 0.05)        | 68.8<br>(48.4 to 90.7)    | 114.7<br>(80.2 to 152.4)  |
| Chronic kidney disease due to hypertension       | Stage IV chronic kidney disease untreated without anaemia due to hypertension            | 722.5<br>(566.0 to 894.6)          | 823.9<br>(648.1 to 1,032.7)        | < 0.05<br>(0.0 to < 0.05)       | < 0.05<br>(0.0 to < 0.05)        | 68.1<br>(43.0 to 98.5)    | 77.5<br>(48.2 to 112.1)   |
| Chronic kidney disease due to hypertension       | Stage IV chronic kidney disease untreated and severe anaemia due to hypertension         | 102.4<br>(84.3 to 123.4)           | 169.7<br>(137.3 to 204.2)          | < 0.05<br>(0.0 to < 0.05)       | < 0.05<br>(0.0 to < 0.05)        | 22.2<br>(14.7 to 30.8)    | 36.3<br>(24.1 to 50.7)    |
| Chronic kidney disease due to hypertension       | Stage IV chronic kidney disease untreated and moderate anaemia due to hypertension       | 1,080.8<br>(865.2 to 1,324.4)      | 1,410.9<br>(1,117.3 to 1,747.5)    | < 0.05<br>(0.0 to < 0.05)       | < 0.05<br>(0.0 to < 0.05)        | 143.0<br>(93.4 to 200.3)  | 186.6<br>(120.8 to 261.8) |
| Chronic kidney disease due to hypertension       | Stage V chronic kidney disease untreated without anaemia due to hypertension             | 166.7<br>(127.0 to 211.6)          | 198.2<br>(151.0 to 254.6)          | < 0.05<br>(0.0 to < 0.05)       | < 0.05<br>(0.0 to < 0.05)        | 86.9<br>(55.8 to 124.7)   | 103.0<br>(65.4 to 148.6)  |
| Chronic kidney disease due to hypertension       | Stage III chronic kidney disease and severe anaemia due to hypertension                  | 241.5<br>(205.2 to 279.0)          | 347.3<br>(293.8 to 401.6)          | < 0.05<br>(0.0 to < 0.05)       | < 0.05<br>(0.0 to < 0.05)        | 31.6<br>(20.7 to 43.7)    | 45.5<br>(29.5 to 62.8)    |
| Chronic kidney disease due to hypertension       | Stage III chronic kidney disease and moderate anaemia due to hypertension                | 5,959.1<br>(5,141.1 to 6,843.5)    | 8,436.3<br>(7,237.6 to 9,707.0)    | < 0.05<br>(0.0 to < 0.05)       | < 0.05<br>(0.0 to < 0.05)        | 279.9<br>(175.4 to 402.5) | 396.5<br>(245.9 to 570.4) |
| Chronic kidney disease due to hypertension       | Stage V chronic kidney disease untreated and moderate anaemia due to hypertension        | 488.7<br>(404.3 to 577.1)          | 630.8<br>(517.2 to 748.6)          | < 0.05<br>(0.0 to < 0.05)       | < 0.05<br>(0.0 to < 0.05)        | 249.9<br>(174.1 to 331.0) | 321.6<br>(220.1 to 429.1) |
| Chronic kidney disease due to hypertension       | End-stage renal disease on dialysis due to hypertension                                  | 411.6<br>(354.3 to 473.4)          | 594.2<br>(505.4 to 685.7)          | --                              | --                               | 204.1<br>(139.9 to 267.3) | 294.2<br>(201.3 to 388.0) |
| Chronic kidney disease due to hypertension       | End-stage renal disease after transplant due to hypertension                             | 71.6<br>(61.4 to 84.0)             | 91.0<br>(77.1 to 108.1)            | --                              | --                               | 1.7<br>(1.0 to 2.8)       | 2.2<br>(1.2 to 3.6)       |
| Chronic kidney disease due to hypertension       | Stage IV chronic kidney disease untreated and mild anaemia due to hypertension           | 192.1<br>(154.8 to 235.5)          | 251.3<br>(206.0 to 310.2)          | < 0.05<br>(0.0 to < 0.05)       | < 0.05<br>(0.0 to < 0.05)        | 18.6<br>(12.0 to 26.3)    | 24.3<br>(15.6 to 34.5)    |
| Chronic kidney disease due to hypertension       | Stage V chronic kidney disease untreated and mild anaemia due to hypertension            | 48.9<br>(40.6 to 58.3)             | 63.4<br>(52.3 to 75.9)             | < 0.05<br>(0.0 to < 0.05)       | < 0.05<br>(0.0 to < 0.05)        | 26.5<br>(17.3 to 36.1)    | 34.4<br>(22.4 to 47.1)    |
| Chronic kidney disease due to hypertension       | Stage III chronic kidney disease and mild anaemia due to hypertension                    | 8,175.8<br>(7,026.0 to 9,319.7)    | 12,518.4<br>(10,649.9 to 14,420.0) | < 0.05<br>(0.0 to < 0.05)       | < 0.05<br>(0.0 to < 0.05)        | 27.9<br>(10.2 to 62.8)    | 42.8<br>(15.6 to 95.8)    |
| Chronic kidney disease due to hypertension       | Stage III chronic kidney disease without anaemia due to hypertension                     | 21,502.6<br>(18,661.0 to 24,416.4) | 24,356.5<br>(20,807.7 to 28,120.2) | 3,087.3<br>(2,705.4 to 3,478.0) | 3,626.2<br>(3,131.3 to 4,163.4)  | < 0.05<br>(0.0 to < 0.05) | < 0.05<br>(0.0 to < 0.05) |
| Chronic kidney disease due to glomerulonephritis | Stage V chronic kidney disease untreated and moderate anaemia due to glomerulonephritis  | 550.7<br>(456.0 to 659.3)          | 645.1<br>(529.6 to 782.6)          | < 0.05<br>(0.0 to < 0.05)       | < 0.05<br>(0.0 to < 0.05)        | 296.3<br>(204.5 to 393.2) | 347.3<br>(238.5 to 463.9) |
| Chronic kidney disease due to glomerulonephritis | Stage III chronic kidney disease and moderate anaemia due to glomerulonephritis          | 5,383.1<br>(4,674.8 to 6,162.9)    | 6,783.3<br>(5,805.8 to 7,848.0)    | < 0.05<br>(0.0 to < 0.05)       | < 0.05<br>(0.0 to < 0.05)        | 258.2<br>(167.5 to 379.6) | 325.6<br>(211.4 to 477.0) |
| Chronic kidney disease due to glomerulonephritis | Stage IV chronic kidney disease untreated and mild anaemia due to glomerulonephritis     | 207.7<br>(170.1 to 251.8)          | 243.3<br>(199.4 to 293.1)          | < 0.05<br>(0.0 to < 0.05)       | < 0.05<br>(0.0 to < 0.05)        | 21.1<br>(13.9 to 30.1)    | 24.9<br>(16.4 to 35.8)    |
| Chronic kidney disease due to glomerulonephritis | Stage IV chronic kidney disease untreated without anaemia due to glomerulonephritis      | 730.0<br>(582.9 to 907.1)          | 739.7<br>(591.6 to 917.9)          | < 0.05<br>(0.0 to < 0.05)       | < 0.05<br>(0.0 to < 0.05)        | 71.3<br>(45.7 to 104.4)   | 72.3<br>(46.1 to 105.5)   |
| Chronic kidney disease due to glomerulonephritis | Stage III chronic kidney disease without anaemia due to glomerulonephritis               | 22,368.7<br>(19,199.7 to 25,632.3) | 29,126.6<br>(24,998.5 to 33,505.6) | 2,833.6<br>(2,409.5 to 3,284.5) | 3,893.1<br>(3,261.3 to 4,529.1)  | < 0.05<br>(0.0 to < 0.05) | < 0.05<br>(0.0 to < 0.05) |
| Chronic kidney disease due to glomerulonephritis | Stage IV chronic kidney disease untreated and moderate anaemia due to glomerulonephritis | 883.8<br>(728.3 to 1,060.8)        | 998.3<br>(811.8 to 1,205.5)        | < 0.05<br>(0.0 to < 0.05)       | < 0.05<br>(0.0 to < 0.05)        | 121.3<br>(82.3 to 168.6)  | 137.1<br>(92.2 to 193.9)  |
| Chronic kidney disease due to glomerulonephritis | Stage V chronic kidney disease untreated and mild anaemia due to glomerulonephritis      | 78.7<br>(63.5 to 95.6)             | 97.8<br>(79.0 to 119.1)            | < 0.05<br>(0.0 to < 0.05)       | < 0.05<br>(0.0 to < 0.05)        | 44.0<br>(29.3 to 60.5)    | 54.6<br>(36.1 to 75.4)    |
| Chronic kidney disease due to glomerulonephritis | End-stage renal disease after transplant due to glomerulonephritis                       | 127.2<br>(110.5 to 145.3)          | 147.1<br>(126.4 to 170.2)          | --                              | --                               | 3.1<br>(1.7 to 5.0)       | 3.5<br>(1.9 to 5.9)       |
| Chronic kidney disease due to glomerulonephritis | Stage V chronic kidney disease untreated and severe anaemia due to glomerulonephritis    | 132.8<br>(110.7 to 158.3)          | 190.2<br>(158.1 to 230.4)          | < 0.05<br>(0.0 to < 0.05)       | < 0.05<br>(0.0 to < 0.05)        | 79.2<br>(55.7 to 103.3)   | 113.6<br>(79.7 to 149.4)  |
| Chronic kidney disease due to glomerulonephritis | Stage IV chronic kidney disease untreated and severe anaemia due to glomerulonephritis   | 109.9<br>(88.6 to 134.9)           | 157.8<br>(128.2 to 195.1)          | < 0.05<br>(0.0 to < 0.05)       | < 0.05<br>(0.0 to < 0.05)        | 25.2<br>(16.8 to 35.7)    | 36.3<br>(24.3 to 52.4)    |
| Chronic kidney disease due to glomerulonephritis | Stage V chronic kidney disease untreated without anaemia due to glomerulonephritis       | 232.3<br>(178.1 to 293.7)          | 237.7<br>(181.9 to 300.5)          | < 0.05<br>(0.0 to < 0.05)       | < 0.05<br>(0.0 to < 0.05)        | 125.7<br>(80.1 to 179.5)  | 129.6<br>(83.6 to 184.8)  |
| Chronic kidney disease due to glomerulonephritis | Stage III chronic kidney disease and severe anaemia due to glomerulonephritis            | 176.4<br>(151.3 to 202.1)          | 239.8<br>(205.0 to 276.8)          | < 0.05<br>(0.0 to < 0.05)       | < 0.05<br>(0.0 to < 0.05)        | 23.9<br>(16.2 to 33.5)    | 32.6<br>(21.9 to 46.0)    |
| Chronic kidney disease due to glomerulonephritis | Stage III chronic kidney disease and mild anaemia due to glomerulonephritis              | 7,602.8<br>(6,674.1 to 8,609.9)    | 9,685.3<br>(8,396.4 to 11,109.2)   | < 0.05<br>(0.0 to < 0.05)       | < 0.05<br>(0.0 to < 0.05)        | 26.6<br>(9.3 to 61.1)     | 33.9<br>(12.0 to 77.0)    |
| Chronic kidney disease due to glomerulonephritis | End-stage renal disease on dialysis due to glomerulonephritis                            | 250.8<br>(217.3 to 286.7)          | 322.5<br>(274.7 to 376.4)          | --                              | --                               | 130.7<br>(91.2 to 170.7)  | 167.8<br>(117.0 to 222.4) |
| Chronic kidney disease due to other causes       | Stage III chronic kidney disease and mild anaemia due to other causes                    | 9,575.1<br>(8,351.1 to 10,800.0)   | 13,762.3<br>(11,899.7 to 15,676.4) | < 0.05<br>(0.0 to < 0.05)       | < 0.05<br>(0.0 to < 0.05)        | 33.3<br>(11.9 to 72.8)    | 47.8<br>(16.9 to 106.1)   |
| Chronic kidney disease due to other causes       | Stage V chronic kidney disease untreated and severe anaemia due to other causes          | 153.9<br>(128.6 to 183.3)          | 235.6<br>(196.0 to 281.6)          | < 0.05<br>(0.0 to < 0.05)       | < 0.05<br>(0.0 to < 0.05)        | 89.7<br>(63.4 to 117.6)   | 136.7<br>(95.8 to 180.3)  |
| Chronic kidney disease due to other causes       | Stage IV chronic kidney disease untreated and mild anaemia due to other causes           | 262.6<br>(216.2 to 314.2)          | 339.7<br>(279.1 to 410.6)          | < 0.05<br>(0.0 to < 0.05)       | < 0.05<br>(0.0 to < 0.05)        | 26.2<br>(17.0 to 37.7)    | 33.8<br>(22.2 to 47.8)    |
| Chronic kidney disease due to other causes       | Stage III chronic kidney disease and severe anaemia due to other causes                  | 274.3<br>(233.0 to 318.9)          | 362.1<br>(307.3 to 421.8)          | < 0.05<br>(0.0 to < 0.05)       | < 0.05<br>(0.0 to < 0.05)        | 36.6<br>(24.4 to 51.9)    | 48.2<br>(32.2 to 68.2)    |
| Chronic kidney disease due to other causes       | End-stage renal disease on dialysis due to other causes                                  | 374.6<br>(325.8 to 429.9)          | 508.8<br>(439.3 to 593.5)          | --                              | --                               | 190.5<br>(132.6 to 249.1) | 257.4<br>(178.6 to 337.9) |
| Chronic kidney disease due to other causes       | Stage V chronic kidney disease untreated and moderate anaemia due to other causes        | 659.2<br>(545.4 to 786.0)          | 815.7<br>(670.5 to 973.1)          | < 0.05<br>(0.0 to < 0.05)       | < 0.05<br>(0.0 to < 0.05)        | 348.5<br>(247.2 to 460.3) | 430.5<br>(302.1 to 575.2) |
| Chronic kidney disease due to other causes       | Stage V chronic kidney disease untreated and mild anaemia due to other causes            | 87.1<br>(71.4 to 105.5)            | 112.3<br>(92.5 to 135.2)           | < 0.05<br>(0.0 to < 0.05)       | < 0.05<br>(0.0 to < 0.05)        | 47.6<br>(32.1 to 66.0)    | 61.4<br>(41.6 to 85.6)    |
| Chronic kidney disease due to other causes       | Stage III chronic kidney disease without anaemia due to other causes                     | 26,872.9<br>(23,201.7 to 30,475.7) | 33,333.0<br>(28,646.7 to 38,080.8) | 3,756.3<br>(3,259.8 to 4,245.3) | 4,831.0<br>(4,135.1 to 5,525.8)  | < 0.05<br>(0.0 to < 0.05) | < 0.05<br>(0.0 to < 0.05) |
| Chronic kidney disease due to other causes       | Stage IV chronic kidney disease untreated and moderate anaemia due to other causes       | 1,138.9<br>(941.6 to 1,365.0)      | 1,405.7<br>(1,155.6 to 1,694.1)    | < 0.05<br>(0.0 to < 0.05)       | < 0.05<br>(0.0 to < 0.05)        | 154.4<br>(102.9 to 217.5) | 190.2<br>(125.8 to 269.3) |
| Chronic kidney disease due to other causes       | Stage III chronic kidney disease and moderate anaemia due to other causes                | 6,125.8<br>(5,234.7 to 7,018.6)    | 8,271.5<br>(7,074.5 to 9,500.9)    | < 0.05<br>(0.0 to < 0.05)       | < 0.05<br>(0.0 to < 0.05)        | 290.7<br>(187.7 to 422.2) | 392.4<br>(254.2 to 569.7) |
| Chronic kidney disease due to other causes       | Stage V chronic kidney disease untreated without anaemia due to other causes             | 294.8<br>(228.3 to 377.9)          | 326.8<br>(255.2 to 419.6)          | < 0.05<br>(0.0 to < 0.05)       | < 0.05<br>(0.0 to < 0.05)        | 156.9<br>(103.9 to 222.8) | 174.3<br>(114.9 to 250.9) |
| Chronic kidney disease due to other causes       | Stage IV chronic kidney disease untreated without anaemia due to other causes            | 952.5<br>(765.5 to 1,174.5)        | 1,038.5<br>(841.5 to 1,288.8)      | < 0.05<br>(0.0 to < 0.05)       | < 0.05<br>(0.0 to < 0.05)        | 92.2<br>(58.0 to 136.1)   | 100.3<br>(63.1 to 147.4)  |
| Chronic kidney disease due to other causes       | End-stage renal disease after transplant due to other causes                             | 131.0<br>(115.5 to 147.9)          | 167.8<br>(146.5 to 191.7)          | --                              | --                               | 3.1<br>(1.7 to 5.1)       | 4.0<br>(2.2 to 6.5)       |

|                                                     |                                                                                  |                                       |                                       |                                       |                                       |                                 |                                 |
|-----------------------------------------------------|----------------------------------------------------------------------------------|---------------------------------------|---------------------------------------|---------------------------------------|---------------------------------------|---------------------------------|---------------------------------|
| Chronic kidney disease due to other causes          | Stage IV chronic kidney disease untreated and severe anaemia due to other causes | 125.8<br>(101.7 to 153.4)             | 182.4<br>(148.9 to 220.5)             | < 0.05<br>(0.0 to < 0.05)             | < 0.05<br>(0.0 to < 0.05)             | 28.4<br>(18.6 to 41.0)          | 40.8<br>(27.1 to 58.4)          |
| Interstitial nephritis and urinary tract infections | Mild interstitial nephritis and urinary tract infections                         | 2,176.1<br>(1,641.6 to 2,773.4)       | 2,486.7<br>(1,875.3 to 3,164.1)       | 114,528.9<br>(88,192.7 to 144,584.1)  | 130,877.7<br>(101,594.9 to 164,983.0) | 12.3<br>(4.7 to 26.5)           | 14.0<br>(5.3 to 29.9)           |
| Interstitial nephritis and urinary tract infections | Moderate interstitial nephritis and urinary tract infections                     | 3,873.7<br>(3,256.5 to 4,546.8)       | 4,426.5<br>(3,724.2 to 5,197.1)       | 201,216.8<br>(169,412.5 to 234,129.3) | 229,937.8<br>(194,786.1 to 268,004.5) | 187.8<br>(116.1 to 281.5)       | 214.3<br>(132.3 to 324.1)       |
| Urolithiasis                                        | Moderate urolithiasis episodes                                                   | 506.2<br>(357.8 to 686.1)             | 618.1<br>(437.3 to 834.1)             | 13,323.1<br>(9,509.8 to 17,372.5)     | 16,251.9<br>(11,644.2 to 21,237.4)    | 54.7<br>(32.9 to 85.7)          | 66.6<br>(39.9 to 104.2)         |
| Urolithiasis                                        | Severe urolithiasis episodes                                                     | 326.8<br>(246.3 to 422.3)             | 399.0<br>(301.1 to 515.4)             | 8,707.3<br>(6,620.4 to 11,178.5)      | 10,621.5<br>(8,071.4 to 13,735.8)     | 100.3<br>(62.0 to 150.1)        | 121.7<br>(75.1 to 180.6)        |
| Urolithiasis                                        | Mild urolithiasis episodes                                                       | 1,491.7<br>(1,276.4 to 1,722.4)       | 1,821.6<br>(1,564.2 to 2,090.1)       | 39,631.9<br>(34,546.6 to 45,687.8)    | 48,344.5<br>(42,082.5 to 55,799.9)    | 15.7<br>(7.5 to 29.4)           | 19.2<br>(9.1 to 35.8)           |
| Benign prostatic hyperplasia                        | Symptomatic benign prostatic hyperplasia                                         | 42,435.2<br>(37,589.6 to 47,330.5)    | 54,713.5<br>(48,498.8 to 61,142.1)    | 5,480.7<br>(4,733.9 to 6,275.1)       | 6,971.0<br>(6,039.3 to 8,020.0)       | 2,625.2<br>(1,692.9 to 3,763.4) | 3,383.9<br>(2,178.0 to 4,835.1) |
| Benign prostatic hyperplasia                        | Asymptomatic benign prostatic hyperplasia                                        | 37,958.9<br>(33,620.2 to 42,209.5)    | 48,941.9<br>(43,484.2 to 54,560.4)    | 4,903.8<br>(4,222.2 to 5,636.8)       | 6,237.2<br>(5,358.4 to 7,186.2)       | < 0.05<br>(0.0 to < 0.05)       | < 0.05<br>(0.0 to < 0.05)       |
| Male infertility                                    | Primary male infertility                                                         | 7,916.9<br>(5,868.2 to 10,403.0)      | 9,665.8<br>(6,995.6 to 13,092.2)      | --                                    | --                                    | 59.0<br>(24.6 to 117.5)         | 72.1<br>(29.5 to 148.0)         |
| Male infertility                                    | Secondary male infertility                                                       | 15,686.2<br>(11,935.4 to 20,653.3)    | 18,378.5<br>(13,754.6 to 24,927.7)    | --                                    | --                                    | 79.3<br>(29.6 to 170.0)         | 92.9<br>(34.5 to 200.9)         |
| Other urinary diseases                              | Other urinary diseases                                                           | --                                    | --                                    | --                                    | --                                    | --                              | --                              |
| Uterine fibroids                                    | Mild abdominal pain due to uterine fibroids, with moderate anaemia               | 9,363.7<br>(8,638.9 to 10,128.6)      | 10,949.1<br>(10,102.7 to 11,843.6)    | < 0.05<br>(0.0 to < 0.05)             | < 0.05<br>(0.0 to < 0.05)             | 548.8<br>(354.5 to 798.8)       | 641.9<br>(414.4 to 940.3)       |
| Uterine fibroids                                    | Mild abdominal pain due to uterine fibroids, with severe anaemia                 | 756.4<br>(682.0 to 834.7)             | 896.5<br>(805.9 to 993.3)             | < 0.05<br>(0.0 to < 0.05)             | < 0.05<br>(0.0 to < 0.05)             | 110.7<br>(77.7 to 151.1)        | 131.4<br>(93.1 to 179.5)        |
| Uterine fibroids                                    | Mild abdominal pain due to uterine fibroids, with mild anaemia                   | 12,706.5<br>(12,033.6 to 13,417.5)    | 14,670.4<br>(13,902.6 to 15,516.6)    | < 0.05<br>(0.0 to < 0.05)             | < 0.05<br>(0.0 to < 0.05)             | 179.6<br>(82.4 to 347.6)        | 207.4<br>(95.6 to 402.8)        |
| Uterine fibroids                                    | Asymptomatic uterine fibroids                                                    | 22,642.8<br>(20,194.6 to 25,159.5)    | 27,293.3<br>(24,341.9 to 30,402.0)    | 2,540.8<br>(2,210.8 to 2,895.8)       | 2,819.5<br>(2,463.4 to 3,214.2)       | < 0.05<br>(0.0 to < 0.05)       | < 0.05<br>(0.0 to < 0.05)       |
| Uterine fibroids                                    | Mild abdominal pain due to uterine fibroids, without anaemia                     | 29,784.5<br>(25,513.5 to 34,625.2)    | 37,202.8<br>(31,933.6 to 43,162.4)    | 5,925.1<br>(5,216.7 to 6,723.3)       | 6,575.0<br>(5,778.2 to 7,441.6)       | 315.6<br>(151.6 to 597.0)       | 393.9<br>(189.0 to 746.0)       |
| Polycystic ovarian syndrome                         | Hirsutism and primary infertility due to polycystic ovarian syndrome             | 418.0<br>(266.8 to 608.8)             | 476.9<br>(298.5 to 697.6)             | --                                    | --                                    | 7.5<br>(3.1 to 15.0)            | 8.6<br>(3.5 to 17.5)            |
| Polycystic ovarian syndrome                         | Primary infertility due to polycystic ovarian syndrome                           | 101.7<br>(8.9 to 283.2)               | 116.0<br>(10.2 to 321.8)              | --                                    | --                                    | 0.8<br>(0.1 to 2.4)             | 0.9<br>(0.1 to 2.7)             |
| Polycystic ovarian syndrome                         | Asymptomatic polycystic ovarian syndrome                                         | 1,612.7<br>(742.3 to 2,788.0)         | 1,711.5<br>(784.7 to 2,949.7)         | 6,474.0<br>(4,717.1 to 8,508.5)       | 7,651.0<br>(5,517.8 to 10,179.4)      | < 0.05<br>(0.0 to < 0.05)       | < 0.05<br>(0.0 to < 0.05)       |
| Polycystic ovarian syndrome                         | Hirsutism and secondary infertility due to polycystic ovarian syndrome           | 978.3<br>(631.9 to 1,388.0)           | 1,126.8<br>(723.2 to 1,596.7)         | --                                    | --                                    | 4.9<br>(1.8 to 10.5)            | 5.6<br>(2.1 to 11.8)            |
| Polycystic ovarian syndrome                         | Secondary infertility due to polycystic ovarian syndrome                         | 240.4<br>(20.5 to 698.8)              | 276.8<br>(23.4 to 803.3)              | --                                    | --                                    | 3.7<br>(0.3 to 11.9)            | 4.3<br>(0.3 to 13.6)            |
| Polycystic ovarian syndrome                         | Hirsutism due to polycystic ovarian syndrome                                     | 6,534.4<br>(5,090.6 to 8,073.0)       | 6,933.8<br>(5,380.2 to 8,594.9)       | --                                    | --                                    | 70.1<br>(31.6 to 131.0)         | 74.4<br>(33.7 to 137.7)         |
| Female infertility                                  | Idiopathic primary female infertility                                            | 6,551.5<br>(4,325.7 to 9,659.2)       | 8,811.4<br>(5,922.9 to 12,837.0)      | --                                    | --                                    | 48.4<br>(18.9 to 100.7)         | 65.4<br>(25.8 to 138.9)         |
| Female infertility                                  | Idiopathic secondary female infertility                                          | 16,200.9<br>(8,390.7 to 29,282.5)     | 22,665.4<br>(11,753.8 to 39,812.4)    | --                                    | --                                    | 81.5<br>(24.7 to 202.2)         | 114.4<br>(36.7 to 279.3)        |
| Endometriosis                                       | Mild abdominal pain due to endometriosis                                         | 178.4<br>(119.9 to 256.8)             | 192.8<br>(129.4 to 279.2)             | --                                    | --                                    | 1.9<br>(0.8 to 3.9)             | 2.1<br>(0.9 to 4.2)             |
| Endometriosis                                       | Moderate abdominal pain and primary infertility due to endometriosis             | 24.7<br>(14.8 to 38.0)                | 25.3<br>(15.4 to 38.6)                | --                                    | --                                    | 3.0<br>(1.6 to 5.2)             | 3.1<br>(1.6 to 5.3)             |
| Endometriosis                                       | Primary infertility due to endometriosis                                         | 14.4<br>(8.8 to 21.4)                 | 14.8<br>(9.0 to 21.9)                 | --                                    | --                                    | 0.1<br>(< 0.05 to 0.2)          | 0.1<br>(< 0.05 to 0.2)          |
| Endometriosis                                       | Moderate abdominal pain and secondary infertility due to endometriosis           | 55.4<br>(36.4 to 82.0)                | 59.5<br>(39.0 to 88.8)                | --                                    | --                                    | 6.5<br>(3.5 to 10.6)            | 7.0<br>(3.8 to 11.4)            |
| Endometriosis                                       | Severe abdominal pain and secondary infertility due to endometriosis             | 12.3<br>(7.7 to 18.0)                 | 13.2<br>(8.2 to 19.5)                 | --                                    | --                                    | 4.0<br>(2.2 to 6.5)             | 4.3<br>(2.3 to 6.9)             |
| Endometriosis                                       | Severe endometriosis                                                             | 367.1<br>(249.3 to 517.9)             | 396.8<br>(270.4 to 560.3)             | --                                    | --                                    | 112.0<br>(63.1 to 178.3)        | 120.9<br>(68.3 to 191.8)        |
| Endometriosis                                       | Secondary infertility due to endometriosis                                       | 32.3<br>(21.0 to 46.6)                | 34.7<br>(22.6 to 50.1)                | --                                    | --                                    | 0.2<br>(0.1 to 0.4)             | 0.2<br>(0.1 to 0.4)             |
| Endometriosis                                       | Moderate abdominal pain due to endometriosis                                     | 1,636.2<br>(1,297.3 to 2,007.5)       | 1,768.5<br>(1,405.3 to 2,161.8)       | --                                    | --                                    | 178.1<br>(112.8 to 261.5)       | 192.2<br>(121.8 to 281.2)       |
| Endometriosis                                       | Mild abdominal pain and primary infertility due to endometriosis                 | 2.7<br>(1.6 to 4.3)                   | 2.8<br>(1.6 to 4.4)                   | --                                    | --                                    | < 0.05<br>(< 0.05 to 0.1)       | 0.1<br>(< 0.05 to 0.1)          |
| Endometriosis                                       | Asymptomatic endometriosis                                                       | 956.4<br>(688.2 to 1,255.7)           | 1,033.8<br>(743.5 to 1,356.0)         | 9,891.7<br>(8,423.2 to 11,767.6)      | 9,261.8<br>(7,894.1 to 10,959.7)      | < 0.05<br>(0.0 to < 0.05)       | < 0.05<br>(0.0 to < 0.05)       |
| Endometriosis                                       | Severe abdominal pain and primary infertility due to endometriosis               | 5.5<br>(3.3 to 8.3)                   | 5.6<br>(3.4 to 8.5)                   | --                                    | --                                    | 1.8<br>(1.0 to 3.0)             | 1.9<br>(1.0 to 3.0)             |
| Endometriosis                                       | Mild abdominal pain and secondary infertility due to endometriosis               | 6.0<br>(3.8 to 9.0)                   | 6.5<br>(4.1 to 9.7)                   | --                                    | --                                    | 0.1<br>(< 0.05 to 0.2)          | 0.1<br>(< 0.05 to 0.2)          |
| Genital prolapse                                    | Asymptomatic genital prolapse                                                    | 176,567.3<br>(151,494.2 to 202,175.0) | 202,619.3<br>(174,362.3 to 232,530.3) | 12,607.9<br>(10,603.2 to 14,728.3)    | 13,441.1<br>(11,326.1 to 15,698.4)    | < 0.05<br>(0.0 to < 0.05)       | < 0.05<br>(0.0 to < 0.05)       |
| Genital prolapse                                    | Stress incontinence due to genital prolapse                                      | 24,368.2<br>(14,490.4 to 35,836.6)    | 27,964.7<br>(16,659.4 to 40,875.2)    | 1,718.6<br>(990.3 to 2,582.1)         | 1,832.2<br>(1,056.3 to 2,748.4)       | 458.2<br>(208.9 to 837.7)       | 526.0<br>(240.0 to 960.4)       |
| Genital prolapse                                    | Abdominal pain due to genital prolapse                                           | 15,153.1<br>(3,566.3 to 34,973.7)     | 17,388.9<br>(4,073.3 to 40,138.8)     | 1,100.4<br>(243.4 to 2,471.4)         | 1,173.3<br>(262.1 to 2,643.4)         | 157.8<br>(30.7 to 410.7)        | 181.1<br>(35.3 to 470.7)        |
| Genital prolapse                                    | Abdominal pain and stress incontinence due to genital prolapse                   | 2,130.8<br>(427.0 to 5,183.5)         | 2,445.2<br>(491.6 to 5,927.7)         | 151.7<br>(30.4 to 358.8)              | 161.8<br>(32.3 to 383.1)              | 62.0<br>(11.8 to 176.9)         | 71.1<br>(13.4 to 201.4)         |
| Premenstrual syndrome                               | Asymptomatic premenstrual syndrome                                               | 369,732.5<br>(351,072.0 to 387,671.2) | 404,045.6<br>(381,561.7 to 425,457.5) | 135,485.8<br>(127,327.8 to 143,270.1) | 144,343.5<br>(135,417.6 to 152,916.6) | < 0.05<br>(0.0 to < 0.05)       | < 0.05<br>(0.0 to < 0.05)       |
| Premenstrual syndrome                               | Abdominal pain and depression due to premenstrual syndrome                       | 16,670.8<br>(12,342.3 to 21,445.1)    | 18,218.5<br>(13,514.2 to 23,414.0)    | 6,121.3<br>(4,477.1 to 7,896.1)       | 6,521.3<br>(4,780.3 to 8,401.6)       | 2,436.1<br>(1,475.1 to 3,549.7) | 2,661.0<br>(1,599.2 to 3,886.7) |
| Premenstrual syndrome                               | Depression due to premenstrual syndrome                                          | 5,650.0<br>(1,772.2 to 11,464.4)      | 6,173.8<br>(1,931.4 to 12,482.8)      | 2,038.6<br>(643.5 to 4,192.1)         | 2,171.9<br>(687.0 to 4,470.6)         | 781.2<br>(220.6 to 1,784.8)     | 853.2<br>(242.9 to 1,940.7)     |

|                              |                                                                                                                        |                                     |                                     |                                    |                                    |                                 |                                 |
|------------------------------|------------------------------------------------------------------------------------------------------------------------|-------------------------------------|-------------------------------------|------------------------------------|------------------------------------|---------------------------------|---------------------------------|
| Premenstrual syndrome        | Abdominal pain due to premenstrual syndrome                                                                            | 23,660.8<br>(17,232.7 to 31,118.2)  | 25,857.6<br>(18,748.8 to 34,053.2)  | 8,821.6<br>(6,269.6 to 11,754.2)   | 9,398.2<br>(6,702.6 to 12,657.6)   | 253.4<br>(114.6 to 494.4)       | 276.9<br>(124.8 to 540.1)       |
| Other gynecological diseases | Mild anaemia due to other gynecological diseases                                                                       | 9,376.3<br>(9,119.0 to 9,641.0)     | 10,442.6<br>(10,132.4 to 10,767.3)  | --                                 | --                                 | 33.8<br>(12.1 to 73.4)          | 37.7<br>(13.4 to 81.8)          |
| Other gynecological diseases | Severe other gynecological disorders                                                                                   | 4,846.0<br>(3,454.8 to 6,499.6)     | 5,383.0<br>(3,828.3 to 7,227.2)     | 5,438.5<br>(3,807.6 to 7,524.2)    | 5,990.9<br>(4,210.4 to 8,239.3)    | 1,458.9<br>(878.2 to 2,275.2)   | 1,620.3<br>(974.4 to 2,506.0)   |
| Other gynecological diseases | Mild other gynecological disorders                                                                                     | 32,187.8<br>(26,414.6 to 38,487.3)  | 35,754.2<br>(29,840.8 to 42,023.0)  | 36,222.6<br>(29,595.3 to 43,299.5) | 39,903.0<br>(32,950.7 to 47,259.5) | 344.8<br>(161.6 to 666.9)       | 382.9<br>(180.2 to 733.7)       |
| Other gynecological diseases | Moderate anaemia due to other gynecological diseases                                                                   | 7,290.3<br>(7,012.3 to 7,604.0)     | 8,193.1<br>(7,842.5 to 8,557.9)     | --                                 | --                                 | 360.3<br>(238.9 to 521.3)       | 405.1<br>(269.5 to 584.4)       |
| Other gynecological diseases | Severe anaemia due to other gynecological diseases                                                                     | 595.0<br>(562.6 to 633.1)           | 648.7<br>(609.2 to 692.4)           | --                                 | --                                 | 83.2<br>(57.4 to 114.8)         | 90.8<br>(62.8 to 125.5)         |
| Other gynecological diseases | Moderate other gynecological disorders                                                                                 | 9,215.7<br>(6,036.8 to 13,023.6)    | 10,237.3<br>(6,696.7 to 14,334.8)   | 10,496.5<br>(6,741.6 to 15,315.5)  | 11,562.8<br>(7,495.9 to 16,706.4)  | 998.4<br>(561.7 to 1,588.0)     | 1,108.6<br>(626.0 to 1,752.2)   |
| Other gynecological diseases | Asymptomatic other gynecological disorders                                                                             | 30,637.2<br>(25,787.0 to 36,244.3)  | 34,033.1<br>(28,977.9 to 39,781.8)  | 34,511.3<br>(28,541.6 to 40,945.6) | 38,018.6<br>(31,808.8 to 44,402.2) | < 0.05<br>(0.0 to < 0.05)       | < 0.05<br>(0.0 to < 0.05)       |
| Thalassemias                 | Beta-thalassemia major, with moderate anaemia                                                                          | 121.7<br>(104.4 to 133.6)           | 119.5<br>(100.1 to 132.7)           | < 0.05<br>(0.0 to < 0.05)          | < 0.05<br>(0.0 to < 0.05)          | 7.5<br>(4.8 to 11.7)            | 7.5<br>(4.7 to 11.4)            |
| Thalassemias                 | Asymptomatic and mild heart failure due to thalassemias                                                                | 2.4<br>(1.9 to 3.0)                 | 2.3<br>(1.8 to 2.9)                 | --                                 | --                                 | 0.1<br>(0.1 to 0.2)             | 0.1<br>(0.1 to 0.2)             |
| Thalassemias                 | Hemoglobin E/Beta-thalassemia, without anaemia                                                                         | 4.8<br>(1.5 to 10.8)                | 5.7<br>(2.0 to 12.1)                | < 0.05<br>(0.0 to < 0.05)          | < 0.05<br>(0.0 to < 0.05)          | 0.1<br>(< 0.05 to 0.2)          | 0.1<br>(< 0.05 to 0.2)          |
| Thalassemias                 | Beta-thalassemia major, with mild anaemia                                                                              | 25.0<br>(22.3 to 28.0)              | 20.7<br>(18.2 to 23.9)              | < 0.05<br>(0.0 to < 0.05)          | < 0.05<br>(0.0 to < 0.05)          | 0.4<br>(0.2 to 0.8)             | 0.3<br>(0.2 to 0.6)             |
| Thalassemias                 | Hemoglobin E/beta-thalassemia, with mild anaemia                                                                       | 9.4<br>(8.0 to 10.7)                | 11.3<br>(9.7 to 13.0)               | < 0.05<br>(0.0 to < 0.05)          | < 0.05<br>(0.0 to < 0.05)          | 0.1<br>(0.1 to 0.3)             | 0.2<br>(0.1 to 0.4)             |
| Thalassemias                 | Severe heart failure due to thalassemias                                                                               | 1.4<br>(1.1 to 1.8)                 | 1.4<br>(1.0 to 1.7)                 | --                                 | --                                 | 0.3<br>(0.2 to 0.4)             | 0.2<br>(0.2 to 0.4)             |
| Thalassemias                 | Hemoglobin E/beta-thalassemia, with severe anaemia                                                                     | 6.9<br>(6.1 to 7.9)                 | 6.2<br>(5.3 to 7.0)                 | < 0.05<br>(0.0 to < 0.05)          | < 0.05<br>(0.0 to < 0.05)          | 1.1<br>(0.7 to 1.6)             | 1.0<br>(0.7 to 1.4)             |
| Thalassemias                 | Moderate heart failure due to thalassemias                                                                             | 0.5<br>(0.3 to 0.7)                 | 0.5<br>(0.3 to 0.7)                 | --                                 | --                                 | < 0.05<br>(< 0.05 to 0.1)       | < 0.05<br>(< 0.05 to 0.1)       |
| Thalassemias                 | Hemoglobin H disease, with severe anaemia                                                                              | 15.3<br>(12.0 to 19.2)              | 14.4<br>(10.9 to 18.5)              | < 0.05<br>(0.0 to < 0.05)          | < 0.05<br>(0.0 to < 0.05)          | 2.4<br>(1.6 to 3.5)             | 2.3<br>(1.5 to 3.4)             |
| Thalassemias                 | Hemoglobin H disease, severe infection with severe anaemia                                                             | 0.4<br>(0.1 to 0.8)                 | 0.4<br>(0.1 to 0.8)                 | < 0.05<br>(0.0 to < 0.05)          | < 0.05<br>(0.0 to < 0.05)          | 0.1<br>(< 0.05 to 0.2)          | 0.1<br>(< 0.05 to 0.2)          |
| Thalassemias                 | Hemoglobin H disease, with mild anaemia                                                                                | 21.0<br>(17.0 to 26.2)              | 22.6<br>(18.2 to 28.1)              | < 0.05<br>(0.0 to < 0.05)          | < 0.05<br>(0.0 to < 0.05)          | 0.3<br>(0.2 to 0.6)             | 0.4<br>(0.2 to 0.7)             |
| Thalassemias                 | Beta-thalassemia major, without anaemia                                                                                | 22.1<br>(8.0 to 45.6)               | 22.9<br>(7.7 to 46.6)               | < 0.05<br>(0.0 to < 0.05)          | < 0.05<br>(0.0 to < 0.05)          | 0.3<br>(0.1 to 0.7)             | 0.3<br>(0.1 to 0.7)             |
| Thalassemias                 | Hemoglobin E/beta-thalassemia, with moderate anaemia                                                                   | 43.2<br>(36.6 to 49.5)              | 45.2<br>(37.6 to 52.1)              | < 0.05<br>(0.0 to < 0.05)          | < 0.05<br>(0.0 to < 0.05)          | 2.7<br>(1.6 to 4.2)             | 2.8<br>(1.7 to 4.4)             |
| Thalassemias                 | Hemoglobin H disease, with moderate anaemia                                                                            | 64.4<br>(51.0 to 81.1)              | 54.9<br>(42.3 to 70.0)              | < 0.05<br>(0.0 to < 0.05)          | < 0.05<br>(0.0 to < 0.05)          | 4.0<br>(2.4 to 6.4)             | 3.4<br>(2.1 to 5.5)             |
| Thalassemias                 | Beta-thalassemia major, severe infection with severe anaemia                                                           | 1.1<br>(0.4 to 2.2)                 | 1.0<br>(0.3 to 2.0)                 | < 0.05<br>(0.0 to < 0.05)          | < 0.05<br>(0.0 to < 0.05)          | 0.3<br>(0.1 to 0.6)             | 0.3<br>(0.1 to 0.6)             |
| Thalassemias                 | Hemoglobin H disease, without anaemia                                                                                  | 16.6<br>(6.6 to 32.2)               | 15.3<br>(6.3 to 29.8)               | < 0.05<br>(0.0 to < 0.05)          | < 0.05<br>(0.0 to < 0.05)          | 0.2<br>(0.1 to 0.5)             | 0.2<br>(0.1 to 0.4)             |
| Thalassemias                 | Hemoglobin E/beta-thalassemia, severe infection with severe anaemia                                                    | 0.2<br>(0.1 to 0.3)                 | 0.2<br>(0.1 to 0.3)                 | < 0.05<br>(0.0 to < 0.05)          | < 0.05<br>(0.0 to < 0.05)          | < 0.05<br>(< 0.05 to 0.1)       | < 0.05<br>(< 0.05 to 0.1)       |
| Thalassemias                 | Beta-thalassemia major, with severe anaemia                                                                            | 22.6<br>(18.2 to 27.3)              | 21.8<br>(17.5 to 26.6)              | < 0.05<br>(0.0 to < 0.05)          | < 0.05<br>(0.0 to < 0.05)          | 3.6<br>(2.3 to 5.1)             | 3.5<br>(2.2 to 4.9)             |
| Thalassaemias trait          | Mild anaemia due to B-thalassaemia trait                                                                               | 66,811.7<br>(63,653.3 to 70,066.9)  | 80,501.5<br>(76,005.6 to 85,233.4)  | --                                 | --                                 | 241.7<br>(86.5 to 521.8)        | 290.8<br>(103.7 to 623.2)       |
| Thalassaemias trait          | Moderate anaemia due to B-thalassaemia trait                                                                           | 45,198.7<br>(42,309.3 to 48,432.7)  | 49,729.9<br>(46,134.5 to 53,897.3)  | --                                 | --                                 | 2,246.0<br>(1,483.2 to 3,231.5) | 2,462.9<br>(1,625.1 to 3,556.3) |
| Thalassaemias trait          | Moderate anaemia due to hemoglobin E trait                                                                             | 2,401.9<br>(2,239.4 to 2,593.4)     | 2,653.7<br>(2,444.5 to 2,888.8)     | --                                 | --                                 | 120.3<br>(78.4 to 174.6)        | 132.7<br>(85.4 to 193.0)        |
| Thalassaemias trait          | Severe anaemia due to hemoglobin E trait                                                                               | 114.0<br>(100.5 to 131.5)           | 166.8<br>(148.0 to 193.9)           | --                                 | --                                 | 16.7<br>(11.0 to 23.6)          | 24.4<br>(16.0 to 34.2)          |
| Thalassaemias trait          | Asymptomatic B-thalassaemia trait                                                                                      | 95,028.5<br>(88,325.9 to 101,722.9) | 99,467.0<br>(92,444.3 to 106,890.4) | < 0.05<br>(0.0 to < 0.05)          | < 0.05<br>(0.0 to < 0.05)          | < 0.05<br>(0.0 to < 0.05)       | < 0.05<br>(0.0 to < 0.05)       |
| Thalassaemias trait          | Severe anaemia due to B-thalassaemia trait                                                                             | 2,207.3<br>(2,018.3 to 2,481.5)     | 2,444.8<br>(2,222.5 to 2,770.0)     | --                                 | --                                 | 311.6<br>(210.1 to 431.2)       | 343.5<br>(231.9 to 469.8)       |
| Thalassaemias trait          | Asymptomatic hemoglobin E trait                                                                                        | 40,479.9<br>(38,474.7 to 42,660.7)  | 44,889.6<br>(42,637.6 to 47,266.9)  | < 0.05<br>(0.0 to < 0.05)          | < 0.05<br>(0.0 to < 0.05)          | < 0.05<br>(0.0 to < 0.05)       | < 0.05<br>(0.0 to < 0.05)       |
| Thalassaemias trait          | Mild anaemia due to hemoglobin E trait                                                                                 | 5,755.4<br>(5,446.6 to 6,089.6)     | 7,253.5<br>(6,796.2 to 7,746.4)     | --                                 | --                                 | 20.8<br>(7.4 to 45.3)           | 26.2<br>(9.4 to 57.3)           |
| Sickle cell disorders        | Homozygous sickle cell and severe sickle cell/beta-thalassemia, with vaso-occlusive crisis and stroke, without anaemia | 4.9<br>(2.8 to 8.0)                 | 7.2<br>(4.2 to 11.2)                | < 0.05<br>(0.0 to < 0.05)          | < 0.05<br>(0.0 to < 0.05)          | 2.6<br>(1.3 to 4.4)             | 3.9<br>(2.0 to 6.4)             |
| Sickle cell disorders        | Mild sickle cell/beta-thalassemia, with stroke and severe anaemia                                                      | 0.2<br>(0.2 to 0.3)                 | 0.3<br>(0.2 to 0.3)                 | < 0.05<br>(0.0 to < 0.05)          | < 0.05<br>(0.0 to < 0.05)          | 0.1<br>(0.1 to 0.1)             | 0.1<br>(0.1 to 0.2)             |
| Sickle cell disorders        | Mild sickle cell/beta-thalassemia, with mild anaemia                                                                   | 1.2<br>(1.1 to 1.4)                 | 2.0<br>(1.7 to 2.3)                 | < 0.05<br>(0.0 to < 0.05)          | < 0.05<br>(0.0 to < 0.05)          | < 0.05<br>(< 0.05 to < 0.05)    | < 0.05<br>(< 0.05 to 0.1)       |
| Sickle cell disorders        | Mild sickle cell/beta-thalassemia, with vaso-occlusive crisis and severe anaemia                                       | 0.2<br>(0.2 to 0.3)                 | 0.3<br>(0.2 to 0.4)                 | < 0.05<br>(0.0 to < 0.05)          | < 0.05<br>(0.0 to < 0.05)          | 0.1<br>(0.1 to 0.1)             | 0.1<br>(0.1 to 0.2)             |
| Sickle cell disorders        | Hemoglobin SC disease, with severe anaemia                                                                             | 17.0<br>(13.5 to 21.1)              | 20.5<br>(14.7 to 29.3)              | < 0.05<br>(0.0 to < 0.05)          | < 0.05<br>(0.0 to < 0.05)          | 2.6<br>(1.6 to 3.9)             | 3.1<br>(1.9 to 5.1)             |
| Sickle cell disorders        | Mild sickle cell/beta-thalassemia, with moderate anaemia                                                               | 8.6<br>(7.6 to 9.7)                 | 10.7<br>(9.4 to 12.0)               | < 0.05<br>(0.0 to < 0.05)          | < 0.05<br>(0.0 to < 0.05)          | 0.5<br>(0.3 to 0.8)             | 0.7<br>(0.4 to 1.0)             |
| Sickle cell disorders        | Hemoglobin SC disease, without anaemia                                                                                 | < 0.05<br>(0.0 to < 0.05)           | < 0.05<br>(0.0 to < 0.05)           | < 0.05<br>(0.0 to < 0.05)          | < 0.05<br>(0.0 to < 0.05)          | < 0.05<br>(0.0 to < 0.05)       | < 0.05<br>(0.0 to < 0.05)       |
| Sickle cell disorders        | Homozygous sickle cell and severe sickle cell/beta-thalassemia, with stroke, without anaemia                           | 49.2<br>(30.0 to 73.4)              | 69.2<br>(45.1 to 99.3)              | < 0.05<br>(0.0 to < 0.05)          | < 0.05<br>(0.0 to < 0.05)          | 15.5<br>(8.6 to 25.3)           | 21.7<br>(12.4 to 34.3)          |
| Sickle cell disorders        | Hemoglobin SC disease, with stroke and severe anaemia                                                                  | 0.5<br>(0.4 to 0.7)                 | 1.8<br>(1.4 to 2.3)                 | < 0.05<br>(0.0 to < 0.05)          | < 0.05<br>(0.0 to < 0.05)          | 0.2<br>(0.1 to 0.3)             | 0.8<br>(0.5 to 1.1)             |

|                                                 |                                                                                                                        |                                       |                                       |                           |                           |                               |                               |
|-------------------------------------------------|------------------------------------------------------------------------------------------------------------------------|---------------------------------------|---------------------------------------|---------------------------|---------------------------|-------------------------------|-------------------------------|
| Sickle cell disorders                           | Mild sickle cell/beta-thalassemia, without anaemia                                                                     | < 0.05<br>(0.0 to < 0.05)             | < 0.05<br>(0.0 to < 0.05)             | < 0.05<br>(0.0 to < 0.05) | < 0.05<br>(0.0 to < 0.05) | < 0.05<br>(0.0 to < 0.05)     | < 0.05<br>(0.0 to < 0.05)     |
| Sickle cell disorders                           | Homozygous sickle cell and severe sickle cell/beta-thalassemia, with vaso-occlusive crisis and severe anaemia          | 50.5<br>(41.6 to 59.0)                | 59.1<br>(49.3 to 69.2)                | < 0.05<br>(0.0 to < 0.05) | < 0.05<br>(0.0 to < 0.05) | 20.9<br>(14.0 to 29.0)        | 24.6<br>(16.4 to 34.2)        |
| Sickle cell disorders                           | Mild sickle cell/beta-thalassemia, with vaso-occlusive crisis, stroke, and severe anaemia                              | < 0.05<br>(< 0.05 to < 0.05)          | < 0.05<br>(< 0.05 to < 0.05)          | < 0.05<br>(0.0 to < 0.05) | < 0.05<br>(0.0 to < 0.05) | < 0.05<br>(< 0.05 to < 0.05)  | < 0.05<br>(< 0.05 to < 0.05)  |
| Sickle cell disorders                           | Mild sickle cell/beta-thalassemia, with vaso-occlusive crisis, without anaemia                                         | 0.1<br>(0.1 to 0.1)                   | 0.1<br>(0.1 to 0.1)                   | < 0.05<br>(0.0 to < 0.05) | < 0.05<br>(0.0 to < 0.05) | < 0.05<br>(< 0.05 to 0.1)     | < 0.05<br>(< 0.05 to 0.1)     |
| Sickle cell disorders                           | Mild sickle cell/beta-thalassemia, with severe anaemia                                                                 | 4.6<br>(3.7 to 5.6)                   | 5.2<br>(4.0 to 6.6)                   | < 0.05<br>(0.0 to < 0.05) | < 0.05<br>(0.0 to < 0.05) | 0.7<br>(0.5 to 1.1)           | 0.8<br>(0.5 to 1.2)           |
| Sickle cell disorders                           | Homozygous sickle cell and severe sickle cell/beta-thalassemia, with vaso-occlusive crisis, without anaemia            | 92.9<br>(56.3 to 142.9)               | 124.1<br>(79.3 to 185.4)              | < 0.05<br>(0.0 to < 0.05) | < 0.05<br>(0.0 to < 0.05) | 30.0<br>(15.8 to 49.9)        | 40.0<br>(21.3 to 66.1)        |
| Sickle cell disorders                           | Homozygous sickle cell and severe sickle cell/beta-thalassemia, without anaemia                                        | < 0.05<br>(0.0 to < 0.05)             | < 0.05<br>(0.0 to < 0.05)             | < 0.05<br>(0.0 to < 0.05) | < 0.05<br>(0.0 to < 0.05) | < 0.05<br>(0.0 to < 0.05)     | < 0.05<br>(0.0 to < 0.05)     |
| Sickle cell disorders                           | Hemoglobin SC disease, with vaso-occlusive crisis, stroke, and severe anaemia                                          | 0.1<br>(< 0.05 to 0.1)                | 0.3<br>(0.2 to 0.4)                   | < 0.05<br>(0.0 to < 0.05) | < 0.05<br>(0.0 to < 0.05) | < 0.05<br>(< 0.05 to 0.1)     | 0.2<br>(0.1 to 0.2)           |
| Sickle cell disorders                           | Mild sickle cell/beta-thalassemia, with stroke, without anaemia                                                        | 0.1<br>(0.1 to 0.2)                   | 0.1<br>(0.1 to 0.2)                   | < 0.05<br>(0.0 to < 0.05) | < 0.05<br>(0.0 to < 0.05) | < 0.05<br>(< 0.05 to 0.1)     | < 0.05<br>(< 0.05 to 0.1)     |
| Sickle cell disorders                           | Homozygous sickle cell and severe sickle cell/beta-thalassemia, with stroke and severe anaemia                         | 19.3<br>(14.6 to 24.1)                | 24.3<br>(18.2 to 30.2)                | < 0.05<br>(0.0 to < 0.05) | < 0.05<br>(0.0 to < 0.05) | 8.0<br>(5.0 to 11.5)          | 10.1<br>(6.2 to 14.5)         |
| Sickle cell disorders                           | Mild sickle cell/beta-thalassemia, with vaso-occlusive crisis and stroke, without anaemia                              | < 0.05<br>(< 0.05 to < 0.05)          | < 0.05<br>(< 0.05 to < 0.05)          | < 0.05<br>(0.0 to < 0.05) | < 0.05<br>(0.0 to < 0.05) | < 0.05<br>(< 0.05 to < 0.05)  | < 0.05<br>(< 0.05 to < 0.05)  |
| Sickle cell disorders                           | Homozygous sickle cell and severe sickle cell/beta-thalassemia, with moderate anaemia                                  | 2,219.8<br>(2,040.2 to 2,565.4)       | 2,512.3<br>(2,301.3 to 2,866.4)       | < 0.05<br>(0.0 to < 0.05) | < 0.05<br>(0.0 to < 0.05) | 136.5<br>(88.0 to 203.2)      | 154.7<br>(98.6 to 233.2)      |
| Sickle cell disorders                           | Hemoglobin SC disease, with vaso-occlusive crisis, without anaemia                                                     | 8.9<br>(5.5 to 12.6)                  | 10.0<br>(6.6 to 14.7)                 | < 0.05<br>(0.0 to < 0.05) | < 0.05<br>(0.0 to < 0.05) | 2.9<br>(1.5 to 5.0)           | 3.3<br>(1.7 to 5.6)           |
| Sickle cell disorders                           | Homozygous sickle cell and severe sickle cell/beta-thalassemia, with severe anaemia                                    | 109.9<br>(92.8 to 130.3)              | 135.3<br>(108.1 to 173.3)             | < 0.05<br>(0.0 to < 0.05) | < 0.05<br>(0.0 to < 0.05) | 16.9<br>(11.3 to 23.7)        | 20.8<br>(13.5 to 30.0)        |
| Sickle cell disorders                           | Hemoglobin SC disease, with moderate anaemia                                                                           | 209.1<br>(188.5 to 234.6)             | 266.1<br>(239.1 to 298.1)             | < 0.05<br>(0.0 to < 0.05) | < 0.05<br>(0.0 to < 0.05) | 12.9<br>(8.1 to 19.4)         | 16.4<br>(10.3 to 24.9)        |
| Sickle cell disorders                           | Hemoglobin SC disease, with vaso-occlusive crisis and stroke, without anaemia                                          | 0.5<br>(0.3 to 0.7)                   | 0.5<br>(0.3 to 0.8)                   | < 0.05<br>(0.0 to < 0.05) | < 0.05<br>(0.0 to < 0.05) | 0.3<br>(0.1 to 0.4)           | 0.3<br>(0.1 to 0.5)           |
| Sickle cell disorders                           | Homozygous sickle cell and severe sickle cell/beta-thalassemia, with mild anaemia                                      | 346.8<br>(298.9 to 478.3)             | 517.6<br>(447.9 to 690.3)             | < 0.05<br>(0.0 to < 0.05) | < 0.05<br>(0.0 to < 0.05) | 5.5<br>(2.6 to 10.8)          | 8.2<br>(3.9 to 16.3)          |
| Sickle cell disorders                           | Homozygous sickle cell and severe sickle cell/beta-thalassemia, with vaso-occlusive crisis, stroke, and severe anaemia | 2.8<br>(1.7 to 4.2)                   | 3.7<br>(2.2 to 5.4)                   | < 0.05<br>(0.0 to < 0.05) | < 0.05<br>(0.0 to < 0.05) | 1.7<br>(1.0 to 2.7)           | 2.2<br>(1.2 to 3.5)           |
| Sickle cell disorders                           | Hemoglobin SC disease, with vaso-occlusive crisis and severe anaemia                                                   | 1.5<br>(1.1 to 1.9)                   | 4.7<br>(3.7 to 5.6)                   | < 0.05<br>(0.0 to < 0.05) | < 0.05<br>(0.0 to < 0.05) | 0.6<br>(0.4 to 0.9)           | 2.0<br>(1.3 to 2.8)           |
| Sickle cell disorders                           | Hemoglobin SC disease, with mild anaemia                                                                               | 83.4<br>(74.8 to 93.4)                | 107.7<br>(95.5 to 122.1)              | < 0.05<br>(0.0 to < 0.05) | < 0.05<br>(0.0 to < 0.05) | 1.3<br>(0.6 to 2.6)           | 1.7<br>(0.8 to 3.3)           |
| Sickle cell disorders                           | Hemoglobin SC disease, with stroke, without anaemia                                                                    | 4.4<br>(2.9 to 6.0)                   | 4.7<br>(3.1 to 6.7)                   | < 0.05<br>(0.0 to < 0.05) | < 0.05<br>(0.0 to < 0.05) | 1.4<br>(0.8 to 2.3)           | 1.5<br>(0.8 to 2.5)           |
| Sickle cell trait                               | Moderate anaemia due to sickle cell trait                                                                              | 21,000.7<br>(19,192.3 to 23,385.2)    | 24,311.7<br>(22,291.2 to 27,003.5)    | --                        | --                        | 1,044.9<br>(668.6 to 1,553.9) | 1,209.2<br>(776.2 to 1,795.1) |
| Sickle cell trait                               | Asymptomatic sickle cell trait                                                                                         | 342,924.5<br>(312,705.3 to 384,216.7) | 400,567.6<br>(363,636.4 to 450,366.3) | < 0.05<br>(0.0 to < 0.05) | < 0.05<br>(0.0 to < 0.05) | < 0.05<br>(0.0 to < 0.05)     | < 0.05<br>(0.0 to < 0.05)     |
| Sickle cell trait                               | Severe anaemia due to sickle cell trait                                                                                | 1,344.5<br>(1,235.5 to 1,476.1)       | 1,578.1<br>(1,421.7 to 1,771.2)       | --                        | --                        | 188.7<br>(127.6 to 265.0)     | 221.0<br>(149.8 to 307.3)     |
| Sickle cell trait                               | Mild anaemia due to sickle cell trait                                                                                  | 27,156.6<br>(24,598.3 to 30,525.9)    | 34,666.4<br>(31,192.3 to 39,308.8)    | --                        | --                        | 97.8<br>(34.0 to 221.1)       | 124.8<br>(44.1 to 284.2)      |
| G6PD deficiency                                 | Asymptomatic and mild heart failure due to G6PD deficiency                                                             | 5.1<br>(4.2 to 6.3)                   | 6.9<br>(5.6 to 8.5)                   | < 0.05<br>(0.0 to < 0.05) | < 0.05<br>(0.0 to < 0.05) | 0.2<br>(0.1 to 0.3)           | 0.3<br>(0.2 to 0.4)           |
| G6PD deficiency                                 | Moderate heart failure due to G6PD deficiency                                                                          | 1.1<br>(0.8 to 1.5)                   | 1.5<br>(1.0 to 2.1)                   | < 0.05<br>(0.0 to < 0.05) | < 0.05<br>(0.0 to < 0.05) | 0.1<br>(< 0.05 to 0.1)        | 0.1<br>(0.1 to 0.2)           |
| G6PD deficiency                                 | Severe heart failure due to G6PD deficiency                                                                            | 3.0<br>(2.4 to 3.7)                   | 4.0<br>(3.2 to 5.0)                   | < 0.05<br>(0.0 to < 0.05) | < 0.05<br>(0.0 to < 0.05) | 0.5<br>(0.3 to 0.8)           | 0.7<br>(0.5 to 1.1)           |
| G6PD deficiency                                 | Asymptomatic G6PD deficiency                                                                                           | 292,537.3<br>(281,285.6 to 305,131.1) | 330,814.8<br>(318,421.4 to 345,602.6) | < 0.05<br>(0.0 to < 0.05) | < 0.05<br>(0.0 to < 0.05) | < 0.05<br>(0.0 to < 0.05)     | < 0.05<br>(0.0 to < 0.05)     |
| G6PD deficiency                                 | Mild anaemia due to G6PD deficiency                                                                                    | 323.3<br>(307.0 to 339.8)             | 437.3<br>(412.8 to 463.0)             | < 0.05<br>(0.0 to < 0.05) | < 0.05<br>(0.0 to < 0.05) | 1.2<br>(0.4 to 2.6)           | 1.6<br>(0.6 to 3.5)           |
| G6PD deficiency                                 | Moderate anaemia due to G6PD deficiency                                                                                | 125.5<br>(117.3 to 134.2)             | 139.8<br>(130.3 to 150.4)             | < 0.05<br>(0.0 to < 0.05) | < 0.05<br>(0.0 to < 0.05) | 6.4<br>(4.2 to 9.4)           | 7.2<br>(4.6 to 10.6)          |
| G6PD deficiency                                 | Severe anaemia due to G6PD deficiency                                                                                  | 96.2<br>(87.6 to 107.2)               | 108.7<br>(98.5 to 122.5)              | < 0.05<br>(0.0 to < 0.05) | < 0.05<br>(0.0 to < 0.05) | 14.3<br>(9.3 to 20.3)         | 16.1<br>(10.6 to 22.7)        |
| G6PD trait                                      | Moderate anaemia due to hemizygous G6PD deficiency                                                                     | 2.1<br>(2.1 to 2.3)                   | 2.6<br>(2.5 to 2.8)                   | --                        | --                        | 0.1<br>(0.1 to 0.2)           | 0.1<br>(0.1 to 0.2)           |
| G6PD trait                                      | Mild anaemia due to hemizygous G6PD deficiency                                                                         | 2.2<br>(2.2 to 2.3)                   | 2.6<br>(2.5 to 2.7)                   | --                        | --                        | < 0.05<br>(< 0.05 to < 0.05)  | < 0.05<br>(< 0.05 to < 0.05)  |
| G6PD trait                                      | Asymptomatic hemizygous G6PD deficiency                                                                                | 769,743.0<br>(757,113.9 to 784,069.9) | 865,919.1<br>(851,710.2 to 882,239.1) | < 0.05<br>(0.0 to < 0.05) | < 0.05<br>(0.0 to < 0.05) | < 0.05<br>(0.0 to < 0.05)     | < 0.05<br>(0.0 to < 0.05)     |
| G6PD trait                                      | Severe anaemia due to hemizygous G6PD deficiency                                                                       | 2.4<br>(2.2 to 2.6)                   | 2.8<br>(2.6 to 3.1)                   | --                        | --                        | 0.4<br>(0.2 to 0.5)           | 0.4<br>(0.3 to 0.6)           |
| Other hemoglobinopathies and hemolytic anaemias | Asymptomatic and mild heart failure due to other hemoglobinopathies and hemolytic anaemias                             | 77.7<br>(65.1 to 92.3)                | 99.3<br>(83.2 to 118.7)               | --                        | --                        | 3.1<br>(1.9 to 4.7)           | 3.9<br>(2.4 to 5.9)           |
| Other hemoglobinopathies and hemolytic anaemias | Moderate heart failure due to other hemoglobinopathies and hemolytic anaemias                                          | 17.1<br>(12.1 to 23.3)                | 21.8<br>(15.4 to 29.5)                | --                        | --                        | 1.2<br>(0.7 to 2.0)           | 1.5<br>(0.9 to 2.5)           |
| Other hemoglobinopathies and hemolytic anaemias | Moderate anaemia due to other hemoglobinopathies and hemolytic anaemias                                                | 17,244.0<br>(16,509.2 to 18,080.1)    | 17,540.9<br>(16,750.1 to 18,356.1)    | --                        | --                        | 855.4<br>(562.8 to 1,239.2)   | 867.6<br>(568.2 to 1,253.5)   |
| Other hemoglobinopathies and hemolytic anaemias | Mild anaemia due to other hemoglobinopathies and hemolytic anaemias                                                    | 36,277.2<br>(35,198.4 to 37,364.8)    | 41,750.7<br>(40,469.0 to 43,071.9)    | --                        | --                        | 130.1<br>(46.0 to 282.4)      | 149.6<br>(53.1 to 324.8)      |
| Other hemoglobinopathies and hemolytic anaemias | Severe heart failure due to other hemoglobinopathies and hemolytic anaemias                                            | 45.5<br>(37.7 to 55.2)                | 58.2<br>(48.1 to 70.6)                | --                        | --                        | 7.7<br>(5.0 to 11.2)          | 9.8<br>(6.3 to 14.5)          |
| Other hemoglobinopathies and hemolytic anaemias | Other hemoglobinopathies and hemolytic anaemias                                                                        | --                                    | --                                    | --                        | --                        | 41.6<br>(29.5 to 57.4)        | 36.9<br>(26.1 to 50.8)        |
| Other hemoglobinopathies and hemolytic anaemias | Severe anaemia due to other hemoglobinopathies and hemolytic anaemias                                                  | 1,364.4<br>(1,275.9 to 1,469.1)       | 2,153.9<br>(2,001.0 to 2,347.8)       | --                        | --                        | 188.9<br>(129.3 to 259.8)     | 301.0<br>(207.9 to 417.2)     |

|                                                   |                                                                                              |                                       |                                       |                                    |                                     |                                   |                                    |
|---------------------------------------------------|----------------------------------------------------------------------------------------------|---------------------------------------|---------------------------------------|------------------------------------|-------------------------------------|-----------------------------------|------------------------------------|
| Endocrine, metabolic, blood, and immune disorders | Severe anaemia due to endocrine, metabolic, blood, and immune disorders                      | 1,454.4<br>(1,354.6 to 1,579.6)       | 1,654.3<br>(1,520.7 to 1,832.1)       | --                                 | --                                  | 201.7<br>(137.7 to 278.9)         | 228.9<br>(154.9 to 313.0)          |
| Endocrine, metabolic, blood, and immune disorders | Severe endocrine, metabolic, blood, and immune disorders                                     | 8,879.6<br>(7,071.8 to 10,938.1)      | 11,089.9<br>(8,759.3 to 13,649.1)     | 1,996.7<br>(1,600.5 to 2,464.8)    | 2,493.6<br>(2,002.1 to 3,080.6)     | 1,285.0<br>(816.3 to 1,877.2)     | 1,600.5<br>(1,010.5 to 2,331.4)    |
| Endocrine, metabolic, blood, and immune disorders | Asymptomatic and mild heart failure due to endocrine, metabolic, blood, and immune disorders | 126.2<br>(106.8 to 148.1)             | 156.3<br>(131.6 to 184.0)             | --                                 | --                                  | 4.8<br>(3.1 to 7.3)               | 6.0<br>(3.8 to 9.0)                |
| Endocrine, metabolic, blood, and immune disorders | Asymptomatic endocrine, metabolic, blood, and immune disorders                               | 25,627.1<br>(22,708.7 to 28,734.0)    | 32,006.4<br>(28,261.9 to 36,032.6)    | 5,781.0<br>(5,080.0 to 6,494.7)    | 7,219.8<br>(6,348.0 to 8,142.7)     | < 0.05<br>(0.0 to < 0.05)         | < 0.05<br>(0.0 to < 0.05)          |
| Endocrine, metabolic, blood, and immune disorders | Moderate heart failure due to endocrine, metabolic, blood, and immune disorders              | 27.7<br>(19.8 to 37.1)                | 34.3<br>(24.3 to 46.0)                | --                                 | --                                  | 1.9<br>(1.1 to 3.0)               | 2.3<br>(1.4 to 3.8)                |
| Endocrine, metabolic, blood, and immune disorders | Mild anaemia due to endocrine, metabolic, blood, and immune disorders                        | 26,362.1<br>(25,694.0 to 27,022.9)    | 29,609.3<br>(28,810.7 to 30,453.3)    | --                                 | --                                  | 94.7<br>(33.4 to 206.6)           | 106.2<br>(37.4 to 230.6)           |
| Endocrine, metabolic, blood, and immune disorders | Moderate anaemia due to endocrine, metabolic, blood, and immune disorders                    | 16,873.0<br>(16,122.1 to 17,697.1)    | 18,022.0<br>(17,201.9 to 18,974.6)    | --                                 | --                                  | 841.4<br>(550.0 to 1,222.6)       | 898.0<br>(585.3 to 1,295.6)        |
| Endocrine, metabolic, blood, and immune disorders | Moderate endocrine, metabolic, blood, and immune disorders                                   | 3,852.3<br>(2,476.6 to 5,538.2)       | 4,810.6<br>(3,084.6 to 6,944.3)       | 862.9<br>(550.3 to 1,251.2)        | 1,077.6<br>(690.6 to 1,566.7)       | 510.2<br>(282.7 to 792.6)         | 635.4<br>(352.5 to 985.1)          |
| Endocrine, metabolic, blood, and immune disorders | Severe heart failure due to endocrine, metabolic, blood, and immune disorders                | 73.9<br>(61.1 to 89.6)                | 91.5<br>(75.3 to 110.8)               | --                                 | --                                  | 12.0<br>(7.8 to 17.3)             | 14.8<br>(9.6 to 21.4)              |
| Endocrine, metabolic, blood, and immune disorders | Mild endocrine, metabolic, blood, and immune disorders                                       | 24,035.5<br>(20,881.2 to 27,408.3)    | 30,018.2<br>(25,939.3 to 34,366.2)    | 5,427.4<br>(4,702.1 to 6,188.6)    | 6,778.2<br>(5,867.4 to 7,749.4)     | 423.1<br>(224.6 to 716.5)         | 527.4<br>(281.3 to 889.0)          |
| Rheumatoid arthritis                              | Moderate rheumatoid arthritis                                                                | 6,492.2<br>(5,541.3 to 7,628.2)       | 8,385.4<br>(7,110.0 to 9,858.7)       | 369.5<br>(319.3 to 426.8)          | 462.5<br>(397.4 to 533.8)           | 1,844.9<br>(1,230.9 to 2,538.5)   | 2,378.0<br>(1,576.6 to 3,276.2)    |
| Rheumatoid arthritis                              | Severe rheumatoid arthritis                                                                  | 2,338.7<br>(1,577.5 to 3,212.3)       | 3,020.8<br>(2,031.2 to 4,145.3)       | 132.0<br>(90.1 to 182.4)           | 165.2<br>(112.4 to 228.8)           | 1,198.7<br>(716.7 to 1,806.9)     | 1,542.9<br>(924.7 to 2,322.5)      |
| Rheumatoid arthritis                              | Mild rheumatoid arthritis                                                                    | 7,688.4<br>(6,461.0 to 9,031.4)       | 9,930.5<br>(8,350.4 to 11,718.3)      | 436.4<br>(371.0 to 507.7)          | 546.3<br>(464.1 to 638.5)           | 828.6<br>(556.9 to 1,178.2)       | 1,068.4<br>(720.9 to 1,514.3)      |
| Osteoarthritis                                    | Moderate osteoarthritis of the knee                                                          | 65,728.8<br>(58,868.9 to 72,432.6)    | 86,053.9<br>(77,434.3 to 94,783.1)    | 3,308.1<br>(2,972.3 to 3,674.2)    | 4,174.0<br>(3,753.5 to 4,630.1)     | 4,769.2<br>(3,281.6 to 6,501.6)   | 6,240.1<br>(4,294.0 to 8,505.1)    |
| Osteoarthritis                                    | Severe osteoarthritis of the knee                                                            | 24,953.1<br>(21,891.1 to 28,433.2)    | 33,377.7<br>(29,270.2 to 38,119.8)    | 1,285.6<br>(1,113.4 to 1,455.4)    | 1,655.4<br>(1,428.3 to 1,871.8)     | 3,727.9<br>(2,540.2 to 5,169.6)   | 4,983.9<br>(3,376.1 to 6,891.4)    |
| Osteoarthritis                                    | Moderate osteoarthritis of the hip                                                           | 9,553.6<br>(8,329.1 to 10,887.4)      | 12,644.5<br>(11,092.8 to 14,333.5)    | 523.0<br>(459.2 to 592.7)          | 681.5<br>(600.4 to 769.6)           | 686.0<br>(459.8 to 940.4)         | 908.0<br>(609.6 to 1,236.6)        |
| Osteoarthritis                                    | Severe osteoarthritis of the hip                                                             | 3,175.1<br>(2,764.5 to 3,635.1)       | 4,351.1<br>(3,789.2 to 4,985.1)       | 183.5<br>(158.1 to 211.7)          | 247.8<br>(213.6 to 286.5)           | 468.6<br>(315.7 to 646.7)         | 642.5<br>(429.4 to 886.4)          |
| Osteoarthritis                                    | Mild osteoarthritis of the hip                                                               | 17,928.8<br>(16,166.6 to 19,666.4)    | 23,131.0<br>(20,935.9 to 25,367.6)    | 945.5<br>(850.6 to 1,047.5)        | 1,195.2<br>(1,073.9 to 1,321.3)     | 378.3<br>(212.8 to 602.5)         | 487.9<br>(273.7 to 779.2)          |
| Osteoarthritis                                    | Mild osteoarthritis of the knee                                                              | 110,646.1<br>(102,312.2 to 119,604.7) | 142,009.0<br>(131,394.2 to 153,339.3) | 5,454.2<br>(5,047.8 to 5,905.0)    | 6,741.8<br>(6,230.4 to 7,288.2)     | 2,355.2<br>(1,362.7 to 3,878.7)   | 3,020.4<br>(1,749.9 to 4,952.8)    |
| Low back pain                                     | Most severe low back pain with leg pain                                                      | 32,554.0<br>(28,173.1 to 37,423.7)    | 38,978.0<br>(33,376.6 to 45,022.8)    | 15,862.5<br>(13,389.9 to 18,777.0) | 18,969.0<br>(15,945.0 to 22,638.9)  | 11,255.1<br>(7,605.9 to 15,235.5) | 13,449.2<br>(9,096.7 to 18,146.5)  |
| Low back pain                                     | Moderate low back pain without leg pain                                                      | 101,868.2<br>(90,696.6 to 114,939.5)  | 119,407.8<br>(105,462.8 to 135,857.4) | 50,153.1<br>(43,805.5 to 56,970.8) | 58,688.9<br>(50,631.9 to 66,859.8)  | 5,203.5<br>(3,325.3 to 7,499.1)   | 6,088.4<br>(3,878.6 to 8,831.6)    |
| Low back pain                                     | Moderate low back pain with leg pain                                                         | 50,549.3<br>(44,861.6 to 56,825.8)    | 60,521.9<br>(53,123.3 to 68,611.2)    | 24,612.2<br>(21,402.6 to 28,342.4) | 29,436.2<br>(25,307.4 to 34,118.1)  | 2,571.5<br>(1,629.1 to 3,739.3)   | 3,074.5<br>(1,916.4 to 4,457.4)    |
| Low back pain                                     | Mild low back pain without leg pain                                                          | 120,194.5<br>(106,852.9 to 135,168.1) | 140,905.7<br>(124,083.9 to 159,983.1) | 59,043.7<br>(51,436.3 to 67,394.7) | 69,094.6<br>(59,851.2 to 79,426.5)  | 2,295.4<br>(1,217.2 to 3,785.5)   | 2,686.4<br>(1,430.9 to 4,417.0)    |
| Low back pain                                     | Mild low back pain with leg pain                                                             | 37,821.5<br>(33,023.0 to 43,222.5)    | 45,287.4<br>(39,064.5 to 52,102.7)    | 18,491.4<br>(15,764.5 to 21,438.9) | 22,118.6<br>(18,762.7 to 25,853.7)  | 719.8<br>(385.6 to 1,216.1)       | 860.9<br>(459.8 to 1,454.2)        |
| Low back pain                                     | Severe low back pain without leg pain                                                        | 30,347.8<br>(26,832.4 to 34,134.5)    | 35,577.1<br>(31,076.1 to 40,284.5)    | 14,938.7<br>(13,103.9 to 16,870.7) | 17,483.0<br>(15,203.0 to 19,893.0)  | 7,545.1<br>(5,127.9 to 10,316.2)  | 8,822.2<br>(5,951.8 to 12,042.5)   |
| Low back pain                                     | Most severe low back pain without leg pain                                                   | 40,334.0<br>(34,679.7 to 46,151.4)    | 47,289.2<br>(40,431.8 to 54,336.7)    | 19,877.2<br>(16,868.4 to 23,119.7) | 23,263.7<br>(19,658.0 to 27,251.3)  | 13,602.1<br>(9,275.8 to 18,378.7) | 15,901.2<br>(10,742.4 to 21,672.4) |
| Low back pain                                     | Severe low back pain with leg pain                                                           | 19,274.9<br>(17,080.4 to 21,859.9)    | 23,080.9<br>(20,359.8 to 26,452.5)    | 9,383.4<br>(8,120.6 to 10,792.9)   | 11,222.8<br>(9,664.3 to 13,102.6)   | 5,661.0<br>(3,872.0 to 7,827.7)   | 6,765.4<br>(4,611.1 to 9,414.1)    |
| Neck pain                                         | Moderate neck pain                                                                           | 28,517.5<br>(18,134.9 to 41,342.1)    | 34,813.7<br>(21,918.9 to 50,358.4)    | 6,432.1<br>(3,951.9 to 9,627.1)    | 7,702.3<br>(4,716.6 to 11,509.8)    | 3,023.7<br>(1,598.3 to 4,814.2)   | 3,685.0<br>(1,940.0 to 5,865.8)    |
| Neck pain                                         | Severe neck pain                                                                             | 14,129.6<br>(10,666.7 to 18,072.4)    | 17,247.9<br>(12,984.0 to 22,145.1)    | 3,093.7<br>(2,336.8 to 3,942.4)    | 3,704.5<br>(2,798.3 to 4,742.2)     | 2,967.2<br>(1,807.8 to 4,385.1)   | 3,615.0<br>(2,207.3 to 5,344.9)    |
| Neck pain                                         | Most severe neck pain                                                                        | 35,293.1<br>(24,559.6 to 48,448.3)    | 43,085.7<br>(29,982.7 to 59,462.8)    | 7,742.3<br>(5,385.8 to 10,416.2)   | 9,271.0<br>(6,508.0 to 12,478.2)    | 9,764.1<br>(5,687.3 to 15,178.0)  | 11,895.3<br>(6,913.3 to 18,343.1)  |
| Neck pain                                         | Mild neck pain                                                                               | 160,051.9<br>(135,628.5 to 186,789.8) | 195,376.7<br>(165,191.1 to 228,857.9) | 35,473.9<br>(30,164.4 to 42,484.7) | 42,479.4<br>(35,932.1 to 50,922.3)  | 7,990.9<br>(5,129.2 to 11,807.3)  | 9,741.0<br>(6,227.2 to 14,437.8)   |
| Gout                                              | Polyarticular gout                                                                           | 868.4<br>(329.6 to 411.2)             | 466.3<br>(417.2 to 520.9)             | 70.1<br>(61.6 to 79.0)             | 88.3<br>(77.6 to 99.2)              | 192.9<br>(132.8 to 250.9)         | 243.1<br>(168.2 to 314.0)          |
| Gout                                              | Asymptomatic gout                                                                            | 23,998.4<br>(21,558.0 to 26,830.5)    | 30,368.6<br>(27,313.4 to 33,982.1)    | 4,563.8<br>(4,027.9 to 5,139.2)    | 5,751.3<br>(5,055.8 to 6,475.5)     | < 0.05<br>(0.0 to < 0.05)         | < 0.05<br>(0.0 to < 0.05)          |
| Gout                                              | Symptomatic episodes of gout                                                                 | 2,483.4<br>(2,089.4 to 2,932.1)       | 3,142.5<br>(2,643.5 to 3,705.9)       | 472.2<br>(390.4 to 562.7)          | 595.1<br>(493.3 to 711.8)           | 656.0<br>(434.4 to 912.5)         | 828.1<br>(549.4 to 1,153.4)        |
| Other musculoskeletal disorders                   | Other musculoskeletal disorders severity level 4                                             | 16,852.6<br>(12,174.4 to 22,527.5)    | 19,312.1<br>(13,815.1 to 25,900.0)    | 15,423.7<br>(11,528.9 to 20,293.2) | 17,994.1<br>(13,428.7 to 23,813.0)  | 2,580.8<br>(1,575.0 to 3,888.8)   | 2,953.1<br>(1,783.6 to 4,522.6)    |
| Other musculoskeletal disorders                   | Other musculoskeletal disorders severity level 6                                             | 19,348.8<br>(10,642.1 to 29,842.5)    | 22,167.3<br>(12,158.7 to 34,151.2)    | 18,003.9<br>(9,906.0 to 29,003.1)  | 21,007.8<br>(11,550.1 to 34,260.7)  | 10,154.8<br>(5,274.5 to 17,130.0) | 11,612.8<br>(5,985.0 to 19,626.9)  |
| Other musculoskeletal disorders                   | Other musculoskeletal disorders severity level 2                                             | 59,822.7<br>(45,226.7 to 75,942.8)    | 68,550.5<br>(51,813.7 to 87,552.0)    | 55,260.2<br>(40,315.7 to 71,118.8) | 64,471.6<br>(46,959.2 to 83,381.6)  | 1,784.7<br>(979.5 to 2,809.8)     | 2,014.3<br>(1,094.5 to 3,220.0)    |
| Other musculoskeletal disorders                   | Other musculoskeletal disorders severity level 3                                             | 30,346.9<br>(19,087.9 to 43,533.7)    | 34,781.8<br>(21,706.4 to 50,092.0)    | 27,862.8<br>(17,382.1 to 39,428.5) | 32,505.3<br>(20,394.1 to 46,406.4)  | 3,323.7<br>(1,839.9 to 5,422.6)   | 3,803.5<br>(2,112.7 to 6,230.3)    |
| Other musculoskeletal disorders                   | Other musculoskeletal disorders severity level 5                                             | 21,249.3<br>(16,100.6 to 27,439.4)    | 24,351.4<br>(18,334.1 to 31,731.8)    | 19,451.4<br>(14,728.6 to 25,133.4) | 22,694.5<br>(17,087.5 to 29,744.2)  | 6,173.4<br>(3,869.9 to 9,063.6)   | 7,061.5<br>(4,399.0 to 10,454.7)   |
| Other musculoskeletal disorders                   | Asymptomatic other musculoskeletal disorders                                                 | 82,384.8<br>(68,278.2 to 98,370.0)    | 94,409.3<br>(76,857.4 to 113,407.7)   | 75,644.9<br>(62,289.0 to 91,141.0) | 88,257.4<br>(72,154.9 to 106,413.0) | < 0.05<br>(0.0 to < 0.05)         | < 0.05<br>(0.0 to < 0.05)          |
| Other musculoskeletal disorders                   | Other musculoskeletal disorders severity level 1                                             | 64,828.6<br>(44,593.6 to 87,418.7)    | 74,287.0<br>(50,825.8 to 100,236.4)   | 59,428.2<br>(40,845.4 to 78,388.1) | 69,336.2<br>(47,818.2 to 92,511.3)  | 1,410.6<br>(722.9 to 2,552.4)     | 1,614.4<br>(834.4 to 2,916.4)      |
| Neural tube defects                               | Moderate motor impairment and incontinence due to encephalocele                              | 1.2<br>(< 0.05 to 5.9)                | 1.3<br>(< 0.05 to 6.3)                | --                                 | --                                  | 0.2<br>(< 0.05 to 1.2)            | 0.2<br>(< 0.05 to 1.3)             |
| Neural tube defects                               | Moderate motor impairment and severe intellectual disability due to encephalocele            | 3.3<br>(0.5 to 8.4)                   | 3.5<br>(0.5 to 9.0)                   | --                                 | --                                  | 0.7<br>(0.1 to 1.9)               | 0.7<br>(0.1 to 2.0)                |

|                     |                                                                                                   |                                 |                                 |    |    |                                |                                      |
|---------------------|---------------------------------------------------------------------------------------------------|---------------------------------|---------------------------------|----|----|--------------------------------|--------------------------------------|
| Neural tube defects | Severe intellectual disability and incontinence due to encephalocele                              | 3.4<br>(0.6 to 8.7)             | 3.7<br>(0.7 to 9.2)             | -- | -- | 1.0<br>(0.2 to 2.5)            | 1.0<br>(0.2 to 2.7)                  |
| Neural tube defects | Severe motor impairment and borderline intellectual disability due to spina bifida                | 8.4<br>( $< 0.05$ to 93.0)      | 9.6<br>( $< 0.05$ to 106.6)     | -- | -- | 3.4<br>( $< 0.05$ to 38.1)     | 3.9<br>( $< 0.05$ to 43.9)           |
| Neural tube defects | Severe motor impairment and severe intellectual disability due to spina bifida                    | 22.7<br>( $< 0.05$ to 145.5)    | 26.1<br>( $< 0.05$ to 166.5)    | -- | -- | 11.2<br>( $< 0.05$ to 72.1)    | 12.9<br>( $< 0.05$ to 82.2)          |
| Neural tube defects | Moderate motor impairment and profound intellectual disability due to encephalocele               | 2.8<br>(0.3 to 7.9)             | 3.0<br>(0.3 to 8.3)             | -- | -- | 1.3<br>(0.1 to 3.9)            | 1.4<br>(0.2 to 4.3)                  |
| Neural tube defects | Mild intellectual disability due to encephalocele                                                 | 24.7<br>(16.3 to 35.7)          | 26.4<br>(17.4 to 38.0)          | -- | -- | 1.1<br>(0.5 to 1.8)            | 1.1<br>(0.6 to 1.9)                  |
| Neural tube defects | Mild motor impairment and severe intellectual disability due to spina bifida                      | 15.6<br>( $< 0.05$ to 122.8)    | 18.0<br>( $< 0.05$ to 139.8)    | -- | -- | 2.6<br>( $< 0.05$ to 19.9)     | 3.0<br>( $< 0.05$ to 22.9)           |
| Neural tube defects | Severe motor impairment and profound intellectual disability due to spina bifida                  | 16.8<br>( $< 0.05$ to 138.4)    | 19.3<br>( $< 0.05$ to 160.2)    | -- | -- | 8.7<br>( $< 0.05$ to 72.2)     | 10.0<br>( $< 0.05$ to 82.7)          |
| Neural tube defects | Mild motor impairment, profound intellectual disability and incontinence due to spina bifida      | 2.9<br>( $< 0.05$ to 3.0)       | 3.3<br>( $< 0.05$ to 3.3)       | -- | -- | 1.0<br>( $< 0.05$ to 1.0)      | 1.1<br>( $< 0.05$ to 1.1)            |
| Neural tube defects | Moderate motor impairment, severe intellectual disability and incontinence due to spina bifida    | 90.3<br>(15.0 to 213.6)         | 103.8<br>(17.2 to 244.1)        | -- | -- | 28.9<br>(4.9 to 72.3)          | 33.2<br>(5.7 to 83.6)                |
| Neural tube defects | Severe motor impairment and incontinence due to spina bifida                                      | 1,393.5<br>(1,113.0 to 1,708.4) | 1,602.0<br>(1,276.9 to 1,962.4) | -- | -- | 677.5<br>(429.9 to 872.2)      | 720.0<br>(491.6 to 991.5)            |
| Neural tube defects | Severe motor impairment and moderate intellectual disability due to encephalocele                 | 8.2<br>(3.5 to 14.3)            | 8.8<br>(3.7 to 15.3)            | -- | -- | 3.8<br>(1.5 to 6.8)            | 4.0<br>(1.6 to 7.2)                  |
| Neural tube defects | Severe motor impairment, severe intellectual disability and incontinence due to encephalocele     | 1.1<br>( $< 0.05$ to 5.8)       | 1.2<br>( $< 0.05$ to 6.1)       | -- | -- | 0.6<br>( $< 0.05$ to 3.2)      | 0.7<br>( $< 0.05$ to 3.4)            |
| Neural tube defects | Moderate motor impairment, profound intellectual disability and incontinence due to encephalocele | 0.4<br>( $< 0.05$ to 4.0)       | 0.4<br>( $< 0.05$ to 4.2)       | -- | -- | 0.1<br>( $< 0.05$ to 1.4)      | 0.1<br>( $< 0.05$ to 1.4)            |
| Neural tube defects | Asymptomatic encephalocele following treatment                                                    | 55.8<br>(41.0 to 73.0)          | 59.5<br>(43.9 to 77.6)          | -- | -- | $< 0.05$<br>(0.0 to $< 0.05$ ) | $< 0.05$<br>(0.0 to $< 0.05$ )       |
| Neural tube defects | Moderate motor impairment and mild intellectual disability due to spina bifida                    | 2.4<br>( $< 0.05$ to 7.9)       | 2.7<br>( $< 0.05$ to 9.0)       | -- | -- | 0.2<br>( $< 0.05$ to 0.8)      | 0.3<br>( $< 0.05$ to 1.0)            |
| Neural tube defects | Moderate motor impairment and mild intellectual disability due to encephalocele                   | 3.5<br>(0.8 to 7.9)             | 3.7<br>(0.8 to 8.5)             | -- | -- | 0.3<br>(0.1 to 0.9)            | 0.4<br>(0.1 to 0.9)                  |
| Neural tube defects | Severe motor impairment and mild intellectual disability due to spina bifida                      | 23.1<br>( $< 0.05$ to 146.4)    | 26.6<br>( $< 0.05$ to 170.0)    | -- | -- | 9.8<br>( $< 0.05$ to 63.0)     | 11.3<br>( $< 0.05$ to 72.0)          |
| Neural tube defects | Mild motor impairment and borderline intellectual disability due to encephalocele                 | 0.3<br>( $< 0.05$ to 3.0)       | 0.3<br>( $< 0.05$ to 3.1)       | -- | -- | $< 0.05$<br>( $< 0.05$ to 0.1) | $< 0.05$<br>( $< 0.05$ to 0.1)       |
| Neural tube defects | Mild motor impairment, severe intellectual disability and incontinence due to encephalocele       | 0.1<br>( $< 0.05$ to 0.1)       | 0.1<br>( $< 0.05$ to 0.1)       | -- | -- | $< 0.05$<br>(0.0 to $< 0.05$ ) | $< 0.05$<br>( $< 0.05$ to $< 0.05$ ) |
| Neural tube defects | Severe intellectual disability due to encephalocele                                               | 23.2<br>(14.7 to 34.7)          | 24.8<br>(15.6 to 36.8)          | -- | -- | 3.7<br>(2.0 to 6.2)            | 4.0<br>(2.2 to 6.6)                  |
| Neural tube defects | Severe motor impairment and profound intellectual disability due to encephalocele                 | 5.9<br>(2.0 to 12.1)            | 6.3<br>(2.2 to 13.0)            | -- | -- | 2.8<br>(0.9 to 6.0)            | 3.0<br>(1.0 to 6.4)                  |
| Neural tube defects | Profound intellectual disability and incontinence due to encephalocele                            | 2.6<br>(0.3 to 7.5)             | 2.8<br>(0.3 to 8.0)             | -- | -- | 0.8<br>(0.1 to 2.5)            | 0.9<br>(0.1 to 2.7)                  |
| Neural tube defects | Moderate motor impairment due to encephalocele                                                    | 8.1<br>(3.4 to 15.2)            | 8.6<br>(3.6 to 16.2)            | -- | -- | 0.5<br>(0.2 to 1.0)            | 0.5<br>(0.2 to 1.1)                  |
| Neural tube defects | Moderate motor impairment and moderate intellectual disability due to encephalocele               | 3.9<br>(0.9 to 8.8)             | 4.2<br>(0.9 to 9.4)             | -- | -- | 0.8<br>(0.2 to 1.9)            | 0.8<br>(0.2 to 2.0)                  |
| Neural tube defects | Mild motor impairment, moderate intellectual disability and incontinence due to encephalocele     | 0.1<br>( $< 0.05$ to 0.7)       | 0.1<br>( $< 0.05$ to 0.7)       | -- | -- | $< 0.05$<br>( $< 0.05$ to 0.2) | $< 0.05$<br>( $< 0.05$ to 0.2)       |
| Neural tube defects | Mild intellectual disability and incontinence due to encephalocele                                | 3.5<br>(0.7 to 8.5)             | 3.7<br>(0.7 to 9.1)             | -- | -- | 0.6<br>(0.1 to 1.6)            | 0.7<br>(0.1 to 1.7)                  |
| Neural tube defects | Severe motor impairment and severe intellectual disability due to encephalocele                   | 7.3<br>(2.8 to 14.0)            | 7.8<br>(3.0 to 14.9)            | -- | -- | 3.6<br>(1.3 to 7.3)            | 3.9<br>(1.4 to 7.7)                  |
| Neural tube defects | Mild motor impairment, profound intellectual disability and incontinence due to encephalocele     | 0.1<br>(0.0 to 0.0)             | 0.1<br>(0.0 to 0.0)             | -- | -- | $< 0.05$<br>(0.0 to $< 0.05$ ) | $< 0.05$<br>(0.0 to $< 0.05$ )       |
| Neural tube defects | Severe motor and cognitive impairment due to anencephaly                                          | 0.2<br>(0.2 to 0.3)             | 0.2<br>(0.2 to 0.3)             | -- | -- | 0.1<br>(0.1 to 0.2)            | 0.1<br>(0.1 to 0.2)                  |
| Neural tube defects | Incontinence due to encephalocele                                                                 | 8.0<br>(3.4 to 14.5)            | 8.5<br>(3.7 to 15.5)            | -- | -- | 1.1<br>(0.4 to 2.2)            | 1.2<br>(0.5 to 2.3)                  |
| Neural tube defects | Mild motor impairment and borderline intellectual disability due to spina bifida                  | 5.5<br>( $< 0.05$ to 63.8)      | 6.4<br>( $< 0.05$ to 72.7)      | -- | -- | 0.1<br>( $< 0.05$ to 1.4)      | 0.1<br>( $< 0.05$ to 1.6)            |
| Neural tube defects | Severe motor impairment and incontinence due to encephalocele                                     | 2.4<br>(0.2 to 7.1)             | 2.6<br>(0.2 to 7.6)             | -- | -- | 1.2<br>(0.1 to 3.7)            | 1.2<br>(0.1 to 3.9)                  |
| Neural tube defects | Moderate motor impairment, mild intellectual disability and incontinence due to spina bifida      | 96.4<br>(21.8 to 233.5)         | 110.8<br>(25.0 to 268.5)        | -- | -- | 26.2<br>(5.2 to 66.8)          | 30.1<br>(5.9 to 76.6)                |
| Neural tube defects | Mild motor impairment, moderate intellectual disability and incontinence due to spina bifida      | 3.5<br>( $< 0.05$ to 24.8)      | 4.0<br>( $< 0.05$ to 28.4)      | -- | -- | 0.8<br>( $< 0.05$ to 5.6)      | 0.9<br>( $< 0.05$ to 6.5)            |
| Neural tube defects | Severe motor impairment and mild intellectual disability due to encephalocele                     | 7.6<br>(3.1 to 14.0)            | 8.1<br>(3.4 to 14.8)            | -- | -- | 3.2<br>(1.2 to 6.3)            | 3.5<br>(1.3 to 6.7)                  |
| Neural tube defects | Mild motor impairment, borderline intellectual disability and incontinence due to spina bifida    | 1.8<br>(0.0 to 0.0)             | 2.1<br>(0.0 to 0.0)             | -- | -- | 0.3<br>(0.0 to 0.0)            | 0.4<br>(0.0 to 0.0)                  |
| Neural tube defects | Borderline intellectual disability due to encephalocele                                           | 9.3<br>(4.4 to 16.7)            | 9.9<br>(4.7 to 17.8)            | -- | -- | 0.1<br>( $< 0.05$ to 0.2)      | 0.1<br>( $< 0.05$ to 0.3)            |
| Neural tube defects | Severe motor impairment, severe intellectual disability and incontinence due to spina bifida      | 77.3<br>(10.5 to 204.3)         | 88.9<br>(12.1 to 236.0)         | -- | -- | 44.0<br>(5.6 to 117.9)         | 50.6<br>(6.5 to 135.3)               |
| Neural tube defects | Severe motor impairment and borderline intellectual disability due to encephalocele               | 2.8<br>(0.4 to 7.4)             | 3.0<br>(0.4 to 7.9)             | -- | -- | 1.2<br>(0.2 to 3.3)            | 1.2<br>(0.2 to 3.5)                  |
| Neural tube defects | Severe motor impairment, moderate intellectual disability and incontinence due to spina bifida    | 89.2<br>(15.0 to 229.2)         | 102.5<br>(17.3 to 266.6)        | -- | -- | 47.6<br>(7.3 to 122.2)         | 54.7<br>(8.3 to 141.1)               |
| Neural tube defects | Moderate motor impairment and borderline intellectual disability due to encephalocele             | 1.3<br>( $< 0.05$ to 5.7)       | 1.4<br>( $< 0.05$ to 6.0)       | -- | -- | 0.1<br>( $< 0.05$ to 0.4)      | 0.1<br>( $< 0.05$ to 0.4)            |
| Neural tube defects | Mild motor impairment and incontinence due to spina bifida                                        | 48.3<br>(2.1 to 174.4)          | 55.6<br>(2.5 to 200.3)          | -- | -- | 7.2<br>(0.3 to 28.0)           | 8.2<br>(0.4 to 31.8)                 |
| Neural tube defects | Mild motor impairment, mild intellectual disability and incontinence due to spina bifida          | 4.8<br>( $< 0.05$ to 6.8)       | 5.5<br>( $< 0.05$ to 7.7)       | -- | -- | 0.8<br>( $< 0.05$ to 1.1)      | 1.0<br>( $< 0.05$ to 1.3)            |



|                            |                                                                                                                                                                              |                                      |                                      |    |    |                                      |                                      |
|----------------------------|------------------------------------------------------------------------------------------------------------------------------------------------------------------------------|--------------------------------------|--------------------------------------|----|----|--------------------------------------|--------------------------------------|
| Neural tube defects        | Mild motor impairment, mild intellectual disability and incontinence due to encephalocele                                                                                    | 0.1<br>( $< 0.05$ to $0.3$ )         | 0.1<br>( $< 0.05$ to $0.3$ )         | -- | -- | $< 0.05$<br>( $< 0.05$ to $0.1$ )    | $< 0.05$<br>( $< 0.05$ to $0.1$ )    |
| Neural tube defects        | Borderline intellectual disability and incontinence due to encephalocele                                                                                                     | 1.3<br>( $< 0.05$ to $6.1$ )         | 1.4<br>( $< 0.05$ to $6.5$ )         | -- | -- | 0.2<br>( $< 0.05$ to $0.9$ )         | 0.2<br>( $< 0.05$ to $1.0$ )         |
| Neural tube defects        | Profound intellectual disability due to encephalocele                                                                                                                        | 18.9<br>(11.3 to 28.2)               | 20.2<br>(12.1 to 30.0)               | -- | -- | 3.8<br>(1.9 to 6.4)                  | 4.0<br>(2.1 to 6.8)                  |
| Neural tube defects        | Mild motor impairment due to spina bifida                                                                                                                                    | 294.4<br>(149.7 to 458.5)            | 338.5<br>(172.0 to 527.0)            | -- | -- | 3.0<br>(1.1 to 6.6)                  | 3.4<br>(1.2 to 7.6)                  |
| Neural tube defects        | Moderate motor impairment, profound intellectual disability and incontinence due to spina bifida                                                                             | 77.6<br>(7.6 to 213.0)               | 89.2<br>(8.7 to 241.1)               | -- | -- | 27.3<br>(2.6 to 73.2)                | 31.4<br>(3.0 to 84.4)                |
| Neural tube defects        | Moderate motor impairment and borderline intellectual disability due to spina bifida                                                                                         | 2.1<br>(0.0 to 0.0)                  | 2.5<br>(0.0 to 0.0)                  | -- | -- | 0.2<br>(0.0 to 0.0)                  | 0.2<br>(0.0 to 0.0)                  |
| Neural tube defects        | Mild motor impairment and mild intellectual disability due to encephalocele                                                                                                  | 0.7<br>( $< 0.05$ to $5.1$ )         | 0.7<br>( $< 0.05$ to $5.5$ )         | -- | -- | $< 0.05$<br>( $< 0.05$ to $0.2$ )    | $< 0.05$<br>( $< 0.05$ to $0.2$ )    |
| Neural tube defects        | Severe motor impairment due to spina bifida                                                                                                                                  | 405.3<br>(237.2 to 611.7)            | 465.9<br>(271.5 to 703.5)            | -- | -- | 158.3<br>(81.4 to 258.5)             | 181.8<br>(93.9 to 298.3)             |
| Neural tube defects        | Severe motor impairment, borderline intellectual disability and incontinence due to encephalocele                                                                            | 0.4<br>( $< 0.05$ to $4.1$ )         | 0.4<br>( $< 0.05$ to $4.5$ )         | -- | -- | 0.2<br>( $< 0.05$ to $2.0$ )         | 0.2<br>( $< 0.05$ to $2.1$ )         |
| Neural tube defects        | Moderate intellectual disability due to encephalocele                                                                                                                        | 26.9<br>(17.8 to 38.2)               | 28.7<br>(19.0 to 40.9)               | -- | -- | 2.7<br>(1.5 to 4.3)                  | 2.9<br>(1.6 to 4.6)                  |
| Neural tube defects        | Severe motor impairment and moderate intellectual disability due to spina bifida                                                                                             | 25.8<br>( $< 0.05$ to $149.9$ )      | 29.6<br>( $< 0.05$ to $171.5$ )      | -- | -- | 11.8<br>( $< 0.05$ to $67.6$ )       | 13.6<br>( $< 0.05$ to $77.9$ )       |
| Neural tube defects        | Moderate motor impairment due to spina bifida                                                                                                                                | 47.9<br>(1.3 to 166.1)               | 55.1<br>(1.5 to 189.6)               | -- | -- | 2.9<br>(0.1 to 9.8)                  | 3.3<br>(0.1 to 11.2)                 |
| Neural tube defects        | Mild motor impairment and incontinence due to encephalocele                                                                                                                  | 0.2<br>( $< 0.05$ to $2.2$ )         | 0.2<br>( $< 0.05$ to $2.3$ )         | -- | -- | $< 0.05$<br>( $< 0.05$ to $0.4$ )    | $< 0.05$<br>( $< 0.05$ to $0.4$ )    |
| Neural tube defects        | Mild motor impairment and moderate intellectual disability due to encephalocele                                                                                              | 0.8<br>( $< 0.05$ to $5.5$ )         | 0.8<br>( $< 0.05$ to $5.9$ )         | -- | -- | 0.1<br>( $< 0.05$ to $0.6$ )         | 0.1<br>( $< 0.05$ to $0.6$ )         |
| Neural tube defects        | profound motor impairment, profound intellectual disability and incontinence due to spina bifida                                                                             | 60.8<br>(4.2 to 186.0)               | 69.9<br>(4.9 to 211.7)               | -- | -- | 35.6<br>(2.4 to 113.2)               | 40.9<br>(2.8 to 131.3)               |
| Neural tube defects        | Mild motor impairment and profound intellectual disability due to encephalocele                                                                                              | 0.5<br>( $< 0.05$ to $4.0$ )         | 0.6<br>( $< 0.05$ to $4.2$ )         | -- | -- | 0.3<br>( $< 0.05$ to $2.0$ )         | 0.3<br>( $< 0.05$ to $2.1$ )         |
| Neural tube defects        | Moderate motor impairment and profound intellectual disability due to spina bifida                                                                                           | 2.5<br>( $< 0.05$ to $0.7$ )         | 2.9<br>( $< 0.05$ to $0.8$ )         | -- | -- | 0.6<br>( $< 0.05$ to $0.2$ )         | 0.7<br>( $< 0.05$ to $0.2$ )         |
| Neural tube defects        | Moderate motor impairment, mild intellectual disability and incontinence due to encephalocele                                                                                | 0.5<br>( $< 0.05$ to $3.8$ )         | 0.5<br>( $< 0.05$ to $4.1$ )         | -- | -- | 0.1<br>( $< 0.05$ to $1.0$ )         | 0.1<br>( $< 0.05$ to $1.1$ )         |
| Neural tube defects        | Moderate motor impairment, borderline intellectual disability and incontinence due to encephalocele                                                                          | 0.2<br>( $< 0.05$ to $2.0$ )         | 0.2<br>( $< 0.05$ to $2.2$ )         | -- | -- | $< 0.05$<br>( $< 0.05$ to $0.4$ )    | $< 0.05$<br>( $< 0.05$ to $0.4$ )    |
| Neural tube defects        | Severe motor impairment, moderate intellectual disability and incontinence due to encephalocele                                                                              | 1.1<br>( $< 0.05$ to $5.4$ )         | 1.2<br>( $< 0.05$ to $5.8$ )         | -- | -- | 0.6<br>( $< 0.05$ to $2.8$ )         | 0.6<br>( $< 0.05$ to $2.9$ )         |
| Neural tube defects        | Severe motor impairment, mild intellectual disability and incontinence due to encephalocele                                                                                  | 1.1<br>( $< 0.05$ to $5.0$ )         | 1.2<br>( $< 0.05$ to $5.4$ )         | -- | -- | 0.5<br>( $< 0.05$ to $2.5$ )         | 0.6<br>( $< 0.05$ to $2.7$ )         |
| Neural tube defects        | Mild motor impairment, severe intellectual disability and incontinence due to spina bifida                                                                                   | 3.6<br>( $< 0.05$ to $17.9$ )        | 4.1<br>( $< 0.05$ to $20.7$ )        | -- | -- | 0.9<br>( $< 0.05$ to $5.7$ )         | 1.1<br>( $< 0.05$ to $6.5$ )         |
| Neural tube defects        | Severe motor impairment, profound intellectual disability and incontinence due to encephalocele                                                                              | 0.9<br>( $< 0.05$ to $5.5$ )         | 1.0<br>( $< 0.05$ to $5.8$ )         | -- | -- | 0.5<br>( $< 0.05$ to $3.2$ )         | 0.6<br>( $< 0.05$ to $3.4$ )         |
| Neural tube defects        | Mild motor impairment due to encephalocele                                                                                                                                   | 1.5<br>( $< 0.05$ to $5.8$ )         | 1.6<br>( $< 0.05$ to $6.2$ )         | -- | -- | $< 0.05$<br>( $< 0.05$ to $0.1$ )    | $< 0.05$<br>( $< 0.05$ to $0.1$ )    |
| Neural tube defects        | Mild motor impairment, borderline intellectual disability and incontinence due to encephalocele                                                                              | $< 0.05$<br>(0.0 to $< 0.05$ )       | $< 0.05$<br>(0.0 to $< 0.05$ )       | -- | -- | $< 0.05$<br>(0.0 to $< 0.05$ )       | $< 0.05$<br>(0.0 to $< 0.05$ )       |
| Neural tube defects        | Severe motor impairment due to encephalocele                                                                                                                                 | 17.3<br>(10.1 to 26.9)               | 18.4<br>(10.8 to 28.3)               | -- | -- | 6.9<br>(3.4 to 12.0)                 | 7.4<br>(3.7 to 12.6)                 |
| Neural tube defects        | Moderate motor impairment, moderate intellectual disability and incontinence due to spina bifida                                                                             | 103.7<br>(22.6 to 236.6)             | 119.2<br>(26.0 to 270.1)             | -- | -- | 28.2<br>(6.0 to 69.1)                | 32.5<br>(6.9 to 78.9)                |
| Neural tube defects        | Mild motor impairment and severe intellectual disability due to encephalocele                                                                                                | 0.6<br>( $< 0.05$ to $4.5$ )         | 0.6<br>( $< 0.05$ to $4.8$ )         | -- | -- | 0.1<br>( $< 0.05$ to $0.7$ )         | 0.1<br>( $< 0.05$ to $0.8$ )         |
| Neural tube defects        | Severe motor impairment, mild intellectual disability and incontinence due to spina bifida                                                                                   | 82.5<br>(13.3 to 211.1)              | 94.9<br>(15.3 to 242.8)              | -- | -- | 41.8<br>(5.9 to 112.5)               | 48.1<br>(6.8 to 128.1)               |
| Neural tube defects        | Severe motor impairment, borderline intellectual disability and incontinence due to spina bifida                                                                             | 29.8<br>(0.1 to 147.1)               | 34.2<br>(0.1 to 169.1)               | -- | -- | 14.6<br>( $< 0.05$ to $80.1$ )       | 16.8<br>( $< 0.05$ to $91.5$ )       |
| Neural tube defects        | Moderate motor impairment, borderline intellectual disability and incontinence due to spina bifida                                                                           | 36.6<br>(0.2 to 158.4)               | 42.1<br>(0.2 to 182.7)               | -- | -- | 7.3<br>( $< 0.05$ to $30.5$ )        | 8.4<br>(0.1 to 35.2)                 |
| Neural tube defects        | Moderate motor impairment and severe intellectual disability due to spina bifida                                                                                             | 2.7<br>( $< 0.05$ to $2.0$ )         | 3.1<br>( $< 0.05$ to $2.3$ )         | -- | -- | 0.6<br>( $< 0.05$ to $0.4$ )         | 0.7<br>( $< 0.05$ to $0.5$ )         |
| Neural tube defects        | Mild motor impairment and moderate intellectual disability due to spina bifida                                                                                               | 18.2<br>( $< 0.05$ to $119.4$ )      | 21.0<br>( $< 0.05$ to $137.6$ )      | -- | -- | 1.9<br>( $< 0.05$ to $12.7$ )        | 2.2<br>( $< 0.05$ to $14.5$ )        |
| Neural tube defects        | Mild motor impairment and profound intellectual disability due to spina bifida                                                                                               | 13.4<br>( $< 0.05$ to $122.2$ )      | 15.5<br>( $< 0.05$ to $141.8$ )      | -- | -- | 2.8<br>( $< 0.05$ to $23.2$ )        | 3.2<br>( $< 0.05$ to $26.4$ )        |
| Neural tube defects        | Mild motor impairment and mild intellectual disability due to spina bifida                                                                                                   | 17.4<br>( $< 0.05$ to $125.3$ )      | 20.1<br>( $< 0.05$ to $146.6$ )      | -- | -- | 0.6<br>( $< 0.05$ to $3.9$ )         | 0.6<br>( $< 0.05$ to $4.5$ )         |
| Neural tube defects        | Moderate motor impairment and moderate intellectual disability due to spina bifida                                                                                           | 2.2<br>( $< 0.05$ to $7.7$ )         | 2.5<br>( $< 0.05$ to $8.8$ )         | -- | -- | 0.4<br>( $< 0.05$ to $1.6$ )         | 0.5<br>( $< 0.05$ to $1.8$ )         |
| Neural tube defects        | Moderate motor impairment and incontinence due to spina bifida                                                                                                               | 1,650.2<br>(1,341.3 to 1,971.4)      | 1,897.2<br>(1,533.3 to 2,273.9)      | -- | -- | 298.2<br>(196.8 to 416.2)            | 342.3<br>(227.2 to 476.7)            |
| Neural tube defects        | Moderate intellectual disability and incontinence due to encephalocele                                                                                                       | 3.8<br>(0.7 to 9.5)                  | 4.1<br>(0.8 to 10.1)                 | -- | -- | 0.9<br>(0.2 to 2.1)                  | 0.9<br>(0.2 to 2.2)                  |
| Neural tube defects        | Moderate motor impairment, moderate intellectual disability and incontinence due to encephalocele                                                                            | 0.6<br>( $< 0.05$ to $5.5$ )         | 0.7<br>( $< 0.05$ to $5.9$ )         | -- | -- | 0.2<br>( $< 0.05$ to $1.4$ )         | 0.2<br>( $< 0.05$ to $1.5$ )         |
| Neural tube defects        | Moderate motor impairment, severe intellectual disability and incontinence due to encephalocele                                                                              | 0.5<br>( $< 0.05$ to $5.0$ )         | 0.6<br>( $< 0.05$ to $5.3$ )         | -- | -- | 0.2<br>( $< 0.05$ to $1.7$ )         | 0.2<br>( $< 0.05$ to $1.8$ )         |
| Congenital heart anomalies | Congenital heart disease and profound intellectual disability without heart failure due to severe congenital heart anomalies excluding single ventricle heart defects        | 10.9<br>(7.2 to 14.9)                | 11.3<br>(7.4 to 15.4)                | -- | -- | 2.2<br>(1.2 to 3.4)                  | 2.3<br>(1.1 to 3.5)                  |
| Congenital heart anomalies | Congenital heart disease, mild intellectual disability and severe heart failure due to single ventricle and single ventricle pathway heart defects                           | 0.1<br>(0.1 to 0.2)                  | 0.1<br>(0.1 to 0.2)                  | -- | -- | $< 0.05$<br>( $< 0.05$ to $< 0.05$ ) | $< 0.05$<br>( $< 0.05$ to $< 0.05$ ) |
| Congenital heart anomalies | Congenital heart disease, severe intellectual disability and mild heart failure due to critical malformations of great vessels, congenital valvular heart disease and patent | $< 0.05$<br>( $< 0.05$ to $< 0.05$ ) | $< 0.05$<br>( $< 0.05$ to $< 0.05$ ) | -- | -- | $< 0.05$<br>( $< 0.05$ to $< 0.05$ ) | $< 0.05$<br>( $< 0.05$ to $< 0.05$ ) |





|                            |                                                                                                                                                                                           |                                 |                                 |    |    |                              |                              |
|----------------------------|-------------------------------------------------------------------------------------------------------------------------------------------------------------------------------------------|---------------------------------|---------------------------------|----|----|------------------------------|------------------------------|
| Congenital heart anomalies | Congenital heart disease and borderline intellectual disability without heart failure due to severe congenital heart anomalies excluding single ventricle heart defects                   | 146.1<br>(110.7 to 181.0)       | 150.8<br>(113.5 to 188.1)       | -- | -- | 1.6<br>(0.7 to 2.9)          | 1.6<br>(0.7 to 3.0)          |
| Congenital heart anomalies | Congenital heart disease, profound intellectual disability and severe heart failure due to single ventricle and single ventricle pathway heart defects                                    | < 0.05<br>(< 0.05 to < 0.05)    | < 0.05<br>(< 0.05 to < 0.05)    | -- | -- | < 0.05<br>(< 0.05 to < 0.05) | < 0.05<br>(< 0.05 to < 0.05) |
| Congenital heart anomalies | Congenital heart disease, mild intellectual disability and mild heart failure due to critical malformations of great vessels, congenital valvular heart disease and patent ductus         | 0.2<br>(0.1 to 0.3)             | 0.2<br>(0.1 to 0.3)             | -- | -- | < 0.05<br>(< 0.05 to < 0.05) | < 0.05<br>(< 0.05 to < 0.05) |
| Congenital heart anomalies | Congenital heart disease without intellectual disability or heart failure due to other congenital cardiovascular anomalies                                                                | 3,994.7<br>(3,611.6 to 4,394.9) | 4,467.3<br>(4,003.3 to 4,962.8) | -- | -- | 233.6<br>(93.2 to 409.2)     | 260.5<br>(104.5 to 455.3)    |
| Congenital heart anomalies | Congenital heart disease, mild intellectual disability and moderate heart failure due to ventricular septal defect and atrial septal defect                                               | 0.1<br>(0.1 to 0.2)             | 0.1<br>(0.1 to 0.2)             | -- | -- | < 0.05<br>(< 0.05 to < 0.05) | < 0.05<br>(< 0.05 to < 0.05) |
| Congenital heart anomalies | Congenital heart disease, moderate intellectual disability and mild heart failure due to severe congenital heart anomalies excluding single ventricle heart defects                       | 0.1<br>(0.1 to 0.1)             | 0.1<br>(0.1 to 0.2)             | -- | -- | < 0.05<br>(< 0.05 to < 0.05) | < 0.05<br>(< 0.05 to < 0.05) |
| Congenital heart anomalies | Congenital heart disease, mild intellectual disability and severe heart failure due to ventricular septal defect and atrial septal defect                                                 | 0.3<br>(0.2 to 0.5)             | 0.3<br>(0.2 to 0.4)             | -- | -- | 0.1<br>(< 0.05 to 0.1)       | 0.1<br>(< 0.05 to 0.1)       |
| Congenital heart anomalies | Congenital heart disease, moderate intellectual disability and severe heart failure due to severe congenital heart anomalies excluding single ventricle heart defects                     | 0.2<br>(0.1 to 0.3)             | 0.2<br>(0.1 to 0.3)             | -- | -- | 0.1<br>(< 0.05 to 0.1)       | 0.1<br>(< 0.05 to 0.1)       |
| Congenital heart anomalies | Congenital heart disease and profound intellectual disability without heart failure due to critical malformations of great vessels, congenital valvular heart disease and patent ductus   | 6.8<br>(4.4 to 9.4)             | 6.9<br>(4.1 to 9.5)             | -- | -- | 1.4<br>(0.7 to 2.2)          | 1.4<br>(0.7 to 2.2)          |
| Congenital heart anomalies | Congenital heart disease, profound intellectual disability and mild heart failure due to ventricular septal defect and atrial septal defect                                               | < 0.05<br>(< 0.05 to 0.1)       | < 0.05<br>(< 0.05 to 0.1)       | -- | -- | < 0.05<br>(< 0.05 to < 0.05) | < 0.05<br>(< 0.05 to < 0.05) |
| Congenital heart anomalies | Congenital heart disease, profound intellectual disability and moderate heart failure due to single ventricle and single ventricle pathway heart defects                                  | < 0.05<br>(< 0.05 to < 0.05)    | < 0.05<br>(< 0.05 to < 0.05)    | -- | -- | < 0.05<br>(< 0.05 to < 0.05) | < 0.05<br>(< 0.05 to < 0.05) |
| Congenital heart anomalies | Congenital heart disease and mild heart failure without intellectual disability due to severe congenital heart anomalies excluding single ventricle heart defects                         | 11.1<br>(6.9 to 15.5)           | 11.7<br>(7.4 to 16.5)           | -- | -- | 0.5<br>(0.2 to 0.8)          | 0.5<br>(0.3 to 0.8)          |
| Congenital heart anomalies | Congenital heart disease and severe intellectual disability without heart failure due to single ventricle and single ventricle pathway heart defects                                      | 1.0<br>(0.4 to 1.6)             | 0.8<br>(0.3 to 1.4)             | -- | -- | 0.2<br>(0.1 to 0.3)          | 0.1<br>(< 0.05 to 0.2)       |
| Congenital heart anomalies | Congenital heart disease, moderate intellectual disability and moderate heart failure due to critical malformations of great vessels, congenital valvular heart disease and patent ductus | < 0.05<br>(< 0.05 to 0.1)       | < 0.05<br>(< 0.05 to 0.1)       | -- | -- | < 0.05<br>(< 0.05 to < 0.05) | < 0.05<br>(< 0.05 to < 0.05) |
| Congenital heart anomalies | Congenital heart disease, mild intellectual disability and severe heart failure due to severe congenital heart anomalies excluding single ventricle heart defects                         | 0.6<br>(0.4 to 0.8)             | 0.6<br>(0.4 to 0.8)             | -- | -- | 0.1<br>(0.1 to 0.2)          | 0.1<br>(0.1 to 0.2)          |
| Congenital heart anomalies | Congenital heart disease, profound intellectual disability and severe heart failure due to ventricular septal defect and atrial septal defect                                             | 0.1<br>(< 0.05 to 0.1)          | 0.1<br>(< 0.05 to 0.1)          | -- | -- | < 0.05<br>(< 0.05 to < 0.05) | < 0.05<br>(< 0.05 to < 0.05) |
| Congenital heart anomalies | Congenital heart disease and borderline intellectual disability without heart failure due to single ventricle and single ventricle pathway heart defects                                  | 30.4<br>(22.1 to 38.7)          | 29.1<br>(21.1 to 37.0)          | -- | -- | 0.3<br>(0.1 to 0.6)          | 0.3<br>(0.1 to 0.6)          |
| Congenital heart anomalies | Congenital heart disease, mild intellectual disability and mild heart failure due to single ventricle and single ventricle pathway heart defects                                          | 0.1<br>(< 0.05 to 0.1)          | 0.1<br>(< 0.05 to 0.1)          | -- | -- | < 0.05<br>(< 0.05 to < 0.05) | < 0.05<br>(< 0.05 to < 0.05) |
| Congenital heart anomalies | Congenital heart disease, severe intellectual disability and severe heart failure due to ventricular septal defect and atrial septal defect                                               | < 0.05<br>(< 0.05 to 0.1)       | < 0.05<br>(< 0.05 to 0.1)       | -- | -- | < 0.05<br>(< 0.05 to < 0.05) | < 0.05<br>(< 0.05 to < 0.05) |
| Congenital heart anomalies | Congenital heart disease, mild intellectual disability and mild heart failure due to ventricular septal defect and atrial septal defect                                                   | 0.1<br>(0.1 to 0.2)             | 0.1<br>(0.1 to 0.2)             | -- | -- | < 0.05<br>(< 0.05 to < 0.05) | < 0.05<br>(< 0.05 to < 0.05) |
| Congenital heart anomalies | Congenital heart disease and moderate heart failure without intellectual disability due to single ventricle and single ventricle pathway heart defects                                    | 2.2<br>(1.5 to 3.0)             | 2.2<br>(1.5 to 3.0)             | -- | -- | 0.2<br>(0.1 to 0.3)          | 0.2<br>(0.1 to 0.3)          |
| Congenital heart anomalies | Congenital heart disease and severe heart failure without intellectual disability due to severe congenital heart anomalies excluding single ventricle heart defects                       | 24.5<br>(19.5 to 30.4)          | 26.0<br>(20.6 to 32.3)          | -- | -- | 4.4<br>(2.8 to 6.5)          | 4.7<br>(3.0 to 6.8)          |
| Congenital heart anomalies | Congenital heart disease and moderate heart failure without intellectual disability due to severe congenital heart anomalies excluding single ventricle heart defects                     | 9.0<br>(6.3 to 12.2)            | 9.6<br>(6.7 to 12.9)            | -- | -- | 0.6<br>(0.4 to 1.0)          | 0.7<br>(0.4 to 1.1)          |
| Congenital heart anomalies | Congenital heart disease, moderate intellectual disability and moderate heart failure due to ventricular septal defect and atrial septal defect                                           | < 0.05<br>(< 0.05 to 0.1)       | < 0.05<br>(< 0.05 to 0.1)       | -- | -- | < 0.05<br>(< 0.05 to < 0.05) | < 0.05<br>(< 0.05 to < 0.05) |
| Congenital heart anomalies | Congenital heart disease and severe heart failure without intellectual disability due to single ventricle and single ventricle pathway heart defects                                      | 5.8<br>(4.5 to 7.5)             | 5.9<br>(4.5 to 7.6)             | -- | -- | 1.0<br>(0.6 to 1.6)          | 1.1<br>(0.6 to 1.6)          |
| Congenital heart anomalies | Congenital heart disease and moderate intellectual disability without heart failure due to critical malformations of great vessels, congenital valvular heart disease and patent ductus   | 12.2<br>(8.1 to 17.1)           | 11.7<br>(7.5 to 16.7)           | -- | -- | 1.2<br>(0.7 to 1.9)          | 1.2<br>(0.6 to 1.9)          |
| Congenital heart anomalies | Congenital heart disease, moderate intellectual disability and moderate heart failure due to severe congenital heart anomalies excluding single ventricle heart defects                   | 0.1<br>(< 0.05 to 0.1)          | 0.1<br>(< 0.05 to 0.1)          | -- | -- | < 0.05<br>(< 0.05 to < 0.05) | < 0.05<br>(< 0.05 to < 0.05) |
| Congenital heart anomalies | Congenital heart disease and mild intellectual disability without heart failure due to severe congenital heart anomalies excluding single ventricle heart defects                         | 59.6<br>(47.5 to 72.1)          | 63.8<br>(50.9 to 77.0)          | -- | -- | 2.5<br>(1.4 to 3.9)          | 2.7<br>(1.5 to 4.3)          |
| Congenital heart anomalies | Congenital heart disease, severe intellectual disability and severe heart failure due to critical malformations of great vessels, congenital valvular heart disease and patent ductus     | < 0.05<br>(< 0.05 to 0.1)       | < 0.05<br>(< 0.05 to 0.1)       | -- | -- | < 0.05<br>(< 0.05 to < 0.05) | < 0.05<br>(< 0.05 to < 0.05) |
| Congenital heart anomalies | Congenital heart disease, borderline intellectual disability and severe heart failure due to critical malformations of great vessels, congenital valvular heart disease and patent ductus | 1.2<br>(0.8 to 1.7)             | 1.3<br>(0.9 to 1.9)             | -- | -- | 0.2<br>(0.1 to 0.3)          | 0.2<br>(0.1 to 0.4)          |
| Congenital heart anomalies | Congenital heart disease and profound intellectual disability without heart failure due to other congenital cardiovascular anomalies                                                      | 11.7<br>(7.4 to 15.4)           | 12.1<br>(7.6 to 16.0)           | -- | -- | 2.3<br>(1.2 to 3.6)          | 2.4<br>(1.2 to 3.7)          |
| Congenital heart anomalies | Congenital heart disease, borderline intellectual disability and moderate heart failure due to single ventricle and single ventricle pathway heart defects                                | 0.1<br>(0.1 to 0.2)             | 0.1<br>(0.1 to 0.2)             | -- | -- | < 0.05<br>(< 0.05 to < 0.05) | < 0.05<br>(< 0.05 to < 0.05) |
| Congenital heart anomalies | Congenital heart disease without intellectual disability or heart failure due to severe congenital heart anomalies excluding single ventricle heart defects                               | 2,547.8<br>(2,209.9 to 2,926.6) | 2,892.7<br>(2,494.3 to 3,333.4) | -- | -- | 149.2<br>(58.5 to 262.6)     | 169.1<br>(66.9 to 297.1)     |
| Congenital heart anomalies | Congenital heart disease, severe intellectual disability and moderate heart failure due to single ventricle and single ventricle pathway heart defects                                    | < 0.05<br>(< 0.05 to < 0.05)    | < 0.05<br>(< 0.05 to < 0.05)    | -- | -- | < 0.05<br>(< 0.05 to < 0.05) | < 0.05<br>(< 0.05 to < 0.05) |
| Congenital heart anomalies | Congenital heart disease, borderline intellectual disability and mild heart failure due to single ventricle and single ventricle pathway heart defects                                    | 0.1<br>(0.1 to 0.2)             | 0.1<br>(0.1 to 0.2)             | -- | -- | < 0.05<br>(< 0.05 to < 0.05) | < 0.05<br>(< 0.05 to < 0.05) |
| Congenital heart anomalies | Congenital heart disease and severe heart failure without intellectual disability due to critical malformations of great vessels, congenital valvular heart disease and patent ductus     | 19.3<br>(15.1 to 24.3)          | 20.6<br>(16.0 to 25.9)          | -- | -- | 3.5<br>(2.2 to 5.1)          | 3.7<br>(2.3 to 5.5)          |
| Congenital heart anomalies | Congenital heart disease and mild intellectual disability without heart failure due to single ventricle and single ventricle pathway heart defects                                        | 10.5<br>(7.9 to 13.5)           | 10.2<br>(7.6 to 13.0)           | -- | -- | 0.4<br>(0.3 to 0.7)          | 0.4<br>(0.2 to 0.7)          |
| Congenital heart anomalies | Congenital heart disease and mild heart failure without intellectual disability due to critical malformations of great vessels, congenital valvular heart disease and patent ductus       | 8.7<br>(5.6 to 12.4)            | 9.3<br>(6.0 to 13.2)            | -- | -- | 0.4<br>(0.2 to 0.6)          | 0.4<br>(0.2 to 0.7)          |
| Congenital heart anomalies | Congenital heart disease and severe intellectual disability without heart failure due to ventricular septal defect and atrial septal defect                                               | 5.4<br>(1.8 to 8.8)             | 4.7<br>(1.4 to 8.0)             | -- | -- | 0.9<br>(0.3 to 1.5)          | 0.7<br>(0.2 to 1.4)          |
| Congenital heart anomalies | Congenital heart disease, borderline intellectual disability and mild heart failure due to critical malformations of great vessels, congenital valvular heart disease and patent ductus   | 0.5<br>(0.3 to 0.8)             | 0.6<br>(0.3 to 0.9)             | -- | -- | < 0.05<br>(< 0.05 to 0.1)    | < 0.05<br>(< 0.05 to 0.1)    |
| Congenital heart anomalies | Congenital heart disease, borderline intellectual disability and severe heart failure due to single ventricle and single ventricle pathway heart defects                                  | 0.3<br>(0.2 to 0.4)             | 0.3<br>(0.2 to 0.5)             | -- | -- | 0.1<br>(< 0.05 to 0.1)       | 0.1<br>(< 0.05 to 0.1)       |
| Congenital heart anomalies | Congenital heart disease, moderate intellectual disability and severe heart failure due to single ventricle and single ventricle pathway heart defects                                    | < 0.05<br>(< 0.05 to 0.1)       | < 0.05<br>(< 0.05 to 0.1)       | -- | -- | < 0.05<br>(< 0.05 to < 0.05) | < 0.05<br>(< 0.05 to < 0.05) |
| Congenital heart anomalies | Congenital heart disease, severe intellectual disability and severe heart failure due to severe congenital heart anomalies excluding single ventricle heart defects                       | 0.1<br>(< 0.05 to 0.1)          | 0.1<br>(< 0.05 to 0.1)          | -- | -- | < 0.05<br>(< 0.05 to < 0.05) | < 0.05<br>(< 0.05 to < 0.05) |

|                            |                                                                                                                                                                                    |                                 |                                 |    |    |                               |                               |
|----------------------------|------------------------------------------------------------------------------------------------------------------------------------------------------------------------------------|---------------------------------|---------------------------------|----|----|-------------------------------|-------------------------------|
| Congenital heart anomalies | Congenital heart disease, severe intellectual disability and moderate heart failure due to critical malformations of great vessels, congenital valvular heart disease and patent   | < 0.05<br>( < 0.05 to < 0.05)   | < 0.05<br>( < 0.05 to < 0.05)   | -- | -- | < 0.05<br>( < 0.05 to < 0.05) | < 0.05<br>( < 0.05 to < 0.05) |
| Congenital heart anomalies | Congenital heart disease and moderate intellectual disability without heart failure due to severe congenital heart anomalies excluding single ventricle heart defects              | 20.8<br>(14.1 to 28.5)          | 20.6<br>(13.3 to 29.2)          | -- | -- | 2.1<br>(1.2 to 3.3)           | 2.1<br>(1.1 to 3.3)           |
| Congenital heart anomalies | Congenital heart disease, moderate intellectual disability and mild heart failure due to single ventricle and single ventricle pathway heart defects                               | < 0.05<br>( < 0.05 to < 0.05)   | < 0.05<br>( < 0.05 to < 0.05)   | -- | -- | < 0.05<br>( < 0.05 to < 0.05) | < 0.05<br>( < 0.05 to < 0.05) |
| Congenital heart anomalies | Congenital heart disease and mild intellectual disability without heart failure due to ventricular septal defect and atrial septal defect                                          | 59.9<br>(46.4 to 74.7)          | 58.4<br>(44.6 to 73.5)          | -- | -- | 2.5<br>(1.5 to 3.9)           | 2.5<br>(1.4 to 3.9)           |
| Congenital heart anomalies | Congenital heart disease and mild heart failure without intellectual disability due to ventricular septal defect and atrial septal defect                                          | 3.9<br>(2.4 to 5.9)             | 3.7<br>(2.3 to 5.7)             | -- | -- | 0.2<br>(0.1 to 0.3)           | 0.2<br>(0.1 to 0.3)           |
| Congenital heart anomalies | Congenital heart disease and mild intellectual disability without heart failure due to critical malformations of great vessels, congenital valvular heart disease and patent       | 37.1<br>(29.5 to 46.2)          | 38.8<br>(30.5 to 48.4)          | -- | -- | 1.6<br>(0.9 to 2.5)           | 1.6<br>(1.0 to 2.6)           |
| Congenital heart anomalies | Congenital heart disease and severe intellectual disability without heart failure due to critical malformations of great vessels, congenital valvular heart disease and patent     | 3.8<br>(1.4 to 6.0)             | 3.6<br>(1.2 to 6.0)             | -- | -- | 0.6<br>(0.2 to 1.1)           | 0.6<br>(0.2 to 1.1)           |
| Congenital heart anomalies | Congenital heart disease and profound intellectual disability without heart failure due to ventricular septal defect and atrial septal defect                                      | 10.9<br>(5.7 to 15.9)           | 10.4<br>(5.2 to 15.1)           | -- | -- | 2.2<br>(1.0 to 3.7)           | 2.1<br>(1.0 to 3.6)           |
| Congenital heart anomalies | Congenital heart disease and moderate intellectual disability without heart failure due to ventricular septal defect and atrial septal defect                                      | 18.0<br>(11.1 to 26.8)          | 16.0<br>(9.5 to 24.2)           | -- | -- | 1.8<br>(0.9 to 3.1)           | 1.6<br>(0.8 to 2.8)           |
| Congenital heart anomalies | Congenital heart disease and severe intellectual disability without heart failure due to other congenital cardiovascular anomalies                                                 | 8.1<br>(2.8 to 12.4)            | 7.9<br>(2.4 to 12.5)            | -- | -- | 1.3<br>(0.4 to 2.2)           | 1.3<br>(0.4 to 2.2)           |
| Congenital heart anomalies | Congenital heart disease, severe intellectual disability and severe heart failure due to single ventricle and single ventricle pathway heart defects                               | < 0.05<br>( < 0.05 to < 0.05)   | < 0.05<br>( < 0.05 to < 0.05)   | -- | -- | < 0.05<br>( < 0.05 to < 0.05) | < 0.05<br>( < 0.05 to < 0.05) |
| Congenital heart anomalies | Congenital heart disease without heart failure or intellectual disability due to critical malformations of great vessels, congenital valvular heart disease and patent ductus      | 1,640.1<br>(1,407.7 to 1,914.8) | 1,807.2<br>(1,539.3 to 2,133.0) | -- | -- | 96.6<br>(37.5 to 169.3)       | 106.1<br>(40.6 to 187.1)      |
| Congenital heart anomalies | Congenital heart disease and borderline intellectual disability without heart failure due to critical malformations of great vessels, congenital valvular heart disease and patent | 106.1<br>(79.2 to 136.6)        | 107.7<br>(79.5 to 139.8)        | -- | -- | 1.1<br>(0.5 to 2.3)           | 1.1<br>(0.5 to 2.3)           |
| Congenital heart anomalies | Congenital heart disease and severe heart without intellectual disability due to ventricular septal defect and atrial septal defect                                                | 8.6<br>(6.3 to 11.8)            | 8.3<br>(6.0 to 11.4)            | -- | -- | 1.5<br>(0.9 to 2.3)           | 1.5<br>(0.9 to 2.3)           |
| Orofacial clefts           | Disfigurement level 2 and speech problems due to orofacial clefts                                                                                                                  | 233.4<br>(209.7 to 257.8)       | 241.5<br>(215.2 to 268.2)       | -- | -- | 27.6<br>(17.6 to 38.7)        | 27.6<br>(18.2 to 39.5)        |
| Orofacial clefts           | Asymptomatic orofacial clefts                                                                                                                                                      | 2,538.0<br>(2,287.1 to 2,804.3) | 2,866.2<br>(2,574.9 to 3,165.3) | -- | -- | < 0.05<br>(0.0 to < 0.05)     | < 0.05<br>(0.0 to < 0.05)     |
| Orofacial clefts           | Disfigurement level 2 due to orofacial clefts                                                                                                                                      | 233.5<br>(210.2 to 258.7)       | 241.4<br>(216.0 to 267.5)       | -- | -- | 15.6<br>(10.3 to 22.3)        | 16.2<br>(10.6 to 23.2)        |
| Orofacial clefts           | Disfigurement level 1 due to orofacial clefts                                                                                                                                      | 233.5<br>(208.9 to 258.2)       | 241.3<br>(216.4 to 267.8)       | -- | -- | 2.6<br>(1.2 to 4.8)           | 2.7<br>(1.2 to 5.0)           |
| Down's syndrome            | Severe intellectual disability, moderate dementia, and congenital heart disease due to Down syndrome                                                                               | 0.5<br>(0.1 to 0.7)             | 0.6<br>(0.1 to 0.8)             | -- | -- | 0.2<br>(0.1 to 0.3)           | 0.3<br>(0.1 to 0.4)           |
| Down's syndrome            | Moderate intellectual disability with congenital heart disease due to Down syndrome                                                                                                | 197.9<br>(170.9 to 229.4)       | 210.5<br>(181.0 to 245.8)       | -- | -- | 19.6<br>(12.7 to 28.6)        | 20.9<br>(13.5 to 30.6)        |
| Down's syndrome            | Borderline intellectual disability, mild dementia, and congenital heart disease due to Down syndrome                                                                               | 3.2<br>(2.8 to 3.8)             | 4.3<br>(3.6 to 5.0)             | -- | -- | 0.3<br>(0.2 to 0.4)           | 0.3<br>(0.2 to 0.5)           |
| Down's syndrome            | Congenital heart disease and severe dementia due to Down syndrome                                                                                                                  | 0.1<br>(0.1 to 0.1)             | 0.1<br>(0.1 to 0.1)             | -- | -- | < 0.05<br>( < 0.05 to 0.1)    | 0.1<br>( < 0.05 to 0.1)       |
| Down's syndrome            | Profound intellectual disability with congenital heart disease due to Down syndrome                                                                                                | 67.6<br>(57.8 to 78.6)          | 71.8<br>(61.3 to 84.2)          | -- | -- | 13.5<br>(8.7 to 19.4)         | 14.4<br>(9.2 to 20.6)         |
| Down's syndrome            | Borderline intellectual disability due to Down syndrome                                                                                                                            | 127.2<br>(108.3 to 149.3)       | 135.2<br>(114.4 to 160.0)       | -- | -- | 1.4<br>(0.7 to 2.6)           | 1.5<br>(0.7 to 2.8)           |
| Down's syndrome            | Severe intellectual disability, severe dementia, and congenital heart disease due to Down syndrome                                                                                 | 0.1<br>( < 0.05 to 0.2)         | 0.2<br>( < 0.05 to 0.3)         | -- | -- | 0.1<br>( < 0.05 to 0.1)       | 0.1<br>( < 0.05 to 0.1)       |
| Down's syndrome            | Mild intellectual disability, severe dementia, and congenital heart disease due to Down syndrome                                                                                   | 0.5<br>(0.4 to 0.6)             | 0.7<br>(0.5 to 0.8)             | -- | -- | 0.2<br>(0.2 to 0.3)           | 0.3<br>(0.2 to 0.4)           |
| Down's syndrome            | Moderate intellectual disability, severe dementia, and congenital heart disease due to Down syndrome                                                                               | 0.4<br>(0.3 to 0.5)             | 0.5<br>(0.3 to 0.6)             | -- | -- | 0.2<br>(0.1 to 0.3)           | 0.2<br>(0.1 to 0.3)           |
| Down's syndrome            | Profound intellectual disability and moderate dementia due to Down syndrome                                                                                                        | 0.7<br>(0.4 to 0.8)             | 0.9<br>(0.6 to 1.1)             | -- | -- | 0.3<br>(0.2 to 0.5)           | 0.4<br>(0.3 to 0.6)           |
| Down's syndrome            | Severe intellectual disability and moderate dementia due to Down syndrome                                                                                                          | 0.6<br>(0.2 to 0.9)             | 0.8<br>(0.2 to 1.2)             | -- | -- | 0.3<br>(0.1 to 0.5)           | 0.4<br>(0.1 to 0.6)           |
| Down's syndrome            | Mild intellectual disability and moderate dementia due to Down syndrome                                                                                                            | 2.4<br>(2.0 to 2.8)             | 3.1<br>(2.6 to 3.7)             | -- | -- | 1.0<br>(0.6 to 1.3)           | 1.3<br>(0.8 to 1.8)           |
| Down's syndrome            | Moderate intellectual disability, mild dementia, and congenital heart disease due to Down syndrome                                                                                 | 5.7<br>(4.0 to 7.2)             | 7.1<br>(4.8 to 9.3)             | -- | -- | 0.9<br>(0.6 to 1.3)           | 1.1<br>(0.7 to 1.7)           |
| Down's syndrome            | Borderline intellectual disability and mild dementia due to Down syndrome                                                                                                          | 4.5<br>(3.8 to 5.2)             | 5.9<br>(5.0 to 6.9)             | -- | -- | 0.4<br>(0.2 to 0.5)           | 0.5<br>(0.3 to 0.7)           |
| Down's syndrome            | Moderate intellectual disability and moderate dementia due to Down syndrome                                                                                                        | 1.7<br>(1.2 to 2.2)             | 2.1<br>(1.4 to 2.8)             | -- | -- | 0.8<br>(0.5 to 1.1)           | 0.9<br>(0.6 to 1.3)           |
| Down's syndrome            | Mild intellectual disability with congenital heart disease due to Down syndrome                                                                                                    | 243.6<br>(208.0 to 283.1)       | 259.0<br>(219.1 to 302.8)       | -- | -- | 10.3<br>(6.2 to 15.6)         | 10.9<br>(6.6 to 16.8)         |
| Down's syndrome            | Profound intellectual disability and mild dementia due to Down syndrome                                                                                                            | 3.1<br>(2.0 to 3.7)             | 4.1<br>(2.6 to 5.0)             | -- | -- | 0.8<br>(0.5 to 1.1)           | 1.1<br>(0.6 to 1.5)           |
| Down's syndrome            | Congenital heart disease and mild dementia due to Down syndrome                                                                                                                    | 1.4<br>(1.2 to 1.6)             | 1.8<br>(1.5 to 2.1)             | -- | -- | 0.1<br>(0.1 to 0.1)           | 0.1<br>(0.1 to 0.2)           |
| Down's syndrome            | Borderline intellectual disability, severe dementia, and congenital heart disease due to Down syndrome                                                                             | 0.2<br>(0.2 to 0.2)             | 0.3<br>(0.2 to 0.3)             | -- | -- | 0.1<br>(0.1 to 0.1)           | 0.1<br>(0.1 to 0.2)           |
| Down's syndrome            | Mild intellectual disability, moderate dementia, and congenital heart disease due to Down syndrome                                                                                 | 1.7<br>(1.4 to 2.0)             | 2.3<br>(1.9 to 2.7)             | -- | -- | 0.7<br>(0.5 to 1.0)           | 0.9<br>(0.6 to 1.3)           |
| Down's syndrome            | Severe intellectual disability and mild dementia due to Down syndrome                                                                                                              | 2.9<br>(0.7 to 4.4)             | 3.5<br>(0.7 to 5.4)             | -- | -- | 0.6<br>(0.1 to 1.0)           | 0.8<br>(0.2 to 1.3)           |
| Down's syndrome            | Moderate dementia due to Down syndrome                                                                                                                                             | 0.4<br>(0.3 to 0.5)             | 0.5<br>(0.5 to 0.6)             | -- | -- | 0.2<br>(0.1 to 0.2)           | 0.2<br>(0.1 to 0.3)           |
| Down's syndrome            | Severe intellectual disability and severe dementia due to Down syndrome                                                                                                            | 0.2<br>( < 0.05 to 0.3)         | 0.2<br>( < 0.05 to 0.3)         | -- | -- | 0.1<br>( < 0.05 to 0.2)       | 0.1<br>( < 0.05 to 0.2)       |
| Down's syndrome            | Severe intellectual disability, mild dementia, and congenital heart disease due to Down syndrome                                                                                   | 2.1<br>(0.5 to 3.2)             | 2.5<br>(0.5 to 3.9)             | -- | -- | 0.5<br>(0.1 to 0.7)           | 0.6<br>(0.1 to 0.9)           |
| Down's syndrome            | Mild intellectual disability and severe dementia due to Down syndrome                                                                                                              | 0.7<br>(0.6 to 0.8)             | 0.9<br>(0.8 to 1.1)             | -- | -- | 0.3<br>(0.2 to 0.5)           | 0.4<br>(0.3 to 0.6)           |

|                                 |                                                                                                                          |                                 |                                 |    |    |                              |                              |
|---------------------------------|--------------------------------------------------------------------------------------------------------------------------|---------------------------------|---------------------------------|----|----|------------------------------|------------------------------|
| Down's syndrome                 | Borderline intellectual disability and moderate dementia due to Down syndrome                                            | 1.0<br>(0.8 to 1.1)             | 1.3<br>(1.1 to 1.5)             | -- | -- | 0.4<br>(0.3 to 0.5)          | 0.5<br>(0.3 to 0.7)          |
| Down's syndrome                 | Borderline intellectual disability with congenital heart disease due to Down syndrome                                    | 92.2<br>(78.5 to 106.9)         | 98.1<br>(82.6 to 114.6)         | -- | -- | 1.0<br>(0.5 to 1.9)          | 1.1<br>(0.5 to 2.1)          |
| Down's syndrome                 | Borderline intellectual disability and severe dementia due to Down syndrome                                              | 0.3<br>(0.2 to 0.3)             | 0.4<br>(0.3 to 0.4)             | -- | -- | 0.1<br>(0.1 to 0.2)          | 0.2<br>(0.1 to 0.2)          |
| Down's syndrome                 | Mild intellectual disability and mild dementia due to Down syndrome                                                      | 10.9<br>(9.0 to 12.8)           | 14.4<br>(11.7 to 17.1)          | -- | -- | 1.2<br>(0.8 to 1.7)          | 1.6<br>(1.0 to 2.3)          |
| Down's syndrome                 | Severe intellectual disability with congenital heart disease due to Down syndrome                                        | 128.1<br>(109.1 to 149.7)       | 136.2<br>(115.2 to 160.2)       | -- | -- | 20.4<br>(13.2 to 29.8)       | 21.8<br>(14.0 to 32.4)       |
| Down's syndrome                 | Mild dementia due to Down syndrome                                                                                       | 1.9<br>(1.6 to 2.2)             | 2.5<br>(2.1 to 2.9)             | -- | -- | 0.1<br>(0.1 to 0.2)          | 0.2<br>(0.1 to 0.2)          |
| Down's syndrome                 | Congenital heart disease and moderate dementia due to Down syndrome                                                      | 0.3<br>(0.3 to 0.3)             | 0.4<br>(0.3 to 0.5)             | -- | -- | 0.1<br>(0.1 to 0.2)          | 0.1<br>(0.1 to 0.2)          |
| Down's syndrome                 | Mild intellectual disability due to Down syndrome                                                                        | 335.3<br>(289.5 to 388.8)       | 356.5<br>(304.5 to 415.2)       | -- | -- | 14.1<br>(8.4 to 21.3)        | 15.0<br>(9.0 to 22.9)        |
| Down's syndrome                 | Borderline intellectual disability, moderate dementia, and congenital heart disease due to Down syndrome                 | 0.7<br>(0.6 to 0.8)             | 0.9<br>(0.8 to 1.1)             | -- | -- | 0.3<br>(0.2 to 0.4)          | 0.4<br>(0.2 to 0.5)          |
| Down's syndrome                 | Moderate intellectual disability, moderate dementia, and congenital heart disease due to Down syndrome                   | 1.2<br>(0.9 to 1.6)             | 1.6<br>(1.0 to 2.0)             | -- | -- | 0.5<br>(0.3 to 0.8)          | 0.7<br>(0.4 to 1.0)          |
| Down's syndrome                 | Asymptomatic Down syndrome                                                                                               | 53.0<br>(45.4 to 61.4)          | 56.4<br>(47.9 to 66.0)          | -- | -- | < 0.05<br>(0.0 to < 0.05)    | < 0.05<br>(0.0 to < 0.05)    |
| Down's syndrome                 | Severe intellectual disability due to Down syndrome                                                                      | 176.5<br>(149.0 to 206.1)       | 187.7<br>(158.0 to 220.2)       | -- | -- | 28.0<br>(18.3 to 40.4)       | 29.8<br>(19.3 to 43.6)       |
| Down's syndrome                 | Profound intellectual disability, severe dementia, and congenital heart disease due to Down syndrome                     | 0.1<br>(0.1 to 0.2)             | 0.2<br>(0.1 to 0.2)             | -- | -- | 0.1<br>(< 0.05 to 0.1)       | 0.1<br>(0.1 to 0.1)          |
| Down's syndrome                 | Profound intellectual disability, mild dementia, and congenital heart disease due to Down syndrome                       | 2.3<br>(1.5 to 2.7)             | 3.0<br>(2.0 to 3.6)             | -- | -- | 0.6<br>(0.3 to 0.8)          | 0.8<br>(0.4 to 1.1)          |
| Down's syndrome                 | Severe dementia due to Down syndrome                                                                                     | 0.1<br>(0.1 to 0.1)             | 0.2<br>(0.1 to 0.2)             | -- | -- | 0.1<br>(< 0.05 to 0.1)       | 0.1<br>(< 0.05 to 0.1)       |
| Down's syndrome                 | Profound intellectual disability, moderate dementia, and congenital heart disease due to Down syndrome                   | 0.5<br>(0.3 to 0.6)             | 0.7<br>(0.4 to 0.8)             | -- | -- | 0.2<br>(0.1 to 0.3)          | 0.3<br>(0.2 to 0.4)          |
| Down's syndrome                 | Moderate intellectual disability and mild dementia due to Down syndrome                                                  | 7.9<br>(5.6 to 9.9)             | 9.8<br>(6.6 to 12.6)            | -- | -- | 1.3<br>(0.8 to 1.9)          | 1.6<br>(0.9 to 2.4)          |
| Down's syndrome                 | Isolated congenital heart disease due to Down syndrome                                                                   | 38.4<br>(32.7 to 44.9)          | 40.8<br>(34.6 to 47.9)          | -- | -- | 2.3<br>(0.9 to 4.1)          | 2.5<br>(1.0 to 4.4)          |
| Down's syndrome                 | Moderate intellectual disability due to Down syndrome                                                                    | 273.5<br>(234.2 to 316.5)       | 290.8<br>(247.0 to 339.0)       | -- | -- | 27.0<br>(17.5 to 39.0)       | 28.8<br>(18.5 to 41.6)       |
| Down's syndrome                 | Mild intellectual disability, mild dementia, and congenital heart disease due to Down syndrome                           | 7.9<br>(6.6 to 9.3)             | 10.4<br>(8.5 to 12.3)           | -- | -- | 0.9<br>(0.6 to 1.2)          | 1.1<br>(0.7 to 1.6)          |
| Down's syndrome                 | Profound intellectual disability due to Down syndrome                                                                    | 93.2<br>(79.8 to 109.8)         | 99.1<br>(84.3 to 118.2)         | -- | -- | 18.7<br>(11.9 to 27.1)       | 19.8<br>(12.5 to 29.0)       |
| Down's syndrome                 | Moderate intellectual disability and severe dementia due to Down syndrome                                                | 0.5<br>(0.4 to 0.6)             | 0.6<br>(0.4 to 0.8)             | -- | -- | 0.3<br>(0.2 to 0.4)          | 0.3<br>(0.2 to 0.5)          |
| Down's syndrome                 | Profound intellectual disability and severe dementia due to Down syndrome                                                | 0.2<br>(0.1 to 0.2)             | 0.3<br>(0.2 to 0.3)             | -- | -- | 0.1<br>(0.1 to 0.2)          | 0.1<br>(0.1 to 0.2)          |
| Turner syndrome                 | Congenital heart disease due to Turner syndrome                                                                          | 268.7<br>(223.2 to 317.6)       | 282.5<br>(236.3 to 331.9)       | -- | -- | 16.0<br>(6.3 to 28.0)        | 16.8<br>(6.7 to 29.5)        |
| Turner syndrome                 | Asymptomatic Turner syndrome                                                                                             | 913.9<br>(799.0 to 1,041.4)     | 960.6<br>(836.0 to 1,093.8)     | -- | -- | < 0.05<br>(0.0 to < 0.05)    | < 0.05<br>(0.0 to < 0.05)    |
| Turner syndrome                 | Primary infertility due to Turner syndrome                                                                               | 1,058.1<br>(923.2 to 1,208.4)   | 1,139.8<br>(987.8 to 1,307.9)   | -- | -- | 7.8<br>(3.3 to 15.3)         | 8.4<br>(3.7 to 16.6)         |
| Turner syndrome                 | Congenital heart disease with infertility due to Turner syndrome                                                         | 312.2<br>(262.8 to 373.0)       | 336.3<br>(280.9 to 404.8)       | -- | -- | 20.5<br>(9.0 to 35.0)        | 22.0<br>(9.7 to 37.3)        |
| Klinefelter syndrome            | Primary infertility due to Klinefelter syndrome                                                                          | 874.2<br>(740.6 to 1,030.8)     | 967.6<br>(817.4 to 1,144.8)     | -- | -- | 6.5<br>(2.8 to 13.2)         | 7.2<br>(3.1 to 14.6)         |
| Klinefelter syndrome            | Mild intellectual disability due to Klinefelter syndrome                                                                 | 28.0<br>(15.2 to 44.9)          | 29.3<br>(16.0 to 46.8)          | -- | -- | 1.2<br>(0.5 to 2.1)          | 1.2<br>(0.6 to 2.2)          |
| Klinefelter syndrome            | Asymptomatic Klinefelter syndrome                                                                                        | 1,390.4<br>(1,166.4 to 1,634.7) | 1,455.2<br>(1,220.3 to 1,719.1) | -- | -- | < 0.05<br>(0.0 to < 0.05)    | < 0.05<br>(0.0 to < 0.05)    |
| Klinefelter syndrome            | Mild intellectual disability with infertility due to Klinefelter syndrome                                                | 17.6<br>(9.6 to 28.6)           | 19.5<br>(10.6 to 31.7)          | -- | -- | 0.9<br>(0.4 to 1.6)          | 1.0<br>(0.4 to 1.8)          |
| Klinefelter syndrome            | Borderline intellectual disability due to Klinefelter syndrome                                                           | 327.6<br>(206.9 to 457.3)       | 342.9<br>(216.7 to 476.9)       | -- | -- | 3.5<br>(1.5 to 7.0)          | 3.6<br>(1.5 to 7.4)          |
| Klinefelter syndrome            | Borderline intellectual disability with infertility due to Klinefelter syndrome                                          | 206.1<br>(121.8 to 290.2)       | 228.1<br>(135.3 to 321.1)       | -- | -- | 3.7<br>(1.6 to 7.5)          | 4.1<br>(1.7 to 8.3)          |
| Other chromosomal abnormalities | Moderate intellectual disability and moderate dementia due to other chromosomal abnormalities                            | < 0.05<br>(< 0.05 to < 0.05)    | < 0.05<br>(< 0.05 to < 0.05)    | -- | -- | < 0.05<br>(< 0.05 to < 0.05) | < 0.05<br>(< 0.05 to < 0.05) |
| Other chromosomal abnormalities | Borderline intellectual disability due to other chromosomal abnormalities                                                | 270.0<br>(223.5 to 322.0)       | 279.6<br>(229.9 to 333.4)       | -- | -- | 2.9<br>(1.4 to 5.6)          | 3.0<br>(1.4 to 5.9)          |
| Other chromosomal abnormalities | Mild intellectual disability with congenital heart disease due to other chromosomal abnormalities                        | 517.2<br>(433.0 to 620.2)       | 535.5<br>(444.2 to 644.5)       | -- | -- | 21.7<br>(13.0 to 33.6)       | 22.4<br>(13.6 to 34.5)       |
| Other chromosomal abnormalities | Profound intellectual disability and severe dementia due to other chromosomal abnormalities                              | < 0.05<br>(< 0.05 to < 0.05)    | < 0.05<br>(< 0.05 to < 0.05)    | -- | -- | < 0.05<br>(< 0.05 to < 0.05) | < 0.05<br>(< 0.05 to < 0.05) |
| Other chromosomal abnormalities | Severe motor and cognitive impairment due to Edward Syndrome or Patau Syndrome                                           | 216.6<br>(162.0 to 289.0)       | 228.9<br>(170.4 to 305.5)       | -- | -- | 113.5<br>(69.5 to 167.1)     | 120.1<br>(74.4 to 174.1)     |
| Other chromosomal abnormalities | Profound intellectual disability, moderate dementia, and congenital heart disease due to other chromosomal abnormalities | < 0.05<br>(< 0.05 to < 0.05)    | < 0.05<br>(< 0.05 to < 0.05)    | -- | -- | < 0.05<br>(< 0.05 to < 0.05) | < 0.05<br>(< 0.05 to < 0.05) |
| Other chromosomal abnormalities | Borderline intellectual disability and moderate dementia due to other chromosomal abnormalities                          | < 0.05<br>(< 0.05 to < 0.05)    | < 0.05<br>(< 0.05 to < 0.05)    | -- | -- | < 0.05<br>(< 0.05 to < 0.05) | < 0.05<br>(< 0.05 to < 0.05) |
| Other chromosomal abnormalities | Mild intellectual disability, mild dementia, and congenital heart disease due to other chromosomal abnormalities         | < 0.05<br>(< 0.05 to < 0.05)    | < 0.05<br>(< 0.05 to < 0.05)    | -- | -- | < 0.05<br>(< 0.05 to < 0.05) | < 0.05<br>(< 0.05 to < 0.05) |
| Other chromosomal abnormalities | Borderline intellectual disability with congenital heart disease due to other chromosomal abnormalities                  | 195.9<br>(161.0 to 234.5)       | 202.8<br>(166.6 to 241.9)       | -- | -- | 2.1<br>(1.0 to 4.2)          | 2.2<br>(1.0 to 4.3)          |
| Other chromosomal abnormalities | Moderate intellectual disability and severe dementia due to other chromosomal abnormalities                              | < 0.05<br>(< 0.05 to < 0.05)    | < 0.05<br>(< 0.05 to < 0.05)    | -- | -- | < 0.05<br>(< 0.05 to < 0.05) | < 0.05<br>(< 0.05 to < 0.05) |



|                                               |                                                                                                                                                                              |                                 |                                 |    |    |                                |                                |
|-----------------------------------------------|------------------------------------------------------------------------------------------------------------------------------------------------------------------------------|---------------------------------|---------------------------------|----|----|--------------------------------|--------------------------------|
| Congenital musculoskeletal and limb anomalies | Disfigurement level 2 due to other congenital musculoskeletal anomalies                                                                                                      | 913.3<br>(746.4 to 1,088.3)     | 1,037.4<br>(837.6 to 1,251.9)   | -- | -- | 58.7<br>(38.2 to 86.5)         | 66.5<br>(42.7 to 99.4)         |
| Congenital musculoskeletal and limb anomalies | Disfigurement level 2 with pain and moderate motor impairment due to congenital limb deficiency                                                                              | 689.0<br>(534.7 to 868.3)       | 781.1<br>(606.6 to 989.0)       | -- | -- | 157.3<br>(99.9 to 233.3)       | 178.0<br>(112.4 to 267.4)      |
| Congenital musculoskeletal and limb anomalies | Disfigurement level 2 with pain due to other congenital musculoskeletal anomalies                                                                                            | 1,624.4<br>(1,412.2 to 1,847.7) | 1,845.1<br>(1,582.2 to 2,119.7) | -- | -- | 286.2<br>(190.1 to 404.1)      | 324.0<br>(214.5 to 455.3)      |
| Congenital musculoskeletal and limb anomalies | Disfigurement level 1 due to polydactyly and syndactyly                                                                                                                      | 671.3<br>(574.4 to 774.7)       | 667.2<br>(565.3 to 782.1)       | -- | -- | 7.3<br>(3.3 to 13.8)           | 7.3<br>(3.2 to 13.7)           |
| Congenital musculoskeletal and limb anomalies | Disfigurement level 2 with pain and moderate motor impairment due to other congenital musculoskeletal anomalies                                                              | 663.4<br>(520.8 to 813.9)       | 753.6<br>(587.0 to 927.4)       | -- | -- | 149.0<br>(96.4 to 217.4)       | 168.7<br>(109.1 to 245.5)      |
| Congenital musculoskeletal and limb anomalies | Disfigurement level 2 due to congenital limb deficiency                                                                                                                      | 948.6<br>(752.4 to 1,151.1)     | 1,075.3<br>(856.7 to 1,315.4)   | -- | -- | 61.5<br>(39.1 to 91.5)         | 69.6<br>(44.2 to 102.9)        |
| Congenital musculoskeletal and limb anomalies | Disfigurement level 2 and moderate motor impairment due to other congenital musculoskeletal anomalies                                                                        | 375.1<br>(263.9 to 495.0)       | 426.1<br>(299.7 to 563.3)       | -- | -- | 44.9<br>(26.2 to 70.7)         | 50.8<br>(29.6 to 79.7)         |
| Congenital musculoskeletal and limb anomalies | Disfigurement level 2 with pain and mild motor impairment due to congenital limb deficiency                                                                                  | 537.0<br>(402.7 to 692.9)       | 608.8<br>(452.4 to 789.4)       | -- | -- | 110.5<br>(61.4 to 158.2)       | 116.3<br>(68.3 to 180.9)       |
| Congenital musculoskeletal and limb anomalies | Disfigurement level 2 and moderate motor impairment due to congenital limb deficiency                                                                                        | 389.5<br>(277.6 to 518.8)       | 441.5<br>(315.1 to 591.9)       | -- | -- | 47.4<br>(26.7 to 74.8)         | 53.8<br>(30.6 to 85.6)         |
| Congenital musculoskeletal and limb anomalies | Disfigurement level 2 with pain due to congenital limb deficiency                                                                                                            | 1,687.3<br>(1,425.7 to 1,964.8) | 1,912.7<br>(1,606.5 to 2,244.0) | -- | -- | 300.8<br>(193.8 to 426.8)      | 340.7<br>(220.3 to 486.6)      |
| Urogenital congenital anomalies               | Atypical genitalia, recurrent urinary tract infections or other abdominal issues and impotence due to congenital genital anomalies                                           | 232.6<br>(129.4 to 371.3)       | 247.7<br>(137.5 to 395.3)       | -- | -- | 9.0<br>(3.6 to 17.9)           | 9.6<br>(3.9 to 19.0)           |
| Urogenital congenital anomalies               | Atypical genitalia and impotence due to congenital anomalies of the urinary tract                                                                                            | 148.7<br>(76.4 to 233.1)        | 146.9<br>(75.9 to 230.1)        | -- | -- | 4.2<br>(1.7 to 8.9)            | 4.1<br>(1.7 to 8.8)            |
| Urogenital congenital anomalies               | Atypical genitalia due to congenital anomalies of the urinary tract                                                                                                          | 514.9<br>(378.2 to 680.7)       | 509.0<br>(371.6 to 676.2)       | -- | -- | 5.6<br>(2.4 to 11.1)           | 5.6<br>(2.4 to 11.2)           |
| Urogenital congenital anomalies               | Incontinence due to congenital anomalies of the urinary tract                                                                                                                | 155.6<br>(86.2 to 251.9)        | 153.8<br>(84.8 to 249.6)        | -- | -- | 21.5<br>(10.0 to 38.5)         | 21.3<br>(10.1 to 38.3)         |
| Urogenital congenital anomalies               | Impotence due to congenital anomalies of the urinary tract                                                                                                                   | 136.5<br>(70.9 to 221.0)        | 135.0<br>(70.1 to 219.4)        | -- | -- | 2.4<br>(0.9 to 4.7)            | 2.3<br>(0.9 to 4.7)            |
| Urogenital congenital anomalies               | Atypical genitalia and primary infertility due to congenital genital anomalies                                                                                               | 136.4<br>(50.8 to 253.0)        | 145.2<br>(54.4 to 269.3)        | -- | -- | 2.5<br>(0.8 to 6.2)            | 2.7<br>(0.8 to 6.2)            |
| Urogenital congenital anomalies               | Atypical genital and recurrent urinary tract infections and other abdominal issues due to congenital genital anomalies                                                       | 777.9<br>(568.7 to 1,019.4)     | 828.3<br>(605.4 to 1,088.9)     | -- | -- | 16.8<br>(7.4 to 33.5)          | 17.9<br>(7.7 to 35.2)          |
| Urogenital congenital anomalies               | Atypical genitalia, infertility and impotence due to congenital genital anomalies                                                                                            | 40.8<br>(1.6 to 158.5)          | 43.5<br>(1.7 to 168.5)          | -- | -- | 1.2<br>( $< 0.05$ to 4.9)      | 1.3<br>( $< 0.05$ to 5.1)      |
| Urogenital congenital anomalies               | Atypical genitalia, incontinence and impotence due to congenital anomalies of the urinary tract                                                                              | 73.5<br>(29.1 to 143.8)         | 72.7<br>(28.7 to 142.1)         | -- | -- | 11.5<br>(4.3 to 24.0)          | 11.4<br>(4.3 to 24.1)          |
| Urogenital congenital anomalies               | Recurrent urinary tract infections or other abdominal issues due to congenital genital anomalies                                                                             | 210.6<br>(99.6 to 356.8)        | 224.2<br>(105.0 to 380.8)       | -- | -- | 2.3<br>(0.9 to 5.0)            | 2.5<br>(0.9 to 5.4)            |
| Urogenital congenital anomalies               | Asymptomatic congenital genital anomalies                                                                                                                                    | 731.9<br>(537.5 to 945.9)       | 779.4<br>(573.2 to 1,010.4)     | -- | -- | $< 0.05$<br>(0.0 to $< 0.05$ ) | $< 0.05$<br>(0.0 to $< 0.05$ ) |
| Urogenital congenital anomalies               | Atypical genitalia, incontinence, impotence, and recurrent urinary tract infections or other abdominal issues and impotence due to congenital anomalies of the urinary tract | 43.1<br>(9.3 to 103.7)          | 42.6<br>(9.2 to 101.6)          | -- | -- | 7.4<br>(1.5 to 19.2)           | 7.3<br>(1.5 to 19.0)           |
| Urogenital congenital anomalies               | Atypical genitalia and incontinence due to congenital anomalies of the urinary tract                                                                                         | 251.5<br>(158.7 to 361.9)       | 248.6<br>(155.9 to 358.9)       | -- | -- | 5.4<br>(2.3 to 10.8)           | 5.4<br>(2.3 to 10.5)           |
| Urogenital congenital anomalies               | Incontinence and impotence due to congenital anomalies of the urinary tract                                                                                                  | 39.6<br>(6.9 to 95.0)           | 39.1<br>(6.9 to 93.8)           | -- | -- | 6.1<br>(1.0 to 14.9)           | 6.0<br>(1.0 to 14.9)           |
| Urogenital congenital anomalies               | Infertility and impotence due to congenital genital anomalies                                                                                                                | 21.6<br>( $< 0.05$ to 111.6)    | 23.0<br>( $< 0.05$ to 119.1)    | -- | -- | 0.5<br>( $< 0.05$ to 3.0)      | 0.6<br>( $< 0.05$ to 3.2)      |
| Urogenital congenital anomalies               | Atypical genitalia, infertility, impotence, and recurrent urinary tract infections or other abdominal issues and impotence due to congenital genital anomalies               | 21.1<br>( $< 0.05$ to 117.7)    | 22.5<br>( $< 0.05$ to 125.4)    | -- | -- | 1.0<br>( $< 0.05$ to 5.7)      | 1.0<br>( $< 0.05$ to 6.1)      |
| Urogenital congenital anomalies               | Impotence and recurrent urinary tract infections or other abdominal issues due to congenital genital anomalies                                                               | 121.5<br>(39.7 to 257.8)        | 129.4<br>(42.1 to 274.1)        | -- | -- | 3.4<br>(0.9 to 7.9)            | 3.6<br>(1.0 to 8.4)            |
| Urogenital congenital anomalies               | Incontinence and recurrent urinary tract infections or other abdominal issues due to congenital anomalies of the urinary tract                                               | 78.1<br>(32.5 to 147.2)         | 77.2<br>(32.1 to 145.4)         | -- | -- | 11.5<br>(4.4 to 23.4)          | 11.4<br>(4.3 to 23.2)          |
| Urogenital congenital anomalies               | Atypical genitalia and impotence due to congenital genital anomalies                                                                                                         | 406.6<br>(261.7 to 594.4)       | 433.0<br>(278.5 to 630.7)       | -- | -- | 11.3<br>(5.1 to 21.7)          | 12.1<br>(5.4 to 23.1)          |
| Urogenital congenital anomalies               | Atypical genitalia, recurrent urinary tract infections or other abdominal issues and incontinence due to congenital anomalies of the urinary tract                           | 147.1<br>(79.1 to 235.1)        | 145.4<br>(78.5 to 234.1)        | -- | -- | 23.1<br>(10.8 to 40.7)         | 22.8<br>(10.8 to 40.3)         |
| Urogenital congenital anomalies               | Infertility, impotence, and recurrent urinary tract infections or other abdominal issues and impotence due to congenital genital anomalies                                   | 10.2<br>( $< 0.05$ to 85.3)     | 10.9<br>( $< 0.05$ to 90.7)     | -- | -- | 0.4<br>( $< 0.05$ to 3.1)      | 0.4<br>( $< 0.05$ to 3.4)      |
| Urogenital congenital anomalies               | Primary infertility and recurrent urinary tract infections or other abdominal issues due to congenital genital anomalies                                                     | 41.7<br>(1.5 to 145.1)          | 44.4<br>(1.6 to 155.1)          | -- | -- | 0.8<br>( $< 0.05$ to 2.9)      | 0.8<br>( $< 0.05$ to 3.1)      |
| Urogenital congenital anomalies               | Atypical genitalia, recurrent urinary tract infections or other abdominal issues and impotence due to congenital anomalies of the urinary tract                              | 39.2<br>(7.0 to 97.6)           | 38.7<br>(6.9 to 96.9)           | -- | -- | 1.5<br>(0.2 to 4.4)            | 1.5<br>(0.2 to 4.4)            |
| Urogenital congenital anomalies               | Atypical genital and recurrent urinary tract infections and other abdominal issues due to congenital anomalies of the urinary tract                                          | 293.0<br>(195.1 to 416.6)       | 289.7<br>(194.0 to 413.4)       | -- | -- | 6.4<br>(2.8 to 12.8)           | 6.3<br>(2.7 to 12.8)           |
| Urogenital congenital anomalies               | Impotence due to congenital genital anomalies                                                                                                                                | 72.4<br>(13.5 to 176.7)         | 77.1<br>(14.3 to 188.2)         | -- | -- | 1.3<br>(0.2 to 3.8)            | 1.3<br>(0.2 to 4.0)            |
| Urogenital congenital anomalies               | Atypical genitalia, recurrent urinary tract infections or other abdominal issues and infertility due to congenital genital anomalies                                         | 75.6<br>(12.8 to 187.9)         | 80.6<br>(13.6 to 199.8)         | -- | -- | 2.2<br>(0.3 to 6.2)            | 2.4<br>(0.3 to 6.6)            |
| Urogenital congenital anomalies               | Impotence and recurrent urinary tract infections or other abdominal issues due to congenital anomalies of the urinary tract                                                  | 148.9<br>(82.6 to 239.0)        | 147.2<br>(81.3 to 237.0)        | -- | -- | 4.2<br>(1.7 to 8.4)            | 4.1<br>(1.6 to 8.2)            |
| Urogenital congenital anomalies               | Incontinence, impotence, and recurrent urinary tract infections or other abdominal issues and impotence due to congenital anomalies of the urinary tract                     | 23.3<br>(1.0 to 79.8)           | 23.0<br>(1.0 to 78.1)           | -- | -- | 3.8<br>(0.2 to 13.5)           | 3.8<br>(0.1 to 13.4)           |
| Urogenital congenital anomalies               | Primary infertility due to congenital genital anomalies                                                                                                                      | 418.4<br>(259.2 to 615.2)       | 445.6<br>(275.8 to 650.2)       | -- | -- | 3.1<br>(1.2 to 6.7)            | 3.3<br>(1.3 to 7.1)            |
| Urogenital congenital anomalies               | Asymptomatic congenital anomalies of the urinary tract                                                                                                                       | 43.4<br>(8.7 to 100.5)          | 42.9<br>(8.6 to 100.0)          | -- | -- | $< 0.05$<br>(0.0 to $< 0.05$ ) | $< 0.05$<br>(0.0 to $< 0.05$ ) |
| Urogenital congenital anomalies               | Atypical genitalia due to congenital genital anomalies                                                                                                                       | 1,359.1<br>(1,101.9 to 1,651.2) | 1,447.3<br>(1,173.7 to 1,755.1) | -- | -- | 14.7<br>(6.8 to 28.1)          | 15.7<br>(7.2 to 29.8)          |
| Urogenital congenital anomalies               | Recurrent urinary tract infections or other abdominal issues due to congenital anomalies of the urinary tract                                                                | 79.2<br>(30.7 to 145.6)         | 78.3<br>(30.3 to 143.3)         | -- | -- | 0.9<br>(0.3 to 2.2)            | 0.9<br>(0.3 to 2.2)            |
| Digestive congenital anomalies                | Chronic abdominal pain and mild chronic respiratory problems due to congenital diaphragmatic hernia                                                                          | 22.9<br>(10.1 to 40.4)          | 25.3<br>(11.2 to 45.7)          | -- | -- | 0.7<br>(0.2 to 1.5)            | 0.8<br>(0.3 to 1.7)            |



|                                |                                                                                                                                                             |                                  |                                  |    |    |                             |                             |
|--------------------------------|-------------------------------------------------------------------------------------------------------------------------------------------------------------|----------------------------------|----------------------------------|----|----|-----------------------------|-----------------------------|
| Digestive congenital anomalies | Acid reflux, dysphagia, and/or constipation due to other congenital malformations of the digestive tract                                                    | 4,188.9<br>(3,730.4 to 4,687.1)  | 4,556.6<br>(4,016.4 to 5,141.4)  | -- | -- | 45.0<br>(21.9 to 83.9)      | 48.9<br>(23.5 to 91.3)      |
| Digestive congenital anomalies | Chronic abdominal pain and developmental delay due to congenital diaphragmatic hernia                                                                       | 32.9<br>(18.3 to 53.9)           | 36.4<br>(20.3 to 59.9)           | -- | -- | 1.7<br>(0.8 to 3.3)         | 1.9<br>(0.9 to 3.7)         |
| Digestive congenital anomalies | Dysphagia or acid reflux, chronic abdominal pain and chronic respiratory problems due to congenital atresia and/or stenosis of the digestive tract          | 117.8<br>(94.1 to 142.9)         | 124.7<br>(98.7 to 153.2)         | -- | -- | 16.6<br>(10.3 to 24.5)      | 17.6<br>(10.9 to 26.2)      |
| Digestive congenital anomalies | Constipation and chronic abdominal pain due to congenital malformations of the abdominal wall                                                               | 25.1<br>(10.9 to 44.5)           | 29.8<br>(13.0 to 52.9)           | -- | -- | 3.1<br>(1.3 to 6.1)         | 3.7<br>(1.5 to 7.2)         |
| Digestive congenital anomalies | Chronic respiratory problems and abdominal pain due to congenital atresia and/or stenosis of the digestive tract                                            | 16.8<br>(9.4 to 25.6)            | 17.7<br>(9.9 to 27.4)            | -- | -- | 0.5<br>(0.2 to 1.0)         | 0.5<br>(0.2 to 1.0)         |
| Digestive congenital anomalies | Constipation due to congenital malformations of the abdominal wall                                                                                          | 65.7<br>(42.2 to 91.7)           | 77.9<br>(50.3 to 109.3)          | -- | -- | 7.5<br>(4.2 to 12.3)        | 8.9<br>(5.0 to 14.5)        |
| Digestive congenital anomalies | Dysphagia or acid reflux due to congenital atresia and/or stenosis of the digestive tract                                                                   | 60.3<br>(45.7 to 77.1)           | 63.8<br>(48.3 to 81.6)           | -- | -- | 0.7<br>(0.3 to 1.3)         | 0.7<br>(0.3 to 1.4)         |
| Digestive congenital anomalies | Chronic abdominal pain due to congenital malformations of the abdominal wall                                                                                | 60.6<br>(39.0 to 86.2)           | 71.9<br>(46.7 to 102.4)          | -- | -- | 0.7<br>(0.3 to 1.5)         | 0.8<br>(0.3 to 1.7)         |
| Digestive congenital anomalies | Chronic respiratory problems and dysphagia or acid reflux due to congenital atresia and/or stenosis of the digestive tract                                  | 94.4<br>(75.1 to 117.1)          | 99.9<br>(79.4 to 126.0)          | -- | -- | 2.8<br>(1.4 to 5.2)         | 3.0<br>(1.5 to 5.5)         |
| Digestive congenital anomalies | Mild chronic respiratory problems and developmental delay due to congenital diaphragmatic hernia                                                            | 20.4<br>(8.8 to 37.9)            | 22.7<br>(9.8 to 41.9)            | -- | -- | 1.3<br>(0.5 to 2.7)         | 1.4<br>(0.5 to 3.0)         |
| Digestive congenital anomalies | Chronic abdominal pain due to congenital atresia and/or stenosis of the digestive tract                                                                     | 13.1<br>(6.7 to 21.4)            | 13.9<br>(7.1 to 22.8)            | -- | -- | 1.5<br>(0.7 to 2.7)         | 1.6<br>(0.7 to 2.9)         |
| Digestive congenital anomalies | Chronic abdominal pain, disfigurement and chronic respiratory problems due to congenital diaphragmatic hernia                                               | 8.0<br>(1.3 to 21.4)             | 8.8<br>(1.4 to 23.6)             | -- | -- | 0.4<br>(0.1 to 1.3)         | 0.5<br>(0.1 to 1.4)         |
| Digestive congenital anomalies | Chronic abdominal pain, disfigurement, developmental delay and chronic respiratory problems due to congenital diaphragmatic hernia                          | 2.2<br>(< 0.05 to 13.7)          | 2.4<br>(< 0.05 to 15.3)          | -- | -- | 0.2<br>(< 0.05 to 1.3)      | 0.2<br>(< 0.05 to 1.4)      |
| Digestive congenital anomalies | Asymptomatic congenital diaphragmatic hernia                                                                                                                | 387.6<br>(331.1 to 450.1)        | 429.4<br>(365.6 to 497.9)        | -- | -- | < 0.05<br>(0.0 to < 0.05)   | < 0.05<br>(0.0 to < 0.05)   |
| Digestive congenital anomalies | Disfigurement due to congenital diaphragmatic hernia                                                                                                        | 133.2<br>(101.9 to 169.3)        | 147.5<br>(112.9 to 189.2)        | -- | -- | 1.5<br>(0.7 to 2.8)         | 1.6<br>(0.7 to 3.1)         |
| Digestive congenital anomalies | Mild chronic respiratory problems and breathlessness due to congenital diaphragmatic hernia                                                                 | 75.2<br>(51.6 to 102.4)          | 83.3<br>(57.4 to 113.9)          | -- | -- | 1.5<br>(0.7 to 2.5)         | 1.6<br>(0.8 to 2.8)         |
| Digestive congenital anomalies | Disfigurement, chronic respiratory problems and developmental delay due to congenital diaphragmatic hernia                                                  | 7.5<br>(1.0 to 21.7)             | 8.3<br>(1.1 to 24.2)             | -- | -- | 0.6<br>(0.1 to 2.0)         | 0.7<br>(0.1 to 2.2)         |
| Digestive congenital anomalies | Asymptomatic other congenital malformations of the digestive tract                                                                                          | 397.0<br>(252.3 to 566.6)        | 431.9<br>(273.9 to 617.0)        | -- | -- | < 0.05<br>(0.0 to < 0.05)   | < 0.05<br>(0.0 to < 0.05)   |
| Digestive congenital anomalies | Disfigurement and mild chronic respiratory problems due to congenital diaphragmatic hernia                                                                  | 25.6<br>(12.0 to 44.2)           | 28.4<br>(13.1 to 48.7)           | -- | -- | 1.2<br>(0.4 to 2.3)         | 1.3<br>(0.5 to 2.6)         |
| Digestive congenital anomalies | Chronic abdominal pain due to congenital diaphragmatic hernia                                                                                               | 115.1<br>(85.5 to 150.0)         | 127.5<br>(95.2 to 166.4)         | -- | -- | 1.3<br>(0.6 to 2.4)         | 1.4<br>(0.6 to 2.6)         |
| Digestive congenital anomalies | Chronic abdominal pain and disfigurement due to congenital diaphragmatic hernia                                                                             | 39.5<br>(22.4 to 61.2)           | 43.7<br>(24.6 to 68.0)           | -- | -- | 1.5<br>(0.6 to 2.8)         | 1.6<br>(0.7 to 3.1)         |
| Digestive congenital anomalies | Chronic abdominal pain and concern about scars due to congenital malformations of the abdominal wall                                                        | 46.6<br>(27.5 to 71.6)           | 55.2<br>(32.6 to 84.7)           | -- | -- | 5.8<br>(3.0 to 10.2)        | 6.9<br>(3.6 to 12.1)        |
| Digestive congenital anomalies | Chronic respiratory problems including difficulty breaking and recurrent upper respiratory infections due to atresia and/or stenosis of the digestive tract | 13.3<br>(6.9 to 22.1)            | 14.1<br>(7.3 to 23.8)            | -- | -- | 0.3<br>(0.1 to 0.5)         | 0.3<br>(0.1 to 0.5)         |
| Digestive congenital anomalies | Chronic abdominal pain and/or nausea with acid reflux, dysphagia, and/or constipation due to other congenital malformations of the digestive tract          | 2,100.0<br>(1,803.2 to 2,441.0)  | 2,284.2<br>(1,948.7 to 2,660.9)  | -- | -- | 248.4<br>(162.7 to 352.9)   | 269.4<br>(176.8 to 383.3)   |
| Digestive congenital anomalies | Chronic abdominal pain, disfigurement and developmental delay due to congenital diaphragmatic hernia                                                        | 11.2<br>(3.0 to 26.3)            | 12.4<br>(3.3 to 29.3)            | -- | -- | 0.9<br>(0.2 to 2.1)         | 1.0<br>(0.2 to 2.4)         |
| Digestive congenital anomalies | Chronic abdominal pain, chronic respiratory problems and developmental delay due to congenital diaphragmatic hernia                                         | 6.3<br>(0.6 to 19.9)             | 7.0<br>(0.7 to 21.8)             | -- | -- | 0.3<br>(< 0.05 to 1.1)      | 0.4<br>(< 0.05 to 1.3)      |
| Digestive congenital anomalies | Constipation, chronic abdominal pain and concern about scars due to congenital malformations of the abdominal wall                                          | 19.3<br>(6.9 to 36.3)            | 22.9<br>(8.3 to 43.0)            | -- | -- | 4.0<br>(1.4 to 7.8)         | 4.7<br>(1.7 to 9.2)         |
| Digestive congenital anomalies | Disfigurement from scars following treatment for congenital malformations of the abdominal wall                                                             | 123.4<br>(91.9 to 159.6)         | 146.3<br>(108.9 to 188.5)        | -- | -- | 1.4<br>(0.6 to 2.7)         | 1.6<br>(0.7 to 3.2)         |
| Digestive congenital anomalies | Asymptomatic congenital malformations of the abdominal wall after treatment                                                                                 | 158.4<br>(122.1 to 197.0)        | 187.7<br>(145.0 to 234.9)        | -- | -- | < 0.05<br>(0.0 to < 0.05)   | < 0.05<br>(0.0 to < 0.05)   |
| Digestive congenital anomalies | Dysphagia or acid reflux and chronic abdominal pain due to congenital atresia and/or stenosis of the digestive tract                                        | 74.0<br>(56.8 to 93.0)           | 78.3<br>(59.6 to 99.0)           | -- | -- | 9.2<br>(5.5 to 13.3)        | 9.7<br>(5.9 to 14.2)        |
| Digestive congenital anomalies | Chronic abdominal pain and/or nausea due to other congenital malformations of the digestive tract                                                           | 202.0<br>(98.8 to 334.9)         | 219.7<br>(106.0 to 365.2)        | -- | -- | 23.2<br>(9.8 to 41.9)       | 25.2<br>(10.7 to 45.7)      |
| Digestive congenital anomalies | Asymptomatic congenital atresia and/or stenosis of the digestive tract                                                                                      | 5.6<br>(1.7 to 11.5)             | 5.9<br>(1.8 to 12.1)             | -- | -- | < 0.05<br>(0.0 to < 0.05)   | < 0.05<br>(0.0 to < 0.05)   |
| Digestive congenital anomalies | Constipation and concern about scars due to congenital malformations of the abdominal wall                                                                  | 51.5<br>(31.4 to 76.4)           | 61.0<br>(37.4 to 90.4)           | -- | -- | 1.1<br>(0.5 to 2.2)         | 1.3<br>(0.6 to 2.7)         |
| Digestive congenital anomalies | Developmental delay or mild intellectual disability due to congenital diaphragmatic hernia                                                                  | 109.7<br>(81.5 to 142.6)         | 121.6<br>(89.6 to 158.8)         | -- | -- | 4.7<br>(2.6 to 7.5)         | 5.2<br>(2.9 to 8.3)         |
| Digestive congenital anomalies | Disfigurement and developmental delay due to congenital diaphragmatic hernia                                                                                | 38.5<br>(22.1 to 61.3)           | 42.7<br>(24.4 to 67.3)           | -- | -- | 2.6<br>(1.2 to 4.9)         | 2.9<br>(1.4 to 5.5)         |
| Other congenital anomalies     | Moderate hearing loss with ringing due to other congenital anomalies                                                                                        | 1,325.6<br>(684.6 to 2,153.8)    | 1,500.8<br>(815.3 to 2,387.5)    | -- | -- | 93.7<br>(45.9 to 169.6)     | 105.8<br>(53.0 to 187.5)    |
| Other congenital anomalies     | Severe hearing loss due to other congenital anomalies                                                                                                       | 1,058.7<br>(477.7 to 1,910.4)    | 1,077.4<br>(483.7 to 1,944.6)    | -- | -- | 159.7<br>(63.6 to 310.4)    | 162.8<br>(65.3 to 313.9)    |
| Other congenital anomalies     | Profound hearing loss with ringing due to other congenital anomalies                                                                                        | 3,371.2<br>(2,024.1 to 5,408.0)  | 3,482.0<br>(2,096.6 to 5,573.7)  | -- | -- | 875.8<br>(453.0 to 1,508.3) | 903.4<br>(461.9 to 1,544.1) |
| Other congenital anomalies     | Moderately severe hearing loss with ringing due to other congenital anomalies                                                                               | 2,650.8<br>(1,678.6 to 4,160.3)  | 2,714.9<br>(1,735.8 to 4,267.0)  | -- | -- | 420.4<br>(226.6 to 701.7)   | 429.7<br>(231.9 to 706.5)   |
| Other congenital anomalies     | Mild hearing loss due to other congenital anomalies                                                                                                         | 8,507.1<br>(3,673.6 to 15,768.0) | 9,785.2<br>(4,165.0 to 18,086.0) | -- | -- | 79.2<br>(24.8 to 188.4)     | 90.9<br>(28.9 to 215.1)     |
| Other congenital anomalies     | Moderate hearing loss due to other congenital anomalies                                                                                                     | 3,062.5<br>(1,563.3 to 4,961.1)  | 3,463.8<br>(1,886.3 to 5,483.0)  | -- | -- | 78.3<br>(35.2 to 148.8)     | 88.5<br>(41.9 to 165.8)     |
| Other congenital anomalies     | Profound hearing loss due to other congenital anomalies                                                                                                     | 1,887.0<br>(1,141.9 to 3,093.3)  | 1,960.2<br>(1,155.1 to 3,160.0)  | -- | -- | 362.9<br>(191.4 to 649.1)   | 377.3<br>(193.3 to 671.9)   |
| Other congenital anomalies     | Complete hearing loss due to other congenital anomalies                                                                                                     | 999.3<br>(615.3 to 1,492.7)      | 982.2<br>(606.3 to 1,514.6)      | -- | -- | 203.5<br>(110.1 to 343.6)   | 200.9<br>(110.1 to 341.2)   |

|                                      |                                                                      |                                       |                                       |                                             |                                             |                                  |                                  |
|--------------------------------------|----------------------------------------------------------------------|---------------------------------------|---------------------------------------|---------------------------------------------|---------------------------------------------|----------------------------------|----------------------------------|
| Other congenital anomalies           | Mild hearing loss with ringing due to other congenital anomalies     | 2,251.7<br>(967.9 to 4,164.4)         | 2,589.7<br>(1,101.9 to 4,743.2)       | --                                          | --                                          | 46.8<br>(16.9 to 99.5)           | 53.8<br>(19.6 to 114.3)          |
| Other congenital anomalies           | Complete hearing loss with ringing due to other congenital anomalies | 1,199.6<br>(754.1 to 1,788.1)         | 1,175.2<br>(732.6 to 1,747.2)         | --                                          | --                                          | 355.9<br>(193.5 to 587.9)        | 348.7<br>(183.5 to 582.3)        |
| Other congenital anomalies           | Severe hearing loss with ringing due to other congenital anomalies   | 599.0<br>(265.6 to 1,068.2)           | 610.8<br>(278.4 to 1,108.4)           | --                                          | --                                          | 150.0<br>(60.1 to 290.8)         | 153.4<br>(61.1 to 293.8)         |
| Other congenital anomalies           | Other congenital birth defects                                       | --                                    | --                                    | --                                          | --                                          | 715.6<br>(501.4 to 937.6)        | 888.7<br>(628.7 to 1,163.4)      |
| Other congenital anomalies           | Moderately severe hearing loss due to other congenital anomalies     | 5,507.5<br>(3,444.2 to 8,619.5)       | 5,641.3<br>(3,565.5 to 8,706.5)       | --                                          | --                                          | 486.8<br>(262.8 to 816.4)        | 497.9<br>(266.9 to 831.7)        |
| Dermatitis                           | Mild contact dermatitis                                              | 32,501.8<br>(28,078.2 to 37,426.6)    | 37,276.1<br>(32,267.8 to 42,789.4)    | 89,871.5<br>(77,823.9 to 102,855.3)         | 103,898.3<br>(90,106.4 to 118,211.2)        | 827.7<br>(468.9 to 1,331.7)      | 947.6<br>(535.6 to 1,527.5)      |
| Dermatitis                           | Mild atopic dermatitis                                               | 167,477.6<br>(150,633.9 to 183,341.7) | 185,968.9<br>(166,835.8 to 204,263.2) | 23,198.2<br>(20,665.5 to 25,490.6)          | 26,120.8<br>(23,203.3 to 28,775.0)          | 4,326.2<br>(2,442.2 to 6,875.2)  | 4,799.7<br>(2,726.9 to 7,603.3)  |
| Dermatitis                           | Asymptomatic seborrhoeic dermatitis                                  | 11,532.2<br>(10,615.9 to 12,604.9)    | 13,244.2<br>(12,213.7 to 14,417.7)    | 80,196.8<br>(71,731.0 to 88,566.2)          | 90,249.1<br>(80,771.5 to 99,564.1)          | < 0.05<br>(0.0 to < 0.05)        | < 0.05<br>(0.0 to < 0.05)        |
| Dermatitis                           | Moderate contact dermatitis                                          | 4,633.9<br>(3,035.1 to 6,498.2)       | 5,314.7<br>(3,476.7 to 7,473.4)       | 12,774.9<br>(8,223.4 to 18,370.3)           | 14,769.0<br>(9,509.5 to 21,271.8)           | 811.8<br>(454.5 to 1,266.7)      | 928.6<br>(513.8 to 1,448.1)      |
| Dermatitis                           | Symptomatic seborrhoeic dermatitis                                   | 13,033.0<br>(12,008.4 to 14,143.5)    | 14,941.9<br>(13,751.9 to 16,183.1)    | 90,427.9<br>(81,999.7 to 99,913.8)          | 101,762.6<br>(92,192.5 to 112,308.5)        | 333.0<br>(189.9 to 539.9)        | 381.1<br>(216.6 to 616.2)        |
| Dermatitis                           | Asymptomatic contact dermatitis                                      | 28,486.3<br>(24,565.1 to 32,738.5)    | 32,670.6<br>(28,400.2 to 37,519.8)    | 78,931.4<br>(68,339.9 to 90,026.1)          | 91,251.9<br>(79,332.3 to 103,381.0)         | < 0.05<br>(0.0 to < 0.05)        | < 0.05<br>(0.0 to < 0.05)        |
| Dermatitis                           | Severe atopic dermatitis                                             | 2,805.6<br>(22.1 to 11,966.8)         | 3,115.9<br>(24.5 to 13,339.7)         | 379.2<br>(1.9 to 1,600.0)                   | 427.1<br>(2.1 to 1,796.2)                   | 1,511.2<br>(11.1 to 6,708.7)     | 1,676.2<br>(12.0 to 7,464.0)     |
| Dermatitis                           | Moderate atopic dermatitis                                           | 12,451.8<br>(3,113.1 to 26,102.7)     | 13,826.7<br>(3,471.2 to 28,975.4)     | 1,684.7<br>(395.9 to 3,473.1)               | 1,897.0<br>(445.7 to 3,911.0)               | 2,233.5<br>(511.7 to 5,125.3)    | 2,477.0<br>(569.8 to 5,692.3)    |
| Psoriasis                            | Moderate psoriasis                                                   | 6,316.4<br>(4,575.7 to 8,341.2)       | 7,703.0<br>(5,587.1 to 10,170.8)      | 794.1<br>(584.5 to 1,016.9)                 | 963.4<br>(710.3 to 1,235.1)                 | 1,106.3<br>(670.2 to 1,675.8)    | 1,346.1<br>(818.4 to 2,036.1)    |
| Psoriasis                            | Mild psoriasis                                                       | 42,416.5<br>(39,698.9 to 44,914.3)    | 51,727.7<br>(48,447.7 to 54,788.5)    | 5,352.2<br>(5,037.7 to 5,686.4)             | 6,493.2<br>(6,104.4 to 6,897.4)             | 1,080.3<br>(619.1 to 1,716.6)    | 1,315.5<br>(754.1 to 2,085.5)    |
| Psoriasis                            | Severe psoriasis                                                     | 4,677.5<br>(3,350.7 to 6,148.6)       | 5,704.2<br>(4,083.8 to 7,490.1)       | 588.0<br>(425.6 to 777.1)                   | 713.4<br>(516.8 to 943.2)                   | 2,452.2<br>(1,573.6 to 3,534.8)  | 2,981.9<br>(1,920.8 to 4,302.7)  |
| Cellulitis                           | Moderate cellulitis                                                  | 886.1<br>(726.2 to 1,061.9)           | 1,013.4<br>(831.9 to 1,213.1)         | 17,893.0<br>(14,944.1 to 21,367.0)          | 20,482.2<br>(17,079.0 to 24,483.9)          | 43.2<br>(26.5 to 65.6)           | 49.2<br>(30.3 to 75.2)           |
| Cellulitis                           | Mild cellulitis                                                      | 962.3<br>(760.6 to 1,174.4)           | 1,100.5<br>(873.9 to 1,340.5)         | 19,534.1<br>(15,790.2 to 23,354.4)          | 22,360.6<br>(18,016.3 to 26,718.6)          | 5.4<br>(2.1 to 11.5)             | 6.2<br>(2.4 to 13.3)             |
| Cellulitis                           | Severe cellulitis                                                    | 791.0<br>(632.6 to 964.7)             | 904.6<br>(721.6 to 1,102.9)           | 16,152.8<br>(12,730.5 to 19,789.6)          | 18,490.4<br>(14,558.6 to 22,642.0)          | 100.8<br>(63.6 to 149.4)         | 114.8<br>(72.8 to 170.6)         |
| Pyoderma                             | Impetigo                                                             | 4,776.0<br>(4,483.3 to 5,075.2)       | 5,736.3<br>(5,377.9 to 6,116.8)       | 87,019.2<br>(81,504.7 to 92,337.0)          | 104,530.8<br>(97,667.1 to 110,882.8)        | 27.3<br>(10.8 to 57.4)           | 32.8<br>(13.0 to 68.9)           |
| Pyoderma                             | Abscess and other bacterial skin diseases                            | 12,323.3<br>(12,035.9 to 12,636.3)    | 15,283.9<br>(14,916.2 to 15,679.7)    | 298,892.1<br>(290,095.3 to 308,898.4)       | 369,853.7<br>(358,588.9 to 382,210.0)       | 68.2<br>(27.5 to 143.4)          | 84.5<br>(34.2 to 177.4)          |
| Scabies                              | Scabies                                                              | 142,060.1<br>(123,104.5 to 165,509.8) | 146,784.6<br>(127,773.0 to 170,008.8) | 442,527.8<br>(382,259.9 to 517,585.7)       | 454,670.6<br>(392,690.4 to 529,184.4)       | 6,370.6<br>(2,034.7 to 5,849.4)  | 3,787.8<br>(2,103.6 to 6,029.0)  |
| Fungal skin diseases                 | Other fungal skin diseases                                           | 418,610.4<br>(373,740.9 to 463,882.3) | 500,640.4<br>(448,978.5 to 556,178.3) | 1,483,855.5<br>(1,316,166.1 to 1,671,368.9) | 1,793,878.4<br>(1,588,423.6 to 2,022,376.4) | 2,336.9<br>(930.5 to 4,930.5)    | 2,789.0<br>(1,107.3 to 5,865.2)  |
| Fungal skin diseases                 | Tinea capitis                                                        | 111,490.0<br>(89,416.9 to 139,892.7)  | 126,059.5<br>(101,477.8 to 158,585.4) | 275,986.1<br>(217,498.7 to 344,658.2)       | 304,864.9<br>(239,365.6 to 381,762.5)       | 636.5<br>(247.9 to 1,357.1)      | 719.8<br>(281.5 to 1,537.0)      |
| Viral skin diseases                  | Severe viral warts                                                   | 58,088.9<br>(46,269.8 to 70,863.2)    | 63,966.8<br>(51,048.2 to 77,759.5)    | 91,142.7<br>(73,372.7 to 109,472.2)         | 100,489.5<br>(80,880.2 to 120,638.0)        | 3,737.8<br>(2,341.6 to 5,445.2)  | 4,110.4<br>(2,569.2 to 6,005.9)  |
| Viral skin diseases                  | Mild molluscum contagiosum                                           | 23,051.5<br>(19,418.1 to 26,797.3)    | 24,386.5<br>(20,552.3 to 28,364.0)    | 22,473.6<br>(19,022.4 to 26,139.8)          | 23,746.6<br>(20,112.5 to 27,586.0)          | 132.0<br>(52.8 to 281.1)         | 139.7<br>(55.9 to 296.6)         |
| Viral skin diseases                  | Mild viral warts                                                     | 78,876.6<br>(66,700.6 to 92,005.1)    | 86,856.7<br>(73,418.3 to 101,217.3)   | 122,284.5<br>(102,187.6 to 141,619.2)       | 134,823.9<br>(113,782.7 to 155,943.0)       | 446.3<br>(176.9 to 927.6)        | 490.8<br>(194.8 to 1,020.1)      |
| Viral skin diseases                  | Severe molluscum contagiosum                                         | 16,977.4<br>(13,397.2 to 20,748.3)    | 17,960.7<br>(14,173.3 to 21,930.3)    | 16,746.4<br>(13,382.0 to 20,473.8)          | 17,694.9<br>(14,166.8 to 21,607.0)          | 1,109.7<br>(689.6 to 1,637.2)    | 1,174.3<br>(726.6 to 1,732.9)    |
| Acne vulgaris                        | Severe acne vulgaris                                                 | 13,546.1<br>(9,511.9 to 18,638.0)     | 14,242.1<br>(9,992.2 to 19,608.8)     | 9,599.8<br>(6,394.1 to 13,762.1)            | 10,031.2<br>(6,693.7 to 14,393.8)           | 5,184.5<br>(3,064.7 to 7,883.6)  | 5,448.0<br>(3,211.0 to 8,295.8)  |
| Acne vulgaris                        | Moderate acne vulgaris                                               | 68,131.8<br>(45,981.3 to 95,484.6)    | 71,637.6<br>(48,296.0 to 100,415.1)   | 47,471.8<br>(30,894.5 to 66,379.5)          | 49,605.8<br>(32,101.5 to 69,321.3)          | 4,434.2<br>(2,485.0 to 7,171.8)  | 4,660.9<br>(2,612.2 to 7,511.2)  |
| Acne vulgaris                        | Mild acne vulgaris                                                   | 503,035.5<br>(452,817.7 to 558,002.7) | 528,891.1<br>(477,879.4 to 584,131.4) | 354,266.3<br>(296,303.1 to 430,980.3)       | 370,185.2<br>(309,524.4 to 452,905.4)       | 5,448.8<br>(2,568.4 to 10,042.6) | 5,727.1<br>(2,711.6 to 10,541.5) |
| Alopecia areata                      | Severe alopecia areata                                               | 5,632.2<br>(4,414.4 to 6,834.3)       | 6,359.7<br>(4,982.2 to 7,733.9)       | 9,905.3<br>(7,920.5 to 11,954.6)            | 11,160.9<br>(8,919.1 to 13,465.6)           | 361.1<br>(228.8 to 537.3)        | 407.3<br>(259.4 to 609.6)        |
| Alopecia areata                      | Mild alopecia areata                                                 | 8,021.1<br>(6,825.4 to 9,226.3)       | 9,055.8<br>(7,698.5 to 10,404.5)      | 14,276.3<br>(12,207.1 to 16,345.5)          | 16,086.0<br>(13,747.2 to 18,445.9)          | 85.9<br>(40.9 to 160.7)          | 96.9<br>(46.2 to 181.7)          |
| Pruritus                             | Pruritus                                                             | 56,391.3<br>(50,120.8 to 63,167.1)    | 66,780.0<br>(59,262.3 to 74,868.4)    | 44,914.5<br>(40,507.6 to 50,267.5)          | 53,046.2<br>(47,751.0 to 59,503.3)          | 599.8<br>(278.6 to 1,087.9)      | 709.1<br>(329.7 to 1,298.7)      |
| Urticaria                            | Mild urticaria                                                       | 47,515.2<br>(41,049.2 to 54,818.0)    | 52,042.0<br>(45,048.8 to 59,841.8)    | 84,721.2<br>(73,341.5 to 99,090.1)          | 92,551.6<br>(80,211.2 to 107,584.6)         | 1,236.5<br>(692.0 to 1,948.3)    | 1,341.9<br>(757.2 to 2,120.2)    |
| Urticaria                            | Severe urticaria                                                     | 13,712.0<br>(10,388.2 to 17,462.5)    | 15,017.7<br>(11,390.9 to 19,124.0)    | 24,579.7<br>(18,282.6 to 31,302.1)          | 26,851.5<br>(19,989.4 to 34,126.5)          | 2,457.9<br>(1,459.5 to 3,678.0)  | 2,688.1<br>(1,592.0 to 4,016.0)  |
| Decubitus ulcer                      | Mild decubitus ulcer                                                 | 800.8<br>(687.4 to 928.5)             | 1,024.5<br>(873.9 to 1,191.1)         | 2,924.9<br>(2,508.6 to 3,357.3)             | 3,751.4<br>(3,204.3 to 4,323.9)             | 19.8<br>(11.4 to 31.0)           | 25.2<br>(14.5 to 39.9)           |
| Decubitus ulcer                      | Moderate decubitus ulcer                                             | 342.5<br>(262.8 to 435.8)             | 438.1<br>(334.8 to 556.2)             | 1,250.6<br>(963.4 to 1,550.8)               | 1,604.0<br>(1,234.9 to 1,991.9)             | 58.7<br>(37.0 to 88.7)           | 74.7<br>(46.7 to 111.7)          |
| Decubitus ulcer                      | Severe decubitus ulcer                                               | 292.0<br>(212.6 to 383.4)             | 373.6<br>(270.7 to 489.8)             | 1,065.6<br>(786.0 to 1,372.4)               | 1,366.6<br>(1,003.1 to 1,764.8)             | 149.6<br>(95.2 to 214.7)         | 189.9<br>(121.9 to 275.8)        |
| Other skin and subcutaneous diseases | Asymptomatic other skin and subcutaneous diseases                    | 204,603.6<br>(198,564.7 to 210,336.8) | 256,801.4<br>(249,310.3 to 263,819.9) | 240,826.5<br>(232,300.8 to 249,042.5)       | 305,593.1<br>(294,679.9 to 315,834.1)       | < 0.05<br>(0.0 to < 0.05)        | < 0.05<br>(0.0 to < 0.05)        |
| Other skin and subcutaneous diseases | Symptomatic other skin and subcutaneous diseases                     | 219,891.2<br>(212,806.9 to 226,520.4) | 275,988.8<br>(267,208.3 to 284,380.8) | 258,751.8<br>(250,211.1 to 267,430.7)       | 328,339.2<br>(317,517.1 to 339,161.1)       | 2,324.9<br>(1,120.7 to 4,256.7)  | 2,912.8<br>(1,409.4 to 5,325.1)  |
| Glaucoma                             | Severe vision impairment due to glaucoma                             | 378.0<br>(280.7 to 502.9)             | 479.0<br>(353.7 to 641.6)             | --                                          | --                                          | 61.1<br>(38.3 to 91.9)           | 77.5<br>(48.6 to 117.6)          |
| Glaucoma                             | Blindness due to glaucoma                                            | 1,390.8<br>(1,093.5 to 1,784.7)       | 1,929.2<br>(1,517.1 to 2,471.9)       | --                                          | --                                          | 228.4<br>(146.6 to 332.5)        | 316.9<br>(202.9 to 465.2)        |



|                                        |                                                                                       |                                             |                                             |                                             |                                             |                                  |                                  |
|----------------------------------------|---------------------------------------------------------------------------------------|---------------------------------------------|---------------------------------------------|---------------------------------------------|---------------------------------------------|----------------------------------|----------------------------------|
| Glaucoma                               | Moderate vision impairment due to glaucoma                                            | 1,773.5<br>(1,385.7 to 2,216.5)             | 2,353.0<br>(1,819.6 to 2,970.8)             | --                                          | --                                          | 50.2<br>(29.2 to 82.8)           | 66.8<br>(38.6 to 111.8)          |
| Cataract                               | Moderate vision impairment due to cataract                                            | 43,496.3<br>(36,955.7 to 50,517.4)          | 57,963.7<br>(48,642.6 to 67,794.5)          | --                                          | --                                          | 1,225.9<br>(762.5 to 1,927.1)    | 1,634.9<br>(1,013.9 to 2,584.9)  |
| Cataract                               | Severe vision impairment due to cataract                                              | 10,281.9<br>(8,391.3 to 12,233.4)           | 13,650.0<br>(11,067.8 to 16,261.4)          | --                                          | --                                          | 1,645.4<br>(1,082.6 to 2,319.7)  | 2,184.8<br>(1,441.8 to 3,088.0)  |
| Cataract                               | Blindness due to cataract                                                             | 9,417.7<br>(8,194.6 to 10,940.2)            | 12,014.8<br>(10,403.9 to 13,956.0)          | --                                          | --                                          | 1,546.9<br>(1,046.5 to 2,140.4)  | 1,969.2<br>(1,324.3 to 2,731.3)  |
| Macular degeneration                   | Blindness due to macular degeneration                                                 | 690.3<br>(527.8 to 868.5)                   | 964.7<br>(746.1 to 1,217.6)                 | --                                          | --                                          | 113.0<br>(72.9 to 161.3)         | 157.9<br>(101.5 to 226.8)        |
| Macular degeneration                   | Severe vision impairment due to macular degeneration                                  | 615.5<br>(456.2 to 809.2)                   | 778.2<br>(573.9 to 1,028.2)                 | --                                          | --                                          | 99.3<br>(62.6 to 145.6)          | 125.5<br>(78.5 to 186.0)         |
| Macular degeneration                   | Moderate vision impairment due to macular degeneration                                | 2,992.7<br>(2,346.3 to 3,788.0)             | 4,404.1<br>(3,449.2 to 5,536.9)             | --                                          | --                                          | 84.8<br>(50.9 to 136.0)          | 125.1<br>(74.4 to 203.3)         |
| Refraction and accommodation disorders | Severe vision impairment due to uncorrected refractive error                          | 11,982.3<br>(10,637.6 to 13,390.5)          | 13,728.0<br>(12,112.8 to 15,513.4)          | --                                          | --                                          | 2,002.3<br>(1,389.0 to 2,767.2)  | 2,293.1<br>(1,585.6 to 3,186.6)  |
| Refraction and accommodation disorders | Moderate vision impairment due to uncorrected refractive error                        | 145,110.2<br>(129,222.6 to 161,547.5)       | 161,812.5<br>(143,336.4 to 180,473.5)       | --                                          | --                                          | 4,274.9<br>(2,623.9 to 6,710.4)  | 4,762.5<br>(2,918.2 to 7,487.9)  |
| Refraction and accommodation disorders | Blindness due to uncorrected refractive error                                         | 6,059.4<br>(5,414.2 to 6,780.0)             | 6,581.2<br>(5,882.3 to 7,391.3)             | --                                          | --                                          | 1,040.2<br>(705.9 to 1,444.2)    | 1,128.8<br>(760.8 to 1,557.8)    |
| Refraction and accommodation disorders | Near vision impairment                                                                | 565,256.6<br>(545,508.3 to 585,259.1)       | 672,177.0<br>(648,254.1 to 697,017.0)       | --                                          | --                                          | 5,718.1<br>(2,692.7 to 10,550.5) | 6,788.1<br>(3,196.5 to 12,474.2) |
| Age-related and other hearing loss     | Profound hearing loss with ringing due to age-related and other hearing loss          | 3,731.9<br>(2,235.7 to 5,232.1)             | 4,308.9<br>(2,702.7 to 5,918.2)             | --                                          | --                                          | 945.0<br>(476.9 to 1,515.4)      | 1,083.4<br>(568.4 to 1,711.2)    |
| Age-related and other hearing loss     | Moderate hearing loss with ringing due to age-related and other hearing loss          | 61,044.4<br>(56,010.5 to 66,314.0)          | 75,485.2<br>(69,178.9 to 82,036.7)          | --                                          | --                                          | 4,154.1<br>(2,739.4 to 5,894.4)  | 5,127.8<br>(3,431.2 to 7,279.4)  |
| Age-related and other hearing loss     | Mild hearing loss due to age-related and other hearing loss                           | 555,337.5<br>(511,966.3 to 602,990.1)       | 707,843.3<br>(655,810.4 to 765,689.4)       | --                                          | --                                          | 5,062.6<br>(2,294.0 to 9,842.9)  | 6,448.7<br>(2,895.1 to 12,564.8) |
| Age-related and other hearing loss     | Severe hearing loss due to age-related and other hearing loss                         | 8,288.1<br>(6,808.0 to 9,838.9)             | 9,501.4<br>(7,894.3 to 11,267.6)            | --                                          | --                                          | 1,195.4<br>(761.5 to 1,739.4)    | 1,363.8<br>(866.7 to 1,957.3)    |
| Age-related and other hearing loss     | Severe hearing loss with ringing due to age-related and other hearing loss            | 4,688.8<br>(3,874.5 to 5,639.2)             | 5,391.8<br>(4,473.1 to 6,448.2)             | --                                          | --                                          | 1,098.0<br>(707.0 to 1,578.8)    | 1,255.0<br>(796.7 to 1,787.7)    |
| Age-related and other hearing loss     | Moderate hearing loss due to age-related and other hearing loss                       | 140,963.7<br>(130,645.3 to 152,356.6)       | 174,247.7<br>(161,150.1 to 188,304.3)       | --                                          | --                                          | 3,504.8<br>(2,067.3 to 5,489.3)  | 4,325.5<br>(2,532.0 to 6,802.3)  |
| Age-related and other hearing loss     | Complete hearing loss with ringing due to age-related and other hearing loss          | 4,728.3<br>(3,836.9 to 5,696.8)             | 5,320.6<br>(4,407.4 to 6,328.3)             | --                                          | --                                          | 1,361.2<br>(869.1 to 1,944.2)    | 1,526.2<br>(996.1 to 2,151.4)    |
| Age-related and other hearing loss     | Moderately severe hearing loss with ringing due to age-related and other hearing loss | 25,126.6<br>(21,844.8 to 28,449.3)          | 30,918.1<br>(26,949.5 to 34,994.3)          | --                                          | --                                          | 3,772.6<br>(2,562.0 to 5,127.6)  | 4,623.4<br>(3,145.4 to 6,229.1)  |
| Age-related and other hearing loss     | Moderately severe hearing loss due to age-related and other hearing loss              | 52,335.7<br>(45,841.9 to 59,148.0)          | 64,251.3<br>(56,351.9 to 72,491.5)          | --                                          | --                                          | 4,413.0<br>(3,007.6 to 5,063.5)  | 5,399.8<br>(3,653.6 to 7,459.8)  |
| Age-related and other hearing loss     | Complete hearing loss due to age-related and other hearing loss                       | 3,958.8<br>(3,213.0 to 4,779.5)             | 4,431.1<br>(3,586.9 to 5,329.5)             | --                                          | --                                          | 784.2<br>(489.5 to 1,137.6)      | 874.8<br>(535.5 to 1,259.0)      |
| Age-related and other hearing loss     | Profound hearing loss due to age-related and other hearing loss                       | 2,094.4<br>(1,265.8 to 2,952.9)             | 2,420.2<br>(1,474.4 to 3,326.6)             | --                                          | --                                          | 393.4<br>(197.4 to 637.1)        | 451.6<br>(241.8 to 725.8)        |
| Age-related and other hearing loss     | Mild hearing loss with ringing due to age-related and other hearing loss              | 147,103.0<br>(135,115.8 to 159,424.3)       | 187,555.3<br>(173,349.3 to 202,585.5)       | --                                          | --                                          | 54,074.2<br>(1,631.0 to 4,958.5) | 2,988.7<br>(2,108.5 to 6,340.8)  |
| Other vision loss                      | Severe vision impairment due to other vision loss                                     | 2,674.6<br>(2,168.4 to 3,256.0)             | 3,277.4<br>(2,633.3 to 4,025.0)             | --                                          | --                                          | 442.9<br>(293.6 to 625.2)        | 542.2<br>(356.5 to 768.8)        |
| Other vision loss                      | Blindness due to other vision loss                                                    | 5,239.1<br>(4,363.4 to 6,226.2)             | 6,743.1<br>(5,612.9 to 7,985.8)             | --                                          | --                                          | 890.0<br>(582.4 to 1,243.7)      | 1,141.7<br>(752.8 to 1,597.0)    |
| Other vision loss                      | Moderate vision impairment due to other vision loss                                   | 15,296.3<br>(13,019.6 to 17,835.8)          | 19,228.6<br>(16,187.2 to 22,515.7)          | --                                          | --                                          | 444.0<br>(271.7 to 710.0)        | 557.3<br>(341.0 to 902.0)        |
| Other sense organ diseases             | Moderate acute sense organ diseases                                                   | 1,499.4<br>(825.7 to 2,237.3)               | 1,715.1<br>(941.9 to 2,558.2)               | 76,348.5<br>(39,713.6 to 118,867.2)         | 87,472.5<br>(45,450.7 to 136,206.1)         | 16.1<br>(6.1 to 34.2)            | 18.4<br>(7.0 to 39.1)            |
| Other sense organ diseases             | Severe chronic sense organ diseases                                                   | 47,459.9<br>(35,147.3 to 59,684.5)          | 58,893.9<br>(43,706.2 to 74,237.8)          | 23,658.7<br>(17,680.7 to 29,690.8)          | 29,520.1<br>(22,082.8 to 37,038.3)          | 4,979.0<br>(3,006.0 to 7,619.5)  | 6,164.8<br>(3,714.3 to 9,418.4)  |
| Other sense organ diseases             | Moderate chronic sense organ diseases                                                 | 25,690.2<br>(14,169.8 to 38,616.9)          | 31,879.9<br>(17,640.7 to 47,964.5)          | 12,584.5<br>(6,518.5 to 19,407.9)           | 15,701.9<br>(8,125.0 to 24,262.9)           | 270.4<br>(103.9 to 579.2)        | 335.0<br>(128.5 to 719.2)        |
| Other sense organ diseases             | Asymptomatic chronic sense organ diseases                                             | 87,156.3<br>(77,661.9 to 98,039.7)          | 108,153.9<br>(96,323.5 to 121,469.5)        | 43,337.5<br>(38,383.0 to 48,379.4)          | 54,074.2<br>(48,024.6 to 60,523.6)          | < 0.05<br>(0.0 to < 0.05)        | < 0.05<br>(0.0 to < 0.05)        |
| Other sense organ diseases             | Asymptomatic acute sense organ diseases                                               | 5,086.3<br>(4,501.1 to 5,732.1)             | 5,817.6<br>(5,158.4 to 6,546.4)             | 262,907.5<br>(233,432.3 to 294,034.5)       | 301,201.9<br>(267,506.8 to 336,233.9)       | < 0.05<br>(0.0 to < 0.05)        | < 0.05<br>(0.0 to < 0.05)        |
| Other sense organ diseases             | Mild acute sense organ diseases                                                       | 3,704.0<br>(2,996.5 to 4,419.0)             | 4,236.6<br>(3,434.5 to 5,067.5)             | 192,055.1<br>(159,641.8 to 228,357.8)       | 220,033.7<br>(182,951.1 to 261,595.7)       | 20.8<br>(8.3 to 42.6)            | 23.8<br>(9.5 to 49.0)            |
| Caries of deciduous teeth              | Asymptomatic caries of deciduous teeth                                                | 441,289.6<br>(367,563.8 to 516,303.2)       | 473,458.0<br>(387,840.6 to 558,474.3)       | 1,586,636.4<br>(1,151,068.7 to 2,132,014.2) | 1,716,300.9<br>(1,229,843.5 to 2,327,542.4) | < 0.05<br>(0.0 to < 0.05)        | < 0.05<br>(0.0 to < 0.05)        |
| Caries of deciduous teeth              | Pain due to caries of deciduous teeth                                                 | 11,836.1<br>(9,551.6 to 14,363.9)           | 12,636.6<br>(10,047.0 to 15,432.9)          | 42,646.5<br>(30,327.4 to 58,595.8)          | 45,963.6<br>(31,863.0 to 63,976.1)          | 119.1<br>(52.5 to 231.1)         | 127.2<br>(55.9 to 249.1)         |
| Caries of permanent teeth              | Asymptomatic caries of permanent teeth                                                | 2,067,749.5<br>(1,935,040.0 to 2,197,910.7) | 2,262,473.1<br>(2,124,069.5 to 2,404,938.9) | 6,060,927.5<br>(5,597,619.1 to 6,567,544.9) | 6,745,370.5<br>(6,222,408.4 to 7,294,862.5) | < 0.05<br>(0.0 to < 0.05)        | < 0.05<br>(0.0 to < 0.05)        |
| Caries of permanent teeth              | Pain due to caries of permanent teeth                                                 | 159,317.3<br>(140,114.7 to 179,637.2)       | 173,376.6<br>(152,582.2 to 195,557.0)       | 468,392.5<br>(407,769.1 to 532,250.1)       | 518,621.5<br>(451,022.1 to 587,744.5)       | 1,571.3<br>(699.0 to 3,047.3)    | 1,707.6<br>(760.1 to 3,324.9)    |
| Periodontal disease                    | Chronic periodontal diseases                                                          | 596,506.9<br>(504,569.1 to 695,735.9)       | 750,847.0<br>(639,974.8 to 874,076.6)       | 72,364.2<br>(59,874.3 to 86,116.6)          | 89,840.5<br>(74,127.9 to 106,715.8)         | 3,893.0<br>(1,550.6 to 8,078.4)  | 4,898.0<br>(1,946.8 to 10,208.7) |
| Edentulism and severe tooth loss       | Asymptomatic edentulism and severe tooth loss                                         | 132,022.1<br>(115,327.7 to 148,124.3)       | 168,096.5<br>(146,241.4 to 188,915.8)       | 10,270.0<br>(8,734.0 to 11,860.7)           | 13,017.4<br>(11,015.6 to 15,153.5)          | < 0.05<br>(0.0 to < 0.05)        | < 0.05<br>(0.0 to < 0.05)        |
| Edentulism and severe tooth loss       | Difficulty eating due to edentulism and severe tooth loss                             | 105,436.4<br>(92,522.0 to 117,971.4)        | 134,246.0<br>(117,063.8 to 150,700.6)       | 8,202.0<br>(6,989.1 to 9,459.9)             | 10,396.2<br>(8,815.9 to 12,068.3)           | 6,553.4<br>(4,335.5 to 9,234.5)  | 8,338.4<br>(5,467.4 to 11,760.4) |
| Other oral disorders                   | Severe other oral disorders                                                           | 64,490.9<br>(55,681.0 to 73,794.5)          | 74,395.9<br>(64,254.3 to 84,888.2)          | --                                          | --                                          | 3,123.1<br>(1,950.9 to 4,604.7)  | 3,597.6<br>(2,246.6 to 5,311.2)  |
| Other oral disorders                   | Mild other oral disorders                                                             | 52,065.0<br>(43,002.0 to 60,731.0)          | 60,061.4<br>(49,574.3 to 70,169.2)          | --                                          | --                                          | 292.9<br>(115.7 to 608.7)        | 337.4<br>(133.1 to 702.7)        |

**SR Table 3: Global prevalence and years lived with disability (YLDs) for 2016, percentage change of YLD counts and percentage change of age-standardised YLD rates between 2006 and 2016 of anaemia by cause, all ages and both sexes combined**

| Cause                                                                         | Prevalence in thousands<br>(95% uncertainty interval)     | YLDs in thousands (95% uncertainty interval)     |                                                      |                                                                         |
|-------------------------------------------------------------------------------|-----------------------------------------------------------|--------------------------------------------------|------------------------------------------------------|-------------------------------------------------------------------------|
|                                                                               | 2016                                                      | 2016                                             | Percentage change in counts<br>between 2006 and 2016 | Percentage change in<br>age-standardised rates<br>between 2006 and 2016 |
| Iron-deficiency anaemia                                                       | 1,244,775.1<br>(1,205,789.8 to 1,284,420.6)               | 34,726.9<br>(22,959.4 to 49,578.8)               | 7.5%<br>(6.2% to 8.9%)                               | -1.8%<br>(-3.0% to -0.5%)                                               |
| HIV/AIDS resulting in other diseases                                          | 35,133.7<br>(33,015.6 to 37,885.9)                        | 3,569.9<br>(2,444.5 to 5,013.0)                  | -8.3%<br>(-25.6% to 12.2%)                           | -20.0%<br>(-35.3% to -1.1%)                                             |
| Thalassaemias trait                                                           | 142,750.2<br>(134,359.7 to 151,953.9)                     | 3,280.4<br>(2,156.8 to 4,823.8)                  | 10.9%<br>(8.0% to 13.9%)                             | -0.6%<br>(-3.1% to 2.0%)                                                |
| Chronic kidney disease due to diabetes mellitus                               | 48,377.6<br>(42,538.3 to 54,909.6)                        | 2,497.0<br>(1,821.0 to 3,268.5)                  | 36.5%<br>(33.2% to 39.7%)                            | 7.5%<br>(5.3% to 10.0%)                                                 |
| Gastritis and duodenitis                                                      | 66,272.2<br>(60,912.2 to 71,950.5)                        | 1,669.5<br>(1,092.3 to 2,415.1)                  | 38.6%<br>(34.5% to 42.9%)                            | 14.0%<br>(10.8% to 17.2%)                                               |
| Sickle cell trait                                                             | 60,556.2<br>(54,907.8 to 67,904.9)                        | 1,555.0<br>(1,014.1 to 2,282.9)                  | 16.8%<br>(14.8% to 18.8%)                            | 7.3%<br>(5.4% to 9.1%)                                                  |
| Other neglected tropical diseases                                             | 49,492.8<br>(47,573.7 to 51,780.9)                        | 1,420.7<br>(926.9 to 2,062.2)                    | 5.2%<br>(2.8% to 7.4%)                               | -1.4%<br>(-3.7% to 0.8%)                                                |
| Chronic kidney disease due to other causes                                    | 25,487.2<br>(21,939.7 to 29,026.5)                        | 1,381.6<br>(1,002.2 to 1,821.5)                  | 30.9%<br>(27.8% to 34.3%)                            | 6.2%<br>(3.8% to 8.9%)                                                  |
| Peptic ulcer disease                                                          | 51,460.3<br>(46,176.1 to 57,534.0)                        | 1,346.1<br>(877.8 to 2,002.4)                    | 39.0%<br>(34.4% to 43.7%)                            | 14.2%<br>(10.7% to 17.9%)                                               |
| Other hemoglobinopathies and hemolytic anaemias                               | 61,445.5<br>(59,501.4 to 63,452.6)                        | 1,318.2<br>(871.7 to 1,904.3)                    | 12.2%<br>(9.9% to 15.2%)                             | 0.8%<br>(-1.2% to 3.4%)                                                 |
| Endocrine, metabolic, blood, and immune disorders                             | 49,285.6<br>(47,765.4 to 50,931.5)                        | 1,233.2<br>(814.9 to 1,770.7)                    | 8.4%<br>(6.7% to 10.1%)                              | -1.3%<br>(-2.7% to 0.3%)                                                |
| Chronic kidney disease due to hypertension                                    | 24,033.2<br>(20,625.7 to 27,469.3)                        | 1,202.7<br>(864.0 to 1,569.8)                    | 38.5%<br>(34.8% to 42.4%)                            | 6.1%<br>(3.3% to 9.0%)                                                  |
| Other infectious diseases                                                     | 44,421.5<br>(42,781.1 to 46,292.5)                        | 1,169.0<br>(764.8 to 1,692.0)                    | 11.8%<br>(9.6% to 14.2%)                             | 4.3%<br>(2.2% to 6.7%)                                                  |
| Chronic kidney disease due to glomerulonephritis                              | 19,041.0<br>(16,476.9 to 21,825.7)                        | 1,106.0<br>(811.9 to 1,459.4)                    | 23.5%<br>(20.1% to 27.0%)                            | 1.9%<br>(-1.1% to 4.8%)                                                 |
| Malaria                                                                       | 26,691.4<br>(23,190.2 to 30,341.1)                        | 1,057.1<br>(675.8 to 1,573.8)                    | -23.0%<br>(-28.8% to -17.4%)                         | -28.2%<br>(-33.8% to -23.0%)                                            |
| Uterine fibroids                                                              | 26,516.0<br>(24,820.5 to 28,336.6)                        | 980.7<br>(627.4 to 1,484.5)                      | 16.9%<br>(15.5% to 18.3%)                            | -0.0%<br>(-1.2% to 1.2%)                                                |
| Hookworm disease                                                              | 27,370.5<br>(25,583.5 to 29,444.7)                        | 578.1<br>(374.4 to 847.6)                        | 1.5%<br>(-6.9% to 11.2%)                             | -7.3%<br>(-15.0% to 1.4%)                                               |
| Other gynecological diseases                                                  | 19,284.4<br>(18,624.1 to 20,000.7)                        | 533.6<br>(359.7 to 769.5)                        | 11.8%<br>(9.7% to 14.1%)                             | 2.0%<br>(0.3% to 4.0%)                                                  |
| Drug-susceptible HIV/AIDS - Tuberculosis                                      | 1,064.5<br>(752.5 to 1,449.9)                             | 409.8<br>(246.5 to 625.1)                        | -20.9%<br>(-24.7% to -17.4%)                         | -30.0%<br>(-33.4% to -26.9%)                                            |
| Schistosomiasis                                                               | 13,367.3<br>(12,502.4 to 14,318.9)                        | 283.3<br>(189.8 to 408.1)                        | -24.4%<br>(-27.0% to -22.2%)                         | -33.2%<br>(-35.4% to -31.1%)                                            |
| Sickle cell disorders                                                         | 3,671.7<br>(3,373.2 to 4,220.8)                           | 246.6<br>(168.4 to 357.2)                        | 18.2%<br>(13.5% to 22.9%)                            | 12.1%<br>(7.7% to 16.6%)                                                |
| G6PD deficiency                                                               | 685.8<br>(645.0 to 730.7)                                 | 24.9<br>(16.7 to 35.2)                           | 13.8%<br>(10.7% to 17.0%)                            | 3.1%<br>(0.3% to 6.0%)                                                  |
| Maternal haemorrhage                                                          | 1,189.7<br>(962.7 to 1,469.9)                             | 24.7<br>(15.2 to 37.4)                           | 4.8%<br>(-1.5% to 12.5%)                             | -4.1%<br>(-9.8% to 2.7%)                                                |
| Thalassaemias                                                                 | 318.2<br>(272.9 to 355.5)                                 | 21.8<br>(14.0 to 32.2)                           | -4.5%<br>(-8.9% to 0.0%)                             | -8.7%<br>(-12.9% to -4.4%)                                              |
| Multidrug-resistant HIV/AIDS - Tuberculosis without extensive drug resistance | 27.5<br>(18.2 to 40.7)                                    | 11.2<br>(6.5 to 18.5)                            | -27.9%<br>(-39.8% to -15.2%)                         | -36.3%<br>(-46.8% to -25.2%)                                            |
| G6PD trait                                                                    | 8.0<br>(7.6 to 8.6)                                       | 0.6<br>(0.4 to 0.8)                              | 17.6%<br>(14.9% to 20.7%)                            | 4.9%<br>(2.6% to 7.5%)                                                  |
| Extensively drug-resistant HIV/AIDS - Tuberculosis                            | 0.3<br>(0.2 to 0.5)                                       | 0.1<br>(0.1 to 0.2)                              | 244.6%<br>(187.5% to 310.0%)                         | 205.0%<br>(155.4% to 263.0%)                                            |
| <b>All causes</b>                                                             | <b>2,042,727.5</b><br><b>(1,979,002.8 to 2,110,036.9)</b> | <b>61,648.6</b><br><b>(41,483.4 to 86,424.1)</b> | <b>9.2%</b><br><b>(6.4% to 11.2%)</b>                | <b>-2.2%</b><br><b>(-4.8% to -0.3%)</b>                                 |

**SR Table 4: Global prevalence and years lived with disability (YLDs) for 2016, percentage change of YLD counts and percentage change of age-standardised YLD rates between 2006 and 2016 of developmental intellectual disability by cause, all ages and both sexes combined**

| Cause                                                    | Prevalence in thousands<br>(95% uncertainty interval) | YLDs in thousands (95% uncertainty interval)     |                                                      |                                                                         |
|----------------------------------------------------------|-------------------------------------------------------|--------------------------------------------------|------------------------------------------------------|-------------------------------------------------------------------------|
|                                                          | 2016                                                  | 2016                                             | Percentage change in counts<br>between 2006 and 2016 | Percentage change in<br>age-standardised rates<br>between 2006 and 2016 |
| Idiopathic developmental intellectual disability         | 114,797.1<br>(69,505.6 to 161,352.7)                  | 4,611.0<br>(2,201.5 to 7,932.1)                  | 2.5%<br>(-0.9% to 4.6%)                              | -6.9%<br>(-10.0% to -4.9%)                                              |
| Autism                                                   | 15,217.5<br>(12,821.1 to 18,264.6)                    | 4,032.4<br>(2,587.1 to 5,998.1)                  | 11.3%<br>(10.2% to 12.4%)                            | -0.1%<br>(-1.0% to 0.9%)                                                |
| Neonatal preterm birth complications                     | 17,607.7<br>(12,984.2 to 22,527.1)                    | 3,217.2<br>(2,051.1 to 4,616.1)                  | 13.0%<br>(-2.1% to 29.6%)                            | 3.0%<br>(-10.7% to 18.2%)                                               |
| Neonatal sepsis and other neonatal infections            | 6,454.3<br>(2,523.0 to 14,864.5)                      | 2,640.6<br>(881.0 to 6,761.8)                    | 30.0%<br>(22.9% to 40.0%)                            | 19.7%<br>(13.3% to 28.6%)                                               |
| Iodine deficiency                                        | 2,513.9<br>(1,764.9 to 3,103.2)                       | 808.0<br>(483.8 to 1,156.5)                      | -1.7%<br>(-6.0% to 2.2%)                             | -9.5%<br>(-13.6% to -5.8%)                                              |
| Congenital heart anomalies                               | 13,088.9<br>(11,645.3 to 14,563.9)                    | 746.0<br>(322.1 to 1,278.0)                      | 8.6%<br>(6.4% to 10.5%)                              | -0.9%<br>(-2.9% to 0.8%)                                                |
| Encephalitis                                             | 6,440.5<br>(3,497.3 to 10,677.3)                      | 652.9<br>(414.6 to 906.0)                        | 1.5%<br>(-5.8% to 7.4%)                              | -11.6%<br>(-17.9% to -6.6%)                                             |
| Other chromosomal abnormalities                          | 4,417.8<br>(3,852.5 to 5,098.8)                       | 649.9<br>(454.9 to 872.5)                        | 2.4%<br>(0.1% to 4.6%)                               | -1.0%<br>(-3.4% to 1.2%)                                                |
| Neonatal encephalopathy due to birth asphyxia and trauma | 4,355.4<br>(2,627.9 to 6,786.6)                       | 628.1<br>(235.4 to 1,430.5)                      | 28.1%<br>(15.3% to 43.9%)                            | 14.9%<br>(3.8% to 27.7%)                                                |
| Neural tube defects                                      | 1,589.0<br>(1,193.3 to 2,098.1)                       | 554.1<br>(349.4 to 823.8)                        | 14.1%<br>(11.6% to 16.7%)                            | 2.8%<br>(0.6% to 5.2%)                                                  |
| Malaria                                                  | 700.7<br>(554.5 to 841.1)                             | 320.1<br>(212.1 to 428.4)                        | 17.6%<br>(9.4% to 25.0%)                             | 9.0%<br>(1.3% to 15.8%)                                                 |
| Hemolytic disease and other neonatal jaundice            | 601.7<br>(432.7 to 740.5)                             | 269.1<br>(164.8 to 378.1)                        | 14.8%<br>(7.4% to 20.3%)                             | 3.8%<br>(-3.1% to 8.9%)                                                 |
| Pneumococcal meningitis                                  | 2,269.1<br>(1,785.4 to 2,847.5)                       | 246.1<br>(156.8 to 352.6)                        | 6.9%<br>(0.0% to 13.1%)                              | -3.8%<br>(-10.1% to 1.9%)                                               |
| Down's syndrome                                          | 1,928.3<br>(1,687.3 to 2,198.1)                       | 181.5<br>(121.7 to 254.6)                        | 8.3%<br>(5.9% to 10.7%)                              | -1.1%<br>(-3.4% to 1.1%)                                                |
| Other meningitis                                         | 1,607.7<br>(984.2 to 2,263.0)                         | 152.5<br>(92.6 to 222.0)                         | 25.5%<br>(16.9% to 33.5%)                            | 12.3%<br>(4.6% to 19.4%)                                                |
| H influenzae type B meningitis                           | 811.2<br>(577.3 to 1,088.4)                           | 100.4<br>(62.0 to 144.4)                         | -14.2%<br>(-20.8% to -8.0%)                          | -22.0%<br>(-28.3% to -16.5%)                                            |
| Meningococcal infection                                  | 573.9<br>(344.5 to 854.1)                             | 62.1<br>(38.1 to 93.5)                           | 14.3%<br>(7.2% to 27.4%)                             | 3.1%<br>(-3.6% to 17.3%)                                                |
| Alcohol use disorders                                    | 352.4<br>(322.5 to 377.5)                             | 20.8<br>(13.5 to 30.1)                           | 9.8%<br>(6.1% to 12.3%)                              | -3.5%<br>(-6.8% to -1.2%)                                               |
| Digestive congenital anomalies                           | 203.8<br>(160.1 to 254.2)                             | 10.4<br>(5.9 to 16.6)                            | 10.8%<br>(8.3% to 13.2%)                             | -4.5%<br>(-6.7% to -2.3%)                                               |
| Klinefelter syndrome                                     | 619.8<br>(451.1 to 793.9)                             | 10.0<br>(5.0 to 18.0)                            | 7.7%<br>(4.0% to 11.5%)                              | 0.4%<br>(-3.0% to 3.9%)                                                 |
| Zika virus disease                                       | 16.6<br>(11.1 to 33.5)                                | 9.8<br>(5.8 to 17.7)                             | --                                                   | --                                                                      |
| Tetanus                                                  | 75.5<br>(47.8 to 102.7)                               | 2.3<br>(1.2 to 4.0)                              | 15.7%<br>(3.7% to 30.1%)                             | 4.7%<br>(-5.8% to 17.4%)                                                |
| <b>All causes</b>                                        | <b>196,242.7</b><br><b>(150,264.0 to 242,144.5)</b>   | <b>19,925.3</b><br><b>(14,584.2 to 26,433.7)</b> | <b>10.7%</b><br><b>(8.3% to 14.2%)</b>               | <b>0.6%</b><br><b>(-1.6% to 3.9%)</b>                                   |

SR Table 5: Global prevalence and years lived with disability (YLDs) for 2016, percentage change of YLD counts and percentage change of age-standardised YLD rates between 2006 and 2016 of epilepsy by cause, all ages and both sexes combined

| Cause                                                    | Prevalence in thousands<br>(95% uncertainty interval) | YLDs in thousands (95% uncertainty interval)     |                                                      |                                                                         |
|----------------------------------------------------------|-------------------------------------------------------|--------------------------------------------------|------------------------------------------------------|-------------------------------------------------------------------------|
|                                                          | 2016                                                  | 2016                                             | Percentage change in counts<br>between 2006 and 2016 | Percentage change in<br>age-standardised rates<br>between 2006 and 2016 |
| Epilepsy                                                 | 23,962.4<br>(20,401.8 to 27,737.0)                    | 7,546.8<br>(5,111.2 to 10,458.3)                 | 8.8%<br>(-2.1% to 22.0%)                             | -2.6%<br>(-12.3% to 9.2%)                                               |
| Neonatal preterm birth complications                     | 8,646.3<br>(6,173.2 to 11,386.0)                      | 3,297.6<br>(1,989.0 to 4,850.0)                  | 13.2%<br>(-4.3% to 32.1%)                            | 3.8%<br>(-12.2% to 21.1%)                                               |
| Neonatal sepsis and other neonatal infections            | 5,582.1<br>(1,957.3 to 13,536.3)                      | 2,522.1<br>(814.8 to 6,470.3)                    | 29.9%<br>(22.8% to 40.2%)                            | 19.8%<br>(13.3% to 29.0%)                                               |
| Neonatal encephalopathy due to birth asphyxia and trauma | 1,705.0<br>(562.4 to 3,937.0)                         | 646.5<br>(199.3 to 1,600.2)                      | 31.6%<br>(18.5% to 54.4%)                            | 18.5%<br>(7.4% to 37.2%)                                                |
| Cysticercosis                                            | 2,675.5<br>(2,231.9 to 3,148.7)                       | 420.9<br>(274.1 to 580.8)                        | -4.6%<br>(-11.0% to 1.4%)                            | -19.9%<br>(-25.3% to -15.1%)                                            |
| Malaria                                                  | 868.0<br>(726.3 to 1,015.3)                           | 361.6<br>(239.3 to 485.0)                        | 17.1%<br>(10.1% to 23.4%)                            | 9.6%<br>(3.0% to 15.5%)                                                 |
| Hemolytic disease and other neonatal jaundice            | 792.1<br>(635.6 to 936.9)                             | 314.3<br>(203.8 to 437.3)                        | 14.7%<br>(8.1% to 20.0%)                             | 4.2%<br>(-1.8% to 9.0%)                                                 |
| Encephalitis                                             | 871.7<br>(775.2 to 981.5)                             | 140.0<br>(95.2 to 187.3)                         | 1.9%<br>(-4.2% to 7.6%)                              | -9.9%<br>(-14.7% to -5.2%)                                              |
| Pneumococcal meningitis                                  | 262.4<br>(224.4 to 305.8)                             | 46.7<br>(31.5 to 65.4)                           | 3.4%<br>(-3.3% to 10.1%)                             | -4.9%<br>(-10.9% to 1.4%)                                               |
| Food-borne trematodiases                                 | 249.1<br>(75.4 to 504.4)                              | 37.3<br>(10.5 to 81.7)                           | -13.8%<br>(-25.7% to -1.7%)                          | -23.3%<br>(-33.9% to -12.6%)                                            |
| Other meningitis                                         | 131.3<br>(111.5 to 152.5)                             | 23.5<br>(15.6 to 33.1)                           | 17.1%<br>(10.3% to 23.6%)                            | 6.9%<br>(0.6% to 12.7%)                                                 |
| H influenzae type B meningitis                           | 122.8<br>(102.3 to 148.5)                             | 22.6<br>(14.9 to 32.4)                           | -0.7%<br>(-9.8% to 8.5%)                             | -6.7%<br>(-15.2% to 1.7%)                                               |
| Meningococcal infection                                  | 46.6<br>(38.3 to 57.3)                                | 8.6<br>(5.5 to 12.3)                             | 14.1%<br>(8.8% to 18.6%)                             | 5.7%<br>(0.8% to 10.0%)                                                 |
| Zika virus disease                                       | 2.4<br>(1.6 to 4.5)                                   | 1.6<br>(1.0 to 2.8)                              | --                                                   | --                                                                      |
| Cystic echinococcosis                                    | 8.1<br>(2.0 to 18.3)                                  | 1.6<br>(0.4 to 3.7)                              | -41.3%<br>(-62.4% to -3.1%)                          | -48.3%<br>(-66.9% to -16.1%)                                            |
| Tetanus                                                  | <0.05<br>(<0.05 to <0.05)                             | <0.05<br>(<0.05 to <0.05)                        | -21.1%<br>(-30.6% to -11.5%)                         | -21.7%<br>(-31.2% to -12.3%)                                            |
| <b>All causes</b>                                        | <b>45,925.8</b><br><b>(39,941.5 to 54,564.0)</b>      | <b>15,391.7</b><br><b>(11,593.7 to 20,379.3)</b> | <b>13.3%</b><br><b>(5.9% to 20.9%)</b>               | <b>2.3%</b><br><b>(-4.7% to 9.2%)</b>                                   |

SR Table 6: Global prevalence and years lived with disability (YLDs) for 2016, percentage change of YLD counts and percentage change of age-standardised YLD rates between 2006 and 2016 of Guillain-Barré syndrome by cause, all ages and both sexes combined

| Cause                        | Prevalence in thousands<br>(95% uncertainty interval) | YLDs in thousands (95% uncertainty interval) |                                                      |                                                                         |
|------------------------------|-------------------------------------------------------|----------------------------------------------|------------------------------------------------------|-------------------------------------------------------------------------|
|                              | 2016                                                  | 2016                                         | Percentage change in counts<br>between 2006 and 2016 | Percentage change in<br>age-standardised rates<br>between 2006 and 2016 |
| Other neurological disorders | 24.0<br>(15.6 to 33.2)                                | 7.1<br>(3.8 to 11.5)                         | 16.8%<br>(14.1% to 19.6%)                            | 0.5%<br>(-0.4% to 1.2%)                                                 |
| Upper respiratory infections | 20.6<br>(14.9 to 27.7)                                | 6.1<br>(3.6 to 9.5)                          | 16.6%<br>(14.1% to 19.4%)                            | 0.5%<br>(-0.4% to 1.2%)                                                 |
| Lower respiratory infections | 7.6<br>(4.1 to 11.7)                                  | 2.3<br>(1.1 to 3.9)                          | 16.6%<br>(14.1% to 19.4%)                            | 0.5%<br>(-0.4% to 1.2%)                                                 |
| Diarrhoeal diseases          | 7.0<br>(4.7 to 9.7)                                   | 2.1<br>(1.2 to 3.2)                          | 16.6%<br>(14.0% to 19.4%)                            | 0.5%<br>(-0.4% to 1.2%)                                                 |
| Other infectious diseases    | 4.5<br>(3.0 to 6.6)                                   | 1.3<br>(0.8 to 2.2)                          | 16.6%<br>(14.0% to 19.4%)                            | 0.5%<br>(-0.4% to 1.2%)                                                 |
| Zika virus disease           | 0.9<br>(0.7 to 1.3)                                   | 0.3<br>(0.2 to 0.5)                          | --                                                   | --                                                                      |
| <b>All causes</b>            | <b>64.7</b><br><b>(51.6 to 81.6)</b>                  | <b>19.2</b><br><b>(11.8 to 28.4)</b>         | <b>18.4%</b><br><b>(15.6% to 21.4%)</b>              | <b>1.9%</b><br><b>(1.2% to 2.7%)</b>                                    |

**SR Table 7: Global prevalence and years lived with disability (YLDs) for 2016, percentage change of YLD counts and percentage change of age-standardised YLD rates between 2006 and 2016 of hearing loss by cause, all ages and both sexes combined**

| Cause                              | Prevalence in thousands<br>(95% uncertainty interval)     | YLDs in thousands (95% uncertainty interval)     |                                                      |                                                                         |
|------------------------------------|-----------------------------------------------------------|--------------------------------------------------|------------------------------------------------------|-------------------------------------------------------------------------|
|                                    | 2016                                                      | 2016                                             | Percentage change in counts<br>between 2006 and 2016 | Percentage change in<br>age-standardised rates<br>between 2006 and 2016 |
| Age-related and other hearing loss | 1,271,674.9<br>(1,210,237.4 to 1,337,731.0)               | 36,287.5<br>(25,341.8 to 50,893.6)               | 22.3%<br>(20.4% to 24.0%)                            | -1.7%<br>(-2.9% to -0.6%)                                               |
| Other congenital anomalies         | 34,983.5<br>(24,583.5 to 49,401.8)                        | 3,413.0<br>(2,101.2 to 5,262.8)                  | 3.0%<br>(0.5% to 5.9%)                               | -7.3%<br>(-9.6% to -4.7%)                                               |
| Otitis media                       | 81,517.9<br>(72,281.5 to 91,965.5)                        | 2,815.5<br>(1,774.2 to 4,133.9)                  | 1.3%<br>(-1.3% to 4.1%)                              | -6.6%<br>(-9.0% to -4.2%)                                               |
| Pneumococcal meningitis            | 983.3<br>(504.4 to 1,332.8)                               | 47.5<br>(8.2 to 76.7)                            | -17.0%<br>(-22.0% to -10.6%)                         | -25.7%<br>(-30.1% to -20.6%)                                            |
| Other meningitis                   | 760.6<br>(392.6 to 1,004.4)                               | 37.3<br>(6.4 to 59.3)                            | 80.7%<br>(69.1% to 93.3%)                            | 60.3%<br>(49.7% to 71.2%)                                               |
| Meningococcal infection            | 289.4<br>(140.7 to 403.4)                                 | 14.7<br>(2.5 to 24.1)                            | 9.3%<br>(2.5% to 17.3%)                              | -1.6%<br>(-7.7% to 5.5%)                                                |
| H influenzae type B meningitis     | 272.4<br>(134.5 to 400.0)                                 | 14.3<br>(2.3 to 24.9)                            | -46.1%<br>(-51.9% to -39.7%)                         | -51.1%<br>(-56.7% to -45.3%)                                            |
| <b>All causes</b>                  | <b>1,390,482.0</b><br><b>(1,329,902.3 to 1,455,762.3)</b> | <b>42,629.8</b><br><b>(30,019.2 to 59,264.5)</b> | <b>18.8%</b><br><b>(17.0% to 20.4%)</b>              | <b>-2.5%</b><br><b>(-3.6% to -1.5%)</b>                                 |

**SR Table 8: Global prevalence and years lived with disability (YLDs) for 2016, percentage change of YLD counts and percentage change of age-standardised YLD rates between 2006 and 2016 of heart failure by cause, all ages and both sexes combined**

| Cause                                               | Prevalence in thousands<br>(95% uncertainty interval) | YLDs in thousands (95% uncertainty interval)  |                                                      |                                                                         |
|-----------------------------------------------------|-------------------------------------------------------|-----------------------------------------------|------------------------------------------------------|-------------------------------------------------------------------------|
|                                                     | 2016                                                  | 2016                                          | Percentage change in counts<br>between 2006 and 2016 | Percentage change in<br>age-standardised rates<br>between 2006 and 2016 |
| Chronic obstructive pulmonary disease               | 8,583.2<br>(7,135.0 to 10,259.9)                      | 3,275.5<br>(2,572.0 to 3,907.8)               | 31.7%<br>(29.3% to 33.9%)                            | 0.2%<br>(-1.6% to 2.0%)                                                 |
| Ischaemic heart disease                             | 26,192.3<br>(23,036.1 to 29,655.3)                    | 2,086.1<br>(1,446.1 to 2,826.8)               | 30.1%<br>(28.1% to 32.2%)                            | -1.6%<br>(-3.0% to -0.1%)                                               |
| Hypertensive heart disease                          | 17,190.0<br>(14,948.1 to 19,774.1)                    | 1,380.1<br>(958.6 to 1,894.5)                 | 31.6%<br>(29.7% to 33.5%)                            | 0.4%<br>(-0.8% to 1.6%)                                                 |
| Other cardiomyopathy                                | 4,005.3<br>(3,533.6 to 4,524.6)                       | 329.1<br>(226.3 to 462.2)                     | 20.6%<br>(18.3% to 22.9%)                            | -4.5%<br>(-6.1% to -2.9%)                                               |
| Other cardiovascular and circulatory diseases       | 1,992.0<br>(1,706.5 to 2,341.3)                       | 159.2<br>(106.4 to 225.9)                     | 25.6%<br>(22.5% to 28.8%)                            | -5.9%<br>(-7.9% to -4.0%)                                               |
| Rheumatic heart disease                             | 1,669.0<br>(1,475.3 to 1,881.0)                       | 137.1<br>(93.1 to 188.3)                      | 31.8%<br>(28.5% to 35.1%)                            | 3.2%<br>(0.6% to 5.6%)                                                  |
| Myocarditis                                         | 1,189.5<br>(1,033.8 to 1,364.8)                       | 104.3<br>(69.1 to 148.5)                      | 11.6%<br>(9.2% to 13.8%)                             | -1.8%<br>(-3.6% to -0.0%)                                               |
| Alcoholic cardiomyopathy                            | 1,165.3<br>(994.2 to 1,358.9)                         | 96.9<br>(65.5 to 138.0)                       | 20.6%<br>(15.6% to 25.7%)                            | -5.4%<br>(-9.0% to -1.7%)                                               |
| Interstitial lung disease and pulmonary sarcoidosis | 219.7<br>(165.8 to 271.0)                             | 91.6<br>(61.2 to 129.3)                       | 30.4%<br>(27.7% to 33.2%)                            | -0.8%<br>(-2.8% to 1.3%)                                                |
| Endocarditis                                        | 415.3<br>(361.6 to 479.7)                             | 34.8<br>(23.6 to 49.1)                        | 22.8%<br>(20.1% to 25.8%)                            | -4.6%<br>(-6.7% to -2.5%)                                               |
| Endocrine, metabolic, blood, and immune disorders   | 282.2<br>(244.8 to 327.6)                             | 23.2<br>(15.6 to 32.8)                        | 23.8%<br>(20.3% to 27.6%)                            | -6.6%<br>(-9.2% to -4.0%)                                               |
| Congenital heart anomalies                          | 153.1<br>(131.3 to 176.3)                             | 21.5<br>(13.8 to 30.0)                        | 2.7%<br>(1.4% to 4.1%)                               | -3.8%<br>(-5.0% to -2.6%)                                               |
| Chagas disease                                      | 328.5<br>(214.7 to 474.0)                             | 16.2<br>(8.8 to 26.8)                         | 12.8%<br>(8.8% to 16.7%)                             | -10.1%<br>(-13.3% to -7.2%)                                             |
| Other hemoglobinopathies and hemolytic anaemias     | 179.3<br>(153.9 to 209.9)                             | 15.2<br>(10.2 to 21.8)                        | 27.7%<br>(24.0% to 31.3%)                            | -3.2%<br>(-5.9% to -0.6%)                                               |
| Silicosis                                           | 8.3<br>(7.1 to 9.5)                                   | 3.7<br>(2.6 to 5.1)                           | 19.9%<br>(15.9% to 24.1%)                            | -8.2%<br>(-11.3% to -5.1%)                                              |
| Coal workers pneumoconiosis                         | 4.1<br>(3.6 to 4.8)                                   | 1.8<br>(1.3 to 2.5)                           | 22.8%<br>(17.5% to 28.2%)                            | -5.5%<br>(-9.7% to -1.2%)                                               |
| Asbestosis                                          | 3.8<br>(3.4 to 4.3)                                   | 1.7<br>(1.2 to 2.3)                           | 24.1%<br>(21.9% to 26.2%)                            | -7.2%<br>(-8.8% to -5.6%)                                               |
| Zika virus disease                                  | 2.8<br>(1.9 to 5.4)                                   | 1.7<br>(1.0 to 2.8)                           | --                                                   | --                                                                      |
| Other pneumoconiosis                                | 2.6<br>(2.3 to 3.1)                                   | 1.2<br>(0.8 to 1.7)                           | 29.1%<br>(26.7% to 31.3%)                            | -1.9%<br>(-3.3% to -0.4%)                                               |
| G6PD deficiency                                     | 12.4<br>(10.2 to 14.8)                                | 1.1<br>(0.7 to 1.6)                           | 34.3%<br>(31.9% to 36.6%)                            | 3.4%<br>(1.6% to 5.2%)                                                  |
| Iron-deficiency anaemia                             | 5.7<br>(4.9 to 6.7)                                   | 0.5<br>(0.3 to 0.7)                           | 32.9%<br>(28.7% to 37.4%)                            | 3.3%<br>(-0.1% to 6.9%)                                                 |
| Thalassemias                                        | 4.2<br>(3.3 to 5.2)                                   | 0.4<br>(0.2 to 0.6)                           | -2.5%<br>(-5.4% to 0.2%)                             | -4.6%<br>(-7.1% to -2.3%)                                               |
| Iodine deficiency                                   | 0.2<br>(0.1 to 0.2)                                   | 0.1<br>(0.1 to 0.1)                           | 35.4%<br>(31.6% to 38.8%)                            | 7.3%<br>(4.2% to 10.0%)                                                 |
| <b>All causes</b>                                   | <b>63,608.8</b><br><b>(56,943.7 to 71,388.3)</b>      | <b>7,783.1</b><br><b>(5,857.3 to 9,788.5)</b> | <b>30.0%</b><br><b>(28.6% to 31.3%)</b>              | <b>-0.7%</b><br><b>(-1.6% to 0.2%)</b>                                  |



SR Table 9: Global prevalence and years lived with disability (YLDs) for 2016, percentage change of YLD counts and percentage change of age-standardised YLD rates between 2006 and 2016 of infertility by cause, all ages and both sexes combined

| Cause                                                  | Prevalence in thousands<br>(95% uncertainty interval) | YLDs in thousands (95% uncertainty interval) |                                                      |                                                                         |
|--------------------------------------------------------|-------------------------------------------------------|----------------------------------------------|------------------------------------------------------|-------------------------------------------------------------------------|
|                                                        | 2016                                                  | 2016                                         | Percentage change in counts<br>between 2006 and 2016 | Percentage change in<br>age-standardised rates<br>between 2006 and 2016 |
| Other sexually transmitted diseases                    | 33,717.4<br>(29,034.7 to 37,480.0)                    | 184.8<br>(73.8 to 372.6)                     | 11.1%<br>(8.5% to 13.6%)                             | -0.5%<br>(-2.6% to 1.6%)                                                |
| Female infertility                                     | 31,476.8<br>(19,471.6 to 49,303.7)                    | 179.8<br>(66.2 to 399.0)                     | 38.5%<br>(29.4% to 49.5%)                            | 25.3%<br>(17.7% to 34.8%)                                               |
| Male infertility                                       | 28,044.3<br>(22,702.7 to 35,076.5)                    | 165.0<br>(66.1 to 327.1)                     | 19.3%<br>(15.7% to 22.6%)                            | 7.9%<br>(4.9% to 10.6%)                                                 |
| Chlamydial infection                                   | 12,871.5<br>(11,105.2 to 14,383.6)                    | 71.6<br>(29.0 to 142.5)                      | 16.2%<br>(13.3% to 18.8%)                            | 4.4%<br>(1.9% to 6.7%)                                                  |
| Turner syndrome                                        | 1,476.1<br>(1,286.3 to 1,680.4)                       | 30.5<br>(15.6 to 49.2)                       | 7.7%<br>(3.5% to 12.1%)                              | -0.2%<br>(-4.1% to 3.8%)                                                |
| Gonococcal infection                                   | 4,722.3<br>(4,127.3 to 5,306.4)                       | 26.1<br>(10.5 to 52.1)                       | 15.2%<br>(11.9% to 18.0%)                            | 3.2%<br>(0.3% to 5.8%)                                                  |
| Polycystic ovarian syndrome                            | 1,996.4<br>(1,368.6 to 2,801.9)                       | 19.4<br>(8.1 to 39.5)                        | 14.6%<br>(10.8% to 18.4%)                            | 4.1%<br>(0.6% to 7.6%)                                                  |
| Endometriosis                                          | 162.4<br>(120.6 to 218.9)                             | 16.7<br>(10.1 to 26.1)                       | 5.9%<br>(2.0% to 10.0%)                              | -3.6%<br>(-7.3% to 0.2%)                                                |
| Klinefelter syndrome                                   | 1,215.2<br>(1,055.8 to 1,400.7)                       | 12.3<br>(5.7 to 23.5)                        | 10.8%<br>(7.7% to 14.0%)                             | -0.7%<br>(-3.5% to 2.2%)                                                |
| Urogenital congenital anomalies                        | 712.6<br>(474.6 to 968.2)                             | 9.1<br>(3.6 to 19.3)                         | 6.5%<br>(4.9% to 8.0%)                               | -2.2%<br>(-3.6% to -0.9%)                                               |
| Maternal sepsis and other pregnancy related infections | 812.2<br>(717.8 to 910.7)                             | 4.1<br>(1.6 to 8.8)                          | 14.1%<br>(10.4% to 17.8%)                            | -0.8%<br>(-3.9% to 2.4%)                                                |
| <b>All causes</b>                                      | <b>117,207.3</b><br><b>(94,951.8 to 145,047.5)</b>    | <b>719.3</b><br><b>(309.5 to 1,399.9)</b>    | <b>19.3%</b><br><b>(16.0% to 22.3%)</b>              | <b>7.6%</b><br><b>(4.9% to 10.0%)</b>                                   |

SR Table 10: Global prevalence and years lived with disability (YLDs) for 2016, percentage change of YLD counts and percentage change of age-standardised YLD rates between 2006 and 2016 of pelvic inflammatory disease by cause, all ages and both sexes combined

| Cause                               | Prevalence in thousands<br>(95% uncertainty interval) | YLDs in thousands (95% uncertainty interval) |                                                      |                                                                         |
|-------------------------------------|-------------------------------------------------------|----------------------------------------------|------------------------------------------------------|-------------------------------------------------------------------------|
|                                     | 2016                                                  | 2016                                         | Percentage change in counts<br>between 2006 and 2016 | Percentage change in<br>age-standardised rates<br>between 2006 and 2016 |
| Other sexually transmitted diseases | 2,871.1<br>(2,463.0 to 3,323.8)                       | 372.8<br>(254.0 to 517.4)                    | 7.0%<br>(4.3% to 9.8%)                               | -6.5%<br>(-8.7% to -4.3%)                                               |
| Chlamydial infection                | 918.2<br>(787.6 to 1,071.9)                           | 120.9<br>(81.2 to 171.1)                     | 9.8%<br>(6.7% to 13.1%)                              | -3.2%<br>(-6.0% to -0.2%)                                               |
| Gonococcal infection                | 310.1<br>(259.0 to 370.2)                             | 41.4<br>(27.2 to 58.6)                       | 9.0%<br>(4.9% to 13.1%)                              | -3.1%<br>(-6.7% to 0.4%)                                                |
| <b>All causes</b>                   | <b>4,099.4</b><br><b>(3,532.9 to 4,740.1)</b>         | <b>535.1</b><br><b>(360.2 to 742.6)</b>      | <b>7.8%</b><br><b>(5.5% to 10.1%)</b>                | <b>-5.5%</b><br><b>(-7.5% to -3.6%)</b>                                 |

SR Table 11: Global prevalence and years lived with disability (YLDs) for 2016, percentage change of YLD counts and percentage change of age-standardised YLD rates between 2006 and 2016 of vision loss by cause, all ages and both sexes combined

| Cause                                                    | Prevalence in thousands<br>(95% uncertainty interval)   | YLDs in thousands (95% uncertainty interval)     |                                                      |                                                                         |
|----------------------------------------------------------|---------------------------------------------------------|--------------------------------------------------|------------------------------------------------------|-------------------------------------------------------------------------|
|                                                          | 2016                                                    | 2016                                             | Percentage change in counts<br>between 2006 and 2016 | Percentage change in<br>age-standardised rates<br>between 2006 and 2016 |
| Refraction and accommodation disorders                   | 854,298.7<br>(822,109.1 to 885,544.8)                   | 14,972.5<br>(9,340.6 to 23,361.5)                | 14.9%<br>(13.7% to 15.9%)                            | -4.9%<br>(-5.8% to -4.3%)                                               |
| Near vision impairment                                   | 672,177.0<br>(648,254.1 to 697,017.0)                   | 6,788.1<br>(3,196.5 to 12,474.2)                 | 18.7%<br>(18.0% to 19.4%)                            | -3.3%<br>(-3.8% to -2.8%)                                               |
| Cataract                                                 | 83,628.5<br>(73,800.3 to 93,904.7)                      | 5,789.0<br>(4,134.6 to 7,915.3)                  | 31.0%<br>(29.4% to 32.6%)                            | 0.0%<br>(-1.2% to 1.1%)                                                 |
| Other vision loss                                        | 29,249.1<br>(25,873.3 to 32,927.4)                      | 2,241.2<br>(1,578.3 to 3,016.4)                  | 26.1%<br>(23.9% to 28.1%)                            | 0.7%<br>(-0.8% to 2.0%)                                                 |
| Neonatal sepsis and other neonatal infections            | 4,000.8<br>(1,411.3 to 10,076.4)                        | 2,015.3<br>(670.9 to 5,234.2)                    | 30.3%<br>(22.7% to 40.5%)                            | 20.4%<br>(13.7% to 29.8%)                                               |
| Neonatal preterm birth complications                     | 10,182.7<br>(8,150.1 to 12,370.1)                       | 1,620.0<br>(1,167.7 to 2,175.2)                  | 17.2%<br>(7.9% to 27.2%)                             | 5.7%<br>(-2.8% to 14.8%)                                                |
| Glaucoma                                                 | 4,761.2<br>(3,973.2 to 5,573.1)                         | 461.1<br>(311.4 to 642.1)                        | 35.7%<br>(33.7% to 38.0%)                            | 2.1%<br>(0.7% to 3.6%)                                                  |
| Macular degeneration                                     | 6,146.9<br>(5,110.6 to 7,401.3)                         | 408.6<br>(277.9 to 555.6)                        | 37.5%<br>(34.7% to 40.4%)                            | 2.7%<br>(0.7% to 4.7%)                                                  |
| Vitamin A deficiency                                     | 5,252.8<br>(4,013.2 to 6,842.2)                         | 252.4<br>(158.8 to 388.3)                        | 12.0%<br>(8.7% to 15.5%)                             | 2.6%<br>(-0.3% to 5.6%)                                                 |
| Trachoma                                                 | 3,337.6<br>(2,439.3 to 4,491.7)                         | 245.2<br>(162.4 to 353.6)                        | -0.5%<br>(-6.5% to 5.2%)                             | -23.8%<br>(-28.5% to -19.3%)                                            |
| Diabetes mellitus                                        | 2,730.4<br>(2,305.9 to 3,251.4)                         | 202.0<br>(136.4 to 278.8)                        | 37.8%<br>(34.8% to 41.1%)                            | 7.6%<br>(5.5% to 10.0%)                                                 |
| Neonatal encephalopathy due to birth asphyxia and trauma | 378.6<br>(127.1 to 864.6)                               | 168.5<br>(52.4 to 393.7)                         | 33.9%<br>(20.2% to 56.8%)                            | 20.0%<br>(8.9% to 38.3%)                                                |
| Encephalitis                                             | 2,636.0<br>(1,310.4 to 4,672.3)                         | 91.1<br>(55.3 to 147.1)                          | 7.1%<br>(3.5% to 11.4%)                              | -10.0%<br>(-12.8% to -6.9%)                                             |
| Malaria                                                  | 186.9<br>(151.8 to 223.1)                               | 90.1<br>(64.1 to 116.5)                          | 17.5%<br>(10.4% to 23.1%)                            | 9.8%<br>(3.1% to 15.0%)                                                 |
| Hemolytic disease and other neonatal jaundice            | 187.0<br>(148.1 to 226.9)                               | 84.1<br>(58.6 to 109.7)                          | 17.7%<br>(9.7% to 24.8%)                             | 6.6%<br>(-0.6% to 12.9%)                                                |
| Onchocerciasis                                           | 781.6<br>(580.8 to 1,188.1)                             | 55.2<br>(36.9 to 77.1)                           | -6.9%<br>(-15.0% to 6.4%)                            | -25.5%<br>(-32.1% to -15.0%)                                            |
| Other meningitis                                         | 644.6<br>(354.9 to 989.1)                               | 20.1<br>(11.7 to 33.0)                           | 87.9%<br>(75.7% to 101.6%)                           | 61.6%<br>(51.6% to 73.0%)                                               |
| Pneumococcal meningitis                                  | 576.8<br>(365.3 to 870.0)                               | 14.4<br>(8.1 to 23.4)                            | -12.3%<br>(-18.0% to -6.5%)                          | -23.4%<br>(-28.3% to -18.4%)                                            |
| Meningococcal infection                                  | 306.8<br>(185.6 to 461.0)                               | 13.7<br>(8.3 to 20.8)                            | 16.2%<br>(8.5% to 25.0%)                             | 1.6%<br>(-5.2% to 9.3%)                                                 |
| H influenzae type B meningitis                           | 184.8<br>(80.8 to 327.0)                                | 3.2<br>(1.3 to 6.5)                              | -44.8%<br>(-51.1% to -38.1%)                         | -50.6%<br>(-56.3% to -44.6%)                                            |
| Tetanus                                                  | <0.05<br>(<0.05 to <0.05)                               | <0.05<br>(<0.05 to <0.05)                        | -25.2%<br>(-34.6% to -15.9%)                         | -25.8%<br>(-35.1% to -16.6%)                                            |
| <b>All causes</b>                                        | <b>1,009,471.7</b><br><b>(969,235.1 to 1,047,829.0)</b> | <b>28,747.6</b><br><b>(20,341.5 to 40,240.5)</b> | <b>20.4%</b><br><b>(19.1% to 22.0%)</b>              | <b>-1.3%</b><br><b>(-2.4% to 0.8%)</b>                                  |

SR Table 12: Global prevalence, incidence, and YLDs for 2016, percentage change of YLD counts and percentage change of YLD rates between 2006 and 2016 by cause, age 0-6 days.

| Cause                                                                                | Prevalence in thousands (95% UI)       | Incidence in thousands (95% UI)            | YLDs in thousands (95% UI)             |                                                                      |                                                                     |
|--------------------------------------------------------------------------------------|----------------------------------------|--------------------------------------------|----------------------------------------|----------------------------------------------------------------------|---------------------------------------------------------------------|
|                                                                                      | 2016 counts<br>(1,471.7 to 1,500.1)    | 2016 counts<br>(16,226.6 to 20,838.1)      | 2016 counts<br>(55.1 to 104.0)         | Percentage change in counts between 2006 and 2016<br>(-10.5 to -4.0) | Percentage change in rates between 2006 and 2016<br>(-10.1 to -3.6) |
| <b>All causes</b>                                                                    | <b>1,486.7</b><br>(1,471.7 to 1,500.1) | <b>18,463.5†</b><br>(16,226.6 to 20,838.1) | <b>77.8</b><br>(55.1 to 104.0)         | <b>-7.4</b><br>(-10.5 to -4.0)                                       | <b>-6.9</b><br>(-10.1 to -3.6)                                      |
| <b>Communicable, maternal, neonatal, and nutritional disorders</b>                   | <b>1,063.8</b><br>(1,046.4 to 1,080.0) | <b>16,941.6†</b><br>(14,720.1 to 19,294.0) | <b>63.1</b><br>(44.1 to 85.0)          | <b>-8.5</b><br>(-12.2 to -4.4)                                       | <b>-8.0</b><br>(-11.7 to -3.9)                                      |
| <b>HIV/AIDS and tuberculosis</b>                                                     | <b>280.0</b><br>(254.5 to 311.8)       | <b>1.2†</b><br>(0.8 to 1.7)                | <b>&lt; 0.05</b><br>(< 0.05 to < 0.05) | <b>-14.8</b><br>(-19.3 to -9.1)                                      | <b>-14.4</b><br>(-18.9 to -8.7)                                     |
| Tuberculosis                                                                         | 267.4<br>(230.9 to 307.7)              | 1.2†<br>(0.8 to 1.7)                       | < 0.05<br>(< 0.05 to < 0.05)           | -14.8<br>(-19.3 to -9.1)                                             | -14.4<br>(-18.9 to -8.7)                                            |
| Drug-susceptible tuberculosis                                                        | < 0.05<br>(< 0.05 to < 0.05)           | 1.2<br>(0.8 to 1.7)                        | < 0.05<br>(< 0.05 to < 0.05)           | -14.9<br>(-19.4 to -9.2)                                             | -14.5<br>(-19.0 to -8.7)                                            |
| Multidrug-resistant tuberculosis without extensive drug resistance                   | < 0.05<br>(< 0.05 to < 0.05)           | < 0.05<br>(< 0.05 to < 0.05)               | < 0.05<br>(< 0.05 to < 0.05)           | -15.1<br>(-32.4 to 7.7)                                              | -14.6<br>(-32.0 to 8.3)                                             |
| Extensively drug-resistant tuberculosis                                              | < 0.05<br>(< 0.05 to < 0.05)           | < 0.05<br>(< 0.05 to < 0.05)               | < 0.05<br>(< 0.05 to < 0.05)           | 206.2<br>(119.8 to 356.4)                                            | 207.8<br>(120.9 to 358.8)                                           |
| Latent tuberculosis infection                                                        | 267.4<br>(230.9 to 307.7)              | --                                         | --                                     | --                                                                   | --                                                                  |
| HIV/AIDS                                                                             | --                                     | --                                         | --                                     | --                                                                   | --                                                                  |
| Drug-susceptible HIV/AIDS - Tuberculosis                                             | --                                     | --                                         | --                                     | --                                                                   | --                                                                  |
| Multidrug-resistant HIV/AIDS - Tuberculosis without extensive drug resistance        | --                                     | --                                         | --                                     | --                                                                   | --                                                                  |
| Extensively drug-resistant HIV/AIDS - Tuberculosis                                   | --                                     | --                                         | --                                     | --                                                                   | --                                                                  |
| HIV/AIDS resulting in other diseases                                                 | --                                     | --                                         | --                                     | --                                                                   | --                                                                  |
| <b>Diarrhoea, lower respiratory infections, and other common infectious diseases</b> | <b>146.1</b><br>(140.7 to 151.3)       | <b>16,542.7†</b><br>(14,316.2 to 18,893.1) | <b>9.1</b><br>(6.1 to 12.8)            | <b>-10.9</b><br>(-13.8 to -8.0)                                      | <b>-10.5</b><br>(-13.4 to -7.5)                                     |
| Diarrhoeal diseases                                                                  | 38.8<br>(33.8 to 44.3)                 | 6,773.5<br>(5,903.9 to 7,739.6)            | 4.5<br>(3.0 to 6.4)                    | -13.1<br>(-16.9 to -9.8)                                             | -12.7<br>(-16.5 to -9.3)                                            |
| Intestinal infectious diseases                                                       | --                                     | --                                         | --                                     | --                                                                   | --                                                                  |
| Typhoid fever                                                                        | --                                     | --                                         | --                                     | --                                                                   | --                                                                  |
| Paratyphoid fever                                                                    | --                                     | --                                         | --                                     | --                                                                   | --                                                                  |
| Other intestinal infectious diseases                                                 | --                                     | --                                         | --                                     | --                                                                   | --                                                                  |
| Lower respiratory infections                                                         | 49.8<br>(40.3 to 61.6)                 | 254.6<br>(196.3 to 323.7)                  | 3.1<br>(1.9 to 4.7)                    | -5.0<br>(-10.8 to 0.4)                                               | -4.5<br>(-10.4 to 0.9)                                              |
| Upper respiratory infections                                                         | 46.6<br>(36.5 to 58.5)                 | 8,536.9<br>(6,638.6 to 10,817.2)           | 1.2<br>(0.7 to 1.9)                    | 1.4<br>(-0.8 to 3.4)                                                 | 1.9<br>(-0.2 to 4.0)                                                |
| Otitis media                                                                         | 3.6<br>(2.8 to 4.7)                    | 375.1<br>(270.7 to 512.3)                  | 0.1<br>(< 0.05 to 0.1)                 | -2.9<br>(-6.4 to 1.0)                                                | -2.4<br>(-5.9 to 1.5)                                               |
| Meningitis                                                                           | 0.4<br>(0.3 to 0.5)                    | 25.7<br>(20.6 to 31.6)                     | 0.1<br>(< 0.05 to 0.1)                 | -2.5<br>(-12.4 to 7.4)                                               | -1.9<br>(-12.0 to 7.9)                                              |
| Pneumococcal meningitis                                                              | < 0.05<br>(< 0.05 to 0.1)              | 4.1<br>(2.6 to 5.8)                        | < 0.05<br>(< 0.05 to < 0.05)           | -27.4<br>(-33.3 to -21.0)                                            | -27.0<br>(-32.9 to -20.6)                                           |
| H influenzae type B meningitis                                                       | < 0.05<br>(< 0.05 to 0.1)              | 4.8<br>(2.9 to 7.1)                        | < 0.05<br>(< 0.05 to < 0.05)           | -44.0<br>(-52.4 to -34.3)                                            | -43.7<br>(-52.2 to -33.9)                                           |
| Meningococcal infection                                                              | < 0.05<br>(< 0.05 to 0.1)              | 5.7<br>(3.7 to 8.2)                        | < 0.05<br>(< 0.05 to < 0.05)           | 4.5<br>(-8.1 to 18.4)                                                | 5.1<br>(-7.6 to 19.1)                                               |
| Other meningitis                                                                     | 0.3<br>(0.2 to 0.4)                    | 11.1<br>(8.1 to 14.4)                      | < 0.05<br>(< 0.05 to 0.1)              | 14.0<br>(-1.9 to 30.9)                                               | 14.6<br>(-1.4 to 31.6)                                              |
| Encephalitis                                                                         | 0.1<br>(< 0.05 to 0.1)                 | 5.8<br>(4.7 to 6.9)                        | < 0.05<br>(< 0.05 to < 0.05)           | -9.8<br>(-14.3 to -6.2)                                              | -9.4<br>(-13.8 to -5.7)                                             |
| Diphtheria                                                                           | --                                     | --                                         | --                                     | --                                                                   | --                                                                  |
| Whooping cough                                                                       | --                                     | --                                         | --                                     | --                                                                   | --                                                                  |
| Tetanus                                                                              | 0.9<br>(0.5 to 1.3)                    | 15.8<br>(7.9 to 23.0)                      | 0.1<br>(0.1 to 0.2)                    | -70.7<br>(-79.9 to -58.7)                                            | -70.5<br>(-79.8 to -58.5)                                           |
| Measles                                                                              | --                                     | --                                         | --                                     | --                                                                   | --                                                                  |
| Varicella and herpes zoster                                                          | 10.7<br>(7.3 to 15.0)                  | 555.2<br>(382.4 to 778.9)                  | 0.1<br>(< 0.05 to 0.1)                 | -3.9<br>(-6.4 to -1.4)                                               | -3.4<br>(-5.9 to -0.9)                                              |
| <b>Neglected tropical diseases and malaria</b>                                       | <b>4.7</b><br>(4.2 to 5.1)             | <b>4.6†</b><br>(3.4 to 7.0)                | <b>&lt; 0.05</b><br>(< 0.05 to < 0.05) | --                                                                   | --                                                                  |
| Malaria                                                                              | --                                     | --                                         | --                                     | --                                                                   | --                                                                  |
| Chagas disease                                                                       | --                                     | --                                         | --                                     | --                                                                   | --                                                                  |
| Leishmaniasis                                                                        | --                                     | --                                         | --                                     | --                                                                   | --                                                                  |
| Visceral leishmaniasis                                                               | --                                     | --                                         | --                                     | --                                                                   | --                                                                  |
| Cutaneous and mucocutaneous leishmaniasis                                            | --                                     | --                                         | --                                     | --                                                                   | --                                                                  |
| African trypanosomiasis                                                              | --                                     | --                                         | --                                     | --                                                                   | --                                                                  |
| Schistosomiasis                                                                      | --                                     | --                                         | --                                     | --                                                                   | --                                                                  |
| Cysticercosis                                                                        | --                                     | --                                         | --                                     | --                                                                   | --                                                                  |
| Cystic echinococcosis                                                                | --                                     | --                                         | --                                     | --                                                                   | --                                                                  |
| Lymphatic filariasis                                                                 | 4.3<br>(3.7 to 4.9)                    | 0.7<br>(0.5 to 1.2)                        | --                                     | --                                                                   | --                                                                  |
| Onchocerciasis                                                                       | --                                     | --                                         | --                                     | --                                                                   | --                                                                  |
| Trachoma                                                                             | --                                     | --                                         | --                                     | --                                                                   | --                                                                  |
| Dengue                                                                               | --                                     | --                                         | --                                     | --                                                                   | --                                                                  |
| Yellow fever                                                                         | --                                     | --                                         | --                                     | --                                                                   | --                                                                  |
| Rabies                                                                               | --                                     | --                                         | --                                     | --                                                                   | --                                                                  |
| Intestinal nematode infections                                                       | --                                     | --                                         | --                                     | --                                                                   | --                                                                  |
| Ascariasis                                                                           | --                                     | --                                         | --                                     | --                                                                   | --                                                                  |

| Cause                                                                   | Prevalence in thousands (95% UI)        | Incidence in thousands (95% UI)                | YLDs in thousands (95% UI)           |                                                   |                                                  |
|-------------------------------------------------------------------------|-----------------------------------------|------------------------------------------------|--------------------------------------|---------------------------------------------------|--------------------------------------------------|
|                                                                         | 2016 counts                             | 2016 counts                                    | 2016 counts                          | Percentage change in counts between 2006 and 2016 | Percentage change in rates between 2006 and 2016 |
| Trichuriasis                                                            | --                                      | --                                             | --                                   | --                                                | --                                               |
| Hookworm disease                                                        | --                                      | --                                             | --                                   | --                                                | --                                               |
| Food-borne trematodiases                                                | --                                      | --                                             | --                                   | --                                                | --                                               |
| Leprosy                                                                 | --                                      | --                                             | --                                   | --                                                | --                                               |
| Ebola virus disease                                                     | --                                      | --                                             | --                                   | --                                                | --                                               |
| Zika virus disease                                                      | 0.1<br>(< 0.05 to 0.1)                  | 3.9<br>(2.7 to 6.3)                            | < 0.05<br>(< 0.05 to < 0.05)         | --                                                | --                                               |
| Guinea worm disease                                                     | --                                      | --                                             | --                                   | --                                                | --                                               |
| Other neglected tropical diseases                                       | --                                      | --                                             | --                                   | --                                                | --                                               |
| <b>Maternal disorders</b>                                               | --                                      | --                                             | --                                   | --                                                | --                                               |
| Maternal haemorrhage                                                    | --                                      | --                                             | --                                   | --                                                | --                                               |
| Maternal sepsis and other pregnancy related infections                  | --                                      | --                                             | --                                   | --                                                | --                                               |
| Maternal hypertensive disorders                                         | --                                      | --                                             | --                                   | --                                                | --                                               |
| Maternal obstructed labour and uterine rupture                          | --                                      | --                                             | --                                   | --                                                | --                                               |
| Maternal abortion, miscarriage, and ectopic pregnancy                   | --                                      | --                                             | --                                   | --                                                | --                                               |
| Other maternal disorders                                                | --                                      | --                                             | --                                   | --                                                | --                                               |
| <b>Neonatal disorders</b>                                               | <b>251.3</b><br><b>(236.5 to 263.8)</b> | --                                             | <b>25.0</b><br><b>(17.0 to 35.2)</b> | <b>-6.5</b><br><b>(-13.6 to 2.7)</b>              | <b>-6.0</b><br><b>(-13.2 to 3.3)</b>             |
| Neonatal preterm birth complications                                    | 186.2<br>(158.9 to 214.9)               | --                                             | 8.5<br>(5.1 to 13.1)                 | -6.7<br>(-24.9 to 16.3)                           | -6.2<br>(-24.5 to 16.9)                          |
| Neonatal encephalopathy due to birth asphyxia and trauma                | 27.5<br>(20.6 to 36.0)                  | --                                             | 3.3<br>(1.9 to 5.4)                  | -4.1<br>(-7.1 to -1.0)                            | -3.6<br>(-6.6 to -0.5)                           |
| Neonatal sepsis and other neonatal infections                           | 43.0<br>(25.6 to 68.7)                  | --                                             | 8.6<br>(4.8 to 15.2)                 | -4.5<br>(-6.6 to -2.4)                            | -4.0<br>(-6.1 to -1.9)                           |
| Hemolytic disease and other neonatal jaundice                           | 1.9<br>(1.6 to 2.3)                     | --                                             | 0.4<br>(0.3 to 0.6)                  | -0.0<br>(-7.5 to 7.3)                             | 0.5<br>(-7.0 to 7.9)                             |
| Other neonatal disorders                                                | --                                      | --                                             | 4.1<br>(2.8 to 5.8)                  | -12.5<br>(-19.1 to -3.9)                          | -12.1<br>(-18.7 to -3.4)                         |
| <b>Nutritional deficiencies</b>                                         | <b>561.2</b><br><b>(541.2 to 575.4)</b> | <b>377.2†</b><br><b>(365.1 to 390.6)</b>       | <b>28.2</b><br><b>(18.9 to 39.1)</b> | <b>-9.8</b><br><b>(-15.0 to -4.5)</b>             | <b>-9.3</b><br><b>(-14.6 to -4.0)</b>            |
| Protein-energy malnutrition                                             | 322.7<br>(312.4 to 334.6)               | 377.2<br>(365.1 to 390.6)                      | 17.2<br>(11.2 to 24.3)               | -12.7<br>(-20.1 to -4.8)                          | -12.2<br>(-19.7 to -4.3)                         |
| Iodine deficiency                                                       | --                                      | --                                             | --                                   | --                                                | --                                               |
| Vitamin A deficiency                                                    | --                                      | --                                             | --                                   | --                                                | --                                               |
| Iron-deficiency anaemia                                                 | 305.6<br>(245.7 to 358.0)               | --                                             | 10.9<br>(7.0 to 16.2)                | -5.0<br>(-7.6 to -2.3)                            | -4.5<br>(-7.1 to -1.8)                           |
| Other nutritional deficiencies                                          | --                                      | --                                             | --                                   | --                                                | --                                               |
| <b>Other communicable, maternal, neonatal, and nutritional diseases</b> | <b>104.7</b><br><b>(78.4 to 139.5)</b>  | <b>15.9</b><br><b>(7.8 to 25.8)</b>            | <b>0.9</b><br><b>(0.6 to 1.2)</b>    | <b>6.5</b><br><b>(3.3 to 9.6)</b>                 | <b>7.0</b><br><b>(3.8 to 10.2)</b>               |
| Sexually transmitted diseases excluding HIV                             | --                                      | --                                             | --                                   | --                                                | --                                               |
| Syphilis                                                                | --                                      | --                                             | --                                   | --                                                | --                                               |
| Chlamydial infection                                                    | --                                      | --                                             | --                                   | --                                                | --                                               |
| Gonococcal infection                                                    | --                                      | --                                             | --                                   | --                                                | --                                               |
| Trichomoniasis                                                          | --                                      | --                                             | --                                   | --                                                | --                                               |
| Genital herpes                                                          | --                                      | --                                             | --                                   | --                                                | --                                               |
| Other sexually transmitted diseases                                     | --                                      | --                                             | --                                   | --                                                | --                                               |
| Hepatitis                                                               | 79.0<br>(40.1 to 136.6)                 | 15.9<br>(7.8 to 25.8)                          | < 0.05<br>(< 0.05 to < 0.05)         | -9.2<br>(-41.6 to 47.9)                           | -8.7<br>(-41.3 to 48.7)                          |
| Acute hepatitis A                                                       | --                                      | --                                             | --                                   | --                                                | --                                               |
| Hepatitis B                                                             | 79.0<br>(40.1 to 136.6)                 | 15.9<br>(7.8 to 25.8)                          | < 0.05<br>(< 0.05 to < 0.05)         | -9.2<br>(-41.6 to 47.9)                           | -8.7<br>(-41.3 to 48.7)                          |
| Hepatitis C                                                             | --                                      | --                                             | --                                   | --                                                | --                                               |
| Acute hepatitis E                                                       | --                                      | --                                             | --                                   | --                                                | --                                               |
| Other infectious diseases                                               | 19.2<br>(15.5 to 22.6)                  | < 0.05<br>(< 0.05 to < 0.05)                   | 0.8<br>(0.6 to 1.2)                  | 6.5<br>(3.3 to 9.7)                               | 7.1<br>(3.8 to 10.2)                             |
| <b>Non-communicable diseases</b>                                        | <b>793.2</b><br><b>(785.1 to 801.9)</b> | <b>1,513.0†</b><br><b>(1,389.8 to 1,653.5)</b> | <b>14.6</b><br><b>(10.6 to 19.2)</b> | <b>-2.5</b><br><b>(-4.1 to -0.9)</b>              | <b>-2.0</b><br><b>(-3.6 to -0.4)</b>             |
| <b>Neoplasms</b>                                                        | --                                      | --                                             | --                                   | --                                                | --                                               |
| Lip and oral cavity cancer                                              | --                                      | --                                             | --                                   | --                                                | --                                               |
| Nasopharynx cancer                                                      | --                                      | --                                             | --                                   | --                                                | --                                               |
| Other pharynx cancer                                                    | --                                      | --                                             | --                                   | --                                                | --                                               |
| Oesophageal cancer                                                      | --                                      | --                                             | --                                   | --                                                | --                                               |
| Stomach cancer                                                          | --                                      | --                                             | --                                   | --                                                | --                                               |
| Colon and rectum cancer                                                 | --                                      | --                                             | --                                   | --                                                | --                                               |
| Liver cancer                                                            | --                                      | --                                             | --                                   | --                                                | --                                               |
| Liver cancer due to hepatitis B                                         | --                                      | --                                             | --                                   | --                                                | --                                               |

| Cause                                              | Prevalence in thousands (95% UI) | Incidence in thousands (95% UI) | YLDs in thousands (95% UI)   |                                                   |                                                  |
|----------------------------------------------------|----------------------------------|---------------------------------|------------------------------|---------------------------------------------------|--------------------------------------------------|
|                                                    | 2016 counts                      | 2016 counts                     | 2016 counts                  | Percentage change in counts between 2006 and 2016 | Percentage change in rates between 2006 and 2016 |
| Liver cancer due to hepatitis C                    | --                               | --                              | --                           | --                                                | --                                               |
| Liver cancer due to alcohol use                    | --                               | --                              | --                           | --                                                | --                                               |
| Liver cancer due to other causes                   | --                               | --                              | --                           | --                                                | --                                               |
| Gallbladder and biliary tract cancer               | --                               | --                              | --                           | --                                                | --                                               |
| Pancreatic cancer                                  | --                               | --                              | --                           | --                                                | --                                               |
| Larynx cancer                                      | --                               | --                              | --                           | --                                                | --                                               |
| Tracheal, bronchus, and lung cancer                | --                               | --                              | --                           | --                                                | --                                               |
| Malignant skin melanoma                            | --                               | --                              | --                           | --                                                | --                                               |
| Non-melanoma skin cancer                           | --                               | --                              | --                           | --                                                | --                                               |
| Non-melanoma skin cancer (squamous-cell carcinoma) | --                               | --                              | --                           | --                                                | --                                               |
| Non-melanoma skin cancer (basal-cell carcinoma)    | --                               | --                              | --                           | --                                                | --                                               |
| Breast cancer                                      | --                               | --                              | --                           | --                                                | --                                               |
| Cervical cancer                                    | --                               | --                              | --                           | --                                                | --                                               |
| Uterine cancer                                     | --                               | --                              | --                           | --                                                | --                                               |
| Ovarian cancer                                     | --                               | --                              | --                           | --                                                | --                                               |
| Prostate cancer                                    | --                               | --                              | --                           | --                                                | --                                               |
| Testicular cancer                                  | --                               | --                              | --                           | --                                                | --                                               |
| Kidney cancer                                      | --                               | --                              | --                           | --                                                | --                                               |
| Bladder cancer                                     | --                               | --                              | --                           | --                                                | --                                               |
| Brain and nervous system cancer                    | --                               | --                              | --                           | --                                                | --                                               |
| Thyroid cancer                                     | --                               | --                              | --                           | --                                                | --                                               |
| Mesothelioma                                       | --                               | --                              | --                           | --                                                | --                                               |
| Hodgkin lymphoma                                   | --                               | --                              | --                           | --                                                | --                                               |
| Non-Hodgkin's lymphoma                             | --                               | --                              | --                           | --                                                | --                                               |
| Multiple myeloma                                   | --                               | --                              | --                           | --                                                | --                                               |
| Leukaemia                                          | --                               | --                              | --                           | --                                                | --                                               |
| Acute lymphoid leukaemia                           | --                               | --                              | --                           | --                                                | --                                               |
| Chronic lymphoid leukaemia                         | --                               | --                              | --                           | --                                                | --                                               |
| Acute myeloid leukaemia                            | --                               | --                              | --                           | --                                                | --                                               |
| Chronic myeloid leukaemia                          | --                               | --                              | --                           | --                                                | --                                               |
| Other leukaemia                                    | --                               | --                              | --                           | --                                                | --                                               |
| Other neoplasms                                    | --                               | --                              | --                           | --                                                | --                                               |
| <b>Cardiovascular diseases</b>                     | < 0.05<br>(< 0.05 to < 0.05)     | 0.6†<br>(0.4 to 0.7)            | < 0.05<br>(< 0.05 to < 0.05) | -7.7<br>(-11.6 to -3.5)                           | -7.2<br>(-11.1 to -3.0)                          |
| Rheumatic heart disease                            | --                               | --                              | --                           | --                                                | --                                               |
| Ischaemic heart disease                            | --                               | --                              | --                           | --                                                | --                                               |
| Cerebrovascular disease                            | --                               | --                              | --                           | --                                                | --                                               |
| Ischaemic stroke                                   | --                               | --                              | --                           | --                                                | --                                               |
| Hemorrhagic stroke                                 | --                               | --                              | --                           | --                                                | --                                               |
| Hypertensive heart disease                         | --                               | --                              | --                           | --                                                | --                                               |
| Cardiomyopathy and myocarditis                     | --                               | --                              | --                           | --                                                | --                                               |
| Myocarditis                                        | --                               | --                              | --                           | --                                                | --                                               |
| Alcoholic cardiomyopathy                           | --                               | --                              | --                           | --                                                | --                                               |
| Other cardiomyopathy                               | --                               | --                              | --                           | --                                                | --                                               |
| Atrial fibrillation and flutter                    | --                               | --                              | --                           | --                                                | --                                               |
| Peripheral vascular disease                        | --                               | --                              | --                           | --                                                | --                                               |
| Endocarditis                                       | < 0.05<br>(< 0.05 to < 0.05)     | 0.6<br>(0.4 to 0.7)             | < 0.05<br>(< 0.05 to < 0.05) | -7.7<br>(-11.6 to -3.5)                           | -7.2<br>(-11.1 to -3.0)                          |
| Other cardiovascular and circulatory diseases      | --                               | --                              | --                           | --                                                | --                                               |
| <b>Chronic respiratory diseases</b>                | --                               | --                              | --                           | --                                                | --                                               |
| Chronic obstructive pulmonary disease              | --                               | --                              | --                           | --                                                | --                                               |
| Pneumoconiosis                                     | --                               | --                              | --                           | --                                                | --                                               |
| Silicosis                                          | --                               | --                              | --                           | --                                                | --                                               |



| Cause                                                          | Prevalence in thousands (95% UI)                    | Incidence in thousands (95% UI)    | YLDs in thousands (95% UI)                          |                                                   |                                                  |
|----------------------------------------------------------------|-----------------------------------------------------|------------------------------------|-----------------------------------------------------|---------------------------------------------------|--------------------------------------------------|
|                                                                | 2016 counts                                         | 2016 counts                        | 2016 counts                                         | Percentage change in counts between 2006 and 2016 | Percentage change in rates between 2006 and 2016 |
| Asbestosis                                                     | --                                                  | --                                 | --                                                  | --                                                | --                                               |
| Coal workers pneumoconiosis                                    | --                                                  | --                                 | --                                                  | --                                                | --                                               |
| Other pneumoconiosis                                           | --                                                  | --                                 | --                                                  | --                                                | --                                               |
| Asthma                                                         | --                                                  | --                                 | --                                                  | --                                                | --                                               |
| Interstitial lung disease and pulmonary sarcoidosis            | --                                                  | --                                 | --                                                  | --                                                | --                                               |
| Other chronic respiratory diseases                             | --                                                  | --                                 | --                                                  | --                                                | --                                               |
| <b>Cirrhosis and other chronic liver diseases</b>              | <b>&lt; 0.05</b><br><b>(&lt; 0.05 to &lt; 0.05)</b> | <b>1.7</b><br><b>(1.5 to 1.9)</b>  | <b>&lt; 0.05</b><br><b>(&lt; 0.05 to &lt; 0.05)</b> | <b>1.6</b><br><b>(0.1 to 3.3)</b>                 | <b>2.1</b><br><b>(0.6 to 3.9)</b>                |
| Cirrhosis and other chronic liver diseases due to hepatitis B  | < 0.05<br>(< 0.05 to < 0.05)                        | < 0.05<br>(< 0.05 to < 0.05)       | < 0.05<br>(< 0.05 to < 0.05)                        | 6.8<br>(2.2 to 11.1)                              | 7.4<br>(2.7 to 11.7)                             |
| Cirrhosis and other chronic liver diseases due to hepatitis C  | < 0.05<br>(< 0.05 to < 0.05)                        | < 0.05<br>(< 0.05 to < 0.05)       | < 0.05<br>(< 0.05 to < 0.05)                        | 4.1<br>(0.0 to 8.3)                               | 4.7<br>(0.5 to 8.9)                              |
| Cirrhosis and other chronic liver diseases due to alcohol use  | --                                                  | --                                 | --                                                  | --                                                | --                                               |
| Cirrhosis and other chronic liver diseases due to other causes | < 0.05<br>(< 0.05 to < 0.05)                        | 1.7<br>(1.5 to 1.9)                | < 0.05<br>(< 0.05 to < 0.05)                        | 1.6<br>(0.1 to 3.3)                               | 2.1<br>(0.6 to 3.9)                              |
| <b>Digestive diseases</b>                                      | <b>0.2</b><br><b>(0.2 to 0.3)</b>                   | <b>1.4†</b><br><b>(1.0 to 1.8)</b> | <b>0.1</b><br><b>(&lt; 0.05 to 0.1)</b>             | <b>-8.4</b><br><b>(-21.9 to 4.7)</b>              | <b>-7.9</b><br><b>(-21.5 to 5.2)</b>             |
| Peptic ulcer disease                                           | --                                                  | --                                 | --                                                  | --                                                | --                                               |
| Gastritis and duodenitis                                       | --                                                  | --                                 | --                                                  | --                                                | --                                               |
| Appendicitis                                                   | --                                                  | --                                 | --                                                  | --                                                | --                                               |
| Paralytic ileus and intestinal obstruction                     | 0.2<br>(0.1 to 0.3)                                 | 1.4<br>(1.0 to 1.8)                | 0.1<br>(< 0.05 to 0.1)                              | -8.4<br>(-21.9 to 4.7)                            | -7.9<br>(-21.5 to 5.2)                           |
| Inguinal, femoral, and abdominal hernia                        | --                                                  | --                                 | --                                                  | --                                                | --                                               |
| Inflammatory bowel disease                                     | --                                                  | --                                 | --                                                  | --                                                | --                                               |
| Vascular intestinal disorders                                  | --                                                  | --                                 | --                                                  | --                                                | --                                               |
| Gallbladder and biliary diseases                               | --                                                  | --                                 | --                                                  | --                                                | --                                               |
| Pancreatitis                                                   | --                                                  | --                                 | --                                                  | --                                                | --                                               |
| Other digestive diseases                                       | --                                                  | --                                 | --                                                  | --                                                | --                                               |
| <b>Neurological disorders</b>                                  | <b>0.1</b><br><b>(&lt; 0.05 to 0.1)</b>             | <b>5.7</b><br><b>(4.2 to 7.4)</b>  | <b>&lt; 0.05</b><br><b>(&lt; 0.05 to &lt; 0.05)</b> | <b>-7.5</b><br><b>(-19.2 to 5.9)</b>              | <b>-7.1</b><br><b>(-18.8 to 6.4)</b>             |
| Alzheimer's disease and other dementias                        | --                                                  | --                                 | --                                                  | --                                                | --                                               |
| Parkinson's disease                                            | --                                                  | --                                 | --                                                  | --                                                | --                                               |
| Epilepsy                                                       | 0.1<br>(< 0.05 to 0.1)                              | 5.6<br>(4.1 to 7.3)                | < 0.05<br>(< 0.05 to < 0.05)                        | -7.5<br>(-19.3 to 6.0)                            | -7.1<br>(-18.8 to 6.5)                           |
| Multiple sclerosis                                             | --                                                  | --                                 | --                                                  | --                                                | --                                               |
| Motor neuron disease                                           | < 0.05<br>(< 0.05 to < 0.05)                        | 0.1<br>(0.1 to 0.1)                | < 0.05<br>(< 0.05 to < 0.05)                        | -7.4<br>(-9.6 to -4.8)                            | -6.9<br>(-9.1 to -4.3)                           |
| Migraine                                                       | --                                                  | --                                 | --                                                  | --                                                | --                                               |
| Tension-type headache                                          | --                                                  | --                                 | --                                                  | --                                                | --                                               |
| Other neurological disorders                                   | --                                                  | --                                 | --                                                  | --                                                | --                                               |
| <b>Mental and substance use disorders</b>                      | <b>18.9</b><br><b>(16.4 to 21.0)</b>                | <b>1.0†</b><br><b>(0.6 to 1.5)</b> | <b>2.1</b><br><b>(1.3 to 3.1)</b>                   | <b>-2.0</b><br><b>(-4.3 to 0.3)</b>               | <b>-1.5</b><br><b>(-3.8 to 0.8)</b>              |
| Schizophrenia                                                  | --                                                  | --                                 | --                                                  | --                                                | --                                               |
| Alcohol use disorders                                          | 0.1<br>(0.1 to 0.1)                                 | --                                 | < 0.05<br>(< 0.05 to < 0.05)                        | 0.3<br>(-6.3 to 6.0)                              | 0.8<br>(-5.8 to 6.5)                             |
| Drug use disorders                                             | --                                                  | --                                 | --                                                  | --                                                | --                                               |
| Opioid use disorders                                           | --                                                  | --                                 | --                                                  | --                                                | --                                               |
| Cocaine use disorders                                          | --                                                  | --                                 | --                                                  | --                                                | --                                               |
| Amphetamine use disorders                                      | --                                                  | --                                 | --                                                  | --                                                | --                                               |
| Cannabis use disorders                                         | --                                                  | --                                 | --                                                  | --                                                | --                                               |
| Other drug use disorders                                       | --                                                  | --                                 | --                                                  | --                                                | --                                               |
| Depressive disorders                                           | --                                                  | --                                 | --                                                  | --                                                | --                                               |
| Major depressive disorder                                      | --                                                  | --                                 | --                                                  | --                                                | --                                               |
| Dysthymia                                                      | --                                                  | --                                 | --                                                  | --                                                | --                                               |
| Bipolar disorder                                               | --                                                  | --                                 | --                                                  | --                                                | --                                               |
| Anxiety disorders                                              | --                                                  | --                                 | --                                                  | --                                                | --                                               |
| Eating disorders                                               | --                                                  | --                                 | --                                                  | --                                                | --                                               |
| Anorexia nervosa                                               | --                                                  | --                                 | --                                                  | --                                                | --                                               |
| Bulimia nervosa                                                | --                                                  | --                                 | --                                                  | --                                                | --                                               |
| Autistic spectrum disorders                                    | 14.2<br>(12.6 to 16.4)                              | 1.0<br>(0.6 to 1.5)                | 1.8<br>(1.1 to 2.8)                                 | -0.5<br>(-2.6 to 1.6)                             | 0.0<br>(-2.0 to 2.1)                             |
| Autism                                                         | 2.5<br>(1.6 to 3.6)                                 | 0.2<br>(0.1 to 0.3)                | 0.7<br>(0.3 to 1.1)                                 | -0.4<br>(-4.7 to 3.9)                             | 0.1<br>(-4.2 to 4.4)                             |
| Asperger syndrome and other autistic spectrum disorders        | 11.4<br>(7.8 to 15.7)                               | 0.8<br>(0.5 to 1.4)                | 1.2<br>(0.7 to 1.9)                                 | -0.6<br>(-2.8 to 1.9)                             | -0.0<br>(-2.3 to 2.4)                            |

| Cause                                                      | Prevalence in thousands (95% UI)  | Incidence in thousands (95% UI)          | YLDs in thousands (95% UI)    |                                                   |                                                  |
|------------------------------------------------------------|-----------------------------------|------------------------------------------|-------------------------------|---------------------------------------------------|--------------------------------------------------|
|                                                            | 2016 counts                       | 2016 counts                              | 2016 counts                   | Percentage change in counts between 2006 and 2016 | Percentage change in rates between 2006 and 2016 |
| Attention-deficit/hyperactivity disorder                   | --                                | --                                       | --                            | --                                                | --                                               |
| Conduct disorder                                           | --                                | --                                       | --                            | --                                                | --                                               |
| Idiopathic developmental intellectual disability           | 5.2<br>(1.6 to 10.2)              | --                                       | 0.2<br>(0.1 to 0.5)           | -13.1<br>(-18.2 to -7.0)                          | -12.7<br>(-17.7 to -6.5)                         |
| Other mental and substance use disorders                   | --                                | --                                       | --                            | --                                                | --                                               |
| <b>Diabetes, urogenital, blood, and endocrine diseases</b> | <b>676.5<br/>(667.9 to 685.8)</b> | <b>116.7†<br/>(96.0 to 138.3)</b>        | <b>2.2<br/>(1.4 to 3.3)</b>   | <b>-9.6<br/>(-12.9 to -6.4)</b>                   | <b>-9.2<br/>(-12.4 to -5.9)</b>                  |
| Diabetes mellitus                                          | --                                | --                                       | --                            | --                                                | --                                               |
| Acute glomerulonephritis                                   | < 0.05<br>(< 0.05 to < 0.05)      | 0.1<br>(0.1 to 0.2)                      | < 0.05<br>(< 0.05 to < 0.05)  | -6.4<br>(-8.1 to -4.7)                            | -5.9<br>(-7.7 to -4.2)                           |
| Chronic kidney disease                                     | < 0.05<br>(< 0.05 to < 0.05)      | 0.3<br>(0.2 to 0.4)                      | < 0.05<br>(< 0.05 to < 0.05)  | -6.1<br>(-11.5 to -0.5)                           | -5.6<br>(-11.0 to 0.0)                           |
| Chronic kidney disease due to diabetes mellitus            | < 0.05<br>(< 0.05 to < 0.05)      | < 0.05<br>(< 0.05 to < 0.05)             | < 0.05<br>(< 0.05 to < 0.05)  | -6.0<br>(-12.5 to 0.8)                            | -5.5<br>(-12.0 to 1.3)                           |
| Chronic kidney disease due to hypertension                 | < 0.05<br>(< 0.05 to < 0.05)      | 0.1<br>(0.1 to 0.2)                      | < 0.05<br>(< 0.05 to < 0.05)  | -8.5<br>(-14.7 to -2.6)                           | -8.0<br>(-14.2 to -2.1)                          |
| Chronic kidney disease due to glomerulonephritis           | < 0.05<br>(< 0.05 to < 0.05)      | < 0.05<br>(< 0.05 to < 0.05)             | < 0.05<br>(< 0.05 to < 0.05)  | -5.3<br>(-10.8 to 0.4)                            | -4.8<br>(-10.3 to 0.9)                           |
| Chronic kidney disease due to other causes                 | < 0.05<br>(< 0.05 to < 0.05)      | 0.1<br>(0.1 to 0.2)                      | < 0.05<br>(< 0.05 to < 0.05)  | -6.7<br>(-11.9 to -1.2)                           | -6.2<br>(-11.5 to -0.7)                          |
| Urinary diseases and male infertility                      | 0.8<br>(0.7 to 0.8)               | 106.4†<br>(85.8 to 128.1)                | < 0.05<br>(< 0.05 to 0.1)     | -18.6<br>(-26.9 to -10.2)                         | -18.1<br>(-26.6 to -9.7)                         |
| Interstitial nephritis and urinary tract infections        | 0.7<br>(0.5 to 0.8)               | 106.4<br>(85.8 to 128.1)                 | < 0.05<br>(< 0.05 to < 0.05)  | -4.4<br>(-14.2 to 5.5)                            | -3.9<br>(-13.8 to 6.1)                           |
| Urolithiasis                                               | --                                | --                                       | --                            | --                                                | --                                               |
| Benign prostatic hyperplasia                               | --                                | --                                       | --                            | --                                                | --                                               |
| Male infertility                                           | --                                | --                                       | --                            | --                                                | --                                               |
| Other urinary diseases                                     | --                                | --                                       | < 0.05<br>(< 0.05 to < 0.05)  | -35.4<br>(-42.0 to -28.7)                         | -35.0<br>(-41.7 to -28.3)                        |
| Gynecological diseases                                     | --                                | --                                       | --                            | --                                                | --                                               |
| Uterine fibroids                                           | --                                | --                                       | --                            | --                                                | --                                               |
| Polycystic ovarian syndrome                                | --                                | --                                       | --                            | --                                                | --                                               |
| Female infertility                                         | --                                | --                                       | --                            | --                                                | --                                               |
| Endometriosis                                              | --                                | --                                       | --                            | --                                                | --                                               |
| Genital prolapse                                           | --                                | --                                       | --                            | --                                                | --                                               |
| Premenstrual syndrome                                      | --                                | --                                       | --                            | --                                                | --                                               |
| Other gynecological diseases                               | --                                | --                                       | --                            | --                                                | --                                               |
| Hemoglobinopathies and hemolytic anaemias                  | 666.6<br>(657.4 to 676.0)         | --                                       | 1.7<br>(1.1 to 2.5)           | -10.7<br>(-14.2 to -7.1)                          | -10.2<br>(-13.8 to -6.6)                         |
| Thalassemias                                               | 1.8<br>(1.6 to 1.9)               | --                                       | 0.1<br>(< 0.05 to 0.1)        | -16.3<br>(-22.0 to -11.0)                         | -15.9<br>(-21.6 to -10.5)                        |
| Thalassaemias trait                                        | 77.2<br>(73.7 to 81.0)            | --                                       | 0.5<br>(0.3 to 0.7)           | -19.1<br>(-25.8 to -12.6)                         | -18.6<br>(-25.4 to -12.1)                        |
| Sickle cell disorders                                      | 5.4<br>(4.5 to 7.0)               | --                                       | 0.3<br>(0.2 to 0.4)           | -0.4<br>(-8.2 to 7.2)                             | 0.1<br>(-7.7 to 7.8)                             |
| Sickle cell trait                                          | 207.9<br>(190.3 to 231.0)         | --                                       | 0.5<br>(0.3 to 0.7)           | -5.8<br>(-10.9 to -0.8)                           | -5.3<br>(-10.4 to -0.3)                          |
| G6PD deficiency                                            | 135.4<br>(129.8 to 142.1)         | --                                       | < 0.05<br>(< 0.05 to < 0.05)  | -8.2<br>(-11.6 to -4.8)                           | -7.8<br>(-11.2 to -4.3)                          |
| G6PD trait                                                 | 311.3<br>(306.0 to 317.4)         | --                                       | < 0.05<br>(< 0.05 to < 0.05)  | -15.0<br>(-19.2 to -10.6)                         | -14.6<br>(-18.8 to -10.1)                        |
| Other hemoglobinopathies and hemolytic anaemias            | 11.1<br>(9.0 to 13.0)             | --                                       | 0.4<br>(0.2 to 0.6)           | -10.1<br>(-14.0 to -6.5)                          | -9.7<br>(-13.6 to -6.0)                          |
| Endocrine, metabolic, blood, and immune disorders          | 14.2<br>(11.4 to 16.6)            | 9.9<br>(8.1 to 11.8)                     | 0.5<br>(0.3 to 0.8)           | -5.1<br>(-8.9 to -1.6)                            | -4.6<br>(-8.4 to -1.1)                           |
| <b>Musculoskeletal disorders</b>                           | <b>--</b>                         | <b>--</b>                                | <b>--</b>                     | <b>--</b>                                         | <b>--</b>                                        |
| Rheumatoid arthritis                                       | --                                | --                                       | --                            | --                                                | --                                               |
| Osteoarthritis                                             | --                                | --                                       | --                            | --                                                | --                                               |
| Low back and neck pain                                     | --                                | --                                       | --                            | --                                                | --                                               |
| Low back pain                                              | --                                | --                                       | --                            | --                                                | --                                               |
| Neck pain                                                  | --                                | --                                       | --                            | --                                                | --                                               |
| Gout                                                       | --                                | --                                       | --                            | --                                                | --                                               |
| Other musculoskeletal disorders                            | --                                | --                                       | --                            | --                                                | --                                               |
| <b>Other non-communicable diseases</b>                     | <b>146.9<br/>(142.9 to 151.0)</b> | <b>1,386.1†<br/>(1,267.0 to 1,533.0)</b> | <b>10.2<br/>(7.4 to 13.6)</b> | <b>-0.9<br/>(-2.8 to 1.1)</b>                     | <b>-0.4<br/>(-2.3 to 1.7)</b>                    |
| Congenital anomalies                                       | 69.0<br>(65.6 to 71.7)            | --                                       | 8.3<br>(6.0 to 11.0)          | 0.6<br>(-1.6 to 2.8)                              | 1.1<br>(-1.1 to 3.3)                             |
| Neural tube defects                                        | 3.4<br>(3.1 to 3.8)               | --                                       | 1.1<br>(0.7 to 1.4)           | 3.2<br>(-1.3 to 8.0)                              | 3.8<br>(-0.8 to 8.6)                             |
| Congenital heart anomalies                                 | 33.2<br>(26.7 to 40.3)            | --                                       | 1.4<br>(0.7 to 2.6)           | -1.9<br>(-5.0 to 0.8)                             | -1.4<br>(-4.5 to 1.3)                            |
| Orofacial clefts                                           | 2.3<br>(1.9 to 2.9)               | --                                       | < 0.05<br>(< 0.05 to 0.1)     | -9.2<br>(-14.6 to -4.4)                           | -8.8<br>(-14.1 to -3.9)                          |
| Down's syndrome                                            | 1.5<br>(1.2 to 1.7)               | --                                       | 0.1<br>(0.1 to 0.2)           | -1.0<br>(-4.6 to 3.0)                             | -0.5<br>(-4.1 to 3.6)                            |
| Turner syndrome                                            | 1.6<br>(1.4 to 1.9)               | --                                       | < 0.05<br>(< 0.05 to < 0.05)  | -5.7<br>(-17.1 to 7.2)                            | -5.2<br>(-16.7 to 7.7)                           |
| Klinefelter syndrome                                       | 2.1<br>(1.8 to 2.4)               | --                                       | < 0.05<br>(< 0.05 to < 0.05)  | 1.3<br>(-6.7 to 9.8)                              | 1.8<br>(-6.2 to 10.4)                            |

| Cause                                         | Prevalence in thousands (95% UI)              | Incidence in thousands (95% UI)    | YLDs in thousands (95% UI)                          |                                                   |                                                  |
|-----------------------------------------------|-----------------------------------------------|------------------------------------|-----------------------------------------------------|---------------------------------------------------|--------------------------------------------------|
|                                               | 2016 counts                                   | 2016 counts                        | 2016 counts                                         | Percentage change in counts between 2006 and 2016 | Percentage change in rates between 2006 and 2016 |
| Other chromosomal abnormalities               | 6.3<br>(5.3 to 7.3)                           | --                                 | 1.2<br>(0.8 to 1.7)                                 | -4.6<br>(-8.7 to -0.3)                            | -4.1<br>(-8.2 to 0.2)                            |
| Congenital musculoskeletal and limb anomalies | 3.4<br>(3.1 to 3.7)                           | --                                 | 0.5<br>(0.3 to 0.6)                                 | -0.0<br>(-3.2 to 3.4)                             | 0.5<br>(-2.7 to 4.0)                             |
| Urogenital congenital anomalies               | 7.6<br>(6.7 to 8.7)                           | --                                 | 0.2<br>(0.1 to 0.3)                                 | -4.6<br>(-7.0 to -2.2)                            | -4.1<br>(-6.5 to -1.7)                           |
| Digestive congenital anomalies                | 3.5<br>(3.2 to 3.9)                           | --                                 | 0.2<br>(0.1 to 0.2)                                 | -2.8<br>(-7.3 to 2.0)                             | -2.3<br>(-6.9 to 2.5)                            |
| Other congenital anomalies                    | 12.7<br>(8.9 to 18.0)                         | --                                 | 3.5<br>(2.4 to 4.8)                                 | 3.7<br>(-0.3 to 7.4)                              | 4.2<br>(0.2 to 8.0)                              |
| Skin and subcutaneous diseases                | 12.2<br>(11.8 to 12.6)                        | 1,386.1<br>(1,267.0 to 1,533.0)    | 0.2<br>(0.1 to 0.3)                                 | -0.9<br>(-5.0 to 3.3)                             | -0.4<br>(-4.5 to 3.8)                            |
| Dermatitis                                    | --                                            | --                                 | --                                                  | --                                                | --                                               |
| Psoriasis                                     | --                                            | --                                 | --                                                  | --                                                | --                                               |
| Cellulitis                                    | 0.1<br>(0.1 to 0.1)                           | 11.8<br>(10.0 to 13.6)             | < 0.05<br>(< 0.05 to < 0.05)                        | 2.1<br>(1.1 to 3.0)                               | 2.6<br>(1.7 to 3.6)                              |
| Pyoderma                                      | 2.2<br>(2.1 to 2.4)                           | 278.8<br>(264.1 to 294.6)          | < 0.05<br>(< 0.05 to < 0.05)                        | 10.9<br>(4.9 to 17.3)                             | 11.5<br>(5.5 to 17.9)                            |
| Scabies                                       | 1.9<br>(1.4 to 2.5)                           | 200.2<br>(146.4 to 264.6)          | < 0.05<br>(< 0.05 to 0.1)                           | -7.2<br>(-12.0 to -2.1)                           | -6.7<br>(-11.6 to -1.6)                          |
| Fungal skin diseases                          | 4.3<br>(3.4 to 5.3)                           | 459.7<br>(367.9 to 570.1)          | < 0.05<br>(< 0.05 to 0.1)                           | 2.9<br>(-0.7 to 6.8)                              | 3.5<br>(-0.1 to 7.3)                             |
| Viral skin diseases                           | --                                            | --                                 | --                                                  | --                                                | --                                               |
| Acne vulgaris                                 | --                                            | --                                 | --                                                  | --                                                | --                                               |
| Alopecia areata                               | --                                            | --                                 | --                                                  | --                                                | --                                               |
| Pruritus                                      | 0.2<br>(0.1 to 0.2)                           | 18.0<br>(13.4 to 23.4)             | < 0.05<br>(< 0.05 to < 0.05)                        | 0.4<br>(-0.8 to 1.7)                              | 1.0<br>(-0.3 to 2.2)                             |
| Urticaria                                     | 1.8<br>(1.3 to 2.2)                           | 185.8<br>(141.9 to 235.8)          | 0.1<br>(0.1 to 0.2)                                 | -0.7<br>(-8.2 to 7.4)                             | -0.2<br>(-7.7 to 8.0)                            |
| Decubitus ulcer                               | --                                            | --                                 | --                                                  | --                                                | --                                               |
| Other skin and subcutaneous diseases          | 2.2<br>(2.0 to 2.4)                           | 231.8<br>(215.1 to 250.1)          | < 0.05<br>(< 0.05 to < 0.05)                        | 4.0<br>(-2.6 to 10.6)                             | 4.5<br>(-2.1 to 11.2)                            |
| Sense organ diseases                          | 68.7<br>(65.8 to 70.8)                        | --                                 | 1.7<br>(1.1 to 2.6)                                 | -7.4<br>(-9.8 to -4.7)                            | -6.9<br>(-9.4 to -4.2)                           |
| Glaucoma                                      | --                                            | --                                 | --                                                  | --                                                | --                                               |
| Cataract                                      | --                                            | --                                 | --                                                  | --                                                | --                                               |
| Macular degeneration                          | --                                            | --                                 | --                                                  | --                                                | --                                               |
| Refraction and accommodation disorders        | 54.4<br>(49.1 to 59.7)                        | --                                 | 0.6<br>(0.3 to 1.1)                                 | -6.4<br>(-8.0 to -4.8)                            | -5.9<br>(-7.6 to -4.2)                           |
| Age-related and other hearing loss            | 5.6<br>(3.9 to 7.9)                           | --                                 | 0.6<br>(0.4 to 1.0)                                 | -7.3<br>(-12.6 to -1.7)                           | -6.9<br>(-12.2 to -1.2)                          |
| Other vision loss                             | 9.5<br>(5.4 to 15.5)                          | --                                 | 0.5<br>(0.3 to 0.9)                                 | -8.5<br>(-14.0 to -4.1)                           | -8.0<br>(-13.5 to -3.6)                          |
| Other sense organ diseases                    | --                                            | --                                 | --                                                  | --                                                | --                                               |
| Oral disorders                                | --                                            | --                                 | --                                                  | --                                                | --                                               |
| Caries of deciduous teeth                     | --                                            | --                                 | --                                                  | --                                                | --                                               |
| Caries of permanent teeth                     | --                                            | --                                 | --                                                  | --                                                | --                                               |
| Periodontal disease                           | --                                            | --                                 | --                                                  | --                                                | --                                               |
| Edentulism and severe tooth loss              | --                                            | --                                 | --                                                  | --                                                | --                                               |
| Other oral disorders                          | --                                            | --                                 | --                                                  | --                                                | --                                               |
| <b>Injuries</b>                               | <b>1.0</b><br><b>(0.9 to 1.2)</b>             | <b>9.0*</b><br><b>(8.2 to 9.8)</b> | <b>0.1</b><br><b>(0.1 to 0.1)</b>                   | <b>-6.8</b><br><b>(-8.6 to -5.0)</b>              | <b>-6.3</b><br><b>(-8.1 to -4.5)</b>             |
| <b>Transport injuries</b>                     | <b>&lt; 0.05</b><br><b>(&lt; 0.05 to 0.1)</b> | <b>0.3</b><br><b>(0.2 to 0.4)</b>  | <b>&lt; 0.05</b><br><b>(&lt; 0.05 to &lt; 0.05)</b> | <b>-4.4</b><br><b>(-7.5 to -1.3)</b>              | <b>-3.9</b><br><b>(-7.0 to -0.8)</b>             |
| Road injuries                                 | < 0.05<br>(< 0.05 to < 0.05)                  | < 0.05<br>(< 0.05 to < 0.05)       | < 0.05<br>(< 0.05 to < 0.05)                        | 11.1<br>(4.3 to 16.7)                             | 11.6<br>(4.9 to 17.3)                            |
| Pedestrian road injuries                      | < 0.05<br>(< 0.05 to < 0.05)                  | < 0.05<br>(< 0.05 to < 0.05)       | < 0.05<br>(< 0.05 to < 0.05)                        | 8.7<br>(1.0 to 16.0)                              | 9.2<br>(1.5 to 16.6)                             |
| Cyclist road injuries                         | --                                            | --                                 | --                                                  | --                                                | --                                               |
| Motorcyclist road injuries                    | < 0.05<br>(< 0.05 to < 0.05)                  | < 0.05<br>(< 0.05 to < 0.05)       | < 0.05<br>(< 0.05 to < 0.05)                        | 12.4<br>(4.7 to 18.9)                             | 13.0<br>(5.3 to 19.5)                            |
| Motor vehicle road injuries                   | < 0.05<br>(< 0.05 to < 0.05)                  | < 0.05<br>(< 0.05 to < 0.05)       | < 0.05<br>(< 0.05 to < 0.05)                        | 8.6<br>(1.3 to 15.3)                              | 9.2<br>(1.8 to 16.0)                             |
| Other road injuries                           | < 0.05<br>(< 0.05 to < 0.05)                  | < 0.05<br>(< 0.05 to < 0.05)       | < 0.05<br>(< 0.05 to < 0.05)                        | 27.3<br>(18.7 to 35.4)                            | 28.0<br>(19.4 to 36.1)                           |
| Other transport injuries                      | < 0.05<br>(< 0.05 to 0.1)                     | 0.2<br>(0.2 to 0.3)                | < 0.05<br>(< 0.05 to < 0.05)                        | -5.6<br>(-8.9 to -2.6)                            | -5.1<br>(-8.4 to -2.1)                           |
| <b>Unintentional injuries</b>                 | <b>1.0</b><br><b>(0.8 to 1.1)</b>             | <b>8.6</b><br><b>(7.8 to 9.4)</b>  | <b>0.1</b><br><b>(&lt; 0.05 to 0.1)</b>             | <b>-7.0</b><br><b>(-8.9 to -5.0)</b>              | <b>-6.5</b><br><b>(-8.4 to -4.5)</b>             |
| Falls                                         | 0.2<br>(0.2 to 0.3)                           | 1.6<br>(1.2 to 2.0)                | < 0.05<br>(< 0.05 to < 0.05)                        | 6.3<br>(2.5 to 9.5)                               | 6.9<br>(3.0 to 10.1)                             |
| Drowning                                      | < 0.05<br>(< 0.05 to < 0.05)                  | < 0.05<br>(< 0.05 to < 0.05)       | < 0.05<br>(< 0.05 to < 0.05)                        | -12.5<br>(-15.6 to -9.6)                          | -12.1<br>(-15.2 to -9.2)                         |
| Fire, heat, and hot substances                | < 0.05<br>(< 0.05 to < 0.05)                  | 0.1<br>(0.1 to 0.2)                | < 0.05<br>(< 0.05 to < 0.05)                        | -5.4<br>(-10.6 to -0.1)                           | -4.9<br>(-10.1 to 0.4)                           |
| Poisonings                                    | < 0.05<br>(< 0.05 to < 0.05)                  | 0.1<br>(< 0.05 to 0.1)             | < 0.05<br>(< 0.05 to < 0.05)                        | 5.2<br>(1.0 to 8.2)                               | 5.8<br>(1.5 to 8.7)                              |
| Exposure to mechanical forces                 | 0.1<br>(0.1 to 0.1)                           | 0.9<br>(0.7 to 1.1)                | < 0.05<br>(< 0.05 to < 0.05)                        | -11.2<br>(-15.9 to -7.1)                          | -10.8<br>(-15.5 to -6.6)                         |
| Unintentional firearm injuries                | < 0.05<br>(< 0.05 to < 0.05)                  | < 0.05<br>(< 0.05 to < 0.05)       | < 0.05<br>(< 0.05 to < 0.05)                        | -3.9<br>(-10.9 to 3.0)                            | -3.4<br>(-10.4 to 3.5)                           |
| Unintentional suffocation                     | < 0.05<br>(< 0.05 to < 0.05)                  | 0.2<br>(0.1 to 0.2)                | < 0.05<br>(< 0.05 to < 0.05)                        | -19.2<br>(-25.1 to -14.1)                         | -18.8<br>(-24.7 to -13.6)                        |
| Other exposure to mechanical forces           | 0.1<br>(0.1 to 0.1)                           | 0.7<br>(0.5 to 0.9)                | < 0.05<br>(< 0.05 to < 0.05)                        | -7.3<br>(-12.4 to -2.8)                           | -6.8<br>(-11.9 to -2.3)                          |

| Cause                                                                               | Prevalence in thousands (95% UI)                    | Incidence in thousands (95% UI)    | YLDs in thousands (95% UI)                          |                                                   |                                                  |
|-------------------------------------------------------------------------------------|-----------------------------------------------------|------------------------------------|-----------------------------------------------------|---------------------------------------------------|--------------------------------------------------|
|                                                                                     | 2016 counts                                         | 2016 counts                        | 2016 counts                                         | Percentage change in counts between 2006 and 2016 | Percentage change in rates between 2006 and 2016 |
| Adverse effects of medical treatment                                                | 0.1<br>(0.1 to 0.2)                                 | 1.8<br>(1.5 to 2.1)                | < 0.05<br>(< 0.05 to < 0.05)                        | -13.2<br>(-17.5 to -9.4)                          | -12.8<br>(-17.1 to -8.9)                         |
| Animal contact                                                                      | 0.1<br>(< 0.05 to 0.1)                              | 0.8<br>(0.6 to 1.0)                | < 0.05<br>(< 0.05 to < 0.05)                        | -13.9<br>(-18.6 to -9.7)                          | -13.4<br>(-18.2 to -9.2)                         |
| Venomous animal contact                                                             | < 0.05<br>(< 0.05 to < 0.05)                        | 0.4<br>(0.3 to 0.5)                | < 0.05<br>(< 0.05 to < 0.05)                        | -17.1<br>(-22.1 to -12.7)                         | -16.7<br>(-21.7 to -12.2)                        |
| Non-venomous animal contact                                                         | < 0.05<br>(< 0.05 to 0.1)                           | 0.4<br>(0.3 to 0.6)                | < 0.05<br>(< 0.05 to < 0.05)                        | -7.2<br>(-12.8 to -2.6)                           | -6.7<br>(-12.3 to -2.1)                          |
| Foreign body                                                                        | 0.1<br>(0.1 to 0.1)                                 | 1.3<br>(1.1 to 1.6)                | < 0.05<br>(< 0.05 to < 0.05)                        | -8.2<br>(-10.8 to -5.7)                           | -7.8<br>(-10.3 to -5.2)                          |
| Pulmonary aspiration and foreign body in airway                                     | 0.1<br>(0.1 to 0.1)                                 | 0.9<br>(0.8 to 1.2)                | < 0.05<br>(< 0.05 to < 0.05)                        | -10.2<br>(-13.3 to -7.0)                          | -9.7<br>(-12.8 to -6.5)                          |
| Foreign body in eyes                                                                | < 0.05<br>(< 0.05 to < 0.05)                        | 0.1<br>(0.1 to 0.2)                | < 0.05<br>(< 0.05 to < 0.05)                        | 3.7<br>(0.4 to 8.4)                               | 4.3<br>(1.0 to 8.9)                              |
| Foreign body in other body part                                                     | < 0.05<br>(< 0.05 to < 0.05)                        | 0.3<br>(0.2 to 0.4)                | < 0.05<br>(< 0.05 to < 0.05)                        | -4.3<br>(-8.3 to -0.6)                            | -3.8<br>(-7.8 to -0.1)                           |
| Environmental heat and cold exposure                                                | 0.1<br>(< 0.05 to 0.1)                              | 0.4<br>(0.3 to 0.6)                | < 0.05<br>(< 0.05 to < 0.05)                        | -9.9<br>(-14.3 to -6.2)                           | -9.4<br>(-13.9 to -5.7)                          |
| Other unintentional injuries                                                        | 0.2<br>(0.2 to 0.3)                                 | 1.6<br>(1.3 to 2.1)                | < 0.05<br>(< 0.05 to < 0.05)                        | -2.5<br>(-7.1 to 2.1)                             | -2.0<br>(-6.6 to 2.6)                            |
| <b>Self-harm and interpersonal violence</b>                                         | <b>&lt; 0.05</b><br><b>(&lt; 0.05 to &lt; 0.05)</b> | <b>0.1†</b><br><b>(0.1 to 0.1)</b> | <b>&lt; 0.05</b><br><b>(&lt; 0.05 to &lt; 0.05)</b> | <b>-6.7</b><br><b>(-12.2 to -1.2)</b>             | <b>-6.2</b><br><b>(-11.8 to -0.7)</b>            |
| Self-harm                                                                           | --                                                  | --                                 | --                                                  | --                                                | --                                               |
| Self-harm by firearm                                                                | --                                                  | --                                 | --                                                  | --                                                | --                                               |
| Self-harm by other specified means                                                  | --                                                  | --                                 | --                                                  | --                                                | --                                               |
| Interpersonal violence                                                              | < 0.05<br>(< 0.05 to < 0.05)                        | 0.1†<br>(0.1 to 0.1)               | < 0.05<br>(< 0.05 to < 0.05)                        | -6.7<br>(-12.2 to -1.2)                           | -6.2<br>(-11.8 to -0.7)                          |
| Assault by firearm                                                                  | < 0.05<br>(< 0.05 to < 0.05)                        | < 0.05<br>(< 0.05 to < 0.05)       | < 0.05<br>(< 0.05 to < 0.05)                        | -2.8<br>(-10.1 to 4.3)                            | -2.3<br>(-9.6 to 4.8)                            |
| Assault by sharp object                                                             | < 0.05<br>(< 0.05 to < 0.05)                        | < 0.05<br>(< 0.05 to < 0.05)       | < 0.05<br>(< 0.05 to < 0.05)                        | -1.7<br>(-8.6 to 5.8)                             | -1.2<br>(-8.1 to 6.4)                            |
| Sexual violence                                                                     | --                                                  | --                                 | --                                                  | --                                                | --                                               |
| Assault by other means                                                              | < 0.05<br>(< 0.05 to < 0.05)                        | 0.1<br>(0.1 to 0.1)                | < 0.05<br>(< 0.05 to < 0.05)                        | -8.8<br>(-14.4 to -3.3)                           | -8.4<br>(-13.9 to -2.8)                          |
| <b>Forces of nature, conflict and terrorism, and executions and police conflict</b> | --                                                  | --                                 | --                                                  | --                                                | --                                               |
| Forces of nature, conflict and terrorism, and state actor violence                  | --                                                  | --                                 | --                                                  | --                                                | --                                               |
| Conflict and terrorism                                                              | --                                                  | --                                 | --                                                  | --                                                | --                                               |
| Executions and police conflict                                                      | --                                                  | --                                 | --                                                  | --                                                | --                                               |

We did not calculate incidence for certain NTDs and causes with only birth prevalence. Blank cells mean that no estimate is available.

† Incidence for aggregate causes represents the sum of the incidence of the causes below the aggregate.

‡ Incidence estimates for stroke represent first-ever stroke only.

^ Incidence of HIV/AIDS represents new infections of HIV only and does not include new infections of Tuberculosis in HIV positive cases.

SR Table 12: Global prevalence, incidence, and YLDs for 2016, percentage change of YLD counts and percentage change of YLD rates between 2006 and 2016 by cause, age 7-27 days.

| Cause                                                                                | Prevalence in thousands (95% UI)       | Incidence in thousands (95% UI)            | YLDs in thousands (95% UI)             |                                                                     |                                                                    |
|--------------------------------------------------------------------------------------|----------------------------------------|--------------------------------------------|----------------------------------------|---------------------------------------------------------------------|--------------------------------------------------------------------|
|                                                                                      | 2016 counts<br>(4,650.0 to 4,726.4)    | 2016 counts<br>(48,706.9 to 62,004.3)      | 2016 counts<br>(179.2 to 333.1)        | Percentage change in counts between 2006 and 2016<br>(-7.5 to -1.8) | Percentage change in rates between 2006 and 2016<br>(-7.4 to -1.6) |
| <b>All causes</b>                                                                    | <b>4,682.5</b><br>(3,429.7 to 3,539.6) | <b>55,267.8†</b><br>(44,094.1 to 57,488.2) | <b>249.8</b><br>(143.9 to 275.1)       | <b>-4.8</b><br>(-8.6 to -1.7)                                       | <b>-4.6</b><br>(-8.4 to -1.5)                                      |
| <b>Communicable, maternal, neonatal, and nutritional disorders</b>                   | <b>3,481.8</b><br>(755.1 to 923.2)     | <b>50,704.3†</b><br>(2.5 to 5.1)           | <b>204.7</b><br>(143.9 to 275.1)       | <b>-5.3</b><br>(-13.3 to 9.4)                                       | <b>-5.1</b><br>(-13.1 to 9.6)                                      |
| <b>HIV/AIDS and tuberculosis</b>                                                     | <b>831.4</b><br>(755.1 to 923.2)       | <b>3.7†</b><br>(2.5 to 5.1)                | <b>&lt; 0.05</b><br>(< 0.05 to < 0.05) | <b>-3.9</b><br>(-13.3 to 9.4)                                       | <b>-3.8</b><br>(-13.1 to 9.6)                                      |
| Tuberculosis                                                                         | 794.4<br>(686.1 to 912.2)              | 3.7†<br>(2.5 to 5.1)                       | < 0.05<br>(< 0.05 to < 0.05)           | -3.9<br>(-13.3 to 9.4)                                              | -3.8<br>(-13.1 to 9.6)                                             |
| Drug-susceptible tuberculosis                                                        | 0.1<br>(< 0.05 to 0.1)                 | 3.6<br>(2.5 to 4.9)                        | < 0.05<br>(< 0.05 to < 0.05)           | -3.8<br>(-13.2 to 9.7)                                              | -3.6<br>(-13.1 to 9.8)                                             |
| Multidrug-resistant tuberculosis without extensive drug resistance                   | < 0.05<br>(< 0.05 to < 0.05)           | 0.1<br>(0.1 to 0.1)                        | < 0.05<br>(< 0.05 to < 0.05)           | -11.9<br>(-26.9 to 6.2)                                             | -11.8<br>(-26.8 to 6.4)                                            |
| Extensively drug-resistant tuberculosis                                              | < 0.05<br>(< 0.05 to < 0.05)           | < 0.05<br>(< 0.05 to < 0.05)               | < 0.05<br>(< 0.05 to < 0.05)           | 157.7<br>(109.0 to 216.0)                                           | 158.1<br>(109.4 to 216.6)                                          |
| Latent tuberculosis infection                                                        | 794.3<br>(686.0 to 912.1)              | --                                         | --                                     | --                                                                  | --                                                                 |
| HIV/AIDS                                                                             | --                                     | --                                         | --                                     | --                                                                  | --                                                                 |
| Drug-susceptible HIV/AIDS - Tuberculosis                                             | --                                     | --                                         | --                                     | --                                                                  | --                                                                 |
| Multidrug-resistant HIV/AIDS - Tuberculosis without extensive drug resistance        | --                                     | --                                         | --                                     | --                                                                  | --                                                                 |
| Extensively drug-resistant HIV/AIDS - Tuberculosis                                   | --                                     | --                                         | --                                     | --                                                                  | --                                                                 |
| HIV/AIDS resulting in other diseases                                                 | --                                     | --                                         | --                                     | --                                                                  | --                                                                 |
| <b>Diarrhoea, lower respiratory infections, and other common infectious diseases</b> | <b>644.9</b><br>(617.6 to 669.9)       | <b>48,555.6†</b><br>(42,077.8 to 55,362.6) | <b>41.7</b><br>(27.5 to 57.1)          | <b>-9.4</b><br>(-12.1 to -7.0)                                      | <b>-9.2</b><br>(-11.9 to -6.8)                                     |
| Diarrhoeal diseases                                                                  | 250.6<br>(219.2 to 285.4)              | 19,416.3<br>(17,088.0 to 22,034.8)         | 29.2<br>(19.3 to 40.9)                 | -12.4<br>(-15.9 to -9.3)                                            | -12.2<br>(-15.8 to -9.1)                                           |
| Intestinal infectious diseases                                                       | --                                     | --                                         | --                                     | --                                                                  | --                                                                 |
| Typhoid fever                                                                        | --                                     | --                                         | --                                     | --                                                                  | --                                                                 |
| Paratyphoid fever                                                                    | --                                     | --                                         | --                                     | --                                                                  | --                                                                 |
| Other intestinal infectious diseases                                                 | --                                     | --                                         | --                                     | --                                                                  | --                                                                 |
| Lower respiratory infections                                                         | 54.6<br>(47.0 to 64.4)                 | 771.8<br>(604.1 to 971.1)                  | 3.4<br>(2.2 to 5.0)                    | -2.7<br>(-7.8 to 2.3)                                               | -2.5<br>(-7.7 to 2.4)                                              |
| Upper respiratory infections                                                         | 294.5<br>(233.3 to 366.9)              | 25,438.1<br>(19,987.3 to 32,132.5)         | 7.5<br>(4.4 to 11.9)                   | 1.7<br>(-0.4 to 3.5)                                                | 1.9<br>(-0.2 to 3.6)                                               |
| Otitis media                                                                         | 39.6<br>(30.8 to 50.6)                 | 1,208.4<br>(918.9 to 1,605.3)              | 0.8<br>(0.4 to 1.2)                    | -2.8<br>(-5.6 to -0.2)                                              | -2.7<br>(-5.4 to -0.0)                                             |
| Meningitis                                                                           | 3.9<br>(3.2 to 4.7)                    | 73.2<br>(58.6 to 90.1)                     | 0.5<br>(0.3 to 0.7)                    | -1.9<br>(-9.8 to 6.0)                                               | -1.7<br>(-9.7 to 6.2)                                              |
| Pneumococcal meningitis                                                              | 0.4<br>(0.3 to 0.6)                    | 11.8<br>(7.6 to 16.4)                      | 0.1<br>(< 0.05 to 0.1)                 | -25.6<br>(-36.9 to -11.6)                                           | -25.5<br>(-36.8 to -11.4)                                          |
| H influenzae type B meningitis                                                       | 0.4<br>(0.3 to 0.6)                    | 13.8<br>(8.3 to 20.3)                      | 0.1<br>(< 0.05 to 0.1)                 | -42.5<br>(-52.0 to -32.3)                                           | -42.4<br>(-51.9 to -32.2)                                          |
| Meningococcal infection                                                              | 0.5<br>(0.3 to 0.6)                    | 16.1<br>(10.7 to 23.0)                     | 0.1<br>(< 0.05 to 0.1)                 | 5.4<br>(-16.6 to 33.0)                                              | 5.5<br>(-16.4 to 33.2)                                             |
| Other meningitis                                                                     | 2.6<br>(2.1 to 3.2)                    | 31.6<br>(23.1 to 40.5)                     | 0.3<br>(0.2 to 0.5)                    | 15.3<br>(3.5 to 28.8)                                               | 15.5<br>(3.7 to 29.0)                                              |
| Encephalitis                                                                         | 0.5<br>(0.4 to 0.6)                    | 16.8<br>(13.8 to 20.0)                     | 0.1<br>(< 0.05 to 0.1)                 | -8.8<br>(-18.6 to 2.7)                                              | -8.6<br>(-18.5 to 2.9)                                             |
| Diphtheria                                                                           | --                                     | --                                         | --                                     | --                                                                  | --                                                                 |
| Whooping cough                                                                       | --                                     | --                                         | --                                     | --                                                                  | --                                                                 |
| Tetanus                                                                              | 0.8<br>(0.5 to 1.1)                    | 11.5<br>(6.5 to 17.4)                      | 0.1<br>(< 0.05 to 0.2)                 | -68.0<br>(-78.6 to -51.6)                                           | -67.9<br>(-78.6 to -51.5)                                          |
| Measles                                                                              | --                                     | --                                         | --                                     | --                                                                  | --                                                                 |
| Varicella and herpes zoster                                                          | 31.1<br>(21.8 to 43.0)                 | 1,619.4<br>(1,139.4 to 2,239.2)            | 0.2<br>(0.1 to 0.4)                    | -3.5<br>(-6.3 to -1.0)                                              | -3.4<br>(-6.1 to -0.8)                                             |
| <b>Neglected tropical diseases and malaria</b>                                       | <b>111.5</b><br>(95.7 to 129.2)        | <b>875.6†</b><br>(586.2 to 1,216.7)        | <b>1.6</b><br>(1.0 to 2.6)             | <b>-30.9</b><br>(-41.5 to -20.3)                                    | <b>-30.8</b><br>(-41.4 to -20.1)                                   |
| Malaria                                                                              | 94.4<br>(70.5 to 121.9)                | 868.8<br>(579.1 to 1,209.7)                | 1.5<br>(0.9 to 2.5)                    | -34.6<br>(-45.1 to -25.2)                                           | -34.5<br>(-45.1 to -25.1)                                          |
| Chagas disease                                                                       | --                                     | --                                         | --                                     | --                                                                  | --                                                                 |
| Leishmaniasis                                                                        | --                                     | --                                         | --                                     | --                                                                  | --                                                                 |
| Visceral leishmaniasis                                                               | --                                     | --                                         | --                                     | --                                                                  | --                                                                 |
| Cutaneous and mucocutaneous leishmaniasis                                            | --                                     | --                                         | --                                     | --                                                                  | --                                                                 |
| African trypanosomiasis                                                              | --                                     | --                                         | --                                     | --                                                                  | --                                                                 |
| Schistosomiasis                                                                      | --                                     | --                                         | --                                     | --                                                                  | --                                                                 |
| Cysticercosis                                                                        | --                                     | --                                         | --                                     | --                                                                  | --                                                                 |
| Cystic echinococcosis                                                                | --                                     | --                                         | --                                     | --                                                                  | --                                                                 |
| Lymphatic filariasis                                                                 | 12.7<br>(11.1 to 14.4)                 | 2.2<br>(1.3 to 3.5)                        | --                                     | --                                                                  | --                                                                 |
| Onchocerciasis                                                                       | --                                     | --                                         | --                                     | --                                                                  | --                                                                 |
| Trachoma                                                                             | --                                     | --                                         | --                                     | --                                                                  | --                                                                 |
| Dengue                                                                               | --                                     | --                                         | --                                     | --                                                                  | --                                                                 |
| Yellow fever                                                                         | < 0.05<br>(< 0.05 to < 0.05)           | 0.1<br>(< 0.05 to 0.2)                     | < 0.05<br>(< 0.05 to < 0.05)           | -18.9<br>(-48.7 to 24.9)                                            | -18.7<br>(-48.6 to 25.1)                                           |
| Rabies                                                                               | --                                     | --                                         | --                                     | --                                                                  | --                                                                 |
| Intestinal nematode infections                                                       | --                                     | --                                         | --                                     | --                                                                  | --                                                                 |
| Ascariasis                                                                           | --                                     | --                                         | --                                     | --                                                                  | --                                                                 |

| Cause                                                                   | Prevalence in thousands (95% UI) | Incidence in thousands (95% UI)  | YLDs in thousands (95% UI)   |                                                   |                                                  |
|-------------------------------------------------------------------------|----------------------------------|----------------------------------|------------------------------|---------------------------------------------------|--------------------------------------------------|
|                                                                         | 2016 counts                      | 2016 counts                      | 2016 counts                  | Percentage change in counts between 2006 and 2016 | Percentage change in rates between 2006 and 2016 |
| Trichuriasis                                                            | --                               | --                               | --                           | --                                                | --                                               |
| Hookworm disease                                                        | --                               | --                               | --                           | --                                                | --                                               |
| Food-borne trematodiases                                                | --                               | --                               | --                           | --                                                | --                                               |
| Leprosy                                                                 | --                               | --                               | --                           | --                                                | --                                               |
| Ebola virus disease                                                     | --                               | --                               | --                           | --                                                | --                                               |
| Zika virus disease                                                      | 0.2<br>(0.1 to 0.4)              | 4.5<br>(2.5 to 8.7)              | 0.1<br>(< 0.05 to 0.1)       | --                                                | --                                               |
| Guinea worm disease                                                     | --                               | --                               | --                           | --                                                | --                                               |
| Other neglected tropical diseases                                       | --                               | --                               | < 0.05<br>(< 0.05 to < 0.05) | -11.3<br>(-44.0 to 36.5)                          | -11.2<br>(-43.9 to 36.7)                         |
| <b>Maternal disorders</b>                                               | --                               | --                               | --                           | --                                                | --                                               |
| Maternal haemorrhage                                                    | --                               | --                               | --                           | --                                                | --                                               |
| Maternal sepsis and other pregnancy related infections                  | --                               | --                               | --                           | --                                                | --                                               |
| Maternal hypertensive disorders                                         | --                               | --                               | --                           | --                                                | --                                               |
| Maternal obstructed labour and uterine rupture                          | --                               | --                               | --                           | --                                                | --                                               |
| Maternal abortion, miscarriage, and ectopic pregnancy                   | --                               | --                               | --                           | --                                                | --                                               |
| Other maternal disorders                                                | --                               | --                               | --                           | --                                                | --                                               |
| <b>Neonatal disorders</b>                                               | 667.3<br>(626.0 to 699.3)        | --                               | 58.2<br>(39.0 to 83.5)       | -5.8<br>(-13.7 to 4.1)                            | -5.6<br>(-13.5 to 4.3)                           |
| Neonatal preterm birth complications                                    | 532.5<br>(454.8 to 618.3)        | --                               | 20.6<br>(12.5 to 31.6)       | -6.0<br>(-23.9 to 16.2)                           | -5.8<br>(-23.7 to 16.5)                          |
| Neonatal encephalopathy due to birth asphyxia and trauma                | 76.0<br>(57.3 to 99.4)           | --                               | 8.6<br>(5.1 to 13.7)         | -2.5<br>(-5.7 to 0.9)                             | -2.3<br>(-5.5 to 1.1)                            |
| Neonatal sepsis and other neonatal infections                           | 66.8<br>(40.3 to 107.3)          | --                               | 17.2<br>(8.9 to 34.2)        | -3.3<br>(-5.8 to -0.4)                            | -3.1<br>(-5.6 to -0.2)                           |
| Hemolytic disease and other neonatal jaundice                           | 5.5<br>(4.7 to 6.5)              | --                               | 1.2<br>(0.8 to 1.7)          | 0.9<br>(-6.1 to 8.1)                              | 1.1<br>(-5.9 to 8.3)                             |
| Other neonatal disorders                                                | --                               | --                               | 10.5<br>(7.0 to 15.1)        | -12.2<br>(-19.5 to -3.0)                          | -12.0<br>(-19.4 to -2.8)                         |
| <b>Nutritional deficiencies</b>                                         | 1,936.4<br>(1,897.4 to 1,972.4)  | 1,222.2†<br>(1,189.8 to 1,255.1) | 100.1<br>(68.0 to 139.4)     | -2.9<br>(-7.5 to 1.4)                             | -2.7<br>(-7.3 to 1.6)                            |
| Protein-energy malnutrition                                             | 1,020.5<br>(991.5 to 1,050.3)    | 1,222.2<br>(1,189.8 to 1,255.1)  | 56.8<br>(37.0 to 81.1)       | -3.2<br>(-10.7 to 4.6)                            | -3.0<br>(-10.5 to 4.8)                           |
| Iodine deficiency                                                       | --                               | --                               | --                           | --                                                | --                                               |
| Vitamin A deficiency                                                    | --                               | --                               | --                           | --                                                | --                                               |
| Iron-deficiency anaemia                                                 | 1,204.2<br>(1,055.1 to 1,334.1)  | --                               | 43.3<br>(28.1 to 62.3)       | -2.5<br>(-5.2 to -0.0)                            | -2.3<br>(-5.0 to 0.1)                            |
| Other nutritional deficiencies                                          | --                               | --                               | --                           | --                                                | --                                               |
| <b>Other communicable, maternal, neonatal, and nutritional diseases</b> | 325.1<br>(255.0 to 421.0)        | 47.1<br>(23.8 to 76.5)           | 3.1<br>(2.0 to 4.4)          | 8.3<br>(4.9 to 11.9)                              | 8.5<br>(5.1 to 12.1)                             |
| Sexually transmitted diseases excluding HIV                             | --                               | --                               | --                           | --                                                | --                                               |
| Syphilis                                                                | --                               | --                               | --                           | --                                                | --                                               |
| Chlamydial infection                                                    | --                               | --                               | --                           | --                                                | --                                               |
| Gonococcal infection                                                    | --                               | --                               | --                           | --                                                | --                                               |
| Trichomoniasis                                                          | --                               | --                               | --                           | --                                                | --                                               |
| Genital herpes                                                          | --                               | --                               | --                           | --                                                | --                                               |
| Other sexually transmitted diseases                                     | --                               | --                               | --                           | --                                                | --                                               |
| Hepatitis                                                               | 234.6<br>(119.5 to 404.8)        | 47.1<br>(23.8 to 76.5)           | < 0.05<br>(< 0.05 to < 0.05) | -8.5<br>(-14.8 to -2.2)                           | -8.3<br>(-14.6 to -2.0)                          |
| Acute hepatitis A                                                       | --                               | --                               | --                           | --                                                | --                                               |
| Hepatitis B                                                             | 234.6<br>(119.5 to 404.8)        | 47.1<br>(23.8 to 76.5)           | < 0.05<br>(< 0.05 to < 0.05) | -8.5<br>(-14.8 to -2.2)                           | -8.3<br>(-14.6 to -2.0)                          |
| Hepatitis C                                                             | --                               | --                               | --                           | --                                                | --                                               |
| Acute hepatitis E                                                       | --                               | --                               | --                           | --                                                | --                                               |
| Other infectious diseases                                               | 75.9<br>(66.5 to 84.0)           | < 0.05<br>(< 0.05 to < 0.05)     | 3.0<br>(2.0 to 4.3)          | 8.5<br>(5.0 to 12.1)                              | 8.7<br>(5.2 to 12.3)                             |
| <b>Non-communicable diseases</b>                                        | 2,449.9<br>(2,427.2 to 2,475.6)  | 4,484.5†<br>(4,132.0 to 4,896.1) | 44.4<br>(31.9 to 59.0)       | -2.6<br>(-3.8 to -1.4)                            | -2.4<br>(-3.7 to -1.2)                           |
| <b>Neoplasms</b>                                                        | --                               | --                               | --                           | --                                                | --                                               |
| Lip and oral cavity cancer                                              | --                               | --                               | --                           | --                                                | --                                               |
| Nasopharynx cancer                                                      | --                               | --                               | --                           | --                                                | --                                               |
| Other pharynx cancer                                                    | --                               | --                               | --                           | --                                                | --                                               |
| Oesophageal cancer                                                      | --                               | --                               | --                           | --                                                | --                                               |
| Stomach cancer                                                          | --                               | --                               | --                           | --                                                | --                                               |
| Colon and rectum cancer                                                 | --                               | --                               | --                           | --                                                | --                                               |
| Liver cancer                                                            | --                               | --                               | --                           | --                                                | --                                               |
| Liver cancer due to hepatitis B                                         | --                               | --                               | --                           | --                                                | --                                               |



| Cause                                              | Prevalence in thousands (95% UI)              | Incidence in thousands (95% UI)    | YLDs in thousands (95% UI)                          |                                                   |                                                  |
|----------------------------------------------------|-----------------------------------------------|------------------------------------|-----------------------------------------------------|---------------------------------------------------|--------------------------------------------------|
|                                                    | 2016 counts                                   | 2016 counts                        | 2016 counts                                         | Percentage change in counts between 2006 and 2016 | Percentage change in rates between 2006 and 2016 |
| Liver cancer due to hepatitis C                    | --                                            | --                                 | --                                                  | --                                                | --                                               |
| Liver cancer due to alcohol use                    | --                                            | --                                 | --                                                  | --                                                | --                                               |
| Liver cancer due to other causes                   | --                                            | --                                 | --                                                  | --                                                | --                                               |
| Gallbladder and biliary tract cancer               | --                                            | --                                 | --                                                  | --                                                | --                                               |
| Pancreatic cancer                                  | --                                            | --                                 | --                                                  | --                                                | --                                               |
| Larynx cancer                                      | --                                            | --                                 | --                                                  | --                                                | --                                               |
| Tracheal, bronchus, and lung cancer                | --                                            | --                                 | --                                                  | --                                                | --                                               |
| Malignant skin melanoma                            | --                                            | --                                 | --                                                  | --                                                | --                                               |
| Non-melanoma skin cancer                           | --                                            | --                                 | --                                                  | --                                                | --                                               |
| Non-melanoma skin cancer (squamous-cell carcinoma) | --                                            | --                                 | --                                                  | --                                                | --                                               |
| Non-melanoma skin cancer (basal-cell carcinoma)    | --                                            | --                                 | --                                                  | --                                                | --                                               |
| Breast cancer                                      | --                                            | --                                 | --                                                  | --                                                | --                                               |
| Cervical cancer                                    | --                                            | --                                 | --                                                  | --                                                | --                                               |
| Uterine cancer                                     | --                                            | --                                 | --                                                  | --                                                | --                                               |
| Ovarian cancer                                     | --                                            | --                                 | --                                                  | --                                                | --                                               |
| Prostate cancer                                    | --                                            | --                                 | --                                                  | --                                                | --                                               |
| Testicular cancer                                  | --                                            | --                                 | --                                                  | --                                                | --                                               |
| Kidney cancer                                      | --                                            | --                                 | --                                                  | --                                                | --                                               |
| Bladder cancer                                     | --                                            | --                                 | --                                                  | --                                                | --                                               |
| Brain and nervous system cancer                    | --                                            | --                                 | --                                                  | --                                                | --                                               |
| Thyroid cancer                                     | --                                            | --                                 | --                                                  | --                                                | --                                               |
| Mesothelioma                                       | --                                            | --                                 | --                                                  | --                                                | --                                               |
| Hodgkin lymphoma                                   | --                                            | --                                 | --                                                  | --                                                | --                                               |
| Non-Hodgkin's lymphoma                             | --                                            | --                                 | --                                                  | --                                                | --                                               |
| Multiple myeloma                                   | --                                            | --                                 | --                                                  | --                                                | --                                               |
| Leukaemia                                          | --                                            | --                                 | --                                                  | --                                                | --                                               |
| Acute lymphoid leukaemia                           | --                                            | --                                 | --                                                  | --                                                | --                                               |
| Chronic lymphoid leukaemia                         | --                                            | --                                 | --                                                  | --                                                | --                                               |
| Acute myeloid leukaemia                            | --                                            | --                                 | --                                                  | --                                                | --                                               |
| Chronic myeloid leukaemia                          | --                                            | --                                 | --                                                  | --                                                | --                                               |
| Other leukaemia                                    | --                                            | --                                 | --                                                  | --                                                | --                                               |
| Other neoplasms                                    | --                                            | --                                 | --                                                  | --                                                | --                                               |
| <b>Cardiovascular diseases</b>                     | <b>&lt; 0.05</b><br><b>(&lt; 0.05 to 0.1)</b> | <b>1.6†</b><br><b>(1.3 to 2.0)</b> | <b>&lt; 0.05</b><br><b>(&lt; 0.05 to &lt; 0.05)</b> | <b>-7.2</b><br><b>(-11.0 to -3.2)</b>             | <b>-7.0</b><br><b>(-10.9 to -3.0)</b>            |
| Rheumatic heart disease                            | --                                            | --                                 | --                                                  | --                                                | --                                               |
| Ischaemic heart disease                            | --                                            | --                                 | --                                                  | --                                                | --                                               |
| Cerebrovascular disease                            | --                                            | --                                 | --                                                  | --                                                | --                                               |
| Ischaemic stroke                                   | --                                            | --                                 | --                                                  | --                                                | --                                               |
| Hemorrhagic stroke                                 | --                                            | --                                 | --                                                  | --                                                | --                                               |
| Hypertensive heart disease                         | --                                            | --                                 | --                                                  | --                                                | --                                               |
| Cardiomyopathy and myocarditis                     | --                                            | --                                 | --                                                  | --                                                | --                                               |
| Myocarditis                                        | --                                            | --                                 | --                                                  | --                                                | --                                               |
| Alcoholic cardiomyopathy                           | --                                            | --                                 | --                                                  | --                                                | --                                               |
| Other cardiomyopathy                               | --                                            | --                                 | --                                                  | --                                                | --                                               |
| Atrial fibrillation and flutter                    | --                                            | --                                 | --                                                  | --                                                | --                                               |
| Peripheral vascular disease                        | --                                            | --                                 | --                                                  | --                                                | --                                               |
| Endocarditis                                       | <b>&lt; 0.05</b><br><b>(&lt; 0.05 to 0.1)</b> | <b>1.6</b><br><b>(1.3 to 2.0)</b>  | <b>&lt; 0.05</b><br><b>(&lt; 0.05 to &lt; 0.05)</b> | <b>-7.2</b><br><b>(-11.0 to -3.2)</b>             | <b>-7.0</b><br><b>(-10.9 to -3.0)</b>            |
| Other cardiovascular and circulatory diseases      | --                                            | --                                 | --                                                  | --                                                | --                                               |
| <b>Chronic respiratory diseases</b>                | --                                            | --                                 | --                                                  | --                                                | --                                               |
| Chronic obstructive pulmonary disease              | --                                            | --                                 | --                                                  | --                                                | --                                               |
| Pneumoconiosis                                     | --                                            | --                                 | --                                                  | --                                                | --                                               |
| Silicosis                                          | --                                            | --                                 | --                                                  | --                                                | --                                               |

| Cause                                                          | Prevalence in thousands (95% UI)     | Incidence in thousands (95% UI)      | YLDs in thousands (95% UI)                    |                                                   |                                                  |
|----------------------------------------------------------------|--------------------------------------|--------------------------------------|-----------------------------------------------|---------------------------------------------------|--------------------------------------------------|
|                                                                | 2016 counts                          | 2016 counts                          | 2016 counts                                   | Percentage change in counts between 2006 and 2016 | Percentage change in rates between 2006 and 2016 |
| Asbestosis                                                     | --                                   | --                                   | --                                            | --                                                | --                                               |
| Coal workers pneumoconiosis                                    | --                                   | --                                   | --                                            | --                                                | --                                               |
| Other pneumoconiosis                                           | --                                   | --                                   | --                                            | --                                                | --                                               |
| Asthma                                                         | --                                   | --                                   | --                                            | --                                                | --                                               |
| Interstitial lung disease and pulmonary sarcoidosis            | --                                   | --                                   | --                                            | --                                                | --                                               |
| Other chronic respiratory diseases                             | --                                   | --                                   | --                                            | --                                                | --                                               |
| <b>Cirrhosis and other chronic liver diseases</b>              | <b>0.2</b><br><b>(0.2 to 0.3)</b>    | <b>4.9</b><br><b>(4.3 to 5.5)</b>    | <b>&lt; 0.05</b><br><b>(&lt; 0.05 to 0.1)</b> | <b>1.9</b><br><b>(0.5 to 3.6)</b>                 | <b>2.1</b><br><b>(0.7 to 3.8)</b>                |
| Cirrhosis and other chronic liver diseases due to hepatitis B  | < 0.05<br>(< 0.05 to < 0.05)         | < 0.05<br>(< 0.05 to < 0.05)         | < 0.05<br>(< 0.05 to < 0.05)                  | 7.2<br>(2.6 to 11.6)                              | 7.4<br>(2.8 to 11.8)                             |
| Cirrhosis and other chronic liver diseases due to hepatitis C  | < 0.05<br>(< 0.05 to < 0.05)         | < 0.05<br>(< 0.05 to < 0.05)         | < 0.05<br>(< 0.05 to < 0.05)                  | 4.5<br>(0.4 to 8.6)                               | 4.7<br>(0.6 to 8.8)                              |
| Cirrhosis and other chronic liver diseases due to alcohol use  | --                                   | --                                   | --                                            | --                                                | --                                               |
| Cirrhosis and other chronic liver diseases due to other causes | 0.2<br>(0.2 to 0.3)                  | 4.9<br>(4.3 to 5.5)                  | < 0.05<br>(< 0.05 to 0.1)                     | 1.9<br>(0.5 to 3.6)                               | 2.1<br>(0.7 to 3.8)                              |
| <b>Digestive diseases</b>                                      | <b>0.3</b><br><b>(0.2 to 0.4)</b>    | <b>4.0†</b><br><b>(3.0 to 5.2)</b>   | <b>0.1</b><br><b>(0.1 to 0.1)</b>             | <b>-7.0</b><br><b>(-12.9 to -1.3)</b>             | <b>-6.8</b><br><b>(-12.7 to -1.1)</b>            |
| Peptic ulcer disease                                           | --                                   | --                                   | --                                            | --                                                | --                                               |
| Gastritis and duodenitis                                       | --                                   | --                                   | --                                            | --                                                | --                                               |
| Appendicitis                                                   | --                                   | --                                   | --                                            | --                                                | --                                               |
| Paralytic ileus and intestinal obstruction                     | 0.3<br>(0.2 to 0.4)                  | 4.0<br>(3.0 to 5.2)                  | 0.1<br>(0.1 to 0.1)                           | -7.0<br>(-12.9 to -1.3)                           | -6.8<br>(-12.7 to -1.1)                          |
| Inguinal, femoral, and abdominal hernia                        | --                                   | --                                   | --                                            | --                                                | --                                               |
| Inflammatory bowel disease                                     | --                                   | --                                   | --                                            | --                                                | --                                               |
| Vascular intestinal disorders                                  | --                                   | --                                   | --                                            | --                                                | --                                               |
| Gallbladder and biliary diseases                               | --                                   | --                                   | --                                            | --                                                | --                                               |
| Pancreatitis                                                   | --                                   | --                                   | --                                            | --                                                | --                                               |
| Other digestive diseases                                       | --                                   | --                                   | --                                            | --                                                | --                                               |
| <b>Neurological disorders</b>                                  | <b>0.8</b><br><b>(0.6 to 1.0)</b>    | <b>16.6</b><br><b>(12.6 to 21.5)</b> | <b>0.3</b><br><b>(0.2 to 0.4)</b>             | <b>-6.8</b><br><b>(-18.4 to 6.8)</b>              | <b>-6.6</b><br><b>(-18.3 to 7.0)</b>             |
| Alzheimer's disease and other dementias                        | --                                   | --                                   | --                                            | --                                                | --                                               |
| Parkinson's disease                                            | --                                   | --                                   | --                                            | --                                                | --                                               |
| Epilepsy                                                       | 0.8<br>(0.6 to 1.0)                  | 16.4<br>(12.4 to 21.2)               | 0.3<br>(0.2 to 0.4)                           | -6.8<br>(-18.5 to 6.9)                            | -6.6<br>(-18.4 to 7.1)                           |
| Multiple sclerosis                                             | --                                   | --                                   | --                                            | --                                                | --                                               |
| Motor neuron disease                                           | < 0.05<br>(< 0.05 to < 0.05)         | 0.2<br>(0.2 to 0.3)                  | < 0.05<br>(< 0.05 to < 0.05)                  | -6.5<br>(-8.6 to -3.9)                            | -6.3<br>(-8.5 to -3.7)                           |
| Migraine                                                       | --                                   | --                                   | --                                            | --                                                | --                                               |
| Tension-type headache                                          | --                                   | --                                   | --                                            | --                                                | --                                               |
| Other neurological disorders                                   | --                                   | --                                   | --                                            | --                                                | --                                               |
| <b>Mental and substance use disorders</b>                      | <b>56.9</b><br><b>(49.1 to 63.0)</b> | <b>2.9†</b><br><b>(1.8 to 4.5)</b>   | <b>6.2</b><br><b>(3.9 to 9.3)</b>             | <b>-1.8</b><br><b>(-4.1 to 0.6)</b>               | <b>-1.6</b><br><b>(-4.0 to 0.8)</b>              |
| Schizophrenia                                                  | --                                   | --                                   | --                                            | --                                                | --                                               |
| Alcohol use disorders                                          | 0.3<br>(0.2 to 0.3)                  | --                                   | < 0.05<br>(< 0.05 to < 0.05)                  | 0.8<br>(-5.6 to 6.5)                              | 1.0<br>(-5.4 to 6.7)                             |
| Drug use disorders                                             | --                                   | --                                   | --                                            | --                                                | --                                               |
| Opioid use disorders                                           | --                                   | --                                   | --                                            | --                                                | --                                               |
| Cocaine use disorders                                          | --                                   | --                                   | --                                            | --                                                | --                                               |
| Amphetamine use disorders                                      | --                                   | --                                   | --                                            | --                                                | --                                               |
| Cannabis use disorders                                         | --                                   | --                                   | --                                            | --                                                | --                                               |
| Other drug use disorders                                       | --                                   | --                                   | --                                            | --                                                | --                                               |
| Depressive disorders                                           | --                                   | --                                   | --                                            | --                                                | --                                               |
| Major depressive disorder                                      | --                                   | --                                   | --                                            | --                                                | --                                               |
| Dysthymia                                                      | --                                   | --                                   | --                                            | --                                                | --                                               |
| Bipolar disorder                                               | --                                   | --                                   | --                                            | --                                                | --                                               |
| Anxiety disorders                                              | --                                   | --                                   | --                                            | --                                                | --                                               |
| Eating disorders                                               | --                                   | --                                   | --                                            | --                                                | --                                               |
| Anorexia nervosa                                               | --                                   | --                                   | --                                            | --                                                | --                                               |
| Bulimia nervosa                                                | --                                   | --                                   | --                                            | --                                                | --                                               |
| Autistic spectrum disorders                                    | 42.4<br>(37.5 to 49.0)               | 2.9<br>(1.8 to 4.5)                  | 5.5<br>(3.4 to 8.2)                           | -0.2<br>(-2.3 to 1.9)                             | -0.1<br>(-2.1 to 2.1)                            |
| Autism                                                         | 7.5<br>(4.7 to 10.8)                 | 0.5<br>(0.2 to 0.8)                  | 2.0<br>(1.0 to 3.3)                           | -0.2<br>(-4.6 to 4.3)                             | -0.0<br>(-4.4 to 4.5)                            |
| Asperger syndrome and other autistic spectrum disorders        | 34.0<br>(23.3 to 46.6)               | 2.5<br>(1.4 to 4.0)                  | 3.5<br>(2.0 to 5.5)                           | -0.3<br>(-2.5 to 2.1)                             | -0.1<br>(-2.4 to 2.2)                            |

| Cause                                                      | Prevalence in thousands (95% UI)              | Incidence in thousands (95% UI)                | YLDs in thousands (95% UI)           |                                                   |                                                  |
|------------------------------------------------------------|-----------------------------------------------|------------------------------------------------|--------------------------------------|---------------------------------------------------|--------------------------------------------------|
|                                                            | 2016 counts                                   | 2016 counts                                    | 2016 counts                          | Percentage change in counts between 2006 and 2016 | Percentage change in rates between 2006 and 2016 |
| Attention-deficit/hyperactivity disorder                   | --                                            | --                                             | --                                   | --                                                | --                                               |
| Conduct disorder                                           | --                                            | --                                             | --                                   | --                                                | --                                               |
| Idiopathic developmental intellectual disability           | 15.9<br>(5.1 to 31.0)                         | --                                             | 0.7<br>(0.2 to 1.5)                  | -13.0<br>(-18.0 to -7.0)                          | -12.8<br>(-17.9 to -6.8)                         |
| Other mental and substance use disorders                   | --                                            | --                                             | --                                   | --                                                | --                                               |
| <b>Diabetes, urogenital, blood, and endocrine diseases</b> | <b>2,029.0</b><br><b>(2,003.2 to 2,057.8)</b> | <b>344.6†</b><br><b>(283.7 to 408.1)</b>       | <b>9.1</b><br><b>(5.9 to 13.2)</b>   | <b>-3.4</b><br><b>(-6.4 to -0.6)</b>              | <b>-3.2</b><br><b>(-6.2 to -0.5)</b>             |
| Diabetes mellitus                                          | --                                            | --                                             | --                                   | --                                                | --                                               |
| Acute glomerulonephritis                                   | < 0.05<br>(< 0.05 to < 0.05)                  | 0.4<br>(0.3 to 0.6)                            | < 0.05<br>(< 0.05 to < 0.05)         | -6.2<br>(-8.0 to -4.5)                            | -6.0<br>(-7.8 to -4.3)                           |
| Chronic kidney disease                                     | < 0.05<br>(< 0.05 to < 0.05)                  | 0.8<br>(0.6 to 1.1)                            | < 0.05<br>(< 0.05 to < 0.05)         | -5.5<br>(-10.8 to 0.1)                            | -5.3<br>(-10.6 to 0.3)                           |
| Chronic kidney disease due to diabetes mellitus            | < 0.05<br>(< 0.05 to < 0.05)                  | < 0.05<br>(< 0.05 to < 0.05)                   | < 0.05<br>(< 0.05 to < 0.05)         | -5.3<br>(-11.9 to 1.6)                            | -5.2<br>(-11.7 to 1.8)                           |
| Chronic kidney disease due to hypertension                 | < 0.05<br>(< 0.05 to < 0.05)                  | 0.3<br>(0.2 to 0.5)                            | < 0.05<br>(< 0.05 to < 0.05)         | -7.9<br>(-14.2 to -1.9)                           | -7.8<br>(-14.0 to -1.7)                          |
| Chronic kidney disease due to glomerulonephritis           | < 0.05<br>(< 0.05 to < 0.05)                  | < 0.05<br>(< 0.05 to < 0.05)                   | < 0.05<br>(< 0.05 to < 0.05)         | 4.6<br>(-10.1 to 1.1)                             | 4.5<br>(-9.9 to 1.3)                             |
| Chronic kidney disease due to other causes                 | < 0.05<br>(< 0.05 to < 0.05)                  | 0.5<br>(0.3 to 0.6)                            | < 0.05<br>(< 0.05 to < 0.05)         | -6.0<br>(-11.2 to -0.6)                           | -5.9<br>(-11.1 to -0.4)                          |
| Urinary diseases and male infertility                      | 5.5<br>(5.0 to 6.3)                           | 314.7†<br>(254.3 to 378.4)                     | 0.2<br>(0.1 to 0.4)                  | -17.6<br>(-23.9 to -11.4)                         | -17.4<br>(-23.8 to -11.3)                        |
| Interstitial nephritis and urinary tract infections        | 5.0<br>(4.0 to 6.0)                           | 314.7<br>(254.3 to 378.4)                      | 0.2<br>(0.1 to 0.3)                  | -4.0<br>(-11.4 to 3.1)                            | -3.8<br>(-11.2 to 3.3)                           |
| Urolithiasis                                               | --                                            | --                                             | --                                   | --                                                | --                                               |
| Benign prostatic hyperplasia                               | --                                            | --                                             | --                                   | --                                                | --                                               |
| Male infertility                                           | --                                            | --                                             | --                                   | --                                                | --                                               |
| Other urinary diseases                                     | --                                            | --                                             | 0.1<br>(0.1 to 0.1)                  | -35.5<br>(-40.5 to -30.7)                         | -35.4<br>(-40.4 to -30.6)                        |
| Gynecological diseases                                     | --                                            | --                                             | --                                   | --                                                | --                                               |
| Uterine fibroids                                           | --                                            | --                                             | --                                   | --                                                | --                                               |
| Polycystic ovarian syndrome                                | --                                            | --                                             | --                                   | --                                                | --                                               |
| Female infertility                                         | --                                            | --                                             | --                                   | --                                                | --                                               |
| Endometriosis                                              | --                                            | --                                             | --                                   | --                                                | --                                               |
| Genital prolapse                                           | --                                            | --                                             | --                                   | --                                                | --                                               |
| Premenstrual syndrome                                      | --                                            | --                                             | --                                   | --                                                | --                                               |
| Other gynecological diseases                               | --                                            | --                                             | --                                   | --                                                | --                                               |
| Hemoglobinopathies and hemolytic anaemias                  | 1,987.1<br>(1,960.7 to 2,014.5)               | --                                             | 6.8<br>(4.4 to 10.0)                 | -3.0<br>(-6.6 to 0.1)                             | -2.8<br>(-6.4 to 0.3)                            |
| Thalassemias                                               | 5.2<br>(4.8 to 5.6)                           | --                                             | 0.2<br>(0.2 to 0.4)                  | -11.9<br>(-16.6 to -7.0)                          | -11.8<br>(-16.5 to -6.8)                         |
| Thalassaemia trait                                         | 230.1<br>(219.6 to 241.5)                     | --                                             | 2.3<br>(1.4 to 3.3)                  | -5.8<br>(-11.1 to -0.4)                           | -5.6<br>(-11.0 to -0.2)                          |
| Sickle cell disorders                                      | 18.2<br>(15.9 to 23.1)                        | --                                             | 1.0<br>(0.6 to 1.5)                  | 2.8<br>(-3.8 to 9.5)                              | 3.0<br>(-3.6 to 9.7)                             |
| Sickle cell trait                                          | 616.0<br>(563.9 to 684.4)                     | --                                             | 1.8<br>(1.2 to 2.7)                  | 2.5<br>(-2.1 to 7.2)                              | 2.6<br>(-1.9 to 7.4)                             |
| G6PD deficiency                                            | 401.4<br>(384.8 to 421.3)                     | --                                             | < 0.05<br>(< 0.05 to < 0.05)         | -6.9<br>(-10.5 to -3.9)                           | -6.7<br>(-10.3 to -3.7)                          |
| G6PD trait                                                 | 925.7<br>(910.0 to 943.7)                     | --                                             | < 0.05<br>(< 0.05 to < 0.05)         | 1.2<br>(-2.7 to 5.4)                              | 1.4<br>(-2.5 to 5.6)                             |
| Other hemoglobinopathies and hemolytic anaemias            | 43.8<br>(38.5 to 48.4)                        | --                                             | 1.5<br>(1.0 to 2.1)                  | -6.6<br>(-10.3 to -2.8)                           | -6.4<br>(-10.1 to -2.7)                          |
| Endocrine, metabolic, blood, and immune disorders          | 56.7<br>(49.9 to 62.7)                        | 28.7<br>(23.7 to 34.2)                         | 2.0<br>(1.3 to 2.9)                  | -2.5<br>(-6.3 to 0.9)                             | -2.3<br>(-6.1 to 1.1)                            |
| <b>Musculoskeletal disorders</b>                           | <b>--</b>                                     | <b>--</b>                                      | <b>--</b>                            | <b>--</b>                                         | <b>--</b>                                        |
| Rheumatoid arthritis                                       | --                                            | --                                             | --                                   | --                                                | --                                               |
| Osteoarthritis                                             | --                                            | --                                             | --                                   | --                                                | --                                               |
| Low back and neck pain                                     | --                                            | --                                             | --                                   | --                                                | --                                               |
| Low back pain                                              | --                                            | --                                             | --                                   | --                                                | --                                               |
| Neck pain                                                  | --                                            | --                                             | --                                   | --                                                | --                                               |
| Gout                                                       | --                                            | --                                             | --                                   | --                                                | --                                               |
| Other musculoskeletal disorders                            | --                                            | --                                             | --                                   | --                                                | --                                               |
| <b>Other non-communicable diseases</b>                     | <b>543.0</b><br><b>(534.2 to 553.0)</b>       | <b>4,109.8†</b><br><b>(3,756.3 to 4,531.2)</b> | <b>28.7</b><br><b>(20.8 to 38.1)</b> | <b>-2.5</b><br><b>(-4.0 to -0.9)</b>              | <b>-2.3</b><br><b>(-3.9 to -0.7)</b>             |
| Congenital anomalies                                       | 199.5<br>(190.2 to 207.2)                     | --                                             | 21.0<br>(15.3 to 27.9)               | -1.7<br>(-3.7 to 0.1)                             | -1.5<br>(-3.5 to 0.3)                            |
| Neural tube defects                                        | 9.3<br>(8.4 to 10.4)                          | --                                             | 2.8<br>(2.0 to 3.7)                  | 4.2<br>(-0.5 to 9.2)                              | 4.4<br>(-0.3 to 9.4)                             |
| Congenital heart anomalies                                 | 94.4<br>(76.0 to 114.5)                       | --                                             | 4.1<br>(1.8 to 7.2)                  | -1.9<br>(-4.8 to 1.0)                             | -1.7<br>(-4.6 to 1.2)                            |
| Orofacial clefts                                           | 6.9<br>(5.6 to 8.6)                           | --                                             | 0.1<br>(0.1 to 0.1)                  | -9.0<br>(-13.9 to -3.9)                           | -8.8<br>(-13.7 to -3.7)                          |
| Down's syndrome                                            | 4.3<br>(3.6 to 5.1)                           | --                                             | 0.4<br>(0.2 to 0.5)                  | -0.7<br>(-4.7 to 3.2)                             | -0.5<br>(-4.5 to 3.4)                            |
| Turner syndrome                                            | 4.8<br>(4.1 to 5.5)                           | --                                             | 0.1<br>(< 0.05 to 0.1)               | -5.8<br>(-17.3 to 7.7)                            | -5.6<br>(-17.2 to 7.9)                           |
| Klinefelter syndrome                                       | 6.2<br>(5.4 to 7.2)                           | --                                             | < 0.05<br>(< 0.05 to < 0.05)         | 2.0<br>(-7.0 to 12.0)                             | 2.2<br>(-6.8 to 12.2)                            |

| Cause                                         | Prevalence in thousands (95% UI)     | Incidence in thousands (95% UI)       | YLDs in thousands (95% UI)                                              |                                                   |                                                  |
|-----------------------------------------------|--------------------------------------|---------------------------------------|-------------------------------------------------------------------------|---------------------------------------------------|--------------------------------------------------|
|                                               | 2016 counts                          | 2016 counts                           | 2016 counts                                                             | Percentage change in counts between 2006 and 2016 | Percentage change in rates between 2006 and 2016 |
| Other chromosomal abnormalities               | 18.4<br>(15.7 to 21.4)               | --                                    | 3.7<br>(2.5 to 5.2)                                                     | -4.2<br>(-8.4 to 0.1)                             | -4.1<br>(-8.3 to 0.2)                            |
| Congenital musculoskeletal and limb anomalies | 10.1<br>(9.1 to 10.9)                | --                                    | 1.3<br>(0.9 to 1.8)                                                     | 0.5<br>(-2.9 to 4.0)                              | 0.7<br>(-2.7 to 4.1)                             |
| Urogenital congenital anomalies               | 22.5<br>(19.8 to 25.7)               | --                                    | 0.6<br>(0.3 to 0.9)                                                     | -4.3<br>(-6.8 to -2.0)                            | -4.2<br>(-6.6 to -1.8)                           |
| Digestive congenital anomalies                | 10.0<br>(9.0 to 11.2)                | --                                    | 0.5<br>(0.3 to 0.7)                                                     | -2.2<br>(-6.7 to 2.5)                             | -2.0<br>(-6.5 to 2.7)                            |
| Other congenital anomalies                    | 37.6<br>(26.4 to 53.4)               | --                                    | 7.6<br>(5.2 to 10.6)                                                    | -2.3<br>(-5.9 to 0.8)                             | -2.2<br>(-5.7 to 1.0)                            |
| Skin and subcutaneous diseases                | 158.5<br>(154.2 to 163.2)            | 4,109.8<br>(3,756.3 to 4,531.2)       | 2.8<br>(1.7 to 4.4)                                                     | -0.7<br>(-2.8 to 1.5)                             | -0.5<br>(-2.6 to 1.7)                            |
| Dermatitis                                    | --                                   | --                                    | --                                                                      | --                                                | --                                               |
| Psoriasis                                     | --                                   | --                                    | --                                                                      | --                                                | --                                               |
| Cellulitis                                    | 1.0<br>(0.9 to 1.2)                  | 35.4<br>(30.4 to 40.8)                | 0.1<br>( $< 0.05$ to 0.1)                                               | 2.5<br>(0.4 to 4.9)                               | 2.7<br>(0.6 to 5.1)                              |
| Pyoderma                                      | 22.7<br>(21.5 to 23.9)               | 820.1<br>(779.2 to 864.9)             | 0.1<br>(0.1 to 0.3)                                                     | 11.4<br>(7.9 to 15.1)                             | 11.6<br>(8.1 to 15.3)                            |
| Scabies                                       | 24.5<br>(18.2 to 32.0)               | 595.4<br>(441.1 to 779.6)             | 0.6<br>(0.3 to 1.1)                                                     | 6.9<br>(-9.6 to -4.1)                             | 6.7<br>(-9.4 to -3.9)                            |
| Fungal skin diseases                          | 56.8<br>(46.3 to 69.9)               | 1,380.1<br>(1,119.5 to 1,705.6)       | 0.3<br>(0.1 to 0.7)                                                     | 3.3<br>(1.3 to 5.3)                               | 3.5<br>(1.5 to 5.5)                              |
| Viral skin diseases                           | --                                   | --                                    | --                                                                      | --                                                | --                                               |
| Acne vulgaris                                 | --                                   | --                                    | --                                                                      | --                                                | --                                               |
| Alopecia areata                               | --                                   | --                                    | --                                                                      | --                                                | --                                               |
| Pruritus                                      | 2.4<br>(1.8 to 3.1)                  | 53.2<br>(40.1 to 69.2)                | $< 0.05$<br>( $< 0.05$ to 0.1)                                          | 1.0<br>(-7.4 to 9.4)                              | 1.1<br>(-7.2 to 9.6)                             |
| Urticaria                                     | 23.8<br>(18.3 to 30.2)               | 548.6<br>(421.9 to 696.1)             | 1.5<br>(0.9 to 2.2)                                                     | -0.4<br>(-4.1 to 3.3)                             | -0.2<br>(-3.9 to 3.5)                            |
| Decubitus ulcer                               | --                                   | --                                    | --                                                                      | --                                                | --                                               |
| Other skin and subcutaneous diseases          | 30.4<br>(28.3 to 32.7)               | 677.0<br>(630.4 to 729.2)             | 0.2<br>(0.1 to 0.3)                                                     | 4.4<br>(1.4 to 7.7)                               | 4.5<br>(1.6 to 7.8)                              |
| Sense organ diseases                          | 200.8<br>(192.6 to 207.3)            | --                                    | 4.9<br>(3.1 to 7.4)                                                     | -6.7<br>(-9.1 to -4.3)                            | -6.5<br>(-8.9 to -4.1)                           |
| Glaucoma                                      | --                                   | --                                    | --                                                                      | --                                                | --                                               |
| Cataract                                      | --                                   | --                                    | --                                                                      | --                                                | --                                               |
| Macular degeneration                          | --                                   | --                                    | --                                                                      | --                                                | --                                               |
| Refraction and accommodation disorders        | 170.6<br>(153.5 to 187.4)            | --                                    | 2.1<br>(1.1 to 3.9)                                                     | -6.7<br>(-8.5 to -4.9)                            | -6.5<br>(-8.3 to -4.8)                           |
| Age-related and other hearing loss            | 11.3<br>(8.1 to 15.7)                | --                                    | 1.5<br>(0.9 to 2.2)                                                     | -6.0<br>(-11.9 to -0.4)                           | -5.8<br>(-11.7 to -0.2)                          |
| Other vision loss                             | 21.3<br>(12.8 to 33.4)               | --                                    | 1.3<br>(0.7 to 2.2)                                                     | -7.4<br>(-12.8 to -2.5)                           | -7.3<br>(-12.6 to -2.3)                          |
| Other sense organ diseases                    | --                                   | --                                    | --                                                                      | --                                                | --                                               |
| Oral disorders                                | --                                   | --                                    | --                                                                      | --                                                | --                                               |
| Caries of deciduous teeth                     | --                                   | --                                    | --                                                                      | --                                                | --                                               |
| Caries of permanent teeth                     | --                                   | --                                    | --                                                                      | --                                                | --                                               |
| Periodontal disease                           | --                                   | --                                    | --                                                                      | --                                                | --                                               |
| Edentulism and severe tooth loss              | --                                   | --                                    | --                                                                      | --                                                | --                                               |
| Other oral disorders                          | --                                   | --                                    | --                                                                      | --                                                | --                                               |
| <b>Injuries</b>                               | <b>10.6</b><br><b>(9.2 to 12.0)</b>  | <b>79.0*</b><br><b>(72.4 to 86.5)</b> | <b>0.7</b><br><b>(0.5 to 1.0)</b>                                       | <b>-6.2</b><br><b>(-8.0 to -4.5)</b>              | <b>-6.0</b><br><b>(-7.8 to -4.3)</b>             |
| <b>Transport injuries</b>                     | <b>0.5</b><br><b>(0.4 to 0.7)</b>    | <b>2.4</b><br><b>(1.8 to 3.1)</b>     | <b><math>&lt; 0.05</math></b><br><b>(<math>&lt; 0.05</math> to 0.1)</b> | <b>-4.0</b><br><b>(-6.8 to -1.3)</b>              | <b>-3.8</b><br><b>(-6.6 to -1.1)</b>             |
| Road injuries                                 | $< 0.05$<br>( $< 0.05$ to 0.1)       | 0.2<br>(0.2 to 0.3)                   | $< 0.05$<br>( $< 0.05$ to $< 0.05$ )                                    | 12.1<br>(6.1 to 17.3)                             | 12.2<br>(6.3 to 17.5)                            |
| Pedestrian road injuries                      | $< 0.05$<br>( $< 0.05$ to $< 0.05$ ) | $< 0.05$<br>( $< 0.05$ to 0.1)        | $< 0.05$<br>( $< 0.05$ to $< 0.05$ )                                    | 9.5<br>(2.8 to 15.8)                              | 9.7<br>(3.0 to 16.0)                             |
| Cyclist road injuries                         | --                                   | --                                    | --                                                                      | --                                                | --                                               |
| Motorcyclist road injuries                    | $< 0.05$<br>( $< 0.05$ to $< 0.05$ ) | 0.1<br>( $< 0.05$ to 0.1)             | $< 0.05$<br>( $< 0.05$ to $< 0.05$ )                                    | 13.3<br>(6.2 to 19.4)                             | 13.5<br>(6.4 to 19.6)                            |
| Motor vehicle road injuries                   | $< 0.05$<br>( $< 0.05$ to $< 0.05$ ) | 0.1<br>(0.1 to 0.2)                   | $< 0.05$<br>( $< 0.05$ to $< 0.05$ )                                    | 9.6<br>(2.8 to 15.9)                              | 9.8<br>(2.9 to 16.1)                             |
| Other road injuries                           | $< 0.05$<br>( $< 0.05$ to $< 0.05$ ) | $< 0.05$<br>( $< 0.05$ to $< 0.05$ )  | $< 0.05$<br>( $< 0.05$ to $< 0.05$ )                                    | 28.7<br>(20.5 to 36.1)                            | 28.9<br>(20.7 to 36.3)                           |
| Other transport injuries                      | 0.5<br>(0.3 to 0.7)                  | 2.1<br>(1.6 to 2.9)                   | $< 0.05$<br>( $< 0.05$ to 0.1)                                          | -5.2<br>(-8.1 to -2.5)                            | -5.0<br>(-8.0 to -2.4)                           |
| <b>Unintentional injuries</b>                 | <b>9.9</b><br><b>(8.6 to 11.3)</b>   | <b>75.7</b><br><b>(69.1 to 83.0)</b>  | <b>0.7</b><br><b>(0.5 to 0.9)</b>                                       | <b>-6.4</b><br><b>(-8.3 to -4.5)</b>              | <b>-6.2</b><br><b>(-8.1 to -4.3)</b>             |
| Falls                                         | 2.3<br>(1.7 to 3.1)                  | 13.8<br>(10.4 to 17.6)                | 0.1<br>(0.1 to 0.2)                                                     | 6.9<br>(3.4 to 9.8)                               | 7.0<br>(3.6 to 10.0)                             |
| Drowning                                      | $< 0.05$<br>( $< 0.05$ to $< 0.05$ ) | 0.1<br>(0.1 to 0.1)                   | $< 0.05$<br>( $< 0.05$ to $< 0.05$ )                                    | -12.6<br>(-15.1 to -9.9)                          | -12.5<br>(-15.0 to -9.7)                         |
| Fire, heat, and hot substances                | 0.2<br>(0.1 to 0.3)                  | 1.2<br>(0.9 to 1.5)                   | $< 0.05$<br>( $< 0.05$ to $< 0.05$ )                                    | -4.9<br>(-9.6 to -0.3)                            | -4.8<br>(-9.4 to -0.1)                           |
| Poisonings                                    | $< 0.05$<br>( $< 0.05$ to $< 0.05$ ) | 0.6<br>(0.4 to 0.8)                   | $< 0.05$<br>( $< 0.05$ to $< 0.05$ )                                    | 5.8<br>(1.9 to 8.2)                               | 6.0<br>(2.0 to 8.4)                              |
| Exposure to mechanical forces                 | 1.3<br>(1.0 to 1.6)                  | 7.8<br>(6.1 to 9.8)                   | 0.1<br>( $< 0.05$ to 0.1)                                               | -11.2<br>(-15.5 to -7.5)                          | -11.1<br>(-15.4 to -7.3)                         |
| Unintentional firearm injuries                | $< 0.05$<br>( $< 0.05$ to $< 0.05$ ) | 0.1<br>( $< 0.05$ to 0.1)             | $< 0.05$<br>( $< 0.05$ to $< 0.05$ )                                    | -3.8<br>(-10.0 to 2.4)                            | -3.6<br>(-9.8 to 2.6)                            |
| Unintentional suffocation                     | 0.3<br>(0.2 to 0.4)                  | 1.5<br>(1.1 to 2.0)                   | $< 0.05$<br>( $< 0.05$ to $< 0.05$ )                                    | -19.3<br>(-24.8 to -14.6)                         | -19.2<br>(-24.6 to -14.4)                        |
| Other exposure to mechanical forces           | 1.0<br>(0.7 to 1.3)                  | 6.2<br>(4.8 to 7.9)                   | $< 0.05$<br>( $< 0.05$ to 0.1)                                          | -7.2<br>(-11.7 to -3.2)                           | -7.1<br>(-11.6 to -3.0)                          |

| Cause                                                                               | Prevalence in thousands (95% UI)  | Incidence in thousands (95% UI)    | YLDs in thousands (95% UI)                          |                                                   |                                                  |
|-------------------------------------------------------------------------------------|-----------------------------------|------------------------------------|-----------------------------------------------------|---------------------------------------------------|--------------------------------------------------|
|                                                                                     | 2016 counts                       | 2016 counts                        | 2016 counts                                         | Percentage change in counts between 2006 and 2016 | Percentage change in rates between 2006 and 2016 |
| Adverse effects of medical treatment                                                | 1.2<br>(0.9 to 1.5)               | 15.6<br>(12.9 to 18.7)             | 0.2<br>(0.1 to 0.2)                                 | -12.6<br>(-16.9 to -8.7)                          | -12.4<br>(-16.7 to -8.5)                         |
| Animal contact                                                                      | 0.6<br>(0.4 to 0.8)               | 6.7<br>(5.2 to 8.4)                | < 0.05<br>(< 0.05 to < 0.05)                        | -13.3<br>(-17.7 to -9.3)                          | -13.1<br>(-17.5 to -9.2)                         |
| Venomous animal contact                                                             | 0.2<br>(0.1 to 0.3)               | 3.1<br>(2.3 to 4.0)                | < 0.05<br>(< 0.05 to < 0.05)                        | -16.2<br>(-21.0 to -12.1)                         | -16.0<br>(-20.8 to -11.9)                        |
| Non-venomous animal contact                                                         | 0.4<br>(0.3 to 0.5)               | 3.6<br>(2.8 to 4.8)                | < 0.05<br>(< 0.05 to < 0.05)                        | -6.7<br>(-12.0 to -2.2)                           | -6.5<br>(-11.8 to -2.0)                          |
| Foreign body                                                                        | 1.3<br>(1.0 to 1.7)               | 11.8<br>(10.0 to 13.8)             | 0.1<br>(0.1 to 0.1)                                 | -8.4<br>(-10.7 to -5.9)                           | -8.2<br>(-10.6 to -5.8)                          |
| Pulmonary aspiration and foreign body in airway                                     | 0.9<br>(0.6 to 1.3)               | 8.2<br>(6.7 to 10.1)               | 0.1<br>(< 0.05 to 0.1)                              | -10.2<br>(-13.0 to -7.3)                          | -10.0<br>(-12.8 to -7.2)                         |
| Foreign body in eyes                                                                | 0.1<br>(< 0.05 to 0.2)            | 0.9<br>(0.5 to 1.5)                | < 0.05<br>(< 0.05 to < 0.05)                        | 4.5<br>(1.2 to 9.1)                               | 4.7<br>(1.4 to 9.3)                              |
| Foreign body in other body part                                                     | 0.3<br>(0.2 to 0.4)               | 2.7<br>(2.0 to 3.4)                | < 0.05<br>(< 0.05 to < 0.05)                        | -4.3<br>(-8.1 to -0.9)                            | -4.2<br>(-8.0 to -0.7)                           |
| Environmental heat and cold exposure                                                | 0.8<br>(0.5 to 1.1)               | 3.7<br>(2.8 to 4.9)                | 0.1<br>(< 0.05 to 0.1)                              | -9.5<br>(-13.5 to -6.2)                           | -9.4<br>(-13.3 to -6.0)                          |
| Other unintentional injuries                                                        | 2.2<br>(1.6 to 3.0)               | 14.5<br>(11.2 to 18.8)             | 0.1<br>(0.1 to 0.2)                                 | -1.9<br>(-6.0 to 2.4)                             | -1.8<br>(-5.9 to 2.6)                            |
| <b>Self-harm and interpersonal violence</b>                                         | <b>0.1</b><br><b>(0.1 to 0.2)</b> | <b>1.0†</b><br><b>(0.8 to 1.3)</b> | <b>&lt; 0.05</b><br><b>(&lt; 0.05 to &lt; 0.05)</b> | <b>-6.3</b><br><b>(-11.5 to -1.2)</b>             | <b>-6.1</b><br><b>(-11.3 to -1.0)</b>            |
| Self-harm                                                                           | --                                | --                                 | --                                                  | --                                                | --                                               |
| Self-harm by firearm                                                                | --                                | --                                 | --                                                  | --                                                | --                                               |
| Self-harm by other specified means                                                  | --                                | --                                 | --                                                  | --                                                | --                                               |
| Interpersonal violence                                                              | 0.1<br>(0.1 to 0.2)               | 1.0†<br>(0.8 to 1.3)               | < 0.05<br>(< 0.05 to < 0.05)                        | -6.3<br>(-11.5 to -1.2)                           | -6.1<br>(-11.3 to -1.0)                          |
| Assault by firearm                                                                  | < 0.05<br>(< 0.05 to < 0.05)      | < 0.05<br>(< 0.05 to 0.1)          | < 0.05<br>(< 0.05 to < 0.05)                        | -2.2<br>(-9.1 to 4.4)                             | -2.0<br>(-9.0 to 4.6)                            |
| Assault by sharp object                                                             | < 0.05<br>(< 0.05 to < 0.05)      | 0.2<br>(0.1 to 0.3)                | < 0.05<br>(< 0.05 to < 0.05)                        | -1.1<br>(-7.6 to 6.0)                             | -0.9<br>(-7.5 to 6.2)                            |
| Sexual violence                                                                     | --                                | --                                 | --                                                  | --                                                | --                                               |
| Assault by other means                                                              | 0.1<br>(0.1 to 0.1)               | 0.7<br>(0.6 to 1.0)                | < 0.05<br>(< 0.05 to < 0.05)                        | -8.4<br>(-13.8 to -3.4)                           | -8.3<br>(-13.7 to -3.3)                          |
| <b>Forces of nature, conflict and terrorism, and executions and police conflict</b> | --                                | --                                 | --                                                  | --                                                | --                                               |
| Forces of nature, conflict and terrorism, and state actor violence                  | --                                | --                                 | --                                                  | --                                                | --                                               |
| Conflict and terrorism                                                              | --                                | --                                 | --                                                  | --                                                | --                                               |
| Executions and police conflict                                                      | --                                | --                                 | --                                                  | --                                                | --                                               |

We did not calculate incidence for certain NTDs and causes with only birth prevalence. Blank cells mean that no estimate is available.

† Incidence for aggregate causes represents the sum of the incidence of the causes below the aggregate.

‡ Incidence estimates for stroke represent first-ever stroke only.

^ Incidence of HIV/AIDS represents new infections of HIV only and does not include new infections of Tuberculosis in HIV positive cases.

SR Table 12: Global prevalence, incidence, and YLDs for 2016, percentage change of YLD counts and percentage change of YLD rates between 2006 and 2016 by cause, age 28-364 days.

| Cause                                                                                | Prevalence in thousands (95% UI)   | Incidence in thousands (95% UI)            | YLDs in thousands (95% UI)      |                                                   |                                                  |
|--------------------------------------------------------------------------------------|------------------------------------|--------------------------------------------|---------------------------------|---------------------------------------------------|--------------------------------------------------|
|                                                                                      | 2016 counts                        | 2016 counts                                | 2016 counts                     | Percentage change in counts between 2006 and 2016 | Percentage change in rates between 2006 and 2016 |
|                                                                                      |                                    |                                            |                                 |                                                   |                                                  |
| <b>All causes</b>                                                                    | 92,760.0<br>(91,394.5 to 95,294.4) | 1,012,306.0†<br>(847,811.2 to 1,206,168.4) | 5,169.0<br>(3,672.0 to 7,071.8) | -3.5<br>(-5.2 to -1.5)                            | -4.2<br>(-5.9 to -2.3)                           |
| <b>Communicable, maternal, neonatal, and nutritional disorders</b>                   | 78,794.9<br>(76,901.4 to 81,851.2) | 923,246.7†<br>(759,626.1 to 1,114,964.5)   | 3,884.5<br>(2,736.9 to 5,310.2) | -4.4<br>(-6.6 to -1.8)                            | -5.2<br>(-7.4 to -2.6)                           |
| <b>HIV/AIDS and tuberculosis</b>                                                     | 13,256.5<br>(12,166.7 to 14,563.8) | 196.6†<br>(178.3 to 216.2)                 | 23.0<br>(16.1 to 30.5)          | -25.3<br>(-30.7 to -19.8)                         | -25.9<br>(-31.2 to -20.5)                        |
| Tuberculosis                                                                         | 12,656.5<br>(11,122.1 to 14,428.7) | 61.4†<br>(45.9 to 78.6)                    | 5.2<br>(3.0 to 8.2)             | -21.5<br>(-31.3 to -7.4)                          | -22.1<br>(-31.9 to -8.2)                         |
| Drug-susceptible tuberculosis                                                        | 15.7<br>(10.9 to 21.3)             | 59.8<br>(44.7 to 76.5)                     | 5.1<br>(2.9 to 8.0)             | -21.4<br>(-31.5 to -7.0)                          | -22.1<br>(-32.1 to -7.7)                         |
| Multidrug-resistant tuberculosis without extensive drug resistance                   | 0.4<br>(0.3 to 0.6)                | 1.6<br>(1.2 to 2.1)                        | 0.1<br>(0.1 to 0.2)             | -25.1<br>(-37.5 to -9.8)                          | -25.7<br>(-38.0 to -10.5)                        |
| Extensively drug-resistant tuberculosis                                              | < 0.05<br>(< 0.05 to < 0.05)       | 0.1<br>(< 0.05 to 0.1)                     | < 0.05<br>(< 0.05 to < 0.05)    | 124.9<br>(92.3 to 161.5)                          | 123.0<br>(90.7 to 159.4)                         |
| Latent tuberculosis infection                                                        | 12,640.3<br>(11,105.7 to 14,414.3) | --                                         | --                              | --                                                | --                                               |
| HIV/AIDS                                                                             | 154.1<br>(144.7 to 163.7)          | 135.2 <sup>a</sup><br>(125.5 to 145.5)     | 17.8<br>(12.7 to 23.2)          | -26.3<br>(-32.7 to -19.8)                         | -26.9<br>(-33.3 to -20.4)                        |
| Drug-susceptible HIV/AIDS - Tuberculosis                                             | 4.0<br>(2.8 to 5.6)                | 6.0<br>(4.1 to 8.3)                        | 1.7<br>(1.0 to 2.6)             | -55.1<br>(-60.1 to -50.3)                         | -55.5<br>(-60.4 to -50.7)                        |
| Multidrug-resistant HIV/AIDS - Tuberculosis without extensive drug resistance        | 0.1<br>(0.1 to 0.2)                | 0.2<br>(0.1 to 0.2)                        | < 0.05<br>(< 0.05 to 0.1)       | -53.8<br>(-64.3 to -42.1)                         | -54.2<br>(-64.5 to -42.6)                        |
| Extensively drug-resistant HIV/AIDS - Tuberculosis                                   | < 0.05<br>(< 0.05 to < 0.05)       | < 0.05<br>(< 0.05 to < 0.05)               | < 0.05<br>(< 0.05 to < 0.05)    | 87.9<br>(53.9 to 129.1)                           | 86.3<br>(52.6 to 127.2)                          |
| HIV/AIDS resulting in other diseases                                                 | 149.9<br>(140.3 to 159.9)          | 135.2<br>(125.5 to 145.5)                  | 16.1<br>(11.5 to 21.1)          | -20.9<br>(-28.5 to -13.1)                         | -21.6<br>(-29.1 to -13.8)                        |
| <b>Diarrhoea, lower respiratory infections, and other common infectious diseases</b> | 12,469.1<br>(12,050.5 to 12,855.9) | 755,863.2†<br>(655,131.7 to 867,814.9)     | 745.1<br>(503.2 to 1,013.1)     | -8.5<br>(-10.9 to -6.6)                           | -9.2<br>(-11.6 to -7.4)                          |
| Diarrhoeal diseases                                                                  | 4,108.9<br>(3,578.2 to 4,659.0)    | 265,772.2<br>(216,916.4 to 314,371.2)      | 474.8<br>(320.6 to 660.0)       | -9.4<br>(-12.4 to -6.9)                           | -10.2<br>(-13.1 to -7.6)                         |
| Intestinal infectious diseases                                                       | 0.7<br>(0.5 to 0.9)                | 13.3†<br>(10.4 to 17.0)                    | 0.6<br>(0.4 to 0.9)             | -42.5<br>(-56.1 to -24.2)                         | -42.9<br>(-56.4 to -24.9)                        |
| Typhoid fever                                                                        | 0.7<br>(0.5 to 0.9)                | 10.3<br>(8.1 to 13.5)                      | 0.1<br>(0.1 to 0.1)             | -16.9<br>(-37.9 to 11.8)                          | -17.6<br>(-38.4 to 10.9)                         |
| Paratyphoid fever                                                                    | 0.1<br>(0.1 to 0.2)                | 2.9<br>(2.2 to 3.9)                        | < 0.05<br>(< 0.05 to < 0.05)    | -14.5<br>(-35.6 to 12.3)                          | -15.2<br>(-36.1 to 11.4)                         |
| Other intestinal infectious diseases                                                 | --                                 | --                                         | 0.5<br>(0.3 to 0.7)             | -46.3<br>(-59.0 to -29.3)                         | -46.8<br>(-59.3 to -29.9)                        |
| Lower respiratory infections                                                         | 346.0<br>(300.8 to 398.4)          | 12,795.4<br>(10,190.7 to 15,702.7)         | 21.4<br>(13.8 to 30.5)          | -5.7<br>(-9.1 to -0.9)                            | -5.7<br>(-9.8 to -1.7)                           |
| Upper respiratory infections                                                         | 5,294.0<br>(4,291.1 to 6,525.0)    | 412,143.6<br>(325,900.4 to 516,654.0)      | 134.2<br>(77.1 to 213.7)        | 2.8<br>(1.0 to 4.4)                               | 2.0<br>(0.1 to 3.5)                              |
| Otitis media                                                                         | 2,178.3<br>(1,723.3 to 2,746.1)    | 37,005.3<br>(25,448.5 to 52,515.9)         | 57.6<br>(35.6 to 87.0)          | -2.3<br>(-5.4 to 0.8)                             | -3.1<br>(-6.2 to -0.0)                           |
| Meningitis                                                                           | 108.3<br>(93.7 to 127.1)           | 673.3<br>(542.9 to 841.8)                  | 12.4<br>(8.5 to 17.1)           | -0.7<br>(-5.6 to 4.9)                             | -1.5<br>(-6.4 to 4.0)                            |
| Pneumococcal meningitis                                                              | 25.1<br>(20.3 to 30.7)             | 113.1<br>(74.0 to 159.5)                   | 2.8<br>(1.8 to 3.9)             | -14.9<br>(-21.5 to -8.1)                          | -15.6<br>(-22.2 to -8.9)                         |
| H influenzae type B meningitis                                                       | 15.8<br>(12.2 to 20.5)             | 126.1<br>(80.0 to 184.5)                   | 1.9<br>(1.2 to 2.6)             | -33.4<br>(-40.4 to -26.8)                         | -33.9<br>(-40.9 to -27.4)                        |
| Meningococcal infection                                                              | 13.9<br>(10.2 to 18.7)             | 146.9<br>(100.5 to 210.1)                  | 1.5<br>(1.0 to 2.2)             | 8.6<br>(-4.3 to 23.8)                             | 7.7<br>(-5.1 to 22.8)                            |
| Other meningitis                                                                     | 53.4<br>(43.8 to 65.7)             | 287.3<br>(212.3 to 372.0)                  | 6.2<br>(4.1 to 9.1)             | 23.9<br>(13.7 to 34.3)                            | 22.9<br>(12.8 to 33.2)                           |
| Encephalitis                                                                         | 19.2<br>(15.5 to 24.0)             | 204.6<br>(165.6 to 246.2)                  | 2.3<br>(1.6 to 3.3)             | -6.7<br>(-12.9 to -0.7)                           | -7.5<br>(-13.6 to -1.5)                          |
| Diphtheria                                                                           | 0.1<br>(< 0.05 to 0.1)             | 0.8<br>(0.5 to 1.2)                        | < 0.05<br>(< 0.05 to < 0.05)    | -62.5<br>(-77.0 to -35.4)                         | -62.8<br>(-77.2 to -35.9)                        |
| Whooping cough                                                                       | 694.6<br>(541.7 to 872.3)          | 5,070.9<br>(3,954.7 to 6,367.6)            | 34.5<br>(20.5 to 54.2)          | -24.3<br>(-26.6 to -21.9)                         | -25.0<br>(-27.2 to -22.5)                        |
| Tetanus                                                                              | 3.2<br>(3.1 to 3.4)                | 4.8<br>(2.5 to 7.5)                        | 0.1<br>(0.1 to 0.2)             | -42.4<br>(-56.6 to -25.7)                         | -42.9<br>(-57.0 to -26.3)                        |
| Measles                                                                              | 55.7<br>(20.2 to 120.7)            | 2,032.8<br>(739.0 to 4,403.9)              | 5.0<br>(1.6 to 11.5)            | -64.2<br>(-69.0 to -59.0)                         | -64.5<br>(-69.2 to -59.4)                        |
| Varicella and herpes zoster                                                          | 387.4<br>(286.2 to 510.6)          | 20,146.3<br>(14,881.8 to 26,588.5)         | 2.3<br>(0.9 to 4.9)             | -2.0<br>(-4.7 to 0.4)                             | -2.8<br>(-5.5 to -0.4)                           |
| <b>Neglected tropical diseases and malaria</b>                                       | 22,919.4<br>(22,206.5 to 23,649.2) | 19,559.0†<br>(13,547.4 to 26,650.9)        | 238.2<br>(160.1 to 347.6)       | -7.4<br>(-11.3 to -3.1)                           | -8.2<br>(-12.0 to -3.9)                          |
| Malaria                                                                              | 2,188.1<br>(1,638.5 to 2,980.8)    | 17,389.2<br>(11,496.5 to 24,441.6)         | 46.0<br>(28.0 to 70.5)          | -28.4<br>(-38.9 to -18.7)                         | -29.0<br>(-39.4 to -19.4)                        |
| Chagas disease                                                                       | 7.5<br>(5.9 to 9.5)                | 3.8<br>(2.5 to 5.3)                        | < 0.05<br>(< 0.05 to < 0.05)    | -26.1<br>(-32.5 to -21.0)                         | -26.8<br>(-33.1 to -21.7)                        |
| Leishmaniasis                                                                        | 5.5<br>(4.4 to 6.8)                | 15.0<br>(11.3 to 19.8)                     | 0.3<br>(0.2 to 0.5)             | -45.1<br>(-60.0 to -24.0)                         | -45.6<br>(-60.4 to -24.6)                        |
| Visceral leishmaniasis                                                               | 3.1<br>(2.2 to 4.3)                | 12.2<br>(8.7 to 17.1)                      | 0.2<br>(0.1 to 0.3)             | -54.1<br>(-69.0 to -31.8)                         | -54.5<br>(-69.3 to -32.4)                        |
| Cutaneous and mucocutaneous leishmaniasis                                            | 1.6<br>(1.1 to 2.2)                | 2.8<br>(2.0 to 3.9)                        | 0.1<br>(0.1 to 0.2)             | -8.6<br>(-36.7 to 36.3)                           | -9.3<br>(-37.2 to 35.1)                          |
| African trypanosomiasis                                                              | --                                 | --                                         | --                              | --                                                | --                                               |
| Schistosomiasis                                                                      | 0.3<br>(0.2 to 0.3)                | 605.7<br>(605.6 to 605.7)                  | < 0.05<br>(< 0.05 to < 0.05)    | 8.8<br>(3.0 to 14.9)                              | 7.9<br>(2.1 to 13.9)                             |
| Cysticercosis                                                                        | --                                 | --                                         | --                              | --                                                | --                                               |
| Cystic echinococcosis                                                                | --                                 | --                                         | --                              | --                                                | --                                               |
| Lymphatic filariasis                                                                 | 215.8<br>(191.1 to 242.6)          | 42.0<br>(26.4 to 64.5)                     | --                              | --                                                | --                                               |
| Onchocerciasis                                                                       | --                                 | --                                         | --                              | --                                                | --                                               |
| Trachoma                                                                             | --                                 | --                                         | --                              | --                                                | --                                               |
| Dengue                                                                               | 85.6<br>(46.6 to 145.0)            | 1,430.4<br>(870.3 to 2,170.0)              | 14.3<br>(6.3 to 26.6)           | 43.7<br>(16.1 to 225.4)                           | 42.6<br>(15.1 to 222.7)                          |
| Yellow fever                                                                         | < 0.05<br>(< 0.05 to 0.1)          | 1.1<br>(0.3 to 2.9)                        | < 0.05<br>(< 0.05 to < 0.05)    | -19.0<br>(-47.3 to 26.8)                          | -19.6<br>(-47.7 to 25.7)                         |
| Rabies                                                                               | < 0.05<br>(< 0.05 to < 0.05)       | 0.2<br>(0.1 to 0.3)                        | < 0.05<br>(< 0.05 to < 0.05)    | -65.8<br>(-75.9 to -50.0)                         | -66.1<br>(-76.1 to -50.4)                        |
| Intestinal nematode infections                                                       | 18,288.1<br>(17,476.1 to 19,094.8) | --                                         | 43.5<br>(26.3 to 68.1)          | -19.0<br>(-24.7 to -12.2)                         | -19.6<br>(-25.3 to -13.0)                        |
| Ascariasis                                                                           | 9,071.7<br>(8,281.6 to 9,932.5)    | --                                         | 15.0<br>(8.6 to 24.6)           | -28.2<br>(-37.0 to -18.1)                         | -28.8<br>(-37.5 to -18.7)                        |



| Cause                                                                   | Prevalence in thousands (95% UI)    | Incidence in thousands (95% UI)      | YLDs in thousands (95% UI)      |                                                                                |                                                                               |
|-------------------------------------------------------------------------|-------------------------------------|--------------------------------------|---------------------------------|--------------------------------------------------------------------------------|-------------------------------------------------------------------------------|
|                                                                         | 2016 counts<br>(5,163.6 to 6,051.8) | 2016 counts                          | 2016 counts<br>(2.1 to 6.3)     | Percentage change in counts between 2006 and 2016<br>-27.4<br>(-39.1 to -14.9) | Percentage change in rates between 2006 and 2016<br>-27.9<br>(-39.6 to -15.6) |
| Trichuriasis                                                            | 5,591.2<br>(5,163.6 to 6,051.8)     | --                                   | 3.7<br>(2.1 to 6.3)             | -27.4<br>(-39.1 to -14.9)                                                      | -27.9<br>(-39.6 to -15.6)                                                     |
| Hookworm disease                                                        | 4,881.2<br>(4,486.4 to 5,339.6)     | --                                   | 24.7<br>(15.3 to 37.5)          | -10.4<br>(-18.9 to -0.7)                                                       | -11.1<br>(-19.5 to -1.5)                                                      |
| Food-borne trematodiasis                                                | --                                  | --                                   | --                              | --                                                                             | --                                                                            |
| Leprosy                                                                 | --                                  | --                                   | --                              | --                                                                             | --                                                                            |
| Ebola virus disease                                                     | < 0.05<br>(< 0.05 to 0.3)           | --                                   | < 0.05<br>(< 0.05 to 0.1)       | --                                                                             | --                                                                            |
| Zika virus disease                                                      | 3.4<br>(2.4 to 5.5)                 | 71.6<br>(41.4 to 125.4)              | 1.3<br>(0.8 to 2.3)             | --                                                                             | --                                                                            |
| Guinea worm disease                                                     | --                                  | --                                   | --                              | --                                                                             | --                                                                            |
| Other neglected tropical diseases                                       | 3,755.9<br>(3,414.9 to 4,134.5)     | --                                   | 132.7<br>(86.1 to 194.5)        | 3.1<br>(0.1 to 5.9)                                                            | 2.2<br>(-0.7 to 5.1)                                                          |
| <b>Maternal disorders</b>                                               | --                                  | --                                   | --                              | --                                                                             | --                                                                            |
| Maternal haemorrhage                                                    | --                                  | --                                   | --                              | --                                                                             | --                                                                            |
| Maternal sepsis and other pregnancy related infections                  | --                                  | --                                   | --                              | --                                                                             | --                                                                            |
| Maternal hypertensive disorders                                         | --                                  | --                                   | --                              | --                                                                             | --                                                                            |
| Maternal obstructed labour and uterine rupture                          | --                                  | --                                   | --                              | --                                                                             | --                                                                            |
| Maternal abortion, miscarriage, and ectopic pregnancy                   | --                                  | --                                   | --                              | --                                                                             | --                                                                            |
| Other maternal disorders                                                | --                                  | --                                   | --                              | --                                                                             | --                                                                            |
| <b>Neonatal disorders</b>                                               | 9,285.0<br>(8,679.0 to 9,831.2)     | --                                   | 597.0<br>(403.7 to 892.4)       | 1.0<br>(-8.1 to 11.5)                                                          | 0.2<br>(-8.8 to 10.6)                                                         |
| Neonatal preterm birth complications                                    | 7,966.0<br>(6,806.4 to 9,233.6)     | --                                   | 225.0<br>(143.6 to 335.8)       | -5.1<br>(-22.3 to 15.7)                                                        | -5.9<br>(-23.0 to 14.8)                                                       |
| Neonatal encephalopathy due to birth asphyxia and trauma                | 888.1<br>(628.0 to 1,210.5)         | --                                   | 70.4<br>(34.3 to 134.0)         | 7.3<br>(-0.6 to 18.1)                                                          | 6.4<br>(-1.4 to 17.1)                                                         |
| Neonatal sepsis and other neonatal infections                           | 443.1<br>(252.9 to 832.9)           | --                                   | 155.6<br>(67.6 to 356.0)        | 5.6<br>(0.4 to 11.9)                                                           | 4.7<br>(-0.5 to 11.0)                                                         |
| Hemolytic disease and other neonatal jaundice                           | 69.8<br>(60.0 to 80.6)              | --                                   | 16.8<br>(11.8 to 22.1)          | 4.1<br>(-2.8 to 12.0)                                                          | 3.2<br>(-3.6 to 11.0)                                                         |
| Other neonatal disorders                                                | --                                  | --                                   | 129.2<br>(87.4 to 193.2)        | 3.5<br>(-5.8 to 14.2)                                                          | 2.6<br>(-6.6 to 13.3)                                                         |
| <b>Nutritional deficiencies</b>                                         | 47,366.9<br>(45,211.2 to 49,554.5)  | 14,881.2†<br>(14,548.5 to 15,245.8)  | 2,170.1<br>(1,455.0 to 3,098.9) | -3.8<br>(-6.7 to -1.0)                                                         | -4.6<br>(-7.4 to -1.8)                                                        |
| Protein-energy malnutrition                                             | 14,050.9<br>(13,723.0 to 14,402.1)  | 14,881.2<br>(14,548.5 to 15,245.8)   | 693.5<br>(444.1 to 977.7)       | -10.8<br>(-16.1 to -5.4)                                                       | -11.6<br>(-16.8 to -6.2)                                                      |
| Iodine deficiency                                                       | --                                  | --                                   | --                              | --                                                                             | --                                                                            |
| Vitamin A deficiency                                                    | --                                  | --                                   | --                              | --                                                                             | --                                                                            |
| Iron-deficiency anaemia                                                 | 42,772.2<br>(38,533.5 to 47,596.6)  | --                                   | 1,455.7<br>(928.2 to 2,125.9)   | 0.1<br>(-2.4 to 2.6)                                                           | -0.7<br>(-3.2 to 1.7)                                                         |
| Other nutritional deficiencies                                          | --                                  | --                                   | 21.0<br>(13.4 to 29.6)          | -18.2<br>(-23.1 to -13.3)                                                      | -18.9<br>(-23.7 to -14.0)                                                     |
| <b>Other communicable, maternal, neonatal, and nutritional diseases</b> | 20,353.1<br>(12,095.1 to 29,554.6)  | 132,746.7<br>(21,826.7 to 301,248.0) | 111.1<br>(72.2 to 160.5)        | -2.6<br>(-10.6 to 5.3)                                                         | -3.4<br>(-11.3 to 4.4)                                                        |
| Sexually transmitted diseases excluding HIV                             | --                                  | --                                   | --                              | --                                                                             | --                                                                            |
| Syphilis                                                                | --                                  | --                                   | --                              | --                                                                             | --                                                                            |
| Chlamydial infection                                                    | --                                  | --                                   | --                              | --                                                                             | --                                                                            |
| Gonococcal infection                                                    | --                                  | --                                   | --                              | --                                                                             | --                                                                            |
| Trichomoniasis                                                          | --                                  | --                                   | --                              | --                                                                             | --                                                                            |
| Genital herpes                                                          | --                                  | --                                   | --                              | --                                                                             | --                                                                            |
| Other sexually transmitted diseases                                     | --                                  | --                                   | --                              | --                                                                             | --                                                                            |
| Hepatitis                                                               | 14,853.2<br>(5,592.2 to 28,206.0)   | 132,746.5<br>(21,826.6 to 301,248.0) | 15.1<br>(7.9 to 26.7)           | -48.9<br>(-59.5 to -35.0)                                                      | 49.4<br>(-59.8 to -35.6)                                                      |
| Acute hepatitis A                                                       | 8,895.5<br>(455.1 to 21,920.7)      | 115,641.6<br>(5,916.0 to 284,969.5)  | 1.5<br>(0.1 to 4.3)             | -53.2<br>(-97.7 to 641.3)                                                      | -53.6<br>(-97.7 to 635.2)                                                     |
| Hepatitis B                                                             | 5,600.3<br>(3,645.0 to 8,216.7)     | 16,015.3<br>(9,077.1 to 25,289.5)    | 12.6<br>(6.2 to 22.8)           | -50.6<br>(-56.6 to -43.6)                                                      | -51.0<br>(-57.0 to -44.1)                                                     |
| Hepatitis C                                                             | 357.3<br>(304.1 to 417.2)           | 1,089.6<br>(921.0 to 1,280.0)        | 1.0<br>(0.5 to 2.0)             | 18.2<br>(5.3 to 33.5)                                                          | 17.3<br>(4.5 to 32.4)                                                         |
| Acute hepatitis E                                                       | --                                  | --                                   | --                              | --                                                                             | --                                                                            |
| Other infectious diseases                                               | 2,694.5<br>(2,427.9 to 2,997.6)     | 0.1<br>(0.1 to 0.2)                  | 96.0<br>(61.3 to 140.1)         | 13.7<br>(10.4 to 17.2)                                                         | 12.7<br>(9.5 to 16.2)                                                         |
| <b>Non-communicable diseases</b>                                        | 47,439.0<br>(47,060.6 to 47,892.6)  | 68,997.6†<br>(62,014.6 to 76,482.2)  | 1,115.6<br>(794.0 to 1,510.1)   | 0.1<br>(-1.2 to 1.7)                                                           | -0.7<br>(-2.0 to 0.8)                                                         |
| <b>Neoplasms</b>                                                        | 24.5<br>(21.7 to 27.0)              | 12.7<br>(9.8 to 14.7)                | 5.6<br>(3.5 to 8.0)             | 41.2<br>(9.4 to 66.1)                                                          | 40.0<br>(8.5 to 64.7)                                                         |
| Lip and oral cavity cancer                                              | --                                  | --                                   | --                              | --                                                                             | --                                                                            |
| Nasopharynx cancer                                                      | --                                  | --                                   | --                              | --                                                                             | --                                                                            |
| Other pharynx cancer                                                    | --                                  | --                                   | --                              | --                                                                             | --                                                                            |
| Oesophageal cancer                                                      | --                                  | --                                   | --                              | --                                                                             | --                                                                            |
| Stomach cancer                                                          | --                                  | --                                   | --                              | --                                                                             | --                                                                            |
| Colon and rectum cancer                                                 | --                                  | --                                   | --                              | --                                                                             | --                                                                            |
| Liver cancer                                                            | --                                  | --                                   | --                              | --                                                                             | --                                                                            |
| Liver cancer due to hepatitis B                                         | --                                  | --                                   | --                              | --                                                                             | --                                                                            |

| Cause                                              | Prevalence in thousands (95% UI) | Incidence in thousands (95% UI) | YLDs in thousands (95% UI)  |                                                   |                                                  |
|----------------------------------------------------|----------------------------------|---------------------------------|-----------------------------|---------------------------------------------------|--------------------------------------------------|
|                                                    | 2016 counts                      | 2016 counts                     | 2016 counts                 | Percentage change in counts between 2006 and 2016 | Percentage change in rates between 2006 and 2016 |
| Liver cancer due to hepatitis C                    | --                               | --                              | --                          | --                                                | --                                               |
| Liver cancer due to alcohol use                    | --                               | --                              | --                          | --                                                | --                                               |
| Liver cancer due to other causes                   | --                               | --                              | --                          | --                                                | --                                               |
| Gallbladder and biliary tract cancer               | --                               | --                              | --                          | --                                                | --                                               |
| Pancreatic cancer                                  | --                               | --                              | --                          | --                                                | --                                               |
| Larynx cancer                                      | --                               | --                              | --                          | --                                                | --                                               |
| Tracheal, bronchus, and lung cancer                | --                               | --                              | --                          | --                                                | --                                               |
| Malignant skin melanoma                            | --                               | --                              | --                          | --                                                | --                                               |
| Non-melanoma skin cancer                           | --                               | --                              | --                          | --                                                | --                                               |
| Non-melanoma skin cancer (squamous-cell carcinoma) | --                               | --                              | --                          | --                                                | --                                               |
| Non-melanoma skin cancer (basal-cell carcinoma)    | --                               | --                              | --                          | --                                                | --                                               |
| Breast cancer                                      | --                               | --                              | --                          | --                                                | --                                               |
| Cervical cancer                                    | --                               | --                              | --                          | --                                                | --                                               |
| Uterine cancer                                     | --                               | --                              | --                          | --                                                | --                                               |
| Ovarian cancer                                     | --                               | --                              | --                          | --                                                | --                                               |
| Prostate cancer                                    | --                               | --                              | --                          | --                                                | --                                               |
| Testicular cancer                                  | --                               | --                              | --                          | --                                                | --                                               |
| Kidney cancer                                      | --                               | --                              | --                          | --                                                | --                                               |
| Bladder cancer                                     | --                               | --                              | --                          | --                                                | --                                               |
| Brain and nervous system cancer                    | --                               | --                              | --                          | --                                                | --                                               |
| Thyroid cancer                                     | --                               | --                              | --                          | --                                                | --                                               |
| Mesothelioma                                       | --                               | --                              | --                          | --                                                | --                                               |
| Hodgkin lymphoma                                   | 0.4<br>(0.3 to 0.5)              | 0.2<br>(0.1 to 0.2)             | 0.1<br>(0.1 to 0.1)         | 7.1<br>(-9.3 to 27.5)                             | 6.2<br>(-10.0 to 26.4)                           |
| Non-Hodgkin's lymphoma                             | --                               | --                              | --                          | --                                                | --                                               |
| Multiple myeloma                                   | --                               | --                              | --                          | --                                                | --                                               |
| Leukaemia                                          | 15.6<br>(9.9 to 20.1)            | 6.8<br>(4.4 to 8.7)             | 3.6<br>(2.0 to 5.5)         | 47.3<br>(1.9 to 83.3)                             | 46.1<br>(1.0 to 81.8)                            |
| Acute lymphoid leukaemia                           | 6.6<br>(4.9 to 8.1)              | 3.0<br>(2.2 to 3.6)             | 1.3<br>(0.8 to 1.9)         | 71.0<br>(24.4 to 104.9)                           | 69.6<br>(23.4 to 103.2)                          |
| Chronic lymphoid leukaemia                         | --                               | --                              | --                          | --                                                | --                                               |
| Acute myeloid leukaemia                            | 1.1<br>(0.8 to 1.5)              | 1.1<br>(0.8 to 1.4)             | 0.3<br>(0.2 to 0.5)         | 38.0<br>(2.0 to 68.2)                             | 36.9<br>(1.2 to 66.8)                            |
| Chronic myeloid leukaemia                          | --                               | --                              | --                          | --                                                | --                                               |
| Other leukaemia                                    | 7.9<br>(4.2 to 10.7)             | 2.8<br>(1.4 to 3.8)             | 2.0<br>(0.9 to 3.1)         | 36.2<br>(-13.1 to 83.0)                           | 35.1<br>(-13.8 to 81.4)                          |
| Other neoplasms                                    | 12.7<br>(11.4 to 13.8)           | 5.7<br>(5.1 to 6.1)             | 1.9<br>(1.3 to 2.5)         | 32.4<br>(7.4 to 47.5)                             | 31.3<br>(6.5 to 46.3)                            |
| <b>Cardiovascular diseases</b>                     | <b>1.6<br/>(1.3 to 1.9)</b>      | <b>24.8†<br/>(20.1 to 30.9)</b> | <b>0.1<br/>(0.1 to 0.1)</b> | <b>-4.0<br/>(-6.8 to -1.2)</b>                    | <b>-4.8<br/>(-7.6 to -2.0)</b>                   |
| Rheumatic heart disease                            | --                               | --                              | --                          | --                                                | --                                               |
| Ischaemic heart disease                            | --                               | --                              | --                          | --                                                | --                                               |
| Cerebrovascular disease                            | --                               | --                              | --                          | --                                                | --                                               |
| Ischaemic stroke                                   | --                               | --                              | --                          | --                                                | --                                               |
| Hemorrhagic stroke                                 | --                               | --                              | --                          | --                                                | --                                               |
| Hypertensive heart disease                         | --                               | --                              | --                          | --                                                | --                                               |
| Cardiomyopathy and myocarditis                     | --                               | --                              | --                          | --                                                | --                                               |
| Myocarditis                                        | --                               | --                              | --                          | --                                                | --                                               |
| Alcoholic cardiomyopathy                           | --                               | --                              | --                          | --                                                | --                                               |
| Other cardiomyopathy                               | --                               | --                              | --                          | --                                                | --                                               |
| Atrial fibrillation and flutter                    | --                               | --                              | --                          | --                                                | --                                               |
| Peripheral vascular disease                        | --                               | --                              | --                          | --                                                | --                                               |
| Endocarditis                                       | 1.6<br>(1.3 to 1.9)              | 24.8<br>(20.1 to 30.9)          | 0.1<br>(0.1 to 0.1)         | -4.0<br>(-6.8 to -1.2)                            | -4.8<br>(-7.6 to -2.0)                           |
| Other cardiovascular and circulatory diseases      | --                               | --                              | --                          | --                                                | --                                               |
| <b>Chronic respiratory diseases</b>                | <b>--</b>                        | <b>--</b>                       | <b>--</b>                   | <b>--</b>                                         | <b>--</b>                                        |
| Chronic obstructive pulmonary disease              | --                               | --                              | --                          | --                                                | --                                               |
| Pneumoconiosis                                     | --                               | --                              | --                          | --                                                | --                                               |
| Silicosis                                          | --                               | --                              | --                          | --                                                | --                                               |

| Cause                                                          | Prevalence in thousands (95% UI)            | Incidence in thousands (95% UI)         | YLDs in thousands (95% UI)             |                                                   |                                                  |
|----------------------------------------------------------------|---------------------------------------------|-----------------------------------------|----------------------------------------|---------------------------------------------------|--------------------------------------------------|
|                                                                | 2016 counts                                 | 2016 counts                             | 2016 counts                            | Percentage change in counts between 2006 and 2016 | Percentage change in rates between 2006 and 2016 |
| Asbestosis                                                     | --                                          | --                                      | --                                     | --                                                | --                                               |
| Coal workers pneumoconiosis                                    | --                                          | --                                      | --                                     | --                                                | --                                               |
| Other pneumoconiosis                                           | --                                          | --                                      | --                                     | --                                                | --                                               |
| Asthma                                                         | --                                          | --                                      | --                                     | --                                                | --                                               |
| Interstitial lung disease and pulmonary sarcoidosis            | --                                          | --                                      | --                                     | --                                                | --                                               |
| Other chronic respiratory diseases                             | --                                          | --                                      | --                                     | --                                                | --                                               |
| <b>Cirrhosis and other chronic liver diseases</b>              | <b>33.0</b><br><b>(30.2 to 36.1)</b>        | <b>50.6</b><br><b>(46.2 to 55.2)</b>    | <b>5.5</b><br><b>(3.6 to 7.9)</b>      | <b>2.8</b><br><b>(-6.5 to 13.2)</b>               | <b>2.0</b><br><b>(-7.2 to 12.3)</b>              |
| Cirrhosis and other chronic liver diseases due to hepatitis B  | < 0.05<br>(< 0.05 to 0.1)                   | 0.1<br>(< 0.05 to 0.1)                  | < 0.05<br>(< 0.05 to < 0.05)           | 8.1<br>(3.8 to 12.2)                              | 7.2<br>(2.9 to 11.3)                             |
| Cirrhosis and other chronic liver diseases due to hepatitis C  | < 0.05<br>(< 0.05 to < 0.05)                | 0.1<br>(< 0.05 to 0.1)                  | < 0.05<br>(< 0.05 to < 0.05)           | 5.4<br>(1.4 to 9.2)                               | 4.6<br>(0.6 to 8.3)                              |
| Cirrhosis and other chronic liver diseases due to alcohol use  | --                                          | --                                      | --                                     | --                                                | --                                               |
| Cirrhosis and other chronic liver diseases due to other causes | 33.0<br>(30.1 to 36.1)                      | 50.5<br>(46.1 to 55.1)                  | 5.5<br>(3.6 to 7.9)                    | 2.8<br>(-6.5 to 13.2)                             | 2.0<br>(-7.2 to 12.3)                            |
| <b>Digestive diseases</b>                                      | <b>2.4</b><br><b>(1.9 to 3.0)</b>           | <b>59.0†</b><br><b>(45.0 to 76.7)</b>   | <b>0.8</b><br><b>(0.5 to 1.1)</b>      | <b>-3.2</b><br><b>(-5.8 to -0.5)</b>              | <b>-4.0</b><br><b>(-6.5 to -1.3)</b>             |
| Peptic ulcer disease                                           | --                                          | --                                      | --                                     | --                                                | --                                               |
| Gastritis and duodenitis                                       | --                                          | --                                      | --                                     | --                                                | --                                               |
| Appendicitis                                                   | --                                          | --                                      | --                                     | --                                                | --                                               |
| Paralytic ileus and intestinal obstruction                     | 2.4<br>(1.9 to 3.0)                         | 59.0<br>(45.0 to 76.7)                  | 0.8<br>(0.5 to 1.1)                    | -3.2<br>(-5.8 to -0.5)                            | -4.0<br>(-6.5 to -1.3)                           |
| Inguinal, femoral, and abdominal hernia                        | --                                          | --                                      | --                                     | --                                                | --                                               |
| Inflammatory bowel disease                                     | --                                          | --                                      | --                                     | --                                                | --                                               |
| Vascular intestinal disorders                                  | --                                          | --                                      | --                                     | --                                                | --                                               |
| Gallbladder and biliary diseases                               | --                                          | --                                      | --                                     | --                                                | --                                               |
| Pancreatitis                                                   | --                                          | --                                      | --                                     | --                                                | --                                               |
| Other digestive diseases                                       | --                                          | --                                      | --                                     | --                                                | --                                               |
| <b>Neurological disorders</b>                                  | <b>144.0</b><br><b>(115.6 to 167.7)</b>     | <b>225.8</b><br><b>(172.5 to 288.6)</b> | <b>64.8</b><br><b>(41.7 to 92.6)</b>   | <b>7.9</b><br><b>(-6.0 to 24.9)</b>               | <b>7.1</b><br><b>(-6.7 to 23.9)</b>              |
| Alzheimer's disease and other dementias                        | --                                          | --                                      | --                                     | --                                                | --                                               |
| Parkinson's disease                                            | --                                          | --                                      | --                                     | --                                                | --                                               |
| Epilepsy                                                       | 118.8<br>(91.8 to 150.9)                    | 223.6<br>(170.3 to 286.3)               | 41.4<br>(26.7 to 59.2)                 | -2.5<br>(-15.1 to 12.9)                           | -3.3<br>(-15.8 to 12.0)                          |
| Multiple sclerosis                                             | --                                          | --                                      | --                                     | --                                                | --                                               |
| Motor neuron disease                                           | 1.0<br>(0.8 to 1.2)                         | 2.2<br>(1.9 to 2.8)                     | 0.2<br>(0.1 to 0.3)                    | -2.4<br>(-4.4 to -0.2)                            | -3.2<br>(-5.1 to -1.0)                           |
| Migraine                                                       | --                                          | --                                      | --                                     | --                                                | --                                               |
| Tension-type headache                                          | --                                          | --                                      | --                                     | --                                                | --                                               |
| Other neurological disorders                                   | --                                          | --                                      | 23.2<br>(14.9 to 33.1)                 | 33.7<br>(16.4 to 54.9)                            | 32.6<br>(15.5 to 53.6)                           |
| <b>Mental and substance use disorders</b>                      | <b>1,022.6</b><br><b>(880.7 to 1,132.1)</b> | <b>47.6†</b><br><b>(31.3 to 70.2)</b>   | <b>108.4</b><br><b>(69.3 to 161.8)</b> | <b>-1.0</b><br><b>(-3.1 to 1.4)</b>               | <b>-1.8</b><br><b>(-4.0 to 0.6)</b>              |
| Schizophrenia                                                  | --                                          | --                                      | --                                     | --                                                | --                                               |
| Alcohol use disorders                                          | 4.6<br>(3.8 to 5.3)                         | --                                      | 0.2<br>(0.1 to 0.2)                    | 2.6<br>(-3.2 to 7.9)                              | 1.8<br>(-4.0 to 7.1)                             |
| Drug use disorders                                             | --                                          | --                                      | --                                     | --                                                | --                                               |
| Opioid use disorders                                           | --                                          | --                                      | --                                     | --                                                | --                                               |
| Cocaine use disorders                                          | --                                          | --                                      | --                                     | --                                                | --                                               |
| Amphetamine use disorders                                      | --                                          | --                                      | --                                     | --                                                | --                                               |
| Cannabis use disorders                                         | --                                          | --                                      | --                                     | --                                                | --                                               |
| Other drug use disorders                                       | --                                          | --                                      | --                                     | --                                                | --                                               |
| Depressive disorders                                           | --                                          | --                                      | --                                     | --                                                | --                                               |
| Major depressive disorder                                      | --                                          | --                                      | --                                     | --                                                | --                                               |
| Dysthymia                                                      | --                                          | --                                      | --                                     | --                                                | --                                               |
| Bipolar disorder                                               | --                                          | --                                      | --                                     | --                                                | --                                               |
| Anxiety disorders                                              | --                                          | --                                      | --                                     | --                                                | --                                               |
| Eating disorders                                               | --                                          | --                                      | --                                     | --                                                | --                                               |
| Anorexia nervosa                                               | --                                          | --                                      | --                                     | --                                                | --                                               |
| Bulimia nervosa                                                | --                                          | --                                      | --                                     | --                                                | --                                               |
| Autistic spectrum disorders                                    | 709.7<br>(642.0 to 805.5)                   | 47.6<br>(31.3 to 70.2)                  | 94.0<br>(59.2 to 137.2)                | 0.8<br>(-1.1 to 2.8)                              | 0.0<br>(-1.9 to 2.0)                             |
| Autism                                                         | 139.9<br>(94.8 to 191.8)                    | 7.2<br>(3.3 to 12.4)                    | 36.9<br>(20.7 to 58.8)                 | 0.9<br>(-3.1 to 4.7)                              | 0.1<br>(-3.9 to 3.9)                             |
| Asperger syndrome and other autistic spectrum disorders        | 558.7<br>(392.0 to 758.8)                   | 40.5<br>(25.1 to 62.8)                  | 57.1<br>(33.3 to 90.0)                 | 0.8<br>(-1.4 to 2.9)                              | -0.1<br>(-2.2 to 2.1)                            |

| Cause                                                      | Prevalence in thousands (95% UI)                 | Incidence in thousands (95% UI)                   | YLDs in thousands (95% UI)              |                                                   |                                                  |
|------------------------------------------------------------|--------------------------------------------------|---------------------------------------------------|-----------------------------------------|---------------------------------------------------|--------------------------------------------------|
|                                                            | 2016 counts                                      | 2016 counts                                       | 2016 counts                             | Percentage change in counts between 2006 and 2016 | Percentage change in rates between 2006 and 2016 |
| Attention-deficit/hyperactivity disorder                   | --                                               | --                                                | --                                      | --                                                | --                                               |
| Conduct disorder                                           | --                                               | --                                                | --                                      | --                                                | --                                               |
| Idiopathic developmental intellectual disability           | 335.3<br>(115.6 to 615.5)                        | --                                                | 14.2<br>(4.1 to 30.5)                   | -11.3<br>(-16.2 to -7.1)                          | -12.1<br>(-16.9 to -7.9)                         |
| Other mental and substance use disorders                   | --                                               | --                                                | --                                      | --                                                | --                                               |
| <b>Diabetes, urogenital, blood, and endocrine diseases</b> | <b>33,654.0</b><br><b>(33,262.1 to 34,074.8)</b> | <b>5,095.8†</b><br><b>(4,268.6 to 6,015.2)</b>    | <b>309.2</b><br><b>(199.4 to 450.4)</b> | <b>-0.0</b><br><b>(-2.8 to 3.1)</b>               | <b>-0.8</b><br><b>(-3.6 to 2.3)</b>              |
| Diabetes mellitus                                          | --                                               | --                                                | --                                      | --                                                | --                                               |
| Acute glomerulonephritis                                   | 0.4<br>(0.3 to 0.6)                              | 7.2<br>(5.0 to 9.8)                               | < 0.05<br>(< 0.05 to < 0.05)            | -5.5<br>(-8.0 to -3.5)                            | -6.3<br>(-8.7 to -4.3)                           |
| Chronic kidney disease                                     | 4.1<br>(3.1 to 5.4)                              | 11.0<br>(8.2 to 14.7)                             | 0.8<br>(0.5 to 1.3)                     | -1.6<br>(-7.2 to 3.6)                             | -2.4<br>(-7.9 to 2.8)                            |
| Chronic kidney disease due to diabetes mellitus            | 0.1<br>(0.1 to 0.2)                              | 0.3<br>(0.2 to 0.5)                               | < 0.05<br>(< 0.05 to < 0.05)            | -1.1<br>(-8.2 to 6.1)                             | -1.9<br>(-8.9 to 5.2)                            |
| Chronic kidney disease due to hypertension                 | 0.5<br>(0.3 to 0.7)                              | 4.5<br>(3.1 to 6.2)                               | < 0.05<br>(< 0.05 to < 0.05)            | -4.6<br>(-10.7 to 1.4)                            | -5.4<br>(-11.4 to 0.6)                           |
| Chronic kidney disease due to glomerulonephritis           | 1.2<br>(0.8 to 1.7)                              | 0.1<br>(< 0.05 to 0.1)                            | 0.3<br>(0.2 to 0.5)                     | -0.8<br>(-6.5 to 4.6)                             | -1.6<br>(-7.3 to 3.8)                            |
| Chronic kidney disease due to other causes                 | 2.3<br>(1.6 to 3.1)                              | 6.1<br>(4.3 to 8.5)                               | 0.5<br>(0.2 to 0.7)                     | -2.2<br>(-7.6 to 2.9)                             | -3.0<br>(-8.3 to 2.0)                            |
| Urinary diseases and male infertility                      | 102.1<br>(91.7 to 114.4)                         | 4,777.8†<br>(3,945.9 to 5,706.7)                  | 4.0<br>(2.3 to 6.3)                     | -14.8<br>(-20.7 to -8.3)                          | -15.5<br>(-21.4 to -9.1)                         |
| Interstitial nephritis and urinary tract infections        | 91.9<br>(75.0 to 110.5)                          | 4,777.8<br>(3,945.9 to 5,706.7)                   | 3.1<br>(1.8 to 4.9)                     | -2.7<br>(-9.5 to 4.7)                             | -3.5<br>(-10.2 to 3.9)                           |
| Urolithiasis                                               | --                                               | --                                                | --                                      | --                                                | --                                               |
| Benign prostatic hyperplasia                               | --                                               | --                                                | --                                      | --                                                | --                                               |
| Male infertility                                           | --                                               | --                                                | --                                      | --                                                | --                                               |
| Other urinary diseases                                     | --                                               | --                                                | 0.9<br>(0.5 to 1.4)                     | -39.9<br>(-44.0 to -35.2)                         | -40.3<br>(-44.5 to -35.8)                        |
| Gynecological diseases                                     | --                                               | --                                                | --                                      | --                                                | --                                               |
| Uterine fibroids                                           | --                                               | --                                                | --                                      | --                                                | --                                               |
| Polycystic ovarian syndrome                                | --                                               | --                                                | --                                      | --                                                | --                                               |
| Female infertility                                         | --                                               | --                                                | --                                      | --                                                | --                                               |
| Endometriosis                                              | --                                               | --                                                | --                                      | --                                                | --                                               |
| Genital prolapse                                           | --                                               | --                                                | --                                      | --                                                | --                                               |
| Premenstrual syndrome                                      | --                                               | --                                                | --                                      | --                                                | --                                               |
| Other gynecological diseases                               | --                                               | --                                                | --                                      | --                                                | --                                               |
| Hemoglobinopathies and hemolytic anaemias                  | 32,129.2<br>(31,725.5 to 32,564.9)               | --                                                | 232.5<br>(148.9 to 340.4)               | 0.1<br>(-3.0 to 3.7)                              | -0.7<br>(-3.8 to 2.9)                            |
| Thalassemias                                               | 71.8<br>(66.5 to 78.0)                           | --                                                | 4.9<br>(3.2 to 7.1)                     | -8.9<br>(-13.8 to -4.1)                           | -9.6<br>(-14.5 to -4.9)                          |
| Thalassaemias trait                                        | 3,766.3<br>(3,561.9 to 4,042.7)                  | --                                                | 91.0<br>(56.0 to 136.4)                 | -2.4<br>(-7.7 to 4.3)                             | -3.2<br>(-8.4 to 3.5)                            |
| Sickle cell disorders                                      | 323.8<br>(279.6 to 428.5)                        | --                                                | 21.9<br>(14.0 to 32.7)                  | 8.2<br>(1.9 to 14.4)                              | 7.3<br>(1.1 to 13.5)                             |
| Sickle cell trait                                          | 9,739.3<br>(8,908.5 to 10,833.5)                 | --                                                | 64.1<br>(41.3 to 95.8)                  | 7.0<br>(3.2 to 10.6)                              | 6.1<br>(2.4 to 9.7)                              |
| G6PD deficiency                                            | 6,359.2<br>(6,096.8 to 6,673.4)                  | --                                                | 1.0<br>(0.6 to 1.4)                     | -5.9<br>(-14.7 to 2.2)                            | -6.7<br>(-15.4 to 1.4)                           |
| G6PD trait                                                 | 14,714.1<br>(14,464.4 to 14,999.9)               | --                                                | < 0.05<br>(< 0.05 to < 0.05)            | 3.0<br>(-1.4 to 7.8)                              | 2.2<br>(-2.2 to 6.9)                             |
| Other hemoglobinopathies and hemolytic anaemias            | 1,558.2<br>(1,410.0 to 1,728.8)                  | --                                                | 49.7<br>(31.8 to 72.8)                  | -5.3<br>(-8.6 to -2.2)                            | -6.1<br>(-9.3 to -3.0)                           |
| Endocrine, metabolic, blood, and immune disorders          | 2,114.2<br>(1,920.3 to 2,337.0)                  | 299.9<br>(251.8 to 357.7)                         | 71.8<br>(46.5 to 104.8)                 | 0.5<br>(-2.3 to 3.3)                              | -0.3<br>(-3.1 to 2.4)                            |
| <b>Musculoskeletal disorders</b>                           | <b>--</b>                                        | <b>--</b>                                         | <b>--</b>                               | <b>--</b>                                         | <b>--</b>                                        |
| Rheumatoid arthritis                                       | --                                               | --                                                | --                                      | --                                                | --                                               |
| Osteoarthritis                                             | --                                               | --                                                | --                                      | --                                                | --                                               |
| Low back and neck pain                                     | --                                               | --                                                | --                                      | --                                                | --                                               |
| Low back pain                                              | --                                               | --                                                | --                                      | --                                                | --                                               |
| Neck pain                                                  | --                                               | --                                                | --                                      | --                                                | --                                               |
| Gout                                                       | --                                               | --                                                | --                                      | --                                                | --                                               |
| Other musculoskeletal disorders                            | --                                               | --                                                | --                                      | --                                                | --                                               |
| <b>Other non-communicable diseases</b>                     | <b>18,698.7</b><br><b>(18,303.2 to 19,110.6)</b> | <b>63,481.2†</b><br><b>(56,559.2 to 70,841.2)</b> | <b>621.3</b><br><b>(436.7 to 841.6)</b> | <b>-0.6</b><br><b>(-1.7 to 0.4)</b>               | <b>-1.4</b><br><b>(-2.5 to -0.4)</b>             |
| Congenital anomalies                                       | 2,714.6<br>(2,618.0 to 2,824.6)                  | --                                                | 286.2<br>(208.0 to 378.2)               | -0.4<br>(-2.4 to 1.6)                             | -1.2<br>(-3.1 to 0.8)                            |
| Neural tube defects                                        | 128.7<br>(116.2 to 142.5)                        | --                                                | 37.8<br>(26.4 to 51.1)                  | 5.3<br>(0.2 to 10.3)                              | 4.4<br>(-0.6 to 9.4)                             |
| Congenital heart anomalies                                 | 1,129.7<br>(921.9 to 1,373.8)                    | --                                                | 47.1<br>(21.4 to 79.8)                  | -1.6<br>(-4.4 to 1.4)                             | -2.4<br>(-5.2 to 0.6)                            |
| Orofacial clefts                                           | 105.5<br>(85.4 to 129.1)                         | --                                                | 1.5<br>(0.9 to 2.2)                     | -7.6<br>(-12.6 to -2.8)                           | -8.3<br>(-13.3 to -3.6)                          |
| Down's syndrome                                            | 57.1<br>(48.6 to 67.1)                           | --                                                | 4.9<br>(3.3 to 7.0)                     | 1.4<br>(-2.1 to 5.0)                              | 0.6<br>(-2.9 to 4.2)                             |
| Turner syndrome                                            | 74.0<br>(63.7 to 84.9)                           | --                                                | 1.0<br>(0.4 to 1.8)                     | -4.1<br>(-15.3 to 9.0)                            | -4.9<br>(-16.0 to 8.1)                           |
| Klinefelter syndrome                                       | 97.2<br>(83.6 to 112.6)                          | --                                                | 0.3<br>(0.1 to 0.5)                     | 2.5<br>(-7.0 to 11.7)                             | 1.6<br>(-7.8 to 10.8)                            |

| Cause                                         | Prevalence in thousands (95% UI)              | Incidence in thousands (95% UI)                   | YLDs in thousands (95% UI)              |                                                   |                                                  |
|-----------------------------------------------|-----------------------------------------------|---------------------------------------------------|-----------------------------------------|---------------------------------------------------|--------------------------------------------------|
|                                               | 2016 counts                                   | 2016 counts                                       | 2016 counts                             | Percentage change in counts between 2006 and 2016 | Percentage change in rates between 2006 and 2016 |
| Other chromosomal abnormalities               | 268.5<br>(231.7 to 310.7)                     | --                                                | 52.8<br>(36.0 to 73.1)                  | -1.9<br>(-6.0 to 2.5)                             | -2.7<br>(-6.8 to 1.7)                            |
| Congenital musculoskeletal and limb anomalies | 155.1<br>(141.4 to 168.6)                     | --                                                | 20.3<br>(13.8 to 28.0)                  | 1.4<br>(-2.0 to 4.5)                              | 0.6<br>(-2.8 to 3.6)                             |
| Urogenital congenital anomalies               | 342.3<br>(301.0 to 389.7)                     | --                                                | 9.1<br>(5.3 to 14.5)                    | -3.3<br>(-5.7 to -1.0)                            | -4.1<br>(-6.5 to -1.8)                           |
| Digestive congenital anomalies                | 144.8<br>(129.8 to 160.7)                     | --                                                | 7.1<br>(4.6 to 10.1)                    | -1.1<br>(-6.2 to 4.1)                             | -1.9<br>(-6.9 to 3.3)                            |
| Other congenital anomalies                    | 598.1<br>(420.9 to 849.7)                     | --                                                | 104.3<br>(71.4 to 146.1)                | -0.9<br>(-4.8 to 3.0)                             | -1.7<br>(-5.6 to 2.2)                            |
| Skin and subcutaneous diseases                | 13,547.5<br>(13,110.4 to 13,953.1)            | 63,481.2<br>(56,559.2 to 70,841.2)                | 265.4<br>(163.8 to 400.7)               | 0.2<br>(-0.8 to 1.2)                              | -0.6<br>(-1.7 to 0.4)                            |
| Dermatitis                                    | --                                            | --                                                | --                                      | --                                                | --                                               |
| Psoriasis                                     | --                                            | --                                                | --                                      | --                                                | --                                               |
| Cellulitis                                    | 34.3<br>(28.9 to 39.9)                        | 639.6<br>(543.1 to 756.3)                         | 2.0<br>(1.3 to 3.0)                     | 4.0<br>(-1.2 to 9.1)                              | 3.1<br>(-2.0 to 8.2)                             |
| Pyoderma                                      | 573.1<br>(541.0 to 606.0)                     | 11,564.4<br>(10,846.6 to 12,346.0)                | 3.3<br>(1.3 to 6.9)                     | 12.7<br>(10.0 to 15.2)                            | 11.8<br>(9.1 to 14.2)                            |
| Scabies                                       | 2,111.6<br>(1,566.1 to 2,733.3)               | 9,522.9<br>(6,998.1 to 12,493.6)                  | 55.2<br>(28.4 to 93.5)                  | -5.7<br>(-7.2 to -4.2)                            | -6.5<br>(-7.9 to -5.0)                           |
| Fungal skin diseases                          | 5,418.8<br>(4,289.8 to 6,799.1)               | 24,872.2<br>(19,107.9 to 31,567.1)                | 31.1<br>(12.3 to 67.2)                  | 4.9<br>(3.9 to 5.8)                               | 4.0<br>(3.0 to 4.9)                              |
| Viral skin diseases                           | --                                            | --                                                | --                                      | --                                                | --                                               |
| Acne vulgaris                                 | --                                            | --                                                | --                                      | --                                                | --                                               |
| Alopecia areata                               | --                                            | --                                                | --                                      | --                                                | --                                               |
| Pruritus                                      | 333.7<br>(255.5 to 429.5)                     | 802.7<br>(612.4 to 1,042.3)                       | 3.6<br>(1.7 to 7.1)                     | 1.8<br>(-0.8 to 4.6)                              | 0.9<br>(-1.6 to 3.7)                             |
| Urticaria                                     | 2,460.7<br>(1,946.1 to 3,065.3)               | 7,891.8<br>(6,115.2 to 9,806.8)                   | 151.1<br>(92.5 to 222.4)                | 0.7<br>(-0.7 to 2.0)                              | -0.2<br>(-1.5 to 1.2)                            |
| Decubitus ulcer                               | --                                            | --                                                | --                                      | --                                                | --                                               |
| Other skin and subcutaneous diseases          | 3,364.7<br>(3,162.7 to 3,574.6)               | 8,187.7<br>(7,621.6 to 8,724.2)                   | 19.0<br>(8.9 to 34.9)                   | 5.5<br>(4.3 to 6.9)                               | 4.6<br>(3.4 to 6.1)                              |
| Sense organ diseases                          | 3,251.4<br>(3,097.3 to 3,399.6)               | --                                                | 69.7<br>(43.6 to 106.9)                 | -4.6<br>(-7.2 to -1.9)                            | -5.4<br>(-8.0 to -2.6)                           |
| Glaucoma                                      | --                                            | --                                                | --                                      | --                                                | --                                               |
| Cataract                                      | --                                            | --                                                | --                                      | --                                                | --                                               |
| Macular degeneration                          | --                                            | --                                                | --                                      | --                                                | --                                               |
| Refraction and accommodation disorders        | 3,008.3<br>(2,728.1 to 3,299.8)               | --                                                | 43.6<br>(24.5 to 76.0)                  | -5.8<br>(-7.5 to -4.2)                            | -6.6<br>(-8.3 to -5.0)                           |
| Age-related and other hearing loss            | 146.0<br>(82.3 to 210.3)                      | --                                                | 21.0<br>(10.2 to 34.3)                  | -1.9<br>(-10.0 to 6.4)                            | -2.7<br>(-10.7 to 5.5)                           |
| Other vision loss                             | 92.7<br>(62.5 to 131.3)                       | --                                                | 5.0<br>(2.9 to 8.2)                     | -5.0<br>(-11.6 to 1.5)                            | -5.8<br>(-12.4 to 0.6)                           |
| Other sense organ diseases                    | --                                            | --                                                | --                                      | --                                                | --                                               |
| Oral disorders                                | --                                            | --                                                | --                                      | --                                                | --                                               |
| Caries of deciduous teeth                     | --                                            | --                                                | --                                      | --                                                | --                                               |
| Caries of permanent teeth                     | --                                            | --                                                | --                                      | --                                                | --                                               |
| Periodontal disease                           | --                                            | --                                                | --                                      | --                                                | --                                               |
| Edentulism and severe tooth loss              | --                                            | --                                                | --                                      | --                                                | --                                               |
| Other oral disorders                          | --                                            | --                                                | --                                      | --                                                | --                                               |
| <b>Injuries</b>                               | <b>2,359.8</b><br><b>(2,115.7 to 2,636.0)</b> | <b>20,061.7†</b><br><b>(18,382.1 to 21,966.6)</b> | <b>169.0</b><br><b>(116.3 to 233.6)</b> | <b>-4.0</b><br><b>(-5.8 to -2.2)</b>              | <b>-4.8</b><br><b>(-6.5 to -3.0)</b>             |
| <b>Transport injuries</b>                     | <b>108.5</b><br><b>(84.6 to 138.4)</b>        | <b>599.2</b><br><b>(464.9 to 787.5)</b>           | <b>9.9</b><br><b>(6.4 to 14.8)</b>      | <b>-1.5</b><br><b>(-4.6 to 1.6)</b>               | <b>-2.3</b><br><b>(-5.4 to 0.8)</b>              |
| Road injuries                                 | 9.8<br>(7.3 to 12.9)                          | 60.6<br>(41.4 to 85.3)                            | 0.8<br>(0.5 to 1.3)                     | 14.2<br>(7.8 to 19.7)                             | 13.2<br>(6.9 to 18.7)                            |
| Pedestrian road injuries                      | 1.5<br>(1.0 to 2.1)                           | 8.4<br>(4.9 to 12.9)                              | 0.1<br>(0.1 to 0.2)                     | 11.4<br>(4.4 to 18.5)                             | 10.5<br>(3.5 to 17.5)                            |
| Cyclist road injuries                         | --                                            | --                                                | --                                      | --                                                | --                                               |
| Motorcyclist road injuries                    | 3.0<br>(2.0 to 4.1)                           | 15.7<br>(9.6 to 23.5)                             | 0.2<br>(0.1 to 0.4)                     | 15.4<br>(8.4 to 21.8)                             | 14.4<br>(7.5 to 20.8)                            |
| Motor vehicle road injuries                   | 4.2<br>(2.9 to 5.9)                           | 28.8<br>(18.5 to 42.1)                            | 0.4<br>(0.2 to 0.6)                     | 11.8<br>(4.6 to 18.5)                             | 10.8<br>(3.7 to 17.5)                            |
| Other road injuries                           | 1.1<br>(0.7 to 1.7)                           | 7.6<br>(4.3 to 12.5)                              | 0.1<br>(< 0.05 to 0.1)                  | 31.2<br>(22.9 to 39.6)                            | 30.2<br>(21.9 to 38.4)                           |
| Other transport injuries                      | 98.6<br>(75.3 to 128.9)                       | 538.6<br>(407.2 to 732.4)                         | 9.1<br>(5.8 to 13.6)                    | -2.7<br>(-6.2 to 0.6)                             | -3.5<br>(-6.9 to -0.3)                           |
| <b>Unintentional injuries</b>                 | <b>2,219.7</b><br><b>(1,981.9 to 2,500.2)</b> | <b>19,211.8</b><br><b>(17,529.8 to 21,074.5)</b>  | <b>156.6</b><br><b>(107.1 to 216.9)</b> | <b>-4.2</b><br><b>(-6.1 to -2.3)</b>              | <b>-5.0</b><br><b>(-6.8 to -3.1)</b>             |
| Falls                                         | 522.5<br>(402.5 to 660.0)                     | 3,501.9<br>(2,649.5 to 4,466.1)                   | 27.1<br>(17.0 to 40.4)                  | 9.3<br>(5.5 to 12.5)                              | 8.4<br>(4.7 to 11.6)                             |
| Drowning                                      | 3.7<br>(2.7 to 5.3)                           | 24.1<br>(19.6 to 29.9)                            | 0.3<br>(0.2 to 0.5)                     | -11.3<br>(-13.9 to -8.3)                          | -12.1<br>(-14.6 to -9.1)                         |
| Fire, heat, and hot substances                | 46.3<br>(35.8 to 59.0)                        | 292.6<br>(225.4 to 374.4)                         | 4.7<br>(2.9 to 7.1)                     | -2.3<br>(-7.2 to 2.6)                             | -3.1<br>(-7.9 to 1.7)                            |
| Poisonings                                    | 4.5<br>(3.3 to 6.3)                           | 152.1<br>(111.4 to 198.1)                         | 0.6<br>(0.3 to 0.9)                     | 6.5<br>(-0.2 to 13.4)                             | 5.6<br>(-1.0 to 12.5)                            |
| Exposure to mechanical forces                 | 271.0<br>(211.5 to 338.2)                     | 1,978.6<br>(1,535.7 to 2,492.2)                   | 11.3<br>(7.5 to 17.1)                   | -8.7<br>(-13.3 to -4.5)                           | -9.4<br>(-14.0 to -5.3)                          |
| Unintentional firearm injuries                | 3.3<br>(2.3 to 4.9)                           | 19.7<br>(12.2 to 29.8)                            | 0.3<br>(0.1 to 0.5)                     | -1.5<br>(-8.6 to 5.4)                             | -2.3<br>(-9.3 to 4.5)                            |
| Unintentional suffocation                     | 59.8<br>(43.7 to 77.9)                        | 392.7<br>(286.0 to 518.0)                         | 3.5<br>(2.2 to 5.5)                     | -17.0<br>(-22.6 to -11.8)                         | -17.7<br>(-23.2 to -12.6)                        |
| Other exposure to mechanical forces           | 207.9<br>(159.8 to 269.0)                     | 1,566.3<br>(1,200.8 to 1,993.3)                   | 7.5<br>(4.9 to 11.3)                    | -4.5<br>(-9.7 to -0.1)                            | -5.3<br>(-10.4 to -0.9)                          |

| Cause                                                                               | Prevalence in thousands (95% UI)     | Incidence in thousands (95% UI)          | YLDs in thousands (95% UI)        |                                                   |                                                  |
|-------------------------------------------------------------------------------------|--------------------------------------|------------------------------------------|-----------------------------------|---------------------------------------------------|--------------------------------------------------|
|                                                                                     | 2016 counts                          | 2016 counts                              | 2016 counts                       | Percentage change in counts between 2006 and 2016 | Percentage change in rates between 2006 and 2016 |
| Adverse effects of medical treatment                                                | 302.1<br>(230.5 to 384.7)            | 3,958.2<br>(3,279.2 to 4,755.5)          | 40.3<br>(24.8 to 62.5)            | -10.8<br>(-15.2 to -6.8)                          | -11.6<br>(-15.8 to -7.6)                         |
| Animal contact                                                                      | 139.0<br>(104.1 to 188.8)            | 1,705.4<br>(1,314.6 to 2,129.9)          | 7.4<br>(4.6 to 11.0)              | -11.1<br>(-15.7 to -6.6)                          | -11.8<br>(-16.4 to -7.4)                         |
| Venomous animal contact                                                             | 47.4<br>(35.1 to 65.2)               | 777.9<br>(581.6 to 1,019.7)              | 4.8<br>(3.0 to 7.0)               | -14.1<br>(-19.2 to -9.4)                          | -14.8<br>(-19.8 to -10.1)                        |
| Non-venomous animal contact                                                         | 91.7<br>(63.5 to 129.0)              | 927.5<br>(709.0 to 1,223.2)              | 2.6<br>(1.5 to 4.1)               | -4.9<br>(-10.3 to -0.2)                           | -5.7<br>(-11.1 to -1.0)                          |
| Foreign body                                                                        | 272.1<br>(214.5 to 333.1)            | 2,983.8<br>(2,537.3 to 3,496.4)          | 22.7<br>(15.3 to 31.9)            | -5.6<br>(-8.2 to -3.0)                            | -6.4<br>(-8.9 to -3.8)                           |
| Pulmonary aspiration and foreign body in airway                                     | 177.3<br>(133.4 to 223.6)            | 2,079.4<br>(1,693.5 to 2,560.8)          | 16.9<br>(11.0 to 23.9)            | -7.7<br>(-10.8 to -4.4)                           | -8.4<br>(-11.5 to -5.1)                          |
| Foreign body in eyes                                                                | 30.8<br>(9.5 to 62.9)                | 227.9<br>(129.5 to 389.2)                | 1.7<br>(0.5 to 3.7)               | 6.2<br>(2.8 to 10.9)                              | 5.3<br>(2.0 to 10.0)                             |
| Foreign body in other body part                                                     | 64.0<br>(47.8 to 83.0)               | 676.5<br>(508.3 to 871.6)                | 4.1<br>(2.6 to 6.1)               | -1.3<br>(-5.3 to 2.4)                             | -2.1<br>(-6.0 to 1.5)                            |
| Environmental heat and cold exposure                                                | 160.8<br>(120.7 to 218.9)            | 949.6<br>(709.1 to 1,242.9)              | 11.6<br>(7.4 to 17.2)             | -6.9<br>(-11.3 to -3.3)                           | -7.7<br>(-12.0 to -4.1)                          |
| Other unintentional injuries                                                        | 497.5<br>(388.8 to 641.2)            | 3,665.6<br>(2,837.5 to 4,760.6)          | 30.6<br>(19.7 to 45.2)            | 0.2<br>(-4.4 to 4.8)                              | -0.6<br>(-5.2 to 3.9)                            |
| <b>Self-harm and interpersonal violence</b>                                         | <b>31.7</b><br><b>(24.1 to 40.9)</b> | <b>250.7†</b><br><b>(189.7 to 329.4)</b> | <b>2.5</b><br><b>(1.6 to 3.7)</b> | <b>-4.2</b><br><b>(-9.7 to 1.3)</b>               | <b>-5.0</b><br><b>(-10.5 to 0.5)</b>             |
| Self-harm                                                                           | --                                   | --                                       | --                                | --                                                | --                                               |
| Self-harm by firearm                                                                | --                                   | --                                       | --                                | --                                                | --                                               |
| Self-harm by other specified means                                                  | --                                   | --                                       | --                                | --                                                | --                                               |
| Interpersonal violence                                                              | 31.7<br>(24.1 to 40.9)               | 250.7†<br>(189.7 to 329.4)               | 2.5<br>(1.6 to 3.7)               | -4.2<br>(-9.7 to 1.3)                             | -5.0<br>(-10.5 to 0.5)                           |
| Assault by firearm                                                                  | 1.5<br>(1.0 to 2.2)                  | 9.7<br>(5.6 to 15.3)                     | 0.2<br>(0.1 to 0.3)               | -0.5<br>(-7.9 to 6.6)                             | -1.4<br>(-8.7 to 5.8)                            |
| Assault by sharp object                                                             | 7.4<br>(5.2 to 10.1)                 | 55.0<br>(35.5 to 80.5)                   | 0.6<br>(0.4 to 1.0)               | 0.8<br>(-6.1 to 8.4)                              | -0.0<br>(-6.9 to 7.5)                            |
| Sexual violence                                                                     | --                                   | --                                       | --                                | --                                                | --                                               |
| Assault by other means                                                              | 22.7<br>(17.0 to 30.3)               | 186.1<br>(138.8 to 241.3)                | 1.7<br>(1.0 to 2.5)               | -6.4<br>(-11.9 to -1.0)                           | -7.1<br>(-12.6 to -1.8)                          |
| <b>Forces of nature, conflict and terrorism, and executions and police conflict</b> | --                                   | --                                       | --                                | --                                                | --                                               |
| Forces of nature, conflict and terrorism, and state actor violence                  | --                                   | --                                       | --                                | --                                                | --                                               |
| Conflict and terrorism                                                              | --                                   | --                                       | --                                | --                                                | --                                               |
| Executions and police conflict                                                      | --                                   | --                                       | --                                | --                                                | --                                               |

We did not calculate incidence for certain NTDs and causes with only birth prevalence. Blank cells mean that no estimate is available.

† Incidence for aggregate causes represents the sum of the incidence of the causes below the aggregate.

‡ Incidence estimates for stroke represent first-ever stroke only.

^ Incidence of HIV/AIDS represents new infections of HIV only and does not include new infections of Tuberculosis in HIV positive cases.



SR Table 12: Global prevalence, incidence, and YLDs for 2016, percentage change of YLD counts and percentage change of YLD rates between 2006 and 2016 by cause, age 1-4 years.

| Cause                                                                                | Prevalence in thousands (95% UI)             | Incidence in thousands (95% UI)                     | YLDs in thousands (95% UI)                |                                                   |                                                  |
|--------------------------------------------------------------------------------------|----------------------------------------------|-----------------------------------------------------|-------------------------------------------|---------------------------------------------------|--------------------------------------------------|
|                                                                                      | 2016 counts                                  | 2016 counts                                         | 2016 counts                               | Percentage change in counts between 2006 and 2016 | Percentage change in rates between 2006 and 2016 |
|                                                                                      |                                              |                                                     |                                           |                                                   |                                                  |
| <b>All causes</b>                                                                    | <b>452,157.7</b><br>(449,874.8 to 454,742.4) | <b>4,099,632.5*</b><br>(3,566,556.6 to 4,692,859.3) | <b>23,797.6</b><br>(16,715.9 to 32,421.5) | <b>4.7</b><br>(2.9 to 6.7)                        | <b>-0.9</b><br>(-2.6 to 1.0)                     |
| <b>Communicable, maternal, neonatal, and nutritional disorders</b>                   | <b>324,063.5</b><br>(320,029.4 to 327,725.9) | <b>3,033,738.2*</b><br>(2,583,621.0 to 3,559,977.8) | <b>13,543.3</b><br>(9,403.3 to 18,447.0)  | <b>3.1</b><br>(0.4 to 6.1)                        | <b>-2.4</b><br>(-4.9 to 0.5)                     |
| <b>HIV/AIDS and tuberculosis</b>                                                     | <b>58,197.5</b><br>(51,158.3 to 66,353.8)    | <b>219.3†</b><br>(152.6 to 307.2)                   | <b>110.0</b><br>(76.4 to 150.2)           | <b>-26.4</b><br>(-30.9 to -21.1)                  | <b>-30.3</b><br>(-34.6 to -25.3)                 |
| Tuberculosis                                                                         | 54,835.5<br>(45,312.1 to 65,686.4)           | 219.3†<br>(152.6 to 307.2)                          | 39.0<br>(21.5 to 63.3)                    | -31.4<br>(-38.0 to -23.4)                         | -35.0<br>(-41.3 to -27.5)                        |
| Drug-susceptible tuberculosis                                                        | 117.7<br>(77.8 to 170.1)                     | 213.3<br>(148.4 to 299.7)                           | 37.9<br>(20.8 to 61.6)                    | -31.4<br>(-38.4 to -23.0)                         | -35.1<br>(-41.6 to -27.1)                        |
| Multidrug-resistant tuberculosis without extensive drug resistance                   | 3.2<br>(2.2 to 4.8)                          | 5.8<br>(3.9 to 8.2)                                 | 1.1<br>(0.6 to 1.8)                       | -31.6<br>(-42.2 to -18.6)                         | -35.2<br>(-45.2 to -22.9)                        |
| Extensively drug-resistant tuberculosis                                              | 0.1<br>(0.1 to 0.2)                          | 0.2<br>(0.1 to 0.3)                                 | < 0.05<br>(< 0.05 to 0.1)                 | 121.8<br>(91.9 to 153.7)                          | 110.1<br>(81.8 to 140.3)                         |
| Latent tuberculosis infection                                                        | 54,714.5<br>(45,236.8 to 65,571.1)           | --                                                  | --                                        | --                                                | --                                               |
| HIV/AIDS                                                                             | 630.3<br>(593.7 to 669.2)                    | --                                                  | 71.0<br>(51.0 to 92.9)                    | -23.4<br>(-29.5 to -16.8)                         | -27.4<br>(-33.2 to -21.2)                        |
| Drug-susceptible HIV/AIDS - Tuberculosis                                             | 17.0<br>(11.7 to 23.4)                       | 24.7<br>(17.1 to 34.2)                              | 6.9<br>(4.0 to 11.0)                      | -52.8<br>(-57.7 to -47.6)                         | -55.3<br>(-60.0 to -50.4)                        |
| Multidrug-resistant HIV/AIDS - Tuberculosis without extensive drug resistance        | 0.5<br>(0.3 to 0.7)                          | 0.7<br>(0.4 to 1.0)                                 | 0.2<br>(0.1 to 0.3)                       | -51.6<br>(-62.3 to -39.4)                         | -54.1<br>(-64.3 to -42.6)                        |
| Extensively drug-resistant HIV/AIDS - Tuberculosis                                   | < 0.05<br>(< 0.05 to < 0.05)                 | < 0.05<br>(< 0.05 to < 0.05)                        | < 0.05<br>(< 0.05 to < 0.05)              | 103.3<br>(66.3 to 149.0)                          | 92.6<br>(57.6 to 135.9)                          |
| HIV/AIDS resulting in other diseases                                                 | 612.9<br>(573.7 to 652.8)                    | --                                                  | 63.9<br>(45.5 to 83.8)                    | -17.7<br>(-25.2 to -9.7)                          | -22.0<br>(-29.2 to -14.4)                        |
| <b>Diarrhoea, lower respiratory infections, and other common infectious diseases</b> | <b>53,556.1</b><br>(51,373.7 to 55,884.1)    | <b>2,792,326.5*</b><br>(2,343,495.3 to 3,317,938.9) | <b>2,889.0</b><br>(1,971.4 to 3,969.1)    | <b>-1.1</b><br>(-3.0 to 0.7)                      | <b>-6.3</b><br>(-8.1 to -4.6)                    |
| Diarrhoeal diseases                                                                  | 12,929.2<br>(11,041.7 to 15,232.1)           | 813,444.9<br>(685,933.6 to 958,579.5)               | 1,491.4<br>(1,000.1 to 2,084.0)           | -2.8<br>(-5.6 to -0.1)                            | -7.9<br>(-10.6 to -5.4)                          |
| Intestinal infectious diseases                                                       | 99.2<br>(74.4 to 137.2)                      | 1,798.6†<br>(1,209.5 to 2,617.5)                    | 15.0<br>(8.6 to 24.2)                     | -26.5<br>(-41.2 to -8.1)                          | -30.4<br>(-44.3 to -12.9)                        |
| Typhoid fever                                                                        | 89.7<br>(57.6 to 135.3)                      | 1,421.2<br>(940.5 to 2,078.9)                       | 13.6<br>(7.7 to 22.0)                     | -25.7<br>(-41.4 to -5.4)                          | -29.6<br>(-44.5 to -10.3)                        |
| Paratyphoid fever                                                                    | 16.6<br>(10.6 to 25.3)                       | 377.4<br>(242.5 to 554.4)                           | 1.0<br>(0.6 to 1.7)                       | -22.7<br>(-39.2 to -1.6)                          | -26.8<br>(-42.4 to -6.8)                         |
| Other intestinal infectious diseases                                                 | --                                           | --                                                  | 0.4<br>(0.2 to 0.6)                       | -52.1<br>(-61.6 to -40.1)                         | -54.6<br>(-63.7 to -43.2)                        |
| Lower respiratory infections                                                         | 1,294.9<br>(1,055.2 to 1,568.5)              | 54,236.6<br>(43,084.4 to 67,283.2)                  | 80.2<br>(50.6 to 121.0)                   | -7.1<br>(-11.9 to -2.4)                           | -12.0<br>(-16.5 to -7.5)                         |
| Upper respiratory infections                                                         | 22,324.5<br>(17,279.4 to 28,255.4)           | 1,694,630.9<br>(1,282,770.6 to 2,188,180.1)         | 565.3<br>(320.1 to 935.5)                 | 7.3<br>(5.1 to 9.1)                               | 1.6<br>(-0.5 to 3.4)                             |
| Otitis media                                                                         | 17,698.8<br>(14,151.6 to 22,212.4)           | 173,838.8<br>(116,385.0 to 253,242.7)               | 551.4<br>(341.3 to 837.9)                 | 2.7<br>(-0.0 to 5.4)                              | -2.7<br>(-5.3 to -0.2)                           |
| Meningitis                                                                           | 820.7<br>(711.3 to 962.3)                    | 753.0<br>(565.1 to 1,032.8)                         | 95.3<br>(67.3 to 127.4)                   | 4.0<br>(-0.1 to 8.2)                              | -1.5<br>(-5.4 to 2.5)                            |
| Pneumococcal meningitis                                                              | 276.4<br>(230.5 to 335.3)                    | 147.9<br>(92.2 to 226.6)                            | 32.9<br>(22.2 to 44.9)                    | -2.2<br>(-9.5 to 6.1)                             | -7.4<br>(-14.3 to 0.5)                           |
| H influenzae type B meningitis                                                       | 138.6<br>(110.7 to 173.6)                    | 134.6<br>(80.7 to 209.6)                            | 18.0<br>(12.5 to 24.1)                    | -21.1<br>(-27.5 to -14.3)                         | -25.3<br>(-31.4 to -18.9)                        |
| Meningococcal infection                                                              | 100.2<br>(72.9 to 133.7)                     | 155.7<br>(97.4 to 233.7)                            | 10.7<br>(7.4 to 14.7)                     | 12.6<br>(8.0 to 17.2)                             | 6.7<br>(2.3 to 11.0)                             |
| Other meningitis                                                                     | 305.4<br>(237.8 to 389.5)                    | 314.8<br>(215.2 to 451.3)                           | 33.7<br>(23.1 to 47.0)                    | 31.2<br>(22.7 to 39.9)                            | 24.2<br>(16.2 to 32.5)                           |
| Encephalitis                                                                         | 252.5<br>(190.6 to 341.2)                    | 727.4<br>(552.8 to 926.0)                           | 30.5<br>(21.0 to 40.9)                    | -3.2<br>(-8.3 to 2.0)                             | -8.3<br>(-13.2 to -3.4)                          |
| Diphtheria                                                                           | 0.1<br>(0.1 to 0.2)                          | 1.4<br>(0.8 to 2.3)                                 | < 0.05<br>(< 0.05 to < 0.05)              | -65.8<br>(-83.1 to -29.7)                         | -67.6<br>(-84.0 to -33.4)                        |
| Whooping cough                                                                       | 781.7<br>(609.7 to 982.0)                    | 5,706.3<br>(4,450.6 to 7,168.8)                     | 38.7<br>(22.9 to 61.4)                    | -20.9<br>(-24.6 to -17.1)                         | -25.1<br>(-28.6 to -21.5)                        |
| Tetanus                                                                              | 12.8<br>(12.6 to 13.0)                       | 3.4<br>(1.6 to 6.3)                                 | 0.3<br>(0.1 to 0.5)                       | -12.0<br>(-36.8 to 19.3)                          | -16.7<br>(-40.1 to 13.0)                         |
| Measles                                                                              | 152.2<br>(55.2 to 330.1)                     | 5,555.1<br>(2,016.7 to 12,048.5)                    | 13.7<br>(4.5 to 31.7)                     | -62.1<br>(-67.2 to -56.5)                         | -64.1<br>(-68.9 to -58.8)                        |
| Varicella and herpes zoster                                                          | 839.6<br>(648.2 to 1,031.2)                  | 41,630.2<br>(31,721.9 to 51,673.9)                  | 7.2<br>(3.7 to 13.6)                      | 4.3<br>(0.8 to 7.5)                               | -1.2<br>(-4.6 to 1.9)                            |
| <b>Neglected tropical diseases and malaria</b>                                       | <b>104,290.6</b><br>(100,575.6 to 107,788.6) | <b>74,749.9†</b><br>(52,278.1 to 100,568.8)         | <b>955.9</b><br>(630.6 to 1,413.0)        | <b>-7.0</b><br>(-11.7 to -2.6)                    | <b>-12.0</b><br>(-16.3 to -7.8)                  |
| Malaria                                                                              | 19,410.3<br>(13,686.3 to 25,193.2)           | 64,064.0<br>(42,138.4 to 89,747.0)                  | 276.3<br>(179.2 to 414.0)                 | -19.9<br>(-30.9 to -10.8)                         | -24.1<br>(-34.5 to -15.5)                        |
| Chagas disease                                                                       | 73.7<br>(56.9 to 90.9)                       | 16.4<br>(11.5 to 21.9)                              | < 0.05<br>(< 0.05 to < 0.05)              | -23.2<br>(-28.3 to -19.2)                         | -27.3<br>(-32.1 to -23.5)                        |
| Leishmaniasis                                                                        | 84.4<br>(71.6 to 98.6)                       | 69.9<br>(52.8 to 89.2)                              | 4.9<br>(3.2 to 7.4)                       | 7.1<br>(-13.7 to 32.6)                            | 1.4<br>(-18.3 to 25.6)                           |
| Visceral leishmaniasis                                                               | 3.9<br>(2.7 to 5.6)                          | 15.8<br>(11.0 to 22.5)                              | 0.3<br>(0.1 to 0.5)                       | -61.9<br>(-75.9 to -39.7)                         | -63.9<br>(-77.1 to -42.9)                        |
| Cutaneous and mucocutaneous leishmaniasis                                            | 70.9<br>(56.1 to 88.2)                       | 54.1<br>(38.4 to 73.4)                              | 4.7<br>(3.0 to 7.0)                       | 19.9<br>(-4.0 to 49.4)                            | 13.6<br>(-9.1 to 41.5)                           |
| African trypanosomiasis                                                              | 0.3<br>(< 0.05 to 1.0)                       | 0.2<br>(< 0.05 to 0.7)                              | 0.1<br>(< 0.05 to 0.3)                    | -75.0<br>(-96.6 to 30.4)                          | -76.3<br>(-96.8 to 23.5)                         |
| Schistosomiasis                                                                      | 279.8<br>(231.4 to 330.8)                    | 4,511.8<br>(4,417.8 to 4,629.2)                     | 2.0<br>(1.0 to 3.8)                       | -12.1<br>(-18.9 to -5.4)                          | -16.7<br>(-23.2 to -10.4)                        |
| Cysticercosis                                                                        | --                                           | --                                                  | --                                        | --                                                | --                                               |
| Cystic echinococcosis                                                                | 49.4<br>(24.4 to 106.0)                      | 10.3<br>(4.4 to 27.8)                               | 4.7<br>(2.0 to 11.9)                      | -39.8<br>(-79.8 to 80.5)                          | -42.9<br>(-80.9 to 71.0)                         |
| Lymphatic filariasis                                                                 | 1,069.5<br>(948.8 to 1,204.9)                | 310.9<br>(178.1 to 477.9)                           | --                                        | --                                                | --                                               |
| Onchocerciasis                                                                       | --                                           | --                                                  | --                                        | --                                                | --                                               |
| Trachoma                                                                             | --                                           | --                                                  | --                                        | --                                                | --                                               |
| Dengue                                                                               | 311.2<br>(169.5 to 527.2)                    | 5,201.9<br>(3,164.0 to 7,892.3)                     | 51.8<br>(23.0 to 97.7)                    | 51.3<br>(21.7 to 245.8)                           | 43.3<br>(15.3 to 227.5)                          |
| Yellow fever                                                                         | 0.3<br>(0.1 to 0.8)                          | 10.6<br>(3.0 to 28.0)                               | < 0.05<br>(< 0.05 to < 0.05)              | -16.8<br>(-48.4 to 27.2)                          | -21.2<br>(-51.2 to 20.4)                         |
| Rabies                                                                               | 0.1<br>(< 0.05 to 0.1)                       | 1.5<br>(0.7 to 2.7)                                 | < 0.05<br>(< 0.05 to < 0.05)              | -43.9<br>(-64.7 to -6.5)                          | -46.9<br>(-66.5 to -11.5)                        |
| Intestinal nematode infections                                                       | 78,323.5<br>(74,543.7 to 81,997.9)           | --                                                  | 168.9<br>(101.6 to 270.6)                 | -15.4<br>(-21.8 to -8.4)                          | -19.9<br>(-25.9 to -13.3)                        |
| Ascariasis                                                                           | 39,190.1<br>(35,663.1 to 43,027.3)           | --                                                  | 62.6<br>(35.8 to 104.4)                   | -24.1<br>(-33.7 to -13.0)                         | -28.1<br>(-37.2 to -17.6)                        |

| Cause                                                                   | Prevalence in thousands (95% UI)                    | Incidence in thousands (95% UI)                          | YLDs in thousands (95% UI)                     |                                                   |                                                  |
|-------------------------------------------------------------------------|-----------------------------------------------------|----------------------------------------------------------|------------------------------------------------|---------------------------------------------------|--------------------------------------------------|
|                                                                         | 2016 counts                                         | 2016 counts                                              | 2016 counts                                    | Percentage change in counts between 2006 and 2016 | Percentage change in rates between 2006 and 2016 |
| Trichuriasis                                                            | 23,744.6<br>(21,903.4 to 25,696.2)                  | --                                                       | 15.4<br>(8.7 to 26.0)                          | -25.1<br>(-37.5 to -11.7)                         | -29.0<br>(-40.8 to -16.3)                        |
| Hookworm disease                                                        | 20,717.9<br>(18,923.1 to 22,788.2)                  | --                                                       | 90.8<br>(56.0 to 143.8)                        | -5.9<br>(-14.4 to 4.4)                            | -10.9<br>(-18.9 to -1.1)                         |
| Food-borne trematodiasis                                                | 658.2<br>(580.8 to 749.1)                           | 210.3<br>(183.0 to 245.8)                                | 5.5<br>(3.0 to 8.5)                            | -5.1<br>(-18.4 to 9.8)                            | -10.1<br>(-22.7 to 4.0)                          |
| Leprosy                                                                 | 0.3<br>(0.2 to 0.4)                                 | 0.1<br>(0.1 to 0.2)                                      | < 0.05<br>(< 0.05 to < 0.05)                   | -24.2<br>(-25.7 to -22.5)                         | -28.2<br>(-29.7 to -26.6)                        |
| Ebola virus disease                                                     | 0.1<br>(< 0.05 to 0.4)                              | --                                                       | < 0.05<br>(< 0.05 to 0.1)                      | --                                                | --                                               |
| Zika virus disease                                                      | 6.1<br>(3.7 to 10.4)                                | 341.9<br>(200.1 to 604.6)                                | 0.4<br>(0.2 to 0.6)                            | --                                                | --                                               |
| Guinea worm disease                                                     | < 0.05<br>(< 0.05 to < 0.05)                        | < 0.05<br>(< 0.05 to < 0.05)                             | < 0.05<br>(< 0.05 to < 0.05)                   | -99.6<br>(-99.7 to -99.4)                         | -99.6<br>(-99.7 to -99.4)                        |
| Other neglected tropical diseases                                       | 13,518.1<br>(12,450.5 to 14,909.0)                  | --                                                       | 441.2<br>(276.8 to 659.7)                      | 3.0<br>(-1.5 to 7.5)                              | -2.5<br>(-6.7 to 1.8)                            |
| <b>Maternal disorders</b>                                               | --                                                  | --                                                       | --                                             | --                                                | --                                               |
| Maternal haemorrhage                                                    | --                                                  | --                                                       | --                                             | --                                                | --                                               |
| Maternal sepsis and other pregnancy related infections                  | --                                                  | --                                                       | --                                             | --                                                | --                                               |
| Maternal hypertensive disorders                                         | --                                                  | --                                                       | --                                             | --                                                | --                                               |
| Maternal obstructed labour and uterine rupture                          | --                                                  | --                                                       | --                                             | --                                                | --                                               |
| Maternal abortion, miscarriage, and ectopic pregnancy                   | --                                                  | --                                                       | --                                             | --                                                | --                                               |
| Other maternal disorders                                                | --                                                  | --                                                       | --                                             | --                                                | --                                               |
| <b>Neonatal disorders</b>                                               | <b>6,784.7</b><br><b>(6,150.4 to 7,366.2)</b>       | --                                                       | <b>1,692.3</b><br><b>(1,148.9 to 2,540.9)</b>  | <b>11.6</b><br><b>(-0.1 to 24.5)</b>              | <b>5.7</b><br><b>(-5.4 to 17.9)</b>              |
| Neonatal preterm birth complications                                    | 5,099.5<br>(4,154.2 to 6,261.9)                     | --                                                       | 755.8<br>(502.5 to 1,096.9)                    | 3.9<br>(-13.4 to 25.2)                            | -1.6<br>(-17.9 to 18.6)                          |
| Neonatal encephalopathy due to birth asphyxia and trauma                | 1,113.2<br>(635.1 to 1,953.4)                       | --                                                       | 146.8<br>(41.0 to 368.8)                       | 31.7<br>(16.5 to 61.3)                            | 24.8<br>(10.4 to 52.8)                           |
| Neonatal sepsis and other neonatal infections                           | 792.3<br>(324.8 to 1,826.3)                         | --                                                       | 363.9<br>(128.1 to 881.6)                      | 25.9<br>(16.9 to 39.4)                            | 19.3<br>(10.7 to 32.1)                           |
| Hemolytic disease and other neonatal jaundice                           | 215.6<br>(190.3 to 241.8)                           | --                                                       | 58.1<br>(43.4 to 74.7)                         | 10.6<br>(4.0 to 18.5)                             | 4.8<br>(-1.5 to 12.3)                            |
| Other neonatal disorders                                                | --                                                  | --                                                       | 367.7<br>(249.6 to 552.1)                      | 9.3<br>(-2.2 to 21.9)                             | 3.5<br>(-7.4 to 15.5)                            |
| <b>Nutritional deficiencies</b>                                         | <b>217,236.7</b><br><b>(211,132.0 to 222,265.3)</b> | <b>132,588.6*</b><br><b>(106,691.8 to 161,107.7)</b>     | <b>7,560.4</b><br><b>(5,018.6 to 10,658.3)</b> | <b>4.9</b><br><b>(1.4 to 8.7)</b>                 | <b>-0.7</b><br><b>(-4.0 to 3.0)</b>              |
| Protein-energy malnutrition                                             | 47,741.0<br>(46,817.4 to 48,730.3)                  | 27,109.0<br>(26,610.8 to 27,673.2)                       | 2,437.4<br>(1,577.2 to 3,420.4)                | 15.9<br>(9.0 to 23.3)                             | 9.8<br>(3.3 to 16.8)                             |
| Iodine deficiency                                                       | 568.3<br>(496.1 to 654.1)                           | 336.6<br>(293.6 to 385.2)                                | 14.2<br>(9.0 to 20.9)                          | -23.7<br>(-29.4 to -17.8)                         | -27.7<br>(-33.1 to -22.2)                        |
| Vitamin A deficiency                                                    | 84,267.0<br>(66,349.2 to 103,250.0)                 | 105,142.9<br>(79,406.0 to 133,429.4)                     | 59.6<br>(33.9 to 97.2)                         | 4.6<br>(-0.6 to 9.9)                              | -0.9<br>(-5.8 to 4.1)                            |
| Iron-deficiency anaemia                                                 | 154,787.1<br>(141,563.8 to 172,446.3)               | --                                                       | 4,961.5<br>(3,095.6 to 7,427.5)                | 0.1<br>(-4.3 to 4.7)                              | -5.2<br>(-9.3 to -0.8)                           |
| Other nutritional deficiencies                                          | --                                                  | --                                                       | 87.7<br>(56.7 to 123.0)                        | 17.7<br>(10.7 to 25.2)                            | 11.5<br>(4.9 to 18.6)                            |
| <b>Other communicable, maternal, neonatal, and nutritional diseases</b> | <b>35,869.2</b><br><b>(31,821.6 to 40,542.0)</b>    | <b>33,854.0</b><br><b>(12,112.2 to 68,462.9)</b>         | <b>335.7</b><br><b>(210.2 to 506.7)</b>        | <b>7.2</b><br><b>(-3.5 to 16.7)</b>               | <b>1.5</b><br><b>(-8.6 to 10.6)</b>              |
| Sexually transmitted diseases excluding HIV                             | --                                                  | --                                                       | --                                             | --                                                | --                                               |
| Syphilis                                                                | --                                                  | --                                                       | --                                             | --                                                | --                                               |
| Chlamydial infection                                                    | --                                                  | --                                                       | --                                             | --                                                | --                                               |
| Gonococcal infection                                                    | --                                                  | --                                                       | --                                             | --                                                | --                                               |
| Trichomoniasis                                                          | --                                                  | --                                                       | --                                             | --                                                | --                                               |
| Genital herpes                                                          | --                                                  | --                                                       | --                                             | --                                                | --                                               |
| Other sexually transmitted diseases                                     | --                                                  | --                                                       | --                                             | --                                                | --                                               |
| Hepatitis                                                               | 26,303.9<br>(18,637.4 to 36,264.8)                  | 33,853.4<br>(12,111.4 to 68,462.1)                       | 14.6<br>(5.8 to 30.3)                          | -49.5<br>(-82.0 to 53.4)                          | 52.2<br>(-83.0 to 45.3)                          |
| Acute hepatitis A                                                       | 1,681.0<br>(87.7 to 4,376.5)                        | 21,853.4<br>(1,140.0 to 56,894.3)                        | 7.1<br>(0.3 to 21.0)                           | -54.6<br>(-98.2 to 974.2)                         | -57.0<br>(-98.3 to 917.5)                        |
| Hepatitis B                                                             | 19,222.5<br>(11,930.4 to 28,941.7)                  | 7,197.3<br>(4,146.9 to 11,675.8)                         | 4.7<br>(2.2 to 8.8)                            | -55.4<br>(-64.8 to -42.8)                         | -57.7<br>(-66.6 to -45.8)                        |
| Hepatitis C                                                             | 5,246.2<br>(4,434.4 to 6,199.7)                     | 2,799.4<br>(2,383.7 to 3,295.9)                          | 2.6<br>(1.2 to 5.0)                            | 20.7<br>(5.0 to 39.3)                             | 14.3<br>(-0.5 to 31.9)                           |
| Acute hepatitis E                                                       | 154.1<br>(125.9 to 181.8)                           | 2,003.4<br>(1,636.1 to 2,363.2)                          | 0.3<br>(0.2 to 0.5)                            | -60.1<br>(-75.5 to -32.9)                         | -62.2<br>(-76.8 to -36.5)                        |
| Other infectious diseases                                               | 9,746.1<br>(8,917.5 to 10,849.7)                    | 0.6<br>(0.3 to 1.0)                                      | 321.0<br>(200.0 to 481.8)                      | 13.0<br>(8.1 to 18.7)                             | 7.0<br>(2.4 to 12.4)                             |
| <b>Non-communicable diseases</b>                                        | <b>372,186.9</b><br><b>(366,430.7 to 379,566.8)</b> | <b>1,013,306.7*</b><br><b>(748,363.8 to 1,328,734.6)</b> | <b>9,513.8</b><br><b>(6,609.1 to 13,014.4)</b> | <b>6.6</b><br><b>(5.2 to 8.1)</b>                 | <b>0.9</b><br><b>(-0.3 to 2.4)</b>               |
| <b>Neoplasms</b>                                                        | <b>320.7</b><br><b>(305.2 to 337.6)</b>             | <b>74.8</b><br><b>(65.3 to 80.7)</b>                     | <b>28.4</b><br><b>(18.8 to 40.0)</b>           | <b>24.2</b><br><b>(2.6 to 41.9)</b>               | <b>17.6</b><br><b>(-2.8 to 34.4)</b>             |
| Lip and oral cavity cancer                                              | --                                                  | --                                                       | --                                             | --                                                | --                                               |
| Nasopharynx cancer                                                      | --                                                  | --                                                       | --                                             | --                                                | --                                               |
| Other pharynx cancer                                                    | --                                                  | --                                                       | --                                             | --                                                | --                                               |
| Oesophageal cancer                                                      | --                                                  | --                                                       | --                                             | --                                                | --                                               |
| Stomach cancer                                                          | --                                                  | --                                                       | --                                             | --                                                | --                                               |
| Colon and rectum cancer                                                 | --                                                  | --                                                       | --                                             | --                                                | --                                               |
| Liver cancer                                                            | --                                                  | --                                                       | --                                             | --                                                | --                                               |
| Liver cancer due to hepatitis B                                         | --                                                  | --                                                       | --                                             | --                                                | --                                               |

| Cause                                              | Prevalence in thousands (95% UI)           | Incidence in thousands (95% UI)             | YLDs in thousands (95% UI)           |                                                   |                                                  |
|----------------------------------------------------|--------------------------------------------|---------------------------------------------|--------------------------------------|---------------------------------------------------|--------------------------------------------------|
|                                                    | 2016 counts                                | 2016 counts                                 | 2016 counts                          | Percentage change in counts between 2006 and 2016 | Percentage change in rates between 2006 and 2016 |
| Liver cancer due to hepatitis C                    | --                                         | --                                          | --                                   | --                                                | --                                               |
| Liver cancer due to alcohol use                    | --                                         | --                                          | --                                   | --                                                | --                                               |
| Liver cancer due to other causes                   | --                                         | --                                          | --                                   | --                                                | --                                               |
| Gallbladder and biliary tract cancer               | --                                         | --                                          | --                                   | --                                                | --                                               |
| Pancreatic cancer                                  | --                                         | --                                          | --                                   | --                                                | --                                               |
| Larynx cancer                                      | --                                         | --                                          | --                                   | --                                                | --                                               |
| Tracheal, bronchus, and lung cancer                | --                                         | --                                          | --                                   | --                                                | --                                               |
| Malignant skin melanoma                            | --                                         | --                                          | --                                   | --                                                | --                                               |
| Non-melanoma skin cancer                           | --                                         | --                                          | --                                   | --                                                | --                                               |
| Non-melanoma skin cancer (squamous-cell carcinoma) | --                                         | --                                          | --                                   | --                                                | --                                               |
| Non-melanoma skin cancer (basal-cell carcinoma)    | --                                         | --                                          | --                                   | --                                                | --                                               |
| Breast cancer                                      | --                                         | --                                          | --                                   | --                                                | --                                               |
| Cervical cancer                                    | --                                         | --                                          | --                                   | --                                                | --                                               |
| Uterine cancer                                     | --                                         | --                                          | --                                   | --                                                | --                                               |
| Ovarian cancer                                     | --                                         | --                                          | --                                   | --                                                | --                                               |
| Prostate cancer                                    | --                                         | --                                          | --                                   | --                                                | --                                               |
| Testicular cancer                                  | --                                         | --                                          | --                                   | --                                                | --                                               |
| Kidney cancer                                      | 46.4<br>(40.0 to 51.6)                     | 8.4<br>(7.3 to 9.4)                         | 3.1<br>(2.0 to 4.5)                  | 7.2<br>(-15.5 to 29.3)                            | 1.6<br>(-19.9 to 22.4)                           |
| Bladder cancer                                     | --                                         | --                                          | --                                   | --                                                | --                                               |
| Brain and nervous system cancer                    | 55.8<br>(47.7 to 60.9)                     | 10.1<br>(8.7 to 11.1)                       | 3.7<br>(2.5 to 5.2)                  | 20.9<br>(0.7 to 38.0)                             | 14.5<br>(-4.6 to 30.7)                           |
| Thyroid cancer                                     | --                                         | --                                          | --                                   | --                                                | --                                               |
| Mesothelioma                                       | --                                         | --                                          | --                                   | --                                                | --                                               |
| Hodgkin lymphoma                                   | 4.8<br>(3.8 to 5.9)                        | 0.9<br>(0.7 to 1.1)                         | 0.3<br>(0.2 to 0.5)                  | -11.3<br>(-26.7 to 15.5)                          | -16.0<br>(-30.5 to 9.4)                          |
| Non-Hodgkin's lymphoma                             | 31.8<br>(25.2 to 35.7)                     | 5.8<br>(4.6 to 6.5)                         | 2.0<br>(1.2 to 2.8)                  | 12.9<br>(-17.2 to 34.5)                           | 7.0<br>(-21.6 to 27.4)                           |
| Multiple myeloma                                   | --                                         | --                                          | --                                   | --                                                | --                                               |
| Leukaemia                                          | 158.1<br>(126.2 to 180.2)                  | 28.7<br>(22.9 to 32.8)                      | 12.9<br>(8.7 to 18.6)                | 30.1<br>(-1.1 to 58.6)                            | 23.2<br>(-6.3 to 50.2)                           |
| Acute lymphoid leukaemia                           | 81.6<br>(68.9 to 91.7)                     | 14.8<br>(12.5 to 16.7)                      | 7.5<br>(5.0 to 10.6)                 | 45.1<br>(7.4 to 74.5)                             | 37.4<br>(1.7 to 65.2)                            |
| Chronic lymphoid leukaemia                         | --                                         | --                                          | --                                   | --                                                | --                                               |
| Acute myeloid leukaemia                            | 28.4<br>(22.7 to 33.0)                     | 5.2<br>(4.1 to 6.0)                         | 2.0<br>(1.3 to 2.9)                  | 20.8<br>(-8.9 to 47.4)                            | 14.4<br>(-13.8 to 39.7)                          |
| Chronic myeloid leukaemia                          | --                                         | --                                          | --                                   | --                                                | --                                               |
| Other leukaemia                                    | 48.1<br>(32.9 to 58.5)                     | 8.7<br>(6.0 to 10.6)                        | 3.4<br>(2.0 to 5.2)                  | 10.0<br>(-21.7 to 53.2)                           | 4.2<br>(-25.8 to 45.1)                           |
| Other neoplasms                                    | 114.4<br>(102.6 to 122.8)                  | 20.8<br>(18.7 to 22.3)                      | 6.4<br>(4.1 to 9.3)                  | 30.8<br>(0.4 to 50.0)                             | 23.9<br>(-4.9 to 42.1)                           |
| <b>Cardiovascular diseases</b>                     | <b>865.5<br/>(725.5 to 1,081.3)</b>        | <b>540.5†<br/>(500.2 to 586.2)</b>          | <b>71.4<br/>(46.8 to 101.8)</b>      | <b>3.0<br/>(-1.8 to 7.3)</b>                      | <b>-2.5<br/>(-7.0 to 1.6)</b>                    |
| Rheumatic heart disease                            | 221.4<br>(194.2 to 249.2)                  | 126.4<br>(110.8 to 142.5)                   | 10.6<br>(6.5 to 15.8)                | 12.8<br>(4.1 to 22.8)                             | 6.8<br>(-1.4 to 16.3)                            |
| Ischaemic heart disease                            | 136.2<br>(121.0 to 153.6)                  | 162.3<br>(140.1 to 186.1)                   | 8.3<br>(5.4 to 12.2)                 | 6.4<br>(3.1 to 9.6)                               | 0.8<br>(-2.3 to 3.8)                             |
| Cerebrovascular disease                            | 64.9<br>(51.5 to 81.0)                     | 59.7†<br>(42.9 to 83.5)                     | 14.1<br>(9.5 to 19.3)                | -21.8<br>(-29.2 to -14.1)                         | -25.9<br>(-32.9 to -18.7)                        |
| Ischaemic stroke                                   | 28.1<br>(19.9 to 37.2)                     | 22.0†<br>(9.7 to 43.0)                      | 4.5<br>(2.8 to 6.7)                  | -0.9<br>(-7.3 to 4.3)                             | -6.1<br>(-12.2 to -1.2)                          |
| Hemorrhagic stroke                                 | 64.5<br>(50.8 to 81.0)                     | 37.7†<br>(27.6 to 52.8)                     | 9.6<br>(6.3 to 13.4)                 | -28.8<br>(-38.4 to -19.0)                         | -32.5<br>(-41.7 to -23.2)                        |
| Hypertensive heart disease                         | 0.1<br>( $< 0.05$ to 0.1)                  | --                                          | $< 0.05$<br>( $< 0.05$ to $< 0.05$ ) | 24.2<br>(18.6 to 30.4)                            | 17.7<br>(12.3 to 23.6)                           |
| Cardiomyopathy and myocarditis                     | 56.8<br>(44.2 to 72.8)                     | 105.7†<br>(85.8 to 130.5)                   | 6.5<br>(4.1 to 9.8)                  | 7.2<br>(5.1 to 9.3)                               | 1.5<br>(-0.5 to 3.5)                             |
| Myocarditis                                        | 38.2<br>(31.7 to 46.2)                     | 105.7<br>(85.8 to 130.5)                    | 2.4<br>(1.5 to 3.6)                  | 5.8<br>(2.1 to 9.5)                               | 0.2<br>(-3.3 to 3.8)                             |
| Alcoholic cardiomyopathy                           | --                                         | --                                          | --                                   | --                                                | --                                               |
| Other cardiomyopathy                               | 45.2<br>(31.5 to 62.4)                     | --                                          | 4.0<br>(2.4 to 6.3)                  | 8.1<br>(5.8 to 10.2)                              | 2.3<br>(0.2 to 4.4)                              |
| Atrial fibrillation and flutter                    | --                                         | --                                          | --                                   | --                                                | --                                               |
| Peripheral vascular disease                        | --                                         | --                                          | --                                   | --                                                | --                                               |
| Endocarditis                                       | 11.6<br>(9.6 to 14.1)                      | 86.4<br>(71.0 to 105.8)                     | 0.9<br>(0.6 to 1.3)                  | 5.9<br>(3.7 to 8.1)                               | 0.3<br>(-1.8 to 2.4)                             |
| Other cardiovascular and circulatory diseases      | 559.7<br>(335.8 to 909.8)                  | --                                          | 31.0<br>(16.0 to 54.9)               | 14.0<br>(6.9 to 21.0)                             | 8.0<br>(1.2 to 14.6)                             |
| <b>Chronic respiratory diseases</b>                | <b>17,963.4<br/>(16,457.8 to 20,025.4)</b> | <b>12,975.6†<br/>(10,797.0 to 15,437.3)</b> | <b>750.3<br/>(491.0 to 1,100.9)</b>  | <b>11.1<br/>(8.4 to 13.8)</b>                     | <b>5.2<br/>(2.6 to 7.8)</b>                      |
| Chronic obstructive pulmonary disease              | 312.6<br>(266.8 to 358.4)                  | 116.3<br>(101.2 to 132.0)                   | 27.6<br>(21.9 to 33.2)               | -2.0<br>(-10.9 to 7.5)                            | -7.2<br>(-15.6 to 1.9)                           |
| Pneumoconiosis                                     | --                                         | --                                          | --                                   | --                                                | --                                               |
| Silicosis                                          | --                                         | --                                          | --                                   | --                                                | --                                               |

| Cause                                                          | Prevalence in thousands (95% UI)        | Incidence in thousands (95% UI)          | YLDs in thousands (95% UI)          |                                                   |                                                  |
|----------------------------------------------------------------|-----------------------------------------|------------------------------------------|-------------------------------------|---------------------------------------------------|--------------------------------------------------|
|                                                                | 2016 counts                             | 2016 counts                              | 2016 counts                         | Percentage change in counts between 2006 and 2016 | Percentage change in rates between 2006 and 2016 |
| Asbestosis                                                     | --                                      | --                                       | --                                  | --                                                | --                                               |
| Coal workers pneumoconiosis                                    | --                                      | --                                       | --                                  | --                                                | --                                               |
| Other pneumoconiosis                                           | --                                      | --                                       | --                                  | --                                                | --                                               |
| Asthma                                                         | 17,164.3<br>(14,736.3 to 19,937.2)      | 12,852.2<br>(10,680.0 to 15,325.1)       | 690.7<br>(436.6 to 1,039.5)         | 10.8<br>(7.9 to 13.6)                             | 5.0<br>(2.2 to 7.6)                              |
| Interstitial lung disease and pulmonary sarcoidosis            | 30.7<br>(24.4 to 38.1)                  | 7.0<br>(5.3 to 9.2)                      | 3.5<br>(2.2 to 5.2)                 | 1.0<br>(-0.2 to 2.1)                              | -4.3<br>(-5.4 to -3.3)                           |
| Other chronic respiratory diseases                             | --                                      | --                                       | 28.6<br>(22.6 to 34.2)              | 38.1<br>(26.8 to 50.0)                            | 30.8<br>(20.1 to 42.1)                           |
| <b>Cirrhosis and other chronic liver diseases</b>              | <b>377.0<br/>(350.8 to 406.0)</b>       | <b>58.3<br/>(49.8 to 67.3)</b>           | <b>59.6<br/>(40.4 to 83.9)</b>      | <b>7.6<br/>(1.4 to 14.0)</b>                      | <b>1.9<br/>(-4.0 to 8.0)</b>                     |
| Cirrhosis and other chronic liver diseases due to hepatitis B  | 2.9<br>(2.1 to 3.7)                     | 0.5<br>(0.4 to 0.7)                      | 0.5<br>(0.3 to 0.8)                 | 12.9<br>(8.8 to 17.2)                             | 7.0<br>(3.0 to 11.0)                             |
| Cirrhosis and other chronic liver diseases due to hepatitis C  | 2.4<br>(1.7 to 3.2)                     | 0.4<br>(0.3 to 0.5)                      | 0.4<br>(0.2 to 0.6)                 | 10.8<br>(6.6 to 14.7)                             | 5.0<br>(0.9 to 8.6)                              |
| Cirrhosis and other chronic liver diseases due to alcohol use  | --                                      | --                                       | --                                  | --                                                | --                                               |
| Cirrhosis and other chronic liver diseases due to other causes | 371.8<br>(346.1 to 400.7)               | 57.5<br>(49.0 to 66.2)                   | 58.8<br>(39.9 to 82.7)              | 7.5<br>(1.2 to 14.0)                              | 1.8<br>(-4.1 to 8.0)                             |
| <b>Digestive diseases</b>                                      | <b>5,600.0<br/>(4,882.2 to 6,316.6)</b> | <b>2,912.7†<br/>(2,467.1 to 3,383.5)</b> | <b>244.3<br/>(160.0 to 347.8)</b>   | <b>1.6<br/>(-2.2 to 5.6)</b>                      | <b>-3.8<br/>(-7.4 to 0.0)</b>                    |
| Peptic ulcer disease                                           | --                                      | --                                       | --                                  | --                                                | --                                               |
| Gastritis and duodenitis                                       | 2,435.2<br>(1,808.1 to 3,224.7)         | 797.6<br>(583.0 to 1,062.6)              | 24.5<br>(12.8 to 42.2)              | 17.6<br>(7.7 to 30.8)                             | 11.4<br>(2.0 to 23.9)                            |
| Appendicitis                                                   | 17.8<br>(14.7 to 21.4)                  | 548.9<br>(452.5 to 661.7)                | 5.7<br>(3.5 to 8.2)                 | 3.6<br>(-7.3 to 16.0)                             | -1.9<br>(-12.2 to 9.8)                           |
| Paralytic ileus and intestinal obstruction                     | 7.6<br>(5.5 to 10.3)                    | 205.0<br>(143.3 to 281.5)                | 2.5<br>(1.4 to 3.7)                 | 5.0<br>(2.8 to 7.1)                               | -0.5<br>(-2.7 to 1.5)                            |
| Inguinal, femoral, and abdominal hernia                        | 3,042.8<br>(1,857.9 to 4,577.3)         | 1,147.7<br>(813.0 to 1,535.5)            | 166.2<br>(103.6 to 245.0)           | 0.3<br>(-4.1 to 4.4)                              | -5.0<br>(-9.2 to -1.2)                           |
| Inflammatory bowel disease                                     | 5.1<br>(4.0 to 6.5)                     | 20.6<br>(16.7 to 24.9)                   | 0.8<br>(0.5 to 1.2)                 | -1.3<br>(-3.7 to 0.6)                             | -6.5<br>(-8.8 to -4.7)                           |
| Vascular intestinal disorders                                  | 5.4<br>(3.5 to 7.7)                     | 21.2<br>(14.5 to 29.2)                   | 1.8<br>(1.0 to 2.9)                 | 9.7<br>(7.9 to 11.5)                              | 3.9<br>(2.2 to 5.6)                              |
| Gallbladder and biliary diseases                               | 92.7<br>(66.6 to 125.8)                 | 143.4<br>(86.7 to 218.4)                 | 0.8<br>(0.4 to 1.3)                 | -1.5<br>(-5.0 to 1.1)                             | -6.7<br>(-10.1 to -4.2)                          |
| Pancreatitis                                                   | 3.1<br>(2.1 to 4.8)                     | 28.4<br>(18.1 to 43.5)                   | 0.4<br>(0.2 to 0.7)                 | -3.9<br>(-10.7 to 1.2)                            | -8.9<br>(-15.5 to -4.2)                          |
| Other digestive diseases                                       | --                                      | --                                       | 41.8<br>(27.4 to 59.5)              | -1.6<br>(-5.4 to 2.2)                             | -6.8<br>(-10.3 to -3.2)                          |
| <b>Neurological disorders</b>                                  | <b>1,912.7<br/>(1,469.4 to 2,274.4)</b> | <b>531.6<br/>(370.1 to 717.4)</b>        | <b>729.5<br/>(462.5 to 1,097.4)</b> | <b>14.6<br/>(0.8 to 31.0)</b>                     | <b>8.5<br/>(-4.6 to 24.1)</b>                    |
| Alzheimer's disease and other dementias                        | --                                      | --                                       | --                                  | --                                                | --                                               |
| Parkinson's disease                                            | --                                      | --                                       | --                                  | --                                                | --                                               |
| Epilepsy                                                       | 1,568.9<br>(1,180.5 to 2,073.8)         | 525.6<br>(364.9 to 712.3)                | 545.0<br>(344.9 to 820.0)           | 8.2<br>(-4.9 to 23.8)                             | 2.5<br>(-9.9 to 17.2)                            |
| Multiple sclerosis                                             | --                                      | --                                       | --                                  | --                                                | --                                               |
| Motor neuron disease                                           | 8.1<br>(6.4 to 10.2)                    | 3.0<br>(2.2 to 4.0)                      | 1.7<br>(1.1 to 2.5)                 | 4.6<br>(3.1 to 6.2)                               | -1.0<br>(-2.3 to 0.6)                            |
| Migraine                                                       | --                                      | --                                       | --                                  | --                                                | --                                               |
| Tension-type headache                                          | --                                      | --                                       | --                                  | --                                                | --                                               |
| Other neurological disorders                                   | 1.4<br>(0.7 to 2.3)                     | 3.0<br>(1.5 to 5.2)                      | 182.8<br>(115.8 to 275.1)           | 39.0<br>(22.2 to 58.9)                            | 31.6<br>(15.8 to 50.5)                           |
| <b>Mental and substance use disorders</b>                      | <b>8,499.5<br/>(7,530.3 to 9,265.5)</b> | <b>1,748.7†<br/>(1,578.2 to 1,941.2)</b> | <b>754.6<br/>(501.6 to 1,074.2)</b> | <b>4.2<br/>(2.4 to 5.9)</b>                       | <b>-1.4<br/>(-3.0 to 0.3)</b>                    |
| Schizophrenia                                                  | --                                      | --                                       | --                                  | --                                                | --                                               |
| Alcohol use disorders                                          | 23.3<br>(20.8 to 25.4)                  | --                                       | 1.0<br>(0.6 to 1.4)                 | 7.0<br>(2.5 to 11.0)                              | 1.4<br>(-2.9 to 5.1)                             |
| Drug use disorders                                             | --                                      | --                                       | --                                  | --                                                | --                                               |
| Opioid use disorders                                           | --                                      | --                                       | --                                  | --                                                | --                                               |
| Cocaine use disorders                                          | --                                      | --                                       | --                                  | --                                                | --                                               |
| Amphetamine use disorders                                      | --                                      | --                                       | --                                  | --                                                | --                                               |
| Cannabis use disorders                                         | --                                      | --                                       | --                                  | --                                                | --                                               |
| Other drug use disorders                                       | --                                      | --                                       | --                                  | --                                                | --                                               |
| Depressive disorders                                           | 5.7<br>(2.6 to 11.7)                    | 20.0<br>(9.1 to 38.0)                    | 1.5<br>(0.7 to 3.2)                 | 8.7<br>(7.1 to 10.0)                              | 2.9<br>(1.5 to 4.2)                              |
| Major depressive disorder                                      | 5.5<br>(1.9 to 11.7)                    | 15.9<br>(5.3 to 33.7)                    | 1.2<br>(0.4 to 2.7)                 | 9.3<br>(7.6 to 10.8)                              | 3.5<br>(1.9 to 4.9)                              |
| Dysthymia                                                      | 2.7<br>(0.9 to 5.8)                     | 4.1<br>(1.4 to 8.7)                      | 0.3<br>(0.1 to 0.6)                 | 6.1<br>(3.2 to 9.3)                               | 0.5<br>(-2.3 to 3.5)                             |
| Bipolar disorder                                               | --                                      | --                                       | --                                  | --                                                | --                                               |
| Anxiety disorders                                              | 624.5<br>(534.4 to 722.5)               | 661.1<br>(566.1 to 765.6)                | 62.9<br>(42.8 to 88.4)              | 6.2<br>(-2.0 to 14.4)                             | 0.5<br>(-7.2 to 8.4)                             |
| Eating disorders                                               | --                                      | --                                       | --                                  | --                                                | --                                               |
| Anorexia nervosa                                               | --                                      | --                                       | --                                  | --                                                | --                                               |
| Bulimia nervosa                                                | --                                      | --                                       | --                                  | --                                                | --                                               |
| Autistic spectrum disorders                                    | 3,837.2<br>(3,568.4 to 4,131.4)         | 210.3<br>(130.6 to 334.0)                | 543.0<br>(348.4 to 784.7)           | 5.6<br>(3.8 to 7.5)                               | 0.1<br>(-1.7 to 1.8)                             |
| Autism                                                         | 962.8<br>(761.1 to 1,178.1)             | 24.2<br>(11.6 to 41.6)                   | 252.5<br>(154.8 to 382.9)           | 5.6<br>(2.7 to 8.9)                               | 0.1<br>(-2.7 to 3.1)                             |
| Asperger syndrome and other autistic spectrum disorders        | 2,846.8<br>(2,206.6 to 3,653.1)         | 186.1<br>(107.2 to 310.1)                | 290.4<br>(180.6 to 437.6)           | 5.6<br>(3.4 to 7.8)                               | 0.1<br>(-2.0 to 2.1)                             |

| Cause                                                      | Prevalence in thousands (95% UI)                    | Incidence in thousands (95% UI)                        | YLDs in thousands (95% UI)                    |                                                   |                                                  |
|------------------------------------------------------------|-----------------------------------------------------|--------------------------------------------------------|-----------------------------------------------|---------------------------------------------------|--------------------------------------------------|
|                                                            | 2016 counts                                         | 2016 counts                                            | 2016 counts                                   | Percentage change in counts between 2006 and 2016 | Percentage change in rates between 2006 and 2016 |
| Attention-deficit/hyperactivity disorder                   | 890.2<br>(794.1 to 1,022.2)                         | 857.2<br>(764.4 to 984.6)                              | 10.8<br>(6.5 to 17.1)                         | 7.7<br>(1.3 to 14.6)                              | 2.0<br>(-4.0 to 8.5)                             |
| Conduct disorder                                           | --                                                  | --                                                     | --                                            | --                                                | --                                               |
| Idiopathic developmental intellectual disability           | 3,277.7<br>(1,484.6 to 5,212.9)                     | --                                                     | 135.4<br>(50.9 to 255.7)                      | -2.5<br>(-6.9 to 0.5)                             | -7.7<br>(-11.8 to -4.8)                          |
| Other mental and substance use disorders                   | --                                                  | --                                                     | --                                            | --                                                | --                                               |
| <b>Diabetes, urogenital, blood, and endocrine diseases</b> | <b>143,754.8</b><br><b>(141,893.4 to 145,596.6)</b> | <b>16,576.8†</b><br><b>(13,266.0 to 20,291.1)</b>      | <b>1,072.3</b><br><b>(672.4 to 1,613.3)</b>   | <b>5.5</b><br><b>(0.5 to 11.5)</b>                | <b>-0.1</b><br><b>(-4.8 to 5.6)</b>              |
| Diabetes mellitus                                          | 30.4<br>(17.4 to 51.3)                              | 22.4<br>(12.8 to 37.7)                                 | 1.5<br>(0.7 to 2.8)                           | -1.0<br>(-12.3 to 8.3)                            | -6.2<br>(-16.9 to 2.6)                           |
| Acute glomerulonephritis                                   | 3.0<br>(1.9 to 4.3)                                 | 46.6<br>(29.2 to 68.8)                                 | 0.1<br>(0.1 to 0.3)                           | -1.0<br>(-3.3 to 1.1)                             | -6.2<br>(-8.4 to -4.2)                           |
| Chronic kidney disease                                     | 60.9<br>(42.0 to 84.5)                              | 42.6<br>(27.8 to 60.2)                                 | 7.5<br>(4.1 to 12.2)                          | 11.2<br>(5.2 to 17.2)                             | 5.4<br>(-0.4 to 11.0)                            |
| Chronic kidney disease due to diabetes mellitus            | 2.0<br>(1.1 to 3.1)                                 | 1.3<br>(0.7 to 2.1)                                    | 0.3<br>(0.1 to 0.5)                           | 12.3<br>(4.4 to 19.7)                             | 6.3<br>(-1.1 to 13.4)                            |
| Chronic kidney disease due to hypertension                 | 9.0<br>(4.9 to 14.7)                                | 17.2<br>(10.3 to 25.3)                                 | 0.1<br>(< 0.05 to 0.1)                        | 8.4<br>(1.5 to 15.1)                              | 2.6<br>(-3.9 to 9.0)                             |
| Chronic kidney disease due to glomerulonephritis           | 16.0<br>(9.5 to 24.4)                               | 0.4<br>(0.2 to 0.7)                                    | 3.0<br>(1.6 to 5.2)                           | 12.0<br>(5.8 to 17.9)                             | 6.0<br>(0.2 to 11.7)                             |
| Chronic kidney disease due to other causes                 | 33.9<br>(23.0 to 48.8)                              | 23.6<br>(15.2 to 34.3)                                 | 4.1<br>(2.2 to 6.8)                           | 10.7<br>(4.8 to 16.8)                             | 4.9<br>(-0.8 to 10.6)                            |
| Urinary diseases and male infertility                      | 358.9<br>(326.2 to 402.0)                           | 15,997.3†<br>(12,693.2 to 19,680.9)                    | 18.2<br>(11.3 to 28.5)                        | -8.1<br>(-14.2 to -2.0)                           | -12.9<br>(-18.7 to -7.2)                         |
| Interstitial nephritis and urinary tract infections        | 319.7<br>(259.6 to 384.6)                           | 15,667.3<br>(12,370.4 to 19,347.0)                     | 10.8<br>(6.5 to 17.4)                         | 3.9<br>(-3.7 to 11.8)                             | -1.6<br>(-8.8 to 5.9)                            |
| Urolithiasis                                               | 12.5<br>(8.8 to 16.9)                               | 330.0<br>(228.8 to 457.9)                              | 1.0<br>(0.6 to 1.5)                           | 3.4<br>(2.4 to 4.4)                               | -2.1<br>(-3.0 to -1.1)                           |
| Benign prostatic hyperplasia                               | --                                                  | --                                                     | --                                            | --                                                | --                                               |
| Male infertility                                           | --                                                  | --                                                     | --                                            | --                                                | --                                               |
| Other urinary diseases                                     | --                                                  | --                                                     | 6.4<br>(4.0 to 10.0)                          | -24.2<br>(-29.2 to -19.1)                         | -28.2<br>(-32.9 to -23.4)                        |
| Gynecological diseases                                     | --                                                  | --                                                     | --                                            | --                                                | --                                               |
| Uterine fibroids                                           | --                                                  | --                                                     | --                                            | --                                                | --                                               |
| Polycystic ovarian syndrome                                | --                                                  | --                                                     | --                                            | --                                                | --                                               |
| Female infertility                                         | --                                                  | --                                                     | --                                            | --                                                | --                                               |
| Endometriosis                                              | --                                                  | --                                                     | --                                            | --                                                | --                                               |
| Genital prolapse                                           | --                                                  | --                                                     | --                                            | --                                                | --                                               |
| Premenstrual syndrome                                      | --                                                  | --                                                     | --                                            | --                                                | --                                               |
| Other gynecological diseases                               | --                                                  | --                                                     | --                                            | --                                                | --                                               |
| Hemoglobinopathies and hemolytic anaemias                  | 137,642.8<br>(135,808.3 to 139,548.9)               | --                                                     | 766.2<br>(473.9 to 1,191.7)                   | 6.8<br>(1.1 to 13.7)                              | 1.2<br>(-4.2 to 7.7)                             |
| Thalassaemias                                              | 172.3<br>(160.0 to 186.3)                           | --                                                     | 10.0<br>(6.0 to 15.1)                         | -3.0<br>(-14.3 to 4.0)                            | -8.1<br>(-15.0 to -1.5)                          |
| Thalassaemia trait                                         | 16,974.0<br>(16,021.6 to 18,665.9)                  | --                                                     | 301.6<br>(171.5 to 495.7)                     | 8.2<br>(-0.0 to 19.7)                             | 2.5<br>(-5.3 to 13.3)                            |
| Sickle cell disorders                                      | 1,013.5<br>(895.9 to 1,269.2)                       | --                                                     | 63.3<br>(40.8 to 94.8)                        | 13.9<br>(6.0 to 22.5)                             | 7.9<br>(0.4 to 16.0)                             |
| Sickle cell trait                                          | 41,377.0<br>(37,755.4 to 46,111.2)                  | --                                                     | 216.0<br>(134.9 to 321.3)                     | 12.6<br>(6.7 to 19.2)                             | 6.7<br>(1.1 to 12.9)                             |
| G6PD deficiency                                            | 27,187.3<br>(26,084.2 to 28,511.2)                  | --                                                     | 3.6<br>(2.1 to 5.8)                           | 4.4<br>(-9.7 to 16.7)                             | -1.1<br>(-14.4 to 10.6)                          |
| G6PD trait                                                 | 63,499.9<br>(62,440.1 to 64,714.3)                  | --                                                     | < 0.05<br>(< 0.05 to 0.1)                     | 12.0<br>(1.4 to 21.9)                             | 6.1<br>(-4.0 to 15.5)                            |
| Other hemoglobinopathies and hemolytic anaemias            | 5,634.4<br>(5,174.4 to 6,243.6)                     | --                                                     | 171.7<br>(107.3 to 254.3)                     | -3.2<br>(-8.8 to 3.7)                             | -8.3<br>(-13.6 to -1.8)                          |
| Endocrine, metabolic, blood, and immune disorders          | 8,519.0<br>(7,831.7 to 9,349.9)                     | 467.9<br>(354.8 to 616.6)                              | 278.8<br>(178.7 to 406.5)                     | 2.8<br>(-1.6 to 7.1)                              | -2.6<br>(-6.8 to 1.5)                            |
| <b>Musculoskeletal disorders</b>                           | --                                                  | --                                                     | --                                            | --                                                | --                                               |
| Rheumatoid arthritis                                       | --                                                  | --                                                     | --                                            | --                                                | --                                               |
| Osteoarthritis                                             | --                                                  | --                                                     | --                                            | --                                                | --                                               |
| Low back and neck pain                                     | --                                                  | --                                                     | --                                            | --                                                | --                                               |
| Low back pain                                              | --                                                  | --                                                     | --                                            | --                                                | --                                               |
| Neck pain                                                  | --                                                  | --                                                     | --                                            | --                                                | --                                               |
| Gout                                                       | --                                                  | --                                                     | --                                            | --                                                | --                                               |
| Other musculoskeletal disorders                            | --                                                  | --                                                     | --                                            | --                                                | --                                               |
| <b>Other non-communicable diseases</b>                     | <b>308,179.6</b><br><b>(298,984.2 to 320,347.2)</b> | <b>977,887.8†</b><br><b>(715,093.0 to 1,291,771.9)</b> | <b>5,803.3</b><br><b>(3,835.6 to 8,235.9)</b> | <b>5.8</b><br><b>(5.0 to 6.7)</b>                 | <b>0.2</b><br><b>(-0.5 to 1.0)</b>               |
| Congenital anomalies                                       | 8,991.6<br>(8,624.1 to 9,376.1)                     | --                                                     | 1,017.0<br>(744.2 to 1,336.2)                 | 4.6<br>(2.6 to 6.9)                               | -0.9<br>(-2.8 to 1.3)                            |
| Neural tube defects                                        | 495.7<br>(447.6 to 549.9)                           | --                                                     | 146.4<br>(102.7 to 196.3)                     | 10.1<br>(5.1 to 15.2)                             | 4.3<br>(-0.4 to 9.1)                             |
| Congenital heart anomalies                                 | 2,828.7<br>(2,360.1 to 3,316.3)                     | --                                                     | 115.5<br>(56.2 to 188.0)                      | 2.7<br>(-0.5 to 5.5)                              | -2.8<br>(-5.8 to -0.0)                           |
| Orofacial clefts                                           | 305.1<br>(265.4 to 352.5)                           | --                                                     | 4.3<br>(2.8 to 6.2)                           | -3.1<br>(-6.3 to -0.1)                            | -8.2<br>(-11.2 to -5.4)                          |
| Down's syndrome                                            | 192.8<br>(168.0 to 221.5)                           | --                                                     | 16.6<br>(11.1 to 23.4)                        | 7.2<br>(4.0 to 10.3)                              | 1.6<br>(-1.5 to 4.5)                             |
| Turner syndrome                                            | 292.6<br>(254.0 to 334.6)                           | --                                                     | 4.0<br>(1.6 to 7.1)                           | 2.2<br>(-10.0 to 15.7)                            | -3.2<br>(-14.7 to 9.6)                           |
| Klinefelter syndrome                                       | 391.3<br>(336.8 to 451.6)                           | --                                                     | 1.1<br>(0.5 to 2.0)                           | 6.8<br>(-2.4 to 16.4)                             | 1.2<br>(-7.5 to 10.2)                            |

| Cause                                         | Prevalence in thousands (95% UI)                 | Incidence in thousands (95% UI)                              | YLDs in thousands (95% UI)                |                                                   |                                                  |
|-----------------------------------------------|--------------------------------------------------|--------------------------------------------------------------|-------------------------------------------|---------------------------------------------------|--------------------------------------------------|
|                                               | 2016 counts                                      | 2016 counts                                                  | 2016 counts                               | Percentage change in counts between 2006 and 2016 | Percentage change in rates between 2006 and 2016 |
| Other chromosomal abnormalities               | 956.0<br>(836.5 to 1,099.9)                      | --                                                           | 154.7<br>(107.6 to 211.3)                 | 8.5<br>(4.1 to 13.1)                              | 2.8<br>(-1.4 to 7.1)                             |
| Congenital musculoskeletal and limb anomalies | 661.7<br>(596.5 to 733.1)                        | --                                                           | 78.5<br>(52.6 to 109.4)                   | 6.5<br>(2.7 to 10.4)                              | 0.9<br>(-2.7 to 4.6)                             |
| Urogenital congenital anomalies               | 1,263.8<br>(1,117.5 to 1,425.7)                  | --                                                           | 36.2<br>(21.5 to 56.9)                    | 1.5<br>(-0.9 to 4.1)                              | -3.9<br>(-6.2 to -1.4)                           |
| Digestive congenital anomalies                | 593.3<br>(530.9 to 656.1)                        | --                                                           | 28.5<br>(18.4 to 41.1)                    | 3.2<br>(-2.2 to 8.6)                              | -2.2<br>(-7.4 to 2.9)                            |
| Other congenital anomalies                    | 2,606.1<br>(1,834.1 to 3,702.7)                  | --                                                           | 431.4<br>(294.9 to 607.8)                 | 2.2<br>(-1.4 to 5.8)                              | -3.2<br>(-6.6 to 0.2)                            |
| Skin and subcutaneous diseases                | 136,264.8<br>(132,751.8 to 139,604.7)            | 310,162.1<br>(270,412.8 to 358,102.2)                        | 3,948.7<br>(2,467.0 to 5,921.0)           | 6.9<br>(6.0 to 7.8)                               | 1.2<br>(0.4 to 2.1)                              |
| Dermatitis                                    | 38,985.4<br>(35,260.0 to 43,058.4)               | 13,637.8<br>(11,979.9 to 15,345.6)                           | 1,732.6<br>(967.4 to 2,923.5)             | 8.5<br>(7.0 to 10.0)                              | 2.8<br>(1.3 to 4.2)                              |
| Psoriasis                                     | 1,095.2<br>(1,002.9 to 1,192.8)                  | 421.5<br>(374.3 to 466.1)                                    | 99.9<br>(69.1 to 134.6)                   | 10.1<br>(4.2 to 16.7)                             | 4.3<br>(-1.3 to 10.6)                            |
| Cellulitis                                    | 179.6<br>(148.4 to 216.8)                        | 3,197.6<br>(2,663.3 to 3,810.3)                              | 10.5<br>(6.5 to 15.9)                     | 7.9<br>(1.5 to 14.6)                              | 2.2<br>(-3.9 to 8.6)                             |
| Pyoderma                                      | 2,145.8<br>(1,968.1 to 2,336.4)                  | 40,591.4<br>(37,308.4 to 44,042.3)                           | 12.3<br>(5.0 to 25.7)                     | 18.4<br>(15.2 to 21.5)                            | 12.2<br>(9.1 to 15.1)                            |
| Scabies                                       | 12,947.7<br>(9,554.0 to 17,138.2)                | 40,061.0<br>(29,084.0 to 54,654.4)                           | 338.2<br>(179.3 to 569.8)                 | 1.1<br>(-2.5 to 0.4)                              | -6.3<br>(-7.6 to -4.9)                           |
| Fungal skin diseases                          | 48,890.2<br>(38,241.2 to 61,919.2)               | 148,843.4<br>(113,439.6 to 193,438.0)                        | 280.2<br>(112.1 to 593.6)                 | 10.8<br>(10.0 to 11.7)                            | 5.0<br>(4.2 to 5.8)                              |
| Viral skin diseases                           | 15,536.4<br>(14,374.7 to 16,879.9)               | 19,451.7<br>(17,657.2 to 21,342.7)                           | 483.8<br>(296.3 to 731.1)                 | 5.8<br>(4.6 to 6.9)                               | 0.2<br>(-0.9 to 1.2)                             |
| Acne vulgaris                                 | --                                               | --                                                           | --                                        | --                                                | --                                               |
| Alopecia areata                               | 312.1<br>(276.4 to 348.1)                        | 545.7<br>(476.0 to 614.3)                                    | 10.5<br>(6.5 to 15.9)                     | 5.5<br>(-1.5 to 13.0)                             | -0.1<br>(-6.7 to 7.1)                            |
| Pruritus                                      | 3,270.0<br>(2,417.8 to 4,285.3)                  | 2,841.4<br>(2,027.8 to 3,871.1)                              | 35.6<br>(16.0 to 66.6)                    | 6.3<br>(4.2 to 8.2)                               | 0.7<br>(-1.3 to 2.5)                             |
| Urticaria                                     | 13,540.2<br>(10,197.2 to 17,576.1)               | 22,587.6<br>(16,545.9 to 29,987.1)                           | 830.0<br>(488.2 to 1,288.6)               | 5.3<br>(4.0 to 6.7)                               | -0.2<br>(-1.5 to 1.0)                            |
| Decubitus ulcer                               | 39.0<br>(27.4 to 52.3)                           | 129.8<br>(90.1 to 173.8)                                     | 6.9<br>(4.2 to 10.4)                      | 4.4<br>(3.3 to 5.4)                               | -1.1<br>(-2.1 to -0.1)                           |
| Other skin and subcutaneous diseases          | 19,168.0<br>(17,509.2 to 20,833.2)               | 17,853.2<br>(16,105.7 to 19,691.6)                           | 108.2<br>(51.2 to 199.6)                  | 10.8<br>(9.6 to 12.1)                             | 5.0<br>(3.8 to 6.2)                              |
| Sense organ diseases                          | 26,076.1<br>(25,314.1 to 26,774.9)               | 79,979.8 <sup>†</sup><br>(71,238.8 to 89,088.7)              | 782.1<br>(507.5 to 1,143.0)               | 2.1<br>(0.2 to 4.2)                               | -3.3<br>(-5.1 to -1.2)                           |
| Glaucoma                                      | --                                               | --                                                           | --                                        | --                                                | --                                               |
| Cataract                                      | --                                               | --                                                           | --                                        | --                                                | --                                               |
| Macular degeneration                          | --                                               | --                                                           | --                                        | --                                                | --                                               |
| Refraction and accommodation disorders        | 18,253.6<br>(16,391.3 to 20,497.9)               | --                                                           | 370.2<br>(218.5 to 603.3)                 | 0.6<br>(-1.0 to 2.0)                              | -4.7<br>(-6.2 to -3.4)                           |
| Age-related and other hearing loss            | 3,141.4<br>(2,045.8 to 4,306.5)                  | --                                                           | 266.6<br>(146.1 to 411.2)                 | 2.1<br>(-3.1 to 7.5)                              | -3.3<br>(-8.2 to 1.8)                            |
| Other vision loss                             | 368.3<br>(265.4 to 502.9)                        | --                                                           | 17.9<br>(10.9 to 27.2)                    | 3.4<br>(-1.5 to 8.7)                              | -2.1<br>(-6.7 to 3.0)                            |
| Other sense organ diseases                    | 5,073.9<br>(4,604.9 to 5,603.0)                  | 79,979.8<br>(71,238.8 to 89,088.7)                           | 127.4<br>(78.1 to 193.2)                  | 6.8<br>(3.7 to 9.6)                               | 1.1<br>(-1.8 to 3.8)                             |
| Oral disorders                                | 229,608.9<br>(204,189.2 to 269,076.5)            | 587,745.9 <sup>†</sup><br>(319,424.7 to 893,620.5)           | 55.5<br>(22.1 to 110.2)                   | 6.0<br>(2.9 to 8.2)                               | 0.4<br>(-2.5 to 2.5)                             |
| Caries of deciduous teeth                     | 213,863.0<br>(161,903.0 to 268,105.0)            | 587,745.9<br>(319,424.7 to 893,620.5)                        | 55.5<br>(22.1 to 110.2)                   | 6.0<br>(2.9 to 8.2)                               | 0.4<br>(-2.5 to 2.5)                             |
| Caries of permanent teeth                     | --                                               | --                                                           | --                                        | --                                                | --                                               |
| Periodontal disease                           | --                                               | --                                                           | --                                        | --                                                | --                                               |
| Edentulism and severe tooth loss              | --                                               | --                                                           | --                                        | --                                                | --                                               |
| Other oral disorders                          | --                                               | --                                                           | --                                        | --                                                | --                                               |
| <b>Injuries</b>                               | <b>16,155.6</b><br><b>(14,336.9 to 18,043.0)</b> | <b>52,587.6<sup>†</sup></b><br><b>(46,469.8 to 59,812.3)</b> | <b>740.5</b><br><b>(490.4 to 1,076.6)</b> | <b>9.8</b><br><b>(8.2 to 11.5)</b>                | <b>4.0</b><br><b>(2.5 to 5.6)</b>                |
| <b>Transport injuries</b>                     | <b>933.4</b><br><b>(747.4 to 1,180.5)</b>        | <b>2,366.8</b><br><b>(1,771.7 to 3,138.4)</b>                | <b>64.7</b><br><b>(40.6 to 98.4)</b>      | <b>4.5</b><br><b>(2.1 to 6.8)</b>                 | <b>-1.0</b><br><b>(-3.3 to 1.2)</b>              |
| Road injuries                                 | 212.6<br>(175.2 to 255.7)                        | 875.3<br>(586.6 to 1,223.3)                                  | 14.9<br>(9.1 to 23.2)                     | 3.4<br>(-2.2 to 8.4)                              | -2.0<br>(-7.4 to 2.7)                            |
| Pedestrian road injuries                      | 38.5<br>(28.4 to 52.1)                           | 140.2<br>(84.3 to 219.7)                                     | 2.7<br>(1.6 to 4.4)                       | -4.2<br>(-10.4 to 1.3)                            | -9.3<br>(-15.2 to -4.0)                          |
| Cyclist road injuries                         | 43.2<br>(30.3 to 58.2)                           | 214.1<br>(116.5 to 338.8)                                    | 2.7<br>(1.5 to 4.5)                       | 4.5<br>(-2.1 to 10.2)                             | -1.0<br>(-7.2 to 4.4)                            |
| Motorcyclist road injuries                    | 46.3<br>(34.5 to 60.9)                           | 138.3<br>(78.8 to 220.4)                                     | 3.1<br>(1.8 to 4.9)                       | 10.4<br>(5.2 to 14.8)                             | 4.6<br>(-0.4 to 8.8)                             |
| Motor vehicle road injuries                   | 61.0<br>(46.1 to 80.8)                           | 272.6<br>(166.9 to 417.9)                                    | 5.0<br>(3.0 to 8.0)                       | 1.3<br>(-4.9 to 6.7)                              | -4.1<br>(-9.9 to 1.1)                            |
| Other road injuries                           | 23.5<br>(16.0 to 33.9)                           | 110.0<br>(56.8 to 189.4)                                     | 1.4<br>(0.7 to 2.4)                       | 11.5<br>(4.1 to 17.7)                             | 5.6<br>(-1.4 to 11.5)                            |
| Other transport injuries                      | 720.8<br>(540.1 to 966.0)                        | 1,491.5<br>(984.4 to 2,183.2)                                | 49.8<br>(30.5 to 76.2)                    | 4.9<br>(2.4 to 7.4)                               | -0.6<br>(-3.0 to 1.7)                            |
| <b>Unintentional injuries</b>                 | <b>14,184.1</b><br><b>(12,474.2 to 16,039.8)</b> | <b>49,328.2</b><br><b>(43,242.1 to 56,582.0)</b>             | <b>641.4</b><br><b>(425.7 to 934.9)</b>   | <b>9.8</b><br><b>(8.3 to 11.4)</b>                | <b>4.0</b><br><b>(2.6 to 5.5)</b>                |
| Falls                                         | 3,946.9<br>(2,997.0 to 5,244.8)                  | 13,528.6<br>(9,713.5 to 19,386.0)                            | 168.2<br>(106.7 to 251.3)                 | 16.0<br>(13.3 to 18.7)                            | 9.9<br>(7.4 to 12.4)                             |
| Drowning                                      | 43.9<br>(32.3 to 61.5)                           | 97.2<br>(78.0 to 118.8)                                      | 2.9<br>(1.7 to 4.6)                       | 2.9<br>(-10.7 to -6.2)                            | -13.3<br>(-15.4 to -11.2)                        |
| Fire, heat, and hot substances                | 864.9<br>(598.0 to 1,177.0)                      | 1,351.6<br>(913.0 to 1,862.5)                                | 35.3<br>(21.6 to 52.7)                    | 7.5<br>(3.2 to 11.4)                              | 1.8<br>(-2.2 to 5.5)                             |
| Poisonings                                    | 54.9<br>(40.8 to 75.0)                           | 609.9<br>(408.4 to 872.1)                                    | 6.6<br>(3.9 to 10.4)                      | 13.5<br>(8.2 to 18.9)                             | 7.5<br>(2.5 to 12.6)                             |
| Exposure to mechanical forces                 | 1,689.4<br>(1,281.8 to 2,158.9)                  | 5,008.7<br>(3,466.8 to 6,947.0)                              | 50.5<br>(30.5 to 78.3)                    | 8.8<br>(5.5 to 12.3)                              | 3.1<br>(-0.1 to 6.4)                             |
| Unintentional firearm injuries                | 30.7<br>(22.2 to 40.1)                           | 79.8<br>(44.1 to 135.2)                                      | 1.8<br>(1.0 to 2.9)                       | 10.1<br>(5.5 to 15.1)                             | 4.3<br>(-0.0 to 9.0)                             |
| Unintentional suffocation                     | 332.0<br>(224.6 to 456.1)                        | 553.4<br>(319.7 to 881.7)                                    | 12.4<br>(7.2 to 20.0)                     | 4.4<br>(0.7 to 8.5)                               | -1.2<br>(-4.6 to 2.8)                            |
| Other exposure to mechanical forces           | 1,326.6<br>(979.5 to 1,760.4)                    | 4,375.5<br>(3,009.4 to 6,026.9)                              | 36.3<br>(22.0 to 57.1)                    | 10.4<br>(6.6 to 13.9)                             | 4.5<br>(1.0 to 7.9)                              |

| Cause                                                                               | Prevalence in thousands (95% UI)            | Incidence in thousands (95% UI)            | YLDs in thousands (95% UI)           |                                                   |                                                  |
|-------------------------------------------------------------------------------------|---------------------------------------------|--------------------------------------------|--------------------------------------|---------------------------------------------------|--------------------------------------------------|
|                                                                                     | 2016 counts                                 | 2016 counts                                | 2016 counts                          | Percentage change in counts between 2006 and 2016 | Percentage change in rates between 2006 and 2016 |
| Adverse effects of medical treatment                                                | 462.7<br>(317.3 to 651.5)                   | 6,050.9<br>(4,384.9 to 8,056.9)            | 61.7<br>(33.6 to 100.4)              | 8.4<br>(4.0 to 12.9)                              | 2.7<br>(-1.5 to 7.0)                             |
| Animal contact                                                                      | 795.3<br>(594.1 to 1,081.9)                 | 5,362.0<br>(3,830.3 to 7,192.1)            | 40.7<br>(25.7 to 59.4)               | 1.1<br>(-2.7 to 5.0)                              | -4.2<br>(-7.8 to -0.6)                           |
| Venomous animal contact                                                             | 324.7<br>(231.1 to 448.9)                   | 2,335.1<br>(1,599.1 to 3,294.7)            | 29.6<br>(18.3 to 43.1)               | 0.1<br>(-4.7 to 5.1)                              | -5.2<br>(-9.7 to -0.5)                           |
| Non-venomous animal contact                                                         | 470.6<br>(321.5 to 699.8)                   | 3,026.9<br>(2,065.3 to 4,202.0)            | 11.1<br>(6.2 to 17.7)                | 3.8<br>(-0.1 to 7.2)                              | -1.7<br>(-5.4 to 1.5)                            |
| Foreign body                                                                        | 1,827.5<br>(1,399.4 to 2,287.1)             | 5,839.3<br>(4,585.4 to 7,392.3)            | 93.8<br>(59.5 to 142.2)              | 6.1<br>(3.8 to 8.4)                               | 0.5<br>(-1.7 to 2.6)                             |
| Pulmonary aspiration and foreign body in airway                                     | 1,109.0<br>(764.4 to 1,562.9)               | 2,837.2<br>(1,988.0 to 4,029.1)            | 62.3<br>(38.9 to 94.8)               | 4.0<br>(1.5 to 6.6)                               | -1.4<br>(-3.9 to 1.0)                            |
| Foreign body in eyes                                                                | 145.5<br>(45.1 to 311.2)                    | 1,050.5<br>(577.1 to 1,822.7)              | 8.1<br>(2.5 to 17.9)                 | 10.7<br>(7.3 to 15.5)                             | 4.9<br>(1.7 to 9.3)                              |
| Foreign body in other body part                                                     | 573.1<br>(400.3 to 783.6)                   | 1,951.7<br>(1,369.1 to 2,767.2)            | 23.4<br>(14.3 to 35.2)               | 10.3<br>(7.5 to 13.1)                             | 4.5<br>(1.8 to 7.1)                              |
| Environmental heat and cold exposure                                                | 1,277.4<br>(907.2 to 1,922.5)               | 2,846.0<br>(1,955.1 to 3,916.3)            | 61.6<br>(37.5 to 95.1)               | 5.4<br>(3.1 to 7.4)                               | -0.2<br>(-2.3 to 1.7)                            |
| Other unintentional injuries                                                        | 3,221.2<br>(2,300.8 to 4,642.0)             | 8,634.0<br>(5,954.1 to 12,422.1)           | 120.1<br>(74.5 to 184.5)             | 12.3<br>(9.6 to 15.0)                             | 6.3<br>(3.8 to 8.9)                              |
| <b>Self-harm and interpersonal violence</b>                                         | <b>1,128.7</b><br><b>(901.9 to 1,384.4)</b> | <b>855.8†</b><br><b>(562.7 to 1,210.6)</b> | <b>21.4</b><br><b>(13.6 to 31.7)</b> | <b>4.5</b><br><b>(2.2 to 6.9)</b>                 | <b>-1.1</b><br><b>(-3.2 to 1.2)</b>              |
| Self-harm                                                                           | --                                          | --                                         | --                                   | --                                                | --                                               |
| Self-harm by firearm                                                                | --                                          | --                                         | --                                   | --                                                | --                                               |
| Self-harm by other specified means                                                  | --                                          | --                                         | --                                   | --                                                | --                                               |
| Interpersonal violence                                                              | 1,128.7<br>(901.9 to 1,384.4)               | 855.8†<br>(562.7 to 1,210.6)               | 21.4<br>(13.6 to 31.7)               | 4.5<br>(2.2 to 6.9)                               | -1.1<br>(-3.2 to 1.2)                            |
| Assault by firearm                                                                  | 10.9<br>(8.1 to 14.6)                       | 28.6<br>(14.6 to 50.5)                     | 0.8<br>(0.4 to 1.3)                  | 10.3<br>(6.4 to 14.3)                             | 4.5<br>(0.8 to 8.3)                              |
| Assault by sharp object                                                             | 70.4<br>(48.8 to 97.9)                      | 229.2<br>(125.5 to 377.1)                  | 3.6<br>(2.0 to 6.0)                  | 11.4<br>(7.5 to 15.6)                             | 5.5<br>(1.9 to 9.5)                              |
| Sexual violence                                                                     | 899.9<br>(677.8 to 1,146.5)                 | --                                         | 9.1<br>(5.5 to 13.7)                 | -1.5<br>(-2.7 to -0.3)                            | -6.7<br>(-7.9 to -5.6)                           |
| Assault by other means                                                              | 147.5<br>(108.2 to 202.5)                   | 598.1<br>(389.1 to 872.8)                  | 8.0<br>(4.6 to 12.7)                 | 8.4<br>(5.0 to 11.8)                              | 2.6<br>(-0.5 to 5.9)                             |
| <b>Forces of nature, conflict and terrorism, and executions and police conflict</b> | <b>809.4</b><br><b>(463.9 to 1,322.5)</b>   | <b>36.9‡</b><br><b>(23.9 to 53.9)</b>      | <b>12.9</b><br><b>(5.6 to 23.8)</b>  | <b>73.5</b><br><b>(34.1 to 147.5)</b>             | <b>64.3</b><br><b>(27.0 to 134.5)</b>            |
| Forces of nature, conflict and terrorism, and state actor violence                  | 7.3<br>(4.1 to 11.8)                        | 15.8<br>(8.7 to 25.0)                      | 0.4<br>(0.2 to 0.8)                  | -84.7<br>(-88.4 to -79.9)                         | -85.5<br>(-89.0 to -80.9)                        |
| Conflict and terrorism                                                              | 795.5<br>(452.3 to 1,300.7)                 | --                                         | 12.5<br>(5.3 to 22.8)                | 173.5<br>(97.6 to 383.1)                          | 159.0<br>(87.2 to 357.6)                         |
| Executions and police conflict                                                      | 6.6<br>(3.5 to 12.5)                        | 21.1<br>(11.5 to 36.4)                     | 0.3<br>(0.1 to 0.7)                  | -8.1<br>(-32.7 to 30.1)                           | -13.0<br>(-36.3 to 23.2)                         |

We did not calculate incidence for certain NTDs and causes with only birth prevalence. Blank cells mean that no estimate is available.

† Incidence for aggregate causes represents the sum of the incidence of the causes below the aggregate.

‡ Incidence estimates for stroke represent first-ever stroke only.

^ Incidence of HIV/AIDS represents new infections of HIV only and does not include new infections of Tuberculosis in HIV positive cases.



SR Table 12: Global prevalence, incidence, and YLDs for 2016, percentage change of YLD counts and percentage change of YLD rates between 2006 and 2016 by cause, age 5-9 years.

| Cause                                                                                | Prevalence in thousands (95% UI)             | Incidence in thousands (95% UI)                     | YLDs in thousands (95% UI)                |                                                   |                                                  |
|--------------------------------------------------------------------------------------|----------------------------------------------|-----------------------------------------------------|-------------------------------------------|---------------------------------------------------|--------------------------------------------------|
|                                                                                      | 2016 counts                                  | 2016 counts                                         | 2016 counts                               | Percentage change in counts between 2006 and 2016 | Percentage change in rates between 2006 and 2016 |
| <b>All causes</b>                                                                    | <b>589,935.9</b><br>(586,136.3 to 593,904.1) | <b>4,375,271.5*</b><br>(3,627,247.2 to 5,231,851.3) | <b>30,681.7</b><br>(21,602.1 to 42,231.1) | <b>6.2</b><br>(5.0 to 7.4)                        | <b>-1.4</b><br>(-2.5 to -0.2)                    |
| <b>Communicable, maternal, neonatal, and nutritional disorders</b>                   | <b>392,128.0</b><br>(387,390.8 to 396,274.1) | <b>2,502,574.3*</b><br>(1,940,494.0 to 3,163,102.7) | <b>12,068.4</b><br>(8,301.2 to 17,086.0)  | <b>2.6</b><br>(0.4 to 5.2)                        | <b>-4.7</b><br>(-6.7 to -2.3)                    |
| <b>HIV/AIDS and tuberculosis</b>                                                     | <b>88,994.0</b><br>(79,927.3 to 101,118.7)   | <b>176.2*</b><br>(116.7 to 255.0)                   | <b>161.8</b><br>(116.4 to 213.6)          | <b>-6.2</b><br>(-14.2 to 3.3)                     | <b>-12.9</b><br>(-20.3 to -4.1)                  |
| Tuberculosis                                                                         | 83,418.2<br>(68,909.3 to 100,087.2)          | 176.2*<br>(116.7 to 255.0)                          | 34.6<br>(19.0 to 56.3)                    | -13.8<br>(-23.2 to -2.2)                          | -19.9<br>(-28.7 to -9.2)                         |
| Drug-susceptible tuberculosis                                                        | 103.8<br>(65.9 to 152.7)                     | 170.9<br>(113.2 to 247.4)                           | 33.4<br>(18.3 to 54.4)                    | -13.8<br>(-23.6 to -2.1)                          | -19.9<br>(-29.1 to -9.0)                         |
| Multidrug-resistant tuberculosis without extensive drug resistance                   | 3.3<br>(2.1 to 4.7)                          | 5.0<br>(3.4 to 7.3)                                 | 1.1<br>(0.6 to 1.8)                       | -15.2<br>(-24.8 to -3.8)                          | -21.3<br>(-30.2 to -10.7)                        |
| Extensively drug-resistant tuberculosis                                              | 0.2<br>(0.1 to 0.2)                          | 0.2<br>(0.2 to 0.3)                                 | 0.1<br>(< 0.05 to 0.1)                    | 170.9<br>(133.1 to 215.1)                         | 151.6<br>(116.5 to 192.6)                        |
| Latent tuberculosis infection                                                        | 83,311.0<br>(68,800.3 to 99,965.1)           | --                                                  | --                                        | --                                                | --                                               |
| HIV/AIDS                                                                             | 914.2<br>(873.1 to 958.6)                    | --                                                  | 127.2<br>(92.5 to 165.9)                  | -3.9<br>(-13.8 to 7.6)                            | -10.7<br>(-19.9 to -0.1)                         |
| Drug-susceptible HIV/AIDS - Tuberculosis                                             | 24.4<br>(16.8 to 33.9)                       | 36.6<br>(25.3 to 50.8)                              | 9.9<br>(5.7 to 15.9)                      | -26.1<br>(-35.6 to -16.3)                         | -31.4<br>(-40.2 to -22.3)                        |
| Multidrug-resistant HIV/AIDS - Tuberculosis without extensive drug resistance        | 0.6<br>(0.4 to 1.0)                          | 1.0<br>(0.6 to 1.5)                                 | 0.3<br>(0.1 to 0.4)                       | -24.9<br>(-41.2 to -7.1)                          | -30.3<br>(-45.4 to -13.7)                        |
| Extensively drug-resistant HIV/AIDS - Tuberculosis                                   | < 0.05<br>(< 0.05 to < 0.05)                 | < 0.05<br>(< 0.05 to < 0.05)                        | < 0.05<br>(< 0.05 to < 0.05)              | 230.8<br>(173.3 to 301.2)                         | 207.2<br>(153.8 to 272.7)                        |
| HIV/AIDS resulting in other diseases                                                 | 889.2<br>(847.5 to 934.9)                    | --                                                  | 117.0<br>(84.7 to 151.1)                  | -1.3<br>(-12.4 to 12.3)                           | -8.3<br>(-18.7 to 4.3)                           |
| <b>Diarrhoea, lower respiratory infections, and other common infectious diseases</b> | <b>49,956.9</b><br>(46,465.0 to 52,748.8)    | <b>2,335,124.8*</b><br>(1,779,261.9 to 2,990,245.8) | <b>2,136.0</b><br>(1,424.3 to 3,079.5)    | <b>4.8</b><br>(3.2 to 6.3)                        | <b>-2.6</b><br>(-4.1 to -1.3)                    |
| Diarrhoeal diseases                                                                  | 4,753.6<br>(3,914.5 to 5,687.2)              | 312,303.3<br>(255,510.0 to 373,349.5)               | 548.5<br>(363.8 to 781.1)                 | 5.0<br>(2.5 to 7.3)                               | -2.5<br>(-4.8 to -0.4)                           |
| Intestinal infectious diseases                                                       | 222.9<br>(182.9 to 280.3)                    | 3,744.2*<br>(2,754.8 to 4,988.4)                    | 31.3<br>(18.3 to 48.8)                    | -24.5<br>(-38.9 to -5.4)                          | -29.9<br>(-43.3 to -12.1)                        |
| Typhoid fever                                                                        | 193.6<br>(137.8 to 264.9)                    | 3,050.9<br>(2,249.1 to 4,126.1)                     | 29.3<br>(17.1 to 45.7)                    | -24.8<br>(-39.9 to -4.3)                          | -30.1<br>(-44.1 to -11.2)                        |
| Paratyphoid fever                                                                    | 30.4<br>(21.1 to 42.9)                       | 693.4<br>(488.6 to 969.2)                           | 1.9<br>(1.1 to 3.2)                       | -20.1<br>(-37.2 to 1.2)                           | -25.8<br>(-41.7 to -6.0)                         |
| Other intestinal infectious diseases                                                 | --                                           | --                                                  | 0.1<br>(< 0.05 to 0.1)                    | -37.6<br>(-49.5 to -21.8)                         | -42.1<br>(-53.1 to -27.4)                        |
| Lower respiratory infections                                                         | 870.4<br>(688.4 to 1,101.2)                  | 34,679.5<br>(27,339.1 to 44,478.8)                  | 53.9<br>(33.0 to 83.6)                    | 14.1<br>(7.4 to 21.1)                             | 6.0<br>(-0.3 to 12.4)                            |
| Upper respiratory infections                                                         | 24,705.4<br>(17,683.5 to 32,769.3)           | 1,863,359.9<br>(1,302,060.1 to 2,504,876.1)         | 625.1<br>(334.1 to 1,077.6)               | 8.2<br>(6.0 to 10.1)                              | 0.5<br>(-1.6 to 2.2)                             |
| Otitis media                                                                         | 19,790.0<br>(16,155.4 to 24,080.6)           | 96,968.5<br>(63,394.0 to 145,302.2)                 | 626.8<br>(374.8 to 979.0)                 | 4.4<br>(1.5 to 7.1)                               | -3.0<br>(-5.7 to -0.5)                           |
| Meningitis                                                                           | 1,296.7<br>(1,108.8 to 1,522.6)              | 274.1<br>(193.8 to 378.7)                           | 149.1<br>(105.2 to 197.9)                 | 4.8<br>(0.4 to 9.1)                               | -2.6<br>(-6.8 to 1.3)                            |
| Pneumococcal meningitis                                                              | 509.1<br>(422.3 to 623.4)                    | 67.3<br>(40.8 to 101.5)                             | 60.2<br>(41.5 to 82.7)                    | 2.2<br>(-5.9 to 10.4)                             | -5.1<br>(-12.6 to 2.5)                           |
| H influenzae type B meningitis                                                       | 223.9<br>(177.9 to 282.6)                    | 38.9<br>(21.4 to 65.9)                              | 29.6<br>(20.0 to 40.3)                    | -19.0<br>(-25.1 to -13.2)                         | -24.8<br>(-30.5 to -19.4)                        |
| Meningococcal infection                                                              | 159.4<br>(113.6 to 216.2)                    | 52.5<br>(30.4 to 81.6)                              | 16.9<br>(11.7 to 23.0)                    | 13.5<br>(9.9 to 17.1)                             | 5.4<br>(2.1 to 8.7)                              |
| Other meningitis                                                                     | 404.3<br>(302.4 to 521.8)                    | 115.4<br>(78.5 to 168.4)                            | 42.3<br>(28.9 to 58.0)                    | 33.1<br>(25.7 to 41.0)                            | 23.6<br>(16.8 to 31.0)                           |
| Encephalitis                                                                         | 665.1<br>(482.6 to 918.9)                    | 891.9<br>(703.9 to 1,119.7)                         | 83.1<br>(57.9 to 110.8)                   | -1.1<br>(-6.8 to 4.9)                             | -8.1<br>(-13.4 to -2.6)                          |
| Diphtheria                                                                           | < 0.05<br>(< 0.05 to < 0.05)                 | 0.3<br>(0.2 to 0.6)                                 | < 0.05<br>(< 0.05 to < 0.05)              | -61.7<br>(-76.6 to -32.7)                         | -64.4<br>(-78.3 to -37.5)                        |
| Whooping cough                                                                       | 79.3<br>(61.9 to 99.7)                       | 579.2<br>(451.6 to 727.5)                           | 3.9<br>(2.3 to 6.2)                       | -22.2<br>(-31.6 to -12.0)                         | -27.8<br>(-36.4 to -18.2)                        |
| Tetanus                                                                              | 17.1<br>(16.9 to 17.4)                       | 2.9<br>(1.2 to 5.3)                                 | 0.4<br>(0.2 to 0.6)                       | -4.3<br>(-30.1 to 30.9)                           | -11.1<br>(-35.1 to 21.6)                         |
| Measles                                                                              | 25.5<br>(9.2 to 55.2)                        | 931.2<br>(337.1 to 2,014.7)                         | 2.4<br>(0.8 to 5.4)                       | -61.0<br>(-66.6 to -53.9)                         | -63.7<br>(-69.0 to -57.2)                        |
| Varicella and herpes zoster                                                          | 560.2<br>(398.0 to 742.9)                    | 21,389.9<br>(13,644.8 to 30,369.8)                  | 11.7<br>(6.6 to 18.8)                     | 6.9<br>(-0.5 to 14.9)                             | -0.7<br>(-7.5 to 6.7)                            |
| <b>Neglected tropical diseases and malaria</b>                                       | <b>169,890.6</b><br>(164,618.8 to 174,765.7) | <b>61,247.3*</b><br>(47,858.0 to 82,142.9)          | <b>1,562.1</b><br>(1,051.0 to 2,284.8)    | <b>-10.4</b><br>(-14.3 to -6.2)                   | <b>-16.8</b><br>(-20.4 to -12.8)                 |
| Malaria                                                                              | 28,222.0<br>(20,819.3 to 35,386.2)           | 39,277.5<br>(26,543.4 to 60,065.6)                  | 391.2<br>(262.1 to 578.5)                 | -14.7<br>(-22.0 to -7.3)                          | -20.8<br>(-27.5 to -13.9)                        |
| Chagas disease                                                                       | 177.1<br>(135.2 to 223.2)                    | 19.2<br>(13.6 to 25.9)                              | 0.1<br>(0.1 to 0.2)                       | -25.3<br>(-35.1 to -14.7)                         | -30.6<br>(-39.7 to -20.8)                        |
| Leishmaniasis                                                                        | 273.1<br>(242.4 to 308.3)                    | 115.4<br>(80.2 to 159.3)                            | 16.6<br>(10.5 to 24.1)                    | 18.1<br>(-1.8 to 43.0)                            | 9.7<br>(-8.8 to 32.8)                            |
| Visceral leishmaniasis                                                               | 1.9<br>(1.3 to 2.7)                          | 7.7<br>(5.2 to 10.8)                                | 0.1<br>(0.1 to 0.2)                       | -65.8<br>(-77.0 to -47.5)                         | -68.2<br>(-78.7 to -51.2)                        |
| Cutaneous and mucocutaneous leishmaniasis                                            | 250.3<br>(210.7 to 297.7)                    | 107.7<br>(71.8 to 151.7)                            | 16.4<br>(10.4 to 23.9)                    | 20.5<br>(-0.2 to 46.6)                            | 12.0<br>(-7.3 to 36.1)                           |
| African trypanosomiasis                                                              | 0.7<br>(0.1 to 2.4)                          | 0.5<br>(0.1 to 1.7)                                 | 0.2<br>(< 0.05 to 0.7)                    | -75.2<br>(-95.8 to 31.3)                          | -77.0<br>(-96.1 to 22.0)                         |
| Schistosomiasis                                                                      | 3,785.1<br>(3,290.4 to 4,293.7)              | 8,205.1<br>(7,198.6 to 9,440.5)                     | 26.9<br>(12.2 to 53.5)                    | -26.0<br>(-29.5 to -23.1)                         | -31.3<br>(-34.6 to -28.5)                        |
| Cysticercosis                                                                        | 0.4<br>(0.1 to 0.8)                          | --                                                  | 0.1<br>(< 0.05 to 0.1)                    | -2.4<br>(-17.6 to 12.8)                           | -9.3<br>(-23.5 to 4.7)                           |
| Cystic echinococcosis                                                                | 68.1<br>(32.3 to 159.2)                      | 14.8<br>(6.1 to 36.7)                               | 6.5<br>(2.8 to 15.5)                      | -41.9<br>(-80.9 to 57.3)                          | -46.1<br>(-82.2 to 46.1)                         |
| Lymphatic filariasis                                                                 | 2,200.8<br>(1,880.3 to 2,625.0)              | 624.1<br>(352.4 to 996.1)                           | 56.8<br>(24.9 to 110.8)                   | -42.4<br>(-54.0 to -32.3)                         | -46.5<br>(-57.3 to -37.1)                        |
| Onchocerciasis                                                                       | 1,043.2<br>(567.8 to 1,598.0)                | 493.5<br>(305.5 to 830.5)                           | 72.7<br>(25.9 to 138.0)                   | -31.4<br>(-52.4 to -14.9)                         | -36.2<br>(-55.8 to -20.9)                        |
| Trachoma                                                                             | --                                           | --                                                  | --                                        | --                                                | --                                               |
| Dengue                                                                               | 701.4<br>(381.1 to 1,189.5)                  | 11,724.6<br>(7,116.6 to 17,813.3)                   | 116.9<br>(51.2 to 219.0)                  | 58.1<br>(26.7 to 266.0)                           | 46.9<br>(17.6 to 239.9)                          |
| Yellow fever                                                                         | 0.6<br>(0.1 to 1.5)                          | 20.7<br>(5.6 to 57.5)                               | < 0.05<br>(< 0.05 to 0.1)                 | -18.9<br>(-48.3 to 22.7)                          | -24.6<br>(-52.0 to 13.9)                         |
| Rabies                                                                               | 0.1<br>(< 0.05 to 0.1)                       | 2.1<br>(0.8 to 3.9)                                 | < 0.05<br>(< 0.05 to < 0.05)              | -49.8<br>(-69.7 to -10.8)                         | -53.4<br>(-71.9 to -17.1)                        |
| Intestinal nematode infections                                                       | 137,644.5<br>(131,797.5 to 142,951.4)        | --                                                  | 322.3<br>(186.0 to 523.6)                 | -20.4<br>(-26.0 to -15.2)                         | -26.1<br>(-31.3 to -21.3)                        |
| Ascariasis                                                                           | 73,279.6<br>(66,489.1 to 81,606.1)           | --                                                  | 118.5<br>(64.2 to 199.3)                  | -27.4<br>(-36.1 to -17.6)                         | -32.5<br>(-40.7 to -23.4)                        |

| Cause                                                                   | Prevalence in thousands (95% UI)                    | Incidence in thousands (95% UI)                            | YLDs in thousands (95% UI)                       |                                                   |                                                  |
|-------------------------------------------------------------------------|-----------------------------------------------------|------------------------------------------------------------|--------------------------------------------------|---------------------------------------------------|--------------------------------------------------|
|                                                                         | 2016 counts                                         | 2016 counts                                                | 2016 counts                                      | Percentage change in counts between 2006 and 2016 | Percentage change in rates between 2006 and 2016 |
| Trichuriasis                                                            | 43,745.8<br>(40,537.0 to 46,905.2)                  | --                                                         | 40.3<br>(22.1 to 70.0)                           | -26.4<br>(-35.2 to -16.4)                         | -31.7<br>(-39.8 to -22.4)                        |
| Hookworm disease                                                        | 37,109.4<br>(34,168.8 to 40,690.5)                  | --                                                         | 163.5<br>(99.1 to 252.1)                         | -12.6<br>(-20.3 to -4.6)                          | -18.8<br>(-26.0 to -11.4)                        |
| Food-borne trematodiasis                                                | 1,736.1<br>(1,530.3 to 1,999.7)                     | 280.8<br>(239.2 to 335.0)                                  | 18.7<br>(9.5 to 32.5)                            | -18.9<br>(-27.8 to -6.2)                          | -24.7<br>(-33.0 to -12.9)                        |
| Leprosy                                                                 | 0.9<br>(0.8 to 1.0)                                 | 0.5<br>(0.4 to 0.6)                                        | < 0.05<br>(< 0.05 to 0.1)                        | -32.9<br>(-34.3 to -31.4)                         | -37.7<br>(-39.0 to -36.3)                        |
| Ebola virus disease                                                     | < 0.05<br>(< 0.05 to 0.2)                           | --                                                         | < 0.05<br>(0.0 to < 0.05)                        | --                                                | --                                               |
| Zika virus disease                                                      | 7.8<br>(4.4 to 14.0)                                | 468.6<br>(265.9 to 847.7)                                  | 0.1<br>(0.1 to 0.3)                              | --                                                | --                                               |
| Guinea worm disease                                                     | < 0.05<br>(< 0.05 to < 0.05)                        | < 0.05<br>(< 0.05 to < 0.05)                               | < 0.05<br>(< 0.05 to < 0.05)                     | -99.5<br>(-99.7 to -99.3)                         | -99.5<br>(-99.7 to -99.4)                        |
| Other neglected tropical diseases                                       | 13,238.1<br>(12,322.8 to 14,154.6)                  | --                                                         | 532.9<br>(346.3 to 787.9)                        | 3.5<br>(0.4 to 6.8)                               | -3.9<br>(-6.8 to -0.8)                           |
| <b>Maternal disorders</b>                                               | --                                                  | --                                                         | --                                               | --                                                | --                                               |
| Maternal haemorrhage                                                    | --                                                  | --                                                         | --                                               | --                                                | --                                               |
| Maternal sepsis and other pregnancy related infections                  | --                                                  | --                                                         | --                                               | --                                                | --                                               |
| Maternal hypertensive disorders                                         | --                                                  | --                                                         | --                                               | --                                                | --                                               |
| Maternal obstructed labour and uterine rupture                          | --                                                  | --                                                         | --                                               | --                                                | --                                               |
| Maternal abortion, miscarriage, and ectopic pregnancy                   | --                                                  | --                                                         | --                                               | --                                                | --                                               |
| Other maternal disorders                                                | --                                                  | --                                                         | --                                               | --                                                | --                                               |
| <b>Neonatal disorders</b>                                               | <b>7,696.7</b><br><b>(7,016.2 to 8,432.1)</b>       | --                                                         | <b>1,506.4</b><br><b>(1,030.1 to 2,205.1)</b>    | <b>19.4</b><br><b>(6.0 to 33.8)</b>               | <b>10.9</b><br><b>(-1.6 to 24.2)</b>             |
| Neonatal preterm birth complications                                    | 6,068.8<br>(4,988.5 to 7,433.5)                     | --                                                         | 950.0<br>(650.4 to 1,364.6)                      | 13.4<br>(-4.9 to 34.5)                            | 5.3<br>(-11.7 to 24.9)                           |
| Neonatal encephalopathy due to birth asphyxia and trauma                | 1,238.0<br>(723.4 to 2,148.6)                       | --                                                         | 162.5<br>(45.5 to 439.7)                         | 36.7<br>(21.7 to 61.8)                            | 26.9<br>(13.1 to 50.3)                           |
| Neonatal sepsis and other neonatal infections                           | 756.3<br>(253.1 to 1,833.8)                         | --                                                         | 322.0<br>(93.4 to 826.9)                         | 33.1<br>(22.2 to 51.4)                            | 23.6<br>(13.5 to 40.6)                           |
| Hemolytic disease and other neonatal jaundice                           | 237.6<br>(210.3 to 265.4)                           | --                                                         | 71.9<br>(54.8 to 91.4)                           | 14.2<br>(7.4 to 21.3)                             | 6.0<br>(-0.2 to 12.7)                            |
| Other neonatal disorders                                                | --                                                  | --                                                         | --                                               | --                                                | --                                               |
| <b>Nutritional deficiencies</b>                                         | <b>217,839.4</b><br><b>(209,759.0 to 223,459.5)</b> | <b>97,729.2†</b><br><b>(76,185.7 to 126,674.8)</b>         | <b>6,298.6</b><br><b>(4,084.2 to 9,348.8)</b>    | <b>2.1</b><br><b>(-0.3 to 5.0)</b>                | <b>-5.2</b><br><b>(-7.4 to -2.5)</b>             |
| Protein-energy malnutrition                                             | --                                                  | --                                                         | --                                               | --                                                | --                                               |
| Iodine deficiency                                                       | 3,968.8<br>(3,468.4 to 4,550.6)                     | 1,040.6<br>(910.1 to 1,186.6)                              | 107.4<br>(69.3 to 155.7)                         | -23.4<br>(-28.1 to -18.7)                         | -28.9<br>(-33.2 to -24.4)                        |
| Vitamin A deficiency                                                    | 106,005.9<br>(84,529.4 to 133,546.9)                | 96,688.6<br>(75,131.6 to 125,556.5)                        | 43.3<br>(24.2 to 74.6)                           | 8.3<br>(1.8 to 15.1)                              | 0.6<br>(-5.5 to 6.9)                             |
| Iron-deficiency anaemia                                                 | 153,365.3<br>(142,685.5 to 164,251.0)               | --                                                         | 6,147.9<br>(3,986.2 to 9,111.1)                  | 2.6<br>(0.3 to 5.6)                               | -4.7<br>(-6.9 to -1.9)                           |
| Other nutritional deficiencies                                          | --                                                  | --                                                         | --                                               | --                                                | --                                               |
| <b>Other communicable, maternal, neonatal, and nutritional diseases</b> | <b>47,817.5</b><br><b>(42,440.2 to 52,938.3)</b>    | <b>8,296.8</b><br><b>(4,817.6 to 12,658.1)</b>             | <b>403.5</b><br><b>(260.9 to 594.3)</b>          | <b>6.7</b><br><b>(2.5 to 11.1)</b>                | <b>-0.9</b><br><b>(-4.8 to 3.2)</b>              |
| Sexually transmitted diseases excluding HIV                             | 54.0<br>(37.2 to 87.3)                              | 74.1<br>(42.8 to 141.1)                                    | < 0.05<br>(< 0.05 to < 0.05)                     | 5.1<br>(-6.1 to 13.1)                             | -2.4<br>(-12.8 to 5.0)                           |
| Syphilis                                                                | 46.4<br>(26.2 to 84.7)                              | 74.1<br>(42.8 to 141.1)                                    | < 0.05<br>(< 0.05 to < 0.05)                     | 5.1<br>(-6.1 to 13.1)                             | -2.4<br>(-12.8 to 5.0)                           |
| Chlamydial infection                                                    | --                                                  | --                                                         | --                                               | --                                                | --                                               |
| Gonococcal infection                                                    | --                                                  | --                                                         | --                                               | --                                                | --                                               |
| Trichomoniasis                                                          | --                                                  | --                                                         | --                                               | --                                                | --                                               |
| Genital herpes                                                          | --                                                  | --                                                         | --                                               | --                                                | --                                               |
| Other sexually transmitted diseases                                     | --                                                  | --                                                         | --                                               | --                                                | --                                               |
| Hepatitis                                                               | 38,110.6<br>(29,114.1 to 48,416.6)                  | 8,221.9<br>(4,742.5 to 12,589.9)                           | 7.6<br>(3.0 to 15.1)                             | -44.6<br>(-79.7 to 50.3)                          | -48.5<br>(-81.1 to 39.6)                         |
| Acute hepatitis A                                                       | 233.7<br>(22.6 to 528.5)                            | 3,038.1<br>(293.7 to 6,870.1)                              | 4.4<br>(0.4 to 10.8)                             | -43.4<br>(-95.4 to 650.6)                         | -47.5<br>(-95.8 to 597.1)                        |
| Hepatitis B                                                             | 28,243.4<br>(19,371.2 to 38,396.5)                  | 3,538.5<br>(1,990.8 to 5,641.8)                            | 1.7<br>(0.8 to 3.0)                              | -44.5<br>(-58.0 to -25.2)                         | -48.4<br>(-61.0 to -30.5)                        |
| Hepatitis C                                                             | 9,523.2<br>(8,145.7 to 11,025.9)                    | 210.8<br>(142.6 to 303.9)                                  | 0.2<br>(0.1 to 0.4)                              | -36.5<br>(-39.1 to -34.8)                         | -41.0<br>(-43.5 to -39.5)                        |
| Acute hepatitis E                                                       | 110.4<br>(89.8 to 131.5)                            | 1,434.5<br>(1,167.3 to 1,709.3)                            | 1.3<br>(0.7 to 2.2)                              | -49.2<br>(-66.0 to -22.4)                         | -52.8<br>(-68.4 to -27.9)                        |
| Other infectious diseases                                               | 9,659.1<br>(8,987.0 to 10,343.9)                    | 0.8<br>(0.4 to 1.3)                                        | 395.9<br>(256.1 to 581.5)                        | 8.7<br>(5.6 to 12.2)                              | 0.9<br>(-1.9 to 4.2)                             |
| <b>Non-communicable diseases</b>                                        | <b>517,935.1</b><br><b>(508,172.1 to 527,920.7)</b> | <b>1,825,947.0†</b><br><b>(1,392,250.4 to 2,329,278.3)</b> | <b>17,286.6</b><br><b>(12,210.7 to 23,494.2)</b> | <b>8.5</b><br><b>(7.5 to 9.7)</b>                 | <b>0.8</b><br><b>(-0.2 to 1.8)</b>               |
| <b>Neoplasms</b>                                                        | <b>108.7</b><br><b>(97.5 to 116.6)</b>              | <b>57.5</b><br><b>(50.2 to 61.7)</b>                       | <b>19.9</b><br><b>(14.0 to 27.2)</b>             | <b>15.0</b><br><b>(3.2 to 24.8)</b>               | <b>6.8</b><br><b>(-4.2 to 15.9)</b>              |
| Lip and oral cavity cancer                                              | --                                                  | --                                                         | --                                               | --                                                | --                                               |
| Nasopharynx cancer                                                      | 2.0<br>(1.8 to 2.2)                                 | 0.5<br>(0.5 to 0.6)                                        | 0.2<br>(0.1 to 0.3)                              | -6.0<br>(-18.4 to 10.7)                           | -12.7<br>(-24.3 to 2.8)                          |
| Other pharynx cancer                                                    | --                                                  | --                                                         | --                                               | --                                                | --                                               |
| Oesophageal cancer                                                      | --                                                  | --                                                         | --                                               | --                                                | --                                               |
| Stomach cancer                                                          | --                                                  | --                                                         | --                                               | --                                                | --                                               |
| Colon and rectum cancer                                                 | --                                                  | --                                                         | --                                               | --                                                | --                                               |
| Liver cancer                                                            | 0.7<br>(0.6 to 0.8)                                 | 0.8<br>(0.7 to 0.8)                                        | 0.2<br>(0.1 to 0.2)                              | 12.8<br>(-7.1 to 29.0)                            | 4.8<br>(-13.7 to 19.8)                           |
| Liver cancer due to hepatitis B                                         | 0.3<br>(0.2 to 0.4)                                 | 0.2<br>(0.1 to 0.3)                                        | < 0.05<br>(< 0.05 to 0.1)                        | 16.1<br>(-2.4 to 36.4)                            | 7.8<br>(-9.3 to 26.7)                            |

| Cause                                              | Prevalence in thousands (95% UI)                 | Incidence in thousands (95% UI)                 | YLDs in thousands (95% UI)                    |                                                   |                                                  |
|----------------------------------------------------|--------------------------------------------------|-------------------------------------------------|-----------------------------------------------|---------------------------------------------------|--------------------------------------------------|
|                                                    | 2016 counts                                      | 2016 counts                                     | 2016 counts                                   | Percentage change in counts between 2006 and 2016 | Percentage change in rates between 2006 and 2016 |
| Liver cancer due to hepatitis C                    | < 0.05<br>(< 0.05 to < 0.05)                     | < 0.05<br>(< 0.05 to < 0.05)                    | < 0.05<br>(< 0.05 to < 0.05)                  | 9.1<br>(-7.9 to 25.8)                             | 1.4<br>(-14.5 to 16.8)                           |
| Liver cancer due to alcohol use                    | --                                               | --                                              | --                                            | --                                                | --                                               |
| Liver cancer due to other causes                   | 0.6<br>(0.5 to 0.7)                              | 0.5<br>(0.5 to 0.6)                             | 0.1<br>(0.1 to 0.2)                           | 11.8<br>(-8.9 to 27.3)                            | 3.8<br>(-15.4 to 18.2)                           |
| Gallbladder and biliary tract cancer               | --                                               | --                                              | --                                            | --                                                | --                                               |
| Pancreatic cancer                                  | --                                               | --                                              | --                                            | --                                                | --                                               |
| Larynx cancer                                      | --                                               | --                                              | --                                            | --                                                | --                                               |
| Tracheal, bronchus, and lung cancer                | --                                               | --                                              | --                                            | --                                                | --                                               |
| Malignant skin melanoma                            | --                                               | --                                              | --                                            | --                                                | --                                               |
| Non-melanoma skin cancer                           | --                                               | --                                              | --                                            | --                                                | --                                               |
| Non-melanoma skin cancer (squamous-cell carcinoma) | --                                               | --                                              | --                                            | --                                                | --                                               |
| Non-melanoma skin cancer (basal-cell carcinoma)    | --                                               | --                                              | --                                            | --                                                | --                                               |
| Breast cancer                                      | --                                               | --                                              | --                                            | --                                                | --                                               |
| Cervical cancer                                    | --                                               | --                                              | --                                            | --                                                | --                                               |
| Uterine cancer                                     | --                                               | --                                              | --                                            | --                                                | --                                               |
| Ovarian cancer                                     | --                                               | --                                              | --                                            | --                                                | --                                               |
| Prostate cancer                                    | --                                               | --                                              | --                                            | --                                                | --                                               |
| Testicular cancer                                  | --                                               | --                                              | --                                            | --                                                | --                                               |
| Kidney cancer                                      | 16.8<br>(14.8 to 18.4)                           | 4.0<br>(3.6 to 4.4)                             | 1.4<br>(0.9 to 1.9)                           | 14.9<br>(2.2 to 25.6)                             | 6.7<br>(-5.1 to 16.6)                            |
| Bladder cancer                                     | --                                               | --                                              | --                                            | --                                                | --                                               |
| Brain and nervous system cancer                    | 29.3<br>(24.5 to 32.3)                           | 12.1<br>(10.4 to 13.2)                          | 3.8<br>(2.6 to 5.2)                           | 24.8<br>(15.2 to 34.6)                            | 15.9<br>(7.0 to 25.0)                            |
| Thyroid cancer                                     | --                                               | --                                              | --                                            | --                                                | --                                               |
| Mesothelioma                                       | --                                               | --                                              | --                                            | --                                                | --                                               |
| Hodgkin lymphoma                                   | 7.1<br>(5.1 to 9.1)                              | 1.9<br>(1.4 to 2.5)                             | 0.7<br>(0.4 to 1.0)                           | -17.0<br>(-31.4 to 4.8)                           | -22.9<br>(-36.3 to -2.6)                         |
| Non-Hodgkin's lymphoma                             | 24.5<br>(19.5 to 27.9)                           | 7.3<br>(5.9 to 8.3)                             | 2.3<br>(1.5 to 3.1)                           | 18.8<br>(1.1 to 34.7)                             | 10.3<br>(-6.1 to 25.1)                           |
| Multiple myeloma                                   | --                                               | --                                              | --                                            | --                                                | --                                               |
| Leukaemia                                          | 70.8<br>(57.8 to 79.4)                           | 18.4<br>(15.3 to 20.3)                          | 7.7<br>(5.2 to 10.7)                          | 9.2<br>(-7.8 to 25.4)                             | 1.4<br>(-14.4 to 16.5)                           |
| Acute lymphoid leukaemia                           | 35.8<br>(30.9 to 39.0)                           | 9.2<br>(8.0 to 10.0)                            | 4.2<br>(2.9 to 5.8)                           | 17.8<br>(-3.9 to 33.5)                            | 9.4<br>(-10.7 to 24.0)                           |
| Chronic lymphoid leukaemia                         | --                                               | --                                              | --                                            | --                                                | --                                               |
| Acute myeloid leukaemia                            | 4.6<br>(3.7 to 5.2)                              | 3.2<br>(2.6 to 3.6)                             | 0.9<br>(0.6 to 1.2)                           | 11.2<br>(-5.6 to 25.5)                            | 3.3<br>(-12.3 to 16.6)                           |
| Chronic myeloid leukaemia                          | --                                               | --                                              | --                                            | --                                                | --                                               |
| Other leukaemia                                    | 30.4<br>(22.5 to 36.1)                           | 5.9<br>(4.4 to 7.0)                             | 2.6<br>(1.6 to 3.7)                           | -3.1<br>(-19.3 to 19.0)                           | -10.0<br>(-25.1 to 10.5)                         |
| Other neoplasms                                    | 46.8<br>(40.6 to 50.4)                           | 12.5<br>(11.0 to 13.4)                          | 3.7<br>(2.5 to 5.1)                           | 26.7<br>(9.9 to 38.4)                             | 17.7<br>(2.0 to 28.5)                            |
| <b>Cardiovascular diseases</b>                     | <b>2,976.9</b><br><b>(2,620.8 to 3,359.9)</b>    | <b>659.8†</b><br><b>(601.8 to 727.3)</b>        | <b>197.0</b><br><b>(130.2 to 282.7)</b>       | <b>11.9</b><br><b>(8.9 to 14.9)</b>               | <b>3.9</b><br><b>(1.1 to 6.7)</b>                |
| Rheumatic heart disease                            | 1,229.7<br>(1,079.8 to 1,386.0)                  | 237.5<br>(209.6 to 267.2)                       | 59.0<br>(36.5 to 86.9)                        | 11.8<br>(6.4 to 17.4)                             | 3.9<br>(-1.2 to 9.0)                             |
| Ischaemic heart disease                            | 278.0<br>(252.2 to 307.1)                        | 201.3<br>(174.5 to 234.5)                       | 16.6<br>(10.9 to 24.5)                        | 9.1<br>(1.2 to 17.9)                              | 1.3<br>(-6.0 to 9.5)                             |
| Cerebrovascular disease                            | 106.8<br>(82.3 to 137.7)                         | 51.7‡<br>(29.3 to 79.9)                         | 27.9<br>(18.1 to 40.0)                        | 2.3<br>(-4.0 to 7.3)                              | 5.0<br>(-10.8 to -0.4)                           |
| Ischaemic stroke                                   | 98.0<br>(66.3 to 135.8)                          | 32.0‡<br>(13.1 to 57.5)                         | 15.3<br>(9.1 to 23.6)                         | 7.5<br>(0.6 to 12.8)                              | -0.1<br>(-6.6 to 4.7)                            |
| Hemorrhagic stroke                                 | 83.5<br>(60.1 to 112.1)                          | 19.7‡<br>(8.2 to 36.0)                          | 12.6<br>(8.0 to 18.6)                         | -3.5<br>(-13.4 to 5.2)                            | -10.3<br>(-19.6 to -2.3)                         |
| Hypertensive heart disease                         | 0.1<br>(< 0.05 to < 0.05)                        | --                                              | < 0.05<br>(< 0.05 to < 0.05)                  | 24.2<br>(18.4 to 30.8)                            | 15.3<br>(9.9 to 21.5)                            |
| Cardiomyopathy and myocarditis                     | 94.9<br>(71.5 to 125.6)                          | 109.1†<br>(81.0 to 143.7)                       | 10.0<br>(5.9 to 16.1)                         | 8.8<br>(7.0 to 10.6)                              | 1.1<br>(-0.6 to 2.7)                             |
| Myocarditis                                        | 92.7<br>(68.9 to 122.8)                          | 109.1<br>(81.0 to 143.7)                        | 7.3<br>(4.3 to 11.6)                          | 8.8<br>(6.6 to 11.0)                              | 1.0<br>(-1.0 to 3.1)                             |
| Alcoholic cardiomyopathy                           | --                                               | --                                              | --                                            | --                                                | --                                               |
| Other cardiomyopathy                               | 30.3<br>(20.1 to 43.8)                           | --                                              | 2.7<br>(1.6 to 4.5)                           | 9.0<br>(7.4 to 10.4)                              | 1.2<br>(-0.2 to 2.6)                             |
| Atrial fibrillation and flutter                    | --                                               | --                                              | --                                            | --                                                | --                                               |
| Peripheral vascular disease                        | --                                               | --                                              | --                                            | --                                                | --                                               |
| Endocarditis                                       | 4.6<br>(3.5 to 5.7)                              | 60.1<br>(44.4 to 74.9)                          | 0.2<br>(0.1 to 0.4)                           | 2.3<br>(-1.1 to 5.3)                              | -5.0<br>(-8.2 to -2.2)                           |
| Other cardiovascular and circulatory diseases      | 1,510.8<br>(920.3 to 2,297.6)                    | --                                              | 83.2<br>(44.4 to 137.8)                       | 16.6<br>(11.3 to 21.8)                            | 8.3<br>(3.4 to 13.1)                             |
| <b>Chronic respiratory diseases</b>                | <b>49,863.2</b><br><b>(45,965.3 to 55,587.5)</b> | <b>9,406.2†</b><br><b>(7,763.6 to 11,587.5)</b> | <b>2,150.8</b><br><b>(1,433.0 to 3,094.4)</b> | <b>15.7</b><br><b>(13.4 to 18.1)</b>              | <b>7.5</b><br><b>(5.3 to 9.6)</b>                |
| Chronic obstructive pulmonary disease              | 1,016.9<br>(909.4 to 1,133.4)                    | 134.9<br>(116.6 to 154.8)                       | 89.9<br>(75.4 to 104.0)                       | 2.5<br>(-4.7 to 10.6)                             | -4.8<br>(-11.5 to 2.7)                           |
| Pneumoconiosis                                     | --                                               | --                                              | --                                            | --                                                | --                                               |
| Silicosis                                          | --                                               | --                                              | --                                            | --                                                | --                                               |

| Cause                                                          | Prevalence in thousands (95% UI)           | Incidence in thousands (95% UI)             | YLDs in thousands (95% UI)              |                                                   |                                                  |
|----------------------------------------------------------------|--------------------------------------------|---------------------------------------------|-----------------------------------------|---------------------------------------------------|--------------------------------------------------|
|                                                                | 2016 counts                                | 2016 counts                                 | 2016 counts                             | Percentage change in counts between 2006 and 2016 | Percentage change in rates between 2006 and 2016 |
| Asbestosis                                                     | --                                         | --                                          | --                                      | --                                                | --                                               |
| Coal workers pneumoconiosis                                    | --                                         | --                                          | --                                      | --                                                | --                                               |
| Other pneumoconiosis                                           | --                                         | --                                          | --                                      | --                                                | --                                               |
| Asthma                                                         | 47,965.0<br>(41,179.9 to 55,484.7)         | 9,268.2<br>(7,617.1 to 11,463.8)            | 1,928.3<br>(1,217.2 to 2,869.2)         | 15.1<br>(12.7 to 17.6)                            | 6.9<br>(4.6 to 9.2)                              |
| Interstitial lung disease and pulmonary sarcoidosis            | 57.8<br>(46.1 to 71.5)                     | 3.1<br>(1.9 to 4.5)                         | 6.5<br>(4.0 to 9.7)                     | 4.7<br>(3.5 to 5.9)                               | -2.8<br>(-3.9 to -1.7)                           |
| Other chronic respiratory diseases                             | --                                         | --                                          | 126.1<br>(106.3 to 145.5)               | 40.6<br>(31.3 to 51.0)                            | 30.6<br>(22.0 to 40.3)                           |
| <b>Cirrhosis and other chronic liver diseases</b>              | <b>600.4<br/>(555.8 to 650.3)</b>          | <b>7.1<br/>(5.0 to 9.8)</b>                 | <b>87.5<br/>(59.5 to 124.4)</b>         | <b>8.6<br/>(2.8 to 14.3)</b>                      | <b>0.8<br/>(-4.5 to 6.2)</b>                     |
| Cirrhosis and other chronic liver diseases due to hepatitis B  | 12.0<br>(9.1 to 15.3)                      | 0.2<br>(0.1 to 0.2)                         | 2.0<br>(1.2 to 2.9)                     | 12.9<br>(7.9 to 17.9)                             | 4.9<br>(0.2 to 9.5)                              |
| Cirrhosis and other chronic liver diseases due to hepatitis C  | 10.0<br>(7.4 to 13.3)                      | 0.1<br>(0.1 to 0.2)                         | 1.6<br>(0.9 to 2.4)                     | 10.7<br>(6.9 to 14.1)                             | 2.8<br>(-0.7 to 6.0)                             |
| Cirrhosis and other chronic liver diseases due to alcohol use  | --                                         | --                                          | --                                      | --                                                | --                                               |
| Cirrhosis and other chronic liver diseases due to other causes | 578.4<br>(534.8 to 627.0)                  | 6.8<br>(4.8 to 9.4)                         | 84.0<br>(56.8 to 119.6)                 | 8.4<br>(2.3 to 14.3)                              | 0.7<br>(-5.0 to 6.2)                             |
| <b>Digestive diseases</b>                                      | <b>7,242.6<br/>(6,349.0 to 8,127.0)</b>    | <b>6,063.2†<br/>(5,201.7 to 6,978.3)</b>    | <b>285.2<br/>(179.6 to 414.3)</b>       | <b>3.3<br/>(-0.5 to 7.3)</b>                      | <b>-4.0<br/>(-7.6 to -0.3)</b>                   |
| Peptic ulcer disease                                           | 264.8<br>(192.8 to 348.2)                  | 209.9<br>(136.4 to 291.0)                   | 8.2<br>(4.4 to 13.4)                    | -11.9<br>(-19.1 to -4.1)                          | -18.2<br>(-24.9 to -10.9)                        |
| Gastritis and duodenitis                                       | 3,162.6<br>(2,262.3 to 4,262.9)            | 2,221.9<br>(1,670.5 to 2,885.1)             | 40.0<br>(23.4 to 64.0)                  | 1.6<br>(-5.6 to 9.6)                              | -5.7<br>(-12.3 to 1.8)                           |
| Appendicitis                                                   | 68.6<br>(56.1 to 83.0)                     | 1,936.0<br>(1,536.3 to 2,367.9)             | 21.6<br>(13.8 to 30.8)                  | 5.2<br>(-6.8 to 17.8)                             | -2.2<br>(-13.4 to 9.4)                           |
| Paralytic ileus and intestinal obstruction                     | 8.3<br>(5.4 to 12.2)                       | 216.0<br>(138.6 to 315.0)                   | 2.7<br>(1.5 to 4.4)                     | 10.2<br>(7.5 to 12.2)                             | 2.3<br>(-0.1 to 4.2)                             |
| Inguinal, femoral, and abdominal hernia                        | 3,817.3<br>(2,336.0 to 5,566.5)            | 1,092.2<br>(737.7 to 1,494.8)               | 169.7<br>(97.8 to 264.6)                | 2.5<br>(-2.3 to 7.6)                              | -4.8<br>(-9.3 to -0.0)                           |
| Inflammatory bowel disease                                     | 28.5<br>(23.4 to 34.0)                     | 91.6<br>(76.3 to 111.2)                     | 4.5<br>(2.9 to 6.7)                     | 0.3<br>(-5.5 to 6.0)                              | -6.8<br>(-12.2 to -1.5)                          |
| Vascular intestinal disorders                                  | 2.8<br>(1.6 to 4.5)                        | 14.9<br>(9.4 to 22.4)                       | 0.9<br>(0.4 to 1.7)                     | 9.7<br>(8.2 to 11.2)                              | 1.9<br>(0.5 to 3.3)                              |
| Gallbladder and biliary diseases                               | 151.0<br>(103.8 to 213.6)                  | 222.8<br>(132.6 to 332.6)                   | 1.1<br>(0.6 to 1.9)                     | 0.7<br>(-2.7 to 3.6)                              | -6.5<br>(-9.6 to -3.8)                           |
| Pancreatitis                                                   | 6.6<br>(4.6 to 9.2)                        | 57.8<br>(39.9 to 79.6)                      | 0.9<br>(0.5 to 1.3)                     | 3.1<br>(-4.2 to 8.1)                              | -4.2<br>(-11.1 to 0.4)                           |
| Other digestive diseases                                       | --                                         | --                                          | 35.6<br>(22.4 to 51.6)                  | 13.2<br>(9.0 to 17.5)                             | 5.1<br>(1.2 to 9.2)                              |
| <b>Neurological disorders</b>                                  | <b>59,371.6<br/>(52,973.2 to 66,350.3)</b> | <b>49,338.8<br/>(36,288.7 to 66,500.3)</b>  | <b>1,661.1<br/>(1,090.3 to 2,360.4)</b> | <b>11.9<br/>(3.2 to 22.1)</b>                     | <b>3.9<br/>(-4.1 to 13.4)</b>                    |
| Alzheimer's disease and other dementias                        | --                                         | --                                          | --                                      | --                                                | --                                               |
| Parkinson's disease                                            | --                                         | --                                          | --                                      | --                                                | --                                               |
| Epilepsy                                                       | 2,406.8<br>(1,798.7 to 3,146.4)            | 341.3<br>(229.7 to 480.9)                   | 827.9<br>(519.9 to 1,251.8)             | 10.7<br>(-2.8 to 26.6)                            | 2.8<br>(-9.7 to 17.6)                            |
| Multiple sclerosis                                             | 3.6<br>(2.6 to 4.8)                        | 1.0<br>(0.7 to 1.4)                         | 1.0<br>(0.6 to 1.5)                     | 7.7<br>(5.4 to 9.5)                               | 0.0<br>(-2.1 to 1.7)                             |
| Motor neuron disease                                           | 12.7<br>(10.0 to 15.8)                     | 0.6<br>(0.4 to 0.9)                         | 2.7<br>(1.8 to 3.9)                     | 8.2<br>(7.0 to 9.6)                               | 0.5<br>(-0.6 to 1.8)                             |
| Migraine                                                       | 14,539.3<br>(13,058.8 to 15,923.5)         | 9,359.2<br>(8,373.5 to 10,291.4)            | 539.6<br>(323.5 to 804.9)               | 5.9<br>(2.5 to 9.2)                               | -1.7<br>(-4.8 to 1.5)                            |
| Tension-type headache                                          | 42,756.6<br>(29,721.8 to 59,128.1)         | 39,632.7<br>(26,653.4 to 57,031.4)          | 74.4<br>(36.8 to 135.7)                 | 3.5<br>(1.0 to 6.2)                               | -3.9<br>(-6.2 to -1.3)                           |
| Other neurological disorders                                   | 2.0<br>(0.9 to 3.9)                        | 4.0<br>(1.9 to 7.0)                         | 215.5<br>(135.7 to 325.2)               | 41.7<br>(24.5 to 61.9)                            | 31.6<br>(15.7 to 50.4)                           |
| <b>Mental and substance use disorders</b>                      | <b>43,639.7<br/>(41,908.6 to 45,509.6)</b> | <b>14,192.9†<br/>(12,027.0 to 16,543.4)</b> | <b>3,598.6<br/>(2,453.3 to 4,932.7)</b> | <b>7.7<br/>(6.4 to 9.0)</b>                       | <b>0.0<br/>(-1.1 to 1.2)</b>                     |
| Schizophrenia                                                  | --                                         | --                                          | --                                      | --                                                | --                                               |
| Alcohol use disorders                                          | 32.3<br>(29.9 to 34.9)                     | --                                          | 1.6<br>(1.0 to 2.3)                     | 10.3<br>(6.5 to 12.7)                             | 2.4<br>(-1.1 to 4.7)                             |
| Drug use disorders                                             | --                                         | --                                          | --                                      | --                                                | --                                               |
| Opioid use disorders                                           | --                                         | --                                          | --                                      | --                                                | --                                               |
| Cocaine use disorders                                          | --                                         | --                                          | --                                      | --                                                | --                                               |
| Amphetamine use disorders                                      | --                                         | --                                          | --                                      | --                                                | --                                               |
| Cannabis use disorders                                         | --                                         | --                                          | --                                      | --                                                | --                                               |
| Other drug use disorders                                       | --                                         | --                                          | --                                      | --                                                | --                                               |
| Depressive disorders                                           | 925.4<br>(766.2 to 1,157.4)                | 1,637.6<br>(1,026.1 to 2,489.1)             | 177.1<br>(99.7 to 289.2)                | 15.2<br>(10.3 to 21.1)                            | 7.0<br>(2.5 to 12.4)                             |
| Major depressive disorder                                      | 704.2<br>(418.0 to 1,123.4)                | 1,467.7<br>(845.1 to 2,311.9)               | 151.8<br>(78.6 to 261.3)                | 16.4<br>(10.6 to 22.9)                            | 8.1<br>(2.7 to 14.1)                             |
| Dysthymia                                                      | 251.7<br>(163.0 to 363.2)                  | 169.9<br>(105.2 to 257.2)                   | 25.3<br>(14.1 to 41.4)                  | 8.5<br>(-0.6 to 18.8)                             | 0.7<br>(-7.7 to 10.3)                            |
| Bipolar disorder                                               | --                                         | --                                          | --                                      | --                                                | --                                               |
| Anxiety disorders                                              | 9,252.2<br>(7,965.9 to 10,726.2)           | 4,101.7<br>(3,522.3 to 4,741.8)             | 930.5<br>(635.6 to 1,283.1)             | 8.1<br>(5.2 to 10.9)                              | 0.4<br>(-2.3 to 3.0)                             |
| Eating disorders                                               | 67.2<br>(47.8 to 101.6)                    | 76.4<br>(46.8 to 118.9)                     | 13.5<br>(6.6 to 24.8)                   | 15.5<br>(5.1 to 26.9)                             | 7.3<br>(-2.4 to 17.9)                            |
| Anorexia nervosa                                               | 56.6<br>(29.4 to 98.8)                     | 49.9<br>(25.0 to 86.4)                      | 12.5<br>(5.7 to 23.7)                   | 15.3<br>(4.2 to 27.8)                             | 7.0<br>(-3.3 to 18.7)                            |
| Bulimia nervosa                                                | 4.5<br>(2.1 to 8.4)                        | 26.5<br>(12.9 to 47.6)                      | 1.0<br>(0.4 to 2.1)                     | 18.6<br>(16.6 to 20.2)                            | 10.1<br>(8.3 to 11.6)                            |
| Autistic spectrum disorders                                    | 6,088.7<br>(5,772.6 to 6,327.9)            | 151.2<br>(82.7 to 242.9)                    | 890.8<br>(591.7 to 1,259.5)             | 7.7<br>(6.1 to 9.4)                               | 0.1<br>(-1.4 to 1.6)                             |
| Autism                                                         | 1,715.3<br>(1,449.9 to 2,017.6)            | 15.7<br>(7.2 to 29.0)                       | 448.7<br>(285.5 to 663.2)               | 7.6<br>(4.9 to 10.4)                              | -0.1<br>(-2.5 to 2.6)                            |
| Asperger syndrome and other autistic spectrum disorders        | 4,335.3<br>(3,524.9 to 5,256.4)            | 135.5<br>(66.9 to 227.9)                    | 442.1<br>(287.9 to 652.1)               | 7.9<br>(6.2 to 9.7)                               | 0.2<br>(-1.4 to 1.9)                             |

| Cause                                                      | Prevalence in thousands (95% UI)                    | Incidence in thousands (95% UI)                            | YLDs in thousands (95% UI)                     |                                                   |                                                  |
|------------------------------------------------------------|-----------------------------------------------------|------------------------------------------------------------|------------------------------------------------|---------------------------------------------------|--------------------------------------------------|
|                                                            | 2016 counts                                         | 2016 counts                                                | 2016 counts                                    | Percentage change in counts between 2006 and 2016 | Percentage change in rates between 2006 and 2016 |
| Attention-deficit/hyperactivity disorder                   | 9,558.7<br>(8,533.6 to 10,936.6)                    | 1,860.4<br>(1,660.4 to 2,132.2)                            | 116.4<br>(69.7 to 184.4)                       | 10.5<br>(8.0 to 13.0)                             | 2.6<br>(0.3 to 4.9)                              |
| Conduct disorder                                           | 8,522.9<br>(6,256.9 to 11,296.5)                    | 6,365.6<br>(4,493.2 to 8,520.7)                            | 1,043.3<br>(598.0 to 1,664.1)                  | 9.2<br>(7.0 to 11.6)                              | 1.4<br>(-0.6 to 3.7)                             |
| Idiopathic developmental intellectual disability           | 10,735.9<br>(6,519.2 to 15,306.6)                   | --                                                         | 425.6<br>(196.6 to 737.0)                      | -0.2<br>(-4.4 to 2.7)                             | -7.3<br>(-11.2 to -4.7)                          |
| Other mental and substance use disorders                   | --                                                  | --                                                         | --                                             | --                                                | --                                               |
| <b>Diabetes, urogenital, blood, and endocrine diseases</b> | <b>178,779.3</b><br><b>(176,721.1 to 181,185.3)</b> | <b>15,170.8†</b><br><b>(11,205.4 to 20,161.3)</b>          | <b>1,380.2</b><br><b>(897.9 to 2,023.2)</b>    | <b>3.4</b><br><b>(0.6 to 6.3)</b>                 | <b>-4.0</b><br><b>(-6.5 to -1.3)</b>             |
| Diabetes mellitus                                          | 456.8<br>(316.0 to 622.2)                           | 179.2<br>(114.3 to 251.4)                                  | 22.0<br>(11.8 to 36.5)                         | 8.1<br>(2.3 to 13.7)                              | 0.4<br>(-5.0 to 5.6)                             |
| Acute glomerulonephritis                                   | 6.3<br>(4.2 to 8.9)                                 | 96.5<br>(65.8 to 134.6)                                    | 0.3<br>(0.2 to 0.5)                            | 3.0<br>(0.7 to 5.9)                               | -4.4<br>(-6.5 to -1.6)                           |
| Chronic kidney disease                                     | 345.6<br>(244.7 to 471.0)                           | 108.3<br>(73.0 to 155.5)                                   | 25.3<br>(14.5 to 40.1)                         | 8.3<br>(3.7 to 12.6)                              | 0.6<br>(-3.6 to 4.5)                             |
| Chronic kidney disease due to diabetes mellitus            | 12.8<br>(6.8 to 21.4)                               | 3.9<br>(2.0 to 6.7)                                        | 1.0<br>(0.5 to 1.8)                            | 6.0<br>(-0.1 to 12.5)                             | -1.6<br>(-7.2 to 4.5)                            |
| Chronic kidney disease due to hypertension                 | 72.4<br>(44.4 to 108.8)                             | 43.6<br>(25.5 to 64.9)                                     | 0.4<br>(0.2 to 0.7)                            | 4.5<br>(-1.1 to 9.6)                              | -3.0<br>(-8.2 to 1.8)                            |
| Chronic kidney disease due to glomerulonephritis           | 71.1<br>(43.2 to 105.5)                             | 1.7<br>(0.9 to 2.7)                                        | 10.3<br>(5.4 to 17.1)                          | 8.9<br>(4.5 to 13.3)                              | 1.2<br>(-3.0 to 5.2)                             |
| Chronic kidney disease due to other causes                 | 189.3<br>(124.0 to 276.9)                           | 59.2<br>(38.1 to 89.8)                                     | 13.6<br>(7.7 to 22.6)                          | 8.2<br>(3.3 to 12.5)                              | 0.5<br>(-4.0 to 4.5)                             |
| Urinary diseases and male infertility                      | 314.3<br>(270.5 to 383.3)                           | 14,491.1†<br>(10,507.7 to 19,483.3)                        | 15.0<br>(9.1 to 24.3)                          | -4.0<br>(-10.0 to 3.1)                            | -10.8<br>(-16.4 to -4.2)                         |
| Interstitial nephritis and urinary tract infections        | 270.8<br>(192.7 to 367.2)                           | 13,968.7<br>(9,980.2 to 18,944.0)                          | 9.2<br>(5.2 to 15.6)                           | 6.6<br>(-1.1 to 15.7)                             | -1.0<br>(-8.1 to 7.4)                            |
| Urolithiasis                                               | 19.5<br>(13.4 to 27.2)                              | 522.3<br>(360.5 to 748.9)                                  | 1.5<br>(0.9 to 2.4)                            | 2.8<br>(1.7 to 3.9)                               | -4.5<br>(-5.6 to -3.5)                           |
| Benign prostatic hyperplasia                               | --                                                  | --                                                         | --                                             | --                                                | --                                               |
| Male infertility                                           | --                                                  | --                                                         | --                                             | --                                                | --                                               |
| Other urinary diseases                                     | --                                                  | --                                                         | 4.3<br>(2.6 to 7.0)                            | -22.1<br>(-27.0 to -16.4)                         | -27.7<br>(-32.2 to -22.3)                        |
| Gynecological diseases                                     | --                                                  | --                                                         | --                                             | --                                                | --                                               |
| Uterine fibroids                                           | --                                                  | --                                                         | --                                             | --                                                | --                                               |
| Polycystic ovarian syndrome                                | --                                                  | --                                                         | --                                             | --                                                | --                                               |
| Female infertility                                         | --                                                  | --                                                         | --                                             | --                                                | --                                               |
| Endometriosis                                              | --                                                  | --                                                         | --                                             | --                                                | --                                               |
| Genital prolapse                                           | --                                                  | --                                                         | --                                             | --                                                | --                                               |
| Premenstrual syndrome                                      | --                                                  | --                                                         | --                                             | --                                                | --                                               |
| Other gynecological diseases                               | --                                                  | --                                                         | --                                             | --                                                | --                                               |
| Hemoglobinopathies and hemolytic anaemias                  | 172,031.6<br>(169,839.1 to 174,424.6)               | --                                                         | 967.6<br>(630.8 to 1,445.0)                    | 2.7<br>(-0.7 to 6.2)                              | -4.6<br>(-7.8 to -1.4)                           |
| Thalassemias                                               | 69.8<br>(64.7 to 75.7)                              | --                                                         | 4.4<br>(2.9 to 6.5)                            | -2.4<br>(-9.8 to 5.3)                             | -9.3<br>(-16.2 to -2.2)                          |
| Thalassaemias trait                                        | 22,678.8<br>(21,819.5 to 23,683.5)                  | --                                                         | 385.3<br>(242.8 to 579.2)                      | -0.8<br>(-6.5 to 5.0)                             | -7.9<br>(-13.2 to -2.5)                          |
| Sickle cell disorders                                      | 928.2<br>(840.6 to 1,070.2)                         | --                                                         | 77.5<br>(52.3 to 110.8)                        | 17.7<br>(9.0 to 26.7)                             | 9.3<br>(1.2 to 17.7)                             |
| Sickle cell trait                                          | 51,379.8<br>(46,907.9 to 57,162.0)                  | --                                                         | 273.8<br>(176.2 to 407.4)                      | 4.2<br>(0.5 to 7.9)                               | -3.2<br>(-6.7 to 0.2)                            |
| G6PD deficiency                                            | 33,857.8<br>(32,511.5 to 35,468.9)                  | --                                                         | 3.6<br>(2.4 to 5.3)                            | -7.9<br>(-14.9 to -0.7)                           | -14.5<br>(-21.0 to -7.8)                         |
| G6PD trait                                                 | 79,732.6<br>(78,413.0 to 81,221.3)                  | --                                                         | < 0.05<br>(< 0.05 to 0.1)                      | 8.9<br>(3.9 to 14.5)                              | 1.2<br>(-3.5 to 6.3)                             |
| Other hemoglobinopathies and hemolytic anaemias            | 5,575.0<br>(5,195.5 to 5,961.8)                     | --                                                         | 222.9<br>(145.2 to 326.5)                      | 3.0<br>(-0.7 to 7.6)                              | -4.3<br>(-7.8 to -0.1)                           |
| Endocrine, metabolic, blood, and immune disorders          | 8,894.2<br>(8,246.8 to 9,620.1)                     | 295.6<br>(191.6 to 433.7)                                  | 350.0<br>(226.3 to 502.3)                      | 4.9<br>(2.1 to 7.8)                               | -2.6<br>(-5.1 to 0.1)                            |
| <b>Musculoskeletal disorders</b>                           | <b>2,257.2</b><br><b>(1,774.6 to 2,950.8)</b>       | <b>2,028.0</b><br><b>(1,321.4 to 2,943.9)</b>              | <b>251.5</b><br><b>(145.6 to 400.1)</b>        | <b>4.0</b><br><b>(-0.2 to 7.7)</b>                | <b>3.4</b><br><b>(-7.4 to 0.0)</b>               |
| Rheumatoid arthritis                                       | 32.0<br>(21.4 to 44.4)                              | 19.2<br>(12.8 to 26.6)                                     | 8.4<br>(4.9 to 12.8)                           | 8.0<br>(4.7 to 10.7)                              | 0.3<br>(-2.8 to 2.9)                             |
| Osteoarthritis                                             | --                                                  | --                                                         | --                                             | --                                                | --                                               |
| Low back and neck pain                                     | 2,255.2<br>(1,772.3 to 2,950.0)                     | 2,008.7<br>(1,303.6 to 2,926.8)                            | 243.2<br>(139.4 to 391.1)                      | 3.9<br>(-0.6 to 7.7)                              | -3.5<br>(-7.6 to 0.0)                            |
| Low back pain                                              | 1,940.2<br>(1,191.9 to 2,927.4)                     | 1,779.1<br>(1,099.6 to 2,682.4)                            | 210.5<br>(113.7 to 352.1)                      | 3.4<br>(-1.6 to 7.8)                              | -3.9<br>(-8.7 to 0.1)                            |
| Neck pain                                                  | 305.2<br>(191.0 to 443.9)                           | 229.6<br>(142.1 to 331.0)                                  | 32.7<br>(16.7 to 53.7)                         | 6.7<br>(2.2 to 11.0)                              | -0.9<br>(-5.0 to 3.1)                            |
| Gout                                                       | --                                                  | --                                                         | --                                             | --                                                | --                                               |
| Other musculoskeletal disorders                            | --                                                  | --                                                         | --                                             | --                                                | --                                               |
| <b>Other non-communicable diseases</b>                     | <b>420,125.7</b><br><b>(402,355.7 to 439,008.1)</b> | <b>1,729,022.9†</b><br><b>(1,298,351.5 to 2,233,415.6)</b> | <b>7,654.8</b><br><b>(5,104.6 to 10,892.2)</b> | <b>7.6</b><br><b>(6.7 to 8.3)</b>                 | <b>-0.1</b><br><b>(-0.9 to 0.6)</b>              |
| Congenital anomalies                                       | 9,600.5<br>(9,152.5 to 10,028.3)                    | --                                                         | 1,075.1<br>(773.6 to 1,431.5)                  | 5.6<br>(3.2 to 8.0)                               | -1.9<br>(-4.2 to 0.3)                            |
| Neural tube defects                                        | 589.1<br>(531.5 to 652.4)                           | --                                                         | 175.7<br>(121.9 to 238.1)                      | 10.5<br>(5.4 to 15.8)                             | 2.6<br>(-2.1 to 7.5)                             |
| Congenital heart anomalies                                 | 2,147.3<br>(1,865.5 to 2,474.6)                     | --                                                         | 101.9<br>(41.5 to 174.7)                       | 5.9<br>(2.5 to 9.3)                               | -1.7<br>(-4.8 to 1.5)                            |
| Orofacial clefts                                           | 305.9<br>(271.1 to 341.0)                           | --                                                         | 4.2<br>(2.8 to 6.1)                            | -1.8<br>(-4.9 to 1.4)                             | -8.8<br>(-11.7 to -5.8)                          |
| Down's syndrome                                            | 223.9<br>(195.2 to 259.1)                           | --                                                         | 19.2<br>(12.8 to 27.3)                         | 7.2<br>(4.0 to 10.3)                              | -0.5<br>(-3.4 to 2.4)                            |
| Turner syndrome                                            | 346.7<br>(302.9 to 396.4)                           | --                                                         | 4.7<br>(1.9 to 8.5)                            | 3.8<br>(-8.9 to 18.4)                             | -3.6<br>(-15.4 to 10.0)                          |
| Klinefelter syndrome                                       | 456.7<br>(393.5 to 526.6)                           | --                                                         | 1.2<br>(0.6 to 2.3)                            | 8.2<br>(-1.2 to 18.2)                             | 0.5<br>(-8.2 to 9.8)                             |

| Cause                                         | Prevalence in thousands (95% UI)                 | Incidence in thousands (95% UI)                   | YLDs in thousands (95% UI)                  |                                                                    |                                                                  |
|-----------------------------------------------|--------------------------------------------------|---------------------------------------------------|---------------------------------------------|--------------------------------------------------------------------|------------------------------------------------------------------|
|                                               | 2016 counts<br>(850.5 to 1,158.6)                | 2016 counts                                       | 2016 counts<br>(71.8 to 144.0)              | Percentage change in counts between 2006 and 2016<br>(9.7 to 16.5) | Percentage change in rates between 2006 and 2016<br>(1.8 to 8.2) |
| Other chromosomal abnormalities               | 995.7                                            | --                                                | 105.8                                       | 13.1                                                               | 5.0                                                              |
| Congenital musculoskeletal and limb anomalies | 940.6<br>(854.5 to 1,034.5)                      | --                                                | 129.0<br>(86.9 to 179.3)                    | 9.1<br>(5.0 to 13.1)                                               | 1.3<br>(-2.4 to 5.0)                                             |
| Urogenital congenital anomalies               | 1,258.4<br>(1,119.8 to 1,422.9)                  | --                                                | 38.6<br>(23.1 to 59.9)                      | 5.3<br>(2.9 to 7.6)                                                | -2.2<br>(-4.5 to -0.1)                                           |
| Digestive congenital anomalies                | 755.8<br>(676.5 to 837.0)                        | --                                                | 35.2<br>(22.9 to 49.9)                      | 6.1<br>(0.9 to 11.8)                                               | -1.4<br>(-6.3 to 3.8)                                            |
| Other congenital anomalies                    | 3,318.3<br>(2,345.3 to 4,695.9)                  | --                                                | 459.5<br>(304.0 to 668.3)                   | 1.3<br>(-2.7 to 5.6)                                               | -5.9<br>(-9.6 to -1.9)                                           |
| Skin and subcutaneous diseases                | 174,715.9<br>(167,354.6 to 181,192.8)            | 369,758.8<br>(318,604.8 to 429,378.5)             | 4,799.2<br>(3,023.9 to 7,064.4)             | 9.2<br>(8.4 to 10.1)                                               | 1.4<br>(0.7 to 2.3)                                              |
| Dermatitis                                    | 41,988.6<br>(37,439.5 to 46,865.3)               | 12,081.5<br>(9,954.4 to 14,307.1)                 | 1,821.8<br>(1,025.4 to 3,080.4)             | 10.8<br>(9.1 to 12.4)                                              | 2.9<br>(1.3 to 4.4)                                              |
| Psoriasis                                     | 2,789.3<br>(2,497.7 to 3,057.8)                  | 504.2<br>(436.8 to 578.0)                         | 254.2<br>(179.2 to 344.6)                   | 13.8<br>(9.1 to 18.7)                                              | 5.7<br>(1.3 to 10.2)                                             |
| Cellulitis                                    | 214.9<br>(170.7 to 265.0)                        | 3,945.5<br>(3,179.9 to 4,760.4)                   | 12.6<br>(7.7 to 19.1)                       | 7.7<br>(2.7 to 13.5)                                               | 0.0<br>(-4.6 to 5.4)                                             |
| Pyoderma                                      | 2,039.8<br>(1,826.2 to 2,251.5)                  | 38,081.7<br>(34,496.4 to 41,445.6)                | 11.7<br>(4.6 to 25.4)                       | 19.6<br>(16.1 to 22.9)                                             | 11.1<br>(7.9 to 14.2)                                            |
| Scabies                                       | 15,919.3<br>(10,806.4 to 22,347.9)               | 49,410.0<br>(33,420.3 to 70,115.8)                | 415.6<br>(213.0 to 729.6)                   | 2.0<br>(0.5 to 3.7)                                                | -5.3<br>(-6.7 to -3.7)                                           |
| Fungal skin diseases                          | 72,070.2<br>(53,712.6 to 95,660.3)               | 185,156.5<br>(139,832.2 to 241,961.1)             | 413.4<br>(156.9 to 877.6)                   | 12.7<br>(11.7 to 13.5)                                             | 4.6<br>(3.7 to 5.4)                                              |
| Viral skin diseases                           | 31,469.0<br>(28,758.4 to 34,434.4)               | 36,431.5<br>(32,907.5 to 40,391.9)                | 979.8<br>(595.3 to 1,469.0)                 | 7.6<br>(6.7 to 8.5)                                                | -0.0<br>(-0.9 to 0.8)                                            |
| Acne vulgaris                                 | 7,567.4<br>(6,280.2 to 8,987.0)                  | 10,620.9<br>(8,601.1 to 12,703.9)                 | 197.8<br>(128.4 to 304.0)                   | 11.1<br>(7.7 to 14.7)                                              | 3.2<br>(-0.0 to 6.6)                                             |
| Alopecia areata                               | 402.7<br>(356.0 to 456.9)                        | 711.0<br>(621.5 to 806.0)                         | 13.5<br>(8.3 to 20.8)                       | 7.7<br>(1.4 to 14.7)                                               | 0.0<br>(-5.9 to 6.5)                                             |
| Pruritus                                      | 3,624.0<br>(2,408.7 to 5,396.6)                  | 2,639.3<br>(1,715.0 to 3,993.3)                   | 39.5<br>(15.7 to 80.0)                      | 8.3<br>(6.0 to 10.4)                                               | 0.6<br>(-1.5 to 2.6)                                             |
| Urticaria                                     | 8,914.6<br>(6,234.9 to 12,614.1)                 | 14,563.3<br>(10,302.5 to 20,463.9)                | 546.2<br>(301.7 to 871.8)                   | 7.2<br>(5.3 to 8.9)                                                | -0.5<br>(-2.2 to 1.2)                                            |
| Decubitus ulcer                               | 33.9<br>(22.6 to 47.0)                           | 116.7<br>(79.0 to 162.8)                          | 6.0<br>(3.5 to 9.5)                         | 6.0<br>(4.8 to 7.0)                                                | -1.5<br>(-2.6 to -0.7)                                           |
| Other skin and subcutaneous diseases          | 15,417.4<br>(13,974.0 to 17,016.2)               | 15,496.7<br>(13,946.6 to 17,099.9)                | 87.2<br>(41.1 to 163.1)                     | 13.3<br>(11.8 to 14.9)                                             | 5.2<br>(3.8 to 6.7)                                              |
| Sense organ diseases                          | 43,986.5<br>(41,928.2 to 46,056.3)               | 72,349.7<br>(64,169.6 to 80,991.9)                | 1,450.7<br>(972.5 to 2,105.4)               | 4.0<br>(2.0 to 6.0)                                                | -3.4<br>(-5.3 to -1.5)                                           |
| Glaucoma                                      | --                                               | --                                                | --                                          | --                                                                 | --                                                               |
| Cataract                                      | --                                               | --                                                | --                                          | --                                                                 | --                                                               |
| Macular degeneration                          | --                                               | --                                                | --                                          | --                                                                 | --                                                               |
| Refraction and accommodation disorders        | 27,796.0<br>(24,550.7 to 31,481.0)               | --                                                | 622.6<br>(373.6 to 990.0)                   | 3.5<br>(1.9 to 4.9)                                                | -3.9<br>(-5.3 to -2.6)                                           |
| Age-related and other hearing loss            | 12,024.2<br>(7,992.8 to 16,633.2)                | --                                                | 663.1<br>(415.8 to 981.5)                   | 3.4<br>(-0.6 to 7.4)                                               | -4.0<br>(-7.6 to -0.3)                                           |
| Other vision loss                             | 467.4<br>(316.6 to 653.7)                        | --                                                | 21.5<br>(12.4 to 32.6)                      | 8.1<br>(2.8 to 13.8)                                               | 0.4<br>(-4.5 to 5.7)                                             |
| Other sense organ diseases                    | 5,412.9<br>(4,774.8 to 6,083.9)                  | 72,349.7<br>(64,169.6 to 80,991.9)                | 143.5<br>(86.9 to 220.0)                    | 9.0<br>(5.8 to 12.3)                                               | 1.3<br>(-1.7 to 4.3)                                             |
| Oral disorders                                | 316,401.4<br>(286,327.5 to 352,581.8)            | 1,286,914.5*<br>(873,624.0 to 1,798,610.1)        | 329.8<br>(187.2 to 539.6)                   | 6.6<br>(5.1 to 7.9)                                                | -1.0<br>(-2.4 to 0.2)                                            |
| Caries of deciduous teeth                     | 261,410.8<br>(191,631.7 to 339,769.4)            | 1,121,157.4<br>(713,500.7 to 1,612,830.8)         | 68.9<br>(28.7 to 139.2)                     | 8.2<br>(4.8 to 10.6)                                               | 0.5<br>(-2.7 to 2.7)                                             |
| Caries of permanent teeth                     | 77,744.2<br>(55,549.4 to 104,471.1)              | 165,757.1<br>(96,478.4 to 260,406.4)              | 54.5<br>(22.6 to 112.5)                     | 0.8<br>(-1.9 to 3.2)                                               | -6.4<br>(-8.9 to -4.1)                                           |
| Periodontal disease                           | --                                               | --                                                | --                                          | --                                                                 | --                                                               |
| Edentulism and severe tooth loss              | --                                               | --                                                | --                                          | --                                                                 | --                                                               |
| Other oral disorders                          | 6,873.6<br>(5,878.9 to 8,012.7)                  | --                                                | 206.3<br>(125.3 to 323.6)                   | 7.7<br>(5.9 to 9.4)                                                | 0.0<br>(-1.6 to 1.6)                                             |
| <b>Injuries</b>                               | <b>32,842.1</b><br><b>(29,336.2 to 36,963.0)</b> | <b>46,750.3*</b><br><b>(39,950.9 to 54,884.2)</b> | <b>1,326.7</b><br><b>(859.0 to 1,978.6)</b> | <b>10.4</b><br><b>(8.7 to 12.1)</b>                                | <b>2.6</b><br><b>(1.0 to 4.1)</b>                                |
| <b>Transport injuries</b>                     | <b>2,440.0</b><br><b>(2,027.9 to 3,013.3)</b>    | <b>3,711.8</b><br><b>(2,818.5 to 4,799.0)</b>     | <b>151.0</b><br><b>(95.4 to 230.7)</b>      | <b>5.8</b><br><b>(3.5 to 7.9)</b>                                  | <b>-1.8</b><br><b>(-3.9 to 0.3)</b>                              |
| Road injuries                                 | 1,011.4<br>(868.1 to 1,150.1)                    | 2,709.7<br>(1,858.0 to 3,619.4)                   | 64.7<br>(39.8 to 98.9)                      | 3.4<br>(-0.3 to 6.9)                                               | -3.9<br>(-7.4 to -0.8)                                           |
| Pedestrian road injuries                      | 227.6<br>(171.6 to 292.7)                        | 530.5<br>(316.7 to 817.2)                         | 14.8<br>(8.7 to 22.9)                       | -5.2<br>(-9.5 to -0.6)                                             | -11.9<br>(-16.0 to -7.7)                                         |
| Cyclist road injuries                         | 256.5<br>(190.3 to 321.4)                        | 901.4<br>(532.6 to 1,353.0)                       | 15.5<br>(9.0 to 24.1)                       | 4.4<br>(-0.4 to 9.0)                                               | -3.1<br>(-7.5 to 1.2)                                            |
| Motorcyclist road injuries                    | 181.8<br>(139.6 to 235.3)                        | 297.1<br>(160.2 to 501.1)                         | 10.8<br>(6.4 to 17.5)                       | 12.5<br>(9.0 to 15.8)                                              | 4.5<br>(1.2 to 7.6)                                              |
| Motor vehicle road injuries                   | 230.9<br>(178.2 to 294.8)                        | 626.9<br>(386.2 to 950.2)                         | 17.0<br>(10.1 to 25.4)                      | 1.7<br>(-2.6 to 5.9)                                               | -5.6<br>(-9.6 to -1.6)                                           |
| Other road injuries                           | 114.6<br>(79.7 to 163.7)                         | 353.8<br>(186.3 to 601.8)                         | 6.5<br>(3.8 to 10.8)                        | 14.4<br>(9.7 to 18.8)                                              | 6.3<br>(1.9 to 10.4)                                             |
| Other transport injuries                      | 1,428.5<br>(1,047.5 to 1,954.1)                  | 1,002.1<br>(624.3 to 1,535.0)                     | 86.3<br>(54.0 to 135.2)                     | 7.6<br>(4.9 to 10.0)                                               | -0.1<br>(-2.6 to 2.1)                                            |
| <b>Unintentional injuries</b>                 | <b>28,410.9</b><br><b>(25,026.2 to 32,451.9)</b> | <b>42,054.8</b><br><b>(35,680.1 to 50,087.3)</b>  | <b>1,054.0</b><br><b>(675.8 to 1,564.1)</b> | <b>11.4</b><br><b>(9.6 to 13.0)</b>                                | <b>3.5</b><br><b>(1.8 to 5.0)</b>                                |
| Falls                                         | 9,187.2<br>(7,178.4 to 11,834.1)                 | 16,745.3<br>(11,427.6 to 23,792.7)                | 359.2<br>(234.3 to 522.7)                   | 14.6<br>(12.3 to 16.8)                                             | 6.5<br>(4.3 to 8.4)                                              |
| Drowning                                      | 111.4<br>(81.8 to 144.2)                         | 93.4<br>(71.6 to 120.7)                           | 6.7<br>(4.1 to 10.3)                        | -7.8<br>(-10.4 to -5.4)                                            | -14.4<br>(-16.8 to -12.2)                                        |
| Fire, heat, and hot substances                | 2,369.5<br>(1,737.8 to 3,254.0)                  | 1,544.6<br>(1,017.6 to 2,228.6)                   | 79.5<br>(50.3 to 118.4)                     | 9.5<br>(5.8 to 13.0)                                               | 1.7<br>(-1.7 to 5.0)                                             |
| Poisonings                                    | 131.2<br>(96.6 to 169.5)                         | 529.8<br>(312.8 to 801.6)                         | 15.6<br>(9.5 to 24.2)                       | 20.0<br>(15.2 to 24.7)                                             | 11.5<br>(7.0 to 15.8)                                            |
| Exposure to mechanical forces                 | 3,535.2<br>(2,778.2 to 4,645.5)                  | 4,826.6<br>(3,029.4 to 7,053.7)                   | 91.2<br>(55.1 to 144.5)                     | 11.8<br>(9.4 to 14.4)                                              | 3.8<br>(1.6 to 6.3)                                              |
| Unintentional firearm injuries                | 86.1<br>(61.3 to 123.4)                          | 101.0<br>(43.0 to 199.1)                          | 3.9<br>(2.2 to 6.7)                         | 13.9<br>(10.6 to 17.5)                                             | 5.8<br>(2.8 to 9.2)                                              |
| Unintentional suffocation                     | 530.0<br>(356.6 to 729.9)                        | 174.6<br>(80.6 to 342.4)                          | 16.6<br>(9.3 to 27.6)                       | 6.3<br>(4.2 to 9.0)                                                | -1.2<br>(-3.2 to 1.2)                                            |
| Other exposure to mechanical forces           | 2,919.1<br>(2,230.2 to 4,025.1)                  | 4,551.0<br>(2,859.7 to 6,654.4)                   | 70.7<br>(43.5 to 109.7)                     | 13.1<br>(10.4 to 15.7)                                             | 5.0<br>(2.5 to 7.4)                                              |

| Cause                                                                               | Prevalence in thousands (95% UI)              | Incidence in thousands (95% UI)            | YLDs in thousands (95% UI)            |                                                   |                                                  |
|-------------------------------------------------------------------------------------|-----------------------------------------------|--------------------------------------------|---------------------------------------|---------------------------------------------------|--------------------------------------------------|
|                                                                                     | 2016 counts                                   | 2016 counts                                | 2016 counts                           | Percentage change in counts between 2006 and 2016 | Percentage change in rates between 2006 and 2016 |
| Adverse effects of medical treatment                                                | 149.9<br>(93.6 to 240.2)                      | 1,960.7<br>(1,269.3 to 3,003.7)            | 20.0<br>(10.7 to 34.2)                | 17.0<br>(13.0 to 20.6)                            | 8.7<br>(5.0 to 12.0)                             |
| Animal contact                                                                      | 1,576.3<br>(1,257.8 to 1,999.0)               | 5,993.7<br>(4,229.9 to 8,452.5)            | 79.1<br>(50.6 to 116.7)               | 1.8<br>(-1.7 to 5.2)                              | -5.5<br>(-8.7 to -2.3)                           |
| Venomous animal contact                                                             | 750.3<br>(539.8 to 1,028.5)                   | 2,749.3<br>(1,814.7 to 4,021.1)            | 62.8<br>(39.6 to 93.0)                | 1.9<br>(-2.2 to 6.0)                              | -5.4<br>(-9.2 to -1.6)                           |
| Non-venomous animal contact                                                         | 826.0<br>(596.3 to 1,209.8)                   | 3,244.3<br>(2,223.4 to 4,698.6)            | 16.3<br>(9.5 to 26.0)                 | 1.3<br>(-2.2 to 4.5)                              | -5.9<br>(-9.2 to -3.0)                           |
| Foreign body                                                                        | 3,092.2<br>(2,356.4 to 3,860.9)               | 3,097.1<br>(2,210.9 to 4,183.1)            | 131.3<br>(81.0 to 207.7)              | 8.0<br>(5.4 to 10.5)                              | 0.3<br>(-2.1 to 2.6)                             |
| Pulmonary aspiration and foreign body in airway                                     | 1,742.5<br>(1,182.3 to 2,600.9)               | 689.2<br>(399.1 to 1,093.0)                | 82.0<br>(49.1 to 129.4)               | 5.4<br>(2.7 to 7.9)                               | -2.1<br>(-4.6 to 0.2)                            |
| Foreign body in eyes                                                                | 179.0<br>(58.9 to 368.0)                      | 1,238.2<br>(624.4 to 2,156.6)              | 10.0<br>(3.1 to 22.5)                 | 12.4<br>(9.0 to 16.5)                             | 4.4<br>(1.2 to 8.2)                              |
| Foreign body in other body part                                                     | 1,170.8<br>(816.8 to 1,619.9)                 | 1,169.6<br>(744.6 to 1,736.2)              | 39.3<br>(24.0 to 61.9)                | 12.8<br>(9.9 to 15.7)                             | 4.8<br>(2.1 to 7.4)                              |
| Environmental heat and cold exposure                                                | 2,536.7<br>(1,874.1 to 3,725.3)               | 2,224.1<br>(1,327.5 to 3,477.3)            | 105.8<br>(62.6 to 165.2)              | 8.6<br>(6.4 to 10.8)                              | 0.9<br>(-1.2 to 2.9)                             |
| Other unintentional injuries                                                        | 5,721.2<br>(4,015.8 to 8,352.5)               | 5,039.7<br>(3,135.6 to 7,632.0)            | 165.6<br>(101.9 to 260.4)             | 14.6<br>(12.7 to 16.3)                            | 6.4<br>(4.7 to 8.0)                              |
| <b>Self-harm and interpersonal violence</b>                                         | <b>7,479.2</b><br><b>(5,856.9 to 9,322.7)</b> | <b>912.5†</b><br><b>(511.6 to 1,468.3)</b> | <b>90.7</b><br><b>(57.4 to 129.3)</b> | <b>2.5</b><br><b>(1.1 to 4.2)</b>                 | <b>-4.8</b><br><b>(-6.1 to -3.2)</b>             |
| Self-harm                                                                           | --                                            | --                                         | --                                    | --                                                | --                                               |
| Self-harm by firearm                                                                | --                                            | --                                         | --                                    | --                                                | --                                               |
| Self-harm by other specified means                                                  | --                                            | --                                         | --                                    | --                                                | --                                               |
| Interpersonal violence                                                              | 7,479.2<br>(5,856.9 to 9,322.7)               | 912.5†<br>(511.6 to 1,468.3)               | 90.7<br>(57.4 to 129.3)               | 2.5<br>(1.1 to 4.2)                               | -4.8<br>(-6.1 to -3.2)                           |
| Assault by firearm                                                                  | 23.0<br>(17.7 to 31.4)                        | 25.2<br>(10.2 to 53.2)                     | 1.2<br>(0.6 to 2.0)                   | 12.0<br>(8.7 to 15.6)                             | 4.0<br>(1.0 to 7.4)                              |
| Assault by sharp object                                                             | 164.2<br>(114.1 to 229.2)                     | 265.1<br>(122.9 to 492.4)                  | 6.4<br>(3.6 to 10.5)                  | 12.6<br>(8.7 to 16.0)                             | 4.5<br>(1.0 to 7.7)                              |
| Sexual violence                                                                     | 6,973.3<br>(5,363.2 to 8,760.1)               | --                                         | 68.6<br>(42.3 to 101.7)               | -0.1<br>(-1.2 to 1.0)                             | -7.2<br>(-8.3 to -6.2)                           |
| Assault by other means                                                              | 318.7<br>(236.7 to 433.0)                     | 622.2<br>(342.8 to 1,002.8)                | 14.5<br>(8.5 to 23.1)                 | 11.2<br>(8.3 to 14.1)                             | 3.2<br>(0.6 to 6.0)                              |
| <b>Forces of nature, conflict and terrorism, and executions and police conflict</b> | <b>1,485.4</b><br><b>(845.8 to 2,474.1)</b>   | <b>71.2†</b><br><b>(47.9 to 101.4)</b>     | <b>31.0</b><br><b>(12.6 to 60.1)</b>  | <b>29.6</b><br><b>(4.1 to 85.9)</b>               | <b>20.4</b><br><b>(-3.3 to 72.6)</b>             |
| Forces of nature, conflict and terrorism, and state actor violence                  | 98.5<br>(45.1 to 182.4)                       | 42.2<br>(24.9 to 64.8)                     | 3.7<br>(1.2 to 7.8)                   | -39.9<br>(-55.2 to -26.5)                         | -44.2<br>(-58.4 to -31.7)                        |
| Conflict and terrorism                                                              | 1,368.1<br>(765.7 to 2,336.8)                 | --                                         | 27.2<br>(11.1 to 52.1)                | 53.2<br>(17.1 to 149.3)                           | 42.2<br>(8.7 to 131.5)                           |
| Executions and police conflict                                                      | 18.8<br>(10.2 to 33.3)                        | 29.1<br>(14.8 to 48.4)                     | 0.7<br>(0.3 to 1.8)                   | -8.7<br>(-18.4 to 4.8)                            | -15.2<br>(-24.2 to -2.7)                         |

We did not calculate incidence for certain NTDs and causes with only birth prevalence. Blank cells mean that no estimate is available.

† Incidence for aggregate causes represents the sum of the incidence of the causes below the aggregate.

‡ Incidence estimates for stroke represent first-ever stroke only.

^ Incidence of HIV/AIDS represents new infections of HIV only and does not include new infections of Tuberculosis in HIV positive cases.



SR Table 12: Global prevalence, incidence, and YLDs for 2016, percentage change of YLD counts and percentage change of YLD rates between 2006 and 2016 by cause, age 10-14 years.

| Cause                                                                                | Prevalence in thousands (95% UI)             | Incidence in thousands (95% UI)                     | YLDs in thousands (95% UI)                |                                                   |                                                  |
|--------------------------------------------------------------------------------------|----------------------------------------------|-----------------------------------------------------|-------------------------------------------|---------------------------------------------------|--------------------------------------------------|
|                                                                                      | 2016 counts                                  | 2016 counts                                         | 2016 counts                               | Percentage change in counts between 2006 and 2016 | Percentage change in rates between 2006 and 2016 |
|                                                                                      |                                              |                                                     |                                           |                                                   |                                                  |
| <b>All causes</b>                                                                    | <b>571,634.4</b><br>(569,411.0 to 573,455.0) | <b>3,377,584.2†</b><br>(2,851,917.1 to 3,998,623.9) | <b>37,275.2</b><br>(26,987.5 to 49,652.8) | <b>1.2</b><br>(0.4 to 2.1)                        | <b>0.4</b><br>(-0.4 to 1.3)                      |
| <b>Communicable, maternal, neonatal, and nutritional disorders</b>                   | <b>354,233.6</b><br>(349,570.2 to 359,243.1) | <b>2,126,713.5†</b><br>(1,612,700.7 to 2,688,154.5) | <b>8,566.0</b><br>(6,010.7 to 11,929.3)   | <b>-1.5</b><br>(-4.0 to 1.8)                      | <b>-2.3</b><br>(-4.8 to 0.9)                     |
| <b>HIV/AIDS and tuberculosis</b>                                                     | <b>112,544.8</b><br>(99,305.8 to 129,181.0)  | <b>239.0†</b><br>(155.0 to 363.9)                   | <b>168.6</b><br>(117.6 to 225.3)          | <b>16.8</b><br>(5.7 to 30.2)                      | <b>15.8</b><br>(4.9 to 29.1)                     |
| Tuberculosis                                                                         | 104,913.1<br>(84,576.5 to 127,963.7)         | 239.0†<br>(155.0 to 363.9)                          | 45.3<br>(24.2 to 76.6)                    | -15.6<br>(-22.7 to -7.7)                          | -16.3<br>(-23.4 to -8.5)                         |
| Drug-susceptible tuberculosis                                                        | 137.2<br>(87.1 to 202.6)                     | 232.0<br>(150.3 to 353.1)                           | 43.8<br>(23.4 to 74.0)                    | -15.5<br>(-22.8 to -7.5)                          | -16.2<br>(-23.4 to -8.3)                         |
| Multidrug-resistant tuberculosis without extensive drug resistance                   | 4.2<br>(2.7 to 6.1)                          | 6.7<br>(4.4 to 10.5)                                | 1.4<br>(0.8 to 2.3)                       | -22.2<br>(-31.6 to -11.5)                         | -22.8<br>(-32.1 to -12.2)                        |
| Extensively drug-resistant tuberculosis                                              | 0.2<br>(0.1 to 0.3)                          | 0.3<br>(0.2 to 0.4)                                 | 0.1<br>( $< 0.05$ to 0.1)                 | 116.8<br>(82.3 to 155.1)                          | 115.0<br>(80.8 to 153.0)                         |
| Latent tuberculosis infection                                                        | 104,771.5<br>(84,418.6 to 127,826.1)         | --                                                  | --                                        | --                                                | --                                               |
| HIV/AIDS                                                                             | 651.2<br>(619.7 to 684.6)                    | --                                                  | 123.3<br>(89.6 to 160.3)                  | 35.9<br>(18.4 to 56.3)                            | 34.8<br>(17.5 to 55.0)                           |
| Drug-susceptible HIV/AIDS - Tuberculosis                                             | 15.9<br>(10.8 to 22.4)                       | 24.7<br>(16.9 to 34.7)                              | 6.4<br>(3.6 to 10.3)                      | 9.7<br>(-4.8 to 24.4)                             | 8.8<br>(-5.5 to 23.4)                            |
| Multidrug-resistant HIV/AIDS - Tuberculosis without extensive drug resistance        | 0.4<br>(0.3 to 0.7)                          | 0.7<br>(0.4 to 1.0)                                 | 0.2<br>(0.1 to 0.3)                       | 21.7<br>(-7.0 to 53.4)                            | 20.7<br>(-7.8 to 52.1)                           |
| Extensively drug-resistant HIV/AIDS - Tuberculosis                                   | < 0.05<br>( $< 0.05$ to < 0.05)              | < 0.05<br>( $< 0.05$ to < 0.05)                     | < 0.05<br>( $< 0.05$ to < 0.05)           | 423.5<br>(332.1 to 529.9)                         | 419.2<br>(328.5 to 524.7)                        |
| HIV/AIDS resulting in other diseases                                                 | 634.8<br>(601.4 to 668.5)                    | --                                                  | 116.7<br>(84.7 to 151.2)                  | 37.8<br>(18.8 to 60.1)                            | 36.6<br>(17.8 to 58.8)                           |
| <b>Diarrhoea, lower respiratory infections, and other common infectious diseases</b> | <b>40,051.6</b><br>(37,880.5 to 42,601.9)    | <b>2,001,147.3†</b><br>(1,497,551.7 to 2,561,030.8) | <b>1,802.5</b><br>(1,224.4 to 2,571.2)    | <b>-1.1</b><br>(-2.3 to 0.2)                      | <b>-1.9</b><br>(-3.1 to -0.7)                    |
| Diarrhoeal diseases                                                                  | 4,518.2<br>(4,016.6 to 5,080.7)              | 306,160.2<br>(272,371.0 to 343,139.9)               | 519.0<br>(358.0 to 719.6)                 | 1.6<br>(-0.4 to 3.6)                              | 0.8<br>(-1.2 to 2.8)                             |
| Intestinal infectious diseases                                                       | 141.3<br>(111.6 to 183.0)                    | 2,514.7†<br>(1,914.9 to 3,316.9)                    | 20.9<br>(12.2 to 33.6)                    | -20.1<br>(-35.4 to -1.6)                          | -20.8<br>(-35.9 to -2.5)                         |
| Typhoid fever                                                                        | 128.7<br>(94.4 to 177.9)                     | 2,028.5<br>(1,530.9 to 2,694.0)                     | 19.6<br>(11.4 to 31.5)                    | -20.4<br>(-36.2 to -0.8)                          | -21.0<br>(-36.8 to -1.6)                         |
| Paratyphoid fever                                                                    | 21.4<br>(15.0 to 30.8)                       | 486.1<br>(349.2 to 688.9)                           | 1.4<br>(0.8 to 2.3)                       | -15.9<br>(-33.7 to 7.3)                           | -16.6<br>(-34.3 to 6.4)                          |
| Other intestinal infectious diseases                                                 | --                                           | --                                                  | < 0.05<br>( $< 0.05$ to < 0.05)           | -34.5<br>(-47.1 to -19.4)                         | -35.1<br>(-47.5 to -20.1)                        |
| Lower respiratory infections                                                         | 459.9<br>(377.4 to 552.1)                    | 18,873.4<br>(15,258.4 to 22,989.0)                  | 28.5<br>(17.7 to 42.1)                    | 17.7<br>(11.2 to 24.9)                            | 16.7<br>(10.3 to 23.9)                           |
| Upper respiratory infections                                                         | 21,569.7<br>(15,289.4 to 28,855.8)           | 1,632,387.2<br>(1,134,542.6 to 2,188,066.4)         | 543.0<br>(306.7 to 909.3)                 | -0.7<br>(-2.2 to 0.8)                             | -1.5<br>(-3.0 to -0.1)                           |
| Otitis media                                                                         | 12,723.9<br>(10,332.1 to 15,407.6)           | 31,203.2<br>(21,560.9 to 46,859.6)                  | 407.4<br>(239.8 to 644.9)                 | -3.2<br>(-7.0 to -0.0)                            | -4.0<br>(-7.8 to -0.9)                           |
| Meningitis                                                                           | 1,356.0<br>(1,166.0 to 1,580.3)              | 166.0<br>(114.6 to 231.6)                           | 153.6<br>(108.8 to 201.3)                 | 3.3<br>(-0.2 to 6.9)                              | 2.5<br>(-1.1 to 6.0)                             |
| Pneumococcal meningitis                                                              | 560.5<br>(464.9 to 683.2)                    | 46.0<br>(28.4 to 73.5)                              | 64.9<br>(45.9 to 88.5)                    | 1.1<br>(-5.7 to 9.3)                              | 0.2<br>(-6.5 to 8.4)                             |
| H influenzae type B meningitis                                                       | 222.5<br>(173.7 to 282.2)                    | 17.6<br>(9.2 to 29.7)                               | 29.2<br>(19.9 to 39.1)                    | -19.7<br>(-25.1 to -14.7)                         | -20.3<br>(-25.7 to -15.4)                        |
| Meningococcal infection                                                              | 160.2<br>(113.5 to 218.2)                    | 31.4<br>(18.0 to 49.8)                              | 17.0<br>(11.7 to 23.1)                    | 11.2<br>(8.3 to 14.1)                             | 10.3<br>(7.4 to 13.2)                            |
| Other meningitis                                                                     | 412.9<br>(308.8 to 532.2)                    | 71.1<br>(43.9 to 105.5)                             | 42.5<br>(29.3 to 57.5)                    | 29.4<br>(22.9 to 35.9)                            | 28.3<br>(21.9 to 34.8)                           |
| Encephalitis                                                                         | 899.0<br>(635.5 to 1,258.8)                  | 656.2<br>(478.1 to 876.1)                           | 114.6<br>(81.5 to 152.6)                  | -10.8<br>(-15.9 to -5.8)                          | -11.6<br>(-16.6 to -6.6)                         |
| Diphtheria                                                                           | < 0.05<br>( $< 0.05$ to < 0.05)              | 0.2<br>(0.1 to 0.3)                                 | < 0.05<br>( $< 0.05$ to < 0.05)           | -59.0<br>(-71.6 to -41.5)                         | -59.4<br>(-71.8 to -42.0)                        |
| Whooping cough                                                                       | 14.7<br>(11.4 to 18.4)                       | 107.1<br>(83.5 to 134.6)                            | 0.7<br>(0.4 to 1.2)                       | -23.0<br>(-24.9 to -21.1)                         | -23.6<br>(-25.5 to -21.7)                        |
| Tetanus                                                                              | 16.7<br>(16.4 to 17.0)                       | 3.6<br>(1.6 to 6.8)                                 | 0.4<br>(0.2 to 0.6)                       | -0.7<br>(-23.7 to 26.7)                           | -1.5<br>(-24.4 to 25.7)                          |
| Measles                                                                              | 6.7<br>(2.4 to 14.4)                         | 242.7<br>(87.7 to 524.4)                            | 0.6<br>(0.2 to 1.4)                       | -60.8<br>(-65.0 to -56.0)                         | -61.1<br>(-65.3 to -56.4)                        |
| Varicella and herpes zoster                                                          | 377.4<br>(304.3 to 466.9)                    | 8,832.8<br>(6,464.1 to 12,296.1)                    | 13.8<br>(7.9 to 22.4)                     | 0.4<br>(-6.1 to 7.1)                              | -0.4<br>(-6.8 to 6.2)                            |
| <b>Neglected tropical diseases and malaria</b>                                       | <b>165,772.2</b><br>(161,182.2 to 169,989.5) | <b>46,434.4†</b><br>(37,369.3 to 59,670.6)          | <b>1,084.3</b><br>(732.5 to 1,540.1)      | <b>-16.5</b><br>(-21.2 to -10.7)                  | <b>-17.2</b><br>(-21.8 to -11.5)                 |
| Malaria                                                                              | 18,540.0<br>(14,526.6 to 24,896.2)           | 23,335.6<br>(16,113.1 to 35,811.7)                  | 243.3<br>(179.9 to 325.9)                 | -8.7<br>(-16.0 to -0.1)                           | -9.4<br>(-16.7 to -1.0)                          |
| Chagas disease                                                                       | 285.6<br>(216.8 to 365.4)                    | 19.3<br>(13.1 to 26.2)                              | 0.7<br>(0.4 to 1.1)                       | -18.8<br>(-32.8 to -2.0)                          | -19.5<br>(-33.3 to -2.8)                         |
| Leishmaniasis                                                                        | 391.9<br>(351.9 to 437.5)                    | 99.5<br>(67.9 to 141.4)                             | 24.0<br>(15.6 to 35.1)                    | 27.9<br>(8.5 to 50.7)                             | 26.9<br>(7.6 to 49.5)                            |
| Visceral leishmaniasis                                                               | 1.1<br>(0.8 to 1.6)                          | 4.5<br>(3.0 to 6.3)                                 | 0.1<br>( $< 0.05$ to 0.1)                 | -64.7<br>(-77.0 to -44.2)                         | -65.0<br>(-77.2 to -44.7)                        |
| Cutaneous and mucocutaneous leishmaniasis                                            | 366.5<br>(317.1 to 427.0)                    | 95.0<br>(62.9 to 136.9)                             | 23.9<br>(15.5 to 35.1)                    | 29.1<br>(9.3 to 52.3)                             | 28.0<br>(8.4 to 51.1)                            |
| African trypanosomiasis                                                              | 0.7<br>(0.2 to 2.3)                          | 0.5<br>(0.1 to 1.7)                                 | 0.2<br>( $< 0.05$ to 0.6)                 | -75.0<br>(-95.4 to 26.0)                          | -75.2<br>(-95.4 to 25.0)                         |
| Schistosomiasis                                                                      | 13,573.9<br>(12,279.4 to 14,857.8)           | 8,938.0<br>(7,364.8 to 11,177.6)                    | 97.3<br>(45.2 to 191.9)                   | -28.9<br>(-31.7 to -26.7)                         | -29.4<br>(-32.2 to -27.3)                        |
| Cysticercosis                                                                        | 13.2<br>(6.4 to 22.2)                        | --                                                  | 2.4<br>(1.1 to 4.3)                       | -9.7<br>(-24.8 to 5.0)                            | -10.4<br>(-25.4 to 4.2)                          |
| Cystic echinococcosis                                                                | 74.3<br>(36.1 to 163.0)                      | 16.2<br>(6.9 to 44.6)                               | 7.1<br>(3.1 to 15.7)                      | -40.5<br>(-78.3 to 62.4)                          | -41.0<br>(-78.5 to 61.1)                         |
| Lymphatic filariasis                                                                 | 2,610.4<br>(2,248.8 to 3,110.1)              | 767.3<br>(441.0 to 1,236.9)                         | 75.5<br>(35.7 to 140.8)                   | -38.8<br>(-51.2 to -29.0)                         | -39.3<br>(-51.6 to -29.6)                        |
| Onchocerciasis                                                                       | 1,424.7<br>(880.7 to 2,265.9)                | 517.1<br>(242.6 to 1,027.2)                         | 91.4<br>(38.0 to 170.2)                   | -32.3<br>(-50.5 to -17.4)                         | -32.8<br>(-50.9 to -18.1)                        |
| Trachoma                                                                             | --                                           | --                                                  | --                                        | --                                                | --                                               |
| Dengue                                                                               | 709.0<br>(385.5 to 1,202.1)                  | 11,851.3<br>(7,197.5 to 17,998.3)                   | 117.7<br>(51.3 to 221.3)                  | 61.9<br>(32.0 to 269.6)                           | 60.6<br>(30.9 to 266.6)                          |
| Yellow fever                                                                         | 0.5<br>(0.1 to 1.2)                          | 17.1<br>(4.7 to 45.0)                               | < 0.05<br>( $< 0.05$ to < 0.05)           | -19.0<br>(-49.4 to 29.5)                          | -19.7<br>(-49.9 to 28.4)                         |
| Rabies                                                                               | < 0.05<br>( $< 0.05$ to 0.1)                 | 1.1<br>(0.5 to 1.8)                                 | < 0.05<br>( $< 0.05$ to < 0.05)           | -49.2<br>(-65.5 to -25.3)                         | -49.6<br>(-65.8 to -25.9)                        |
| Intestinal nematode infections                                                       | 140,427.0<br>(135,334.1 to 145,076.5)        | --                                                  | 288.4<br>(169.2 to 463.0)                 | -22.1<br>(-27.5 to -16.1)                         | -22.8<br>(-28.1 to -16.8)                        |
| Ascariasis                                                                           | 74,623.4<br>(67,920.7 to 82,262.5)           | --                                                  | 93.9<br>(51.6 to 158.5)                   | -32.7<br>(-42.0 to -23.2)                         | -33.3<br>(-42.5 to -23.8)                        |

| Cause                                                                   | Prevalence in thousands (95% UI)              | Incidence in thousands (95% UI)                      | YLDs in thousands (95% UI)                 |                                                   |                                                  |
|-------------------------------------------------------------------------|-----------------------------------------------|------------------------------------------------------|--------------------------------------------|---------------------------------------------------|--------------------------------------------------|
|                                                                         | 2016 counts                                   | 2016 counts                                          | 2016 counts                                | Percentage change in counts between 2006 and 2016 | Percentage change in rates between 2006 and 2016 |
| Trichuriasis                                                            | 43,497.4<br>(40,124.9 to 46,960.8)            | --                                                   | 36.0<br>(19.6 to 60.6)                     | -26.8<br>(-35.6 to -16.6)                         | -27.4<br>(-36.1 to -17.3)                        |
| Hookworm disease                                                        | 41,728.0<br>(38,496.8 to 45,257.4)            | --                                                   | 158.5<br>(96.2 to 247.0)                   | -12.7<br>(-20.5 to -4.0)                          | -13.4<br>(-21.1 to -4.8)                         |
| Food-borne trematodiasis                                                | 2,810.5<br>(2,565.2 to 3,119.8)               | 330.2<br>(296.9 to 367.4)                            | 46.1<br>(24.1 to 82.8)                     | -35.2<br>(-42.2 to -23.7)                         | -35.8<br>(-42.7 to -24.3)                        |
| Leprosy                                                                 | 2.7<br>(2.4 to 3.0)                           | 1.6<br>(1.4 to 1.8)                                  | 0.1<br>(0.1 to 0.2)                        | -27.7<br>(-28.9 to -26.4)                         | -28.3<br>(-29.5 to -27.0)                        |
| Ebola virus disease                                                     | < 0.05<br>(< 0.05 to < 0.2)                   | < 0.05<br>(< 0.05 to < 0.05)                         | < 0.05<br>(< 0.05 to < 0.05)               | --                                                | --                                               |
| Zika virus disease                                                      | 8.9<br>(5.4 to 15.7)                          | 539.5<br>(326.8 to 943.1)                            | 0.2<br>(0.1 to 0.3)                        | --                                                | --                                               |
| Guinea worm disease                                                     | < 0.05<br>(< 0.05 to < 0.05)                  | < 0.05<br>(< 0.05 to < 0.05)                         | < 0.05<br>(< 0.05 to < 0.05)               | -99.5<br>(-99.7 to -99.3)                         | -99.5<br>(-99.7 to -99.3)                        |
| Other neglected tropical diseases                                       | 2,352.0<br>(2,073.0 to 2,649.2)               | --                                                   | 89.9<br>(57.0 to 130.9)                    | 2.5<br>(-2.5 to 8.0)                              | 1.7<br>(-3.3 to 7.1)                             |
| <b>Maternal disorders</b>                                               | <b>5.6<br/>(3.9 to 7.5)</b>                   | <b>114.6†<br/>(93.4 to 139.5)</b>                    | <b>1.4<br/>(0.9 to 2.2)</b>                | <b>-15.0<br/>(-25.3 to -3.2)</b>                  | <b>-15.7<br/>(-25.9 to -4.0)</b>                 |
| Maternal haemorrhage                                                    | 1.0<br>(0.7 to 1.5)                           | 9.1<br>(6.0 to 13.9)                                 | 0.1<br>(0.1 to 0.1)                        | -16.7<br>(-28.9 to -2.3)                          | -17.3<br>(-29.5 to -3.1)                         |
| Maternal sepsis and other pregnancy related infections                  | 2.5<br>(1.6 to 3.9)                           | 19.9<br>(13.2 to 27.9)                               | 0.1<br>(< 0.05 to 0.2)                     | -10.6<br>(-53.6 to 80.7)                          | -11.4<br>(-54.0 to 79.2)                         |
| Maternal hypertensive disorders                                         | 5.0<br>(2.9 to 7.2)                           | 24.2<br>(18.5 to 29.9)                               | 0.2<br>(0.1 to 0.4)                        | -16.9<br>(-47.4 to 32.3)                          | -17.6<br>(-47.9 to 31.2)                         |
| Maternal obstructed labour and uterine rupture                          | 2.0<br>(1.1 to 3.4)                           | 9.1<br>(6.4 to 12.3)                                 | 0.7<br>(0.3 to 1.3)                        | -10.8<br>(-17.5 to -3.7)                          | -11.5<br>(-18.2 to -4.5)                         |
| Maternal abortion, miscarriage, and ectopic pregnancy                   | 0.4<br>(0.2 to 0.7)                           | 52.4<br>(35.0 to 75.6)                               | < 0.05<br>(< 0.05 to 0.1)                  | -23.0<br>(-52.1 to 20.4)                          | -23.7<br>(-52.5 to 19.4)                         |
| Other maternal disorders                                                | --                                            | --                                                   | 0.2<br>(0.1 to 0.4)                        | -22.9<br>(-32.2 to -12.2)                         | -23.5<br>(-32.8 to -12.9)                        |
| <b>Neonatal disorders</b>                                               | <b>7,036.2<br/>(6,404.0 to 7,713.6)</b>       | <b>--</b>                                            | <b>1,384.3<br/>(947.4 to 2,002.6)</b>      | <b>14.0<br/>(0.8 to 28.7)</b>                     | <b>13.1<br/>(-0.1 to 27.7)</b>                   |
| Neonatal preterm birth complications                                    | 5,651.2<br>(4,663.0 to 6,904.7)               | --                                                   | 897.3<br>(607.8 to 1,294.3)                | 9.5<br>(-8.7 to 30.8)                             | 8.6<br>(-9.5 to 29.7)                            |
| Neonatal encephalopathy due to birth asphyxia and trauma                | 1,115.9<br>(657.8 to 1,917.3)                 | --                                                   | 148.5<br>(42.6 to 398.0)                   | 26.7<br>(15.2 to 43.2)                            | 25.6<br>(14.3 to 42.0)                           |
| Neonatal sepsis and other neonatal infections                           | 657.9<br>(208.6 to 1,602.7)                   | --                                                   | 270.2<br>(73.3 to 711.8)                   | 25.7<br>(16.7 to 40.9)                            | 24.7<br>(15.7 to 39.8)                           |
| Hemolytic disease and other neonatal jaundice                           | 216.1<br>(191.1 to 241.5)                     | --                                                   | 68.2<br>(52.1 to 85.9)                     | 9.4<br>(3.8 to 15.5)                              | 8.5<br>(3.0 to 14.6)                             |
| Other neonatal disorders                                                | --                                            | --                                                   | --                                         | --                                                | --                                               |
| <b>Nutritional deficiencies</b>                                         | <b>141,028.8<br/>(134,938.4 to 144,750.3)</b> | <b>60,388.8†<br/>(48,831.4 to 76,778.2)</b>          | <b>3,991.2<br/>(2,554.2 to 5,800.2)</b>    | <b>-2.1<br/>(-4.9 to 0.6)</b>                     | <b>-3.0<br/>(-5.7 to -0.2)</b>                   |
| Protein-energy malnutrition                                             | --                                            | --                                                   | --                                         | --                                                | --                                               |
| Iodine deficiency                                                       | 8,960.5<br>(7,851.7 to 10,244.4)              | 969.8<br>(852.4 to 1,100.2)                          | 245.2<br>(161.6 to 350.8)                  | -20.6<br>(-23.6 to -17.3)                         | -21.3<br>(-24.3 to -18.0)                        |
| Vitamin A deficiency                                                    | 54,464.5<br>(46,094.1 to 66,408.1)            | 59,419.0<br>(47,752.5 to 75,717.9)                   | 25.4<br>(14.2 to 41.6)                     | 5.6<br>(-1.4 to 12.8)                             | 4.8<br>(-2.2 to 11.9)                            |
| Iron-deficiency anaemia                                                 | 97,982.7<br>(89,090.4 to 108,171.7)           | --                                                   | 3,720.6<br>(2,386.0 to 5,439.3)            | -0.7<br>(-3.7 to 2.4)                             | -1.5<br>(-4.5 to 1.5)                            |
| Other nutritional deficiencies                                          | --                                            | --                                                   | --                                         | --                                                | --                                               |
| <b>Other communicable, maternal, neonatal, and nutritional diseases</b> | <b>49,394.8<br/>(44,438.4 to 53,993.3)</b>    | <b>18,389.5<br/>(14,361.9 to 23,330.4)</b>           | <b>133.5<br/>(84.9 to 197.8)</b>           | <b>-1.5<br/>(-11.2 to 8.3)</b>                    | <b>-2.3<br/>(-12.0 to 7.4)</b>                   |
| Sexually transmitted diseases excluding HIV                             | 6,247.9<br>(5,791.1 to 6,666.5)               | 9,425.4<br>(7,755.8 to 11,643.8)                     | 13.2<br>(8.0 to 21.3)                      | 2.5<br>(-4.1 to 9.3)                              | 1.6<br>(-4.9 to 8.4)                             |
| Syphilis                                                                | 816.7<br>(471.6 to 1,228.6)                   | 1,070.3<br>(590.8 to 1,673.0)                        | 0.2<br>(< 0.05 to 0.5)                     | 4.5<br>(-16.5 to 25.6)                            | 3.6<br>(-17.2 to 24.6)                           |
| Chlamydial infection                                                    | 303.0<br>(184.0 to 458.6)                     | 574.2<br>(406.6 to 757.4)                            | 3.0<br>(1.9 to 4.6)                        | 1.4<br>(-1.3 to 4.4)                              | 0.6<br>(-2.1 to 3.5)                             |
| Gonococcal infection                                                    | 331.5<br>(148.4 to 709.5)                     | 1,459.2<br>(667.8 to 2,916.5)                        | 2.6<br>(1.2 to 5.2)                        | 3.0<br>(-21.6 to 19.4)                            | 2.1<br>(-22.2 to 18.4)                           |
| Trichomoniasis                                                          | 965.5<br>(586.6 to 1,472.6)                   | 1,268.8<br>(767.6 to 1,926.6)                        | 1.2<br>(0.4 to 2.8)                        | 7.8<br>(0.2 to 15.7)                              | 6.9<br>(-0.7 to 14.8)                            |
| Genital herpes                                                          | 3,956.3<br>(2,979.5 to 5,062.9)               | 4,670.0<br>(3,506.4 to 5,987.8)                      | 2.1<br>(0.8 to 4.5)                        | 4.3<br>(-4.6 to 14.0)                             | 3.4<br>(-5.4 to 13.0)                            |
| Other sexually transmitted diseases                                     | 20.7<br>(15.0 to 28.1)                        | 382.8<br>(285.2 to 511.2)                            | 4.0<br>(2.5 to 6.0)                        | 0.4<br>(-9.3 to 11.0)                             | -0.5<br>(-10.0 to 10.1)                          |
| Hepatitis                                                               | 40,874.8<br>(31,913.2 to 50,424.3)            | 8,963.5<br>(5,465.1 to 13,183.5)                     | 12.0<br>(5.3 to 22.0)                      | -35.7<br>(-72.1 to 42.8)                          | -36.3<br>(-72.4 to 41.6)                         |
| Acute hepatitis A                                                       | 168.8<br>(15.3 to 406.8)                      | 2,195.1<br>(198.4 to 5,288.0)                        | 5.6<br>(0.5 to 14.1)                       | -35.1<br>(-95.0 to 645.1)                         | -35.6<br>(-95.0 to 639.0)                        |
| Hepatitis B                                                             | 30,826.4<br>(21,779.7 to 40,137.3)            | 4,601.3<br>(2,419.6 to 7,698.7)                      | 2.8<br>(1.2 to 5.2)                        | -32.6<br>(-53.8 to -1.0)                          | -33.2<br>(-54.2 to -1.8)                         |
| Hepatitis C                                                             | 9,721.0<br>(8,363.9 to 11,101.4)              | 105.1<br>(73.3 to 145.7)                             | 0.1<br>(< 0.05 to 0.2)                     | -29.6<br>(-30.2 to -29.0)                         | -30.2<br>(-30.8 to -29.6)                        |
| Acute hepatitis E                                                       | 158.6<br>(136.1 to 181.1)                     | 2,062.0<br>(1,769.4 to 2,354.6)                      | 3.5<br>(2.1 to 5.4)                        | -39.1<br>(-55.0 to -17.0)                         | -39.6<br>(-55.3 to -17.7)                        |
| Other infectious diseases                                               | 2,620.0<br>(2,314.5 to 2,955.3)               | 0.7<br>(0.3 to 1.2)                                  | 108.4<br>(69.5 to 158.9)                   | 4.2<br>(-0.2 to 8.8)                              | 3.3<br>(-1.1 to 7.9)                             |
| <b>Non-communicable diseases</b>                                        | <b>525,035.3<br/>(520,270.4 to 529,562.6)</b> | <b>1,209,348.6†<br/>(1,016,405.6 to 1,411,635.7)</b> | <b>26,931.1<br/>(19,310.5 to 35,741.0)</b> | <b>2.0<br/>(1.3 to 2.7)</b>                       | <b>1.2<br/>(0.5 to 1.8)</b>                      |
| <b>Neoplasms</b>                                                        | <b>88.3<br/>(80.7 to 93.9)</b>                | <b>53.3<br/>(48.6 to 56.1)</b>                       | <b>19.0<br/>(13.4 to 25.6)</b>             | <b>6.9<br/>(0.8 to 12.8)</b>                      | <b>6.0<br/>(0.0 to 11.8)</b>                     |
| Lip and oral cavity cancer                                              | --                                            | --                                                   | --                                         | --                                                | --                                               |
| Nasopharynx cancer                                                      | 3.6<br>(3.2 to 4.1)                           | 1.0<br>(0.9 to 1.2)                                  | 0.4<br>(0.3 to 0.6)                        | -12.4<br>(-22.7 to 1.1)                           | -13.1<br>(-23.3 to 0.3)                          |
| Other pharynx cancer                                                    | --                                            | --                                                   | --                                         | --                                                | --                                               |
| Oesophageal cancer                                                      | --                                            | --                                                   | --                                         | --                                                | --                                               |
| Stomach cancer                                                          | --                                            | --                                                   | --                                         | --                                                | --                                               |
| Colon and rectum cancer                                                 | --                                            | --                                                   | --                                         | --                                                | --                                               |
| Liver cancer                                                            | 0.7<br>(0.6 to 0.8)                           | 0.9<br>(0.8 to 1.1)                                  | 0.2<br>(0.1 to 0.3)                        | 0.8<br>(-12.2 to 14.3)                            | -0.1<br>(-12.9 to 13.4)                          |
| Liver cancer due to hepatitis B                                         | 0.4<br>(0.3 to 0.6)                           | 0.4<br>(0.3 to 0.5)                                  | 0.1<br>(0.1 to 0.1)                        | -1.6<br>(-15.5 to 15.5)                           | -2.4<br>(-16.1 to 14.6)                          |

| Cause                                              | Prevalence in thousands (95% UI)                 | Incidence in thousands (95% UI)                | YLDs in thousands (95% UI)                    |                                                   |                                                  |
|----------------------------------------------------|--------------------------------------------------|------------------------------------------------|-----------------------------------------------|---------------------------------------------------|--------------------------------------------------|
|                                                    | 2016 counts                                      | 2016 counts                                    | 2016 counts                                   | Percentage change in counts between 2006 and 2016 | Percentage change in rates between 2006 and 2016 |
| Liver cancer due to hepatitis C                    | < 0.05<br>(< 0.05 to < 0.05)                     | < 0.05<br>(< 0.05 to < 0.05)                   | < 0.05<br>(< 0.05 to < 0.05)                  | 3.0<br>(-9.2 to 17.4)                             | 2.1<br>(-9.9 to 16.4)                            |
| Liver cancer due to alcohol use                    | --                                               | --                                             | --                                            | --                                                | --                                               |
| Liver cancer due to other causes                   | 0.6<br>(0.5 to 0.8)                              | 0.6<br>(0.5 to 0.7)                            | 0.1<br>(0.1 to 0.2)                           | 2.3<br>(-10.7 to 15.3)                            | 1.4<br>(-11.4 to 14.3)                           |
| Gallbladder and biliary tract cancer               | --                                               | --                                             | --                                            | --                                                | --                                               |
| Pancreatic cancer                                  | --                                               | --                                             | --                                            | --                                                | --                                               |
| Larynx cancer                                      | --                                               | --                                             | --                                            | --                                                | --                                               |
| Tracheal, bronchus, and lung cancer                | --                                               | --                                             | --                                            | --                                                | --                                               |
| Malignant skin melanoma                            | --                                               | --                                             | --                                            | --                                                | --                                               |
| Non-melanoma skin cancer                           | --                                               | --                                             | --                                            | --                                                | --                                               |
| Non-melanoma skin cancer (squamous-cell carcinoma) | --                                               | --                                             | --                                            | --                                                | --                                               |
| Non-melanoma skin cancer (basal-cell carcinoma)    | --                                               | --                                             | --                                            | --                                                | --                                               |
| Breast cancer                                      | --                                               | --                                             | --                                            | --                                                | --                                               |
| Cervical cancer                                    | --                                               | --                                             | --                                            | --                                                | --                                               |
| Uterine cancer                                     | --                                               | --                                             | --                                            | --                                                | --                                               |
| Ovarian cancer                                     | --                                               | --                                             | --                                            | --                                                | --                                               |
| Prostate cancer                                    | --                                               | --                                             | --                                            | --                                                | --                                               |
| Testicular cancer                                  | --                                               | --                                             | --                                            | --                                                | --                                               |
| Kidney cancer                                      | 6.5<br>(5.9 to 7.0)                              | 1.7<br>(1.6 to 1.8)                            | 0.6<br>(0.4 to 0.8)                           | 10.8<br>(4.1 to 17.2)                             | 9.9<br>(3.3 to 16.2)                             |
| Bladder cancer                                     | --                                               | --                                             | --                                            | --                                                | --                                               |
| Brain and nervous system cancer                    | 22.8<br>(19.5 to 24.9)                           | 10.3<br>(9.0 to 11.1)                          | 3.3<br>(2.3 to 4.4)                           | 16.9<br>(10.4 to 24.1)                            | 16.0<br>(9.5 to 23.1)                            |
| Thyroid cancer                                     | 5.7<br>(4.9 to 6.2)                              | 1.1<br>(0.9 to 1.2)                            | 0.4<br>(0.2 to 0.5)                           | 29.6<br>(19.7 to 40.7)                            | 28.5<br>(18.7 to 39.5)                           |
| Mesothelioma                                       | --                                               | --                                             | --                                            | --                                                | --                                               |
| Hodgkin lymphoma                                   | 7.6<br>(5.9 to 8.8)                              | 2.2<br>(1.7 to 2.6)                            | 0.9<br>(0.6 to 1.2)                           | -9.3<br>(-16.8 to -0.5)                           | -10.1<br>(-17.4 to -1.3)                         |
| Non-Hodgkin's lymphoma                             | 17.4<br>(14.4 to 19.3)                           | 5.7<br>(4.8 to 6.3)                            | 1.8<br>(1.2 to 2.5)                           | 17.2<br>(6.0 to 28.1)                             | 16.2<br>(5.2 to 27.1)                            |
| Multiple myeloma                                   | --                                               | --                                             | --                                            | --                                                | --                                               |
| Leukaemia                                          | 46.5<br>(40.8 to 50.6)                           | 13.5<br>(12.0 to 14.6)                         | 6.2<br>(4.3 to 8.6)                           | -9.8<br>(-17.0 to -1.1)                           | -10.6<br>(-17.7 to -1.9)                         |
| Acute lymphoid leukaemia                           | 20.7<br>(18.5 to 22.7)                           | 6.0<br>(5.3 to 6.6)                            | 2.8<br>(2.0 to 3.8)                           | 3.6<br>(-8.9 to 13.8)                             | 2.8<br>(-9.7 to 12.8)                            |
| Chronic lymphoid leukaemia                         | --                                               | --                                             | --                                            | --                                                | --                                               |
| Acute myeloid leukaemia                            | 3.6<br>(3.1 to 4.0)                              | 2.7<br>(2.3 to 3.0)                            | 0.8<br>(0.5 to 1.0)                           | -0.4<br>(-8.3 to 8.1)                             | -1.2<br>(-9.1 to 7.2)                            |
| Chronic myeloid leukaemia                          | --                                               | --                                             | --                                            | --                                                | --                                               |
| Other leukaemia                                    | 22.2<br>(18.2 to 25.1)                           | 4.9<br>(4.0 to 5.5)                            | 2.7<br>(1.8 to 3.7)                           | -22.2<br>(-30.8 to -11.8)                         | -22.9<br>(-31.4 to -12.5)                        |
| Other neoplasms                                    | 57.9<br>(50.3 to 62.2)                           | 16.9<br>(14.8 to 18.1)                         | 5.1<br>(3.6 to 7.0)                           | 29.0<br>(17.5 to 39.9)                            | 28.0<br>(16.5 to 38.8)                           |
| <b>Cardiovascular diseases</b>                     | <b>4,087.1</b><br><b>(3,734.9 to 4,352.2)</b>    | <b>558.4†</b><br><b>(500.8 to 619.0)</b>       | <b>267.6</b><br><b>(178.8 to 385.9)</b>       | <b>4.7</b><br><b>(1.6 to 7.5)</b>                 | <b>3.8</b><br><b>(0.8 to 6.6)</b>                |
| Rheumatic heart disease                            | 2,153.1<br>(1,903.9 to 2,420.8)                  | 193.5<br>(172.6 to 216.3)                      | 103.1<br>(64.5 to 152.6)                      | 10.3<br>(5.4 to 15.0)                             | 9.4<br>(4.6 to 14.0)                             |
| Ischaemic heart disease                            | 397.4<br>(357.9 to 437.8)                        | 191.4<br>(163.5 to 224.2)                      | 23.4<br>(15.3 to 34.3)                        | 2.8<br>(-4.8 to 11.1)                             | 1.9<br>(-5.6 to 10.2)                            |
| Cerebrovascular disease                            | 207.1<br>(159.8 to 271.8)                        | 48.0†<br>(26.7 to 75.3)                        | 45.9<br>(30.4 to 64.6)                        | -7.7<br>(-13.3 to -3.0)                           | -8.5<br>(-14.0 to -3.8)                          |
| Ischaemic stroke                                   | 201.9<br>(146.1 to 270.0)                        | 30.4†<br>(13.6 to 54.7)                        | 31.1<br>(19.5 to 46.1)                        | -7.7<br>(-15.5 to -1.3)                           | -8.4<br>(-16.2 to -2.1)                          |
| Hemorrhagic stroke                                 | 97.5<br>(71.7 to 127.3)                          | 17.6†<br>(7.5 to 33.1)                         | 14.8<br>(9.6 to 21.7)                         | -7.9<br>(-15.1 to -1.3)                           | -8.6<br>(-15.8 to -2.1)                          |
| Hypertensive heart disease                         | 0.1<br>(< 0.05 to < 0.05)                        | --                                             | < 0.05<br>(< 0.05 to < 0.05)                  | 22.9<br>(17.0 to 29.8)                            | 21.9<br>(16.0 to 28.8)                           |
| Cardiomyopathy and myocarditis                     | 107.6<br>(83.0 to 140.2)                         | 93.9†<br>(67.4 to 125.7)                       | 12.3<br>(7.4 to 19.4)                         | -1.0<br>(-3.5 to 1.2)                             | -1.9<br>(-4.3 to 0.4)                            |
| Myocarditis                                        | 102.1<br>(77.3 to 133.4)                         | 93.9<br>(67.4 to 125.7)                        | 8.3<br>(5.0 to 13.1)                          | -1.8<br>(-5.1 to 1.2)                             | -2.6<br>(-5.9 to 0.4)                            |
| Alcoholic cardiomyopathy                           | --                                               | --                                             | --                                            | --                                                | --                                               |
| Other cardiomyopathy                               | 44.5<br>(31.1 to 60.3)                           | --                                             | 4.0<br>(2.3 to 6.4)                           | 0.6<br>(-1.3 to 2.4)                              | -0.2<br>(-2.1 to 1.6)                            |
| Atrial fibrillation and flutter                    | --                                               | --                                             | --                                            | --                                                | --                                               |
| Peripheral vascular disease                        | --                                               | --                                             | --                                            | --                                                | --                                               |
| Endocarditis                                       | 9.7<br>(7.0 to 12.7)                             | 31.6<br>(17.6 to 46.4)                         | 0.8<br>(0.5 to 1.2)                           | 7.1<br>(5.1 to 9.2)                               | 6.2<br>(4.2 to 8.3)                              |
| Other cardiovascular and circulatory diseases      | 1,500.5<br>(936.0 to 2,356.9)                    | --                                             | 82.2<br>(43.7 to 138.6)                       | 7.3<br>(2.3 to 12.6)                              | 6.4<br>(1.4 to 11.7)                             |
| <b>Chronic respiratory diseases</b>                | <b>37,716.0</b><br><b>(34,581.7 to 41,361.9)</b> | <b>5,256.5†</b><br><b>(4,110.8 to 6,546.7)</b> | <b>1,749.0</b><br><b>(1,208.0 to 2,411.6)</b> | <b>8.4</b><br><b>(6.3 to 10.7)</b>                | <b>7.5</b><br><b>(5.5 to 9.8)</b>                |
| Chronic obstructive pulmonary disease              | 1,592.4<br>(1,440.2 to 1,754.9)                  | 123.5<br>(104.2 to 143.9)                      | 137.5<br>(117.0 to 157.3)                     | 1.6<br>(-4.5 to 7.4)                              | 0.7<br>(-5.3 to 6.5)                             |
| Pneumoconiosis                                     | 0.2<br>(0.1 to 0.2)                              | 0.1<br>(0.1 to 0.1)                            | < 0.05<br>(< 0.05 to < 0.05)                  | -1.8<br>(-3.9 to 0.3)                             | -2.6<br>(-4.7 to -0.6)                           |
| Silicosis                                          | --                                               | --                                             | --                                            | --                                                | --                                               |

| Cause                                                          | Prevalence in thousands (95% UI)                    | Incidence in thousands (95% UI)                   | YLDs in thousands (95% UI)                     |                                                   |                                                  |
|----------------------------------------------------------------|-----------------------------------------------------|---------------------------------------------------|------------------------------------------------|---------------------------------------------------|--------------------------------------------------|
|                                                                | 2016 counts                                         | 2016 counts                                       | 2016 counts                                    | Percentage change in counts between 2006 and 2016 | Percentage change in rates between 2006 and 2016 |
| Asbestosis                                                     | 0.1<br>(< 0.05 to 0.1)                              | < 0.05<br>(< 0.05 to 0.1)                         | < 0.05<br>(< 0.05 to < 0.05)                   | 1.2<br>(-2.7 to 4.6)                              | 0.3<br>(-3.5 to 3.8)                             |
| Coal workers pneumoconiosis                                    | < 0.05<br>(< 0.05 to < 0.05)                        | < 0.05<br>(< 0.05 to < 0.05)                      | < 0.05<br>(< 0.05 to < 0.05)                   | -7.2<br>(-9.9 to -4.3)                            | -7.9<br>(-10.7 to -5.1)                          |
| Other pneumoconiosis                                           | 0.1<br>(0.1 to 0.1)                                 | 0.1<br>(< 0.05 to 0.1)                            | < 0.05<br>(< 0.05 to < 0.05)                   | -3.0<br>(-5.7 to -0.4)                            | -3.8<br>(-6.5 to -1.2)                           |
| Asthma                                                         | 35,680.9<br>(30,944.3 to 41,009.1)                  | 5,131.1<br>(3,990.3 to 6,427.5)                   | 1,426.7<br>(919.0 to 2,081.7)                  | 6.2<br>(3.9 to 8.5)                               | 5.3<br>(3.0 to 7.6)                              |
| Interstitial lung disease and pulmonary sarcoidosis            | 54.9<br>(44.4 to 66.3)                              | 1.8<br>(1.1 to 2.7)                               | 6.2<br>(3.8 to 9.3)                            | -6.1<br>(-8.3 to -4.3)                            | -6.9<br>(-9.1 to -5.1)                           |
| Other chronic respiratory diseases                             | --                                                  | --                                                | 178.6<br>(151.7 to 204.3)                      | 39.2<br>(31.3 to 46.8)                            | 38.0<br>(30.2 to 45.6)                           |
| <b>Cirrhosis and other chronic liver diseases</b>              | <b>649.2</b><br><b>(591.9 to 721.6)</b>             | <b>3.8</b><br><b>(2.5 to 5.3)</b>                 | <b>81.3</b><br><b>(55.6 to 115.4)</b>          | <b>4.1</b><br><b>(-1.2 to 9.4)</b>                | <b>3.2</b><br><b>(-2.0 to 8.5)</b>               |
| Cirrhosis and other chronic liver diseases due to hepatitis B  | 23.1<br>(17.3 to 29.9)                              | 0.1<br>(0.1 to 0.2)                               | 3.4<br>(2.0 to 5.2)                            | 9.1<br>(-6.9 to 28.4)                             | 8.2<br>(-7.7 to 27.3)                            |
| Cirrhosis and other chronic liver diseases due to hepatitis C  | 20.1<br>(14.9 to 26.8)                              | 0.1<br>(0.1 to 0.2)                               | 2.7<br>(1.5 to 4.2)                            | 8.3<br>(-7.7 to 27.1)                             | 7.4<br>(-8.4 to 26.0)                            |
| Cirrhosis and other chronic liver diseases due to alcohol use  | --                                                  | --                                                | --                                             | --                                                | --                                               |
| Cirrhosis and other chronic liver diseases due to other causes | 606.0<br>(550.5 to 674.6)                           | 3.5<br>(2.3 to 4.9)                               | 75.2<br>(51.3 to 107.0)                        | 3.7<br>(-1.9 to 9.4)                              | 2.9<br>(-2.7 to 8.5)                             |
| <b>Digestive diseases</b>                                      | <b>5,953.9</b><br><b>(5,480.9 to 6,426.6)</b>       | <b>7,383.7†</b><br><b>(6,408.4 to 8,406.5)</b>    | <b>194.5</b><br><b>(133.5 to 274.5)</b>        | <b>-6.6</b><br><b>(-10.0 to -2.9)</b>             | <b>-7.4</b><br><b>(-10.8 to -3.7)</b>            |
| Peptic ulcer disease                                           | 1,069.8<br>(839.9 to 1,355.5)                       | 454.4<br>(323.2 to 615.8)                         | 20.3<br>(11.9 to 33.2)                         | -7.4<br>(-14.0 to -0.8)                           | -8.2<br>(-14.7 to -1.6)                          |
| Gastritis and duodenitis                                       | 2,723.6<br>(1,999.6 to 3,765.9)                     | 2,453.9<br>(1,757.0 to 3,292.7)                   | 33.4<br>(20.2 to 52.1)                         | -12.0<br>(-17.7 to -5.3)                          | -12.7<br>(-18.3 to -6.1)                         |
| Appendicitis                                                   | 116.0<br>(96.8 to 137.9)                            | 3,127.1<br>(2,590.7 to 3,753.8)                   | 36.1<br>(22.7 to 51.6)                         | -0.1<br>(-9.3 to 9.5)                             | -1.0<br>(-10.0 to 8.6)                           |
| Paralytic ileus and intestinal obstruction                     | 7.6<br>(5.0 to 10.6)                                | 196.7<br>(128.7 to 272.1)                         | 2.5<br>(1.5 to 3.9)                            | 6.3<br>(4.0 to 8.3)                               | 5.5<br>(3.1 to 7.4)                              |
| Inguinal, femoral, and abdominal hernia                        | 2,016.4<br>(1,200.4 to 3,158.8)                     | 554.1<br>(380.4 to 769.5)                         | 71.1<br>(41.2 to 113.3)                        | -9.0<br>(-14.6 to -3.3)                           | -9.7<br>(-15.3 to -4.1)                          |
| Inflammatory bowel disease                                     | 69.8<br>(59.1 to 83.8)                              | 174.8<br>(143.8 to 212.2)                         | 11.0<br>(7.0 to 15.8)                          | -3.3<br>(-8.1 to 2.0)                             | -4.1<br>(-8.9 to 1.2)                            |
| Vascular intestinal disorders                                  | 1.7<br>(0.8 to 2.8)                                 | 10.7<br>(6.4 to 16.8)                             | 0.5<br>(0.2 to 1.0)                            | 2.1<br>(0.1 to 3.7)                               | 1.2<br>(-0.8 to 2.9)                             |
| Gallbladder and biliary diseases                               | 283.9<br>(203.6 to 393.8)                           | 342.7<br>(224.9 to 510.0)                         | 1.6<br>(0.9 to 2.8)                            | -2.1<br>(-3.9 to -0.4)                            | -2.9<br>(-4.7 to -1.2)                           |
| Pancreatitis                                                   | 8.0<br>(5.5 to 10.9)                                | 69.3<br>(48.1 to 95.4)                            | 1.0<br>(0.6 to 1.7)                            | -9.8<br>(-17.0 to -4.2)                           | -10.5<br>(-17.7 to -5.0)                         |
| Other digestive diseases                                       | --                                                  | --                                                | 16.9<br>(11.6 to 23.9)                         | -0.9<br>(-4.5 to 3.0)                             | -1.7<br>(-5.3 to 2.2)                            |
| <b>Neurological disorders</b>                                  | <b>182,073.9</b><br><b>(171,065.0 to 195,237.8)</b> | <b>93,818.9</b><br><b>(65,602.7 to 127,379.4)</b> | <b>3,794.2</b><br><b>(2,549.7 to 5,257.4)</b>  | <b>3.0</b><br><b>(-0.6 to 7.2)</b>                | <b>2.1</b><br><b>(-1.4 to 6.3)</b>               |
| Alzheimer's disease and other dementias                        | --                                                  | --                                                | --                                             | --                                                | --                                               |
| Parkinson's disease                                            | --                                                  | --                                                | --                                             | --                                                | --                                               |
| Epilepsy                                                       | 2,271.1<br>(1,756.6 to 2,843.9)                     | 264.4<br>(173.9 to 373.4)                         | 768.5<br>(487.2 to 1,114.2)                    | 0.6<br>(-11.3 to 14.5)                            | -0.2<br>(-12.0 to 13.6)                          |
| Multiple sclerosis                                             | 10.9<br>(8.0 to 14.0)                               | 2.1<br>(1.5 to 3.0)                               | 3.1<br>(1.9 to 4.4)                            | 2.1<br>(0.6 to 3.6)                               | 1.3<br>(-0.2 to 2.8)                             |
| Motor neuron disease                                           | 13.0<br>(10.4 to 16.2)                              | 0.2<br>(0.1 to 0.4)                               | 2.8<br>(1.9 to 3.9)                            | -1.0<br>(-1.9 to 0.2)                             | -1.8<br>(-2.8 to -0.6)                           |
| Migraine                                                       | 63,260.8<br>(58,214.2 to 68,225.5)                  | 14,055.0<br>(12,487.9 to 15,685.3)                | 2,468.2<br>(1,532.8 to 3,607.8)                | 1.6<br>(0.3 to 3.1)                               | 0.8<br>(-0.6 to 2.2)                             |
| Tension-type headache                                          | 131,709.2<br>(99,562.3 to 166,599.7)                | 79,493.8<br>(51,243.3 to 113,394.4)               | 301.9<br>(179.3 to 496.2)                      | 0.9<br>(-0.9 to 3.2)                              | 0.1<br>(-1.7 to 2.4)                             |
| Other neurological disorders                                   | 1.8<br>(0.8 to 3.5)                                 | 3.4<br>(1.6 to 6.0)                               | 249.7<br>(158.5 to 361.4)                      | 33.0<br>(17.3 to 51.3)                            | 31.9<br>(16.4 to 50.0)                           |
| <b>Mental and substance use disorders</b>                      | <b>81,261.7</b><br><b>(78,765.3 to 83,517.1)</b>    | <b>28,256.5†</b><br><b>(24,011.7 to 33,074.7)</b> | <b>8,402.1</b><br><b>(5,798.2 to 11,366.1)</b> | <b>2.1</b><br><b>(1.2 to 3.1)</b>                 | <b>1.3</b><br><b>(0.4 to 2.2)</b>                |
| Schizophrenia                                                  | 27.9<br>(15.9 to 44.8)                              | 16.9<br>(9.6 to 27.1)                             | 19.8<br>(10.2 to 33.6)                         | -0.5<br>(-1.6 to 0.9)                             | -1.3<br>(-2.4 to 0.1)                            |
| Alcohol use disorders                                          | 464.7<br>(285.8 to 723.0)                           | 433.6<br>(257.4 to 698.4)                         | 47.2<br>(25.1 to 81.3)                         | 0.8<br>(-3.5 to 4.9)                              | -0.1<br>(-4.3 to 4.0)                            |
| Drug use disorders                                             | 397.0<br>(310.2 to 552.2)                           | 470.4<br>(295.7 to 697.4)                         | 15.6<br>(9.2 to 24.4)                          | -9.1<br>(-15.3 to -4.5)                           | -9.9<br>(-16.0 to -5.3)                          |
| Opioid use disorders                                           | --                                                  | --                                                | --                                             | --                                                | --                                               |
| Cocaine use disorders                                          | --                                                  | --                                                | --                                             | --                                                | --                                               |
| Amphetamine use disorders                                      | 21.7<br>(13.6 to 32.0)                              | 43.4<br>(27.1 to 64.2)                            | 3.0<br>(1.6 to 5.2)                            | -8.5<br>(-16.0 to -2.8)                           | -9.3<br>(-16.7 to -3.6)                          |
| Cannabis use disorders                                         | 352.3<br>(206.5 to 545.1)                           | 426.4<br>(254.8 to 653.2)                         | 10.6<br>(5.2 to 18.4)                          | -9.5<br>(-17.4 to -3.4)                           | -10.2<br>(-18.1 to -4.1)                         |
| Other drug use disorders                                       | 0.3<br>(0.1 to 0.6)                                 | 0.6<br>(0.2 to 1.3)                               | 2.0<br>(1.1 to 3.4)                            | -8.4<br>(-15.8 to -1.5)                           | -9.2<br>(-16.4 to -2.3)                          |
| Depressive disorders                                           | 7,952.0<br>(7,197.3 to 8,798.0)                     | 11,734.7<br>(8,589.9 to 15,707.7)                 | 1,454.2<br>(931.1 to 2,168.8)                  | 4.5<br>(2.6 to 6.5)                               | 3.6<br>(1.7 to 5.7)                              |
| Major depressive disorder                                      | 6,006.1<br>(4,381.4 to 8,076.5)                     | 10,995.8<br>(7,800.9 to 15,015.6)                 | 1,280.2<br>(788.4 to 1,970.7)                  | 4.7<br>(2.5 to 7.0)                               | 3.8<br>(1.6 to 6.2)                              |
| Dysthymia                                                      | 1,746.2<br>(1,264.4 to 2,406.5)                     | 738.9<br>(512.3 to 1,030.9)                       | 174.0<br>(105.1 to 276.9)                      | 3.0<br>(-0.4 to 6.2)                              | 2.1<br>(-1.2 to 5.4)                             |
| Bipolar disorder                                               | 1,521.5<br>(1,121.7 to 1,984.5)                     | 835.5<br>(615.8 to 1,092.2)                       | 323.0<br>(192.9 to 510.1)                      | 3.8<br>(-0.1 to 7.2)                              | 2.9<br>(-0.9 to 6.3)                             |
| Anxiety disorders                                              | 21,635.6<br>(18,709.0 to 25,192.7)                  | 5,089.2<br>(4,495.3 to 5,748.0)                   | 2,161.7<br>(1,482.1 to 2,985.6)                | 1.1<br>(-1.1 to 3.2)                              | 0.3<br>(-1.9 to 2.3)                             |
| Eating disorders                                               | 664.3<br>(579.4 to 778.7)                           | 1,052.1<br>(645.2 to 1,637.2)                     | 137.8<br>(82.1 to 223.5)                       | 9.9<br>(5.7 to 14.0)                              | 9.0<br>(4.8 to 13.1)                             |
| Anorexia nervosa                                               | 290.8<br>(200.4 to 413.7)                           | 180.3<br>(125.3 to 251.2)                         | 63.0<br>(36.0 to 98.7)                         | 8.3<br>(1.9 to 14.8)                              | 7.4<br>(1.1 to 13.8)                             |
| Bulimia nervosa                                                | 348.2<br>(185.9 to 591.7)                           | 871.8<br>(485.7 to 1,431.5)                       | 74.8<br>(36.0 to 138.1)                        | 11.4<br>(6.0 to 17.6)                             | 10.4<br>(5.1 to 16.6)                            |
| Autistic spectrum disorders                                    | 6,168.9<br>(5,889.2 to 6,412.8)                     | 37.2<br>(17.0 to 80.0)                            | 909.7<br>(614.1 to 1,282.0)                    | 1.4<br>(-0.1 to 3.0)                              | 0.6<br>(-0.9 to 2.2)                             |
| Autism                                                         | 1,793.9<br>(1,544.6 to 2,087.0)                     | 3.1<br>(1.0 to 7.3)                               | 466.6<br>(299.5 to 677.9)                      | 1.5<br>(-1.0 to 4.1)                              | 0.6<br>(-1.8 to 3.2)                             |
| Asperger syndrome and other autistic spectrum disorders        | 4,358.5<br>(3,629.1 to 5,229.2)                     | 34.0<br>(13.9 to 74.4)                            | 443.2<br>(290.8 to 645.8)                      | 1.3<br>(-0.4 to 2.9)                              | 0.5<br>(-1.2 to 2.1)                             |

| Cause                                                      | Prevalence in thousands (95% UI)                    | Incidence in thousands (95% UI)                          | YLDs in thousands (95% UI)                      |                                                   |                                                  |
|------------------------------------------------------------|-----------------------------------------------------|----------------------------------------------------------|-------------------------------------------------|---------------------------------------------------|--------------------------------------------------|
|                                                            | 2016 counts                                         | 2016 counts                                              | 2016 counts                                     | Percentage change in counts between 2006 and 2016 | Percentage change in rates between 2006 and 2016 |
| Attention-deficit/hyperactivity disorder                   | 12,017.4<br>(10,676.7 to 13,643.7)                  | 155.0<br>(138.3 to 177.5)                                | 145.9<br>(88.1 to 232.3)                        | -0.2<br>(-2.1 to 1.6)                             | -1.0<br>(-2.9 to 0.8)                            |
| Conduct disorder                                           | 21,122.2<br>(16,392.3 to 26,578.2)                  | 8,006.2<br>(5,621.7 to 10,185.9)                         | 2,571.7<br>(1,507.2 to 4,052.9)                 | 3.4<br>(1.8 to 4.9)                               | 2.5<br>(0.9 to 4.0)                              |
| Idiopathic developmental intellectual disability           | 14,318.2<br>(8,889.3 to 19,655.1)                   | --                                                       | 559.6<br>(260.8 to 960.6)                       | -4.9<br>(-8.4 to -2.5)                            | -5.7<br>(-9.2 to -3.3)                           |
| Other mental and substance use disorders                   | 716.6<br>(590.5 to 855.2)                           | 426.0<br>(350.8 to 508.8)                                | 56.0<br>(37.3 to 81.5)                          | 1.1<br>(-4.7 to 7.4)                              | 0.3<br>(-5.5 to 6.5)                             |
| <b>Diabetes, urogenital, blood, and endocrine diseases</b> | <b>168,627.0</b><br><b>(166,560.1 to 171,125.9)</b> | <b>20,768.2†</b><br><b>(16,317.8 to 26,175.2)</b>        | <b>979.6</b><br><b>(643.1 to 1,405.8)</b>       | <b>0.1</b><br><b>(-3.1 to 3.2)</b>                | <b>-0.7</b><br><b>(-3.9 to 2.3)</b>              |
| Diabetes mellitus                                          | 1,955.9<br>(1,425.6 to 2,569.1)                     | 457.1<br>(326.3 to 624.5)                                | 99.2<br>(56.6 to 158.6)                         | 8.0<br>(4.4 to 11.1)                              | 7.1<br>(3.5 to 10.2)                             |
| Acute glomerulonephritis                                   | 7.2<br>(4.9 to 10.2)                                | 104.8<br>(71.6 to 147.5)                                 | 0.4<br>(0.2 to 0.6)                             | -4.8<br>(-7.6 to -1.3)                            | -5.6<br>(-8.4 to -2.1)                           |
| Chronic kidney disease                                     | 1,137.5<br>(856.7 to 1,457.6)                       | 249.5<br>(173.7 to 346.6)                                | 56.8<br>(34.2 to 87.4)                          | 0.9<br>(-3.8 to 5.5)                              | 0.1<br>(-4.6 to 4.6)                             |
| Chronic kidney disease due to diabetes mellitus            | 50.6<br>(28.9 to 82.9)                              | 10.4<br>(5.6 to 18.2)                                    | 2.7<br>(1.4 to 4.8)                             | -1.7<br>(-7.1 to 4.2)                             | -2.5<br>(-7.8 to 3.3)                            |
| Chronic kidney disease due to hypertension                 | 316.1<br>(206.2 to 444.6)                           | 105.4<br>(64.9 to 159.2)                                 | 1.5<br>(0.8 to 2.7)                             | -2.4<br>(-7.4 to 2.8)                             | -3.1<br>(-8.2 to 1.9)                            |
| Chronic kidney disease due to glomerulonephritis           | 193.6<br>(127.8 to 269.4)                           | 6.2<br>(3.6 to 10.4)                                     | 24.0<br>(13.1 to 38.8)                          | 0.7<br>(-3.7 to 5.3)                              | 0.1<br>(-4.5 to 4.4)                             |
| Chronic kidney disease due to other causes                 | 577.3<br>(397.1 to 809.3)                           | 127.5<br>(82.8 to 185.5)                                 | 28.6<br>(15.9 to 45.3)                          | 1.5<br>(-3.5 to 6.7)                              | 0.7<br>(-4.3 to 5.8)                             |
| Urinary diseases and male infertility                      | 389.1<br>(344.2 to 466.7)                           | 19,746.4†<br>(15,249.6 to 25,190.9)                      | 19.0<br>(11.4 to 30.2)                          | -7.0<br>(-12.2 to -1.4)                           | -7.8<br>(-12.9 to -2.2)                          |
| Interstitial nephritis and urinary tract infections        | 344.7<br>(258.4 to 445.3)                           | 19,011.9<br>(14,515.0 to 24,329.7)                       | 11.6<br>(6.7 to 19.0)                           | 0.7<br>(-6.0 to 7.7)                              | -0.2<br>(-6.8 to 6.8)                            |
| Urolithiasis                                               | 27.1<br>(18.6 to 37.8)                              | 734.6<br>(507.9 to 1,044.6)                              | 2.1<br>(1.2 to 3.4)                             | -3.2<br>(-4.3 to -2.0)                            | -4.0<br>(-5.1 to -2.8)                           |
| Benign prostatic hyperplasia                               | --                                                  | --                                                       | --                                              | --                                                | --                                               |
| Male infertility                                           | --                                                  | --                                                       | --                                              | --                                                | --                                               |
| Other urinary diseases                                     | --                                                  | --                                                       | 5.3<br>(3.2 to 8.4)                             | -21.4<br>(-25.7 to -16.6)                         | -22.0<br>(-26.4 to -17.3)                        |
| Gynecological diseases                                     | --                                                  | --                                                       | --                                              | --                                                | --                                               |
| Uterine fibroids                                           | --                                                  | --                                                       | --                                              | --                                                | --                                               |
| Polycystic ovarian syndrome                                | --                                                  | --                                                       | --                                              | --                                                | --                                               |
| Female infertility                                         | --                                                  | --                                                       | --                                              | --                                                | --                                               |
| Endometriosis                                              | --                                                  | --                                                       | --                                              | --                                                | --                                               |
| Genital prolapse                                           | --                                                  | --                                                       | --                                              | --                                                | --                                               |
| Premenstrual syndrome                                      | --                                                  | --                                                       | --                                              | --                                                | --                                               |
| Other gynecological diseases                               | --                                                  | --                                                       | --                                              | --                                                | --                                               |
| Hemoglobinopathies and hemolytic anaemias                  | 163,124.2<br>(160,753.0 to 165,566.5)               | --                                                       | 625.8<br>(407.6 to 905.8)                       | -0.8<br>(-4.9 to 3.3)                             | -1.6<br>(-5.7 to 2.5)                            |
| Thalassemias                                               | 20.8<br>(19.3 to 22.7)                              | --                                                       | 1.1<br>(0.7 to 1.6)                             | -8.9<br>(-16.1 to -2.2)                           | -9.7<br>(-16.8 to -3.0)                          |
| Thalassaemias trait                                        | 22,274.6<br>(21,459.3 to 23,157.9)                  | --                                                       | 224.2<br>(144.9 to 324.8)                       | -10.8<br>(-16.4 to -4.8)                          | -11.5<br>(-17.1 to -5.5)                         |
| Sickle cell disorders                                      | 577.7<br>(527.9 to 645.6)                           | --                                                       | 44.4<br>(29.5 to 63.2)                          | 19.8<br>(10.5 to 31.5)                            | 18.8<br>(9.6 to 30.4)                            |
| Sickle cell trait                                          | 48,141.9<br>(43,658.2 to 53,992.0)                  | --                                                       | 166.4<br>(107.7 to 249.3)                       | 7.2<br>(3.3 to 11.4)                              | 6.4<br>(2.5 to 10.5)                             |
| G6PD deficiency                                            | 31,773.5<br>(30,522.2 to 33,267.5)                  | --                                                       | 2.1<br>(1.3 to 3.0)                             | 1.2<br>(-4.6 to 8.5)                              | 0.4<br>(-5.4 to 7.6)                             |
| G6PD trait                                                 | 75,574.6<br>(74,340.7 to 76,956.1)                  | --                                                       | < 0.05<br>(< 0.05 to < 0.05)                    | -2.1<br>(-6.4 to 1.8)                             | -3.0<br>(-7.1 to 1.0)                            |
| Other hemoglobinopathies and hemolytic anaemias            | 4,838.2<br>(4,259.6 to 5,465.8)                     | --                                                       | 187.6<br>(121.1 to 273.4)                       | 2.0<br>(-4.3 to 9.0)                              | 1.1<br>(-5.1 to 8.1)                             |
| Endocrine, metabolic, blood, and immune disorders          | 4,734.9<br>(4,206.9 to 5,304.3)                     | 210.3<br>(131.9 to 308.8)                                | 178.3<br>(114.0 to 259.2)                       | -0.3<br>(-3.6 to 3.2)                             | -1.1<br>(-4.4 to 2.3)                            |
| <b>Musculoskeletal disorders</b>                           | <b>13,604.3</b><br><b>(12,343.5 to 14,805.0)</b>    | <b>7,948.8</b><br><b>(5,950.2 to 10,306.6)</b>           | <b>1,443.9</b><br><b>(932.9 to 2,059.7)</b>     | <b>4.6</b><br><b>(-7.2 to -2.6)</b>               | <b>-5.4</b><br><b>(-7.9 to -3.4)</b>             |
| Rheumatoid arthritis                                       | 180.0<br>(131.8 to 238.8)                           | 39.6<br>(31.2 to 49.4)                                   | 46.2<br>(28.5 to 69.1)                          | 1.7<br>(-3.9 to 7.0)                              | 0.8<br>(-4.7 to 6.1)                             |
| Osteoarthritis                                             | --                                                  | --                                                       | --                                              | --                                                | --                                               |
| Low back and neck pain                                     | 11,362.4<br>(9,955.1 to 13,136.6)                   | 6,349.1<br>(4,526.4 to 8,568.1)                          | 1,183.3<br>(728.6 to 1,754.7)                   | -2.8<br>(-5.6 to -0.6)                            | -3.6<br>(-6.4 to -1.4)                           |
| Low back pain                                              | 9,436.3<br>(6,589.1 to 12,629.1)                    | 5,710.7<br>(3,869.5 to 7,900.8)                          | 1,020.3<br>(606.9 to 1,540.0)                   | -2.9<br>(-6.2 to -0.4)                            | -3.7<br>(-7.0 to -1.2)                           |
| Neck pain                                                  | 1,561.2<br>(1,138.8 to 2,120.2)                     | 638.4<br>(424.2 to 907.7)                                | 163.1<br>(97.2 to 251.2)                        | -2.1<br>(-5.8 to 1.6)                             | -2.9<br>(-6.5 to 0.8)                            |
| Gout                                                       | --                                                  | --                                                       | --                                              | --                                                | --                                               |
| Other musculoskeletal disorders                            | 2,387.5<br>(1,425.7 to 3,685.5)                     | 1,560.1<br>(1,040.0 to 2,389.1)                          | 214.4<br>(113.2 to 354.7)                       | -14.6<br>(-22.4 to -8.7)                          | -15.3<br>(-23.0 to -9.5)                         |
| <b>Other non-communicable diseases</b>                     | <b>402,907.7</b><br><b>(392,186.5 to 415,534.0)</b> | <b>1,045,300.5†</b><br><b>(853,140.3 to 1,244,088.8)</b> | <b>10,000.1</b><br><b>(6,765.9 to 14,385.1)</b> | <b>1.8</b><br><b>(1.0 to 2.4)</b>                 | <b>0.9</b><br><b>(0.2 to 1.6)</b>                |
| Congenital anomalies                                       | 8,189.1<br>(7,723.5 to 8,599.5)                     | --                                                       | 925.1<br>(654.6 to 1,240.3)                     | -0.6<br>(-2.8 to 1.8)                             | -1.4<br>(-3.6 to 0.9)                            |
| Neural tube defects                                        | 542.3<br>(488.6 to 601.2)                           | --                                                       | 162.7<br>(113.7 to 218.8)                       | 5.8<br>(1.1 to 11.0)                              | 4.9<br>(0.3 to 10.1)                             |
| Congenital heart anomalies                                 | 1,418.4<br>(1,240.2 to 1,606.9)                     | --                                                       | 69.4<br>(29.0 to 119.0)                         | -2.9<br>(-6.0 to 0.3)                             | -3.7<br>(-6.8 to -0.6)                           |
| Orofacial clefts                                           | 276.1<br>(245.2 to 308.2)                           | --                                                       | 3.8<br>(2.5 to 5.5)                             | -7.1<br>(-9.9 to -4.2)                            | -7.9<br>(-10.6 to -5.0)                          |
| Down's syndrome                                            | 210.6<br>(183.8 to 243.1)                           | --                                                       | 18.1<br>(12.2 to 25.5)                          | -0.6<br>(-3.8 to 2.4)                             | -1.4<br>(-4.6 to 1.5)                            |
| Turner syndrome                                            | 316.1<br>(276.4 to 361.4)                           | --                                                       | 4.3<br>(1.7 to 7.4)                             | -1.4<br>(-12.7 to 11.3)                           | -2.2<br>(-13.4 to 10.4)                          |
| Klinefelter syndrome                                       | 413.2<br>(355.2 to 475.0)                           | --                                                       | 1.1<br>(0.5 to 2.1)                             | 2.9<br>(-5.2 to 12.8)                             | 2.1<br>(-6.0 to 11.8)                            |

| Cause                                         | Prevalence in thousands (95% UI)                 | Incidence in thousands (95% UI)                   | YLDs in thousands (95% UI)                    |                                                   |                                                  |
|-----------------------------------------------|--------------------------------------------------|---------------------------------------------------|-----------------------------------------------|---------------------------------------------------|--------------------------------------------------|
|                                               | 2016 counts                                      | 2016 counts                                       | 2016 counts                                   | Percentage change in counts between 2006 and 2016 | Percentage change in rates between 2006 and 2016 |
| Other chromosomal abnormalities               | 895.8<br>(761.3 to 1,048.0)                      | --                                                | 77.5<br>(51.3 to 109.3)                       | 1.8<br>(-1.8 to 5.2)                              | 1.0<br>(-2.6 to 4.3)                             |
| Congenital musculoskeletal and limb anomalies | 889.4<br>(813.9 to 968.9)                        | --                                                | 127.2<br>(86.1 to 176.7)                      | 2.4<br>(-0.9 to 5.8)                              | 1.6<br>(-1.8 to 4.9)                             |
| Urogenital congenital anomalies               | 944.4<br>(844.4 to 1,062.2)                      | --                                                | 29.9<br>(18.0 to 46.3)                        | -2.9<br>(-5.2 to -0.6)                            | -3.7<br>(-6.0 to -1.4)                           |
| Digestive congenital anomalies                | 717.2<br>(642.6 to 793.5)                        | --                                                | 32.7<br>(21.5 to 46.7)                        | -5.8<br>(-10.5 to -0.8)                           | -6.5<br>(-11.2 to -1.7)                          |
| Other congenital anomalies                    | 3,166.6<br>(2,243.0 to 4,461.5)                  | --                                                | 398.4<br>(258.6 to 592.5)                     | -3.2<br>(-7.3 to 1.0)                             | -4.0<br>(-8.1 to 0.2)                            |
| Skin and subcutaneous diseases                | 240,107.4<br>(234,956.2 to 245,651.5)            | 457,925.9<br>(396,896.8 to 539,475.4)             | 7,104.2<br>(4,682.2 to 10,421.1)              | 3.0<br>(2.2 to 3.6)                               | 2.1<br>(1.3 to 2.8)                              |
| Dermatitis                                    | 31,501.0<br>(27,912.1 to 35,191.9)               | 20,270.6<br>(16,464.3 to 24,991.6)                | 1,267.1<br>(721.7 to 2,096.6)                 | 3.7<br>(1.6 to 5.6)                               | 2.8<br>(0.8 to 4.8)                              |
| Psoriasis                                     | 3,406.4<br>(3,089.8 to 3,759.5)                  | 465.6<br>(398.7 to 544.3)                         | 308.2<br>(213.7 to 413.1)                     | 6.8<br>(3.2 to 10.3)                              | 5.9<br>(2.3 to 9.4)                              |
| Cellulitis                                    | 213.4<br>(169.3 to 265.6)                        | 4,003.7<br>(3,287.0 to 4,907.9)                   | 12.4<br>(7.8 to 18.8)                         | 2.2<br>(-3.3 to 8.0)                              | 1.3<br>(-4.1 to 7.1)                             |
| Pyoderma                                      | 1,256.2<br>(1,107.2 to 1,414.3)                  | 23,577.0<br>(21,065.3 to 26,280.6)                | 7.2<br>(2.8 to 14.3)                          | 16.0<br>(11.8 to 20.4)                            | 15.0<br>(10.9 to 19.4)                           |
| Scabies                                       | 15,766.5<br>(10,862.0 to 21,673.0)               | 49,181.3<br>(33,346.0 to 69,123.8)                | 409.9<br>(214.0 to 708.7)                     | 4.6<br>(-6.3 to -3.0)                             | -5.4<br>(-7.1 to -3.8)                           |
| Fungal skin diseases                          | 49,677.8<br>(36,456.7 to 64,469.9)               | 129,520.4<br>(97,045.6 to 165,904.6)              | 285.2<br>(109.2 to 618.9)                     | 7.1<br>(6.0 to 8.2)                               | 6.2<br>(5.1 to 7.2)                              |
| Viral skin diseases                           | 26,845.1<br>(23,603.8 to 30,623.0)               | 37,190.0<br>(33,067.4 to 41,607.9)                | 833.4<br>(508.2 to 1,263.8)                   | 0.5<br>(-0.4 to 1.4)                              | -0.3<br>(-1.2 to 0.6)                            |
| Acne vulgaris                                 | 133,810.6<br>(114,133.4 to 156,989.5)            | 160,645.8<br>(111,054.9 to 233,032.5)             | 3,483.4<br>(2,269.9 to 5,141.7)               | 3.8<br>(2.6 to 4.9)                               | 3.0<br>(1.8 to 4.0)                              |
| Alopecia areata                               | 493.2<br>(439.5 to 551.5)                        | 916.8<br>(794.7 to 1,039.6)                       | 16.5<br>(10.3 to 24.8)                        | 0.5<br>(-5.2 to 6.7)                              | -0.3<br>(-5.9 to 5.9)                            |
| Pruritus                                      | 2,992.8<br>(1,999.0 to 4,234.8)                  | 2,255.3<br>(1,530.2 to 3,083.7)                   | 32.6<br>(13.9 to 67.4)                        | 1.3<br>(-0.8 to 3.6)                              | 0.5<br>(-1.6 to 2.8)                             |
| Urticaria                                     | 5,570.4<br>(3,838.9 to 7,539.7)                  | 9,516.7<br>(6,576.1 to 12,779.6)                  | 339.7<br>(191.8 to 541.2)                     | 0.2<br>(-1.9 to 2.2)                              | -0.6<br>(-2.7 to 1.4)                            |
| Decubitus ulcer                               | 30.7<br>(20.4 to 44.7)                           | 107.2<br>(69.2 to 153.1)                          | 5.4<br>(3.1 to 9.0)                           | 2.4<br>(1.4 to 3.2)                               | 1.6<br>(0.6 to 2.4)                              |
| Other skin and subcutaneous diseases          | 18,304.5<br>(16,652.3 to 20,073.6)               | 20,275.6<br>(18,332.9 to 22,410.3)                | 103.2<br>(48.5 to 191.0)                      | 5.7<br>(4.5 to 7.0)                               | 4.8<br>(3.6 to 6.1)                              |
| Sense organ diseases                          | 47,783.3<br>(46,026.1 to 49,742.3)               | 50,314.5†<br>(44,607.2 to 57,272.7)               | 1,621.8<br>(1,080.8 to 2,302.5)               | -1.1<br>(-3.2 to 0.7)                             | -1.9<br>(-4.0 to -0.1)                           |
| Glaucoma                                      | --                                               | --                                                | --                                            | --                                                | --                                               |
| Cataract                                      | --                                               | --                                                | --                                            | --                                                | --                                               |
| Macular degeneration                          | --                                               | --                                                | --                                            | --                                                | --                                               |
| Refraction and accommodation disorders        | 27,645.7<br>(24,412.8 to 31,110.6)               | --                                                | 608.8<br>(371.9 to 960.1)                     | -1.8<br>(-3.1 to -0.3)                            | -2.6<br>(-3.9 to -1.2)                           |
| Age-related and other hearing loss            | 16,310.2<br>(12,260.5 to 21,034.3)               | --                                                | 838.5<br>(543.3 to 1,198.9)                   | -1.2<br>(-4.9 to 2.3)                             | -2.0<br>(-5.7 to 1.5)                            |
| Other vision loss                             | 450.4<br>(313.0 to 621.1)                        | --                                                | 22.0<br>(13.0 to 34.2)                        | -0.1<br>(-6.4 to 6.6)                             | -0.9<br>(-7.2 to 5.8)                            |
| Other sense organ diseases                    | 5,283.3<br>(4,662.8 to 5,969.7)                  | 50,314.5<br>(44,607.2 to 57,272.7)                | 152.4<br>(92.9 to 233.4)                      | 1.5<br>(-1.1 to 4.0)                              | 0.6<br>(-1.9 to 3.2)                             |
| Oral disorders                                | 246,054.3<br>(214,832.4 to 281,821.9)            | 537,060.2†<br>(361,955.4 to 728,053.3)            | 349.1<br>(193.4 to 593.0)                     | -2.0<br>(-3.3 to -0.5)                            | -2.8<br>(-4.1 to -1.4)                           |
| Caries of deciduous teeth                     | 10,820.8<br>(1,094.7 to 23,506.6)                | 53,361.2<br>(3,325.2 to 193,327.0)                | 2.8<br>(0.3 to 8.1)                           | -7.5<br>(-52.7 to 1.6)                            | -8.3<br>(-53.1 to 0.7)                           |
| Caries of permanent teeth                     | 226,313.7<br>(172,956.8 to 280,080.8)            | 483,699.0<br>(333,330.0 to 628,973.5)             | 155.1<br>(67.5 to 308.9)                      | -5.1<br>(-7.4 to -3.2)                            | -5.9<br>(-8.2 to -4.0)                           |
| Periodontal disease                           | --                                               | --                                                | --                                            | --                                                | --                                               |
| Edentulism and severe tooth loss              | --                                               | --                                                | --                                            | --                                                | --                                               |
| Other oral disorders                          | 6,380.9<br>(5,439.9 to 7,439.9)                  | --                                                | 191.2<br>(117.3 to 297.6)                     | 0.8<br>(-0.9 to 2.4)                              | -0.0<br>(-1.7 to 1.6)                            |
| <b>Injuries</b>                               | <b>44,366.2</b><br><b>(39,664.3 to 49,263.6)</b> | <b>41,522.1†</b><br><b>(35,136.4 to 49,039.6)</b> | <b>1,778.1</b><br><b>(1,136.5 to 2,613.1)</b> | <b>3.6</b><br><b>(2.1 to 4.8)</b>                 | <b>2.7</b><br><b>(1.3 to 3.9)</b>                |
| <b>Transport injuries</b>                     | <b>4,073.4</b><br><b>(3,520.7 to 4,695.5)</b>    | <b>4,784.5</b><br><b>(3,605.0 to 6,232.1)</b>     | <b>242.7</b><br><b>(151.8 to 367.1)</b>       | <b>-1.0</b><br><b>(-2.9 to 0.9)</b>               | <b>-1.8</b><br><b>(-3.7 to 0.1)</b>              |
| Road injuries                                 | 2,253.8<br>(1,975.9 to 2,546.9)                  | 4,049.9<br>(2,996.6 to 5,434.1)                   | 137.0<br>(84.5 to 207.8)                      | -1.4<br>(-4.0 to 1.5)                             | 2.2<br>(-4.8 to 0.7)                             |
| Pedestrian road injuries                      | 549.5<br>(409.6 to 714.3)                        | 771.0<br>(485.8 to 1,205.5)                       | 33.7<br>(20.3 to 53.2)                        | -8.0<br>(-10.8 to -4.8)                           | -8.7<br>(-11.5 to -5.5)                          |
| Cyclist road injuries                         | 610.1<br>(446.9 to 816.2)                        | 1,372.2<br>(860.8 to 2,031.2)                     | 34.9<br>(21.1 to 52.5)                        | 0.0<br>(-3.2 to 3.8)                              | -0.8<br>(-4.0 to 2.9)                            |
| Motorcyclist road injuries                    | 389.7<br>(306.5 to 493.0)                        | 478.0<br>(273.0 to 757.9)                         | 22.7<br>(13.6 to 35.0)                        | 4.9<br>(2.3 to 7.7)                               | 4.0<br>(1.5 to 6.8)                              |
| Motor vehicle road injuries                   | 467.2<br>(369.7 to 591.1)                        | 937.0<br>(581.8 to 1,413.0)                       | 32.7<br>(20.3 to 48.9)                        | -3.5<br>(-7.0 to 0.5)                             | -4.3<br>(-7.8 to -0.4)                           |
| Other road injuries                           | 237.4<br>(180.9 to 319.7)                        | 491.7<br>(262.1 to 812.8)                         | 13.0<br>(7.6 to 19.8)                         | 9.3<br>(6.2 to 13.2)                              | 8.4<br>(5.4 to 12.3)                             |
| Other transport injuries                      | 1,819.6<br>(1,377.6 to 2,356.6)                  | 734.6<br>(453.4 to 1,122.9)                       | 105.7<br>(66.1 to 160.3)                      | -0.5<br>(-2.7 to 1.4)                             | -1.3<br>(-3.5 to 0.5)                            |
| <b>Unintentional injuries</b>                 | <b>37,291.7</b><br><b>(32,731.5 to 41,996.9)</b> | <b>34,964.8</b><br><b>(28,881.6 to 42,319.3)</b>  | <b>1,317.8</b><br><b>(852.1 to 1,933.5)</b>   | <b>5.2</b><br><b>(3.8 to 6.3)</b>                 | <b>4.3</b><br><b>(3.0 to 5.5)</b>                |
| Falls                                         | 13,343.8<br>(10,614.8 to 16,386.2)               | 14,754.4<br>(9,620.1 to 20,848.0)                 | 506.1<br>(335.4 to 737.2)                     | 7.4<br>(5.9 to 8.8)                               | 6.5<br>(5.0 to 8.0)                              |
| Drowning                                      | 154.2<br>(117.6 to 197.8)                        | 69.3<br>(53.6 to 89.7)                            | 8.9<br>(5.6 to 13.5)                          | -14.7<br>(-16.6 to -12.9)                         | -15.4<br>(-17.3 to -13.6)                        |
| Fire, heat, and hot substances                | 3,416.5<br>(2,570.2 to 4,570.8)                  | 1,125.1<br>(677.6 to 1,765.7)                     | 106.4<br>(68.9 to 159.5)                      | 5.0<br>(2.0 to 7.5)                               | 4.2<br>(1.2 to 6.6)                              |
| Poisonings                                    | 167.5<br>(126.3 to 214.6)                        | 386.1<br>(223.3 to 597.7)                         | 19.2<br>(11.8 to 29.2)                        | 14.0<br>(10.4 to 17.4)                            | 13.0<br>(9.5 to 16.4)                            |
| Exposure to mechanical forces                 | 4,918.1<br>(3,795.8 to 6,204.7)                  | 4,808.1<br>(3,044.1 to 7,456.3)                   | 121.1<br>(73.0 to 190.9)                      | 4.5<br>(2.7 to 6.1)                               | 3.6<br>(1.9 to 5.2)                              |
| Unintentional firearm injuries                | 141.9<br>(103.6 to 193.5)                        | 118.8<br>(53.2 to 231.8)                          | 6.1<br>(3.6 to 10.0)                          | 6.5<br>(4.1 to 9.0)                               | 5.6<br>(3.3 to 8.1)                              |
| Unintentional suffocation                     | 555.0<br>(382.0 to 764.1)                        | 75.0<br>(34.6 to 143.5)                           | 17.0<br>(9.6 to 28.4)                         | -5.1<br>(-6.9 to -3.4)                            | -5.9<br>(-7.6 to -4.2)                           |
| Other exposure to mechanical forces           | 4,221.2<br>(3,149.3 to 5,503.7)                  | 4,614.2<br>(2,915.4 to 7,110.7)                   | 98.0<br>(59.6 to 152.0)                       | 6.2<br>(4.3 to 7.9)                               | 5.3<br>(3.4 to 7.0)                              |

| Cause                                                                               | Prevalence in thousands (95% UI)                 | Incidence in thousands (95% UI)                | YLDs in thousands (95% UI)              |                                                   |                                                  |
|-------------------------------------------------------------------------------------|--------------------------------------------------|------------------------------------------------|-----------------------------------------|---------------------------------------------------|--------------------------------------------------|
|                                                                                     | 2016 counts                                      | 2016 counts                                    | 2016 counts                             | Percentage change in counts between 2006 and 2016 | Percentage change in rates between 2006 and 2016 |
| Adverse effects of medical treatment                                                | 78.5<br>(48.2 to 120.8)                          | 1,026.7<br>(660.6 to 1,555.7)                  | 10.5<br>(5.3 to 18.2)                   | 6.2<br>(1.3 to 10.2)                              | 5.3<br>(0.5 to 9.3)                              |
| Animal contact                                                                      | 2,190.3<br>(1,782.2 to 2,714.8)                  | 5,845.8<br>(4,047.2 to 8,304.6)                | 104.8<br>(68.1 to 150.8)                | -0.1<br>(-3.1 to 2.7)                             | -1.0<br>(-3.9 to 1.8)                            |
| Venomous animal contact                                                             | 1,100.9<br>(819.6 to 1,500.0)                    | 2,878.0<br>(1,885.4 to 4,236.9)                | 85.3<br>(55.8 to 123.5)                 | 0.5<br>(-3.0 to 3.9)                              | -0.3<br>(-3.8 to 3.0)                            |
| Non-venomous animal contact                                                         | 1,089.4<br>(817.6 to 1,512.2)                    | 2,967.8<br>(1,974.3 to 4,339.9)                | 19.5<br>(11.7 to 31.2)                  | -3.1<br>(-5.9 to -0.8)                            | -3.9<br>(-6.7 to -1.6)                           |
| Foreign body                                                                        | 3,257.9<br>(2,494.9 to 4,051.5)                  | 1,935.0<br>(1,350.8 to 2,733.6)                | 132.2<br>(79.8 to 208.5)                | 3.6<br>(1.4 to 5.5)                               | 2.8<br>(0.6 to 4.6)                              |
| Pulmonary aspiration and foreign body in airway                                     | 1,750.3<br>(1,197.9 to 2,552.5)                  | 270.6<br>(154.8 to 456.3)                      | 80.2<br>(47.3 to 124.8)                 | 0.3<br>(-1.7 to 2.1)                              | -0.5<br>(-2.5 to 1.3)                            |
| Foreign body in eyes                                                                | 161.7<br>(63.0 to 309.2)                         | 1,063.2<br>(573.3 to 1,749.4)                  | 9.1<br>(3.4 to 18.5)                    | 10.9<br>(7.3 to 16.1)                             | 10.0<br>(6.4 to 15.1)                            |
| Foreign body in other body part                                                     | 1,345.9<br>(995.6 to 1,866.8)                    | 601.2<br>(345.1 to 933.5)                      | 42.9<br>(26.0 to 67.9)                  | 8.8<br>(6.3 to 11.0)                              | 7.9<br>(5.4 to 10.1)                             |
| Environmental heat and cold exposure                                                | 3,228.8<br>(2,462.8 to 4,271.6)                  | 1,543.1<br>(915.8 to 2,362.5)                  | 127.2<br>(78.4 to 196.6)                | 2.1<br>(0.2 to 3.7)                               | 1.3<br>(-0.6 to 2.8)                             |
| Other unintentional injuries                                                        | 6,536.1<br>(4,657.4 to 9,364.7)                  | 3,471.3<br>(2,081.2 to 5,257.8)                | 181.5<br>(111.6 to 278.7)               | 6.6<br>(4.8 to 8.2)                               | 5.7<br>(4.0 to 7.3)                              |
| <b>Self-harm and interpersonal violence</b>                                         | <b>14,001.9</b><br><b>(10,965.8 to 17,276.7)</b> | <b>1,670.2†</b><br><b>(1,122.3 to 2,301.2)</b> | <b>170.0</b><br><b>(108.1 to 239.1)</b> | <b>-2.5</b><br><b>(-3.7 to -1.2)</b>              | <b>-3.3</b><br><b>(-4.5 to -2.0)</b>             |
| Self-harm                                                                           | 131.9<br>(101.4 to 173.6)                        | 315.5<br>(209.3 to 459.4)                      | 9.5<br>(5.6 to 15.0)                    | 3.4<br>(1.3 to 5.3)                               | 2.5<br>(0.5 to 4.4)                              |
| Self-harm by firearm                                                                | 13.0<br>(9.9 to 17.4)                            | 16.8<br>(6.8 to 32.5)                          | 0.6<br>(0.3 to 0.9)                     | -0.4<br>(-3.4 to 2.9)                             | -1.2<br>(-4.2 to 2.0)                            |
| Self-harm by other specified means                                                  | 118.9<br>(89.0 to 161.0)                         | 298.7<br>(196.8 to 435.6)                      | 9.0<br>(5.2 to 14.1)                    | 3.6<br>(1.5 to 5.6)                               | 2.8<br>(0.7 to 4.8)                              |
| Interpersonal violence                                                              | 13,870.1<br>(10,837.3 to 17,159.2)               | 1,354.7†<br>(829.0 to 1,986.7)                 | 160.5<br>(102.3 to 226.2)               | -2.8<br>(-4.0 to -1.5)                            | -3.6<br>(-4.8 to -2.3)                           |
| Assault by firearm                                                                  | 36.7<br>(29.1 to 49.4)                           | 32.9<br>(13.7 to 63.6)                         | 1.8<br>(1.0 to 2.9)                     | 4.8<br>(2.0 to 7.6)                               | 3.9<br>(1.2 to 6.8)                              |
| Assault by sharp object                                                             | 272.8<br>(195.8 to 367.2)                        | 351.9<br>(172.8 to 620.2)                      | 10.0<br>(6.0 to 15.5)                   | 4.5<br>(1.2 to 7.8)                               | 3.7<br>(0.4 to 6.9)                              |
| Sexual violence                                                                     | 13,023.4<br>(10,012.2 to 16,223.2)               | --                                             | 124.4<br>(76.5 to 182.5)                | -4.7<br>(-5.7 to -3.7)                            | -5.5<br>(-6.5 to -4.5)                           |
| Assault by other means                                                              | 537.2<br>(404.8 to 706.5)                        | 969.9<br>(558.7 to 1,469.4)                    | 24.2<br>(14.5 to 37.5)                  | 4.4<br>(1.7 to 6.6)                               | 3.5<br>(0.9 to 5.7)                              |
| <b>Forces of nature, conflict and terrorism, and executions and police conflict</b> | <b>2,022.5</b><br><b>(1,190.2 to 3,156.9)</b>    | <b>102.5†</b><br><b>(70.3 to 139.9)</b>        | <b>47.6</b><br><b>(17.9 to 92.0)</b>    | <b>6.9</b><br><b>(-8.3 to 33.2)</b>               | <b>6.0</b><br><b>(-9.1 to 32.1)</b>              |
| Forces of nature, conflict and terrorism, and state actor violence                  | 303.1<br>(158.6 to 491.1)                        | 69.6<br>(40.7 to 104.5)                        | 11.7<br>(3.9 to 23.2)                   | -14.6<br>(-32.0 to 8.7)                           | -15.3<br>(-32.6 to 7.8)                          |
| Conflict and terrorism                                                              | 1,687.2<br>(937.3 to 2,781.9)                    | --                                             | 35.7<br>(13.5 to 68.5)                  | 14.0<br>(-6.6 to 53.6)                            | 13.0<br>(-7.4 to 52.4)                           |
| Executions and police conflict                                                      | 32.2<br>(17.9 to 55.3)                           | 33.0<br>(17.7 to 52.2)                         | 1.1<br>(0.4 to 2.8)                     | -18.6<br>(-25.1 to -6.9)                          | -19.3<br>(-25.8 to -7.6)                         |

We did not calculate incidence for certain NTDs and causes with only birth prevalence. Blank cells mean that no estimate is available.

† Incidence for aggregate causes represents the sum of the incidence of the causes below the aggregate.

‡ Incidence estimates for stroke represent first-ever stroke only.

^ Incidence of HIV/AIDS represents new infections of HIV only and does not include new infections of Tuberculosis in HIV positive cases.



SR Table 12: Global prevalence, incidence, and YLDs for 2016, percentage change of YLD counts and percentage change of YLD rates between 2006 and 2016 by cause, age 15-19 years.

| Cause                                                                                | Prevalence in thousands (95% UI)             | Incidence in thousands (95% UI)                     | YLDs in thousands (95% UI)                |                                                   |                                                  |
|--------------------------------------------------------------------------------------|----------------------------------------------|-----------------------------------------------------|-------------------------------------------|---------------------------------------------------|--------------------------------------------------|
|                                                                                      | 2016 counts                                  | 2016 counts                                         | 2016 counts                               | Percentage change in counts between 2006 and 2016 | Percentage change in rates between 2006 and 2016 |
| <b>All causes</b>                                                                    | <b>571,836.5</b><br>(570,897.1 to 573,090.5) | <b>3,463,494.0*</b><br>(2,941,436.9 to 4,050,623.3) | <b>46,098.8</b><br>(34,011.1 to 60,449.0) | <b>-4.6</b><br>(-5.2 to -4.0)                     | <b>0.9</b><br>(0.3 to 1.6)                       |
| <b>Communicable, maternal, neonatal, and nutritional disorders</b>                   | <b>382,272.8</b><br>(377,923.3 to 387,163.8) | <b>2,023,173.4*</b><br>(1,564,744.1 to 2,538,304.8) | <b>7,324.1</b><br>(5,273.5 to 10,028.5)   | <b>-4.8</b><br>(-7.4 to -1.7)                     | <b>0.7</b><br>(-1.9 to 4.0)                      |
| <b>HIV/AIDS and tuberculosis</b>                                                     | <b>142,735.2</b><br>(123,964.0 to 167,574.0) | <b>1,018.6*</b><br>(779.4 to 1,298.4)               | <b>248.8</b><br>(155.8 to 367.6)          | <b>1.8</b><br>(-6.9 to 15.9)                      | <b>7.8</b><br>(-1.5 to 22.7)                     |
| Tuberculosis                                                                         | 133,084.9<br>(107,469.8 to 166,245.3)        | 855.1*<br>(620.4 to 1,134.1)                        | 153.6<br>(87.6 to 240.4)                  | -10.2<br>(-14.7 to -4.8)                          | -4.9<br>(-9.7 to 0.7)                            |
| Drug-susceptible tuberculosis                                                        | 468.2<br>(322.4 to 654.8)                    | 828.6<br>(600.4 to 1,099.7)                         | 148.3<br>(84.7 to 232.4)                  | -9.9<br>(-14.6 to -4.4)                           | -4.6<br>(-9.6 to 1.2)                            |
| Multidrug-resistant tuberculosis without extensive drug resistance                   | 15.1<br>(10.7 to 20.5)                       | 25.4<br>(18.5 to 33.7)                              | 5.0<br>(2.9 to 7.7)                       | -19.4<br>(-27.1 to -10.5)                         | -14.6<br>(-22.8 to -5.2)                         |
| Extensively drug-resistant tuberculosis                                              | 0.8<br>(0.6 to 1.0)                          | 1.1<br>(0.8 to 1.5)                                 | 0.2<br>(0.1 to 0.4)                       | 102.2<br>(76.6 to 130.6)                          | 114.0<br>(86.9 to 144.1)                         |
| Latent tuberculosis infection                                                        | 132,600.9<br>(107,081.0 to 165,707.7)        | --                                                  | --                                        | --                                                | --                                               |
| HIV/AIDS                                                                             | 774.8<br>(701.9 to 865.5)                    | 163.5*<br>(144.2 to 189.6)                          | 95.2<br>(60.9 to 148.7)                   | 29.8<br>(5.5 to 65.5)                             | 37.4<br>(11.7 to 75.2)                           |
| Drug-susceptible HIV/AIDS - Tuberculosis                                             | 32.1<br>(22.8 to 43.6)                       | 40.6<br>(28.7 to 56.1)                              | 12.8<br>(7.6 to 19.9)                     | -18.9<br>(-25.8 to -11.1)                         | -14.2<br>(-21.4 to -5.9)                         |
| Multidrug-resistant HIV/AIDS - Tuberculosis without extensive drug resistance        | 0.6<br>(0.4 to 0.9)                          | 0.9<br>(0.6 to 1.4)                                 | 0.3<br>(0.1 to 0.4)                       | -44.6<br>(-54.4 to -33.1)                         | -41.4<br>(-51.7 to -29.2)                        |
| Extensively drug-resistant HIV/AIDS - Tuberculosis                                   | < 0.05<br>(< 0.05 to < 0.05)                 | < 0.05<br>(< 0.05 to < 0.05)                        | < 0.05<br>(< 0.05 to < 0.05)              | 41.7<br>(9.5 to 89.9)                             | 50.0<br>(15.9 to 101.0)                          |
| HIV/AIDS resulting in other diseases                                                 | 742.0<br>(670.2 to 831.6)                    | 163.5<br>(144.2 to 189.6)                           | 82.1<br>(51.9 to 134.0)                   | 43.9<br>(12.9 to 89.5)                            | 52.3<br>(19.5 to 100.5)                          |
| <b>Diarrhoea, lower respiratory infections, and other common infectious diseases</b> | <b>36,198.7</b><br>(33,729.6 to 38,120.7)    | <b>1,851,628.0*</b><br>(1,386,335.5 to 2,365,263.1) | <b>1,633.5</b><br>(1,122.0 to 2,294.0)    | <b>-6.4</b><br>(-7.5 to -5.2)                     | <b>-0.9</b><br>(-2.1 to 0.4)                     |
| Diarrhoeal diseases                                                                  | 4,369.6<br>(3,870.5 to 4,918.8)              | 295,961.5<br>(261,761.7 to 335,008.2)               | 498.3<br>(336.2 to 698.9)                 | -1.4<br>(-3.7 to 0.9)                             | 4.3<br>(2.0 to 6.8)                              |
| Intestinal infectious diseases                                                       | 89.7<br>(67.5 to 120.2)                      | 1,687.4*<br>(1,222.4 to 2,303.7)                    | 13.7<br>(7.9 to 21.9)                     | -15.8<br>(-33.2 to 6.9)                           | -10.9<br>(-29.3 to 13.1)                         |
| Typhoid fever                                                                        | 83.3<br>(58.4 to 116.4)                      | 1,315.8<br>(940.3 to 1,793.2)                       | 12.7<br>(7.2 to 20.4)                     | -16.0<br>(-35.0 to 8.2)                           | -11.1<br>(-31.2 to 14.5)                         |
| Paratyphoid fever                                                                    | 16.4<br>(11.2 to 23.0)                       | 371.6<br>(256.5 to 527.7)                           | 1.0<br>(0.6 to 1.7)                       | -13.4<br>(-29.6 to 7.8)                           | -8.3<br>(-25.5 to 14.1)                          |
| Other intestinal infectious diseases                                                 | --                                           | --                                                  | < 0.05<br>(< 0.05 to < 0.05)              | -34.1<br>(-47.7 to -16.3)                         | -30.3<br>(-44.7 to -11.4)                        |
| Lower respiratory infections                                                         | 326.5<br>(286.1 to 372.8)                    | 13,410.9<br>(11,537.5 to 15,748.7)                  | 20.2<br>(13.0 to 29.2)                    | 10.8<br>(4.8 to 17.2)                             | 17.2<br>(10.9 to 24.0)                           |
| Upper respiratory infections                                                         | 20,053.7<br>(14,209.8 to 26,316.0)           | 1,512,361.0<br>(1,062,862.5 to 2,032,780.9)         | 502.4<br>(278.7 to 827.6)                 | -7.8<br>(-9.5 to -6.5)                            | -2.4<br>(-4.2 to -1.1)                           |
| Otitis media                                                                         | 10,081.1<br>(8,205.0 to 12,167.9)            | 22,214.0<br>(17,440.8 to 28,846.8)                  | 304.8<br>(176.9 to 494.2)                 | -9.5<br>(-13.2 to -6.3)                           | -4.2<br>(-8.1 to -0.8)                           |
| Meningitis                                                                           | 1,361.7<br>(1,175.4 to 1,578.8)              | 130.2<br>(95.8 to 169.7)                            | 150.0<br>(105.3 to 198.8)                 | 0.4<br>(-3.1 to 4.0)                              | 6.3<br>(2.6 to 10.0)                             |
| Pneumococcal meningitis                                                              | 581.1<br>(481.6 to 703.1)                    | 37.5<br>(23.3 to 56.6)                              | 64.9<br>(45.0 to 88.2)                    | -1.9<br>(-9.0 to 5.2)                             | 3.9<br>(-3.7 to 11.3)                            |
| H influenzae type B meningitis                                                       | 211.4<br>(164.2 to 268.4)                    | 11.8<br>(6.4 to 19.6)                               | 27.2<br>(18.2 to 36.3)                    | -21.1<br>(-26.6 to -16.5)                         | -16.5<br>(-22.3 to -11.6)                        |
| Meningococcal infection                                                              | 156.1<br>(110.9 to 209.1)                    | 24.5<br>(15.0 to 37.5)                              | 16.3<br>(11.1 to 22.4)                    | 6.6<br>(3.9 to 9.5)                               | 12.9<br>(9.9 to 15.8)                            |
| Other meningitis                                                                     | 413.7<br>(309.7 to 531.5)                    | 56.4<br>(38.9 to 78.0)                              | 24.3<br>(28.5 to 57.1)                    | 24.3<br>(18.4 to 30.9)                            | 31.6<br>(25.3 to 38.5)                           |
| Encephalitis                                                                         | 1,031.5<br>(725.5 to 1,469.7)                | 414.8<br>(320.8 to 526.0)                           | 130.0<br>(92.0 to 171.5)                  | -17.7<br>(-22.3 to -13.0)                         | -12.9<br>(-17.8 to -7.9)                         |
| Diphtheria                                                                           | < 0.05<br>(< 0.05 to < 0.05)                 | 0.1<br>(0.1 to 0.2)                                 | < 0.05<br>(< 0.05 to < 0.05)              | -56.3<br>(-68.2 to -40.8)                         | -53.7<br>(-66.3 to -37.3)                        |
| Whooping cough                                                                       | 5.4<br>(4.2 to 6.8)                          | 39.5<br>(30.8 to 49.6)                              | 0.3<br>(0.2 to 0.4)                       | -23.5<br>(-25.0 to -21.9)                         | -19.0<br>(-20.6 to -17.4)                        |
| Tetanus                                                                              | 15.9<br>(15.6 to 16.1)                       | 5.0<br>(2.0 to 9.2)                                 | 0.4<br>(0.2 to 0.6)                       | -0.6<br>(-27.8 to 35.9)                           | 5.2<br>(-23.5 to 43.8)                           |
| Measles                                                                              | 2.3<br>(0.8 to 5.0)                          | 83.8<br>(30.3 to 181.0)                             | 0.2<br>(0.1 to 0.5)                       | -60.5<br>(-64.8 to -55.6)                         | -58.2<br>(-62.7 to -53.1)                        |
| Varicella and herpes zoster                                                          | 306.0<br>(245.3 to 371.4)                    | 5,319.8<br>(3,349.1 to 8,100.2)                     | 13.2<br>(7.8 to 20.8)                     | -6.8<br>(-12.5 to 0.0)                            | -1.3<br>(-7.4 to 5.9)                            |
| <b>Neglected tropical diseases and malaria</b>                                       | <b>173,349.0</b><br>(168,202.1 to 177,881.2) | <b>36,263.4*</b><br>(30,137.7 to 43,284.9)          | <b>1,097.1</b><br>(748.8 to 1,581.4)      | <b>-20.7</b><br>(-25.4 to -15.1)                  | <b>-16.1</b><br>(-21.0 to -10.1)                 |
| Malaria                                                                              | 13,649.6<br>(11,447.1 to 16,553.8)           | 14,664.1<br>(10,965.0 to 18,779.8)                  | 178.0<br>(135.3 to 227.3)                 | -5.5<br>(-11.6 to 1.9)                            | 0.1<br>(-6.4 to 7.8)                             |
| Chagas disease                                                                       | 385.4<br>(299.4 to 483.6)                    | 18.5<br>(12.8 to 26.2)                              | 1.6<br>(0.9 to 2.4)                       | -16.3<br>(-26.8 to -4.4)                          | -11.4<br>(-22.5 to 1.2)                          |
| Leishmaniasis                                                                        | 439.6<br>(399.4 to 482.9)                    | 75.5<br>(53.0 to 103.9)                             | 26.9<br>(17.7 to 38.8)                    | 30.1<br>(14.7 to 49.2)                            | 37.7<br>(21.4 to 57.9)                           |
| Visceral leishmaniasis                                                               | 1.3<br>(0.9 to 1.9)                          | 5.2<br>(3.5 to 7.4)                                 | 0.1<br>(0.1 to 0.1)                       | -62.2<br>(-75.5 to -41.2)                         | -60.0<br>(-74.1 to -37.7)                        |
| Cutaneous and mucocutaneous leishmaniasis                                            | 413.7<br>(364.5 to 469.7)                    | 70.2<br>(47.8 to 99.6)                              | 26.8<br>(17.6 to 38.6)                    | 31.2<br>(15.5 to 50.4)                            | 38.9<br>(22.2 to 59.2)                           |
| African trypanosomiasis                                                              | 0.8<br>(0.2 to 2.6)                          | 0.5<br>(0.1 to 1.6)                                 | 0.2<br>(< 0.05 to 0.8)                    | -72.5<br>(-94.9 to 72.7)                          | -70.9<br>(-94.6 to 82.8)                         |
| Schistosomiasis                                                                      | 22,033.4<br>(20,059.7 to 24,212.1)           | 8,563.9<br>(7,007.9 to 10,488.4)                    | 173.8<br>(84.4 to 330.7)                  | -26.1<br>(-28.3 to -23.9)                         | -21.8<br>(-24.1 to -19.4)                        |
| Cysticercosis                                                                        | 82.2<br>(51.6 to 122.3)                      | --                                                  | 14.2<br>(7.7 to 24.0)                     | -17.2<br>(-32.0 to -4.7)                          | -12.3<br>(-28.0 to 0.9)                          |
| Cystic echinococcosis                                                                | 79.8<br>(37.9 to 181.8)                      | 17.4<br>(7.2 to 48.3)                               | 7.5<br>(3.1 to 17.4)                      | -41.1<br>(-79.1 to 70.5)                          | -37.7<br>(-77.9 to 80.5)                         |
| Lymphatic filariasis                                                                 | 2,662.6<br>(2,295.4 to 3,155.3)              | 814.9<br>(485.9 to 1,282.1)                         | 83.4<br>(40.0 to 151.5)                   | -38.6<br>(-52.9 to -28.1)                         | -35.0<br>(-50.1 to -23.8)                        |
| Onchocerciasis                                                                       | 1,629.3<br>(1,012.6 to 2,728.1)              | 492.9<br>(215.6 to 992.5)                           | 98.2<br>(42.0 to 176.8)                   | -32.8<br>(-49.6 to -17.9)                         | -28.9<br>(-46.7 to -13.1)                        |
| Trachoma                                                                             | 5.5<br>(1.5 to 13.2)                         | --                                                  | 0.3<br>(0.1 to 0.6)                       | -40.9<br>(-62.9 to -12.5)                         | -37.4<br>(-60.7 to -7.4)                         |
| Dengue                                                                               | 633.7<br>(344.7 to 1,074.4)                  | 10,592.8<br>(6,434.5 to 16,084.0)                   | 104.5<br>(45.8 to 197.3)                  | 61.9<br>(31.9 to 272.0)                           | 71.4<br>(39.7 to 293.7)                          |
| Yellow fever                                                                         | 0.4<br>(0.1 to 1.1)                          | 13.9<br>(3.7 to 38.1)                               | < 0.05<br>(< 0.05 to < 0.05)              | -17.5<br>(-47.8 to 29.5)                          | -12.7<br>(-44.7 to 37.1)                         |
| Rabies                                                                               | < 0.05<br>(< 0.05 to < 0.05)                 | 0.9<br>(0.4 to 1.3)                                 | < 0.05<br>(< 0.05 to < 0.05)              | -49.9<br>(-64.5 to -29.7)                         | -46.9<br>(-62.4 to -25.6)                        |
| Intestinal nematode infections                                                       | 145,668.5<br>(139,684.3 to 150,264.5)        | --                                                  | 294.0<br>(167.5 to 481.4)                 | -23.0<br>(-28.5 to -16.4)                         | -18.5<br>(-24.4 to -11.5)                        |
| Ascariasis                                                                           | 76,579.4<br>(69,687.6 to 84,692.8)           | --                                                  | 84.9<br>(45.6 to 144.7)                   | -36.0<br>(-44.0 to -26.6)                         | -32.3<br>(-40.8 to -22.3)                        |

| Cause                                                                   | Prevalence in thousands (95% UI)              | Incidence in thousands (95% UI)                      | YLDs in thousands (95% UI)                 |                                                   |                                                  |
|-------------------------------------------------------------------------|-----------------------------------------------|------------------------------------------------------|--------------------------------------------|---------------------------------------------------|--------------------------------------------------|
|                                                                         | 2016 counts                                   | 2016 counts                                          | 2016 counts                                | Percentage change in counts between 2006 and 2016 | Percentage change in rates between 2006 and 2016 |
| Trichuriasis                                                            | 41,775.8<br>(38,713.2 to 45,450.6)            | --                                                   | 33.8<br>(18.4 to 58.4)                     | -26.6<br>(-36.7 to -15.6)                         | -22.3<br>(-33.0 to -10.7)                        |
| Hookworm disease                                                        | 47,478.2<br>(43,859.3 to 51,849.7)            | --                                                   | 175.4<br>(102.4 to 272.8)                  | -13.8<br>(-22.3 to -3.8)                          | -8.8<br>(-17.7 to 1.8)                           |
| Food-borne trematodiasis                                                | 3,719.4<br>(3,439.5 to 4,039.7)               | 377.6<br>(330.9 to 427.3)                            | 69.3<br>(31.2 to 136.1)                    | -49.2<br>(-52.7 to -42.6)                         | -46.2<br>(-49.9 to -39.2)                        |
| Leprosy                                                                 | 6.3<br>(5.8 to 6.9)                           | 3.0<br>(2.8 to 3.4)                                  | 0.4<br>(0.2 to 0.5)                        | -26.0<br>(-30.4 to -21.1)                         | -21.6<br>(-26.3 to -16.5)                        |
| Ebola virus disease                                                     | < 0.05<br>(< 0.05 to 0.3)                     | --                                                   | < 0.05<br>(< 0.05 to 0.1)                  | --                                                | --                                               |
| Zika virus disease                                                      | 10.4<br>(6.1 to 19.3)                         | 627.4<br>(366.8 to 1,167.0)                          | 0.2<br>(0.1 to 0.4)                        | --                                                | --                                               |
| Guinea worm disease                                                     | < 0.05<br>(< 0.05 to < 0.05)                  | < 0.05<br>(< 0.05 to < 0.05)                         | < 0.05<br>(< 0.05 to < 0.05)               | -99.5<br>(-99.7 to -99.3)                         | -99.5<br>(-99.7 to -99.2)                        |
| Other neglected tropical diseases                                       | 2,582.7<br>(2,305.9 to 2,888.4)               | --                                                   | 44.5<br>(28.1 to 67.7)                     | 9.7<br>(3.1 to 17.0)                              | 16.1<br>(9.2 to 23.8)                            |
| <b>Maternal disorders</b>                                               | <b>756.8<br/>(671.7 to 836.8)</b>             | <b>10,617.2†<br/>(8,765.0 to 12,653.1)</b>           | <b>69.1<br/>(44.7 to 99.4)</b>             | <b>-18.0<br/>(-33.2 to 1.8)</b>                   | <b>-13.2<br/>(-29.4 to 7.8)</b>                  |
| Maternal haemorrhage                                                    | 99.3<br>(73.0 to 131.9)                       | 832.1<br>(563.9 to 1,205.6)                          | 5.4<br>(3.4 to 8.1)                        | -18.4<br>(-36.7 to 3.6)                           | -13.6<br>(-33.0 to 9.6)                          |
| Maternal sepsis and other pregnancy related infections                  | 133.6<br>(74.2 to 213.8)                      | 1,479.9<br>(1,064.0 to 1,985.1)                      | 6.0<br>(2.9 to 11.2)                       | -11.6<br>(-55.6 to 82.4)                          | -6.4<br>(-53.0 to 93.1)                          |
| Maternal hypertensive disorders                                         | 467.8<br>(287.1 to 678.7)                     | 2,240.3<br>(1,757.3 to 2,727.6)                      | 22.9<br>(11.9 to 38.0)                     | -15.5<br>(-46.5 to 34.9)                          | -10.6<br>(-43.4 to 42.8)                         |
| Maternal obstructed labour and uterine rupture                          | 55.7<br>(40.8 to 73.3)                        | 673.6<br>(463.0 to 913.6)                            | 18.4<br>(11.4 to 28.7)                     | -17.9<br>(-30.8 to -4.7)                          | -13.1<br>(-26.8 to 0.9)                          |
| Maternal abortion, miscarriage, and ectopic pregnancy                   | 44.2<br>(26.8 to 66.4)                        | 5,391.2<br>(3,747.3 to 7,375.3)                      | 4.9<br>(2.5 to 8.3)                        | -23.1<br>(-52.1 to 20.9)                          | -18.6<br>(-49.3 to 27.9)                         |
| Other maternal disorders                                                | --                                            | --                                                   | 11.5<br>(7.4 to 16.5)                      | -23.3<br>(-37.6 to -4.8)                          | -18.8<br>(-33.9 to 0.8)                          |
| <b>Neonatal disorders</b>                                               | <b>6,528.1<br/>(5,925.3 to 7,139.4)</b>       | <b>1,257.0</b>                                       | <b>8.5<br/>(870.3 to 1,814.2)</b>          | <b>8.5<br/>(-3.5 to 22.2)</b>                     | <b>14.9<br/>(2.1 to 29.3)</b>                    |
| Neonatal preterm birth complications                                    | 5,300.3<br>(4,407.9 to 6,445.0)               | --                                                   | 819.2<br>(560.4 to 1,175.3)                | 5.4<br>(-11.7 to 25.6)                            | 11.6<br>(-6.6 to 33.0)                           |
| Neonatal encephalopathy due to birth asphyxia and trauma                | 1,022.9<br>(608.9 to 1,732.0)                 | --                                                   | 135.9<br>(41.3 to 353.8)                   | 14.5<br>(5.1 to 25.5)                             | 21.2<br>(11.2 to 32.9)                           |
| Neonatal sepsis and other neonatal infections                           | 591.9<br>(198.8 to 1,429.8)                   | --                                                   | 239.2<br>(66.6 to 627.4)                   | 18.2<br>(10.2 to 30.2)                            | 25.1<br>(16.6 to 37.9)                           |
| Hemolytic disease and other neonatal jaundice                           | 197.7<br>(175.4 to 221.1)                     | --                                                   | 62.7<br>(48.3 to 79.2)                     | 4.5<br>(-0.9 to 10.1)                             | 10.6<br>(4.9 to 16.5)                            |
| Other neonatal disorders                                                | --                                            | --                                                   | --                                         | --                                                | --                                               |
| <b>Nutritional deficiencies</b>                                         | <b>144,447.4<br/>(139,904.3 to 148,384.4)</b> | <b>51,958.2†<br/>(42,379.1 to 65,675.5)</b>          | <b>2,805.2<br/>(1,830.6 to 4,124.2)</b>    | <b>-1.6<br/>(-4.5 to 1.7)</b>                     | <b>4.2<br/>(1.1 to 7.6)</b>                      |
| Protein-energy malnutrition                                             | --                                            | --                                                   | --                                         | --                                                | --                                               |
| Iodine deficiency                                                       | 11,448.9<br>(10,054.0 to 13,054.8)            | 334.1<br>(297.0 to 375.3)                            | 309.2<br>(204.8 to 442.0)                  | -22.3<br>(-25.4 to -19.4)                         | -17.7<br>(-21.0 to -14.7)                        |
| Vitamin A deficiency                                                    | 45,540.4<br>(38,603.9 to 55,159.5)            | 51,624.1<br>(42,033.3 to 65,353.2)                   | 18.5<br>(11.0 to 29.7)                     | 1.9<br>(-4.7 to 9.0)                              | 7.9<br>(0.9 to 15.4)                             |
| Iron-deficiency anaemia                                                 | 107,467.2<br>(97,780.7 to 118,249.2)          | --                                                   | 2,477.5<br>(1,604.3 to 3,642.2)            | 1.8<br>(-1.5 to 5.5)                              | 7.7<br>(4.3 to 11.6)                             |
| Other nutritional deficiencies                                          | --                                            | --                                                   | --                                         | --                                                | --                                               |
| <b>Other communicable, maternal, neonatal, and nutritional diseases</b> | <b>87,851.9<br/>(83,763.8 to 92,209.5)</b>    | <b>71,688.2<br/>(60,331.8 to 86,324.7)</b>           | <b>210.7<br/>(131.8 to 322.8)</b>          | <b>-6.6<br/>(-17.9 to 4.7)</b>                    | <b>-1.1<br/>(-13.2 to 10.8)</b>                  |
| Sexually transmitted diseases excluding HIV                             | 45,677.2<br>(43,137.8 to 48,127.8)            | 52,942.8<br>(43,096.8 to 64,789.0)                   | 118.3<br>(70.3 to 190.1)                   | -3.9<br>(-9.4 to 1.3)                             | 1.7<br>(-4.1 to 7.2)                             |
| Syphilis                                                                | 3,776.4<br>(2,578.0 to 5,640.5)               | 3,510.8<br>(2,248.9 to 5,723.9)                      | 1.2<br>(0.5 to 2.7)                        | 2.9<br>(-6.2 to 11.7)                             | 8.9<br>(-0.7 to 18.2)                            |
| Chlamydial infection                                                    | 5,796.6<br>(3,933.7 to 8,212.8)               | 7,042.8<br>(4,743.4 to 10,192.5)                     | 29.1<br>(17.2 to 47.9)                     | -8.0<br>(-13.1 to -1.5)                           | -2.6<br>(-8.1 to 4.2)                            |
| Gonococcal infection                                                    | 3,786.3<br>(2,236.7 to 5,870.0)               | 15,501.4<br>(8,509.7 to 25,298.8)                    | 25.8<br>(12.8 to 48.8)                     | 0.4<br>(-16.1 to 11.7)                            | 6.2<br>(-11.2 to 18.2)                           |
| Trichomoniasis                                                          | 10,011.2<br>(7,033.0 to 13,707.2)             | 12,345.0<br>(8,155.5 to 17,572.4)                    | 12.8<br>(4.6 to 28.4)                      | 3.0<br>(0.2 to 5.9)                               | 9.0<br>(6.1 to 12.1)                             |
| Genital herpes                                                          | 24,446.6<br>(18,544.3 to 31,008.6)            | 13,088.8<br>(9,812.0 to 16,773.8)                    | 9.3<br>(3.3 to 19.5)                       | -1.4<br>(-5.7 to 3.0)                             | 4.4<br>(-0.2 to 9.0)                             |
| Other sexually transmitted diseases                                     | 475.7<br>(364.9 to 581.2)                     | 1,454.0<br>(1,074.7 to 1,943.8)                      | 40.2<br>(25.4 to 61.0)                     | -6.1<br>(-12.3 to -0.2)                           | -0.6<br>(-7.2 to 5.6)                            |
| Hepatitis                                                               | 44,167.8<br>(35,577.2 to 53,872.1)            | 18,744.8<br>(12,276.9 to 26,887.4)                   | 27.0<br>(13.2 to 50.1)                     | -30.0<br>(-67.3 to 46.2)                          | -25.9<br>(-65.4 to 54.8)                         |
| Acute hepatitis A                                                       | 270.1<br>(21.6 to 655.3)                      | 3,511.3<br>(280.5 to 8,519.2)                        | 10.8<br>(0.7 to 30.0)                      | -29.6<br>(-95.2 to 705.2)                         | -25.4<br>(-94.9 to 752.4)                        |
| Hepatitis B                                                             | 33,822.5<br>(25,534.7 to 43,503.0)            | 11,591.9<br>(7,200.8 to 18,798.5)                    | 8.6<br>(4.5 to 15.9)                       | -25.7<br>(-51.6 to 19.4)                          | -21.4<br>(-48.7 to 26.4)                         |
| Hepatitis C                                                             | 9,809.5<br>(8,501.5 to 11,075.3)              | 188.8<br>(133.2 to 251.3)                            | 0.2<br>(0.1 to 0.4)                        | -24.3<br>(-24.9 to -23.7)                         | -19.9<br>(-20.5 to -19.3)                        |
| Acute hepatitis E                                                       | 265.6<br>(209.0 to 321.1)                     | 3,452.8<br>(2,717.5 to 4,174.3)                      | 7.4<br>(4.4 to 11.5)                       | -35.0<br>(-48.7 to -18.9)                         | -31.2<br>(-45.7 to -14.1)                        |
| Other infectious diseases                                               | 2,923.3<br>(2,605.3 to 3,271.1)               | 0.5<br>(0.3 to 0.9)                                  | 65.4<br>(41.6 to 100.0)                    | 2.3<br>(-2.0 to 7.5)                              | 8.3<br>(3.7 to 13.8)                             |
| <b>Non-communicable diseases</b>                                        | <b>541,744.3<br/>(538,796.9 to 544,490.1)</b> | <b>1,399,489.0†<br/>(1,231,289.9 to 1,594,710.0)</b> | <b>36,515.7<br/>(26,686.4 to 47,766.1)</b> | <b>-4.7<br/>(-5.2 to -4.2)</b>                    | <b>0.9<br/>(0.4 to 1.4)</b>                      |
| <b>Neoplasms</b>                                                        | <b>87.9<br/>(81.6 to 92.3)</b>                | <b>71.4<br/>(66.2 to 76.8)</b>                       | <b>24.6<br/>(17.7 to 32.9)</b>             | <b>-5.6<br/>(-9.1 to -1.1)</b>                    | <b>-0.0<br/>(-3.8 to 4.7)</b>                    |
| Lip and oral cavity cancer                                              | 5.1<br>(4.7 to 5.5)                           | 1.4<br>(1.3 to 1.5)                                  | 0.5<br>(0.4 to 0.7)                        | 0.7<br>(-7.9 to 9.7)                              | 6.6<br>(-2.6 to 16.1)                            |
| Nasopharynx cancer                                                      | 4.8<br>(4.5 to 5.3)                           | 1.4<br>(1.3 to 1.5)                                  | 0.6<br>(0.4 to 0.8)                        | -19.5<br>(-27.3 to -10.0)                         | -14.8<br>(-23.0 to -4.7)                         |
| Other pharynx cancer                                                    | 1.0<br>(0.9 to 1.2)                           | 0.4<br>(0.4 to 0.5)                                  | 0.1<br>(0.1 to 0.2)                        | -4.0<br>(-17.3 to 10.1)                           | 1.6<br>(-12.4 to 16.6)                           |
| Oesophageal cancer                                                      | 0.4<br>(0.4 to 0.4)                           | 0.3<br>(0.3 to 0.4)                                  | 0.1<br>(0.1 to 0.1)                        | -26.2<br>(-32.2 to -18.7)                         | -21.9<br>(-28.2 to -14.0)                        |
| Stomach cancer                                                          | 1.8<br>(1.7 to 2.0)                           | 1.1<br>(1.0 to 1.2)                                  | 0.3<br>(0.2 to 0.4)                        | -27.4<br>(-32.0 to -20.4)                         | -23.1<br>(-28.0 to -15.8)                        |
| Colon and rectum cancer                                                 | 5.0<br>(4.6 to 5.4)                           | 1.5<br>(1.4 to 1.6)                                  | 0.5<br>(0.4 to 0.7)                        | -8.5<br>(-16.6 to 0.9)                            | -3.2<br>(-11.7 to 6.8)                           |
| Liver cancer                                                            | 1.2<br>(1.0 to 1.3)                           | 1.6<br>(1.4 to 1.8)                                  | 0.4<br>(0.2 to 0.5)                        | -11.0<br>(-20.7 to 1.2)                           | -5.8<br>(-16.0 to 7.1)                           |
| Liver cancer due to hepatitis B                                         | 0.9<br>(0.7 to 1.1)                           | 0.7<br>(0.6 to 0.9)                                  | 0.2<br>(0.1 to 0.2)                        | -14.9<br>(-26.1 to -0.9)                          | -10.0<br>(-21.8 to 4.9)                          |

| Cause                                              | Prevalence in thousands (95% UI)                 | Incidence in thousands (95% UI)                | YLDs in thousands (95% UI)                  |                                                   |                                                  |
|----------------------------------------------------|--------------------------------------------------|------------------------------------------------|---------------------------------------------|---------------------------------------------------|--------------------------------------------------|
|                                                    | 2016 counts                                      | 2016 counts                                    | 2016 counts                                 | Percentage change in counts between 2006 and 2016 | Percentage change in rates between 2006 and 2016 |
| Liver cancer due to hepatitis C                    | 0.1<br>( $< 0.05$ to 0.1)                        | 0.1<br>( $< 0.05$ to 0.1)                      | $< 0.05$<br>( $< 0.05$ to $< 0.05$ )        | -4.6<br>(-17.4 to 11.7)                           | 1.0<br>(-12.6 to 18.2)                           |
| Liver cancer due to alcohol use                    | $< 0.05$<br>( $< 0.05$ to $< 0.05$ )             | $< 0.05$<br>( $< 0.05$ to $< 0.05$ )           | $< 0.05$<br>( $< 0.05$ to $< 0.05$ )        | -2.3<br>(-16.0 to 12.6)                           | 3.4<br>(-11.1 to 19.2)                           |
| Liver cancer due to other causes                   | 0.9<br>(0.7 to 1.2)                              | 0.8<br>(0.6 to 1.0)                            | 0.2<br>(0.1 to 0.2)                         | -7.5<br>(-17.0 to 4.4)                            | -2.1<br>(-12.1 to 10.5)                          |
| Gallbladder and biliary tract cancer               | 0.1<br>(0.1 to 0.1)                              | 0.1<br>(0.1 to 0.1)                            | $< 0.05$<br>( $< 0.05$ to $< 0.05$ )        | -11.7<br>(-17.3 to -7.0)                          | -6.6<br>(-12.5 to -1.5)                          |
| Pancreatic cancer                                  | 0.1<br>(0.1 to 0.1)                              | 0.2<br>(0.2 to 0.2)                            | $< 0.05$<br>( $< 0.05$ to 0.1)              | -9.7<br>(-14.0 to -5.3)                           | -4.4<br>(-8.9 to 0.2)                            |
| Larynx cancer                                      | 0.8<br>(0.8 to 0.8)                              | 0.2<br>(0.2 to 0.2)                            | 0.1<br>(0.1 to 0.1)                         | -11.9<br>(-15.6 to -7.3)                          | -6.7<br>(-10.7 to -1.9)                          |
| Tracheal, bronchus, and lung cancer                | 1.2<br>(1.2 to 1.3)                              | 1.0<br>(1.0 to 1.1)                            | 0.3<br>(0.2 to 0.3)                         | -15.3<br>(-21.3 to -8.6)                          | -10.4<br>(-16.7 to -3.2)                         |
| Malignant skin melanoma                            | 5.9<br>(5.0 to 6.7)                              | 1.2<br>(1.1 to 1.4)                            | 0.4<br>(0.3 to 0.6)                         | 3.7<br>(-4.6 to 12.7)                             | 9.8<br>(1.0 to 19.2)                             |
| Non-melanoma skin cancer                           | 0.5<br>(0.1 to 1.3)                              | 2.6<br>(0.8 to 7.8)                            | $< 0.05$<br>( $< 0.05$ to 0.1)              | 29.2<br>(10.6 to 41.6)                            | 36.7<br>(17.0 to 49.9)                           |
| Non-melanoma skin cancer (squamous-cell carcinoma) | 0.5<br>(0.1 to 1.3)                              | 1.1<br>(0.2 to 2.5)                            | $< 0.05$<br>( $< 0.05$ to 0.1)              | 31.6<br>(13.5 to 44.4)                            | 39.2<br>(20.1 to 52.9)                           |
| Non-melanoma skin cancer (basal-cell carcinoma)    | 0.1<br>( $< 0.05$ to 0.7)                        | 1.5<br>(0.2 to 6.9)                            | $< 0.05$<br>( $< 0.05$ to $< 0.05$ )        | 2.0<br>(-20.5 to 9.8)                             | 8.0<br>(-15.9 to 16.2)                           |
| Breast cancer                                      | 4.7<br>(3.9 to 5.5)                              | 1.0<br>(0.8 to 1.2)                            | 0.4<br>(0.3 to 0.6)                         | 5.2<br>(-10.3 to 23.6)                            | 11.3<br>(-5.1 to 30.8)                           |
| Cervical cancer                                    | 3.1<br>(2.1 to 3.7)                              | 0.8<br>(0.6 to 1.0)                            | 0.3<br>(0.2 to 0.4)                         | -24.3<br>(-30.9 to -10.4)                         | -19.9<br>(-26.9 to -5.1)                         |
| Uterine cancer                                     | 1.5<br>(1.4 to 1.7)                              | 0.3<br>(0.3 to 0.4)                            | 0.1<br>(0.1 to 0.2)                         | -9.6<br>(-17.9 to 2.3)                            | -4.3<br>(-13.1 to 8.3)                           |
| Ovarian cancer                                     | 8.2<br>(7.2 to 9.0)                              | 2.6<br>(2.4 to 2.9)                            | 1.3<br>(0.9 to 1.8)                         | 1.8<br>(-10.2 to 11.7)                            | 7.7<br>(-5.0 to 18.2)                            |
| Prostate cancer                                    | 2.0<br>(1.7 to 2.2)                              | 0.4<br>(0.4 to 0.5)                            | 0.2<br>(0.1 to 0.2)                         | 13.8<br>(4.3 to 20.3)                             | 20.5<br>(10.4 to 27.3)                           |
| Testicular cancer                                  | 13.1<br>(12.2 to 14.4)                           | 2.6<br>(2.4 to 2.8)                            | 0.9<br>(0.6 to 1.3)                         | 14.1<br>(1.8 to 28.9)                             | 20.8<br>(7.8 to 36.4)                            |
| Kidney cancer                                      | 4.7<br>(4.2 to 4.9)                              | 1.2<br>(1.2 to 1.3)                            | 0.4<br>(0.3 to 0.6)                         | -0.8<br>(-7.0 to 5.2)                             | 5.0<br>(-1.6 to 11.4)                            |
| Bladder cancer                                     | 1.9<br>(1.8 to 2.0)                              | 0.5<br>(0.4 to 0.5)                            | 0.2<br>(0.1 to 0.2)                         | 2.0<br>(-4.4 to 8.9)                              | 8.0<br>(1.2 to 15.3)                             |
| Brain and nervous system cancer                    | 17.1<br>(14.8 to 18.6)                           | 7.6<br>(6.7 to 8.3)                            | 2.5<br>(1.7 to 3.3)                         | 5.3<br>(-2.5 to 12.6)                             | 11.4<br>(3.2 to 19.1)                            |
| Thyroid cancer                                     | 8.8<br>(8.0 to 10.1)                             | 1.7<br>(1.5 to 1.9)                            | 0.6<br>(0.4 to 0.8)                         | 14.1<br>(2.7 to 30.8)                             | 20.8<br>(8.7 to 38.5)                            |
| Mesothelioma                                       | 0.2<br>(0.2 to 0.2)                              | 0.1<br>(0.1 to 0.1)                            | $< 0.05$<br>( $< 0.05$ to 0.1)              | -10.8<br>(-16.3 to -5.2)                          | -5.5<br>(-11.5 to 0.3)                           |
| Hodgkin lymphoma                                   | 14.4<br>(12.2 to 16.2)                           | 3.7<br>(3.1 to 4.2)                            | 1.5<br>(1.0 to 2.0)                         | -9.9<br>(-16.2 to -2.4)                           | -4.6<br>(-11.3 to 3.4)                           |
| Non-Hodgkin's lymphoma                             | 17.5<br>(15.2 to 18.7)                           | 5.5<br>(4.8 to 5.8)                            | 1.8<br>(1.2 to 2.4)                         | 7.7<br>(0.9 to 13.5)                              | 14.0<br>(6.8 to 20.1)                            |
| Multiple myeloma                                   | 0.8<br>(0.5 to 0.9)                              | 0.3<br>(0.3 to 0.4)                            | 0.2<br>(0.1 to 0.2)                         | 4.2<br>(-6.4 to 15.4)                             | 10.2<br>(-0.9 to 22.2)                           |
| Leukaemia                                          | 40.8<br>(36.1 to 44.4)                           | 12.1<br>(10.9 to 13.2)                         | 5.5<br>(3.8 to 7.4)                         | -24.0<br>(-29.5 to -17.7)                         | -19.6<br>(-25.4 to -12.9)                        |
| Acute lymphoid leukaemia                           | 14.4<br>(12.8 to 15.7)                           | 4.2<br>(3.7 to 4.5)                            | 1.9<br>(1.3 to 2.6)                         | -4.9<br>(-14.8 to 2.6)                            | 0.7<br>(-9.8 to 8.6)                             |
| Chronic lymphoid leukaemia                         | 2.5<br>(2.3 to 2.9)                              | 0.6<br>(0.5 to 0.6)                            | 0.3<br>(0.2 to 0.4)                         | -24.3<br>(-34.7 to -15.0)                         | -19.9<br>(-30.9 to -10.0)                        |
| Acute myeloid leukaemia                            | 3.6<br>(3.2 to 4.1)                              | 2.8<br>(2.4 to 3.1)                            | 0.8<br>(0.5 to 1.0)                         | -5.5<br>(-11.6 to 1.3)                            | 0.0<br>(-6.5 to 7.2)                             |
| Chronic myeloid leukaemia                          | 1.7<br>(1.4 to 1.9)                              | 0.6<br>(0.5 to 0.7)                            | 0.2<br>(0.1 to 0.3)                         | -23.6<br>(-32.7 to -11.1)                         | -19.2<br>(-28.8 to -5.9)                         |
| Other leukaemia                                    | 18.6<br>(15.6 to 20.4)                           | 4.1<br>(3.4 to 4.5)                            | 2.3<br>(1.6 to 3.1)                         | -38.6<br>(-45.3 to -30.2)                         | -35.0<br>(-42.1 to -26.1)                        |
| Other neoplasms                                    | 58.5<br>(51.9 to 61.8)                           | 17.7<br>(15.8 to 18.7)                         | 5.4<br>(3.9 to 7.2)                         | 10.0<br>(1.6 to 17.9)                             | 16.4<br>(7.5 to 24.8)                            |
| <b>Cardiovascular diseases</b>                     | <b>8,566.9</b><br><b>(7,911.9 to 9,254.3)</b>    | <b>521.4†</b><br><b>(467.5 to 578.7)</b>       | <b>526.8</b><br><b>(351.4 to 760.9)</b>     | <b>-0.2</b><br><b>(-2.9 to 2.5)</b>               | <b>5.7</b><br><b>(2.8 to 8.5)</b>                |
| Rheumatic heart disease                            | 2,762.3<br>(2,456.9 to 3,102.0)                  | 152.7<br>(137.0 to 169.8)                      | 131.5<br>(82.0 to 194.5)                    | 7.4<br>(2.7 to 11.8)                              | 13.7<br>(8.7 to 18.4)                            |
| Ischaemic heart disease                            | 628.0<br>(556.2 to 705.1)                        | 187.2<br>(157.3 to 219.1)                      | 36.6<br>(23.8 to 54.3)                      | -2.6<br>(-8.2 to 3.9)                             | 3.1<br>(-2.9 to 10.0)                            |
| Cerebrovascular disease                            | 344.4<br>(287.2 to 430.4)                        | 45.9†<br>(26.4 to 72.3)                        | 70.0<br>(46.7 to 98.7)                      | -19.1<br>(-23.8 to -14.5)                         | -14.3<br>(-19.3 to -9.5)                         |
| Ischaemic stroke                                   | 325.7<br>(250.0 to 424.6)                        | 29.3†<br>(13.8 to 49.5)                        | 49.9<br>(32.4 to 71.5)                      | -19.1<br>(-25.9 to -13.0)                         | -14.4<br>(-21.5 to -7.9)                         |
| Hemorrhagic stroke                                 | 130.8<br>(101.1 to 165.4)                        | 16.5†<br>(7.1 to 31.7)                         | 20.1<br>(13.3 to 28.7)                      | -18.9<br>(-24.6 to -13.5)                         | -14.2<br>(-20.2 to -8.4)                         |
| Hypertensive heart disease                         | 0.1<br>( $< 0.05$ to 0.1)                        | --                                             | $< 0.05$<br>( $< 0.05$ to $< 0.05$ )        | 18.4<br>(12.5 to 25.4)                            | 25.3<br>(19.1 to 32.7)                           |
| Cardiomyopathy and myocarditis                     | 153.7<br>(127.9 to 186.9)                        | 104.9†<br>(75.6 to 144.0)                      | 18.8<br>(12.0 to 28.9)                      | -8.0<br>(-10.9 to -5.2)                           | -2.6<br>(-5.7 to 0.4)                            |
| Myocarditis                                        | 129.9<br>(103.8 to 161.3)                        | 104.9<br>(75.6 to 144.0)                       | 10.6<br>(6.8 to 16.3)                       | -9.6<br>(-13.8 to -5.3)                           | -4.3<br>(-8.8 to 0.2)                            |
| Alcoholic cardiomyopathy                           | $< 0.05$<br>( $< 0.05$ to $< 0.05$ )             | --                                             | $< 0.05$<br>( $< 0.05$ to $< 0.05$ )        | 3.2<br>(-8.6 to 15.8)                             | 9.3<br>(-3.2 to 22.5)                            |
| Other cardiomyopathy                               | 92.1<br>(70.5 to 118.0)                          | --                                             | 8.2<br>(5.1 to 12.8)                        | -5.9<br>(-9.7 to -2.0)                            | -0.4<br>(-4.4 to 3.7)                            |
| Atrial fibrillation and flutter                    | --                                               | --                                             | --                                          | --                                                | --                                               |
| Peripheral vascular disease                        | --                                               | --                                             | --                                          | --                                                | --                                               |
| Endocarditis                                       | 7.8<br>(6.0 to 9.9)                              | 30.7<br>(19.2 to 44.5)                         | 0.6<br>(0.4 to 0.9)                         | 6.0<br>(4.1 to 8.0)                               | 12.2<br>(10.2 to 14.3)                           |
| Other cardiovascular and circulatory diseases      | 4,966.4<br>(3,460.4 to 6,813.4)                  | --                                             | 269.2<br>(159.9 to 428.5)                   | 3.5<br>(-0.4 to 7.2)                              | 9.5<br>(5.4 to 13.5)                             |
| <b>Chronic respiratory diseases</b>                | <b>29,198.6</b><br><b>(27,376.2 to 31,582.4)</b> | <b>4,117.5†</b><br><b>(3,460.2 to 4,871.3)</b> | <b>1,292.6</b><br><b>(900.8 to 1,808.4)</b> | <b>-1.2</b><br><b>(-3.1 to 0.7)</b>               | <b>4.6</b><br><b>(2.6 to 6.6)</b>                |
| Chronic obstructive pulmonary disease              | 2,134.4<br>(1,945.2 to 2,342.5)                  | 121.8<br>(98.7 to 148.0)                       | 177.6<br>(150.7 to 202.5)                   | -1.2<br>(-6.2 to 3.8)                             | 4.5<br>(-0.7 to 9.9)                             |
| Pneumoconiosis                                     | 1.3<br>(1.0 to 1.7)                              | 0.4<br>(0.3 to 0.5)                            | 0.2<br>(0.1 to 0.3)                         | -5.2<br>(-7.5 to -3.0)                            | 0.3<br>(-2.1 to 2.7)                             |
| Silicosis                                          | 0.1<br>(0.1 to 0.1)                              | 0.1<br>( $< 0.05$ to 0.1)                      | $< 0.05$<br>( $< 0.05$ to $< 0.05$ )        | -12.3<br>(-15.4 to -9.5)                          | -7.1<br>(-10.4 to -4.2)                          |

| Cause                                                          | Prevalence in thousands (95% UI)              | Incidence in thousands (95% UI)              | YLDs in thousands (95% UI)                |                                                   |                                                  |
|----------------------------------------------------------------|-----------------------------------------------|----------------------------------------------|-------------------------------------------|---------------------------------------------------|--------------------------------------------------|
|                                                                | 2016 counts                                   | 2016 counts                                  | 2016 counts                               | Percentage change in counts between 2006 and 2016 | Percentage change in rates between 2006 and 2016 |
| Asbestosis                                                     | 0.5<br>(0.3 to 0.8)                           | 0.1<br>(0.1 to 0.2)                          | 0.1<br>(< 0.05 to 0.1)                    | -0.5<br>(-4.4 to 3.7)                             | 5.3<br>(1.2 to 9.7)                              |
| Coal workers pneumoconiosis                                    | 0.1<br>(0.1 to 0.2)                           | < 0.05<br>(< 0.05 to < 0.05)                 | < 0.05<br>(< 0.05 to < 0.05)              | -11.6<br>(-14.5 to -8.7)                          | -6.4<br>(-9.4 to -3.3)                           |
| Other pneumoconiosis                                           | 0.6<br>(0.4 to 0.8)                           | 0.1<br>(0.1 to 0.2)                          | 0.1<br>(< 0.05 to 0.1)                    | -6.4<br>(-9.6 to -2.9)                            | -0.9<br>(-4.3 to 2.8)                            |
| Asthma                                                         | 26,918.6<br>(23,273.6 to 31,067.8)            | 3,993.5<br>(3,327.8 to 4,744.7)              | 1,068.7<br>(684.0 to 1,574.7)             | -2.1<br>(-4.2 to 0.1)                             | 3.7<br>(1.4 to 5.9)                              |
| Interstitial lung disease and pulmonary sarcoidosis            | 51.4<br>(42.1 to 60.6)                        | 1.8<br>(1.1 to 2.6)                          | 5.8<br>(3.6 to 8.6)                       | -11.2<br>(-14.4 to -8.4)                          | -6.0<br>(-9.4 to -3.1)                           |
| Other chronic respiratory diseases                             | --                                            | --                                           | 40.3<br>(34.1 to 45.8)                    | 31.2<br>(24.8 to 37.7)                            | 38.9<br>(32.1 to 45.8)                           |
| <b>Cirrhosis and other chronic liver diseases</b>              | <b>841.2<br/>(757.2 to 936.0)</b>             | <b>7.4<br/>(5.3 to 10.0)</b>                 | <b>76.5<br/>(52.6 to 107.5)</b>           | <b>-0.4<br/>(-5.6 to 4.5)</b>                     | <b>5.4<br/>(-0.1 to 10.6)</b>                    |
| Cirrhosis and other chronic liver diseases due to hepatitis B  | 47.4<br>(33.5 to 64.4)                        | 0.5<br>(0.3 to 0.7)                          | 4.9<br>(2.8 to 7.9)                       | 3.8<br>(-11.2 to 21.3)                            | 9.8<br>(-6.0 to 28.4)                            |
| Cirrhosis and other chronic liver diseases due to hepatitis C  | 42.4<br>(28.9 to 58.2)                        | 0.4<br>(0.2 to 0.6)                          | 4.1<br>(2.3 to 6.5)                       | 4.4<br>(-9.2 to 20.3)                             | 10.5<br>(-3.9 to 27.4)                           |
| Cirrhosis and other chronic liver diseases due to alcohol use  | 11.8<br>(6.8 to 17.9)                         | 0.1<br>(0.1 to 0.2)                          | 1.1<br>(0.6 to 2.0)                       | 3.9<br>(-0.6 to 8.8)                              | 10.0<br>(5.2 to 15.2)                            |
| Cirrhosis and other chronic liver diseases due to other causes | 739.7<br>(662.5 to 833.6)                     | 6.4<br>(4.6 to 8.6)                          | 66.4<br>(45.4 to 94.4)                    | -1.1<br>(-6.3 to 4.3)                             | 4.7<br>(-0.8 to 10.4)                            |
| <b>Digestive diseases</b>                                      | <b>6,696.9<br/>(6,298.1 to 7,058.9)</b>       | <b>7,708.7†<br/>(6,696.8 to 8,673.4)</b>     | <b>176.9<br/>(123.6 to 246.7)</b>         | <b>-9.1<br/>(-12.4 to -5.6)</b>                   | <b>-3.8<br/>(-7.3 to -0.1)</b>                   |
| Peptic ulcer disease                                           | 1,802.3<br>(1,426.8 to 2,311.9)               | 549.8<br>(375.8 to 788.8)                    | 23.0<br>(13.2 to 38.0)                    | -8.9<br>(-15.8 to -1.7)                           | -3.6<br>(-10.8 to 4.1)                           |
| Gastritis and duodenitis                                       | 2,737.7<br>(2,034.4 to 3,606.0)               | 2,300.7<br>(1,607.0 to 3,118.9)              | 27.2<br>(16.2 to 42.2)                    | -17.2<br>(-23.8 to -10.3)                         | -12.3<br>(-19.4 to -5.1)                         |
| Appendicitis                                                   | 126.0<br>(104.8 to 149.5)                     | 3,249.3<br>(2,676.2 to 3,846.1)              | 38.9<br>(24.8 to 56.0)                    | -4.0<br>(-12.5 to 4.1)                            | 1.6<br>(-7.4 to 10.2)                            |
| Paralytic ileus and intestinal obstruction                     | 6.8<br>(4.6 to 9.5)                           | 176.8<br>(119.5 to 245.8)                    | 2.2<br>(1.2 to 3.5)                       | 1.6<br>(-0.6 to 3.4)                              | 7.5<br>(5.3 to 9.4)                              |
| Inguinal, femoral, and abdominal hernia                        | 1,674.0<br>(1,024.8 to 2,478.1)               | 496.2<br>(322.8 to 696.0)                    | 47.3<br>(26.9 to 78.2)                    | -12.0<br>(-18.2 to -5.2)                          | -6.9<br>(-13.4 to 0.4)                           |
| Inflammatory bowel disease                                     | 132.2<br>(113.1 to 153.4)                     | 254.1<br>(214.3 to 304.0)                    | 20.4<br>(13.5 to 29.1)                    | -9.8<br>(-14.2 to -5.2)                           | -4.5<br>(-9.2 to 0.3)                            |
| Vascular intestinal disorders                                  | 1.5<br>(0.8 to 2.7)                           | 10.5<br>(6.4 to 16.1)                        | 0.5<br>(0.2 to 0.9)                       | 3.6<br>(-5.7 to -1.6)                             | 2.0<br>(-0.2 to 4.1)                             |
| Gallbladder and biliary diseases                               | 488.0<br>(360.0 to 636.8)                     | 583.3<br>(405.2 to 829.2)                    | 2.8<br>(1.5 to 4.5)                       | -8.2<br>(-10.2 to -6.4)                           | -2.9<br>(-4.9 to -1.0)                           |
| Pancreatitis                                                   | 10.0<br>(6.9 to 13.2)                         | 88.0<br>(61.1 to 117.5)                      | 1.3<br>(0.7 to 2.0)                       | -17.4<br>(-24.3 to -12.6)                         | -12.6<br>(-19.9 to -7.5)                         |
| Other digestive diseases                                       | --                                            | --                                           | 13.4<br>(9.4 to 18.7)                     | 7.1<br>(3.3 to 11.3)                              | 13.3<br>(9.3 to 17.8)                            |
| <b>Neurological disorders</b>                                  | <b>229,667.2<br/>(212,250.0 to 246,167.2)</b> | <b>114,161.6<br/>(76,011.7 to 176,325.0)</b> | <b>5,116.1<br/>(3,426.2 to 7,077.6)</b>   | <b>-3.4<br/>(-5.5 to -1.0)</b>                    | <b>2.2<br/>(0.1 to 4.8)</b>                      |
| Alzheimer's disease and other dementias                        | --                                            | --                                           | --                                        | --                                                | --                                               |
| Parkinson's disease                                            | --                                            | --                                           | --                                        | --                                                | --                                               |
| Epilepsy                                                       | 2,136.2<br>(1,699.5 to 2,646.5)               | 219.3<br>(158.5 to 293.3)                    | 707.9<br>(450.5 to 1,026.7)               | -7.1<br>(-17.2 to 5.9)                            | -1.7<br>(-12.3 to 12.1)                          |
| Multiple sclerosis                                             | 28.0<br>(21.6 to 35.2)                        | 5.4<br>(3.6 to 7.4)                          | 8.0<br>(5.2 to 11.3)                      | -2.0<br>(-4.5 to 0.2)                             | 3.8<br>(1.1 to 6.0)                              |
| Motor neuron disease                                           | 13.5<br>(10.8 to 16.6)                        | 0.2<br>(0.1 to 0.4)                          | 2.9<br>(1.9 to 4.0)                       | -7.5<br>(-8.4 to -6.3)                            | -2.0<br>(-3.0 to -0.8)                           |
| Migraine                                                       | 85,153.6<br>(77,677.9 to 92,901.8)            | 10,283.4<br>(8,743.0 to 11,837.3)            | 3,645.2<br>(2,302.5 to 5,178.2)           | -3.2<br>(-4.2 to -2.1)                            | 2.5<br>(1.4 to 3.6)                              |
| Tension-type headache                                          | 169,459.7<br>(122,071.6 to 224,789.0)         | 103,650.5<br>(65,729.9 to 166,183.9)         | 561.2<br>(340.2 to 859.7)                 | -3.6<br>(-5.2 to -1.7)                            | 2.0<br>(0.3 to 4.0)                              |
| Other neurological disorders                                   | 1.4<br>(0.8 to 2.5)                           | 2.9<br>(1.5 to 5.0)                          | 191.0<br>(121.6 to 276.2)                 | 8.1<br>(-3.4 to 23.0)                             | 14.4<br>(2.2 to 30.2)                            |
| <b>Mental and substance use disorders</b>                      | <b>101,583.2<br/>(99,282.1 to 104,163.5)</b>  | <b>36,558.2†<br/>(31,538.9 to 42,282.4)</b>  | <b>12,326.1<br/>(8,781.9 to 16,389.7)</b> | <b>-4.9<br/>(-5.7 to -4.2)</b>                    | <b>0.7<br/>(-0.1 to 1.4)</b>                     |
| Schizophrenia                                                  | 281.6<br>(199.4 to 383.8)                     | 124.7<br>(82.9 to 171.5)                     | 188.2<br>(119.5 to 276.2)                 | -12.6<br>(-17.8 to -7.4)                          | -7.4<br>(-12.9 to -2.0)                          |
| Alcohol use disorders                                          | 4,695.9<br>(3,493.7 to 6,163.1)               | 3,340.0<br>(2,362.4 to 4,422.5)              | 479.6<br>(296.9 to 719.1)                 | -6.1<br>(-9.0 to -3.4)                            | -0.6<br>(-3.6 to 2.2)                            |
| Drug use disorders                                             | 6,624.7<br>(6,128.0 to 7,254.0)               | 2,118.0<br>(1,813.1 to 2,480.9)              | 813.6<br>(574.9 to 1,111.1)               | -9.4<br>(-11.9 to -6.7)                           | -4.1<br>(-6.8 to -1.2)                           |
| Opioid use disorders                                           | 718.6<br>(574.0 to 936.5)                     | 417.9<br>(330.7 to 542.4)                    | 306.5<br>(198.6 to 425.8)                 | -6.5<br>(-11.7 to -1.8)                           | 1.0<br>(-6.5 to 3.9)                             |
| Cocaine use disorders                                          | 703.0<br>(577.3 to 840.6)                     | 213.2<br>(177.8 to 255.4)                    | 98.2<br>(59.8 to 147.6)                   | -2.3<br>(-6.0 to 1.9)                             | 3.5<br>(-0.5 to 7.8)                             |
| Amphetamine use disorders                                      | 948.6<br>(610.5 to 1,381.9)                   | 238.8<br>(157.8 to 342.7)                    | 126.4<br>(66.9 to 212.4)                  | -14.9<br>(-20.1 to -10.1)                         | -9.9<br>(-15.4 to -4.9)                          |
| Cannabis use disorders                                         | 4,338.7<br>(3,104.2 to 5,931.2)               | 1,193.7<br>(918.1 to 1,511.0)                | 127.6<br>(74.1 to 201.6)                  | -14.3<br>(-18.4 to -10.7)                         | -9.3<br>(-13.7 to -5.5)                          |
| Other drug use disorders                                       | 82.9<br>(64.0 to 103.5)                       | 54.4<br>(41.8 to 69.0)                       | 155.0<br>(97.0 to 232.0)                  | -9.9<br>(-13.8 to -5.8)                           | -4.7<br>(-8.8 to -0.3)                           |
| Depressive disorders                                           | 17,139.2<br>(15,782.0 to 18,343.9)            | 20,846.5<br>(16,138.9 to 26,004.5)           | 3,110.9<br>(2,022.9 to 4,420.4)           | -5.2<br>(-6.9 to -3.6)                            | 0.4<br>(-1.4 to 2.0)                             |
| Major depressive disorder                                      | 12,652.4<br>(9,696.1 to 15,965.7)             | 19,664.0<br>(14,922.8 to 24,787.3)           | 2,667.5<br>(1,722.0 to 3,857.5)           | -5.7<br>(-7.6 to -3.9)                            | -0.1<br>(-2.2 to 1.7)                            |
| Dysthymia                                                      | 4,487.8<br>(3,328.2 to 5,993.3)               | 1,182.5<br>(876.6 to 1,584.4)                | 443.4<br>(269.2 to 676.1)                 | -2.0<br>(-4.8 to 0.5)                             | 3.8<br>(0.8 to 6.4)                              |
| Bipolar disorder                                               | 4,905.2<br>(3,716.9 to 6,295.8)               | 841.6<br>(673.8 to 1,045.6)                  | 1,029.7<br>(621.1 to 1,595.4)             | -0.8<br>(-2.7 to 0.9)                             | 5.0<br>(3.0 to 6.8)                              |
| Anxiety disorders                                              | 25,134.3<br>(22,200.7 to 28,547.4)            | 3,777.8<br>(3,239.0 to 4,431.7)              | 2,485.4<br>(1,707.4 to 3,428.3)           | -4.9<br>(-6.8 to -3.1)                            | 0.7<br>(-1.3 to 2.5)                             |
| Eating disorders                                               | 1,724.2<br>(1,484.1 to 2,090.4)               | 1,759.8<br>(1,089.0 to 2,753.5)              | 354.4<br>(205.8 to 556.6)                 | 4.2<br>(1.6 to 6.6)                               | 10.3<br>(7.6 to 12.8)                            |
| Anorexia nervosa                                               | 586.8<br>(383.9 to 836.8)                     | 233.9<br>(142.6 to 345.0)                    | 125.5<br>(70.8 to 203.0)                  | 2.3<br>(-1.3 to 5.9)                              | 8.3<br>(4.5 to 12.1)                             |
| Bulimia nervosa                                                | 1,077.0<br>(600.8 to 1,755.6)                 | 1,525.9<br>(859.7 to 2,518.8)                | 228.9<br>(116.8 to 411.4)                 | 5.4<br>(2.2 to 8.6)                               | 11.5<br>(8.1 to 14.9)                            |
| Autistic spectrum disorders                                    | 5,826.0<br>(5,534.3 to 6,089.6)               | --                                           | 856.1<br>(579.0 to 1,204.1)               | -4.8<br>(-6.2 to -3.4)                            | 0.8<br>(-0.7 to 2.3)                             |
| Autism                                                         | 1,705.1<br>(1,469.7 to 1,990.5)               | --                                           | 439.9<br>(283.6 to 640.2)                 | -4.8<br>(-7.1 to -2.5)                            | 0.8<br>(-1.7 to 3.2)                             |
| Asperger syndrome and other autistic spectrum disorders        | 4,114.4<br>(3,448.5 to 4,939.2)               | --                                           | 416.1<br>(271.3 to 605.5)                 | -4.8<br>(-6.4 to -3.3)                            | 0.8<br>(-0.9 to 2.4)                             |

| Cause                                                      | Prevalence in thousands (95% UI)                    | Incidence in thousands (95% UI)                          | YLDs in thousands (95% UI)                      |                                                   |                                                  |
|------------------------------------------------------------|-----------------------------------------------------|----------------------------------------------------------|-------------------------------------------------|---------------------------------------------------|--------------------------------------------------|
|                                                            | 2016 counts                                         | 2016 counts                                              | 2016 counts                                     | Percentage change in counts between 2006 and 2016 | Percentage change in rates between 2006 and 2016 |
| Attention-deficit/hyperactivity disorder                   | 9,407.2<br>(8,409.6 to 10,549.0)                    | --                                                       | 113.7<br>(68.0 to 182.1)                        | -9.6<br>(-11.5 to -7.7)                           | -4.3<br>(-6.3 to -2.3)                           |
| Conduct disorder                                           | 16,548.8<br>(13,335.5 to 20,114.2)                  | 2,514.8<br>(1,582.0 to 3,370.0)                          | 1,994.0<br>(1,228.2 to 3,041.9)                 | -3.1<br>(-4.8 to -1.3)                            | 2.6<br>(0.7 to 4.5)                              |
| Idiopathic developmental intellectual disability           | 13,913.4<br>(8,840.6 to 19,167.8)                   | --                                                       | 539.9<br>(259.0 to 930.0)                       | -10.1<br>(-13.5 to -8.0)                          | -4.9<br>(-8.4 to -2.6)                           |
| Other mental and substance use disorders                   | 4,701.0<br>(3,882.4 to 5,604.8)                     | 1,234.9<br>(1,016.9 to 1,473.9)                          | 360.6<br>(240.7 to 524.6)                       | -5.1<br>(-7.8 to -2.4)                            | 0.4<br>(-2.5 to 3.3)                             |
| <b>Diabetes, urogenital, blood, and endocrine diseases</b> | <b>200,013.1</b><br><b>(197,827.5 to 202,355.4)</b> | <b>72,510.8†</b><br><b>(63,757.1 to 82,642.3)</b>        | <b>1,596.0</b><br><b>(1,087.1 to 2,292.7)</b>   | <b>-3.1</b><br><b>(-5.1 to -1.0)</b>              | <b>2.6</b><br><b>(0.5 to 4.8)</b>                |
| Diabetes mellitus                                          | 4,896.7<br>(3,768.1 to 6,195.6)                     | 758.1<br>(550.2 to 1,009.9)                              | 270.2<br>(165.3 to 414.9)                       | -0.2<br>(-2.9 to 2.4)                             | 5.6<br>(2.8 to 8.4)                              |
| Acute glomerulonephritis                                   | 5.9<br>(3.8 to 8.6)                                 | 84.5<br>(53.9 to 121.5)                                  | 0.3<br>(0.1 to 0.5)                             | -17.1<br>(-19.8 to -14.8)                         | -12.2<br>(-15.1 to -9.8)                         |
| Chronic kidney disease                                     | 2,648.9<br>(2,065.1 to 3,339.2)                     | 390.4<br>(270.5 to 527.1)                                | 119.9<br>(75.2 to 184.0)                        | -0.5<br>(-5.2 to 4.2)                             | 5.4<br>(0.3 to 10.2)                             |
| Chronic kidney disease due to diabetes mellitus            | 171.2<br>(95.9 to 275.4)                            | 23.4<br>(12.2 to 38.9)                                   | 10.2<br>(5.0 to 18.4)                           | -2.6<br>(-8.5 to 4.6)                             | 3.1<br>(-3.1 to 10.7)                            |
| Chronic kidney disease due to hypertension                 | 672.5<br>(458.2 to 948.7)                           | 172.4<br>(108.0 to 258.1)                                | 5.9<br>(3.1 to 9.9)                             | -1.8<br>(-7.7 to 3.7)                             | 3.9<br>(-2.3 to 9.8)                             |
| Chronic kidney disease due to glomerulonephritis           | 605.5<br>(411.4 to 835.2)                           | 15.1<br>(8.8 to 23.7)                                    | 52.7<br>(31.4 to 85.1)                          | -1.3<br>(-6.4 to 3.5)                             | 4.5<br>(-0.9 to 9.6)                             |
| Chronic kidney disease due to other causes                 | 1,199.7<br>(810.0 to 1,682.4)                       | 179.6<br>(113.6 to 259.9)                                | 51.1<br>(28.7 to 81.7)                          | 1.1<br>(-4.3 to 5.9)                              | 7.0<br>(1.3 to 12.1)                             |
| Urinary diseases and male infertility                      | 1,672.2<br>(1,384.7 to 2,046.0)                     | 31,239.4†<br>(23,190.8 to 40,422.3)                      | 36.8<br>(21.4 to 59.7)                          | -6.5<br>(-10.8 to -1.7)                           | -1.1<br>(-5.6 to 4.0)                            |
| Interstitial nephritis and urinary tract infections        | 551.4<br>(403.4 to 717.9)                           | 29,816.5<br>(21,592.0 to 39,199.1)                       | 18.5<br>(10.3 to 30.2)                          | -5.1<br>(-9.7 to -0.0)                            | 0.5<br>(-4.4 to 5.8)                             |
| Urolithiasis                                               | 50.7<br>(36.0 to 67.3)                              | 1,422.8<br>(1,018.4 to 1,922.8)                          | 3.9<br>(2.4 to 6.2)                             | -7.6<br>(-8.8 to -6.3)                            | -2.2<br>(-3.5 to -0.8)                           |
| Benign prostatic hyperplasia                               | --                                                  | --                                                       | --                                              | --                                                | --                                               |
| Male infertility                                           | 1,041.5<br>(628.3 to 1,600.0)                       | --                                                       | 7.3<br>(2.7 to 16.2)                            | 12.2<br>(1.5 to 22.2)                             | 18.7<br>(7.5 to 29.3)                            |
| Other urinary diseases                                     | --                                                  | --                                                       | 7.0<br>(4.2 to 11.0)                            | -22.6<br>(-25.7 to -19.2)                         | -18.1<br>(-21.4 to -14.5)                        |
| Gynecological diseases                                     | 56,083.3<br>(54,041.5 to 58,334.3)                  | 39,829.4†<br>(35,935.5 to 44,201.4)                      | 611.8<br>(402.7 to 884.5)                       | -5.7<br>(-7.8 to -3.4)                            | -0.2<br>(-2.4 to 2.2)                            |
| Uterine fibroids                                           | 288.5<br>(220.6 to 369.9)                           | 71.0<br>(44.6 to 102.5)                                  | 7.0<br>(4.0 to 11.5)                            | -5.5<br>(-12.5 to 2.1)                            | 0.0<br>(-7.4 to 8.0)                             |
| Polycystic ovarian syndrome                                | 446.7<br>(323.6 to 628.3)                           | 797.9<br>(571.5 to 1,110.6)                              | 4.1<br>(1.8 to 8.3)                             | -6.3<br>(-10.2 to -2.4)                           | -0.8<br>(-5.0 to 3.3)                            |
| Female infertility                                         | 1,021.7<br>(505.2 to 1,775.6)                       | --                                                       | 6.8<br>(2.2 to 15.4)                            | 24.2<br>(-29.0 to 74.9)                           | 31.4<br>(-24.8 to 85.1)                          |
| Endometriosis                                              | 242.9<br>(190.3 to 301.8)                           | 2,844.1<br>(2,139.8 to 3,760.8)                          | 23.2<br>(14.8 to 33.9)                          | -18.6<br>(-24.4 to -11.9)                         | -13.8<br>(-20.0 to -6.7)                         |
| Genital prolapse                                           | 2,070.5<br>(1,448.5 to 2,801.8)                     | 1,080.9<br>(804.4 to 1,399.2)                            | 6.7<br>(2.9 to 13.3)                            | -12.2<br>(-17.0 to -7.5)                          | -7.0<br>(-12.2 to -2.0)                          |
| Premenstrual syndrome                                      | 49,808.1<br>(44,585.0 to 55,774.1)                  | 32,692.1<br>(28,909.3 to 37,095.5)                       | 421.5<br>(260.9 to 649.7)                       | -7.5<br>(-10.0 to -5.2)                           | -2.0<br>(-4.7 to 0.3)                            |
| Other gynecological diseases                               | 4,380.3<br>(3,840.1 to 4,954.9)                     | 2,343.4<br>(1,555.9 to 3,219.9)                          | 142.4<br>(94.7 to 201.0)                        | 1.7<br>(-2.8 to 6.6)                              | 7.7<br>(2.9 to 12.8)                             |
| Hemoglobinopathies and hemolytic anaemias                  | 154,702.5<br>(152,604.1 to 157,066.6)               | --                                                       | 440.7<br>(286.0 to 652.1)                       | -1.6<br>(-6.4 to 3.6)                             | 4.1<br>(-0.9 to 9.7)                             |
| Thalassemias                                               | 8.9<br>(8.3 to 9.6)                                 | --                                                       | 0.7<br>(0.5 to 1.0)                             | -11.9<br>(-18.9 to -5.6)                          | -6.7<br>(-14.2 to -0.1)                          |
| Thalassaemia trait                                         | 21,399.7<br>(20,565.2 to 22,322.6)                  | --                                                       | 178.5<br>(111.2 to 275.3)                       | -19.2<br>(-26.3 to -12.1)                         | -14.4<br>(-22.0 to -7.0)                         |
| Sickle cell disorders                                      | 425.7<br>(392.6 to 466.9)                           | --                                                       | 38.1<br>(26.1 to 52.0)                          | 21.2<br>(11.9 to 31.2)                            | 28.3<br>(18.4 to 38.9)                           |
| Sickle cell trait                                          | 44,385.2<br>(40,102.1 to 50,048.8)                  | --                                                       | 119.2<br>(76.5 to 176.9)                        | 11.4<br>(6.9 to 16.2)                             | 18.0<br>(13.2 to 23.0)                           |
| G6PD deficiency                                            | 29,718.8<br>(28,561.4 to 31,106.5)                  | --                                                       | 1.9<br>(1.2 to 2.8)                             | 7.2<br>(2.5 to 12.1)                              | 13.4<br>(8.5 to 18.6)                            |
| G6PD trait                                                 | 72,093.3<br>(70,911.4 to 73,419.2)                  | --                                                       | < 0.05<br>(< 0.05 to 0.1)                       | -8.5<br>(-14.0 to -2.4)                           | -3.1<br>(-9.0 to 3.3)                            |
| Other hemoglobinopathies and hemolytic anaemias            | 5,419.4<br>(4,807.1 to 6,086.8)                     | --                                                       | 102.3<br>(66.5 to 151.1)                        | 18.6<br>(10.6 to 28.2)                            | 25.5<br>(17.1 to 35.8)                           |
| Endocrine, metabolic, blood, and immune disorders          | 4,860.7<br>(4,344.6 to 5,434.7)                     | 208.9<br>(135.1 to 310.2)                                | 116.3<br>(76.0 to 165.9)                        | -1.8<br>(-5.4 to 2.1)                             | 4.0<br>(0.1 to 8.1)                              |
| <b>Musculoskeletal disorders</b>                           | <b>36,872.4</b><br><b>(34,129.1 to 39,374.9)</b>    | <b>20,602.5</b><br><b>(15,646.8 to 26,164.0)</b>         | <b>3,830.7</b><br><b>(2,565.0 to 5,288.7)</b>   | <b>-8.9</b><br><b>(-11.2 to -7.0)</b>             | <b>-3.6</b><br><b>(-6.0 to -1.5)</b>             |
| Rheumatoid arthritis                                       | 358.9<br>(285.9 to 442.2)                           | 43.8<br>(30.5 to 61.0)                                   | 90.0<br>(58.5 to 128.2)                         | -3.4<br>(-7.9 to 1.6)                             | 2.2<br>(-2.5 to 7.6)                             |
| Osteoarthritis                                             | --                                                  | --                                                       | --                                              | --                                                | --                                               |
| Low back and neck pain                                     | 22,365.9<br>(20,236.1 to 25,180.2)                  | 10,477.3<br>(7,424.6 to 13,575.0)                        | 2,389.5<br>(1,522.8 to 3,456.9)                 | -7.7<br>(-10.1 to -5.4)                           | -2.2<br>(-4.8 to 0.1)                            |
| Low back pain                                              | 18,360.6<br>(13,116.7 to 24,119.0)                  | 9,115.5<br>(6,170.3 to 12,345.5)                         | 2,011.3<br>(1,229.9 to 2,965.5)                 | -7.1<br>(-10.0 to -4.6)                           | -1.6<br>(-4.8 to 1.0)                            |
| Neck pain                                                  | 3,651.4<br>(2,531.9 to 4,973.7)                     | 1,361.8<br>(852.4 to 1,955.4)                            | 378.2<br>(231.1 to 589.4)                       | -10.6<br>(-13.3 to -7.9)                          | -5.4<br>(-8.2 to -2.5)                           |
| Gout                                                       | 40.7<br>(24.3 to 63.0)                              | 28.4<br>(16.9 to 44.4)                                   | 1.4<br>(0.7 to 2.4)                             | -5.8<br>(-7.1 to -4.6)                            | -0.3<br>(-1.7 to 1.0)                            |
| Other musculoskeletal disorders                            | 15,216.8<br>(10,493.7 to 21,054.5)                  | 10,052.9<br>(6,336.7 to 14,521.7)                        | 1,349.8<br>(797.0 to 2,035.5)                   | -11.4<br>(-16.2 to -7.8)                          | -6.2<br>(-11.3 to -2.4)                          |
| <b>Other non-communicable diseases</b>                     | <b>432,269.7</b><br><b>(424,918.1 to 440,008.3)</b> | <b>1,143,229.7†</b><br><b>(984,257.0 to 1,338,697.3)</b> | <b>11,549.3</b><br><b>(7,864.3 to 16,392.5)</b> | <b>4.3</b><br><b>(-4.9 to -3.6)</b>               | <b>1.3</b><br><b>(0.7 to 2.0)</b>                |
| Congenital anomalies                                       | 7,369.1<br>(6,972.1 to 7,715.5)                     | --                                                       | 854.0<br>(603.2 to 1,138.7)                     | -6.0<br>(-8.1 to -3.8)                            | -0.5<br>(-2.7 to 1.9)                            |
| Neural tube defects                                        | 509.0<br>(459.2 to 564.5)                           | --                                                       | 152.7<br>(107.5 to 205.9)                       | 1.3<br>(-3.2 to 5.9)                              | 7.2<br>(2.4 to 12.1)                             |
| Congenital heart anomalies                                 | 1,065.6<br>(944.5 to 1,199.8)                       | --                                                       | 53.7<br>(23.0 to 92.5)                          | -12.3<br>(-15.4 to -9.1)                          | -7.1<br>(-10.5 to -3.8)                          |
| Orofacial clefts                                           | 263.1<br>(234.2 to 293.0)                           | --                                                       | 3.6<br>(2.3 to 5.2)                             | -12.8<br>(-15.5 to -10.2)                         | -7.7<br>(-10.6 to -4.9)                          |
| Down's syndrome                                            | 203.1<br>(177.3 to 234.4)                           | --                                                       | 17.4<br>(11.8 to 24.6)                          | -7.3<br>(-10.2 to -4.2)                           | -1.8<br>(-4.9 to 1.4)                            |
| Turner syndrome                                            | 294.7<br>(257.6 to 336.1)                           | --                                                       | 6.1<br>(3.1 to 9.9)                             | -6.3<br>(-14.6 to 2.1)                            | -0.8<br>(-9.6 to 8.1)                            |
| Klinefelter syndrome                                       | 378.4<br>(326.0 to 433.7)                           | --                                                       | 1.0<br>(0.5 to 1.9)                             | -2.4<br>(-10.8 to 6.8)                            | 3.4<br>(-5.6 to 13.1)                            |

| Cause                                         | Prevalence in thousands (95% UI)                 | Incidence in thousands (95% UI)                              | YLDs in thousands (95% UI)                    |                                                   |                                                  |
|-----------------------------------------------|--------------------------------------------------|--------------------------------------------------------------|-----------------------------------------------|---------------------------------------------------|--------------------------------------------------|
|                                               | 2016 counts                                      | 2016 counts                                                  | 2016 counts                                   | Percentage change in counts between 2006 and 2016 | Percentage change in rates between 2006 and 2016 |
| Other chromosomal abnormalities               | 870.9<br>(740.1 to 1,018.1)                      | --                                                           | 73.0<br>(48.8 to 104.5)                       | -6.2<br>(-9.4 to -2.6)                            | -0.7<br>(-4.1 to 3.1)                            |
| Congenital musculoskeletal and limb anomalies | 820.8<br>(756.5 to 891.9)                        | --                                                           | 118.9<br>(81.3 to 164.2)                      | -5.4<br>(-8.5 to -2.2)                            | 0.1<br>(-3.2 to 3.6)                             |
| Urogenital congenital anomalies               | 735.6<br>(653.3 to 823.0)                        | --                                                           | 23.2<br>(14.0 to 36.0)                        | -11.8<br>(-13.9 to -9.8)                          | -6.6<br>(-8.9 to -4.5)                           |
| Digestive congenital anomalies                | 703.9<br>(631.7 to 778.6)                        | --                                                           | 31.7<br>(20.7 to 45.1)                        | -15.7<br>(-19.8 to -11.1)                         | -10.8<br>(-15.1 to -5.9)                         |
| Other congenital anomalies                    | 3,026.2<br>(2,138.7 to 4,264.3)                  | --                                                           | 372.7<br>(243.3 to 549.0)                     | -6.5<br>(-10.5 to -2.2)                           | -1.0<br>(-5.2 to 3.5)                            |
| Skin and subcutaneous diseases                | 281,874.6<br>(272,835.6 to 292,013.2)            | 422,609.6<br>(373,425.0 to 482,853.6)                        | 8,477.2<br>(5,723.1 to 12,252.9)              | -3.6<br>(-4.3 to -2.8)                            | 2.1<br>(1.3 to 2.9)                              |
| Dermatitis                                    | 24,814.1<br>(21,608.1 to 28,453.9)               | 29,453.5<br>(23,704.8 to 35,465.7)                           | 933.4<br>(551.8 to 1,506.7)                   | -1.4<br>(-3.3 to 0.5)                             | 4.4<br>(2.4 to 6.4)                              |
| Psoriasis                                     | 3,689.3<br>(3,346.8 to 4,055.5)                  | 493.5<br>(423.5 to 567.5)                                    | 330.4<br>(228.6 to 441.2)                     | 0.2<br>(-2.8 to 3.4)                              | 6.1<br>(2.9 to 9.4)                              |
| Cellulitis                                    | 240.4<br>(192.5 to 293.6)                        | 4,463.2<br>(3,713.7 to 5,327.1)                              | 13.8<br>(8.6 to 21.1)                         | -2.8<br>(-8.7 to 4.1)                             | 2.9<br>(-3.3 to 10.2)                            |
| Pyoderma                                      | 868.4<br>(789.0 to 949.3)                        | 17,290.9<br>(15,753.6 to 18,942.1)                           | 5.0<br>(2.0 to 10.7)                          | 6.6<br>(2.6 to 10.4)                              | 12.8<br>(8.7 to 16.8)                            |
| Scabies                                       | 16,728.3<br>(11,608.1 to 23,596.0)               | 52,626.5<br>(36,274.7 to 74,697.9)                           | 434.4<br>(219.6 to 761.6)                     | -12.7<br>(-14.0 to -11.3)                         | -7.6<br>(-8.9 to -6.2)                           |
| Fungal skin diseases                          | 37,857.2<br>(27,961.4 to 50,763.3)               | 108,572.2<br>(79,712.9 to 144,751.4)                         | 215.9<br>(83.4 to 481.4)                      | -0.8<br>(-2.0 to 0.4)                             | 5.0<br>(3.8 to 6.2)                              |
| Viral skin diseases                           | 21,509.3<br>(18,492.7 to 25,194.3)               | 31,877.8<br>(27,561.0 to 36,439.5)                           | 663.0<br>(408.8 to 977.5)                     | -5.5<br>(-6.7 to -4.4)                            | -0.0<br>(-1.3 to 1.2)                            |
| Acne vulgaris                                 | 209,587.1<br>(175,308.5 to 246,418.1)            | 141,922.0<br>(110,224.5 to 184,521.2)                        | 5,414.6<br>(3,581.7 to 7,931.2)               | -3.1<br>(-4.1 to -2.1)                            | 2.6<br>(1.5 to 3.6)                              |
| Alopecia areata                               | 876.9<br>(779.2 to 981.7)                        | 1,690.5<br>(1,492.2 to 1,893.7)                              | 29.1<br>(18.1 to 44.9)                        | -5.7<br>(-9.6 to -1.4)                            | -0.2<br>(-4.3 to 4.4)                            |
| Pruritus                                      | 3,181.5<br>(2,143.0 to 4,529.0)                  | 2,475.5<br>(1,670.5 to 3,374.1)                              | 34.5<br>(14.8 to 65.3)                        | -5.0<br>(-6.9 to -3.2)                            | 0.5<br>(-1.4 to 2.4)                             |
| Urticaria                                     | 4,488.8<br>(3,094.1 to 6,269.2)                  | 7,779.0<br>(5,327.8 to 10,755.3)                             | 271.8<br>(151.0 to 443.3)                     | -6.6<br>(-8.9 to -4.4)                            | -1.1<br>(-3.6 to 1.2)                            |
| Decubitus ulcer                               | 30.2<br>(20.7 to 41.8)                           | 106.1<br>(73.6 to 146.9)                                     | 5.3<br>(3.1 to 8.3)                           | -3.5<br>(-4.4 to -2.6)                            | 2.2<br>(1.2 to 3.1)                              |
| Other skin and subcutaneous diseases          | 22,446.0<br>(20,099.0 to 25,074.5)               | 23,858.9<br>(21,531.5 to 26,586.2)                           | 125.9<br>(59.8 to 228.6)                      | -0.8<br>(-1.9 to 0.3)                             | 5.0<br>(3.9 to 6.1)                              |
| Sense organ diseases                          | 51,850.3<br>(50,049.5 to 53,638.6)               | 39,986.3 <sup>†</sup><br>(35,587.5 to 44,735.2)              | 1,746.7<br>(1,178.0 to 2,473.9)               | -6.4<br>(-8.4 to -4.6)                            | -0.9<br>(-3.0 to 0.9)                            |
| Glaucoma                                      | --                                               | --                                                           | --                                            | --                                                | --                                               |
| Cataract                                      | --                                               | --                                                           | --                                            | --                                                | --                                               |
| Macular degeneration                          | --                                               | --                                                           | --                                            | --                                                | --                                               |
| Refraction and accommodation disorders        | 27,886.2<br>(24,961.7 to 30,919.3)               | --                                                           | 595.7<br>(369.7 to 930.6)                     | -6.9<br>(-8.2 to -5.7)                            | -1.5<br>(-2.8 to -0.1)                           |
| Age-related and other hearing loss            | 19,607.8<br>(15,285.1 to 24,465.1)               | --                                                           | 939.0<br>(621.8 to 1,342.5)                   | -6.2<br>(-9.9 to -3.1)                            | -0.8<br>(-4.7 to 2.6)                            |
| Other vision loss                             | 513.5<br>(360.7 to 719.1)                        | --                                                           | 32.1<br>(18.4 to 49.9)                        | -8.0<br>(-14.6 to -1.2)                           | -2.6<br>(-9.6 to 4.6)                            |
| Other sense organ diseases                    | 5,932.6<br>(5,237.6 to 6,668.3)                  | 39,986.3<br>(35,587.5 to 44,735.2)                           | 180.0<br>(110.2 to 277.4)                     | -4.9<br>(-7.2 to -2.6)                            | 0.7<br>(-1.7 to 3.1)                             |
| Oral disorders                                | 264,786.4<br>(236,765.2 to 297,720.2)            | 680,633.8 <sup>†</sup><br>(526,602.8 to 872,978.9)           | 471.4<br>(262.1 to 772.8)                     | -5.7<br>(-6.7 to -4.7)                            | -0.2<br>(-1.2 to 0.9)                            |
| Caries of deciduous teeth                     | --                                               | --                                                           | --                                            | --                                                | --                                               |
| Caries of permanent teeth                     | 248,543.6<br>(198,444.3 to 296,907.5)            | 679,138.1<br>(524,976.2 to 871,518.7)                        | 168.3<br>(71.0 to 324.8)                      | -7.4<br>(-8.9 to -6.1)                            | -2.0<br>(-3.6 to -0.6)                           |
| Periodontal disease                           | 4,706.4<br>(2,564.3 to 7,529.1)                  | 1,495.7<br>(841.1 to 2,359.6)                                | 31.6<br>(10.5 to 73.9)                        | 4.0<br>(1.6 to 6.4)                               | 10.1<br>(7.6 to 12.6)                            |
| Edentulism and severe tooth loss              | --                                               | --                                                           | --                                            | --                                                | --                                               |
| Other oral disorders                          | 9,110.9<br>(8,002.8 to 10,381.9)                 | --                                                           | 271.5<br>(163.1 to 416.7)                     | -5.6<br>(-6.9 to -4.3)                            | -0.1<br>(-1.5 to 1.3)                            |
| <b>Injuries</b>                               | <b>56,862.8</b><br><b>(51,712.1 to 62,660.9)</b> | <b>40,831.5<sup>†</sup></b><br><b>(35,080.5 to 47,427.7)</b> | <b>2,259.1</b><br><b>(1,476.5 to 3,288.6)</b> | <b>-3.4</b><br><b>(-4.6 to -2.3)</b>              | <b>2.2</b><br><b>(1.0 to 3.4)</b>                |
| <b>Transport injuries</b>                     | <b>6,376.8</b><br><b>(5,448.0 to 7,247.4)</b>    | <b>6,587.3</b><br><b>(5,031.8 to 8,171.9)</b>                | <b>370.0</b><br><b>(237.6 to 550.4)</b>       | <b>-5.5</b><br><b>(-7.3 to -3.8)</b>              | <b>0.1</b><br><b>(-1.9 to 1.8)</b>               |
| Road injuries                                 | 4,226.8<br>(3,643.8 to 4,805.9)                  | 5,924.8<br>(4,403.7 to 7,488.4)                              | 248.8<br>(158.7 to 367.9)                     | 4.5<br>(-6.7 to -2.4)                             | 1.1<br>(-1.2 to 3.3)                             |
| Pedestrian road injuries                      | 995.6<br>(757.2 to 1,278.3)                      | 973.9<br>(620.8 to 1,433.6)                                  | 59.1<br>(37.2 to 89.3)                        | -8.4<br>(-10.6 to -5.9)                           | -3.0<br>(-5.4 to -0.4)                           |
| Cyclist road injuries                         | 1,079.5<br>(804.8 to 1,420.9)                    | 1,553.1<br>(961.7 to 2,296.0)                                | 57.5<br>(35.6 to 86.5)                        | -2.0<br>(-4.5 to 1.0)                             | 3.7<br>(1.1 to 6.9)                              |
| Motorcyclist road injuries                    | 822.3<br>(655.0 to 1,021.0)                      | 1,074.8<br>(690.6 to 1,565.0)                                | 48.9<br>(30.8 to 72.3)                        | -1.1<br>(-3.6 to 1.6)                             | 4.7<br>(2.0 to 7.6)                              |
| Motor vehicle road injuries                   | 929.0<br>(735.1 to 1,191.7)                      | 1,708.3<br>(1,171.4 to 2,378.1)                              | 62.2<br>(39.5 to 90.3)                        | -8.5<br>(-11.6 to -5.5)                           | -3.1<br>(-6.5 to -0.0)                           |
| Other road injuries                           | 400.3<br>(306.2 to 530.8)                        | 614.7<br>(335.2 to 975.7)                                    | 21.0<br>(12.7 to 31.3)                        | 5.5<br>(2.9 to 8.6)                               | 11.6<br>(8.9 to 15.0)                            |
| Other transport injuries                      | 2,149.9<br>(1,667.3 to 2,741.7)                  | 662.5<br>(421.2 to 942.7)                                    | 121.2<br>(78.5 to 180.1)                      | -7.3<br>(-9.2 to -5.5)                            | -1.9<br>(-3.9 to 0.1)                            |
| <b>Unintentional injuries</b>                 | <b>46,199.0</b><br><b>(41,119.1 to 51,685.3)</b> | <b>30,980.2</b><br><b>(25,768.0 to 37,158.1)</b>             | <b>1,566.1</b><br><b>(1,019.5 to 2,276.4)</b> | <b>-1.2</b><br><b>(-2.4 to -0.2)</b>              | <b>4.6</b><br><b>(3.3 to 5.7)</b>                |
| Falls                                         | 16,841.5<br>(13,547.5 to 20,469.1)               | 11,793.7<br>(8,014.2 to 16,975.7)                            | 624.3<br>(417.5 to 900.6)                     | 0.0<br>(-1.3 to 1.2)                              | 5.9<br>(4.5 to 7.1)                              |
| Drowning                                      | 191.3<br>(151.5 to 235.9)                        | 55.6<br>(42.6 to 71.9)                                       | 10.7<br>(6.8 to 16.0)                         | -20.8<br>(-22.4 to -19.2)                         | -16.1<br>(-17.8 to -14.5)                        |
| Fire, heat, and hot substances                | 4,636.3<br>(3,566.7 to 5,919.9)                  | 917.8<br>(608.6 to 1,338.3)                                  | 133.7<br>(87.9 to 194.6)                      | -0.7<br>(-3.0 to 1.3)                             | 5.1<br>(2.6 to 7.2)                              |
| Poisonings                                    | 193.2<br>(150.0 to 244.6)                        | 350.4<br>(213.9 to 556.1)                                    | 21.2<br>(13.1 to 32.1)                        | 7.4<br>(4.2 to 10.4)                              | 13.6<br>(10.3 to 16.9)                           |
| Exposure to mechanical forces                 | 6,754.5<br>(5,176.2 to 9,749.6)                  | 5,259.5<br>(3,573.1 to 7,417.2)                              | 160.8<br>(98.8 to 256.0)                      | -2.6<br>(-4.1 to -1.2)                            | 3.1<br>(1.6 to 4.6)                              |
| Unintentional firearm injuries                | 213.6<br>(160.4 to 293.7)                        | 147.8<br>(75.4 to 275.2)                                     | 8.8<br>(5.4 to 13.5)                          | -1.1<br>(-3.2 to 1.2)                             | 4.7<br>(2.5 to 7.1)                              |
| Unintentional suffocation                     | 567.8<br>(398.0 to 770.6)                        | 50.4<br>(23.0 to 96.2)                                       | 17.2<br>(9.7 to 28.1)                         | -15.4<br>(-16.8 to -13.9)                         | -10.4<br>(-11.9 to -8.8)                         |
| Other exposure to mechanical forces           | 5,973.0<br>(4,463.4 to 8,972.8)                  | 5,061.4<br>(3,418.7 to 7,104.3)                              | 134.9<br>(83.3 to 214.1)                      | -0.8<br>(-2.4 to 0.8)                             | 5.0<br>(3.3 to 6.7)                              |

| Cause                                                                               | Prevalence in thousands (95% UI)                 | Incidence in thousands (95% UI)                | YLDs in thousands (95% UI)              |                                                   |                                                  |
|-------------------------------------------------------------------------------------|--------------------------------------------------|------------------------------------------------|-----------------------------------------|---------------------------------------------------|--------------------------------------------------|
|                                                                                     | 2016 counts                                      | 2016 counts                                    | 2016 counts                             | Percentage change in counts between 2006 and 2016 | Percentage change in rates between 2006 and 2016 |
| Adverse effects of medical treatment                                                | 67.3<br>(40.2 to 99.8)                           | 880.2<br>(565.3 to 1,262.7)                    | 9.0<br>(4.6 to 15.2)                    | -3.1<br>(-9.0 to 1.1)                             | 2.6<br>(-3.7 to 7.0)                             |
| Animal contact                                                                      | 2,706.7<br>(2,238.8 to 3,380.9)                  | 5,606.5<br>(3,763.1 to 8,009.7)                | 120.9<br>(79.8 to 171.3)                | -1.5<br>(-4.4 to 1.4)                             | 4.2<br>(1.2 to 7.4)                              |
| Venomous animal contact                                                             | 1,381.4<br>(1,058.4 to 1,755.3)                  | 2,845.4<br>(1,821.8 to 4,216.4)                | 98.4<br>(64.4 to 139.9)                 | -0.4<br>(-4.0 to 3.0)                             | 5.4<br>(1.7 to 9.0)                              |
| Non-venomous animal contact                                                         | 1,325.3<br>(961.3 to 1,839.4)                    | 2,761.1<br>(1,763.5 to 4,070.7)                | 22.5<br>(13.3 to 35.9)                  | -6.0<br>(-8.6 to -3.7)                            | -0.6<br>(-3.3 to 1.9)                            |
| Foreign body                                                                        | 3,388.7<br>(2,635.2 to 4,154.2)                  | 1,577.9<br>(1,030.3 to 2,392.2)                | 133.1<br>(81.9 to 206.1)                | -1.2<br>(-3.0 to 0.6)                             | 4.6<br>(2.6 to 6.5)                              |
| Pulmonary aspiration and foreign body in airway                                     | 1,751.9<br>(1,222.8 to 2,497.6)                  | 195.7<br>(111.5 to 328.8)                      | 78.6<br>(46.7 to 124.8)                 | -5.3<br>(-6.9 to -3.9)                            | 0.3<br>(-1.4 to 1.7)                             |
| Foreign body in eyes                                                                | 154.8<br>(65.8 to 296.0)                         | 958.3<br>(469.3 to 1,764.3)                    | 8.8<br>(3.4 to 18.5)                    | 8.6<br>(4.4 to 13.2)                              | 14.9<br>(10.5 to 19.8)                           |
| Foreign body in other body part                                                     | 1,482.0<br>(1,114.2 to 2,026.9)                  | 423.9<br>(255.1 to 662.7)                      | 45.7<br>(28.2 to 71.0)                  | 4.8<br>(2.6 to 6.9)                               | 10.9<br>(8.6 to 13.2)                            |
| Environmental heat and cold exposure                                                | 3,754.8<br>(2,920.5 to 4,795.2)                  | 1,214.4<br>(704.6 to 1,832.5)                  | 143.8<br>(90.1 to 216.4)                | -4.5<br>(-6.0 to -3.0)                            | 1.1<br>(-0.5 to 2.7)                             |
| Other unintentional injuries                                                        | 7,664.7<br>(5,580.7 to 10,475.0)                 | 3,324.4<br>(2,174.5 to 4,921.6)                | 208.5<br>(132.0 to 315.3)               | -1.1<br>(-2.5 to 0.1)                             | 4.7<br>(3.2 to 6.0)                              |
| <b>Self-harm and interpersonal violence</b>                                         | <b>20,799.7</b><br><b>(15,947.6 to 26,779.4)</b> | <b>3,182.3†</b><br><b>(2,413.7 to 4,170.3)</b> | <b>260.2</b><br><b>(169.6 to 382.6)</b> | <b>-8.8</b><br><b>(-9.9 to -7.8)</b>              | <b>-3.5</b><br><b>(-4.6 to -2.4)</b>             |
| Self-harm                                                                           | 265.4<br>(203.7 to 344.9)                        | 615.8<br>(455.0 to 807.2)                      | 17.9<br>(11.0 to 27.2)                  | -5.9<br>(-7.8 to -4.1)                            | -0.4<br>(-2.4 to 1.5)                            |
| Self-harm by firearm                                                                | 20.7<br>(16.0 to 26.2)                           | 14.0<br>(4.6 to 29.4)                          | 0.8<br>(0.5 to 1.3)                     | -8.1<br>(-10.8 to -5.3)                           | -2.7<br>(-5.6 to 0.3)                            |
| Self-harm by other specified means                                                  | 244.7<br>(184.9 to 322.7)                        | 601.8<br>(444.7 to 791.0)                      | 17.1<br>(10.5 to 25.9)                  | -5.8<br>(-7.7 to -4.0)                            | -0.3<br>(-2.3 to 1.7)                            |
| Interpersonal violence                                                              | 20,534.2<br>(15,680.2 to 26,519.6)               | 2,566.5†<br>(1,796.8 to 3,538.8)               | 242.3<br>(157.7 to 356.7)               | -9.0<br>(-10.1 to -8.0)                           | -3.7<br>(-4.9 to -2.6)                           |
| Assault by firearm                                                                  | 69.4<br>(55.2 to 91.3)                           | 90.8<br>(54.5 to 143.5)                        | 3.5<br>(2.2 to 5.4)                     | -3.1<br>(-6.7 to 0.8)                             | 2.6<br>(-1.2 to 6.7)                             |
| Assault by sharp object                                                             | 466.3<br>(358.8 to 628.5)                        | 625.1<br>(376.8 to 998.5)                      | 17.0<br>(10.7 to 25.2)                  | -6.7<br>(-10.0 to -3.4)                           | -1.2<br>(-4.7 to 2.3)                            |
| Sexual violence                                                                     | 19,005.9<br>(14,200.2 to 24,991.7)               | --                                             | 177.3<br>(109.7 to 275.4)               | -9.8<br>(-10.9 to -8.8)                           | -4.5<br>(-5.7 to -3.4)                           |
| Assault by other means                                                              | 992.6<br>(789.1 to 1,259.4)                      | 1,850.6<br>(1,272.6 to 2,571.4)                | 44.4<br>(28.2 to 65.6)                  | -7.3<br>(-10.0 to -4.9)                           | -1.9<br>(-4.7 to 0.7)                            |
| <b>Forces of nature, conflict and terrorism, and executions and police conflict</b> | <b>2,493.2</b><br><b>(1,542.2 to 3,744.2)</b>    | <b>81.6†</b><br><b>(57.2 to 111.8)</b>         | <b>62.8</b><br><b>(21.9 to 126.5)</b>   | <b>-18.4</b><br><b>(-27.5 to -7.2)</b>            | <b>-13.7</b><br><b>(-23.3 to -1.8)</b>           |
| Forces of nature, conflict and terrorism, and state actor violence                  | 475.6<br>(254.2 to 768.2)                        | 37.8<br>(21.8 to 56.7)                         | 17.6<br>(5.4 to 35.2)                   | -2.7<br>(-22.5 to 24.9)                           | 3.0<br>(-17.9 to 32.1)                           |
| Conflict and terrorism                                                              | 1,967.8<br>(1,163.6 to 3,134.1)                  | --                                             | 44.9<br>(16.4 to 89.9)                  | -24.6<br>(-35.1 to -11.1)                         | -20.2<br>(-31.3 to -5.9)                         |
| Executions and police conflict                                                      | 49.8<br>(29.2 to 82.4)                           | 43.8<br>(25.1 to 67.8)                         | 1.5<br>(0.5 to 4.1)                     | -37.0<br>(-41.2 to -33.2)                         | -33.3<br>(-37.8 to -29.3)                        |

We did not calculate incidence for certain NTDs and causes with only birth prevalence. Blank cells mean that no estimate is available.

† Incidence for aggregate causes represents the sum of the incidence of the causes below the aggregate.

‡ Incidence estimates for stroke represent first-ever stroke only.

^ Incidence of HIV/AIDS represents new infections of HIV only and does not include new infections of Tuberculosis in HIV positive cases.



SR Table 12: Global prevalence, incidence, and YLDs for 2016, percentage change of YLD counts and percentage change of YLD rates between 2006 and 2016 by cause, age 20-24 years.

| Cause                                                                                | Prevalence in thousands (95% UI)             | Incidence in thousands (95% UI)                     | YLDs in thousands (95% UI)                |                                                   |                                                  |
|--------------------------------------------------------------------------------------|----------------------------------------------|-----------------------------------------------------|-------------------------------------------|---------------------------------------------------|--------------------------------------------------|
|                                                                                      | 2016 counts                                  | 2016 counts                                         | 2016 counts                               | Percentage change in counts between 2006 and 2016 | Percentage change in rates between 2006 and 2016 |
|                                                                                      |                                              |                                                     |                                           |                                                   |                                                  |
| <b>All causes</b>                                                                    | <b>581,199.6</b><br>(580,166.2 to 582,361.1) | <b>3,436,189.4†</b><br>(2,930,909.1 to 4,064,037.9) | <b>50,427.3</b><br>(37,154.2 to 65,877.4) | <b>3.2</b><br>(2.6 to 3.9)                        | <b>-1.5</b><br>(-2.1 to -0.9)                    |
| <b>Communicable, maternal, neonatal, and nutritional disorders</b>                   | <b>417,286.9</b><br>(412,633.4 to 422,033.3) | <b>2,025,069.7†</b><br>(1,555,485.0 to 2,652,644.2) | <b>7,863.1</b><br>(5,622.6 to 10,743.9)   | <b>0.6</b><br>(-2.1 to 3.8)                       | <b>-4.1</b><br>(-6.6 to -1.0)                    |
| <b>HIV/AIDS and tuberculosis</b>                                                     | <b>176,233.7</b><br>(155,260.8 to 200,050.5) | <b>1,547.4†</b><br>(1,206.8 to 1,937.4)             | <b>521.3</b><br>(351.5 to 725.6)          | <b>-6.1</b><br>(-11.1 to 0.8)                     | <b>-10.4</b><br>(-15.2 to -3.9)                  |
| Tuberculosis                                                                         | 165,397.0<br>(133,409.2 to 198,938.9)        | 1,158.5†<br>(819.5 to 1,547.1)                      | 262.1<br>(151.7 to 402.6)                 | 4.4<br>(-1.3 to 12.0)                             | -0.4<br>(-5.9 to 6.8)                            |
| Drug-susceptible tuberculosis                                                        | 798.3<br>(550.2 to 1,103.6)                  | 1,121.0<br>(791.5 to 1,497.2)                       | 252.8<br>(146.2 to 388.1)                 | 4.6<br>(-1.2 to 12.3)                             | -0.2<br>(-5.8 to 7.1)                            |
| Multidrug-resistant tuberculosis without extensive drug resistance                   | 27.1<br>(19.6 to 36.8)                       | 35.8<br>(26.1 to 47.3)                              | 8.8<br>(5.2 to 13.7)                      | -4.6<br>(-17.2 to 12.9)                           | -9.0<br>(-21.0 to 7.7)                           |
| Extensively drug-resistant tuberculosis                                              | 1.6<br>(1.2 to 2.1)                          | 1.8<br>(1.3 to 2.4)                                 | 0.5<br>(0.3 to 0.8)                       | 154.5<br>(119.9 to 190.8)                         | 142.8<br>(109.7 to 177.4)                        |
| Latent tuberculosis infection                                                        | 164,570.0<br>(132,586.3 to 197,749.6)        | --                                                  | --                                        | --                                                | --                                               |
| HIV/AIDS                                                                             | 2,567.9<br>(2,366.8 to 2,802.6)              | 388.8*<br>(350.0 to 441.7)                          | 259.1<br>(186.2 to 345.6)                 | -14.7<br>(-22.2 to -3.2)                          | -18.6<br>(-25.7 to -7.7)                         |
| Drug-susceptible HIV/AIDS - Tuberculosis                                             | 101.8<br>(72.1 to 139.2)                     | 128.5<br>(90.9 to 177.0)                            | 40.1<br>(23.7 to 62.4)                    | -37.1<br>(-41.4 to -32.5)                         | -40.0<br>(-44.1 to -35.6)                        |
| Multidrug-resistant HIV/AIDS - Tuberculosis without extensive drug resistance        | 2.2<br>(1.5 to 3.4)                          | 3.1<br>(2.0 to 4.6)                                 | 0.9<br>(0.5 to 1.6)                       | -51.1<br>(-60.1 to -40.8)                         | -53.4<br>(-61.9 to -43.5)                        |
| Extensively drug-resistant HIV/AIDS - Tuberculosis                                   | 0.1<br>(0.1 to 0.1)                          | 0.1<br>(0.1 to 0.1)                                 | < 0.05<br>(< 0.05 to 0.1)                 | 44.6<br>(15.9 to 83.1)                            | 38.0<br>(10.6 to 74.6)                           |
| HIV/AIDS resulting in other diseases                                                 | 2,463.8<br>(2,264.5 to 2,703.3)              | 388.8<br>(350.0 to 441.7)                           | 218.1<br>(154.4 to 291.0)                 | -8.4<br>(-18.2 to 7.1)                            | -12.6<br>(-22.0 to 2.1)                          |
| <b>Diarrhoea, lower respiratory infections, and other common infectious diseases</b> | <b>33,613.7</b><br>(30,929.8 to 36,089.8)    | <b>1,793,505.8†</b><br>(1,325,484.4 to 2,414,177.7) | <b>1,532.3</b><br>(1,032.7 to 2,156.9)    | <b>1.5</b><br>(0.1 to 2.8)                        | <b>-3.2</b><br>(-4.5 to -2.0)                    |
| Diarrhoeal diseases                                                                  | 4,168.4<br>(3,633.1 to 4,760.2)              | 281,438.0<br>(244,472.6 to 321,376.9)               | 474.6<br>(319.9 to 670.6)                 | 5.0<br>(2.5 to 7.3)                               | 0.1<br>(-2.2 to 2.4)                             |
| Intestinal infectious diseases                                                       | 54.1<br>(39.2 to 72.2)                       | 1,109.0†<br>(809.4 to 1,449.4)                      | 8.8<br>(5.2 to 13.8)                      | -8.3<br>(-28.1 to 14.2)                           | -12.5<br>(-31.4 to 8.9)                          |
| Typhoid fever                                                                        | 52.3<br>(36.0 to 71.1)                       | 824.5<br>(594.5 to 1,076.3)                         | 8.0<br>(4.7 to 12.7)                      | -8.3<br>(-29.6 to 16.9)                           | -12.5<br>(-32.9 to 11.5)                         |
| Paratyphoid fever                                                                    | 12.5<br>(8.7 to 17.4)                        | 284.5<br>(204.4 to 379.3)                           | 0.8<br>(0.4 to 1.3)                       | -7.2<br>(-25.6 to 18.2)                           | -11.5<br>(-29.1 to 12.8)                         |
| Other intestinal infectious diseases                                                 | --                                           | --                                                  | < 0.05<br>(< 0.05 to < 0.05)              | -36.2<br>(-50.0 to -20.6)                         | -39.2<br>(-52.3 to -24.3)                        |
| Lower respiratory infections                                                         | 257.9<br>(217.6 to 305.8)                    | 10,991.0<br>(8,872.6 to 13,326.4)                   | 16.0<br>(10.0 to 23.5)                    | 19.0<br>(11.6 to 26.1)                            | 13.5<br>(6.4 to 20.3)                            |
| Upper respiratory infections                                                         | 19,587.5<br>(13,293.9 to 27,449.8)           | 1,477,047.4<br>(1,002,667.1 to 2,090,335.7)         | 491.9<br>(252.6 to 855.5)                 | 2.8<br>(1.4 to 4.2)                               | -2.0<br>(-3.3 to -0.6)                           |
| Otitis media                                                                         | 8,362.1<br>(6,141.6 to 11,216.3)             | 17,026.6<br>(13,335.4 to 21,668.1)                  | 233.8<br>(131.9 to 379.4)                 | -5.5<br>(-9.5 to -1.3)                            | -9.9<br>(-13.7 to -5.9)                          |
| Meningitis                                                                           | 1,363.7<br>(1,177.9 to 1,580.7)              | 107.3<br>(76.8 to 148.4)                            | 147.2<br>(102.6 to 195.0)                 | 3.9<br>(0.3 to 7.5)                               | -0.9<br>(-4.4 to 2.6)                            |
| Pneumococcal meningitis                                                              | 594.2<br>(490.7 to 714.4)                    | 31.2<br>(19.3 to 48.0)                              | 64.7<br>(44.9 to 86.4)                    | 0.5<br>(-6.4 to 7.8)                              | -4.1<br>(-10.7 to 2.8)                           |
| H influenzae type B meningitis                                                       | 200.4<br>(156.5 to 255.8)                    | 8.6<br>(4.5 to 15.0)                                | 25.5<br>(17.0 to 34.5)                    | -18.4<br>(-23.6 to -13.4)                         | -22.1<br>(-27.1 to -17.4)                        |
| Meningococcal infection                                                              | 154.3<br>(110.3 to 206.1)                    | 19.6<br>(11.6 to 30.5)                              | 15.9<br>(10.7 to 21.5)                    | 8.7<br>(5.7 to 11.7)                              | 3.7<br>(0.8 to 6.5)                              |
| Other meningitis                                                                     | 414.8<br>(313.8 to 536.1)                    | 47.9<br>(31.4 to 69.2)                              | 41.1<br>(27.9 to 56.9)                    | 31.0<br>(24.6 to 37.5)                            | 24.9<br>(18.8 to 31.2)                           |
| Encephalitis                                                                         | 1,159.1<br>(802.5 to 1,671.4)                | 308.3<br>(224.2 to 409.9)                           | 145.5<br>(102.8 to 191.4)                 | -5.1<br>(-10.1 to 0.1)                            | -9.4<br>(-14.2 to -4.5)                          |
| Diphtheria                                                                           | < 0.05<br>(< 0.05 to < 0.05)                 | 0.1<br>(0.1 to 0.2)                                 | < 0.05<br>(< 0.05 to < 0.05)              | -52.6<br>(-65.2 to -35.6)                         | -54.8<br>(-66.8 to -38.6)                        |
| Whooping cough                                                                       | 4.1<br>(3.2 to 5.2)                          | 30.0<br>(23.4 to 37.7)                              | 0.2<br>(0.1 to 0.3)                       | -21.0<br>(-22.8 to -19.3)                         | -24.7<br>(-26.3 to -23.0)                        |
| Tetanus                                                                              | 13.8<br>(13.5 to 14.0)                       | 3.5<br>(1.6 to 6.0)                                 | 0.3<br>(0.2 to 0.5)                       | -0.1<br>(-23.9 to 32.1)                           | -4.7<br>(-27.4 to 26.0)                          |
| Measles                                                                              | 1.2<br>(0.4 to 2.6)                          | 43.3<br>(15.6 to 93.2)                              | 0.1<br>(< 0.05 to 0.2)                    | -59.6<br>(-64.0 to -54.5)                         | -61.4<br>(-65.7 to -56.6)                        |
| Varicella and herpes zoster                                                          | 315.4<br>(243.6 to 394.8)                    | 5,401.3<br>(3,511.8 to 7,686.4)                     | 13.8<br>(7.7 to 22.5)                     | 4.6<br>(-1.9 to 11.8)                             | -0.2<br>(-6.4 to 6.7)                            |
| <b>Neglected tropical diseases and malaria</b>                                       | <b>167,566.7</b><br>(162,192.8 to 172,097.3) | <b>31,712.7†</b><br>(26,475.6 to 37,887.1)          | <b>1,144.7</b><br>(779.7 to 1,626.2)      | <b>-17.1</b><br>(-21.4 to -12.4)                  | <b>-20.9</b><br>(-25.1 to -16.5)                 |
| Malaria                                                                              | 10,423.1<br>(8,753.0 to 12,479.4)            | 12,029.8<br>(9,003.4 to 15,393.4)                   | 143.2<br>(109.5 to 181.1)                 | -6.6<br>(-13.1 to 0.6)                            | -10.9<br>(-17.1 to -4.1)                         |
| Chagas disease                                                                       | 469.2<br>(368.9 to 583.4)                    | 16.9<br>(11.5 to 23.2)                              | 2.4<br>(1.4 to 3.6)                       | -15.7<br>(-24.7 to -5.6)                          | -19.6<br>(-28.2 to -9.9)                         |
| Leishmaniasis                                                                        | 435.4<br>(393.9 to 479.7)                    | 58.9<br>(42.4 to 80.7)                              | 26.4<br>(17.5 to 37.8)                    | 25.5<br>(7.8 to 45.9)                             | 19.7<br>(2.8 to 39.1)                            |
| Visceral leishmaniasis                                                               | 1.6<br>(1.1 to 2.3)                          | 6.5<br>(4.5 to 9.1)                                 | 0.1<br>(0.1 to 0.2)                       | -57.1<br>(-71.4 to -34.6)                         | -59.1<br>(-72.7 to -37.7)                        |
| Cutaneous and mucocutaneous leishmaniasis                                            | 406.9<br>(356.8 to 465.6)                    | 52.4<br>(35.6 to 73.8)                              | 26.3<br>(17.4 to 37.7)                    | 26.6<br>(8.5 to 47.7)                             | 20.8<br>(3.5 to 40.9)                            |
| African trypanosomiasis                                                              | 0.8<br>(0.2 to 2.5)                          | 0.5<br>(0.1 to 1.8)                                 | 0.2<br>(< 0.05 to 0.7)                    | -71.0<br>(-95.1 to 57.3)                          | -72.4<br>(-95.3 to 50.0)                         |
| Schistosomiasis                                                                      | 23,533.0<br>(21,221.9 to 25,844.9)           | 7,697.7<br>(6,365.9 to 9,609.5)                     | 195.1<br>(95.9 to 364.3)                  | -25.9<br>(-27.9 to -23.4)                         | -29.4<br>(-31.2 to -27.0)                        |
| Cysticercosis                                                                        | 180.3<br>(117.7 to 253.5)                    | --                                                  | 30.5<br>(16.9 to 47.9)                    | -14.8<br>(-26.2 to -5.0)                          | -18.8<br>(-29.6 to -9.4)                         |
| Cystic echinococcosis                                                                | 83.7<br>(41.7 to 194.1)                      | 18.1<br>(8.0 to 50.2)                               | 7.9<br>(3.4 to 18.5)                      | -40.3<br>(-77.5 to 73.1)                          | -43.1<br>(-78.5 to 65.1)                         |
| Lymphatic filariasis                                                                 | 2,573.4<br>(2,190.6 to 3,120.7)              | 792.1<br>(437.8 to 1,253.9)                         | 89.5<br>(43.9 to 160.8)                   | -41.0<br>(-54.6 to -29.9)                         | -43.8<br>(-56.7 to -33.1)                        |
| Onchocerciasis                                                                       | 1,817.4<br>(1,090.6 to 3,192.4)              | 447.8<br>(186.1 to 893.8)                           | 101.7<br>(43.8 to 184.9)                  | -28.1<br>(-46.2 to -11.5)                         | -31.4<br>(-48.7 to -15.5)                        |
| Trachoma                                                                             | 10.4<br>(3.6 to 24.3)                        | --                                                  | 0.9<br>(0.4 to 1.6)                       | -36.7<br>(-54.7 to -15.4)                         | -39.6<br>(-56.8 to -19.3)                        |
| Dengue                                                                               | 563.8<br>(306.9 to 955.5)                    | 9,424.3<br>(5,729.2 to 14,301.3)                    | 93.0<br>(40.7 to 173.6)                   | 66.4<br>(34.2 to 277.9)                           | 58.7<br>(28.0 to 260.5)                          |
| Yellow fever                                                                         | 0.3<br>(0.1 to 0.8)                          | 11.0<br>(3.1 to 30.8)                               | < 0.05<br>(< 0.05 to < 0.05)              | -18.4<br>(-48.1 to 30.4)                          | -22.2<br>(-50.5 to 24.4)                         |
| Rabies                                                                               | < 0.05<br>(< 0.05 to < 0.05)                 | 0.9<br>(0.5 to 1.3)                                 | < 0.05<br>(< 0.05 to < 0.05)              | -46.3<br>(-60.9 to -26.3)                         | -48.8<br>(-62.7 to -29.7)                        |
| Intestinal nematode infections                                                       | 140,013.2<br>(133,974.3 to 145,129.0)        | --                                                  | 284.1<br>(164.7 to 462.1)                 | -18.5<br>(-24.4 to -12.3)                         | -22.2<br>(-27.9 to -16.3)                        |
| Ascariasis                                                                           | 74,070.5<br>(67,120.9 to 82,418.4)           | --                                                  | 81.9<br>(44.2 to 140.1)                   | -31.7<br>(-40.3 to -21.4)                         | -34.8<br>(-43.0 to -25.0)                        |

| Cause                                                                   | Prevalence in thousands (95% UI)                    | Incidence in thousands (95% UI)                            | YLDs in thousands (95% UI)                       |                                                   |                                                  |
|-------------------------------------------------------------------------|-----------------------------------------------------|------------------------------------------------------------|--------------------------------------------------|---------------------------------------------------|--------------------------------------------------|
|                                                                         | 2016 counts                                         | 2016 counts                                                | 2016 counts                                      | Percentage change in counts between 2006 and 2016 | Percentage change in rates between 2006 and 2016 |
| Trichuriasis                                                            | 40,041.9<br>(37,161.7 to 43,455.8)                  | --                                                         | 32.4<br>(17.7 to 56.0)                           | -23.0<br>(-33.8 to -11.6)                         | -26.6<br>(-36.8 to -15.7)                        |
| Hookworm disease                                                        | 44,314.3<br>(41,088.6 to 47,836.2)                  | --                                                         | 169.8<br>(101.1 to 267.3)                        | -9.0<br>(-17.9 to 0.7)                            | -13.2<br>(-21.7 to -3.9)                         |
| Food-borne trematodiasis                                                | 5,465.5<br>(5,068.2 to 5,928.2)                     | 542.7<br>(461.9 to 620.8)                                  | 133.7<br>(64.6 to 248.7)                         | -16.6<br>(-21.3 to -9.3)                          | -20.4<br>(-24.9 to -13.5)                        |
| Leprosy                                                                 | 12.4<br>(11.5 to 13.4)                              | 4.8<br>(4.4 to 5.3)                                        | 0.7<br>(0.5 to 1.1)                              | -27.6<br>(-33.9 to -19.9)                         | -30.9<br>(-37.0 to -23.6)                        |
| Ebola virus disease                                                     | < 0.05<br>(< 0.05 to < 0.3)                         | < 0.05<br>(< 0.05 to < 0.05)                               | < 0.05<br>(< 0.05 to 0.1)                        | --                                                | --                                               |
| Zika virus disease                                                      | 11.1<br>(6.5 to 19.9)                               | 667.1<br>(391.5 to 1,205.2)                                | 0.2<br>(0.1 to 0.4)                              | --                                                | --                                               |
| Guinea worm disease                                                     | < 0.05<br>(< 0.05 to < 0.05)                        | < 0.05<br>(< 0.05 to < 0.05)                               | < 0.05<br>(< 0.05 to < 0.05)                     | -99.5<br>(-99.7 to -99.3)                         | -99.5<br>(-99.7 to -99.3)                        |
| Other neglected tropical diseases                                       | 2,058.0<br>(1,775.9 to 2,358.3)                     | --                                                         | 35.2<br>(22.2 to 53.7)                           | 17.6<br>(11.0 to 25.2)                            | 12.2<br>(5.9 to 19.5)                            |
| <b>Maternal disorders</b>                                               | <b>2,163.6</b><br><b>(1,972.2 to 2,349.8)</b>       | <b>33,126.7†</b><br><b>(26,638.3 to 40,106.1)</b>          | <b>199.3</b><br><b>(132.7 to 285.1)</b>          | <b>-12.5</b><br><b>(-27.1 to 6.8)</b>             | <b>-16.5</b><br><b>(-30.4 to 1.9)</b>            |
| Maternal haemorrhage                                                    | 334.4<br>(243.9 to 458.2)                           | 2,500.4<br>(1,788.2 to 3,493.2)                            | 16.2<br>(10.2 to 24.0)                           | -8.0<br>(-28.7 to 17.9)                           | -12.3<br>(-32.0 to 12.4)                         |
| Maternal sepsis and other pregnancy related infections                  | 317.9<br>(184.3 to 499.0)                           | 3,206.1<br>(2,226.8 to 4,627.2)                            | 13.2<br>(6.1 to 24.6)                            | -6.0<br>(-52.6 to 90.2)                           | -10.4<br>(-54.8 to 81.5)                         |
| Maternal hypertensive disorders                                         | 1,240.3<br>(764.2 to 1,818.2)                       | 5,855.1<br>(4,588.7 to 7,246.3)                            | 60.4<br>(30.9 to 100.2)                          | -6.1<br>(-40.8 to 51.0)                           | -10.5<br>(-43.6 to 44.0)                         |
| Maternal obstructed labour and uterine rupture                          | 182.6<br>(136.7 to 242.1)                           | 2,072.5<br>(1,486.6 to 2,805.7)                            | 59.5<br>(36.6 to 90.7)                           | -18.2<br>(-28.0 to -7.8)                          | -22.0<br>(-31.3 to -12.1)                        |
| Maternal abortion, miscarriage, and ectopic pregnancy                   | 159.8<br>(97.0 to 243.9)                            | 19,492.7<br>(13,417.5 to 26,282.3)                         | 17.5<br>(9.4 to 30.2)                            | -13.8<br>(-46.6 to 36.8)                          | -17.8<br>(-49.0 to 30.4)                         |
| Other maternal disorders                                                | --                                                  | --                                                         | 32.5<br>(21.6 to 46.4)                           | -16.0<br>(-30.0 to 2.6)                           | -19.9<br>(-33.2 to -2.2)                         |
| <b>Neonatal disorders</b>                                               | <b>6,267.6</b><br><b>(5,723.4 to 6,853.7)</b>       | --                                                         | <b>1,212.9</b><br><b>(852.1 to 1,722.0)</b>      | <b>17.9</b><br><b>(5.3 to 33.2)</b>               | <b>12.5</b><br><b>(0.4 to 27.0)</b>              |
| Neonatal preterm birth complications                                    | 5,168.3<br>(4,328.0 to 6,195.9)                     | --                                                         | 793.9<br>(544.0 to 1,134.6)                      | 15.6<br>(-2.9 to 38.7)                            | 10.2<br>(-7.3 to 32.3)                           |
| Neonatal encephalopathy due to birth asphyxia and trauma                | 980.0<br>(593.2 to 1,644.0)                         | --                                                         | 138.0<br>(46.7 to 337.8)                         | 23.0<br>(14.2 to 36.8)                            | 17.3<br>(8.9 to 30.4)                            |
| Neonatal sepsis and other neonatal infections                           | 555.9<br>(195.8 to 1,322.9)                         | --                                                         | 219.8<br>(65.1 to 574.6)                         | 25.4<br>(15.8 to 39.3)                            | 19.6<br>(10.5 to 32.9)                           |
| Hemolytic disease and other neonatal jaundice                           | 187.7<br>(166.4 to 210.1)                           | --                                                         | 61.2<br>(47.0 to 76.8)                           | 13.5<br>(7.9 to 19.4)                             | 8.2<br>(2.9 to 13.9)                             |
| Other neonatal disorders                                                | --                                                  | --                                                         | --                                               | --                                                | --                                               |
| <b>Nutritional deficiencies</b>                                         | <b>138,225.2</b><br><b>(132,544.9 to 143,645.4)</b> | <b>44,306.9†</b><br><b>(36,308.6 to 55,760.2)</b>          | <b>2,852.9</b><br><b>(1,879.5 to 4,166.1)</b>    | <b>5.0</b><br><b>(1.1 to 9.1)</b>                 | <b>0.2</b><br><b>(-3.6 to 4.1)</b>               |
| Protein-energy malnutrition                                             | --                                                  | --                                                         | --                                               | --                                                | --                                               |
| Iodine deficiency                                                       | 11,817.9<br>(10,392.6 to 13,428.2)                  | 54.2<br>(44.2 to 65.6)                                     | 322.4<br>(215.0 to 455.1)                        | -15.5<br>(-18.3 to -12.9)                         | -19.4<br>(-22.1 to -16.9)                        |
| Vitamin A deficiency                                                    | 39,536.0<br>(33,544.3 to 47,544.4)                  | 44,252.7<br>(36,262.4 to 55,708.0)                         | 15.6<br>(9.3 to 25.0)                            | 8.5<br>(1.5 to 16.1)                              | 3.5<br>(-3.1 to 10.8)                            |
| Iron-deficiency anaemia                                                 | 103,050.1<br>(90,946.1 to 115,759.2)                | --                                                         | 2,515.0<br>(1,636.2 to 3,738.0)                  | 8.4<br>(3.9 to 13.2)                              | 3.4<br>(-0.8 to 7.9)                             |
| Other nutritional deficiencies                                          | --                                                  | --                                                         | --                                               | --                                                | --                                               |
| <b>Other communicable, maternal, neonatal, and nutritional diseases</b> | <b>149,861.4</b><br><b>(145,377.7 to 154,678.6)</b> | <b>120,870.3</b><br><b>(101,903.2 to 143,989.8)</b>        | <b>389.4</b><br><b>(241.5 to 622.0)</b>          | <b>2.2</b><br><b>(-5.2 to 10.4)</b>               | <b>-2.5</b><br><b>(-9.6 to 5.3)</b>              |
| Sexually transmitted diseases excluding HIV                             | 108,456.6<br>(103,593.2 to 112,369.8)               | 95,824.8<br>(80,636.9 to 113,647.8)                        | 299.5<br>(181.0 to 488.0)                        | 5.2<br>(1.8 to 8.8)                               | 0.4<br>(-2.9 to 3.8)                             |
| Syphilis                                                                | 8,243.6<br>(5,415.2 to 12,991.3)                    | 5,569.1<br>(3,411.1 to 8,684.0)                            | 4.0<br>(2.3 to 7.2)                              | 7.9<br>(2.4 to 12.4)                              | 2.9<br>(-2.3 to 7.2)                             |
| Chlamydial infection                                                    | 20,318.3<br>(14,881.1 to 27,136.2)                  | 18,509.9<br>(13,202.3 to 25,258.6)                         | 92.5<br>(54.3 to 150.6)                          | 3.6<br>(0.0 to 7.2)                               | -1.2<br>(-4.6 to 2.3)                            |
| Gonococcal infection                                                    | 8,396.7<br>(5,691.3 to 12,246.4)                    | 29,097.2<br>(18,484.4 to 44,307.5)                         | 66.2<br>(35.7 to 117.1)                          | 7.8<br>(-2.5 to 15.8)                             | 2.8<br>(-7.0 to 10.4)                            |
| Trichomoniasis                                                          | 25,520.1<br>(18,860.4 to 33,541.1)                  | 24,139.2<br>(17,282.7 to 31,733.5)                         | 31.4<br>(11.9 to 66.9)                           | 8.0<br>(6.0 to 10.2)                              | 3.1<br>(1.1 to 5.1)                              |
| Genital herpes                                                          | 56,684.3<br>(44,153.1 to 70,660.1)                  | 15,181.8<br>(12,469.0 to 18,376.0)                         | 17.7<br>(6.3 to 38.5)                            | 5.4<br>(2.1 to 8.9)                               | 0.5<br>(-2.6 to 3.9)                             |
| Other sexually transmitted diseases                                     | 2,034.0<br>(1,840.6 to 2,225.5)                     | 3,327.7<br>(2,665.9 to 4,088.0)                            | 87.8<br>(56.9 to 133.5)                          | 3.9<br>(0.0 to 8.0)                               | -0.9<br>(-4.6 to 3.0)                            |
| Hepatitis                                                               | 50,086.3<br>(41,998.9 to 60,041.5)                  | 25,045.0<br>(15,492.9 to 38,432.2)                         | 34.9<br>(16.4 to 61.0)                           | -22.9<br>(-59.2 to 46.4)                          | -26.4<br>(-61.0 to 39.6)                         |
| Acute hepatitis A                                                       | 270.5<br>(30.9 to 673.3)                            | 3,516.1<br>(401.9 to 8,752.7)                              | 11.3<br>(1.1 to 29.0)                            | -25.4<br>(-93.3 to 816.6)                         | -28.9<br>(-93.6 to 774.3)                        |
| Hepatitis B                                                             | 38,939.9<br>(30,921.9 to 48,784.2)                  | 18,054.7<br>(10,025.4 to 31,116.2)                         | 15.8<br>(7.2 to 30.7)                            | -18.2<br>(-52.7 to 39.6)                          | -22.0<br>(-54.9 to 33.2)                         |
| Hepatitis C                                                             | 10,628.7<br>(9,284.9 to 11,959.2)                   | 259.4<br>(185.7 to 345.3)                                  | 0.2<br>(0.1 to 0.5)                              | -16.8<br>(-17.4 to -16.2)                         | -20.7<br>(-21.2 to -20.1)                        |
| Acute hepatitis E                                                       | 247.3<br>(162.4 to 329.8)                           | 3,214.7<br>(2,111.2 to 4,287.8)                            | 7.5<br>(4.1 to 12.5)                             | -28.1<br>(-44.0 to -9.5)                          | -31.4<br>(-46.5 to -13.7)                        |
| Other infectious diseases                                               | 2,378.4<br>(2,050.1 to 2,742.5)                     | 0.5<br>(0.3 to 0.9)                                        | 55.1<br>(34.0 to 85.0)                           | 7.9<br>(3.5 to 12.7)                              | 2.9<br>(-1.3 to 7.5)                             |
| <b>Non-communicable diseases</b>                                        | <b>543,552.2</b><br><b>(540,289.4 to 547,300.3)</b> | <b>1,367,273.4†</b><br><b>(1,169,435.2 to 1,566,371.5)</b> | <b>39,698.7</b><br><b>(29,043.3 to 51,574.2)</b> | <b>3.8</b><br><b>(3.2 to 4.3)</b>                 | <b>-1.0</b><br><b>(-1.6 to -0.5)</b>             |
| <b>Neoplasms</b>                                                        | <b>152.5</b><br><b>(144.8 to 159.3)</b>             | <b>117.7</b><br><b>(109.9 to 128.2)</b>                    | <b>39.5</b><br><b>(28.5 to 52.4)</b>             | <b>9.1</b><br><b>(5.7 to 13.6)</b>                | <b>4.1</b><br><b>(0.8 to 8.3)</b>                |
| Lip and oral cavity cancer                                              | 11.9<br>(11.1 to 12.7)                              | 3.2<br>(3.0 to 3.4)                                        | 1.2<br>(0.9 to 1.7)                              | 9.1<br>(0.5 to 18.1)                              | 4.1<br>(-4.1 to 12.7)                            |
| Nasopharynx cancer                                                      | 7.6<br>(7.0 to 8.3)                                 | 2.2<br>(2.0 to 2.4)                                        | 0.9<br>(0.6 to 1.2)                              | -5.9<br>(-15.4 to 5.3)                            | -10.2<br>(-19.3 to 0.5)                          |
| Other pharynx cancer                                                    | 1.9<br>(1.7 to 2.1)                                 | 0.8<br>(0.7 to 0.8)                                        | 0.3<br>(0.2 to 0.4)                              | 4.9<br>(-8.7 to 16.9)                             | 0.1<br>(-12.9 to 11.5)                           |
| Oesophageal cancer                                                      | 0.9<br>(0.8 to 1.0)                                 | 0.8<br>(0.7 to 0.8)                                        | 0.2<br>(0.1 to 0.3)                              | -12.1<br>(-17.4 to -6.1)                          | -16.1<br>(-21.3 to -10.4)                        |
| Stomach cancer                                                          | 5.3<br>(5.0 to 5.7)                                 | 3.0<br>(2.9 to 3.2)                                        | 0.8<br>(0.6 to 1.1)                              | -11.7<br>(-16.6 to -6.0)                          | -15.7<br>(-20.4 to -10.4)                        |
| Colon and rectum cancer                                                 | 14.5<br>(13.6 to 15.3)                              | 4.2<br>(4.0 to 4.5)                                        | 1.6<br>(1.1 to 2.1)                              | 6.6<br>(-1.8 to 14.2)                             | 1.7<br>(-6.3 to 8.9)                             |
| Liver cancer                                                            | 3.2<br>(2.7 to 3.8)                                 | 4.2<br>(3.7 to 4.7)                                        | 1.0<br>(0.7 to 1.3)                              | 11.8<br>(-2.0 to 31.0)                            | 6.7<br>(-6.5 to 24.9)                            |
| Liver cancer due to hepatitis B                                         | 2.9<br>(2.3 to 3.6)                                 | 2.4<br>(1.9 to 2.8)                                        | 0.5<br>(0.4 to 0.7)                              | 10.9<br>(-3.8 to 30.8)                            | 5.8<br>(-8.2 to 24.7)                            |

| Cause                                              | Prevalence in thousands (95% UI)                 | Incidence in thousands (95% UI)                | YLDs in thousands (95% UI)                  |                                                   |                                                  |
|----------------------------------------------------|--------------------------------------------------|------------------------------------------------|---------------------------------------------|---------------------------------------------------|--------------------------------------------------|
|                                                    | 2016 counts                                      | 2016 counts                                    | 2016 counts                                 | Percentage change in counts between 2006 and 2016 | Percentage change in rates between 2006 and 2016 |
| Liver cancer due to hepatitis C                    | 0.2<br>(0.2 to 0.3)                              | 0.2<br>(0.1 to 0.2)                            | < 0.05<br>(< 0.05 to 0.1)                   | 13.4<br>(-1.0 to 36.3)                            | 8.1<br>(-5.6 to 30.0)                            |
| Liver cancer due to alcohol use                    | 0.1<br>(0.1 to 0.1)                              | 0.1<br>(< 0.05 to 0.1)                         | < 0.05<br>(< 0.05 to < 0.05)                | 15.5<br>(-1.4 to 34.9)                            | 10.1<br>(-6.0 to 28.7)                           |
| Liver cancer due to other causes                   | 1.9<br>(1.5 to 2.5)                              | 1.6<br>(1.2 to 1.9)                            | 0.4<br>(0.2 to 0.5)                         | 12.9<br>(-0.4 to 32.4)                            | 7.7<br>(-5.0 to 26.3)                            |
| Gallbladder and biliary tract cancer               | 0.2<br>(0.2 to 0.2)                              | 0.2<br>(0.2 to 0.2)                            | 0.1<br>(< 0.05 to 0.1)                      | -5.6<br>(-13.8 to 2.6)                            | -10.0<br>(-17.7 to -2.1)                         |
| Pancreatic cancer                                  | 0.4<br>(0.3 to 0.4)                              | 0.5<br>(0.4 to 0.5)                            | 0.1<br>(0.1 to 0.1)                         | 2.0<br>(-3.0 to 7.1)                              | -2.7<br>(-7.5 to 2.2)                            |
| Larynx cancer                                      | 1.2<br>(1.2 to 1.3)                              | 0.4<br>(0.3 to 0.4)                            | 0.2<br>(0.1 to 0.2)                         | -3.1<br>(-7.6 to 2.1)                             | -7.5<br>(-11.8 to -2.6)                          |
| Tracheal, bronchus, and lung cancer                | 3.0<br>(2.8 to 3.2)                              | 2.4<br>(2.2 to 2.5)                            | 0.6<br>(0.4 to 0.8)                         | 0.8<br>(-6.8 to 8.4)                              | -3.8<br>(-11.1 to 3.4)                           |
| Malignant skin melanoma                            | 19.0<br>(16.8 to 23.7)                           | 3.9<br>(3.5 to 4.8)                            | 1.3<br>(0.9 to 1.8)                         | 17.7<br>(6.4 to 30.7)                             | 12.2<br>(1.5 to 24.6)                            |
| Non-melanoma skin cancer                           | 0.9<br>(0.3 to 2.0)                              | 7.4<br>(2.7 to 17.2)                           | < 0.05<br>(< 0.05 to 0.1)                   | 39.1<br>(17.7 to 55.2)                            | 32.6<br>(12.3 to 48.0)                           |
| Non-melanoma skin cancer (squamous-cell carcinoma) | 0.6<br>(0.1 to 1.5)                              | 1.1<br>(0.3 to 2.8)                            | < 0.05<br>(< 0.05 to 0.1)                   | 48.1<br>(27.3 to 62.3)                            | 41.3<br>(21.5 to 54.8)                           |
| Non-melanoma skin cancer (basal-cell carcinoma)    | 0.6<br>(0.2 to 1.7)                              | 6.3<br>(1.8 to 15.9)                           | < 0.05<br>(< 0.05 to < 0.05)                | 9.2<br>(-3.7 to 17.4)                             | 4.2<br>(-8.1 to 12.0)                            |
| Breast cancer                                      | 19.4<br>(16.4 to 22.3)                           | 4.4<br>(3.8 to 5.0)                            | 1.8<br>(1.2 to 2.5)                         | 16.6<br>(-0.8 to 38.4)                            | 11.2<br>(-5.4 to 32.0)                           |
| Cervical cancer                                    | 16.0<br>(11.1 to 18.7)                           | 4.2<br>(3.0 to 4.8)                            | 1.6<br>(1.0 to 2.2)                         | -13.0<br>(-21.7 to 2.3)                           | -17.0<br>(-25.3 to -2.4)                         |
| Uterine cancer                                     | 4.4<br>(4.0 to 5.0)                              | 0.9<br>(0.8 to 1.1)                            | 0.4<br>(0.2 to 0.5)                         | 5.4<br>(-5.0 to 22.5)                             | 0.6<br>(-9.4 to 16.9)                            |
| Ovarian cancer                                     | 15.2<br>(13.6 to 16.4)                           | 4.9<br>(4.4 to 5.3)                            | 2.4<br>(1.7 to 3.2)                         | 14.5<br>(0.0 to 25.0)                             | 9.2<br>(-4.6 to 19.3)                            |
| Prostate cancer                                    | 3.1<br>(2.5 to 3.4)                              | 0.7<br>(0.5 to 0.7)                            | 0.3<br>(0.2 to 0.4)                         | 31.9<br>(20.7 to 39.3)                            | 25.8<br>(15.2 to 32.9)                           |
| Testicular cancer                                  | 46.2<br>(43.5 to 49.3)                           | 9.0<br>(8.5 to 9.6)                            | 3.2<br>(2.2 to 4.4)                         | 28.6<br>(17.2 to 41.2)                            | 22.7<br>(11.8 to 34.7)                           |
| Kidney cancer                                      | 8.3<br>(7.6 to 8.6)                              | 2.2<br>(2.0 to 2.3)                            | 0.8<br>(0.5 to 1.0)                         | 16.0<br>(10.6 to 22.0)                            | 10.7<br>(5.5 to 16.3)                            |
| Bladder cancer                                     | 3.7<br>(3.4 to 4.0)                              | 0.9<br>(0.8 to 1.0)                            | 0.4<br>(0.2 to 0.5)                         | 16.6<br>(7.4 to 25.3)                             | 11.2<br>(2.4 to 19.5)                            |
| Brain and nervous system cancer                    | 25.2<br>(21.6 to 27.8)                           | 11.0<br>(9.6 to 12.2)                          | 3.6<br>(2.5 to 4.7)                         | 40.1<br>(29.6 to 51.4)                            | 33.7<br>(23.6 to 44.5)                           |
| Thyroid cancer                                     | 21.1<br>(19.3 to 24.0)                           | 4.0<br>(3.7 to 4.6)                            | 1.3<br>(0.9 to 1.9)                         | 33.2<br>(17.8 to 55.1)                            | 27.1<br>(12.3 to 47.9)                           |
| Mesothelioma                                       | 0.3<br>(0.3 to 0.4)                              | 0.2<br>(0.2 to 0.2)                            | 0.1<br>(< 0.05 to 0.1)                      | -3.7<br>(-10.4 to 4.1)                            | -8.1<br>(-14.5 to -0.7)                          |
| Hodgkin lymphoma                                   | 30.3<br>(27.3 to 35.6)                           | 7.2<br>(6.5 to 8.5)                            | 2.8<br>(2.0 to 3.8)                         | 0.7<br>(-7.1 to 8.7)                              | -4.0<br>(-11.4 to 3.7)                           |
| Non-Hodgkin's lymphoma                             | 20.0<br>(17.8 to 21.3)                           | 6.3<br>(5.6 to 6.7)                            | 2.0<br>(1.4 to 2.7)                         | 12.6<br>(5.9 to 18.3)                             | 7.4<br>(1.0 to 12.8)                             |
| Multiple myeloma                                   | 1.3<br>(0.9 to 1.5)                              | 0.6<br>(0.5 to 0.6)                            | 0.3<br>(0.2 to 0.4)                         | 33.3<br>(18.2 to 46.8)                            | 27.1<br>(12.8 to 40.1)                           |
| Leukaemia                                          | 41.0<br>(35.5 to 44.0)                           | 12.1<br>(10.5 to 12.9)                         | 5.5<br>(3.8 to 7.4)                         | -12.8<br>(-18.2 to -6.8)                          | -16.8<br>(-22.0 to -11.1)                        |
| Acute lymphoid leukaemia                           | 11.2<br>(9.8 to 12.2)                            | 3.2<br>(2.8 to 3.5)                            | 1.5<br>(1.0 to 2.0)                         | 3.7<br>(-6.0 to 11.2)                             | -1.1<br>(-10.3 to 6.0)                           |
| Chronic lymphoid leukaemia                         | 5.5<br>(4.8 to 6.3)                              | 1.2<br>(1.0 to 1.4)                            | 0.7<br>(0.5 to 0.9)                         | 8.8<br>(-4.8 to 21.2)                             | 3.8<br>(-9.2 to 15.6)                            |
| Acute myeloid leukaemia                            | 3.7<br>(3.2 to 4.1)                              | 2.8<br>(2.4 to 3.1)                            | 0.8<br>(0.5 to 1.1)                         | 2.0<br>(-3.5 to 8.0)                              | -2.8<br>(-8.0 to 3.1)                            |
| Chronic myeloid leukaemia                          | 2.3<br>(2.0 to 2.6)                              | 0.8<br>(0.7 to 0.9)                            | 0.3<br>(0.2 to 0.4)                         | -18.8<br>(-27.0 to -9.1)                          | -22.6<br>(-30.3 to -13.3)                        |
| Other leukaemia                                    | 18.3<br>(14.6 to 19.8)                           | 4.0<br>(3.3 to 4.4)                            | 2.2<br>(1.5 to 3.0)                         | -27.7<br>(-34.4 to -19.6)                         | -31.1<br>(-37.4 to -23.3)                        |
| Other neoplasms                                    | 52.8<br>(46.6 to 55.9)                           | 16.0<br>(14.2 to 16.9)                         | 4.9<br>(3.5 to 6.6)                         | 20.7<br>(13.6 to 28.0)                            | 15.1<br>(8.3 to 22.1)                            |
| <b>Cardiovascular diseases</b>                     | <b>8,571.6</b><br><b>(8,119.6 to 9,025.2)</b>    | <b>544.3†</b><br><b>(492.1 to 600.5)</b>       | <b>561.6</b><br><b>(384.4 to 787.8)</b>     | <b>6.0</b><br><b>(3.7 to 8.1)</b>                 | <b>1.1</b><br><b>(-1.1 to 3.1)</b>               |
| Rheumatic heart disease                            | 3,138.0<br>(2,797.7 to 3,512.4)                  | 117.9<br>(106.7 to 131.0)                      | 149.3<br>(93.6 to 222.1)                    | 10.8<br>(6.3 to 14.9)                             | 5.7<br>(1.4 to 9.6)                              |
| Ischaemic heart disease                            | 1,127.8<br>(993.3 to 1,278.2)                    | 220.4<br>(192.2 to 251.6)                      | 65.4<br>(42.7 to 96.0)                      | 6.9<br>(2.2 to 12.0)                              | 2.0<br>(-2.5 to 6.9)                             |
| Cerebrovascular disease                            | 558.6<br>(497.0 to 656.1)                        | 53.5†<br>(33.2 to 81.1)                        | 108.8<br>(73.7 to 146.3)                    | 2.7<br>(-7.9 to 2.8)                              | -7.2<br>(-12.2 to -2.0)                          |
| Ischaemic stroke                                   | 503.7<br>(402.0 to 634.9)                        | 34.3†<br>(17.5 to 58.0)                        | 78.5<br>(52.6 to 110.3)                     | -1.9<br>(-9.3 to 4.9)                             | -6.4<br>(-13.5 to 0.1)                           |
| Hemorrhagic stroke                                 | 193.1<br>(148.7 to 239.8)                        | 19.1†<br>(9.6 to 33.4)                         | 30.3<br>(19.9 to 43.4)                      | -4.7<br>(-12.3 to 2.5)                            | -9.1<br>(-16.3 to -2.2)                          |
| Hypertensive heart disease                         | 0.2<br>(0.1 to 0.4)                              | --                                             | < 0.05<br>(< 0.05 to < 0.05)                | 17.8<br>(12.6 to 22.8)                            | 12.3<br>(7.4 to 17.2)                            |
| Cardiomyopathy and myocarditis                     | 251.0<br>(220.5 to 291.4)                        | 116.5†<br>(86.6 to 157.3)                      | 28.9<br>(18.0 to 43.5)                      | 4.5<br>(-0.4 to 9.1)                              | -0.3<br>(-5.0 to 4.1)                            |
| Myocarditis                                        | 150.6<br>(121.2 to 185.7)                        | 116.5<br>(86.6 to 157.3)                       | 12.3<br>(7.7 to 18.7)                       | 4.7<br>(-1.0 to 10.9)                             | -0.1<br>(-5.6 to 5.8)                            |
| Alcoholic cardiomyopathy                           | < 0.05<br>(< 0.05 to < 0.05)                     | --                                             | < 0.05<br>(< 0.05 to < 0.05)                | 8.3<br>(-1.3 to 18.3)                             | 3.3<br>(-5.8 to 12.8)                            |
| Other cardiomyopathy                               | 190.5<br>(147.9 to 241.8)                        | --                                             | 16.7<br>(10.3 to 25.0)                      | 4.5<br>(-1.8 to 11.5)                             | -0.4<br>(-6.4 to 6.3)                            |
| Atrial fibrillation and flutter                    | --                                               | --                                             | --                                          | --                                                | --                                               |
| Peripheral vascular disease                        | --                                               | --                                             | --                                          | --                                                | --                                               |
| Endocarditis                                       | 17.7<br>(13.2 to 22.7)                           | 36.1<br>(24.9 to 49.8)                         | 1.5<br>(0.9 to 2.3)                         | 9.4<br>(7.6 to 11.3)                              | 4.4<br>(2.6 to 6.1)                              |
| Other cardiovascular and circulatory diseases      | 3,826.0<br>(2,675.1 to 5,222.2)                  | --                                             | 207.7<br>(120.6 to 324.4)                   | 7.5<br>(3.7 to 10.8)                              | 2.5<br>(-1.1 to 5.7)                             |
| <b>Chronic respiratory diseases</b>                | <b>22,841.7</b><br><b>(21,617.5 to 24,321.8)</b> | <b>3,921.7†</b><br><b>(3,216.2 to 4,684.2)</b> | <b>1,076.4</b><br><b>(774.8 to 1,449.7)</b> | <b>8.1</b><br><b>(6.3 to 9.9)</b>                 | <b>3.1</b><br><b>(1.4 to 4.9)</b>                |
| Chronic obstructive pulmonary disease              | 2,907.1<br>(2,654.7 to 3,191.9)                  | 203.6<br>(177.8 to 233.1)                      | 228.2<br>(195.0 to 258.6)                   | 7.3<br>(3.0 to 12.3)                              | 2.4<br>(-1.8 to 7.1)                             |
| Pneumoconiosis                                     | 3.9<br>(3.1 to 4.7)                              | 0.6<br>(0.5 to 0.7)                            | 0.6<br>(0.4 to 0.9)                         | 3.4<br>(1.9 to 5.0)                               | -1.4<br>(-2.8 to 0.1)                            |
| Silicosis                                          | 0.7<br>(0.5 to 0.9)                              | 0.2<br>(0.1 to 0.2)                            | 0.1<br>(0.1 to 0.2)                         | 0.5<br>(-1.4 to 2.4)                              | -4.1<br>(-5.9 to -2.4)                           |

| Cause                                                          | Prevalence in thousands (95% UI)              | Incidence in thousands (95% UI)              | YLDs in thousands (95% UI)                 |                                                   |                                                  |
|----------------------------------------------------------------|-----------------------------------------------|----------------------------------------------|--------------------------------------------|---------------------------------------------------|--------------------------------------------------|
|                                                                | 2016 counts                                   | 2016 counts                                  | 2016 counts                                | Percentage change in counts between 2006 and 2016 | Percentage change in rates between 2006 and 2016 |
| Asbestosis                                                     | 1.3<br>(0.8 to 1.9)                           | 0.2<br>(0.1 to 0.2)                          | 0.2<br>(0.1 to 0.3)                        | 6.0<br>(3.0 to 9.5)                               | 1.2<br>(-1.8 to 4.5)                             |
| Coal workers pneumoconiosis                                    | 0.4<br>(0.3 to 0.5)                           | 0.1<br>( $< 0.05$ to 0.1)                    | 0.1<br>( $< 0.05$ to 0.1)                  | 1.4<br>(-1.9 to 4.3)                              | -3.3<br>(-6.5 to -0.5)                           |
| Other pneumoconiosis                                           | 1.6<br>(1.1 to 2.2)                           | 0.2<br>(0.2 to 0.3)                          | 0.2<br>(0.1 to 0.4)                        | 3.1<br>(0.7 to 5.5)                               | -1.7<br>(-4.0 to 0.6)                            |
| Asthma                                                         | 19,941.2<br>(17,042.6 to 22,942.7)            | 3,714.9<br>(3,013.6 to 4,477.3)              | 790.3<br>(505.6 to 1,155.6)                | 6.6<br>(4.6 to 8.5)                               | 1.7<br>(-0.2 to 3.5)                             |
| Interstitial lung disease and pulmonary sarcoidosis            | 57.5<br>(47.5 to 67.5)                        | 2.5<br>(1.6 to 3.7)                          | 6.5<br>(4.1 to 9.7)                        | -0.8<br>(-4.8 to 2.9)                             | -5.4<br>(-9.2 to -1.8)                           |
| Other chronic respiratory diseases                             | --                                            | --                                           | 50.9<br>(43.3 to 57.5)                     | 44.1<br>(38.4 to 50.7)                            | 37.5<br>(32.0 to 43.8)                           |
| <b>Cirrhosis and other chronic liver diseases</b>              | <b>1,289.7<br/>(1,164.3 to 1,423.6)</b>       | <b>15.8<br/>(11.7 to 20.1)</b>               | <b>73.9<br/>(50.2 to 104.7)</b>            | <b>7.4<br/>(2.4 to 12.7)</b>                      | <b>2.4<br/>(-2.4 to 7.5)</b>                     |
| Cirrhosis and other chronic liver diseases due to hepatitis B  | 235.4<br>(173.5 to 304.4)                     | 3.2<br>(2.2 to 4.6)                          | 14.5<br>(9.0 to 22.0)                      | 9.6<br>(-2.5 to 22.0)                             | 4.5<br>(-7.0 to 16.4)                            |
| Cirrhosis and other chronic liver diseases due to hepatitis C  | 181.6<br>(134.4 to 234.9)                     | 2.3<br>(1.6 to 3.3)                          | 10.7<br>(6.4 to 16.9)                      | 9.5<br>(-4.0 to 24.3)                             | 4.4<br>(-8.4 to 18.6)                            |
| Cirrhosis and other chronic liver diseases due to alcohol use  | 90.1<br>(66.0 to 119.3)                       | 1.2<br>(0.8 to 1.7)                          | 5.2<br>(3.1 to 8.1)                        | 7.6<br>(-5.1 to 22.9)                             | 2.7<br>(-9.5 to 17.2)                            |
| Cirrhosis and other chronic liver diseases due to other causes | 782.5<br>(662.4 to 911.9)                     | 9.0<br>(6.6 to 11.8)                         | 43.5<br>(28.8 to 62.1)                     | 6.2<br>(-0.6 to 13.0)                             | 1.3<br>(-5.2 to 7.7)                             |
| <b>Digestive diseases</b>                                      | <b>8,449.0<br/>(7,918.0 to 9,010.3)</b>       | <b>8,200.2†<br/>(7,195.2 to 9,391.1)</b>     | <b>225.2<br/>(151.2 to 311.4)</b>          | <b>5.0<br/>(1.3 to 8.9)</b>                       | <b>0.1<br/>(-3.4 to 3.9)</b>                     |
| Peptic ulcer disease                                           | 2,544.1<br>(2,002.8 to 3,163.2)               | 706.7<br>(500.5 to 993.8)                    | 38.2<br>(22.0 to 63.1)                     | 11.6<br>(3.6 to 20.5)                             | 6.4<br>(-1.2 to 15.0)                            |
| Gastritis and duodenitis                                       | 2,980.3<br>(2,210.3 to 3,960.9)               | 2,470.3<br>(1,742.9 to 3,330.0)              | 36.9<br>(22.3 to 59.0)                     | 10.8<br>(2.8 to 19.6)                             | 5.7<br>(-2.0 to 14.1)                            |
| Appendicitis                                                   | 102.8<br>(81.5 to 124.5)                      | 2,620.4<br>(2,095.9 to 3,163.0)              | 31.8<br>(20.1 to 45.8)                     | 3.0<br>(-6.4 to 13.6)                             | -1.8<br>(-10.7 to 8.3)                           |
| Paralytic ileus and intestinal obstruction                     | 6.6<br>(4.5 to 9.1)                           | 175.0<br>(120.5 to 239.2)                    | 2.1<br>(1.2 to 3.3)                        | 9.8<br>(7.4 to 11.8)                              | 4.7<br>(2.4 to 6.7)                              |
| Inguinal, femoral, and abdominal hernia                        | 2,201.7<br>(1,374.6 to 3,218.3)               | 676.5<br>(463.1 to 941.0)                    | 64.4<br>(37.2 to 102.6)                    | -1.8<br>(-7.8 to 4.5)                             | -6.4<br>(-12.0 to -0.3)                          |
| Inflammatory bowel disease                                     | 207.6<br>(180.8 to 238.3)                     | 323.1<br>(265.9 to 391.8)                    | 31.7<br>(21.1 to 45.7)                     | 6.4<br>(1.9 to 11.6)                              | 1.5<br>(-2.9 to 6.4)                             |
| Vascular intestinal disorders                                  | 1.8<br>(1.0 to 3.0)                           | 12.5<br>(8.1 to 18.0)                        | 0.6<br>(0.3 to 1.0)                        | 7.9<br>(5.9 to 9.5)                               | 2.9<br>(1.0 to 4.5)                              |
| Gallbladder and biliary diseases                               | 682.2<br>(476.3 to 956.1)                     | 1,081.7<br>(766.2 to 1,469.1)                | 5.2<br>(3.1 to 8.1)                        | 2.9<br>(0.5 to 5.4)                               | -1.9<br>(-4.1 to 0.5)                            |
| Pancreatitis                                                   | 15.1<br>(11.0 to 20.5)                        | 134.1<br>(96.2 to 186.7)                     | 2.0<br>(1.2 to 3.1)                        | 2.0<br>(-3.3 to 6.8)                              | -2.7<br>(-7.7 to 1.9)                            |
| Other digestive diseases                                       | --                                            | --                                           | 12.3<br>(8.3 to 17.1)                      | 9.6<br>(5.8 to 13.7)                              | 4.5<br>(0.9 to 8.4)                              |
| <b>Neurological disorders</b>                                  | <b>268,288.3<br/>(252,623.4 to 290,540.3)</b> | <b>143,334.2<br/>(96,059.4 to 207,256.9)</b> | <b>5,757.1<br/>(3,847.1 to 7,947.3)</b>    | <b>4.1<br/>(2.3 to 6.1)</b>                       | <b>-0.7<br/>(-2.4 to 1.2)</b>                    |
| Alzheimer's disease and other dementias                        | --                                            | --                                           | --                                         | --                                                | --                                               |
| Parkinson's disease                                            | 1.4<br>(0.6 to 2.5)                           | 0.8<br>(0.4 to 1.5)                          | 0.2<br>(0.1 to 0.4)                        | 10.3<br>(2.7 to 19.6)                             | 5.2<br>(-2.0 to 14.1)                            |
| Epilepsy                                                       | 2,050.8<br>(1,598.0 to 2,549.5)               | 180.8<br>(125.0 to 248.6)                    | 668.9<br>(431.0 to 943.5)                  | -0.1<br>(-11.0 to 12.8)                           | -4.7<br>(-15.2 to 7.6)                           |
| Multiple sclerosis                                             | 71.2<br>(57.2 to 89.8)                        | 11.1<br>(8.1 to 14.2)                        | 19.9<br>(13.3 to 28.4)                     | 8.4<br>(2.2 to 14.2)                              | 3.4<br>(-2.5 to 8.9)                             |
| Motor neuron disease                                           | 15.1<br>(12.2 to 18.5)                        | 0.3<br>(0.2 to 0.6)                          | 3.2<br>(2.2 to 4.5)                        | 6.2<br>(5.2 to 7.4)                               | 1.3<br>(0.3 to 2.5)                              |
| Migraine                                                       | 99,718.9<br>(91,617.8 to 107,875.4)           | 11,701.7<br>(9,930.0 to 13,702.8)            | 4,256.3<br>(2,687.6 to 6,127.9)            | 4.4<br>(3.4 to 5.5)                               | -0.4<br>(-1.4 to 0.6)                            |
| Tension-type headache                                          | 208,790.0<br>(157,312.5 to 270,309.5)         | 131,436.7<br>(84,742.4 to 195,771.3)         | 672.6<br>(401.6 to 1,043.2)                | 3.9<br>(2.3 to 5.6)                               | -0.9<br>(-2.4 to 0.7)                            |
| Other neurological disorders                                   | 1.3<br>(0.7 to 2.4)                           | 2.7<br>(1.4 to 4.6)                          | 135.9<br>(88.1 to 190.1)                   | 20.6<br>(7.9 to 35.6)                             | 15.1<br>(3.0 to 29.4)                            |
| <b>Mental and substance use disorders</b>                      | <b>108,209.2<br/>(105,929.5 to 110,180.7)</b> | <b>37,353.5†<br/>(32,086.6 to 44,045.0)</b>  | <b>14,782.9<br/>(10,608.9 to 19,378.6)</b> | <b>3.2<br/>(2.4 to 4.0)</b>                       | <b>-1.6<br/>(-2.4 to -0.8)</b>                   |
| Schizophrenia                                                  | 1,308.4<br>(956.7 to 1,679.4)                 | 261.4<br>(192.1 to 343.0)                    | 874.2<br>(561.6 to 1,204.1)                | 2.3<br>(-0.8 to 5.5)                              | -2.4<br>(-5.4 to 0.6)                            |
| Alcohol use disorders                                          | 12,482.0<br>(9,161.7 to 16,398.6)             | 6,484.1<br>(4,972.4 to 8,088.7)              | 1,275.9<br>(793.6 to 1,906.0)              | 1.7<br>(-1.4 to 4.6)                              | -3.0<br>(-6.0 to -0.3)                           |
| Drug use disorders                                             | 11,826.5<br>(11,320.5 to 12,441.6)            | 1,590.8<br>(1,314.6 to 1,918.5)              | 2,358.9<br>(1,643.2 to 3,142.5)            | 4.0<br>(1.5 to 6.6)                               | -0.8<br>(-3.1 to 1.7)                            |
| Opioid use disorders                                           | 3,850.5<br>(3,094.0 to 4,862.4)               | 723.7<br>(592.8 to 894.3)                    | 1,638.2<br>(1,086.4 to 2,273.2)            | 4.5<br>(1.0 to 7.9)                               | 0.3<br>(-3.6 to 2.9)                             |
| Cocaine use disorders                                          | 901.2<br>(782.0 to 1,038.1)                   | 36.4<br>(22.5 to 53.6)                       | 125.3<br>(79.2 to 184.3)                   | 5.8<br>(1.8 to 9.8)                               | 0.9<br>(-2.9 to 4.7)                             |
| Amphetamine use disorders                                      | 1,398.0<br>(949.0 to 1,942.9)                 | 35.8<br>(15.1 to 64.5)                       | 186.0<br>(103.6 to 306.8)                  | 0.8<br>(-4.6 to 5.7)                              | -3.9<br>(-9.0 to 0.8)                            |
| Cannabis use disorders                                         | 5,612.2<br>(4,391.6 to 7,041.4)               | 687.4<br>(448.8 to 968.9)                    | 164.8<br>(99.7 to 247.3)                   | 3.8<br>(0.5 to 7.4)                               | -1.0<br>(-4.2 to 2.5)                            |
| Other drug use disorders                                       | 382.4<br>(304.1 to 471.8)                     | 107.5<br>(89.2 to 128.9)                     | 244.5<br>(156.1 to 355.1)                  | 2.6<br>(-0.9 to 6.4)                              | -2.1<br>(-5.5 to 1.5)                            |
| Depressive disorders                                           | 20,739.1<br>(19,266.1 to 22,006.8)            | 22,863.5<br>(17,864.7 to 29,029.6)           | 3,693.0<br>(2,408.4 to 5,371.2)            | 0.4<br>(-1.5 to 2.3)                              | -4.2<br>(-6.1 to -2.5)                           |
| Major depressive disorder                                      | 14,392.5<br>(10,947.9 to 18,645.9)            | 21,505.7<br>(16,472.9 to 27,813.0)           | 3,026.8<br>(1,924.7 to 4,514.8)            | -1.0<br>(-3.4 to 1.2)                             | -5.5<br>(-7.9 to -3.5)                           |
| Dysthymia                                                      | 6,744.6<br>(5,204.2 to 8,639.5)               | 1,357.8<br>(951.8 to 1,811.2)                | 666.2<br>(418.7 to 1,018.7)                | 7.3<br>(4.5 to 10.1)                              | 2.3<br>(-0.3 to 5.0)                             |
| Bipolar disorder                                               | 5,150.1<br>(4,112.4 to 6,330.9)               | 283.4<br>(159.0 to 441.3)                    | 1,078.4<br>(643.6 to 1,634.2)              | 5.5<br>(3.5 to 7.5)                               | 0.6<br>(-1.2 to 2.5)                             |
| Anxiety disorders                                              | 24,699.5<br>(21,543.9 to 28,395.4)            | 3,392.3<br>(2,768.8 to 4,109.1)              | 2,434.7<br>(1,652.7 to 3,397.7)            | 4.3<br>(2.4 to 6.1)                               | -0.5<br>(-2.4 to 1.2)                            |
| Eating disorders                                               | 1,941.7<br>(1,619.7 to 2,362.8)               | 1,134.3<br>(628.0 to 1,799.5)                | 403.1<br>(231.8 to 634.5)                  | 15.8<br>(13.1 to 18.6)                            | 10.5<br>(7.9 to 13.2)                            |
| Anorexia nervosa                                               | 601.0<br>(400.9 to 868.8)                     | 177.8<br>(119.9 to 248.5)                    | 128.2<br>(74.2 to 204.7)                   | 14.1<br>(9.6 to 18.6)                             | 8.8<br>(4.5 to 13.1)                             |
| Bulimia nervosa                                                | 1,297.3<br>(755.1 to 2,105.2)                 | 956.5<br>(459.5 to 1,634.4)                  | 275.0<br>(139.8 to 469.5)                  | 16.7<br>(13.1 to 20.7)                            | 11.3<br>(7.9 to 15.1)                            |
| Autistic spectrum disorders                                    | 5,694.4<br>(5,411.8 to 5,930.2)               | --                                           | 838.1<br>(566.8 to 1,179.9)                | 5.4<br>(3.9 to 7.0)                               | 0.6<br>(-0.9 to 2.1)                             |
| Autism                                                         | 1,675.9<br>(1,440.2 to 1,946.6)               | --                                           | 431.8<br>(279.7 to 623.4)                  | 5.2<br>(2.7 to 7.7)                               | 0.3<br>(-2.0 to 2.8)                             |
| Asperger syndrome and other autistic spectrum disorders        | 4,017.6<br>(3,361.4 to 4,829.3)               | --                                           | 406.2<br>(266.2 to 592.9)                  | 5.7<br>(3.9 to 7.5)                               | 0.8<br>(-0.9 to 2.6)                             |

| Cause                                                      | Prevalence in thousands (95% UI)              | Incidence in thousands (95% UI)                    | YLDs in thousands (95% UI)               |                                                   |                                                  |
|------------------------------------------------------------|-----------------------------------------------|----------------------------------------------------|------------------------------------------|---------------------------------------------------|--------------------------------------------------|
|                                                            | 2016 counts                                   | 2016 counts                                        | 2016 counts                              | Percentage change in counts between 2006 and 2016 | Percentage change in rates between 2006 and 2016 |
| Attention-deficit/hyperactivity disorder                   | 7,473.8<br>(6,692.4 to 8,385.8)               | --                                                 | 90.3<br>(53.2 to 143.0)                  | 4.3<br>(2.0 to 6.6)                               | -0.5<br>(-2.7 to 1.7)                            |
| Conduct disorder                                           | 2,811.1<br>(2,279.3 to 3,400.5)               | --                                                 | 338.3<br>(204.7 to 515.0)                | 5.9<br>(2.6 to 9.0)                               | 1.0<br>(-2.2 to 3.9)                             |
| Idiopathic developmental intellectual disability           | 13,182.9<br>(8,414.5 to 18,141.6)             | --                                                 | 519.0<br>(251.3 to 888.7)                | -2.2<br>(-5.7 to 0.1)                             | -6.7<br>(-10.1 to -4.5)                          |
| Other mental and substance use disorders                   | 11,474.5<br>(9,507.1 to 13,639.3)             | 1,343.7<br>(1,141.4 to 1,584.7)                    | 878.9<br>(583.3 to 1,270.7)              | 5.2<br>(3.3 to 7.1)                               | 0.4<br>(-1.5 to 2.2)                             |
| <b>Diabetes, urogenital, blood, and endocrine diseases</b> | <b>217,564.1<br/>(215,245.8 to 219,867.5)</b> | <b>70,152.2†<br/>(61,263.2 to 80,630.2)</b>        | <b>2,396.3<br/>(1,635.2 to 3,394.3)</b>  | <b>6.7<br/>(4.7 to 8.8)</b>                       | <b>1.7<br/>(-0.1 to 3.8)</b>                     |
| Diabetes mellitus                                          | 9,472.9<br>(7,623.7 to 11,694.0)              | 966.2<br>(679.0 to 1,279.1)                        | 564.5<br>(360.5 to 858.6)                | 7.0<br>(4.0 to 10.0)                              | 2.1<br>(-0.8 to 4.9)                             |
| Acute glomerulonephritis                                   | 5.5<br>(3.4 to 8.1)                           | 80.4<br>(51.3 to 115.5)                            | 0.3<br>(0.1 to 0.5)                      | -6.5<br>(-8.8 to -4.5)                            | -10.9<br>(-13.0 to -8.9)                         |
| Chronic kidney disease                                     | 4,631.8<br>(3,742.2 to 5,691.9)               | 452.2<br>(305.7 to 608.2)                          | 229.7<br>(147.3 to 334.5)                | 9.6<br>(4.4 to 14.7)                              | 4.5<br>(-0.4 to 9.4)                             |
| Chronic kidney disease due to diabetes mellitus            | 508.1<br>(305.7 to 758.9)                     | 46.4<br>(25.5 to 75.5)                             | 30.4<br>(16.3 to 50.7)                   | 16.0<br>(9.5 to 24.3)                             | 10.6<br>(4.4 to 18.6)                            |
| Chronic kidney disease due to hypertension                 | 1,218.0<br>(854.3 to 1,643.2)                 | 199.6<br>(120.1 to 299.0)                          | 15.1<br>(8.4 to 24.9)                    | 7.7<br>(2.0 to 13.0)                              | 2.8<br>(-2.7 to 7.8)                             |
| Chronic kidney disease due to glomerulonephritis           | 1,083.2<br>(770.5 to 1,451.0)                 | 24.9<br>(14.5 to 38.3)                             | 100.2<br>(59.4 to 152.3)                 | 7.1<br>(1.3 to 13.1)                              | 2.2<br>(-3.4 to 7.9)                             |
| Chronic kidney disease due to other causes                 | 1,822.5<br>(1,210.2 to 2,499.6)               | 181.3<br>(108.9 to 268.9)                          | 84.0<br>(47.3 to 132.3)                  | 10.8<br>(4.5 to 17.5)                             | 5.7<br>(-0.3 to 12.1)                            |
| Urinary diseases and male infertility                      | 5,534.2<br>(4,445.1 to 6,885.9)               | 39,904.3†<br>(32,170.8 to 49,780.1)                | 71.5<br>(40.8 to 119.9)                  | 5.3<br>(-0.2 to 11.2)                             | 0.5<br>(-4.8 to 6.1)                             |
| Interstitial nephritis and urinary tract infections        | 706.3<br>(545.2 to 907.6)                     | 37,096.3<br>(29,265.2 to 46,941.8)                 | 23.7<br>(13.4 to 37.8)                   | 1.9<br>(-3.0 to 6.5)                              | -2.8<br>(-7.4 to 1.6)                            |
| Urolithiasis                                               | 102.2<br>(74.7 to 136.7)                      | 2,808.1<br>(2,027.3 to 3,830.3)                    | 7.9<br>(4.9 to 12.4)                     | 2.8<br>(1.3 to 4.4)                               | -2.0<br>(-3.4 to -0.4)                           |
| Benign prostatic hyperplasia                               | --                                            | --                                                 | --                                       | --                                                | --                                               |
| Male infertility                                           | 4,431.7<br>(2,994.6 to 6,293.7)               | --                                                 | 29.4<br>(10.9 to 62.3)                   | 21.2<br>(13.6 to 28.3)                            | 15.7<br>(8.3 to 22.4)                            |
| Other urinary diseases                                     | --                                            | --                                                 | 10.5<br>(6.4 to 16.1)                    | -17.4<br>(-20.2 to -14.6)                         | -21.2<br>(-23.9 to -18.5)                        |
| Gynecological diseases                                     | 77,995.9<br>(76,135.5 to 79,759.7)            | 28,438.5†<br>(25,084.1 to 31,946.0)                | 979.8<br>(653.1 to 1,421.0)              | 5.2<br>(2.7 to 7.8)                               | 0.3<br>(-2.0 to 2.8)                             |
| Uterine fibroids                                           | 820.4<br>(635.6 to 1,030.3)                   | 234.1<br>(149.1 to 329.4)                          | 20.8<br>(12.3 to 33.7)                   | 5.6<br>(0.6 to 10.8)                              | 0.7<br>(-4.0 to 5.7)                             |
| Polycystic ovarian syndrome                                | 1,179.2<br>(892.3 to 1,563.4)                 | 409.5<br>(214.4 to 655.8)                          | 10.9<br>(4.8 to 21.6)                    | 4.4<br>(1.3 to 7.5)                               | -0.4<br>(-3.4 to 2.5)                            |
| Female infertility                                         | 6,529.8<br>(3,772.0 to 9,869.6)               | --                                                 | 41.0<br>(14.8 to 93.6)                   | 30.1<br>(19.8 to 41.9)                            | 24.1<br>(14.3 to 35.4)                           |
| Endometriosis                                              | 537.8<br>(448.8 to 633.6)                     | 1,056.3<br>(670.6 to 1,559.4)                      | 50.8<br>(33.0 to 72.7)                   | -1.4<br>(-6.8 to 4.4)                             | -6.0<br>(-11.1 to -0.5)                          |
| Genital prolapse                                           | 5,956.9<br>(4,313.2 to 7,950.3)               | 980.2<br>(550.4 to 1,477.6)                        | 19.2<br>(8.4 to 36.6)                    | -3.5<br>(-7.1 to 0.5)                             | -7.9<br>(-11.4 to -4.2)                          |
| Premenstrual syndrome                                      | 60,311.2<br>(53,440.8 to 67,084.4)            | 18,447.2<br>(15,425.3 to 21,579.3)                 | 509.6<br>(313.8 to 791.8)                | 1.8<br>(-1.3 to 4.5)                              | -2.9<br>(-5.8 to -0.3)                           |
| Other gynecological diseases                               | 9,441.4<br>(7,960.2 to 10,913.4)              | 7,311.1<br>(5,790.7 to 9,021.4)                    | 327.5<br>(213.4 to 466.0)                | 10.0<br>(5.4 to 16.0)                             | 4.9<br>(0.5 to 10.6)                             |
| Hemoglobinopathies and hemolytic anaemias                  | 150,344.5<br>(148,306.6 to 152,461.4)         | --                                                 | 436.4<br>(283.6 to 647.6)                | 8.5<br>(2.3 to 15.3)                              | 3.5<br>(-2.4 to 10.0)                            |
| Thalassemias                                               | 4.8<br>(4.5 to 5.1)                           | --                                                 | 0.4<br>(0.2 to 0.5)                      | -1.4<br>(-8.5 to 7.2)                             | -6.0<br>(-12.7 to 2.3)                           |
| Thalassaemias trait                                        | 22,367.4<br>(21,488.0 to 23,312.4)            | --                                                 | 214.9<br>(136.2 to 325.1)                | -2.3<br>(-10.9 to 7.5)                            | -6.8<br>(-15.1 to 2.5)                           |
| Sickle cell disorders                                      | 244.0<br>(224.0 to 265.6)                     | --                                                 | 23.7<br>(16.6 to 32.2)                   | 29.0<br>(18.6 to 40.2)                            | 23.1<br>(13.2 to 33.8)                           |
| Sickle cell trait                                          | 40,777.2<br>(36,840.2 to 45,990.1)            | --                                                 | 116.9<br>(73.9 to 172.0)                 | 17.6<br>(12.3 to 23.1)                            | 12.1<br>(7.1 to 17.4)                            |
| G6PD deficiency                                            | 28,596.8<br>(27,517.5 to 29,894.1)            | --                                                 | 1.7<br>(1.1 to 2.4)                      | 15.2<br>(10.0 to 20.6)                            | 9.9<br>(4.9 to 15.0)                             |
| G6PD trait                                                 | 71,350.4<br>(70,181.1 to 72,679.8)            | --                                                 | < 0.05<br>(< 0.05 to 0.1)                | 10.4<br>(4.7 to 17.5)                             | 5.3<br>(-0.1 to 12.1)                            |
| Other hemoglobinopathies and hemolytic anaemias            | 4,272.1<br>(3,661.3 to 4,952.7)               | --                                                 | 78.8<br>(50.6 to 117.7)                  | 25.6<br>(16.8 to 35.9)                            | 19.8<br>(11.4 to 29.6)                           |
| Endocrine, metabolic, blood, and immune disorders          | 4,580.3<br>(4,015.8 to 5,208.5)               | 310.5<br>(205.8 to 449.9)                          | 114.2<br>(74.1 to 167.0)                 | 5.9<br>(2.1 to 9.5)                               | 1.0<br>(-2.6 to 4.5)                             |
| <b>Musculoskeletal disorders</b>                           | <b>58,167.5<br/>(54,955.8 to 61,301.8)</b>    | <b>33,242.1<br/>(26,690.8 to 40,310.1)</b>         | <b>6,228.9<br/>(4,222.4 to 8,512.7)</b>  | <b>1.8<br/>(-0.3 to 3.8)</b>                      | <b>2.9<br/>(-4.9 to -1.0)</b>                    |
| Rheumatoid arthritis                                       | 567.1<br>(446.1 to 713.1)                     | 51.6<br>(36.5 to 69.9)                             | 141.0<br>(90.2 to 198.7)                 | 7.2<br>(2.8 to 12.2)                              | 2.3<br>(-1.9 to 7.1)                             |
| Osteoarthritis                                             | --                                            | --                                                 | --                                       | --                                                | --                                               |
| Low back and neck pain                                     | 33,173.6<br>(30,485.5 to 37,610.5)            | 14,922.1<br>(10,748.9 to 20,302.9)                 | 3,731.8<br>(2,447.0 to 5,422.8)          | 3.1<br>(0.7 to 5.6)                               | -1.7<br>(-3.9 to 0.7)                            |
| Low back pain                                              | 25,933.6<br>(19,051.4 to 35,401.6)            | 12,474.0<br>(8,557.8 to 17,831.3)                  | 2,935.3<br>(1,832.0 to 4,437.6)          | 2.9<br>(-0.1 to 6.1)                              | -1.8<br>(-4.7 to 1.2)                            |
| Neck pain                                                  | 7,696.0<br>(5,410.7 to 10,365.6)              | 2,448.1<br>(1,516.0 to 3,567.4)                    | 796.6<br>(481.6 to 1,235.6)              | 3.6<br>(0.9 to 6.3)                               | -1.2<br>(-3.8 to 1.4)                            |
| Gout                                                       | 272.8<br>(199.8 to 369.6)                     | 107.4<br>(83.2 to 134.5)                           | 9.6<br>(5.7 to 14.8)                     | 5.2<br>(1.7 to 8.7)                               | 0.3<br>(-3.0 to 3.7)                             |
| Other musculoskeletal disorders                            | 26,497.5<br>(19,014.1 to 34,394.9)            | 18,160.9<br>(13,149.5 to 24,027.3)                 | 2,346.5<br>(1,430.0 to 3,493.6)          | -0.6<br>(-4.6 to 2.9)                             | -5.1<br>(-9.0 to -1.9)                           |
| <b>Other non-communicable diseases</b>                     | <b>384,191.8<br/>(375,702.3 to 391,831.3)</b> | <b>1,070,392.0†<br/>(877,478.1 to 1,264,498.1)</b> | <b>8,557.1<br/>(5,794.9 to 12,369.3)</b> | <b>4.5<br/>(3.8 to 5.1)</b>                       | <b>-0.3<br/>(-1.0 to 0.3)</b>                    |
| Congenital anomalies                                       | 6,553.5<br>(6,147.2 to 6,945.0)               | --                                                 | 771.3<br>(543.1 to 1,028.0)              | 2.2<br>(-0.3 to 4.6)                              | -2.5<br>(-4.9 to -0.2)                           |
| Neural tube defects                                        | 490.4<br>(442.7 to 543.6)                     | --                                                 | 147.8<br>(103.7 to 200.5)                | 7.6<br>(2.8 to 12.7)                              | 2.6<br>(-1.9 to 7.5)                             |
| Congenital heart anomalies                                 | 949.9<br>(846.3 to 1,061.2)                   | --                                                 | 49.3<br>(21.0 to 84.7)                   | 2.6<br>(-0.9 to 6.1)                              | -2.2<br>(-5.5 to 1.2)                            |
| Orofacial clefts                                           | 269.6<br>(240.0 to 299.8)                     | --                                                 | 3.6<br>(2.3 to 5.2)                      | -3.6<br>(-6.5 to -0.8)                            | -8.1<br>(-10.8 to -5.3)                          |
| Down's syndrome                                            | 205.9<br>(178.9 to 236.8)                     | --                                                 | 17.7<br>(11.9 to 24.8)                   | 0.6<br>(-3.3 to 4.2)                              | -4.1<br>(-7.7 to -0.6)                           |
| Turner syndrome                                            | 284.3<br>(248.6 to 323.4)                     | --                                                 | 5.9<br>(3.0 to 9.6)                      | 2.2<br>(-7.1 to 11.9)                             | -2.5<br>(-11.4 to 6.7)                           |
| Klinefelter syndrome                                       | 353.6<br>(305.8 to 407.4)                     | --                                                 | 3.6<br>(1.7 to 6.9)                      | 5.2<br>(-0.4 to 10.7)                             | 0.3<br>(-5.0 to 5.6)                             |

| Cause                                         | Prevalence in thousands (95% UI)                 | Incidence in thousands (95% UI)                   | YLDs in thousands (95% UI)                    |                                                   |                                                  |
|-----------------------------------------------|--------------------------------------------------|---------------------------------------------------|-----------------------------------------------|---------------------------------------------------|--------------------------------------------------|
|                                               | 2016 counts                                      | 2016 counts                                       | 2016 counts                                   | Percentage change in counts between 2006 and 2016 | Percentage change in rates between 2006 and 2016 |
| Other chromosomal abnormalities               | 297.7<br>(256.8 to 347.2)                        | --                                                | 25.2<br>(16.7 to 34.9)                        | 2.0<br>(-2.2 to 6.2)                              | -2.7<br>(-6.7 to 1.3)                            |
| Congenital musculoskeletal and limb anomalies | 840.8<br>(774.5 to 914.1)                        | --                                                | 122.1<br>(83.5 to 170.0)                      | 4.2<br>(0.9 to 7.5)                               | -0.7<br>(-3.8 to 2.5)                            |
| Urogenital congenital anomalies               | 576.3<br>(512.7 to 644.0)                        | --                                                | 16.8<br>(10.2 to 25.9)                        | -2.0<br>(-4.0 to -0.2)                            | -6.6<br>(-8.4 to -4.8)                           |
| Digestive congenital anomalies                | 758.4<br>(682.2 to 839.1)                        | --                                                | 34.0<br>(22.2 to 49.0)                        | 0.9<br>(-4.1 to 6.0)                              | -3.8<br>(-8.5 to 1.1)                            |
| Other congenital anomalies                    | 2,979.1<br>(2,098.1 to 4,206.4)                  | --                                                | 345.5<br>(223.4 to 514.3)                     | -0.2<br>(-4.4 to 4.2)                             | -4.8<br>(-8.8 to -0.7)                           |
| Skin and subcutaneous diseases                | 188,287.8<br>(184,433.8 to 192,020.4)            | 318,512.4<br>(288,699.7 to 353,305.0)             | 5,134.2<br>(3,379.8 to 7,492.1)               | 5.7<br>(5.0 to 6.4)                               | 0.8<br>(0.2 to 1.5)                              |
| Dermatitis                                    | 20,932.5<br>(18,108.1 to 24,164.5)               | 38,582.8<br>(31,014.7 to 47,661.1)                | 741.6<br>(438.5 to 1,190.0)                   | 6.1<br>(4.2 to 7.9)                               | 1.2<br>(-0.6 to 3.0)                             |
| Psoriasis                                     | 4,277.1<br>(3,890.4 to 4,692.8)                  | 607.0<br>(531.1 to 689.2)                         | 382.0<br>(267.9 to 509.7)                     | 11.0<br>(7.9 to 14.2)                             | 5.9<br>(2.9 to 8.9)                              |
| Cellulitis                                    | 239.1<br>(193.9 to 295.0)                        | 4,371.4<br>(3,628.6 to 5,201.6)                   | 13.8<br>(8.4 to 20.7)                         | 6.1<br>(-0.3 to 12.7)                             | 1.2<br>(-4.9 to 7.5)                             |
| Pyoderma                                      | 751.6<br>(686.9 to 819.7)                        | 15,776.8<br>(14,338.8 to 17,467.6)                | 4.3<br>(1.7 to 9.2)                           | 9.6<br>(5.8 to 13.4)                              | 4.5<br>(0.9 to 8.2)                              |
| Scabies                                       | 17,155.2<br>(12,092.0 to 23,490.4)               | 52,491.1<br>(36,106.9 to 72,417.2)                | 446.2<br>(223.5 to 793.6)                     | 1.5<br>(-2.8 to -0.1)                             | -6.0<br>(-7.3 to -4.7)                           |
| Fungal skin diseases                          | 33,417.1<br>(26,869.4 to 41,168.8)               | 104,813.9<br>(83,978.1 to 131,518.4)              | 190.5<br>(73.5 to 395.5)                      | 7.0<br>(6.3 to 7.7)                               | 2.1<br>(1.4 to 2.7)                              |
| Viral skin diseases                           | 17,214.5<br>(14,662.6 to 20,104.7)               | 25,755.1<br>(22,032.1 to 29,998.3)                | 530.2<br>(325.7 to 793.2)                     | 4.7<br>(3.5 to 5.9)                               | -0.1<br>(-1.2 to 1.0)                            |
| Acne vulgaris                                 | 90,264.8<br>(77,966.5 to 103,089.9)              | 35,895.5<br>(29,359.2 to 43,208.2)                | 2,329.2<br>(1,518.3 to 3,427.1)               | 6.2<br>(5.1 to 7.2)                               | 1.3<br>(0.3 to 2.3)                              |
| Alopecia areata                               | 1,557.3<br>(1,399.1 to 1,721.7)                  | 2,892.3<br>(2,576.5 to 3,237.2)                   | 51.7<br>(32.2 to 78.3)                        | 4.7<br>(1.5 to 7.7)                               | -0.1<br>(-3.2 to 2.7)                            |
| Pruritus                                      | 3,841.3<br>(2,747.9 to 5,245.6)                  | 3,070.2<br>(2,140.8 to 4,188.1)                   | 41.5<br>(19.3 to 78.5)                        | 6.0<br>(4.1 to 7.8)                               | 1.1<br>(-0.7 to 2.8)                             |
| Urticaria                                     | 4,255.4<br>(2,860.0 to 5,942.8)                  | 7,513.1<br>(5,085.1 to 10,259.5)                  | 257.8<br>(142.6 to 416.7)                     | 4.3<br>(2.1 to 6.6)                               | -0.5<br>(-2.6 to 1.7)                            |
| Decubitus ulcer                               | 31.0<br>(21.5 to 42.4)                           | 108.9<br>(76.5 to 150.0)                          | 5.5<br>(3.3 to 8.6)                           | 3.2<br>(2.1 to 4.3)                               | -1.6<br>(-2.6 to -0.6)                           |
| Other skin and subcutaneous diseases          | 24,960.4<br>(22,450.5 to 27,759.7)               | 26,634.3<br>(23,968.4 to 29,491.8)                | 140.1<br>(64.9 to 258.1)                      | 10.5<br>(9.4 to 11.6)                             | 5.4<br>(4.4 to 6.5)                              |
| Sense organ diseases                          | 60,206.1<br>(58,021.8 to 62,376.6)               | 37,154.5†<br>(33,144.8 to 41,447.7)               | 1,975.3<br>(1,335.5 to 2,797.2)               | 2.5<br>(0.4 to 4.5)                               | -2.2<br>(-4.3 to -0.3)                           |
| Glaucoma                                      | --                                               | --                                                | --                                            | --                                                | --                                               |
| Cataract                                      | 33.5<br>(20.6 to 49.3)                           | --                                                | 3.6<br>(1.8 to 6.5)                           | -2.6<br>(-13.4 to 5.5)                            | -7.0<br>(-17.4 to 0.6)                           |
| Macular degeneration                          | --                                               | --                                                | --                                            | --                                                | --                                               |
| Refraction and accommodation disorders        | 29,592.7<br>(26,527.3 to 33,263.9)               | --                                                | 617.9<br>(381.7 to 961.3)                     | 0.9<br>(-0.3 to 2.1)                              | -3.7<br>(-4.9 to -2.6)                           |
| Age-related and other hearing loss            | 25,409.0<br>(18,796.4 to 32,528.2)               | --                                                | 1,073.2<br>(715.0 to 1,553.5)                 | 2.8<br>(-1.0 to 6.5)                              | -1.9<br>(-5.6 to 1.5)                            |
| Other vision loss                             | 674.5<br>(480.7 to 917.2)                        | --                                                | 51.5<br>(29.7 to 81.7)                        | 1.2<br>(-6.2 to 8.0)                              | -3.5<br>(-10.5 to 3.0)                           |
| Other sense organ diseases                    | 7,300.7<br>(6,431.6 to 8,166.4)                  | 37,154.5<br>(33,144.8 to 41,447.7)                | 229.1<br>(139.0 to 351.1)                     | 5.9<br>(3.5 to 8.2)                               | 1.0<br>(-1.2 to 3.2)                             |
| Oral disorders                                | 254,443.7<br>(235,016.4 to 282,231.7)            | 714,725.1†<br>(527,015.1 to 910,255.8)            | 676.2<br>(387.9 to 1,061.9)                   | 4.0<br>(3.1 to 5.0)                               | -0.8<br>(-1.7 to 0.1)                            |
| Caries of deciduous teeth                     | --                                               | --                                                | --                                            | --                                                | --                                               |
| Caries of permanent teeth                     | 235,525.5<br>(193,355.7 to 280,441.9)            | 710,629.8<br>(521,891.8 to 906,349.3)             | 161.8<br>(70.6 to 309.2)                      | 0.3<br>(-1.0 to 1.5)                              | -4.3<br>(-5.5 to -3.1)                           |
| Periodontal disease                           | 14,596.9<br>(9,245.3 to 21,002.3)                | 3,507.4<br>(1,925.4 to 5,665.7)                   | 97.5<br>(35.3 to 214.5)                       | 8.7<br>(7.0 to 10.3)                              | 3.7<br>(2.1 to 5.2)                              |
| Edentulism and severe tooth loss              | 2,641.2<br>(1,876.7 to 3,507.7)                  | 587.9<br>(430.6 to 797.2)                         | 76.5<br>(44.2 to 117.5)                       | 3.4<br>(-0.1 to 6.7)                              | -1.4<br>(-4.7 to 1.8)                            |
| Other oral disorders                          | 11,429.6<br>(10,270.1 to 12,701.5)               | --                                                | 340.4<br>(205.4 to 523.0)                     | 4.7<br>(3.5 to 5.9)                               | -0.1<br>(-1.2 to 1.0)                            |
| <b>Injuries</b>                               | <b>72,665.8</b><br><b>(66,355.9 to 79,418.9)</b> | <b>43,846.3†</b><br><b>(38,325.4 to 49,732.2)</b> | <b>2,865.5</b><br><b>(1,890.4 to 4,176.5)</b> | <b>3.2</b><br><b>(0.7 to 5.2)</b>                 | <b>-1.6</b><br><b>(-3.9 to 0.4)</b>              |
| <b>Transport injuries</b>                     | <b>9,912.2</b><br><b>(8,498.9 to 11,012.1)</b>   | <b>7,860.4</b><br><b>(6,064.0 to 9,773.5)</b>     | <b>562.4</b><br><b>(363.6 to 825.6)</b>       | <b>6.0</b><br><b>(4.3 to 7.5)</b>                 | <b>1.1</b><br><b>(-0.5 to 2.6)</b>               |
| Road injuries                                 | 7,246.3<br>(6,181.4 to 8,152.2)                  | 7,216.1<br>(5,516.4 to 9,174.2)                   | 416.3<br>(268.9 to 614.1)                     | 6.8<br>(5.0 to 8.5)                               | 1.9<br>(0.1 to 3.5)                              |
| Pedestrian road injuries                      | 1,613.0<br>(1,275.9 to 2,007.7)                  | 1,092.2<br>(696.9 to 1,577.3)                     | 93.0<br>(58.8 to 138.6)                       | 4.2<br>(2.3 to 6.2)                               | -0.6<br>(-2.4 to 1.3)                            |
| Cyclist road injuries                         | 1,593.3<br>(1,191.7 to 2,037.0)                  | 1,478.9<br>(923.7 to 2,182.9)                     | 83.5<br>(52.8 to 126.5)                       | 9.8<br>(7.9 to 12.0)                              | 4.7<br>(2.9 to 6.8)                              |
| Motorcyclist road injuries                    | 1,696.5<br>(1,328.2 to 2,112.6)                  | 1,583.8<br>(1,085.6 to 2,259.6)                   | 97.9<br>(62.8 to 144.8)                       | 9.0<br>(6.8 to 11.1)                              | 4.0<br>(1.9 to 6.0)                              |
| Motor vehicle road injuries                   | 1,714.9<br>(1,382.7 to 2,114.4)                  | 2,389.3<br>(1,689.3 to 3,165.8)                   | 110.0<br>(71.5 to 158.8)                      | 1.3<br>(-1.1 to 3.9)                              | -3.3<br>(-5.6 to -0.9)                           |
| Other road injuries                           | 628.5<br>(464.4 to 815.5)                        | 671.8<br>(361.2 to 1,068.9)                       | 32.0<br>(19.9 to 48.7)                        | 22.4<br>(20.0 to 24.8)                            | 16.8<br>(14.5 to 19.0)                           |
| Other transport injuries                      | 2,665.9<br>(2,129.1 to 3,389.5)                  | 644.3<br>(398.3 to 946.8)                         | 146.1<br>(96.6 to 212.3)                      | 3.6<br>(1.6 to 5.5)                               | -1.2<br>(-3.1 to 0.6)                            |
| <b>Unintentional injuries</b>                 | <b>56,531.4</b><br><b>(50,630.1 to 63,169.4)</b> | <b>31,572.7</b><br><b>(26,654.2 to 36,763.0)</b>  | <b>1,875.2</b><br><b>(1,225.2 to 2,694.2)</b> | <b>6.6</b><br><b>(4.9 to 8.0)</b>                 | <b>1.7</b><br><b>(0.1 to 3.0)</b>                |
| Falls                                         | 20,864.3<br>(16,812.1 to 25,065.9)               | 11,045.0<br>(7,581.2 to 15,221.8)                 | 768.9<br>(511.6 to 1,092.4)                   | 7.0<br>(5.4 to 8.4)                               | 2.1<br>(0.6 to 3.4)                              |
| Drowning                                      | 243.4<br>(194.2 to 295.3)                        | 50.6<br>(39.4 to 66.0)                            | 13.1<br>(8.4 to 19.2)                         | -9.2<br>(-11.5 to -7.2)                           | -13.4<br>(-15.6 to -11.5)                        |
| Fire, heat, and hot substances                | 5,546.0<br>(4,337.9 to 7,157.7)                  | 848.1<br>(564.6 to 1,246.2)                       | 157.3<br>(105.3 to 226.9)                     | 6.8<br>(3.3 to 9.7)                               | 1.8<br>(-1.5 to 4.7)                             |
| Poisonings                                    | 228.8<br>(183.1 to 282.5)                        | 373.4<br>(208.3 to 609.5)                         | 24.0<br>(15.3 to 35.7)                        | 16.6<br>(13.1 to 19.7)                            | 11.2<br>(7.9 to 14.2)                            |
| Exposure to mechanical forces                 | 9,326.9<br>(7,538.4 to 12,899.1)                 | 6,282.7<br>(4,327.1 to 8,646.4)                   | 217.7<br>(134.7 to 338.0)                     | 7.5<br>(5.7 to 9.2)                               | 2.6<br>(0.8 to 4.2)                              |
| Unintentional firearm injuries                | 337.0<br>(247.2 to 449.1)                        | 175.7<br>(88.2 to 307.9)                          | 13.1<br>(7.9 to 20.8)                         | 8.3<br>(6.1 to 10.5)                              | 3.3<br>(1.2 to 5.4)                              |
| Unintentional suffocation                     | 640.6<br>(461.8 to 861.8)                        | 52.0<br>(23.6 to 101.4)                           | 19.1<br>(11.0 to 30.9)                        | -0.6<br>(-2.4 to 1.3)                             | -5.2<br>(-6.9 to -3.4)                           |
| Other exposure to mechanical forces           | 8,349.3<br>(6,530.1 to 11,967.9)                 | 6,055.0<br>(4,158.7 to 8,309.6)                   | 185.5<br>(116.0 to 287.2)                     | 8.4<br>(6.4 to 10.2)                              | 3.4<br>(1.5 to 5.1)                              |

| Cause                                                                               | Prevalence in thousands (95% UI)                 | Incidence in thousands (95% UI)                | YLDs in thousands (95% UI)              |                                                   |                                                  |
|-------------------------------------------------------------------------------------|--------------------------------------------------|------------------------------------------------|-----------------------------------------|---------------------------------------------------|--------------------------------------------------|
|                                                                                     | 2016 counts                                      | 2016 counts                                    | 2016 counts                             | Percentage change in counts between 2006 and 2016 | Percentage change in rates between 2006 and 2016 |
| Adverse effects of medical treatment                                                | 86.2<br>(55.1 to 127.4)                          | 1,127.1<br>(761.2 to 1,576.1)                  | 11.5<br>(6.2 to 18.9)                   | 3.9<br>(-2.0 to 8.2)                              | -0.9<br>(-6.5 to 3.2)                            |
| Animal contact                                                                      | 3,222.4<br>(2,709.4 to 3,866.0)                  | 5,513.9<br>(3,623.8 to 7,902.6)                | 133.4<br>(88.6 to 188.7)                | 3.3<br>(0.8 to 5.8)                               | -1.4<br>(-3.8 to 0.9)                            |
| Venomous animal contact                                                             | 1,624.5<br>(1,236.2 to 2,051.4)                  | 2,825.4<br>(1,819.3 to 4,174.3)                | 107.1<br>(71.4 to 151.3)                | 4.4<br>(1.4 to 7.3)                               | -0.4<br>(-3.3 to 2.4)                            |
| Non-venomous animal contact                                                         | 1,597.9<br>(1,201.2 to 2,137.6)                  | 2,688.5<br>(1,705.6 to 3,979.0)                | 26.4<br>(15.8 to 41.4)                  | -0.8<br>(-3.4 to 1.4)                             | -5.3<br>(-7.9 to -3.3)                           |
| Foreign body                                                                        | 3,621.3<br>(2,868.7 to 4,412.6)                  | 1,730.0<br>(1,083.8 to 2,584.9)                | 139.5<br>(87.1 to 213.1)                | 6.3<br>(4.0 to 8.6)                               | 1.4<br>(-0.8 to 3.6)                             |
| Pulmonary aspiration and foreign body in airway                                     | 1,819.5<br>(1,289.7 to 2,556.2)                  | 203.4<br>(116.7 to 325.5)                      | 79.9<br>(47.6 to 124.7)                 | 2.6<br>(0.6 to 4.4)                               | -2.1<br>(-4.0 to -0.4)                           |
| Foreign body in eyes                                                                | 183.5<br>(81.1 to 349.3)                         | 1,113.0<br>(523.6 to 1,936.0)                  | 10.5<br>(4.1 to 21.7)                   | 14.5<br>(10.6 to 18.8)                            | 9.2<br>(5.5 to 13.4)                             |
| Foreign body in other body part                                                     | 1,618.2<br>(1,227.4 to 2,167.1)                  | 413.7<br>(240.7 to 618.8)                      | 49.1<br>(30.7 to 75.4)                  | 11.2<br>(8.2 to 13.9)                             | 6.0<br>(3.2 to 8.7)                              |
| Environmental heat and cold exposure                                                | 4,438.5<br>(3,533.2 to 5,532.1)                  | 1,066.6<br>(636.7 to 1,621.6)                  | 166.1<br>(105.2 to 245.4)               | 6.2<br>(4.0 to 8.0)                               | 1.2<br>(-0.8 to 3.0)                             |
| Other unintentional injuries                                                        | 8,953.6<br>(6,791.7 to 11,619.4)                 | 3,535.4<br>(2,382.6 to 5,091.3)                | 243.7<br>(155.7 to 362.5)               | 6.9<br>(4.7 to 8.3)                               | 1.9<br>(-0.1 to 3.3)                             |
| <b>Self-harm and interpersonal violence</b>                                         | <b>26,039.0</b><br><b>(19,653.9 to 34,915.5)</b> | <b>4,293.9†</b><br><b>(3,300.6 to 5,546.9)</b> | <b>345.3</b><br><b>(227.8 to 505.5)</b> | <b>-0.8</b><br><b>(-2.0 to 0.2)</b>               | <b>-5.4</b><br><b>(-6.5 to -4.4)</b>             |
| Self-harm                                                                           | 473.2<br>(374.2 to 612.9)                        | 771.9<br>(577.4 to 1,033.7)                    | 29.3<br>(18.6 to 44.0)                  | 0.7<br>(-1.5 to 2.9)                              | -4.0<br>(-6.0 to -1.8)                           |
| Self-harm by firearm                                                                | 25.9<br>(20.7 to 31.8)                           | 8.3<br>(2.3 to 21.9)                           | 1.0<br>(0.6 to 1.6)                     | -3.4<br>(-6.2 to -0.8)                            | -7.9<br>(-10.5 to -5.4)                          |
| Self-harm by other specified means                                                  | 447.3<br>(346.8 to 583.8)                        | 763.7<br>(570.5 to 1,027.7)                    | 28.4<br>(18.0 to 42.5)                  | 0.8<br>(-1.3 to 3.1)                              | -3.8<br>(-5.9 to -1.7)                           |
| Interpersonal violence                                                              | 25,565.8<br>(19,242.2 to 34,458.9)               | 3,522.0†<br>(2,572.7 to 4,751.8)               | 316.0<br>(208.3 to 465.5)               | -1.0<br>(-2.2 to 0.1)                             | -5.5<br>(-6.7 to -4.5)                           |
| Assault by firearm                                                                  | 135.5<br>(97.9 to 185.6)                         | 116.6<br>(72.4 to 175.1)                       | 6.1<br>(3.7 to 9.7)                     | 1.8<br>(-0.8 to 4.5)                              | -2.9<br>(-5.4 to -0.3)                           |
| Assault by sharp object                                                             | 744.1<br>(568.7 to 976.3)                        | 839.9<br>(532.4 to 1,223.5)                    | 26.0<br>(16.6 to 39.4)                  | -0.2<br>(-3.2 to 2.5)                             | -4.8<br>(-7.7 to -2.2)                           |
| Sexual violence                                                                     | 22,939.6<br>(16,523.1 to 31,844.7)               | --                                             | 209.1<br>(123.9 to 331.1)               | -1.8<br>(-3.3 to -0.6)                            | -6.4<br>(-7.8 to -5.2)                           |
| Assault by other means                                                              | 1,746.6<br>(1,379.5 to 2,274.5)                  | 2,565.4<br>(1,798.6 to 3,538.4)                | 74.8<br>(48.2 to 112.2)                 | 1.0<br>(-1.0 to 3.1)                              | -3.7<br>(-5.6 to -1.7)                           |
| <b>Forces of nature, conflict and terrorism, and executions and police conflict</b> | <b>3,122.8</b><br><b>(1,989.4 to 4,558.4)</b>    | <b>119.3†</b><br><b>(78.3 to 169.4)</b>        | <b>82.5</b><br><b>(29.6 to 169.2)</b>   | <b>-40.4</b><br><b>(-54.0 to -30.9)</b>           | <b>-43.1</b><br><b>(-56.1 to -34.0)</b>          |
| Forces of nature, conflict and terrorism, and state actor violence                  | 599.3<br>(319.1 to 972.7)                        | 28.3<br>(16.5 to 42.5)                         | 20.9<br>(6.2 to 46.9)                   | 2.7<br>(-5.6 to 12.9)                             | -2.0<br>(-10.0 to 7.7)                           |
| Conflict and terrorism                                                              | 2,432.5<br>(1,479.6 to 3,741.2)                  | --                                             | 61.5<br>(23.2 to 123.5)                 | -48.2<br>(-61.2 to -38.2)                         | -50.6<br>(-63.0 to -41.1)                        |
| Executions and police conflict                                                      | 90.9<br>(54.9 to 141.8)                          | 91.0<br>(53.1 to 139.3)                        | 2.8<br>(1.1 to 7.0)                     | -43.3<br>(-48.3 to -36.2)                         | -45.9<br>(-50.7 to -39.1)                        |

We did not calculate incidence for certain NTDs and causes with only birth prevalence. Blank cells mean that no estimate is available.

† Incidence for aggregate causes represents the sum of the incidence of the causes below the aggregate.

‡ Incidence estimates for stroke represent first-ever stroke only.

^ Incidence of HIV/AIDS represents new infections of HIV only and does not include new infections of Tuberculosis in HIV positive cases.



SR Table 12: Global prevalence, incidence, and YLDs for 2016, percentage change of YLD counts and percentage change of YLD rates between 2006 and 2016 by cause, age 25-29 years.

| Cause                                                                                | Prevalence in thousands (95% UI)             | Incidence in thousands (95% UI)                     | YLDs in thousands (95% UI)                |                                                   |                                                  |
|--------------------------------------------------------------------------------------|----------------------------------------------|-----------------------------------------------------|-------------------------------------------|---------------------------------------------------|--------------------------------------------------|
|                                                                                      | 2016 counts                                  | 2016 counts                                         | 2016 counts                               | Percentage change in counts between 2006 and 2016 | Percentage change in rates between 2006 and 2016 |
| <b>All causes</b>                                                                    | <b>596,297.5</b><br>(595,217.1 to 597,277.2) | <b>3,442,263.6†</b><br>(2,965,019.5 to 4,019,040.6) | <b>55,802.9</b><br>(40,811.7 to 72,594.9) | <b>15.4</b><br>(14.7 to 16.0)                     | <b>-2.8</b><br>(-3.4 to -2.3)                    |
| <b>Communicable, maternal, neonatal, and nutritional disorders</b>                   | <b>433,103.4</b><br>(427,674.6 to 438,492.4) | <b>1,982,526.0†</b><br>(1,540,285.5 to 2,528,888.2) | <b>7,658.9</b><br>(5,529.9 to 10,394.6)   | <b>7.9</b><br>(4.9 to 11.3)                       | <b>-9.1</b><br>(-11.6 to -6.2)                   |
| <b>HIV/AIDS and tuberculosis</b>                                                     | <b>189,273.8</b><br>(168,190.5 to 216,258.6) | <b>1,323.5†</b><br>(1,034.7 to 1,718.7)             | <b>701.1</b><br>(483.2 to 947.0)          | <b>-11.2</b><br>(-20.6 to -3.7)                   | <b>-25.2</b><br>(-33.1 to -18.9)                 |
| Tuberculosis                                                                         | 174,888.6<br>(140,632.8 to 215,186.1)        | 963.7†<br>(672.2 to 1,350.3)                        | 213.4<br>(121.2 to 332.9)                 | 14.9<br>(6.6 to 28.3)                             | -3.2<br>(-10.2 to 8.1)                           |
| Drug-susceptible tuberculosis                                                        | 652.3<br>(431.0 to 940.6)                    | 929.9<br>(648.9 to 1,305.3)                         | 205.5<br>(116.3 to 320.0)                 | 15.0<br>(6.4 to 28.5)                             | -3.1<br>(-10.4 to 8.3)                           |
| Multidrug-resistant tuberculosis without extensive drug resistance                   | 22.7<br>(15.7 to 31.9)                       | 31.9<br>(22.9 to 43.5)                              | 7.5<br>(4.3 to 11.7)                      | 8.6<br>(-6.2 to 26.7)                             | -8.5<br>(-21.0 to 6.7)                           |
| Extensively drug-resistant tuberculosis                                              | 1.5<br>(1.0 to 2.0)                          | 2.0<br>(1.4 to 2.7)                                 | 0.5<br>(0.3 to 0.8)                       | 205.7<br>(163.1 to 257.3)                         | 157.5<br>(121.6 to 201.0)                        |
| Latent tuberculosis infection                                                        | 174,212.1<br>(139,944.8 to 214,513.1)        | --                                                  | --                                        | --                                                | --                                               |
| HIV/AIDS                                                                             | 4,584.3<br>(4,326.3 to 4,847.2)              | 359.8*<br>(322.1 to 405.2)                          | 487.7<br>(344.7 to 652.7)                 | -19.3<br>(-29.1 to -10.5)                         | -32.0<br>(-40.3 to -24.6)                        |
| Drug-susceptible HIV/AIDS - Tuberculosis                                             | 158.1<br>(113.2 to 214.7)                    | 207.8<br>(147.4 to 283.9)                           | 61.6<br>(36.6 to 95.3)                    | -35.4<br>(-39.6 to -30.8)                         | -45.6<br>(-49.1 to -41.7)                        |
| Multidrug-resistant HIV/AIDS - Tuberculosis without extensive drug resistance        | 3.9<br>(2.6 to 5.9)                          | 5.3<br>(3.5 to 8.0)                                 | 1.6<br>(0.9 to 2.7)                       | -42.1<br>(-53.1 to -29.1)                         | -51.2<br>(-60.5 to -40.3)                        |
| Extensively drug-resistant HIV/AIDS - Tuberculosis                                   | 0.2<br>(0.1 to 0.3)                          | 0.2<br>(0.1 to 0.3)                                 | 0.1<br>(< 0.05 to 0.1)                    | 87.1<br>(53.0 to 127.2)                           | 57.6<br>(28.9 to 91.4)                           |
| HIV/AIDS resulting in other diseases                                                 | 4,422.1<br>(4,155.6 to 4,691.6)              | 359.8<br>(322.1 to 405.2)                           | 424.4<br>(300.3 to 569.8)                 | -16.1<br>(-28.3 to -4.5)                          | -29.4<br>(-39.6 to -19.6)                        |
| <b>Diarrhoea, lower respiratory infections, and other common infectious diseases</b> | <b>31,299.5</b><br>(29,073.4 to 33,449.6)    | <b>1,760,326.8†</b><br>(1,314,866.7 to 2,312,866.2) | <b>1,433.8</b><br>(980.6 to 2,056.6)      | <b>13.5</b><br>(12.0 to 15.0)                     | <b>-4.4</b><br>(-5.7 to -3.1)                    |
| Diarrhoeal diseases                                                                  | 3,889.9<br>(3,495.2 to 4,290.1)              | 262,511.8<br>(236,879.1 to 289,091.0)               | 441.4<br>(297.8 to 614.3)                 | 14.0<br>(11.5 to 16.4)                            | -4.0<br>(-6.0 to -1.9)                           |
| Intestinal infectious diseases                                                       | 37.6<br>(29.2 to 48.5)                       | 835.2†<br>(690.3 to 1,037.0)                        | 6.4<br>(4.0 to 9.5)                       | -4.2<br>(-22.4 to 17.8)                           | -19.3<br>(-34.6 to -8.8)                         |
| Typhoid fever                                                                        | 36.9<br>(28.2 to 48.0)                       | 582.4<br>(473.2 to 725.9)                           | 5.7<br>(3.5 to 8.5)                       | -4.0<br>(-24.5 to 21.2)                           | -19.2<br>(-36.4 to 2.1)                          |
| Paratyphoid fever                                                                    | 11.1<br>(8.6 to 13.9)                        | 252.8<br>(204.8 to 315.8)                           | 0.7<br>(0.4 to 1.0)                       | -4.8<br>(-22.2 to 15.6)                           | -19.8<br>(-34.4 to -2.7)                         |
| Other intestinal infectious diseases                                                 | --                                           | --                                                  | < 0.05<br>(< 0.05 to < 0.05)              | -29.3<br>(-42.7 to -13.1)                         | -40.5<br>(-51.8 to -26.8)                        |
| Lower respiratory infections                                                         | 261.9<br>(231.4 to 294.4)                    | 11,267.8<br>(9,790.8 to 12,828.2)                   | 16.2<br>(10.5 to 23.3)                    | 32.3<br>(25.1 to 40.3)                            | 11.4<br>(5.4 to 18.2)                            |
| Upper respiratory infections                                                         | 19,443.1<br>(13,830.2 to 26,775.7)           | 1,464,922.8<br>(1,018,666.2 to 2,021,029.1)         | 487.5<br>(254.7 to 823.4)                 | 16.7<br>(15.3 to 18.2)                            | -1.7<br>(-2.9 to -0.4)                           |
| Otitis media                                                                         | 5,960.0<br>(4,490.8 to 7,969.9)              | 14,744.1<br>(12,185.3 to 17,745.1)                  | 163.8<br>(93.5 to 258.1)                  | 5.2<br>(0.7 to 9.8)                               | -11.4<br>(-15.2 to -7.5)                         |
| Meningitis                                                                           | 1,320.0<br>(1,134.3 to 1,525.4)              | 96.5<br>(69.0 to 129.0)                             | 142.0<br>(99.3 to 185.7)                  | 12.9<br>(9.3 to 16.7)                             | -4.9<br>(-7.9 to -1.7)                           |
| Pneumococcal meningitis                                                              | 584.8<br>(485.6 to 698.2)                    | 27.5<br>(17.0 to 41.8)                              | 62.9<br>(43.1 to 83.6)                    | 8.7<br>(1.8 to 15.6)                              | -8.4<br>(-14.3 to -2.6)                          |
| H influenzae type B meningitis                                                       | 185.5<br>(145.4 to 235.1)                    | 7.0<br>(3.7 to 11.8)                                | 23.8<br>(15.8 to 32.2)                    | -10.5<br>(-16.4 to -5.6)                          | -24.6<br>(-29.5 to -20.5)                        |
| Meningococcal infection                                                              | 146.9<br>(106.4 to 195.5)                    | 16.6<br>(9.4 to 25.8)                               | 17.7<br>(10.4 to 20.8)                    | 17.7<br>(13.8 to 21.6)                            | -0.8<br>(-4.1 to 2.4)                            |
| Other meningitis                                                                     | 402.9<br>(304.5 to 514.0)                    | 45.4<br>(30.8 to 63.0)                              | 40.0<br>(26.9 to 54.8)                    | 41.5<br>(35.6 to 48.4)                            | 19.2<br>(14.2 to 25.0)                           |
| Encephalitis                                                                         | 1,280.9<br>(878.7 to 1,842.3)                | 322.5<br>(239.5 to 423.4)                           | 160.5<br>(114.0 to 212.7)                 | 11.5<br>(4.9 to 17.5)                             | -6.1<br>(-11.7 to -1.0)                          |
| Diphtheria                                                                           | < 0.05<br>(< 0.05 to < 0.05)                 | 0.1<br>(0.1 to 0.2)                                 | < 0.05<br>(< 0.05 to < 0.05)              | -47.2<br>(-60.4 to -29.1)                         | -55.5<br>(-66.7 to -40.3)                        |
| Whooping cough                                                                       | 2.7<br>(2.1 to 3.5)                          | 20.0<br>(15.6 to 25.2)                              | 0.1<br>(0.1 to 0.2)                       | -16.2<br>(-18.2 to -14.2)                         | -29.4<br>(-31.1 to -27.7)                        |
| Tetanus                                                                              | 12.6<br>(12.4 to 12.8)                       | 3.1<br>(1.7 to 5.0)                                 | 0.3<br>(0.1 to 0.4)                       | 7.4<br>(-17.4 to 38.9)                            | -9.5<br>(-30.4 to 17.0)                          |
| Measles                                                                              | 0.6<br>(0.2 to 1.4)                          | 23.3<br>(8.4 to 50.1)                               | 0.1<br>(< 0.05 to 0.1)                    | -56.7<br>(-61.5 to -51.2)                         | -63.5<br>(-67.6 to -58.9)                        |
| Varicella and herpes zoster                                                          | 346.2<br>(277.0 to 428.6)                    | 5,579.4<br>(3,758.8 to 7,608.1)                     | 15.5<br>(8.6 to 25.4)                     | 19.8<br>(12.3 to 27.3)                            | 0.9<br>(-5.4 to 7.2)                             |
| <b>Neglected tropical diseases and malaria</b>                                       | <b>164,138.2</b><br>(159,117.0 to 168,667.7) | <b>26,644.2†</b><br>(22,266.1 to 31,999.2)          | <b>1,169.7</b><br>(792.5 to 1,658.6)      | <b>-8.2</b><br>(-14.4 to -1.4)                    | <b>-22.7</b><br>(-27.9 to -17.0)                 |
| Malaria                                                                              | 8,489.4<br>(7,273.2 to 9,983.4)              | 8,462.6<br>(6,344.5 to 10,808.3)                    | 112.1<br>(85.0 to 141.7)                  | -3.3<br>(-9.9 to 3.6)                             | -18.5<br>(-24.1 to -12.7)                        |
| Chagas disease                                                                       | 556.0<br>(451.3 to 684.5)                    | 15.9<br>(10.5 to 22.6)                              | 3.2<br>(2.0 to 4.8)                       | -10.6<br>(-18.7 to -1.7)                          | -24.7<br>(-31.6 to -17.2)                        |
| Leishmaniasis                                                                        | 421.9<br>(375.5 to 477.6)                    | 50.1<br>(36.2 to 67.9)                              | 25.1<br>(16.4 to 36.4)                    | 26.9<br>(8.6 to 50.3)                             | 6.9<br>(-8.5 to 26.6)                            |
| Visceral leishmaniasis                                                               | 1.4<br>(0.9 to 1.9)                          | 5.5<br>(3.7 to 7.6)                                 | 0.1<br>(0.1 to 0.2)                       | -55.7<br>(-70.5 to -33.3)                         | -62.7<br>(-75.2 to -43.8)                        |
| Cutaneous and mucocutaneous leishmaniasis                                            | 389.0<br>(334.3 to 453.9)                    | 44.7<br>(31.2 to 62.5)                              | 25.0<br>(16.3 to 36.3)                    | 27.9<br>(9.2 to 51.9)                             | 7.7<br>(-8.1 to 27.9)                            |
| African trypanosomiasis                                                              | 0.7<br>(0.1 to 2.2)                          | 0.5<br>(0.1 to 1.5)                                 | 0.2<br>(< 0.05 to 0.6)                    | -71.9<br>(-94.9 to 69.6)                          | -76.3<br>(-95.7 to 42.9)                         |
| Schistosomiasis                                                                      | 23,066.1<br>(20,996.5 to 25,128.5)           | 6,712.6<br>(5,682.6 to 8,117.7)                     | 192.3<br>(97.3 to 354.4)                  | -22.6<br>(-25.1 to -19.6)                         | -34.8<br>(-36.9 to -32.3)                        |
| Cysticercosis                                                                        | 239.6<br>(155.6 to 339.4)                    | --                                                  | 39.9<br>(22.3 to 62.5)                    | -8.4<br>(-19.9 to 1.4)                            | -22.8<br>(-32.5 to -14.6)                        |
| Cystic echinococcosis                                                                | 86.9<br>(44.4 to 192.3)                      | 18.7<br>(8.0 to 49.0)                               | 8.2<br>(3.5 to 18.8)                      | -37.4<br>(-76.2 to 64.8)                          | -47.2<br>(-80.0 to 38.8)                         |
| Lymphatic filariasis                                                                 | 2,538.9<br>(2,125.2 to 3,120.6)              | 750.4<br>(433.7 to 1,165.0)                         | 101.4<br>(49.2 to 185.3)                  | -42.2<br>(-56.5 to -31.2)                         | -51.4<br>(-63.3 to -42.0)                        |
| Onchocerciasis                                                                       | 1,785.9<br>(1,046.9 to 3,132.8)              | 393.4<br>(169.4 to 774.2)                           | 100.2<br>(43.5 to 180.0)                  | -20.3<br>(-40.6 to -0.7)                          | -32.8<br>(-50.0 to -16.3)                        |
| Trachoma                                                                             | 11.3<br>(5.2 to 22.1)                        | --                                                  | 1.2<br>(0.6 to 2.1)                       | -26.7<br>(-45.8 to -5.8)                          | -38.2<br>(-54.4 to -20.6)                        |
| Dengue                                                                               | 515.1<br>(280.7 to 872.3)                    | 8,610.4<br>(5,239.3 to 13,057.8)                    | 84.6<br>(37.2 to 158.3)                   | 78.0<br>(43.9 to 302.2)                           | 50.0<br>(21.2 to 238.8)                          |
| Yellow fever                                                                         | 0.2<br>(0.1 to 0.6)                          | 8.8<br>(2.4 to 23.5)                                | < 0.05<br>(< 0.05 to < 0.05)              | -18.6<br>(-46.8 to 26.8)                          | -31.4<br>(-55.1 to 6.8)                          |
| Rabies                                                                               | < 0.05<br>(< 0.05 to < 0.05)                 | 0.4<br>(0.2 to 0.5)                                 | < 0.05<br>(< 0.05 to < 0.05)              | -47.8<br>(-57.4 to -34.8)                         | -56.0<br>(-64.1 to -45.1)                        |
| Intestinal nematode infections                                                       | 135,889.4<br>(129,780.3 to 141,060.3)        | --                                                  | 264.5<br>(152.8 to 434.7)                 | -11.9<br>(-18.6 to -5.0)                          | -25.8<br>(-31.4 to -20.0)                        |
| Ascariasis                                                                           | 72,190.2<br>(65,074.7 to 80,152.0)           | --                                                  | 78.1<br>(41.5 to 133.0)                   | -26.4<br>(-35.8 to -15.4)                         | -38.0<br>(-45.9 to -28.7)                        |

| Cause                                                                   | Prevalence in thousands (95% UI)                    | Incidence in thousands (95% UI)                            | YLDs in thousands (95% UI)                       |                                                   |                                                  |
|-------------------------------------------------------------------------|-----------------------------------------------------|------------------------------------------------------------|--------------------------------------------------|---------------------------------------------------|--------------------------------------------------|
|                                                                         | 2016 counts                                         | 2016 counts                                                | 2016 counts                                      | Percentage change in counts between 2006 and 2016 | Percentage change in rates between 2006 and 2016 |
| Trichuriasis                                                            | 38,497.6<br>(35,492.8 to 42,103.0)                  | --                                                         | 30.1<br>(16.4 to 52.0)                           | -19.5<br>(-31.0 to -7.5)                          | -32.2<br>(-41.9 to -22.1)                        |
| Hookworm disease                                                        | 41,879.1<br>(38,661.3 to 45,524.9)                  | --                                                         | 156.3<br>(92.6 to 248.7)                         | -0.2<br>(-10.3 to 9.9)                            | -16.0<br>(-24.4 to -7.4)                         |
| Food-borne trematodiasis                                                | 8,494.3<br>(7,979.9 to 9,078.3)                     | 904.9<br>(678.5 to 1,080.9)                                | 208.2<br>(99.3 to 390.1)                         | 34.2<br>(26.2 to 45.3)                            | 13.0<br>(6.3 to 22.4)                            |
| Leprosy                                                                 | 18.9<br>(17.6 to 20.4)                              | 4.4<br>(4.1 to 4.8)                                        | 1.2<br>(0.8 to 1.7)                              | -25.1<br>(-34.0 to -14.4)                         | -36.9<br>(-44.4 to -27.9)                        |
| Ebola virus disease                                                     | 0.1<br>( $< 0.05$ to 0.5)                           | --                                                         | $< 0.05$<br>( $< 0.05$ to 0.1)                   | --                                                | --                                               |
| Zika virus disease                                                      | 11.8<br>(6.9 to 19.9)                               | 711.1<br>(414.9 to 1,207.6)                                | 0.2<br>(0.1 to 0.4)                              | --                                                | --                                               |
| Guinea worm disease                                                     | $< 0.05$<br>( $< 0.05$ to $< 0.05$ )                | $< 0.05$<br>( $< 0.05$ to $< 0.05$ )                       | $< 0.05$<br>( $< 0.05$ to $< 0.05$ )             | -99.5<br>(-99.7 to -99.3)                         | -99.6<br>(-99.7 to -99.4)                        |
| Other neglected tropical diseases                                       | 1,717.0<br>(1,478.0 to 1,997.8)                     | --                                                         | 27.3<br>(17.2 to 42.0)                           | 21.4<br>(14.6 to 29.2)                            | 2.2<br>(-3.5 to 8.9)                             |
| <b>Maternal disorders</b>                                               | <b>2,260.3</b><br><b>(2,062.8 to 2,451.5)</b>       | <b>34,459.2†</b><br><b>(28,176.6 to 43,379.6)</b>          | <b>214.5</b><br><b>(143.5 to 296.7)</b>          | <b>0.9</b><br><b>(-14.3 to 19.9)</b>              | <b>-15.0</b><br><b>(-27.8 to 1.0)</b>            |
| Maternal haemorrhage                                                    | 405.0<br>(304.2 to 538.8)                           | 2,988.8<br>(2,224.7 to 4,007.8)                            | 17.8<br>(11.0 to 26.8)                           | 13.5<br>(-12.9 to 49.0)                           | -4.4<br>(-26.7 to 25.5)                          |
| Maternal sepsis and other pregnancy related infections                  | 327.7<br>(214.2 to 477.9)                           | 2,792.6<br>(2,037.5 to 3,816.3)                            | 11.7<br>(5.4 to 22.5)                            | 10.3<br>(-44.0 to 118.7)                          | -7.1<br>(-52.8 to 84.2)                          |
| Maternal hypertensive disorders                                         | 1,233.7<br>(765.9 to 1,762.1)                       | 5,746.2<br>(4,611.2 to 6,924.4)                            | 60.0<br>(31.3 to 100.5)                          | 19.7<br>(-24.7 to 90.1)                           | 0.9<br>(-36.5 to 60.1)                           |
| Maternal obstructed labour and uterine rupture                          | 227.4<br>(179.7 to 282.0)                           | 2,239.2<br>(1,648.8 to 3,032.9)                            | 74.0<br>(47.1 to 107.5)                          | -13.1<br>(-21.4 to -4.2)                          | -26.8<br>(-33.8 to -19.3)                        |
| Maternal abortion, miscarriage, and ectopic pregnancy                   | 169.8<br>(101.3 to 265.8)                           | 20,692.3<br>(14,869.5 to 29,078.7)                         | 18.6<br>(9.7 to 32.3)                            | 5.0<br>(-34.9 to 65.5)                            | -11.5<br>(-45.1 to 39.4)                         |
| Other maternal disorders                                                | --                                                  | --                                                         | 32.4<br>(21.7 to 44.8)                           | -2.7<br>(-17.4 to 15.6)                           | -18.1<br>(-30.4 to -2.6)                         |
| <b>Neonatal disorders</b>                                               | <b>6,156.6</b><br><b>(5,643.0 to 6,741.8)</b>       | <b>1,190.3</b><br><b>(839.9 to 1,678.5)</b>                | <b>32.3</b><br><b>(18.2 to 49.4)</b>             | <b>11.5</b><br><b>(-0.4 to 25.8)</b>              |                                                  |
| Neonatal preterm birth complications                                    | 5,117.1<br>(4,286.6 to 6,130.0)                     | --                                                         | 781.6<br>(543.6 to 1,110.7)                      | 29.7<br>(8.5 to 55.2)                             | 9.3<br>(-8.6 to 30.7)                            |
| Neonatal encephalopathy due to birth asphyxia and trauma                | 962.7<br>(595.3 to 1,559.7)                         | --                                                         | 140.8<br>(51.9 to 327.9)                         | 39.8<br>(28.8 to 60.5)                            | 17.8<br>(8.5 to 35.2)                            |
| Neonatal sepsis and other neonatal infections                           | 531.7<br>(197.8 to 1,275.2)                         | --                                                         | 208.1<br>(62.3 to 540.3)                         | 39.2<br>(28.4 to 59.4)                            | 17.3<br>(8.1 to 34.3)                            |
| Hemolytic disease and other neonatal jaundice                           | 183.0<br>(162.3 to 204.1)                           | --                                                         | 59.8<br>(45.6 to 75.8)                           | 27.8<br>(21.6 to 34.5)                            | 7.7<br>(2.4 to 13.2)                             |
| Other neonatal disorders                                                | --                                                  | --                                                         | --                                               | --                                                | --                                               |
| <b>Nutritional deficiencies</b>                                         | <b>121,322.7</b><br><b>(116,682.3 to 125,793.9)</b> | <b>38,753.5†</b><br><b>(32,028.1 to 48,188.0)</b>          | <b>2,422.6</b><br><b>(1,588.0 to 3,545.4)</b>    | <b>10.3</b><br><b>(6.6 to 14.0)</b>               | <b>-7.1</b><br><b>(-10.2 to -4.0)</b>            |
| Protein-energy malnutrition                                             | --                                                  | --                                                         | --                                               | --                                                | --                                               |
| Iodine deficiency                                                       | 11,871.9<br>(10,485.8 to 13,413.7)                  | 55.4<br>(45.9 to 66.2)                                     | 321.9<br>(215.9 to 454.1)                        | -4.9<br>(-7.8 to -2.1)                            | -19.9<br>(-22.3 to -17.5)                        |
| Vitamin A deficiency                                                    | 34,866.7<br>(29,703.9 to 41,691.3)                  | 38,698.1<br>(31,979.9 to 48,134.6)                         | 14.8<br>(8.9 to 23.3)                            | 20.2<br>(12.3 to 28.3)                            | 1.3<br>(-5.4 to 8.1)                             |
| Iron-deficiency anaemia                                                 | 88,606.2<br>(78,161.7 to 101,225.6)                 | --                                                         | 2,085.9<br>(1,344.4 to 3,083.1)                  | 13.0<br>(8.9 to 17.2)                             | -4.8<br>(-8.2 to -1.3)                           |
| Other nutritional deficiencies                                          | --                                                  | --                                                         | --                                               | --                                                | --                                               |
| <b>Other communicable, maternal, neonatal, and nutritional diseases</b> | <b>188,076.3</b><br><b>(182,772.7 to 193,464.2)</b> | <b>121,018.8</b><br><b>(101,607.4 to 144,504.9)</b>        | <b>510.2</b><br><b>(320.8 to 811.4)</b>          | <b>16.9</b><br><b>(11.4 to 21.8)</b>              | <b>-1.5</b><br><b>(-6.2 to 2.6)</b>              |
| Sexually transmitted diseases excluding HIV                             | 145,837.1<br>(140,132.1 to 152,204.0)               | 105,013.6<br>(86,951.9 to 126,582.0)                       | 437.9<br>(267.7 to 707.6)                        | 20.0<br>(16.9 to 23.2)                            | 1.1<br>(-1.6 to 3.8)                             |
| Syphilis                                                                | 9,567.3<br>(6,209.5 to 14,297.6)                    | 6,105.3<br>(3,844.4 to 9,870.9)                            | 7.6<br>(5.0 to 11.4)                             | 20.8<br>(15.2 to 25.8)                            | 1.8<br>(-3.0 to 6.0)                             |
| Chlamydial infection                                                    | 28,298.7<br>(19,952.4 to 38,841.4)                  | 21,046.4<br>(14,941.0 to 29,457.2)                         | 134.5<br>(74.9 to 226.1)                         | 20.6<br>(17.0 to 24.9)                            | 1.6<br>(-1.5 to 5.2)                             |
| Gonococcal infection                                                    | 10,279.3<br>(6,575.0 to 15,366.2)                   | 35,375.1<br>(22,289.0 to 53,547.6)                         | 100.1<br>(53.6 to 171.8)                         | 22.5<br>(13.6 to 29.5)                            | 3.1<br>(-4.3 to 9.1)                             |
| Trichomoniasis                                                          | 28,885.3<br>(20,367.8 to 38,891.1)                  | 24,644.0<br>(16,773.9 to 34,299.3)                         | 33.9<br>(13.1 to 73.1)                           | 18.5<br>(16.3 to 20.6)                            | -0.2<br>(-2.0 to 1.6)                            |
| Genital herpes                                                          | 83,443.8<br>(69,739.4 to 99,385.5)                  | 11,564.7<br>(8,890.4 to 15,112.4)                          | 23.4<br>(7.8 to 52.6)                            | 17.5<br>(14.7 to 20.6)                            | -1.1<br>(-3.4 to 1.6)                            |
| Other sexually transmitted diseases                                     | 4,625.8<br>(4,142.5 to 5,194.4)                     | 6,278.1<br>(4,656.2 to 8,456.4)                            | 138.3<br>(90.0 to 211.0)                         | 18.3<br>(14.5 to 21.9)                            | -0.3<br>(-3.6 to 2.7)                            |
| Hepatitis                                                               | 55,363.2<br>(46,621.6 to 65,980.6)                  | 16,004.6<br>(10,125.7 to 25,156.9)                         | 26.0<br>(13.5 to 44.9)                           | -16.1<br>(-53.1 to 46.4)                          | -29.4<br>(-60.5 to 23.3)                         |
| Acute hepatitis A                                                       | 145.4<br>(13.4 to 359.6)                            | 1,890.1<br>(174.3 to 4,674.8)                              | 6.2<br>(0.5 to 16.1)                             | -19.4<br>(-92.8 to 67.8)                          | -32.1<br>(-94.0 to 55.2)                         |
| Hepatitis B                                                             | 43,327.7<br>(34,585.3 to 54,040.5)                  | 12,064.4<br>(6,802.9 to 20,740.8)                          | 15.2<br>(7.0 to 30.2)                            | -12.4<br>(-53.6 to 73.5)                          | -26.2<br>(-60.9 to 46.1)                         |
| Hepatitis C                                                             | 11,747.6<br>(10,373.4 to 13,193.5)                  | 197.1<br>(134.7 to 274.9)                                  | 0.2<br>(0.1 to 0.4)                              | -11.3<br>(-11.9 to -10.6)                         | -25.2<br>(-25.8 to -24.7)                        |
| Acute hepatitis E                                                       | 142.5<br>(110.1 to 179.7)                           | 1,853.0<br>(1,431.9 to 2,336.4)                            | 4.4<br>(2.6 to 6.9)                              | -23.3<br>(-39.7 to -4.6)                          | -35.4<br>(-49.2 to -19.7)                        |
| Other infectious diseases                                               | 1,996.5<br>(1,716.3 to 2,336.3)                     | 0.5<br>(0.3 to 0.9)                                        | 46.3<br>(28.6 to 72.1)                           | 14.6<br>(10.1 to 19.1)                            | -3.5<br>(-7.3 to 0.4)                            |
| <b>Non-communicable diseases</b>                                        | <b>559,300.1</b><br><b>(555,488.3 to 562,516.6)</b> | <b>1,414,856.4†</b><br><b>(1,252,112.2 to 1,608,214.9)</b> | <b>44,650.6</b><br><b>(32,813.5 to 58,147.0)</b> | <b>16.7</b><br><b>(16.1 to 17.2)</b>              | <b>-1.7</b><br><b>(-2.2 to -1.2)</b>             |
| <b>Neoplasms</b>                                                        | <b>378.7</b><br><b>(364.2 to 392.7)</b>             | <b>215.5</b><br><b>(202.1 to 239.5)</b>                    | <b>71.6</b><br><b>(51.8 to 95.0)</b>             | <b>26.9</b><br><b>(22.8 to 32.2)</b>              | <b>6.9</b><br><b>(3.4 to 11.4)</b>               |
| Lip and oral cavity cancer                                              | 24.1<br>(22.4 to 26.0)                              | 6.5<br>(6.0 to 7.0)                                        | 2.5<br>(1.8 to 3.4)                              | 20.8<br>(8.2 to 34.3)                             | 1.8<br>(-8.8 to 13.1)                            |
| Nasopharynx cancer                                                      | 13.1<br>(11.8 to 14.6)                              | 3.7<br>(3.4 to 4.1)                                        | 1.6<br>(1.1 to 2.1)                              | 15.9<br>(1.5 to 32.4)                             | -2.4<br>(-14.5 to 11.5)                          |
| Other pharynx cancer                                                    | 3.4<br>(3.0 to 3.7)                                 | 1.3<br>(1.2 to 1.5)                                        | 0.5<br>(0.3 to 0.6)                              | 14.4<br>(0.7 to 26.2)                             | -3.6<br>(-15.2 to 6.4)                           |
| Oesophageal cancer                                                      | 1.7<br>(1.6 to 1.8)                                 | 1.4<br>(1.4 to 1.5)                                        | 0.4<br>(0.3 to 0.5)                              | 2.2<br>(-3.8 to 8.9)                              | -13.9<br>(-18.9 to -8.3)                         |
| Stomach cancer                                                          | 13.4<br>(12.8 to 14.0)                              | 7.4<br>(7.1 to 7.8)                                        | 2.1<br>(1.5 to 2.7)                              | 8.1<br>(2.9 to 13.7)                              | -8.9<br>(-13.3 to -4.2)                          |
| Colon and rectum cancer                                                 | 33.8<br>(31.9 to 35.9)                              | 9.5<br>(9.0 to 10.1)                                       | 3.6<br>(2.6 to 4.8)                              | 28.8<br>(18.6 to 37.7)                            | 8.5<br>(-0.1 to 16.0)                            |
| Liver cancer                                                            | 8.8<br>(7.4 to 10.2)                                | 10.4<br>(9.5 to 11.5)                                      | 2.4<br>(1.7 to 3.3)                              | 31.3<br>(17.4 to 47.0)                            | 10.6<br>(-1.1 to 23.9)                           |
| Liver cancer due to hepatitis B                                         | 8.4<br>(6.7 to 10.1)                                | 6.5<br>(5.2 to 7.7)                                        | 1.5<br>(1.0 to 2.1)                              | 31.1<br>(16.2 to 47.9)                            | 10.4<br>(-2.1 to 24.6)                           |

| Cause                                              | Prevalence in thousands (95% UI)                 | Incidence in thousands (95% UI)                | YLDs in thousands (95% UI)                  |                                                   |                                                  |
|----------------------------------------------------|--------------------------------------------------|------------------------------------------------|---------------------------------------------|---------------------------------------------------|--------------------------------------------------|
|                                                    | 2016 counts                                      | 2016 counts                                    | 2016 counts                                 | Percentage change in counts between 2006 and 2016 | Percentage change in rates between 2006 and 2016 |
| Liver cancer due to hepatitis C                    | 0.6<br>(0.4 to 0.8)                              | 0.5<br>(0.3 to 0.7)                            | 0.1<br>(0.1 to 0.2)                         | 28.5<br>(14.0 to 46.4)                            | 8.2<br>(-4.0 to 23.3)                            |
| Liver cancer due to alcohol use                    | 0.3<br>(0.2 to 0.5)                              | 0.3<br>(0.1 to 0.4)                            | 0.1<br>( $< 0.05$ to 0.1)                   | 22.2<br>(2.2 to 41.6)                             | 2.9<br>(-13.9 to 19.2)                           |
| Liver cancer due to other causes                   | 4.2<br>(3.2 to 5.6)                              | 3.2<br>(2.4 to 4.2)                            | 0.7<br>(0.5 to 1.1)                         | 33.0<br>(19.4 to 50.1)                            | 12.0<br>(0.6 to 26.4)                            |
| Gallbladder and biliary tract cancer               | 0.5<br>(0.4 to 0.5)                              | 0.6<br>(0.5 to 0.6)                            | 0.1<br>(0.1 to 0.2)                         | 8.1<br>(-2.1 to 19.3)                             | -9.0<br>(-17.6 to 0.5)                           |
| Pancreatic cancer                                  | 0.9<br>(0.9 to 0.9)                              | 1.1<br>(1.1 to 1.2)                            | 0.2<br>(0.2 to 0.3)                         | 22.4<br>(16.8 to 28.1)                            | 3.1<br>(-1.6 to 7.9)                             |
| Larynx cancer                                      | 2.2<br>(2.1 to 2.3)                              | 0.7<br>(0.6 to 0.7)                            | 0.3<br>(0.2 to 0.4)                         | 15.1<br>(9.0 to 22.4)                             | -3.0<br>(-8.2 to 3.1)                            |
| Tracheal, bronchus, and lung cancer                | 7.6<br>(7.1 to 8.1)                              | 5.8<br>(5.4 to 6.2)                            | 1.5<br>(1.1 to 2.0)                         | 20.1<br>(12.2 to 28.8)                            | 1.2<br>(-5.5 to 8.5)                             |
| Malignant skin melanoma                            | 45.8<br>(40.1 to 56.1)                           | 9.3<br>(8.2 to 11.3)                           | 3.0<br>(2.0 to 4.3)                         | 32.9<br>(21.7 to 44.4)                            | 12.0<br>(2.5 to 21.6)                            |
| Non-melanoma skin cancer                           | 1.7<br>(0.6 to 4.1)                              | 14.0<br>(4.5 to 36.8)                          | 0.1<br>( $< 0.05$ to 0.1)                   | 44.3<br>(24.6 to 63.1)                            | 21.6<br>(4.9 to 37.4)                            |
| Non-melanoma skin cancer (squamous-cell carcinoma) | 1.0<br>(0.3 to 2.5)                              | 1.4<br>(0.4 to 3.8)                            | $< 0.05$<br>( $< 0.05$ to 0.1)              | 55.8<br>(34.7 to 71.0)                            | 31.2<br>(13.4 to 44.1)                           |
| Non-melanoma skin cancer (basal-cell carcinoma)    | 1.4<br>(0.4 to 3.9)                              | 12.6<br>(3.4 to 34.9)                          | $< 0.05$<br>( $< 0.05$ to $< 0.05$ )        | 16.8<br>(5.4 to 24.4)                             | -1.6<br>(-11.2 to 4.8)                           |
| Breast cancer                                      | 94.2<br>(79.0 to 104.4)                          | 19.8<br>(16.7 to 21.9)                         | 8.3<br>(5.8 to 11.4)                        | 33.4<br>(17.3 to 51.0)                            | 12.3<br>(-1.2 to 27.2)                           |
| Cervical cancer                                    | 66.8<br>(50.1 to 73.8)                           | 17.4<br>(13.3 to 18.9)                         | 6.5<br>(4.4 to 8.8)                         | 2.9<br>(-7.2 to 16.4)                             | -13.3<br>(-21.8 to -1.9)                         |
| Uterine cancer                                     | 13.1<br>(11.9 to 14.6)                           | 2.7<br>(2.5 to 3.1)                            | 1.0<br>(0.7 to 1.4)                         | 39.0<br>(18.7 to 61.0)                            | 17.1<br>(0.0 to 35.7)                            |
| Ovarian cancer                                     | 18.7<br>(16.9 to 20.0)                           | 6.0<br>(5.5 to 6.4)                            | 3.0<br>(2.1 to 4.0)                         | 24.8<br>(12.9 to 34.6)                            | 5.1<br>(-4.9 to 13.4)                            |
| Prostate cancer                                    | 4.8<br>(3.7 to 5.2)                              | 1.1<br>(0.9 to 1.2)                            | 0.4<br>(0.3 to 0.6)                         | 54.9<br>(38.4 to 66.3)                            | 30.5<br>(16.6 to 40.1)                           |
| Testicular cancer                                  | 70.5<br>(66.3 to 75.0)                           | 13.7<br>(12.9 to 14.6)                         | 4.8<br>(3.3 to 6.7)                         | 37.3<br>(25.5 to 49.6)                            | 15.7<br>(5.7 to 26.0)                            |
| Kidney cancer                                      | 15.3<br>(14.1 to 16.0)                           | 4.0<br>(3.8 to 4.2)                            | 1.4<br>(1.0 to 1.9)                         | 37.3<br>(31.2 to 43.3)                            | 15.7<br>(10.5 to 20.7)                           |
| Bladder cancer                                     | 7.3<br>(6.7 to 7.9)                              | 1.8<br>(1.6 to 1.9)                            | 0.7<br>(0.5 to 1.0)                         | 35.5<br>(22.1 to 49.8)                            | 14.1<br>(2.8 to 26.2)                            |
| Brain and nervous system cancer                    | 29.5<br>(25.8 to 32.6)                           | 13.0<br>(11.6 to 14.4)                         | 4.2<br>(2.9 to 5.6)                         | 49.1<br>(37.4 to 63.5)                            | 25.6<br>(15.8 to 37.7)                           |
| Thyroid cancer                                     | 45.8<br>(42.5 to 50.9)                           | 8.7<br>(8.1 to 9.6)                            | 2.9<br>(1.9 to 4.1)                         | 61.5<br>(43.2 to 83.8)                            | 36.0<br>(20.6 to 54.8)                           |
| Mesothelioma                                       | 0.7<br>(0.6 to 0.7)                              | 0.4<br>(0.4 to 0.5)                            | 0.1<br>(0.1 to 0.2)                         | 13.0<br>(5.2 to 22.2)                             | -4.8<br>(-11.3 to 2.9)                           |
| Hodgkin lymphoma                                   | 30.3<br>(27.6 to 35.5)                           | 7.3<br>(6.6 to 8.5)                            | 2.9<br>(2.0 to 3.9)                         | 14.1<br>(5.7 to 23.1)                             | -3.9<br>(-10.9 to 3.7)                           |
| Non-Hodgkin's lymphoma                             | 26.4<br>(23.6 to 27.9)                           | 8.2<br>(7.3 to 8.6)                            | 2.7<br>(1.9 to 3.6)                         | 26.7<br>(18.9 to 33.8)                            | 6.8<br>(0.1 to 12.7)                             |
| Multiple myeloma                                   | 2.0<br>(1.4 to 2.3)                              | 0.9<br>(0.7 to 0.9)                            | 0.5<br>(0.3 to 0.6)                         | 69.4<br>(45.8 to 86.2)                            | 42.7<br>(22.8 to 56.9)                           |
| Leukaemia                                          | 49.2<br>(42.0 to 52.8)                           | 14.6<br>(12.6 to 15.5)                         | 6.6<br>(4.6 to 8.8)                         | 9.8<br>(3.5 to 16.8)                              | -7.5<br>(-12.8 to -1.6)                          |
| Acute lymphoid leukaemia                           | 9.6<br>(8.2 to 10.8)                             | 2.8<br>(2.4 to 3.1)                            | 1.3<br>(0.9 to 1.8)                         | 21.8<br>(7.8 to 31.0)                             | 2.6<br>(-9.2 to 10.3)                            |
| Chronic lymphoid leukaemia                         | 7.6<br>(6.6 to 8.5)                              | 1.7<br>(1.4 to 1.9)                            | 0.9<br>(0.7 to 1.3)                         | 36.6<br>(21.0 to 51.9)                            | 15.0<br>(1.9 to 27.9)                            |
| Acute myeloid leukaemia                            | 4.6<br>(4.0 to 5.1)                              | 3.5<br>(3.0 to 3.9)                            | 1.0<br>(0.7 to 1.3)                         | 18.6<br>(11.7 to 24.6)                            | -0.1<br>(-5.9 to 5.0)                            |
| Chronic myeloid leukaemia                          | 4.7<br>(4.0 to 5.2)                              | 1.7<br>(1.4 to 1.8)                            | 0.6<br>(0.4 to 0.8)                         | -2.4<br>(-11.3 to 8.4)                            | -17.8<br>(-25.2 to -8.7)                         |
| Other leukaemia                                    | 22.7<br>(17.7 to 24.6)                           | 5.0<br>(3.9 to 5.4)                            | 2.8<br>(1.9 to 3.8)                         | -1.0<br>(-9.8 to 7.8)                             | -16.6<br>(-24.0 to -9.2)                         |
| Other neoplasms                                    | 82.6<br>(73.8 to 88.5)                           | 24.1<br>(21.5 to 25.7)                         | 7.3<br>(5.2 to 9.9)                         | 50.3<br>(39.6 to 61.5)                            | 26.6<br>(17.6 to 36.0)                           |
| <b>Cardiovascular diseases</b>                     | <b>10,398.9</b><br><b>(9,958.3 to 10,863.9)</b>  | <b>703.4†</b><br><b>(545.7 to 669.5)</b>       | <b>19.2</b><br><b>(483.2 to 988.6)</b>      | <b>19.2</b><br><b>(17.0 to 21.5)</b>              | <b>0.4</b><br><b>(-1.4 to 2.4)</b>               |
| Rheumatic heart disease                            | 3,355.5<br>(3,013.1 to 3,742.8)                  | 89.1<br>(80.2 to 100.2)                        | 159.3<br>(99.4 to 235.1)                    | 18.8<br>(14.5 to 23.0)                            | 0.1<br>(-3.6 to 3.6)                             |
| Ischaemic heart disease                            | 1,852.1<br>(1,685.0 to 2,048.8)                  | 287.5<br>(251.6 to 324.9)                      | 107.0<br>(70.5 to 156.2)                    | 20.2<br>(16.0 to 24.5)                            | 1.2<br>(-2.3 to 4.9)                             |
| Cerebrovascular disease                            | 874.6<br>(806.5 to 975.9)                        | 68.2†<br>(40.4 to 103.4)                       | 161.3<br>(111.2 to 216.3)                   | 16.5<br>(10.1 to 23.0)                            | -1.9<br>(-7.3 to 3.6)                            |
| Ischaemic stroke                                   | 749.3<br>(604.5 to 912.6)                        | 43.6†<br>(20.3 to 77.0)                        | 118.4<br>(80.5 to 161.7)                    | 17.7<br>(9.1 to 26.3)                             | -0.8<br>(-8.1 to 6.4)                            |
| Hemorrhagic stroke                                 | 267.4<br>(213.1 to 327.1)                        | 24.6†<br>(12.7 to 40.7)                        | 43.0<br>(28.7 to 60.7)                      | 13.2<br>(4.7 to 22.1)                             | -4.7<br>(-11.8 to 2.9)                           |
| Hypertensive heart disease                         | 0.8<br>(0.4 to 1.3)                              | --                                             | 0.1<br>( $< 0.05$ to 0.1)                   | 20.5<br>(12.6 to 27.5)                            | 1.5<br>(-5.1 to 7.4)                             |
| Cardiomyopathy and myocarditis                     | 402.8<br>(357.7 to 458.9)                        | 118.5†<br>(85.1 to 157.7)                      | 42.4<br>(25.5 to 66.0)                      | 20.5<br>(15.1 to 26.0)                            | 1.5<br>(-3.0 to 6.2)                             |
| Myocarditis                                        | 224.7<br>(172.3 to 285.0)                        | 118.5<br>(85.1 to 157.7)                       | 18.6<br>(11.2 to 28.7)                      | 23.8<br>(15.8 to 32.1)                            | 4.3<br>(-2.5 to 11.3)                            |
| Alcoholic cardiomyopathy                           | $< 0.05$<br>( $< 0.05$ to $< 0.05$ )             | --                                             | $< 0.05$<br>( $< 0.05$ to $< 0.05$ )        | 3.0<br>(-6.5 to 13.5)                             | -13.3<br>(-21.2 to -4.4)                         |
| Other cardiomyopathy                               | 273.6<br>(201.1 to 357.3)                        | --                                             | 23.8<br>(14.0 to 36.8)                      | 18.0<br>(10.7 to 25.8)                            | -0.6<br>(-6.8 to 6.0)                            |
| Atrial fibrillation and flutter                    | --                                               | --                                             | --                                          | --                                                | --                                               |
| Peripheral vascular disease                        | --                                               | --                                             | --                                          | --                                                | --                                               |
| Endocarditis                                       | 34.5<br>(24.0 to 46.2)                           | 47.1<br>(32.0 to 67.9)                         | 3.0<br>(1.7 to 4.8)                         | 17.4<br>(15.0 to 19.7)                            | -1.1<br>(-3.2 to 0.8)                            |
| Other cardiovascular and circulatory diseases      | 4,261.8<br>(2,826.8 to 5,937.4)                  | --                                             | 230.7<br>(127.8 to 366.1)                   | 20.8<br>(17.1 to 24.6)                            | 1.8<br>(-1.3 to 4.9)                             |
| <b>Chronic respiratory diseases</b>                | <b>23,138.3</b><br><b>(22,132.6 to 23,913.7)</b> | <b>4,750.4†</b><br><b>(4,034.2 to 5,552.9)</b> | <b>1,120.6</b><br><b>(834.1 to 1,462.3)</b> | <b>20.5</b><br><b>(18.4 to 22.5)</b>              | <b>1.5</b><br><b>(-0.3 to 3.2)</b>               |
| Chronic obstructive pulmonary disease              | 4,357.8<br>(4,047.5 to 4,733.4)                  | 361.1<br>(302.4 to 425.1)                      | 320.8<br>(273.3 to 361.9)                   | 19.7<br>(15.0 to 24.1)                            | 0.8<br>(-3.2 to 4.6)                             |
| Pneumoconiosis                                     | 7.5<br>(6.3 to 8.6)                              | 0.8<br>(0.6 to 1.1)                            | 1.2<br>(0.8 to 1.7)                         | 14.4<br>(12.9 to 15.9)                            | -3.6<br>(-4.9 to -2.3)                           |
| Silicosis                                          | 1.8<br>(1.4 to 2.4)                              | 0.3<br>(0.2 to 0.4)                            | 0.3<br>(0.2 to 0.4)                         | 17.4<br>(15.5 to 19.1)                            | -1.1<br>(-2.7 to 0.3)                            |

| Cause                                                          | Prevalence in thousands (95% UI)              | Incidence in thousands (95% UI)              | YLDs in thousands (95% UI)                 |                                                   |                                                  |
|----------------------------------------------------------------|-----------------------------------------------|----------------------------------------------|--------------------------------------------|---------------------------------------------------|--------------------------------------------------|
|                                                                | 2016 counts                                   | 2016 counts                                  | 2016 counts                                | Percentage change in counts between 2006 and 2016 | Percentage change in rates between 2006 and 2016 |
| Asbestos                                                       | 2.1<br>(1.5 to 2.9)                           | 0.2<br>(0.1 to 0.3)                          | 0.3<br>(0.2 to 0.5)                        | 15.3<br>(12.5 to 17.8)                            | -2.9<br>(-5.3 to -0.7)                           |
| Coal workers pneumoconiosis                                    | 0.7<br>(0.5 to 0.9)                           | 0.1<br>(< 0.05 to 0.1)                       | 0.1<br>(0.1 to 0.2)                        | 10.9<br>(3.3 to 17.9)                             | -6.6<br>(-13.0 to -0.7)                          |
| Other pneumoconiosis                                           | 2.8<br>(2.1 to 3.6)                           | 0.3<br>(0.1 to 0.5)                          | 0.4<br>(0.3 to 0.7)                        | 12.8<br>(9.6 to 15.7)                             | -5.0<br>(-7.7 to -2.5)                           |
| Asthma                                                         | 18,876.1<br>(16,803.7 to 21,362.9)            | 4,384.6<br>(3,687.4 to 5,201.2)              | 746.5<br>(485.1 to 1,076.3)                | 19.5<br>(17.4 to 21.6)                            | 0.6<br>(-1.1 to 2.4)                             |
| Interstitial lung disease and pulmonary sarcoidosis            | 71.0<br>(59.0 to 83.4)                        | 3.9<br>(2.6 to 5.7)                          | 8.0<br>(5.0 to 11.9)                       | 15.8<br>(12.0 to 19.5)                            | -2.5<br>(-5.7 to 0.7)                            |
| Other chronic respiratory diseases                             | --                                            | --                                           | 44.2<br>(37.6 to 49.9)                     | 52.3<br>(46.5 to 57.8)                            | 28.3<br>(23.4 to 32.9)                           |
| <b>Cirrhosis and other chronic liver diseases</b>              | <b>2,051.6<br/>(1,844.8 to 2,277.4)</b>       | <b>32.2<br/>(25.6 to 40.1)</b>               | <b>74.2<br/>(50.5 to 104.2)</b>            | <b>21.2<br/>(15.4 to 26.9)</b>                    | <b>2.1<br/>(-2.8 to 6.9)</b>                     |
| Cirrhosis and other chronic liver diseases due to hepatitis B  | 565.1<br>(430.5 to 708.6)                     | 10.0<br>(7.0 to 13.9)                        | 21.3<br>(13.6 to 32.0)                     | 22.3<br>(11.8 to 34.5)                            | 3.1<br>(-5.9 to 13.3)                            |
| Cirrhosis and other chronic liver diseases due to hepatitis C  | 425.3<br>(324.1 to 548.3)                     | 6.9<br>(4.9 to 9.5)                          | 15.5<br>(9.6 to 24.0)                      | 20.7<br>(8.3 to 34.0)                             | 1.7<br>(-8.8 to 12.9)                            |
| Cirrhosis and other chronic liver diseases due to alcohol use  | 231.1<br>(170.1 to 304.5)                     | 3.7<br>(2.5 to 5.4)                          | 8.2<br>(4.9 to 12.5)                       | 18.1<br>(4.8 to 32.2)                             | -0.5<br>(-11.7 to 11.4)                          |
| Cirrhosis and other chronic liver diseases due to other causes | 830.1<br>(658.1 to 1,019.0)                   | 11.6<br>(8.4 to 15.2)                        | 29.2<br>(19.0 to 42.8)                     | 21.5<br>(12.8 to 31.1)                            | 2.4<br>(-5.0 to 10.4)                            |
| <b>Digestive diseases</b>                                      | <b>10,523.2<br/>(9,921.6 to 11,190.6)</b>     | <b>9,512.2†<br/>(8,297.8 to 10,874.2)</b>    | <b>285.8<br/>(194.1 to 397.7)</b>          | <b>19.2<br/>(15.0 to 23.8)</b>                    | <b>0.4<br/>(-3.2 to 4.3)</b>                     |
| Peptic ulcer disease                                           | 3,493.6<br>(2,770.8 to 4,350.0)               | 873.9<br>(633.5 to 1,178.5)                  | 52.1<br>(30.5 to 83.9)                     | 29.8<br>(21.0 to 38.1)                            | 9.4<br>(1.9 to 16.3)                             |
| Gastritis and duodenitis                                       | 3,679.7<br>(2,720.7 to 4,826.6)               | 3,051.5<br>(2,188.9 to 4,107.5)              | 47.0<br>(27.9 to 73.2)                     | 32.6<br>(24.2 to 40.9)                            | 11.7<br>(4.6 to 18.7)                            |
| Appendicitis                                                   | 80.5<br>(64.2 to 99.9)                        | 2,056.4<br>(1,653.9 to 2,527.8)              | 24.9<br>(15.5 to 37.3)                     | 13.6<br>(1.5 to 25.7)                             | -4.3<br>(-14.5 to 5.9)                           |
| Paralytic ileus and intestinal obstruction                     | 7.1<br>(5.0 to 9.8)                           | 189.4<br>(134.2 to 262.2)                    | 2.3<br>(1.3 to 3.5)                        | 20.8<br>(18.0 to 23.2)                            | 1.7<br>(-0.6 to 3.8)                             |
| Inguinal, femoral, and abdominal hernia                        | 2,461.4<br>(1,722.0 to 3,366.5)               | 952.5<br>(651.8 to 1,348.5)                  | 87.6<br>(51.5 to 135.7)                    | 9.9<br>(4.3 to 15.8)                              | -7.4<br>(-12.1 to -2.5)                          |
| Inflammatory bowel disease                                     | 280.5<br>(240.1 to 325.2)                     | 371.4<br>(308.6 to 452.5)                    | 42.4<br>(27.8 to 59.4)                     | 18.1<br>(12.5 to 24.5)                            | -0.5<br>(-5.2 to 4.9)                            |
| Vascular intestinal disorders                                  | 2.3<br>(1.3 to 3.6)                           | 15.5<br>(9.8 to 22.5)                        | 0.7<br>(0.4 to 1.3)                        | 20.2<br>(17.7 to 22.2)                            | 1.2<br>(-0.9 to 2.9)                             |
| Gallbladder and biliary diseases                               | 899.9<br>(623.5 to 1,225.0)                   | 1,790.1<br>(1,289.5 to 2,441.3)              | 8.9<br>(5.2 to 14.3)                       | 15.0<br>(10.6 to 19.6)                            | -3.2<br>(-6.8 to 0.8)                            |
| Pancreatitis                                                   | 23.4<br>(17.2 to 30.5)                        | 211.4<br>(153.6 to 275.6)                    | 3.0<br>(1.9 to 4.6)                        | 20.1<br>(14.0 to 25.4)                            | 1.2<br>(-4.0 to 5.6)                             |
| Other digestive diseases                                       | --                                            | --                                           | 16.9<br>(11.5 to 23.5)                     | 20.4<br>(16.2 to 25.1)                            | 1.4<br>(-2.1 to 5.4)                             |
| <b>Neurological disorders</b>                                  | <b>290,050.9<br/>(268,106.6 to 313,303.8)</b> | <b>149,098.9<br/>(98,023.7 to 217,452.8)</b> | <b>6,331.4<br/>(4,167.8 to 8,754.8)</b>    | <b>16.1<br/>(14.4 to 17.8)</b>                    | <b>-2.2<br/>(-3.6 to -0.8)</b>                   |
| Alzheimer's disease and other dementias                        | --                                            | --                                           | --                                         | --                                                | --                                               |
| Parkinson's disease                                            | 9.5<br>(4.4 to 17.3)                          | 2.4<br>(1.1 to 4.5)                          | 1.3<br>(0.5 to 2.5)                        | 22.4<br>(12.9 to 31.6)                            | 3.1<br>(-4.9 to 10.8)                            |
| Epilepsy                                                       | 1,910.3<br>(1,524.2 to 2,328.8)               | 141.9<br>(97.3 to 192.9)                     | 613.8<br>(400.2 to 861.9)                  | 10.7<br>(-0.7 to 24.5)                            | -6.7<br>(-16.3 to 4.9)                           |
| Multiple sclerosis                                             | 141.3<br>(117.6 to 166.5)                     | 15.2<br>(11.1 to 19.2)                       | 38.8<br>(26.1 to 52.5)                     | 20.0<br>(12.7 to 27.7)                            | 1.1<br>(-5.0 to 7.6)                             |
| Motor neuron disease                                           | 17.1<br>(14.1 to 20.7)                        | 0.6<br>(0.3 to 0.9)                          | 3.6<br>(2.4 to 5.1)                        | 20.0<br>(18.7 to 21.3)                            | 1.1<br>(0.0 to 2.2)                              |
| Migraine                                                       | 117,510.8<br>(108,194.4 to 127,095.3)         | 12,891.3<br>(10,923.6 to 14,861.6)           | 4,876.7<br>(3,069.8 to 6,954.1)            | 16.4<br>(15.3 to 17.5)                            | -2.0<br>(-2.9 to -1.1)                           |
| Tension-type headache                                          | 224,855.1<br>(166,445.5 to 291,409.9)         | 136,044.6<br>(84,517.7 to 204,119.9)         | 700.8<br>(416.2 to 1,076.6)                | 16.7<br>(14.9 to 18.9)                            | -1.7<br>(-3.2 to 0.1)                            |
| Other neurological disorders                                   | 1.4<br>(0.7 to 2.4)                           | 2.9<br>(1.5 to 4.8)                          | 96.4<br>(64.2 to 134.3)                    | 35.0<br>(22.1 to 50.9)                            | 13.7<br>(2.9 to 27.1)                            |
| <b>Mental and substance use disorders</b>                      | <b>112,821.4<br/>(110,736.8 to 115,185.7)</b> | <b>37,773.5†<br/>(32,925.3 to 43,508.9)</b>  | <b>16,508.7<br/>(12,056.5 to 21,443.3)</b> | <b>16.6<br/>(15.7 to 17.4)</b>                    | <b>-1.8<br/>(-2.6 to -1.1)</b>                   |
| Schizophrenia                                                  | 2,414.2<br>(1,878.5 to 3,003.6)               | 224.5<br>(158.2 to 300.7)                    | 1,604.9<br>(1,082.4 to 2,133.5)            | 22.8<br>(19.2 to 24.7)                            | 2.8<br>(0.4 to 5.0)                              |
| Alcohol use disorders                                          | 15,170.1<br>(12,244.1 to 18,521.6)            | 8,148.9<br>(6,401.4 to 10,192.1)             | 1,544.5<br>(1,033.7 to 2,237.1)            | 13.5<br>(9.9 to 16.8)                             | -4.4<br>(-7.4 to -1.6)                           |
| Drug use disorders                                             | 11,929.6<br>(11,338.5 to 12,524.5)            | 912.2<br>(750.9 to 1,087.4)                  | 3,008.9<br>(2,107.0 to 4,035.0)            | 19.2<br>(16.4 to 21.8)                            | 0.5<br>(-2.0 to 2.6)                             |
| Opioid use disorders                                           | 5,658.0<br>(4,709.3 to 6,890.4)               | 477.4<br>(376.3 to 607.6)                    | 2,397.8<br>(1,622.5 to 3,257.1)            | 19.7<br>(16.1 to 22.7)                            | 0.9<br>(-2.2 to 3.4)                             |
| Cocaine use disorders                                          | 802.9<br>(705.7 to 920.5)                     | 23.9<br>(16.9 to 31.5)                       | 111.3<br>(69.5 to 159.9)                   | 15.1<br>(10.3 to 20.0)                            | -3.1<br>(-7.1 to 1.1)                            |
| Amphetamine use disorders                                      | 1,112.3<br>(802.3 to 1,477.3)                 | 24.2<br>(12.2 to 41.0)                       | 147.5<br>(85.5 to 235.2)                   | 18.4<br>(11.3 to 25.0)                            | -0.3<br>(-6.2 to 5.3)                            |
| Cannabis use disorders                                         | 4,071.2<br>(3,067.3 to 5,269.0)               | 278.3<br>(169.5 to 411.5)                    | 119.4<br>(69.9 to 185.7)                   | 17.6<br>(13.3 to 22.3)                            | -0.9<br>(-4.6 to 3.0)                            |
| Other drug use disorders                                       | 586.9<br>(503.4 to 688.3)                     | 108.5<br>(84.0 to 132.6)                     | 233.0<br>(155.5 to 329.5)                  | 17.7<br>(13.8 to 21.8)                            | -0.9<br>(-4.2 to 2.6)                            |
| Depressive disorders                                           | 22,360.7<br>(21,042.3 to 23,354.7)            | 22,988.2<br>(18,447.3 to 28,324.4)           | 3,847.8<br>(2,603.9 to 5,428.1)            | 12.6<br>(10.7 to 14.3)                            | -5.1<br>(-6.8 to -3.7)                           |
| Major depressive disorder                                      | 14,418.0<br>(11,812.8 to 17,698.4)            | 21,492.6<br>(16,949.7 to 26,766.3)           | 3,021.9<br>(2,002.1 to 4,372.4)            | 10.8<br>(8.4 to 12.8)                             | -6.7<br>(-8.7 to -5.0)                           |
| Dysthymia                                                      | 8,380.5<br>(6,506.0 to 10,800.0)              | 1,495.6<br>(1,209.5 to 1,824.9)              | 825.9<br>(520.0 to 1,281.5)                | 19.9<br>(16.9 to 22.9)                            | 1.0<br>(-1.6 to 3.6)                             |
| Bipolar disorder                                               | 4,842.1<br>(3,974.0 to 5,941.2)               | 250.2<br>(155.7 to 360.9)                    | 1,009.1<br>(612.2 to 1,506.5)              | 16.1<br>(13.8 to 18.2)                            | -2.2<br>(-4.1 to -0.4)                           |
| Anxiety disorders                                              | 25,082.4<br>(21,805.2 to 28,860.8)            | 3,752.0<br>(3,311.3 to 4,258.1)              | 2,463.0<br>(1,669.9 to 3,448.3)            | 16.2<br>(14.1 to 18.4)                            | -2.1<br>(-3.9 to -0.3)                           |
| Eating disorders                                               | 1,981.6<br>(1,714.6 to 2,399.0)               | 798.5<br>(565.1 to 1,067.1)                  | 409.7<br>(244.6 to 640.1)                  | 27.7<br>(24.8 to 30.5)                            | 7.5<br>(5.1 to 9.9)                              |
| Anorexia nervosa                                               | 471.3<br>(339.4 to 654.4)                     | 115.1<br>(87.9 to 146.2)                     | 100.1<br>(59.5 to 153.4)                   | 23.7<br>(18.2 to 28.9)                            | 4.2<br>(-0.4 to 8.5)                             |
| Bulimia nervosa                                                | 1,465.5<br>(980.5 to 2,208.4)                 | 683.3<br>(444.2 to 943.2)                    | 309.6<br>(173.1 to 502.9)                  | 29.0<br>(25.8 to 32.2)                            | 8.7<br>(6.0 to 11.4)                             |
| Autistic spectrum disorders                                    | 5,585.3<br>(5,350.6 to 5,781.8)               | --                                           | 820.7<br>(560.4 to 1,153.5)                | 19.1<br>(17.4 to 20.8)                            | 0.4<br>(-1.1 to 1.8)                             |
| Autism                                                         | 1,649.9<br>(1,417.6 to 1,918.0)               | --                                           | 423.9<br>(275.0 to 618.0)                  | 18.8<br>(16.0 to 21.6)                            | 0.0<br>(-2.3 to 2.4)                             |
| Asperger syndrome and other autistic spectrum disorders        | 3,933.8<br>(3,287.7 to 4,715.3)               | --                                           | 396.8<br>(260.1 to 578.9)                  | 19.5<br>(17.7 to 21.4)                            | 0.7<br>(-0.8 to 2.3)                             |

| Cause                                                      | Prevalence in thousands (95% UI)              | Incidence in thousands (95% UI)                    | YLDs in thousands (95% UI)               |                                                   |                                                  |
|------------------------------------------------------------|-----------------------------------------------|----------------------------------------------------|------------------------------------------|---------------------------------------------------|--------------------------------------------------|
|                                                            | 2016 counts                                   | 2016 counts                                        | 2016 counts                              | Percentage change in counts between 2006 and 2016 | Percentage change in rates between 2006 and 2016 |
| Attention-deficit/hyperactivity disorder                   | 6,290.8<br>(5,632.9 to 7,139.9)               | --                                                 | 75.9<br>(45.0 to 118.0)                  | 22.5<br>(19.8 to 25.4)                            | 3.2<br>(0.9 to 5.7)                              |
| Conduct disorder                                           | --                                            | --                                                 | --                                       | --                                                | --                                               |
| Idiopathic developmental intellectual disability           | 12,277.1<br>(7,785.9 to 16,947.2)             | --                                                 | 487.6<br>(238.0 to 827.8)                | 9.8<br>(5.7 to 12.6)                              | -7.5<br>(-11.0 to -5.2)                          |
| Other mental and substance use disorders                   | 16,193.6<br>(13,816.9 to 19,036.2)            | 699.1<br>(585.9 to 838.3)                          | 1,236.7<br>(828.7 to 1,788.6)            | 18.8<br>(17.2 to 20.7)                            | 0.1<br>(-1.3 to 1.6)                             |
| <b>Diabetes, urogenital, blood, and endocrine diseases</b> | <b>228,756.9<br/>(226,354.6 to 231,270.6)</b> | <b>85,373.8†<br/>(74,606.7 to 98,018.7)</b>        | <b>3,080.7<br/>(2,121.7 to 4,329.0)</b>  | <b>20.0<br/>(18.0 to 22.1)</b>                    | <b>1.1<br/>(-0.6 to 2.9)</b>                     |
| Diabetes mellitus                                          | 14,905.7<br>(12,394.2 to 18,143.7)            | 1,098.2<br>(751.7 to 1,501.5)                      | 956.8<br>(614.7 to 1,396.4)              | 20.4<br>(16.7 to 23.7)                            | 1.4<br>(-1.7 to 4.2)                             |
| Acute glomerulonephritis                                   | 6.1<br>(3.8 to 9.0)                           | 89.7<br>(58.6 to 130.4)                            | 0.3<br>(0.2 to 0.5)                      | 9.6<br>(7.1 to 11.7)                              | -7.7<br>(-9.8 to -5.9)                           |
| Chronic kidney disease                                     | 6,763.8<br>(5,543.0 to 8,090.9)               | 511.7<br>(335.0 to 728.3)                          | 326.3<br>(219.8 to 453.7)                | 22.1<br>(16.7 to 27.8)                            | 2.8<br>(-1.7 to 7.6)                             |
| Chronic kidney disease due to diabetes mellitus            | 1,239.5<br>(818.4 to 1,750.1)                 | 89.6<br>(50.6 to 141.9)                            | 67.6<br>(39.7 to 105.5)                  | 30.8<br>(22.9 to 40.3)                            | 10.2<br>(3.6 to 18.2)                            |
| Chronic kidney disease due to hypertension                 | 1,716.9<br>(1,223.1 to 2,318.9)               | 204.5<br>(118.3 to 310.8)                          | 25.7<br>(14.8 to 41.4)                   | 19.6<br>(13.4 to 26.3)                            | 0.7<br>(-4.5 to 6.4)                             |
| Chronic kidney disease due to glomerulonephritis           | 1,450.4<br>(1,042.4 to 1,937.7)               | 36.4<br>(20.6 to 58.4)                             | 126.5<br>(75.2 to 201.4)                 | 19.8<br>(12.8 to 26.4)                            | 0.9<br>(-5.0 to 6.5)                             |
| Chronic kidney disease due to other causes                 | 2,357.1<br>(1,616.1 to 3,280.4)               | 181.2<br>(109.7 to 281.2)                          | 106.5<br>(61.6 to 165.8)                 | 20.3<br>(13.3 to 28.0)                            | 1.3<br>(-4.5 to 7.8)                             |
| Urinary diseases and male infertility                      | 6,650.6<br>(5,440.8 to 8,315.2)               | 44,860.4†<br>(35,019.9 to 56,920.6)                | 86.3<br>(50.5 to 144.9)                  | 15.8<br>(10.2 to 21.6)                            | -2.5<br>(-7.2 to 2.4)                            |
| Interstitial nephritis and urinary tract infections        | 775.3<br>(600.0 to 992.4)                     | 40,613.5<br>(31,028.9 to 52,329.0)                 | 25.9<br>(15.3 to 41.0)                   | 14.6<br>(9.6 to 19.7)                             | -3.5<br>(-7.6 to 0.8)                            |
| Urolithiasis                                               | 158.7<br>(111.8 to 212.0)                     | 4,246.9<br>(2,943.4 to 5,688.6)                    | 12.3<br>(7.3 to 19.1)                    | 15.0<br>(12.1 to 18.0)                            | -3.1<br>(-5.6 to -0.6)                           |
| Benign prostatic hyperplasia                               | --                                            | --                                                 | --                                       | --                                                | --                                               |
| Male infertility                                           | 5,256.9<br>(3,526.7 to 7,573.8)               | --                                                 | 31.9<br>(11.8 to 71.7)                   | 32.9<br>(25.5 to 39.0)                            | 12.0<br>(5.8 to 17.1)                            |
| Other urinary diseases                                     | --                                            | --                                                 | 16.2<br>(10.3 to 24.1)                   | -6.0<br>(-8.8 to -3.0)                            | -20.8<br>(-23.2 to -18.3)                        |
| Gynecological diseases                                     | 87,234.0<br>(84,985.1 to 88,711.5)            | 38,320.9†<br>(34,238.0 to 42,503.8)                | 1,200.9<br>(801.5 to 1,739.4)            | 17.4<br>(14.8 to 19.7)                            | -1.1<br>(-3.3 to 0.9)                            |
| Uterine fibroids                                           | 2,234.4<br>(1,749.5 to 2,790.8)               | 571.4<br>(409.0 to 774.7)                          | 53.4<br>(31.6 to 87.7)                   | 18.0<br>(14.2 to 21.9)                            | -0.6<br>(-3.8 to 2.7)                            |
| Polycystic ovarian syndrome                                | 1,554.1<br>(1,196.5 to 2,058.7)               | 333.4<br>(164.8 to 567.2)                          | 14.0<br>(6.3 to 28.1)                    | 17.7<br>(14.3 to 21.3)                            | -0.9<br>(-3.7 to 2.2)                            |
| Female infertility                                         | 7,382.6<br>(3,316.0 to 13,874.7)              | --                                                 | 42.7<br>(12.2 to 113.4)                  | 55.0<br>(42.0 to 80.1)                            | 30.5<br>(19.6 to 51.7)                           |
| Endometriosis                                              | 563.9<br>(474.9 to 658.3)                     | 746.1<br>(537.0 to 985.9)                          | 53.1<br>(34.7 to 75.6)                   | 20.3<br>(13.8 to 27.0)                            | 1.3<br>(-4.2 to 7.0)                             |
| Genital prolapse                                           | 7,427.6<br>(5,626.9 to 9,634.9)               | 703.4<br>(431.0 to 1,111.7)                        | 23.9<br>(10.9 to 45.9)                   | 6.4<br>(3.2 to 9.8)                               | -10.4<br>(-13.0 to -7.5)                         |
| Premenstrual syndrome                                      | 63,442.3<br>(57,297.6 to 69,918.4)            | 23,761.2<br>(21,107.0 to 26,651.8)                 | 535.0<br>(328.4 to 834.3)                | 15.4<br>(11.4 to 18.9)                            | -2.8<br>(-6.1 to 0.2)                            |
| Other gynecological diseases                               | 13,604.0<br>(11,125.9 to 16,496.7)            | 12,205.5<br>(9,155.4 to 15,844.5)                  | 478.8<br>(312.8 to 697.1)                | 17.4<br>(13.7 to 20.8)                            | -1.2<br>(-4.2 to 1.8)                            |
| Hemoglobinopathies and hemolytic anaemias                  | 148,568.2<br>(146,729.1 to 150,617.3)         | --                                                 | 386.7<br>(247.2 to 577.9)                | 28.2<br>(20.9 to 35.4)                            | 8.0<br>(1.9 to 14.1)                             |
| Thalassemias                                               | 3.4<br>(3.3 to 3.6)                           | --                                                 | 0.3<br>(0.2 to 0.4)                      | 20.0<br>(10.4 to 30.9)                            | 1.1<br>(-7.0 to 10.3)                            |
| Thalassaemias trait                                        | 24,430.2<br>(23,568.4 to 25,337.4)            | --                                                 | 214.4<br>(136.5 to 323.7)                | 30.5<br>(19.2 to 41.5)                            | 9.9<br>(0.5 to 19.2)                             |
| Sickle cell disorders                                      | 145.3<br>(131.7 to 159.3)                     | --                                                 | 16.7<br>(11.5 to 22.7)                   | 41.6<br>(32.8 to 50.6)                            | 19.3<br>(11.9 to 26.9)                           |
| Sickle cell trait                                          | 37,916.4<br>(34,301.6 to 42,739.0)            | --                                                 | 96.4<br>(61.8 to 145.2)                  | 23.6<br>(18.4 to 28.9)                            | 4.1<br>(-0.2 to 8.6)                             |
| G6PD deficiency                                            | 27,788.5<br>(26,764.6 to 28,993.6)            | --                                                 | 1.5<br>(0.9 to 2.2)                      | 35.8<br>(29.9 to 42.2)                            | 14.4<br>(9.4 to 19.8)                            |
| G6PD trait                                                 | 71,279.1<br>(70,115.9 to 72,607.4)            | --                                                 | < 0.05<br>(< 0.05 to 0.1)                | 26.9<br>(20.6 to 33.0)                            | 6.9<br>(1.6 to 12.0)                             |
| Other hemoglobinopathies and hemolytic anaemias            | 3,571.7<br>(3,038.4 to 4,211.5)               | --                                                 | 57.3<br>(36.1 to 86.7)                   | 24.6<br>(17.8 to 32.6)                            | 5.0<br>(-0.8 to 11.7)                            |
| Endocrine, metabolic, blood, and immune disorders          | 4,716.9<br>(4,073.9 to 5,401.5)               | 492.9<br>(333.4 to 673.8)                          | 123.5<br>(79.4 to 181.5)                 | 16.6<br>(13.0 to 20.1)                            | -1.8<br>(-4.8 to 1.2)                            |
| <b>Musculoskeletal disorders</b>                           | <b>75,513.1<br/>(69,738.9 to 79,734.9)</b>    | <b>44,892.5<br/>(34,073.3 to 57,772.9)</b>         | <b>8,316.8<br/>(5,558.3 to 11,542.0)</b> | <b>14.7<br/>(12.4 to 16.8)</b>                    | <b>3.4<br/>(-5.3 to -1.6)</b>                    |
| Rheumatoid arthritis                                       | 808.4<br>(642.2 to 990.6)                     | 61.7<br>(40.8 to 88.4)                             | 199.7<br>(129.0 to 281.3)                | 21.3<br>(16.1 to 26.1)                            | 2.2<br>(-2.2 to 6.2)                             |
| Osteoarthritis                                             | --                                            | --                                                 | --                                       | --                                                | --                                               |
| Low back and neck pain                                     | 45,800.9<br>(41,475.5 to 51,235.7)            | 20,088.1<br>(14,789.9 to 26,572.9)                 | 5,282.7<br>(3,441.1 to 7,706.4)          | 14.3<br>(11.4 to 17.1)                            | -3.8<br>(-6.2 to -1.3)                           |
| Low back pain                                              | 34,186.5<br>(24,667.6 to 47,103.7)            | 16,259.5<br>(11,279.6 to 22,553.9)                 | 3,933.6<br>(2,410.4 to 6,011.9)          | 12.5<br>(8.4 to 16.1)                             | -5.3<br>(-8.7 to -2.2)                           |
| Neck pain                                                  | 13,056.1<br>(9,428.5 to 18,047.5)             | 3,828.6<br>(2,409.2 to 5,602.7)                    | 1,349.1<br>(829.2 to 2,095.4)            | 19.8<br>(16.6 to 22.8)                            | 0.9<br>(-1.7 to 3.5)                             |
| Gout                                                       | 751.1<br>(573.9 to 968.9)                     | 209.9<br>(146.1 to 285.3)                          | 25.8<br>(16.2 to 37.9)                   | 18.4<br>(9.2 to 27.5)                             | -0.3<br>(-8.0 to 7.4)                            |
| Other musculoskeletal disorders                            | 31,797.2<br>(21,993.2 to 41,840.1)            | 24,532.8<br>(15,043.6 to 35,936.1)                 | 2,808.6<br>(1,742.0 to 4,286.4)          | 14.9<br>(10.4 to 18.9)                            | -3.2<br>(-7.0 to 0.1)                            |
| <b>Other non-communicable diseases</b>                     | <b>386,243.4<br/>(377,307.2 to 394,631.7)</b> | <b>1,082,597.0†<br/>(929,451.6 to 1,267,593.0)</b> | <b>8,156.9<br/>(5,511.5 to 11,661.2)</b> | <b>17.2<br/>(16.4 to 18.0)</b>                    | <b>-1.2<br/>(-1.9 to -0.6)</b>                   |
| Congenital anomalies                                       | 6,220.0<br>(5,790.8 to 6,598.3)               | --                                                 | 718.0<br>(505.1 to 963.6)                | 14.6<br>(11.6 to 17.6)                            | -3.5<br>(-6.0 to -0.9)                           |
| Neural tube defects                                        | 475.8<br>(429.8 to 527.1)                     | --                                                 | 143.5<br>(101.7 to 191.8)                | 18.7<br>(13.8 to 24.0)                            | 0.0<br>(-4.2 to 4.5)                             |
| Congenital heart anomalies                                 | 902.0<br>(803.6 to 1,004.0)                   | --                                                 | 47.9<br>(20.2 to 82.5)                   | 22.4<br>(18.3 to 26.9)                            | 3.1<br>(-0.3 to 6.9)                             |
| Orofacial clefts                                           | 280.2<br>(249.3 to 311.0)                     | --                                                 | 3.6<br>(2.3 to 5.3)                      | 9.1<br>(5.7 to 12.2)                              | -8.1<br>(-11.0 to -5.5)                          |
| Down's syndrome                                            | 207.3<br>(180.3 to 237.7)                     | --                                                 | 17.8<br>(12.0 to 24.8)                   | 13.7<br>(9.2 to 18.2)                             | -4.2<br>(-8.0 to -0.4)                           |
| Turner syndrome                                            | 267.3<br>(232.3 to 303.5)                     | --                                                 | 5.5<br>(2.8 to 8.9)                      | 16.3<br>(5.5 to 26.7)                             | -2.0<br>(-11.1 to 6.7)                           |
| Klinefelter syndrome                                       | 309.1<br>(267.6 to 355.7)                     | --                                                 | 3.1<br>(1.4 to 6.0)                      | 16.1<br>(9.8 to 22.9)                             | -2.2<br>(-7.5 to 3.6)                            |

| Cause                                         | Prevalence in thousands (95% UI)                 | Incidence in thousands (95% UI)                              | YLDs in thousands (95% UI)                    |                                                   |                                                  |
|-----------------------------------------------|--------------------------------------------------|--------------------------------------------------------------|-----------------------------------------------|---------------------------------------------------|--------------------------------------------------|
|                                               | 2016 counts                                      | 2016 counts                                                  | 2016 counts                                   | Percentage change in counts between 2006 and 2016 | Percentage change in rates between 2006 and 2016 |
| Other chromosomal abnormalities               | 0.8<br>(0.7 to 0.9)                              | --                                                           | 0.2<br>(0.1 to 0.2)                           | 51.9<br>(0.5 to 121.6)                            | 28.0<br>(-15.3 to 86.7)                          |
| Congenital musculoskeletal and limb anomalies | 862.8<br>(795.8 to 935.7)                        | --                                                           | 125.7<br>(85.8 to 173.0)                      | 18.4<br>(14.7 to 22.2)                            | -0.3<br>(-3.4 to 2.9)                            |
| Urogenital congenital anomalies               | 418.7<br>(375.9 to 462.4)                        | --                                                           | 9.7<br>(5.5 to 15.6)                          | 12.6<br>(9.5 to 15.6)                             | -5.1<br>(-7.8 to -2.6)                           |
| Digestive congenital anomalies                | 823.7<br>(742.3 to 910.1)                        | --                                                           | 36.7<br>(23.8 to 52.7)                        | 21.4<br>(15.8 to 27.4)                            | 2.3<br>(-2.4 to 7.4)                             |
| Other congenital anomalies                    | 2,959.8<br>(2,076.7 to 4,181.7)                  | --                                                           | 324.2<br>(209.3 to 487.6)                     | 9.9<br>(5.3 to 15.0)                              | -7.4<br>(-11.3 to -3.2)                          |
| Skin and subcutaneous diseases                | 162,061.7<br>(157,992.0 to 165,405.0)            | 316,287.5<br>(281,112.9 to 352,137.3)                        | 4,137.1<br>(2,755.4 to 5,958.3)               | 19.2<br>(18.4 to 20.1)                            | 0.4<br>(-0.3 to 1.1)                             |
| Dermatitis                                    | 19,838.3<br>(17,168.4 to 22,991.9)               | 45,895.0<br>(37,552.7 to 55,177.2)                           | 666.1<br>(402.1 to 1,039.9)                   | 17.0<br>(15.2 to 18.7)                            | -1.4<br>(-2.9 to 0.0)                            |
| Psoriasis                                     | 5,106.9<br>(4,681.0 to 5,577.4)                  | 702.2<br>(615.5 to 793.5)                                    | 454.7<br>(316.3 to 605.3)                     | 24.3<br>(21.1 to 27.6)                            | 4.7<br>(2.0 to 7.5)                              |
| Cellulitis                                    | 217.0<br>(172.2 to 265.4)                        | 4,083.7<br>(3,419.4 to 4,891.5)                              | 12.5<br>(7.7 to 18.4)                         | 15.4<br>(8.6 to 23.1)                             | -2.8<br>(-8.5 to 3.7)                            |
| Pyoderma                                      | 732.9<br>(662.5 to 806.7)                        | 16,200.8<br>(14,576.4 to 17,988.7)                           | 4.2<br>(1.6 to 8.9)                           | 18.2<br>(13.8 to 22.2)                            | -0.5<br>(-4.1 to 2.9)                            |
| Scabies                                       | 14,317.2<br>(9,483.1 to 20,692.5)                | 43,020.6<br>(28,851.9 to 61,310.2)                           | 372.0<br>(179.0 to 649.6)                     | 13.8<br>(12.0 to 15.7)                            | -4.1<br>(-5.7 to -2.6)                           |
| Fungal skin diseases                          | 34,535.0<br>(26,671.3 to 43,077.1)               | 111,801.9<br>(83,437.2 to 143,791.0)                         | 196.5<br>(76.2 to 406.2)                      | 19.5<br>(18.8 to 20.2)                            | 0.7<br>(0.1 to 1.2)                              |
| Viral skin diseases                           | 14,244.5<br>(12,179.6 to 16,783.4)               | 22,252.8<br>(19,156.5 to 25,631.2)                           | 438.2<br>(268.6 to 663.8)                     | 18.1<br>(16.8 to 19.5)                            | -0.5<br>(-1.6 to 0.7)                            |
| Acne vulgaris                                 | 56,019.6<br>(48,916.7 to 63,523.8)               | 26,553.0<br>(22,496.0 to 30,733.5)                           | 1,441.4<br>(943.7 to 2,144.3)                 | 20.0<br>(18.4 to 21.6)                            | 1.1<br>(-0.2 to 2.4)                             |
| Alopecia areata                               | 2,145.2<br>(1,912.5 to 2,384.8)                  | 3,880.0<br>(3,505.6 to 4,265.4)                              | 71.0<br>(44.8 to 109.0)                       | 17.2<br>(14.2 to 20.3)                            | -1.3<br>(-3.8 to 1.3)                            |
| Pruritus                                      | 4,761.9<br>(3,372.0 to 6,541.0)                  | 3,877.3<br>(2,697.3 to 5,342.1)                              | 51.3<br>(22.9 to 97.8)                        | 20.5<br>(18.5 to 22.3)                            | 1.5<br>(-0.1 to 3.0)                             |
| Urticaria                                     | 4,407.9<br>(3,053.8 to 6,043.6)                  | 7,797.9<br>(5,443.4 to 10,748.0)                             | 265.3<br>(154.2 to 403.1)                     | 18.8<br>(16.2 to 21.3)                            | 0.1<br>(-2.1 to 2.2)                             |
| Decubitus ulcer                               | 33.8<br>(23.4 to 48.0)                           | 120.5<br>(84.2 to 172.4)                                     | 6.0<br>(3.5 to 9.4)                           | 13.9<br>(12.6 to 15.1)                            | -4.1<br>(-5.2 to -3.0)                           |
| Other skin and subcutaneous diseases          | 28,194.1<br>(25,508.5 to 31,142.3)               | 30,101.7<br>(27,050.5 to 33,352.7)                           | 158.0<br>(75.8 to 290.0)                      | 25.0<br>(23.8 to 26.2)                            | 5.3<br>(4.3 to 6.3)                              |
| Sense organ diseases                          | 76,628.9<br>(73,711.2 to 78,716.5)               | 39,916.1 <sup>†</sup><br>(35,722.3 to 43,984.9)              | 2,369.1<br>(1,576.8 to 3,400.8)               | 15.0<br>(12.7 to 16.9)                            | -3.1<br>(-5.0 to -1.5)                           |
| Glaucoma                                      | --                                               | --                                                           | --                                            | --                                                | --                                               |
| Cataract                                      | 205.5<br>(135.7 to 291.7)                        | --                                                           | 22.9<br>(12.0 to 38.2)                        | 10.6<br>(0.1 to 19.4)                             | -6.9<br>(-15.7 to 0.6)                           |
| Macular degeneration                          | --                                               | --                                                           | --                                            | --                                                | --                                               |
| Refraction and accommodation disorders        | 32,619.4<br>(29,605.3 to 36,081.6)               | --                                                           | 664.8<br>(408.4 to 1,047.7)                   | 12.9<br>(11.5 to 14.3)                            | -4.9<br>(-6.1 to -3.7)                           |
| Age-related and other hearing loss            | 37,276.9<br>(29,915.8 to 46,229.8)               | --                                                           | 1,291.9<br>(846.6 to 1,868.0)                 | 14.9<br>(11.0 to 18.6)                            | -3.2<br>(-6.5 to -0.1)                           |
| Other vision loss                             | 869.0<br>(631.4 to 1,166.5)                      | --                                                           | 71.5<br>(43.7 to 110.9)                       | 15.2<br>(8.3 to 21.8)                             | -3.0<br>(-8.7 to 2.6)                            |
| Other sense organ diseases                    | 9,955.1<br>(8,808.9 to 11,283.8)                 | 39,916.1<br>(35,722.3 to 43,984.9)                           | 318.0<br>(197.9 to 494.0)                     | 20.4<br>(18.1 to 22.7)                            | 1.4<br>(-0.5 to 3.4)                             |
| Oral disorders                                | 262,280.6<br>(240,221.5 to 286,074.0)            | 726,393.4 <sup>†</sup><br>(573,726.7 to 914,305.7)           | 932.7<br>(529.4 to 1,512.2)                   | 16.5<br>(15.6 to 17.3)                            | -1.9<br>(-2.6 to -1.2)                           |
| Caries of deciduous teeth                     | --                                               | --                                                           | --                                            | --                                                | --                                               |
| Caries of permanent teeth                     | 230,791.4<br>(187,366.2 to 276,376.1)            | 719,475.4<br>(568,269.7 to 908,168.9)                        | 161.7<br>(70.1 to 317.3)                      | 11.7<br>(10.0 to 13.3)                            | -5.9<br>(-7.4 to -4.5)                           |
| Periodontal disease                           | 32,446.5<br>(21,369.4 to 46,782.6)               | 6,270.2<br>(3,685.1 to 9,952.0)                              | 216.9<br>(79.3 to 471.2)                      | 18.4<br>(17.2 to 19.5)                            | -0.2<br>(-1.3 to 0.7)                            |
| Edentulism and severe tooth loss              | 5,741.6<br>(4,361.9 to 7,550.9)                  | 647.9<br>(425.9 to 942.8)                                    | 166.1<br>(100.9 to 254.3)                     | 13.6<br>(10.6 to 16.3)                            | -4.3<br>(-6.8 to -2.1)                           |
| Other oral disorders                          | 13,045.6<br>(11,616.5 to 14,597.8)               | --                                                           | 388.0<br>(237.5 to 593.1)                     | 18.8<br>(17.5 to 20.0)                            | 0.1<br>(-1.0 to 1.1)                             |
| <b>Injuries</b>                               | <b>91,624.1</b><br><b>(84,973.1 to 99,701.7)</b> | <b>44,881.3<sup>†</sup></b><br><b>(39,290.4 to 51,319.6)</b> | <b>3,493.4</b><br><b>(2,307.8 to 5,074.6)</b> | <b>16.5</b><br><b>(13.1 to 19.0)</b>              | <b>-1.9</b><br><b>(-4.7 to 0.2)</b>              |
| <b>Transport injuries</b>                     | <b>13,907.4</b><br><b>(12,324.8 to 15,197.0)</b> | <b>7,581.5</b><br><b>(5,877.6 to 9,765.9)</b>                | <b>761.5</b><br><b>(497.9 to 1,113.8)</b>     | <b>21.3</b><br><b>(19.4 to 23.1)</b>              | <b>2.2</b><br><b>(0.6 to 3.7)</b>                |
| Road injuries                                 | 10,728.9<br>(9,507.1 to 11,884.1)                | 6,948.7<br>(5,244.9 to 9,129.2)                              | 591.6<br>(379.1 to 871.9)                     | 22.4<br>(20.5 to 24.3)                            | 3.1<br>(1.5 to 4.7)                              |
| Pedestrian road injuries                      | 2,301.9<br>(1,849.0 to 2,835.4)                  | 1,069.3<br>(684.2 to 1,580.0)                                | 128.2<br>(81.9 to 189.3)                      | 21.8<br>(19.5 to 24.0)                            | 2.6<br>(0.6 to 4.5)                              |
| Cyclist road injuries                         | 2,200.9<br>(1,686.2 to 2,838.0)                  | 1,363.8<br>(837.2 to 2,099.8)                                | 110.9<br>(70.9 to 167.2)                      | 26.0<br>(24.1 to 28.1)                            | 6.1<br>(4.5 to 7.9)                              |
| Motorcyclist road injuries                    | 2,713.7<br>(2,029.1 to 3,567.2)                  | 1,516.7<br>(1,023.4 to 2,139.2)                              | 148.8<br>(96.0 to 217.8)                      | 23.0<br>(20.9 to 25.0)                            | 3.6<br>(1.9 to 5.3)                              |
| Motor vehicle road injuries                   | 2,638.2<br>(2,095.6 to 3,347.5)                  | 2,330.7<br>(1,644.9 to 3,207.6)                              | 160.3<br>(103.9 to 233.2)                     | 15.7<br>(13.6 to 18.0)                            | -2.6<br>(-4.4 to -0.6)                           |
| Other road injuries                           | 874.1<br>(678.9 to 1,082.6)                      | 668.2<br>(375.4 to 1,040.1)                                  | 43.3<br>(27.4 to 65.9)                        | 43.5<br>(40.6 to 46.5)                            | 20.9<br>(18.4 to 23.4)                           |
| Other transport injuries                      | 3,178.6<br>(2,563.0 to 3,962.4)                  | 632.9<br>(417.9 to 924.7)                                    | 169.9<br>(112.5 to 246.8)                     | 17.6<br>(15.0 to 20.0)                            | -1.0<br>(-3.1 to 1.1)                            |
| <b>Unintentional injuries</b>                 | <b>69,429.5</b><br><b>(63,250.7 to 76,908.6)</b> | <b>33,013.4</b><br><b>(27,875.1 to 38,930.4)</b>             | <b>2,255.0</b><br><b>(1,482.7 to 3,202.8)</b> | <b>20.2</b><br><b>(18.0 to 21.9)</b>              | <b>1.2</b><br><b>(-0.6 to 2.7)</b>               |
| Falls                                         | 25,989.8<br>(21,434.8 to 30,947.1)               | 11,320.2<br>(7,875.6 to 15,376.9)                            | 958.4<br>(645.8 to 1,342.2)                   | 20.8<br>(18.8 to 22.4)                            | 1.8<br>(0.1 to 3.1)                              |
| Drowning                                      | 301.7<br>(250.8 to 362.1)                        | 48.4<br>(36.8 to 63.4)                                       | 15.7<br>(10.1 to 23.0)                        | 5.5<br>(2.5 to 8.2)                               | -11.2<br>(-13.7 to -8.9)                         |
| Fire, heat, and hot substances                | 6,898.5<br>(5,632.9 to 8,589.4)                  | 808.9<br>(516.6 to 1,159.8)                                  | 188.5<br>(125.2 to 272.8)                     | 20.5<br>(16.6 to 23.6)                            | 1.5<br>(-1.7 to 4.1)                             |
| Poisonings                                    | 261.7<br>(209.9 to 320.1)                        | 390.9<br>(231.7 to 609.6)                                    | 25.9<br>(16.5 to 38.4)                        | 29.8<br>(26.2 to 33.4)                            | 9.3<br>(6.3 to 12.4)                             |
| Exposure to mechanical forces                 | 12,499.0<br>(10,210.6 to 16,403.1)               | 6,849.7<br>(4,800.9 to 9,562.8)                              | 287.7<br>(181.6 to 438.8)                     | 23.2<br>(21.0 to 25.2)                            | 3.8<br>(1.9 to 5.5)                              |
| Unintentional firearm injuries                | 464.0<br>(359.9 to 620.1)                        | 179.2<br>(92.5 to 317.8)                                     | 17.4<br>(10.8 to 27.1)                        | 22.4<br>(19.9 to 24.9)                            | 3.1<br>(1.0 to 5.2)                              |
| Unintentional suffocation                     | 731.9<br>(539.0 to 968.9)                        | 62.0<br>(29.8 to 118.7)                                      | 21.7<br>(12.9 to 34.5)                        | 19.0<br>(16.4 to 21.4)                            | 0.2<br>(-2.0 to 2.2)                             |
| Other exposure to mechanical forces           | 11,303.1<br>(9,104.0 to 15,292.9)                | 6,608.5<br>(4,636.2 to 9,237.1)                              | 248.6<br>(158.3 to 376.1)                     | 23.7<br>(21.5 to 25.7)                            | 4.2<br>(2.3 to 5.9)                              |

| Cause                                                                               | Prevalence in thousands (95% UI)                 | Incidence in thousands (95% UI)                | YLDs in thousands (95% UI)              |                                                   |                                                  |
|-------------------------------------------------------------------------------------|--------------------------------------------------|------------------------------------------------|-----------------------------------------|---------------------------------------------------|--------------------------------------------------|
|                                                                                     | 2016 counts                                      | 2016 counts                                    | 2016 counts                             | Percentage change in counts between 2006 and 2016 | Percentage change in rates between 2006 and 2016 |
| Adverse effects of medical treatment                                                | 111.7<br>(76.1 to 154.9)                         | 1,460.9<br>(1,048.3 to 1,985.1)                | 14.9<br>(8.4 to 24.0)                   | 16.5<br>(11.6 to 20.9)                            | -1.9<br>(-6.0 to 1.9)                            |
| Animal contact                                                                      | 3,811.4<br>(3,227.3 to 4,564.4)                  | 5,491.4<br>(3,640.6 to 7,733.2)                | 142.6<br>(94.6 to 203.0)                | 12.3<br>(9.7 to 14.8)                             | -5.4<br>(-7.6 to -3.2)                           |
| Venomous animal contact                                                             | 1,896.7<br>(1,468.2 to 2,413.1)                  | 2,806.5<br>(1,756.3 to 4,150.1)                | 111.8<br>(74.9 to 157.0)                | 13.7<br>(10.7 to 16.6)                            | -4.2<br>(-6.8 to -1.8)                           |
| Non-venomous animal contact                                                         | 1,914.8<br>(1,470.9 to 2,417.5)                  | 2,685.0<br>(1,666.0 to 3,974.2)                | 30.8<br>(18.6 to 47.7)                  | 7.8<br>(4.7 to 10.3)                              | -9.2<br>(-11.8 to -7.1)                          |
| Foreign body                                                                        | 3,946.1<br>(3,171.4 to 4,756.7)                  | 2,051.0<br>(1,295.0 to 3,113.8)                | 149.0<br>(92.6 to 225.2)                | 18.6<br>(15.6 to 21.5)                            | -0.1<br>(-2.6 to 2.3)                            |
| Pulmonary aspiration and foreign body in airway                                     | 1,928.4<br>(1,378.1 to 2,664.3)                  | 247.3<br>(143.0 to 390.7)                      | 82.7<br>(50.1 to 127.5)                 | 15.6<br>(13.0 to 18.0)                            | -2.6<br>(-4.9 to -0.6)                           |
| Foreign body in eyes                                                                | 226.0<br>(101.1 to 413.5)                        | 1,350.7<br>(634.9 to 2,354.6)                  | 13.0<br>(5.3 to 25.5)                   | 26.0<br>(22.3 to 30.1)                            | 6.1<br>(3.0 to 9.6)                              |
| Foreign body in other body part                                                     | 1,791.6<br>(1,383.8 to 2,383.0)                  | 453.0<br>(261.9 to 711.2)                      | 53.3<br>(33.5 to 81.6)                  | 21.8<br>(18.0 to 25.0)                            | 2.6<br>(-0.6 to 5.3)                             |
| Environmental heat and cold exposure                                                | 5,197.4<br>(4,235.5 to 6,375.8)                  | 1,022.0<br>(650.1 to 1,554.0)                  | 190.1<br>(122.0 to 278.2)               | 21.9<br>(18.9 to 24.5)                            | 2.7<br>(0.1 to 4.9)                              |
| Other unintentional injuries                                                        | 10,412.1<br>(8,268.0 to 13,097.2)                | 3,570.1<br>(2,317.5 to 5,010.8)                | 282.3<br>(183.6 to 417.3)               | 19.2<br>(17.0 to 20.9)                            | 0.4<br>(-1.5 to 1.9)                             |
| <b>Self-harm and interpersonal violence</b>                                         | <b>25,843.0</b><br><b>(19,252.1 to 33,893.2)</b> | <b>4,140.4†</b><br><b>(3,145.8 to 5,454.3)</b> | <b>371.5</b><br><b>(248.2 to 527.1)</b> | <b>11.6</b><br><b>(10.2 to 12.8)</b>              | <b>-6.0</b><br><b>(-7.2 to -5.0)</b>             |
| Self-harm                                                                           | 655.5<br>(530.8 to 809.7)                        | 684.7<br>(494.1 to 902.8)                      | 37.2<br>(23.8 to 55.0)                  | 9.5<br>(7.3 to 11.8)                              | -7.8<br>(-9.6 to -5.8)                           |
| Self-harm by firearm                                                                | 29.8<br>(24.4 to 36.0)                           | 7.2<br>(1.8 to 18.7)                           | 1.1<br>(0.7 to 1.7)                     | 4.8<br>(1.9 to 7.6)                               | -11.7<br>(-14.2 to -9.4)                         |
| Self-harm by other specified means                                                  | 625.6<br>(501.9 to 781.3)                        | 677.6<br>(490.2 to 890.4)                      | 36.1<br>(23.1 to 53.4)                  | 9.7<br>(7.4 to 12.0)                              | -7.6<br>(-9.5 to -5.7)                           |
| Interpersonal violence                                                              | 25,187.5<br>(18,639.9 to 33,127.5)               | 3,455.7†<br>(2,478.9 to 4,687.1)               | 334.3<br>(220.3 to 472.6)               | 11.8<br>(10.4 to 13.1)                            | -5.8<br>(-7.0 to -4.8)                           |
| Assault by firearm                                                                  | 189.8<br>(135.8 to 245.1)                        | 93.0<br>(54.4 to 150.5)                        | 7.9<br>(4.8 to 12.2)                    | 9.5<br>(7.1 to 12.0)                              | -7.7<br>(-9.8 to -5.6)                           |
| Assault by sharp object                                                             | 1,053.5<br>(790.5 to 1,337.0)                    | 801.4<br>(511.0 to 1,216.1)                    | 33.5<br>(21.1 to 49.8)                  | 11.0<br>(8.1 to 13.9)                             | -6.5<br>(-9.0 to -4.0)                           |
| Sexual violence                                                                     | 21,435.5<br>(14,849.5 to 29,482.7)               | --                                             | 188.6<br>(111.0 to 302.8)               | 10.2<br>(8.0 to 11.7)                             | -7.2<br>(-9.0 to -5.9)                           |
| Assault by other means                                                              | 2,508.7<br>(2,006.7 to 3,223.2)                  | 2,561.3<br>(1,780.1 to 3,524.1)                | 104.2<br>(68.1 to 154.5)                | 15.4<br>(13.2 to 17.4)                            | -2.8<br>(-4.6 to -1.1)                           |
| <b>Forces of nature, conflict and terrorism, and executions and police conflict</b> | <b>3,879.8</b><br><b>(2,475.9 to 5,605.9)</b>    | <b>145.9†</b><br><b>(88.3 to 211.5)</b>        | <b>105.4</b><br><b>(38.3 to 218.4)</b>  | <b>-35.3</b><br><b>(-51.0 to -23.3)</b>           | <b>-45.5</b><br><b>(-58.7 to -35.4)</b>          |
| Forces of nature, conflict and terrorism, and state actor violence                  | 674.4<br>(374.0 to 1,092.8)                      | 28.7<br>(16.4 to 44.0)                         | 23.4<br>(6.6 to 54.7)                   | -2.4<br>(-13.7 to 3.0)                            | -17.8<br>(-27.3 to -13.2)                        |
| Conflict and terrorism                                                              | 3,037.3<br>(1,838.5 to 4,631.8)                  | --                                             | 82.1<br>(31.7 to 164.8)                 | -40.8<br>(-56.2 to -27.7)                         | -50.1<br>(-63.1 to -39.1)                        |
| Executions and police conflict                                                      | 168.1<br>(99.3 to 260.0)                         | 117.2<br>(60.5 to 181.7)                       | 4.6<br>(1.7 to 11.6)                    | -40.5<br>(-44.5 to -24.4)                         | -49.9<br>(-53.2 to -36.3)                        |

We did not calculate incidence for certain NTDs and causes with only birth prevalence. Blank cells mean that no estimate is available.

† Incidence for aggregate causes represents the sum of the incidence of the causes below the aggregate.

‡ Incidence estimates for stroke represent first-ever stroke only.

^ Incidence of HIV/AIDS represents new infections of HIV only and does not include new infections of Tuberculosis in HIV positive cases.



SR Table 12: Global prevalence, incidence, and YLDs for 2016, percentage change of YLD counts and percentage change of YLD rates between 2006 and 2016 by cause, age 30-34 years.

| Cause                                                                                | Prevalence in thousands (95% UI)             | Incidence in thousands (95% UI)                     | YLDs in thousands (95% UI)                |                                                   |                                                  |
|--------------------------------------------------------------------------------------|----------------------------------------------|-----------------------------------------------------|-------------------------------------------|---------------------------------------------------|--------------------------------------------------|
|                                                                                      | 2016 counts                                  | 2016 counts                                         | 2016 counts                               | Percentage change in counts between 2006 and 2016 | Percentage change in rates between 2006 and 2016 |
| <b>All causes</b>                                                                    | <b>550,412.2</b><br>(549,460.1 to 551,191.6) | <b>3,235,579.9†</b><br>(2,823,430.4 to 3,768,527.7) | <b>57,197.8</b><br>(42,248.5 to 74,516.2) | <b>12.3</b><br>(11.5 to 13.0)                     | <b>-0.5</b><br>(-1.2 to 0.1)                     |
| <b>Communicable, maternal, neonatal, and nutritional disorders</b>                   | <b>405,140.1</b><br>(399,842.3 to 409,638.2) | <b>1,796,816.6†</b><br>(1,424,611.2 to 2,283,829.1) | <b>7,302.4</b><br>(5,227.4 to 10,025.4)   | <b>7.5</b><br>(2.8 to 11.0)                       | <b>-4.8</b><br>(-9.0 to -1.7)                    |
| <b>HIV/AIDS and tuberculosis</b>                                                     | <b>186,844.1</b><br>(166,320.9 to 210,014.7) | <b>1,193.5†</b><br>(914.4 to 1,554.4)               | <b>849.7</b><br>(583.2 to 1,169.8)        | <b>-10.4</b><br>(-26.4 to 2.7)                    | <b>-20.7</b><br>(-34.8 to -9.1)                  |
| Tuberculosis                                                                         | 172,633.6<br>(143,096.7 to 207,606.1)        | 902.9†<br>(628.8 to 1,263.5)                        | 240.7<br>(140.0 to 373.1)                 | 6.8<br>(1.1 to 14.4)                              | -5.4<br>(-10.5 to 1.3)                           |
| Drug-susceptible tuberculosis                                                        | 741.0<br>(510.9 to 1,028.8)                  | 870.2<br>(604.6 to 1,220.5)                         | 231.8<br>(134.3 to 358.7)                 | 6.9<br>(1.1 to 15.0)                              | -5.3<br>(-10.5 to 1.8)                           |
| Multidrug-resistant tuberculosis without extensive drug resistance                   | 25.8<br>(18.6 to 34.5)                       | 30.7<br>(22.3 to 41.6)                              | 8.4<br>(5.0 to 13.1)                      | -0.5<br>(-15.3 to 17.9)                           | -11.9<br>(-25.0 to 4.4)                          |
| Extensively drug-resistant tuberculosis                                              | 1.7<br>(1.2 to 2.2)                          | 2.0<br>(1.5 to 2.7)                                 | 0.6<br>(0.3 to 0.8)                       | 173.0<br>(137.1 to 212.9)                         | 141.8<br>(110.0 to 177.1)                        |
| Latent tuberculosis infection                                                        | 171,865.2<br>(142,362.4 to 206,921.1)        | --                                                  | --                                        | --                                                | --                                               |
| HIV/AIDS                                                                             | 5,579.1<br>(5,218.7 to 5,964.2)              | 290.6†<br>(259.2 to 332.3)                          | 609.0<br>(420.4 to 846.5)                 | -15.8<br>(-33.1 to 0.3)                           | -25.4<br>(-40.7 to -11.2)                        |
| Drug-susceptible HIV/AIDS - Tuberculosis                                             | 184.0<br>(131.2 to 252.2)                    | 235.0<br>(169.7 to 314.9)                           | 71.1<br>(43.4 to 109.3)                   | -25.8<br>(-30.5 to -21.5)                         | -34.3<br>(-38.5 to -30.5)                        |
| Multidrug-resistant HIV/AIDS - Tuberculosis without extensive drug resistance        | 4.6<br>(3.1 to 6.8)                          | 6.2<br>(4.0 to 8.9)                                 | 1.9<br>(1.1 to 3.1)                       | -33.7<br>(-45.9 to -20.4)                         | -41.2<br>(-52.1 to -29.5)                        |
| Extensively drug-resistant HIV/AIDS - Tuberculosis                                   | 0.2<br>(0.1 to 0.3)                          | 0.2<br>(0.1 to 0.4)                                 | 0.1<br>(< 0.05 to 0.1)                    | 124.2<br>(84.4 to 170.3)                          | 98.6<br>(63.3 to 139.4)                          |
| HIV/AIDS resulting in other diseases                                                 | 5,390.3<br>(5,040.2 to 5,780.0)              | 290.6<br>(259.2 to 332.3)                           | 536.0<br>(364.6 to 753.2)                 | -14.2<br>(-34.0 to 6.0)                           | -24.0<br>(-41.6 to -6.1)                         |
| <b>Diarrhoea, lower respiratory infections, and other common infectious diseases</b> | <b>27,039.2</b><br>(25,104.6 to 28,698.2)    | <b>1,616,679.2†</b><br>(1,247,188.0 to 2,091,416.5) | <b>1,261.2</b><br>(870.0 to 1,763.1)      | <b>11.0</b><br>(9.6 to 12.4)                      | <b>-1.7</b><br>(-3.0 to -0.5)                    |
| Diarrhoeal diseases                                                                  | 3,438.3<br>(3,102.8 to 3,776.9)              | 231,972.4<br>(208,497.3 to 255,265.5)               | 388.1<br>(265.4 to 533.9)                 | 14.9<br>(12.5 to 17.3)                            | 1.7<br>(-0.4 to 3.9)                             |
| Intestinal infectious diseases                                                       | 28.7<br>(21.9 to 37.6)                       | 669.7†<br>(542.2 to 845.1)                          | 5.0<br>(3.1 to 7.7)                       | -2.7<br>(-20.8 to 19.8)                           | -13.8<br>(-29.9 to 6.1)                          |
| Typhoid fever                                                                        | 28.2<br>(21.4 to 37.5)                       | 445.5<br>(353.9 to 566.9)                           | 4.4<br>(2.6 to 6.7)                       | -2.4<br>(-23.0 to 23.2)                           | -13.6<br>(-31.8 to 9.1)                          |
| Paratyphoid fever                                                                    | 9.8<br>(7.6 to 12.8)                         | 224.2<br>(176.8 to 283.8)                           | 0.6<br>(0.4 to 1.0)                       | -3.6<br>(-21.1 to 18.8)                           | -14.7<br>(-30.1 to 5.2)                          |
| Other intestinal infectious diseases                                                 | --                                           | --                                                  | < 0.05<br>(< 0.05 to < 0.05)              | -21.1<br>(-35.8 to -2.8)                          | -30.1<br>(-43.1 to -13.9)                        |
| Lower respiratory infections                                                         | 249.9<br>(226.4 to 276.6)                    | 10,777.2<br>(9,593.6 to 12,221.0)                   | 15.4<br>(10.2 to 22.1)                    | 33.1<br>(26.0 to 40.1)                            | 17.9<br>(11.6 to 24.1)                           |
| Upper respiratory infections                                                         | 17,847.4<br>(13,012.4 to 23,663.3)           | 1,355,522.0<br>(981,732.8 to 1,823,514.4)           | 445.1<br>(252.1 to 749.3)                 | 11.2<br>(9.8 to 12.5)                             | -1.6<br>(-2.8 to -0.4)                           |
| Otitis media                                                                         | 4,035.1<br>(2,912.5 to 5,490.0)              | 12,057.3<br>(9,964.8 to 14,658.2)                   | 108.4<br>(61.2 to 180.0)                  | 1.7<br>(-3.1 to 6.8)                              | -9.9<br>(-14.2 to -5.4)                          |
| Meningitis                                                                           | 1,228.5<br>(1,057.9 to 1,420.5)              | 81.8<br>(58.1 to 110.2)                             | 129.8<br>(90.9 to 170.2)                  | 15.6<br>(11.9 to 19.4)                            | 2.4<br>(-0.9 to 5.7)                             |
| Pneumococcal meningitis                                                              | 553.4<br>(464.6 to 660.0)                    | 22.5<br>(13.6 to 34.4)                              | 58.1<br>(39.8 to 78.1)                    | 12.9<br>(6.0 to 20.2)                             | -0.0<br>(-6.2 to 6.4)                            |
| H influenzae type B meningitis                                                       | 166.7<br>(131.1 to 211.9)                    | 5.6<br>(3.1 to 9.6)                                 | 21.2<br>(14.3 to 29.1)                    | -7.2<br>(-12.8 to -2.1)                           | -17.8<br>(-22.7 to -13.3)                        |
| Meningococcal infection                                                              | 135.0<br>(97.7 to 179.6)                     | 13.8<br>(7.6 to 22.8)                               | 14.0<br>(9.4 to 19.2)                     | 7.7<br>(17.8 to 25.5)                             | 7.7<br>(4.4 to 11.1)                             |
| Other meningitis                                                                     | 373.5<br>(279.6 to 475.1)                    | 39.9<br>(27.2 to 55.9)                              | 36.4<br>(24.4 to 50.1)                    | 38.0<br>(31.6 to 44.9)                            | 22.2<br>(16.6 to 28.3)                           |
| Encephalitis                                                                         | 1,237.2<br>(838.7 to 1,784.7)                | 309.9<br>(230.6 to 406.6)                           | 152.5<br>(108.6 to 200.8)                 | 3.3<br>(-2.4 to 9.0)                              | -8.5<br>(-13.6 to -3.5)                          |
| Diphtheria                                                                           | < 0.05<br>(< 0.05 to < 0.05)                 | 0.1<br>(0.1 to 0.2)                                 | < 0.05<br>(< 0.05 to < 0.05)              | -45.0<br>(-59.0 to -28.0)                         | -51.3<br>(-63.7 to -36.2)                        |
| Whooping cough                                                                       | 2.2<br>(1.7 to 2.7)                          | 15.7<br>(12.3 to 19.8)                              | 0.1<br>(0.1 to 0.2)                       | -14.5<br>(-16.3 to -12.7)                         | -24.3<br>(-25.9 to -22.7)                        |
| Tetanus                                                                              | 11.8<br>(11.6 to 12.0)                       | 3.2<br>(1.8 to 4.6)                                 | 0.3<br>(0.1 to 0.4)                       | 8.8<br>(-16.2 to 38.9)                            | -3.7<br>(-25.8 to 23.0)                          |
| Measles                                                                              | 0.4<br>(0.1 to 0.9)                          | 15.1<br>(5.5 to 32.5)                               | < 0.05<br>(< 0.05 to 0.1)                 | -54.9<br>(-59.9 to -49.2)                         | -60.1<br>(-64.5 to -55.1)                        |
| Varicella and herpes zoster                                                          | 357.7<br>(303.5 to 424.5)                    | 5,254.7<br>(3,862.3 to 6,807.9)                     | 16.5<br>(9.7 to 26.0)                     | 11.5<br>(5.2 to 17.7)                             | -1.3<br>(-6.8 to 4.2)                            |
| <b>Neglected tropical diseases and malaria</b>                                       | <b>147,870.0</b><br>(143,432.1 to 151,544.9) | <b>22,802.9†</b><br>(19,093.7 to 27,331.0)          | <b>1,104.4</b><br>(745.4 to 1,574.7)      | <b>-12.2</b><br>(-17.9 to -6.6)                   | <b>-22.2</b><br>(-27.3 to -17.3)                 |
| Malaria                                                                              | 6,881.6<br>(5,951.1 to 7,869.6)              | 6,721.5<br>(5,034.9 to 8,587.4)                     | 94.2<br>(71.0 to 120.2)                   | -0.3<br>(-6.6 to 7.3)                             | -11.7<br>(-17.3 to -5.0)                         |
| Chagas disease                                                                       | 629.3<br>(521.1 to 765.9)                    | 14.8<br>(9.8 to 21.2)                               | 4.0<br>(2.5 to 6.0)                       | 1.4<br>(-8.9 to 6.9)                              | -12.6<br>(-19.3 to -5.3)                         |
| Leishmaniasis                                                                        | 412.1<br>(354.3 to 479.4)                    | 45.5<br>(33.5 to 61.0)                              | 23.9<br>(15.3 to 35.0)                    | 34.4<br>(14.8 to 59.8)                            | 19.0<br>(1.6 to 41.6)                            |
| Visceral leishmaniasis                                                               | 1.2<br>(0.8 to 1.7)                          | 4.9<br>(3.4 to 6.8)                                 | 0.1<br>(< 0.05 to 0.1)                    | -56.8<br>(-71.0 to -36.0)                         | -61.7<br>(-74.4 to -43.3)                        |
| Cutaneous and mucocutaneous leishmaniasis                                            | 373.7<br>(309.9 to 455.5)                    | 40.6<br>(28.6 to 55.8)                              | 23.9<br>(15.2 to 34.9)                    | 35.4<br>(15.3 to 62.1)                            | 19.9<br>(2.1 to 43.6)                            |
| African trypanosomiasis                                                              | 0.6<br>(0.1 to 2.0)                          | 0.4<br>(0.1 to 1.3)                                 | 0.2<br>(< 0.05 to 0.6)                    | -71.0<br>(-94.5 to 54.8)                          | -74.3<br>(-95.2 to 37.1)                         |
| Schistosomiasis                                                                      | 21,521.4<br>(19,665.1 to 23,300.1)           | 5,733.7<br>(4,952.5 to 6,868.1)                     | 180.8<br>(91.4 to 331.6)                  | -19.6<br>(-22.2 to -16.3)                         | -28.8<br>(-31.1 to -25.9)                        |
| Cysticercosis                                                                        | 245.5<br>(162.2 to 349.0)                    | --                                                  | 40.4<br>(22.5 to 62.9)                    | -13.9<br>(-24.8 to -4.3)                          | -23.8<br>(-33.4 to -15.3)                        |
| Cystic echinococcosis                                                                | 86.6<br>(46.1 to 190.8)                      | 18.6<br>(8.4 to 46.2)                               | 8.1<br>(3.6 to 18.1)                      | -36.0<br>(-76.3 to 57.7)                          | -43.3<br>(-79.0 to 39.6)                         |
| Lymphatic filariasis                                                                 | 2,594.2<br>(2,121.8 to 3,320.3)              | 696.6<br>(406.1 to 1,113.6)                         | 119.6<br>(57.4 to 216.2)                  | -40.2<br>(-54.5 to -28.9)                         | -47.1<br>(-59.7 to -37.0)                        |
| Onchocerciasis                                                                       | 1,505.2<br>(916.7 to 2,592.9)                | 333.2<br>(139.7 to 668.4)                           | 91.1<br>(40.2 to 164.4)                   | -16.2<br>(-38.1 to 4.1)                           | -25.8<br>(-45.2 to -7.8)                         |
| Trachoma                                                                             | 13.0<br>(6.8 to 24.0)                        | --                                                  | 1.6<br>(0.9 to 2.7)                       | -19.8<br>(-38.0 to 2.2)                           | -28.9<br>(-45.1 to -9.5)                         |
| Dengue                                                                               | 447.4<br>(243.8 to 757.8)                    | 7,479.0<br>(4,550.3 to 11,342.7)                    | 73.0<br>(31.8 to 135.7)                   | 86.5<br>(50.1 to 335.8)                           | 65.2<br>(33.0 to 285.9)                          |
| Yellow fever                                                                         | 0.2<br>(0.1 to 0.6)                          | 7.1<br>(2.0 to 20.5)                                | < 0.05<br>(< 0.05 to < 0.05)              | -16.0<br>(-45.8 to 27.5)                          | -25.6<br>(-52.0 to 12.9)                         |
| Rabies                                                                               | < 0.05<br>(< 0.05 to < 0.05)                 | 0.5<br>(0.3 to 0.7)                                 | < 0.05<br>(< 0.05 to < 0.05)              | -50.9<br>(-59.3 to -39.5)                         | -56.5<br>(-64.0 to -46.5)                        |
| Intestinal nematode infections                                                       | 122,189.6<br>(116,899.4 to 126,232.9)        | --                                                  | 243.1<br>(139.8 to 393.7)                 | -12.5<br>(-18.9 to -4.8)                          | -22.5<br>(-28.2 to -15.7)                        |
| Ascariasis                                                                           | 65,236.1<br>(58,789.4 to 72,713.3)           | --                                                  | 70.9<br>(38.1 to 121.0)                   | -25.4<br>(-35.0 to -15.0)                         | -33.9<br>(-42.5 to -24.7)                        |

| Cause                                                                   | Prevalence in thousands (95% UI)              | Incidence in thousands (95% UI)                      | YLDs in thousands (95% UI)                 |                                                   |                                                  |
|-------------------------------------------------------------------------|-----------------------------------------------|------------------------------------------------------|--------------------------------------------|---------------------------------------------------|--------------------------------------------------|
|                                                                         | 2016 counts                                   | 2016 counts                                          | 2016 counts                                | Percentage change in counts between 2006 and 2016 | Percentage change in rates between 2006 and 2016 |
| Trichuriasis                                                            | 34,381.6<br>(31,667.2 to 37,486.6)            | --                                                   | 26.8<br>(14.5 to 45.7)                     | -18.1<br>(-29.6 to -5.3)                          | -27.5<br>(-37.7 to -16.1)                        |
| Hookworm disease                                                        | 37,570.5<br>(34,660.8 to 40,862.5)            | --                                                   | 145.4<br>(85.3 to 228.3)                   | -3.1<br>(-12.4 to 7.5)                            | -14.2<br>(-22.4 to -4.8)                         |
| Food-borne trematodiasis                                                | 7,295.4<br>(6,834.2 to 7,877.2)               | 1,001.5<br>(696.2 to 1,263.0)                        | 196.8<br>(99.4 to 356.1)                   | 4.7<br>(-10.2 to 3.4)                             | -15.6<br>(-20.4 to -8.4)                         |
| Leprosy                                                                 | 26.5<br>(24.7 to 28.7)                        | 4.1<br>(3.8 to 4.4)                                  | 1.7<br>(1.1 to 2.4)                        | -18.1<br>(-28.0 to -7.7)                          | -27.5<br>(-36.2 to -18.2)                        |
| Ebola virus disease                                                     | < 0.05<br>(< 0.05 to 0.3)                     | --                                                   | < 0.05<br>(< 0.05 to 0.1)                  | --                                                | --                                               |
| Zika virus disease                                                      | 12.4<br>(7.0 to 22.4)                         | 746.4<br>(423.4 to 1,356.8)                          | 0.2<br>(0.1 to 0.4)                        | --                                                | --                                               |
| Guinea worm disease                                                     | < 0.05<br>(< 0.05 to < 0.05)                  | < 0.05<br>(< 0.05 to < 0.05)                         | < 0.05<br>(< 0.05 to < 0.05)               | -99.5<br>(-99.7 to -99.4)                         | -99.6<br>(-99.7 to -99.4)                        |
| Other neglected tropical diseases                                       | 1,728.6<br>(1,491.7 to 2,004.3)               | --                                                   | 25.8<br>(15.8 to 40.7)                     | 27.2<br>(20.2 to 34.6)                            | 12.7<br>(6.5 to 19.2)                            |
| <b>Maternal disorders</b>                                               | <b>1,715.2<br/>(1,592.5 to 1,823.0)</b>       | <b>22,775.5†<br/>(18,735.2 to 27,453.8)</b>          | <b>166.9<br/>(114.2 to 230.3)</b>          | <b>2.0<br/>(-11.5 to 19.4)</b>                    | <b>-9.7<br/>(-21.6 to 5.8)</b>                   |
| Maternal haemorrhage                                                    | 342.7<br>(252.5 to 471.1)                     | 1,989.3<br>(1,476.4 to 2,633.6)                      | 12.2<br>(7.4 to 18.3)                      | 14.6<br>(-12.2 to 48.4)                           | 1.5<br>(-22.3 to 31.5)                           |
| Maternal sepsis and other pregnancy related infections                  | 263.7<br>(195.0 to 360.3)                     | 1,670.9<br>(1,178.7 to 2,314.1)                      | 7.4<br>(3.4 to 13.7)                       | 16.7<br>(-38.0 to 129.5)                          | 3.4<br>(-45.1 to 103.2)                          |
| Maternal hypertensive disorders                                         | 855.2<br>(562.1 to 1,210.3)                   | 3,941.3<br>(3,252.8 to 4,675.5)                      | 41.3<br>(22.3 to 66.6)                     | 26.4<br>(-20.2 to 102.3)                          | 12.0<br>(-29.4 to 79.1)                          |
| Maternal obstructed labour and uterine rupture                          | 215.3<br>(171.2 to 265.9)                     | 1,375.4<br>(978.3 to 1,942.9)                        | 69.6<br>(43.1 to 101.2)                    | -10.1<br>(-18.0 to -1.2)                          | -20.3<br>(-27.4 to -12.5)                        |
| Maternal abortion, miscarriage, and ectopic pregnancy                   | 113.3<br>(69.5 to 169.9)                      | 13,798.7<br>(10,025.1 to 18,365.7)                   | 12.4<br>(6.4 to 20.4)                      | 3.1<br>(-34.4 to 66.6)                            | -8.7<br>(-41.9 to 47.6)                          |
| Other maternal disorders                                                | --                                            | --                                                   | 24.0<br>(16.4 to 33.1)                     | -2.4<br>(-15.3 to 14.3)                           | -13.6<br>(-25.0 to 1.2)                          |
| <b>Neonatal disorders</b>                                               | <b>5,547.1<br/>(5,081.5 to 6,059.3)</b>       | <b>--</b>                                            | <b>1,043.5<br/>(734.1 to 1,479.0)</b>      | <b>29.8<br/>(15.4 to 46.4)</b>                    | <b>14.9<br/>(2.2 to 29.7)</b>                    |
| Neonatal preterm birth complications                                    | 4,618.8<br>(3,883.7 to 5,517.3)               | --                                                   | 681.6<br>(472.4 to 961.5)                  | 26.7<br>(5.8 to 52.1)                             | 12.2<br>(-6.3 to 34.8)                           |
| Neonatal encephalopathy due to birth asphyxia and trauma                | 867.1<br>(544.1 to 1,380.9)                   | --                                                   | 125.4<br>(47.9 to 284.7)                   | 35.2<br>(26.1 to 53.1)                            | 19.7<br>(11.7 to 35.6)                           |
| Neonatal sepsis and other neonatal infections                           | 471.5<br>(179.4 to 1,132.9)                   | --                                                   | 183.6<br>(58.1 to 478.8)                   | 39.8<br>(30.3 to 54.9)                            | 23.8<br>(15.4 to 37.2)                           |
| Hemolytic disease and other neonatal jaundice                           | 163.0<br>(144.5 to 182.0)                     | --                                                   | 52.9<br>(40.6 to 66.3)                     | 26.4<br>(20.3 to 32.5)                            | 11.9<br>(6.5 to 17.4)                            |
| Other neonatal disorders                                                | --                                            | --                                                   | --                                         | --                                                | --                                               |
| <b>Nutritional deficiencies</b>                                         | <b>114,879.2<br/>(110,198.8 to 119,576.2)</b> | <b>33,670.0†<br/>(28,012.8 to 41,331.0)</b>          | <b>2,341.8<br/>(1,511.3 to 3,429.4)</b>    | <b>17.2<br/>(13.5 to 20.7)</b>                    | <b>3.8<br/>(0.5 to 6.9)</b>                      |
| Protein-energy malnutrition                                             | --                                            | --                                                   | --                                         | --                                                | --                                               |
| Iodine deficiency                                                       | 10,997.9<br>(9,732.5 to 12,396.0)             | 46.8<br>(39.0 to 56.1)                               | 294.8<br>(198.2 to 412.6)                  | -5.2<br>(-8.1 to -2.6)                            | -16.0<br>(-18.6 to -13.8)                        |
| Vitamin A deficiency                                                    | 30,454.5<br>(26,193.1 to 36,123.8)            | 33,623.3<br>(27,970.4 to 41,285.6)                   | 13.3<br>(8.1 to 20.2)                      | 20.5<br>(12.7 to 29.2)                            | 6.8<br>(-0.2 to 14.4)                            |
| Iron-deficiency anaemia                                                 | 86,355.9<br>(75,807.6 to 98,633.8)            | --                                                   | 2,033.8<br>(1,294.4 to 3,003.7)            | 21.3<br>(17.1 to 25.5)                            | 7.5<br>(3.7 to 11.1)                             |
| Other nutritional deficiencies                                          | --                                            | --                                                   | --                                         | --                                                | --                                               |
| <b>Other communicable, maternal, neonatal, and nutritional diseases</b> | <b>183,180.0<br/>(179,671.2 to 186,804.9)</b> | <b>99,695.6<br/>(82,372.8 to 122,769.3)</b>          | <b>513.7<br/>(323.2 to 796.8)</b>          | <b>14.4<br/>(9.8 to 19.6)</b>                     | <b>1.3<br/>(-2.8 to 5.9)</b>                     |
| Sexually transmitted diseases excluding HIV                             | 144,550.8<br>(140,205.2 to 148,568.5)         | 89,641.7<br>(72,148.9 to 112,174.5)                  | 447.7<br>(278.7 to 696.4)                  | 16.1<br>(12.3 to 20.7)                            | 2.9<br>(-0.5 to 6.9)                             |
| Syphilis                                                                | 8,776.3<br>(5,681.6 to 14,259.9)              | 5,744.6<br>(3,482.1 to 9,575.0)                      | 11.0<br>(7.4 to 15.5)                      | 19.3<br>(15.2 to 23.2)                            | 5.6<br>(2.0 to 9.2)                              |
| Chlamydial infection                                                    | 18,678.8<br>(13,447.4 to 26,119.2)            | 11,928.3<br>(8,312.8 to 16,974.5)                    | 97.5<br>(56.3 to 158.1)                    | 8.7<br>(4.7 to 12.4)                              | -3.8<br>(-7.3 to -0.4)                           |
| Gonococcal infection                                                    | 11,368.5<br>(7,557.6 to 16,909.0)             | 37,865.4<br>(23,771.8 to 59,118.6)                   | 115.0<br>(64.0 to 195.0)                   | 29.8<br>(21.8 to 36.5)                            | 15.0<br>(7.9 to 20.9)                            |
| Trichomoniasis                                                          | 23,390.0<br>(15,477.0 to 32,229.1)            | 19,332.2<br>(12,332.9 to 27,134.7)                   | 26.9<br>(10.1 to 58.4)                     | 15.1<br>(13.1 to 17.0)                            | 1.9<br>(0.1 to 3.6)                              |
| Genital herpes                                                          | 93,976.5<br>(81,230.2 to 109,028.3)           | 7,247.8<br>(4,527.9 to 10,933.7)                     | 24.9<br>(8.0 to 56.9)                      | 14.7<br>(12.4 to 17.0)                            | 1.6<br>(-0.5 to 3.6)                             |
| Other sexually transmitted diseases                                     | 7,200.9<br>(6,230.2 to 8,209.3)               | 7,523.4<br>(5,885.0 to 9,560.9)                      | 172.5<br>(111.2 to 259.8)                  | 12.8<br>(9.2 to 17.1)                             | -0.1<br>(-3.3 to 3.7)                            |
| Hepatitis                                                               | 51,585.8<br>(43,842.1 to 61,566.2)            | 10,053.3<br>(6,700.7 to 14,911.8)                    | 21.2<br>(10.9 to 37.4)                     | -13.8<br>(-52.2 to 46.0)                          | -23.6<br>(-57.6 to 29.3)                         |
| Acute hepatitis A                                                       | 88.7<br>(10.2 to 211.1)                       | 1,152.7<br>(133.2 to 2,744.4)                        | 3.7<br>(0.4 to 9.2)                        | -17.0<br>(-91.7 to 576.1)                         | -26.5<br>(-92.6 to 498.8)                        |
| Hepatitis B                                                             | 40,206.1<br>(32,465.0 to 49,745.2)            | 7,681.8<br>(4,669.6 to 12,316.6)                     | 14.8<br>(6.5 to 29.6)                      | -11.8<br>(-57.3 to 72.5)                          | -21.9<br>(-62.2 to 52.8)                         |
| Hepatitis C                                                             | 11,210.0<br>(9,948.1 to 12,539.6)             | 167.0<br>(122.0 to 219.7)                            | 0.1<br>(0.1 to 0.3)                        | -9.8<br>(-10.5 to -9.2)                           | -20.2<br>(-20.8 to -19.6)                        |
| Acute hepatitis E                                                       | 80.9<br>(66.3 to 99.0)                        | 1,051.9<br>(861.7 to 1,287.3)                        | 2.5<br>(1.5 to 3.9)                        | -20.0<br>(-36.6 to -0.1)                          | -29.1<br>(-43.9 to -11.5)                        |
| Other infectious diseases                                               | 2,045.0<br>(1,754.9 to 2,383.8)               | 0.6<br>(0.3 to 0.9)                                  | 44.9<br>(27.6 to 70.6)                     | 14.9<br>(10.7 to 19.5)                            | 1.8<br>(-2.0 to 5.8)                             |
| <b>Non-communicable diseases</b>                                        | <b>523,198.5<br/>(520,807.0 to 525,736.9)</b> | <b>1,397,318.4†<br/>(1,220,934.2 to 1,573,243.6)</b> | <b>46,052.8<br/>(33,928.4 to 60,148.9)</b> | <b>12.8<br/>(12.3 to 13.4)</b>                    | <b>-0.1<br/>(-0.5 to 0.4)</b>                    |
| <b>Neoplasms</b>                                                        | <b>654.2<br/>(635.3 to 672.6)</b>             | <b>315.2<br/>(300.4 to 336.5)</b>                    | <b>104.9<br/>(76.2 to 138.5)</b>           | <b>16.2<br/>(12.6 to 21.6)</b>                    | <b>2.9<br/>(-0.3 to 7.7)</b>                     |
| Lip and oral cavity cancer                                              | 39.3<br>(36.8 to 42.2)                        | 10.6<br>(9.9 to 11.4)                                | 4.1<br>(2.9 to 5.5)                        | 19.9<br>(8.6 to 32.4)                             | 6.2<br>(-3.9 to 17.2)                            |
| Nasopharynx cancer                                                      | 19.6<br>(17.4 to 22.2)                        | 5.5<br>(4.9 to 6.3)                                  | 2.3<br>(1.6 to 3.2)                        | -7.1<br>(-19.3 to 7.3)                            | -17.7<br>(-28.5 to -5.0)                         |
| Other pharynx cancer                                                    | 5.8<br>(5.2 to 6.4)                           | 2.3<br>(2.0 to 2.5)                                  | 0.8<br>(0.6 to 1.1)                        | 20.6<br>(6.3 to 31.4)                             | 6.8<br>(-5.9 to 16.4)                            |
| Oesophageal cancer                                                      | 3.1<br>(2.9 to 3.3)                           | 2.6<br>(2.5 to 2.7)                                  | 0.7<br>(0.5 to 0.9)                        | -5.7<br>(-11.5 to 0.7)                            | -16.5<br>(-21.6 to -10.8)                        |
| Stomach cancer                                                          | 21.6<br>(20.7 to 22.5)                        | 12.1<br>(11.7 to 12.6)                               | 3.4<br>(2.4 to 4.5)                        | -10.0<br>(-13.9 to -5.7)                          | -20.2<br>(-23.7 to -16.5)                        |
| Colon and rectum cancer                                                 | 55.5<br>(52.7 to 58.6)                        | 15.6<br>(14.8 to 16.5)                               | 5.9<br>(4.2 to 7.9)                        | 14.7<br>(5.9 to 24.7)                             | 1.6<br>(-6.2 to 10.5)                            |
| Liver cancer                                                            | 16.3<br>(13.4 to 20.1)                        | 17.7<br>(15.8 to 19.9)                               | 4.1<br>(2.9 to 5.6)                        | 5.4<br>(-5.7 to 20.0)                             | -6.7<br>(-16.5 to 6.3)                           |
| Liver cancer due to hepatitis B                                         | 14.6<br>(11.9 to 17.8)                        | 11.0<br>(9.1 to 12.9)                                | 2.6<br>(1.7 to 3.5)                        | 4.3<br>(-6.9 to 20.4)                             | -7.6<br>(-17.5 to 6.7)                           |

| Cause                                              | Prevalence in thousands (95% UI)                 | Incidence in thousands (95% UI)                | YLDs in thousands (95% UI)                  |                                                   |                                                  |
|----------------------------------------------------|--------------------------------------------------|------------------------------------------------|---------------------------------------------|---------------------------------------------------|--------------------------------------------------|
|                                                    | 2016 counts                                      | 2016 counts                                    | 2016 counts                                 | Percentage change in counts between 2006 and 2016 | Percentage change in rates between 2006 and 2016 |
| Liver cancer due to hepatitis C                    | 1.2<br>(0.9 to 1.6)                              | 1.0<br>(0.7 to 1.3)                            | 0.2<br>(0.1 to 0.3)                         | 16.5<br>(3.4 to 36.0)                             | 3.2<br>(-8.4 to 20.5)                            |
| Liver cancer due to alcohol use                    | 1.0<br>(0.7 to 1.3)                              | 0.8<br>(0.6 to 1.1)                            | 0.2<br>(0.1 to 0.3)                         | 17.1<br>(2.5 to 33.0)                             | 3.7<br>(-9.2 to 17.8)                            |
| Liver cancer due to other causes                   | 6.7<br>(5.0 to 9.0)                              | 4.9<br>(3.7 to 6.4)                            | 1.2<br>(0.7 to 1.7)                         | 4.1<br>(-9.7 to 23.2)                             | -7.8<br>(-20.0 to 9.1)                           |
| Gallbladder and biliary tract cancer               | 1.2<br>(1.0 to 1.2)                              | 1.4<br>(1.2 to 1.5)                            | 0.3<br>(0.2 to 0.4)                         | 5.1<br>(-3.8 to 14.5)                             | -6.9<br>(-14.8 to 1.4)                           |
| Pancreatic cancer                                  | 1.9<br>(1.8 to 1.9)                              | 2.4<br>(2.3 to 2.4)                            | 0.5<br>(0.4 to 0.7)                         | 14.7<br>(9.8 to 19.5)                             | 1.6<br>(-2.7 to 5.9)                             |
| Larynx cancer                                      | 4.1<br>(3.9 to 4.4)                              | 1.2<br>(1.2 to 1.3)                            | 0.5<br>(0.4 to 0.7)                         | 6.8<br>(-0.3 to 14.9)                             | -5.4<br>(-11.7 to 1.7)                           |
| Tracheal, bronchus, and lung cancer                | 13.9<br>(12.8 to 14.9)                           | 10.6<br>(9.8 to 11.2)                          | 2.8<br>(2.0 to 3.6)                         | 3.1<br>(-3.8 to 10.1)                             | -8.7<br>(-14.8 to -2.5)                          |
| Malignant skin melanoma                            | 56.1<br>(50.0 to 68.9)                           | 11.3<br>(10.2 to 13.9)                         | 3.7<br>(2.5 to 5.3)                         | 28.0<br>(17.5 to 39.8)                            | 13.4<br>(4.1 to 23.8)                            |
| Non-melanoma skin cancer                           | 2.5<br>(1.1 to 5.2)                              | 18.9<br>(9.3 to 39.7)                          | 0.1<br>(< 0.05 to 0.2)                      | 29.6<br>(13.1 to 46.9)                            | 14.8<br>(0.1 to 30.1)                            |
| Non-melanoma skin cancer (squamous-cell carcinoma) | 1.7<br>(0.6 to 3.9)                              | 2.2<br>(0.9 to 4.7)                            | 0.1<br>(< 0.05 to 0.2)                      | 34.6<br>(14.3 to 53.1)                            | 19.2<br>(1.3 to 35.6)                            |
| Non-melanoma skin cancer (basal-cell carcinoma)    | 1.9<br>(0.7 to 4.5)                              | 16.7<br>(7.4 to 37.5)                          | < 0.05<br>(< 0.05 to 0.1)                   | 12.5<br>(2.8 to 21.0)                             | -0.4<br>(-9.0 to 7.1)                            |
| Breast cancer                                      | 200.4<br>(182.2 to 216.0)                        | 41.9<br>(38.4 to 45.1)                         | 17.6<br>(12.5 to 23.9)                      | 19.9<br>(8.0 to 33.6)                             | 6.2<br>(-4.3 to 18.3)                            |
| Cervical cancer                                    | 139.6<br>(107.2 to 152.7)                        | 36.3<br>(28.4 to 39.2)                         | 13.6<br>(9.1 to 18.3)                       | 0.5<br>(-8.4 to 12.5)                             | -11.0<br>(-18.9 to -0.4)                         |
| Uterine cancer                                     | 22.1<br>(20.4 to 24.4)                           | 4.6<br>(4.3 to 5.1)                            | 1.7<br>(1.2 to 2.4)                         | 18.4<br>(3.9 to 37.6)                             | 4.9<br>(-8.0 to 21.9)                            |
| Ovarian cancer                                     | 23.6<br>(21.9 to 24.9)                           | 7.6<br>(7.2 to 8.0)                            | 3.8<br>(2.6 to 5.0)                         | 7.9<br>(10.6 to 30.2)                             | 7.9<br>(-2.1 to 15.3)                            |
| Prostate cancer                                    | 5.6<br>(4.5 to 6.2)                              | 1.4<br>(1.2 to 1.5)                            | 0.6<br>(0.4 to 0.8)                         | 41.3<br>(28.3 to 50.0)                            | 25.2<br>(13.6 to 32.8)                           |
| Testicular cancer                                  | 60.6<br>(57.1 to 64.5)                           | 11.8<br>(11.1 to 12.6)                         | 4.1<br>(2.9 to 5.7)                         | 32.2<br>(20.5 to 45.8)                            | 17.1<br>(6.8 to 29.1)                            |
| Kidney cancer                                      | 19.4<br>(18.1 to 20.2)                           | 5.1<br>(4.9 to 5.3)                            | 1.8<br>(1.3 to 2.4)                         | 22.3<br>(17.4 to 27.8)                            | 8.3<br>(4.0 to 13.2)                             |
| Bladder cancer                                     | 14.0<br>(12.9 to 15.1)                           | 3.4<br>(3.2 to 3.7)                            | 1.4<br>(1.0 to 1.8)                         | 26.3<br>(15.2 to 37.9)                            | 11.9<br>(2.0 to 22.1)                            |
| Brain and nervous system cancer                    | 38.2<br>(34.2 to 42.1)                           | 16.8<br>(15.2 to 18.6)                         | 5.4<br>(3.9 to 7.1)                         | 39.1<br>(28.7 to 51.4)                            | 23.2<br>(14.0 to 34.1)                           |
| Thyroid cancer                                     | 68.2<br>(63.2 to 74.9)                           | 12.9<br>(12.0 to 14.2)                         | 4.2<br>(2.9 to 6.0)                         | 50.4<br>(35.4 to 69.2)                            | 33.2<br>(19.9 to 49.9)                           |
| Mesothelioma                                       | 0.7<br>(0.6 to 0.8)                              | 0.5<br>(0.4 to 0.5)                            | 0.1<br>(0.1 to 0.2)                         | 9.0<br>(2.1 to 16.2)                              | -3.5<br>(-9.6 to 2.9)                            |
| Hodgkin lymphoma                                   | 28.2<br>(25.5 to 32.8)                           | 6.8<br>(6.1 to 7.9)                            | 2.6<br>(1.9 to 3.6)                         | 17.7<br>(7.6 to 28.2)                             | 4.2<br>(-4.7 to 13.5)                            |
| Non-Hodgkin's lymphoma                             | 37.9<br>(34.0 to 40.6)                           | 11.3<br>(10.1 to 12.0)                         | 3.7<br>(2.6 to 4.9)                         | 32.7<br>(25.4 to 39.7)                            | 17.5<br>(11.0 to 23.7)                           |
| Multiple myeloma                                   | 2.6<br>(2.1 to 2.9)                              | 1.2<br>(1.0 to 1.3)                            | 0.6<br>(0.4 to 0.8)                         | 37.7<br>(27.8 to 46.8)                            | 21.9<br>(13.2 to 30.0)                           |
| Leukaemia                                          | 43.0<br>(36.3 to 46.0)                           | 12.9<br>(11.1 to 13.8)                         | 5.7<br>(4.0 to 7.7)                         | -5.3<br>(-10.7 to 0.9)                            | -16.1<br>(-20.9 to -10.7)                        |
| Acute lymphoid leukaemia                           | 8.3<br>(7.0 to 9.1)                              | 2.4<br>(2.0 to 2.7)                            | 1.1<br>(0.8 to 1.5)                         | 15.0<br>(-0.4 to 23.0)                            | 1.8<br>(-11.7 to 8.9)                            |
| Chronic lymphoid leukaemia                         | 6.6<br>(5.6 to 7.3)                              | 1.4<br>(1.2 to 1.6)                            | 0.8<br>(0.6 to 1.1)                         | 11.2<br>(-3.0 to 24.0)                            | -1.5<br>(-14.1 to 9.8)                           |
| Acute myeloid leukaemia                            | 4.2<br>(3.7 to 4.7)                              | 3.2<br>(2.8 to 3.5)                            | 0.9<br>(0.6 to 1.2)                         | 14.3<br>(8.1 to 20.2)                             | 1.2<br>(-4.2 to 6.4)                             |
| Chronic myeloid leukaemia                          | 4.7<br>(4.0 to 5.2)                              | 1.7<br>(1.4 to 1.8)                            | 0.6<br>(0.4 to 0.8)                         | -3.9<br>(-12.0 to 5.4)                            | -14.9<br>(-22.0 to -6.7)                         |
| Other leukaemia                                    | 19.2<br>(15.3 to 20.8)                           | 4.2<br>(3.4 to 4.6)                            | 2.4<br>(1.6 to 3.2)                         | -21.2<br>(-28.2 to -13.3)                         | -30.2<br>(-36.4 to -23.2)                        |
| Other neoplasms                                    | 97.5<br>(86.9 to 104.2)                          | 28.5<br>(25.6 to 30.3)                         | 8.7<br>(6.1 to 11.6)                        | 42.9<br>(33.1 to 52.7)                            | 26.5<br>(17.9 to 35.2)                           |
| <b>Cardiovascular diseases</b>                     | <b>10,494.9</b><br><b>(10,119.9 to 10,871.4)</b> | <b>735.9†</b><br><b>(667.7 to 804.9)</b>       | <b>758.7</b><br><b>(530.6 to 1,041.2)</b>   | <b>12.9</b><br><b>(10.4 to 15.3)</b>              | <b>0.0</b><br><b>(-2.2 to 2.1)</b>               |
| Rheumatic heart disease                            | 3,306.3<br>(2,973.2 to 3,677.7)                  | 62.6<br>(54.1 to 74.2)                         | 157.6<br>(99.6 to 231.4)                    | 21.8<br>(17.2 to 26.2)                            | 7.8<br>(3.8 to 11.8)                             |
| Ischaemic heart disease                            | 2,770.6<br>(2,541.7 to 3,017.0)                  | 353.6<br>(306.3 to 401.5)                      | 165.1<br>(110.3 to 233.1)                   | 18.3<br>(15.2 to 21.4)                            | 4.8<br>(2.0 to 7.5)                              |
| Cerebrovascular disease                            | 1,173.6<br>(1,106.8 to 1,273.0)                  | 122.5†<br>(90.4 to 158.7)                      | 200.5<br>(139.6 to 272.1)                   | 2.6<br>(-2.9 to 8.3)                              | -9.2<br>(-14.0 to -4.0)                          |
| Ischaemic stroke                                   | 964.4<br>(791.6 to 1,169.8)                      | 78.3†<br>(50.4 to 110.3)                       | 148.8<br>(100.4 to 206.1)                   | 2.4<br>(-4.8 to 9.7)                              | -9.3<br>(-15.6 to -2.8)                          |
| Hemorrhagic stroke                                 | 323.2<br>(262.5 to 398.7)                        | 44.1†<br>(30.0 to 60.0)                        | 51.7<br>(34.2 to 72.0)                      | 3.2<br>(-5.3 to 12.3)                             | -8.6<br>(-16.1 to -0.6)                          |
| Hypertensive heart disease                         | 167.6<br>(119.2 to 221.1)                        | --                                             | 14.6<br>(8.7 to 22.8)                       | 12.9<br>(4.3 to 21.7)                             | 0.0<br>(-7.6 to 7.8)                             |
| Cardiomyopathy and myocarditis                     | 268.7<br>(234.9 to 308.1)                        | 117.4†<br>(87.6 to 153.5)                      | 30.9<br>(18.9 to 46.5)                      | 10.7<br>(6.0 to 15.6)                             | -1.9<br>(-6.1 to 2.4)                            |
| Myocarditis                                        | 127.4<br>(100.4 to 155.2)                        | 117.4<br>(87.6 to 153.5)                       | 10.2<br>(6.2 to 15.3)                       | 7.4<br>(1.1 to 13.9)                              | -4.9<br>(-10.5 to 0.9)                           |
| Alcoholic cardiomyopathy                           | 37.6<br>(28.4 to 47.1)                           | --                                             | 3.3<br>(2.0 to 5.0)                         | 7.6<br>(-6.9 to 22.2)                             | -4.7<br>(-17.6 to 8.2)                           |
| Other cardiomyopathy                               | 201.1<br>(152.5 to 253.1)                        | --                                             | 17.5<br>(10.7 to 26.3)                      | 13.4<br>(6.9 to 20.9)                             | 0.5<br>(-5.4 to 7.0)                             |
| Atrial fibrillation and flutter                    | 491.8<br>(382.6 to 602.6)                        | 27.3<br>(20.9 to 34.9)                         | 41.7<br>(25.8 to 60.9)                      | 12.6<br>(6.0 to 20.3)                             | -0.3<br>(-6.2 to 6.5)                            |
| Peripheral vascular disease                        | --                                               | --                                             | --                                          | --                                                | --                                               |
| Endocarditis                                       | 11.9<br>(8.7 to 16.0)                            | 52.5<br>(37.9 to 72.6)                         | 0.9<br>(0.6 to 1.4)                         | 15.0<br>(13.1 to 16.9)                            | 1.9<br>(0.1 to 3.5)                              |
| Other cardiovascular and circulatory diseases      | 2,735.0<br>(1,740.4 to 4,066.1)                  | --                                             | 147.3<br>(78.6 to 242.0)                    | 14.4<br>(10.3 to 18.5)                            | 1.4<br>(-2.3 to 4.9)                             |
| <b>Chronic respiratory diseases</b>                | <b>24,585.3</b><br><b>(23,468.5 to 25,397.0)</b> | <b>4,696.8†</b><br><b>(4,052.6 to 5,350.9)</b> | <b>1,231.6</b><br><b>(933.8 to 1,593.6)</b> | <b>18.4</b><br><b>(16.4 to 20.6)</b>              | <b>4.8</b><br><b>(3.0 to 6.8)</b>                |
| Chronic obstructive pulmonary disease              | 5,972.5<br>(5,523.9 to 6,466.9)                  | 482.5<br>(405.2 to 573.1)                      | 429.3<br>(363.8 to 487.6)                   | 17.2<br>(13.3 to 21.2)                            | 3.8<br>(0.4 to 7.3)                              |
| Pneumoconiosis                                     | 11.3<br>(9.7 to 13.1)                            | 1.2<br>(1.0 to 1.5)                            | 1.8<br>(1.2 to 2.5)                         | 10.4<br>(8.9 to 12.0)                             | -2.2<br>(-3.6 to -0.8)                           |
| Silicosis                                          | 3.2<br>(2.4 to 4.1)                              | 0.4<br>(0.3 to 0.6)                            | 0.5<br>(0.3 to 0.8)                         | 5.5<br>(3.4 to 7.7)                               | -6.6<br>(-8.4 to -4.7)                           |

| Cause                                                          | Prevalence in thousands (95% UI)                    | Incidence in thousands (95% UI)                    | YLDs in thousands (95% UI)                       |                                                   |                                                  |
|----------------------------------------------------------------|-----------------------------------------------------|----------------------------------------------------|--------------------------------------------------|---------------------------------------------------|--------------------------------------------------|
|                                                                | 2016 counts                                         | 2016 counts                                        | 2016 counts                                      | Percentage change in counts between 2006 and 2016 | Percentage change in rates between 2006 and 2016 |
| Asbestosis                                                     | 2.9<br>(2.1 to 3.8)                                 | 0.2<br>(0.1 to 0.3)                                | 0.5<br>(0.3 to 0.7)                              | 16.9<br>(14.0 to 19.6)                            | 3.6<br>(0.9 to 5.9)                              |
| Coal workers pneumoconiosis                                    | 1.1<br>(0.8 to 1.4)                                 | 0.1<br>(0.1 to 0.2)                                | 0.2<br>(0.1 to 0.2)                              | 1.6<br>(-2.7 to 6.5)                              | -10.0<br>(-13.8 to -5.7)                         |
| Other pneumoconiosis                                           | 4.1<br>(3.1 to 5.5)                                 | 0.4<br>(0.3 to 0.6)                                | 0.7<br>(0.4 to 1.0)                              | 12.6<br>(9.6 to 15.9)                             | -0.3<br>(-3.0 to 2.6)                            |
| Asthma                                                         | 18,705.9<br>(16,282.1 to 21,496.8)                  | 4,207.4<br>(3,588.2 to 4,876.0)                    | 736.1<br>(470.9 to 1,079.8)                      | 16.9<br>(14.6 to 19.1)                            | 3.6<br>(1.5 to 5.5)                              |
| Interstitial lung disease and pulmonary sarcoidosis            | 83.4<br>(70.3 to 97.9)                              | 5.7<br>(3.8 to 8.1)                                | 9.3<br>(5.9 to 14.0)                             | 14.7<br>(5.6 to 25.2)                             | 1.6<br>(-6.5 to 10.9)                            |
| Other chronic respiratory diseases                             | --                                                  | --                                                 | 55.1<br>(46.5 to 62.5)                           | 58.9<br>(53.7 to 64.2)                            | 40.7<br>(36.1 to 45.4)                           |
| <b>Cirrhosis and other chronic liver diseases</b>              | <b>2,779.0</b><br><b>(2,536.1 to 3,074.6)</b>       | <b>58.1</b><br><b>(46.4 to 69.7)</b>               | <b>74.7</b><br><b>(51.1 to 103.7)</b>            | <b>18.9</b><br><b>(13.1 to 24.2)</b>              | <b>5.2</b><br><b>(0.2 to 10.0)</b>               |
| Cirrhosis and other chronic liver diseases due to hepatitis B  | 841.4<br>(706.7 to 991.1)                           | 20.0<br>(15.6 to 25.2)                             | 24.4<br>(16.1 to 35.3)                           | 17.8<br>(8.2 to 28.8)                             | 4.3<br>(-4.2 to 14.1)                            |
| Cirrhosis and other chronic liver diseases due to hepatitis C  | 692.3<br>(569.8 to 827.1)                           | 14.3<br>(10.8 to 18.3)                             | 18.3<br>(11.8 to 26.3)                           | 22.0<br>(11.4 to 33.1)                            | 8.1<br>(-1.4 to 17.9)                            |
| Cirrhosis and other chronic liver diseases due to alcohol use  | 542.6<br>(451.1 to 639.5)                           | 11.3<br>(8.6 to 14.2)                              | 13.9<br>(9.2 to 20.3)                            | 18.9<br>(8.2 to 30.1)                             | 5.3<br>(-4.2 to 15.2)                            |
| Cirrhosis and other chronic liver diseases due to other causes | 702.7<br>(552.7 to 863.7)                           | 12.6<br>(9.2 to 16.4)                              | 18.0<br>(11.2 to 26.1)                           | 17.2<br>(6.6 to 28.1)                             | 3.8<br>(-5.6 to 13.4)                            |
| <b>Digestive diseases</b>                                      | <b>13,626.4</b><br><b>(12,918.1 to 14,379.0)</b>    | <b>10,587.4†</b><br><b>(9,130.5 to 12,144.1)</b>   | <b>395.6</b><br><b>(269.1 to 562.4)</b>          | <b>9.2</b><br><b>(4.6 to 14.6)</b>                | <b>-3.3</b><br><b>(-7.4 to 1.5)</b>              |
| Peptic ulcer disease                                           | 4,789.6<br>(3,791.2 to 6,039.2)                     | 845.4<br>(608.3 to 1,136.6)                        | 91.7<br>(53.0 to 149.6)                          | 8.6<br>(-1.2 to 18.6)                             | -3.9<br>(-12.5 to 5.0)                           |
| Gastritis and duodenitis                                       | 5,127.2<br>(3,845.7 to 6,692.6)                     | 3,734.9<br>(2,749.5 to 5,035.3)                    | 83.6<br>(47.2 to 133.2)                          | 2.9<br>(-7.3 to 13.1)                             | -8.9<br>(-17.9 to 0.2)                           |
| Appendicitis                                                   | 59.8<br>(47.1 to 73.0)                              | 1,520.5<br>(1,200.8 to 1,838.7)                    | 18.4<br>(11.5 to 26.9)                           | 15.5<br>(3.2 to 27.6)                             | 2.2<br>(-8.6 to 13.0)                            |
| Paralytic ileus and intestinal obstruction                     | 7.5<br>(5.5 to 10.0)                                | 203.1<br>(146.3 to 272.4)                          | 2.5<br>(1.4 to 3.7)                              | 19.3<br>(16.8 to 21.8)                            | 5.7<br>(3.4 to 7.9)                              |
| Inguinal, femoral, and abdominal hernia                        | 2,760.6<br>(1,909.9 to 3,824.9)                     | 1,178.6<br>(794.2 to 1,684.3)                      | 106.4<br>(60.4 to 166.5)                         | 11.5<br>(5.8 to 17.1)                             | -1.3<br>(-6.4 to 3.7)                            |
| Inflammatory bowel disease                                     | 325.0<br>(280.5 to 376.0)                           | 353.4<br>(288.3 to 434.5)                          | 48.7<br>(31.9 to 69.3)                           | 12.6<br>(7.5 to 17.7)                             | -0.3<br>(-4.8 to 4.2)                            |
| Vascular intestinal disorders                                  | 2.7<br>(1.6 to 4.4)                                 | 16.6<br>(10.7 to 23.8)                             | 0.9<br>(0.4 to 1.6)                              | 16.3<br>(13.8 to 18.2)                            | 3.0<br>(0.8 to 4.7)                              |
| Gallbladder and biliary diseases                               | 1,045.9<br>(762.4 to 1,381.2)                       | 2,476.9<br>(1,809.5 to 3,353.8)                    | 12.3<br>(7.0 to 19.6)                            | 11.8<br>(5.5 to 17.9)                             | -1.0<br>(-6.6 to 4.4)                            |
| Pancreatitis                                                   | 29.1<br>(21.5 to 38.9)                              | 258.1<br>(188.8 to 346.7)                          | 3.8<br>(2.3 to 5.7)                              | 14.4<br>(7.9 to 20.2)                             | 1.3<br>(-4.5 to 6.5)                             |
| Other digestive diseases                                       | --                                                  | --                                                 | 27.4<br>(18.6 to 38.9)                           | 11.0<br>(6.3 to 16.5)                             | -1.7<br>(-5.8 to 3.2)                            |
| <b>Neurological disorders</b>                                  | <b>274,616.8</b><br><b>(258,574.1 to 297,508.4)</b> | <b>136,321.3</b><br><b>(89,288.5 to 196,387.1)</b> | <b>6,545.0</b><br><b>(4,361.0 to 8,988.8)</b>    | <b>14.4</b><br><b>(12.9 to 15.9)</b>              | <b>1.3</b><br><b>(0.0 to 2.7)</b>                |
| Alzheimer's disease and other dementias                        | --                                                  | --                                                 | --                                               | --                                                | --                                               |
| Parkinson's disease                                            | 24.1<br>(13.4 to 40.9)                              | 4.0<br>(2.4 to 6.4)                                | 3.2<br>(1.6 to 6.0)                              | 19.3<br>(12.3 to 26.4)                            | 5.7<br>(-0.6 to 11.9)                            |
| Epilepsy                                                       | 1,605.1<br>(1,303.5 to 1,915.5)                     | 114.4<br>(72.1 to 161.6)                           | 509.3<br>(334.1 to 716.5)                        | 8.0<br>(-3.6 to 21.1)                             | -4.4<br>(-14.6 to 7.3)                           |
| Multiple sclerosis                                             | 207.1<br>(177.5 to 236.4)                           | 12.9<br>(9.4 to 16.6)                              | 56.1<br>(38.3 to 76.0)                           | 22.6<br>(16.0 to 29.5)                            | 8.6<br>(2.7 to 14.7)                             |
| Motor neuron disease                                           | 17.7<br>(14.6 to 21.2)                              | 0.9<br>(0.6 to 1.4)                                | 3.8<br>(2.5 to 5.2)                              | 11.7<br>(10.8 to 12.7)                            | -1.1<br>(-1.9 to -0.2)                           |
| Migraine                                                       | 120,909.4<br>(111,727.5 to 129,951.1)               | 11,259.6<br>(9,445.0 to 13,178.8)                  | 5,137.9<br>(3,275.7 to 7,224.9)                  | 14.7<br>(13.7 to 15.7)                            | 1.5<br>(0.7 to 2.4)                              |
| Tension-type headache                                          | 208,325.1<br>(156,814.3 to 277,938.4)               | 124,926.7<br>(77,366.8 to 185,518.3)               | 755.4<br>(462.4 to 1,142.7)                      | 15.2<br>(13.4 to 17.4)                            | 2.0<br>(0.5 to 4.0)                              |
| Other neurological disorders                                   | 1.4<br>(0.7 to 2.6)                                 | 2.9<br>(1.5 to 4.8)                                | 79.3<br>(53.0 to 109.9)                          | 31.8<br>(19.2 to 46.4)                            | 16.7<br>(5.6 to 29.6)                            |
| <b>Mental and substance use disorders</b>                      | <b>104,369.1</b><br><b>(102,454.4 to 106,410.6)</b> | <b>35,906.6†</b><br><b>(31,172.8 to 41,906.1)</b>  | <b>15,466.8</b><br><b>(11,344.9 to 20,140.3)</b> | <b>12.7</b><br><b>(11.9 to 13.6)</b>              | <b>-0.2</b><br><b>(-0.9 to 0.6)</b>              |
| Schizophrenia                                                  | 2,663.5<br>(2,194.6 to 3,155.9)                     | 152.6<br>(95.5 to 224.8)                           | 1,753.7<br>(1,247.2 to 2,266.4)                  | 8.0<br>(5.9 to 10.1)                              | -4.3<br>(-6.2 to -2.5)                           |
| Alcohol use disorders                                          | 14,126.7<br>(11,356.4 to 17,244.7)                  | 7,751.7<br>(6,098.7 to 9,561.7)                    | 1,429.5<br>(948.9 to 2,086.4)                    | 10.8<br>(6.9 to 14.3)                             | -1.9<br>(-5.3 to 1.2)                            |
| Drug use disorders                                             | 8,911.0<br>(8,544.8 to 9,179.0)                     | 579.3<br>(454.4 to 725.1)                          | 2,422.9<br>(1,688.6 to 3,246.3)                  | 17.9<br>(15.0 to 20.6)                            | 4.4<br>(1.9 to 6.8)                              |
| Opioid use disorders                                           | 4,756.4<br>(3,814.5 to 5,712.0)                     | 281.9<br>(186.8 to 401.4)                          | 1,999.4<br>(1,364.3 to 2,731.9)                  | 19.1<br>(15.9 to 22.3)                            | 5.5<br>(2.6 to 8.3)                              |
| Cocaine use disorders                                          | 678.9<br>(593.1 to 773.0)                           | 14.8<br>(9.2 to 21.6)                              | 93.7<br>(57.6 to 134.9)                          | 14.8<br>(9.7 to 20.3)                             | 1.7<br>(-2.9 to 6.5)                             |
| Amphetamine use disorders                                      | 610.7<br>(430.3 to 845.4)                           | 16.2<br>(6.8 to 30.4)                              | 80.3<br>(44.9 to 127.1)                          | 11.4<br>(3.7 to 18.7)                             | -1.4<br>(-8.2 to 5.1)                            |
| Cannabis use disorders                                         | 2,458.7<br>(1,923.1 to 3,118.2)                     | 173.4<br>(111.5 to 255.7)                          | 71.8<br>(42.2 to 108.8)                          | 7.9<br>(3.3 to 12.5)                              | -4.4<br>(-8.5 to -0.4)                           |
| Other drug use disorders                                       | 587.6<br>(482.3 to 702.7)                           | 93.0<br>(70.7 to 114.7)                            | 177.7<br>(119.2 to 243.5)                        | 13.4<br>(9.7 to 17.4)                             | 0.4<br>(-2.8 to 3.9)                             |
| Depressive disorders                                           | 22,352.8<br>(21,031.3 to 23,602.2)                  | 22,720.1<br>(18,267.5 to 28,211.6)                 | 3,765.9<br>(2,463.6 to 5,380.8)                  | 10.4<br>(8.7 to 12.0)                             | -2.2<br>(-3.7 to -0.8)                           |
| Major depressive disorder                                      | 13,937.5<br>(10,938.9 to 17,467.4)                  | 21,242.0<br>(16,737.7 to 26,768.4)                 | 2,901.2<br>(1,863.9 to 4,294.8)                  | 9.4<br>(7.0 to 11.3)                              | -3.1<br>(-5.3 to -1.4)                           |
| Dysthymia                                                      | 8,223.5<br>(7,195.5 to 10,882.9)                    | 1,478.1<br>(1,190.8 to 1,796.4)                    | 864.8<br>(555.6 to 1,304.5)                      | 13.9<br>(11.2 to 16.5)                            | 0.9<br>(-1.5 to 3.1)                             |
| Bipolar disorder                                               | 4,444.7<br>(3,675.1 to 5,427.2)                     | 231.1<br>(145.4 to 342.0)                          | 919.3<br>(552.7 to 1,377.2)                      | 16.1<br>(13.9 to 18.2)                            | 2.9<br>(0.9 to 4.7)                              |
| Anxiety disorders                                              | 24,429.7<br>(21,750.9 to 27,508.1)                  | 3,764.3<br>(3,376.9 to 4,210.4)                    | 2,380.9<br>(1,638.4 to 3,281.3)                  | 14.6<br>(12.6 to 16.4)                            | 1.5<br>(-0.3 to 3.1)                             |
| Eating disorders                                               | 1,867.7<br>(1,608.7 to 2,237.5)                     | 433.2<br>(281.9 to 636.4)                          | 378.2<br>(221.2 to 579.4)                        | 23.5<br>(20.6 to 26.4)                            | 9.4<br>(6.8 to 12.0)                             |
| Anorexia nervosa                                               | 293.1<br>(205.7 to 425.2)                           | 65.1<br>(43.4 to 91.0)                             | 61.9<br>(36.4 to 99.2)                           | 16.9<br>(10.0 to 23.2)                            | 3.5<br>(-2.6 to 9.1)                             |
| Bulimia nervosa                                                | 1,506.5<br>(1,026.5 to 2,123.4)                     | 368.1<br>(213.5 to 573.3)                          | 316.4<br>(178.8 to 502.5)                        | 24.9<br>(21.5 to 28.1)                            | 10.6<br>(7.6 to 13.5)                            |
| Autistic spectrum disorders                                    | 4,919.5<br>(4,684.0 to 5,130.5)                     | --                                                 | 718.9<br>(490.3 to 1,009.4)                      | 13.1<br>(11.5 to 14.8)                            | 0.1<br>(-1.3 to 1.6)                             |
| Autism                                                         | 1,454.2<br>(1,251.2 to 1,691.3)                     | --                                                 | 371.5<br>(239.6 to 538.6)                        | 12.7<br>(10.0 to 15.5)                            | -0.2<br>(-2.5 to 2.3)                            |
| Asperger syndrome and other autistic spectrum disorders        | 3,460.8<br>(2,884.9 to 4,153.8)                     | --                                                 | 347.4<br>(228.4 to 503.2)                        | 13.5<br>(11.9 to 15.3)                            | 0.6<br>(-0.9 to 2.1)                             |

| Cause                                                      | Prevalence in thousands (95% UI)              | Incidence in thousands (95% UI)                    | YLDs in thousands (95% UI)               |                                                   |                                                  |
|------------------------------------------------------------|-----------------------------------------------|----------------------------------------------------|------------------------------------------|---------------------------------------------------|--------------------------------------------------|
|                                                            | 2016 counts                                   | 2016 counts                                        | 2016 counts                              | Percentage change in counts between 2006 and 2016 | Percentage change in rates between 2006 and 2016 |
| Attention-deficit/hyperactivity disorder                   | 4,715.6<br>(4,212.6 to 5,343.1)               | --                                                 | 56.7<br>(33.7 to 89.2)                   | 11.1<br>(8.3 to 13.9)                             | -1.6<br>(-4.1 to 0.9)                            |
| Conduct disorder                                           | --                                            | --                                                 | --                                       | --                                                | --                                               |
| Idiopathic developmental intellectual disability           | 10,216.1<br>(6,323.2 to 14,187.5)             | --                                                 | 405.7<br>(196.1 to 689.1)                | 4.9<br>(0.7 to 7.7)                               | -7.1<br>(-10.8 to -4.6)                          |
| Other mental and substance use disorders                   | 16,281.9<br>(14,193.9 to 18,875.9)            | 274.2<br>(178.1 to 410.8)                          | 1,235.1<br>(841.4 to 1,787.7)            | 13.0<br>(11.4 to 14.7)                            | 0.1<br>(-1.4 to 1.6)                             |
| <b>Diabetes, urogenital, blood, and endocrine diseases</b> | <b>223,291.7<br/>(220,879.0 to 225,901.1)</b> | <b>85,754.5†<br/>(75,551.4 to 97,612.0)</b>        | <b>3,688.5<br/>(2,550.5 to 5,137.9)</b>  | <b>11.3<br/>(9.3 to 13.3)</b>                     | <b>-1.5<br/>(-3.2 to 0.4)</b>                    |
| Diabetes mellitus                                          | 18,813.8<br>(15,923.2 to 22,110.4)            | 1,421.6<br>(1,035.5 to 1,865.4)                    | 1,296.7<br>(841.2 to 1,869.2)            | 10.2<br>(6.8 to 13.2)                             | -2.4<br>(-5.4 to 0.3)                            |
| Acute glomerulonephritis                                   | 5.9<br>(3.9 to 8.5)                           | 87.2<br>(57.7 to 124.2)                            | 0.3<br>(0.2 to 0.5)                      | -2.4<br>(-5.0 to 0.1)                             | -13.5<br>(-15.8 to -11.4)                        |
| Chronic kidney disease                                     | 8,635.7<br>(7,172.4 to 10,261.8)              | 590.4<br>(376.1 to 832.4)                          | 427.2<br>(298.1 to 595.1)                | 21.1<br>(16.3 to 26.0)                            | 7.2<br>(3.0 to 11.6)                             |
| Chronic kidney disease due to diabetes mellitus            | 2,266.4<br>(1,579.5 to 3,204.8)               | 150.3<br>(83.4 to 237.9)                           | 122.7<br>(74.4 to 189.1)                 | 20.2<br>(13.4 to 26.9)                            | 6.5<br>(0.4 to 12.4)                             |
| Chronic kidney disease due to hypertension                 | 1,764.4<br>(1,269.3 to 2,392.1)               | 194.6<br>(111.1 to 308.9)                          | 39.3<br>(23.8 to 61.2)                   | 17.9<br>(11.4 to 25.3)                            | 4.4<br>(-1.3 to 11.0)                            |
| Chronic kidney disease due to glomerulonephritis           | 1,778.5<br>(1,277.5 to 2,342.7)               | 49.9<br>(28.7 to 78.4)                             | 134.2<br>(80.2 to 200.0)                 | 21.1<br>(14.8 to 27.6)                            | 7.3<br>(1.6 to 13.0)                             |
| Chronic kidney disease due to other causes                 | 2,826.4<br>(1,986.9 to 3,926.6)               | 195.6<br>(116.7 to 305.0)                          | 131.1<br>(80.5 to 202.3)                 | 22.9<br>(16.3 to 30.1)                            | 8.9<br>(3.0 to 15.2)                             |
| Urinary diseases and male infertility                      | 7,170.4<br>(5,927.5 to 9,003.3)               | 41,788.5†<br>(32,388.9 to 53,021.0)                | 89.3<br>(52.5 to 147.4)                  | 12.3<br>(8.4 to 16.3)                             | -0.6<br>(-4.0 to 3.0)                            |
| Interstitial nephritis and urinary tract infections        | 712.2<br>(525.3 to 941.6)                     | 36,596.2<br>(27,320.4 to 47,627.3)                 | 23.7<br>(13.7 to 37.9)                   | 14.2<br>(9.5 to 19.0)                             | 1.1<br>(-3.0 to 5.4)                             |
| Urolithiasis                                               | 194.0<br>(138.4 to 259.5)                     | 5,192.4<br>(3,708.4 to 6,916.6)                    | 14.9<br>(9.0 to 22.3)                    | 11.6<br>(7.1 to 16.6)                             | -1.2<br>(-5.2 to 3.2)                            |
| Benign prostatic hyperplasia                               | --                                            | --                                                 | --                                       | --                                                | --                                               |
| Male infertility                                           | 5,747.5<br>(3,794.3 to 8,283.2)               | --                                                 | 33.0<br>(12.5 to 72.6)                   | 21.7<br>(15.8 to 26.8)                            | 7.8<br>(2.6 to 12.3)                             |
| Other urinary diseases                                     | --                                            | --                                                 | 17.7<br>(11.2 to 26.0)                   | -3.4<br>(-6.1 to -0.5)                            | -14.4<br>(-16.8 to -11.9)                        |
| Gynecological diseases                                     | 90,820.4<br>(87,980.9 to 92,695.0)            | 41,227.6†<br>(37,117.6 to 45,651.0)                | 1,313.7<br>(876.1 to 1,889.4)            | 9.4<br>(6.6 to 11.9)                              | -3.1<br>(-5.6 to -0.9)                           |
| Uterine fibroids                                           | 4,921.9<br>(3,976.1 to 5,968.5)               | 1,219.4<br>(852.2 to 1,610.1)                      | 112.3<br>(64.8 to 179.0)                 | 21.3<br>(18.3 to 24.9)                            | 7.4<br>(4.8 to 10.6)                             |
| Polycystic ovarian syndrome                                | 1,902.2<br>(1,499.5 to 2,388.2)               | 1,324.4<br>(900.3 to 1,825.2)                      | 16.8<br>(7.7 to 31.7)                    | 13.2<br>(10.5 to 16.1)                            | 0.3<br>(-2.2 to 2.8)                             |
| Female infertility                                         | 7,124.9<br>(2,363.7 to 14,286.5)              | --                                                 | 39.3<br>(9.1 to 106.5)                   | 46.8<br>(31.0 to 95.0)                            | 30.0<br>(16.0 to 72.7)                           |
| Endometriosis                                              | 413.8<br>(347.4 to 498.2)                     | 980.0<br>(717.4 to 1,267.4)                        | 38.8<br>(25.4 to 55.1)                   | 7.5<br>(0.6 to 14.5)                              | -4.8<br>(-11.0 to 1.4)                           |
| Genital prolapse                                           | 7,987.7<br>(6,209.3 to 10,253.9)              | 1,003.4<br>(684.7 to 1,424.0)                      | 25.6<br>(11.6 to 49.8)                   | 10.2<br>(7.3 to 13.3)                             | -2.4<br>(-5.0 to 0.3)                            |
| Premenstrual syndrome                                      | 64,622.7<br>(58,249.9 to 70,866.9)            | 22,461.5<br>(19,966.7 to 25,146.8)                 | 541.5<br>(330.9 to 823.6)                | 9.8<br>(5.8 to 13.3)                              | -2.8<br>(-6.3 to 0.3)                            |
| Other gynecological diseases                               | 15,343.6<br>(12,558.4 to 18,484.9)            | 14,239.0<br>(11,234.8 to 17,774.4)                 | 539.5<br>(353.0 to 786.9)                | 4.9<br>(1.2 to 8.1)                               | -7.2<br>(-10.4 to -4.3)                          |
| Hemoglobinopathies and hemolytic anaemias                  | 136,537.1<br>(134,851.9 to 138,467.4)         | --                                                 | 415.7<br>(259.4 to 625.5)                | 9.4<br>(0.9 to 17.6)                              | -3.1<br>(-10.7 to 4.2)                           |
| Thalassemias                                               | 2.3<br>(2.2 to 2.4)                           | --                                                 | 0.2<br>(0.1 to 0.3)                      | 0.3<br>(-17.2 to 18.0)                            | -11.2<br>(-26.6 to 4.5)                          |
| Thalassaemias trait                                        | 22,485.9<br>(21,611.8 to 23,503.6)            | --                                                 | 247.7<br>(152.3 to 380.9)                | -1.8<br>(-13.0 to 8.6)                            | -13.1<br>(-22.9 to -3.9)                         |
| Sickle cell disorders                                      | 89.5<br>(81.4 to 98.2)                        | --                                                 | 11.7<br>(8.3 to 15.8)                    | 53.6<br>(42.4 to 65.4)                            | 36.0<br>(26.1 to 46.5)                           |
| Sickle cell trait                                          | 34,566.3<br>(31,271.1 to 38,994.2)            | --                                                 | 100.7<br>(63.5 to 150.3)                 | 29.1<br>(23.9 to 34.9)                            | 14.3<br>(9.7 to 19.4)                            |
| G6PD deficiency                                            | 25,288.7<br>(24,363.3 to 26,382.8)            | --                                                 | 1.6<br>(1.0 to 2.4)                      | 29.9<br>(23.2 to 36.6)                            | 15.0<br>(9.1 to 20.9)                            |
| G6PD trait                                                 | 65,677.8<br>(64,596.0 to 66,897.2)            | --                                                 | 0.1<br>(< 0.05 to 0.1)                   | 12.5<br>(4.1 to 22.5)                             | -0.3<br>(-7.8 to 8.5)                            |
| Other hemoglobinopathies and hemolytic anaemias            | 3,697.7<br>(3,154.9 to 4,336.3)               | --                                                 | 53.7<br>(33.5 to 84.0)                   | 32.9<br>(26.3 to 39.9)                            | 17.7<br>(11.8 to 23.9)                           |
| Endocrine, metabolic, blood, and immune disorders          | 5,386.4<br>(4,577.6 to 6,290.9)               | 639.2<br>(426.6 to 910.9)                          | 145.7<br>(92.6 to 215.2)                 | 16.9<br>(13.6 to 20.6)                            | 3.5<br>(0.6 to 6.8)                              |
| <b>Musculoskeletal disorders</b>                           | <b>91,735.0<br/>(88,054.9 to 96,775.4)</b>    | <b>51,734.5<br/>(39,842.6 to 63,950.5)</b>         | <b>9,995.9<br/>(6,815.2 to 13,855.9)</b> | <b>11.8<br/>(10.0 to 13.5)</b>                    | <b>-1.0<br/>(-2.6 to 0.6)</b>                    |
| Rheumatoid arthritis                                       | 1,005.0<br>(802.9 to 1,233.9)                 | 75.0<br>(54.8 to 100.5)                            | 246.1<br>(159.1 to 348.0)                | 18.2<br>(13.8 to 22.2)                            | 4.7<br>(0.8 to 8.3)                              |
| Osteoarthritis                                             | 7,314.8<br>(6,688.6 to 7,983.5)               | 706.6<br>(607.0 to 824.3)                          | 441.3<br>(306.4 to 607.3)                | 15.8<br>(14.0 to 17.6)                            | 2.5<br>(1.0 to 4.2)                              |
| Low back and neck pain                                     | 55,187.1<br>(50,988.6 to 59,323.4)            | 23,352.1<br>(17,396.1 to 30,169.8)                 | 6,405.2<br>(4,172.9 to 8,876.5)          | 11.1<br>(8.7 to 13.1)                             | -1.7<br>(-3.8 to 0.2)                            |
| Low back pain                                              | 38,618.2<br>(28,335.5 to 50,977.8)            | 17,859.5<br>(12,572.7 to 24,461.4)                 | 4,474.2<br>(2,735.0 to 6,588.9)          | 10.5<br>(7.3 to 13.3)                             | -2.1<br>(-5.0 to 0.3)                            |
| Neck pain                                                  | 18,812.3<br>(13,279.3 to 25,356.1)            | 5,492.5<br>(3,598.4 to 8,178.1)                    | 1,931.0<br>(1,142.0 to 2,982.4)          | 12.3<br>(9.6 to 14.9)                             | -0.6<br>(-3.0 to 1.7)                            |
| Gout                                                       | 1,291.5<br>(971.9 to 1,684.9)                 | 293.0<br>(229.2 to 371.7)                          | 43.8<br>(27.0 to 65.0)                   | 10.7<br>(4.6 to 17.2)                             | -2.0<br>(-7.4 to 3.8)                            |
| Other musculoskeletal disorders                            | 32,580.8<br>(22,030.9 to 44,938.1)            | 27,307.8<br>(17,374.0 to 38,924.7)                 | 2,859.5<br>(1,678.5 to 4,629.1)          | 12.4<br>(8.0 to 16.5)                             | -0.4<br>(-4.4 to 3.2)                            |
| <b>Other non-communicable diseases</b>                     | <b>377,910.9<br/>(369,368.3 to 385,857.7)</b> | <b>1,071,208.2†<br/>(904,681.8 to 1,233,790.4)</b> | <b>7,791.0<br/>(5,227.9 to 11,169.6)</b> | <b>13.2<br/>(12.3 to 14.0)</b>                    | <b>0.2<br/>(-0.6 to 0.9)</b>                     |
| Congenital anomalies                                       | 5,479.7<br>(5,106.6 to 5,812.2)               | --                                                 | 648.4<br>(457.7 to 865.2)                | 12.2<br>(9.6 to 15.1)                             | -0.7<br>(-3.0 to 1.9)                            |
| Neural tube defects                                        | 432.1<br>(390.5 to 478.7)                     | --                                                 | 130.2<br>(91.5 to 173.1)                 | 19.8<br>(14.8 to 25.4)                            | 6.1<br>(1.7 to 11.0)                             |
| Congenital heart anomalies                                 | 748.7<br>(665.2 to 832.3)                     | --                                                 | 40.4<br>(16.8 to 69.7)                   | 11.7<br>(7.9 to 15.6)                             | -1.1<br>(-4.5 to 2.4)                            |
| Orofacial clefts                                           | 257.9<br>(229.8 to 286.7)                     | --                                                 | 3.3<br>(2.1 to 4.8)                      | 4.0<br>(0.6 to 7.1)                               | -7.9<br>(-10.9 to -5.1)                          |
| Down's syndrome                                            | 186.9<br>(162.7 to 214.1)                     | --                                                 | 16.0<br>(10.8 to 22.6)                   | 14.1<br>(9.7 to 18.8)                             | 1.0<br>(-2.9 to 5.2)                             |
| Turner syndrome                                            | 220.2<br>(190.9 to 250.9)                     | --                                                 | 4.5<br>(2.3 to 7.2)                      | 14.4<br>(3.4 to 26.4)                             | 1.3<br>(-8.4 to 12.0)                            |
| Klinefelter syndrome                                       | 230.8<br>(198.1 to 269.2)                     | --                                                 | 2.3<br>(1.1 to 4.5)                      | 13.6<br>(6.6 to 20.3)                             | 0.6<br>(-5.6 to 6.5)                             |

| Cause                                         | Prevalence in thousands (95% UI)                   | Incidence in thousands (95% UI)                   | YLDs in thousands (95% UI)                    |                                                   |                                                  |
|-----------------------------------------------|----------------------------------------------------|---------------------------------------------------|-----------------------------------------------|---------------------------------------------------|--------------------------------------------------|
|                                               | 2016 counts                                        | 2016 counts                                       | 2016 counts                                   | Percentage change in counts between 2006 and 2016 | Percentage change in rates between 2006 and 2016 |
| Other chromosomal abnormalities               | 0.1<br>(0.1 to 0.1)                                | --                                                | 0.1<br>(< 0.05 to 0.1)                        | 15.3<br>(-41.5 to 121.8)                          | 2.1<br>(-48.2 to 96.4)                           |
| Congenital musculoskeletal and limb anomalies | 798.8<br>(736.3 to 867.0)                          | --                                                | 116.8<br>(80.1 to 160.6)                      | 16.7<br>(13.0 to 20.4)                            | 3.3<br>(0.1 to 6.6)                              |
| Urogenital congenital anomalies               | 285.9<br>(258.1 to 314.8)                          | --                                                | 5.0<br>(2.6 to 8.6)                           | 9.8<br>(6.3 to 12.9)                              | -2.8<br>(-5.9 to 0.0)                            |
| Digestive congenital anomalies                | 739.3<br>(665.5 to 818.0)                          | --                                                | 32.5<br>(21.2 to 46.5)                        | 7.0<br>(1.7 to 12.1)                              | -5.2<br>(-10.0 to -0.7)                          |
| Other congenital anomalies                    | 2,675.1<br>(1,880.3 to 3,785.8)                    | --                                                | 297.3<br>(191.7 to 442.2)                     | 8.1<br>(3.9 to 13.0)                              | -4.2<br>(-8.0 to 0.1)                            |
| Skin and subcutaneous diseases                | 139,198.8<br>(135,713.6 to 142,256.9)              | 289,418.1<br>(259,478.5 to 321,830.0)             | 3,377.1<br>(2,265.6 to 4,789.1)               | 13.7<br>(12.9 to 14.5)                            | 0.7<br>(-0.0 to 1.4)                             |
| Dermatitis                                    | 18,019.7<br>(15,338.9 to 20,808.7)                 | 44,440.9<br>(35,986.3 to 53,240.3)                | 590.1<br>(346.3 to 919.6)                     | 12.6<br>(10.8 to 14.4)                            | -0.3<br>(-1.9 to 1.3)                            |
| Psoriasis                                     | 5,274.6<br>(4,812.8 to 5,733.8)                    | 661.7<br>(576.6 to 749.6)                         | 466.7<br>(328.0 to 618.6)                     | 19.6<br>(16.5 to 22.6)                            | 5.9<br>(3.2 to 8.5)                              |
| Cellulitis                                    | 199.6<br>(162.4 to 242.7)                          | 3,794.8<br>(3,133.8 to 4,494.7)                   | 11.4<br>(7.3 to 17.1)                         | 15.5<br>(8.0 to 23.0)                             | 2.2<br>(-4.3 to 9.0)                             |
| Pyoderma                                      | 830.0<br>(762.6 to 904.4)                          | 18,591.5<br>(16,789.2 to 20,731.4)                | 4.7<br>(1.9 to 9.8)                           | 17.8<br>(13.9 to 21.7)                            | 4.3<br>(0.8 to 7.8)                              |
| Scabies                                       | 9,940.3<br>(6,802.6 to 13,946.9)                   | 29,749.8<br>(20,122.9 to 41,716.7)                | 257.5<br>(124.4 to 451.4)                     | 3.1<br>(1.6 to 4.6)                               | -8.7<br>(-10.1 to -7.4)                          |
| Fungal skin diseases                          | 33,113.3<br>(25,167.7 to 42,481.7)                 | 109,057.9<br>(81,115.1 to 139,231.3)              | 187.8<br>(74.2 to 394.1)                      | 15.1<br>(14.3 to 15.9)                            | 1.9<br>(1.2 to 2.6)                              |
| Viral skin diseases                           | 11,649.4<br>(9,732.6 to 13,807.2)                  | 18,399.7<br>(15,624.9 to 21,704.8)                | 356.8<br>(219.2 to 538.1)                     | 13.2<br>(11.8 to 14.7)                            | 0.2<br>(-1.0 to 1.6)                             |
| Acne vulgaris                                 | 38,115.6<br>(33,137.5 to 44,287.8)                 | 18,447.1<br>(15,660.1 to 21,349.5)                | 974.5<br>(641.9 to 1,435.9)                   | 14.2<br>(12.6 to 15.8)                            | 1.1<br>(-0.3 to 2.6)                             |
| Alopecia areata                               | 2,094.8<br>(1,866.1 to 2,324.6)                    | 3,623.2<br>(3,291.6 to 4,013.0)                   | 69.0<br>(43.2 to 104.2)                       | 11.6<br>(8.6 to 14.5)                             | -1.2<br>(-3.8 to 1.4)                            |
| Pruritus                                      | 4,962.8<br>(3,471.1 to 6,825.6)                    | 3,938.8<br>(2,712.6 to 5,442.9)                   | 53.3<br>(22.8 to 103.7)                       | 14.3<br>(12.5 to 16.1)                            | 1.2<br>(-0.4 to 2.8)                             |
| Urticaria                                     | 3,958.8<br>(2,781.3 to 5,513.6)                    | 6,911.8<br>(4,879.8 to 9,573.7)                   | 236.8<br>(136.8 to 368.8)                     | 13.2<br>(10.8 to 15.7)                            | 0.2<br>(-1.8 to 2.5)                             |
| Decubitus ulcer                               | 38.5<br>(25.9 to 54.7)                             | 138.9<br>(90.5 to 197.5)                          | 6.8<br>(3.9 to 10.5)                          | 14.2<br>(12.8 to 15.6)                            | 1.2<br>(-0.1 to 2.4)                             |
| Other skin and subcutaneous diseases          | 28,956.0<br>(26,154.1 to 31,955.3)                 | 31,661.8<br>(28,360.9 to 34,697.2)                | 161.7<br>(77.0 to 297.5)                      | 18.7<br>(17.6 to 19.8)                            | 5.2<br>(4.1 to 6.1)                              |
| Sense organ diseases                          | 88,815.0<br>(85,495.0 to 91,942.9)                 | 38,162.6†<br>(34,322.3 to 42,293.3)               | 2,624.7<br>(1,729.2 to 3,739.5)               | 12.0<br>(9.8 to 14.0)                             | -0.8<br>(-2.7 to 0.9)                            |
| Glaucoma                                      | --                                                 | --                                                | --                                            | --                                                | --                                               |
| Cataract                                      | 511.1<br>(365.8 to 680.1)                          | --                                                | 54.2<br>(31.2 to 85.3)                        | 11.9<br>(4.1 to 18.9)                             | -0.9<br>(-7.8 to 5.4)                            |
| Macular degeneration                          | --                                                 | --                                                | --                                            | --                                                | --                                               |
| Refraction and accommodation disorders        | 35,052.5<br>(31,632.2 to 38,923.7)                 | --                                                | 690.5<br>(423.1 to 1,079.2)                   | 11.7<br>(10.4 to 13.1)                            | -1.1<br>(-2.2 to 0.2)                            |
| Age-related and other hearing loss            | 47,989.4<br>(38,545.3 to 60,363.6)                 | --                                                | 1,444.2<br>(936.2 to 2,104.5)                 | 11.5<br>(7.7 to 15.1)                             | -1.2<br>(-4.6 to 1.9)                            |
| Other vision loss                             | 1,038.2<br>(789.0 to 1,352.2)                      | --                                                | 88.9<br>(56.5 to 132.6)                       | 13.7<br>(7.6 to 19.4)                             | 0.7<br>(-4.7 to 5.8)                             |
| Other sense organ diseases                    | 10,819.9<br>(9,507.9 to 12,201.4)                  | 38,162.6<br>(34,322.3 to 42,293.3)                | 346.9<br>(214.1 to 535.6)                     | 14.0<br>(12.1 to 16.1)                            | 1.0<br>(-0.7 to 2.8)                             |
| Oral disorders                                | 271,807.3<br>(254,197.1 to 289,969.9)              | 743,627.6†<br>(582,412.6 to 906,165.2)            | 1,140.8<br>(642.7 to 1,883.6)                 | 15.0<br>(13.8 to 16.1)                            | 1.8<br>(0.8 to 2.8)                              |
| Caries of deciduous teeth                     | --                                                 | --                                                | --                                            | --                                                | --                                               |
| Caries of permanent teeth                     | 231,036.3<br>(190,179.0 to 275,346.6)              | 734,504.5<br>(574,892.3 to 897,418.9)             | 163.5<br>(69.6 to 322.0)                      | 9.1<br>(7.9 to 10.2)                              | -3.4<br>(-4.5 to -2.4)                           |
| Periodontal disease                           | 54,060.8<br>(38,835.6 to 75,864.5)                 | 8,526.5<br>(4,502.1 to 12,772.6)                  | 360.9<br>(131.5 to 799.4)                     | 20.5<br>(19.4 to 21.5)                            | 6.7<br>(5.8 to 7.6)                              |
| Edentulism and severe tooth loss              | 8,214.3<br>(6,286.5 to 10,558.0)                   | 596.5<br>(364.8 to 923.8)                         | 236.5<br>(144.0 to 358.9)                     | 14.4<br>(12.4 to 16.3)                            | 1.4<br>(-0.5 to 3.0)                             |
| Other oral disorders                          | 12,833.0<br>(11,571.2 to 14,230.7)                 | --                                                | 380.0<br>(234.6 to 573.6)                     | 13.1<br>(11.8 to 14.3)                            | 0.1<br>(-1.0 to 1.2)                             |
| <b>Injuries</b>                               | <b>104,783.5</b><br><b>(98,042.9 to 112,995.8)</b> | <b>41,444.8†</b><br><b>(36,279.4 to 46,742.6)</b> | <b>3,842.7</b><br><b>(2,537.6 to 5,493.8)</b> | <b>15.6</b><br><b>(13.9 to 17.0)</b>              | <b>2.4</b><br><b>(0.9 to 3.6)</b>                |
| <b>Transport injuries</b>                     | <b>16,402.4</b><br><b>(14,824.0 to 18,011.5)</b>   | <b>6,669.0</b><br><b>(5,156.9 to 8,458.1)</b>     | <b>878.1</b><br><b>(578.6 to 1,275.5)</b>     | <b>16.2</b><br><b>(14.7 to 17.4)</b>              | <b>2.9</b><br><b>(1.6 to 4.0)</b>                |
| Road injuries                                 | 13,036.3<br>(11,672.7 to 14,501.4)                 | 6,114.9<br>(4,605.8 to 7,866.3)                   | 701.3<br>(458.3 to 1,021.0)                   | 17.8<br>(16.4 to 19.0)                            | 4.3<br>(3.0 to 5.4)                              |
| Pedestrian road injuries                      | 2,742.5<br>(2,289.1 to 3,238.5)                    | 938.5<br>(564.3 to 1,388.6)                       | 149.6<br>(98.2 to 217.4)                      | 16.9<br>(15.3 to 18.4)                            | 3.6<br>(2.1 to 4.9)                              |
| Cyclist road injuries                         | 2,520.8<br>(1,990.8 to 3,167.3)                    | 1,157.1<br>(707.4 to 1,726.2)                     | 124.4<br>(81.0 to 184.4)                      | 19.2<br>(17.8 to 20.7)                            | 5.6<br>(4.3 to 6.9)                              |
| Motorcyclist road injuries                    | 3,454.4<br>(2,716.5 to 4,473.2)                    | 1,321.0<br>(854.1 to 1,856.7)                     | 183.7<br>(119.2 to 267.6)                     | 17.4<br>(15.8 to 18.9)                            | 4.0<br>(2.5 to 5.3)                              |
| Motor vehicle road injuries                   | 3,334.7<br>(2,726.6 to 4,084.1)                    | 2,101.2<br>(1,464.4 to 2,893.0)                   | 195.1<br>(127.7 to 281.4)                     | 14.5<br>(12.7 to 16.2)                            | 1.4<br>(-0.2 to 2.9)                             |
| Other road injuries                           | 984.0<br>(779.3 to 1,217.0)                        | 597.2<br>(337.9 to 992.9)                         | 48.5<br>(31.2 to 72.6)                        | 34.1<br>(32.1 to 36.1)                            | 18.7<br>(17.0 to 20.5)                           |
| Other transport injuries                      | 3,366.0<br>(2,747.5 to 4,081.2)                    | 554.0<br>(369.4 to 798.6)                         | 176.8<br>(118.1 to 254.7)                     | 10.1<br>(8.2 to 11.8)                             | -2.5<br>(-4.2 to -1.0)                           |
| <b>Unintentional injuries</b>                 | <b>77,037.1</b><br><b>(71,018.5 to 84,655.8)</b>   | <b>31,227.7</b><br><b>(26,494.5 to 36,234.6)</b>  | <b>2,439.8</b><br><b>(1,622.7 to 3,482.8)</b> | <b>17.7</b><br><b>(16.3 to 18.7)</b>              | <b>4.2</b><br><b>(3.0 to 5.2)</b>                |
| Falls                                         | 28,335.0<br>(23,852.9 to 32,971.4)                 | 10,960.4<br>(8,103.6 to 14,413.4)                 | 1,049.3<br>(716.4 to 1,473.0)                 | 19.1<br>(17.9 to 20.2)                            | 5.5<br>(4.4 to 6.5)                              |
| Drowning                                      | 318.2<br>(270.7 to 377.8)                          | 40.9<br>(30.9 to 55.0)                            | 16.3<br>(10.6 to 23.6)                        | -1.5<br>(-3.6 to 0.3)                             | -12.8<br>(-14.6 to -11.1)                        |
| Fire, heat, and hot substances                | 8,662.0<br>(7,100.8 to 10,659.1)                   | 734.4<br>(509.9 to 1,039.4)                       | 216.3<br>(141.4 to 322.1)                     | 17.9<br>(15.7 to 19.7)                            | 4.4<br>(2.4 to 6.0)                              |
| Poisonings                                    | 272.5<br>(225.4 to 326.2)                          | 343.7<br>(202.5 to 526.5)                         | 24.9<br>(15.9 to 36.8)                        | 26.3<br>(23.0 to 29.6)                            | 11.9<br>(9.0 to 14.8)                            |
| Exposure to mechanical forces                 | 14,186.5<br>(11,668.1 to 18,167.5)                 | 6,011.4<br>(4,067.9 to 8,301.2)                   | 322.7<br>(204.2 to 485.7)                     | 18.7<br>(17.2 to 20.1)                            | 5.1<br>(3.8 to 6.4)                              |
| Unintentional firearm injuries                | 554.3<br>(441.0 to 685.8)                          | 146.9<br>(73.5 to 250.2)                          | 19.8<br>(12.2 to 29.7)                        | 18.8<br>(17.1 to 20.4)                            | 5.2<br>(3.7 to 6.7)                              |
| Unintentional suffocation                     | 694.6<br>(517.0 to 914.1)                          | 59.7<br>(28.0 to 110.1)                           | 20.8<br>(12.3 to 32.5)                        | 6.8<br>(5.2 to 8.4)                               | -5.4<br>(-6.8 to -4.0)                           |
| Other exposure to mechanical forces           | 12,937.5<br>(10,564.2 to 16,787.7)                 | 5,804.9<br>(3,939.5 to 8,010.4)                   | 282.1<br>(179.1 to 421.7)                     | 19.7<br>(18.2 to 21.1)                            | 6.0<br>(4.7 to 7.2)                              |

| Cause                                                                               | Prevalence in thousands (95% UI)           | Incidence in thousands (95% UI)          | YLDs in thousands (95% UI)        |                                                   |                                                  |
|-------------------------------------------------------------------------------------|--------------------------------------------|------------------------------------------|-----------------------------------|---------------------------------------------------|--------------------------------------------------|
|                                                                                     | 2016 counts                                | 2016 counts                              | 2016 counts                       | Percentage change in counts between 2006 and 2016 | Percentage change in rates between 2006 and 2016 |
| Adverse effects of medical treatment                                                | 116.2<br>(79.7 to 166.1)                   | 1,519.0<br>(1,065.5 to 2,100.7)          | 15.5<br>(8.7 to 25.9)             | 9.8<br>(5.2 to 14.1)                              | -2.8<br>(-6.9 to 1.1)                            |
| Animal contact                                                                      | 4,140.7<br>(3,527.1 to 4,964.9)            | 5,044.3<br>(3,132.9 to 7,280.6)          | 141.0<br>(94.9 to 197.6)          | 13.8<br>(11.1 to 16.1)                            | 0.8<br>(-1.6 to 2.9)                             |
| Venomous animal contact                                                             | 2,041.8<br>(1,627.1 to 2,600.5)            | 2,500.7<br>(1,510.8 to 3,696.7)          | 107.2<br>(72.1 to 151.5)          | 15.9<br>(12.5 to 19.0)                            | 2.6<br>(-0.3 to 5.4)                             |
| Non-venomous animal contact                                                         | 2,098.9<br>(1,632.1 to 2,684.0)            | 2,543.6<br>(1,517.7 to 3,795.2)          | 33.7<br>(20.9 to 51.5)            | 7.7<br>(4.9 to 9.7)                               | -4.6<br>(-7.1 to -2.8)                           |
| Foreign body                                                                        | 3,944.9<br>(3,224.7 to 4,701.5)            | 2,115.6<br>(1,436.2 to 3,109.2)          | 147.2<br>(92.4 to 221.7)          | 17.3<br>(15.3 to 19.3)                            | 3.9<br>(2.1 to 5.7)                              |
| Pulmonary aspiration and foreign body in airway                                     | 1,857.2<br>(1,352.7 to 2,537.9)            | 273.8<br>(171.6 to 400.5)                | 78.6<br>(47.8 to 119.0)           | 12.7<br>(10.9 to 14.5)                            | -0.2<br>(-1.8 to 1.4)                            |
| Foreign body in eyes                                                                | 247.8<br>(120.3 to 426.4)                  | 1,414.2<br>(764.1 to 2,345.3)            | 14.3<br>(6.2 to 27.4)             | 26.4<br>(22.8 to 29.7)                            | 12.0<br>(8.8 to 14.9)                            |
| Foreign body in other body part                                                     | 1,839.8<br>(1,459.7 to 2,399.4)            | 427.6<br>(263.0 to 655.9)                | 54.2<br>(34.0 to 81.6)            | 22.2<br>(19.9 to 24.2)                            | 8.3<br>(6.2 to 10.0)                             |
| Environmental heat and cold exposure                                                | 5,395.3<br>(4,433.2 to 6,518.4)            | 978.5<br>(602.3 to 1,465.1)              | 195.4<br>(127.0 to 284.2)         | 16.0<br>(14.0 to 17.8)                            | 2.7<br>(1.0 to 4.3)                              |
| Other unintentional injuries                                                        | 11,666.1<br>(9,398.5 to 14,272.1)          | 3,479.3<br>(2,381.8 to 4,956.8)          | 311.2<br>(202.7 to 457.8)         | 15.5<br>(13.9 to 17.0)                            | 2.3<br>(0.8 to 3.6)                              |
| <b>Self-harm and interpersonal violence</b>                                         | <b>23,945.4<br/>(17,958.0 to 31,047.3)</b> | <b>3,422.9†<br/>(2,527.3 to 4,508.2)</b> | <b>366.3<br/>(240.9 to 527.5)</b> | <b>7.6<br/>(6.5 to 8.6)</b>                       | <b>-4.7<br/>(-5.7 to -3.8)</b>                   |
| Self-harm                                                                           | 802.4<br>(654.5 to 984.0)                  | 602.9<br>(456.5 to 810.8)                | 41.4<br>(26.2 to 61.1)            | 7.8<br>(6.1 to 9.5)                               | -4.5<br>(-6.0 to -3.1)                           |
| Self-harm by firearm                                                                | 31.3<br>(26.1 to 37.1)                     | 7.4<br>(1.8 to 20.5)                     | 1.1<br>(0.7 to 1.7)               | 4.1<br>(1.5 to 6.4)                               | -7.8<br>(-10.1 to -5.7)                          |
| Self-harm by other specified means                                                  | 771.1<br>(622.9 to 955.4)                  | 595.5<br>(451.2 to 799.7)                | 40.2<br>(25.5 to 59.4)            | 7.9<br>(6.2 to 9.6)                               | -4.4<br>(-5.9 to -3.0)                           |
| Interpersonal violence                                                              | 23,143.0<br>(17,105.0 to 30,257.3)         | 2,820.0†<br>(1,943.1 to 3,858.6)         | 324.9<br>(211.5 to 469.4)         | 7.5<br>(6.4 to 8.6)                               | -4.8<br>(-5.8 to -3.8)                           |
| Assault by firearm                                                                  | 225.6<br>(168.2 to 295.9)                  | 74.0<br>(42.8 to 121.9)                  | 8.9<br>(5.5 to 13.8)              | 10.8<br>(9.1 to 12.6)                             | -1.9<br>(-3.4 to -0.3)                           |
| Assault by sharp object                                                             | 1,250.0<br>(950.7 to 1,569.8)              | 630.4<br>(368.4 to 1,007.2)              | 37.1<br>(23.6 to 56.4)            | 4.9<br>(2.7 to 7.0)                               | -7.1<br>(-9.1 to -5.2)                           |
| Sexual violence                                                                     | 18,549.3<br>(12,301.5 to 25,674.1)         | --                                       | 157.9<br>(90.3 to 245.1)          | 7.6<br>(5.6 to 9.1)                               | -4.7<br>(-6.5 to -3.4)                           |
| Assault by other means                                                              | 3,118.0<br>(2,481.1 to 4,009.8)            | 2,115.6<br>(1,464.5 to 2,929.1)          | 121.0<br>(78.2 to 179.4)          | 8.1<br>(6.6 to 9.4)                               | -4.3<br>(-5.6 to -3.1)                           |
| <b>Forces of nature, conflict and terrorism, and executions and police conflict</b> | <b>5,948.0<br/>(3,720.2 to 8,882.7)</b>    | <b>125.4†<br/>(70.5 to 182.9)</b>        | <b>158.5<br/>(60.6 to 322.0)</b>  | <b>3.6<br/>(-7.8 to 14.5)</b>                     | <b>-8.3<br/>(-18.4 to 1.4)</b>                   |
| Forces of nature, conflict and terrorism, and state actor violence                  | 736.1<br>(403.1 to 1,170.4)                | 25.8<br>(15.0 to 40.2)                   | 25.0<br>(6.8 to 59.0)             | 13.7<br>(-3.6 to 21.0)                            | 0.7<br>(-14.6 to 7.2)                            |
| Conflict and terrorism                                                              | 4,957.0<br>(2,876.0 to 7,729.5)            | --                                       | 134.6<br>(53.5 to 261.4)          | 8.2<br>(-6.5 to 22.7)                             | -4.2<br>(-17.2 to 8.7)                           |
| Executions and police conflict                                                      | 254.8<br>(140.8 to 395.2)                  | 99.5<br>(45.6 to 155.9)                  | 6.4<br>(2.1 to 16.6)              | -56.3<br>(-59.4 to -39.0)                         | -61.3<br>(-64.1 to -46.0)                        |

We did not calculate incidence for certain NTDs and causes with only birth prevalence. Blank cells mean that no estimate is available.

† Incidence for aggregate causes represents the sum of the incidence of the causes below the aggregate.

‡ Incidence estimates for stroke represent first-ever stroke only.

^ Incidence of HIV/AIDS represents new infections of HIV only and does not include new infections of Tuberculosis in HIV positive cases.



SR Table 12: Global prevalence, incidence, and YLDs for 2016, percentage change of YLD counts and percentage change of YLD rates between 2006 and 2016 by cause, age 35-39 years.

| Cause                                                                                | Prevalence in thousands (95% UI)             | Incidence in thousands (95% UI)                     | YLDs in thousands (95% UI)                |                                                   |                                                  |
|--------------------------------------------------------------------------------------|----------------------------------------------|-----------------------------------------------------|-------------------------------------------|---------------------------------------------------|--------------------------------------------------|
|                                                                                      | 2016 counts                                  | 2016 counts                                         | 2016 counts                               | Percentage change in counts between 2006 and 2016 | Percentage change in rates between 2006 and 2016 |
| <b>All causes</b>                                                                    | <b>495,336.1</b><br>(494,934.0 to 495,829.7) | <b>2,861,344.7†</b><br>(2,449,840.7 to 3,373,499.4) | <b>56,138.3</b><br>(41,533.9 to 72,995.4) | <b>6.1</b><br>(5.3 to 6.8)                        | <b>0.3</b><br>(-0.4 to 0.9)                      |
| <b>Communicable, maternal, neonatal, and nutritional disorders</b>                   | <b>365,996.1</b><br>(360,626.3 to 370,544.3) | <b>1,565,506.4†</b><br>(1,204,100.9 to 2,047,537.9) | <b>6,427.6</b><br>(4,615.5 to 8,602.6)    | <b>1.5</b><br>(-3.2 to 5.8)                       | <b>-4.0</b><br>(-8.5 to -0.0)                    |
| <b>HIV/AIDS and tuberculosis</b>                                                     | <b>179,606.1</b><br>(154,867.9 to 207,011.8) | <b>860.3†</b><br>(643.3 to 1,176.2)                 | <b>835.3</b><br>(571.7 to 1,176.5)        | <b>-13.1</b><br>(-28.1 to 3.9)                    | <b>-17.8</b><br>(-32.0 to -1.8)                  |
| Tuberculosis                                                                         | 166,938.9<br>(134,446.4 to 205,398.8)        | 669.7†<br>(446.7 to 985.9)                          | 209.4<br>(121.1 to 328.0)                 | -2.9<br>(-7.1 to 2.6)                             | -8.2<br>(-12.2 to -3.0)                          |
| Drug-susceptible tuberculosis                                                        | 649.7<br>(430.5 to 945.8)                    | 644.7<br>(428.9 to 951.8)                           | 201.6<br>(116.2 to 316.8)                 | -2.7<br>(-7.0 to 2.7)                             | -8.1<br>(-12.0 to -2.9)                          |
| Multidrug-resistant tuberculosis without extensive drug resistance                   | 22.8<br>(16.0 to 31.7)                       | 23.4<br>(16.4 to 32.7)                              | 7.3<br>(4.2 to 11.2)                      | -10.5<br>(-24.6 to 7.2)                           | -15.4<br>(-28.7 to 1.3)                          |
| Extensively drug-resistant tuberculosis                                              | 1.4<br>(1.0 to 1.9)                          | 1.6<br>(1.1 to 2.3)                                 | 0.5<br>(0.3 to 0.7)                       | 144.2<br>(112.2 to 180.1)                         | 130.8<br>(100.6 to 164.8)                        |
| Latent tuberculosis infection                                                        | 166,265.0<br>(133,736.8 to 204,462.9)        | --                                                  | --                                        | --                                                | --                                               |
| HIV/AIDS                                                                             | 5,535.5<br>(5,200.4 to 5,885.5)              | 190.5†<br>(162.9 to 228.4)                          | 625.9<br>(422.7 to 897.6)                 | -16.0<br>(-33.2 to 7.1)                           | -20.6<br>(-36.8 to 1.3)                          |
| Drug-susceptible HIV/AIDS - Tuberculosis                                             | 164.1<br>(116.1 to 227.6)                    | 203.3<br>(147.4 to 280.0)                           | 62.9<br>(38.7 to 96.2)                    | -17.2<br>(-22.2 to -12.0)                         | -21.7<br>(-26.5 to -16.8)                        |
| Multidrug-resistant HIV/AIDS - Tuberculosis without extensive drug resistance        | 4.1<br>(2.7 to 6.1)                          | 5.3<br>(3.5 to 7.7)                                 | 1.7<br>(1.0 to 2.7)                       | -26.9<br>(-39.1 to -13.6)                         | -30.9<br>(-42.4 to -18.3)                        |
| Extensively drug-resistant HIV/AIDS - Tuberculosis                                   | 0.2<br>(0.1 to 0.3)                          | 0.2<br>(0.1 to 0.4)                                 | 0.1<br>(< 0.05 to 0.1)                    | 145.7<br>(104.5 to 198.2)                         | 132.3<br>(93.3 to 181.8)                         |
| HIV/AIDS resulting in other diseases                                                 | 5,367.1<br>(5,034.9 to 5,716.1)              | 190.5<br>(162.9 to 228.4)                           | 561.2<br>(373.6 to 816.0)                 | -15.9<br>(-34.3 to 11.9)                          | -20.5<br>(-37.9 to 5.8)                          |
| <b>Diarrhoea, lower respiratory infections, and other common infectious diseases</b> | <b>24,159.0</b><br>(22,226.7 to 26,263.9)    | <b>1,427,067.3†</b><br>(1,060,738.4 to 1,906,208.0) | <b>1,104.1</b><br>(761.6 to 1,532.5)      | <b>5.3</b><br>(4.0 to 6.7)                        | <b>-0.5</b><br>(-1.7 to 0.8)                     |
| Diarrhoeal diseases                                                                  | 2,898.3<br>(2,520.7 to 3,314.2)              | 195,506.3<br>(168,158.0 to 224,118.1)               | 325.0<br>(218.5 to 451.6)                 | 11.3<br>(8.7 to 14.2)                             | 5.2<br>(2.7 to 7.9)                              |
| Intestinal infectious diseases                                                       | 23.4<br>(18.0 to 30.2)                       | 561.9†<br>(447.7 to 698.9)                          | 4.1<br>(2.5 to 6.2)                       | -3.7<br>(-20.9 to 16.7)                           | -9.0<br>(-25.2 to 10.3)                          |
| Typhoid fever                                                                        | 22.9<br>(17.3 to 29.9)                       | 362.9<br>(284.9 to 456.6)                           | 3.5<br>(2.1 to 5.3)                       | -22.6<br>(-22.6 to 21.5)                          | -8.6<br>(-26.8 to 14.8)                          |
| Paratyphoid fever                                                                    | 8.7<br>(6.8 to 10.7)                         | 199.0<br>(157.8 to 245.4)                           | 0.6<br>(0.3 to 0.8)                       | -4.6<br>(-20.2 to 16.1)                           | -9.8<br>(-24.5 to 9.8)                           |
| Other intestinal infectious diseases                                                 | --                                           | --                                                  | < 0.05<br>(< 0.05 to 0.1)                 | -24.0<br>(-37.6 to -7.9)                          | -28.2<br>(-41.0 to -13.0)                        |
| Lower respiratory infections                                                         | 229.0<br>(201.0 to 261.5)                    | 9,901.3<br>(8,449.2 to 11,778.2)                    | 14.1<br>(9.3 to 20.2)                     | 27.5<br>(20.8 to 34.8)                            | 20.6<br>(14.2 to 27.4)                           |
| Upper respiratory infections                                                         | 16,035.8<br>(11,250.8 to 22,080.4)           | 1,206,306.9<br>(847,395.8 to 1,691,813.1)           | 398.1<br>(222.3 to 670.7)                 | 3.7<br>(2.4 to 5.1)                               | -1.9<br>(-3.2 to -0.7)                           |
| Otitis media                                                                         | 3,459.4<br>(2,679.1 to 4,440.1)              | 9,812.4<br>(8,272.2 to 11,927.2)                    | 92.9<br>(54.4 to 147.4)                   | -3.5<br>(-7.9 to 1.0)                             | -8.8<br>(-12.9 to -4.6)                          |
| Meningitis                                                                           | 1,077.2<br>(926.4 to 1,249.9)                | 63.8<br>(44.6 to 85.4)                              | 111.5<br>(77.8 to 147.7)                  | 13.2<br>(10.0 to 16.8)                            | 7.0<br>(3.9 to 10.4)                             |
| Pneumococcal meningitis                                                              | 490.1<br>(411.6 to 584.4)                    | 16.5<br>(10.0 to 24.4)                              | 50.3<br>(34.5 to 68.2)                    | 11.8<br>(5.0 to 18.4)                             | 5.7<br>(-0.8 to 11.9)                            |
| H influenzae type B meningitis                                                       | 141.5<br>(111.0 to 180.8)                    | 4.2<br>(2.4 to 7.2)                                 | 17.9<br>(12.0 to 24.6)                    | -7.8<br>(-13.1 to -3.6)                           | -12.9<br>(-17.8 to -8.9)                         |
| Meningococcal infection                                                              | 117.6<br>(85.5 to 155.3)                     | 10.8<br>(6.4 to 17.2)                               | 12.1<br>(8.0 to 16.6)                     | 20.0<br>(16.4 to 23.4)                            | 13.4<br>(10.1 to 16.6)                           |
| Other meningitis                                                                     | 328.0<br>(244.7 to 414.9)                    | 32.1<br>(21.6 to 44.6)                              | 31.3<br>(21.3 to 42.6)                    | 30.0<br>(24.2 to 36.4)                            | 22.9<br>(17.4 to 29.0)                           |
| Encephalitis                                                                         | 1,171.8<br>(793.1 to 1,692.0)                | 285.5<br>(227.0 to 346.2)                           | 141.2<br>(99.6 to 185.7)                  | -3.4<br>(-8.3 to 1.6)                             | -8.7<br>(-13.3 to -4.0)                          |
| Diphtheria                                                                           | < 0.05<br>(< 0.05 to < 0.05)                 | 0.2<br>(0.1 to 0.3)                                 | < 0.05<br>(< 0.05 to < 0.05)              | -44.9<br>(-57.5 to -28.0)                         | -47.9<br>(-59.8 to -32.0)                        |
| Whooping cough                                                                       | 1.6<br>(1.2 to 2.0)                          | 11.7<br>(9.1 to 14.7)                               | 0.1<br>(< 0.05 to 0.1)                    | -15.8<br>(-17.3 to -14.2)                         | -20.4<br>(-21.9 to -18.9)                        |
| Tetanus                                                                              | 10.5<br>(10.3 to 10.7)                       | 3.6<br>(1.9 to 5.5)                                 | 0.2<br>(0.1 to 0.4)                       | 6.0<br>(-18.1 to 36.7)                            | 0.2<br>(-22.6 to 29.2)                           |
| Measles                                                                              | 0.3<br>(0.1 to 0.6)                          | 9.4<br>(3.4 to 20.2)                                | < 0.05<br>(< 0.05 to 0.1)                 | -55.1<br>(-60.0 to -49.5)                         | -57.6<br>(-62.2 to -52.3)                        |
| Varicella and herpes zoster                                                          | 353.6<br>(293.4 to 423.2)                    | 4,604.3<br>(3,441.4 to 6,148.9)                     | 16.9<br>(10.0 to 26.9)                    | 3.0<br>(-2.9 to 8.9)                              | -2.7<br>(-8.2 to 3.0)                            |
| <b>Neglected tropical diseases and malaria</b>                                       | <b>130,191.6</b><br>(126,256.6 to 133,598.4) | <b>20,060.6†</b><br>(16,733.9 to 24,004.5)          | <b>975.4</b><br>(665.8 to 1,389.8)        | <b>-17.2</b><br>(-23.0 to -11.4)                  | <b>-21.7</b><br>(-27.2 to -16.2)                 |
| Malaria                                                                              | 5,435.2<br>(4,711.3 to 6,216.7)              | 5,888.1<br>(4,395.0 to 7,543.8)                     | 72.3<br>(55.0 to 92.2)                    | -0.1<br>(-6.8 to 7.9)                             | -5.6<br>(-11.9 to 2.0)                           |
| Chagas disease                                                                       | 667.2<br>(556.9 to 809.6)                    | 12.8<br>(8.4 to 18.1)                               | 4.6<br>(2.8 to 6.8)                       | 2.4<br>(-5.5 to 10.1)                             | -3.2<br>(-10.7 to 4.0)                           |
| Leishmaniasis                                                                        | 390.0<br>(322.2 to 466.9)                    | 41.8<br>(30.8 to 54.6)                              | 22.1<br>(13.8 to 33.9)                    | 33.6<br>(18.5 to 57.0)                            | 26.3<br>(12.0 to 48.5)                           |
| Visceral leishmaniasis                                                               | 1.5<br>(1.0 to 2.0)                          | 5.8<br>(4.0 to 8.2)                                 | 0.1<br>(0.1 to 0.2)                       | -57.6<br>(-71.4 to -37.9)                         | -59.9<br>(-73.0 to -41.3)                        |
| Cutaneous and mucocutaneous leishmaniasis                                            | 346.9<br>(276.5 to 440.6)                    | 36.0<br>(25.5 to 49.3)                              | 22.0<br>(13.8 to 33.8)                    | 35.0<br>(19.2 to 58.9)                            | 27.6<br>(12.6 to 50.2)                           |
| African trypanosomiasis                                                              | 0.5<br>(0.1 to 2.0)                          | 0.4<br>(0.1 to 1.3)                                 | 0.1<br>(< 0.05 to 0.5)                    | -71.8<br>(-94.6 to 61.6)                          | -73.3<br>(-94.9 to 52.8)                         |
| Schistosomiasis                                                                      | 18,595.2<br>(17,108.1 to 19,939.8)           | 4,733.9<br>(4,192.4 to 5,491.7)                     | 152.5<br>(77.9 to 284.3)                  | -20.3<br>(-22.9 to -17.1)                         | -24.7<br>(-27.1 to -21.6)                        |
| Cysticercosis                                                                        | 238.1<br>(157.2 to 332.8)                    | --                                                  | 38.6<br>(22.6 to 59.2)                    | -19.2<br>(-29.1 to -10.2)                         | -23.6<br>(-33.0 to -15.1)                        |
| Cystic echinococcosis                                                                | 82.6<br>(43.8 to 173.4)                      | 17.4<br>(7.9 to 43.9)                               | 7.7<br>(3.5 to 17.4)                      | -39.7<br>(-75.1 to 62.1)                          | -39.7<br>(-76.5 to 53.3)                         |
| Lymphatic filariasis                                                                 | 2,528.9<br>(2,023.8 to 3,276.3)              | 610.4<br>(343.8 to 960.4)                           | 129.9<br>(63.4 to 233.4)                  | -39.3<br>(-54.2 to -27.8)                         | -42.6<br>(-56.8 to -31.7)                        |
| Onchocerciasis                                                                       | 1,176.7<br>(731.5 to 2,020.9)                | 273.0<br>(112.9 to 546.8)                           | 76.5<br>(34.0 to 138.3)                   | -19.2<br>(-40.6 to 0.9)                           | -23.6<br>(-43.8 to -4.7)                         |
| Trachoma                                                                             | 19.1<br>(10.7 to 32.6)                       | --                                                  | 2.6<br>(1.4 to 4.4)                       | -13.7<br>(-29.5 to 3.4)                           | -18.5<br>(-33.3 to -2.3)                         |
| Dengue                                                                               | 394.4<br>(214.9 to 667.9)                    | 6,591.9<br>(4,010.3 to 9,997.8)                     | 63.9<br>(28.2 to 119.6)                   | 84.4<br>(48.4 to 321.2)                           | 74.3<br>(40.2 to 298.1)                          |
| Yellow fever                                                                         | 0.1<br>(< 0.05 to 0.4)                       | 5.6<br>(1.6 to 15.7)                                | < 0.05<br>(< 0.05 to < 0.05)              | -14.6<br>(-45.3 to 32.8)                          | -19.2<br>(-48.3 to 25.6)                         |
| Rabies                                                                               | < 0.05<br>(< 0.05 to < 0.05)                 | 0.6<br>(0.3 to 0.9)                                 | < 0.05<br>(< 0.05 to < 0.05)              | -47.5<br>(-58.0 to -30.8)                         | -50.4<br>(-60.3 to -34.6)                        |
| Intestinal nematode infections                                                       | 107,799.4<br>(102,933.6 to 111,570.9)        | --                                                  | 209.6<br>(120.0 to 343.5)                 | -14.7<br>(-21.6 to -7.9)                          | -19.4<br>(-25.9 to -13.0)                        |
| Ascariasis                                                                           | 57,765.5<br>(51,964.8 to 64,482.9)           | --                                                  | 62.2<br>(33.8 to 105.4)                   | -28.0<br>(-37.3 to -17.8)                         | -32.0<br>(-40.7 to -22.3)                        |

| Cause                                                                   | Prevalence in thousands (95% UI)              | Incidence in thousands (95% UI)                      | YLDs in thousands (95% UI)                 |                                                   |                                                  |
|-------------------------------------------------------------------------|-----------------------------------------------|------------------------------------------------------|--------------------------------------------|---------------------------------------------------|--------------------------------------------------|
|                                                                         | 2016 counts                                   | 2016 counts                                          | 2016 counts                                | Percentage change in counts between 2006 and 2016 | Percentage change in rates between 2006 and 2016 |
| Trichuriasis                                                            | 30,310.5<br>(27,910.6 to 33,193.2)            | --                                                   | 23.5<br>(12.7 to 40.6)                     | -18.9<br>(-30.5 to -5.8)                          | -23.3<br>(-34.3 to -10.9)                        |
| Hookworm disease                                                        | 32,815.6<br>(30,373.3 to 35,876.2)            | --                                                   | 123.9<br>(72.5 to 196.4)                   | -5.0<br>(-14.5 to 6.1)                            | -10.2<br>(-19.2 to 0.3)                          |
| Food-borne trematodiasis                                                | 6,388.2<br>(5,968.6 to 6,885.4)               | 1,187.1<br>(776.7 to 1,528.1)                        | 169.9<br>(87.4 to 308.2)                   | -22.5<br>(-26.7 to -16.4)                         | -26.7<br>(-30.7 to -20.9)                        |
| Leprosy                                                                 | 33.4<br>(31.2 to 36.0)                        | 3.6<br>(3.2 to 3.9)                                  | 2.1<br>(1.4 to 3.0)                        | -10.5<br>(-19.9 to 0.3)                           | -15.4<br>(-24.3 to -5.2)                         |
| Ebola virus disease                                                     | 0.1<br>(< 0.05 to 0.4)                        | < 0.05<br>(< 0.05 to < 0.05)                         | < 0.05<br>(< 0.05 to 0.1)                  | --                                                | --                                               |
| Zika virus disease                                                      | 11.5<br>(6.7 to 20.4)                         | 694.0<br>(403.8 to 1,231.7)                          | 0.2<br>(0.1 to 0.4)                        | --                                                | --                                               |
| Guinea worm disease                                                     | < 0.05<br>(< 0.05 to < 0.05)                  | < 0.05<br>(< 0.05 to < 0.05)                         | < 0.05<br>(< 0.05 to < 0.05)               | -99.6<br>(-99.7 to -99.4)                         | -99.6<br>(-99.7 to -99.4)                        |
| Other neglected tropical diseases                                       | 1,519.3<br>(1,324.9 to 1,722.4)               | --                                                   | 22.8<br>(13.9 to 36.0)                     | 22.2<br>(14.8 to 29.9)                            | 15.5<br>(8.5 to 22.8)                            |
| <b>Maternal disorders</b>                                               | <b>996.7<br/>(927.7 to 1,069.2)</b>           | <b>12,092.9†<br/>(9,778.6 to 14,555.1)</b>           | <b>105.8<br/>(72.7 to 145.4)</b>           | <b>-1.0<br/>(-12.8 to 13.2)</b>                   | <b>-6.4<br/>(-17.6 to 7.0)</b>                   |
| Maternal haemorrhage                                                    | 158.3<br>(112.2 to 219.2)                     | 921.2<br>(664.5 to 1,291.8)                          | 5.4<br>(3.3 to 8.3)                        | 15.6<br>(-13.2 to 51.7)                           | 9.2<br>(-17.9 to 43.4)                           |
| Maternal sepsis and other pregnancy related infections                  | 201.5<br>(164.8 to 250.6)                     | 797.8<br>(541.5 to 1,129.5)                          | 3.9<br>(1.9 to 7.0)                        | 14.6<br>(-37.7 to 106.0)                          | 8.3<br>(-41.1 to 94.7)                           |
| Maternal hypertensive disorders                                         | 464.2<br>(302.3 to 651.0)                     | 2,131.8<br>(1,705.0 to 2,563.0)                      | 22.4<br>(12.0 to 37.8)                     | 24.9<br>(-20.4 to 97.9)                           | 18.0<br>(-24.7 to 87.1)                          |
| Maternal obstructed labour and uterine rupture                          | 161.4<br>(128.8 to 200.3)                     | 627.0<br>(446.5 to 871.3)                            | 51.9<br>(31.6 to 75.4)                     | -10.3<br>(-18.3 to -1.8)                          | -15.2<br>(-22.8 to -7.2)                         |
| Maternal abortion, miscarriage, and ectopic pregnancy                   | 62.5<br>(37.7 to 92.0)                        | 7,615.1<br>(5,400.1 to 9,936.4)                      | 6.8<br>(3.6 to 11.2)                       | 2.7<br>(-36.4 to 64.7)                            | -2.9<br>(-39.9 to 55.7)                          |
| Other maternal disorders                                                | --                                            | --                                                   | 15.5<br>(10.6 to 21.2)                     | -5.8<br>(-17.1 to 7.7)                            | -10.9<br>(-21.6 to 1.8)                          |
| <b>Neonatal disorders</b>                                               | <b>4,802.2<br/>(4,387.3 to 5,245.7)</b>       | --                                                   | <b>878.4<br/>(619.3 to 1,237.7)</b>        | <b>22.6<br/>(9.5 to 37.9)</b>                     | <b>15.9<br/>(3.5 to 30.3)</b>                    |
| Neonatal preterm birth complications                                    | 4,015.6<br>(3,390.7 to 4,789.3)               | --                                                   | 570.8<br>(395.6 to 805.9)                  | 19.3<br>(-0.1 to 43.0)                            | 12.8<br>(-5.6 to 35.2)                           |
| Neonatal encephalopathy due to birth asphyxia and trauma                | 755.5<br>(478.7 to 1,180.9)                   | --                                                   | 108.3<br>(42.9 to 232.3)                   | 26.8<br>(18.6 to 42.5)                            | 19.9<br>(12.1 to 34.7)                           |
| Neonatal sepsis and other neonatal infections                           | 398.1<br>(155.6 to 944.0)                     | --                                                   | 154.2<br>(50.1 to 396.7)                   | 33.7<br>(24.9 to 47.2)                            | 26.4<br>(18.1 to 39.2)                           |
| Hemolytic disease and other neonatal jaundice                           | 139.6<br>(124.1 to 155.9)                     | --                                                   | 45.0<br>(34.6 to 57.2)                     | 21.0<br>(15.5 to 27.0)                            | 14.4<br>(9.1 to 20.1)                            |
| Other neonatal disorders                                                | --                                            | --                                                   | --                                         | --                                                | --                                               |
| <b>Nutritional deficiencies</b>                                         | <b>100,567.3<br/>(94,901.9 to 104,782.3)</b>  | <b>28,003.7†<br/>(23,656.9 to 33,931.8)</b>          | <b>2,068.1<br/>(1,358.4 to 3,010.1)</b>    | <b>9.8<br/>(6.2 to 13.7)</b>                      | <b>3.8<br/>(0.4 to 7.5)</b>                      |
| Protein-energy malnutrition                                             | --                                            | --                                                   | --                                         | --                                                | --                                               |
| Iodine deficiency                                                       | 9,903.0<br>(8,771.0 to 11,104.6)              | 39.7<br>(33.2 to 47.4)                               | 262.6<br>(178.2 to 368.0)                  | -7.1<br>(-9.9 to -4.6)                            | -12.2<br>(-14.8 to -9.8)                         |
| Vitamin A deficiency                                                    | 25,490.5<br>(22,094.5 to 29,967.6)            | 27,964.0<br>(23,612.5 to 33,892.9)                   | 11.8<br>(7.2 to 17.7)                      | 17.0<br>(8.8 to 26.2)                             | 10.6<br>(2.9 to 19.3)                            |
| Iron-deficiency anaemia                                                 | 75,861.5<br>(67,087.6 to 85,343.7)            | --                                                   | 1,793.7<br>(1,163.6 to 2,628.5)            | 12.8<br>(8.7 to 17.2)                             | 6.6<br>(2.7 to 10.8)                             |
| Other nutritional deficiencies                                          | --                                            | --                                                   | --                                         | --                                                | --                                               |
| <b>Other communicable, maternal, neonatal, and nutritional diseases</b> | <b>168,477.7<br/>(163,498.9 to 173,429.6)</b> | <b>77,421.7<br/>(62,453.1 to 96,791.1)</b>           | <b>443.0<br/>(276.1 to 687.2)</b>          | <b>8.9<br/>(3.7 to 14.2)</b>                      | <b>2.9<br/>(-1.9 to 8.0)</b>                     |
| Sexually transmitted diseases excluding HIV                             | 133,337.7<br>(128,013.8 to 137,898.7)         | 69,992.0<br>(55,172.7 to 88,600.3)                   | 386.7<br>(239.0 to 602.8)                  | 10.1<br>(5.7 to 14.8)                             | 4.0<br>(-0.1 to 8.6)                             |
| Syphilis                                                                | 7,517.8<br>(4,994.4 to 11,143.1)              | 5,203.7<br>(3,333.9 to 8,263.0)                      | 13.6<br>(9.3 to 18.7)                      | 14.1<br>(10.6 to 17.6)                            | 7.9<br>(4.5 to 11.2)                             |
| Chlamydial infection                                                    | 10,352.8<br>(7,718.9 to 13,706.1)             | 6,265.0<br>(4,556.4 to 8,324.5)                      | 65.1<br>(39.1 to 104.5)                    | 3.1<br>(-1.6 to 7.3)                              | -2.6<br>(-7.0 to 1.4)                            |
| Gonococcal infection                                                    | 9,968.7<br>(6,375.4 to 15,020.2)              | 31,648.5<br>(18,607.1 to 49,765.8)                   | 100.4<br>(55.2 to 170.0)                   | 27.5<br>(19.0 to 34.2)                            | 20.6<br>(12.5 to 26.8)                           |
| Trichomoniasis                                                          | 19,141.0<br>(13,725.1 to 26,626.4)            | 16,202.8<br>(11,287.0 to 22,607.0)                   | 21.7<br>(7.9 to 47.4)                      | 9.0<br>(7.1 to 10.9)                              | 3.0<br>(1.3 to 4.8)                              |
| Genital herpes                                                          | 92,979.6<br>(80,740.1 to 107,746.1)           | 3,354.1<br>(2,336.4 to 4,538.7)                      | 23.5<br>(7.2 to 54.0)                      | 7.8<br>(5.8 to 9.9)                               | 1.9<br>(-0.0 to 3.9)                             |
| Other sexually transmitted diseases                                     | 9,050.1<br>(7,022.8 to 10,519.3)              | 7,318.0<br>(5,567.3 to 9,355.6)                      | 162.3<br>(103.9 to 243.1)                  | 4.2<br>(-0.2 to 8.9)                              | -1.5<br>(-5.7 to 2.9)                            |
| Hepatitis                                                               | 47,488.5<br>(40,612.1 to 56,055.6)            | 7,429.2<br>(4,916.8 to 11,407.9)                     | 17.3<br>(8.7 to 31.2)                      | -14.4<br>(-47.8 to 43.2)                          | -19.1<br>(-50.7 to 35.3)                         |
| Acute hepatitis A                                                       | 63.7<br>(9.5 to 149.9)                        | 827.6<br>(124.1 to 1,948.6)                          | 2.7<br>(0.4 to 6.8)                        | -19.5<br>(-88.8 to 416.6)                         | -23.9<br>(-89.5 to 388.3)                        |
| Hepatitis B                                                             | 36,651.3<br>(30,015.2 to 45,134.5)            | 5,820.2<br>(3,519.3 to 9,550.6)                      | 13.0<br>(6.0 to 25.6)                      | -13.3<br>(-51.5 to 58.7)                          | -18.1<br>(-54.2 to 50.1)                         |
| Hepatitis C                                                             | 10,726.4<br>(9,505.1 to 11,985.8)             | 168.3<br>(119.2 to 221.8)                            | 0.2<br>(0.1 to 0.3)                        | -11.5<br>(-12.2 to -10.8)                         | -16.3<br>(-17.0 to -15.7)                        |
| Acute hepatitis E                                                       | 47.2<br>(33.0 to 64.9)                        | 613.1<br>(428.7 to 843.6)                            | 1.5<br>(0.8 to 2.4)                        | -14.1<br>(-33.5 to 9.4)                           | -18.8<br>(-37.1 to 3.4)                          |
| Other infectious diseases                                               | 1,802.2<br>(1,564.0 to 2,058.9)               | 0.5<br>(0.3 to 0.9)                                  | 39.0<br>(23.7 to 59.5)                     | 10.6<br>(5.9 to 15.8)                             | 4.6<br>(0.1 to 9.5)                              |
| <b>Non-communicable diseases</b>                                        | <b>475,936.6<br/>(474,451.9 to 477,535.4)</b> | <b>1,258,375.7†<br/>(1,113,606.6 to 1,396,540.6)</b> | <b>45,731.3<br/>(34,024.8 to 58,964.8)</b> | <b>6.4<br/>(5.8 to 6.9)</b>                       | <b>0.5<br/>(0.0 to 1.1)</b>                      |
| <b>Neoplasms</b>                                                        | <b>1,024.5<br/>(999.6 to 1,048.3)</b>         | <b>428.7<br/>(412.2 to 453.1)</b>                    | <b>145.2<br/>(105.0 to 192.3)</b>          | <b>4.9<br/>(1.1 to 10.2)</b>                      | <b>-0.9<br/>(-4.4 to 4.2)</b>                    |
| Lip and oral cavity cancer                                              | 59.5<br>(56.0 to 63.6)                        | 16.1<br>(15.2 to 17.2)                               | 6.3<br>(4.5 to 8.2)                        | 17.6<br>(7.9 to 28.3)                             | 11.1<br>(2.0 to 21.3)                            |
| Nasopharynx cancer                                                      | 25.9<br>(23.3 to 29.0)                        | 7.4<br>(6.6 to 8.2)                                  | 3.1<br>(2.1 to 4.2)                        | -22.5<br>(-33.4 to -10.4)                         | -26.7<br>(-37.1 to -15.3)                        |
| Other pharynx cancer                                                    | 10.2<br>(9.2 to 10.9)                         | 3.9<br>(3.5 to 4.2)                                  | 1.4<br>(1.0 to 1.8)                        | 19.9<br>(6.0 to 30.1)                             | 13.3<br>(0.2 to 23.0)                            |
| Oesophageal cancer                                                      | 5.5<br>(5.2 to 5.9)                           | 4.7<br>(4.4 to 4.9)                                  | 1.2<br>(0.9 to 1.7)                        | -14.5<br>(-19.5 to -8.0)                          | -19.1<br>(-23.9 to -13.0)                        |
| Stomach cancer                                                          | 29.8<br>(28.7 to 31.0)                        | 16.8<br>(16.2 to 17.4)                               | 4.7<br>(3.3 to 6.2)                        | -23.7<br>(-27.2 to -19.7)                         | -27.9<br>(-31.2 to -24.1)                        |
| Colon and rectum cancer                                                 | 93.2<br>(88.5 to 98.1)                        | 25.8<br>(24.5 to 27.1)                               | 9.7<br>(7.0 to 12.8)                       | 7.4<br>(-0.7 to 15.8)                             | 1.5<br>(-6.1 to 9.5)                             |
| Liver cancer                                                            | 22.2<br>(18.8 to 25.6)                        | 24.6<br>(22.4 to 26.9)                               | 5.7<br>(4.0 to 7.6)                        | -14.9<br>(-23.3 to -5.8)                          | -19.6<br>(-27.5 to -11.0)                        |
| Liver cancer due to hepatitis B                                         | 19.4<br>(15.6 to 23.1)                        | 14.7<br>(11.9 to 17.2)                               | 3.4<br>(2.3 to 4.6)                        | -16.9<br>(-25.4 to -7.5)                          | -21.5<br>(-29.5 to -12.6)                        |

| Cause                                              | Prevalence in thousands (95% UI)                 | Incidence in thousands (95% UI)                | YLDs in thousands (95% UI)                    |                                                   |                                                  |
|----------------------------------------------------|--------------------------------------------------|------------------------------------------------|-----------------------------------------------|---------------------------------------------------|--------------------------------------------------|
|                                                    | 2016 counts                                      | 2016 counts                                    | 2016 counts                                   | Percentage change in counts between 2006 and 2016 | Percentage change in rates between 2006 and 2016 |
| Liver cancer due to hepatitis C                    | 2.0<br>(1.4 to 2.6)                              | 1.6<br>(1.2 to 2.2)                            | 0.4<br>(0.2 to 0.6)                           | -0.6<br>(-11.9 to 13.4)                           | -6.0<br>(-16.7 to 7.2)                           |
| Liver cancer due to alcohol use                    | 2.2<br>(1.4 to 3.1)                              | 1.8<br>(1.2 to 2.6)                            | 0.4<br>(0.2 to 0.7)                           | 3.8<br>(-6.2 to 14.5)                             | -1.9<br>(-11.4 to 8.2)                           |
| Liver cancer due to other causes                   | 8.8<br>(6.9 to 11.4)                             | 6.5<br>(5.1 to 8.3)                            | 1.5<br>(1.0 to 2.2)                           | -17.4<br>(-27.5 to -6.0)                          | -21.9<br>(-31.5 to -11.2)                        |
| Gallbladder and biliary tract cancer               | 2.1<br>(1.8 to 2.3)                              | 2.6<br>(2.3 to 2.8)                            | 0.6<br>(0.4 to 0.8)                           | 0.4<br>(-7.6 to 9.0)                              | -5.1<br>(-12.7 to 3.0)                           |
| Pancreatic cancer                                  | 3.2<br>(3.1 to 3.3)                              | 4.0<br>(3.9 to 4.1)                            | 0.9<br>(0.6 to 1.1)                           | 2.1<br>(-1.4 to 5.3)                              | -3.5<br>(-6.8 to -0.4)                           |
| Larynx cancer                                      | 7.4<br>(7.0 to 7.8)                              | 2.2<br>(2.1 to 2.3)                            | 0.9<br>(0.7 to 1.2)                           | -2.0<br>(-7.1 to 3.6)                             | -7.4<br>(-12.2 to -2.1)                          |
| Tracheal, bronchus, and lung cancer                | 20.7<br>(19.6 to 21.8)                           | 15.7<br>(15.0 to 16.4)                         | 4.1<br>(2.9 to 5.4)                           | -18.7<br>(-23.0 to -13.1)                         | -23.1<br>(-27.2 to -17.9)                        |
| Malignant skin melanoma                            | 63.4<br>(55.6 to 77.2)                           | 12.8<br>(11.3 to 15.6)                         | 4.2<br>(2.8 to 5.9)                           | 13.1<br>(3.7 to 22.7)                             | 6.9<br>(-2.0 to 16.0)                            |
| Non-melanoma skin cancer                           | 3.7<br>(1.9 to 7.1)                              | 22.0<br>(11.1 to 43.1)                         | 0.2<br>(0.1 to 0.4)                           | 12.1<br>(0.4 to 26.2)                             | 6.0<br>(-5.1 to 19.3)                            |
| Non-melanoma skin cancer (squamous-cell carcinoma) | 3.1<br>(1.2 to 7.0)                              | 3.4<br>(1.4 to 6.9)                            | 0.1<br>(0.1 to 0.3)                           | 13.8<br>(-1.0 to 28.7)                            | 7.5<br>(-6.4 to 21.6)                            |
| Non-melanoma skin cancer (basal-cell carcinoma)    | 2.1<br>(0.9 to 4.6)                              | 18.6<br>(8.1 to 39.5)                          | < 0.05<br>(< 0.05 to 0.1)                     | 2.7<br>(-4.5 to 10.1)                             | -2.9<br>(-9.7 to 4.0)                            |
| Breast cancer                                      | 370.6<br>(345.2 to 398.9)                        | 77.4<br>(72.2 to 83.4)                         | 32.8<br>(23.1 to 44.5)                        | 9.1<br>(-1.0 to 21.4)                             | 3.1<br>(-6.4 to 14.8)                            |
| Cervical cancer                                    | 197.1<br>(151.7 to 213.9)                        | 51.5<br>(40.2 to 55.5)                         | 19.0<br>(12.9 to 25.4)                        | -3.4<br>(-10.7 to 6.9)                            | -8.7<br>(-15.6 to 1.0)                           |
| Uterine cancer                                     | 42.9<br>(40.0 to 47.0)                           | 9.0<br>(8.4 to 9.8)                            | 3.3<br>(2.3 to 4.6)                           | 7.2<br>(-5.5 to 23.3)                             | 1.3<br>(-10.6 to 16.6)                           |
| Ovarian cancer                                     | 32.8<br>(30.4 to 34.4)                           | 10.6<br>(10.0 to 11.1)                         | 5.2<br>(3.7 to 6.9)                           | 15.2<br>(6.1 to 22.8)                             | 8.9<br>(0.3 to 16.1)                             |
| Prostate cancer                                    | 8.1<br>(6.6 to 8.8)                              | 2.1<br>(1.7 to 2.2)                            | 0.8<br>(0.5 to 1.1)                           | 31.6<br>(20.0 to 39.1)                            | 24.4<br>(13.5 to 31.5)                           |
| Testicular cancer                                  | 42.3<br>(39.7 to 45.6)                           | 8.3<br>(7.8 to 8.9)                            | 2.9<br>(2.0 to 4.0)                           | 17.1<br>(6.4 to 29.8)                             | 10.7<br>(0.6 to 22.7)                            |
| Kidney cancer                                      | 29.2<br>(27.8 to 30.4)                           | 7.8<br>(7.5 to 8.0)                            | 2.7<br>(1.9 to 3.6)                           | 10.4<br>(4.4 to 16.8)                             | 4.4<br>(-1.3 to 10.4)                            |
| Bladder cancer                                     | 22.9<br>(21.3 to 24.5)                           | 5.6<br>(5.2 to 6.0)                            | 2.2<br>(1.6 to 3.0)                           | 13.5<br>(4.5 to 22.7)                             | 7.3<br>(-1.3 to 16.0)                            |
| Brain and nervous system cancer                    | 37.9<br>(33.5 to 41.8)                           | 16.8<br>(15.1 to 18.6)                         | 5.4<br>(3.8 to 7.2)                           | 20.5<br>(12.5 to 29.5)                            | 14.0<br>(6.3 to 22.4)                            |
| Thyroid cancer                                     | 98.1<br>(92.0 to 107.5)                          | 18.6<br>(17.4 to 20.3)                         | 6.0<br>(4.1 to 8.5)                           | 34.6<br>(21.4 to 51.4)                            | 27.2<br>(14.7 to 43.1)                           |
| Mesothelioma                                       | 1.1<br>(1.0 to 1.1)                              | 0.7<br>(0.7 to 0.8)                            | 0.2<br>(0.2 to 0.3)                           | 5.9<br>(-0.1 to 12.4)                             | 0.1<br>(-5.5 to 6.3)                             |
| Hodgkin lymphoma                                   | 23.2<br>(21.1 to 26.7)                           | 5.7<br>(5.1 to 6.6)                            | 2.2<br>(1.6 to 3.0)                           | 7.5<br>(-0.2 to 16.7)                             | 1.7<br>(-5.6 to 10.3)                            |
| Non-Hodgkin's lymphoma                             | 46.8<br>(42.3 to 51.9)                           | 13.6<br>(12.3 to 15.0)                         | 4.5<br>(3.1 to 6.0)                           | 24.5<br>(16.6 to 31.3)                            | 17.7<br>(10.2 to 24.1)                           |
| Multiple myeloma                                   | 4.0<br>(3.4 to 4.4)                              | 1.8<br>(1.6 to 2.0)                            | 0.9<br>(0.6 to 1.2)                           | 22.3<br>(15.4 to 29.0)                            | 15.6<br>(9.1 to 21.9)                            |
| Leukaemia                                          | 40.6<br>(35.5 to 44.1)                           | 12.4<br>(11.0 to 13.5)                         | 5.5<br>(3.8 to 7.3)                           | -14.8<br>(-20.8 to -8.0)                          | -19.5<br>(-25.1 to -13.0)                        |
| Acute lymphoid leukaemia                           | 6.9<br>(6.1 to 7.8)                              | 2.0<br>(1.8 to 2.3)                            | 0.9<br>(0.7 to 1.2)                           | 4.2<br>(-7.0 to 11.8)                             | -1.4<br>(-12.1 to 5.7)                           |
| Chronic lymphoid leukaemia                         | 7.5<br>(6.5 to 8.6)                              | 1.7<br>(1.4 to 1.9)                            | 0.9<br>(0.6 to 1.2)                           | 3.4<br>(-9.8 to 14.8)                             | -2.3<br>(-14.7 to 8.5)                           |
| Acute myeloid leukaemia                            | 4.4<br>(3.9 to 4.8)                              | 3.3<br>(2.9 to 3.6)                            | 0.9<br>(0.6 to 1.2)                           | 10.6<br>(4.8 to 17.2)                             | 4.5<br>(-1.0 to 10.8)                            |
| Chronic myeloid leukaemia                          | 4.5<br>(3.9 to 5.0)                              | 1.6<br>(1.4 to 1.8)                            | 0.6<br>(0.4 to 0.8)                           | -9.3<br>(-15.4 to -2.2)                           | -14.3<br>(-20.0 to -7.5)                         |
| Other leukaemia                                    | 17.3<br>(14.5 to 19.0)                           | 3.8<br>(3.2 to 4.2)                            | 2.1<br>(1.5 to 2.8)                           | -33.0<br>(-40.4 to -23.9)                         | -36.6<br>(-43.7 to -28.1)                        |
| Other neoplasms                                    | 96.4<br>(86.8 to 102.9)                          | 28.3<br>(25.6 to 30.1)                         | 8.6<br>(6.1 to 11.5)                          | 31.3<br>(23.0 to 41.0)                            | 24.1<br>(16.3 to 33.3)                           |
| <b>Cardiovascular diseases</b>                     | <b>12,415.3</b><br><b>(11,966.0 to 12,674.9)</b> | <b>903.5†</b><br><b>(800.6 to 1,019.4)</b>     | <b>910.4</b><br><b>(634.7 to 1,219.3)</b>     | <b>5.2</b><br><b>(2.8 to 7.4)</b>                 | <b>-0.5</b><br><b>(-2.8 to 1.6)</b>              |
| Rheumatic heart disease                            | 3,012.2<br>(2,727.3 to 3,339.3)                  | 39.9<br>(31.1 to 52.0)                         | 144.3<br>(91.3 to 210.8)                      | 17.2<br>(13.0 to 21.2)                            | 10.8<br>(6.8 to 14.6)                            |
| Ischaemic heart disease                            | 3,931.2<br>(3,595.8 to 4,296.9)                  | 420.1<br>(350.1 to 494.3)                      | 221.5<br>(147.0 to 313.2)                     | 12.4<br>(9.9 to 15.1)                             | 6.2<br>(3.9 to 8.8)                              |
| Cerebrovascular disease                            | 1,703.3<br>(1,624.7 to 1,801.7)                  | 207.7†<br>(147.5 to 275.3)                     | 274.6<br>(191.9 to 359.5)                     | 5.4<br>(-11.1 to 0.0)                             | -10.5<br>(-16.0 to -5.5)                         |
| Ischaemic stroke                                   | 1,358.4<br>(1,149.2 to 1,620.2)                  | 132.9†<br>(82.8 to 196.9)                      | 207.5<br>(142.7 to 277.7)                     | -5.9<br>(-13.0 to 0.9)                            | -11.1<br>(-17.7 to -4.6)                         |
| Hemorrhagic stroke                                 | 425.8<br>(353.0 to 512.0)                        | 74.8†<br>(48.9 to 104.8)                       | 67.1<br>(45.3 to 91.2)                        | -3.5<br>(-12.3 to 5.9)                            | -8.8<br>(-17.1 to 0.1)                           |
| Hypertensive heart disease                         | 412.0<br>(305.8 to 547.1)                        | --                                             | 35.2<br>(21.5 to 53.6)                        | 4.4<br>(-1.2 to 10.2)                             | -1.3<br>(-6.6 to 4.2)                            |
| Cardiomyopathy and myocarditis                     | 188.8<br>(163.1 to 225.6)                        | 124.5†<br>(91.8 to 165.0)                      | 22.0<br>(13.1 to 33.1)                        | 3.7<br>(-0.9 to 8.3)                              | -2.0<br>(-6.3 to 2.3)                            |
| Myocarditis                                        | 99.4<br>(78.2 to 124.2)                          | 124.5<br>(91.8 to 165.0)                       | 7.6<br>(4.6 to 11.3)                          | -0.1<br>(-5.8 to 6.2)                             | -5.6<br>(-11.0 to 0.4)                           |
| Alcoholic cardiomyopathy                           | 47.8<br>(34.8 to 64.0)                           | --                                             | 4.2<br>(2.4 to 6.6)                           | 4.2<br>(-8.4 to 19.3)                             | -1.5<br>(-13.5 to 12.8)                          |
| Other cardiomyopathy                               | 117.3<br>(86.0 to 155.4)                         | --                                             | 10.2<br>(6.0 to 15.5)                         | 6.5<br>(0.6 to 12.8)                              | 0.7<br>(-4.9 to 6.6)                             |
| Atrial fibrillation and flutter                    | 649.5<br>(534.1 to 771.8)                        | 58.4<br>(45.4 to 75.6)                         | 54.7<br>(34.7 to 78.5)                        | 5.7<br>(-0.1 to 11.5)                             | -0.1<br>(-5.5 to 5.4)                            |
| Peripheral vascular disease                        | --                                               | --                                             | --                                            | --                                                | --                                               |
| Endocarditis                                       | 6.4<br>(4.9 to 8.3)                              | 53.0<br>(36.3 to 74.0)                         | 0.4<br>(0.3 to 0.7)                           | 10.9<br>(9.2 to 12.7)                             | 4.9<br>(3.2 to 6.5)                              |
| Other cardiovascular and circulatory diseases      | 2,945.7<br>(2,008.1 to 4,098.6)                  | --                                             | 157.6<br>(92.0 to 249.9)                      | 6.8<br>(3.0 to 10.4)                              | 0.9<br>(-2.6 to 4.4)                             |
| <b>Chronic respiratory diseases</b>                | <b>25,612.4</b><br><b>(24,789.1 to 26,149.6)</b> | <b>4,310.4†</b><br><b>(3,740.7 to 4,968.4)</b> | <b>1,340.8</b><br><b>(1,033.6 to 1,702.1)</b> | <b>12.7</b><br><b>(10.6 to 14.8)</b>              | <b>6.5</b><br><b>(4.6 to 8.5)</b>                |
| Chronic obstructive pulmonary disease              | 7,976.4<br>(7,350.7 to 8,620.9)                  | 706.2<br>(580.1 to 842.3)                      | 567.2<br>(479.8 to 650.0)                     | 11.4<br>(7.6 to 15.3)                             | 5.3<br>(1.8 to 9.0)                              |
| Pneumoconiosis                                     | 16.8<br>(14.8 to 19.1)                           | 2.0<br>(1.5 to 2.5)                            | 2.6<br>(1.8 to 3.7)                           | -1.2<br>(-2.9 to 0.6)                             | -6.6<br>(-8.2 to -4.9)                           |
| Silicosis                                          | 5.0<br>(3.9 to 6.4)                              | 0.7<br>(0.5 to 1.0)                            | 0.8<br>(0.5 to 1.2)                           | -9.2<br>(-11.4 to -6.9)                           | -14.1<br>(-16.2 to -12.0)                        |

| Cause                                                          | Prevalence in thousands (95% UI)                    | Incidence in thousands (95% UI)                    | YLDs in thousands (95% UI)                       |                                                   |                                                  |
|----------------------------------------------------------------|-----------------------------------------------------|----------------------------------------------------|--------------------------------------------------|---------------------------------------------------|--------------------------------------------------|
|                                                                | 2016 counts                                         | 2016 counts                                        | 2016 counts                                      | Percentage change in counts between 2006 and 2016 | Percentage change in rates between 2006 and 2016 |
| Asbestos                                                       | 3.8<br>(2.9 to 4.8)                                 | 0.3<br>(0.2 to 0.5)                                | 0.6<br>(0.4 to 0.9)                              | 11.1<br>(8.5 to 13.1)                             | 5.0<br>(2.6 to 7.0)                              |
| Coal workers pneumoconiosis                                    | 2.0<br>(1.5 to 2.4)                                 | 0.3<br>(0.2 to 0.4)                                | 0.3<br>(0.2 to 0.5)                              | -12.0<br>(-14.5 to -9.4)                          | -16.8<br>(-19.2 to -14.3)                        |
| Other pneumoconiosis                                           | 6.1<br>(4.7 to 7.9)                                 | 0.7<br>(0.4 to 1.0)                                | 1.0<br>(0.6 to 1.4)                              | 3.4<br>(0.3 to 6.2)                               | -2.3<br>(-5.2 to 0.4)                            |
| Asthma                                                         | 17,968.7<br>(15,947.4 to 20,219.7)                  | 3,594.2<br>(3,013.9 to 4,270.9)                    | 703.2<br>(456.4 to 1,009.0)                      | 11.5<br>(9.5 to 13.3)                             | 5.4<br>(3.5 to 7.1)                              |
| Interstitial lung disease and pulmonary sarcoidosis            | 100.3<br>(83.6 to 119.8)                            | 8.0<br>(5.2 to 11.5)                               | 11.2<br>(7.2 to 16.9)                            | 6.7<br>(-0.2 to 14.5)                             | 0.9<br>(-5.7 to 8.2)                             |
| Other chronic respiratory diseases                             | --                                                  | --                                                 | 56.5<br>(47.7 to 65.0)                           | 54.7<br>(49.6 to 60.1)                            | 46.2<br>(41.4 to 51.3)                           |
| <b>Cirrhosis and other chronic liver diseases</b>              | <b>3,438.8</b><br><b>(3,145.0 to 3,739.0)</b>       | <b>88.7</b><br><b>(72.8 to 105.3)</b>              | <b>81.4</b><br><b>(55.3 to 113.6)</b>            | <b>10.8</b><br><b>(6.1 to 15.5)</b>               | <b>4.7</b><br><b>(0.3 to 9.2)</b>                |
| Cirrhosis and other chronic liver diseases due to hepatitis B  | 1,068.8<br>(897.7 to 1,241.6)                       | 31.2<br>(24.6 to 39.4)                             | 27.9<br>(18.8 to 40.4)                           | 8.3<br>(-0.2 to 17.1)                             | 2.3<br>(-5.7 to 10.7)                            |
| Cirrhosis and other chronic liver diseases due to hepatitis C  | 919.0<br>(738.3 to 1,114.6)                         | 22.8<br>(17.5 to 28.8)                             | 20.9<br>(13.3 to 30.6)                           | 15.8<br>(7.3 to 25.1)                             | 9.5<br>(1.5 to 18.2)                             |
| Cirrhosis and other chronic liver diseases due to alcohol use  | 886.7<br>(726.4 to 1,059.2)                         | 22.2<br>(17.2 to 28.4)                             | 19.9<br>(13.1 to 29.1)                           | 12.3<br>(3.9 to 21.7)                             | 6.2<br>(-1.8 to 15.1)                            |
| Cirrhosis and other chronic liver diseases due to other causes | 564.3<br>(418.2 to 739.2)                           | 12.5<br>(8.8 to 16.9)                              | 12.6<br>(7.7 to 19.3)                            | 6.2<br>(-4.1 to 18.3)                             | 0.4<br>(-9.4 to 11.8)                            |
| <b>Digestive diseases</b>                                      | <b>16,380.7</b><br><b>(15,412.5 to 17,217.5)</b>    | <b>11,862.5†</b><br><b>(10,118.1 to 13,760.1)</b>  | <b>478.2</b><br><b>(315.9 to 675.9)</b>          | <b>10.3</b><br><b>(4.6 to 16.5)</b>               | <b>4.2</b><br><b>(-1.1 to 10.1)</b>              |
| Peptic ulcer disease                                           | 5,539.4<br>(4,423.5 to 6,852.9)                     | 777.8<br>(566.6 to 1,036.6)                        | 117.8<br>(65.9 to 190.8)                         | 17.8<br>(6.0 to 28.3)                             | 10.9<br>(0.2 to 21.3)                            |
| Gastritis and duodenitis                                       | 6,368.5<br>(4,786.7 to 8,209.3)                     | 4,253.0<br>(2,911.0 to 5,729.6)                    | 112.8<br>(67.7 to 176.5)                         | 11.5<br>(0.4 to 22.2)                             | 5.4<br>(-5.0 to 15.5)                            |
| Appendicitis                                                   | 47.9<br>(38.3 to 57.9)                              | 1,259.4<br>(1,021.2 to 1,540.5)                    | 14.8<br>(9.4 to 21.7)                            | 10.4<br>(0.0 to 21.7)                             | 4.3<br>(-5.5 to 15.0)                            |
| Paralytic ileus and intestinal obstruction                     | 8.2<br>(6.0 to 11.0)                                | 224.0<br>(160.8 to 298.0)                          | 2.7<br>(1.6 to 4.2)                              | 11.2<br>(9.2 to 13.2)                             | 5.1<br>(3.2 to 7.0)                              |
| Inguinal, femoral, and abdominal hernia                        | 3,302.6<br>(2,299.7 to 4,541.2)                     | 1,465.3<br>(1,011.3 to 2,039.7)                    | 123.5<br>(73.1 to 196.0)                         | 9.1<br>(4.3 to 13.9)                              | 3.2<br>(-1.4 to 7.7)                             |
| Inflammatory bowel disease                                     | 366.1<br>(313.2 to 427.6)                           | 316.4<br>(250.0 to 387.6)                          | 54.4<br>(35.2 to 77.0)                           | -2.3<br>(-6.6 to 2.1)                             | -7.7<br>(-11.7 to -3.5)                          |
| Vascular intestinal disorders                                  | 2.9<br>(1.8 to 4.8)                                 | 17.0<br>(11.6 to 23.9)                             | 1.0<br>(0.5 to 1.7)                              | 10.1<br>(7.3 to 12.2)                             | 4.0<br>(1.4 to 6.0)                              |
| Gallbladder and biliary diseases                               | 1,189.5<br>(867.6 to 1,529.0)                       | 3,249.9<br>(2,348.8 to 4,350.2)                    | 16.0<br>(9.8 to 24.8)                            | 5.2<br>(-1.7 to 11.6)                             | -0.6<br>(-7.0 to 5.5)                            |
| Pancreatitis                                                   | 33.0<br>(25.1 to 42.7)                              | 299.9<br>(226.5 to 388.4)                          | 4.3<br>(2.7 to 6.6)                              | 2.6<br>(-3.8 to 8.7)                              | -3.0<br>(-9.1 to 2.8)                            |
| Other digestive diseases                                       | --                                                  | --                                                 | 31.0<br>(20.5 to 43.9)                           | 14.2<br>(8.4 to 20.7)                             | 8.0<br>(2.5 to 14.1)                             |
| <b>Neurological disorders</b>                                  | <b>254,770.1</b><br><b>(243,637.6 to 270,107.2)</b> | <b>121,260.4</b><br><b>(78,173.6 to 170,865.7)</b> | <b>6,353.7</b><br><b>(4,186.5 to 8,769.1)</b>    | <b>8.8</b><br><b>(7.5 to 10.2)</b>                | <b>2.9</b><br><b>(1.7 to 4.2)</b>                |
| Alzheimer's disease and other dementias                        | --                                                  | --                                                 | --                                               | --                                                | --                                               |
| Parkinson's disease                                            | 43.2<br>(26.3 to 69.4)                              | 5.2<br>(2.2 to 9.6)                                | 5.8<br>(3.0 to 9.9)                              | 12.9<br>(7.9 to 19.2)                             | 6.8<br>(2.0 to 12.7)                             |
| Epilepsy                                                       | 1,360.5<br>(1,116.4 to 1,631.7)                     | 103.6<br>(71.2 to 144.3)                           | 425.9<br>(281.9 to 596.1)                        | 1.8<br>(-8.8 to 13.8)                             | -3.8<br>(-13.8 to 7.5)                           |
| Multiple sclerosis                                             | 233.3<br>(205.3 to 263.8)                           | 7.3<br>(5.2 to 10.4)                               | 62.5<br>(43.4 to 83.2)                           | 13.5<br>(7.0 to 20.4)                             | 7.3<br>(1.2 to 13.8)                             |
| Motor neuron disease                                           | 17.7<br>(14.6 to 21.4)                              | 1.3<br>(0.8 to 2.1)                                | 3.8<br>(2.6 to 5.3)                              | 2.5<br>(1.7 to 3.3)                               | -3.1<br>(-3.8 to -2.3)                           |
| Migraine                                                       | 112,363.8<br>(104,010.9 to 121,695.2)               | 9,676.8<br>(8,313.6 to 11,261.7)                   | 4,976.7<br>(3,118.0 to 6,928.8)                  | 9.2<br>(8.1 to 10.2)                              | 3.2<br>(2.2 to 4.2)                              |
| Tension-type headache                                          | 191,698.7<br>(139,588.4 to 244,476.4)               | 111,463.3<br>(68,568.2 to 160,565.2)               | 807.0<br>(494.2 to 1,251.5)                      | 9.7<br>(7.9 to 11.9)                              | 3.7<br>(2.0 to 5.8)                              |
| Other neurological disorders                                   | 1.4<br>(0.7 to 2.5)                                 | 2.9<br>(1.5 to 4.7)                                | 72.0<br>(49.1 to 98.6)                           | 18.1<br>(7.7 to 30.3)                             | 11.7<br>(1.8 to 23.1)                            |
| <b>Mental and substance use disorders</b>                      | <b>93,134.9</b><br><b>(91,597.1 to 94,356.9)</b>    | <b>33,708.5†</b><br><b>(29,097.9 to 38,192.0)</b>  | <b>13,724.5</b><br><b>(10,092.0 to 17,677.8)</b> | <b>5.4</b><br><b>(4.6 to 6.2)</b>                 | <b>-0.4</b><br><b>(-1.1 to 0.4)</b>              |
| Schizophrenia                                                  | 2,580.5<br>(2,176.1 to 3,024.0)                     | 103.6<br>(79.2 to 131.0)                           | 1,684.5<br>(1,208.6 to 2,133.1)                  | -0.8<br>(-2.8 to 1.1)                             | -6.3<br>(-8.1 to -4.5)                           |
| Alcohol use disorders                                          | 11,781.4<br>(9,797.0 to 13,986.0)                   | 6,088.6<br>(4,751.7 to 7,541.7)                    | 1,184.9<br>(785.2 to 1,667.4)                    | 3.3<br>(-0.0 to 6.4)                              | -2.4<br>(-5.5 to 0.6)                            |
| Drug use disorders                                             | 6,033.0<br>(5,767.5 to 6,255.2)                     | 409.1<br>(329.4 to 496.4)                          | 1,622.3<br>(1,128.9 to 2,164.5)                  | 10.7<br>(8.0 to 13.6)                             | 4.7<br>(2.1 to 7.4)                              |
| Opioid use disorders                                           | 3,181.5<br>(2,581.2 to 3,815.0)                     | 184.3<br>(128.5 to 254.5)                          | 1,326.5<br>(900.3 to 1,798.3)                    | 12.2<br>(8.8 to 15.5)                             | 6.1<br>(2.9 to 9.2)                              |
| Cocaine use disorders                                          | 551.4<br>(483.3 to 627.9)                           | 12.0<br>(7.5 to 17.6)                              | 75.7<br>(47.1 to 108.8)                          | 6.4<br>(1.7 to 11.3)                              | 0.6<br>(-3.9 to 5.2)                             |
| Amphetamine use disorders                                      | 314.4<br>(221.3 to 436.7)                           | 15.6<br>(7.4 to 26.9)                              | 41.3<br>(23.4 to 66.6)                           | 4.3<br>(-4.1 to 12.9)                             | -1.4<br>(-9.3 to 6.8)                            |
| Cannabis use disorders                                         | 1,594.2<br>(1,213.6 to 2,030.7)                     | 122.3<br>(77.2 to 172.6)                           | 46.4<br>(27.5 to 70.2)                           | -0.9<br>(-5.7 to 3.8)                             | -6.3<br>(-10.8 to -1.9)                          |
| Other drug use disorders                                       | 515.8<br>(431.3 to 608.6)                           | 74.9<br>(58.8 to 92.9)                             | 132.5<br>(89.6 to 181.5)                         | 5.8<br>(2.3 to 9.2)                               | -0.0<br>(-3.3 to 3.2)                            |
| Depressive disorders                                           | 22,373.2<br>(21,476.5 to 23,293.7)                  | 22,942.2<br>(18,723.2 to 27,286.2)                 | 3,764.5<br>(2,521.9 to 5,242.4)                  | 3.9<br>(2.6 to 5.3)                               | -1.8<br>(-3.1 to -0.5)                           |
| Major depressive disorder                                      | 14,067.0<br>(11,716.7 to 16,672.6)                  | 21,524.0<br>(17,272.9 to 25,960.4)                 | 2,906.6<br>(1,875.2 to 4,174.1)                  | 3.8<br>(2.1 to 5.5)                               | -1.9<br>(-3.5 to -0.3)                           |
| Dysthymia                                                      | 8,799.3<br>(7,125.6 to 10,826.5)                    | 1,418.2<br>(1,042.6 to 1,814.3)                    | 857.9<br>(557.3 to 1,290.9)                      | 4.4<br>(1.6 to 7.1)                               | -1.4<br>(-4.0 to 1.2)                            |
| Bipolar disorder                                               | 4,033.0<br>(3,339.7 to 4,856.2)                     | 231.3<br>(141.2 to 335.8)                          | 829.0<br>(498.8 to 1,246.2)                      | 11.2<br>(9.1 to 13.4)                             | 5.2<br>(3.2 to 7.2)                              |
| Anxiety disorders                                              | 23,308.4<br>(20,997.8 to 25,893.2)                  | 3,641.0<br>(3,153.7 to 4,203.8)                    | 2,256.3<br>(1,571.3 to 3,084.8)                  | 8.1<br>(6.0 to 9.9)                               | 2.1<br>(0.2 to 3.9)                              |
| Eating disorders                                               | 1,325.4<br>(1,113.4 to 1,625.0)                     | 152.9<br>(105.9 to 214.4)                          | 264.2<br>(157.2 to 406.8)                        | 15.9<br>(12.7 to 19.0)                            | 9.6<br>(6.5 to 12.5)                             |
| Anorexia nervosa                                               | 169.4<br>(119.0 to 245.3)                           | 42.2<br>(28.2 to 59.0)                             | 35.6<br>(20.8 to 56.3)                           | 7.9<br>(1.0 to 15.0)                              | 2.0<br>(-4.5 to 8.7)                             |
| Bulimia nervosa                                                | 1,095.6<br>(745.8 to 1,552.5)                       | 110.7<br>(64.3 to 172.2)                           | 228.6<br>(128.5 to 359.0)                        | 17.3<br>(13.6 to 20.8)                            | 10.8<br>(7.4 to 14.2)                            |
| Autistic spectrum disorders                                    | 4,239.7<br>(4,052.9 to 4,432.9)                     | --                                                 | 616.9<br>(421.6 to 868.9)                        | 5.9<br>(4.2 to 7.5)                               | 0.1<br>(-1.5 to 1.6)                             |
| Autism                                                         | 1,258.5<br>(1,086.0 to 1,461.6)                     | --                                                 | 319.4<br>(207.5 to 460.1)                        | 5.2<br>(2.7 to 7.8)                               | -0.6<br>(-3.0 to 1.9)                            |
| Asperger syndrome and other autistic spectrum disorders        | 2,978.5<br>(2,480.2 to 3,567.6)                     | --                                                 | 297.5<br>(194.7 to 431.8)                        | 6.6<br>(5.0 to 8.5)                               | 0.8<br>(-0.7 to 2.5)                             |

| Cause                                                      | Prevalence in thousands (95% UI)              | Incidence in thousands (95% UI)                  | YLDs in thousands (95% UI)                |                                                   |                                                  |
|------------------------------------------------------------|-----------------------------------------------|--------------------------------------------------|-------------------------------------------|---------------------------------------------------|--------------------------------------------------|
|                                                            | 2016 counts                                   | 2016 counts                                      | 2016 counts                               | Percentage change in counts between 2006 and 2016 | Percentage change in rates between 2006 and 2016 |
| Attention-deficit/hyperactivity disorder                   | 3,548.1<br>(3,143.3 to 4,007.9)               | --                                               | 42.5<br>(25.4 to 66.6)                    | 1.6<br>(-1.1 to 4.5)                              | -3.9<br>(-6.5 to -1.2)                           |
| Conduct disorder                                           | --                                            | --                                               | --                                        | --                                                | --                                               |
| Idiopathic developmental intellectual disability           | 8,287.4<br>(5,049.1 to 11,564.2)              | --                                               | 330.7<br>(159.3 to 564.9)                 | -1.2<br>(-5.4 to 1.5)                             | -6.6<br>(-10.6 to -4.0)                          |
| Other mental and substance use disorders                   | 14,970.7<br>(13,132.8 to 17,157.0)            | 139.8<br>(95.4 to 197.0)                         | 1,128.8<br>(763.6 to 1,627.8)             | 5.8<br>(4.2 to 7.3)                               | -0.0<br>(-1.5 to 1.4)                            |
| <b>Diabetes, urogenital, blood, and endocrine diseases</b> | <b>209,667.8<br/>(207,188.9 to 211,818.0)</b> | <b>78,670.9†<br/>(70,207.9 to 87,652.5)</b>      | <b>4,180.3<br/>(2,882.9 to 5,796.8)</b>   | <b>5.0<br/>(3.2 to 6.8)</b>                       | <b>-0.8<br/>(-2.4 to 1.0)</b>                    |
| Diabetes mellitus                                          | 23,744.0<br>(20,403.9 to 27,492.3)            | 1,863.9<br>(1,363.9 to 2,493.3)                  | 1,711.5<br>(1,146.0 to 2,433.2)           | 3.3<br>(0.2 to 6.2)                               | -2.4<br>(-5.2 to 0.4)                            |
| Acute glomerulonephritis                                   | 6.0<br>(3.8 to 8.9)                           | 89.6<br>(57.2 to 133.6)                          | 0.3<br>(0.2 to 0.5)                       | -13.6<br>(-16.4 to -11.3)                         | -18.4<br>(-20.9 to -16.1)                        |
| Chronic kidney disease                                     | 10,405.5<br>(8,789.6 to 12,285.7)             | 709.4<br>(469.8 to 968.6)                        | 495.9<br>(342.9 to 695.4)                 | 18.6<br>(14.0 to 23.2)                            | 12.1<br>(7.8 to 16.5)                            |
| Chronic kidney disease due to diabetes mellitus            | 3,531.2<br>(2,484.8 to 4,642.0)               | 234.7<br>(145.7 to 346.7)                        | 183.5<br>(116.4 to 273.5)                 | 16.0<br>(10.2 to 22.1)                            | 9.7<br>(4.2 to 15.4)                             |
| Chronic kidney disease due to hypertension                 | 1,881.2<br>(1,327.3 to 2,468.4)               | 191.3<br>(113.8 to 297.9)                        | 52.5<br>(32.6 to 77.8)                    | 15.1<br>(8.5 to 21.7)                             | 8.8<br>(2.5 to 15.1)                             |
| Chronic kidney disease due to glomerulonephritis           | 1,912.5<br>(1,395.0 to 2,503.6)               | 71.0<br>(41.9 to 106.9)                          | 123.7<br>(72.4 to 182.9)                  | 20.1<br>(13.8 to 26.2)                            | 13.5<br>(7.6 to 19.3)                            |
| Chronic kidney disease due to other causes                 | 3,080.5<br>(2,188.3 to 4,113.4)               | 212.4<br>(126.9 to 327.4)                        | 136.2<br>(82.5 to 204.2)                  | 22.2<br>(16.2 to 29.2)                            | 15.6<br>(9.8 to 22.1)                            |
| Urinary diseases and male infertility                      | 6,926.6<br>(5,356.2 to 9,301.6)               | 34,182.9†<br>(26,339.2 to 42,148.1)              | 80.2<br>(48.9 to 126.1)                   | 5.3<br>(2.0 to 8.6)                               | -0.4<br>(-3.6 to 2.6)                            |
| Interstitial nephritis and urinary tract infections        | 552.2<br>(420.3 to 699.1)                     | 28,238.8<br>(21,200.9 to 36,177.3)               | 18.3<br>(10.8 to 28.1)                    | 9.7<br>(4.4 to 15.1)                              | 3.7<br>(-1.3 to 8.8)                             |
| Urolithiasis                                               | 223.2<br>(163.4 to 302.2)                     | 5,944.1<br>(4,341.3 to 8,107.7)                  | 16.9<br>(10.5 to 26.1)                    | 3.3<br>(-1.3 to 8.5)                              | -2.3<br>(-6.7 to 2.6)                            |
| Benign prostatic hyperplasia                               | --                                            | --                                               | --                                        | --                                                | --                                               |
| Male infertility                                           | 5,534.0<br>(3,396.4 to 8,685.7)               | --                                               | 30.6<br>(11.3 to 64.4)                    | 8.8<br>(3.6 to 13.3)                              | 2.9<br>(-2.1 to 7.1)                             |
| Other urinary diseases                                     | --                                            | --                                               | 14.5<br>(9.3 to 20.9)                     | -3.9<br>(-7.1 to -0.6)                            | -9.2<br>(-12.2 to -6.1)                          |
| Gynecological diseases                                     | 87,749.8<br>(84,992.7 to 89,676.0)            | 41,060.7†<br>(36,283.5 to 45,976.2)              | 1,350.4<br>(910.6 to 1,949.0)             | 1.2<br>(-1.3 to 3.7)                              | -4.4<br>(-6.7 to -2.0)                           |
| Uterine fibroids                                           | 9,930.9<br>(8,038.1 to 11,906.8)              | 2,363.6<br>(1,713.6 to 3,094.8)                  | 197.8<br>(115.8 to 317.5)                 | 9.2<br>(6.5 to 12.0)                              | 3.2<br>(0.7 to 5.9)                              |
| Polycystic ovarian syndrome                                | 2,964.8<br>(2,356.8 to 3,655.0)               | 3,015.2<br>(2,009.3 to 4,279.5)                  | 25.7<br>(11.8 to 47.5)                    | 3.8<br>(1.8 to 5.8)                               | -1.9<br>(-3.8 to 0.1)                            |
| Female infertility                                         | 5,312.6<br>(1,115.7 to 14,738.0)              | --                                               | 27.9<br>(4.6 to 82.3)                     | 25.8<br>(8.0 to 60.4)                             | 18.9<br>(2.0 to 51.6)                            |
| Endometriosis                                              | 417.4<br>(354.4 to 488.6)                     | 1,720.8<br>(1,252.0 to 2,271.9)                  | 38.9<br>(25.5 to 55.7)                    | -8.7<br>(-14.3 to -2.8)                           | -13.7<br>(-19.0 to -8.1)                         |
| Genital prolapse                                           | 10,361.6<br>(8,273.6 to 12,685.1)             | 1,672.0<br>(1,088.9 to 2,357.8)                  | 33.1<br>(16.0 to 62.6)                    | 7.4<br>(4.9 to 10.2)                              | 1.5<br>(-0.8 to 4.2)                             |
| Premenstrual syndrome                                      | 56,713.7<br>(52,669.9 to 61,462.5)            | 17,051.1<br>(14,884.4 to 19,667.7)               | 472.3<br>(295.3 to 719.5)                 | 3.7<br>(1.5 to 6.0)                               | -2.0<br>(-4.0 to 0.1)                            |
| Other gynecological diseases                               | 15,782.5<br>(12,743.8 to 18,489.8)            | 15,238.0<br>(11,163.2 to 18,915.1)               | 554.7<br>(354.1 to 810.5)                 | -4.0<br>(-7.5 to 0.7)                             | -9.2<br>(-12.6 to -4.9)                          |
| Hemoglobinopathies and hemolytic anaemias                  | 121,079.8<br>(119,729.4 to 122,786.6)         | --                                               | 379.6<br>(240.1 to 575.3)                 | 9.4<br>(1.4 to 17.6)                              | 3.4<br>(-4.2 to 11.1)                            |
| Thalassemias                                               | 1.8<br>(1.7 to 1.8)                           | --                                               | 0.1<br>(0.1 to 0.2)                       | 2.4<br>(-13.5 to 25.7)                            | -3.2<br>(-18.2 to 18.9)                          |
| Thalassaemia trait                                         | 20,469.5<br>(19,697.7 to 21,402.1)            | --                                               | 236.1<br>(146.1 to 354.7)                 | 0.4<br>(-9.7 to 10.9)                             | -5.1<br>(-14.6 to 4.9)                           |
| Sickle cell disorders                                      | 52.6<br>(47.5 to 58.0)                        | --                                               | 8.1<br>(5.7 to 10.8)                      | 50.1<br>(37.6 to 63.4)                            | 41.9<br>(30.1 to 54.4)                           |
| Sickle cell trait                                          | 30,067.7<br>(27,174.8 to 33,967.2)            | --                                               | 88.5<br>(56.0 to 134.2)                   | 30.1<br>(24.8 to 35.4)                            | 23.0<br>(18.0 to 28.0)                           |
| G6PD deficiency                                            | 22,127.8<br>(21,316.1 to 23,073.4)            | --                                               | 1.4<br>(0.9 to 2.0)                       | 37.6<br>(30.5 to 44.7)                            | 30.1<br>(23.4 to 36.8)                           |
| G6PD trait                                                 | 58,451.0<br>(57,496.7 to 59,537.0)            | --                                               | < 0.05<br>(< 0.05 to 0.1)                 | 6.1<br>(-0.0 to 13.0)                             | 0.2<br>(-5.5 to 6.9)                             |
| Other hemoglobinopathies and hemolytic anaemias            | 3,265.0<br>(2,815.8 to 3,745.1)               | --                                               | 45.3<br>(27.7 to 71.0)                    | 21.3<br>(14.9 to 28.2)                            | 14.7<br>(8.6 to 21.2)                            |
| Endocrine, metabolic, blood, and immune disorders          | 5,690.0<br>(4,775.1 to 6,862.3)               | 764.4<br>(520.7 to 1,098.3)                      | 162.4<br>(103.9 to 246.5)                 | 8.9<br>(6.1 to 11.8)                              | 3.0<br>(0.3 to 5.7)                              |
| <b>Musculoskeletal disorders</b>                           | <b>101,597.5<br/>(95,832.1 to 107,736.0)</b>  | <b>55,958.2<br/>(44,075.1 to 70,056.9)</b>       | <b>11,068.3<br/>(7,513.2 to 15,304.9)</b> | <b>5.4<br/>(3.5 to 7.1)</b>                       | <b>-0.4<br/>(-2.1 to 1.2)</b>                    |
| Rheumatoid arthritis                                       | 1,222.3<br>(998.4 to 1,469.5)                 | 92.1<br>(62.0 to 128.6)                          | 296.9<br>(198.2 to 409.9)                 | 11.2<br>(7.2 to 14.7)                             | 5.1<br>(1.4 to 8.4)                              |
| Osteoarthritis                                             | 11,178.4<br>(10,264.0 to 12,131.5)            | 1,238.9<br>(1,027.3 to 1,473.5)                  | 667.1<br>(465.4 to 929.2)                 | 7.9<br>(6.3 to 9.6)                               | 2.0<br>(0.5 to 3.6)                              |
| Low back and neck pain                                     | 63,192.8<br>(57,333.6 to 68,509.5)            | 26,808.7<br>(19,782.6 to 35,019.9)               | 7,322.4<br>(4,832.5 to 10,499.7)          | 5.2<br>(2.8 to 7.4)                               | -0.6<br>(-2.9 to 1.5)                            |
| Low back pain                                              | 41,033.1<br>(30,524.6 to 56,180.0)            | 19,880.3<br>(13,729.4 to 28,042.3)               | 4,755.1<br>(2,974.9 to 7,209.6)           | 6.2<br>(2.8 to 9.0)                               | 0.4<br>(-2.9 to 3.1)                             |
| Neck pain                                                  | 25,149.5<br>(17,771.4 to 34,650.0)            | 6,928.5<br>(4,178.8 to 10,032.3)                 | 2,567.3<br>(1,546.8 to 3,913.5)           | 3.3<br>(0.6 to 5.9)                               | -2.4<br>(-4.9 to 0.1)                            |
| Gout                                                       | 1,828.4<br>(1,478.2 to 2,226.6)               | 362.7<br>(262.4 to 484.9)                        | 61.1<br>(39.1 to 86.7)                    | 2.9<br>(-2.2 to 8.5)                              | -2.7<br>(-7.5 to 2.5)                            |
| Other musculoskeletal disorders                            | 31,185.9<br>(21,631.7 to 43,106.1)            | 27,455.7<br>(17,775.6 to 38,913.9)               | 2,720.8<br>(1,624.2 to 4,256.5)           | 4.7<br>(0.5 to 8.6)                               | -1.0<br>(-5.0 to 2.6)                            |
| <b>Other non-communicable diseases</b>                     | <b>355,645.3<br/>(348,808.3 to 362,330.9)</b> | <b>951,183.8†<br/>(813,753.1 to 1,081,929.2)</b> | <b>7,448.6<br/>(4,950.1 to 10,721.8)</b>  | <b>7.2<br/>(6.3 to 7.9)</b>                       | <b>1.3<br/>(0.5 to 2.0)</b>                      |
| Congenital anomalies                                       | 4,694.4<br>(4,354.7 to 4,993.2)               | --                                               | 559.7<br>(394.7 to 749.5)                 | 5.4<br>(2.7 to 8.0)                               | -0.4<br>(-2.9 to 2.1)                            |
| Neural tube defects                                        | 379.3<br>(343.2 to 420.2)                     | --                                               | 114.0<br>(80.5 to 151.9)                  | 15.4<br>(10.7 to 20.7)                            | 9.1<br>(4.6 to 14.1)                             |
| Congenital heart anomalies                                 | 627.6<br>(558.5 to 698.0)                     | --                                               | 34.4<br>(14.4 to 60.1)                    | 2.3<br>(-1.7 to 6.0)                              | -3.3<br>(-7.1 to 0.2)                            |
| Orofacial clefts                                           | 233.7<br>(208.2 to 259.2)                     | --                                               | 3.0<br>(1.9 to 4.3)                       | -2.6<br>(-5.3 to 0.3)                             | -7.9<br>(-10.5 to -5.2)                          |
| Down's syndrome                                            | 158.9<br>(138.9 to 182.6)                     | --                                               | 13.6<br>(9.2 to 19.3)                     | 10.2<br>(6.2 to 14.6)                             | 4.2<br>(0.4 to 8.3)                              |
| Turner syndrome                                            | 169.5<br>(147.1 to 193.8)                     | --                                               | 3.5<br>(1.8 to 5.5)                       | 9.4<br>(-0.6 to 21.2)                             | 3.4<br>(-6.1 to 14.6)                            |
| Klinefelter syndrome                                       | 154.6<br>(133.1 to 181.3)                     | --                                               | 1.6<br>(0.7 to 3.0)                       | 6.9<br>(0.4 to 13.9)                              | 1.1<br>(-5.1 to 7.7)                             |

| Cause                                         | Prevalence in thousands (95% UI)                    | Incidence in thousands (95% UI)                   | YLDs in thousands (95% UI)                    |                                                   |                                                  |
|-----------------------------------------------|-----------------------------------------------------|---------------------------------------------------|-----------------------------------------------|---------------------------------------------------|--------------------------------------------------|
|                                               | 2016 counts                                         | 2016 counts                                       | 2016 counts                                   | Percentage change in counts between 2006 and 2016 | Percentage change in rates between 2006 and 2016 |
| Other chromosomal abnormalities               | 0.1<br>(0.1 to 0.1)                                 | --                                                | < 0.05<br>(< 0.05 to 0.1)                     | -13.8<br>(-63.5 to 98.9)                          | -18.5<br>(-65.5 to 88.0)                         |
| Congenital musculoskeletal and limb anomalies | 713.8<br>(657.9 to 774.7)                           | --                                                | 104.6<br>(71.0 to 143.7)                      | 8.5<br>(4.7 to 12.3)                              | 2.5<br>(-1.0 to 6.2)                             |
| Urogenital congenital anomalies               | 223.2<br>(200.5 to 245.6)                           | --                                                | 3.5<br>(1.7 to 6.2)                           | 4.0<br>(1.1 to 6.9)                               | -1.7<br>(-4.4 to 1.1)                            |
| Digestive congenital anomalies                | 660.0<br>(594.0 to 729.5)                           | --                                                | 28.5<br>(18.7 to 40.8)                        | -4.2<br>(-8.7 to 0.8)                             | -9.4<br>(-13.7 to -4.8)                          |
| Other congenital anomalies                    | 2,361.9<br>(1,661.7 to 3,336.1)                     | --                                                | 253.1<br>(163.3 to 380.4)                     | 1.6<br>(-2.6 to 6.4)                              | -3.9<br>(-7.9 to 0.6)                            |
| Skin and subcutaneous diseases                | 120,457.6<br>(118,152.1 to 123,193.8)               | 263,949.6<br>(241,491.5 to 288,994.5)             | 2,793.4<br>(1,865.5 to 3,999.5)               | 6.6<br>(5.8 to 7.5)                               | 0.8<br>(0.0 to 1.6)                              |
| Dermatitis                                    | 15,904.2<br>(13,692.6 to 18,445.3)                  | 40,877.0<br>(33,274.6 to 48,821.8)                | 514.0<br>(314.0 to 795.0)                     | 5.4<br>(3.7 to 7.0)                               | -0.4<br>(-2.0 to 1.2)                            |
| Psoriasis                                     | 5,046.9<br>(4,570.3 to 5,522.1)                     | 583.8<br>(503.5 to 674.1)                         | 443.6<br>(315.0 to 588.2)                     | 11.4<br>(8.6 to 14.2)                             | 5.3<br>(2.7 to 7.9)                              |
| Cellulitis                                    | 164.6<br>(133.4 to 199.7)                           | 3,276.8<br>(2,742.4 to 3,857.4)                   | 9.4<br>(6.0 to 14.0)                          | 8.9<br>(2.9 to 15.2)                              | 3.0<br>(-2.8 to 8.8)                             |
| Pyoderma                                      | 915.6<br>(834.3 to 1,002.8)                         | 20,679.0<br>(18,434.3 to 23,014.3)                | 5.2<br>(2.1 to 10.8)                          | 11.1<br>(7.8 to 14.5)                             | 5.0<br>(1.9 to 8.3)                              |
| Scabies                                       | 7,459.0<br>(5,058.0 to 10,964.3)                    | 22,571.6<br>(15,438.3 to 32,623.0)                | 192.5<br>(93.9 to 350.0)                      | 5.3<br>(-6.8 to -3.8)                             | -10.4<br>(-11.9 to -9.0)                         |
| Fungal skin diseases                          | 31,045.9<br>(25,465.8 to 37,295.7)                  | 103,740.3<br>(84,830.2 to 124,287.0)              | 175.6<br>(70.4 to 358.5)                      | 8.9<br>(8.1 to 9.8)                               | 3.0<br>(2.1 to 3.8)                              |
| Viral skin diseases                           | 9,582.7<br>(8,165.2 to 11,260.2)                    | 15,054.1<br>(12,844.4 to 17,508.5)                | 292.1<br>(178.7 to 438.4)                     | 6.0<br>(4.5 to 7.5)                               | 0.2<br>(-1.2 to 1.6)                             |
| Acne vulgaris                                 | 26,860.2<br>(23,524.5 to 30,462.7)                  | 12,407.9<br>(10,561.5 to 14,158.6)                | 683.9<br>(443.7 to 989.4)                     | 7.2<br>(5.5 to 8.9)                               | 1.4<br>(-0.3 to 2.9)                             |
| Alopecia areata                               | 1,668.7<br>(1,492.2 to 1,871.3)                     | 2,891.3<br>(2,625.0 to 3,200.4)                   | 54.8<br>(35.0 to 83.4)                        | 4.2<br>(1.7 to 7.0)                               | -1.5<br>(-3.9 to 1.1)                            |
| Pruritus                                      | 4,665.9<br>(3,303.9 to 6,499.4)                     | 3,646.3<br>(2,517.2 to 4,956.5)                   | 50.2<br>(21.8 to 99.4)                        | 7.0<br>(5.2 to 8.7)                               | 1.2<br>(-0.5 to 2.7)                             |
| Urticaria                                     | 3,343.5<br>(2,358.6 to 4,645.5)                     | 5,862.6<br>(4,165.9 to 8,145.8)                   | 199.1<br>(115.5 to 305.9)                     | 6.1<br>(3.6 to 8.4)                               | 0.3<br>(-2.1 to 2.5)                             |
| Decubitus ulcer                               | 44.5<br>(29.7 to 62.1)                              | 160.4<br>(107.0 to 219.2)                         | 7.9<br>(4.5 to 12.3)                          | 7.9<br>(6.5 to 9.1)                               | 2.0<br>(0.7 to 3.1)                              |
| Other skin and subcutaneous diseases          | 29,665.2<br>(26,777.2 to 32,505.6)                  | 32,198.6<br>(28,778.6 to 35,755.7)                | 165.2<br>(78.1 to 308.4)                      | 10.9<br>(9.8 to 11.9)                             | 4.9<br>(3.8 to 5.8)                              |
| Sense organ diseases                          | 102,607.2<br>(98,714.2 to 105,810.6)                | 36,546.0†<br>(32,830.5 to 40,431.5)               | 2,825.6<br>(1,884.0 to 4,020.9)               | 6.7<br>(5.1 to 8.2)                               | 0.9<br>(-0.6 to 2.3)                             |
| Glaucoma                                      | --                                                  | --                                                | --                                            | --                                                | --                                               |
| Cataract                                      | 1,054.1<br>(788.6 to 1,407.6)                       | --                                                | 99.4<br>(61.2 to 149.7)                       | 9.3<br>(4.0 to 14.1)                              | 3.3<br>(-1.7 to 7.9)                             |
| Macular degeneration                          | --                                                  | --                                                | --                                            | --                                                | --                                               |
| Refraction and accommodation disorders        | 41,163.6<br>(37,159.2 to 45,739.3)                  | --                                                | 769.7<br>(476.1 to 1,210.0)                   | 7.6<br>(6.3 to 8.8)                               | 1.7<br>(0.5 to 2.9)                              |
| Age-related and other hearing loss            | 59,845.0<br>(49,074.9 to 72,381.6)                  | --                                                | 1,527.6<br>(1,012.6 to 2,258.4)               | 6.0<br>(2.9 to 8.7)                               | 0.2<br>(-2.7 to 2.7)                             |
| Other vision loss                             | 1,257.5<br>(944.5 to 1,623.4)                       | --                                                | 109.6<br>(68.0 to 166.1)                      | 8.9<br>(4.5 to 13.5)                              | 3.0<br>(-1.2 to 7.2)                             |
| Other sense organ diseases                    | 10,036.9<br>(8,808.9 to 11,481.2)                   | 36,546.0<br>(32,830.5 to 40,431.5)                | 319.3<br>(194.0 to 485.1)                     | 6.7<br>(4.9 to 8.7)                               | 0.9<br>(-0.9 to 2.8)                             |
| Oral disorders                                | 258,916.7<br>(245,070.6 to 270,628.0)               | 650,688.2†<br>(519,601.7 to 777,914.3)            | 1,269.8<br>(709.8 to 2,126.3)                 | 10.1<br>(8.8 to 11.3)                             | 4.1<br>(2.9 to 5.2)                              |
| Caries of deciduous teeth                     | --                                                  | --                                                | --                                            | --                                                | --                                               |
| Caries of permanent teeth                     | 208,263.9<br>(172,393.5 to 244,975.8)               | 640,668.5<br>(507,360.5 to 767,326.8)             | 147.6<br>(65.0 to 287.6)                      | 4.0<br>(2.9 to 5.1)                               | -1.7<br>(-2.7 to -0.6)                           |
| Periodontal disease                           | 71,789.4<br>(51,848.9 to 95,143.7)                  | 9,352.2<br>(5,094.4 to 13,394.1)                  | 477.3<br>(180.3 to 1,038.0)                   | 15.6<br>(14.3 to 16.6)                            | 9.2<br>(8.1 to 10.2)                             |
| Edentulism and severe tooth loss              | 10,215.8<br>(7,987.9 to 12,941.7)                   | 667.5<br>(386.3 to 1,027.4)                       | 293.0<br>(181.7 to 434.8)                     | 10.3<br>(8.7 to 11.9)                             | 4.3<br>(2.7 to 5.8)                              |
| Other oral disorders                          | 11,942.5<br>(10,652.6 to 13,269.5)                  | --                                                | 352.0<br>(218.7 to 533.0)                     | 5.8<br>(4.6 to 7.0)                               | 0.0<br>(-1.1 to 1.1)                             |
| <b>Injuries</b>                               | <b>109,550.1</b><br><b>(102,920.9 to 117,674.1)</b> | <b>37,462.6†</b><br><b>(33,124.6 to 42,457.2)</b> | <b>3,979.4</b><br><b>(2,646.1 to 5,657.6)</b> | <b>10.6</b><br><b>(9.1 to 12.1)</b>               | <b>4.5</b><br><b>(3.1 to 6.0)</b>                |
| <b>Transport injuries</b>                     | <b>17,893.0</b><br><b>(16,328.1 to 19,615.8)</b>    | <b>5,991.0</b><br><b>(4,590.9 to 7,715.7)</b>     | <b>950.6</b><br><b>(632.6 to 1,375.2)</b>     | <b>9.3</b><br><b>(8.0 to 10.7)</b>                | <b>3.4</b><br><b>(2.1 to 4.6)</b>                |
| Road injuries                                 | 14,486.2<br>(13,157.9 to 16,004.8)                  | 5,473.8<br>(4,061.9 to 7,262.5)                   | 774.0<br>(514.7 to 1,120.1)                   | 11.1<br>(9.8 to 12.4)                             | 5.0<br>(3.8 to 6.2)                              |
| Pedestrian road injuries                      | 2,999.4<br>(2,505.5 to 3,503.1)                     | 871.5<br>(544.1 to 1,294.6)                       | 162.2<br>(107.8 to 232.7)                     | 10.0<br>(8.6 to 11.5)                             | 4.0<br>(2.6 to 5.4)                              |
| Cyclist road injuries                         | 2,744.6<br>(2,220.3 to 3,417.3)                     | 1,053.4<br>(637.0 to 1,557.0)                     | 134.7<br>(87.8 to 197.8)                      | 11.8<br>(10.4 to 13.2)                            | 5.7<br>(4.3 to 7.0)                              |
| Motorcyclist road injuries                    | 3,872.1<br>(3,178.4 to 5,001.2)                     | 1,121.6<br>(751.5 to 1,633.8)                     | 205.2<br>(136.8 to 297.8)                     | 10.2<br>(8.9 to 11.6)                             | 4.2<br>(2.9 to 5.5)                              |
| Motor vehicle road injuries                   | 3,781.9<br>(3,050.2 to 4,542.6)                     | 1,900.9<br>(1,348.2 to 2,630.7)                   | 218.9<br>(145.4 to 315.6)                     | 9.1<br>(7.4 to 10.8)                              | 3.1<br>(1.5 to 4.7)                              |
| Other road injuries                           | 1,088.1<br>(874.1 to 1,321.8)                       | 526.4<br>(273.9 to 894.5)                         | 53.1<br>(34.3 to 78.7)                        | 26.3<br>(24.6 to 28.0)                            | 19.4<br>(17.7 to 21.0)                           |
| Other transport injuries                      | 3,406.8<br>(2,777.5 to 4,111.4)                     | 517.2<br>(335.0 to 766.8)                         | 176.6<br>(118.7 to 253.5)                     | 2.3<br>(0.7 to 3.9)                               | -3.3<br>(-4.8 to -1.8)                           |
| <b>Unintentional injuries</b>                 | <b>79,192.1</b><br><b>(73,042.0 to 86,432.7)</b>    | <b>28,525.5</b><br><b>(24,380.2 to 33,268.8)</b>  | <b>2,509.2</b><br><b>(1,671.4 to 3,556.9)</b> | <b>12.1</b><br><b>(11.0 to 13.2)</b>              | <b>6.0</b><br><b>(4.9 to 7.0)</b>                |
| Falls                                         | 29,721.4<br>(25,348.1 to 34,135.6)                  | 10,243.3<br>(7,257.1 to 14,106.8)                 | 1,117.5<br>(771.6 to 1,554.7)                 | 14.3<br>(13.2 to 15.5)                            | 8.1<br>(7.0 to 9.2)                              |
| Drowning                                      | 321.3<br>(273.8 to 378.0)                           | 34.6<br>(26.4 to 45.0)                            | 16.3<br>(10.8 to 23.5)                        | -9.1<br>(-10.9 to -7.5)                           | -14.1<br>(-15.8 to -12.5)                        |
| Fire, heat, and hot substances                | 8,693.4<br>(7,202.4 to 10,634.4)                    | 640.5<br>(411.0 to 911.6)                         | 213.8<br>(139.5 to 320.4)                     | 11.4<br>(9.5 to 13.1)                             | 5.3<br>(3.5 to 6.9)                              |
| Poisonings                                    | 268.9<br>(223.7 to 319.4)                           | 296.3<br>(177.7 to 447.6)                         | 23.2<br>(15.0 to 33.8)                        | 19.2<br>(15.8 to 23.1)                            | 12.7<br>(9.5 to 16.4)                            |
| Exposure to mechanical forces                 | 14,889.0<br>(12,315.1 to 19,029.8)                  | 5,044.5<br>(3,459.3 to 7,022.2)                   | 338.2<br>(214.1 to 503.8)                     | 11.6<br>(10.3 to 12.8)                            | 5.5<br>(4.3 to 6.6)                              |
| Unintentional firearm injuries                | 589.5<br>(460.1 to 752.6)                           | 110.5<br>(55.9 to 189.3)                          | 20.4<br>(12.6 to 30.9)                        | 11.5<br>(10.0 to 13.1)                            | 5.4<br>(4.0 to 6.9)                              |
| Unintentional suffocation                     | 650.8<br>(496.4 to 838.3)                           | 55.6<br>(25.4 to 102.7)                           | 19.6<br>(12.0 to 30.4)                        | -2.9<br>(-4.3 to -1.3)                            | -8.2<br>(-9.5 to -6.7)                           |
| Other exposure to mechanical forces           | 13,648.8<br>(11,132.9 to 17,753.5)                  | 4,878.4<br>(3,354.0 to 6,764.2)                   | 298.2<br>(189.4 to 442.6)                     | 12.8<br>(11.4 to 13.9)                            | 6.6<br>(5.3 to 7.7)                              |

| Cause                                                                               | Prevalence in thousands (95% UI)                 | Incidence in thousands (95% UI)                | YLDs in thousands (95% UI)              |                                                   |                                                  |
|-------------------------------------------------------------------------------------|--------------------------------------------------|------------------------------------------------|-----------------------------------------|---------------------------------------------------|--------------------------------------------------|
|                                                                                     | 2016 counts                                      | 2016 counts                                    | 2016 counts                             | Percentage change in counts between 2006 and 2016 | Percentage change in rates between 2006 and 2016 |
| Adverse effects of medical treatment                                                | 113.1<br>(74.7 to 160.8)                         | 1,478.2<br>(1,008.2 to 2,011.0)                | 15.1<br>(8.5 to 24.1)                   | 1.0<br>(-4.2 to 5.0)                              | -4.5<br>(-9.5 to -0.8)                           |
| Animal contact                                                                      | 4,224.6<br>(3,635.4 to 5,028.3)                  | 4,569.5<br>(3,051.4 to 6,564.4)                | 133.1<br>(90.0 to 184.8)                | 10.9<br>(8.5 to 13.3)                             | 4.9<br>(2.6 to 7.1)                              |
| Venomous animal contact                                                             | 2,022.9<br>(1,644.3 to 2,466.9)                  | 2,196.1<br>(1,396.4 to 3,271.3)                | 97.7<br>(65.7 to 135.2)                 | 13.6<br>(10.3 to 16.8)                            | 7.4<br>(4.3 to 10.4)                             |
| Non-venomous animal contact                                                         | 2,201.7<br>(1,741.0 to 2,774.8)                  | 2,373.4<br>(1,495.8 to 3,493.9)                | 35.4<br>(22.3 to 53.2)                  | 4.2<br>(2.0 to 6.1)                               | -1.5<br>(-3.6 to 0.3)                            |
| Foreign body                                                                        | 3,817.0<br>(3,123.0 to 4,492.3)                  | 1,976.0<br>(1,345.4 to 2,929.6)                | 140.6<br>(89.2 to 212.0)                | 12.6<br>(10.7 to 14.5)                            | 6.4<br>(4.6 to 8.3)                              |
| Pulmonary aspiration and foreign body in airway                                     | 1,763.2<br>(1,320.0 to 2,365.3)                  | 290.5<br>(188.8 to 417.6)                      | 73.6<br>(45.9 to 110.9)                 | 7.5<br>(5.6 to 9.3)                               | 1.6<br>(-0.1 to 3.3)                             |
| Foreign body in eyes                                                                | 244.1<br>(121.7 to 437.1)                        | 1,311.7<br>(721.0 to 2,235.0)                  | 14.3<br>(6.7 to 27.0)                   | 22.3<br>(18.6 to 25.7)                            | 15.6<br>(12.1 to 18.8)                           |
| Foreign body in other body part                                                     | 1,809.7<br>(1,438.0 to 2,300.1)                  | 373.8<br>(220.6 to 579.8)                      | 52.7<br>(33.7 to 78.8)                  | 17.7<br>(15.8 to 19.5)                            | 11.3<br>(9.4 to 13.0)                            |
| Environmental heat and cold exposure                                                | 5,333.7<br>(4,411.9 to 6,363.2)                  | 958.6<br>(594.5 to 1,458.5)                    | 193.8<br>(128.8 to 279.6)               | 9.2<br>(7.5 to 10.8)                              | 3.2<br>(1.6 to 4.8)                              |
| Other unintentional injuries                                                        | 11,809.7<br>(9,635.4 to 14,237.8)                | 3,284.2<br>(2,108.9 to 4,826.8)                | 317.6<br>(206.0 to 463.6)               | 9.2<br>(7.7 to 10.8)                              | 3.2<br>(1.8 to 4.7)                              |
| <b>Self-harm and interpersonal violence</b>                                         | <b>20,698.1</b><br><b>(15,988.3 to 26,339.3)</b> | <b>2,849.9†</b><br><b>(2,102.1 to 3,779.4)</b> | <b>341.2</b><br><b>(221.3 to 489.6)</b> | <b>0.6</b><br><b>(-0.5 to 1.5)</b>                | <b>-4.9</b><br><b>(-5.9 to -4.1)</b>             |
| Self-harm                                                                           | 889.6<br>(730.7 to 1,063.0)                      | 558.3<br>(406.8 to 746.9)                      | 43.2<br>(27.7 to 63.1)                  | 2.0<br>(0.4 to 3.5)                               | -3.6<br>(-5.1 to -2.1)                           |
| Self-harm by firearm                                                                | 31.5<br>(26.7 to 36.8)                           | 6.8<br>(1.8 to 19.9)                           | 1.2<br>(0.7 to 1.7)                     | -0.4<br>(-2.7 to 1.7)                             | -5.9<br>(-8.0 to -3.9)                           |
| Self-harm by other specified means                                                  | 858.1<br>(697.1 to 1,028.6)                      | 551.5<br>(401.1 to 739.2)                      | 42.1<br>(27.0 to 61.3)                  | 2.0<br>(0.5 to 3.6)                               | -3.5<br>(-5.0 to -2.1)                           |
| Interpersonal violence                                                              | 19,808.5<br>(15,065.7 to 25,409.2)               | 2,291.6†<br>(1,591.0 to 3,214.2)               | 298.0<br>(192.6 to 431.3)               | 0.4<br>(-0.8 to 1.4)                              | -5.1<br>(-6.2 to -4.1)                           |
| Assault by firearm                                                                  | 245.9<br>(191.5 to 312.3)                        | 58.0<br>(33.1 to 94.5)                         | 9.5<br>(5.9 to 14.3)                    | 4.2<br>(2.8 to 5.8)                               | -1.5<br>(-2.8 to 0.0)                            |
| Assault by sharp object                                                             | 1,315.4<br>(1,022.6 to 1,611.9)                  | 490.6<br>(283.9 to 757.1)                      | 37.7<br>(24.2 to 56.8)                  | -2.6<br>(-4.5 to -0.8)                            | -8.0<br>(-9.7 to -6.2)                           |
| Sexual violence                                                                     | 14,947.8<br>(10,072.0 to 20,720.7)               | --                                             | 123.0<br>(68.5 to 202.6)                | 2.1<br>(0.6 to 3.5)                               | -3.5<br>(-4.9 to -2.2)                           |
| Assault by other means                                                              | 3,299.4<br>(2,661.4 to 4,241.5)                  | 1,743.0<br>(1,193.3 to 2,477.2)                | 127.8<br>(83.6 to 188.7)                | -0.7<br>(-2.0 to 0.6)                             | -6.1<br>(-7.4 to -4.9)                           |
| <b>Forces of nature, conflict and terrorism, and executions and police conflict</b> | <b>6,714.7</b><br><b>(4,136.0 to 10,038.2)</b>   | <b>96.2†</b><br><b>(53.0 to 138.3)</b>         | <b>178.4</b><br><b>(67.6 to 356.6)</b>  | <b>17.1</b><br><b>(5.0 to 33.1)</b>               | <b>10.7</b><br><b>(-0.7 to 25.8)</b>             |
| Forces of nature, conflict and terrorism, and state actor violence                  | 925.1<br>(504.3 to 1,446.6)                      | 22.4<br>(13.2 to 34.8)                         | 30.0<br>(8.2 to 71.2)                   | 64.7<br>(50.4 to 72.9)                            | 55.6<br>(42.2 to 63.4)                           |
| Conflict and terrorism                                                              | 5,429.6<br>(3,194.0 to 8,697.1)                  | --                                             | 148.7<br>(60.5 to 287.2)                | 25.9<br>(9.0 to 44.5)                             | 19.0<br>(3.0 to 36.6)                            |
| Executions and police conflict                                                      | 360.1<br>(172.3 to 557.1)                        | 73.9<br>(32.0 to 116.0)                        | 8.5<br>(2.4 to 22.3)                    | -63.2<br>(-66.0 to -50.3)                         | -65.2<br>(-67.9 to -53.0)                        |

We did not calculate incidence for certain NTDs and causes with only birth prevalence. Blank cells mean that no estimate is available.

† Incidence for aggregate causes represents the sum of the incidence of the causes below the aggregate.

‡ Incidence estimates for stroke represent first-ever stroke only.

^ Incidence of HIV/AIDS represents new infections of HIV only and does not include new infections of Tuberculosis in HIV positive cases.



SR Table 12: Global prevalence, incidence, and YLDs for 2016, percentage change of YLD counts and percentage change of YLD rates between 2006 and 2016 by cause, age 40-44 years.

| Cause                                                                                | Prevalence in thousands (95% UI)             | Incidence in thousands (95% UI)                     | YLDs in thousands (95% UI)                |                                                   |                                                  |
|--------------------------------------------------------------------------------------|----------------------------------------------|-----------------------------------------------------|-------------------------------------------|---------------------------------------------------|--------------------------------------------------|
|                                                                                      | 2016 counts                                  | 2016 counts                                         | 2016 counts                               | Percentage change in counts between 2006 and 2016 | Percentage change in rates between 2006 and 2016 |
| <b>All causes</b>                                                                    | <b>479,809.5</b><br>(479,313.8 to 480,260.1) | <b>2,652,150.2†</b><br>(2,312,235.6 to 3,082,333.4) | <b>59,216.8</b><br>(43,971.0 to 77,096.8) | <b>12.5</b><br>(11.5 to 13.2)                     | <b>-1.2</b><br>(-2.0 to -0.6)                    |
| <b>Communicable, maternal, neonatal, and nutritional disorders</b>                   | <b>352,093.3</b><br>(347,836.8 to 356,708.0) | <b>1,405,018.1†</b><br>(1,094,907.7 to 1,833,654.2) | <b>5,879.6</b><br>(4,257.5 to 7,872.6)    | <b>5.6</b><br>(0.2 to 9.8)                        | <b>-7.2</b><br>(-12.0 to -3.5)                   |
| <b>HIV/AIDS and tuberculosis</b>                                                     | <b>176,078.6</b><br>(155,936.7 to 199,781.5) | <b>740.4†</b><br>(542.6 to 989.1)                   | <b>747.7</b><br>(497.3 to 1,064.6)        | <b>-7.8</b><br>(-25.5 to 13.5)                    | <b>-19.0</b><br>(-34.6 to -0.4)                  |
| Tuberculosis                                                                         | 164,875.9<br>(135,266.7 to 197,557.6)        | 621.5†<br>(418.4 to 871.1)                          | 221.5<br>(130.7 to 339.9)                 | 2.6<br>(-1.6 to 7.9)                              | -9.9<br>(-13.6 to -5.2)                          |
| Drug-susceptible tuberculosis                                                        | 692.9<br>(465.1 to 997.4)                    | 597.8<br>(401.7 to 839.8)                           | 213.1<br>(125.3 to 328.0)                 | 2.7<br>(-1.6 to 8.0)                              | -9.8<br>(-13.6 to -5.1)                          |
| Multidrug-resistant tuberculosis without extensive drug resistance                   | 24.6<br>(17.0 to 34.1)                       | 22.1<br>(15.7 to 30.4)                              | 7.9<br>(4.6 to 12.1)                      | -3.0<br>(-17.8 to 14.0)                           | -14.8<br>(-27.8 to 0.1)                          |
| Extensively drug-resistant tuberculosis                                              | 1.5<br>(1.0 to 2.0)                          | 1.6<br>(1.1 to 2.2)                                 | 0.5<br>(0.3 to 0.8)                       | 167.0<br>(132.5 to 205.0)                         | 134.5<br>(104.2 to 167.8)                        |
| Latent tuberculosis infection                                                        | 164,157.0<br>(134,581.8 to 196,983.8)        | --                                                  | --                                        | --                                                | --                                               |
| HIV/AIDS                                                                             | 4,707.0<br>(4,203.2 to 5,260.6)              | 119.0*<br>(98.9 to 149.5)                           | 526.2<br>(341.3 to 782.0)                 | -11.6<br>(-32.0 to 18.1)                          | -22.3<br>(-40.3 to 3.7)                          |
| Drug-susceptible HIV/AIDS - Tuberculosis                                             | 128.5<br>(90.8 to 180.8)                     | 157.4<br>(113.4 to 214.2)                           | 49.1<br>(28.9 to 76.1)                    | -7.9<br>(-13.8 to -1.6)                           | -19.1<br>(-24.3 to -13.6)                        |
| Multidrug-resistant HIV/AIDS - Tuberculosis without extensive drug resistance        | 3.4<br>(2.2 to 5.1)                          | 4.2<br>(2.7 to 6.1)                                 | 1.4<br>(0.8 to 2.3)                       | -16.3<br>(-31.2 to 0.4)                           | -26.5<br>(-39.6 to -11.9)                        |
| Extensively drug-resistant HIV/AIDS - Tuberculosis                                   | 0.2<br>(0.1 to 0.2)                          | 0.2<br>(0.1 to 0.3)                                 | 0.1<br>(< 0.05 to 0.1)                    | 191.2<br>(143.7 to 252.2)                         | 155.7<br>(114.0 to 209.3)                        |
| HIV/AIDS resulting in other diseases                                                 | 4,575.0<br>(4,079.6 to 5,121.2)              | 119.0<br>(98.9 to 149.5)                            | 475.7<br>(302.1 to 722.2)                 | -11.9<br>(-33.4 to 22.8)                          | -22.6<br>(-41.5 to 7.8)                          |
| <b>Diarrhoea, lower respiratory infections, and other common infectious diseases</b> | <b>22,809.7</b><br>(20,672.0 to 24,772.2)    | <b>1,300,167.4†</b><br>(987,439.0 to 1,728,026.4)   | <b>1,040.5</b><br>(719.0 to 1,448.3)      | <b>11.0</b><br>(9.6 to 12.3)                      | <b>-2.5</b><br>(-3.7 to -1.4)                    |
| Diarrhoeal diseases                                                                  | 2,736.8<br>(2,370.5 to 3,122.6)              | 188,557.1<br>(164,230.8 to 213,536.3)               | 304.8<br>(206.3 to 422.6)                 | 12.8<br>(10.3 to 15.5)                            | -0.9<br>(-3.1 to 1.4)                            |
| Intestinal infectious diseases                                                       | 20.3<br>(15.8 to 25.5)                       | 502.5†<br>(394.8 to 612.5)                          | 3.6<br>(2.2 to 5.4)                       | -2.9<br>(-19.6 to 17.4)                           | -14.7<br>(-29.4 to 3.1)                          |
| Typhoid fever                                                                        | 19.9<br>(15.1 to 25.2)                       | 314.7<br>(246.7 to 387.3)                           | 3.1<br>(1.9 to 4.7)                       | -2.5<br>(-21.6 to 23.3)                           | -14.4<br>(-31.2 to 8.3)                          |
| Paratyphoid fever                                                                    | 8.2<br>(6.5 to 10.2)                         | 187.8<br>(147.5 to 228.7)                           | 0.5<br>(0.3 to 0.8)                       | -4.1<br>(-19.8 to 13.7)                           | -15.7<br>(-29.6 to -0.1)                         |
| Other intestinal infectious diseases                                                 | --                                           | --                                                  | < 0.05<br>(< 0.05 to 0.1)                 | -18.3<br>(-32.3 to -1.2)                          | -28.2<br>(-40.5 to -13.2)                        |
| Lower respiratory infections                                                         | 252.6<br>(224.5 to 286.3)                    | 11,213.9<br>(9,806.6 to 12,892.3)                   | 15.4<br>(10.2 to 22.0)                    | 30.3<br>(23.8 to 37.1)                            | 14.5<br>(8.8 to 20.4)                            |
| Upper respiratory infections                                                         | 14,519.1<br>(10,386.2 to 20,257.0)           | 1,086,944.0<br>(777,175.2 to 1,512,037.3)           | 358.0<br>(198.1 to 593.4)                 | 11.3<br>(9.6 to 12.7)                             | -2.3<br>(-3.7 to -1.0)                           |
| Otitis media                                                                         | 3,712.4<br>(2,637.8 to 5,044.0)              | 8,367.5<br>(6,915.7 to 10,028.7)                    | 100.8<br>(57.8 to 169.2)                  | 3.1<br>(-1.6 to 8.0)                              | -9.4<br>(-13.6 to -5.1)                          |
| Meningitis                                                                           | 945.5<br>(810.6 to 1,091.9)                  | 55.4<br>(39.4 to 75.2)                              | 96.6<br>(67.2 to 128.5)                   | 15.0<br>(11.5 to 18.5)                            | 1.0<br>(-2.1 to 4.0)                             |
| Pneumococcal meningitis                                                              | 431.3<br>(359.9 to 513.2)                    | 13.6<br>(8.4 to 20.5)                               | 43.5<br>(29.6 to 58.1)                    | 12.9<br>(6.3 to 19.7)                             | -0.9<br>(-6.6 to 5.1)                            |
| H influenzae type B meningitis                                                       | 120.0<br>(94.0 to 153.3)                     | 3.7<br>(2.1 to 6.4)                                 | 15.1<br>(10.0 to 21.0)                    | -6.1<br>(-11.8 to -1.7)                           | -17.5<br>(-22.5 to -13.7)                        |
| Meningococcal infection                                                              | 101.7<br>(74.1 to 133.8)                     | 9.4<br>(5.5 to 14.3)                                | 10.4<br>(7.1 to 14.3)                     | 19.7<br>(16.9 to 22.4)                            | 5.1<br>(2.7 to 7.5)                              |
| Other meningitis                                                                     | 292.5<br>(219.9 to 369.7)                    | 28.7<br>(19.6 to 40.1)                              | 27.7<br>(18.8 to 37.5)                    | 33.3<br>(27.8 to 39.2)                            | 17.0<br>(12.3 to 22.2)                           |
| Encephalitis                                                                         | 1,214.8<br>(816.3 to 1,769.5)                | 298.0<br>(243.2 to 359.1)                           | 142.3<br>(100.3 to 187.0)                 | 8.4<br>(3.0 to 13.9)                              | -4.7<br>(-9.5 to 0.0)                            |
| Diphtheria                                                                           | < 0.05<br>(< 0.05 to < 0.05)                 | 0.2<br>(0.1 to 0.3)                                 | < 0.05<br>(< 0.05 to < 0.05)              | -40.3<br>(-54.7 to -22.7)                         | -47.6<br>(-60.2 to -32.1)                        |
| Whooping cough                                                                       | 1.7<br>(1.4 to 2.2)                          | 12.7<br>(9.9 to 16.0)                               | 0.1<br>(0.1 to 0.1)                       | -15.7<br>(-17.4 to -14.0)                         | -25.9<br>(-27.4 to -24.5)                        |
| Tetanus                                                                              | 9.3<br>(9.1 to 9.5)                          | 4.4<br>(2.3 to 6.5)                                 | 0.2<br>(0.1 to 0.4)                       | 0.8<br>(-20.9 to 30.5)                            | -11.5<br>(-30.5 to 14.7)                         |
| Measles                                                                              | 0.2<br>(0.1 to 0.4)                          | 6.6<br>(2.4 to 14.3)                                | < 0.05<br>(< 0.05 to < 0.05)              | -54.6<br>(-59.5 to -48.9)                         | -60.1<br>(-64.4 to -55.1)                        |
| Varicella and herpes zoster                                                          | 377.0<br>(292.7 to 469.3)                    | 4,205.0<br>(3,100.5 to 5,491.8)                     | 18.6<br>(10.5 to 29.9)                    | 13.3<br>(6.4 to 20.2)                             | -0.5<br>(-6.5 to 5.6)                            |
| <b>Neglected tropical diseases and malaria</b>                                       | <b>119,885.2</b><br>(115,814.9 to 123,392.9) | <b>17,007.0†</b><br>(14,204.5 to 20,278.7)          | <b>911.4</b><br>(617.8 to 1,274.1)        | <b>-11.7</b><br>(-18.5 to -5.5)                   | <b>-22.4</b><br>(-28.4 to -17.0)                 |
| Malaria                                                                              | 4,191.2<br>(3,625.0 to 4,801.5)              | 4,902.6<br>(3,647.0 to 6,298.2)                     | 57.2<br>(42.9 to 73.5)                    | -1.5<br>(-7.9 to 6.6)                             | -13.5<br>(-19.1 to -6.4)                         |
| Chagas disease                                                                       | 653.3<br>(548.4 to 792.0)                    | 10.3<br>(6.7 to 14.6)                               | 4.9<br>(2.9 to 7.2)                       | -0.7<br>(-7.9 to 6.7)                             | -12.8<br>(-19.1 to -6.3)                         |
| Leishmaniasis                                                                        | 351.3<br>(277.5 to 431.9)                    | 36.6<br>(26.8 to 48.3)                              | 19.5<br>(11.9 to 30.2)                    | 26.2<br>(15.5 to 43.5)                            | 10.8<br>(1.5 to 26.0)                            |
| Visceral leishmaniasis                                                               | 1.5<br>(1.0 to 2.1)                          | 5.9<br>(4.1 to 8.2)                                 | 0.1<br>(0.1 to 0.2)                       | -55.5<br>(-69.8 to -34.5)                         | -61.0<br>(-73.4 to -42.5)                        |
| Cutaneous and mucocutaneous leishmaniasis                                            | 307.8<br>(237.2 to 406.2)                    | 30.7<br>(21.3 to 41.5)                              | 19.4<br>(11.9 to 30.1)                    | 27.4<br>(16.4 to 45.7)                            | 11.9<br>(2.2 to 28.0)                            |
| African trypanosomiasis                                                              | 0.5<br>(0.1 to 1.7)                          | 0.3<br>(0.1 to 1.0)                                 | 0.1<br>(< 0.05 to 0.4)                    | -70.5<br>(-95.3 to 111.1)                         | -74.1<br>(-95.9 to 85.4)                         |
| Schistosomiasis                                                                      | 15,449.9<br>(14,228.0 to 16,652.5)           | 3,821.3<br>(3,405.7 to 4,362.5)                     | 125.8<br>(64.6 to 231.0)                  | -22.6<br>(-25.3 to -18.9)                         | -32.0<br>(-34.4 to -28.8)                        |
| Cysticercosis                                                                        | 248.7<br>(170.5 to 350.7)                    | --                                                  | 39.6<br>(23.3 to 61.7)                    | -11.4<br>(-21.8 to -3.0)                          | -22.2<br>(-31.3 to -14.8)                        |
| Cystic echinococcosis                                                                | 75.8<br>(40.1 to 159.7)                      | 15.8<br>(7.2 to 37.8)                               | 7.0<br>(3.2 to 15.2)                      | -37.7<br>(-75.3 to 59.9)                          | -45.3<br>(-78.3 to 40.5)                         |
| Lymphatic filariasis                                                                 | 2,360.3<br>(1,872.8 to 3,134.2)              | 514.0<br>(286.2 to 812.8)                           | 129.8<br>(65.0 to 238.4)                  | -38.3<br>(-53.2 to -26.5)                         | -45.8<br>(-58.9 to -35.5)                        |
| Onchocerciasis                                                                       | 935.1<br>(593.1 to 1,599.6)                  | 221.2<br>(90.6 to 449.2)                            | 64.4<br>(29.5 to 118.3)                   | -21.8<br>(-41.6 to -2.8)                          | -31.3<br>(-48.7 to -14.6)                        |
| Trachoma                                                                             | 38.6<br>(22.9 to 68.5)                       | --                                                  | 5.4<br>(2.9 to 8.9)                       | -7.4<br>(-21.4 to 9.2)                            | -18.7<br>(-31.0 to -4.1)                         |
| Dengue                                                                               | 331.8<br>(180.7 to 562.0)                    | 5,545.9<br>(3,373.2 to 8,412.5)                     | 53.3<br>(24.0 to 100.5)                   | 85.5<br>(49.7 to 326.2)                           | 62.9<br>(31.5 to 274.3)                          |
| Yellow fever                                                                         | 0.1<br>(< 0.05 to 0.3)                       | 4.4<br>(1.3 to 11.9)                                | < 0.05<br>(< 0.05 to < 0.05)              | -15.6<br>(-44.6 to 29.7)                          | -25.9<br>(-51.3 to 13.9)                         |
| Rabies                                                                               | < 0.05<br>(< 0.05 to < 0.05)                 | 0.7<br>(0.4 to 0.9)                                 | < 0.05<br>(< 0.05 to < 0.05)              | -50.9<br>(-58.9 to -40.5)                         | -56.9<br>(-63.9 to -47.7)                        |
| Intestinal nematode infections                                                       | 99,453.1<br>(94,283.5 to 103,191.7)          | --                                                  | 187.9<br>(109.6 to 309.9)                 | -11.0<br>(-17.9 to -3.5)                          | -21.8<br>(-27.9 to -15.2)                        |
| Ascariasis                                                                           | 53,203.0<br>(47,633.7 to 59,982.6)           | --                                                  | 55.1<br>(30.2 to 93.1)                    | -26.7<br>(-36.2 to -15.7)                         | -35.6<br>(-44.0 to -26.0)                        |

| Cause                                                                   | Prevalence in thousands (95% UI)                    | Incidence in thousands (95% UI)                            | YLDs in thousands (95% UI)                       |                                                   |                                                  |
|-------------------------------------------------------------------------|-----------------------------------------------------|------------------------------------------------------------|--------------------------------------------------|---------------------------------------------------|--------------------------------------------------|
|                                                                         | 2016 counts                                         | 2016 counts                                                | 2016 counts                                      | Percentage change in counts between 2006 and 2016 | Percentage change in rates between 2006 and 2016 |
| Trichuriasis                                                            | 27,732.0<br>(25,562.5 to 30,390.1)                  | --                                                         | 20.6<br>(11.2 to 34.8)                           | -18.1<br>(-29.6 to -4.4)                          | -28.1<br>(-38.1 to -16.0)                        |
| Hookworm disease                                                        | 29,827.4<br>(27,422.4 to 32,625.6)                  | --                                                         | 112.3<br>(67.6 to 178.5)                         | 1.4<br>(-9.3 to 12.9)                             | -11.0<br>(-20.4 to -0.8)                         |
| Food-borne trematodiasis                                                | 7,383.7<br>(6,736.1 to 8,108.3)                     | 1,304.3<br>(708.6 to 1,788.5)                              | 192.5<br>(94.2 to 356.1)                         | 8.7<br>(3.2 to 15.8)                              | -4.6<br>(-9.4 to 1.7)                            |
| Leprosy                                                                 | 41.1<br>(38.5 to 44.0)                              | 4.9<br>(4.5 to 5.4)                                        | 2.6<br>(1.7 to 3.6)                              | -4.6<br>(-14.0 to 5.5)                            | -16.2<br>(-24.4 to -7.4)                         |
| Ebola virus disease                                                     | 0.1<br>( $< 0.05$ to $< 0.3$ )                      | $< 0.05$<br>( $< 0.05$ to $< 0.05$ )                       | $< 0.05$<br>( $< 0.05$ to $< 0.1$ )              | --                                                | --                                               |
| Zika virus disease                                                      | 10.3<br>(6.0 to 20.3)                               | 624.7<br>(362.1 to 1,227.2)                                | 0.2<br>(0.1 to 0.4)                              | --                                                | --                                               |
| Guinea worm disease                                                     | $< 0.05$<br>( $< 0.05$ to $< 0.05$ )                | $< 0.05$<br>( $< 0.05$ to $< 0.05$ )                       | $< 0.05$<br>( $< 0.05$ to $< 0.05$ )             | -99.6<br>(-99.7 to -99.4)                         | -99.6<br>(-99.8 to -99.5)                        |
| Other neglected tropical diseases                                       | 1,510.3<br>(1,325.8 to 1,715.2)                     | --                                                         | 21.2<br>(13.5 to 33.0)                           | 27.4<br>(20.4 to 35.3)                            | 11.8<br>(5.8 to 18.9)                            |
| <b>Maternal disorders</b>                                               | <b>444.2</b><br><b>(420.8 to 469.2)</b>             | <b>4,089.4†</b><br><b>(3,380.2 to 4,826.5)</b>             | <b>53.7</b><br><b>(37.1 to 72.8)</b>             | <b>-9.0</b><br><b>(-18.2 to 0.5)</b>              | <b>-20.0</b><br><b>(-28.1 to -11.7)</b>          |
| Maternal haemorrhage                                                    | 51.8<br>(38.0 to 68.3)                              | 304.0<br>(215.5 to 419.7)                                  | 1.9<br>(1.2 to 2.9)                              | 9.4<br>(-15.4 to 40.3)                            | -3.9<br>(-25.7 to 23.2)                          |
| Maternal sepsis and other pregnancy related infections                  | 160.2<br>(140.3 to 182.8)                           | 304.1<br>(218.5 to 408.8)                                  | 1.9<br>(0.9 to 3.5)                              | 4.4<br>(-34.8 to 67.1)                            | 8.3<br>(-42.7 to 46.7)                           |
| Maternal hypertensive disorders                                         | 148.0<br>(92.7 to 211.1)                            | 698.1<br>(572.3 to 826.9)                                  | 7.1<br>(3.9 to 11.9)                             | 13.9<br>(-27.8 to 81.1)                           | 0.1<br>(-36.6 to 59.0)                           |
| Maternal obstructed labour and uterine rupture                          | 102.0<br>(85.1 to 122.1)                            | 193.8<br>(134.6 to 266.9)                                  | 32.5<br>(21.0 to 46.1)                           | -13.5<br>(-21.5 to -4.4)                          | -24.0<br>(-31.1 to -16.0)                        |
| Maternal abortion, miscarriage, and ectopic pregnancy                   | 21.3<br>(13.0 to 30.7)                              | 2,589.3<br>(1,921.2 to 3,313.7)                            | 2.4<br>(1.3 to 3.9)                              | -0.7<br>(-38.2 to 58.8)                           | -12.8<br>(-45.7 to 39.5)                         |
| Other maternal disorders                                                | --                                                  | --                                                         | 7.9<br>(5.4 to 10.7)                             | -14.4<br>(-23.1 to -5.5)                          | -24.9<br>(-32.4 to -17.0)                        |
| <b>Neonatal disorders</b>                                               | <b>4,342.7</b><br><b>(3,976.2 to 4,749.3)</b>       | --                                                         | <b>769.2</b><br><b>(545.3 to 1,070.4)</b>        | <b>29.0</b><br><b>(15.5 to 45.2)</b>              | <b>13.3</b><br><b>(1.5 to 27.5)</b>              |
| Neonatal preterm birth complications                                    | 3,659.4<br>(3,089.5 to 4,329.6)                     | --                                                         | 498.2<br>(344.5 to 705.2)                        | 27.4<br>(6.6 to 52.8)                             | 11.9<br>(-6.3 to 34.2)                           |
| Neonatal encephalopathy due to birth asphyxia and trauma                | 682.6<br>(437.0 to 1,040.3)                         | --                                                         | 98.5<br>(41.6 to 207.3)                          | 30.5<br>(22.1 to 45.6)                            | 14.6<br>(7.2 to 27.9)                            |
| Neonatal sepsis and other neonatal infections                           | 343.9<br>(136.3 to 809.3)                           | --                                                         | 132.4<br>(44.6 to 342.9)                         | 34.4<br>(25.4 to 48.8)                            | 18.0<br>(10.1 to 30.7)                           |
| Hemolytic disease and other neonatal jaundice                           | 124.3<br>(110.5 to 138.3)                           | --                                                         | 40.1<br>(30.9 to 50.6)                           | 28.4<br>(22.6 to 34.6)                            | 12.8<br>(7.7 to 18.3)                            |
| Other neonatal disorders                                                | --                                                  | --                                                         | --                                               | --                                                | --                                               |
| <b>Nutritional deficiencies</b>                                         | <b>94,255.5</b><br><b>(90,491.6 to 97,851.0)</b>    | <b>23,215.5†</b><br><b>(19,713.8 to 27,837.5)</b>          | <b>1,966.3</b><br><b>(1,323.2 to 2,898.2)</b>    | <b>10.4</b><br><b>(6.8 to 14.1)</b>               | <b>-3.1</b><br><b>(-6.2 to 0.2)</b>              |
| Protein-energy malnutrition                                             | --                                                  | --                                                         | --                                               | --                                                | --                                               |
| Iodine deficiency                                                       | 9,336.6<br>(8,353.6 to 10,436.2)                    | 38.4<br>(32.5 to 45.4)                                     | 244.9<br>(166.8 to 342.4)                        | -2.2<br>(-4.6 to 0.4)                             | -14.1<br>(-16.2 to -11.8)                        |
| Vitamin A deficiency                                                    | 21,319.9<br>(18,630.0 to 24,833.0)                  | 23,177.2<br>(19,678.7 to 27,799.5)                         | 10.5<br>(6.4 to 15.8)                            | 22.7<br>(14.4 to 31.3)                            | 7.7<br>(0.5 to 15.4)                             |
| Iron-deficiency anaemia                                                 | 73,083.7<br>(64,780.0 to 82,314.5)                  | --                                                         | 1,710.9<br>(1,131.1 to 2,556.0)                  | 12.4<br>(8.4 to 16.6)                             | -1.3<br>(-4.8 to 2.5)                            |
| Other nutritional deficiencies                                          | --                                                  | --                                                         | --                                               | --                                                | --                                               |
| <b>Other communicable, maternal, neonatal, and nutritional diseases</b> | <b>164,308.0</b><br><b>(159,935.8 to 169,966.2)</b> | <b>59,798.3</b><br><b>(47,927.0 to 74,411.9)</b>           | <b>378.0</b><br><b>(233.7 to 595.5)</b>          | <b>15.1</b><br><b>(10.1 to 19.8)</b>              | <b>1.1</b><br><b>(-3.3 to 5.2)</b>               |
| Sexually transmitted diseases excluding HIV                             | 127,436.4<br>(122,957.3 to 133,151.0)               | 52,710.3<br>(41,557.6 to 66,455.4)                         | 326.4<br>(200.3 to 527.8)                        | 16.4<br>(12.8 to 20.3)                            | 2.3<br>(-1.0 to 5.7)                             |
| Syphilis                                                                | 6,362.1<br>(4,167.4 to 9,503.7)                     | 4,556.3<br>(2,769.6 to 7,157.8)                            | 16.4<br>(11.3 to 21.9)                           | 19.0<br>(15.8 to 22.6)                            | 4.5<br>(1.7 to 7.7)                              |
| Chlamydial infection                                                    | 6,865.8<br>(5,346.7 to 8,604.5)                     | 3,906.6<br>(2,988.9 to 5,001.8)                            | 51.9<br>(31.5 to 82.5)                           | 13.6<br>(8.9 to 18.0)                             | -0.2<br>(-4.3 to 3.6)                            |
| Gonococcal infection                                                    | 7,345.5<br>(4,790.1 to 11,047.9)                    | 21,299.8<br>(12,256.1 to 33,347.2)                         | 73.6<br>(39.3 to 127.2)                          | 27.4<br>(18.9 to 34.1)                            | 11.9<br>(4.4 to 17.8)                            |
| Trichomoniasis                                                          | 18,021.0<br>(12,524.4 to 24,563.4)                  | 15,005.5<br>(10,330.0 to 20,811.8)                         | 20.0<br>(7.5 to 41.8)                            | 15.4<br>(13.6 to 17.2)                            | 1.4<br>(-0.2 to 2.9)                             |
| Genital herpes                                                          | 91,845.6<br>(80,287.6 to 106,587.2)                 | 1,353.4<br>(756.7 to 2,106.1)                              | 22.7<br>(6.7 to 51.8)                            | 13.2<br>(11.0 to 15.4)                            | -0.6<br>(-2.5 to 1.4)                            |
| Other sexually transmitted diseases                                     | 10,978.9<br>(7,943.9 to 13,084.4)                   | 6,588.7<br>(4,898.7 to 8,574.1)                            | 141.8<br>(86.6 to 222.6)                         | 12.8<br>(8.4 to 17.2)                             | -0.9<br>(-4.8 to 2.9)                            |
| Hepatitis                                                               | 49,594.2<br>(42,345.8 to 57,919.3)                  | 7,087.4<br>(4,480.6 to 10,906.2)                           | 16.8<br>(8.6 to 29.8)                            | -11.5<br>(-47.6 to 51.5)                          | -22.2<br>(-54.0 to 33.1)                         |
| Acute hepatitis A                                                       | 61.1<br>(10.3 to 135.3)                             | 795.0<br>(134.5 to 1,759.5)                                | 2.6<br>(0.4 to 6.3)                              | -21.7<br>(-90.3 to 274.2)                         | -31.2<br>(-91.5 to 228.6)                        |
| Hepatitis B                                                             | 37,939.6<br>(30,974.0 to 46,254.8)                  | 5,584.2<br>(3,239.7 to 9,179.1)                            | 12.8<br>(6.0 to 24.3)                            | -9.5<br>(-50.5 to 63.6)                           | -20.5<br>(-56.5 to 43.7)                         |
| Hepatitis C                                                             | 11,555.2<br>(10,270.8 to 12,896.2)                  | 210.7<br>(157.2 to 272.5)                                  | 0.2<br>(0.1 to 0.4)                              | -9.7<br>(-10.4 to -9.1)                           | -20.7<br>(-21.3 to -20.2)                        |
| Acute hepatitis E                                                       | 38.3<br>(23.5 to 57.1)                              | 497.6<br>(305.9 to 742.2)                                  | 1.2<br>(0.6 to 2.0)                              | -8.0<br>(-27.3 to 16.9)                           | -19.2<br>(-36.2 to 2.7)                          |
| Other infectious diseases                                               | 1,804.2<br>(1,575.0 to 2,065.3)                     | 0.6<br>(0.3 to 0.9)                                        | 34.9<br>(21.7 to 54.3)                           | 19.2<br>(14.3 to 24.5)                            | 4.7<br>(0.4 to 9.4)                              |
| <b>Non-communicable diseases</b>                                        | <b>464,218.0</b><br><b>(463,182.1 to 465,385.3)</b> | <b>1,210,583.5†</b><br><b>(1,076,431.4 to 1,346,384.6)</b> | <b>49,060.2</b><br><b>(36,380.1 to 63,821.7)</b> | <b>13.1</b><br><b>(12.4 to 13.7)</b>              | <b>-0.7</b><br><b>(-1.3 to -0.1)</b>             |
| <b>Neoplasms</b>                                                        | <b>1,750.8</b><br><b>(1,712.7 to 1,787.9)</b>       | <b>685.5</b><br><b>(660.0 to 722.8)</b>                    | <b>228.0</b><br><b>(165.5 to 300.2)</b>          | <b>13.1</b><br><b>(8.9 to 18.4)</b>               | <b>-0.7</b><br><b>(-4.3 to 4.0)</b>              |
| Lip and oral cavity cancer                                              | 73.1<br>(68.8 to 77.8)                              | 19.8<br>(18.7 to 21.2)                                     | 7.7<br>(5.5 to 10.2)                             | 17.1<br>(8.1 to 27.1)                             | 2.9<br>(-5.1 to 11.7)                            |
| Nasopharynx cancer                                                      | 35.2<br>(31.4 to 39.8)                              | 9.9<br>(8.9 to 11.2)                                       | 4.1<br>(2.9 to 5.5)                              | -7.8<br>(-21.6 to 8.5)                            | -19.0<br>(-31.1 to -4.7)                         |
| Other pharynx cancer                                                    | 20.8<br>(18.9 to 22.1)                              | 7.6<br>(6.9 to 8.2)                                        | 2.7<br>(1.9 to 3.5)                              | 18.3<br>(5.5 to 28.9)                             | 3.9<br>(-7.4 to 13.3)                            |
| Oesophageal cancer                                                      | 12.2<br>(11.5 to 13.0)                              | 10.1<br>(9.6 to 10.7)                                      | 2.7<br>(1.9 to 3.6)                              | -12.4<br>(-18.0 to -4.9)                          | -23.0<br>(-27.9 to -16.4)                        |
| Stomach cancer                                                          | 57.9<br>(55.3 to 60.9)                              | 31.8<br>(30.4 to 33.3)                                     | 8.9<br>(6.4 to 11.7)                             | -9.5<br>(-14.6 to -4.4)                           | -20.6<br>(-25.0 to -16.1)                        |
| Colon and rectum cancer                                                 | 167.7<br>(159.3 to 177.0)                           | 45.6<br>(43.3 to 48.1)                                     | 17.0<br>(12.2 to 22.7)                           | 19.0<br>(10.8 to 28.4)                            | 4.5<br>(-2.7 to 12.8)                            |
| Liver cancer                                                            | 48.7<br>(41.6 to 55.7)                              | 50.6<br>(45.8 to 55.7)                                     | 11.8<br>(8.1 to 16.1)                            | 21.1<br>(8.0 to 35.9)                             | 6.3<br>(-5.2 to 19.4)                            |
| Liver cancer due to hepatitis B                                         | 40.6<br>(32.4 to 48.2)                              | 29.4<br>(23.4 to 34.5)                                     | 6.9<br>(4.5 to 9.6)                              | 20.1<br>(5.7 to 37.2)                             | 5.5<br>(-7.2 to 20.5)                            |

| Cause                                              | Prevalence in thousands (95% UI)                 | Incidence in thousands (95% UI)                | YLDs in thousands (95% UI)                    |                                                   |                                                  |
|----------------------------------------------------|--------------------------------------------------|------------------------------------------------|-----------------------------------------------|---------------------------------------------------|--------------------------------------------------|
|                                                    | 2016 counts                                      | 2016 counts                                    | 2016 counts                                   | Percentage change in counts between 2006 and 2016 | Percentage change in rates between 2006 and 2016 |
| Liver cancer due to hepatitis C                    | 4.7<br>(3.6 to 6.0)                              | 3.7<br>(2.9 to 4.7)                            | 0.8<br>(0.6 to 1.2)                           | 22.2<br>(10.1 to 34.9)                            | 7.4<br>(-3.3 to 18.5)                            |
| Liver cancer due to alcohol use                    | 5.5<br>(3.8 to 7.5)                              | 4.4<br>(3.1 to 6.1)                            | 1.0<br>(0.6 to 1.6)                           | 27.6<br>(14.9 to 40.9)                            | 12.1<br>(0.9 to 23.7)                            |
| Liver cancer due to other causes                   | 18.4<br>(14.3 to 24.0)                           | 13.1<br>(10.4 to 16.9)                         | 3.1<br>(2.0 to 4.4)                           | 20.8<br>(4.5 to 37.9)                             | 6.1<br>(-8.2 to 21.1)                            |
| Gallbladder and biliary tract cancer               | 4.0<br>(3.4 to 4.3)                              | 4.8<br>(4.2 to 5.1)                            | 1.1<br>(0.8 to 1.5)                           | 6.4<br>(-1.4 to 14.1)                             | -6.5<br>(-13.4 to 0.2)                           |
| Pancreatic cancer                                  | 6.3<br>(6.1 to 6.5)                              | 7.8<br>(7.7 to 8.0)                            | 1.7<br>(1.2 to 2.2)                           | 8.2<br>(4.3 to 11.6)                              | -5.0<br>(-8.4 to -2.0)                           |
| Larynx cancer                                      | 16.8<br>(16.1 to 17.6)                           | 5.0<br>(4.8 to 5.2)                            | 2.1<br>(1.5 to 2.8)                           | -3.6<br>(-8.5 to 2.6)                             | -15.3<br>(-19.7 to -9.9)                         |
| Tracheal, bronchus, and lung cancer                | 45.3<br>(43.1 to 47.7)                           | 33.8<br>(32.3 to 35.4)                         | 8.9<br>(6.2 to 11.6)                          | -11.3<br>(-16.3 to -5.1)                          | -22.1<br>(-26.5 to -16.6)                        |
| Malignant skin melanoma                            | 86.0<br>(74.7 to 103.6)                          | 17.4<br>(15.2 to 21.0)                         | 5.7<br>(3.9 to 7.9)                           | 14.0<br>(5.4 to 22.5)                             | 0.1<br>(-7.4 to 7.6)                             |
| Non-melanoma skin cancer                           | 7.1<br>(4.0 to 13.2)                             | 38.1<br>(20.4 to 74.7)                         | 0.4<br>(0.2 to 0.7)                           | 1.9<br>(-10.5 to 15.5)                            | -10.5<br>(-21.4 to 1.5)                          |
| Non-melanoma skin cancer (squamous-cell carcinoma) | 6.5<br>(3.0 to 12.7)                             | 6.8<br>(3.6 to 11.9)                           | 0.3<br>(0.1 to 0.7)                           | 1.4<br>(-13.6 to 16.4)                            | -10.9<br>(-24.1 to 2.2)                          |
| Non-melanoma skin cancer (basal-cell carcinoma)    | 3.5<br>(1.5 to 7.5)                              | 31.3<br>(14.3 to 66.9)                         | < 0.05<br>(< 0.05 to 0.1)                     | 5.9<br>(0.6 to 11.2)                              | -7.0<br>(-11.7 to -2.3)                          |
| Breast cancer                                      | 686.3<br>(637.6 to 741.1)                        | 142.3<br>(132.8 to 153.5)                      | 59.0<br>(42.2 to 79.3)                        | 15.2<br>(5.2 to 26.6)                             | 1.2<br>(-7.6 to 11.2)                            |
| Cervical cancer                                    | 249.8<br>(193.3 to 267.8)                        | 65.3<br>(51.3 to 69.8)                         | 24.0<br>(16.2 to 32.2)                        | 2.9<br>(-5.2 to 12.5)                             | -9.6<br>(-16.8 to -1.2)                          |
| Uterine cancer                                     | 81.2<br>(75.1 to 88.8)                           | 17.0<br>(15.8 to 18.6)                         | 6.3<br>(4.4 to 8.7)                           | 18.1<br>(5.8 to 34.8)                             | 3.7<br>(-7.1 to 18.4)                            |
| Ovarian cancer                                     | 55.4<br>(51.5 to 58.0)                           | 17.9<br>(16.8 to 18.7)                         | 8.7<br>(6.1 to 11.4)                          | 18.3<br>(6.8 to 30.2)                             | 3.9<br>(-6.2 to 14.4)                            |
| Prostate cancer                                    | 20.0<br>(17.0 to 22.0)                           | 5.8<br>(5.1 to 6.3)                            | 1.9<br>(1.3 to 2.6)                           | 25.1<br>(13.6 to 34.8)                            | 9.8<br>(-0.2 to 18.4)                            |
| Testicular cancer                                  | 29.9<br>(27.8 to 32.7)                           | 5.8<br>(5.4 to 6.4)                            | 2.0<br>(1.4 to 2.9)                           | 13.7<br>(1.0 to 28.9)                             | -0.1<br>(-11.3 to 13.2)                          |
| Kidney cancer                                      | 50.4<br>(47.7 to 52.6)                           | 13.3<br>(12.8 to 13.9)                         | 4.6<br>(3.3 to 6.1)                           | 10.8<br>(4.1 to 17.6)                             | -2.7<br>(-8.6 to 3.3)                            |
| Bladder cancer                                     | 33.5<br>(31.5 to 35.4)                           | 8.2<br>(7.7 to 8.7)                            | 3.3<br>(2.4 to 4.4)                           | 13.4<br>(5.3 to 21.4)                             | 0.4<br>(-7.5 to 6.6)                             |
| Brain and nervous system cancer                    | 44.9<br>(40.1 to 50.4)                           | 19.9<br>(18.0 to 22.4)                         | 6.4<br>(4.5 to 8.7)                           | 28.9<br>(20.5 to 39.2)                            | 13.3<br>(5.8 to 22.3)                            |
| Thyroid cancer                                     | 120.6<br>(112.3 to 131.8)                        | 22.8<br>(21.3 to 24.9)                         | 7.4<br>(5.1 to 10.5)                          | 42.6<br>(29.4 to 59.0)                            | 25.2<br>(13.7 to 39.7)                           |
| Mesothelioma                                       | 1.7<br>(1.5 to 1.8)                              | 1.1<br>(1.0 to 1.2)                            | 0.4<br>(0.2 to 0.5)                           | 10.3<br>(3.9 to 16.6)                             | -3.1<br>(-8.7 to 2.4)                            |
| Hodgkin lymphoma                                   | 19.2<br>(17.1 to 21.7)                           | 4.8<br>(4.2 to 5.5)                            | 1.9<br>(1.3 to 2.5)                           | 3.2<br>(-4.5 to 12.0)                             | -9.3<br>(-16.1 to -1.6)                          |
| Non-Hodgkin's lymphoma                             | 67.0<br>(61.4 to 73.4)                           | 19.2<br>(17.6 to 20.8)                         | 6.3<br>(4.5 to 8.5)                           | 31.1<br>(22.7 to 38.9)                            | 15.1<br>(7.7 to 21.9)                            |
| Multiple myeloma                                   | 8.0<br>(6.8 to 8.7)                              | 3.5<br>(3.1 to 3.9)                            | 1.8<br>(1.2 to 2.4)                           | 24.8<br>(18.3 to 32.1)                            | 9.6<br>(3.9 to 16.1)                             |
| Leukaemia                                          | 53.5<br>(47.6 to 57.3)                           | 15.7<br>(14.1 to 16.7)                         | 7.1<br>(5.0 to 9.6)                           | 5.1<br>(-1.7 to 12.9)                             | -7.7<br>(-13.6 to -0.9)                          |
| Acute lymphoid leukaemia                           | 8.1<br>(7.1 to 9.0)                              | 2.4<br>(2.1 to 2.6)                            | 1.1<br>(0.8 to 1.5)                           | 22.5<br>(10.5 to 30.7)                            | 7.6<br>(-3.0 to 14.8)                            |
| Chronic lymphoid leukaemia                         | 11.5<br>(10.1 to 12.7)                           | 2.5<br>(2.2 to 2.8)                            | 1.4<br>(1.0 to 1.9)                           | 24.5<br>(11.3 to 36.8)                            | 9.3<br>(-2.2 to 20.1)                            |
| Acute myeloid leukaemia                            | 5.0<br>(4.5 to 5.6)                              | 3.8<br>(3.3 to 4.2)                            | 1.1<br>(0.7 to 1.4)                           | 18.9<br>(12.8 to 25.3)                            | 4.5<br>(-0.9 to 10.0)                            |
| Chronic myeloid leukaemia                          | 5.3<br>(4.6 to 5.9)                              | 1.9<br>(1.6 to 2.0)                            | 0.7<br>(0.5 to 0.9)                           | -4.4<br>(-10.8 to 2.7)                            | -16.1<br>(-21.7 to -9.8)                         |
| Other leukaemia                                    | 23.6<br>(20.1 to 26.0)                           | 5.2<br>(4.5 to 5.7)                            | 2.9<br>(2.0 to 4.0)                           | -8.4<br>(-17.8 to 2.6)                            | -19.6<br>(-27.8 to -9.8)                         |
| Other neoplasms                                    | 140.5<br>(127.5 to 150.1)                        | 40.4<br>(36.8 to 43.0)                         | 12.2<br>(8.7 to 16.3)                         | 46.8<br>(36.7 to 57.8)                            | 28.9<br>(20.1 to 38.6)                           |
| <b>Cardiovascular diseases</b>                     | <b>20,421.4</b><br><b>(19,680.9 to 20,930.7)</b> | <b>2,021.4†</b><br><b>(1,849.5 to 2,219.6)</b> | <b>1,288.7</b><br><b>(898.6 to 1,731.0)</b>   | <b>14.0</b><br><b>(11.5 to 16.6)</b>              | <b>0.2</b><br><b>(-2.0 to 2.4)</b>               |
| Rheumatic heart disease                            | 2,678.0<br>(2,432.0 to 2,962.2)                  | 25.2<br>(18.7 to 34.1)                         | 129.2<br>(81.2 to 188.0)                      | 17.5<br>(13.2 to 21.3)                            | 3.2<br>(-0.5 to 6.5)                             |
| Ischaemic heart disease                            | 5,681.8<br>(5,182.7 to 6,172.8)                  | 682.2<br>(604.9 to 775.4)                      | 307.8<br>(203.6 to 432.0)                     | 18.4<br>(16.2 to 20.5)                            | 4.0<br>(2.1 to 5.8)                              |
| Cerebrovascular disease                            | 2,795.2<br>(2,650.5 to 2,950.6)                  | 453.2†<br>(378.9 to 528.2)                     | 447.3<br>(312.2 to 588.8)                     | 11.7<br>(5.2 to 17.9)                             | 1.9<br>(-7.6 to 3.6)                             |
| Ischaemic stroke                                   | 2,224.0<br>(1,876.7 to 2,652.5)                  | 295.4†<br>(229.2 to 369.6)                     | 344.4<br>(237.0 to 457.1)                     | 11.6<br>(3.7 to 19.3)                             | -2.0<br>(-8.9 to 4.8)                            |
| Hemorrhagic stroke                                 | 651.7<br>(539.5 to 782.7)                        | 157.8†<br>(128.3 to 189.1)                     | 102.9<br>(70.4 to 139.8)                      | 12.0<br>(1.7 to 22.9)                             | -1.6<br>(-10.7 to 8.0)                           |
| Hypertensive heart disease                         | 646.6<br>(499.1 to 833.7)                        | --                                             | 54.8<br>(33.7 to 81.4)                        | 15.6<br>(10.6 to 21.0)                            | 1.5<br>(-2.8 to 6.2)                             |
| Cardiomyopathy and myocarditis                     | 199.5<br>(173.0 to 234.6)                        | 143.2†<br>(106.1 to 186.4)                     | 22.8<br>(13.7 to 34.0)                        | 10.9<br>(5.6 to 16.3)                             | -2.6<br>(-7.3 to 2.2)                            |
| Myocarditis                                        | 101.0<br>(79.0 to 127.9)                         | 143.2<br>(106.1 to 186.4)                      | 7.6<br>(4.7 to 11.5)                          | 15.2<br>(9.8 to 20.5)                             | 1.2<br>(-3.6 to 5.8)                             |
| Alcoholic cardiomyopathy                           | 55.8<br>(41.6 to 74.1)                           | --                                             | 4.9<br>(2.8 to 7.5)                           | 2.0<br>(-12.3 to 19.9)                            | -10.4<br>(-23.0 to 5.3)                          |
| Other cardiomyopathy                               | 119.3<br>(86.4 to 160.9)                         | --                                             | 10.3<br>(6.0 to 15.6)                         | 12.4<br>(6.0 to 18.7)                             | -1.3<br>(-6.9 to 4.2)                            |
| Atrial fibrillation and flutter                    | 994.6<br>(825.6 to 1,190.0)                      | 89.8<br>(68.4 to 116.8)                        | 83.3<br>(53.7 to 119.5)                       | 13.1<br>(8.2 to 17.8)                             | -0.7<br>(-4.9 to 3.5)                            |
| Peripheral vascular disease                        | 3,520.0<br>(2,576.5 to 4,698.4)                  | 570.7<br>(444.7 to 724.5)                      | 0.1<br>(< 0.05 to 0.2)                        | 3.8<br>(0.6 to 6.3)                               | -8.8<br>(-11.6 to -6.6)                          |
| Endocarditis                                       | 11.7<br>(9.0 to 14.9)                            | 57.1<br>(41.7 to 76.8)                         | 0.9<br>(0.6 to 1.4)                           | 14.8<br>(11.1 to 18.3)                            | 0.8<br>(-2.4 to 3.9)                             |
| Other cardiovascular and circulatory diseases      | 4,564.7<br>(3,097.8 to 6,451.8)                  | --                                             | 242.4<br>(140.4 to 376.7)                     | 11.8<br>(8.6 to 14.7)                             | -1.8<br>(-4.7 to 0.8)                            |
| <b>Chronic respiratory diseases</b>                | <b>29,540.3</b><br><b>(28,884.7 to 30,243.5)</b> | <b>4,693.4†</b><br><b>(4,082.7 to 5,339.1)</b> | <b>1,626.9</b><br><b>(1,283.5 to 2,030.2)</b> | <b>18.0</b><br><b>(15.8 to 20.3)</b>              | <b>3.7</b><br><b>(1.8 to 5.6)</b>                |
| Chronic obstructive pulmonary disease              | 12,012.2<br>(11,140.6 to 12,986.9)               | 1,239.4<br>(1,066.8 to 1,440.7)                | 835.4<br>(707.8 to 961.9)                     | 16.5<br>(13.0 to 20.1)                            | 2.3<br>(-0.7 to 5.5)                             |
| Pneumoconiosis                                     | 28.7<br>(25.2 to 32.7)                           | 4.1<br>(3.5 to 4.8)                            | 4.5<br>(3.0 to 6.4)                           | 9.6<br>(8.3 to 11.0)                              | -3.7<br>(-4.9 to -2.5)                           |
| Silicosis                                          | 9.1<br>(7.0 to 11.4)                             | 1.4<br>(1.0 to 2.0)                            | 1.4<br>(0.9 to 2.1)                           | 6.5<br>(4.5 to 8.6)                               | -6.4<br>(-8.2 to -4.6)                           |

| Cause                                                          | Prevalence in thousands (95% UI)              | Incidence in thousands (95% UI)             | YLDs in thousands (95% UI)                |                                                   |                                                  |
|----------------------------------------------------------------|-----------------------------------------------|---------------------------------------------|-------------------------------------------|---------------------------------------------------|--------------------------------------------------|
|                                                                | 2016 counts                                   | 2016 counts                                 | 2016 counts                               | Percentage change in counts between 2006 and 2016 | Percentage change in rates between 2006 and 2016 |
| Asbestosis                                                     | 5.0<br>(3.9 to 6.3)                           | 0.4<br>(0.3 to 0.6)                         | 0.8<br>(0.5 to 1.2)                       | 11.2<br>(9.3 to 12.7)                             | -2.3<br>(-4.0 to -1.0)                           |
| Coal workers pneumoconiosis                                    | 5.1<br>(4.1 to 6.1)                           | 1.1<br>(0.9 to 1.4)                         | 0.8<br>(0.5 to 1.2)                       | 8.0<br>(5.8 to 10.1)                              | -5.1<br>(-7.0 to -3.3)                           |
| Other pneumoconiosis                                           | 9.6<br>(7.3 to 12.5)                          | 1.1<br>(0.8 to 1.5)                         | 1.5<br>(1.0 to 2.3)                       | 12.8<br>(9.8 to 15.9)                             | -0.9<br>(-3.5 to 1.8)                            |
| Asthma                                                         | 18,247.1<br>(15,965.2 to 20,803.8)            | 3,437.3<br>(2,861.3 to 4,054.1)             | 709.8<br>(458.7 to 1,035.6)               | 17.4<br>(15.0 to 19.8)                            | 3.1<br>(1.0 to 5.2)                              |
| Interstitial lung disease and pulmonary sarcoidosis            | 137.1<br>(113.2 to 164.7)                     | 12.6<br>(8.5 to 18.0)                       | 15.4<br>(9.8 to 23.2)                     | 10.1<br>(3.5 to 16.2)                             | -3.3<br>(-9.1 to 2.0)                            |
| Other chronic respiratory diseases                             | --                                            | --                                          | 61.8<br>(52.1 to 71.2)                    | 59.5<br>(54.8 to 64.4)                            | 40.1<br>(36.0 to 44.4)                           |
| <b>Cirrhosis and other chronic liver diseases</b>              | <b>4,570.8<br/>(4,214.5 to 4,965.1)</b>       | <b>125.8<br/>(106.6 to 145.8)</b>           | <b>102.1<br/>(69.5 to 144.9)</b>          | <b>15.0<br/>(10.1 to 19.9)</b>                    | <b>1.0<br/>(-3.3 to 5.3)</b>                     |
| Cirrhosis and other chronic liver diseases due to hepatitis B  | 1,435.8<br>(1,249.4 to 1,636.4)               | 43.0<br>(34.5 to 52.0)                      | 34.8<br>(23.0 to 50.7)                    | 16.5<br>(8.9 to 25.1)                             | 2.3<br>(-4.4 to 9.9)                             |
| Cirrhosis and other chronic liver diseases due to hepatitis C  | 1,212.5<br>(1,019.1 to 1,427.2)               | 32.7<br>(25.5 to 40.5)                      | 26.2<br>(17.1 to 37.9)                    | 16.7<br>(8.5 to 24.8)                             | 2.5<br>(-4.7 to 9.6)                             |
| Cirrhosis and other chronic liver diseases due to alcohol use  | 1,262.2<br>(1,086.3 to 1,467.7)               | 34.1<br>(27.4 to 41.6)                      | 27.1<br>(17.9 to 39.7)                    | 13.0<br>(5.5 to 21.4)                             | -0.8<br>(-7.3 to 6.7)                            |
| Cirrhosis and other chronic liver diseases due to other causes | 660.3<br>(496.0 to 862.5)                     | 15.9<br>(11.4 to 21.2)                      | 14.0<br>(8.2 to 21.9)                     | 12.1<br>(1.5 to 24.1)                             | -1.5<br>(-10.8 to 9.0)                           |
| <b>Digestive diseases</b>                                      | <b>21,843.4<br/>(20,453.6 to 23,020.5)</b>    | <b>14,926.9†<br/>(12,701.8 to 17,265.4)</b> | <b>658.2<br/>(436.0 to 930.4)</b>         | <b>29.1<br/>(21.4 to 37.5)</b>                    | <b>13.4<br/>(6.7 to 20.7)</b>                    |
| Peptic ulcer disease                                           | 7,182.5<br>(5,789.4 to 8,886.3)               | 767.2<br>(560.9 to 1,011.6)                 | 172.8<br>(99.1 to 278.2)                  | 45.2<br>(32.6 to 57.6)                            | 27.6<br>(16.5 to 38.5)                           |
| Gastritis and duodenitis                                       | 9,196.4<br>(7,071.1 to 11,687.1)              | 5,519.8<br>(3,963.1 to 7,258.7)             | 184.6<br>(111.2 to 292.5)                 | 44.6<br>(30.9 to 59.7)                            | 27.0<br>(15.0 to 40.2)                           |
| Appendicitis                                                   | 45.3<br>(37.0 to 55.3)                        | 1,172.5<br>(958.9 to 1,422.4)               | 14.0<br>(8.8 to 20.2)                     | 15.3<br>(4.9 to 26.6)                             | 1.2<br>(-7.8 to 11.2)                            |
| Paralytic ileus and intestinal obstruction                     | 9.9<br>(7.2 to 13.0)                          | 268.2<br>(197.1 to 350.8)                   | 3.2<br>(2.0 to 4.9)                       | 17.1<br>(14.4 to 19.6)                            | 2.8<br>(0.5 to 5.0)                              |
| Inguinal, femoral, and abdominal hernia                        | 3,961.9<br>(2,818.8 to 5,339.2)               | 2,130.2<br>(1,493.6 to 2,948.3)             | 143.2<br>(83.4 to 228.0)                  | 11.5<br>(6.6 to 16.2)                             | -2.1<br>(-6.3 to 2.1)                            |
| Inflammatory bowel disease                                     | 488.7<br>(411.5 to 573.7)                     | 308.6<br>(247.5 to 377.4)                   | 71.8<br>(47.1 to 101.2)                   | 9.9<br>(4.4 to 16.3)                              | -3.4<br>(-8.3 to 2.1)                            |
| Vascular intestinal disorders                                  | 3.6<br>(2.2 to 5.6)                           | 20.9<br>(14.0 to 29.3)                      | 1.2<br>(0.6 to 2.0)                       | 14.8<br>(11.2 to 17.8)                            | 0.8<br>(-2.3 to 3.5)                             |
| Gallbladder and biliary diseases                               | 1,578.0<br>(1,145.3 to 2,097.6)               | 4,334.7<br>(3,171.2 to 5,811.7)             | 20.9<br>(12.3 to 33.1)                    | 15.7<br>(7.3 to 24.1)                             | 1.6<br>(-5.8 to 9.0)                             |
| Pancreatitis                                                   | 44.9<br>(33.3 to 57.8)                        | 405.0<br>(300.0 to 519.8)                   | 5.8<br>(3.5 to 8.7)                       | 13.4<br>(4.5 to 20.9)                             | -0.4<br>(-8.2 to 6.2)                            |
| Other digestive diseases                                       | --                                            | --                                          | 40.8<br>(27.1 to 57.7)                    | 35.0<br>(26.9 to 43.7)                            | 18.6<br>(11.5 to 26.2)                           |
| <b>Neurological disorders</b>                                  | <b>235,079.4<br/>(224,656.6 to 248,589.9)</b> | <b>98,514.9<br/>(62,797.3 to 142,431.2)</b> | <b>6,038.7<br/>(4,022.4 to 8,313.0)</b>   | <b>13.8<br/>(12.5 to 15.1)</b>                    | <b>-0.1<br/>(-1.2 to 1.1)</b>                    |
| Alzheimer's disease and other dementias                        | 46.1<br>(26.4 to 77.7)                        | 27.2<br>(15.6 to 45.8)                      | 6.3<br>(3.2 to 11.3)                      | 6.0<br>(1.1 to 9.6)                               | -6.9<br>(-11.2 to -3.7)                          |
| Parkinson's disease                                            | 76.5<br>(47.3 to 118.3)                       | 10.7<br>(6.3 to 16.1)                       | 10.2<br>(5.6 to 17.1)                     | 21.6<br>(15.0 to 28.5)                            | 6.8<br>(1.0 to 12.9)                             |
| Epilepsy                                                       | 1,278.1<br>(1,058.2 to 1,545.3)               | 100.2<br>(70.3 to 139.1)                    | 393.2<br>(266.4 to 552.7)                 | 7.4<br>(-3.7 to 19.9)                             | -5.7<br>(-15.5 to 5.4)                           |
| Multiple sclerosis                                             | 247.4<br>(223.3 to 276.5)                     | 4.4<br>(3.1 to 6.0)                         | 65.9<br>(45.4 to 86.8)                    | 12.4<br>(6.2 to 18.3)                             | -1.3<br>(-6.7 to 3.9)                            |
| Motor neuron disease                                           | 19.3<br>(15.6 to 24.5)                        | 2.2<br>(1.4 to 3.3)                         | 4.1<br>(2.7 to 5.8)                       | 11.7<br>(10.4 to 12.8)                            | -1.9<br>(-3.0 to -0.9)                           |
| Migraine                                                       | 105,267.9<br>(97,313.9 to 113,388.9)          | 8,960.1<br>(7,789.9 to 10,308.1)            | 4,693.4<br>(3,014.7 to 6,573.9)           | 14.0<br>(13.0 to 15.0)                            | 0.1<br>(-0.7 to 1.0)                             |
| Tension-type headache                                          | 172,730.1<br>(126,598.8 to 220,525.4)         | 89,407.1<br>(53,889.3 to 133,276.1)         | 772.7<br>(484.1 to 1,175.2)               | 14.9<br>(13.1 to 16.8)                            | 0.9<br>(-0.6 to 2.6)                             |
| Other neurological disorders                                   | 1.5<br>(0.7 to 2.8)                           | 3.0<br>(1.6 to 4.7)                         | 92.9<br>(64.2 to 126.5)                   | 22.9<br>(12.4 to 34.9)                            | 8.0<br>(-1.2 to 18.5)                            |
| <b>Mental and substance use disorders</b>                      | <b>88,609.9<br/>(86,685.0 to 90,054.7)</b>    | <b>32,996.7†<br/>(28,117.7 to 37,666.2)</b> | <b>12,855.9<br/>(9,447.6 to 16,740.1)</b> | <b>11.1<br/>(10.2 to 12.1)</b>                    | <b>-2.4<br/>(-3.2 to -1.6)</b>                   |
| Schizophrenia                                                  | 2,602.8<br>(2,251.9 to 2,975.4)               | 78.6<br>(54.7 to 108.8)                     | 1,682.9<br>(1,231.5 to 2,111.0)           | 12.5<br>(10.5 to 14.6)                            | -1.2<br>(-2.9 to 0.6)                            |
| Alcohol use disorders                                          | 10,364.9<br>(8,173.0 to 12,978.6)             | 5,109.2<br>(3,941.9 to 6,398.9)             | 1,036.2<br>(663.0 to 1,487.2)             | 5.8<br>(0.7 to 10.8)                              | -7.1<br>(-11.6 to -2.7)                          |
| Drug use disorders                                             | 4,244.3<br>(4,061.4 to 4,430.1)               | 356.6<br>(286.0 to 438.2)                   | 1,083.4<br>(761.7 to 1,424.2)             | 14.8<br>(11.4 to 18.1)                            | 0.8<br>(-2.1 to 3.7)                             |
| Opioid use disorders                                           | 2,061.3<br>(1,686.9 to 2,512.7)               | 144.4<br>(92.2 to 208.4)                    | 851.2<br>(580.6 to 1,144.9)               | 16.5<br>(12.5 to 20.4)                            | 2.3<br>(-1.2 to 5.8)                             |
| Cocaine use disorders                                          | 475.4<br>(417.8 to 543.8)                     | 10.9<br>(6.4 to 16.5)                       | 64.9<br>(39.8 to 94.6)                    | 6.7<br>(1.2 to 11.9)                              | -6.3<br>(-11.1 to -1.7)                          |
| Amphetamine use disorders                                      | 187.0<br>(128.1 to 265.1)                     | 15.5<br>(8.0 to 25.9)                       | 24.6<br>(13.7 to 41.0)                    | 9.9<br>(-0.0 to 19.4)                             | -3.5<br>(-12.2 to 4.9)                           |
| Cannabis use disorders                                         | 1,163.3<br>(901.8 to 1,482.6)                 | 121.8<br>(83.5 to 174.0)                    | 33.8<br>(20.5 to 51.4)                    | 7.4<br>(1.3 to 13.5)                              | -5.7<br>(-11.1 to -0.3)                          |
| Other drug use disorders                                       | 466.8<br>(391.9 to 558.6)                     | 64.1<br>(49.1 to 82.2)                      | 109.0<br>(72.2 to 148.3)                  | 10.5<br>(6.6 to 14.5)                             | -2.9<br>(-6.4 to 0.6)                            |
| Depressive disorders                                           | 23,614.1<br>(22,018.3 to 24,821.1)            | 23,691.0<br>(19,181.9 to 28,351.8)          | 3,912.2<br>(2,615.9 to 5,539.2)           | 8.6<br>(6.9 to 10.3)                              | -4.6<br>(-6.1 to -3.1)                           |
| Major depressive disorder                                      | 14,570.7<br>(11,690.8 to 17,630.8)            | 22,188.5<br>(17,548.4 to 26,900.8)          | 2,987.5<br>(1,939.9 to 4,363.7)           | 7.6<br>(5.4 to 9.4)                               | -5.5<br>(-7.5 to -3.9)                           |
| Dysthymia                                                      | 9,540.8<br>(7,379.8 to 11,992.6)              | 1,502.4<br>(1,132.0 to 1,909.6)             | 924.6<br>(584.1 to 1,399.1)               | 12.1<br>(8.7 to 15.5)                             | -1.5<br>(-4.6 to 1.5)                            |
| Bipolar disorder                                               | 3,853.6<br>(3,120.2 to 4,653.5)               | 227.9<br>(144.9 to 318.3)                   | 785.3<br>(476.5 to 1,176.0)               | 14.2<br>(12.1 to 16.3)                            | 0.3<br>(-1.6 to 2.1)                             |
| Anxiety disorders                                              | 23,344.5<br>(20,805.6 to 26,276.1)            | 3,430.2<br>(2,942.5 to 3,949.5)             | 2,242.7<br>(1,544.3 to 3,058.4)           | 12.6<br>(10.4 to 15.1)                            | -1.1<br>(-3.1 to 1.1)                            |
| Eating disorders                                               | 700.3<br>(566.5 to 858.3)                     | 24.8<br>(16.6 to 34.7)                      | 136.8<br>(80.7 to 208.1)                  | 21.7<br>(17.6 to 25.8)                            | 6.9<br>(3.3 to 10.5)                             |
| Anorexia nervosa                                               | 95.8<br>(67.5 to 133.2)                       | 24.8<br>(16.6 to 34.7)                      | 20.1<br>(11.8 to 31.0)                    | 15.5<br>(6.8 to 25.8)                             | 1.4<br>(-6.2 to 10.5)                            |
| Bulimia nervosa                                                | 564.4<br>(365.8 to 817.4)                     | --                                          | 116.8<br>(65.0 to 184.6)                  | 22.9<br>(18.4 to 27.6)                            | 7.9<br>(4.0 to 12.1)                             |
| Autistic spectrum disorders                                    | 3,942.3<br>(3,774.7 to 4,102.0)               | --                                          | 572.4<br>(388.6 to 809.4)                 | 13.8<br>(12.1 to 15.7)                            | -0.0<br>(-1.6 to 1.6)                            |
| Autism                                                         | 1,181.3<br>(1,017.2 to 1,378.3)               | --                                          | 298.1<br>(190.9 to 431.1)                 | 12.8<br>(10.0 to 15.8)                            | -0.9<br>(-3.4 to 1.7)                            |
| Asperger syndrome and other autistic spectrum disorders        | 2,760.9<br>(2,311.8 to 3,300.9)               | --                                          | 274.3<br>(178.7 to 398.6)                 | 14.9<br>(13.0 to 16.8)                            | 0.9<br>(-0.7 to 2.6)                             |

| Cause                                                      | Prevalence in thousands (95% UI)              | Incidence in thousands (95% UI)                  | YLDs in thousands (95% UI)                |                                                   |                                                  |
|------------------------------------------------------------|-----------------------------------------------|--------------------------------------------------|-------------------------------------------|---------------------------------------------------|--------------------------------------------------|
|                                                            | 2016 counts                                   | 2016 counts                                      | 2016 counts                               | Percentage change in counts between 2006 and 2016 | Percentage change in rates between 2006 and 2016 |
| Attention-deficit/hyperactivity disorder                   | 2,969.0<br>(2,639.0 to 3,347.8)               | --                                               | 35.4<br>(21.3 to 55.6)                    | 13.6<br>(10.0 to 17.1)                            | -0.3<br>(-3.4 to 2.9)                            |
| Conduct disorder                                           | --                                            | --                                               | --                                        | --                                                | --                                               |
| Idiopathic developmental intellectual disability           | 7,191.1<br>(4,325.7 to 10,078.4)              | --                                               | 290.0<br>(140.7 to 496.2)                 | 6.2<br>(1.8 to 9.1)                               | -6.7<br>(-10.6 to -4.2)                          |
| Other mental and substance use disorders                   | 14,402.4<br>(12,684.0 to 16,454.3)            | 78.4<br>(45.0 to 122.4)                          | 1,078.5<br>(735.8 to 1,548.3)             | 13.7<br>(12.2 to 15.2)                            | -0.1<br>(-1.4 to 1.2)                            |
| <b>Diabetes, urogenital, blood, and endocrine diseases</b> | <b>217,459.7<br/>(215,054.3 to 219,216.0)</b> | <b>90,565.4†<br/>(82,675.3 to 99,884.9)</b>      | <b>5,207.3<br/>(3,620.8 to 7,260.8)</b>   | <b>14.4<br/>(12.2 to 16.4)</b>                    | <b>0.5<br/>(-1.4 to 2.3)</b>                     |
| Diabetes mellitus                                          | 31,633.7<br>(27,216.6 to 36,549.3)            | 2,267.5<br>(1,783.4 to 2,811.6)                  | 2,334.1<br>(1,554.2 to 3,345.7)           | 11.3<br>(7.5 to 14.8)                             | -2.3<br>(-5.6 to 0.8)                            |
| Acute glomerulonephritis                                   | 7.0<br>(4.7 to 10.0)                          | 103.3<br>(68.9 to 147.8)                         | 0.4<br>(0.2 to 0.6)                       | -3.3<br>(-5.8 to -1.0)                            | -15.1<br>(-17.3 to -13.1)                        |
| Chronic kidney disease                                     | 12,899.0<br>(11,052.7 to 15,068.6)            | 905.0<br>(624.9 to 1,235.7)                      | 578.4<br>(413.4 to 776.2)                 | 23.6<br>(19.4 to 28.6)                            | 8.6<br>(4.9 to 12.9)                             |
| Chronic kidney disease due to diabetes mellitus            | 5,320.5<br>(3,894.2 to 6,901.6)               | 367.2<br>(228.3 to 525.5)                        | 259.7<br>(169.9 to 368.0)                 | 24.6<br>(19.0 to 30.6)                            | 9.4<br>(4.5 to 14.7)                             |
| Chronic kidney disease due to hypertension                 | 2,120.7<br>(1,544.5 to 2,722.7)               | 196.1<br>(112.0 to 301.2)                        | 72.3<br>(45.1 to 108.0)                   | 24.1<br>(17.7 to 31.6)                            | 9.0<br>(3.4 to 15.6)                             |
| Chronic kidney disease due to glomerulonephritis           | 2,167.9<br>(1,590.5 to 2,777.4)               | 108.1<br>(67.3 to 161.2)                         | 113.0<br>(64.7 to 174.6)                  | 21.2<br>(15.5 to 27.1)                            | 6.5<br>(1.4 to 11.7)                             |
| Chronic kidney disease due to other causes                 | 3,289.9<br>(2,241.5 to 4,552.5)               | 233.5<br>(135.7 to 352.0)                        | 133.4<br>(80.2 to 200.9)                  | 23.6<br>(18.0 to 29.5)                            | 8.5<br>(3.6 to 13.7)                             |
| Urinary diseases and male infertility                      | 8,110.0<br>(7,209.9 to 9,300.6)               | 32,330.8†<br>(25,786.0 to 39,975.6)              | 142.8<br>(90.1 to 209.0)                  | 11.7<br>(8.2 to 14.9)                             | -1.9<br>(-5.0 to 0.9)                            |
| Interstitial nephritis and urinary tract infections        | 471.1<br>(339.5 to 615.1)                     | 24,423.9<br>(18,120.1 to 31,497.7)               | 15.5<br>(8.8 to 24.9)                     | 15.3<br>(9.7 to 21.0)                             | 1.2<br>(-3.7 to 6.3)                             |
| Urolithiasis                                               | 264.0<br>(192.9 to 351.6)                     | 7,009.1<br>(5,113.7 to 9,208.9)                  | 19.8<br>(12.1 to 30.2)                    | 11.2<br>(4.1 to 19.0)                             | -2.3<br>(-8.6 to 4.5)                            |
| Benign prostatic hyperplasia                               | 1,881.2<br>(1,432.4 to 2,405.6)               | 897.9<br>(716.3 to 1,111.0)                      | 64.0<br>(39.2 to 97.2)                    | 11.7<br>(5.8 to 16.8)                             | -1.9<br>(-7.1 to 2.6)                            |
| Male infertility                                           | 5,486.8<br>(3,676.0 to 7,917.3)               | --                                               | 30.1<br>(11.1 to 65.4)                    | 15.4<br>(9.2 to 20.8)                             | 1.3<br>(-4.1 to 6.1)                             |
| Other urinary diseases                                     | --                                            | --                                               | 13.4<br>(8.8 to 19.2)                     | 1.2<br>(-2.9 to 5.6)                              | -11.1<br>(-14.7 to -7.3)                         |
| Gynecological diseases                                     | 98,646.3<br>(96,423.7 to 100,858.4)           | 53,952.8†<br>(49,372.9 to 58,581.4)              | 1,543.6<br>(1,062.0 to 2,188.5)           | 12.6<br>(10.4 to 15.6)                            | -1.1<br>(-3.0 to 1.5)                            |
| Uterine fibroids                                           | 17,919.1<br>(14,688.9 to 21,363.6)            | 2,901.7<br>(2,226.9 to 3,629.1)                  | 284.0<br>(168.2 to 468.6)                 | 12.7<br>(10.7 to 14.6)                            | -1.1<br>(-2.8 to 0.7)                            |
| Polycystic ovarian syndrome                                | 2,503.2<br>(1,918.8 to 3,193.2)               | 1,770.7<br>(1,182.9 to 2,513.3)                  | 21.5<br>(9.7 to 40.1)                     | 7.7<br>(5.0 to 10.3)                              | -5.4<br>(-7.7 to -3.1)                           |
| Female infertility                                         | 3,887.0<br>(1,557.8 to 10,320.0)              | --                                               | 20.9<br>(5.3 to 62.1)                     | 35.5<br>(15.8 to 61.6)                            | 19.1<br>(1.7 to 42.0)                            |
| Endometriosis                                              | 576.2<br>(482.8 to 691.5)                     | 1,534.4<br>(1,172.9 to 1,987.0)                  | 53.3<br>(34.9 to 77.1)                    | 8.4<br>(3.0 to 14.5)                              | -4.8<br>(-9.6 to 0.6)                            |
| Genital prolapse                                           | 15,207.4<br>(12,050.9 to 18,817.1)            | 2,773.6<br>(2,244.8 to 3,391.2)                  | 48.2<br>(23.5 to 89.0)                    | 6.5<br>(4.2 to 8.6)                               | -6.5<br>(-8.4 to -4.7)                           |
| Premenstrual syndrome                                      | 61,116.0<br>(56,404.5 to 66,257.3)            | 28,043.7<br>(25,809.8 to 30,268.7)               | 505.4<br>(312.3 to 781.5)                 | 12.4<br>(10.3 to 14.3)                            | -1.3<br>(-3.1 to 0.4)                            |
| Other gynecological diseases                               | 17,410.7<br>(13,951.5 to 20,557.7)            | 16,928.9<br>(13,101.5 to 20,883.1)               | 610.3<br>(395.8 to 886.6)                 | 13.3<br>(8.6 to 20.5)                             | -0.5<br>(-4.7 to 5.9)                            |
| Hemoglobinopathies and hemolytic anaemias                  | 113,235.9<br>(111,899.4 to 114,710.2)         | --                                               | 410.0<br>(264.4 to 615.1)                 | 30.7<br>(21.3 to 40.7)                            | 14.8<br>(6.5 to 23.6)                            |
| Thalassemias                                               | 1.4<br>(1.3 to 1.4)                           | --                                               | 0.1<br>(0.1 to 0.2)                       | 27.1<br>(-5.1 to 65.3)                            | 11.6<br>(-16.6 to 45.2)                          |
| Thalassaemias trait                                        | 21,098.4<br>(20,265.2 to 21,989.5)            | --                                               | 279.4<br>(177.7 to 420.2)                 | 29.9<br>(17.7 to 42.8)                            | 14.1<br>(3.4 to 25.4)                            |
| Sickle cell disorders                                      | 31.0<br>(27.6 to 34.4)                        | --                                               | 5.3<br>(3.7 to 7.1)                       | 56.2<br>(45.1 to 68.3)                            | 37.2<br>(27.5 to 47.9)                           |
| Sickle cell trait                                          | 25,979.6<br>(23,552.1 to 29,250.7)            | --                                               | 81.9<br>(52.4 to 123.7)                   | 34.3<br>(28.7 to 39.9)                            | 17.9<br>(13.0 to 22.9)                           |
| G6PD deficiency                                            | 20,242.0<br>(19,510.8 to 21,081.8)            | --                                               | 1.4<br>(0.9 to 2.0)                       | 43.4<br>(36.8 to 50.0)                            | 25.9<br>(20.2 to 31.7)                           |
| G6PD trait                                                 | 54,696.6<br>(53,829.2 to 55,707.6)            | --                                               | 0.1<br>(< 0.05 to 0.1)                    | 39.3<br>(30.2 to 49.9)                            | 22.4<br>(14.4 to 31.7)                           |
| Other hemoglobinopathies and hemolytic anaemias            | 3,300.3<br>(2,870.1 to 3,788.8)               | --                                               | 41.9<br>(26.6 to 65.5)                    | 25.9<br>(19.5 to 33.1)                            | 10.6<br>(5.0 to 16.9)                            |
| Endocrine, metabolic, blood, and immune disorders          | 6,681.8<br>(5,583.9 to 8,067.2)               | 1,006.0<br>(712.1 to 1,349.7)                    | 198.1<br>(124.8 to 298.0)                 | 13.6<br>(10.8 to 16.6)                            | -0.2<br>(-2.7 to 2.4)                            |
| <b>Musculoskeletal disorders</b>                           | <b>119,510.2<br/>(112,739.4 to 126,336.4)</b> | <b>63,621.4<br/>(50,765.5 to 78,027.5)</b>       | <b>13,199.9<br/>(8,952.3 to 18,119.0)</b> | <b>12.6<br/>(10.7 to 14.4)</b>                    | <b>-1.1<br/>(-2.8 to 0.5)</b>                    |
| Rheumatoid arthritis                                       | 1,579.4<br>(1,297.2 to 1,897.6)               | 117.0<br>(88.0 to 151.0)                         | 380.4<br>(254.4 to 518.6)                 | 17.4<br>(14.0 to 20.9)                            | 3.1<br>(0.1 to 6.2)                              |
| Osteoarthritis                                             | 18,189.0<br>(16,464.0 to 20,150.6)            | 1,801.7<br>(1,586.2 to 2,035.9)                  | 1,073.0<br>(741.7 to 1,474.1)             | 17.1<br>(15.8 to 18.5)                            | 2.9<br>(1.8 to 4.1)                              |
| Low back and neck pain                                     | 75,746.3<br>(69,984.2 to 81,350.1)            | 31,517.1<br>(23,743.9 to 41,848.3)               | 8,890.4<br>(5,911.2 to 12,661.0)          | 12.5<br>(10.0 to 15.0)                            | -1.2<br>(-3.4 to 1.0)                            |
| Low back pain                                              | 47,376.7<br>(35,209.6 to 62,669.4)            | 22,871.0<br>(15,810.9 to 32,846.6)               | 5,499.4<br>(3,462.5 to 8,236.7)           | 12.5<br>(8.7 to 15.9)                             | -1.2<br>(-4.5 to 1.8)                            |
| Neck pain                                                  | 33,416.3<br>(23,673.4 to 44,992.0)            | 8,646.1<br>(5,930.0 to 12,091.9)                 | 3,391.0<br>(2,049.2 to 5,342.1)           | 12.7<br>(9.3 to 15.5)                             | -1.1<br>(-4.0 to 1.5)                            |
| Gout                                                       | 2,532.7<br>(1,976.0 to 3,198.0)               | 470.9<br>(370.0 to 591.8)                        | 83.9<br>(52.4 to 122.0)                   | 12.2<br>(6.7 to 17.8)                             | -1.4<br>(-6.2 to 3.4)                            |
| Other musculoskeletal disorders                            | 32,021.0<br>(21,634.8 to 45,231.7)            | 29,714.7<br>(20,540.3 to 40,579.7)               | 2,772.2<br>(1,637.5 to 4,433.2)           | 10.3<br>(4.7 to 14.7)                             | -3.1<br>(-8.0 to 0.8)                            |
| <b>Other non-communicable diseases</b>                     | <b>355,481.5<br/>(350,836.6 to 362,150.5)</b> | <b>902,432.2†<br/>(778,108.0 to 1,033,955.0)</b> | <b>7,854.5<br/>(5,182.4 to 11,495.1)</b>  | <b>13.4<br/>(12.5 to 14.1)</b>                    | <b>-0.4<br/>(-1.2 to 0.3)</b>                    |
| Congenital anomalies                                       | 4,366.1<br>(4,042.5 to 4,658.1)               | --                                               | 516.5<br>(364.7 to 693.5)                 | 10.8<br>(8.2 to 13.7)                             | -2.7<br>(-5.0 to -0.2)                           |
| Neural tube defects                                        | 341.4<br>(309.5 to 377.9)                     | --                                               | 102.2<br>(73.2 to 136.1)                  | 17.2<br>(12.5 to 22.2)                            | 3.0<br>(-1.2 to 7.3)                             |
| Congenital heart anomalies                                 | 606.6<br>(541.9 to 675.4)                     | --                                               | 33.4<br>(14.2 to 57.8)                    | 14.9<br>(10.4 to 19.5)                            | 1.0<br>(-3.1 to 5.0)                             |
| Orofacial clefts                                           | 232.1<br>(207.0 to 257.0)                     | --                                               | 2.9<br>(1.9 to 4.2)                       | 6.5<br>(3.5 to 9.6)                               | -6.4<br>(-9.1 to -3.8)                           |
| Down's syndrome                                            | 136.0<br>(118.6 to 155.7)                     | --                                               | 11.6<br>(7.9 to 16.5)                     | 13.0<br>(8.0 to 18.2)                             | -0.8<br>(-5.1 to 3.8)                            |
| Turner syndrome                                            | 135.6<br>(118.0 to 154.7)                     | --                                               | 2.8<br>(1.4 to 4.5)                       | 16.5<br>(4.4 to 29.4)                             | 2.3<br>(-8.3 to 13.7)                            |
| Klinefelter syndrome                                       | 102.2<br>(86.3 to 119.8)                      | --                                               | 1.0<br>(0.5 to 2.0)                       | 10.5<br>(3.5 to 17.9)                             | -3.0<br>(-9.1 to 3.6)                            |

| Cause                                         | Prevalence in thousands (95% UI)              | Incidence in thousands (95% UI)                        | YLDs in thousands (95% UI)              |                                                   |                                                  |
|-----------------------------------------------|-----------------------------------------------|--------------------------------------------------------|-----------------------------------------|---------------------------------------------------|--------------------------------------------------|
|                                               | 2016 counts                                   | 2016 counts                                            | 2016 counts                             | Percentage change in counts between 2006 and 2016 | Percentage change in rates between 2006 and 2016 |
| Other chromosomal abnormalities               | 0.1<br>(0.1 to 0.1)                           | --                                                     | < 0.05<br>(< 0.05 to < 0.05)            | 18.6<br>(-53.6 to 191.7)                          | 4.1<br>(-59.2 to 156.2)                          |
| Congenital musculoskeletal and limb anomalies | 682.7<br>(629.3 to 740.8)                     | --                                                     | 99.9<br>(68.3 to 137.4)                 | 10.7<br>(6.9 to 14.6)                             | -2.8<br>(-6.1 to 0.7)                            |
| Urogenital congenital anomalies               | 204.3<br>(183.8 to 225.3)                     | --                                                     | 3.1<br>(1.5 to 5.7)                     | 13.1<br>(9.6 to 16.8)                             | -0.7<br>(-3.7 to 2.6)                            |
| Digestive congenital anomalies                | 673.7<br>(607.3 to 745.5)                     | --                                                     | 28.8<br>(19.0 to 40.7)                  | 9.3<br>(4.0 to 14.8)                              | -4.0<br>(-8.7 to 0.9)                            |
| Other congenital anomalies                    | 2,217.6<br>(1,556.5 to 3,116.9)               | --                                                     | 230.6<br>(150.5 to 348.1)               | 7.7<br>(3.3 to 12.9)                              | -5.4<br>(-9.3 to -0.9)                           |
| Skin and subcutaneous diseases                | 114,929.4<br>(111,881.8 to 117,281.2)         | 266,161.6<br>(242,762.7 to 295,470.6)                  | 2,512.6<br>(1,689.2 to 3,687.7)         | 14.2<br>(13.4 to 15.0)                            | 0.3<br>(-0.4 to 1.0)                             |
| Dermatitis                                    | 15,331.5<br>(13,022.5 to 18,285.8)            | 40,509.6<br>(33,022.9 to 48,953.5)                     | 486.8<br>(293.6 to 752.1)               | 11.9<br>(10.1 to 13.7)                            | -1.7<br>(-3.3 to -0.2)                           |
| Psoriasis                                     | 5,092.5<br>(4,670.0 to 5,563.8)               | 567.9<br>(490.2 to 665.2)                              | 444.4<br>(313.7 to 585.7)               | 17.5<br>(14.9 to 20.2)                            | 3.2<br>(0.9 to 5.6)                              |
| Cellulitis                                    | 156.6<br>(127.1 to 192.9)                     | 3,258.9<br>(2,725.5 to 3,869.9)                        | 9.0<br>(5.6 to 13.2)                    | 9.7<br>(3.5 to 16.4)                              | -3.6<br>(-9.1 to 2.2)                            |
| Pyoderma                                      | 1,051.0<br>(957.6 to 1,143.3)                 | 24,653.9<br>(22,215.2 to 27,242.7)                     | 5.9<br>(2.4 to 12.2)                    | 16.0<br>(12.7 to 19.1)                            | 1.9<br>(-1.0 to 4.6)                             |
| Scabies                                       | 7,196.6<br>(5,066.9 to 9,891.2)               | 22,012.7<br>(15,315.9 to 30,537.7)                     | 184.6<br>(94.2 to 325.4)                | 8.5<br>(6.5 to 10.1)                              | -4.7<br>(-6.5 to -3.3)                           |
| Fungal skin diseases                          | 30,961.7<br>(25,259.0 to 37,861.9)            | 104,459.8<br>(84,604.2 to 131,006.6)                   | 174.6<br>(67.8 to 361.1)                | 16.3<br>(15.7 to 17.0)                            | 2.2<br>(1.6 to 2.7)                              |
| Viral skin diseases                           | 8,510.6<br>(7,193.4 to 10,126.8)              | 12,919.8<br>(10,908.7 to 15,249.4)                     | 257.9<br>(158.6 to 385.4)               | 13.4<br>(12.0 to 15.0)                            | -0.4<br>(-1.6 to 1.0)                            |
| Acne vulgaris                                 | 18,630.8<br>(16,211.9 to 21,326.6)            | 8,363.5<br>(7,071.3 to 9,727.9)                        | 470.7<br>(314.9 to 689.6)               | 14.5<br>(12.6 to 16.7)                            | 0.6<br>(-1.1 to 2.5)                             |
| Alopecia areata                               | 1,393.2<br>(1,242.2 to 1,549.6)               | 2,354.5<br>(2,115.0 to 2,594.3)                        | 45.5<br>(29.0 to 68.7)                  | 11.8<br>(8.6 to 15.1)                             | -1.8<br>(-4.6 to 1.1)                            |
| Pruritus                                      | 4,932.3<br>(3,347.3 to 7,100.0)               | 3,821.9<br>(2,587.4 to 5,360.5)                        | 52.9<br>(22.4 to 106.9)                 | 15.7<br>(13.9 to 17.4)                            | 1.7<br>(0.0 to 3.1)                              |
| Urticaria                                     | 3,147.2<br>(2,183.9 to 4,400.2)               | 5,536.0<br>(3,845.6 to 7,775.0)                        | 186.2<br>(107.6 to 288.4)               | 13.8<br>(11.1 to 16.3)                            | -0.1<br>(-2.4 to 2.1)                            |
| Decubitus ulcer                               | 56.0<br>(39.6 to 75.1)                        | 202.5<br>(145.8 to 270.5)                              | 9.9<br>(5.9 to 15.3)                    | 11.7<br>(10.5 to 12.8)                            | -1.9<br>(-3.0 to -0.9)                           |
| Other skin and subcutaneous diseases          | 33,175.5<br>(29,885.5 to 36,603.9)            | 37,500.7<br>(33,850.8 to 41,713.0)                     | 184.2<br>(84.4 to 351.4)                | 18.8<br>(17.7 to 19.8)                            | 4.4<br>(3.4 to 5.2)                              |
| Sense organ diseases                          | 129,319.6<br>(124,116.0 to 133,669.3)         | 37,197.1 <sup>†</sup><br>(33,540.1 to 40,826.3)        | 3,392.6<br>(2,231.0 to 4,928.3)         | 12.7<br>(11.0 to 14.2)                            | -1.0<br>(-2.5 to 0.3)                            |
| Glaucoma                                      | --                                            | --                                                     | --                                      | --                                                | --                                               |
| Cataract                                      | 1,798.2<br>(1,333.3 to 2,385.5)               | --                                                     | 155.0<br>(97.3 to 227.6)                | 14.6<br>(10.9 to 18.1)                            | 0.7<br>(-2.6 to 3.7)                             |
| Macular degeneration                          | --                                            | --                                                     | --                                      | --                                                | --                                               |
| Refraction and accommodation disorders        | 54,652.6<br>(49,001.9 to 60,756.7)            | --                                                     | 954.0<br>(590.1 to 1,536.7)             | 10.7<br>(9.3 to 11.9)                             | -2.8<br>(-4.0 to -1.7)                           |
| Age-related and other hearing loss            | 76,577.7<br>(61,565.5 to 93,710.6)            | --                                                     | 1,738.1<br>(1,133.7 to 2,609.1)         | 12.7<br>(9.6 to 15.3)                             | -1.0<br>(-3.8 to 1.3)                            |
| Other vision loss                             | 1,643.8<br>(1,255.7 to 2,105.4)               | --                                                     | 143.3<br>(92.0 to 206.6)                | 17.1<br>(13.1 to 21.1)                            | 2.9<br>(-0.7 to 6.4)                             |
| Other sense organ diseases                    | 12,565.3<br>(10,964.2 to 14,265.9)            | 37,197.1<br>(33,540.1 to 40,826.3)                     | 402.2<br>(244.3 to 605.3)               | 15.0<br>(13.3 to 16.8)                            | 1.0<br>(-0.5 to 2.6)                             |
| Oral disorders                                | 252,633.5<br>(243,174.5 to 262,305.4)         | 599,073.6 <sup>†</sup><br>(477,218.2 to 722,268.6)     | 1,432.9<br>(791.4 to 2,372.7)           | 14.8<br>(13.8 to 15.6)                            | 0.8<br>(-0.1 to 1.5)                             |
| Caries of deciduous teeth                     | --                                            | --                                                     | --                                      | --                                                | --                                               |
| Caries of permanent teeth                     | 189,090.5<br>(158,503.9 to 223,818.3)         | 588,391.7<br>(467,178.1 to 710,670.0)                  | 133.4<br>(57.2 to 255.6)                | 9.8<br>(8.4 to 11.0)                              | -3.6<br>(-4.8 to -2.5)                           |
| Periodontal disease                           | 86,733.0<br>(62,484.6 to 109,667.6)           | 9,703.0<br>(5,554.4 to 13,986.6)                       | 574.0<br>(218.7 to 1,229.8)             | 17.4<br>(16.4 to 18.4)                            | 3.1<br>(2.2 to 4.0)                              |
| Edentulism and severe tooth loss              | 13,313.2<br>(10,561.4 to 16,389.5)            | 978.9<br>(603.8 to 1,447.1)                            | 380.1<br>(238.6 to 565.8)               | 13.4<br>(11.9 to 14.8)                            | -0.4<br>(-1.8 to 0.9)                            |
| Other oral disorders                          | 11,780.0<br>(10,517.8 to 13,008.0)            | --                                                     | 345.4<br>(215.1 to 519.5)               | 14.0<br>(12.7 to 15.2)                            | 0.1<br>(-1.0 to 1.2)                             |
| <b>Injuries</b>                               | <b>118,148.7<br/>(111,589.9 to 125,891.8)</b> | <b>36,548.7<sup>†</sup><br/>(32,049.0 to 41,267.9)</b> | <b>4,277.0<br/>(2,871.2 to 6,096.7)</b> | <b>15.3<br/>(13.9 to 16.5)</b>                    | <b>1.3<br/>(0.1 to 2.3)</b>                      |
| <b>Transport injuries</b>                     | <b>20,925.1<br/>(19,264.2 to 22,726.9)</b>    | <b>5,916.6<br/>(4,521.9 to 7,516.9)</b>                | <b>1,100.9<br/>(740.1 to 1,574.9)</b>   | <b>18.1<br/>(16.9 to 19.3)</b>                    | <b>3.8<br/>(2.7 to 4.8)</b>                      |
| Road injuries                                 | 17,144.6<br>(15,665.5 to 18,677.5)            | 5,405.2<br>(4,067.7 to 6,995.5)                        | 908.7<br>(609.1 to 1,301.4)             | 19.6<br>(18.3 to 20.8)                            | 5.0<br>(3.9 to 6.1)                              |
| Pedestrian road injuries                      | 3,593.6<br>(2,979.9 to 4,205.4)               | 929.1<br>(588.8 to 1,362.8)                            | 194.2<br>(130.3 to 278.9)               | 20.6<br>(19.1 to 22.2)                            | 5.9<br>(4.6 to 7.3)                              |
| Cyclist road injuries                         | 3,269.1<br>(2,698.6 to 3,936.9)               | 1,169.8<br>(733.7 to 1,736.4)                          | 160.1<br>(106.1 to 232.2)               | 22.7<br>(21.4 to 24.2)                            | 7.8<br>(6.6 to 9.1)                              |
| Motorcyclist road injuries                    | 4,513.9<br>(3,815.0 to 5,688.5)               | 965.0<br>(619.8 to 1,400.6)                            | 236.0<br>(157.5 to 334.9)               | 19.1<br>(17.7 to 20.4)                            | 4.6<br>(3.4 to 5.7)                              |
| Motor vehicle road injuries                   | 4,473.7<br>(3,736.3 to 5,259.0)               | 1,833.1<br>(1,262.7 to 2,575.0)                        | 255.2<br>(172.8 to 360.6)               | 13.2<br>(11.8 to 14.7)                            | -0.5<br>(-1.8 to 0.7)                            |
| Other road injuries                           | 1,294.2<br>(1,046.5 to 1,608.6)               | 508.2<br>(270.6 to 852.7)                              | 63.1<br>(41.1 to 93.6)                  | 40.7<br>(38.9 to 42.5)                            | 23.6<br>(22.0 to 25.2)                           |
| Other transport injuries                      | 3,780.6<br>(3,079.8 to 4,520.3)               | 511.4<br>(351.4 to 735.4)                              | 192.2<br>(129.4 to 273.4)               | 11.7<br>(9.9 to 13.4)                             | -1.9<br>(-3.5 to -0.4)                           |
| <b>Unintentional injuries</b>                 | <b>84,948.1<br/>(78,403.5 to 91,883.5)</b>    | <b>27,967.1<br/>(24,194.8 to 32,549.7)</b>             | <b>2,687.0<br/>(1,821.8 to 3,799.0)</b> | <b>15.9<br/>(14.7 to 17.0)</b>                    | <b>1.8<br/>(0.8 to 2.7)</b>                      |
| Falls                                         | 32,205.7<br>(27,679.1 to 36,777.7)            | 10,444.5<br>(7,757.7 to 14,187.0)                      | 1,224.6<br>(849.0 to 1,698.1)           | 16.7<br>(15.5 to 17.9)                            | 2.5<br>(1.4 to 3.6)                              |
| Drowning                                      | 352.8<br>(303.4 to 411.0)                     | 33.0<br>(25.0 to 42.8)                                 | 17.6<br>(11.6 to 25.2)                  | -0.7<br>(-2.9 to 1.4)                             | -12.8<br>(-14.7 to -11.0)                        |
| Fire, heat, and hot substances                | 8,763.4<br>(7,363.4 to 10,589.6)              | 576.9<br>(366.5 to 832.2)                              | 213.6<br>(139.9 to 320.1)               | 14.8<br>(12.9 to 16.4)                            | 0.8<br>(-0.8 to 2.2)                             |
| Poisonings                                    | 281.8<br>(238.8 to 328.1)                     | 274.9<br>(180.4 to 414.6)                              | 22.9<br>(14.8 to 33.0)                  | 23.2<br>(20.1 to 26.6)                            | 8.2<br>(5.5 to 11.2)                             |
| Exposure to mechanical forces                 | 16,940.9<br>(14,272.3 to 21,191.2)            | 4,702.4<br>(3,252.7 to 6,642.2)                        | 380.2<br>(246.3 to 560.8)               | 17.3<br>(16.1 to 18.3)                            | 3.0<br>(1.9 to 3.9)                              |
| Unintentional firearm injuries                | 643.7<br>(510.8 to 821.2)                     | 90.3<br>(45.5 to 165.8)                                | 21.5<br>(13.6 to 32.6)                  | 16.3<br>(15.0 to 17.7)                            | 2.1<br>(1.0 to 3.4)                              |
| Unintentional suffocation                     | 699.1<br>(534.6 to 903.1)                     | 54.8<br>(24.9 to 101.5)                                | 20.8<br>(12.9 to 31.7)                  | 8.3<br>(6.7 to 9.8)                               | -4.9<br>(-6.3 to -3.5)                           |
| Other exposure to mechanical forces           | 15,598.1<br>(12,948.4 to 19,830.1)            | 4,557.4<br>(3,159.2 to 6,418.8)                        | 337.9<br>(219.5 to 496.9)               | 18.0<br>(16.7 to 19.1)                            | 3.6<br>(2.5 to 4.6)                              |

| Cause                                                                               | Prevalence in thousands (95% UI)           | Incidence in thousands (95% UI)          | YLDs in thousands (95% UI)        |                                                   |                                                  |
|-------------------------------------------------------------------------------------|--------------------------------------------|------------------------------------------|-----------------------------------|---------------------------------------------------|--------------------------------------------------|
|                                                                                     | 2016 counts                                | 2016 counts                              | 2016 counts                       | Percentage change in counts between 2006 and 2016 | Percentage change in rates between 2006 and 2016 |
| Adverse effects of medical treatment                                                | 123.1<br>(82.8 to 184.6)                   | 1,609.2<br>(1,115.9 to 2,295.7)          | 16.4<br>(9.6 to 27.5)             | 8.2<br>(3.2 to 12.8)                              | -5.0<br>(-9.4 to -1.0)                           |
| Animal contact                                                                      | 4,311.2<br>(3,733.1 to 5,039.4)            | 4,255.2<br>(2,920.8 to 5,930.8)          | 126.9<br>(85.9 to 178.3)          | 10.5<br>(8.4 to 12.4)                             | -3.0<br>(-4.8 to -1.2)                           |
| Venomous animal contact                                                             | 2,025.1<br>(1,696.2 to 2,414.0)            | 2,047.3<br>(1,340.0 to 3,032.9)          | 90.5<br>(62.0 to 125.8)           | 12.6<br>(9.9 to 15.2)                             | -1.1<br>(-3.5 to 1.2)                            |
| Non-venomous animal contact                                                         | 2,286.1<br>(1,825.9 to 2,950.0)            | 2,207.9<br>(1,414.3 to 3,218.9)          | 36.4<br>(23.1 to 55.7)            | 5.6<br>(3.4 to 7.5)                               | -7.2<br>(-9.2 to -5.6)                           |
| Foreign body                                                                        | 3,850.5<br>(3,200.4 to 4,498.3)            | 1,823.8<br>(1,283.9 to 2,671.4)          | 139.2<br>(89.8 to 207.5)          | 16.6<br>(14.6 to 18.5)                            | 2.4<br>(0.6 to 4.1)                              |
| Pulmonary aspiration and foreign body in airway                                     | 1,787.8<br>(1,356.2 to 2,340.3)            | 311.7<br>(204.7 to 463.9)                | 72.8<br>(46.4 to 108.9)           | 13.1<br>(11.1 to 15.0)                            | -0.7<br>(-2.4 to 1.0)                            |
| Foreign body in eyes                                                                | 236.5<br>(133.8 to 393.6)                  | 1,154.4<br>(640.1 to 1,963.4)            | 14.0<br>(7.4 to 25.5)             | 25.6<br>(21.8 to 30.7)                            | 10.3<br>(7.0 to 14.8)                            |
| Foreign body in other body part                                                     | 1,826.3<br>(1,479.6 to 2,320.9)            | 357.7<br>(213.6 to 545.3)                | 52.4<br>(33.9 to 78.3)            | 19.5<br>(17.5 to 21.1)                            | 4.9<br>(3.2 to 6.4)                              |
| Environmental heat and cold exposure                                                | 5,704.5<br>(4,699.3 to 6,720.9)            | 985.4<br>(612.8 to 1,422.7)              | 206.8<br>(138.0 to 297.1)         | 16.7<br>(14.7 to 18.6)                            | 2.5<br>(0.7 to 4.2)                              |
| Other unintentional injuries                                                        | 12,414.2<br>(9,915.0 to 15,209.1)          | 3,261.8<br>(2,122.5 to 4,848.3)          | 338.8<br>(220.7 to 495.8)         | 14.7<br>(13.3 to 16.0)                            | 0.7<br>(-0.5 to 1.9)                             |
| <b>Self-harm and interpersonal violence</b>                                         | <b>18,905.0<br/>(14,348.4 to 23,227.0)</b> | <b>2,578.7†<br/>(1,960.8 to 3,355.8)</b> | <b>332.4<br/>(218.5 to 474.8)</b> | <b>5.4<br/>(4.3 to 6.4)</b>                       | <b>-7.4<br/>(-8.4 to -6.6)</b>                   |
| Self-harm                                                                           | 997.5<br>(811.7 to 1,202.5)                | 554.6<br>(416.0 to 718.8)                | 46.3<br>(30.1 to 67.6)            | 4.3<br>(2.7 to 5.9)                               | -8.4<br>(-9.8 to -7.0)                           |
| Self-harm by firearm                                                                | 32.2<br>(27.2 to 37.6)                     | 5.5<br>(1.6 to 13.7)                     | 1.2<br>(0.7 to 1.7)               | 0.0<br>(-2.2 to 1.9)                              | -12.1<br>(-14.1 to -10.5)                        |
| Self-harm by other specified means                                                  | 965.3<br>(779.4 to 1,170.2)                | 549.1<br>(412.3 to 711.9)                | 45.1<br>(29.3 to 66.0)            | 4.4<br>(2.8 to 6.0)                               | -8.3<br>(-9.7 to -6.9)                           |
| Interpersonal violence                                                              | 17,307.5<br>(13,436.6 to 22,116.3)         | 2,024.1†<br>(1,426.4 to 2,781.5)         | 286.1<br>(189.5 to 409.0)         | 5.6<br>(4.4 to 6.6)                               | -7.3<br>(-8.3 to -6.4)                           |
| Assault by firearm                                                                  | 265.7<br>(211.8 to 323.9)                  | 45.4<br>(24.8 to 77.8)                   | 9.9<br>(6.2 to 15.0)              | 4.2<br>(2.9 to 5.8)                               | -8.4<br>(-9.6 to -7.1)                           |
| Assault by sharp object                                                             | 1,450.2<br>(1,154.4 to 1,739.5)            | 399.4<br>(228.9 to 637.2)                | 40.2<br>(25.9 to 59.5)            | 2.1<br>(0.2 to 3.8)                               | -10.3<br>(-12.0 to -8.8)                         |
| Sexual violence                                                                     | 11,861.7<br>(8,135.1 to 16,697.9)          | 93.5<br>--                               | 8.2<br>(52.0 to 155.1)            | 8.2<br>(6.8 to 9.6)                               | -5.0<br>(-6.2 to -3.8)                           |
| Assault by other means                                                              | 3,729.8<br>(3,030.9 to 4,629.8)            | 1,579.2<br>(1,091.8 to 2,180.5)          | 142.4<br>(94.6 to 208.7)          | 5.0<br>(3.6 to 6.1)                               | -7.8<br>(-9.0 to -6.8)                           |
| <b>Forces of nature, conflict and terrorism, and executions and police conflict</b> | <b>5,832.1<br/>(3,672.3 to 8,452.2)</b>    | <b>86.3†<br/>(50.5 to 124.2)</b>         | <b>156.8<br/>(56.2 to 320.9)</b>  | <b>9.2<br/>(-1.6 to 19.1)</b>                     | <b>-4.1<br/>(-13.5 to 4.6)</b>                   |
| Forces of nature, conflict and terrorism, and state actor violence                  | 838.3<br>(466.1 to 1,298.8)                | 23.2<br>(12.6 to 36.1)                   | 27.2<br>(7.5 to 64.6)             | 73.0<br>(60.6 to 81.3)                            | 52.0<br>(41.1 to 59.2)                           |
| Conflict and terrorism                                                              | 4,375.3<br>(2,542.9 to 6,798.1)            | --                                       | 123.8<br>(47.8 to 242.2)          | 12.5<br>(-2.0 to 24.9)                            | -1.2<br>(-13.9 to 9.7)                           |
| Executions and police conflict                                                      | 618.5<br>(213.9 to 972.9)                  | 63.1<br>(28.3 to 101.6)                  | 13.7<br>(3.1 to 35.4)             | -43.6<br>(-47.1 to -29.9)                         | -50.5<br>(-53.6 to -38.4)                        |

We did not calculate incidence for certain NTDs and causes with only birth prevalence. Blank cells mean that no estimate is available.

† Incidence for aggregate causes represents the sum of the incidence of the causes below the aggregate.

‡ Incidence estimates for stroke represent first-ever stroke only.

^ Incidence of HIV/AIDS represents new infections of HIV only and does not include new infections of Tuberculosis in HIV positive cases.



SR Table 12: Global prevalence, incidence, and YLDs for 2016, percentage change of YLD counts and percentage change of YLD rates between 2006 and 2016 by cause, age 45-49 years.

| Cause                                                                                | Prevalence in thousands (95% UI)             | Incidence in thousands (95% UI)                     | YLDs in thousands (95% UI)                |                                                   |                                                  |
|--------------------------------------------------------------------------------------|----------------------------------------------|-----------------------------------------------------|-------------------------------------------|---------------------------------------------------|--------------------------------------------------|
|                                                                                      | 2016 counts                                  | 2016 counts                                         | 2016 counts                               | Percentage change in counts between 2006 and 2016 | Percentage change in rates between 2006 and 2016 |
| <b>All causes</b>                                                                    | <b>455,607.8</b><br>(455,279.4 to 455,987.2) | <b>2,420,797.2†</b><br>(2,110,052.5 to 2,778,929.4) | <b>61,321.9</b><br>(45,588.5 to 79,275.2) | <b>22.0</b><br>(21.2 to 22.7)                     | <b>-2.2</b><br>(-2.9 to -1.6)                    |
| <b>Communicable, maternal, neonatal, and nutritional disorders</b>                   | <b>326,087.3</b><br>(320,860.1 to 329,942.9) | <b>1,247,676.0†</b><br>(966,469.7 to 1,588,208.9)   | <b>5,052.9</b><br>(3,652.7 to 6,816.7)    | <b>12.6</b><br>(7.6 to 16.9)                      | <b>-9.7</b><br>(-13.7 to -6.3)                   |
| <b>HIV/AIDS and tuberculosis</b>                                                     | <b>167,134.2</b><br>(146,824.5 to 191,601.4) | <b>684.6†</b><br>(492.6 to 919.3)                   | <b>635.1</b><br>(422.2 to 917.1)          | <b>-3.2</b><br>(-19.5 to 16.8)                    | <b>-22.4</b><br>(-35.5 to -6.3)                  |
| Tuberculosis                                                                         | 156,416.0<br>(127,438.2 to 190,581.2)        | 621.4†<br>(428.9 to 860.9)                          | 230.3<br>(137.0 to 358.0)                 | 10.9<br>(6.3 to 16.4)                             | -11.1<br>(-14.8 to -6.7)                         |
| Drug-susceptible tuberculosis                                                        | 727.5<br>(506.3 to 1,009.4)                  | 598.4<br>(412.4 to 831.5)                           | 221.8<br>(131.9 to 345.4)                 | 11.0<br>(6.4 to 16.6)                             | -11.0<br>(-14.7 to -6.5)                         |
| Multidrug-resistant tuberculosis without extensive drug resistance                   | 25.4<br>(18.5 to 34.1)                       | 21.5<br>(15.4 to 28.5)                              | 8.0<br>(4.7 to 12.2)                      | 3.6<br>(-11.6 to 21.7)                            | -16.9<br>(-29.1 to -2.4)                         |
| Extensively drug-resistant tuberculosis                                              | 1.6<br>(1.2 to 2.1)                          | 1.5<br>(1.1 to 2.0)                                 | 0.5<br>(0.3 to 0.8)                       | 186.9<br>(148.5 to 229.5)                         | 130.1<br>(99.2 to 164.2)                         |
| Latent tuberculosis infection                                                        | 155,661.5<br>(126,666.5 to 189,834.9)        | --                                                  | --                                        | --                                                | --                                               |
| HIV/AIDS                                                                             | 3,612.5<br>(3,157.6 to 4,169.9)              | 63.2†<br>(50.4 to 81.0)                             | 404.8<br>(258.0 to 601.6)                 | -9.7<br>(-28.9 to 20.9)                           | -27.6<br>(-43.0 to -3.1)                         |
| Drug-susceptible HIV/AIDS - Tuberculosis                                             | 91.2<br>(63.9 to 125.8)                      | 112.6<br>(81.2 to 153.0)                            | 34.6<br>(20.2 to 53.3)                    | 1.6<br>(-6.2 to 9.5)                              | -18.6<br>(-24.8 to -12.2)                        |
| Multidrug-resistant HIV/AIDS - Tuberculosis without extensive drug resistance        | 2.5<br>(1.7 to 3.7)                          | 3.0<br>(2.0 to 4.4)                                 | 1.0<br>(0.6 to 1.7)                       | -6.5<br>(-22.2 to 11.3)                           | -25.0<br>(-37.6 to -10.8)                        |
| Extensively drug-resistant HIV/AIDS - Tuberculosis                                   | 0.1<br>(0.1 to 0.2)                          | 0.1<br>(0.1 to 0.2)                                 | < 0.05<br>(< 0.05 to 0.1)                 | 236.5<br>(184.4 to 304.8)                         | 169.9<br>(128.1 to 224.6)                        |
| HIV/AIDS resulting in other diseases                                                 | 3,518.7<br>(3,069.9 to 4,064.7)              | 63.2<br>(50.4 to 81.0)                              | 369.1<br>(227.1 to 559.3)                 | -10.7<br>(-30.4 to 23.4)                          | -28.4<br>(-44.2 to -1.0)                         |
| <b>Diarrhoea, lower respiratory infections, and other common infectious diseases</b> | <b>21,711.4</b><br>(20,377.3 to 22,675.9)    | <b>1,171,056.9†</b><br>(889,613.2 to 1,509,088.7)   | <b>1,017.0</b><br>(706.5 to 1,405.2)      | <b>19.5</b><br>(18.0 to 21.2)                     | <b>-4.2</b><br>(-5.4 to -2.8)                    |
| Diarrhoeal diseases                                                                  | 2,895.7<br>(2,625.0 to 3,171.1)              | 199,414.4<br>(180,606.6 to 217,825.4)               | 320.0<br>(219.8 to 439.4)                 | 17.6<br>(15.3 to 20.0)                            | -5.7<br>(-7.5 to -3.8)                           |
| Intestinal infectious diseases                                                       | 18.5<br>(14.8 to 22.9)                       | 473.0†<br>(386.1 to 566.4)                          | 3.4<br>(2.1 to 4.9)                       | 0.4<br>(-16.7 to 20.6)                            | -19.5<br>(-33.2 to -3.3)                         |
| Typhoid fever                                                                        | 18.2<br>(14.2 to 22.6)                       | 288.0<br>(232.7 to 348.5)                           | 2.8<br>(1.8 to 4.2)                       | 1.0<br>(-19.2 to 25.3)                            | -19.0<br>(-35.2 to 0.5)                          |
| Paratyphoid fever                                                                    | 8.1<br>(6.4 to 10.0)                         | 185.0<br>(150.8 to 225.9)                           | 0.5<br>(0.3 to 0.8)                       | -1.3<br>(-17.6 to 17.2)                           | -20.9<br>(-34.0 to -6.0)                         |
| Other intestinal infectious diseases                                                 | --                                           | --                                                  | < 0.05<br>(< 0.05 to 0.1)                 | -16.9<br>(-31.1 to -0.2)                          | -33.4<br>(-44.7 to -20.0)                        |
| Lower respiratory infections                                                         | 312.3<br>(288.3 to 341.3)                    | 13,741.0<br>(12,401.0 to 15,304.5)                  | 18.9<br>(12.7 to 26.8)                    | 36.2<br>(29.7 to 43.0)                            | 9.2<br>(4.0 to 14.6)                             |
| Upper respiratory infections                                                         | 12,675.7<br>(8,926.7 to 17,064.7)            | 945,613.2<br>(663,130.8 to 1,285,943.3)             | 311.8<br>(165.6 to 510.6)                 | 21.3<br>(19.4 to 23.1)                            | -2.8<br>(-4.2 to -1.3)                           |
| Otitis media                                                                         | 4,338.7<br>(3,312.5 to 5,532.1)              | 7,114.3<br>(5,857.2 to 8,506.7)                     | 119.4<br>(71.0 to 189.0)                  | 13.1<br>(8.2 to 18.1)                             | -9.3<br>(-13.2 to -5.3)                          |
| Meningitis                                                                           | 830.8<br>(708.1 to 957.7)                    | 53.2<br>(37.4 to 72.1)                              | 82.7<br>(57.8 to 110.1)                   | 20.2<br>(16.4 to 24.0)                            | -3.6<br>(-6.7 to -0.5)                           |
| Pneumococcal meningitis                                                              | 378.9<br>(315.7 to 454.2)                    | 12.6<br>(7.5 to 19.3)                               | 37.1<br>(25.6 to 50.6)                    | 17.3<br>(10.6 to 24.4)                            | -6.0<br>(-11.3 to -0.2)                          |
| H influenzae type B meningitis                                                       | 101.2<br>(78.5 to 129.5)                     | 3.6<br>(2.0 to 5.8)                                 | 12.4<br>(8.2 to 17.3)                     | -2.2<br>(-8.6 to 2.9)                             | -21.6<br>(-26.7 to -17.5)                        |
| Meningococcal infection                                                              | 88.3<br>(65.0 to 115.7)                      | 9.0<br>(5.1 to 14.3)                                | 8.9<br>(6.1 to 12.3)                      | 21.8<br>(18.9 to 24.4)                            | -2.3<br>(-4.6 to -0.2)                           |
| Other meningitis                                                                     | 262.4<br>(198.5 to 330.6)                    | 28.1<br>(19.6 to 40.2)                              | 24.3<br>(16.6 to 33.0)                    | 41.2<br>(35.8 to 47.3)                            | 13.3<br>(8.9 to 18.2)                            |
| Encephalitis                                                                         | 1,219.0<br>(813.6 to 1,778.7)                | 318.3<br>(262.6 to 376.2)                           | 138.3<br>(96.4 to 180.7)                  | 22.7<br>(17.2 to 28.4)                            | -1.6<br>(-6.0 to 3.0)                            |
| Diphtheria                                                                           | < 0.05<br>(< 0.05 to < 0.05)                 | 0.2<br>(0.2 to 0.3)                                 | < 0.05<br>(< 0.05 to < 0.05)              | -34.8<br>(-47.8 to -15.1)                         | -47.7<br>(-58.1 to -31.9)                        |
| Whooping cough                                                                       | 1.5<br>(1.2 to 1.9)                          | 11.2<br>(8.7 to 14.0)                               | 0.1<br>(< 0.05 to 0.1)                    | -14.0<br>(-15.9 to -12.1)                         | -31.1<br>(-32.6 to -29.5)                        |
| Tetanus                                                                              | 8.1<br>(7.9 to 8.3)                          | 4.6<br>(2.2 to 6.8)                                 | 0.2<br>(0.1 to 0.3)                       | 3.1<br>(-19.0 to 28.6)                            | -17.4<br>(-35.0 to 3.1)                          |
| Measles                                                                              | 0.1<br>(< 0.05 to 0.3)                       | 4.8<br>(1.7 to 10.3)                                | < 0.05<br>(< 0.05 to < 0.05)              | -53.3<br>(-58.7 to -47.3)                         | -62.6<br>(-66.9 to -57.8)                        |
| Varicella and herpes zoster                                                          | 438.9<br>(349.0 to 541.4)                    | 4,308.9<br>(3,427.0 to 5,243.1)                     | 22.3<br>(12.9 to 35.9)                    | 29.0<br>(22.1 to 36.0)                            | 3.5<br>(-2.1 to 9.1)                             |
| <b>Neglected tropical diseases and malaria</b>                                       | <b>109,501.6</b><br>(105,676.8 to 112,676.4) | <b>13,934.1†</b><br>(11,587.3 to 16,639.2)          | <b>818.2</b><br>(548.8 to 1,150.8)        | <b>-3.6</b><br>(-12.5 to 6.4)                     | <b>-22.7</b><br>(-29.9 to -14.7)                 |
| Malaria                                                                              | 3,213.8<br>(2,797.8 to 3,633.1)              | 3,444.0<br>(2,544.3 to 4,442.1)                     | 40.1<br>(29.9 to 51.3)                    | 6.0<br>(-12.4 to 1.7)                             | -24.6<br>(-29.8 to -18.5)                        |
| Chagas disease                                                                       | 636.1<br>(533.6 to 761.0)                    | 8.5<br>(5.7 to 12.0)                                | 5.2<br>(3.3 to 7.6)                       | 4.3<br>(-3.2 to 11.4)                             | -16.4<br>(-22.4 to -10.6)                        |
| Leishmaniasis                                                                        | 322.8<br>(248.6 to 399.8)                    | 33.4<br>(24.9 to 44.1)                              | 17.5<br>(10.7 to 27.7)                    | 22.1<br>(13.1 to 36.7)                            | -2.1<br>(-9.3 to 9.7)                            |
| Visceral leishmaniasis                                                               | 1.4<br>(0.9 to 1.9)                          | 5.5<br>(3.8 to 7.8)                                 | 0.1<br>(0.1 to 0.1)                       | -55.2<br>(-70.6 to -28.1)                         | -64.1<br>(-76.4 to -42.3)                        |
| Cutaneous and mucocutaneous leishmaniasis                                            | 279.1<br>(208.8 to 375.1)                    | 27.9<br>(19.8 to 38.2)                              | 17.4<br>(10.6 to 27.6)                    | 23.3<br>(14.0 to 38.8)                            | -1.2<br>(-8.6 to 11.3)                           |
| African trypanosomiasis                                                              | 0.4<br>(0.1 to 1.3)                          | 0.3<br>(0.1 to 1.0)                                 | 0.1<br>(< 0.05 to 0.4)                    | -71.7<br>(-96.2 to 81.6)                          | -77.3<br>(-97.0 to 45.6)                         |
| Schistosomiasis                                                                      | 12,343.9<br>(11,581.6 to 13,167.0)           | 3,084.5<br>(2,820.0 to 3,422.6)                     | 95.4<br>(47.9 to 177.8)                   | -26.4<br>(-28.5 to -23.7)                         | -41.0<br>(-42.6 to -38.8)                        |
| Cysticercosis                                                                        | 261.7<br>(175.7 to 374.6)                    | --                                                  | 41.0<br>(24.7 to 65.0)                    | -0.6<br>(-9.5 to 7.6)                             | -20.3<br>(-27.5 to -13.7)                        |
| Cystic echinococcosis                                                                | 67.7<br>(34.9 to 134.4)                      | 13.8<br>(6.6 to 32.0)                               | 6.2<br>(2.7 to 13.3)                      | 2.2<br>(-76.8 to 54.3)                            | -50.7<br>(-81.4 to 23.8)                         |
| Lymphatic filariasis                                                                 | 2,094.3<br>(1,650.9 to 2,763.8)              | 423.7<br>(245.3 to 665.7)                           | 118.4<br>(60.1 to 211.3)                  | -35.8<br>(-50.9 to -23.3)                         | -48.5<br>(-60.6 to -38.5)                        |
| Onchocerciasis                                                                       | 784.3<br>(510.0 to 1,325.0)                  | 177.6<br>(73.3 to 349.8)                            | 57.2<br>(27.1 to 103.7)                   | -20.3<br>(-39.8 to -1.2)                          | -36.1<br>(-51.8 to -20.7)                        |
| Trachoma                                                                             | 61.8<br>(34.1 to 117.2)                      | --                                                  | 7.8<br>(4.4 to 12.8)                      | -3.6<br>(-17.4 to 11.8)                           | -22.7<br>(-33.7 to -10.4)                        |
| Dengue                                                                               | 286.4<br>(156.2 to 485.0)                    | 4,788.2<br>(2,914.3 to 7,259.8)                     | 45.7<br>(20.0 to 85.6)                    | 94.6<br>(57.2 to 345.7)                           | 56.1<br>(26.0 to 257.4)                          |
| Yellow fever                                                                         | 0.1<br>(< 0.05 to 0.2)                       | 3.3<br>(0.9 to 8.7)                                 | < 0.05<br>(< 0.05 to < 0.05)              | -20.1<br>(-48.0 to 20.9)                          | -35.9<br>(-58.3 to -3.0)                         |
| Rabies                                                                               | < 0.05<br>(< 0.05 to 0.1)                    | 1.0<br>(0.5 to 1.4)                                 | < 0.05<br>(< 0.05 to < 0.05)              | -40.6<br>(-51.8 to -25.9)                         | -52.4<br>(-61.4 to -40.6)                        |
| Intestinal nematode infections                                                       | 91,399.9<br>(86,741.5 to 94,893.1)           | --                                                  | 160.1<br>(91.1 to 262.2)                  | -5.8<br>(-13.4 to 3.0)                            | -24.4<br>(-30.6 to -17.4)                        |
| Ascariasis                                                                           | 48,880.6<br>(43,618.7 to 55,473.5)           | --                                                  | 49.3<br>(26.5 to 82.5)                    | -20.8<br>(-31.4 to -8.6)                          | -36.5<br>(-45.0 to -26.7)                        |

| Cause                                                                   | Prevalence in thousands (95% UI)                    | Incidence in thousands (95% UI)                            | YLDs in thousands (95% UI)                       |                                                   |                                                  |
|-------------------------------------------------------------------------|-----------------------------------------------------|------------------------------------------------------------|--------------------------------------------------|---------------------------------------------------|--------------------------------------------------|
|                                                                         | 2016 counts                                         | 2016 counts                                                | 2016 counts                                      | Percentage change in counts between 2006 and 2016 | Percentage change in rates between 2006 and 2016 |
| Trichuriasis                                                            | 25,471.9<br>(23,254.8 to 27,986.5)                  | --                                                         | 18.3<br>(10.1 to 31.1)                           | -12.1<br>(-25.2 to 2.5)                           | -29.5<br>(-40.0 to -17.8)                        |
| Hookworm disease                                                        | 26,966.2<br>(24,816.4 to 29,237.8)                  | --                                                         | 92.4<br>(54.3 to 148.9)                          | 6.5<br>(-5.2 to 19.8)                             | -14.6<br>(-24.0 to -3.9)                         |
| Food-borne trematodiasis                                                | 7,893.1<br>(7,247.7 to 8,610.2)                     | 1,399.4<br>(725.8 to 1,932.0)                              | 204.2<br>(99.2 to 371.2)                         | 54.6<br>(47.6 to 62.1)                            | 24.0<br>(18.4 to 30.0)                           |
| Leprosy                                                                 | 48.3<br>(45.6 to 51.2)                              | 5.0<br>(4.7 to 5.4)                                        | 3.0<br>(2.0 to 4.3)                              | -0.1<br>(-9.0 to 9.6)                             | -19.9<br>(-27.0 to -12.1)                        |
| Ebola virus disease                                                     | < 0.05<br>(< 0.05 to 0.2)                           | --                                                         | < 0.05<br>(< 0.05 to 0.1)                        | --                                                | --                                               |
| Zika virus disease                                                      | 9.1<br>(5.2 to 17.1)                                | 551.4<br>(315.8 to 1,033.1)                                | 0.2<br>(0.1 to 0.3)                              | --                                                | --                                               |
| Guinea worm disease                                                     | < 0.05<br>(< 0.05 to < 0.05)                        | < 0.05<br>(< 0.05 to < 0.05)                               | < 0.05<br>(< 0.05 to < 0.05)                     | -99.6<br>(-99.7 to -99.3)                         | -99.7<br>(-99.8 to -99.5)                        |
| Other neglected tropical diseases                                       | 1,313.4<br>(1,146.2 to 1,490.0)                     | --                                                         | 16.2<br>(9.5 to 25.5)                            | 30.5<br>(22.5 to 38.7)                            | 4.6<br>(-1.8 to 11.2)                            |
| <b>Maternal disorders</b>                                               | <b>229.4</b><br><b>(218.7 to 240.3)</b>             | <b>977.7†</b><br><b>(805.6 to 1,157.2)</b>                 | <b>27.4</b><br><b>(18.8 to 37.9)</b>             | <b>-14.7</b><br><b>(-22.3 to -6.2)</b>            | <b>-31.6</b><br><b>(-37.7 to -24.8)</b>          |
| Maternal haemorrhage                                                    | 10.0<br>(6.8 to 14.2)                               | 76.4<br>(47.3 to 113.3)                                    | 0.7<br>(0.4 to 1.1)                              | 0.1<br>(-16.3 to 20.1)                            | -19.7<br>(-32.9 to -3.7)                         |
| Maternal sepsis and other pregnancy related infections                  | 135.6<br>(120.2 to 151.7)                           | 99.5<br>(62.8 to 147.7)                                    | 1.0<br>(0.5 to 1.9)                              | 3.2<br>(-25.9 to 40.5)                            | -17.2<br>(-40.5 to 12.7)                         |
| Maternal hypertensive disorders                                         | 33.4<br>(21.4 to 47.7)                              | 167.1<br>(137.3 to 195.8)                                  | 1.6<br>(0.9 to 2.6)                              | 3.1<br>(-35.1 to 65.5)                            | -17.4<br>(-47.9 to 32.7)                         |
| Maternal obstructed labour and uterine rupture                          | 60.6<br>(50.9 to 72.1)                              | 45.8<br>(29.7 to 69.4)                                     | 19.2<br>(12.3 to 27.5)                           | -16.3<br>(-24.6 to -7.3)                          | -32.9<br>(-39.6 to -25.7)                        |
| Maternal abortion, miscarriage, and ectopic pregnancy                   | 4.8<br>(3.1 to 7.4)                                 | 588.9<br>(431.5 to 757.0)                                  | 0.5<br>(0.3 to 0.9)                              | -10.1<br>(-43.6 to 43.3)                          | -27.9<br>(-54.8 to 15.0)                         |
| Other maternal disorders                                                | --                                                  | --                                                         | 4.3<br>(3.0 to 6.0)                              | -19.1<br>(-26.3 to -11.0)                         | -35.1<br>(-40.9 to -28.6)                        |
| <b>Neonatal disorders</b>                                               | <b>3,875.7</b><br><b>(3,551.2 to 4,245.0)</b>       | <b>--</b>                                                  | <b>662.6</b><br><b>(467.7 to 921.3)</b>          | <b>39.6</b><br><b>(25.0 to 57.6)</b>              | <b>11.9</b><br><b>(0.2 to 26.4)</b>              |
| Neonatal preterm birth complications                                    | 3,291.1<br>(2,777.0 to 3,877.2)                     | --                                                         | 427.4<br>(296.4 to 605.1)                        | 39.7<br>(16.1 to 67.3)                            | 12.0<br>(-6.9 to 34.1)                           |
| Neonatal encephalopathy due to birth asphyxia and trauma                | 610.9<br>(399.4 to 914.4)                           | --                                                         | 88.2<br>(38.1 to 178.9)                          | 38.2<br>(28.9 to 55.1)                            | 10.9<br>(3.4 to 24.3)                            |
| Neonatal sepsis and other neonatal infections                           | 293.7<br>(120.2 to 687.4)                           | --                                                         | 112.3<br>(38.4 to 291.8)                         | 40.4<br>(30.8 to 56.6)                            | 12.6<br>(4.9 to 25.6)                            |
| Hemolytic disease and other neonatal jaundice                           | 107.4<br>(95.4 to 119.4)                            | --                                                         | 34.8<br>(26.9 to 43.8)                           | 38.8<br>(32.1 to 45.5)                            | 11.3<br>(5.9 to 16.7)                            |
| Other neonatal disorders                                                | --                                                  | --                                                         | --                                               | --                                                | --                                               |
| <b>Nutritional deficiencies</b>                                         | <b>81,324.2</b><br><b>(77,594.7 to 84,183.6)</b>    | <b>19,064.3†</b><br><b>(16,225.1 to 22,519.4)</b>          | <b>1,655.6</b><br><b>(1,072.8 to 2,423.0)</b>    | <b>16.1</b><br><b>(12.5 to 19.4)</b>              | <b>-6.9</b><br><b>(-9.8 to -4.2)</b>             |
| Protein-energy malnutrition                                             | --                                                  | --                                                         | --                                               | --                                                | --                                               |
| Iodine deficiency                                                       | 8,717.7<br>(7,812.5 to 9,722.0)                     | 35.1<br>(30.0 to 41.4)                                     | 226.5<br>(153.1 to 314.9)                        | 6.0<br>(3.5 to 8.7)                               | -15.0<br>(-17.0 to -12.8)                        |
| Vitamin A deficiency                                                    | 17,657.0<br>(15,527.5 to 20,350.2)                  | 19,029.2<br>(16,189.0 to 22,483.9)                         | 9.5<br>(5.9 to 14.4)                             | 30.5<br>(21.6 to 40.6)                            | 4.7<br>(-2.5 to 12.7)                            |
| Iron-deficiency anaemia                                                 | 62,779.1<br>(54,938.5 to 70,914.4)                  | --                                                         | 1,419.5<br>(900.3 to 2,101.1)                    | 17.8<br>(13.7 to 21.6)                            | -5.6<br>(-8.9 to -2.5)                           |
| Other nutritional deficiencies                                          | --                                                  | --                                                         | --                                               | --                                                | --                                               |
| <b>Other communicable, maternal, neonatal, and nutritional diseases</b> | <b>145,708.7</b><br><b>(140,799.7 to 150,125.1)</b> | <b>41,958.4</b><br><b>(34,103.6 to 51,745.8)</b>           | <b>229.1</b><br><b>(149.3 to 345.8)</b>          | <b>23.5</b><br><b>(16.9 to 29.7)</b>              | <b>-1.0</b><br><b>(-6.3 to 4.0)</b>              |
| Sexually transmitted diseases excluding HIV                             | 107,933.4<br>(103,263.2 to 112,511.2)               | 35,356.5<br>(28,189.2 to 44,304.1)                         | 184.6<br>(117.3 to 284.5)                        | 26.7<br>(22.6 to 30.4)                            | 1.6<br>(-1.7 to 4.6)                             |
| Syphilis                                                                | 5,037.6<br>(3,315.3 to 7,753.1)                     | 3,652.5<br>(2,258.6 to 6,341.6)                            | 18.7<br>(13.1 to 25.1)                           | 27.1<br>(22.8 to 31.7)                            | 1.9<br>(-1.6 to 5.6)                             |
| Chlamydial infection                                                    | 2,031.5<br>(1,474.9 to 2,795.6)                     | 2,385.6<br>(1,879.2 to 2,950.3)                            | 23.8<br>(15.3 to 34.2)                           | 23.1<br>(16.5 to 30.1)                            | -1.3<br>(-6.6 to 4.3)                            |
| Gonococcal infection                                                    | 3,593.7<br>(2,056.5 to 5,986.2)                     | 11,841.0<br>(6,893.7 to 19,639.1)                          | 39.7<br>(20.6 to 72.3)                           | 35.0<br>(25.3 to 42.2)                            | 8.3<br>(0.5 to 14.0)                             |
| Trichomoniasis                                                          | 15,409.0<br>(10,818.7 to 21,897.4)                  | 12,512.4<br>(8,788.0 to 17,577.5)                          | 16.9<br>(6.4 to 36.8)                            | 24.8<br>(22.7 to 26.7)                            | 0.1<br>(-1.6 to 1.6)                             |
| Genital herpes                                                          | 87,703.3<br>(76,683.3 to 101,391.2)                 | 544.6<br>(350.9 to 798.1)                                  | 21.4<br>(6.2 to 48.8)                            | 22.0<br>(19.3 to 24.5)                            | -2.2<br>(-4.3 to -0.2)                           |
| Other sexually transmitted diseases                                     | 1,774.4<br>(1,157.1 to 2,553.1)                     | 4,420.5<br>(3,439.1 to 5,515.8)                            | 64.1<br>(42.4 to 92.9)                           | 25.3<br>(19.0 to 31.4)                            | 0.5<br>(-4.6 to 5.3)                             |
| Hepatitis                                                               | 49,355.1<br>(42,321.7 to 57,496.2)                  | 6,601.3<br>(4,373.1 to 9,884.9)                            | 15.7<br>(8.3 to 26.6)                            | 4.4<br>(-42.8 to 62.1)                            | -23.4<br>(-54.1 to 30.0)                         |
| Acute hepatitis A                                                       | 60.4<br>(12.0 to 130.8)                             | 785.8<br>(156.5 to 1,699.9)                                | 2.5<br>(0.5 to 6.1)                              | -15.5<br>(-86.4 to 284.5)                         | -32.2<br>(-89.1 to 208.3)                        |
| Hepatitis B                                                             | 37,023.2<br>(29,942.6 to 45,093.7)                  | 5,112.0<br>(2,982.6 to 8,227.8)                            | 11.8<br>(5.8 to 21.8)                            | -1.9<br>(-46.9 to 82.9)                           | -21.3<br>(-57.5 to 46.6)                         |
| Hepatitis C                                                             | 12,237.0<br>(10,941.8 to 13,532.3)                  | 254.7<br>(183.9 to 338.0)                                  | 0.2<br>(0.1 to 0.5)                              | -3.3<br>(-5.9 to -1.0)                            | -22.5<br>(-24.6 to -20.6)                        |
| Acute hepatitis E                                                       | 34.5<br>(23.7 to 48.4)                              | 448.8<br>(307.5 to 629.7)                                  | 1.1<br>(0.6 to 1.7)                              | -2.4<br>(-23.6 to 23.9)                           | -21.7<br>(-38.8 to -0.7)                         |
| Other infectious diseases                                               | 1,566.0<br>(1,358.1 to 1,781.1)                     | 0.6<br>(0.3 to 1.0)                                        | 28.8<br>(17.1 to 45.0)                           | 23.2<br>(18.4 to 28.0)                            | -1.2<br>(-5.1 to 2.6)                            |
| <b>Non-communicable diseases</b>                                        | <b>443,808.7</b><br><b>(442,681.6 to 444,888.2)</b> | <b>1,137,486.8†</b><br><b>(1,006,167.0 to 1,275,026.6)</b> | <b>51,689.8</b><br><b>(38,085.9 to 66,780.6)</b> | <b>22.9</b><br><b>(22.1 to 23.6)</b>              | <b>-1.5</b><br><b>(-2.1 to -0.9)</b>             |
| <b>Neoplasms</b>                                                        | <b>2,667.1</b><br><b>(2,613.5 to 2,717.0)</b>       | <b>1,034.9</b><br><b>(990.9 to 1,107.8)</b>                | <b>337.3</b><br><b>(247.1 to 442.6)</b>          | <b>24.8</b><br><b>(21.0 to 29.6)</b>              | <b>0.1</b><br><b>(-3.0 to 3.9)</b>               |
| Lip and oral cavity cancer                                              | 105.2<br>(100.2 to 110.7)                           | 28.5<br>(27.1 to 30.1)                                     | 11.0<br>(7.9 to 14.5)                            | 22.8<br>(13.1 to 33.2)                            | -1.5<br>(-9.3 to 6.8)                            |
| Nasopharynx cancer                                                      | 44.9<br>(40.6 to 49.6)                              | 12.7<br>(11.6 to 14.0)                                     | 5.3<br>(3.7 to 7.1)                              | 22.8<br>(7.9 to 37.8)                             | -1.5<br>(-13.5 to 10.5)                          |
| Other pharynx cancer                                                    | 37.0<br>(34.2 to 38.9)                              | 13.2<br>(12.1 to 13.9)                                     | 4.6<br>(3.3 to 6.1)                              | 19.1<br>(7.9 to 27.9)                             | -4.5<br>(-13.4 to 2.6)                           |
| Oesophageal cancer                                                      | 25.7<br>(24.6 to 27.2)                              | 21.2<br>(20.4 to 22.2)                                     | 5.7<br>(3.9 to 7.5)                              | 1.1<br>(-6.3 to 8.8)                              | -18.9<br>(-24.9 to -12.8)                        |
| Stomach cancer                                                          | 102.4<br>(97.4 to 108.1)                            | 55.3<br>(52.7 to 58.0)                                     | 15.5<br>(10.9 to 20.5)                           | 10.7<br>(2.9 to 18.7)                             | -11.3<br>(-17.5 to -4.9)                         |
| Colon and rectum cancer                                                 | 278.5<br>(266.1 to 294.2)                           | 75.4<br>(72.0 to 79.5)                                     | 28.0<br>(20.1 to 36.9)                           | 30.1<br>(22.1 to 39.8)                            | 4.3<br>(-2.1 to 12.1)                            |
| Liver cancer                                                            | 81.7<br>(70.7 to 92.4)                              | 81.8<br>(74.4 to 88.8)                                     | 19.1<br>(13.3 to 25.6)                           | 49.8<br>(33.9 to 66.6)                            | 20.1<br>(7.4 to 33.6)                            |
| Liver cancer due to hepatitis B                                         | 63.5<br>(50.0 to 75.1)                              | 45.1<br>(36.0 to 52.7)                                     | 10.5<br>(6.7 to 14.3)                            | 50.5<br>(30.0 to 72.2)                            | 20.7<br>(4.2 to 38.1)                            |

| Cause                                              | Prevalence in thousands (95% UI)                 | Incidence in thousands (95% UI)                | YLDs in thousands (95% UI)                    |                                                   |                                                  |
|----------------------------------------------------|--------------------------------------------------|------------------------------------------------|-----------------------------------------------|---------------------------------------------------|--------------------------------------------------|
|                                                    | 2016 counts                                      | 2016 counts                                    | 2016 counts                                   | Percentage change in counts between 2006 and 2016 | Percentage change in rates between 2006 and 2016 |
| Liver cancer due to hepatitis C                    | 9.9<br>(7.6 to 12.5)                             | 7.7<br>(5.9 to 9.7)                            | 1.8<br>(1.2 to 2.6)                           | 38.1<br>(26.6 to 49.6)                            | 10.8<br>(1.6 to 19.9)                            |
| Liver cancer due to alcohol use                    | 10.1<br>(6.9 to 14.1)                            | 8.1<br>(5.5 to 11.3)                           | 1.9<br>(1.1 to 2.9)                           | 47.0<br>(33.4 to 64.5)                            | 17.8<br>(7.0 to 31.9)                            |
| Liver cancer due to other causes                   | 29.8<br>(23.3 to 38.9)                           | 20.9<br>(16.5 to 26.9)                         | 4.9<br>(3.2 to 7.2)                           | 54.0<br>(35.4 to 76.1)                            | 23.5<br>(8.6 to 41.2)                            |
| Gallbladder and biliary tract cancer               | 6.3<br>(5.5 to 6.7)                              | 7.5<br>(6.6 to 8.0)                            | 1.7<br>(1.2 to 2.3)                           | 11.7<br>(4.6 to 18.1)                             | -10.5<br>(-16.1 to -5.3)                         |
| Pancreatic cancer                                  | 12.0<br>(11.7 to 12.4)                           | 14.8<br>(14.5 to 15.1)                         | 3.2<br>(2.2 to 4.2)                           | 17.1<br>(13.3 to 20.1)                            | -6.1<br>(-9.2 to -3.7)                           |
| Larynx cancer                                      | 36.8<br>(35.5 to 38.5)                           | 10.8<br>(10.4 to 11.3)                         | 4.4<br>(3.2 to 5.9)                           | 3.5<br>(-2.2 to 9.5)                              | -17.0<br>(-21.6 to -12.2)                        |
| Tracheal, bronchus, and lung cancer                | 103.7<br>(99.0 to 108.5)                         | 76.6<br>(73.4 to 79.5)                         | 19.8<br>(14.0 to 25.7)                        | 11.9<br>(3.5 to 21.4)                             | -10.3<br>(-17.0 to -2.6)                         |
| Malignant skin melanoma                            | 96.4<br>(82.2 to 114.7)                          | 19.6<br>(16.7 to 23.3)                         | 6.4<br>(4.4 to 9.0)                           | 17.4<br>(8.4 to 26.5)                             | -5.8<br>(-13.1 to 1.5)                           |
| Non-melanoma skin cancer                           | 14.2<br>(7.9 to 25.8)                            | 63.5<br>(30.2 to 130.3)                        | 0.7<br>(0.3 to 1.4)                           | -5.6<br>(-19.7 to 7.9)                            | -24.3<br>(-35.6 to -13.5)                        |
| Non-melanoma skin cancer (squamous-cell carcinoma) | 12.5<br>(5.1 to 25.1)                            | 11.7<br>(5.2 to 23.4)                          | 0.6<br>(0.2 to 1.3)                           | -7.1<br>(-22.7 to 7.6)                            | -25.5<br>(-38.0 to -13.7)                        |
| Non-melanoma skin cancer (basal-cell carcinoma)    | 5.9<br>(2.1 to 12.8)                             | 51.9<br>(20.2 to 115.9)                        | 0.1<br>( $< 0.05$ to 0.2)                     | 10.9<br>(2.9 to 18.4)                             | -11.1<br>(-17.5 to -5.0)                         |
| Breast cancer                                      | 970.8<br>(910.6 to 1,043.8)                      | 200.6<br>(188.1 to 215.7)                      | 83.7<br>(59.5 to 112.3)                       | 23.3<br>(13.3 to 33.8)                            | -1.2<br>(-9.1 to 7.3)                            |
| Cervical cancer                                    | 265.4<br>(204.2 to 286.5)                        | 69.6<br>(54.4 to 74.2)                         | 12.6<br>(17.0 to 34.0)                        | 25.4<br>(3.1 to 22.2)                             | -9.7<br>(-17.3 to -2.0)                          |
| Uterine cancer                                     | 156.4<br>(147.3 to 168.1)                        | 32.8<br>(30.8 to 35.2)                         | 12.0<br>(8.5 to 16.4)                         | 32.8<br>(20.1 to 49.1)                            | 6.5<br>(-3.7 to 19.5)                            |
| Ovarian cancer                                     | 79.5<br>(74.2 to 82.9)                           | 25.7<br>(24.3 to 26.7)                         | 12.2<br>(8.6 to 16.0)                         | 22.3<br>(9.2 to 35.4)                             | -1.9<br>(-12.4 to 8.6)                           |
| Prostate cancer                                    | 71.9<br>(62.6 to 83.1)                           | 18.7<br>(16.6 to 20.8)                         | 6.5<br>(4.5 to 8.9)                           | 26.1<br>(15.0 to 36.5)                            | 1.1<br>(-7.8 to 9.4)                             |
| Testicular cancer                                  | 23.0<br>(21.3 to 25.4)                           | 4.5<br>(4.2 to 4.9)                            | 1.6<br>(1.1 to 2.2)                           | 25.4<br>(11.1 to 43.9)                            | 0.6<br>(-10.9 to 15.4)                           |
| Kidney cancer                                      | 88.2<br>(83.7 to 92.3)                           | 23.4<br>(22.5 to 24.4)                         | 8.0<br>(5.8 to 10.8)                          | 16.4<br>(9.2 to 23.0)                             | -6.7<br>(-12.4 to -1.3)                          |
| Bladder cancer                                     | 58.5<br>(55.7 to 61.0)                           | 14.2<br>(13.5 to 14.8)                         | 5.7<br>(4.0 to 7.5)                           | 19.8<br>(12.5 to 27.5)                            | -3.9<br>(-9.8 to 2.3)                            |
| Brain and nervous system cancer                    | 56.3<br>(50.3 to 62.4)                           | 24.8<br>(22.6 to 27.8)                         | 8.0<br>(5.5 to 10.6)                          | 44.8<br>(34.2 to 56.8)                            | 16.1<br>(7.6 to 25.7)                            |
| Thyroid cancer                                     | 138.6<br>(129.4 to 149.9)                        | 26.3<br>(24.6 to 28.4)                         | 8.6<br>(5.9 to 12.0)                          | 48.4<br>(35.2 to 63.7)                            | 19.0<br>(8.4 to 31.3)                            |
| Mesothelioma                                       | 2.4<br>(2.2 to 2.6)                              | 1.6<br>(1.5 to 1.7)                            | 0.5<br>(0.4 to 0.7)                           | 21.9<br>(13.7 to 27.9)                            | -2.3<br>(-8.8 to 2.6)                            |
| Hodgkin lymphoma                                   | 20.0<br>(17.9 to 22.8)                           | 5.0<br>(4.5 to 5.8)                            | 2.0<br>(1.4 to 2.7)                           | 10.1<br>(2.0 to 19.2)                             | -11.7<br>(-18.2 to -4.4)                         |
| Non-Hodgkin's lymphoma                             | 99.5<br>(89.4 to 110.3)                          | 28.0<br>(25.1 to 30.6)                         | 9.2<br>(6.6 to 12.5)                          | 46.6<br>(35.8 to 54.8)                            | 17.5<br>(8.9 to 24.1)                            |
| Multiple myeloma                                   | 14.1<br>(12.3 to 15.8)                           | 5.9<br>(5.3 to 6.6)                            | 3.1<br>(2.1 to 4.1)                           | 34.0<br>(26.8 to 41.9)                            | 7.4<br>(1.7 to 13.8)                             |
| Leukaemia                                          | 78.2<br>(69.9 to 84.6)                           | 22.7<br>(20.4 to 24.3)                         | 10.4<br>(7.2 to 13.9)                         | 31.7<br>(24.1 to 40.8)                            | 5.6<br>(-0.5 to 12.9)                            |
| Acute lymphoid leukaemia                           | 10.9<br>(9.5 to 11.9)                            | 3.2<br>(2.8 to 3.5)                            | 1.5<br>(1.0 to 2.0)                           | 48.0<br>(34.8 to 58.7)                            | 18.7<br>(8.1 to 27.3)                            |
| Chronic lymphoid leukaemia                         | 18.9<br>(17.1 to 21.3)                           | 4.2<br>(3.8 to 4.7)                            | 2.3<br>(1.6 to 3.1)                           | 45.3<br>(33.2 to 59.0)                            | 16.5<br>(6.8 to 27.5)                            |
| Acute myeloid leukaemia                            | 7.1<br>(6.4 to 7.9)                              | 5.4<br>(4.8 to 5.9)                            | 1.5<br>(1.0 to 2.0)                           | 31.6<br>(25.5 to 38.1)                            | 5.5<br>(0.6 to 10.7)                             |
| Chronic myeloid leukaemia                          | 7.2<br>(6.3 to 8.0)                              | 2.6<br>(2.2 to 2.8)                            | 0.9<br>(0.6 to 1.3)                           | 6.2<br>(-0.6 to 13.1)                             | -14.8<br>(-20.3 to -9.3)                         |
| Other leukaemia                                    | 34.0<br>(28.3 to 37.7)                           | 7.5<br>(6.2 to 8.3)                            | 4.2<br>(2.8 to 5.7)                           | 26.9<br>(14.3 to 41.3)                            | 1.8<br>(-8.3 to 13.3)                            |
| Other neoplasms                                    | 176.5<br>(156.5 to 187.6)                        | 50.4<br>(45.0 to 53.4)                         | 15.2<br>(10.8 to 20.2)                        | 60.9<br>(49.9 to 71.4)                            | 29.0<br>(20.2 to 37.5)                           |
| <b>Cardiovascular diseases</b>                     | <b>28,505.4</b><br><b>(27,610.3 to 29,225.0)</b> | <b>3,029.6†</b><br><b>(2,690.5 to 3,442.1)</b> | <b>1,794.9</b><br><b>(1,266.9 to 2,349.2)</b> | <b>28.1</b><br><b>(24.8 to 31.6)</b>              | <b>2.7</b><br><b>(0.1 to 5.5)</b>                |
| Rheumatic heart disease                            | 2,284.3<br>(2,070.3 to 2,537.2)                  | 15.4<br>(12.0 to 19.0)                         | 111.6<br>(70.8 to 160.9)                      | 21.3<br>(17.3 to 25.1)                            | -2.8<br>(-6.0 to 0.3)                            |
| Ischaemic heart disease                            | 8,560.5<br>(7,914.9 to 9,209.2)                  | 1,066.7<br>(881.6 to 1,271.6)                  | 443.4<br>(296.2 to 623.7)                     | 26.9<br>(25.1 to 28.9)                            | 1.8<br>(0.3 to 3.4)                              |
| Cerebrovascular disease                            | 4,630.6<br>(4,397.8 to 4,827.1)                  | 836.6†<br>(686.5 to 1,021.5)                   | 743.3<br>(533.1 to 968.2)                     | 32.9<br>(25.2 to 40.7)                            | 6.6<br>(0.4 to 12.8)                             |
| Ischaemic stroke                                   | 3,722.0<br>(3,199.5 to 4,302.1)                  | 553.6†<br>(413.6 to 725.7)                     | 581.9<br>(412.4 to 760.4)                     | 34.2<br>(25.4 to 43.2)                            | 7.6<br>(0.5 to 14.9)                             |
| Hemorrhagic stroke                                 | 1,026.2<br>(880.7 to 1,221.2)                    | 283.0†<br>(220.0 to 355.2)                     | 161.5<br>(111.6 to 214.3)                     | 28.4<br>(17.2 to 40.4)                            | 2.9<br>(-6.0 to 12.6)                            |
| Hypertensive heart disease                         | 997.0<br>(797.8 to 1,215.1)                      | --                                             | 83.9<br>(54.5 to 119.9)                       | 29.6<br>(24.9 to 33.9)                            | 3.9<br>(0.1 to 7.4)                              |
| Cardiomyopathy and myocarditis                     | 333.4<br>(304.2 to 367.9)                        | 151.9†<br>(106.7 to 211.2)                     | 35.2<br>(21.8 to 51.2)                        | 16.9<br>(11.9 to 22.1)                            | -6.2<br>(-10.3 to -2.1)                          |
| Myocarditis                                        | 106.9<br>(86.8 to 129.5)                         | 151.9<br>(106.7 to 211.2)                      | 8.0<br>(5.1 to 11.5)                          | 29.0<br>(22.1 to 36.4)                            | 3.5<br>(-2.1 to 9.4)                             |
| Alcoholic cardiomyopathy                           | 126.0<br>(99.2 to 156.3)                         | --                                             | 10.8<br>(6.6 to 15.9)                         | 5.9<br>(-3.9 to 17.5)                             | -15.1<br>(-22.9 to -5.8)                         |
| Other cardiomyopathy                               | 191.2<br>(147.5 to 239.8)                        | --                                             | 16.3<br>(10.0 to 24.1)                        | 19.7<br>(13.1 to 26.2)                            | -4.0<br>(-9.3 to 1.2)                            |
| Atrial fibrillation and flutter                    | 1,452.5<br>(1,191.5 to 1,784.8)                  | 117.4<br>(87.9 to 153.0)                       | 120.7<br>(76.9 to 174.5)                      | 23.3<br>(19.2 to 27.4)                            | -1.1<br>(-4.4 to 2.2)                            |
| Peripheral vascular disease                        | 6,600.3<br>(5,158.1 to 8,259.8)                  | 779.8<br>(544.0 to 1,082.1)                    | 0.4<br>(0.1 to 0.9)                           | 12.7<br>(4.3 to 21.5)                             | -9.7<br>(-16.4 to -2.6)                          |
| Endocarditis                                       | 18.9<br>(14.8 to 23.9)                           | 61.9<br>(42.4 to 81.2)                         | 1.5<br>(1.0 to 2.2)                           | 20.5<br>(17.1 to 24.3)                            | -3.4<br>(-6.1 to -0.3)                           |
| Other cardiovascular and circulatory diseases      | 4,810.1<br>(3,487.1 to 6,553.6)                  | --                                             | 254.8<br>(159.8 to 391.5)                     | 23.8<br>(20.7 to 26.9)                            | -0.7<br>(-3.2 to 1.8)                            |
| <b>Chronic respiratory diseases</b>                | <b>35,420.1</b><br><b>(34,619.5 to 36,170.7)</b> | <b>5,152.9†</b><br><b>(4,477.7 to 5,885.4)</b> | <b>2,044.0</b><br><b>(1,650.5 to 2,477.2)</b> | <b>24.7</b><br><b>(22.1 to 27.3)</b>              | <b>-0.0</b><br><b>(-2.1 to 2.0)</b>              |
| Chronic obstructive pulmonary disease              | 18,181.4<br>(16,906.4 to 19,523.3)               | 1,773.0<br>(1,525.1 to 2,014.4)                | 1,245.1<br>(1,056.7 to 1,433.1)               | 23.2<br>(19.5 to 27.3)                            | -1.2<br>(-4.2 to 2.1)                            |
| Pneumoconiosis                                     | 51.7<br>(45.4 to 58.1)                           | 7.4<br>(6.0 to 8.9)                            | 8.1<br>(5.3 to 11.5)                          | 29.1<br>(23.9 to 34.3)                            | 3.5<br>(-0.6 to 7.7)                             |
| Silicosis                                          | 15.3<br>(12.2 to 19.1)                           | 2.4<br>(1.6 to 3.3)                            | 2.4<br>(1.5 to 3.6)                           | 31.9<br>(21.4 to 44.0)                            | 5.8<br>(-2.7 to 15.5)                            |

| Cause                                                          | Prevalence in thousands (95% UI)              | Incidence in thousands (95% UI)             | YLDs in thousands (95% UI)                |                                                   |                                                  |
|----------------------------------------------------------------|-----------------------------------------------|---------------------------------------------|-------------------------------------------|---------------------------------------------------|--------------------------------------------------|
|                                                                | 2016 counts                                   | 2016 counts                                 | 2016 counts                               | Percentage change in counts between 2006 and 2016 | Percentage change in rates between 2006 and 2016 |
| Asbestosis                                                     | 6.9<br>(5.5 to 8.5)                           | 0.6<br>(0.4 to 0.9)                         | 1.1<br>(0.7 to 1.6)                       | 12.1<br>(9.3 to 14.2)                             | -10.1<br>(-12.4 to -8.4)                         |
| Coal workers pneumoconiosis                                    | 14.6<br>(11.6 to 18.0)                        | 2.7<br>(2.0 to 3.6)                         | 2.3<br>(1.4 to 3.4)                       | 36.5<br>(22.6 to 52.4)                            | 9.5<br>(-1.7 to 22.2)                            |
| Other pneumoconiosis                                           | 15.0<br>(11.3 to 18.9)                        | 1.6<br>(0.8 to 2.5)                         | 2.4<br>(1.5 to 3.4)                       | 28.6<br>(25.2 to 31.7)                            | 3.1<br>(0.4 to 5.6)                              |
| Asthma                                                         | 18,464.8<br>(16,481.2 to 20,687.2)            | 3,354.1<br>(2,724.8 to 3,986.7)             | 714.0<br>(462.1 to 1,025.2)               | 25.5<br>(22.9 to 28.0)                            | 0.7<br>(-1.4 to 2.6)                             |
| Interstitial lung disease and pulmonary sarcoidosis            | 191.5<br>(157.7 to 236.0)                     | 18.3<br>(12.2 to 26.4)                      | 21.5<br>(13.6 to 32.4)                    | 19.3<br>(11.9 to 26.3)                            | -4.4<br>(-10.3 to 1.3)                           |
| Other chronic respiratory diseases                             | --                                            | --                                          | 55.4<br>(46.8 to 63.8)                    | 54.9<br>(50.4 to 60.0)                            | 24.2<br>(20.6 to 28.3)                           |
| <b>Cirrhosis and other chronic liver diseases</b>              | <b>5,359.6<br/>(4,983.2 to 5,774.2)</b>       | <b>160.4<br/>(134.1 to 188.9)</b>           | <b>127.7<br/>(86.4 to 178.8)</b>          | <b>24.2<br/>(19.0 to 29.0)</b>                    | <b>-0.4<br/>(-4.6 to 3.5)</b>                    |
| Cirrhosis and other chronic liver diseases due to hepatitis B  | 1,592.8<br>(1,366.8 to 1,837.3)               | 50.0<br>(39.3 to 61.8)                      | 40.8<br>(26.7 to 58.7)                    | 31.2<br>(22.9 to 39.8)                            | 5.2<br>(-1.4 to 12.1)                            |
| Cirrhosis and other chronic liver diseases due to hepatitis C  | 1,399.7<br>(1,156.0 to 1,668.3)               | 42.5<br>(33.0 to 53.5)                      | 32.8<br>(21.1 to 47.6)                    | 22.7<br>(14.8 to 30.6)                            | -1.6<br>(-7.9 to 4.8)                            |
| Cirrhosis and other chronic liver diseases due to alcohol use  | 1,539.6<br>(1,312.6 to 1,784.1)               | 46.0<br>(36.1 to 57.2)                      | 35.5<br>(23.2 to 51.2)                    | 18.7<br>(11.5 to 26.7)                            | -4.8<br>(-10.6 to 1.6)                           |
| Cirrhosis and other chronic liver diseases due to other causes | 827.5<br>(615.1 to 1,084.9)                   | 21.8<br>(15.2 to 28.9)                      | 18.6<br>(11.1 to 28.7)                    | 23.4<br>(13.3 to 34.2)                            | -1.0<br>(-9.1 to 7.6)                            |
| <b>Digestive diseases</b>                                      | <b>25,322.5<br/>(23,757.5 to 26,443.5)</b>    | <b>18,168.5†<br/>(15,483.1 to 21,198.6)</b> | <b>716.0<br/>(474.9 to 993.1)</b>         | <b>42.0<br/>(33.6 to 51.0)</b>                    | <b>13.8<br/>(7.2 to 21.1)</b>                    |
| Peptic ulcer disease                                           | 8,167.9<br>(6,606.6 to 10,038.1)              | 783.4<br>(581.5 to 1,032.0)                 | 173.2<br>(98.1 to 274.4)                  | 60.5<br>(47.4 to 72.9)                            | 28.7<br>(18.2 to 38.6)                           |
| Gastritis and duodenitis                                       | 11,499.5<br>(8,568.7 to 15,812.9)             | 7,057.3<br>(5,214.9 to 9,536.9)             | 196.8<br>(114.0 to 308.9)                 | 65.3<br>(50.6 to 79.7)                            | 32.5<br>(20.8 to 44.1)                           |
| Appendicitis                                                   | 36.8<br>(29.2 to 45.0)                        | 950.2<br>(767.7 to 1,150.1)                 | 11.4<br>(7.2 to 16.3)                     | 27.3<br>(16.5 to 39.7)                            | 2.1<br>(-6.6 to 12.0)                            |
| Paralytic ileus and intestinal obstruction                     | 11.4<br>(8.5 to 14.7)                         | 309.1<br>(229.6 to 398.8)                   | 3.7<br>(2.3 to 5.5)                       | 29.7<br>(26.7 to 33.1)                            | 4.0<br>(1.6 to 6.7)                              |
| Inguinal, femoral, and abdominal hernia                        | 4,114.7<br>(2,958.1 to 5,465.8)               | 2,888.7<br>(1,962.3 to 3,987.2)             | 161.2<br>(96.4 to 248.0)                  | 16.1<br>(11.8 to 20.7)                            | -6.9<br>(-10.3 to -3.2)                          |
| Inflammatory bowel disease                                     | 606.8<br>(515.5 to 728.2)                     | 301.9<br>(240.6 to 365.6)                   | 88.2<br>(59.2 to 124.8)                   | 28.4<br>(21.5 to 35.9)                            | 3.0<br>(-2.6 to 8.9)                             |
| Vascular intestinal disorders                                  | 4.5<br>(2.7 to 6.8)                           | 26.3<br>(17.7 to 37.4)                      | 1.5<br>(0.8 to 2.4)                       | 20.3<br>(14.3 to 24.7)                            | -3.6<br>(-8.3 to -0.1)                           |
| Gallbladder and biliary diseases                               | 1,834.8<br>(1,346.2 to 2,452.8)               | 5,378.4<br>(3,983.3 to 6,988.8)             | 25.2<br>(15.6 to 39.3)                    | 29.9<br>(21.4 to 39.1)                            | 4.2<br>(-2.7 to 11.5)                            |
| Pancreatitis                                                   | 53.2<br>(39.9 to 68.4)                        | 473.3<br>(356.6 to 607.0)                   | 6.8<br>(4.2 to 10.4)                      | 26.0<br>(14.1 to 37.6)                            | 1.1<br>(-8.5 to 10.3)                            |
| Other digestive diseases                                       | --                                            | --                                          | 47.8<br>(31.7 to 66.3)                    | 50.0<br>(41.2 to 59.6)                            | 20.3<br>(13.2 to 28.0)                           |
| <b>Neurological disorders</b>                                  | <b>201,856.8<br/>(190,257.9 to 213,689.6)</b> | <b>75,659.6<br/>(46,762.4 to 109,777.3)</b> | <b>5,321.1<br/>(3,620.1 to 7,352.4)</b>   | <b>21.6<br/>(20.2 to 23.2)</b>                    | <b>-2.5<br/>(-3.6 to -1.2)</b>                   |
| Alzheimer's disease and other dementias                        | 312.0<br>(211.8 to 453.6)                     | 84.0<br>(53.8 to 118.8)                     | 40.5<br>(23.7 to 65.6)                    | 19.2<br>(12.8 to 24.9)                            | -4.4<br>(-9.5 to 0.2)                            |
| Parkinson's disease                                            | 145.3<br>(97.1 to 205.0)                      | 19.8<br>(10.4 to 31.9)                      | 18.5<br>(10.8 to 29.9)                    | 34.5<br>(22.9 to 45.8)                            | 7.8<br>(-1.4 to 16.9)                            |
| Epilepsy                                                       | 1,237.3<br>(1,021.2 to 1,511.5)               | 97.6<br>(67.0 to 132.2)                     | 373.5<br>(257.4 to 521.5)                 | 16.7<br>(4.8 to 30.5)                             | -6.4<br>(-16.0 to 4.6)                           |
| Multiple sclerosis                                             | 249.2<br>(227.9 to 275.5)                     | 2.7<br>(2.0 to 3.6)                         | 65.9<br>(46.1 to 86.2)                    | 17.8<br>(11.6 to 24.0)                            | -5.5<br>(-10.5 to -0.5)                          |
| Motor neuron disease                                           | 21.6<br>(16.8 to 27.8)                        | 3.5<br>(2.3 to 4.9)                         | 4.6<br>(3.1 to 6.8)                       | 23.1<br>(20.7 to 25.5)                            | -1.3<br>(-3.2 to 0.7)                            |
| Migraine                                                       | 94,052.8<br>(87,250.3 to 100,531.5)           | 7,336.1<br>(6,086.6 to 8,602.0)             | 4,074.5<br>(2,629.3 to 5,714.4)           | 21.6<br>(20.6 to 22.7)                            | -2.5<br>(-3.3 to -1.6)                           |
| Tension-type headache                                          | 141,739.5<br>(105,146.3 to 186,954.2)         | 68,113.1<br>(39,919.0 to 102,537.4)         | 629.3<br>(389.9 to 955.5)                 | 22.7<br>(20.9 to 24.8)                            | -1.6<br>(-3.1 to 0.0)                            |
| Other neurological disorders                                   | 1.5<br>(0.7 to 2.6)                           | 3.0<br>(1.6 to 5.0)                         | 114.3<br>(80.2 to 154.3)                  | 33.9<br>(23.4 to 45.3)                            | 7.4<br>(-1.1 to 16.5)                            |
| <b>Mental and substance use disorders</b>                      | <b>82,944.6<br/>(81,387.9 to 84,381.6)</b>    | <b>31,576.5†<br/>(28,163.3 to 35,167.1)</b> | <b>11,888.7<br/>(8,696.1 to 15,401.3)</b> | <b>20.3<br/>(19.4 to 21.3)</b>                    | <b>-3.5<br/>(-4.2 to -2.7)</b>                   |
| Schizophrenia                                                  | 2,452.6<br>(2,140.9 to 2,779.4)               | 63.5<br>(47.5 to 82.9)                      | 1,569.5<br>(1,179.1 to 1,964.1)           | 27.8<br>(25.6 to 29.9)                            | 2.4<br>(0.7 to 4.2)                              |
| Alcohol use disorders                                          | 8,925.2<br>(7,449.0 to 10,630.3)              | 4,180.7<br>(3,310.4 to 5,156.8)             | 885.6<br>(581.8 to 1,228.0)               | 10.3<br>(5.2 to 14.6)                             | -11.6<br>(-15.7 to -8.1)                         |
| Drug use disorders                                             | 3,182.7<br>(3,041.1 to 3,273.5)               | 304.0<br>(248.9 to 373.3)                   | 776.9<br>(545.2 to 1,007.8)               | 21.8<br>(18.3 to 25.6)                            | -2.4<br>(-5.1 to 0.7)                            |
| Opioid use disorders                                           | 1,444.5<br>(1,199.5 to 1,743.8)               | 136.2<br>(93.0 to 192.2)                    | 590.6<br>(401.8 to 783.6)                 | 24.0<br>(19.5 to 28.7)                            | -0.5<br>(-4.2 to 3.2)                            |
| Cocaine use disorders                                          | 404.0<br>(354.1 to 461.0)                     | 10.0<br>(6.2 to 14.8)                       | 54.7<br>(33.9 to 78.2)                    | 10.5<br>(5.3 to 16.2)                             | -11.4<br>(-15.6 to -6.8)                         |
| Amphetamine use disorders                                      | 121.5<br>(86.1 to 169.0)                      | 13.8<br>(8.1 to 20.7)                       | 16.1<br>(8.8 to 27.1)                     | 14.5<br>(3.5 to 25.4)                             | -8.2<br>(-17.0 to 0.6)                           |
| Cannabis use disorders                                         | 922.4<br>(727.0 to 1,157.0)                   | 92.4<br>(61.8 to 131.0)                     | 26.6<br>(16.3 to 39.7)                    | 18.5<br>(11.9 to 25.3)                            | -5.0<br>(-10.3 to 0.5)                           |
| Other drug use disorders                                       | 395.1<br>(331.6 to 466.9)                     | 51.6<br>(40.1 to 64.1)                      | 88.8<br>(59.0 to 121.0)                   | 17.3<br>(12.9 to 21.6)                            | -6.0<br>(-9.5 to -2.5)                           |
| Depressive disorders                                           | 24,376.6<br>(23,160.5 to 25,500.2)            | 23,833.0<br>(20,550.1 to 27,293.1)          | 3,962.3<br>(2,694.5 to 5,470.0)           | 17.6<br>(16.0 to 19.3)                            | -5.7<br>(-7.0 to -4.3)                           |
| Major depressive disorder                                      | 14,612.9<br>(12,553.1 to 16,853.5)            | 22,261.8<br>(19,040.5 to 25,799.8)          | 2,973.3<br>(1,991.2 to 4,224.4)           | 15.2<br>(13.4 to 16.9)                            | -7.6<br>(-9.1 to -6.3)                           |
| Dysthymia                                                      | 10,268.9<br>(8,139.7 to 12,738.0)             | 1,571.2<br>(1,298.4 to 1,899.8)             | 989.0<br>(625.8 to 1,466.6)               | 25.5<br>(21.9 to 28.9)                            | 0.6<br>(-2.3 to 3.4)                             |
| Bipolar disorder                                               | 3,584.8<br>(2,928.0 to 4,284.3)               | 211.8<br>(141.8 to 298.8)                   | 724.7<br>(443.3 to 1,087.5)               | 21.0<br>(18.9 to 23.1)                            | -3.0<br>(-4.7 to -1.3)                           |
| Anxiety disorders                                              | 22,242.9<br>(19,894.4 to 24,947.3)            | 2,912.2<br>(2,584.6 to 3,263.0)             | 2,120.6<br>(1,466.5 to 2,876.8)           | 21.6<br>(19.1 to 24.2)                            | -2.5<br>(-4.5 to -0.4)                           |
| Eating disorders                                               | 250.2<br>(205.7 to 319.5)                     | 7.9<br>(5.3 to 11.1)                        | 49.9<br>(30.1 to 78.2)                    | 31.4<br>(24.3 to 38.4)                            | 5.4<br>(-0.4 to 11.0)                            |
| Anorexia nervosa                                               | 41.2<br>(27.7 to 59.4)                        | 7.9<br>(5.3 to 11.1)                        | 8.8<br>(5.0 to 13.9)                      | 27.0<br>(15.6 to 39.4)                            | 1.8<br>(-7.3 to 11.8)                            |
| Bulimia nervosa                                                | 199.9<br>(126.0 to 298.6)                     | --                                          | 41.2<br>(22.7 to 66.6)                    | 32.4<br>(24.4 to 40.9)                            | 6.1<br>(-0.3 to 13.0)                            |
| Autistic spectrum disorders                                    | 3,588.8<br>(3,424.8 to 3,726.3)               | --                                          | 519.8<br>(356.3 to 731.9)                 | 24.5<br>(22.4 to 26.6)                            | -0.2<br>(-1.8 to 1.5)                            |
| Autism                                                         | 1,089.7<br>(937.9 to 1,271.2)                 | --                                          | 272.8<br>(174.8 to 394.4)                 | 23.6<br>(20.5 to 27.0)                            | -0.9<br>(-3.4 to 1.8)                            |
| Asperger syndrome and other autistic spectrum disorders        | 2,501.8<br>(2,100.2 to 2,987.9)               | --                                          | 247.0<br>(161.3 to 358.8)                 | 25.5<br>(23.4 to 27.5)                            | 0.6<br>(-1.1 to 2.2)                             |

| Cause                                                      | Prevalence in thousands (95% UI)              | Incidence in thousands (95% UI)                | YLDs in thousands (95% UI)                 |                                                   |                                                  |
|------------------------------------------------------------|-----------------------------------------------|------------------------------------------------|--------------------------------------------|---------------------------------------------------|--------------------------------------------------|
|                                                            | 2016 counts                                   | 2016 counts                                    | 2016 counts                                | Percentage change in counts between 2006 and 2016 | Percentage change in rates between 2006 and 2016 |
| Attention-deficit/hyperactivity disorder                   | 2,366.2<br>(2,089.7 to 2,666.1)               | --                                             | 28.0<br>(17.0 to 44.3)                     | 28.3<br>(24.3 to 32.6)                            | 2.9<br>(-0.3 to 6.4)                             |
| Conduct disorder                                           | --                                            | --                                             | --                                         | --                                                | --                                               |
| Idiopathic developmental intellectual disability           | 6,118.8<br>(3,627.6 to 8,621.6)               | --                                             | 249.7<br>(121.2 to 424.1)                  | 15.7<br>(11.6 to 18.6)                            | -7.2<br>(-10.5 to -4.9)                          |
| Other mental and substance use disorders                   | 13,474.8<br>(11,873.5 to 15,419.8)            | 63.3<br>(38.8 to 90.6)                         | 1,001.7<br>(684.9 to 1,430.2)              | 24.4<br>(22.8 to 26.1)                            | -0.2<br>(-1.5 to 1.1)                            |
| <b>Diabetes, urogenital, blood, and endocrine diseases</b> | <b>221,586.2<br/>(220,090.7 to 222,964.0)</b> | <b>78,376.7†<br/>(71,297.3 to 85,776.9)</b>    | <b>6,074.3<br/>(4,234.3 to 8,397.4)</b>    | <b>23.9<br/>(21.5 to 26.1)</b>                    | <b>-0.7<br/>(-2.5 to 1.2)</b>                    |
| Diabetes mellitus                                          | 39,423.8<br>(34,507.8 to 44,831.1)            | 2,567.7<br>(1,921.7 to 3,379.2)                | 2,969.2<br>(1,993.2 to 4,281.4)            | 21.5<br>(17.4 to 25.5)                            | -2.6<br>(-5.8 to 0.6)                            |
| Acute glomerulonephritis                                   | 7.5<br>(5.0 to 10.8)                          | 109.8<br>(71.7 to 158.0)                       | 0.4<br>(0.2 to 0.6)                        | 11.0<br>(8.0 to 13.3)                             | -11.0<br>(-13.4 to -9.2)                         |
| Chronic kidney disease                                     | 16,046.4<br>(13,770.4 to 18,685.2)            | 1,175.0<br>(790.6 to 1,648.8)                  | 666.6<br>(470.5 to 878.0)                  | 28.6<br>(24.1 to 33.5)                            | 3.1<br>(-0.5 to 7.1)                             |
| Chronic kidney disease due to diabetes mellitus            | 7,488.9<br>(5,694.8 to 9,546.4)               | 547.0<br>(345.9 to 786.5)                      | 332.7<br>(226.5 to 458.5)                  | 30.8<br>(25.1 to 36.9)                            | 4.8<br>(0.3 to 9.8)                              |
| Chronic kidney disease due to hypertension                 | 2,458.6<br>(1,810.7 to 3,180.3)               | 205.6<br>(117.5 to 329.3)                      | 95.3<br>(61.0 to 138.4)                    | 35.5<br>(28.1 to 44.7)                            | 8.7<br>(2.8 to 16.1)                             |
| Chronic kidney disease due to glomerulonephritis           | 2,538.7<br>(1,901.1 to 3,236.6)               | 160.0<br>(100.0 to 238.0)                      | 104.5<br>(60.2 to 164.8)                   | 19.2<br>(12.4 to 25.7)                            | -4.4<br>(-9.9 to 0.8)                            |
| Chronic kidney disease due to other causes                 | 3,560.2<br>(2,298.3 to 5,097.2)               | 262.6<br>(149.4 to 417.7)                      | 134.1<br>(72.9 to 207.2)                   | 26.5<br>(20.7 to 32.5)                            | 1.5<br>(-3.2 to 6.3)                             |
| Urinary diseases and male infertility                      | 8,628.5<br>(7,920.0 to 9,343.8)               | 31,639.2†<br>(25,900.1 to 38,243.2)            | 296.9<br>(191.6 to 428.4)                  | 20.0<br>(17.4 to 22.7)                            | -3.8<br>(-5.8 to -1.6)                           |
| Interstitial nephritis and urinary tract infections        | 434.4<br>(336.2 to 545.3)                     | 22,576.9<br>(17,164.7 to 28,660.5)             | 14.2<br>(8.3 to 22.5)                      | 24.1<br>(17.8 to 30.2)                            | -0.5<br>(-5.5 to 4.5)                            |
| Urolithiasis                                               | 292.6<br>(217.3 to 388.1)                     | 7,748.0<br>(5,740.2 to 10,116.5)               | 21.7<br>(13.2 to 34.1)                     | 21.8<br>(13.1 to 32.1)                            | -2.3<br>(-9.3 to 5.9)                            |
| Benign prostatic hyperplasia                               | 7,246.5<br>(5,945.7 to 8,596.6)               | 1,314.4<br>(1,023.4 to 1,709.5)                | 244.9<br>(154.7 to 360.7)                  | 20.2<br>(17.4 to 23.2)                            | -3.6<br>(-5.9 to -1.2)                           |
| Male infertility                                           | 545.9<br>(296.2 to 885.8)                     | --                                             | 2.8<br>(0.9 to 6.5)                        | 23.0<br>(9.6 to 34.1)                             | -1.4<br>(-12.1 to 7.5)                           |
| Other urinary diseases                                     | --                                            | --                                             | 13.3<br>(8.7 to 19.0)                      | 8.6<br>(3.4 to 14.2)                              | -12.9<br>(-17.1 to -8.4)                         |
| Gynecological diseases                                     | 108,340.4<br>(107,090.6 to 109,831.7)         | 41,563.1†<br>(37,309.2 to 45,487.1)            | 1,565.9<br>(1,082.4 to 2,218.9)            | 24.2<br>(22.2 to 26.4)                            | -0.4<br>(-2.0 to 1.4)                            |
| Uterine fibroids                                           | 20,595.4<br>(17,632.4 to 23,936.5)            | 1,574.4<br>(1,096.5 to 2,147.4)                | 288.9<br>(169.3 to 468.8)                  | 22.3<br>(19.8 to 24.4)                            | -1.9<br>(-3.9 to -0.2)                           |
| Polycystic ovarian syndrome                                | 90.8<br>(67.3 to 120.0)                       | --                                             | 0.8<br>(0.3 to 1.5)                        | 10.0<br>(0.6 to 19.0)                             | -11.8<br>(-19.3 to -4.6)                         |
| Female infertility                                         | 218.3<br>(127.6 to 369.0)                     | --                                             | 1.3<br>(0.5 to 2.8)                        | 29.9<br>(16.5 to 42.4)                            | 4.1<br>(-6.6 to 14.2)                            |
| Endometriosis                                              | 540.8<br>(459.5 to 625.1)                     | 371.4<br>(220.2 to 582.6)                      | 49.7<br>(32.4 to 71.6)                     | 35.9<br>(28.6 to 43.6)                            | 9.0<br>(3.2 to 15.1)                             |
| Genital prolapse                                           | 25,050.9<br>(21,555.3 to 28,790.2)            | 4,160.5<br>(3,400.3 to 5,102.1)                | 79.1<br>(38.5 to 144.5)                    | 10.3<br>(8.7 to 11.8)                             | -11.6<br>(-12.9 to -10.3)                        |
| Premenstrual syndrome                                      | 71,237.2<br>(67,156.2 to 75,433.6)            | 19,978.1<br>(17,842.6 to 21,934.0)             | 585.2<br>(365.7 to 896.3)                  | 23.5<br>(21.5 to 25.5)                            | -1.0<br>(-2.6 to 0.6)                            |
| Other gynecological diseases                               | 16,171.6<br>(13,457.4 to 18,709.9)            | 15,478.8<br>(11,988.2 to 19,175.7)             | 560.9<br>(369.0 to 806.0)                  | 27.4<br>(22.8 to 33.2)                            | 2.1<br>(-1.6 to 6.8)                             |
| Hemoglobinopathies and hemolytic anaemias                  | 104,233.5<br>(103,078.8 to 105,520.7)         | --                                             | 335.6<br>(207.1 to 518.0)                  | 40.7<br>(31.2 to 49.6)                            | 12.8<br>(5.2 to 20.0)                            |
| Thalassemias                                               | 1.0<br>(0.9 to 1.0)                           | --                                             | 0.1<br>(0.1 to 0.2)                        | 28.1<br>(-40.1 to 178.4)                          | 2.8<br>(-52.0 to 123.2)                          |
| Thalassaemia trait                                         | 20,324.8<br>(19,589.6 to 21,103.4)            | --                                             | 234.8<br>(143.9 to 363.6)                  | 44.0<br>(31.8 to 56.1)                            | 15.5<br>(5.7 to 25.2)                            |
| Sickle cell disorders                                      | 16.7<br>(14.9 to 18.4)                        | --                                             | 2.8<br>(2.0 to 3.8)                        | 54.1<br>(42.6 to 66.3)                            | 23.6<br>(14.4 to 33.4)                           |
| Sickle cell trait                                          | 22,436.0<br>(20,296.8 to 25,303.9)            | --                                             | 64.5<br>(40.0 to 95.9)                     | 32.8<br>(27.8 to 38.3)                            | 6.5<br>(2.5 to 10.9)                             |
| G6PD deficiency                                            | 18,355.9<br>(17,698.9 to 19,108.7)            | --                                             | 1.2<br>(0.8 to 1.8)                        | 42.3<br>(36.6 to 48.8)                            | 14.1<br>(9.5 to 19.3)                            |
| G6PD trait                                                 | 50,996.0<br>(50,178.3 to 51,951.9)            | --                                             | < 0.05<br>(< 0.05 to 0.1)                  | 31.6<br>(20.0 to 44.0)                            | 5.5<br>(-3.7 to 15.4)                            |
| Other hemoglobinopathies and hemolytic anaemias            | 2,881.4<br>(2,495.2 to 3,280.2)               | --                                             | 32.1<br>(19.4 to 49.8)                     | 32.6<br>(25.5 to 40.8)                            | 6.4<br>(0.6 to 12.9)                             |
| Endocrine, metabolic, blood, and immune disorders          | 7,715.8<br>(6,281.1 to 9,478.7)               | 1,321.8<br>(941.3 to 1,802.2)                  | 239.6<br>(148.8 to 351.4)                  | 22.5<br>(19.2 to 25.4)                            | -1.8<br>(-4.4 to 0.6)                            |
| <b>Musculoskeletal disorders</b>                           | <b>132,595.2<br/>(126,981.8 to 137,155.9)</b> | <b>67,772.1<br/>(53,446.5 to 84,397.0)</b>     | <b>14,775.4<br/>(10,321.5 to 20,117.5)</b> | <b>23.5<br/>(21.5 to 25.4)</b>                    | <b>-1.0<br/>(-2.6 to 0.6)</b>                    |
| Rheumatoid arthritis                                       | 1,993.7<br>(1,698.0 to 2,329.1)               | 142.4<br>(104.6 to 187.7)                      | 476.6<br>(322.9 to 656.5)                  | 27.0<br>(23.3 to 30.6)                            | 1.9<br>(-1.2 to 4.7)                             |
| Osteoarthritis                                             | 27,001.9<br>(24,719.5 to 29,324.8)            | 2,302.4<br>(1,945.6 to 2,668.4)                | 1,569.9<br>(1,094.9 to 2,170.5)            | 29.0<br>(27.6 to 30.5)                            | 3.5<br>(2.3 to 4.6)                              |
| Low back and neck pain                                     | 82,870.8<br>(76,545.2 to 89,245.7)            | 32,790.8<br>(24,248.8 to 43,353.5)             | 9,787.1<br>(6,529.4 to 13,881.4)           | 23.3<br>(20.4 to 25.9)                            | -1.1<br>(-3.5 to 1.0)                            |
| Low back pain                                              | 49,988.1<br>(37,469.0 to 66,821.8)            | 23,938.4<br>(16,054.8 to 34,291.6)             | 5,755.7<br>(3,677.7 to 8,544.8)            | 21.0<br>(16.9 to 24.5)                            | -3.0<br>(-6.2 to -0.1)                           |
| Neck pain                                                  | 39,933.8<br>(28,234.9 to 52,711.9)            | 8,852.4<br>(5,980.7 to 12,592.2)               | 4,031.4<br>(2,390.7 to 6,125.7)            | 26.8<br>(22.7 to 30.5)                            | 1.6<br>(-1.6 to 4.7)                             |
| Gout                                                       | 3,158.3<br>(2,579.7 to 3,834.2)               | 575.5<br>(397.2 to 777.1)                      | 103.1<br>(66.7 to 149.6)                   | 24.3<br>(18.6 to 30.2)                            | -0.3<br>(-4.9 to 4.4)                            |
| Other musculoskeletal disorders                            | 33,071.1<br>(23,080.1 to 44,721.0)            | 31,961.0<br>(20,907.4 to 46,166.7)             | 2,838.6<br>(1,709.0 to 4,376.3)            | 20.6<br>(14.7 to 24.9)                            | -3.3<br>(-8.0 to 0.1)                            |
| <b>Other non-communicable diseases</b>                     | <b>352,630.0<br/>(348,375.5 to 357,765.4)</b> | <b>856,555.7†<br/>(722,512.1 to 987,611.5)</b> | <b>8,610.4<br/>(5,745.6 to 12,698.3)</b>   | <b>22.5<br/>(21.6 to 23.4)</b>                    | <b>-1.8<br/>(-2.5 to -1.1)</b>                   |
| Congenital anomalies                                       | 4,053.3<br>(3,775.6 to 4,338.7)               | --                                             | 519.6<br>(372.1 to 692.7)                  | 22.2<br>(19.2 to 25.6)                            | -2.0<br>(-4.4 to 0.7)                            |
| Neural tube defects                                        | 307.9<br>(279.8 to 340.2)                     | --                                             | 91.9<br>(65.2 to 122.4)                    | 22.9<br>(17.6 to 28.5)                            | -1.5<br>(-5.7 to 3.0)                            |
| Congenital heart anomalies                                 | 582.9<br>(521.8 to 651.0)                     | --                                             | 32.2<br>(13.4 to 55.4)                     | 31.4<br>(26.1 to 36.9)                            | 5.4<br>(1.1 to 9.8)                              |
| Orofacial clefts                                           | 223.5<br>(199.5 to 247.2)                     | --                                             | 2.7<br>(1.8 to 3.9)                        | 18.0<br>(14.9 to 21.1)                            | -5.4<br>(-7.8 to -2.9)                           |
| Down's syndrome                                            | 102.7<br>(88.7 to 118.0)                      | --                                             | 9.6<br>(6.5 to 13.4)                       | 16.9<br>(11.5 to 21.8)                            | -6.3<br>(-10.6 to -2.3)                          |
| Turner syndrome                                            | 104.5<br>(91.1 to 120.0)                      | --                                             | 2.2<br>(1.1 to 3.5)                        | 25.1<br>(12.1 to 39.2)                            | 0.3<br>(-10.1 to 11.6)                           |
| Klinefelter syndrome                                       | 64.9<br>(54.3 to 76.5)                        | --                                             | 0.7<br>(0.3 to 1.2)                        | 19.0<br>(10.5 to 27.7)                            | -4.5<br>(-11.4 to 2.4)                           |

| Cause                                         | Prevalence in thousands (95% UI)                    | Incidence in thousands (95% UI)                   | YLDs in thousands (95% UI)                    |                                                   |                                                  |
|-----------------------------------------------|-----------------------------------------------------|---------------------------------------------------|-----------------------------------------------|---------------------------------------------------|--------------------------------------------------|
|                                               | 2016 counts                                         | 2016 counts                                       | 2016 counts                                   | Percentage change in counts between 2006 and 2016 | Percentage change in rates between 2006 and 2016 |
| Other chromosomal abnormalities               | 0.1<br>(0.1 to 0.1)                                 | --                                                | < 0.05<br>(< 0.05 to < 0.05)                  | 105.2<br>(-23.2 to 407.0)                         | 64.5<br>(-38.4 to 306.6)                         |
| Congenital musculoskeletal and limb anomalies | 654.2<br>(604.1 to 708.1)                           | --                                                | 95.5<br>(65.4 to 130.8)                       | 16.8<br>(12.9 to 20.8)                            | -6.3<br>(-9.5 to -3.1)                           |
| Urogenital congenital anomalies               | 188.9<br>(170.6 to 208.5)                           | --                                                | 2.9<br>(1.4 to 5.2)                           | 25.5<br>(21.7 to 29.6)                            | 0.6<br>(-2.4 to 3.9)                             |
| Digestive congenital anomalies                | 668.5<br>(603.5 to 739.2)                           | --                                                | 28.4<br>(18.9 to 40.7)                        | 26.7<br>(19.9 to 33.7)                            | 1.6<br>(-3.8 to 7.2)                             |
| Other congenital anomalies                    | 2,062.4<br>(1,445.3 to 2,888.1)                     | --                                                | 253.5<br>(170.6 to 365.0)                     | 22.8<br>(17.5 to 28.8)                            | -1.6<br>(-5.8 to 3.2)                            |
| Skin and subcutaneous diseases                | 111,548.2<br>(108,614.6 to 114,312.4)               | 266,014.1<br>(237,025.0 to 302,240.8)             | 2,299.3<br>(1,551.6 to 3,355.2)               | 25.0<br>(24.0 to 25.9)                            | 0.3<br>(-0.6 to 0.9)                             |
| Dermatitis                                    | 14,674.6<br>(12,471.9 to 17,141.0)                  | 37,881.4<br>(31,074.0 to 46,200.5)                | 463.3<br>(273.1 to 717.2)                     | 21.2<br>(19.5 to 22.9)                            | -2.8<br>(-4.2 to -1.4)                           |
| Psoriasis                                     | 5,099.2<br>(4,660.6 to 5,579.0)                     | 582.1<br>(499.8 to 662.8)                         | 441.9<br>(308.1 to 591.2)                     | 27.5<br>(24.6 to 30.2)                            | 2.2<br>(-0.1 to 4.4)                             |
| Cellulitis                                    | 164.0<br>(133.7 to 198.4)                           | 3,381.0<br>(2,847.9 to 4,011.9)                   | 9.3<br>(5.9 to 14.2)                          | 13.6<br>(6.7 to 20.6)                             | -8.9<br>(-14.4 to -3.3)                          |
| Pyoderma                                      | 1,229.1<br>(1,130.8 to 1,339.5)                     | 28,919.7<br>(26,027.2 to 32,096.2)                | 6.9<br>(2.7 to 14.6)                          | 25.8<br>(22.6 to 28.8)                            | 0.8<br>(-1.7 to 3.3)                             |
| Scabies                                       | 6,862.7<br>(4,752.3 to 9,677.4)                     | 20,901.9<br>(14,332.8 to 29,858.2)                | 175.4<br>(84.8 to 315.3)                      | 25.6<br>(23.4 to 27.8)                            | 0.7<br>(-1.0 to 2.4)                             |
| Fungal skin diseases                          | 30,098.4<br>(23,007.6 to 39,846.0)                  | 102,304.9<br>(75,941.1 to 138,282.9)              | 169.0<br>(62.8 to 364.3)                      | 26.4<br>(25.5 to 27.2)                            | 1.4<br>(0.7 to 2.0)                              |
| Viral skin diseases                           | 7,419.2<br>(6,263.5 to 8,786.8)                     | 11,346.7<br>(9,606.6 to 13,382.9)                 | 223.7<br>(137.2 to 341.0)                     | 24.2<br>(22.5 to 25.8)                            | -0.4<br>(-1.8 to 0.9)                            |
| Acne vulgaris                                 | 12,704.1<br>(11,252.4 to 14,365.2)                  | 5,435.0<br>(4,688.9 to 6,328.3)                   | 319.2<br>(212.5 to 474.4)                     | 24.4<br>(21.9 to 26.9)                            | -0.2<br>(-2.3 to 1.7)                            |
| Alopecia areata                               | 1,106.9<br>(986.2 to 1,249.8)                       | 1,934.3<br>(1,746.6 to 2,157.0)                   | 36.0<br>(22.8 to 54.9)                        | 21.6<br>(18.2 to 25.2)                            | -2.5<br>(-5.2 to 0.4)                            |
| Pruritus                                      | 5,027.8<br>(3,382.2 to 7,143.1)                     | 3,882.4<br>(2,523.3 to 5,605.8)                   | 53.6<br>(23.1 to 111.7)                       | 27.1<br>(25.1 to 29.1)                            | 1.9<br>(0.3 to 3.5)                              |
| Urticaria                                     | 2,960.5<br>(2,095.4 to 3,979.6)                     | 5,221.9<br>(3,707.8 to 7,020.9)                   | 174.3<br>(99.4 to 273.3)                      | 24.5<br>(21.5 to 27.2)                            | -0.1<br>(-2.6 to 2.0)                            |
| Decubitus ulcer                               | 71.3<br>(51.5 to 95.3)                              | 258.3<br>(183.4 to 352.8)                         | 12.6<br>(7.3 to 19.5)                         | 19.0<br>(16.3 to 21.4)                            | -4.6<br>(-6.7 to -2.7)                           |
| Other skin and subcutaneous diseases          | 38,753.9<br>(34,940.2 to 42,693.9)                  | 43,964.5<br>(39,420.2 to 48,712.1)                | 214.0<br>(100.5 to 388.9)                     | 30.2<br>(29.2 to 31.2)                            | 4.4<br>(3.6 to 5.2)                              |
| Sense organ diseases                          | 157,821.6<br>(151,480.7 to 162,474.1)               | 38,146.1†<br>(34,425.0 to 42,237.9)               | 4,200.3<br>(2,822.9 to 6,177.6)               | 21.2<br>(19.5 to 22.8)                            | -2.8<br>(-4.2 to -1.5)                           |
| Glaucoma                                      | 24.1<br>(15.9 to 34.4)                              | --                                                | 2.8<br>(1.5 to 4.6)                           | 26.6<br>(19.6 to 33.2)                            | 1.5<br>(-4.1 to 6.9)                             |
| Cataract                                      | 2,756.6<br>(2,051.5 to 3,583.6)                     | --                                                | 218.7<br>(143.1 to 321.9)                     | 22.2<br>(19.3 to 25.2)                            | -2.0<br>(-4.4 to 0.4)                            |
| Macular degeneration                          | 22.6<br>(13.8 to 32.8)                              | --                                                | 2.6<br>(1.4 to 4.4)                           | 29.6<br>(26.8 to 32.2)                            | 3.9<br>(1.6 to 6.0)                              |
| Refraction and accommodation disorders        | 69,627.4<br>(62,891.5 to 76,737.0)                  | --                                                | 1,146.5<br>(689.4 to 1,856.6)                 | 16.2<br>(14.6 to 17.6)                            | -6.8<br>(-8.1 to -5.7)                           |
| Age-related and other hearing loss            | 97,763.0<br>(81,418.0 to 115,473.4)                 | --                                                | 2,189.5<br>(1,425.0 to 3,291.7)               | 22.4<br>(18.9 to 25.3)                            | -1.9<br>(-4.7 to 0.5)                            |
| Other vision loss                             | 2,109.4<br>(1,633.3 to 2,670.7)                     | --                                                | 177.9<br>(116.6 to 266.5)                     | 27.2<br>(23.6 to 30.7)                            | 2.0<br>(-0.9 to 4.8)                             |
| Other sense organ diseases                    | 14,421.7<br>(12,687.5 to 16,448.5)                  | 38,146.1<br>(34,425.0 to 42,237.9)                | 462.5<br>(283.8 to 719.9)                     | 26.2<br>(24.3 to 28.0)                            | 1.2<br>(-0.3 to 2.7)                             |
| Oral disorders                                | 244,012.3<br>(234,962.3 to 253,352.0)               | 552,395.5†<br>(423,638.1 to 677,574.4)            | 1,591.2<br>(888.5 to 2,640.7)                 | 22.4<br>(21.5 to 23.2)                            | -1.8<br>(-2.6 to -1.2)                           |
| Caries of deciduous teeth                     | --                                                  | --                                                | --                                            | --                                                | --                                               |
| Caries of permanent teeth                     | 171,650.5<br>(140,549.5 to 204,938.7)               | 541,019.7<br>(412,232.2 to 667,545.3)             | 121.0<br>(50.1 to 239.7)                      | 17.7<br>(16.0 to 19.4)                            | -5.6<br>(-7.0 to -4.2)                           |
| Periodontal disease                           | 95,957.5<br>(73,958.7 to 119,283.0)                 | 9,799.3<br>(5,469.9 to 14,241.4)                  | 632.5<br>(239.1 to 1,340.4)                   | 24.9<br>(24.0 to 25.8)                            | 0.2<br>(-0.6 to 0.9)                             |
| Edentulism and severe tooth loss              | 17,966.9<br>(14,240.9 to 21,692.4)                  | 1,576.5<br>(1,025.0 to 2,304.5)                   | 510.5<br>(317.8 to 757.1)                     | 19.1<br>(17.9 to 20.4)                            | -4.5<br>(-5.5 to -3.4)                           |
| Other oral disorders                          | 11,218.0<br>(10,003.7 to 12,395.0)                  | --                                                | 327.2<br>(202.6 to 491.6)                     | 24.9<br>(23.6 to 26.3)                            | 0.2<br>(-0.9 to 1.3)                             |
| <b>Injuries</b>                               | <b>126,271.1</b><br><b>(118,828.6 to 134,333.1)</b> | <b>35,634.5†</b><br><b>(31,457.1 to 40,420.7)</b> | <b>4,579.2</b><br><b>(3,073.8 to 6,536.9)</b> | <b>23.2</b><br><b>(21.8 to 24.5)</b>              | <b>-1.2</b><br><b>(-2.3 to -0.1)</b>             |
| <b>Transport injuries</b>                     | <b>23,527.3</b><br><b>(21,684.8 to 25,340.5)</b>    | <b>5,606.1</b><br><b>(4,256.4 to 7,261.8)</b>     | <b>1,223.6</b><br><b>(827.6 to 1,747.6)</b>   | <b>29.6</b><br><b>(28.2 to 31.0)</b>              | <b>3.9</b><br><b>(2.8 to 5.0)</b>                |
| Road injuries                                 | 19,490.0<br>(17,945.1 to 21,016.8)                  | 5,135.6<br>(3,795.2 to 6,748.2)                   | 1,022.9<br>(693.1 to 1,460.2)                 | 30.8<br>(29.4 to 32.1)                            | 4.9<br>(3.8 to 5.9)                              |
| Pedestrian road injuries                      | 4,236.8<br>(3,564.1 to 4,954.4)                     | 918.2<br>(570.6 to 1,367.8)                       | 226.9<br>(152.1 to 321.5)                     | 33.8<br>(32.1 to 35.5)                            | 7.3<br>(5.9 to 8.6)                              |
| Cyclist road injuries                         | 3,719.3<br>(3,093.4 to 4,447.1)                     | 1,191.4<br>(774.7 to 1,777.7)                     | 182.8<br>(121.9 to 263.4)                     | 36.6<br>(35.2 to 38.0)                            | 9.5<br>(8.4 to 10.7)                             |
| Motorcyclist road injuries                    | 5,021.7<br>(4,237.4 to 6,262.0)                     | 822.1<br>(520.7 to 1,248.6)                       | 259.0<br>(173.6 to 373.7)                     | 32.7<br>(31.2 to 34.1)                            | 6.4<br>(5.2 to 7.6)                              |
| Motor vehicle road injuries                   | 5,065.4<br>(4,221.4 to 5,895.0)                     | 1,696.6<br>(1,147.6 to 2,368.7)                   | 284.0<br>(192.4 to 400.7)                     | 18.5<br>(16.9 to 20.0)                            | -5.0<br>(-6.2 to -3.7)                           |
| Other road injuries                           | 1,446.8<br>(1,169.6 to 1,761.0)                     | 507.3<br>(251.5 to 817.6)                         | 70.2<br>(46.6 to 104.1)                       | 59.2<br>(57.2 to 61.1)                            | 27.7<br>(26.1 to 29.2)                           |
| Other transport injuries                      | 4,037.3<br>(3,315.1 to 4,874.2)                     | 470.5<br>(318.5 to 649.2)                         | 200.7<br>(136.3 to 284.2)                     | 24.1<br>(21.9 to 26.1)                            | -0.5<br>(-2.2 to 1.1)                            |
| <b>Unintentional injuries</b>                 | <b>90,192.9</b><br><b>(83,075.9 to 97,402.9)</b>    | <b>27,668.0</b><br><b>(23,822.6 to 32,134.8)</b>  | <b>2,874.1</b><br><b>(1,962.1 to 4,055.2)</b> | <b>21.6</b><br><b>(20.3 to 22.8)</b>              | <b>-2.5</b><br><b>(-3.5 to -1.5)</b>             |
| Falls                                         | 35,144.5<br>(30,596.4 to 40,046.1)                  | 11,388.5<br>(8,420.3 to 15,030.6)                 | 1,362.9<br>(935.2 to 1,887.3)                 | 20.7<br>(19.4 to 21.9)                            | -3.2<br>(-4.3 to -2.2)                           |
| Drowning                                      | 385.2<br>(332.8 to 445.2)                           | 32.5<br>(24.8 to 41.8)                            | 18.9<br>(12.5 to 26.8)                        | 11.9<br>(9.4 to 14.3)                             | -10.2<br>(-12.3 to -8.3)                         |
| Fire, heat, and hot substances                | 8,787.5<br>(7,510.5 to 10,506.1)                    | 500.9<br>(328.6 to 723.1)                         | 210.5<br>(138.4 to 316.3)                     | 20.4<br>(18.3 to 22.2)                            | -3.4<br>(-5.1 to -2.0)                           |
| Poisonings                                    | 286.8<br>(241.9 to 329.5)                           | 237.0<br>(151.1 to 365.9)                         | 22.0<br>(14.2 to 31.7)                        | 29.6<br>(26.2 to 32.9)                            | 3.9<br>(1.2 to 6.6)                              |
| Exposure to mechanical forces                 | 18,185.7<br>(15,199.2 to 22,227.2)                  | 4,294.6<br>(2,909.1 to 5,960.7)                   | 407.6<br>(265.1 to 594.3)                     | 25.7<br>(24.5 to 26.8)                            | 0.8<br>(-0.2 to 1.7)                             |
| Unintentional firearm injuries                | 685.2<br>(553.0 to 852.4)                           | 75.7<br>(37.1 to 136.6)                           | 22.2<br>(14.3 to 33.2)                        | 27.3<br>(26.0 to 28.8)                            | 2.1<br>(1.1 to 3.2)                              |
| Unintentional suffocation                     | 727.6<br>(563.3 to 933.1)                           | 48.0<br>(22.6 to 89.8)                            | 21.4<br>(13.4 to 32.3)                        | 22.6<br>(20.9 to 24.2)                            | -1.7<br>(-3.0 to -0.4)                           |
| Other exposure to mechanical forces           | 16,772.9<br>(13,841.2 to 20,691.0)                  | 4,171.0<br>(2,846.0 to 5,756.8)                   | 363.9<br>(236.4 to 528.5)                     | 25.8<br>(24.5 to 26.9)                            | 0.9<br>(-0.1 to 1.8)                             |

| Cause                                                                               | Prevalence in thousands (95% UI)                 | Incidence in thousands (95% UI)                | YLDs in thousands (95% UI)              |                                                   |                                                  |
|-------------------------------------------------------------------------------------|--------------------------------------------------|------------------------------------------------|-----------------------------------------|---------------------------------------------------|--------------------------------------------------|
|                                                                                     | 2016 counts                                      | 2016 counts                                    | 2016 counts                             | Percentage change in counts between 2006 and 2016 | Percentage change in rates between 2006 and 2016 |
| Adverse effects of medical treatment                                                | 137.9<br>(88.9 to 203.4)                         | 1,801.8<br>(1,234.0 to 2,583.5)                | 18.3<br>(10.4 to 30.0)                  | 17.6<br>(13.6 to 22.1)                            | -5.7<br>(-8.9 to -2.0)                           |
| Animal contact                                                                      | 4,451.6<br>(3,877.6 to 5,138.7)                  | 3,605.5<br>(2,531.1 to 4,930.2)                | 121.7<br>(81.8 to 170.6)                | 13.1<br>(11.0 to 15.2)                            | -9.3<br>(-11.0 to -7.6)                          |
| Venomous animal contact                                                             | 2,054.8<br>(1,688.6 to 2,440.2)                  | 1,731.3<br>(1,139.0 to 2,415.8)                | 84.1<br>(57.3 to 116.5)                 | 15.0<br>(12.2 to 17.7)                            | -7.8<br>(-10.0 to -5.6)                          |
| Non-venomous animal contact                                                         | 2,396.8<br>(1,970.5 to 2,988.6)                  | 1,874.2<br>(1,240.0 to 2,692.5)                | 37.6<br>(24.1 to 58.2)                  | 9.1<br>(6.8 to 11.0)                              | -12.5<br>(-14.4 to -11.0)                        |
| Foreign body                                                                        | 3,861.0<br>(3,215.0 to 4,466.2)                  | 1,626.8<br>(1,125.5 to 2,380.2)                | 137.0<br>(87.4 to 203.3)                | 22.1<br>(20.1 to 24.2)                            | -2.1<br>(-3.7 to -0.4)                           |
| Pulmonary aspiration and foreign body in airway                                     | 1,790.5<br>(1,368.7 to 2,306.4)                  | 303.5<br>(194.7 to 441.8)                      | 71.4<br>(45.8 to 105.5)                 | 19.4<br>(17.3 to 21.4)                            | -4.3<br>(-6.0 to -2.7)                           |
| Foreign body in eyes                                                                | 222.7<br>(131.6 to 367.1)                        | 965.5<br>(521.3 to 1,750.2)                    | 13.3<br>(7.2 to 24.0)                   | 31.5<br>(27.1 to 37.3)                            | 5.4<br>(1.9 to 10.1)                             |
| Foreign body in other body part                                                     | 1,847.8<br>(1,503.2 to 2,334.3)                  | 357.9<br>(226.6 to 528.6)                      | 52.3<br>(33.9 to 77.2)                  | 23.8<br>(21.8 to 25.4)                            | -0.8<br>(-2.3 to 0.6)                            |
| Environmental heat and cold exposure                                                | 6,066.2<br>(5,051.9 to 7,077.9)                  | 977.7<br>(622.1 to 1,450.6)                    | 219.8<br>(146.7 to 311.6)               | 24.5<br>(22.2 to 26.8)                            | -0.1<br>(-2.0 to 1.7)                            |
| Other unintentional injuries                                                        | 12,886.4<br>(10,394.5 to 15,810.9)               | 3,202.7<br>(2,140.3 to 4,625.8)                | 355.4<br>(234.6 to 522.5)               | 22.9<br>(21.5 to 24.2)                            | -1.4<br>(-2.6 to -0.4)                           |
| <b>Self-harm and interpersonal violence</b>                                         | <b>17,258.4</b><br><b>(13,637.3 to 21,608.5)</b> | <b>2,288.5†</b><br><b>(1,710.5 to 2,919.4)</b> | <b>332.0</b><br><b>(222.5 to 471.5)</b> | <b>13.3</b><br><b>(12.2 to 14.4)</b>              | <b>-9.1</b><br><b>(-10.1 to -8.3)</b>            |
| Self-harm                                                                           | 1,083.2<br>(894.6 to 1,302.2)                    | 531.6<br>(403.5 to 694.8)                      | 48.1<br>(31.1 to 69.9)                  | 7.3<br>(5.8 to 8.7)                               | -14.0<br>(-15.2 to -12.8)                        |
| Self-harm by firearm                                                                | 32.6<br>(27.5 to 37.9)                           | 5.2<br>(1.4 to 14.5)                           | 1.1<br>(0.7 to 1.7)                     | 2.4<br>(0.1 to 4.5)                               | -17.9<br>(-19.8 to -16.2)                        |
| Self-harm by other specified means                                                  | 1,050.6<br>(861.4 to 1,269.5)                    | 526.5<br>(400.5 to 690.5)                      | 47.0<br>(30.3 to 68.3)                  | 7.4<br>(5.9 to 8.8)                               | -13.9<br>(-15.1 to -12.7)                        |
| Interpersonal violence                                                              | 16,175.2<br>(12,609.9 to 20,547.6)               | 1,756.9†<br>(1,211.5 to 2,360.6)               | 283.8<br>(190.4 to 404.1)               | 14.4<br>(13.3 to 15.4)                            | -8.2<br>(-9.2 to -7.4)                           |
| Assault by firearm                                                                  | 282.9<br>(226.9 to 340.8)                        | 34.8<br>(18.1 to 58.9)                         | 10.2<br>(6.6 to 15.2)                   | 11.0<br>(9.7 to 12.7)                             | -11.0<br>(-12.1 to -9.7)                         |
| Assault by sharp object                                                             | 1,540.9<br>(1,239.9 to 1,847.2)                  | 310.5<br>(178.6 to 500.3)                      | 41.3<br>(26.9 to 60.1)                  | 11.2<br>(9.4 to 12.9)                             | -10.9<br>(-12.3 to -9.5)                         |
| Sexual violence                                                                     | 10,264.3<br>(6,861.2 to 14,649.8)                | --                                             | 77.5<br>(42.1 to 124.3)                 | 18.3<br>(17.0 to 19.4)                            | -5.2<br>(-6.2 to -4.2)                           |
| Assault by other means                                                              | 4,087.2<br>(3,345.4 to 5,015.4)                  | 1,411.5<br>(969.5 to 1,903.2)                  | 154.7<br>(103.9 to 224.7)               | 13.7<br>(12.5 to 14.8)                            | -8.9<br>(-9.8 to -7.9)                           |
| <b>Forces of nature, conflict and terrorism, and executions and police conflict</b> | <b>5,556.8</b><br><b>(3,555.7 to 7,953.5)</b>    | <b>71.8†</b><br><b>(42.9 to 99.8)</b>          | <b>149.5</b><br><b>(51.5 to 314.1)</b>  | <b>28.1</b><br><b>(16.4 to 37.8)</b>              | <b>2.8</b><br><b>(-6.7 to 10.5)</b>              |
| Forces of nature, conflict and terrorism, and state actor violence                  | 671.4<br>(373.2 to 1,043.6)                      | 22.1<br>(11.6 to 34.8)                         | 22.7<br>(6.1 to 55.1)                   | 67.4<br>(51.8 to 74.5)                            | 34.3<br>(21.7 to 39.9)                           |
| Conflict and terrorism                                                              | 3,933.4<br>(2,304.5 to 6,082.1)                  | --                                             | 113.0<br>(44.2 to 221.0)                | 28.8<br>(13.8 to 41.6)                            | 3.3<br>(-8.7 to 13.6)                            |
| Executions and police conflict                                                      | 952.1<br>(255.3 to 1,488.9)                      | 49.7<br>(24.8 to 74.2)                         | 20.4<br>(3.8 to 53.3)                   | 0.6<br>(-4.1 to 9.2)                              | -19.4<br>(-23.1 to -12.4)                        |

We did not calculate incidence for certain NTDs and causes with only birth prevalence. Blank cells mean that no estimate is available.

† Incidence for aggregate causes represents the sum of the incidence of the causes below the aggregate.

‡ Incidence estimates for stroke represent first-ever stroke only.

^ Incidence of HIV/AIDS represents new infections of HIV only and does not include new infections of Tuberculosis in HIV positive cases.



SR Table 12: Global prevalence, incidence, and YLDs for 2016, percentage change of YLD counts and percentage change of YLD rates between 2006 and 2016 by cause, age 50-54 years.

| Cause                                                                                | Prevalence in thousands (95% UI)             | Incidence in thousands (95% UI)                     | YLDs in thousands (95% UI)                |                                                   |                                                  |
|--------------------------------------------------------------------------------------|----------------------------------------------|-----------------------------------------------------|-------------------------------------------|---------------------------------------------------|--------------------------------------------------|
|                                                                                      | 2016 counts                                  | 2016 counts                                         | 2016 counts                               | Percentage change in counts between 2006 and 2016 | Percentage change in rates between 2006 and 2016 |
|                                                                                      |                                              |                                                     |                                           |                                                   |                                                  |
| <b>All causes</b>                                                                    | <b>407,104.3</b><br>(406,839.4 to 407,421.2) | <b>2,156,823.5†</b><br>(1,855,168.0 to 2,497,606.5) | <b>59,915.4</b><br>(44,199.3 to 76,981.2) | <b>23.1</b><br>(22.3 to 23.7)                     | <b>-1.2</b><br>(-1.8 to -0.7)                    |
| <b>Communicable, maternal, neonatal, and nutritional disorders</b>                   | <b>282,864.3</b><br>(279,484.5 to 286,443.8) | <b>1,098,692.8*</b><br>(825,715.9 to 1,416,292.2)   | <b>3,950.8</b><br>(2,888.0 to 5,284.1)    | <b>12.1</b><br>(7.8 to 16.1)                      | <b>-10.0</b><br>(-13.5 to -6.8)                  |
| <b>HIV/AIDS and tuberculosis</b>                                                     | <b>148,388.9</b><br>(130,633.1 to 171,974.9) | <b>617.2†</b><br>(460.9 to 827.0)                   | <b>495.2</b><br>(326.6 to 705.0)          | <b>5.0</b><br>(-13.8 to 27.2)                     | <b>-15.7</b><br>(-30.8 to 2.1)                   |
| Tuberculosis                                                                         | 139,034.5<br>(110,912.6 to 171,289.4)        | 568.1†<br>(412.0 to 780.5)                          | 227.4<br>(135.2 to 361.9)                 | 7.5<br>(3.2 to 12.4)                              | -13.7<br>(-17.2 to -9.8)                         |
| Drug-susceptible tuberculosis                                                        | 726.0<br>(500.1 to 1,051.8)                  | 546.8<br>(395.6 to 752.4)                           | 219.0<br>(129.7 to 348.4)                 | 7.7<br>(3.4 to 12.7)                              | -13.5<br>(-17.0 to -9.5)                         |
| Multidrug-resistant tuberculosis without extensive drug resistance                   | 25.3<br>(17.8 to 35.4)                       | 19.8<br>(14.9 to 26.4)                              | 7.9<br>(4.8 to 12.4)                      | -1.1<br>(-15.3 to 17.6)                           | -20.6<br>(-32.0 to -5.6)                         |
| Extensively drug-resistant tuberculosis                                              | 1.6<br>(1.1 to 2.2)                          | 1.5<br>(1.1 to 1.9)                                 | 0.5<br>(0.3 to 0.8)                       | 178.6<br>(142.1 to 219.2)                         | 123.7<br>(94.4 to 156.3)                         |
| Latent tuberculosis infection                                                        | 138,281.7<br>(110,206.7 to 170,372.1)        | --                                                  | --                                        | --                                                | --                                               |
| HIV/AIDS                                                                             | 2,533.1<br>(2,183.4 to 2,973.0)              | 49.1*<br>(39.0 to 61.5)                             | 267.8<br>(167.6 to 405.2)                 | 2.9<br>(-24.7 to 49.9)                            | -17.4<br>(-39.5 to 20.4)                         |
| Drug-susceptible HIV/AIDS - Tuberculosis                                             | 56.6<br>(39.6 to 79.0)                       | 71.6<br>(51.5 to 97.0)                              | 21.4<br>(12.6 to 33.2)                    | 7.5<br>(-1.3 to 16.5)                             | -13.7<br>(-20.7 to -6.4)                         |
| Multidrug-resistant HIV/AIDS - Tuberculosis without extensive drug resistance        | 1.6<br>(1.1 to 2.4)                          | 2.0<br>(1.3 to 2.9)                                 | 0.7<br>(0.4 to 1.1)                       | -0.2<br>(-16.9 to 16.9)                           | -19.9<br>(-33.2 to -6.1)                         |
| Extensively drug-resistant HIV/AIDS - Tuberculosis                                   | 0.1<br>( $< 0.05$ to 0.1)                    | 0.1<br>( $< 0.05$ to 0.1)                           | $< 0.05$<br>( $< 0.05$ to 0.1)            | 250.8<br>(200.0 to 314.6)                         | 181.7<br>(140.9 to 232.9)                        |
| HIV/AIDS resulting in other diseases                                                 | 2,474.8<br>(2,122.2 to 2,911.1)              | 49.1<br>(39.0 to 61.5)                              | 245.7<br>(151.1 to 376.7)                 | 2.5<br>(-26.4 to 57.1)                            | -17.7<br>(-40.9 to 26.2)                         |
| <b>Diarrhoea, lower respiratory infections, and other common infectious diseases</b> | <b>20,054.5</b><br>(18,691.3 to 21,070.7)    | <b>1,042,243.6†</b><br>(769,238.8 to 1,361,255.9)   | <b>947.6</b><br>(658.6 to 1,318.4)        | <b>20.3</b><br>(18.7 to 21.9)                     | <b>-3.4</b><br>(-4.7 to -2.1)                    |
| Diarrhoeal diseases                                                                  | 2,915.5<br>(2,617.4 to 3,234.4)              | 200,371.9<br>(179,023.2 to 222,792.1)               | 319.4<br>(220.1 to 436.9)                 | 19.2<br>(16.9 to 21.8)                            | -4.3<br>(-6.2 to -2.2)                           |
| Intestinal infectious diseases                                                       | 15.9<br>(12.6 to 19.7)                       | 396.0†<br>(321.0 to 478.4)                          | 2.8<br>(1.8 to 4.2)                       | 1.6<br>(-15.7 to 21.1)                            | -18.4<br>(-32.3 to -2.8)                         |
| Typhoid fever                                                                        | 15.5<br>(12.0 to 19.5)                       | 245.6<br>(196.6 to 297.8)                           | 2.4<br>(1.5 to 3.6)                       | 2.0<br>(-17.8 to 25.1)                            | -18.1<br>(-34.0 to 0.4)                          |
| Paratyphoid fever                                                                    | 6.6<br>(5.2 to 8.2)                          | 150.4<br>(119.9 to 183.6)                           | 0.4<br>(0.3 to 0.6)                       | 0.1<br>(-15.0 to 19.2)                            | -19.7<br>(-31.8 to -4.3)                         |
| Other intestinal infectious diseases                                                 | --                                           | --                                                  | $< 0.05$<br>( $< 0.05$ to $< 0.05$ )      | -18.4<br>(-32.3 to -2.7)                          | -34.5<br>(-45.6 to -21.9)                        |
| Lower respiratory infections                                                         | 356.9<br>(326.5 to 392.6)                    | 15,560.1<br>(13,869.1 to 17,543.2)                  | 21.4<br>(14.1 to 30.2)                    | 41.4<br>(33.7 to 48.8)                            | 13.5<br>(7.4 to 19.5)                            |
| Upper respiratory infections                                                         | 10,849.5<br>(7,300.7 to 14,801.1)            | 815,350.2<br>(542,287.8 to 1,132,202.1)             | 266.2<br>(137.1 to 447.1)                 | 22.9<br>(21.2 to 24.9)                            | -1.3<br>(-2.7 to 0.3)                            |
| Otitis media                                                                         | 4,438.2<br>(3,153.8 to 5,916.8)              | 5,858.9<br>(4,835.5 to 6,962.4)                     | 122.4<br>(70.9 to 191.2)                  | 12.8<br>(7.7 to 18.0)                             | -9.5<br>(-13.5 to -5.2)                          |
| Meningitis                                                                           | 718.4<br>(608.2 to 830.2)                    | 51.8<br>(38.2 to 68.3)                              | 68.1<br>(47.9 to 90.3)                    | 23.5<br>(19.9 to 27.3)                            | -0.8<br>(-3.8 to 2.2)                            |
| Pneumococcal meningitis                                                              | 327.6<br>(271.3 to 395.2)                    | 12.0<br>(7.5 to 18.1)                               | 30.6<br>(21.2 to 42.2)                    | 21.5<br>(15.3 to 28.4)                            | -2.5<br>(-7.4 to 3.1)                            |
| H influenzae type B meningitis                                                       | 83.4<br>(64.1 to 106.8)                      | 3.5<br>(1.9 to 5.7)                                 | 9.7<br>(6.4 to 13.5)                      | 0.7<br>(-6.5 to 6.6)                              | -19.2<br>(-24.9 to -14.4)                        |
| Meningococcal infection                                                              | 77.5<br>(56.7 to 101.3)                      | 9.0<br>(5.2 to 13.4)                                | 7.5<br>(5.1 to 10.4)                      | 25.5<br>(22.6 to 28.5)                            | 0.8<br>(-1.6 to 3.1)                             |
| Other meningitis                                                                     | 230.0<br>(172.3 to 291.3)                    | 27.4<br>(19.5 to 37.0)                              | 20.3<br>(13.7 to 27.7)                    | 41.5<br>(36.6 to 46.7)                            | 13.6<br>(9.7 to 17.8)                            |
| Encephalitis                                                                         | 1,118.4<br>(737.0 to 1,639.0)                | 327.4<br>(279.8 to 381.4)                           | 120.9<br>(84.3 to 159.3)                  | 19.9<br>(14.0 to 26.3)                            | -3.7<br>(-8.4 to 1.4)                            |
| Diphtheria                                                                           | $< 0.05$<br>( $< 0.05$ to $< 0.05$ )         | 0.2<br>(0.2 to 0.3)                                 | $< 0.05$<br>( $< 0.05$ to $< 0.05$ )      | -31.4<br>(-46.0 to -12.3)                         | -44.9<br>(-56.7 to -29.6)                        |
| Whooping cough                                                                       | 1.4<br>(1.1 to 1.8)                          | 10.4<br>(8.1 to 13.1)                               | 0.1<br>( $< 0.05$ to 0.1)                 | -10.1<br>(-12.0 to -8.2)                          | -27.8<br>(-29.3 to -26.3)                        |
| Tetanus                                                                              | 7.0<br>(6.8 to 7.1)                          | 4.6<br>(2.3 to 7.0)                                 | 0.2<br>(0.1 to 0.3)                       | -1.4<br>(-22.8 to 24.1)                           | -20.8<br>(-38.1 to -0.4)                         |
| Measles                                                                              | 0.1<br>( $< 0.05$ to 0.2)                    | 3.7<br>(1.3 to 7.9)                                 | $< 0.05$<br>( $< 0.05$ to $< 0.05$ )      | -53.0<br>(-58.4 to -47.0)                         | -62.2<br>(-66.6 to -57.4)                        |
| Varicella and herpes zoster                                                          | 505.4<br>(420.9 to 602.0)                    | 4,308.2<br>(3,506.8 to 5,233.4)                     | 26.2<br>(15.8 to 41.5)                    | 28.5<br>(22.6 to 34.3)                            | 3.2<br>(-1.6 to 7.8)                             |
| <b>Neglected tropical diseases and malaria</b>                                       | <b>92,793.8</b><br>(89,392.4 to 95,629.5)    | <b>13,428.7†</b><br>(10,951.1 to 16,100.9)          | <b>660.4</b><br>(446.5 to 930.3)          | <b>-5.4</b><br>(-13.2 to 2.1)                     | <b>-24.1</b><br>(-30.3 to -18.0)                 |
| Malaria                                                                              | 2,509.1<br>(2,204.5 to 2,813.7)              | 3,182.1<br>(2,344.8 to 4,109.8)                     | 28.6<br>(21.4 to 36.9)                    | -4.8<br>(-11.8 to 3.2)                            | -23.6<br>(-29.2 to -17.1)                        |
| Chagas disease                                                                       | 612.2<br>(516.7 to 725.2)                    | 7.0<br>(4.7 to 10.2)                                | 5.6<br>(3.6 to 8.2)                       | 12.4<br>(5.2 to 20.1)                             | -9.7<br>(-15.6 to -3.6)                          |
| Leishmaniasis                                                                        | 299.0<br>(227.8 to 369.9)                    | 32.1<br>(24.4 to 42.0)                              | 16.0<br>(9.7 to 25.2)                     | 22.9<br>(14.5 to 35.7)                            | -1.3<br>(-8.0 to 9.0)                            |
| Visceral leishmaniasis                                                               | 1.4<br>(1.0 to 1.9)                          | 5.5<br>(3.9 to 7.7)                                 | 0.1<br>(0.1 to 0.2)                       | -56.0<br>(-71.1 to -32.9)                         | -64.6<br>(-76.8 to -46.1)                        |
| Cutaneous and mucocutaneous leishmaniasis                                            | 256.8<br>(188.4 to 345.8)                    | 26.6<br>(19.0 to 36.0)                              | 15.9<br>(9.6 to 25.1)                     | 24.3<br>(15.6 to 37.9)                            | -0.2<br>(-7.2 to 10.7)                           |
| African trypanosomiasis                                                              | 0.3<br>(0.1 to 1.1)                          | 0.2<br>( $< 0.05$ to 0.7)                           | 0.1<br>( $< 0.05$ to 0.3)                 | -71.7<br>(-95.6 to 64.2)                          | -77.3<br>(-96.5 to 31.8)                         |
| Schistosomiasis                                                                      | 9,947.7<br>(9,321.4 to 10,620.2)             | 2,504.4<br>(2,309.7 to 2,764.0)                     | 73.7<br>(36.6 to 139.5)                   | -25.5<br>(-28.2 to -22.0)                         | -40.2<br>(-42.3 to -37.4)                        |
| Cysticercosis                                                                        | 258.6<br>(176.5 to 355.3)                    | --                                                  | 39.8<br>(24.0 to 61.6)                    | -3.0<br>(-11.5 to 4.5)                            | -22.1<br>(-28.9 to -16.1)                        |
| Cystic echinococcosis                                                                | 59.4<br>(31.1 to 113.6)                      | 11.9<br>(5.5 to 28.4)                               | 5.4<br>(2.5 to 11.0)                      | -5.4<br>(-75.6 to 46.3)                           | -50.3<br>(-80.4 to 17.5)                         |
| Lymphatic filariasis                                                                 | 1,783.2<br>(1,405.1 to 2,328.7)              | 348.8<br>(195.3 to 559.1)                           | 99.7<br>(50.3 to 175.2)                   | -32.4<br>(-48.2 to -19.2)                         | -45.7<br>(-58.4 to -35.1)                        |
| Onchocerciasis                                                                       | 643.6<br>(429.3 to 1,037.8)                  | 140.7<br>(56.4 to 279.7)                            | 50.1<br>(24.4 to 89.9)                    | -20.0<br>(-38.6 to -0.1)                          | -35.8<br>(-50.7 to -19.8)                        |
| Trachoma                                                                             | 111.0<br>(47.6 to 227.0)                     | --                                                  | 10.9<br>(5.6 to 19.6)                     | -0.4<br>(-13.1 to 12.7)                           | -20.0<br>(-30.2 to -9.5)                         |
| Dengue                                                                               | 261.7<br>(142.8 to 442.8)                    | 4,374.8<br>(2,664.7 to 6,629.3)                     | 41.4<br>(18.5 to 77.5)                    | 100.4<br>(61.9 to 355.9)                          | 60.9<br>(30.0 to 266.1)                          |
| Yellow fever                                                                         | 0.1<br>( $< 0.05$ to 0.2)                    | 2.6<br>(0.7 to 6.9)                                 | $< 0.05$<br>( $< 0.05$ to $< 0.05$ )      | -19.8<br>(-48.6 to 24.5)                          | -35.6<br>(-58.7 to -0.1)                         |
| Rabies                                                                               | $< 0.05$<br>( $< 0.05$ to $< 0.05$ )         | 0.7<br>(0.4 to 1.1)                                 | $< 0.05$<br>( $< 0.05$ to $< 0.05$ )      | -49.9<br>(-56.7 to -41.0)                         | -59.7<br>(-65.2 to -52.6)                        |
| Intestinal nematode infections                                                       | 78,149.3<br>(74,126.1 to 81,248.3)           | --                                                  | 131.0<br>(74.7 to 217.5)                  | -2.7<br>(-10.1 to 5.5)                            | -21.9<br>(-27.8 to -15.2)                        |
| Ascariasis                                                                           | 41,874.5<br>(37,309.8 to 47,389.8)           | --                                                  | 42.4<br>(23.2 to 72.0)                    | -16.2<br>(-27.6 to -4.4)                          | -32.7<br>(-41.9 to -23.2)                        |

| Cause                                                                   | Prevalence in thousands (95% UI)                    | Incidence in thousands (95% UI)                          | YLDs in thousands (95% UI)                       |                                                   |                                                  |
|-------------------------------------------------------------------------|-----------------------------------------------------|----------------------------------------------------------|--------------------------------------------------|---------------------------------------------------|--------------------------------------------------|
|                                                                         | 2016 counts                                         | 2016 counts                                              | 2016 counts                                      | Percentage change in counts between 2006 and 2016 | Percentage change in rates between 2006 and 2016 |
| Trichuriasis                                                            | 21,693.5<br>(19,894.7 to 23,843.6)                  | --                                                       | 15.7<br>(8.6 to 26.7)                            | -7.7<br>(-21.3 to 7.7)                            | -25.9<br>(-36.8 to -13.5)                        |
| Hookworm disease                                                        | 22,921.9<br>(21,185.5 to 25,107.9)                  | --                                                       | 73.0<br>(41.4 to 119.5)                          | 8.8<br>(-3.1 to 21.9)                             | -12.7<br>(-22.2 to -2.1)                         |
| Food-borne trematodiasis                                                | 6,151.7<br>(5,650.6 to 6,698.7)                     | 2,335.2<br>(1,034.2 to 3,322.6)                          | 142.8<br>(65.0 to 269.4)                         | 27.7<br>(21.5 to 34.4)                            | 2.5<br>(-2.5 to 7.9)                             |
| Leprosy                                                                 | 53.5<br>(50.6 to 56.4)                              | 5.0<br>(4.6 to 5.4)                                      | 3.3<br>(2.2 to 4.6)                              | 1.4<br>(-6.3 to 10.3)                             | -18.5<br>(-24.8 to -11.4)                        |
| Ebola virus disease                                                     | < 0.05<br>(< 0.05 to 0.2)                           | --                                                       | < 0.05<br>(0.0 to < 0.05)                        | --                                                | --                                               |
| Zika virus disease                                                      | 8.0<br>(4.5 to 15.1)                                | 483.1<br>(273.7 to 915.4)                                | 0.1<br>(0.1 to 0.3)                              | --                                                | --                                               |
| Guinea worm disease                                                     | < 0.05<br>(< 0.05 to < 0.05)                        | < 0.05<br>(< 0.05 to < 0.05)                             | < 0.05<br>(< 0.05 to < 0.05)                     | -99.5<br>(-99.7 to -99.2)                         | -99.6<br>(-99.8 to -99.4)                        |
| Other neglected tropical diseases                                       | 1,054.7<br>(927.0 to 1,197.7)                       | --                                                       | 11.8<br>(7.2 to 19.3)                            | 18.8<br>(10.6 to 26.8)                            | -4.6<br>(-11.2 to 1.8)                           |
| <b>Maternal disorders</b>                                               | <b>158.6</b><br><b>(149.9 to 167.2)</b>             | <b>43.5*</b><br><b>(37.1 to 50.6)</b>                    | <b>14.2</b><br><b>(9.6 to 19.6)</b>              | <b>-18.4</b><br><b>(-27.9 to -8.1)</b>            | <b>-34.5</b><br><b>(-42.1 to -26.2)</b>          |
| Maternal haemorrhage                                                    | 0.6<br>(0.4 to 0.7)                                 | 4.4<br>(3.2 to 5.9)                                      | < 0.05<br>(< 0.05 to 0.1)                        | 10.6<br>(-8.4 to 32.2)                            | -11.2<br>(-26.5 to 6.1)                          |
| Maternal sepsis and other pregnancy related infections                  | 119.1<br>(106.2 to 133.8)                           | 5.9<br>(4.4 to 7.8)                                      | 0.6<br>(0.2 to 1.3)                              | 16.6<br>(7.8 to 25.1)                             | -6.4<br>(-13.5 to 0.5)                           |
| Maternal hypertensive disorders                                         | 1.3<br>(0.8 to 1.8)                                 | 7.0<br>(5.8 to 8.2)                                      | 0.1<br>(< 0.05 to 0.1)                           | -2.0<br>(-35.3 to 49.8)                           | -21.3<br>(-48.0 to 20.2)                         |
| Maternal obstructed labour and uterine rupture                          | 34.4<br>(28.9 to 41.1)                              | 2.2<br>(1.5 to 3.0)                                      | 10.8<br>(6.9 to 15.3)                            | -19.4<br>(-28.6 to -8.7)                          | -35.3<br>(-42.7 to -26.7)                        |
| Maternal abortion, miscarriage, and ectopic pregnancy                   | 0.2<br>(0.1 to 0.3)                                 | 24.0<br>(18.3 to 30.4)                                   | < 0.05<br>(< 0.05 to < 0.05)                     | -7.4<br>(-38.6 to 37.6)                           | -25.7<br>(-50.7 to 10.5)                         |
| Other maternal disorders                                                | --                                                  | --                                                       | 2.7<br>(1.8 to 3.7)                              | -20.9<br>(-30.1 to -10.9)                         | -36.5<br>(-43.9 to -28.4)                        |
| <b>Neonatal disorders</b>                                               | <b>3,262.4</b><br><b>(2,985.1 to 3,568.1)</b>       | <b>--</b>                                                | <b>530.7</b><br><b>(376.5 to 735.1)</b>          | <b>42.0</b><br><b>(27.3 to 60.0)</b>              | <b>14.0</b><br><b>(2.2 to 28.4)</b>              |
| Neonatal preterm birth complications                                    | 2,780.1<br>(2,370.5 to 3,263.8)                     | --                                                       | 334.6<br>(233.4 to 471.8)                        | 41.0<br>(17.2 to 68.8)                            | 13.2<br>(-5.9 to 35.5)                           |
| Neonatal encephalopathy due to birth asphyxia and trauma                | 534.7<br>(357.1 to 788.9)                           | --                                                       | 75.9<br>(34.1 to 152.3)                          | 43.5<br>(33.3 to 64.5)                            | 15.2<br>(7.0 to 32.0)                            |
| Neonatal sepsis and other neonatal infections                           | 243.1<br>(103.4 to 561.2)                           | --                                                       | 92.0<br>(32.6 to 236.2)                          | 45.5<br>(34.5 to 63.0)                            | 16.8<br>(8.0 to 30.9)                            |
| Hemolytic disease and other neonatal jaundice                           | 86.4<br>(77.1 to 96.5)                              | --                                                       | 28.2<br>(21.8 to 35.8)                           | 39.1<br>(32.9 to 45.1)                            | 11.7<br>(6.7 to 16.5)                            |
| Other neonatal disorders                                                | --                                                  | --                                                       | --                                               | --                                                | --                                               |
| <b>Nutritional deficiencies</b>                                         | <b>62,449.6</b><br><b>(59,973.8 to 64,575.2)</b>    | <b>15,398.2†</b><br><b>(13,185.5 to 18,112.3)</b>        | <b>1,148.9</b><br><b>(756.6 to 1,704.1)</b>      | <b>10.0</b><br><b>(6.5 to 13.4)</b>               | <b>-11.7</b><br><b>(-14.5 to -8.9)</b>           |
| Protein-energy malnutrition                                             | --                                                  | --                                                       | --                                               | --                                                | --                                               |
| Iodine deficiency                                                       | 7,713.5<br>(6,913.4 to 8,580.4)                     | 28.1<br>(24.1 to 33.0)                                   | 199.0<br>(135.4 to 276.9)                        | 5.7<br>(3.3 to 8.3)                               | -15.1<br>(-17.1 to -13.1)                        |
| Vitamin A deficiency                                                    | 14,321.2<br>(12,654.1 to 16,363.5)                  | 15,370.1<br>(13,155.8 to 18,082.9)                       | 8.2<br>(5.2 to 12.5)                             | 28.2<br>(19.0 to 38.0)                            | 3.0<br>(-4.4 to 10.8)                            |
| Iron-deficiency anaemia                                                 | 46,463.0<br>(40,610.9 to 53,182.1)                  | --                                                       | 941.7<br>(596.9 to 1,439.1)                      | 10.8<br>(6.7 to 14.8)                             | -11.0<br>(-14.3 to -7.9)                         |
| Other nutritional deficiencies                                          | --                                                  | --                                                       | --                                               | --                                                | --                                               |
| <b>Other communicable, maternal, neonatal, and nutritional diseases</b> | <b>125,060.4</b><br><b>(120,812.3 to 129,577.6)</b> | <b>26,961.6</b><br><b>(22,445.1 to 32,733.5)</b>         | <b>150.2</b><br><b>(100.9 to 222.2)</b>          | <b>20.0</b><br><b>(11.6 to 28.6)</b>              | <b>-3.6</b><br><b>(-10.4 to 3.2)</b>             |
| Sexually transmitted diseases excluding HIV                             | 92,001.2<br>(87,045.5 to 96,950.4)                  | 20,835.4<br>(17,141.2 to 25,510.9)                       | 112.5<br>(74.8 to 168.4)                         | 24.4<br>(19.9 to 29.1)                            | -0.2<br>(-3.7 to 3.7)                            |
| Syphilis                                                                | 3,503.2<br>(2,207.8 to 5,406.2)                     | 2,364.3<br>(1,458.5 to 3,833.2)                          | 20.0<br>(13.6 to 27.1)                           | 30.7<br>(25.6 to 36.2)                            | 4.9<br>(0.8 to 9.3)                              |
| Chlamydial infection                                                    | 603.8<br>(414.1 to 857.4)                           | 1,218.5<br>(888.9 to 1,597.3)                            | 10.9<br>(6.8 to 16.3)                            | 17.5<br>(9.7 to 26.2)                             | -5.6<br>(-11.9 to 1.3)                           |
| Gonococcal infection                                                    | 1,539.7<br>(940.4 to 2,439.9)                       | 5,078.7<br>(3,250.2 to 7,587.2)                          | 18.2<br>(9.8 to 32.0)                            | 37.4<br>(25.6 to 47.8)                            | 10.3<br>(0.8 to 18.7)                            |
| Trichomoniasis                                                          | 11,703.6<br>(8,357.8 to 15,981.3)                   | 9,252.0<br>(6,368.5 to 13,004.5)                         | 12.8<br>(4.8 to 28.4)                            | 25.2<br>(23.0 to 27.4)                            | 0.5<br>(-1.2 to 2.3)                             |
| Genital herpes                                                          | 79,050.6<br>(69,204.4 to 91,411.6)                  | 117.9<br>(65.8 to 192.9)                                 | 19.1<br>(5.6 to 43.6)                            | 23.6<br>(21.2 to 26.2)                            | -0.8<br>(-2.7 to 1.3)                            |
| Other sexually transmitted diseases                                     | 191.2<br>(136.1 to 262.9)                           | 2,803.9<br>(2,035.5 to 3,771.2)                          | 31.5<br>(20.6 to 46.9)                           | 16.8<br>(9.3 to 25.2)                             | -6.2<br>(-12.3 to 0.5)                           |
| Hepatitis                                                               | 43,254.3<br>(37,196.7 to 50,308.3)                  | 6,125.7<br>(3,966.9 to 9,497.3)                          | 14.7<br>(7.8 to 25.8)                            | 2.9<br>(-42.2 to 63.3)                            | -22.0<br>(-53.6 to 31.1)                         |
| Acute hepatitis A                                                       | 64.1<br>(14.2 to 131.9)                             | 833.6<br>(184.4 to 1,714.1)                              | 2.7<br>(0.6 to 6.0)                              | -8.7<br>(-81.8 to 270.5)                          | -26.7<br>(-85.4 to 197.5)                        |
| Hepatitis B                                                             | 31,271.5<br>(25,449.5 to 37,758.5)                  | 4,594.1<br>(2,610.6 to 7,783.2)                          | 10.9<br>(5.2 to 20.2)                            | -1.9<br>(-45.2 to 93.2)                           | -21.2<br>(-56.0 to 55.1)                         |
| Hepatitis C                                                             | 11,887.8<br>(10,715.8 to 13,184.9)                  | 296.1<br>(219.0 to 389.3)                                | 0.3<br>(0.1 to 0.6)                              | 0.3<br>(-3.4 to 3.9)                              | -19.5<br>(-22.4 to -16.6)                        |
| Acute hepatitis E                                                       | 30.9<br>(21.9 to 42.7)                              | 401.9<br>(285.4 to 554.7)                                | 1.0<br>(0.5 to 1.6)                              | 2.0<br>(-18.9 to 27.8)                            | -18.1<br>(-34.9 to 2.6)                          |
| Other infectious diseases                                               | 1,242.9<br>(1,094.0 to 1,423.1)                     | 0.6<br>(0.3 to 1.0)                                      | 22.9<br>(14.1 to 36.2)                           | 17.8<br>(13.0 to 22.7)                            | -5.4<br>(-9.3 to -1.5)                           |
| <b>Non-communicable diseases</b>                                        | <b>399,506.9</b><br><b>(398,845.3 to 400,290.2)</b> | <b>1,023,906.3†</b><br><b>(910,851.5 to 1,138,083.5)</b> | <b>51,238.9</b><br><b>(37,719.7 to 65,758.8)</b> | <b>23.7</b><br><b>(23.0 to 24.4)</b>              | <b>-0.7</b><br><b>(-1.2 to -0.2)</b>             |
| <b>Neoplasms</b>                                                        | <b>3,667.6</b><br><b>(3,608.8 to 3,730.2)</b>       | <b>1,429.3</b><br><b>(1,378.1 to 1,509.5)</b>            | <b>455.3</b><br><b>(333.9 to 594.4)</b>          | <b>25.4</b><br><b>(22.0 to 29.4)</b>              | <b>0.7</b><br><b>(-2.1 to 3.9)</b>               |
| Lip and oral cavity cancer                                              | 149.1<br>(142.4 to 155.5)                           | 40.5<br>(38.6 to 42.3)                                   | 15.5<br>(11.1 to 20.4)                           | 26.8<br>(17.6 to 36.2)                            | 1.8<br>(-5.5 to 9.4)                             |
| Nasopharynx cancer                                                      | 38.1<br>(35.5 to 41.2)                              | 10.9<br>(10.2 to 11.8)                                   | 4.5<br>(3.2 to 6.2)                              | 7.7<br>(-5.3 to 21.8)                             | -13.6<br>(-23.9 to -2.2)                         |
| Other pharynx cancer                                                    | 65.2<br>(61.1 to 68.4)                              | 22.6<br>(21.1 to 23.7)                                   | 7.9<br>(5.7 to 10.3)                             | 29.4<br>(18.3 to 39.5)                            | 3.9<br>(-5.0 to 12.0)                            |
| Oesophageal cancer                                                      | 42.9<br>(41.3 to 45.0)                              | 35.4<br>(34.1 to 36.9)                                   | 9.4<br>(6.6 to 12.5)                             | -7.0<br>(-15.5 to 2.1)                            | -25.3<br>(-32.2 to -18.0)                        |
| Stomach cancer                                                          | 159.6<br>(150.7 to 168.9)                           | 85.6<br>(81.2 to 90.2)                                   | 23.6<br>(16.9 to 31.0)                           | 5.9<br>(-2.9 to 15.1)                             | -15.0<br>(-22.0 to -7.6)                         |
| Colon and rectum cancer                                                 | 449.0<br>(430.2 to 471.7)                           | 120.8<br>(115.6 to 126.7)                                | 43.7<br>(31.9 to 58.0)                           | 30.3<br>(21.5 to 40.8)                            | 4.7<br>(-2.4 to 13.0)                            |
| Liver cancer                                                            | 113.1<br>(99.7 to 127.1)                            | 109.8<br>(100.8 to 117.7)                                | 25.3<br>(17.8 to 33.3)                           | 36.1<br>(22.7 to 51.0)                            | 9.2<br>(-1.5 to 21.2)                            |
| Liver cancer due to hepatitis B                                         | 78.6<br>(61.5 to 93.8)                              | 55.7<br>(43.8 to 66.1)                                   | 12.8<br>(8.2 to 17.7)                            | 34.8<br>(17.0 to 55.4)                            | 8.2<br>(-6.0 to 24.8)                            |

| Cause                                              | Prevalence in thousands (95% UI)                 | Incidence in thousands (95% UI)                | YLDs in thousands (95% UI)                    |                                                   |                                                  |
|----------------------------------------------------|--------------------------------------------------|------------------------------------------------|-----------------------------------------------|---------------------------------------------------|--------------------------------------------------|
|                                                    | 2016 counts                                      | 2016 counts                                    | 2016 counts                                   | Percentage change in counts between 2006 and 2016 | Percentage change in rates between 2006 and 2016 |
| Liver cancer due to hepatitis C                    | 18.5<br>(14.5 to 22.4)                           | 14.1<br>(11.1 to 17.2)                         | 3.3<br>(2.1 to 4.7)                           | 34.9<br>(22.7 to 48.0)                            | 8.3<br>(-1.5 to 18.9)                            |
| Liver cancer due to alcohol use                    | 16.3<br>(11.4 to 22.0)                           | 13.1<br>(9.2 to 17.6)                          | 3.0<br>(1.8 to 4.5)                           | 43.2<br>(29.4 to 62.2)                            | 15.0<br>(3.9 to 30.2)                            |
| Liver cancer due to other causes                   | 38.4<br>(29.9 to 49.3)                           | 26.9<br>(21.3 to 34.3)                         | 6.3<br>(4.1 to 9.0)                           | 36.0<br>(19.2 to 56.4)                            | 9.2<br>(-4.3 to 25.6)                            |
| Gallbladder and biliary tract cancer               | 9.5<br>(8.2 to 10.1)                             | 11.4<br>(10.0 to 12.0)                         | 2.6<br>(1.8 to 3.5)                           | 13.4<br>(7.0 to 19.5)                             | -8.9<br>(-14.1 to -4.1)                          |
| Pancreatic cancer                                  | 21.4<br>(20.8 to 22.0)                           | 26.0<br>(25.5 to 26.5)                         | 5.6<br>(3.9 to 7.4)                           | 20.6<br>(17.0 to 23.9)                            | -3.1<br>(-6.0 to -0.5)                           |
| Larynx cancer                                      | 67.7<br>(65.4 to 70.5)                           | 19.7<br>(19.1 to 20.5)                         | 8.1<br>(5.9 to 10.7)                          | 10.6<br>(4.3 to 17.6)                             | -11.2<br>(-16.3 to -5.6)                         |
| Tracheal, bronchus, and lung cancer                | 190.5<br>(182.2 to 198.5)                        | 139.9<br>(134.3 to 145.2)                      | 35.3<br>(24.7 to 45.8)                        | 13.2<br>(4.7 to 22.8)                             | -9.1<br>(-16.0 to -1.4)                          |
| Malignant skin melanoma                            | 125.0<br>(107.2 to 145.8)                        | 25.5<br>(22.0 to 29.7)                         | 8.3<br>(5.7 to 11.5)                          | 31.8<br>(22.5 to 41.5)                            | 5.8<br>(-1.6 to 13.6)                            |
| Non-melanoma skin cancer                           | 27.9<br>(18.4 to 45.9)                           | 96.7<br>(55.2 to 162.8)                        | 1.2<br>(0.6 to 2.5)                           | -7.8<br>(-21.5 to 6.9)                            | -25.9<br>(-37.0 to -14.2)                        |
| Non-melanoma skin cancer (squamous-cell carcinoma) | 23.9<br>(12.0 to 45.1)                           | 23.5<br>(12.8 to 41.3)                         | 1.1<br>(0.5 to 2.4)                           | -9.4<br>(-24.5 to 5.6)                            | -27.2<br>(-39.4 to -15.2)                        |
| Non-melanoma skin cancer (basal-cell carcinoma)    | 8.4<br>(3.6 to 16.9)                             | 73.2<br>(35.4 to 132.8)                        | 0.1<br>(< 0.05 to 0.2)                        | 18.2<br>(8.0 to 27.0)                             | -5.1<br>(-13.3 to 2.0)                           |
| Breast cancer                                      | 1,051.2<br>(989.2 to 1,114.4)                    | 217.2<br>(204.3 to 230.4)                      | 93.2<br>(65.6 to 125.5)                       | 25.6<br>(16.9 to 35.2)                            | 0.8<br>(-6.2 to 8.5)                             |
| Cervical cancer                                    | 250.7<br>(192.2 to 270.6)                        | 66.0<br>(51.5 to 70.3)                         | 23.9<br>(16.1 to 31.8)                        | 13.2<br>(5.3 to 22.4)                             | -9.1<br>(-15.5 to -1.7)                          |
| Uterine cancer                                     | 265.7<br>(249.6 to 286.0)                        | 55.7<br>(52.4 to 60.0)                         | 20.2<br>(14.3 to 27.4)                        | 36.8<br>(24.4 to 52.4)                            | 9.8<br>(-0.1 to 22.4)                            |
| Ovarian cancer                                     | 92.9<br>(86.2 to 96.9)                           | 30.2<br>(28.3 to 31.3)                         | 14.1<br>(10.1 to 18.4)                        | 24.7<br>(12.2 to 37.9)                            | 0.1<br>(-9.9 to 10.7)                            |
| Prostate cancer                                    | 229.2<br>(201.8 to 268.8)                        | 52.9<br>(47.0 to 60.6)                         | 19.4<br>(13.2 to 26.7)                        | 34.4<br>(23.2 to 46.1)                            | 7.9<br>(-1.1 to 17.3)                            |
| Testicular cancer                                  | 16.6<br>(15.5 to 18.1)                           | 3.3<br>(3.1 to 3.6)                            | 1.2<br>(0.8 to 1.6)                           | 38.2<br>(21.4 to 57.8)                            | 11.0<br>(-2.5 to 26.7)                           |
| Kidney cancer                                      | 123.2<br>(116.9 to 129.0)                        | 32.7<br>(31.2 to 34.2)                         | 11.1<br>(8.0 to 14.9)                         | 22.0<br>(14.2 to 30.0)                            | -2.0<br>(-8.3 to 4.4)                            |
| Bladder cancer                                     | 109.4<br>(105.5 to 112.7)                        | 26.4<br>(25.5 to 27.3)                         | 10.5<br>(7.5 to 14.0)                         | 24.5<br>(17.5 to 32.0)                            | 0.0<br>(-5.7 to 6.0)                             |
| Brain and nervous system cancer                    | 64.0<br>(57.7 to 71.8)                           | 28.4<br>(26.1 to 32.4)                         | 9.1<br>(6.5 to 12.1)                          | 35.5<br>(27.0 to 47.6)                            | 8.8<br>(2.0 to 18.5)                             |
| Thyroid cancer                                     | 155.1<br>(146.3 to 164.9)                        | 29.6<br>(27.9 to 31.4)                         | 9.7<br>(6.7 to 13.5)                          | 52.5<br>(41.1 to 64.7)                            | 22.4<br>(13.3 to 32.2)                           |
| Mesothelioma                                       | 3.8<br>(3.5 to 4.1)                              | 2.5<br>(2.3 to 2.7)                            | 0.8<br>(0.6 to 1.1)                           | 23.4<br>(15.1 to 29.6)                            | -0.9<br>(-7.6 to 4.1)                            |
| Hodgkin lymphoma                                   | 21.6<br>(19.4 to 24.4)                           | 5.5<br>(4.9 to 6.3)                            | 2.2<br>(1.5 to 2.9)                           | 19.9<br>(10.7 to 29.2)                            | -3.7<br>(-11.1 to 3.8)                           |
| Non-Hodgkin's lymphoma                             | 137.2<br>(124.6 to 152.3)                        | 38.2<br>(34.7 to 41.9)                         | 12.5<br>(9.0 to 16.8)                         | 52.5<br>(42.3 to 60.8)                            | 22.4<br>(14.2 to 29.1)                           |
| Multiple myeloma                                   | 26.3<br>(23.2 to 29.9)                           | 10.7<br>(9.6 to 12.4)                          | 5.7<br>(3.9 to 7.6)                           | 41.5<br>(34.1 to 49.7)                            | 13.6<br>(7.7 to 20.2)                            |
| Leukaemia                                          | 106.2<br>(93.4 to 113.6)                         | 30.5<br>(26.9 to 32.4)                         | 14.1<br>(10.0 to 19.0)                        | 36.0<br>(27.7 to 45.6)                            | 9.2<br>(2.5 to 16.9)                             |
| Acute lymphoid leukaemia                           | 12.8<br>(11.0 to 13.8)                           | 3.7<br>(3.2 to 4.0)                            | 1.7<br>(1.2 to 2.3)                           | 55.0<br>(41.3 to 65.9)                            | 24.4<br>(13.4 to 33.2)                           |
| Chronic lymphoid leukaemia                         | 33.2<br>(30.3 to 36.5)                           | 7.4<br>(6.7 to 8.1)                            | 4.1<br>(2.9 to 5.5)                           | 45.1<br>(34.5 to 56.9)                            | 16.5<br>(8.0 to 26.0)                            |
| Acute myeloid leukaemia                            | 9.2<br>(8.3 to 10.1)                             | 7.0<br>(6.2 to 7.6)                            | 1.9<br>(1.3 to 2.6)                           | 41.7<br>(34.5 to 48.9)                            | 13.8<br>(8.0 to 19.6)                            |
| Chronic myeloid leukaemia                          | 8.6<br>(7.5 to 9.5)                              | 3.0<br>(2.6 to 3.3)                            | 1.1<br>(0.8 to 1.5)                           | 12.5<br>(6.1 to 19.0)                             | -9.7<br>(-14.8 to -4.5)                          |
| Other leukaemia                                    | 42.4<br>(34.0 to 47.0)                           | 9.4<br>(7.5 to 10.4)                           | 5.2<br>(3.6 to 7.1)                           | 28.1<br>(14.7 to 44.5)                            | 2.9<br>(-7.9 to 16.0)                            |
| Other neoplasms                                    | 189.3<br>(171.3 to 199.2)                        | 54.8<br>(49.6 to 57.4)                         | 16.5<br>(11.8 to 21.7)                        | 55.3<br>(46.1 to 64.5)                            | 24.7<br>(17.3 to 32.1)                           |
| <b>Cardiovascular diseases</b>                     | <b>37,851.0</b><br><b>(36,605.9 to 38,801.2)</b> | <b>4,126.6†</b><br><b>(3,763.6 to 4,503.2)</b> | <b>2,379.7</b><br><b>(1,697.9 to 3,112.1)</b> | <b>27.8</b><br><b>(24.0 to 32.0)</b>              | <b>2.6</b><br><b>(-0.4 to 6.0)</b>               |
| Rheumatic heart disease                            | 1,802.5<br>(1,631.6 to 2,007.0)                  | 12.7<br>(10.4 to 15.0)                         | 89.4<br>(58.1 to 128.9)                       | 20.7<br>(16.3 to 24.6)                            | -3.1<br>(-6.6 to 0.0)                            |
| Ischaemic heart disease                            | 12,174.8<br>(11,162.3 to 13,224.5)               | 1,463.4<br>(1,273.8 to 1,658.5)                | 579.9<br>(389.7 to 819.9)                     | 28.0<br>(26.4 to 29.7)                            | 2.8<br>(1.5 to 4.2)                              |
| Cerebrovascular disease                            | 6,633.5<br>(6,310.7 to 6,919.1)                  | 1,173.5†<br>(1,018.5 to 1,342.2)               | 1,082.7<br>(767.4 to 1,411.2)                 | 30.6<br>(22.4 to 39.4)                            | 4.8<br>(-1.8 to 12.0)                            |
| Ischaemic stroke                                   | 5,440.1<br>(4,663.3 to 6,317.2)                  | 805.5†<br>(656.3 to 962.0)                     | 864.9<br>(610.0 to 1,150.5)                   | 33.0<br>(23.4 to 43.5)                            | 6.8<br>(-0.9 to 15.2)                            |
| Hemorrhagic stroke                                 | 1,371.5<br>(1,144.6 to 1,652.0)                  | 368.0†<br>(307.6 to 433.7)                     | 217.8<br>(147.3 to 290.3)                     | 21.6<br>(9.6 to 34.4)                             | -2.4<br>(-12.0 to 7.9)                           |
| Hypertensive heart disease                         | 1,264.3<br>(981.5 to 1,582.1)                    | --                                             | 105.8<br>(68.6 to 153.6)                      | 26.2<br>(22.2 to 30.3)                            | 1.3<br>(-1.9 to 4.6)                             |
| Cardiomyopathy and myocarditis                     | 443.8<br>(400.9 to 494.5)                        | 173.8†<br>(127.2 to 235.0)                     | 43.1<br>(27.0 to 62.7)                        | 21.7<br>(16.3 to 26.9)                            | -2.3<br>(-6.6 to 1.9)                            |
| Myocarditis                                        | 98.4<br>(79.3 to 121.1)                          | 173.8<br>(127.2 to 235.0)                      | 7.1<br>(4.5 to 10.2)                          | 21.1<br>(14.2 to 28.1)                            | -2.8<br>(-8.3 to 2.8)                            |
| Alcoholic cardiomyopathy                           | 175.7<br>(134.4 to 225.2)                        | --                                             | 14.9<br>(9.3 to 21.9)                         | 20.0<br>(9.3 to 31.3)                             | -3.7<br>(-12.2 to 5.4)                           |
| Other cardiomyopathy                               | 250.6<br>(186.0 to 323.4)                        | --                                             | 21.1<br>(13.0 to 30.9)                        | 23.2<br>(16.7 to 29.5)                            | -1.1<br>(-6.3 to 4.0)                            |
| Atrial fibrillation and flutter                    | 2,048.8<br>(1,716.4 to 2,454.4)                  | 218.5<br>(170.9 to 268.5)                      | 168.8<br>(108.7 to 244.2)                     | 25.4<br>(21.9 to 28.8)                            | 0.7<br>(-2.1 to 3.4)                             |
| Peripheral vascular disease                        | 9,909.7<br>(7,890.5 to 12,465.9)                 | 1,017.3<br>(769.6 to 1,306.4)                  | 10.6<br>(4.6 to 19.4)                         | 18.0<br>(14.5 to 21.7)                            | -5.2<br>(-8.1 to -2.3)                           |
| Endocarditis                                       | 23.4<br>(18.2 to 29.7)                           | 67.3<br>(50.9 to 84.8)                         | 1.9<br>(1.2 to 2.9)                           | 24.4<br>(21.2 to 28.0)                            | -0.1<br>(-2.7 to 2.8)                            |
| Other cardiovascular and circulatory diseases      | 5,643.0<br>(4,056.8 to 7,609.0)                  | --                                             | 297.6<br>(184.2 to 454.0)                     | 23.2<br>(20.0 to 26.1)                            | -1.0<br>(-3.6 to 1.3)                            |
| <b>Chronic respiratory diseases</b>                | <b>41,113.5</b><br><b>(40,124.7 to 41,897.6)</b> | <b>5,632.5†</b><br><b>(5,022.0 to 6,243.4)</b> | <b>2,470.9</b><br><b>(2,031.5 to 2,906.6)</b> | <b>26.1</b><br><b>(23.3 to 29.2)</b>              | <b>1.3</b><br><b>(-1.0 to 3.8)</b>               |
| Chronic obstructive pulmonary disease              | 24,558.2<br>(22,889.0 to 26,195.6)               | 2,110.9<br>(1,824.2 to 2,436.8)                | 1,676.7<br>(1,426.0 to 1,902.8)               | 24.2<br>(20.3 to 28.2)                            | -0.3<br>(-3.4 to 3.0)                            |
| Pneumoconiosis                                     | 81.7<br>(72.0 to 92.5)                           | 11.9<br>(10.3 to 13.8)                         | 12.7<br>(8.3 to 18.2)                         | 22.5<br>(14.1 to 31.7)                            | -1.6<br>(-8.4 to 5.7)                            |
| Silicosis                                          | 22.9<br>(18.2 to 28.3)                           | 4.0<br>(2.8 to 5.7)                            | 3.6<br>(2.2 to 5.4)                           | 24.8<br>(12.8 to 38.0)                            | 0.2<br>(-9.4 to 10.8)                            |

| Cause                                                          | Prevalence in thousands (95% UI)              | Incidence in thousands (95% UI)             | YLDs in thousands (95% UI)                |                                                   |                                                  |
|----------------------------------------------------------------|-----------------------------------------------|---------------------------------------------|-------------------------------------------|---------------------------------------------------|--------------------------------------------------|
|                                                                | 2016 counts                                   | 2016 counts                                 | 2016 counts                               | Percentage change in counts between 2006 and 2016 | Percentage change in rates between 2006 and 2016 |
| Asbestosis                                                     | 9.8<br>(7.9 to 12.0)                          | 1.1<br>(0.8 to 1.4)                         | 1.5<br>(1.0 to 2.2)                       | 12.9<br>(10.8 to 14.8)                            | -9.4<br>(-11.0 to -7.9)                          |
| Coal workers pneumoconiosis                                    | 27.7<br>(21.9 to 34.4)                        | 4.2<br>(3.4 to 5.0)                         | 4.2<br>(2.6 to 6.2)                       | 21.6<br>(-0.2 to 46.9)                            | -2.4<br>(-19.8 to 17.9)                          |
| Other pneumoconiosis                                           | 21.3<br>(16.0 to 27.3)                        | 2.7<br>(2.0 to 3.5)                         | 3.4<br>(2.0 to 5.0)                       | 26.3<br>(21.5 to 30.2)                            | 1.4<br>(-2.5 to 4.5)                             |
| Asthma                                                         | 18,444.5<br>(16,063.4 to 20,903.3)            | 3,484.4<br>(2,961.2 to 4,047.2)             | 708.2<br>(459.2 to 1,032.7)               | 29.5<br>(26.5 to 32.3)                            | 4.0<br>(1.6 to 6.2)                              |
| Interstitial lung disease and pulmonary sarcoidosis            | 256.7<br>(211.7 to 307.2)                     | 25.2<br>(17.1 to 35.0)                      | 28.3<br>(17.8 to 43.2)                    | 22.7<br>(15.1 to 29.9)                            | -1.4<br>(-7.6 to 4.3)                            |
| Other chronic respiratory diseases                             | --                                            | --                                          | 45.0<br>(38.0 to 51.0)                    | 60.4<br>(55.5 to 65.5)                            | 28.8<br>(24.9 to 32.9)                           |
| <b>Cirrhosis and other chronic liver diseases</b>              | <b>5,465.3<br/>(5,102.8 to 5,850.3)</b>       | <b>178.6<br/>(151.4 to 209.4)</b>           | <b>145.2<br/>(97.6 to 203.3)</b>          | <b>24.9<br/>(20.1 to 29.4)</b>                    | <b>0.3<br/>(-3.6 to 3.9)</b>                     |
| Cirrhosis and other chronic liver diseases due to hepatitis B  | 1,517.5<br>(1,292.9 to 1,750.3)               | 51.4<br>(40.7 to 64.1)                      | 43.9<br>(29.2 to 63.1)                    | 26.7<br>(19.5 to 34.4)                            | 1.7<br>(-4.0 to 7.9)                             |
| Cirrhosis and other chronic liver diseases due to hepatitis C  | 1,421.5<br>(1,173.3 to 1,676.9)               | 48.0<br>(37.5 to 59.8)                      | 37.4<br>(24.2 to 53.9)                    | 26.5<br>(19.4 to 34.5)                            | 1.6<br>(-4.1 to 8.0)                             |
| Cirrhosis and other chronic liver diseases due to alcohol use  | 1,615.4<br>(1,390.4 to 1,869.7)               | 53.0<br>(42.1 to 65.3)                      | 41.6<br>(27.7 to 60.8)                    | 23.2<br>(16.1 to 30.3)                            | -1.1<br>(-6.8 to 4.6)                            |
| Cirrhosis and other chronic liver diseases due to other causes | 910.9<br>(688.3 to 1,170.8)                   | 26.2<br>(19.1 to 34.6)                      | 22.4<br>(14.0 to 34.1)                    | 22.2<br>(12.8 to 32.0)                            | 1.9<br>(-9.5 to 6.0)                             |
| <b>Digestive diseases</b>                                      | <b>25,249.5<br/>(23,485.0 to 26,985.5)</b>    | <b>19,958.7†<br/>(17,124.7 to 23,356.2)</b> | <b>647.4<br/>(435.5 to 895.8)</b>         | <b>39.2<br/>(31.0 to 48.0)</b>                    | <b>11.8<br/>(5.2 to 18.8)</b>                    |
| Peptic ulcer disease                                           | 7,702.3<br>(6,287.5 to 9,359.6)               | 778.8<br>(587.0 to 982.6)                   | 128.9<br>(70.7 to 208.4)                  | 60.9<br>(45.8 to 76.9)                            | 29.2<br>(17.1 to 42.1)                           |
| Gastritis and duodenitis                                       | 11,733.2<br>(8,823.2 to 14,998.4)             | 7,645.1<br>(5,736.4 to 10,225.3)            | 150.2<br>(88.2 to 234.8)                  | 61.8<br>(46.9 to 76.8)                            | 29.9<br>(17.9 to 42.0)                           |
| Appendicitis                                                   | 28.9<br>(23.2 to 35.1)                        | 751.8<br>(609.1 to 907.2)                   | 8.9<br>(5.7 to 13.0)                      | 27.3<br>(16.6 to 38.7)                            | 2.2<br>(-6.4 to 11.3)                            |
| Paralytic ileus and intestinal obstruction                     | 12.6<br>(9.5 to 16.2)                         | 344.7<br>(255.3 to 438.9)                   | 4.1<br>(2.5 to 6.1)                       | 31.0<br>(27.8 to 34.0)                            | 5.2<br>(2.6 to 7.6)                              |
| Inguinal, femoral, and abdominal hernia                        | 4,167.1<br>(3,088.2 to 5,353.9)               | 3,596.5<br>(2,533.2 to 4,836.0)             | 174.0<br>(107.0 to 265.6)                 | 18.4<br>(13.3 to 23.0)                            | -4.9<br>(-9.1 to -1.2)                           |
| Inflammatory bowel disease                                     | 687.3<br>(579.8 to 812.3)                     | 284.0<br>(226.4 to 351.4)                   | 99.0<br>(66.2 to 139.0)                   | 29.9<br>(23.3 to 36.8)                            | 4.3<br>(-1.0 to 9.8)                             |
| Vascular intestinal disorders                                  | 5.9<br>(3.8 to 9.0)                           | 33.9<br>(23.1 to 48.6)                      | 1.9<br>(1.1 to 3.2)                       | 26.1<br>(20.4 to 30.7)                            | 1.2<br>(-3.4 to 4.9)                             |
| Gallbladder and biliary diseases                               | 1,881.5<br>(1,426.0 to 2,510.0)               | 6,023.7<br>(4,600.6 to 7,812.6)             | 27.3<br>(16.5 to 41.8)                    | 32.2<br>(23.4 to 41.5)                            | 6.1<br>(-0.9 to 13.6)                            |
| Pancreatitis                                                   | 56.4<br>(42.7 to 71.9)                        | 500.1<br>(380.2 to 639.9)                   | 7.1<br>(4.3 to 10.7)                      | 28.4<br>(14.5 to 41.6)                            | 3.1<br>(-8.1 to 13.7)                            |
| Other digestive diseases                                       | --                                            | --                                          | 45.8<br>(30.8 to 63.4)                    | 48.5<br>(39.7 to 57.8)                            | 19.2<br>(12.2 to 26.7)                           |
| <b>Neurological disorders</b>                                  | <b>169,972.0<br/>(159,135.5 to 180,646.1)</b> | <b>61,595.8<br/>(40,189.0 to 91,359.1)</b>  | <b>4,546.7<br/>(3,091.7 to 6,167.2)</b>   | <b>24.2<br/>(22.7 to 25.8)</b>                    | <b>-0.3<br/>(-1.5 to 1.0)</b>                    |
| Alzheimer's disease and other dementias                        | 782.5<br>(577.0 to 1,023.4)                   | 139.4<br>(93.5 to 201.3)                    | 99.3<br>(60.1 to 150.2)                   | 22.4<br>(17.7 to 26.6)                            | -1.8<br>(-5.5 to 1.7)                            |
| Parkinson's disease                                            | 247.4<br>(172.8 to 350.5)                     | 34.3<br>(22.7 to 48.1)                      | 31.0<br>(18.4 to 47.8)                    | 32.5<br>(23.9 to 42.0)                            | 6.4<br>(-0.5 to 14.0)                            |
| Epilepsy                                                       | 1,168.9<br>(953.4 to 1,426.3)                 | 90.1<br>(62.3 to 121.1)                     | 345.8<br>(238.0 to 485.5)                 | 18.1<br>(6.1 to 31.1)                             | -5.2<br>(-14.8 to 5.2)                           |
| Multiple sclerosis                                             | 241.8<br>(221.9 to 264.6)                     | 1.7<br>(1.0 to 2.3)                         | 63.5<br>(44.8 to 82.9)                    | 28.9<br>(22.2 to 36.1)                            | 3.5<br>(-1.9 to 9.3)                             |
| Motor neuron disease                                           | 24.1<br>(18.7 to 31.1)                        | 4.6<br>(3.2 to 6.5)                         | 5.1<br>(3.4 to 7.4)                       | 26.3<br>(23.6 to 28.6)                            | 1.4<br>(-0.7 to 3.3)                             |
| Migraine                                                       | 77,102.8<br>(71,263.1 to 82,744.4)            | 5,336.8<br>(4,533.5 to 6,292.7)             | 3,364.7<br>(2,182.2 to 4,728.5)           | 24.3<br>(23.2 to 25.5)                            | -0.2<br>(-1.1 to 0.8)                            |
| Tension-type headache                                          | 118,597.4<br>(84,501.6 to 157,672.9)          | 55,985.7<br>(34,619.6 to 85,843.1)          | 541.2<br>(336.4 to 811.2)                 | 24.9<br>(23.1 to 27.0)                            | 0.3<br>(-1.1 to 2.0)                             |
| Other neurological disorders                                   | 1.6<br>(0.8 to 2.8)                           | 3.2<br>(1.7 to 5.0)                         | 96.0<br>(67.5 to 129.0)                   | 33.3<br>(24.2 to 42.9)                            | 7.0<br>(-0.3 to 14.8)                            |
| <b>Mental and substance use disorders</b>                      | <b>73,359.8<br/>(71,942.1 to 74,740.7)</b>    | <b>28,817.6†<br/>(25,727.5 to 32,160.0)</b> | <b>10,462.4<br/>(7,647.4 to 13,555.3)</b> | <b>20.9<br/>(19.9 to 21.9)</b>                    | <b>-2.9<br/>(-3.7 to -2.1)</b>                   |
| Schizophrenia                                                  | 2,066.3<br>(1,809.5 to 2,352.2)               | 46.4<br>(38.0 to 56.9)                      | 1,307.5<br>(986.6 to 1,619.8)             | 25.0<br>(22.7 to 27.3)                            | 0.3<br>(-1.4 to 2.2)                             |
| Alcohol use disorders                                          | 7,452.2<br>(5,940.6 to 9,080.6)               | 3,277.0<br>(2,538.4 to 4,103.2)             | 731.9<br>(474.8 to 1,025.0)               | 13.7<br>(8.5 to 18.4)                             | -8.7<br>(-12.9 to -4.9)                          |
| Drug use disorders                                             | 2,376.4<br>(2,269.0 to 2,462.8)               | 238.7<br>(197.9 to 294.9)                   | 610.8<br>(423.9 to 790.4)                 | 26.2<br>(22.6 to 30.0)                            | 1.3<br>(-1.6 to 4.4)                             |
| Opioid use disorders                                           | 1,147.3<br>(916.5 to 1,395.0)                 | 141.5<br>(104.0 to 191.7)                   | 464.0<br>(313.8 to 621.8)                 | 27.5<br>(22.8 to 32.1)                            | 2.4<br>(-1.4 to 6.0)                             |
| Cocaine use disorders                                          | 349.2<br>(304.8 to 394.7)                     | 9.4<br>(5.9 to 13.4)                        | 46.9<br>(28.9 to 66.3)                    | 20.7<br>(14.8 to 27.0)                            | -3.1<br>(-7.8 to 2.0)                            |
| Amphetamine use disorders                                      | 88.0<br>(63.0 to 118.7)                       | 11.1<br>(5.5 to 17.9)                       | 11.7<br>(6.2 to 19.4)                     | 20.0<br>(8.3 to 30.4)                             | -3.7<br>(-13.0 to 4.7)                           |
| Cannabis use disorders                                         | 593.4<br>(479.4 to 738.2)                     | 39.7<br>(23.9 to 60.5)                      | 17.2<br>(10.5 to 25.7)                    | 20.8<br>(13.5 to 29.1)                            | -3.0<br>(-8.9 to 3.7)                            |
| Other drug use disorders                                       | 306.4<br>(254.2 to 365.8)                     | 37.1<br>(27.3 to 50.0)                      | 71.0<br>(47.1 to 96.8)                    | 23.7<br>(19.3 to 28.4)                            | -0.7<br>(-4.2 to 3.1)                            |
| Depressive disorders                                           | 23,607.0<br>(22,582.9 to 24,424.0)            | 22,708.3<br>(19,678.5 to 25,925.3)          | 3,779.8<br>(2,549.6 to 5,150.3)           | 17.8<br>(16.1 to 19.4)                            | -5.4<br>(-6.8 to -4.2)                           |
| Major depressive disorder                                      | 13,894.7<br>(12,117.5 to 15,865.3)            | 21,195.6<br>(18,257.0 to 24,423.7)          | 2,803.1<br>(1,892.0 to 3,896.4)           | 15.5<br>(13.7 to 17.2)                            | -7.3<br>(-8.7 to -5.9)                           |
| Dysthymia                                                      | 10,215.9<br>(8,460.8 to 12,421.1)             | 1,512.7<br>(1,207.7 to 1,850.6)             | 976.7<br>(627.5 to 1,435.3)               | 24.9<br>(21.8 to 28.5)                            | 0.3<br>(-2.2 to 3.1)                             |
| Bipolar disorder                                               | 3,183.5<br>(2,646.0 to 3,845.1)               | 185.2<br>(122.2 to 264.6)                   | 637.8<br>(392.6 to 966.2)                 | 24.5<br>(22.2 to 27.0)                            | -0.0<br>(-1.9 to 2.0)                            |
| Anxiety disorders                                              | 19,643.2<br>(17,749.1 to 21,730.0)            | 2,310.5<br>(2,067.3 to 2,566.9)             | 1,857.4<br>(1,291.5 to 2,519.3)           | 23.3<br>(20.8 to 25.8)                            | -1.0<br>(-3.0 to 1.0)                            |
| Eating disorders                                               | --                                            | --                                          | --                                        | --                                                | --                                               |
| Anorexia nervosa                                               | --                                            | --                                          | --                                        | --                                                | --                                               |
| Bulimia nervosa                                                | --                                            | --                                          | --                                        | --                                                | --                                               |
| Autistic spectrum disorders                                    | 3,077.0<br>(2,950.5 to 3,186.6)               | --                                          | 444.4<br>(304.3 to 624.3)                 | 24.6<br>(22.5 to 26.6)                            | 0.1<br>(-1.6 to 1.7)                             |
| Autism                                                         | 948.8<br>(815.6 to 1,108.4)                   | --                                          | 235.3<br>(151.4 to 339.7)                 | 24.2<br>(20.9 to 27.4)                            | -0.3<br>(-2.9 to 2.3)                            |
| Asperger syndrome and other autistic spectrum disorders        | 2,134.4<br>(1,787.0 to 2,535.5)               | --                                          | 209.1<br>(136.4 to 303.0)                 | 25.1<br>(22.8 to 27.3)                            | 0.4<br>(-1.4 to 2.2)                             |

| Cause                                                      | Prevalence in thousands (95% UI)              | Incidence in thousands (95% UI)                | YLDs in thousands (95% UI)                 |                                                   |                                                  |
|------------------------------------------------------------|-----------------------------------------------|------------------------------------------------|--------------------------------------------|---------------------------------------------------|--------------------------------------------------|
|                                                            | 2016 counts                                   | 2016 counts                                    | 2016 counts                                | Percentage change in counts between 2006 and 2016 | Percentage change in rates between 2006 and 2016 |
| Attention-deficit/hyperactivity disorder                   | 1,649.4<br>(1,437.3 to 1,877.2)               | --                                             | 19.4<br>(11.7 to 30.9)                     | 24.7<br>(20.3 to 29.4)                            | 0.1<br>(-3.4 to 3.9)                             |
| Conduct disorder                                           | --                                            | --                                             | --                                         | --                                                | --                                               |
| Idiopathic developmental intellectual disability           | 4,838.2<br>(2,802.0 to 6,867.4)               | --                                             | 200.4<br>(97.2 to 342.3)                   | 13.3<br>(8.2 to 16.2)                             | -9.0<br>(-13.1 to -6.7)                          |
| Other mental and substance use disorders                   | 11,852.4<br>(10,434.7 to 13,529.2)            | 51.5<br>(31.9 to 74.9)                         | 872.9<br>(595.6 to 1,246.0)                | 24.5<br>(22.7 to 26.3)                            | -0.0<br>(-1.5 to 1.4)                            |
| <b>Diabetes, urogenital, blood, and endocrine diseases</b> | <b>195,480.1<br/>(194,141.8 to 196,929.2)</b> | <b>50,855.1†<br/>(44,189.6 to 57,409.6)</b>    | <b>6,037.4<br/>(4,266.2 to 8,374.3)</b>    | <b>23.3<br/>(20.9 to 25.9)</b>                    | <b>-1.0<br/>(-2.9 to 1.1)</b>                    |
| Diabetes mellitus                                          | 44,201.7<br>(38,494.2 to 49,901.0)            | 2,570.9<br>(2,034.7 to 3,228.2)                | 3,379.6<br>(2,274.7 to 4,788.4)            | 22.3<br>(18.3 to 26.7)                            | -1.8<br>(-5.0 to 1.7)                            |
| Acute glomerulonephritis                                   | 7.3<br>(4.8 to 10.3)                          | 106.6<br>(69.7 to 155.3)                       | 0.4<br>(0.2 to 0.6)                        | 5.7<br>(2.7 to 8.3)                               | -15.2<br>(-17.6 to -13.0)                        |
| Chronic kidney disease                                     | 20,038.2<br>(17,131.9 to 23,606.5)            | 1,651.0<br>(1,103.2 to 2,294.3)                | 714.1<br>(513.5 to 944.5)                  | 31.3<br>(27.1 to 35.8)                            | 5.4<br>(2.1 to 9.1)                              |
| Chronic kidney disease due to diabetes mellitus            | 9,733.9<br>(7,249.9 to 12,245.8)              | 804.7<br>(508.4 to 1,188.0)                    | 364.7<br>(244.4 to 509.4)                  | 31.4<br>(26.2 to 37.3)                            | 5.5<br>(1.4 to 10.2)                             |
| Chronic kidney disease due to hypertension                 | 3,007.4<br>(2,217.8 to 3,948.0)               | 259.4<br>(148.4 to 414.3)                      | 114.7<br>(73.3 to 168.1)                   | 37.1<br>(29.3 to 46.3)                            | 10.0<br>(3.9 to 17.5)                            |
| Chronic kidney disease due to glomerulonephritis           | 3,148.4<br>(2,390.6 to 4,052.6)               | 245.1<br>(152.9 to 376.9)                      | 99.5<br>(56.6 to 152.1)                    | 25.1<br>(17.6 to 32.4)                            | 0.5<br>(-5.6 to 6.3)                             |
| Chronic kidney disease due to other causes                 | 4,148.5<br>(2,671.3 to 5,987.5)               | 341.8<br>(193.5 to 548.4)                      | 135.2<br>(81.1 to 209.7)                   | 31.1<br>(25.1 to 37.5)                            | 5.3<br>(0.4 to 10.4)                             |
| Urinary diseases and male infertility                      | 13,535.8<br>(11,958.6 to 15,377.6)            | 29,604.0†<br>(24,107.6 to 35,237.4)            | 458.6<br>(295.6 to 675.6)                  | 20.2<br>(17.5 to 22.8)                            | -3.5<br>(-5.7 to -1.4)                           |
| Interstitial nephritis and urinary tract infections        | 390.4<br>(292.7 to 494.6)                     | 20,316.6<br>(15,316.7 to 25,491.1)             | 12.7<br>(7.2 to 20.4)                      | 28.4<br>(21.7 to 34.8)                            | 3.1<br>(-2.3 to 8.2)                             |
| Urolithiasis                                               | 294.8<br>(219.2 to 387.6)                     | 7,774.9<br>(5,742.5 to 10,308.8)               | 21.6<br>(12.9 to 32.5)                     | 21.5<br>(12.5 to 31.6)                            | -2.5<br>(-9.7 to 5.7)                            |
| Benign prostatic hyperplasia                               | 12,346.2<br>(10,251.5 to 14,822.0)            | 1,512.5<br>(1,204.2 to 1,885.3)                | 413.9<br>(256.5 to 610.0)                  | 20.3<br>(17.5 to 23.3)                            | -3.4<br>(-5.7 to -1.0)                           |
| Male infertility                                           | --                                            | --                                             | --                                         | --                                                | --                                               |
| Other urinary diseases                                     | --                                            | --                                             | 10.4<br>(6.8 to 15.1)                      | 4.7<br>(-0.8 to 10.5)                             | -16.0<br>(-20.3 to -11.3)                        |
| Gynecological diseases                                     | 76,204.4<br>(74,708.2 to 77,341.8)            | 15,363.2†<br>(12,181.2 to 18,885.3)            | 991.5<br>(673.6 to 1,401.6)                | 19.9<br>(17.4 to 22.5)                            | -3.7<br>(-5.8 to -1.7)                           |
| Uterine fibroids                                           | 15,189.9<br>(13,400.3 to 17,410.2)            | 325.5<br>(202.0 to 490.0)                      | 202.9<br>(119.3 to 339.5)                  | 21.1<br>(18.5 to 23.3)                            | -2.7<br>(-4.9 to -1.0)                           |
| Polycystic ovarian syndrome                                | 0.7<br>(0.6 to 0.9)                           | --                                             | < 0.05<br>(< 0.05 to < 0.05)               | 16.4<br>(15.1 to 17.9)                            | -6.5<br>(-7.6 to -5.4)                           |
| Female infertility                                         | --                                            | --                                             | --                                         | --                                                | --                                               |
| Endometriosis                                              | 261.7<br>(228.3 to 303.7)                     | 8.7<br>(0.5 to 39.6)                           | 24.0<br>(15.9 to 34.4)                     | 26.1<br>(16.9 to 35.1)                            | 1.2<br>(-6.2 to 8.4)                             |
| Genital prolapse                                           | 35,806.1<br>(31,467.5 to 40,568.5)            | 3,298.3<br>(2,584.5 to 4,154.4)                | 112.6<br>(54.3 to 204.0)                   | 13.7<br>(12.3 to 15.2)                            | -8.7<br>(-9.9 to -7.5)                           |
| Premenstrual syndrome                                      | 27,044.3<br>(25,258.6 to 28,885.7)            | --                                             | 220.8<br>(138.6 to 338.6)                  | 23.5<br>(20.9 to 26.1)                            | -0.8<br>(-2.9 to 1.2)                            |
| Other gynecological diseases                               | 12,558.0<br>(9,788.9 to 15,797.3)             | 11,730.7<br>(8,836.4 to 15,223.0)              | 431.3<br>(277.2 to 649.9)                  | 19.1<br>(13.9 to 24.2)                            | -4.4<br>(-8.5 to -0.2)                           |
| Hemoglobinopathies and hemolytic anaemias                  | 90,563.3<br>(89,636.4 to 91,637.3)            | --                                             | 217.2<br>(133.2 to 341.5)                  | 38.3<br>(28.0 to 47.0)                            | 11.1<br>(2.8 to 18.0)                            |
| Thalassemias                                               | 0.5<br>(0.5 to 0.5)                           | --                                             | 0.1<br>(< 0.05 to 0.1)                     | 27.7<br>(9.4 to 67.1)                             | 2.6<br>(-12.2 to 34.2)                           |
| Thalassaemias trait                                        | 16,920.2<br>(16,282.1 to 17,610.6)            | --                                             | 143.9<br>(88.0 to 228.7)                   | 42.8<br>(29.3 to 54.7)                            | 14.7<br>(3.8 to 24.2)                            |
| Sickle cell disorders                                      | 8.7<br>(7.7 to 9.6)                           | --                                             | 1.4<br>(1.0 to 1.9)                        | 61.2<br>(48.8 to 73.7)                            | 29.4<br>(19.4 to 39.5)                           |
| Sickle cell trait                                          | 19,429.4<br>(17,647.2 to 21,826.6)            | --                                             | 44.8<br>(28.2 to 68.2)                     | 36.6<br>(30.7 to 42.6)                            | 9.7<br>(4.9 to 14.5)                             |
| G6PD deficiency                                            | 15,810.5<br>(15,241.4 to 16,467.1)            | --                                             | 1.0<br>(0.6 to 1.4)                        | 30.2<br>(22.2 to 37.2)                            | 4.5<br>(-1.9 to 10.2)                            |
| G6PD trait                                                 | 45,150.3<br>(44,413.1 to 46,017.0)            | --                                             | < 0.05<br>(< 0.05 to 0.1)                  | 66.0<br>(46.1 to 91.7)                            | 33.3<br>(17.3 to 53.9)                           |
| Other hemoglobinopathies and hemolytic anaemias            | 2,329.2<br>(2,047.4 to 2,667.5)               | --                                             | 26.1<br>(15.8 to 41.9)                     | 19.6<br>(12.4 to 26.1)                            | -4.0<br>(-9.8 to 1.3)                            |
| Endocrine, metabolic, blood, and immune disorders          | 8,544.0<br>(6,898.1 to 10,882.5)              | 1,559.5<br>(1,104.5 to 2,096.2)                | 276.0<br>(173.1 to 404.8)                  | 23.3<br>(20.2 to 26.3)                            | -1.0<br>(-3.5 to 1.4)                            |
| <b>Musculoskeletal disorders</b>                           | <b>133,304.2<br/>(126,948.2 to 139,726.9)</b> | <b>65,556.6<br/>(51,139.3 to 82,292.3)</b>     | <b>14,829.4<br/>(10,384.8 to 19,749.7)</b> | <b>24.3<br/>(22.4 to 26.2)</b>                    | <b>-0.2<br/>(-1.7 to 1.3)</b>                    |
| Rheumatoid arthritis                                       | 2,337.5<br>(2,008.4 to 2,704.0)               | 144.1<br>(110.9 to 183.2)                      | 554.1<br>(377.2 to 762.7)                  | 29.7<br>(25.9 to 33.3)                            | 4.1<br>(1.1 to 7.0)                              |
| Osteoarthritis                                             | 34,890.2<br>(31,994.3 to 37,869.2)            | 2,380.4<br>(2,062.1 to 2,710.4)                | 1,985.5<br>(1,392.7 to 2,712.8)            | 27.3<br>(26.3 to 28.4)                            | 2.2<br>(1.4 to 3.1)                              |
| Low back and neck pain                                     | 80,169.1<br>(74,503.6 to 86,149.4)            | 30,303.1<br>(22,169.9 to 41,161.5)             | 9,459.1<br>(6,343.7 to 13,351.8)           | 24.2<br>(21.5 to 26.5)                            | -0.2<br>(-2.4 to 1.6)                            |
| Low back pain                                              | 49,570.2<br>(36,157.7 to 66,904.4)            | 23,952.6<br>(16,266.8 to 34,325.9)             | 5,679.8<br>(3,627.9 to 8,424.0)            | 24.1<br>(20.2 to 27.3)                            | -0.3<br>(-3.5 to 2.2)                            |
| Neck pain                                                  | 37,758.1<br>(27,626.6 to 49,591.2)            | 6,350.5<br>(3,906.4 to 9,481.6)                | 3,779.3<br>(2,323.3 to 5,765.7)            | 24.4<br>(20.9 to 27.8)                            | -0.1<br>(-3.0 to 2.6)                            |
| Gout                                                       | 3,571.9<br>(2,796.9 to 4,417.2)               | 692.4<br>(524.2 to 886.5)                      | 115.2<br>(73.3 to 167.3)                   | 25.2<br>(20.0 to 31.1)                            | 0.5<br>(-3.6 to 5.3)                             |
| Other musculoskeletal disorders                            | 31,934.7<br>(20,274.9 to 45,313.5)            | 32,036.6<br>(21,792.0 to 44,977.0)             | 2,715.4<br>(1,511.5 to 4,343.5)            | 21.6<br>(14.8 to 26.7)                            | -2.4<br>(-7.8 to 1.7)                            |
| <b>Other non-communicable diseases</b>                     | <b>332,441.4<br/>(328,588.5 to 336,481.1)</b> | <b>785,755.6†<br/>(680,153.3 to 902,610.1)</b> | <b>9,264.6<br/>(6,227.4 to 13,643.7)</b>   | <b>22.9<br/>(21.8 to 23.9)</b>                    | <b>-1.3<br/>(-2.2 to -0.6)</b>                   |
| Congenital anomalies                                       | 3,582.5<br>(3,326.1 to 3,832.7)               | --                                             | 461.2<br>(328.2 to 608.2)                  | 24.2<br>(21.1 to 27.4)                            | -0.3<br>(-2.8 to 2.3)                            |
| Neural tube defects                                        | 271.9<br>(247.4 to 300.4)                     | --                                             | 80.8<br>(57.6 to 107.0)                    | 25.8<br>(21.0 to 31.0)                            | 1.0<br>(-2.8 to 5.2)                             |
| Congenital heart anomalies                                 | 520.7<br>(466.2 to 581.7)                     | --                                             | 29.0<br>(12.1 to 50.3)                     | 30.1<br>(25.0 to 35.0)                            | 4.5<br>(0.4 to 8.4)                              |
| Orofacial clefts                                           | 197.8<br>(176.6 to 219.1)                     | --                                             | 2.4<br>(1.6 to 3.5)                        | 16.3<br>(13.0 to 19.6)                            | -6.6<br>(-9.3 to -4.0)                           |
| Down's syndrome                                            | 67.2<br>(57.2 to 78.4)                        | --                                             | 9.4<br>(6.4 to 12.8)                       | 23.4<br>(19.4 to 27.1)                            | -0.9<br>(-4.1 to 2.1)                            |
| Turner syndrome                                            | 76.2<br>(65.8 to 88.2)                        | --                                             | 1.0<br>(0.4 to 1.9)                        | 27.5<br>(9.8 to 47.5)                             | 2.4<br>(-11.8 to 18.4)                           |
| Klinefelter syndrome                                       | 38.9<br>(32.1 to 46.3)                        | --                                             | 0.1<br>(0.1 to 0.2)                        | 23.9<br>(11.2 to 37.1)                            | -0.5<br>(-10.7 to 10.1)                          |

| Cause                                         | Prevalence in thousands (95% UI)                    | Incidence in thousands (95% UI)                              | YLDs in thousands (95% UI)                    |                                                   |                                                  |
|-----------------------------------------------|-----------------------------------------------------|--------------------------------------------------------------|-----------------------------------------------|---------------------------------------------------|--------------------------------------------------|
|                                               | 2016 counts                                         | 2016 counts                                                  | 2016 counts                                   | Percentage change in counts between 2006 and 2016 | Percentage change in rates between 2006 and 2016 |
| Other chromosomal abnormalities               | < 0.05<br>(< 0.05 to < 0.05)                        | --                                                           | < 0.05<br>(< 0.05 to < 0.05)                  | 26.5<br>(-53.9 to 279.7)                          | 1.6<br>(-63.0 to 204.9)                          |
| Congenital musculoskeletal and limb anomalies | 617.3<br>(570.1 to 668.8)                           | --                                                           | 89.9<br>(62.4 to 123.0)                       | 22.7<br>(18.2 to 27.0)                            | -1.5<br>(-5.1 to 2.0)                            |
| Urogenital congenital anomalies               | 167.4<br>(151.2 to 184.8)                           | --                                                           | 2.6<br>(1.3 to 4.6)                           | 28.4<br>(24.8 to 32.2)                            | 3.1<br>(0.2 to 6.2)                              |
| Digestive congenital anomalies                | 596.8<br>(539.0 to 659.0)                           | --                                                           | 25.5<br>(16.6 to 36.3)                        | 23.1<br>(16.6 to 29.7)                            | -1.2<br>(-6.4 to 4.2)                            |
| Other congenital anomalies                    | 1,795.2<br>(1,256.7 to 2,517.1)                     | --                                                           | 220.5<br>(150.2 to 317.6)                     | 23.7<br>(18.7 to 29.2)                            | -0.7<br>(-4.7 to 3.8)                            |
| Skin and subcutaneous diseases                | 105,472.6<br>(102,810.1 to 107,888.5)               | 260,721.0<br>(234,182.9 to 291,272.1)                        | 2,067.1<br>(1,386.8 to 2,982.9)               | 25.9<br>(24.9 to 26.9)                            | 1.1<br>(0.3 to 1.9)                              |
| Dermatitis                                    | 13,619.6<br>(11,458.1 to 16,143.0)                  | 30,333.4<br>(24,650.0 to 37,258.7)                           | 430.6<br>(257.3 to 655.0)                     | 22.7<br>(20.6 to 24.6)                            | -1.5<br>(-3.2 to 0.0)                            |
| Psoriasis                                     | 5,042.0<br>(4,637.0 to 5,510.3)                     | 611.2<br>(526.9 to 700.9)                                    | 433.1<br>(305.8 to 574.2)                     | 29.8<br>(26.9 to 33.0)                            | 4.2<br>(1.9 to 6.8)                              |
| Cellulitis                                    | 174.5<br>(142.9 to 216.7)                           | 3,710.5<br>(3,078.2 to 4,463.1)                              | 9.8<br>(6.2 to 15.1)                          | 20.6<br>(12.4 to 28.9)                            | -3.1<br>(-9.8 to 3.5)                            |
| Pyoderma                                      | 1,303.3<br>(1,201.6 to 1,412.7)                     | 30,994.8<br>(28,006.4 to 34,151.1)                           | 7.3<br>(2.9 to 15.0)                          | 26.0<br>(23.0 to 29.1)                            | 1.2<br>(-1.3 to 3.6)                             |
| Scabies                                       | 5,604.4<br>(3,787.2 to 7,853.2)                     | 17,101.1<br>(11,427.8 to 23,899.5)                           | 142.3<br>(71.8 to 240.9)                      | 20.3<br>(18.0 to 22.2)                            | -3.4<br>(-5.2 to -1.8)                           |
| Fungal skin diseases                          | 29,861.0<br>(23,286.9 to 38,308.3)                  | 104,466.4<br>(79,973.7 to 132,542.2)                         | 166.9<br>(63.8 to 360.0)                      | 26.3<br>(25.6 to 27.0)                            | 1.4<br>(0.8 to 2.0)                              |
| Viral skin diseases                           | 6,825.7<br>(5,779.9 to 8,063.9)                     | 10,644.0<br>(9,044.2 to 12,321.9)                            | 204.6<br>(127.4 to 303.3)                     | 24.6<br>(22.9 to 26.4)                            | 0.1<br>(-1.3 to 1.5)                             |
| Acne vulgaris                                 | 7,755.7<br>(6,769.7 to 8,856.8)                     | 3,452.5<br>(2,975.6 to 4,010.7)                              | 193.8<br>(127.5 to 289.0)                     | 26.2<br>(23.2 to 29.2)                            | 1.3<br>(-1.1 to 3.8)                             |
| Alopecia areata                               | 929.1<br>(838.9 to 1,036.8)                         | 1,582.6<br>(1,435.8 to 1,749.4)                              | 30.0<br>(18.8 to 45.3)                        | 22.7<br>(18.6 to 26.9)                            | -1.5<br>(-4.8 to 1.9)                            |
| Pruritus                                      | 4,742.5<br>(3,328.5 to 6,626.0)                     | 3,831.7<br>(2,617.4 to 5,180.6)                              | 50.4<br>(21.2 to 96.7)                        | 26.2<br>(24.2 to 28.0)                            | 1.3<br>(-0.3 to 2.8)                             |
| Urticaria                                     | 2,620.2<br>(1,825.1 to 3,614.1)                     | 4,609.9<br>(3,220.0 to 6,224.8)                              | 153.0<br>(90.0 to 236.5)                      | 24.5<br>(21.5 to 27.5)                            | -0.0<br>(-2.5 to 2.4)                            |
| Decubitus ulcer                               | 89.6<br>(65.1 to 119.2)                             | 325.8<br>(233.2 to 434.7)                                    | 15.7<br>(9.7 to 24.6)                         | 21.7<br>(16.1 to 27.2)                            | -2.3<br>(-6.8 to 2.1)                            |
| Other skin and subcutaneous diseases          | 41,781.8<br>(38,094.2 to 45,457.7)                  | 49,057.1<br>(44,132.9 to 54,141.6)                           | 229.6<br>(112.7 to 424.1)                     | 30.8<br>(29.8 to 31.8)                            | 5.0<br>(4.2 to 5.8)                              |
| Sense organ diseases                          | 179,055.1<br>(174,773.8 to 182,836.4)               | 37,707.2 <sup>†</sup><br>(33,950.7 to 41,435.3)              | 5,013.1<br>(3,348.0 to 7,397.6)               | 21.1<br>(19.2 to 22.6)                            | -2.8<br>(-4.3 to -1.6)                           |
| Glaucoma                                      | 183.1<br>(125.0 to 251.4)                           | --                                                           | 19.5<br>(11.1 to 31.1)                        | 27.0<br>(19.0 to 35.4)                            | 2.0<br>(-4.5 to 8.8)                             |
| Cataract                                      | 4,135.9<br>(3,111.1 to 5,395.1)                     | --                                                           | 302.9<br>(200.0 to 440.1)                     | 24.2<br>(21.4 to 27.2)                            | -0.3<br>(-2.5 to 2.1)                            |
| Macular degeneration                          | 181.1<br>(128.0 to 253.5)                           | --                                                           | 16.0<br>(9.3 to 25.5)                         | 27.6<br>(18.3 to 36.8)                            | 2.5<br>(-5.0 to 9.8)                             |
| Refraction and accommodation disorders        | 80,296.9<br>(73,390.2 to 87,613.1)                  | --                                                           | 1,278.8<br>(752.8 to 2,055.3)                 | 16.1<br>(14.1 to 17.7)                            | -6.8<br>(-8.4 to -5.5)                           |
| Age-related and other hearing loss            | 119,143.0<br>(102,229.9 to 138,158.8)               | --                                                           | 2,661.4<br>(1,737.8 to 3,959.2)               | 22.0<br>(18.5 to 24.9)                            | -2.0<br>(-4.8 to 0.2)                            |
| Other vision loss                             | 2,478.9<br>(1,904.5 to 3,209.3)                     | --                                                           | 201.8<br>(130.2 to 297.6)                     | 25.3<br>(21.8 to 28.8)                            | 0.6<br>(-2.2 to 3.4)                             |
| Other sense organ diseases                    | 16,627.6<br>(14,313.6 to 19,089.1)                  | 37,707.2<br>(33,950.7 to 41,435.3)                           | 532.7<br>(328.5 to 819.3)                     | 25.7<br>(24.0 to 27.4)                            | 0.9<br>(-0.4 to 2.3)                             |
| Oral disorders                                | 224,074.8<br>(217,535.6 to 231,425.5)               | 487,327.4 <sup>†</sup><br>(385,038.9 to 596,005.0)           | 1,723.2<br>(996.4 to 2,827.2)                 | 24.7<br>(23.9 to 25.4)                            | 0.2<br>(-0.5 to 0.7)                             |
| Caries of deciduous teeth                     | --                                                  | --                                                           | --                                            | --                                                | --                                               |
| Caries of permanent teeth                     | 148,280.2<br>(120,912.2 to 175,779.0)               | 475,439.7<br>(373,577.5 to 584,594.9)                        | 105.5<br>(47.1 to 198.4)                      | 19.7<br>(18.2 to 21.1)                            | -3.9<br>(-5.1 to -2.8)                           |
| Periodontal disease                           | 95,906.4<br>(73,919.2 to 116,215.6)                 | 9,561.0<br>(5,479.9 to 14,160.6)                             | 629.0<br>(244.0 to 1,296.1)                   | 27.2<br>(26.4 to 28.1)                            | 2.2<br>(1.5 to 2.8)                              |
| Edentulism and severe tooth loss              | 24,603.0<br>(20,028.0 to 30,241.4)                  | 2,326.7<br>(1,486.9 to 3,441.2)                              | 694.8<br>(448.4 to 1,021.5)                   | 23.3<br>(22.2 to 24.4)                            | -1.0<br>(-1.9 to -0.1)                           |
| Other oral disorders                          | 10,130.3<br>(9,109.7 to 11,136.7)                   | --                                                           | 293.9<br>(182.2 to 446.2)                     | 24.7<br>(23.3 to 26.1)                            | 0.1<br>(-1.0 to 1.2)                             |
| <b>Injuries</b>                               | <b>131,136.9</b><br><b>(122,777.1 to 139,741.8)</b> | <b>34,224.5<sup>†</sup></b><br><b>(30,012.6 to 38,829.0)</b> | <b>4,725.7</b><br><b>(3,167.3 to 6,785.5)</b> | <b>26.7</b><br><b>(25.3 to 28.0)</b>              | <b>1.7</b><br><b>(0.6 to 2.8)</b>                |
| <b>Transport injuries</b>                     | <b>24,316.4</b><br><b>(22,533.8 to 26,347.8)</b>    | <b>4,806.9</b><br><b>(3,749.9 to 6,099.8)</b>                | <b>1,248.0</b><br><b>(838.8 to 1,780.2)</b>   | <b>30.3</b><br><b>(28.9 to 31.6)</b>              | <b>4.6</b><br><b>(3.5 to 5.7)</b>                |
| Road injuries                                 | 20,326.4<br>(18,723.7 to 22,014.1)                  | 4,372.2<br>(3,344.8 to 5,678.8)                              | 1,052.7<br>(705.8 to 1,503.7)                 | 32.0<br>(30.7 to 33.2)                            | 6.0<br>(4.9 to 7.0)                              |
| Pedestrian road injuries                      | 4,433.3<br>(3,825.4 to 5,171.5)                     | 764.0<br>(494.2 to 1,087.7)                                  | 234.5<br>(158.0 to 333.6)                     | 32.8<br>(31.2 to 34.3)                            | 6.6<br>(5.4 to 7.8)                              |
| Cyclist road injuries                         | 3,906.2<br>(3,215.8 to 4,599.3)                     | 1,022.7<br>(643.0 to 1,559.3)                                | 190.1<br>(125.9 to 274.3)                     | 35.0<br>(33.6 to 36.4)                            | 8.4<br>(7.3 to 9.5)                              |
| Motorcyclist road injuries                    | 5,018.3<br>(4,258.8 to 6,075.4)                     | 666.0<br>(421.2 to 995.6)                                    | 255.2<br>(170.7 to 365.6)                     | 33.1<br>(31.7 to 34.4)                            | 6.9<br>(5.8 to 7.9)                              |
| Motor vehicle road injuries                   | 5,476.5<br>(4,559.0 to 6,400.3)                     | 1,473.2<br>(1,017.4 to 2,059.2)                              | 300.9<br>(202.2 to 428.8)                     | 23.9<br>(22.4 to 25.3)                            | -0.5<br>(-1.7 to 0.6)                            |
| Other road injuries                           | 1,492.1<br>(1,218.8 to 1,815.7)                     | 446.3<br>(247.8 to 724.4)                                    | 72.1<br>(47.7 to 105.4)                       | 58.0<br>(56.3 to 59.7)                            | 26.9<br>(25.5 to 28.2)                           |
| Other transport injuries                      | 3,990.0<br>(3,345.0 to 4,715.4)                     | 434.6<br>(279.6 to 668.4)                                    | 195.3<br>(133.0 to 274.2)                     | 22.0<br>(20.0 to 24.0)                            | -2.0<br>(-3.6 to -0.5)                           |
| <b>Unintentional injuries</b>                 | <b>94,558.8</b><br><b>(86,821.2 to 102,543.3)</b>   | <b>27,522.3</b><br><b>(23,571.5 to 32,058.5)</b>             | <b>3,038.9</b><br><b>(2,052.4 to 4,302.5)</b> | <b>25.6</b><br><b>(24.2 to 26.7)</b>              | <b>0.8</b><br><b>(-0.2 to 1.7)</b>               |
| Falls                                         | 38,710.5<br>(33,919.2 to 43,978.5)                  | 12,609.4<br>(9,492.6 to 16,596.4)                            | 1,526.4<br>(1,052.6 to 2,115.3)               | 26.6<br>(25.2 to 27.9)                            | 1.7<br>(0.6 to 2.7)                              |
| Drowning                                      | 383.3<br>(332.8 to 439.9)                           | 31.1<br>(23.4 to 42.0)                                       | 18.6<br>(12.3 to 26.7)                        | 12.2<br>(9.7 to 14.6)                             | -9.9<br>(-12.0 to -8.0)                          |
| Fire, heat, and hot substances                | 8,916.9<br>(7,619.8 to 10,500.4)                    | 420.0<br>(285.5 to 606.0)                                    | 205.4<br>(133.7 to 310.8)                     | 24.1<br>(22.2 to 25.7)                            | -0.3<br>(-1.9 to 0.9)                            |
| Poisonings                                    | 281.3<br>(240.3 to 323.1)                           | 193.1<br>(121.2 to 281.7)                                    | 20.7<br>(13.4 to 30.2)                        | 33.1<br>(30.1 to 36.2)                            | 6.9<br>(4.4 to 9.3)                              |
| Exposure to mechanical forces                 | 18,812.5<br>(15,881.9 to 22,926.2)                  | 3,678.0<br>(2,605.7 to 5,075.7)                              | 417.1<br>(274.5 to 606.7)                     | 28.8<br>(27.5 to 30.0)                            | 3.5<br>(2.4 to 4.4)                              |
| Unintentional firearm injuries                | 692.3<br>(563.6 to 860.7)                           | 57.7<br>(28.9 to 106.2)                                      | 21.6<br>(13.8 to 32.0)                        | 29.5<br>(28.2 to 30.7)                            | 4.0<br>(3.0 to 5.0)                              |
| Unintentional suffocation                     | 692.5<br>(544.5 to 877.3)                           | 40.0<br>(18.4 to 75.9)                                       | 20.4<br>(12.7 to 30.8)                        | 22.1<br>(20.7 to 23.6)                            | -2.0<br>(-3.1 to -0.8)                           |
| Other exposure to mechanical forces           | 17,427.7<br>(14,448.8 to 21,618.6)                  | 3,580.3<br>(2,520.6 to 4,938.7)                              | 375.1<br>(246.8 to 545.5)                     | 29.2<br>(27.8 to 30.4)                            | 3.7<br>(2.6 to 4.7)                              |

| Cause                                                                               | Prevalence in thousands (95% UI)                 | Incidence in thousands (95% UI)                | YLDs in thousands (95% UI)              |                                                   |                                                  |
|-------------------------------------------------------------------------------------|--------------------------------------------------|------------------------------------------------|-----------------------------------------|---------------------------------------------------|--------------------------------------------------|
|                                                                                     | 2016 counts                                      | 2016 counts                                    | 2016 counts                             | Percentage change in counts between 2006 and 2016 | Percentage change in rates between 2006 and 2016 |
| Adverse effects of medical treatment                                                | 146.6<br>(100.2 to 209.8)                        | 1,917.7<br>(1,391.9 to 2,662.6)                | 19.5<br>(10.6 to 30.5)                  | 20.1<br>(15.4 to 24.1)                            | -3.6<br>(-7.4 to -0.4)                           |
| Animal contact                                                                      | 4,426.1<br>(3,851.7 to 5,076.4)                  | 3,180.3<br>(2,191.0 to 4,371.7)                | 114.8<br>(77.3 to 160.6)                | 15.7<br>(13.4 to 17.9)                            | -7.1<br>(-8.9 to -5.3)                           |
| Venomous animal contact                                                             | 2,009.5<br>(1,663.8 to 2,383.5)                  | 1,515.6<br>(1,018.2 to 2,184.7)                | 77.3<br>(52.5 to 106.8)                 | 17.8<br>(14.9 to 20.8)                            | -5.4<br>(-7.8 to -3.0)                           |
| Non-venomous animal contact                                                         | 2,416.7<br>(1,981.1 to 2,936.1)                  | 1,664.8<br>(1,097.8 to 2,389.3)                | 37.6<br>(24.3 to 58.1)                  | 11.6<br>(9.0 to 13.7)                             | -10.4<br>(-12.5 to -8.7)                         |
| Foreign body                                                                        | 3,802.6<br>(3,199.7 to 4,332.8)                  | 1,504.0<br>(1,010.3 to 2,376.6)                | 132.8<br>(86.0 to 196.5)                | 24.0<br>(21.9 to 26.2)                            | -0.5<br>(-2.1 to 1.3)                            |
| Pulmonary aspiration and foreign body in airway                                     | 1,748.0<br>(1,351.7 to 2,213.1)                  | 305.8<br>(205.0 to 436.5)                      | 68.2<br>(43.8 to 100.3)                 | 19.6<br>(17.6 to 21.6)                            | -3.9<br>(-5.6 to -2.4)                           |
| Foreign body in eyes                                                                | 216.0<br>(135.0 to 342.6)                        | 853.1<br>(418.1 to 1,673.9)                    | 13.0<br>(7.2 to 22.5)                   | 35.8<br>(31.1 to 43.7)                            | 9.0<br>(5.3 to 15.4)                             |
| Foreign body in other body part                                                     | 1,838.6<br>(1,516.8 to 2,261.7)                  | 345.1<br>(198.5 to 530.6)                      | 51.5<br>(33.4 to 75.2)                  | 27.3<br>(25.3 to 29.2)                            | 2.2<br>(0.6 to 3.7)                              |
| Environmental heat and cold exposure                                                | 6,077.0<br>(5,206.9 to 7,063.5)                  | 970.0<br>(633.9 to 1,432.2)                    | 221.1<br>(149.2 to 316.9)               | 23.7<br>(21.5 to 25.8)                            | -0.7<br>(-2.4 to 1.0)                            |
| Other unintentional injuries                                                        | 13,001.8<br>(10,570.6 to 15,637.8)               | 3,018.7<br>(1,928.3 to 4,395.1)                | 362.5<br>(236.3 to 527.5)               | 24.2<br>(22.7 to 25.5)                            | -0.3<br>(-1.4 to 0.8)                            |
| <b>Self-harm and interpersonal violence</b>                                         | <b>13,532.7</b><br><b>(11,085.6 to 16,387.4)</b> | <b>1,847.6†</b><br><b>(1,418.2 to 2,379.3)</b> | <b>300.5</b><br><b>(199.8 to 430.0)</b> | <b>15.4</b><br><b>(14.5 to 16.4)</b>              | <b>-7.3</b><br><b>(-8.1 to -6.6)</b>             |
| Self-harm                                                                           | 1,149.0<br>(938.8 to 1,368.8)                    | 472.9<br>(351.9 to 618.7)                      | 49.0<br>(31.5 to 70.9)                  | 10.7<br>(9.2 to 12.1)                             | -11.1<br>(-12.3 to -10.0)                        |
| Self-harm by firearm                                                                | 32.3<br>(27.6 to 37.4)                           | 5.7<br>(1.5 to 14.4)                           | 1.1<br>(0.7 to 1.6)                     | 4.5<br>(2.2 to 6.6)                               | -16.1<br>(-17.9 to -14.4)                        |
| Self-harm by other specified means                                                  | 1,116.7<br>(907.7 to 1,336.1)                    | 467.2<br>(348.8 to 611.7)                      | 47.9<br>(30.7 to 69.3)                  | 10.9<br>(9.4 to 12.3)                             | -11.0<br>(-12.2 to -9.9)                         |
| Interpersonal violence                                                              | 12,383.7<br>(9,966.9 to 15,225.9)                | 1,374.7†<br>(962.4 to 1,885.6)                 | 251.6<br>(168.8 to 361.3)               | 16.4<br>(15.4 to 17.3)                            | -6.6<br>(-7.3 to -5.8)                           |
| Assault by firearm                                                                  | 292.4<br>(242.1 to 351.9)                        | 27.1<br>(14.6 to 47.2)                         | 10.2<br>(6.6 to 15.2)                   | 18.5<br>(17.2 to 19.8)                            | -4.9<br>(-5.9 to -3.8)                           |
| Assault by sharp object                                                             | 1,539.7<br>(1,274.0 to 1,821.7)                  | 222.9<br>(124.9 to 356.1)                      | 39.8<br>(25.7 to 58.2)                  | 14.3<br>(12.6 to 15.8)                            | -8.2<br>(-9.6 to -7.0)                           |
| Sexual violence                                                                     | 6,324.9<br>(4,106.4 to 9,007.1)                  | --                                             | 45.4<br>(24.6 to 71.9)                  | 17.4<br>(16.2 to 18.5)                            | -5.8<br>(-6.7 to -4.9)                           |
| Assault by other means                                                              | 4,226.8<br>(3,524.0 to 5,053.2)                  | 1,124.8<br>(782.3 to 1,549.9)                  | 156.2<br>(105.0 to 226.3)               | 16.5<br>(15.3 to 17.6)                            | -6.5<br>(-7.4 to -5.6)                           |
| <b>Forces of nature, conflict and terrorism, and executions and police conflict</b> | <b>5,053.9</b><br><b>(3,284.5 to 7,204.0)</b>    | <b>47.8†</b><br><b>(30.4 to 66.7)</b>          | <b>138.2</b><br><b>(46.9 to 292.4)</b>  | <b>51.2</b><br><b>(41.0 to 66.6)</b>              | <b>21.4</b><br><b>(13.2 to 33.8)</b>             |
| Forces of nature, conflict and terrorism, and state actor violence                  | 572.9<br>(319.2 to 881.4)                        | 17.5<br>(9.2 to 27.5)                          | 19.7<br>(5.1 to 47.9)                   | 75.3<br>(59.9 to 83.1)                            | 40.8<br>(28.4 to 47.0)                           |
| Conflict and terrorism                                                              | 3,461.6<br>(2,038.2 to 5,306.6)                  | --                                             | 102.6<br>(39.8 to 203.7)                | 54.0<br>(40.4 to 74.0)                            | 23.7<br>(12.7 to 39.8)                           |
| Executions and police conflict                                                      | 1,019.4<br>(247.9 to 1,596.7)                    | 30.3<br>(15.1 to 46.4)                         | 21.6<br>(3.6 to 56.5)                   | 25.8<br>(18.8 to 33.8)                            | 1.0<br>(-4.6 to 7.5)                             |

We did not calculate incidence for certain NTDs and causes with only birth prevalence. Blank cells mean that no estimate is available.

† Incidence for aggregate causes represents the sum of the incidence of the causes below the aggregate.

‡ Incidence estimates for stroke represent first-ever stroke only.

^ Incidence of HIV/AIDS represents new infections of HIV only and does not include new infections of Tuberculosis in HIV positive cases.



SR Table 12: Global prevalence, incidence, and YLDs for 2016, percentage change of YLD counts and percentage change of YLD rates between 2006 and 2016 by cause, age 55-59 years.

| Cause                                                                                | Prevalence in thousands (95% UI)             | Incidence in thousands (95% UI)                     | YLDs in thousands (95% UI)                |                                                                     |                                                                   |
|--------------------------------------------------------------------------------------|----------------------------------------------|-----------------------------------------------------|-------------------------------------------|---------------------------------------------------------------------|-------------------------------------------------------------------|
|                                                                                      | 2016 counts<br>(344,072.4 to 344,374.1)      | 2016 counts<br>(1,624,800.3 to 2,126,246.9)         | 2016 counts<br>(56,103.8 to 72,698.3)     | Percentage change in counts between 2006 and 2016<br>(29.4 to 30.7) | Percentage change in rates between 2006 and 2016<br>(-0.9 to 0.1) |
| <b>All causes</b>                                                                    | <b>344,221.7</b><br>(344,072.4 to 344,374.1) | <b>1,866,285.0*</b><br>(1,624,800.3 to 2,126,246.9) | <b>56,103.8</b><br>(41,788.7 to 72,698.3) | <b>30.0</b><br>(29.4 to 30.7)                                       | <b>-0.4</b><br>(-0.9 to 0.1)                                      |
| <b>Communicable, maternal, neonatal, and nutritional disorders</b>                   | <b>237,129.6</b><br>(233,657.1 to 240,439.5) | <b>923,622.8*</b><br>(716,766.4 to 1,167,894.5)     | <b>3,387.5</b><br>(2,445.4 to 4,507.7)    | <b>23.1</b><br>(19.2 to 26.6)                                       | <b>-5.7</b><br>(-8.7 to -3.0)                                     |
| <b>HIV/AIDS and tuberculosis</b>                                                     | <b>125,205.4</b><br>(109,147.0 to 143,108.9) | <b>578.6*</b><br>(428.8 to 751.9)                   | <b>384.9</b><br>(256.6 to 540.3)          | <b>14.7</b><br>(-3.1 to 33.8)                                       | <b>-12.1</b><br>(-25.8 to 2.6)                                    |
| Tuberculosis                                                                         | 118,084.0<br>(95,815.9 to 142,292.3)         | 541.1*<br>(392.2 to 714.7)                          | 213.4<br>(130.1 to 315.5)                 | 13.2<br>(9.0 to 18.1)                                               | -13.2<br>(-16.5 to -9.5)                                          |
| Drug-susceptible tuberculosis                                                        | 691.4<br>(487.8 to 942.6)                    | 521.1<br>(377.7 to 689.4)                           | 205.6<br>(125.3 to 303.6)                 | 13.4<br>(9.2 to 18.5)                                               | -13.1<br>(-16.3 to -9.2)                                          |
| Multidrug-resistant tuberculosis without extensive drug resistance                   | 24.0<br>(17.1 to 32.1)                       | 18.6<br>(13.7 to 24.4)                              | 7.4<br>(4.5 to 11.1)                      | 4.2<br>(-11.7 to 22.8)                                              | -20.2<br>(-32.3 to -5.9)                                          |
| Extensively drug-resistant tuberculosis                                              | 1.5<br>(1.0 to 2.0)                          | 1.3<br>(1.0 to 1.7)                                 | 0.5<br>(0.3 to 0.8)                       | 197.2<br>(157.7 to 241.7)                                           | 127.7<br>(97.5 to 161.8)                                          |
| Latent tuberculosis infection                                                        | 117,367.1<br>(95,003.5 to 141,590.9)         | --                                                  | --                                        | --                                                                  | --                                                                |
| HIV/AIDS                                                                             | 1,671.9<br>(1,403.9 to 1,998.3)              | 37.5*<br>(29.4 to 47.1)                             | 171.5<br>(108.7 to 257.4)                 | 16.4<br>(-15.1 to 69.4)                                             | -10.8<br>(-34.9 to 29.8)                                          |
| Drug-susceptible HIV/AIDS - Tuberculosis                                             | 35.6<br>(24.9 to 49.4)                       | 45.4<br>(32.6 to 61.7)                              | 13.4<br>(7.9 to 20.7)                     | 13.9<br>(3.9 to 24.6)                                               | -12.7<br>(-20.4 to -4.5)                                          |
| Multidrug-resistant HIV/AIDS - Tuberculosis without extensive drug resistance        | 1.1<br>(0.7 to 1.6)                          | 1.3<br>(0.9 to 1.9)                                 | 0.4<br>(0.2 to 0.7)                       | 9.2<br>(-10.3 to 29.1)                                              | -16.3<br>(-31.3 to -1.1)                                          |
| Extensively drug-resistant HIV/AIDS - Tuberculosis                                   | < 0.05<br>(< 0.05 to < 0.1)                  | < 0.05<br>(< 0.05 to < 0.1)                         | < 0.05<br>(< 0.05 to < 0.05)              | 278.9<br>(224.8 to 348.9)                                           | 190.3<br>(148.9 to 244.0)                                         |
| HIV/AIDS resulting in other diseases                                                 | 1,635.2<br>(1,366.1 to 1,964.6)              | 37.5<br>(29.4 to 47.1)                              | 157.6<br>(97.4 to 239.5)                  | 16.7<br>(-17.2 to 77.4)                                             | -10.6<br>(-36.6 to 35.9)                                          |
| <b>Diarrhoea, lower respiratory infections, and other common infectious diseases</b> | <b>16,580.9</b><br>(15,366.2 to 17,669.3)    | <b>882,225.3*</b><br>(675,328.9 to 1,127,804.8)     | <b>807.3</b><br>(561.9 to 1,113.2)        | <b>27.5</b><br>(25.8 to 29.2)                                       | <b>-2.3</b><br>(-3.6 to -1.0)                                     |
| Diarrhoeal diseases                                                                  | 2,760.2<br>(2,407.2 to 3,160.8)              | 189,381.0<br>(165,328.1 to 217,294.7)               | 299.0<br>(206.8 to 409.3)                 | 27.2<br>(24.4 to 30.1)                                              | -2.5<br>(-4.6 to -0.3)                                            |
| Intestinal infectious diseases                                                       | 12.5<br>(9.7 to 16.1)                        | 291.6*<br>(236.7 to 358.6)                          | 2.2<br>(1.3 to 3.2)                       | 10.5<br>(-7.7 to 34.2)                                              | -15.3<br>(-29.3 to 2.9)                                           |
| Typhoid fever                                                                        | 12.2<br>(9.3 to 16.0)                        | 192.4<br>(154.2 to 238.1)                           | 1.9<br>(1.1 to 2.8)                       | 11.1<br>(-9.4 to 39.2)                                              | -14.8<br>(-30.6 to 6.7)                                           |
| Paratyphoid fever                                                                    | 4.4<br>(3.5 to 5.4)                          | 99.3<br>(80.3 to 122.7)                             | 0.3<br>(0.2 to 0.4)                       | 8.5<br>(-8.8 to 30.1)                                               | -16.9<br>(-30.1 to -0.3)                                          |
| Other intestinal infectious diseases                                                 | --                                           | --                                                  | < 0.05<br>(< 0.05 to < 0.05)              | -15.6<br>(-29.5 to 2.5)                                             | -35.3<br>(-46.0 to -21.4)                                         |
| Lower respiratory infections                                                         | 366.5<br>(328.3 to 407.7)                    | 15,870.9<br>(13,866.5 to 18,145.7)                  | 21.7<br>(14.7 to 30.8)                    | 50.5<br>(42.9 to 58.8)                                              | 15.3<br>(9.5 to 21.7)                                             |
| Upper respiratory infections                                                         | 8,942.4<br>(6,190.0 to 12,235.2)             | 667,939.1<br>(464,442.8 to 908,183.3)               | 217.4<br>(117.8 to 382.6)                 | 27.8<br>(25.8 to 29.8)                                              | -2.0<br>(-3.6 to -0.5)                                            |
| Otitis media                                                                         | 3,331.5<br>(2,512.9 to 4,287.2)              | 4,563.3<br>(3,844.4 to 5,454.2)                     | 91.0<br>(54.2 to 143.5)                   | 17.9<br>(12.6 to 23.3)                                              | -9.7<br>(-13.7 to -5.5)                                           |
| Meningitis                                                                           | 590.3<br>(498.5 to 685.1)                    | 48.8<br>(35.0 to 64.4)                              | 51.5<br>(36.6 to 68.5)                    | 31.9<br>(28.1 to 35.7)                                              | 1.1<br>(-1.8 to 4.0)                                              |
| Pneumococcal meningitis                                                              | 267.0<br>(219.6 to 322.6)                    | 11.1<br>(6.9 to 16.6)                               | 23.2<br>(15.9 to 32.1)                    | 29.7<br>(23.3 to 36.0)                                              | -0.6<br>(-5.5 to 4.2)                                             |
| H influenzae type B meningitis                                                       | 65.4<br>(49.4 to 84.4)                       | 3.2<br>(1.8 to 5.1)                                 | 6.9<br>(4.7 to 9.7)                       | 7.6<br>(-1.1 to 15.4)                                               | -17.6<br>(-24.2 to -11.5)                                         |
| Meningococcal infection                                                              | 65.3<br>(47.4 to 85.5)                       | 8.6<br>(5.2 to 13.1)                                | 5.8<br>(4.0 to 8.0)                       | 33.1<br>(29.4 to 37.3)                                              | 2.0<br>(-0.8 to 5.2)                                              |
| Other meningitis                                                                     | 192.6<br>(142.4 to 244.4)                    | 25.9<br>(17.8 to 35.8)                              | 15.6<br>(10.5 to 21.3)                    | 50.4<br>(46.0 to 56.0)                                              | 15.3<br>(11.9 to 19.5)                                            |
| Encephalitis                                                                         | 978.1<br>(628.4 to 1,452.5)                  | 321.9<br>(272.5 to 376.9)                           | 97.3<br>(68.4 to 127.1)                   | 28.9<br>(23.2 to 35.3)                                              | -1.2<br>(-5.6 to 3.6)                                             |
| Diphtheria                                                                           | < 0.05<br>(< 0.05 to < 0.05)                 | 0.2<br>(0.1 to 0.2)                                 | < 0.05<br>(< 0.05 to < 0.05)              | -25.4<br>(-43.0 to -1.8)                                            | -42.9<br>(-56.3 to -24.7)                                         |
| Whooping cough                                                                       | 1.7<br>(1.4 to 2.2)                          | 12.7<br>(9.9 to 16.0)                               | 0.1<br>(0.1 to 0.1)                       | -3.3<br>(-5.3 to -1.3)                                              | -25.9<br>(-27.4 to -24.4)                                         |
| Tetanus                                                                              | 5.9<br>(5.7 to 6.0)                          | 3.9<br>(1.9 to 5.8)                                 | 0.1<br>(0.1 to 0.2)                       | 6.7<br>(-17.1 to 36.5)                                              | -18.2<br>(-36.4 to 4.6)                                           |
| Measles                                                                              | 0.1<br>(< 0.05 to 0.2)                       | 3.5<br>(1.3 to 7.6)                                 | < 0.05<br>(< 0.05 to < 0.05)              | -48.5<br>(-54.5 to -42.0)                                           | -60.6<br>(-65.1 to -55.6)                                         |
| Varicella and herpes zoster                                                          | 515.1<br>(416.7 to 629.3)                    | 3,788.3<br>(3,094.9 to 4,615.9)                     | 27.1<br>(15.9 to 42.0)                    | 35.4<br>(29.3 to 42.2)                                              | 3.7<br>(-0.9 to 9.0)                                              |
| <b>Neglected tropical diseases and malaria</b>                                       | <b>75,423.4</b><br>(72,630.9 to 77,711.1)    | <b>12,681.0*</b><br>(10,062.8 to 15,377.5)          | <b>539.2</b><br>(370.6 to 756.2)          | <b>-1.5</b><br>(-8.8 to 5.6)                                        | <b>-24.5</b><br>(-30.1 to -19.1)                                  |
| Malaria                                                                              | 1,937.1<br>(1,673.9 to 2,203.7)              | 2,599.1<br>(1,912.9 to 3,361.0)                     | 21.1<br>(15.5 to 27.5)                    | -14.2<br>(-21.0 to -5.8)                                            | -34.2<br>(-39.4 to -27.8)                                         |
| Chagas disease                                                                       | 542.3<br>(458.9 to 639.0)                    | 5.4<br>(3.6 to 8.0)                                 | 5.7<br>(3.7 to 8.3)                       | 19.7<br>(11.4 to 28.7)                                              | -8.2<br>(-14.7 to -1.4)                                           |
| Leishmaniasis                                                                        | 271.5<br>(206.1 to 334.2)                    | 29.1<br>(21.7 to 38.4)                              | 14.3<br>(8.6 to 22.5)                     | 23.6<br>(16.6 to 35.1)                                              | -5.3<br>(-10.7 to 3.6)                                            |
| Visceral leishmaniasis                                                               | 1.2<br>(0.8 to 1.6)                          | 4.7<br>(3.3 to 6.5)                                 | 0.1<br>(< 0.05 to 0.1)                    | -50.7<br>(-67.3 to -27.8)                                           | -62.2<br>(-75.0 to -44.6)                                         |
| Cutaneous and mucocutaneous leishmaniasis                                            | 232.2<br>(169.6 to 313.3)                    | 24.3<br>(17.0 to 33.7)                              | 14.2<br>(8.6 to 22.4)                     | 24.7<br>(17.3 to 36.8)                                              | -4.5<br>(-10.1 to 4.9)                                            |
| African trypanosomiasis                                                              | 0.2<br>(< 0.05 to 0.9)                       | 0.2<br>(< 0.05 to 0.6)                              | 0.1<br>(< 0.05 to 0.2)                    | -72.5<br>(-95.4 to 81.6)                                            | -79.0<br>(-96.5 to 39.1)                                          |
| Schistosomiasis                                                                      | 7,987.2<br>(7,328.1 to 8,609.1)              | 2,006.8<br>(1,819.6 to 2,218.8)                     | 58.5<br>(28.5 to 109.9)                   | -28.0<br>(-30.2 to -25.2)                                           | -44.8<br>(-46.6 to -42.7)                                         |
| Cysticercosis                                                                        | 233.5<br>(167.7 to 319.2)                    | --                                                  | 35.6<br>(22.2 to 53.9)                    | 7.5<br>(-0.3 to 14.9)                                               | -17.7<br>(-23.6 to -12.0)                                         |
| Cystic echinococcosis                                                                | 50.0<br>(24.8 to 104.1)                      | 9.9<br>(4.4 to 24.7)                                | 4.5<br>(2.0 to 9.5)                       | -35.2<br>(-75.2 to 66.8)                                            | -50.4<br>(-81.0 to 27.8)                                          |
| Lymphatic filariasis                                                                 | 1,426.1<br>(1,139.8 to 1,834.5)              | 284.0<br>(156.3 to 454.5)                           | 74.6<br>(37.8 to 131.6)                   | -27.0<br>(-44.2 to -12.0)                                           | -44.1<br>(-57.3 to -32.6)                                         |
| Onchocerciasis                                                                       | 541.7<br>(370.7 to 839.3)                    | 110.2<br>(45.1 to 229.8)                            | 43.9<br>(22.8 to 78.1)                    | -19.5<br>(-37.8 to 0.6)                                             | -38.3<br>(-52.3 to -22.9)                                         |
| Trachoma                                                                             | 260.9<br>(125.5 to 452.7)                    | --                                                  | 20.3<br>(11.3 to 34.6)                    | 5.7<br>(-7.4 to 17.5)                                               | -19.0<br>(-29.1 to -10.0)                                         |
| Dengue                                                                               | 222.1<br>(121.1 to 376.2)                    | 3,713.4<br>(2,259.6 to 5,630.8)                     | 34.6<br>(15.3 to 64.2)                    | 118.5<br>(74.9 to 407.0)                                            | 67.4<br>(34.0 to 288.5)                                           |
| Yellow fever                                                                         | 0.1<br>(< 0.05 to 0.1)                       | 2.0<br>(0.6 to 5.2)                                 | < 0.05<br>(< 0.05 to < 0.05)              | -19.5<br>(-49.7 to 24.5)                                            | -38.3<br>(-61.5 to -4.6)                                          |
| Rabies                                                                               | < 0.05<br>(< 0.05 to < 0.05)                 | 0.7<br>(0.3 to 1.0)                                 | < 0.05<br>(< 0.05 to < 0.05)              | -42.4<br>(-53.7 to -28.4)                                           | -55.9<br>(-64.5 to -45.1)                                         |
| Intestinal nematode infections                                                       | 63,680.9<br>(60,388.1 to 66,275.6)           | --                                                  | 107.3<br>(61.7 to 175.9)                  | 4.9<br>(-3.2 to 14.3)                                               | -19.6<br>(-25.8 to -12.4)                                         |
| Ascariasis                                                                           | 34,205.8<br>(30,531.9 to 38,698.7)           | --                                                  | 34.3<br>(18.6 to 57.0)                    | -8.9<br>(-20.9 to 4.6)                                              | -30.2<br>(-39.4 to -19.9)                                         |

| Cause                                                                   | Prevalence in thousands (95% UI)                    | Incidence in thousands (95% UI)                        | YLDs in thousands (95% UI)                       |                                                   |                                                  |
|-------------------------------------------------------------------------|-----------------------------------------------------|--------------------------------------------------------|--------------------------------------------------|---------------------------------------------------|--------------------------------------------------|
|                                                                         | 2016 counts                                         | 2016 counts                                            | 2016 counts                                      | Percentage change in counts between 2006 and 2016 | Percentage change in rates between 2006 and 2016 |
| Trichuriasis                                                            | 17,561.5<br>(16,147.6 to 19,216.1)                  | --                                                     | 12.7<br>(6.9 to 21.5)                            | 2.3<br>(-12.8 to 19.8)                            | -21.6<br>(-33.2 to -8.2)                         |
| Hookworm disease                                                        | 18,672.3<br>(17,112.3 to 20,365.4)                  | --                                                     | 60.4<br>(36.0 to 97.3)                           | 15.4<br>(2.7 to 29.9)                             | -11.5<br>(-21.3 to -0.4)                         |
| Food-borne trematodiasis                                                | 4,417.8<br>(4,006.7 to 4,867.6)                     | 3,551.2<br>(1,526.4 to 5,243.6)                        | 101.4<br>(48.6 to 183.3)                         | 30.0<br>(23.8 to 37.4)                            | -0.4<br>(-5.1 to 5.3)                            |
| Leprosy                                                                 | 56.6<br>(53.8 to 59.2)                              | 4.6<br>(4.2 to 5.1)                                    | 3.5<br>(2.3 to 4.9)                              | 10.1<br>(1.9 to 19.1)                             | -15.6<br>(-21.9 to -8.7)                         |
| Ebola virus disease                                                     | < 0.05<br>(< 0.05 to < 0.1)                         | < 0.05<br>(< 0.05 to < 0.05)                           | < 0.05<br>(< 0.05 to < 0.05)                     | --                                                | --                                               |
| Zika virus disease                                                      | 6.0<br>(3.4 to 11.3)                                | 364.5<br>(202.7 to 684.1)                              | 0.1<br>(0.1 to 0.2)                              | --                                                | --                                               |
| Guinea worm disease                                                     | < 0.05<br>(< 0.05 to < 0.05)                        | < 0.05<br>(< 0.05 to < 0.05)                           | < 0.05<br>(< 0.05 to < 0.05)                     | -99.6<br>(-99.7 to -99.3)                         | -99.7<br>(-99.8 to -99.5)                        |
| Other neglected tropical diseases                                       | 1,126.7<br>(984.8 to 1,250.8)                       | --                                                     | 13.8<br>(8.4 to 21.7)                            | 39.4<br>(31.5 to 47.7)                            | 6.8<br>(0.8 to 13.2)                             |
| <b>Maternal disorders</b>                                               | --                                                  | --                                                     | --                                               | --                                                | --                                               |
| Maternal haemorrhage                                                    | --                                                  | --                                                     | --                                               | --                                                | --                                               |
| Maternal sepsis and other pregnancy related infections                  | --                                                  | --                                                     | --                                               | --                                                | --                                               |
| Maternal hypertensive disorders                                         | --                                                  | --                                                     | --                                               | --                                                | --                                               |
| Maternal obstructed labour and uterine rupture                          | --                                                  | --                                                     | --                                               | --                                                | --                                               |
| Maternal abortion, miscarriage, and ectopic pregnancy                   | --                                                  | --                                                     | --                                               | --                                                | --                                               |
| Other maternal disorders                                                | --                                                  | --                                                     | --                                               | --                                                | --                                               |
| <b>Neonatal disorders</b>                                               | <b>2,571.0</b><br><b>(2,361.2 to 2,798.9)</b>       | --                                                     | <b>385.7</b><br><b>(274.3 to 532.9)</b>          | <b>50.5</b><br><b>(35.8 to 68.6)</b>              | <b>15.3</b><br><b>(4.1 to 29.2)</b>              |
| Neonatal preterm birth complications                                    | 2,194.3<br>(1,865.5 to 2,572.2)                     | --                                                     | 236.2<br>(164.6 to 330.1)                        | 49.9<br>(24.6 to 78.9)                            | 14.9<br>(-4.5 to 37.1)                           |
| Neonatal encephalopathy due to birth asphyxia and trauma                | 440.3<br>(298.4 to 640.4)                           | --                                                     | 60.2<br>(28.1 to 119.4)                          | 49.1<br>(38.1 to 66.1)                            | 14.3<br>(5.8 to 27.3)                            |
| Neonatal sepsis and other neonatal infections                           | 182.7<br>(79.5 to 430.2)                            | --                                                     | 68.1<br>(24.3 to 175.6)                          | 54.2<br>(43.5 to 69.2)                            | 18.2<br>(10.0 to 29.7)                           |
| Hemolytic disease and other neonatal jaundice                           | 64.1<br>(56.8 to 71.8)                              | --                                                     | 21.2<br>(16.3 to 26.6)                           | 49.8<br>(43.1 to 57.1)                            | 14.8<br>(9.7 to 20.4)                            |
| Other neonatal disorders                                                | --                                                  | --                                                     | --                                               | --                                                | --                                               |
| <b>Nutritional deficiencies</b>                                         | <b>59,241.9</b><br><b>(56,686.2 to 61,428.5)</b>    | <b>12,279.5†</b><br><b>(10,534.0 to 14,292.7)</b>      | <b>1,160.6</b><br><b>(752.8 to 1,724.3)</b>      | <b>29.8</b><br><b>(26.2 to 33.5)</b>              | <b>-0.5</b><br><b>(-3.3 to 2.3)</b>              |
| Protein-energy malnutrition                                             | --                                                  | --                                                     | --                                               | --                                                | --                                               |
| Iodine deficiency                                                       | 6,522.8<br>(5,849.6 to 7,252.6)                     | 21.1<br>(18.1 to 24.7)                                 | 166.6<br>(114.6 to 230.7)                        | 12.1<br>(9.4 to 14.9)                             | -14.1<br>(-16.2 to -12.0)                        |
| Vitamin A deficiency                                                    | 11,448.1<br>(10,137.7 to 12,955.2)                  | 12,258.4<br>(10,513.0 to 14,270.1)                     | 7.0<br>(4.5 to 10.4)                             | 36.4<br>(26.4 to 47.5)                            | 4.5<br>(-3.1 to 13.0)                            |
| Iron-deficiency anaemia                                                 | 47,157.2<br>(40,890.8 to 52,725.4)                  | --                                                     | 987.1<br>(631.8 to 1,478.9)                      | 33.4<br>(29.3 to 37.4)                            | 2.2<br>(-0.9 to 5.3)                             |
| Other nutritional deficiencies                                          | --                                                  | --                                                     | --                                               | --                                                | --                                               |
| <b>Other communicable, maternal, neonatal, and nutritional diseases</b> | <b>102,232.1</b><br><b>(98,438.1 to 105,813.2)</b>  | <b>15,858.4</b><br><b>(13,130.0 to 19,248.6)</b>       | <b>109.7</b><br><b>(74.1 to 163.6)</b>           | <b>28.0</b><br><b>(18.2 to 38.3)</b>              | <b>-1.9</b><br><b>(-9.4 to 6.0)</b>              |
| Sexually transmitted diseases excluding HIV                             | 74,680.4<br>(70,025.9 to 79,905.6)                  | 10,262.8<br>(8,383.5 to 12,664.1)                      | 72.7<br>(48.1 to 107.1)                          | 32.0<br>(28.2 to 35.8)                            | 1.1<br>(-1.8 to 4.0)                             |
| Syphilis                                                                | 1,627.0<br>(1,107.2 to 2,338.0)                     | 860.7<br>(527.9 to 1,315.3)                            | 19.7<br>(13.4 to 26.8)                           | 39.2<br>(33.3 to 45.3)                            | 6.7<br>(2.2 to 11.3)                             |
| Chlamydial infection                                                    | 217.0<br>(150.9 to 312.3)                           | 520.1<br>(420.7 to 632.7)                              | 4.8<br>(3.2 to 6.8)                              | 27.3<br>(16.5 to 39.2)                            | -2.5<br>(-10.7 to 6.7)                           |
| Gonococcal infection                                                    | 420.6<br>(215.6 to 743.5)                           | 1,292.8<br>(681.3 to 2,409.8)                          | 5.1<br>(2.5 to 9.5)                              | 41.1<br>(21.2 to 57.0)                            | 8.2<br>(-7.2 to 20.3)                            |
| Trichomoniasis                                                          | 7,569.1<br>(5,283.6 to 10,749.9)                    | 5,630.1<br>(4,071.0 to 7,752.5)                        | 8.3<br>(3.0 to 20.1)                             | 31.1<br>(28.5 to 33.8)                            | 0.5<br>(-1.5 to 2.6)                             |
| Genital herpes                                                          | 67,036.2<br>(58,683.4 to 77,529.3)                  | 33.1<br>(18.5 to 54.2)                                 | 16.0<br>(4.7 to 36.6)                            | 30.2<br>(27.7 to 33.0)                            | -0.2<br>(-2.2 to 1.9)                            |
| Other sexually transmitted diseases                                     | 132.7<br>(106.3 to 165.4)                           | 1,926.0<br>(1,550.2 to 2,364.0)                        | 18.9<br>(12.7 to 26.5)                           | 25.9<br>(18.0 to 35.1)                            | -3.5<br>(-9.6 to 3.6)                            |
| Hepatitis                                                               | 35,782.3<br>(30,976.9 to 41,162.8)                  | 5,595.0<br>(3,625.0 to 8,419.3)                        | 13.5<br>(7.2 to 23.6)                            | 6.0<br>(-35.2 to 87.1)                            | -18.8<br>(-50.3 to 43.4)                         |
| Acute hepatitis A                                                       | 60.9<br>(14.0 to 127.3)                             | 791.0<br>(182.2 to 1,655.5)                            | 2.5<br>(0.6 to 5.8)                              | -0.7<br>(-78.9 to 352.4)                          | -23.9<br>(-83.9 to 246.7)                        |
| Hepatitis B                                                             | 24,956.1<br>(20,466.5 to 30,154.0)                  | 4,135.1<br>(2,338.1 to 6,728.4)                        | 9.9<br>(4.9 to 18.3)                             | 7.4<br>(-40.6 to 94.0)                            | -17.7<br>(-54.5 to 48.7)                         |
| Hepatitis C                                                             | 10,739.2<br>(9,657.7 to 11,928.8)                   | 328.7<br>(245.0 to 429.0)                              | 0.3<br>(0.1 to 0.6)                              | 6.7<br>(-2.1 to 16.3)                             | -18.2<br>(-25.0 to -10.9)                        |
| Acute hepatitis E                                                       | 26.2<br>(15.0 to 43.5)                              | 340.2<br>(194.4 to 565.4)                              | 0.8<br>(0.4 to 1.5)                              | 10.1<br>(-11.9 to 38.4)                           | -15.6<br>(-32.5 to 6.0)                          |
| Other infectious diseases                                               | 1,351.0<br>(1,172.7 to 1,507.5)                     | 0.6<br>(0.3 to 1.0)                                    | 23.4<br>(14.8 to 36.1)                           | 31.6<br>(26.3 to 36.8)                            | 0.8<br>(-3.2 to 4.8)                             |
| <b>Non-communicable diseases</b>                                        | <b>340,082.8</b><br><b>(339,787.0 to 340,368.0)</b> | <b>912,187.5†</b><br><b>(821,455.6 to 1,008,685.5)</b> | <b>48,167.8</b><br><b>(35,793.5 to 62,385.8)</b> | <b>30.1</b><br><b>(29.4 to 30.8)</b>              | <b>-0.3</b><br><b>(-0.8 to 0.2)</b>              |
| <b>Neoplasms</b>                                                        | <b>4,514.8</b><br><b>(4,451.8 to 4,585.1)</b>       | <b>1,763.2</b><br><b>(1,695.7 to 1,852.0)</b>          | <b>546.1</b><br><b>(401.9 to 712.0)</b>          | <b>28.8</b><br><b>(25.7 to 32.6)</b>              | <b>-1.3</b><br><b>(-3.7 to 1.6)</b>              |
| Lip and oral cavity cancer                                              | 177.1<br>(170.5 to 184.0)                           | 48.4<br>(46.6 to 50.4)                                 | 18.2<br>(13.1 to 23.9)                           | 36.1<br>(27.1 to 45.8)                            | 4.3<br>(-2.6 to 11.7)                            |
| Nasopharynx cancer                                                      | 33.5<br>(31.6 to 35.6)                              | 9.7<br>(9.2 to 10.3)                                   | 4.0<br>(2.9 to 5.4)                              | 13.0<br>(2.4 to 24.3)                             | -13.4<br>(-21.5 to -4.7)                         |
| Other pharynx cancer                                                    | 80.9<br>(76.2 to 84.5)                              | 27.9<br>(26.1 to 29.2)                                 | 9.6<br>(7.0 to 12.6)                             | 41.3<br>(28.4 to 53.1)                            | 8.3<br>(-1.6 to 17.3)                            |
| Oesophageal cancer                                                      | 60.7<br>(58.3 to 63.4)                              | 49.8<br>(48.0 to 51.9)                                 | 13.1<br>(9.2 to 17.1)                            | -0.6<br>(-10.1 to 9.4)                            | -23.8<br>(-31.1 to -16.2)                        |
| Stomach cancer                                                          | 209.1<br>(197.4 to 222.2)                           | 112.6<br>(106.9 to 118.9)                              | 30.6<br>(21.9 to 39.9)                           | 10.0<br>(1.6 to 19.5)                             | -15.7<br>(-22.2 to -8.4)                         |
| Colon and rectum cancer                                                 | 606.0<br>(582.3 to 634.7)                           | 163.5<br>(157.2 to 171.0)                              | 58.3<br>(42.8 to 76.6)                           | 30.9<br>(22.6 to 39.8)                            | 0.3<br>(-6.1 to 7.2)                             |
| Liver cancer                                                            | 127.2<br>(115.1 to 142.0)                           | 124.4<br>(116.0 to 133.3)                              | 28.4<br>(20.1 to 37.9)                           | 43.2<br>(30.9 to 57.6)                            | 9.8<br>(0.3 to 20.8)                             |
| Liver cancer due to hepatitis B                                         | 80.7<br>(62.8 to 96.2)                              | 58.1<br>(44.9 to 68.7)                                 | 13.2<br>(8.3 to 18.2)                            | 43.5<br>(26.1 to 64.9)                            | 10.0<br>(-3.4 to 26.4)                           |

| Cause                                              | Prevalence in thousands (95% UI)                 | Incidence in thousands (95% UI)               | YLDs in thousands (95% UI)                    |                                                   |                                                  |
|----------------------------------------------------|--------------------------------------------------|-----------------------------------------------|-----------------------------------------------|---------------------------------------------------|--------------------------------------------------|
|                                                    | 2016 counts                                      | 2016 counts                                   | 2016 counts                                   | Percentage change in counts between 2006 and 2016 | Percentage change in rates between 2006 and 2016 |
| Liver cancer due to hepatitis C                    | 26.1<br>(21.9 to 31.5)                           | 19.8<br>(16.6 to 23.9)                        | 4.6<br>(3.1 to 6.4)                           | 34.8<br>(24.4 to 46.5)                            | 3.3<br>(-4.7 to 12.2)                            |
| Liver cancer due to alcohol use                    | 21.0<br>(15.1 to 28.0)                           | 16.9<br>(12.1 to 22.5)                        | 3.9<br>(2.4 to 5.8)                           | 50.3<br>(32.0 to 72.0)                            | 15.2<br>(1.2 to 31.8)                            |
| Liver cancer due to other causes                   | 41.4<br>(32.9 to 53.5)                           | 29.6<br>(23.7 to 37.8)                        | 6.8<br>(4.5 to 9.7)                           | 44.9<br>(26.2 to 68.5)                            | 11.0<br>(-3.3 to 29.2)                           |
| Gallbladder and biliary tract cancer               | 13.6<br>(11.9 to 14.5)                           | 15.8<br>(14.0 to 16.8)                        | 3.6<br>(2.5 to 4.9)                           | 17.7<br>(11.0 to 24.3)                            | -9.8<br>(-15.0 to -4.7)                          |
| Pancreatic cancer                                  | 31.3<br>(30.4 to 32.2)                           | 37.8<br>(37.0 to 38.5)                        | 8.2<br>(5.7 to 10.7)                          | 25.9<br>(22.1 to 29.6)                            | -3.5<br>(-6.4 to -0.7)                           |
| Larynx cancer                                      | 99.2<br>(95.9 to 102.8)                          | 28.9<br>(27.9 to 29.8)                        | 11.6<br>(8.4 to 15.4)                         | 22.8<br>(13.9 to 32.6)                            | -5.9<br>(-12.7 to 1.6)                           |
| Tracheal, bronchus, and lung cancer                | 280.2<br>(268.9 to 290.9)                        | 206.0<br>(198.6 to 213.1)                     | 50.6<br>(36.2 to 64.9)                        | 21.8<br>(13.8 to 30.0)                            | -6.7<br>(-12.8 to -0.4)                          |
| Malignant skin melanoma                            | 138.1<br>(119.2 to 154.7)                        | 28.3<br>(24.6 to 31.8)                        | 9.1<br>(6.3 to 12.8)                          | 36.2<br>(27.6 to 45.1)                            | 4.4<br>(-2.3 to 11.2)                            |
| Non-melanoma skin cancer                           | 51.1<br>(34.7 to 82.9)                           | 127.3<br>(71.2 to 212.4)                      | 2.1<br>(1.0 to 4.2)                           | -9.0<br>(-26.0 to 7.8)                            | -30.3<br>(-43.3 to -17.4)                        |
| Non-melanoma skin cancer (squamous-cell carcinoma) | 41.7<br>(20.9 to 78.8)                           | 38.6<br>(18.9 to 75.3)                        | 2.0<br>(0.8 to 4.0)                           | -10.5<br>(-28.3 to 6.7)                           | -31.4<br>(-45.0 to -18.2)                        |
| Non-melanoma skin cancer (basal-cell carcinoma)    | 10.4<br>(4.5 to 23.3)                            | 88.7<br>(41.3 to 168.7)                       | 0.1<br>(< 0.05 to 0.3)                        | 25.0<br>(11.9 to 35.9)                            | -4.2<br>(-14.3 to 4.1)                           |
| Breast cancer                                      | 1,024.1<br>(964.7 to 1,087.2)                    | 211.8<br>(199.4 to 226.1)                     | 92.3<br>(67.0 to 124.1)                       | 26.9<br>(18.4 to 36.6)                            | -2.7<br>(-9.3 to 4.7)                            |
| Cervical cancer                                    | 221.8<br>(176.2 to 240.1)                        | 58.7<br>(47.5 to 63.3)                        | 21.1<br>(14.5 to 28.2)                        | 16.5<br>(8.1 to 28.0)                             | -10.7<br>(-17.2 to -1.9)                         |
| Uterine cancer                                     | 313.9<br>(293.4 to 339.3)                        | 66.0<br>(61.8 to 71.4)                        | 23.7<br>(16.5 to 32.0)                        | 41.8<br>(28.5 to 57.3)                            | 8.6<br>(-1.6 to 20.6)                            |
| Ovarian cancer                                     | 94.3<br>(87.7 to 98.4)                           | 30.7<br>(29.0 to 32.0)                        | 14.2<br>(10.1 to 18.6)                        | 27.1<br>(13.7 to 40.8)                            | -2.6<br>(-12.8 to 7.9)                           |
| Prostate cancer                                    | 463.7<br>(408.9 to 556.0)                        | 112.7<br>(100.6 to 131.3)                     | 38.9<br>(26.7 to 52.8)                        | 34.3<br>(25.9 to 44.3)                            | 2.9<br>(-3.5 to 10.6)                            |
| Testicular cancer                                  | 10.9<br>(10.1 to 11.9)                           | 2.2<br>(2.0 to 2.4)                           | 0.8<br>(0.5 to 1.1)                           | 45.0<br>(27.1 to 67.7)                            | 11.1<br>(-2.6 to 28.5)                           |
| Kidney cancer                                      | 146.9<br>(139.3 to 154.4)                        | 39.2<br>(37.4 to 41.1)                        | 13.2<br>(9.4 to 17.7)                         | 27.2<br>(18.3 to 36.9)                            | -2.5<br>(-9.4 to 4.9)                            |
| Bladder cancer                                     | 153.8<br>(149.0 to 158.8)                        | 37.2<br>(36.1 to 38.4)                        | 14.7<br>(10.4 to 19.5)                        | 27.2<br>(19.4 to 34.7)                            | -2.5<br>(-8.5 to 3.2)                            |
| Brain and nervous system cancer                    | 66.2<br>(59.1 to 73.0)                           | 29.8<br>(27.2 to 33.3)                        | 9.6<br>(6.7 to 12.5)                          | 34.5<br>(26.5 to 45.3)                            | 3.1<br>(-3.1 to 11.3)                            |
| Thyroid cancer                                     | 156.3<br>(148.3 to 166.7)                        | 29.9<br>(28.4 to 31.9)                        | 9.9<br>(6.9 to 13.5)                          | 53.7<br>(42.9 to 66.3)                            | 17.8<br>(9.5 to 27.4)                            |
| Mesothelioma                                       | 5.4<br>(5.0 to 5.8)                              | 3.6<br>(3.4 to 3.9)                           | 1.2<br>(0.8 to 1.6)                           | 22.3<br>(16.3 to 27.7)                            | -6.2<br>(-10.9 to -2.1)                          |
| Hodgkin lymphoma                                   | 19.3<br>(17.1 to 21.9)                           | 5.0<br>(4.4 to 5.9)                           | 2.0<br>(1.4 to 2.7)                           | 20.0<br>(11.8 to 29.1)                            | -8.0<br>(-14.4 to -1.1)                          |
| Non-Hodgkin's lymphoma                             | 158.4<br>(145.0 to 176.1)                        | 44.0<br>(40.3 to 48.5)                        | 14.3<br>(10.3 to 18.9)                        | 49.4<br>(40.7 to 56.8)                            | 14.5<br>(7.8 to 20.2)                            |
| Multiple myeloma                                   | 35.6<br>(31.1 to 41.7)                           | 14.4<br>(13.0 to 16.8)                        | 7.6<br>(5.3 to 10.1)                          | 42.2<br>(34.0 to 52.2)                            | 9.0<br>(2.7 to 16.6)                             |
| Leukaemia                                          | 120.9<br>(107.6 to 129.0)                        | 34.1<br>(30.5 to 36.1)                        | 16.1<br>(11.5 to 21.6)                        | 35.4<br>(27.8 to 44.5)                            | 3.8<br>(-2.1 to 10.7)                            |
| Acute lymphoid leukaemia                           | 12.9<br>(11.0 to 14.0)                           | 3.8<br>(3.2 to 4.0)                           | 1.7<br>(1.2 to 2.4)                           | 50.8<br>(37.2 to 61.4)                            | 15.6<br>(5.1 to 23.7)                            |
| Chronic lymphoid leukaemia                         | 44.8<br>(41.2 to 50.0)                           | 10.0<br>(9.2 to 11.2)                         | 5.6<br>(3.9 to 7.5)                           | 40.4<br>(30.7 to 51.9)                            | 7.6<br>(0.1 to 16.4)                             |
| Acute myeloid leukaemia                            | 9.6<br>(8.4 to 10.4)                             | 7.2<br>(6.4 to 7.9)                           | 2.0<br>(1.4 to 2.7)                           | 39.6<br>(33.0 to 46.4)                            | 7.0<br>(2.0 to 12.2)                             |
| Chronic myeloid leukaemia                          | 8.2<br>(7.2 to 9.0)                              | 2.9<br>(2.5 to 3.2)                           | 1.1<br>(0.7 to 1.4)                           | 13.2<br>(6.7 to 19.9)                             | -13.2<br>(-18.2 to -8.1)                         |
| Other leukaemia                                    | 45.5<br>(37.2 to 50.0)                           | 10.1<br>(8.3 to 11.1)                         | 5.7<br>(3.9 to 7.7)                           | 30.1<br>(17.1 to 44.2)                            | -0.3<br>(-10.3 to 10.5)                          |
| Other neoplasms                                    | 218.6<br>(197.4 to 230.5)                        | 63.5<br>(57.6 to 66.7)                        | 19.1<br>(13.7 to 25.4)                        | 58.2<br>(49.7 to 66.5)                            | 21.3<br>(14.7 to 27.6)                           |
| <b>Cardiovascular diseases</b>                     | <b>46,100.5</b><br><b>(44,728.6 to 47,453.7)</b> | <b>2,955.8</b><br><b>(4,463.1 to 5,698.9)</b> | <b>34.8</b><br><b>(2,111.6 to 3,873.3)</b>    | <b>3.3</b><br><b>(30.2 to 38.9)</b>               | <b>3.3</b><br><b>(-0.2 to 6.5)</b>               |
| Rheumatic heart disease                            | 1,344.8<br>(1,218.2 to 1,482.1)                  | 14.7<br>(11.3 to 17.8)                        | 68.6<br>(45.2 to 98.0)                        | 25.8<br>(21.9 to 29.8)                            | -3.6<br>(-6.6 to -0.5)                           |
| Ischaemic heart disease                            | 15,465.8<br>(14,318.6 to 16,625.4)               | 1,766.0<br>(1,463.0 to 2,076.8)               | 676.5<br>(454.6 to 940.4)                     | 34.0<br>(32.5 to 35.7)                            | 2.7<br>(1.5 to 4.0)                              |
| Cerebrovascular disease                            | 8,532.9<br>(8,144.9 to 8,843.8)                  | 1,412.1<br>(1,158.9 to 1,662.6)               | 1,438.2<br>(1,032.4 to 1,859.3)               | 39.3<br>(29.6 to 47.6)                            | 6.8<br>(-0.7 to 13.1)                            |
| Ischaemic stroke                                   | 7,085.0<br>(6,117.1 to 8,077.7)                  | 1,003.2<br>(768.8 to 1,263.2)                 | 1,164.5<br>(822.1 to 1,513.5)                 | 42.5<br>(31.1 to 52.2)                            | 9.2<br>(0.4 to 16.6)                             |
| Hemorrhagic stroke                                 | 1,668.2<br>(1,421.1 to 1,950.4)                  | 408.9<br>(319.0 to 523.4)                     | 273.7<br>(192.3 to 357.8)                     | 27.2<br>(16.2 to 39.7)                            | -2.5<br>(-10.9 to 7.0)                           |
| Hypertensive heart disease                         | 1,399.7<br>(1,081.8 to 1,790.0)                  | --                                            | 116.0<br>(74.0 to 171.3)                      | 32.3<br>(28.3 to 36.1)                            | 1.4<br>(-1.7 to 4.3)                             |
| Cardiomyopathy and myocarditis                     | 443.0<br>(394.3 to 487.4)                        | 205.6 <sup>†</sup><br>(146.1 to 283.6)        | 40.0<br>(25.5 to 59.3)                        | 25.5<br>(19.7 to 31.1)                            | -3.8<br>(-8.3 to 0.4)                            |
| Myocarditis                                        | 104.2<br>(83.6 to 127.4)                         | 205.6<br>(146.1 to 283.6)                     | 7.2<br>(4.6 to 10.5)                          | 22.0<br>(15.6 to 29.3)                            | -6.5<br>(-11.4 to -0.9)                          |
| Alcoholic cardiomyopathy                           | 155.0<br>(117.7 to 199.6)                        | --                                            | 13.0<br>(8.1 to 19.7)                         | 29.9<br>(16.6 to 43.7)                            | -0.4<br>(-10.6 to 10.1)                          |
| Other cardiomyopathy                               | 237.1<br>(177.5 to 309.9)                        | --                                            | 19.8<br>(12.3 to 29.9)                        | 24.0<br>(18.1 to 29.5)                            | -5.0<br>(-9.5 to -0.7)                           |
| Atrial fibrillation and flutter                    | 3,070.6<br>(2,543.0 to 3,624.4)                  | 353.0<br>(247.7 to 480.1)                     | 250.1<br>(158.4 to 357.5)                     | 31.4<br>(28.7 to 34.4)                            | 0.7<br>(-1.4 to 3.0)                             |
| Peripheral vascular disease                        | 13,018.5<br>(10,683.3 to 15,841.3)               | 1,227.0<br>(809.2 to 1,712.1)                 | 39.0<br>(17.1 to 72.2)                        | 23.2<br>(21.0 to 25.3)                            | -5.6<br>(-7.3 to -4.0)                           |
| Endocarditis                                       | 25.9<br>(19.8 to 33.4)                           | 71.2<br>(52.9 to 92.5)                        | 2.1<br>(1.3 to 3.3)                           | 26.7<br>(21.4 to 31.8)                            | -2.9<br>(-7.0 to 1.0)                            |
| Other cardiovascular and circulatory diseases      | 6,224.3<br>(4,416.2 to 8,673.3)                  | --                                            | 325.2<br>(200.4 to 511.8)                     | 25.9<br>(22.4 to 29.2)                            | -3.5<br>(-6.2 to -1.0)                           |
| <b>Chronic respiratory diseases</b>                | <b>45,162.5</b><br><b>(44,294.5 to 45,880.8)</b> | <b>5,990.7</b><br><b>(5,230.5 to 6,855.5)</b> | <b>2,790.9</b><br><b>(2,336.2 to 3,251.1)</b> | <b>3.8</b><br><b>(32.4 to 38.7)</b>               | <b>3.8</b><br><b>(1.5 to 6.3)</b>                |
| Chronic obstructive pulmonary disease              | 29,491.3<br>(27,616.1 to 31,299.2)               | 2,228.4<br>(1,888.4 to 2,568.3)               | 2,010.2<br>(1,719.8 to 2,253.9)               | 35.0<br>(31.0 to 39.1)                            | 3.5<br>(0.4 to 6.6)                              |
| Pneumoconiosis                                     | 127.7<br>(115.7 to 140.9)                        | 19.7<br>(17.2 to 22.4)                        | 19.1<br>(12.7 to 26.9)                        | 29.1<br>(18.7 to 40.4)                            | -1.1<br>(-9.0 to 7.6)                            |
| Silicosis                                          | 40.9<br>(33.9 to 49.9)                           | 9.1<br>(7.2 to 11.3)                          | 6.0<br>(3.8 to 8.7)                           | 30.5<br>(7.9 to 56.4)                             | 0.0<br>(-17.3 to 19.9)                           |

| Cause                                                          | Prevalence in thousands (95% UI)              | Incidence in thousands (95% UI)             | YLDs in thousands (95% UI)               |                                                   |                                                  |
|----------------------------------------------------------------|-----------------------------------------------|---------------------------------------------|------------------------------------------|---------------------------------------------------|--------------------------------------------------|
|                                                                | 2016 counts                                   | 2016 counts                                 | 2016 counts                              | Percentage change in counts between 2006 and 2016 | Percentage change in rates between 2006 and 2016 |
| Asbestosis                                                     | 14.1<br>(11.7 to 16.9)                        | 1.6<br>(1.1 to 2.1)                         | 2.2<br>(1.4 to 3.2)                      | 20.7<br>(15.6 to 25.6)                            | -7.5<br>(-11.4 to -3.7)                          |
| Coal workers pneumoconiosis                                    | 42.7<br>(36.2 to 50.3)                        | 5.2<br>(4.1 to 6.3)                         | 6.2<br>(4.1 to 9.2)                      | 27.8<br>(6.5 to 55.3)                             | -2.1<br>(-18.4 to 19.0)                          |
| Other pneumoconiosis                                           | 30.0<br>(24.1 to 36.2)                        | 3.7<br>(2.6 to 5.0)                         | 4.6<br>(2.9 to 6.8)                      | 33.5<br>(20.6 to 46.3)                            | 2.3<br>(-7.6 to 12.1)                            |
| Asthma                                                         | 17,996.4<br>(15,974.2 to 20,114.6)            | 3,708.2<br>(3,022.9 to 4,484.7)             | 684.5<br>(446.8 to 987.7)                | 35.6<br>(32.8 to 38.5)                            | 3.9<br>(1.8 to 6.1)                              |
| Interstitial lung disease and pulmonary sarcoidosis            | 325.4<br>(271.8 to 390.9)                     | 34.4<br>(23.9 to 47.8)                      | 35.1<br>(22.2 to 52.0)                   | 30.9<br>(22.3 to 39.1)                            | 0.3<br>(-6.2 to 6.6)                             |
| Other chronic respiratory diseases                             | --                                            | --                                          | 42.0<br>(35.8 to 47.1)                   | 74.1<br>(69.1 to 79.2)                            | 33.4<br>(29.6 to 37.3)                           |
| <b>Cirrhosis and other chronic liver diseases</b>              | <b>4,988.2<br/>(4,687.4 to 5,322.8)</b>       | <b>179.0<br/>(153.6 to 205.2)</b>           | <b>144.5<br/>(100.7 to 202.4)</b>        | <b>32.0<br/>(27.6 to 36.7)</b>                    | <b>1.2<br/>(-2.2 to 4.7)</b>                     |
| Cirrhosis and other chronic liver diseases due to hepatitis B  | 1,372.4<br>(1,182.1 to 1,585.4)               | 51.5<br>(40.7 to 63.0)                      | 43.6<br>(29.3 to 62.9)                   | 33.1<br>(26.2 to 40.1)                            | 2.0<br>(-3.3 to 7.4)                             |
| Cirrhosis and other chronic liver diseases due to hepatitis C  | 1,271.9<br>(1,080.7 to 1,483.8)               | 47.2<br>(38.3 to 57.9)                      | 36.3<br>(23.9 to 51.3)                   | 32.0<br>(25.0 to 39.7)                            | 1.2<br>(-4.2 to 7.1)                             |
| Cirrhosis and other chronic liver diseases due to alcohol use  | 1,437.8<br>(1,205.1 to 1,662.9)               | 51.3<br>(40.9 to 63.3)                      | 40.2<br>(25.9 to 58.0)                   | 31.2<br>(24.3 to 38.3)                            | 0.6<br>(-4.8 to 6.0)                             |
| Cirrhosis and other chronic liver diseases due to other causes | 906.7<br>(692.9 to 1,159.4)                   | 29.0<br>(21.3 to 38.0)                      | 24.4<br>(15.0 to 37.3)                   | 31.5<br>(23.2 to 40.5)                            | 0.8<br>(-5.5 to 7.7)                             |
| <b>Digestive diseases</b>                                      | <b>25,023.2<br/>(23,386.1 to 26,338.1)</b>    | <b>20,137.4†<br/>(17,396.4 to 23,413.3)</b> | <b>657.8<br/>(444.0 to 920.6)</b>        | <b>39.0<br/>(32.3 to 46.1)</b>                    | <b>6.5<br/>(1.4 to 12.0)</b>                     |
| Peptic ulcer disease                                           | 7,281.1<br>(5,937.6 to 9,125.2)               | 727.3<br>(562.2 to 915.2)                   | 124.9<br>(71.3 to 205.5)                 | 50.0<br>(35.1 to 64.4)                            | 15.0<br>(3.5 to 26.0)                            |
| Gastritis and duodenitis                                       | 12,062.6<br>(9,208.9 to 15,750.5)             | 7,501.3<br>(5,765.9 to 9,709.2)             | 154.0<br>(89.8 to 238.7)                 | 46.5<br>(32.5 to 59.8)                            | 12.3<br>(1.5 to 22.5)                            |
| Appendicitis                                                   | 27.3<br>(22.3 to 32.9)                        | 738.4<br>(610.5 to 890.5)                   | 8.3<br>(5.4 to 12.0)                     | 36.6<br>(24.6 to 50.3)                            | 4.7<br>(-4.5 to 15.2)                            |
| Paralytic ileus and intestinal obstruction                     | 13.0<br>(10.0 to 16.4)                        | 356.6<br>(272.2 to 450.6)                   | 4.2<br>(2.6 to 6.3)                      | 39.2<br>(32.1 to 46.0)                            | 6.7<br>(1.2 to 11.9)                             |
| Inguinal, femoral, and abdominal hernia                        | 4,188.3<br>(3,158.7 to 5,468.5)               | 4,120.3<br>(2,867.0 to 5,762.9)             | 183.4<br>(111.2 to 277.6)                | 25.9<br>(20.4 to 31.2)                            | -3.5<br>(-7.7 to 0.5)                            |
| Inflammatory bowel disease                                     | 695.8<br>(597.2 to 818.9)                     | 236.3<br>(187.6 to 288.8)                   | 99.2<br>(65.8 to 139.8)                  | 38.0<br>(31.7 to 44.6)                            | 5.7<br>(0.9 to 10.8)                             |
| Vascular intestinal disorders                                  | 7.5<br>(5.2 to 10.5)                          | 40.7<br>(28.5 to 55.2)                      | 2.4<br>(1.4 to 3.8)                      | 30.4<br>(21.6 to 37.4)                            | -0.1<br>(-6.8 to 5.3)                            |
| Gallbladder and biliary diseases                               | 1,725.7<br>(1,283.6 to 2,260.7)               | 5,890.9<br>(4,405.1 to 7,679.0)             | 26.3<br>(15.9 to 40.8)                   | 40.7<br>(29.7 to 51.0)                            | 7.9<br>(-0.6 to 15.8)                            |
| Pancreatitis                                                   | 58.7<br>(45.6 to 73.8)                        | 525.6<br>(408.9 to 665.9)                   | 7.3<br>(4.5 to 10.9)                     | 39.6<br>(25.4 to 54.9)                            | 7.0<br>(-3.9 to 18.7)                            |
| Other digestive diseases                                       | --                                            | --                                          | 47.7<br>(32.2 to 66.7)                   | 48.0<br>(40.8 to 55.5)                            | 13.4<br>(7.9 to 19.2)                            |
| <b>Neurological disorders</b>                                  | <b>132,561.8<br/>(125,239.4 to 144,607.5)</b> | <b>47,176.5<br/>(30,506.1 to 67,366.4)</b>  | <b>3,744.2<br/>(2,572.5 to 5,053.3)</b>  | <b>30.7<br/>(29.0 to 32.3)</b>                    | <b>0.1<br/>(-1.1 to 1.4)</b>                     |
| Alzheimer's disease and other dementias                        | 1,399.4<br>(1,080.9 to 1,793.5)               | 220.9<br>(142.9 to 324.5)                   | 174.3<br>(113.2 to 257.4)                | 30.0<br>(26.6 to 33.7)                            | -0.4<br>(-3.0 to 2.4)                            |
| Parkinson's disease                                            | 394.9<br>(284.3 to 528.5)                     | 50.1<br>(28.9 to 76.5)                      | 48.9<br>(29.9 to 73.3)                   | 37.8<br>(30.7 to 45.2)                            | 5.6<br>(0.2 to 11.3)                             |
| Epilepsy                                                       | 1,055.2<br>(857.2 to 1,273.8)                 | 77.8<br>(53.6 to 112.5)                     | 306.9<br>(208.0 to 426.2)                | 26.6<br>(13.5 to 41.5)                            | -3.0<br>(-13.1 to 8.5)                           |
| Multiple sclerosis                                             | 212.1<br>(194.4 to 230.6)                     | 1.2<br>(0.8 to 1.7)                         | 55.1<br>(38.8 to 73.1)                   | 33.5<br>(26.4 to 40.9)                            | 2.3<br>(-3.2 to 8.0)                             |
| Motor neuron disease                                           | 25.4<br>(19.8 to 32.6)                        | 5.9<br>(4.3 to 7.9)                         | 5.4<br>(3.5 to 7.8)                      | 27.6<br>(24.6 to 30.7)                            | -2.2<br>(-4.5 to 0.2)                            |
| Migraine                                                       | 57,838.5<br>(53,437.8 to 62,337.6)            | 3,749.5<br>(3,205.0 to 4,406.2)             | 2,609.6<br>(1,699.7 to 3,585.0)          | 30.7<br>(29.5 to 31.9)                            | 0.1<br>(-0.8 to 1.1)                             |
| Tension-type headache                                          | 93,009.1<br>(67,364.4 to 123,872.0)           | 43,067.8<br>(26,585.8 to 63,365.2)          | 462.4<br>(286.0 to 682.4)                | 31.7<br>(29.7 to 34.0)                            | 0.9<br>(-0.6 to 2.7)                             |
| Other neurological disorders                                   | 1.6<br>(0.8 to 2.8)                           | 3.2<br>(1.8 to 5.2)                         | 81.6<br>(57.9 to 107.8)                  | 35.9<br>(28.4 to 44.1)                            | 4.2<br>(-1.6 to 10.5)                            |
| <b>Mental and substance use disorders</b>                      | <b>60,968.9<br/>(59,860.4 to 62,008.5)</b>    | <b>24,742.0†<br/>(21,505.8 to 28,607.5)</b> | <b>8,708.4<br/>(6,354.9 to 11,296.3)</b> | <b>26.8<br/>(25.8 to 27.9)</b>                    | <b>-2.8<br/>(-3.6 to -2.0)</b>                   |
| Schizophrenia                                                  | 1,605.0<br>(1,414.2 to 1,815.7)               | 30.6<br>(25.1 to 36.5)                      | 1,001.1<br>(756.1 to 1,227.1)            | 30.5<br>(28.0 to 32.9)                            | 0.0<br>(-1.9 to 1.9)                             |
| Alcohol use disorders                                          | 5,605.6<br>(4,692.8 to 6,614.9)               | 2,292.2<br>(1,819.2 to 2,834.7)             | 543.8<br>(364.9 to 752.1)                | 22.4<br>(17.5 to 27.2)                            | -6.2<br>(-9.9 to -2.5)                           |
| Drug use disorders                                             | 1,876.0<br>(1,803.9 to 1,935.4)               | 216.5<br>(189.3 to 248.6)                   | 530.5<br>(375.1 to 688.4)                | 33.2<br>(29.3 to 37.1)                            | 2.1<br>(-0.9 to 5.0)                             |
| Opioid use disorders                                           | 1,058.5<br>(888.8 to 1,243.5)                 | 150.5<br>(124.7 to 181.0)                   | 423.0<br>(294.1 to 558.4)                | 34.7<br>(29.8 to 39.5)                            | 3.2<br>(-0.6 to 6.9)                             |
| Cocaine use disorders                                          | 287.0<br>(252.7 to 322.8)                     | 8.8<br>(6.6 to 11.6)                        | 38.1<br>(23.7 to 54.2)                   | 26.2<br>(19.2 to 34.0)                            | -3.3<br>(-8.7 to 2.7)                            |
| Amphetamine use disorders                                      | 57.5<br>(40.9 to 77.7)                        | 7.3<br>(4.1 to 11.0)                        | 7.7<br>(4.2 to 12.4)                     | 25.0<br>(13.1 to 37.6)                            | -4.2<br>(-13.3 to 5.5)                           |
| Cannabis use disorders                                         | 362.0<br>(289.5 to 445.8)                     | 27.5<br>(21.5 to 34.9)                      | 10.6<br>(6.4 to 16.2)                    | 27.3<br>(21.8 to 32.8)                            | -2.5<br>(-6.7 to 1.8)                            |
| Other drug use disorders                                       | 201.1<br>(167.5 to 236.1)                     | 22.4<br>(17.3 to 28.2)                      | 51.1<br>(33.7 to 69.9)                   | 29.4<br>(24.1 to 35.4)                            | -0.8<br>(-4.9 to 3.8)                            |
| Depressive disorders                                           | 21,436.1<br>(20,715.6 to 22,136.1)            | 20,317.5<br>(16,968.4 to 24,077.8)          | 3,377.1<br>(2,298.7 to 4,675.2)          | 24.0<br>(22.1 to 26.0)                            | -5.0<br>(-6.5 to -3.4)                           |
| Major depressive disorder                                      | 12,402.8<br>(10,536.6 to 14,583.9)            | 18,953.2<br>(15,586.3 to 22,710.9)          | 2,474.1<br>(1,654.8 to 3,445.2)          | 21.1<br>(18.9 to 23.3)                            | -7.2<br>(-8.9 to -5.5)                           |
| Dysthymia                                                      | 9,537.3<br>(7,938.6 to 11,409.8)              | 1,364.3<br>(1,019.4 to 1,742.9)             | 903.0<br>(589.1 to 1,327.7)              | 32.6<br>(29.2 to 36.1)                            | 1.6<br>(-1.0 to 4.3)                             |
| Bipolar disorder                                               | 2,625.7<br>(2,190.3 to 3,173.4)               | 147.5<br>(110.7 to 195.1)                   | 520.1<br>(317.1 to 786.1)                | 29.5<br>(27.0 to 31.9)                            | -0.8<br>(-2.7 to 1.1)                            |
| Anxiety disorders                                              | 16,019.1<br>(14,504.1 to 17,631.6)            | 1,694.0<br>(1,442.3 to 1,960.3)             | 1,498.1<br>(1,041.7 to 2,008.6)          | 27.9<br>(25.4 to 30.2)                            | -2.0<br>(-3.9 to -0.2)                           |
| Eating disorders                                               | --                                            | --                                          | --                                       | --                                                | --                                               |
| Anorexia nervosa                                               | --                                            | --                                          | --                                       | --                                                | --                                               |
| Bulimia nervosa                                                | --                                            | --                                          | --                                       | --                                                | --                                               |
| Autistic spectrum disorders                                    | 2,493.2<br>(2,383.0 to 2,596.9)               | --                                          | 357.2<br>(244.3 to 500.9)                | 29.9<br>(27.7 to 32.0)                            | -0.5<br>(-2.1 to 1.2)                            |
| Autism                                                         | 775.2<br>(666.8 to 904.9)                     | --                                          | 190.2<br>(123.0 to 273.0)                | 28.4<br>(25.0 to 31.8)                            | -1.6<br>(-4.2 to 1.0)                            |
| Asperger syndrome and other autistic spectrum disorders        | 1,722.7<br>(1,436.5 to 2,044.4)               | --                                          | 167.0<br>(108.5 to 238.2)                | 31.6<br>(29.3 to 33.8)                            | 0.9<br>(-0.9 to 2.5)                             |

| Cause                                                      | Prevalence in thousands (95% UI)                    | Incidence in thousands (95% UI)                      | YLDs in thousands (95% UI)                      |                                                   |                                                  |
|------------------------------------------------------------|-----------------------------------------------------|------------------------------------------------------|-------------------------------------------------|---------------------------------------------------|--------------------------------------------------|
|                                                            | 2016 counts                                         | 2016 counts                                          | 2016 counts                                     | Percentage change in counts between 2006 and 2016 | Percentage change in rates between 2006 and 2016 |
| Attention-deficit/hyperactivity disorder                   | 957.9<br>(828.9 to 1,102.7)                         | --                                                   | 11.2<br>(6.7 to 17.6)                           | 30.8<br>(25.2 to 37.0)                            | 0.2<br>(-4.0 to 5.0)                             |
| Conduct disorder                                           | --                                                  | --                                                   | --                                              | --                                                | --                                               |
| Idiopathic developmental intellectual disability           | 3,595.2<br>(2,027.2 to 5,162.7)                     | --                                                   | 152.4<br>(73.9 to 259.6)                        | 19.8<br>(14.3 to 23.1)                            | -8.2<br>(-12.4 to -5.7)                          |
| Other mental and substance use disorders                   | 9,843.5<br>(8,669.9 to 11,231.2)                    | 43.7<br>(28.4 to 65.8)                               | 717.1<br>(488.1 to 1,017.7)                     | 30.3<br>(28.3 to 32.4)                            | -0.1<br>(-1.7 to 1.4)                            |
| <b>Diabetes, urogenital, blood, and endocrine diseases</b> | <b>164,104.3</b><br><b>(162,410.5 to 165,729.3)</b> | <b>33,918.8†</b><br><b>(29,539.3 to 38,982.7)</b>    | <b>5,516.2</b><br><b>(3,923.4 to 7,492.3)</b>   | <b>30.4</b><br><b>(27.9 to 33.2)</b>              | <b>-0.0</b><br><b>(-1.9 to 2.1)</b>              |
| Diabetes mellitus                                          | 44,904.0<br>(40,254.5 to 49,795.5)                  | 2,330.2<br>(1,832.2 to 2,928.7)                      | 3,447.3<br>(2,353.2 to 4,800.8)                 | 30.1<br>(26.0 to 34.4)                            | -0.3<br>(-3.4 to 3.0)                            |
| Acute glomerulonephritis                                   | 6.8<br>(4.5 to 10.0)                                | 99.4<br>(65.3 to 149.2)                              | 0.3<br>(0.2 to 0.6)                             | 10.4<br>(6.8 to 13.7)                             | -15.4<br>(-18.2 to -12.9)                        |
| Chronic kidney disease                                     | 24,859.3<br>(20,817.1 to 29,368.1)                  | 2,290.0<br>(1,598.5 to 3,140.1)                      | 768.9<br>(543.2 to 1,026.1)                     | 35.2<br>(31.1 to 39.4)                            | 3.6<br>(0.4 to 6.9)                              |
| Chronic kidney disease due to diabetes mellitus            | 12,397.3<br>(9,296.6 to 15,603.8)                   | 1,146.8<br>(751.7 to 1,635.0)                        | 399.8<br>(274.2 to 555.1)                       | 35.2<br>(30.7 to 40.0)                            | 3.6<br>(0.2 to 7.3)                              |
| Chronic kidney disease due to hypertension                 | 3,731.1<br>(2,730.4 to 4,906.8)                     | 321.2<br>(191.6 to 490.8)                            | 137.1<br>(90.4 to 199.2)                        | 41.7<br>(34.1 to 50.0)                            | 8.6<br>(2.8 to 15.0)                             |
| Chronic kidney disease due to glomerulonephritis           | 3,846.3<br>(2,883.4 to 5,028.9)                     | 371.0<br>(236.4 to 562.0)                            | 93.0<br>(55.5 to 143.0)                         | 28.5<br>(20.4 to 35.5)                            | -1.5<br>(-7.7 to 3.8)                            |
| Chronic kidney disease due to other causes                 | 4,884.7<br>(3,299.1 to 7,037.9)                     | 451.0<br>(269.6 to 707.4)                            | 138.9<br>(84.0 to 221.2)                        | 33.7<br>(28.0 to 40.3)                            | 2.4<br>(-1.9 to 7.5)                             |
| Urinary diseases and male infertility                      | 16,290.6<br>(14,815.6 to 18,181.2)                  | 26,524.9†<br>(22,224.8 to 31,334.6)                  | 546.3<br>(349.9 to 791.3)                       | 26.0<br>(23.8 to 28.5)                            | -3.5<br>(-5.1 to -1.5)                           |
| Interstitial nephritis and urinary tract infections        | 334.7<br>(268.1 to 412.7)                           | 17,427.7<br>(13,810.9 to 21,679.1)                   | 10.8<br>(6.4 to 16.9)                           | 37.9<br>(30.5 to 44.9)                            | 5.7<br>(0.0 to 11.1)                             |
| Urolithiasis                                               | 283.3<br>(210.7 to 374.7)                           | 7,480.9<br>(5,581.9 to 10,088.9)                     | 20.4<br>(12.5 to 30.4)                          | 30.2<br>(20.8 to 41.1)                            | -0.2<br>(-7.5 to 8.2)                            |
| Benign prostatic hyperplasia                               | 15,204.6<br>(12,887.3 to 17,757.3)                  | 1,616.4<br>(1,099.7 to 2,249.7)                      | 505.1<br>(318.1 to 742.6)                       | 25.9<br>(23.6 to 28.6)                            | -3.5<br>(-5.3 to -1.4)                           |
| Male infertility                                           | --                                                  | --                                                   | --                                              | --                                                | --                                               |
| Other urinary diseases                                     | --                                                  | --                                                   | 10.0<br>(6.5 to 14.1)                           | 11.4<br>(5.2 to 17.6)                             | -14.6<br>(-19.4 to -9.9)                         |
| Gynecological diseases                                     | 43,139.7<br>(41,368.5 to 45,544.6)                  | 1,001.4†<br>(799.0 to 1,239.6)                       | 249.0<br>(142.3 to 423.4)                       | 26.5<br>(24.6 to 29.0)                            | -3.1<br>(-4.5 to -1.2)                           |
| Uterine fibroids                                           | 8,935.2<br>(7,882.3 to 10,206.7)                    | 65.3<br>(35.5 to 101.7)                              | 133.8<br>(78.3 to 221.6)                        | 34.1<br>(31.8 to 36.8)                            | 2.8<br>(1.0 to 4.8)                              |
| Polycystic ovarian syndrome                                | --                                                  | --                                                   | --                                              | --                                                | --                                               |
| Female infertility                                         | --                                                  | --                                                   | --                                              | --                                                | --                                               |
| Endometriosis                                              | --                                                  | --                                                   | --                                              | --                                                | --                                               |
| Genital prolapse                                           | 36,872.4<br>(32,349.1 to 41,840.9)                  | 936.1<br>(734.9 to 1,176.8)                          | 115.2<br>(55.1 to 207.9)                        | 18.7<br>(17.2 to 20.2)                            | -9.1<br>(-10.2 to -7.9)                          |
| Premenstrual syndrome                                      | --                                                  | --                                                   | --                                              | --                                                | --                                               |
| Other gynecological diseases                               | --                                                  | --                                                   | --                                              | --                                                | --                                               |
| Hemoglobinopathies and hemolytic anaemias                  | 76,191.0<br>(75,472.1 to 76,995.3)                  | --                                                   | 207.3<br>(131.1 to 317.9)                       | 36.2<br>(27.6 to 43.8)                            | 4.4<br>(-2.2 to 10.2)                            |
| Thalassemias                                               | 0.2<br>(0.2 to 0.3)                                 | --                                                   | < 0.05<br>(< 0.05 to < 0.05)                    | 6.0<br>(-25.9 to 7.5)                             | -27.9<br>(-43.2 to -17.6)                        |
| Thalassaemias trait                                        | 13,917.6<br>(13,383.4 to 14,496.5)                  | --                                                   | 131.4<br>(82.5 to 204.7)                        | 35.4<br>(23.7 to 45.7)                            | 3.7<br>(-5.2 to 11.6)                            |
| Sickle cell disorders                                      | 4.2<br>(3.7 to 4.7)                                 | --                                                   | 0.7<br>(0.5 to 0.9)                             | 65.1<br>(59.8 to 70.6)                            | 26.5<br>(22.5 to 30.7)                           |
| Sickle cell trait                                          | 16,175.9<br>(14,841.4 to 17,958.8)                  | --                                                   | 40.8<br>(26.0 to 61.4)                          | 39.5<br>(34.1 to 45.1)                            | 6.9<br>(2.7 to 11.2)                             |
| G6PD deficiency                                            | 13,029.2<br>(12,559.5 to 13,572.3)                  | --                                                   | 1.1<br>(0.7 to 1.6)                             | 30.7<br>(24.8 to 36.2)                            | 0.1<br>(-4.4 to 4.4)                             |
| G6PD trait                                                 | 38,147.7<br>(37,517.5 to 38,876.7)                  | --                                                   | < 0.05<br>(< 0.05 to < 0.05)                    | 32.7<br>(14.5 to 57.7)                            | 1.7<br>(-12.3 to 20.8)                           |
| Other hemoglobinopathies and hemolytic anaemias            | 2,553.0<br>(2,218.5 to 2,846.8)                     | --                                                   | 33.2<br>(21.0 to 50.6)                          | 35.3<br>(28.2 to 42.5)                            | 3.9<br>(-1.7 to 9.2)                             |
| Endocrine, metabolic, blood, and immune disorders          | 9,207.2<br>(7,493.4 to 11,334.9)                    | 1,672.9<br>(1,181.1 to 2,251.5)                      | 297.0<br>(189.9 to 438.4)                       | 31.3<br>(27.8 to 34.7)                            | 0.6<br>(-2.1 to 3.2)                             |
| <b>Musculoskeletal disorders</b>                           | <b>121,839.5</b><br><b>(117,155.8 to 126,369.3)</b> | <b>59,650.4</b><br><b>(47,300.0 to 74,549.7)</b>     | <b>13,360.2</b><br><b>(9,503.5 to 18,042.5)</b> | <b>30.0</b><br><b>(28.2 to 31.7)</b>              | <b>0.4</b><br><b>(-1.8 to 0.9)</b>               |
| Rheumatoid arthritis                                       | 2,448.9<br>(2,130.6 to 2,814.2)                     | 126.0<br>(94.2 to 163.5)                             | 574.1<br>(386.8 to 775.6)                       | 35.5<br>(31.9 to 38.9)                            | 3.9<br>(1.1 to 6.4)                              |
| Osteoarthritis                                             | 39,052.0<br>(36,119.2 to 42,114.7)                  | 2,091.5<br>(1,787.2 to 2,418.9)                      | 2,173.7<br>(1,525.6 to 2,961.3)                 | 34.3<br>(33.1 to 35.6)                            | 2.9<br>(2.0 to 3.9)                              |
| Low back and neck pain                                     | 68,616.6<br>(63,160.1 to 73,848.4)                  | 26,345.5<br>(18,372.8 to 35,837.5)                   | 8,084.0<br>(5,470.5 to 11,370.8)                | 29.2<br>(26.6 to 31.6)                            | -1.0<br>(-3.0 to 0.9)                            |
| Low back pain                                              | 45,677.6<br>(33,100.1 to 61,424.9)                  | 22,248.6<br>(14,242.6 to 31,320.7)                   | 5,202.6<br>(3,251.4 to 7,749.2)                 | 28.6<br>(24.5 to 32.0)                            | -1.5<br>(-4.6 to 1.2)                            |
| Neck pain                                                  | 29,077.5<br>(20,939.2 to 38,595.1)                  | 4,096.9<br>(2,238.2 to 6,412.3)                      | 2,881.4<br>(1,745.8 to 4,299.6)                 | 30.4<br>(27.1 to 33.5)                            | -0.1<br>(-2.6 to 2.3)                            |
| Gout                                                       | 3,929.9<br>(3,199.9 to 4,759.3)                     | 790.4<br>(567.6 to 1,035.7)                          | 125.3<br>(81.9 to 180.1)                        | 28.8<br>(24.2 to 33.8)                            | -1.3<br>(-4.8 to 2.5)                            |
| Other musculoskeletal disorders                            | 28,601.0<br>(20,237.5 to 38,969.6)                  | 30,297.0<br>(20,641.0 to 42,527.9)                   | 2,403.0<br>(1,450.9 to 3,756.9)                 | 27.8<br>(22.3 to 32.9)                            | -2.0<br>(-6.2 to 1.8)                            |
| <b>Other non-communicable diseases</b>                     | <b>297,553.5</b><br><b>(295,260.5 to 299,258.0)</b> | <b>713,579.8†</b><br><b>(625,604.4 to 805,364.6)</b> | <b>9,744.0</b><br><b>(6,556.5 to 14,292.2)</b>  | <b>29.4</b><br><b>(28.4 to 30.4)</b>              | <b>-0.8</b><br><b>(-1.6 to -0.1)</b>             |
| Congenital anomalies                                       | 2,968.3<br>(2,761.5 to 3,170.1)                     | --                                                   | 387.6<br>(278.8 to 516.7)                       | 30.0<br>(26.6 to 33.2)                            | -0.4<br>(-3.0 to 2.1)                            |
| Neural tube defects                                        | 227.0<br>(206.3 to 251.1)                           | --                                                   | 67.0<br>(47.9 to 89.0)                          | 32.1<br>(26.3 to 38.0)                            | 1.2<br>(-3.2 to 5.7)                             |
| Congenital heart anomalies                                 | 435.5<br>(389.2 to 486.7)                           | --                                                   | 24.3<br>(10.0 to 42.4)                          | 32.7<br>(27.6 to 38.1)                            | 1.7<br>(-2.2 to 5.8)                             |
| Orofacial clefts                                           | 166.2<br>(148.3 to 184.1)                           | --                                                   | 2.0<br>(1.3 to 2.9)                             | 21.7<br>(18.3 to 25.0)                            | -6.8<br>(-9.4 to -4.2)                           |
| Down's syndrome                                            | 40.3<br>(33.9 to 46.9)                              | --                                                   | 6.9<br>(4.6 to 9.4)                             | 29.1<br>(24.6 to 33.3)                            | -1.0<br>(-4.5 to 2.1)                            |
| Turner syndrome                                            | 51.4<br>(44.2 to 59.8)                              | --                                                   | 0.7<br>(0.3 to 1.2)                             | 32.4<br>(11.3 to 57.3)                            | 1.4<br>(-14.7 to 20.6)                           |
| Klinefelter syndrome                                       | 21.2<br>(17.4 to 25.4)                              | --                                                   | 0.1<br>(< 0.05 to 0.1)                          | 23.3<br>(19.7 to 26.9)                            | -5.5<br>(-8.3 to -2.8)                           |

| Cause                                         | Prevalence in thousands (95% UI)                    | Incidence in thousands (95% UI)                   | YLDs in thousands (95% UI)                    |                                                   |                                                  |
|-----------------------------------------------|-----------------------------------------------------|---------------------------------------------------|-----------------------------------------------|---------------------------------------------------|--------------------------------------------------|
|                                               | 2016 counts                                         | 2016 counts                                       | 2016 counts                                   | Percentage change in counts between 2006 and 2016 | Percentage change in rates between 2006 and 2016 |
| Other chromosomal abnormalities               | < 0.05<br>(< 0.05 to < 0.05)                        | --                                                | < 0.05<br>(< 0.05 to < 0.05)                  | -16.8<br>(-74.5 to 158.9)                         | -36.2<br>(-80.5 to 98.4)                         |
| Congenital musculoskeletal and limb anomalies | 546.7<br>(506.4 to 591.2)                           | --                                                | 79.1<br>(54.8 to 108.1)                       | 29.8<br>(25.0 to 34.8)                            | -0.5<br>(-4.2 to 3.3)                            |
| Urogenital congenital anomalies               | 140.5<br>(126.7 to 155.3)                           | --                                                | 2.1<br>(1.1 to 3.8)                           | 34.6<br>(30.6 to 38.9)                            | 3.1<br>(0.1 to 6.5)                              |
| Digestive congenital anomalies                | 496.7<br>(448.6 to 548.6)                           | --                                                | 20.9<br>(13.8 to 30.1)                        | 28.2<br>(21.6 to 35.0)                            | -1.7<br>(-6.8 to 3.5)                            |
| Other congenital anomalies                    | 1,478.4<br>(1,034.0 to 2,072.0)                     | --                                                | 184.5<br>(124.4 to 265.0)                     | 29.2<br>(23.9 to 34.7)                            | -1.0<br>(-5.0 to 3.2)                            |
| Skin and subcutaneous diseases                | 99,961.8<br>(97,503.4 to 102,257.1)                 | 251,550.2<br>(225,029.7 to 282,084.2)             | 1,842.1<br>(1,238.8 to 2,697.4)               | 31.1<br>(30.0 to 32.1)                            | 0.5<br>(-0.4 to 1.2)                             |
| Dermatitis                                    | 11,745.4<br>(9,847.5 to 14,036.5)                   | 20,526.4<br>(15,522.2 to 26,129.6)                | 374.7<br>(228.5 to 569.6)                     | 26.8<br>(24.9 to 28.8)                            | -2.8<br>(-4.3 to -1.3)                           |
| Psoriasis                                     | 4,813.3<br>(4,427.2 to 5,225.2)                     | 572.6<br>(498.2 to 649.7)                         | 408.8<br>(293.1 to 537.4)                     | 33.5<br>(30.6 to 36.3)                            | 2.3<br>(0.1 to 4.5)                              |
| Cellulitis                                    | 171.9<br>(141.5 to 208.0)                           | 3,737.3<br>(3,114.5 to 4,429.4)                   | 9.5<br>(6.0 to 14.1)                          | 27.5<br>(19.9 to 36.0)                            | -2.3<br>(-8.2 to 4.2)                            |
| Pyoderma                                      | 1,320.0<br>(1,215.6 to 1,432.1)                     | 31,959.2<br>(28,843.4 to 35,269.3)                | 7.3<br>(2.9 to 15.7)                          | 32.1<br>(29.2 to 35.0)                            | 1.2<br>(-1.0 to 3.5)                             |
| Scabies                                       | 4,256.6<br>(2,842.5 to 6,144.6)                     | 12,907.5<br>(8,606.0 to 18,287.4)                 | 106.9<br>(52.2 to 180.0)                      | 28.8<br>(26.4 to 31.4)                            | -1.3<br>(-3.2 to 0.7)                            |
| Fungal skin diseases                          | 30,293.1<br>(24,257.3 to 37,510.3)                  | 107,539.4<br>(83,499.6 to 136,846.4)              | 168.5<br>(62.6 to 367.6)                      | 32.4<br>(31.7 to 33.0)                            | 1.4<br>(1.0 to 1.9)                              |
| Viral skin diseases                           | 6,102.7<br>(5,232.3 to 7,105.3)                     | 9,813.8<br>(8,424.5 to 11,411.4)                  | 181.5<br>(112.5 to 267.6)                     | 30.2<br>(28.4 to 32.0)                            | -0.2<br>(-1.6 to 1.2)                            |
| Acne vulgaris                                 | 5,199.0<br>(4,597.2 to 5,874.6)                     | 2,324.3<br>(2,030.2 to 2,661.0)                   | 128.8<br>(86.2 to 186.7)                      | 31.2<br>(27.5 to 34.9)                            | 0.5<br>(-2.3 to 3.4)                             |
| Alopecia areata                               | 763.6<br>(676.4 to 855.6)                           | 1,379.2<br>(1,244.3 to 1,522.8)                   | 24.5<br>(15.6 to 37.5)                        | 26.9<br>(22.5 to 31.2)                            | -2.8<br>(-6.1 to 0.5)                            |
| Pruritus                                      | 4,622.2<br>(3,151.4 to 6,248.0)                     | 3,709.2<br>(2,527.0 to 5,194.9)                   | 48.7<br>(21.0 to 94.0)                        | 32.5<br>(30.6 to 34.4)                            | 1.6<br>(0.1 to 3.0)                              |
| Urticaria                                     | 2,160.1<br>(1,501.8 to 2,985.3)                     | 3,777.5<br>(2,669.9 to 5,076.0)                   | 125.0<br>(72.9 to 193.4)                      | 30.6<br>(27.0 to 33.8)                            | 0.1<br>(-2.6 to 2.5)                             |
| Decubitus ulcer                               | 104.0<br>(74.2 to 134.6)                            | 375.9<br>(271.3 to 491.9)                         | 17.9<br>(10.9 to 26.6)                        | 29.1<br>(22.0 to 35.7)                            | -1.1<br>(-6.5 to 4.0)                            |
| Other skin and subcutaneous diseases          | 43,927.1<br>(40,310.5 to 48,199.7)                  | 52,928.1<br>(47,863.4 to 58,940.5)                | 240.0<br>(114.3 to 439.2)                     | 35.7<br>(34.8 to 36.6)                            | 4.0<br>(3.3 to 4.7)                              |
| Sense organ diseases                          | 187,450.0<br>(184,281.1 to 189,749.7)               | 37,513.5†<br>(33,966.4 to 41,272.2)               | 5,736.4<br>(3,875.1 to 8,435.8)               | 28.4<br>(26.7 to 30.1)                            | -1.6<br>(-2.9 to -0.3)                           |
| Glaucoma                                      | 479.7<br>(372.9 to 615.1)                           | --                                                | 49.0<br>(30.2 to 74.0)                        | 35.2<br>(29.6 to 41.1)                            | 3.6<br>(-0.7 to 8.1)                             |
| Cataract                                      | 6,560.4<br>(4,970.2 to 8,396.7)                     | --                                                | 453.2<br>(301.0 to 656.2)                     | 36.2<br>(32.8 to 39.5)                            | 4.4<br>(1.8 to 6.9)                              |
| Macular degeneration                          | 546.5<br>(409.9 to 705.9)                           | --                                                | 38.8<br>(24.6 to 56.9)                        | 34.4<br>(27.8 to 40.4)                            | 3.0<br>(-2.1 to 7.6)                             |
| Refraction and accommodation disorders        | 84,473.4<br>(77,821.9 to 90,640.9)                  | --                                                | 1,354.2<br>(807.6 to 2,173.3)                 | 23.2<br>(21.1 to 25.0)                            | -5.6<br>(-7.2 to -4.2)                           |
| Age-related and other hearing loss            | 137,270.3<br>(122,671.9 to 150,884.8)               | --                                                | 3,057.7<br>(1,999.7 to 4,571.5)               | 28.7<br>(25.5 to 31.5)                            | -1.4<br>(-3.8 to 0.8)                            |
| Other vision loss                             | 2,819.1<br>(2,158.4 to 3,658.7)                     | --                                                | 222.5<br>(141.1 to 320.3)                     | 32.9<br>(29.3 to 36.2)                            | 1.8<br>(-0.9 to 4.4)                             |
| Other sense organ diseases                    | 17,596.0<br>(15,288.5 to 20,252.6)                  | 37,513.5<br>(33,966.4 to 41,272.2)                | 560.9<br>(349.9 to 847.9)                     | 31.4<br>(29.8 to 33.1)                            | 0.7<br>(-0.6 to 2.0)                             |
| Oral disorders                                | 196,811.1<br>(191,083.7 to 202,551.8)               | 424,516.1†<br>(341,065.8 to 508,306.7)            | 1,777.9<br>(1,072.6 to 2,845.8)               | 30.8<br>(30.0 to 31.4)                            | 0.2<br>(-0.4 to 0.7)                             |
| Caries of deciduous teeth                     | --                                                  | --                                                | --                                            | --                                                | --                                               |
| Caries of permanent teeth                     | 128,021.6<br>(107,468.9 to 150,277.0)               | 412,806.7<br>(329,903.9 to 496,524.0)             | 91.5<br>(39.7 to 177.6)                       | 25.5<br>(24.0 to 26.9)                            | -3.9<br>(-5.0 to -2.7)                           |
| Periodontal disease                           | 85,623.1<br>(67,876.6 to 103,711.7)                 | 8,566.0<br>(4,214.6 to 12,520.8)                  | 556.8<br>(219.2 to 1,195.5)                   | 33.1<br>(32.2 to 34.0)                            | 2.0<br>(1.3 to 2.7)                              |
| Edentulism and severe tooth loss              | 31,325.9<br>(25,243.4 to 38,787.9)                  | 3,143.3<br>(2,049.4 to 4,559.5)                   | 878.5<br>(558.0 to 1,322.2)                   | 30.0<br>(28.9 to 31.1)                            | -0.4<br>(-1.2 to 0.5)                            |
| Other oral disorders                          | 8,718.5<br>(7,717.2 to 9,689.1)                     | --                                                | 251.0<br>(153.8 to 382.9)                     | 30.3<br>(28.8 to 31.7)                            | -0.1<br>(-1.3 to 0.9)                            |
| <b>Injuries</b>                               | <b>125,958.6</b><br><b>(118,869.4 to 133,862.5)</b> | <b>30,474.7†</b><br><b>(26,847.9 to 34,560.9)</b> | <b>4,548.4</b><br><b>(3,066.2 to 6,491.6)</b> | <b>35.1</b><br><b>(33.7 to 36.5)</b>              | <b>3.5</b><br><b>(2.5 to 4.6)</b>                |
| <b>Transport injuries</b>                     | <b>23,111.0</b><br><b>(21,534.0 to 24,989.2)</b>    | <b>3,678.1</b><br><b>(2,769.1 to 4,674.2)</b>     | <b>1,165.6</b><br><b>(782.4 to 1,662.9)</b>   | <b>38.7</b><br><b>(37.4 to 40.0)</b>              | <b>6.3</b><br><b>(5.3 to 7.3)</b>                |
| Road injuries                                 | 19,426.9<br>(17,850.8 to 21,058.0)                  | 3,322.8<br>(2,431.9 to 4,314.4)                   | 988.3<br>(663.4 to 1,411.2)                   | 40.6<br>(39.3 to 41.7)                            | 7.7<br>(6.7 to 8.6)                              |
| Pedestrian road injuries                      | 4,235.2<br>(3,656.2 to 4,880.5)                     | 586.6<br>(376.1 to 868.3)                         | 220.6<br>(148.5 to 311.0)                     | 42.0<br>(40.5 to 43.5)                            | 8.8<br>(7.6 to 10.0)                             |
| Cyclist road injuries                         | 3,771.2<br>(3,139.8 to 4,404.5)                     | 790.9<br>(511.5 to 1,129.0)                       | 180.8<br>(120.6 to 259.2)                     | 42.3<br>(41.0 to 43.6)                            | 9.1<br>(8.0 to 10.0)                             |
| Motorcyclist road injuries                    | 4,614.2<br>(3,949.3 to 5,483.1)                     | 470.3<br>(296.2 to 696.7)                         | 230.9<br>(155.3 to 329.0)                     | 42.6<br>(41.4 to 43.8)                            | 9.3<br>(8.3 to 10.2)                             |
| Motor vehicle road injuries                   | 5,419.9<br>(4,458.7 to 6,294.4)                     | 1,134.4<br>(771.2 to 1,554.1)                     | 289.8<br>(194.6 to 410.3)                     | 32.3<br>(30.5 to 33.9)                            | 1.4<br>(0.0 to 2.6)                              |
| Other road injuries                           | 1,386.3<br>(1,150.0 to 1,704.2)                     | 340.6<br>(187.2 to 558.2)                         | 66.2<br>(43.9 to 96.2)                        | 67.0<br>(65.1 to 68.6)                            | 27.9<br>(26.6 to 29.2)                           |
| Other transport injuries                      | 3,684.1<br>(3,061.7 to 4,236.2)                     | 355.3<br>(230.1 to 521.4)                         | 177.3<br>(120.0 to 251.2)                     | 29.1<br>(27.3 to 31.0)                            | -1.0<br>(-2.5 to 0.4)                            |
| <b>Unintentional injuries</b>                 | <b>92,156.1</b><br><b>(85,726.0 to 99,502.2)</b>    | <b>25,483.7</b><br><b>(21,852.6 to 29,592.5)</b>  | <b>3,017.6</b><br><b>(2,058.3 to 4,240.2)</b> | <b>33.5</b><br><b>(32.4 to 34.6)</b>              | <b>2.4</b><br><b>(1.5 to 3.1)</b>                |
| Falls                                         | 39,851.6<br>(35,485.4 to 45,320.0)                  | 12,534.7<br>(9,537.2 to 16,249.0)                 | 1,612.6<br>(1,131.5 to 2,225.0)               | 35.3<br>(33.9 to 36.6)                            | 3.7<br>(2.6 to 4.7)                              |
| Drowning                                      | 350.5<br>(308.1 to 399.1)                           | 27.8<br>(20.8 to 37.0)                            | 16.9<br>(11.3 to 24.0)                        | 17.3<br>(14.8 to 19.6)                            | -10.1<br>(-12.1 to -8.3)                         |
| Fire, heat, and hot substances                | 8,304.0<br>(7,191.3 to 9,599.3)                     | 322.5<br>(227.7 to 446.2)                         | 184.0<br>(119.2 to 279.1)                     | 30.6<br>(28.8 to 32.6)                            | 0.1<br>(-1.3 to 1.6)                             |
| Poisonings                                    | 256.3<br>(219.5 to 294.6)                           | 153.2<br>(94.2 to 224.8)                          | 18.2<br>(11.9 to 26.1)                        | 36.6<br>(32.9 to 40.4)                            | 4.7<br>(1.9 to 7.6)                              |
| Exposure to mechanical forces                 | 17,605.4<br>(14,963.0 to 21,345.7)                  | 2,897.7<br>(2,129.7 to 3,892.6)                   | 388.4<br>(255.3 to 563.2)                     | 35.6<br>(34.4 to 36.7)                            | 3.9<br>(3.0 to 4.7)                              |
| Unintentional firearm injuries                | 635.9<br>(520.5 to 773.1)                           | 40.2<br>(20.6 to 70.9)                            | 19.1<br>(12.4 to 27.8)                        | 35.7<br>(34.4 to 37.0)                            | 4.0<br>(3.0 to 5.0)                              |
| Unintentional suffocation                     | 609.4<br>(488.1 to 765.6)                           | 32.9<br>(16.3 to 59.6)                            | 17.9<br>(11.4 to 26.8)                        | 31.2<br>(29.8 to 32.7)                            | 0.6<br>(-0.5 to 1.7)                             |
| Other exposure to mechanical forces           | 16,360.2<br>(13,752.9 to 20,121.8)                  | 2,824.6<br>(2,067.8 to 3,796.3)                   | 351.4<br>(231.3 to 509.7)                     | 35.8<br>(34.5 to 36.9)                            | 4.0<br>(3.1 to 4.9)                              |

| Cause                                                                               | Prevalence in thousands (95% UI)                | Incidence in thousands (95% UI)              | YLDs in thousands (95% UI)              |                                                   |                                                  |
|-------------------------------------------------------------------------------------|-------------------------------------------------|----------------------------------------------|-----------------------------------------|---------------------------------------------------|--------------------------------------------------|
|                                                                                     | 2016 counts                                     | 2016 counts                                  | 2016 counts                             | Percentage change in counts between 2006 and 2016 | Percentage change in rates between 2006 and 2016 |
| Adverse effects of medical treatment                                                | 149.3<br>(101.3 to 211.4)                       | 1,952.0<br>(1,379.2 to 2,640.8)              | 19.9<br>(11.3 to 31.5)                  | 22.9<br>(17.8 to 27.3)                            | -5.8<br>(-9.7 to -2.4)                           |
| Animal contact                                                                      | 4,176.3<br>(3,692.5 to 4,738.0)                 | 2,661.6<br>(1,873.5 to 3,775.7)              | 103.2<br>(70.0 to 144.9)                | 22.9<br>(20.9 to 24.6)                            | -5.8<br>(-7.4 to -4.5)                           |
| Venomous animal contact                                                             | 1,857.9<br>(1,577.4 to 2,205.1)                 | 1,271.3<br>(860.8 to 1,895.4)                | 67.4<br>(46.1 to 92.8)                  | 26.0<br>(23.4 to 28.4)                            | -3.4<br>(-5.4 to -1.6)                           |
| Non-venomous animal contact                                                         | 2,318.4<br>(1,943.8 to 2,751.7)                 | 1,390.3<br>(938.9 to 2,011.6)                | 35.8<br>(23.0 to 55.5)                  | 17.5<br>(15.3 to 19.4)                            | -9.9<br>(-11.7 to -8.5)                          |
| Foreign body                                                                        | 3,531.0<br>(3,011.2 to 4,025.0)                 | 1,353.7<br>(915.4 to 2,042.9)                | 121.8<br>(80.3 to 177.1)                | 31.2<br>(29.2 to 33.5)                            | 0.6<br>(-1.0 to 2.3)                             |
| Pulmonary aspiration and foreign body in airway                                     | 1,599.9<br>(1,269.4 to 1,998.1)                 | 305.9<br>(208.8 to 422.6)                    | 61.6<br>(39.9 to 89.6)                  | 28.2<br>(26.1 to 30.5)                            | -1.7<br>(-3.4 to 0.0)                            |
| Foreign body in eyes                                                                | 201.1<br>(130.7 to 303.6)                       | 744.3<br>(355.1 to 1,420.4)                  | 12.2<br>(6.8 to 20.4)                   | 40.5<br>(35.2 to 49.1)                            | 7.6<br>(3.6 to 14.2)                             |
| Foreign body in other body part                                                     | 1,730.0<br>(1,451.1 to 2,117.2)                 | 303.6<br>(178.9 to 475.6)                    | 48.0<br>(31.0 to 69.0)                  | 32.9<br>(31.2 to 34.6)                            | 1.9<br>(0.6 to 3.1)                              |
| Environmental heat and cold exposure                                                | 5,700.6<br>(4,957.3 to 6,542.8)                 | 908.7<br>(587.2 to 1,293.5)                  | 208.9<br>(140.7 to 298.3)               | 32.3<br>(30.2 to 34.4)                            | 1.4<br>(-0.2 to 3.0)                             |
| Other unintentional injuries                                                        | 12,231.1<br>(10,167.9 to 14,701.6)              | 2,672.0<br>(1,744.2 to 3,781.5)              | 343.6<br>(224.5 to 500.1)               | 31.5<br>(30.1 to 32.9)                            | 0.8<br>(-0.3 to 1.8)                             |
| <b>Self-harm and interpersonal violence</b>                                         | <b>10,440.2</b><br><b>(8,940.7 to 12,416.2)</b> | <b>1,285.1†</b><br><b>(999.6 to 1,657.8)</b> | <b>254.6</b><br><b>(169.5 to 367.7)</b> | <b>22.8</b><br><b>(21.9 to 23.7)</b>              | <b>-5.9</b><br><b>(-6.6 to -5.2)</b>             |
| Self-harm                                                                           | 1,126.4<br>(927.2 to 1,327.4)                   | 380.6<br>(285.5 to 512.5)                    | 46.3<br>(29.8 to 66.9)                  | 14.8<br>(13.5 to 16.2)                            | -12.0<br>(-13.1 to -11.0)                        |
| Self-harm by firearm                                                                | 30.8<br>(26.3 to 35.3)                          | 4.9<br>(1.4 to 12.6)                         | 1.0<br>(0.7 to 1.5)                     | 10.7<br>(8.6 to 12.8)                             | -15.2<br>(-16.8 to -13.6)                        |
| Self-harm by other specified means                                                  | 1,095.6<br>(896.2 to 1,297.9)                   | 375.7<br>(282.9 to 506.2)                    | 45.2<br>(29.2 to 65.4)                  | 14.9<br>(13.5 to 16.3)                            | -11.9<br>(-13.0 to -10.9)                        |
| Interpersonal violence                                                              | 9,313.8<br>(7,880.6 to 11,250.2)                | 904.5†<br>(640.5 to 1,266.8)                 | 208.4<br>(139.8 to 299.4)               | 24.8<br>(23.8 to 25.7)                            | -4.4<br>(-5.1 to -3.7)                           |
| Assault by firearm                                                                  | 272.2<br>(230.6 to 321.3)                       | 20.4<br>(10.5 to 35.5)                       | 9.1<br>(5.9 to 13.4)                    | 25.8<br>(24.6 to 27.2)                            | -3.6<br>(-4.5 to -2.5)                           |
| Assault by sharp object                                                             | 1,375.5<br>(1,133.3 to 1,627.0)                 | 143.2<br>(79.5 to 241.5)                     | 34.2<br>(22.1 to 50.0)                  | 23.1<br>(21.6 to 24.4)                            | -5.6<br>(-6.8 to -4.6)                           |
| Sexual violence                                                                     | 3,813.3<br>(2,485.5 to 5,648.4)                 | --                                           | 26.2<br>(14.6 to 43.1)                  | 25.1<br>(23.8 to 26.3)                            | -4.2<br>(-5.1 to -3.2)                           |
| Assault by other means                                                              | 3,852.9<br>(3,245.4 to 4,644.9)                 | 740.9<br>(518.2 to 1,041.1)                  | 138.8<br>(93.3 to 200.7)                | 25.0<br>(23.9 to 26.1)                            | -4.2<br>(-5.0 to -3.4)                           |
| <b>Forces of nature, conflict and terrorism, and executions and police conflict</b> | <b>4,064.6</b><br><b>(2,695.7 to 5,761.8)</b>   | <b>27.8†</b><br><b>(18.3 to 38.9)</b>        | <b>110.6</b><br><b>(36.8 to 241.5)</b>  | <b>85.8</b><br><b>(71.3 to 108.1)</b>             | <b>42.4</b><br><b>(31.3 to 59.5)</b>             |
| Forces of nature, conflict and terrorism, and state actor violence                  | 499.2<br>(287.2 to 762.9)                       | 13.1<br>(7.0 to 21.1)                        | 17.0<br>(4.3 to 41.3)                   | 86.5<br>(72.4 to 95.2)                            | 42.9<br>(32.1 to 49.6)                           |
| Conflict and terrorism                                                              | 2,714.2<br>(1,602.3 to 4,253.3)                 | --                                           | 79.6<br>(30.4 to 159.5)                 | 86.2<br>(67.7 to 117.2)                           | 42.7<br>(28.5 to 66.5)                           |
| Executions and police conflict                                                      | 851.2<br>(207.2 to 1,371.9)                     | 14.7<br>(7.9 to 23.1)                        | 18.0<br>(2.9 to 48.2)                   | 76.3<br>(64.3 to 89.8)                            | 35.1<br>(25.9 to 45.4)                           |

We did not calculate incidence for certain NTDs and causes with only birth prevalence. Blank cells mean that no estimate is available.

† Incidence for aggregate causes represents the sum of the incidence of the causes below the aggregate.

‡ Incidence estimates for stroke represent first-ever stroke only.

^ Incidence of HIV/AIDS represents new infections of HIV only and does not include new infections of Tuberculosis in HIV positive cases.



SR Table 12: Global prevalence, incidence, and YLDs for 2016, percentage change of YLD counts and percentage change of YLD rates between 2006 and 2016 by cause, age 60-64 years.

| Cause                                                                                | Prevalence in thousands (95% UI)             | Incidence in thousands (95% UI)                     | YLDs in thousands (95% UI)                |                                                   |                                                  |
|--------------------------------------------------------------------------------------|----------------------------------------------|-----------------------------------------------------|-------------------------------------------|---------------------------------------------------|--------------------------------------------------|
|                                                                                      | 2016 counts                                  | 2016 counts                                         | 2016 counts                               | Percentage change in counts between 2006 and 2016 | Percentage change in rates between 2006 and 2016 |
| <b>All causes</b>                                                                    | <b>299,009.8</b><br>(298,929.5 to 299,088.6) | <b>1,662,103.4†</b><br>(1,474,657.1 to 1,892,166.3) | <b>54,084.0</b><br>(40,571.9 to 69,155.6) | <b>49.4</b><br>(48.6 to 50.1)                     | <b>-0.9</b><br>(-1.4 to -0.4)                    |
| <b>Communicable, maternal, neonatal, and nutritional disorders</b>                   | <b>200,406.1</b><br>(197,307.1 to 203,595.7) | <b>792,439.7†</b><br>(630,728.6 to 993,454.7)       | <b>2,677.5</b><br>(1,944.1 to 3,529.2)    | <b>33.1</b><br>(29.6 to 36.9)                     | <b>-11.7</b><br>(-14.1 to -9.2)                  |
| <b>HIV/AIDS and tuberculosis</b>                                                     | <b>106,185.7</b><br>(93,143.0 to 119,955.4)  | <b>497.8†</b><br>(377.8 to 637.9)                   | <b>330.0</b><br>(212.3 to 468.9)          | <b>24.9</b><br>(8.5 to 41.7)                      | <b>-17.2</b><br>(-28.0 to -6.0)                  |
| Tuberculosis                                                                         | 99,777.0<br>(82,884.9 to 118,949.9)          | 466.8†<br>(345.7 to 605.9)                          | 223.8<br>(137.0 to 337.1)                 | 29.6<br>(24.5 to 36.2)                            | -14.0<br>(-17.4 to -9.7)                         |
| Drug-susceptible tuberculosis                                                        | 735.1<br>(537.2 to 968.6)                    | 449.6<br>(332.1 to 584.8)                           | 215.4<br>(131.7 to 324.9)                 | 29.6<br>(24.4 to 36.3)                            | -14.1<br>(-17.5 to -9.6)                         |
| Multidrug-resistant tuberculosis without extensive drug resistance                   | 26.2<br>(19.2 to 34.2)                       | 16.1<br>(12.2 to 20.7)                              | 7.9<br>(4.9 to 11.8)                      | 24.7<br>(7.7 to 45.7)                             | -17.3<br>(-28.6 to -3.3)                         |
| Extensively drug-resistant tuberculosis                                              | 1.6<br>(1.2 to 2.1)                          | 1.1<br>(0.8 to 1.4)                                 | 0.5<br>(0.3 to 0.8)                       | 279.3<br>(229.9 to 332.1)                         | 151.6<br>(118.8 to 186.6)                        |
| Latent tuberculosis infection                                                        | 99,014.1<br>(82,016.9 to 118,031.1)          | --                                                  | --                                        | --                                                | --                                               |
| HIV/AIDS                                                                             | 1,059.7<br>(898.3 to 1,275.0)                | 31.0*<br>(24.9 to 37.7)                             | 106.2<br>(68.5 to 157.0)                  | 16.0<br>(-14.5 to 64.8)                           | -23.0<br>(-43.3 to 9.3)                          |
| Drug-susceptible HIV/AIDS - Tuberculosis                                             | 23.9<br>(16.5 to 33.6)                       | 28.9<br>(20.7 to 39.3)                              | 9.0<br>(5.1 to 14.1)                      | 12.9<br>(1.5 to 24.4)                             | -25.1<br>(-32.7 to -17.4)                        |
| Multidrug-resistant HIV/AIDS - Tuberculosis without extensive drug resistance        | 0.8<br>(0.5 to 1.2)                          | 0.9<br>(0.6 to 1.3)                                 | 0.3<br>(0.2 to 0.6)                       | 21.8<br>(-1.5 to 45.4)                            | -19.2<br>(-34.7 to -3.6)                         |
| Extensively drug-resistant HIV/AIDS - Tuberculosis                                   | < 0.05<br>(< 0.05 to 0.1)                    | < 0.05<br>(< 0.05 to 0.1)                           | < 0.05<br>(< 0.05 to < 0.05)              | 401.3<br>(329.0 to 492.1)                         | 232.5<br>(184.6 to 292.7)                        |
| HIV/AIDS resulting in other diseases                                                 | 1,034.9<br>(875.3 to 1,244.8)                | 31.0<br>(24.9 to 37.7)                              | 96.8<br>(60.4 to 146.8)                   | 16.3<br>(-16.4 to 73.0)                           | -22.9<br>(-44.6 to 14.8)                         |
| <b>Diarrhoea, lower respiratory infections, and other common infectious diseases</b> | <b>14,066.5</b><br>(13,056.0 to 15,117.2)    | <b>760,395.8†</b><br>(599,393.8 to 963,377.0)       | <b>695.0</b><br>(486.9 to 948.6)          | <b>42.1</b><br>(40.3 to 44.1)                     | <b>-5.7</b><br>(-6.9 to -4.5)                    |
| Diarrhoeal diseases                                                                  | 2,662.9<br>(2,373.9 to 2,981.5)              | 184,473.2<br>(165,647.6 to 205,820.1)               | 285.0<br>(198.3 to 389.1)                 | 35.0<br>(32.2 to 37.9)                            | -10.5<br>(-12.3 to -8.6)                         |
| Intestinal infectious diseases                                                       | 11.6<br>(9.4 to 14.5)                        | 255.8†<br>(210.6 to 307.1)                          | 2.0<br>(1.2 to 2.9)                       | 15.0<br>(-4.8 to 38.9)                            | -23.7<br>(-36.9 to -9.9)                         |
| Typhoid fever                                                                        | 11.3<br>(9.0 to 14.3)                        | 178.5<br>(146.2 to 215.2)                           | 1.7<br>(1.1 to 2.6)                       | 15.5<br>(-6.9 to 43.0)                            | -23.4<br>(-38.2 to -5.2)                         |
| Paratyphoid fever                                                                    | 3.4<br>(2.7 to 4.1)                          | 77.2<br>(63.5 to 93.0)                              | 0.2<br>(0.1 to 0.3)                       | 15.1<br>(-2.8 to 37.8)                            | -23.7<br>(-35.5 to -8.6)                         |
| Other intestinal infectious diseases                                                 | --                                           | --                                                  | < 0.05<br>(< 0.05 to < 0.05)              | -12.9<br>(-27.9 to 5.3)                           | -42.2<br>(-52.2 to -30.2)                        |
| Lower respiratory infections                                                         | 425.8<br>(390.1 to 463.6)                    | 18,920.2<br>(17,122.6 to 20,932.3)                  | 24.9<br>(16.8 to 35.1)                    | 74.1<br>(67.0 to 82.1)                            | 15.5<br>(10.8 to 20.8)                           |
| Upper respiratory infections                                                         | 7,348.5<br>(5,199.3 to 10,029.1)             | 549,389.2<br>(386,232.6 to 742,572.2)               | 176.9<br>(98.1 to 304.0)                  | 48.8<br>(46.5 to 51.1)                            | -1.3<br>(-2.9 to 0.2)                            |
| Otitis media                                                                         | 2,308.4<br>(1,598.8 to 3,103.7)              | 3,540.5<br>(2,924.3 to 4,209.1)                     | 62.1<br>(34.7 to 102.6)                   | 33.1<br>(27.1 to 39.6)                            | -11.7<br>(-15.7 to -7.4)                         |
| Meningitis                                                                           | 469.6<br>(393.7 to 549.1)                    | 44.9<br>(32.8 to 57.7)                              | 37.1<br>(26.3 to 49.2)                    | 41.2<br>(36.4 to 46.0)                            | -6.4<br>(-9.5 to -3.1)                           |
| Pneumococcal meningitis                                                              | 208.8<br>(169.6 to 254.7)                    | 10.0<br>(6.3 to 14.7)                               | 16.4<br>(11.2 to 22.7)                    | 36.4<br>(29.6 to 43.8)                            | -9.5<br>(-14.1 to -4.6)                          |
| H influenzae type B meningitis                                                       | 49.6<br>(36.8 to 64.8)                       | 2.9<br>(1.6 to 4.5)                                 | 4.7<br>(3.2 to 6.3)                       | 13.8<br>(2.6 to 25.2)                             | -24.5<br>(-32.0 to -17.0)                        |
| Meningococcal infection                                                              | 53.1<br>(37.8 to 70.0)                       | 8.2<br>(5.2 to 12.2)                                | 4.3<br>(2.9 to 6.0)                       | 43.9<br>(37.8 to 51.7)                            | -4.6<br>(-8.6 to 0.6)                            |
| Other meningitis                                                                     | 158.2<br>(115.7 to 203.0)                    | 23.8<br>(16.7 to 31.7)                              | 11.7<br>(8.0 to 16.0)                     | 64.0<br>(59.0 to 69.5)                            | 8.8<br>(5.4 to 12.4)                             |
| Encephalitis                                                                         | 875.8<br>(545.1 to 1,329.5)                  | 312.9<br>(273.8 to 356.6)                           | 78.7<br>(55.2 to 102.8)                   | 50.8<br>(43.4 to 58.9)                            | 0.0<br>(-4.9 to 5.4)                             |
| Diphtheria                                                                           | --                                           | --                                                  | --                                        | --                                                | --                                               |
| Whooping cough                                                                       | --                                           | --                                                  | --                                        | --                                                | --                                               |
| Tetanus                                                                              | 5.0<br>(4.9 to 5.1)                          | 2.8<br>(1.4 to 4.1)                                 | 0.1<br>(0.1 to 0.2)                       | 14.1<br>(-13.5 to 44.8)                           | -24.3<br>(-42.6 to -4.0)                         |
| Measles                                                                              | --                                           | --                                                  | --                                        | --                                                | --                                               |
| Varicella and herpes zoster                                                          | 533.5<br>(412.8 to 670.1)                    | 3,456.4<br>(2,722.2 to 4,253.4)                     | 28.3<br>(16.2 to 45.3)                    | 58.1<br>(49.8 to 66.4)                            | 4.9<br>(-0.7 to 10.4)                            |
| <b>Neglected tropical diseases and malaria</b>                                       | <b>62,352.2</b><br>(60,001.1 to 64,396.4)    | <b>11,889.4†</b><br>(9,273.1 to 14,641.9)           | <b>448.9</b><br>(305.5 to 620.2)          | <b>8.1</b><br>(-1.1 to 17.8)                      | <b>-28.3</b><br>(-34.4 to -21.8)                 |
| Malaria                                                                              | 1,446.3<br>(1,232.2 to 1,646.1)              | 2,200.7<br>(1,620.2 to 2,846.9)                     | 13.8<br>(10.2 to 18.0)                    | -12.2<br>(-18.9 to -4.7)                          | -41.8<br>(-46.2 to -36.8)                        |
| Chagas disease                                                                       | 460.4<br>(389.2 to 539.0)                    | 4.0<br>(2.6 to 5.8)                                 | 5.6<br>(3.6 to 8.3)                       | 25.9<br>(18.1 to 33.9)                            | -16.5<br>(-21.7 to -11.2)                        |
| Leishmaniasis                                                                        | 235.3<br>(176.3 to 289.6)                    | 26.5<br>(19.8 to 34.9)                              | 12.2<br>(7.4 to 19.2)                     | 29.5<br>(23.1 to 39.1)                            | -14.1<br>(-18.4 to -7.7)                         |
| Visceral leishmaniasis                                                               | 1.3<br>(0.8 to 2.0)                          | 5.4<br>(3.4 to 7.9)                                 | 0.1<br>(0.1 to 0.1)                       | -33.8<br>(-57.3 to -1.9)                          | -56.1<br>(-71.7 to -34.9)                        |
| Cutaneous and mucocutaneous leishmaniasis                                            | 200.4<br>(144.9 to 271.5)                    | 21.2<br>(14.8 to 29.0)                              | 12.2<br>(7.3 to 19.1)                     | 30.4<br>(23.9 to 40.3)                            | -13.5<br>(-17.9 to -7.0)                         |
| African trypanosomiasis                                                              | 0.2<br>(< 0.05 to 0.8)                       | 0.1<br>(< 0.05 to 0.6)                              | 0.1<br>(< 0.05 to 0.2)                    | -71.3<br>(-96.0 to 57.0)                          | -81.0<br>(-97.3 to 4.2)                          |
| Schistosomiasis                                                                      | 6,158.7<br>(5,678.2 to 6,656.4)              | 1,550.8<br>(1,410.3 to 1,707.4)                     | 43.1<br>(21.1 to 81.7)                    | -26.2<br>(-28.7 to -23.0)                         | -51.1<br>(-52.7 to -49.0)                        |
| Cysticercosis                                                                        | 219.5<br>(160.0 to 305.6)                    | --                                                  | 33.0<br>(20.2 to 50.2)                    | 23.7<br>(15.2 to 32.3)                            | -18.0<br>(-23.6 to -12.2)                        |
| Cystic echinococcosis                                                                | 40.4<br>(20.3 to 86.4)                       | 7.9<br>(3.5 to 19.0)                                | 3.6<br>(1.7 to 8.1)                       | -30.3<br>(-72.5 to 94.5)                          | -53.8<br>(-81.8 to 29.0)                         |
| Lymphatic filariasis                                                                 | 1,070.1<br>(875.5 to 1,352.8)                | 225.7<br>(126.6 to 371.7)                           | 49.9<br>(25.4 to 86.3)                    | -25.9<br>(-44.2 to -8.3)                          | -50.9<br>(-63.0 to -39.2)                        |
| Onchocerciasis                                                                       | 470.5<br>(325.1 to 710.9)                    | 83.8<br>(34.1 to 173.5)                             | 38.8<br>(20.7 to 68.1)                    | -16.7<br>(-34.0 to 3.7)                           | -44.8<br>(-56.2 to -31.2)                        |
| Trachoma                                                                             | 456.6<br>(247.1 to 753.1)                    | --                                                  | 33.0<br>(19.6 to 53.8)                    | 10.3<br>(-0.8 to 20.7)                            | -26.8<br>(-34.2 to -20.0)                        |
| Dengue                                                                               | 188.9<br>(102.8 to 320.1)                    | 3,157.2<br>(1,919.3 to 4,790.9)                     | 29.1<br>(13.1 to 53.8)                    | 125.1<br>(82.7 to 428.1)                          | 49.3<br>(21.2 to 250.3)                          |
| Yellow fever                                                                         | < 0.05<br>(< 0.05 to 0.1)                    | 1.5<br>(0.4 to 4.0)                                 | < 0.05<br>(< 0.05 to < 0.05)              | -20.4<br>(-49.9 to 24.4)                          | -47.2<br>(-66.8 to -17.5)                        |
| Rabies                                                                               | < 0.05<br>(< 0.05 to < 0.05)                 | 0.5<br>(0.2 to 0.6)                                 | < 0.05<br>(< 0.05 to < 0.05)              | -40.2<br>(-50.8 to -28.6)                         | -60.3<br>(-67.4 to -52.7)                        |
| Intestinal nematode infections                                                       | 52,700.5<br>(49,910.2 to 54,817.5)           | --                                                  | 83.6<br>(47.3 to 135.6)                   | 8.4<br>(-1.0 to 18.2)                             | -28.1<br>(-34.3 to -21.6)                        |
| Ascariasis                                                                           | 28,108.9<br>(24,804.5 to 32,123.6)           | --                                                  | 26.7<br>(14.3 to 44.6)                    | -7.3<br>(-19.9 to 7.2)                            | -38.5<br>(-46.9 to -28.9)                        |

| Cause                                                                   | Prevalence in thousands (95% UI)                    | Incidence in thousands (95% UI)                      | YLDs in thousands (95% UI)                       |                                                   |                                                  |
|-------------------------------------------------------------------------|-----------------------------------------------------|------------------------------------------------------|--------------------------------------------------|---------------------------------------------------|--------------------------------------------------|
|                                                                         | 2016 counts                                         | 2016 counts                                          | 2016 counts                                      | Percentage change in counts between 2006 and 2016 | Percentage change in rates between 2006 and 2016 |
| Trichuriasis                                                            | 14,450.2<br>(13,183.3 to 15,986.7)                  | --                                                   | 9.8<br>(5.4 to 16.6)                             | 3.9<br>(-11.3 to 21.0)                            | -31.1<br>(-41.2 to -19.7)                        |
| Hookworm disease                                                        | 15,539.2<br>(14,125.8 to 17,103.8)                  | --                                                   | 47.1<br>(27.2 to 74.7)                           | 21.2<br>(7.2 to 37.0)                             | -19.6<br>(-28.9 to -9.1)                         |
| Food-borne trematodiasis                                                | 4,019.7<br>(3,639.0 to 4,414.4)                     | 4,356.3<br>(2,103.6 to 6,380.2)                      | 89.9<br>(43.8 to 161.7)                          | 73.6<br>(63.8 to 84.0)                            | 15.2<br>(8.7 to 22.0)                            |
| Leprosy                                                                 | 57.7<br>(55.0 to 60.3)                              | 4.7<br>(4.3 to 5.1)                                  | 3.5<br>(2.3 to 4.8)                              | 16.1<br>(8.8 to 24.3)                             | -23.0<br>(-27.8 to -17.5)                        |
| Ebola virus disease                                                     | < 0.05<br>(< 0.05 to < 0.1)                         | < 0.05<br>(< 0.05 to < 0.05)                         | < 0.05<br>(< 0.05 to < 0.05)                     | --                                                | --                                               |
| Zika virus disease                                                      | 4.5<br>(2.4 to 8.9)                                 | 269.5<br>(147.0 to 539.6)                            | 0.1<br>(< 0.05 to 0.2)                           | --                                                | --                                               |
| Guinea worm disease                                                     | < 0.05<br>(< 0.05 to < 0.05)                        | < 0.05<br>(< 0.05 to < 0.05)                         | < 0.05<br>(< 0.05 to < 0.05)                     | -99.6<br>(-99.8 to -99.3)                         | -99.7<br>(-99.8 to -99.5)                        |
| Other neglected tropical diseases                                       | 695.9<br>(637.2 to 752.9)                           | --                                                   | 9.6<br>(6.1 to 14.3)                             | 46.5<br>(37.3 to 55.2)                            | -2.9<br>(-8.9 to 2.9)                            |
| <b>Maternal disorders</b>                                               | --                                                  | --                                                   | --                                               | --                                                | --                                               |
| Maternal haemorrhage                                                    | --                                                  | --                                                   | --                                               | --                                                | --                                               |
| Maternal sepsis and other pregnancy related infections                  | --                                                  | --                                                   | --                                               | --                                                | --                                               |
| Maternal hypertensive disorders                                         | --                                                  | --                                                   | --                                               | --                                                | --                                               |
| Maternal obstructed labour and uterine rupture                          | --                                                  | --                                                   | --                                               | --                                                | --                                               |
| Maternal abortion, miscarriage, and ectopic pregnancy                   | --                                                  | --                                                   | --                                               | --                                                | --                                               |
| Other maternal disorders                                                | --                                                  | --                                                   | --                                               | --                                                | --                                               |
| <b>Neonatal disorders</b>                                               | <b>2,021.1</b><br><b>(1,859.6 to 2,196.3)</b>       | --                                                   | <b>270.8</b><br><b>(193.5 to 372.7)</b>          | <b>75.1</b><br><b>(58.4 to 96.2)</b>              | <b>16.2</b><br><b>(5.1 to 30.1)</b>              |
| Neonatal preterm birth complications                                    | 1,734.2<br>(1,476.7 to 2,018.9)                     | --                                                   | 160.7<br>(112.2 to 221.8)                        | 73.2<br>(45.1 to 108.3)                           | 14.9<br>(-3.7 to 38.2)                           |
| Neonatal encephalopathy due to birth asphyxia and trauma                | 356.9<br>(246.6 to 503.5)                           | --                                                   | 46.1<br>(22.1 to 89.5)                           | 79.9<br>(65.5 to 99.5)                            | 19.3<br>(9.8 to 32.3)                            |
| Neonatal sepsis and other neonatal infections                           | 131.9<br>(56.4 to 317.3)                            | --                                                   | 48.4<br>(16.7 to 126.8)                          | 77.2<br>(64.3 to 97.7)                            | 17.5<br>(9.0 to 31.2)                            |
| Hemolytic disease and other neonatal jaundice                           | 46.4<br>(41.0 to 52.2)                              | --                                                   | 15.6<br>(12.1 to 19.7)                           | 75.1<br>(68.1 to 81.7)                            | 16.2<br>(11.5 to 20.5)                           |
| Other neonatal disorders                                                | --                                                  | --                                                   | --                                               | --                                                | --                                               |
| <b>Nutritional deficiencies</b>                                         | <b>44,289.9</b><br><b>(42,911.1 to 45,388.4)</b>    | <b>9,665.4†</b><br><b>(8,299.0 to 11,205.4)</b>      | <b>851.8</b><br><b>(564.6 to 1,212.6)</b>        | <b>34.6</b><br><b>(31.6 to 37.5)</b>              | <b>-10.7</b><br><b>(-12.7 to -8.8)</b>           |
| Protein-energy malnutrition                                             | --                                                  | --                                                   | --                                               | --                                                | --                                               |
| Iodine deficiency                                                       | 5,695.3<br>(5,118.7 to 6,319.0)                     | 17.0<br>(14.6 to 19.8)                               | 143.3<br>(98.1 to 198.8)                         | 25.7<br>(22.7 to 28.7)                            | -16.6<br>(-18.6 to -14.6)                        |
| Vitamin A deficiency                                                    | 9,010.9<br>(7,978.5 to 10,206.3)                    | 9,648.4<br>(8,282.4 to 11,188.4)                     | 5.6<br>(3.6 to 8.4)                              | 46.1<br>(35.6 to 57.6)                            | -3.1<br>(-10.1 to 4.5)                           |
| Iron-deficiency anaemia                                                 | 34,336.6<br>(31,135.5 to 37,565.8)                  | --                                                   | 703.0<br>(457.4 to 1,009.5)                      | 36.6<br>(32.8 to 39.8)                            | -9.4<br>(-11.9 to -7.2)                          |
| Other nutritional deficiencies                                          | --                                                  | --                                                   | --                                               | --                                                | --                                               |
| <b>Other communicable, maternal, neonatal, and nutritional diseases</b> | <b>86,032.8</b><br><b>(83,388.0 to 88,947.4)</b>    | <b>9,991.3</b><br><b>(8,141.9 to 12,321.6)</b>       | <b>81.0</b><br><b>(53.9 to 116.3)</b>            | <b>43.9</b><br><b>(31.8 to 56.5)</b>              | <b>-4.6</b><br><b>(-12.6 to 3.8)</b>             |
| Sexually transmitted diseases excluding HIV                             | 61,836.3<br>(57,911.0 to 67,302.2)                  | 5,222.2<br>(4,611.3 to 5,884.0)                      | 51.8<br>(34.8 to 75.8)                           | 54.2<br>(49.7 to 59.5)                            | 2.2<br>(-0.7 to 5.8)                             |
| Syphilis                                                                | 404.4<br>(319.2 to 505.9)                           | 108.3<br>(64.6 to 176.9)                             | 19.4<br>(13.2 to 26.6)                           | 58.8<br>(50.4 to 67.3)                            | 5.4<br>(-0.3 to 11.0)                            |
| Chlamydial infection                                                    | 81.3<br>(58.1 to 111.8)                             | 217.8<br>(170.1 to 277.0)                            | 2.1<br>(1.3 to 3.1)                              | 50.8<br>(35.8 to 68.4)                            | 0.0<br>(-9.9 to 11.7)                            |
| Gonococcal infection                                                    | 73.5<br>(50.3 to 108.3)                             | 247.0<br>(175.3 to 345.6)                            | 1.0<br>(0.6 to 1.4)                              | 52.9<br>(40.9 to 65.3)                            | 1.4<br>(-6.5 to 9.6)                             |
| Trichomoniasis                                                          | 4,598.7<br>(3,861.0 to 5,339.5)                     | 3,511.1<br>(3,017.2 to 4,034.0)                      | 5.0<br>(2.0 to 10.6)                             | 49.9<br>(46.3 to 53.5)                            | -0.6<br>(-3.0 to 1.8)                            |
| Genital herpes                                                          | 57,529.3<br>(50,326.8 to 66,551.9)                  | --                                                   | 13.6<br>(4.0 to 31.2)                            | 48.9<br>(46.1 to 52.5)                            | -1.2<br>(-3.1 to 1.2)                            |
| Other sexually transmitted diseases                                     | 81.2<br>(62.4 to 104.4)                             | 1,137.9<br>(860.0 to 1,476.9)                        | 10.7<br>(6.8 to 15.6)                            | 55.7<br>(43.8 to 71.2)                            | 3.3<br>(-4.6 to 13.6)                            |
| Hepatitis                                                               | 31,874.7<br>(27,813.8 to 36,185.1)                  | 4,768.5<br>(3,021.1 to 7,083.8)                      | 11.5<br>(6.1 to 19.6)                            | 13.8<br>(-29.9 to 89.9)                           | -24.5<br>(-53.5 to 26.0)                         |
| Acute hepatitis A                                                       | 54.0<br>(12.9 to 111.5)                             | 701.4<br>(168.2 to 1,450.0)                          | 2.2<br>(0.5 to 4.9)                              | 6.1<br>(-76.5 to 311.1)                           | -29.6<br>(-84.4 to 172.7)                        |
| Hepatitis B                                                             | 21,734.5<br>(17,948.1 to 26,003.5)                  | 3,504.3<br>(1,978.0 to 5,738.1)                      | 8.4<br>(4.0 to 15.7)                             | 16.1<br>(-35.8 to 109.7)                          | -23.0<br>(-57.4 to 39.1)                         |
| Hepatitis C                                                             | 10,064.2<br>(9,003.4 to 11,175.6)                   | 277.1<br>(198.7 to 370.9)                            | 0.2<br>(0.1 to 0.5)                              | 10.9<br>(5.6 to 15.9)                             | -26.4<br>(-30.0 to -23.1)                        |
| Acute hepatitis E                                                       | 22.0<br>(11.5 to 38.5)                              | 285.8<br>(150.1 to 500.9)                            | 0.7<br>(0.3 to 1.3)                              | 13.3<br>(-10.3 to 42.6)                           | -24.9<br>(-40.5 to -5.4)                         |
| Other infectious diseases                                               | 823.6<br>(752.2 to 893.8)                           | 0.6<br>(0.3 to 1.0)                                  | 17.7<br>(11.3 to 26.0)                           | 40.5<br>(35.4 to 45.7)                            | -6.8<br>(-10.2 to -3.4)                          |
| <b>Non-communicable diseases</b>                                        | <b>296,877.7</b><br><b>(296,682.5 to 297,045.2)</b> | <b>842,148.1†</b><br><b>(759,269.2 to 932,610.8)</b> | <b>47,006.2</b><br><b>(35,271.8 to 60,057.0)</b> | <b>49.6</b><br><b>(48.8 to 50.5)</b>              | <b>-0.7</b><br><b>(-1.3 to -0.2)</b>             |
| <b>Neoplasms</b>                                                        | <b>5,665.6</b><br><b>(5,587.4 to 5,754.2)</b>       | <b>2,231.1</b><br><b>(2,154.1 to 2,337.6)</b>        | <b>670.9</b><br><b>(491.9 to 873.5)</b>          | <b>55.3</b><br><b>(52.0 to 59.2)</b>              | <b>3.0</b><br><b>(0.8 to 5.6)</b>                |
| Lip and oral cavity cancer                                              | 185.9<br>(178.3 to 193.2)                           | 51.2<br>(49.1 to 53.3)                               | 19.1<br>(13.8 to 24.9)                           | 53.0<br>(43.0 to 63.8)                            | 1.5<br>(-5.1 to 8.7)                             |
| Nasopharynx cancer                                                      | 34.3<br>(31.9 to 36.6)                              | 10.0<br>(9.4 to 10.7)                                | 4.2<br>(2.9 to 5.5)                              | 45.4<br>(32.2 to 60.5)                            | -3.5<br>(-12.3 to 6.4)                           |
| Other pharynx cancer                                                    | 85.3<br>(80.0 to 89.2)                              | 29.8<br>(27.8 to 31.3)                               | 10.1<br>(7.2 to 13.2)                            | 59.9<br>(43.7 to 74.2)                            | 6.0<br>(-4.7 to 15.5)                            |
| Oesophageal cancer                                                      | 87.8<br>(83.7 to 92.3)                              | 71.3<br>(68.6 to 74.5)                               | 18.2<br>(12.8 to 23.8)                           | 31.2<br>(19.9 to 44.1)                            | -13.0<br>(-20.5 to -4.5)                         |
| Stomach cancer                                                          | 306.0<br>(287.3 to 326.9)                           | 163.8<br>(154.7 to 173.8)                            | 43.4<br>(31.0 to 56.6)                           | 48.1<br>(35.6 to 61.3)                            | -1.8<br>(-10.1 to 7.0)                           |
| Colon and rectum cancer                                                 | 814.7<br>(781.5 to 856.5)                           | 220.3<br>(211.4 to 231.3)                            | 77.7<br>(57.3 to 101.7)                          | 59.7<br>(50.8 to 69.0)                            | 6.0<br>(0.0 to 12.1)                             |
| Liver cancer                                                            | 149.5<br>(136.3 to 164.4)                           | 147.3<br>(136.7 to 157.1)                            | 33.3<br>(23.7 to 44.2)                           | 80.0<br>(65.0 to 97.2)                            | 19.4<br>(9.5 to 30.8)                            |
| Liver cancer due to hepatitis B                                         | 88.8<br>(65.4 to 107.0)                             | 64.6<br>(47.2 to 77.4)                               | 14.5<br>(9.1 to 20.3)                            | 86.3<br>(64.4 to 112.8)                           | 23.6<br>(9.0 to 41.1)                            |

| Cause                                              | Prevalence in thousands (95% UI)                 | Incidence in thousands (95% UI)                | YLDs in thousands (95% UI)                    |                                                   |                                                  |
|----------------------------------------------------|--------------------------------------------------|------------------------------------------------|-----------------------------------------------|---------------------------------------------------|--------------------------------------------------|
|                                                    | 2016 counts                                      | 2016 counts                                    | 2016 counts                                   | Percentage change in counts between 2006 and 2016 | Percentage change in rates between 2006 and 2016 |
| Liver cancer due to hepatitis C                    | 33.6<br>(28.1 to 40.6)                           | 25.4<br>(21.4 to 30.9)                         | 5.8<br>(4.0 to 8.2)                           | 56.0<br>(44.3 to 67.6)                            | 3.4<br>(-4.3 to 11.2)                            |
| Liver cancer due to alcohol use                    | 27.8<br>(20.6 to 36.3)                           | 22.6<br>(16.7 to 29.3)                         | 5.2<br>(3.3 to 7.5)                           | 83.4<br>(63.5 to 106.9)                           | 21.6<br>(8.4 to 37.2)                            |
| Liver cancer due to other causes                   | 48.0<br>(38.7 to 62.0)                           | 34.7<br>(28.2 to 44.0)                         | 7.9<br>(5.3 to 11.2)                          | 87.6<br>(62.7 to 117.2)                           | 24.4<br>(7.9 to 44.1)                            |
| Gallbladder and biliary tract cancer               | 19.6<br>(17.1 to 21.2)                           | 22.3<br>(20.0 to 24.0)                         | 5.2<br>(3.5 to 6.9)                           | 37.0<br>(29.1 to 45.5)                            | -9.1<br>(-14.4 to -3.5)                          |
| Pancreatic cancer                                  | 44.2<br>(42.6 to 45.5)                           | 53.1<br>(51.6 to 54.3)                         | 11.5<br>(8.0 to 15.0)                         | 52.4<br>(47.6 to 57.1)                            | 1.1<br>(-2.1 to 4.2)                             |
| Larynx cancer                                      | 115.8<br>(112.3 to 119.9)                        | 33.9<br>(32.9 to 35.1)                         | 13.6<br>(9.8 to 17.7)                         | 47.9<br>(38.4 to 57.8)                            | -1.9<br>(-8.2 to 4.7)                            |
| Tracheal, bronchus, and lung cancer                | 406.4<br>(389.3 to 425.9)                        | 297.6<br>(287.1 to 309.9)                      | 71.5<br>(51.2 to 91.3)                        | 54.3<br>(45.4 to 64.2)                            | 2.4<br>(-3.5 to 8.9)                             |
| Malignant skin melanoma                            | 149.2<br>(125.9 to 165.7)                        | 30.8<br>(26.2 to 34.2)                         | 9.9<br>(6.9 to 13.7)                          | 60.4<br>(49.7 to 71.4)                            | 6.4<br>(-0.7 to 13.7)                            |
| Non-melanoma skin cancer                           | 84.8<br>(62.2 to 120.7)                          | 171.2<br>(108.9 to 257.5)                      | 3.3<br>(1.6 to 6.2)                           | 8.0<br>(-8.1 to 26.6)                             | -28.3<br>(-39.1 to -16.1)                        |
| Non-melanoma skin cancer (squamous-cell carcinoma) | 67.5<br>(35.5 to 115.9)                          | 65.2<br>(37.1 to 112.8)                        | 3.1<br>(1.5 to 6.0)                           | 6.8<br>(-9.8 to 25.1)                             | -29.1<br>(-40.2 to -17.0)                        |
| Non-melanoma skin cancer (basal-cell carcinoma)    | 12.7<br>(5.5 to 28.1)                            | 105.9<br>(54.6 to 181.2)                       | 0.1<br>(< 0.05 to 0.3)                        | 46.1<br>(28.2 to 63.3)                            | -3.1<br>(-15.0 to 8.3)                           |
| Breast cancer                                      | 1,023.0<br>(966.9 to 1,089.4)                    | 211.8<br>(200.2 to 226.7)                      | 92.4<br>(66.5 to 124.4)                       | 50.9<br>(41.2 to 60.9)                            | 0.1<br>(-6.3 to 6.7)                             |
| Cervical cancer                                    | 183.6<br>(146.1 to 201.4)                        | 49.0<br>(39.3 to 53.4)                         | 17.6<br>(12.2 to 23.6)                        | 32.7<br>(22.3 to 46.0)                            | -12.0<br>(-18.9 to -3.1)                         |
| Uterine cancer                                     | 333.1<br>(310.1 to 361.5)                        | 70.5<br>(65.7 to 76.5)                         | 25.1<br>(17.7 to 34.1)                        | 74.9<br>(59.8 to 92.9)                            | 16.0<br>(6.0 to 27.9)                            |
| Ovarian cancer                                     | 92.9<br>(86.7 to 97.3)                           | 30.5<br>(28.7 to 31.8)                         | 14.0<br>(10.1 to 18.3)                        | 46.7<br>(32.3 to 61.6)                            | -2.7<br>(-12.2 to 7.2)                           |
| Prostate cancer                                    | 838.5<br>(734.6 to 1,000.7)                      | 209.4<br>(187.4 to 241.2)                      | 72.6<br>(51.3 to 98.1)                        | 52.6<br>(42.8 to 62.9)                            | 1.2<br>(-5.3 to 8.0)                             |
| Testicular cancer                                  | 8.8<br>(8.2 to 9.4)                              | 1.8<br>(1.7 to 1.9)                            | 0.7<br>(0.5 to 0.9)                           | 75.1<br>(55.4 to 96.3)                            | 16.1<br>(3.1 to 30.2)                            |
| Kidney cancer                                      | 169.3<br>(160.8 to 177.2)                        | 45.5<br>(43.8 to 47.5)                         | 15.1<br>(10.8 to 19.9)                        | 54.8<br>(45.2 to 64.3)                            | 2.7<br>(-3.7 to 9.0)                             |
| Bladder cancer                                     | 221.9<br>(213.3 to 229.8)                        | 54.1<br>(52.0 to 55.9)                         | 20.8<br>(15.0 to 27.6)                        | 50.7<br>(42.4 to 59.3)                            | -0.0<br>(-5.6 to 5.6)                            |
| Brain and nervous system cancer                    | 75.8<br>(66.3 to 81.9)                           | 34.1<br>(30.5 to 36.9)                         | 10.9<br>(7.6 to 14.4)                         | 67.2<br>(57.9 to 79.9)                            | 10.9<br>(4.7 to 19.3)                            |
| Thyroid cancer                                     | 134.3<br>(127.2 to 143.8)                        | 25.9<br>(24.5 to 27.7)                         | 8.6<br>(6.0 to 11.9)                          | 76.6<br>(64.8 to 90.1)                            | 17.1<br>(9.3 to 26.1)                            |
| Mesothelioma                                       | 5.9<br>(5.4 to 6.3)                              | 3.9<br>(3.6 to 4.2)                            | 1.3<br>(0.9 to 1.7)                           | 33.2<br>(27.1 to 40.1)                            | -11.6<br>(-15.7 to -7.1)                         |
| Hodgkin lymphoma                                   | 19.7<br>(17.3 to 22.2)                           | 5.1<br>(4.5 to 5.9)                            | 2.1<br>(1.5 to 2.8)                           | 40.6<br>(29.3 to 52.5)                            | -6.8<br>(-14.3 to 1.2)                           |
| Non-Hodgkin's lymphoma                             | 192.7<br>(177.2 to 208.2)                        | 53.6<br>(49.4 to 58.1)                         | 17.3<br>(12.5 to 22.9)                        | 71.1<br>(60.2 to 80.1)                            | 13.5<br>(6.3 to 19.5)                            |
| Multiple myeloma                                   | 45.9<br>(39.3 to 52.7)                           | 18.5<br>(16.2 to 21.2)                         | 9.6<br>(6.7 to 12.9)                          | 64.8<br>(52.3 to 80.3)                            | 9.3<br>(1.0 to 19.6)                             |
| Leukaemia                                          | 149.5<br>(134.1 to 158.8)                        | 41.6<br>(37.5 to 44.0)                         | 20.0<br>(14.1 to 26.6)                        | 61.3<br>(52.5 to 70.9)                            | 7.0<br>(1.1 to 13.4)                             |
| Acute lymphoid leukaemia                           | 12.7<br>(10.7 to 13.7)                           | 3.8<br>(3.2 to 4.1)                            | 1.7<br>(1.2 to 2.4)                           | 75.2<br>(58.3 to 87.6)                            | 16.2<br>(5.0 to 24.4)                            |
| Chronic lymphoid leukaemia                         | 58.5<br>(54.2 to 63.7)                           | 13.2<br>(12.2 to 14.4)                         | 7.3<br>(5.2 to 9.7)                           | 61.2<br>(49.4 to 74.3)                            | 6.9<br>(-0.9 to 15.6)                            |
| Acute myeloid leukaemia                            | 11.2<br>(9.6 to 12.0)                            | 8.6<br>(7.3 to 9.2)                            | 2.4<br>(1.6 to 3.2)                           | 59.4<br>(51.8 to 67.6)                            | 5.7<br>(0.7 to 11.2)                             |
| Chronic myeloid leukaemia                          | 7.7<br>(6.8 to 8.5)                              | 2.8<br>(2.4 to 3.0)                            | 1.0<br>(0.7 to 1.4)                           | 25.9<br>(18.1 to 33.5)                            | -16.5<br>(-21.7 to -11.5)                        |
| Other leukaemia                                    | 59.4<br>(48.8 to 65.2)                           | 13.4<br>(11.0 to 14.7)                         | 7.5<br>(5.1 to 10.1)                          | 65.3<br>(50.4 to 83.1)                            | 9.6<br>(-0.2 to 21.4)                            |
| Other neoplasms                                    | 250.3<br>(221.9 to 264.5)                        | 73.0<br>(64.8 to 76.7)                         | 21.9<br>(15.6 to 28.9)                        | 85.4<br>(73.1 to 96.2)                            | 23.0<br>(14.8 to 30.1)                           |
| <b>Cardiovascular diseases</b>                     | <b>56,105.0</b><br><b>(54,528.0 to 57,430.0)</b> | <b>6,249.4†</b><br><b>(5,711.0 to 6,877.8)</b> | <b>3,823.4</b><br><b>(2,770.5 to 4,960.0)</b> | <b>61.1</b><br><b>(55.0 to 66.7)</b>              | <b>6.8</b><br><b>(2.8 to 10.6)</b>               |
| Rheumatic heart disease                            | 979.1<br>(884.6 to 1,081.5)                      | 17.2<br>(14.0 to 20.0)                         | 53.3<br>(35.4 to 75.0)                        | 33.6<br>(29.1 to 38.2)                            | -11.4<br>(-14.4 to -8.3)                         |
| Ischaemic heart disease                            | 18,793.0<br>(17,388.2 to 20,177.3)               | 2,143.0<br>(1,859.8 to 2,434.5)                | 796.7<br>(544.8 to 1,089.1)                   | 52.3<br>(50.8 to 53.8)                            | 1.0<br>(0.1 to 2.0)                              |
| Cerebrovascular disease                            | 10,947.9<br>(10,547.5 to 11,391.0)               | 1,754.4†<br>(1,522.3 to 1,995.5)               | 1,919.2<br>(1,352.5 to 2,489.6)               | 74.7<br>(62.3 to 85.7)                            | 15.8<br>(7.6 to 23.2)                            |
| Ischaemic stroke                                   | 9,193.1<br>(7,862.8 to 10,476.1)                 | 1,254.5†<br>(1,035.8 to 1,480.3)               | 1,569.8<br>(1,087.7 to 2,053.7)               | 78.6<br>(63.8 to 91.0)                            | 18.5<br>(8.7 to 26.7)                            |
| Hemorrhagic stroke                                 | 2,044.7<br>(1,673.6 to 2,462.1)                  | 499.8†<br>(411.6 to 603.0)                     | 349.4<br>(241.1 to 471.9)                     | 58.9<br>(42.3 to 75.0)                            | 5.4<br>(-5.6 to 16.1)                            |
| Hypertensive heart disease                         | 1,796.2<br>(1,394.0 to 2,276.0)                  | --                                             | 147.3<br>(95.4 to 214.4)                      | 53.4<br>(49.5 to 57.2)                            | 1.7<br>(-0.9 to 4.3)                             |
| Cardiomyopathy and myocarditis                     | 503.5<br>(462.1 to 556.5)                        | 238.0†<br>(185.4 to 309.1)                     | 42.9<br>(26.8 to 65.8)                        | 46.5<br>(40.6 to 52.3)                            | -2.8<br>(-6.7 to 1.0)                            |
| Myocarditis                                        | 94.5<br>(76.0 to 114.9)                          | 238.0<br>(185.4 to 309.1)                      | 6.0<br>(3.9 to 8.9)                           | 50.6<br>(42.2 to 59.5)                            | -0.1<br>(-5.7 to 5.8)                            |
| Alcoholic cardiomyopathy                           | 165.8<br>(124.1 to 216.7)                        | --                                             | 13.7<br>(8.6 to 21.2)                         | 59.0<br>(45.9 to 73.8)                            | 5.5<br>(-3.2 to 15.3)                            |
| Other cardiomyopathy                               | 280.7<br>(204.5 to 370.6)                        | --                                             | 23.2<br>(14.5 to 36.4)                        | 39.0<br>(33.1 to 45.2)                            | -7.8<br>(-11.7 to -3.7)                          |
| Atrial fibrillation and flutter                    | 4,675.1<br>(3,834.3 to 5,611.4)                  | 547.2<br>(444.2 to 673.9)                      | 376.3<br>(237.7 to 546.2)                     | 52.1<br>(49.4 to 54.6)                            | 0.9<br>(-0.9 to 2.5)                             |
| Peripheral vascular disease                        | 16,232.2<br>(13,126.4 to 19,795.0)               | 1,463.4<br>(1,070.4 to 1,940.1)                | 72.8<br>(33.2 to 137.9)                       | 40.0<br>(38.0 to 42.1)                            | -7.1<br>(-8.5 to -5.7)                           |
| Endocarditis                                       | 34.1<br>(26.7 to 43.5)                           | 86.2<br>(67.5 to 105.0)                        | 2.8<br>(1.8 to 4.3)                           | 41.2<br>(34.0 to 48.7)                            | -6.4<br>(-11.1 to -1.4)                          |
| Other cardiovascular and circulatory diseases      | 7,956.0<br>(5,766.2 to 10,632.4)                 | --                                             | 412.1<br>(256.7 to 630.5)                     | 44.4<br>(40.9 to 48.0)                            | -4.2<br>(-6.5 to -1.9)                           |
| <b>Chronic respiratory diseases</b>                | <b>48,255.2</b><br><b>(47,026.8 to 49,291.5)</b> | <b>6,498.1†</b><br><b>(5,823.8 to 7,243.5)</b> | <b>2,994.6</b><br><b>(2,506.0 to 3,454.1)</b> | <b>50.1</b><br><b>(46.5 to 53.9)</b>              | <b>-0.4</b><br><b>(-2.8 to 2.0)</b>              |
| Chronic obstructive pulmonary disease              | 33,641.7<br>(31,569.7 to 35,785.6)               | 2,350.9<br>(2,001.9 to 2,712.3)                | 2,223.9<br>(1,918.7 to 2,499.7)               | 48.9<br>(44.3 to 53.5)                            | -1.3<br>(-4.3 to 1.8)                            |
| Pneumoconiosis                                     | 210.0<br>(190.6 to 230.1)                        | 23.2<br>(20.6 to 26.1)                         | 30.5<br>(20.5 to 42.8)                        | 59.3<br>(48.4 to 71.1)                            | 5.7<br>(-1.6 to 13.5)                            |
| Silicosis                                          | 85.5<br>(72.3 to 99.0)                           | 12.6<br>(10.5 to 15.0)                         | 12.2<br>(8.1 to 17.5)                         | 60.5<br>(40.6 to 82.5)                            | 6.4<br>(-6.7 to 21.0)                            |

| Cause                                                          | Prevalence in thousands (95% UI)             | Incidence in thousands (95% UI)             | YLDs in thousands (95% UI)              |                                                   |                                                  |
|----------------------------------------------------------------|----------------------------------------------|---------------------------------------------|-----------------------------------------|---------------------------------------------------|--------------------------------------------------|
|                                                                | 2016 counts                                  | 2016 counts                                 | 2016 counts                             | Percentage change in counts between 2006 and 2016 | Percentage change in rates between 2006 and 2016 |
| Asbestosis                                                     | 20.0<br>(16.2 to 24.1)                       | 2.1<br>(1.7 to 2.5)                         | 3.1<br>(2.0 to 4.4)                     | 43.3<br>(34.5 to 53.3)                            | -4.9<br>(-10.8 to 1.7)                           |
| Coal workers pneumoconiosis                                    | 62.9<br>(53.7 to 73.0)                       | 4.6<br>(3.6 to 5.6)                         | 9.0<br>(5.9 to 12.9)                    | 61.8<br>(40.4 to 86.0)                            | 7.3<br>(-6.9 to 23.4)                            |
| Other pneumoconiosis                                           | 41.6<br>(33.3 to 50.4)                       | 3.9<br>(2.9 to 5.0)                         | 6.2<br>(3.9 to 9.3)                     | 62.1<br>(43.6 to 83.9)                            | 7.5<br>(-4.7 to 22.0)                            |
| Asthma                                                         | 17,655.0<br>(15,279.1 to 20,139.0)           | 4,076.5<br>(3,484.4 to 4,718.4)             | 664.5<br>(432.2 to 960.9)               | 52.5<br>(48.8 to 56.2)                            | 1.1<br>(-1.3 to 3.6)                             |
| Interstitial lung disease and pulmonary sarcoidosis            | 436.5<br>(362.6 to 529.2)                    | 47.6<br>(33.8 to 62.9)                      | 46.2<br>(28.8 to 68.0)                  | 58.1<br>(49.8 to 65.7)                            | 4.9<br>(-0.6 to 9.9)                             |
| Other chronic respiratory diseases                             | --                                           | --                                          | 29.4<br>(25.2 to 33.0)                  | 82.0<br>(76.8 to 87.5)                            | 20.8<br>(17.2 to 24.4)                           |
| <b>Cirrhosis and other chronic liver diseases</b>              | <b>4,542.0<br/>(4,268.5 to 4,835.9)</b>      | <b>174.6<br/>(149.5 to 203.6)</b>           | <b>139.0<br/>(94.7 to 199.3)</b>        | <b>52.4<br/>(47.5 to 57.3)</b>                    | <b>1.1<br/>(-2.2 to 4.3)</b>                     |
| Cirrhosis and other chronic liver diseases due to hepatitis B  | 1,317.2<br>(1,135.9 to 1,529.4)              | 52.7<br>(41.4 to 65.3)                      | 43.7<br>(28.9 to 62.9)                  | 55.2<br>(47.8 to 63.3)                            | 3.0<br>(-1.9 to 8.3)                             |
| Cirrhosis and other chronic liver diseases due to hepatitis C  | 1,123.2<br>(937.1 to 1,339.0)                | 44.6<br>(35.3 to 55.9)                      | 33.6<br>(22.1 to 49.3)                  | 49.1<br>(41.6 to 56.9)                            | -1.1<br>(-6.1 to 4.1)                            |
| Cirrhosis and other chronic liver diseases due to alcohol use  | 1,254.2<br>(1,034.8 to 1,478.3)              | 47.6<br>(36.5 to 59.2)                      | 37.2<br>(24.2 to 55.5)                  | 50.4<br>(42.4 to 58.6)                            | -0.2<br>(-5.5 to 5.2)                            |
| Cirrhosis and other chronic liver diseases due to other causes | 847.4<br>(630.0 to 1,112.5)                  | 29.8<br>(21.3 to 39.7)                      | 24.5<br>(15.3 to 37.1)                  | 55.0<br>(45.5 to 64.9)                            | 2.8<br>(-3.5 to 9.3)                             |
| <b>Digestive diseases</b>                                      | <b>24,335.0<br/>(23,012.8 to 25,411.8)</b>   | <b>21,073.4†<br/>(18,312.7 to 24,366.1)</b> | <b>605.4<br/>(422.9 to 836.4)</b>       | <b>68.1<br/>(62.3 to 74.9)</b>                    | <b>11.5<br/>(7.6 to 16.0)</b>                    |
| Peptic ulcer disease                                           | 6,722.2<br>(5,550.9 to 8,258.2)              | 759.5<br>(585.5 to 980.2)                   | 91.2<br>(55.3 to 139.6)                 | 77.7<br>(63.5 to 93.4)                            | 17.8<br>(8.5 to 28.2)                            |
| Gastritis and duodenitis                                       | 12,185.8<br>(9,278.7 to 16,233.3)            | 8,089.6<br>(6,385.1 to 10,533.8)            | 120.7<br>(74.4 to 180.6)                | 85.3<br>(71.7 to 98.9)                            | 22.9<br>(13.9 to 31.9)                           |
| Appendicitis                                                   | 26.9<br>(22.2 to 32.5)                       | 703.5<br>(585.0 to 846.9)                   | 8.1<br>(5.1 to 11.6)                    | 51.7<br>(38.1 to 67.2)                            | 0.6<br>(-8.4 to 10.9)                            |
| Paralytic ileus and intestinal obstruction                     | 13.4<br>(10.2 to 16.9)                       | 370.9<br>(285.5 to 469.8)                   | 4.3<br>(2.7 to 6.4)                     | 61.5<br>(52.5 to 70.1)                            | 7.1<br>(1.2 to 12.8)                             |
| Inguinal, femoral, and abdominal hernia                        | 4,077.1<br>(3,075.4 to 5,271.0)              | 4,462.4<br>(3,067.5 to 5,960.8)             | 193.9<br>(117.0 to 290.4)               | 50.2<br>(43.5 to 56.7)                            | -0.4<br>(-4.8 to 4.0)                            |
| Inflammatory bowel disease                                     | 718.3<br>(614.3 to 855.3)                    | 189.3<br>(152.2 to 236.2)                   | 101.2<br>(67.0 to 143.3)                | 78.0<br>(69.1 to 86.2)                            | 18.0<br>(12.2 to 23.5)                           |
| Vascular intestinal disorders                                  | 8.8<br>(6.3 to 11.8)                         | 48.8<br>(35.1 to 66.5)                      | 2.8<br>(1.7 to 4.3)                     | 48.3<br>(37.2 to 59.0)                            | -1.6<br>(-9.0 to 5.5)                            |
| Gallbladder and biliary diseases                               | 1,656.2<br>(1,258.0 to 2,115.6)              | 5,902.4<br>(4,419.8 to 7,737.5)             | 25.4<br>(15.3 to 39.0)                  | 71.0<br>(57.6 to 85.1)                            | 13.4<br>(4.5 to 22.8)                            |
| Pancreatitis                                                   | 61.8<br>(48.4 to 77.5)                       | 547.1<br>(421.3 to 685.1)                   | 7.6<br>(4.5 to 11.8)                    | 74.5<br>(56.5 to 91.4)                            | 15.8<br>(3.8 to 26.9)                            |
| Other digestive diseases                                       | --                                           | --                                          | 50.2<br>(35.1 to 69.4)                  | 75.8<br>(69.7 to 83.0)                            | 16.6<br>(12.6 to 21.4)                           |
| <b>Neurological disorders</b>                                  | <b>103,525.5<br/>(96,397.7 to 111,424.4)</b> | <b>34,325.7<br/>(22,495.7 to 49,936.0)</b>  | <b>3,065.0<br/>(2,098.9 to 4,069.2)</b> | <b>49.5<br/>(47.6 to 51.5)</b>                    | <b>-0.8<br/>(-2.1 to 0.5)</b>                    |
| Alzheimer's disease and other dementias                        | 2,544.3<br>(1,987.0 to 3,263.3)              | 422.1<br>(267.8 to 601.5)                   | 312.5<br>(205.0 to 455.9)               | 54.1<br>(50.9 to 57.1)                            | 2.2<br>(0.1 to 4.2)                              |
| Parkinson's disease                                            | 623.2<br>(455.5 to 836.9)                    | 79.5<br>(55.0 to 107.9)                     | 76.1<br>(47.9 to 113.5)                 | 62.2<br>(56.0 to 68.5)                            | 7.6<br>(3.5 to 11.8)                             |
| Epilepsy                                                       | 989.3<br>(805.6 to 1,200.4)                  | 74.1<br>(47.9 to 103.0)                     | 281.7<br>(189.3 to 396.9)               | 43.0<br>(27.9 to 60.3)                            | -5.2<br>(-15.2 to 6.3)                           |
| Multiple sclerosis                                             | 179.5<br>(164.0 to 194.9)                    | 1.0<br>(0.7 to 1.4)                         | 46.2<br>(32.6 to 60.4)                  | 53.9<br>(45.4 to 61.9)                            | 2.1<br>(-3.6 to 7.4)                             |
| Motor neuron disease                                           | 28.7<br>(23.2 to 35.9)                       | 7.3<br>(5.7 to 9.2)                         | 6.1<br>(4.0 to 8.6)                     | 47.8<br>(43.4 to 52.2)                            | -1.9<br>(-4.9 to 0.9)                            |
| Migraine                                                       | 41,864.5<br>(38,858.3 to 45,121.6)           | 2,421.7<br>(2,050.8 to 2,814.5)             | 1,919.5<br>(1,272.4 to 2,665.8)         | 49.0<br>(47.5 to 50.4)                            | -1.2<br>(-2.2 to -0.2)                           |
| Tension-type headache                                          | 72,548.8<br>(50,919.3 to 95,866.4)           | 31,316.8<br>(19,487.3 to 47,199.0)          | 365.4<br>(228.8 to 545.3)               | 50.4<br>(47.9 to 53.1)                            | -0.2<br>(-1.9 to 1.6)                            |
| Other neurological disorders                                   | 1.6<br>(0.8 to 2.9)                          | 3.2<br>(1.8 to 4.9)                         | 57.4<br>(40.4 to 76.1)                  | 53.4<br>(46.4 to 60.9)                            | 1.8<br>(-2.9 to 6.7)                             |
| <b>Mental and substance use disorders</b>                      | <b>51,770.8<br/>(50,725.2 to 52,870.0)</b>   | <b>21,636.9†<br/>(18,795.2 to 24,994.3)</b> | <b>7,410.6<br/>(5,421.4 to 9,588.4)</b> | <b>47.4<br/>(46.1 to 48.8)</b>                    | <b>-2.2<br/>(-3.1 to -1.3)</b>                   |
| Schizophrenia                                                  | 1,267.9<br>(1,124.5 to 1,427.5)              | 19.9<br>(15.0 to 25.7)                      | 778.3<br>(588.3 to 951.4)               | 53.3<br>(50.1 to 56.6)                            | 1.7<br>(-0.4 to 3.9)                             |
| Alcohol use disorders                                          | 4,068.2<br>(3,233.0 to 4,951.9)              | 1,551.0<br>(1,164.5 to 1,978.9)             | 389.1<br>(255.1 to 549.7)               | 45.8<br>(39.3 to 52.3)                            | -3.3<br>(-7.6 to 1.1)                            |
| Drug use disorders                                             | 1,649.2<br>(1,593.4 to 1,692.9)              | 155.5<br>(129.8 to 180.4)                   | 505.0<br>(362.3 to 643.5)               | 59.4<br>(55.1 to 63.5)                            | 5.7<br>(2.9 to 8.4)                              |
| Opioid use disorders                                           | 1,078.8<br>(950.4 to 1,227.7)                | 110.3<br>(87.2 to 134.5)                    | 425.6<br>(302.9 to 553.0)               | 61.6<br>(56.6 to 66.4)                            | 7.2<br>(3.9 to 10.4)                             |
| Cocaine use disorders                                          | 236.0<br>(210.5 to 263.2)                    | 6.1<br>(4.0 to 8.5)                         | 30.9<br>(19.3 to 43.9)                  | 44.8<br>(36.6 to 53.7)                            | -4.0<br>(-9.4 to 1.9)                            |
| Amphetamine use disorders                                      | 35.1<br>(24.1 to 49.2)                       | 5.2<br>(2.5 to 8.8)                         | 4.7<br>(2.6 to 7.8)                     | 52.5<br>(39.1 to 63.7)                            | 1.1<br>(-7.8 to 8.6)                             |
| Cannabis use disorders                                         | 243.3<br>(205.3 to 288.0)                    | 16.1<br>(10.7 to 22.7)                      | 7.1<br>(4.5 to 10.8)                    | 49.8<br>(43.4 to 56.1)                            | -0.6<br>(-4.9 to 3.5)                            |
| Other drug use disorders                                       | 127.7<br>(106.7 to 150.9)                    | 17.9<br>(13.0 to 23.5)                      | 36.6<br>(24.5 to 50.3)                  | 51.2<br>(44.2 to 58.2)                            | 0.3<br>(-4.4 to 4.9)                             |
| Depressive disorders                                           | 19,884.7<br>(19,217.5 to 20,523.4)           | 18,409.2<br>(15,566.3 to 21,654.4)          | 3,075.5<br>(2,055.6 to 4,213.5)         | 44.6<br>(42.2 to 47.1)                            | -4.1<br>(-5.7 to -2.4)                           |
| Major depressive disorder                                      | 11,280.4<br>(9,524.1 to 13,306.9)            | 17,228.5<br>(14,397.0 to 20,392.0)          | 2,221.4<br>(1,476.0 to 3,088.7)         | 40.4<br>(38.0 to 42.6)                            | -6.9<br>(-8.4 to -5.4)                           |
| Dysthymia                                                      | 9,116.4<br>(7,343.7 to 11,175.8)             | 1,180.7<br>(889.3 to 1,511.5)               | 854.1<br>(558.1 to 1,259.5)             | 57.1<br>(52.2 to 62.4)                            | 4.2<br>(1.0 to 7.7)                              |
| Bipolar disorder                                               | 2,146.2<br>(1,809.8 to 2,550.2)              | 119.2<br>(77.4 to 165.5)                    | 419.4<br>(257.5 to 630.8)               | 47.3<br>(44.1 to 50.1)                            | -2.3<br>(-4.4 to -0.4)                           |
| Anxiety disorders                                              | 13,217.5<br>(11,674.9 to 14,862.9)           | 1,342.9<br>(1,126.1 to 1,575.1)             | 1,221.1<br>(840.0 to 1,650.5)           | 45.9<br>(42.8 to 49.2)                            | -3.2<br>(-5.2 to -1.0)                           |
| Eating disorders                                               | --                                           | --                                          | --                                      | --                                                | --                                               |
| Anorexia nervosa                                               | --                                           | --                                          | --                                      | --                                                | --                                               |
| Bulimia nervosa                                                | --                                           | --                                          | --                                      | --                                                | --                                               |
| Autistic spectrum disorders                                    | 2,072.7<br>(1,975.2 to 2,162.0)              | --                                          | 294.6<br>(202.0 to 414.7)               | 49.9<br>(47.6 to 52.4)                            | -0.6<br>(-2.1 to 1.1)                            |
| Autism                                                         | 651.3<br>(560.0 to 759.8)                    | --                                          | 157.8<br>(101.4 to 226.5)               | 48.5<br>(44.8 to 52.3)                            | -1.5<br>(-4.0 to 1.0)                            |
| Asperger syndrome and other autistic spectrum disorders        | 1,426.8<br>(1,188.3 to 1,697.2)              | --                                          | 136.8<br>(90.1 to 198.0)                | 51.6<br>(48.8 to 54.3)                            | 0.6<br>(-1.3 to 2.4)                             |

| Cause                                                      | Prevalence in thousands (95% UI)              | Incidence in thousands (95% UI)                | YLDs in thousands (95% UI)                |                                                   |                                                  |
|------------------------------------------------------------|-----------------------------------------------|------------------------------------------------|-------------------------------------------|---------------------------------------------------|--------------------------------------------------|
|                                                            | 2016 counts                                   | 2016 counts                                    | 2016 counts                               | Percentage change in counts between 2006 and 2016 | Percentage change in rates between 2006 and 2016 |
| Attention-deficit/hyperactivity disorder                   | 506.9<br>(434.7 to 583.3)                     | --                                             | 5.9<br>(3.6 to 9.4)                       | 54.7<br>(45.6 to 64.5)                            | 2.6<br>(-3.5 to 9.1)                             |
| Conduct disorder                                           | --                                            | --                                             | --                                        | --                                                | --                                               |
| Idiopathic developmental intellectual disability           | 2,699.5<br>(1,466.4 to 3,903.0)               | --                                             | 118.3<br>(58.7 to 199.6)                  | 36.2<br>(29.7 to 40.1)                            | -9.7<br>(-14.0 to -7.1)                          |
| Other mental and substance use disorders                   | 8,388.5<br>(7,428.8 to 9,550.5)               | 39.2<br>(25.5 to 57.4)                         | 603.5<br>(417.9 to 854.5)                 | 50.5<br>(48.3 to 52.9)                            | -0.1<br>(-1.6 to 1.4)                            |
| <b>Diabetes, urogenital, blood, and endocrine diseases</b> | <b>152,450.1<br/>(150,742.4 to 153,944.6)</b> | <b>31,360.9†<br/>(27,450.0 to 35,707.1)</b>    | <b>5,490.0<br/>(3,904.5 to 7,346.3)</b>   | <b>47.4<br/>(44.6 to 50.4)</b>                    | <b>-2.2<br/>(-4.1 to -0.2)</b>                   |
| Diabetes mellitus                                          | 44,580.5<br>(40,450.3 to 49,064.4)            | 1,864.3<br>(1,419.4 to 2,416.2)                | 3,406.3<br>(2,319.1 to 4,680.8)           | 47.2<br>(42.9 to 51.6)                            | -2.4<br>(-5.2 to 0.6)                            |
| Acute glomerulonephritis                                   | 7.2<br>(4.9 to 10.4)                          | 106.5<br>(71.5 to 155.6)                       | 0.4<br>(0.2 to 0.6)                       | 35.1<br>(30.4 to 39.6)                            | -10.4<br>(-13.5 to -7.4)                         |
| Chronic kidney disease                                     | 30,886.1<br>(26,124.0 to 36,416.6)            | 2,825.2<br>(1,925.2 to 3,737.2)                | 817.5<br>(600.6 to 1,088.8)               | 49.5<br>(45.5 to 53.9)                            | -0.9<br>(-3.5 to 2.1)                            |
| Chronic kidney disease due to diabetes mellitus            | 15,761.0<br>(12,352.2 to 19,701.0)            | 1,451.8<br>(972.2 to 2,008.5)                  | 428.0<br>(302.3 to 576.6)                 | 48.9<br>(44.0 to 54.2)                            | -1.2<br>(-4.5 to 2.3)                            |
| Chronic kidney disease due to hypertension                 | 4,584.8<br>(3,409.3 to 5,914.3)               | 351.9<br>(209.5 to 530.9)                      | 163.7<br>(109.4 to 233.6)                 | 56.3<br>(48.6 to 65.2)                            | 3.7<br>(-1.4 to 9.6)                             |
| Chronic kidney disease due to glomerulonephritis           | 4,907.2<br>(3,777.2 to 6,332.3)               | 504.8<br>(317.9 to 717.9)                      | 87.4<br>(52.8 to 136.3)                   | 45.6<br>(37.8 to 53.2)                            | -3.5<br>(-8.6 to 1.6)                            |
| Chronic kidney disease due to other causes                 | 5,633.1<br>(3,816.3 to 8,050.0)               | 516.6<br>(305.9 to 794.1)                      | 138.4<br>(83.2 to 214.0)                  | 45.9<br>(39.7 to 52.4)                            | -3.2<br>(-7.3 to 1.1)                            |
| Urinary diseases and male infertility                      | 17,832.7<br>(15,801.1 to 20,367.2)            | 24,682.3†<br>(21,101.5 to 29,249.8)            | 589.6<br>(372.9 to 855.5)                 | 46.3<br>(44.3 to 48.4)                            | -3.0<br>(-4.3 to -1.6)                           |
| Interstitial nephritis and urinary tract infections        | 291.2<br>(233.2 to 363.9)                     | 15,194.2<br>(12,359.4 to 18,931.8)             | 9.4<br>(5.4 to 14.6)                      | 61.1<br>(53.0 to 68.9)                            | 6.8<br>(1.5 to 12.0)                             |
| Urolithiasis                                               | 283.6<br>(216.1 to 375.1)                     | 7,481.9<br>(5,670.3 to 9,837.3)                | 20.1<br>(12.4 to 29.7)                    | 62.2<br>(49.7 to 76.8)                            | 7.6<br>(-0.7 to 17.3)                            |
| Benign prostatic hyperplasia                               | 16,719.4<br>(13,776.7 to 19,992.6)            | 2,006.1<br>(1,520.4 to 2,626.6)                | 550.6<br>(339.8 to 808.5)                 | 46.0<br>(43.8 to 48.1)                            | -3.2<br>(-4.6 to -1.8)                           |
| Male infertility                                           | --                                            | --                                             | --                                        | --                                                | --                                               |
| Other urinary diseases                                     | --                                            | --                                             | 9.6<br>(6.2 to 13.8)                      | 27.2<br>(20.2 to 34.9)                            | -15.7<br>(-20.3 to -10.5)                        |
| Gynecological diseases                                     | 35,712.9<br>(34,024.7 to 38,152.0)            | 25.4†<br>(15.0 to 38.6)                        | 137.3<br>(68.5 to 245.3)                  | 34.7<br>(32.5 to 37.2)                            | -10.7<br>(-12.1 to -9.0)                         |
| Uterine fibroids                                           | 5,211.1<br>(4,641.6 to 5,879.4)               | 25.4<br>(15.0 to 38.6)                         | 38.1<br>(18.4 to 71.8)                    | 52.8<br>(50.9 to 54.6)                            | 1.4<br>(0.1 to 2.6)                              |
| Polycystic ovarian syndrome                                | --                                            | --                                             | --                                        | --                                                | --                                               |
| Female infertility                                         | --                                            | --                                             | --                                        | --                                                | --                                               |
| Endometriosis                                              | --                                            | --                                             | --                                        | --                                                | --                                               |
| Genital prolapse                                           | 32,025.7<br>(28,100.5 to 36,340.6)            | --                                             | 99.3<br>(47.5 to 179.8)                   | 28.8<br>(27.2 to 30.5)                            | -14.6<br>(-15.6 to -13.5)                        |
| Premenstrual syndrome                                      | --                                            | --                                             | --                                        | --                                                | --                                               |
| Other gynecological diseases                               | --                                            | --                                             | --                                        | --                                                | --                                               |
| Hemoglobinopathies and hemolytic anaemias                  | 66,138.6<br>(65,616.6 to 66,716.0)            | --                                             | 192.8<br>(123.4 to 281.1)                 | 47.6<br>(41.6 to 53.2)                            | -2.1<br>(-6.1 to 1.6)                            |
| Thalassemias                                               | 0.1<br>(0.1 to 0.1)                           | --                                             | < 0.05<br>(< 0.05 to < 0.05)              | 39.6<br>(19.3 to 71.4)                            | -7.4<br>(-20.9 to 13.7)                          |
| Thalassaemias trait                                        | 12,466.0<br>(12,015.0 to 12,951.0)            | --                                             | 91.9<br>(57.1 to 136.1)                   | 59.8<br>(49.1 to 69.9)                            | 6.0<br>(-1.1 to 12.7)                            |
| Sickle cell disorders                                      | 1.9<br>(1.7 to 2.1)                           | --                                             | 0.3<br>(0.2 to 0.5)                       | 74.2<br>(68.2 to 80.2)                            | 15.6<br>(11.6 to 19.5)                           |
| Sickle cell trait                                          | 13,075.3<br>(12,136.4 to 14,322.6)            | --                                             | 22.1<br>(14.0 to 32.7)                    | 35.9<br>(29.4 to 42.3)                            | -9.8<br>(-14.1 to -5.6)                          |
| G6PD deficiency                                            | 10,799.6<br>(10,414.0 to 11,239.6)            | --                                             | 0.7<br>(0.5 to 1.0)                       | 49.6<br>(44.8 to 54.3)                            | -0.8<br>(-3.9 to 2.3)                            |
| G6PD trait                                                 | 32,715.1<br>(32,176.0 to 33,336.3)            | --                                             | < 0.05<br>(< 0.05 to < 0.05)              | 51.0<br>(43.1 to 58.0)                            | 0.1<br>(-5.1 to 4.8)                             |
| Other hemoglobinopathies and hemolytic anaemias            | 4,156.8<br>(3,783.6 to 4,525.7)               | --                                             | 77.8<br>(50.8 to 111.2)                   | 38.5<br>(34.3 to 42.5)                            | -8.1<br>(-10.9 to -5.5)                          |
| Endocrine, metabolic, blood, and immune disorders          | 10,916.1<br>(8,978.3 to 13,067.8)             | 1,857.4<br>(1,342.4 to 2,437.9)                | 346.1<br>(224.8 to 501.5)                 | 52.7<br>(48.3 to 57.4)                            | 1.3<br>(-1.6 to 4.4)                             |
| <b>Musculoskeletal disorders</b>                           | <b>113,181.8<br/>(109,305.8 to 117,143.5)</b> | <b>56,001.4<br/>(44,946.9 to 68,627.5)</b>     | <b>12,279.1<br/>(8,643.4 to 16,815.8)</b> | <b>49.2<br/>(47.0 to 51.3)</b>                    | <b>1.0<br/>(-2.5 to 0.3)</b>                     |
| Rheumatoid arthritis                                       | 2,482.0<br>(2,171.6 to 2,823.7)               | 104.7<br>(77.5 to 138.8)                       | 574.5<br>(386.7 to 766.6)                 | 56.4<br>(52.8 to 60.0)                            | 3.8<br>(1.3 to 6.1)                              |
| Osteoarthritis                                             | 42,252.3<br>(39,339.0 to 45,193.7)            | 1,733.7<br>(1,471.5 to 2,016.9)                | 2,310.6<br>(1,616.8 to 3,131.4)           | 56.7<br>(55.3 to 58.2)                            | 4.0<br>(3.0 to 4.9)                              |
| Low back and neck pain                                     | 60,618.7<br>(56,491.5 to 66,094.7)            | 24,634.6<br>(17,544.3 to 32,949.4)             | 7,123.1<br>(4,749.1 to 10,163.2)          | 48.7<br>(45.2 to 51.7)                            | -1.4<br>(-3.7 to 0.7)                            |
| Low back pain                                              | 42,224.8<br>(31,784.0 to 56,967.8)            | 20,567.8<br>(13,707.6 to 29,105.2)             | 4,771.1<br>(3,065.1 to 7,144.5)           | 46.5<br>(41.3 to 50.6)                            | -2.8<br>(-6.3 to -0.1)                           |
| Neck pain                                                  | 24,047.3<br>(17,846.8 to 32,684.4)            | 4,066.8<br>(2,508.7 to 5,937.9)                | 2,352.0<br>(1,475.9 to 3,565.8)           | 53.3<br>(49.6 to 57.0)                            | 1.7<br>(-0.8 to 4.1)                             |
| Gout                                                       | 4,316.9<br>(3,438.2 to 5,427.8)               | 826.6<br>(619.7 to 1,050.8)                    | 135.6<br>(87.9 to 193.4)                  | 49.2<br>(44.0 to 54.3)                            | -1.1<br>(-4.5 to 2.4)                            |
| Other musculoskeletal disorders                            | 25,747.8<br>(17,585.1 to 35,857.7)            | 28,701.9<br>(20,946.0 to 38,903.0)             | 2,135.3<br>(1,251.4 to 3,424.8)           | 41.8<br>(33.9 to 48.1)                            | -5.9<br>(-11.2 to -1.7)                          |
| <b>Other non-communicable diseases</b>                     | <b>269,119.8<br/>(268,072.9 to 270,325.6)</b> | <b>662,596.6†<br/>(581,488.3 to 754,082.6)</b> | <b>10,528.5<br/>(7,085.1 to 15,078.4)</b> | <b>47.7<br/>(46.1 to 49.0)</b>                    | <b>-2.0<br/>(-3.1 to -1.2)</b>                   |
| Congenital anomalies                                       | 2,544.3<br>(2,370.1 to 2,731.0)               | --                                             | 338.3<br>(243.4 to 447.2)                 | 47.5<br>(43.6 to 51.3)                            | -2.2<br>(-4.8 to 0.4)                            |
| Neural tube defects                                        | 189.5<br>(172.4 to 209.3)                     | --                                             | 55.6<br>(39.5 to 73.7)                    | 46.3<br>(40.4 to 52.1)                            | -3.0<br>(-6.9 to 0.9)                            |
| Congenital heart anomalies                                 | 390.6<br>(349.1 to 436.1)                     | --                                             | 21.8<br>(9.3 to 37.9)                     | 59.8<br>(53.3 to 66.2)                            | 6.0<br>(1.7 to 10.2)                             |
| Orofacial clefts                                           | 147.0<br>(131.2 to 162.8)                     | --                                             | 1.8<br>(1.1 to 2.5)                       | 41.3<br>(37.6 to 45.0)                            | -6.2<br>(-8.7 to -3.8)                           |
| Down's syndrome                                            | 23.4<br>(19.4 to 27.6)                        | --                                             | 4.0<br>(2.8 to 5.5)                       | 58.4<br>(52.6 to 64.0)                            | 5.0<br>(1.2 to 8.8)                              |
| Turner syndrome                                            | 34.8<br>(29.9 to 40.4)                        | --                                             | 0.5<br>(0.2 to 0.9)                       | 60.8<br>(38.2 to 88.6)                            | 6.7<br>(-8.3 to 25.1)                            |
| Klinefelter syndrome                                       | 11.7<br>(9.6 to 14.3)                         | --                                             | < 0.05<br>(< 0.05 to 0.1)                 | 41.2<br>(38.6 to 44.2)                            | -6.3<br>(-8.1 to -4.4)                           |

| Cause                                         | Prevalence in thousands (95% UI)                    | Incidence in thousands (95% UI)                              | YLDs in thousands (95% UI)                    |                                                   |                                                  |
|-----------------------------------------------|-----------------------------------------------------|--------------------------------------------------------------|-----------------------------------------------|---------------------------------------------------|--------------------------------------------------|
|                                               | 2016 counts                                         | 2016 counts                                                  | 2016 counts                                   | Percentage change in counts between 2006 and 2016 | Percentage change in rates between 2006 and 2016 |
| Other chromosomal abnormalities               | < 0.05<br>(< 0.05 to < 0.05)                        | --                                                           | < 0.05<br>(< 0.05 to < 0.05)                  | 37.5<br>(-66.2 to 427.2)                          | -8.8<br>(-77.6 to 249.7)                         |
| Congenital musculoskeletal and limb anomalies | 483.6<br>(447.0 to 522.0)                           | --                                                           | 69.5<br>(48.2 to 94.6)                        | 53.7<br>(48.3 to 59.1)                            | 1.9<br>(-1.6 to 5.6)                             |
| Urogenital congenital anomalies               | 122.2<br>(110.1 to 135.2)                           | --                                                           | 1.9<br>(0.9 to 3.3)                           | 60.0<br>(55.5 to 65.2)                            | 6.1<br>(3.1 to 9.6)                              |
| Digestive congenital anomalies                | 442.3<br>(399.7 to 488.9)                           | --                                                           | 18.5<br>(12.2 to 26.4)                        | 55.3<br>(47.5 to 62.9)                            | 3.0<br>(-2.1 to 8.0)                             |
| Other congenital anomalies                    | 1,249.0<br>(871.8 to 1,748.2)                       | --                                                           | 164.8<br>(113.1 to 233.7)                     | 42.8<br>(37.2 to 48.6)                            | -5.3<br>(-9.0 to -1.4)                           |
| Skin and subcutaneous diseases                | 96,768.0<br>(93,544.9 to 99,409.4)                  | 250,682.9<br>(215,837.0 to 291,515.1)                        | 1,676.3<br>(1,110.9 to 2,502.8)               | 51.7<br>(50.6 to 52.7)                            | 0.6<br>(-0.1 to 1.3)                             |
| Dermatitis                                    | 10,646.1<br>(9,022.1 to 12,694.1)                   | 16,242.6<br>(12,148.9 to 21,188.6)                           | 339.3<br>(205.8 to 516.3)                     | 46.6<br>(44.5 to 48.7)                            | -2.7<br>(-4.1 to -1.4)                           |
| Psoriasis                                     | 4,531.1<br>(4,163.7 to 4,910.4)                     | 507.9<br>(439.2 to 584.0)                                    | 380.1<br>(274.6 to 497.4)                     | 54.2<br>(51.2 to 57.0)                            | 2.3<br>(0.3 to 4.1)                              |
| Cellulitis                                    | 153.3<br>(125.1 to 185.8)                           | 3,447.9<br>(2,886.7 to 4,162.4)                              | 8.4<br>(5.3 to 12.3)                          | 46.2<br>(37.6 to 54.6)                            | -3.0<br>(-8.8 to 2.6)                            |
| Pyoderma                                      | 1,390.8<br>(1,284.0 to 1,500.5)                     | 34,639.0<br>(31,249.2 to 38,049.4)                           | 7.7<br>(3.1 to 15.8)                          | 56.1<br>(53.0 to 59.3)                            | 3.6<br>(1.5 to 5.7)                              |
| Scabies                                       | 3,358.7<br>(2,374.8 to 4,713.1)                     | 10,173.5<br>(7,361.6 to 14,188.0)                            | 83.7<br>(43.5 to 141.4)                       | 51.0<br>(48.1 to 53.9)                            | 0.2<br>(-1.8 to 2.1)                             |
| Fungal skin diseases                          | 30,344.8<br>(22,431.5 to 39,618.5)                  | 108,678.1<br>(76,923.6 to 149,069.9)                         | 167.7<br>(64.1 to 366.1)                      | 51.0<br>(50.1 to 52.0)                            | 0.2<br>(-0.4 to 0.8)                             |
| Viral skin diseases                           | 5,552.4<br>(4,780.2 to 6,434.3)                     | 8,946.0<br>(7,738.1 to 10,276.8)                             | 163.8<br>(100.5 to 243.7)                     | 50.3<br>(47.8 to 52.8)                            | -0.3<br>(-1.9 to 1.3)                            |
| Acne vulgaris                                 | 3,285.6<br>(3,153.2 to 3,429.0)                     | 1,513.3<br>(1,457.2 to 1,578.3)                              | 80.4<br>(54.9 to 115.5)                       | 52.7<br>(48.1 to 57.5)                            | 1.3<br>(-1.8 to 4.5)                             |
| Alopecia areata                               | 687.5<br>(616.7 to 767.6)                           | 1,162.4<br>(1,043.3 to 1,286.3)                              | 21.8<br>(13.8 to 32.1)                        | 46.4<br>(41.5 to 51.5)                            | -2.9<br>(-6.2 to 0.5)                            |
| Pruritus                                      | 4,451.7<br>(3,129.8 to 6,288.9)                     | 3,418.2<br>(2,413.4 to 4,710.9)                              | 46.6<br>(20.7 to 92.2)                        | 53.9<br>(51.6 to 56.0)                            | 2.1<br>(0.6 to 3.5)                              |
| Urticaria                                     | 1,805.2<br>(1,260.2 to 2,490.2)                     | 3,160.7<br>(2,203.9 to 4,340.9)                              | 103.5<br>(59.2 to 167.3)                      | 51.1<br>(47.6 to 54.8)                            | 0.2<br>(-2.1 to 2.7)                             |
| Decubitus ulcer                               | 123.5<br>(90.8 to 162.5)                            | 449.7<br>(328.5 to 599.4)                                    | 20.6<br>(13.1 to 30.8)                        | 50.3<br>(42.3 to 58.2)                            | -0.3<br>(-5.6 to 5.0)                            |
| Other skin and subcutaneous diseases          | 46,676.7<br>(42,726.8 to 50,627.8)                  | 58,343.5<br>(52,617.3 to 64,295.2)                           | 252.8<br>(123.1 to 456.7)                     | 56.7<br>(55.6 to 57.9)                            | 3.9<br>(3.2 to 4.7)                              |
| Sense organ diseases                          | 190,254.0<br>(187,818.6 to 192,142.9)               | 40,311.3 <sup>†</sup><br>(36,475.8 to 44,186.2)              | 6,655.6<br>(4,507.8 to 9,506.8)               | 46.2<br>(43.8 to 48.2)                            | -3.0<br>(-4.6 to -1.7)                           |
| Glaucoma                                      | 821.7<br>(643.8 to 1,031.0)                         | --                                                           | 80.8<br>(51.2 to 119.5)                       | 54.5<br>(49.8 to 59.5)                            | 2.5<br>(-0.7 to 5.8)                             |
| Cataract                                      | 9,940.8<br>(7,725.8 to 12,484.9)                    | --                                                           | 665.2<br>(444.0 to 948.2)                     | 48.0<br>(44.3 to 51.9)                            | -1.8<br>(-4.3 to 0.7)                            |
| Macular degeneration                          | 1,064.4<br>(798.6 to 1,380.0)                       | --                                                           | 66.8<br>(43.6 to 97.2)                        | 55.9<br>(48.8 to 62.8)                            | 3.4<br>(-1.3 to 8.0)                             |
| Refraction and accommodation disorders        | 86,303.8<br>(79,232.9 to 92,573.4)                  | --                                                           | 1,399.1<br>(865.7 to 2,241.6)                 | 40.5<br>(37.6 to 42.8)                            | -6.8<br>(-8.8 to -5.3)                           |
| Age-related and other hearing loss            | 151,702.8<br>(139,765.2 to 162,110.6)               | --                                                           | 3,514.3<br>(2,297.2 to 5,129.6)               | 46.2<br>(42.1 to 49.6)                            | -3.0<br>(-5.7 to -0.8)                           |
| Other vision loss                             | 3,180.3<br>(2,430.0 to 4,082.2)                     | --                                                           | 241.9<br>(158.5 to 341.9)                     | 53.9<br>(49.9 to 57.9)                            | 2.1<br>(-0.6 to 4.7)                             |
| Other sense organ diseases                    | 21,676.4<br>(18,937.4 to 24,906.3)                  | 40,311.3<br>(36,475.8 to 44,186.2)                           | 687.5<br>(428.9 to 1,069.5)                   | 52.6<br>(51.0 to 54.2)                            | 1.2<br>(0.2 to 2.3)                              |
| Oral disorders                                | 174,759.6<br>(170,055.9 to 178,862.3)               | 371,602.5 <sup>†</sup><br>(297,782.0 to 447,556.8)           | 1,858.2<br>(1,137.7 to 2,908.3)               | 49.5<br>(48.6 to 50.4)                            | -0.8<br>(-1.4 to -0.2)                           |
| Caries of deciduous teeth                     | --                                                  | --                                                           | --                                            | --                                                | --                                               |
| Caries of permanent teeth                     | 108,999.9<br>(91,146.9 to 130,890.1)                | 359,993.1<br>(285,472.7 to 435,098.0)                        | 77.3<br>(34.3 to 149.2)                       | 45.0<br>(43.2 to 46.7)                            | -3.9<br>(-5.0 to -2.7)                           |
| Periodontal disease                           | 73,004.8<br>(56,067.6 to 88,347.3)                  | 7,509.5<br>(3,736.1 to 11,240.7)                             | 470.2<br>(183.5 to 1,011.4)                   | 49.5<br>(48.2 to 50.5)                            | -0.8<br>(-1.7 to -0.2)                           |
| Edentulism and severe tooth loss              | 39,459.9<br>(31,943.0 to 47,637.8)                  | 4,099.9<br>(2,637.2 to 5,707.2)                              | 1,097.8<br>(691.2 to 1,632.1)                 | 49.7<br>(48.3 to 50.9)                            | -0.7<br>(-1.6 to 0.1)                            |
| Other oral disorders                          | 7,461.3<br>(6,654.2 to 8,276.2)                     | --                                                           | 212.9<br>(130.0 to 323.8)                     | 50.7<br>(48.9 to 52.5)                            | -0.0<br>(-1.2 to 1.1)                            |
| <b>Injuries</b>                               | <b>121,910.0</b><br><b>(114,835.8 to 130,101.1)</b> | <b>27,515.5<sup>†</sup></b><br><b>(24,094.4 to 31,650.5)</b> | <b>4,400.3</b><br><b>(2,974.6 to 6,184.1)</b> | <b>58.5</b><br><b>(56.7 to 60.1)</b>              | <b>5.1</b><br><b>(3.9 to 6.2)</b>                |
| <b>Transport injuries</b>                     | <b>22,216.8</b><br><b>(20,688.2 to 23,904.0)</b>    | <b>2,870.6</b><br><b>(2,221.1 to 3,647.0)</b>                | <b>1,096.3</b><br><b>(737.8 to 1,565.9)</b>   | <b>63.3</b><br><b>(61.5 to 64.9)</b>              | <b>8.3</b><br><b>(7.1 to 9.4)</b>                |
| Road injuries                                 | 18,743.9<br>(17,254.8 to 20,272.4)                  | 2,570.0<br>(1,930.9 to 3,386.9)                              | 933.5<br>(628.7 to 1,332.6)                   | 66.6<br>(65.0 to 68.0)                            | 10.5<br>(9.5 to 11.5)                            |
| Pedestrian road injuries                      | 4,229.6<br>(3,691.2 to 4,882.5)                     | 514.7<br>(320.6 to 789.6)                                    | 215.9<br>(146.2 to 303.8)                     | 70.7<br>(68.3 to 72.8)                            | 13.2<br>(11.7 to 14.6)                           |
| Cyclist road injuries                         | 3,720.6<br>(3,133.1 to 4,344.9)                     | 635.3<br>(403.3 to 950.8)                                    | 175.7<br>(117.5 to 253.5)                     | 71.6<br>(70.0 to 73.0)                            | 13.8<br>(12.8 to 14.8)                           |
| Motorcyclist road injuries                    | 4,310.2<br>(3,705.3 to 5,082.3)                     | 336.2<br>(203.3 to 500.6)                                    | 210.2<br>(142.8 to 299.8)                     | 66.3<br>(64.6 to 67.8)                            | 10.3<br>(9.2 to 11.3)                            |
| Motor vehicle road injuries                   | 5,129.2<br>(4,197.8 to 5,980.4)                     | 818.7<br>(561.0 to 1,139.2)                                  | 267.9<br>(180.4 to 381.5)                     | 56.0<br>(54.1 to 57.7)                            | 3.5<br>(2.2 to 4.6)                              |
| Other road injuries                           | 1,354.4<br>(1,136.8 to 1,627.3)                     | 265.1<br>(144.0 to 431.6)                                    | 63.7<br>(42.3 to 91.2)                        | 92.7<br>(90.0 to 95.0)                            | 27.8<br>(26.1 to 29.4)                           |
| Other transport injuries                      | 3,472.8<br>(2,923.2 to 3,992.6)                     | 300.6<br>(206.5 to 419.3)                                    | 162.9<br>(111.0 to 229.1)                     | 46.6<br>(44.0 to 49.1)                            | -2.8<br>(-4.5 to -1.1)                           |
| <b>Unintentional injuries</b>                 | <b>90,530.5</b><br><b>(84,408.1 to 98,195.8)</b>    | <b>23,738.3</b><br><b>(20,468.5 to 27,822.3)</b>             | <b>3,000.6</b><br><b>(2,055.9 to 4,175.9)</b> | <b>56.8</b><br><b>(55.2 to 58.2)</b>              | <b>4.0</b><br><b>(2.9 to 4.9)</b>                |
| Falls                                         | 40,987.7<br>(36,514.3 to 46,342.8)                  | 12,206.4<br>(9,282.0 to 15,953.4)                            | 1,682.5<br>(1,173.4 to 2,314.9)               | 60.7<br>(58.9 to 62.2)                            | 6.6<br>(5.4 to 7.6)                              |
| Drowning                                      | 339.3<br>(297.2 to 381.3)                           | 27.5<br>(20.5 to 35.3)                                       | 16.2<br>(10.9 to 23.0)                        | 36.5<br>(33.2 to 39.8)                            | -9.4<br>(-11.7 to -7.3)                          |
| Fire, heat, and hot substances                | 7,588.7<br>(6,623.4 to 8,752.9)                     | 251.4<br>(171.8 to 355.0)                                    | 159.8<br>(101.5 to 244.6)                     | 52.1<br>(49.7 to 54.8)                            | 0.9<br>(-0.7 to 2.7)                             |
| Poisonings                                    | 238.1<br>(205.5 to 273.1)                           | 129.2<br>(75.9 to 206.8)                                     | 16.1<br>(10.6 to 23.3)                        | 59.8<br>(55.1 to 64.2)                            | 6.0<br>(2.9 to 8.9)                              |
| Exposure to mechanical forces                 | 16,784.7<br>(14,476.1 to 19,982.2)                  | 2,265.8<br>(1,655.6 to 3,013.9)                              | 365.0<br>(240.0 to 527.8)                     | 61.8<br>(60.3 to 63.0)                            | 7.3<br>(6.3 to 8.1)                              |
| Unintentional firearm injuries                | 584.0<br>(481.4 to 701.4)                           | 31.1<br>(15.7 to 57.3)                                       | 16.9<br>(11.0 to 24.5)                        | 55.0<br>(53.5 to 56.3)                            | 2.8<br>(1.8 to 3.7)                              |
| Unintentional suffocation                     | 563.7<br>(464.5 to 699.2)                           | 29.9<br>(14.9 to 54.4)                                       | 16.4<br>(10.4 to 24.2)                        | 59.5<br>(57.4 to 61.5)                            | 5.8<br>(4.4 to 7.1)                              |
| Other exposure to mechanical forces           | 15,637.0<br>(13,360.3 to 18,863.9)                  | 2,204.8<br>(1,611.9 to 2,925.2)                              | 331.8<br>(219.1 to 479.8)                     | 62.3<br>(60.7 to 63.5)                            | 7.7<br>(6.6 to 8.5)                              |

| Cause                                                                               | Prevalence in thousands (95% UI)        | Incidence in thousands (95% UI)      | YLDs in thousands (95% UI)        |                                                   |                                                  |
|-------------------------------------------------------------------------------------|-----------------------------------------|--------------------------------------|-----------------------------------|---------------------------------------------------|--------------------------------------------------|
|                                                                                     | 2016 counts                             | 2016 counts                          | 2016 counts                       | Percentage change in counts between 2006 and 2016 | Percentage change in rates between 2006 and 2016 |
| Adverse effects of medical treatment                                                | 164.8<br>(116.4 to 225.7)               | 2,154.7<br>(1,591.4 to 2,827.9)      | 22.0<br>(13.0 to 34.3)            | 31.8<br>(25.9 to 37.3)                            | -12.6<br>(-16.5 to -8.9)                         |
| Animal contact                                                                      | 3,896.7<br>(3,460.6 to 4,369.8)         | 2,260.0<br>(1,537.3 to 3,188.0)      | 92.0<br>(62.9 to 128.5)           | 31.1<br>(28.7 to 33.5)                            | -13.0<br>(-14.7 to -11.5)                        |
| Venomous animal contact                                                             | 1,700.1<br>(1,465.9 to 2,007.6)         | 1,089.3<br>(699.1 to 1,588.8)        | 58.4<br>(40.3 to 79.9)            | 32.8<br>(29.7 to 36.0)                            | -11.9<br>(-14.0 to -9.8)                         |
| Non-venomous animal contact                                                         | 2,196.6<br>(1,882.2 to 2,586.5)         | 1,170.7<br>(769.9 to 1,702.5)        | 33.6<br>(22.0 to 51.5)            | 28.3<br>(25.3 to 30.7)                            | -14.9<br>(-16.9 to -13.3)                        |
| Foreign body                                                                        | 3,297.7<br>(2,858.4 to 3,721.3)         | 1,181.1<br>(831.6 to 1,663.6)        | 111.7<br>(73.5 to 161.2)          | 50.9<br>(48.3 to 53.4)                            | 0.1<br>(-1.7 to 1.8)                             |
| Pulmonary aspiration and foreign body in airway                                     | 1,509.7<br>(1,229.1 to 1,835.5)         | 309.5<br>(219.7 to 433.3)            | 56.6<br>(37.1 to 82.2)            | 51.7<br>(48.6 to 54.8)                            | 0.7<br>(-1.4 to 2.7)                             |
| Foreign body in eyes                                                                | 185.7<br>(127.9 to 269.7)               | 611.6<br>(320.5 to 1,048.4)          | 11.3<br>(6.9 to 17.9)             | 55.1<br>(50.8 to 61.5)                            | 2.8<br>(0.0 to 7.1)                              |
| Foreign body in other body part                                                     | 1,602.3<br>(1,360.8 to 1,952.0)         | 260.0<br>(153.8 to 405.6)            | 43.8<br>(28.4 to 62.9)            | 48.9<br>(46.4 to 51.0)                            | -1.3<br>(-2.9 to 0.2)                            |
| Environmental heat and cold exposure                                                | 5,522.5<br>(4,859.4 to 6,328.7)         | 865.9<br>(560.8 to 1,240.2)          | 202.6<br>(136.8 to 286.0)         | 55.3<br>(52.2 to 58.3)                            | 3.0<br>(0.9 to 5.0)                              |
| Other unintentional injuries                                                        | 11,715.2<br>(9,698.2 to 14,099.6)       | 2,396.3<br>(1,549.1 to 3,498.5)      | 332.5<br>(219.7 to 480.4)         | 49.8<br>(47.9 to 51.6)                            | -0.6<br>(-1.9 to 0.6)                            |
| <b>Self-harm and interpersonal violence</b>                                         | <b>8,748.1<br/>(7,785.2 to 9,865.8)</b> | <b>887.0†<br/>(686.3 to 1,135.6)</b> | <b>220.2<br/>(146.1 to 312.0)</b> | <b>43.8<br/>(42.4 to 45.0)</b>                    | <b>-4.7<br/>(-5.5 to -3.8)</b>                   |
| Self-harm                                                                           | 1,096.9<br>(911.3 to 1,285.7)           | 302.4<br>(215.7 to 418.8)            | 43.2<br>(28.1 to 61.8)            | 33.0<br>(31.3 to 34.5)                            | -11.8<br>(-12.9 to -10.8)                        |
| Self-harm by firearm                                                                | 28.1<br>(24.2 to 32.2)                  | 3.7<br>(1.1 to 9.6)                  | 0.9<br>(0.6 to 1.3)               | 21.0<br>(18.7 to 23.5)                            | -19.7<br>(-21.3 to -18.1)                        |
| Self-harm by other specified means                                                  | 1,068.7<br>(884.1 to 1,255.4)           | 298.7<br>(211.9 to 410.6)            | 42.3<br>(27.5 to 60.5)            | 33.3<br>(31.5 to 34.7)                            | -11.6<br>(-12.8 to -10.6)                        |
| Interpersonal violence                                                              | 7,651.2<br>(6,708.8 to 8,826.6)         | 584.5†<br>(413.1 to 795.0)           | 176.9<br>(117.8 to 250.2)         | 46.6<br>(45.2 to 47.9)                            | -2.7<br>(-3.7 to -1.9)                           |
| Assault by firearm                                                                  | 244.1<br>(206.0 to 288.0)               | 15.3<br>(7.8 to 26.9)                | 7.9<br>(5.1 to 11.4)              | 41.2<br>(39.8 to 42.6)                            | -6.4<br>(-7.2 to -5.4)                           |
| Assault by sharp object                                                             | 1,210.3<br>(1,000.8 to 1,427.2)         | 89.3<br>(51.2 to 144.6)              | 28.9<br>(18.7 to 42.1)            | 42.0<br>(40.1 to 43.6)                            | -5.8<br>(-7.1 to -4.7)                           |
| Sexual violence                                                                     | 2,677.8<br>(1,928.6 to 3,652.9)         | --                                   | 17.8<br>(10.1 to 28.0)            | 38.7<br>(36.8 to 40.5)                            | -8.0<br>(-9.3 to -6.8)                           |
| Assault by other means                                                              | 3,519.0<br>(2,981.8 to 4,233.5)         | 479.9<br>(331.4 to 659.7)            | 122.4<br>(82.0 to 174.3)          | 49.4<br>(48.0 to 50.8)                            | -0.9<br>(-1.8 to 0.0)                            |
| <b>Forces of nature, conflict and terrorism, and executions and police conflict</b> | <b>3,092.5<br/>(2,068.9 to 4,350.6)</b> | <b>19.7†<br/>(13.0 to 27.1)</b>      | <b>83.2<br/>(26.1 to 189.4)</b>   | <b>114.9<br/>(98.1 to 141.7)</b>                  | <b>42.5<br/>(31.4 to 60.3)</b>                   |
| Forces of nature, conflict and terrorism, and state actor violence                  | 390.4<br>(226.2 to 603.8)               | 10.1<br>(5.6 to 16.0)                | 13.4<br>(3.3 to 33.7)             | 95.8<br>(80.3 to 105.6)                           | 29.9<br>(19.6 to 36.4)                           |
| Conflict and terrorism                                                              | 2,007.6<br>(1,200.4 to 3,147.9)         | --                                   | 57.7<br>(20.8 to 119.5)           | 108.6<br>(87.1 to 146.5)                          | 38.4<br>(24.1 to 63.5)                           |
| Executions and police conflict                                                      | 694.5<br>(176.5 to 1,106.5)             | 9.5<br>(4.9 to 14.2)                 | 14.8<br>(2.4 to 40.6)             | 159.0<br>(141.1 to 179.0)                         | 71.8<br>(60.0 to 85.0)                           |

We did not calculate incidence for certain NTDs and causes with only birth prevalence. Blank cells mean that no estimate is available.

† Incidence for aggregate causes represents the sum of the incidence of the causes below the aggregate.

‡ Incidence estimates for stroke represent first-ever stroke only.

^ Incidence of HIV/AIDS represents new infections of HIV only and does not include new infections of Tuberculosis in HIV positive cases.



SR Table 12: Global prevalence, incidence, and YLDs for 2016, percentage change of YLD counts and percentage change of YLD rates between 2006 and 2016 by cause, age 65-69 years.

| Cause                                                                                | Prevalence in thousands (95% UI)             | Incidence in thousands (95% UI)                     | YLDs in thousands (95% UI)                |                                                   |                                                  |
|--------------------------------------------------------------------------------------|----------------------------------------------|-----------------------------------------------------|-------------------------------------------|---------------------------------------------------|--------------------------------------------------|
|                                                                                      | 2016 counts                                  | 2016 counts                                         | 2016 counts                               | Percentage change in counts between 2006 and 2016 | Percentage change in rates between 2006 and 2016 |
| <b>All causes</b>                                                                    | <b>225,247.5</b><br>(225,219.7 to 225,273.7) | <b>1,336,423.4†</b><br>(1,197,016.9 to 1,509,562.7) | <b>46,206.8</b><br>(34,854.3 to 59,193.8) | <b>31.2</b><br>(30.6 to 31.9)                     | <b>-1.0</b><br>(-1.5 to -0.5)                    |
| <b>Communicable, maternal, neonatal, and nutritional disorders</b>                   | <b>146,704.6</b><br>(144,533.2 to 148,682.2) | <b>616,961.2†</b><br>(494,711.3 to 779,867.8)       | <b>2,058.9</b><br>(1,489.1 to 2,762.4)    | <b>18.7</b><br>(16.3 to 21.1)                     | <b>-10.4</b><br>(-12.2 to -8.6)                  |
| <b>HIV/AIDS and tuberculosis</b>                                                     | <b>75,219.1</b><br>(66,536.1 to 84,941.6)    | <b>378.0†</b><br>(294.5 to 474.7)                   | <b>246.2</b><br>(166.5 to 353.4)          | <b>14.0</b><br>(2.4 to 26.3)                      | <b>-14.0</b><br>(-22.8 to -4.7)                  |
| Tuberculosis                                                                         | 70,742.2<br>(58,452.1 to 84,384.1)           | 358.0†<br>(273.9 to 454.2)                          | 180.2<br>(114.5 to 266.7)                 | 14.8<br>(10.2 to 20.4)                            | -13.3<br>(-16.8 to -9.1)                         |
| Drug-susceptible tuberculosis                                                        | 602.7<br>(453.9 to 783.5)                    | 345.3<br>(263.5 to 438.4)                           | 173.4<br>(110.0 to 257.5)                 | 15.0<br>(10.4 to 20.6)                            | -13.2<br>(-16.7 to -9.0)                         |
| Multidrug-resistant tuberculosis without extensive drug resistance                   | 21.3<br>(16.0 to 27.6)                       | 11.8<br>(9.3 to 14.9)                               | 6.3<br>(4.0 to 9.3)                       | 6.8<br>(-9.0 to 24.8)                             | -19.4<br>(-31.3 to -5.8)                         |
| Extensively drug-resistant tuberculosis                                              | 1.4<br>(1.0 to 1.8)                          | 0.8<br>(0.6 to 1.0)                                 | 0.5<br>(0.3 to 0.7)                       | 211.9<br>(173.8 to 257.8)                         | 135.4<br>(106.6 to 170.0)                        |
| Latent tuberculosis infection                                                        | 70,116.8<br>(57,833.8 to 83,828.9)           | --                                                  | --                                        | --                                                | --                                               |
| HIV/AIDS                                                                             | 660.6<br>(567.7 to 782.2)                    | 20.0†<br>(16.3 to 24.2)                             | 66.0<br>(42.4 to 96.7)                    | 11.6<br>(-19.2 to 60.3)                           | -15.8<br>(-39.0 to 21.0)                         |
| Drug-susceptible HIV/AIDS - Tuberculosis                                             | 16.5<br>(11.3 to 23.4)                       | 18.3<br>(13.0 to 25.4)                              | 6.2<br>(3.6 to 9.8)                       | 12.5<br>(-0.0 to 23.9)                            | -15.1<br>(-24.5 to -6.5)                         |
| Multidrug-resistant HIV/AIDS - Tuberculosis without extensive drug resistance        | 0.6<br>(0.4 to 0.9)                          | 0.6<br>(0.4 to 0.8)                                 | 0.2<br>(0.1 to 0.4)                       | 24.6<br>(0.7 to 47.6)                             | -5.9<br>(-24.0 to 11.4)                          |
| Extensively drug-resistant HIV/AIDS - Tuberculosis                                   | < 0.05<br>(< 0.05 to < 0.1)                  | < 0.05<br>(< 0.05 to < 0.05)                        | < 0.05<br>(< 0.05 to < 0.05)              | 420.9<br>(337.3 to 516.4)                         | 293.2<br>(230.0 to 365.2)                        |
| HIV/AIDS resulting in other diseases                                                 | 643.4<br>(549.2 to 766.2)                    | 20.0<br>(16.3 to 24.2)                              | 59.6<br>(37.7 to 89.8)                    | 11.4<br>(-21.2 to 67.2)                           | -15.9<br>(-40.5 to 26.2)                         |
| <b>Diarrhoea, lower respiratory infections, and other common infectious diseases</b> | <b>10,714.9</b><br>(10,085.1 to 11,330.6)    | <b>593,896.0†</b><br>(472,138.9 to 756,150.6)       | <b>537.7</b><br>(381.4 to 732.5)          | <b>26.1</b><br>(24.6 to 27.5)                     | <b>-4.9</b><br>(-5.9 to -3.8)                    |
| Diarrhoeal diseases                                                                  | 2,345.2<br>(2,163.4 to 2,561.8)              | 162,013.0<br>(149,435.4 to 176,474.1)               | 246.6<br>(171.8 to 334.4)                 | 22.0<br>(19.9 to 24.1)                            | -7.9<br>(-9.5 to -6.4)                           |
| Intestinal infectious diseases                                                       | 10.8<br>(8.6 to 13.9)                        | 224.5†<br>(180.7 to 278.2)                          | 1.8<br>(1.1 to 2.7)                       | 7.2<br>(-12.4 to 30.3)                            | -19.1<br>(-33.9 to -1.7)                         |
| Typhoid fever                                                                        | 10.5<br>(8.2 to 13.7)                        | 165.9<br>(133.2 to 205.0)                           | 1.6<br>(1.0 to 2.4)                       | 7.7<br>(-13.5 to 33.9)                            | -18.7<br>(-34.7 to 1.1)                          |
| Paratyphoid fever                                                                    | 2.6<br>(2.0 to 3.2)                          | 58.6<br>(46.6 to 73.5)                              | 0.2<br>(0.1 to 0.3)                       | 6.9<br>(-11.1 to 28.7)                            | -19.4<br>(-32.9 to -2.8)                         |
| Other intestinal infectious diseases                                                 | --                                           | --                                                  | < 0.05<br>(< 0.05 to < 0.05)              | -14.8<br>(-30.3 to 3.6)                           | -35.7<br>(-47.4 to -21.8)                        |
| Lower respiratory infections                                                         | 464.9<br>(429.7 to 499.8)                    | 20,359.3<br>(18,550.6 to 22,223.8)                  | 26.7<br>(18.0 to 37.5)                    | 50.1<br>(44.2 to 56.7)                            | 13.3<br>(8.8 to 18.2)                            |
| Upper respiratory infections                                                         | 5,432.0<br>(3,850.3 to 7,323.8)              | 405,890.7<br>(283,314.3 to 566,629.9)               | 129.3<br>(73.0 to 224.6)                  | 28.9<br>(26.5 to 31.1)                            | -2.8<br>(-4.5 to -1.0)                           |
| Otitis media                                                                         | 1,404.2<br>(1,046.7 to 1,825.7)              | 2,435.7<br>(1,956.7 to 2,952.1)                     | 37.0<br>(22.2 to 59.6)                    | 18.8<br>(13.2 to 24.7)                            | -10.3<br>(-14.6 to -5.9)                         |
| Meningitis                                                                           | 338.6<br>(279.2 to 399.5)                    | 38.1<br>(27.0 to 50.6)                              | 22.6<br>(16.0 to 29.9)                    | 24.4<br>(19.7 to 29.5)                            | -6.1<br>(-9.7 to -2.3)                           |
| Pneumococcal meningitis                                                              | 147.2<br>(117.8 to 182.1)                    | 8.2<br>(5.1 to 12.3)                                | 9.8<br>(6.8 to 13.3)                      | 18.8<br>(12.8 to 25.8)                            | -10.3<br>(-14.9 to -5.1)                         |
| H influenzae type B meningitis                                                       | 33.8<br>(24.5 to 44.7)                       | 2.4<br>(1.4 to 3.8)                                 | 2.6<br>(1.8 to 3.5)                       | -3.7<br>(-14.5 to 8.6)                            | -27.3<br>(-35.5 to -18.1)                        |
| Meningococcal infection                                                              | 39.4<br>(27.5 to 52.6)                       | 7.3<br>(4.4 to 11.2)                                | 2.7<br>(1.8 to 3.8)                       | 26.1<br>(20.1 to 36.7)                            | -4.8<br>(-9.4 to 3.1)                            |
| Other meningitis                                                                     | 118.2<br>(85.9 to 152.4)                     | 20.1<br>(13.4 to 28.1)                              | 7.4<br>(5.1 to 10.1)                      | 48.0<br>(43.1 to 53.5)                            | 11.7<br>(8.0 to 15.8)                            |
| Encephalitis                                                                         | 645.2<br>(386.9 to 1,005.6)                  | 254.5<br>(222.1 to 289.7)                           | 50.1<br>(35.7 to 65.4)                    | 30.8<br>(24.8 to 37.8)                            | -1.3<br>(-5.8 to 4.0)                            |
| Diphtheria                                                                           | --                                           | --                                                  | --                                        | --                                                | --                                               |
| Whooping cough                                                                       | --                                           | --                                                  | --                                        | --                                                | --                                               |
| Tetanus                                                                              | 3.5<br>(3.4 to 3.5)                          | 2.7<br>(1.5 to 4.1)                                 | 0.1<br>(< 0.05 to 0.1)                    | -4.1<br>(-25.3 to 24.2)                           | -27.7<br>(-43.6 to -6.3)                         |
| Measles                                                                              | --                                           | --                                                  | --                                        | --                                                | --                                               |
| Varicella and herpes zoster                                                          | 447.5<br>(351.8 to 568.9)                    | 2,677.6<br>(2,180.8 to 3,217.3)                     | 23.6<br>(13.2 to 37.3)                    | 38.7<br>(31.9 to 45.6)                            | 4.7<br>(-0.5 to 9.9)                             |
| <b>Neglected tropical diseases and malaria</b>                                       | <b>44,585.6</b><br>(42,911.4 to 45,959.0)    | <b>9,368.6†</b><br>(7,047.3 to 11,714.1)            | <b>342.9</b><br>(238.3 to 471.3)          | <b>-0.1</b><br>(-6.7 to 7.0)                      | <b>-24.6</b><br>(-29.6 to -19.2)                 |
| Malaria                                                                              | 1,035.1<br>(888.7 to 1,173.7)                | 1,532.2<br>(1,126.8 to 1,984.2)                     | 9.8<br>(7.1 to 13.1)                      | -17.5<br>(-23.1 to -10.9)                         | -37.7<br>(-42.0 to -32.8)                        |
| Chagas disease                                                                       | 356.9<br>(303.3 to 418.0)                    | 2.7<br>(1.7 to 4.1)                                 | 5.1<br>(3.3 to 7.4)                       | 21.1<br>(14.0 to 28.1)                            | -8.6<br>(-14.0 to -3.3)                          |
| Leishmaniasis                                                                        | 194.7<br>(146.3 to 239.3)                    | 23.4<br>(17.5 to 30.6)                              | 10.0<br>(6.1 to 15.5)                     | 36.7<br>(29.8 to 44.6)                            | 3.2<br>(-2.0 to 9.2)                             |
| Visceral leishmaniasis                                                               | 1.9<br>(1.1 to 2.9)                          | 7.5<br>(4.4 to 11.8)                                | 0.1<br>(0.1 to 0.2)                       | -17.5<br>(-49.0 to 32.9)                          | -37.7<br>(-61.5 to 0.3)                          |
| Cutaneous and mucocutaneous leishmaniasis                                            | 164.8<br>(118.2 to 223.7)                    | 15.9<br>(11.2 to 21.7)                              | 9.8<br>(6.0 to 15.3)                      | 37.8<br>(30.7 to 46.4)                            | 4.0<br>(-1.3 to 10.5)                            |
| African trypanosomiasis                                                              | 0.2<br>(< 0.05 to 0.6)                       | 0.1<br>(< 0.05 to 0.5)                              | < 0.05<br>(< 0.05 to 0.2)                 | -71.4<br>(-95.7 to 71.1)                          | -78.4<br>(-96.8 to 29.1)                         |
| Schistosomiasis                                                                      | 4,645.9<br>(4,350.7 to 4,961.8)              | 1,132.3<br>(1,050.8 to 1,221.9)                     | 32.2<br>(15.9 to 60.7)                    | -28.2<br>(-30.6 to -25.4)                         | -45.9<br>(-47.6 to -43.7)                        |
| Cysticercosis                                                                        | 176.9<br>(126.7 to 246.0)                    | 26.2                                                | 11.2<br>(15.7 to 40.9)                    | 11.2<br>(4.0 to 18.3)                             | -16.1<br>(-21.5 to -10.7)                        |
| Cystic echinococcosis                                                                | 28.7<br>(14.6 to 63.9)                       | 5.6<br>(2.6 to 13.6)                                | 2.5<br>(1.1 to 6.1)                       | -37.7<br>(-76.7 to 63.9)                          | -53.0<br>(-82.4 to 23.7)                         |
| Lymphatic filariasis                                                                 | 704.3<br>(590.0 to 863.6)                    | 161.2<br>(90.8 to 251.7)                            | 29.0<br>(14.9 to 50.2)                    | -29.8<br>(-47.5 to -13.6)                         | -47.0<br>(-60.4 to -34.8)                        |
| Onchocerciasis                                                                       | 361.4<br>(248.4 to 534.3)                    | 63.8<br>(25.5 to 128.7)                             | 30.2<br>(17.0 to 51.8)                    | -19.1<br>(-34.9 to 1.0)                           | -39.0<br>(-50.9 to -23.8)                        |
| Trachoma                                                                             | 609.7<br>(381.7 to 930.3)                    | --                                                  | 42.3<br>(26.1 to 63.5)                    | -1.2<br>(-10.9 to 7.9)                            | -25.4<br>(-32.7 to -18.5)                        |
| Dengue                                                                               | 137.3<br>(74.8 to 232.4)                     | 2,294.4<br>(1,396.4 to 3,478.8)                     | 20.7<br>(9.4 to 38.4)                     | 102.4<br>(63.7 to 368.9)                          | 52.7<br>(23.5 to 253.9)                          |
| Yellow fever                                                                         | < 0.05<br>(< 0.05 to 0.1)                    | 1.1<br>(0.3 to 2.9)                                 | < 0.05<br>(< 0.05 to < 0.05)              | -21.2<br>(-49.7 to 24.1)                          | -40.5<br>(-62.0 to -6.4)                         |
| Rabies                                                                               | < 0.05<br>(< 0.05 to < 0.05)                 | 0.5<br>(0.2 to 0.7)                                 | < 0.05<br>(< 0.05 to < 0.05)              | -47.0<br>(-58.7 to -31.2)                         | -60.0<br>(-68.8 to -48.1)                        |
| Intestinal nematode infections                                                       | 37,349.6<br>(35,431.4 to 38,894.7)           | --                                                  | 60.9<br>(35.1 to 99.5)                    | -0.9<br>(-8.9 to 8.1)                             | -25.2<br>(-31.3 to -18.4)                        |
| Ascariasis                                                                           | 19,949.1<br>(17,577.3 to 22,790.6)           | --                                                  | 18.6<br>(10.1 to 31.2)                    | -16.8<br>(-28.9 to -3.2)                          | -37.2<br>(-46.4 to -27.0)                        |

| Cause                                                                   | Prevalence in thousands (95% UI)                    | Incidence in thousands (95% UI)                      | YLDs in thousands (95% UI)                       |                                                   |                                                  |
|-------------------------------------------------------------------------|-----------------------------------------------------|------------------------------------------------------|--------------------------------------------------|---------------------------------------------------|--------------------------------------------------|
|                                                                         | 2016 counts                                         | 2016 counts                                          | 2016 counts                                      | Percentage change in counts between 2006 and 2016 | Percentage change in rates between 2006 and 2016 |
| Trichuriasis                                                            | 10,242.8<br>(9,325.1 to 11,328.1)                   | --                                                   | 6.9<br>(3.8 to 11.6)                             | -6.7<br>(-20.6 to 8.6)                            | -29.6<br>(-40.0 to -18.0)                        |
| Hookworm disease                                                        | 11,031.6<br>(10,126.2 to 12,126.7)                  | --                                                   | 35.4<br>(21.0 to 57.4)                           | 11.7<br>(-0.2 to 26.5)                            | -15.7<br>(-24.7 to -4.5)                         |
| Food-borne trematodiasis                                                | 2,831.8<br>(2,470.5 to 3,197.8)                     | 3,968.9<br>(1,905.2 to 5,927.9)                      | 63.0<br>(29.8 to 112.6)                          | 39.5<br>(30.6 to 51.1)                            | 5.3<br>(-1.4 to 14.0)                            |
| Leprosy                                                                 | 51.3<br>(49.1 to 53.4)                              | 3.5<br>(3.2 to 3.7)                                  | 3.1<br>(2.1 to 4.2)                              | 8.5<br>(2.2 to 15.5)                              | -18.1<br>(-22.9 to -12.8)                        |
| Ebola virus disease                                                     | < 0.05<br>(< 0.05 to 0.1)                           | --                                                   | < 0.05<br>(0.0 to < 0.05)                        | --                                                | --                                               |
| Zika virus disease                                                      | 3.0<br>(1.7 to 5.6)                                 | 179.0<br>(100.4 to 341.5)                            | 0.1<br>(< 0.05 to 0.1)                           | --                                                | --                                               |
| Guinea worm disease                                                     | < 0.05<br>(< 0.05 to < 0.05)                        | < 0.05<br>(< 0.05 to < 0.05)                         | < 0.05<br>(< 0.05 to < 0.05)                     | -99.6<br>(-99.8 to -99.3)                         | -99.7<br>(-99.8 to -99.5)                        |
| Other neglected tropical diseases                                       | 517.4<br>(487.7 to 539.2)                           | --                                                   | 7.8<br>(5.0 to 11.3)                             | 31.0<br>(24.6 to 37.4)                            | -1.1<br>(-6.0 to 3.7)                            |
| <b>Maternal disorders</b>                                               | --                                                  | --                                                   | --                                               | --                                                | --                                               |
| Maternal haemorrhage                                                    | --                                                  | --                                                   | --                                               | --                                                | --                                               |
| Maternal sepsis and other pregnancy related infections                  | --                                                  | --                                                   | --                                               | --                                                | --                                               |
| Maternal hypertensive disorders                                         | --                                                  | --                                                   | --                                               | --                                                | --                                               |
| Maternal obstructed labour and uterine rupture                          | --                                                  | --                                                   | --                                               | --                                                | --                                               |
| Maternal abortion, miscarriage, and ectopic pregnancy                   | --                                                  | --                                                   | --                                               | --                                                | --                                               |
| Other maternal disorders                                                | --                                                  | --                                                   | --                                               | --                                                | --                                               |
| <b>Neonatal disorders</b>                                               | <b>1,390.9</b><br><b>(1,274.2 to 1,506.8)</b>       | --                                                   | <b>151.2</b><br><b>(107.7 to 207.9)</b>          | <b>52.5</b><br><b>(39.1 to 69.6)</b>              | <b>15.1</b><br><b>(5.0 to 28.0)</b>              |
| Neonatal preterm birth complications                                    | 1,200.6<br>(1,018.0 to 1,391.5)                     | --                                                   | 89.9<br>(64.2 to 123.2)                          | 53.5<br>(31.8 to 82.4)                            | 15.9<br>(-0.6 to 37.6)                           |
| Neonatal encephalopathy due to birth asphyxia and trauma                | 230.7<br>(165.4 to 320.5)                           | --                                                   | 24.3<br>(12.0 to 46.1)                           | 49.4<br>(37.9 to 65.4)                            | 12.8<br>(4.1 to 24.8)                            |
| Neonatal sepsis and other neonatal infections                           | 78.9<br>(32.7 to 194.1)                             | --                                                   | 27.8<br>(8.6 to 75.8)                            | 52.5<br>(39.7 to 76.2)                            | 15.1<br>(5.5 to 33.0)                            |
| Hemolytic disease and other neonatal jaundice                           | 26.6<br>(23.0 to 30.1)                              | --                                                   | 9.1<br>(6.9 to 11.5)                             | 51.1<br>(45.7 to 56.8)                            | 14.0<br>(9.9 to 18.3)                            |
| Other neonatal disorders                                                | --                                                  | --                                                   | --                                               | --                                                | --                                               |
| <b>Nutritional deficiencies</b>                                         | <b>33,233.8</b><br><b>(32,522.1 to 33,738.1)</b>    | <b>6,535.3†</b><br><b>(5,580.1 to 7,608.3)</b>       | <b>723.5</b><br><b>(486.5 to 1,028.1)</b>        | <b>19.9</b><br><b>(18.2 to 21.8)</b>              | <b>-9.5</b><br><b>(-10.8 to -8.1)</b>            |
| Protein-energy malnutrition                                             | --                                                  | --                                                   | --                                               | --                                                | --                                               |
| Iodine deficiency                                                       | 4,251.9<br>(3,828.7 to 4,724.6)                     | 11.2<br>(9.6 to 13.1)                                | 104.8<br>(71.9 to 145.0)                         | 13.3<br>(10.9 to 16.1)                            | -14.5<br>(-16.3 to -12.4)                        |
| Vitamin A deficiency                                                    | 6,116.1<br>(5,416.0 to 6,964.2)                     | 6,524.0<br>(5,569.1 to 7,597.6)                      | 3.9<br>(2.5 to 5.9)                              | 31.8<br>(21.8 to 42.0)                            | -0.5<br>(-8.1 to 7.2)                            |
| Iron-deficiency anaemia                                                 | 26,489.1<br>(24,604.3 to 27,879.0)                  | --                                                   | 614.8<br>(408.7 to 879.4)                        | 21.1<br>(19.0 to 23.2)                            | -8.6<br>(-10.2 to -7.0)                          |
| Other nutritional deficiencies                                          | --                                                  | --                                                   | --                                               | --                                                | --                                               |
| <b>Other communicable, maternal, neonatal, and nutritional diseases</b> | <b>63,543.9</b><br><b>(61,589.8 to 65,535.5)</b>    | <b>6,783.3</b><br><b>(5,197.5 to 8,747.3)</b>        | <b>57.5</b><br><b>(39.0 to 84.2)</b>             | <b>23.8</b><br><b>(11.3 to 36.4)</b>              | <b>-6.6</b><br><b>(-16.0 to 2.9)</b>             |
| Sexually transmitted diseases excluding HIV                             | 45,991.9<br>(42,920.6 to 50,423.8)                  | 2,693.7<br>(2,349.3 to 3,057.0)                      | 33.6<br>(22.5 to 50.3)                           | 31.8<br>(27.6 to 37.2)                            | -0.5<br>(-3.7 to 3.6)                            |
| Syphilis                                                                | 125.9<br>(107.6 to 147.9)                           | 5.1<br>(3.7 to 7.0)                                  | 16.5<br>(11.0 to 22.7)                           | 31.6<br>(24.0 to 41.3)                            | -0.7<br>(-6.4 to 6.7)                            |
| Chlamydial infection                                                    | 24.2<br>(17.3 to 34.0)                              | 51.2<br>(40.2 to 64.9)                               | 0.6<br>(0.4 to 0.8)                              | 30.1<br>(25.9 to 35.3)                            | -1.8<br>(-5.0 to 2.1)                            |
| Gonococcal infection                                                    | 19.3<br>(13.4 to 27.9)                              | 59.8<br>(42.6 to 83.7)                               | 0.2<br>(0.2 to 0.4)                              | 35.5<br>(28.2 to 42.2)                            | 2.2<br>(-3.2 to 7.3)                             |
| Trichomoniasis                                                          | 2,942.3<br>(2,489.1 to 3,404.0)                     | 2,297.3<br>(1,974.5 to 2,642.5)                      | 3.2<br>(1.3 to 6.8)                              | 34.2<br>(30.5 to 37.8)                            | 1.3<br>(-1.5 to 4.0)                             |
| Genital herpes                                                          | 43,207.9<br>(37,798.3 to 49,982.2)                  | --                                                   | 10.1<br>(3.0 to 23.2)                            | 30.6<br>(28.1 to 33.5)                            | -1.4<br>(-3.4 to 0.8)                            |
| Other sexually transmitted diseases                                     | 22.5<br>(17.1 to 28.8)                              | 280.3<br>(211.6 to 364.0)                            | 3.0<br>(1.9 to 4.2)                              | 34.8<br>(22.8 to 50.0)                            | 1.8<br>(-7.3 to 13.2)                            |
| Hepatitis                                                               | 23,252.2<br>(20,498.9 to 26,238.9)                  | 4,089.1<br>(2,545.3 to 5,957.1)                      | 9.9<br>(5.1 to 17.0)                             | 2.8<br>(-39.3 to 66.4)                            | -22.4<br>(-54.2 to 25.6)                         |
| Acute hepatitis A                                                       | 45.9<br>(10.2 to 98.5)                              | 596.8<br>(133.2 to 1,280.6)                          | 1.9<br>(0.4 to 4.4)                              | -4.0<br>(-80.2 to 279.0)                          | -27.6<br>(-85.0 to 186.1)                        |
| Hepatitis B                                                             | 15,287.6<br>(12,638.7 to 18,149.9)                  | 3,004.0<br>(1,671.3 to 4,706.9)                      | 7.2<br>(3.3 to 13.0)                             | 4.7<br>(-41.1 to 85.0)                            | -21.0<br>(-55.5 to 39.6)                         |
| Hepatitis C                                                             | 7,896.8<br>(7,063.1 to 8,755.7)                     | 204.0<br>(147.5 to 267.3)                            | 0.2<br>(0.1 to 0.4)                              | 2.1<br>(-3.5 to 8.4)                              | -22.9<br>(-27.1 to -18.2)                        |
| Acute hepatitis E                                                       | 21.9<br>(14.0 to 34.0)                              | 284.3<br>(181.6 to 442.1)                            | 0.7<br>(0.3 to 1.2)                              | 3.9<br>(-16.8 to 29.4)                            | -21.6<br>(-37.2 to -2.3)                         |
| Other infectious diseases                                               | 634.2<br>(593.8 to 662.5)                           | 0.5<br>(0.3 to 0.8)                                  | 14.0<br>(9.2 to 20.6)                            | 23.2<br>(19.3 to 27.7)                            | -7.0<br>(-10.0 to -3.6)                          |
| <b>Non-communicable diseases</b>                                        | <b>224,407.3</b><br><b>(224,335.4 to 224,464.6)</b> | <b>697,246.6†</b><br><b>(640,557.6 to 762,357.9)</b> | <b>40,494.1</b><br><b>(30,299.5 to 51,918.5)</b> | <b>31.6</b><br><b>(30.9 to 32.3)</b>              | <b>-0.7</b><br><b>(-1.2 to -0.2)</b>             |
| <b>Neoplasms</b>                                                        | <b>5,858.2</b><br><b>(5,780.7 to 5,942.8)</b>       | <b>2,317.1</b><br><b>(2,226.9 to 2,423.5)</b>        | <b>680.6</b><br><b>(505.3 to 877.2)</b>          | <b>36.7</b><br><b>(33.2 to 40.8)</b>              | <b>3.2</b><br><b>(0.6 to 6.3)</b>                |
| Lip and oral cavity cancer                                              | 167.7<br>(161.4 to 173.9)                           | 46.7<br>(45.0 to 48.5)                               | 17.2<br>(12.6 to 22.6)                           | 35.7<br>(27.3 to 44.9)                            | 2.4<br>(-3.9 to 9.4)                             |
| Nasopharynx cancer                                                      | 26.2<br>(24.7 to 28.0)                              | 7.8<br>(7.3 to 8.3)                                  | 3.2<br>(2.3 to 4.3)                              | 24.1<br>(12.1 to 36.8)                            | -6.4<br>(-15.4 to 3.3)                           |
| Other pharynx cancer                                                    | 67.5<br>(63.5 to 70.6)                              | 23.7<br>(22.1 to 24.9)                               | 8.0<br>(5.8 to 10.4)                             | 40.4<br>(27.2 to 53.2)                            | 6.0<br>(-4.0 to 15.6)                            |
| Oesophageal cancer                                                      | 90.8<br>(86.6 to 95.2)                              | 73.4<br>(70.5 to 76.5)                               | 18.3<br>(13.2 to 23.9)                           | 15.5<br>(5.1 to 26.7)                             | -12.8<br>(-20.7 to -4.4)                         |
| Stomach cancer                                                          | 321.0<br>(301.7 to 342.6)                           | 172.3<br>(162.8 to 182.7)                            | 44.6<br>(32.1 to 57.7)                           | 23.2<br>(13.7 to 33.4)                            | -7.0<br>(-14.2 to 0.7)                           |
| Colon and rectum cancer                                                 | 898.5<br>(864.5 to 952.9)                           | 244.4<br>(235.1 to 258.8)                            | 85.5<br>(62.8 to 109.9)                          | 37.7<br>(29.8 to 46.9)                            | 3.9<br>(-2.0 to 10.9)                            |
| Liver cancer                                                            | 129.3<br>(119.7 to 139.0)                           | 132.1<br>(123.9 to 140.1)                            | 29.6<br>(21.1 to 38.6)                           | 50.6<br>(38.6 to 63.0)                            | 13.7<br>(4.6 to 23.0)                            |
| Liver cancer due to hepatitis B                                         | 69.5<br>(51.7 to 83.5)                              | 52.0<br>(39.1 to 62.3)                               | 11.5<br>(7.3 to 15.8)                            | 53.4<br>(36.8 to 72.4)                            | 15.8<br>(3.3 to 30.1)                            |

| Cause                                              | Prevalence in thousands (95% UI)                 | Incidence in thousands (95% UI)                | YLDs in thousands (95% UI)                    |                                                   |                                                  |
|----------------------------------------------------|--------------------------------------------------|------------------------------------------------|-----------------------------------------------|---------------------------------------------------|--------------------------------------------------|
|                                                    | 2016 counts                                      | 2016 counts                                    | 2016 counts                                   | Percentage change in counts between 2006 and 2016 | Percentage change in rates between 2006 and 2016 |
| Liver cancer due to hepatitis C                    | 35.1<br>(29.9 to 40.8)                           | 26.3<br>(22.4 to 30.6)                         | 6.0<br>(4.1 to 8.2)                           | 40.7<br>(30.7 to 51.2)                            | 6.2<br>(-1.4 to 14.2)                            |
| Liver cancer due to alcohol use                    | 29.7<br>(23.4 to 36.1)                           | 24.2<br>(19.2 to 29.5)                         | 5.5<br>(3.6 to 7.7)                           | 49.4<br>(33.6 to 69.0)                            | 12.8<br>(0.9 to 27.6)                            |
| Liver cancer due to other causes                   | 40.1<br>(32.8 to 49.7)                           | 29.6<br>(24.5 to 36.1)                         | 6.6<br>(4.4 to 9.1)                           | 56.6<br>(35.2 to 79.5)                            | 18.2<br>(2.0 to 35.5)                            |
| Gallbladder and biliary tract cancer               | 21.5<br>(19.2 to 23.2)                           | 24.2<br>(21.9 to 26.0)                         | 5.6<br>(3.9 to 7.5)                           | 20.3<br>(13.0 to 28.2)                            | -9.2<br>(-14.7 to -3.3)                          |
| Pancreatic cancer                                  | 50.5<br>(48.2 to 52.3)                           | 59.9<br>(57.7 to 61.5)                         | 12.6<br>(8.8 to 16.7)                         | 35.4<br>(27.7 to 43.0)                            | 2.2<br>(-3.6 to 7.9)                             |
| Larynx cancer                                      | 100.2<br>(97.1 to 103.8)                         | 29.7<br>(28.8 to 30.7)                         | 11.8<br>(8.6 to 15.5)                         | 25.9<br>(17.3 to 35.6)                            | -5.0<br>(-11.5 to 2.3)                           |
| Tracheal, bronchus, and lung cancer                | 452.8<br>(432.0 to 473.0)                        | 329.8<br>(317.5 to 343.0)                      | 77.7<br>(57.0 to 98.7)                        | 36.7<br>(28.6 to 44.8)                            | 3.1<br>(-2.9 to 9.3)                             |
| Malignant skin melanoma                            | 153.7<br>(129.0 to 169.2)                        | 32.0<br>(27.1 to 35.2)                         | 10.2<br>(7.1 to 14.1)                         | 55.4<br>(43.3 to 67.5)                            | 17.3<br>(8.2 to 26.4)                            |
| Non-melanoma skin cancer                           | 121.2<br>(97.3 to 157.6)                         | 204.8<br>(137.6 to 290.9)                      | 4.4<br>(2.2 to 7.8)                           | 12.4<br>(-0.6 to 29.2)                            | -15.2<br>(-25.0 to -2.5)                         |
| Non-melanoma skin cancer (squamous-cell carcinoma) | 97.0<br>(54.8 to 150.2)                          | 91.7<br>(53.0 to 142.2)                        | 4.3<br>(2.1 to 7.7)                           | 11.8<br>(-1.4 to 29.1)                            | -15.6<br>(-25.6 to -2.6)                         |
| Non-melanoma skin cancer (basal-cell carcinoma)    | 13.1<br>(6.4 to 24.5)                            | 113.1<br>(62.2 to 183.5)                       | 0.1<br>(< 0.05 to 0.3)                        | 34.0<br>(16.0 to 49.5)                            | 1.1<br>(-12.5 to 12.8)                           |
| Breast cancer                                      | 862.2<br>(819.4 to 920.9)                        | 179.3<br>(170.2 to 191.5)                      | 78.9<br>(56.8 to 105.3)                       | 34.7<br>(26.6 to 43.3)                            | 1.7<br>(-4.5 to 8.2)                             |
| Cervical cancer                                    | 133.6<br>(107.2 to 146.7)                        | 36.0<br>(29.4 to 39.1)                         | 12.9<br>(9.0 to 17.0)                         | 14.4<br>(6.0 to 26.9)                             | -13.7<br>(-20.0 to -4.2)                         |
| Uterine cancer                                     | 264.1<br>(247.4 to 287.5)                        | 56.3<br>(52.7 to 61.3)                         | 19.9<br>(14.2 to 26.7)                        | 45.4<br>(31.0 to 62.3)                            | 9.7<br>(-1.1 to 22.5)                            |
| Ovarian cancer                                     | 79.7<br>(74.4 to 83.7)                           | 26.4<br>(24.8 to 27.6)                         | 12.0<br>(8.6 to 15.6)                         | 26.2<br>(12.9 to 40.3)                            | -4.8<br>(-14.8 to 5.9)                           |
| Prostate cancer                                    | 1,112.4<br>(984.9 to 1,312.8)                    | 279.7<br>(251.9 to 323.1)                      | 99.1<br>(69.9 to 132.4)                       | 41.9<br>(31.5 to 52.7)                            | 7.1<br>(-0.7 to 15.2)                            |
| Testicular cancer                                  | 6.4<br>(5.9 to 6.8)                              | 1.3<br>(1.2 to 1.4)                            | 0.5<br>(0.4 to 0.7)                           | 49.2<br>(31.7 to 69.6)                            | 12.6<br>(-0.6 to 28.0)                           |
| Kidney cancer                                      | 168.2<br>(158.8 to 175.8)                        | 45.6<br>(43.4 to 47.5)                         | 14.9<br>(10.8 to 19.7)                        | 32.7<br>(24.0 to 41.7)                            | 0.2<br>(-6.4 to 7.0)                             |
| Bladder cancer                                     | 249.7<br>(240.2 to 260.3)                        | 61.3<br>(58.9 to 63.8)                         | 23.4<br>(17.1 to 30.9)                        | 31.4<br>(23.1 to 39.8)                            | -0.8<br>(-7.1 to 5.5)                            |
| Brain and nervous system cancer                    | 67.6<br>(58.5 to 72.4)                           | 30.6<br>(26.8 to 32.8)                         | 9.7<br>(6.8 to 12.9)                          | 45.7<br>(37.6 to 54.5)                            | 10.0<br>(3.9 to 16.6)                            |
| Thyroid cancer                                     | 105.9<br>(100.2 to 113.9)                        | 20.6<br>(19.6 to 22.2)                         | 7.0<br>(4.9 to 9.5)                           | 51.0<br>(39.5 to 64.2)                            | 14.0<br>(5.3 to 23.9)                            |
| Mesothelioma                                       | 7.2<br>(6.7 to 7.7)                              | 4.9<br>(4.5 to 5.2)                            | 1.6<br>(1.1 to 2.1)                           | 31.1<br>(21.7 to 39.7)                            | -1.1<br>(-8.1 to 5.4)                            |
| Hodgkin lymphoma                                   | 16.2<br>(14.3 to 18.1)                           | 4.3<br>(3.8 to 4.9)                            | 1.8<br>(1.2 to 2.4)                           | 19.6<br>(11.3 to 28.0)                            | -9.7<br>(-16.0 to -3.4)                          |
| Non-Hodgkin's lymphoma                             | 194.8<br>(178.2 to 210.3)                        | 54.1<br>(49.4 to 58.1)                         | 17.2<br>(12.4 to 22.9)                        | 56.2<br>(46.4 to 64.9)                            | 17.9<br>(10.5 to 24.5)                           |
| Multiple myeloma                                   | 50.7<br>(42.8 to 59.6)                           | 20.2<br>(17.5 to 23.7)                         | 10.5<br>(7.3 to 13.9)                         | 48.4<br>(35.5 to 62.3)                            | 12.0<br>(2.2 to 22.5)                            |
| Leukaemia                                          | 160.4<br>(145.7 to 170.3)                        | 45.7<br>(41.2 to 48.2)                         | 21.7<br>(15.6 to 28.6)                        | 45.0<br>(36.4 to 55.7)                            | 9.4<br>(3.0 to 17.5)                             |
| Acute lymphoid leukaemia                           | 12.6<br>(10.7 to 13.5)                           | 3.8<br>(3.2 to 4.0)                            | 1.7<br>(1.2 to 2.4)                           | 61.1<br>(45.0 to 73.0)                            | 21.6<br>(9.4 to 30.5)                            |
| Chronic lymphoid leukaemia                         | 64.8<br>(59.5 to 71.0)                           | 14.8<br>(13.6 to 16.2)                         | 8.2<br>(5.9 to 10.8)                          | 42.8<br>(29.6 to 57.6)                            | 7.7<br>(-2.2 to 18.9)                            |
| Acute myeloid leukaemia                            | 13.3<br>(11.3 to 14.3)                           | 10.2<br>(8.6 to 10.9)                          | 2.8<br>(1.9 to 3.8)                           | 53.2<br>(45.0 to 60.5)                            | 15.6<br>(9.4 to 21.1)                            |
| Chronic myeloid leukaemia                          | 7.7<br>(6.9 to 8.3)                              | 2.8<br>(2.5 to 3.0)                            | 1.0<br>(0.7 to 1.4)                           | 11.0<br>(3.6 to 18.1)                             | -16.2<br>(-21.8 to -10.8)                        |
| Other leukaemia                                    | 62.0<br>(51.8 to 68.2)                           | 14.2<br>(11.9 to 15.6)                         | 7.9<br>(5.6 to 10.5)                          | 47.0<br>(33.0 to 62.1)                            | 10.9<br>(0.4 to 22.4)                            |
| Other neoplasms                                    | 239.8<br>(213.6 to 253.1)                        | 70.2<br>(62.7 to 73.7)                         | 20.7<br>(14.8 to 27.6)                        | 58.8<br>(47.7 to 68.7)                            | 19.8<br>(11.5 to 27.3)                           |
| <b>Cardiovascular diseases</b>                     | <b>58,074.6</b><br><b>(56,877.5 to 59,390.5)</b> | <b>6,466.6†</b><br><b>(5,741.9 to 7,265.0)</b> | <b>4,082.6</b><br><b>(2,978.9 to 5,318.6)</b> | <b>35.1</b><br><b>(30.7 to 39.2)</b>              | <b>1.9</b><br><b>(-1.4 to 5.1)</b>               |
| Rheumatic heart disease                            | 635.8<br>(572.3 to 701.5)                        | 15.5<br>(12.5 to 19.0)                         | 38.0<br>(25.6 to 52.3)                        | 25.4<br>(20.5 to 30.4)                            | -5.3<br>(-9.1 to -1.6)                           |
| Ischaemic heart disease                            | 20,711.6<br>(19,289.7 to 22,131.8)               | 2,247.7<br>(1,899.7 to 2,670.8)                | 859.5<br>(597.8 to 1,165.1)                   | 28.8<br>(27.5 to 30.2)                            | -2.8<br>(-3.8 to -1.8)                           |
| Cerebrovascular disease                            | 10,895.5<br>(10,498.2 to 11,332.3)               | 1,707.3†<br>(1,407.2 to 2,017.0)               | 1,932.4<br>(1,362.3 to 2,493.3)               | 40.7<br>(31.3 to 49.2)                            | 6.2<br>(-0.9 to 12.6)                            |
| Ischaemic stroke                                   | 9,280.1<br>(8,011.1 to 10,622.6)                 | 1,209.8†<br>(936.9 to 1,507.3)                 | 1,593.0<br>(1,109.4 to 2,079.7)               | 41.8<br>(30.4 to 51.9)                            | 7.0<br>(-1.6 to 14.6)                            |
| Hemorrhagic stroke                                 | 1,971.6<br>(1,664.9 to 2,333.5)                  | 497.5†<br>(390.2 to 612.1)                     | 339.4<br>(237.8 to 452.1)                     | 35.8<br>(23.8 to 47.3)                            | 2.5<br>(-6.6 to 11.2)                            |
| Hypertensive heart disease                         | 2,142.6<br>(1,681.2 to 2,682.4)                  | --                                             | 173.2<br>(112.7 to 248.4)                     | 31.2<br>(28.2 to 34.3)                            | -1.0<br>(-3.2 to 1.3)                            |
| Cardiomyopathy and myocarditis                     | 591.1<br>(535.1 to 641.7)                        | 222.6†<br>(168.7 to 279.4)                     | 48.2<br>(31.6 to 69.7)                        | 26.5<br>(21.4 to 31.9)                            | -4.5<br>(-8.4 to -0.4)                           |
| Myocarditis                                        | 95.9<br>(79.6 to 113.7)                          | 222.6<br>(168.7 to 279.4)                      | 6.1<br>(4.0 to 8.8)                           | 31.3<br>(24.1 to 38.0)                            | -0.9<br>(-6.3 to 4.1)                            |
| Alcoholic cardiomyopathy                           | 155.6<br>(119.4 to 199.0)                        | --                                             | 12.7<br>(8.2 to 18.6)                         | 16.8<br>(6.4 to 28.7)                             | -11.8<br>(-19.7 to -2.9)                         |
| Other cardiomyopathy                               | 361.7<br>(275.7 to 462.7)                        | --                                             | 29.4<br>(19.1 to 43.1)                        | 30.1<br>(24.6 to 35.5)                            | -1.8<br>(-6.0 to 2.2)                            |
| Atrial fibrillation and flutter                    | 6,198.9<br>(5,271.2 to 7,317.3)                  | 676.1<br>(492.2 to 921.0)                      | 490.6<br>(319.7 to 693.4)                     | 35.8<br>(34.0 to 37.6)                            | 2.5<br>(1.2 to 3.8)                              |
| Peripheral vascular disease                        | 16,869.3<br>(14,053.1 to 20,326.0)               | 1,506.2<br>(1,056.2 to 2,073.3)                | 92.9<br>(41.6 to 173.2)                       | 24.2<br>(22.4 to 26.4)                            | -6.2<br>(-7.7 to -4.6)                           |
| Endocarditis                                       | 41.9<br>(32.9 to 52.1)                           | 91.1<br>(69.5 to 116.5)                        | 3.4<br>(2.2 to 5.3)                           | 30.6<br>(21.1 to 40.4)                            | -1.4<br>(-8.6 to 6.0)                            |
| Other cardiovascular and circulatory diseases      | 8,646.4<br>(6,522.9 to 11,095.1)                 | --                                             | 444.5<br>(277.9 to 685.8)                     | 29.5<br>(26.3 to 32.8)                            | -2.2<br>(-4.7 to 0.3)                            |
| <b>Chronic respiratory diseases</b>                | <b>44,039.9</b><br><b>(43,221.6 to 44,773.0)</b> | <b>6,096.4†</b><br><b>(5,452.6 to 6,805.5)</b> | <b>2,698.2</b><br><b>(2,271.8 to 3,090.1)</b> | <b>33.9</b><br><b>(30.7 to 37.0)</b>              | <b>1.0</b><br><b>(-1.4 to 3.4)</b>               |
| Chronic obstructive pulmonary disease              | 31,875.5<br>(30,008.7 to 33,653.1)               | 2,111.2<br>(1,780.9 to 2,444.6)                | 2,019.2<br>(1,760.5 to 2,257.2)               | 33.3<br>(29.2 to 37.4)                            | 0.6<br>(-2.5 to 3.7)                             |
| Pneumoconiosis                                     | 210.4<br>(194.2 to 227.7)                        | 13.2<br>(11.0 to 15.3)                         | 30.2<br>(20.7 to 41.9)                        | 35.4<br>(27.3 to 43.8)                            | 2.1<br>(-3.9 to 8.5)                             |
| Silicosis                                          | 93.0<br>(82.2 to 105.4)                          | 6.7<br>(4.8 to 8.6)                            | 13.2<br>(8.8 to 18.7)                         | 33.2<br>(19.9 to 46.1)                            | 0.5<br>(-9.5 to 10.3)                            |

| Cause                                                          | Prevalence in thousands (95% UI)           | Incidence in thousands (95% UI)             | YLDs in thousands (95% UI)              |                                                   |                                                  |
|----------------------------------------------------------------|--------------------------------------------|---------------------------------------------|-----------------------------------------|---------------------------------------------------|--------------------------------------------------|
|                                                                | 2016 counts                                | 2016 counts                                 | 2016 counts                             | Percentage change in counts between 2006 and 2016 | Percentage change in rates between 2006 and 2016 |
| Asbestos                                                       | 24.1<br>(20.8 to 27.7)                     | 2.4<br>(2.1 to 2.8)                         | 3.6<br>(2.4 to 5.1)                     | 38.0<br>(29.8 to 47.4)                            | 4.2<br>(-2.0 to 11.2)                            |
| Coal workers pneumoconiosis                                    | 54.2<br>(46.5 to 62.8)                     | 1.7<br>(1.3 to 2.1)                         | 7.7<br>(5.0 to 11.0)                    | 38.2<br>(20.5 to 58.1)                            | 4.3<br>(-9.0 to 19.3)                            |
| Other pneumoconiosis                                           | 39.1<br>(32.3 to 46.5)                     | 2.5<br>(1.8 to 3.5)                         | 5.7<br>(3.7 to 8.1)                     | 35.1<br>(19.7 to 52.7)                            | 1.9<br>(-9.7 to 15.2)                            |
| Asthma                                                         | 15,594.6<br>(14,036.2 to 17,366.2)         | 3,920.0<br>(3,346.5 to 4,579.6)             | 578.3<br>(385.4 to 830.9)               | 34.3<br>(31.6 to 37.1)                            | 1.3<br>(-0.7 to 3.5)                             |
| Interstitial lung disease and pulmonary sarcoidosis            | 484.3<br>(406.7 to 575.8)                  | 52.0<br>(37.2 to 67.9)                      | 50.5<br>(32.7 to 74.3)                  | 37.4<br>(31.4 to 43.7)                            | 3.7<br>(-0.8 to 8.4)                             |
| Other chronic respiratory diseases                             | --                                         | --                                          | 20.2<br>(17.5 to 22.6)                  | 68.8<br>(63.7 to 73.8)                            | 27.4<br>(23.6 to 31.2)                           |
| <b>Cirrhosis and other chronic liver diseases</b>              | <b>3,432.4<br/>(3,232.2 to 3,642.7)</b>    | <b>146.2<br/>(124.0 to 168.5)</b>           | <b>109.8<br/>(74.5 to 151.8)</b>        | <b>33.1<br/>(28.4 to 37.6)</b>                    | <b>0.5<br/>(-3.1 to 3.8)</b>                     |
| Cirrhosis and other chronic liver diseases due to hepatitis B  | 984.7<br>(849.1 to 1,137.5)                | 44.4<br>(35.1 to 54.9)                      | 34.4<br>(22.8 to 48.5)                  | 34.1<br>(27.7 to 40.9)                            | 1.2<br>(-3.6 to 6.4)                             |
| Cirrhosis and other chronic liver diseases due to hepatitis C  | 877.4<br>(751.1 to 1,013.3)                | 38.4<br>(30.4 to 47.1)                      | 27.2<br>(18.0 to 38.8)                  | 33.7<br>(26.7 to 40.7)                            | 0.9<br>(-4.3 to 6.2)                             |
| Cirrhosis and other chronic liver diseases due to alcohol use  | 958.7<br>(817.6 to 1,098.2)                | 39.0<br>(31.2 to 47.7)                      | 29.4<br>(18.9 to 41.6)                  | 31.1<br>(23.9 to 38.2)                            | -1.1<br>(-6.5 to 4.3)                            |
| Cirrhosis and other chronic liver diseases due to other causes | 611.6<br>(458.8 to 782.5)                  | 24.4<br>(17.8 to 31.9)                      | 18.9<br>(11.4 to 28.0)                  | 33.7<br>(25.3 to 43.1)                            | 0.9<br>(-5.4 to 8.0)                             |
| <b>Digestive diseases</b>                                      | <b>22,332.7<br/>(21,182.7 to 23,291.0)</b> | <b>18,151.9†<br/>(15,992.4 to 20,448.8)</b> | <b>578.2<br/>(407.2 to 795.5)</b>       | <b>46.1<br/>(40.6 to 51.9)</b>                    | <b>10.2<br/>(6.1 to 14.6)</b>                    |
| Peptic ulcer disease                                           | 6,017.2<br>(4,964.1 to 7,215.6)            | 686.5<br>(528.7 to 844.9)                   | 103.8<br>(64.6 to 158.8)                | 51.4<br>(39.9 to 63.0)                            | 14.2<br>(5.6 to 23.0)                            |
| Gastritis and duodenitis                                       | 12,239.0<br>(9,365.2 to 15,480.9)          | 7,226.9<br>(5,824.2 to 8,892.5)             | 143.9<br>(90.0 to 212.9)                | 56.9<br>(48.1 to 65.4)                            | 18.4<br>(11.8 to 24.8)                           |
| Appendicitis                                                   | 21.2<br>(17.2 to 25.1)                     | 571.8<br>(465.9 to 679.3)                   | 6.2<br>(4.0 to 8.9)                     | 33.4<br>(22.0 to 45.9)                            | 0.6<br>(-7.9 to 10.1)                            |
| Paralytic ileus and intestinal obstruction                     | 12.1<br>(9.5 to 14.8)                      | 339.5<br>(267.8 to 413.0)                   | 3.9<br>(2.4 to 5.6)                     | 46.6<br>(39.6 to 54.4)                            | 10.6<br>(5.3 to 16.5)                            |
| Inguinal, femoral, and abdominal hernia                        | 3,459.7<br>(2,574.5 to 4,505.8)            | 3,827.7<br>(2,819.8 to 5,104.0)             | 164.5<br>(100.4 to 247.0)               | 29.6<br>(23.6 to 35.8)                            | -2.2<br>(-6.7 to 2.5)                            |
| Inflammatory bowel disease                                     | 578.2<br>(499.9 to 668.3)                  | 123.9<br>(95.9 to 158.0)                    | 80.0<br>(53.3 to 111.6)                 | 54.9<br>(47.5 to 62.3)                            | 16.9<br>(11.3 to 22.5)                           |
| Vascular intestinal disorders                                  | 10.1<br>(7.7 to 13.1)                      | 55.7<br>(41.5 to 73.0)                      | 3.1<br>(1.9 to 4.6)                     | 38.5<br>(20.4 to 55.4)                            | 4.5<br>(-9.1 to 17.3)                            |
| Gallbladder and biliary diseases                               | 1,315.7<br>(1,016.5 to 1,689.5)            | 4,837.6<br>(3,598.3 to 6,265.0)             | 20.2<br>(12.7 to 29.5)                  | 42.1<br>(30.4 to 54.2)                            | 7.2<br>(-1.6 to 16.4)                            |
| Pancreatitis                                                   | 54.2<br>(42.5 to 68.0)                     | 482.2<br>(378.6 to 606.4)                   | 6.6<br>(4.1 to 10.1)                    | 54.4<br>(36.5 to 72.2)                            | 16.5<br>(3.0 to 30.0)                            |
| Other digestive diseases                                       | --                                         | --                                          | 45.9<br>(32.3 to 63.1)                  | 58.9<br>(53.0 to 65.2)                            | 19.9<br>(15.4 to 24.7)                           |
| <b>Neurological disorders</b>                                  | <b>69,485.6<br/>(64,248.0 to 74,783.2)</b> | <b>22,482.2<br/>(15,014.5 to 32,519.6)</b>  | <b>2,292.6<br/>(1,586.8 to 3,052.2)</b> | <b>31.7<br/>(29.6 to 33.8)</b>                    | <b>-0.6<br/>(-2.2 to 1.0)</b>                    |
| Alzheimer's disease and other dementias                        | 3,942.4<br>(3,038.8 to 5,058.7)            | 666.1<br>(431.8 to 946.7)                   | 476.4<br>(313.1 to 698.1)               | 36.1<br>(33.9 to 38.0)                            | 2.7<br>(1.1 to 4.2)                              |
| Parkinson's disease                                            | 826.8<br>(617.6 to 1,069.2)                | 100.1<br>(58.3 to 152.7)                    | 98.0<br>(61.8 to 144.9)                 | 38.9<br>(34.1 to 43.7)                            | 4.8<br>(1.2 to 8.4)                              |
| Epilepsy                                                       | 846.3<br>(688.4 to 1,024.8)                | 63.7<br>(45.5 to 86.1)                      | 234.0<br>(159.0 to 326.5)               | 27.3<br>(13.3 to 43.3)                            | -4.0<br>(-14.5 to 8.1)                           |
| Multiple sclerosis                                             | 140.2<br>(128.4 to 152.8)                  | 0.8<br>(0.6 to 1.1)                         | 35.5<br>(24.9 to 46.2)                  | 45.8<br>(36.5 to 55.4)                            | 10.1<br>(3.0 to 17.3)                            |
| Motor neuron disease                                           | 29.7<br>(24.1 to 36.3)                     | 7.7<br>(6.0 to 9.7)                         | 6.3<br>(4.3 to 8.7)                     | 44.2<br>(40.4 to 48.2)                            | 8.9<br>(6.0 to 11.9)                             |
| Migraine                                                       | 25,427.6<br>(23,537.8 to 27,385.1)         | 1,440.0<br>(1,225.4 to 1,675.4)             | 1,169.3<br>(778.3 to 1,621.6)           | 29.8<br>(28.4 to 31.4)                            | -2.0<br>(-3.1 to -0.9)                           |
| Tension-type headache                                          | 47,272.8<br>(35,059.2 to 64,543.3)         | 20,201.1<br>(12,703.2 to 30,306.5)          | 235.2<br>(148.0 to 353.5)               | 30.4<br>(28.0 to 33.3)                            | -1.6<br>(-3.4 to 0.6)                            |
| Other neurological disorders                                   | 1.3<br>(0.7 to 2.2)                        | 2.7<br>(1.5 to 4.0)                         | 38.1<br>(26.6 to 50.6)                  | 39.7<br>(34.9 to 44.8)                            | 5.5<br>(1.8 to 9.3)                              |
| <b>Mental and substance use disorders</b>                      | <b>37,528.6<br/>(36,950.4 to 38,126.5)</b> | <b>16,118.4†<br/>(14,359.5 to 18,123.7)</b> | <b>5,293.1<br/>(3,881.5 to 6,858.6)</b> | <b>29.2<br/>(28.1 to 30.3)</b>                    | <b>-2.5<br/>(-3.3 to -1.6)</b>                   |
| Schizophrenia                                                  | 801.5<br>(710.7 to 903.5)                  | 10.6<br>(8.0 to 13.7)                       | 481.3<br>(363.2 to 587.8)               | 36.4<br>(33.4 to 39.6)                            | 2.9<br>(0.7 to 5.4)                              |
| Alcohol use disorders                                          | 2,418.8<br>(1,999.8 to 2,886.6)            | 847.6<br>(664.9 to 1,059.6)                 | 227.4<br>(154.8 to 317.2)               | 19.4<br>(13.8 to 24.9)                            | -9.9<br>(-14.1 to -5.8)                          |
| Drug use disorders                                             | 1,199.4<br>(1,156.9 to 1,238.6)            | 53.4<br>(46.6 to 60.7)                      | 368.7<br>(261.6 to 474.4)               | 39.3<br>(35.1 to 43.7)                            | 5.1<br>(2.0 to 8.4)                              |
| Opioid use disorders                                           | 808.3<br>(708.4 to 920.1)                  | 27.2<br>(21.5 to 33.2)                      | 312.6<br>(221.4 to 410.7)               | 39.3<br>(34.6 to 44.5)                            | 5.2<br>(1.6 to 9.0)                              |
| Cocaine use disorders                                          | 176.9<br>(158.0 to 198.4)                  | 1.6<br>(1.0 to 2.2)                         | 22.9<br>(14.2 to 32.7)                  | 38.6<br>(29.8 to 47.2)                            | 4.6<br>(-2.0 to 11.1)                            |
| Amphetamine use disorders                                      | 21.0<br>(13.7 to 30.2)                     | 3.7<br>(2.2 to 5.6)                         | 2.9<br>(1.6 to 5.0)                     | 39.6<br>(32.1 to 46.4)                            | 5.4<br>(-0.3 to 10.5)                            |
| Cannabis use disorders                                         | 158.9<br>(133.0 to 189.1)                  | 4.1<br>(2.7 to 5.7)                         | 4.6<br>(3.0 to 6.9)                     | 36.0<br>(30.3 to 42.0)                            | 2.6<br>(-1.7 to 7.2)                             |
| Other drug use disorders                                       | 87.2<br>(73.9 to 103.2)                    | 16.9<br>(14.3 to 19.8)                      | 25.8<br>(17.2 to 35.4)                  | 39.7<br>(33.3 to 46.0)                            | 5.5<br>(0.6 to 10.2)                             |
| Depressive disorders                                           | 15,171.6<br>(14,693.2 to 15,692.3)         | 14,104.7<br>(12,375.7 to 16,056.1)          | 2,318.5<br>(1,601.1 to 3,149.8)         | 26.2<br>(24.3 to 28.2)                            | -4.8<br>(-6.2 to -3.3)                           |
| Major depressive disorder                                      | 8,709.5<br>(7,657.0 to 9,957.9)            | 13,300.6<br>(11,586.5 to 15,245.3)          | 1,684.1<br>(1,134.1 to 2,324.8)         | 23.0<br>(21.1 to 24.9)                            | -7.1<br>(-8.6 to -5.7)                           |
| Dysthymia                                                      | 6,876.4<br>(5,518.7 to 8,406.3)            | 804.1<br>(645.1 to 982.4)                   | 634.4<br>(416.7 to 926.6)               | 35.4<br>(30.9 to 39.7)                            | 2.2<br>(-1.2 to 5.4)                             |
| Bipolar disorder                                               | 1,508.6<br>(1,257.3 to 1,809.9)            | 84.0<br>(63.4 to 108.0)                     | 289.4<br>(178.0 to 433.1)               | 31.8<br>(28.8 to 34.7)                            | -0.6<br>(-2.8 to 1.7)                            |
| Anxiety disorders                                              | 9,653.1<br>(8,458.5 to 10,913.3)           | 987.1<br>(879.3 to 1,111.3)                 | 876.6<br>(607.8 to 1,183.3)             | 30.0<br>(27.2 to 32.8)                            | -1.9<br>(-4.0 to 0.2)                            |
| Eating disorders                                               | --                                         | --                                          | --                                      | --                                                | --                                               |
| Anorexia nervosa                                               | --                                         | --                                          | --                                      | --                                                | --                                               |
| Bulimia nervosa                                                | --                                         | --                                          | --                                      | --                                                | --                                               |
| Autistic spectrum disorders                                    | 1,494.1<br>(1,428.6 to 1,556.3)            | --                                          | 210.7<br>(144.3 to 295.5)               | 33.0<br>(30.7 to 35.3)                            | 0.4<br>(-1.3 to 2.1)                             |
| Autism                                                         | 481.0<br>(413.5 to 561.7)                  | --                                          | 114.7<br>(73.2 to 165.3)                | 33.0<br>(29.3 to 36.8)                            | 0.4<br>(-2.4 to 3.3)                             |
| Asperger syndrome and other autistic spectrum disorders        | 1,016.1<br>(849.0 to 1,212.0)              | --                                          | 96.0<br>(63.6 to 138.0)                 | 33.1<br>(30.6 to 35.6)                            | 0.4<br>(-1.4 to 2.3)                             |

| Cause                                                      | Prevalence in thousands (95% UI)              | Incidence in thousands (95% UI)                | YLDs in thousands (95% UI)               |                                                   |                                                  |
|------------------------------------------------------------|-----------------------------------------------|------------------------------------------------|------------------------------------------|---------------------------------------------------|--------------------------------------------------|
|                                                            | 2016 counts                                   | 2016 counts                                    | 2016 counts                              | Percentage change in counts between 2006 and 2016 | Percentage change in rates between 2006 and 2016 |
| Attention-deficit/hyperactivity disorder                   | 195.3<br>(163.0 to 232.2)                     | --                                             | 2.2<br>(1.3 to 3.6)                      | 35.9<br>(25.6 to 46.6)                            | 2.6<br>(-5.2 to 10.7)                            |
| Conduct disorder                                           | --                                            | --                                             | --                                       | --                                                | --                                               |
| Idiopathic developmental intellectual disability           | 1,698.2<br>(873.4 to 2,505.7)                 | --                                             | 78.5<br>(39.1 to 130.5)                  | 21.2<br>(16.5 to 24.9)                            | -8.5<br>(-12.1 to -5.7)                          |
| Other mental and substance use disorders                   | 6,220.9<br>(5,522.1 to 7,039.0)               | 30.9<br>(19.4 to 46.2)                         | 439.9<br>(304.3 to 619.1)                | 32.7<br>(30.6 to 34.8)                            | 0.1<br>(-1.4 to 1.7)                             |
| <b>Diabetes, urogenital, blood, and endocrine diseases</b> | <b>123,104.4<br/>(121,856.6 to 124,432.7)</b> | <b>25,872.9†<br/>(23,041.2 to 29,072.7)</b>    | <b>4,827.1<br/>(3,428.6 to 6,436.8)</b>  | <b>32.0<br/>(29.5 to 34.5)</b>                    | <b>-0.4<br/>(-2.3 to 1.5)</b>                    |
| Diabetes mellitus                                          | 36,541.0<br>(33,205.4 to 40,272.3)            | 1,120.1<br>(845.0 to 1,527.4)                  | 2,797.6<br>(1,907.6 to 3,889.1)          | 31.8<br>(27.9 to 36.0)                            | -0.5<br>(-3.5 to 2.6)                            |
| Acute glomerulonephritis                                   | 6.8<br>(4.8 to 9.5)                           | 100.7<br>(68.8 to 139.5)                       | 0.3<br>(0.2 to 0.6)                      | 19.4<br>(8.8 to 30.6)                             | -9.9<br>(-17.9 to -1.5)                          |
| Chronic kidney disease                                     | 32,854.2<br>(28,204.5 to 37,715.8)            | 2,802.4<br>(1,942.3 to 3,735.7)                | 888.0<br>(644.5 to 1,172.6)              | 35.9<br>(32.2 to 39.5)                            | 2.6<br>(-0.2 to 5.2)                             |
| Chronic kidney disease due to diabetes mellitus            | 16,304.8<br>(12,717.0 to 20,287.6)            | 1,411.7<br>(909.1 to 1,990.7)                  | 447.4<br>(310.2 to 607.3)                | 37.7<br>(33.4 to 42.4)                            | 4.0<br>(0.7 to 7.5)                              |
| Chronic kidney disease due to hypertension                 | 5,226.7<br>(3,992.2 to 6,749.9)               | 330.2<br>(197.6 to 504.2)                      | 194.2<br>(129.1 to 275.2)                | 40.4<br>(34.8 to 46.8)                            | 6.0<br>(1.7 to 10.8)                             |
| Chronic kidney disease due to glomerulonephritis           | 5,365.2<br>(4,151.9 to 6,928.7)               | 553.2<br>(356.2 to 784.0)                      | 94.2<br>(57.0 to 145.1)                  | 24.0<br>(15.5 to 31.7)                            | -6.4<br>(-12.8 to -0.6)                          |
| Chronic kidney disease due to other causes                 | 5,957.4<br>(4,006.0 to 8,469.5)               | 507.3<br>(310.8 to 763.8)                      | 152.2<br>(93.7 to 234.5)                 | 33.4<br>(27.4 to 39.8)                            | 0.7<br>(-3.8 to 5.5)                             |
| Urinary diseases and male infertility                      | 16,739.8<br>(15,344.1 to 18,942.5)            | 20,068.7†<br>(17,247.9 to 23,225.8)            | 549.3<br>(358.7 to 793.3)                | 29.9<br>(28.4 to 31.3)                            | -2.0<br>(-3.1 to -0.9)                           |
| Interstitial nephritis and urinary tract infections        | 224.6<br>(187.0 to 272.9)                     | 11,728.0<br>(9,618.3 to 14,354.7)              | 7.1<br>(4.3 to 10.8)                     | 39.6<br>(31.3 to 47.8)                            | 5.4<br>(-0.9 to 11.5)                            |
| Urolithiasis                                               | 235.0<br>(178.4 to 314.3)                     | 6,192.5<br>(4,756.7 to 8,141.5)                | 16.4<br>(10.3 to 24.4)                   | 36.6<br>(26.3 to 47.8)                            | 3.1<br>(-4.7 to 11.6)                            |
| Benign prostatic hyperplasia                               | 15,942.6<br>(13,379.6 to 18,642.3)            | 2,148.2<br>(1,448.6 to 2,865.3)                | 519.0<br>(338.6 to 756.4)                | 29.8<br>(28.4 to 31.3)                            | -2.0<br>(-3.1 to -0.9)                           |
| Male infertility                                           | --                                            | --                                             | --                                       | --                                                | --                                               |
| Other urinary diseases                                     | --                                            | --                                             | 6.7<br>(4.4 to 9.6)                      | 12.9<br>(6.7 to 19.6)                             | -14.8<br>(-19.5 to -9.7)                         |
| Gynecological diseases                                     | 26,617.7<br>(25,188.4 to 28,744.0)            | 17.2†<br>(11.5 to 24.2)                        | 94.6<br>(47.1 to 167.3)                  | 19.9<br>(18.3 to 21.7)                            | -9.5<br>(-10.7 to -8.2)                          |
| Uterine fibroids                                           | 2,615.2<br>(2,324.6 to 2,971.8)               | 17.2<br>(11.5 to 24.2)                         | 18.9<br>(9.2 to 35.0)                    | 30.9<br>(28.8 to 33.1)                            | -1.2<br>(-2.8 to 0.5)                            |
| Polycystic ovarian syndrome                                | --                                            | --                                             | --                                       | --                                                | --                                               |
| Female infertility                                         | --                                            | --                                             | --                                       | --                                                | --                                               |
| Endometriosis                                              | --                                            | --                                             | --                                       | --                                                | --                                               |
| Genital prolapse                                           | 24,728.9<br>(21,713.5 to 28,041.3)            | --                                             | 75.7<br>(36.3 to 137.0)                  | 17.4<br>(15.8 to 19.0)                            | -11.4<br>(-12.6 to -10.2)                        |
| Premenstrual syndrome                                      | --                                            | --                                             | --                                       | --                                                | --                                               |
| Other gynecological diseases                               | --                                            | --                                             | --                                       | --                                                | --                                               |
| Hemoglobinopathies and hemolytic anaemias                  | 49,408.1<br>(48,977.1 to 49,828.5)            | --                                             | 182.2<br>(119.8 to 264.4)                | 32.6<br>(28.7 to 36.2)                            | 0.1<br>(-2.9 to 2.8)                             |
| Thalassemias                                               | 0.1<br>(0.1 to 0.1)                           | --                                             | < 0.05<br>(< 0.05 to < 0.05)             | 22.5<br>(11.2 to 33.4)                            | -7.5<br>(-16.1 to 0.7)                           |
| Thalassaemias trait                                        | 9,453.3<br>(9,086.7 to 9,844.3)               | --                                             | 98.2<br>(62.6 to 144.0)                  | 43.5<br>(37.4 to 49.7)                            | 8.3<br>(3.7 to 13.0)                             |
| Sickle cell disorders                                      | 1.0<br>(0.9 to 1.0)                           | --                                             | 0.2<br>(0.1 to 0.2)                      | 70.3<br>(65.2 to 75.5)                            | 28.5<br>(24.7 to 32.5)                           |
| Sickle cell trait                                          | 9,581.8<br>(8,826.3 to 10,593.9)              | --                                             | 19.8<br>(12.8 to 28.9)                   | 32.0<br>(27.5 to 36.5)                            | -0.4<br>(-3.7 to 3.0)                            |
| G6PD deficiency                                            | 7,755.1<br>(7,473.7 to 8,077.8)               | --                                             | 0.8<br>(0.5 to 1.2)                      | 32.1<br>(28.5 to 35.7)                            | -0.3<br>(-3.0 to 2.5)                            |
| G6PD trait                                                 | 24,681.5<br>(24,266.5 to 25,168.0)            | --                                             | < 0.05<br>(< 0.05 to < 0.05)             | 44.4<br>(39.3 to 49.9)                            | 9.0<br>(5.1 to 13.1)                             |
| Other hemoglobinopathies and hemolytic anaemias            | 3,224.7<br>(3,012.3 to 3,375.7)               | --                                             | 63.1<br>(41.8 to 90.5)                   | 18.6<br>(15.5 to 21.3)                            | -10.5<br>(-12.8 to -8.4)                         |
| Endocrine, metabolic, blood, and immune disorders          | 9,855.9<br>(8,282.0 to 11,675.8)              | 1,763.8<br>(1,229.5 to 2,375.0)                | 315.1<br>(209.5 to 439.8)                | 30.5<br>(26.7 to 34.4)                            | -1.5<br>(-4.4 to 1.4)                            |
| <b>Musculoskeletal disorders</b>                           | <b>92,007.2<br/>(89,171.3 to 95,135.9)</b>    | <b>46,170.5<br/>(37,236.7 to 56,737.0)</b>     | <b>9,940.8<br/>(7,027.8 to 13,102.3)</b> | <b>31.9<br/>(30.3 to 33.5)</b>                    | <b>-0.5<br/>(-1.7 to 0.8)</b>                    |
| Rheumatoid arthritis                                       | 2,127.1<br>(1,863.3 to 2,399.8)               | 71.8<br>(52.9 to 94.2)                         | 484.1<br>(334.7 to 643.5)                | 41.1<br>(38.0 to 44.2)                            | 6.5<br>(4.1 to 8.8)                              |
| Osteoarthritis                                             | 37,689.4<br>(35,279.3 to 40,085.9)            | 1,160.4<br>(998.0 to 1,347.5)                  | 1,979.2<br>(1,383.7 to 2,668.7)          | 35.4<br>(34.5 to 36.3)                            | 2.2<br>(1.5 to 2.9)                              |
| Low back and neck pain                                     | 48,518.8<br>(45,001.6 to 52,252.7)            | 20,411.8<br>(14,409.3 to 26,783.3)             | 5,697.0<br>(3,887.5 to 7,864.0)          | 30.7<br>(28.1 to 33.2)                            | -1.4<br>(-3.3 to 0.5)                            |
| Low back pain                                              | 34,234.4<br>(25,591.3 to 43,698.7)            | 16,815.9<br>(10,969.6 to 23,425.8)             | 3,791.2<br>(2,414.6 to 5,551.4)          | 28.2<br>(24.7 to 31.5)                            | -3.2<br>(-5.9 to -0.8)                           |
| Neck pain                                                  | 19,812.0<br>(14,592.8 to 26,641.7)            | 3,595.9<br>(2,339.5 to 5,306.9)                | 1,905.8<br>(1,208.5 to 2,859.3)          | 35.7<br>(32.8 to 39.2)                            | 2.4<br>(0.2 to 5.1)                              |
| Gout                                                       | 3,881.5<br>(3,159.6 to 4,743.0)               | 699.1<br>(504.0 to 938.6)                      | 119.3<br>(80.4 to 167.3)                 | 34.5<br>(30.1 to 38.8)                            | 1.5<br>(-1.8 to 4.8)                             |
| Other musculoskeletal disorders                            | 20,387.1<br>(15,011.9 to 26,915.0)            | 23,827.4<br>(17,200.5 to 31,862.8)             | 1,661.2<br>(1,051.1 to 2,487.8)          | 29.4<br>(23.2 to 35.4)                            | -2.3<br>(-7.0 to 2.2)                            |
| <b>Other non-communicable diseases</b>                     | <b>209,378.0<br/>(208,968.5 to 209,942.0)</b> | <b>553,424.6†<br/>(500,636.9 to 618,795.7)</b> | <b>9,991.2<br/>(6,889.3 to 14,132.4)</b> | <b>29.3<br/>(28.0 to 30.6)</b>                    | <b>-2.4<br/>(-3.4 to -1.4)</b>                   |
| Congenital anomalies                                       | 1,900.5<br>(1,768.3 to 2,032.1)               | --                                             | 248.8<br>(180.7 to 329.2)                | 29.6<br>(26.1 to 33.0)                            | -2.2<br>(-4.8 to 0.4)                            |
| Neural tube defects                                        | 141.3<br>(128.7 to 156.0)                     | --                                             | 41.0<br>(29.5 to 54.2)                   | 28.5<br>(22.8 to 34.2)                            | -3.0<br>(-7.4 to 1.3)                            |
| Congenital heart anomalies                                 | 303.4<br>(271.4 to 339.4)                     | --                                             | 16.9<br>(7.2 to 29.1)                    | 42.4<br>(36.7 to 47.9)                            | 7.5<br>(3.1 to 11.6)                             |
| Orofacial clefts                                           | 112.5<br>(100.2 to 124.5)                     | --                                             | 1.3<br>(0.9 to 1.9)                      | 26.8<br>(23.5 to 30.1)                            | -4.3<br>(-6.8 to -1.8)                           |
| Down's syndrome                                            | 9.2<br>(7.5 to 11.0)                          | --                                             | 1.6<br>(1.1 to 2.2)                      | 15.3<br>(9.8 to 20.8)                             | -13.0<br>(-17.1 to -8.8)                         |
| Turner syndrome                                            | 20.3<br>(17.4 to 23.6)                        | --                                             | 0.3<br>(0.1 to 0.5)                      | 31.6<br>(23.4 to 41.5)                            | -0.7<br>(-6.9 to 6.8)                            |
| Klinefelter syndrome                                       | 5.9<br>(4.8 to 7.2)                           | --                                             | < 0.05<br>(< 0.05 to < 0.05)             | 30.0<br>(27.2 to 33.1)                            | -1.9<br>(-4.0 to 0.5)                            |

| Cause                                         | Prevalence in thousands (95% UI)                   | Incidence in thousands (95% UI)                              | YLDs in thousands (95% UI)                    |                                                   |                                                  |
|-----------------------------------------------|----------------------------------------------------|--------------------------------------------------------------|-----------------------------------------------|---------------------------------------------------|--------------------------------------------------|
|                                               | 2016 counts                                        | 2016 counts                                                  | 2016 counts                                   | Percentage change in counts between 2006 and 2016 | Percentage change in rates between 2006 and 2016 |
| Other chromosomal abnormalities               | < 0.05<br>(< 0.05 to < 0.05)                       | --                                                           | < 0.05<br>(< 0.05 to < 0.05)                  | 59.0<br>(-63.4 to 570.1)                          | 20.0<br>(-72.4 to 405.8)                         |
| Congenital musculoskeletal and limb anomalies | 381.7<br>(352.6 to 411.7)                          | --                                                           | 54.3<br>(37.8 to 73.5)                        | 33.0<br>(27.7 to 38.1)                            | 0.4<br>(-3.6 to 4.2)                             |
| Urogenital congenital anomalies               | 93.2<br>(84.0 to 103.2)                            | --                                                           | 1.4<br>(0.7 to 2.5)                           | 39.0<br>(34.3 to 44.3)                            | 4.9<br>(1.3 to 8.9)                              |
| Digestive congenital anomalies                | 330.4<br>(298.5 to 365.1)                          | --                                                           | 13.6<br>(9.1 to 19.3)                         | 33.3<br>(26.6 to 40.5)                            | 0.6<br>(-4.5 to 6.0)                             |
| Other congenital anomalies                    | 911.8<br>(634.1 to 1,278.3)                        | --                                                           | 118.5<br>(81.2 to 168.5)                      | 26.7<br>(21.2 to 32.1)                            | -4.4<br>(-8.5 to -0.3)                           |
| Skin and subcutaneous diseases                | 84,014.3<br>(81,591.1 to 86,426.4)                 | 236,658.8<br>(209,441.1 to 269,223.7)                        | 1,369.0<br>(917.4 to 2,048.4)                 | 35.2<br>(34.3 to 36.3)                            | 2.1<br>(1.4 to 2.9)                              |
| Dermatitis                                    | 9,140.2<br>(7,849.2 to 10,648.4)                   | 13,402.7<br>(10,124.8 to 17,131.8)                           | 281.1<br>(171.2 to 427.6)                     | 33.8<br>(31.9 to 35.8)                            | 1.0<br>(-0.5 to 2.5)                             |
| Psoriasis                                     | 3,673.2<br>(3,396.0 to 3,994.1)                    | 373.3<br>(320.9 to 433.6)                                    | 303.0<br>(219.5 to 396.5)                     | 38.3<br>(35.2 to 41.3)                            | 4.4<br>(2.0 to 6.7)                              |
| Cellulitis                                    | 130.3<br>(107.9 to 158.2)                          | 3,092.6<br>(2,593.7 to 3,656.9)                              | 7.0<br>(4.6 to 10.5)                          | 35.9<br>(27.5 to 44.4)                            | 2.5<br>(-3.8 to 9.0)                             |
| Pyoderma                                      | 1,275.3<br>(1,175.0 to 1,384.3)                    | 32,540.2<br>(29,354.3 to 36,029.1)                           | 6.9<br>(2.9 to 14.2)                          | 31.7<br>(28.9 to 34.5)                            | -0.6<br>(-2.7 to 1.5)                            |
| Scabies                                       | 2,361.2<br>(1,648.9 to 3,249.8)                    | 7,265.2<br>(5,113.1 to 10,030.6)                             | 58.2<br>(29.5 to 101.2)                       | 31.1<br>(28.9 to 33.5)                            | -1.1<br>(-2.7 to 0.8)                            |
| Fungal skin diseases                          | 29,294.2<br>(23,014.9 to 37,571.0)                 | 110,442.8<br>(85,596.2 to 142,550.9)                         | 160.0<br>(62.9 to 344.9)                      | 31.5<br>(30.9 to 32.2)                            | -0.7<br>(-1.2 to -0.2)                           |
| Viral skin diseases                           | 4,238.9<br>(3,601.4 to 4,997.9)                    | 6,704.1<br>(5,728.0 to 7,882.8)                              | 123.4<br>(73.1 to 183.7)                      | 32.5<br>(30.4 to 34.6)                            | -0.0<br>(-1.6 to 1.6)                            |
| Acne vulgaris                                 | 2,138.7<br>(2,075.2 to 2,214.0)                    | 1,005.4<br>(968.3 to 1,048.6)                                | 51.6<br>(35.4 to 73.9)                        | 38.4<br>(33.9 to 43.3)                            | 4.4<br>(1.0 to 8.1)                              |
| Alopecia areata                               | 422.3<br>(375.2 to 474.8)                          | 730.7<br>(659.4 to 810.9)                                    | 13.2<br>(8.3 to 19.6)                         | 33.2<br>(27.8 to 38.6)                            | 0.5<br>(-3.5 to 4.6)                             |
| Pruritus                                      | 3,641.7<br>(2,655.3 to 5,056.1)                    | 2,835.6<br>(2,008.8 to 3,814.9)                              | 37.5<br>(16.8 to 75.0)                        | 34.6<br>(32.7 to 36.6)                            | 1.6<br>(0.1 to 3.1)                              |
| Urticaria                                     | 1,330.2<br>(956.9 to 1,777.7)                      | 2,350.6<br>(1,658.1 to 3,152.9)                              | 75.2<br>(44.7 to 117.9)                       | 32.5<br>(29.2 to 36.5)                            | -0.0<br>(-2.5 to 3.1)                            |
| Decubitus ulcer                               | 146.4<br>(107.7 to 197.4)                          | 542.9<br>(394.8 to 744.2)                                    | 23.3<br>(15.0 to 35.3)                        | 33.2<br>(23.3 to 42.5)                            | 0.5<br>(-6.9 to 7.5)                             |
| Other skin and subcutaneous diseases          | 42,760.7<br>(39,325.4 to 46,139.1)                 | 55,372.7<br>(50,069.4 to 61,357.7)                           | 228.7<br>(111.3 to 411.1)                     | 39.1<br>(38.2 to 40.1)                            | 5.0<br>(4.3 to 5.8)                              |
| Sense organ diseases                          | 160,931.4<br>(159,890.6 to 162,101.6)              | 36,240.3 <sup>†</sup><br>(33,049.8 to 39,611.1)              | 6,674.3<br>(4,578.1 to 9,328.5)               | 27.8<br>(25.9 to 29.7)                            | -3.6<br>(-5.0 to -2.1)                           |
| Glaucoma                                      | 924.3<br>(731.5 to 1,155.6)                        | --                                                           | 88.2<br>(56.5 to 126.4)                       | 34.2<br>(30.2 to 38.1)                            | 1.3<br>(-1.7 to 4.2)                             |
| Cataract                                      | 12,568.3<br>(10,138.2 to 15,284.8)                 | --                                                           | 835.4<br>(578.1 to 1,170.8)                   | 30.3<br>(27.6 to 32.8)                            | -1.7<br>(-3.7 to 0.2)                            |
| Macular degeneration                          | 1,252.2<br>(966.1 to 1,603.8)                      | --                                                           | 75.3<br>(49.3 to 105.2)                       | 39.5<br>(34.6 to 44.5)                            | 5.3<br>(1.6 to 9.1)                              |
| Refraction and accommodation disorders        | 73,712.8<br>(68,471.2 to 79,251.6)                 | --                                                           | 1,217.5<br>(762.5 to 1,922.6)                 | 21.2<br>(18.6 to 23.2)                            | -8.5<br>(-10.5 to -7.0)                          |
| Age-related and other hearing loss            | 140,789.6<br>(134,674.2 to 146,338.0)              | --                                                           | 3,575.2<br>(2,372.0 to 5,152.1)               | 27.9<br>(24.6 to 31.4)                            | -3.5<br>(-6.0 to -0.9)                           |
| Other vision loss                             | 3,066.8<br>(2,426.5 to 3,882.0)                    | --                                                           | 227.7<br>(149.5 to 315.7)                     | 33.0<br>(29.8 to 36.0)                            | 0.4<br>(-2.0 to 2.6)                             |
| Other sense organ diseases                    | 20,909.7<br>(18,425.2 to 23,763.4)                 | 36,240.3<br>(33,049.8 to 39,611.1)                           | 655.1<br>(409.2 to 992.5)                     | 33.6<br>(32.3 to 34.9)                            | 0.8<br>(-0.1 to 1.8)                             |
| Oral disorders                                | 135,404.9<br>(132,814.0 to 138,313.4)              | 280,525.5 <sup>†</sup><br>(232,459.1 to 335,856.8)           | 1,699.0<br>(1,080.4 to 2,547.8)               | 30.8<br>(29.8 to 31.8)                            | -1.3<br>(-2.0 to -0.5)                           |
| Caries of deciduous teeth                     | --                                                 | --                                                           | --                                            | --                                                | --                                               |
| Caries of permanent teeth                     | 83,167.0<br>(72,011.3 to 94,772.7)                 | 271,003.8<br>(222,329.4 to 324,910.8)                        | 59.2<br>(26.6 to 113.8)                       | 25.0<br>(23.6 to 26.4)                            | -5.7<br>(-6.7 to -4.6)                           |
| Periodontal disease                           | 51,960.1<br>(38,564.0 to 63,370.6)                 | 5,579.7<br>(2,573.5 to 8,472.2)                              | 330.4<br>(128.0 to 717.1)                     | 31.3<br>(29.8 to 32.3)                            | -0.9<br>(-2.1 to -0.2)                           |
| Edentulism and severe tooth loss              | 42,144.2<br>(34,964.8 to 49,680.1)                 | 3,942.0<br>(2,558.9 to 5,460.2)                              | 1,158.7<br>(737.8 to 1,688.1)                 | 30.8<br>(29.4 to 32.2)                            | -1.3<br>(-2.4 to -0.2)                           |
| Other oral disorders                          | 5,347.9<br>(4,805.7 to 5,903.4)                    | --                                                           | 150.7<br>(92.0 to 226.1)                      | 32.6<br>(31.2 to 34.2)                            | 0.1<br>(-1.0 to 1.3)                             |
| <b>Injuries</b>                               | <b>101,339.6</b><br><b>(95,516.7 to 106,972.9)</b> | <b>22,215.6<sup>†</sup></b><br><b>(19,343.6 to 25,587.2)</b> | <b>3,653.8</b><br><b>(2,505.0 to 5,112.1)</b> | <b>35.3</b><br><b>(33.8 to 36.5)</b>              | <b>2.1</b><br><b>(1.0 to 3.1)</b>                |
| <b>Transport injuries</b>                     | <b>17,823.0</b><br><b>(16,663.1 to 19,077.5)</b>   | <b>2,002.9</b><br><b>(1,561.2 to 2,523.6)</b>                | <b>853.2</b><br><b>(574.0 to 1,207.1)</b>     | <b>40.7</b><br><b>(39.4 to 41.9)</b>              | <b>6.2</b><br><b>(5.2 to 7.1)</b>                |
| Road injuries                                 | 15,017.0<br>(13,951.9 to 16,202.9)                 | 1,755.8<br>(1,340.0 to 2,262.4)                              | 725.7<br>(487.6 to 1,028.3)                   | 42.6<br>(41.5 to 43.6)                            | 7.7<br>(6.8 to 8.4)                              |
| Pedestrian road injuries                      | 3,439.7<br>(2,994.1 to 3,998.2)                    | 389.2<br>(247.1 to 568.1)                                    | 171.6<br>(116.7 to 240.9)                     | 43.5<br>(42.0 to 44.9)                            | 8.3<br>(7.2 to 9.4)                              |
| Cyclist road injuries                         | 3,016.1<br>(2,550.8 to 3,527.9)                    | 443.6<br>(295.7 to 637.9)                                    | 138.5<br>(92.6 to 199.3)                      | 46.9<br>(45.8 to 48.0)                            | 10.9<br>(10.0 to 11.7)                           |
| Motorcyclist road injuries                    | 3,311.3<br>(2,850.6 to 3,884.8)                    | 208.1<br>(128.7 to 327.0)                                    | 156.6<br>(107.3 to 221.4)                     | 46.9<br>(45.7 to 47.9)                            | 10.9<br>(10.0 to 11.7)                           |
| Motor vehicle road injuries                   | 4,176.2<br>(3,463.0 to 4,844.9)                    | 546.4<br>(379.0 to 767.8)                                    | 210.2<br>(141.5 to 297.7)                     | 32.5<br>(31.2 to 33.8)                            | 0.0<br>(-1.0 to 1.0)                             |
| Other road injuries                           | 1,073.7<br>(910.9 to 1,281.4)                      | 168.5<br>(88.5 to 276.5)                                     | 48.8<br>(32.5 to 70.0)                        | 64.0<br>(62.2 to 65.5)                            | 23.8<br>(22.4 to 24.9)                           |
| Other transport injuries                      | 2,806.0<br>(2,380.1 to 3,228.8)                    | 247.1<br>(171.1 to 340.6)                                    | 127.5<br>(87.2 to 178.7)                      | 30.8<br>(28.4 to 33.0)                            | -1.3<br>(-3.1 to 0.4)                            |
| <b>Unintentional injuries</b>                 | <b>76,918.3</b><br><b>(71,501.5 to 82,384.1)</b>   | <b>19,625.3</b><br><b>(16,855.4 to 22,935.3)</b>             | <b>2,581.7</b><br><b>(1,788.9 to 3,552.1)</b> | <b>33.6</b><br><b>(32.2 to 34.8)</b>              | <b>0.8</b><br><b>(-0.2 to 1.7)</b>               |
| Falls                                         | 36,667.7<br>(32,442.4 to 40,937.6)                 | 10,329.9<br>(7,913.0 to 13,463.4)                            | 1,524.3<br>(1,077.2 to 2,069.1)               | 36.0<br>(34.5 to 37.3)                            | 2.7<br>(1.5 to 3.6)                              |
| Drowning                                      | 287.1<br>(249.7 to 321.2)                          | 26.0<br>(19.4 to 33.6)                                       | 13.5<br>(9.0 to 19.1)                         | 18.5<br>(15.9 to 20.9)                            | -10.6<br>(-12.5 to -8.8)                         |
| Fire, heat, and hot substances                | 5,942.5<br>(5,201.9 to 6,839.0)                    | 185.6<br>(123.3 to 266.0)                                    | 118.0<br>(73.8 to 182.5)                      | 28.3<br>(26.4 to 29.8)                            | -3.1<br>(-4.6 to -2.0)                           |
| Poisonings                                    | 193.2<br>(167.5 to 221.1)                          | 95.7<br>(56.2 to 159.5)                                      | 12.7<br>(8.4 to 18.2)                         | 41.3<br>(37.0 to 45.6)                            | 6.6<br>(3.4 to 9.9)                              |
| Exposure to mechanical forces                 | 13,639.4<br>(11,839.3 to 16,224.1)                 | 1,482.0<br>(1,017.0 to 2,042.1)                              | 289.5<br>(191.7 to 420.6)                     | 38.1<br>(36.6 to 39.4)                            | 4.2<br>(3.1 to 5.2)                              |
| Unintentional firearm injuries                | 479.4<br>(399.6 to 572.0)                          | 20.7<br>(9.9 to 36.2)                                        | 12.8<br>(8.4 to 18.6)                         | 38.3<br>(36.9 to 39.5)                            | 4.4<br>(3.3 to 5.2)                              |
| Unintentional suffocation                     | 435.3<br>(360.4 to 535.6)                          | 23.5<br>(11.3 to 41.7)                                       | 12.4<br>(8.0 to 18.3)                         | 32.8<br>(31.2 to 34.4)                            | 0.3<br>(-0.9 to 1.4)                             |
| Other exposure to mechanical forces           | 12,724.8<br>(10,932.5 to 15,329.3)                 | 1,437.9<br>(991.1 to 1,978.4)                                | 264.2<br>(175.8 to 383.5)                     | 38.4<br>(36.8 to 39.7)                            | 4.4<br>(3.3 to 5.4)                              |

| Cause                                                                               | Prevalence in thousands (95% UI)        | Incidence in thousands (95% UI)    | YLDs in thousands (95% UI)        |                                                   |                                                  |
|-------------------------------------------------------------------------------------|-----------------------------------------|------------------------------------|-----------------------------------|---------------------------------------------------|--------------------------------------------------|
|                                                                                     | 2016 counts                             | 2016 counts                        | 2016 counts                       | Percentage change in counts between 2006 and 2016 | Percentage change in rates between 2006 and 2016 |
| Adverse effects of medical treatment                                                | 168.6<br>(119.2 to 229.9)               | 2,203.8<br>(1,657.7 to 2,837.5)    | 22.4<br>(13.4 to 35.3)            | 23.5<br>(17.8 to 28.4)                            | -6.8<br>(-11.1 to -3.1)                          |
| Animal contact                                                                      | 3,190.0<br>(2,849.3 to 3,601.8)         | 1,707.0<br>(1,202.0 to 2,321.1)    | 71.9<br>(49.8 to 100.3)           | 17.8<br>(15.6 to 19.9)                            | -11.1<br>(-12.8 to -9.5)                         |
| Venomous animal contact                                                             | 1,357.2<br>(1,163.2 to 1,616.2)         | 829.5<br>(573.3 to 1,161.3)        | 44.3<br>(30.7 to 61.2)            | 17.9<br>(15.5 to 20.3)                            | -11.0<br>(-12.9 to -9.2)                         |
| Non-venomous animal contact                                                         | 1,832.8<br>(1,564.4 to 2,131.4)         | 877.5<br>(587.7 to 1,224.8)        | 27.6<br>(18.3 to 41.9)            | 17.6<br>(14.5 to 19.9)                            | -11.3<br>(-13.6 to -9.5)                         |
| Foreign body                                                                        | 2,710.5<br>(2,365.0 to 3,081.8)         | 961.2<br>(700.6 to 1,351.5)        | 90.2<br>(59.4 to 130.1)           | 26.3<br>(24.3 to 28.1)                            | -4.7<br>(-6.2 to -3.3)                           |
| Pulmonary aspiration and foreign body in airway                                     | 1,216.8<br>(994.3 to 1,472.8)           | 301.1<br>(220.4 to 403.7)          | 44.9<br>(29.5 to 64.8)            | 19.1<br>(17.2 to 20.9)                            | -10.1<br>(-11.5 to -8.8)                         |
| Foreign body in eyes                                                                | 152.8<br>(107.9 to 221.3)               | 452.1<br>(232.4 to 825.2)          | 9.3<br>(5.6 to 14.6)              | 40.1<br>(36.5 to 44.8)                            | 5.8<br>(3.1 to 9.3)                              |
| Foreign body in other body part                                                     | 1,340.9<br>(1,134.2 to 1,628.0)         | 208.0<br>(122.5 to 304.6)          | 36.0<br>(23.5 to 52.1)            | 32.9<br>(30.7 to 34.8)                            | 0.3<br>(-1.4 to 1.7)                             |
| Environmental heat and cold exposure                                                | 4,461.8<br>(3,884.7 to 5,152.0)         | 659.8<br>(433.9 to 971.7)          | 163.8<br>(111.5 to 232.8)         | 25.8<br>(23.5 to 27.9)                            | -5.0<br>(-6.8 to -3.5)                           |
| Other unintentional injuries                                                        | 9,657.8<br>(8,067.0 to 11,447.1)        | 1,974.4<br>(1,321.2 to 2,871.2)    | 275.2<br>(182.8 to 396.7)         | 31.4<br>(30.0 to 32.7)                            | -0.9<br>(-1.9 to 0.1)                            |
| <b>Self-harm and interpersonal violence</b>                                         | <b>7,156.1<br/>(6,523.4 to 7,922.9)</b> | <b>575.9†<br/>(449.9 to 738.8)</b> | <b>167.8<br/>(112.2 to 239.3)</b> | <b>24.0<br/>(23.0 to 25.0)</b>                    | <b>-6.4<br/>(-7.2 to -5.7)</b>                   |
| Self-harm                                                                           | 951.2<br>(795.2 to 1,113.3)             | 243.0<br>(174.1 to 343.7)          | 35.9<br>(23.5 to 51.2)            | 17.5<br>(15.8 to 19.0)                            | -11.3<br>(-12.6 to -10.2)                        |
| Self-harm by firearm                                                                | 22.9<br>(19.7 to 26.3)                  | 3.2<br>(0.9 to 7.5)                | 0.7<br>(0.5 to 1.0)               | 4.9<br>(2.8 to 6.9)                               | -20.8<br>(-22.4 to -19.3)                        |
| Self-harm by other specified means                                                  | 928.4<br>(772.4 to 1,090.8)             | 239.8<br>(171.3 to 339.8)          | 35.2<br>(23.0 to 50.2)            | 17.8<br>(16.1 to 19.3)                            | -11.1<br>(-12.4 to -10.0)                        |
| Interpersonal violence                                                              | 6,204.9<br>(5,584.7 to 6,927.8)         | 332.9†<br>(227.2 to 480.4)         | 131.8<br>(88.6 to 186.7)          | 25.9<br>(25.0 to 26.9)                            | -4.9<br>(-5.7 to -4.2)                           |
| Assault by firearm                                                                  | 201.7<br>(170.7 to 237.9)               | 10.7<br>(5.5 to 18.5)              | 6.1<br>(4.0 to 9.0)               | 35.8<br>(34.4 to 37.1)                            | 2.5<br>(1.4 to 3.5)                              |
| Assault by sharp object                                                             | 917.5<br>(762.1 to 1,084.4)             | 49.5<br>(25.9 to 84.5)             | 20.8<br>(13.7 to 30.3)            | 23.6<br>(21.8 to 25.1)                            | -6.7<br>(-8.1 to -5.6)                           |
| Sexual violence                                                                     | 2,380.2<br>(1,925.8 to 2,950.7)         | --                                 | 15.3<br>(9.1 to 22.6)             | 25.5<br>(24.3 to 26.6)                            | -5.3<br>(-6.2 to -4.4)                           |
| Assault by other means                                                              | 2,705.6<br>(2,300.5 to 3,241.4)         | 272.7<br>(185.1 to 391.5)          | 89.6<br>(60.2 to 129.3)           | 26.0<br>(24.9 to 26.9)                            | -4.9<br>(-5.8 to -4.2)                           |
| <b>Forces of nature, conflict and terrorism, and executions and police conflict</b> | <b>1,822.4<br/>(1,207.9 to 2,564.0)</b> | <b>11.4†<br/>(7.5 to 16.5)</b>     | <b>51.2<br/>(15.4 to 119.4)</b>   | <b>90.3<br/>(76.8 to 113.8)</b>                   | <b>43.6<br/>(33.4 to 61.4)</b>                   |
| Forces of nature, conflict and terrorism, and state actor violence                  | 286.2<br>(162.5 to 446.1)               | 6.2<br>(3.3 to 9.9)                | 9.9<br>(2.4 to 25.4)              | 86.3<br>(73.6 to 96.2)                            | 40.6<br>(31.1 to 48.1)                           |
| Conflict and terrorism                                                              | 1,158.6<br>(698.6 to 1,795.0)           | --                                 | 34.7<br>(11.8 to 76.0)            | 81.1<br>(63.5 to 115.5)                           | 36.7<br>(23.4 to 62.7)                           |
| Executions and police conflict                                                      | 377.7<br>(104.5 to 615.5)               | 5.2<br>(2.5 to 8.4)                | 8.3<br>(1.4 to 23.3)              | 129.4<br>(117.5 to 145.8)                         | 73.1<br>(64.2 to 85.5)                           |

We did not calculate incidence for certain NTDs and causes with only birth prevalence. Blank cells mean that no estimate is available.

† Incidence for aggregate causes represents the sum of the incidence of the causes below the aggregate.

‡ Incidence estimates for stroke represent first-ever stroke only.

^ Incidence of HIV/AIDS represents new infections of HIV only and does not include new infections of Tuberculosis in HIV positive cases.



SR Table 12: Global prevalence, incidence, and YLDs for 2016, percentage change of YLD counts and percentage change of YLD rates between 2006 and 2016 by cause, age 70-74 years.

| Cause                                                                                | Prevalence in thousands (95% UI)             | Incidence in thousands (95% UI)                 | YLDs in thousands (95% UI)                |                                                   |                                                  |
|--------------------------------------------------------------------------------------|----------------------------------------------|-------------------------------------------------|-------------------------------------------|---------------------------------------------------|--------------------------------------------------|
|                                                                                      | 2016 counts                                  | 2016 counts                                     | 2016 counts                               | Percentage change in counts between 2006 and 2016 | Percentage change in rates between 2006 and 2016 |
| <b>All causes</b>                                                                    | <b>157,045.4</b><br>(157,034.0 to 157,056.9) | <b>988,628.5†</b><br>(892,779.5 to 1,092,400.2) | <b>36,344.9</b><br>(27,593.4 to 46,576.8) | <b>19.0</b><br>(18.3 to 19.6)                     | <b>-0.6</b><br>(-1.1 to -0.1)                    |
| <b>Communicable, maternal, neonatal, and nutritional disorders</b>                   | <b>98,748.9</b><br>(97,800.0 to 100,172.5)   | <b>434,591.5†</b><br>(351,416.5 to 538,033.9)   | <b>1,465.5</b><br>(1,048.5 to 1,950.0)    | <b>10.2</b><br>(8.1 to 12.1)                      | <b>-7.9</b><br>(-9.6 to -6.3)                    |
| <b>HIV/AIDS and tuberculosis</b>                                                     | <b>46,782.7</b><br>(42,328.2 to 52,377.6)    | <b>244.4†</b><br>(194.2 to 304.9)               | <b>188.9</b><br>(128.3 to 263.0)          | <b>1.8</b><br>(-6.2 to 10.4)                      | <b>-14.9</b><br>(-21.6 to -7.8)                  |
| Tuberculosis                                                                         | 44,443.7<br>(36,883.5 to 51,933.9)           | 233.3†<br>(183.9 to 294.7)                      | 150.3<br>(97.3 to 216.6)                  | 0.9<br>(-2.5 to 5.0)                              | -15.7<br>(-18.5 to -12.2)                        |
| Drug-susceptible tuberculosis                                                        | 512.5<br>(400.7 to 658.1)                    | 225.3<br>(177.2 to 284.7)                       | 144.8<br>(93.8 to 208.6)                  | 1.2<br>(-2.4 to 5.3)                              | -15.5<br>(-18.4 to -12.0)                        |
| Multidrug-resistant tuberculosis without extensive drug resistance                   | 17.8<br>(13.9 to 22.5)                       | 7.6<br>(6.0 to 9.5)                             | 5.1<br>(3.3 to 7.5)                       | -9.3<br>(-20.9 to 5.6)                            | -24.2<br>(-33.9 to -11.8)                        |
| Extensively drug-resistant tuberculosis                                              | 1.2<br>(0.9 to 1.5)                          | 0.5<br>(0.4 to 0.6)                             | 0.4<br>(0.2 to 0.6)                       | 165.4<br>(133.2 to 207.5)                         | 121.8<br>(94.9 to 157.0)                         |
| Latent tuberculosis infection                                                        | 43,912.2<br>(36,323.9 to 51,387.0)           | --                                              | --                                        | --                                                | --                                               |
| HIV/AIDS                                                                             | 389.2<br>(337.8 to 451.2)                    | 11.0*<br>(9.1 to 13.3)                          | 38.7<br>(25.1 to 55.8)                    | 5.2<br>(-24.0 to 52.9)                            | -12.0<br>(-36.5 to 27.8)                         |
| Drug-susceptible HIV/AIDS - Tuberculosis                                             | 11.0<br>(7.6 to 15.5)                        | 11.7<br>(8.4 to 16.1)                           | 4.0<br>(2.4 to 6.3)                       | 3.5<br>(-6.0 to 13.0)                             | -13.5<br>(-21.4 to -5.6)                         |
| Multidrug-resistant HIV/AIDS - Tuberculosis without extensive drug resistance        | 0.4<br>(0.2 to 0.5)                          | 0.3<br>(0.2 to 0.5)                             | 0.1<br>(0.1 to 0.2)                       | 9.6<br>(-10.5 to 29.4)                            | -8.4<br>(-25.2 to 8.1)                           |
| Extensively drug-resistant HIV/AIDS - Tuberculosis                                   | < 0.05<br>(< 0.05 to < 0.05)                 | < 0.05<br>(< 0.05 to < 0.05)                    | < 0.05<br>(< 0.05 to < 0.05)              | 325.5<br>(244.3 to 408.2)                         | 255.7<br>(187.8 to 324.8)                        |
| HIV/AIDS resulting in other diseases                                                 | 377.8<br>(326.9 to 441.7)                    | 11.0<br>(9.1 to 13.3)                           | 34.5<br>(22.0 to 50.9)                    | 5.4<br>(-26.4 to 62.1)                            | -11.9<br>(-38.5 to 35.5)                         |
| <b>Diarrhoea, lower respiratory infections, and other common infectious diseases</b> | <b>7,501.8</b><br>(7,049.2 to 7,972.3)       | <b>418,086.0†</b><br>(333,899.6 to 520,950.7)   | <b>388.8</b><br>(274.4 to 526.5)          | <b>17.8</b><br>(16.4 to 19.4)                     | <b>-1.6</b><br>(-2.8 to -0.2)                    |
| Diarrhoeal diseases                                                                  | 1,917.9<br>(1,741.4 to 2,114.3)              | 132,135.4<br>(119,798.2 to 146,336.7)           | 198.0<br>(137.9 to 269.4)                 | 16.9<br>(14.7 to 19.1)                            | -2.3<br>(-4.1 to -0.4)                           |
| Intestinal infectious diseases                                                       | 9.2<br>(7.6 to 11.4)                         | 184.6†<br>(153.5 to 221.4)                      | 1.5<br>(1.0 to 2.2)                       | 6.4<br>(-13.7 to 29.5)                            | -11.1<br>(-27.9 to 8.2)                          |
| Typhoid fever                                                                        | 8.9<br>(7.1 to 11.1)                         | 140.3<br>(117.0 to 169.1)                       | 1.3<br>(0.9 to 2.0)                       | 7.2<br>(-14.2 to 33.4)                            | -10.4<br>(-28.2 to 11.5)                         |
| Paratyphoid fever                                                                    | 1.9<br>(1.6 to 2.4)                          | 44.3<br>(36.3 to 53.9)                          | 0.1<br>(0.1 to 0.2)                       | 7.2<br>(-11.5 to 30.1)                            | -10.4<br>(-26.1 to 8.7)                          |
| Other intestinal infectious diseases                                                 | --                                           | --                                              | < 0.05<br>(< 0.05 to < 0.05)              | -22.7<br>(-37.3 to -5.9)                          | -35.4<br>(-47.6 to -21.4)                        |
| Lower respiratory infections                                                         | 420.4<br>(385.1 to 460.4)                    | 18,203.1<br>(16,365.3 to 20,151.7)              | 23.8<br>(16.0 to 33.3)                    | 36.8<br>(31.9 to 42.1)                            | 14.3<br>(10.2 to 18.8)                           |
| Upper respiratory infections                                                         | 3,558.4<br>(2,481.3 to 5,063.2)              | 263,889.9<br>(185,547.1 to 370,478.2)           | 83.7<br>(45.9 to 139.9)                   | 16.8<br>(15.0 to 18.7)                            | -2.4<br>(-3.9 to -0.8)                           |
| Otitis media                                                                         | 852.7<br>(595.3 to 1,165.1)                  | 1,533.2<br>(1,213.5 to 1,863.4)                 | 22.2<br>(12.4 to 37.0)                    | 9.4<br>(4.3 to 15.0)                              | -8.6<br>(-12.8 to -3.9)                          |
| Meningitis                                                                           | 237.7<br>(193.0 to 282.2)                    | 30.1<br>(22.7 to 38.6)                          | 13.2<br>(9.1 to 17.9)                     | 16.2<br>(11.1 to 28.3)                            | -2.9<br>(-7.2 to 7.2)                            |
| Pneumococcal meningitis                                                              | 101.8<br>(79.7 to 126.5)                     | 6.5<br>(4.2 to 9.6)                             | 5.5<br>(3.8 to 7.5)                       | 8.0<br>(2.5 to 15.6)                              | -9.7<br>(-14.4 to -3.4)                          |
| H influenzae type B meningitis                                                       | 22.5<br>(15.7 to 30.4)                       | 1.9<br>(1.1 to 3.0)                             | 1.4<br>(0.9 to 1.9)                       | -15.9<br>(-25.1 to -1.4)                          | -29.7<br>(-37.4 to -17.6)                        |
| Meningococcal infection                                                              | 28.6<br>(19.4 to 39.5)                       | 6.0<br>(3.7 to 8.9)                             | 1.8<br>(1.1 to 3.3)                       | 27.0<br>(12.1 to 137.9)                           | 6.2<br>(-6.4 to 98.8)                            |
| Other meningitis                                                                     | 84.8<br>(60.2 to 109.5)                      | 15.8<br>(11.3 to 21.2)                          | 4.5<br>(3.1 to 6.2)                       | 40.7<br>(35.2 to 46.6)                            | 17.6<br>(13.0 to 22.6)                           |
| Encephalitis                                                                         | 448.3<br>(254.4 to 718.2)                    | 197.5<br>(174.6 to 223.8)                       | 29.1<br>(20.7 to 38.3)                    | 18.2<br>(12.4 to 24.5)                            | -1.2<br>(-6.0 to 4.0)                            |
| Diphtheria                                                                           | --                                           | --                                              | --                                        | --                                                | --                                               |
| Whooping cough                                                                       | --                                           | --                                              | --                                        | --                                                | --                                               |
| Tetanus                                                                              | 2.4<br>(2.3 to 2.5)                          | 2.7<br>(1.3 to 4.2)                             | 0.1<br>(< 0.05 to 0.1)                    | -16.6<br>(-36.2 to 8.8)                           | -30.3<br>(-46.7 to -9.1)                         |
| Measles                                                                              | --                                           | --                                              | --                                        | --                                                | --                                               |
| Varicella and herpes zoster                                                          | 331.0<br>(274.3 to 397.2)                    | 1,909.5<br>(1,596.3 to 2,247.1)                 | 17.3<br>(10.3 to 26.8)                    | 22.8<br>(18.0 to 28.0)                            | 2.7<br>(-1.4 to 7.0)                             |
| <b>Neglected tropical diseases and malaria</b>                                       | <b>30,513.6</b><br>(29,367.2 to 31,487.3)    | <b>7,406.4†</b><br>(5,469.9 to 9,214.2)         | <b>251.0</b><br>(174.2 to 346.4)          | <b>-4.5</b><br>(-10.5 to 2.3)                     | <b>-20.2</b><br>(-25.2 to -14.5)                 |
| Malaria                                                                              | 679.2<br>(584.3 to 774.0)                    | 1,265.7<br>(930.1 to 1,639.8)                   | 6.4<br>(4.6 to 8.8)                       | -20.7<br>(-25.7 to -15.0)                         | -33.8<br>(-37.9 to -28.9)                        |
| Chagas disease                                                                       | 266.9<br>(226.5 to 311.6)                    | 1.8<br>(1.1 to 2.8)                             | 4.5<br>(2.9 to 6.5)                       | 17.6<br>(11.1 to 24.6)                            | -1.7<br>(-7.1 to 4.1)                            |
| Leishmaniasis                                                                        | 140.1<br>(106.2 to 170.3)                    | 17.6<br>(13.6 to 22.3)                          | 7.1<br>(4.4 to 10.8)                      | 32.1<br>(26.7 to 38.6)                            | 10.4<br>(5.9 to 15.9)                            |
| Visceral leishmaniasis                                                               | 1.5<br>(1.0 to 2.1)                          | 6.0<br>(4.0 to 8.6)                             | 0.1<br>(0.1 to 0.2)                       | -39.5<br>(-60.9 to -8.6)                          | -49.4<br>(-67.3 to -23.6)                        |
| Cutaneous and mucocutaneous leishmaniasis                                            | 118.9<br>(86.5 to 158.6)                     | 11.6<br>(8.2 to 16.0)                           | 7.0<br>(4.3 to 10.7)                      | 34.3<br>(29.0 to 41.7)                            | 12.2<br>(7.8 to 18.4)                            |
| African trypanosomiasis                                                              | 0.1<br>(< 0.05 to 0.5)                       | 0.1<br>(< 0.05 to 0.3)                          | < 0.05<br>(< 0.05 to 0.1)                 | -70.8<br>(-95.9 to 79.2)                          | -75.6<br>(-96.6 to 49.7)                         |
| Schistosomiasis                                                                      | 3,234.7<br>(3,000.3 to 3,486.3)              | 765.6<br>(704.0 to 829.6)                       | 22.0<br>(11.0 to 41.4)                    | 22.0<br>(-34.3 to -28.7)                          | -42.9<br>(-45.1 to -40.4)                        |
| Cysticercosis                                                                        | 117.6<br>(84.5 to 162.4)                     | --                                              | 17.2<br>(10.2 to 25.9)                    | 0.8<br>(-6.0 to 7.5)                              | -15.8<br>(-21.4 to -10.2)                        |
| Cystic echinococcosis                                                                | 18.7<br>(9.4 to 36.9)                        | 3.6<br>(1.6 to 8.4)                             | 1.7<br>(0.7 to 3.4)                       | 1.7<br>(-75.9 to 42.7)                            | -49.7<br>(-79.9 to 19.3)                         |
| Lymphatic filariasis                                                                 | 453.0<br>(385.7 to 543.6)                    | 111.2<br>(61.8 to 173.6)                        | 16.3<br>(8.6 to 28.0)                     | -30.3<br>(-47.3 to -14.6)                         | -41.8<br>(-56.0 to -28.6)                        |
| Onchocerciasis                                                                       | 264.6<br>(181.8 to 387.2)                    | 44.7<br>(18.2 to 92.2)                          | 22.4<br>(12.9 to 38.7)                    | -16.2<br>(-32.4 to 4.7)                           | -29.9<br>(-43.5 to -12.5)                        |
| Trachoma                                                                             | 634.4<br>(390.2 to 981.8)                    | --                                              | 43.0<br>(26.4 to 64.9)                    | -7.4<br>(-17.6 to 1.7)                            | -22.6<br>(-31.2 to -15.0)                        |
| Dengue                                                                               | 98.1<br>(53.6 to 166.0)                      | 1,640.4<br>(999.7 to 2,484.9)                   | 14.5<br>(6.6 to 26.8)                     | 93.5<br>(56.1 to 344.5)                           | 61.7<br>(30.4 to 271.5)                          |
| Yellow fever                                                                         | < 0.05<br>(< 0.05 to 0.1)                    | 0.7<br>(0.2 to 1.9)                             | < 0.05<br>(< 0.05 to < 0.05)              | -21.1<br>(-50.7 to 24.4)                          | -34.0<br>(-58.8 to 4.0)                          |
| Rabies                                                                               | < 0.05<br>(< 0.05 to < 0.05)                 | 0.3<br>(0.2 to 0.5)                             | < 0.05<br>(< 0.05 to < 0.05)              | -49.8<br>(-59.9 to -37.0)                         | -58.1<br>(-66.5 to -47.4)                        |
| Intestinal nematode infections                                                       | 25,362.4<br>(24,108.0 to 26,402.5)           | --                                              | 41.3<br>(24.1 to 66.6)                    | -9.4<br>(-16.7 to -2.0)                           | -24.3<br>(-30.4 to -18.1)                        |
| Ascariasis                                                                           | 13,551.6<br>(12,046.6 to 15,448.4)           | --                                              | 12.6<br>(6.9 to 21.0)                     | -23.8<br>(-33.4 to -12.7)                         | -36.3<br>(-44.3 to -27.0)                        |

| Cause                                                                   | Prevalence in thousands (95% UI)                    | Incidence in thousands (95% UI)                      | YLDs in thousands (95% UI)                       |                                                   |                                                  |
|-------------------------------------------------------------------------|-----------------------------------------------------|------------------------------------------------------|--------------------------------------------------|---------------------------------------------------|--------------------------------------------------|
|                                                                         | 2016 counts                                         | 2016 counts                                          | 2016 counts                                      | Percentage change in counts between 2006 and 2016 | Percentage change in rates between 2006 and 2016 |
| Trichuriasis                                                            | 6,996.5<br>(6,400.0 to 7,718.0)                     | --                                                   | 4.7<br>(2.6 to 7.9)                              | -15.3<br>(-28.5 to -0.8)                          | -29.2<br>(-40.2 to -17.0)                        |
| Hookworm disease                                                        | 7,478.3<br>(6,861.9 to 8,199.6)                     | --                                                   | 24.0<br>(14.2 to 37.7)                           | 2.0<br>(-9.7 to 14.4)                             | -14.7<br>(-24.5 to -4.4)                         |
| Food-borne trematodiasis                                                | 2,004.4<br>(1,628.6 to 2,381.0)                     | 3,439.6<br>(1,669.4 to 4,938.5)                      | 46.5<br>(19.3 to 85.8)                           | 25.9<br>(13.1 to 48.9)                            | 5.2<br>(-5.5 to 24.4)                            |
| Leprosy                                                                 | 43.0<br>(41.4 to 44.6)                              | 2.6<br>(2.4 to 2.7)                                  | 2.5<br>(1.8 to 3.5)                              | 6.4<br>(0.8 to 12.5)                              | -11.1<br>(-15.8 to -6.0)                         |
| Ebola virus disease                                                     | < 0.05<br>(< 0.05 to < 0.1)                         | < 0.05<br>(< 0.05 to < 0.05)                         | < 0.05<br>(< 0.05 to < 0.05)                     | --                                                | --                                               |
| Zika virus disease                                                      | 1.9<br>(1.1 to 3.4)                                 | 112.5<br>(64.3 to 205.1)                             | < 0.05<br>(< 0.05 to < 0.1)                      | --                                                | --                                               |
| Guinea worm disease                                                     | < 0.05<br>(< 0.05 to < 0.05)                        | < 0.05<br>(< 0.05 to < 0.05)                         | < 0.05<br>(< 0.05 to < 0.05)                     | -99.6<br>(-99.7 to -99.3)                         | -99.6<br>(-99.8 to -99.4)                        |
| Other neglected tropical diseases                                       | 356.4<br>(342.3 to 369.3)                           | --                                                   | 5.4<br>(3.6 to 8.1)                              | 22.2<br>(16.1 to 28.3)                            | 2.1<br>(-3.0 to 7.2)                             |
| <b>Maternal disorders</b>                                               | --                                                  | --                                                   | --                                               | --                                                | --                                               |
| Maternal haemorrhage                                                    | --                                                  | --                                                   | --                                               | --                                                | --                                               |
| Maternal sepsis and other pregnancy related infections                  | --                                                  | --                                                   | --                                               | --                                                | --                                               |
| Maternal hypertensive disorders                                         | --                                                  | --                                                   | --                                               | --                                                | --                                               |
| Maternal obstructed labour and uterine rupture                          | --                                                  | --                                                   | --                                               | --                                                | --                                               |
| Maternal abortion, miscarriage, and ectopic pregnancy                   | --                                                  | --                                                   | --                                               | --                                                | --                                               |
| Other maternal disorders                                                | --                                                  | --                                                   | --                                               | --                                                | --                                               |
| <b>Neonatal disorders</b>                                               | <b>909.3</b><br><b>(825.7 to 988.3)</b>             | --                                                   | <b>73.1</b><br><b>(52.3 to 103.1)</b>            | <b>38.4</b><br><b>(27.3 to 53.0)</b>              | <b>15.7</b><br><b>(6.4 to 27.9)</b>              |
| Neonatal preterm birth complications                                    | 780.6<br>(664.5 to 908.3)                           | --                                                   | 45.0<br>(32.4 to 60.7)                           | 36.3<br>(19.1 to 58.7)                            | 13.9<br>(-0.5 to 32.7)                           |
| Neonatal encephalopathy due to birth asphyxia and trauma                | 136.2<br>(100.3 to 185.3)                           | --                                                   | 9.8<br>(4.8 to 19.0)                             | 42.0<br>(29.8 to 56.1)                            | 18.7<br>(8.5 to 30.4)                            |
| Neonatal sepsis and other neonatal infections                           | 41.8<br>(16.6 to 106.9)                             | --                                                   | 13.9<br>(3.6 to 39.8)                            | 42.4<br>(31.7 to 64.9)                            | 19.1<br>(10.1 to 37.9)                           |
| Hemolytic disease and other neonatal jaundice                           | 12.7<br>(10.8 to 14.6)                              | --                                                   | 4.4<br>(3.3 to 5.7)                              | 40.1<br>(34.4 to 45.6)                            | 17.1<br>(12.3 to 21.7)                           |
| Other neonatal disorders                                                | --                                                  | --                                                   | --                                               | --                                                | --                                               |
| <b>Nutritional deficiencies</b>                                         | <b>22,930.0</b><br><b>(22,518.3 to 23,214.5)</b>    | <b>4,231.4*</b><br><b>(3,590.7 to 4,953.7)</b>       | <b>524.2</b><br><b>(356.7 to 733.9)</b>          | <b>13.0</b><br><b>(11.5 to 14.4)</b>              | <b>-5.5</b><br><b>(-6.8 to -4.4)</b>             |
| Protein-energy malnutrition                                             | --                                                  | --                                                   | --                                               | --                                                | --                                               |
| Iodine deficiency                                                       | 2,988.0<br>(2,689.8 to 3,321.1)                     | 6.8<br>(5.7 to 8.0)                                  | 71.8<br>(49.4 to 99.2)                           | 4.8<br>(2.5 to 7.1)                               | -12.4<br>(-14.3 to -10.5)                        |
| Vitamin A deficiency                                                    | 3,975.7<br>(3,488.4 to 4,547.8)                     | 4,224.6<br>(3,583.8 to 4,947.2)                      | 2.6<br>(1.6 to 3.8)                              | 22.8<br>(14.0 to 32.1)                            | 2.7<br>(-4.7 to 10.4)                            |
| Iron-deficiency anaemia                                                 | 18,417.2<br>(17,487.9 to 19,255.2)                  | --                                                   | 449.8<br>(303.6 to 643.2)                        | 14.4<br>(12.7 to 16.0)                            | -4.4<br>(-5.8 to -3.0)                           |
| Other nutritional deficiencies                                          | --                                                  | --                                                   | --                                               | --                                                | --                                               |
| <b>Other communicable, maternal, neonatal, and nutritional diseases</b> | <b>43,566.9</b><br><b>(42,181.2 to 45,008.4)</b>    | <b>4,623.3</b><br><b>(3,506.4 to 6,091.8)</b>        | <b>39.5</b><br><b>(27.3 to 56.8)</b>             | <b>13.5</b><br><b>(1.2 to 27.6)</b>               | <b>-5.1</b><br><b>(-15.4 to 6.7)</b>             |
| Sexually transmitted diseases excluding HIV                             | 31,897.4<br>(29,658.1 to 35,060.6)                  | 1,362.1<br>(1,170.9 to 1,568.4)                      | 22.3<br>(15.1 to 33.4)                           | 20.2<br>(15.5 to 25.1)                            | 0.5<br>(-3.5 to 4.6)                             |
| Syphilis                                                                | 92.2<br>(78.0 to 111.1)                             | 4.3<br>(3.0 to 6.0)                                  | 13.4<br>(9.0 to 18.5)                            | 21.1<br>(13.4 to 28.7)                            | 1.2<br>(-5.2 to 7.6)                             |
| Chlamydial infection                                                    | 1.8<br>(1.1 to 2.9)                                 | --                                                   | < 0.05<br>(< 0.05 to < 0.05)                     | 19.9<br>(15.7 to 24.4)                            | 0.2<br>(-3.3 to 4.0)                             |
| Gonococcal infection                                                    | 0.3<br>(0.2 to 0.4)                                 | --                                                   | < 0.05<br>(< 0.05 to < 0.05)                     | 22.3<br>(13.1 to 29.7)                            | 2.2<br>(-5.4 to 8.4)                             |
| Trichomoniasis                                                          | 1,753.0<br>(1,482.8 to 2,028.8)                     | 1,357.8<br>(1,166.6 to 1,563.7)                      | 1.9<br>(0.8 to 4.0)                              | 20.2<br>(16.5 to 23.7)                            | 0.5<br>(-2.6 to 3.4)                             |
| Genital herpes                                                          | 30,122.8<br>(26,370.8 to 34,792.7)                  | --                                                   | 7.0<br>(2.0 to 15.9)                             | 18.7<br>(16.4 to 21.4)                            | -0.8<br>(-2.7 to 1.4)                            |
| Other sexually transmitted diseases                                     | 0.2<br>(0.2 to 0.3)                                 | --                                                   | < 0.05<br>(< 0.05 to 0.1)                        | 16.3<br>(11.9 to 21.8)                            | -2.8<br>(-6.4 to 1.8)                            |
| Hepatitis                                                               | 15,555.1<br>(13,748.7 to 17,437.9)                  | 3,260.8<br>(2,186.0 to 4,696.9)                      | 7.9<br>(4.4 to 13.2)                             | 4.1<br>(-40.5 to 58.7)                            | -19.8<br>(-50.3 to 32.7)                         |
| Acute hepatitis A                                                       | 36.6<br>(8.7 to 80.8)                               | 475.9<br>(113.3 to 1,050.0)                          | 1.4<br>(0.3 to 3.3)                              | -13.1<br>(-80.5 to 241.7)                         | -27.4<br>(-83.7 to 185.6)                        |
| Hepatitis B                                                             | 9,870.7<br>(8,102.9 to 11,663.8)                    | 2,387.3<br>(1,394.8 to 3,809.5)                      | 5.7<br>(2.8 to 10.2)                             | -1.9<br>(-44.6 to 74.1)                           | -18.0<br>(-53.7 to 45.6)                         |
| Hepatitis C                                                             | 5,627.9<br>(5,034.6 to 6,242.2)                     | 138.2<br>(94.2 to 196.9)                             | 0.1<br>(0.1 to 0.2)                              | -3.7<br>(-9.5 to 3.0)                             | -19.5<br>(-24.4 to -14.0)                        |
| Acute hepatitis E                                                       | 20.0<br>(11.4 to 30.7)                              | 259.4<br>(148.3 to 398.4)                            | 0.6<br>(0.3 to 1.1)                              | 0.2<br>(-20.8 to 24.2)                            | -16.3<br>(-33.8 to 3.8)                          |
| Other infectious diseases                                               | 443.0<br>(424.4 to 460.5)                           | 0.4<br>(0.2 to 0.6)                                  | 9.2<br>(6.1 to 13.6)                             | 15.9<br>(12.2 to 19.9)                            | -3.1<br>(-6.2 to 0.2)                            |
| <b>Non-communicable diseases</b>                                        | <b>156,756.2</b><br><b>(156,725.2 to 156,785.0)</b> | <b>536,502.5*</b><br><b>(489,854.2 to 589,221.6)</b> | <b>32,089.3</b><br><b>(24,328.8 to 41,048.0)</b> | <b>19.1</b><br><b>(18.4 to 19.7)</b>              | <b>-0.5</b><br><b>(-1.1 to 0.1)</b>              |
| <b>Neoplasms</b>                                                        | <b>5,043.6</b><br><b>(4,976.8 to 5,112.4)</b>       | <b>2,020.4</b><br><b>(1,935.7 to 2,125.4)</b>        | <b>586.3</b><br><b>(432.7 to 755.0)</b>          | <b>21.6</b><br><b>(18.3 to 25.4)</b>              | <b>1.6</b><br><b>(-1.1 to 4.9)</b>               |
| Lip and oral cavity cancer                                              | 128.1<br>(123.4 to 133.0)                           | 36.4<br>(35.1 to 37.8)                               | 33.3<br>(9.8 to 17.4)                            | 25.5<br>(18.4 to 33.4)                            | 4.9<br>(-1.1 to 11.5)                            |
| Nasopharynx cancer                                                      | 17.2<br>(16.1 to 18.4)                              | 5.2<br>(4.9 to 5.6)                                  | 2.2<br>(1.6 to 2.9)                              | 7.0<br>(-3.2 to 17.9)                             | -10.6<br>(-19.1 to -1.4)                         |
| Other pharynx cancer                                                    | 45.8<br>(43.0 to 48.0)                              | 16.6<br>(15.6 to 17.5)                               | 5.6<br>(4.0 to 7.4)                              | 30.6<br>(18.4 to 41.5)                            | 9.2<br>(-1.0 to 18.3)                            |
| Oesophageal cancer                                                      | 73.8<br>(70.3 to 78.2)                              | 59.6<br>(57.2 to 62.3)                               | 14.7<br>(10.3 to 19.0)                           | -2.8<br>(-10.9 to 6.5)                            | -18.8<br>(-25.6 to -11.0)                        |
| Stomach cancer                                                          | 286.1<br>(271.5 to 301.0)                           | 154.5<br>(147.4 to 161.8)                            | 39.1<br>(28.3 to 50.1)                           | 5.5<br>(-1.6 to 12.9)                             | -11.8<br>(-17.7 to -5.6)                         |
| Colon and rectum cancer                                                 | 822.0<br>(787.5 to 878.0)                           | 226.3<br>(216.9 to 241.0)                            | 78.3<br>(58.0 to 101.3)                          | 20.5<br>(13.7 to 29.2)                            | 0.7<br>(-5.0 to 8.0)                             |
| Liver cancer                                                            | 104.3<br>(97.6 to 111.9)                            | 106.7<br>(99.5 to 112.1)                             | 23.7<br>(16.8 to 30.9)                           | 27.3<br>(18.1 to 36.7)                            | 6.4<br>(-1.3 to 14.3)                            |
| Liver cancer due to hepatitis B                                         | 49.1<br>(36.0 to 59.0)                              | 37.5<br>(27.6 to 45.4)                               | 8.2<br>(5.1 to 11.5)                             | 26.7<br>(13.1 to 41.6)                            | 5.9<br>(-5.5 to 18.3)                            |

| Cause                                              | Prevalence in thousands (95% UI)                 | Incidence in thousands (95% UI)                | YLDs in thousands (95% UI)                    |                                                   |                                                  |
|----------------------------------------------------|--------------------------------------------------|------------------------------------------------|-----------------------------------------------|---------------------------------------------------|--------------------------------------------------|
|                                                    | 2016 counts                                      | 2016 counts                                    | 2016 counts                                   | Percentage change in counts between 2006 and 2016 | Percentage change in rates between 2006 and 2016 |
| Liver cancer due to hepatitis C                    | 34.2<br>(29.6 to 39.6)                           | 25.4<br>(21.9 to 29.5)                         | 5.7<br>(4.0 to 7.7)                           | 25.5<br>(15.1 to 35.4)                            | 4.9<br>(-3.8 to 13.2)                            |
| Liver cancer due to alcohol use                    | 25.5<br>(20.4 to 31.5)                           | 20.8<br>(16.6 to 25.4)                         | 4.7<br>(3.1 to 6.6)                           | 26.9<br>(12.8 to 42.0)                            | 6.0<br>(-5.7 to 18.7)                            |
| Liver cancer due to other causes                   | 30.6<br>(25.3 to 37.4)                           | 23.0<br>(19.0 to 28.0)                         | 5.1<br>(3.4 to 7.0)                           | 31.0<br>(16.2 to 45.7)                            | 9.5<br>(-2.9 to 21.8)                            |
| Gallbladder and biliary tract cancer               | 21.2<br>(19.1 to 23.1)                           | 23.4<br>(21.4 to 25.2)                         | 5.4<br>(3.7 to 7.2)                           | 8.8<br>(1.5 to 17.8)                              | -9.0<br>(-15.2 to -1.5)                          |
| Pancreatic cancer                                  | 49.0<br>(46.5 to 51.0)                           | 57.5<br>(55.0 to 59.2)                         | 11.7<br>(8.2 to 15.2)                         | 22.6<br>(14.7 to 30.3)                            | 2.4<br>(-4.2 to 8.9)                             |
| Larynx cancer                                      | 72.4<br>(70.2 to 74.8)                           | 21.8<br>(21.2 to 22.5)                         | 8.7<br>(6.2 to 11.2)                          | 12.9<br>(5.7 to 19.7)                             | -5.6<br>(-11.7 to 0.1)                           |
| Tracheal, bronchus, and lung cancer                | 405.2<br>(388.8 to 422.0)                        | 295.2<br>(285.0 to 305.9)                      | 68.2<br>(49.8 to 86.1)                        | 20.5<br>(14.4 to 26.9)                            | 0.7<br>(-4.4 to 6.0)                             |
| Malignant skin melanoma                            | 134.2<br>(108.4 to 147.4)                        | 28.3<br>(23.0 to 31.1)                         | 8.9<br>(6.2 to 12.0)                          | 44.7<br>(32.0 to 55.0)                            | 20.9<br>(10.3 to 29.5)                           |
| Non-melanoma skin cancer                           | 122.0<br>(99.0 to 152.1)                         | 193.2<br>(124.7 to 285.0)                      | 4.4<br>(2.3 to 7.2)                           | 1.8<br>(-9.9 to 17.1)                             | -14.9<br>(-24.7 to -2.1)                         |
| Non-melanoma skin cancer (squamous-cell carcinoma) | 98.0<br>(56.0 to 142.8)                          | 92.6<br>(53.1 to 134.6)                        | 4.2<br>(2.1 to 7.1)                           | 1.4<br>(-10.8 to 17.1)                            | -15.3<br>(-25.4 to -2.1)                         |
| Non-melanoma skin cancer (basal-cell carcinoma)    | 11.5<br>(5.5 to 22.7)                            | 100.5<br>(52.6 to 178.4)                       | 0.1<br>(< 0.05 to 0.3)                        | 19.0<br>(-0.2 to 34.3)                            | -0.5<br>(-16.6 to 12.3)                          |
| Breast cancer                                      | 615.9<br>(586.2 to 660.9)                        | 128.8<br>(122.3 to 138.9)                      | 58.0<br>(42.1 to 75.8)                        | 19.9<br>(13.2 to 27.6)                            | 0.3<br>(-5.4 to 6.6)                             |
| Cervical cancer                                    | 79.0<br>(65.3 to 87.2)                           | 21.8<br>(18.3 to 23.9)                         | 7.8<br>(5.5 to 10.3)                          | 1.3<br>(-5.7 to 11.3)                             | -15.3<br>(-21.2 to -6.9)                         |
| Uterine cancer                                     | 179.1<br>(168.8 to 195.0)                        | 38.7<br>(36.5 to 42.0)                         | 13.7<br>(10.0 to 18.2)                        | 27.3<br>(15.4 to 41.9)                            | 6.4<br>(-3.6 to 18.6)                            |
| Ovarian cancer                                     | 61.2<br>(56.5 to 64.2)                           | 20.6<br>(19.2 to 21.5)                         | 9.2<br>(6.7 to 11.9)                          | 14.0<br>(1.5 to 24.9)                             | -4.8<br>(-15.2 to 4.4)                           |
| Prostate cancer                                    | 1,061.5<br>(925.3 to 1,319.7)                    | 266.5<br>(235.9 to 315.2)                      | 99.2<br>(69.5 to 131.8)                       | 29.8<br>(20.9 to 40.7)                            | 8.5<br>(1.0 to 17.6)                             |
| Testicular cancer                                  | 4.2<br>(4.0 to 4.5)                              | 0.9<br>(0.9 to 1.0)                            | 0.4<br>(0.3 to 0.5)                           | 24.6<br>(14.4 to 35.5)                            | 4.1<br>(-4.4 to 13.2)                            |
| Kidney cancer                                      | 140.3<br>(131.4 to 146.9)                        | 38.5<br>(36.4 to 40.0)                         | 12.4<br>(9.0 to 16.4)                         | 20.2<br>(12.7 to 28.4)                            | 0.4<br>(-5.8 to 7.3)                             |
| Bladder cancer                                     | 236.4<br>(226.4 to 246.5)                        | 59.0<br>(56.6 to 61.4)                         | 22.4<br>(16.4 to 29.7)                        | 16.1<br>(9.3 to 23.0)                             | -3.0<br>(-8.6 to 2.8)                            |
| Brain and nervous system cancer                    | 51.9<br>(43.5 to 56.1)                           | 23.7<br>(20.2 to 25.4)                         | 7.5<br>(5.2 to 10.0)                          | 30.8<br>(22.5 to 38.7)                            | 9.3<br>(2.4 to 15.9)                             |
| Thyroid cancer                                     | 70.7<br>(66.8 to 76.4)                           | 14.0<br>(13.3 to 15.1)                         | 4.9<br>(3.5 to 6.6)                           | 29.5<br>(20.3 to 41.3)                            | 8.3<br>(0.5 to 18.1)                             |
| Mesothelioma                                       | 7.0<br>(6.4 to 7.5)                              | 4.8<br>(4.4 to 5.0)                            | 1.6<br>(1.1 to 2.1)                           | 22.6<br>(13.2 to 30.7)                            | 2.4<br>(-5.4 to 9.2)                             |
| Hodgkin lymphoma                                   | 11.6<br>(10.5 to 12.9)                           | 3.1<br>(2.8 to 3.6)                            | 1.3<br>(0.9 to 1.8)                           | 5.4<br>(-0.8 to 12.5)                             | -11.9<br>(-17.1 to -6.0)                         |
| Non-Hodgkin's lymphoma                             | 180.6<br>(164.3 to 193.3)                        | 50.2<br>(45.8 to 53.8)                         | 15.7<br>(11.4 to 20.7)                        | 40.6<br>(30.8 to 49.4)                            | 17.6<br>(9.3 to 24.9)                            |
| Multiple myeloma                                   | 47.5<br>(38.7 to 54.3)                           | 18.7<br>(15.8 to 21.4)                         | 9.6<br>(6.5 to 12.5)                          | 33.6<br>(22.6 to 46.3)                            | 11.7<br>(2.4 to 22.3)                            |
| Leukaemia                                          | 144.6<br>(133.0 to 153.3)                        | 42.2<br>(38.7 to 44.6)                         | 19.9<br>(14.2 to 26.1)                        | 26.1<br>(19.2 to 34.4)                            | 5.4<br>(-0.4 to 12.4)                            |
| Acute lymphoid leukaemia                           | 9.9<br>(8.7 to 10.7)                             | 3.0<br>(2.6 to 3.2)                            | 1.4<br>(1.0 to 1.9)                           | 38.0<br>(26.3 to 47.4)                            | 15.3<br>(5.6 to 23.2)                            |
| Chronic lymphoid leukaemia                         | 59.4<br>(54.7 to 65.6)                           | 13.8<br>(12.7 to 15.2)                         | 7.6<br>(5.5 to 10.0)                          | 24.7<br>(14.6 to 35.7)                            | 4.2<br>(-4.2 to 13.4)                            |
| Acute myeloid leukaemia                            | 12.8<br>(10.6 to 13.8)                           | 9.9<br>(8.2 to 10.6)                           | 2.7<br>(1.8 to 3.6)                           | 38.3<br>(28.6 to 47.0)                            | 15.6<br>(7.5 to 22.9)                            |
| Chronic myeloid leukaemia                          | 7.0<br>(6.3 to 7.7)                              | 2.6<br>(2.3 to 2.8)                            | 0.9<br>(0.6 to 1.2)                           | 0.7<br>(-6.4 to 7.6)                              | -15.8<br>(-21.8 to -10.1)                        |
| Other leukaemia                                    | 55.4<br>(46.8 to 60.1)                           | 12.9<br>(11.0 to 14.0)                         | 7.2<br>(5.1 to 9.6)                           | 25.3<br>(14.5 to 37.5)                            | 4.7<br>(-4.3 to 14.9)                            |
| Other neoplasms                                    | 218.6<br>(194.9 to 230.3)                        | 64.5<br>(57.7 to 67.6)                         | 18.7<br>(13.4 to 24.6)                        | 43.1<br>(33.0 to 52.3)                            | 19.6<br>(11.2 to 27.3)                           |
| <b>Cardiovascular diseases</b>                     | <b>52,361.3</b><br><b>(51,399.6 to 53,525.1)</b> | <b>6,016.3†</b><br><b>(5,514.5 to 6,535.5)</b> | <b>3,857.1</b><br><b>(2,831.6 to 5,000.1)</b> | <b>18.9</b><br><b>(15.0 to 22.6)</b>              | <b>-0.6</b><br><b>(-3.9 to 2.5)</b>              |
| Rheumatic heart disease                            | 383.6<br>(343.3 to 424.0)                        | 14.1<br>(12.1 to 16.4)                         | 24.2<br>(16.3 to 33.5)                        | 21.8<br>(16.1 to 27.2)                            | 1.8<br>(-2.9 to 6.4)                             |
| Ischaemic heart disease                            | 19,344.8<br>(17,977.5 to 20,816.8)               | 2,170.2<br>(1,908.0 to 2,462.2)                | 805.7<br>(566.5 to 1,100.3)                   | 17.5<br>(16.2 to 18.7)                            | -1.8<br>(-2.9 to -0.8)                           |
| Cerebrovascular disease                            | 9,375.1<br>(8,929.1 to 9,863.8)                  | 1,573.5†<br>(1,379.7 to 1,779.0)               | 1,722.6<br>(1,205.7 to 2,249.1)               | 20.2<br>(11.2 to 27.9)                            | 0.5<br>(-7.1 to 6.9)                             |
| Ischaemic stroke                                   | 8,099.1<br>(6,943.0 to 9,382.5)                  | 1,115.6†<br>(923.9 to 1,309.7)                 | 1,431.5<br>(984.8 to 1,877.7)                 | 20.7<br>(10.4 to 29.5)                            | 0.9<br>(-7.7 to 8.2)                             |
| Hemorrhagic stroke                                 | 1,636.4<br>(1,329.2 to 1,970.4)                  | 457.9†<br>(385.2 to 531.0)                     | 291.1<br>(205.3 to 395.2)                     | 17.6<br>(4.9 to 29.4)                             | -1.7<br>(-12.3 to 8.2)                           |
| Hypertensive heart disease                         | 2,133.7<br>(1,622.3 to 2,735.3)                  | --                                             | 169.8<br>(108.6 to 245.0)                     | 18.1<br>(15.2 to 20.9)                            | -1.3<br>(-3.7 to 1.1)                            |
| Cardiomyopathy and myocarditis                     | 527.1<br>(473.7 to 591.7)                        | 173.1†<br>(134.7 to 214.0)                     | 41.6<br>(26.4 to 61.2)                        | 12.6<br>(8.2 to 17.3)                             | -5.9<br>(-9.6 to -1.9)                           |
| Myocarditis                                        | 84.2<br>(67.7 to 103.2)                          | 173.1<br>(134.7 to 214.0)                      | 5.5<br>(3.5 to 8.0)                           | 15.5<br>(8.8 to 21.7)                             | -3.5<br>(-9.1 to 1.7)                            |
| Alcoholic cardiomyopathy                           | 100.6<br>(71.2 to 133.9)                         | --                                             | 8.1<br>(5.0 to 12.0)                          | 9.2<br>(0.1 to 20.1)                              | -8.7<br>(-16.3 to 0.4)                           |
| Other cardiomyopathy                               | 350.8<br>(247.4 to 472.1)                        | --                                             | 28.1<br>(17.8 to 41.4)                        | 13.1<br>(8.2 to 18.2)                             | -5.5<br>(-9.6 to -1.2)                           |
| Atrial fibrillation and flutter                    | 6,933.2<br>(5,774.4 to 8,388.5)                  | 623.3<br>(495.2 to 782.9)                      | 539.1<br>(361.9 to 758.1)                     | 22.6<br>(21.0 to 24.0)                            | 2.4<br>(1.2 to 3.7)                              |
| Peripheral vascular disease                        | 15,445.9<br>(12,733.3 to 18,715.6)               | 1,372.2<br>(1,019.4 to 1,784.0)                | 91.2<br>(41.6 to 172.5)                       | 13.6<br>(12.0 to 15.2)                            | -5.0<br>(-6.4 to -3.7)                           |
| Endocarditis                                       | 48.3<br>(37.6 to 60.3)                           | 89.8<br>(74.7 to 107.2)                        | 3.8<br>(2.4 to 5.9)                           | 18.2<br>(9.6 to 27.3)                             | -1.2<br>(-8.4 to 6.4)                            |
| Other cardiovascular and circulatory diseases      | 9,022.4<br>(6,907.2 to 11,763.7)                 | --                                             | 459.0<br>(290.6 to 700.4)                     | 14.9<br>(11.8 to 17.9)                            | -4.0<br>(-6.6 to -1.4)                           |
| <b>Chronic respiratory diseases</b>                | <b>35,699.3</b><br><b>(35,069.3 to 36,300.6)</b> | <b>4,556.8†</b><br><b>(4,052.7 to 5,115.3)</b> | <b>2,166.2</b><br><b>(1,845.2 to 2,470.2)</b> | <b>22.4</b><br><b>(19.5 to 25.2)</b>              | <b>2.3</b><br><b>(-0.1 to 4.7)</b>               |
| Chronic obstructive pulmonary disease              | 26,752.0<br>(25,232.7 to 28,228.8)               | 1,645.9<br>(1,369.6 to 1,921.9)                | 1,638.4<br>(1,439.0 to 1,819.2)               | 22.2<br>(18.5 to 25.9)                            | 2.2<br>(-0.9 to 5.3)                             |
| Pneumoconiosis                                     | 156.3<br>(145.1 to 169.2)                        | 6.1<br>(5.1 to 7.3)                            | 22.2<br>(14.8 to 30.1)                        | 16.9<br>(10.8 to 23.6)                            | -2.3<br>(-7.4 to 3.3)                            |
| Silicosis                                          | 66.8<br>(59.3 to 75.7)                           | 2.5<br>(1.7 to 3.5)                            | 9.4<br>(6.3 to 13.0)                          | 13.0<br>(3.5 to 23.2)                             | -5.6<br>(-13.5 to 3.0)                           |

| Cause                                                          | Prevalence in thousands (95% UI)           | Incidence in thousands (95% UI)             | YLDs in thousands (95% UI)              |                                                   |                                                  |
|----------------------------------------------------------------|--------------------------------------------|---------------------------------------------|-----------------------------------------|---------------------------------------------------|--------------------------------------------------|
|                                                                | 2016 counts                                | 2016 counts                                 | 2016 counts                             | Percentage change in counts between 2006 and 2016 | Percentage change in rates between 2006 and 2016 |
| Asbestosis                                                     | 23.2<br>(20.8 to 25.8)                     | 1.5<br>(1.3 to 1.8)                         | 3.4<br>(2.3 to 4.6)                     | 26.7<br>(19.6 to 34.2)                            | 5.9<br>(0.0 to 12.2)                             |
| Coal workers pneumoconiosis                                    | 36.8<br>(31.8 to 42.8)                     | 0.6<br>(0.4 to 0.8)                         | 5.2<br>(3.5 to 7.3)                     | 17.5<br>(4.6 to 33.5)                             | -1.8<br>(-12.6 to 11.6)                          |
| Other pneumoconiosis                                           | 29.5<br>(24.5 to 35.7)                     | 1.5<br>(1.0 to 2.2)                         | 4.2<br>(2.8 to 6.0)                     | 18.1<br>(6.4 to 30.8)                             | -1.3<br>(-11.1 to 9.3)                           |
| Asthma                                                         | 12,153.1<br>(10,670.1 to 13,871.5)         | 2,857.0<br>(2,435.0 to 3,337.2)             | 443.8<br>(293.3 to 634.5)               | 22.5<br>(19.7 to 25.5)                            | 2.4<br>(0.1 to 4.9)                              |
| Interstitial lung disease and pulmonary sarcoidosis            | 472.6<br>(396.6 to 554.9)                  | 47.8<br>(34.7 to 61.8)                      | 48.2<br>(31.0 to 69.8)                  | 21.4<br>(16.9 to 26.2)                            | 1.5<br>(-2.3 to 5.5)                             |
| Other chronic respiratory diseases                             | --                                         | --                                          | 13.7<br>(11.9 to 15.2)                  | 62.4<br>(57.6 to 67.0)                            | 35.7<br>(31.7 to 39.6)                           |
| <b>Cirrhosis and other chronic liver diseases</b>              | <b>2,296.8<br/>(2,163.9 to 2,439.2)</b>    | <b>112.5<br/>(95.5 to 131.2)</b>            | <b>78.1<br/>(53.1 to 107.6)</b>         | <b>20.6<br/>(16.7 to 24.4)</b>                    | <b>0.8<br/>(-2.5 to 4.0)</b>                     |
| Cirrhosis and other chronic liver diseases due to hepatitis B  | 654.3<br>(565.7 to 755.6)                  | 33.9<br>(26.7 to 42.5)                      | 24.1<br>(16.0 to 34.4)                  | 19.3<br>(13.8 to 24.8)                            | -0.3<br>(-4.9 to 4.3)                            |
| Cirrhosis and other chronic liver diseases due to hepatitis C  | 584.9<br>(502.6 to 675.5)                  | 29.5<br>(23.4 to 36.9)                      | 19.3<br>(13.0 to 27.2)                  | 23.1<br>(16.9 to 30.0)                            | 2.9<br>(-2.3 to 8.7)                             |
| Cirrhosis and other chronic liver diseases due to alcohol use  | 650.6<br>(542.3 to 757.5)                  | 30.0<br>(23.9 to 36.8)                      | 21.1<br>(13.8 to 29.6)                  | 20.9<br>(14.6 to 26.9)                            | 1.1<br>(-4.2 to 6.1)                             |
| Cirrhosis and other chronic liver diseases due to other causes | 407.1<br>(308.6 to 521.5)                  | 19.2<br>(13.8 to 25.3)                      | 13.6<br>(8.4 to 19.9)                   | 18.9<br>(12.2 to 26.1)                            | 0.6<br>(-6.2 to 5.4)                             |
| <b>Digestive diseases</b>                                      | <b>16,676.3<br/>(15,640.1 to 17,402.2)</b> | <b>13,304.2†<br/>(11,780.7 to 15,071.0)</b> | <b>421.6<br/>(295.3 to 568.8)</b>       | <b>26.6<br/>(22.9 to 30.5)</b>                    | <b>5.8<br/>(2.8 to 9.1)</b>                      |
| Peptic ulcer disease                                           | 4,307.5<br>(3,581.8 to 5,211.4)            | 554.4<br>(441.3 to 678.2)                   | 74.2<br>(46.1 to 114.0)                 | 28.4<br>(20.3 to 36.0)                            | 7.4<br>(0.6 to 13.7)                             |
| Gastritis and duodenitis                                       | 9,523.5<br>(7,311.7 to 12,177.3)           | 5,177.9<br>(4,151.8 to 6,396.8)             | 107.1<br>(69.5 to 157.2)                | 31.3<br>(25.1 to 37.1)                            | 9.7<br>(4.6 to 14.6)                             |
| Appendicitis                                                   | 15.7<br>(12.9 to 18.8)                     | 404.6<br>(338.9 to 476.3)                   | 4.5<br>(2.9 to 6.4)                     | 22.6<br>(12.0 to 34.7)                            | 2.5<br>(-6.4 to 12.6)                            |
| Paralytic ileus and intestinal obstruction                     | 10.4<br>(8.2 to 12.8)                      | 297.3<br>(231.2 to 368.9)                   | 3.3<br>(2.0 to 4.7)                     | 31.1<br>(23.6 to 38.5)                            | 9.6<br>(3.3 to 15.8)                             |
| Inguinal, femoral, and abdominal hernia                        | 2,550.9<br>(1,883.6 to 3,397.6)            | 2,806.5<br>(2,051.8 to 3,707.3)             | 121.3<br>(75.5 to 177.8)                | 18.7<br>(11.9 to 24.7)                            | -0.8<br>(-6.4 to 4.2)                            |
| Inflammatory bowel disease                                     | 372.2<br>(323.4 to 424.1)                  | 75.3<br>(59.4 to 93.9)                      | 50.6<br>(34.2 to 70.1)                  | 27.2<br>(21.8 to 33.6)                            | 6.4<br>(1.8 to 11.6)                             |
| Vascular intestinal disorders                                  | 10.9<br>(8.6 to 13.5)                      | 58.4<br>(43.8 to 75.6)                      | 3.2<br>(2.0 to 4.8)                     | 24.6<br>(9.1 to 42.8)                             | 4.1<br>(-8.8 to 19.3)                            |
| Gallbladder and biliary diseases                               | 940.9<br>(718.2 to 1,202.1)                | 3,510.4<br>(2,650.2 to 4,543.2)             | 14.5<br>(9.4 to 21.0)                   | 25.5<br>(15.1 to 36.7)                            | 4.9<br>(-3.8 to 14.3)                            |
| Pancreatitis                                                   | 46.5<br>(36.2 to 58.6)                     | 419.2<br>(328.0 to 529.6)                   | 5.5<br>(3.5 to 8.0)                     | 34.5<br>(20.3 to 48.7)                            | 12.4<br>(0.5 to 24.3)                            |
| Other digestive diseases                                       | --                                         | --                                          | 37.4<br>(26.2 to 50.4)                  | 36.6<br>(32.6 to 40.8)                            | 14.2<br>(10.9 to 17.7)                           |
| <b>Neurological disorders</b>                                  | <b>46,469.4<br/>(44,159.6 to 48,458.5)</b> | <b>14,137.0<br/>(9,472.6 to 20,729.3)</b>   | <b>1,920.4<br/>(1,346.4 to 2,530.8)</b> | <b>20.2<br/>(18.5 to 21.9)</b>                    | <b>0.5<br/>(-0.9 to 1.9)</b>                     |
| Alzheimer's disease and other dementias                        | 5,553.9<br>(4,273.2 to 7,106.6)            | 945.1<br>(630.3 to 1,302.7)                 | 780.5<br>(510.8 to 1,089.3)             | 21.8<br>(20.1 to 23.2)                            | 1.8<br>(0.4 to 2.9)                              |
| Parkinson's disease                                            | 932.9<br>(686.6 to 1,233.6)                | 111.9<br>(77.2 to 151.2)                    | 107.9<br>(65.0 to 158.0)                | 22.8<br>(19.3 to 26.3)                            | 2.6<br>(-0.3 to 5.6)                             |
| Epilepsy                                                       | 683.6<br>(555.2 to 821.2)                  | 48.6<br>(35.4 to 63.7)                      | 183.5<br>(123.7 to 255.3)               | 17.0<br>(4.0 to 32.5)                             | -2.2<br>(-13.1 to 10.8)                          |
| Multiple sclerosis                                             | 96.4<br>(88.2 to 105.6)                    | 0.6<br>(0.4 to 0.8)                         | 24.1<br>(17.3 to 31.4)                  | 32.8<br>(24.7 to 41.5)                            | 11.0<br>(4.2 to 18.3)                            |
| Motor neuron disease                                           | 25.1<br>(20.4 to 31.2)                     | 6.6<br>(5.2 to 8.2)                         | 5.3<br>(3.6 to 7.3)                     | 31.8<br>(27.4 to 35.9)                            | 10.2<br>(6.5 to 13.6)                            |
| Migraine                                                       | 14,341.7<br>(13,220.7 to 15,549.6)         | 832.3<br>(698.6 to 984.5)                   | 655.6<br>(436.1 to 909.9)               | 18.5<br>(17.1 to 20.0)                            | -1.0<br>(-2.1 to 0.3)                            |
| Tension-type headache                                          | 29,614.0<br>(20,706.7 to 41,431.2)         | 12,189.8<br>(7,599.2 to 18,645.0)           | 138.5<br>(87.4 to 207.1)                | 18.6<br>(16.4 to 20.8)                            | -0.9<br>(-2.7 to 1.0)                            |
| Other neurological disorders                                   | 1.0<br>(0.5 to 1.7)                        | 2.1<br>(1.2 to 3.1)                         | 24.9<br>(17.3 to 33.8)                  | 27.9<br>(25.0 to 30.5)                            | 6.9<br>(4.5 to 9.1)                              |
| <b>Mental and substance use disorders</b>                      | <b>24,938.3<br/>(24,498.7 to 25,347.6)</b> | <b>11,163.0†<br/>(9,816.5 to 12,642.5)</b>  | <b>3,424.2<br/>(2,519.0 to 4,435.2)</b> | <b>16.6<br/>(15.6 to 17.6)</b>                    | <b>-2.6<br/>(-3.4 to -1.7)</b>                   |
| Schizophrenia                                                  | 435.2<br>(385.4 to 491.1)                  | 4.4<br>(3.3 to 5.7)                         | 255.4<br>(194.2 to 311.4)               | 22.7<br>(19.4 to 26.1)                            | 2.5<br>(-0.2 to 5.4)                             |
| Alcohol use disorders                                          | 1,272.4<br>(1,021.7 to 1,573.1)            | 429.5<br>(322.1 to 556.8)                   | 117.7<br>(78.2 to 168.3)                | 12.5<br>(7.1 to 17.6)                             | -6.0<br>(-10.5 to -1.8)                          |
| Drug use disorders                                             | 727.8<br>(697.5 to 750.1)                  | 16.3<br>(14.3 to 18.5)                      | 216.9<br>(153.2 to 277.9)               | 23.2<br>(19.3 to 27.1)                            | 3.0<br>(-0.3 to 6.2)                             |
| Opioid use disorders                                           | 477.4<br>(420.8 to 545.4)                  | --                                          | 180.6<br>(128.9 to 235.0)               | 22.8<br>(18.3 to 27.4)                            | 2.6<br>(-1.1 to 6.5)                             |
| Cocaine use disorders                                          | 114.1<br>(101.0 to 128.8)                  | --                                          | 14.6<br>(8.9 to 20.9)                   | 25.2<br>(17.2 to 32.9)                            | 4.6<br>(-2.0 to 11.1)                            |
| Amphetamine use disorders                                      | 12.3<br>(8.5 to 17.0)                      | 2.4<br>(1.5 to 3.6)                         | 1.7<br>(1.0 to 2.9)                     | 26.3<br>(21.6 to 30.7)                            | 5.6<br>(1.6 to 9.2)                              |
| Cannabis use disorders                                         | 97.3<br>(81.4 to 115.2)                    | --                                          | 2.8<br>(1.8 to 4.2)                     | 20.5<br>(15.6 to 25.7)                            | 0.7<br>(-3.4 to 5.0)                             |
| Other drug use disorders                                       | 63.6<br>(55.6 to 72.9)                     | 13.9<br>(12.1 to 15.9)                      | 17.1<br>(11.5 to 23.2)                  | 25.7<br>(19.8 to 32.2)                            | 5.1<br>(0.1 to 10.5)                             |
| Depressive disorders                                           | 10,464.9<br>(10,063.8 to 10,811.4)         | 9,959.3<br>(8,648.4 to 11,415.6)            | 1,588.3<br>(1,092.6 to 2,177.9)         | 13.9<br>(12.3 to 15.5)                            | -4.8<br>(-6.2 to -3.5)                           |
| Major depressive disorder                                      | 6,185.3<br>(5,391.4 to 7,077.5)            | 9,454.3<br>(8,119.7 to 10,876.1)            | 1,172.6<br>(783.5 to 1,621.3)           | 11.8<br>(10.1 to 13.4)                            | -6.6<br>(-8.0 to -5.2)                           |
| Dysthymia                                                      | 4,578.5<br>(3,769.0 to 5,510.3)            | 505.1<br>(414.6 to 604.1)                   | 415.7<br>(274.6 to 598.3)               | 20.2<br>(16.5 to 23.8)                            | 0.5<br>(-2.6 to 3.5)                             |
| Bipolar disorder                                               | 943.3<br>(784.4 to 1,124.8)                | 54.6<br>(43.0 to 67.9)                      | 177.3<br>(109.2 to 261.4)               | 19.1<br>(16.4 to 22.0)                            | -0.4<br>(-2.7 to 1.9)                            |
| Anxiety disorders                                              | 6,553.7<br>(5,792.0 to 7,348.5)            | 672.9<br>(613.9 to 739.9)                   | 583.9<br>(408.7 to 786.4)               | 17.1<br>(14.6 to 19.6)                            | -2.1<br>(-4.2 to -0.0)                           |
| Eating disorders                                               | --                                         | --                                          | --                                      | --                                                | --                                               |
| Anorexia nervosa                                               | --                                         | --                                          | --                                      | --                                                | --                                               |
| Bulimia nervosa                                                | --                                         | --                                          | --                                      | --                                                | --                                               |
| Autistic spectrum disorders                                    | 993.8<br>(952.4 to 1,031.4)                | --                                          | 139.1<br>(95.9 to 192.2)                | 20.7<br>(18.7 to 22.9)                            | 0.9<br>(-0.8 to 2.7)                             |
| Autism                                                         | 327.3<br>(281.5 to 382.3)                  | --                                          | 76.7<br>(50.0 to 110.1)                 | 20.7<br>(17.5 to 24.1)                            | 0.9<br>(-1.8 to 3.7)                             |
| Asperger syndrome and other autistic spectrum disorders        | 670.7<br>(560.3 to 801.8)                  | --                                          | 62.4<br>(41.5 to 89.5)                  | 20.8<br>(18.5 to 23.1)                            | 1.0<br>(-1.0 to 2.9)                             |

| Cause                                                      | Prevalence in thousands (95% UI)              | Incidence in thousands (95% UI)                | YLDs in thousands (95% UI)               |                                                   |                                                  |
|------------------------------------------------------------|-----------------------------------------------|------------------------------------------------|------------------------------------------|---------------------------------------------------|--------------------------------------------------|
|                                                            | 2016 counts                                   | 2016 counts                                    | 2016 counts                              | Percentage change in counts between 2006 and 2016 | Percentage change in rates between 2006 and 2016 |
| Attention-deficit/hyperactivity disorder                   | 60.4<br>(47.1 to 75.5)                        | --                                             | 0.7<br>(0.4 to 1.1)                      | 19.7<br>(8.6 to 32.3)                             | 0.1<br>(-9.3 to 10.6)                            |
| Conduct disorder                                           | --                                            | --                                             | --                                       | --                                                | --                                               |
| Idiopathic developmental intellectual disability           | 978.0<br>(477.9 to 1,469.4)                   | --                                             | 48.0<br>(24.0 to 79.3)                   | 9.8<br>(5.6 to 12.9)                              | -8.2<br>(-11.7 to -5.6)                          |
| Other mental and substance use disorders                   | 4,278.5<br>(3,804.5 to 4,830.4)               | 26.0<br>(17.1 to 39.1)                         | 297.1<br>(206.8 to 413.6)                | 20.1<br>(18.3 to 21.8)                            | 0.4<br>(-1.1 to 1.8)                             |
| <b>Diabetes, urogenital, blood, and endocrine diseases</b> | <b>91,937.1<br/>(90,995.6 to 92,720.7)</b>    | <b>18,768.2†<br/>(16,589.1 to 21,115.0)</b>    | <b>3,775.0<br/>(2,686.6 to 5,057.2)</b>  | <b>20.7<br/>(18.6 to 22.8)</b>                    | <b>0.8<br/>(-0.9 to 2.6)</b>                     |
| Diabetes mellitus                                          | 26,878.5<br>(24,540.2 to 29,576.6)            | 638.0<br>(442.8 to 900.3)                      | 2,073.9<br>(1,429.1 to 2,853.7)          | 20.0<br>(16.5 to 23.4)                            | 0.3<br>(-2.6 to 3.1)                             |
| Acute glomerulonephritis                                   | 5.7<br>(4.1 to 7.7)                           | 83.2<br>(59.9 to 115.7)                        | 0.3<br>(0.2 to 0.5)                      | 7.4<br>(-4.0 to 18.9)                             | -10.2<br>(-19.7 to -0.6)                         |
| Chronic kidney disease                                     | 31,122.7<br>(26,970.7 to 35,290.4)            | 2,378.5<br>(1,576.8 to 3,210.1)                | 803.4<br>(593.6 to 1,064.9)              | 25.3<br>(22.3 to 28.4)                            | 4.7<br>(2.2 to 7.4)                              |
| Chronic kidney disease due to diabetes mellitus            | 14,525.3<br>(11,299.1 to 17,851.3)            | 1,130.3<br>(726.8 to 1,574.9)                  | 377.8<br>(265.0 to 517.7)                | 27.6<br>(23.8 to 31.5)                            | 6.6<br>(3.5 to 9.9)                              |
| Chronic kidney disease due to hypertension                 | 5,376.2<br>(4,189.9 to 6,694.8)               | 280.7<br>(163.6 to 439.0)                      | 192.5<br>(125.8 to 270.1)                | 26.4<br>(21.5 to 31.1)                            | 5.6<br>(1.5 to 9.6)                              |
| Chronic kidney disease due to glomerulonephritis           | 5,377.2<br>(4,221.5 to 6,675.5)               | 519.2<br>(319.0 to 751.0)                      | 87.2<br>(54.4 to 138.7)                  | 15.0<br>(7.3 to 21.7)                             | -3.9<br>(-10.3 to 1.8)                           |
| Chronic kidney disease due to other causes                 | 5,844.1<br>(4,078.0 to 8,084.0)               | 448.3<br>(267.7 to 681.2)                      | 146.0<br>(92.5 to 219.8)                 | 24.8<br>(19.9 to 29.7)                            | 4.3<br>(0.2 to 8.4)                              |
| Urinary diseases and male infertility                      | 13,849.7<br>(12,664.4 to 16,210.6)            | 14,184.5†<br>(12,189.8 to 16,345.4)            | 444.4<br>(285.3 to 653.8)                | 18.4<br>(17.2 to 19.6)                            | -1.1<br>(-2.1 to 0.0)                            |
| Interstitial nephritis and urinary tract infections        | 159.1<br>(128.9 to 193.8)                     | 8,316.6<br>(6,847.9 to 10,042.6)               | 5.0<br>(3.0 to 7.5)                      | 30.0<br>(23.0 to 36.9)                            | 8.7<br>(2.8 to 14.5)                             |
| Urolithiasis                                               | 162.8<br>(123.6 to 208.7)                     | 4,231.7<br>(3,217.5 to 5,383.0)                | 11.2<br>(7.2 to 16.5)                    | 22.1<br>(13.4 to 31.8)                            | 2.0<br>(-5.2 to 10.2)                            |
| Benign prostatic hyperplasia                               | 13,201.0<br>(10,829.0 to 16,031.6)            | 1,636.2<br>(1,190.5 to 2,123.1)                | 424.2<br>(270.6 to 628.3)                | 18.3<br>(17.0 to 19.6)                            | -1.1<br>(-2.2 to -0.0)                           |
| Male infertility                                           | --                                            | --                                             | --                                       | --                                                | --                                               |
| Other urinary diseases                                     | --                                            | --                                             | 4.0<br>(2.7 to 5.8)                      | 3.7<br>(-1.9 to 9.8)                              | -13.3<br>(-18.0 to -8.2)                         |
| Gynecological diseases                                     | 18,834.7<br>(17,756.3 to 20,509.5)            | 10.6†<br>(7.2 to 14.5)                         | 62.9<br>(31.4 to 110.5)                  | 11.1<br>(9.7 to 12.6)                             | -7.2<br>(-8.3 to -5.9)                           |
| Uterine fibroids                                           | 1,246.0<br>(1,106.7 to 1,413.0)               | 10.6<br>(7.2 to 14.5)                          | 8.9<br>(4.4 to 16.2)                     | 17.8<br>(15.7 to 19.8)                            | -1.6<br>(-3.3 to 0.2)                            |
| Polycystic ovarian syndrome                                | --                                            | --                                             | --                                       | --                                                | --                                               |
| Female infertility                                         | --                                            | --                                             | --                                       | --                                                | --                                               |
| Endometriosis                                              | --                                            | --                                             | --                                       | --                                                | --                                               |
| Genital prolapse                                           | 17,871.3<br>(15,681.1 to 20,256.4)            | --                                             | 54.0<br>(25.9 to 97.1)                   | 10.0<br>(8.5 to 11.6)                             | -8.0<br>(-9.3 to -6.7)                           |
| Premenstrual syndrome                                      | --                                            | --                                             | --                                       | --                                                | --                                               |
| Other gynecological diseases                               | --                                            | --                                             | --                                       | --                                                | --                                               |
| Hemoglobinopathies and hemolytic anaemias                  | 34,359.4<br>(34,050.4 to 34,687.1)            | --                                             | 130.5<br>(87.0 to 190.4)                 | 21.1<br>(18.5 to 23.7)                            | 1.2<br>(-1.0 to 3.4)                             |
| Thalassemias                                               | < 0.05<br>(< 0.05 to 0.1)                     | --                                             | < 0.05<br>(< 0.05 to < 0.05)             | 5.5<br>(-1.4 to 12.9)                             | -11.9<br>(-17.6 to -5.7)                         |
| Thalassaemias trait                                        | 6,383.5<br>(6,123.6 to 6,667.3)               | --                                             | 72.0<br>(46.7 to 106.8)                  | 28.9<br>(24.9 to 33.1)                            | 7.8<br>(4.4 to 11.3)                             |
| Sickle cell disorders                                      | 0.4<br>(0.3 to 0.4)                           | --                                             | 0.1<br>(< 0.05 to 0.1)                   | 39.6<br>(35.5 to 43.8)                            | 16.7<br>(13.2 to 20.2)                           |
| Sickle cell trait                                          | 6,598.9<br>(6,033.7 to 7,365.0)               | --                                             | 14.6<br>(9.6 to 21.4)                    | 31.6<br>(26.9 to 36.1)                            | 10.0<br>(6.1 to 13.8)                            |
| G6PD deficiency                                            | 5,277.4<br>(5,080.8 to 5,501.4)               | --                                             | 0.5<br>(0.3 to 0.7)                      | 20.1<br>(15.9 to 24.4)                            | 0.4<br>(-3.1 to 4.0)                             |
| G6PD trait                                                 | 17,522.4<br>(17,214.9 to 17,881.9)            | --                                             | < 0.05<br>(< 0.05 to < 0.05)             | 27.9<br>(23.6 to 32.9)                            | 6.9<br>(3.3 to 11.1)                             |
| Other hemoglobinopathies and hemolytic anaemias            | 2,247.5<br>(2,149.4 to 2,339.6)               | --                                             | 43.3<br>(29.2 to 63.1)                   | 7.4<br>(4.8 to 9.8)                               | -10.3<br>(-12.4 to -8.2)                         |
| Endocrine, metabolic, blood, and immune disorders          | 8,101.4<br>(6,738.0 to 9,824.5)               | 1,473.3<br>(1,025.4 to 2,021.9)                | 259.6<br>(173.9 to 365.7)                | 18.5<br>(14.4 to 22.4)                            | -0.9<br>(-4.4 to 2.3)                            |
| <b>Musculoskeletal disorders</b>                           | <b>67,996.5<br/>(65,422.6 to 70,260.7)</b>    | <b>32,352.1<br/>(25,787.3 to 40,086.3)</b>     | <b>7,211.7<br/>(5,171.4 to 9,526.5)</b>  | <b>19.3<br/>(17.7 to 20.9)</b>                    | <b>-0.3<br/>(-1.6 to 1.0)</b>                    |
| Rheumatoid arthritis                                       | 1,595.5<br>(1,408.9 to 1,785.6)               | 41.1<br>(27.8 to 57.9)                         | 356.3<br>(249.4 to 464.2)                | 26.9<br>(24.2 to 29.7)                            | 6.1<br>(3.8 to 8.4)                              |
| Osteoarthritis                                             | 29,691.4<br>(27,993.5 to 31,499.3)            | 662.1<br>(540.1 to 803.1)                      | 1,503.9<br>(1,049.6 to 2,038.4)          | 21.2<br>(20.5 to 22.0)                            | 1.3<br>(0.8 to 1.9)                              |
| Low back and neck pain                                     | 36,405.0<br>(33,471.6 to 39,783.0)            | 15,673.5<br>(11,437.8 to 20,653.0)             | 4,175.2<br>(2,856.7 to 5,863.7)          | 18.7<br>(16.7 to 20.6)                            | -0.8<br>(-2.5 to 0.8)                            |
| Low back pain                                              | 25,921.1<br>(19,301.7 to 34,119.4)            | 13,225.2<br>(9,110.6 to 18,227.9)              | 2,806.5<br>(1,834.7 to 4,141.1)          | 17.6<br>(14.8 to 20.1)                            | -1.7<br>(-4.0 to 0.4)                            |
| Neck pain                                                  | 14,432.1<br>(11,023.5 to 19,255.1)            | 2,448.3<br>(1,418.5 to 3,679.1)                | 1,368.6<br>(884.5 to 2,102.4)            | 21.1<br>(18.3 to 23.6)                            | 1.2<br>(-1.1 to 3.3)                             |
| Gout                                                       | 3,061.2<br>(2,359.1 to 3,786.4)               | 530.8<br>(393.8 to 686.8)                      | 92.1<br>(59.9 to 131.2)                  | 21.2<br>(17.7 to 25.2)                            | 1.3<br>(-1.6 to 4.7)                             |
| Other musculoskeletal disorders                            | 13,565.8<br>(8,973.8 to 18,947.0)             | 15,444.6<br>(10,978.2 to 20,842.7)             | 1,084.2<br>(618.5 to 1,695.7)            | 16.4<br>(8.0 to 24.0)                             | -2.7<br>(-9.8 to 3.6)                            |
| <b>Other non-communicable diseases</b>                     | <b>149,375.2<br/>(149,056.7 to 149,625.0)</b> | <b>434,072.1†<br/>(389,237.0 to 486,382.5)</b> | <b>8,648.8<br/>(6,134.2 to 11,996.5)</b> | <b>17.7<br/>(16.4 to 18.9)</b>                    | <b>-1.6<br/>(-2.7 to -0.6)</b>                   |
| Congenital anomalies                                       | 1,328.5<br>(1,236.5 to 1,419.6)               | --                                             | 145.2<br>(104.5 to 192.4)                | 16.8<br>(13.9 to 19.8)                            | -2.4<br>(-4.8 to 0.1)                            |
| Neural tube defects                                        | 99.0<br>(90.3 to 109.3)                       | --                                             | 28.4<br>(20.4 to 37.6)                   | 19.0<br>(13.9 to 24.4)                            | -0.6<br>(-4.8 to 4.0)                            |
| Congenital heart anomalies                                 | 217.8<br>(195.4 to 242.8)                     | --                                             | 11.9<br>(5.0 to 20.7)                    | 26.5<br>(21.7 to 31.2)                            | 5.8<br>(1.7 to 9.6)                              |
| Orofacial clefts                                           | 79.0<br>(70.4 to 87.5)                        | --                                             | 0.9<br>(0.6 to 1.3)                      | 14.8<br>(11.6 to 17.7)                            | -4.1<br>(-6.7 to -1.6)                           |
| Down's syndrome                                            | --                                            | --                                             | --                                       | --                                                | --                                               |
| Turner syndrome                                            | 10.9<br>(9.3 to 12.8)                         | --                                             | 0.1<br>(0.1 to 0.3)                      | 20.1<br>(17.3 to 22.8)                            | 0.4<br>(-1.9 to 2.7)                             |
| Klinefelter syndrome                                       | 2.7<br>(2.1 to 3.4)                           | --                                             | < 0.05<br>(< 0.05 to < 0.05)             | 23.9<br>(21.0 to 27.3)                            | 3.5<br>(1.2 to 6.4)                              |

| Cause                                         | Prevalence in thousands (95% UI)                 | Incidence in thousands (95% UI)                   | YLDs in thousands (95% UI)                    |                                                   |                                                  |
|-----------------------------------------------|--------------------------------------------------|---------------------------------------------------|-----------------------------------------------|---------------------------------------------------|--------------------------------------------------|
|                                               | 2016 counts                                      | 2016 counts                                       | 2016 counts                                   | Percentage change in counts between 2006 and 2016 | Percentage change in rates between 2006 and 2016 |
| Other chromosomal abnormalities               | < 0.05<br>(< 0.05 to < 0.05)                     | --                                                | < 0.05<br>(< 0.05 to < 0.05)                  | 11.3<br>(9.9 to 12.8)                             | -7.0<br>(-8.1 to -5.7)                           |
| Congenital musculoskeletal and limb anomalies | 270.9<br>(249.9 to 292.1)                        | --                                                | 38.1<br>(26.4 to 51.5)                        | 20.1<br>(15.6 to 24.9)                            | 0.4<br>(-3.4 to 4.4)                             |
| Urogenital congenital anomalies               | 66.0<br>(59.5 to 73.1)                           | --                                                | 1.0<br>(0.5 to 1.8)                           | 26.0<br>(21.7 to 30.3)                            | 5.3<br>(1.7 to 8.9)                              |
| Digestive congenital anomalies                | 227.8<br>(206.0 to 251.7)                        | --                                                | 9.3<br>(6.2 to 13.2)                          | 17.3<br>(11.4 to 23.8)                            | -2.0<br>(-6.9 to 3.5)                            |
| Other congenital anomalies                    | 631.2<br>(438.2 to 885.7)                        | --                                                | 55.5<br>(35.0 to 84.2)                        | 11.5<br>(6.5 to 16.9)                             | -6.8<br>(-11.0 to -2.3)                          |
| Skin and subcutaneous diseases                | 67,523.6<br>(65,049.2 to 69,480.2)               | 211,330.3<br>(182,752.1 to 246,753.7)             | 1,033.3<br>(682.8 to 1,569.2)                 | 22.0<br>(21.2 to 22.9)                            | 2.0<br>(1.3 to 2.7)                              |
| Dermatitis                                    | 7,031.2<br>(5,972.2 to 8,324.2)                  | 9,964.7<br>(7,341.8 to 13,249.6)                  | 211.0<br>(130.1 to 322.1)                     | 20.5<br>(18.8 to 22.2)                            | 0.7<br>(-0.7 to 2.1)                             |
| Psoriasis                                     | 2,592.6<br>(2,385.0 to 2,817.9)                  | 239.2<br>(203.9 to 273.2)                         | 209.8<br>(153.0 to 274.0)                     | 25.5<br>(23.1 to 28.1)                            | 4.9<br>(2.9 to 7.0)                              |
| Cellulitis                                    | 106.8<br>(89.4 to 127.3)                         | 2,585.3<br>(2,206.7 to 3,057.6)                   | 5.7<br>(3.7 to 8.2)                           | 25.3<br>(18.1 to 33.0)                            | 4.7<br>(-1.3 to 11.2)                            |
| Pyoderma                                      | 1,088.5<br>(992.1 to 1,188.5)                    | 28,168.5<br>(25,381.2 to 31,314.4)                | 5.8<br>(2.4 to 12.0)                          | 19.3<br>(17.0 to 21.7)                            | -0.2<br>(-2.2 to 1.7)                            |
| Scabies                                       | 1,697.1<br>(1,184.5 to 2,443.7)                  | 5,250.1<br>(3,596.9 to 7,716.4)                   | 41.4<br>(20.3 to 73.9)                        | 15.1<br>(12.8 to 17.3)                            | 3.8<br>(-5.7 to -1.9)                            |
| Fungal skin diseases                          | 28,127.0<br>(22,509.7 to 34,232.0)               | 109,405.8<br>(81,726.9 to 144,090.4)              | 151.4<br>(60.2 to 325.3)                      | 19.4<br>(18.9 to 19.8)                            | -0.2<br>(-0.6 to 0.1)                            |
| Viral skin diseases                           | 2,814.5<br>(2,389.1 to 3,350.9)                  | 4,367.9<br>(3,737.9 to 5,092.2)                   | 80.8<br>(48.9 to 119.2)                       | 19.3<br>(17.6 to 21.0)                            | -0.3<br>(-1.7 to 1.1)                            |
| Acne vulgaris                                 | 1,313.9<br>(1,276.2 to 1,356.5)                  | 599.2<br>(577.2 to 625.1)                         | 31.2<br>(21.3 to 44.1)                        | 24.6<br>(20.9 to 28.8)                            | 4.2<br>(1.0 to 7.6)                              |
| Alopecia areata                               | 272.6<br>(244.4 to 300.9)                        | 466.5<br>(423.3 to 513.9)                         | 8.4<br>(5.4 to 12.6)                          | 20.0<br>(15.2 to 24.9)                            | 0.3<br>(-3.7 to 4.4)                             |
| Pruritus                                      | 2,911.6<br>(2,049.9 to 4,162.1)                  | 2,260.1<br>(1,571.3 to 3,109.4)                   | 29.5<br>(13.3 to 56.8)                        | 20.8<br>(19.1 to 22.5)                            | 1.0<br>(-0.4 to 2.4)                             |
| Urticaria                                     | 899.4<br>(636.5 to 1,226.2)                      | 1,563.8<br>(1,107.4 to 2,087.0)                   | 49.9<br>(29.2 to 76.8)                        | 19.3<br>(16.5 to 22.4)                            | -0.3<br>(-2.6 to 2.3)                            |
| Decubitus ulcer                               | 181.8<br>(134.4 to 238.1)                        | 683.8<br>(502.7 to 918.4)                         | 27.4<br>(17.6 to 39.4)                        | 22.2<br>(13.9 to 30.1)                            | 2.2<br>(-4.8 to 8.7)                             |
| Other skin and subcutaneous diseases          | 34,288.9<br>(31,404.7 to 37,271.8)               | 45,775.4<br>(40,926.9 to 50,673.6)                | 181.1<br>(88.2 to 332.7)                      | 25.7<br>(24.8 to 26.5)                            | 5.1<br>(4.4 to 5.7)                              |
| Sense organ diseases                          | 123,256.8<br>(122,086.7 to 124,732.0)            | 29,404.0†<br>(26,687.7 to 32,057.7)               | 6,101.0<br>(4,329.4 to 8,344.1)               | 16.8<br>(15.1 to 18.4)                            | -2.4<br>(-3.8 to -1.0)                           |
| Glaucoma                                      | 799.8<br>(633.8 to 992.7)                        | --                                                | 75.9<br>(49.5 to 107.1)                       | 20.8<br>(17.8 to 23.8)                            | 0.9<br>(-1.6 to 3.5)                             |
| Cataract                                      | 13,267.6<br>(10,550.8 to 16,203.0)               | --                                                | 885.8<br>(617.2 to 1,218.2)                   | 20.2<br>(17.6 to 22.5)                            | 0.5<br>(-1.7 to 2.4)                             |
| Macular degeneration                          | 1,064.4<br>(811.5 to 1,386.9)                    | --                                                | 65.2<br>(42.8 to 90.7)                        | 22.9<br>(19.1 to 26.8)                            | 2.8<br>(-0.4 to 6.0)                             |
| Refraction and accommodation disorders        | 57,386.5<br>(53,243.7 to 61,783.3)               | --                                                | 950.7<br>(594.7 to 1,506.9)                   | 9.8<br>(7.5 to 11.8)                              | -8.2<br>(-10.2 to -6.5)                          |
| Age-related and other hearing loss            | 116,630.9<br>(112,964.4 to 119,989.2)            | --                                                | 3,414.8<br>(2,376.2 to 4,765.3)               | 17.2<br>(14.2 to 20.0)                            | -2.1<br>(-4.6 to 0.3)                            |
| Other vision loss                             | 2,580.0<br>(2,021.5 to 3,266.9)                  | --                                                | 190.8<br>(127.8 to 262.7)                     | 17.4<br>(14.7 to 20.2)                            | -1.9<br>(-4.2 to 0.4)                            |
| Other sense organ diseases                    | 16,789.3<br>(14,559.9 to 19,022.3)               | 29,404.0<br>(26,687.7 to 32,057.7)                | 517.8<br>(321.2 to 785.7)                     | 20.7<br>(19.6 to 21.9)                            | 0.9<br>(-0.0 to 1.9)                             |
| Oral disorders                                | 96,739.8<br>(94,640.5 to 99,258.0)               | 193,337.8†<br>(159,991.5 to 230,123.6)            | 1,369.3<br>(867.9 to 2,053.4)                 | 18.8<br>(17.8 to 19.6)                            | -0.7<br>(-1.5 to -0.0)                           |
| Caries of deciduous teeth                     | --                                               | --                                                | --                                            | --                                                | --                                               |
| Caries of permanent teeth                     | 57,905.8<br>(48,900.2 to 68,471.1)               | 186,869.9<br>(153,518.1 to 223,751.5)             | 41.1<br>(18.8 to 78.0)                        | 12.9<br>(11.4 to 14.3)                            | -5.7<br>(-6.9 to -4.5)                           |
| Periodontal disease                           | 34,329.2<br>(25,522.5 to 42,276.3)               | 3,906.8<br>(2,027.1 to 5,814.0)                   | 215.7<br>(84.9 to 480.5)                      | 20.9<br>(19.9 to 21.7)                            | 1.0<br>(0.2 to 1.7)                              |
| Edentulism and severe tooth loss              | 37,385.5<br>(31,458.2 to 44,141.6)               | 2,561.2<br>(1,587.9 to 3,710.1)                   | 1,014.3<br>(646.0 to 1,466.1)                 | 18.5<br>(17.3 to 19.7)                            | -0.9<br>(-2.0 to 0.0)                            |
| Other oral disorders                          | 3,533.7<br>(3,153.1 to 3,925.1)                  | --                                                | 98.2<br>(60.2 to 147.6)                       | 19.7<br>(18.3 to 21.1)                            | 0.0<br>(-1.2 to 1.2)                             |
| <b>Injuries</b>                               | <b>77,137.2</b><br><b>(72,903.1 to 81,297.0)</b> | <b>17,534.5†</b><br><b>(15,024.5 to 20,544.0)</b> | <b>2,790.1</b><br><b>(1,955.5 to 3,844.2)</b> | <b>23.0</b><br><b>(21.9 to 23.9)</b>              | <b>2.8</b><br><b>(1.9 to 3.6)</b>                |
| <b>Transport injuries</b>                     | <b>13,130.9</b><br><b>(12,260.3 to 13,992.7)</b> | <b>1,462.1</b><br><b>(1,169.0 to 1,851.0)</b>     | <b>610.9</b><br><b>(415.6 to 866.4)</b>       | <b>25.7</b><br><b>(24.8 to 26.6)</b>              | <b>5.1</b><br><b>(4.3 to 5.8)</b>                |
| Road injuries                                 | 11,016.7<br>(10,287.2 to 11,803.2)               | 1,244.9<br>(956.8 to 1,619.4)                     | 517.1<br>(351.5 to 734.3)                     | 27.0<br>(26.1 to 27.8)                            | 6.2<br>(5.4 to 6.8)                              |
| Pedestrian road injuries                      | 2,545.4<br>(2,242.7 to 2,940.7)                  | 290.1<br>(193.6 to 412.4)                         | 124.7<br>(85.2 to 176.2)                      | 27.1<br>(26.0 to 28.2)                            | 6.3<br>(5.3 to 7.1)                              |
| Cyclist road injuries                         | 2,255.7<br>(1,916.0 to 2,648.3)                  | 319.1<br>(212.0 to 472.3)                         | 100.7<br>(67.9 to 144.6)                      | 29.6<br>(28.6 to 30.5)                            | 8.3<br>(7.5 to 9.1)                              |
| Motorcyclist road injuries                    | 2,370.8<br>(2,043.8 to 2,787.6)                  | 133.1<br>(82.8 to 204.4)                          | 108.2<br>(74.7 to 153.6)                      | 33.6<br>(32.8 to 34.4)                            | 11.7<br>(11.0 to 12.3)                           |
| Motor vehicle road injuries                   | 3,055.7<br>(2,546.9 to 3,507.1)                  | 394.1<br>(275.9 to 549.4)                         | 148.8<br>(100.9 to 209.3)                     | 17.4<br>(16.2 to 18.4)                            | -1.9<br>(-2.9 to -1.0)                           |
| Other road injuries                           | 789.2<br>(680.8 to 940.4)                        | 108.5<br>(56.5 to 177.6)                          | 34.8<br>(23.3 to 50.0)                        | 46.8<br>(45.6 to 47.9)                            | 22.7<br>(21.7 to 23.6)                           |
| Other transport injuries                      | 2,114.2<br>(1,760.5 to 2,398.5)                  | 217.2<br>(157.2 to 286.4)                         | 93.8<br>(63.9 to 131.4)                       | 19.2<br>(17.5 to 20.8)                            | -0.4<br>(-1.8 to 1.0)                            |
| <b>Unintentional injuries</b>                 | <b>59,584.8</b><br><b>(55,679.4 to 63,520.1)</b> | <b>15,641.1</b><br><b>(13,149.0 to 18,623.9)</b>  | <b>2,032.6</b><br><b>(1,435.8 to 2,779.9)</b> | <b>22.4</b><br><b>(21.3 to 23.4)</b>              | <b>2.3</b><br><b>(1.4 to 3.1)</b>                |
| Falls                                         | 29,688.8<br>(26,227.2 to 32,712.9)               | 8,570.5<br>(6,296.2 to 11,452.3)                  | 1,252.5<br>(905.5 to 1,686.8)                 | 24.2<br>(22.9 to 25.5)                            | 3.9<br>(2.7 to 4.9)                              |
| Drowning                                      | 233.6<br>(204.8 to 265.3)                        | 25.9<br>(20.3 to 32.9)                            | 10.9<br>(7.3 to 15.3)                         | 9.2<br>(7.2 to 11.0)                              | -8.8<br>(-10.4 to -7.2)                          |
| Fire, heat, and hot substances                | 4,285.5<br>(3,760.2 to 4,922.0)                  | 133.0<br>(92.0 to 190.2)                          | 81.0<br>(50.6 to 126.8)                       | 17.8<br>(16.6 to 18.9)                            | -1.5<br>(-2.6 to -0.6)                           |
| Poisonings                                    | 142.7<br>(124.1 to 162.9)                        | 70.0<br>(41.1 to 114.4)                           | 9.1<br>(6.0 to 13.0)                          | 28.7<br>(25.5 to 31.9)                            | 7.5<br>(4.9 to 10.2)                             |
| Exposure to mechanical forces                 | 9,956.8<br>(8,630.6 to 11,686.6)                 | 902.9<br>(616.8 to 1,234.1)                       | 206.2<br>(137.2 to 299.1)                     | 24.6<br>(23.6 to 25.6)                            | 4.2<br>(3.3 to 5.0)                              |
| Unintentional firearm injuries                | 353.9<br>(296.7 to 419.4)                        | 11.7<br>(5.8 to 20.6)                             | 8.9<br>(5.8 to 13.0)                          | 26.5<br>(25.5 to 27.4)                            | 5.8<br>(4.9 to 6.5)                              |
| Unintentional suffocation                     | 309.4<br>(258.7 to 375.4)                        | 18.3<br>(8.9 to 31.6)                             | 8.7<br>(5.7 to 12.8)                          | 20.1<br>(18.6 to 21.4)                            | 0.4<br>(-0.9 to 1.5)                             |
| Other exposure to mechanical forces           | 9,293.5<br>(7,980.8 to 10,969.1)                 | 872.8<br>(601.0 to 1,199.0)                       | 188.7<br>(125.6 to 273.7)                     | 24.8<br>(23.7 to 25.7)                            | 4.3<br>(3.4 to 5.1)                              |

| Cause                                                                               | Prevalence in thousands (95% UI)              | Incidence in thousands (95% UI)          | YLDs in thousands (95% UI)             |                                                   |                                                  |
|-------------------------------------------------------------------------------------|-----------------------------------------------|------------------------------------------|----------------------------------------|---------------------------------------------------|--------------------------------------------------|
|                                                                                     | 2016 counts                                   | 2016 counts                              | 2016 counts                            | Percentage change in counts between 2006 and 2016 | Percentage change in rates between 2006 and 2016 |
| Adverse effects of medical treatment                                                | 152.0<br>(107.2 to 210.7)                     | 1,987.2<br>(1,517.0 to 2,557.6)          | 20.3<br>(12.2 to 33.0)                 | 13.6<br>(8.6 to 18.2)                             | -5.0<br>(-9.2 to -1.2)                           |
| Animal contact                                                                      | 2,419.8<br>(2,190.2 to 2,718.8)               | 1,185.8<br>(825.5 to 1,608.9)            | 52.8<br>(36.6 to 73.4)                 | 12.3<br>(10.3 to 14.0)                            | -6.2<br>(-7.8 to -4.7)                           |
| Venomous animal contact                                                             | 1,016.9<br>(868.7 to 1,206.4)                 | 572.2<br>(385.8 to 805.2)                | 31.8<br>(22.1 to 43.4)                 | 13.3<br>(10.9 to 15.5)                            | -5.3<br>(-7.3 to -3.5)                           |
| Non-venomous animal contact                                                         | 1,402.9<br>(1,227.2 to 1,621.9)               | 613.6<br>(407.6 to 865.6)                | 21.0<br>(13.8 to 31.7)                 | 10.7<br>(8.4 to 12.6)                             | -7.5<br>(-9.4 to -5.9)                           |
| Foreign body                                                                        | 2,067.6<br>(1,802.6 to 2,338.3)               | 806.5<br>(588.3 to 1,076.6)              | 68.3<br>(44.6 to 98.9)                 | 16.4<br>(14.9 to 17.7)                            | -2.8<br>(-4.0 to -1.6)                           |
| Pulmonary aspiration and foreign body in airway                                     | 910.1<br>(737.2 to 1,098.7)                   | 293.1<br>(216.6 to 384.5)                | 33.3<br>(21.6 to 48.1)                 | 9.5<br>(8.1 to 10.8)                              | -8.5<br>(-9.6 to -7.4)                           |
| Foreign body in eyes                                                                | 125.3<br>(91.0 to 173.4)                      | 346.7<br>(173.8 to 600.0)                | 7.6<br>(4.7 to 11.9)                   | 29.5<br>(26.2 to 33.4)                            | 8.2<br>(5.5 to 11.5)                             |
| Foreign body in other body part                                                     | 1,032.2<br>(865.1 to 1,246.3)                 | 166.7<br>(99.2 to 250.2)                 | 27.4<br>(17.9 to 39.7)                 | 22.2<br>(20.6 to 23.6)                            | 2.2<br>(0.8 to 3.3)                              |
| Environmental heat and cold exposure                                                | 3,244.7<br>(2,859.8 to 3,692.5)               | 459.7<br>(296.9 to 640.2)                | 119.4<br>(81.2 to 168.2)               | 15.7<br>(14.1 to 17.3)                            | -3.3<br>(-4.7 to -2.0)                           |
| Other unintentional injuries                                                        | 7,393.3<br>(6,202.8 to 8,740.0)               | 1,499.7<br>(993.9 to 2,106.1)            | 212.1<br>(143.0 to 302.6)              | 21.3<br>(20.3 to 22.2)                            | 1.4<br>(0.5 to 2.2)                              |
| <b>Self-harm and interpersonal violence</b>                                         | <b>5,334.5</b><br><b>(4,925.3 to 5,810.0)</b> | <b>422.2†</b><br><b>(326.1 to 526.4)</b> | <b>116.8</b><br><b>(78.6 to 165.2)</b> | <b>12.1</b><br><b>(11.3 to 12.7)</b>              | <b>-6.3</b><br><b>(-6.9 to -5.8)</b>             |
| Self-harm                                                                           | 740.5<br>(626.8 to 860.7)                     | 208.2<br>(149.8 to 285.3)                | 27.2<br>(17.9 to 38.3)                 | 5.9<br>(4.7 to 6.9)                               | -11.5<br>(-12.5 to -10.7)                        |
| Self-harm by firearm                                                                | 17.5<br>(15.0 to 20.0)                        | 2.9<br>(0.8 to 7.1)                      | 0.5<br>(0.4 to 0.8)                    | -0.0<br>(-1.9 to 1.6)                             | -16.5<br>(-18.0 to -15.1)                        |
| Self-harm by other specified means                                                  | 723.0<br>(609.0 to 843.5)                     | 205.3<br>(146.5 to 280.6)                | 26.7<br>(17.5 to 37.6)                 | 6.0<br>(4.8 to 7.0)                               | -11.4<br>(-12.4 to -10.5)                        |
| Interpersonal violence                                                              | 4,594.0<br>(4,196.8 to 5,075.4)               | 214.0†<br>(145.7 to 288.9)               | 89.6<br>(60.6 to 127.2)                | 14.1<br>(13.4 to 14.8)                            | -4.6<br>(-5.2 to -4.1)                           |
| Assault by firearm                                                                  | 148.5<br>(126.3 to 173.6)                     | 8.7<br>(4.5 to 15.5)                     | 4.3<br>(2.8 to 6.3)                    | 25.1<br>(24.1 to 26.1)                            | 4.6<br>(3.7 to 5.4)                              |
| Assault by sharp object                                                             | 634.1<br>(531.7 to 748.5)                     | 30.8<br>(16.6 to 52.2)                   | 13.8<br>(9.0 to 20.0)                  | 13.1<br>(11.8 to 14.2)                            | -5.5<br>(-6.6 to -4.6)                           |
| Sexual violence                                                                     | 1,936.5<br>(1,645.9 to 2,241.7)               | --                                       | 12.1<br>(7.9 to 17.7)                  | 13.6<br>(12.8 to 14.5)                            | -5.0<br>(-5.7 to -4.3)                           |
| Assault by other means                                                              | 1,874.9<br>(1,598.9 to 2,245.1)               | 174.4<br>(117.7 to 242.0)                | 59.4<br>(39.9 to 84.9)                 | 13.7<br>(12.9 to 14.4)                            | -5.0<br>(-5.6 to -4.4)                           |
| <b>Forces of nature, conflict and terrorism, and executions and police conflict</b> | <b>1,023.5</b><br><b>(675.1 to 1,453.3)</b>   | <b>9.2†</b><br><b>(5.9 to 13.2)</b>      | <b>29.9</b><br><b>(8.4 to 71.9)</b>    | <b>65.7</b><br><b>(55.5 to 85.5)</b>              | <b>38.5</b><br><b>(30.0 to 55.1)</b>             |
| Forces of nature, conflict and terrorism, and state actor violence                  | 191.9<br>(108.9 to 297.4)                     | 5.3<br>(3.0 to 8.2)                      | 6.7<br>(1.6 to 17.4)                   | 71.4<br>(61.7 to 81.2)                            | 43.3<br>(35.1 to 51.5)                           |
| Conflict and terrorism                                                              | 648.4<br>(388.6 to 1,034.1)                   | --                                       | 20.0<br>(6.4 to 45.2)                  | 53.8<br>(40.4 to 83.7)                            | 28.6<br>(17.4 to 53.6)                           |
| Executions and police conflict                                                      | 183.2<br>(51.7 to 299.4)                      | 3.9<br>(1.6 to 6.8)                      | 4.2<br>(0.7 to 12.1)                   | 105.8<br>(94.6 to 118.5)                          | 72.0<br>(62.6 to 82.6)                           |

We did not calculate incidence for certain NTDs and causes with only birth prevalence. Blank cells mean that no estimate is available.

† Incidence for aggregate causes represents the sum of the incidence of the causes below the aggregate.

‡ Incidence estimates for stroke represent first-ever stroke only.

^ Incidence of HIV/AIDS represents new infections of HIV only and does not include new infections of Tuberculosis in HIV positive cases.



SR Table 12: Global prevalence, incidence, and YLDs for 2016, percentage change of YLD counts and percentage change of YLD rates between 2006 and 2016 by cause, age 75-79 years.

| Cause                                                                                | Prevalence in thousands (95% UI)             | Incidence in thousands (95% UI)               | YLDs in thousands (95% UI)                |                                                                     |                                                                   |
|--------------------------------------------------------------------------------------|----------------------------------------------|-----------------------------------------------|-------------------------------------------|---------------------------------------------------------------------|-------------------------------------------------------------------|
|                                                                                      | 2016 counts<br>(116,456.9 to 116,474.9)      | 2016 counts<br>(699,148.7 to 853,382.5)       | 2016 counts<br>(22,840.6 to 37,859.5)     | Percentage change in counts between 2006 and 2016<br>(23.9 to 24.6) | Percentage change in rates between 2006 and 2016<br>(-1.0 to 0.2) |
| <b>All causes</b>                                                                    | <b>116,464.5</b><br>(116,456.9 to 116,474.9) | <b>771,670.2†</b><br>(699,148.7 to 853,382.5) | <b>29,991.6</b><br>(22,840.6 to 37,859.5) | <b>23.9</b><br>(23.2 to 24.6)                                       | <b>-0.4</b><br>(-1.0 to 0.2)                                      |
| <b>Communicable, maternal, neonatal, and nutritional disorders</b>                   | <b>69,859.8</b><br>(69,140.9 to 70,756.6)    | <b>320,804.3†</b><br>(262,197.7 to 394,238.9) | <b>1,017.4</b><br>(733.7 to 1,337.5)      | <b>16.6</b><br>(14.5 to 19.3)                                       | <b>-6.2</b><br>(-8.0 to -4.0)                                     |
| <b>HIV/AIDS and tuberculosis</b>                                                     | <b>30,437.4</b><br>(28,054.9 to 33,220.5)    | <b>160.5†</b><br>(129.7 to 195.3)             | <b>115.9</b><br>(77.4 to 161.9)           | <b>8.6</b><br>(0.6 to 16.8)                                         | <b>-12.7</b><br>(-19.1 to -6.1)                                   |
| Tuberculosis                                                                         | 29,076.4<br>(25,026.6 to 33,046.7)           | 154.5†<br>(123.8 to 189.2)                    | 94.8<br>(60.8 to 135.7)                   | 8.3<br>(4.5 to 12.8)                                                | -12.9<br>(-16.0 to -9.3)                                          |
| Drug-susceptible tuberculosis                                                        | 328.6<br>(259.2 to 408.9)                    | 149.0<br>(119.2 to 182.8)                     | 91.2<br>(58.5 to 130.7)                   | 8.5<br>(4.6 to 13.0)                                                | -12.8<br>(-15.9 to -9.2)                                          |
| Multidrug-resistant tuberculosis without extensive drug resistance                   | 11.7<br>(9.2 to 14.7)                        | 5.1<br>(4.1 to 6.3)                           | 3.3<br>(2.1 to 4.8)                       | -2.4<br>(-15.6 to 14.1)                                             | -21.5<br>(-32.1 to -8.2)                                          |
| Extensively drug-resistant tuberculosis                                              | 0.8<br>(0.7 to 1.0)                          | 0.4<br>(0.3 to 0.4)                           | 0.3<br>(0.2 to 0.4)                       | 200.7<br>(165.2 to 242.4)                                           | 141.8<br>(113.3 to 175.4)                                         |
| Latent tuberculosis infection                                                        | 28,735.3<br>(24,717.4 to 32,701.0)           | --                                            | --                                        | --                                                                  | --                                                                |
| HIV/AIDS                                                                             | 213.4<br>(183.8 to 253.6)                    | 6.0^<br>(4.7 to 7.4)                          | 21.1<br>(13.7 to 30.8)                    | 9.9<br>(-19.7 to 55.9)                                              | -11.6<br>(-35.4 to 25.4)                                          |
| Drug-susceptible HIV/AIDS - Tuberculosis                                             | 6.3<br>(4.3 to 8.8)                          | 6.6<br>(4.7 to 9.0)                           | 2.3<br>(1.3 to 3.6)                       | -7.8<br>(-15.9 to 0.8)                                              | -25.9<br>(-32.4 to -18.9)                                         |
| Multidrug-resistant HIV/AIDS - Tuberculosis without extensive drug resistance        | 0.2<br>(0.1 to 0.3)                          | 0.2<br>(0.1 to 0.3)                           | 0.1<br>(< 0.05 to 0.1)                    | 13.2<br>(-12.4 to 37.0)                                             | -9.0<br>(-29.6 to 10.2)                                           |
| Extensively drug-resistant HIV/AIDS - Tuberculosis                                   | < 0.05<br>(< 0.05 to < 0.05)                 | < 0.05<br>(< 0.05 to < 0.05)                  | < 0.05<br>(< 0.05 to < 0.05)              | 325.3<br>(202.9 to 439.7)                                           | 242.0<br>(143.6 to 334.0)                                         |
| HIV/AIDS resulting in other diseases                                                 | 206.9<br>(177.5 to 247.7)                    | 6.0<br>(4.7 to 7.4)                           | 18.7<br>(11.8 to 27.9)                    | 12.6<br>(-21.0 to 70.1)                                             | -9.5<br>(-36.4 to 36.8)                                           |
| <b>Diarrhoea, lower respiratory infections, and other common infectious diseases</b> | <b>5,466.5</b><br>(5,195.1 to 5,789.2)       | <b>307,927.9†</b><br>(249,693.2 to 380,244.3) | <b>288.5</b><br>(202.7 to 387.9)          | <b>25.2</b><br>(23.2 to 28.6)                                       | <b>0.7</b><br>(-0.9 to 3.4)                                       |
| Diarrhoeal diseases                                                                  | 1,501.5<br>(1,326.2 to 1,696.3)              | 103,243.4<br>(90,807.8 to 117,449.5)          | 152.6<br>(106.5 to 207.6)                 | 25.1<br>(22.3 to 27.8)                                              | 0.6<br>(-1.6 to 2.8)                                              |
| Intestinal infectious diseases                                                       | 7.0<br>(5.9 to 8.3)                          | 138.1^<br>(120.2 to 158.0)                    | 1.1<br>(0.7 to 1.6)                       | 16.6<br>(-8.0 to 47.5)                                              | -6.2<br>(-26.0 to 18.6)                                           |
| Typhoid fever                                                                        | 6.6<br>(5.5 to 8.0)                          | 105.3<br>(91.2 to 120.9)                      | 1.0<br>(0.6 to 1.4)                       | 18.0<br>(-8.5 to 52.4)                                              | -5.1<br>(-26.4 to 22.6)                                           |
| Paratyphoid fever                                                                    | 1.4<br>(1.2 to 1.7)                          | 32.8<br>(28.1 to 37.8)                        | 0.1<br>(0.1 to 0.1)                       | 20.0<br>(-0.3 to 46.7)                                              | -3.5<br>(-19.9 to 18.0)                                           |
| Other intestinal infectious diseases                                                 | --                                           | --                                            | < 0.05<br>(< 0.05 to 0.1)                 | -10.8<br>(-29.7 to 12.8)                                            | -28.3<br>(-43.4 to -9.3)                                          |
| Lower respiratory infections                                                         | 384.2<br>(347.8 to 425.3)                    | 16,487.6<br>(14,552.2 to 18,417.6)            | 21.4<br>(14.3 to 29.8)                    | 45.7<br>(39.9 to 51.8)                                              | 17.2<br>(12.5 to 22.1)                                            |
| Upper respiratory infections                                                         | 2,497.1<br>(1,733.8 to 3,413.1)              | 185,411.3<br>(128,345.3 to 253,354.3)         | 57.9<br>(32.4 to 98.3)                    | 22.0<br>(19.8 to 24.5)                                              | -1.9<br>(-3.7 to 0.1)                                             |
| Otitis media                                                                         | 613.8<br>(455.2 to 791.5)                    | 1,000.7<br>(789.3 to 1,242.1)                 | 15.8<br>(9.5 to 25.0)                     | 14.8<br>(9.3 to 20.9)                                               | -7.7<br>(-12.1 to -2.8)                                           |
| Meningitis                                                                           | 167.5<br>(133.9 to 211.0)                    | 22.7<br>(17.1 to 29.2)                        | 8.5<br>(5.3 to 16.0)                      | 26.2<br>(13.7 to 126.0)                                             | 1.5<br>(-8.6 to 81.7)                                             |
| Pneumococcal meningitis                                                              | 70.1<br>(53.9 to 87.7)                       | 4.9<br>(3.2 to 7.2)                           | 3.3<br>(2.1 to 4.5)                       | 7.9<br>(2.7 to 15.0)                                                | -13.2<br>(-17.4 to -7.5)                                          |
| H influenzae type B meningitis                                                       | 15.0<br>(10.3 to 20.4)                       | 1.3<br>(0.8 to 2.2)                           | 0.8<br>(0.5 to 1.1)                       | -17.8<br>(-27.2 to -1.3)                                            | -33.9<br>(-41.5 to -20.7)                                         |
| Meningococcal infection                                                              | 22.3<br>(13.7 to 56.0)                       | 4.5<br>(2.8 to 6.8)                           | 1.6<br>(0.7 to 8.3)                       | 87.2<br>(14.2 to 834.0)                                             | 50.6<br>(-8.2 to 651.1)                                           |
| Other meningitis                                                                     | 60.1<br>(42.1 to 77.5)                       | 11.9<br>(8.7 to 16.0)                         | 2.8<br>(1.9 to 4.0)                       | 50.2<br>(42.8 to 56.7)                                              | 20.8<br>(14.8 to 26.0)                                            |
| Encephalitis                                                                         | 330.1<br>(178.6 to 540.1)                    | 160.6<br>(139.7 to 181.2)                     | 17.7<br>(12.5 to 23.9)                    | 23.5<br>(18.6 to 28.9)                                              | -0.7<br>(-4.6 to 3.6)                                             |
| Diphtheria                                                                           | --                                           | --                                            | --                                        | --                                                                  | --                                                                |
| Whooping cough                                                                       | --                                           | --                                            | --                                        | --                                                                  | --                                                                |
| Tetanus                                                                              | 1.5<br>(1.4 to 1.6)                          | 2.0<br>(0.9 to 3.0)                           | < 0.05<br>(< 0.05 to 0.1)                 | -13.2<br>(-31.7 to 11.1)                                            | -30.2<br>(-45.1 to -10.7)                                         |
| Measles                                                                              | --                                           | --                                            | --                                        | --                                                                  | --                                                                |
| Varicella and herpes zoster                                                          | 258.9<br>(212.9 to 310.3)                    | 1,461.5<br>(1,191.8 to 1,769.4)               | 13.3<br>(7.8 to 20.6)                     | 27.0<br>(22.4 to 31.9)                                              | 2.1<br>(-1.6 to 6.1)                                              |
| <b>Neglected tropical diseases and malaria</b>                                       | <b>20,653.8</b><br>(19,870.3 to 21,302.9)    | <b>6,710.0†</b><br>(4,513.7 to 8,581.1)       | <b>180.2</b><br>(125.2 to 250.8)          | <b>2.9</b><br>(-5.4 to 13.2)                                        | <b>-17.3</b><br>(-23.9 to -9.0)                                   |
| Malaria                                                                              | 375.4<br>(318.0 to 434.8)                    | 754.1<br>(553.9 to 976.8)                     | 3.4<br>(2.4 to 4.8)                       | -23.0<br>(-28.6 to -17.6)                                           | -38.1<br>(-42.6 to -33.7)                                         |
| Chagas disease                                                                       | 192.0<br>(162.9 to 224.8)                    | 1.2<br>(0.8 to 1.9)                           | 3.8<br>(2.5 to 5.5)                       | 16.2<br>(10.5 to 22.7)                                              | -6.6<br>(-11.1 to -1.4)                                           |
| Leishmaniasis                                                                        | 88.9<br>(67.8 to 106.3)                      | 13.4<br>(10.1 to 17.4)                        | 4.5<br>(2.8 to 6.7)                       | 24.5<br>(18.6 to 31.9)                                              | 0.1<br>(-4.6 to 6.0)                                              |
| Visceral leishmaniasis                                                               | 1.3<br>(0.8 to 2.0)                          | 5.3<br>(3.4 to 7.8)                           | 0.1<br>(< 0.05 to 0.1)                    | -33.6<br>(-57.6 to 1.2)                                             | -46.6<br>(-65.9 to -18.6)                                         |
| Cutaneous and mucocutaneous leishmaniasis                                            | 75.2<br>(55.8 to 98.2)                       | 8.1<br>(5.7 to 11.0)                          | 4.4<br>(2.8 to 6.6)                       | 26.7<br>(20.7 to 34.6)                                              | 1.9<br>(-3.0 to 8.2)                                              |
| African trypanosomiasis                                                              | 0.1<br>(< 0.05 to 0.3)                       | 0.1<br>(< 0.05 to 0.3)                        | < 0.05<br>(< 0.05 to 0.1)                 | -68.8<br>(-95.3 to 90.5)                                            | -74.9<br>(-96.2 to 53.2)                                          |
| Schistosomiasis                                                                      | 2,010.1<br>(1,821.1 to 2,195.7)              | 461.9<br>(411.9 to 510.7)                     | 13.7<br>(6.9 to 25.9)                     | -31.6<br>(-35.0 to -28.2)                                           | -45.0<br>(-47.7 to -42.3)                                         |
| Cysticercosis                                                                        | 76.9<br>(54.6 to 106.4)                      | --                                            | 11.0<br>(6.7 to 17.0)                     | 6.7<br>(-0.6 to 14.0)                                               | -14.2<br>(-20.0 to -8.4)                                          |
| Cystic echinococcosis                                                                | 11.9<br>(6.1 to 23.4)                        | 2.3<br>(1.1 to 5.4)                           | 1.0<br>(0.5 to 2.3)                       | -37.0<br>(-76.1 to 61.1)                                            | -49.3<br>(-80.8 to 29.6)                                          |
| Lymphatic filariasis                                                                 | 265.8<br>(229.5 to 317.8)                    | 68.6<br>(39.9 to 108.6)                       | 8.6<br>(4.5 to 14.9)                      | -29.9<br>(-48.0 to -13.3)                                           | -43.7<br>(-58.2 to -30.3)                                         |
| Onchocerciasis                                                                       | 157.3<br>(108.4 to 230.4)                    | 26.7<br>(10.8 to 54.4)                        | 13.8<br>(8.1 to 23.9)                     | -15.2<br>(-31.5 to 6.9)                                             | -31.8<br>(-44.9 to -14.0)                                         |
| Trachoma                                                                             | 541.6<br>(360.0 to 766.6)                    | --                                            | 36.9<br>(23.3 to 54.4)                    | -3.3<br>(-13.4 to 7.1)                                              | -22.2<br>(-30.4 to -13.8)                                         |
| Dengue                                                                               | 73.5<br>(40.2 to 124.2)                      | 1,228.4<br>(749.6 to 1,859.2)                 | 10.7<br>(4.8 to 19.9)                     | 110.2<br>(70.2 to 380.8)                                            | 69.1<br>(36.9 to 286.7)                                           |
| Yellow fever                                                                         | < 0.05<br>(< 0.05 to < 0.05)                 | 0.4<br>(0.1 to 1.1)                           | < 0.05<br>(< 0.05 to < 0.05)              | -19.5<br>(-50.0 to 20.7)                                            | -35.2<br>(-59.8 to -2.9)                                          |
| Rabies                                                                               | < 0.05<br>(< 0.05 to < 0.05)                 | 0.4<br>(0.2 to 0.6)                           | < 0.05<br>(< 0.05 to < 0.05)              | -44.7<br>(-58.5 to -28.6)                                           | -55.5<br>(-66.6 to -42.6)                                         |
| Intestinal nematode infections                                                       | 17,015.8<br>(16,092.0 to 17,684.9)           | --                                            | 27.6<br>(15.9 to 44.3)                    | -5.2<br>(-12.2 to 2.8)                                              | -23.7<br>(-29.4 to -17.3)                                         |
| Ascariasis                                                                           | 9,144.8<br>(8,095.6 to 10,424.8)             | --                                            | 8.4<br>(4.6 to 14.0)                      | -20.0<br>(-30.6 to -8.3)                                            | -35.6<br>(-44.2 to -26.3)                                         |

| Cause                                                                   | Prevalence in thousands (95% UI)                    | Incidence in thousands (95% UI)                      | YLDs in thousands (95% UI)                       |                                                   |                                                  |
|-------------------------------------------------------------------------|-----------------------------------------------------|------------------------------------------------------|--------------------------------------------------|---------------------------------------------------|--------------------------------------------------|
|                                                                         | 2016 counts                                         | 2016 counts                                          | 2016 counts                                      | Percentage change in counts between 2006 and 2016 | Percentage change in rates between 2006 and 2016 |
| Trichuriasis                                                            | 4,684.8<br>(4,270.4 to 5,153.9)                     | --                                                   | 3.1<br>(1.8 to 5.2)                              | -13.7<br>(-26.8 to 1.5)                           | -30.6<br>(-41.1 to -18.4)                        |
| Hookworm disease                                                        | 4,944.2<br>(4,557.6 to 5,388.6)                     | --                                                   | 16.1<br>(9.5 to 25.1)                            | 7.3<br>(-3.9 to 21.1)                             | -13.7<br>(-22.7 to -2.6)                         |
| Food-borne trematodiasis                                                | 1,648.7<br>(1,232.3 to 2,058.8)                     | 4,079.5<br>(1,955.3 to 5,811.6)                      | 39.7<br>(14.4 to 77.3)                           | 50.2<br>(28.9 to 88.5)                            | 20.8<br>(3.6 to 51.6)                            |
| Leprosy                                                                 | 33.5<br>(32.3 to 34.6)                              | 1.6<br>(1.5 to 1.8)                                  | 2.0<br>(1.4 to 2.7)                              | 13.7<br>(7.9 to 19.9)                             | -8.6<br>(-13.2 to -3.6)                          |
| Ebola virus disease                                                     | < 0.05<br>(0.0 to < 0.05)                           | --                                                   | < 0.05<br>(0.0 to < 0.05)                        | --                                                | --                                               |
| Zika virus disease                                                      | 1.2<br>(0.7 to 2.1)                                 | 71.5<br>(40.4 to 130.2)                              | < 0.05<br>(< 0.05 to < 0.05)                     | --                                                | --                                               |
| Guinea worm disease                                                     | < 0.05<br>(< 0.05 to < 0.05)                        | < 0.05<br>(< 0.05 to < 0.05)                         | < 0.05<br>(< 0.05 to < 0.05)                     | -99.5<br>(-99.7 to -99.2)                         | -99.6<br>(-99.8 to -99.4)                        |
| Other neglected tropical diseases                                       | 234.3<br>(227.3 to 242.2)                           | --                                                   | 3.6<br>(2.4 to 5.3)                              | 26.2<br>(19.9 to 32.8)                            | 1.5<br>(-3.6 to 6.8)                             |
| <b>Maternal disorders</b>                                               | --                                                  | --                                                   | --                                               | --                                                | --                                               |
| Maternal haemorrhage                                                    | --                                                  | --                                                   | --                                               | --                                                | --                                               |
| Maternal sepsis and other pregnancy related infections                  | --                                                  | --                                                   | --                                               | --                                                | --                                               |
| Maternal hypertensive disorders                                         | --                                                  | --                                                   | --                                               | --                                                | --                                               |
| Maternal obstructed labour and uterine rupture                          | --                                                  | --                                                   | --                                               | --                                                | --                                               |
| Maternal abortion, miscarriage, and ectopic pregnancy                   | --                                                  | --                                                   | --                                               | --                                                | --                                               |
| Other maternal disorders                                                | --                                                  | --                                                   | --                                               | --                                                | --                                               |
| <b>Neonatal disorders</b>                                               | <b>637.0</b><br><b>(577.5 to 686.3)</b>             | --                                                   | <b>34.3</b><br><b>(24.0 to 50.3)</b>             | <b>40.6</b><br><b>(31.7 to 50.5)</b>              | <b>13.1</b><br><b>(5.9 to 21.0)</b>              |
| Neonatal preterm birth complications                                    | 534.7<br>(454.6 to 624.2)                           | --                                                   | 21.5<br>(15.7 to 29.0)                           | 34.0<br>(23.2 to 48.0)                            | 7.7<br>(-0.9 to 19.0)                            |
| Neonatal encephalopathy due to birth asphyxia and trauma                | 93.0<br>(68.5 to 125.8)                             | --                                                   | 4.1<br>(1.9 to 7.9)                              | 51.9<br>(32.7 to 68.0)                            | 22.2<br>(6.7 to 35.1)                            |
| Neonatal sepsis and other neonatal infections                           | 22.1<br>(8.6 to 52.9)                               | --                                                   | 6.8<br>(1.5 to 19.7)                             | 55.5<br>(44.2 to 81.7)                            | 25.1<br>(16.0 to 46.1)                           |
| Hemolytic disease and other neonatal jaundice                           | 5.6<br>(4.6 to 6.7)                                 | --                                                   | 2.0<br>(1.5 to 2.6)                              | 50.1<br>(42.1 to 57.4)                            | 20.7<br>(14.3 to 26.6)                           |
| Other neonatal disorders                                                | --                                                  | --                                                   | --                                               | --                                                | --                                               |
| <b>Nutritional deficiencies</b>                                         | <b>15,455.8</b><br><b>(15,169.2 to 15,644.1)</b>    | <b>2,519.7†</b><br><b>(2,092.7 to 3,002.7)</b>       | <b>367.9</b><br><b>(251.4 to 512.8)</b>          | <b>18.7</b><br><b>(16.9 to 20.2)</b>              | <b>-4.6</b><br><b>(-6.0 to -3.3)</b>             |
| Protein-energy malnutrition                                             | --                                                  | --                                                   | --                                               | --                                                | --                                               |
| Iodine deficiency                                                       | 2,148.6<br>(1,931.6 to 2,389.1)                     | 4.4<br>(3.6 to 5.3)                                  | 50.6<br>(35.0 to 70.0)                           | 12.1<br>(9.5 to 14.9)                             | -9.8<br>(-12.0 to -7.6)                          |
| Vitamin A deficiency                                                    | 2,388.0<br>(2,065.2 to 2,782.9)                     | 2,515.3<br>(2,088.6 to 2,997.7)                      | 1.6<br>(1.0 to 2.3)                              | 30.5<br>(20.4 to 40.5)                            | 4.9<br>(-3.2 to 13.0)                            |
| Iron-deficiency anaemia                                                 | 12,418.1<br>(11,900.0 to 12,992.4)                  | --                                                   | 315.7<br>(214.3 to 443.4)                        | 19.7<br>(17.7 to 21.5)                            | -3.7<br>(-5.3 to -2.3)                           |
| Other nutritional deficiencies                                          | --                                                  | --                                                   | --                                               | --                                                | --                                               |
| <b>Other communicable, maternal, neonatal, and nutritional diseases</b> | <b>31,972.3</b><br><b>(31,000.6 to 33,003.0)</b>    | <b>3,486.3</b><br><b>(2,523.0 to 4,936.2)</b>        | <b>30.6</b><br><b>(21.2 to 43.6)</b>             | <b>18.5</b><br><b>(4.0 to 33.1)</b>               | <b>-4.7</b><br><b>(-16.4 to 7.0)</b>             |
| Sexually transmitted diseases excluding HIV                             | 23,694.8<br>(21,965.3 to 26,089.6)                  | 819.8<br>(705.6 to 943.5)                            | 17.8<br>(12.3 to 25.6)                           | 24.8<br>(19.2 to 30.9)                            | 0.4<br>(-4.1 to 5.2)                             |
| Syphilis                                                                | 83.1<br>(69.0 to 100.0)                             | 3.6<br>(2.5 to 5.4)                                  | 11.5<br>(7.8 to 15.8)                            | 26.1<br>(17.3 to 34.3)                            | 1.4<br>(-5.7 to 8.0)                             |
| Chlamydial infection                                                    | 0.1<br>(< 0.05 to 0.1)                              | --                                                   | < 0.05<br>(< 0.05 to < 0.05)                     | 35.9<br>(19.7 to 57.1)                            | 9.3<br>(-3.8 to 26.4)                            |
| Gonococcal infection                                                    | < 0.05<br>(< 0.05 to < 0.05)                        | --                                                   | < 0.05<br>(< 0.05 to < 0.05)                     | 42.0<br>(-9.2 to 134.6)                           | 14.2<br>(-26.9 to 88.7)                          |
| Trichomoniasis                                                          | 1,066.4<br>(904.6 to 1,233.5)                       | 816.2<br>(701.8 to 940.2)                            | 1.2<br>(0.5 to 2.5)                              | 22.4<br>(18.4 to 26.4)                            | -1.6<br>(-4.8 to 1.7)                            |
| Genital herpes                                                          | 22,483.8<br>(19,680.5 to 25,944.5)                  | --                                                   | 5.1<br>(1.5 to 11.6)                             | 22.6<br>(20.0 to 25.4)                            | -1.4<br>(-3.5 to 0.8)                            |
| Other sexually transmitted diseases                                     | < 0.05<br>(< 0.05 to < 0.05)                        | --                                                   | < 0.05<br>(< 0.05 to < 0.05)                     | 34.7<br>(18.6 to 55.7)                            | 8.3<br>(-4.6 to 25.2)                            |
| Hepatitis                                                               | 11,147.4<br>(9,885.0 to 12,447.6)                   | 2,666.1<br>(1,700.2 to 4,077.7)                      | 6.4<br>(3.5 to 10.9)                             | 2.6<br>(-37.6 to 65.8)                            | -17.4<br>(-49.8 to 33.4)                         |
| Acute hepatitis A                                                       | 31.7<br>(8.4 to 64.6)                               | 412.5<br>(109.8 to 839.5)                            | 1.2<br>(0.3 to 2.7)                              | -8.0<br>(-80.8 to 189.7)                          | -26.0<br>(-84.5 to 132.9)                        |
| Hepatitis B                                                             | 6,803.0<br>(5,614.0 to 8,020.4)                     | 1,926.3<br>(1,049.7 to 3,281.5)                      | 4.6<br>(2.2 to 8.8)                              | 5.7<br>(-41.4 to 90.3)                            | -15.0<br>(-52.8 to 53.0)                         |
| Hepatitis C                                                             | 4,294.8<br>(3,854.1 to 4,758.0)                     | 95.5<br>(72.2 to 121.1)                              | 0.1<br>(< 0.05 to 0.2)                           | 1.6<br>(-4.5 to 8.7)                              | -18.3<br>(-23.2 to -12.6)                        |
| Acute hepatitis E                                                       | 17.8<br>(7.8 to 31.1)                               | 231.8<br>(101.6 to 403.7)                            | 0.5<br>(0.2 to 1.0)                              | 5.0<br>(-15.6 to 30.6)                            | -15.5<br>(-32.1 to 5.0)                          |
| Other infectious diseases                                               | 304.7<br>(294.1 to 317.3)                           | 0.3<br>(0.2 to 0.5)                                  | 6.3<br>(4.2 to 9.1)                              | 20.2<br>(16.1 to 24.7)                            | -3.4<br>(-6.6 to 0.3)                            |
| <b>Non-communicable diseases</b>                                        | <b>116,343.3</b><br><b>(116,328.9 to 116,357.7)</b> | <b>435,309.5†</b><br><b>(393,592.5 to 485,253.2)</b> | <b>26,580.7</b><br><b>(20,258.7 to 33,596.9)</b> | <b>23.8</b><br><b>(23.0 to 24.6)</b>              | <b>-0.5</b><br><b>(-1.1 to 0.2)</b>              |
| <b>Neoplasms</b>                                                        | <b>4,321.6</b><br><b>(4,265.5 to 4,381.4)</b>       | <b>1,773.1</b><br><b>(1,693.0 to 1,872.6)</b>        | <b>511.8</b><br><b>(377.9 to 650.3)</b>          | <b>22.9</b><br><b>(20.0 to 26.2)</b>              | <b>-1.2</b><br><b>(-3.5 to 1.5)</b>              |
| Lip and oral cavity cancer                                              | 102.1<br>(98.9 to 105.4)                            | 29.8<br>(28.9 to 30.9)                               | 10.8<br>(7.9 to 14.0)                            | 29.8<br>(22.4 to 37.7)                            | 4.4<br>(-1.6 to 10.7)                            |
| Nasopharynx cancer                                                      | 11.3<br>(10.7 to 12.1)                              | 3.6<br>(3.4 to 3.8)                                  | 1.5<br>(1.1 to 2.0)                              | 17.4<br>(5.8 to 28.8)                             | -5.6<br>(-14.9 to 3.6)                           |
| Other pharynx cancer                                                    | 25.3<br>(23.8 to 26.4)                              | 9.6<br>(9.0 to 10.1)                                 | 3.2<br>(2.4 to 4.2)                              | 33.5<br>(20.6 to 45.2)                            | 7.4<br>(-3.0 to 16.8)                            |
| Oesophageal cancer                                                      | 61.3<br>(58.4 to 64.5)                              | 50.2<br>(48.2 to 52.4)                               | 12.1<br>(8.6 to 15.6)                            | 6.2<br>(-1.9 to 15.2)                             | -14.6<br>(-21.1 to -7.4)                         |
| Stomach cancer                                                          | 254.3<br>(244.0 to 265.3)                           | 140.2<br>(135.1 to 146.0)                            | 34.6<br>(25.1 to 44.2)                           | 13.5<br>(7.0 to 20.6)                             | -8.7<br>(-14.0 to -3.1)                          |
| Colon and rectum cancer                                                 | 779.4<br>(748.8 to 831.8)                           | 221.3<br>(212.8 to 235.6)                            | 75.6<br>(55.9 to 96.9)                           | 23.4<br>(16.9 to 32.4)                            | -0.8<br>(-6.0 to 6.5)                            |
| Liver cancer                                                            | 83.3<br>(78.1 to 88.9)                              | 86.7<br>(81.4 to 91.6)                               | 19.1<br>(13.5 to 24.8)                           | 35.6<br>(26.5 to 45.4)                            | 9.1<br>(1.7 to 16.9)                             |
| Liver cancer due to hepatitis B                                         | 36.1<br>(26.9 to 44.5)                              | 28.2<br>(20.9 to 34.6)                               | 6.1<br>(3.8 to 8.6)                              | 38.0<br>(24.8 to 54.6)                            | 11.0<br>(0.3 to 24.3)                            |

| Cause                                              | Prevalence in thousands (95% UI)                 | Incidence in thousands (95% UI)                | YLDs in thousands (95% UI)                    |                                                   |                                                  |
|----------------------------------------------------|--------------------------------------------------|------------------------------------------------|-----------------------------------------------|---------------------------------------------------|--------------------------------------------------|
|                                                    | 2016 counts                                      | 2016 counts                                    | 2016 counts                                   | Percentage change in counts between 2006 and 2016 | Percentage change in rates between 2006 and 2016 |
| Liver cancer due to hepatitis C                    | 31.7<br>(27.6 to 36.0)                           | 23.7<br>(20.7 to 27.3)                         | 5.3<br>(3.7 to 7.0)                           | 30.2<br>(20.4 to 40.1)                            | 4.7<br>(-3.2 to 12.6)                            |
| Liver cancer due to alcohol use                    | 19.9<br>(16.0 to 24.2)                           | 16.4<br>(13.2 to 20.0)                         | 3.7<br>(2.5 to 5.1)                           | 36.0<br>(23.1 to 51.7)                            | 9.4<br>(-1.0 to 22.0)                            |
| Liver cancer due to other causes                   | 24.0<br>(20.0 to 28.8)                           | 18.4<br>(15.5 to 22.0)                         | 4.0<br>(2.7 to 5.5)                           | 39.2<br>(25.1 to 54.2)                            | 11.9<br>(0.6 to 24.0)                            |
| Gallbladder and biliary tract cancer               | 21.1<br>(19.2 to 22.8)                           | 23.3<br>(21.4 to 25.0)                         | 5.2<br>(3.6 to 7.0)                           | 11.8<br>(3.5 to 20.8)                             | -10.1<br>(-16.8 to -2.9)                         |
| Pancreatic cancer                                  | 46.6<br>(44.0 to 48.6)                           | 54.6<br>(52.2 to 56.6)                         | 10.9<br>(7.7 to 14.1)                         | 25.5<br>(16.4 to 33.9)                            | 0.9<br>(-6.4 to 7.6)                             |
| Larynx cancer                                      | 53.5<br>(51.9 to 55.3)                           | 16.6<br>(16.1 to 17.1)                         | 6.6<br>(4.8 to 8.5)                           | 20.3<br>(12.6 to 28.2)                            | -3.3<br>(-9.5 to 3.1)                            |
| Tracheal, bronchus, and lung cancer                | 349.9<br>(336.9 to 363.2)                        | 258.0<br>(248.8 to 266.8)                      | 58.4<br>(42.8 to 73.4)                        | 23.7<br>(17.5 to 30.1)                            | -0.6<br>(-5.5 to 4.6)                            |
| Malignant skin melanoma                            | 108.3<br>(86.3 to 117.8)                         | 23.6<br>(18.9 to 25.6)                         | 7.4<br>(5.1 to 10.0)                          | 35.2<br>(23.7 to 46.0)                            | 8.7<br>(-0.6 to 17.4)                            |
| Non-melanoma skin cancer                           | 112.5<br>(90.1 to 139.4)                         | 177.7<br>(112.4 to 272.9)                      | 4.0<br>(2.0 to 6.6)                           | -6.6<br>(-18.0 to 6.9)                            | -24.9<br>(-34.1 to -14.1)                        |
| Non-melanoma skin cancer (squamous-cell carcinoma) | 90.2<br>(52.1 to 127.8)                          | 86.2<br>(48.9 to 124.4)                        | 3.9<br>(1.9 to 6.5)                           | -7.2<br>(-19.0 to 6.8)                            | -25.3<br>(-34.9 to -14.1)                        |
| Non-melanoma skin cancer (basal-cell carcinoma)    | 10.8<br>(4.6 to 23.4)                            | 91.5<br>(44.0 to 176.2)                        | 0.1<br>(< 0.05 to 0.3)                        | 17.7<br>(-2.0 to 34.4)                            | -5.4<br>(-21.2 to 8.1)                           |
| Breast cancer                                      | 490.0<br>(468.1 to 517.0)                        | 104.1<br>(99.0 to 110.7)                       | 47.7<br>(35.1 to 61.9)                        | 15.6<br>(9.5 to 22.5)                             | -7.1<br>(-12.0 to -1.5)                          |
| Cervical cancer                                    | 54.8<br>(46.5 to 59.8)                           | 15.3<br>(13.2 to 16.6)                         | 5.5<br>(3.9 to 7.3)                           | 4.0<br>(-2.8 to 12.8)                             | -16.3<br>(-21.9 to -9.3)                         |
| Uterine cancer                                     | 130.7<br>(121.0 to 142.9)                        | 29.0<br>(26.9 to 31.7)                         | 10.3<br>(7.4 to 13.7)                         | 24.6<br>(11.1 to 40.7)                            | 0.2<br>(-10.7 to 13.2)                           |
| Ovarian cancer                                     | 46.8<br>(43.5 to 49.4)                           | 16.0<br>(15.0 to 16.8)                         | 7.2<br>(5.2 to 9.3)                           | 11.7<br>(-0.7 to 25.7)                            | -10.2<br>(-20.1 to 1.1)                          |
| Prostate cancer                                    | 872.9<br>(766.6 to 1,019.1)                      | 221.3<br>(196.9 to 248.8)                      | 87.7<br>(63.9 to 114.8)                       | 26.1<br>(16.6 to 35.3)                            | 1.4<br>(-6.2 to 8.8)                             |
| Testicular cancer                                  | 3.3<br>(3.1 to 3.5)                              | 0.7<br>(0.7 to 0.8)                            | 0.3<br>(0.2 to 0.4)                           | 30.9<br>(19.1 to 44.5)                            | 5.2<br>(-4.2 to 16.2)                            |
| Kidney cancer                                      | 120.7<br>(112.4 to 127.1)                        | 34.2<br>(32.2 to 35.8)                         | 10.9<br>(7.9 to 14.3)                         | 24.2<br>(15.8 to 33.4)                            | -0.1<br>(-6.9 to 7.2)                            |
| Bladder cancer                                     | 234.8<br>(224.8 to 245.1)                        | 60.4<br>(57.9 to 63.1)                         | 22.6<br>(16.5 to 29.5)                        | 18.3<br>(11.8 to 25.1)                            | -4.9<br>(-10.1 to 0.6)                           |
| Brain and nervous system cancer                    | 41.5<br>(32.6 to 45.9)                           | 19.3<br>(15.6 to 21.1)                         | 6.1<br>(4.1 to 8.2)                           | 37.4<br>(26.7 to 47.4)                            | 10.5<br>(1.9 to 18.5)                            |
| Thyroid cancer                                     | 52.4<br>(49.5 to 56.6)                           | 10.8<br>(10.2 to 11.6)                         | 4.0<br>(2.9 to 5.3)                           | 31.5<br>(22.9 to 42.5)                            | 5.7<br>(-1.2 to 14.6)                            |
| Mesothelioma                                       | 6.7<br>(6.2 to 7.1)                              | 4.7<br>(4.3 to 4.9)                            | 1.5<br>(1.0 to 2.0)                           | 26.5<br>(15.5 to 36.4)                            | 1.7<br>(-7.1 to 9.7)                             |
| Hodgkin lymphoma                                   | 8.1<br>(7.3 to 8.7)                              | 2.2<br>(1.9 to 2.4)                            | 0.9<br>(0.7 to 1.2)                           | 7.2<br>(0.8 to 14.7)                              | -13.8<br>(-18.9 to -7.7)                         |
| Non-Hodgkin's lymphoma                             | 152.9<br>(136.8 to 162.1)                        | 43.0<br>(38.8 to 45.5)                         | 13.4<br>(9.8 to 17.6)                         | 34.7<br>(25.6 to 43.9)                            | 8.3<br>(1.0 to 15.7)                             |
| Multiple myeloma                                   | 45.1<br>(35.8 to 50.5)                           | 17.8<br>(14.7 to 20.0)                         | 9.0<br>(6.2 to 11.8)                          | 31.0<br>(19.4 to 42.7)                            | 5.3<br>(-4.0 to 14.8)                            |
| Leukaemia                                          | 124.5<br>(115.9 to 132.1)                        | 37.1<br>(34.1 to 39.1)                         | 17.6<br>(12.7 to 23.2)                        | 23.6<br>(16.3 to 31.4)                            | -0.6<br>(-6.5 to 5.7)                            |
| Acute lymphoid leukaemia                           | 6.2<br>(5.4 to 6.6)                              | 1.9<br>(1.7 to 2.1)                            | 0.9<br>(0.6 to 1.2)                           | 42.3<br>(30.8 to 52.1)                            | 14.4<br>(5.2 to 22.3)                            |
| Chronic lymphoid leukaemia                         | 52.6<br>(48.3 to 57.2)                           | 12.6<br>(11.5 to 13.6)                         | 6.9<br>(4.9 to 8.9)                           | 20.9<br>(10.0 to 33.7)                            | -2.8<br>(-11.5 to 7.5)                           |
| Acute myeloid leukaemia                            | 10.8<br>(9.2 to 11.6)                            | 8.4<br>(7.1 to 9.0)                            | 2.3<br>(1.6 to 3.1)                           | 33.3<br>(24.0 to 41.2)                            | 7.2<br>(-0.3 to 13.6)                            |
| Chronic myeloid leukaemia                          | 6.8<br>(6.1 to 7.4)                              | 2.5<br>(2.3 to 2.8)                            | 0.9<br>(0.6 to 1.2)                           | 0.6<br>(-7.1 to 9.2)                              | -19.1<br>(-25.3 to -12.2)                        |
| Other leukaemia                                    | 48.1<br>(42.1 to 51.9)                           | 11.6<br>(10.1 to 12.5)                         | 6.6<br>(4.7 to 8.7)                           | 24.9<br>(14.3 to 35.9)                            | 0.5<br>(-8.1 to 9.3)                             |
| Other neoplasms                                    | 207.4<br>(184.3 to 220.4)                        | 62.0<br>(55.4 to 65.6)                         | 17.7<br>(13.1 to 22.8)                        | 47.2<br>(34.6 to 57.4)                            | 18.3<br>(8.3 to 26.6)                            |
| <b>Cardiovascular diseases</b>                     | <b>47,590.3</b><br><b>(46,801.6 to 48,536.7)</b> | <b>5,946.8†</b><br><b>(5,362.8 to 6,574.4)</b> | <b>3,797.8</b><br><b>(2,800.4 to 4,858.5)</b> | <b>23.9</b><br><b>(20.0 to 27.9)</b>              | <b>-0.3</b><br><b>(-3.5 to 2.9)</b>              |
| Rheumatic heart disease                            | 222.6<br>(198.9 to 246.3)                        | 14.6<br>(11.7 to 16.9)                         | 14.8<br>(10.3 to 20.1)                        | 26.0<br>(20.3 to 32.2)                            | 1.4<br>(-3.3 to 6.3)                             |
| Ischaemic heart disease                            | 18,410.3<br>(17,178.7 to 19,787.9)               | 2,261.6<br>(1,952.7 to 2,603.0)                | 759.2<br>(536.1 to 1,025.9)                   | 24.0<br>(22.4 to 25.5)                            | -0.3<br>(-1.6 to 0.9)                            |
| Cerebrovascular disease                            | 8,862.7<br>(8,412.0 to 9,387.8)                  | 1,623.8†<br>(1,382.7 to 1,866.5)               | 1,755.0<br>(1,218.2 to 2,271.3)               | 26.4<br>(18.2 to 34.9)                            | 1.7<br>(-5.0 to 8.5)                             |
| Ischaemic stroke                                   | 7,837.9<br>(6,819.7 to 9,017.3)                  | 1,171.8†<br>(961.6 to 1,389.3)                 | 1,481.9<br>(1,032.5 to 1,938.2)               | 27.2<br>(17.3 to 37.5)                            | 2.3<br>(-5.7 to 10.6)                            |
| Hemorrhagic stroke                                 | 1,435.4<br>(1,208.6 to 1,698.8)                  | 452.0†<br>(379.3 to 531.2)                     | 273.1<br>(189.4 to 365.8)                     | 22.3<br>(12.4 to 33.2)                            | -1.7<br>(-9.6 to 7.2)                            |
| Hypertensive heart disease                         | 2,120.6<br>(1,572.9 to 2,749.4)                  | --                                             | 166.1<br>(107.1 to 246.4)                     | 24.3<br>(21.0 to 27.4)                            | -0.1<br>(-2.7 to 2.4)                            |
| Cardiomyopathy and myocarditis                     | 504.9<br>(456.6 to 559.9)                        | 134.1†<br>(105.3 to 163.6)                     | 38.4<br>(24.4 to 56.8)                        | 13.2<br>(8.0 to 18.3)                             | -9.0<br>(-13.2 to -4.9)                          |
| Myocarditis                                        | 68.0<br>(55.0 to 82.1)                           | 134.1<br>(105.3 to 163.6)                      | 4.4<br>(2.9 to 6.4)                           | 18.4<br>(10.5 to 26.4)                            | -4.8<br>(-11.1 to 1.6)                           |
| Alcoholic cardiomyopathy                           | 81.6<br>(59.7 to 106.1)                          | --                                             | 6.4<br>(4.0 to 9.7)                           | 21.9<br>(8.7 to 36.5)                             | -2.0<br>(-12.6 to 9.8)                           |
| Other cardiomyopathy                               | 350.2<br>(258.5 to 455.0)                        | --                                             | 27.5<br>(17.3 to 41.2)                        | 10.6<br>(5.5 to 15.8)                             | -11.1<br>(-15.1 to -6.9)                         |
| Atrial fibrillation and flutter                    | 7,448.3<br>(6,373.3 to 8,765.5)                  | 552.4<br>(438.6 to 672.9)                      | 569.8<br>(388.1 to 795.7)                     | 24.3<br>(22.8 to 25.7)                            | -0.0<br>(-1.3 to 1.1)                            |
| Peripheral vascular disease                        | 14,726.7<br>(12,284.3 to 17,334.7)               | 1,270.5<br>(822.5 to 1,776.8)                  | 84.2<br>(39.2 to 158.3)                       | 17.6<br>(15.7 to 19.4)                            | -5.4<br>(-7.0 to -4.0)                           |
| Endocarditis                                       | 69.0<br>(52.6 to 90.2)                           | 89.9<br>(72.7 to 109.0)                        | 5.4<br>(3.4 to 8.2)                           | 15.0<br>(7.8 to 22.6)                             | -7.5<br>(-13.3 to -1.4)                          |
| Other cardiovascular and circulatory diseases      | 8,057.2<br>(5,993.4 to 10,575.6)                 | --                                             | 404.9<br>(259.6 to 600.3)                     | 15.8<br>(12.7 to 18.9)                            | -6.9<br>(-9.4 to -4.4)                           |
| <b>Chronic respiratory diseases</b>                | <b>28,538.4</b><br><b>(28,058.8 to 28,935.5)</b> | <b>3,176.4†</b><br><b>(2,831.7 to 3,516.0)</b> | <b>1,656.9</b><br><b>(1,417.9 to 1,881.9)</b> | <b>27.7</b><br><b>(24.8 to 30.9)</b>              | <b>2.7</b><br><b>(0.3 to 5.2)</b>                |
| Chronic obstructive pulmonary disease              | 22,259.0<br>(20,936.0 to 23,513.2)               | 1,337.9<br>(1,132.0 to 1,562.1)                | 1,269.5<br>(1,117.4 to 1,416.0)               | 27.8<br>(24.1 to 31.8)                            | 2.8<br>(-0.2 to 6.0)                             |
| Pneumoconiosis                                     | 109.4<br>(101.7 to 118.1)                        | 3.5<br>(2.9 to 4.2)                            | 15.3<br>(10.7 to 20.9)                        | 27.0<br>(20.1 to 34.2)                            | 2.1<br>(-3.4 to 7.9)                             |
| Silicosis                                          | 43.7<br>(38.7 to 49.6)                           | 1.6<br>(1.2 to 2.2)                            | 6.0<br>(4.1 to 8.4)                           | 26.8<br>(16.0 to 38.1)                            | 1.9<br>(-6.7 to 11.0)                            |

| Cause                                                          | Prevalence in thousands (95% UI)           | Incidence in thousands (95% UI)            | YLDs in thousands (95% UI)              |                                                   |                                                  |
|----------------------------------------------------------------|--------------------------------------------|--------------------------------------------|-----------------------------------------|---------------------------------------------------|--------------------------------------------------|
|                                                                | 2016 counts                                | 2016 counts                                | 2016 counts                             | Percentage change in counts between 2006 and 2016 | Percentage change in rates between 2006 and 2016 |
| Asbestosis                                                     | 18.8<br>(16.9 to 20.8)                     | 0.6<br>(0.5 to 0.7)                        | 2.7<br>(1.9 to 3.7)                     | 21.8<br>(15.2 to 29.1)                            | -2.1<br>(-7.4 to 3.8)                            |
| Coal workers pneumoconiosis                                    | 24.9<br>(21.5 to 29.0)                     | 0.4<br>(0.3 to 0.5)                        | 3.5<br>(2.3 to 4.9)                     | 30.1<br>(14.9 to 47.6)                            | 4.6<br>(-7.6 to 18.7)                            |
| Other pneumoconiosis                                           | 22.0<br>(18.5 to 26.4)                     | 0.9<br>(0.6 to 1.3)                        | 3.1<br>(2.1 to 4.4)                     | 29.0<br>(15.2 to 43.5)                            | 3.7<br>(-7.3 to 15.4)                            |
| Asthma                                                         | 8,827.0<br>(7,906.6 to 9,794.0)            | 1,794.7<br>(1,557.1 to 2,049.3)            | 317.4<br>(213.4 to 448.7)               | 26.6<br>(24.0 to 29.2)                            | 1.8<br>(-0.3 to 3.9)                             |
| Interstitial lung disease and pulmonary sarcoidosis            | 458.6<br>(388.1 to 536.5)                  | 40.3<br>(30.2 to 50.3)                     | 45.8<br>(30.6 to 65.8)                  | 28.1<br>(23.7 to 33.0)                            | 3.0<br>(-0.6 to 6.9)                             |
| Other chronic respiratory diseases                             | --                                         | --                                         | 8.8<br>(7.8 to 9.9)                     | 64.1<br>(59.6 to 69.0)                            | 32.0<br>(28.3 to 35.9)                           |
| <b>Cirrhosis and other chronic liver diseases</b>              | <b>1,567.7<br/>(1,473.8 to 1,667.8)</b>    | <b>90.8<br/>(76.8 to 105.6)</b>            | <b>54.3<br/>(37.4 to 74.5)</b>          | <b>26.2<br/>(21.7 to 30.8)</b>                    | <b>1.4<br/>(-2.1 to 5.2)</b>                     |
| Cirrhosis and other chronic liver diseases due to hepatitis B  | 444.1<br>(381.2 to 505.4)                  | 27.2<br>(21.7 to 33.6)                     | 16.0<br>(10.6 to 22.8)                  | 27.8<br>(21.4 to 34.3)                            | 2.8<br>(-2.4 to 8.0)                             |
| Cirrhosis and other chronic liver diseases due to hepatitis C  | 370.8<br>(310.2 to 441.4)                  | 22.3<br>(17.3 to 28.3)                     | 12.8<br>(8.5 to 18.6)                   | 25.9<br>(18.7 to 34.0)                            | 1.3<br>(-4.5 to 7.7)                             |
| Cirrhosis and other chronic liver diseases due to alcohol use  | 456.7<br>(388.0 to 527.6)                  | 24.5<br>(19.5 to 30.2)                     | 15.3<br>(10.3 to 21.8)                  | 26.2<br>(19.1 to 33.6)                            | 1.5<br>(-4.2 to 7.4)                             |
| Cirrhosis and other chronic liver diseases due to other causes | 296.1<br>(228.9 to 369.4)                  | 16.7<br>(12.6 to 21.8)                     | 10.2<br>(6.5 to 14.7)                   | 23.7<br>(16.7 to 31.5)                            | 0.5<br>(-6.2 to 5.7)                             |
| <b>Digestive diseases</b>                                      | <b>12,871.6<br/>(12,238.9 to 13,403.3)</b> | <b>10,149.6†<br/>(9,106.1 to 11,290.0)</b> | <b>327.5<br/>(226.9 to 441.3)</b>       | <b>31.4<br/>(27.5 to 35.8)</b>                    | <b>5.7<br/>(2.5 to 9.2)</b>                      |
| Peptic ulcer disease                                           | 3,408.7<br>(2,853.4 to 4,058.1)            | 394.1<br>(322.9 to 470.5)                  | 61.0<br>(37.5 to 93.5)                  | 36.0<br>(28.0 to 44.7)                            | 9.4<br>(3.0 to 16.4)                             |
| Gastritis and duodenitis                                       | 7,533.1<br>(5,650.9 to 9,622.2)            | 3,542.7<br>(2,982.1 to 4,161.4)            | 89.0<br>(56.0 to 128.4)                 | 38.0<br>(32.0 to 44.0)                            | 10.9<br>(6.2 to 15.8)                            |
| Appendicitis                                                   | 12.6<br>(10.8 to 14.8)                     | 349.2<br>(301.9 to 405.9)                  | 3.6<br>(2.3 to 4.9)                     | 27.8<br>(17.5 to 38.3)                            | 2.8<br>(-5.5 to 11.2)                            |
| Paralytic ileus and intestinal obstruction                     | 9.6<br>(7.7 to 11.7)                       | 275.2<br>(221.9 to 337.8)                  | 2.9<br>(1.8 to 4.3)                     | 28.8<br>(19.0 to 38.3)                            | 3.5<br>(-4.3 to 11.2)                            |
| Inguinal, femoral, and abdominal hernia                        | 1,743.7<br>(1,266.8 to 2,376.7)            | 2,340.6<br>(1,689.8 to 3,136.5)            | 90.3<br>(57.0 to 129.4)                 | 24.8<br>(18.2 to 31.7)                            | 0.3<br>(-5.0 to 5.9)                             |
| Inflammatory bowel disease                                     | 244.8<br>(211.6 to 280.2)                  | 51.4<br>(39.9 to 65.3)                     | 32.7<br>(22.3 to 45.6)                  | 23.1<br>(17.8 to 28.8)                            | -1.0<br>(-5.2 to 3.5)                            |
| Vascular intestinal disorders                                  | 11.4<br>(8.9 to 14.2)                      | 62.6<br>(48.9 to 80.5)                     | 3.2<br>(2.0 to 4.6)                     | 19.8<br>(3.0 to 38.5)                             | -3.7<br>(-17.2 to 11.4)                          |
| Gallbladder and biliary diseases                               | 739.2<br>(584.3 to 929.2)                  | 2,785.7<br>(2,177.9 to 3,473.2)            | 11.2<br>(7.3 to 16.2)                   | 31.6<br>(20.8 to 43.7)                            | 5.8<br>(-2.9 to 15.6)                            |
| Pancreatitis                                                   | 39.9<br>(32.4 to 49.1)                     | 348.1<br>(287.3 to 418.3)                  | 4.6<br>(3.0 to 6.7)                     | 38.1<br>(23.5 to 54.4)                            | 11.0<br>(-0.7 to 24.1)                           |
| Other digestive diseases                                       | --                                         | --                                         | 29.2<br>(20.2 to 39.3)                  | 35.6<br>(31.6 to 40.2)                            | 9.1<br>(5.9 to 12.8)                             |
| <b>Neurological disorders</b>                                  | <b>33,249.4<br/>(30,856.9 to 35,066.2)</b> | <b>9,879.1<br/>(6,912.9 to 13,460.8)</b>   | <b>1,875.8<br/>(1,307.0 to 2,486.6)</b> | <b>24.7<br/>(22.9 to 26.4)</b>                    | <b>0.3<br/>(-1.2 to 1.7)</b>                     |
| Alzheimer's disease and other dementias                        | 7,898.7<br>(6,190.2 to 9,860.6)            | 1,402.8<br>(922.4 to 2,057.3)              | 1,091.2<br>(724.8 to 1,543.1)           | 25.5<br>(23.8 to 27.1)                            | 1.0<br>(-0.5 to 2.2)                             |
| Parkinson's disease                                            | 1,072.9<br>(811.9 to 1,366.8)              | 126.4<br>(82.9 to 185.2)                   | 121.8<br>(76.0 to 174.7)                | 26.0<br>(22.3 to 29.1)                            | 1.3<br>(-1.6 to 3.8)                             |
| Epilepsy                                                       | 563.2<br>(462.1 to 678.4)                  | 36.6<br>(27.0 to 47.3)                     | 146.1<br>(99.8 to 200.2)                | 21.6<br>(6.4 to 40.1)                             | -2.2<br>(-14.4 to 12.6)                          |
| Multiple sclerosis                                             | 71.4<br>(64.7 to 78.5)                     | 0.6<br>(0.5 to 0.7)                        | 17.5<br>(12.5 to 22.8)                  | 28.7<br>(19.8 to 38.5)                            | 3.5<br>(-3.7 to 11.4)                            |
| Motor neuron disease                                           | 19.5<br>(15.4 to 24.4)                     | 5.0<br>(3.9 to 6.2)                        | 4.1<br>(2.8 to 5.7)                     | 27.0<br>(22.0 to 31.7)                            | 2.1<br>(-1.9 to 5.9)                             |
| Migraine                                                       | 8,548.8<br>(7,909.5 to 9,276.3)            | 495.9<br>(403.5 to 591.5)                  | 391.7<br>(261.6 to 538.3)               | 23.2<br>(21.4 to 25.0)                            | -1.0<br>(-2.4 to 0.5)                            |
| Tension-type headache                                          | 19,079.0<br>(12,974.4 to 25,778.4)         | 7,810.2<br>(4,903.7 to 11,296.0)           | 87.2<br>(55.3 to 129.6)                 | 23.1<br>(20.5 to 26.1)                            | -1.0<br>(-3.1 to 1.4)                            |
| Other neurological disorders                                   | 0.8<br>(0.4 to 1.4)                        | 1.6<br>(0.9 to 2.6)                        | 16.2<br>(11.2 to 22.0)                  | 27.2<br>(24.8 to 29.3)                            | 2.3<br>(0.3 to 4.0)                              |
| <b>Mental and substance use disorders</b>                      | <b>17,789.2<br/>(17,421.1 to 18,082.9)</b> | <b>8,412.1†<br/>(7,003.8 to 9,841.5)</b>   | <b>2,380.8<br/>(1,740.0 to 3,079.6)</b> | <b>22.4<br/>(21.3 to 23.5)</b>                    | <b>-1.6<br/>(-2.5 to -0.7)</b>                   |
| Schizophrenia                                                  | 231.2<br>(202.6 to 263.8)                  | 1.1<br>(0.8 to 1.4)                        | 132.7<br>(100.9 to 162.6)               | 28.3<br>(23.9 to 32.4)                            | 3.2<br>(-0.3 to 6.4)                             |
| Alcohol use disorders                                          | 785.0<br>(651.6 to 950.2)                  | 252.9<br>(193.6 to 332.1)                  | 71.4<br>(48.1 to 100.6)                 | 25.2<br>(19.5 to 30.3)                            | 0.7<br>(-3.9 to 4.8)                             |
| Drug use disorders                                             | 489.0<br>(469.7 to 504.7)                  | 14.0<br>(11.8 to 16.3)                     | 140.7<br>(99.5 to 178.9)                | 28.1<br>(24.0 to 32.6)                            | 3.0<br>(-0.3 to 6.7)                             |
| Opioid use disorders                                           | 312.2<br>(273.7 to 358.1)                  | --                                         | 115.5<br>(80.9 to 149.1)                | 29.2<br>(24.4 to 34.5)                            | 3.9<br>(0.0 to 8.1)                              |
| Cocaine use disorders                                          | 76.1<br>(67.0 to 86.3)                     | --                                         | 9.6<br>(6.1 to 13.8)                    | 20.0<br>(11.7 to 28.6)                            | -3.5<br>(-10.2 to 3.4)                           |
| Amphetamine use disorders                                      | 8.2<br>(5.5 to 11.8)                       | 1.6<br>(0.8 to 2.9)                        | 1.1<br>(0.6 to 2.0)                     | 25.1<br>(20.7 to 29.1)                            | 0.6<br>(-2.9 to 3.8)                             |
| Cannabis use disorders                                         | 64.7<br>(53.6 to 77.0)                     | --                                         | 1.9<br>(1.2 to 2.8)                     | 21.6<br>(15.8 to 27.5)                            | -2.2<br>(-6.8 to 2.5)                            |
| Other drug use disorders                                       | 54.8<br>(48.4 to 62.1)                     | 12.4<br>(10.5 to 14.5)                     | 12.5<br>(8.5 to 16.9)                   | 26.4<br>(20.1 to 32.8)                            | 1.6<br>(-3.4 to 6.8)                             |
| Depressive disorders                                           | 7,708.5<br>(7,391.6 to 7,979.8)            | 7,594.3<br>(6,223.3 to 9,030.0)            | 1,167.7<br>(797.9 to 1,610.3)           | 20.9<br>(18.9 to 22.7)                            | -2.8<br>(-4.4 to -1.3)                           |
| Major depressive disorder                                      | 4,739.5<br>(3,959.2 to 5,613.1)            | 7,256.7<br>(5,910.5 to 8,700.5)            | 881.5<br>(584.5 to 1,241.5)             | 19.4<br>(17.0 to 21.5)                            | -4.0<br>(-5.9 to -2.3)                           |
| Dysthymia                                                      | 3,200.5<br>(2,638.9 to 3,876.2)            | 337.6<br>(264.5 to 420.8)                  | 286.2<br>(187.1 to 411.6)               | 25.8<br>(22.5 to 29.1)                            | 1.2<br>(-1.5 to 3.8)                             |
| Bipolar disorder                                               | 610.0<br>(510.0 to 726.8)                  | 37.6<br>(27.0 to 50.5)                     | 112.4<br>(69.9 to 163.7)                | 22.3<br>(18.8 to 25.6)                            | -1.7<br>(-4.5 to 1.0)                            |
| Anxiety disorders                                              | 4,750.4<br>(4,248.3 to 5,298.0)            | 487.2<br>(439.3 to 537.3)                  | 415.4<br>(294.3 to 556.7)               | 21.1<br>(18.8 to 23.5)                            | -2.6<br>(-4.5 to -0.7)                           |
| Eating disorders                                               | --                                         | --                                         | --                                      | --                                                | --                                               |
| Anorexia nervosa                                               | --                                         | --                                         | --                                      | --                                                | --                                               |
| Bulimia nervosa                                                | --                                         | --                                         | --                                      | --                                                | --                                               |
| Autistic spectrum disorders                                    | 691.9<br>(661.6 to 719.8)                  | --                                         | 96.1<br>(65.7 to 132.9)                 | 25.2<br>(22.8 to 27.5)                            | 0.7<br>(-1.2 to 2.6)                             |
| Autism                                                         | 233.3<br>(200.4 to 272.1)                  | --                                         | 53.7<br>(34.7 to 76.8)                  | 24.1<br>(20.7 to 27.7)                            | -0.2<br>(-3.0 to 2.7)                            |
| Asperger syndrome and other autistic spectrum disorders        | 463.7<br>(386.5 to 555.1)                  | --                                         | 42.4<br>(28.4 to 60.2)                  | 26.6<br>(24.0 to 29.4)                            | 1.8<br>(-0.2 to 4.1)                             |

| Cause                                                      | Prevalence in thousands (95% UI)              | Incidence in thousands (95% UI)                | YLDs in thousands (95% UI)               |                                                   |                                                  |
|------------------------------------------------------------|-----------------------------------------------|------------------------------------------------|------------------------------------------|---------------------------------------------------|--------------------------------------------------|
|                                                            | 2016 counts                                   | 2016 counts                                    | 2016 counts                              | Percentage change in counts between 2006 and 2016 | Percentage change in rates between 2006 and 2016 |
| Attention-deficit/hyperactivity disorder                   | 15.5<br>(10.8 to 21.1)                        | --                                             | 0.2<br>(0.1 to 0.3)                      | 25.4<br>(15.5 to 35.2)                            | 0.8<br>(-7.1 to 8.7)                             |
| Conduct disorder                                           | --                                            | --                                             | --                                       | --                                                | --                                               |
| Idiopathic developmental intellectual disability           | 573.5<br>(265.7 to 887.4)                     | --                                             | 30.0<br>(15.0 to 48.3)                   | 15.7<br>(10.7 to 19.1)                            | -7.0<br>(-11.0 to -4.3)                          |
| Other mental and substance use disorders                   | 3,141.8<br>(2,787.1 to 3,539.4)               | 25.1<br>(15.1 to 41.2)                         | 214.3<br>(150.7 to 296.9)                | 24.8<br>(22.7 to 26.6)                            | 0.3<br>(-1.3 to 1.8)                             |
| <b>Diabetes, urogenital, blood, and endocrine diseases</b> | <b>71,102.0<br/>(70,377.9 to 71,787.0)</b>    | <b>14,244.0†<br/>(12,688.6 to 15,959.3)</b>    | <b>3,002.8<br/>(2,153.4 to 3,983.2)</b>  | <b>24.7<br/>(22.8 to 26.9)</b>                    | <b>0.3<br/>(-1.2 to 2.0)</b>                     |
| Diabetes mellitus                                          | 19,894.2<br>(18,133.5 to 21,914.8)            | 381.3<br>(263.1 to 520.2)                      | 1,562.4<br>(1,090.7 to 2,133.6)          | 23.4<br>(19.8 to 27.0)                            | -0.8<br>(-3.7 to 2.1)                            |
| Acute glomerulonephritis                                   | 4.3<br>(3.1 to 5.9)                           | 61.5<br>(44.9 to 83.8)                         | 0.2<br>(0.1 to 0.4)                      | 16.9<br>(7.0 to 27.5)                             | -6.0<br>(-14.0 to 2.6)                           |
| Chronic kidney disease                                     | 29,394.5<br>(25,253.7 to 33,233.6)            | 1,870.2<br>(1,261.4 to 2,540.6)                | 728.1<br>(535.0 to 951.2)                | 28.6<br>(25.1 to 31.9)                            | 3.4<br>(0.6 to 6.1)                              |
| Chronic kidney disease due to diabetes mellitus            | 12,024.5<br>(9,329.6 to 15,053.4)             | 779.4<br>(500.3 to 1,104.5)                    | 302.6<br>(210.3 to 417.8)                | 31.5<br>(27.5 to 35.7)                            | 5.8<br>(2.5 to 9.1)                              |
| Chronic kidney disease due to hypertension                 | 5,798.6<br>(4,482.1 to 7,154.7)               | 259.4<br>(153.5 to 395.9)                      | 191.2<br>(125.2 to 262.2)                | 29.8<br>(25.0 to 34.6)                            | 4.4<br>(0.5 to 8.2)                              |
| Chronic kidney disease due to glomerulonephritis           | 5,599.2<br>(4,337.3 to 6,911.7)               | 447.7<br>(272.7 to 634.4)                      | 91.1<br>(55.6 to 134.9)                  | 17.6<br>(8.7 to 25.2)                             | -5.4<br>(-12.6 to 0.7)                           |
| Chronic kidney disease due to other causes                 | 5,972.2<br>(4,110.1 to 8,231.9)               | 383.7<br>(224.6 to 575.8)                      | 143.2<br>(89.8 to 214.8)                 | 28.5<br>(22.5 to 34.2)                            | 3.3<br>(-1.5 to 7.9)                             |
| Urinary diseases and male infertility                      | 10,932.9<br>(9,997.5 to 12,595.8)             | 10,650.4†<br>(9,326.9 to 12,211.8)             | 346.9<br>(220.9 to 519.0)                | 25.7<br>(24.4 to 26.9)                            | 1.1<br>(0.0 to 2.1)                              |
| Interstitial nephritis and urinary tract infections        | 121.6<br>(102.4 to 144.2)                     | 6,360.6<br>(5,318.2 to 7,638.6)                | 3.7<br>(2.3 to 5.6)                      | 33.9<br>(25.7 to 41.8)                            | 7.7<br>(1.1 to 14.0)                             |
| Urolithiasis                                               | 121.5<br>(92.6 to 156.1)                      | 3,167.8<br>(2,439.1 to 4,021.4)                | 8.2<br>(5.2 to 11.9)                     | 31.2<br>(20.1 to 42.2)                            | 5.5<br>(-3.4 to 14.3)                            |
| Benign prostatic hyperplasia                               | 10,486.3<br>(8,798.1 to 12,455.1)             | 1,122.0<br>(789.4 to 1,539.8)                  | 332.5<br>(208.7 to 500.2)                | 25.6<br>(24.3 to 26.9)                            | 1.0<br>(-0.1 to 2.0)                             |
| Male infertility                                           | --                                            | --                                             | --                                       | --                                                | --                                               |
| Other urinary diseases                                     | --                                            | --                                             | 2.5<br>(1.7 to 3.5)                      | 11.9<br>(5.0 to 18.5)                             | -10.0<br>(-15.5 to -4.7)                         |
| Gynecological diseases                                     | 14,047.9<br>(13,211.4 to 15,410.9)            | 7.0†<br>(4.1 to 10.4)                          | 44.8<br>(22.0 to 79.0)                   | 15.9<br>(14.3 to 17.6)                            | -6.8<br>(-8.1 to -5.5)                           |
| Uterine fibroids                                           | 652.4<br>(575.8 to 738.1)                     | 7.0<br>(4.1 to 10.4)                           | 4.6<br>(2.3 to 8.4)                      | 22.5<br>(19.6 to 25.6)                            | -1.5<br>(-3.8 to 1.0)                            |
| Polycystic ovarian syndrome                                | --                                            | --                                             | --                                       | --                                                | --                                               |
| Female infertility                                         | --                                            | --                                             | --                                       | --                                                | --                                               |
| Endometriosis                                              | --                                            | --                                             | --                                       | --                                                | --                                               |
| Genital prolapse                                           | 13,467.0<br>(11,789.7 to 15,275.9)            | --                                             | 40.2<br>(19.4 to 72.3)                   | 15.2<br>(13.5 to 16.8)                            | -7.4<br>(-8.8 to -6.0)                           |
| Premenstrual syndrome                                      | --                                            | --                                             | --                                       | --                                                | --                                               |
| Other gynecological diseases                               | --                                            | --                                             | --                                       | --                                                | --                                               |
| Hemoglobinopathies and hemolytic anaemias                  | 24,638.6<br>(24,423.3 to 24,864.4)            | --                                             | 100.3<br>(66.9 to 145.1)                 | 24.8<br>(21.9 to 27.5)                            | 0.3<br>(-2.0 to 2.5)                             |
| Thalassemias                                               | < 0.05<br>(< 0.05 to < 0.05)                  | --                                             | < 0.05<br>(< 0.05 to < 0.05)             | 1.9<br>(-5.9 to 8.4)                              | -18.1<br>(-24.3 to -12.8)                        |
| Thalassaemia trait                                         | 4,522.4<br>(4,331.0 to 4,734.4)               | --                                             | 56.9<br>(37.3 to 83.7)                   | 33.3<br>(29.1 to 37.8)                            | 7.2<br>(3.8 to 10.8)                             |
| Sickle cell disorders                                      | 0.1<br>(0.1 to 0.2)                           | --                                             | < 0.05<br>(< 0.05 to < 0.05)             | 22.8<br>(19.5 to 26.5)                            | -1.2<br>(-3.9 to 1.8)                            |
| Sickle cell trait                                          | 4,400.4<br>(4,028.6 to 4,902.8)               | --                                             | 10.7<br>(7.1 to 15.3)                    | 40.0<br>(35.8 to 44.7)                            | 12.6<br>(9.2 to 16.3)                            |
| G6PD deficiency                                            | 3,569.4<br>(3,433.9 to 3,722.3)               | --                                             | 0.5<br>(0.3 to 0.7)                      | 27.4<br>(23.3 to 31.3)                            | 2.5<br>(-0.8 to 5.5)                             |
| G6PD trait                                                 | 13,106.4<br>(12,867.1 to 13,383.6)            | --                                             | < 0.05<br>(< 0.05 to < 0.05)             | 18.3<br>(6.4 to 29.0)                             | -4.9<br>(-14.5 to 3.8)                           |
| Other hemoglobinopathies and hemolytic anaemias            | 1,532.4<br>(1,475.5 to 1,597.0)               | --                                             | 32.2<br>(21.8 to 46.1)                   | 8.5<br>(5.5 to 11.1)                              | -12.8<br>(-15.1 to -10.7)                        |
| Endocrine, metabolic, blood, and immune disorders          | 6,848.9<br>(5,682.0 to 8,440.5)               | 1,273.7<br>(914.4 to 1,704.2)                  | 220.1<br>(143.6 to 314.7)                | 22.9<br>(18.0 to 27.5)                            | -1.2<br>(-5.1 to 2.5)                            |
| <b>Musculoskeletal disorders</b>                           | <b>51,543.3<br/>(49,779.2 to 53,173.7)</b>    | <b>21,817.8<br/>(17,157.7 to 27,256.4)</b>     | <b>5,342.0<br/>(3,847.0 to 7,013.9)</b>  | <b>22.5<br/>(20.8 to 24.1)</b>                    | <b>1.5<br/>(-2.9 to -0.2)</b>                    |
| Rheumatoid arthritis                                       | 1,211.7<br>(1,072.4 to 1,355.4)               | 21.0<br>(15.1 to 27.7)                         | 265.7<br>(186.3 to 346.1)                | 27.5<br>(24.4 to 30.5)                            | 2.5<br>(0.0 to 4.9)                              |
| Osteoarthritis                                             | 24,072.4<br>(22,700.5 to 25,510.4)            | 344.4<br>(284.2 to 407.6)                      | 1,193.3<br>(835.5 to 1,626.6)            | 26.5<br>(25.6 to 27.5)                            | 1.8<br>(1.0 to 2.5)                              |
| Low back and neck pain                                     | 29,211.2<br>(26,595.1 to 31,690.3)            | 13,065.5<br>(9,454.5 to 17,167.8)              | 3,275.7<br>(2,255.0 to 4,433.0)          | 22.6<br>(19.9 to 24.8)                            | -1.5<br>(-3.6 to 0.3)                            |
| Low back pain                                              | 21,616.7<br>(16,072.2 to 27,820.0)            | 11,213.7<br>(7,802.0 to 15,209.0)              | 2,289.4<br>(1,493.3 to 3,243.4)          | 21.8<br>(17.9 to 24.9)                            | -2.0<br>(-5.2 to 0.4)                            |
| Neck pain                                                  | 10,569.0<br>(7,816.0 to 14,423.5)             | 1,851.8<br>(1,121.6 to 2,704.2)                | 986.3<br>(618.3 to 1,493.9)              | 24.3<br>(21.7 to 27.0)                            | -0.0<br>(-2.1 to 2.1)                            |
| Gout                                                       | 2,462.2<br>(1,983.9 to 2,987.9)               | 416.9<br>(300.3 to 549.9)                      | 72.6<br>(48.7 to 101.0)                  | 24.7<br>(20.7 to 28.7)                            | 0.3<br>(-2.9 to 3.5)                             |
| Other musculoskeletal disorders                            | 6,821.6<br>(4,581.8 to 9,177.9)               | 7,970.0<br>(5,216.8 to 11,196.9)               | 534.7<br>(317.2 to 808.8)                | 12.1<br>(3.4 to 20.0)                             | -9.9<br>(-16.9 to -3.5)                          |
| <b>Other non-communicable diseases</b>                     | <b>112,219.3<br/>(112,024.9 to 112,388.2)</b> | <b>359,819.8†<br/>(317,513.4 to 411,047.7)</b> | <b>7,630.9<br/>(5,405.3 to 10,454.9)</b> | <b>23.4<br/>(21.8 to 25.0)</b>                    | <b>-0.8<br/>(-2.1 to 0.5)</b>                    |
| Congenital anomalies                                       | 984.1<br>(921.6 to 1,045.0)                   | --                                             | 106.3<br>(77.3 to 139.4)                 | 21.5<br>(18.6 to 24.6)                            | -2.3<br>(-4.7 to 0.2)                            |
| Neural tube defects                                        | 72.0<br>(65.6 to 79.5)                        | --                                             | 20.5<br>(14.8 to 27.0)                   | 23.2<br>(17.8 to 28.9)                            | -0.9<br>(-5.3 to 3.6)                            |
| Congenital heart anomalies                                 | 167.2<br>(150.0 to 186.1)                     | --                                             | 9.1<br>(3.8 to 15.8)                     | 28.8<br>(23.6 to 34.1)                            | 3.6<br>(-0.6 to 7.8)                             |
| Orofacial clefts                                           | 58.4<br>(52.1 to 64.8)                        | --                                             | 0.7<br>(0.4 to 1.0)                      | 18.3<br>(15.2 to 21.4)                            | -4.8<br>(-7.4 to -2.4)                           |
| Down's syndrome                                            | --                                            | --                                             | --                                       | --                                                | --                                               |
| Turner syndrome                                            | 7.1<br>(6.0 to 8.4)                           | --                                             | 0.1<br>(< 0.05 to 0.2)                   | 27.4<br>(24.6 to 30.3)                            | 2.5<br>(0.2 to 4.8)                              |
| Klinefelter syndrome                                       | 1.3<br>(1.0 to 1.6)                           | --                                             | < 0.05<br>(< 0.05 to < 0.05)             | 29.0<br>(25.5 to 32.9)                            | 3.8<br>(0.9 to 6.9)                              |

| Cause                                         | Prevalence in thousands (95% UI)                 | Incidence in thousands (95% UI)                   | YLDs in thousands (95% UI)                    |                                                   |                                                  |
|-----------------------------------------------|--------------------------------------------------|---------------------------------------------------|-----------------------------------------------|---------------------------------------------------|--------------------------------------------------|
|                                               | 2016 counts                                      | 2016 counts                                       | 2016 counts                                   | Percentage change in counts between 2006 and 2016 | Percentage change in rates between 2006 and 2016 |
| Other chromosomal abnormalities               | < 0.05<br>(< 0.05 to < 0.05)                     | --                                                | < 0.05<br>(< 0.05 to < 0.05)                  | 7.5<br>(6.0 to 9.1)                               | -13.6<br>(-14.8 to -12.3)                        |
| Congenital musculoskeletal and limb anomalies | 216.3<br>(199.3 to 233.5)                        | --                                                | 29.9<br>(21.1 to 40.2)                        | 28.9<br>(17.4 to 27.7)                            | -1.4<br>(-5.6 to 2.7)                            |
| Urogenital congenital anomalies               | 51.2<br>(46.1 to 56.7)                           | --                                                | 0.8<br>(0.4 to 1.4)                           | 28.9<br>(24.4 to 34.2)                            | 3.6<br>(0.0 to 7.9)                              |
| Digestive congenital anomalies                | 171.4<br>(155.1 to 189.2)                        | --                                                | 6.9<br>(4.6 to 9.8)                           | 22.7<br>(16.6 to 29.6)                            | -1.3<br>(-6.2 to 4.2)                            |
| Other congenital anomalies                    | 447.0<br>(309.1 to 628.3)                        | --                                                | 38.4<br>(24.4 to 58.3)                        | 17.9<br>(12.5 to 24.0)                            | -5.2<br>(-9.5 to -0.3)                           |
| Skin and subcutaneous diseases                | 55,269.4<br>(53,227.3 to 57,485.7)               | 190,694.6<br>(156,449.7 to 236,073.3)             | 806.4<br>(523.4 to 1,248.3)                   | 25.3<br>(24.4 to 26.2)                            | 0.8<br>(0.0 to 1.5)                              |
| Dermatitis                                    | 5,566.4<br>(4,775.5 to 6,554.0)                  | 7,791.5<br>(5,595.9 to 10,425.5)                  | 164.3<br>(99.7 to 247.1)                      | 21.9<br>(20.1 to 23.6)                            | -2.0<br>(-3.4 to -0.6)                           |
| Psoriasis                                     | 1,863.8<br>(1,705.2 to 2,021.8)                  | 157.1<br>(134.7 to 179.8)                         | 148.1<br>(107.0 to 191.9)                     | 27.6<br>(24.7 to 30.4)                            | 2.6<br>(0.3 to 4.9)                              |
| Cellulitis                                    | 95.7<br>(80.4 to 114.8)                          | 2,315.0<br>(1,936.6 to 2,700.8)                   | 5.0<br>(3.3 to 7.3)                           | 22.4<br>(14.9 to 30.1)                            | -1.6<br>(-7.6 to 4.6)                            |
| Pyoderma                                      | 1,001.9<br>(920.2 to 1,085.9)                    | 26,485.8<br>(23,868.8 to 28,912.3)                | 5.3<br>(2.2 to 11.0)                          | 27.9<br>(25.3 to 30.3)                            | 2.9<br>(0.8 to 4.8)                              |
| Scabies                                       | 1,368.8<br>(889.1 to 1,933.9)                    | 4,285.3<br>(2,767.6 to 6,207.1)                   | 32.9<br>(16.3 to 58.2)                        | 23.3<br>(21.1 to 25.6)                            | -0.9<br>(-2.6 to 1.0)                            |
| Fungal skin diseases                          | 26,215.7<br>(19,582.7 to 33,375.9)               | 105,116.3<br>(71,624.6 to 149,450.8)              | 139.1<br>(52.9 to 306.2)                      | 25.6<br>(25.1 to 26.0)                            | 1.0<br>(0.6 to 1.3)                              |
| Viral skin diseases                           | 1,893.1<br>(1,587.6 to 2,280.7)                  | 2,903.2<br>(2,463.8 to 3,437.8)                   | 53.6<br>(33.3 to 78.6)                        | 23.2<br>(21.3 to 25.4)                            | -0.9<br>(-2.5 to 0.8)                            |
| Acne vulgaris                                 | 833.3<br>(810.9 to 859.0)                        | 365.1<br>(351.5 to 380.8)                         | 19.5<br>(13.4 to 27.8)                        | 26.4<br>(21.2 to 31.6)                            | 1.6<br>(-2.5 to 5.8)                             |
| Alopecia areata                               | 161.2<br>(142.6 to 178.9)                        | 270.3<br>(242.7 to 299.1)                         | 4.9<br>(3.2 to 7.3)                           | 19.4<br>(13.9 to 25.6)                            | -4.0<br>(-8.4 to -1.0)                           |
| Pruritus                                      | 2,302.8<br>(1,609.0 to 3,341.7)                  | 1,756.9<br>(1,235.8 to 2,420.2)                   | 23.1<br>(10.2 to 45.4)                        | 26.2<br>(24.4 to 27.9)                            | 1.5<br>(0.0 to 2.8)                              |
| Urticaria                                     | 606.5<br>(428.8 to 844.3)                        | 1,052.0<br>(738.3 to 1,469.2)                     | 33.2<br>(19.5 to 52.0)                        | 23.9<br>(20.5 to 27.5)                            | -0.4<br>(-3.1 to 2.5)                            |
| Decubitus ulcer                               | 227.3<br>(173.2 to 297.1)                        | 840.2<br>(634.8 to 1,097.8)                       | 33.6<br>(21.9 to 48.2)                        | 25.7<br>(18.1 to 33.2)                            | 1.1<br>(-5.1 to 7.1)                             |
| Other skin and subcutaneous diseases          | 27,554.8<br>(25,117.3 to 29,783.5)               | 37,356.1<br>(33,361.7 to 41,328.5)                | 143.7<br>(69.9 to 263.5)                      | 28.3<br>(27.5 to 29.2)                            | 3.2<br>(2.5 to 3.9)                              |
| Sense organ diseases                          | 97,881.8<br>(96,826.1 to 99,042.2)               | 25,117.1*<br>(22,831.3 to 27,484.8)               | 5,611.8<br>(4,019.8 to 7,581.6)               | 23.1<br>(21.0 to 25.3)                            | -1.0<br>(-2.7 to 0.8)                            |
| Glaucoma                                      | 679.5<br>(551.4 to 833.3)                        | --                                                | 64.4<br>(42.2 to 92.0)                        | 27.0<br>(23.8 to 30.1)                            | 2.1<br>(-0.5 to 4.6)                             |
| Cataract                                      | 12,702.0<br>(10,616.8 to 15,104.0)               | --                                                | 847.4<br>(597.7 to 1,160.7)                   | 26.1<br>(23.9 to 28.1)                            | 1.4<br>(-0.4 to 3.0)                             |
| Macular degeneration                          | 868.3<br>(689.2 to 1,114.6)                      | --                                                | 55.8<br>(37.0 to 78.7)                        | 27.0<br>(23.3 to 30.1)                            | 2.1<br>(-0.8 to 4.6)                             |
| Refraction and accommodation disorders        | 46,940.8<br>(43,823.6 to 50,388.4)               | --                                                | 770.9<br>(485.3 to 1,202.2)                   | 18.4<br>(16.3 to 20.2)                            | -4.8<br>(-6.5 to -3.4)                           |
| Age-related and other hearing loss            | 95,820.4<br>(93,893.6 to 97,633.7)               | --                                                | 3,288.2<br>(2,328.3 to 4,450.3)               | 23.1<br>(19.7 to 26.9)                            | -1.0<br>(-3.8 to 2.0)                            |
| Other vision loss                             | 2,294.8<br>(1,824.4 to 2,821.6)                  | --                                                | 168.3<br>(114.2 to 231.3)                     | 24.4<br>(21.8 to 27.0)                            | 0.0<br>(-2.1 to 2.1)                             |
| Other sense organ diseases                    | 13,733.6<br>(12,043.0 to 15,530.1)               | 25,117.1<br>(22,831.3 to 27,484.8)                | 417.0<br>(264.2 to 622.0)                     | 25.1<br>(23.8 to 26.4)                            | 0.6<br>(-0.5 to 1.6)                             |
| Oral disorders                                | 73,216.9<br>(71,825.6 to 74,730.3)               | 144,008.0*<br>(121,418.2 to 165,634.8)            | 1,106.4<br>(708.7 to 1,620.6)                 | 23.4<br>(22.4 to 24.2)                            | -0.8<br>(-1.6 to -0.1)                           |
| Caries of deciduous teeth                     | --                                               | --                                                | --                                            | --                                                | --                                               |
| Caries of permanent teeth                     | 42,837.2<br>(37,435.1 to 49,095.3)               | 139,653.2<br>(117,826.0 to 161,173.8)             | 31.0<br>(14.2 to 59.2)                        | 18.5<br>(16.9 to 20.0)                            | -4.7<br>(-6.0 to -3.5)                           |
| Periodontal disease                           | 24,246.5<br>(18,387.4 to 29,938.9)               | 2,953.3<br>(1,613.2 to 4,248.5)                   | 150.5<br>(58.5 to 327.1)                      | 27.1<br>(26.2 to 28.1)                            | 2.2<br>(1.4 to 3.0)                              |
| Edentulism and severe tooth loss              | 32,036.2<br>(26,826.7 to 37,682.0)               | 1,401.5<br>(902.8 to 2,081.9)                     | 857.0<br>(554.6 to 1,220.5)                   | 22.9<br>(21.5 to 24.1)                            | -1.2<br>(-2.3 to -0.2)                           |
| Other oral disorders                          | 2,481.0<br>(2,213.6 to 2,731.5)                  | --                                                | 68.0<br>(42.5 to 102.1)                       | 24.1<br>(22.5 to 25.8)                            | -0.2<br>(-1.5 to 1.1)                            |
| <b>Injuries</b>                               | <b>66,012.6</b><br><b>(62,408.2 to 69,910.7)</b> | <b>15,556.4*</b><br><b>(13,470.2 to 18,295.7)</b> | <b>2,393.5</b><br><b>(1,679.9 to 3,302.2)</b> | <b>28.3</b><br><b>(27.2 to 29.2)</b>              | <b>3.2</b><br><b>(2.3 to 3.9)</b>                |
| <b>Transport injuries</b>                     | <b>10,624.1</b><br><b>(9,905.8 to 11,382.4)</b>  | <b>1,218.7</b><br><b>(975.1 to 1,493.5)</b>       | <b>477.9</b><br><b>(327.0 to 679.8)</b>       | <b>30.0</b><br><b>(29.1 to 30.9)</b>              | <b>4.6</b><br><b>(3.8 to 5.2)</b>                |
| Road injuries                                 | 8,955.5<br>(8,366.2 to 9,663.0)                  | 1,018.5<br>(792.6 to 1,286.4)                     | 405.3<br>(277.3 to 577.3)                     | 31.2<br>(30.3 to 32.1)                            | 5.5<br>(4.8 to 6.2)                              |
| Pedestrian road injuries                      | 2,146.7<br>(1,891.3 to 2,511.3)                  | 249.3<br>(172.9 to 336.2)                         | 101.7<br>(70.0 to 144.5)                      | 32.5<br>(31.4 to 33.6)                            | 6.6<br>(5.7 to 7.4)                              |
| Cyclist road injuries                         | 1,869.7<br>(1,589.5 to 2,174.8)                  | 256.8<br>(178.2 to 364.5)                         | 80.8<br>(54.4 to 116.2)                       | 34.5<br>(33.6 to 35.5)                            | 8.2<br>(7.4 to 9.0)                              |
| Motorcyclist road injuries                    | 1,773.8<br>(1,529.0 to 2,068.0)                  | 95.3<br>(60.8 to 141.6)                           | 77.7<br>(53.2 to 110.9)                       | 39.6<br>(38.8 to 40.5)                            | 12.3<br>(11.6 to 13.0)                           |
| Motor vehicle road injuries                   | 2,546.9<br>(2,111.1 to 2,923.9)                  | 336.1<br>(238.1 to 450.1)                         | 118.9<br>(81.3 to 169.2)                      | 19.7<br>(18.4 to 20.9)                            | -3.8<br>(-4.8 to -2.8)                           |
| Other road injuries                           | 618.4<br>(535.9 to 728.3)                        | 81.0<br>(46.0 to 131.2)                           | 26.2<br>(17.6 to 38.1)                        | 54.4<br>(53.2 to 55.5)                            | 24.1<br>(23.2 to 25.1)                           |
| Other transport injuries                      | 1,668.6<br>(1,393.3 to 1,895.5)                  | 200.1<br>(142.2 to 269.3)                         | 72.7<br>(49.8 to 101.9)                       | 23.6<br>(22.1 to 25.0)                            | -0.6<br>(-1.8 to 0.6)                            |
| <b>Unintentional injuries</b>                 | <b>52,084.8</b><br><b>(48,680.9 to 55,645.1)</b> | <b>13,949.4</b><br><b>(11,895.6 to 16,735.0)</b>  | <b>1,808.1</b><br><b>(1,275.9 to 2,446.9)</b> | <b>28.1</b><br><b>(26.9 to 29.1)</b>              | <b>3.0</b><br><b>(2.0 to 3.9)</b>                |
| Falls                                         | 27,548.4<br>(24,336.5 to 30,912.1)               | 8,304.2<br>(6,518.7 to 10,910.4)                  | 1,176.9<br>(844.1 to 1,584.0)                 | 29.4<br>(27.7 to 30.7)                            | 4.0<br>(2.7 to 5.1)                              |
| Drowning                                      | 212.5<br>(184.8 to 242.7)                        | 30.2<br>(24.5 to 36.8)                            | 9.7<br>(6.6 to 13.9)                          | 12.2<br>(10.6 to 13.8)                            | -9.7<br>(-11.1 to -8.5)                          |
| Fire, heat, and hot substances                | 3,641.4<br>(3,201.0 to 4,172.7)                  | 115.7<br>(85.4 to 157.9)                          | 65.2<br>(39.3 to 103.2)                       | 23.2<br>(22.0 to 24.6)                            | -0.9<br>(-1.9 to 0.2)                            |
| Poisonings                                    | 115.3<br>(100.0 to 131.7)                        | 51.6<br>(32.7 to 75.5)                            | 7.0<br>(4.7 to 10.0)                          | 31.5<br>(28.1 to 34.7)                            | 5.8<br>(3.0 to 8.3)                              |
| Exposure to mechanical forces                 | 8,013.9<br>(6,960.2 to 9,407.8)                  | 605.9<br>(441.7 to 801.2)                         | 162.4<br>(107.5 to 237.1)                     | 30.3<br>(29.4 to 31.0)                            | 4.8<br>(4.1 to 5.3)                              |
| Unintentional firearm injuries                | 267.3<br>(225.4 to 314.2)                        | 6.9<br>(3.5 to 12.6)                              | 6.4<br>(4.2 to 9.4)                           | 31.2<br>(30.2 to 32.2)                            | 5.5<br>(4.7 to 6.3)                              |
| Unintentional suffocation                     | 252.1<br>(211.1 to 301.1)                        | 17.9<br>(10.0 to 30.0)                            | 7.0<br>(4.6 to 10.3)                          | 30.5<br>(29.1 to 31.8)                            | 5.0<br>(3.8 to 6.0)                              |
| Other exposure to mechanical forces           | 7,494.5<br>(6,435.9 to 8,838.1)                  | 581.0<br>(425.5 to 769.6)                         | 149.0<br>(98.8 to 217.5)                      | 30.2<br>(29.3 to 31.0)                            | 4.7<br>(4.0 to 5.3)                              |

| Cause                                                                               | Prevalence in thousands (95% UI)        | Incidence in thousands (95% UI)    | YLDs in thousands (95% UI)      |                                                   |                                                  |
|-------------------------------------------------------------------------------------|-----------------------------------------|------------------------------------|---------------------------------|---------------------------------------------------|--------------------------------------------------|
|                                                                                     | 2016 counts                             | 2016 counts                        | 2016 counts                     | Percentage change in counts between 2006 and 2016 | Percentage change in rates between 2006 and 2016 |
| Adverse effects of medical treatment                                                | 131.2<br>(93.0 to 179.4)                | 1,716.0<br>(1,289.7 to 2,219.8)    | 17.5<br>(10.4 to 27.4)          | 13.7<br>(7.4 to 19.5)                             | -8.6<br>(-13.6 to -3.9)                          |
| Animal contact                                                                      | 1,830.5<br>(1,655.8 to 2,058.7)         | 777.8<br>(564.6 to 1,044.8)        | 38.5<br>(26.6 to 53.2)          | 17.9<br>(16.1 to 19.5)                            | -5.2<br>(-6.7 to -3.9)                           |
| Venomous animal contact                                                             | 754.0<br>(644.2 to 897.3)               | 368.3<br>(255.0 to 502.7)          | 22.6<br>(15.8 to 30.9)          | 20.8<br>(18.0 to 23.4)                            | -2.9<br>(-5.1 to -0.8)                           |
| Non-venomous animal contact                                                         | 1,076.5<br>(949.2 to 1,232.0)           | 409.5<br>(282.9 to 567.7)          | 15.9<br>(10.5 to 24.0)          | 13.9<br>(12.1 to 15.3)                            | -8.4<br>(-9.9 to -7.2)                           |
| Foreign body                                                                        | 1,792.0<br>(1,576.6 to 2,010.1)         | 748.5<br>(571.5 to 982.0)          | 58.5<br>(38.8 to 85.4)          | 23.4<br>(21.9 to 24.8)                            | -0.8<br>(-2.0 to 0.3)                            |
| Pulmonary aspiration and foreign body in airway                                     | 840.2<br>(690.8 to 992.9)               | 328.6<br>(255.8 to 433.3)          | 30.1<br>(19.8 to 43.8)          | 20.9<br>(19.2 to 22.5)                            | -2.8<br>(-4.2 to -1.5)                           |
| Foreign body in eyes                                                                | 105.5<br>(76.5 to 145.2)                | 282.6<br>(141.1 to 494.9)          | 6.4<br>(3.9 to 9.9)             | 32.6<br>(29.6 to 35.9)                            | 6.7<br>(4.2 to 9.2)                              |
| Foreign body in other body part                                                     | 846.3<br>(710.3 to 1,011.3)             | 137.3<br>(84.5 to 199.8)           | 22.1<br>(14.5 to 32.2)          | 24.3<br>(22.9 to 25.6)                            | -0.0<br>(-1.1 to 1.0)                            |
| Environmental heat and cold exposure                                                | 2,721.7<br>(2,421.2 to 3,130.7)         | 359.2<br>(250.1 to 488.2)          | 97.9<br>(66.3 to 139.5)         | 25.5<br>(23.7 to 27.2)                            | 0.9<br>(-0.6 to 2.3)                             |
| Other unintentional injuries                                                        | 6,077.9<br>(5,238.4 to 7,087.9)         | 1,240.4<br>(813.5 to 1,733.6)      | 174.4<br>(116.7 to 248.5)       | 27.9<br>(26.9 to 28.7)                            | 2.9<br>(2.1 to 3.5)                              |
| <b>Self-harm and interpersonal violence</b>                                         | <b>4,298.3<br/>(3,954.2 to 4,679.0)</b> | <b>381.9†<br/>(317.0 to 455.1)</b> | <b>89.7<br/>(60.7 to 128.1)</b> | <b>17.2<br/>(16.6 to 17.9)</b>                    | <b>-5.7<br/>(-6.2 to -5.2)</b>                   |
| Self-harm                                                                           | 635.4<br>(537.7 to 742.7)               | 222.5<br>(174.5 to 280.7)          | 22.5<br>(14.9 to 31.9)          | 8.2<br>(7.0 to 9.3)                               | -13.0<br>(-13.9 to -12.1)                        |
| Self-harm by firearm                                                                | 13.9<br>(12.0 to 16.5)                  | 2.5<br>(0.8 to 5.8)                | 0.4<br>(0.3 to 0.6)             | 4.6<br>(3.1 to 6.2)                               | -15.9<br>(-17.1 to -14.6)                        |
| Self-harm by other specified means                                                  | 621.4<br>(524.4 to 729.7)               | 220.1<br>(172.1 to 276.1)          | 22.1<br>(14.7 to 31.4)          | 8.3<br>(7.1 to 9.4)                               | -12.9<br>(-13.9 to -12.0)                        |
| Interpersonal violence                                                              | 3,663.0<br>(3,336.4 to 4,051.1)         | 159.3†<br>(114.1 to 211.5)         | 67.2<br>(45.4 to 96.0)          | 20.6<br>(20.0 to 21.3)                            | -3.0<br>(-3.5 to -2.5)                           |
| Assault by firearm                                                                  | 110.5<br>(94.7 to 128.2)                | 7.3<br>(3.7 to 12.5)               | 3.1<br>(2.0 to 4.5)             | 23.4<br>(22.3 to 24.6)                            | -0.8<br>(-1.6 to 0.2)                            |
| Assault by sharp object                                                             | 474.1<br>(395.9 to 561.5)               | 25.5<br>(13.9 to 41.3)             | 9.9<br>(6.6 to 14.4)            | 18.6<br>(17.7 to 19.5)                            | -4.6<br>(-5.4 to -3.9)                           |
| Sexual violence                                                                     | 1,610.8<br>(1,377.7 to 1,874.6)         | --                                 | 9.7<br>(6.4 to 14.3)            | 20.0<br>(18.9 to 21.0)                            | -3.5<br>(-4.4 to -2.7)                           |
| Assault by other means                                                              | 1,467.5<br>(1,250.0 to 1,747.8)         | 126.6<br>(90.4 to 170.1)           | 44.4<br>(29.7 to 64.3)          | 21.0<br>(20.2 to 21.9)                            | -2.7<br>(-3.3 to -2.0)                           |
| <b>Forces of nature, conflict and terrorism, and executions and police conflict</b> | <b>616.2<br/>(409.6 to 880.6)</b>       | <b>6.4†<br/>(4.0 to 9.4)</b>       | <b>17.8<br/>(4.8 to 43.9)</b>   | <b>75.6<br/>(65.1 to 93.9)</b>                    | <b>41.2<br/>(32.8 to 55.9)</b>                   |
| Forces of nature, conflict and terrorism, and state actor violence                  | 136.0<br>(75.8 to 207.0)                | 4.0<br>(2.2 to 6.2)                | 4.7<br>(1.0 to 12.1)            | 71.1<br>(57.7 to 82.6)                            | 37.6<br>(26.8 to 46.9)                           |
| Conflict and terrorism                                                              | 386.4<br>(227.0 to 604.1)               | --                                 | 11.7<br>(3.5 to 27.7)           | 61.6<br>(48.2 to 91.2)                            | 30.0<br>(19.2 to 53.8)                           |
| Executions and police conflict                                                      | 93.9<br>(28.2 to 154.9)                 | 2.5<br>(0.9 to 4.5)                | 2.2<br>(0.4 to 6.4)             | 163.4<br>(147.7 to 183.2)                         | 111.8<br>(99.2 to 127.8)                         |

We did not calculate incidence for certain NTDs and causes with only birth prevalence. Blank cells mean that no estimate is available.

† Incidence for aggregate causes represents the sum of the incidence of the causes below the aggregate.

‡ Incidence estimates for stroke represent first-ever stroke only.

^ Incidence of HIV/AIDS represents new infections of HIV only and does not include new infections of Tuberculosis in HIV positive cases.



SR Table 12: Global prevalence, incidence, and YLDs for 2016, percentage change of YLD counts and percentage change of YLD rates between 2006 and 2016 by cause, age 80-84 years.

| Cause                                                                                | Prevalence in thousands (95% UI)   | Incidence in thousands (95% UI)        | YLDs in thousands (95% UI)         |                                                   |                                                  |
|--------------------------------------------------------------------------------------|------------------------------------|----------------------------------------|------------------------------------|---------------------------------------------------|--------------------------------------------------|
|                                                                                      | 2016 counts                        | 2016 counts                            | 2016 counts                        | Percentage change in counts between 2006 and 2016 | Percentage change in rates between 2006 and 2016 |
|                                                                                      |                                    |                                        |                                    |                                                   |                                                  |
| <b>All causes</b>                                                                    | 72,540.6<br>(72,533.4 to 72,555.1) | 525,469.7†<br>(480,677.4 to 574,753.3) | 20,728.5<br>(15,754.3 to 26,231.2) | 30.2<br>(29.4 to 31.1)                            | -0.6<br>(-1.2 to 0.1)                            |
| <b>Communicable, maternal, neonatal, and nutritional disorders</b>                   | 41,328.1<br>(40,856.1 to 41,742.6) | 305,548.1*<br>(172,108.0 to 250,654.1) | 623.7<br>(449.7 to 811.3)          | 25.8<br>(23.4 to 29.1)                            | 3.9<br>(-5.8 to -1.4)                            |
| <b>HIV/AIDS and tuberculosis</b>                                                     | 16,591.9<br>(15,527.2 to 17,833.3) | 118.4†<br>(102.3 to 135.6)             | 66.7<br>(46.0 to 91.1)             | 19.7<br>(12.4 to 26.2)                            | -8.6<br>(-14.2 to -3.7)                          |
| Tuberculosis                                                                         | 16,033.7<br>(14,379.8 to 17,737.2) | 118.4†<br>(102.3 to 135.6)             | 58.4<br>(39.2 to 80.2)             | 18.8<br>(15.4 to 22.6)                            | -9.3<br>(-11.9 to -6.4)                          |
| Drug-susceptible tuberculosis                                                        | 206.3<br>(174.1 to 244.5)          | 114.2<br>(98.7 to 131.0)               | 56.1<br>(37.6 to 77.2)             | 18.9<br>(15.4 to 22.8)                            | -9.2<br>(-11.9 to -6.2)                          |
| Multidrug-resistant tuberculosis without extensive drug resistance                   | 7.5<br>(6.2 to 8.9)                | 3.9<br>(3.3 to 4.5)                    | 2.1<br>(1.4 to 2.9)                | 8.7<br>(5.4 to 25.9)                              | -17.0<br>(-27.8 to -3.9)                         |
| Extensively drug-resistant tuberculosis                                              | 0.5<br>(0.4 to 0.6)                | 0.3<br>(0.2 to 0.3)                    | 0.2<br>(0.1 to 0.2)                | 234.4<br>(195.1 to 279.0)                         | 155.3<br>(125.3 to 189.4)                        |
| Latent tuberculosis infection                                                        | 15,819.4<br>(14,178.6 to 17,526.4) | --                                     | --                                 | --                                                | --                                               |
| HIV/AIDS                                                                             | 81.1<br>(68.1 to 100.4)            | --                                     | 8.3<br>(5.2 to 12.5)               | 26.2<br>(-13.6 to 93.7)                           | -3.7<br>(-34.0 to 47.9)                          |
| Drug-susceptible HIV/AIDS - Tuberculosis                                             | 3.1<br>(2.1 to 4.4)                | 3.3<br>(2.4 to 4.5)                    | 1.1<br>(0.7 to 1.7)                | 19.2<br>(8.1 to 30.5)                             | -9.0<br>(-17.4 to -0.3)                          |
| Multidrug-resistant HIV/AIDS - Tuberculosis without extensive drug resistance        | 0.1<br>(0.1 to 0.1)                | 0.1<br>(0.1 to 0.1)                    | < 0.05<br>(< 0.05 to 0.1)          | 40.8<br>(2.1 to 78.5)                             | 7.5<br>(-22.1 to 36.3)                           |
| Extensively drug-resistant HIV/AIDS - Tuberculosis                                   | < 0.05<br>(< 0.05 to < 0.05)       | < 0.05<br>(< 0.05 to < 0.05)           | < 0.05<br>(< 0.05 to < 0.05)       | 465.3<br>(272.0 to 671.7)                         | 331.7<br>(184.1 to 489.2)                        |
| HIV/AIDS resulting in other diseases                                                 | 78.0<br>(64.8 to 97.0)             | --                                     | 7.2<br>(4.4 to 11.2)               | 27.2<br>(-16.1 to 116.1)                          | -2.9<br>(-36.0 to 65.0)                          |
| <b>Diarrhoea, lower respiratory infections, and other common infectious diseases</b> | 3,527.0<br>(3,310.5 to 3,681.7)    | 197,350.9†<br>(163,656.8 to 242,647.6) | 187.2<br>(131.7 to 246.6)          | 33.5<br>(31.2 to 42.5)                            | 2.0<br>(0.2 to 8.8)                              |
| Diarrhoeal diseases                                                                  | 1,020.5<br>(921.7 to 1,134.9)      | 70,677.6<br>(63,815.5 to 78,372.3)     | 102.0<br>(71.4 to 137.0)           | 33.9<br>(31.2 to 36.4)                            | 2.2<br>(0.2 to 4.2)                              |
| Intestinal infectious diseases                                                       | 4.4<br>(3.7 to 5.2)                | 84.4†<br>(73.3 to 97.0)                | 0.7<br>(0.4 to 1.0)                | 25.2<br>(1.0 to 56.7)                             | -4.4<br>(-22.9 to 19.6)                          |
| Typhoid fever                                                                        | 4.1<br>(3.3 to 5.0)                | 64.6<br>(56.0 to 74.5)                 | 0.6<br>(0.4 to 0.8)                | 26.7<br>(0.5 to 63.2)                             | -3.3<br>(-23.3 to 24.6)                          |
| Paratyphoid fever                                                                    | 0.9<br>(0.7 to 1.0)                | 19.8<br>(17.2 to 22.9)                 | 0.1<br>(< 0.05 to 0.1)             | 26.9<br>(3.7 to 54.4)                             | -3.1<br>(-20.8 to 17.9)                          |
| Other intestinal infectious diseases                                                 | --                                 | --                                     | < 0.05<br>(< 0.05 to < 0.05)       | -2.2<br>(-21.1 to 22.4)                           | -25.4<br>(-39.8 to -6.5)                         |
| Lower respiratory infections                                                         | 302.3<br>(279.7 to 329.4)          | 13,207.5<br>(11,978.1 to 14,485.4)     | 16.6<br>(11.2 to 23.0)             | 53.4<br>(48.0 to 58.9)                            | 17.2<br>(13.0 to 21.3)                           |
| Upper respiratory infections                                                         | 1,496.0<br>(1,057.1 to 2,103.5)    | 111,760.4<br>(78,649.1 to 157,362.3)   | 34.1<br>(19.1 to 57.2)             | 27.3<br>(24.7 to 29.9)                            | -2.8<br>(-4.8 to -0.8)                           |
| Otitis media                                                                         | 394.1<br>(277.4 to 550.0)          | 537.9<br>(410.8 to 667.8)              | 10.1<br>(5.8 to 16.9)              | 22.2<br>(16.2 to 28.8)                            | -6.7<br>(-11.3 to -1.7)                          |
| Meningitis                                                                           | 102.7<br>(77.8 to 172.0)           | 16.2<br>(12.8 to 20.4)                 | 5.4<br>(2.7 to 17.1)               | 48.6<br>(18.2 to 359.4)                           | 13.5<br>(-9.8 to 250.8)                          |
| Pneumococcal meningitis                                                              | 42.1<br>(32.2 to 52.6)             | 3.7<br>(2.5 to 5.2)                    | 1.8<br>(1.1 to 2.6)                | 11.9<br>(7.1 to 18.9)                             | -14.6<br>(-18.2 to -9.2)                         |
| H influenzae type B meningitis                                                       | 8.5<br>(5.9 to 11.6)               | 1.0<br>(0.6 to 1.6)                    | 0.4<br>(0.3 to 0.6)                | -17.7<br>(-27.2 to 0.4)                           | -37.2<br>(-44.4 to -23.4)                        |
| Meningococcal infection                                                              | 16.1<br>(7.7 to 81.9)              | 3.1<br>(1.9 to 4.5)                    | 1.5<br>(0.4 to 12.5)               | 235.1<br>(17.4 to 2,510.7)                        | 155.9<br>(-10.4 to 1,893.4)                      |
| Other meningitis                                                                     | 35.9<br>(24.5 to 46.4)             | 8.5<br>(6.5 to 11.1)                   | 1.6<br>(1.0 to 2.2)                | 58.4<br>(50.5 to 65.9)                            | 21.0<br>(14.9 to 26.7)                           |
| Encephalitis                                                                         | 204.5<br>(107.7 to 339.0)          | 107.4<br>(95.9 to 121.0)               | 9.6<br>(6.6 to 13.3)               | 29.4<br>(24.0 to 35.5)                            | -1.2<br>(-5.3 to 3.5)                            |
| Diphtheria                                                                           | --                                 | --                                     | --                                 | --                                                | --                                               |
| Whooping cough                                                                       | --                                 | --                                     | --                                 | --                                                | --                                               |
| Tetanus                                                                              | 0.9<br>(0.9 to 1.0)                | 1.3<br>(0.6 to 1.9)                    | < 0.05<br>(< 0.05 to < 0.05)       | -5.9<br>(-27.8 to 24.2)                           | -28.1<br>(-44.9 to -5.2)                         |
| Measles                                                                              | --                                 | --                                     | --                                 | --                                                | --                                               |
| Varicella and herpes zoster                                                          | 171.9<br>(131.8 to 220.8)          | 958.2<br>(735.9 to 1,234.8)            | 8.7<br>(5.0 to 13.9)               | 33.6<br>(27.6 to 40.3)                            | 2.0<br>(-2.6 to 7.2)                             |
| <b>Neglected tropical diseases and malaria</b>                                       | 12,103.6<br>(11,654.1 to 12,532.6) | 4,341.6†<br>(2,780.6 to 5,858.3)       | 106.9<br>(73.7 to 150.3)           | 11.7<br>(1.7 to 24.5)                             | -14.7<br>(-22.3 to -4.9)                         |
| Malaria                                                                              | 153.0<br>(128.1 to 178.0)          | 349.0<br>(257.1 to 452.8)              | 1.5<br>(1.0 to 2.1)                | -26.4<br>(-31.7 to -21.0)                         | -43.8<br>(-47.9 to -39.7)                        |
| Chagas disease                                                                       | 127.9<br>(108.4 to 150.4)          | 0.8<br>(0.4 to 1.1)                    | 3.0<br>(1.9 to 4.4)                | 26.8<br>(19.9 to 33.1)                            | -3.2<br>(-8.4 to 1.6)                            |
| Leishmaniasis                                                                        | 48.1<br>(37.5 to 57.2)             | 8.3<br>(6.3 to 10.9)                   | 2.4<br>(1.5 to 3.5)                | 23.8<br>(16.8 to 32.2)                            | -5.5<br>(-10.8 to 1.0)                           |
| Visceral leishmaniasis                                                               | 0.8<br>(0.5 to 1.2)                | 3.3<br>(2.2 to 5.0)                    | 0.1<br>(< 0.05 to 0.1)             | -24.5<br>(-53.5 to 16.4)                          | -42.3<br>(-64.5 to -11.1)                        |
| Cutaneous and mucocutaneous leishmaniasis                                            | 40.6<br>(30.4 to 52.2)             | 4.9<br>(3.5 to 6.7)                    | 2.3<br>(1.5 to 3.4)                | 25.6<br>(18.6 to 34.8)                            | -4.1<br>(-9.5 to 2.9)                            |
| African trypanosomiasis                                                              | < 0.05<br>(< 0.05 to < 0.05)       | < 0.05<br>(< 0.05 to 0.1)              | < 0.05<br>(< 0.05 to < 0.05)       | -65.6<br>(-96.0 to 149.8)                         | -73.8<br>(-96.9 to 90.7)                         |
| Schistosomiasis                                                                      | 1,025.4<br>(925.0 to 1,121.2)      | 229.9<br>(204.9 to 253.9)              | 7.1<br>(3.6 to 13.2)               | -29.7<br>(-33.4 to -26.6)                         | -46.3<br>(-49.1 to -43.9)                        |
| Cysticercosis                                                                        | 49.0<br>(34.2 to 68.3)             | --                                     | 6.9<br>(4.0 to 10.3)               | 14.9<br>(6.7 to 23.0)                             | -12.3<br>(-18.5 to -6.1)                         |
| Cystic echinococcosis                                                                | 6.1<br>(3.1 to 12.1)               | 1.2<br>(0.5 to 3.0)                    | 0.5<br>(0.2 to 1.1)                | -34.2<br>(-73.8 to 73.2)                          | -49.8<br>(-80.0 to 32.3)                         |
| Lymphatic filariasis                                                                 | 133.0<br>(115.8 to 158.1)          | 35.0<br>(19.7 to 54.8)                 | 3.9<br>(2.0 to 7.0)                | -32.8<br>(-52.6 to -15.2)                         | -48.7<br>(-63.8 to -35.2)                        |
| Onchocerciasis                                                                       | 73.1<br>(50.0 to 109.4)            | 12.5<br>(5.3 to 24.4)                  | 6.7<br>(3.9 to 11.8)               | -8.5<br>(-25.9 to 15.1)                           | -30.2<br>(-43.4 to -12.1)                        |
| Trachoma                                                                             | 339.0<br>(217.9 to 490.6)          | --                                     | 23.4<br>(14.9 to 35.0)             | 2.8<br>(-7.6 to 13.2)                             | -21.5<br>(-29.4 to -13.6)                        |
| Dengue                                                                               | 42.6<br>(23.4 to 71.9)             | 712.8<br>(436.2 to 1,076.6)            | 6.1<br>(2.8 to 11.1)               | 125.6<br>(83.6 to 417.7)                          | 72.2<br>(40.2 to 295.3)                          |
| Yellow fever                                                                         | < 0.05<br>(< 0.05 to < 0.05)       | 0.2<br>(< 0.05 to 0.5)                 | < 0.05<br>(< 0.05 to < 0.05)       | -17.5<br>(-50.6 to 28.8)                          | -37.0<br>(-62.3 to -1.7)                         |
| Rabies                                                                               | < 0.05<br>(< 0.05 to < 0.05)       | 0.2<br>(0.1 to 0.3)                    | < 0.05<br>(< 0.05 to < 0.05)       | 1.2<br>(-49.1 to 54.2)                            | -22.8<br>(-61.1 to 17.8)                         |
| Intestinal nematode infections                                                       | 10,037.6<br>(9,507.7 to 10,468.6)  | --                                     | 16.8<br>(9.8 to 26.9)              | 1.4<br>(-5.9 to 9.3)                              | -22.6<br>(-28.2 to -16.6)                        |
| Ascariasis                                                                           | 5,328.6<br>(4,711.3 to 6,068.9)    | --                                     | 4.9<br>(2.7 to 8.3)                | -14.7<br>(-25.1 to -2.4)                          | -34.9<br>(-42.8 to -25.5)                        |

| Cause                                                                   | Prevalence in thousands (95% UI)                 | Incidence in thousands (95% UI)                      | YLDs in thousands (95% UI)                       |                                                   |                                                  |
|-------------------------------------------------------------------------|--------------------------------------------------|------------------------------------------------------|--------------------------------------------------|---------------------------------------------------|--------------------------------------------------|
|                                                                         | 2016 counts                                      | 2016 counts                                          | 2016 counts                                      | Percentage change in counts between 2006 and 2016 | Percentage change in rates between 2006 and 2016 |
| Trichuriasis                                                            | 2,822.5<br>(2,575.8 to 3,101.7)                  | --                                                   | 1.9<br>(1.1 to 3.2)                              | -7.0<br>(-20.5 to 8.9)                            | -29.0<br>(-39.3 to -16.9)                        |
| Hookworm disease                                                        | 2,957.1<br>(2,708.5 to 3,237.0)                  | --                                                   | 9.9<br>(5.9 to 15.3)                             | 14.2<br>(3.3 to 27.9)                             | -12.8<br>(-21.1 to -2.3)                         |
| Food-borne trematodiasis                                                | 1,038.1<br>(728.6 to 1,335.3)                    | 2,950.7<br>(1,401.3 to 4,351.1)                      | 25.2<br>(8.3 to 51.8)                            | 71.3<br>(43.9 to 118.6)                           | 30.8<br>(9.9 to 66.9)                            |
| Leprosy                                                                 | 21.7<br>(20.9 to 22.4)                           | 0.9<br>(0.8 to 1.0)                                  | 1.2<br>(0.9 to 1.7)                              | 24.2<br>(17.8 to 31.3)                            | -5.2<br>(-10.1 to 0.2)                           |
| Ebola virus disease                                                     | < 0.05<br>(0.0 to < 0.05)                        | --                                                   | < 0.05<br>(0.0 to < 0.05)                        | --                                                | --                                               |
| Zika virus disease                                                      | 0.7<br>(0.4 to 1.2)                              | 40.3<br>(23.1 to 73.4)                               | < 0.05<br>(< 0.05 to < 0.05)                     | --                                                | --                                               |
| Guinea worm disease                                                     | < 0.05<br>(< 0.05 to < 0.05)                     | < 0.05<br>(< 0.05 to < 0.05)                         | < 0.05<br>(< 0.05 to < 0.05)                     | -99.5<br>(-99.7 to -99.2)                         | -99.6<br>(-99.8 to -99.4)                        |
| Other neglected tropical diseases                                       | 131.8<br>(128.6 to 135.4)                        | --                                                   | 2.2<br>(1.5 to 3.1)                              | 34.7<br>(27.2 to 41.7)                            | 2.8<br>(-2.9 to 8.2)                             |
| <b>Maternal disorders</b>                                               | --                                               | --                                                   | --                                               | --                                                | --                                               |
| Maternal haemorrhage                                                    | --                                               | --                                                   | --                                               | --                                                | --                                               |
| Maternal sepsis and other pregnancy related infections                  | --                                               | --                                                   | --                                               | --                                                | --                                               |
| Maternal hypertensive disorders                                         | --                                               | --                                                   | --                                               | --                                                | --                                               |
| Maternal obstructed labour and uterine rupture                          | --                                               | --                                                   | --                                               | --                                                | --                                               |
| Maternal abortion, miscarriage, and ectopic pregnancy                   | --                                               | --                                                   | --                                               | --                                                | --                                               |
| Other maternal disorders                                                | --                                               | --                                                   | --                                               | --                                                | --                                               |
| <b>Neonatal disorders</b>                                               | <b>119.7</b><br><b>(106.6 to 137.2)</b>          | --                                                   | <b>9.5</b><br><b>(6.5 to 15.0)</b>               | <b>51.6</b><br><b>(42.1 to 61.1)</b>              | <b>15.8</b><br><b>(8.5 to 23.0)</b>              |
| Neonatal preterm birth complications                                    | 109.3<br>(87.1 to 132.6)                         | --                                                   | 6.3<br>(4.4 to 8.6)                              | 42.4<br>(31.8 to 53.2)                            | 8.7<br>(0.7 to 17.0)                             |
| Neonatal encephalopathy due to birth asphyxia and trauma                | 1.7<br>(0.3 to 4.9)                              | --                                                   | 0.6<br>(0.1 to 1.7)                              | 87.6<br>(70.0 to 136.5)                           | 43.3<br>(29.8 to 80.6)                           |
| Neonatal sepsis and other neonatal infections                           | 5.3<br>(0.9 to 15.7)                             | --                                                   | 2.1<br>(0.4 to 6.9)                              | 73.5<br>(61.2 to 110.4)                           | 32.4<br>(23.1 to 60.6)                           |
| Hemolytic disease and other neonatal jaundice                           | 1.6<br>(1.2 to 2.0)                              | --                                                   | 0.6<br>(0.4 to 0.8)                              | 59.5<br>(47.1 to 69.8)                            | 21.8<br>(12.3 to 29.6)                           |
| Other neonatal disorders                                                | --                                               | --                                                   | --                                               | --                                                | --                                               |
| <b>Nutritional deficiencies</b>                                         | <b>8,805.8</b><br><b>(8,665.5 to 8,896.0)</b>    | <b>1,319.1*</b><br><b>(1,058.3 to 1,592.0)</b>       | <b>233.2</b><br><b>(161.7 to 320.4)</b>          | <b>27.8</b><br><b>(26.2 to 29.5)</b>              | <b>-2.4</b><br><b>(-3.7 to -1.1)</b>             |
| Protein-energy malnutrition                                             | --                                               | --                                                   | --                                               | --                                                | --                                               |
| Iodine deficiency                                                       | 1,316.0<br>(1,181.4 to 1,465.0)                  | 2.3<br>(1.8 to 3.0)                                  | 30.5<br>(21.1 to 42.0)                           | 18.0<br>(15.0 to 21.1)                            | -9.9<br>(-12.2 to -7.5)                          |
| Vitamin A deficiency                                                    | 1,257.9<br>(1,064.6 to 1,490.5)                  | 1,316.8<br>(1,056.0 to 1,589.8)                      | 0.8<br>(0.5 to 1.2)                              | 40.5<br>(29.1 to 52.2)                            | 7.3<br>(-1.4 to 16.2)                            |
| Iron-deficiency anaemia                                                 | 7,067.7<br>(6,821.1 to 7,338.5)                  | --                                                   | 201.9<br>(138.1 to 278.9)                        | 29.4<br>(27.5 to 31.2)                            | -1.2<br>(-2.6 to 0.2)                            |
| Other nutritional deficiencies                                          | --                                               | --                                                   | --                                               | --                                                | --                                               |
| <b>Other communicable, maternal, neonatal, and nutritional diseases</b> | <b>19,395.4</b><br><b>(18,707.4 to 20,038.5)</b> | <b>2,418.0</b><br><b>(1,695.7 to 3,302.2)</b>        | <b>20.2</b><br><b>(14.1 to 28.3)</b>             | <b>31.7</b><br><b>(16.2 to 48.3)</b>              | <b>0.6</b><br><b>(-11.3 to 13.2)</b>             |
| Sexually transmitted diseases excluding HIV                             | 14,531.8<br>(13,445.6 to 16,047.5)               | 401.2<br>(345.5 to 461.7)                            | 11.5<br>(8.0 to 16.2)                            | 30.9<br>(24.7 to 37.7)                            | -0.0<br>(-4.8 to 5.2)                            |
| Syphilis                                                                | 58.2<br>(47.8 to 71.3)                           | 2.6<br>(1.8 to 3.8)                                  | 7.8<br>(5.3 to 10.8)                             | 33.5<br>(24.1 to 42.5)                            | 1.9<br>(-5.3 to 8.8)                             |
| Chlamydial infection                                                    | < 0.05<br>(< 0.05 to < 0.05)                     | --                                                   | < 0.05<br>(< 0.05 to < 0.05)                     | 49.5<br>(21.2 to 90.4)                            | 14.1<br>(-7.5 to 45.4)                           |
| Gonococcal infection                                                    | < 0.05<br>(< 0.05 to < 0.05)                     | --                                                   | < 0.05<br>(< 0.05 to < 0.05)                     | 68.4<br>(-14.4 to 283.0)                          | 28.6<br>(-34.6 to 192.5)                         |
| Trichomoniasis                                                          | 530.3<br>(451.3 to 613.9)                        | 398.7<br>(343.0 to 459.3)                            | 0.6<br>(0.2 to 1.3)                              | 25.3<br>(20.6 to 30.0)                            | -4.3<br>(-7.9 to -0.7)                           |
| Genital herpes                                                          | 13,839.6<br>(12,107.9 to 15,963.8)               | --                                                   | 3.1<br>(0.9 to 7.0)                              | 26.1<br>(23.5 to 29.1)                            | -3.7<br>(-5.7 to -1.4)                           |
| Other sexually transmitted diseases                                     | < 0.05<br>(< 0.05 to < 0.05)                     | --                                                   | < 0.05<br>(< 0.05 to < 0.05)                     | 48.1<br>(20.0 to 88.5)                            | 13.0<br>(-8.4 to 44.0)                           |
| Hepatitis                                                               | 6,588.0<br>(5,842.6 to 7,361.0)                  | 2,016.6<br>(1,302.5 to 2,912.0)                      | 4.8<br>(2.6 to 8.2)                              | 26.6<br>(-21.2 to 95.1)                           | -3.3<br>(-39.8 to 49.0)                          |
| Acute hepatitis A                                                       | 23.8<br>(6.3 to 50.1)                            | 309.9<br>(81.8 to 651.9)                             | 0.9<br>(0.2 to 2.0)                              | 13.4<br>(-73.4 to 269.1)                          | -13.4<br>(-79.7 to 181.8)                        |
| Hepatitis B                                                             | 3,875.5<br>(3,188.1 to 4,589.5)                  | 1,348.2<br>(714.5 to 2,223.6)                        | 3.2<br>(1.5 to 5.9)                              | 29.2<br>(-29.4 to 132.6)                          | -1.3<br>(-46.1 to 77.6)                          |
| Hepatitis C                                                             | 2,666.1<br>(2,384.2 to 2,952.1)                  | 64.4<br>(45.3 to 85.0)                               | 0.1<br>(< 0.05 to 0.1)                           | 26.6<br>(15.8 to 37.1)                            | -3.4<br>(-11.6 to 4.7)                           |
| Acute hepatitis E                                                       | 22.6<br>(13.9 to 33.2)                           | 294.1<br>(180.9 to 431.8)                            | 0.6<br>(0.3 to 1.1)                              | 35.6<br>(9.3 to 67.4)                             | 3.5<br>(-16.5 to 27.8)                           |
| Other infectious diseases                                               | 175.6<br>(170.4 to 181.2)                        | 0.2<br>(0.1 to 0.3)                                  | 3.9<br>(2.7 to 5.6)                              | 40.9<br>(35.5 to 46.2)                            | 7.5<br>(3.5 to 11.6)                             |
| <b>Non-communicable diseases</b>                                        | <b>72,496.2</b><br><b>(72,487.6 to 72,512.1)</b> | <b>306,824.0*</b><br><b>(278,950.3 to 337,204.5)</b> | <b>18,389.5</b><br><b>(14,035.6 to 23,260.8)</b> | <b>30.1</b><br><b>(29.1 to 31.1)</b>              | <b>-0.7</b><br><b>(-1.4 to 0.1)</b>              |
| <b>Neoplasms</b>                                                        | <b>3,622.9</b><br><b>(3,583.7 to 3,662.7)</b>    | <b>1,173.3</b><br><b>(1,115.7 to 1,245.4)</b>        | <b>295.3</b><br><b>(217.8 to 384.2)</b>          | <b>31.3</b><br><b>(28.7 to 34.3)</b>              | <b>0.3</b><br><b>(-1.8 to 2.5)</b>               |
| Lip and oral cavity cancer                                              | 90.3<br>(87.6 to 93.0)                           | 18.8<br>(18.3 to 19.4)                               | 6.2<br>(4.5 to 8.2)                              | 40.9<br>(33.1 to 48.6)                            | 7.6<br>(1.6 to 13.4)                             |
| Nasopharynx cancer                                                      | 10.0<br>(9.4 to 10.7)                            | 2.2<br>(2.1 to 2.4)                                  | 0.8<br>(0.6 to 1.1)                              | 29.6<br>(19.4 to 41.1)                            | -1.1<br>(-8.9 to 7.8)                            |
| Other pharynx cancer                                                    | 18.9<br>(17.9 to 19.8)                           | 5.6<br>(5.2 to 6.0)                                  | 1.8<br>(1.3 to 2.3)                              | 46.6<br>(32.0 to 62.3)                            | 12.0<br>(0.8 to 23.9)                            |
| Oesophageal cancer                                                      | 55.9<br>(53.4 to 58.7)                           | 32.9<br>(31.7 to 34.1)                               | 8.0<br>(5.8 to 10.1)                             | 20.8<br>(12.6 to 29.4)                            | -7.8<br>(-14.0 to -1.2)                          |
| Stomach cancer                                                          | 253.1<br>(245.1 to 261.4)                        | 93.2<br>(90.3 to 96.1)                               | 23.8<br>(17.8 to 30.2)                           | 26.2<br>(19.9 to 32.5)                            | -3.7<br>(-8.4 to 1.2)                            |
| Colon and rectum cancer                                                 | 707.8<br>(680.8 to 748.2)                        | 139.7<br>(134.5 to 147.4)                            | 45.3<br>(32.5 to 60.2)                           | 28.4<br>(22.3 to 36.0)                            | -2.0<br>(-6.6 to 3.8)                            |
| Liver cancer                                                            | 91.9<br>(86.7 to 97.3)                           | 58.2<br>(54.7 to 61.3)                               | 13.2<br>(9.5 to 17.2)                            | 60.4<br>(49.9 to 72.4)                            | 22.5<br>(14.5 to 31.7)                           |
| Liver cancer due to hepatitis B                                         | 30.1<br>(21.4 to 38.6)                           | 17.1<br>(12.1 to 21.9)                               | 3.8<br>(2.3 to 5.5)                              | 63.1<br>(47.1 to 83.0)                            | 24.5<br>(12.3 to 39.8)                           |

| Cause                                              | Prevalence in thousands (95% UI)                 | Incidence in thousands (95% UI)                | YLDs in thousands (95% UI)                    |                                                   |                                                  |
|----------------------------------------------------|--------------------------------------------------|------------------------------------------------|-----------------------------------------------|---------------------------------------------------|--------------------------------------------------|
|                                                    | 2016 counts                                      | 2016 counts                                    | 2016 counts                                   | Percentage change in counts between 2006 and 2016 | Percentage change in rates between 2006 and 2016 |
| Liver cancer due to hepatitis C                    | 38.8<br>(34.1 to 43.8)                           | 19.1<br>(16.7 to 21.8)                         | 4.4<br>(3.1 to 5.9)                           | 57.0<br>(45.7 to 70.8)                            | 19.9<br>(11.2 to 30.4)                           |
| Liver cancer due to alcohol use                    | 18.0<br>(13.8 to 22.5)                           | 10.2<br>(7.7 to 12.7)                          | 2.3<br>(1.6 to 3.3)                           | 58.2<br>(42.8 to 75.6)                            | 20.8<br>(9.1 to 34.1)                            |
| Liver cancer due to other causes                   | 21.4<br>(17.9 to 25.9)                           | 11.9<br>(9.9 to 14.4)                          | 2.7<br>(1.9 to 3.7)                           | 64.4<br>(49.5 to 82.3)                            | 25.5<br>(14.2 to 39.2)                           |
| Gallbladder and biliary tract cancer               | 24.8<br>(22.5 to 27.4)                           | 19.6<br>(18.2 to 20.9)                         | 4.4<br>(3.1 to 5.7)                           | 23.1<br>(13.7 to 33.1)                            | -6.0<br>(-13.2 to 1.6)                           |
| Pancreatic cancer                                  | 50.9<br>(47.4 to 54.0)                           | 44.4<br>(42.1 to 46.2)                         | 8.9<br>(6.4 to 11.4)                          | 39.6<br>(29.3 to 50.0)                            | 6.6<br>(-1.3 to 14.5)                            |
| Larynx cancer                                      | 39.6<br>(38.5 to 41.1)                           | 8.7<br>(8.4 to 9.0)                            | 3.3<br>(2.4 to 4.3)                           | 32.3<br>(24.7 to 40.5)                            | 1.0<br>(-4.8 to 7.3)                             |
| Tracheal, bronchus, and lung cancer                | 351.6<br>(334.7 to 365.8)                        | 176.3<br>(168.7 to 182.8)                      | 40.1<br>(30.1 to 50.2)                        | 44.4<br>(37.0 to 52.0)                            | 10.3<br>(4.6 to 16.1)                            |
| Malignant skin melanoma                            | 83.6<br>(65.9 to 90.1)                           | 15.4<br>(12.2 to 16.6)                         | 4.5<br>(3.0 to 6.3)                           | 39.1<br>(25.8 to 49.4)                            | 6.2<br>(-3.9 to 14.0)                            |
| Non-melanoma skin cancer                           | 106.7<br>(82.7 to 129.8)                         | 160.4<br>(106.9 to 230.5)                      | 3.7<br>(1.9 to 6.0)                           | -1.6<br>(-14.0 to 14.6)                           | -24.9<br>(-34.3 to -12.5)                        |
| Non-melanoma skin cancer (squamous-cell carcinoma) | 86.3<br>(49.5 to 120.4)                          | 84.0<br>(50.1 to 116.4)                        | 3.6<br>(1.8 to 5.9)                           | -2.0<br>(-14.5 to 14.4)                           | -25.2<br>(-34.8 to -12.6)                        |
| Non-melanoma skin cancer (basal-cell carcinoma)    | 8.8<br>(4.2 to 17.6)                             | 76.4<br>(43.4 to 137.3)                        | 0.1<br>(< 0.05 to 0.2)                        | 16.3<br>(-2.4 to 33.3)                            | -11.2<br>(-25.5 to 1.8)                          |
| Breast cancer                                      | 341.1<br>(327.8 to 358.1)                        | 60.3<br>(57.5 to 63.7)                         | 24.8<br>(16.9 to 34.2)                        | 14.0<br>(8.9 to 19.3)                             | -12.9<br>(-16.9 to -8.9)                         |
| Cervical cancer                                    | 47.7<br>(40.9 to 51.6)                           | 9.5<br>(8.1 to 10.2)                           | 3.1<br>(2.1 to 4.1)                           | 7.5<br>(0.9 to 15.9)                              | -17.9<br>(-22.9 to -11.5)                        |
| Uterine cancer                                     | 79.1<br>(74.5 to 85.6)                           | 14.6<br>(13.7 to 15.7)                         | 4.7<br>(3.2 to 6.3)                           | 21.1<br>(10.5 to 33.6)                            | -7.6<br>(-15.7 to 2.0)                           |
| Ovarian cancer                                     | 52.0<br>(48.4 to 54.8)                           | 11.0<br>(10.3 to 11.6)                         | 3.3<br>(2.4 to 4.4)                           | 10.8<br>(2.4 to 19.9)                             | -15.4<br>(-21.9 to -8.5)                         |
| Prostate cancer                                    | 496.6<br>(436.0 to 565.3)                        | 109.9<br>(98.0 to 122.2)                       | 34.0<br>(23.5 to 46.2)                        | 30.9<br>(23.2 to 38.5)                            | -0.1<br>(-5.9 to 5.7)                            |
| Testicular cancer                                  | 2.3<br>(2.1 to 2.5)                              | 0.4<br>(0.4 to 0.5)                            | 0.1<br>(0.1 to 0.2)                           | 45.6<br>(27.9 to 64.8)                            | 11.1<br>(-2.4 to 25.8)                           |
| Kidney cancer                                      | 78.8<br>(73.2 to 82.4)                           | 16.1<br>(15.2 to 16.7)                         | 5.1<br>(3.6 to 6.9)                           | 27.4<br>(18.5 to 36.5)                            | -2.8<br>(-9.5 to 4.2)                            |
| Bladder cancer                                     | 221.7<br>(209.5 to 233.1)                        | 42.3<br>(40.1 to 44.4)                         | 15.7<br>(11.3 to 21.1)                        | 32.3<br>(24.2 to 40.2)                            | 1.0<br>(-5.2 to 7.0)                             |
| Brain and nervous system cancer                    | 39.0<br>(27.9 to 46.0)                           | 12.0<br>(8.9 to 13.8)                          | 3.7<br>(2.3 to 5.1)                           | 51.2<br>(36.4 to 70.2)                            | 15.4<br>(4.1 to 29.9)                            |
| Thyroid cancer                                     | 27.7<br>(26.5 to 29.3)                           | 5.1<br>(4.9 to 5.4)                            | 1.5<br>(1.1 to 2.1)                           | 32.4<br>(22.6 to 43.4)                            | 1.1<br>(-6.4 to 9.5)                             |
| Mesothelioma                                       | 6.2<br>(5.7 to 6.6)                              | 3.0<br>(2.8 to 3.2)                            | 1.0<br>(0.7 to 1.3)                           | 35.8<br>(26.1 to 44.8)                            | 3.7<br>(-3.7 to 10.5)                            |
| Hodgkin lymphoma                                   | 6.0<br>(5.3 to 6.4)                              | 1.2<br>(1.1 to 1.4)                            | 0.4<br>(0.3 to 0.6)                           | 12.1<br>(1.7 to 23.7)                             | -14.4<br>(-22.3 to -5.5)                         |
| Non-Hodgkin's lymphoma                             | 150.3<br>(130.0 to 159.1)                        | 30.2<br>(26.3 to 31.8)                         | 9.0<br>(6.2 to 12.2)                          | 38.5<br>(30.0 to 46.3)                            | 5.7<br>(-0.7 to 11.7)                            |
| Multiple myeloma                                   | 45.6<br>(36.3 to 49.9)                           | 11.2<br>(9.3 to 12.3)                          | 3.9<br>(2.8 to 5.2)                           | 28.0<br>(18.1 to 37.8)                            | -2.2<br>(-9.8 to 5.2)                            |
| Leukaemia                                          | 125.5<br>(118.0 to 132.9)                        | 28.6<br>(26.8 to 30.1)                         | 9.7<br>(7.0 to 13.1)                          | 30.7<br>(24.2 to 37.7)                            | -0.2<br>(-5.2 to 5.1)                            |
| Acute lymphoid leukaemia                           | 6.8<br>(6.2 to 7.4)                              | 1.4<br>(1.3 to 1.6)                            | 0.7<br>(0.5 to 0.9)                           | 56.3<br>(43.1 to 68.5)                            | 19.3<br>(9.2 to 28.7)                            |
| Chronic lymphoid leukaemia                         | 42.9<br>(38.6 to 47.4)                           | 7.9<br>(7.1 to 8.7)                            | 2.8<br>(1.9 to 3.8)                           | 24.4<br>(13.5 to 36.1)                            | -5.0<br>(-13.4 to 4.0)                           |
| Acute myeloid leukaemia                            | 13.6<br>(11.7 to 14.7)                           | 7.4<br>(6.3 to 7.9)                            | 2.0<br>(1.4 to 2.7)                           | 43.5<br>(32.8 to 53.2)                            | 9.6<br>(1.4 to 16.9)                             |
| Chronic myeloid leukaemia                          | 9.2<br>(8.4 to 10.2)                             | 2.1<br>(1.9 to 2.3)                            | 0.8<br>(0.5 to 1.0)                           | 8.1<br>(-2.0 to 20.1)                             | -17.5<br>(-25.2 to -8.3)                         |
| Other leukaemia                                    | 53.0<br>(47.9 to 56.8)                           | 9.8<br>(8.8 to 10.5)                           | 3.5<br>(2.5 to 4.8)                           | 30.9<br>(21.2 to 41.7)                            | -0.0<br>(-7.5 to 8.2)                            |
| Other neoplasms                                    | 204.3<br>(181.5 to 217.6)                        | 42.8<br>(38.3 to 45.3)                         | 11.6<br>(8.1 to 15.9)                         | 53.0<br>(42.0 to 63.4)                            | 16.8<br>(8.4 to 24.8)                            |
| <b>Cardiovascular diseases</b>                     | <b>33,876.5</b><br><b>(33,163.5 to 34,401.0)</b> | <b>4,754.0†</b><br><b>(4,373.2 to 5,161.9)</b> | <b>2,834.3</b><br><b>(2,106.4 to 3,603.1)</b> | <b>28.0</b><br><b>(23.7 to 32.7)</b>              | <b>-2.2</b><br><b>(-5.6 to 1.3)</b>              |
| Rheumatic heart disease                            | 108.2<br>(96.4 to 121.0)                         | 16.4<br>(14.7 to 18.2)                         | 7.5<br>(5.2 to 10.1)                          | 27.2<br>(21.3 to 33.6)                            | -2.9<br>(-7.4 to 2.0)                            |
| Ischaemic heart disease                            | 12,919.5<br>(11,941.8 to 13,995.7)               | 2,078.7<br>(1,889.2 to 2,298.6)                | 539.9<br>(383.0 to 725.7)                     | 29.6<br>(27.7 to 31.6)                            | -1.0<br>(-2.5 to 0.4)                            |
| Cerebrovascular disease                            | 6,377.4<br>(5,901.8 to 6,743.7)                  | 1,231.8†<br>(1,072.6 to 1,383.8)               | 1,307.6<br>(916.9 to 1,680.3)                 | 29.0<br>(19.5 to 39.1)                            | -1.5<br>(-8.8 to 6.2)                            |
| Ischaemic stroke                                   | 5,611.9<br>(4,763.7 to 6,492.9)                  | 871.3†<br>(722.2 to 1,012.1)                   | 1,105.7<br>(771.6 to 1,442.0)                 | 29.4<br>(17.9 to 41.1)                            | -1.2<br>(-9.9 to 7.8)                            |
| Hemorrhagic stroke                                 | 1,014.2<br>(808.0 to 1,229.1)                    | 360.4†<br>(310.8 to 412.9)                     | 201.9<br>(136.1 to 269.1)                     | 26.6<br>(14.7 to 38.8)                            | -3.3<br>(-12.4 to 6.0)                           |
| Hypertensive heart disease                         | 1,821.4<br>(1,365.0 to 2,326.1)                  | --                                             | 140.3<br>(93.8 to 207.8)                      | 31.4<br>(28.2 to 34.9)                            | 0.3<br>(-2.1 to 3.0)                             |
| Cardiomyopathy and myocarditis                     | 438.4<br>(388.7 to 489.4)                        | 84.0†<br>(66.6 to 100.7)                       | 32.3<br>(21.2 to 47.8)                        | 18.6<br>(13.2 to 24.5)                            | -9.5<br>(-13.5 to -4.9)                          |
| Myocarditis                                        | 51.3<br>(41.4 to 62.7)                           | 84.0                                           | 3.4<br>(2.2 to 4.9)                           | 26.8<br>(18.4 to 35.4)                            | -3.2<br>(-9.6 to 3.4)                            |
| Alcoholic cardiomyopathy                           | 40.9<br>(29.8 to 54.7)                           | --                                             | 3.2<br>(2.0 to 4.8)                           | 16.0<br>(3.0 to 31.1)                             | -11.4<br>(-21.4 to 0.1)                          |
| Other cardiomyopathy                               | 333.8<br>(245.3 to 439.4)                        | --                                             | 25.8<br>(16.7 to 38.4)                        | 17.9<br>(12.2 to 23.7)                            | -10.0<br>(-14.3 to -5.6)                         |
| Atrial fibrillation and flutter                    | 6,201.9<br>(5,398.5 to 7,090.6)                  | 351.1<br>(265.0 to 439.8)                      | 466.6<br>(321.9 to 642.4)                     | 28.6<br>(26.9 to 30.2)                            | -1.8<br>(-3.1 to -0.6)                           |
| Peripheral vascular disease                        | 11,548.4<br>(9,531.6 to 13,839.0)                | 925.1<br>(671.1 to 1,243.3)                    | 63.7<br>(28.9 to 120.5)                       | 22.9<br>(20.9 to 24.7)                            | -6.2<br>(-7.7 to -4.8)                           |
| Endocarditis                                       | 51.5<br>(39.4 to 66.2)                           | 66.9<br>(55.4 to 79.2)                         | 3.9<br>(2.5 to 5.8)                           | 21.2<br>(12.8 to 28.9)                            | -7.5<br>(-13.9 to -1.6)                          |
| Other cardiovascular and circulatory diseases      | 5,452.8<br>(4,103.1 to 7,041.2)                  | --                                             | 272.4<br>(174.1 to 399.2)                     | 20.9<br>(17.2 to 24.3)                            | -7.7<br>(-10.5 to -5.1)                          |
| <b>Chronic respiratory diseases</b>                | <b>18,701.4</b><br><b>(18,374.1 to 19,030.0)</b> | <b>1,935.3†</b><br><b>(1,716.5 to 2,167.1)</b> | <b>1,054.2</b><br><b>(915.6 to 1,185.8)</b>   | <b>36.5</b><br><b>(32.9 to 40.0)</b>              | <b>4.2</b><br><b>(1.5 to 6.9)</b>                |
| Chronic obstructive pulmonary disease              | 15,241.4<br>(14,342.7 to 16,168.1)               | 908.6<br>(763.5 to 1,057.1)                    | 825.0<br>(734.6 to 916.5)                     | 37.0<br>(32.5 to 41.4)                            | 4.6<br>(1.2 to 7.9)                              |
| Pneumoconiosis                                     | 60.4<br>(56.1 to 65.1)                           | 2.3<br>(1.9 to 2.8)                            | 8.4<br>(5.8 to 11.6)                          | 41.0<br>(33.9 to 47.7)                            | 7.7<br>(2.2 to 12.8)                             |
| Silicosis                                          | 22.6<br>(19.9 to 25.7)                           | 1.3<br>(1.0 to 1.6)                            | 3.1<br>(2.1 to 4.4)                           | 46.0<br>(33.0 to 59.9)                            | 11.4<br>(1.6 to 22.1)                            |

| Cause                                                          | Prevalence in thousands (95% UI)           | Incidence in thousands (95% UI)          | YLDs in thousands (95% UI)              |                                                   |                                                  |
|----------------------------------------------------------------|--------------------------------------------|------------------------------------------|-----------------------------------------|---------------------------------------------------|--------------------------------------------------|
|                                                                | 2016 counts                                | 2016 counts                              | 2016 counts                             | Percentage change in counts between 2006 and 2016 | Percentage change in rates between 2006 and 2016 |
| Asbestosis                                                     | 11.8<br>(10.6 to 13.0)                     | 0.2<br>(0.2 to 0.3)                      | 1.7<br>(1.2 to 2.3)                     | 27.6<br>(20.5 to 34.8)                            | -2.6<br>(-8.0 to 2.9)                            |
| Coal workers pneumoconiosis                                    | 13.7<br>(11.8 to 15.9)                     | 0.2<br>(0.2 to 0.3)                      | 1.9<br>(1.3 to 2.6)                     | 45.8<br>(29.1 to 65.0)                            | 11.3<br>(-1.4 to 26.0)                           |
| Other pneumoconiosis                                           | 12.3<br>(10.4 to 14.9)                     | 0.6<br>(0.4 to 0.9)                      | 1.7<br>(1.2 to 2.5)                     | 41.8<br>(28.7 to 56.3)                            | 8.3<br>(-1.8 to 19.4)                            |
| Asthma                                                         | 5,103.3<br>(4,557.2 to 5,672.4)            | 992.4<br>(839.6 to 1,159.4)              | 180.6<br>(122.5 to 252.5)               | 33.1<br>(30.1 to 35.9)                            | 1.6<br>(-0.6 to 3.8)                             |
| Interstitial lung disease and pulmonary sarcoidosis            | 352.0<br>(303.7 to 406.1)                  | 31.9<br>(24.8 to 39.8)                   | 34.4<br>(23.2 to 49.1)                  | 38.2<br>(33.7 to 42.9)                            | 5.5<br>(2.1 to 9.1)                              |
| Other chronic respiratory diseases                             | --                                         | --                                       | 5.8<br>(5.1 to 6.5)                     | 70.1<br>(64.7 to 75.2)                            | 29.9<br>(25.8 to 33.8)                           |
| <b>Cirrhosis and other chronic liver diseases</b>              | <b>873.7<br/>(813.9 to 935.8)</b>          | <b>70.2<br/>(59.9 to 80.7)</b>           | <b>32.3<br/>(22.5 to 44.9)</b>          | <b>36.7<br/>(31.8 to 42.0)</b>                    | <b>4.4<br/>(0.6 to 8.4)</b>                      |
| Cirrhosis and other chronic liver diseases due to hepatitis B  | 231.2<br>(195.2 to 266.5)                  | 19.9<br>(15.9 to 24.1)                   | 8.6<br>(5.7 to 12.2)                    | 41.3<br>(34.1 to 48.9)                            | 7.9<br>(2.4 to 13.7)                             |
| Cirrhosis and other chronic liver diseases due to hepatitis C  | 201.0<br>(167.8 to 239.3)                  | 17.0<br>(13.2 to 21.2)                   | 7.6<br>(5.1 to 11.2)                    | 36.8<br>(28.8 to 45.0)                            | 4.5<br>(-1.7 to 10.7)                            |
| Cirrhosis and other chronic liver diseases due to alcohol use  | 261.2<br>(219.8 to 303.6)                  | 19.2<br>(15.5 to 23.7)                   | 9.5<br>(6.4 to 13.5)                    | 35.2<br>(27.8 to 43.3)                            | 3.3<br>(-2.4 to 9.4)                             |
| Cirrhosis and other chronic liver diseases due to other causes | 180.2<br>(138.4 to 228.2)                  | 14.1<br>(10.6 to 18.2)                   | 6.6<br>(4.2 to 9.8)                     | 32.9<br>(24.6 to 40.6)                            | 1.5<br>(-4.8 to 7.4)                             |
| <b>Digestive diseases</b>                                      | <b>8,051.6<br/>(7,750.4 to 8,430.2)</b>    | <b>6,402.0†<br/>(5,730.4 to 7,066.2)</b> | <b>218.7<br/>(153.1 to 293.4)</b>       | <b>37.9<br/>(34.0 to 42.3)</b>                    | <b>5.3<br/>(2.3 to 8.7)</b>                      |
| Peptic ulcer disease                                           | 2,193.7<br>(1,830.7 to 2,630.6)            | 235.6<br>(195.2 to 277.4)                | 44.7<br>(27.4 to 69.4)                  | 41.7<br>(33.5 to 49.6)                            | 8.2<br>(1.9 to 14.2)                             |
| Gastritis and duodenitis                                       | 4,876.5<br>(3,794.6 to 6,288.0)            | 2,205.2<br>(1,808.0 to 2,599.9)          | 67.3<br>(44.0 to 98.2)                  | 45.6<br>(39.8 to 51.5)                            | 11.2<br>(6.8 to 15.7)                            |
| Appendicitis                                                   | 11.6<br>(10.8 to 12.7)                     | 317.0<br>(294.4 to 344.2)                | 3.2<br>(2.2 to 4.2)                     | 32.8<br>(24.4 to 41.6)                            | 1.4<br>(-5.0 to 8.1)                             |
| Paralytic ileus and intestinal obstruction                     | 7.2<br>(5.6 to 9.0)                        | 209.7<br>(165.9 to 264.2)                | 2.1<br>(1.3 to 3.0)                     | 34.5<br>(21.4 to 47.5)                            | 2.7<br>(-7.3 to 12.6)                            |
| Inguinal, femoral, and abdominal hernia                        | 984.3<br>(714.0 to 1,339.5)                | 1,460.7<br>(1,078.0 to 1,849.6)          | 50.3<br>(31.8 to 73.0)                  | 31.6<br>(24.4 to 39.0)                            | 0.5<br>(-5.0 to 6.1)                             |
| Inflammatory bowel disease                                     | 123.8<br>(105.8 to 141.3)                  | 26.3<br>(21.1 to 32.5)                   | 16.2<br>(10.9 to 22.2)                  | 21.9<br>(16.1 to 27.2)                            | -7.0<br>(-11.3 to -2.9)                          |
| Vascular intestinal disorders                                  | 9.7<br>(7.8 to 11.9)                       | 54.5<br>(43.3 to 68.2)                   | 2.7<br>(1.7 to 3.9)                     | 23.8<br>(7.3 to 41.6)                             | -5.5<br>(-18.1 to 8.2)                           |
| Gallbladder and biliary diseases                               | 435.0<br>(340.5 to 556.5)                  | 1,694.1<br>(1,345.2 to 2,094.8)          | 6.7<br>(4.4 to 9.6)                     | 38.0<br>(26.0 to 51.4)                            | 5.3<br>(-3.8 to 15.6)                            |
| Pancreatitis                                                   | 22.4<br>(18.7 to 26.7)                     | 198.9<br>(165.8 to 237.8)                | 2.6<br>(1.7 to 3.7)                     | 43.7<br>(28.9 to 60.0)                            | 9.7<br>(-1.6 to 22.2)                            |
| Other digestive diseases                                       | --                                         | --                                       | 22.9<br>(16.1 to 30.8)                  | 39.3<br>(35.3 to 43.7)                            | 6.4<br>(3.3 to 9.7)                              |
| <b>Neurological disorders</b>                                  | <b>22,451.5<br/>(21,258.5 to 23,455.2)</b> | <b>6,684.4<br/>(4,945.9 to 8,639.6)</b>  | <b>1,914.6<br/>(1,309.3 to 2,621.6)</b> | <b>31.3<br/>(29.3 to 33.1)</b>                    | <b>0.2<br/>(-1.2 to 1.6)</b>                     |
| Alzheimer's disease and other dementias                        | 8,861.2<br>(6,956.6 to 11,400.3)           | 1,550.2<br>(1,057.4 to 2,139.4)          | 1,442.9<br>(962.1 to 2,029.2)           | 32.0<br>(29.9 to 33.9)                            | 0.8<br>(-0.8 to 2.3)                             |
| Parkinson's disease                                            | 899.5<br>(682.9 to 1,168.2)                | 88.5<br>(60.3 to 125.2)                  | 100.2<br>(63.1 to 147.8)                | 31.9<br>(27.4 to 35.6)                            | 0.7<br>(-2.7 to 3.6)                             |
| Epilepsy                                                       | 385.8<br>(311.8 to 464.1)                  | 21.4<br>(15.5 to 28.5)                   | 96.3<br>(66.7 to 132.5)                 | 27.5<br>(10.2 to 48.7)                            | -2.7<br>(-15.9 to 13.6)                          |
| Multiple sclerosis                                             | 46.0<br>(41.4 to 50.7)                     | 0.4<br>(0.3 to 0.5)                      | 11.1<br>(8.0 to 14.5)                   | 28.8<br>(19.3 to 39.0)                            | -1.6<br>(-8.9 to 6.1)                            |
| Motor neuron disease                                           | 12.5<br>(9.9 to 15.3)                      | 3.1<br>(2.4 to 3.8)                      | 2.6<br>(1.8 to 3.7)                     | 31.0<br>(25.6 to 36.0)                            | 0.0<br>(-4.1 to 3.8)                             |
| Migraine                                                       | 4,244.7<br>(3,893.3 to 4,613.5)            | 276.8<br>(230.3 to 333.4)                | 200.6<br>(134.3 to 276.2)               | 28.3<br>(26.2 to 30.6)                            | -2.0<br>(-3.6 to -0.3)                           |
| Tension-type headache                                          | 11,262.7<br>(8,064.9 to 15,154.6)          | 4,743.0<br>(3,077.9 to 6,594.8)          | 49.7<br>(30.9 to 75.5)                  | 28.6<br>(25.7 to 31.5)                            | -1.8<br>(-4.1 to 0.4)                            |
| Other neurological disorders                                   | 0.6<br>(0.3 to 1.0)                        | 1.1<br>(0.6 to 1.7)                      | 11.2<br>(7.6 to 15.6)                   | 34.8<br>(32.5 to 36.8)                            | 2.9<br>(1.2 to 4.5)                              |
| <b>Mental and substance use disorders</b>                      | <b>10,618.1<br/>(10,384.4 to 10,824.5)</b> | <b>5,063.6†<br/>(4,284.7 to 5,920.4)</b> | <b>1,367.8<br/>(1,006.1 to 1,763.2)</b> | <b>28.7<br/>(27.5 to 30.0)</b>                    | <b>-1.7<br/>(-2.7 to -0.7)</b>                   |
| Schizophrenia                                                  | 97.9<br>(83.0 to 113.3)                    | --                                       | 54.8<br>(41.0 to 67.9)                  | 37.2<br>(31.1 to 43.7)                            | 4.8<br>(0.1 to 9.7)                              |
| Alcohol use disorders                                          | 395.8<br>(312.0 to 494.0)                  | 133.3<br>(101.0 to 172.5)                | 35.4<br>(23.8 to 51.0)                  | 36.2<br>(29.6 to 42.0)                            | 4.0<br>(-1.0 to 8.4)                             |
| Drug use disorders                                             | 282.1<br>(272.2 to 291.6)                  | 11.1<br>(9.8 to 12.6)                    | 76.9<br>(54.6 to 97.6)                  | 33.5<br>(28.9 to 37.9)                            | 1.9<br>(-1.6 to 5.3)                             |
| Opioid use disorders                                           | 168.7<br>(147.3 to 193.9)                  | --                                       | 61.0<br>(42.7 to 78.0)                  | 34.8<br>(29.1 to 40.3)                            | 3.0<br>(-1.5 to 7.2)                             |
| Cocaine use disorders                                          | 46.9<br>(41.2 to 53.0)                     | --                                       | 5.8<br>(3.6 to 8.2)                     | 24.3<br>(15.2 to 33.7)                            | -5.1<br>(-12.1 to 2.1)                           |
| Amphetamine use disorders                                      | 6.0<br>(3.8 to 9.2)                        | 1.7<br>(1.1 to 2.6)                      | 0.8<br>(0.4 to 1.5)                     | 26.8<br>(19.9 to 31.6)                            | -3.2<br>(-8.5 to 0.5)                            |
| Cannabis use disorders                                         | 37.7<br>(31.2 to 45.0)                     | --                                       | 1.1<br>(0.7 to 1.6)                     | 27.8<br>(21.4 to 34.4)                            | -2.5<br>(-7.3 to 2.6)                            |
| Other drug use disorders                                       | 39.6<br>(34.9 to 45.6)                     | 9.4<br>(8.2 to 10.7)                     | 8.2<br>(5.7 to 11.2)                    | 31.9<br>(25.1 to 39.0)                            | 0.7<br>(-4.5 to 6.1)                             |
| Depressive disorders                                           | 4,576.2<br>(4,385.4 to 4,773.2)            | 4,613.4<br>(3,838.9 to 5,487.2)          | 688.2<br>(469.1 to 950.3)               | 27.0<br>(24.9 to 28.9)                            | -3.0<br>(-4.7 to -1.6)                           |
| Major depressive disorder                                      | 2,903.0<br>(2,401.2 to 3,457.8)            | 4,426.7<br>(3,667.1 to 5,292.3)          | 529.6<br>(350.9 to 742.2)               | 25.9<br>(23.4 to 28.3)                            | -3.9<br>(-5.8 to -2.1)                           |
| Dysthymia                                                      | 1,804.2<br>(1,439.5 to 2,249.6)            | 186.7<br>(143.1 to 240.7)                | 158.7<br>(102.5 to 232.8)               | 30.8<br>(26.9 to 34.6)                            | -0.2<br>(-3.1 to 2.8)                            |
| Bipolar disorder                                               | 331.8<br>(270.9 to 402.2)                  | 21.4<br>(14.6 to 29.2)                   | 59.8<br>(37.4 to 88.1)                  | 28.2<br>(24.5 to 32.2)                            | -2.1<br>(-4.9 to 1.0)                            |
| Anxiety disorders                                              | 2,901.7<br>(2,585.7 to 3,264.7)            | 263.2<br>(232.1 to 296.1)                | 248.6<br>(176.5 to 334.0)               | 26.6<br>(23.8 to 29.3)                            | -3.4<br>(-5.4 to -1.3)                           |
| Eating disorders                                               | --                                         | --                                       | --                                      | --                                                | --                                               |
| Anorexia nervosa                                               | --                                         | --                                       | --                                      | --                                                | --                                               |
| Bulimia nervosa                                                | --                                         | --                                       | --                                      | --                                                | --                                               |
| Autistic spectrum disorders                                    | 408.2<br>(392.2 to 422.8)                  | --                                       | 56.4<br>(39.1 to 77.7)                  | 35.3<br>(32.9 to 37.9)                            | 3.3<br>(1.4 to 5.3)                              |
| Autism                                                         | 142.3<br>(122.0 to 166.5)                  | --                                       | 32.2<br>(21.1 to 46.0)                  | 33.7<br>(30.1 to 37.7)                            | 2.1<br>(-0.7 to 5.2)                             |
| Asperger syndrome and other autistic spectrum disorders        | 268.7<br>(223.3 to 321.7)                  | --                                       | 24.2<br>(16.2 to 34.6)                  | 37.5<br>(34.7 to 40.4)                            | 5.0<br>(2.8 to 7.2)                              |

| Cause                                                      | Prevalence in thousands (95% UI)           | Incidence in thousands (95% UI)                | YLDs in thousands (95% UI)              |                                                   |                                                  |
|------------------------------------------------------------|--------------------------------------------|------------------------------------------------|-----------------------------------------|---------------------------------------------------|--------------------------------------------------|
|                                                            | 2016 counts                                | 2016 counts                                    | 2016 counts                             | Percentage change in counts between 2006 and 2016 | Percentage change in rates between 2006 and 2016 |
| Attention-deficit/hyperactivity disorder                   | 1.7<br>(1.0 to 2.5)                        | --                                             | < 0.05<br>(< 0.05 to < 0.05)            | 38.4<br>(35.7 to 41.4)                            | 5.7<br>(3.6 to 8.0)                              |
| Conduct disorder                                           | --                                         | --                                             | --                                      | --                                                | --                                               |
| Idiopathic developmental intellectual disability           | 354.8<br>(196.5 to 523.4)                  | --                                             | 16.3<br>(8.5 to 26.2)                   | 24.9<br>(19.2 to 28.9)                            | -4.6<br>(-9.0 to -1.5)                           |
| Other mental and substance use disorders                   | 1,960.6<br>(1,740.8 to 2,217.5)            | 21.2<br>(13.6 to 31.4)                         | 131.2<br>(93.0 to 181.5)                | 32.1<br>(30.1 to 34.1)                            | 0.9<br>(-0.7 to 2.4)                             |
| <b>Diabetes, urogenital, blood, and endocrine diseases</b> | <b>45,644.3<br/>(45,204.9 to 46,174.8)</b> | <b>8,901.2†<br/>(7,947.4 to 9,980.5)</b>       | <b>2,005.7<br/>(1,444.4 to 2,654.4)</b> | <b>31.8<br/>(29.7 to 34.0)</b>                    | <b>0.6<br/>(-1.0 to 2.3)</b>                     |
| Diabetes mellitus                                          | 12,189.4<br>(11,072.7 to 13,425.0)         | 197.2<br>(130.3 to 275.4)                      | 968.2<br>(679.8 to 1,315.7)             | 30.2<br>(26.5 to 34.1)                            | -0.6<br>(-3.4 to 2.4)                            |
| Acute glomerulonephritis                                   | 2.6<br>(1.9 to 3.3)                        | 38.1<br>(28.6 to 48.3)                         | 0.1<br>(0.1 to 0.2)                     | 27.6<br>(17.8 to 37.5)                            | -2.6<br>(-10.0 to 5.0)                           |
| Chronic kidney disease                                     | 21,702.0<br>(18,691.4 to 24,369.5)         | 1,139.5<br>(797.9 to 1,630.3)                  | 564.9<br>(415.7 to 741.3)               | 33.5<br>(29.2 to 37.5)                            | 1.9<br>(-1.4 to 5.0)                             |
| Chronic kidney disease due to diabetes mellitus            | 7,630.7<br>(5,696.1 to 9,587.8)            | 406.2<br>(253.3 to 608.0)                      | 200.9<br>(136.6 to 279.5)               | 38.5<br>(33.5 to 43.9)                            | 5.8<br>(1.9 to 9.9)                              |
| Chronic kidney disease due to hypertension                 | 4,781.0<br>(3,743.3 to 5,827.9)            | 154.2<br>(94.4 to 240.9)                       | 171.6<br>(116.5 to 236.3)               | 35.5<br>(30.3 to 40.8)                            | 3.5<br>(-0.5 to 7.5)                             |
| Chronic kidney disease due to glomerulonephritis           | 4,534.2<br>(3,572.5 to 5,535.8)            | 327.4<br>(210.4 to 501.9)                      | 71.4<br>(44.6 to 106.7)                 | 16.4<br>(7.1 to 24.9)                             | -11.2<br>(-18.2 to -4.7)                         |
| Chronic kidney disease due to other causes                 | 4,756.0<br>(3,455.1 to 6,407.1)            | 251.6<br>(157.1 to 380.8)                      | 121.1<br>(77.8 to 176.2)                | 34.3<br>(27.8 to 40.9)                            | 2.6<br>(-2.4 to 7.6)                             |
| Urinary diseases and male infertility                      | 6,746.7<br>(6,097.3 to 7,889.4)            | 6,553.7†<br>(5,774.9 to 7,506.7)               | 210.3<br>(132.3 to 312.5)               | 39.3<br>(38.0 to 40.7)                            | 6.4<br>(5.4 to 7.4)                              |
| Interstitial nephritis and urinary tract infections        | 79.1<br>(65.1 to 95.3)                     | 4,170.5<br>(3,498.7 to 4,959.0)                | 2.4<br>(1.5 to 3.6)                     | 37.9<br>(30.8 to 45.0)                            | 5.3<br>(-0.1 to 10.7)                            |
| Urolithiasis                                               | 68.3<br>(52.9 to 88.3)                     | 1,772.3<br>(1,355.7 to 2,266.0)                | 4.6<br>(3.0 to 6.8)                     | 38.0<br>(27.1 to 50.0)                            | 5.4<br>(-3.0 to 14.5)                            |
| Benign prostatic hyperplasia                               | 6,458.8<br>(5,311.3 to 7,811.0)            | 610.9<br>(421.9 to 847.1)                      | 201.9<br>(125.6 to 303.2)               | 39.5<br>(38.1 to 40.9)                            | 6.5<br>(5.5 to 7.6)                              |
| Male infertility                                           | --                                         | --                                             | --                                      | --                                                | --                                               |
| Other urinary diseases                                     | --                                         | --                                             | 1.4<br>(1.0 to 2.0)                     | 27.1<br>(20.3 to 34.4)                            | -2.9<br>(-8.2 to 2.6)                            |
| Gynecological diseases                                     | 8,828.9<br>(8,291.7 to 9,705.1)            | 4.2†<br>(2.5 to 6.3)                           | 27.1<br>(13.3 to 47.7)                  | 17.5<br>(15.8 to 19.2)                            | -10.3<br>(-11.6 to -9.0)                         |
| Uterine fibroids                                           | 287.4<br>(252.3 to 329.1)                  | 4.2<br>(2.5 to 6.3)                            | 2.0<br>(1.0 to 3.6)                     | 25.1<br>(21.5 to 28.9)                            | -4.5<br>(-7.2 to -1.6)                           |
| Polycystic ovarian syndrome                                | --                                         | --                                             | --                                      | --                                                | --                                               |
| Female infertility                                         | --                                         | --                                             | --                                      | --                                                | --                                               |
| Endometriosis                                              | --                                         | --                                             | --                                      | --                                                | --                                               |
| Genital prolapse                                           | 8,517.7<br>(7,462.2 to 9,652.4)            | --                                             | 25.1<br>(12.2 to 45.0)                  | 16.9<br>(15.1 to 18.8)                            | -10.7<br>(-12.1 to -9.3)                         |
| Premenstrual syndrome                                      | --                                         | --                                             | --                                      | --                                                | --                                               |
| Other gynecological diseases                               | --                                         | --                                             | --                                      | --                                                | --                                               |
| Hemoglobinopathies and hemolytic anaemias                  | 15,125.9<br>(14,983.4 to 15,277.5)         | --                                             | 72.9<br>(49.8 to 102.5)                 | 30.6<br>(27.5 to 33.5)                            | -0.3<br>(-2.6 to 1.9)                            |
| Thalassaemias                                              | < 0.05<br>(< 0.05 to < 0.05)               | --                                             | < 0.05<br>(< 0.05 to < 0.05)            | 18.6<br>(11.5 to 24.5)                            | -9.4<br>(-14.9 to -4.9)                          |
| Thalassaemias trait                                        | 2,804.4<br>(2,682.0 to 2,939.0)            | --                                             | 40.9<br>(27.7 to 58.5)                  | 38.6<br>(34.3 to 42.9)                            | 5.9<br>(2.6 to 9.1)                              |
| Sickle cell disorders                                      | 0.1<br>(0.1 to 0.1)                        | --                                             | < 0.05<br>(< 0.05 to < 0.05)            | 17.2<br>(14.6 to 19.9)                            | -10.5<br>(-12.5 to -8.5)                         |
| Sickle cell trait                                          | 2,549.3<br>(2,321.0 to 2,864.1)            | --                                             | 6.8<br>(4.6 to 9.9)                     | 41.9<br>(37.4 to 46.8)                            | 8.4<br>(4.9 to 12.1)                             |
| G6PD deficiency                                            | 2,064.1<br>(1,985.9 to 2,152.1)            | --                                             | 0.3<br>(0.2 to 0.4)                     | 31.4<br>(28.1 to 34.8)                            | 0.3<br>(-2.2 to 2.9)                             |
| G6PD trait                                                 | 8,293.7<br>(8,141.5 to 8,470.9)            | --                                             | < 0.05<br>(< 0.05 to < 0.05)            | 28.0<br>(22.4 to 33.1)                            | -2.3<br>(-6.5 to 1.7)                            |
| Other hemoglobinopathies and hemolytic anaemias            | 892.9<br>(864.5 to 923.9)                  | --                                             | 24.9<br>(17.3 to 34.7)                  | 16.8<br>(13.9 to 19.7)                            | -10.8<br>(-13.1 to -8.6)                         |
| Endocrine, metabolic, blood, and immune disorders          | 5,025.8<br>(4,093.0 to 6,277.1)            | 968.5<br>(691.3 to 1,290.4)                    | 162.2<br>(107.8 to 231.2)               | 29.8<br>(24.0 to 35.0)                            | -0.9<br>(-5.3 to 3.1)                            |
| <b>Musculoskeletal disorders</b>                           | <b>32,479.5<br/>(31,559.8 to 33,436.3)</b> | <b>13,033.9<br/>(10,042.4 to 16,664.6)</b>     | <b>3,252.4<br/>(2,333.9 to 4,238.8)</b> | <b>27.3<br/>(25.6 to 28.9)</b>                    | <b>-2.8<br/>(-4.1 to -1.6)</b>                   |
| Rheumatoid arthritis                                       | 762.0<br>(678.4 to 848.8)                  | 11.5<br>(7.5 to 16.1)                          | 163.8<br>(114.8 to 210.8)               | 31.2<br>(27.9 to 34.4)                            | 0.2<br>(-2.3 to 2.6)                             |
| Osteoarthritis                                             | 16,045.2<br>(15,129.6 to 16,988.1)         | 156.3<br>(120.3 to 193.5)                      | 759.0<br>(533.1 to 1,031.3)             | 32.2<br>(31.0 to 33.5)                            | 0.9<br>(0.0 to 1.9)                              |
| Low back and neck pain                                     | 18,455.7<br>(17,278.4 to 20,011.6)         | 8,554.5<br>(6,252.4 to 11,708.4)               | 2,032.3<br>(1,402.9 to 2,768.5)         | 27.1<br>(24.7 to 29.1)                            | -2.9<br>(-4.8 to -1.4)                           |
| Low back pain                                              | 14,056.0<br>(10,809.9 to 18,206.9)         | 7,195.0<br>(4,927.8 to 10,191.3)               | 1,444.5<br>(938.9 to 2,048.5)           | 26.2<br>(22.9 to 28.7)                            | -3.6<br>(-6.2 to -1.7)                           |
| Neck pain                                                  | 6,409.0<br>(4,648.3 to 8,312.4)            | 1,359.5<br>(859.4 to 1,995.0)                  | 587.7<br>(371.9 to 871.4)               | 29.5<br>(26.8 to 32.0)                            | -1.1<br>(-3.2 to 0.8)                            |
| Gout                                                       | 1,649.9<br>(1,307.4 to 2,054.4)            | 257.6<br>(185.6 to 338.6)                      | 47.7<br>(31.9 to 66.3)                  | 33.1<br>(29.0 to 37.5)                            | 1.6<br>(-1.5 to 5.0)                             |
| Other musculoskeletal disorders                            | 3,248.8<br>(2,002.2 to 4,988.1)            | 4,054.0<br>(2,426.8 to 6,179.2)                | 249.7<br>(138.5 to 406.0)               | 13.2<br>(-0.1 to 24.8)                            | -13.6<br>(-23.8 to -4.7)                         |
| <b>Other non-communicable diseases</b>                     | <b>70,444.8<br/>(70,332.8 to 70,540.8)</b> | <b>259,806.0†<br/>(232,389.8 to 288,886.4)</b> | <b>5,414.2<br/>(3,924.7 to 7,294.8)</b> | <b>30.7<br/>(28.6 to 32.6)</b>                    | <b>-0.2<br/>(-1.8 to 1.2)</b>                    |
| Congenital anomalies                                       | 604.3<br>(569.4 to 639.2)                  | --                                             | 64.5<br>(47.1 to 84.6)                  | 27.0<br>(23.9 to 30.1)                            | -3.0<br>(-5.4 to -0.7)                           |
| Neural tube defects                                        | 43.1<br>(39.3 to 47.6)                     | --                                             | 12.1<br>(8.7 to 16.0)                   | 29.4<br>(23.4 to 35.7)                            | -1.2<br>(-5.8 to 3.6)                            |
| Congenital heart anomalies                                 | 109.8<br>(98.7 to 122.1)                   | --                                             | 5.9<br>(2.4 to 10.2)                    | 34.7<br>(29.3 to 40.4)                            | 2.8<br>(-1.3 to 7.2)                             |
| Orofacial clefts                                           | 37.1<br>(33.1 to 41.2)                     | --                                             | 0.4<br>(0.3 to 0.6)                     | 26.2<br>(22.4 to 29.6)                            | -3.6<br>(-6.5 to -1.0)                           |
| Down's syndrome                                            | --                                         | --                                             | --                                      | --                                                | --                                               |
| Turner syndrome                                            | 3.7<br>(3.1 to 4.5)                        | --                                             | 0.1<br>(< 0.05 to 0.1)                  | 28.0<br>(25.4 to 31.0)                            | -2.2<br>(-4.3 to -0.0)                           |
| Klinefelter syndrome                                       | 0.5<br>(0.4 to 0.7)                        | --                                             | < 0.05<br>(< 0.05 to < 0.05)            | 43.2<br>(39.0 to 47.5)                            | 9.4<br>(6.1 to 12.6)                             |

| Cause                                         | Prevalence in thousands (95% UI)                 | Incidence in thousands (95% UI)                              | YLDs in thousands (95% UI)                    |                                                   |                                                  |
|-----------------------------------------------|--------------------------------------------------|--------------------------------------------------------------|-----------------------------------------------|---------------------------------------------------|--------------------------------------------------|
|                                               | 2016 counts                                      | 2016 counts                                                  | 2016 counts                                   | Percentage change in counts between 2006 and 2016 | Percentage change in rates between 2006 and 2016 |
| Other chromosomal abnormalities               | < 0.05<br>(< 0.05 to < 0.05)                     | --                                                           | < 0.05<br>(< 0.05 to < 0.05)                  | 41.4<br>(39.5 to 43.0)                            | 7.9<br>(6.5 to 9.2)                              |
| Congenital musculoskeletal and limb anomalies | 137.9<br>(127.1 to 148.6)                        | --                                                           | 18.8<br>(13.2 to 25.2)                        | 23.7<br>(18.5 to 29.2)                            | -5.5<br>(-9.5 to -1.4)                           |
| Urogenital congenital anomalies               | 32.3<br>(29.1 to 35.7)                           | --                                                           | 0.5<br>(0.2 to 0.9)                           | 31.7<br>(27.0 to 37.0)                            | 0.6<br>(-3.1 to 4.6)                             |
| Digestive congenital anomalies                | 106.9<br>(96.7 to 117.8)                         | --                                                           | 4.3<br>(2.9 to 6.1)                           | 28.4<br>(21.8 to 35.1)                            | -1.9<br>(-7.0 to 3.1)                            |
| Other congenital anomalies                    | 264.6<br>(182.6 to 371.9)                        | --                                                           | 22.5<br>(14.4 to 34.4)                        | 26.3<br>(20.5 to 32.6)                            | -3.6<br>(-8.0 to 1.3)                            |
| Skin and subcutaneous diseases                | 38,574.2<br>(37,487.3 to 39,502.4)               | 152,871.4<br>(130,383.1 to 180,112.2)                        | 532.0<br>(343.3 to 830.3)                     | 31.1<br>(29.9 to 32.0)                            | 0.1<br>(-0.8 to 0.8)                             |
| Dermatitis                                    | 3,677.3<br>(3,149.2 to 4,269.5)                  | 4,877.0<br>(3,573.7 to 6,463.2)                              | 107.1<br>(66.0 to 163.1)                      | 27.4<br>(25.6 to 29.1)                            | -2.7<br>(-4.1 to -1.5)                           |
| Psoriasis                                     | 1,066.9<br>(985.6 to 1,150.7)                    | 78.4<br>(65.7 to 92.9)                                       | 83.1<br>(59.9 to 107.2)                       | 32.1<br>(29.1 to 35.3)                            | 0.9<br>(-1.4 to 3.3)                             |
| Cellulitis                                    | 74.4<br>(61.5 to 90.1)                           | 1,809.8<br>(1,525.3 to 2,143.2)                              | 3.8<br>(2.5 to 5.6)                           | 24.1<br>(17.5 to 31.1)                            | -5.3<br>(-10.3 to 0.1)                           |
| Pyoderma                                      | 692.2<br>(631.8 to 754.7)                        | 18,441.7<br>(16,697.0 to 20,213.1)                           | 3.6<br>(1.5 to 7.6)                           | 32.9<br>(30.3 to 35.4)                            | 1.4<br>(-0.5 to 3.4)                             |
| Scabies                                       | 942.6<br>(633.9 to 1,341.9)                      | 2,940.2<br>(1,968.4 to 4,245.0)                              | 22.2<br>(11.6 to 37.6)                        | 32.9<br>(30.4 to 35.2)                            | 1.5<br>(-0.5 to 3.2)                             |
| Fungal skin diseases                          | 21,454.3<br>(17,296.4 to 26,187.9)               | 95,035.7<br>(72,471.6 to 121,753.9)                          | 112.2<br>(44.0 to 243.6)                      | 32.7<br>(32.1 to 33.2)                            | 1.3<br>(0.8 to 1.7)                              |
| Viral skin diseases                           | 1,059.6<br>(871.5 to 1,301.7)                    | 1,612.1<br>(1,332.0 to 1,956.9)                              | 29.6<br>(18.5 to 45.1)                        | 28.3<br>(25.9 to 30.8)                            | -2.0<br>(-3.8 to -0.2)                           |
| Acne vulgaris                                 | 436.7<br>(424.9 to 449.1)                        | 180.8<br>(174.1 to 188.6)                                    | 10.1<br>(6.9 to 14.3)                         | 31.8<br>(25.9 to 37.6)                            | 0.6<br>(-3.9 to 5.0)                             |
| Alopecia areata                               | 81.1<br>(71.7 to 91.2)                           | 138.1<br>(124.3 to 152.3)                                    | 2.4<br>(1.5 to 3.6)                           | 22.8<br>(16.1 to 29.6)                            | -6.2<br>(-11.3 to -1.0)                          |
| Pruritus                                      | 1,417.2<br>(1,011.1 to 1,947.5)                  | 1,081.6<br>(728.1 to 1,494.0)                                | 14.0<br>(6.2 to 26.8)                         | 32.5<br>(30.4 to 34.6)                            | 1.2<br>(-0.4 to 2.8)                             |
| Urticaria                                     | 344.4<br>(237.9 to 469.7)                        | 597.4<br>(403.3 to 802.7)                                    | 18.6<br>(10.9 to 29.2)                        | 29.8<br>(25.8 to 33.5)                            | -0.9<br>(-3.9 to 2.0)                            |
| Decubitus ulcer                               | 218.5<br>(164.9 to 287.6)                        | 806.3<br>(596.9 to 1,072.0)                                  | 31.7<br>(20.5 to 46.4)                        | 28.6<br>(20.2 to 36.4)                            | -1.8<br>(-8.2 to 4.2)                            |
| Other skin and subcutaneous diseases          | 18,210.9<br>(16,730.1 to 19,706.2)               | 25,272.2<br>(22,589.5 to 28,084.3)                           | 93.5<br>(44.7 to 171.8)                       | 34.4<br>(33.6 to 35.2)                            | 2.6<br>(2.0 to 3.3)                              |
| Sense organ diseases                          | 64,060.5<br>(63,282.8 to 64,780.2)               | 17,417.4 <sup>†</sup><br>(15,852.8 to 19,051.6)              | 4,126.5<br>(2,985.9 to 5,481.8)               | 30.9<br>(28.1 to 33.4)                            | -0.1<br>(-2.2 to 1.9)                            |
| Glaucoma                                      | 458.5<br>(367.8 to 564.2)                        | --                                                           | 43.3<br>(29.2 to 61.8)                        | 35.4<br>(32.1 to 38.5)                            | 3.4<br>(0.9 to 5.7)                              |
| Cataract                                      | 9,384.7<br>(7,594.9 to 11,391.8)                 | --                                                           | 637.0<br>(450.3 to 886.2)                     | 33.3<br>(31.4 to 35.1)                            | 1.8<br>(0.3 to 3.2)                              |
| Macular degeneration                          | 597.6<br>(464.7 to 768.4)                        | --                                                           | 41.9<br>(28.1 to 60.0)                        | 33.7<br>(29.9 to 37.4)                            | 2.1<br>(-0.8 to 4.9)                             |
| Refraction and accommodation disorders        | 31,227.6<br>(28,991.8 to 33,762.2)               | --                                                           | 505.7<br>(318.9 to 781.8)                     | 27.4<br>(25.3 to 29.0)                            | -2.7<br>(-4.3 to -1.5)                           |
| Age-related and other hearing loss            | 63,451.7<br>(62,326.1 to 64,381.4)               | --                                                           | 2,491.2<br>(1,783.3 to 3,312.2)               | 30.7<br>(26.3 to 34.8)                            | -0.2<br>(-3.6 to 2.9)                            |
| Other vision loss                             | 1,672.6<br>(1,313.1 to 2,086.0)                  | --                                                           | 123.0<br>(83.9 to 166.8)                      | 33.0<br>(30.4 to 35.5)                            | 1.5<br>(-0.4 to 3.5)                             |
| Other sense organ diseases                    | 9,517.6<br>(8,317.6 to 10,780.5)                 | 17,417.4<br>(15,852.8 to 19,051.6)                           | 284.3<br>(178.8 to 423.0)                     | 31.7<br>(30.4 to 33.0)                            | 0.5<br>(-0.5 to 1.6)                             |
| Oral disorders                                | 45,584.6<br>(44,512.3 to 46,627.9)               | 88,517.2 <sup>†</sup><br>(74,678.0 to 102,543.1)             | 691.3<br>(444.1 to 989.7)                     | 29.6<br>(28.5 to 30.5)                            | -1.0<br>(-1.9 to -0.4)                           |
| Caries of deciduous teeth                     | --                                               | --                                                           | --                                            | --                                                | --                                               |
| Caries of permanent teeth                     | 26,424.4<br>(22,734.1 to 30,575.5)               | 86,171.7<br>(71,930.7 to 99,886.0)                           | 19.2<br>(8.8 to 37.8)                         | 24.2<br>(22.4 to 26.0)                            | -5.2<br>(-6.5 to -3.8)                           |
| Periodontal disease                           | 14,494.4<br>(10,646.3 to 17,945.9)               | 1,760.8<br>(949.5 to 2,708.2)                                | 88.6<br>(33.4 to 191.7)                       | 34.2<br>(33.2 to 35.4)                            | 2.5<br>(1.7 to 3.3)                              |
| Edentulism and severe tooth loss              | 20,761.9<br>(17,568.8 to 24,033.9)               | 584.7<br>(364.7 to 895.6)                                    | 547.0<br>(361.8 to 776.3)                     | 29.1<br>(27.8 to 30.2)                            | -1.4<br>(-2.4 to -0.6)                           |
| Other oral disorders                          | 1,349.4<br>(1,182.1 to 1,503.7)                  | --                                                           | 36.4<br>(22.9 to 54.7)                        | 30.1<br>(28.1 to 32.1)                            | -0.7<br>(-2.2 to 0.9)                            |
| <b>Injuries</b>                               | <b>46,464.8</b><br><b>(43,981.2 to 49,203.6)</b> | <b>13,097.6<sup>†</sup></b><br><b>(11,526.5 to 15,007.9)</b> | <b>1,715.3</b><br><b>(1,197.2 to 2,325.8)</b> | <b>33.4</b><br><b>(32.1 to 34.4)</b>              | <b>1.9</b><br><b>(0.8 to 2.6)</b>                |
| <b>Transport injuries</b>                     | <b>7,146.5</b><br><b>(6,678.2 to 7,663.8)</b>    | <b>874.3</b><br><b>(728.5 to 1,034.1)</b>                    | <b>312.2</b><br><b>(212.8 to 441.5)</b>       | <b>35.7</b><br><b>(34.8 to 36.7)</b>              | <b>3.6</b><br><b>(2.9 to 4.4)</b>                |
| Road injuries                                 | 5,973.7<br>(5,569.1 to 6,472.1)                  | 704.1<br>(571.2 to 857.0)                                    | 261.6<br>(177.5 to 371.6)                     | 36.6<br>(35.6 to 37.6)                            | 4.3<br>(3.5 to 5.1)                              |
| Pedestrian road injuries                      | 1,473.5<br>(1,273.2 to 1,734.0)                  | 163.3<br>(117.9 to 216.7)                                    | 68.2<br>(46.6 to 97.0)                        | 37.8<br>(36.5 to 39.1)                            | 5.2<br>(4.2 to 6.2)                              |
| Cyclist road injuries                         | 1,274.2<br>(1,070.8 to 1,482.4)                  | 189.0<br>(130.4 to 251.0)                                    | 53.4<br>(35.9 to 76.2)                        | 41.9<br>(40.8 to 43.3)                            | 8.4<br>(7.5 to 9.4)                              |
| Motorcyclist road injuries                    | 1,122.3<br>(964.3 to 1,295.1)                    | 59.1<br>(37.8 to 83.5)                                       | 47.2<br>(32.3 to 66.9)                        | 50.1<br>(48.9 to 51.2)                            | 14.6<br>(13.7 to 15.4)                           |
| Motor vehicle road injuries                   | 1,702.3<br>(1,416.8 to 1,963.2)                  | 239.8<br>(176.6 to 307.5)                                    | 76.4<br>(52.2 to 107.9)                       | 21.4<br>(20.0 to 22.8)                            | -7.3<br>(-8.4 to -6.2)                           |
| Other road injuries                           | 401.4<br>(349.9 to 470.0)                        | 52.8<br>(33.4 to 80.3)                                       | 16.3<br>(11.0 to 23.4)                        | 63.2<br>(61.8 to 64.7)                            | 24.6<br>(23.5 to 25.7)                           |
| Other transport injuries                      | 1,172.7<br>(989.3 to 1,353.0)                    | 170.2<br>(128.1 to 215.1)                                    | 50.6<br>(34.6 to 70.6)                        | 31.6<br>(29.9 to 33.0)                            | 0.5<br>(-0.8 to 1.6)                             |
| <b>Unintentional injuries</b>                 | <b>37,255.6</b><br><b>(34,912.7 to 39,849.7)</b> | <b>11,919.2</b><br><b>(10,310.8 to 13,792.1)</b>             | <b>1,337.3</b><br><b>(946.9 to 1,802.6)</b>   | <b>33.0</b><br><b>(31.5 to 34.2)</b>              | <b>1.6</b><br><b>(0.4 to 2.5)</b>                |
| Falls                                         | 20,781.7<br>(18,606.4 to 23,294.5)               | 7,487.5<br>(5,999.9 to 9,247.4)                              | 910.9<br>(651.3 to 1,236.3)                   | 33.5<br>(31.6 to 35.3)                            | 2.0<br>(0.4 to 3.3)                              |
| Drowning                                      | 188.4<br>(164.8 to 222.7)                        | 38.6<br>(32.5 to 44.6)                                       | 8.6<br>(5.8 to 12.2)                          | 16.9<br>(15.0 to 18.5)                            | -10.8<br>(-12.2 to -9.5)                         |
| Fire, heat, and hot substances                | 2,449.4<br>(2,159.7 to 2,784.4)                  | 93.0<br>(71.8 to 119.7)                                      | 42.5<br>(25.2 to 67.3)                        | 26.7<br>(25.4 to 27.9)                            | -3.3<br>(-4.2 to -2.3)                           |
| Poisonings                                    | 77.6<br>(67.4 to 88.3)                           | 31.4<br>(20.9 to 43.8)                                       | 4.5<br>(3.1 to 6.4)                           | 36.9<br>(32.6 to 41.3)                            | 4.5<br>(1.3 to 7.9)                              |
| Exposure to mechanical forces                 | 5,213.6<br>(4,528.4 to 6,121.9)                  | 416.5<br>(322.8 to 529.8)                                    | 103.1<br>(68.5 to 149.8)                      | 36.8<br>(35.8 to 37.5)                            | 4.4<br>(3.7 to 5.0)                              |
| Unintentional firearm injuries                | 174.1<br>(145.7 to 206.3)                        | 5.2<br>(3.1 to 8.4)                                          | 3.8<br>(2.5 to 5.6)                           | 39.0<br>(37.8 to 40.1)                            | 6.1<br>(5.2 to 7.0)                              |
| Unintentional suffocation                     | 165.9<br>(137.0 to 195.4)                        | 19.0<br>(12.6 to 28.4)                                       | 4.6<br>(3.0 to 6.6)                           | 34.7<br>(33.2 to 36.1)                            | 2.9<br>(1.7 to 3.9)                              |
| Other exposure to mechanical forces           | 4,873.6<br>(4,204.8 to 5,757.1)                  | 392.4<br>(303.0 to 497.5)                                    | 94.8<br>(63.1 to 137.1)                       | 36.8<br>(35.8 to 37.6)                            | 4.4<br>(3.7 to 5.0)                              |

| Cause                                                                               | Prevalence in thousands (95% UI)              | Incidence in thousands (95% UI)          | YLDs in thousands (95% UI)           |                                                   |                                                  |
|-------------------------------------------------------------------------------------|-----------------------------------------------|------------------------------------------|--------------------------------------|---------------------------------------------------|--------------------------------------------------|
|                                                                                     | 2016 counts                                   | 2016 counts                              | 2016 counts                          | Percentage change in counts between 2006 and 2016 | Percentage change in rates between 2006 and 2016 |
| Adverse effects of medical treatment                                                | 113.0<br>(83.0 to 149.4)                      | 1,478.4<br>(1,160.1 to 1,805.4)          | 15.1<br>(9.2 to 23.8)                | 19.0<br>(12.8 to 24.6)                            | -9.2<br>(-13.8 to -4.8)                          |
| Animal contact                                                                      | 1,194.2<br>(1,083.0 to 1,331.8)               | 443.3<br>(321.7 to 576.9)                | 24.1<br>(16.7 to 33.3)               | 24.9<br>(23.2 to 26.2)                            | -4.7<br>(-5.9 to -3.6)                           |
| Venomous animal contact                                                             | 471.3<br>(407.8 to 559.2)                     | 207.6<br>(146.5 to 278.9)                | 13.6<br>(9.6 to 18.6)                | 28.5<br>(25.9 to 31.0)                            | -1.9<br>(-3.9 to 0.0)                            |
| Non-venomous animal contact                                                         | 722.8<br>(633.3 to 817.4)                     | 235.7<br>(165.2 to 327.3)                | 10.5<br>(6.9 to 15.7)                | 20.4<br>(18.8 to 21.6)                            | -8.0<br>(-9.3 to -7.2)                           |
| Foreign body                                                                        | 1,281.5<br>(1,127.5 to 1,436.2)               | 692.3<br>(566.2 to 842.0)                | 42.3<br>(28.0 to 61.2)               | 31.0<br>(29.6 to 32.3)                            | 0.0<br>(-1.1 to 1.0)                             |
| Pulmonary aspiration and foreign body in airway                                     | 612.3<br>(496.5 to 742.4)                     | 396.1<br>(316.5 to 486.1)                | 22.2<br>(14.6 to 32.0)               | 29.9<br>(28.2 to 31.4)                            | -0.8<br>(-2.1 to 0.4)                            |
| Foreign body in eyes                                                                | 76.8<br>(57.5 to 103.9)                       | 176.2<br>(90.7 to 304.0)                 | 4.6<br>(2.9 to 7.0)                  | 41.3<br>(38.5 to 44.8)                            | 7.9<br>(5.8 to 10.6)                             |
| Foreign body in other body part                                                     | 592.3<br>(494.7 to 720.1)                     | 120.0<br>(84.3 to 162.1)                 | 15.5<br>(10.3 to 22.6)               | 29.7<br>(28.2 to 31.0)                            | -1.0<br>(-2.1 to 0.0)                            |
| Environmental heat and cold exposure                                                | 1,750.8<br>(1,525.4 to 2,019.2)               | 268.9<br>(199.2 to 359.5)                | 63.6<br>(43.2 to 89.2)               | 32.2<br>(30.3 to 34.1)                            | 1.0<br>(-0.5 to 2.4)                             |
| Other unintentional injuries                                                        | 4,205.3<br>(3,638.0 to 4,857.0)               | 969.4<br>(660.1 to 1,389.7)              | 122.6<br>(82.7 to 174.0)             | 34.5<br>(33.5 to 35.2)                            | 2.7<br>(2.0 to 3.3)                              |
| <b>Self-harm and interpersonal violence</b>                                         | <b>2,848.0</b><br><b>(2,593.7 to 3,134.3)</b> | <b>296.2†</b><br><b>(248.5 to 357.8)</b> | <b>56.1</b><br><b>(38.0 to 79.3)</b> | <b>23.2</b><br><b>(22.4 to 24.0)</b>              | <b>-5.9</b><br><b>(-6.6 to -5.4)</b>             |
| Self-harm                                                                           | 460.9<br>(390.6 to 549.8)                     | 201.2<br>(161.7 to 246.2)                | 15.8<br>(10.5 to 22.5)               | 14.8<br>(13.2 to 16.3)                            | -12.3<br>(-13.5 to -11.2)                        |
| Self-harm by firearm                                                                | 9.5<br>(8.0 to 11.6)                          | 1.8<br>(0.6 to 4.4)                      | 0.2<br>(0.2 to 0.4)                  | 15.5<br>(13.8 to 17.2)                            | -11.8<br>(-13.1 to -10.5)                        |
| Self-harm by other specified means                                                  | 451.4<br>(380.1 to 540.5)                     | 199.5<br>(160.5 to 244.0)                | 15.5<br>(10.4 to 22.1)               | 14.8<br>(13.2 to 16.3)                            | -12.3<br>(-13.6 to -11.2)                        |
| Interpersonal violence                                                              | 2,387.1<br>(2,143.1 to 2,669.8)               | 95.0†<br>(66.6 to 131.4)                 | 40.3<br>(27.3 to 57.3)               | 26.8<br>(26.1 to 27.5)                            | -3.2<br>(-3.7 to -2.6)                           |
| Assault by firearm                                                                  | 74.5<br>(63.3 to 85.3)                        | 5.2<br>(2.6 to 9.0)                      | 2.0<br>(1.3 to 2.8)                  | 29.6<br>(28.2 to 31.2)                            | -1.0<br>(-2.1 to 0.1)                            |
| Assault by sharp object                                                             | 292.7<br>(246.0 to 344.4)                     | 19.3<br>(11.0 to 31.3)                   | 5.9<br>(3.9 to 8.7)                  | 26.1<br>(25.1 to 27.0)                            | -3.7<br>(-4.5 to -3.1)                           |
| Sexual violence                                                                     | 1,118.2<br>(931.3 to 1,341.1)                 | --                                       | 6.5<br>(4.2 to 9.7)                  | 26.0<br>(24.7 to 27.3)                            | -3.8<br>(-4.8 to -2.8)                           |
| Assault by other means                                                              | 901.7<br>(770.5 to 1,071.7)                   | 70.4<br>(48.7 to 100.2)                  | 25.9<br>(17.3 to 36.9)               | 27.0<br>(26.1 to 27.8)                            | -3.1<br>(-3.7 to -2.4)                           |
| <b>Forces of nature, conflict and terrorism, and executions and police conflict</b> | <b>333.0</b><br><b>(224.1 to 474.0)</b>       | <b>8.0†</b><br><b>(3.9 to 12.9)</b>      | <b>9.7</b><br><b>(2.5 to 24.6)</b>   | <b>89.8</b><br><b>(77.6 to 108.1)</b>             | <b>44.9</b><br><b>(35.6 to 58.9)</b>             |
| Forces of nature, conflict and terrorism, and state actor violence                  | 91.2<br>(50.9 to 140.5)                       | 2.7<br>(1.4 to 4.1)                      | 3.1<br>(0.7 to 8.1)                  | 96.7<br>(80.6 to 118.3)                           | 50.2<br>(37.9 to 66.7)                           |
| Conflict and terrorism                                                              | 199.4<br>(114.2 to 320.7)                     | --                                       | 6.0<br>(1.7 to 14.6)                 | 71.5<br>(58.0 to 99.1)                            | 31.0<br>(20.6 to 52.0)                           |
| Executions and police conflict                                                      | 42.4<br>(13.4 to 69.4)                        | 5.3<br>(1.5 to 10.1)                     | 1.1<br>(0.2 to 3.1)                  | 153.1<br>(96.2 to 188.3)                          | 93.2<br>(49.8 to 120.2)                          |

We did not calculate incidence for certain NTDs and causes with only birth prevalence. Blank cells mean that no estimate is available.

† Incidence for aggregate causes represents the sum of the incidence of the causes below the aggregate.

‡ Incidence estimates for stroke represent first-ever stroke only.

^ Incidence of HIV/AIDS represents new infections of HIV only and does not include new infections of Tuberculosis in HIV positive cases.



SR Table 12: Global prevalence, incidence, and YLDs for 2016, percentage change of YLD counts and percentage change of YLD rates between 2006 and 2016 by cause, age 85-89 years.

| Cause                                                                                | Prevalence in thousands (95% UI)          | Incidence in thousands (95% UI)               | YLDs in thousands (95% UI)               |                                                   |                                                  |
|--------------------------------------------------------------------------------------|-------------------------------------------|-----------------------------------------------|------------------------------------------|---------------------------------------------------|--------------------------------------------------|
|                                                                                      | 2016 counts                               | 2016 counts                                   | 2016 counts                              | Percentage change in counts between 2006 and 2016 | Percentage change in rates between 2006 and 2016 |
| <b>All causes</b>                                                                    | <b>39,828.8</b><br>(39,819.9 to 39,847.6) | <b>322,939.7†</b><br>(295,386.1 to 355,654.2) | <b>12,477.8</b><br>(9,532.3 to 15,823.0) | <b>59.4</b><br>(58.3 to 60.4)                     | <b>-0.7</b><br>(-1.4 to -0.1)                    |
| <b>Communicable, maternal, neonatal, and nutritional disorders</b>                   | <b>21,387.8</b><br>(21,130.4 to 21,584.9) | <b>118,538.8†</b><br>(99,386.4 to 141,032.8)  | <b>320.2</b><br>(228.9 to 416.7)         | <b>46.1</b><br>(42.8 to 52.7)                     | <b>-9.0</b><br>(-11.0 to -4.9)                   |
| <b>HIV/AIDS and tuberculosis</b>                                                     | <b>7,816.5</b><br>(7,344.6 to 8,314.2)    | <b>62.0†</b><br>(53.7 to 71.8)                | <b>30.7</b><br>(21.6 to 41.5)            | <b>36.6</b><br>(28.8 to 43.6)                     | <b>-14.9</b><br>(-19.8 to -10.5)                 |
| Tuberculosis                                                                         | 7,582.8<br>(6,940.6 to 8,282.4)           | 62.0†<br>(53.7 to 71.8)                       | 27.0<br>(18.5 to 36.5)                   | 34.8<br>(30.9 to 39.5)                            | -16.0<br>(-18.4 to -13.1)                        |
| Drug-susceptible tuberculosis                                                        | 96.7<br>(83.4 to 111.7)                   | 59.9<br>(51.8 to 69.4)                        | 25.9<br>(17.8 to 35.0)                   | 34.8<br>(30.5 to 39.3)                            | -16.0<br>(-18.7 to -13.2)                        |
| Multidrug-resistant tuberculosis without extensive drug resistance                   | 3.6<br>(3.0 to 4.2)                       | 2.0<br>(1.8 to 2.4)                           | 1.0<br>(0.7 to 1.4)                      | 28.0<br>(11.6 to 49.6)                            | -20.3<br>(-30.5 to -6.8)                         |
| Extensively drug-resistant tuberculosis                                              | 0.3<br>(0.2 to 0.3)                       | 0.1<br>(0.1 to 0.2)                           | 0.1<br>(0.1 to 0.1)                      | 320.3<br>(268.6 to 379.8)                         | 161.8<br>(129.7 to 199.0)                        |
| Latent tuberculosis infection                                                        | 7,482.3<br>(6,839.2 to 8,177.2)           | --                                            | --                                       | --                                                | --                                               |
| HIV/AIDS                                                                             | 36.4<br>(30.7 to 44.8)                    | --                                            | 3.7<br>(2.4 to 5.5)                      | 51.0<br>(3.0 to 129.2)                            | -5.9<br>(-35.8 to 42.8)                          |
| Drug-susceptible HIV/AIDS - Tuberculosis                                             | 1.3<br>(0.9 to 1.8)                       | 1.4<br>(1.0 to 1.9)                           | 0.5<br>(0.3 to 0.7)                      | 29.6<br>(17.8 to 40.2)                            | -19.2<br>(-26.6 to -12.7)                        |
| Multidrug-resistant HIV/AIDS - Tuberculosis without extensive drug resistance        | < 0.05<br>(< 0.05 to 0.1)                 | < 0.05<br>(< 0.05 to 0.1)                     | < 0.05<br>(< 0.05 to < 0.05)             | 56.3<br>(12.4 to 100.7)                           | -2.6<br>(-30.0 to 25.0)                          |
| Extensively drug-resistant HIV/AIDS - Tuberculosis                                   | < 0.05<br>(< 0.05 to < 0.05)              | < 0.05<br>(< 0.05 to < 0.05)                  | < 0.05<br>(< 0.05 to < 0.05)             | 504.7<br>(286.3 to 741.9)                         | 276.8<br>(140.7 to 424.6)                        |
| HIV/AIDS resulting in other diseases                                                 | 35.1<br>(29.3 to 43.6)                    | --                                            | 3.2<br>(2.0 to 5.0)                      | 54.6<br>(1.1 to 155.9)                            | -3.6<br>(-37.0 to 59.5)                          |
| <b>Diarrhoea, lower respiratory infections, and other common infectious diseases</b> | <b>2,053.9</b><br>(1,931.0 to 2,160.0)    | <b>114,272.9†</b><br>(95,403.0 to 136,678.9)  | <b>107.2</b><br>(75.2 to 146.6)          | <b>58.9</b><br>(55.1 to 82.0)                     | <b>-1.0</b><br>(-3.4 to 13.4)                    |
| Diarrhoeal diseases                                                                  | 580.0<br>(530.5 to 630.5)                 | 40,102.7<br>(36,739.5 to 43,714.2)            | 57.2<br>(40.3 to 76.7)                   | 53.5<br>(50.6 to 56.5)                            | -4.3<br>(-6.2 to -2.5)                           |
| Intestinal infectious diseases                                                       | 1.8<br>(1.5 to 2.2)                       | 35.8†<br>(31.8 to 39.6)                       | 0.3<br>(0.2 to 0.4)                      | 29.0<br>(3.8 to 59.4)                             | -19.6<br>(-35.3 to -0.7)                         |
| Typhoid fever                                                                        | 1.7<br>(1.4 to 2.1)                       | 27.5<br>(24.4 to 30.5)                        | 0.2<br>(0.2 to 0.4)                      | 31.3<br>(3.7 to 65.2)                             | -18.2<br>(-35.4 to 2.9)                          |
| Paratyphoid fever                                                                    | 0.4<br>(0.3 to 0.4)                       | 8.3<br>(7.3 to 9.4)                           | < 0.05<br>(< 0.05 to < 0.05)             | 27.5<br>(5.3 to 57.4)                             | -20.5<br>(-34.4 to -1.9)                         |
| Other intestinal infectious diseases                                                 | --                                        | --                                            | < 0.05<br>(< 0.05 to < 0.05)             | 12.2<br>(-9.7 to 38.6)                            | -30.1<br>(-43.7 to -13.6)                        |
| Lower respiratory infections                                                         | 219.1<br>(201.5 to 238.8)                 | 9,565.2<br>(8,637.6 to 10,545.5)              | 11.9<br>(8.2 to 16.3)                    | 82.8<br>(76.3 to 89.2)                            | 13.9<br>(9.8 to 17.9)                            |
| Upper respiratory infections                                                         | 852.1<br>(598.2 to 1,153.5)               | 63,727.4<br>(44,688.1 to 86,675.7)            | 19.2<br>(10.5 to 31.4)                   | 60.8<br>(57.3 to 64.2)                            | 0.2<br>(-2.0 to 2.3)                             |
| Otitis media                                                                         | 228.7<br>(172.0 to 302.1)                 | 243.4<br>(184.7 to 309.8)                     | 5.8<br>(3.4 to 9.1)                      | 49.2<br>(41.4 to 57.3)                            | -7.0<br>(-11.9 to -2.0)                          |
| Meningitis                                                                           | 56.1<br>(38.7 to 144.3)                   | 10.0<br>(8.4 to 12.0)                         | 3.4<br>(1.3 to 17.5)                     | 113.2<br>(33.9 to 1,025.3)                        | 32.9<br>(-16.6 to 601.1)                         |
| Pneumococcal meningitis                                                              | 21.5<br>(16.2 to 26.7)                    | 2.4<br>(1.7 to 3.3)                           | 0.9<br>(0.5 to 1.3)                      | 26.4<br>(21.1 to 34.7)                            | -21.2<br>(-24.5 to -16.1)                        |
| H influenzae type B meningitis                                                       | 4.0<br>(2.7 to 5.5)                       | 0.6<br>(0.3 to 1.0)                           | 0.2<br>(0.1 to 0.3)                      | -9.4<br>(-18.8 to 11.9)                           | -43.6<br>(-49.4 to -30.3)                        |
| Meningococcal infection                                                              | 12.6<br>(3.9 to 100.8)                    | 1.9<br>(1.2 to 2.8)                           | 1.5<br>(0.2 to 15.7)                     | 642.8<br>(34.1 to 6,692.1)                        | 362.8<br>(-16.5 to 4,131.9)                      |
| Other meningitis                                                                     | 18.0<br>(12.4 to 23.1)                    | 5.1<br>(4.0 to 6.4)                           | 0.8<br>(0.5 to 1.1)                      | 78.1<br>(69.3 to 86.7)                            | 11.0<br>(5.5 to 16.3)                            |
| Encephalitis                                                                         | 109.9<br>(56.8 to 183.7)                  | 61.1<br>(53.8 to 69.7)                        | 4.7<br>(3.2 to 6.6)                      | 50.4<br>(42.6 to 59.3)                            | -6.3<br>(-11.2 to -0.7)                          |
| Diphtheria                                                                           | --                                        | --                                            | --                                       | --                                                | --                                               |
| Whooping cough                                                                       | --                                        | --                                            | --                                       | --                                                | --                                               |
| Tetanus                                                                              | 0.4<br>(0.4 to 0.4)                       | 0.6<br>(0.2 to 0.8)                           | < 0.05<br>(< 0.05 to < 0.05)             | 1.5<br>(-21.0 to 31.4)                            | -36.8<br>(-50.8 to -18.1)                        |
| Measles                                                                              | --                                        | --                                            | --                                       | --                                                | --                                               |
| Varicella and herpes zoster                                                          | 95.9<br>(75.0 to 123.1)                   | 526.7<br>(414.5 to 661.1)                     | 4.8<br>(2.8 to 7.7)                      | 61.2<br>(53.3 to 68.9)                            | 0.5<br>(-4.5 to 5.3)                             |
| <b>Neglected tropical diseases and malaria</b>                                       | <b>5,705.6</b><br>(5,489.5 to 5,923.9)    | <b>2,560.3†</b><br>(1,546.0 to 3,553.0)       | <b>51.8</b><br>(35.7 to 74.4)            | <b>25.1</b><br>(11.7 to 43.6)                     | <b>-22.1</b><br>(-30.4 to -10.6)                 |
| Malaria                                                                              | 58.4<br>(48.6 to 69.4)                    | 126.8<br>(93.3 to 164.2)                      | 0.6<br>(0.4 to 0.8)                      | 24.7<br>(-30.1 to -19.1)                          | -53.1<br>(-56.5 to -49.6)                        |
| Chagas disease                                                                       | 68.7<br>(58.2 to 80.9)                    | 0.4<br>(0.2 to 0.6)                           | 1.9<br>(1.2 to 3.0)                      | 41.2<br>(33.2 to 49.9)                            | -12.0<br>(-17.0 to -6.6)                         |
| Leishmaniasis                                                                        | 21.7<br>(17.3 to 25.2)                    | 5.1<br>(3.9 to 6.8)                           | 1.1<br>(0.7 to 1.6)                      | 32.9<br>(24.9 to 43.4)                            | -17.2<br>(-22.2 to -10.7)                        |
| Visceral leishmaniasis                                                               | 0.6<br>(0.4 to 1.0)                       | 2.4<br>(1.4 to 3.8)                           | < 0.05<br>(< 0.05 to 0.1)                | -15.0<br>(-49.6 to 38.5)                          | -47.0<br>(-68.6 to -13.7)                        |
| Cutaneous and mucocutaneous leishmaniasis                                            | 18.1<br>(13.9 to 22.6)                    | 2.7<br>(1.9 to 3.7)                           | 1.0<br>(0.7 to 1.5)                      | 35.7<br>(27.2 to 47.4)                            | -15.5<br>(-20.8 to -8.2)                         |
| African trypanosomiasis                                                              | < 0.05<br>(< 0.05 to < 0.05)              | < 0.05<br>(< 0.05 to < 0.05)                  | < 0.05<br>(< 0.05 to < 0.05)             | -70.3<br>(-96.0 to 125.2)                         | -81.5<br>(-97.5 to 40.3)                         |
| Schistosomiasis                                                                      | 434.1<br>(392.5 to 475.1)                 | 94.9<br>(84.6 to 105.1)                       | 3.0<br>(1.6 to 5.6)                      | -27.7<br>(-31.4 to -24.2)                         | -54.9<br>(-57.3 to -52.8)                        |
| Cysticercosis                                                                        | 24.0<br>(17.2 to 32.6)                    | --                                            | 3.3<br>(2.0 to 4.8)                      | 29.5<br>(20.1 to 39.1)                            | -19.3<br>(-25.2 to -13.3)                        |
| Cystic echinococcosis                                                                | 2.6<br>(1.4 to 5.3)                       | 0.5<br>(0.2 to 1.3)                           | 0.2<br>(0.1 to 0.5)                      | -19.9<br>(-70.1 to 108.8)                         | -50.1<br>(-81.4 to 30.1)                         |
| Lymphatic filariasis                                                                 | 58.3<br>(49.5 to 71.1)                    | 15.1<br>(8.6 to 24.4)                         | 1.9<br>(0.9 to 3.4)                      | -35.9<br>(-54.8 to -20.8)                         | -60.1<br>(-71.8 to -50.7)                        |
| Onchocerciasis                                                                       | 27.4<br>(18.4 to 41.0)                    | 4.9<br>(2.0 to 9.8)                           | 2.5<br>(1.5 to 4.5)                      | -8.0<br>(-26.7 to 19.3)                           | -42.6<br>(-54.3 to -25.6)                        |
| Trachoma                                                                             | 162.2<br>(110.6 to 225.4)                 | --                                            | 11.3<br>(7.4 to 16.5)                    | 11.3<br>(0.6 to 22.7)                             | -30.7<br>(-37.3 to -23.5)                        |
| Dengue                                                                               | 23.3<br>(12.8 to 39.1)                    | 388.9<br>(239.1 to 585.5)                     | 3.3<br>(1.5 to 6.0)                      | 148.6<br>(101.4 to 472.6)                         | 54.9<br>(25.5 to 256.8)                          |
| Yellow fever                                                                         | < 0.05<br>(< 0.05 to < 0.05)              | 0.1<br>(< 0.05 to 0.2)                        | < 0.05<br>(< 0.05 to < 0.05)             | -17.2<br>(-50.0 to 32.4)                          | -48.4<br>(-68.8 to -17.5)                        |
| Rabies                                                                               | < 0.05<br>(< 0.05 to < 0.05)              | 0.1<br>(< 0.05 to 0.2)                        | < 0.05<br>(< 0.05 to < 0.05)             | 27.8<br>(-42.3 to 103.5)                          | -20.4<br>(-64.0 to 26.8)                         |
| Intestinal nematode infections                                                       | 4,693.7<br>(4,463.8 to 4,886.0)           | --                                            | 7.9<br>(4.6 to 12.4)                     | 9.6<br>(1.7 to 18.1)                              | -31.7<br>(-36.7 to -26.4)                        |
| Ascariasis                                                                           | 2,488.5<br>(2,198.1 to 2,849.9)           | --                                            | 2.3<br>(1.2 to 3.8)                      | -8.8<br>(-20.2 to 3.5)                            | -43.2<br>(-50.3 to -35.5)                        |

| Cause                                                                   | Prevalence in thousands (95% UI)                 | Incidence in thousands (95% UI)                      | YLDs in thousands (95% UI)                      |                                                   |                                                  |
|-------------------------------------------------------------------------|--------------------------------------------------|------------------------------------------------------|-------------------------------------------------|---------------------------------------------------|--------------------------------------------------|
|                                                                         | 2016 counts                                      | 2016 counts                                          | 2016 counts                                     | Percentage change in counts between 2006 and 2016 | Percentage change in rates between 2006 and 2016 |
| Trichuriasis                                                            | 1,337.4<br>(1,218.1 to 1,472.5)                  | --                                                   | 0.9<br>(0.5 to 1.5)                             | 2.5<br>(-11.4 to 19.4)                            | -36.1<br>(-44.8 to -25.6)                        |
| Hookworm disease                                                        | 1,357.3<br>(1,244.0 to 1,491.1)                  | --                                                   | 4.7<br>(2.8 to 7.1)                             | 23.8<br>(11.7 to 37.5)                            | -22.9<br>(-30.4 to -14.3)                        |
| Food-borne trematodiasis                                                | 552.1<br>(375.7 to 720.1)                        | 1,904.5<br>(877.6 to 2,890.4)                        | 13.3<br>(4.0 to 28.5)                           | 117.8<br>(77.9 to 181.5)                          | 35.7<br>(10.9 to 75.4)                           |
| Leprosy                                                                 | 10.8<br>(10.5 to 11.2)                           | 0.3<br>(0.3 to 0.4)                                  | 0.6<br>(0.4 to 0.8)                             | 38.1<br>(31.9 to 45.0)                            | -14.0<br>(-17.8 to -9.7)                         |
| Ebola virus disease                                                     | < 0.05<br>(0.0 to < 0.05)                        | --                                                   | < 0.05<br>(0.0 to < 0.05)                       | --                                                | --                                               |
| Zika virus disease                                                      | 0.3<br>(0.2 to 0.6)                              | 18.7<br>(10.6 to 34.0)                               | < 0.05<br>(< 0.05 to < 0.05)                    | --                                                | --                                               |
| Guinea worm disease                                                     | < 0.05<br>(< 0.05 to < 0.05)                     | < 0.05<br>(< 0.05 to < 0.05)                         | < 0.05<br>(< 0.05 to < 0.05)                    | -99.4<br>(-99.7 to -99.1)                         | -99.7<br>(-99.8 to -99.5)                        |
| Other neglected tropical diseases                                       | 60.0<br>(58.2 to 61.7)                           | --                                                   | 1.0<br>(0.7 to 1.4)                             | 48.8<br>(40.0 to 57.0)                            | -7.3<br>(-12.8 to -2.2)                          |
| <b>Maternal disorders</b>                                               | --                                               | --                                                   | --                                              | --                                                | --                                               |
| Maternal haemorrhage                                                    | --                                               | --                                                   | --                                              | --                                                | --                                               |
| Maternal sepsis and other pregnancy related infections                  | --                                               | --                                                   | --                                              | --                                                | --                                               |
| Maternal hypertensive disorders                                         | --                                               | --                                                   | --                                              | --                                                | --                                               |
| Maternal obstructed labour and uterine rupture                          | --                                               | --                                                   | --                                              | --                                                | --                                               |
| Maternal abortion, miscarriage, and ectopic pregnancy                   | --                                               | --                                                   | --                                              | --                                                | --                                               |
| Other maternal disorders                                                | --                                               | --                                                   | --                                              | --                                                | --                                               |
| <b>Neonatal disorders</b>                                               | <b>63.3</b><br><b>(56.3 to 72.7)</b>             | --                                                   | <b>3.7</b><br><b>(2.5 to 5.3)</b>               | <b>77.7</b><br><b>(65.3 to 92.0)</b>              | <b>10.7</b><br><b>(3.0 to 19.6)</b>              |
| Neonatal preterm birth complications                                    | 57.7<br>(46.1 to 70.2)                           | --                                                   | 3.0<br>(2.0 to 4.2)                             | 69.2<br>(57.5 to 83.0)                            | 5.4<br>(-1.9 to 14.0)                            |
| Neonatal encephalopathy due to birth asphyxia and trauma                | 0.3<br>(< 0.05 to 1.1)                           | --                                                   | 0.1<br>(< 0.05 to 0.4)                          | 158.7<br>(129.2 to 263.4)                         | 61.1<br>(42.8 to 126.4)                          |
| Neonatal sepsis and other neonatal infections                           | 1.1<br>(0.1 to 3.6)                              | --                                                   | 0.5<br>(< 0.05 to 1.5)                          | 135.2<br>(115.4 to 215.4)                         | 46.6<br>(34.2 to 96.5)                           |
| Hemolytic disease and other neonatal jaundice                           | 0.3<br>(0.2 to 0.4)                              | --                                                   | 0.1<br>(0.1 to 0.1)                             | 93.9<br>(67.0 to 115.1)                           | 20.8<br>(4.0 to 34.0)                            |
| Other neonatal disorders                                                | --                                               | --                                                   | --                                              | --                                                | --                                               |
| <b>Nutritional deficiencies</b>                                         | <b>4,295.0</b><br><b>(4,231.9 to 4,345.0)</b>    | <b>532.4*</b><br><b>(406.8 to 659.8)</b>             | <b>116.2</b><br><b>(81.2 to 158.8)</b>          | <b>46.9</b><br><b>(45.0 to 48.6)</b>              | <b>-8.5</b><br><b>(-9.6 to -7.4)</b>             |
| Protein-energy malnutrition                                             | --                                               | --                                                   | --                                              | --                                                | --                                               |
| Iodine deficiency                                                       | 687.6<br>(614.4 to 767.7)                        | 1.1<br>(0.8 to 1.4)                                  | 15.7<br>(10.9 to 21.6)                          | 43.4<br>(39.6 to 47.2)                            | -10.6<br>(-13.1 to -8.3)                         |
| Vitamin A deficiency                                                    | 513.0<br>(414.9 to 629.1)                        | 531.3<br>(405.9 to 658.8)                            | 0.3<br>(0.2 to 0.5)                             | 55.0<br>(43.7 to 66.6)                            | -3.4<br>(-10.5 to 3.8)                           |
| Iron-deficiency anaemia                                                 | 3,457.6<br>(3,304.2 to 3,593.2)                  | --                                                   | 100.1<br>(69.7 to 136.3)                        | 47.4<br>(45.5 to 49.3)                            | -8.1<br>(-9.3 to -7.0)                           |
| Other nutritional deficiencies                                          | --                                               | --                                                   | --                                              | --                                                | --                                               |
| <b>Other communicable, maternal, neonatal, and nutritional diseases</b> | <b>10,498.0</b><br><b>(10,128.3 to 10,864.8)</b> | <b>1,111.2</b><br><b>(808.2 to 1,519.1)</b>          | <b>10.6</b><br><b>(7.5 to 14.8)</b>             | <b>58.4</b><br><b>(43.2 to 74.3)</b>              | <b>-1.3</b><br><b>(-10.8 to 8.6)</b>             |
| Sexually transmitted diseases excluding HIV                             | 8,072.9<br>(7,450.1 to 8,924.3)                  | 158.7<br>(136.7 to 182.7)                            | 6.5<br>(4.5 to 9.2)                             | 61.4<br>(53.4 to 70.4)                            | 0.6<br>(-4.5 to 6.2)                             |
| Syphilis                                                                | 36.3<br>(29.3 to 45.1)                           | 1.6<br>(1.0 to 2.7)                                  | 4.6<br>(3.2 to 6.4)                             | 64.6<br>(52.8 to 75.9)                            | 2.5<br>(-4.8 to 9.6)                             |
| Chlamydial infection                                                    | < 0.05<br>(< 0.05 to < 0.05)                     | --                                                   | < 0.05<br>(< 0.05 to < 0.05)                    | 89.6<br>(45.0 to 168.2)                           | 18.1<br>(-9.7 to 67.1)                           |
| Gonococcal infection                                                    | < 0.05<br>(< 0.05 to < 0.05)                     | --                                                   | < 0.05<br>(< 0.05 to < 0.05)                    | 108.0<br>(-13.5 to 444.9)                         | 29.6<br>(-46.1 to 239.5)                         |
| Trichomoniasis                                                          | 215.3<br>(183.1 to 250.2)                        | 157.1<br>(135.3 to 181.1)                            | 0.3<br>(0.1 to 0.6)                             | 52.4<br>(46.0 to 59.3)                            | -5.1<br>(-9.0 to -0.7)                           |
| Genital herpes                                                          | 7,723.7<br>(6,766.0 to 8,910.2)                  | --                                                   | 1.7<br>(0.5 to 3.9)                             | 55.0<br>(51.4 to 58.5)                            | -3.5<br>(-5.7 to -1.2)                           |
| Other sexually transmitted diseases                                     | < 0.05<br>(< 0.05 to < 0.05)                     | --                                                   | < 0.05<br>(< 0.05 to < 0.05)                    | 86.1<br>(42.3 to 163.3)                           | 16.0<br>(-11.3 to 64.0)                          |
| Hepatitis                                                               | 3,343.1<br>(2,965.1 to 3,734.3)                  | 952.4<br>(659.2 to 1,354.9)                          | 2.2<br>(1.3 to 3.7)                             | 47.7<br>(-1.1 to 119.8)                           | 8.0<br>(-38.4 to 37.0)                           |
| Acute hepatitis A                                                       | 10.5<br>(3.3 to 21.0)                            | 136.7<br>(43.0 to 272.4)                             | 0.4<br>(0.1 to 0.9)                             | 29.2<br>(-61.1 to 290.1)                          | -19.5<br>(-75.7 to 143.0)                        |
| Hepatitis B                                                             | 1,848.8<br>(1,508.8 to 2,216.7)                  | 569.6<br>(310.2 to 946.2)                            | 1.3<br>(0.7 to 2.5)                             | 50.2<br>(-18.5 to 165.5)                          | -6.4<br>(-49.2 to 65.4)                          |
| Hepatitis C                                                             | 1,467.0<br>(1,316.1 to 1,620.3)                  | 28.7<br>(22.6 to 36.2)                               | < 0.05<br>(< 0.05 to 0.1)                       | 46.4<br>(31.1 to 65.0)                            | -8.8<br>(-18.3 to 2.8)                           |
| Acute hepatitis E                                                       | 16.7<br>(10.0 to 27.7)                           | 217.4<br>(130.3 to 360.4)                            | 0.5<br>(0.2 to 0.8)                             | 59.8<br>(27.1 to 96.8)                            | -0.4<br>(-20.8 to 22.6)                          |
| Other infectious diseases                                               | 86.4<br>(83.4 to 89.3)                           | 0.1<br>(0.1 to 0.2)                                  | 1.9<br>(1.3 to 2.6)                             | 61.9<br>(56.0 to 67.6)                            | 0.9<br>(-2.8 to 4.4)                             |
| <b>Non-communicable diseases</b>                                        | <b>39,812.7</b><br><b>(39,804.4 to 39,827.4)</b> | <b>194,538.9*</b><br><b>(174,958.4 to 217,985.4)</b> | <b>11,026.2</b><br><b>(8,417.7 to 13,946.7)</b> | <b>59.2</b><br><b>(58.0 to 60.3)</b>              | <b>-0.8</b><br><b>(-1.5 to -0.1)</b>             |
| <b>Neoplasms</b>                                                        | <b>1,895.7</b><br><b>(1,872.7 to 1,920.8)</b>    | <b>881.4</b><br><b>(830.6 to 942.0)</b>              | <b>246.0</b><br><b>(184.1 to 307.6)</b>         | <b>61.8</b><br><b>(59.1 to 65.0)</b>              | <b>0.8</b><br><b>(-0.9 to 2.8)</b>               |
| Lip and oral cavity cancer                                              | 42.6<br>(41.3 to 44.0)                           | 14.1<br>(13.7 to 14.6)                               | 5.0<br>(3.7 to 6.4)                             | 68.6<br>(58.6 to 78.6)                            | 5.0<br>(-1.2 to 11.3)                            |
| Nasopharynx cancer                                                      | 3.2<br>(3.0 to 3.4)                              | 1.2<br>(1.1 to 1.2)                                  | 0.5<br>(0.4 to 0.7)                             | 57.7<br>(46.5 to 68.8)                            | -1.7<br>(-8.7 to 5.2)                            |
| Other pharynx cancer                                                    | 6.7<br>(6.4 to 7.0)                              | 3.0<br>(2.8 to 3.1)                                  | 1.0<br>(0.7 to 1.3)                             | 66.8<br>(53.3 to 82.5)                            | 3.9<br>(-4.5 to 13.7)                            |
| Oesophageal cancer                                                      | 23.2<br>(22.4 to 24.1)                           | 19.8<br>(19.2 to 20.4)                               | 4.6<br>(3.3 to 5.9)                             | 47.0<br>(37.9 to 56.5)                            | -8.4<br>(-14.1 to -2.5)                          |
| Stomach cancer                                                          | 112.9<br>(109.5 to 116.4)                        | 66.2<br>(64.4 to 68.1)                               | 15.6<br>(11.6 to 19.5)                          | 57.9<br>(50.9 to 65.4)                            | -1.6<br>(-6.0 to 3.1)                            |
| Colon and rectum cancer                                                 | 365.4<br>(352.9 to 380.9)                        | 116.6<br>(112.6 to 121.3)                            | 40.0<br>(30.2 to 50.3)                          | 60.4<br>(53.6 to 67.5)                            | -0.1<br>(-4.3 to 4.4)                            |
| Liver cancer                                                            | 31.6<br>(29.9 to 33.4)                           | 34.4<br>(32.7 to 36.1)                               | 7.3<br>(5.3 to 9.6)                             | 92.5<br>(82.2 to 103.9)                           | 19.9<br>(13.5 to 27.0)                           |
| Liver cancer due to hepatitis B                                         | 10.9<br>(8.3 to 13.5)                            | 9.3<br>(7.1 to 11.6)                                 | 1.9<br>(1.3 to 2.7)                             | 92.4<br>(74.6 to 113.1)                           | 19.9<br>(8.8 to 32.8)                            |

| Cause                                              | Prevalence in thousands (95% UI)                 | Incidence in thousands (95% UI)                | YLDs in thousands (95% UI)                    |                                                   |                                                  |
|----------------------------------------------------|--------------------------------------------------|------------------------------------------------|-----------------------------------------------|---------------------------------------------------|--------------------------------------------------|
|                                                    | 2016 counts                                      | 2016 counts                                    | 2016 counts                                   | Percentage change in counts between 2006 and 2016 | Percentage change in rates between 2006 and 2016 |
| Liver cancer due to hepatitis C                    | 16.4<br>(14.8 to 18.1)                           | 13.0<br>(11.6 to 14.3)                         | 2.8<br>(2.0 to 3.7)                           | 91.0<br>(78.2 to 105.0)                           | 19.0<br>(11.0 to 27.7)                           |
| Liver cancer due to alcohol use                    | 6.5<br>(5.0 to 7.9)                              | 5.8<br>(4.5 to 7.0)                            | 1.3<br>(0.9 to 1.8)                           | 96.4<br>(78.3 to 116.7)                           | 22.4<br>(11.1 to 35.0)                           |
| Liver cancer due to other causes                   | 7.6<br>(6.5 to 8.8)                              | 6.3<br>(5.4 to 7.4)                            | 1.4<br>(1.0 to 1.8)                           | 92.3<br>(77.8 to 107.4)                           | 19.8<br>(10.8 to 29.2)                           |
| Gallbladder and biliary tract cancer               | 14.0<br>(12.8 to 15.3)                           | 15.6<br>(14.5 to 16.6)                         | 3.2<br>(2.3 to 4.2)                           | 55.6<br>(43.1 to 70.0)                            | -3.1<br>(-10.8 to 5.9)                           |
| Pancreatic cancer                                  | 28.2<br>(26.6 to 29.6)                           | 33.1<br>(31.6 to 34.4)                         | 6.1<br>(4.4 to 7.9)                           | 72.0<br>(60.2 to 83.9)                            | 7.1<br>(-0.2 to 14.6)                            |
| Larynx cancer                                      | 14.2<br>(13.8 to 14.7)                           | 5.0<br>(4.9 to 5.2)                            | 2.0<br>(1.5 to 2.5)                           | 62.8<br>(52.4 to 73.9)                            | 1.5<br>(-5.0 to 8.3)                             |
| Tracheal, bronchus, and lung cancer                | 140.3<br>(134.4 to 145.2)                        | 107.7<br>(103.4 to 111.4)                      | 23.4<br>(17.2 to 29.0)                        | 77.2<br>(68.2 to 85.8)                            | 10.4<br>(4.8 to 15.8)                            |
| Malignant skin melanoma                            | 50.7<br>(39.7 to 54.7)                           | 12.6<br>(10.0 to 13.6)                         | 4.0<br>(2.8 to 5.2)                           | 75.3<br>(61.3 to 88.9)                            | 9.2<br>(0.5 to 17.7)                             |
| Non-melanoma skin cancer                           | 103.5<br>(77.6 to 128.0)                         | 131.6<br>(86.9 to 189.8)                       | 3.5<br>(1.8 to 5.8)                           | 22.5<br>(5.5 to 46.3)                             | -23.7<br>(-34.3 to -8.8)                         |
| Non-melanoma skin cancer (squamous-cell carcinoma) | 84.2<br>(48.5 to 121.7)                          | 73.0<br>(43.7 to 105.6)                        | 3.4<br>(1.8 to 5.7)                           | 22.3<br>(5.1 to 46.3)                             | -23.8<br>(-34.5 to -8.8)                         |
| Non-melanoma skin cancer (basal-cell carcinoma)    | 6.7<br>(3.3 to 12.4)                             | 58.6<br>(31.0 to 107.5)                        | 0.1<br>(< 0.05 to 0.1)                        | 36.2<br>(18.5 to 56.1)                            | -15.1<br>(-26.2 to -2.7)                         |
| Breast cancer                                      | 230.8<br>(222.6 to 240.5)                        | 54.3<br>(52.0 to 56.9)                         | 25.9<br>(19.5 to 32.7)                        | 44.1<br>(37.4 to 51.6)                            | -10.2<br>(-14.4 to -5.6)                         |
| Cervical cancer                                    | 19.6<br>(17.2 to 21.2)                           | 6.2<br>(5.5 to 6.7)                            | 2.3<br>(1.7 to 2.9)                           | 34.3<br>(25.4 to 43.9)                            | -16.4<br>(-21.8 to -10.4)                        |
| Uterine cancer                                     | 44.9<br>(42.2 to 48.1)                           | 11.3<br>(10.7 to 12.1)                         | 4.2<br>(3.1 to 5.4)                           | 56.4<br>(41.6 to 71.9)                            | -2.5<br>(-11.8 to 7.1)                           |
| Ovarian cancer                                     | 20.6<br>(19.3 to 21.6)                           | 7.8<br>(7.4 to 8.2)                            | 3.5<br>(2.5 to 4.5)                           | 40.9<br>(26.5 to 55.7)                            | -12.2<br>(-21.2 to -3.0)                         |
| Prostate cancer                                    | 318.1<br>(279.4 to 363.9)                        | 91.0<br>(80.9 to 103.1)                        | 41.1<br>(29.7 to 51.8)                        | 62.0<br>(53.4 to 73.4)                            | 0.9<br>(-4.4 to 8.0)                             |
| Testicular cancer                                  | 1.2<br>(1.1 to 1.2)                              | 0.3<br>(0.3 to 0.3)                            | 0.1<br>(0.1 to 0.2)                           | 91.5<br>(72.2 to 114.8)                           | 19.3<br>(7.3 to 33.8)                            |
| Kidney cancer                                      | 37.5<br>(35.5 to 39.1)                           | 12.1<br>(11.5 to 12.5)                         | 3.8<br>(2.8 to 4.9)                           | 63.8<br>(52.3 to 76.0)                            | 2.1<br>(-5.1 to 9.7)                             |
| Bladder cancer                                     | 124.0<br>(118.4 to 129.8)                        | 36.5<br>(34.9 to 38.2)                         | 12.7<br>(9.5 to 16.2)                         | 68.5<br>(60.1 to 77.6)                            | 5.0<br>(-0.2 to 10.6)                            |
| Brain and nervous system cancer                    | 13.0<br>(9.1 to 15.5)                            | 6.7<br>(4.8 to 7.8)                            | 2.1<br>(1.3 to 2.9)                           | 84.2<br>(66.0 to 107.8)                           | 14.7<br>(3.5 to 29.5)                            |
| Thyroid cancer                                     | 16.1<br>(15.5 to 17.0)                           | 3.8<br>(3.6 to 4.0)                            | 1.6<br>(1.2 to 2.1)                           | 63.2<br>(55.1 to 73.8)                            | 1.7<br>(-3.4 to 8.3)                             |
| Mesothelioma                                       | 2.5<br>(2.3 to 2.6)                              | 1.8<br>(1.7 to 1.9)                            | 0.6<br>(0.4 to 0.8)                           | 70.8<br>(58.2 to 85.6)                            | 6.4<br>(-1.4 to 15.6)                            |
| Hodgkin lymphoma                                   | 2.6<br>(2.3 to 2.7)                              | 0.8<br>(0.7 to 0.8)                            | 0.4<br>(0.3 to 0.5)                           | 40.0<br>(30.8 to 49.3)                            | -12.8<br>(-18.5 to -7.0)                         |
| Non-Hodgkin's lymphoma                             | 74.8<br>(65.5 to 78.7)                           | 23.2<br>(20.4 to 24.4)                         | 7.1<br>(5.2 to 9.2)                           | 70.1<br>(59.4 to 80.8)                            | 6.0<br>(-0.7 to 12.6)                            |
| Multiple myeloma                                   | 19.2<br>(15.2 to 21.8)                           | 8.3<br>(6.7 to 9.5)                            | 4.2<br>(2.9 to 5.4)                           | 64.4<br>(50.8 to 79.7)                            | 2.4<br>(-6.0 to 11.9)                            |
| Leukaemia                                          | 66.2<br>(63.1 to 69.3)                           | 22.1<br>(21.0 to 23.0)                         | 10.7<br>(7.8 to 13.7)                         | 63.3<br>(54.1 to 73.1)                            | 1.8<br>(-4.0 to 7.8)                             |
| Acute lymphoid leukaemia                           | 2.6<br>(2.4 to 2.9)                              | 0.9<br>(0.8 to 1.0)                            | 0.4<br>(0.3 to 0.6)                           | 88.4<br>(74.1 to 103.2)                           | 17.4<br>(8.5 to 26.6)                            |
| Chronic lymphoid leukaemia                         | 26.3<br>(24.1 to 28.6)                           | 7.1<br>(6.5 to 7.8)                            | 4.1<br>(3.0 to 5.3)                           | 60.0<br>(45.6 to 76.1)                            | -0.3<br>(-9.3 to 9.8)                            |
| Acute myeloid leukaemia                            | 5.7<br>(4.9 to 6.1)                              | 4.8<br>(4.1 to 5.1)                            | 1.2<br>(0.9 to 1.6)                           | 74.8<br>(62.1 to 87.9)                            | 8.9<br>(1.0 to 17.0)                             |
| Chronic myeloid leukaemia                          | 4.1<br>(3.8 to 4.5)                              | 1.7<br>(1.6 to 1.9)                            | 0.6<br>(0.4 to 0.8)                           | 38.3<br>(26.2 to 51.4)                            | -13.8<br>(-21.4 to -5.7)                         |
| Other leukaemia                                    | 27.5<br>(25.2 to 29.1)                           | 7.5<br>(6.9 to 8.0)                            | 4.4<br>(3.1 to 5.6)                           | 65.4<br>(51.6 to 79.2)                            | 3.1<br>(-5.6 to 11.7)                            |
| Other neoplasms                                    | 104.2<br>(95.4 to 111.3)                         | 34.4<br>(31.6 to 36.5)                         | 9.6<br>(7.1 to 12.3)                          | 88.4<br>(73.7 to 103.2)                           | 17.4<br>(8.2 to 26.6)                            |
| <b>Cardiovascular diseases</b>                     | <b>20,379.0</b><br><b>(20,012.9 to 20,682.7)</b> | <b>3,889.7†</b><br><b>(3,112.2 to 3,729.9)</b> | <b>1,789.8</b><br><b>(1,341.2 to 2,263.9)</b> | <b>57.9</b><br><b>(52.6 to 63.2)</b>              | <b>-1.6</b><br><b>(-4.9 to 1.7)</b>              |
| Rheumatic heart disease                            | 44.4<br>(38.9 to 49.9)                           | 15.5<br>(13.8 to 17.4)                         | 3.2<br>(2.3 to 4.4)                           | 45.6<br>(38.2 to 53.2)                            | -9.3<br>(-13.9 to -4.5)                          |
| Ischaemic heart disease                            | 7,426.2<br>(6,708.4 to 8,134.0)                  | 1,731.5<br>(1,561.9 to 1,922.8)                | 339.7<br>(237.0 to 460.7)                     | 63.9<br>(61.7 to 65.9)                            | 2.1<br>(0.7 to 3.4)                              |
| Cerebrovascular disease                            | 3,796.6<br>(3,545.1 to 4,036.0)                  | 817.1†<br>(745.2 to 889.1)                     | 815.3<br>(567.1 to 1,042.1)                   | 58.0<br>(46.0 to 69.2)                            | 1.5<br>(-9.0 to 5.4)                             |
| Ischaemic stroke                                   | 3,360.8<br>(2,861.5 to 3,870.7)                  | 571.1†<br>(503.9 to 641.0)                     | 689.0<br>(476.0 to 893.0)                     | 59.1<br>(44.8 to 73.0)                            | -0.8<br>(-9.8 to 7.8)                            |
| Hemorrhagic stroke                                 | 609.4<br>(504.2 to 718.1)                        | 246.0†<br>(217.7 to 274.0)                     | 126.3<br>(88.3 to 165.2)                      | 52.2<br>(40.0 to 65.5)                            | -5.2<br>(-12.8 to 3.1)                           |
| Hypertensive heart disease                         | 1,427.2<br>(1,112.2 to 1,802.9)                  | --                                             | 108.4<br>(71.3 to 155.6)                      | 60.6<br>(57.1 to 63.8)                            | 0.1<br>(-2.1 to 2.1)                             |
| Cardiomyopathy and myocarditis                     | 368.7<br>(323.0 to 430.3)                        | 45.6†<br>(34.0 to 55.6)                        | 26.3<br>(17.4 to 39.1)                        | 52.6<br>(47.1 to 58.4)                            | -4.9<br>(-8.4 to -1.3)                           |
| Myocarditis                                        | 11.2<br>(8.7 to 14.0)                            | 45.6<br>(34.0 to 55.6)                         | 0.5<br>(0.3 to 0.8)                           | 62.4<br>(47.5 to 78.8)                            | 1.2<br>(-8.1 to 11.4)                            |
| Alcoholic cardiomyopathy                           | 20.8<br>(15.7 to 27.2)                           | --                                             | 1.6<br>(1.0 to 2.4)                           | 82.4<br>(62.2 to 104.6)                           | 13.7<br>(1.1 to 27.5)                            |
| Other cardiomyopathy                               | 319.0<br>(244.6 to 414.7)                        | --                                             | 24.2<br>(16.0 to 36.0)                        | 50.8<br>(45.0 to 56.8)                            | -6.1<br>(-9.7 to -2.3)                           |
| Atrial fibrillation and flutter                    | 4,087.0<br>(3,574.5 to 4,654.4)                  | 166.2<br>(135.6 to 201.6)                      | 302.5<br>(208.3 to 416.2)                     | 57.4<br>(55.3 to 59.4)                            | -2.0<br>(-3.2 to -0.7)                           |
| Peripheral vascular disease                        | 7,815.4<br>(6,564.4 to 9,343.3)                  | 573.9<br>(376.4 to 851.1)                      | 41.2<br>(17.9 to 82.0)                        | 50.3<br>(47.5 to 53.3)                            | -6.3<br>(-8.1 to -4.5)                           |
| Endocarditis                                       | 48.4<br>(36.7 to 62.2)                           | 39.9<br>(32.8 to 47.7)                         | 3.6<br>(2.3 to 5.3)                           | 45.8<br>(38.0 to 53.3)                            | -9.2<br>(-14.0 to -4.5)                          |
| Other cardiovascular and circulatory diseases      | 2,975.2<br>(2,225.2 to 3,819.9)                  | --                                             | 149.5<br>(98.5 to 219.0)                      | 47.6<br>(43.9 to 50.8)                            | -8.1<br>(-10.3 to -6.0)                          |
| <b>Chronic respiratory diseases</b>                | <b>10,126.1</b><br><b>(9,921.9 to 10,351.4)</b>  | <b>1,036.0†</b><br><b>(938.1 to 1,142.9)</b>   | <b>542.6</b><br><b>(475.7 to 609.5)</b>       | <b>60.0</b><br><b>(55.7 to 63.9)</b>              | <b>-0.3</b><br><b>(-3.0 to 2.1)</b>              |
| Chronic obstructive pulmonary disease              | 8,336.0<br>(7,826.8 to 8,860.6)                  | 502.7<br>(422.9 to 597.8)                      | 423.1<br>(375.8 to 471.9)                     | 59.5<br>(54.4 to 64.2)                            | -0.6<br>(-3.8 to 2.3)                            |
| Pneumoconiosis                                     | 25.5<br>(23.6 to 27.6)                           | 1.4<br>(1.2 to 1.7)                            | 3.6<br>(2.6 to 4.9)                           | 70.0<br>(61.8 to 77.8)                            | 5.9<br>(0.8 to 10.8)                             |
| Silicosis                                          | 8.2<br>(7.0 to 9.5)                              | 0.8<br>(0.6 to 1.0)                            | 1.2<br>(0.8 to 1.6)                           | 76.3<br>(60.5 to 93.2)                            | 9.8<br>(0.0 to 20.4)                             |

| Cause                                                          | Prevalence in thousands (95% UI)           | Incidence in thousands (95% UI)          | YLDs in thousands (95% UI)              |                                                   |                                                  |
|----------------------------------------------------------------|--------------------------------------------|------------------------------------------|-----------------------------------------|---------------------------------------------------|--------------------------------------------------|
|                                                                | 2016 counts                                | 2016 counts                              | 2016 counts                             | Percentage change in counts between 2006 and 2016 | Percentage change in rates between 2006 and 2016 |
| Asbestosis                                                     | 5.9<br>(5.3 to 6.5)                        | 0.1<br>(0.1 to 0.2)                      | 0.8<br>(0.6 to 1.1)                     | 55.5<br>(46.1 to 65.6)                            | -3.1<br>(-9.0 to 3.2)                            |
| Coal workers pneumoconiosis                                    | 5.7<br>(5.0 to 6.6)                        | 0.1<br>(0.1 to 0.1)                      | 0.8<br>(0.5 to 1.1)                     | 71.3<br>(52.2 to 92.5)                            | 6.7<br>(-5.2 to 19.9)                            |
| Other pneumoconiosis                                           | 5.7<br>(4.8 to 6.8)                        | 0.4<br>(0.2 to 0.6)                      | 0.8<br>(0.6 to 1.2)                     | 76.8<br>(62.9 to 94.0)                            | 10.2<br>(1.5 to 20.9)                            |
| Asthma                                                         | 2,599.1<br>(2,321.0 to 2,886.3)            | 509.5<br>(450.1 to 566.2)                | 90.7<br>(61.9 to 127.3)                 | 59.6<br>(56.0 to 63.0)                            | -0.5<br>(-2.8 to 1.6)                            |
| Interstitial lung disease and pulmonary sarcoidosis            | 230.7<br>(201.1 to 264.4)                  | 22.4<br>(19.1 to 26.5)                   | 22.1<br>(14.9 to 31.2)                  | 66.8<br>(61.6 to 72.0)                            | 3.9<br>(0.7 to 7.2)                              |
| Other chronic respiratory diseases                             | --                                         | --                                       | 3.1<br>(2.7 to 3.4)                     | 93.4<br>(87.6 to 99.0)                            | 20.5<br>(16.9 to 24.0)                           |
| <b>Cirrhosis and other chronic liver diseases</b>              | <b>418.0<br/>(387.2 to 450.7)</b>          | <b>42.8<br/>(37.7 to 48.1)</b>           | <b>17.3<br/>(12.0 to 24.1)</b>          | <b>64.7<br/>(58.3 to 70.9)</b>                    | <b>2.6<br/>(-1.3 to 6.5)</b>                     |
| Cirrhosis and other chronic liver diseases due to hepatitis B  | 95.1<br>(82.4 to 108.2)                    | 10.8<br>(9.0 to 13.0)                    | 3.8<br>(2.5 to 5.5)                     | 69.2<br>(60.0 to 78.6)                            | 5.4<br>(-0.3 to 11.3)                            |
| Cirrhosis and other chronic liver diseases due to hepatitis C  | 95.7<br>(81.9 to 111.0)                    | 10.4<br>(8.4 to 12.6)                    | 4.2<br>(2.8 to 6.0)                     | 65.5<br>(55.6 to 76.0)                            | 3.1<br>(-3.0 to 9.7)                             |
| Cirrhosis and other chronic liver diseases due to alcohol use  | 129.8<br>(114.0 to 147.3)                  | 12.1<br>(10.1 to 14.1)                   | 5.5<br>(3.8 to 7.8)                     | 63.9<br>(54.5 to 73.2)                            | 2.1<br>(-3.7 to 7.9)                             |
| Cirrhosis and other chronic liver diseases due to other causes | 97.5<br>(80.8 to 117.1)                    | 9.6<br>(7.8 to 11.8)                     | 3.8<br>(2.5 to 5.4)                     | 60.5<br>(50.9 to 70.5)                            | 0.0<br>(-6.0 to 6.2)                             |
| <b>Digestive diseases</b>                                      | <b>4,230.7<br/>(4,012.2 to 4,481.8)</b>    | <b>3,597.1†<br/>(3,288.0 to 3,938.3)</b> | <b>117.8<br/>(82.3 to 159.6)</b>        | <b>68.8<br/>(60.8 to 70.9)</b>                    | <b>3.3<br/>(0.2 to 6.5)</b>                      |
| Peptic ulcer disease                                           | 1,249.7<br>(1,055.8 to 1,462.1)            | 146.9<br>(131.0 to 164.8)                | 25.7<br>(16.2 to 38.8)                  | 63.6<br>(54.5 to 73.8)                            | 1.9<br>(-3.8 to 8.3)                             |
| Gastritis and duodenitis                                       | 2,499.5<br>(1,916.7 to 3,183.9)            | 1,299.9<br>(1,139.4 to 1,467.1)          | 37.4<br>(24.3 to 54.7)                  | 73.0<br>(66.0 to 80.2)                            | 7.8<br>(3.4 to 12.3)                             |
| Appendicitis                                                   | 7.5<br>(7.0 to 8.1)                        | 202.7<br>(188.3 to 219.4)                | 2.0<br>(1.4 to 2.7)                     | 49.2<br>(40.0 to 59.3)                            | -7.0<br>(-12.8 to -0.7)                          |
| Paralytic ileus and intestinal obstruction                     | 4.6<br>(3.7 to 5.7)                        | 141.8<br>(117.3 to 171.5)                | 1.3<br>(0.9 to 1.9)                     | 63.6<br>(47.5 to 82.6)                            | 1.9<br>(-8.1 to 13.8)                            |
| Inguinal, femoral, and abdominal hernia                        | 491.8<br>(355.3 to 707.6)                  | 743.3<br>(541.7 to 972.6)                | 23.8<br>(15.5 to 34.7)                  | 62.5<br>(54.1 to 71.4)                            | 1.2<br>(-4.0 to 6.8)                             |
| Inflammatory bowel disease                                     | 55.7<br>(47.9 to 63.8)                     | 11.5<br>(9.4 to 13.8)                    | 7.2<br>(5.0 to 10.0)                    | 51.7<br>(44.1 to 59.2)                            | -5.5<br>(-10.2 to -0.8)                          |
| Vascular intestinal disorders                                  | 6.9<br>(5.4 to 8.9)                        | 39.6<br>(31.9 to 49.3)                   | 1.9<br>(1.2 to 2.7)                     | 56.7<br>(36.1 to 79.8)                            | -2.4<br>(-15.2 to 12.0)                          |
| Gallbladder and biliary diseases                               | 233.2<br>(180.7 to 291.3)                  | 899.0<br>(724.5 to 1,100.0)              | 3.6<br>(2.3 to 5.1)                     | 79.6<br>(63.7 to 96.5)                            | 11.9<br>(2.0 to 22.5)                            |
| Pancreatitis                                                   | 12.4<br>(10.9 to 14.2)                     | 112.4<br>(98.9 to 127.2)                 | 1.4<br>(1.0 to 2.0)                     | 78.6<br>(61.3 to 98.5)                            | 11.3<br>(0.5 to 23.7)                            |
| Other digestive diseases                                       | --                                         | --                                       | 13.6<br>(9.5 to 18.4)                   | 64.2<br>(59.3 to 69.2)                            | 2.3<br>(-0.7 to 5.5)                             |
| <b>Neurological disorders</b>                                  | <b>13,530.7<br/>(12,781.0 to 14,130.2)</b> | <b>3,441.5<br/>(2,630.3 to 4,420.2)</b>  | <b>1,465.8<br/>(1,015.4 to 1,991.4)</b> | <b>59.8<br/>(57.3 to 61.8)</b>                    | <b>-0.5<br/>(-2.0 to 0.8)</b>                    |
| Alzheimer's disease and other dementias                        | 7,601.5<br>(6,108.0 to 9,350.3)            | 1,308.2<br>(909.5 to 1,777.7)            | 1,217.9<br>(811.8 to 1,672.4)           | 59.7<br>(57.0 to 61.9)                            | -0.5<br>(-2.2 to 0.9)                            |
| Parkinson's disease                                            | 542.8<br>(423.9 to 689.2)                  | 44.0<br>(27.6 to 65.7)                   | 59.4<br>(38.4 to 86.0)                  | 64.1<br>(58.9 to 68.8)                            | 2.2<br>(-1.0 to 5.2)                             |
| Epilepsy                                                       | 220.1<br>(175.1 to 264.1)                  | 9.6<br>(6.3 to 13.6)                     | 52.7<br>(36.1 to 72.0)                  | 53.6<br>(30.9 to 81.1)                            | -4.3<br>(-18.4 to 12.8)                          |
| Multiple sclerosis                                             | 27.8<br>(25.0 to 30.9)                     | 0.2<br>(0.2 to 0.3)                      | 6.6<br>(4.6 to 8.5)                     | 65.9<br>(52.9 to 79.8)                            | 3.4<br>(-4.8 to 12.0)                            |
| Motor neuron disease                                           | 6.7<br>(5.5 to 8.2)                        | 1.4<br>(1.0 to 1.7)                      | 1.4<br>(1.0 to 2.0)                     | 59.9<br>(54.2 to 65.3)                            | -0.4<br>(-3.9 to 3.0)                            |
| Migraine                                                       | 1,899.2<br>(1,737.4 to 2,076.6)            | 146.1<br>(117.4 to 182.7)                | 96.2<br>(64.2 to 133.3)                 | 60.9<br>(57.9 to 63.7)                            | 0.2<br>(-1.6 to 2.0)                             |
| Tension-type headache                                          | 5,457.8<br>(3,883.8 to 7,368.7)            | 1,931.5<br>(1,248.8 to 2,842.6)          | 26.2<br>(16.6 to 39.0)                  | 60.8<br>(56.9 to 65.1)                            | 0.2<br>(-2.3 to 2.8)                             |
| Other neurological disorders                                   | 0.3<br>(0.2 to 0.5)                        | 0.6<br>(0.3 to 0.9)                      | 5.4<br>(3.7 to 7.4)                     | 66.2<br>(63.5 to 68.6)                            | 3.6<br>(1.9 to 5.0)                              |
| <b>Mental and substance use disorders</b>                      | <b>5,578.6<br/>(5,484.1 to 5,665.1)</b>    | <b>2,743.0†<br/>(2,358.0 to 3,155.0)</b> | <b>701.9<br/>(523.9 to 906.8)</b>       | <b>59.1<br/>(57.7 to 60.5)</b>                    | <b>-0.8<br/>(-1.7 to 0.0)</b>                    |
| Schizophrenia                                                  | 35.9<br>(30.0 to 42.4)                     | --                                       | 19.6<br>(14.5 to 24.8)                  | 69.4<br>(60.8 to 78.2)                            | 5.6<br>(0.2 to 11.1)                             |
| Alcohol use disorders                                          | 212.3<br>(173.5 to 253.6)                  | 73.3<br>(54.3 to 92.8)                   | 18.7<br>(12.4 to 25.7)                  | 73.1<br>(66.0 to 80.1)                            | 7.9<br>(3.4 to 12.2)                             |
| Drug use disorders                                             | 151.1<br>(146.4 to 155.7)                  | 8.5<br>(7.6 to 9.6)                      | 38.7<br>(27.6 to 48.7)                  | 63.0<br>(57.3 to 68.4)                            | 1.6<br>(-2.0 to 4.9)                             |
| Opioid use disorders                                           | 82.1<br>(71.2 to 95.1)                     | --                                       | 29.0<br>(20.5 to 38.0)                  | 65.0<br>(58.2 to 72.0)                            | 2.8<br>(-1.4 to 7.2)                             |
| Cocaine use disorders                                          | 25.5<br>(22.3 to 28.9)                     | --                                       | 3.1<br>(1.9 to 4.4)                     | 51.0<br>(39.5 to 63.6)                            | -5.9<br>(-13.1 to 1.9)                           |
| Amphetamine use disorders                                      | 6.4<br>(4.7 to 8.5)                        | 2.0<br>(1.4 to 2.6)                      | 0.8<br>(0.5 to 1.4)                     | 48.5<br>(35.0 to 61.0)                            | -7.5<br>(-15.9 to 0.3)                           |
| Cannabis use disorders                                         | 18.1<br>(15.0 to 21.5)                     | --                                       | 0.5<br>(0.3 to 0.8)                     | 56.5<br>(48.6 to 64.8)                            | -2.5<br>(-7.4 to 2.7)                            |
| Other drug use disorders                                       | 28.1<br>(25.1 to 31.8)                     | 6.6<br>(5.8 to 7.4)                      | 5.3<br>(3.7 to 7.1)                     | 62.8<br>(54.8 to 71.1)                            | 1.4<br>(-3.6 to 6.6)                             |
| Depressive disorders                                           | 2,419.4<br>(2,316.9 to 2,524.3)            | 2,532.0<br>(2,155.9 to 2,942.2)          | 362.9<br>(257.6 to 496.6)               | 58.1<br>(56.0 to 60.0)                            | -1.5<br>(-2.8 to -0.3)                           |
| Major depressive disorder                                      | 1,601.0<br>(1,369.8 to 1,838.7)            | 2,441.2<br>(2,062.2 to 2,843.1)          | 287.0<br>(197.5 to 398.2)               | 57.5<br>(55.1 to 59.6)                            | -1.8<br>(-3.4 to -0.5)                           |
| Dysthymia                                                      | 876.7<br>(691.5 to 1,107.2)                | 90.8<br>(71.0 to 113.7)                  | 75.9<br>(48.8 to 111.0)                 | 60.1<br>(54.9 to 65.0)                            | -0.3<br>(-3.5 to 2.8)                            |
| Bipolar disorder                                               | 160.0<br>(129.7 to 198.5)                  | 10.4<br>(7.7 to 13.4)                    | 28.3<br>(17.2 to 41.2)                  | 58.1<br>(52.3 to 63.6)                            | -1.5<br>(-5.1 to 1.9)                            |
| Anxiety disorders                                              | 1,510.1<br>(1,339.9 to 1,706.3)            | 103.0<br>(90.8 to 116.2)                 | 127.0<br>(91.2 to 169.5)                | 55.7<br>(52.1 to 59.5)                            | -3.0<br>(-5.2 to -0.6)                           |
| Eating disorders                                               | --                                         | --                                       | --                                      | --                                                | --                                               |
| Anorexia nervosa                                               | --                                         | --                                       | --                                      | --                                                | --                                               |
| Bulimia nervosa                                                | --                                         | --                                       | --                                      | --                                                | --                                               |
| Autistic spectrum disorders                                    | 204.8<br>(195.7 to 212.0)                  | --                                       | 28.3<br>(19.6 to 39.0)                  | 65.2<br>(61.8 to 68.7)                            | 2.9<br>(0.8 to 5.1)                              |
| Autism                                                         | 74.7<br>(64.0 to 87.5)                     | --                                       | 16.6<br>(11.0 to 23.7)                  | 64.1<br>(59.1 to 69.3)                            | 2.3<br>(-0.8 to 5.5)                             |
| Asperger syndrome and other autistic spectrum disorders        | 131.8<br>(109.5 to 158.7)                  | --                                       | 11.7<br>(7.9 to 16.6)                   | 66.7<br>(62.8 to 70.4)                            | 3.8<br>(1.4 to 6.2)                              |

| Cause                                                      | Prevalence in thousands (95% UI)           | Incidence in thousands (95% UI)                | YLDs in thousands (95% UI)              |                                                   |                                                  |
|------------------------------------------------------------|--------------------------------------------|------------------------------------------------|-----------------------------------------|---------------------------------------------------|--------------------------------------------------|
|                                                            | 2016 counts                                | 2016 counts                                    | 2016 counts                             | Percentage change in counts between 2006 and 2016 | Percentage change in rates between 2006 and 2016 |
| Attention-deficit/hyperactivity disorder                   | 0.1<br>(0.1 to 0.2)                        | --                                             | < 0.05<br>(< 0.05 to < 0.05)            | 66.3<br>(62.7 to 69.9)                            | 3.6<br>(1.4 to 5.8)                              |
| Conduct disorder                                           | --                                         | --                                             | --                                      | --                                                | --                                               |
| Idiopathic developmental intellectual disability           | 141.8<br>(75.7 to 218.6)                   | --                                             | 6.8<br>(3.5 to 11.3)                    | 49.7<br>(37.8 to 55.7)                            | -6.7<br>(-14.1 to -3.0)                          |
| Other mental and substance use disorders                   | 1,089.3<br>(970.7 to 1,224.7)              | 15.8<br>(9.6 to 24.3)                          | 71.6<br>(51.2 to 97.9)                  | 61.8<br>(59.2 to 64.5)                            | 0.8<br>(-0.8 to 2.5)                             |
| <b>Diabetes, urogenital, blood, and endocrine diseases</b> | <b>25,631.5<br/>(25,413.0 to 25,887.5)</b> | <b>5,117.9†<br/>(4,555.2 to 5,775.0)</b>       | <b>1,132.5<br/>(813.1 to 1,491.4)</b>   | <b>59.7<br/>(57.0 to 62.5)</b>                    | <b>-0.5<br/>(-2.2 to 1.2)</b>                    |
| Diabetes mellitus                                          | 6,334.7<br>(5,725.3 to 6,963.0)            | 88.3<br>(58.0 to 126.3)                        | 510.1<br>(361.1 to 699.8)               | 57.9<br>(53.2 to 62.5)                            | -1.6<br>(-4.6 to 1.2)                            |
| Acute glomerulonephritis                                   | 1.5<br>(1.2 to 1.9)                        | 23.0<br>(18.6 to 28.1)                         | 0.1<br>(< 0.05 to 0.1)                  | 58.4<br>(46.2 to 70.0)                            | -1.3<br>(-8.9 to 5.9)                            |
| Chronic kidney disease                                     | 13,877.0<br>(12,226.9 to 15,485.3)         | 673.4<br>(436.9 to 986.6)                      | 360.7<br>(263.5 to 465.0)               | 60.6<br>(55.4 to 65.5)                            | 0.0<br>(-3.2 to 3.1)                             |
| Chronic kidney disease due to diabetes mellitus            | 4,182.1<br>(3,034.5 to 5,505.2)            | 206.5<br>(122.8 to 322.9)                      | 108.6<br>(72.6 to 157.4)                | 62.4<br>(55.5 to 69.4)                            | 1.2<br>(-3.1 to 5.6)                             |
| Chronic kidney disease due to hypertension                 | 3,403.8<br>(2,724.6 to 4,133.9)            | 81.9<br>(49.0 to 131.1)                        | 128.6<br>(86.9 to 177.0)                | 57.4<br>(51.1 to 63.1)                            | -1.9<br>(-5.8 to 1.6)                            |
| Chronic kidney disease due to glomerulonephritis           | 3,158.2<br>(2,535.6 to 3,831.2)            | 233.2<br>(148.8 to 353.3)                      | 43.5<br>(27.5 to 66.1)                  | 57.0<br>(47.3 to 67.8)                            | -2.2<br>(-8.2 to 4.6)                            |
| Chronic kidney disease due to other causes                 | 3,132.9<br>(2,204.5 to 4,222.3)            | 151.8<br>(84.7 to 247.7)                       | 79.9<br>(50.3 to 118.6)                 | 65.5<br>(57.2 to 74.3)                            | 3.1<br>(-2.1 to 8.6)                             |
| Urinary diseases and male infertility                      | 3,256.7<br>(2,920.0 to 3,805.9)            | 3,727.9†<br>(3,250.5 to 4,277.5)               | 100.4<br>(64.3 to 146.6)                | 72.3<br>(70.6 to 73.9)                            | 7.4<br>(6.3 to 8.4)                              |
| Interstitial nephritis and urinary tract infections        | 49.2<br>(42.0 to 58.4)                     | 2,604.9<br>(2,195.1 to 3,107.0)                | 1.5<br>(0.9 to 2.2)                     | 68.4<br>(59.4 to 77.1)                            | 4.9<br>(-0.7 to 10.3)                            |
| Urolithiasis                                               | 33.4<br>(24.6 to 44.2)                     | 859.0<br>(633.8 to 1,134.1)                    | 2.2<br>(1.4 to 3.3)                     | 84.0<br>(69.7 to 99.3)                            | 14.6<br>(5.7 to 24.2)                            |
| Benign prostatic hyperplasia                               | 3,121.0<br>(2,639.2 to 3,755.8)            | 263.9<br>(173.4 to 376.1)                      | 96.1<br>(60.9 to 141.4)                 | 72.2<br>(70.4 to 73.8)                            | 7.3<br>(6.2 to 8.3)                              |
| Male infertility                                           | --                                         | --                                             | --                                      | --                                                | --                                               |
| Other urinary diseases                                     | --                                         | --                                             | 0.6<br>(0.4 to 0.8)                     | 63.6<br>(54.9 to 72.9)                            | 1.9<br>(-3.5 to 7.7)                             |
| Gynecological diseases                                     | 4,997.6<br>(4,687.2 to 5,492.9)            | 2.5†<br>(1.8 to 3.5)                           | 14.9<br>(7.3 to 26.4)                   | 44.8<br>(42.5 to 47.0)                            | -9.8<br>(-11.2 to -8.4)                          |
| Uterine fibroids                                           | 121.2<br>(106.0 to 139.9)                  | 2.5<br>(1.8 to 3.5)                            | 0.8<br>(0.4 to 1.5)                     | 56.3<br>(50.6 to 62.1)                            | -2.6<br>(-6.2 to 1.0)                            |
| Polycystic ovarian syndrome                                | --                                         | --                                             | --                                      | --                                                | --                                               |
| Female infertility                                         | --                                         | --                                             | --                                      | --                                                | --                                               |
| Endometriosis                                              | --                                         | --                                             | --                                      | --                                                | --                                               |
| Genital prolapse                                           | 4,835.0<br>(4,244.7 to 5,477.1)            | --                                             | 14.0<br>(6.9 to 25.2)                   | 44.1<br>(41.8 to 46.4)                            | -10.2<br>(-11.7 to -8.8)                         |
| Premenstrual syndrome                                      | --                                         | --                                             | --                                      | --                                                | --                                               |
| Other gynecological diseases                               | --                                         | --                                             | --                                      | --                                                | --                                               |
| Hemoglobinopathies and hemolytic anaemias                  | 8,095.3<br>(8,025.9 to 8,171.1)            | --                                             | 41.9<br>(28.7 to 58.2)                  | 53.4<br>(49.8 to 56.8)                            | -4.5<br>(-6.7 to -2.3)                           |
| Thalassemias                                               | < 0.05<br>(< 0.05 to < 0.05)               | --                                             | < 0.05<br>(< 0.05 to < 0.05)            | 46.0<br>(38.5 to 53.1)                            | -9.0<br>(-13.7 to -4.6)                          |
| Thalassaemias trait                                        | 1,455.2<br>(1,386.7 to 1,530.7)            | --                                             | 24.2<br>(16.1 to 33.9)                  | 67.5<br>(62.7 to 72.7)                            | 4.4<br>(1.4 to 7.6)                              |
| Sickle cell disorders                                      | < 0.05<br>(< 0.05 to < 0.05)               | --                                             | < 0.05<br>(< 0.05 to < 0.05)            | 43.5<br>(40.1 to 47.1)                            | -10.6<br>(-12.7 to -8.3)                         |
| Sickle cell trait                                          | 1,225.0<br>(1,119.8 to 1,369.5)            | --                                             | 3.5<br>(2.4 to 4.9)                     | 59.4<br>(54.1 to 65.5)                            | -0.7<br>(-4.0 to 3.1)                            |
| G6PD deficiency                                            | 989.6<br>(950.5 to 1,033.6)                | --                                             | 0.1<br>(0.1 to 0.2)                     | 56.5<br>(51.1 to 62.0)                            | -2.5<br>(-5.9 to 0.9)                            |
| G6PD trait                                                 | 4,716.2<br>(4,626.0 to 4,819.0)            | --                                             | < 0.05<br>(< 0.05 to < 0.05)            | 54.7<br>(48.4 to 61.4)                            | -3.6<br>(-7.5 to 0.6)                            |
| Other hemoglobinopathies and hemolytic anaemias            | 434.2<br>(417.4 to 449.2)                  | --                                             | 14.1<br>(9.6 to 19.3)                   | 32.9<br>(29.6 to 35.9)                            | -17.2<br>(-19.2 to -15.3)                        |
| Endocrine, metabolic, blood, and immune disorders          | 3,239.8<br>(2,580.8 to 4,041.5)            | 602.8<br>(442.6 to 800.1)                      | 104.5<br>(69.5 to 155.8)                | 59.3<br>(52.3 to 66.8)                            | -0.7<br>(-5.1 to 3.9)                            |
| <b>Musculoskeletal disorders</b>                           | <b>18,269.4<br/>(17,795.7 to 18,881.0)</b> | <b>6,900.3<br/>(5,504.9 to 8,593.7)</b>        | <b>1,768.7<br/>(1,277.3 to 2,344.9)</b> | <b>58.1<br/>(56.4 to 59.7)</b>                    | <b>1.5<br/>(-2.6 to -0.5)</b>                    |
| Rheumatoid arthritis                                       | 426.0<br>(379.7 to 473.7)                  | 7.4<br>(5.7 to 9.6)                            | 89.9<br>(62.9 to 115.6)                 | 61.9<br>(57.8 to 65.9)                            | 0.8<br>(-1.7 to 3.4)                             |
| Osteoarthritis                                             | 9,479.6<br>(8,956.2 to 10,021.0)           | 75.2<br>(58.2 to 93.8)                         | 428.2<br>(302.2 to 582.8)               | 63.1<br>(61.5 to 64.8)                            | 1.6<br>(0.6 to 2.7)                              |
| Low back and neck pain                                     | 10,134.6<br>(9,341.0 to 11,012.2)          | 4,460.4<br>(3,194.6 to 5,878.9)                | 1,085.6<br>(726.0 to 1,508.6)           | 59.1<br>(56.8 to 61.2)                            | -0.9<br>(-2.3 to 0.5)                            |
| Low back pain                                              | 7,747.4<br>(5,806.9 to 9,913.3)            | 3,736.5<br>(2,527.3 to 5,114.2)                | 768.3<br>(487.7 to 1,106.1)             | 59.0<br>(56.0 to 61.8)                            | -0.9<br>(-2.8 to 0.8)                            |
| Neck pain                                                  | 3,516.9<br>(2,549.6 to 4,641.0)            | 724.0<br>(476.1 to 1,037.5)                    | 317.3<br>(200.3 to 473.1)               | 59.1<br>(55.8 to 62.3)                            | -0.9<br>(-2.9 to 1.1)                            |
| Gout                                                       | 872.6<br>(711.3 to 1,066.8)                | 124.8<br>(90.8 to 165.6)                       | 24.7<br>(16.2 to 34.0)                  | 63.7<br>(58.1 to 68.8)                            | 2.0<br>(-1.5 to 5.2)                             |
| Other musculoskeletal disorders                            | 1,852.7<br>(1,317.9 to 2,629.8)            | 2,232.5<br>(1,518.3 to 3,222.8)                | 140.3<br>(85.3 to 216.7)                | 36.2<br>(25.4 to 46.7)                            | -15.1<br>(-21.9 to -8.6)                         |
| <b>Other non-communicable diseases</b>                     | <b>38,878.6<br/>(38,838.2 to 38,919.3)</b> | <b>167,389.2†<br/>(147,947.8 to 189,870.6)</b> | <b>3,243.9<br/>(2,346.8 to 4,343.0)</b> | <b>59.7<br/>(57.1 to 62.5)</b>                    | <b>-0.5<br/>(-2.1 to 1.2)</b>                    |
| Congenital anomalies                                       | 329.6<br>(310.2 to 347.6)                  | --                                             | 34.9<br>(25.6 to 45.4)                  | 57.0<br>(53.3 to 60.7)                            | -2.2<br>(-4.5 to 0.1)                            |
| Neural tube defects                                        | 23.2<br>(21.1 to 25.5)                     | --                                             | 6.5<br>(4.7 to 8.5)                     | 58.1<br>(50.9 to 65.9)                            | -1.5<br>(-6.0 to 3.3)                            |
| Congenital heart anomalies                                 | 64.7<br>(58.2 to 71.8)                     | --                                             | 3.4<br>(1.4 to 5.9)                     | 67.9<br>(60.5 to 75.2)                            | 4.6<br>(0.0 to 9.1)                              |
| Orofacial clefts                                           | 20.7<br>(18.4 to 22.9)                     | --                                             | 0.2<br>(0.1 to 0.3)                     | 52.4<br>(48.0 to 56.5)                            | -5.1<br>(-7.8 to -2.5)                           |
| Down's syndrome                                            | --                                         | --                                             | --                                      | --                                                | --                                               |
| Turner syndrome                                            | 2.0<br>(1.6 to 2.4)                        | --                                             | < 0.05<br>(< 0.05 to < 0.05)            | 70.6<br>(66.9 to 74.5)                            | 6.3<br>(4.0 to 8.7)                              |
| Klinefelter syndrome                                       | 0.2<br>(0.1 to 0.2)                        | --                                             | < 0.05<br>(< 0.05 to < 0.05)            | 82.8<br>(77.2 to 89.0)                            | 13.9<br>(10.4 to 17.8)                           |

| Cause                                         | Prevalence in thousands (95% UI)                 | Incidence in thousands (95% UI)                 | YLDs in thousands (95% UI)                  |                                                   |                                                  |
|-----------------------------------------------|--------------------------------------------------|-------------------------------------------------|---------------------------------------------|---------------------------------------------------|--------------------------------------------------|
|                                               | 2016 counts                                      | 2016 counts                                     | 2016 counts                                 | Percentage change in counts between 2006 and 2016 | Percentage change in rates between 2006 and 2016 |
| Other chromosomal abnormalities               | < 0.05<br>(< 0.05 to < 0.05)                     | --                                              | < 0.05<br>(< 0.05 to < 0.05)                | 86.3<br>(81.9 to 89.9)                            | 16.1<br>(13.3 to 18.3)                           |
| Congenital musculoskeletal and limb anomalies | 83.0<br>(76.6 to 89.4)                           | --                                              | 11.1<br>(7.8 to 14.8)                       | 58.9<br>(51.9 to 66.0)                            | -1.0<br>(-5.3 to 3.4)                            |
| Urogenital congenital anomalies               | 18.8<br>(17.0 to 20.8)                           | --                                              | 0.3<br>(0.1 to 0.5)                         | 67.2<br>(60.9 to 73.8)                            | 4.2<br>(0.3 to 8.3)                              |
| Digestive congenital anomalies                | 59.5<br>(53.9 to 65.6)                           | --                                              | 2.4<br>(1.6 to 3.3)                         | 59.1<br>(51.4 to 67.0)                            | -0.9<br>(-5.7 to 4.0)                            |
| Other congenital anomalies                    | 132.3<br>(90.9 to 187.9)                         | --                                              | 11.1<br>(7.0 to 17.2)                       | 50.8<br>(44.0 to 57.7)                            | -6.0<br>(-10.3 to -1.8)                          |
| Skin and subcutaneous diseases                | 23,844.5<br>(23,312.4 to 24,424.7)               | 109,090.1<br>(91,261.0 to 130,687.7)            | 309.6<br>(196.2 to 492.3)                   | 60.6<br>(59.1 to 61.8)                            | 0.1<br>(-0.9 to 0.8)                             |
| Dermatitis                                    | 2,052.1<br>(1,761.4 to 2,390.2)                  | 2,517.0<br>(1,848.4 to 3,323.3)                 | 59.5<br>(36.8 to 89.1)                      | 56.6<br>(54.1 to 59.0)                            | -2.4<br>(-4.0 to -0.9)                           |
| Psoriasis                                     | 503.0<br>(460.8 to 552.5)                        | 30.8<br>(25.8 to 36.0)                          | 38.5<br>(27.9 to 49.7)                      | 63.6<br>(59.1 to 68.3)                            | 2.0<br>(-0.9 to 4.9)                             |
| Cellulitis                                    | 53.8<br>(45.7 to 64.7)                           | 1,347.3<br>(1,165.2 to 1,569.3)                 | 2.7<br>(1.7 to 3.9)                         | 51.8<br>(44.0 to 59.9)                            | -5.4<br>(-10.3 to -0.4)                          |
| Pyoderma                                      | 379.2<br>(348.6 to 411.2)                        | 10,088.6<br>(9,180.3 to 10,996.1)               | 1.9<br>(0.8 to 3.9)                         | 68.2<br>(65.0 to 71.5)                            | 4.8<br>(2.8 to 6.9)                              |
| Scabies                                       | 529.5<br>(370.8 to 728.4)                        | 1,664.4<br>(1,174.6 to 2,314.2)                 | 32.3<br>(6.5 to 21.0)                       | 54.3<br>(51.3 to 56.9)                            | -3.9<br>(-5.8 to -2.2)                           |
| Fungal skin diseases                          | 15,513.7<br>(13,025.9 to 18,309.2)               | 76,419.1<br>(58,743.1 to 97,748.5)              | 80.0<br>(32.3 to 170.6)                     | 63.2<br>(62.6 to 63.8)                            | 1.7<br>(1.3 to 2.0)                              |
| Viral skin diseases                           | 508.2<br>(422.2 to 614.1)                        | 779.0<br>(658.7 to 913.3)                       | 14.0<br>(8.6 to 20.9)                       | 58.5<br>(55.6 to 61.7)                            | -1.2<br>(-3.1 to 0.7)                            |
| Acne vulgaris                                 | 190.9<br>(185.1 to 196.6)                        | 73.0<br>(70.3 to 76.1)                          | 4.5<br>(3.1 to 6.4)                         | 62.1<br>(55.5 to 68.9)                            | 1.0<br>(-3.1 to 5.2)                             |
| Alopecia areata                               | 36.4<br>(32.5 to 40.1)                           | 59.7<br>(53.9 to 65.3)                          | 1.1<br>(0.7 to 1.6)                         | 50.3<br>(40.6 to 59.8)                            | -6.4<br>(-12.4 to -0.4)                          |
| Pruritus                                      | 760.6<br>(540.6 to 1,069.0)                      | 577.3<br>(404.7 to 798.0)                       | 7.4<br>(3.2 to 13.8)                        | 62.9<br>(59.9 to 65.5)                            | 1.5<br>(-0.4 to 3.1)                             |
| Urticaria                                     | 162.9<br>(112.5 to 224.1)                        | 275.9<br>(190.5 to 374.1)                       | 8.6<br>(5.1 to 13.6)                        | 59.8<br>(54.1 to 65.0)                            | -0.5<br>(-4.0 to 2.8)                            |
| Decubitus ulcer                               | 186.5<br>(141.2 to 238.5)                        | 691.6<br>(519.9 to 910.0)                       | 26.4<br>(17.7 to 37.8)                      | 54.2<br>(44.5 to 62.9)                            | -3.9<br>(-10.0 to 1.5)                           |
| Other skin and subcutaneous diseases          | 10,390.7<br>(9,605.4 to 11,210.6)                | 14,566.6<br>(13,243.7 to 16,012.4)              | 52.6<br>(25.9 to 95.1)                      | 64.6<br>(63.4 to 65.8)                            | 2.6<br>(1.8 to 3.3)                              |
| Sense organ diseases                          | 35,839.9<br>(35,507.1 to 36,164.4)               | 10,077.1†<br>(9,191.8 to 10,966.4)              | 2,528.8<br>(1,853.7 to 3,353.3)             | 59.3<br>(56.0 to 62.9)                            | -0.7<br>(-2.8 to 1.5)                            |
| Glaucoma                                      | 265.5<br>(214.3 to 322.7)                        | --                                              | 25.2<br>(16.9 to 36.4)                      | 64.9<br>(61.1 to 69.1)                            | 2.7<br>(0.4 to 5.4)                              |
| Cataract                                      | 5,773.9<br>(4,834.1 to 6,814.8)                  | --                                              | 397.4<br>(283.0 to 543.1)                   | 55.5<br>(53.4 to 57.5)                            | -3.1<br>(-4.4 to -1.9)                           |
| Macular degeneration                          | 358.6<br>(289.0 to 446.8)                        | --                                              | 28.5<br>(19.5 to 40.0)                      | 59.7<br>(55.4 to 64.1)                            | -0.5<br>(-3.2 to 2.3)                            |
| Refraction and accommodation disorders        | 18,091.9<br>(16,861.2 to 19,500.3)               | --                                              | 282.9<br>(177.1 to 434.3)                   | 56.5<br>(54.3 to 58.4)                            | -2.5<br>(-3.9 to -1.3)                           |
| Age-related and other hearing loss            | 35,574.4<br>(35,135.0 to 35,962.3)               | --                                              | 1,568.4<br>(1,134.7 to 2,077.8)             | 60.4<br>(54.8 to 66.2)                            | -0.1<br>(-3.5 to 3.5)                            |
| Other vision loss                             | 1,062.1<br>(817.3 to 1,330.2)                    | --                                              | 78.6<br>(53.6 to 109.1)                     | 62.8<br>(59.9 to 66.0)                            | 1.5<br>(-0.4 to 3.4)                             |
| Other sense organ diseases                    | 5,044.3<br>(4,463.2 to 5,748.5)                  | 10,077.1<br>(9,191.8 to 10,966.4)               | 147.9<br>(92.8 to 225.9)                    | 61.7<br>(59.6 to 63.8)                            | 0.7<br>(-0.5 to 2.1)                             |
| Oral disorders                                | 24,913.0<br>(24,380.8 to 25,481.4)               | 48,222.0†<br>(41,055.6 to 55,599.5)             | 370.6<br>(240.5 to 531.2)                   | 61.7<br>(60.6 to 62.9)                            | 0.8<br>(0.0 to 1.5)                              |
| Caries of deciduous teeth                     | --                                               | --                                              | --                                          | --                                                | --                                               |
| Caries of permanent teeth                     | 14,616.5<br>(12,820.9 to 16,594.0)               | 47,066.2<br>(39,839.6 to 54,466.7)              | 10.9<br>(4.8 to 20.9)                       | 57.2<br>(55.2 to 59.1)                            | -2.1<br>(-3.3 to -0.9)                           |
| Periodontal disease                           | 7,633.1<br>(5,725.5 to 9,577.5)                  | 934.1<br>(497.8 to 1,468.7)                     | 46.0<br>(17.4 to 95.2)                      | 62.1<br>(60.8 to 63.3)                            | 1.0<br>(0.2 to 1.8)                              |
| Edentulism and severe tooth loss              | 11,494.6<br>(9,660.1 to 13,547.5)                | 221.6<br>(128.8 to 349.3)                       | 298.4<br>(198.2 to 425.2)                   | 61.9<br>(60.5 to 63.4)                            | 0.9<br>(-0.0 to 1.8)                             |
| Other oral disorders                          | 576.1<br>(505.9 to 641.5)                        | --                                              | 15.3<br>(9.5 to 23.1)                       | 59.9<br>(57.2 to 62.8)                            | -0.4<br>(-2.0 to 1.4)                            |
| <b>Injuries</b>                               | <b>29,999.8</b><br><b>(28,272.3 to 31,902.5)</b> | <b>9,862.1†</b><br><b>(8,623.7 to 11,240.5)</b> | <b>1,131.3</b><br><b>(797.8 to 1,529.7)</b> | <b>65.0</b><br><b>(62.8 to 66.8)</b>              | <b>2.8</b><br><b>(1.4 to 3.9)</b>                |
| <b>Transport injuries</b>                     | <b>4,236.0</b><br><b>(3,980.5 to 4,538.8)</b>    | <b>538.4</b><br><b>(442.8 to 640.4)</b>         | <b>178.9</b><br><b>(121.0 to 252.0)</b>     | <b>65.5</b><br><b>(64.2 to 66.8)</b>              | <b>3.1</b><br><b>(2.3 to 4.0)</b>                |
| Road injuries                                 | 3,513.6<br>(3,283.8 to 3,803.4)                  | 418.3<br>(326.6 to 515.2)                       | 148.2<br>(100.2 to 209.7)                   | 68.4<br>(67.2 to 69.8)                            | 5.0<br>(4.2 to 5.8)                              |
| Pedestrian road injuries                      | 886.7<br>(763.8 to 1,033.2)                      | 94.3<br>(67.9 to 125.4)                         | 39.7<br>(26.9 to 56.2)                      | 71.0<br>(69.4 to 72.8)                            | 6.6<br>(5.5 to 7.7)                              |
| Cyclist road injuries                         | 762.9<br>(642.6 to 878.1)                        | 122.2<br>(87.8 to 160.4)                        | 31.1<br>(20.8 to 44.3)                      | 77.2<br>(75.6 to 79.2)                            | 10.4<br>(9.4 to 11.6)                            |
| Motorcyclist road injuries                    | 594.4<br>(509.6 to 686.0)                        | 30.2<br>(19.7 to 44.9)                          | 23.9<br>(16.1 to 33.8)                      | 80.4<br>(79.0 to 81.7)                            | 12.4<br>(11.5 to 13.2)                           |
| Motor vehicle road injuries                   | 1,044.0<br>(879.2 to 1,200.8)                    | 141.5<br>(104.8 to 181.2)                       | 44.8<br>(30.4 to 62.9)                      | 51.8<br>(50.1 to 53.5)                            | -5.4<br>(-6.5 to -4.4)                           |
| Other road injuries                           | 225.6<br>(195.9 to 262.5)                        | 30.2<br>(17.7 to 47.6)                          | 8.8<br>(5.9 to 12.5)                        | 94.8<br>(93.1 to 96.5)                            | 21.4<br>(20.3 to 22.4)                           |
| Other transport injuries                      | 722.4<br>(608.8 to 847.1)                        | 120.1<br>(84.6 to 168.8)                        | 30.7<br>(20.7 to 42.8)                      | 52.6<br>(50.1 to 55.0)                            | -4.9<br>(-6.5 to -3.5)                           |
| <b>Unintentional injuries</b>                 | <b>24,591.7</b><br><b>(22,963.2 to 26,464.0)</b> | <b>9,120.7</b><br><b>(7,879.9 to 10,470.1)</b>  | <b>916.6</b><br><b>(649.1 to 1,242.9)</b>   | <b>65.2</b><br><b>(62.6 to 67.3)</b>              | <b>2.9</b><br><b>(1.3 to 4.3)</b>                |
| Falls                                         | 14,614.9<br>(13,092.2 to 16,436.4)               | 5,960.0<br>(4,776.0 to 7,270.2)                 | 655.3<br>(466.2 to 882.4)                   | 67.0<br>(63.5 to 69.7)                            | 4.1<br>(1.9 to 5.8)                              |
| Drowning                                      | 155.1<br>(132.5 to 186.9)                        | 35.8<br>(30.4 to 42.7)                          | 6.9<br>(4.6 to 9.8)                         | 33.9<br>(31.0 to 36.3)                            | -16.6<br>(-18.4 to -15.1)                        |
| Fire, heat, and hot substances                | 1,513.1<br>(1,343.9 to 1,703.7)                  | 71.9<br>(57.9 to 86.8)                          | 25.7<br>(15.1 to 40.6)                      | 59.4<br>(57.6 to 60.9)                            | -0.7<br>(-1.8 to 0.3)                            |
| Poisonings                                    | 46.5<br>(40.5 to 52.9)                           | 17.1<br>(11.9 to 24.4)                          | 2.6<br>(1.8 to 3.7)                         | 70.9<br>(65.7 to 76.4)                            | 6.5<br>(3.3 to 9.9)                              |
| Exposure to mechanical forces                 | 3,054.2<br>(2,667.0 to 3,582.7)                  | 305.7<br>(242.6 to 386.9)                       | 59.9<br>(39.6 to 86.2)                      | 69.9<br>(68.4 to 71.1)                            | 5.9<br>(4.9 to 6.6)                              |
| Unintentional firearm injuries                | 101.2<br>(85.3 to 119.6)                         | 4.4<br>(2.6 to 7.0)                             | 2.1<br>(1.3 to 3.1)                         | 65.8<br>(64.7 to 66.9)                            | 3.3<br>(2.6 to 4.0)                              |
| Unintentional suffocation                     | 107.8<br>(89.7 to 126.2)                         | 19.1<br>(13.0 to 28.0)                          | 3.0<br>(1.9 to 4.4)                         | 67.2<br>(64.9 to 69.4)                            | 4.2<br>(2.8 to 5.6)                              |
| Other exposure to mechanical forces           | 2,845.2<br>(2,464.7 to 3,378.5)                  | 282.2<br>(223.8 to 357.8)                       | 54.8<br>(36.3 to 78.8)                      | 70.2<br>(68.6 to 71.5)                            | 6.1<br>(5.1 to 6.9)                              |

| Cause                                                                               | Prevalence in thousands (95% UI)              | Incidence in thousands (95% UI)          | YLDs in thousands (95% UI)           |                                                   |                                                  |
|-------------------------------------------------------------------------------------|-----------------------------------------------|------------------------------------------|--------------------------------------|---------------------------------------------------|--------------------------------------------------|
|                                                                                     | 2016 counts                                   | 2016 counts                              | 2016 counts                          | Percentage change in counts between 2006 and 2016 | Percentage change in rates between 2006 and 2016 |
| Adverse effects of medical treatment                                                | 83.6<br>(59.9 to 111.8)                       | 1,093.6<br>(854.8 to 1,386.1)            | 11.1<br>(6.8 to 17.9)                | 43.0<br>(34.4 to 51.5)                            | -10.9<br>(-16.2 to -5.6)                         |
| Animal contact                                                                      | 647.6<br>(585.3 to 718.3)                     | 213.7<br>(159.4 to 283.9)                | 12.4<br>(8.6 to 17.3)                | 45.3<br>(43.0 to 47.2)                            | -9.5<br>(-10.9 to -8.2)                          |
| Venomous animal contact                                                             | 230.4<br>(198.8 to 270.7)                     | 93.8<br>(65.0 to 128.8)                  | 6.5<br>(4.6 to 8.9)                  | 47.3<br>(44.3 to 50.1)                            | -8.2<br>(-10.1 to -6.5)                          |
| Non-venomous animal contact                                                         | 417.3<br>(365.3 to 468.8)                     | 119.9<br>(84.7 to 164.1)                 | 5.9<br>(3.8 to 8.9)                  | 43.2<br>(40.8 to 45.0)                            | -10.8<br>(-12.3 to -9.7)                         |
| Foreign body                                                                        | 867.7<br>(760.5 to 989.4)                     | 567.6<br>(476.2 to 688.2)                | 28.7<br>(19.1 to 41.5)               | 59.9<br>(58.0 to 61.8)                            | -0.4<br>(-1.6 to 0.8)                            |
| Pulmonary aspiration and foreign body in airway                                     | 445.1<br>(364.0 to 550.8)                     | 382.9<br>(311.3 to 482.6)                | 16.0<br>(10.6 to 23.2)               | 62.1<br>(59.4 to 64.6)                            | 1.0<br>(-0.7 to 2.6)                             |
| Foreign body in eyes                                                                | 46.9<br>(35.8 to 61.8)                        | 87.2<br>(48.9 to 152.5)                  | 2.8<br>(1.8 to 4.2)                  | 68.5<br>(66.1 to 71.9)                            | 5.0<br>(3.5 to 7.1)                              |
| Foreign body in other body part                                                     | 375.7<br>(314.9 to 455.5)                     | 97.7<br>(67.2 to 136.9)                  | 10.0<br>(6.6 to 14.5)                | 54.4<br>(52.4 to 56.2)                            | -3.8<br>(-5.0 to -2.7)                           |
| Environmental heat and cold exposure                                                | 1,026.5<br>(896.4 to 1,164.7)                 | 186.2<br>(132.9 to 246.7)                | 37.1<br>(25.5 to 51.7)               | 61.5<br>(58.5 to 64.3)                            | 0.7<br>(-1.3 to 2.4)                             |
| Other unintentional injuries                                                        | 2,582.4<br>(2,236.9 to 2,962.5)               | 669.0<br>(464.6 to 933.6)                | 76.8<br>(52.0 to 109.0)              | 62.9<br>(61.4 to 64.3)                            | 1.5<br>(0.6 to 2.4)                              |
| <b>Self-harm and interpersonal violence</b>                                         | <b>1,559.1</b><br><b>(1,417.3 to 1,720.6)</b> | <b>197.3†</b><br><b>(166.0 to 235.7)</b> | <b>31.2</b><br><b>(21.0 to 44.6)</b> | <b>52.1</b><br><b>(50.9 to 53.3)</b>              | <b>-5.2</b><br><b>(-6.0 to -4.5)</b>             |
| Self-harm                                                                           | 305.0<br>(257.5 to 365.0)                     | 137.8<br>(113.6 to 171.6)                | 10.1<br>(6.6 to 14.4)                | 41.0<br>(38.8 to 43.0)                            | -12.2<br>(-13.5 to -10.9)                        |
| Self-harm by firearm                                                                | 5.5<br>(4.7 to 7.0)                           | 1.2<br>(0.5 to 2.6)                      | 0.1<br>(0.1 to 0.2)                  | 40.5<br>(37.6 to 43.3)                            | -12.5<br>(-14.3 to -10.7)                        |
| Self-harm by other specified means                                                  | 299.4<br>(252.1 to 359.1)                     | 136.6<br>(112.9 to 170.0)                | 9.9<br>(6.5 to 14.2)                 | 41.0<br>(38.8 to 43.0)                            | -12.2<br>(-13.5 to -10.9)                        |
| Interpersonal violence                                                              | 1,254.1<br>(1,122.1 to 1,411.5)               | 59.5‡<br>(42.0 to 83.0)                  | 21.1<br>(14.3 to 30.2)               | 58.1<br>(57.1 to 59.0)                            | -1.5<br>(-2.1 to -0.9)                           |
| Assault by firearm                                                                  | 44.4<br>(37.7 to 50.8)                        | 3.6<br>(1.9 to 6.1)                      | 1.1<br>(0.7 to 1.6)                  | 54.5<br>(52.9 to 56.2)                            | -3.7<br>(-4.7 to -2.6)                           |
| Assault by sharp object                                                             | 161.1<br>(136.1 to 189.1)                     | 13.7<br>(7.8 to 21.7)                    | 3.2<br>(2.1 to 4.7)                  | 55.1<br>(53.6 to 56.3)                            | -3.4<br>(-4.3 to -2.6)                           |
| Sexual violence                                                                     | 543.5<br>(445.0 to 659.0)                     | --                                       | 3.1<br>(2.0 to 4.5)                  | 52.7<br>(50.8 to 54.6)                            | -4.9<br>(-6.0 to -3.7)                           |
| Assault by other means                                                              | 505.2<br>(434.8 to 599.5)                     | 42.2<br>(29.1 to 59.2)                   | 13.8<br>(9.2 to 20.0)                | 60.3<br>(59.3 to 61.4)                            | -0.1<br>(-0.7 to 0.5)                            |
| <b>Forces of nature, conflict and terrorism, and executions and police conflict</b> | <b>156.6</b><br><b>(106.5 to 223.2)</b>       | <b>5.7†</b><br><b>(2.4 to 9.5)</b>       | <b>4.6</b><br><b>(1.2 to 11.9)</b>   | <b>108.0</b><br><b>(93.2 to 129.4)</b>            | <b>29.6</b><br><b>(20.4 to 42.9)</b>             |
| Forces of nature, conflict and terrorism, and state actor violence                  | 50.5<br>(28.1 to 77.4)                        | 1.7<br>(0.8 to 2.7)                      | 1.7<br>(0.4 to 4.4)                  | 135.4<br>(114.8 to 168.0)                         | 46.7<br>(33.8 to 67.0)                           |
| Conflict and terrorism                                                              | 90.7<br>(54.3 to 146.2)                       | --                                       | 2.7<br>(0.8 to 6.9)                  | 91.5<br>(78.3 to 119.4)                           | 19.3<br>(11.1 to 36.7)                           |
| Executions and police conflict                                                      | 15.4<br>(5.4 to 23.9)                         | 4.0<br>(1.0 to 7.7)                      | 0.4<br>(0.1 to 1.3)                  | 87.4<br>(46.4 to 129.3)                           | 16.8<br>(-8.8 to 42.9)                           |

We did not calculate incidence for certain NTDs and causes with only birth prevalence. Blank cells mean that no estimate is available.

† Incidence for aggregate causes represents the sum of the incidence of the causes below the aggregate.

‡ Incidence estimates for stroke represent first-ever stroke only.

^ Incidence of HIV/AIDS represents new infections of HIV only and does not include new infections of Tuberculosis in HIV positive cases.



SR Table 12: Global prevalence, incidence, and YLDs for 2016, percentage change of YLD counts and percentage change of YLD rates between 2006 and 2016 by cause, age 90-94 years.

| Cause                                                                                | Prevalence in thousands (95% UI)          | Incidence in thousands (95% UI)               | YLDs in thousands (95% UI)             |                                                   |                                                  |
|--------------------------------------------------------------------------------------|-------------------------------------------|-----------------------------------------------|----------------------------------------|---------------------------------------------------|--------------------------------------------------|
|                                                                                      | 2016 counts                               | 2016 counts                                   | 2016 counts                            | Percentage change in counts between 2006 and 2016 | Percentage change in rates between 2006 and 2016 |
| <b>All causes</b>                                                                    | <b>14,766.4</b><br>(14,761.6 to 14,778.5) | <b>132,203.1†</b><br>(119,155.4 to 148,346.4) | <b>4,970.7</b><br>(3,755.7 to 6,260.5) | <b>66.1</b><br>(65.0 to 67.2)                     | <b>-0.8</b><br>(-1.4 to -0.1)                    |
| <b>Communicable, maternal, neonatal, and nutritional disorders</b>                   | <b>7,344.3</b><br>(7,248.1 to 7,431.3)    | <b>45,425.0†</b><br>(38,831.7 to 54,379.4)    | <b>109.1</b><br>(79.0 to 143.0)        | <b>56.4</b><br>(52.1 to 73.4)                     | <b>-6.5</b><br>(-9.2 to 3.6)                     |
| <b>HIV/AIDS and tuberculosis</b>                                                     | <b>2,367.2</b><br>(2,174.6 to 2,609.6)    | <b>19.6†</b><br>(16.3 to 23.8)                | <b>8.6</b><br>(6.0 to 11.7)            | <b>40.5</b><br>(32.2 to 48.2)                     | <b>-16.1</b><br>(-21.0 to -11.4)                 |
| Tuberculosis                                                                         | 2,273.4<br>(2,002.2 to 2,601.1)           | 19.6†<br>(16.3 to 23.8)                       | 7.5<br>(5.2 to 10.3)                   | 37.5<br>(32.7 to 42.7)                            | -17.9<br>(-20.7 to -14.8)                        |
| Drug-susceptible tuberculosis                                                        | 27.2<br>(22.4 to 32.8)                    | 19.0<br>(15.7 to 23.0)                        | 7.2<br>(4.9 to 10.0)                   | 37.6<br>(32.6 to 42.9)                            | -17.8<br>(-20.8 to -14.6)                        |
| Multidrug-resistant tuberculosis without extensive drug resistance                   | 1.0<br>(0.8 to 1.2)                       | 0.6<br>(0.5 to 0.8)                           | 0.3<br>(0.2 to 0.4)                    | 28.4<br>(10.5 to 50.3)                            | -23.3<br>(-34.0 to -10.2)                        |
| Extensively drug-resistant tuberculosis                                              | 0.1<br>(0.1 to 0.1)                       | < 0.05<br>(< 0.05 to 0.1)                     | < 0.05<br>(< 0.05 to < 0.05)           | 308.9<br>(256.8 to 374.1)                         | 144.3<br>(113.2 to 183.3)                        |
| Latent tuberculosis infection                                                        | 2,245.1<br>(1,973.4 to 2,570.7)           | --                                            | --                                     | --                                                | --                                               |
| HIV/AIDS                                                                             | 10.9<br>(9.2 to 13.3)                     | --                                            | 1.1<br>(0.7 to 1.6)                    | 65.1<br>(11.8 to 149.8)                           | -1.4<br>(-33.2 to 49.2)                          |
| Drug-susceptible HIV/AIDS - Tuberculosis                                             | 0.4<br>(0.2 to 0.5)                       | 0.4<br>(0.3 to 0.5)                           | 0.1<br>(0.1 to 0.2)                    | 29.5<br>(18.7 to 39.7)                            | -27.6<br>(-29.1 to -16.5)                        |
| Multidrug-resistant HIV/AIDS - Tuberculosis without extensive drug resistance        | < 0.05<br>(< 0.05 to < 0.05)              | < 0.05<br>(< 0.05 to < 0.05)                  | < 0.05<br>(< 0.05 to < 0.05)           | 50.9<br>(6.6 to 95.9)                             | -9.8<br>(-36.3 to 17.0)                          |
| Extensively drug-resistant HIV/AIDS - Tuberculosis                                   | < 0.05<br>(< 0.05 to < 0.05)              | < 0.05<br>(< 0.05 to < 0.05)                  | < 0.05<br>(< 0.05 to < 0.05)           | 471.3<br>(266.0 to 717.0)                         | 241.3<br>(118.7 to 388.1)                        |
| HIV/AIDS resulting in other diseases                                                 | 10.5<br>(8.8 to 13.0)                     | --                                            | 1.0<br>(0.6 to 1.5)                    | 71.2<br>(10.8 to 184.7)                           | 2.3<br>(-33.8 to 70.1)                           |
| <b>Diarrhoea, lower respiratory infections, and other common infectious diseases</b> | <b>789.6</b><br>(751.7 to 824.5)          | <b>43,940.3†</b><br>(37,390.6 to 52,844.1)    | <b>41.3</b><br>(29.5 to 57.1)          | <b>71.9</b><br>(65.4 to 123.2)                    | <b>2.7</b><br>(-1.2 to 33.4)                     |
| Diarrhoeal diseases                                                                  | 221.3<br>(197.7 to 244.6)                 | 15,263.9<br>(13,580.3 to 16,934.1)            | 21.6<br>(15.3 to 29.0)                 | 68.0<br>(64.2 to 71.8)                            | 0.4<br>(-1.9 to 2.6)                             |
| Intestinal infectious diseases                                                       | 0.5<br>(0.4 to 0.6)                       | 10.1†<br>(8.6 to 11.9)                        | 0.1<br>(0.1 to 0.1)                    | 32.1<br>(4.4 to 64.7)                             | -21.1<br>(-37.6 to -1.6)                         |
| Typhoid fever                                                                        | 0.5<br>(0.4 to 0.6)                       | 7.8<br>(6.6 to 9.3)                           | 0.1<br>(< 0.05 to 0.1)                 | 34.7<br>(4.5 to 71.8)                             | -19.5<br>(-37.6 to 2.6)                          |
| Paratyphoid fever                                                                    | 0.1<br>(0.1 to 0.1)                       | 2.3<br>(1.9 to 2.8)                           | < 0.05<br>(< 0.05 to < 0.05)           | 29.0<br>(6.1 to 58.1)                             | -22.9<br>(-36.6 to -5.5)                         |
| Other intestinal infectious diseases                                                 | --                                        | --                                            | < 0.05<br>(< 0.05 to < 0.05)           | 21.4<br>(-4.0 to 51.4)                            | -27.4<br>(-42.6 to -9.6)                         |
| Lower respiratory infections                                                         | 98.0<br>(87.9 to 109.1)                   | 4,258.6<br>(3,746.8 to 4,805.0)               | 5.2<br>(3.6 to 7.2)                    | 86.1<br>(77.1 to 95.0)                            | 11.2<br>(5.8 to 16.5)                            |
| Upper respiratory infections                                                         | 322.2<br>(238.1 to 440.8)                 | 24,121.5<br>(17,924.1 to 32,860.8)            | 7.2<br>(4.0 to 11.6)                   | 65.0<br>(61.3 to 68.7)                            | -1.4<br>(-3.6 to 0.8)                            |
| Otitis media                                                                         | 87.8<br>(61.6 to 118.8)                   | 70.0<br>(49.2 to 91.7)                        | 2.2<br>(1.3 to 3.5)                    | 57.5<br>(48.2 to 67.1)                            | -5.9<br>(-11.4 to -0.1)                          |
| Meningitis                                                                           | 22.6<br>(13.0 to 98.8)                    | 3.8<br>(3.0 to 4.7)                           | 1.7<br>(0.4 to 13.2)                   | 232.0<br>(39.8 to 2,334.3)                        | 98.4<br>(-16.5 to 1,354.4)                       |
| Pneumococcal meningitis                                                              | 7.4<br>(5.6 to 9.2)                       | 1.0<br>(0.7 to 1.4)                           | 0.3<br>(0.2 to 0.5)                    | 33.9<br>(28.3 to 42.0)                            | -20.0<br>(-23.3 to -15.1)                        |
| H influenzae type B meningitis                                                       | 1.3<br>(0.9 to 1.7)                       | 0.2<br>(0.1 to 0.4)                           | 0.1<br>(< 0.05 to 0.1)                 | -5.2<br>(-14.9 to 16.5)                           | -43.4<br>(-49.1 to -30.4)                        |
| Meningococcal infection                                                              | 8.0<br>(1.3 to 82.7)                      | 0.8<br>(0.5 to 1.1)                           | 1.1<br>(0.1 to 12.5)                   | 1,482.6<br>(38.6 to 11,779.8)                     | 845.5<br>(-17.2 to 6,997.7)                      |
| Other meningitis                                                                     | 5.9<br>(4.1 to 7.6)                       | 1.8<br>(1.3 to 2.4)                           | 0.3<br>(0.1 to 0.4)                    | 81.8<br>(73.4 to 89.6)                            | 8.6<br>(3.6 to 13.3)                             |
| Encephalitis                                                                         | 38.5<br>(19.6 to 64.5)                    | 24.5<br>(21.5 to 28.0)                        | 1.6<br>(1.1 to 2.2)                    | 55.1<br>(46.6 to 64.9)                            | -7.3<br>(-12.4 to -1.5)                          |
| Diphtheria                                                                           | --                                        | --                                            | --                                     | --                                                | --                                               |
| Whooping cough                                                                       | --                                        | --                                            | --                                     | --                                                | --                                               |
| Tetanus                                                                              | 0.1<br>(0.1 to 0.1)                       | 0.2<br>(0.1 to 0.3)                           | < 0.05<br>(< 0.05 to < 0.05)           | 6.5<br>(-16.5 to 38.8)                            | -36.4<br>(-50.1 to -17.1)                        |
| Measles                                                                              | --                                        | --                                            | --                                     | --                                                | --                                               |
| Varicella and herpes zoster                                                          | 34.2<br>(27.5 to 43.1)                    | 187.8<br>(147.9 to 237.8)                     | 1.7<br>(1.0 to 2.6)                    | 68.7<br>(60.7 to 77.1)                            | 0.8<br>(-4.0 to 5.8)                             |
| <b>Neglected tropical diseases and malaria</b>                                       | <b>1,790.3</b><br>(1,719.1 to 1,862.4)    | <b>987.9†</b><br>(594.5 to 1,393.9)           | <b>17.5</b><br>(12.1 to 24.9)          | <b>34.5</b><br>(19.6 to 53.1)                     | <b>-19.7</b><br>(-28.6 to -8.5)                  |
| Malaria                                                                              | 14.6<br>(11.5 to 18.0)                    | 30.5<br>(22.3 to 39.7)                        | 0.1<br>(0.1 to 0.2)                    | -27.7<br>(-29.0 to -16.4)                         | -53.8<br>(-57.6 to -50.0)                        |
| Chagas disease                                                                       | 25.4<br>(21.2 to 30.3)                    | 0.1<br>(0.1 to 0.2)                           | 0.8<br>(0.4 to 1.5)                    | 58.4<br>(49.8 to 67.3)                            | -5.4<br>(-10.5 to -0.1)                          |
| Leishmaniasis                                                                        | 6.5<br>(5.3 to 7.5)                       | 1.3<br>(1.0 to 1.8)                           | 0.3<br>(0.2 to 0.5)                    | 49.4<br>(40.0 to 60.7)                            | -10.8<br>(-16.3 to -4.0)                         |
| Visceral leishmaniasis                                                               | 0.1<br>(< 0.05 to 0.1)                    | 0.4<br>(0.2 to 0.6)                           | < 0.05<br>(< 0.05 to < 0.05)           | -39.0<br>(-72.9 to 18.1)                          | -63.6<br>(-83.8 to -29.4)                        |
| Cutaneous and mucocutaneous leishmaniasis                                            | 5.5<br>(4.3 to 6.9)                       | 1.0<br>(0.7 to 1.3)                           | 0.3<br>(0.2 to 0.5)                    | 53.5<br>(44.1 to 66.1)                            | -8.3<br>(-13.9 to -0.8)                          |
| African trypanosomiasis                                                              | < 0.05<br>(< 0.05 to < 0.05)              | < 0.05<br>(< 0.05 to < 0.05)                  | < 0.05<br>(< 0.05 to < 0.05)           | -66.2<br>(-95.4 to 194.2)                         | -79.8<br>(-97.3 to 75.8)                         |
| Schistosomiasis                                                                      | 124.1<br>(109.1 to 139.6)                 | 26.1<br>(22.4 to 29.9)                        | 0.9<br>(0.5 to 1.6)                    | -24.6<br>(-28.7 to -20.4)                         | -5.0<br>(-57.4 to -52.4)                         |
| Cysticercosis                                                                        | 8.0<br>(5.4 to 12.2)                      | --                                            | 1.1<br>(0.6 to 1.7)                    | 34.4<br>(24.3 to 44.4)                            | -19.7<br>(-25.7 to -13.8)                        |
| Cystic echinococcosis                                                                | 0.7<br>(0.4 to 1.5)                       | 0.1<br>(0.1 to 0.3)                           | 0.1<br>(< 0.05 to 0.1)                 | -16.0<br>(-66.8 to 125.4)                         | -49.8<br>(-80.2 to 34.7)                         |
| Lymphatic filariasis                                                                 | 18.4<br>(15.1 to 23.8)                    | 4.5<br>(2.6 to 7.1)                           | 0.7<br>(0.4 to 1.3)                    | -35.6<br>(-55.0 to -21.8)                         | -61.5<br>(-73.1 to -53.3)                        |
| Onchocerciasis                                                                       | 7.2<br>(4.8 to 10.9)                      | 1.4<br>(0.6 to 2.7)                           | 0.7<br>(0.4 to 1.2)                    | -7.1<br>(-27.1 to 23.5)                           | -44.5<br>(-56.5 to -26.2)                        |
| Trachoma                                                                             | 51.5<br>(34.0 to 75.7)                    | --                                            | 3.6<br>(2.3 to 5.3)                    | 18.1<br>(6.7 to 29.9)                             | -29.4<br>(-36.2 to -22.4)                        |
| Dengue                                                                               | 12.6<br>(6.9 to 21.2)                     | 211.0<br>(130.5 to 316.4)                     | 1.8<br>(0.8 to 3.2)                    | 173.9<br>(122.5 to 268.8)                         | 63.6<br>(32.9 to 268.8)                          |
| Yellow fever                                                                         | < 0.05<br>(< 0.05 to < 0.05)              | < 0.05<br>(< 0.05 to < 0.05)                  | < 0.05<br>(< 0.05 to < 0.05)           | -16.6<br>(-48.6 to 34.1)                          | -50.2<br>(-69.3 to -19.9)                        |
| Rabies                                                                               | < 0.05<br>(< 0.05 to < 0.05)              | < 0.05<br>(< 0.05 to 0.1)                     | < 0.05<br>(< 0.05 to < 0.05)           | 139.0<br>(-33.3 to 324.8)                         | 42.8<br>(-60.1 to 153.8)                         |
| Intestinal nematode infections                                                       | 1,462.2<br>(1,392.2 to 1,524.2)           | --                                            | 2.5<br>(1.5 to 3.9)                    | 13.7<br>(5.9 to 22.2)                             | -32.1<br>(-36.8 to -27.0)                        |
| Ascariasis                                                                           | 778.6<br>(689.2 to 884.3)                 | --                                            | 0.7<br>(0.4 to 1.2)                    | -5.1<br>(-16.0 to 6.8)                            | -43.3<br>(-49.8 to -36.2)                        |

| Cause                                                                   | Prevalence in thousands (95% UI)                 | Incidence in thousands (95% UI)                   | YLDs in thousands (95% UI)                    |                                                   |                                                  |
|-------------------------------------------------------------------------|--------------------------------------------------|---------------------------------------------------|-----------------------------------------------|---------------------------------------------------|--------------------------------------------------|
|                                                                         | 2016 counts                                      | 2016 counts                                       | 2016 counts                                   | Percentage change in counts between 2006 and 2016 | Percentage change in rates between 2006 and 2016 |
| Trichuriasis                                                            | 424.1<br>(387.9 to 465.2)                        | --                                                | 0.3<br>(0.2 to 0.5)                           | 9.3<br>(-6.8 to 27.8)                             | -34.7<br>(-44.3 to -23.6)                        |
| Hookworm disease                                                        | 410.7<br>(377.6 to 449.6)                        | --                                                | 1.4<br>(0.9 to 2.2)                           | 27.5<br>(15.0 to 40.2)                            | -23.9<br>(-31.3 to -16.2)                        |
| Food-borne trematodiasis                                                | 185.5<br>(124.9 to 243.7)                        | 706.8<br>(319.9 to 1,099.1)                       | 4.4<br>(1.3 to 9.7)                           | 121.9<br>(80.6 to 184.8)                          | 32.6<br>(7.9 to 70.2)                            |
| Leprosy                                                                 | 3.6<br>(3.4 to 3.7)                              | 0.1<br>(0.1 to 0.1)                               | 0.2<br>(0.1 to 0.3)                           | 53.1<br>(46.0 to 60.6)                            | -8.5<br>(-12.8 to -4.0)                          |
| Ebola virus disease                                                     | < 0.05<br>(0.0 to < 0.05)                        | --                                                | < 0.05<br>(0.0 to < 0.05)                     | --                                                | --                                               |
| Zika virus disease                                                      | 0.1<br>(0.1 to 0.2)                              | 5.9<br>(3.3 to 10.6)                              | < 0.05<br>(< 0.05 to < 0.05)                  | --                                                | --                                               |
| Guinea worm disease                                                     | < 0.05<br>(< 0.05 to < 0.05)                     | < 0.05<br>(< 0.05 to < 0.05)                      | < 0.05<br>(< 0.05 to < 0.05)                  | -99.4<br>(-99.6 to -99.1)                         | -99.7<br>(-99.8 to -99.5)                        |
| Other neglected tropical diseases                                       | 18.5<br>(17.9 to 19.1)                           | --                                                | 0.3<br>(0.2 to 0.4)                           | 57.7<br>(48.8 to 67.1)                            | -5.8<br>(-11.1 to -0.2)                          |
| <b>Maternal disorders</b>                                               | --                                               | --                                                | --                                            | --                                                | --                                               |
| Maternal haemorrhage                                                    | --                                               | --                                                | --                                            | --                                                | --                                               |
| Maternal sepsis and other pregnancy related infections                  | --                                               | --                                                | --                                            | --                                                | --                                               |
| Maternal hypertensive disorders                                         | --                                               | --                                                | --                                            | --                                                | --                                               |
| Maternal obstructed labour and uterine rupture                          | --                                               | --                                                | --                                            | --                                                | --                                               |
| Maternal abortion, miscarriage, and ectopic pregnancy                   | --                                               | --                                                | --                                            | --                                                | --                                               |
| Other maternal disorders                                                | --                                               | --                                                | --                                            | --                                                | --                                               |
| <b>Neonatal disorders</b>                                               | <b>22.8</b><br><b>(20.2 to 26.3)</b>             | --                                                | <b>1.1</b><br><b>(0.7 to 1.5)</b>             | <b>77.2</b><br><b>(62.9 to 92.8)</b>              | <b>5.9</b><br><b>(-2.7 to 15.2)</b>              |
| Neonatal preterm birth complications                                    | 20.8<br>(16.5 to 25.4)                           | --                                                | 1.0<br>(0.7 to 1.4)                           | 73.8<br>(59.9 to 88.2)                            | 3.8<br>(-4.5 to 12.4)                            |
| Neonatal encephalopathy due to birth asphyxia and trauma                | < 0.05<br>(< 0.05 to 0.2)                        | --                                                | < 0.05<br>(< 0.05 to 0.1)                     | 193.2<br>(150.8 to 393.7)                         | 75.2<br>(49.9 to 194.9)                          |
| Neonatal sepsis and other neonatal infections                           | 0.1<br>(< 0.05 to 0.4)                           | --                                                | < 0.05<br>(< 0.05 to 0.1)                     | 173.9<br>(144.2 to 322.5)                         | 63.6<br>(45.9 to 152.4)                          |
| Hemolytic disease and other neonatal jaundice                           | < 0.05<br>(< 0.05 to < 0.05)                     | --                                                | < 0.05<br>(< 0.05 to < 0.05)                  | 91.2<br>(49.2 to 129.8)                           | 14.2<br>(-10.8 to 37.3)                          |
| Other neonatal disorders                                                | --                                               | --                                                | --                                            | --                                                | --                                               |
| <b>Nutritional deficiencies</b>                                         | <b>1,409.0</b><br><b>(1,388.9 to 1,429.2)</b>    | <b>146.2*</b><br><b>(104.8 to 187.8)</b>          | <b>36.9</b><br><b>(25.9 to 50.4)</b>          | <b>55.5</b><br><b>(53.3 to 57.6)</b>              | <b>-7.1</b><br><b>(-8.4 to -5.8)</b>             |
| Protein-energy malnutrition                                             | --                                               | --                                                | --                                            | --                                                | --                                               |
| Iodine deficiency                                                       | 246.5<br>(219.4 to 277.2)                        | 0.3<br>(0.2 to 0.5)                               | 5.6<br>(3.9 to 7.7)                           | 53.3<br>(48.5 to 58.2)                            | -8.4<br>(-11.3 to -5.5)                          |
| Vitamin A deficiency                                                    | 142.5<br>(107.8 to 182.0)                        | 145.9<br>(104.4 to 187.5)                         | 0.1<br>(0.1 to 0.1)                           | 66.1<br>(54.5 to 77.5)                            | -0.8<br>(-7.7 to 6.0)                            |
| Iron-deficiency anaemia                                                 | 1,124.5<br>(1,071.2 to 1,181.0)                  | --                                                | 31.3<br>(21.7 to 42.4)                        | 55.9<br>(53.5 to 58.3)                            | -6.9<br>(-8.3 to -5.4)                           |
| Other nutritional deficiencies                                          | --                                               | --                                                | --                                            | --                                                | --                                               |
| <b>Other communicable, maternal, neonatal, and nutritional diseases</b> | <b>3,789.7</b><br><b>(3,648.9 to 3,935.4)</b>    | <b>330.9</b><br><b>(232.1 to 458.0)</b>           | <b>3.7</b><br><b>(2.6 to 5.0)</b>             | <b>65.1</b><br><b>(52.4 to 78.5)</b>              | <b>-1.3</b><br><b>(-8.9 to 6.7)</b>              |
| Sexually transmitted diseases excluding HIV                             | 3,008.4<br>(2,764.8 to 3,335.2)                  | 36.2<br>(31.2 to 41.8)                            | 2.4<br>(1.7 to 3.4)                           | 64.2<br>(56.1 to 73.2)                            | -1.9<br>(-6.8 to 3.5)                            |
| Syphilis                                                                | 14.2<br>(11.2 to 18.4)                           | 0.6<br>(0.4 to 1.1)                               | 1.7<br>(1.1 to 2.4)                           | 65.3<br>(53.5 to 76.7)                            | -1.2<br>(-8.3 to 5.6)                            |
| Chlamydial infection                                                    | < 0.05<br>(< 0.05 to < 0.05)                     | --                                                | < 0.05<br>(< 0.05 to < 0.05)                  | 90.2<br>(31.5 to 189.2)                           | 13.6<br>(-21.4 to 72.8)                          |
| Gonococcal infection                                                    | < 0.05<br>(< 0.05 to < 0.05)                     | --                                                | < 0.05<br>(< 0.05 to < 0.05)                  | 148.0<br>(-76.3 to 1,262.9)                       | 48.2<br>(-85.9 to 714.3)                         |
| Trichomoniasis                                                          | 52.1<br>(44.0 to 60.9)                           | 35.6<br>(30.6 to 41.0)                            | 0.1<br>(< 0.05 to 0.1)                        | 62.5<br>(52.7 to 72.8)                            | -2.9<br>(-8.8 to 3.2)                            |
| Genital herpes                                                          | 2,890.3<br>(2,534.3 to 3,330.2)                  | --                                                | 0.6<br>(0.2 to 1.4)                           | 61.4<br>(57.2 to 65.7)                            | -3.6<br>(-6.1 to -1.0)                           |
| Other sexually transmitted diseases                                     | < 0.05<br>(< 0.05 to < 0.05)                     | --                                                | < 0.05<br>(< 0.05 to < 0.05)                  | 86.6<br>(29.0 to 183.7)                           | 11.5<br>(-22.9 to 69.5)                          |
| Hepatitis                                                               | 1,099.5<br>(977.9 to 1,232.7)                    | 294.7<br>(197.2 to 423.9)                         | 0.7<br>(0.4 to 1.1)                           | 64.2<br>(13.2 to 132.6)                           | -1.9<br>(-32.4 to 38.9)                          |
| Acute hepatitis A                                                       | 3.3<br>(1.2 to 6.1)                              | 43.0<br>(16.1 to 79.5)                            | 0.1<br>(< 0.05 to 0.3)                        | 45.7<br>(-49.4 to 253.0)                          | -13.0<br>(-69.8 to 110.9)                        |
| Hepatitis B                                                             | 559.2<br>(451.8 to 675.9)                        | 154.0<br>(79.7 to 262.6)                          | 0.4<br>(0.2 to 0.7)                           | 63.7<br>(-11.6 to 196.9)                          | -2.2<br>(-47.2 to 77.4)                          |
| Hepatitis C                                                             | 530.1<br>(475.7 to 585.3)                        | 8.8<br>(6.6 to 11.5)                              | < 0.05<br>(< 0.05 to < 0.05)                  | 61.0<br>(43.8 to 81.4)                            | -3.8<br>(-14.1 to 8.4)                           |
| Acute hepatitis E                                                       | 6.8<br>(3.7 to 12.5)                             | 88.8<br>(48.3 to 162.1)                           | 0.2<br>(0.1 to 0.4)                           | 80.8<br>(43.9 to 123.7)                           | 8.0<br>(-14.0 to 33.6)                           |
| Other infectious diseases                                               | 28.3<br>(27.2 to 29.6)                           | < 0.05<br>(< 0.05 to 0.1)                         | 0.6<br>(0.4 to 0.8)                           | 70.5<br>(64.5 to 76.5)                            | 1.9<br>(-1.7 to 5.5)                             |
| <b>Non-communicable diseases</b>                                        | <b>14,761.4</b><br><b>(14,757.3 to 14,769.5)</b> | <b>81,118.6†</b><br><b>(70,401.8 to 94,544.7)</b> | <b>4,329.0</b><br><b>(3,281.3 to 5,424.1)</b> | <b>66.0</b><br><b>(64.8 to 67.2)</b>              | <b>-0.8</b><br><b>(-1.6 to -0.1)</b>             |
| <b>Neoplasms</b>                                                        | <b>903.6</b><br><b>(890.9 to 916.6)</b>          | <b>446.1</b><br><b>(417.3 to 483.7)</b>           | <b>127.5</b><br><b>(96.7 to 158.0)</b>        | <b>73.8</b><br><b>(70.7 to 77.1)</b>              | <b>3.9</b><br><b>(2.0 to 5.8)</b>                |
| Lip and oral cavity cancer                                              | 20.0<br>(19.5 to 20.7)                           | 7.4<br>(7.2 to 7.7)                               | 2.5<br>(1.9 to 3.2)                           | 77.7<br>(66.4 to 88.7)                            | 6.2<br>(-0.6 to 12.7)                            |
| Nasopharynx cancer                                                      | 1.2<br>(1.1 to 1.2)                              | 0.5<br>(0.5 to 0.5)                               | 0.2<br>(0.1 to 0.3)                           | 67.1<br>(57.9 to 78.0)                            | -0.1<br>(-5.7 to 6.3)                            |
| Other pharynx cancer                                                    | 2.3<br>(2.2 to 2.4)                              | 1.1<br>(1.0 to 1.1)                               | 0.4<br>(0.3 to 0.5)                           | 76.7<br>(64.7 to 89.4)                            | 5.5<br>(-1.6 to 13.1)                            |
| Oesophageal cancer                                                      | 8.4<br>(8.2 to 8.7)                              | 7.5<br>(7.4 to 7.8)                               | 1.8<br>(1.3 to 2.2)                           | 54.8<br>(45.9 to 64.5)                            | -7.5<br>(-12.8 to -1.7)                          |
| Stomach cancer                                                          | 50.1<br>(48.6 to 51.6)                           | 31.3<br>(30.5 to 32.2)                            | 7.1<br>(5.4 to 8.8)                           | 62.1<br>(54.4 to 69.8)                            | -3.2<br>(-7.8 to 1.4)                            |
| Colon and rectum cancer                                                 | 181.8<br>(176.2 to 187.6)                        | 65.2<br>(63.2 to 67.3)                            | 21.8<br>(16.4 to 27.0)                        | 69.1<br>(62.2 to 76.2)                            | 1.0<br>(-3.1 to 5.3)                             |
| Liver cancer                                                            | 10.8<br>(10.2 to 11.3)                           | 12.8<br>(12.2 to 13.3)                            | 2.7<br>(1.9 to 3.5)                           | 96.0<br>(84.8 to 107.8)                           | 17.1<br>(10.4 to 24.2)                           |
| Liver cancer due to hepatitis B                                         | 3.3<br>(2.5 to 4.3)                              | 3.1<br>(2.3 to 4.0)                               | 0.6<br>(0.4 to 0.9)                           | 92.9<br>(72.8 to 114.4)                           | 15.3<br>(3.2 to 28.1)                            |

| Cause                                              | Prevalence in thousands (95% UI)              | Incidence in thousands (95% UI)                | YLDs in thousands (95% UI)              |                                                   |                                                  |
|----------------------------------------------------|-----------------------------------------------|------------------------------------------------|-----------------------------------------|---------------------------------------------------|--------------------------------------------------|
|                                                    | 2016 counts                                   | 2016 counts                                    | 2016 counts                             | Percentage change in counts between 2006 and 2016 | Percentage change in rates between 2006 and 2016 |
| Liver cancer due to hepatitis C                    | 6.6<br>(5.9 to 7.3)                           | 5.6<br>(5.0 to 6.2)                            | 1.2<br>(0.8 to 1.5)                     | 96.7<br>(81.5 to 113.0)                           | 17.5<br>(8.4 to 27.3)                            |
| Liver cancer due to alcohol use                    | 2.0<br>(1.5 to 2.6)                           | 1.9<br>(1.4 to 2.5)                            | 0.4<br>(0.3 to 0.6)                     | 101.5<br>(85.3 to 120.8)                          | 20.4<br>(10.7 to 31.9)                           |
| Liver cancer due to other causes                   | 2.3<br>(1.9 to 2.8)                           | 2.1<br>(1.7 to 2.5)                            | 0.5<br>(0.3 to 0.6)                     | 93.5<br>(81.0 to 107.7)                           | 15.6<br>(8.1 to 24.1)                            |
| Gallbladder and biliary tract cancer               | 7.2<br>(6.7 to 8.0)                           | 8.3<br>(7.8 to 8.9)                            | 1.7<br>(1.2 to 2.1)                     | 63.2<br>(48.6 to 80.7)                            | -2.5<br>(-11.2 to 8.0)                           |
| Pancreatic cancer                                  | 13.3<br>(12.7 to 14.0)                        | 16.1<br>(15.6 to 16.8)                         | 2.9<br>(2.0 to 3.6)                     | 82.0<br>(67.8 to 96.3)                            | 8.7<br>(0.3 to 17.3)                             |
| Larynx cancer                                      | 4.8<br>(4.7 to 5.0)                           | 1.9<br>(1.9 to 2.0)                            | 0.7<br>(0.6 to 0.9)                     | 72.5<br>(60.8 to 85.0)                            | 3.1<br>(-3.9 to 10.6)                            |
| Tracheal, bronchus, and lung cancer                | 51.5<br>(49.1 to 53.3)                        | 41.4<br>(39.6 to 42.8)                         | 8.8<br>(6.5 to 10.9)                    | 86.4<br>(76.6 to 95.3)                            | 11.4<br>(5.5 to 16.7)                            |
| Malignant skin melanoma                            | 25.3<br>(20.1 to 27.5)                        | 7.2<br>(5.8 to 7.9)                            | 2.2<br>(1.6 to 2.9)                     | 96.1<br>(78.5 to 114.1)                           | 17.2<br>(6.6 to 27.9)                            |
| Non-melanoma skin cancer                           | 67.4<br>(48.8 to 87.6)                        | 70.9<br>(44.1 to 107.4)                        | 2.2<br>(1.1 to 3.7)                     | 40.9<br>(16.1 to 71.7)                            | -15.8<br>(-30.7 to 2.6)                          |
| Non-melanoma skin cancer (squamous-cell carcinoma) | 54.7<br>(31.3 to 84.0)                        | 40.4<br>(23.7 to 62.1)                         | 2.1<br>(1.1 to 3.7)                     | 40.8<br>(15.9 to 71.9)                            | -15.9<br>(-30.7 to 2.7)                          |
| Non-melanoma skin cancer (basal-cell carcinoma)    | 3.5<br>(1.3 to 7.6)                           | 30.5<br>(12.9 to 62.0)                         | < 0.05<br>(< 0.05 to 0.1)               | 45.4<br>(24.9 to 64.6)                            | -13.1<br>(-25.4 to -1.6)                         |
| Breast cancer                                      | 126.2<br>(121.8 to 131.6)                     | 34.8<br>(33.5 to 36.4)                         | 16.4<br>(12.5 to 20.2)                  | 60.9<br>(52.7 to 69.4)                            | -3.9<br>(-8.8 to 1.2)                            |
| Cervical cancer                                    | 8.1<br>(7.4 to 8.6)                           | 2.9<br>(2.6 to 3.0)                            | 1.0<br>(0.8 to 1.3)                     | 45.2<br>(32.4 to 58.9)                            | -13.2<br>(-20.9 to -5.1)                         |
| Uterine cancer                                     | 21.2<br>(20.0 to 22.5)                        | 6.1<br>(5.8 to 6.5)                            | 2.3<br>(1.7 to 2.8)                     | 68.6<br>(51.6 to 88.0)                            | 0.7<br>(-9.4 to 12.3)                            |
| Ovarian cancer                                     | 9.4<br>(8.9 to 9.8)                           | 4.0<br>(3.8 to 4.1)                            | 1.8<br>(1.3 to 2.2)                     | 53.2<br>(38.0 to 69.2)                            | -8.5<br>(-17.6 to 1.1)                           |
| Prostate cancer                                    | 155.6<br>(134.9 to 174.2)                     | 49.9<br>(43.4 to 54.9)                         | 24.3<br>(17.6 to 30.9)                  | 80.6<br>(71.5 to 94.5)                            | 7.9<br>(2.4 to 16.2)                             |
| Testicular cancer                                  | 0.5<br>(0.5 to 0.5)                           | 0.1<br>(0.1 to 0.2)                            | 0.1<br>(0.1 to 0.1)                     | 105.1<br>(85.0 to 129.2)                          | 22.5<br>(10.5 to 36.9)                           |
| Kidney cancer                                      | 15.9<br>(15.1 to 16.6)                        | 5.8<br>(5.6 to 6.0)                            | 1.8<br>(1.3 to 2.2)                     | 73.5<br>(60.6 to 88.2)                            | 3.6<br>(-4.0 to 12.4)                            |
| Bladder cancer                                     | 59.6<br>(57.5 to 61.9)                        | 20.1<br>(19.4 to 20.9)                         | 6.7<br>(5.0 to 8.4)                     | 79.4<br>(69.8 to 89.4)                            | 7.2<br>(1.4 to 13.2)                             |
| Brain and nervous system cancer                    | 4.2<br>(3.0 to 5.2)                           | 2.4<br>(1.7 to 2.9)                            | 0.7<br>(0.5 to 1.0)                     | 95.0<br>(74.1 to 126.7)                           | 16.5<br>(4.0 to 35.4)                            |
| Thyroid cancer                                     | 7.2<br>(7.0 to 7.6)                           | 1.9<br>(1.9 to 2.0)                            | 0.9<br>(0.6 to 1.1)                     | 76.4<br>(63.4 to 91.2)                            | 5.4<br>(-2.4 to 14.2)                            |
| Mesothelioma                                       | 0.9<br>(0.8 to 1.0)                           | 0.7<br>(0.7 to 0.8)                            | 0.2<br>(0.1 to 0.3)                     | 84.8<br>(71.6 to 97.9)                            | 10.4<br>(2.5 to 18.2)                            |
| Hodgkin lymphoma                                   | 0.8<br>(0.8 to 0.9)                           | 0.3<br>(0.3 to 0.3)                            | 0.1<br>(0.1 to 0.2)                     | 54.2<br>(43.9 to 63.1)                            | -7.9<br>(-14.0 to -2.6)                          |
| Non-Hodgkin's lymphoma                             | 32.1<br>(28.6 to 33.9)                        | 11.2<br>(10.1 to 11.8)                         | 3.4<br>(2.5 to 4.3)                     | 88.4<br>(76.2 to 101.6)                           | 12.6<br>(5.2 to 20.4)                            |
| Multiple myeloma                                   | 7.9<br>(6.5 to 9.0)                           | 3.8<br>(3.2 to 4.4)                            | 1.9<br>(1.3 to 2.4)                     | 80.0<br>(64.5 to 97.7)                            | 7.6<br>(-1.7 to 18.1)                            |
| Leukaemia                                          | 32.2<br>(30.7 to 33.8)                        | 11.8<br>(11.3 to 12.3)                         | 6.0<br>(4.3 to 7.6)                     | 80.1<br>(69.7 to 91.5)                            | 7.6<br>(1.4 to 14.4)                             |
| Acute lymphoid leukaemia                           | 1.1<br>(1.0 to 1.1)                           | 0.4<br>(0.4 to 0.4)                            | 0.2<br>(0.1 to 0.2)                     | 95.4<br>(82.0 to 109.0)                           | 16.7<br>(8.7 to 24.9)                            |
| Chronic lymphoid leukaemia                         | 13.6<br>(12.5 to 14.8)                        | 4.2<br>(3.9 to 4.6)                            | 2.5<br>(1.8 to 3.2)                     | 77.1<br>(60.6 to 95.1)                            | 5.8<br>(-4.1 to 16.6)                            |
| Acute myeloid leukaemia                            | 2.3<br>(2.1 to 2.6)                           | 2.1<br>(1.9 to 2.3)                            | 0.5<br>(0.4 to 0.7)                     | 91.1<br>(77.4 to 105.7)                           | 14.2<br>(6.0 to 22.9)                            |
| Chronic myeloid leukaemia                          | 2.1<br>(2.0 to 2.4)                           | 1.0<br>(0.9 to 1.1)                            | 0.3<br>(0.2 to 0.4)                     | 54.9<br>(40.5 to 71.5)                            | -7.4<br>(-16.0 to 2.5)                           |
| Other leukaemia                                    | 13.0<br>(12.1 to 13.9)                        | 4.1<br>(3.8 to 4.3)                            | 2.4<br>(1.7 to 3.1)                     | 84.1<br>(68.8 to 100.5)                           | 10.0<br>(0.9 to 19.8)                            |
| Other neoplasms                                    | 50.2<br>(46.2 to 53.8)                        | 18.6<br>(17.2 to 19.8)                         | 5.1<br>(3.9 to 6.4)                     | 101.9<br>(86.6 to 119.3)                          | 20.6<br>(11.5 to 31.0)                           |
| <b>Cardiovascular diseases</b>                     | <b>7,965.3</b><br><b>(7,795.8 to 8,140.9)</b> | <b>1,549.0†</b><br><b>(1,430.2 to 1,686.2)</b> | <b>59.7</b><br><b>(52.5 to 913.0)</b>   | <b>59.7</b><br><b>(53.9 to 65.0)</b>              | <b>-4.6</b><br><b>(-8.0 to -1.4)</b>             |
| Rheumatic heart disease                            | 12.8<br>(11.3 to 14.3)                        | 10.9<br>(10.1 to 11.8)                         | 0.9<br>(0.7 to 1.3)                     | 63.1<br>(53.5 to 73.9)                            | -2.6<br>(-8.3 to 3.9)                            |
| Ischaemic heart disease                            | 2,459.7<br>(2,161.3 to 2,769.3)               | 852.8<br>(783.2 to 935.0)                      | 132.9<br>(92.5 to 182.4)                | 68.3<br>(65.6 to 70.9)                            | 0.6<br>(-1.1 to 2.1)                             |
| Cerebrovascular disease                            | 1,421.3<br>(1,333.3 to 1,509.6)               | 347.5‡<br>(311.4 to 386.6)                     | 311.9<br>(217.3 to 399.3)               | 51.9<br>(39.1 to 63.5)                            | 9.2<br>(-16.9 to -2.3)                           |
| Ischaemic stroke                                   | 1,237.2<br>(1,014.4 to 1,446.0)               | 240.4‡<br>(207.8 to 275.0)                     | 260.9<br>(178.7 to 342.5)               | 51.5<br>(36.2 to 65.8)                            | -9.5<br>(-18.6 to -0.9)                          |
| Hemorrhagic stroke                                 | 239.0<br>(195.7 to 285.9)                     | 107.1‡<br>(91.7 to 122.6)                      | 51.0<br>(36.0 to 66.8)                  | 54.1<br>(40.4 to 67.3)                            | -8.0<br>(-16.1 to -0.0)                          |
| Hypertensive heart disease                         | 678.2<br>(502.5 to 882.9)                     | --                                             | 50.9<br>(32.2 to 74.2)                  | 69.4<br>(64.8 to 73.2)                            | 1.2<br>(-1.5 to 3.5)                             |
| Cardiomyopathy and myocarditis                     | 192.4<br>(161.9 to 236.1)                     | 167.†<br>(12.5 to 20.5)                        | 13.3<br>(8.6 to 19.8)                   | 66.7<br>(59.8 to 74.0)                            | -0.4<br>(-4.5 to 4.0)                            |
| Myocarditis                                        | 4.1<br>(3.0 to 5.2)                           | 16.7<br>(12.5 to 20.5)                         | 0.2<br>(0.1 to 0.3)                     | 68.6<br>(51.9 to 87.6)                            | 0.7<br>(-9.3 to 12.1)                            |
| Alcoholic cardiomyopathy                           | 2.1<br>(1.5 to 2.8)                           | --                                             | 0.2<br>(0.1 to 0.2)                     | 60.1<br>(26.2 to 102.2)                           | -4.3<br>(-24.6 to 20.8)                          |
| Other cardiomyopathy                               | 173.8<br>(125.3 to 232.7)                     | --                                             | 13.0<br>(8.3 to 19.3)                   | 66.7<br>(59.6 to 74.2)                            | -0.4<br>(-4.6 to 4.0)                            |
| Atrial fibrillation and flutter                    | 1,679.4<br>(1,475.8 to 1,900.1)               | 51.8<br>(40.6 to 65.2)                         | 122.6<br>(84.2 to 167.8)                | 66.2<br>(64.0 to 68.4)                            | -0.7<br>(-2.0 to 0.6)                            |
| Peripheral vascular disease                        | 3,532.6<br>(2,939.9 to 4,227.5)               | 249.3<br>(163.2 to 353.0)                      | 18.4<br>(8.0 to 35.3)                   | 57.5<br>(54.7 to 60.4)                            | -5.9<br>(-7.5 to -4.2)                           |
| Endocarditis                                       | 14.8<br>(11.0 to 19.4)                        | 19.9<br>(17.1 to 23.0)                         | 1.1<br>(0.7 to 1.6)                     | 61.8<br>(51.5 to 72.1)                            | -3.4<br>(-9.5 to 2.8)                            |
| Other cardiovascular and circulatory diseases      | 1,172.3<br>(868.7 to 1,544.8)                 | --                                             | 59.3<br>(38.4 to 86.7)                  | 62.5<br>(58.1 to 66.7)                            | -2.9<br>(-5.5 to -0.4)                           |
| <b>Chronic respiratory diseases</b>                | <b>3,679.3</b><br><b>(3,584.4 to 3,770.2)</b> | <b>450.3†</b><br><b>(405.4 to 500.4)</b>       | <b>187.0</b><br><b>(164.6 to 210.0)</b> | <b>69.8</b><br><b>(65.5 to 74.4)</b>              | <b>1.5</b><br><b>(-1.2 to 4.2)</b>               |
| Chronic obstructive pulmonary disease              | 3,011.9<br>(2,805.1 to 3,248.4)               | 262.6<br>(227.7 to 302.9)                      | 143.5<br>(126.6 to 161.3)               | 69.7<br>(64.0 to 75.2)                            | 1.4<br>(-2.0 to 4.6)                             |
| Pneumoconiosis                                     | 6.7<br>(6.1 to 7.3)                           | 0.6<br>(0.5 to 0.7)                            | 0.9<br>(0.7 to 1.3)                     | 74.0<br>(66.1 to 82.8)                            | 4.0<br>(-0.7 to 9.2)                             |
| Silicosis                                          | 1.7<br>(1.4 to 2.0)                           | 0.3<br>(0.2 to 0.4)                            | 0.2<br>(0.1 to 0.3)                     | 68.7<br>(48.7 to 90.0)                            | 0.8<br>(-11.2 to 13.5)                           |

| Cause                                                          | Prevalence in thousands (95% UI)        | Incidence in thousands (95% UI)          | YLDs in thousands (95% UI)        |                                                   |                                                  |
|----------------------------------------------------------------|-----------------------------------------|------------------------------------------|-----------------------------------|---------------------------------------------------|--------------------------------------------------|
|                                                                | 2016 counts                             | 2016 counts                              | 2016 counts                       | Percentage change in counts between 2006 and 2016 | Percentage change in rates between 2006 and 2016 |
| Asbestosis                                                     | 1.9<br>(1.7 to 2.1)                     | 0.1<br>(< 0.05 to 0.1)                   | 0.3<br>(0.2 to 0.4)               | 77.0<br>(66.8 to 89.7)                            | 5.8<br>(-0.3 to 13.3)                            |
| Coal workers pneumoconiosis                                    | 1.4<br>(1.2 to 1.7)                     | < 0.05<br>(< 0.05 to 0.1)                | 0.2<br>(0.1 to 0.3)               | 69.1<br>(50.8 to 88.9)                            | 1.0<br>(-9.9 to 12.8)                            |
| Other pneumoconiosis                                           | 1.7<br>(1.4 to 2.1)                     | 0.2<br>(0.2 to 0.3)                      | 0.2<br>(0.2 to 0.4)               | 80.0<br>(66.8 to 93.7)                            | 7.6<br>(-0.3 to 15.7)                            |
| Asthma                                                         | 928.4<br>(840.4 to 1,020.3)             | 176.8<br>(152.9 to 202.4)                | 32.0<br>(21.8 to 44.8)            | 67.8<br>(64.6 to 70.9)                            | 0.2<br>(-1.6 to 2.1)                             |
| Interstitial lung disease and pulmonary sarcoidosis            | 99.0<br>(85.2 to 114.8)                 | 10.3<br>(8.1 to 12.7)                    | 9.3<br>(6.4 to 13.1)              | 75.4<br>(69.8 to 81.3)                            | 4.8<br>(1.4 to 8.3)                              |
| Other chronic respiratory diseases                             | --                                      | --                                       | 1.2<br>(1.1 to 1.4)               | 106.8<br>(100.3 to 113.1)                         | 23.5<br>(19.7 to 27.3)                           |
| <b>Cirrhosis and other chronic liver diseases</b>              | <b>157.8<br/>(144.9 to 171.4)</b>       | <b>21.1<br/>(18.9 to 23.5)</b>           | <b>6.7<br/>(4.6 to 9.0)</b>       | <b>75.0<br/>(67.8 to 82.2)</b>                    | <b>4.5<br/>(0.2 to 8.9)</b>                      |
| Cirrhosis and other chronic liver diseases due to hepatitis B  | 31.3<br>(26.0 to 36.8)                  | 4.6<br>(3.7 to 5.6)                      | 1.2<br>(0.8 to 1.8)               | 77.8<br>(66.1 to 90.0)                            | 6.2<br>(-0.8 to 13.5)                            |
| Cirrhosis and other chronic liver diseases due to hepatitis C  | 38.0<br>(31.5 to 45.3)                  | 5.1<br>(4.0 to 6.2)                      | 1.7<br>(1.1 to 2.3)               | 74.4<br>(63.3 to 86.1)                            | 4.2<br>(-2.5 to 11.2)                            |
| Cirrhosis and other chronic liver diseases due to alcohol use  | 48.6<br>(41.4 to 56.2)                  | 6.3<br>(5.2 to 7.5)                      | 2.3<br>(1.5 to 3.1)               | 76.6<br>(66.9 to 87.4)                            | 5.5<br>(-0.3 to 12.0)                            |
| Cirrhosis and other chronic liver diseases due to other causes | 39.9<br>(31.8 to 50.1)                  | 5.1<br>(4.0 to 6.4)                      | 1.5<br>(1.0 to 2.2)               | 71.0<br>(60.4 to 82.0)                            | 2.2<br>(-4.2 to 8.7)                             |
| <b>Digestive diseases</b>                                      | <b>1,507.8<br/>(1,409.9 to 1,592.5)</b> | <b>1,298.8†<br/>(1,193.3 to 1,412.9)</b> | <b>41.9<br/>(29.5 to 56.0)</b>    | <b>73.7<br/>(68.3 to 79.1)</b>                    | <b>3.8<br/>(0.6 to 7.0)</b>                      |
| Peptic ulcer disease                                           | 473.9<br>(401.5 to 553.3)               | 61.9<br>(55.1 to 69.6)                   | 9.5<br>(5.9 to 14.2)              | 67.9<br>(57.2 to 77.8)                            | 0.3<br>(-6.1 to 6.2)                             |
| Gastritis and duodenitis                                       | 856.4<br>(673.6 to 1,077.8)             | 480.3<br>(413.8 to 556.7)                | 13.2<br>(8.5 to 19.1)             | 81.9<br>(73.5 to 90.1)                            | 8.7<br>(3.6 to 13.6)                             |
| Appendicitis                                                   | 3.0<br>(2.8 to 3.3)                     | 80.5<br>(73.9 to 88.0)                   | 0.8<br>(0.5 to 1.1)               | 55.6<br>(47.3 to 65.7)                            | -7.1<br>(-12.0 to -1.0)                          |
| Paralytic ileus and intestinal obstruction                     | 2.1<br>(1.7 to 2.6)                     | 68.9<br>(57.9 to 81.4)                   | 0.6<br>(0.4 to 0.8)               | 71.3<br>(49.5 to 95.9)                            | 2.4<br>(-10.7 to 17.0)                           |
| Inguinal, femoral, and abdominal hernia                        | 178.5<br>(119.4 to 279.7)               | 248.1<br>(184.2 to 322.2)                | 7.6<br>(4.8 to 10.8)              | 67.7<br>(58.7 to 76.6)                            | 0.2<br>(-5.2 to 5.5)                             |
| Inflammatory bowel disease                                     | 17.2<br>(14.8 to 19.7)                  | 3.4<br>(2.8 to 4.2)                      | 2.2<br>(1.5 to 3.0)               | 67.7<br>(58.6 to 76.5)                            | 0.2<br>(-5.2 to 5.5)                             |
| Vascular intestinal disorders                                  | 2.8<br>(2.2 to 3.5)                     | 18.2<br>(15.1 to 22.3)                   | 0.7<br>(0.5 to 1.0)               | 71.8<br>(46.0 to 98.9)                            | 2.6<br>(-12.8 to 18.8)                           |
| Gallbladder and biliary diseases                               | 77.4<br>(62.0 to 97.3)                  | 295.3<br>(239.1 to 356.3)                | 1.1<br>(0.8 to 1.6)               | 88.9<br>(70.2 to 109.2)                           | 12.8<br>(1.7 to 25.0)                            |
| Pancreatitis                                                   | 4.6<br>(4.0 to 5.3)                     | 42.1<br>(36.8 to 48.2)                   | 0.5<br>(0.4 to 0.7)               | 83.7<br>(64.6 to 102.9)                           | 9.8<br>(-1.7 to 21.2)                            |
| Other digestive diseases                                       | --                                      | --                                       | 5.5<br>(3.9 to 7.4)               | 76.4<br>(70.9 to 81.8)                            | 5.4<br>(2.1 to 8.6)                              |
| <b>Neurological disorders</b>                                  | <b>5,262.5<br/>(5,000.6 to 5,546.7)</b> | <b>1,331.4<br/>(1,022.2 to 1,756.1)</b>  | <b>696.2<br/>(484.4 to 925.6)</b> | <b>67.7<br/>(65.2 to 69.7)</b>                    | <b>0.2<br/>(-1.3 to 1.4)</b>                     |
| Alzheimer's disease and other dementias                        | 3,830.7<br>(3,128.1 to 4,621.7)         | 761.1<br>(500.5 to 1,084.8)              | 605.3<br>(406.1 to 818.6)         | 67.5<br>(65.0 to 69.7)                            | 0.1<br>(-1.4 to 1.4)                             |
| Parkinson's disease                                            | 188.0<br>(144.9 to 243.2)               | 15.1<br>(8.6 to 23.5)                    | 20.2<br>(13.0 to 28.7)            | 72.6<br>(67.3 to 77.6)                            | 3.1<br>(-0.1 to 6.1)                             |
| Epilepsy                                                       | 85.5<br>(67.7 to 103.6)                 | 3.9<br>(2.5 to 5.5)                      | 19.6<br>(13.4 to 26.9)            | 64.7<br>(35.8 to 100.8)                           | -1.6<br>(-18.9 to 19.9)                          |
| Multiple sclerosis                                             | 11.7<br>(10.4 to 13.0)                  | 0.1<br>(0.1 to 0.1)                      | 2.7<br>(1.9 to 3.5)               | 79.4<br>(64.2 to 97.1)                            | 7.2<br>(-1.9 to 17.8)                            |
| Motor neuron disease                                           | 2.2<br>(1.8 to 2.8)                     | 0.4<br>(0.3 to 0.5)                      | 0.5<br>(0.3 to 0.7)               | 77.2<br>(71.9 to 81.9)                            | 5.8<br>(2.7 to 8.7)                              |
| Migraine                                                       | 595.7<br>(540.1 to 657.3)               | 68.5<br>(53.5 to 85.7)                   | 35.6<br>(24.2 to 49.3)            | 68.7<br>(65.4 to 71.8)                            | 0.8<br>(-1.2 to 2.6)                             |
| Tension-type headache                                          | 1,476.6<br>(1,061.6 to 2,031.9)         | 482.1<br>(297.2 to 694.1)                | 10.6<br>(6.6 to 15.8)             | 68.4<br>(63.5 to 73.4)                            | 0.6<br>(-2.3 to 3.6)                             |
| Other neurological disorders                                   | 0.1<br>(0.1 to 0.2)                     | 0.2<br>(0.1 to 0.4)                      | 1.6<br>(1.1 to 2.2)               | 83.6<br>(80.7 to 85.9)                            | 9.7<br>(8.0 to 11.1)                             |
| <b>Mental and substance use disorders</b>                      | <b>1,990.3<br/>(1,945.6 to 2,034.0)</b> | <b>246.8<br/>(854.1 to 1,260.0)</b>      | <b>66.5<br/>(181.2 to 320.6)</b>  | <b>66.5<br/>(64.8 to 68.2)</b>                    | <b>-0.5<br/>(-1.5 to 0.5)</b>                    |
| Schizophrenia                                                  | 9.2<br>(7.4 to 11.1)                    | --                                       | 4.9<br>(3.6 to 6.3)               | 82.0<br>(68.9 to 96.8)                            | 8.8<br>(0.9 to 17.6)                             |
| Alcohol use disorders                                          | 83.5<br>(66.7 to 100.6)                 | 30.2<br>(23.7 to 37.8)                   | 7.2<br>(4.9 to 10.1)              | 78.0<br>(69.7 to 85.6)                            | 6.3<br>(1.4 to 10.9)                             |
| Drug use disorders                                             | 55.4<br>(53.7 to 57.0)                  | 4.2<br>(3.7 to 4.9)                      | 13.2<br>(9.5 to 16.6)             | 67.8<br>(61.6 to 74.3)                            | 0.3<br>(-3.4 to 4.1)                             |
| Opioid use disorders                                           | 25.5<br>(21.7 to 29.7)                  | --                                       | 8.8<br>(6.2 to 11.4)              | 68.5<br>(60.7 to 76.2)                            | 0.7<br>(-4.0 to 5.3)                             |
| Cocaine use disorders                                          | 9.7<br>(8.5 to 11.0)                    | --                                       | 1.2<br>(0.7 to 1.6)               | 64.5<br>(48.8 to 81.9)                            | -1.7<br>(-11.1 to 8.7)                           |
| Amphetamine use disorders                                      | 4.8<br>(3.5 to 6.3)                     | 1.3<br>(0.9 to 1.7)                      | 0.6<br>(0.3 to 0.9)               | 53.3<br>(34.5 to 74.4)                            | -8.4<br>(-19.7 to 4.2)                           |
| Cannabis use disorders                                         | 5.3<br>(4.3 to 6.4)                     | --                                       | 0.1<br>(0.1 to 0.2)               | 66.8<br>(59.1 to 74.6)                            | -0.3<br>(-5.0 to 4.3)                            |
| Other drug use disorders                                       | 13.6<br>(12.1 to 15.5)                  | 3.0<br>(2.6 to 3.4)                      | 2.4<br>(1.7 to 3.2)               | 71.0<br>(61.8 to 80.5)                            | 2.1<br>(-3.4 to 7.8)                             |
| Depressive disorders                                           | 870.6<br>(829.2 to 905.6)               | 961.1<br>(786.0 to 1,187.3)              | 131.2<br>(91.9 to 182.3)          | 65.0<br>(62.7 to 67.4)                            | -1.4<br>(-2.8 to -0.0)                           |
| Major depressive disorder                                      | 609.0<br>(508.1 to 732.0)               | 931.9<br>(760.0 to 1,157.5)              | 107.6<br>(73.5 to 152.2)          | 64.8<br>(62.1 to 67.4)                            | -1.5<br>(-3.2 to -0.0)                           |
| Dysthymia                                                      | 276.5<br>(219.1 to 346.4)               | 29.2<br>(21.8 to 36.9)                   | 23.6<br>(15.3 to 34.6)            | 66.0<br>(61.1 to 71.0)                            | -0.8<br>(-3.7 to 2.1)                            |
| Bipolar disorder                                               | 53.3<br>(42.9 to 66.8)                  | 3.4<br>(2.4 to 5.0)                      | 9.3<br>(5.7 to 13.8)              | 66.8<br>(60.0 to 73.9)                            | -0.4<br>(-4.4 to 3.9)                            |
| Anxiety disorders                                              | 515.6<br>(456.4 to 586.1)               | 22.9<br>(20.2 to 25.9)                   | 42.7<br>(31.0 to 57.0)            | 65.1<br>(60.8 to 69.8)                            | -1.4<br>(-3.9 to 1.4)                            |
| Eating disorders                                               | --                                      | --                                       | --                                | --                                                | --                                               |
| Anorexia nervosa                                               | --                                      | --                                       | --                                | --                                                | --                                               |
| Bulimia nervosa                                                | --                                      | --                                       | --                                | --                                                | --                                               |
| Autistic spectrum disorders                                    | 68.1<br>(65.2 to 70.9)                  | --                                       | 9.5<br>(6.6 to 13.1)              | 71.7<br>(67.3 to 75.7)                            | 2.6<br>(-0.0 to 5.0)                             |
| Autism                                                         | 26.3<br>(22.4 to 30.8)                  | --                                       | 5.8<br>(3.8 to 8.3)               | 71.5<br>(65.3 to 77.5)                            | 2.4<br>(-1.2 to 6.1)                             |
| Asperger syndrome and other autistic spectrum disorders        | 42.4<br>(35.0 to 51.4)                  | --                                       | 3.7<br>(2.5 to 5.3)               | 72.0<br>(67.7 to 76.6)                            | 2.7<br>(0.2 to 5.5)                              |

| Cause                                                      | Prevalence in thousands (95% UI)           | Incidence in thousands (95% UI)             | YLDs in thousands (95% UI)            |                                                   |                                                  |
|------------------------------------------------------------|--------------------------------------------|---------------------------------------------|---------------------------------------|---------------------------------------------------|--------------------------------------------------|
|                                                            | 2016 counts                                | 2016 counts                                 | 2016 counts                           | Percentage change in counts between 2006 and 2016 | Percentage change in rates between 2006 and 2016 |
| Attention-deficit/hyperactivity disorder                   | < 0.05<br>(< 0.05 to < 0.05)               | --                                          | < 0.05<br>(< 0.05 to < 0.05)          | 90.7<br>(85.9 to 96.5)                            | 14.0<br>(11.1 to 17.4)                           |
| Conduct disorder                                           | --                                         | --                                          | --                                    | --                                                | --                                               |
| Idiopathic developmental intellectual disability           | 37.1<br>(18.4 to 59.9)                     | --                                          | 1.9<br>(0.9 to 3.1)                   | 57.2<br>(34.1 to 65.7)                            | -6.1<br>(-19.9 to -1.0)                          |
| Other mental and substance use disorders                   | 415.6<br>(370.8 to 464.8)                  | 8.2<br>(5.1 to 11.9)                        | 26.9<br>(19.4 to 36.8)                | 68.6<br>(65.3 to 72.1)                            | 0.7<br>(-1.2 to 2.8)                             |
| <b>Diabetes, urogenital, blood, and endocrine diseases</b> | <b>9,766.1<br/>(9,656.4 to 9,859.5)</b>    | <b>2,180.3†<br/>(1,953.8 to 2,437.8)</b>    | <b>425.3<br/>(307.8 to 553.5)</b>     | <b>68.1<br/>(65.0 to 71.3)</b>                    | <b>0.4<br/>(-1.4 to 2.3)</b>                     |
| Diabetes mellitus                                          | 2,162.9<br>(1,931.7 to 2,387.9)            | 28.9<br>(17.9 to 42.0)                      | 176.3<br>(124.9 to 243.1)             | 67.2<br>(61.9 to 72.6)                            | -0.1<br>(-3.3 to 3.1)                            |
| Acute glomerulonephritis                                   | 0.6<br>(0.5 to 0.8)                        | 8.9<br>(6.9 to 11.3)                        | < 0.05<br>(< 0.05 to < 0.05)          | 66.7<br>(55.6 to 78.4)                            | -0.4<br>(-7.0 to 6.5)                            |
| Chronic kidney disease                                     | 5,994.4<br>(5,369.5 to 6,718.2)            | 399.3<br>(273.8 to 549.8)                   | 150.9<br>(109.3 to 194.6)             | 68.8<br>(62.8 to 74.8)                            | 0.9<br>(-2.8 to 4.4)                             |
| Chronic kidney disease due to diabetes mellitus            | 1,722.9<br>(1,254.5 to 2,265.5)            | 119.0<br>(74.1 to 182.0)                    | 42.8<br>(27.6 to 60.5)                | 73.0<br>(64.8 to 81.1)                            | 3.4<br>(-1.6 to 8.2)                             |
| Chronic kidney disease due to hypertension                 | 1,554.5<br>(1,261.6 to 1,864.8)            | 39.2<br>(24.4 to 59.9)                      | 60.7<br>(41.3 to 83.2)                | 68.2<br>(61.2 to 74.9)                            | 0.5<br>(-3.7 to 4.5)                             |
| Chronic kidney disease due to glomerulonephritis           | 1,439.0<br>(1,170.4 to 1,726.5)            | 155.2<br>(102.2 to 223.5)                   | 15.7<br>(10.0 to 23.5)                | 55.0<br>(44.0 to 65.2)                            | -7.4<br>(-14.0 to -1.3)                          |
| Chronic kidney disease due to other causes                 | 1,278.0<br>(938.1 to 1,703.0)              | 85.9<br>(51.6 to 127.2)                     | 31.7<br>(20.3 to 45.9)                | 71.9<br>(62.6 to 82.2)                            | 2.7<br>(-2.9 to 8.9)                             |
| Urinary diseases and male infertility                      | 946.3<br>(839.5 to 1,106.0)                | 1,473.2†<br>(1,305.1 to 1,670.8)            | 28.7<br>(18.6 to 41.5)                | 74.9<br>(73.2 to 76.9)                            | 4.5<br>(3.5 to 5.7)                              |
| Interstitial nephritis and urinary tract infections        | 21.6<br>(18.6 to 25.5)                     | 1,158.8<br>(1,001.2 to 1,363.4)             | 0.6<br>(0.4 to 1.0)                   | 82.3<br>(73.9 to 91.1)                            | 8.9<br>(3.9 to 14.2)                             |
| Urolithiasis                                               | 9.5<br>(7.1 to 12.7)                       | 245.3<br>(184.0 to 323.4)                   | 0.6<br>(0.4 to 1.0)                   | 81.8<br>(65.9 to 98.5)                            | 8.6<br>(-0.9 to 18.6)                            |
| Benign prostatic hyperplasia                               | 898.6<br>(746.1 to 1,084.0)                | 69.1<br>(41.9 to 103.9)                     | 27.3<br>(17.4 to 39.7)                | 74.7<br>(73.0 to 76.6)                            | 4.4<br>(3.3 to 5.5)                              |
| Male infertility                                           | --                                         | --                                          | --                                    | --                                                | --                                               |
| Other urinary diseases                                     | --                                         | --                                          | 0.2<br>(0.1 to 0.2)                   | 67.2<br>(59.3 to 75.5)                            | -0.1<br>(-4.8 to 4.9)                            |
| Gynecological diseases                                     | 1,928.3<br>(1,803.5 to 2,118.8)            | 1.0†<br>(0.7 to 1.5)                        | 5.6<br>(2.8 to 9.9)                   | 56.5<br>(53.5 to 59.5)                            | -6.5<br>(-8.3 to -4.7)                           |
| Uterine fibroids                                           | 36.3<br>(31.5 to 41.8)                     | 1.0<br>(0.7 to 1.5)                         | 0.2<br>(0.1 to 0.5)                   | 64.6<br>(57.4 to 71.2)                            | -1.7<br>(-6.0 to 2.3)                            |
| Polycystic ovarian syndrome                                | --                                         | --                                          | --                                    | --                                                | --                                               |
| Female infertility                                         | --                                         | --                                          | --                                    | --                                                | --                                               |
| Endometriosis                                              | --                                         | --                                          | --                                    | --                                                | --                                               |
| Genital prolapse                                           | 1,869.9<br>(1,647.5 to 2,116.3)            | --                                          | 5.4<br>(2.6 to 9.5)                   | 56.1<br>(53.2 to 59.2)                            | -6.7<br>(-8.5 to -4.9)                           |
| Premenstrual syndrome                                      | --                                         | --                                          | --                                    | --                                                | --                                               |
| Other gynecological diseases                               | --                                         | --                                          | --                                    | --                                                | --                                               |
| Hemoglobinopathies and hemolytic anaemias                  | 2,996.0<br>(2,971.5 to 3,023.1)            | --                                          | 18.1<br>(12.3 to 25.2)                | 53.6<br>(49.0 to 58.5)                            | -8.2<br>(-11.0 to -5.3)                          |
| Thalassemias                                               | < 0.05<br>(< 0.05 to < 0.05)               | --                                          | < 0.05<br>(< 0.05 to < 0.05)          | 32.9<br>(24.2 to 41.0)                            | -20.6<br>(-25.8 to -15.8)                        |
| Thalassaemias trait                                        | 499.8<br>(473.3 to 531.4)                  | --                                          | 8.6<br>(5.7 to 12.1)                  | 73.6<br>(66.1 to 80.7)                            | 3.7<br>(-0.7 to 8.0)                             |
| Sickle cell disorders                                      | < 0.05<br>(< 0.05 to < 0.05)               | --                                          | < 0.05<br>(< 0.05 to < 0.05)          | 67.1<br>(62.5 to 72.1)                            | -0.2<br>(-2.9 to 2.8)                            |
| Sickle cell trait                                          | 411.2<br>(378.0 to 456.8)                  | --                                          | 1.2<br>(0.8 to 1.7)                   | 72.1<br>(65.7 to 78.5)                            | 2.8<br>(-1.0 to 6.7)                             |
| G6PD deficiency                                            | 322.1<br>(308.9 to 337.1)                  | --                                          | 0.1<br>(< 0.05 to 0.1)                | 62.2<br>(55.9 to 68.9)                            | -3.1<br>(-6.9 to 0.9)                            |
| G6PD trait                                                 | 1,854.4<br>(1,816.1 to 1,897.0)            | --                                          | < 0.05<br>(< 0.05 to < 0.05)          | 61.7<br>(50.7 to 72.7)                            | -3.4<br>(-10.0 to 3.2)                           |
| Other hemoglobinopathies and hemolytic anaemias            | 157.2<br>(149.6 to 165.7)                  | --                                          | 8.3<br>(5.7 to 11.5)                  | 35.5<br>(31.6 to 39.6)                            | -19.1<br>(-21.4 to -16.6)                        |
| Endocrine, metabolic, blood, and immune disorders          | 1,415.2<br>(1,147.6 to 1,742.8)            | 268.9<br>(196.8 to 352.5)                   | 45.5<br>(29.6 to 65.1)                | 73.0<br>(65.0 to 80.5)                            | 3.4<br>(-1.4 to 7.8)                             |
| <b>Musculoskeletal disorders</b>                           | <b>6,678.5<br/>(6,542.9 to 6,844.9)</b>    | <b>2,265.4<br/>(1,782.0 to 2,878.9)</b>     | <b>609.1<br/>(448.4 to 789.0)</b>     | <b>66.0<br/>(64.2 to 67.6)</b>                    | <b>-0.8<br/>(-1.9 to 0.1)</b>                    |
| Rheumatoid arthritis                                       | 163.0<br>(146.1 to 181.1)                  | 3.1<br>(2.2 to 4.2)                         | 33.9<br>(24.0 to 43.4)                | 72.5<br>(68.1 to 77.5)                            | 3.1<br>(0.4 to 6.1)                              |
| Osteoarthritis                                             | 3,801.9<br>(3,601.8 to 4,011.4)            | 32.1<br>(25.5 to 39.1)                      | 160.7<br>(114.2 to 218.3)             | 69.5<br>(68.3 to 70.8)                            | 1.2<br>(0.6 to 2.0)                              |
| Low back and neck pain                                     | 3,331.8<br>(3,080.7 to 3,625.3)            | 1,402.4<br>(1,034.1 to 1,839.9)             | 349.5<br>(240.3 to 473.8)             | 65.9<br>(63.4 to 68.2)                            | -0.9<br>(-2.4 to 0.5)                            |
| Low back pain                                              | 2,601.0<br>(1,973.3 to 3,347.6)            | 1,199.0<br>(817.8 to 1,649.3)               | 249.8<br>(163.4 to 348.0)             | 64.7<br>(61.4 to 67.8)                            | -1.6<br>(-3.6 to 0.3)                            |
| Neck pain                                                  | 1,120.8<br>(848.2 to 1,474.1)              | 203.4<br>(124.3 to 302.2)                   | 99.7<br>(64.4 to 148.5)               | 69.1<br>(66.2 to 72.3)                            | 1.0<br>(-0.7 to 2.9)                             |
| Gout                                                       | 297.0<br>(236.2 to 369.2)                  | 40.5<br>(27.8 to 54.4)                      | 8.3<br>(5.4 to 11.6)                  | 73.0<br>(66.4 to 79.8)                            | 3.4<br>(-0.6 to 7.5)                             |
| Other musculoskeletal disorders                            | 760.4<br>(547.2 to 1,094.7)                | 787.4<br>(503.4 to 1,176.4)                 | 56.8<br>(35.1 to 88.0)                | 52.6<br>(42.0 to 63.5)                            | -8.8<br>(-15.2 to -2.3)                          |
| <b>Other non-communicable diseases</b>                     | <b>14,440.0<br/>(14,422.0 to 14,461.8)</b> | <b>70,546.2†<br/>(60,123.4 to 84,117.6)</b> | <b>1,277.3<br/>(922.5 to 1,706.6)</b> | <b>66.3<br/>(63.2 to 69.4)</b>                    | <b>-0.6<br/>(-2.5 to 1.2)</b>                    |
| Congenital anomalies                                       | 120.7<br>(114.4 to 126.6)                  | --                                          | 12.7<br>(9.4 to 16.4)                 | 65.3<br>(60.9 to 69.6)                            | -1.2<br>(-3.9 to 1.3)                            |
| Neural tube defects                                        | 8.4<br>(7.7 to 9.2)                        | --                                          | 2.3<br>(1.7 to 3.1)                   | 67.2<br>(57.5 to 76.4)                            | -0.1<br>(-5.9 to 5.4)                            |
| Congenital heart anomalies                                 | 25.9<br>(23.3 to 28.7)                     | --                                          | 1.4<br>(0.6 to 2.3)                   | 77.1<br>(68.7 to 84.8)                            | 5.8<br>(0.8 to 10.4)                             |
| Orofacial clefts                                           | 7.8<br>(6.9 to 8.6)                        | --                                          | 0.1<br>(0.1 to 0.1)                   | 61.6<br>(56.5 to 66.2)                            | -3.5<br>(-6.5 to -0.7)                           |
| Down's syndrome                                            | --                                         | --                                          | --                                    | --                                                | --                                               |
| Turner syndrome                                            | 0.7<br>(0.6 to 0.9)                        | --                                          | < 0.05<br>(< 0.05 to < 0.05)          | 73.3<br>(69.3 to 77.2)                            | 3.5<br>(1.2 to 5.9)                              |
| Klinefelter syndrome                                       | < 0.05<br>(< 0.05 to < 0.05)               | --                                          | < 0.05<br>(< 0.05 to < 0.05)          | 90.0<br>(83.4 to 97.2)                            | 13.5<br>(9.6 to 17.9)                            |

| Cause                                         | Prevalence in thousands (95% UI)                 | Incidence in thousands (95% UI)                | YLDs in thousands (95% UI)              |                                                   |                                                  |
|-----------------------------------------------|--------------------------------------------------|------------------------------------------------|-----------------------------------------|---------------------------------------------------|--------------------------------------------------|
|                                               | 2016 counts                                      | 2016 counts                                    | 2016 counts                             | Percentage change in counts between 2006 and 2016 | Percentage change in rates between 2006 and 2016 |
| Other chromosomal abnormalities               | < 0.05<br>(< 0.05 to < 0.05)                     | --                                             | < 0.05<br>(< 0.05 to < 0.05)            | 96.0<br>(85.6 to 104.0)                           | 17.1<br>(10.9 to 21.9)                           |
| Congenital musculoskeletal and limb anomalies | 33.2<br>(30.7 to 35.6)                           | --                                             | 4.4<br>(3.1 to 5.8)                     | 67.8<br>(59.8 to 75.6)                            | 0.2<br>(-4.5 to 4.9)                             |
| Urogenital congenital anomalies               | 7.3<br>(6.6 to 8.1)                              | --                                             | 0.1<br>(0.1 to 0.2)                     | 77.5<br>(69.5 to 85.3)                            | 6.0<br>(1.2 to 10.7)                             |
| Digestive congenital anomalies                | 22.1<br>(20.0 to 24.4)                           | --                                             | 0.9<br>(0.6 to 1.2)                     | 65.1<br>(56.2 to 74.3)                            | -1.4<br>(-6.7 to 4.2)                            |
| Other congenital anomalies                    | 43.7<br>(29.9 to 62.1)                           | --                                             | 3.6<br>(2.3 to 5.6)                     | 57.4<br>(49.3 to 65.0)                            | -6.0<br>(-10.8 to -1.4)                          |
| Skin and subcutaneous diseases                | 9,500.4<br>(9,221.4 to 9,803.5)                  | 48,731.8<br>(38,890.8 to 61,412.5)             | 119.6<br>(76.3 to 188.3)                | 68.4<br>(66.7 to 70.1)                            | 0.6<br>(-0.4 to 1.6)                             |
| Dermatitis                                    | 736.4<br>(639.1 to 850.1)                        | 892.2<br>(647.9 to 1,178.7)                    | 21.4<br>(13.2 to 33.0)                  | 66.2<br>(63.4 to 69.3)                            | -0.7<br>(-2.4 to 1.1)                            |
| Psoriasis                                     | 146.8<br>(134.8 to 160.1)                        | 8.3<br>(6.9 to 9.8)                            | 11.0<br>(8.0 to 14.3)                   | 72.6<br>(66.4 to 78.9)                            | 3.1<br>(-0.6 to 6.9)                             |
| Cellulitis                                    | 26.2<br>(22.3 to 31.2)                           | 652.4<br>(562.4 to 755.3)                      | 1.3<br>(0.9 to 1.8)                     | 65.7<br>(57.1 to 75.3)                            | -1.0<br>(-6.2 to 4.7)                            |
| Pyoderma                                      | 126.7<br>(116.5 to 137.8)                        | 3,405.0<br>(3,112.4 to 3,736.1)                | 0.7<br>(0.3 to 1.3)                     | 73.5<br>(68.8 to 78.1)                            | 3.6<br>(0.8 to 6.4)                              |
| Scabies                                       | 190.6<br>(133.0 to 258.1)                        | 599.0<br>(413.3 to 812.5)                      | 4.4<br>(2.3 to 7.7)                     | 58.6<br>(55.2 to 61.7)                            | -5.2<br>(-7.3 to -3.4)                           |
| Fungal skin diseases                          | 6,764.8<br>(5,585.5 to 8,026.9)                  | 36,709.4<br>(26,898.5 to 49,675.8)             | 34.5<br>(14.0 to 71.9)                  | 68.8<br>(68.2 to 69.2)                            | 0.8<br>(0.5 to 1.1)                              |
| Viral skin diseases                           | 162.5<br>(134.7 to 201.0)                        | 255.5<br>(211.4 to 308.8)                      | 4.4<br>(2.8 to 6.7)                     | 67.0<br>(63.0 to 71.4)                            | -0.2<br>(-2.6 to 2.4)                            |
| Acne vulgaris                                 | 50.6<br>(48.8 to 52.4)                           | 16.9<br>(16.3 to 17.6)                         | 1.2<br>(0.8 to 1.7)                     | 70.4<br>(64.1 to 77.1)                            | 1.8<br>(-2.0 to 5.8)                             |
| Alopecia areata                               | 9.4<br>(8.4 to 10.6)                             | 15.4<br>(13.8 to 17.3)                         | 0.3<br>(0.2 to 0.4)                     | 60.4<br>(46.2 to 75.9)                            | -4.2<br>(-12.6 to 5.1)                           |
| Pruritus                                      | 271.0<br>(187.4 to 377.6)                        | 207.5<br>(145.6 to 278.3)                      | 2.6<br>(1.2 to 5.1)                     | 70.2<br>(66.9 to 73.3)                            | 1.7<br>(-0.3 to 3.5)                             |
| Urticaria                                     | 48.2<br>(33.9 to 67.0)                           | 82.8<br>(59.9 to 113.8)                        | 2.5<br>(1.5 to 4.0)                     | 67.1<br>(60.1 to 74.7)                            | -0.1<br>(-4.4 to 4.4)                            |
| Decubitus ulcer                               | 112.4<br>(84.2 to 144.6)                         | 419.4<br>(325.6 to 527.8)                      | 15.7<br>(10.3 to 22.3)                  | 66.1<br>(57.5 to 75.6)                            | -0.8<br>(-5.9 to 4.9)                            |
| Other skin and subcutaneous diseases          | 3,916.9<br>(3,642.8 to 4,204.4)                  | 5,468.2<br>(4,977.6 to 6,009.4)                | 19.6<br>(9.6 to 34.4)                   | 72.5<br>(70.8 to 74.2)                            | 3.1<br>(2.1 to 4.1)                              |
| Sense organ diseases                          | 13,226.2<br>(13,092.2 to 13,356.1)               | 3,691.5<br>(3,353.9 to 4,076.8)                | 1,012.8<br>(738.1 to 1,333.5)           | 65.8<br>(62.0 to 69.6)                            | -0.9<br>(-3.2 to 1.4)                            |
| Glaucoma                                      | 101.1<br>(80.1 to 126.3)                         | --                                             | 9.7<br>(6.7 to 13.9)                    | 71.1<br>(66.5 to 75.8)                            | 2.2<br>(-0.5 to 5.0)                             |
| Cataract                                      | 2,332.2<br>(1,916.7 to 2,815.5)                  | --                                             | 166.2<br>(116.3 to 227.1)               | 62.8<br>(60.9 to 64.8)                            | -2.7<br>(-3.9 to -1.5)                           |
| Macular degeneration                          | 152.6<br>(120.7 to 188.7)                        | --                                             | 14.0<br>(9.7 to 19.9)                   | 68.5<br>(63.3 to 74.2)                            | 0.7<br>(-2.4 to 4.1)                             |
| Refraction and accommodation disorders        | 6,778.8<br>(6,249.8 to 7,353.1)                  | --                                             | 102.5<br>(63.8 to 155.3)                | 62.2<br>(60.4 to 63.9)                            | -3.1<br>(-4.2 to -2.1)                           |
| Age-related and other hearing loss            | 13,091.2<br>(12,906.7 to 13,262.2)               | --                                             | 637.8<br>(460.7 to 834.0)               | 66.8<br>(60.8 to 72.9)                            | -0.3<br>(-3.9 to 3.3)                            |
| Other vision loss                             | 454.5<br>(348.6 to 590.8)                        | --                                             | 34.1<br>(23.2 to 47.6)                  | 67.8<br>(64.7 to 71.0)                            | 0.2<br>(-1.6 to 2.2)                             |
| Other sense organ diseases                    | 1,688.0<br>(1,470.1 to 1,928.5)                  | 3,691.5<br>(3,353.9 to 4,076.8)                | 48.6<br>(31.2 to 71.5)                  | 67.6<br>(64.1 to 72.1)                            | 0.1<br>(-2.0 to 2.8)                             |
| Oral disorders                                | 9,147.5<br>(8,948.4 to 9,319.8)                  | 18,122.8<br>(15,337.5 to 20,856.8)             | 132.2<br>(85.4 to 189.3)                | 68.4<br>(67.0 to 69.8)                            | 0.6<br>(-0.2 to 1.4)                             |
| Caries of deciduous teeth                     | --                                               | --                                             | --                                      | --                                                | --                                               |
| Caries of permanent teeth                     | 5,447.0<br>(4,730.2 to 6,203.2)                  | 17,719.3<br>(15,026.5 to 20,496.1)             | 4.2<br>(1.8 to 7.7)                     | 64.3<br>(62.1 to 66.8)                            | -1.8<br>(-3.1 to -0.4)                           |
| Periodontal disease                           | 2,744.6<br>(2,102.1 to 3,515.2)                  | 339.7<br>(142.1 to 558.9)                      | 16.4<br>(6.2 to 34.4)                   | 68.2<br>(66.9 to 69.6)                            | 0.5<br>(-0.3 to 1.4)                             |
| Edentulism and severe tooth loss              | 4,156.6<br>(3,464.9 to 4,990.2)                  | 63.9<br>(38.8 to 98.9)                         | 106.6<br>(70.6 to 150.8)                | 68.7<br>(67.0 to 70.3)                            | 0.8<br>(-0.2 to 1.8)                             |
| Other oral disorders                          | 195.6<br>(172.8 to 219.8)                        | --                                             | 5.2<br>(3.2 to 7.7)                     | 67.0<br>(63.4 to 70.3)                            | -0.2<br>(-2.4 to 1.7)                            |
| <b>Injuries</b>                               | <b>13,463.8</b><br><b>(12,607.8 to 14,384.1)</b> | <b>5,659.5†</b><br><b>(5,089.8 to 6,290.6)</b> | <b>532.7</b><br><b>(375.9 to 728.2)</b> | <b>69.6</b><br><b>(67.2 to 71.7)</b>              | <b>1.3</b><br><b>(-0.1 to 2.6)</b>               |
| <b>Transport injuries</b>                     | <b>1,677.9</b><br><b>(1,574.0 to 1,796.4)</b>    | <b>228.3</b><br><b>(188.8 to 273.1)</b>        | <b>69.3</b><br><b>(46.4 to 99.4)</b>    | <b>69.3</b><br><b>(68.0 to 70.4)</b>              | <b>1.1</b><br><b>(0.3 to 1.8)</b>                |
| Road injuries                                 | 1,369.6<br>(1,278.8 to 1,478.0)                  | 170.4<br>(134.8 to 209.1)                      | 56.4<br>(37.6 to 80.8)                  | 70.8<br>(69.5 to 72.2)                            | 2.1<br>(1.3 to 2.9)                              |
| Pedestrian road injuries                      | 348.2<br>(301.4 to 400.6)                        | 38.6<br>(28.5 to 51.8)                         | 15.3<br>(10.3 to 21.9)                  | 72.5<br>(71.0 to 74.1)                            | 3.1<br>(2.2 to 4.0)                              |
| Cyclist road injuries                         | 300.5<br>(254.8 to 344.9)                        | 44.0<br>(31.1 to 59.1)                         | 12.0<br>(7.9 to 17.3)                   | 77.2<br>(75.6 to 78.9)                            | 5.9<br>(4.9 to 6.9)                              |
| Motorcyclist road injuries                    | 209.1<br>(179.4 to 242.5)                        | 11.0<br>(7.1 to 16.0)                          | 8.1<br>(5.4 to 11.6)                    | 84.8<br>(83.4 to 86.2)                            | 10.4<br>(9.6 to 11.2)                            |
| Motor vehicle road injuries                   | 426.5<br>(365.7 to 489.4)                        | 64.5<br>(48.6 to 82.3)                         | 17.8<br>(12.0 to 25.3)                  | 56.7<br>(55.0 to 58.4)                            | -6.4<br>(-7.4 to -5.4)                           |
| Other road injuries                           | 85.2<br>(73.9 to 98.1)                           | 12.4<br>(7.5 to 19.1)                          | 3.2<br>(2.1 to 4.6)                     | 96.3<br>(94.6 to 98.2)                            | 17.3<br>(16.3 to 18.4)                           |
| Other transport injuries                      | 308.3<br>(259.0 to 378.0)                        | 57.9<br>(41.6 to 79.6)                         | 13.0<br>(8.6 to 19.1)                   | 62.6<br>(60.0 to 64.9)                            | -2.9<br>(-4.4 to -1.5)                           |
| <b>Unintentional injuries</b>                 | <b>11,350.2</b><br><b>(10,529.5 to 12,242.0)</b> | <b>5,330.5</b><br><b>(4,766.7 to 5,962.6)</b>  | <b>450.7</b><br><b>(319.1 to 619.8)</b> | <b>70.0</b><br><b>(67.2 to 72.5)</b>              | <b>1.6</b><br><b>(-0.1 to 3.0)</b>               |
| Falls                                         | 7,198.4<br>(6,406.3 to 8,067.9)                  | 3,438.0<br>(2,908.0 to 4,043.6)                | 336.3<br>(240.0 to 457.0)               | 71.8<br>(68.0 to 75.0)                            | 2.6<br>(0.4 to 4.6)                              |
| Drowning                                      | 79.2<br>(66.0 to 99.3)                           | 17.9<br>(15.3 to 21.5)                         | 3.4<br>(2.3 to 4.9)                     | 20.3<br>(16.6 to 23.4)                            | -28.1<br>(-30.3 to -26.3)                        |
| Fire, heat, and hot substances                | 628.6<br>(560.7 to 710.9)                        | 44.5<br>(37.8 to 52.4)                         | 10.7<br>(6.3 to 16.8)                   | 60.5<br>(58.7 to 62.1)                            | -4.1<br>(-5.2 to -3.2)                           |
| Poisonings                                    | 18.7<br>(16.4 to 21.3)                           | 8.2<br>(6.1 to 11.1)                           | 1.0<br>(0.7 to 1.5)                     | 76.7<br>(70.0 to 84.4)                            | 5.5<br>(1.6 to 10.2)                             |
| Exposure to mechanical forces                 | 1,208.2<br>(1,060.3 to 1,403.0)                  | 202.1<br>(169.0 to 240.9)                      | 24.3<br>(16.0 to 35.3)                  | 72.8<br>(71.2 to 74.2)                            | 3.2<br>(2.3 to 4.1)                              |
| Unintentional firearm injuries                | 42.1<br>(35.7 to 48.9)                           | 3.7<br>(2.6 to 5.2)                            | 0.8<br>(0.5 to 1.2)                     | 70.8<br>(68.7 to 72.4)                            | 2.0<br>(0.8 to 3.0)                              |
| Unintentional suffocation                     | 52.3<br>(43.8 to 63.1)                           | 17.0<br>(12.3 to 22.8)                         | 1.5<br>(1.0 to 2.2)                     | 72.2<br>(70.3 to 74.6)                            | 2.9<br>(1.8 to 4.3)                              |
| Other exposure to mechanical forces           | 1,113.8<br>(967.5 to 1,312.2)                    | 181.4<br>(151.6 to 218.2)                      | 22.0<br>(14.4 to 31.9)                  | 72.9<br>(71.2 to 74.3)                            | 3.3<br>(2.3 to 4.2)                              |

| Cause                                                                               | Prevalence in thousands (95% UI)        | Incidence in thousands (95% UI)        | YLDs in thousands (95% UI)          |                                                   |                                                  |
|-------------------------------------------------------------------------------------|-----------------------------------------|----------------------------------------|-------------------------------------|---------------------------------------------------|--------------------------------------------------|
|                                                                                     | 2016 counts                             | 2016 counts                            | 2016 counts                         | Percentage change in counts between 2006 and 2016 | Percentage change in rates between 2006 and 2016 |
| Adverse effects of medical treatment                                                | 48.8<br>(36.4 to 62.9)                  | 639.2<br>(529.0 to 769.5)              | 6.5<br>(4.1 to 9.9)                 | 60.0<br>(52.1 to 68.2)                            | -4.4<br>(-9.2 to 0.5)                            |
| Animal contact                                                                      | 242.9<br>(218.3 to 269.2)               | 92.1<br>(71.4 to 119.2)                | 4.5<br>(3.1 to 6.3)                 | 54.8<br>(52.3 to 56.9)                            | -7.5<br>(-9.0 to -6.3)                           |
| Venomous animal contact                                                             | 75.1<br>(64.6 to 88.0)                  | 36.8<br>(27.2 to 50.0)                 | 2.1<br>(1.5 to 3.0)                 | 56.0<br>(52.7 to 59.2)                            | -6.8<br>(-8.8 to -4.9)                           |
| Non-venomous animal contact                                                         | 167.8<br>(146.2 to 188.1)               | 55.3<br>(41.2 to 73.4)                 | 2.4<br>(1.5 to 3.6)                 | 53.8<br>(51.3 to 55.5)                            | -8.1<br>(-9.6 to -7.1)                           |
| Foreign body                                                                        | 420.7<br>(359.9 to 496.5)               | 413.5<br>(361.6 to 470.8)              | 14.5<br>(9.6 to 21.0)               | 66.2<br>(64.4 to 67.8)                            | -0.7<br>(-1.8 to 0.3)                            |
| Pulmonary aspiration and foreign body in airway                                     | 231.7<br>(185.4 to 298.4)               | 321.6<br>(274.3 to 369.3)              | 8.7<br>(5.7 to 12.7)                | 67.4<br>(65.0 to 69.7)                            | 0.0<br>(-1.4 to 1.4)                             |
| Foreign body in eyes                                                                | 20.2<br>(16.1 to 27.2)                  | 32.4<br>(16.8 to 72.2)                 | 1.2<br>(0.8 to 1.8)                 | 75.5<br>(72.8 to 78.9)                            | 4.9<br>(3.2 to 6.9)                              |
| Foreign body in other body part                                                     | 168.8<br>(139.6 to 198.5)               | 59.5<br>(46.4 to 75.0)                 | 4.6<br>(3.0 to 6.7)                 | 61.9<br>(60.1 to 63.7)                            | -3.3<br>(-4.3 to -2.2)                           |
| Environmental heat and cold exposure                                                | 395.7<br>(352.2 to 445.1)               | 106.5<br>(84.8 to 133.5)               | 14.9<br>(10.3 to 20.7)              | 61.4<br>(58.9 to 63.5)                            | -3.6<br>(-5.1 to -2.3)                           |
| Other unintentional injuries                                                        | 1,109.0<br>(959.5 to 1,275.4)           | 368.4<br>(268.3 to 480.8)              | 34.6<br>(23.1 to 49.4)              | 70.7<br>(69.1 to 72.0)                            | 2.0<br>(1.0 to 2.8)                              |
| <b>Self-harm and interpersonal violence</b>                                         | <b>495.8</b><br><b>(453.4 to 538.4)</b> | <b>97.5†</b><br><b>(82.7 to 113.6)</b> | <b>11.2</b><br><b>(7.4 to 15.8)</b> | <b>52.6</b><br><b>(51.2 to 54.0)</b>              | <b>-8.8</b><br><b>(-9.7 to -8.0)</b>             |
| Self-harm                                                                           | 126.1<br>(105.7 to 146.3)               | 66.5<br>(54.4 to 80.0)                 | 4.1<br>(2.7 to 5.8)                 | 39.1<br>(37.1 to 41.2)                            | -16.9<br>(-18.1 to -15.6)                        |
| Self-harm by firearm                                                                | 2.2<br>(1.8 to 2.8)                     | 0.5<br>(0.2 to 1.1)                    | 0.1<br>( $< 0.05$ to 0.1)           | 55.4<br>(51.2 to 59.5)                            | -7.2<br>(-9.7 to -4.7)                           |
| Self-harm by other specified means                                                  | 123.8<br>(103.5 to 144.2)               | 66.0<br>(54.0 to 79.2)                 | 4.0<br>(2.6 to 5.7)                 | 39.0<br>(36.9 to 41.0)                            | -17.0<br>(-18.2 to -15.8)                        |
| Interpersonal violence                                                              | 369.7<br>(334.9 to 413.6)               | 31.0†<br>(22.9 to 40.0)                | 7.1<br>(4.7 to 10.1)                | 61.7<br>(60.5 to 62.8)                            | -3.4<br>(-4.1 to -2.7)                           |
| Assault by firearm                                                                  | 18.8<br>(16.1 to 21.7)                  | 2.3<br>(1.4 to 3.5)                    | 0.5<br>(0.3 to 0.7)                 | 70.9<br>(69.4 to 72.4)                            | 2.1<br>(1.2 to 3.0)                              |
| Assault by sharp object                                                             | 58.4<br>(49.8 to 68.7)                  | 7.8<br>(5.2 to 11.2)                   | 1.2<br>(0.8 to 1.7)                 | 59.2<br>(57.2 to 60.9)                            | -4.9<br>(-6.1 to -3.9)                           |
| Sexual violence                                                                     | 110.3<br>(90.6 to 133.3)                | --                                     | 0.6<br>(0.4 to 0.9)                 | 59.4<br>(57.4 to 61.3)                            | -4.8<br>(-6.0 to -3.6)                           |
| Assault by other means                                                              | 182.2<br>(156.5 to 214.3)               | 20.9<br>(14.9 to 27.7)                 | 4.9<br>(3.2 to 7.0)                 | 61.8<br>(60.6 to 63.0)                            | -3.3<br>(-4.0 to -2.6)                           |
| <b>Forces of nature, conflict and terrorism, and executions and police conflict</b> | <b>50.1</b><br><b>(34.0 to 69.8)</b>    | <b>3.2†</b><br><b>(1.1 to 6.5)</b>     | <b>1.5</b><br><b>(0.4 to 4.0)</b>   | <b>103.6</b><br><b>(87.5 to 129.4)</b>            | <b>21.6</b><br><b>(12.1 to 37.1)</b>             |
| Forces of nature, conflict and terrorism, and state actor violence                  | 19.1<br>(10.4 to 30.1)                  | 0.4<br>(0.2 to 0.6)                    | 0.6<br>(0.1 to 1.7)                 | 138.0<br>(118.4 to 168.6)                         | 42.2<br>(30.5 to 60.5)                           |
| Conflict and terrorism                                                              | 26.0<br>(15.8 to 42.8)                  | --                                     | 0.8<br>(0.2 to 2.1)                 | 87.9<br>(74.7 to 116.2)                           | 12.3<br>(4.4 to 29.2)                            |
| Executions and police conflict                                                      | 5.0<br>(1.7 to 8.2)                     | 2.8<br>(0.8 to 6.1)                    | 0.2<br>( $< 0.05$ to 0.5)           | 44.8<br>(5.9 to 110.2)                            | -13.5<br>(-36.8 to 25.6)                         |

We did not calculate incidence for certain NTDs and causes with only birth prevalence. Blank cells mean that no estimate is available.

† Incidence for aggregate causes represents the sum of the incidence of the causes below the aggregate.

‡ Incidence estimates for stroke represent first-ever stroke only.

^ Incidence of HIV/AIDS represents new infections of HIV only and does not include new infections of Tuberculosis in HIV positive cases.

SR Table 12: Global prevalence, incidence, and YLDs for 2016, percentage change of YLD counts and percentage change of YLD rates between 2006 and 2016 by cause, age 95+ years.

| Cause                                                                                | Prevalence in thousands (95% UI)       | Incidence in thousands (95% UI)            | YLDs in thousands (95% UI)           |                                                   |                                                  |
|--------------------------------------------------------------------------------------|----------------------------------------|--------------------------------------------|--------------------------------------|---------------------------------------------------|--------------------------------------------------|
|                                                                                      | 2016 counts                            | 2016 counts                                | 2016 counts                          | Percentage change in counts between 2006 and 2016 | Percentage change in rates between 2006 and 2016 |
| <b>All causes</b>                                                                    | <b>3,297.9</b><br>(3,296.7 to 3,300.2) | <b>32,291.1†</b><br>(28,207.4 to 36,948.2) | <b>1,114.4</b><br>(840.4 to 1,410.2) | <b>55.1</b><br>(53.8 to 56.6)                     | <b>-1.0</b><br>(-1.9 to -0.1)                    |
| <b>Communicable, maternal, neonatal, and nutritional disorders</b>                   | <b>1,576.7</b><br>(1,553.9 to 1,603.4) | <b>10,494.1†</b><br>(8,625.0 to 12,908.5)  | <b>23.1</b><br>(16.8 to 31.9)        | <b>57.0</b><br>(50.6 to 97.9)                     | <b>0.2</b><br>(-3.9 to 26.3)                     |
| <b>HIV/AIDS and tuberculosis</b>                                                     | <b>457.1</b><br>(403.0 to 538.7)       | <b>3.9†</b><br>(2.9 to 5.1)                | <b>1.6</b><br>(1.0 to 2.2)           | <b>48.4</b><br>(38.1 to 59.1)                     | <b>-5.3</b><br>(-11.9 to 1.5)                    |
| Tuberculosis                                                                         | 429.4<br>(350.1 to 536.0)              | 3.9†<br>(2.9 to 5.1)                       | 1.4<br>(0.9 to 1.9)                  | 45.2<br>(39.2 to 52.7)                            | -7.3<br>(-11.2 to -2.5)                          |
| Drug-susceptible tuberculosis                                                        | 4.8<br>(3.7 to 6.2)                    | 3.7<br>(2.8 to 4.9)                        | 1.3<br>(0.8 to 1.9)                  | 45.2<br>(39.0 to 52.6)                            | -7.3<br>(-11.3 to -2.6)                          |
| Multidrug-resistant tuberculosis without extensive drug resistance                   | 0.2<br>(0.1 to 0.2)                    | 0.1<br>(0.1 to 0.1)                        | < 0.05<br>(< 0.05 to 0.1)            | 36.3<br>(15.5 to 64.6)                            | -13.0<br>(-26.3 to 5.0)                          |
| Extensively drug-resistant tuberculosis                                              | < 0.05<br>(< 0.05 to < 0.05)           | < 0.05<br>(< 0.05 to < 0.05)               | < 0.05<br>(< 0.05 to < 0.05)         | 322.3<br>(260.6 to 407.3)                         | 169.5<br>(130.1 to 223.7)                        |
| Latent tuberculosis infection                                                        | 424.4<br>(344.6 to 530.3)              | --                                         | --                                   | --                                                | --                                               |
| HIV/AIDS                                                                             | 2.1<br>(1.8 to 2.5)                    | --                                         | 0.2<br>(0.1 to 0.3)                  | 72.5<br>(17.2 to 155.7)                           | 10.1<br>(-25.2 to 63.1)                          |
| Drug-susceptible HIV/AIDS - Tuberculosis                                             | 0.1<br>(< 0.05 to 0.1)                 | 0.1<br>(< 0.05 to 0.1)                     | < 0.05<br>(< 0.05 to < 0.05)         | 26.5<br>(16.1 to 36.9)                            | -19.2<br>(-25.9 to -12.7)                        |
| Multidrug-resistant HIV/AIDS - Tuberculosis without extensive drug resistance        | < 0.05<br>(< 0.05 to < 0.05)           | < 0.05<br>(< 0.05 to < 0.05)               | < 0.05<br>(< 0.05 to < 0.05)         | 49.2<br>(3.9 to 102.9)                            | -4.8<br>(-33.7 to 29.5)                          |
| Extensively drug-resistant HIV/AIDS - Tuberculosis                                   | < 0.05<br>(< 0.05 to < 0.05)           | < 0.05<br>(< 0.05 to < 0.05)               | < 0.05<br>(< 0.05 to < 0.05)         | 454.4<br>(244.0 to 722.2)                         | 253.8<br>(119.5 to 424.7)                        |
| HIV/AIDS resulting in other diseases                                                 | 2.0<br>(1.7 to 2.5)                    | --                                         | 0.2<br>(0.1 to 0.3)                  | 80.6<br>(16.3 to 191.3)                           | 15.3<br>(-25.8 to 85.9)                          |
| <b>Diarrhoea, lower respiratory infections, and other common infectious diseases</b> | <b>185.0</b><br>(171.3 to 202.2)       | <b>10,122.9†</b><br>(8,270.7 to 12,546.7)  | <b>9.9</b><br>(6.9 to 15.9)          | <b>69.8</b><br>(58.3 to 174.7)                    | <b>8.3</b><br>(1.0 to 75.3)                      |
| Diarrhoeal diseases                                                                  | 51.0<br>(44.1 to 57.7)                 | 3,506.6<br>(3,042.9 to 3,972.8)            | 5.0<br>(3.5 to 6.8)                  | 64.0<br>(58.8 to 69.4)                            | 4.7<br>(1.4 to 8.1)                              |
| Intestinal infectious diseases                                                       | 0.1<br>(0.1 to 0.1)                    | 1.8†<br>(1.4 to 2.4)                       | < 0.05<br>(< 0.05 to < 0.05)         | 29.3<br>(2.0 to 66.1)                             | -17.5<br>(-34.9 to 6.0)                          |
| Typhoid fever                                                                        | 0.1<br>(0.1 to 0.1)                    | 1.4<br>(1.1 to 1.9)                        | < 0.05<br>(< 0.05 to < 0.05)         | 32.8<br>(2.9 to 74.7)                             | -15.2<br>(-34.3 to 11.5)                         |
| Paratyphoid fever                                                                    | < 0.05<br>(< 0.05 to < 0.05)           | 0.4<br>(0.3 to 0.5)                        | < 0.05<br>(< 0.05 to < 0.05)         | 23.8<br>(-1.5 to 55.5)                            | -21.0<br>(-37.1 to -0.8)                         |
| Other intestinal infectious diseases                                                 | --                                     | --                                         | < 0.05<br>(< 0.05 to < 0.05)         | 23.0<br>(-3.0 to 58.1)                            | -21.5<br>(-38.1 to 0.9)                          |
| Lower respiratory infections                                                         | 25.8<br>(22.5 to 29.2)                 | 1,115.0<br>(958.1 to 1,276.1)              | 1.4<br>(1.0 to 1.9)                  | 72.8<br>(62.7 to 82.7)                            | 10.2<br>(3.8 to 16.6)                            |
| Upper respiratory infections                                                         | 72.7<br>(50.3 to 101.3)                | 5,440.4<br>(3,638.2 to 7,818.7)            | 1.6<br>(0.9 to 2.6)                  | 51.6<br>(48.0 to 55.4)                            | -3.2<br>(-5.5 to -0.9)                           |
| Otitis media                                                                         | 19.3<br>(13.2 to 27.4)                 | 10.4<br>(6.3 to 15.6)                      | 0.5<br>(0.3 to 0.8)                  | 51.1<br>(42.9 to 59.9)                            | -3.6<br>(-8.8 to 2.0)                            |
| Meningitis                                                                           | 6.7<br>(2.8 to 43.8)                   | 0.9<br>(0.7 to 1.2)                        | 0.6<br>(0.1 to 6.3)                  | 519.2<br>(42.3 to 4,718.9)                        | 295.2<br>(-9.2 to 2,975.1)                       |
| Pneumococcal meningitis                                                              | 1.7<br>(1.2 to 2.1)                    | 0.2<br>(0.1 to 0.4)                        | 0.1<br>(< 0.05 to 0.1)               | 39.0<br>(33.4 to 45.7)                            | -11.3<br>(-14.8 to -7.0)                         |
| H influenzae type B meningitis                                                       | 0.3<br>(0.2 to 0.4)                    | 0.1<br>(< 0.05 to 0.1)                     | < 0.05<br>(< 0.05 to < 0.05)         | 1.6<br>(-9.0 to 19.8)                             | -35.1<br>(-42.0 to -23.6)                        |
| Meningococcal infection                                                              | 3.5<br>(0.3 to 40.5)                   | 0.2<br>(0.1 to 0.3)                        | 0.5<br>(< 0.05 to 6.2)               | 3,128.5<br>(36.3 to 13,160.7)                     | -1,960.2<br>(-13.0 to 8,362.0)                   |
| Other meningitis                                                                     | 1.2<br>(0.9 to 1.6)                    | 0.4<br>(0.3 to 0.6)                        | 0.1<br>(< 0.05 to 0.1)               | 78.6<br>(70.7 to 86.3)                            | 13.9<br>(8.9 to 18.9)                            |
| Encephalitis                                                                         | 8.9<br>(4.6 to 14.8)                   | 6.6<br>(5.3 to 7.9)                        | 0.4<br>(0.3 to 0.5)                  | 56.1<br>(45.9 to 66.9)                            | -0.4<br>(-6.9 to 6.5)                            |
| Diphtheria                                                                           | --                                     | --                                         | --                                   | --                                                | --                                               |
| Whooping cough                                                                       | --                                     | --                                         | --                                   | --                                                | --                                               |
| Tetanus                                                                              | < 0.05<br>(< 0.05 to < 0.05)           | 0.1<br>(< 0.05 to 0.1)                     | < 0.05<br>(< 0.05 to < 0.05)         | -2.3<br>(-26.2 to 34.3)                           | -37.6<br>(-52.9 to -14.3)                        |
| Measles                                                                              | --                                     | --                                         | --                                   | --                                                | --                                               |
| Varicella and herpes zoster                                                          | 7.5<br>(5.1 to 10.7)                   | 41.0<br>(27.5 to 58.8)                     | 0.4<br>(0.2 to 0.6)                  | 63.3<br>(54.2 to 72.5)                            | 4.2<br>(-1.6 to 10.1)                            |
| <b>Neglected tropical diseases and malaria</b>                                       | <b>369.9</b><br>(355.6 to 382.0)       | <b>277.2†</b><br>(177.3 to 381.6)          | <b>3.5</b><br>(2.4 to 4.8)           | <b>37.6</b><br>(23.4 to 55.1)                     | <b>-12.2</b><br>(-21.2 to -1.0)                  |
| Malaria                                                                              | 0.6<br>(0.4 to 0.9)                    | 10.1<br>(7.4 to 13.2)                      | < 0.05<br>(< 0.05 to < 0.05)         | -7.3<br>(-20.2 to 5.0)                            | -40.9<br>(-49.1 to -33.0)                        |
| Chagas disease                                                                       | 7.6<br>(6.5 to 8.9)                    | < 0.05<br>(< 0.05 to 0.1)                  | 0.3<br>(0.1 to 0.6)                  | 54.9<br>(47.4 to 62.6)                            | -1.1<br>(-6.0 to 3.8)                            |
| Leishmaniasis                                                                        | 1.5<br>(1.2 to 1.8)                    | 0.4<br>(0.3 to 0.6)                        | 0.1<br>(< 0.05 to 0.1)               | 76.4<br>(62.9 to 91.0)                            | 12.5<br>(3.9 to 21.9)                            |
| Visceral leishmaniasis                                                               | < 0.05<br>(< 0.05 to 0.1)              | 0.2<br>(0.1 to 0.3)                        | < 0.05<br>(< 0.05 to < 0.05)         | -20.3<br>(-71.9 to 91.7)                          | -49.1<br>(-82.1 to 22.3)                         |
| Cutaneous and mucocutaneous leishmaniasis                                            | 1.3<br>(1.0 to 1.6)                    | 0.2<br>(0.1 to 0.3)                        | 0.1<br>(< 0.05 to 0.1)               | 84.0<br>(73.4 to 98.0)                            | 17.4<br>(10.7 to 26.4)                           |
| African trypanosomiasis                                                              | < 0.05<br>(< 0.05 to < 0.05)           | < 0.05<br>(< 0.05 to < 0.05)               | < 0.05<br>(< 0.05 to < 0.05)         | -61.4<br>(-96.4 to 228.2)                         | -75.4<br>(-97.7 to 109.5)                        |
| Schistosomiasis                                                                      | 23.9<br>(19.9 to 27.9)                 | 4.7<br>(3.8 to 5.6)                        | 0.2<br>(0.1 to 0.3)                  | -22.1<br>(-27.3 to -17.0)                         | -50.3<br>(-53.6 to -47.0)                        |
| Cysticercosis                                                                        | 1.9<br>(1.0 to 3.4)                    | --                                         | 0.2<br>(0.1 to 0.5)                  | 41.4<br>(30.0 to 52.3)                            | -9.8<br>(-17.1 to -2.8)                          |
| Cystic echinococcosis                                                                | 0.1<br>(0.1 to 0.3)                    | < 0.05<br>(< 0.05 to 0.1)                  | < 0.05<br>(< 0.05 to < 0.05)         | -19.5<br>(-69.7 to 106.8)                         | -48.7<br>(-80.6 to 32.0)                         |
| Lymphatic filariasis                                                                 | 3.8<br>(3.0 to 5.1)                    | 0.9<br>(0.5 to 1.4)                        | 0.2<br>(0.1 to 0.3)                  | -34.3<br>(-53.8 to -19.5)                         | -58.1<br>(-70.5 to -48.6)                        |
| Onchocerciasis                                                                       | 1.3<br>(0.8 to 2.0)                    | 0.3<br>(0.1 to 0.5)                        | 0.1<br>(0.1 to 0.2)                  | -5.2<br>(-26.5 to 27.2)                           | -39.5<br>(-53.1 to -18.8)                        |
| Trachoma                                                                             | 11.0<br>(6.6 to 16.2)                  | --                                         | 0.8<br>(0.4 to 1.2)                  | 26.3<br>(12.0 to 41.4)                            | -19.4<br>(-28.5 to -9.8)                         |
| Dengue                                                                               | 6.1<br>(3.4 to 10.2)                   | 102.2<br>(63.6 to 152.6)                   | 0.9<br>(0.4 to 1.6)                  | 192.2<br>(139.3 to 562.6)                         | 86.5<br>(52.7 to 322.8)                          |
| Yellow fever                                                                         | < 0.05<br>(< 0.05 to < 0.05)           | < 0.05<br>(< 0.05 to < 0.05)               | < 0.05<br>(< 0.05 to < 0.05)         | -9.8<br>(-44.2 to 50.1)                           | -42.4<br>(-64.4 to -4.2)                         |
| Rabies                                                                               | < 0.05<br>(< 0.05 to < 0.05)           | < 0.05<br>(< 0.05 to < 0.05)               | < 0.05<br>(< 0.05 to < 0.05)         | 86.4<br>(-22.3 to 226.9)                          | 18.9<br>(-50.4 to 108.6)                         |
| Intestinal nematode infections                                                       | 304.8<br>(290.4 to 317.3)              | --                                         | 0.5<br>(0.3 to 0.8)                  | 14.3<br>(6.7 to 23.1)                             | -27.1<br>(-31.9 to -21.5)                        |
| Ascariasis                                                                           | 162.2<br>(144.4 to 184.1)              | --                                         | 0.2<br>(0.1 to 0.3)                  | -4.4<br>(-15.2 to 8.2)                            | -39.0<br>(-45.9 to -30.9)                        |



| Cause                                                                   | Prevalence in thousands (95% UI) | Incidence in thousands (95% UI)                 | YLDs in thousands (95% UI)   |                                                   |                                                  |
|-------------------------------------------------------------------------|----------------------------------|-------------------------------------------------|------------------------------|---------------------------------------------------|--------------------------------------------------|
|                                                                         | 2016 counts                      | 2016 counts                                     | 2016 counts                  | Percentage change in counts between 2006 and 2016 | Percentage change in rates between 2006 and 2016 |
| Trichuriasis                                                            | 91.1<br>(83.1 to 99.8)           | --                                              | 0.1<br>(< 0.05 to 0.1)       | 12.9<br>(-4.8 to 34.7)                            | -28.0<br>(-39.3 to -14.1)                        |
| Hookworm disease                                                        | 82.5<br>(75.8 to 90.2)           | --                                              | 0.3<br>(0.2 to 0.5)          | 28.3<br>(16.5 to 42.1)                            | -18.2<br>(-25.7 to -9.3)                         |
| Food-borne trematodiasis                                                | 30.6<br>(20.8 to 38.0)           | 157.5<br>(70.3 to 248.1)                        | 0.1<br>(< 0.05 to 0.2)       | 106.5<br>(74.3 to 147.1)                          | 31.8<br>(11.2 to 57.7)                           |
| Leprosy                                                                 | 0.7<br>(0.7 to 0.8)              | < 0.05<br>(< 0.05 to < 0.05)                    | < 0.05<br>(< 0.05 to 0.1)    | 65.5<br>(56.3 to 74.9)                            | 5.6<br>(-0.2 to 11.6)                            |
| Ebola virus disease                                                     | < 0.05<br>(0.0 to < 0.05)        | --                                              | < 0.05<br>(0.0 to < 0.05)    | --                                                | --                                               |
| Zika virus disease                                                      | < 0.05<br>(< 0.05 to < 0.05)     | 1.0<br>(0.5 to 1.9)                             | < 0.05<br>(< 0.05 to < 0.05) | --                                                | --                                               |
| Guinea worm disease                                                     | < 0.05<br>(< 0.05 to < 0.05)     | < 0.05<br>(< 0.05 to < 0.05)                    | < 0.05<br>(< 0.05 to < 0.05) | -99.5<br>(-99.7 to -99.2)                         | -99.7<br>(-99.8 to -99.5)                        |
| Other neglected tropical diseases                                       | 3.8<br>(3.6 to 4.0)              | --                                              | 0.1<br>(0.1 to 0.1)          | 76.4<br>(64.2 to 105.3)                           | 12.6<br>(4.8 to 31.0)                            |
| <b>Maternal disorders</b>                                               | --                               | --                                              | --                           | --                                                | --                                               |
| Maternal haemorrhage                                                    | --                               | --                                              | --                           | --                                                | --                                               |
| Maternal sepsis and other pregnancy related infections                  | --                               | --                                              | --                           | --                                                | --                                               |
| Maternal hypertensive disorders                                         | --                               | --                                              | --                           | --                                                | --                                               |
| Maternal obstructed labour and uterine rupture                          | --                               | --                                              | --                           | --                                                | --                                               |
| Maternal abortion, miscarriage, and ectopic pregnancy                   | --                               | --                                              | --                           | --                                                | --                                               |
| Other maternal disorders                                                | --                               | --                                              | --                           | --                                                | --                                               |
| <b>Neonatal disorders</b>                                               | 5.0<br>(4.5 to 5.8)              | --                                              | 0.2<br>(0.1 to 0.3)          | 65.9<br>(51.8 to 81.2)                            | 5.9<br>(-3.1 to 15.7)                            |
| Neonatal preterm birth complications                                    | 4.6<br>(3.6 to 5.6)              | --                                              | 0.2<br>(0.1 to 0.3)          | 65.5<br>(51.5 to 81.0)                            | 5.6<br>(-3.3 to 15.5)                            |
| Neonatal encephalopathy due to birth asphyxia and trauma                | < 0.05<br>(< 0.05 to < 0.05)     | --                                              | < 0.05<br>(< 0.05 to < 0.05) | 188.8<br>(142.4 to 269.3)                         | 84.3<br>(54.7 to 327.1)                          |
| Neonatal sepsis and other neonatal infections                           | < 0.05<br>(< 0.05 to < 0.05)     | --                                              | < 0.05<br>(< 0.05 to < 0.05) | 189.4<br>(151.0 to 463.7)                         | 84.7<br>(60.1 to 259.7)                          |
| Hemolytic disease and other neonatal jaundice                           | < 0.05<br>(< 0.05 to < 0.05)     | --                                              | < 0.05<br>(< 0.05 to < 0.05) | 97.2<br>(24.8 to 189.7)                           | 25.9<br>(-20.4 to 84.9)                          |
| Other neonatal disorders                                                | --                               | --                                              | --                           | --                                                | --                                               |
| <b>Nutritional deficiencies</b>                                         | 289.3<br>(280.9 to 296.8)        | 26.1 <sup>†</sup><br>(17.0 to 35.3)             | 7.2<br>(5.0 to 9.8)          | 52.9<br>(50.0 to 55.7)                            | -2.5<br>(-4.3 to -0.6)                           |
| Protein-energy malnutrition                                             | --                               | --                                              | --                           | --                                                | --                                               |
| Iodine deficiency                                                       | 52.5<br>(46.9 to 59.0)           | 0.1<br>(< 0.05 to 0.1)                          | 1.2<br>(0.8 to 1.6)          | 43.9<br>(38.8 to 48.9)                            | -8.2<br>(-11.4 to -5.0)                          |
| Vitamin A deficiency                                                    | 25.7<br>(17.8 to 33.9)           | 26.1<br>(17.0 to 35.2)                          | < 0.05<br>(< 0.05 to < 0.05) | 75.9<br>(64.4 to 88.2)                            | 12.3<br>(4.9 to 20.1)                            |
| Iron-deficiency anaemia                                                 | 229.2<br>(214.3 to 250.4)        | --                                              | 6.0<br>(4.1 to 8.2)          | 54.8<br>(51.5 to 58.2)                            | -1.2<br>(-3.3 to 0.9)                            |
| Other nutritional deficiencies                                          | --                               | --                                              | --                           | --                                                | --                                               |
| <b>Other communicable, maternal, neonatal, and nutritional diseases</b> | 846.4<br>(816.4 to 879.5)        | 64.1<br>(41.2 to 93.6)                          | 0.8<br>(0.6 to 1.1)          | 59.6<br>(48.0 to 71.7)                            | 1.9<br>(-5.6 to 9.5)                             |
| Sexually transmitted diseases excluding HIV                             | 684.5<br>(628.2 to 761.8)        | 2.9<br>(2.5 to 3.4)                             | 0.6<br>(0.4 to 0.8)          | 57.0<br>(48.5 to 66.3)                            | 0.2<br>(-5.2 to 6.1)                             |
| Syphilis                                                                | 3.4<br>(2.6 to 4.8)              | 0.1<br>(0.1 to 0.3)                             | 0.4<br>(0.2 to 0.6)          | 59.0<br>(47.0 to 70.1)                            | 1.5<br>(-6.2 to 8.6)                             |
| Chlamydial infection                                                    | < 0.05<br>(< 0.05 to < 0.05)     | --                                              | < 0.05<br>(< 0.05 to < 0.05) | 56.3<br>(2.6 to 172.3)                            | -0.2<br>(-34.5 to 73.8)                          |
| Gonococcal infection                                                    | < 0.05<br>(< 0.05 to < 0.05)     | --                                              | < 0.05<br>(< 0.05 to < 0.05) | 155.1<br>(-97.8 to 3,353.1)                       | 62.8<br>(-98.6 to 2,103.5)                       |
| Trichomoniasis                                                          | 5.2<br>(4.4 to 6.2)              | 2.8<br>(2.4 to 3.2)                             | < 0.05<br>(< 0.05 to < 0.05) | 56.0<br>(41.7 to 70.7)                            | -0.5<br>(-9.6 to 8.9)                            |
| Genital herpes                                                          | 660.1<br>(579.1 to 760.4)        | --                                              | 0.1<br>(< 0.05 to 0.3)       | 51.7<br>(47.8 to 55.6)                            | -3.2<br>(-5.7 to -0.7)                           |
| Other sexually transmitted diseases                                     | --                               | --                                              | < 0.05<br>(< 0.05 to < 0.05) | 49.8<br>(-1.7 to 160.9)                           | -4.4<br>(-37.3 to 66.5)                          |
| Hepatitis                                                               | 232.6<br>(206.5 to 261.4)        | 61.1<br>(38.3 to 90.6)                          | 0.1<br>(0.1 to 0.2)          | 66.0<br>(18.5 to 132.7)                           | 5.9<br>(-24.4 to 48.5)                           |
| Acute hepatitis A                                                       | 0.6<br>(0.3 to 1.1)              | 8.2<br>(3.3 to 13.8)                            | < 0.05<br>(< 0.05 to < 0.05) | 43.8<br>(-45.1 to 235.2)                          | -8.2<br>(-65.0 to 113.9)                         |
| Hepatitis B                                                             | 111.4<br>(89.5 to 137.4)         | 28.9<br>(11.4 to 51.0)                          | 0.1<br>(< 0.05 to 0.1)       | 65.2<br>(-9.4 to 192.4)                           | 5.4<br>(-42.2 to 86.6)                           |
| Hepatitis C                                                             | 118.9<br>(106.7 to 131.6)        | 1.8<br>(1.2 to 2.6)                             | < 0.05<br>(< 0.05 to < 0.05) | 58.8<br>(41.3 to 79.5)                            | 1.3<br>(-9.8 to 14.5)                            |
| Acute hepatitis E                                                       | 1.7<br>(0.8 to 3.2)              | 22.3<br>(11.0 to 42.2)                          | < 0.05<br>(< 0.05 to 0.1)    | 81.9<br>(41.2 to 130.0)                           | 16.1<br>(-9.9 to 46.8)                           |
| Other infectious diseases                                               | 6.0<br>(5.7 to 6.5)              | < 0.05<br>(< 0.05 to < 0.05)                    | 0.1<br>(0.1 to 0.2)          | 65.1<br>(59.2 to 70.8)                            | 5.3<br>(1.6 to 9.0)                              |
| <b>Non-communicable diseases</b>                                        | 3,296.7<br>(3,295.5 to 3,299.1)  | 19,945.8 <sup>†</sup><br>(16,676.7 to 24,079.5) | 935.8<br>(707.9 to 1,174.8)  | 55.4<br>(54.0 to 56.7)                            | -0.8<br>(-1.7 to 0.0)                            |
| <b>Neoplasms</b>                                                        | 234.6<br>(230.6 to 238.4)        | 125.7<br>(116.3 to 138.0)                       | 36.3<br>(27.3 to 44.8)       | 61.6<br>(58.5 to 64.7)                            | 3.1<br>(1.2 to 5.1)                              |
| Lip and oral cavity cancer                                              | 5.7<br>(5.5 to 5.9)              | 2.3<br>(2.2 to 2.4)                             | 0.8<br>(0.6 to 1.0)          | 70.4<br>(59.1 to 82.4)                            | 8.7<br>(1.5 to 16.4)                             |
| Nasopharynx cancer                                                      | 0.3<br>(0.3 to 0.3)              | 0.1<br>(0.1 to 0.1)                             | 0.1<br>(< 0.05 to 0.1)       | 62.9<br>(51.3 to 75.3)                            | 3.9<br>(-3.5 to 11.9)                            |
| Other pharynx cancer                                                    | 0.5<br>(0.4 to 0.5)              | 0.2<br>(0.2 to 0.2)                             | 0.1<br>(0.1 to 0.1)          | 67.2<br>(57.2 to 77.8)                            | 6.7<br>(0.3 to 13.5)                             |
| Oesophageal cancer                                                      | 1.9<br>(1.8 to 2.0)              | 1.8<br>(1.7 to 1.8)                             | 0.4<br>(0.3 to 0.5)          | 57.0<br>(47.8 to 66.5)                            | 0.1<br>(-5.7 to 6.3)                             |
| Stomach cancer                                                          | 14.3<br>(13.9 to 14.7)           | 9.3<br>(9.1 to 9.6)                             | 2.1<br>(1.6 to 2.6)          | 64.3<br>(57.1 to 71.8)                            | 4.9<br>(0.2 to 9.6)                              |
| Colon and rectum cancer                                                 | 49.9<br>(48.4 to 51.5)           | 19.7<br>(19.2 to 20.3)                          | 6.7<br>(5.1 to 8.2)          | 56.4<br>(50.4 to 62.2)                            | -0.2<br>(-4.0 to 3.5)                            |
| Liver cancer                                                            | 2.5<br>(2.4 to 2.6)              | 3.0<br>(2.9 to 3.2)                             | 0.6<br>(0.4 to 0.8)          | 93.1<br>(81.6 to 106.1)                           | 23.2<br>(15.9 to 31.5)                           |
| Liver cancer due to hepatitis B                                         | 0.7<br>(0.4 to 1.0)              | 0.7<br>(0.4 to 0.9)                             | 0.1<br>(0.1 to 0.2)          | 102.1<br>(83.4 to 126.3)                          | 29.0<br>(17.1 to 44.4)                           |

| Cause                                              | Prevalence in thousands (95% UI)              | Incidence in thousands (95% UI)          | YLDs in thousands (95% UI)              |                                                   |                                                  |
|----------------------------------------------------|-----------------------------------------------|------------------------------------------|-----------------------------------------|---------------------------------------------------|--------------------------------------------------|
|                                                    | 2016 counts                                   | 2016 counts                              | 2016 counts                             | Percentage change in counts between 2006 and 2016 | Percentage change in rates between 2006 and 2016 |
| Liver cancer due to hepatitis C                    | 1.7<br>(1.5 to 1.9)                           | 1.5<br>(1.3 to 1.7)                      | 0.3<br>(0.2 to 0.4)                     | 90.2<br>(76.1 to 106.5)                           | 21.4<br>(12.3 to 31.8)                           |
| Liver cancer due to alcohol use                    | 0.4<br>(0.2 to 0.5)                           | 0.4<br>(0.2 to 0.5)                      | 0.1<br>( $< 0.05$ to 0.1)               | 89.5<br>(72.9 to 111.7)                           | 20.9<br>(10.3 to 35.1)                           |
| Liver cancer due to other causes                   | 0.5<br>(0.4 to 0.6)                           | 0.5<br>(0.4 to 0.6)                      | 0.1<br>(0.1 to 0.1)                     | 93.0<br>(81.0 to 107.0)                           | 23.2<br>(15.5 to 32.1)                           |
| Gallbladder and biliary tract cancer               | 2.2<br>(2.1 to 2.4)                           | 2.6<br>(2.5 to 2.8)                      | 0.5<br>(0.4 to 0.6)                     | 60.4<br>(47.1 to 75.6)                            | 2.3<br>(-6.2 to 12.1)                            |
| Pancreatic cancer                                  | 3.5<br>(3.3 to 3.6)                           | 4.3<br>(4.2 to 4.4)                      | 0.8<br>(0.5 to 1.0)                     | 71.9<br>(59.3 to 85.9)                            | 9.7<br>(1.7 to 18.6)                             |
| Larynx cancer                                      | 0.9<br>(0.9 to 0.9)                           | 0.4<br>(0.4 to 0.4)                      | 0.1<br>(0.1 to 0.2)                     | 64.8<br>(54.9 to 75.5)                            | 5.2<br>(-1.2 to 12.0)                            |
| Tracheal, bronchus, and lung cancer                | 12.2<br>(11.6 to 12.8)                        | 10.1<br>(9.6 to 10.5)                    | 2.1<br>(1.6 to 2.7)                     | 88.9<br>(78.2 to 99.8)                            | 20.5<br>(13.7 to 27.5)                           |
| Malignant skin melanoma                            | 6.8<br>(5.3 to 8.0)                           | 2.2<br>(1.7 to 2.6)                      | 0.7<br>(0.5 to 0.9)                     | 73.1<br>(58.9 to 87.9)                            | 10.5<br>(1.4 to 19.9)                            |
| Non-melanoma skin cancer                           | 25.0<br>(17.1 to 33.7)                        | 21.0<br>(12.1 to 33.7)                   | 0.8<br>(0.4 to 1.4)                     | 34.8<br>(5.4 to 67.9)                             | -14.0<br>(-32.8 to 7.1)                          |
| Non-melanoma skin cancer (squamous-cell carcinoma) | 20.2<br>(11.1 to 32.6)                        | 12.3<br>(7.0 to 20.0)                    | 0.8<br>(0.4 to 1.4)                     | 34.8<br>(5.2 to 68.5)                             | -14.0<br>(-32.9 to 7.5)                          |
| Non-melanoma skin cancer (basal-cell carcinoma)    | 1.0<br>(0.3 to 2.6)                           | 8.7<br>(2.8 to 19.2)                     | $< 0.05$<br>( $< 0.05$ to $< 0.05$ )    | 27.9<br>(6.1 to 44.3)                             | -18.4<br>(-32.3 to -7.9)                         |
| Breast cancer                                      | 40.0<br>(38.6 to 41.5)                        | 40.6<br>(12.1 to 13.1)                   | 5.9<br>(4.5 to 7.2)                     | 46.6<br>(39.1 to 53.7)                            | -6.4<br>(-11.2 to -1.9)                          |
| Cervical cancer                                    | 2.1<br>(1.9 to 2.2)                           | 0.8<br>(0.8 to 0.9)                      | 0.3<br>(0.2 to 0.4)                     | 38.8<br>(25.6 to 51.9)                            | -11.4<br>(-19.9 to -3.1)                         |
| Uterine cancer                                     | 5.4<br>(5.1 to 5.8)                           | 1.8<br>(1.7 to 1.9)                      | 0.7<br>(0.5 to 0.8)                     | 56.7<br>(41.6 to 71.1)                            | 0.0<br>(-9.7 to 9.2)                             |
| Ovarian cancer                                     | 2.2<br>(2.2 to 2.3)                           | 1.0<br>(1.0 to 1.1)                      | 0.5<br>(0.3 to 0.6)                     | 39.2<br>(25.6 to 54.6)                            | -11.2<br>(-19.9 to -1.3)                         |
| Prostate cancer                                    | 33.4<br>(28.3 to 35.8)                        | 12.2<br>(10.4 to 13.0)                   | 6.2<br>(4.5 to 7.8)                     | 70.1<br>(63.3 to 79.4)                            | 8.5<br>(4.2 to 14.5)                             |
| Testicular cancer                                  | 0.1<br>(0.1 to 0.1)                           | $< 0.05$<br>( $< 0.05$ to $< 0.05$ )     | $< 0.05$<br>( $< 0.05$ to $< 0.05$ )    | 91.5<br>(74.3 to 111.6)                           | 22.2<br>(11.2 to 35.1)                           |
| Kidney cancer                                      | 3.4<br>(3.3 to 3.5)                           | 1.4<br>(1.3 to 1.4)                      | 0.4<br>(0.3 to 0.5)                     | 55.0<br>(43.2 to 67.3)                            | -1.1<br>(-8.6 to 6.7)                            |
| Bladder cancer                                     | 14.3<br>(13.9 to 14.7)                        | 5.5<br>(5.3 to 5.6)                      | 1.8<br>(1.3 to 2.2)                     | 61.7<br>(54.7 to 69.4)                            | 3.2<br>(-1.3 to 8.1)                             |
| Brain and nervous system cancer                    | 0.8<br>(0.6 to 1.0)                           | 0.5<br>(0.4 to 0.6)                      | 0.2<br>(0.1 to 0.2)                     | 85.0<br>(63.0 to 113.2)                           | 18.0<br>(4.0 to 36.0)                            |
| Thyroid cancer                                     | 1.9<br>(1.8 to 2.0)                           | 0.6<br>(0.5 to 0.6)                      | 0.2<br>(0.2 to 0.3)                     | 74.8<br>(58.2 to 92.5)                            | 11.5<br>(1.0 to 22.9)                            |
| Mesothelioma                                       | 0.2<br>(0.2 to 0.2)                           | 0.1<br>(0.1 to 0.2)                      | $< 0.05$<br>( $< 0.05$ to 0.1)          | 64.6<br>(56.6 to 72.5)                            | 5.0<br>(-0.1 to 10.1)                            |
| Hodgkin lymphoma                                   | 0.2<br>(0.1 to 0.2)                           | 0.1<br>(0.1 to 0.1)                      | $< 0.05$<br>( $< 0.05$ to $< 0.05$ )    | 47.2<br>(37.1 to 55.3)                            | -6.1<br>(-12.5 to -0.9)                          |
| Non-Hodgkin's lymphoma                             | 7.0<br>(6.5 to 7.3)                           | 2.7<br>(2.6 to 2.9)                      | 0.8<br>(0.6 to 1.0)                     | 77.6<br>(66.1 to 90.5)                            | 13.3<br>(6.0 to 21.5)                            |
| Multiple myeloma                                   | 1.5<br>(1.2 to 1.7)                           | 0.8<br>(0.7 to 0.9)                      | 0.4<br>(0.3 to 0.5)                     | 64.8<br>(49.1 to 82.4)                            | 5.1<br>(-4.9 to 16.4)                            |
| Leukaemia                                          | 7.9<br>(7.6 to 8.2)                           | 3.2<br>(3.1 to 3.3)                      | 1.7<br>(1.2 to 2.1)                     | 60.5<br>(50.8 to 69.8)                            | 2.4<br>(-3.8 to 8.3)                             |
| Acute lymphoid leukaemia                           | 0.3<br>(0.3 to 0.3)                           | 0.1<br>(0.1 to 0.1)                      | 0.1<br>( $< 0.05$ to 0.1)               | 91.0<br>(79.3 to 103.2)                           | 21.9<br>(14.4 to 29.7)                           |
| Chronic lymphoid leukaemia                         | 3.4<br>(3.1 to 3.6)                           | 1.2<br>(1.1 to 1.3)                      | 0.7<br>(0.5 to 0.9)                     | 53.6<br>(40.3 to 67.9)                            | -2.0<br>(-10.5 to 7.2)                           |
| Acute myeloid leukaemia                            | 0.5<br>(0.5 to 0.6)                           | 0.5<br>(0.5 to 0.5)                      | 0.1<br>(0.1 to 0.2)                     | 70.3<br>(58.8 to 82.4)                            | 8.7<br>(1.3 to 16.4)                             |
| Chronic myeloid leukaemia                          | 0.5<br>(0.5 to 0.6)                           | 0.3<br>(0.2 to 0.3)                      | 0.1<br>(0.1 to 0.1)                     | 30.3<br>(17.2 to 45.6)                            | -16.8<br>(-25.2 to -7.1)                         |
| Other leukaemia                                    | 3.2<br>(3.1 to 3.4)                           | 1.1<br>(1.1 to 1.2)                      | 0.7<br>(0.5 to 0.9)                     | 69.4<br>(55.5 to 84.0)                            | 8.1<br>(-0.8 to 17.4)                            |
| Other neoplasms                                    | 12.7<br>(12.0 to 13.5)                        | 5.2<br>(4.9 to 5.5)                      | 1.4<br>(1.1 to 1.8)                     | 81.4<br>(68.4 to 94.9)                            | 15.8<br>(7.5 to 24.4)                            |
| <b>Cardiovascular diseases</b>                     | <b>1,845.2</b><br><b>(1,796.5 to 1,889.4)</b> | <b>419.9†</b><br><b>(369.0 to 477.4)</b> | <b>169.6</b><br><b>(124.7 to 217.8)</b> | <b>45.4</b><br><b>(38.8 to 52.2)</b>              | <b>-7.2</b><br><b>(-11.4 to -2.9)</b>            |
| Rheumatic heart disease                            | 2.4<br>(2.0 to 2.8)                           | 4.2<br>(3.7 to 4.7)                      | 0.2<br>(0.1 to 0.2)                     | 67.9<br>(56.1 to 80.7)                            | 7.2<br>(-0.4 to 15.3)                            |
| Ischaemic heart disease                            | 463.9<br>(400.7 to 547.4)                     | 243.2<br>(209.8 to 285.9)                | 30.6<br>(20.6 to 42.5)                  | 55.4<br>(51.7 to 58.8)                            | -0.9<br>(-3.2 to 1.3)                            |
| Cerebrovascular disease                            | 322.1<br>(294.0 to 349.3)                     | 88.9†<br>(77.2 to 101.4)                 | 73.8<br>(50.8 to 97.1)                  | 35.9<br>(22.4 to 50.8)                            | -13.3<br>(-21.9 to -3.8)                         |
| Ischaemic stroke                                   | 274.8<br>(214.3 to 337.8)                     | 61.2†<br>(51.0 to 72.2)                  | 61.1<br>(40.6 to 82.2)                  | 34.0<br>(17.7 to 50.6)                            | -14.5<br>(-24.9 to -3.9)                         |
| Hemorrhagic stroke                                 | 56.4<br>(44.1 to 71.9)                        | 27.6†<br>(22.8 to 32.4)                  | 12.7<br>(8.7 to 17.0)                   | 45.9<br>(29.4 to 63.7)                            | -6.9<br>(-17.4 to 4.5)                           |
| Hypertensive heart disease                         | 181.5<br>(125.2 to 253.1)                     | --                                       | 13.6<br>(8.2 to 21.2)                   | 61.1<br>(56.1 to 65.6)                            | 2.8<br>(-0.4 to 5.7)                             |
| Cardiomyopathy and myocarditis                     | 48.1<br>(37.1 to 62.8)                        | 3.7†<br>(2.6 to 4.7)                     | 3.2<br>(1.9 to 5.1)                     | 44.0<br>(37.2 to 51.3)                            | -8.1<br>(-12.5 to -3.4)                          |
| Myocarditis                                        | 0.9<br>(0.7 to 1.2)                           | 3.7<br>(2.6 to 4.7)                      | $< 0.05$<br>( $< 0.05$ to 0.1)          | 56.3<br>(40.0 to 74.4)                            | -0.3<br>(-10.7 to 11.3)                          |
| Alcoholic cardiomyopathy                           | $< 0.05$<br>( $< 0.05$ to $< 0.05$ )          | --                                       | $< 0.05$<br>( $< 0.05$ to $< 0.05$ )    | 43.4<br>(-29.5 to 199.5)                          | -8.5<br>(-55.0 to 91.1)                          |
| Other cardiomyopathy                               | 42.5<br>(26.3 to 62.4)                        | --                                       | 3.2<br>(1.8 to 5.1)                     | 43.9<br>(36.9 to 51.3)                            | -8.2<br>(-12.6 to -3.4)                          |
| Atrial fibrillation and flutter                    | 378.9<br>(333.1 to 429.2)                     | 8.7<br>(5.2 to 13.2)                     | 27.7<br>(19.1 to 37.8)                  | 53.7<br>(51.7 to 55.8)                            | -1.9<br>(-3.2 to -0.6)                           |
| Peripheral vascular disease                        | 925.9<br>(759.1 to 1,114.1)                   | 64.8<br>(35.1 to 107.8)                  | 5.1<br>(2.2 to 9.8)                     | 47.4<br>(44.3 to 50.4)                            | -6.0<br>(-7.9 to -4.0)                           |
| Endocarditis                                       | 6.3<br>(4.2 to 8.9)                           | 6.5<br>(5.0 to 8.2)                      | 0.5<br>(0.3 to 0.7)                     | 52.1<br>(43.1 to 61.0)                            | -3.0<br>(-8.7 to 2.7)                            |
| Other cardiovascular and circulatory diseases      | 292.0<br>(194.0 to 419.7)                     | --                                       | 14.9<br>(8.8 to 23.1)                   | 48.6<br>(43.6 to 53.4)                            | -5.2<br>(-8.3 to -2.1)                           |
| <b>Chronic respiratory diseases</b>                | <b>231.1</b><br><b>(216.9 to 246.3)</b>       | <b>41.9†</b><br><b>(33.6 to 51.0)</b>    | <b>9.8</b><br><b>(6.8 to 13.3)</b>      | <b>61.5</b><br><b>(58.6 to 64.7)</b>              | <b>3.1</b><br><b>(1.2 to 5.1)</b>                |
| Chronic obstructive pulmonary disease              | --                                            | --                                       | --                                      | --                                                | --                                               |
| Pneumoconiosis                                     | 1.2<br>(1.1 to 1.3)                           | 0.2<br>(0.1 to 0.2)                      | 0.2<br>(0.1 to 0.2)                     | 80.4<br>(72.0 to 89.0)                            | 15.1<br>(9.8 to 20.6)                            |
| Silicosis                                          | 0.2<br>(0.2 to 0.3)                           | 0.1<br>( $< 0.05$ to 0.1)                | $< 0.05$<br>( $< 0.05$ to $< 0.05$ )    | 78.8<br>(55.5 to 102.9)                           | 14.1<br>(-0.8 to 29.5)                           |

| Cause                                                          | Prevalence in thousands (95% UI)        | Incidence in thousands (95% UI)               | YLDs in thousands (95% UI)        |                                                   |                                                  |
|----------------------------------------------------------------|-----------------------------------------|-----------------------------------------------|-----------------------------------|---------------------------------------------------|--------------------------------------------------|
|                                                                | 2016 counts                             | 2016 counts                                   | 2016 counts                       | Percentage change in counts between 2006 and 2016 | Percentage change in rates between 2006 and 2016 |
| Asbestosis                                                     | 0.3<br>(0.3 to 0.4)                     | < 0.05<br>(< 0.05 to < 0.05)                  | < 0.05<br>(< 0.05 to 0.1)         | 79.5<br>(67.9 to 92.6)                            | 14.6<br>(7.2 to 22.9)                            |
| Coal workers pneumoconiosis                                    | 0.2<br>(0.2 to 0.3)                     | < 0.05<br>(< 0.05 to < 0.05)                  | < 0.05<br>(< 0.05 to < 0.05)      | 71.4<br>(51.2 to 95.2)                            | 9.4<br>(-3.5 to 24.6)                            |
| Other pneumoconiosis                                           | 0.4<br>(0.3 to 0.5)                     | 0.1<br>(0.1 to 0.1)                           | 0.1<br>(< 0.05 to 0.1)            | 87.8<br>(73.8 to 103.4)                           | 19.8<br>(10.9 to 29.8)                           |
| Asthma                                                         | 205.8<br>(180.0 to 236.6)               | 39.0<br>(30.9 to 48.0)                        | 7.1<br>(4.7 to 10.1)              | 57.2<br>(54.0 to 60.6)                            | 0.3<br>(-1.8 to 2.5)                             |
| Interstitial lung disease and pulmonary sarcoidosis            | 26.1<br>(21.5 to 31.5)                  | 2.8<br>(2.0 to 3.6)                           | 2.5<br>(1.7 to 3.6)               | 73.8<br>(68.0 to 79.8)                            | 10.9<br>(7.2 to 14.7)                            |
| Other chronic respiratory diseases                             | --                                      | --                                            | < 0.05<br>(< 0.05 to < 0.05)      | 102.0<br>(95.5 to 108.6)                          | 28.9<br>(24.8 to 33.1)                           |
| <b>Cirrhosis and other chronic liver diseases</b>              | <b>50.6<br/>(45.3 to 55.7)</b>          | <b>7.3<br/>(6.3 to 8.3)</b>                   | <b>2.1<br/>(1.5 to 3.0)</b>       | <b>66.0<br/>(58.1 to 73.7)</b>                    | <b>5.9<br/>(0.9 to 10.8)</b>                     |
| Cirrhosis and other chronic liver diseases due to hepatitis B  | 9.8<br>(7.5 to 12.1)                    | 1.4<br>(1.0 to 1.8)                           | 0.4<br>(0.2 to 0.6)               | 70.5<br>(59.1 to 81.9)                            | 8.8<br>(1.5 to 16.1)                             |
| Cirrhosis and other chronic liver diseases due to hepatitis C  | 13.0<br>(10.2 to 16.3)                  | 1.7<br>(1.2 to 2.2)                           | 0.5<br>(0.3 to 0.8)               | 62.7<br>(51.9 to 73.3)                            | 3.8<br>(-3.1 to 10.6)                            |
| Cirrhosis and other chronic liver diseases due to alcohol use  | 14.4<br>(11.5 to 17.3)                  | 2.2<br>(1.7 to 2.7)                           | 0.7<br>(0.5 to 1.0)               | 64.2<br>(54.2 to 73.6)                            | 4.8<br>(-1.6 to 10.8)                            |
| Cirrhosis and other chronic liver diseases due to other causes | 13.5<br>(9.8 to 17.8)                   | 1.9<br>(1.4 to 2.6)                           | 0.5<br>(0.3 to 0.8)               | 68.5<br>(57.4 to 79.2)                            | 7.5<br>(0.5 to 14.3)                             |
| <b>Digestive diseases</b>                                      | <b>363.2<br/>(345.0 to 382.6)</b>       | <b>298.1<sup>a</sup><br/>(263.3 to 339.9)</b> | <b>9.8<br/>(6.8 to 13.4)</b>      | <b>71.5<br/>(64.5 to 78.1)</b>                    | <b>9.5<br/>(5.0 to 13.7)</b>                     |
| Peptic ulcer disease                                           | 124.4<br>(102.7 to 149.2)               | 15.5<br>(13.5 to 17.9)                        | 2.4<br>(1.4 to 3.7)               | 68.2<br>(56.2 to 80.2)                            | 7.4<br>(-0.3 to 15.0)                            |
| Gastritis and duodenitis                                       | 199.3<br>(155.0 to 254.9)               | 110.0<br>(89.1 to 135.0)                      | 2.9<br>(1.8 to 4.4)               | 86.7<br>(77.1 to 96.2)                            | 19.1<br>(13.0 to 25.2)                           |
| Appendicitis                                                   | 0.8<br>(0.7 to 0.8)                     | 19.9<br>(18.1 to 22.0)                        | 0.2<br>(0.1 to 0.3)               | 56.3<br>(46.4 to 65.7)                            | -0.3<br>(-6.6 to 5.7)                            |
| Paralytic ileus and intestinal obstruction                     | 0.6<br>(0.5 to 0.7)                     | 19.4<br>(15.5 to 23.7)                        | 0.1<br>(0.1 to 0.2)               | 56.9<br>(35.2 to 79.0)                            | 0.1<br>(-13.7 to 14.2)                           |
| Inguinal, femoral, and abdominal hernia                        | 44.5<br>(23.5 to 78.5)                  | 52.5<br>(35.1 to 74.8)                        | 1.7<br>(1.1 to 2.6)               | 55.7<br>(45.0 to 66.3)                            | -0.6<br>(-7.5 to 6.1)                            |
| Inflammatory bowel disease                                     | 3.5<br>(2.9 to 4.1)                     | 0.7<br>(0.5 to 0.9)                           | 0.5<br>(0.3 to 0.6)               | 66.7<br>(57.4 to 77.1)                            | 6.4<br>(0.4 to 13.0)                             |
| Vascular intestinal disorders                                  | 0.6<br>(0.4 to 0.7)                     | 4.5<br>(3.6 to 5.8)                           | 0.1<br>(0.1 to 0.2)               | 56.3<br>(32.5 to 83.1)                            | -0.3<br>(-15.4 to 16.8)                          |
| Gallbladder and biliary diseases                               | 17.7<br>(14.0 to 23.0)                  | 66.0<br>(51.3 to 86.3)                        | 0.2<br>(0.2 to 0.4)               | 78.6<br>(59.7 to 98.4)                            | 14.0<br>(1.9 to 26.6)                            |
| Pancreatitis                                                   | 1.0<br>(0.8 to 1.3)                     | 9.6<br>(7.8 to 11.8)                          | 0.1<br>(0.1 to 0.2)               | 70.2<br>(48.4 to 92.1)                            | 8.6<br>(-5.3 to 22.6)                            |
| Other digestive diseases                                       | --                                      | --                                            | 1.5<br>(1.0 to 2.0)               | 75.3<br>(68.1 to 82.0)                            | 11.8<br>(7.3 to 16.2)                            |
| <b>Neurological disorders</b>                                  | <b>1,305.9<br/>(1,215.0 to 1,443.6)</b> | <b>384.3<br/>(268.9 to 589.9)</b>             | <b>191.5<br/>(129.1 to 259.4)</b> | <b>57.4<br/>(55.1 to 59.4)</b>                    | <b>0.4<br/>(-1.1 to 1.7)</b>                     |
| Alzheimer's disease and other dementias                        | 1,063.1<br>(838.1 to 1,373.5)           | 252.1<br>(150.4 to 440.7)                     | 168.4<br>(110.7 to 233.7)         | 57.7<br>(55.2 to 59.9)                            | 0.6<br>(-1.0 to 2.0)                             |
| Parkinson's disease                                            | 34.5<br>(25.9 to 45.8)                  | 3.1<br>(1.6 to 5.9)                           | 3.7<br>(2.4 to 5.5)               | 60.8<br>(55.0 to 65.8)                            | 2.6<br>(-1.1 to 5.8)                             |
| Epilepsy                                                       | 19.8<br>(15.6 to 23.9)                  | 1.1<br>(0.6 to 1.8)                           | 4.6<br>(3.1 to 6.3)               | 49.6<br>(24.9 to 82.4)                            | -4.5<br>(-20.3 to 16.4)                          |
| Multiple sclerosis                                             | 2.6<br>(2.3 to 3.0)                     | < 0.05<br>(< 0.05 to < 0.05)                  | 0.6<br>(0.4 to 0.8)               | 57.6<br>(43.1 to 72.3)                            | 0.5<br>(-8.7 to 10.0)                            |
| Motor neuron disease                                           | 0.4<br>(0.3 to 0.5)                     | 0.1<br>(< 0.05 to 0.1)                        | 0.1<br>(0.1 to 0.1)               | 62.3<br>(57.2 to 67.3)                            | 3.6<br>(0.3 to 6.8)                              |
| Migraine                                                       | 130.9<br>(113.2 to 152.0)               | 25.9<br>(16.1 to 38.9)                        | 10.3<br>(6.8 to 14.6)             | 54.6<br>(51.5 to 57.8)                            | -1.4<br>(-3.3 to 0.7)                            |
| Tension-type headache                                          | 288.2<br>(208.4 to 395.5)               | 101.9<br>(62.6 to 167.0)                      | 3.4<br>(2.1 to 5.2)               | 54.6<br>(50.7 to 59.0)                            | -1.3<br>(-3.8 to 1.5)                            |
| Other neurological disorders                                   | < 0.05<br>(< 0.05 to 0.1)               | 0.1<br>(< 0.05 to 0.1)                        | 0.4<br>(0.2 to 0.5)               | 61.2<br>(58.9 to 63.4)                            | 2.9<br>(1.4 to 4.3)                              |
| <b>Mental and substance use disorders</b>                      | <b>432.4<br/>(419.5 to 445.7)</b>       | <b>241.6<sup>a</sup><br/>(184.1 to 313.8)</b> | <b>54.1<br/>(39.8 to 71.6)</b>    | <b>56.1<br/>(54.2 to 58.0)</b>                    | <b>-0.4<br/>(-1.6 to 0.8)</b>                    |
| Schizophrenia                                                  | 1.4<br>(1.1 to 1.8)                     | --                                            | 0.8<br>(0.5 to 1.0)               | 75.6<br>(59.6 to 92.4)                            | 12.0<br>(1.8 to 22.8)                            |
| Alcohol use disorders                                          | 24.1<br>(18.7 to 31.2)                  | 8.4<br>(5.3 to 11.8)                          | 2.1<br>(1.4 to 3.0)               | 70.5<br>(62.6 to 78.3)                            | 8.8<br>(3.7 to 13.8)                             |
| Drug use disorders                                             | 12.9<br>(12.5 to 13.2)                  | 1.2<br>(1.0 to 1.4)                           | 2.9<br>(2.1 to 3.6)               | 60.4<br>(54.1 to 66.9)                            | 2.4<br>(-1.6 to 6.5)                             |
| Opioid use disorders                                           | 4.9<br>(4.1 to 5.7)                     | --                                            | 1.7<br>(1.2 to 2.2)               | 65.8<br>(57.3 to 74.0)                            | 5.8<br>(0.4 to 11.1)                             |
| Cocaine use disorders                                          | 2.1<br>(1.9 to 2.4)                     | --                                            | 0.2<br>(0.2 to 0.4)               | 54.1<br>(40.2 to 68.7)                            | -1.6<br>(-10.6 to 7.6)                           |
| Amphetamine use disorders                                      | 1.9<br>(1.3 to 2.6)                     | 0.4<br>(0.3 to 0.6)                           | 0.2<br>(0.1 to 0.3)               | 39.7<br>(21.6 to 58.0)                            | -10.8<br>(-22.4 to 0.8)                          |
| Cannabis use disorders                                         | 0.8<br>(0.6 to 1.0)                     | --                                            | < 0.05<br>(< 0.05 to < 0.05)      | 61.0<br>(52.9 to 69.1)                            | 2.7<br>(-2.5 to 7.9)                             |
| Other drug use disorders                                       | 4.0<br>(3.4 to 4.8)                     | 0.8<br>(0.7 to 0.9)                           | 0.7<br>(0.5 to 0.9)               | 57.3<br>(48.9 to 65.2)                            | 0.4<br>(-5.0 to 5.5)                             |
| Depressive disorders                                           | 194.7<br>(181.2 to 207.7)               | 227.1<br>(170.3 to 299.5)                     | 30.0<br>(20.4 to 43.3)            | 55.3<br>(52.3 to 57.9)                            | -0.9<br>(-2.8 to 0.8)                            |
| Major depressive disorder                                      | 144.1<br>(110.2 to 185.5)               | 221.5<br>(165.5 to 294.1)                     | 25.5<br>(16.7 to 38.0)            | 55.0<br>(51.6 to 58.0)                            | -1.1<br>(-3.2 to 0.8)                            |
| Dysthymia                                                      | 52.0<br>(38.8 to 67.6)                  | 5.6<br>(3.4 to 7.9)                           | 4.5<br>(2.8 to 6.7)               | 56.9<br>(51.6 to 62.0)                            | 0.1<br>(-3.2 to 3.4)                             |
| Bipolar disorder                                               | 10.2<br>(7.9 to 13.2)                   | 0.6<br>(0.3 to 1.1)                           | 1.8<br>(1.1 to 2.8)               | 51.9<br>(44.8 to 60.2)                            | -3.1<br>(-7.6 to 2.2)                            |
| Anxiety disorders                                              | 96.8<br>(83.7 to 112.0)                 | 1.7<br>(1.5 to 1.9)                           | 8.0<br>(5.7 to 10.8)              | 51.8<br>(46.7 to 56.9)                            | -3.2<br>(-6.4 to 0.1)                            |
| Eating disorders                                               | --                                      | --                                            | --                                | --                                                | --                                               |
| Anorexia nervosa                                               | --                                      | --                                            | --                                | --                                                | --                                               |
| Bulimia nervosa                                                | --                                      | --                                            | --                                | --                                                | --                                               |
| Autistic spectrum disorders                                    | 13.5<br>(12.8 to 14.0)                  | --                                            | 1.9<br>(1.3 to 2.6)               | 61.0<br>(56.9 to 65.2)                            | 2.7<br>(0.1 to 5.4)                              |
| Autism                                                         | 5.5<br>(4.7 to 6.4)                     | --                                            | 1.2<br>(0.8 to 1.7)               | 60.0<br>(53.9 to 66.5)                            | 2.1<br>(-1.8 to 6.2)                             |
| Asperger syndrome and other autistic spectrum disorders        | 8.2<br>(6.8 to 9.9)                     | --                                            | 0.7<br>(0.5 to 1.0)               | 62.7<br>(58.5 to 67.4)                            | 3.9<br>(1.1 to 6.8)                              |

| Cause                                                      | Prevalence in thousands (95% UI)              | Incidence in thousands (95% UI)                   | YLDs in thousands (95% UI)              |                                                   |                                                  |
|------------------------------------------------------------|-----------------------------------------------|---------------------------------------------------|-----------------------------------------|---------------------------------------------------|--------------------------------------------------|
|                                                            | 2016 counts                                   | 2016 counts                                       | 2016 counts                             | Percentage change in counts between 2006 and 2016 | Percentage change in rates between 2006 and 2016 |
| Attention-deficit/hyperactivity disorder                   | < 0.05<br>(< 0.05 to < 0.05)                  | --                                                | < 0.05<br>(< 0.05 to < 0.05)            | 99.2<br>(91.9 to 106.5)                           | 27.2<br>(22.4 to 31.7)                           |
| Conduct disorder                                           | --                                            | --                                                | --                                      | --                                                | --                                               |
| Idiopathic developmental intellectual disability           | 5.7<br>(2.7 to 9.8)                           | --                                                | 0.3<br>(0.2 to 0.5)                     | 47.4<br>(20.1 to 57.5)                            | -6.0<br>(-23.4 to 0.5)                           |
| Other mental and substance use disorders                   | 98.3<br>(86.7 to 111.7)                       | 2.5<br>(1.6 to 4.6)                               | 6.4<br>(4.5 to 8.8)                     | 57.9<br>(54.8 to 60.8)                            | 0.7<br>(-1.2 to 2.6)                             |
| <b>Diabetes, urogenital, blood, and endocrine diseases</b> | <b>2,250.0</b><br><b>(2,226.4 to 2,275.6)</b> | <b>627.1*</b><br><b>(520.1 to 744.7)</b>          | <b>99.3</b><br><b>(72.0 to 131.2)</b>   | <b>60.1</b><br><b>(56.3 to 63.7)</b>              | <b>2.2</b><br><b>(-0.2 to 4.4)</b>               |
| Diabetes mellitus                                          | 432.5<br>(379.2 to 485.0)                     | 6.8<br>(3.8 to 10.7)                              | 36.2<br>(25.0 to 50.8)                  | 61.8<br>(55.8 to 67.7)                            | 3.2<br>(-0.6 to 7.0)                             |
| Acute glomerulonephritis                                   | 0.1<br>(0.1 to 0.2)                           | 2.2<br>(1.6 to 3.0)                               | < 0.05<br>(< 0.05 to < 0.05)            | 69.2<br>(58.0 to 81.1)                            | 8.0<br>(0.8 to 15.6)                             |
| Chronic kidney disease                                     | 1,622.3<br>(1,454.0 to 1,795.2)               | 152.9<br>(93.7 to 229.8)                          | 40.9<br>(29.8 to 53.7)                  | 60.2<br>(53.4 to 66.8)                            | 2.2<br>(-2.1 to 6.5)                             |
| Chronic kidney disease due to diabetes mellitus            | 482.3<br>(327.5 to 647.2)                     | 47.8<br>(26.8 to 78.7)                            | 12.0<br>(7.4 to 17.6)                   | 69.4<br>(60.7 to 79.6)                            | 8.1<br>(2.6 to 14.6)                             |
| Chronic kidney disease due to hypertension                 | 402.9<br>(320.9 to 504.3)                     | 12.5<br>(6.2 to 21.7)                             | 17.3<br>(11.7 to 24.0)                  | 60.7<br>(53.0 to 68.9)                            | 2.6<br>(-2.4 to 7.8)                             |
| Chronic kidney disease due to glomerulonephritis           | 421.3<br>(332.8 to 521.7)                     | 62.6<br>(35.3 to 100.6)                           | 3.8<br>(2.1 to 6.5)                     | 38.8<br>(26.3 to 50.8)                            | -11.5<br>(-19.4 to -3.8)                         |
| Chronic kidney disease due to other causes                 | 315.9<br>(205.6 to 450.0)                     | 30.0<br>(15.5 to 50.0)                            | 7.9<br>(4.5 to 12.2)                    | 57.7<br>(47.2 to 68.5)                            | 0.7<br>(-6.1 to 7.5)                             |
| Urinary diseases and male infertility                      | 160.6<br>(142.2 to 187.7)                     | 392.8*                                            | 4.9<br>(3.2 to 7.1)                     | 66.5<br>(64.8 to 68.2)                            | 6.2<br>(5.2 to 7.3)                              |
| Interstitial nephritis and urinary tract infections        | 6.1<br>(4.9 to 7.7)                           | 329.0<br>(257.8 to 414.7)                         | 0.2<br>(0.1 to 0.3)                     | 80.0<br>(71.7 to 90.5)                            | 14.8<br>(9.6 to 21.6)                            |
| Urolithiasis                                               | 2.0<br>(1.4 to 2.7)                           | 53.3<br>(37.6 to 71.6)                            | 0.1<br>(0.1 to 0.2)                     | 80.3<br>(66.0 to 94.8)                            | 15.0<br>(5.9 to 24.3)                            |
| Benign prostatic hyperplasia                               | 149.1<br>(119.2 to 181.5)                     | 10.5<br>(6.0 to 17.9)                             | 4.5<br>(2.9 to 6.7)                     | 65.6<br>(63.9 to 67.3)                            | 5.7<br>(4.6 to 6.7)                              |
| Male infertility                                           | --                                            | --                                                | --                                      | --                                                | --                                               |
| Other urinary diseases                                     | --                                            | --                                                | < 0.05<br>(< 0.05 to < 0.05)            | 68.6<br>(61.1 to 76.8)                            | 7.6<br>(2.8 to 12.8)                             |
| Gynecological diseases                                     | 374.9<br>(348.4 to 417.2)                     | 0.2†                                              | 1.1<br>(0.5 to 1.9)                     | 41.0<br>(38.5 to 43.9)                            | -10.0<br>(-11.6 to -8.2)                         |
| Uterine fibroids                                           | 6.9<br>(5.7 to 8.2)                           | 0.2<br>(0.1 to 0.4)                               | < 0.05<br>(< 0.05 to 0.1)               | 56.9<br>(49.1 to 65.2)                            | 0.1<br>(-4.9 to 5.4)                             |
| Polycystic ovarian syndrome                                | --                                            | --                                                | --                                      | --                                                | --                                               |
| Female infertility                                         | --                                            | --                                                | --                                      | --                                                | --                                               |
| Endometriosis                                              | --                                            | --                                                | --                                      | --                                                | --                                               |
| Genital prolapse                                           | 361.7<br>(312.5 to 416.6)                     | --                                                | 1.0<br>(0.5 to 1.8)                     | 40.3<br>(37.6 to 43.3)                            | -10.4<br>(-12.2 to -8.6)                         |
| Premenstrual syndrome                                      | --                                            | --                                                | --                                      | --                                                | --                                               |
| Other gynecological diseases                               | --                                            | --                                                | --                                      | --                                                | --                                               |
| Hemoglobinopathies and hemolytic anaemias                  | 670.6<br>(665.4 to 676.1)                     | --                                                | 4.0<br>(2.7 to 5.8)                     | 50.0<br>(42.2 to 57.7)                            | -4.3<br>(-9.3 to 0.6)                            |
| Thalassaemias                                              | < 0.05<br>(< 0.05 to < 0.05)                  | --                                                | < 0.05<br>(< 0.05 to < 0.05)            | 39.0<br>(28.4 to 52.3)                            | -11.3<br>(-18.0 to -2.8)                         |
| Thalassaemia trait                                         | 107.7<br>(102.0 to 114.6)                     | --                                                | 1.7<br>(1.1 to 2.5)                     | 77.4<br>(66.4 to 88.4)                            | 13.2<br>(6.2 to 20.2)                            |
| Sickle cell disorders                                      | < 0.05<br>(< 0.05 to < 0.05)                  | --                                                | < 0.05<br>(< 0.05 to < 0.05)            | 47.6<br>(42.7 to 52.8)                            | -5.8<br>(-8.9 to -2.5)                           |
| Sickle cell trait                                          | 86.3<br>(80.0 to 95.0)                        | --                                                | 0.2<br>(0.1 to 0.3)                     | 63.2<br>(55.6 to 70.8)                            | 4.2<br>(-0.7 to 9.0)                             |
| G6PD deficiency                                            | 62.9<br>(60.4 to 65.7)                        | --                                                | < 0.05<br>(< 0.05 to < 0.05)            | 59.8<br>(50.1 to 70.6)                            | 1.9<br>(-4.2 to 8.9)                             |
| G6PD trait                                                 | 437.2<br>(428.9 to 447.0)                     | --                                                | < 0.05<br>(< 0.05 to < 0.05)            | 48.0<br>(33.3 to 62.9)                            | -5.5<br>(-14.9 to 4.0)                           |
| Other hemoglobinopathies and hemolytic anaemias            | 28.7<br>(27.0 to 31.0)                        | --                                                | 2.1<br>(1.3 to 3.1)                     | 32.2<br>(25.4 to 39.2)                            | -15.6<br>(-20.0 to -11.2)                        |
| Endocrine, metabolic, blood, and immune disorders          | 373.8<br>(291.4 to 466.6)                     | 72.2<br>(43.6 to 105.3)                           | 12.1<br>(7.8 to 17.4)                   | 58.2<br>(49.9 to 66.5)                            | 0.9<br>(-4.4 to 6.2)                             |
| <b>Musculoskeletal disorders</b>                           | <b>1,477.2</b><br><b>(1,446.9 to 1,510.1)</b> | <b>456.9</b><br><b>(339.2 to 614.8)</b>           | <b>127.6</b><br><b>(93.8 to 164.6)</b>  | <b>55.6</b><br><b>(53.7 to 57.7)</b>              | <b>-0.7</b><br><b>(-1.9 to 0.6)</b>              |
| Rheumatoid arthritis                                       | 36.3<br>(32.4 to 40.6)                        | 0.8<br>(0.5 to 1.1)                               | 7.6<br>(5.3 to 9.8)                     | 60.1<br>(55.1 to 64.4)                            | 2.1<br>(-1.0 to 4.9)                             |
| Osteoarthritis                                             | 908.7<br>(863.7 to 957.4)                     | 10.1<br>(7.5 to 13.4)                             | 37.4<br>(26.7 to 50.9)                  | 59.3<br>(57.6 to 61.4)                            | 1.7<br>(0.6 to 3.0)                              |
| Low back and neck pain                                     | 664.7<br>(600.5 to 745.3)                     | 268.5<br>(176.8 to 392.9)                         | 67.3<br>(45.3 to 92.8)                  | 53.9<br>(51.6 to 56.4)                            | -1.8<br>(-3.3 to -0.2)                           |
| Low back pain                                              | 525.7<br>(395.2 to 694.4)                     | 234.5<br>(147.4 to 356.2)                         | 49.6<br>(31.9 to 72.0)                  | 52.1<br>(49.1 to 55.1)                            | -3.0<br>(-4.8 to -1.0)                           |
| Neck pain                                                  | 199.7<br>(144.6 to 271.2)                     | 34.0<br>(20.2 to 56.2)                            | 17.8<br>(11.1 to 27.2)                  | 59.1<br>(56.1 to 62.4)                            | 1.6<br>(-0.4 to 3.6)                             |
| Gout                                                       | 58.8<br>(45.4 to 73.6)                        | 7.8<br>(4.9 to 11.8)                              | 1.7<br>(1.1 to 2.4)                     | 61.7<br>(54.8 to 68.6)                            | 3.2<br>(-1.2 to 7.6)                             |
| Other musculoskeletal disorders                            | 181.6<br>(126.8 to 263.7)                     | 169.7<br>(100.9 to 276.8)                         | 13.6<br>(8.2 to 21.3)                   | 51.2<br>(40.2 to 62.4)                            | -3.5<br>(-10.5 to 3.6)                           |
| <b>Other non-communicable diseases</b>                     | <b>3,207.0</b><br><b>(3,197.6 to 3,215.0)</b> | <b>17,343.0†</b><br><b>(13,986.0 to 21,429.5)</b> | <b>235.8</b><br><b>(170.5 to 319.3)</b> | <b>57.5</b><br><b>(55.9 to 59.3)</b>              | <b>0.5</b><br><b>(-0.5 to 1.6)</b>               |
| Congenital anomalies                                       | 26.3<br>(25.1 to 27.5)                        | --                                                | 2.8<br>(2.1 to 3.6)                     | 53.7<br>(49.7 to 57.8)                            | -1.9<br>(-4.5 to 0.7)                            |
| Neural tube defects                                        | 1.9<br>(1.7 to 2.0)                           | --                                                | 0.5<br>(0.4 to 0.7)                     | 57.0<br>(49.0 to 65.6)                            | 0.2<br>(-4.9 to 5.7)                             |
| Congenital heart anomalies                                 | 6.1<br>(5.5 to 6.8)                           | --                                                | 0.3<br>(0.1 to 0.6)                     | 65.3<br>(57.2 to 73.0)                            | 5.5<br>(0.3 to 10.4)                             |
| Orofacial clefts                                           | 1.8<br>(1.6 to 2.0)                           | --                                                | < 0.05<br>(< 0.05 to < 0.05)            | 58.4<br>(52.8 to 63.4)                            | 1.1<br>(-2.5 to 4.2)                             |
| Down's syndrome                                            | --                                            | --                                                | --                                      | --                                                | --                                               |
| Turner syndrome                                            | 0.1<br>(0.1 to 0.2)                           | --                                                | < 0.05<br>(< 0.05 to < 0.05)            | 50.0<br>(46.5 to 53.1)                            | -4.3<br>(-6.5 to -2.3)                           |
| Klinefelter syndrome                                       | < 0.05<br>(< 0.05 to < 0.05)                  | --                                                | < 0.05<br>(< 0.05 to < 0.05)            | 63.6<br>(57.6 to 69.6)                            | 4.4<br>(0.6 to 8.2)                              |

| Cause                                         | Prevalence in thousands (95% UI)              | Incidence in thousands (95% UI)                           | YLDs in thousands (95% UI)              |                                                   |                                                  |
|-----------------------------------------------|-----------------------------------------------|-----------------------------------------------------------|-----------------------------------------|---------------------------------------------------|--------------------------------------------------|
|                                               | 2016 counts                                   | 2016 counts                                               | 2016 counts                             | Percentage change in counts between 2006 and 2016 | Percentage change in rates between 2006 and 2016 |
| Other chromosomal abnormalities               | < 0.05<br>(< 0.05 to < 0.05)                  | --                                                        | < 0.05<br>(< 0.05 to < 0.05)            | 107.1<br>(78.8 to 131.0)                          | 32.1<br>(14.1 to 47.4)                           |
| Congenital musculoskeletal and limb anomalies | 7.5<br>(6.9 to 8.0)                           | --                                                        | 1.0<br>(0.7 to 1.3)                     | 49.9<br>(43.0 to 57.5)                            | -4.3<br>(-8.7 to 0.5)                            |
| Urogenital congenital anomalies               | 1.6<br>(1.4 to 1.8)                           | --                                                        | < 0.05<br>(< 0.05 to < 0.05)            | 58.4<br>(51.4 to 65.4)                            | 1.1<br>(-3.4 to 5.5)                             |
| Digestive congenital anomalies                | 4.9<br>(4.4 to 5.4)                           | --                                                        | 0.2<br>(0.1 to 0.3)                     | 53.5<br>(44.6 to 63.0)                            | -2.0<br>(-7.7 to 4.0)                            |
| Other congenital anomalies                    | 8.8<br>(5.9 to 12.7)                          | --                                                        | 0.8<br>(0.5 to 1.2)                     | 51.7<br>(43.8 to 60.0)                            | -3.2<br>(-8.3 to 2.1)                            |
| Skin and subcutaneous diseases                | 2,221.6<br>(2,128.5 to 2,303.9)               | 12,497.3<br>(9,449.5 to 16,455.0)                         | 28.1<br>(18.2 to 43.8)                  | 56.5<br>(54.0 to 58.5)                            | -0.2<br>(-1.8 to 1.2)                            |
| Dermatitis                                    | 154.5<br>(133.2 to 181.0)                     | 198.2<br>(142.5 to 267.0)                                 | 4.5<br>(2.8 to 6.9)                     | 55.1<br>(52.2 to 57.9)                            | -1.0<br>(-2.9 to 0.8)                            |
| Psoriasis                                     | 24.9<br>(22.4 to 27.7)                        | 1.7<br>(1.2 to 2.3)                                       | 1.9<br>(1.3 to 2.5)                     | 56.9<br>(50.6 to 64.0)                            | 0.1<br>(-3.9 to 4.6)                             |
| Cellulitis                                    | 6.9<br>(5.8 to 8.2)                           | 171.8<br>(140.0 to 205.1)                                 | 0.3<br>(0.2 to 0.5)                     | 56.1<br>(47.9 to 64.2)                            | -0.4<br>(-5.6 to 4.8)                            |
| Pyoderma                                      | 24.0<br>(22.0 to 26.2)                        | 635.6<br>(570.1 to 709.4)                                 | 0.1<br>(0.1 to 0.2)                     | 52.5<br>(48.1 to 56.8)                            | -2.7<br>(-5.5 to 0.0)                            |
| Scabies                                       | 44.4<br>(28.8 to 66.0)                        | 139.5<br>(85.6 to 214.8)                                  | 1.0<br>(0.5 to 1.8)                     | 69.2<br>(65.6 to 73.0)                            | 8.0<br>(5.7 to 10.4)                             |
| Fungal skin diseases                          | 1,684.7<br>(1,367.1 to 2,023.6)               | 9,947.2<br>(6,833.2 to 13,934.4)                          | 8.6<br>(3.5 to 17.9)                    | 56.9<br>(56.1 to 57.6)                            | 0.1<br>(-0.4 to 0.6)                             |
| Viral skin diseases                           | 32.5<br>(27.0 to 40.2)                        | 50.4<br>(41.2 to 63.0)                                    | 0.9<br>(0.6 to 1.3)                     | 54.6<br>(47.8 to 61.6)                            | -1.3<br>(-5.7 to 3.1)                            |
| Acne vulgaris                                 | 6.0<br>(5.7 to 6.3)                           | 1.3<br>(1.3 to 1.4)                                       | 0.1<br>(0.1 to 0.2)                     | 60.7<br>(54.5 to 67.2)                            | 2.5<br>(-1.4 to 6.7)                             |
| Alopecia areata                               | 1.4<br>(1.2 to 1.5)                           | 2.2<br>(1.9 to 2.5)                                       | < 0.05<br>(< 0.05 to 0.1)               | 52.6<br>(35.0 to 71.8)                            | -2.6<br>(-13.9 to 9.6)                           |
| Pruritus                                      | 62.0<br>(41.6 to 87.8)                        | 45.8<br>(28.1 to 66.9)                                    | 0.6<br>(0.3 to 1.2)                     | 61.1<br>(58.2 to 64.0)                            | 2.8<br>(1.0 to 4.7)                              |
| Urticaria                                     | 9.4<br>(6.4 to 14.0)                          | 16.2<br>(10.4 to 24.4)                                    | 0.5<br>(0.3 to 0.8)                     | 57.5<br>(50.2 to 65.4)                            | 0.5<br>(-4.2 to 5.5)                             |
| Decubitus ulcer                               | 37.4<br>(27.0 to 49.6)                        | 137.2<br>(97.5 to 180.8)                                  | 5.2<br>(3.3 to 7.6)                     | 52.3<br>(43.0 to 62.1)                            | -2.8<br>(-8.7 to 3.4)                            |
| Other skin and subcutaneous diseases          | 843.5<br>(779.5 to 912.0)                     | 1,150.2<br>(1,008.9 to 1,300.9)                           | 4.2<br>(2.0 to 7.7)                     | 59.0<br>(57.6 to 60.5)                            | 1.5<br>(0.5 to 2.4)                              |
| Sense organ diseases                          | 2,629.7<br>(2,601.0 to 2,657.0)               | 772.1 <sup>†</sup><br>(680.5 to 876.0)                    | 176.4<br>(128.4 to 236.8)               | 58.1<br>(55.9 to 60.4)                            | 0.9<br>(-0.5 to 2.4)                             |
| Glaucoma                                      | 24.1<br>(18.4 to 30.2)                        | --                                                        | 2.3<br>(1.5 to 3.5)                     | 65.7<br>(61.3 to 70.5)                            | 5.8<br>(2.9 to 8.8)                              |
| Cataract                                      | 603.8<br>(483.0 to 738.3)                     | --                                                        | 44.9<br>(30.6 to 62.5)                  | 59.1<br>(57.1 to 61.1)                            | 1.5<br>(0.3 to 2.8)                              |
| Macular degeneration                          | 38.6<br>(29.7 to 48.6)                        | --                                                        | 3.8<br>(2.4 to 5.7)                     | 52.2<br>(46.6 to 58.1)                            | -2.9<br>(-6.4 to 0.9)                            |
| Refraction and accommodation disorders        | 1,563.3<br>(1,400.2 to 1,756.2)               | --                                                        | 23.2<br>(14.2 to 36.4)                  | 56.7<br>(54.7 to 58.5)                            | 0.0<br>(-1.3 to 1.1)                             |
| Age-related and other hearing loss            | 2,093.2<br>(1,954.0 to 2,221.4)               | --                                                        | 83.7<br>(59.4 to 113.1)                 | 57.2<br>(52.7 to 62.0)                            | 0.3<br>(-2.5 to 3.4)                             |
| Other vision loss                             | 124.7<br>(85.8 to 173.2)                      | --                                                        | 9.5<br>(6.1 to 13.8)                    | 65.5<br>(62.0 to 69.0)                            | 5.6<br>(3.4 to 7.8)                              |
| Other sense organ diseases                    | 312.4<br>(271.1 to 356.6)                     | 772.1<br>(680.5 to 876.0)                                 | 9.0<br>(5.8 to 13.4)                    | 57.1<br>(54.2 to 61.1)                            | 0.2<br>(-1.6 to 2.8)                             |
| Oral disorders                                | 2,002.5<br>(1,944.9 to 2,055.4)               | 4,073.7 <sup>†</sup><br>(3,152.9 to 4,934.6)              | 28.6<br>(18.5 to 41.5)                  | 55.6<br>(54.3 to 56.9)                            | -0.7<br>(-1.5 to 0.1)                            |
| Caries of deciduous teeth                     | --                                            | --                                                        | --                                      | --                                                | --                                               |
| Caries of permanent teeth                     | 1,190.4<br>(997.8 to 1,401.7)                 | 3,984.7<br>(3,072.7 to 4,849.7)                           | 0.9<br>(0.4 to 1.8)                     | 48.2<br>(45.5 to 50.7)                            | -5.4<br>(-7.1 to -3.8)                           |
| Periodontal disease                           | 614.5<br>(430.6 to 816.8)                     | 75.2<br>(26.3 to 131.4)                                   | 3.7<br>(1.3 to 7.9)                     | 59.6<br>(58.3 to 61.0)                            | 1.9<br>(1.0 to 2.8)                              |
| Edentulism and severe tooth loss              | 881.7<br>(725.0 to 1,085.9)                   | 13.8<br>(7.0 to 23.7)                                     | 22.6<br>(15.0 to 32.1)                  | 55.2<br>(53.7 to 56.9)                            | -0.9<br>(-1.9 to 0.1)                            |
| Other oral disorders                          | 49.5<br>(39.8 to 60.1)                        | --                                                        | 1.3<br>(0.8 to 1.9)                     | 56.4<br>(52.8 to 60.2)                            | -0.2<br>(-2.5 to 2.2)                            |
| <b>Injuries</b>                               | <b>3,719.6</b><br><b>(3,453.7 to 3,987.1)</b> | <b>1,851.2<sup>†</sup></b><br><b>(1,575.2 to 2,180.9)</b> | <b>155.5</b><br><b>(109.3 to 215.5)</b> | <b>53.0</b><br><b>(49.3 to 56.8)</b>              | <b>-2.4</b><br><b>(-4.7 to 0.0)</b>              |
| <b>Transport injuries</b>                     | <b>411.9</b><br><b>(382.6 to 444.2)</b>       | <b>61.9</b><br><b>(48.0 to 80.9)</b>                      | <b>17.1</b><br><b>(11.4 to 25.1)</b>    | <b>61.3</b><br><b>(59.7 to 62.9)</b>              | <b>2.9</b><br><b>(1.9 to 3.9)</b>                |
| Road injuries                                 | 324.7<br>(302.1 to 355.4)                     | 43.8<br>(31.8 to 60.7)                                    | 13.4<br>(8.9 to 19.6)                   | 59.3<br>(57.6 to 61.1)                            | 1.7<br>(0.6 to 2.8)                              |
| Pedestrian road injuries                      | 85.8<br>(74.6 to 101.0)                       | 9.7<br>(6.0 to 14.8)                                      | 3.8<br>(2.5 to 5.6)                     | 61.9<br>(59.9 to 64.0)                            | 3.3<br>(2.1 to 4.7)                              |
| Cyclist road injuries                         | 68.3<br>(58.7 to 79.1)                        | 9.3<br>(4.9 to 15.0)                                      | 2.7<br>(1.8 to 4.0)                     | 62.2<br>(60.2 to 64.5)                            | 3.5<br>(2.2 to 4.9)                              |
| Motorcyclist road injuries                    | 44.9<br>(38.6 to 51.7)                        | 2.9<br>(1.5 to 5.0)                                       | 1.7<br>(1.2 to 2.6)                     | 76.5<br>(74.6 to 78.4)                            | 12.6<br>(11.4 to 13.8)                           |
| Motor vehicle road injuries                   | 105.7<br>(92.0 to 121.4)                      | 18.5<br>(12.3 to 26.7)                                    | 4.4<br>(3.0 to 6.4)                     | 46.6<br>(44.7 to 48.7)                            | -6.5<br>(-7.7 to -5.1)                           |
| Other road injuries                           | 19.9<br>(17.4 to 22.8)                        | 3.3<br>(1.7 to 5.9)                                       | 0.7<br>(0.5 to 1.1)                     | 84.2<br>(81.9 to 87.3)                            | 17.5<br>(16.1 to 19.5)                           |
| Other transport injuries                      | 87.3<br>(70.5 to 104.9)                       | 18.2<br>(12.0 to 26.2)                                    | 3.7<br>(2.4 to 5.5)                     | 68.8<br>(66.0 to 71.5)                            | 7.7<br>(5.9 to 9.5)                              |
| <b>Unintentional injuries</b>                 | <b>3,200.0</b><br><b>(2,943.7 to 3,457.7)</b> | <b>1,756.1</b><br><b>(1,484.0 to 2,086.9)</b>             | <b>135.3</b><br><b>(95.2 to 185.8)</b>  | <b>52.1</b><br><b>(47.9 to 56.3)</b>              | <b>-3.0</b><br><b>(-5.6 to -0.2)</b>             |
| Falls                                         | 2,080.4<br>(1,818.8 to 2,340.4)               | 1,089.8<br>(817.9 to 1,430.7)                             | 101.9<br>(71.9 to 138.9)                | 51.2<br>(45.9 to 56.7)                            | -3.5<br>(-6.9 to -0.0)                           |
| Drowning                                      | 28.0<br>(22.8 to 34.2)                        | 5.7<br>(4.6 to 7.2)                                       | 1.2<br>(0.8 to 1.7)                     | 22.4<br>(18.7 to 25.9)                            | -21.9<br>(-24.2 to -19.7)                        |
| Fire, heat, and hot substances                | 169.4<br>(149.8 to 192.4)                     | 16.9<br>(13.8 to 20.6)                                    | 3.0<br>(1.8 to 4.7)                     | 48.0<br>(46.7 to 49.3)                            | -5.6<br>(-6.4 to -4.7)                           |
| Poisonings                                    | 4.6<br>(4.1 to 5.3)                           | 2.7<br>(1.9 to 3.8)                                       | 0.2<br>(0.2 to 0.4)                     | 62.9<br>(57.3 to 68.3)                            | 4.0<br>(0.4 to 7.4)                              |
| Exposure to mechanical forces                 | 300.2<br>(263.6 to 345.0)                     | 74.0<br>(58.3 to 94.8)                                    | 6.5<br>(4.2 to 9.5)                     | 57.5<br>(56.0 to 58.9)                            | 0.5<br>(-0.5 to 1.4)                             |
| Unintentional firearm injuries                | 11.2<br>(9.4 to 13.0)                         | 1.7<br>(1.0 to 2.6)                                       | 0.2<br>(0.1 to 0.3)                     | 58.5<br>(56.6 to 60.6)                            | 1.2<br>(-0.1 to 2.5)                             |
| Unintentional suffocation                     | 17.6<br>(14.3 to 24.6)                        | 7.0<br>(4.9 to 9.7)                                       | 0.5<br>(0.3 to 0.8)                     | 60.2<br>(58.0 to 62.7)                            | 2.2<br>(0.8 to 3.8)                              |
| Other exposure to mechanical forces           | 271.3<br>(235.3 to 316.5)                     | 65.4<br>(51.0 to 84.7)                                    | 5.8<br>(3.8 to 8.4)                     | 57.2<br>(55.7 to 58.7)                            | 0.3<br>(-0.6 to 1.2)                             |

| Cause                                                                               | Prevalence in thousands (95% UI)      | Incidence in thousands (95% UI)       | YLDs in thousands (95% UI)           |                                                   |                                                  |
|-------------------------------------------------------------------------------------|---------------------------------------|---------------------------------------|--------------------------------------|---------------------------------------------------|--------------------------------------------------|
|                                                                                     | 2016 counts                           | 2016 counts                           | 2016 counts                          | Percentage change in counts between 2006 and 2016 | Percentage change in rates between 2006 and 2016 |
| Adverse effects of medical treatment                                                | 16.2<br>(11.6 to 22.2)                | 212.0<br>(161.7 to 275.5)             | 2.1<br>(1.3 to 3.4)                  | 52.7<br>(42.1 to 63.4)                            | -2.6<br>(-9.3 to 4.2)                            |
| Animal contact                                                                      | 59.4<br>(53.6 to 65.7)                | 28.1<br>(20.8 to 37.4)                | 1.1<br>(0.8 to 1.6)                  | 54.0<br>(51.9 to 55.9)                            | -1.8<br>(-3.1 to -0.5)                           |
| Venomous animal contact                                                             | 16.1<br>(13.9 to 18.6)                | 10.6<br>(7.2 to 15.0)                 | 0.5<br>(0.3 to 0.7)                  | 57.1<br>(53.8 to 60.5)                            | 0.3<br>(-1.9 to 2.4)                             |
| Non-venomous animal contact                                                         | 43.3<br>(38.1 to 48.4)                | 17.5<br>(12.9 to 23.7)                | 0.6<br>(0.4 to 1.0)                  | 51.6<br>(49.7 to 53.4)                            | -3.3<br>(-4.5 to -2.1)                           |
| Foreign body                                                                        | 145.5<br>(120.6 to 177.8)             | 174.3<br>(143.9 to 207.5)             | 5.2<br>(3.4 to 7.7)                  | 63.8<br>(61.5 to 66.0)                            | 4.5<br>(3.0 to 5.9)                              |
| Pulmonary aspiration and foreign body in airway                                     | 89.5<br>(68.0 to 123.6)               | 144.6<br>(116.7 to 174.8)             | 3.4<br>(2.2 to 5.1)                  | 66.6<br>(63.2 to 69.5)                            | 6.3<br>(4.2 to 8.2)                              |
| Foreign body in eyes                                                                | 5.5<br>(4.4 to 7.8)                   | 8.2<br>(3.3 to 23.7)                  | 0.3<br>(0.2 to 0.5)                  | 64.5<br>(61.6 to 67.7)                            | 5.0<br>(3.1 to 7.0)                              |
| Foreign body in other body part                                                     | 50.6<br>(40.9 to 59.7)                | 21.5<br>(14.5 to 32.2)                | 1.5<br>(1.0 to 2.2)                  | 57.5<br>(55.9 to 59.0)                            | 0.5<br>(-0.5 to 1.5)                             |
| Environmental heat and cold exposure                                                | 107.5<br>(94.5 to 127.0)              | 36.2<br>(25.1 to 51.5)                | 4.3<br>(2.9 to 6.1)                  | 55.2<br>(52.8 to 57.3)                            | -1.0<br>(-2.5 to 0.4)                            |
| Other unintentional injuries                                                        | 288.8<br>(247.3 to 337.7)             | 116.4<br>(79.9 to 169.7)              | 9.7<br>(6.5 to 13.9)                 | 55.8<br>(53.9 to 58.1)                            | -0.6<br>(-1.8 to 0.9)                            |
| <b>Self-harm and interpersonal violence</b>                                         | <b>99.8</b><br><b>(90.1 to 108.8)</b> | <b>32.6†</b><br><b>(25.9 to 40.7)</b> | <b>2.7</b><br><b>(1.8 to 3.9)</b>    | <b>47.2</b><br><b>(45.6 to 48.8)</b>              | <b>-6.1</b><br><b>(-7.1 to -5.0)</b>             |
| Self-harm                                                                           | 34.3<br>(28.9 to 40.6)                | 22.3<br>(16.6 to 28.8)                | 1.1<br>(0.7 to 1.6)                  | 35.1<br>(32.6 to 37.7)                            | -13.8<br>(-15.4 to -12.1)                        |
| Self-harm by firearm                                                                | 0.6<br>(0.5 to 0.7)                   | 0.1<br>( $< 0.05$ to 0.3)             | $< 0.05$<br>( $< 0.05$ to $< 0.05$ ) | 61.7<br>(56.7 to 66.6)                            | 3.2<br>(0.0 to 6.3)                              |
| Self-harm by other specified means                                                  | 33.7<br>(28.4 to 40.0)                | 22.1<br>(16.4 to 28.6)                | 1.1<br>(0.7 to 1.6)                  | 34.9<br>(32.4 to 37.4)                            | -13.9<br>(-15.5 to -12.3)                        |
| Interpersonal violence                                                              | 65.5<br>(58.9 to 72.7)                | 10.3‡<br>(7.2 to 14.6)                | 1.6<br>(1.0 to 2.3)                  | 57.2<br>(55.7 to 58.9)                            | 0.3<br>(-0.6 to 1.4)                             |
| Assault by firearm                                                                  | 5.0<br>(4.3 to 5.7)                   | 0.8<br>(0.4 to 1.5)                   | 0.1<br>(0.1 to 0.2)                  | 68.0<br>(66.0 to 70.3)                            | 7.2<br>(5.9 to 8.7)                              |
| Assault by sharp object                                                             | 13.6<br>(11.6 to 15.8)                | 2.7<br>(1.6 to 4.4)                   | 0.3<br>(0.2 to 0.4)                  | 57.1<br>(54.8 to 59.6)                            | 0.3<br>(-1.2 to 1.9)                             |
| Sexual violence                                                                     | 5.3<br>(4.2 to 6.7)                   | --                                    | $< 0.05$<br>( $< 0.05$ to $< 0.05$ ) | 53.9<br>(51.4 to 55.9)                            | -1.8<br>(-3.4 to -0.5)                           |
| Assault by other means                                                              | 41.6<br>(35.9 to 48.9)                | 6.8<br>(4.5 to 9.9)                   | 1.1<br>(0.8 to 1.7)                  | 56.1<br>(54.7 to 57.9)                            | -0.4<br>(-1.3 to 0.8)                            |
| <b>Forces of nature, conflict and terrorism, and executions and police conflict</b> | <b>13.2</b><br><b>(8.7 to 18.4)</b>   | <b>0.5†</b><br><b>(0.3 to 0.8)</b>    | <b>0.4</b><br><b>(0.1 to 1.1)</b>    | <b>88.6</b><br><b>(76.1 to 109.0)</b>             | <b>20.4</b><br><b>(12.4 to 33.3)</b>             |
| Forces of nature, conflict and terrorism, and state actor violence                  | 5.0<br>(2.5 to 8.0)                   | 0.2<br>(0.1 to 0.3)                   | 0.2<br>( $< 0.05$ to 0.5)            | 131.1<br>(113.7 to 150.2)                         | 47.5<br>(36.3 to 59.7)                           |
| Conflict and terrorism                                                              | 7.0<br>(4.4 to 11.2)                  | --                                    | 0.2<br>(0.1 to 0.6)                  | 62.1<br>(49.0 to 89.9)                            | 3.5<br>(-4.9 to 21.2)                            |
| Executions and police conflict                                                      | 1.2<br>(0.5 to 2.0)                   | 0.3<br>(0.1 to 0.6)                   | $< 0.05$<br>( $< 0.05$ to 0.1)       | 23.9<br>(12.8 to 38.2)                            | -21.0<br>(-28.0 to -11.8)                        |

We did not calculate incidence for certain NTDs and causes with only birth prevalence. Blank cells mean that no estimate is available.

† Incidence for aggregate causes represents the sum of the incidence of the causes below the aggregate.

‡ Incidence estimates for stroke represent first-ever stroke only.

^ Incidence of HIV/AIDS represents new infections of HIV only and does not include new infections of Tuberculosis in HIV positive cases.

SR Table 13a: Global prevalence and years lived with disability (YLDs) for 2016, percentage change of YLD counts and rates between 2006 and 2016 of anaemia by cause, ages 0-6 days

| Cause                                             | Prevalence in thousands (95% uncertainty interval) | YLDs in thousands (95% uncertainty interval) |                                                   |                                                  |
|---------------------------------------------------|----------------------------------------------------|----------------------------------------------|---------------------------------------------------|--------------------------------------------------|
|                                                   |                                                    | 2016                                         | Percentage change in counts between 2006 and 2016 | Percentage change in rates between 2006 and 2016 |
| Iron-deficiency anaemia                           | 305.6<br>(245.7 to 358.0)                          | 10.9<br>(6.9 to 16.2)                        | -4.9%<br>(-7.6% to -2.3%)                         | -4.4%<br>(-7.1% to -1.8%)                        |
| Other infectious diseases                         | 19.2<br>(15.5 to 22.5)                             | 0.7<br>(0.4 to 1.0)                          | 5.3%<br>(1.3% to 9.0%)                            | 5.8%<br>(1.9% to 9.5%)                           |
| Endocrine, metabolic, blood, and immune disorders | 14.1<br>(11.3 to 16.5)                             | 0.5<br>(0.3 to 0.7)                          | -5.1%<br>(-8.9% to -1.6%)                         | -4.6%<br>(-8.4% to -1.1%)                        |
| Thalassaemias trait                               | 15.1<br>(11.3 to 18.6)                             | 0.5<br>(0.3 to 0.7)                          | -19.1%<br>(-25.8% to -12.6%)                      | -18.6%<br>(-25.4% to -12.1%)                     |
| Sickle cell trait                                 | 12.7<br>(10.3 to 15.4)                             | 0.5<br>(0.3 to 0.7)                          | -5.8%<br>(-10.9% to -0.8%)                        | -5.3%<br>(-10.4% to -0.3%)                       |
| Other hemoglobinopathies and hemolytic anaemias   | 11.1<br>(9.0 to 13.0)                              | 0.4<br>(0.2 to 0.6)                          | -8.5%<br>(-12.5% to -4.7%)                        | -8.0%<br>(-12.0% to -4.2%)                       |
| Sickle cell disorders                             | 5.4<br>(4.5 to 7.0)                                | 0.3<br>(0.2 to 0.4)                          | -0.4%<br>(-8.2% to 7.2%)                          | 0.1%<br>(-7.7% to 7.8%)                          |
| Thalassaemias                                     | 1.1<br>(0.9 to 1.4)                                | 0.1<br>(<0.05 to 0.1)                        | -16.5%<br>(-23.6% to -10.0%)                      | -16.0%<br>(-23.2% to -9.5%)                      |
| G6PD deficiency                                   | 0.1<br>(0.1 to 0.1)                                | <0.05<br>(<0.05 to <0.05)                    | -8.3%<br>(-11.6% to -4.8%)                        | -7.8%<br>(-11.2% to -4.3%)                       |
| Chronic kidney disease due to other causes        | <0.05<br>(<0.05 to <0.05)                          | <0.05<br>(<0.05 to <0.05)                    | -8.5%<br>(-15.4% to -1.9%)                        | -8.0%<br>(-14.9% to -1.4%)                       |
| Chronic kidney disease due to glomerulonephritis  | <0.05<br>(<0.05 to <0.05)                          | <0.05<br>(<0.05 to <0.05)                    | -8.3%<br>(-15.0% to -1.6%)                        | -7.9%<br>(-14.6% to -1.0%)                       |
| G6PD trait                                        | <0.05<br>(<0.05 to <0.05)                          | <0.05<br>(<0.05 to <0.05)                    | -15.0%<br>(-19.2% to -10.6%)                      | -14.6%<br>(-18.8% to -10.1%)                     |
| Chronic kidney disease due to diabetes mellitus   | <0.05<br>(<0.05 to <0.05)                          | <0.05<br>(<0.05 to <0.05)                    | -7.7%<br>(-15.1% to 0.5%)                         | -7.2%<br>(-14.7% to 1.0%)                        |
| Chronic kidney disease due to hypertension        | <0.05<br>(<0.05 to <0.05)                          | <0.05<br>(<0.05 to <0.05)                    | -10.4%<br>(-18.3% to -2.7%)                       | -9.9%<br>(-17.9% to -2.2%)                       |
| <b>All causes</b>                                 | <b>384.4</b><br><b>(308.8 to 450.6)</b>            | <b>13.8</b><br><b>(8.7 to 20.4)</b>          | <b>-5.2%</b><br><b>(-7.8% to -2.5%)</b>           | <b>-4.7%</b><br><b>(-7.3% to -2.0%)</b>          |

SR Table 13a: Global prevalence and years lived with disability (YLDs) for 2016, percentage change of YLD counts and rates between 2006 and 2016 of anaemia by cause, ages 7-27 days

| Cause                                             | Prevalence in thousands (95% uncertainty interval) | YLDs in thousands (95% uncertainty interval) |                                                   |                                                  |
|---------------------------------------------------|----------------------------------------------------|----------------------------------------------|---------------------------------------------------|--------------------------------------------------|
|                                                   |                                                    | 2016                                         | Percentage change in counts between 2006 and 2016 | Percentage change in rates between 2006 and 2016 |
| Iron-deficiency anaemia                           | 1,204.2<br>(1,055.1 to 1,334.1)                    | 43.3<br>(28.1 to 62.3)                       | -2.5%<br>(-5.2% to -0.0%)                         | -2.3%<br>(-5.0% to 0.1%)                         |
| Other infectious diseases                         | 75.8<br>(66.5 to 84.0)                             | 2.7<br>(1.7 to 3.9)                          | 7.7%<br>(3.9% to 11.7%)                           | 7.9%<br>(4.1% to 11.9%)                          |
| Thalassaemias trait                               | 69.5<br>(58.2 to 80.5)                             | 2.3<br>(1.4 to 3.3)                          | -5.8%<br>(-11.1% to -0.4%)                        | -5.6%<br>(-11.0% to -0.2%)                       |
| Endocrine, metabolic, blood, and immune disorders | 55.4<br>(48.6 to 61.4)                             | 2.0<br>(1.3 to 2.9)                          | -2.5%<br>(-6.4% to 0.9%)                          | -2.3%<br>(-6.3% to 1.1%)                         |
| Sickle cell trait                                 | 50.4<br>(43.4 to 58.8)                             | 1.8<br>(1.2 to 2.7)                          | 2.5%<br>(-2.1% to 7.2%)                           | 2.6%<br>(-1.9% to 7.4%)                          |
| Other hemoglobinopathies and hemolytic anaemias   | 43.8<br>(38.4 to 48.4)                             | 1.5<br>(1.0 to 2.1)                          | -6.4%<br>(-10.1% to -2.5%)                        | -6.2%<br>(-9.9% to -2.4%)                        |
| Sickle cell disorders                             | 18.2<br>(15.9 to 23.1)                             | 1.0<br>(0.6 to 1.5)                          | 2.8%<br>(-3.8% to 9.5%)                           | 3.0%<br>(-3.6% to 9.7%)                          |
| Malaria                                           | 11.7<br>(8.5 to 15.4)                              | 0.7<br>(0.4 to 1.1)                          | -36.2%<br>(-46.3% to -23.7%)                      | -36.1%<br>(-46.2% to -23.6%)                     |
| Thalassaemias                                     | 4.2<br>(3.6 to 4.7)                                | 0.2<br>(0.1 to 0.3)                          | -12.1%<br>(-17.9% to -6.7%)                       | -11.9%<br>(-17.7% to -6.6%)                      |
| G6PD deficiency                                   | 0.4<br>(0.4 to 0.5)                                | <0.05<br>(<0.05 to <0.05)                    | -6.9%<br>(-10.5% to -3.9%)                        | -6.7%<br>(-10.3% to -3.7%)                       |
| Chronic kidney disease due to other causes        | <0.05<br>(<0.05 to <0.05)                          | <0.05<br>(<0.05 to <0.05)                    | -6.4%<br>(-13.2% to 0.4%)                         | -6.2%<br>(-13.0% to 0.6%)                        |
| Chronic kidney disease due to glomerulonephritis  | <0.05<br>(<0.05 to <0.05)                          | <0.05<br>(<0.05 to <0.05)                    | -4.8%<br>(-11.6% to 2.0%)                         | -4.6%<br>(-11.5% to 2.1%)                        |
| G6PD trait                                        | <0.05<br>(<0.05 to <0.05)                          | <0.05<br>(<0.05 to <0.05)                    | 1.2%<br>(-2.7% to 5.4%)                           | 1.4%<br>(-2.5% to 5.6%)                          |
| Chronic kidney disease due to diabetes mellitus   | <0.05<br>(<0.05 to <0.05)                          | <0.05<br>(<0.05 to <0.05)                    | -5.4%<br>(-13.2% to 3.3%)                         | -5.3%<br>(-13.1% to 3.5%)                        |
| Chronic kidney disease due to hypertension        | <0.05<br>(<0.05 to <0.05)                          | <0.05<br>(<0.05 to <0.05)                    | -9.2%<br>(-16.8% to -1.3%)                        | -9.0%<br>(-16.7% to -1.2%)                       |
| <b>All causes</b>                                 | <b>1,533.6</b><br><b>(1,342.7 to 1,698.2)</b>      | <b>55.4</b><br><b>(35.9 to 80.2)</b>         | <b>-2.7%</b><br><b>(-5.4% to -0.4%)</b>           | <b>-2.5%</b><br><b>(-5.2% to -0.2%)</b>          |



SR Table 13a: Global prevalence and years lived with disability (YLDs) for 2016, percentage change of YLD counts and rates between 2006 and 2016 of anaemia by cause, ages 28-364 days

| Cause                                                                         | Prevalence in thousands (95% uncertainty interval) | YLDs in thousands (95% uncertainty interval)  |                                                   |                                                  |
|-------------------------------------------------------------------------------|----------------------------------------------------|-----------------------------------------------|---------------------------------------------------|--------------------------------------------------|
|                                                                               |                                                    | 2016                                          | Percentage change in counts between 2006 and 2016 | Percentage change in rates between 2006 and 2016 |
| Iron-deficiency anaemia                                                       | 42,772.2<br>(38,533.5 to 47,596.6)                 | 1,455.7<br>(928.2 to 2,125.9)                 | 0.2%<br>(-2.4% to 2.6%)                           | -0.7%<br>(-3.2% to 1.7%)                         |
| Other neglected tropical diseases                                             | 3,755.9<br>(3,414.9 to 4,134.5)                    | 129.7<br>(83.4 to 190.0)                      | 2.1%<br>(-0.8% to 4.9%)                           | 1.3%<br>(-1.6% to 4.0%)                          |
| Thalassaemias trait                                                           | 2,634.6<br>(2,231.4 to 3,125.8)                    | 91.0<br>(56.0 to 136.4)                       | -2.4%<br>(-7.7% to 4.3%)                          | -3.2%<br>(-8.4% to 3.5%)                         |
| Other infectious diseases                                                     | 2,694.4<br>(2,427.9 to 2,997.6)                    | 90.9<br>(58.0 to 132.8)                       | 12.6%<br>(9.0% to 16.3%)                          | 11.7%<br>(8.1% to 15.3%)                         |
| Endocrine, metabolic, blood, and immune disorders                             | 1,969.7<br>(1,775.4 to 2,191.4)                    | 66.3<br>(42.4 to 97.3)                        | 0.3%<br>(-2.7% to 3.3%)                           | -0.5%<br>(-3.5% to 2.4%)                         |
| Sickle cell trait                                                             | 1,859.8<br>(1,607.3 to 2,162.6)                    | 64.1<br>(41.3 to 95.8)                        | 7.0%<br>(3.2% to 10.6%)                           | 6.1%<br>(2.4% to 9.7%)                           |
| Other hemoglobinopathies and hemolytic anaemias                               | 1,558.2<br>(1,410.0 to 1,728.8)                    | 49.5<br>(31.7 to 72.5)                        | -5.3%<br>(-8.5% to -2.1%)                         | -6.0%<br>(-9.3% to -2.9%)                        |
| Malaria                                                                       | 587.6<br>(431.0 to 799.2)                          | 33.7<br>(19.9 to 54.4)                        | -35.0%<br>(-45.2% to -24.5%)                      | -35.5%<br>(-45.6% to -25.1%)                     |
| Sickle cell disorders                                                         | 323.8<br>(279.6 to 428.5)                          | 21.8<br>(14.0 to 32.7)                        | 8.2%<br>(1.9% to 14.4%)                           | 7.3%<br>(1.0% to 13.5%)                          |
| HIV/AIDS resulting in other diseases                                          | 148.1<br>(138.4 to 158.1)                          | 15.5<br>(11.1 to 20.4)                        | -22.4%<br>(-29.8% to -14.6%)                      | -23.0%<br>(-30.4% to -15.3%)                     |
| Hookworm disease                                                              | 414.0<br>(361.5 to 473.7)                          | 13.2<br>(8.3 to 19.7)                         | -6.2%<br>(-17.3% to 6.6%)                         | -7.0%<br>(-18.0% to 5.7%)                        |
| Thalassaemias                                                                 | 65.4<br>(54.8 to 73.5)                             | 4.8<br>(3.1 to 7.0)                           | -8.9%<br>(-14.4% to -3.9%)                        | -9.7%<br>(-15.1% to -4.7%)                       |
| Drug-susceptible HIV/AIDS - Tuberculosis                                      | 3.9<br>(2.7 to 5.3)                                | 1.6<br>(0.9 to 2.4)                           | -56.2%<br>(-61.1% to -51.3%)                      | -56.6%<br>(-61.4% to -51.7%)                     |
| G6PD deficiency                                                               | 20.8<br>(17.9 to 24.1)                             | 1.0<br>(0.6 to 1.4)                           | -5.9%<br>(-14.7% to 2.2%)                         | -6.6%<br>(-15.4% to 1.4%)                        |
| Chronic kidney disease due to other causes                                    | 1.4<br>(0.9 to 2.0)                                | 0.3<br>(0.2 to 0.6)                           | -2.8%<br>(-9.4% to 3.0%)                          | -3.6%<br>(-10.2% to 2.2%)                        |
| Chronic kidney disease due to glomerulonephritis                              | 1.1<br>(0.7 to 1.5)                                | 0.3<br>(0.1 to 0.4)                           | -1.4%<br>(-8.2% to 4.6%)                          | -2.2%<br>(-9.0% to 3.8%)                         |
| Multidrug-resistant HIV/AIDS - Tuberculosis without extensive drug resistance | 0.1<br>(0.1 to 0.2)                                | <0.05<br>(<0.05 to 0.1)                       | -54.8%<br>(-65.2% to -43.1%)                      | -55.2%<br>(-65.5% to -43.6%)                     |
| Chronic kidney disease due to diabetes mellitus                               | 0.1<br>(<0.05 to 0.1)                              | <0.05<br>(<0.05 to <0.05)                     | -1.3%<br>(-9.1% to 6.6%)                          | -2.1%<br>(-9.9% to 5.7%)                         |
| G6PD trait                                                                    | 0.2<br>(0.2 to 0.2)                                | <0.05<br>(<0.05 to <0.05)                     | 3.0%<br>(-1.4% to 7.8%)                           | 2.2%<br>(-2.2% to 6.9%)                          |
| Chronic kidney disease due to hypertension                                    | <0.05<br>(<0.05 to <0.05)                          | <0.05<br>(<0.05 to <0.05)                     | -6.1%<br>(-13.6% to 0.9%)                         | -6.9%<br>(-14.3% to 0.0%)                        |
| Schistosomiasis                                                               | <0.05<br>(<0.05 to <0.05)                          | <0.05<br>(<0.05 to <0.05)                     | 7.0%<br>(-1.9% to 16.7%)                          | 6.2%<br>(-2.8% to 15.8%)                         |
| Extensively drug-resistant HIV/AIDS - Tuberculosis                            | <0.05<br>(<0.05 to <0.05)                          | <0.05<br>(<0.05 to <0.05)                     | 109.3%<br>(70.0% to 155.5%)                       | 107.6%<br>(68.6% to 153.4%)                      |
| <b>All causes</b>                                                             | <b>58,811.2</b><br><b>(52,889.6 to 65,426.2)</b>   | <b>2,039.5</b><br><b>(1,309.4 to 2,980.6)</b> | <b>-0.5%</b><br><b>(-3.0% to 2.0%)</b>            | <b>-1.3%</b><br><b>(-3.7% to 1.1%)</b>           |

SR Table 13a: Global prevalence and years lived with disability (YLDs) for 2016, percentage change of YLD counts and rates between 2006 and 2016 of anaemia by cause, ages 1-4 years

| Cause                                                                         | Prevalence in thousands (95% uncertainty interval)  | YLDs in thousands (95% uncertainty interval)   |                                                   |                                                  |
|-------------------------------------------------------------------------------|-----------------------------------------------------|------------------------------------------------|---------------------------------------------------|--------------------------------------------------|
|                                                                               |                                                     | 2016                                           | Percentage change in counts between 2006 and 2016 | Percentage change in rates between 2006 and 2016 |
| Iron-deficiency anaemia                                                       | 154,787.1<br>(141,563.8 to 172,446.2)               | 4,961.5<br>(3,095.6 to 7,427.5)                | 0.1%<br>(-4.3% to 4.7%)                           | -5.2%<br>(-9.3% to -0.8%)                        |
| Other neglected tropical diseases                                             | 13,518.1<br>(12,450.5 to 14,909.0)                  | 434.8<br>(271.5 to 650.2)                      | 2.4%<br>(-2.3% to 7.0%)                           | -3.0%<br>(-7.4% to 1.4%)                         |
| Other infectious diseases                                                     | 9,745.9<br>(8,917.1 to 10,849.4)                    | 309.1<br>(192.3 to 461.7)                      | 12.0%<br>(6.8% to 18.0%)                          | 6.1%<br>(1.2% to 11.8%)                          |
| Thalassaemias trait                                                           | 10,501.4<br>(8,287.1 to 13,524.5)                   | 301.6<br>(171.5 to 495.6)                      | 8.3%<br>(-0.0% to 19.7%)                          | 2.5%<br>(-5.3% to 13.3%)                         |
| Malaria                                                                       | 4,689.2<br>(3,260.5 to 6,172.0)                     | 231.0<br>(139.0 to 361.2)                      | -23.6%<br>(-36.2% to -12.9%)                      | -27.6%<br>(-39.6% to -17.5%)                     |
| Endocrine, metabolic, blood, and immune disorders                             | 7,126.3<br>(6,519.5 to 7,936.4)                     | 225.8<br>(142.2 to 338.7)                      | 0.6%<br>(-4.1% to 5.6%)                           | -4.7%<br>(-9.2% to 0.0%)                         |
| Sickle cell trait                                                             | 6,777.4<br>(5,921.3 to 7,924.5)                     | 216.0<br>(134.9 to 321.3)                      | 12.6%<br>(6.7% to 19.2%)                          | 6.7%<br>(1.1% to 12.9%)                          |
| Other hemoglobinopathies and hemolytic anaemias                               | 5,634.4<br>(5,174.4 to 6,243.6)                     | 171.4<br>(107.1 to 253.9)                      | -3.2%<br>(-8.8% to 3.8%)                          | -8.3%<br>(-13.6% to -1.7%)                       |
| Sickle cell disorders                                                         | 1,013.5<br>(895.9 to 1,269.2)                       | 63.3<br>(40.8 to 94.8)                         | 13.9%<br>(6.0% to 22.5%)                          | 7.9%<br>(0.4% to 16.0%)                          |
| HIV/AIDS resulting in other diseases                                          | 606.8<br>(569.0 to 646.8)                           | 62.1<br>(44.3 to 81.3)                         | -19.2%<br>(-26.4% to -11.1%)                      | -23.4%<br>(-30.3% to -15.8%)                     |
| Hookworm disease                                                              | 1,544.0<br>(1,327.5 to 1,825.1)                     | 43.5<br>(26.3 to 65.9)                         | -0.8%<br>(-13.7% to 14.7%)                        | -6.0%<br>(-18.2% to 8.6%)                        |
| Gastritis and duodenitis                                                      | 962.0<br>(661.5 to 1,391.2)                         | 24.5<br>(12.9 to 42.3)                         | 17.6%<br>(7.7% to 30.8%)                          | 11.4%<br>(2.0% to 23.9%)                         |
| Thalassaemias                                                                 | 150.6<br>(112.3 to 174.9)                           | 9.6<br>(5.6 to 14.7)                           | -3.2%<br>(-11.7% to 4.8%)                         | -8.3%<br>(-16.4% to -0.7%)                       |
| Drug-susceptible HIV/AIDS - Tuberculosis                                      | 16.3<br>(11.2 to 22.5)                              | 6.6<br>(3.8 to 10.5)                           | -54.2%<br>(-59.1% to -48.9%)                      | -56.6%<br>(-61.3% to -51.6%)                     |
| G6PD deficiency                                                               | 85.9<br>(71.5 to 106.5)                             | 3.6<br>(2.1 to 5.8)                            | 4.4%<br>(-9.7% to 16.7%)                          | -1.1%<br>(-14.4% to 10.6%)                       |
| Chronic kidney disease due to other causes                                    | 19.0<br>(11.1 to 30.7)                              | 3.2<br>(1.5 to 6.2)                            | 11.5%<br>(2.5% to 18.9%)                          | 5.6%<br>(-2.9% to 12.7%)                         |
| Chronic kidney disease due to glomerulonephritis                              | 13.5<br>(7.3 to 22.3)                               | 2.3<br>(1.1 to 4.5)                            | 12.4%<br>(3.0% to 20.1%)                          | 6.4%<br>(-2.4% to 13.8%)                         |
| Schistosomiasis                                                               | 6.6<br>(5.0 to 8.6)                                 | 0.4<br>(0.3 to 0.7)                            | -12.9%<br>(-23.3% to -1.0%)                       | -17.5%<br>(-27.4% to -6.2%)                      |
| Chronic kidney disease due to diabetes mellitus                               | 1.1<br>(0.5 to 2.0)                                 | 0.2<br>(0.1 to 0.4)                            | 13.5%<br>(4.1% to 22.7%)                          | 7.5%<br>(-1.4% to 16.2%)                         |
| Multidrug-resistant HIV/AIDS - Tuberculosis without extensive drug resistance | 0.5<br>(0.3 to 0.7)                                 | 0.2<br>(0.1 to 0.3)                            | -52.6%<br>(-63.3% to -40.2%)                      | -55.1%<br>(-65.2% to -43.3%)                     |
| Chronic kidney disease due to hypertension                                    | 0.3<br>(0.1 to 0.5)                                 | 0.1<br>(<0.05 to 0.1)                          | 7.9%<br>(-2.0% to 16.5%)                          | 2.2%<br>(-7.2% to 10.3%)                         |
| G6PD trait                                                                    | 0.6<br>(0.4 to 0.9)                                 | <0.05<br>(<0.05 to 0.1)                        | 12.0%<br>(1.4% to 21.9%)                          | 6.1%<br>(-4.0% to 15.5%)                         |
| Extensively drug-resistant HIV/AIDS - Tuberculosis                            | <0.05<br>(<0.05 to <0.05)                           | <0.05<br>(<0.05 to <0.05)                      | 150.2%<br>(96.6% to 211.5%)                       | 137.0%<br>(86.2% to 195.0%)                      |
| <b>All causes</b>                                                             | <b>217,200.4</b><br><b>(197,837.8 to 243,074.4)</b> | <b>7,070.7</b><br><b>(4,408.1 to 10,631.5)</b> | <b>0.1%</b><br><b>(-4.3% to 4.9%)</b>             | <b>-5.2%</b><br><b>(-9.3% to -0.7%)</b>          |

SR Table 13a: Global prevalence and years lived with disability (YLDs) for 2016, percentage change of YLD counts and rates between 2006 and 2016 of anaemia by cause, ages 5-9 years

| Cause                                                                         | Prevalence in thousands (95% uncertainty interval)  | YLDs in thousands (95% uncertainty interval)   |                                                   |                                                  |
|-------------------------------------------------------------------------------|-----------------------------------------------------|------------------------------------------------|---------------------------------------------------|--------------------------------------------------|
|                                                                               |                                                     | 2016                                           | Percentage change in counts between 2006 and 2016 | Percentage change in rates between 2006 and 2016 |
| Iron-deficiency anaemia                                                       | 153,365.1<br>(142,685.4 to 164,250.8)               | 6,147.9<br>(3,986.2 to 9,111.0)                | 2.6%<br>(0.3% to 5.6%)                            | -4.7%<br>(-6.9% to -1.9%)                        |
| Other neglected tropical diseases                                             | 13,238.1<br>(12,322.8 to 14,154.6)                  | 529.3<br>(344.3 to 781.4)                      | 3.1%<br>(-0.0% to 6.4%)                           | -4.3%<br>(-7.1% to -1.1%)                        |
| Thalassaemias trait                                                           | 11,037.5<br>(9,686.7 to 12,623.2)                   | 385.3<br>(242.8 to 579.2)                      | -0.8%<br>(-6.5% to 5.0%)                          | -7.9%<br>(-13.2% to -2.5%)                       |
| Other infectious diseases                                                     | 9,658.7<br>(8,986.7 to 10,343.7)                    | 384.9<br>(249.2 to 566.0)                      | 8.6%<br>(5.4% to 12.2%)                           | 0.8%<br>(-2.1% to 4.2%)                          |
| Malaria                                                                       | 6,196.1<br>(4,523.2 to 7,970.4)                     | 294.8<br>(175.8 to 473.2)                      | -21.2%<br>(-30.6% to -12.7%)                      | -26.8%<br>(-35.6% to -18.9%)                     |
| Endocrine, metabolic, blood, and immune disorders                             | 7,058.7<br>(6,567.9 to 7,560.5)                     | 280.5<br>(182.2 to 416.5)                      | 2.8%<br>(-0.4% to 6.3%)                           | -4.5%<br>(-7.5% to -1.2%)                        |
| Sickle cell trait                                                             | 6,892.3<br>(6,153.8 to 7,848.7)                     | 273.8<br>(176.2 to 407.5)                      | 4.3%<br>(0.5% to 7.9%)                            | -3.2%<br>(-6.5% to 0.2%)                         |
| Other hemoglobinopathies and hemolytic anaemias                               | 5,574.8<br>(5,195.4 to 5,961.7)                     | 222.2<br>(144.7 to 325.5)                      | 3.1%<br>(-0.7% to 7.7%)                           | -4.3%<br>(-7.7% to 0.0%)                         |
| HIV/AIDS resulting in other diseases                                          | 885.1<br>(843.5 to 931.0)                           | 115.7<br>(83.7 to 149.4)                       | -1.7%<br>(-12.8% to 11.6%)                        | -8.7%<br>(-19.0% to -2.6%)                       |
| Hookworm disease                                                              | 2,184.2<br>(1,936.5 to 2,460.8)                     | 80.3<br>(50.5 to 119.9)                        | -12.5%<br>(-23.6% to 0.6%)                        | -18.8%<br>(-29.0% to -6.6%)                      |
| Sickle cell disorders                                                         | 886.6<br>(808.7 to 1,017.0)                         | 64.1<br>(43.2 to 92.9)                         | 15.5%<br>(6.4% to 25.1%)                          | 7.3%<br>(-1.2% to 16.2%)                         |
| Gastritis and duodenitis                                                      | 1,130.2<br>(809.8 to 1,533.4)                       | 39.9<br>(23.3 to 63.9)                         | 1.6%<br>(-5.6% to 9.7%)                           | -5.6%<br>(-12.3% to 1.9%)                        |
| Chronic kidney disease due to other causes                                    | 79.0<br>(49.6 to 117.6)                             | 10.8<br>(5.9 to 18.3)                          | 4.1%<br>(-1.7% to 9.3%)                           | -3.3%<br>(-8.7% to 1.5%)                         |
| Drug-susceptible HIV/AIDS - Tuberculosis                                      | 23.8<br>(16.4 to 33.1)                              | 9.6<br>(5.6 to 15.4)                           | -27.3%<br>(-36.8% to -17.7%)                      | -32.5%<br>(-41.3% to -23.6%)                     |
| Chronic kidney disease due to glomerulonephritis                              | 60.0<br>(34.5 to 91.5)                              | 8.4<br>(4.3 to 14.2)                           | 5.8%<br>(0.4% to 10.5%)                           | -1.8%<br>(-6.8% to 2.7%)                         |
| Peptic ulcer disease                                                          | 139.3<br>(92.8 to 199.8)                            | 8.0<br>(4.3 to 13.0)                           | -12.1%<br>(-19.4% to -4.4%)                       | -18.4%<br>(-25.1% to -11.2%)                     |
| Schistosomiasis                                                               | 146.0<br>(117.4 to 179.0)                           | 5.4<br>(3.2 to 8.2)                            | -28.3%<br>(-37.1% to -18.4%)                      | -33.4%<br>(-41.6% to -24.2%)                     |
| Thalassaemias                                                                 | 63.4<br>(54.8 to 71.0)                              | 4.3<br>(2.7 to 6.4)                            | -2.8%<br>(-10.8% to 5.2%)                         | -9.7%<br>(-17.1% to -2.3%)                       |
| G6PD deficiency                                                               | 74.0<br>(66.1 to 82.1)                              | 3.7<br>(2.3 to 5.3)                            | -7.9%<br>(-14.9% to -0.7%)                        | -14.5%<br>(-21.0% to -7.8%)                      |
| Chronic kidney disease due to diabetes mellitus                               | 5.5<br>(2.8 to 9.4)                                 | 0.8<br>(0.4 to 1.5)                            | 0.5%<br>(-6.2% to 7.6%)                           | -6.7%<br>(-12.9% to -0.1%)                       |
| Chronic kidney disease due to hypertension                                    | 2.2<br>(1.2 to 3.7)                                 | 0.3<br>(0.2 to 0.6)                            | 1.1%<br>(-5.1% to 7.2%)                           | -6.1%<br>(-11.9% to -0.4%)                       |
| Multidrug-resistant HIV/AIDS - Tuberculosis without extensive drug resistance | 0.6<br>(0.4 to 0.9)                                 | 0.3<br>(0.1 to 0.4)                            | -25.6%<br>(-42.1% to -7.7%)                       | -30.9%<br>(-46.2% to -14.3%)                     |
| G6PD trait                                                                    | 0.6<br>(0.5 to 0.7)                                 | <0.05<br>(<0.05 to 0.1)                        | 8.9%<br>(3.9% to 14.5%)                           | 1.2%<br>(-3.5% to 6.3%)                          |
| Extensively drug-resistant HIV/AIDS - Tuberculosis                            | <0.05<br>(<0.05 to <0.05)                           | <0.05<br>(<0.05 to <0.05)                      | 253.8%<br>(187.1% to 338.1%)                      | 228.6%<br>(166.6% to 306.9%)                     |
| <b>All causes</b>                                                             | <b>218,702.1</b><br><b>(202,866.2 to 234,767.9)</b> | <b>8,870.4</b><br><b>(5,770.6 to 13,089.9)</b> | <b>1.6%</b><br><b>(-0.8% to 4.6%)</b>             | <b>-5.7%</b><br><b>(-7.9% to -2.9%)</b>          |

SR Table 13a: Global prevalence and years lived with disability (YLDs) for 2016, percentage change of YLD counts and rates between 2006 and 2016 of anaemia by cause, ages 10-14 years

| Cause                                                                         | Prevalence in thousands (95% uncertainty interval)  | YLDs in thousands (95% uncertainty interval)  |                                                   |                                                  |
|-------------------------------------------------------------------------------|-----------------------------------------------------|-----------------------------------------------|---------------------------------------------------|--------------------------------------------------|
|                                                                               |                                                     | 2016                                          | Percentage change in counts between 2006 and 2016 | Percentage change in rates between 2006 and 2016 |
| Iron-deficiency anaemia                                                       | 97,982.7<br>(89,090.4 to 108,171.7)                 | 3,720.6<br>(2,386.0 to 5,439.3)               | -0.7%<br>(-3.7% to 2.4%)                          | -1.5%<br>(-4.5% to 1.5%)                         |
| Thalassaemias trait                                                           | 6,581.0<br>(5,750.1 to 7,607.8)                     | 224.2<br>(144.9 to 324.8)                     | -10.7%<br>(-16.4% to -4.8%)                       | -11.5%<br>(-17.1% to -5.5%)                      |
| Other hemoglobinopathies and hemolytic anaemias                               | 4,838.0<br>(4,259.4 to 5,465.6)                     | 187.0<br>(120.6 to 272.5)                     | 2.1%<br>(-4.2% to 9.1%)                           | 1.3%<br>(-5.0% to 8.2%)                          |
| Sickle cell trait                                                             | 4,415.0<br>(3,877.4 to 5,112.7)                     | 166.4<br>(107.7 to 249.3)                     | 7.2%<br>(3.3% to 11.4%)                           | 6.4%<br>(2.4% to 10.5%)                          |
| Malaria                                                                       | 2,787.1<br>(2,114.3 to 3,760.4)                     | 129.8<br>(80.0 to 205.3)                      | -23.3%<br>(-32.8% to -10.5%)                      | -24.0%<br>(-33.3% to -11.2%)                     |
| Endocrine, metabolic, blood, and immune disorders                             | 3,284.1<br>(2,951.4 to 3,669.3)                     | 123.6<br>(79.0 to 182.0)                      | -0.7%<br>(-4.8% to 4.0%)                          | -1.5%<br>(-5.6% to 3.1%)                         |
| HIV/AIDS resulting in other diseases                                          | 632.5<br>(599.1 to 666.4)                           | 115.9<br>(83.9 to 150.3)                      | 37.3%<br>(18.4% to 59.7%)                         | 36.2%<br>(17.4% to 58.4%)                        |
| Other infectious diseases                                                     | 2,619.6<br>(2,314.1 to 2,954.9)                     | 97.2<br>(62.4 to 141.1)                       | 4.6%<br>(-0.5% to 9.7%)                           | 3.7%<br>(-1.3% to 8.8%)                          |
| Other neglected tropical diseases                                             | 2,352.0<br>(2,073.0 to 2,649.3)                     | 87.6<br>(55.8 to 127.4)                       | 1.1%<br>(-3.8% to 6.6%)                           | 0.3%<br>(-4.6% to 5.8%)                          |
| Hookworm disease                                                              | 1,604.3<br>(1,396.5 to 1,835.3)                     | 56.9<br>(36.6 to 83.9)                        | -11.3%<br>(-22.2% to 1.1%)                        | -12.0%<br>(-22.8% to 0.3%)                       |
| Gastritis and duodenitis                                                      | 916.0<br>(704.2 to 1,205.8)                         | 33.3<br>(20.1 to 52.0)                        | -12.0%<br>(-17.7% to -5.3%)                       | -12.8%<br>(-18.4% to -6.1%)                      |
| Sickle cell disorders                                                         | 539.1<br>(494.1 to 599.7)                           | 32.1<br>(21.2 to 47.6)                        | 17.7%<br>(7.9% to 29.1%)                          | 16.7%<br>(7.0% to 28.1%)                         |
| Peptic ulcer disease                                                          | 474.3<br>(345.6 to 633.5)                           | 19.8<br>(11.6 to 32.2)                        | -7.4%<br>(-14.1% to -0.5%)                        | -8.1%<br>(-14.8% to -1.3%)                       |
| Chronic kidney disease due to other causes                                    | 153.9<br>(99.7 to 226.3)                            | 17.9<br>(9.6 to 29.7)                         | -1.2%<br>(-7.1% to 4.5%)                          | -2.0%<br>(-7.9% to 3.7%)                         |
| Schistosomiasis                                                               | 473.8<br>(386.5 to 566.7)                           | 17.4<br>(11.0 to 25.9)                        | -33.6%<br>(-39.8% to -27.9%)                      | -34.2%<br>(-40.3% to -28.5%)                     |
| Chronic kidney disease due to glomerulonephritis                              | 135.3<br>(85.6 to 194.8)                            | 15.7<br>(8.4 to 26.1)                         | -2.7%<br>(-8.4% to 2.3%)                          | -3.5%<br>(-9.2% to 1.4%)                         |
| Drug-susceptible HIV/AIDS - Tuberculosis                                      | 15.8<br>(10.7 to 22.2)                              | 6.3<br>(3.6 to 10.1)                          | 9.0%<br>(-5.5% to 23.6%)                          | 8.1%<br>(-6.3% to 22.6%)                         |
| GGPD deficiency                                                               | 38.1<br>(33.1 to 44.2)                              | 2.1<br>(1.3 to 3.0)                           | 1.2%<br>(-4.6% to 8.5%)                           | 0.4%<br>(-5.4% to 7.6%)                          |
| Chronic kidney disease due to diabetes mellitus                               | 13.4<br>(7.5 to 22.7)                               | 1.7<br>(0.8 to 3.1)                           | -5.9%<br>(-12.4% to 0.5%)                         | -6.6%<br>(-13.1% to -0.3%)                       |
| Chronic kidney disease due to hypertension                                    | 7.7<br>(4.5 to 12.3)                                | 1.0<br>(0.5 to 1.7)                           | -5.0%<br>(-10.9% to 0.9%)                         | -5.8%<br>(-11.6% to 0.0%)                        |
| Thalassaemias                                                                 | 14.3<br>(12.0 to 16.8)                              | 0.9<br>(0.6 to 1.4)                           | -9.8%<br>(-18.9% to -1.2%)                        | -10.5%<br>(-19.5% to -2.0%)                      |
| Multidrug-resistant HIV/AIDS - Tuberculosis without extensive drug resistance | 0.4<br>(0.3 to 0.7)                                 | 0.2<br>(0.1 to 0.3)                           | 21.0%<br>(-7.6% to 52.9%)                         | 20.0%<br>(-8.4% to 51.6%)                        |
| Maternal haemorrhage                                                          | 0.8<br>(0.5 to 1.3)                                 | 0.1<br>(<0.05 to 0.1)                         | -18.5%<br>(-23.7% to -13.7%)                      | -19.2%<br>(-24.4% to -14.4%)                     |
| GGPD trait                                                                    | 0.5<br>(0.4 to 0.5)                                 | <0.05<br>(<0.05 to <0.05)                     | -2.1%<br>(-6.4% to 1.8%)                          | -2.9%<br>(-7.1% to 1.0%)                         |
| Extensively drug-resistant HIV/AIDS - Tuberculosis                            | <0.05<br>(<0.05 to <0.05)                           | <0.05<br>(<0.05 to <0.05)                     | 396.8%<br>(300.8% to 506.5%)                      | 392.7%<br>(297.5% to 501.5%)                     |
| <b>All causes</b>                                                             | <b>129,879.8</b><br><b>(117,967.0 to 143,789.1)</b> | <b>5,057.8</b><br><b>(3,263.0 to 7,335.2)</b> | <b>-1.1%</b><br><b>(-4.0% to 1.8%)</b>            | <b>-2.0%</b><br><b>(-4.8% to 1.0%)</b>           |

SR Table 13a: Global prevalence and years lived with disability (YLDs) for 2016, percentage change of YLD counts and rates between 2006 and 2016 of anaemia by cause, ages 15-19 years

| Cause                                                                         | Prevalence in thousands (95% uncertainty interval)  | YLDs in thousands (95% uncertainty interval)  |                                                   |                                                  |
|-------------------------------------------------------------------------------|-----------------------------------------------------|-----------------------------------------------|---------------------------------------------------|--------------------------------------------------|
|                                                                               |                                                     | 2016                                          | Percentage change in counts between 2006 and 2016 | Percentage change in rates between 2006 and 2016 |
| Iron-deficiency anaemia                                                       | 107,466.9<br>(97,780.5 to 118,249.0)                | 2,477.5<br>(1,604.2 to 3,642.2)               | 1.8%<br>(-1.5% to 5.4%)                           | 7.7%<br>(4.3% to 11.6%)                          |
| Thalassaemias trait                                                           | 9,650.8<br>(8,356.5 to 11,228.0)                    | 178.5<br>(111.2 to 275.3)                     | -19.2%<br>(-26.3% to -12.1%)                      | -14.4%<br>(-22.0% to -7.0%)                      |
| Sickle cell trait                                                             | 5,353.2<br>(4,655.6 to 6,190.5)                     | 119.2<br>(76.5 to 176.9)                      | 11.4%<br>(6.9% to 16.2%)                          | 18.0%<br>(13.1% to 23.0%)                        |
| Other hemoglobinopathies and hemolytic anaemias                               | 5,418.6<br>(4,806.3 to 6,086.0)                     | 101.3<br>(65.6 to 149.9)                      | 19.2%<br>(11.0% to 29.3%)                         | 26.2%<br>(17.5% to 36.9%)                        |
| Other gynecological diseases                                                  | 2,853.2<br>(2,641.7 to 3,085.4)                     | 85.6<br>(57.1 to 124.2)                       | 1.2%<br>(-3.1% to 5.8%)                           | 7.1%<br>(2.5% to 12.0%)                          |
| HIV/AIDS resulting in other diseases                                          | 738.6<br>(667.4 to 826.6)                           | 81.0<br>(51.3 to 132.3)                       | 44.3%<br>(13.0% to 90.6%)                         | 52.7%<br>(19.6% to 101.7%)                       |
| Malaria                                                                       | 2,614.5<br>(2,131.1 to 3,259.1)                     | 75.9<br>(47.1 to 115.3)                       | -23.6%<br>(-31.3% to -14.1%)                      | -19.2%<br>(-27.2% to -9.1%)                      |
| Endocrine, metabolic, blood, and immune disorders                             | 3,635.9<br>(3,283.9 to 4,031.9)                     | 70.4<br>(45.5 to 105.6)                       | 4.5%<br>(-0.4% to 9.7%)                           | 10.6%<br>(5.5% to 16.1%)                         |
| Hookworm disease                                                              | 2,730.1<br>(2,376.5 to 3,157.4)                     | 54.0<br>(33.6 to 81.6)                        | -6.4%<br>(-19.6% to 9.2%)                         | -0.9%<br>(-14.9% to 15.6%)                       |
| Other infectious diseases                                                     | 2,923.0<br>(2,605.0 to 3,270.5)                     | 49.2<br>(31.0 to 74.9)                        | 8.9%<br>(3.5% to 15.4%)                           | 15.3%<br>(9.6% to 22.1%)                         |
| Other neglected tropical diseases                                             | 2,582.7<br>(2,305.9 to 2,888.4)                     | 43.3<br>(27.2 to 66.0)                        | 8.3%<br>(1.5% to 15.3%)                           | 14.6%<br>(7.5% to 22.0%)                         |
| Chronic kidney disease due to glomerulonephritis                              | 488.6<br>(321.3 to 689.9)                           | 40.7<br>(23.5 to 66.3)                        | 2.0%<br>(-4.4% to 7.6%)                           | 8.0%<br>(1.1% to 13.9%)                          |
| Chronic kidney disease due to other causes                                    | 464.3<br>(305.6 to 668.5)                           | 37.0<br>(20.4 to 59.9)                        | 4.4%<br>(-2.6% to 10.7%)                          | 10.5%<br>(3.1% to 17.2%)                         |
| Schistosomiasis                                                               | 1,294.0<br>(1,084.5 to 1,518.0)                     | 28.1<br>(17.9 to 42.2)                        | -27.9%<br>(-33.5% to -22.3%)                      | -23.7%<br>(-29.6% to -17.8%)                     |
| Gastritis and duodenitis                                                      | 1,382.9<br>(1,049.3 to 1,767.3)                     | 27.2<br>(16.2 to 42.2)                        | -17.2%<br>(-23.8% to -10.3%)                      | -12.3%<br>(-19.4% to -5.1%)                      |
| Peptic ulcer disease                                                          | 1,074.5<br>(785.4 to 1,479.8)                       | 22.6<br>(12.9 to 37.2)                        | -8.7%<br>(-15.6% to -1.3%)                        | -3.3%<br>(-10.7% to 4.4%)                        |
| Sickle cell disorders                                                         | 360.4<br>(332.3 to 394.6)                           | 16.7<br>(11.0 to 25.2)                        | 14.6%<br>(2.5% to 26.8%)                          | 21.3%<br>(8.5% to 34.2%)                         |
| Drug-susceptible HIV/AIDS - Tuberculosis                                      | 31.4<br>(22.3 to 42.7)                              | 12.5<br>(7.4 to 19.4)                         | -18.5%<br>(-25.6% to -10.4%)                      | -13.8%<br>(-21.3% to -5.1%)                      |
| Chronic kidney disease due to diabetes mellitus                               | 75.3<br>(42.1 to 124.2)                             | 8.3<br>(3.9 to 15.0)                          | 0.4%<br>(-7.7% to 7.7%)                           | 6.2%<br>(-2.3% to 14.0%)                         |
| Uterine fibroids                                                              | 201.8<br>(154.3 to 258.2)                           | 7.0<br>(4.0 to 11.5)                          | -5.5%<br>(-12.5% to 2.1%)                         | 0.1%<br>(-7.4% to 8.1%)                          |
| Chronic kidney disease due to hypertension                                    | 41.9<br>(24.9 to 65.5)                              | 4.7<br>(2.4 to 7.9)                           | 0.6%<br>(-6.5% to 7.5%)                           | 6.5%<br>(-1.1% to 13.7%)                         |
| Maternal haemorrhage                                                          | 80.8<br>(57.0 to 111.9)                             | 2.3<br>(1.3 to 3.7)                           | -21.8%<br>(-32.4% to -10.7%)                      | -17.2%<br>(-28.5% to -5.5%)                      |
| G6PD deficiency                                                               | 57.0<br>(49.6 to 65.7)                              | 1.9<br>(1.3 to 2.8)                           | 7.2%<br>(2.5% to 12.1%)                           | 13.4%<br>(8.5% to 18.6%)                         |
| Thalassaemias                                                                 | 6.7<br>(5.5 to 7.7)                                 | 0.6<br>(0.4 to 0.8)                           | -11.6%<br>(-20.4% to -3.8%)                       | -6.5%<br>(-15.8% to 1.8%)                        |
| Multidrug-resistant HIV/AIDS - Tuberculosis without extensive drug resistance | 0.6<br>(0.4 to 0.9)                                 | 0.3<br>(0.1 to 0.4)                           | -44.1%<br>(-54.0% to -32.3%)                      | -40.8%<br>(-51.3% to -28.3%)                     |
| G6PD trait                                                                    | 0.6<br>(0.5 to 0.7)                                 | <0.05<br>(<0.05 to 0.1)                       | -8.5%<br>(-14.0% to -2.4%)                        | -3.1%<br>(-9.0% to 3.3%)                         |
| Extensively drug-resistant HIV/AIDS - Tuberculosis                            | <0.05<br>(<0.05 to <0.05)                           | <0.05<br>(<0.05 to <0.05)                     | 78.4%<br>(37.3% to 141.2%)                        | 88.8%<br>(45.4% to 155.3%)                       |
| <b>All causes</b>                                                             | <b>151,528.2</b><br><b>(137,702.7 to 167,102.8)</b> | <b>3,545.6</b><br><b>(2,329.2 to 5,233.3)</b> | <b>0.6%</b><br><b>(-2.7% to 4.2%)</b>             | <b>6.5%</b><br><b>(3.0% to 10.3%)</b>            |

SR Table 13a: Global prevalence and years lived with disability (YLDs) for 2016, percentage change of YLD counts and rates between 2006 and 2016 of anaemia by cause, ages 20-24 years

| Cause                                                                         | Prevalence in thousands (95% uncertainty interval)  | YLDs in thousands (95% uncertainty interval)  |                                                   |                                                  |
|-------------------------------------------------------------------------------|-----------------------------------------------------|-----------------------------------------------|---------------------------------------------------|--------------------------------------------------|
|                                                                               |                                                     | 2016                                          | Percentage change in counts between 2006 and 2016 | Percentage change in rates between 2006 and 2016 |
| Iron-deficiency anaemia                                                       | 103,049.8<br>(90,945.7 to 115,758.9)                | 2,514.9<br>(1,636.2 to 3,738.0)               | 8.4%<br>(3.9% to 13.2%)                           | 3.4%<br>(-0.9% to 7.9%)                          |
| HIV/AIDS resulting in other diseases                                          | 2,455.7<br>(2,257.7 to 2,693.6)                     | 215.6<br>(152.8 to 288.7)                     | -8.6%<br>(-18.4% to 6.8%)                         | -12.9%<br>(-22.2% to 1.9%)                       |
| Thalassaemias trait                                                           | 10,829.0<br>(9,158.6 to 12,713.8)                   | 214.9<br>(136.2 to 325.1)                     | -2.3%<br>(-10.9% to 7.5%)                         | -6.8%<br>(-15.0% to 2.5%)                        |
| Sickle cell trait                                                             | 5,108.2<br>(4,350.0 to 6,043.5)                     | 116.9<br>(73.9 to 172.0)                      | 17.6%<br>(12.3% to 23.1%)                         | 12.1%<br>(7.1% to 17.5%)                         |
| Other gynecological diseases                                                  | 3,267.1<br>(2,917.4 to 3,608.7)                     | 98.6<br>(64.8 to 144.7)                       | 8.3%<br>(3.2% to 13.9%)                           | 3.3%<br>(-1.6% to 8.6%)                          |
| Other hemoglobinopathies and hemolytic anaemias                               | 4,268.9<br>(3,658.4 to 4,949.5)                     | 77.6<br>(49.7 to 116.1)                       | 26.6%<br>(17.4% to 37.4%)                         | 20.8%<br>(12.0% to 31.1%)                        |
| Chronic kidney disease due to glomerulonephritis                              | 839.0<br>(557.8 to 1,157.9)                         | 77.0<br>(43.7 to 120.0)                       | 12.2%<br>(4.8% to 19.5%)                          | 7.0%<br>(-0.1% to 14.0%)                         |
| Chronic kidney disease due to other causes                                    | 715.6<br>(453.1 to 995.1)                           | 63.6<br>(34.7 to 100.0)                       | 15.8%<br>(7.6% to 24.4%)                          | 10.5%<br>(2.6% to 18.7%)                         |
| Endocrine, metabolic, blood, and immune disorders                             | 3,197.4<br>(2,789.9 to 3,639.2)                     | 62.5<br>(40.2 to 93.2)                        | 10.4%<br>(5.0% to 16.0%)                          | 5.3%<br>(0.1% to 10.7%)                          |
| Malaria                                                                       | 2,058.3<br>(1,678.6 to 2,522.8)                     | 62.2<br>(38.4 to 94.6)                        | -24.5%<br>(-31.9% to -15.3%)                      | -28.0%<br>(-35.0% to -19.2%)                     |
| Hookworm disease                                                              | 2,690.9<br>(2,304.9 to 3,127.9)                     | 56.0<br>(35.0 to 84.9)                        | -1.4%<br>(-14.5% to 12.7%)                        | -6.0%<br>(-18.4% to 7.5%)                        |
| Other infectious diseases                                                     | 2,378.2<br>(2,049.9 to 2,742.2)                     | 39.5<br>(24.9 to 60.3)                        | 12.8%<br>(6.7% to 19.5%)                          | 7.6%<br>(1.8% to 14.0%)                          |
| Drug-susceptible HIV/AIDS - Tuberculosis                                      | 100.3<br>(71.1 to 137.0)                            | 39.3<br>(23.2 to 61.3)                        | -37.1%<br>(-41.6% to -32.5%)                      | -40.0%<br>(-44.3% to -35.6%)                     |
| Peptic ulcer disease                                                          | 1,699.0<br>(1,204.1 to 2,276.6)                     | 37.4<br>(21.6 to 61.6)                        | 11.9%<br>(3.9% to 20.8%)                          | 6.7%<br>(-0.9% to 15.2%)                         |
| Gastritis and duodenitis                                                      | 1,751.9<br>(1,329.0 to 2,238.2)                     | 36.8<br>(22.3 to 59.0)                        | 10.8%<br>(2.8% to 19.6%)                          | 5.7%<br>(-2.0% to 14.1%)                         |
| Schistosomiasis                                                               | 1,590.1<br>(1,345.9 to 1,870.8)                     | 36.3<br>(23.0 to 55.4)                        | -26.0%<br>(-30.7% to -21.0%)                      | -29.4%<br>(-33.9% to -24.6%)                     |
| Other neglected tropical diseases                                             | 2,058.0<br>(1,775.9 to 2,358.3)                     | 34.1<br>(21.5 to 52.4)                        | 16.0%<br>(9.6% to 23.6%)                          | 10.6%<br>(4.6% to 17.9%)                         |
| Chronic kidney disease due to diabetes mellitus                               | 234.5<br>(139.8 to 358.9)                           | 24.8<br>(12.9 to 42.2)                        | 19.2%<br>(10.9% to 27.9%)                         | 13.7%<br>(5.8% to 22.0%)                         |
| Uterine fibroids                                                              | 573.6<br>(446.9 to 721.1)                           | 20.8<br>(12.3 to 33.7)                        | 5.6%<br>(0.6% to 10.8%)                           | 0.7%<br>(-4.0% to 5.7%)                          |
| Chronic kidney disease due to hypertension                                    | 105.9<br>(66.0 to 159.5)                            | 12.1<br>(6.5 to 20.5)                         | 11.9%<br>(5.0% to 19.3%)                          | 6.7%<br>(0.1% to 13.8%)                          |
| Sickle cell disorders                                                         | 207.2<br>(190.5 to 228.0)                           | 11.6<br>(7.8 to 16.8)                         | 20.5%<br>(8.5% to 33.0%)                          | 14.9%<br>(3.5% to 26.9%)                         |
| Maternal haemorrhage                                                          | 279.0<br>(198.7 to 392.8)                           | 7.1<br>(3.9 to 11.5)                          | -4.7%<br>(-14.5% to 8.2%)                         | -9.1%<br>(-18.5% to 3.2%)                        |
| GGPD deficiency                                                               | 52.1<br>(44.2 to 61.3)                              | 1.7<br>(1.1 to 2.4)                           | 15.2%<br>(10.0% to 20.6%)                         | 9.9%<br>(4.9% to 15.0%)                          |
| Multidrug-resistant HIV/AIDS - Tuberculosis without extensive drug resistance | 2.2<br>(1.4 to 3.3)                                 | 0.9<br>(0.5 to 1.5)                           | -51.2%<br>(-60.3% to -41.0%)                      | -53.5%<br>(-62.1% to -43.7%)                     |
| Thalassaemias                                                                 | 3.7<br>(2.9 to 4.4)                                 | 0.4<br>(0.2 to 0.5)                           | -1.8%<br>(-9.7% to 7.6%)                          | -6.3%<br>(-13.8% to 2.6%)                        |
| GGPD trait                                                                    | 0.7<br>(0.6 to 0.8)                                 | <0.05<br>(<0.05 to 0.1)                       | 10.4%<br>(4.7% to 17.5%)                          | 5.3%<br>(-0.1% to 12.1%)                         |
| Extensively drug-resistant HIV/AIDS - Tuberculosis                            | <0.05<br>(<0.05 to <0.05)                           | <0.05<br>(<0.05 to <0.05)                     | 79.4%<br>(44.6% to 125.1%)                        | 71.2%<br>(37.9% to 114.7%)                       |
| <b>All causes</b>                                                             | <b>149,516.3</b><br><b>(131,283.0 to 168,240.8)</b> | <b>3,862.4</b><br><b>(2,553.0 to 5,651.8)</b> | <b>5.5%</b><br><b>(1.4% to 9.6%)</b>              | <b>0.6%</b><br><b>(-3.3% to 4.5%)</b>            |

SR Table 13a: Global prevalence and years lived with disability (YLDs) for 2016, percentage change of YLD counts and rates between 2006 and 2016 of anaemia by cause, ages 25-29 years

| Cause                                                                         | Prevalence in thousands (95% uncertainty interval)  |                                               | YLDs in thousands (95% uncertainty interval)      |                                                  |
|-------------------------------------------------------------------------------|-----------------------------------------------------|-----------------------------------------------|---------------------------------------------------|--------------------------------------------------|
|                                                                               | 2016                                                | 2016                                          | Percentage change in counts between 2006 and 2016 | Percentage change in rates between 2006 and 2016 |
| Iron-deficiency anaemia                                                       | 88,606.0<br>(78,161.5 to 101,225.4)                 | 2,085.9<br>(1,344.4 to 3,083.1)               | 13.0%<br>(8.9% to 17.2%)                          | -4.8%<br>(-8.2% to -1.3%)                        |
| HIV/AIDS resulting in other diseases                                          | 4,408.0<br>(4,143.6 to 4,678.0)                     | 420.2<br>(298.0 to 563.9)                     | -16.6%<br>(-28.6% to -5.0%)                       | -29.7%<br>(-39.9% to -20.0%)                     |
| Thalassaemias trait                                                           | 11,489.4<br>(9,732.4 to 13,609.6)                   | 214.4<br>(136.5 to 323.7)                     | 30.5%<br>(19.2% to 41.5%)                         | 9.9%<br>(0.5% to 19.2%)                          |
| Sickle cell trait                                                             | 4,566.3<br>(3,877.5 to 5,426.5)                     | 96.4<br>(61.8 to 145.1)                       | 23.6%<br>(18.4% to 28.9%)                         | 4.1%<br>(-0.3% to 8.6%)                          |
| Chronic kidney disease due to glomerulonephritis                              | 1,044.1<br>(704.2 to 1,462.2)                       | 95.3<br>(56.5 to 151.9)                       | 26.0%<br>(16.0% to 35.2%)                         | 6.2%<br>(-2.3% to 13.9%)                         |
| Other gynecological diseases                                                  | 2,867.6<br>(2,578.1 to 3,198.8)                     | 82.0<br>(52.7 to 119.7)                       | 13.7%<br>(8.4% to 19.3%)                          | -4.3%<br>(-8.7% to 0.5%)                         |
| Chronic kidney disease due to other causes                                    | 870.1<br>(575.8 to 1,234.8)                         | 76.7<br>(43.2 to 121.0)                       | 25.9%<br>(15.9% to 35.4%)                         | 6.1%<br>(-2.4% to 14.1%)                         |
| Drug-susceptible HIV/AIDS - Tuberculosis                                      | 156.6<br>(112.2 to 212.4)                           | 60.9<br>(36.2 to 94.0)                        | -35.5%<br>(-39.7% to -30.9%)                      | -45.7%<br>(-49.2% to -41.8%)                     |
| Other hemoglobinopathies and hemolytic anaemias                               | 3,569.1<br>(3,036.4 to 4,208.5)                     | 55.9<br>(35.2 to 85.3)                        | 25.5%<br>(18.5% to 34.1%)                         | 5.7%<br>(-0.2% to 13.0%)                         |
| Uterine fibroids                                                              | 1,471.6<br>(1,152.3 to 1,831.9)                     | 52.4<br>(31.1 to 85.5)                        | 17.9%<br>(14.0% to 22.0%)                         | -0.7%<br>(-4.0% to 2.7%)                         |
| Chronic kidney disease due to diabetes mellitus                               | 530.0<br>(343.5 to 771.5)                           | 52.2<br>(29.3 to 83.5)                        | 40.1%<br>(29.0% to 51.8%)                         | 18.0%<br>(8.6% to 27.8%)                         |
| Peptic ulcer disease                                                          | 2,321.7<br>(1,645.4 to 3,082.7)                     | 51.0<br>(29.6 to 82.0)                        | 29.8%<br>(21.0% to 38.1%)                         | 9.4%<br>(1.9% to 16.3%)                          |
| Hookworm disease                                                              | 2,462.6<br>(2,094.7 to 2,897.3)                     | 49.9<br>(30.5 to 77.1)                        | 14.4%<br>(-0.9% to 33.4%)                         | -3.6%<br>(-16.5% to 12.3%)                       |
| Malaria                                                                       | 1,673.0<br>(1,385.8 to 2,029.0)                     | 49.1<br>(31.1 to 72.7)                        | -21.3%<br>(-28.2% to -13.2%)                      | -33.7%<br>(-39.5% to -26.9%)                     |
| Endocrine, metabolic, blood, and immune disorders                             | 2,715.8<br>(2,373.2 to 3,127.3)                     | 48.9<br>(31.4 to 72.8)                        | 16.8%<br>(11.1% to 22.9%)                         | -1.6%<br>(-6.4% to 3.5%)                         |
| Gastritis and duodenitis                                                      | 2,189.9<br>(1,668.4 to 2,830.4)                     | 46.9<br>(27.9 to 73.2)                        | 32.6%<br>(24.2% to 40.9%)                         | 11.7%<br>(4.6% to 18.7%)                         |
| Schistosomiasis                                                               | 1,584.1<br>(1,324.7 to 1,877.9)                     | 35.9<br>(22.6 to 53.5)                        | -20.6%<br>(-25.6% to -15.2%)                      | -33.1%<br>(-37.3% to -28.6%)                     |
| Other infectious diseases                                                     | 1,996.2<br>(1,716.1 to 2,336.0)                     | 30.0<br>(18.6 to 46.5)                        | 14.2%<br>(7.9% to 20.5%)                          | -3.8%<br>(-9.1% to 1.5%)                         |
| Other neglected tropical diseases                                             | 1,717.0<br>(1,478.0 to 1,997.8)                     | 26.0<br>(16.3 to 40.2)                        | 18.9%<br>(12.2% to 26.4%)                         | 0.2%<br>(-5.5% to 6.5%)                          |
| Chronic kidney disease due to hypertension                                    | 190.5<br>(121.6 to 286.5)                           | 19.5<br>(10.9 to 32.5)                        | 27.0%<br>(18.1% to 35.5%)                         | 6.9%<br>(-0.5% to 14.2%)                         |
| Sickle cell disorders                                                         | 124.3<br>(112.0 to 137.7)                           | 9.6<br>(6.5 to 13.3)                          | 32.1%<br>(19.2% to 45.3%)                         | 11.3%<br>(0.4% to 22.4%)                         |
| Maternal haemorrhage                                                          | 338.8<br>(239.5 to 474.5)                           | 7.0<br>(3.9 to 11.5)                          | 16.4%<br>(4.6% to 31.7%)                          | -2.0%<br>(-11.9% to 10.9%)                       |
| Multidrug-resistant HIV/AIDS - Tuberculosis without extensive drug resistance | 3.9<br>(2.6 to 5.8)                                 | 1.6<br>(0.9 to 2.6)                           | -42.5%<br>(-53.5% to -29.8%)                      | -51.6%<br>(-60.8% to -40.9%)                     |
| GGPD deficiency                                                               | 47.9<br>(40.4 to 57.9)                              | 1.5<br>(0.9 to 2.2)                           | 35.8%<br>(29.9% to 42.2%)                         | 14.4%<br>(9.4% to 19.8%)                         |
| Thalassaemias                                                                 | 2.7<br>(2.0 to 3.1)                                 | 0.3<br>(0.2 to 0.4)                           | 21.7%<br>(10.7% to 33.7%)                         | 2.5%<br>(-6.7% to 12.6%)                         |
| GGPD trait                                                                    | 0.7<br>(0.6 to 0.8)                                 | <0.05<br>(<0.05 to 0.1)                       | 26.9%<br>(20.5% to 33.0%)                         | 6.9%<br>(1.5% to 12.0%)                          |
| Extensively drug-resistant HIV/AIDS - Tuberculosis                            | <0.05<br>(<0.05 to 0.1)                             | <0.05<br>(<0.05 to <0.05)                     | 152.5%<br>(105.5% to 213.0%)                      | 112.7%<br>(73.1% to 163.7%)                      |
| <b>All causes</b>                                                             | <b>136,948.0</b><br><b>(120,814.2 to 156,266.5)</b> | <b>3,669.4</b><br><b>(2,439.7 to 5,262.9)</b> | <b>8.9%</b><br><b>(3.4% to 13.4%)</b>             | <b>-8.3%</b><br><b>(-12.9% to -4.4%)</b>         |

SR Table 13a: Global prevalence and years lived with disability (YLDs) for 2016, percentage change of YLD counts and rates between 2006 and 2016 of anaemia by cause, ages 30-34 years

| Cause                                                                         | Prevalence in thousands (95% uncertainty interval)  |                                               | YLDs in thousands (95% uncertainty interval)      |                                                  |
|-------------------------------------------------------------------------------|-----------------------------------------------------|-----------------------------------------------|---------------------------------------------------|--------------------------------------------------|
|                                                                               | 2016                                                | 2016                                          | Percentage change in counts between 2006 and 2016 | Percentage change in rates between 2006 and 2016 |
| Iron-deficiency anaemia                                                       | 86,355.7<br>(75,807.4 to 98,633.7)                  | 2,033.8<br>(1,294.4 to 3,003.7)               | 21.3%<br>(17.1% to 25.5%)                         | 7.5%<br>(3.7% to 11.1%)                          |
| HIV/AIDS resulting in other diseases                                          | 5,373.9<br>(5,025.1 to 5,760.5)                     | 531.5<br>(361.4 to 747.8)                     | -14.5%<br>(-34.2% to 5.7%)                        | -24.2%<br>(-41.7% to -6.4%)                      |
| Thalassaemias trait                                                           | 12,173.8<br>(10,062.2 to 14,543.0)                  | 247.7<br>(152.3 to 380.9)                     | -1.8%<br>(-13.0% to 8.6%)                         | -13.1%<br>(-22.9% to -3.9%)                      |
| Chronic kidney disease due to glomerulonephritis                              | 1,294.4<br>(878.7 to 1,793.9)                       | 108.7<br>(62.8 to 166.8)                      | 26.4%<br>(18.5% to 34.5%)                         | 11.9%<br>(4.9% to 19.2%)                         |
| Uterine fibroids                                                              | 3,003.5<br>(2,461.5 to 3,582.2)                     | 107.6<br>(63.0 to 169.7)                      | 21.6%<br>(18.0% to 25.6%)                         | 7.6%<br>(4.5% to 11.2%)                          |
| Chronic kidney disease due to other causes                                    | 1,262.8<br>(845.7 to 1,810.0)                       | 103.3<br>(61.1 to 164.9)                      | 28.1%<br>(19.2% to 37.0%)                         | 13.4%<br>(5.6% to 21.4%)                         |
| Sickle cell trait                                                             | 4,865.4<br>(4,077.2 to 5,752.6)                     | 100.7<br>(63.5 to 150.3)                      | 29.1%<br>(23.8% to 34.9%)                         | 14.3%<br>(9.7% to 19.5%)                         |
| Chronic kidney disease due to diabetes mellitus                               | 1,109.8<br>(731.0 to 1,572.0)                       | 97.5<br>(58.0 to 153.8)                       | 25.0%<br>(15.2% to 33.7%)                         | 10.7%<br>(2.0% to 18.4%)                         |
| Peptic ulcer disease                                                          | 3,704.2<br>(2,623.0 to 5,147.5)                     | 90.1<br>(52.0 to 146.4)                       | 8.8%<br>(-0.9% to 18.9%)                          | -3.7%<br>(-12.3% to 5.3%)                        |
| Gastritis and duodenitis                                                      | 3,478.0<br>(2,602.2 to 4,534.8)                     | 83.5<br>(47.1 to 133.1)                       | 2.8%<br>(-7.3% to 13.1%)                          | -8.9%<br>(-17.9% to 0.1%)                        |
| Other gynecological diseases                                                  | 2,685.8<br>(2,401.9 to 2,993.5)                     | 74.5<br>(48.0 to 110.1)                       | 21.0%<br>(15.6% to 27.0%)                         | 7.2%<br>(2.3% to 12.4%)                          |
| Drug-susceptible HIV/AIDS - Tuberculosis                                      | 182.7<br>(130.2 to 250.5)                           | 70.5<br>(43.0 to 108.4)                       | -25.7%<br>(-30.4% to -21.4%)                      | -34.2%<br>(-38.4% to -30.4%)                     |
| Other hemoglobinopathies and hemolytic anaemias                               | 3,694.8<br>(3,152.3 to 4,333.6)                     | 52.3<br>(32.4 to 82.5)                        | 34.9%<br>(28.1% to 42.6%)                         | 19.5%<br>(13.4% to 26.3%)                        |
| Hookworm disease                                                              | 2,570.7<br>(2,163.7 to 3,022.2)                     | 50.4<br>(30.7 to 77.2)                        | 3.8%<br>(-10.1% to 22.2%)                         | -8.1%<br>(-20.4% to 8.2%)                        |
| Endocrine, metabolic, blood, and immune disorders                             | 2,722.5<br>(2,370.8 to 3,135.7)                     | 47.1<br>(29.9 to 70.7)                        | 27.5%<br>(21.6% to 33.7%)                         | 13.0%<br>(7.7% to 18.4%)                         |
| Malaria                                                                       | 1,546.7<br>(1,289.7 to 1,835.7)                     | 44.4<br>(27.8 to 66.1)                        | -18.2%<br>(-25.0% to -10.0%)                      | -27.5%<br>(-33.6% to -20.3%)                     |
| Schistosomiasis                                                               | 1,686.2<br>(1,413.8 to 1,966.9)                     | 37.7<br>(23.5 to 56.5)                        | -18.3%<br>(-23.8% to -13.0%)                      | -27.6%<br>(-32.5% to -22.9%)                     |
| Chronic kidney disease due to hypertension                                    | 335.9<br>(228.8 to 472.2)                           | 31.7<br>(18.9 to 50.5)                        | 22.1%<br>(13.5% to 31.6%)                         | 8.2%<br>(0.6% to 16.6%)                          |
| Other infectious diseases                                                     | 2,044.8<br>(1,754.7 to 2,383.6)                     | 29.5<br>(18.1 to 46.7)                        | 23.1%<br>(17.0% to 29.7%)                         | 9.1%<br>(3.6% to 14.8%)                          |
| Other neglected tropical diseases                                             | 1,728.6<br>(1,491.7 to 2,004.3)                     | 24.8<br>(15.0 to 39.3)                        | 24.9%<br>(17.9% to 32.1%)                         | 10.6%<br>(4.4% to 17.0%)                         |
| Sickle cell disorders                                                         | 81.4<br>(73.0 to 90.7)                              | 9.0<br>(6.3 to 12.1)                          | 48.4%<br>(33.4% to 62.9%)                         | 31.4%<br>(18.2% to 44.2%)                        |
| Maternal haemorrhage                                                          | 298.6<br>(211.3 to 427.7)                           | 5.0<br>(2.8 to 8.4)                           | 16.0%<br>(0.8% to 33.2%)                          | 2.7%<br>(-10.7% to 17.9%)                        |
| Multidrug-resistant HIV/AIDS - Tuberculosis without extensive drug resistance | 4.6<br>(3.0 to 6.8)                                 | 1.8<br>(1.1 to 3.1)                           | -33.8%<br>(-45.9% to -20.5%)                      | -41.3%<br>(-52.1% to -29.6%)                     |
| G6PD deficiency                                                               | 51.4<br>(42.5 to 61.2)                              | 1.6<br>(1.0 to 2.4)                           | 29.9%<br>(23.2% to 36.6%)                         | 15.0%<br>(9.1% to 20.9%)                         |
| Thalassaemias                                                                 | 1.9<br>(1.4 to 2.3)                                 | 0.2<br>(0.1 to 0.3)                           | 1.9%<br>(-17.7% to 23.1%)                         | -9.8%<br>(-27.1% to 9.0%)                        |
| G6PD trait                                                                    | 0.8<br>(0.6 to 0.9)                                 | 0.1<br>(<0.05 to 0.1)                         | 12.5%<br>(4.1% to 22.5%)                          | -0.3%<br>(-7.8% to 8.5%)                         |
| Extensively drug-resistant HIV/AIDS - Tuberculosis                            | 0.1<br>(<0.05 to 0.1)                               | <0.05<br>(<0.05 to <0.05)                     | 214.5%<br>(149.7% to 291.0%)                      | 178.5%<br>(121.2% to 246.2%)                     |
| <b>All causes</b>                                                             | <b>142,259.0</b><br><b>(124,468.6 to 163,586.4)</b> | <b>3,984.9</b><br><b>(2,660.6 to 5,729.0)</b> | <b>11.0%</b><br><b>(2.2% to 17.0%)</b>            | <b>-1.7%</b><br><b>(-9.5% to 3.6%)</b>           |



SR Table 13a: Global prevalence and years lived with disability (YLDs) for 2016, percentage change of YLD counts and rates between 2006 and 2016 of anaemia by cause, ages 35-39 years

| Cause                                                                         | Prevalence in thousands (95% uncertainty interval)  | YLDs in thousands (95% uncertainty interval)  |                                        |                                                   |                                                  |
|-------------------------------------------------------------------------------|-----------------------------------------------------|-----------------------------------------------|----------------------------------------|---------------------------------------------------|--------------------------------------------------|
|                                                                               |                                                     | 2016                                          | 2016                                   | Percentage change in counts between 2006 and 2016 | Percentage change in rates between 2006 and 2016 |
| Iron-deficiency anaemia                                                       | 75,861.4<br>(67,087.5 to 85,343.6)                  | 1,793.7<br>(1,163.6 to 2,628.5)               | 12.8%<br>(8.7% to 17.2%)               | 6.6%<br>(2.7% to 10.8%)                           |                                                  |
| HIV/AIDS resulting in other diseases                                          | 5,350.7<br>(5,019.4 to 5,698.5)                     | 557.0<br>(370.6 to 809.9)                     | -16.1%<br>(-34.5% to 11.6%)            | -20.7%<br>(-38.1% to 5.5%)                        |                                                  |
| Thalassaemias trait                                                           | 11,290.2<br>(9,511.4 to 13,297.5)                   | 236.1<br>(146.1 to 354.7)                     | 0.4%<br>(-9.7% to 10.9%)               | -5.1%<br>(-14.6% to 4.9%)                         |                                                  |
| Uterine fibroids                                                              | 4,636.3<br>(3,938.6 to 5,355.2)                     | 172.9<br>(104.7 to 266.6)                     | 12.3%<br>(8.7% to 15.6%)               | 6.1%<br>(2.8% to 9.3%)                            |                                                  |
| Chronic kidney disease due to diabetes mellitus                               | 1,683.1<br>(1,169.9 to 2,314.3)                     | 139.7<br>(83.9 to 215.8)                      | 20.5%<br>(12.0% to 28.3%)              | 13.9%<br>(5.9% to 21.3%)                          |                                                  |
| Peptic ulcer disease                                                          | 4,333.7<br>(3,033.7 to 5,952.0)                     | 116.0<br>(64.9 to 187.8)                      | 17.4%<br>(6.1% to 28.4%)               | 11.0%<br>(0.3% to 21.4%)                          |                                                  |
| Gastritis and duodenitis                                                      | 4,305.3<br>(3,234.2 to 5,531.0)                     | 112.6<br>(67.6 to 176.4)                      | 11.4%<br>(0.4% to 22.2%)               | 5.3%<br>(-5.1% to 15.5%)                          |                                                  |
| Chronic kidney disease due to other causes                                    | 1,377.7<br>(926.0 to 1,880.1)                       | 105.8<br>(61.3 to 162.5)                      | 26.8%<br>(18.6% to 35.2%)              | 19.8%<br>(12.1% to 27.8%)                         |                                                  |
| Chronic kidney disease due to glomerulonephritis                              | 1,271.9<br>(820.9 to 1,802.2)                       | 97.8<br>(56.2 to 148.8)                       | 25.3%<br>(17.0% to 32.3%)              | 18.4%<br>(10.6% to 25.0%)                         |                                                  |
| Sickle cell trait                                                             | 4,285.1<br>(3,615.5 to 5,038.3)                     | 88.5<br>(56.0 to 134.2)                       | 30.1%<br>(24.8% to 35.4%)              | 23.0%<br>(18.0% to 28.0%)                         |                                                  |
| Other gynecological diseases                                                  | 2,347.2<br>(2,112.2 to 2,593.3)                     | 63.6<br>(41.8 to 93.0)                        | 14.1%<br>(8.4% to 19.7%)               | 7.9%<br>(2.5% to 13.2%)                           |                                                  |
| Drug-susceptible HIV/AIDS - Tuberculosis                                      | 163.0<br>(115.3 to 226.1)                           | 62.4<br>(38.4 to 95.5)                        | -17.0%<br>(-22.1% to -11.7%)           | -21.5%<br>(-26.4% to -16.6%)                      |                                                  |
| Other hemoglobinopathies and hemolytic anaemias                               | 3,262.7<br>(2,813.1 to 3,742.5)                     | 44.0<br>(26.7 to 69.4)                        | 23.6%<br>(16.9% to 30.9%)              | 16.8%<br>(10.5% to 23.8%)                         |                                                  |
| Chronic kidney disease due to hypertension                                    | 474.1<br>(326.9 to 647.6)                           | 41.3<br>(25.2 to 64.0)                        | 19.0%<br>(10.5% to 27.3%)              | 12.5%<br>(4.5% to 20.3%)                          |                                                  |
| Hookworm disease                                                              | 2,254.6<br>(1,930.9 to 2,630.8)                     | 41.0<br>(25.0 to 63.6)                        | 3.9%<br>(-11.4% to 21.3%)              | -1.8%<br>(-16.3% to 14.7%)                        |                                                  |
| Endocrine, metabolic, blood, and immune disorders                             | 2,395.5<br>(2,105.8 to 2,704.3)                     | 41.0<br>(25.9 to 61.7)                        | 19.5%<br>(12.9% to 25.7%)              | 13.0%<br>(6.7% to 18.8%)                          |                                                  |
| Malaria                                                                       | 1,190.0<br>(1,004.2 to 1,402.2)                     | 34.6<br>(21.6 to 51.9)                        | -19.0%<br>(-25.9% to -11.4%)           | -23.5%<br>(-30.0% to -16.2%)                      |                                                  |
| Schistosomiasis                                                               | 1,519.1<br>(1,269.5 to 1,799.7)                     | 32.1<br>(20.2 to 47.6)                        | -18.5%<br>(-23.9% to -13.2%)           | -22.9%<br>(-28.1% to -17.9%)                      |                                                  |
| Other infectious diseases                                                     | 1,801.9<br>(1,563.8 to 2,058.6)                     | 25.9<br>(15.6 to 40.9)                        | 18.3%<br>(12.0% to 25.8%)              | 11.8%<br>(5.9% to 18.9%)                          |                                                  |
| Other neglected tropical diseases                                             | 1,519.3<br>(1,324.9 to 1,722.4)                     | 21.9<br>(13.2 to 34.5)                        | 20.2%<br>(13.0% to 28.1%)              | 13.6%<br>(6.8% to 21.1%)                          |                                                  |
| Sickle cell disorders                                                         | 50.1<br>(44.8 to 55.6)                              | 7.2<br>(5.1 to 9.6)                           | 45.3%<br>(32.0% to 59.1%)              | 37.3%<br>(24.8% to 50.4%)                         |                                                  |
| Maternal haemorrhage                                                          | 137.9<br>(92.6 to 199.4)                            | 2.0<br>(1.0 to 3.2)                           | 20.9%<br>(4.2% to 43.6%)               | 14.3%<br>(-1.5% to 35.7%)                         |                                                  |
| Multidrug-resistant HIV/AIDS - Tuberculosis without extensive drug resistance | 4.1<br>(2.7 to 6.0)                                 | 1.7<br>(1.0 to 2.7)                           | -26.8%<br>(-39.0% to -13.5%)           | -30.8%<br>(-42.3% to -18.2%)                      |                                                  |
| GGPD deficiency                                                               | 47.3<br>(39.9 to 56.5)                              | 1.4<br>(0.9 to 2.0)                           | 37.6%<br>(30.5% to 44.7%)              | 30.1%<br>(23.4% to 36.8%)                         |                                                  |
| Thalassaemias                                                                 | 1.4<br>(1.0 to 1.7)                                 | 0.1<br>(0.1 to 0.2)                           | 4.0%<br>(-14.7% to 30.6%)              | -1.6%<br>(-19.4% to 23.5%)                        |                                                  |
| GGPD trait                                                                    | 0.7<br>(0.6 to 0.8)                                 | <0.05<br>(<0.05 to 0.1)                       | 6.1%<br>(-0.0% to 13.0%)               | 0.3%<br>(-5.5% to 6.9%)                           |                                                  |
| Extensively drug-resistant HIV/AIDS - Tuberculosis                            | 0.1<br>(<0.05 to 0.1)                               | <0.05<br>(<0.05 to <0.05)                     | 300.8%<br>(213.3% to 402.9%)           | 278.9%<br>(196.1% to 375.4%)                      |                                                  |
| <b>All causes</b>                                                             | <b>131,564.4</b><br><b>(116,309.8 to 148,105.1)</b> | <b>3,840.3</b><br><b>(2,583.0 to 5,505.4)</b> | <b>6.8%</b><br><b>(-1.8% to 13.5%)</b> | <b>0.9%</b><br><b>(-7.2% to 7.3%)</b>             |                                                  |

SR Table 13a: Global prevalence and years lived with disability (YLDs) for 2016, percentage change of YLD counts and rates between 2006 and 2016 of anaemia by cause, ages 40-44 years

| Cause                                                                         | Prevalence in thousands (95% uncertainty interval)  |                                               | YLDs in thousands (95% uncertainty interval)      |                                                  |
|-------------------------------------------------------------------------------|-----------------------------------------------------|-----------------------------------------------|---------------------------------------------------|--------------------------------------------------|
|                                                                               | 2016                                                | 2016                                          | Percentage change in counts between 2006 and 2016 | Percentage change in rates between 2006 and 2016 |
| Iron-deficiency anaemia                                                       | 73,083.6<br>(64,779.9 to 82,314.4)                  | 1,710.9<br>(1,131.1 to 2,556.0)               | 12.4%<br>(8.4% to 16.6%)                          | -1.3%<br>(-4.8% to 2.4%)                         |
| HIV/AIDS resulting in other diseases                                          | 4,557.5<br>(4,065.3 to 5,102.4)                     | 471.5<br>(299.0 to 716.4)                     | -12.2%<br>(-33.6% to 22.2%)                       | -22.9%<br>(-41.7% to 7.3%)                       |
| Thalassaemias trait                                                           | 12,115.0<br>(10,241.4 to 14,236.6)                  | 279.4<br>(177.7 to 420.2)                     | 29.9%<br>(17.7% to 42.8%)                         | 14.1%<br>(3.4% to 25.4%)                         |
| Uterine fibroids                                                              | 5,411.6<br>(4,800.6 to 6,095.0)                     | 207.6<br>(131.8 to 314.0)                     | 12.5%<br>(9.5% to 15.6%)                          | -1.1%<br>(-3.8% to 1.5%)                         |
| Chronic kidney disease due to diabetes mellitus                               | 2,621.6<br>(1,871.9 to 3,479.9)                     | 191.4<br>(116.5 to 284.9)                     | 31.0%<br>(22.9% to 38.8%)                         | 15.1%<br>(7.9% to 21.9%)                         |
| Gastritis and duodenitis                                                      | 6,223.1<br>(4,769.8 to 7,976.8)                     | 184.3<br>(111.0 to 292.2)                     | 44.6%<br>(30.9% to 59.6%)                         | 27.0%<br>(15.0% to 40.2%)                        |
| Peptic ulcer disease                                                          | 5,760.6<br>(4,107.5 to 7,856.1)                     | 170.6<br>(97.8 to 275.0)                      | 45.4%<br>(32.8% to 58.1%)                         | 27.7%<br>(16.7% to 38.8%)                        |
| Chronic kidney disease due to other causes                                    | 1,461.2<br>(973.5 to 2,081.6)                       | 97.6<br>(57.1 to 154.2)                       | 28.4%<br>(20.5% to 36.2%)                         | 12.8%<br>(5.9% to 19.7%)                         |
| Chronic kidney disease due to glomerulonephritis                              | 1,309.3<br>(843.2 to 1,818.6)                       | 88.1<br>(49.5 to 140.6)                       | 27.2%<br>(19.4% to 34.7%)                         | 11.7%<br>(4.8% to 18.3%)                         |
| Sickle cell trait                                                             | 3,779.0<br>(3,221.3 to 4,389.1)                     | 81.9<br>(52.4 to 123.7)                       | 34.3%<br>(28.6% to 39.9%)                         | 17.9%<br>(13.0% to 22.9%)                        |
| Other gynecological diseases                                                  | 2,181.5<br>(1,974.0 to 2,399.7)                     | 57.3<br>(38.5 to 84.2)                        | 13.1%<br>(8.1% to 18.7%)                          | -0.6%<br>(-5.1% to 4.3%)                         |
| Chronic kidney disease due to hypertension                                    | 731.5<br>(527.6 to 1,007.3)                         | 55.2<br>(33.5 to 84.5)                        | 29.2%<br>(19.8% to 38.4%)                         | 13.4%<br>(5.3% to 21.5%)                         |
| Drug-susceptible HIV/AIDS - Tuberculosis                                      | 127.5<br>(90.1 to 179.4)                            | 48.6<br>(28.7 to 75.3)                        | -7.7%<br>(-13.7% to -1.4%)                        | -18.9%<br>(-24.2% to -13.4%)                     |
| Other hemoglobinopathies and hemolytic anaemias                               | 3,297.2<br>(2,867.3 to 3,786.0)                     | 40.6<br>(25.6 to 63.9)                        | 28.1%<br>(21.2% to 36.0%)                         | 12.5%<br>(6.5% to 19.4%)                         |
| Endocrine, metabolic, blood, and immune disorders                             | 2,356.3<br>(2,084.9 to 2,661.4)                     | 39.6<br>(25.7 to 59.5)                        | 19.4%<br>(13.4% to 25.5%)                         | 4.9%<br>(-0.4% to 10.3%)                         |
| Hookworm disease                                                              | 2,184.1<br>(1,855.7 to 2,546.7)                     | 38.5<br>(24.2 to 60.7)                        | 19.3%<br>(2.3% to 38.7%)                          | 4.8%<br>(-10.2% to 21.8%)                        |
| Malaria                                                                       | 967.2<br>(811.2 to 1,141.2)                         | 29.6<br>(18.9 to 43.4)                        | -18.0%<br>(-25.2% to -10.2%)                      | -28.0%<br>(-34.3% to -21.1%)                     |
| Schistosomiasis                                                               | 1,352.7<br>(1,132.4 to 1,602.6)                     | 28.2<br>(17.7 to 42.2)                        | -18.7%<br>(-24.5% to -13.1%)                      | -28.6%<br>(-33.7% to -23.7%)                     |
| Other infectious diseases                                                     | 1,803.9<br>(1,574.7 to 2,065.0)                     | 24.2<br>(15.3 to 38.3)                        | 25.9%<br>(18.7% to 33.9%)                         | 10.6%<br>(4.3% to 17.6%)                         |
| Other neglected tropical diseases                                             | 1,510.3<br>(1,325.8 to 1,715.2)                     | 20.4<br>(12.9 to 32.2)                        | 25.4%<br>(18.1% to 33.6%)                         | 10.1%<br>(3.7% to 17.3%)                         |
| Sickle cell disorders                                                         | 29.9<br>(26.3 to 33.5)                              | 4.9<br>(3.5 to 6.8)                           | 53.9%<br>(42.5% to 66.3%)                         | 35.2%<br>(25.1% to 46.0%)                        |
| GGPD deficiency                                                               | 43.2<br>(36.4 to 50.9)                              | 1.4<br>(0.9 to 2.0)                           | 43.4%<br>(36.8% to 50.0%)                         | 25.9%<br>(20.2% to 31.7%)                        |
| Multidrug-resistant HIV/AIDS - Tuberculosis without extensive drug resistance | 3.3<br>(2.2 to 5.0)                                 | 1.4<br>(0.8 to 2.2)                           | -16.1%<br>(-31.1% to 0.6%)                        | -26.4%<br>(-39.5% to -11.6%)                     |
| Maternal haemorrhage                                                          | 45.1<br>(32.0 to 60.8)                              | 0.8<br>(0.5 to 1.3)                           | 15.5%<br>(1.9% to 32.2%)                          | 1.4%<br>(-10.5% to 16.1%)                        |
| Thalassaemias                                                                 | 1.1<br>(0.8 to 1.4)                                 | 0.1<br>(0.1 to 0.2)                           | 27.8%<br>(-6.2% to 72.1%)                         | 12.3%<br>(-17.6% to 51.1%)                       |
| GGPD trait                                                                    | 0.7<br>(0.6 to 0.8)                                 | 0.1<br>(<0.05 to 0.1)                         | 39.3%<br>(30.2% to 49.9%)                         | 22.4%<br>(14.4% to 31.7%)                        |
| Extensively drug-resistant HIV/AIDS - Tuberculosis                            | <0.05<br>(<0.05 to 0.1)                             | <0.05<br>(<0.05 to <0.05)                     | 282.9%<br>(214.7% to 360.9%)                      | 236.3%<br>(176.4% to 304.8%)                     |
| <b>All causes</b>                                                             | <b>132,958.1</b><br><b>(117,331.8 to 150,563.0)</b> | <b>3,874.3</b><br><b>(2,624.2 to 5,567.6)</b> | <b>13.5%</b><br><b>(3.6% to 20.7%)</b>            | <b>-0.3%</b><br><b>(-9.0% to 6.0%)</b>           |

SR Table 13a: Global prevalence and years lived with disability (YLDs) for 2016, percentage change of YLD counts and rates between 2006 and 2016 of anaemia by cause, ages 45-49 years

| Cause                                                                         | Prevalence in thousands (95% uncertainty interval)  | YLDs in thousands (95% uncertainty interval)  |                                                   |                                                  |
|-------------------------------------------------------------------------------|-----------------------------------------------------|-----------------------------------------------|---------------------------------------------------|--------------------------------------------------|
|                                                                               |                                                     | 2016                                          | Percentage change in counts between 2006 and 2016 | Percentage change in rates between 2006 and 2016 |
| Iron-deficiency anaemia                                                       | 62,779.0<br>(54,938.3 to 70,914.3)                  | 1,419.5<br>(900.3 to 2,101.1)                 | 17.8%<br>(13.6% to 21.6%)                         | -5.6%<br>(-8.9% to -2.5%)                        |
| HIV/AIDS resulting in other diseases                                          | 3,505.6<br>(3,059.9 to 4,046.3)                     | 365.9<br>(224.7 to 554.7)                     | -11.0%<br>(-30.6% to 23.0%)                       | -28.6%<br>(-44.4% to -1.3%)                      |
| Thalassaemias trait                                                           | 11,227.3<br>(9,341.7 to 13,208.8)                   | 234.8<br>(143.9 to 363.6)                     | 44.0%<br>(31.8% to 56.1%)                         | 15.5%<br>(5.7% to 25.2%)                         |
| Chronic kidney disease due to diabetes mellitus                               | 3,407.3<br>(2,465.1 to 4,503.3)                     | 233.3<br>(149.3 to 340.6)                     | 37.0%<br>(28.9% to 44.6%)                         | 9.9%<br>(3.4% to 16.0%)                          |
| Gastritis and duodenitis                                                      | 7,174.4<br>(5,377.9 to 9,482.7)                     | 196.5<br>(113.8 to 308.6)                     | 65.3%<br>(50.6% to 79.6%)                         | 32.5%<br>(20.7% to 44.1%)                        |
| Uterine fibroids                                                              | 5,006.7<br>(4,477.8 to 5,550.5)                     | 188.7<br>(118.4 to 283.9)                     | 17.9%<br>(14.2% to 21.4%)                         | -5.4%<br>(-8.4% to -2.7%)                        |
| Peptic ulcer disease                                                          | 6,298.4<br>(4,512.6 to 8,587.2)                     | 171.3<br>(97.1 to 270.5)                      | 60.7%<br>(47.5% to 73.0%)                         | 28.8%<br>(18.2% to 38.7%)                        |
| Chronic kidney disease due to other causes                                    | 1,490.6<br>(926.9 to 2,169.8)                       | 91.4<br>(48.4 to 144.9)                       | 30.8%<br>(22.6% to 38.6%)                         | 4.9%<br>(-1.7% to 11.1%)                         |
| Chronic kidney disease due to glomerulonephritis                              | 1,279.7<br>(814.6 to 1,840.8)                       | 77.5<br>(43.1 to 124.5)                       | 23.4%<br>(14.1% to 32.3%)                         | -1.0%<br>(-8.5% to 6.1%)                         |
| Chronic kidney disease due to hypertension                                    | 974.3<br>(689.4 to 1,337.1)                         | 68.4<br>(42.0 to 104.0)                       | 38.7%<br>(28.4% to 49.7%)                         | 11.2%<br>(3.0% to 20.0%)                         |
| Sickle cell trait                                                             | 3,114.4<br>(2,642.6 to 3,709.2)                     | 64.5<br>(40.0 to 95.9)                        | 32.8%<br>(27.8% to 38.3%)                         | 6.5%<br>(2.4% to 10.9%)                          |
| Other gynecological diseases                                                  | 1,837.8<br>(1,649.3 to 2,033.4)                     | 44.7<br>(28.3 to 64.6)                        | 18.9%<br>(13.3% to 24.2%)                         | -4.6%<br>(-9.2% to -0.4%)                        |
| Drug-susceptible HIV/AIDS - Tuberculosis                                      | 90.4<br>(63.4 to 124.6)                             | 34.3<br>(20.0 to 52.7)                        | 1.8%<br>(-6.2% to 9.8%)                           | -18.4%<br>(-24.7% to -12.0%)                     |
| Endocrine, metabolic, blood, and immune disorders                             | 2,027.7<br>(1,772.2 to 2,292.8)                     | 32.4<br>(20.5 to 49.2)                        | 22.0%<br>(15.5% to 28.4%)                         | -2.2%<br>(-7.4% to 3.0%)                         |
| Other hemoglobinopathies and hemolytic anaemias                               | 2,874.6<br>(2,488.7 to 3,273.1)                     | 30.8<br>(18.3 to 48.3)                        | 34.5%<br>(26.8% to 43.3%)                         | 7.8%<br>(1.7% to 14.9%)                          |
| Hookworm disease                                                              | 1,736.3<br>(1,466.1 to 2,039.5)                     | 26.3<br>(15.7 to 40.8)                        | 17.9%<br>(1.2% to 38.7%)                          | -5.4%<br>(-18.8% to 11.2%)                       |
| Malaria                                                                       | 694.7<br>(585.0 to 811.9)                           | 20.5<br>(12.5 to 30.1)                        | -23.4%<br>(-29.6% to -17.1%)                      | -38.6%<br>(-43.6% to -33.5%)                     |
| Other infectious diseases                                                     | 1,565.7<br>(1,357.9 to 1,780.8)                     | 18.6<br>(10.9 to 29.6)                        | 27.0%<br>(19.5% to 34.4%)                         | 1.8%<br>(-4.2% to 7.7%)                          |
| Schistosomiasis                                                               | 978.9<br>(830.1 to 1,129.8)                         | 17.8<br>(10.8 to 26.7)                        | -30.1%<br>(-35.1% to -25.4%)                      | -44.0%<br>(-47.9% to -40.2%)                     |
| Other neglected tropical diseases                                             | 1,313.4<br>(1,146.2 to 1,490.0)                     | 15.6<br>(9.1 to 24.6)                         | 28.5%<br>(20.2% to 36.6%)                         | 3.0%<br>(-3.6% to 9.6%)                          |
| Sickle cell disorders                                                         | 16.0<br>(14.0 to 18.0)                              | 2.6<br>(1.8 to 3.5)                           | 53.7%<br>(41.3% to 67.1%)                         | 23.3%<br>(13.3% to 34.0%)                        |
| GGPD deficiency                                                               | 38.6<br>(32.3 to 45.6)                              | 1.1<br>(0.7 to 1.6)                           | 43.0%<br>(36.7% to 49.9%)                         | 14.6%<br>(9.6% to 20.2%)                         |
| Multidrug-resistant HIV/AIDS - Tuberculosis without extensive drug resistance | 2.5<br>(1.7 to 3.7)                                 | 1.0<br>(0.6 to 1.6)                           | -6.3%<br>(-22.1% to 11.6%)                        | -24.9%<br>(-37.5% to -10.5%)                     |
| Maternal haemorrhage                                                          | 8.3<br>(5.3 to 12.5)                                | 0.4<br>(0.2 to 0.7)                           | 5.1%<br>(-4.9% to 17.8%)                          | -15.7%<br>(-23.8% to -5.6%)                      |
| Thalassaemias                                                                 | 0.8<br>(0.6 to 0.9)                                 | 0.1<br>(<0.05 to 0.2)                         | 28.8%<br>(-41.8% to 195.6%)                       | 3.3%<br>(-53.3% to 137.1%)                       |
| GGPD trait                                                                    | 0.6<br>(0.5 to 0.7)                                 | <0.05<br>(<0.05 to 0.1)                       | 31.6%<br>(20.0% to 44.0%)                         | 5.5%<br>(-3.7% to 15.4%)                         |
| Extensively drug-resistant HIV/AIDS - Tuberculosis                            | <0.05<br>(<0.05 to <0.05)                           | <0.05<br>(<0.05 to <0.05)                     | 335.9%<br>(264.1% to 423.7%)                      | 249.6%<br>(192.0% to 320.0%)                     |
| <b>All causes</b>                                                             | <b>119,444.1</b><br><b>(103,485.2 to 136,131.2)</b> | <b>3,358.1</b><br><b>(2,217.8 to 4,754.0)</b> | <b>20.3%</b><br><b>(10.3% to 27.7%)</b>           | <b>-3.6%</b><br><b>(-11.6% to 2.4%)</b>          |

SR Table 13a: Global prevalence and years lived with disability (YLDs) for 2016, percentage change of YLD counts and rates between 2006 and 2016 of anaemia by cause, ages 50-54 years

| Cause                                                                         | Prevalence in thousands (95% uncertainty interval) | YLDs in thousands (95% uncertainty interval)  |                                                   |                                                  |  |
|-------------------------------------------------------------------------------|----------------------------------------------------|-----------------------------------------------|---------------------------------------------------|--------------------------------------------------|--|
|                                                                               | 2016                                               | 2016                                          | Percentage change in counts between 2006 and 2016 | Percentage change in rates between 2006 and 2016 |  |
| Iron-deficiency anaemia                                                       | 46,462.9<br>(40,610.8 to 53,182.0)                 | 941.6<br>(596.9 to 1,439.1)                   | 10.8%<br>(6.7% to 14.8%)                          | -11.0%<br>(-14.3% to -7.9%)                      |  |
| HIV/AIDS resulting in other diseases                                          | 2,467.2<br>(2,115.2 to 2,903.1)                    | 243.9<br>(150.0 to 374.1)                     | 2.3%<br>(-26.6% to 56.8%)                         | -17.9%<br>(-41.1% to 25.9%)                      |  |
| Chronic kidney disease due to diabetes mellitus                               | 3,799.5<br>(2,692.2 to 5,032.2)                    | 230.7<br>(143.8 to 339.8)                     | 41.3%<br>(33.8% to 49.2%)                         | 13.5%<br>(7.4% to 19.8%)                         |  |
| Gastritis and duodenitis                                                      | 6,112.6<br>(4,692.6 to 8,087.0)                    | 149.9<br>(88.0 to 234.5)                      | 61.8%<br>(46.9% to 76.9%)                         | 29.9%<br>(17.9% to 42.0%)                        |  |
| Thalassaemias trait                                                           | 7,724.4<br>(6,339.7 to 9,249.1)                    | 143.9<br>(88.0 to 228.7)                      | 42.8%<br>(29.3% to 54.7%)                         | 14.7%<br>(3.8% to 24.2%)                         |  |
| Peptic ulcer disease                                                          | 5,035.1<br>(3,649.8 to 6,944.0)                    | 127.5<br>(70.0 to 206.4)                      | 61.0%<br>(45.9% to 77.1%)                         | 29.3%<br>(17.1% to 42.2%)                        |  |
| Uterine fibroids                                                              | 3,441.4<br>(3,064.3 to 3,853.1)                    | 126.6<br>(79.6 to 199.3)                      | 15.7%<br>(11.5% to 19.7%)                         | -7.1%<br>(-10.5% to -3.9%)                       |  |
| Chronic kidney disease due to other causes                                    | 1,613.4<br>(1,027.8 to 2,407.1)                    | 90.0<br>(50.1 to 143.9)                       | 38.9%<br>(30.2% to 47.8%)                         | 11.5%<br>(4.6% to 18.6%)                         |  |
| Chronic kidney disease due to hypertension                                    | 1,174.1<br>(823.1 to 1,623.4)                      | 75.8<br>(46.0 to 114.3)                       | 46.5%<br>(35.4% to 57.4%)                         | 17.6%<br>(8.7% to 26.4%)                         |  |
| Chronic kidney disease due to glomerulonephritis                              | 1,262.9<br>(805.7 to 1,838.4)                      | 67.9<br>(37.1 to 107.2)                       | 31.5%<br>(20.3% to 42.1%)                         | 5.6%<br>(-3.4% to 14.1%)                         |  |
| Sickle cell trait                                                             | 2,369.1<br>(1,990.5 to 2,811.6)                    | 44.8<br>(28.2 to 68.2)                        | 36.6%<br>(30.7% to 42.6%)                         | 9.7%<br>(4.9% to 14.5%)                          |  |
| Other gynecological diseases                                                  | 1,244.1<br>(1,104.2 to 1,399.1)                    | 27.3<br>(17.4 to 41.2)                        | 13.8%<br>(7.8% to 19.4%)                          | -8.6%<br>(-13.4% to -4.1%)                       |  |
| Other hemoglobinopathies and hemolytic anaemias                               | 2,318.3<br>(2,035.7 to 2,656.6)                    | 24.2<br>(14.5 to 39.3)                        | 21.1%<br>(13.3% to 28.4%)                         | -2.8%<br>(-9.0% to 3.1%)                         |  |
| Endocrine, metabolic, blood, and immune disorders                             | 1,552.6<br>(1,365.4 to 1,772.8)                    | 23.4<br>(14.6 to 36.3)                        | 16.9%<br>(10.5% to 22.9%)                         | -6.1%<br>(-11.2% to -1.3%)                       |  |
| Drug-susceptible HIV/AIDS - Tuberculosis                                      | 56.1<br>(39.2 to 78.3)                             | 21.1<br>(12.4 to 32.8)                        | 7.4%<br>(-1.5% to 16.4%)                          | -13.8%<br>(-20.9% to -6.5%)                      |  |
| Hookworm disease                                                              | 1,244.6<br>(1,053.7 to 1,468.3)                    | 16.8<br>(10.3 to 27.8)                        | 23.3%<br>(6.2% to 43.7%)                          | -1.0%<br>(-14.7% to 15.4%)                       |  |
| Malaria                                                                       | 477.0<br>(395.3 to 561.3)                          | 14.4<br>(9.0 to 21.5)                         | -22.4%<br>(-29.0% to -15.7%)                      | -37.7%<br>(-43.0% to -32.3%)                     |  |
| Other infectious diseases                                                     | 1,242.6<br>(1,093.8 to 1,422.8)                    | 13.8<br>(8.2 to 22.5)                         | 16.3%<br>(9.1% to 24.0%)                          | -6.6%<br>(-12.4% to -0.4%)                       |  |
| Schistosomiasis                                                               | 731.1<br>(614.5 to 870.1)                          | 12.1<br>(7.5 to 18.7)                         | -21.6%<br>(-27.2% to -15.6%)                      | -37.1%<br>(-41.5% to -32.3%)                     |  |
| Other neglected tropical diseases                                             | 1,054.7<br>(926.9 to 1,197.7)                      | 11.2<br>(6.8 to 18.5)                         | 16.1%<br>(7.8% to 23.9%)                          | -6.8%<br>(-13.5% to -0.5%)                       |  |
| Sickle cell disorders                                                         | 8.3<br>(7.2 to 9.4)                                | 1.3<br>(0.9 to 1.7)                           | 59.2%<br>(46.8% to 72.0%)                         | 27.8%<br>(17.9% to 38.1%)                        |  |
| GGPD deficiency                                                               | 31.0<br>(25.7 to 36.9)                             | 0.8<br>(0.5 to 1.2)                           | 29.5%<br>(20.4% to 37.5%)                         | 4.0%<br>(-3.3% to 10.4%)                         |  |
| Multidrug-resistant HIV/AIDS - Tuberculosis without extensive drug resistance | 1.6<br>(1.1 to 2.4)                                | 0.7<br>(0.4 to 1.1)                           | -0.2%<br>(-17.0% to 17.1%)                        | -19.9%<br>(-33.4% to -6.0%)                      |  |
| Thalassaemias                                                                 | 0.4<br>(0.3 to 0.5)                                | <0.05<br>(<0.05 to 0.1)                       | 31.0%<br>(9.5% to 84.7%)                          | 5.2%<br>(-12.0% to 48.3%)                        |  |
| Maternal haemorrhage                                                          | 0.4<br>(0.3 to 0.6)                                | <0.05<br>(<0.05 to 0.1)                       | 20.8%<br>(6.7% to 39.3%)                          | -3.0%<br>(-14.3% to 11.9%)                       |  |
| GGPD trait                                                                    | 0.4<br>(0.3 to 0.5)                                | <0.05<br>(<0.05 to 0.1)                       | 66.0%<br>(46.1% to 91.7%)                         | 33.3%<br>(17.3% to 53.9%)                        |  |
| Extensively drug-resistant HIV/AIDS - Tuberculosis                            | <0.05<br>(<0.05 to <0.05)                          | <0.05<br>(<0.05 to <0.05)                     | 399.2%<br>(317.4% to 493.2%)                      | 300.8%<br>(235.2% to 376.3%)                     |  |
| <b>All causes</b>                                                             | <b>91,426.0</b><br><b>(78,931.9 to 105,124.7)</b>  | <b>2,410.0</b><br><b>(1,597.2 to 3,487.3)</b> | <b>21.1%</b><br><b>(11.4% to 27.6%)</b>           | <b>-2.7%</b><br><b>(-10.5% to 2.5%)</b>          |  |

SR Table 13a: Global prevalence and years lived with disability (YLDs) for 2016, percentage change of YLD counts and rates between 2006 and 2016 of anaemia by cause, ages 55-59 years

| Cause                                                                         | Prevalence in thousands (95% uncertainty interval) | YLDs in thousands (95% uncertainty interval)  |                                         |                                                   |                                                  |
|-------------------------------------------------------------------------------|----------------------------------------------------|-----------------------------------------------|-----------------------------------------|---------------------------------------------------|--------------------------------------------------|
|                                                                               |                                                    | 2016                                          | 2016                                    | Percentage change in counts between 2006 and 2016 | Percentage change in rates between 2006 and 2016 |
| Iron-deficiency anaemia                                                       | 47,157.0<br>(40,890.7 to 52,725.3)                 | 987.0<br>(631.8 to 1,478.9)                   | 33.4%<br>(29.3% to 37.4%)               | 2.2%<br>(-0.9% to 5.3%)                           |                                                  |
| Chronic kidney disease due to diabetes mellitus                               | 4,811.2<br>(3,383.5 to 6,445.2)                    | 252.6<br>(153.2 to 378.4)                     | 39.7%<br>(32.2% to 46.3%)               | 7.0%<br>(1.3% to 12.1%)                           |                                                  |
| HIV/AIDS resulting in other diseases                                          | 1,628.5<br>(1,361.0 to 1,953.4)                    | 155.9<br>(96.3 to 237.0)                      | 16.2%<br>(-17.7% to 76.8%)              | -11.0%<br>(-36.9% to 35.5%)                       |                                                  |
| Gastritis and duodenitis                                                      | 6,157.8<br>(4,703.5 to 7,917.7)                    | 153.7<br>(89.6 to 238.4)                      | 46.5%<br>(32.4% to 59.8%)               | 12.2%<br>(1.5% to 22.5%)                          |                                                  |
| Thalassaemias trait                                                           | 6,621.1<br>(5,394.7 to 7,820.5)                    | 131.4<br>(82.6 to 204.7)                      | 35.4%<br>(23.7% to 45.7%)               | 3.7%<br>(-5.2% to 11.6%)                          |                                                  |
| Peptic ulcer disease                                                          | 4,718.8<br>(3,316.8 to 6,481.8)                    | 123.6<br>(70.7 to 203.7)                      | 50.1%<br>(35.1% to 64.6%)               | 15.0%<br>(3.5% to 26.1%)                          |                                                  |
| Uterine fibroids                                                              | 2,769.4<br>(2,443.9 to 3,094.9)                    | 97.1<br>(61.1 to 151.9)                       | 36.5%<br>(32.6% to 40.4%)               | 4.6%<br>(1.6% to 7.6%)                            |                                                  |
| Chronic kidney disease due to other causes                                    | 1,898.2<br>(1,192.6 to 2,831.3)                    | 93.0<br>(53.1 to 154.7)                       | 38.6%<br>(30.6% to 47.3%)               | 6.2%<br>(0.1% to 12.8%)                           |                                                  |
| Chronic kidney disease due to hypertension                                    | 1,637.9<br>(1,180.0 to 2,273.7)                    | 92.1<br>(57.0 to 142.0)                       | 44.2%<br>(33.6% to 54.5%)               | 10.5%<br>(2.4% to 18.4%)                          |                                                  |
| Chronic kidney disease due to glomerulonephritis                              | 1,335.3<br>(820.1 to 1,970.4)                      | 63.7<br>(35.0 to 104.4)                       | 30.5%<br>(18.2% to 42.3%)               | -0.0%<br>(-9.4% to 9.0%)                          |                                                  |
| Sickle cell trait                                                             | 2,088.3<br>(1,752.9 to 2,452.1)                    | 40.8<br>(26.0 to 61.4)                        | 39.5%<br>(34.1% to 45.1%)               | 6.9%<br>(2.7% to 11.2%)                           |                                                  |
| Other hemoglobinopathies and hemolytic anaemias                               | 2,540.2<br>(2,203.9 to 2,834.7)                    | 30.9<br>(19.3 to 47.6)                        | 39.4%<br>(31.2% to 47.4%)               | 6.9%<br>(0.5% to 13.0%)                           |                                                  |
| Endocrine, metabolic, blood, and immune disorders                             | 1,638.9<br>(1,427.8 to 1,830.9)                    | 25.7<br>(16.2 to 38.8)                        | 39.5%<br>(32.4% to 46.3%)               | 6.9%<br>(1.5% to 12.1%)                           |                                                  |
| Other infectious diseases                                                     | 1,350.6<br>(1,172.4 to 1,507.3)                    | 16.3<br>(10.0 to 25.7)                        | 35.4%<br>(28.2% to 42.6%)               | 3.8%<br>(-1.8% to 9.3%)                           |                                                  |
| Hookworm disease                                                              | 1,071.0<br>(913.1 to 1,247.9)                      | 14.9<br>(9.0 to 23.6)                         | 26.6%<br>(9.2% to 45.5%)                | -3.0%<br>(-16.3% to 11.5%)                        |                                                  |
| Other neglected tropical diseases                                             | 1,126.7<br>(984.8 to 1,250.8)                      | 13.3<br>(8.0 to 21.2)                         | 37.8%<br>(29.3% to 46.2%)               | 5.6%<br>(-0.9% to 12.0%)                          |                                                  |
| Drug-susceptible HIV/AIDS - Tuberculosis                                      | 35.1<br>(24.5 to 48.6)                             | 13.2<br>(7.8 to 20.4)                         | 13.4%<br>(3.3% to 24.2%)                | -13.1%<br>(-20.8% to -4.8%)                       |                                                  |
| Malaria                                                                       | 403.8<br>(337.7 to 476.6)                          | 11.7<br>(7.3 to 17.0)                         | -31.8%<br>(-38.0% to -25.5%)            | -47.7%<br>(-52.5% to -42.9%)                      |                                                  |
| Schistosomiasis                                                               | 608.3<br>(502.5 to 714.7)                          | 10.1<br>(6.2 to 15.4)                         | -32.3%<br>(-37.3% to -27.6%)            | -48.1%<br>(-51.9% to -44.5%)                      |                                                  |
| GGPD deficiency                                                               | 27.3<br>(22.7 to 31.7)                             | 0.8<br>(0.5 to 1.2)                           | 29.1%<br>(22.1% to 36.0%)               | -1.1%<br>(-6.4% to 4.2%)                          |                                                  |
| Sickle cell disorders                                                         | 4.1<br>(3.6 to 4.7)                                | 0.7<br>(0.5 to 0.9)                           | 65.6%<br>(59.7% to 71.9%)               | 26.9%<br>(22.4% to 31.7%)                         |                                                  |
| Multidrug-resistant HIV/AIDS - Tuberculosis without extensive drug resistance | 1.1<br>(0.7 to 1.6)                                | 0.4<br>(0.2 to 0.7)                           | 9.0%<br>(-10.6% to 29.4%)               | -16.5%<br>(-31.5% to -0.9%)                       |                                                  |
| GGPD trait                                                                    | 0.3<br>(0.2 to 0.4)                                | <0.05<br>(<0.05 to <0.05)                     | 32.7%<br>(14.5% to 57.7%)               | 1.7%<br>(-12.3% to 20.8%)                         |                                                  |
| Thalassaemias                                                                 | 0.2<br>(0.1 to 0.2)                                | <0.05<br>(<0.05 to <0.05)                     | -3.7%<br>(-30.4% to 14.3%)              | -26.2%<br>(-46.7% to -12.4%)                      |                                                  |
| Extensively drug-resistant HIV/AIDS - Tuberculosis                            | <0.05<br>(<0.05 to <0.05)                          | <0.05<br>(<0.05 to <0.05)                     | 337.0%<br>(267.5% to 417.2%)            | 234.9%<br>(181.6% to 296.3%)                      |                                                  |
| <b>All causes</b>                                                             | <b>89,630.9</b><br><b>(76,159.1 to 102,615.7)</b>  | <b>2,329.0</b><br><b>(1,544.5 to 3,429.7)</b> | <b>33.9%</b><br><b>(26.1% to 39.8%)</b> | <b>2.6%</b><br><b>(-3.3% to 7.1%)</b>             |                                                  |

SR Table 13a: Global prevalence and years lived with disability (YLDs) for 2016, percentage change of YLD counts and rates between 2006 and 2016 of anaemia by cause, ages 60-64 years

| Cause                                                                         | Prevalence in thousands (95% uncertainty interval) | YLDs in thousands (95% uncertainty interval)  |                                         |                                                   |                                                  |
|-------------------------------------------------------------------------------|----------------------------------------------------|-----------------------------------------------|-----------------------------------------|---------------------------------------------------|--------------------------------------------------|
|                                                                               |                                                    | 2016                                          | 2016                                    | Percentage change in counts between 2006 and 2016 | Percentage change in rates between 2006 and 2016 |
| Iron-deficiency anaemia                                                       | 34,336.4<br>(31,135.3 to 37,565.5)                 | 702.9<br>(457.4 to 1,009.5)                   | 36.6%<br>(32.8% to 39.8%)               | -9.4%<br>(-11.9% to -7.3%)                        |                                                  |
| Chronic kidney disease due to diabetes mellitus                               | 5,006.7<br>(3,690.6 to 6,444.4)                    | 237.0<br>(153.9 to 342.6)                     | 48.5%<br>(41.1% to 56.1%)               | -1.5%<br>(-6.4% to 3.5%)                          |                                                  |
| Gastritis and duodenitis                                                      | 5,101.8<br>(3,965.2 to 6,554.6)                    | 120.4<br>(74.3 to 180.3)                      | 85.3%<br>(71.7% to 98.9%)               | 22.9%<br>(13.9% to 31.9%)                         |                                                  |
| Chronic kidney disease due to hypertension                                    | 1,902.4<br>(1,392.8 to 2,628.8)                    | 99.1<br>(63.6 to 148.7)                       | 55.1%<br>(45.4% to 65.3%)               | 2.9%<br>(-3.6% to 9.7%)                           |                                                  |
| HIV/AIDS resulting in other diseases                                          | 1,031.4<br>(872.4 to 1,238.5)                      | 95.9<br>(59.9 to 145.3)                       | 15.8%<br>(-16.9% to 72.5%)              | -23.2%<br>(-44.9% to 14.4%)                       |                                                  |
| Thalassaemias trait                                                           | 4,938.7<br>(4,254.8 to 5,745.0)                    | 91.9<br>(57.1 to 136.1)                       | 59.8%<br>(49.1% to 69.9%)               | 6.0%<br>(-1.1% to 12.7%)                          |                                                  |
| Peptic ulcer disease                                                          | 3,639.9<br>(2,688.2 to 4,825.9)                    | 90.3<br>(54.8 to 138.5)                       | 77.9%<br>(63.7% to 93.8%)               | 18.0%<br>(8.6% to 28.5%)                          |                                                  |
| Chronic kidney disease due to other causes                                    | 1,805.9<br>(1,163.4 to 2,697.7)                    | 82.3<br>(46.1 to 132.8)                       | 46.3%<br>(38.4% to 54.5%)               | -3.0%<br>(-8.2% to 2.5%)                          |                                                  |
| Other hemoglobinopathies and hemolytic anaemias                               | 4,136.5<br>(3,764.5 to 4,507.1)                    | 74.6<br>(48.8 to 107.7)                       | 39.4%<br>(35.0% to 43.5%)               | -7.6%<br>(-10.5% to -4.8%)                        |                                                  |
| Chronic kidney disease due to glomerulonephritis                              | 1,169.7<br>(735.1 to 1,754.2)                      | 52.8<br>(29.5 to 88.5)                        | 44.8%<br>(34.4% to 54.8%)               | -4.0%<br>(-10.9% to 2.7%)                         |                                                  |
| Endocrine, metabolic, blood, and immune disorders                             | 2,486.0<br>(2,263.7 to 2,709.1)                    | 46.5<br>(30.9 to 66.2)                        | 42.5%<br>(37.3% to 47.3%)               | -5.5%<br>(-8.9% to -2.3%)                         |                                                  |
| Sickle cell trait                                                             | 1,457.5<br>(1,282.5 to 1,678.3)                    | 22.1<br>(14.0 to 32.7)                        | 35.9%<br>(29.4% to 42.3%)               | -9.9%<br>(-14.1% to -5.6%)                        |                                                  |
| Other infectious diseases                                                     | 823.3<br>(752.0 to 893.4)                          | 11.6<br>(7.5 to 17.1)                         | 42.0%<br>(35.0% to 49.6%)               | -5.8%<br>(-10.4% to -0.8%)                        |                                                  |
| Hookworm disease                                                              | 757.1<br>(657.3 to 863.9)                          | 10.4<br>(6.3 to 15.8)                         | 32.2%<br>(13.8% to 52.9%)               | -12.3%<br>(-24.5% to 1.4%)                        |                                                  |
| Other neglected tropical diseases                                             | 695.9<br>(637.2 to 752.9)                          | 9.2<br>(5.8 to 13.7)                          | 44.9%<br>(36.1% to 53.5%)               | -3.9%<br>(-9.7% to 1.8%)                          |                                                  |
| Drug-susceptible HIV/AIDS - Tuberculosis                                      | 23.7<br>(16.3 to 33.2)                             | 8.9<br>(5.1 to 13.9)                          | 12.7%<br>(1.2% to 24.3%)                | -25.2%<br>(-32.9% to -17.6%)                      |                                                  |
| Malaria                                                                       | 268.4<br>(227.3 to 312.5)                          | 8.1<br>(5.1 to 11.7)                          | -27.5%<br>(-33.7% to -21.2%)            | -51.9%<br>(-56.0% to -47.8%)                      |                                                  |
| Schistosomiasis                                                               | 408.2<br>(342.4 to 472.5)                          | 6.3<br>(3.9 to 9.3)                           | -27.5%<br>(-32.5% to -22.3%)            | -51.9%<br>(-55.2% to -48.4%)                      |                                                  |
| G6PD deficiency                                                               | 20.5<br>(17.8 to 23.5)                             | 0.6<br>(0.4 to 0.9)                           | 49.2%<br>(44.0% to 54.6%)               | -1.0%<br>(-4.5% to 2.5%)                          |                                                  |
| Multidrug-resistant HIV/AIDS - Tuberculosis without extensive drug resistance | 0.8<br>(0.5 to 1.2)                                | 0.3<br>(0.2 to 0.5)                           | 21.5%<br>(-1.9% to 45.3%)               | -19.4%<br>(-35.0% to -3.6%)                       |                                                  |
| Sickle cell disorders                                                         | 1.8<br>(1.6 to 2.1)                                | 0.3<br>(0.2 to 0.4)                           | 71.2%<br>(65.4% to 77.1%)               | 13.5%<br>(9.7% to 17.5%)                          |                                                  |
| G6PD trait                                                                    | 0.2<br>(0.2 to 0.2)                                | <0.05<br>(<0.05 to <0.05)                     | 51.0%<br>(43.1% to 58.0%)               | 0.1%<br>(-5.1% to 4.8%)                           |                                                  |
| Thalassemsias                                                                 | 0.1<br>(0.1 to 0.1)                                | <0.05<br>(<0.05 to <0.05)                     | 48.9%<br>(19.5% to 99.3%)               | -1.3%<br>(-20.7% to 32.2%)                        |                                                  |
| Extensively drug-resistant HIV/AIDS - Tuberculosis                            | <0.05<br>(<0.05 to <0.05)                          | <0.05<br>(<0.05 to <0.05)                     | 495.1%<br>(399.5% to 609.0%)            | 294.7%<br>(231.3% to 370.3%)                      |                                                  |
| <b>All causes</b>                                                             | <b>70,012.8</b><br><b>(62,218.0 to 78,289.3)</b>   | <b>1,771.6</b><br><b>(1,207.9 to 2,507.2)</b> | <b>42.8%</b><br><b>(35.5% to 48.3%)</b> | <b>-5.3%</b><br><b>(-10.1% to -1.6%)</b>          |                                                  |

SR Table 13a: Global prevalence and years lived with disability (YLDs) for 2016, percentage change of YLD counts and rates between 2006 and 2016 of anaemia by cause, ages 65-69 years

| Cause                                                                         | Prevalence in thousands (95% uncertainty interval) | YLDs in thousands (95% uncertainty interval)  |                                                   |                                                  |
|-------------------------------------------------------------------------------|----------------------------------------------------|-----------------------------------------------|---------------------------------------------------|--------------------------------------------------|
|                                                                               |                                                    | 2016                                          | Percentage change in counts between 2006 and 2016 | Percentage change in rates between 2006 and 2016 |
| Iron-deficiency anaemia                                                       | 26,488.7<br>(24,603.9 to 27,878.7)                 | 614.8<br>(408.7 to 879.4)                     | 21.1%<br>(19.0% to 23.2%)                         | -8.6%<br>(-10.2% to -7.0%)                       |
| Chronic kidney disease due to diabetes mellitus                               | 6,434.9<br>(4,892.7 to 8,107.3)                    | 284.7<br>(188.5 to 414.6)                     | 36.5%<br>(30.7% to 42.5%)                         | 3.0%<br>(-1.3% to 7.6%)                          |
| Gastritis and duodenitis                                                      | 6,122.7<br>(4,944.9 to 7,502.1)                    | 143.6<br>(89.8 to 212.4)                      | 56.9%<br>(48.1% to 65.4%)                         | 18.4%<br>(11.8% to 24.8%)                        |
| Chronic kidney disease due to hypertension                                    | 2,781.2<br>(2,073.4 to 3,686.6)                    | 132.3<br>(84.5 to 193.7)                      | 39.0%<br>(31.3% to 46.4%)                         | 4.9%<br>(-0.9% to 10.5%)                         |
| Chronic kidney disease due to other causes                                    | 2,358.1<br>(1,550.6 to 3,389.3)                    | 104.8<br>(60.4 to 168.2)                      | 32.8%<br>(26.0% to 39.7%)                         | 0.2%<br>(-4.9% to 5.4%)                          |
| Peptic ulcer disease                                                          | 4,035.8<br>(3,063.1 to 5,355.5)                    | 102.7<br>(64.0 to 157.3)                      | 51.6%<br>(40.1% to 63.3%)                         | 14.4%<br>(5.7% to 23.3%)                         |
| Thalassaemias trait                                                           | 4,824.4<br>(4,294.3 to 5,309.4)                    | 98.2<br>(62.6 to 144.0)                       | 43.5%<br>(37.4% to 49.7%)                         | 8.3%<br>(3.7% to 13.0%)                          |
| Chronic kidney disease due to glomerulonephritis                              | 1,519.6<br>(990.8 to 2,200.8)                      | 66.2<br>(37.9 to 105.9)                       | 23.0%<br>(12.4% to 33.2%)                         | -7.2%<br>(-15.2% to 0.6%)                        |
| HIV/AIDS resulting in other diseases                                          | 639.8<br>(546.6 to 762.1)                          | 58.7<br>(37.1 to 88.4)                        | 10.8%<br>(-21.8% to 66.4%)                        | -16.4%<br>(-41.0% to 25.6%)                      |
| Other hemoglobinopathies and hemolytic anaemias                               | 3,189.8<br>(2,976.2 to 3,339.6)                    | 58.0<br>(38.0 to 83.7)                        | 20.2%<br>(16.8% to 23.1%)                         | -9.3%<br>(-11.8% to -7.1%)                       |
| Endocrine, metabolic, blood, and immune disorders                             | 1,914.1<br>(1,787.4 to 2,005.7)                    | 36.5<br>(24.3 to 51.5)                        | 21.3%<br>(17.8% to 24.9%)                         | -8.4%<br>(-11.1% to -5.8%)                       |
| Sickle cell trait                                                             | 1,251.7<br>(1,121.5 to 1,405.7)                    | 19.8<br>(12.8 to 28.9)                        | 32.0%<br>(27.5% to 36.5%)                         | -0.4%<br>(-3.7% to 3.0%)                         |
| Hookworm disease                                                              | 679.9<br>(606.2 to 756.9)                          | 9.6<br>(5.9 to 14.5)                          | 23.2%<br>(8.1% to 40.9%)                          | -7.1%<br>(-18.4% to 6.4%)                        |
| Other infectious diseases                                                     | 633.9<br>(593.6 to 662.3)                          | 9.5<br>(6.1 to 13.9)                          | 23.2%<br>(17.9% to 29.1%)                         | -7.1%<br>(-11.0% to -2.6%)                       |
| Other neglected tropical diseases                                             | 517.4<br>(487.7 to 539.2)                          | 7.5<br>(4.8 to 10.9)                          | 29.9%<br>(23.4% to 36.2%)                         | -2.0%<br>(-6.9% to 2.8%)                         |
| Malaria                                                                       | 219.5<br>(188.3 to 252.1)                          | 6.8<br>(4.4 to 9.7)                           | -27.1%<br>(-32.7% to -21.6%)                      | -45.0%<br>(-49.2% to -40.8%)                     |
| Drug-susceptible HIV/AIDS - Tuberculosis                                      | 16.3<br>(11.1 to 23.1)                             | 6.1<br>(3.6 to 9.6)                           | 12.8%<br>(0.0% to 24.5%)                          | -14.8%<br>(-24.5% to -6.0%)                      |
| Schistosomiasis                                                               | 364.2<br>(319.0 to 409.5)                          | 5.6<br>(3.6 to 8.1)                           | -31.1%<br>(-35.6% to -26.4%)                      | -48.0%<br>(-51.4% to -44.4%)                     |
| GGPD deficiency                                                               | 17.4<br>(15.5 to 19.0)                             | 0.6<br>(0.4 to 0.8)                           | 30.8%<br>(26.4% to 35.0%)                         | -1.3%<br>(-4.6% to 1.9%)                         |
| Multidrug-resistant HIV/AIDS - Tuberculosis without extensive drug resistance | 0.6<br>(0.4 to 0.8)                                | 0.2<br>(0.1 to 0.4)                           | 24.8%<br>(0.4% to 48.0%)                          | -5.8%<br>(-24.2% to 11.7%)                       |
| Sickle cell disorders                                                         | 0.9<br>(0.8 to 1.0)                                | 0.2<br>(0.1 to 0.2)                           | 63.2%<br>(58.0% to 68.6%)                         | 23.2%<br>(19.3% to 27.2%)                        |
| GGPD trait                                                                    | 0.2<br>(0.2 to 0.2)                                | <0.05<br>(<0.05 to <0.05)                     | 44.4%<br>(39.3% to 49.9%)                         | 9.0%<br>(5.1% to 13.1%)                          |
| Thalassaemias                                                                 | 0.1<br>(<0.05 to 0.1)                              | <0.05<br>(<0.05 to <0.05)                     | 26.0%<br>(10.0% to 43.0%)                         | -4.9%<br>(-17.0% to 7.9%)                        |
| Extensively drug-resistant HIV/AIDS - Tuberculosis                            | <0.05<br>(<0.05 to <0.05)                          | <0.05<br>(<0.05 to <0.05)                     | 528.6%<br>(433.2% to 638.0%)                      | 374.4%<br>(302.4% to 457.0%)                     |
| <b>All causes</b>                                                             | <b>64,011.0</b><br><b>(58,220.6 to 69,447.8)</b>   | <b>1,766.0</b><br><b>(1,212.6 to 2,453.1)</b> | <b>29.6%</b><br><b>(25.2% to 33.0%)</b>           | <b>-2.2%</b><br><b>(-5.5% to 0.4%)</b>           |

SR Table 13a: Global prevalence and years lived with disability (YLDs) for 2016, percentage change of YLD counts and rates between 2006 and 2016 of anaemia by cause, ages 70-74 years

| Cause                                                                         | Prevalence in thousands (95% uncertainty interval) | YLDs in thousands (95% uncertainty interval)  |                                                   |                                                  |
|-------------------------------------------------------------------------------|----------------------------------------------------|-----------------------------------------------|---------------------------------------------------|--------------------------------------------------|
|                                                                               |                                                    | 2016                                          | Percentage change in counts between 2006 and 2016 | Percentage change in rates between 2006 and 2016 |
| Iron-deficiency anaemia                                                       | 18,416.6<br>(17,487.2 to 19,254.5)                 | 449.7<br>(303.6 to 643.1)                     | 14.4%<br>(12.7% to 16.0%)                         | -4.4%<br>(-5.8% to -3.0%)                        |
| Chronic kidney disease due to diabetes mellitus                               | 6,110.9<br>(4,727.1 to 7,555.8)                    | 252.7<br>(170.0 to 360.3)                     | 28.1%<br>(23.4% to 32.6%)                         | 7.1%<br>(3.2% to 10.8%)                          |
| Chronic kidney disease due to hypertension                                    | 3,105.2<br>(2,355.0 to 3,964.4)                    | 134.7<br>(86.1 to 195.8)                      | 26.9%<br>(21.1% to 32.2%)                         | 6.0%<br>(1.2% to 10.5%)                          |
| Gastritis and duodenitis                                                      | 4,752.0<br>(3,779.8 to 5,861.4)                    | 106.9<br>(69.3 to 157.0)                      | 31.3%<br>(25.1% to 37.2%)                         | 9.7%<br>(4.6% to 14.6%)                          |
| Chronic kidney disease due to other causes                                    | 2,423.4<br>(1,658.0 to 3,411.1)                    | 103.2<br>(63.7 to 158.4)                      | 25.3%<br>(19.2% to 31.0%)                         | 4.8%<br>(-0.4% to 9.5%)                          |
| Peptic ulcer disease                                                          | 2,906.0<br>(2,250.0 to 3,735.3)                    | 73.3<br>(45.5 to 113.0)                       | 28.6%<br>(20.5% to 36.1%)                         | 7.5%<br>(0.7% to 13.8%)                          |
| Thalassaemias trait                                                           | 3,407.1<br>(3,112.9 to 3,732.1)                    | 72.1<br>(46.7 to 106.8)                       | 28.9%<br>(24.9% to 33.1%)                         | 7.8%<br>(4.4% to 11.3%)                          |
| Chronic kidney disease due to glomerulonephritis                              | 1,503.8<br>(1,019.6 to 2,151.7)                    | 63.9<br>(38.5 to 103.9)                       | 14.9%<br>(6.0% to 23.2%)                          | -4.0%<br>(-11.4% to 3.0%)                        |
| Other hemoglobinopathies and hemolytic anaemias                               | 2,227.9<br>(2,129.3 to 2,321.5)                    | 39.5<br>(26.5 to 57.5)                        | 11.0%<br>(8.3% to 13.5%)                          | -7.3%<br>(-9.5% to -5.1%)                        |
| HIV/AIDS resulting in other diseases                                          | 375.3<br>(324.8 to 438.5)                          | 33.9<br>(21.7 to 50.0)                        | 4.7%<br>(-26.9% to 61.1%)                         | -12.5%<br>(-38.9% to 34.6%)                      |
| Endocrine, metabolic, blood, and immune disorders                             | 1,336.7<br>(1,278.0 to 1,393.4)                    | 25.3<br>(17.1 to 36.0)                        | 12.0%<br>(8.8% to 15.3%)                          | -6.4%<br>(-9.1% to -3.7%)                        |
| Sickle cell trait                                                             | 931.5<br>(836.4 to 1,053.4)                        | 14.6<br>(9.6 to 21.4)                         | 31.6%<br>(26.9% to 36.1%)                         | 10.0%<br>(6.1% to 13.8%)                         |
| Hookworm disease                                                              | 499.2<br>(451.0 to 552.9)                          | 6.6<br>(4.2 to 9.8)                           | 12.6%<br>(-1.4% to 28.7%)                         | -5.9%<br>(-17.6% to 7.6%)                        |
| Other infectious diseases                                                     | 442.8<br>(424.3 to 460.2)                          | 6.5<br>(4.3 to 9.6)                           | 15.5%<br>(10.5% to 20.9%)                         | -3.5%<br>(-7.6% to 1.1%)                         |
| Other neglected tropical diseases                                             | 356.4<br>(342.3 to 369.3)                          | 5.1<br>(3.4 to 7.7)                           | 19.8%<br>(13.8% to 26.3%)                         | 0.1%<br>(-4.9% to 5.5%)                          |
| Malaria                                                                       | 156.1<br>(133.5 to 179.1)                          | 5.0<br>(3.3 to 7.1)                           | -26.6%<br>(-32.3% to -20.8%)                      | -38.6%<br>(-43.4% to -33.8%)                     |
| Schistosomiasis                                                               | 274.0<br>(240.4 to 308.9)                          | 4.1<br>(2.7 to 6.0)                           | -33.0%<br>(-36.9% to -28.8%)                      | -44.0%<br>(-47.3% to -40.5%)                     |
| Drug-susceptible HIV/AIDS - Tuberculosis                                      | 10.8<br>(7.4 to 15.2)                              | 4.0<br>(2.3 to 6.1)                           | 4.3%<br>(-5.8% to 14.2%)                          | -12.9%<br>(-21.2% to -4.6%)                      |
| G6PD deficiency                                                               | 13.0<br>(11.9 to 14.0)                             | 0.4<br>(0.3 to 0.6)                           | 20.4%<br>(15.7% to 25.1%)                         | 0.7%<br>(-3.3% to 4.6%)                          |
| Multidrug-resistant HIV/AIDS - Tuberculosis without extensive drug resistance | 0.3<br>(0.2 to 0.5)                                | 0.1<br>(0.1 to 0.2)                           | 10.2%<br>(-10.4% to 30.2%)                        | -7.9%<br>(-25.1% to 8.8%)                        |
| Sickle cell disorders                                                         | 0.4<br>(0.3 to 0.4)                                | 0.1<br>(<0.05 to 0.1)                         | 39.0%<br>(34.8% to 43.3%)                         | 16.2%<br>(12.7% to 19.8%)                        |
| G6PD trait                                                                    | 0.1<br>(0.1 to 0.2)                                | <0.05<br>(<0.05 to <0.05)                     | 27.9%<br>(23.6% to 32.9%)                         | 6.9%<br>(3.3% to 11.1%)                          |
| Thalassaemias                                                                 | <0.05<br>(<0.05 to <0.05)                          | <0.05<br>(<0.05 to <0.05)                     | 6.2%<br>(-4.9% to 17.9%)                          | -11.2%<br>(-20.5% to -1.5%)                      |
| Extensively drug-resistant HIV/AIDS - Tuberculosis                            | <0.05<br>(<0.05 to <0.05)                          | <0.05<br>(<0.05 to <0.05)                     | 430.9%<br>(348.8% to 519.4%)                      | 343.8%<br>(275.1% to 417.7%)                     |
| <b>All causes</b>                                                             | <b>49,249.4</b><br><b>(45,498.9 to 52,905.0)</b>   | <b>1,401.5</b><br><b>(1,003.0 to 1,918.2)</b> | <b>20.5%</b><br><b>(17.7% to 23.1%)</b>           | <b>0.7%</b><br><b>(-1.7% to 2.9%)</b>            |



SR Table 13a: Global prevalence and years lived with disability (YLDs) for 2016, percentage change of YLD counts and rates between 2006 and 2016 of anaemia by cause, ages 75-79 years

| Cause                                                                         | Prevalence in thousands (95% uncertainty interval) | YLDs in thousands (95% uncertainty interval) |                                                   |                                                  |
|-------------------------------------------------------------------------------|----------------------------------------------------|----------------------------------------------|---------------------------------------------------|--------------------------------------------------|
|                                                                               |                                                    | 2016                                         | Percentage change in counts between 2006 and 2016 | Percentage change in rates between 2006 and 2016 |
| Iron-deficiency anaemia                                                       | 12,417.4<br>(11,899.1 to 12,991.8)                 | 315.6<br>(214.3 to 443.4)                    | 19.7%<br>(17.7% to 21.5%)                         | -3.7%<br>(-5.3% to -2.3%)                        |
| Chronic kidney disease due to diabetes mellitus                               | 5,493.6<br>(4,166.4 to 6,889.4)                    | 212.6<br>(142.2 to 298.6)                    | 34.6%<br>(29.5% to 40.3%)                         | 8.2%<br>(4.1% to 12.8%)                          |
| Chronic kidney disease due to hypertension                                    | 3,416.5<br>(2,573.7 to 4,407.9)                    | 138.5<br>(88.7 to 196.0)                     | 31.8%<br>(25.8% to 37.5%)                         | 6.0%<br>(1.2% to 10.5%)                          |
| Chronic kidney disease due to other causes                                    | 2,691.3<br>(1,853.2 to 3,753.6)                    | 107.0<br>(65.0 to 165.6)                     | 30.3%<br>(23.2% to 37.6%)                         | 4.8%<br>(-0.9% to 10.7%)                         |
| Gastritis and duodenitis                                                      | 3,861.8<br>(3,081.6 to 4,785.1)                    | 88.8<br>(55.9 to 128.2)                      | 38.0%<br>(32.0% to 44.0%)                         | 10.9%<br>(6.2% to 15.8%)                         |
| Chronic kidney disease due to glomerulonephritis                              | 1,801.9<br>(1,256.3 to 2,533.0)                    | 69.6<br>(41.3 to 104.8)                      | 18.3%<br>(7.2% to 27.8%)                          | -4.9%<br>(-13.8% to 2.8%)                        |
| Peptic ulcer disease                                                          | 2,343.5<br>(1,830.6 to 2,957.5)                    | 60.3<br>(37.1 to 92.6)                       | 36.2%<br>(28.1% to 44.9%)                         | 9.5%<br>(3.0% to 16.5%)                          |
| Thalassaemias trait                                                           | 2,572.3<br>(2,346.4 to 2,824.3)                    | 56.9<br>(37.3 to 83.7)                       | 33.3%<br>(29.1% to 37.8%)                         | 7.2%<br>(3.8% to 10.8%)                          |
| Other hemoglobinopathies and hemolytic anaemias                               | 1,520.5<br>(1,464.0 to 1,584.3)                    | 27.1<br>(18.2 to 38.8)                       | 13.1%<br>(9.9% to 15.9%)                          | -9.1%<br>(-11.6% to -6.8%)                       |
| HIV/AIDS resulting in other diseases                                          | 204.9<br>(175.8 to 245.0)                          | 18.3<br>(11.5 to 27.3)                       | 11.9%<br>(-21.4% to 70.1%)                        | -10.0%<br>(-36.8% to 36.8%)                      |
| Endocrine, metabolic, blood, and immune disorders                             | 914.5<br>(879.7 to 953.6)                          | 17.5<br>(11.8 to 24.8)                       | 18.7%<br>(15.2% to 22.4%)                         | -4.5%<br>(-7.4% to -1.5%)                        |
| Sickle cell trait                                                             | 670.9<br>(600.6 to 763.5)                          | 10.7<br>(7.1 to 15.3)                        | 40.0%<br>(35.8% to 44.7%)                         | 12.6%<br>(9.2% to 16.3%)                         |
| Hookworm disease                                                              | 355.6<br>(323.2 to 392.8)                          | 4.7<br>(3.0 to 7.1)                          | 19.8%<br>(5.9% to 36.8%)                          | -3.6%<br>(-14.8% to 10.0%)                       |
| Other infectious diseases                                                     | 304.5<br>(294.0 to 317.1)                          | 4.6<br>(3.1 to 6.6)                          | 19.8%<br>(14.7% to 25.4%)                         | -3.7%<br>(-7.8% to 0.9%)                         |
| Other neglected tropical diseases                                             | 234.3<br>(227.3 to 242.2)                          | 3.4<br>(2.3 to 5.0)                          | 23.5%<br>(17.2% to 29.8%)                         | -0.7%<br>(-5.7% to 4.4%)                         |
| Schistosomiasis                                                               | 184.7<br>(159.1 to 212.2)                          | 2.9<br>(1.9 to 4.3)                          | -31.1%<br>(-35.5% to -26.7%)                      | -44.6%<br>(-48.1% to -41.1%)                     |
| Malaria                                                                       | 91.7<br>(77.1 to 106.6)                            | 2.9<br>(2.0 to 4.2)                          | -25.7%<br>(-31.6% to -20.2%)                      | -40.3%<br>(-45.0% to -35.8%)                     |
| Drug-susceptible HIV/AIDS - Tuberculosis                                      | 6.1<br>(4.2 to 8.6)                                | 2.2<br>(1.3 to 3.5)                          | -5.9%<br>(-14.3% to 3.1%)                         | -24.3%<br>(-31.1% to -17.1%)                     |
| G6PD deficiency                                                               | 9.5<br>(8.8 to 10.3)                               | 0.3<br>(0.2 to 0.5)                          | 26.7%<br>(21.2% to 31.8%)                         | 1.9%<br>(-2.5% to 5.9%)                          |
| Multidrug-resistant HIV/AIDS - Tuberculosis without extensive drug resistance | 0.2<br>(0.1 to 0.3)                                | 0.1<br>(<0.05 to 0.1)                        | 15.1%<br>(-10.7% to 39.5%)                        | -7.5%<br>(-28.2% to 12.2%)                       |
| Sickle cell disorders                                                         | 0.1<br>(0.1 to 0.2)                                | <0.05<br>(<0.05 to <0.05)                    | 23.0%<br>(19.6% to 27.0%)                         | -1.1%<br>(-3.8% to 2.1%)                         |
| G6PD trait                                                                    | 0.1<br>(0.1 to 0.1)                                | <0.05<br>(<0.05 to <0.05)                    | 18.3%<br>(6.4% to 29.0%)                          | -4.9%<br>(-14.5% to 3.8%)                        |
| Thalassaemias                                                                 | <0.05<br>(<0.05 to <0.05)                          | <0.05<br>(<0.05 to <0.05)                    | 1.8%<br>(-9.1% to 10.3%)                          | -18.1%<br>(-26.9% to -11.3%)                     |
| Extensively drug-resistant HIV/AIDS - Tuberculosis                            | <0.05<br>(<0.05 to <0.05)                          | <0.05<br>(<0.05 to <0.05)                    | 511.5%<br>(386.5% to 636.0%)                      | 391.7%<br>(291.2% to 491.9%)                     |
| <b>All causes</b>                                                             | <b>39,095.9</b><br><b>(35,951.6 to 42,649.5)</b>   | <b>1,144.0</b><br><b>(819.6 to 1,545.0)</b>  | <b>26.7%</b><br><b>(23.5% to 29.8%)</b>           | <b>1.9%</b><br><b>(-0.7% to 4.4%)</b>            |

SR Table 13a: Global prevalence and years lived with disability (YLDs) for 2016, percentage change of YLD counts and rates between 2006 and 2016 of anaemia by cause, ages 80-84

| Cause                                                                         | Prevalence in thousands (95% uncertainty interval) | YLDs in thousands (95% uncertainty interval) |                                         |                                                   |
|-------------------------------------------------------------------------------|----------------------------------------------------|----------------------------------------------|-----------------------------------------|---------------------------------------------------|
|                                                                               |                                                    | 2016                                         | 2016                                    | Percentage change in counts between 2006 and 2016 |
| Iron-deficiency anaemia                                                       | 7,066.9<br>(6,820.5 to 7,337.9)                    | 201.9<br>(138.1 to 278.8)                    | 29.4%<br>(27.5% to 31.2%)               | -1.2%<br>(-2.6% to 0.2%)                          |
| Chronic kidney disease due to diabetes mellitus                               | 3,766.1<br>(2,794.2 to 4,786.9)                    | 148.7<br>(97.3 to 213.3)                     | 40.5%<br>(34.6% to 46.3%)               | 7.2%<br>(2.8% to 11.7%)                           |
| Chronic kidney disease due to hypertension                                    | 3,160.6<br>(2,407.8 to 3,996.6)                    | 130.2<br>(86.0 to 184.3)                     | 36.8%<br>(30.6% to 42.4%)               | 4.4%<br>(-0.3% to 8.8%)                           |
| Chronic kidney disease due to other causes                                    | 2,333.1<br>(1,666.7 to 3,149.7)                    | 94.3<br>(58.1 to 139.6)                      | 33.6%<br>(26.3% to 41.0%)               | 2.0%<br>(-3.6% to 7.6%)                           |
| Gastritis and duodenitis                                                      | 2,607.8<br>(2,104.3 to 3,206.5)                    | 67.2<br>(43.8 to 98.2)                       | 45.6%<br>(39.9% to 51.5%)               | 11.2%<br>(6.8% to 15.7%)                          |
| Chronic kidney disease due to glomerulonephritis                              | 1,425.1<br>(1,023.9 to 1,918.0)                    | 56.9<br>(35.4 to 86.4)                       | 14.7%<br>(4.4% to 23.8%)                | -12.4%<br>(-20.3% to -5.4%)                       |
| Peptic ulcer disease                                                          | 1,598.3<br>(1,246.9 to 2,068.5)                    | 44.3<br>(27.1 to 68.9)                       | 41.8%<br>(33.6% to 49.8%)               | 8.3%<br>(2.0% to 14.4%)                           |
| Thalassaemia trait                                                            | 1,710.4<br>(1,570.9 to 1,863.1)                    | 40.9<br>(27.7 to 58.5)                       | 38.6%<br>(34.3% to 42.9%)               | 5.9%<br>(2.6% to 9.1%)                            |
| Other hemoglobinopathies and hemolytic anaemias                               | 869.7<br>(842.6 to 899.5)                          | 17.6<br>(12.1 to 24.5)                       | 32.5%<br>(29.5% to 35.3%)               | 1.2%<br>(-1.1% to 3.3%)                           |
| Endocrine, metabolic, blood, and immune disorders                             | 523.9<br>(508.0 to 541.7)                          | 10.6<br>(7.3 to 14.5)                        | 35.5%<br>(31.6% to 39.5%)               | 3.5%<br>(0.5% to 6.5%)                            |
| HIV/AIDS resulting in other diseases                                          | 77.1<br>(64.0 to 95.8)                             | 7.0<br>(4.2 to 10.9)                         | 26.5%<br>(-16.5% to 115.3%)             | -3.4%<br>(-36.3% to 64.4%)                        |
| Sickle cell trait                                                             | 410.7<br>(367.0 to 471.1)                          | 6.8<br>(4.6 to 9.9)                          | 41.9%<br>(37.4% to 46.8%)               | 8.4%<br>(4.9% to 12.1%)                           |
| Hookworm disease                                                              | 229.4<br>(209.0 to 251.8)                          | 3.1<br>(2.1 to 4.6)                          | 22.9%<br>(8.7% to 40.3%)                | -6.1%<br>(-17.0% to 7.1%)                         |
| Other infectious diseases                                                     | 175.5<br>(170.3 to 181.1)                          | 2.8<br>(1.9 to 3.9)                          | 35.8%<br>(29.5% to 42.4%)               | 3.7%<br>(-1.1% to 8.7%)                           |
| Other neglected tropical diseases                                             | 131.8<br>(128.6 to 135.4)                          | 2.1<br>(1.4 to 2.9)                          | 33.8%<br>(26.5% to 40.9%)               | 2.1%<br>(-3.4% to 7.6%)                           |
| Schistosomiasis                                                               | 102.2<br>(88.5 to 117.2)                           | 1.7<br>(1.1 to 2.5)                          | -33.0%<br>(-37.4% to -28.5%)            | -48.8%<br>(-52.2% to -45.4%)                      |
| Malaria                                                                       | 38.9<br>(32.3 to 45.3)                             | 1.3<br>(0.9 to 1.9)                          | -28.1%<br>(-33.5% to -22.6%)            | -45.1%<br>(-49.2% to -40.9%)                      |
| Drug-susceptible HIV/AIDS - Tuberculosis                                      | 3.0<br>(2.0 to 4.2)                                | 1.1<br>(0.6 to 1.7)                          | 22.6%<br>(10.6% to 34.7%)               | -6.4%<br>(-15.5% to 2.8%)                         |
| G6PD deficiency                                                               | 6.0<br>(5.5 to 6.4)                                | 0.2<br>(0.1 to 0.3)                          | 31.1%<br>(26.8% to 35.8%)               | 0.1%<br>(-3.2% to 3.7%)                           |
| Multidrug-resistant HIV/AIDS - Tuberculosis without extensive drug resistance | 0.1<br>(0.1 to 0.1)                                | <0.05<br>(<0.05 to 0.1)                      | 45.0%<br>(6.8% to 83.2%)                | 10.7%<br>(-18.5% to 39.9%)                        |
| Sickle cell disorders                                                         | 0.1<br>(0.1 to 0.1)                                | <0.05<br>(<0.05 to <0.05)                    | 17.4%<br>(14.7% to 20.5%)               | -10.4%<br>(-12.4% to -8.0%)                       |
| G6PD trait                                                                    | 0.1<br>(0.1 to 0.1)                                | <0.05<br>(<0.05 to <0.05)                    | 28.0%<br>(22.4% to 33.1%)               | -2.3%<br>(-6.5% to 1.7%)                          |
| Thalassemas                                                                   | <0.05<br>(<0.05 to <0.05)                          | <0.05<br>(<0.05 to <0.05)                    | 20.4%<br>(11.2% to 28.1%)               | -8.1%<br>(-15.1% to -2.2%)                        |
| Extensively drug-resistant HIV/AIDS - Tuberculosis                            | <0.05<br>(<0.05 to <0.05)                          | <0.05<br>(<0.05 to <0.05)                    | 800.0%<br>(563.0% to 1,047.8%)          | 587.2%<br>(406.2% to 776.4%)                      |
| <b>All causes</b>                                                             | <b>26,236.5</b><br><b>(24,062.1 to 28,508.1)</b>   | <b>838.7</b><br><b>(589.0 to 1,127.4)</b>    | <b>33.7%</b><br><b>(30.5% to 37.0%)</b> | <b>2.1%</b><br><b>(-0.4% to 4.6%)</b>             |

SR Table 13a: Global prevalence and years lived with disability (YLDs) for 2016, percentage change of YLD counts and rates between 2006 and 2016 of anaemia by cause, ages 85-89

| Cause                                                                         | Prevalence in thousands (95% uncertainty interval) | YLDs in thousands (95% uncertainty interval) |                                         |                                                  |
|-------------------------------------------------------------------------------|----------------------------------------------------|----------------------------------------------|-----------------------------------------|--------------------------------------------------|
|                                                                               |                                                    | 2016                                         | 2016                                    | Percentage change in rates between 2006 and 2016 |
| Chronic kidney disease due to hypertension                                    | 2,468.7<br>(1,892.7 to 3,081.0)                    | 101.6<br>(66.2 to 140.9)                     | 58.2%<br>(51.4% to 64.7%)               | -1.4%<br>(-5.7% to 2.6%)                         |
| Iron-deficiency anaemia                                                       | 3,456.9<br>(3,303.5 to 3,592.5)                    | 100.1<br>(69.6 to 136.2)                     | 47.4%<br>(45.5% to 49.3%)               | -8.1%<br>(-9.4% to -7.0%)                        |
| Chronic kidney disease due to diabetes mellitus                               | 2,169.0<br>(1,551.6 to 2,862.6)                    | 85.1<br>(55.3 to 126.9)                      | 63.8%<br>(55.9% to 71.7%)               | 2.0%<br>(-2.9% to 7.0%)                          |
| Chronic kidney disease due to other causes                                    | 1,641.0<br>(1,162.1 to 2,180.8)                    | 65.9<br>(39.8 to 97.1)                       | 64.1%<br>(55.4% to 73.5%)               | 2.2%<br>(-3.2% to 8.1%)                          |
| Gastritis and duodenitis                                                      | 1,419.5<br>(1,170.6 to 1,753.2)                    | 37.3<br>(24.2 to 54.6)                       | 73.1%<br>(66.0% to 80.3%)               | 7.9%<br>(3.4% to 12.4%)                          |
| Chronic kidney disease due to glomerulonephritis                              | 890.2<br>(639.0 to 1,240.4)                        | 36.3<br>(22.3 to 55.8)                       | 56.9%<br>(45.7% to 69.8%)               | -2.2%<br>(-9.2% to 5.8%)                         |
| Peptic ulcer disease                                                          | 933.8<br>(734.8 to 1,191.2)                        | 25.5<br>(16.1 to 38.5)                       | 63.8%<br>(54.6% to 74.0%)               | 2.0%<br>(-3.7% to 8.4%)                          |
| Thalassaemias trait                                                           | 939.4<br>(861.0 to 1,017.4)                        | 24.2<br>(16.1 to 33.9)                       | 67.5%<br>(62.7% to 72.7%)               | 4.4%<br>(1.3% to 7.6%)                           |
| Other hemoglobinopathies and hemolytic anaemias                               | 427.3<br>(410.8 to 442.6)                          | 8.7<br>(6.0 to 11.9)                         | 49.2%<br>(46.1% to 52.2%)               | -7.0%<br>(-9.0% to -5.1%)                        |
| Endocrine, metabolic, blood, and immune disorders                             | 258.1<br>(248.2 to 267.2)                          | 5.2<br>(3.6 to 7.1)                          | 58.7%<br>(54.0% to 63.6%)               | -1.1%<br>(-4.1% to 1.9%)                         |
| Sickle cell trait                                                             | 209.7<br>(188.0 to 239.2)                          | 3.5<br>(2.4 to 4.9)                          | 59.4%<br>(54.0% to 65.5%)               | -0.7%<br>(-4.0% to 3.1%)                         |
| HIV/AIDS resulting in other diseases                                          | 34.6<br>(28.9 to 43.0)                             | 3.1<br>(1.9 to 4.8)                          | 54.0%<br>(0.9% to 155.5%)               | -4.1%<br>(-37.1% to 59.2%)                       |
| Hookworm disease                                                              | 114.0<br>(104.1 to 124.6)                          | 1.6<br>(1.1 to 2.3)                          | 30.8%<br>(15.1% to 48.1%)               | -18.5%<br>(-28.3% to -7.7%)                      |
| Other infectious diseases                                                     | 86.4<br>(83.3 to 89.2)                             | 1.3<br>(0.9 to 1.9)                          | 52.4%<br>(45.6% to 59.5%)               | -5.1%<br>(-9.3% to -0.6%)                        |
| Other neglected tropical diseases                                             | 60.0<br>(58.2 to 61.7)                             | 0.9<br>(0.7 to 1.3)                          | 48.0%<br>(39.3% to 55.8%)               | -7.8%<br>(-13.2% to -2.9%)                       |
| Schistosomiasis                                                               | 46.2<br>(40.0 to 52.6)                             | 0.8<br>(0.5 to 1.2)                          | -33.6%<br>(-38.2% to -29.1%)            | -58.7%<br>(-61.5% to -55.9%)                     |
| Malaria                                                                       | 15.7<br>(13.0 to 18.6)                             | 0.5<br>(0.3 to 0.7)                          | -25.8%<br>(-31.4% to -20.4%)            | -53.8%<br>(-57.3% to -50.4%)                     |
| Drug-susceptible HIV/AIDS - Tuberculosis                                      | 1.3<br>(0.9 to 1.8)                                | 0.4<br>(0.3 to 0.7)                          | 34.8%<br>(22.5% to 46.9%)               | -16.0%<br>(-23.6% to -8.5%)                      |
| G6PD deficiency                                                               | 3.0<br>(2.8 to 3.3)                                | 0.1<br>(0.1 to 0.2)                          | 57.0%<br>(51.1% to 63.1%)               | -2.2%<br>(-5.8% to 1.6%)                         |
| Multidrug-resistant HIV/AIDS - Tuberculosis without extensive drug resistance | <0.05<br>(<0.05 to 0.1)                            | <0.05<br>(<0.05 to <0.05)                    | 62.1%<br>(17.9% to 108.1%)              | 1.0%<br>(-26.5% to 29.6%)                        |
| Sickle cell disorders                                                         | <0.05<br>(<0.05 to <0.05)                          | <0.05<br>(<0.05 to <0.05)                    | 43.5%<br>(40.2% to 47.1%)               | -10.6%<br>(-12.6% to -8.3%)                      |
| G6PD trait                                                                    | <0.05<br>(<0.05 to <0.05)                          | <0.05<br>(<0.05 to <0.05)                    | 54.7%<br>(48.4% to 61.4%)               | -3.6%<br>(-7.5% to 0.6%)                         |
| Thalassaemias                                                                 | <0.05<br>(<0.05 to <0.05)                          | <0.05<br>(<0.05 to <0.05)                    | 46.0%<br>(37.1% to 54.6%)               | -9.0%<br>(-14.6% to -3.7%)                       |
| Extensively drug-resistant HIV/AIDS - Tuberculosis                            | <0.05<br>(<0.05 to <0.05)                          | <0.05<br>(<0.05 to <0.05)                    | 831.7%<br>(568.0% to 1,117.1%)          | 480.5%<br>(316.2% to 658.3%)                     |
| <b>All causes</b>                                                             | <b>15,174.9</b><br><b>(13,961.2 to 16,396.4)</b>   | <b>502.3</b><br><b>(350.1 to 668.0)</b>      | <b>58.3%</b><br><b>(54.3% to 62.4%)</b> | <b>-1.4%</b><br><b>(-3.9% to 1.2%)</b>           |

SR Table 13a: Global prevalence and years lived with disability (YLDs) for 2016, percentage change of YLD counts and rates between 2006 and 2016 of anaemia by cause, ages 90-94

| Cause                                                                         | Prevalence in thousands (95% uncertainty interval) | YLDs in thousands (95% uncertainty interval) |                                                   |                                                  |
|-------------------------------------------------------------------------------|----------------------------------------------------|----------------------------------------------|---------------------------------------------------|--------------------------------------------------|
|                                                                               |                                                    | 2016                                         | Percentage change in counts between 2006 and 2016 | Percentage change in rates between 2006 and 2016 |
| Chronic kidney disease due to hypertension                                    | 1,212.1<br>(954.3 to 1,492.7)                      | 50.3<br>(33.6 to 69.5)                       | 69.3%<br>(60.9% to 76.7%)                         | 1.2%<br>(-3.9% to 5.6%)                          |
| Chronic kidney disease due to diabetes mellitus                               | 883.9<br>(649.1 to 1,172.7)                        | 33.9<br>(21.2 to 48.8)                       | 74.9%<br>(65.9% to 83.7%)                         | 4.5%<br>(-0.9% to 9.8%)                          |
| Iron-deficiency anaemia                                                       | 1,124.2<br>(1,070.9 to 1,180.7)                    | 31.2<br>(21.7 to 42.3)                       | 55.9%<br>(53.5% to 58.3%)                         | -6.9%<br>(-8.3% to -5.4%)                        |
| Chronic kidney disease due to other causes                                    | 678.8<br>(498.4 to 908.4)                          | 27.2<br>(17.0 to 39.7)                       | 69.6%<br>(59.4% to 80.6%)                         | 1.3%<br>(-4.8% to 7.9%)                          |
| Chronic kidney disease due to glomerulonephritis                              | 326.0<br>(232.3 to 442.1)                          | 13.6<br>(8.6 to 20.4)                        | 54.0%<br>(41.6% to 65.6%)                         | -8.0%<br>(-15.4% to -1.0%)                       |
| Gastritis and duodenitis                                                      | 505.2<br>(418.9 to 607.8)                          | 13.2<br>(8.5 to 19.0)                        | 82.0%<br>(73.5% to 90.1%)                         | 8.7%<br>(3.7% to 13.6%)                          |
| Peptic ulcer disease                                                          | 352.3<br>(278.2 to 437.2)                          | 9.4<br>(5.9 to 14.1)                         | 67.9%<br>(57.3% to 77.9%)                         | 0.3%<br>(-6.0% to 6.3%)                          |
| Thalassaemia trait                                                            | 331.5<br>(299.1 to 366.2)                          | 8.6<br>(5.7 to 12.1)                         | 73.6%<br>(66.1% to 80.7%)                         | 3.7%<br>(-0.7% to 7.9%)                          |
| Other hemoglobinopathies and hemolytic anaemias                               | 140.7<br>(134.6 to 147.1)                          | 2.8<br>(1.9 to 3.9)                          | 59.1%<br>(55.5% to 62.7%)                         | -5.0%<br>(-7.1% to -2.8%)                        |
| Endocrine, metabolic, blood, and immune disorders                             | 84.2<br>(80.7 to 87.9)                             | 1.6<br>(1.1 to 2.3)                          | 66.3%<br>(61.1% to 71.8%)                         | -0.7%<br>(-3.8% to 2.7%)                         |
| Sickle cell trait                                                             | 73.1<br>(65.3 to 83.7)                             | 1.2<br>(0.8 to 1.7)                          | 72.1%<br>(65.7% to 78.5%)                         | 2.8%<br>(-1.0% to 6.7%)                          |
| HIV/AIDS resulting in other diseases                                          | 10.4<br>(8.7 to 12.8)                              | 0.9<br>(0.6 to 1.4)                          | 70.5%<br>(9.9% to 185.4%)                         | 1.9%<br>(-34.3% to 70.5%)                        |
| Hookworm disease                                                              | 36.4<br>(33.3 to 39.7)                             | 0.5<br>(0.3 to 0.8)                          | 32.5%<br>(16.8% to 49.7%)                         | -20.8%<br>(-30.2% to -10.6%)                     |
| Other infectious diseases                                                     | 28.3<br>(27.2 to 29.6)                             | 0.4<br>(0.3 to 0.6)                          | 58.7%<br>(51.2% to 65.6%)                         | -5.2%<br>(-9.7% to -1.1%)                        |
| Other neglected tropical diseases                                             | 18.5<br>(17.9 to 19.1)                             | 0.3<br>(0.2 to 0.4)                          | 55.6%<br>(47.2% to 63.6%)                         | -7.1%<br>(-12.1% to -2.2%)                       |
| Schistosomiasis                                                               | 14.1<br>(11.7 to 16.5)                             | 0.3<br>(0.2 to 0.4)                          | -27.9%<br>(-32.8% to -22.7%)                      | -56.9%<br>(-59.9% to -53.8%)                     |
| Malaria                                                                       | 4.1<br>(3.2 to 5.1)                                | 0.1<br>(0.1 to 0.2)                          | -23.7%<br>(-30.3% to -17.3%)                      | -54.4%<br>(-58.4% to -50.6%)                     |
| Drug-susceptible HIV/AIDS - Tuberculosis                                      | 0.3<br>(0.2 to 0.5)                                | 0.1<br>(0.1 to 0.2)                          | 34.8%<br>(23.1% to 46.5%)                         | -19.5%<br>(-26.4% to -12.5%)                     |
| G6PD deficiency                                                               | 1.0<br>(0.9 to 1.1)                                | <0.05<br>(<0.05 to 0.1)                      | 61.9%<br>(54.2% to 69.7%)                         | -3.3%<br>(-7.9% to 1.4%)                         |
| Multidrug-resistant HIV/AIDS - Tuberculosis without extensive drug resistance | <0.05<br>(<0.05 to <0.05)                          | <0.05<br>(<0.05 to <0.05)                    | 56.6%<br>(12.1% to 102.6%)                        | -6.4%<br>(-33.0% to 21.1%)                       |
| G6PD trait                                                                    | <0.05<br>(<0.05 to <0.05)                          | <0.05<br>(<0.05 to <0.05)                    | 61.7%<br>(50.7% to 72.7%)                         | -3.4%<br>(-10.0% to 3.2%)                        |
| Sickle cell disorders                                                         | <0.05<br>(<0.05 to <0.05)                          | <0.05<br>(<0.05 to <0.05)                    | 67.1%<br>(62.5% to 72.1%)                         | -0.2%<br>(-2.9% to 2.8%)                         |
| Extensively drug-resistant HIV/AIDS - Tuberculosis                            | <0.05<br>(<0.05 to <0.05)                          | <0.05<br>(<0.05 to <0.05)                    | 758.4%<br>(503.6% to 1,048.3%)                    | 412.8%<br>(260.6% to 586.0%)                     |
| Thalassaemias                                                                 | <0.05<br>(<0.05 to <0.05)                          | <0.05<br>(<0.05 to <0.05)                    | 31.8%<br>(21.7% to 41.6%)                         | -21.2%<br>(-27.3% to -15.4%)                     |
| <b>All causes</b>                                                             | <b>5,825.0</b><br><b>(5,320.7 to 6,331.1)</b>      | <b>195.8</b><br><b>(136.9 to 260.2)</b>      | <b>66.9%</b><br><b>(61.8% to 71.8%)</b>           | <b>-0.3%</b><br><b>(-3.4% to 2.6%)</b>           |

SR Table 13a: Global prevalence and years lived with disability (YLDs) for 2016, percentage change of YLD counts and rates between 2006 and 2016 of anaemia by cause, ages 95+ years

| Cause                                                                         | Prevalence in thousands (95% uncertainty interval) | YLDs in thousands (95% uncertainty interval) |                                         |                                                   |
|-------------------------------------------------------------------------------|----------------------------------------------------|----------------------------------------------|-----------------------------------------|---------------------------------------------------|
|                                                                               |                                                    | 2016                                         | 2016                                    | Percentage change in counts between 2006 and 2016 |
| Chronic kidney disease due to hypertension                                    | 310.2<br>(232.7 to 394.2)                          | 13.9<br>(9.2 to 20.1)                        | 62.6%<br>(54.0% to 71.7%)               | 3.8%<br>(-1.7% to 9.6%)                           |
| Chronic kidney disease due to diabetes mellitus                               | 220.1<br>(147.5 to 297.0)                          | 9.2<br>(5.4 to 14.0)                         | 71.4%<br>(61.8% to 82.4%)               | 9.4%<br>(3.2% to 16.4%)                           |
| Chronic kidney disease due to other causes                                    | 148.4<br>(94.5 to 219.6)                           | 6.2<br>(3.5 to 9.9)                          | 55.5%<br>(43.8% to 67.7%)               | -0.8%<br>(-8.2% to 7.0%)                          |
| Iron-deficiency anaemia                                                       | 228.9<br>(214.1 to 250.1)                          | 5.9<br>(4.1 to 8.2)                          | 54.8%<br>(51.5% to 58.1%)               | -1.2%<br>(-3.3% to 0.9%)                          |
| Chronic kidney disease due to glomerulonephritis                              | 69.8<br>(42.9 to 108.2)                            | 3.2<br>(1.8 to 5.5)                          | 37.4%<br>(24.0% to 50.4%)               | -12.3%<br>(-20.9% to -4.0%)                       |
| Gastritis and duodenitis                                                      | 117.5<br>(94.3 to 146.6)                           | 2.9<br>(1.8 to 4.4)                          | 86.7%<br>(77.1% to 96.3%)               | 19.2%<br>(13.0% to 25.3%)                         |
| Peptic ulcer disease                                                          | 91.1<br>(69.0 to 121.6)                            | 2.3<br>(1.4 to 3.7)                          | 68.3%<br>(56.3% to 80.3%)               | 7.4%<br>(-0.2% to 15.0%)                          |
| Thalassaemias trait                                                           | 66.2<br>(57.5 to 77.9)                             | 1.7<br>(1.1 to 2.5)                          | 77.4%<br>(66.4% to 88.3%)               | 13.2%<br>(6.2% to 20.2%)                          |
| Other hemoglobinopathies and hemolytic anaemias                               | 28.7<br>(27.0 to 31.0)                             | 0.5<br>(0.4 to 0.7)                          | 53.5%<br>(49.1% to 58.2%)               | -2.0%<br>(-4.8% to 0.9%)                          |
| Endocrine, metabolic, blood, and immune disorders                             | 17.4<br>(16.4 to 18.8)                             | 0.3<br>(0.2 to 0.4)                          | 59.8%<br>(54.0% to 65.1%)               | 2.0%<br>(-1.8% to 5.3%)                           |
| Sickle cell trait                                                             | 14.7<br>(13.0 to 17.0)                             | 0.2<br>(0.1 to 0.3)                          | 63.2%<br>(55.7% to 70.8%)               | 4.2%<br>(-0.7% to 9.0%)                           |
| HIV/AIDS resulting in other diseases                                          | 2.0<br>(1.7 to 2.4)                                | 0.2<br>(0.1 to 0.3)                          | 80.5%<br>(15.8% to 193.2%)              | 15.2%<br>(-26.1% to 87.1%)                        |
| Hookworm disease                                                              | 7.4<br>(6.6 to 8.2)                                | 0.1<br>(0.1 to 0.1)                          | 34.3%<br>(17.7% to 52.2%)               | -14.3%<br>(-24.9% to -2.8%)                       |
| Other infectious diseases                                                     | 6.0<br>(5.7 to 6.5)                                | 0.1<br>(0.1 to 0.1)                          | 59.0%<br>(51.1% to 66.3%)               | 1.5%<br>(-3.6% to 6.1%)                           |
| Other neglected tropical diseases                                             | 3.8<br>(3.6 to 4.0)                                | 0.1<br>(<0.05 to 0.1)                        | 64.7%<br>(56.0% to 73.6%)               | 5.1%<br>(-0.5% to 10.8%)                          |
| Schistosomiasis                                                               | 2.8<br>(2.2 to 3.5)                                | 0.1<br>(<0.05 to 0.1)                        | -27.0%<br>(-33.4% to -20.1%)            | -53.4%<br>(-57.5% to -49.0%)                      |
| Drug-susceptible HIV/AIDS - Tuberculosis                                      | 0.1<br>(<0.05 to 0.1)                              | <0.05<br>(<0.05 to <0.05)                    | 32.0%<br>(20.6% to 43.0%)               | -15.7%<br>(-23.0% to -8.8%)                       |
| GGPD deficiency                                                               | 0.2<br>(0.2 to 0.2)                                | <0.05<br>(<0.05 to <0.05)                    | 59.8%<br>(50.1% to 70.6%)               | 2.0%<br>(-4.2% to 8.9%)                           |
| Multidrug-resistant HIV/AIDS - Tuberculosis without extensive drug resistance | <0.05<br>(<0.05 to <0.05)                          | <0.05<br>(<0.05 to <0.05)                    | 54.6%<br>(9.6% to 109.6%)               | -1.3%<br>(-30.0% to 33.8%)                        |
| GGPD trait                                                                    | <0.05<br>(<0.05 to <0.05)                          | <0.05<br>(<0.05 to <0.05)                    | 48.0%<br>(33.3% to 62.9%)               | -5.6%<br>(-14.9% to 4.0%)                         |
| Sickle cell disorders                                                         | <0.05<br>(<0.05 to <0.05)                          | <0.05<br>(<0.05 to <0.05)                    | 47.4%<br>(41.4% to 52.8%)               | -5.9%<br>(-9.7% to -2.5%)                         |
| Extensively drug-resistant HIV/AIDS - Tuberculosis                            | <0.05<br>(<0.05 to <0.05)                          | <0.05<br>(<0.05 to <0.05)                    | 699.0%<br>(428.5% to 1,035.8%)          | 409.8%<br>(237.3% to 624.8%)                      |
| Thalassaemias                                                                 | <0.05<br>(<0.05 to <0.05)                          | <0.05<br>(<0.05 to <0.05)                    | 38.3%<br>(24.0% to 56.2%)               | -11.8%<br>(-20.9% to -0.3%)                       |
| <b>All causes</b>                                                             | <b>1,335.2</b><br><b>(1,183.0 to 1,543.1)</b>      | <b>47.0</b><br><b>(33.2 to 63.1)</b>         | <b>61.9%</b><br><b>(55.6% to 68.3%)</b> | <b>3.3%</b><br><b>(-0.7% to 7.4%)</b>             |

SR Table 13b: Global prevalence and years lived with disability (YLDs) for 2016, percentage change of YLD counts and rates between 2006 and 2016 of developmental intellectual disability by cause, ages 0-6 days

| Cause                                                    | Prevalence in thousands (95% uncertainty interval) | YLDs in thousands (95% uncertainty interval) |                                         |                                                   |
|----------------------------------------------------------|----------------------------------------------------|----------------------------------------------|-----------------------------------------|---------------------------------------------------|
|                                                          |                                                    | 2016                                         | 2016                                    | Percentage change in counts between 2006 and 2016 |
| Neonatal sepsis and other neonatal infections            | 8.7<br>(3.9 to 18.9)                               | 4.4<br>(1.8 to 10.2)                         | -4.9%<br>(-8.3% to -1.4%)               | -4.4%<br>(-7.8% to -0.9%)                         |
| Congenital heart anomalies                               | 27.2<br>(21.9 to 33.2)                             | 1.4<br>(0.6 to 2.5)                          | -1.6%<br>(-4.6% to 1.3%)                | -1.0%<br>(-4.1% to 1.8%)                          |
| Autism                                                   | 2.1<br>(1.3 to 3.1)                                | 0.6<br>(0.3 to 1.0)                          | -0.4%<br>(-4.8% to 4.1%)                | 0.1%<br>(-4.3% to 4.6%)                           |
| Neonatal preterm birth complications                     | 2.9<br>(2.0 to 4.0)                                | 0.4<br>(0.3 to 0.7)                          | -16.1%<br>(-23.9% to -8.6%)             | -15.7%<br>(-23.5% to -8.1%)                       |
| Other chromosomal abnormalities                          | 4.4<br>(3.7 to 5.2)                                | 0.4<br>(0.3 to 0.6)                          | 5.0%<br>(1.4% to 9.0%)                  | 5.6%<br>(2.0% to 9.6%)                            |
| Neural tube defects                                      | 1.0<br>(0.8 to 1.2)                                | 0.3<br>(0.2 to 0.5)                          | 3.3%<br>(-1.7% to 8.6%)                 | 3.8%<br>(-1.2% to 9.1%)                           |
| Idiopathic developmental intellectual disability         | 5.2<br>(1.6 to 10.2)                               | 0.2<br>(0.1 to 0.5)                          | -13.1%<br>(-18.2% to -7.0%)             | -12.7%<br>(-17.7% to -6.5%)                       |
| Neonatal encephalopathy due to birth asphyxia and trauma | 1.2<br>(0.7 to 1.7)                                | 0.2<br>(0.1 to 0.3)                          | -12.6%<br>(-24.5% to -0.2%)             | -12.1%<br>(-24.1% to 0.3%)                        |
| Down's syndrome                                          | 1.4<br>(1.2 to 1.7)                                | 0.1<br>(0.1 to 0.2)                          | -1.0%<br>(-4.6% to 3.0%)                | -0.4%<br>(-4.1% to 3.6%)                          |
| Haemolytic disease and other neonatal jaundice           | <0.05<br>(<0.05 to 0.1)                            | <0.05<br>(<0.05 to <0.05)                    | -9.4%<br>(-21.3% to 1.0%)               | -8.9%<br>(-20.8% to 1.5%)                         |
| Encephalitis                                             | <0.05<br>(<0.05 to <0.05)                          | <0.05<br>(<0.05 to <0.05)                    | -5.0%<br>(-28.9% to 3.6%)               | -4.5%<br>(-28.5% to 4.1%)                         |
| Klinefelter syndrome                                     | 0.4<br>(0.3 to 0.6)                                | <0.05<br>(<0.05 to <0.05)                    | 1.3%<br>(-6.7% to 9.8%)                 | 1.8%<br>(-6.2% to 10.4%)                          |
| Alcohol use disorders                                    | 0.1<br>(0.1 to 0.1)                                | <0.05<br>(<0.05 to <0.05)                    | 0.3%<br>(-6.3% to 5.9%)                 | 0.8%<br>(-5.8% to 6.5%)                           |
| Meningococcal infection                                  | <0.05<br>(<0.05 to 0.1)                            | <0.05<br>(<0.05 to <0.05)                    | 700.3%<br>(-19.2% to 3,358.4%)          | 704.5%<br>(-18.8% to 3,376.5%)                    |
| Pneumococcal meningitis                                  | <0.05<br>(<0.05 to <0.05)                          | <0.05<br>(<0.05 to <0.05)                    | -11.2%<br>(-27.9% to -2.6%)             | -10.7%<br>(-27.5% to -2.0%)                       |
| Digestive congenital anomalies                           | <0.05<br>(<0.05 to <0.05)                          | <0.05<br>(<0.05 to <0.05)                    | -5.8%<br>(-8.6% to -3.2%)               | -5.3%<br>(-8.2% to -2.7%)                         |
| Other meningitis                                         | <0.05<br>(<0.05 to <0.05)                          | <0.05<br>(<0.05 to <0.05)                    | -0.1%<br>(-18.7% to 8.6%)               | 0.4%<br>(-18.2% to 9.2%)                          |
| H influenzae type B meningitis                           | <0.05<br>(<0.05 to <0.05)                          | <0.05<br>(<0.05 to <0.05)                    | -17.7%<br>(-44.1% to -4.1%)             | -17.3%<br>(-43.8% to -3.6%)                       |
| Tetanus                                                  | <0.05<br>(<0.05 to <0.05)                          | <0.05<br>(<0.05 to <0.05)                    | -16.7%<br>(-22.8% to -11.2%)            | -16.2%<br>(-22.4% to -10.7%)                      |
| Malaria                                                  | <0.05<br>(<0.05 to <0.05)                          | <0.05<br>(<0.05 to <0.05)                    | 18.4%<br>(6.4% to 28.5%)                | 19.0%<br>(7.0% to 29.2%)                          |
| <b>All causes</b>                                        | <b>54.6</b><br><b>(46.2 to 66.4)</b>               | <b>8.0</b><br><b>(5.0 to 13.7)</b>           | <b>-4.3%</b><br><b>(-6.4% to -2.1%)</b> | <b>-3.8%</b><br><b>(-5.9% to -1.6%)</b>           |

SR Table 13b: Global prevalence and years lived with disability (YLDs) for 2016, percentage change of YLD counts and rates between 2006 and 2016 of developmental intellectual disability by cause, ages 7-27 days

| Cause                                                    | Prevalence in thousands (95% uncertainty interval) | YLDs in thousands (95% uncertainty interval) |                                         |                                                  |
|----------------------------------------------------------|----------------------------------------------------|----------------------------------------------|-----------------------------------------|--------------------------------------------------|
|                                                          |                                                    | 2016                                         | 2016                                    | Percentage change in rates between 2006 and 2016 |
| Neonatal sepsis and other neonatal infections            | 25.1<br>(11.1 to 54.8)                             | 12.5<br>(5.3 to 28.5)                        | -3.3%<br>(-6.8% to 0.5%)                | -3.2%<br>(-6.6% to 0.7%)                         |
| Congenital heart anomalies                               | 76.5<br>(61.5 to 93.3)                             | 4.0<br>(1.7 to 7.0)                          | -1.5%<br>(-4.3% to 1.4%)                | -1.3%<br>(-4.2% to 1.5%)                         |
| Other chromosomal abnormalities                          | 15.4<br>(13.0 to 17.8)                             | 2.4<br>(1.7 to 3.3)                          | -2.3%<br>(-6.6% to 1.6%)                | -2.2%<br>(-6.5% to 1.8%)                         |
| Autism                                                   | 6.3<br>(3.9 to 9.2)                                | 1.7<br>(0.9 to 2.9)                          | -0.2%<br>(-5.0% to 5.0%)                | -0.1%<br>(-4.8% to 5.2%)                         |
| Neonatal preterm birth complications                     | 9.0<br>(6.2 to 12.3)                               | 1.4<br>(0.8 to 2.2)                          | -15.9%<br>(-24.1% to -8.0%)             | -15.7%<br>(-24.0% to -7.8%)                      |
| Neural tube defects                                      | 2.8<br>(2.2 to 3.6)                                | 0.9<br>(0.6 to 1.4)                          | 3.7%<br>(-1.3% to 9.1%)                 | 3.9%<br>(-1.2% to 9.3%)                          |
| Idiopathic developmental intellectual disability         | 15.9<br>(5.1 to 31.0)                              | 0.7<br>(0.2 to 1.5)                          | -13.0%<br>(-18.0% to -7.0%)             | -12.8%<br>(-17.9% to -6.8%)                      |
| Neonatal encephalopathy due to birth asphyxia and trauma | 3.7<br>(2.2 to 5.3)                                | 0.5<br>(0.3 to 0.9)                          | -11.7%<br>(-23.6% to 0.4%)              | -11.5%<br>(-23.4% to 0.6%)                       |
| Down's syndrome                                          | 4.1<br>(3.4 to 4.8)                                | 0.4<br>(0.2 to 0.5)                          | -0.7%<br>(-4.7% to 3.2%)                | -0.5%<br>(-4.5% to 3.4%)                         |
| Haemolytic disease and other neonatal jaundice           | 0.1<br>(0.1 to 0.2)                                | 0.1<br>(<0.05 to 0.1)                        | -9.0%<br>(-20.5% to 0.9%)               | -8.8%<br>(-20.4% to 1.1%)                        |
| Zika virus disease                                       | 0.1<br>(0.1 to 0.2)                                | 0.1<br>(<0.05 to 0.1)                        | --                                      | --                                               |
| Klinefelter syndrome                                     | 1.3<br>(0.8 to 1.8)                                | <0.05<br>(<0.05 to <0.05)                    | 2.0%<br>(-7.0% to 12.0%)                | 2.2%<br>(-6.8% to 12.2%)                         |
| Encephalitis                                             | <0.05<br>(<0.05 to <0.05)                          | <0.05<br>(<0.05 to <0.05)                    | -5.7%<br>(-31.5% to 4.4%)               | -5.5%<br>(-31.4% to 4.6%)                        |
| Alcohol use disorders                                    | 0.2<br>(0.2 to 0.3)                                | <0.05<br>(<0.05 to <0.05)                    | 0.8%<br>(-5.6% to 6.5%)                 | 1.0%<br>(-5.4% to 6.7%)                          |
| Tetanus                                                  | <0.05<br>(<0.05 to 0.1)                            | <0.05<br>(<0.05 to <0.05)                    | -16.9%<br>(-42.2% to 18.7%)             | -16.7%<br>(-42.1% to 18.9%)                      |
| Digestive congenital anomalies                           | <0.05<br>(<0.05 to <0.05)                          | <0.05<br>(<0.05 to <0.05)                    | -5.1%<br>(-8.0% to -2.4%)               | -4.9%<br>(-7.8% to -2.2%)                        |
| Pneumococcal meningitis                                  | <0.05<br>(<0.05 to <0.05)                          | <0.05<br>(<0.05 to <0.05)                    | -24.1%<br>(-34.3% to -12.9%)            | -24.0%<br>(-34.2% to -12.7%)                     |
| Other meningitis                                         | <0.05<br>(<0.05 to <0.05)                          | <0.05<br>(<0.05 to <0.05)                    | 24.8%<br>(2.6% to 45.9%)                | 25.0%<br>(2.8% to 46.2%)                         |
| H influenzae type B meningitis                           | <0.05<br>(<0.05 to <0.05)                          | <0.05<br>(<0.05 to <0.05)                    | -44.3%<br>(-54.8% to -34.5%)            | -44.2%<br>(-54.7% to -34.4%)                     |
| Meningococcal infection                                  | <0.05<br>(<0.05 to <0.05)                          | <0.05<br>(<0.05 to <0.05)                    | -7.0%<br>(-17.3% to 2.6%)               | -6.8%<br>(-17.1% to 2.8%)                        |
| Malaria                                                  | <0.05<br>(<0.05 to <0.05)                          | <0.05<br>(<0.05 to <0.05)                    | -3.6%<br>(-17.3% to 9.3%)               | -3.5%<br>(-17.2% to 9.5%)                        |
| <b>All causes</b>                                        | <b>160.6</b><br><b>(136.3 to 195.6)</b>            | <b>24.7</b><br><b>(16.0 to 41.1)</b>         | <b>-3.6%</b><br><b>(-5.5% to -1.3%)</b> | <b>-3.4%</b><br><b>(-5.4% to -1.2%)</b>          |

SR Table 13b: Global prevalence and years lived with disability (YLDs) for 2016, percentage change of YLD counts and rates between 2006 and 2016 of developmental intellectual disability by cause, ages 28-364 days

| Cause                                                    | Prevalence in thousands (95% uncertainty interval) | YLDs in thousands (95% uncertainty interval) |                                                   |                                                  |
|----------------------------------------------------------|----------------------------------------------------|----------------------------------------------|---------------------------------------------------|--------------------------------------------------|
|                                                          |                                                    | 2016                                         | Percentage change in counts between 2006 and 2016 | Percentage change in rates between 2006 and 2016 |
| Neonatal sepsis and other neonatal infections            | 301.0<br>(132.6 to 669.8)                          | 145.4<br>(59.1 to 342.9)                     | 5.6%<br>(0.2% to 12.5%)                           | 4.8%<br>(-0.6% to 11.5%)                         |
| Other chromosomal abnormalities                          | 249.0<br>(215.0 to 288.6)                          | 47.8<br>(32.5 to 67.0)                       | -3.1%<br>(-6.7% to 0.6%)                          | -3.9%<br>(-7.5% to -0.3%)                        |
| Congenital heart anomalies                               | 889.6<br>(728.5 to 1,092.1)                        | 45.6<br>(19.9 to 78.1)                       | -1.3%<br>(-4.1% to 1.6%)                          | -2.1%<br>(-4.9% to 0.8%)                         |
| Autism                                                   | 116.3<br>(77.5 to 164.5)                           | 32.0<br>(17.6 to 52.1)                       | 0.9%<br>(-3.5% to 5.0%)                           | 0.1%<br>(-4.3% to 4.1%)                          |
| Neonatal preterm birth complications                     | 156.9<br>(109.5 to 211.2)                          | 24.1<br>(14.1 to 37.4)                       | -15.4%<br>(-23.5% to -7.9%)                       | -16.1%<br>(-24.2% to -8.7%)                      |
| Neural tube defects                                      | 49.4<br>(40.2 to 60.3)                             | 18.3<br>(12.2 to 25.8)                       | 3.4%<br>(-2.5% to 9.0%)                           | 2.5%<br>(-3.3% to 8.1%)                          |
| Idiopathic developmental intellectual disability         | 335.3<br>(115.6 to 615.5)                          | 14.2<br>(4.1 to 30.5)                        | -11.4%<br>(-16.2% to -7.1%)                       | -12.1%<br>(-16.9% to -7.9%)                      |
| Neonatal encephalopathy due to birth asphyxia and trauma | 59.9<br>(36.2 to 87.8)                             | 7.7<br>(3.9 to 13.4)                         | -5.4%<br>(-17.8% to 7.7%)                         | -6.2%<br>(-18.5% to 6.8%)                        |
| Down's syndrome                                          | 54.3<br>(46.1 to 63.8)                             | 4.8<br>(3.2 to 6.9)                          | 1.4%<br>(-2.2% to 5.1%)                           | 0.6%<br>(-3.0% to 4.2%)                          |
| Haemolytic disease and other neonatal jaundice           | 3.1<br>(1.7 to 5.0)                                | 1.3<br>(0.7 to 2.3)                          | -7.9%<br>(-18.5% to 1.5%)                         | -8.6%<br>(-19.2% to 0.7%)                        |
| Zika virus disease                                       | 2.2<br>(1.5 to 4.7)                                | 1.3<br>(0.8 to 2.4)                          | --                                                | --                                               |
| Klinefelter syndrome                                     | 19.8<br>(12.9 to 27.5)                             | 0.3<br>(0.1 to 0.5)                          | 2.4%<br>(-7.0% to 11.7%)                          | 1.6%<br>(-7.8% to 10.8%)                         |
| Pneumococcal meningitis                                  | 4.6<br>(3.2 to 6.5)                                | 0.2<br>(0.1 to 0.3)                          | -18.5%<br>(-27.4% to -8.3%)                       | -19.2%<br>(-28.0% to -9.0%)                      |
| Other meningitis                                         | 4.7<br>(2.3 to 7.2)                                | 0.2<br>(0.1 to 0.3)                          | 31.1%<br>(9.8% to 51.0%)                          | 30.1%<br>(8.9% to 49.8%)                         |
| Alcohol use disorders                                    | 3.7<br>(2.9 to 4.4)                                | 0.2<br>(0.1 to 0.2)                          | 2.6%<br>(-3.2% to 7.9%)                           | 1.8%<br>(-4.0% to 7.1%)                          |
| H influenzae type B meningitis                           | 2.6<br>(1.4 to 4.3)                                | 0.1<br>(0.1 to 0.2)                          | -40.7%<br>(-50.2% to -31.6%)                      | -41.2%<br>(-50.7% to -32.1%)                     |
| Encephalitis                                             | 2.3<br>(0.9 to 4.4)                                | 0.1<br>(<0.05 to 0.1)                        | -16.2%<br>(-22.5% to -9.3%)                       | -16.9%<br>(-23.2% to -10.1%)                     |
| Malaria                                                  | 0.2<br>(0.1 to 0.3)                                | 0.1<br>(<0.05 to 0.1)                        | -5.1%<br>(-16.4% to 6.3%)                         | -5.8%<br>(-17.1% to 5.5%)                        |
| Meningococcal infection                                  | 1.9<br>(0.8 to 3.2)                                | 0.1<br>(<0.05 to 0.1)                        | -2.2%<br>(-11.7% to 7.7%)                         | -3.0%<br>(-12.4% to 6.9%)                        |
| Tetanus                                                  | 1.2<br>(0.7 to 1.6)                                | <0.05<br>(<0.05 to 0.1)                      | -12.4%<br>(-42.7% to 32.8%)                       | -13.2%<br>(-43.2% to 31.7%)                      |
| Digestive congenital anomalies                           | 0.7<br>(0.5 to 0.9)                                | <0.05<br>(<0.05 to 0.1)                      | -3.4%<br>(-5.9% to -1.0%)                         | -4.1%<br>(-6.6% to -1.8%)                        |
| <b>All causes</b>                                        | <b>2,258.6</b><br><b>(1,919.1 to 2,719.5)</b>      | <b>343.8</b><br><b>(236.7 to 556.0)</b>      | <b>0.3%</b><br><b>(-2.6% to 3.3%)</b>             | <b>-0.5%</b><br><b>(-3.4% to 2.5%)</b>           |



SR Table 13b: Global prevalence and years lived with disability (YLDs) for 2016, percentage change of YLD counts and rates between 2006 and 2016 of developmental intellectual disability by cause, ages 1-4 years

| Cause                                                    | Prevalence in thousands (95% uncertainty interval) | YLDs in thousands (95% uncertainty interval) |                                       |                                                  |
|----------------------------------------------------------|----------------------------------------------------|----------------------------------------------|---------------------------------------|--------------------------------------------------|
|                                                          |                                                    | 2016                                         | 2016                                  | Percentage change in rates between 2006 and 2016 |
| Neonatal sepsis and other neonatal infections            | 783.2<br>(321.9 to 1,793.0)                        | 357.7<br>(130.0 to 865.5)                    | 25.5%<br>(16.5% to 38.8%)             | 18.9%<br>(10.3% to 31.4%)                        |
| Autism                                                   | 800.5<br>(620.5 to 1,003.4)                        | 219.1<br>(131.9 to 336.3)                    | 5.7%<br>(2.4% to 9.1%)                | 0.1%<br>(-3.0% to 3.3%)                          |
| Other chromosomal abnormalities                          | 989.3<br>(866.0 to 1,136.6)                        | 191.5<br>(130.9 to 265.9)                    | 2.0%<br>(-1.8% to 5.7%)               | -3.4%<br>(-7.0% to 0.1%)                         |
| Neonatal preterm birth complications                     | 942.2<br>(666.4 to 1,242.7)                        | 146.6<br>(86.7 to 223.8)                     | -9.9%<br>(-17.5% to -2.1%)            | -14.6%<br>(-21.8% to -7.3%)                      |
| Idiopathic developmental intellectual disability         | 3,277.7<br>(1,484.6 to 5,212.9)                    | 135.4<br>(50.9 to 255.7)                     | -2.5%<br>(-6.9% to 0.5%)              | -7.7%<br>(-11.8% to -4.8%)                       |
| Congenital heart anomalies                               | 2,177.2<br>(1,816.9 to 2,570.9)                    | 111.2<br>(52.8 to 183.1)                     | 2.8%<br>(-0.4% to 5.7%)               | -2.6%<br>(-5.6% to 0.1%)                         |
| Neural tube defects                                      | 149.4<br>(116.3 to 190.0)                          | 49.5<br>(31.9 to 72.4)                       | 9.5%<br>(5.2% to 14.4%)               | 3.7%<br>(-0.3% to 8.4%)                          |
| Neonatal encephalopathy due to birth asphyxia and trauma | 307.1<br>(173.2 to 485.4)                          | 32.6<br>(10.7 to 76.4)                       | 17.9%<br>(-0.9% to 48.2%)             | 11.7%<br>(-6.2% to 40.4%)                        |
| Down's syndrome                                          | 183.1<br>(159.5 to 210.7)                          | 16.3<br>(10.9 to 23.1)                       | 7.2%<br>(4.0% to 10.3%)               | 1.6%<br>(-1.5% to 4.5%)                          |
| Haemolytic disease and other neonatal jaundice           | 24.4<br>(14.0 to 36.6)                             | 10.5<br>(5.6 to 16.9)                        | -3.8%<br>(-13.7% to 5.4%)             | -8.8%<br>(-18.3% to -0.2%)                       |
| Pneumococcal meningitis                                  | 79.5<br>(58.4 to 104.3)                            | 6.0<br>(3.4 to 9.2)                          | -6.8%<br>(-18.9% to 4.2%)             | -11.7%<br>(-23.2% to -1.3%)                      |
| Iodine deficiency                                        | 17.3<br>(10.7 to 23.0)                             | 6.0<br>(3.1 to 9.0)                          | -30.4%<br>(-40.6% to -18.8%)          | -34.1%<br>(-43.8% to -23.1%)                     |
| Zika virus disease                                       | 9.5<br>(6.4 to 20.5)                               | 5.6<br>(3.3 to 10.1)                         | --                                    | --                                               |
| Malaria                                                  | 15.1<br>(8.4 to 22.0)                              | 5.5<br>(2.8 to 8.7)                          | 3.8%<br>(-24.9% to 34.4%)             | -1.7%<br>(-28.9% to 27.3%)                       |
| Other meningitis                                         | 65.8<br>(36.8 to 98.9)                             | 3.8<br>(2.1 to 6.0)                          | 26.8%<br>(9.2% to 44.6%)              | 20.1%<br>(3.4% to 37.0%)                         |
| H influenzae type B meningitis                           | 39.8<br>(24.7 to 59.0)                             | 3.0<br>(1.7 to 4.7)                          | -29.4%<br>(-39.9% to -19.2%)          | -33.2%<br>(-43.0% to -23.5%)                     |
| Encephalitis                                             | 60.5<br>(27.4 to 109.0)                            | 2.9<br>(1.6 to 4.7)                          | -13.2%<br>(-21.2% to -5.6%)           | -17.7%<br>(-25.3% to -10.6%)                     |
| Meningococcal infection                                  | 27.2<br>(14.3 to 43.2)                             | 1.8<br>(1.0 to 2.9)                          | 3.6%<br>(-7.1% to 13.5%)              | -1.9%<br>(-12.0% to 7.5%)                        |
| Klinefelter syndrome                                     | 79.7<br>(51.9 to 111.0)                            | 1.0<br>(0.5 to 2.0)                          | 6.8%<br>(-2.3% to 16.4%)              | 1.2%<br>(-7.5% to 10.2%)                         |
| Alcohol use disorders                                    | 19.7<br>(17.0 to 21.8)                             | 1.0<br>(0.6 to 1.4)                          | 7.0%<br>(2.5% to 11.0%)               | 1.4%<br>(-2.9% to 5.1%)                          |
| Digestive congenital anomalies                           | 6.0<br>(4.6 to 7.6)                                | 0.3<br>(0.2 to 0.5)                          | 1.3%<br>(-0.9% to 3.5%)               | -4.0%<br>(-6.2% to -2.0%)                        |
| Tetanus                                                  | 5.9<br>(3.7 to 8.1)                                | 0.2<br>(0.1 to 0.3)                          | 1.1%<br>(-36.1% to 59.1%)             | -4.2%<br>(-39.5% to 50.7%)                       |
| <b>All causes</b>                                        | <b>10,060.2</b><br><b>(8,065.7 to 12,271.8)</b>    | <b>1,307.7</b><br><b>(937.1 to 1,897.6)</b>  | <b>6.8%</b><br><b>(3.5% to 11.6%)</b> | <b>1.2%</b><br><b>(-2.0% to 5.7%)</b>            |

SR Table 13b: Global prevalence and years lived with disability (YLDs) for 2016, percentage change of YLD counts and rates between 2006 and 2016 of developmental intellectual disability by cause, ages 5-9 years

| Cause                                                    | Prevalence in thousands (95% uncertainty interval) | YLDs in thousands (95% uncertainty interval)  |                                                   |                                                  |
|----------------------------------------------------------|----------------------------------------------------|-----------------------------------------------|---------------------------------------------------|--------------------------------------------------|
|                                                          |                                                    | 2016                                          | Percentage change in counts between 2006 and 2016 | Percentage change in rates between 2006 and 2016 |
| Idiopathic developmental intellectual disability         | 10,735.9<br>(6,519.2 to 15,306.6)                  | 425.6<br>(196.6 to 737.0)                     | -0.2%<br>(-4.4% to 2.7%)                          | -7.3%<br>(-11.2% to -4.6%)                       |
| Autism                                                   | 1,426.2<br>(1,165.3 to 1,731.4)                    | 389.1<br>(245.6 to 589.1)                     | 7.6%<br>(4.4% to 10.6%)                           | -0.1%<br>(-3.0% to 2.7%)                         |
| Neonatal sepsis and other neonatal infections            | 765.9<br>(264.7 to 1,843.6)                        | 328.4<br>(98.5 to 837.8)                      | 32.9%<br>(22.2% to 50.0%)                         | 23.4%<br>(13.5% to 39.3%)                        |
| Neonatal preterm birth complications                     | 1,678.2<br>(1,218.1 to 2,168.2)                    | 316.9<br>(198.4 to 455.3)                     | 4.4%<br>(-7.9% to 16.6%)                          | -3.1%<br>(-14.5% to 8.3%)                        |
| Other chromosomal abnormalities                          | 1,109.6<br>(962.9 to 1,280.6)                      | 188.2<br>(130.9 to 257.8)                     | 7.7%<br>(3.9% to 11.7%)                           | 0.1%<br>(-3.5% to 3.7%)                          |
| Congenital heart anomalies                               | 1,692.8<br>(1,466.1 to 1,954.5)                    | 101.4<br>(41.3 to 174.4)                      | 5.9%<br>(2.5% to 9.3%)                            | -1.7%<br>(-4.8% to 1.5%)                         |
| Neural tube defects                                      | 171.4<br>(131.7 to 220.7)                          | 57.6<br>(36.7 to 84.0)                        | 9.9%<br>(5.1% to 15.4%)                           | 2.1%<br>(-2.4% to 7.2%)                          |
| Neonatal encephalopathy due to birth asphyxia and trauma | 445.9<br>(248.8 to 719.9)                          | 54.2<br>(13.7 to 141.7)                       | 32.4%<br>(10.1% to 68.8%)                         | 23.0%<br>(2.3% to 56.8%)                         |
| Iodine deficiency                                        | 151.7<br>(103.7 to 196.9)                          | 50.1<br>(29.6 to 74.1)                        | -29.7%<br>(-36.8% to -21.4%)                      | -34.7%<br>(-41.3% to -27.0%)                     |
| Malaria                                                  | 64.8<br>(52.1 to 77.9)                             | 24.8<br>(17.1 to 33.8)                        | 14.4%<br>(0.9% to 28.9%)                          | 6.2%<br>(-6.3% to 19.7%)                         |
| Haemolytic disease and other neonatal jaundice           | 55.1<br>(38.2 to 71.5)                             | 23.8<br>(14.4 to 34.6)                        | 6.3%<br>(-3.4% to 13.7%)                          | -1.3%<br>(-10.3% to 5.6%)                        |
| Down's syndrome                                          | 212.7<br>(185.8 to 245.7)                          | 19.0<br>(12.7 to 26.9)                        | 7.1%<br>(4.0% to 10.3%)                           | -0.5%<br>(-3.4% to 2.4%)                         |
| Pneumococcal meningitis                                  | 180.7<br>(137.4 to 233.0)                          | 18.4<br>(11.1 to 27.7)                        | 1.1%<br>(-10.5% to 12.3%)                         | -6.1%<br>(-16.9% to 4.3%)                        |
| Encephalitis                                             | 219.8<br>(113.2 to 372.4)                          | 15.2<br>(9.1 to 22.5)                         | -6.3%<br>(-17.2% to 3.9%)                         | -13.0%<br>(-23.1% to -3.5%)                      |
| Other meningitis                                         | 134.1<br>(80.1 to 196.1)                           | 11.4<br>(6.7 to 17.0)                         | 27.1%<br>(13.2% to 40.3%)                         | 18.1%<br>(5.1% to 30.3%)                         |
| H influenzae type B meningitis                           | 82.2<br>(55.2 to 113.9)                            | 9.0<br>(5.4 to 13.4)                          | -23.0%<br>(-32.9% to -13.5%)                      | -28.5%<br>(-37.7% to -19.6%)                     |
| Meningococcal infection                                  | 54.1<br>(30.8 to 81.7)                             | 5.2<br>(3.2 to 7.9)                           | 9.8%<br>(1.4% to 16.9%)                           | 2.0%<br>(-5.9% to 8.6%)                          |
| Zika virus disease                                       | 4.6<br>(3.0 to 8.0)                                | 2.7<br>(1.5 to 4.8)                           | --                                                | --                                               |
| Alcohol use disorders                                    | 28.1<br>(25.6 to 30.7)                             | 1.5<br>(1.0 to 2.3)                           | 10.3%<br>(6.5% to 12.7%)                          | 2.4%<br>(-1.1% to 4.7%)                          |
| Klinefelter syndrome                                     | 93.0<br>(60.3 to 128.8)                            | 1.2<br>(0.6 to 2.3)                           | 8.2%<br>(-1.2% to 18.2%)                          | 0.5%<br>(-8.2% to 9.8%)                          |
| Digestive congenital anomalies                           | 9.2<br>(7.2 to 11.6)                               | 0.5<br>(0.3 to 0.8)                           | 3.6%<br>(1.5% to 5.5%)                            | -3.8%<br>(-5.7% to -2.0%)                        |
| Tetanus                                                  | 8.3<br>(5.3 to 11.3)                               | 0.3<br>(0.1 to 0.5)                           | 4.6%<br>(-32.3% to 62.1%)                         | -2.8%<br>(-37.2% to 50.6%)                       |
| <b>All causes</b>                                        | <b>19,324.3</b><br><b>(14,750.6 to 23,994.5)</b>   | <b>2,044.5</b><br><b>(1,490.9 to 2,776.1)</b> | <b>7.7%</b><br><b>(4.6% to 12.2%)</b>             | <b>-0.0%</b><br><b>(-2.8% to 4.2%)</b>           |

SR Table 13b: Global prevalence and years lived with disability (YLDs) for 2016, percentage change of YLD counts and rates between 2006 and 2016 of developmental intellectual disability by cause, ages 10-14 years

| Cause                                                    | Prevalence in thousands (95% uncertainty interval) | YLDs in thousands (95% uncertainty interval)  |                                       |                                                   |
|----------------------------------------------------------|----------------------------------------------------|-----------------------------------------------|---------------------------------------|---------------------------------------------------|
|                                                          |                                                    | 2016                                          | 2016                                  | Percentage change in counts between 2006 and 2016 |
| Idiopathic developmental intellectual disability         | 14,318.2<br>(8,889.3 to 19,655.1)                  | 559.6<br>(260.8 to 960.6)                     | -4.9%<br>(-8.4% to -2.5%)             | -5.7%<br>(-9.2% to -3.3%)                         |
| Autism                                                   | 1,491.6<br>(1,254.5 to 1,785.8)                    | 404.6<br>(261.4 to 608.5)                     | 1.5%<br>(-1.2% to 4.2%)               | 0.6%<br>(-2.0% to 3.4%)                           |
| Neonatal preterm birth complications                     | 1,770.0<br>(1,296.6 to 2,278.4)                    | 361.1<br>(227.6 to 523.6)                     | 3.0%<br>(-10.7% to 18.3%)             | 2.1%<br>(-11.4% to 17.3%)                         |
| Neonatal sepsis and other neonatal infections            | 663.2<br>(212.6 to 1,610.4)                        | 273.7<br>(75.9 to 718.4)                      | 26.0%<br>(16.9% to 40.7%)             | 25.0%<br>(15.9% to 39.6%)                         |
| Other chromosomal abnormalities                          | 924.1<br>(794.9 to 1,073.8)                        | 114.6<br>(79.7 to 154.6)                      | 2.9%<br>(-0.4% to 6.5%)               | 2.1%<br>(-1.3% to 5.6%)                           |
| Iodine deficiency                                        | 328.2<br>(223.7 to 413.3)                          | 107.8<br>(63.9 to 157.9)                      | -12.8%<br>(-19.7% to -5.9%)           | -13.5%<br>(-20.3% to -6.6%)                       |
| Congenital heart anomalies                               | 1,153.7<br>(1,008.8 to 1,308.8)                    | 69.1<br>(28.8 to 118.7)                       | -2.9%<br>(-6.0% to 0.3%)              | -3.7%<br>(-6.8% to -0.6%)                         |
| Neonatal encephalopathy due to birth asphyxia and trauma | 437.0<br>(247.2 to 723.3)                          | 59.5<br>(15.4 to 158.9)                       | 26.4%<br>(8.6% to 50.4%)              | 25.4%<br>(7.7% to 49.1%)                          |
| Neural tube defects                                      | 153.4<br>(116.4 to 200.3)                          | 52.3<br>(32.8 to 77.2)                        | 5.4%<br>(1.1% to 9.9%)                | 4.5%<br>(0.3% to 9.0%)                            |
| Malaria                                                  | 101.1<br>(81.8 to 121.6)                           | 43.4<br>(29.1 to 58.9)                        | 12.0%<br>(0.5% to 25.2%)              | 11.0%<br>(-0.3% to 24.2%)                         |
| Encephalitis                                             | 345.3<br>(191.7 to 571.3)                          | 30.4<br>(19.3 to 43.7)                        | -13.4%<br>(-21.2% to -6.0%)           | -14.1%<br>(-21.8% to -6.8%)                       |
| Haemolytic disease and other neonatal jaundice           | 63.0<br>(45.6 to 78.2)                             | 28.0<br>(17.4 to 39.5)                        | 3.8%<br>(-3.0% to 9.4%)               | 2.9%<br>(-3.8% to 8.5%)                           |
| Pneumococcal meningitis                                  | 211.7<br>(164.0 to 267.7)                          | 24.1<br>(14.9 to 35.6)                        | 0.7%<br>(-9.7% to 11.7%)              | -0.1%<br>(-10.4% to 10.8%)                        |
| Down's syndrome                                          | 200.0<br>(175.0 to 231.1)                          | 17.8<br>(12.0 to 25.2)                        | -0.6%<br>(-3.8% to 2.4%)              | -1.4%<br>(-4.6% to 1.6%)                          |
| Other meningitis                                         | 149.1<br>(92.5 to 211.7)                           | 14.7<br>(8.9 to 21.8)                         | 22.0%<br>(11.5% to 31.9%)             | 21.0%<br>(10.6% to 30.8%)                         |
| H influenzae type B meningitis                           | 89.5<br>(63.6 to 121.4)                            | 11.3<br>(6.7 to 16.4)                         | -21.5%<br>(-30.1% to -13.7%)          | -22.1%<br>(-30.7% to -14.4%)                      |
| Meningococcal infection                                  | 57.9<br>(34.2 to 86.0)                             | 6.4<br>(3.9 to 9.6)                           | 8.8%<br>(1.8% to 14.4%)               | 7.9%<br>(1.0% to 13.5%)                           |
| Alcohol use disorders                                    | 27.9<br>(25.6 to 30.2)                             | 1.6<br>(1.0 to 2.3)                           | 1.3%<br>(-2.1% to 4.1%)               | 0.5%<br>(-2.9% to 3.2%)                           |
| Klinefelter syndrome                                     | 84.1<br>(54.6 to 116.2)                            | 1.1<br>(0.5 to 2.1)                           | 2.9%<br>(-5.2% to 12.8%)              | 2.1%<br>(-6.0% to 11.8%)                          |
| Digestive congenital anomalies                           | 12.2<br>(9.5 to 15.2)                              | 0.6<br>(0.4 to 1.0)                           | -6.3%<br>(-8.2% to -4.4%)             | -7.1%<br>(-9.0% to -5.1%)                         |
| Tetanus                                                  | 8.1<br>(5.2 to 11.0)                               | 0.3<br>(0.1 to 0.5)                           | 8.3%<br>(-23.6% to 50.2%)             | 7.4%<br>(-24.2% to 49.0%)                         |
| Zika virus disease                                       | 0.2<br>(0.1 to 0.3)                                | 0.1<br>(0.1 to 0.2)                           | --                                    | --                                                |
| <b>All causes</b>                                        | <b>22,589.4</b><br><b>(17,173.4 to 27,942.0)</b>   | <b>2,182.0</b><br><b>(1,592.4 to 2,917.8)</b> | <b>2.1%</b><br><b>(-0.6% to 6.0%)</b> | <b>1.3%</b><br><b>(-1.4% to 5.1%)</b>             |

SR Table 13b: Global prevalence and years lived with disability (YLDs) for 2016, percentage change of YLD counts and rates between 2006 and 2016 of developmental intellectual disability by cause, ages 15-19 years

| Cause                                                    | Prevalence in thousands (95% uncertainty interval) | YLDs in thousands (95% uncertainty interval)  |                                                   |                                                  |
|----------------------------------------------------------|----------------------------------------------------|-----------------------------------------------|---------------------------------------------------|--------------------------------------------------|
|                                                          |                                                    | 2016                                          | Percentage change in counts between 2006 and 2016 | Percentage change in rates between 2006 and 2016 |
| Idiopathic developmental intellectual disability         | 13,913.4<br>(8,840.6 to 19,167.8)                  | 539.9<br>(259.0 to 930.0)                     | -10.1%<br>(-13.5% to -8.0%)                       | -4.9%<br>(-8.4% to -2.6%)                        |
| Autism                                                   | 1,417.7<br>(1,189.8 to 1,701.5)                    | 381.7<br>(245.4 to 569.3)                     | -4.8%<br>(-7.2% to -2.2%)                         | 0.8%<br>(-1.7% to 3.5%)                          |
| Neonatal preterm birth complications                     | 1,689.6<br>(1,245.9 to 2,172.0)                    | 342.1<br>(217.4 to 499.9)                     | -1.0%<br>(-15.1% to 14.0%)                        | 4.8%<br>(-10.2% to 20.7%)                        |
| Neonatal sepsis and other neonatal infections            | 593.0<br>(199.0 to 1,429.7)                        | 240.0<br>(67.0 to 631.0)                      | 18.4%<br>(10.1% to 30.5%)                         | 25.3%<br>(16.6% to 38.2%)                        |
| Iodine deficiency                                        | 360.0<br>(245.3 to 452.2)                          | 117.2<br>(68.8 to 171.4)                      | -5.8%<br>(-12.5% to 1.1%)                         | -0.3%<br>(-7.4% to 7.0%)                         |
| Other chromosomal abnormalities                          | 840.9<br>(716.3 to 980.7)                          | 79.1<br>(53.2 to 110.7)                       | -5.2%<br>(-8.3% to -1.9%)                         | 0.4%<br>(-2.9% to 3.9%)                          |
| Neonatal encephalopathy due to birth asphyxia and trauma | 405.5<br>(232.1 to 664.4)                          | 56.5<br>(15.7 to 148.7)                       | 16.3%<br>(2.3% to 34.3%)                          | 23.1%<br>(8.3% to 42.1%)                         |
| Congenital heart anomalies                               | 894.8<br>(791.8 to 1,005.8)                        | 53.4<br>(22.6 to 92.2)                        | -12.3%<br>(-15.4% to -9.1%)                       | -7.1%<br>(-10.5% to -3.8%)                       |
| Malaria                                                  | 113.9<br>(89.1 to 136.8)                           | 52.6<br>(34.3 to 71.3)                        | 9.6%<br>(-1.9% to 21.0%)                          | 16.0%<br>(3.9% to 28.1%)                         |
| Neural tube defects                                      | 140.6<br>(106.3 to 184.8)                          | 48.6<br>(31.0 to 72.0)                        | 1.0%<br>(-3.5% to 5.6%)                           | 6.9%<br>(2.2% to 11.8%)                          |
| Encephalitis                                             | 433.3<br>(246.3 to 705.9)                          | 44.8<br>(28.0 to 63.4)                        | -20.6%<br>(-28.0% to -13.7%)                      | -15.9%<br>(-23.8% to -8.7%)                      |
| Haemolytic disease and other neonatal jaundice           | 60.4<br>(43.8 to 74.8)                             | 27.0<br>(16.9 to 37.8)                        | -0.9%<br>(-7.5% to 4.1%)                          | 4.9%<br>(-2.1% to 10.2%)                         |
| Pneumococcal meningitis                                  | 221.1<br>(173.0 to 275.2)                          | 25.5<br>(15.7 to 37.0)                        | -2.6%<br>(-12.9% to 7.3%)                         | 3.1%<br>(-7.8% to 13.6%)                         |
| Down's syndrome                                          | 192.9<br>(168.6 to 222.8)                          | 17.2<br>(11.7 to 24.2)                        | -7.3%<br>(-10.2% to -4.1%)                        | -1.8%<br>(-5.0% to 1.5%)                         |
| Other meningitis                                         | 151.7<br>(95.0 to 213.9)                           | 15.4<br>(9.6 to 22.7)                         | 15.6%<br>(6.7% to 24.4%)                          | 22.3%<br>(12.9% to 31.6%)                        |
| H influenzae type B meningitis                           | 87.3<br>(61.9 to 118.4)                            | 11.4<br>(6.9 to 16.5)                         | -22.2%<br>(-29.8% to -15.8%)                      | -17.6%<br>(-25.7% to -10.8%)                     |
| Meningococcal infection                                  | 56.7<br>(33.6 to 84.0)                             | 6.4<br>(3.9 to 9.6)                           | 4.9%<br>(-0.7% to 9.8%)                           | 11.1%<br>(5.1% to 16.2%)                         |
| Alcohol use disorders                                    | 26.8<br>(24.5 to 28.9)                             | 1.5<br>(1.0 to 2.2)                           | -6.7%<br>(-10.0% to -3.9%)                        | -1.3%<br>(-4.7% to 1.8%)                         |
| Klinefelter syndrome                                     | 77.1<br>(50.0 to 106.5)                            | 1.0<br>(0.5 to 1.9)                           | -2.4%<br>(-10.8% to 6.8%)                         | 3.4%<br>(-5.6% to 13.1%)                         |
| Digestive congenital anomalies                           | 12.0<br>(9.4 to 14.9)                              | 0.6<br>(0.4 to 1.0)                           | -14.9%<br>(-16.9% to -12.9%)                      | -10.0%<br>(-12.0% to -7.8%)                      |
| Tetanus                                                  | 7.7<br>(4.9 to 10.4)                               | 0.2<br>(0.1 to 0.4)                           | 12.9%<br>(-29.1% to 76.1%)                        | 19.5%<br>(-25.0% to 86.4%)                       |
| <b>All causes</b>                                        | <b>21,696.5</b><br><b>(16,377.0 to 26,840.1)</b>   | <b>2,062.3</b><br><b>(1,499.0 to 2,746.6)</b> | <b>-3.2%</b><br><b>(-5.5% to 0.2%)</b>            | <b>2.5%</b><br><b>(-0.0% to 6.1%)</b>            |

SR Table 13b: Global prevalence and years lived with disability (YLDs) for 2016, percentage change of YLD counts and rates between 2006 and 2016 of developmental intellectual disability by cause, ages 20-24 years

| Cause                                                    | Prevalence in thousands (95% uncertainty interval) | YLDs in thousands (95% uncertainty interval)  |                                                   |                                                  |
|----------------------------------------------------------|----------------------------------------------------|-----------------------------------------------|---------------------------------------------------|--------------------------------------------------|
|                                                          |                                                    | 2016                                          | Percentage change in counts between 2006 and 2016 | Percentage change in rates between 2006 and 2016 |
| Idiopathic developmental intellectual disability         | 13,182.9<br>(8,414.5 to 18,141.6)                  | 519.0<br>(251.3 to 888.7)                     | -2.2%<br>(-5.7% to 0.1%)                          | -6.7%<br>(-10.1% to -4.5%)                       |
| Autism                                                   | 1,393.4<br>(1,171.5 to 1,677.9)                    | 374.6<br>(241.4 to 557.0)                     | 5.2%<br>(2.5% to 8.1%)                            | 0.3%<br>(-2.2% to 3.1%)                          |
| Neonatal preterm birth complications                     | 1,704.5<br>(1,258.3 to 2,193.2)                    | 343.2<br>(217.1 to 501.6)                     | 9.8%<br>(-5.9% to 27.5%)                          | 4.7%<br>(-10.2% to 21.6%)                        |
| Neonatal sepsis and other neonatal infections            | 556.8<br>(195.9 to 1,325.7)                        | 220.5<br>(64.9 to 578.0)                      | 25.7%<br>(16.1% to 39.5%)                         | 19.9%<br>(10.7% to 33.1%)                        |
| Iodine deficiency                                        | 349.2<br>(240.8 to 431.1)                          | 113.2<br>(68.1 to 163.3)                      | -2.6%<br>(-9.0% to 3.8%)                          | -7.1%<br>(-13.2% to -0.9%)                       |
| Neonatal encephalopathy due to birth asphyxia and trauma | 401.5<br>(235.8 to 647.3)                          | 60.8<br>(19.6 to 150.9)                       | 21.8%<br>(9.6% to 36.5%)                          | 16.2%<br>(4.6% to 30.2%)                         |
| Encephalitis                                             | 516.9<br>(301.8 to 832.3)                          | 57.3<br>(36.5 to 81.2)                        | -11.3%<br>(-19.1% to -3.7%)                       | -15.4%<br>(-22.9% to -8.2%)                      |
| Malaria                                                  | 103.8<br>(79.9 to 124.9)                           | 49.9<br>(32.8 to 67.2)                        | 20.8%<br>(8.6% to 32.4%)                          | 15.2%<br>(3.6% to 26.3%)                         |
| Congenital heart anomalies                               | 820.9<br>(731.0 to 918.5)                          | 49.0<br>(20.6 to 84.5)                        | 2.6%<br>(-0.9% to 6.1%)                           | -2.2%<br>(-5.5% to 1.2%)                         |
| Neural tube defects                                      | 133.0<br>(99.7 to 176.3)                           | 46.4<br>(29.3 to 69.2)                        | 7.5%<br>(3.2% to 12.3%)                           | 2.5%<br>(-1.6% to 7.1%)                          |
| Haemolytic disease and other neonatal jaundice           | 62.6<br>(46.2 to 76.3)                             | 28.0<br>(17.6 to 38.9)                        | 8.7%<br>(1.5% to 14.5%)                           | 3.7%<br>(-3.2% to 9.2%)                          |
| Pneumococcal meningitis                                  | 225.9<br>(176.0 to 280.2)                          | 26.5<br>(16.3 to 38.2)                        | 1.1%<br>(-8.9% to 10.2%)                          | -3.6%<br>(-13.1% to 5.2%)                        |
| Other chromosomal abnormalities                          | 283.9<br>(244.9 to 330.6)                          | 25.5<br>(16.8 to 35.4)                        | 2.3%<br>(-1.9% to 6.5%)                           | -2.4%<br>(-6.4% to 1.6%)                         |
| Down's syndrome                                          | 195.6<br>(170.6 to 225.1)                          | 17.4<br>(11.7 to 24.6)                        | 0.5%<br>(-3.3% to 4.2%)                           | -4.1%<br>(-7.8% to -0.6%)                        |
| Other meningitis                                         | 152.6<br>(96.7 to 213.8)                           | 16.0<br>(9.8 to 23.8)                         | 22.3%<br>(12.7% to 31.3%)                         | 16.6%<br>(7.5% to 25.3%)                         |
| H influenzae type B meningitis                           | 83.9<br>(60.9 to 112.3)                            | 11.3<br>(6.9 to 16.3)                         | -17.3%<br>(-24.6% to -11.3%)                      | -21.2%<br>(-28.1% to -15.4%)                     |
| Meningococcal infection                                  | 55.4<br>(33.5 to 81.3)                             | 6.5<br>(4.0 to 9.8)                           | 8.0%<br>(2.3% to 13.1%)                           | 3.1%<br>(-2.4% to 7.9%)                          |
| Alcohol use disorders                                    | 29.4<br>(27.4 to 31.2)                             | 1.8<br>(1.2 to 2.6)                           | 4.3%<br>(-0.2% to 8.5%)                           | -0.5%<br>(-4.8% to 3.5%)                         |
| Klinefelter syndrome                                     | 72.0<br>(44.7 to 99.6)                             | 1.5<br>(0.7 to 2.8)                           | 5.5%<br>(-4.6% to 15.5%)                          | 0.7%<br>(-9.0% to 10.2%)                         |
| Digestive congenital anomalies                           | 11.8<br>(9.3 to 14.7)                              | 0.6<br>(0.3 to 1.0)                           | -1.1%<br>(-3.1% to 1.0%)                          | -5.7%<br>(-7.6% to -3.7%)                        |
| Tetanus                                                  | 6.7<br>(4.2 to 9.1)                                | 0.2<br>(0.1 to 0.4)                           | 11.6%<br>(-23.7% to 65.9%)                        | 6.5%<br>(-27.2% to 58.3%)                        |
| <b>All causes</b>                                        | <b>20,342.7</b><br><b>(15,332.2 to 25,296.5)</b>   | <b>1,969.2</b><br><b>(1,442.8 to 2,607.8)</b> | <b>5.4%</b><br><b>(2.8% to 8.6%)</b>              | <b>0.5%</b><br><b>(-1.9% to 3.6%)</b>            |

SR Table 13b: Global prevalence and years lived with disability (YLDs) for 2016, percentage change of YLD counts and rates between 2006 and 2016 of developmental intellectual disability by cause, ages 25-29 years

| Cause                                                    | Prevalence in thousands (95% uncertainty interval) | YLDs in thousands (95% uncertainty interval)  |                                                   |                                                  |
|----------------------------------------------------------|----------------------------------------------------|-----------------------------------------------|---------------------------------------------------|--------------------------------------------------|
|                                                          |                                                    | 2016                                          | Percentage change in counts between 2006 and 2016 | Percentage change in rates between 2006 and 2016 |
| Idiopathic developmental intellectual disability         | 12,277.1<br>(7,785.9 to 16,947.2)                  | 487.6<br>(238.0 to 827.7)                     | 9.8%<br>(5.7% to 12.6%)                           | -7.5%<br>(-11.0% to -5.2%)                       |
| Autism                                                   | 1,371.9<br>(1,156.9 to 1,645.4)                    | 367.7<br>(239.7 to 553.7)                     | 18.8%<br>(15.7% to 21.7%)                         | 0.0%<br>(-2.5% to 2.5%)                          |
| Neonatal preterm birth complications                     | 1,701.8<br>(1,254.8 to 2,184.9)                    | 343.5<br>(217.6 to 497.6)                     | 23.8%<br>(5.8% to 44.0%)                          | 4.3%<br>(-10.9% to 21.3%)                        |
| Neonatal sepsis and other neonatal infections            | 532.9<br>(197.4 to 1,279.9)                        | 209.0<br>(62.2 to 542.3)                      | 39.5%<br>(28.7% to 59.1%)                         | 17.5%<br>(8.4% to 34.0%)                         |
| Iodine deficiency                                        | 316.7<br>(222.0 to 387.1)                          | 102.3<br>(62.5 to 146.0)                      | 5.2%<br>(-2.0% to 12.5%)                          | -11.4%<br>(-17.5% to -5.2%)                      |
| Encephalitis                                             | 587.8<br>(347.9 to 943.3)                          | 67.8<br>(42.4 to 95.3)                        | 3.7%<br>(-5.3% to 12.4%)                          | -12.6%<br>(-20.3% to -5.3%)                      |
| Neonatal encephalopathy due to birth asphyxia and trauma | 398.3<br>(240.3 to 627.6)                          | 64.3<br>(23.6 to 147.5)                       | 35.2%<br>(22.3% to 53.0%)                         | 13.9%<br>(3.1% to 28.9%)                         |
| Congenital heart anomalies                               | 801.2<br>(712.6 to 892.7)                          | 47.7<br>(19.9 to 82.2)                        | 22.4%<br>(18.3% to 26.9%)                         | 3.1%<br>(-0.3% to 6.9%)                          |
| Neural tube defects                                      | 127.3<br>(94.7 to 169.6)                           | 44.8<br>(27.9 to 66.6)                        | 18.5%<br>(13.6% to 23.9%)                         | -0.2%<br>(-4.3% to 4.4%)                         |
| Malaria                                                  | 84.7<br>(64.1 to 102.5)                            | 40.9<br>(26.6 to 55.3)                        | 27.4%<br>(13.6% to 39.8%)                         | 7.3%<br>(-4.3% to 17.8%)                         |
| Haemolytic disease and other neonatal jaundice           | 63.1<br>(46.7 to 76.4)                             | 28.3<br>(17.6 to 39.5)                        | 22.4%<br>(14.0% to 28.4%)                         | 3.1%<br>(-3.9% to 8.1%)                          |
| Pneumococcal meningitis                                  | 225.7<br>(177.1 to 279.4)                          | 26.5<br>(16.5 to 38.2)                        | 8.0%<br>(-2.3% to 17.9%)                          | -9.0%<br>(-17.7% to -0.7%)                       |
| Down's syndrome                                          | 196.9<br>(171.5 to 225.6)                          | 17.5<br>(11.7 to 24.6)                        | 13.7%<br>(9.2% to 18.2%)                          | -4.2%<br>(-8.0% to -0.4%)                        |
| Other meningitis                                         | 151.5<br>(96.7 to 211.6)                           | 16.2<br>(9.9 to 24.1)                         | 31.9%<br>(23.1% to 41.1%)                         | 11.1%<br>(3.7% to 18.9%)                         |
| H influenzae type B meningitis                           | 79.7<br>(57.7 to 106.5)                            | 11.0<br>(6.7 to 16.0)                         | -10.0%<br>(-17.7% to -3.4%)                       | -24.2%<br>(-30.6% to -18.7%)                     |
| Meningococcal infection                                  | 54.0<br>(33.4 to 78.3)                             | 6.5<br>(4.0 to 9.7)                           | 15.3%<br>(7.2% to 22.7%)                          | -2.9%<br>(-9.7% to 3.4%)                         |
| Alcohol use disorders                                    | 30.2<br>(28.4 to 31.9)                             | 1.9<br>(1.2 to 2.7)                           | 15.7%<br>(10.6% to 20.2%)                         | -2.6%<br>(-6.9% to 1.3%)                         |
| Klinefelter syndrome                                     | 63.0<br>(39.4 to 87.0)                             | 1.3<br>(0.6 to 2.5)                           | 15.9%<br>(5.0% to 28.7%)                          | -2.4%<br>(-11.5% to 8.4%)                        |
| Digestive congenital anomalies                           | 13.8<br>(10.9 to 17.2)                             | 0.7<br>(0.4 to 1.1)                           | 17.0%<br>(14.7% to 19.3%)                         | -1.4%<br>(-3.4% to 0.5%)                         |
| Tetanus                                                  | 6.1<br>(3.9 to 8.3)                                | 0.2<br>(0.1 to 0.3)                           | 19.9%<br>(-16.8% to 71.9%)                        | 1.0%<br>(-29.9% to 44.8%)                        |
| Other chromosomal abnormalities                          | 0.7<br>(0.7 to 0.8)                                | 0.2<br>(0.1 to 0.2)                           | 3.1%<br>(-15.3% to 26.7%)                         | -13.2%<br>(-28.6% to 6.7%)                       |
| <b>All causes</b>                                        | <b>19,084.4</b><br><b>(14,385.6 to 23,663.1)</b>   | <b>1,885.4</b><br><b>(1,396.3 to 2,487.2)</b> | <b>18.1%</b><br><b>(15.3% to 22.0%)</b>           | <b>-0.5%</b><br><b>(-2.8% to 2.8%)</b>           |

SR Table 13b: Global prevalence and years lived with disability (YLDs) for 2016, percentage change of YLD counts and rates between 2006 and 2016 of developmental intellectual disability by cause, ages 30-34 years

| Cause                                                    | Prevalence in thousands (95% uncertainty interval) | YLDs in thousands (95% uncertainty interval)  |                                         |                                                   |
|----------------------------------------------------------|----------------------------------------------------|-----------------------------------------------|-----------------------------------------|---------------------------------------------------|
|                                                          |                                                    | 2016                                          | 2016                                    | Percentage change in counts between 2006 and 2016 |
| Idiopathic developmental intellectual disability         | 10,216.1<br>(6,323.2 to 14,187.5)                  | 405.7<br>(196.1 to 689.1)                     | 4.9%<br>(0.7% to 7.7%)                  | -7.1%<br>(-10.8% to -4.6%)                        |
| Autism                                                   | 1,209.1<br>(1,019.4 to 1,452.2)                    | 322.2<br>(206.0 to 475.3)                     | 12.7%<br>(9.8% to 15.8%)                | -0.2%<br>(-2.7% to 2.5%)                          |
| Neonatal preterm birth complications                     | 1,519.6<br>(1,117.9 to 1,948.9)                    | 296.2<br>(188.0 to 430.0)                     | 19.3%<br>(1.6% to 39.4%)                | 5.7%<br>(-10.0% to 23.5%)                         |
| Neonatal sepsis and other neonatal infections            | 472.2<br>(179.1 to 1,131.0)                        | 184.1<br>(58.0 to 479.7)                      | 39.3%<br>(30.0% to 55.0%)               | 23.3%<br>(15.1% to 37.3%)                         |
| Iodine deficiency                                        | 267.9<br>(187.3 to 328.2)                          | 85.9<br>(51.9 to 123.0)                       | 10.1%<br>(1.9% to 17.2%)                | -2.5%<br>(-9.8% to 3.8%)                          |
| Encephalitis                                             | 575.6<br>(339.9 to 925.0)                          | 67.7<br>(42.5 to 94.3)                        | -0.5%<br>(-9.2% to 7.6%)                | -11.9%<br>(-19.6% to -4.7%)                       |
| Neonatal encephalopathy due to birth asphyxia and trauma | 355.5<br>(215.8 to 555.2)                          | 56.8<br>(21.6 to 127.5)                       | 29.1%<br>(17.2% to 45.5%)               | 14.4%<br>(3.8% to 28.8%)                          |
| Neural tube defects                                      | 114.3<br>(84.3 to 152.8)                           | 40.4<br>(24.8 to 60.1)                        | 19.5%<br>(15.3% to 24.1%)               | 5.9%<br>(2.1% to 9.9%)                            |
| Congenital heart anomalies                               | 678.9<br>(602.8 to 755.4)                          | 40.2<br>(16.6 to 69.5)                        | 11.7%<br>(7.8% to 15.6%)                | -1.0%<br>(-4.5% to 2.4%)                          |
| Malaria                                                  | 62.8<br>(48.4 to 75.8)                             | 29.7<br>(19.2 to 39.7)                        | 16.6%<br>(5.0% to 27.6%)                | 3.3%<br>(-7.0% to 13.0%)                          |
| Haemolytic disease and other neonatal jaundice           | 55.3<br>(40.4 to 67.1)                             | 24.8<br>(15.4 to 34.6)                        | 18.7%<br>(10.4% to 24.6%)               | 5.2%<br>(-2.2% to 10.3%)                          |
| Pneumococcal meningitis                                  | 213.7<br>(166.3 to 264.6)                          | 24.4<br>(14.9 to 35.1)                        | 8.5%<br>(-0.8% to 17.5%)                | -3.9%<br>(-12.2% to 4.1%)                         |
| Down's syndrome                                          | 177.5<br>(154.7 to 203.0)                          | 15.8<br>(10.5 to 22.3)                        | 14.1%<br>(9.6% to 18.9%)                | 1.0%<br>(-2.9% to 5.3%)                           |
| Other meningitis                                         | 141.6<br>(89.3 to 196.9)                           | 14.8<br>(8.9 to 22.1)                         | 25.4%<br>(16.2% to 34.4%)               | 11.0%<br>(2.9% to 19.0%)                          |
| H influenzae type B meningitis                           | 71.9<br>(52.0 to 95.9)                             | 9.7<br>(5.9 to 14.5)                          | -9.9%<br>(-16.5% to -3.9%)              | -20.2%<br>(-26.1% to -14.9%)                      |
| Meningococcal infection                                  | 49.9<br>(30.8 to 72.4)                             | 5.9<br>(3.5 to 9.0)                           | 15.1%<br>(7.5% to 21.9%)                | 1.9%<br>(-4.8% to 8.0%)                           |
| Alcohol use disorders                                    | 27.5<br>(25.7 to 29.2)                             | 1.7<br>(1.1 to 2.4)                           | 8.8%<br>(2.9% to 13.8%)                 | -3.7%<br>(-8.9% to 0.7%)                          |
| Klinefelter syndrome                                     | 47.0<br>(29.5 to 64.2)                             | 1.0<br>(0.4 to 1.9)                           | 13.7%<br>(3.1% to 25.3%)                | 0.7%<br>(-8.7% to 11.0%)                          |
| Digestive congenital anomalies                           | 14.7<br>(11.6 to 18.3)                             | 0.7<br>(0.4 to 1.2)                           | 6.1%<br>(3.7% to 8.6%)                  | -6.1%<br>(-8.2% to -3.8%)                         |
| Tetanus                                                  | 5.7<br>(3.6 to 7.7)                                | 0.2<br>(0.1 to 0.3)                           | 22.9%<br>(-13.7% to 77.0%)              | 8.9%<br>(-23.5% to 56.7%)                         |
| Other chromosomal abnormalities                          | 0.2<br>(0.1 to 0.2)                                | 0.1<br>(<0.05 to 0.1)                         | 37.7%<br>(-19.7% to 123.2%)             | 22.0%<br>(-28.9% to 97.7%)                        |
| <b>All causes</b>                                        | <b>16,277.2</b><br><b>(12,275.2 to 20,226.8)</b>   | <b>1,627.9</b><br><b>(1,198.2 to 2,139.9)</b> | <b>14.1%</b><br><b>(11.4% to 18.4%)</b> | <b>1.1%</b><br><b>(-1.4% to 4.8%)</b>             |

SR Table 13b: Global prevalence and years lived with disability (YLDs) for 2016, percentage change of YLD counts and rates between 2006 and 2016 of developmental intellectual disability by cause, ages 35-39 years

| Cause                                                    | Prevalence in thousands (95% uncertainty interval) | YLDs in thousands (95% uncertainty interval)  |                                       |                                                   |
|----------------------------------------------------------|----------------------------------------------------|-----------------------------------------------|---------------------------------------|---------------------------------------------------|
|                                                          |                                                    | 2016                                          | 2016                                  | Percentage change in counts between 2006 and 2016 |
| Idiopathic developmental intellectual disability         | 8,287.4<br>(5,049.1 to 11,564.2)                   | 330.7<br>(159.3 to 564.9)                     | -1.2%<br>(-5.4% to 1.5%)              | -6.6%<br>(-10.6% to -4.0%)                        |
| Autism                                                   | 1,046.4<br>(882.2 to 1,256.8)                      | 277.0<br>(178.0 to 410.8)                     | 5.2%<br>(2.4% to 8.1%)                | -0.5%<br>(-3.2% to 2.2%)                          |
| Neonatal preterm birth complications                     | 1,309.8<br>(959.8 to 1,683.1)                      | 245.0<br>(154.7 to 354.7)                     | 11.8%<br>(-4.3% to 29.1%)             | 5.7%<br>(-9.5% to 22.1%)                          |
| Neonatal sepsis and other neonatal infections            | 399.1<br>(155.7 to 946.4)                          | 154.9<br>(50.2 to 398.0)                      | 33.3%<br>(24.6% to 47.0%)             | 26.0%<br>(17.8% to 39.0%)                         |
| Iodine deficiency                                        | 213.5<br>(149.4 to 261.5)                          | 67.9<br>(40.3 to 96.4)                        | 9.9%<br>(1.6% to 17.6%)               | 3.8%<br>(-4.0% to 11.2%)                          |
| Encephalitis                                             | 543.6<br>(319.5 to 878.9)                          | 62.7<br>(38.9 to 87.6)                        | -8.3%<br>(-16.4% to -0.8%)            | -13.4%<br>(-21.0% to -6.3%)                       |
| Neonatal encephalopathy due to birth asphyxia and trauma | 306.3<br>(186.2 to 474.0)                          | 48.1<br>(19.0 to 106.1)                       | 20.9%<br>(9.9% to 35.4%)              | 14.3%<br>(3.9% to 28.0%)                          |
| Neural tube defects                                      | 99.5<br>(73.2 to 133.5)                            | 35.3<br>(22.0 to 52.9)                        | 15.2%<br>(11.1% to 20.1%)             | 8.9%<br>(5.0% to 13.5%)                           |
| Congenital heart anomalies                               | 579.1<br>(514.9 to 644.9)                          | 34.2<br>(14.3 to 60.0)                        | 2.3%<br>(-1.7% to 6.0%)               | -3.3%<br>(-7.1% to 0.2%)                          |
| Malaria                                                  | 46.5<br>(36.2 to 56.3)                             | 21.7<br>(14.4 to 29.3)                        | 13.8%<br>(1.8% to 25.9%)              | 7.6%<br>(-3.7% to 19.0%)                          |
| Pneumococcal meningitis                                  | 190.1<br>(148.8 to 237.3)                          | 21.3<br>(13.1 to 31.2)                        | 6.9%<br>(-2.6% to 15.5%)              | 1.1%<br>(-7.9% to 9.1%)                           |
| Haemolytic disease and other neonatal jaundice           | 46.6<br>(33.6 to 56.8)                             | 20.8<br>(12.9 to 29.2)                        | 12.8%<br>(4.6% to 18.6%)              | 6.6%<br>(-1.1% to 12.1%)                          |
| Down's syndrome                                          | 150.9<br>(131.9 to 173.4)                          | 13.4<br>(9.0 to 19.0)                         | 10.2%<br>(6.2% to 14.6%)              | 4.2%<br>(0.4% to 8.3%)                            |
| Other meningitis                                         | 126.0<br>(78.6 to 176.0)                           | 12.9<br>(7.5 to 19.2)                         | 17.1%<br>(8.1% to 25.2%)              | 10.7%<br>(2.2% to 18.4%)                          |
| H influenzae type B meningitis                           | 61.6<br>(44.1 to 83.3)                             | 8.2<br>(4.9 to 12.4)                          | -11.3%<br>(-17.8% to -5.7%)           | -16.1%<br>(-22.3% to -10.9%)                      |
| Meningococcal infection                                  | 43.8<br>(27.1 to 63.4)                             | 5.1<br>(3.0 to 7.8)                           | 12.8%<br>(5.1% to 19.8%)              | 6.6%<br>(-0.7% to 13.3%)                          |
| Alcohol use disorders                                    | 24.7<br>(22.9 to 26.2)                             | 1.5<br>(1.0 to 2.2)                           | 0.2%<br>(-5.4% to 5.2%)               | -5.2%<br>(-10.6% to -0.6%)                        |
| Digestive congenital anomalies                           | 16.1<br>(12.7 to 20.1)                             | 0.8<br>(0.5 to 1.3)                           | -3.7%<br>(-6.2% to -1.1%)             | -9.0%<br>(-11.3% to -6.5%)                        |
| Klinefelter syndrome                                     | 31.5<br>(19.9 to 42.9)                             | 0.6<br>(0.3 to 1.2)                           | 6.9%<br>(-5.2% to 20.0%)              | 1.0%<br>(-10.4% to 13.4%)                         |
| Tetanus                                                  | 5.1<br>(3.2 to 6.9)                                | 0.2<br>(0.1 to 0.3)                           | 22.7%<br>(-13.3% to 77.2%)            | 16.0%<br>(-18.1% to 67.5%)                        |
| Other chromosomal abnormalities                          | 0.1<br>(0.1 to 0.1)                                | 0.1<br>(<0.05 to 0.1)                         | 37.1%<br>(-20.1% to 137.6%)           | 29.6%<br>(-24.5% to 124.6%)                       |
| <b>All causes</b>                                        | <b>13,527.5</b><br><b>(10,215.0 to 16,815.6)</b>   | <b>1,362.4</b><br><b>(1,000.6 to 1,785.0)</b> | <b>7.7%</b><br><b>(5.0% to 11.8%)</b> | <b>1.8%</b><br><b>(-0.8% to 5.7%)</b>             |



SR Table 13b: Global prevalence and years lived with disability (YLDs) for 2016, percentage change of YLD counts and rates between 2006 and 2016 of developmental intellectual disability by cause, ages 40-44 years

| Cause                                                    | Prevalence in thousands (95% uncertainty interval) | YLDs in thousands (95% uncertainty interval) |                                                   |                                                  |
|----------------------------------------------------------|----------------------------------------------------|----------------------------------------------|---------------------------------------------------|--------------------------------------------------|
|                                                          |                                                    | 2016                                         | Percentage change in counts between 2006 and 2016 | Percentage change in rates between 2006 and 2016 |
| Idiopathic developmental intellectual disability         | 7,191.1<br>(4,325.7 to 10,078.4)                   | 290.0<br>(140.7 to 496.2)                    | 6.2%<br>(1.8% to 9.1%)                            | -6.7%<br>(-10.6% to -4.2%)                       |
| Autism                                                   | 982.2<br>(827.9 to 1,180.0)                        | 258.5<br>(165.2 to 384.9)                    | 12.9%<br>(10.1% to 16.2%)                         | -0.9%<br>(-3.3% to 2.1%)                         |
| Neonatal preterm birth complications                     | 1,194.0<br>(873.4 to 1,535.4)                      | 215.6<br>(135.2 to 311.6)                    | 20.3%<br>(3.2% to 40.0%)                          | 5.6%<br>(-9.4% to 23.0%)                         |
| Neonatal sepsis and other neonatal infections            | 345.7<br>(137.1 to 810.7)                          | 133.6<br>(44.9 to 346.0)                     | 34.8%<br>(26.0% to 49.1%)                         | 18.4%<br>(10.7% to 31.0%)                        |
| Encephalitis                                             | 559.0<br>(323.9 to 912.2)                          | 61.8<br>(38.6 to 85.6)                       | -0.8%<br>(-9.8% to 7.9%)                          | -12.9%<br>(-20.8% to -5.2%)                      |
| Iodine deficiency                                        | 166.8<br>(117.4 to 203.8)                          | 52.5<br>(31.5 to 74.4)                       | 7.5%<br>(-0.1% to 15.4%)                          | -5.6%<br>(-12.3% to -1.4%)                       |
| Neonatal encephalopathy due to birth asphyxia and trauma | 273.9<br>(168.3 to 417.8)                          | 43.5<br>(17.9 to 92.3)                       | 26.3%<br>(15.4% to 41.9%)                         | 11.0%<br>(1.4% to 24.7%)                         |
| Congenital heart anomalies                               | 566.1<br>(505.4 to 631.4)                          | 33.3<br>(14.0 to 57.6)                       | 14.9%<br>(10.3% to 19.6%)                         | 1.0%<br>(-3.1% to 5.0%)                          |
| Neural tube defects                                      | 89.1<br>(65.4 to 119.6)                            | 31.7<br>(19.9 to 47.4)                       | 17.2%<br>(13.0% to 22.2%)                         | 3.0%<br>(-0.8% to 7.3%)                          |
| Pneumococcal meningitis                                  | 167.9<br>(130.6 to 212.2)                          | 18.7<br>(11.4 to 27.8)                       | 10.4%<br>(1.3% to 19.0%)                          | -3.0%<br>(-11.0% to 4.5%)                        |
| Haemolytic disease and other neonatal jaundice           | 41.7<br>(29.9 to 50.9)                             | 18.7<br>(11.6 to 26.1)                       | 21.4%<br>(12.8% to 27.8%)                         | 6.7%<br>(-1.0% to 12.3%)                         |
| Malaria                                                  | 35.8<br>(27.4 to 43.5)                             | 17.0<br>(11.0 to 22.8)                       | 26.2%<br>(11.9% to 40.5%)                         | 10.9%<br>(-1.7% to 23.4%)                        |
| Other meningitis                                         | 113.2<br>(71.4 to 158.1)                           | 11.6<br>(6.8 to 17.0)                        | 22.0%<br>(13.4% to 29.7%)                         | 7.1%<br>(-0.4% to 13.9%)                         |
| Down's syndrome                                          | 129.2<br>(112.8 to 147.8)                          | 11.5<br>(7.7 to 16.3)                        | 13.0%<br>(7.9% to 18.2%)                          | -0.8%<br>(-5.2% to 3.8%)                         |
| H influenzae type B meningitis                           | 52.7<br>(37.5 to 71.5)                             | 7.0<br>(4.2 to 10.6)                         | -8.1%<br>(-15.4% to -2.1%)                        | -19.3%<br>(-25.7% to -14.0%)                     |
| Meningococcal infection                                  | 38.1<br>(23.4 to 55.4)                             | 4.4<br>(2.6 to 6.8)                          | 15.6%<br>(9.3% to 20.9%)                          | 1.5%<br>(-4.0% to 6.2%)                          |
| Alcohol use disorders                                    | 24.1<br>(22.2 to 25.7)                             | 1.5<br>(0.9 to 2.1)                          | 5.1%<br>(-1.3% to 10.5%)                          | -7.7%<br>(-13.3% to -2.9%)                       |
| Digestive congenital anomalies                           | 17.6<br>(13.9 to 21.9)                             | 0.9<br>(0.5 to 1.4)                          | 6.6%<br>(4.0% to 9.3%)                            | -6.3%<br>(-8.7% to -4.0%)                        |
| Klinefelter syndrome                                     | 20.8<br>(13.1 to 28.8)                             | 0.4<br>(0.2 to 0.8)                          | 10.5%<br>(1.2% to 21.0%)                          | -2.9%<br>(-11.1% to 6.3%)                        |
| Tetanus                                                  | 4.4<br>(2.8 to 6.0)                                | 0.1<br>(0.1 to 0.2)                          | 21.5%<br>(-14.8% to 74.4%)                        | 6.7%<br>(-25.2% to 53.2%)                        |
| Other chromosomal abnormalities                          | 0.1<br>(0.1 to 0.1)                                | <0.05<br>(<0.05 to 0.1)                      | 7.6%<br>(-43.3% to 102.2%)                        | -5.5%<br>(-50.2% to 77.6%)                       |
| <b>All causes</b>                                        | <b>12,013.4</b><br><b>(9,074.8 to 14,910.8)</b>    | <b>1,212.4</b><br><b>(893.4 to 1,584.8)</b>  | <b>14.2%</b><br><b>(11.5% to 17.8%)</b>           | <b>0.3%</b><br><b>(-2.0% to 3.4%)</b>            |

SR Table 13b: Global prevalence and years lived with disability (YLDs) for 2016, percentage change of YLD counts and rates between 2006 and 2016 of developmental intellectual disability by cause, ages 45-49 years

| Cause                                                    | Prevalence in thousands (95% uncertainty interval) | YLDs in thousands (95% uncertainty interval) |                                         |                                                   |
|----------------------------------------------------------|----------------------------------------------------|----------------------------------------------|-----------------------------------------|---------------------------------------------------|
|                                                          |                                                    | 2016                                         | 2016                                    | Percentage change in counts between 2006 and 2016 |
| Idiopathic developmental intellectual disability         | 6,118.8<br>(3,627.6 to 8,621.6)                    | 249.7<br>(121.2 to 424.1)                    | 15.7%<br>(11.6% to 18.6%)               | -7.2%<br>(-10.5% to -4.9%)                        |
| Autism                                                   | 906.0<br>(764.0 to 1,085.7)                        | 236.6<br>(152.2 to 351.0)                    | 23.6%<br>(20.1% to 27.3%)               | -0.9%<br>(-3.7% to 2.1%)                          |
| Neonatal preterm birth complications                     | 1,069.2<br>(784.7 to 1,370.7)                      | 185.5<br>(115.4 to 267.6)                    | 32.3%<br>(12.6% to 53.6%)               | 6.1%<br>(-9.7% to 23.1%)                          |
| Neonatal sepsis and other neonatal infections            | 295.1<br>(120.5 to 689.2)                          | 113.2<br>(38.5 to 293.4)                     | 40.9%<br>(31.3% to 57.3%)               | 13.0%<br>(5.3% to 26.1%)                          |
| Encephalitis                                             | 556.3<br>(317.9 to 913.0)                          | 59.9<br>(37.2 to 83.8)                       | 12.7%<br>(3.1% to 21.3%)                | -9.6%<br>(-17.4% to -2.7%)                        |
| Iodine deficiency                                        | 127.5<br>(90.7 to 155.9)                           | 39.6<br>(24.2 to 56.0)                       | 7.2%<br>(-1.0% to 15.7%)                | -14.0%<br>(-20.7% to -7.2%)                       |
| Neonatal encephalopathy due to birth asphyxia and trauma | 243.2<br>(151.9 to 364.6)                          | 38.9<br>(16.4 to 80.7)                       | 34.2%<br>(22.2% to 50.5%)               | 7.6%<br>(-2.0% to 20.7%)                          |
| Congenital heart anomalies                               | 550.6<br>(492.3 to 614.5)                          | 32.1<br>(13.3 to 55.2)                       | 31.4%<br>(26.1% to 36.9%)               | 5.4%<br>(1.1% to 9.8%)                            |
| Neural tube defects                                      | 80.1<br>(58.8 to 107.6)                            | 28.6<br>(17.8 to 42.5)                       | 23.0%<br>(19.1% to 27.5%)               | -1.4%<br>(-4.5% to 2.2%)                          |
| Haemolytic disease and other neonatal jaundice           | 36.4<br>(25.9 to 44.4)                             | 16.4<br>(10.1 to 22.9)                       | 32.6%<br>(23.1% to 39.7%)               | 6.3%<br>(-1.3% to 12.0%)                          |
| Pneumococcal meningitis                                  | 145.7<br>(113.4 to 184.9)                          | 16.0<br>(9.7 to 23.8)                        | 15.0%<br>(5.9% to 23.5%)                | -7.8%<br>(-15.0% to -1.0%)                        |
| Malaria                                                  | 26.3<br>(20.1 to 31.9)                             | 12.5<br>(8.1 to 17.0)                        | 31.4%<br>(16.1% to 47.8%)               | 5.4%<br>(-6.9% to 18.5%)                          |
| Other meningitis                                         | 100.9<br>(63.4 to 140.5)                           | 10.2<br>(6.0 to 14.9)                        | 30.5%<br>(21.2% to 38.4%)               | 4.6%<br>(-2.8% to 11.0%)                          |
| Down's syndrome                                          | 97.5<br>(84.1 to 112.0)                            | 9.4<br>(6.4 to 13.2)                         | 16.9%<br>(11.4% to 21.9%)               | -6.3%<br>(-10.6% to -2.3%)                        |
| H influenzae type B meningitis                           | 44.2<br>(31.0 to 60.7)                             | 5.8<br>(3.4 to 9.0)                          | -4.1%<br>(-12.3% to 2.6%)               | -23.1%<br>(-29.7% to -17.8%)                      |
| Meningococcal infection                                  | 32.8<br>(19.6 to 47.4)                             | 3.8<br>(2.2 to 5.8)                          | 18.5%<br>(11.9% to 24.0%)               | -4.9%<br>(-10.3% to -0.5%)                        |
| Alcohol use disorders                                    | 23.0<br>(21.0 to 24.6)                             | 1.4<br>(0.9 to 2.0)                          | 11.6%<br>(5.6% to 17.6%)                | -10.5%<br>(-15.3% to -5.7%)                       |
| Digestive congenital anomalies                           | 18.2<br>(14.3 to 22.5)                             | 0.9<br>(0.5 to 1.5)                          | 20.8%<br>(17.9% to 23.7%)               | -3.1%<br>(-5.5% to -0.8%)                         |
| Klinefelter syndrome                                     | 13.2<br>(8.4 to 18.3)                              | 0.3<br>(0.1 to 0.5)                          | 18.9%<br>(8.3% to 31.0%)                | -4.6%<br>(-13.2% to 5.0%)                         |
| Tetanus                                                  | 3.8<br>(2.4 to 5.2)                                | 0.1<br>(0.1 to 0.2)                          | 28.5%<br>(-10.3% to 81.3%)              | 3.1%<br>(-28.1% to 45.4%)                         |
| Other chromosomal abnormalities                          | <0.05<br>(<0.05 to <0.05)                          | <0.05<br>(<0.05 to <0.05)                    | 18.1%<br>(-41.8% to 147.2%)             | -5.3%<br>(-53.4% to 98.2%)                        |
| <b>All causes</b>                                        | <b>10,488.9</b><br><b>(7,979.6 to 13,021.3)</b>    | <b>1,060.8</b><br><b>(775.0 to 1,382.8)</b>  | <b>23.7%</b><br><b>(20.9% to 27.4%)</b> | <b>-0.8%</b><br><b>(-3.1% to 2.1%)</b>            |

SR Table 13b: Global prevalence and years lived with disability (YLDs) for 2016, percentage change of YLD counts and rates between 2006 and 2016 of developmental intellectual disability by cause, ages 50-54 years

| Cause                                                    | Prevalence in thousands (95% uncertainty interval) | YLDs in thousands (95% uncertainty interval) |                                                   |                                                  |
|----------------------------------------------------------|----------------------------------------------------|----------------------------------------------|---------------------------------------------------|--------------------------------------------------|
|                                                          |                                                    | 2016                                         | Percentage change in counts between 2006 and 2016 | Percentage change in rates between 2006 and 2016 |
| Autism                                                   | 788.9<br>(664.7 to 945.1)                          | 204.1<br>(129.9 to 301.8)                    | 24.2%<br>(20.7% to 27.9%)                         | -0.3%<br>(-3.0% to 2.7%)                         |
| Idiopathic developmental intellectual disability         | 4,838.2<br>(2,802.0 to 6,867.4)                    | 200.4<br>(97.2 to 342.3)                     | 13.3%<br>(8.2% to 16.2%)                          | -9.0%<br>(-13.1% to -6.7%)                       |
| Neonatal preterm birth complications                     | 898.7<br>(659.5 to 1,153.8)                        | 146.7<br>(91.0 to 210.7)                     | 33.0%<br>(13.1% to 54.9%)                         | 6.8%<br>(-9.2% to 24.4%)                         |
| Neonatal sepsis and other neonatal infections            | 243.8<br>(104.0 to 561.8)                          | 92.5<br>(32.8 to 236.9)                      | 45.1%<br>(34.1% to 62.3%)                         | 16.5%<br>(7.7% to 30.3%)                         |
| Encephalitis                                             | 504.4<br>(276.1 to 833.5)                          | 53.1<br>(32.5 to 74.5)                       | 13.6%<br>(3.5% to 22.3%)                          | -8.8%<br>(-16.9% to -1.8%)                       |
| Neonatal encephalopathy due to birth asphyxia and trauma | 212.1<br>(134.1 to 316.3)                          | 33.5<br>(14.9 to 68.1)                       | 35.7%<br>(23.0% to 54.3%)                         | 8.9%<br>(-1.3% to 23.9%)                         |
| Iodine deficiency                                        | 96.5<br>(68.3 to 117.0)                            | 29.6<br>(18.2 to 41.7)                       | 12.1%<br>(2.6% to 21.6%)                          | -10.0%<br>(-17.6% to -2.3%)                      |
| Congenital heart anomalies                               | 498.8<br>(445.4 to 557.2)                          | 28.9<br>(12.0 to 50.2)                       | 30.1%<br>(25.0% to 35.0%)                         | 4.5%<br>(0.4% to 8.4%)                           |
| Neural tube defects                                      | 70.4<br>(51.6 to 94.8)                             | 25.2<br>(15.6 to 37.4)                       | 25.8%<br>(21.7% to 30.2%)                         | 1.0%<br>(-2.3% to 4.6%)                          |
| Haemolytic disease and other neonatal jaundice           | 29.7<br>(21.0 to 36.1)                             | 13.4<br>(8.1 to 18.8)                        | 30.8%<br>(21.1% to 37.5%)                         | 5.0%<br>(-2.8% to 10.4%)                         |
| Pneumococcal meningitis                                  | 123.1<br>(94.2 to 158.2)                           | 13.2<br>(7.7 to 19.6)                        | 17.0%<br>(8.0% to 24.7%)                          | -6.0%<br>(-13.3% to 0.1%)                        |
| Down's syndrome                                          | 63.5<br>(54.1 to 74.2)                             | 9.1<br>(6.2 to 12.4)                         | 23.4%<br>(19.3% to 27.0%)                         | -0.9%<br>(-4.2% to 2.0%)                         |
| Malaria                                                  | 18.3<br>(14.0 to 22.2)                             | 8.6<br>(5.7 to 11.8)                         | 23.2%<br>(9.7% to 37.5%)                          | -1.1%<br>(-11.9% to 10.4%)                       |
| Other meningitis                                         | 87.0<br>(53.4 to 121.4)                            | 8.4<br>(4.8 to 12.5)                         | 28.7%<br>(19.7% to 36.4%)                         | 3.3%<br>(-3.9% to 9.5%)                          |
| H influenzae type B meningitis                           | 36.0<br>(24.8 to 50.3)                             | 4.5<br>(2.7 to 7.1)                          | -3.2%<br>(-12.0% to 3.6%)                         | -22.3%<br>(-29.4% to -16.8%)                     |
| Meningococcal infection                                  | 28.1<br>(16.7 to 40.8)                             | 3.1<br>(1.8 to 4.7)                          | 18.9%<br>(11.8% to 24.6%)                         | -4.5%<br>(-10.2% to 0.1%)                        |
| Alcohol use disorders                                    | 21.4<br>(19.3 to 23.1)                             | 1.3<br>(0.8 to 1.9)                          | 16.5%<br>(9.1% to 23.3%)                          | -6.4%<br>(-12.4% to -1.0%)                       |
| Digestive congenital anomalies                           | 14.0<br>(11.0 to 17.4)                             | 0.7<br>(0.4 to 1.1)                          | 19.5%<br>(16.4% to 22.5%)                         | -4.1%<br>(-6.5% to -1.7%)                        |
| Klinefelter syndrome                                     | 8.0<br>(5.0 to 11.5)                               | 0.1<br>(0.1 to 0.2)                          | 23.9%<br>(11.2% to 37.1%)                         | -0.5%<br>(-10.7% to 10.1%)                       |
| Tetanus                                                  | 3.3<br>(2.1 to 4.5)                                | 0.1<br>(<0.05 to 0.2)                        | 26.2%<br>(-13.1% to 79.6%)                        | 1.4%<br>(-30.2% to 44.2%)                        |
| Other chromosomal abnormalities                          | <0.05<br>(<0.05 to <0.05)                          | <0.05<br>(<0.05 to <0.05)                    | 70.8%<br>(-30.6% to 308.4%)                       | 37.1%<br>(-44.3% to 227.9%)                      |
| <b>All causes</b>                                        | <b>8,584.2</b><br><b>(6,542.8 to 10,634.4)</b>     | <b>876.6</b><br><b>(640.0 to 1,140.3)</b>    | <b>24.0%</b><br><b>(21.3% to 28.0%)</b>           | <b>-0.4%</b><br><b>(-2.6% to 2.7%)</b>           |

SR Table 13b: Global prevalence and years lived with disability (YLDs) for 2016, percentage change of YLD counts and rates between 2006 and 2016 of developmental intellectual disability by cause, ages 55-59 years

| Cause                                                    | Prevalence in thousands (95% uncertainty interval) | YLDs in thousands (95% uncertainty interval) |                                         |                                                   |
|----------------------------------------------------------|----------------------------------------------------|----------------------------------------------|-----------------------------------------|---------------------------------------------------|
|                                                          |                                                    | 2016                                         | 2016                                    | Percentage change in counts between 2006 and 2016 |
| Autism                                                   | 644.5<br>(541.8 to 773.4)                          | 165.0<br>(105.1 to 243.2)                    | 28.4%<br>(24.9% to 32.3%)               | -1.6%<br>(-4.3% to 1.4%)                          |
| Idiopathic developmental intellectual disability         | 3,595.2<br>(2,027.2 to 5,162.7)                    | 152.4<br>(73.9 to 259.7)                     | 19.8%<br>(14.3% to 23.1%)               | -8.2%<br>(-12.4% to -5.7%)                        |
| Neonatal preterm birth complications                     | 704.1<br>(514.1 to 905.2)                          | 105.6<br>(65.1 to 151.0)                     | 41.8%<br>(19.8% to 65.1%)               | 8.6%<br>(-8.2% to 26.5%)                          |
| Neonatal sepsis and other neonatal infections            | 183.5<br>(79.8 to 431.7)                           | 68.7<br>(24.6 to 176.6)                      | 53.7%<br>(43.0% to 68.9%)               | 17.8%<br>(9.6% to 29.4%)                          |
| Encephalitis                                             | 432.1<br>(222.2 to 734.0)                          | 43.1<br>(26.2 to 61.5)                       | 19.4%<br>(9.1% to 28.6%)                | -8.5%<br>(-16.4% to -1.4%)                        |
| Neonatal encephalopathy due to birth asphyxia and trauma | 175.2<br>(110.8 to 258.3)                          | 27.1<br>(12.3 to 54.6)                       | 40.9%<br>(27.9% to 58.9%)               | 8.0%<br>(-2.0% to 21.8%)                          |
| Congenital heart anomalies                               | 420.8<br>(375.0 to 470.7)                          | 24.2<br>(9.9 to 42.2)                        | 32.7%<br>(27.6% to 38.1%)               | 1.7%<br>(-2.2% to 5.8%)                           |
| Neural tube defects                                      | 58.6<br>(42.9 to 78.9)                             | 21.0<br>(13.1 to 31.1)                       | 32.3%<br>(27.9% to 36.9%)               | 1.4%<br>(-2.0% to 4.9%)                           |
| Iodine deficiency                                        | 64.8<br>(46.3 to 77.9)                             | 19.6<br>(11.9 to 27.4)                       | 22.8%<br>(10.5% to 35.8%)               | -5.9%<br>(-15.3% to 4.1%)                         |
| Haemolytic disease and other neonatal jaundice           | 22.7<br>(15.9 to 27.8)                             | 10.3<br>(6.1 to 14.5)                        | 39.0%<br>(29.0% to 45.9%)               | 6.5%<br>(-1.1% to 11.8%)                          |
| Pneumococcal meningitis                                  | 96.9<br>(73.6 to 125.7)                            | 10.1<br>(5.9 to 15.2)                        | 25.7%<br>(16.3% to 33.9%)               | -3.7%<br>(-10.9% to 2.6%)                         |
| Down's syndrome                                          | 37.9<br>(31.9 to 44.1)                             | 6.6<br>(4.5 to 9.0)                          | 29.0%<br>(24.4% to 33.3%)               | -1.1%<br>(-4.7% to 2.1%)                          |
| Other meningitis                                         | 71.1<br>(41.9 to 100.2)                            | 6.4<br>(3.8 to 9.5)                          | 35.9%<br>(26.6% to 44.3%)               | 4.1%<br>(-2.9% to 10.6%)                          |
| Malaria                                                  | 12.2<br>(9.3 to 14.8)                              | 5.8<br>(3.7 to 7.8)                          | 25.5%<br>(11.1% to 40.5%)               | -3.8%<br>(-14.9% to 7.7%)                         |
| H influenzae type B meningitis                           | 27.8<br>(18.5 to 38.7)                             | 3.3<br>(1.9 to 5.1)                          | 3.9%<br>(-5.8% to 11.8%)                | -20.4%<br>(-27.8% to -14.3%)                      |
| Meningococcal infection                                  | 22.9<br>(13.0 to 33.7)                             | 2.4<br>(1.4 to 3.6)                          | 26.6%<br>(18.2% to 33.7%)               | -3.0%<br>(-9.4% to 2.5%)                          |
| Alcohol use disorders                                    | 18.4<br>(16.4 to 20.0)                             | 1.1<br>(0.7 to 1.6)                          | 21.3%<br>(13.7% to 28.0%)               | -7.1%<br>(-12.8% to -1.9%)                        |
| Digestive congenital anomalies                           | 13.2<br>(10.4 to 16.5)                             | 0.7<br>(0.4 to 1.1)                          | 25.8%<br>(22.5% to 29.1%)               | -3.6%<br>(-6.2% to -1.1%)                         |
| Tetanus                                                  | 2.8<br>(1.7 to 3.8)                                | 0.1<br>(<0.05 to 0.2)                        | 39.9%<br>(-3.3% to 97.6%)               | 7.2%<br>(-25.9% to 51.4%)                         |
| Klinefelter syndrome                                     | 4.3<br>(2.7 to 6.3)                                | 0.1<br>(<0.05 to 0.1)                        | 23.3%<br>(19.6% to 26.9%)               | -5.5%<br>(-8.3% to -2.8%)                         |
| Other chromosomal abnormalities                          | <0.05<br>(<0.05 to <0.05)                          | <0.05<br>(<0.05 to <0.05)                    | 63.2%<br>(-10.9% to 229.9%)             | 25.0%<br>(-31.7% to 152.8%)                       |
| <b>All causes</b>                                        | <b>6,609.0</b><br><b>(5,020.2 to 8,189.0)</b>      | <b>673.5</b><br><b>(494.4 to 873.3)</b>      | <b>30.3%</b><br><b>(27.4% to 34.3%)</b> | <b>-0.1%</b><br><b>(-2.4% to 2.9%)</b>            |

SR Table 13b: Global prevalence and years lived with disability (YLDs) for 2016, percentage change of YLD counts and rates between 2006 and 2016 of developmental intellectual disability by cause, ages 60-64 years

| Cause                                                    | Prevalence in thousands (95% uncertainty interval) | YLDs in thousands (95% uncertainty interval) |                                         |                                                   |
|----------------------------------------------------------|----------------------------------------------------|----------------------------------------------|-----------------------------------------|---------------------------------------------------|
|                                                          |                                                    | 2016                                         | 2016                                    | Percentage change in counts between 2006 and 2016 |
| Autism                                                   | 541.6<br>(453.3 to 650.7)                          | 136.9<br>(88.1 to 202.9)                     | 48.5%<br>(44.3% to 52.5%)               | -1.5%<br>(-4.3% to 1.2%)                          |
| Idiopathic developmental intellectual disability         | 2,699.5<br>(1,466.4 to 3,903.0)                    | 118.3<br>(58.7 to 199.6)                     | 36.2%<br>(29.7% to 40.1%)               | -9.7%<br>(-14.0% to -7.1%)                        |
| Neonatal preterm birth complications                     | 546.3<br>(394.3 to 707.5)                          | 73.4<br>(45.1 to 105.5)                      | 66.1%<br>(40.7% to 94.9%)               | 10.1%<br>(-6.7% to 29.3%)                         |
| Neonatal sepsis and other neonatal infections            | 133.1<br>(57.3 to 320.4)                           | 49.2<br>(17.1 to 128.5)                      | 77.1%<br>(64.4% to 97.0%)               | 17.4%<br>(9.0% to 30.7%)                          |
| Encephalitis                                             | 379.8<br>(183.4 to 662.0)                          | 35.0<br>(21.1 to 49.5)                       | 38.5%<br>(27.0% to 49.6%)               | -8.1%<br>(-15.7% to -0.8%)                        |
| Neonatal encephalopathy due to birth asphyxia and trauma | 142.7<br>(90.3 to 208.5)                           | 21.7<br>(9.9 to 42.5)                        | 67.1%<br>(49.7% to 89.4%)               | 10.8%<br>(-0.7% to 25.6%)                         |
| Congenital heart anomalies                               | 379.9<br>(338.7 to 424.6)                          | 21.7<br>(9.2 to 37.8)                        | 59.8%<br>(53.3% to 66.2%)               | 6.0%<br>(1.7% to 10.2%)                           |
| Neural tube defects                                      | 48.8<br>(35.7 to 65.8)                             | 17.5<br>(10.9 to 26.0)                       | 46.6%<br>(41.9% to 52.1%)               | -2.7%<br>(-5.9% to 0.9%)                          |
| Iodine deficiency                                        | 36.7<br>(26.6 to 42.7)                             | 10.9<br>(7.0 to 15.1)                        | 33.6%<br>(17.3% to 50.7%)               | -11.4%<br>(-22.2% to -0.1%)                       |
| Haemolytic disease and other neonatal jaundice           | 17.3<br>(11.9 to 21.3)                             | 8.0<br>(4.7 to 11.3)                         | 63.3%<br>(51.0% to 72.1%)               | 8.3%<br>(0.2% to 14.1%)                           |
| Pneumococcal meningitis                                  | 72.2<br>(54.4 to 94.4)                             | 7.3<br>(4.2 to 11.0)                         | 38.6%<br>(27.5% to 48.4%)               | -8.1%<br>(-15.4% to -1.5%)                        |
| Other meningitis                                         | 56.6<br>(32.2 to 81.3)                             | 4.8<br>(2.8 to 7.2)                          | 52.5%<br>(42.4% to 61.9%)               | 1.1%<br>(-5.5% to 7.4%)                           |
| Malaria                                                  | 7.9<br>(5.8 to 9.7)                                | 3.9<br>(2.5 to 5.3)                          | 39.9%<br>(22.2% to 59.5%)               | -7.2%<br>(-19.0% to 5.8%)                         |
| Down's syndrome                                          | 22.1<br>(18.2 to 26.0)                             | 3.9<br>(2.6 to 5.3)                          | 58.2%<br>(52.4% to 63.9%)               | 4.9%<br>(1.1% to 8.7%)                            |
| H influenzae type B meningitis                           | 20.6<br>(13.1 to 29.3)                             | 2.3<br>(1.4 to 3.6)                          | 15.5%<br>(2.1% to 26.7%)                | -23.4%<br>(-32.3% to -16.0%)                      |
| Meningococcal infection                                  | 17.9<br>(9.8 to 26.9)                              | 1.8<br>(1.0 to 2.7)                          | 42.2%<br>(30.6% to 53.7%)               | -5.7%<br>(-13.4% to 2.0%)                         |
| Alcohol use disorders                                    | 15.6<br>(13.8 to 17.2)                             | 1.0<br>(0.6 to 1.4)                          | 44.6%<br>(38.1% to 50.9%)               | -4.1%<br>(-8.4% to 0.1%)                          |
| Digestive congenital anomalies                           | 12.4<br>(9.7 to 15.4)                              | 0.6<br>(0.4 to 1.0)                          | 49.4%<br>(45.5% to 53.3%)               | -0.9%<br>(-3.5% to 1.7%)                          |
| Tetanus                                                  | 2.4<br>(1.5 to 3.2)                                | 0.1<br>(<0.05 to 0.1)                        | 48.3%<br>(-4.4% to 121.5%)              | -1.6%<br>(-36.6% to 46.9%)                        |
| Klinefelter syndrome                                     | 2.4<br>(1.5 to 3.5)                                | <0.05<br>(<0.05 to 0.1)                      | 41.2%<br>(38.6% to 44.2%)               | -6.3%<br>(-8.1% to -4.4%)                         |
| Other chromosomal abnormalities                          | <0.05<br>(<0.05 to <0.05)                          | <0.05<br>(<0.05 to <0.05)                    | 22.1%<br>(-56.5% to 234.3%)             | -19.0%<br>(-71.1% to 121.8%)                      |
| <b>All causes</b>                                        | <b>5,155.7</b><br><b>(3,919.5 to 6,357.7)</b>      | <b>518.4</b><br><b>(377.8 to 674.2)</b>      | <b>49.8%</b><br><b>(46.2% to 54.4%)</b> | <b>-0.6%</b><br><b>(-3.0% to 2.4%)</b>            |

SR Table 13b: Global prevalence and years lived with disability (YLDs) for 2016, percentage change of YLD counts and rates between 2006 and 2016 of developmental intellectual disability by cause, ages 65-69 years

| Cause                                                    | Prevalence in thousands (95% uncertainty interval) | YLDs in thousands (95% uncertainty interval) |                                                   |                                                  |
|----------------------------------------------------------|----------------------------------------------------|----------------------------------------------|---------------------------------------------------|--------------------------------------------------|
|                                                          |                                                    | 2016                                         | Percentage change in counts between 2006 and 2016 | Percentage change in rates between 2006 and 2016 |
| Autism                                                   | 399.9<br>(335.2 to 481.1)                          | 99.5<br>(63.6 to 148.1)                      | 33.0%<br>(29.0% to 37.2%)                         | 0.4%<br>(-2.7% to 3.5%)                          |
| Idiopathic developmental intellectual disability         | 1,698.2<br>(873.4 to 2,505.7)                      | 78.5<br>(39.1 to 130.5)                      | 21.2%<br>(16.5% to 24.9%)                         | -8.5%<br>(-12.1% to -5.7%)                       |
| Neonatal preterm birth complications                     | 359.9<br>(260.9 to 470.4)                          | 41.1<br>(25.4 to 59.2)                       | 49.1%<br>(26.0% to 75.2%)                         | 12.5%<br>(-4.9% to 32.3%)                        |
| Neonatal sepsis and other neonatal infections            | 80.0<br>(33.4 to 196.1)                            | 28.6<br>(9.0 to 77.6)                        | 52.7%<br>(40.2% to 76.0%)                         | 15.3%<br>(5.8% to 32.9%)                         |
| Encephalitis                                             | 273.9<br>(119.8 to 494.3)                          | 23.5<br>(13.6 to 32.9)                       | 22.7%<br>(12.2% to 32.5%)                         | -7.4%<br>(-15.3% to 0.0%)                        |
| Congenital heart anomalies                               | 296.9<br>(265.5 to 331.4)                          | 16.8<br>(7.0 to 29.0)                        | 42.4%<br>(36.7% to 47.9%)                         | 7.5%<br>(3.1% to 11.6%)                          |
| Neural tube defects                                      | 36.3<br>(26.6 to 49.0)                             | 13.0<br>(8.1 to 19.3)                        | 28.7%<br>(24.8% to 32.7%)                         | -2.9%<br>(-5.8% to 0.2%)                         |
| Neonatal encephalopathy due to birth asphyxia and trauma | 94.7<br>(59.6 to 138.6)                            | 12.9<br>(5.9 to 24.8)                        | 43.3%<br>(29.6% to 59.2%)                         | 8.2%<br>(-2.2% to 20.1%)                         |
| Haemolytic disease and other neonatal jaundice           | 10.8<br>(7.3 to 13.3)                              | 5.1<br>(2.9 to 7.1)                          | 44.3%<br>(35.3% to 51.8%)                         | 8.9%<br>(2.1% to 14.6%)                          |
| Pneumococcal meningitis                                  | 46.7<br>(34.2 to 62.3)                             | 4.2<br>(2.5 to 6.2)                          | 23.2%<br>(13.9% to 31.4%)                         | -7.0%<br>(-14.0% to -0.8%)                       |
| Iodine deficiency                                        | 13.5<br>(10.2 to 15.2)                             | 4.2<br>(2.7 to 5.7)                          | 15.6%<br>(1.9% to 30.2%)                          | -12.7%<br>(-23.1% to -1.8%)                      |
| Other meningitis                                         | 40.1<br>(21.6 to 58.9)                             | 2.9<br>(1.7 to 4.4)                          | 36.9%<br>(28.0% to 45.3%)                         | 3.3%<br>(-3.4% to 9.6%)                          |
| Malaria                                                  | 4.3<br>(3.1 to 5.2)                                | 2.1<br>(1.4 to 2.9)                          | 21.1%<br>(3.8% to 38.6%)                          | -8.6%<br>(-21.7% to 4.6%)                        |
| Down's syndrome                                          | 8.6<br>(7.0 to 10.4)                               | 1.5<br>(1.0 to 2.1)                          | 15.2%<br>(9.6% to 20.8%)                          | -13.1%<br>(-17.3% to -8.9%)                      |
| H influenzae type B meningitis                           | 13.4<br>(8.0 to 19.4)                              | 1.3<br>(0.8 to 1.9)                          | 2.2%<br>(-11.2% to 13.1%)                         | -22.9%<br>(-33.0% to -14.7%)                     |
| Meningococcal infection                                  | 12.4<br>(6.2 to 19.5)                              | 1.1<br>(0.6 to 1.7)                          | 26.7%<br>(16.2% to 41.1%)                         | -4.4%<br>(-12.3% to 6.5%)                        |
| Alcohol use disorders                                    | 11.7<br>(10.2 to 13.1)                             | 0.7<br>(0.5 to 1.1)                          | 29.4%<br>(23.7% to 34.7%)                         | -2.4%<br>(-6.6% to 1.7%)                         |
| Digestive congenital anomalies                           | 10.3<br>(8.1 to 12.9)                              | 0.5<br>(0.3 to 0.8)                          | 30.6%<br>(27.1% to 34.0%)                         | -1.4%<br>(-4.1% to 1.1%)                         |
| Tetanus                                                  | 1.6<br>(1.0 to 2.2)                                | <0.05<br>(<0.05 to 0.1)                      | 33.0%<br>(-12.8% to 92.8%)                        | 0.4%<br>(-34.2% to 45.5%)                        |
| Klinefelter syndrome                                     | 1.2<br>(0.8 to 1.7)                                | <0.05<br>(<0.05 to <0.05)                    | 30.0%<br>(27.2% to 33.1%)                         | -1.9%<br>(-4.0% to 0.5%)                         |
| Other chromosomal abnormalities                          | <0.05<br>(<0.05 to <0.05)                          | <0.05<br>(<0.05 to <0.05)                    | 6.0%<br>(-72.3% to 334.9%)                        | -20.0%<br>(-79.1% to 228.2%)                     |
| <b>All causes</b>                                        | <b>3,414.5</b><br><b>(2,606.8 to 4,215.3)</b>      | <b>337.5</b><br><b>(248.5 to 438.9)</b>      | <b>32.5%</b><br><b>(29.6% to 36.4%)</b>           | <b>0.0%</b><br><b>(-2.2% to 2.9%)</b>            |

SR Table 13b: Global prevalence and years lived with disability (YLDs) for 2016, percentage change of YLD counts and rates between 2006 and 2016 of developmental intellectual disability by cause, ages 70-74 years

| Cause                                                    | Prevalence in thousands (95% uncertainty interval) | YLDs in thousands (95% uncertainty interval) |                                                   |                                                  |
|----------------------------------------------------------|----------------------------------------------------|----------------------------------------------|---------------------------------------------------|--------------------------------------------------|
|                                                          |                                                    | 2016                                         | Percentage change in counts between 2006 and 2016 | Percentage change in rates between 2006 and 2016 |
| Autism                                                   | 272.2<br>(228.3 to 328.1)                          | 66.5<br>(43.6 to 98.0)                       | 20.7%<br>(17.3% to 24.2%)                         | 0.9%<br>(-2.0% to 3.8%)                          |
| Idiopathic developmental intellectual disability         | 978.0<br>(477.9 to 1,469.4)                        | 48.0<br>(24.0 to 79.3)                       | 9.8%<br>(5.6% to 12.9%)                           | -8.2%<br>(-11.7% to -5.6%)                       |
| Neonatal preterm birth complications                     | 216.5<br>(154.1 to 288.6)                          | 19.7<br>(12.0 to 27.8)                       | 34.8%<br>(13.9% to 59.9%)                         | 12.7%<br>(-4.8% to 33.7%)                        |
| Neonatal sepsis and other neonatal infections            | 42.5<br>(17.0 to 108.3)                            | 14.4<br>(4.0 to 41.3)                        | 42.0%<br>(31.7% to 62.7%)                         | 18.7%<br>(10.1% to 36.0%)                        |
| Encephalitis                                             | 184.6<br>(70.4 to 343.6)                           | 13.8<br>(8.0 to 19.8)                        | 13.1%<br>(3.3% to 22.1%)                          | -5.5%<br>(-13.3% to -2.1%)                       |
| Congenital heart anomalies                               | 214.3<br>(192.0 to 238.7)                          | 11.9<br>(4.9 to 20.6)                        | 26.5%<br>(21.7% to 31.2%)                         | 5.8%<br>(1.7% to 9.6%)                           |
| Neural tube defects                                      | 25.4<br>(18.6 to 34.3)                             | 9.1<br>(5.6 to 13.5)                         | 19.3%<br>(15.4% to 23.3%)                         | -0.3%<br>(-3.5% to 3.1%)                         |
| Neonatal encephalopathy due to birth asphyxia and trauma | 55.5<br>(33.8 to 82.1)                             | 6.0<br>(2.7 to 11.6)                         | 33.5%<br>(20.6% to 48.4%)                         | 11.6%<br>(0.8% to 24.0%)                         |
| Haemolytic disease and other neonatal jaundice           | 5.6<br>(3.7 to 7.0)                                | 2.7<br>(1.5 to 3.8)                          | 34.1%<br>(26.1% to 40.6%)                         | 12.1%<br>(5.4% to 17.5%)                         |
| Pneumococcal meningitis                                  | 28.8<br>(20.4 to 39.8)                             | 2.1<br>(1.3 to 3.0)                          | 15.8%<br>(7.8% to 23.9%)                          | -3.2%<br>(-9.9% to 3.5%)                         |
| Other meningitis                                         | 26.9<br>(13.6 to 40.1)                             | 1.5<br>(0.9 to 2.3)                          | 30.5%<br>(22.6% to 38.9%)                         | 9.0%<br>(2.4% to 16.1%)                          |
| Iodine deficiency                                        | 3.1<br>(2.4 to 3.5)                                | 1.1<br>(0.7 to 1.4)                          | 10.9%<br>(8.4% to 12.8%)                          | -7.3%<br>(-9.4% to -5.7%)                        |
| Malaria                                                  | 2.0<br>(1.5 to 2.4)                                | 1.0<br>(0.7 to 1.4)                          | 15.3%<br>(-0.9% to 30.8%)                         | -3.6%<br>(-17.2% to 9.3%)                        |
| H influenzae type B meningitis                           | 8.3<br>(4.7 to 12.5)                               | 0.6<br>(0.4 to 0.9)                          | -5.4%<br>(-18.7% to 6.1%)                         | -20.9%<br>(-32.1% to -11.3%)                     |
| Meningococcal infection                                  | 8.3<br>(3.7 to 13.3)                               | 0.6<br>(0.3 to 1.1)                          | 30.3%<br>(10.7% to 67.2%)                         | 8.9%<br>(-7.5% to 39.8%)                         |
| Alcohol use disorders                                    | 7.5<br>(6.5 to 8.7)                                | 0.5<br>(0.3 to 0.7)                          | 15.4%<br>(10.5% to 19.9%)                         | -3.6%<br>(-7.6% to 0.2%)                         |
| Digestive congenital anomalies                           | 7.6<br>(6.0 to 9.5)                                | 0.4<br>(0.2 to 0.6)                          | 17.3%<br>(14.1% to 20.4%)                         | -2.0%<br>(-4.6% to 0.6%)                         |
| Tetanus                                                  | 1.1<br>(0.7 to 1.5)                                | <0.05<br>(<0.05 to 0.1)                      | 25.6%<br>(-16.0% to 80.0%)                        | 5.0%<br>(-29.8% to 50.4%)                        |
| Klinefelter syndrome                                     | 0.6<br>(0.3 to 0.8)                                | <0.05<br>(<0.05 to <0.05)                    | 23.9%<br>(21.0% to 27.3%)                         | 3.5%<br>(1.2% to 6.4%)                           |
| Other chromosomal abnormalities                          | <0.05<br>(<0.05 to <0.05)                          | <0.05<br>(<0.05 to <0.05)                    | 28.1%<br>(-68.0% to 484.4%)                       | 7.1%<br>(-73.2% to 388.4%)                       |
| <b>All causes</b>                                        | <b>2,088.8</b><br><b>(1,608.6 to 2,566.2)</b>      | <b>199.9</b><br><b>(146.5 to 259.5)</b>      | <b>20.4%</b><br><b>(18.0% to 23.5%)</b>           | <b>0.7%</b><br><b>(-1.3% to 3.2%)</b>            |

SR Table 13b: Global prevalence and years lived with disability (YLDs) for 2016, percentage change of YLD counts and rates between 2006 and 2016 of developmental intellectual disability by cause, ages 75-79 years

| Cause                                                    | Prevalence in thousands (95% uncertainty interval) | YLDs in thousands (95% uncertainty interval) |                                                   |                                                  |
|----------------------------------------------------------|----------------------------------------------------|----------------------------------------------|---------------------------------------------------|--------------------------------------------------|
|                                                          |                                                    | 2016                                         | Percentage change in counts between 2006 and 2016 | Percentage change in rates between 2006 and 2016 |
| Autism                                                   | 194.0<br>(162.2 to 234.1)                          | 46.6<br>(30.4 to 68.6)                       | 24.2%<br>(20.3% to 28.3%)                         | -0.1%<br>(-3.2% to 3.1%)                         |
| Idiopathic developmental intellectual disability         | 573.5<br>(265.7 to 887.4)                          | 30.0<br>(15.0 to 48.3)                       | 15.7%<br>(10.7% to 19.1%)                         | -7.0%<br>(-11.0% to -4.3%)                       |
| Congenital heart anomalies                               | 165.0<br>(148.0 to 183.7)                          | 9.0<br>(3.7 to 15.7)                         | 28.8%<br>(23.6% to 34.1%)                         | 3.6%<br>(-0.6% to 7.8%)                          |
| Neonatal preterm birth complications                     | 133.1<br>(91.9 to 179.5)                           | 8.4<br>(5.2 to 12.2)                         | 34.1%<br>(15.9% to 58.5%)                         | 7.8%<br>(-6.8% to 27.5%)                         |
| Encephalitis                                             | 130.3<br>(42.9 to 251.7)                           | 8.1<br>(4.8 to 11.7)                         | 21.8%<br>(11.2% to 32.4%)                         | -2.0%<br>(-10.6% to 6.5%)                        |
| Neonatal sepsis and other neonatal infections            | 22.6<br>(8.8 to 53.8)                              | 7.1<br>(1.6 to 20.4)                         | 54.3%<br>(43.4% to 77.0%)                         | 24.1%<br>(15.3% to 42.3%)                        |
| Neural tube defects                                      | 18.5<br>(13.5 to 25.0)                             | 6.6<br>(4.1 to 9.9)                          | 23.4%<br>(19.8% to 27.2%)                         | -0.8%<br>(-3.6% to 2.3%)                         |
| Neonatal encephalopathy due to birth asphyxia and trauma | 35.1<br>(20.9 to 52.4)                             | 2.7<br>(1.2 to 5.4)                          | 45.0%<br>(25.2% to 60.5%)                         | 16.6%<br>(0.7% to 29.1%)                         |
| Haemolytic disease and other neonatal jaundice           | 2.7<br>(1.7 to 3.4)                                | 1.4<br>(0.7 to 1.9)                          | 45.0%<br>(35.6% to 52.6%)                         | 16.6%<br>(9.1% to 22.7%)                         |
| Pneumococcal meningitis                                  | 17.6<br>(11.8 to 25.2)                             | 1.0<br>(0.6 to 1.4)                          | 19.6%<br>(9.8% to 28.8%)                          | -3.9%<br>(-11.7% to 3.6%)                        |
| Other meningitis                                         | 17.7<br>(8.4 to 27.0)                              | 0.7<br>(0.4 to 1.1)                          | 42.8%<br>(34.2% to 52.4%)                         | 14.8%<br>(7.9% to 22.6%)                         |
| Malaria                                                  | 0.8<br>(0.6 to 1.0)                                | 0.4<br>(0.3 to 0.6)                          | 33.5%<br>(18.8% to 47.1%)                         | 7.3%<br>(-4.4% to 18.3%)                         |
| Meningococcal infection                                  | 5.9<br>(2.2 to 9.5)                                | 0.4<br>(0.2 to 1.1)                          | 92.5%<br>(14.8% to 400.8%)                        | 54.8%<br>(-7.7% to 302.7%)                       |
| Alcohol use disorders                                    | 5.3<br>(4.5 to 6.2)                                | 0.3<br>(0.2 to 0.5)                          | 16.5%<br>(11.8% to 20.9%)                         | -6.3%<br>(-10.1% to -2.8%)                       |
| Digestive congenital anomalies                           | 6.2<br>(4.9 to 7.8)                                | 0.3<br>(0.2 to 0.5)                          | 22.0%<br>(18.4% to 25.4%)                         | -1.9%<br>(-4.8% to 0.9%)                         |
| H influenzae type B meningitis                           | 5.1<br>(2.7 to 7.9)                                | 0.3<br>(0.2 to 0.4)                          | -2.8%<br>(-18.5% to 12.5%)                        | -21.9%<br>(-34.5% to -9.5%)                      |
| Iodine deficiency                                        | 0.4<br>(0.3 to 0.5)                                | 0.1<br>(0.1 to 0.2)                          | 20.3%<br>(14.1% to 25.2%)                         | -3.2%<br>(-8.3% to 0.7%)                         |
| Tetanus                                                  | 0.7<br>(0.4 to 0.9)                                | <0.05<br>(<0.05 to <0.05)                    | 33.2%<br>(-8.4% to 95.5%)                         | 7.1%<br>(-26.4% to 57.2%)                        |
| Klinefelter syndrome                                     | 0.3<br>(0.2 to 0.4)                                | <0.05<br>(<0.05 to <0.05)                    | 29.0%<br>(25.5% to 32.9%)                         | 3.7%<br>(0.9% to 6.9%)                           |
| Other chromosomal abnormalities                          | <0.05<br>(<0.05 to <0.05)                          | <0.05<br>(<0.05 to <0.05)                    | 26.9%<br>(-35.4% to 139.5%)                       | 2.0%<br>(-48.0% to 92.6%)                        |
| <b>All causes</b>                                        | <b>1,334.9</b><br><b>(1,033.5 to 1,629.7)</b>      | <b>123.6</b><br><b>(90.8 to 161.8)</b>       | <b>24.8%</b><br><b>(22.4% to 28.2%)</b>           | <b>0.4%</b><br><b>(-1.5% to 3.1%)</b>            |



SR Table 13b: Global prevalence and years lived with disability (YLDs) for 2016, percentage change of YLD counts and rates between 2006 and 2016 of developmental intellectual disability by cause, ages 80-84

| Cause                                                    | Prevalence in thousands (95% uncertainty interval) | YLDs in thousands (95% uncertainty interval) |                                                   |                                                  |
|----------------------------------------------------------|----------------------------------------------------|----------------------------------------------|---------------------------------------------------|--------------------------------------------------|
|                                                          |                                                    | 2016                                         | Percentage change in counts between 2006 and 2016 | Percentage change in rates between 2006 and 2016 |
| Autism                                                   | 118.3<br>(98.5 to 143.0)                           | 27.9<br>(18.3 to 41.1)                       | 33.8%<br>(29.8% to 38.4%)                         | 2.1%<br>(-0.9% to 5.7%)                          |
| Idiopathic developmental intellectual disability         | 354.8<br>(196.5 to 523.4)                          | 16.3<br>(8.5 to 26.2)                        | 24.9%<br>(19.2% to 29.0%)                         | -4.6%<br>(-9.0% to -1.5%)                        |
| Congenital heart anomalies                               | 108.7<br>(97.5 to 121.0)                           | 5.9<br>(2.4 to 10.2)                         | 34.7%<br>(29.3% to 40.5%)                         | 2.8%<br>(-1.3% to 7.2%)                          |
| Neural tube defects                                      | 11.1<br>(8.1 to 14.9)                              | 4.0<br>(2.4 to 5.9)                          | 29.7%<br>(26.0% to 33.7%)                         | -1.0%<br>(-3.8% to 2.1%)                         |
| Encephalitis                                             | 79.2<br>(22.3 to 157.3)                            | 3.8<br>(2.2 to 5.7)                          | 31.8%<br>(20.8% to 41.9%)                         | 0.6%<br>(-7.7% to 8.4%)                          |
| Neonatal sepsis and other neonatal infections            | 5.6<br>(1.0 to 16.4)                               | 2.3<br>(0.4 to 7.3)                          | 70.9%<br>(59.7% to 104.7%)                        | 30.5%<br>(21.9% to 56.3%)                        |
| Neonatal preterm birth complications                     | 1.3<br>(0.5 to 2.1)                                | 0.7<br>(0.2 to 1.2)                          | 48.5%<br>(9.1% to 95.2%)                          | 13.4%<br>(-16.7% to 49.0%)                       |
| Neonatal encephalopathy due to birth asphyxia and trauma | 1.0<br>(0.2 to 2.7)                                | 0.5<br>(0.1 to 1.4)                          | 79.4%<br>(53.4% to 121.2%)                        | 37.0%<br>(17.1% to 68.9%)                        |
| Haemolytic disease and other neonatal jaundice           | 0.9<br>(0.5 to 1.1)                                | 0.4<br>(0.2 to 0.6)                          | 55.8%<br>(42.1% to 66.7%)                         | 19.0%<br>(8.5% to 27.3%)                         |
| Pneumococcal meningitis                                  | 10.3<br>(6.7 to 15.1)                              | 0.4<br>(0.2 to 0.6)                          | 20.2%<br>(10.9% to 29.6%)                         | -8.2%<br>(-15.3% to -1.1%)                       |
| Other meningitis                                         | 10.4<br>(4.8 to 16.1)                              | 0.3<br>(0.2 to 0.5)                          | 53.8%<br>(44.0% to 64.9%)                         | 17.4%<br>(9.9% to 25.9%)                         |
| Meningococcal infection                                  | 3.7<br>(1.2 to 9.9)                                | 0.3<br>(0.1 to 1.6)                          | 203.5%<br>(15.3% to 2,127.3%)                     | 131.8%<br>(-11.9% to 1,600.6%)                   |
| Alcohol use disorders                                    | 3.9<br>(3.3 to 4.6)                                | 0.2<br>(0.2 to 0.4)                          | 18.3%<br>(11.8% to 23.9%)                         | -9.7%<br>(-14.6% to -5.4%)                       |
| Digestive congenital anomalies                           | 4.1<br>(3.2 to 5.1)                                | 0.2<br>(0.1 to 0.3)                          | 29.2%<br>(25.3% to 32.9%)                         | -1.4%<br>(-4.3% to 1.5%)                         |
| H influenzae type B meningitis                           | 2.8<br>(1.4 to 4.4)                                | 0.1<br>(0.1 to 0.2)                          | -4.4%<br>(-21.7% to 13.7%)                        | -27.0%<br>(-40.2% to -13.2%)                     |
| Malaria                                                  | 0.2<br>(0.1 to 0.2)                                | 0.1<br>(0.1 to 0.2)                          | 50.7%<br>(38.8% to 55.9%)                         | 15.1%<br>(6.0% to 19.1%)                         |
| Tetanus                                                  | 0.4<br>(0.3 to 0.6)                                | <0.05<br>(<0.05 to <0.05)                    | 45.1%<br>(-3.5% to 121.3%)                        | 10.8%<br>(-26.3% to 69.0%)                       |
| Iodine deficiency                                        | <0.05<br>(<0.05 to <0.05)                          | <0.05<br>(<0.05 to <0.05)                    | 22.6%<br>(10.6% to 32.2%)                         | -6.4%<br>(-15.6% to 0.9%)                        |
| Klinefelter syndrome                                     | 0.1<br>(0.1 to 0.2)                                | <0.05<br>(<0.05 to <0.05)                    | 43.2%<br>(39.0% to 47.5%)                         | 9.4%<br>(6.1% to 12.6%)                          |
| Other chromosomal abnormalities                          | <0.05<br>(<0.05 to <0.05)                          | <0.05<br>(<0.05 to <0.05)                    | 13.1%<br>(11.4% to 15.0%)                         | -13.6%<br>(-14.9% to -12.2%)                     |
| <b>All causes</b>                                        | <b>716.7</b><br><b>(559.1 to 871.2)</b>            | <b>63.4</b><br><b>(46.5 to 83.4)</b>         | <b>32.8%</b><br><b>(30.2% to 36.6%)</b>           | <b>1.4%</b><br><b>(-0.6% to 4.3%)</b>            |

SR Table 13b: Global prevalence and years lived with disability (YLDs) for 2016, percentage change of YLD counts and rates between 2006 and 2016 of developmental intellectual disability by cause, ages 85-89

| Cause                                                    | Prevalence in thousands (95% uncertainty interval) | YLDs in thousands (95% uncertainty interval) |                                         |                                                   |
|----------------------------------------------------------|----------------------------------------------------|----------------------------------------------|-----------------------------------------|---------------------------------------------------|
|                                                          |                                                    | 2016                                         | 2016                                    | Percentage change in counts between 2006 and 2016 |
| Autism                                                   | 62.1<br>(51.8 to 75.1)                             | 14.4<br>(9.5 to 21.3)                        | 64.1%<br>(58.6% to 70.0%)               | 2.3%<br>(-1.2% to 5.9%)                           |
| Idiopathic developmental intellectual disability         | 141.8<br>(75.6 to 218.6)                           | 6.8<br>(3.5 to 11.3)                         | 49.7%<br>(37.8% to 55.7%)               | -6.7%<br>(-14.1% to -3.0%)                        |
| Congenital heart anomalies                               | 64.1<br>(57.7 to 71.2)                             | 3.4<br>(1.4 to 5.9)                          | 67.9%<br>(60.5% to 75.2%)               | 4.6%<br>(-0.0% to 9.2%)                           |
| Neural tube defects                                      | 5.9<br>(4.3 to 8.0)                                | 2.1<br>(1.3 to 3.2)                          | 58.5%<br>(53.8% to 63.2%)               | -1.2%<br>(-4.2% to 1.7%)                          |
| Encephalitis                                             | 40.1<br>(10.0 to 80.4)                             | 1.5<br>(0.8 to 2.2)                          | 61.0%<br>(47.6% to 73.2%)               | 0.3%<br>(-8.0% to 7.9%)                           |
| Neonatal sepsis and other neonatal infections            | 1.2<br>(0.2 to 3.9)                                | 0.5<br>(0.1 to 1.7)                          | 128.6%<br>(111.8% to 183.4%)            | 42.4%<br>(32.0% to 76.6%)                         |
| Meningococcal infection                                  | 2.0<br>(0.5 to 8.9)                                | 0.2<br>(<0.05 to 1.8)                        | 410.4%<br>(31.1% to 4,524.4%)           | 218.0%<br>(-18.3% to 2,781.3%)                    |
| Pneumococcal meningitis                                  | 4.9<br>(3.1 to 7.2)                                | 0.2<br>(0.1 to 0.2)                          | 32.7%<br>(22.6% to 43.8%)               | -17.3%<br>(-23.6% to -10.4%)                      |
| Alcohol use disorders                                    | 2.1<br>(1.8 to 2.5)                                | 0.1<br>(0.1 to 0.2)                          | 52.2%<br>(41.2% to 58.1%)               | -5.2%<br>(-12.1% to -1.5%)                        |
| Digestive congenital anomalies                           | 2.5<br>(1.9 to 3.1)                                | 0.1<br>(0.1 to 0.2)                          | 60.2%<br>(55.4% to 65.0%)               | -0.2%<br>(-3.2% to 2.8%)                          |
| Other meningitis                                         | 4.9<br>(2.2 to 7.7)                                | 0.1<br>(0.1 to 0.2)                          | 78.1%<br>(67.1% to 90.2%)               | 11.0%<br>(4.1% to 18.5%)                          |
| Neonatal encephalopathy due to birth asphyxia and trauma | 0.2<br>(<0.05 to 0.6)                              | 0.1<br>(<0.05 to 0.3)                        | 139.1%<br>(92.7% to 225.8%)             | 49.0%<br>(20.0% to 103.0%)                        |
| Haemolytic disease and other neonatal jaundice           | 0.2<br>(0.1 to 0.2)                                | 0.1<br>(<0.05 to 0.1)                        | 93.0%<br>(64.2% to 115.8%)              | 20.3%<br>(2.3% to 34.4%)                          |
| H influenzae type B meningitis                           | 1.2<br>(0.6 to 2.0)                                | <0.05<br>(<0.05 to 0.1)                      | 2.8%<br>(-17.0% to 28.0%)               | -35.9%<br>(-48.3% to -20.3%)                      |
| Neonatal preterm birth complications                     | 0.1<br>(<0.05 to 0.1)                              | <0.05<br>(<0.05 to 0.1)                      | 75.8%<br>(15.8% to 163.4%)              | 9.6%<br>(-27.9% to 64.1%)                         |
| Malaria                                                  | <0.05<br>(<0.05 to <0.05)                          | <0.05<br>(<0.05 to <0.05)                    | 89.8%<br>(79.0% to 96.6%)               | 18.2%<br>(11.6% to 22.5%)                         |
| Tetanus                                                  | 0.2<br>(0.1 to 0.2)                                | <0.05<br>(<0.05 to <0.05)                    | 55.8%<br>(5.1% to 122.0%)               | -2.9%<br>(-34.5% to 38.3%)                        |
| Klinefelter syndrome                                     | <0.05<br>(<0.05 to 0.1)                            | <0.05<br>(<0.05 to <0.05)                    | 82.8%<br>(77.2% to 89.0%)               | 13.9%<br>(10.4% to 17.8%)                         |
| Other chromosomal abnormalities                          | <0.05<br>(<0.05 to <0.05)                          | <0.05<br>(<0.05 to <0.05)                    | 59.3%<br>(55.4% to 63.2%)               | -0.7%<br>(-3.2% to 1.7%)                          |
| Iodine deficiency                                        | <0.05<br>(<0.05 to <0.05)                          | <0.05<br>(<0.05 to <0.05)                    | 66.8%<br>(39.2% to 82.0%)               | 3.9%<br>(-13.3% to 13.4%)                         |
| <b>All causes</b>                                        | <b>333.6</b><br><b>(263.4 to 402.7)</b>            | <b>29.7</b><br><b>(21.8 to 38.9)</b>         | <b>61.8%</b><br><b>(58.1% to 68.2%)</b> | <b>0.8%</b><br><b>(-1.5% to 4.8%)</b>             |

SR Table 13b: Global prevalence and years lived with disability (YLDs) for 2016, percentage change of YLD counts and rates between 2006 and 2016 of developmental intellectual disability by cause, ages 90-94

| Cause                                                    | Prevalence in thousands (95% uncertainty interval) | YLDs in thousands (95% uncertainty interval) |                                         |                                                  |
|----------------------------------------------------------|----------------------------------------------------|----------------------------------------------|-----------------------------------------|--------------------------------------------------|
|                                                          |                                                    | 2016                                         | 2016                                    | Percentage change in rates between 2006 and 2016 |
| Autism                                                   | 21.9<br>(18.3 to 26.6)                             | 5.0<br>(3.3 to 7.4)                          | 71.4%<br>(65.0% to 78.0%)               | 2.4%<br>(-1.4% to 6.3%)                          |
| Idiopathic developmental intellectual disability         | 37.1<br>(18.4 to 59.9)                             | 1.9<br>(0.9 to 3.1)                          | 57.2%<br>(34.1% to 65.7%)               | -6.1%<br>(-19.9% to -1.0%)                       |
| Congenital heart anomalies                               | 25.7<br>(23.1 to 28.5)                             | 1.3<br>(0.6 to 2.3)                          | 77.1%<br>(68.7% to 84.8%)               | 5.8%<br>(0.8% to 10.4%)                          |
| Neural tube defects                                      | 2.2<br>(1.6 to 2.9)                                | 0.8<br>(0.5 to 1.2)                          | 67.6%<br>(62.7% to 72.5%)               | 0.2%<br>(-2.8% to 3.1%)                          |
| Encephalitis                                             | 13.0<br>(3.1 to 25.8)                              | 0.4<br>(0.2 to 0.6)                          | 62.3%<br>(49.6% to 75.4%)               | -3.0%<br>(-10.6% to 4.8%)                        |
| Meningococcal infection                                  | 0.7<br>(0.2 to 5.5)                                | 0.1<br>(<0.05 to 1.1)                        | 657.3%<br>(28.8% to 4,982.5%)           | 352.5%<br>(-23.1% to 2,936.5%)                   |
| Neonatal sepsis and other neonatal infections            | 0.1<br>(<0.05 to 0.4)                              | 0.1<br>(<0.05 to 0.2)                        | 158.7%<br>(134.2% to 218.7%)            | 54.5%<br>(39.9% to 90.4%)                        |
| Digestive congenital anomalies                           | 1.0<br>(0.8 to 1.3)                                | 0.1<br>(<0.05 to 0.1)                        | 69.0%<br>(64.1% to 74.1%)               | 1.0%<br>(-2.0% to 4.0%)                          |
| Alcohol use disorders                                    | 0.8<br>(0.6 to 0.9)                                | <0.05<br>(<0.05 to 0.1)                      | 56.5%<br>(27.5% to 64.8%)               | -6.5%<br>(-23.8% to -1.5%)                       |
| Pneumococcal meningitis                                  | 1.6<br>(1.0 to 2.3)                                | <0.05<br>(<0.05 to 0.1)                      | 35.7%<br>(25.5% to 46.6%)               | -18.9%<br>(-25.0% to -12.4%)                     |
| Other meningitis                                         | 1.5<br>(0.6 to 2.4)                                | <0.05<br>(<0.05 to 0.1)                      | 79.8%<br>(67.8% to 91.2%)               | 7.4%<br>(0.2% to 14.2%)                          |
| Neonatal encephalopathy due to birth asphyxia and trauma | <0.05<br>(<0.05 to 0.1)                            | <0.05<br>(<0.05 to 0.1)                      | 175.4%<br>(67.1% to 375.5%)             | 64.5%<br>(-0.2% to 184.1%)                       |
| H influenzae type B meningitis                           | 0.4<br>(0.2 to 0.6)                                | <0.05<br>(<0.05 to <0.05)                    | 3.1%<br>(-17.9% to 32.3%)               | -38.4%<br>(-51.0% to -21.0%)                     |
| Haemolytic disease and other neonatal jaundice           | <0.05<br>(<0.05 to <0.05)                          | <0.05<br>(<0.05 to <0.05)                    | 95.8%<br>(37.6% to 131.8%)              | 17.0%<br>(-17.8% to 38.5%)                       |
| Tetanus                                                  | <0.05<br>(<0.05 to 0.1)                            | <0.05<br>(<0.05 to <0.05)                    | 63.6%<br>(15.8% to 136.3%)              | -2.2%<br>(-30.8% to 41.2%)                       |
| Malaria                                                  | <0.05<br>(<0.05 to <0.05)                          | <0.05<br>(<0.05 to <0.05)                    | 101.0%<br>(90.3% to 110.9%)             | 20.1%<br>(13.7% to 26.0%)                        |
| Neonatal preterm birth complications                     | <0.05<br>(<0.05 to <0.05)                          | <0.05<br>(<0.05 to <0.05)                    | 108.9%<br>(12.9% to 206.2%)             | 24.8%<br>(-32.5% to 82.9%)                       |
| Klinefelter syndrome                                     | <0.05<br>(<0.05 to <0.05)                          | <0.05<br>(<0.05 to <0.05)                    | 90.0%<br>(83.4% to 97.3%)               | 13.5%<br>(9.6% to 17.8%)                         |
| Other chromosomal abnormalities                          | <0.05<br>(<0.05 to <0.05)                          | <0.05<br>(<0.05 to <0.05)                    | 91.2%<br>(87.6% to 94.7%)               | 14.2%<br>(12.1% to 16.3%)                        |
| Iodine deficiency                                        | <0.05<br>(<0.05 to <0.05)                          | <0.05<br>(<0.05 to <0.05)                    | 70.8%<br>(44.9% to 97.2%)               | 2.0%<br>(-13.4% to 17.8%)                        |
| <b>All causes</b>                                        | <b>106.1</b><br><b>(85.1 to 126.8)</b>             | <b>9.7</b><br><b>(7.1 to 12.7)</b>           | <b>69.6%</b><br><b>(65.0% to 82.4%)</b> | <b>1.3%</b><br><b>(-1.4% to 9.0%)</b>            |

SR Table 13b: Global prevalence and years lived with disability (YLDs) for 2016, percentage change of YLD counts and rates between 2006 and 2016 of developmental intellectual disability by cause, ages 95+ years

| Cause                                                    | Prevalence in thousands (95% uncertainty interval) | YLDs in thousands (95% uncertainty interval) |                                         |                                                   |
|----------------------------------------------------------|----------------------------------------------------|----------------------------------------------|-----------------------------------------|---------------------------------------------------|
|                                                          |                                                    | 2016                                         | 2016                                    | Percentage change in counts between 2006 and 2016 |
| Autism                                                   | 4.6<br>(3.8 to 5.5)                                | 1.0<br>(0.7 to 1.5)                          | 59.9%<br>(53.4% to 66.8%)               | 2.0%<br>(-2.1% to 6.4%)                           |
| Congenital heart anomalies                               | 6.1<br>(5.5 to 6.7)                                | 0.3<br>(0.1 to 0.5)                          | 65.3%<br>(57.2% to 73.1%)               | 5.5%<br>(0.3% to 10.4%)                           |
| Idiopathic developmental intellectual disability         | 5.7<br>(2.7 to 9.8)                                | 0.3<br>(0.2 to 0.5)                          | 47.4%<br>(20.1% to 57.4%)               | -6.0%<br>(-23.4% to 0.5%)                         |
| Neural tube defects                                      | 0.5<br>(0.4 to 0.6)                                | 0.2<br>(0.1 to 0.3)                          | 57.5%<br>(52.5% to 63.0%)               | 0.5%<br>(-2.7% to 4.0%)                           |
| Encephalitis                                             | 2.7<br>(0.6 to 5.2)                                | 0.1<br>(<0.05 to 0.1)                        | 54.3%<br>(32.8% to 63.0%)               | -1.5%<br>(-15.3% to 4.0%)                         |
| Meningococcal infection                                  | 0.2<br>(<0.05 to 1.6)                              | <0.05<br>(<0.05 to 0.3)                      | 737.1%<br>(18.2% to 3,374.8%)           | 434.2%<br>(-24.6% to 2,117.4%)                    |
| Digestive congenital anomalies                           | 0.2<br>(0.2 to 0.3)                                | <0.05<br>(<0.05 to <0.05)                    | 58.4%<br>(53.2% to 63.7%)               | 1.1%<br>(-2.2% to 4.5%)                           |
| Alcohol use disorders                                    | 0.2<br>(0.1 to 0.2)                                | <0.05<br>(<0.05 to <0.05)                    | 37.2%<br>(-8.4% to 47.9%)               | -12.4%<br>(-41.5% to -5.6%)                       |
| Pneumococcal meningitis                                  | 0.3<br>(0.2 to 0.5)                                | <0.05<br>(<0.05 to <0.05)                    | 35.1%<br>(22.3% to 46.4%)               | -13.8%<br>(-22.0% to -6.6%)                       |
| Other meningitis                                         | 0.3<br>(0.1 to 0.5)                                | <0.05<br>(<0.05 to <0.05)                    | 74.0%<br>(58.3% to 85.7%)               | 11.0%<br>(1.0% to 18.5%)                          |
| H influenzae type B meningitis                           | 0.1<br>(<0.05 to 0.1)                              | <0.05<br>(<0.05 to <0.05)                    | -0.1%<br>(-21.4% to 28.8%)              | -36.2%<br>(-49.8% to -17.8%)                      |
| Neonatal sepsis and other neonatal infections            | <0.05<br>(<0.05 to <0.05)                          | <0.05<br>(<0.05 to <0.05)                    | 149.0%<br>(124.2% to 223.1%)            | 58.9%<br>(43.0% to 106.2%)                        |
| Neonatal encephalopathy due to birth asphyxia and trauma | <0.05<br>(<0.05 to <0.05)                          | <0.05<br>(<0.05 to <0.05)                    | 170.1%<br>(10.3% to 569.0%)             | 72.3%<br>(-29.6% to 326.9%)                       |
| Haemolytic disease and other neonatal jaundice           | <0.05<br>(<0.05 to <0.05)                          | <0.05<br>(<0.05 to <0.05)                    | 77.8%<br>(-12.2% to 139.1%)             | 13.5%<br>(-44.0% to 52.6%)                        |
| Tetanus                                                  | <0.05<br>(<0.05 to <0.05)                          | <0.05<br>(<0.05 to <0.05)                    | 70.0%<br>(19.8% to 135.1%)              | 8.5%<br>(-23.6% to 50.0%)                         |
| Malaria                                                  | <0.05<br>(<0.05 to <0.05)                          | <0.05<br>(<0.05 to <0.05)                    | 78.7%<br>(65.7% to 90.4%)               | 14.1%<br>(5.7% to 21.5%)                          |
| Neonatal preterm birth complications                     | <0.05<br>(<0.05 to <0.05)                          | <0.05<br>(<0.05 to <0.05)                    | 108.1%<br>(-33.0% to 246.1%)            | 32.8%<br>(-57.2% to 120.9%)                       |
| Klinefelter syndrome                                     | <0.05<br>(<0.05 to <0.05)                          | <0.05<br>(<0.05 to <0.05)                    | 63.6%<br>(57.6% to 69.6%)               | 4.4%<br>(0.6% to 8.2%)                            |
| Other chromosomal abnormalities                          | <0.05<br>(<0.05 to <0.05)                          | <0.05<br>(<0.05 to <0.05)                    | 84.5%<br>(77.7% to 90.0%)               | 17.7%<br>(13.4% to 21.3%)                         |
| Iodine deficiency                                        | <0.05<br>(<0.05 to <0.05)                          | <0.05<br>(<0.05 to <0.05)                    | 74.5%<br>(40.5% to 120.1%)              | 11.3%<br>(-10.3% to 40.5%)                        |
| <b>All causes</b>                                        | <b>20.8</b><br><b>(17.0 to 24.5)</b>               | <b>2.0</b><br><b>(1.4 to 2.6)</b>            | <b>59.1%</b><br><b>(54.4% to 74.0%)</b> | <b>1.5%</b><br><b>(-1.5% to 11.0%)</b>            |

SR Table 13c: Global prevalence and years lived with disability (YLDs) for 2016, percentage change of YLD counts and rates between 2006 and 2016 of epilepsy by cause, ages 0-6 days

| Cause                                                    | Prevalence in thousands (95% uncertainty interval) | YLDs in thousands (95% uncertainty interval) |                                         |                                                  |
|----------------------------------------------------------|----------------------------------------------------|----------------------------------------------|-----------------------------------------|--------------------------------------------------|
|                                                          |                                                    | 2016                                         | 2016                                    | Percentage change in rates between 2006 and 2016 |
| Neonatal sepsis and other neonatal infections            | 8.5<br>(3.6 to 18.5)                               | 4.3<br>(1.8 to 10.1)                         | -4.9%<br>(-8.3% to -1.3%)               | -4.4%<br>(-7.8% to -0.8%)                        |
| Neonatal preterm birth complications                     | 0.9<br>(0.5 to 1.3)                                | 0.4<br>(0.2 to 0.6)                          | -16.4%<br>(-25.5% to -7.5%)             | -15.9%<br>(-25.1% to -7.1%)                      |
| Neonatal encephalopathy due to birth asphyxia and trauma | 0.3<br>(0.2 to 0.5)                                | 0.1<br>(0.1 to 0.2)                          | -14.0%<br>(-29.5% to 1.3%)              | -13.5%<br>(-29.1% to 1.9%)                       |
| Zika virus disease                                       | <0.05<br>(<0.05 to 0.1)                            | <0.05<br>(<0.05 to <0.05)                    | --                                      | --                                               |
| Epilepsy                                                 | 0.1<br>(<0.05 to 0.1)                              | <0.05<br>(<0.05 to <0.05)                    | -7.6%<br>(-19.3% to 6.0%)               | -7.1%<br>(-18.8% to 6.6%)                        |
| Haemolytic disease and other neonatal jaundice           | <0.05<br>(<0.05 to 0.1)                            | <0.05<br>(<0.05 to <0.05)                    | -9.2%<br>(-20.5% to 0.7%)               | -8.7%<br>(-20.1% to 1.2%)                        |
| Tetanus                                                  | <0.05<br>(<0.05 to <0.05)                          | <0.05<br>(<0.05 to <0.05)                    | -32.7%<br>(-42.7% to -22.9%)            | -32.4%<br>(-42.4% to -22.5%)                     |
| Encephalitis                                             | <0.05<br>(<0.05 to <0.05)                          | <0.05<br>(<0.05 to <0.05)                    | -2.8%<br>(-23.4% to 23.9%)              | -2.3%<br>(-23.0% to 24.5%)                       |
| Pneumococcal meningitis                                  | <0.05<br>(<0.05 to <0.05)                          | <0.05<br>(<0.05 to <0.05)                    | -4.7%<br>(-25.9% to 19.3%)              | -4.2%<br>(-25.5% to 19.9%)                       |
| H influenzae type B meningitis                           | <0.05<br>(<0.05 to <0.05)                          | <0.05<br>(<0.05 to <0.05)                    | -2.2%<br>(-26.3% to 26.6%)              | -1.7%<br>(-25.9% to 27.3%)                       |
| Other meningitis                                         | <0.05<br>(<0.05 to <0.05)                          | <0.05<br>(<0.05 to <0.05)                    | 26.7%<br>(-1.2% to 57.4%)               | 27.3%<br>(-0.7% to 58.2%)                        |
| Meningococcal infection                                  | <0.05<br>(<0.05 to <0.05)                          | <0.05<br>(<0.05 to <0.05)                    | 4.8%<br>(-17.3% to 27.4%)               | 5.4%<br>(-16.8% to 28.1%)                        |
| <b>All causes</b>                                        | <b>9.8</b><br><b>(5.1 to 19.8)</b>                 | <b>4.9</b><br><b>(2.4 to 10.6)</b>           | <b>-5.7%</b><br><b>(-8.8% to -2.7%)</b> | <b>-5.2%</b><br><b>(-8.3% to -2.2%)</b>          |

SR Table 13c: Global prevalence and years lived with disability (YLDs) for 2016, percentage change of YLD counts and rates between 2006 and 2016 of epilepsy by cause, ages 7-27 days

| Cause                                                    | Prevalence in thousands (95% uncertainty interval) | YLDs in thousands (95% uncertainty interval) |                                                   |                                                  |
|----------------------------------------------------------|----------------------------------------------------|----------------------------------------------|---------------------------------------------------|--------------------------------------------------|
|                                                          |                                                    | 2016                                         | Percentage change in counts between 2006 and 2016 | Percentage change in rates between 2006 and 2016 |
| Neonatal sepsis and other neonatal infections            | 24.3<br>(10.5 to 53.8)                             | 12.4<br>(5.3 to 28.5)                        | -3.3%<br>(-6.8% to 0.5%)                          | -3.2%<br>(-6.6% to 0.7%)                         |
| Neonatal preterm birth complications                     | 2.8<br>(1.8 to 4.0)                                | 1.1<br>(0.6 to 1.8)                          | -14.9%<br>(-24.6% to -5.4%)                       | -14.7%<br>(-24.5% to -5.2%)                      |
| Neonatal encephalopathy due to birth asphyxia and trauma | 1.0<br>(0.6 to 1.7)                                | 0.4<br>(0.2 to 0.7)                          | -11.8%<br>(-26.7% to 3.1%)                        | -11.6%<br>(-26.6% to 3.2%)                       |
| Epilepsy                                                 | 0.8<br>(0.6 to 1.0)                                | 0.3<br>(0.2 to 0.4)                          | -6.8%<br>(-18.5% to 6.9%)                         | -6.6%<br>(-18.4% to 7.1%)                        |
| Zika virus disease                                       | 0.1<br>(0.1 to 0.2)                                | 0.1<br>(<0.05 to 0.1)                        | --                                                | --                                               |
| Haemolytic disease and other neonatal jaundice           | 0.2<br>(0.1 to 0.2)                                | 0.1<br>(<0.05 to 0.1)                        | -6.9%<br>(-17.6% to 3.0%)                         | -6.7%<br>(-17.4% to 3.1%)                        |
| Tetanus                                                  | <0.05<br>(<0.05 to <0.05)                          | <0.05<br>(<0.05 to <0.05)                    | -32.0%<br>(-41.6% to -22.8%)                      | -31.9%<br>(-41.5% to -22.6%)                     |
| Malaria                                                  | <0.05<br>(<0.05 to <0.05)                          | <0.05<br>(<0.05 to <0.05)                    | -3.5%<br>(-17.3% to 9.5%)                         | -3.4%<br>(-17.2% to 9.7%)                        |
| Encephalitis                                             | <0.05<br>(<0.05 to <0.05)                          | <0.05<br>(<0.05 to <0.05)                    | -5.0%<br>(-24.4% to 19.6%)                        | -4.8%<br>(-24.2% to 19.9%)                       |
| Pneumococcal meningitis                                  | <0.05<br>(<0.05 to <0.05)                          | <0.05<br>(<0.05 to <0.05)                    | -3.0%<br>(-23.8% to 18.1%)                        | -2.8%<br>(-23.6% to 18.3%)                       |
| H influenzae type B meningitis                           | <0.05<br>(<0.05 to <0.05)                          | <0.05<br>(<0.05 to <0.05)                    | -1.8%<br>(-24.7% to 24.4%)                        | -1.6%<br>(-24.6% to 24.7%)                       |
| Other meningitis                                         | <0.05<br>(<0.05 to <0.05)                          | <0.05<br>(<0.05 to <0.05)                    | 27.0%<br>(2.0% to 52.9%)                          | 27.2%<br>(2.2% to 53.2%)                         |
| Meningococcal infection                                  | <0.05<br>(<0.05 to <0.05)                          | <0.05<br>(<0.05 to <0.05)                    | 8.3%<br>(-14.5% to 36.0%)                         | 8.5%<br>(-14.4% to 36.2%)                        |
| <b>All causes</b>                                        | <b>29.1</b><br><b>(15.8 to 57.7)</b>               | <b>14.4</b><br><b>(7.0 to 30.2)</b>          | <b>-4.2%</b><br><b>(-7.4% to -1.0%)</b>           | <b>-4.0%</b><br><b>(-7.2% to -0.8%)</b>          |

SR Table 13c: Global prevalence and years lived with disability (YLDs) for 2016, percentage change of YLD counts and rates between 2006 and 2016 of epilepsy by cause, ages 28-364 days

| Cause                                                    | Prevalence in thousands (95% uncertainty interval) |                                         | YLDs in thousands (95% uncertainty interval)      |                                                  |
|----------------------------------------------------------|----------------------------------------------------|-----------------------------------------|---------------------------------------------------|--------------------------------------------------|
|                                                          | 2016                                               | 2016                                    | Percentage change in counts between 2006 and 2016 | Percentage change in rates between 2006 and 2016 |
| Neonatal sepsis and other neonatal infections            | 291.2<br>(122.4 to 659.8)                          | 147.2<br>(59.8 to 347.0)                | 5.9%<br>(0.5% to 12.8%)                           | 5.0%<br>(-0.4% to 11.9%)                         |
| Epilepsy                                                 | 118.8<br>(91.8 to 150.9)                           | 41.4<br>(26.7 to 59.2)                  | -2.5%<br>(-15.1% to 12.9%)                        | -3.3%<br>(-15.8% to 12.0%)                       |
| Neonatal preterm birth complications                     | 102.0<br>(74.5 to 132.5)                           | 36.2<br>(22.8 to 53.2)                  | -8.0%<br>(-20.7% to 6.6%)                         | -8.7%<br>(-21.3% to 5.7%)                        |
| Neonatal encephalopathy due to birth asphyxia and trauma | 33.4<br>(18.7 to 55.7)                             | 11.8<br>(5.8 to 20.9)                   | 6.6%<br>(-6.1% to 21.5%)                          | 5.7%<br>(-6.9% to 20.5%)                         |
| Haemolytic disease and other neonatal jaundice           | 8.5<br>(6.5 to 11.1)                               | 3.0<br>(2.0 to 4.3)                     | 2.2%<br>(-6.5% to 10.1%)                          | 1.3%<br>(-7.3% to 9.2%)                          |
| Zika virus disease                                       | 1.9<br>(1.3 to 3.9)                                | 1.3<br>(0.7 to 2.2)                     | --                                                | --                                               |
| Pneumococcal meningitis                                  | 1.5<br>(0.9 to 2.2)                                | 0.3<br>(0.1 to 0.5)                     | -5.2%<br>(-17.1% to 8.3%)                         | -5.9%<br>(-17.8% to 7.4%)                        |
| H influenzae type B meningitis                           | 1.1<br>(0.7 to 1.7)                                | 0.2<br>(0.1 to 0.4)                     | -0.1%<br>(-17.5% to 19.2%)                        | -0.9%<br>(-18.2% to 18.2%)                       |
| Malaria                                                  | 0.5<br>(0.3 to 0.8)                                | 0.2<br>(0.1 to 0.3)                     | 9.1%<br>(-3.2% to 21.7%)                          | 8.2%<br>(-4.0% to 20.7%)                         |
| Other meningitis                                         | 1.0<br>(0.5 to 1.5)                                | 0.2<br>(0.1 to 0.3)                     | 39.5%<br>(19.5% to 61.1%)                         | 38.4%<br>(18.5% to 59.7%)                        |
| Encephalitis                                             | 0.9<br>(0.6 to 1.4)                                | 0.2<br>(0.1 to 0.3)                     | -6.5%<br>(-18.5% to 7.5%)                         | -7.3%<br>(-19.2% to 6.6%)                        |
| Meningococcal infection                                  | 0.4<br>(0.2 to 0.7)                                | 0.1<br>(<0.05 to 0.1)                   | 21.5%<br>(5.0% to 41.3%)                          | 20.5%<br>(4.1% to 40.1%)                         |
| Tetanus                                                  | <0.05<br>(<0.05 to <0.05)                          | <0.05<br>(<0.05 to <0.05)               | -20.2%<br>(-29.7% to -10.5%)                      | -20.8%<br>(-30.3% to -11.2%)                     |
| <b>All causes</b>                                        | <b>561.3</b><br><b>(395.5 to 887.2)</b>            | <b>241.9</b><br><b>(149.5 to 433.2)</b> | <b>2.6%</b><br><b>(-2.5% to 7.6%)</b>             | <b>1.8%</b><br><b>(-3.3% to 6.7%)</b>            |

SR Table 13c: Global prevalence and years lived with disability (YLDs) for 2016, percentage change of YLD counts and rates between 2006 and 2016 of epilepsy by cause, ages 1-4 years

| Cause                                                    | Prevalence in thousands (95% uncertainty interval) | YLDs in thousands (95% uncertainty interval) |                                                   |                                                  |
|----------------------------------------------------------|----------------------------------------------------|----------------------------------------------|---------------------------------------------------|--------------------------------------------------|
|                                                          |                                                    | 2016                                         | Percentage change in counts between 2006 and 2016 | Percentage change in rates between 2006 and 2016 |
| Epilepsy                                                 | 1,568.9<br>(1,180.5 to 2,073.8)                    | 545.0<br>(344.9 to 820.0)                    | 8.2%<br>(-4.9% to 23.8%)                          | 2.5%<br>(-9.9% to 17.2%)                         |
| Neonatal sepsis and other neonatal infections            | 722.7<br>(271.6 to 1,718.1)                        | 355.5<br>(125.2 to 867.6)                    | 26.0%<br>(16.9% to 39.6%)                         | 19.3%<br>(10.7% to 32.2%)                        |
| Neonatal preterm birth complications                     | 593.1<br>(433.2 to 776.4)                          | 209.9<br>(130.1 to 312.1)                    | -1.7%<br>(-15.1% to 13.6%)                        | -6.9%<br>(-19.6% to 7.6%)                        |
| Neonatal encephalopathy due to birth asphyxia and trauma | 118.0<br>(24.2 to 305.2)                           | 42.4<br>(7.6 to 115.7)                       | 32.8%<br>(13.4% to 86.2%)                         | 25.8%<br>(7.4% to 76.4%)                         |
| Haemolytic disease and other neonatal jaundice           | 51.1<br>(41.0 to 63.7)                             | 18.6<br>(12.2 to 26.5)                       | 4.5%<br>(-1.6% to 10.6%)                          | -1.1%<br>(-6.8% to 4.8%)                         |
| Malaria                                                  | 32.8<br>(23.1 to 43.8)                             | 13.2<br>(7.9 to 20.2)                        | 6.5%<br>(-8.5% to 22.1%)                          | 0.9%<br>(-13.3% to 15.7%)                        |
| Pneumococcal meningitis                                  | 34.8<br>(28.1 to 42.3)                             | 6.4<br>(4.2 to 9.4)                          | -2.6%<br>(-19.3% to 16.7%)                        | -7.7%<br>(-23.6% to 10.5%)                       |
| Encephalitis                                             | 32.3<br>(24.9 to 41.3)                             | 5.7<br>(3.5 to 8.4)                          | -2.6%<br>(-16.0% to 12.4%)                        | -7.8%<br>(-20.5% to 6.5%)                        |
| H influenzae type B meningitis                           | 24.8<br>(19.4 to 30.8)                             | 4.6<br>(3.0 to 6.8)                          | -4.2%<br>(-23.4% to 20.8%)                        | -9.2%<br>(-27.5% to 14.4%)                       |
| Other meningitis                                         | 21.1<br>(16.5 to 26.1)                             | 3.9<br>(2.4 to 5.8)                          | 30.8%<br>(10.5% to 55.6%)                         | 23.9%<br>(4.7% to 47.3%)                         |
| Meningococcal infection                                  | 8.7<br>(6.8 to 11.0)                               | 1.7<br>(1.0 to 2.4)                          | 14.7%<br>(1.4% to 28.4%)                          | 8.7%<br>(-3.9% to 21.6%)                         |
| Zika virus disease                                       | 0.4<br>(0.2 to 0.6)                                | 0.3<br>(0.1 to 0.4)                          | --                                                | --                                               |
| Cystic echinococcosis                                    | 0.4<br>(0.1 to 1.1)                                | 0.1<br>(<0.05 to 0.2)                        | -40.8%<br>(-80.8% to 85.4%)                       | -43.9%<br>(-81.8% to 75.6%)                      |
| Food-borne trematodiasis                                 | 0.3<br>(0.1 to 0.7)                                | <0.05<br>(<0.05 to 0.1)                      | -20.4%<br>(-26.1% to -14.8%)                      | -24.6%<br>(-30.0% to -19.3%)                     |
| Tetanus                                                  | <0.05<br>(<0.05 to <0.05)                          | <0.05<br>(<0.05 to <0.05)                    | -22.2%<br>(-32.7% to -12.5%)                      | -26.3%<br>(-36.3% to -17.1%)                     |
| <b>All causes</b>                                        | <b>3,209.4</b><br><b>(2,531.5 to 4,277.6)</b>      | <b>1,207.2</b><br><b>(861.1 to 1,775.9)</b>  | <b>11.4%</b><br><b>(3.0% to 20.0%)</b>            | <b>5.5%</b><br><b>(-2.4% to 13.7%)</b>           |



SR Table 13c: Global prevalence and years lived with disability (YLDs) for 2016, percentage change of YLD counts and rates between 2006 and 2016 of epilepsy by cause, ages 5-9 years

| Cause                                                    | Prevalence in thousands (95% uncertainty interval) | YLDs in thousands (95% uncertainty interval)  |                                                   |                                                  |
|----------------------------------------------------------|----------------------------------------------------|-----------------------------------------------|---------------------------------------------------|--------------------------------------------------|
|                                                          |                                                    | 2016                                          | Percentage change in counts between 2006 and 2016 | Percentage change in rates between 2006 and 2016 |
| Epilepsy                                                 | 2,406.8<br>(1,798.7 to 3,146.4)                    | 827.9<br>(519.9 to 1,251.8)                   | 10.7%<br>(-2.8% to 26.6%)                         | 2.8%<br>(-9.7% to 17.6%)                         |
| Neonatal preterm birth complications                     | 949.9<br>(691.4 to 1,231.4)                        | 361.7<br>(223.7 to 527.6)                     | 7.3%<br>(-6.9% to 22.0%)                          | -0.3%<br>(-13.6% to 13.3%)                       |
| Neonatal sepsis and other neonatal infections            | 667.7<br>(192.5 to 1,674.2)                        | 312.4<br>(89.1 to 804.4)                      | 33.1%<br>(22.1% to 52.1%)                         | 23.6%<br>(13.4% to 41.3%)                        |
| Neonatal encephalopathy due to birth asphyxia and trauma | 157.5<br>(28.4 to 440.4)                           | 60.2<br>(9.8 to 174.8)                        | 41.0%<br>(18.8% to 95.1%)                         | 30.9%<br>(10.3% to 81.2%)                        |
| Malaria                                                  | 122.6<br>(97.7 to 149.9)                           | 51.5<br>(32.6 to 72.2)                        | 14.7%<br>(1.0% to 30.4%)                          | 6.5%<br>(-6.2% to 21.1%)                         |
| Haemolytic disease and other neonatal jaundice           | 80.4<br>(63.9 to 97.6)                             | 31.4<br>(20.4 to 44.5)                        | 8.2%<br>(1.0% to 14.6%)                           | 0.5%<br>(-6.2% to 6.4%)                          |
| Encephalitis                                             | 72.0<br>(54.0 to 94.3)                             | 12.4<br>(7.7 to 18.1)                         | -1.7%<br>(-16.6% to 16.9%)                        | -8.7%<br>(-22.6% to 8.6%)                        |
| Pneumococcal meningitis                                  | 44.8<br>(34.7 to 56.8)                             | 8.1<br>(5.1 to 12.0)                          | -1.5%<br>(-20.4% to 17.2%)                        | -8.5%<br>(-26.1% to 8.9%)                        |
| H influenzae type B meningitis                           | 29.0<br>(22.2 to 37.4)                             | 5.4<br>(3.4 to 8.0)                           | -4.3%<br>(-21.5% to 17.0%)                        | -11.1%<br>(-27.1% to 8.6%)                       |
| Other meningitis                                         | 24.5<br>(18.9 to 30.8)                             | 4.5<br>(2.9 to 6.6)                           | 21.4%<br>(2.9% to 43.0%)                          | 12.7%<br>(-4.5% to 32.8%)                        |
| Meningococcal infection                                  | 10.1<br>(7.7 to 13.3)                              | 1.9<br>(1.2 to 2.8)                           | 13.8%<br>(2.5% to 25.1%)                          | 5.7%<br>(-4.8% to 16.2%)                         |
| Food-borne trematodiasis                                 | 4.7<br>(1.3 to 11.2)                               | 0.7<br>(0.2 to 1.7)                           | -18.7%<br>(-42.3% to 15.0%)                       | -24.5%<br>(-46.4% to 6.8%)                       |
| Cystic echinococcosis                                    | 0.6<br>(0.1 to 1.7)                                | 0.1<br>(<0.05 to 0.4)                         | -43.5%<br>(-82.3% to 67.6%)                       | -47.5%<br>(-83.6% to 55.7%)                      |
| Cysticercosis                                            | 0.4<br>(0.1 to 0.8)                                | 0.1<br>(<0.05 to 0.2)                         | -2.4%<br>(-17.6% to 12.8%)                        | -9.3%<br>(-23.5% to 4.7%)                        |
| Tetanus                                                  | <0.05<br>(<0.05 to <0.05)                          | <0.05<br>(<0.05 to <0.05)                     | -27.1%<br>(-46.8% to -2.3%)                       | -32.3%<br>(-50.6% to -9.3%)                      |
| <b>All causes</b>                                        | <b>4,571.0</b><br><b>(3,674.1 to 5,781.8)</b>      | <b>1,678.3</b><br><b>(1,243.9 to 2,364.3)</b> | <b>14.2%</b><br><b>(5.7% to 23.1%)</b>            | <b>6.1%</b><br><b>(-1.9% to 14.4%)</b>           |

SR Table 13c: Global prevalence and years lived with disability (YLDs) for 2016, percentage change of YLD counts and rates between 2006 and 2016 of epilepsy by cause, ages 10-14 years

| Cause                                                    | Prevalence in thousands (95% uncertainty interval) | YLDs in thousands (95% uncertainty interval)  |                                                   |                                                  |
|----------------------------------------------------------|----------------------------------------------------|-----------------------------------------------|---------------------------------------------------|--------------------------------------------------|
|                                                          |                                                    | 2016                                          | Percentage change in counts between 2006 and 2016 | Percentage change in rates between 2006 and 2016 |
| Epilepsy                                                 | 2,271.1<br>(1,756.6 to 2,843.9)                    | 768.5<br>(487.2 to 1,114.3)                   | 0.6%<br>(-11.3% to 14.5%)                         | -0.2%<br>(-12.0% to 13.6%)                       |
| Neonatal preterm birth complications                     | 983.3<br>(711.4 to 1,280.9)                        | 380.3<br>(232.0 to 562.2)                     | 2.4%<br>(-12.6% to 19.0%)                         | 1.5%<br>(-13.3% to 18.0%)                        |
| Neonatal sepsis and other neonatal infections            | 573.8<br>(155.9 to 1,462.1)                        | 261.1<br>(69.3 to 691.2)                      | 25.8%<br>(16.7% to 41.4%)                         | 24.7%<br>(15.7% to 40.3%)                        |
| Malaria                                                  | 153.1<br>(127.8 to 179.5)                          | 64.6<br>(42.1 to 87.0)                        | 17.1%<br>(5.1% to 30.0%)                          | 16.2%<br>(4.2% to 29.0%)                         |
| Neonatal encephalopathy due to birth asphyxia and trauma | 157.9<br>(31.5 to 429.5)                           | 61.5<br>(11.4 to 177.9)                       | 29.0%<br>(13.6% to 60.0%)                         | 27.9%<br>(12.7% to 58.7%)                        |
| Haemolytic disease and other neonatal jaundice           | 83.5<br>(66.8 to 99.4)                             | 33.3<br>(21.8 to 46.4)                        | 3.6%<br>(-2.7% to 9.0%)                           | 2.8%<br>(-3.5% to 8.1%)                          |
| Encephalitis                                             | 82.3<br>(63.8 to 102.8)                            | 14.1<br>(9.1 to 20.4)                         | -12.0%<br>(-23.4% to 1.2%)                        | -12.7%<br>(-24.0% to 0.4%)                       |
| Pneumococcal meningitis                                  | 34.6<br>(27.6 to 43.6)                             | 6.3<br>(4.0 to 9.1)                           | -4.4%<br>(-20.2% to 14.1%)                        | -5.2%<br>(-20.9% to 13.2%)                       |
| H influenzae type B meningitis                           | 19.2<br>(14.9 to 24.7)                             | 3.6<br>(2.3 to 5.2)                           | -7.4%<br>(-19.3% to 5.5%)                         | -8.2%<br>(-19.9% to 4.6%)                        |
| Other meningitis                                         | 16.8<br>(13.3 to 20.6)                             | 3.1<br>(2.0 to 4.3)                           | 10.6%<br>(2.3% to 17.6%)                          | 9.7%<br>(1.5% to 16.6%)                          |
| Cysticercosis                                            | 13.2<br>(6.4 to 22.3)                              | 2.4<br>(1.1 to 4.3)                           | -9.7%<br>(-24.8% to 5.0%)                         | -10.4%<br>(-25.4% to 4.2%)                       |
| Food-borne trematodiasis                                 | 14.4<br>(4.2 to 31.2)                              | 2.2<br>(0.6 to 5.3)                           | -30.6%<br>(-48.1% to -8.4%)                       | -31.2%<br>(-48.5% to -9.1%)                      |
| Meningococcal infection                                  | 6.7<br>(5.1 to 8.6)                                | 1.3<br>(0.8 to 1.9)                           | 10.3%<br>(3.7% to 16.5%)                          | 9.4%<br>(2.9% to 15.5%)                          |
| Cystic echinococcosis                                    | 0.6<br>(0.1 to 1.9)                                | 0.1<br>(<0.05 to 0.4)                         | -42.5%<br>(-81.0% to 65.6%)                       | -43.0%<br>(-81.2% to 64.2%)                      |
| Tetanus                                                  | <0.05<br>(<0.05 to <0.05)                          | <0.05<br>(<0.05 to <0.05)                     | -49.0%<br>(-70.0% to -12.4%)                      | -49.4%<br>(-70.3% to -13.1%)                     |
| <b>All causes</b>                                        | <b>4,410.5</b><br><b>(3,630.9 to 5,423.6)</b>      | <b>1,602.3</b><br><b>(1,183.3 to 2,159.2)</b> | <b>5.8%</b><br><b>(-2.3% to 14.0%)</b>            | <b>4.9%</b><br><b>(-3.1% to 13.1%)</b>           |

SR Table 13c: Global prevalence and years lived with disability (YLDs) for 2016, percentage change of YLD counts and rates between 2006 and 2016 of epilepsy by cause, ages 15-19 years

| Cause                                                    | Prevalence in thousands (95% uncertainty interval) | YLDs in thousands (95% uncertainty interval)  |                                        |                                                   |
|----------------------------------------------------------|----------------------------------------------------|-----------------------------------------------|----------------------------------------|---------------------------------------------------|
|                                                          |                                                    | 2016                                          | 2016                                   | Percentage change in counts between 2006 and 2016 |
| Epilepsy                                                 | 2,136.2<br>(1,699.5 to 2,646.5)                    | 707.9<br>(450.5 to 1,026.7)                   | -7.1%<br>(-17.2% to 5.9%)              | -1.7%<br>(-12.3% to 12.1%)                        |
| Neonatal preterm birth complications                     | 904.8<br>(645.6 to 1,187.3)                        | 347.0<br>(214.9 to 513.6)                     | -1.4%<br>(-16.6% to 14.6%)             | 4.3%<br>(-11.7% to 21.3%)                         |
| Neonatal sepsis and other neonatal infections            | 511.8<br>(147.3 to 1,296.5)                        | 229.7<br>(62.0 to 599.5)                      | 18.4%<br>(10.3% to 30.9%)              | 25.3%<br>(16.7% to 38.6%)                         |
| Malaria                                                  | 139.1<br>(115.7 to 160.9)                          | 58.2<br>(39.3 to 78.8)                        | 15.1%<br>(4.5% to 25.8%)               | 21.8%<br>(10.6% to 33.2%)                         |
| Neonatal encephalopathy due to birth asphyxia and trauma | 146.7<br>(32.7 to 387.0)                           | 56.6<br>(11.7 to 160.7)                       | 16.1%<br>(3.4% to 36.4%)               | 22.9%<br>(9.5% to 44.4%)                          |
| Haemolytic disease and other neonatal jaundice           | 77.8<br>(62.8 to 91.9)                             | 30.9<br>(20.0 to 43.3)                        | -1.2%<br>(-7.4% to 3.7%)               | 4.6%<br>(-2.0% to 9.8%)                           |
| Cysticercosis                                            | 82.2<br>(51.6 to 122.3)                            | 14.2<br>(7.7 to 24.0)                         | -17.2%<br>(-32.0% to -4.6%)            | -12.3%<br>(-28.0% to 0.9%)                        |
| Encephalitis                                             | 78.3<br>(62.7 to 97.7)                             | 13.3<br>(8.9 to 18.4)                         | -17.9%<br>(-28.7% to -6.1%)            | -13.0%<br>(-24.5% to -0.6%)                       |
| Pneumococcal meningitis                                  | 27.0<br>(21.4 to 33.3)                             | 4.9<br>(3.2 to 7.1)                           | -5.0%<br>(-18.4% to 9.5%)              | 0.5%<br>(-13.7% to 15.9%)                         |
| Food-borne trematodiasis                                 | 20.2<br>(6.4 to 40.3)                              | 3.1<br>(0.8 to 6.8)                           | -48.4%<br>(-59.7% to -32.3%)           | -45.4%<br>(-57.3% to -28.3%)                      |
| H influenzae type B meningitis                           | 12.7<br>(9.9 to 16.1)                              | 2.3<br>(1.5 to 3.5)                           | -8.1%<br>(-15.5% to -1.1%)             | -2.7%<br>(-10.5% to 4.7%)                         |
| Other meningitis                                         | 11.8<br>(9.3 to 14.3)                              | 2.1<br>(1.4 to 3.0)                           | 3.5%<br>(-3.9% to 9.3%)                | 9.6%<br>(1.7% to 15.7%)                           |
| Meningococcal infection                                  | 4.5<br>(3.5 to 5.8)                                | 0.8<br>(0.5 to 1.2)                           | 6.1%<br>(1.6% to 10.1%)                | 12.3%<br>(7.5% to 16.5%)                          |
| Cystic echinococcosis                                    | 0.7<br>(0.1 to 2.0)                                | 0.1<br>(<0.05 to 0.4)                         | -43.9%<br>(-80.7% to 60.8%)            | -40.6%<br>(-79.6% to 70.2%)                       |
| Tetanus                                                  | <0.05<br>(<0.05 to <0.05)                          | <0.05<br>(<0.05 to <0.05)                     | -36.4%<br>(-74.3% to 61.2%)            | -32.6%<br>(-72.8% to 70.7%)                       |
| <b>All causes</b>                                        | <b>4,153.8</b><br><b>(3,440.4 to 5,037.5)</b>      | <b>1,471.2</b><br><b>(1,073.8 to 1,968.9)</b> | <b>-1.2%</b><br><b>(-8.6% to 6.5%)</b> | <b>4.6%</b><br><b>(-3.3% to 12.7%)</b>            |

SR Table 13c: Global prevalence and years lived with disability (YLDs) for 2016, percentage change of YLD counts and rates between 2006 and 2016 of epilepsy by cause, ages 20-24 years

| Cause                                                    | Prevalence in thousands (95% uncertainty interval) | YLDs in thousands (95% uncertainty interval)  |                                                   |                                                  |
|----------------------------------------------------------|----------------------------------------------------|-----------------------------------------------|---------------------------------------------------|--------------------------------------------------|
|                                                          |                                                    | 2016                                          | Percentage change in counts between 2006 and 2016 | Percentage change in rates between 2006 and 2016 |
| Epilepsy                                                 | 2,050.8<br>(1,598.0 to 2,549.4)                    | 668.9<br>(431.0 to 943.5)                     | -0.1%<br>(-11.0% to 12.8%)                        | -4.7%<br>(-15.1% to 7.6%)                        |
| Neonatal preterm birth complications                     | 898.5<br>(631.6 to 1,185.0)                        | 346.5<br>(212.7 to 517.3)                     | 9.5%<br>(-7.3% to 28.8%)                          | 4.4%<br>(-11.6% to 22.9%)                        |
| Neonatal sepsis and other neonatal infections            | 474.9<br>(149.7 to 1,191.6)                        | 209.0<br>(60.2 to 549.5)                      | 25.7%<br>(16.0% to 40.0%)                         | 19.9%<br>(10.7% to 33.5%)                        |
| Neonatal encephalopathy due to birth asphyxia and trauma | 159.8<br>(45.9 to 392.8)                           | 61.7<br>(16.9 to 161.9)                       | 22.6%<br>(10.4% to 44.9%)                         | 17.0%<br>(5.3% to 38.3%)                         |
| Malaria                                                  | 109.1<br>(91.5 to 127.0)                           | 45.6<br>(30.6 to 61.2)                        | 13.7%<br>(1.4% to 25.4%)                          | 8.4%<br>(-3.2% to 19.6%)                         |
| Haemolytic disease and other neonatal jaundice           | 79.1<br>(63.7 to 92.8)                             | 31.7<br>(20.7 to 44.2)                        | 8.0%<br>(1.5% to 13.4%)                           | 3.0%<br>(-3.2% to 8.2%)                          |
| Cysticercosis                                            | 180.3<br>(117.7 to 253.5)                          | 30.5<br>(16.9 to 47.9)                        | -14.8%<br>(-26.2% to -5.0%)                       | -18.8%<br>(-29.6% to -9.4%)                      |
| Encephalitis                                             | 70.3<br>(57.4 to 86.1)                             | 11.8<br>(7.7 to 16.7)                         | -7.5%<br>(-19.3% to 5.6%)                         | -11.8%<br>(-23.0% to 0.7%)                       |
| Pneumococcal meningitis                                  | 21.5<br>(17.1 to 26.5)                             | 3.9<br>(2.5 to 5.5)                           | -1.0%<br>(-12.5% to 11.2%)                        | -5.6%<br>(-16.6% to 6.1%)                        |
| Food-borne trematodiasis                                 | 25.1<br>(8.0 to 50.5)                              | 3.8<br>(1.0 to 8.4)                           | -23.6%<br>(-40.1% to 1.1%)                        | -27.1%<br>(-42.9% to -3.5%)                      |
| Other meningitis                                         | 8.8<br>(6.9 to 11.0)                               | 1.6<br>(1.0 to 2.3)                           | 6.7%<br>(0.0% to 11.8%)                           | 1.8%<br>(-4.6% to 6.7%)                          |
| H influenzae type B meningitis                           | 8.5<br>(6.6 to 10.6)                               | 1.6<br>(1.0 to 2.3)                           | -3.7%<br>(-9.0% to 1.4%)                          | -8.1%<br>(-13.2% to -3.3%)                       |
| Meningococcal infection                                  | 3.2<br>(2.5 to 4.1)                                | 0.6<br>(0.4 to 0.9)                           | 7.4%<br>(3.1% to 11.4%)                           | 2.4%<br>(-1.6% to 6.3%)                          |
| Cystic echinococcosis                                    | 0.7<br>(0.1 to 2.1)                                | 0.1<br>(<0.05 to 0.4)                         | -42.4%<br>(-80.5% to 70.8%)                       | -45.0%<br>(-81.4% to 62.9%)                      |
| Tetanus                                                  | <0.05<br>(<0.05 to <0.05)                          | <0.05<br>(<0.05 to <0.05)                     | -26.4%<br>(-79.9% to 219.0%)                      | -29.8%<br>(-80.8% to 204.3%)                     |
| <b>All causes</b>                                        | <b>4,090.5</b><br><b>(3,400.9 to 4,961.3)</b>      | <b>1,417.3</b><br><b>(1,044.2 to 1,888.8)</b> | <b>6.3%</b><br><b>(-1.5% to 14.2%)</b>            | <b>1.4%</b><br><b>(-6.0% to 8.9%)</b>            |

SR Table 13c: Global prevalence and years lived with disability (YLDs) for 2016, percentage change of YLD counts and rates between 2006 and 2016 of epilepsy by cause, ages 25-29 years

| Cause                                                    | Prevalence in thousands (95% uncertainty interval) | YLDs in thousands (95% uncertainty interval) |                                                   |                                                  |
|----------------------------------------------------------|----------------------------------------------------|----------------------------------------------|---------------------------------------------------|--------------------------------------------------|
|                                                          |                                                    | 2016                                         | Percentage change in counts between 2006 and 2016 | Percentage change in rates between 2006 and 2016 |
| Epilepsy                                                 | 1,910.3<br>(1,524.2 to 2,328.8)                    | 613.8<br>(400.2 to 861.9)                    | 10.7%<br>(-0.7% to 24.5%)                         | -6.7%<br>(-16.3% to 4.9%)                        |
| Neonatal preterm birth complications                     | 884.1<br>(624.3 to 1,174.4)                        | 341.2<br>(204.8 to 505.3)                    | 23.5%<br>(3.2% to 45.8%)                          | 4.0%<br>(-13.1% to 22.8%)                        |
| Neonatal sepsis and other neonatal infections            | 451.7<br>(148.6 to 1,142.2)                        | 196.6<br>(58.0 to 517.3)                     | 39.6%<br>(28.6% to 59.9%)                         | 17.6%<br>(8.3% to 34.7%)                         |
| Neonatal encephalopathy due to birth asphyxia and trauma | 167.7<br>(56.4 to 388.2)                           | 64.4<br>(21.0 to 157.3)                      | 37.7%<br>(22.8% to 66.4%)                         | 16.0%<br>(3.5% to 40.1%)                         |
| Cysticercosis                                            | 239.6<br>(155.6 to 339.4)                          | 39.9<br>(22.3 to 62.5)                       | -8.4%<br>(-19.9% to 1.4%)                         | -22.8%<br>(-32.6% to -14.6%)                     |
| Malaria                                                  | 84.9<br>(70.8 to 99.2)                             | 35.2<br>(23.4 to 47.9)                       | 16.6%<br>(5.2% to 27.2%)                          | -1.8%<br>(-11.4% to 7.1%)                        |
| Haemolytic disease and other neonatal jaundice           | 78.0<br>(63.1 to 91.6)                             | 31.3<br>(20.1 to 43.4)                       | 21.7%<br>(14.3% to 27.5%)                         | 2.5%<br>(-3.7% to 7.4%)                          |
| Encephalitis                                             | 63.0<br>(51.2 to 75.7)                             | 10.4<br>(6.7 to 14.5)                        | 4.4%<br>(-8.3% to 19.6%)                          | -12.0%<br>(-22.8% to 0.8%)                       |
| Food-borne trematodiasis                                 | 33.4<br>(10.7 to 66.8)                             | 5.0<br>(1.4 to 11.0)                         | 14.3%<br>(-14.7% to 51.6%)                        | -3.7%<br>(-28.2% to 27.7%)                       |
| Pneumococcal meningitis                                  | 17.7<br>(14.1 to 21.9)                             | 3.1<br>(2.0 to 4.6)                          | 7.1%<br>(-5.0% to 19.0%)                          | -9.8%<br>(-19.9% to 0.3%)                        |
| Other meningitis                                         | 7.1<br>(5.5 to 9.1)                                | 1.3<br>(0.8 to 1.8)                          | 14.1%<br>(7.4% to 19.4%)                          | -3.9%<br>(-9.5% to 0.6%)                         |
| H influenzae type B meningitis                           | 6.0<br>(4.7 to 7.5)                                | 1.1<br>(0.7 to 1.6)                          | 6.5%<br>(0.7% to 12.0%)                           | -10.3%<br>(-15.2% to -5.6%)                      |
| Meningococcal infection                                  | 2.4<br>(1.9 to 3.1)                                | 0.4<br>(0.3 to 0.6)                          | 14.7%<br>(10.1% to 19.0%)                         | -3.4%<br>(-7.3% to 0.2%)                         |
| Cystic echinococcosis                                    | 0.7<br>(0.2 to 2.1)                                | 0.1<br>(<0.05 to 0.4)                        | -40.8%<br>(-79.0% to 74.7%)                       | -50.1%<br>(-82.3% to 47.1%)                      |
| Tetanus                                                  | <0.05<br>(<0.05 to <0.05)                          | <0.05<br>(<0.05 to <0.05)                    | -24.2%<br>(-83.0% to 316.1%)                      | -36.2%<br>(-85.6% to 250.5%)                     |
| <b>All causes</b>                                        | <b>3,946.4</b><br><b>(3,267.4 to 4,795.3)</b>      | <b>1,343.9</b><br><b>(992.8 to 1,789.4)</b>  | <b>18.1%</b><br><b>(9.6% to 26.5%)</b>            | <b>-0.5%</b><br><b>(-7.7% to 6.6%)</b>           |

SR Table 13c: Global prevalence and years lived with disability (YLDs) for 2016, percentage change of YLD counts and rates between 2006 and 2016 of epilepsy by cause, ages 30-34 years

| Cause                                                    | Prevalence in thousands (95% uncertainty interval) | YLDs in thousands (95% uncertainty interval) |                                                   |                                                  |
|----------------------------------------------------------|----------------------------------------------------|----------------------------------------------|---------------------------------------------------|--------------------------------------------------|
|                                                          |                                                    | 2016                                         | Percentage change in counts between 2006 and 2016 | Percentage change in rates between 2006 and 2016 |
| Epilepsy                                                 | 1,605.1<br>(1,303.5 to 1,915.6)                    | 509.3<br>(334.1 to 716.5)                    | 8.0%<br>(-3.5% to 21.1%)                          | -4.4%<br>(-14.6% to 7.3%)                        |
| Neonatal preterm birth complications                     | 754.2<br>(536.2 to 999.1)                          | 289.1<br>(173.8 to 427.2)                    | 19.3%<br>(-0.0% to 40.2%)                         | 5.6%<br>(-11.4% to 24.2%)                        |
| Neonatal sepsis and other neonatal infections            | 399.0<br>(135.1 to 1,002.2)                        | 172.8<br>(53.6 to 455.6)                     | 39.9%<br>(30.1% to 55.3%)                         | 23.9%<br>(15.2% to 37.5%)                        |
| Neonatal encephalopathy due to birth asphyxia and trauma | 147.4<br>(52.0 to 333.5)                           | 56.1<br>(18.4 to 135.8)                      | 31.1%<br>(19.0% to 55.1%)                         | 16.1%<br>(5.4% to 37.3%)                         |
| Cysticercosis                                            | 245.5<br>(162.3 to 349.0)                          | 40.4<br>(22.5 to 62.9)                       | -13.9%<br>(-24.8% to -4.3%)                       | -23.7%<br>(-33.4% to -15.3%)                     |
| Malaria                                                  | 66.7<br>(55.8 to 78.0)                             | 27.5<br>(18.5 to 36.8)                       | 21.7%<br>(8.7% to 36.3%)                          | 7.8%<br>(-3.8% to 20.7%)                         |
| Haemolytic disease and other neonatal jaundice           | 68.0<br>(54.6 to 80.4)                             | 27.2<br>(17.6 to 37.8)                       | 18.7%<br>(11.2% to 24.6%)                         | 5.1%<br>(-1.5% to 10.4%)                         |
| Encephalitis                                             | 52.3<br>(41.7 to 64.7)                             | 8.7<br>(5.5 to 12.5)                         | 0.3%<br>(-12.1% to 14.2%)                         | -11.2%<br>(-22.1% to 1.1%)                       |
| Food-borne trematodiasis                                 | 25.1<br>(8.2 to 50.9)                              | 3.8<br>(1.0 to 8.2)                          | -23.3%<br>(-42.5% to -2.5%)                       | -32.1%<br>(-49.1% to -13.6%)                     |
| Pneumococcal meningitis                                  | 14.5<br>(11.3 to 18.2)                             | 2.6<br>(1.6 to 3.8)                          | 12.4%<br>(5.2% to 19.7%)                          | -0.5%<br>(-6.9% to 6.0%)                         |
| Other meningitis                                         | 5.7<br>(4.4 to 7.4)                                | 1.0<br>(0.6 to 1.5)                          | 11.0%<br>(4.0% to 16.6%)                          | -1.7%<br>(-7.9% to 3.2%)                         |
| H influenzae type B meningitis                           | 4.3<br>(3.3 to 5.5)                                | 0.8<br>(0.5 to 1.2)                          | 13.8%<br>(6.8% to 20.4%)                          | 0.8%<br>(-5.4% to 6.6%)                          |
| Meningococcal infection                                  | 1.9<br>(1.4 to 2.4)                                | 0.3<br>(0.2 to 0.5)                          | 18.8%<br>(13.8% to 23.7%)                         | 5.2%<br>(0.8% to 9.6%)                           |
| Cystic echinococcosis                                    | 0.7<br>(0.2 to 1.9)                                | 0.1<br>(<0.05 to 0.4)                        | -40.6%<br>(-78.0% to 53.9%)                       | -47.4%<br>(-80.5% to 36.3%)                      |
| Tetanus                                                  | <0.05<br>(<0.05 to <0.05)                          | <0.05<br>(<0.05 to <0.05)                    | -14.4%<br>(-83.2% to 445.5%)                      | -24.2%<br>(-85.2% to 383.1%)                     |
| <b>All causes</b>                                        | <b>3,390.4</b><br><b>(2,861.0 to 4,101.0)</b>      | <b>1,139.6</b><br><b>(848.4 to 1,512.5)</b>  | <b>15.0%</b><br><b>(6.6% to 23.5%)</b>            | <b>1.9%</b><br><b>(-5.6% to 9.4%)</b>            |

SR Table 13c: Global prevalence and years lived with disability (YLDs) for 2016, percentage change of YLD counts and rates between 2006 and 2016 of epilepsy by cause, ages 35-39 years

| Cause                                                    | Prevalence in thousands (95% uncertainty interval) | YLDs in thousands (95% uncertainty interval) |                                                   |                                                  |
|----------------------------------------------------------|----------------------------------------------------|----------------------------------------------|---------------------------------------------------|--------------------------------------------------|
|                                                          |                                                    | 2016                                         | Percentage change in counts between 2006 and 2016 | Percentage change in rates between 2006 and 2016 |
| Epilepsy                                                 | 1,360.5<br>(1,116.4 to 1,631.7)                    | 425.9<br>(281.9 to 596.1)                    | 1.8%<br>(-8.9% to 13.8%)                          | -3.8%<br>(-13.8% to 7.6%)                        |
| Neonatal preterm birth complications                     | 625.0<br>(441.3 to 823.4)                          | 238.4<br>(144.3 to 352.0)                    | 11.7%<br>(-6.3% to 32.4%)                         | 5.6%<br>(-11.4% to 25.1%)                        |
| Neonatal sepsis and other neonatal infections            | 336.5<br>(117.8 to 838.5)                          | 145.2<br>(46.7 to 379.0)                     | 33.9%<br>(24.9% to 47.7%)                         | 26.6%<br>(18.1% to 39.7%)                        |
| Neonatal encephalopathy due to birth asphyxia and trauma | 126.3<br>(46.7 to 275.1)                           | 47.8<br>(16.4 to 113.8)                      | 22.5%<br>(10.9% to 44.9%)                         | 15.8%<br>(4.8% to 37.0%)                         |
| Cysticercosis                                            | 238.1<br>(157.2 to 332.8)                          | 38.6<br>(22.6 to 59.2)                       | -19.2%<br>(-29.1% to -10.2%)                      | -23.6%<br>(-33.0% to -15.1%)                     |
| Haemolytic disease and other neonatal jaundice           | 57.5<br>(46.2 to 68.1)                             | 23.0<br>(14.8 to 31.8)                       | 13.0%<br>(5.8% to 18.6%)                          | 6.8%<br>(-0.0% to 12.1%)                         |
| Malaria                                                  | 50.3<br>(41.9 to 58.8)                             | 20.6<br>(13.9 to 27.9)                       | 24.9%<br>(11.7% to 40.4%)                         | 18.1%<br>(5.6% to 32.8%)                         |
| Encephalitis                                             | 45.5<br>(36.5 to 56.1)                             | 7.5<br>(4.8 to 10.5)                         | -4.4%<br>(-17.2% to 8.6%)                         | -9.7%<br>(-21.8% to 2.7%)                        |
| Food-borne trematodiasis                                 | 20.1<br>(6.5 to 40.9)                              | 3.0<br>(0.9 to 6.6)                          | -39.5%<br>(-56.4% to -20.3%)                      | -42.8%<br>(-58.8% to -24.6%)                     |
| Pneumococcal meningitis                                  | 11.6<br>(9.0 to 14.7)                              | 2.1<br>(1.3 to 3.1)                          | 11.7%<br>(4.3% to 18.5%)                          | 5.6%<br>(-1.4% to 12.1%)                         |
| Other meningitis                                         | 4.8<br>(3.6 to 6.2)                                | 0.8<br>(0.5 to 1.2)                          | 6.0%<br>(-0.6% to 11.3%)                          | 0.2%<br>(-6.0% to 5.2%)                          |
| H influenzae type B meningitis                           | 3.2<br>(2.5 to 4.0)                                | 0.6<br>(0.4 to 0.8)                          | 15.4%<br>(7.9% to 22.4%)                          | 9.1%<br>(2.0% to 15.8%)                          |
| Meningococcal infection                                  | 1.5<br>(1.1 to 1.9)                                | 0.3<br>(0.2 to 0.4)                          | 18.3%<br>(13.4% to 23.3%)                         | 11.8%<br>(7.2% to 16.6%)                         |
| Cystic echinococcosis                                    | 0.7<br>(0.2 to 1.8)                                | 0.1<br>(<0.05 to 0.4)                        | -40.2%<br>(-77.4% to 59.8%)                       | -43.5%<br>(-78.7% to 51.1%)                      |
| Tetanus                                                  | <0.05<br>(<0.05 to <0.05)                          | <0.05<br>(<0.05 to <0.05)                    | -12.6%<br>(-85.0% to 564.6%)                      | -17.4%<br>(-85.8% to 528.3%)                     |
| <b>All causes</b>                                        | <b>2,881.5</b><br><b>(2,449.5 to 3,496.2)</b>      | <b>953.9</b><br><b>(709.5 to 1,267.1)</b>    | <b>8.4%</b><br><b>(0.7% to 16.5%)</b>             | <b>2.4%</b><br><b>(-4.8% to 10.1%)</b>           |

SR Table 13c: Global prevalence and years lived with disability (YLDs) for 2016, percentage change of YLD counts and rates between 2006 and 2016 of epilepsy by cause, ages 40-44 years

| Cause                                                    | Prevalence in thousands (95% uncertainty interval) | YLDs in thousands (95% uncertainty interval) |                                                   |                                                  |
|----------------------------------------------------------|----------------------------------------------------|----------------------------------------------|---------------------------------------------------|--------------------------------------------------|
|                                                          |                                                    | 2016                                         | Percentage change in counts between 2006 and 2016 | Percentage change in rates between 2006 and 2016 |
| Epilepsy                                                 | 1,278.1<br>(1,058.2 to 1,545.3)                    | 393.2<br>(266.4 to 552.7)                    | 7.4%<br>(-3.7% to 19.9%)                          | -5.7%<br>(-15.4% to 5.4%)                        |
| Neonatal preterm birth complications                     | 551.5<br>(386.7 to 740.2)                          | 209.7<br>(126.8 to 310.2)                    | 21.1%<br>(1.7% to 43.4%)                          | 6.3%<br>(-10.6% to 26.0%)                        |
| Neonatal sepsis and other neonatal infections            | 291.6<br>(104.0 to 721.2)                          | 125.1<br>(41.4 to 328.6)                     | 34.5%<br>(25.4% to 49.3%)                         | 18.1%<br>(10.2% to 31.1%)                        |
| Neonatal encephalopathy due to birth asphyxia and trauma | 115.7<br>(44.9 to 240.4)                           | 43.5<br>(16.0 to 99.5)                       | 27.8%<br>(15.7% to 49.4%)                         | 12.2%<br>(1.7% to 31.2%)                         |
| Cysticercosis                                            | 248.7<br>(170.5 to 350.7)                          | 39.6<br>(23.3 to 61.7)                       | -11.4%<br>(-21.8% to -3.0%)                       | -22.2%<br>(-31.3% to -14.8%)                     |
| Haemolytic disease and other neonatal jaundice           | 51.8<br>(41.2 to 61.2)                             | 20.6<br>(13.4 to 28.4)                       | 21.6%<br>(14.0% to 27.6%)                         | 6.8%<br>(0.1% to 12.1%)                          |
| Malaria                                                  | 36.8<br>(30.7 to 43.1)                             | 15.1<br>(9.9 to 20.6)                        | 23.8%<br>(9.2% to 38.7%)                          | 8.7%<br>(-4.1% to 21.8%)                         |
| Encephalitis                                             | 45.0<br>(35.8 to 55.3)                             | 7.2<br>(4.5 to 10.5)                         | 2.7%<br>(-9.9% to 16.4%)                          | -9.8%<br>(-20.8% to 2.3%)                        |
| Food-borne trematodiasis                                 | 22.2<br>(7.2 to 44.1)                              | 3.3<br>(1.0 to 7.2)                          | -13.6%<br>(-34.9% to 14.5%)                       | -24.1%<br>(-42.8% to 0.5%)                       |
| Pneumococcal meningitis                                  | 9.7<br>(7.4 to 12.2)                               | 1.7<br>(1.1 to 2.5)                          | 12.2%<br>(5.2% to 18.5%)                          | -1.4%<br>(-7.6% to 4.1%)                         |
| Other meningitis                                         | 4.4<br>(3.4 to 5.7)                                | 0.8<br>(0.5 to 1.1)                          | 10.2%<br>(3.6% to 15.1%)                          | -3.2%<br>(-9.0% to 1.1%)                         |
| H influenzae type B meningitis                           | 2.5<br>(1.9 to 3.2)                                | 0.4<br>(0.3 to 0.6)                          | 18.5%<br>(10.9% to 25.8%)                         | 4.0%<br>(-2.6% to 10.5%)                         |
| Meningococcal infection                                  | 1.2<br>(0.9 to 1.6)                                | 0.2<br>(0.1 to 0.3)                          | 17.5%<br>(12.9% to 21.9%)                         | 3.2%<br>(-0.8% to 7.1%)                          |
| Cystic echinococcosis                                    | 0.6<br>(0.1 to 1.5)                                | 0.1<br>(<0.05 to 0.3)                        | -40.9%<br>(-78.0% to 53.0%)                       | -48.1%<br>(-80.7% to 34.4%)                      |
| Tetanus                                                  | <0.05<br>(<0.05 to <0.05)                          | <0.05<br>(<0.05 to <0.05)                    | -20.3%<br>(-88.2% to 586.2%)                      | -30.0%<br>(-89.6% to 502.7%)                     |
| <b>All causes</b>                                        | <b>2,659.7</b><br><b>(2,262.6 to 3,211.9)</b>      | <b>860.8</b><br><b>(651.5 to 1,140.5)</b>    | <b>14.1%</b><br><b>(6.1% to 22.4%)</b>            | <b>0.2%</b><br><b>(-6.8% to 7.5%)</b>            |



SR Table 13c: Global prevalence and years lived with disability (YLDs) for 2016, percentage change of YLD counts and rates between 2006 and 2016 of epilepsy by cause, ages 45-49 years

| Cause                                                    | Prevalence in thousands (95% uncertainty interval) | YLDs in thousands (95% uncertainty interval) |                                                   |                                                  |
|----------------------------------------------------------|----------------------------------------------------|----------------------------------------------|---------------------------------------------------|--------------------------------------------------|
|                                                          |                                                    | 2016                                         | Percentage change in counts between 2006 and 2016 | Percentage change in rates between 2006 and 2016 |
| Epilepsy                                                 | 1,237.3<br>(1,021.2 to 1,511.5)                    | 373.5<br>(257.4 to 521.5)                    | 16.7%<br>(4.8% to 30.5%)                          | -6.4%<br>(-16.0% to 4.6%)                        |
| Neonatal preterm birth complications                     | 476.5<br>(330.4 to 641.2)                          | 180.6<br>(106.5 to 270.2)                    | 34.3%<br>(10.9% to 59.2%)                         | 7.7%<br>(-11.1% to 27.7%)                        |
| Neonatal sepsis and other neonatal infections            | 248.7<br>(89.5 to 613.8)                           | 106.2<br>(35.7 to 279.6)                     | 40.5%<br>(30.8% to 57.7%)                         | 12.7%<br>(4.9% to 26.4%)                         |
| Cysticercosis                                            | 261.7<br>(175.7 to 374.6)                          | 41.0<br>(24.7 to 65.0)                       | -0.6%<br>(-9.5% to 7.6%)                          | -20.3%<br>(-27.5% to -13.7%)                     |
| Neonatal encephalopathy due to birth asphyxia and trauma | 104.9<br>(42.5 to 208.8)                           | 39.2<br>(15.2 to 86.8)                       | 36.8%<br>(24.4% to 61.1%)                         | 9.7%<br>(-0.2% to 29.2%)                         |
| Haemolytic disease and other neonatal jaundice           | 45.5<br>(35.9 to 53.8)                             | 18.2<br>(11.6 to 25.3)                       | 32.4%<br>(23.9% to 38.8%)                         | 6.1%<br>(-0.6% to 11.3%)                         |
| Malaria                                                  | 26.7<br>(22.3 to 31.2)                             | 10.9<br>(7.1 to 14.9)                        | 21.2%<br>(6.7% to 36.3%)                          | -2.8%<br>(-14.4% to 9.3%)                        |
| Encephalitis                                             | 46.7<br>(37.8 to 56.7)                             | 7.3<br>(4.6 to 10.3)                         | 11.9%<br>(-1.1% to 26.4%)                         | -10.3%<br>(-20.7% to 1.3%)                       |
| Food-borne trematodiasis                                 | 24.1<br>(7.7 to 47.9)                              | 3.6<br>(1.1 to 7.4)                          | 28.7%<br>(2.0% to 66.5%)                          | 3.2%<br>(-18.2% to 33.5%)                        |
| Pneumococcal meningitis                                  | 8.6<br>(6.7 to 10.6)                               | 1.5<br>(0.9 to 2.1)                          | 16.0%<br>(9.8% to 21.1%)                          | -7.0%<br>(-12.0% to -2.9%)                       |
| Other meningitis                                         | 4.3<br>(3.3 to 5.6)                                | 0.7<br>(0.4 to 1.1)                          | 17.2%<br>(11.1% to 21.7%)                         | -6.0%<br>(-10.9% to -2.4%)                       |
| H influenzae type B meningitis                           | 2.1<br>(1.7 to 2.7)                                | 0.4<br>(0.2 to 0.6)                          | 24.2%<br>(16.7% to 31.6%)                         | -0.4%<br>(-6.4% to 5.5%)                         |
| Meningococcal infection                                  | 1.1<br>(0.8 to 1.4)                                | 0.2<br>(0.1 to 0.3)                          | 18.6%<br>(14.1% to 22.7%)                         | -4.9%<br>(-8.5% to -1.6%)                        |
| Cystic echinococcosis                                    | 0.5<br>(0.1 to 1.4)                                | 0.1<br>(<0.05 to 0.3)                        | -42.5%<br>(-79.4% to 54.2%)                       | -53.9%<br>(-83.4% to 23.7%)                      |
| Tetanus                                                  | <0.05<br>(<0.05 to <0.05)                          | <0.05<br>(<0.05 to <0.05)                    | -13.5%<br>(-90.8% to 872.6%)                      | -30.7%<br>(-92.6% to 679.9%)                     |
| <b>All causes</b>                                        | <b>2,488.9</b><br><b>(2,130.4 to 2,968.1)</b>      | <b>783.3</b><br><b>(597.3 to 1,035.7)</b>    | <b>23.5%</b><br><b>(14.8% to 32.5%)</b>           | <b>-1.0%</b><br><b>(-8.0% to 6.3%)</b>           |

SR Table 13c: Global prevalence and years lived with disability (YLDs) for 2016, percentage change of YLD counts and rates between 2006 and 2016 of epilepsy by cause, ages 50-54 years

| Cause                                                    | Prevalence in thousands (95% uncertainty interval) | YLDs in thousands (95% uncertainty interval) |                                                   |                                                  |
|----------------------------------------------------------|----------------------------------------------------|----------------------------------------------|---------------------------------------------------|--------------------------------------------------|
|                                                          |                                                    | 2016                                         | Percentage change in counts between 2006 and 2016 | Percentage change in rates between 2006 and 2016 |
| Epilepsy                                                 | 1,168.8<br>(953.3 to 1,426.3)                      | 345.8<br>(238.0 to 485.5)                    | 18.1%<br>(6.1% to 31.1%)                          | -5.2%<br>(-14.8% to 5.2%)                        |
| Neonatal preterm birth complications                     | 371.3<br>(253.4 to 506.4)                          | 141.1<br>(83.9 to 215.0)                     | 36.2%<br>(12.3% to 62.1%)                         | 9.4%<br>(-9.9% to 30.2%)                         |
| Neonatal sepsis and other neonatal infections            | 204.6<br>(76.3 to 504.9)                           | 86.9<br>(29.9 to 224.0)                      | 45.6%<br>(34.1% to 63.7%)                         | 16.9%<br>(7.7% to 31.4%)                         |
| Cysticercosis                                            | 258.6<br>(176.5 to 355.3)                          | 39.8<br>(24.0 to 61.6)                       | -3.0%<br>(-11.5% to 4.5%)                         | -22.1%<br>(-28.9% to -16.1%)                     |
| Neonatal encephalopathy due to birth asphyxia and trauma | 91.4<br>(39.6 to 177.5)                            | 34.0<br>(13.5 to 73.9)                       | 40.2%<br>(26.0% to 69.4%)                         | 12.6%<br>(1.2% to 36.1%)                         |
| Haemolytic disease and other neonatal jaundice           | 37.3<br>(29.3 to 44.1)                             | 14.9<br>(9.5 to 20.5)                        | 31.2%<br>(23.2% to 37.2%)                         | 5.3%<br>(-1.1% to 10.2%)                         |
| Malaria                                                  | 19.3<br>(16.1 to 22.5)                             | 7.9<br>(5.3 to 10.7)                         | 23.1%<br>(9.7% to 38.0%)                          | -1.1%<br>(-11.9% to 10.8%)                       |
| Encephalitis                                             | 48.0<br>(39.0 to 59.7)                             | 7.4<br>(4.8 to 10.6)                         | 13.9%<br>(2.0% to 27.7%)                          | -8.6%<br>(-18.1% to 2.6%)                        |
| Food-borne trematodiasis                                 | 19.0<br>(5.9 to 40.6)                              | 2.8<br>(0.8 to 6.1)                          | 8.4%<br>(-14.2% to 41.7%)                         | -12.9%<br>(-31.1% to 13.8%)                      |
| Pneumococcal meningitis                                  | 7.8<br>(6.2 to 9.7)                                | 1.3<br>(0.9 to 1.9)                          | 21.4%<br>(16.4% to 25.3%)                         | -2.5%<br>(-6.5% to 0.6%)                         |
| Other meningitis                                         | 4.0<br>(3.0 to 5.2)                                | 0.7<br>(0.4 to 1.0)                          | 18.5%<br>(13.7% to 22.1%)                         | -4.9%<br>(-8.7% to -1.9%)                        |
| H influenzae type B meningitis                           | 1.9<br>(1.5 to 2.5)                                | 0.3<br>(0.2 to 0.5)                          | 30.6%<br>(23.1% to 38.6%)                         | 4.9%<br>(-1.2% to 11.3%)                         |
| Meningococcal infection                                  | 1.0<br>(0.7 to 1.3)                                | 0.2<br>(0.1 to 0.3)                          | 22.2%<br>(18.6% to 25.9%)                         | -1.9%<br>(-4.8% to 1.1%)                         |
| Cystic echinococcosis                                    | 0.5<br>(0.1 to 1.3)                                | 0.1<br>(<0.05 to 0.3)                        | -42.1%<br>(-77.7% to 43.6%)                       | -53.5%<br>(-82.1% to 15.3%)                      |
| Tetanus                                                  | <0.05<br>(<0.05 to <0.05)                          | <0.05<br>(<0.05 to <0.05)                    | 12.3%<br>(-89.5% to 1,647.6%)                     | -9.8%<br>(-91.6% to 1,303.2%)                    |
| <b>All causes</b>                                        | <b>2,233.7</b><br><b>(1,893.4 to 2,638.3)</b>      | <b>683.2</b><br><b>(518.2 to 895.7)</b>      | <b>24.1%</b><br><b>(15.4% to 33.8%)</b>           | <b>-0.3%</b><br><b>(-7.4% to 7.4%)</b>           |

SR Table 13c: Global prevalence and years lived with disability (YLDs) for 2016, percentage change of YLD counts and rates between 2006 and 2016 of epilepsy by cause, ages 55-59 years

| Cause                                                    | Prevalence in thousands (95% uncertainty interval) | YLDs in thousands (95% uncertainty interval) |                                                   |                                                  |
|----------------------------------------------------------|----------------------------------------------------|----------------------------------------------|---------------------------------------------------|--------------------------------------------------|
|                                                          |                                                    | 2016                                         | Percentage change in counts between 2006 and 2016 | Percentage change in rates between 2006 and 2016 |
| Epilepsy                                                 | 1,055.2<br>(857.2 to 1,273.7)                      | 306.9<br>(208.0 to 426.2)                    | 26.6%<br>(13.5% to 41.5%)                         | -3.0%<br>(-13.1% to 8.5%)                        |
| Neonatal preterm birth complications                     | 256.9<br>(173.6 to 354.6)                          | 98.7<br>(56.3 to 150.7)                      | 47.5%<br>(19.8% to 77.9%)                         | 13.1%<br>(-8.2% to 36.4%)                        |
| Neonatal sepsis and other neonatal infections            | 151.9<br>(57.4 to 381.8)                           | 64.2<br>(22.5 to 166.5)                      | 54.3%<br>(43.3% to 70.0%)                         | 18.3%<br>(9.8% to 30.3%)                         |
| Cysticercosis                                            | 233.5<br>(167.7 to 319.2)                          | 35.6<br>(22.2 to 53.9)                       | 7.5%<br>(-0.3% to 14.9%)                          | -17.6%<br>(-23.6% to -11.9%)                     |
| Neonatal encephalopathy due to birth asphyxia and trauma | 73.5<br>(32.5 to 140.9)                            | 27.3<br>(11.2 to 58.5)                       | 45.3%<br>(31.6% to 68.1%)                         | 11.3%<br>(0.9% to 28.8%)                         |
| Haemolytic disease and other neonatal jaundice           | 28.5<br>(22.1 to 33.7)                             | 11.5<br>(7.3 to 15.9)                        | 41.4%<br>(33.0% to 47.8%)                         | 8.4%<br>(1.9% to 13.2%)                          |
| Encephalitis                                             | 48.2<br>(39.9 to 57.9)                             | 7.3<br>(4.8 to 10.1)                         | 23.7%<br>(10.9% to 37.8%)                         | -5.2%<br>(-15.0% to 5.6%)                        |
| Malaria                                                  | 12.8<br>(10.6 to 15.0)                             | 5.3<br>(3.5 to 7.2)                          | 28.3%<br>(11.2% to 47.0%)                         | -1.6%<br>(-14.8% to 12.7%)                       |
| Food-borne trematodiasis                                 | 13.1<br>(3.9 to 28.5)                              | 1.9<br>(0.5 to 4.4)                          | 12.3%<br>(-9.0% to 41.2%)                         | -13.9%<br>(-30.2% to 8.2%)                       |
| Pneumococcal meningitis                                  | 6.8<br>(5.4 to 8.4)                                | 1.2<br>(0.7 to 1.6)                          | 31.6%<br>(26.4% to 36.9%)                         | 0.8%<br>(-3.1% to 4.9%)                          |
| Other meningitis                                         | 3.7<br>(2.8 to 4.7)                                | 0.6<br>(0.4 to 0.9)                          | 26.5%<br>(22.8% to 29.7%)                         | -3.0%<br>(-5.9% to -0.6%)                        |
| H influenzae type B meningitis                           | 1.7<br>(1.4 to 2.2)                                | 0.3<br>(0.2 to 0.4)                          | 42.1%<br>(34.3% to 51.0%)                         | 8.9%<br>(2.9% to 15.7%)                          |
| Meningococcal infection                                  | 0.9<br>(0.7 to 1.2)                                | 0.2<br>(0.1 to 0.2)                          | 29.3%<br>(26.0% to 32.9%)                         | -0.9%<br>(-3.5% to 1.8%)                         |
| Cystic echinococcosis                                    | 0.4<br>(0.1 to 1.1)                                | 0.1<br>(<0.05 to <0.2)                       | -38.0%<br>(-77.5% to 60.7%)                       | -52.5%<br>(-82.7% to 23.2%)                      |
| Tetanus                                                  | <0.05<br>(<0.05 to <0.05)                          | <0.05<br>(<0.05 to <0.05)                    | 23.7%<br>(-91.2% to 2,330.2%)                     | -5.2%<br>(-93.3% to 1,762.4%)                    |
| <b>All causes</b>                                        | <b>1,887.2</b><br><b>(1,603.3 to 2,214.9)</b>      | <b>561.0</b><br><b>(424.9 to 733.8)</b>      | <b>32.1%</b><br><b>(22.3% to 42.8%)</b>           | <b>1.3%</b><br><b>(-6.3% to 9.4%)</b>            |

SR Table 13c: Global prevalence and years lived with disability (YLDs) for 2016, percentage change of YLD counts and rates between 2006 and 2016 of epilepsy by cause, ages 60-64 years

| Cause                                                    | Prevalence in thousands (95% uncertainty interval) | YLDs in thousands (95% uncertainty interval) |                                         |                                                  |
|----------------------------------------------------------|----------------------------------------------------|----------------------------------------------|-----------------------------------------|--------------------------------------------------|
|                                                          |                                                    | 2016                                         | 2016                                    | Percentage change in rates between 2006 and 2016 |
| Epilepsy                                                 | 989.3<br>(805.6 to 1,200.4)                        | 281.7<br>(189.3 to 396.9)                    | 43.0%<br>(27.9% to 60.3%)               | -5.2%<br>(-15.2% to 6.3%)                        |
| Neonatal preterm birth complications                     | 165.5<br>(111.1 to 235.2)                          | 64.8<br>(36.6 to 100.6)                      | 75.0%<br>(40.8% to 112.2%)              | 16.1%<br>(-6.6% to 40.8%)                        |
| Neonatal sepsis and other neonatal infections            | 108.1<br>(40.0 to 277.1)                           | 45.6<br>(15.4 to 120.5)                      | 77.4%<br>(64.2% to 99.0%)               | 17.7%<br>(8.9% to 32.0%)                         |
| Cysticercosis                                            | 219.5<br>(160.0 to 305.5)                          | 33.0<br>(20.2 to 50.2)                       | 23.7%<br>(15.2% to 32.3%)               | -18.0%<br>(-23.6% to -12.3%)                     |
| Neonatal encephalopathy due to birth asphyxia and trauma | 57.2<br>(25.7 to 108.8)                            | 21.4<br>(8.9 to 45.2)                        | 77.1%<br>(59.3% to 107.9%)              | 17.4%<br>(5.6% to 37.9%)                         |
| Haemolytic disease and other neonatal jaundice           | 21.5<br>(16.4 to 25.5)                             | 8.8<br>(5.4 to 12.2)                         | 66.0%<br>(56.6% to 73.7%)               | 10.1%<br>(3.9% to 15.2%)                         |
| Encephalitis                                             | 48.9<br>(40.0 to 59.0)                             | 7.3<br>(4.8 to 10.3)                         | 39.9%<br>(25.1% to 57.1%)               | -7.2%<br>(-17.0% to 4.2%)                        |
| Malaria                                                  | 7.5<br>(6.2 to 8.8)                                | 3.2<br>(2.1 to 4.3)                          | 32.5%<br>(14.6% to 51.4%)               | -12.1%<br>(-24.0% to 0.4%)                       |
| Food-borne trematodiasis                                 | 11.8<br>(3.3 to 26.8)                              | 1.7<br>(0.4 to 4.0)                          | 58.3%<br>(26.6% to 98.9%)               | 5.0%<br>(-16.0% to 31.9%)                        |
| Pneumococcal meningitis                                  | 5.8<br>(4.6 to 7.2)                                | 1.0<br>(0.6 to 1.4)                          | 39.3%<br>(34.5% to 44.0%)               | -7.6%<br>(-10.8% to -4.5%)                       |
| Other meningitis                                         | 3.5<br>(2.7 to 4.4)                                | 0.6<br>(0.4 to 0.9)                          | 37.4%<br>(33.9% to 40.7%)               | -8.9%<br>(-11.2% to -6.7%)                       |
| H influenzae type B meningitis                           | 1.6<br>(1.2 to 2.0)                                | 0.3<br>(0.2 to 0.4)                          | 51.2%<br>(43.3% to 60.9%)               | 0.3%<br>(-5.0% to 6.7%)                          |
| Meningococcal infection                                  | 0.8<br>(0.6 to 1.1)                                | 0.1<br>(0.1 to 0.2)                          | 37.6%<br>(34.1% to 40.8%)               | -8.7%<br>(-11.0% to -6.6%)                       |
| Cystic echinococcosis                                    | 0.3<br>(0.1 to 1.0)                                | 0.1<br>(<0.05 to 0.2)                        | -33.6%<br>(-76.0% to 91.3%)             | -56.0%<br>(-84.1% to 26.9%)                      |
| Tetanus                                                  | <0.05<br>(<0.05 to <0.05)                          | <0.05<br>(<0.05 to <0.05)                    | 66.1%<br>(-90.2% to 3,636.5%)           | 10.2%<br>(-93.5% to 2,378.5%)                    |
| <b>All causes</b>                                        | <b>1,641.2</b><br><b>(1,391.0 to 1,947.5)</b>      | <b>469.6</b><br><b>(349.1 to 618.0)</b>      | <b>49.5%</b><br><b>(38.0% to 61.9%)</b> | <b>-0.8%</b><br><b>(-8.4% to 7.4%)</b>           |

SR Table 13c: Global prevalence and years lived with disability (YLDs) for 2016, percentage change of YLD counts and rates between 2006 and 2016 of epilepsy by cause, ages 65-69 years

| Cause                                                    | Prevalence in thousands (95% uncertainty interval) | YLDs in thousands (95% uncertainty interval) |                                                   |                                                  |
|----------------------------------------------------------|----------------------------------------------------|----------------------------------------------|---------------------------------------------------|--------------------------------------------------|
|                                                          |                                                    | 2016                                         | Percentage change in counts between 2006 and 2016 | Percentage change in rates between 2006 and 2016 |
| Epilepsy                                                 | 846.3<br>(688.3 to 1,024.8)                        | 234.0<br>(159.0 to 326.5)                    | 27.3%<br>(13.3% to 43.3%)                         | -3.9%<br>(-14.5% to 8.1%)                        |
| Neonatal preterm birth complications                     | 82.8<br>(54.4 to 116.7)                            | 33.1<br>(18.6 to 52.3)                       | 61.1%<br>(28.9% to 97.2%)                         | 21.6%<br>(-2.7% to 48.9%)                        |
| Cysticercosis                                            | 176.9<br>(126.7 to 246.0)                          | 26.2<br>(15.7 to 40.9)                       | 11.2%<br>(4.0% to 18.3%)                          | -16.1%<br>(-21.5% to -10.7%)                     |
| Neonatal sepsis and other neonatal infections            | 62.7<br>(21.1 to 169.5)                            | 26.1<br>(7.9 to 72.2)                        | 52.6%<br>(39.4% to 77.8%)                         | 15.2%<br>(5.2% to 34.2%)                         |
| Neonatal encephalopathy due to birth asphyxia and trauma | 30.1<br>(13.2 to 58.0)                             | 11.5<br>(4.5 to 24.5)                        | 50.8%<br>(37.0% to 76.1%)                         | 13.8%<br>(3.4% to 32.9%)                         |
| Encephalitis                                             | 41.6<br>(34.8 to 49.9)                             | 6.1<br>(4.1 to 8.5)                          | 20.2%<br>(8.1% to 34.4%)                          | -9.3%<br>(-18.4% to 1.5%)                        |
| Haemolytic disease and other neonatal jaundice           | 12.9<br>(9.8 to 15.5)                              | 5.4<br>(3.3 to 7.6)                          | 45.9%<br>(38.8% to 52.7%)                         | 10.1%<br>(4.7% to 15.2%)                         |
| Malaria                                                  | 3.8<br>(3.2 to 4.5)                                | 1.6<br>(1.1 to 2.2)                          | 32.7%<br>(13.7% to 52.4%)                         | 0.2%<br>(-14.2% to 15.1%)                        |
| Food-borne trematodiasis                                 | 7.2<br>(2.0 to 17.0)                               | 1.0<br>(0.3 to 2.4)                          | 29.7%<br>(0.1% to 64.7%)                          | -2.1%<br>(-24.4% to 24.3%)                       |
| Pneumococcal meningitis                                  | 4.7<br>(3.7 to 5.6)                                | 0.8<br>(0.5 to 1.1)                          | 24.2%<br>(17.5% to 31.1%)                         | -6.3%<br>(-11.3% to -1.1%)                       |
| Other meningitis                                         | 3.0<br>(2.4 to 3.7)                                | 0.5<br>(0.3 to 0.7)                          | 23.6%<br>(20.6% to 26.3%)                         | -6.7%<br>(-9.0% to -4.6%)                        |
| H influenzae type B meningitis                           | 1.3<br>(1.0 to 1.6)                                | 0.2<br>(0.1 to 0.3)                          | 35.6%<br>(28.5% to 43.4%)                         | 2.3%<br>(-3.0% to 8.2%)                          |
| Meningococcal infection                                  | 0.7<br>(0.5 to 0.9)                                | 0.1<br>(0.1 to 0.2)                          | 24.2%<br>(21.4% to 26.9%)                         | -6.3%<br>(-8.4% to -4.3%)                        |
| Cystic echinococcosis                                    | 0.2<br>(0.1 to 0.7)                                | <0.05<br>(<0.05 to 0.1)                      | -39.9%<br>(-78.2% to 60.5%)                       | -54.7%<br>(-83.5% to 21.1%)                      |
| Tetanus                                                  | <0.05<br>(<0.05 to <0.05)                          | <0.05<br>(<0.05 to <0.05)                    | 25.8%<br>(-90.6% to 2,320.5%)                     | -5.1%<br>(-92.9% to 1,726.8%)                    |
| <b>All causes</b>                                        | <b>1,274.1</b><br><b>(1,075.8 to 1,492.1)</b>      | <b>346.7</b><br><b>(252.0 to 457.5)</b>      | <b>30.9%</b><br><b>(20.1% to 43.1%)</b>           | <b>-1.2%</b><br><b>(-9.4% to 8.0%)</b>           |

SR Table 13c: Global prevalence and years lived with disability (YLDs) for 2016, percentage change of YLD counts and rates between 2006 and 2016 of epilepsy by cause, ages 70-74 years

| Cause                                                    | Prevalence in thousands (95% uncertainty interval) | YLDs in thousands (95% uncertainty interval) |                                                   |                                                  |
|----------------------------------------------------------|----------------------------------------------------|----------------------------------------------|---------------------------------------------------|--------------------------------------------------|
|                                                          |                                                    | 2016                                         | Percentage change in counts between 2006 and 2016 | Percentage change in rates between 2006 and 2016 |
| Epilepsy                                                 | 683.6<br>(555.2 to 821.2)                          | 183.5<br>(123.7 to 255.3)                    | 17.0%<br>(4.0% to 32.5%)                          | -2.2%<br>(-13.1% to 10.8%)                       |
| Cysticercosis                                            | 117.6<br>(84.6 to 162.4)                           | 17.2<br>(10.2 to 25.9)                       | 0.8%<br>(-6.0% to 7.5%)                           | -15.8%<br>(-21.4% to -10.2%)                     |
| Neonatal preterm birth complications                     | 33.4<br>(20.7 to 48.6)                             | 13.7<br>(7.5 to 21.9)                        | 48.1%<br>(15.5% to 85.4%)                         | 23.8%<br>(-3.4% to 54.9%)                        |
| Neonatal sepsis and other neonatal infections            | 31.4<br>(8.9 to 92.8)                              | 13.0<br>(3.2 to 37.7)                        | 42.7%<br>(31.9% to 67.3%)                         | 19.3%<br>(10.2% to 39.9%)                        |
| Encephalitis                                             | 33.1<br>(27.9 to 39.3)                             | 4.7<br>(3.2 to 6.6)                          | 9.5%<br>(-1.4% to 21.7%)                          | -8.4%<br>(-17.6% to 1.7%)                        |
| Neonatal encephalopathy due to birth asphyxia and trauma | 11.3<br>(4.3 to 23.7)                              | 4.5<br>(1.5 to 10.1)                         | 47.6%<br>(35.1% to 73.3%)                         | 23.4%<br>(12.9% to 44.8%)                        |
| Haemolytic disease and other neonatal jaundice           | 6.5<br>(4.8 to 7.8)                                | 2.7<br>(1.7 to 3.8)                          | 36.1%<br>(28.9% to 42.3%)                         | 13.7%<br>(7.7% to 18.9%)                         |
| Malaria                                                  | 1.5<br>(1.3 to 1.9)                                | 0.7<br>(0.5 to 0.9)                          | 35.3%<br>(28.7% to 39.8%)                         | 13.1%<br>(7.6% to 16.9%)                         |
| Pneumococcal meningitis                                  | 3.8<br>(2.9 to 4.7)                                | 0.6<br>(0.4 to 0.9)                          | 18.2%<br>(7.7% to 29.9%)                          | -1.2%<br>(-10.0% to 8.5%)                        |
| Food-borne trematodiasis                                 | 4.1<br>(1.1 to 9.5)                                | 0.6<br>(0.2 to 1.4)                          | 6.0%<br>(-17.9% to 35.9%)                         | -11.4%<br>(-31.4% to 13.6%)                      |
| Other meningitis                                         | 2.4<br>(1.9 to 3.1)                                | 0.4<br>(0.3 to 0.6)                          | 16.1%<br>(13.2% to 18.8%)                         | -3.0%<br>(-5.3% to -0.7%)                        |
| H influenzae type B meningitis                           | 1.0<br>(0.8 to 1.3)                                | 0.2<br>(0.1 to 0.3)                          | 28.6%<br>(22.3% to 36.5%)                         | 7.5%<br>(2.2% to 14.1%)                          |
| Meningococcal infection                                  | 0.6<br>(0.4 to 0.7)                                | 0.1<br>(0.1 to 0.1)                          | 18.4%<br>(15.6% to 21.1%)                         | -1.0%<br>(-3.4% to 1.2%)                         |
| Cystic echinococcosis                                    | 0.2<br>(<0.05 to 0.4)                              | <0.05<br>(<0.05 to 0.1)                      | -42.7%<br>(-77.8% to 36.7%)                       | -52.1%<br>(-81.4% to 14.2%)                      |
| Tetanus                                                  | <0.05<br>(<0.05 to <0.05)                          | <0.05<br>(<0.05 to <0.05)                    | -20.8%<br>(-90.0% to 489.8%)                      | -33.8%<br>(-91.7% to 393.0%)                     |
| <b>All causes</b>                                        | <b>930.5</b><br><b>(780.0 to 1,095.0)</b>          | <b>241.9</b><br><b>(172.8 to 322.5)</b>      | <b>18.7%</b><br><b>(8.0% to 30.9%)</b>            | <b>-0.8%</b><br><b>(-9.7% to 9.4%)</b>           |

SR Table 13c: Global prevalence and years lived with disability (YLDs) for 2016, percentage change of YLD counts and rates between 2006 and 2016 of epilepsy by cause, ages 75-79 years

| Cause                                                    | Prevalence in thousands (95% uncertainty interval) | YLDs in thousands (95% uncertainty interval) |                                                   |                                                  |
|----------------------------------------------------------|----------------------------------------------------|----------------------------------------------|---------------------------------------------------|--------------------------------------------------|
|                                                          |                                                    | 2016                                         | Percentage change in counts between 2006 and 2016 | Percentage change in rates between 2006 and 2016 |
| Epilepsy                                                 | 563.2<br>(462.1 to 678.4)                          | 146.1<br>(99.8 to 200.2)                     | 21.6%<br>(6.4% to 40.1%)                          | -2.2%<br>(-14.4% to 12.6%)                       |
| Cysticercosis                                            | 76.9<br>(54.5 to 106.4)                            | 11.0<br>(6.7 to 17.0)                        | 6.7%<br>(-0.6% to 14.0%)                          | -14.2%<br>(-20.0% to -8.4%)                      |
| Neonatal sepsis and other neonatal infections            | 15.2<br>(3.4 to 43.1)                              | 6.3<br>(1.2 to 18.6)                         | 56.2%<br>(44.3% to 87.5%)                         | 25.6%<br>(16.0% to 50.8%)                        |
| Encephalitis                                             | 27.8<br>(23.8 to 32.8)                             | 3.9<br>(2.6 to 5.4)                          | 17.6%<br>(6.3% to 30.7%)                          | -5.5%<br>(-14.5% to 5.1%)                        |
| Neonatal preterm birth complications                     | 9.2<br>(5.4 to 14.1)                               | 3.8<br>(2.0 to 6.5)                          | 48.4%<br>(11.4% to 91.3%)                         | 19.3%<br>(-10.4% to 53.8%)                       |
| Neonatal encephalopathy due to birth asphyxia and trauma | 4.0<br>(1.0 to 9.4)                                | 1.6<br>(0.4 to 4.2)                          | 71.9%<br>(52.2% to 102.5%)                        | 38.3%<br>(22.4% to 62.8%)                        |
| Haemolytic disease and other neonatal jaundice           | 3.0<br>(2.1 to 3.7)                                | 1.3<br>(0.8 to 1.8)                          | 47.7%<br>(37.9% to 56.1%)                         | 18.8%<br>(10.9% to 25.5%)                        |
| Pneumococcal meningitis                                  | 3.2<br>(2.6 to 3.9)                                | 0.5<br>(0.3 to 0.7)                          | 24.4%<br>(15.9% to 34.1%)                         | 0.0%<br>(-6.8% to 7.8%)                          |
| Food-borne trematodiasis                                 | 2.5<br>(0.7 to 5.9)                                | 0.4<br>(0.1 to 0.8)                          | 18.2%<br>(-11.7% to 52.4%)                        | -5.0%<br>(-29.0% to 22.6%)                       |
| Other meningitis                                         | 2.0<br>(1.6 to 2.6)                                | 0.3<br>(0.2 to 0.5)                          | 23.1%<br>(16.6% to 30.4%)                         | -1.0%<br>(-6.2% to 4.9%)                         |
| Malaria                                                  | 0.4<br>(0.3 to 0.4)                                | 0.2<br>(0.1 to 0.2)                          | 44.0%<br>(38.1% to 48.8%)                         | 15.8%<br>(11.1% to 19.6%)                        |
| H influenzae type B meningitis                           | 0.8<br>(0.7 to 1.0)                                | 0.1<br>(0.1 to 0.2)                          | 35.4%<br>(29.6% to 42.1%)                         | 8.9%<br>(4.2% to 14.3%)                          |
| Meningococcal infection                                  | 0.5<br>(0.4 to 0.6)                                | 0.1<br>(0.1 to 0.1)                          | 23.9%<br>(21.1% to 26.5%)                         | -0.4%<br>(-2.6% to 1.7%)                         |
| Cystic echinococcosis                                    | 0.1<br>(<0.05 to 0.3)                              | <0.05<br>(<0.05 to 0.1)                      | -41.6%<br>(-77.0% to 46.8%)                       | -53.1%<br>(-81.5% to 18.0%)                      |
| Tetanus                                                  | <0.05<br>(<0.05 to <0.05)                          | <0.05<br>(<0.05 to <0.05)                    | -24.3%<br>(-88.2% to 300.1%)                      | -39.1%<br>(-90.5% to 221.7%)                     |
| <b>All causes</b>                                        | <b>708.7</b><br><b>(596.5 to 833.5)</b>            | <b>175.6</b><br><b>(124.1 to 235.2)</b>      | <b>22.4%</b><br><b>(9.1% to 38.0%)</b>            | <b>-1.6%</b><br><b>(-12.3% to 11.0%)</b>         |

SR Table 13c: Global prevalence and years lived with disability (YLDs) for 2016, percentage change of YLD counts and rates between 2006 and 2016 of epilepsy by cause, ages 80-84

| Cause                                                    | Prevalence in thousands (95% uncertainty interval) | YLDs in thousands (95% uncertainty interval) |                                                   |                                                  |
|----------------------------------------------------------|----------------------------------------------------|----------------------------------------------|---------------------------------------------------|--------------------------------------------------|
|                                                          |                                                    | 2016                                         | Percentage change in counts between 2006 and 2016 | Percentage change in rates between 2006 and 2016 |
| Epilepsy                                                 | 385.8<br>(311.8 to 464.1)                          | 96.3<br>(66.7 to 132.5)                      | 27.5%<br>(10.2% to 48.7%)                         | -2.7%<br>(-15.9% to 13.6%)                       |
| Cysticercosis                                            | 49.0<br>(34.2 to 68.3)                             | 6.9<br>(4.0 to 10.4)                         | 14.9%<br>(6.7% to 23.0%)                          | -12.3%<br>(-18.5% to -6.1%)                      |
| Encephalitis                                             | 19.1<br>(16.3 to 22.2)                             | 2.6<br>(1.8 to 3.5)                          | 25.5%<br>(13.3% to 39.5%)                         | -4.2%<br>(-13.5% to 6.5%)                        |
| Neonatal sepsis and other neonatal infections            | 4.8<br>(0.8 to 14.3)                               | 2.0<br>(0.3 to 6.4)                          | 73.2%<br>(60.9% to 113.5%)                        | 32.3%<br>(22.9% to 63.0%)                        |
| Neonatal encephalopathy due to birth asphyxia and trauma | 0.9<br>(0.1 to 2.5)                                | 0.4<br>(<0.05 to 1.1)                        | 83.6%<br>(57.8% to 137.2%)                        | 40.2%<br>(20.5% to 81.1%)                        |
| Haemolytic disease and other neonatal jaundice           | 0.8<br>(0.6 to 1.1)                                | 0.4<br>(0.2 to 0.5)                          | 57.7%<br>(42.8% to 69.9%)                         | 20.4%<br>(9.1% to 29.8%)                         |
| Pneumococcal meningitis                                  | 2.2<br>(1.8 to 2.8)                                | 0.3<br>(0.2 to 0.5)                          | 30.4%<br>(20.1% to 41.5%)                         | -0.4%<br>(-8.3% to 8.1%)                         |
| Neonatal preterm birth complications                     | 0.6<br>(0.3 to 1.1)                                | 0.2<br>(0.1 to 0.5)                          | 40.3%<br>(-7.7% to 104.3%)                        | 7.1%<br>(-29.5% to 56.0%)                        |
| Other meningitis                                         | 1.3<br>(1.0 to 1.7)                                | 0.2<br>(0.1 to 0.3)                          | 31.2%<br>(23.6% to 38.1%)                         | 0.2%<br>(-5.7% to 5.5%)                          |
| Food-borne trematodiasis                                 | 1.3<br>(0.4 to 2.9)                                | 0.2<br>(<0.05 to 0.4)                        | 28.7%<br>(-6.7% to 69.6%)                         | -1.8%<br>(-28.7% to 29.5%)                       |
| H influenzae type B meningitis                           | 0.6<br>(0.4 to 0.7)                                | 0.1<br>(0.1 to 0.1)                          | 44.0%<br>(37.3% to 51.9%)                         | 10.0%<br>(4.9% to 16.0%)                         |
| Meningococcal infection                                  | 0.3<br>(0.2 to 0.4)                                | 0.1<br>(<0.05 to 0.1)                        | 32.0%<br>(29.0% to 34.7%)                         | 0.8%<br>(-1.5% to 2.9%)                          |
| Malaria                                                  | <0.05<br>(<0.05 to 0.1)                            | <0.05<br>(<0.05 to <0.05)                    | 56.9%<br>(50.1% to 64.4%)                         | 19.8%<br>(14.6% to 25.5%)                        |
| Cystic echinococcosis                                    | 0.1<br>(<0.05 to 0.1)                              | <0.05<br>(<0.05 to <0.05)                    | -38.5%<br>(-75.9% to 60.3%)                       | -53.0%<br>(-81.6% to 22.4%)                      |
| Tetanus                                                  | <0.05<br>(<0.05 to <0.05)                          | <0.05<br>(<0.05 to <0.05)                    | -11.8%<br>(-85.6% to 448.3%)                      | -32.7%<br>(-89.0% to 318.6%)                     |
| <b>All causes</b>                                        | <b>466.7</b><br><b>(386.6 to 548.8)</b>            | <b>109.6</b><br><b>(76.6 to 148.0)</b>       | <b>27.4%</b><br><b>(12.1% to 46.0%)</b>           | <b>-2.7%</b><br><b>(-14.4% to 11.5%)</b>         |



SR Table 13c: Global prevalence and years lived with disability (YLDs) for 2016, percentage change of YLD counts and rates between 2006 and 2016 of epilepsy by cause, ages 85-89

| Cause                                                    | Prevalence in thousands (95% uncertainty interval) | YLDs in thousands (95% uncertainty interval) |                                                   |                                                  |
|----------------------------------------------------------|----------------------------------------------------|----------------------------------------------|---------------------------------------------------|--------------------------------------------------|
|                                                          | 2016                                               | 2016                                         | Percentage change in counts between 2006 and 2016 | Percentage change in rates between 2006 and 2016 |
| Epilepsy                                                 | 220.1<br>(175.1 to 264.1)                          | 52.7<br>(36.1 to 71.9)                       | 53.6%<br>(30.9% to 81.1%)                         | -4.3%<br>(-18.4% to 12.8%)                       |
| Cysticercosis                                            | 24.0<br>(17.2 to 32.6)                             | 3.3<br>(2.0 to 4.8)                          | 29.5%<br>(20.1% to 39.1%)                         | -19.3%<br>(-25.2% to -13.3%)                     |
| Encephalitis                                             | 11.1<br>(9.5 to 12.9)                              | 1.5<br>(1.0 to 2.0)                          | 48.6%<br>(33.9% to 65.7%)                         | -7.4%<br>(-16.5% to 3.3%)                        |
| Neonatal sepsis and other neonatal infections            | 1.0<br>(0.1 to 3.3)                                | 0.4<br>(<0.05 to 1.4)                        | 135.0%<br>(115.1% to 214.1%)                      | 46.4%<br>(34.0% to 95.7%)                        |
| Pneumococcal meningitis                                  | 1.3<br>(1.0 to 1.5)                                | 0.2<br>(0.1 to 0.3)                          | 51.1%<br>(36.2% to 67.8%)                         | -5.8%<br>(-15.1% to 4.5%)                        |
| Other meningitis                                         | 0.7<br>(0.6 to 0.9)                                | 0.1<br>(0.1 to 0.2)                          | 51.4%<br>(43.6% to 58.7%)                         | -5.7%<br>(-10.5% to -1.1%)                       |
| Food-borne trematodiasis                                 | 0.5<br>(0.1 to 1.2)                                | 0.1<br>(<0.05 to 0.2)                        | 45.9%<br>(1.3% to 98.0%)                          | -9.1%<br>(-36.9% to 23.4%)                       |
| Neonatal encephalopathy due to birth asphyxia and trauma | 0.2<br>(<0.05 to 0.6)                              | 0.1<br>(<0.05 to 0.3)                        | 153.6%<br>(95.9% to 282.0%)                       | 58.0%<br>(22.0% to 138.0%)                       |
| Haemolytic disease and other neonatal jaundice           | 0.1<br>(0.1 to 0.2)                                | 0.1<br>(<0.05 to 0.1)                        | 91.5%<br>(56.4% to 115.2%)                        | 19.3%<br>(-2.6% to 34.1%)                        |
| H influenzae type B meningitis                           | 0.3<br>(0.2 to 0.4)                                | 0.1<br>(<0.05 to 0.1)                        | 63.2%<br>(56.0% to 70.7%)                         | 1.7%<br>(-2.8% to 6.4%)                          |
| Meningococcal infection                                  | 0.2<br>(0.1 to 0.2)                                | <0.05<br>(<0.05 to <0.05)                    | 55.5%<br>(51.0% to 60.0%)                         | -3.1%<br>(-5.9% to -0.3%)                        |
| Neonatal preterm birth complications                     | <0.05<br>(<0.05 to <0.05)                          | <0.05<br>(<0.05 to <0.05)                    | 95.4%<br>(21.7% to 174.7%)                        | 21.8%<br>(-24.2% to 71.1%)                       |
| Cystic echinococcosis                                    | <0.05<br>(<0.05 to 0.1)                            | <0.05<br>(<0.05 to <0.05)                    | -26.6%<br>(-73.0% to 96.1%)                       | -54.3%<br>(-83.2% to 22.2%)                      |
| Malaria                                                  | <0.05<br>(<0.05 to <0.05)                          | <0.05<br>(<0.05 to <0.05)                    | 76.4%<br>(65.5% to 86.5%)                         | 9.9%<br>(3.1% to 16.2%)                          |
| Tetanus                                                  | <0.05<br>(<0.05 to <0.05)                          | <0.05<br>(<0.05 to <0.05)                    | 2.7%<br>(-83.5% to 796.3%)                        | -36.0%<br>(-89.7% to 458.5%)                     |
| <b>All causes</b>                                        | <b>259.6</b><br><b>(213.3 to 307.6)</b>            | <b>58.4</b><br><b>(40.5 to 79.3)</b>         | <b>52.3%</b><br><b>(31.8% to 77.2%)</b>           | <b>-5.1%</b><br><b>(-17.9% to 10.4%)</b>         |

SR Table 13c: Global prevalence and years lived with disability (YLDs) for 2016, percentage change of YLD counts and rates between 2006 and 2016 of epilepsy by cause, ages 90-94

| Cause                                                    | Prevalence in thousands (95% uncertainty interval) | YLDs in thousands (95% uncertainty interval) |                                                   |                                                  |
|----------------------------------------------------------|----------------------------------------------------|----------------------------------------------|---------------------------------------------------|--------------------------------------------------|
|                                                          |                                                    | 2016                                         | Percentage change in counts between 2006 and 2016 | Percentage change in rates between 2006 and 2016 |
| Epilepsy                                                 | 85.5<br>(67.7 to 103.6)                            | 19.6<br>(13.4 to 26.9)                       | 64.7%<br>(35.8% to 100.8%)                        | -1.6%<br>(-18.9% to 19.9%)                       |
| Cysticercosis                                            | 8.0<br>(5.4 to 12.2)                               | 1.1<br>(0.6 to 1.7)                          | 34.4%<br>(24.3% to 44.4%)                         | -19.7%<br>(-25.7% to -13.8%)                     |
| Encephalitis                                             | 4.2<br>(3.6 to 5.0)                                | 0.5<br>(0.4 to 0.7)                          | 52.8%<br>(38.5% to 69.5%)                         | -8.7%<br>(-17.2% to 1.3%)                        |
| Pneumococcal meningitis                                  | 0.5<br>(0.4 to 0.6)                                | 0.1<br>(<0.05 to 0.1)                        | 57.3%<br>(43.7% to 72.5%)                         | -6.0%<br>(-14.1% to 3.0%)                        |
| Other meningitis                                         | 0.3<br>(0.2 to 0.3)                                | <0.05<br>(<0.05 to 0.1)                      | 57.2%<br>(45.7% to 68.6%)                         | -6.1%<br>(-13.0% to 0.7%)                        |
| Neonatal sepsis and other neonatal infections            | 0.1<br>(<0.05 to 0.3)                              | <0.05<br>(<0.05 to 0.1)                      | 173.7%<br>(143.1% to 322.3%)                      | 63.5%<br>(45.3% to 152.3%)                       |
| H influenzae type B meningitis                           | 0.1<br>(0.1 to 0.1)                                | <0.05<br>(<0.05 to <0.05)                    | 68.9%<br>(59.2% to 79.9%)                         | 0.9%<br>(-4.9% to 7.5%)                          |
| Food-borne trematodiasis                                 | 0.1<br>(<0.05 to 0.3)                              | <0.05<br>(<0.05 to <0.05)                    | 38.5%<br>(-3.7% to 99.1%)                         | -17.3%<br>(-42.4% to 18.9%)                      |
| Meningococcal infection                                  | 0.1<br>(0.1 to 0.1)                                | <0.05<br>(<0.05 to <0.05)                    | 62.7%<br>(57.0% to 67.6%)                         | -2.8%<br>(-6.2% to 0.1%)                         |
| Neonatal encephalopathy due to birth asphyxia and trauma | <0.05<br>(<0.05 to 0.1)                            | <0.05<br>(<0.05 to <0.05)                    | 186.2%<br>(82.7% to 442.1%)                       | 71.0%<br>(9.1% to 223.9%)                        |
| Haemolytic disease and other neonatal jaundice           | <0.05<br>(<0.05 to <0.05)                          | <0.05<br>(<0.05 to <0.05)                    | 86.8%<br>(15.5% to 128.2%)                        | 11.6%<br>(-31.0% to 36.3%)                       |
| Cystic echinococcosis                                    | <0.05<br>(<0.05 to <0.05)                          | <0.05<br>(<0.05 to <0.05)                    | -23.7%<br>(-72.7% to 113.4%)                      | -54.4%<br>(-83.7% to 27.5%)                      |
| Neonatal preterm birth complications                     | <0.05<br>(<0.05 to <0.05)                          | <0.05<br>(<0.05 to <0.05)                    | 117.4%<br>(4.8% to 243.2%)                        | 29.9%<br>(-37.4% to 105.0%)                      |
| Malaria                                                  | <0.05<br>(<0.05 to <0.05)                          | <0.05<br>(<0.05 to <0.05)                    | 98.6%<br>(82.1% to 116.0%)                        | 18.7%<br>(8.8% to 29.0%)                         |
| Tetanus                                                  | <0.05<br>(<0.05 to <0.05)                          | <0.05<br>(<0.05 to <0.05)                    | 19.7%<br>(-85.6% to 1,262.1%)                     | -28.5%<br>(-91.4% to 713.8%)                     |
| <b>All causes</b>                                        | <b>98.9</b><br><b>(80.5 to 119.1)</b>              | <b>21.4</b><br><b>(14.8 to 29.4)</b>         | <b>62.6%</b><br><b>(36.3% to 95.2%)</b>           | <b>-2.8%</b><br><b>(-18.5% to 16.6%)</b>         |

SR Table 13c: Global prevalence and years lived with disability (YLDs) for 2016, percentage change of YLD counts and rates between 2006 and 2016 of epilepsy by cause, ages 95+ years

| Cause                                                    | Prevalence in thousands (95% uncertainty interval) | YLDs in thousands (95% uncertainty interval) |                                                   |                                                  |
|----------------------------------------------------------|----------------------------------------------------|----------------------------------------------|---------------------------------------------------|--------------------------------------------------|
|                                                          |                                                    | 2016                                         | Percentage change in counts between 2006 and 2016 | Percentage change in rates between 2006 and 2016 |
| Epilepsy                                                 | 19.8<br>(15.6 to 23.9)                             | 4.6<br>(3.1 to 6.3)                          | 49.6%<br>(24.9% to 82.4%)                         | -4.5%<br>(-20.3% to 16.4%)                       |
| Cysticercosis                                            | 1.9<br>(1.0 to 3.4)                                | 0.3<br>(0.1 to 0.5)                          | 41.4%<br>(30.0% to 52.3%)                         | -9.8%<br>(-17.1% to -2.8%)                       |
| Encephalitis                                             | 1.1<br>(0.9 to 1.2)                                | 0.1<br>(0.1 to 0.2)                          | 52.0%<br>(35.1% to 70.1%)                         | -3.0%<br>(-13.8% to 8.6%)                        |
| Pneumococcal meningitis                                  | 0.1<br>(0.1 to 0.1)                                | <0.05<br>(<0.05 to <0.05)                    | 56.6%<br>(44.8% to 68.0%)                         | -0.1%<br>(-7.6% to 7.2%)                         |
| Other meningitis                                         | 0.1<br>(<0.05 to 0.1)                              | <0.05<br>(<0.05 to <0.05)                    | 59.9%<br>(47.5% to 73.8%)                         | 2.0%<br>(-5.9% to 10.9%)                         |
| H influenzae type B meningitis                           | <0.05<br>(<0.05 to <0.05)                          | <0.05<br>(<0.05 to <0.05)                    | 66.5%<br>(58.0% to 76.4%)                         | 6.2%<br>(0.8% to 12.6%)                          |
| Meningococcal infection                                  | <0.05<br>(<0.05 to <0.05)                          | <0.05<br>(<0.05 to <0.05)                    | 63.4%<br>(50.4% to 75.7%)                         | 4.3%<br>(-4.0% to 12.1%)                         |
| Neonatal encephalopathy due to birth asphyxia and trauma | <0.05<br>(<0.05 to <0.05)                          | <0.05<br>(<0.05 to <0.05)                    | 176.1%<br>(25.0% to 653.2%)                       | 76.2%<br>(-20.2% to 380.6%)                      |
| Neonatal sepsis and other neonatal infections            | <0.05<br>(<0.05 to <0.05)                          | <0.05<br>(<0.05 to <0.05)                    | 189.2%<br>(150.3% to 460.6%)                      | 84.5%<br>(59.7% to 257.7%)                       |
| Cystic echinococcosis                                    | <0.05<br>(<0.05 to <0.05)                          | <0.05<br>(<0.05 to <0.05)                    | -26.1%<br>(-71.7% to 89.1%)                       | -52.8%<br>(-81.9% to 20.7%)                      |
| Haemolytic disease and other neonatal jaundice           | <0.05<br>(<0.05 to <0.05)                          | <0.05<br>(<0.05 to <0.05)                    | 88.4%<br>(-14.7% to 188.2%)                       | 20.2%<br>(-45.6% to 83.9%)                       |
| Neonatal preterm birth complications                     | <0.05<br>(<0.05 to <0.05)                          | <0.05<br>(<0.05 to <0.05)                    | 118.2%<br>(-18.1% to 279.7%)                      | 39.2%<br>(-47.7% to 142.3%)                      |
| Malaria                                                  | <0.05<br>(<0.05 to <0.05)                          | <0.05<br>(<0.05 to <0.05)                    | 119.8%<br>(95.4% to 150.8%)                       | 40.3%<br>(24.7% to 60.1%)                        |
| Tetanus                                                  | <0.05<br>(<0.05 to <0.05)                          | <0.05<br>(<0.05 to <0.05)                    | 34.4%<br>(-86.2% to 5,001.1%)                     | -14.2%<br>(-91.2% to 3,155.2%)                   |
| <b>All causes</b>                                        | <b>22.9</b><br><b>(18.7 to 27.7)</b>               | <b>5.0</b><br><b>(3.4 to 6.9)</b>            | <b>49.3%</b><br><b>(26.4% to 78.9%)</b>           | <b>-4.7%</b><br><b>(-19.4% to 14.2%)</b>         |

SR Table 13d: Global prevalence and years lived with disability (YLDs) for 2016, percentage change of YLD counts and rates between 2006 and 2016 of Guillain-Barré syndrome by cause, ages 0-6 days

| Cause                        | Prevalence in thousands (95% uncertainty interval) | YLDs in thousands (95% uncertainty interval)     |                                                   |                                                  |
|------------------------------|----------------------------------------------------|--------------------------------------------------|---------------------------------------------------|--------------------------------------------------|
|                              | 2016                                               | 2016                                             | Percentage change in counts between 2006 and 2016 | Percentage change in rates between 2006 and 2016 |
| Zika virus disease           | <0.05<br>(<0.05 to <0.05)                          | <0.05<br>(<0.05 to <0.05)                        | --                                                | --                                               |
| Upper respiratory infections | <0.05<br>(<0.05 to <0.05)                          | <0.05<br>(<0.05 to <0.05)                        | -0.6%<br>(-1.6% to 0.2%)                          | -0.1%<br>(-1.1% to 0.7%)                         |
| Lower respiratory infections | <0.05<br>(<0.05 to <0.05)                          | <0.05<br>(<0.05 to <0.05)                        | -0.6%<br>(-1.6% to 0.2%)                          | -0.1%<br>(-1.1% to 0.8%)                         |
| Diarrhoeal diseases          | <0.05<br>(<0.05 to <0.05)                          | <0.05<br>(<0.05 to <0.05)                        | -0.6%<br>(-1.6% to 0.2%)                          | -0.1%<br>(-1.1% to 0.7%)                         |
| Other infectious diseases    | <0.05<br>(<0.05 to <0.05)                          | <0.05<br>(<0.05 to <0.05)                        | -0.6%<br>(-1.7% to 0.2%)                          | -0.1%<br>(-1.1% to 0.8%)                         |
| <b>All causes</b>            | <b>&lt;0.05</b><br><b>(&lt;0.05 to &lt;0.05)</b>   | <b>&lt;0.05</b><br><b>(&lt;0.05 to &lt;0.05)</b> | <b>90.9%</b><br><b>(38.8% to 226.2%)</b>          | <b>91.9%</b><br><b>(39.5% to 227.9%)</b>         |

SR Table 13d: Global prevalence and years lived with disability (YLDs) for 2016, percentage change of YLD counts and rates between 2006 and 2016 of Guillain-Barré syndrome by cause, ages 7-27 days

| Cause                        | Prevalence in thousands (95% uncertainty interval) | YLDs in thousands (95% uncertainty interval)     |                                                   |                                                  |
|------------------------------|----------------------------------------------------|--------------------------------------------------|---------------------------------------------------|--------------------------------------------------|
|                              | 2016                                               | 2016                                             | Percentage change in counts between 2006 and 2016 | Percentage change in rates between 2006 and 2016 |
| Upper respiratory infections | <0.05<br>(<0.05 to <0.05)                          | <0.05<br>(<0.05 to <0.05)                        | -0.3%<br>(-1.3% to 0.6%)                          | -0.1%<br>(-1.1% to 0.8%)                         |
| Zika virus disease           | <0.05<br>(<0.05 to <0.05)                          | <0.05<br>(<0.05 to <0.05)                        | --                                                | --                                               |
| Lower respiratory infections | <0.05<br>(<0.05 to <0.05)                          | <0.05<br>(<0.05 to <0.05)                        | -0.3%<br>(-1.3% to 0.6%)                          | -0.1%<br>(-1.1% to 0.8%)                         |
| Diarrhoeal diseases          | <0.05<br>(<0.05 to <0.05)                          | <0.05<br>(<0.05 to <0.05)                        | -0.3%<br>(-1.3% to 0.6%)                          | -0.1%<br>(-1.1% to 0.8%)                         |
| Other infectious diseases    | <0.05<br>(<0.05 to <0.05)                          | <0.05<br>(<0.05 to <0.05)                        | -0.3%<br>(-1.3% to 0.6%)                          | -0.1%<br>(-1.1% to 0.8%)                         |
| <b>All causes</b>            | <b>&lt;0.05</b><br><b>(&lt;0.05 to &lt;0.05)</b>   | <b>&lt;0.05</b><br><b>(&lt;0.05 to &lt;0.05)</b> | <b>19.9%</b><br><b>(8.4% to 48.4%)</b>            | <b>20.2%</b><br><b>(8.6% to 48.6%)</b>           |

SR Table 13d: Global prevalence and years lived with disability (YLDs) for 2016, percentage change of YLD counts and rates between 2006 and 2016 of Guillain-Barré syndrome by cause, ages 28-364 days

| Cause                        | Prevalence in thousands (95% uncertainty interval) | YLDs in thousands (95% uncertainty interval) |                                                   |                                                  |
|------------------------------|----------------------------------------------------|----------------------------------------------|---------------------------------------------------|--------------------------------------------------|
|                              | 2016                                               | 2016                                         | Percentage change in counts between 2006 and 2016 | Percentage change in rates between 2006 and 2016 |
| Upper respiratory infections | 0.1<br>(0.1 to 0.2)                                | <0.05<br>(<0.05 to 0.1)                      | 0.7%<br>(-0.4% to 1.6%)                           | -0.2%<br>(-1.2% to 0.8%)                         |
| Lower respiratory infections | 0.1<br>(<0.05 to 0.1)                              | <0.05<br>(<0.05 to <0.05)                    | 0.7%<br>(-0.4% to 1.6%)                           | -0.2%<br>(-1.2% to 0.8%)                         |
| Diarrhoeal diseases          | <0.05<br>(<0.05 to 0.1)                            | <0.05<br>(<0.05 to <0.05)                    | 0.7%<br>(-0.4% to 1.6%)                           | -0.1%<br>(-1.2% to 0.8%)                         |
| Other infectious diseases    | <0.05<br>(<0.05 to 0.1)                            | <0.05<br>(<0.05 to <0.05)                    | 0.7%<br>(-0.4% to 1.6%)                           | -0.2%<br>(-1.2% to 0.8%)                         |
| Zika virus disease           | <0.05<br>(<0.05 to <0.05)                          | <0.05<br>(<0.05 to <0.05)                    | --                                                | --                                               |
| <b>All causes</b>            | <b>0.3</b><br><b>(0.2 to 0.5)</b>                  | <b>0.1</b><br><b>(&lt;0.05 to 0.1)</b>       | <b>3.7%</b><br><b>(1.8% to 7.2%)</b>              | <b>2.9%</b><br><b>(1.0% to 6.4%)</b>             |

| SR Table 13d: Global prevalence and years lived with disability (YLDs) for 2016, percentage change of YLD counts and rates between 2006 and 2016 of Guillain-Barré syndrome by cause, ages 1-4 years |                                                    |                                              |                                      |                                                  |
|------------------------------------------------------------------------------------------------------------------------------------------------------------------------------------------------------|----------------------------------------------------|----------------------------------------------|--------------------------------------|--------------------------------------------------|
| Cause                                                                                                                                                                                                | Prevalence in thousands (95% uncertainty interval) | YLDs in thousands (95% uncertainty interval) |                                      |                                                  |
|                                                                                                                                                                                                      |                                                    | 2016                                         | 2016                                 | Percentage change in rates between 2006 and 2016 |
| Other neurological disorders                                                                                                                                                                         | 1.4<br>(0.7 to 2.3)                                | 0.4<br>(0.2 to 0.8)                          | 5.2%<br>(3.5% to 6.5%)               | -0.4%<br>(-1.9% to 0.9%)                         |
| Upper respiratory infections                                                                                                                                                                         | 1.2<br>(0.6 to 2.0)                                | 0.3<br>(0.2 to 0.6)                          | 5.2%<br>(3.5% to 6.5%)               | -0.4%<br>(-1.9% to 0.9%)                         |
| Lower respiratory infections                                                                                                                                                                         | 0.4<br>(0.2 to 0.8)                                | 0.1<br>(0.1 to 0.3)                          | 5.2%<br>(3.5% to 6.5%)               | -0.4%<br>(-1.9% to 0.9%)                         |
| Diarrhoeal diseases                                                                                                                                                                                  | 0.4<br>(0.2 to 0.7)                                | 0.1<br>(0.1 to 0.2)                          | 5.2%<br>(3.6% to 6.5%)               | -0.4%<br>(-1.9% to 0.9%)                         |
| Other infectious diseases                                                                                                                                                                            | 0.3<br>(0.1 to 0.5)                                | 0.1<br>(<0.05 to 0.1)                        | 5.2%<br>(3.5% to 6.5%)               | -0.4%<br>(-1.9% to 0.9%)                         |
| Zika virus disease                                                                                                                                                                                   | <0.05<br>(<0.05 to 0.1)                            | <0.05<br>(<0.05 to <0.05)                    | --                                   | --                                               |
| <b>All causes</b>                                                                                                                                                                                    | <b>3.7</b><br><b>(2.0 to 6.0)</b>                  | <b>1.1</b><br><b>(0.5 to 2.0)</b>            | <b>6.3%</b><br><b>(4.8% to 7.7%)</b> | <b>0.7%</b><br><b>(-0.7% to 2.0%)</b>            |

| SR Table 13d: Global prevalence and years lived with disability (YLDs) for 2016, percentage change of YLD counts and rates between 2006 and 2016 of Guillain-Barré syndrome by cause, ages 5-9 years |                                                    |                                              |                                      |                                                  |
|------------------------------------------------------------------------------------------------------------------------------------------------------------------------------------------------------|----------------------------------------------------|----------------------------------------------|--------------------------------------|--------------------------------------------------|
| Cause                                                                                                                                                                                                | Prevalence in thousands (95% uncertainty interval) | YLDs in thousands (95% uncertainty interval) |                                      |                                                  |
|                                                                                                                                                                                                      |                                                    | 2016                                         | 2016                                 | Percentage change in rates between 2006 and 2016 |
| Other neurological disorders                                                                                                                                                                         | 2.0<br>(0.9 to 3.9)                                | 0.6<br>(0.3 to 1.2)                          | 7.1%<br>(4.7% to 8.4%)               | -0.5%<br>(-2.8% to 0.7%)                         |
| Upper respiratory infections                                                                                                                                                                         | 1.7<br>(0.8 to 3.1)                                | 0.5<br>(0.2 to 1.0)                          | 7.1%<br>(4.7% to 8.4%)               | -0.5%<br>(-2.7% to 0.7%)                         |
| Lower respiratory infections                                                                                                                                                                         | 0.6<br>(0.3 to 1.2)                                | 0.2<br>(0.1 to 0.4)                          | 7.1%<br>(4.7% to 8.4%)               | -0.5%<br>(-2.7% to 0.7%)                         |
| Diarrhoeal diseases                                                                                                                                                                                  | 0.6<br>(0.3 to 1.1)                                | 0.2<br>(0.1 to 0.3)                          | 7.1%<br>(4.7% to 8.4%)               | -0.5%<br>(-2.7% to 0.7%)                         |
| Other infectious diseases                                                                                                                                                                            | 0.4<br>(0.2 to 0.7)                                | 0.1<br>(<0.05 to 0.2)                        | 7.1%<br>(4.7% to 8.4%)               | -0.5%<br>(-2.7% to 0.7%)                         |
| Zika virus disease                                                                                                                                                                                   | 0.1<br>(<0.05 to 0.1)                              | <0.05<br>(<0.05 to <0.05)                    | --                                   | --                                               |
| <b>All causes</b>                                                                                                                                                                                    | <b>5.4</b><br><b>(2.7 to 9.6)</b>                  | <b>1.6</b><br><b>(0.7 to 3.1)</b>            | <b>8.2%</b><br><b>(6.3% to 9.6%)</b> | <b>0.5%</b><br><b>(-1.2% to 1.8%)</b>            |



SR Table 13d: Global prevalence and years lived with disability (YLDs) for 2016, percentage change of YLD counts and rates between 2006 and 2016 of Guillain-Barré syndrome by cause, ages 10-14 years

| Cause                        | Prevalence in thousands (95% uncertainty interval) | YLDs in thousands (95% uncertainty interval) |                                      |                                                  |
|------------------------------|----------------------------------------------------|----------------------------------------------|--------------------------------------|--------------------------------------------------|
|                              |                                                    | 2016                                         | 2016                                 | Percentage change in rates between 2006 and 2016 |
| Other neurological disorders | 1.8<br>(0.8 to 3.5)                                | 0.5<br>(0.2 to 1.1)                          | 3.0%<br>(0.9% to 4.2%)               | 2.1%<br>(0.1% to 3.3%)                           |
| Upper respiratory infections | 1.5<br>(0.7 to 2.8)                                | 0.4<br>(0.2 to 0.9)                          | 3.0%<br>(0.9% to 4.2%)               | 2.1%<br>(0.1% to 3.3%)                           |
| Lower respiratory infections | 0.6<br>(0.2 to 1.1)                                | 0.2<br>(0.1 to 0.4)                          | 3.0%<br>(0.9% to 4.2%)               | 2.1%<br>(0.1% to 3.3%)                           |
| Diarrhoeal diseases          | 0.5<br>(0.2 to 1.0)                                | 0.2<br>(0.1 to 0.3)                          | 3.0%<br>(0.9% to 4.2%)               | 2.1%<br>(0.1% to 3.3%)                           |
| Other infectious diseases    | 0.3<br>(0.2 to 0.7)                                | 0.1<br>(<0.05 to 0.2)                        | 3.0%<br>(0.9% to 4.2%)               | 2.1%<br>(0.1% to 3.3%)                           |
| Zika virus disease           | 0.1<br>(<0.05 to 0.1)                              | <0.05<br>(<0.05 to <0.05)                    | --                                   | --                                               |
| <b>All causes</b>            | <b>4.7</b><br><b>(2.3 to 8.6)</b>                  | <b>1.4</b><br><b>(0.6 to 2.9)</b>            | <b>4.5%</b><br><b>(3.0% to 6.1%)</b> | <b>3.6%</b><br><b>(2.2% to 5.2%)</b>             |

| SR Table 13d: Global prevalence and years lived with disability (YLDs) for 2016, percentage change of YLD counts and rates between 2006 and 2016 of Guillain-Barré syndrome by cause, ages 15–19 years |                                                    |                                              |                                        |                                                  |
|--------------------------------------------------------------------------------------------------------------------------------------------------------------------------------------------------------|----------------------------------------------------|----------------------------------------------|----------------------------------------|--------------------------------------------------|
| Cause                                                                                                                                                                                                  | Prevalence in thousands (95% uncertainty interval) | YLDs in thousands (95% uncertainty interval) |                                        |                                                  |
|                                                                                                                                                                                                        |                                                    | 2016                                         | 2016                                   | Percentage change in rates between 2006 and 2016 |
| Other neurological disorders                                                                                                                                                                           | 1.4<br>(0.7 to 2.5)                                | 0.4<br>(0.2 to 0.8)                          | -2.2%<br>(-3.6% to -1.0%)              | 3.5%<br>(2.0% to 4.8%)                           |
| Upper respiratory infections                                                                                                                                                                           | 1.2<br>(0.6 to 2.1)                                | 0.4<br>(0.2 to 0.7)                          | -2.2%<br>(-3.6% to -1.0%)              | 3.5%<br>(2.0% to 4.8%)                           |
| Lower respiratory infections                                                                                                                                                                           | 0.4<br>(0.2 to 0.8)                                | 0.1<br>(0.1 to 0.3)                          | -2.2%<br>(-3.6% to -1.0%)              | 3.5%<br>(2.0% to 4.8%)                           |
| Diarrhoeal diseases                                                                                                                                                                                    | 0.4<br>(0.2 to 0.7)                                | 0.1<br>(0.1 to 0.2)                          | -2.2%<br>(-3.6% to -1.0%)              | 3.5%<br>(2.0% to 4.8%)                           |
| Other infectious diseases                                                                                                                                                                              | 0.3<br>(0.1 to 0.5)                                | 0.1<br>(<0.05 to 0.1)                        | -2.2%<br>(-3.6% to -1.0%)              | 3.5%<br>(2.0% to 4.8%)                           |
| Zika virus disease                                                                                                                                                                                     | 0.1<br>(<0.05 to 0.1)                              | <0.05<br>(<0.05 to <0.05)                    | --                                     | --                                               |
| <b>All causes</b>                                                                                                                                                                                      | <b>3.8</b><br><b>(2.1 to 6.2)</b>                  | <b>1.1</b><br><b>(0.5 to 2.0)</b>            | <b>-0.2%</b><br><b>(-1.7% to 1.8%)</b> | <b>5.6%</b><br><b>(4.0% to 7.7%)</b>             |

SR Table 13d: Global prevalence and years lived with disability (YLDs) for 2016, percentage change of YLD counts and rates between 2006 and 2016 of Guillain-Barré syndrome by cause, ages 20-24 years

| Cause                        | Prevalence in thousands (95% uncertainty interval) | YLDs in thousands (95% uncertainty interval) |                                       |                                                  |
|------------------------------|----------------------------------------------------|----------------------------------------------|---------------------------------------|--------------------------------------------------|
|                              |                                                    | 2016                                         | 2016                                  | Percentage change in rates between 2006 and 2016 |
| Other neurological disorders | 1.3<br>(0.7 to 2.4)                                | 0.4<br>(0.2 to 0.7)                          | 5.8%<br>(4.0% to 7.2%)                | 0.9%<br>(-0.8% to 2.2%)                          |
| Upper respiratory infections | 1.1<br>(0.6 to 2.0)                                | 0.3<br>(0.2 to 0.6)                          | 5.8%<br>(4.0% to 7.2%)                | 0.9%<br>(-0.8% to 2.2%)                          |
| Lower respiratory infections | 0.4<br>(0.2 to 0.8)                                | 0.1<br>(<0.05 to 0.2)                        | 5.7%<br>(4.0% to 7.2%)                | 0.9%<br>(-0.8% to 2.2%)                          |
| Diarrhoeal diseases          | 0.4<br>(0.2 to 0.7)                                | 0.1<br>(0.1 to 0.2)                          | 5.8%<br>(4.0% to 7.2%)                | 0.9%<br>(-0.8% to 2.2%)                          |
| Other infectious diseases    | 0.2<br>(0.1 to 0.5)                                | 0.1<br>(<0.05 to 0.1)                        | 5.8%<br>(4.0% to 7.2%)                | 0.9%<br>(-0.8% to 2.2%)                          |
| Zika virus disease           | 0.1<br>(<0.05 to 0.2)                              | <0.05<br>(<0.05 to <0.05)                    | --                                    | --                                               |
| <b>All causes</b>            | <b>3.5</b><br><b>(2.1 to 6.0)</b>                  | <b>1.0</b><br><b>(0.5 to 1.9)</b>            | <b>8.2%</b><br><b>(6.5% to 10.5%)</b> | <b>3.2%</b><br><b>(1.6% to 5.4%)</b>             |

SR Table 13d: Global prevalence and years lived with disability (YLDs) for 2016, percentage change of YLD counts and rates between 2006 and 2016 of Guillain-Barré syndrome by cause, ages 25–29 years

| Cause                        | Prevalence in thousands (95% uncertainty interval) | YLDs in thousands (95% uncertainty interval) |                                         |                                                  |
|------------------------------|----------------------------------------------------|----------------------------------------------|-----------------------------------------|--------------------------------------------------|
|                              |                                                    | 2016                                         | 2016                                    | Percentage change in rates between 2006 and 2016 |
| Other neurological disorders | 1.4<br>(0.7 to 2.4)                                | 0.4<br>(0.2 to 0.8)                          | 18.0%<br>(16.1% to 19.5%)               | -0.6%<br>(-2.2% to 0.7%)                         |
| Upper respiratory infections | 1.2<br>(0.6 to 2.0)                                | 0.4<br>(0.2 to 0.7)                          | 18.0%<br>(16.2% to 19.5%)               | -0.6%<br>(-2.2% to 0.7%)                         |
| Lower respiratory infections | 0.4<br>(0.2 to 0.8)                                | 0.1<br>(<0.05 to 0.3)                        | 18.0%<br>(16.2% to 19.5%)               | -0.6%<br>(-2.1% to 0.7%)                         |
| Diarrhoeal diseases          | 0.4<br>(0.2 to 0.7)                                | 0.1<br>(0.1 to 0.2)                          | 18.0%<br>(16.2% to 19.5%)               | -0.6%<br>(-2.2% to 0.7%)                         |
| Other infectious diseases    | 0.3<br>(0.1 to 0.5)                                | 0.1<br>(<0.05 to 0.1)                        | 18.0%<br>(16.2% to 19.5%)               | -0.6%<br>(-2.2% to 0.7%)                         |
| Zika virus disease           | 0.1<br>(<0.05 to 0.2)                              | <0.05<br>(<0.05 to 0.1)                      | --                                      | --                                               |
| <b>All causes</b>            | <b>3.8</b><br><b>(2.1 to 6.2)</b>                  | <b>1.1</b><br><b>(0.6 to 2.1)</b>            | <b>20.8%</b><br><b>(18.9% to 23.1%)</b> | <b>1.7%</b><br><b>(0.2% to 3.7%)</b>             |

SR Table 13d: Global prevalence and years lived with disability (YLDs) for 2016, percentage change of YLD counts and rates between 2006 and 2016 of Guillain-Barré syndrome by cause, ages 30-34 years

| Cause                        | Prevalence in thousands (95% uncertainty interval) | YLDs in thousands (95% uncertainty interval) |                                         |                                                  |
|------------------------------|----------------------------------------------------|----------------------------------------------|-----------------------------------------|--------------------------------------------------|
|                              |                                                    | 2016                                         | 2016                                    | Percentage change in rates between 2006 and 2016 |
| Other neurological disorders | 1.4<br>(0.7 to 2.6)                                | 0.4<br>(0.2 to 0.9)                          | 15.4%<br>(13.5% to 17.0%)               | 2.2%<br>(0.5% to 3.6%)                           |
| Upper respiratory infections | 1.2<br>(0.6 to 2.1)                                | 0.4<br>(0.2 to 0.7)                          | 15.4%<br>(13.6% to 17.0%)               | 2.2%<br>(0.6% to 3.6%)                           |
| Lower respiratory infections | 0.4<br>(0.2 to 0.9)                                | 0.1<br>(<0.05 to 0.3)                        | 15.4%<br>(13.5% to 17.0%)               | 2.2%<br>(0.6% to 3.6%)                           |
| Diarrhoeal diseases          | 0.4<br>(0.2 to 0.8)                                | 0.1<br>(0.1 to 0.2)                          | 15.4%<br>(13.6% to 17.0%)               | 2.2%<br>(0.6% to 3.6%)                           |
| Other infectious diseases    | 0.3<br>(0.1 to 0.5)                                | 0.1<br>(<0.05 to 0.2)                        | 15.4%<br>(13.6% to 17.0%)               | 2.2%<br>(0.6% to 3.6%)                           |
| Zika virus disease           | 0.1<br>(<0.05 to 0.2)                              | <0.05<br>(<0.05 to 0.1)                      | --                                      | --                                               |
| <b>All causes</b>            | <b>3.8</b><br><b>(2.1 to 6.8)</b>                  | <b>1.1</b><br><b>(0.5 to 2.2)</b>            | <b>18.2%</b><br><b>(16.2% to 20.9%)</b> | <b>4.7%</b><br><b>(2.9% to 7.1%)</b>             |

SR Table 13d: Global prevalence and years lived with disability (YLDs) for 2016, percentage change of YLD counts and rates between 2006 and 2016 of Guillain-Barré syndrome by cause, ages 35–39 years

| Cause                        | Prevalence in thousands (95% uncertainty interval) | YLDs in thousands (95% uncertainty interval) |                                         |                                                  |
|------------------------------|----------------------------------------------------|----------------------------------------------|-----------------------------------------|--------------------------------------------------|
|                              |                                                    | 2016                                         | 2016                                    | Percentage change in rates between 2006 and 2016 |
| Other neurological disorders | 1.4<br>(0.7 to 2.5)                                | 0.4<br>(0.2 to 0.8)                          | 9.5%<br>(7.3% to 11.2%)                 | 3.5%<br>(1.5% to 5.1%)                           |
| Upper respiratory infections | 1.2<br>(0.6 to 2.0)                                | 0.4<br>(0.2 to 0.6)                          | 9.5%<br>(7.4% to 11.2%)                 | 3.5%<br>(1.5% to 5.1%)                           |
| Lower respiratory infections | 0.4<br>(0.2 to 0.8)                                | 0.1<br>(0.1 to 0.3)                          | 9.5%<br>(7.3% to 11.2%)                 | 3.5%<br>(1.5% to 5.1%)                           |
| Diarrhoeal diseases          | 0.4<br>(0.2 to 0.7)                                | 0.1<br>(0.1 to 0.2)                          | 9.5%<br>(7.4% to 11.2%)                 | 3.5%<br>(1.5% to 5.1%)                           |
| Other infectious diseases    | 0.3<br>(0.1 to 0.5)                                | 0.1<br>(<0.05 to 0.1)                        | 9.5%<br>(7.4% to 11.2%)                 | 3.5%<br>(1.5% to 5.1%)                           |
| Zika virus disease           | 0.1<br>(<0.05 to 0.2)                              | <0.05<br>(<0.05 to 0.1)                      | --                                      | --                                               |
| <b>All causes</b>            | <b>3.8</b><br><b>(2.2 to 6.3)</b>                  | <b>1.1</b><br><b>(0.6 to 2.0)</b>            | <b>12.0%</b><br><b>(10.1% to 14.3%)</b> | <b>5.9%</b><br><b>(4.1% to 8.1%)</b>             |

SR Table 13d: Global prevalence and years lived with disability (YLDs) for 2016, percentage change of YLD counts and rates between 2006 and 2016 of Guillain-Barré syndrome by cause, ages 40–44 years

| Cause                        | Prevalence in thousands (95% uncertainty interval) | YLDs in thousands (95% uncertainty interval) |                                         |                                                  |
|------------------------------|----------------------------------------------------|----------------------------------------------|-----------------------------------------|--------------------------------------------------|
|                              |                                                    | 2016                                         | 2016                                    | Percentage change in rates between 2006 and 2016 |
| Other neurological disorders | 1.5<br>(0.7 to 2.8)                                | 0.4<br>(0.2 to 0.9)                          | 14.1%<br>(11.6% to 16.1%)               | 0.2%<br>(-2.0% to 2.0%)                          |
| Upper respiratory infections | 1.3<br>(0.7 to 2.4)                                | 0.4<br>(0.2 to 0.7)                          | 14.1%<br>(11.6% to 16.1%)               | 0.2%<br>(-2.0% to 2.0%)                          |
| Lower respiratory infections | 0.5<br>(0.2 to 1.0)                                | 0.1<br>(0.1 to 0.3)                          | 14.1%<br>(11.6% to 16.1%)               | 0.2%<br>(-2.0% to 2.0%)                          |
| Diarrhoeal diseases          | 0.4<br>(0.2 to 0.8)                                | 0.1<br>(0.1 to 0.2)                          | 14.1%<br>(11.6% to 16.1%)               | 0.2%<br>(-2.0% to 2.0%)                          |
| Other infectious diseases    | 0.3<br>(0.1 to 0.5)                                | 0.1<br>(<0.05 to 0.2)                        | 14.1%<br>(11.6% to 16.1%)               | 0.2%<br>(-2.0% to 2.0%)                          |
| Zika virus disease           | 0.1<br>(<0.05 to 0.1)                              | <0.05<br>(<0.05 to <0.05)                    | --                                      | --                                               |
| <b>All causes</b>            | <b>4.0</b><br><b>(2.3 to 7.2)</b>                  | <b>1.2</b><br><b>(0.6 to 2.2)</b>            | <b>16.3%</b><br><b>(14.1% to 18.6%)</b> | <b>2.1%</b><br><b>(0.2% to 4.1%)</b>             |

SR Table 13d: Global prevalence and years lived with disability (YLDs) for 2016, percentage change of YLD counts and rates between 2006 and 2016 of Guillain-Barré syndrome by cause, ages 45–49 years

| Cause                        | Prevalence in thousands (95% uncertainty interval) | YLDs in thousands (95% uncertainty interval) |                                         |                                                  |
|------------------------------|----------------------------------------------------|----------------------------------------------|-----------------------------------------|--------------------------------------------------|
|                              |                                                    | 2016                                         | 2016                                    | Percentage change in rates between 2006 and 2016 |
| Other neurological disorders | 1.5<br>(0.7 to 2.6)                                | 0.5<br>(0.2 to 0.8)                          | 21.7%<br>(18.8% to 23.8%)               | -2.4%<br>(-4.7% to -0.7%)                        |
| Upper respiratory infections | 1.3<br>(0.7 to 2.2)                                | 0.4<br>(0.2 to 0.7)                          | 21.7%<br>(18.9% to 23.8%)               | -2.4%<br>(-4.7% to -0.7%)                        |
| Lower respiratory infections | 0.5<br>(0.2 to 0.9)                                | 0.1<br>(0.1 to 0.3)                          | 21.7%<br>(18.9% to 23.8%)               | -2.4%<br>(-4.7% to -0.7%)                        |
| Diarrhoeal diseases          | 0.4<br>(0.2 to 0.8)                                | 0.1<br>(0.1 to 0.2)                          | 21.7%<br>(18.9% to 23.8%)               | -2.4%<br>(-4.7% to -0.7%)                        |
| Other infectious diseases    | 0.3<br>(0.1 to 0.5)                                | 0.1<br>(<0.05 to 0.2)                        | 21.7%<br>(18.9% to 23.8%)               | -2.4%<br>(-4.7% to -0.7%)                        |
| Zika virus disease           | 0.1<br>(<0.05 to 0.1)                              | <0.05<br>(<0.05 to <0.05)                    | --                                      | --                                               |
| <b>All causes</b>            | <b>4.1</b><br><b>(2.2 to 6.5)</b>                  | <b>1.2</b><br><b>(0.6 to 2.1)</b>            | <b>23.8%</b><br><b>(21.5% to 25.8%)</b> | <b>-0.7%</b><br><b>(-2.5% to 0.9%)</b>           |



SR Table 13d: Global prevalence and years lived with disability (YLDs) for 2016, percentage change of YLD counts and rates between 2006 and 2016 of Guillain-Barré syndrome by cause, ages 50-54 years

| Cause                        | Prevalence in thousands (95% uncertainty interval) | YLDs in thousands (95% uncertainty interval) |                                         |                                                  |
|------------------------------|----------------------------------------------------|----------------------------------------------|-----------------------------------------|--------------------------------------------------|
|                              |                                                    | 2016                                         | 2016                                    | Percentage change in rates between 2006 and 2016 |
| Other neurological disorders | 1.6<br>(0.8 to 2.8)                                | 0.5<br>(0.2 to 0.9)                          | 25.0%<br>(22.6% to 26.7%)               | 0.4%<br>(-1.6% to 1.7%)                          |
| Upper respiratory infections | 1.4<br>(0.7 to 2.4)                                | 0.4<br>(0.2 to 0.7)                          | 25.0%<br>(22.6% to 26.7%)               | 0.4%<br>(-1.6% to 1.7%)                          |
| Lower respiratory infections | 0.5<br>(0.2 to 1.0)                                | 0.1<br>(0.1 to 0.3)                          | 25.0%<br>(22.6% to 26.7%)               | 0.4%<br>(-1.6% to 1.7%)                          |
| Diarrhoeal diseases          | 0.5<br>(0.2 to 0.8)                                | 0.1<br>(0.1 to 0.3)                          | 25.0%<br>(22.6% to 26.7%)               | 0.4%<br>(-1.6% to 1.7%)                          |
| Other infectious diseases    | 0.3<br>(0.2 to 0.5)                                | 0.1<br>(<0.05 to 0.2)                        | 25.0%<br>(22.6% to 26.7%)               | 0.4%<br>(-1.6% to 1.7%)                          |
| Zika virus disease           | 0.1<br>(<0.05 to 0.1)                              | <0.05<br>(<0.05 to <0.05)                    | --                                      | --                                               |
| <b>All causes</b>            | <b>4.3</b><br><b>(2.3 to 7.1)</b>                  | <b>1.3</b><br><b>(0.6 to 2.3)</b>            | <b>26.7%</b><br><b>(24.9% to 28.6%)</b> | <b>1.8%</b><br><b>(0.3% to 3.3%)</b>             |

SR Table 13d: Global prevalence and years lived with disability (YLDs) for 2016, percentage change of YLD counts and rates between 2006 and 2016 of Guillain-Barré syndrome by cause, ages 55–59 years

| Cause                        | Prevalence in thousands (95% uncertainty interval) | YLDs in thousands (95% uncertainty interval) |                                         |                                                  |
|------------------------------|----------------------------------------------------|----------------------------------------------|-----------------------------------------|--------------------------------------------------|
|                              |                                                    | 2016                                         | 2016                                    | Percentage change in rates between 2006 and 2016 |
| Other neurological disorders | 1.6<br>(0.8 to 2.8)                                | 0.5<br>(0.2 to 0.9)                          | 32.1%<br>(29.4% to 34.1%)               | 1.2%<br>(-0.8% to 2.8%)                          |
| Upper respiratory infections | 1.4<br>(0.8 to 2.3)                                | 0.4<br>(0.2 to 0.7)                          | 32.1%<br>(29.4% to 34.1%)               | 1.2%<br>(-0.8% to 2.8%)                          |
| Lower respiratory infections | 0.5<br>(0.2 to 1.0)                                | 0.1<br>(0.1 to 0.3)                          | 32.1%<br>(29.4% to 34.1%)               | 1.3%<br>(-0.8% to 2.8%)                          |
| Diarrhoeal diseases          | 0.5<br>(0.2 to 0.8)                                | 0.1<br>(0.1 to 0.3)                          | 32.1%<br>(29.4% to 34.2%)               | 1.3%<br>(-0.8% to 2.8%)                          |
| Other infectious diseases    | 0.3<br>(0.2 to 0.5)                                | 0.1<br>(<0.05 to 0.2)                        | 32.1%<br>(29.4% to 34.2%)               | 1.2%<br>(-0.8% to 2.8%)                          |
| Zika virus disease           | <0.05<br>(<0.05 to 0.1)                            | <0.05<br>(<0.05 to <0.05)                    | --                                      | --                                               |
| <b>All causes</b>            | <b>4.3</b><br><b>(2.5 to 7.1)</b>                  | <b>1.3</b><br><b>(0.6 to 2.2)</b>            | <b>33.5%</b><br><b>(31.1% to 35.5%)</b> | <b>2.3%</b><br><b>(0.5% to 3.8%)</b>             |

SR Table 13d: Global prevalence and years lived with disability (YLDs) for 2016, percentage change of YLD counts and rates between 2006 and 2016 of Guillain-Barré syndrome by cause, ages 60-64 years

| Cause                        | Prevalence in thousands (95% uncertainty interval) | YLDs in thousands (95% uncertainty interval) |                                         |                                                  |
|------------------------------|----------------------------------------------------|----------------------------------------------|-----------------------------------------|--------------------------------------------------|
|                              |                                                    | 2016                                         | 2016                                    | Percentage change in rates between 2006 and 2016 |
| Other neurological disorders | 1.6<br>(0.8 to 2.9)                                | 0.5<br>(0.2 to 0.9)                          | 49.6%<br>(45.9% to 52.1%)               | -0.8%<br>(-3.3% to 0.9%)                         |
| Upper respiratory infections | 1.4<br>(0.7 to 2.4)                                | 0.4<br>(0.2 to 0.8)                          | 49.6%<br>(45.9% to 52.1%)               | -0.8%<br>(-3.3% to 0.9%)                         |
| Lower respiratory infections | 0.5<br>(0.2 to 1.0)                                | 0.1<br>(0.1 to 0.3)                          | 49.6%<br>(45.9% to 52.1%)               | -0.8%<br>(-3.2% to 0.9%)                         |
| Diarrhoeal diseases          | 0.5<br>(0.2 to 0.9)                                | 0.1<br>(0.1 to 0.3)                          | 49.6%<br>(45.9% to 52.1%)               | -0.8%<br>(-3.3% to 0.9%)                         |
| Other infectious diseases    | 0.3<br>(0.1 to 0.6)                                | 0.1<br>(<0.05 to 0.2)                        | 49.6%<br>(45.9% to 52.1%)               | -0.8%<br>(-3.3% to 0.9%)                         |
| Zika virus disease           | <0.05<br>(<0.05 to 0.1)                            | <0.05<br>(<0.05 to <0.05)                    | --                                      | --                                               |
| <b>All causes</b>            | <b>4.2</b><br><b>(2.5 to 7.3)</b>                  | <b>1.3</b><br><b>(0.6 to 2.3)</b>            | <b>50.8%</b><br><b>(47.5% to 53.3%)</b> | <b>0.0%</b><br><b>(-2.2% to 1.7%)</b>            |

SR Table 13d: Global prevalence and years lived with disability (YLDs) for 2016, percentage change of YLD counts and rates between 2006 and 2016 of Guillain-Barré syndrome by cause, ages 65–69 years

| Cause                        | Prevalence in thousands (95% uncertainty interval) | YLDs in thousands (95% uncertainty interval) |                                         |                                                  |
|------------------------------|----------------------------------------------------|----------------------------------------------|-----------------------------------------|--------------------------------------------------|
|                              |                                                    | 2016                                         | 2016                                    | Percentage change in rates between 2006 and 2016 |
| Other neurological disorders | 1.3<br>(0.7 to 2.2)                                | 0.4<br>(0.2 to 0.7)                          | 31.1%<br>(26.9% to 33.7%)               | -1.1%<br>(-4.2% to 0.9%)                         |
| Upper respiratory infections | 1.1<br>(0.6 to 1.8)                                | 0.3<br>(0.2 to 0.6)                          | 31.1%<br>(26.8% to 33.7%)               | -1.1%<br>(-4.3% to 0.9%)                         |
| Lower respiratory infections | 0.4<br>(0.2 to 0.8)                                | 0.1<br>(0.1 to 0.2)                          | 31.1%<br>(26.8% to 33.7%)               | -1.1%<br>(-4.3% to 0.9%)                         |
| Diarrhoeal diseases          | 0.4<br>(0.2 to 0.6)                                | 0.1<br>(0.1 to 0.2)                          | 31.1%<br>(26.9% to 33.7%)               | -1.1%<br>(-4.2% to 0.9%)                         |
| Other infectious diseases    | 0.2<br>(0.1 to 0.4)                                | 0.1<br>(<0.05 to 0.1)                        | 31.1%<br>(26.8% to 33.7%)               | -1.1%<br>(-4.3% to 0.9%)                         |
| Zika virus disease           | <0.05<br>(<0.05 to <0.05)                          | <0.05<br>(<0.05 to <0.05)                    | --                                      | --                                               |
| <b>All causes</b>            | <b>3.5</b><br><b>(2.1 to 5.6)</b>                  | <b>1.0</b><br><b>(0.6 to 1.8)</b>            | <b>31.9%</b><br><b>(27.8% to 34.5%)</b> | <b>-0.5%</b><br><b>(-3.5% to 1.5%)</b>           |

| SR Table 13d: Global prevalence and years lived with disability (YLDs) for 2016, percentage change of YLD counts and rates between 2006 and 2016 of Guillain-Barré syndrome by cause, ages 70-74 years |                                                    |                                              |                                         |                                                  |
|--------------------------------------------------------------------------------------------------------------------------------------------------------------------------------------------------------|----------------------------------------------------|----------------------------------------------|-----------------------------------------|--------------------------------------------------|
| Cause                                                                                                                                                                                                  | Prevalence in thousands (95% uncertainty interval) | YLDs in thousands (95% uncertainty interval) |                                         |                                                  |
|                                                                                                                                                                                                        |                                                    | 2016                                         | 2016                                    | Percentage change in rates between 2006 and 2016 |
| Other neurological disorders                                                                                                                                                                           | 1.0<br>(0.5 to 1.7)                                | 0.3<br>(0.1 to 0.6)                          | 20.2%<br>(16.5% to 22.4%)               | 0.4%<br>(-2.7% to 2.3%)                          |
| Upper respiratory infections                                                                                                                                                                           | 0.9<br>(0.5 to 1.4)                                | 0.3<br>(0.1 to 0.5)                          | 20.2%<br>(16.5% to 22.4%)               | 0.4%<br>(-2.6% to 2.3%)                          |
| Lower respiratory infections                                                                                                                                                                           | 0.3<br>(0.1 to 0.6)                                | 0.1<br>(<0.05 to 0.2)                        | 20.1%<br>(16.5% to 22.5%)               | 0.4%<br>(-2.6% to 2.3%)                          |
| Diarrhoeal diseases                                                                                                                                                                                    | 0.3<br>(0.2 to 0.5)                                | 0.1<br>(<0.05 to 0.2)                        | 20.2%<br>(16.5% to 22.5%)               | 0.4%<br>(-2.6% to 2.3%)                          |
| Other infectious diseases                                                                                                                                                                              | 0.2<br>(0.1 to 0.3)                                | 0.1<br>(<0.05 to 0.1)                        | 20.2%<br>(16.5% to 22.5%)               | 0.4%<br>(-2.7% to 2.4%)                          |
| Zika virus disease                                                                                                                                                                                     | <0.05<br>(<0.05 to <0.05)                          | <0.05<br>(<0.05 to <0.05)                    | --                                      | --                                               |
| <b>All causes</b>                                                                                                                                                                                      | <b>2.7</b><br><b>(1.5 to 4.4)</b>                  | <b>0.8</b><br><b>(0.4 to 1.4)</b>            | <b>20.7%</b><br><b>(17.3% to 23.0%)</b> | <b>0.9%</b><br><b>(-1.9% to 2.8%)</b>            |

SR Table 13d: Global prevalence and years lived with disability (YLDs) for 2016, percentage change of YLD counts and rates between 2006 and 2016 of Guillain-Barré syndrome by cause, ages 75–79 years

| Cause                        | Prevalence in thousands (95% uncertainty interval) | YLDs in thousands (95% uncertainty interval) |                                         |                                                  |
|------------------------------|----------------------------------------------------|----------------------------------------------|-----------------------------------------|--------------------------------------------------|
|                              |                                                    | 2016                                         | 2016                                    | Percentage change in rates between 2006 and 2016 |
| Other neurological disorders | 0.8<br>(0.4 to 1.4)                                | 0.2<br>(0.1 to 0.5)                          | 23.9%<br>(20.1% to 26.2%)               | -0.4%<br>(-3.4% to 1.5%)                         |
| Upper respiratory infections | 0.7<br>(0.4 to 1.1)                                | 0.2<br>(0.1 to 0.4)                          | 23.9%<br>(20.1% to 26.2%)               | -0.4%<br>(-3.4% to 1.5%)                         |
| Lower respiratory infections | 0.3<br>(0.1 to 0.5)                                | 0.1<br>(<0.05 to 0.1)                        | 23.8%<br>(20.1% to 26.2%)               | -0.4%<br>(-3.4% to 1.5%)                         |
| Diarrhoeal diseases          | 0.2<br>(0.1 to 0.4)                                | 0.1<br>(<0.05 to 0.1)                        | 23.9%<br>(20.1% to 26.2%)               | -0.4%<br>(-3.4% to 1.5%)                         |
| Other infectious diseases    | 0.2<br>(0.1 to 0.3)                                | <0.05<br>(<0.05 to 0.1)                      | 23.9%<br>(20.2% to 26.2%)               | -0.4%<br>(-3.4% to 1.5%)                         |
| Zika virus disease           | <0.05<br>(<0.05 to <0.05)                          | <0.05<br>(<0.05 to <0.05)                    | --                                      | --                                               |
| <b>All causes</b>            | <b>2.2</b><br><b>(1.3 to 3.3)</b>                  | <b>0.7</b><br><b>(0.3 to 1.1)</b>            | <b>24.4%</b><br><b>(20.9% to 26.6%)</b> | <b>-0.0%</b><br><b>(-2.8% to 1.8%)</b>           |

SR Table 13d: Global prevalence and years lived with disability (YLDs) for 2016, percentage change of YLD counts and rates between 2006 and 2016 of Guillain-Barré syndrome by cause, ages 80-84

| Cause                        | Prevalence in thousands (95% uncertainty interval) | YLDs in thousands (95% uncertainty interval) |                                                   |                                                  |
|------------------------------|----------------------------------------------------|----------------------------------------------|---------------------------------------------------|--------------------------------------------------|
|                              | 2016                                               | 2016                                         | Percentage change in counts between 2006 and 2016 | Percentage change in rates between 2006 and 2016 |
| Other neurological disorders | 0.5<br>(0.3 to 1.0)                                | 0.2<br>(0.1 to 0.3)                          | 30.2%<br>(25.2% to 33.4%)                         | -0.6%<br>(-4.4% to 1.8%)                         |
| Upper respiratory infections | 0.5<br>(0.2 to 0.8)                                | 0.1<br>(0.1 to 0.3)                          | 30.2%<br>(25.2% to 33.4%)                         | -0.6%<br>(-4.4% to 1.8%)                         |
| Lower respiratory infections | 0.2<br>(0.1 to 0.3)                                | 0.1<br>(<0.05 to 0.1)                        | 30.1%<br>(25.2% to 33.4%)                         | -0.6%<br>(-4.4% to 1.8%)                         |
| Diarrhoeal diseases          | 0.2<br>(0.1 to 0.3)                                | <0.05<br>(<0.05 to 0.1)                      | 30.2%<br>(25.2% to 33.4%)                         | -0.6%<br>(-4.4% to 1.8%)                         |
| Other infectious diseases    | 0.1<br>(0.1 to 0.2)                                | <0.05<br>(<0.05 to 0.1)                      | 30.2%<br>(25.2% to 33.4%)                         | -0.6%<br>(-4.4% to 1.9%)                         |
| Zika virus disease           | <0.05<br>(<0.05 to <0.05)                          | <0.05<br>(<0.05 to <0.05)                    | --                                                | --                                               |
| <b>All causes</b>            | <b>1.5</b><br><b>(0.8 to 2.4)</b>                  | <b>0.4</b><br><b>(0.2 to 0.8)</b>            | <b>30.6%</b><br><b>(25.7% to 33.8%)</b>           | <b>-0.3%</b><br><b>(-4.0% to 2.1%)</b>           |

SR Table 13d: Global prevalence and years lived with disability (YLDs) for 2016, percentage change of YLD counts and rates between 2006 and 2016 of Guillain-Barré syndrome by cause, ages 85-89

| Cause                        | Prevalence in thousands (95% uncertainty interval) | YLDs in thousands (95% uncertainty interval) |                                         |                                                  |
|------------------------------|----------------------------------------------------|----------------------------------------------|-----------------------------------------|--------------------------------------------------|
|                              |                                                    | 2016                                         | 2016                                    | Percentage change in rates between 2006 and 2016 |
| Other neurological disorders | 0.3<br>(0.2 to 0.5)                                | 0.1<br>(<0.05 to 0.2)                        | 62.4%<br>(56.1% to 66.3%)               | 1.2%<br>(-2.7% to 3.6%)                          |
| Upper respiratory infections | 0.2<br>(0.1 to 0.4)                                | 0.1<br>(<0.05 to 0.1)                        | 62.4%<br>(56.1% to 66.3%)               | 1.2%<br>(-2.7% to 3.6%)                          |
| Lower respiratory infections | 0.1<br>(<0.05 to 0.2)                              | <0.05<br>(<0.05 to 0.1)                      | 62.4%<br>(56.1% to 66.3%)               | 1.2%<br>(-2.7% to 3.6%)                          |
| Diarrhoeal diseases          | 0.1<br>(<0.05 to 0.1)                              | <0.05<br>(<0.05 to <0.05)                    | 62.4%<br>(56.1% to 66.3%)               | 1.2%<br>(-2.7% to 3.6%)                          |
| Other infectious diseases    | 0.1<br>(<0.05 to 0.1)                              | <0.05<br>(<0.05 to <0.05)                    | 62.4%<br>(56.1% to 66.3%)               | 1.2%<br>(-2.7% to 3.6%)                          |
| Zika virus disease           | <0.05<br>(<0.05 to <0.05)                          | <0.05<br>(<0.05 to <0.05)                    | --                                      | --                                               |
| <b>All causes</b>            | <b>0.8</b><br><b>(0.5 to 1.2)</b>                  | <b>0.2</b><br><b>(0.1 to 0.4)</b>            | <b>62.9%</b><br><b>(56.8% to 66.6%)</b> | <b>1.5%</b><br><b>(-2.3% to 3.8%)</b>            |



SR Table 13d: Global prevalence and years lived with disability (YLDs) for 2016, percentage change of YLD counts and rates between 2006 and 2016 of Guillain-Barré syndrome by cause, ages 90-94

| Cause                        | Prevalence in thousands (95% uncertainty interval) | YLDs in thousands (95% uncertainty interval) |                                                   |                                                  |
|------------------------------|----------------------------------------------------|----------------------------------------------|---------------------------------------------------|--------------------------------------------------|
|                              |                                                    | 2016                                         | 2016                                              | Percentage change in rates between 2006 and 2016 |
|                              |                                                    |                                              | Percentage change in counts between 2006 and 2016 | Percentage change in rates between 2006 and 2016 |
| Other neurological disorders | 0.1<br>(0.1 to 0.2)                                | <0.05<br>(<0.05 to 0.1)                      | 76.3%<br>(71.1% to 80.8%)                         | 5.3%<br>(2.2% to 8.0%)                           |
| Upper respiratory infections | 0.1<br>(0.1 to 0.2)                                | <0.05<br>(<0.05 to 0.1)                      | 76.3%<br>(71.1% to 80.8%)                         | 5.3%<br>(2.2% to 8.0%)                           |
| Lower respiratory infections | <0.05<br>(<0.05 to 0.1)                            | <0.05<br>(<0.05 to <0.05)                    | 76.4%<br>(71.1% to 80.8%)                         | 5.4%<br>(2.2% to 8.0%)                           |
| Diarrhoeal diseases          | <0.05<br>(<0.05 to 0.1)                            | <0.05<br>(<0.05 to <0.05)                    | 76.3%<br>(71.1% to 80.8%)                         | 5.4%<br>(2.2% to 8.0%)                           |
| Other infectious diseases    | <0.05<br>(<0.05 to <0.05)                          | <0.05<br>(<0.05 to <0.05)                    | 76.3%<br>(71.1% to 80.8%)                         | 5.3%<br>(2.2% to 8.0%)                           |
| Zika virus disease           | <0.05<br>(<0.05 to <0.05)                          | <0.05<br>(<0.05 to <0.05)                    | --                                                | --                                               |
| <b>All causes</b>            | <b>0.3</b><br><b>(0.2 to 0.5)</b>                  | <b>0.1</b><br><b>(&lt;0.05 to 0.2)</b>       | <b>76.7%</b><br><b>(71.6% to 81.2%)</b>           | <b>5.6%</b><br><b>(2.5% to 8.3%)</b>             |

SR Table 13d: Global prevalence and years lived with disability (YLDs) for 2016, percentage change of YLD counts and rates between 2006 and 2016 of Guillain-Barré syndrome by cause, ages 95+ years

| Cause                        | Prevalence in thousands (95% uncertainty interval) | YLDs in thousands (95% uncertainty interval)     |                                                   |                                                  |
|------------------------------|----------------------------------------------------|--------------------------------------------------|---------------------------------------------------|--------------------------------------------------|
|                              |                                                    | 2016                                             | 2016                                              | Percentage change in rates between 2006 and 2016 |
|                              |                                                    |                                                  | Percentage change in counts between 2006 and 2016 | Percentage change in rates between 2006 and 2016 |
| Other neurological disorders | <0.05<br>(<0.05 to 0.1)                            | <0.05<br>(<0.05 to <0.05)                        | 79.0%<br>(73.5% to 84.2%)                         | 14.2%<br>(10.7% to 17.5%)                        |
| Upper respiratory infections | <0.05<br>(<0.05 to 0.1)                            | <0.05<br>(<0.05 to <0.05)                        | 79.0%<br>(73.5% to 84.2%)                         | 14.2%<br>(10.7% to 17.6%)                        |
| Lower respiratory infections | <0.05<br>(<0.05 to <0.05)                          | <0.05<br>(<0.05 to <0.05)                        | 79.0%<br>(73.5% to 84.2%)                         | 14.2%<br>(10.7% to 17.6%)                        |
| Diarrhoeal diseases          | <0.05<br>(<0.05 to <0.05)                          | <0.05<br>(<0.05 to <0.05)                        | 79.0%<br>(73.5% to 84.2%)                         | 14.2%<br>(10.7% to 17.5%)                        |
| Other infectious diseases    | <0.05<br>(<0.05 to <0.05)                          | <0.05<br>(<0.05 to <0.05)                        | 79.0%<br>(73.5% to 84.2%)                         | 14.2%<br>(10.7% to 17.5%)                        |
| Zika virus disease           | <0.05<br>(<0.05 to <0.05)                          | <0.05<br>(<0.05 to <0.05)                        | --                                                | --                                               |
| <b>All causes</b>            | <b>0.1</b><br><b>(&lt;0.05 to 0.2)</b>             | <b>&lt;0.05</b><br><b>(&lt;0.05 to &lt;0.05)</b> | <b>79.2%</b><br><b>(73.9% to 84.6%)</b>           | <b>14.4%</b><br><b>(11.0% to 17.8%)</b>          |

SR Table 13e: Global prevalence and years lived with disability (YLDs) for 2016, percentage change of YLD counts and rates between 2006 and 2016 of hearing loss by cause, ages 0-6 days

| Cause                              | Prevalence in thousands (95% uncertainty interval) | YLDs in thousands (95% uncertainty interval) |                                                   |                                                  |
|------------------------------------|----------------------------------------------------|----------------------------------------------|---------------------------------------------------|--------------------------------------------------|
|                                    |                                                    | 2016                                         | Percentage change in counts between 2006 and 2016 | Percentage change in rates between 2006 and 2016 |
| Other congenital anomalies         | 12.7<br>(8.9 to 18.0)                              | 1.3<br>(0.8 to 2.1)                          | -9.6%<br>(-14.1% to -5.0%)                        | -9.1%<br>(-13.6% to -4.5%)                       |
| Age-related and other hearing loss | 5.6<br>(3.9 to 7.9)                                | 0.6<br>(0.4 to 1.0)                          | -7.3%<br>(-12.6% to -1.7%)                        | -6.9%<br>(-12.2% to -1.2%)                       |
| Otitis media                       | 0.6<br>(0.5 to 0.8)                                | <0.05<br>(<0.05 to <0.05)                    | -6.5%<br>(-10.1% to -2.5%)                        | -6.0%<br>(-9.6% to -2.0%)                        |
| Other meningitis                   | <0.05<br>(<0.05 to <0.05)                          | <0.05<br>(<0.05 to <0.05)                    | 71.9%<br>(50.8% to 94.7%)                         | 72.8%<br>(51.6% to 95.7%)                        |
| Pneumococcal meningitis            | <0.05<br>(<0.05 to <0.05)                          | <0.05<br>(<0.05 to <0.05)                    | -31.8%<br>(-38.8% to -25.0%)                      | -31.4%<br>(-38.5% to -24.6%)                     |
| Meningococcal infection            | <0.05<br>(<0.05 to <0.05)                          | <0.05<br>(<0.05 to <0.05)                    | 1.1%<br>(-8.8% to 12.3%)                          | 1.6%<br>(-8.3% to 12.8%)                         |
| H influenzae type B meningitis     | <0.05<br>(<0.05 to <0.05)                          | <0.05<br>(<0.05 to <0.05)                    | -48.5%<br>(-55.7% to -40.1%)                      | -48.2%<br>(-55.4% to -39.8%)                     |
| <b>All causes</b>                  | <b>18.9</b><br><b>(13.4 to 26.7)</b>               | <b>2.0</b><br><b>(1.2 to 3.1)</b>            | <b>-8.9%</b><br><b>(-12.7% to -5.0%)</b>          | <b>-8.4%</b><br><b>(-12.2% to -4.5%)</b>         |

SR Table 13e: Global prevalence and years lived with disability (YLDs) for 2016, percentage change of YLD counts and rates between 2006 and 2016 of hearing loss by cause, ages 7-27 days

| Cause                              | Prevalence in thousands (95% uncertainty interval) | YLDs in thousands (95% uncertainty interval) |                                                   |                                                  |
|------------------------------------|----------------------------------------------------|----------------------------------------------|---------------------------------------------------|--------------------------------------------------|
|                                    |                                                    | 2016                                         | Percentage change in counts between 2006 and 2016 | Percentage change in rates between 2006 and 2016 |
| Other congenital anomalies         | 37.6<br>(26.4 to 53.4)                             | 4.0<br>(2.4 to 6.3)                          | -9.2%<br>(-13.5% to -4.8%)                        | -9.0%<br>(-13.3% to -4.6%)                       |
| Age-related and other hearing loss | 11.3<br>(8.1 to 15.7)                              | 1.5<br>(0.9 to 2.2)                          | -6.0%<br>(-11.9% to -0.4%)                        | -5.8%<br>(-11.7% to -0.2%)                       |
| Otitis media                       | 7.4<br>(5.9 to 9.2)                                | 0.3<br>(0.2 to 0.5)                          | -6.0%<br>(-9.4% to -2.3%)                         | -5.8%<br>(-9.3% to -2.1%)                        |
| Other meningitis                   | <0.05<br>(<0.05 to <0.05)                          | <0.05<br>(<0.05 to <0.05)                    | 72.7%<br>(52.6% to 95.9%)                         | 73.0%<br>(52.9% to 96.2%)                        |
| Pneumococcal meningitis            | <0.05<br>(<0.05 to <0.05)                          | <0.05<br>(<0.05 to <0.05)                    | -31.4%<br>(-38.4% to -24.3%)                      | -31.3%<br>(-38.3% to -24.2%)                     |
| Meningococcal infection            | <0.05<br>(<0.05 to <0.05)                          | <0.05<br>(<0.05 to <0.05)                    | 1.4%<br>(-7.9% to 12.4%)                          | 1.6%<br>(-7.8% to 12.6%)                         |
| H influenzae type B meningitis     | <0.05<br>(<0.05 to <0.05)                          | <0.05<br>(<0.05 to <0.05)                    | -48.3%<br>(-55.7% to -40.2%)                      | -48.2%<br>(-55.6% to -40.1%)                     |
| <b>All causes</b>                  | <b>56.3</b><br><b>(41.5 to 76.4)</b>               | <b>5.8</b><br><b>(3.6 to 8.7)</b>            | <b>-8.2%</b><br><b>(-11.5% to -4.7%)</b>          | <b>-8.1%</b><br><b>(-11.4% to -4.5%)</b>         |

SR Table 13e: Global prevalence and years lived with disability (YLDs) for 2016, percentage change of YLD counts and rates between 2006 and 2016 of hearing loss by cause, ages 28-364 days

| Cause                              | Prevalence in thousands (95% uncertainty interval) | YLDs in thousands (95% uncertainty interval) |                                                   |                                                  |
|------------------------------------|----------------------------------------------------|----------------------------------------------|---------------------------------------------------|--------------------------------------------------|
|                                    |                                                    | 2016                                         | Percentage change in counts between 2006 and 2016 | Percentage change in rates between 2006 and 2016 |
| Other congenital anomalies         | 598.1<br>(420.9 to 849.7)                          | 62.7<br>(37.8 to 98.0)                       | -8.3%<br>(-13.0% to -3.6%)                        | -9.1%<br>(-13.7% to -4.4%)                       |
| Otitis media                       | 608.7<br>(513.5 to 705.0)                          | 36.9<br>(23.2 to 54.6)                       | -4.4%<br>(-8.3% to -0.1%)                         | -5.1%<br>(-9.1% to -0.9%)                        |
| Age-related and other hearing loss | 146.0<br>(82.3 to 210.3)                           | 21.0<br>(10.2 to 34.3)                       | -1.9%<br>(-10.0% to 6.4%)                         | -2.7%<br>(-10.7% to 5.5%)                        |
| Other meningitis                   | 1.8<br>(0.5 to 2.5)                                | 0.2<br>(<0.05 to 0.3)                        | 73.4%<br>(52.8% to 97.0%)                         | 72.0%<br>(51.5% to 95.4%)                        |
| Pneumococcal meningitis            | 1.7<br>(0.5 to 2.7)                                | 0.2<br>(<0.05 to 0.4)                        | -30.5%<br>(-37.7% to -23.2%)                      | -31.1%<br>(-38.2% to -23.9%)                     |
| H influenzae type B meningitis     | 0.8<br>(0.2 to 1.4)                                | 0.1<br>(<0.05 to 0.2)                        | -48.3%<br>(-55.2% to -39.9%)                      | -48.7%<br>(-55.6% to -40.4%)                     |
| Meningococcal infection            | 0.8<br>(0.2 to 1.3)                                | 0.1<br>(<0.05 to 0.2)                        | 1.5%<br>(-8.6% to 12.6%)                          | 0.7%<br>(-9.4% to 11.7%)                         |
| <b>All causes</b>                  | <b>1,357.9</b><br><b>(1,126.9 to 1,647.1)</b>      | <b>121.3</b><br><b>(79.3 to 171.4)</b>       | <b>-6.1%</b><br><b>(-9.1% to -3.0%)</b>           | <b>-6.9%</b><br><b>(-9.8% to -3.8%)</b>          |

SR Table 13e: Global prevalence and years lived with disability (YLDs) for 2016, percentage change of YLD counts and rates between 2006 and 2016 of hearing loss by cause, ages 1-4 years

| Cause                              | Prevalence in thousands (95% uncertainty interval) | YLDs in thousands (95% uncertainty interval) |                                                   |                                                  |
|------------------------------------|----------------------------------------------------|----------------------------------------------|---------------------------------------------------|--------------------------------------------------|
|                                    |                                                    | 2016                                         | Percentage change in counts between 2006 and 2016 | Percentage change in rates between 2006 and 2016 |
| Otitis media                       | 8,212.7<br>(6,938.4 to 9,625.0)                    | 426.5<br>(261.5 to 638.7)                    | 1.4%<br>(-1.8% to 4.5%)                           | -3.9%<br>(-7.0% to -1.0%)                        |
| Other congenital anomalies         | 2,606.1<br>(1,834.1 to 3,702.7)                    | 270.8<br>(165.1 to 420.7)                    | -4.0%<br>(-9.0% to 1.0%)                          | -9.0%<br>(-13.8% to -4.4%)                       |
| Age-related and other hearing loss | 3,141.4<br>(2,045.8 to 4,306.5)                    | 266.6<br>(146.1 to 411.2)                    | 2.1%<br>(-3.1% to 7.5%)                           | -3.3%<br>(-8.2% to 1.8%)                         |
| Pneumococcal meningitis            | 20.9<br>(6.9 to 33.1)                              | 1.9<br>(0.2 to 3.5)                          | -24.3%<br>(-31.4% to -17.0%)                      | -28.3%<br>(-35.0% to -21.4%)                     |
| Other meningitis                   | 19.8<br>(6.9 to 28.4)                              | 1.8<br>(0.2 to 3.1)                          | 85.1%<br>(63.7% to 107.1%)                        | 75.3%<br>(55.1% to 96.2%)                        |
| H influenzae type B meningitis     | 9.3<br>(3.1 to 14.8)                               | 0.9<br>(0.1 to 1.6)                          | -45.8%<br>(-53.1% to -38.0%)                      | -48.6%<br>(-55.6% to -41.2%)                     |
| Meningococcal infection            | 8.7<br>(2.9 to 13.6)                               | 0.8<br>(0.1 to 1.5)                          | 7.8%<br>(-2.3% to 19.1%)                          | 2.1%<br>(-7.5% to 12.8%)                         |
| <b>All causes</b>                  | <b>14,018.8</b><br><b>(12,015.6 to 16,090.2)</b>   | <b>969.2</b><br><b>(653.6 to 1,357.1)</b>    | <b>-0.0%</b><br><b>(-2.6% to 2.3%)</b>            | <b>-5.3%</b><br><b>(-7.7% to -3.1%)</b>          |

SR Table 13e: Global prevalence and years lived with disability (YLDs) for 2016, percentage change of YLD counts and rates between 2006 and 2016 of hearing loss by cause, ages 5-9 years

| Cause                              | Prevalence in thousands (95% uncertainty interval) | YLDs in thousands (95% uncertainty interval)  |                                                   |                                                  |
|------------------------------------|----------------------------------------------------|-----------------------------------------------|---------------------------------------------------|--------------------------------------------------|
|                                    |                                                    | 2016                                          | Percentage change in counts between 2006 and 2016 | Percentage change in rates between 2006 and 2016 |
| Age-related and other hearing loss | 12,024.2<br>(7,992.8 to 16,633.2)                  | 663.1<br>(415.8 to 981.5)                     | 3.4%<br>(-0.6% to 7.4%)                           | -4.0%<br>(-7.6% to -0.3%)                        |
| Otitis media                       | 13,999.9<br>(11,307.5 to 17,410.7)                 | 550.7<br>(329.7 to 866.1)                     | 3.9%<br>(0.5% to 6.9%)                            | -3.5%<br>(-6.6% to -0.7%)                        |
| Other congenital anomalies         | 3,318.3<br>(2,345.3 to 4,695.9)                    | 341.5<br>(208.5 to 535.6)                     | -3.2%<br>(-8.4% to 1.8%)                          | -10.1%<br>(-14.9% to -5.5%)                      |
| Pneumococcal meningitis            | 52.3<br>(21.8 to 79.8)                             | 3.7<br>(0.5 to 6.7)                           | -22.7%<br>(-29.4% to -15.3%)                      | -28.2%<br>(-34.4% to -21.4%)                     |
| Other meningitis                   | 46.4<br>(19.5 to 67.1)                             | 3.2<br>(0.4 to 5.5)                           | 85.4%<br>(66.8% to 104.9%)                        | 72.2%<br>(54.9% to 90.3%)                        |
| H influenzae type B meningitis     | 21.0<br>(8.2 to 33.5)                              | 1.5<br>(0.2 to 2.9)                           | -46.2%<br>(-53.1% to -38.8%)                      | -50.1%<br>(-56.5% to -43.2%)                     |
| Meningococcal infection            | 19.9<br>(8.0 to 30.3)                              | 1.4<br>(0.2 to 2.6)                           | 8.6%<br>(-1.1% to 19.6%)                          | 0.8%<br>(-8.2% to 11.1%)                         |
| <b>All causes</b>                  | <b>29,482.0</b><br><b>(23,882.9 to 35,736.0)</b>   | <b>1,565.2</b><br><b>(1,074.7 to 2,197.7)</b> | <b>2.0%</b><br><b>(-0.4% to 4.2%)</b>             | <b>-5.3%</b><br><b>(-7.5% to -3.3%)</b>          |

SR Table 13e: Global prevalence and years lived with disability (YLDs) for 2016, percentage change of YLD counts and rates between 2006 and 2016 of hearing loss by cause, ages 10-14 years

| Cause                              | Prevalence in thousands (95% uncertainty interval) | YLDs in thousands (95% uncertainty interval)  |                                                   |                                                  |
|------------------------------------|----------------------------------------------------|-----------------------------------------------|---------------------------------------------------|--------------------------------------------------|
|                                    |                                                    | 2016                                          | Percentage change in counts between 2006 and 2016 | Percentage change in rates between 2006 and 2016 |
| Age-related and other hearing loss | 16,310.2<br>(12,260.5 to 21,034.3)                 | 838.5<br>(543.3 to 1,198.9)                   | -1.2%<br>(-4.9% to 2.3%)                          | -2.0%<br>(-5.7% to 1.5%)                         |
| Otitis media                       | 10,987.5<br>(8,668.2 to 13,531.2)                  | 384.6<br>(224.8 to 610.9)                     | -3.6%<br>(-7.7% to -0.4%)                         | -4.3%<br>(-8.5% to -1.2%)                        |
| Other congenital anomalies         | 3,166.6<br>(2,243.0 to 4,461.5)                    | 323.1<br>(199.1 to 502.6)                     | -6.4%<br>(-11.1% to -1.6%)                        | -7.1%<br>(-11.8% to -2.4%)                       |
| Pneumococcal meningitis            | 73.4<br>(32.0 to 107.4)                            | 4.7<br>(0.6 to 8.3)                           | -22.0%<br>(-28.3% to -14.3%)                      | -22.7%<br>(-28.9% to -15.0%)                     |
| Other meningitis                   | 61.4<br>(26.1 to 85.6)                             | 3.9<br>(0.5 to 6.7)                           | 83.3%<br>(66.8% to 101.4%)                        | 81.7%<br>(65.5% to 99.7%)                        |
| H influenzae type B meningitis     | 26.8<br>(11.1 to 42.2)                             | 1.8<br>(0.2 to 3.3)                           | -46.1%<br>(-52.8% to -38.8%)                      | -46.5%<br>(-53.2% to -39.3%)                     |
| Meningococcal infection            | 25.5<br>(10.3 to 37.7)                             | 1.7<br>(0.2 to 3.0)                           | 8.6%<br>(-0.0% to 19.3%)                          | 7.7%<br>(-0.8% to 18.3%)                         |
| <b>All causes</b>                  | <b>30,651.4</b><br><b>(25,736.3 to 36,155.0)</b>   | <b>1,558.4</b><br><b>(1,066.5 to 2,158.9)</b> | <b>-2.9%</b><br><b>(-5.4% to -0.8%)</b>           | <b>-3.7%</b><br><b>(-6.1% to -1.6%)</b>          |



SR Table 13e: Global prevalence and years lived with disability (YLDs) for 2016, percentage change of YLD counts and rates between 2006 and 2016 of hearing loss by cause, ages 15-19 years

| Cause                              | Prevalence in thousands (95% uncertainty interval) | YLDs in thousands (95% uncertainty interval)  |                                                   |                                                  |
|------------------------------------|----------------------------------------------------|-----------------------------------------------|---------------------------------------------------|--------------------------------------------------|
|                                    |                                                    | 2016                                          | Percentage change in counts between 2006 and 2016 | Percentage change in rates between 2006 and 2016 |
| Age-related and other hearing loss | 19,607.8<br>(15,285.1 to 24,465.1)                 | 939.0<br>(621.8 to 1,342.5)                   | -6.3%<br>(-9.9% to -3.1%)                         | -0.8%<br>(-4.7% to 2.6%)                         |
| Other congenital anomalies         | 3,026.2<br>(2,138.7 to 4,264.3)                    | 304.1<br>(185.1 to 470.5)                     | -10.1%<br>(-14.6% to -5.5%)                       | -4.8%<br>(-9.6% to 0.1%)                         |
| Otitis media                       | 8,901.3<br>(7,046.5 to 10,874.8)                   | 289.4<br>(167.0 to 469.9)                     | -10.0%<br>(-13.7% to -6.6%)                       | -4.7%<br>(-8.7% to -1.1%)                        |
| Pneumococcal meningitis            | 88.6<br>(39.1 to 126.4)                            | 5.2<br>(0.8 to 8.9)                           | -22.6%<br>(-28.3% to -15.2%)                      | -18.1%<br>(-24.1% to -10.2%)                     |
| Other meningitis                   | 70.8<br>(30.8 to 97.0)                             | 4.2<br>(0.6 to 7.0)                           | 77.3%<br>(63.8% to 93.3%)                         | 87.7%<br>(73.3% to 104.6%)                       |
| H influenzae type B meningitis     | 29.3<br>(12.8 to 45.1)                             | 1.8<br>(0.3 to 3.3)                           | -47.0%<br>(-53.5% to -40.0%)                      | -43.9%<br>(-50.8% to -36.4%)                     |
| Meningococcal infection            | 28.4<br>(11.7 to 42.0)                             | 1.8<br>(0.2 to 3.0)                           | 6.1%<br>(-2.1% to 15.7%)                          | 12.3%<br>(3.7% to 22.5%)                         |
| <b>All causes</b>                  | <b>31,752.5</b><br><b>(27,287.5 to 36,967.0)</b>   | <b>1,545.5</b><br><b>(1,048.9 to 2,145.2)</b> | <b>-7.8%</b><br><b>(-10.2% to -5.7%)</b>          | <b>-2.4%</b><br><b>(-4.9% to -0.1%)</b>          |

SR Table 13e: Global prevalence and years lived with disability (YLDs) for 2016, percentage change of YLD counts and rates between 2006 and 2016 of hearing loss by cause, ages 20-24 years

| Cause                              | Prevalence in thousands (95% uncertainty interval) | YLDs in thousands (95% uncertainty interval)  |                                       |                                                  |
|------------------------------------|----------------------------------------------------|-----------------------------------------------|---------------------------------------|--------------------------------------------------|
|                                    |                                                    | 2016                                          | 2016                                  | Percentage change in rates between 2006 and 2016 |
| Age-related and other hearing loss | 25,408.9<br>(18,796.3 to 32,528.2)                 | 1,073.2<br>(715.0 to 1,553.5)                 | 2.8%<br>(-1.0% to 6.4%)               | -1.9%<br>(-5.6% to 1.5%)                         |
| Other congenital anomalies         | 2,979.1<br>(2,098.1 to 4,206.4)                    | 295.4<br>(181.6 to 457.5)                     | -2.4%<br>(-7.1% to 2.4%)              | -6.9%<br>(-11.4% to -2.3%)                       |
| Otitis media                       | 7,481.9<br>(5,295.4 to 10,292.7)                   | 222.4<br>(125.1 to 364.4)                     | -6.1%<br>(-10.3% to -1.6%)            | -10.4%<br>(-14.5% to -6.2%)                      |
| Pneumococcal meningitis            | 103.9<br>(50.1 to 146.3)                           | 5.5<br>(0.9 to 9.1)                           | -23.0%<br>(-29.0% to -16.3%)          | -26.6%<br>(-32.2% to -20.2%)                     |
| Other meningitis                   | 80.8<br>(39.5 to 110.2)                            | 4.3<br>(0.7 to 7.1)                           | 80.3%<br>(66.5% to 96.0%)             | 72.0%<br>(58.8% to 86.9%)                        |
| Meningococcal infection            | 32.6<br>(15.1 to 47.1)                             | 1.8<br>(0.3 to 2.9)                           | 4.6%<br>(-3.0% to 14.2%)              | -0.2%<br>(-7.5% to 8.9%)                         |
| H influenzae type B meningitis     | 31.9<br>(15.4 to 47.0)                             | 1.7<br>(0.3 to 3.0)                           | -48.0%<br>(-54.2% to -41.2%)          | -50.4%<br>(-56.3% to -43.9%)                     |
| <b>All causes</b>                  | <b>36,119.1</b><br><b>(30,393.2 to 43,131.9)</b>   | <b>1,604.2</b><br><b>(1,082.8 to 2,229.8)</b> | <b>0.4%</b><br><b>(-2.4% to 2.9%)</b> | <b>-4.2%</b><br><b>(-6.9% to -1.9%)</b>          |

SR Table 13e: Global prevalence and years lived with disability (YLDs) for 2016, percentage change of YLD counts and rates between 2006 and 2016 of hearing loss by cause, ages 25-29 years

| Cause                              | Prevalence in thousands (95% uncertainty interval) | YLDs in thousands (95% uncertainty interval)  |                                        |                                                  |
|------------------------------------|----------------------------------------------------|-----------------------------------------------|----------------------------------------|--------------------------------------------------|
|                                    |                                                    | 2016                                          | 2016                                   | Percentage change in rates between 2006 and 2016 |
| Age-related and other hearing loss | 37,276.9<br>(29,915.8 to 46,229.8)                 | 1,291.9<br>(846.6 to 1,868.0)                 | 14.9%<br>(11.0% to 18.6%)              | -3.2%<br>(-6.5% to -0.1%)                        |
| Other congenital anomalies         | 2,959.8<br>(2,076.7 to 4,181.7)                    | 289.1<br>(178.8 to 449.4)                     | 8.7%<br>(3.6% to 13.9%)                | -8.5%<br>(-12.7% to -4.0%)                       |
| Otitis media                       | 5,196.8<br>(3,787.8 to 7,174.4)                    | 153.9<br>(87.9 to 245.6)                      | 4.4%<br>(-0.2% to 9.2%)                | -12.1%<br>(-15.9% to -8.0%)                      |
| Pneumococcal meningitis            | 99.5<br>(50.1 to 138.0)                            | 4.8<br>(0.8 to 8.1)                           | -18.4%<br>(-24.3% to -11.4%)           | -31.2%<br>(-36.3% to -25.3%)                     |
| Other meningitis                   | 75.6<br>(38.4 to 102.3)                            | 3.6<br>(0.6 to 6.0)                           | 88.0%<br>(73.1% to 103.4%)             | 58.3%<br>(45.8% to 71.4%)                        |
| Meningococcal infection            | 29.5<br>(14.2 to 42.5)                             | 1.4<br>(0.3 to 2.4)                           | 8.8%<br>(0.9% to 18.6%)                | -8.3%<br>(-15.0% to -0.1%)                       |
| H influenzae type B meningitis     | 28.2<br>(14.2 to 41.3)                             | 1.4<br>(0.2 to 2.4)                           | -46.1%<br>(-52.4% to -39.7%)           | -54.6%<br>(-59.9% to -49.2%)                     |
| <b>All causes</b>                  | <b>45,666.3</b><br><b>(38,723.7 to 54,357.4)</b>   | <b>1,746.2</b><br><b>(1,192.9 to 2,448.4)</b> | <b>12.7%</b><br><b>(9.6% to 15.4%)</b> | <b>-5.1%</b><br><b>(-7.7% to -2.8%)</b>          |

SR Table 13e: Global prevalence and years lived with disability (YLDs) for 2016, percentage change of YLD counts and rates between 2006 and 2016 of hearing loss by cause, ages 30-34 years

| Cause                              | Prevalence in thousands (95% uncertainty interval) | YLDs in thousands (95% uncertainty interval)  |                                       |                                                  |
|------------------------------------|----------------------------------------------------|-----------------------------------------------|---------------------------------------|--------------------------------------------------|
|                                    |                                                    | 2016                                          | 2016                                  | Percentage change in rates between 2006 and 2016 |
| Age-related and other hearing loss | 47,989.4<br>(38,545.3 to 60,363.6)                 | 1,444.2<br>(936.2 to 2,104.5)                 | 11.5%<br>(7.7% to 15.1%)              | -1.2%<br>(-4.6% to 1.9%)                         |
| Other congenital anomalies         | 2,675.1<br>(1,880.3 to 3,785.8)                    | 259.7<br>(161.0 to 399.4)                     | 5.6%<br>(0.9% to 10.8%)               | -6.5%<br>(-10.7% to -1.9%)                       |
| Otitis media                       | 3,406.0<br>(2,289.1 to 4,864.8)                    | 100.3<br>(55.8 to 165.5)                      | 0.6%<br>(-4.7% to 5.8%)               | -10.9%<br>(-15.6% to -6.3%)                      |
| Pneumococcal meningitis            | 91.8<br>(48.4 to 126.3)                            | 4.1<br>(0.7 to 6.7)                           | -14.1%<br>(-20.1% to -6.9%)           | -23.9%<br>(-29.2% to -17.5%)                     |
| Other meningitis                   | 68.0<br>(36.5 to 91.8)                             | 3.0<br>(0.5 to 5.1)                           | 86.6%<br>(73.8% to 101.1%)            | 65.2%<br>(53.9% to 78.1%)                        |
| Meningococcal infection            | 26.0<br>(13.2 to 37.0)                             | 1.2<br>(0.2 to 1.9)                           | 12.7%<br>(4.8% to 22.1%)              | -0.2%<br>(-7.2% to 8.1%)                         |
| H influenzae type B meningitis     | 24.4<br>(12.8 to 35.5)                             | 1.1<br>(0.2 to 2.0)                           | -44.4%<br>(-50.2% to -37.7%)          | -50.7%<br>(-55.9% to -44.9%)                     |
| <b>All causes</b>                  | <b>54,280.7</b><br><b>(44,708.1 to 65,719.7)</b>   | <b>1,813.4</b><br><b>(1,231.6 to 2,568.0)</b> | <b>9.9%</b><br><b>(6.9% to 12.7%)</b> | <b>-2.6%</b><br><b>(-5.3% to -0.2%)</b>          |

SR Table 13e: Global prevalence and years lived with disability (YLDs) for 2016, percentage change of YLD counts and rates between 2006 and 2016 of hearing loss by cause, ages 35-39 years

| Cause                              | Prevalence in thousands (95% uncertainty interval) | YLDs in thousands (95% uncertainty interval)  |                                                   |                                                  |
|------------------------------------|----------------------------------------------------|-----------------------------------------------|---------------------------------------------------|--------------------------------------------------|
|                                    |                                                    | 2016                                          | Percentage change in counts between 2006 and 2016 | Percentage change in rates between 2006 and 2016 |
| Age-related and other hearing loss | 59,845.0<br>(49,074.9 to 72,381.6)                 | 1,527.6<br>(1,012.6 to 2,258.4)               | 6.0%<br>(2.9% to 8.7%)                            | 0.2%<br>(-2.7% to 2.7%)                          |
| Other congenital anomalies         | 2,361.9<br>(1,661.7 to 3,336.1)                    | 227.7<br>(141.5 to 351.3)                     | 0.1%<br>(-4.4% to 5.3%)                           | -5.4%<br>(-9.6% to -0.4%)                        |
| Otitis media                       | 2,936.6<br>(2,173.4 to 3,932.4)                    | 86.1<br>(49.8 to 135.4)                       | -4.6%<br>(-9.1% to 0.2%)                          | -9.8%<br>(-14.1% to -5.2%)                       |
| Pneumococcal meningitis            | 77.4<br>(43.8 to 105.1)                            | 3.1<br>(0.6 to 5.1)                           | -14.0%<br>(-19.8% to -6.8%)                       | -18.7%<br>(-24.2% to -11.9%)                     |
| Other meningitis                   | 56.8<br>(32.2 to 75.6)                             | 2.2<br>(0.5 to 3.7)                           | 79.2%<br>(67.5% to 92.6%)                         | 69.4%<br>(58.3% to 82.1%)                        |
| Meningococcal infection            | 21.4<br>(11.7 to 29.7)                             | 0.8<br>(0.2 to 1.4)                           | 12.9%<br>(5.6% to 22.4%)                          | 6.7%<br>(-0.2% to 15.7%)                         |
| H influenzae type B meningitis     | 19.6<br>(10.9 to 28.2)                             | 0.8<br>(0.2 to 1.4)                           | -45.0%<br>(-51.2% to -38.3%)                      | -48.0%<br>(-53.9% to -41.7%)                     |
| <b>All causes</b>                  | <b>65,318.8</b><br><b>(54,365.7 to 77,448.1)</b>   | <b>1,848.4</b><br><b>(1,240.8 to 2,667.9)</b> | <b>4.7%</b><br><b>(2.1% to 6.9%)</b>              | <b>-1.1%</b><br><b>(-3.5% to 1.1%)</b>           |

SR Table 13e: Global prevalence and years lived with disability (YLDs) for 2016, percentage change of YLD counts and rates between 2006 and 2016 of hearing loss by cause, ages 40-44 years

| Cause                              | Prevalence in thousands (95% uncertainty interval) | YLDs in thousands (95% uncertainty interval)  |                                        |                                                  |
|------------------------------------|----------------------------------------------------|-----------------------------------------------|----------------------------------------|--------------------------------------------------|
|                                    |                                                    | 2016                                          | 2016                                   | Percentage change in rates between 2006 and 2016 |
| Age-related and other hearing loss | 76,577.7<br>(61,565.5 to 93,710.6)                 | 1,738.1<br>(1,133.7 to 2,609.1)               | 12.7%<br>(9.6% to 15.4%)               | -1.0%<br>(-3.8% to 1.3%)                         |
| Other congenital anomalies         | 2,217.6<br>(1,556.5 to 3,116.9)                    | 211.4<br>(133.1 to 323.8)                     | 6.7%<br>(1.8% to 12.2%)                | -6.3%<br>(-10.6% to -1.5%)                       |
| Otitis media                       | 3,258.5<br>(2,189.1 to 4,578.3)                    | 94.9<br>(53.8 to 160.5)                       | 2.4%<br>(-2.5% to 7.6%)                | -10.0%<br>(-14.3% to -5.5%)                      |
| Pneumococcal meningitis            | 66.1<br>(39.2 to 89.0)                             | 2.4<br>(0.5 to 4.0)                           | -14.4%<br>(-20.0% to -7.0%)            | -24.8%<br>(-29.7% to -18.4%)                     |
| Other meningitis                   | 48.5<br>(28.9 to 64.8)                             | 1.8<br>(0.4 to 2.9)                           | 77.0%<br>(64.9% to 90.3%)              | 55.4%<br>(44.8% to 67.2%)                        |
| Meningococcal infection            | 17.7<br>(10.2 to 24.7)                             | 0.6<br>(0.1 to 1.1)                           | 10.1%<br>(3.0% to 19.4%)               | -3.3%<br>(-9.6% to 4.9%)                         |
| H influenzae type B meningitis     | 16.0<br>(9.2 to 23.0)                              | 0.6<br>(0.1 to 1.1)                           | -46.2%<br>(-52.0% to -40.2%)           | -52.8%<br>(-57.8% to -47.5%)                     |
| <b>All causes</b>                  | <b>82,202.1</b><br><b>(67,058.3 to 99,255.0)</b>   | <b>2,049.8</b><br><b>(1,360.1 to 2,984.5)</b> | <b>11.5%</b><br><b>(8.8% to 13.8%)</b> | <b>-2.1%</b><br><b>(-4.4% to -0.0%)</b>          |

SR Table 13e: Global prevalence and years lived with disability (YLDs) for 2016, percentage change of YLD counts and rates between 2006 and 2016 of hearing loss by cause, ages 45-49 years

| Cause                              | Prevalence in thousands (95% uncertainty interval) | YLDs in thousands (95% uncertainty interval)  |                                                   |                                                  |
|------------------------------------|----------------------------------------------------|-----------------------------------------------|---------------------------------------------------|--------------------------------------------------|
|                                    |                                                    | 2016                                          | Percentage change in counts between 2006 and 2016 | Percentage change in rates between 2006 and 2016 |
| Age-related and other hearing loss | 97,763.0<br>(81,418.0 to 115,473.4)                | 2,189.5<br>(1,425.0 to 3,291.7)               | 22.4%<br>(18.9% to 25.3%)                         | -1.9%<br>(-4.7% to 0.5%)                         |
| Other congenital anomalies         | 2,062.4<br>(1,445.3 to 2,888.1)                    | 193.6<br>(122.8 to 297.5)                     | 17.0%<br>(11.5% to 23.4%)                         | -6.2%<br>(-10.6% to -1.1%)                       |
| Otitis media                       | 3,950.0<br>(2,938.9 to 5,134.4)                    | 114.4<br>(67.3 to 181.1)                      | 12.7%<br>(7.6% to 18.0%)                          | -9.6%<br>(-13.8% to -5.4%)                       |
| Pneumococcal meningitis            | 59.7<br>(35.1 to 80.0)                             | 2.2<br>(0.5 to 3.5)                           | -12.6%<br>(-18.1% to -5.9%)                       | -29.9%<br>(-34.3% to -24.5%)                     |
| Other meningitis                   | 44.0<br>(26.2 to 58.1)                             | 1.6<br>(0.4 to 2.5)                           | 78.7%<br>(67.1% to 92.3%)                         | 43.3%<br>(34.0% to 54.2%)                        |
| Meningococcal infection            | 15.4<br>(8.9 to 21.3)                              | 0.6<br>(0.1 to 0.9)                           | 8.7%<br>(1.3% to 17.1%)                           | -12.8%<br>(-18.7% to -6.1%)                      |
| H influenzae type B meningitis     | 13.8<br>(8.0 to 19.7)                              | 0.5<br>(0.1 to 0.9)                           | -46.7%<br>(-52.3% to -40.6%)                      | -57.3%<br>(-61.8% to -52.3%)                     |
| <b>All causes</b>                  | <b>103,908.2</b><br><b>(87,224.5 to 121,504.6)</b> | <b>2,502.3</b><br><b>(1,661.8 to 3,670.6)</b> | <b>21.4%</b><br><b>(18.4% to 24.0%)</b>           | <b>-2.6%</b><br><b>(-5.0% to -0.5%)</b>          |

SR Table 13e: Global prevalence and years lived with disability (YLDs) for 2016, percentage change of YLD counts and rates between 2006 and 2016 of hearing loss by cause, ages 50-54 years

| Cause                              | Prevalence in thousands (95% uncertainty interval)  | YLDs in thousands (95% uncertainty interval)  |                                                   |                                                  |
|------------------------------------|-----------------------------------------------------|-----------------------------------------------|---------------------------------------------------|--------------------------------------------------|
|                                    |                                                     | 2016                                          | Percentage change in counts between 2006 and 2016 | Percentage change in rates between 2006 and 2016 |
| Age-related and other hearing loss | 119,143.0<br>(102,229.9 to 138,158.8)               | 2,661.4<br>(1,737.8 to 3,959.2)               | 22.0%<br>(18.5% to 24.9%)                         | -2.0%<br>(-4.8% to 0.3%)                         |
| Other congenital anomalies         | 1,795.3<br>(1,256.7 to 2,517.1)                     | 166.4<br>(104.3 to 254.9)                     | 17.5%<br>(11.9% to 23.4%)                         | -5.7%<br>(-10.1% to -0.9%)                       |
| Otitis media                       | 4,114.6<br>(2,849.0 to 5,567.8)                     | 118.3<br>(68.0 to 184.4)                      | 12.3%<br>(7.1% to 17.8%)                          | -9.8%<br>(-14.0% to -5.4%)                       |
| Pneumococcal meningitis            | 54.2<br>(31.6 to 72.2)                              | 1.9<br>(0.4 to 3.1)                           | -8.4%<br>(-13.6% to -1.7%)                        | -26.5%<br>(-30.7% to -21.0%)                     |
| Other meningitis                   | 39.8<br>(23.6 to 52.4)                              | 1.4<br>(0.3 to 2.2)                           | 78.0%<br>(67.3% to 90.9%)                         | 43.0%<br>(34.3% to 53.3%)                        |
| Meningococcal infection            | 13.8<br>(7.9 to 19.3)                               | 0.5<br>(0.1 to 0.8)                           | 11.8%<br>(4.8% to 20.8%)                          | -10.2%<br>(-15.9% to -3.0%)                      |
| H influenzae type B meningitis     | 12.0<br>(7.1 to 17.1)                               | 0.4<br>(0.1 to 0.8)                           | -45.8%<br>(-51.3% to -39.5%)                      | -56.5%<br>(-60.9% to -51.5%)                     |
| <b>All causes</b>                  | <b>125,172.7</b><br><b>(107,940.2 to 144,066.3)</b> | <b>2,950.4</b><br><b>(1,930.2 to 4,338.3)</b> | <b>21.3%</b><br><b>(18.2% to 23.8%)</b>           | <b>-2.6%</b><br><b>(-5.1% to -0.6%)</b>          |



SR Table 13e: Global prevalence and years lived with disability (YLDs) for 2016, percentage change of YLD counts and rates between 2006 and 2016 of hearing loss by cause, ages 55-59 years

| Cause                              | Prevalence in thousands (95% uncertainty interval)  | YLDs in thousands (95% uncertainty interval)  |                                                   |                                                  |
|------------------------------------|-----------------------------------------------------|-----------------------------------------------|---------------------------------------------------|--------------------------------------------------|
|                                    |                                                     | 2016                                          | Percentage change in counts between 2006 and 2016 | Percentage change in rates between 2006 and 2016 |
| Age-related and other hearing loss | 137,270.3<br>(122,671.9 to 150,884.8)               | 3,057.7<br>(1,999.7 to 4,571.5)               | 28.7%<br>(25.5% to 31.5%)                         | -1.4%<br>(-3.8% to 0.8%)                         |
| Other congenital anomalies         | 1,478.4<br>(1,034.0 to 2,072.0)                     | 135.8<br>(85.3 to 208.5)                      | 22.2%<br>(16.4% to 28.1%)                         | -6.3%<br>(-10.8% to -1.8%)                       |
| Otitis media                       | 3,077.7<br>(2,267.0 to 4,069.5)                     | 87.7<br>(51.9 to 138.6)                       | 17.4%<br>(11.9% to 22.9%)                         | -10.0%<br>(-14.2% to -5.8%)                      |
| Pneumococcal meningitis            | 47.7<br>(27.8 to 61.7)                              | 1.7<br>(0.4 to 2.7)                           | -3.7%<br>(-10.0% to 3.8%)                         | -26.2%<br>(-31.0% to -20.4%)                     |
| Other meningitis                   | 35.0<br>(20.5 to 45.5)                              | 1.2<br>(0.3 to 1.9)                           | 84.2%<br>(72.9% to 96.7%)                         | 41.2%<br>(32.5% to 50.8%)                        |
| Meningococcal infection            | 12.1<br>(7.0 to 16.5)                               | 0.4<br>(0.1 to 0.7)                           | 16.3%<br>(9.1% to 26.5%)                          | -10.9%<br>(-16.4% to -3.1%)                      |
| H influenzae type B meningitis     | 10.2<br>(6.0 to 14.4)                               | 0.4<br>(0.1 to 0.6)                           | -43.2%<br>(-49.0% to -36.7%)                      | -56.5%<br>(-60.9% to -51.5%)                     |
| <b>All causes</b>                  | <b>141,931.3</b><br><b>(127,223.5 to 155,647.8)</b> | <b>3,285.0</b><br><b>(2,151.5 to 4,852.5)</b> | <b>28.1%</b><br><b>(25.1% to 30.7%)</b>           | <b>-1.9%</b><br><b>(-4.1% to 0.2%)</b>           |

SR Table 13e: Global prevalence and years lived with disability (YLDs) for 2016, percentage change of YLD counts and rates between 2006 and 2016 of hearing loss by cause, ages 60-64 years

| Cause                              | Prevalence in thousands (95% uncertainty interval)  | YLDs in thousands (95% uncertainty interval)  |                                                   |                                                  |
|------------------------------------|-----------------------------------------------------|-----------------------------------------------|---------------------------------------------------|--------------------------------------------------|
|                                    |                                                     | 2016                                          | Percentage change in counts between 2006 and 2016 | Percentage change in rates between 2006 and 2016 |
| Age-related and other hearing loss | 151,702.8<br>(139,765.3 to 162,110.6)               | 3,514.3<br>(2,297.2 to 5,129.6)               | 46.2%<br>(42.1% to 49.6%)                         | -3.0%<br>(-5.7% to -0.8%)                        |
| Other congenital anomalies         | 1,249.0<br>(871.8 to 1,748.2)                       | 113.0<br>(71.4 to 172.5)                      | 34.8%<br>(29.1% to 41.3%)                         | -10.6%<br>(-14.4% to -6.3%)                      |
| Otitis media                       | 2,109.1<br>(1,409.8 to 2,922.2)                     | 59.6<br>(32.8 to 99.0)                        | 32.6%<br>(26.5% to 39.5%)                         | -12.0%<br>(-16.1% to -7.4%)                      |
| Pneumococcal meningitis            | 41.6<br>(23.4 to 53.7)                              | 1.5<br>(0.3 to 2.4)                           | -2.1%<br>(-8.4% to 5.3%)                          | -35.0%<br>(-39.3% to -30.2%)                     |
| Other meningitis                   | 30.9<br>(17.5 to 39.8)                              | 1.1<br>(0.2 to 1.8)                           | 85.5%<br>(73.8% to 98.6%)                         | 23.1%<br>(15.3% to 31.8%)                        |
| Meningococcal infection            | 10.5<br>(5.9 to 14.3)                               | 0.4<br>(0.1 to 0.6)                           | 18.3%<br>(10.5% to 28.1%)                         | -21.5%<br>(-26.7% to -15.1%)                     |
| H influenzae type B meningitis     | 8.7<br>(4.9 to 12.2)                                | 0.3<br>(0.1 to 0.5)                           | -43.1%<br>(-48.6% to -36.8%)                      | -62.2%<br>(-65.9% to -58.1%)                     |
| <b>All causes</b>                  | <b>155,152.6</b><br><b>(143,200.7 to 165,592.4)</b> | <b>3,690.2</b><br><b>(2,433.1 to 5,365.9)</b> | <b>45.6%</b><br><b>(41.6% to 48.8%)</b>           | <b>-3.4%</b><br><b>(-6.1% to -1.3%)</b>          |

SR Table 13e: Global prevalence and years lived with disability (YLDs) for 2016, percentage change of YLD counts and rates between 2006 and 2016 of hearing loss by cause, ages 65-69 years

| Cause                              | Prevalence in thousands (95% uncertainty interval)  | YLDs in thousands (95% uncertainty interval)  |                                                   |                                                  |
|------------------------------------|-----------------------------------------------------|-----------------------------------------------|---------------------------------------------------|--------------------------------------------------|
|                                    |                                                     | 2016                                          | Percentage change in counts between 2006 and 2016 | Percentage change in rates between 2006 and 2016 |
| Age-related and other hearing loss | 140,789.6<br>(134,674.2 to 146,338.0)               | 3,575.2<br>(2,372.0 to 5,152.1)               | 27.9%<br>(24.6% to 31.3%)                         | -3.5%<br>(-6.0% to -0.9%)                        |
| Other congenital anomalies         | 911.8<br>(634.1 to 1,278.3)                         | 81.5<br>(51.5 to 124.9)                       | 19.6%<br>(14.0% to 25.7%)                         | -9.7%<br>(-14.0% to -5.1%)                       |
| Otitis media                       | 1,266.2<br>(912.0 to 1,677.0)                       | 35.3<br>(21.0 to 56.8)                        | 18.3%<br>(12.6% to 24.5%)                         | -10.7%<br>(-15.0% to -6.0%)                      |
| Pneumococcal meningitis            | 33.9<br>(17.8 to 43.5)                              | 1.3<br>(0.3 to 2.1)                           | -9.7%<br>(-15.2% to -3.3%)                        | -31.9%<br>(-36.0% to -27.0%)                     |
| Other meningitis                   | 25.9<br>(13.8 to 32.9)                              | 1.0<br>(0.2 to 1.6)                           | 68.9%<br>(58.7% to 79.9%)                         | 27.4%<br>(19.8% to 35.8%)                        |
| Meningococcal infection            | 8.7<br>(4.6 to 11.7)                                | 0.3<br>(0.1 to 0.5)                           | 8.9%<br>(2.8% to 16.1%)                           | -17.8%<br>(-22.4% to -12.4%)                     |
| H influenzae type B meningitis     | 6.9<br>(3.7 to 9.6)                                 | 0.3<br>(0.1 to 0.5)                           | -47.6%<br>(-52.7% to -42.0%)                      | -60.4%<br>(-64.3% to -56.2%)                     |
| <b>All causes</b>                  | <b>143,042.9</b><br><b>(136,910.1 to 148,685.3)</b> | <b>3,694.9</b><br><b>(2,480.1 to 5,305.6)</b> | <b>27.6%</b><br><b>(24.3% to 30.9%)</b>           | <b>-3.7%</b><br><b>(-6.2% to -1.2%)</b>          |

SR Table 13e: Global prevalence and years lived with disability (YLDs) for 2016, percentage change of YLD counts and rates between 2006 and 2016 of hearing loss by cause, ages 70-74 years

| Cause                              | Prevalence in thousands (95% uncertainty interval)  | YLDs in thousands (95% uncertainty interval)  |                                                   |                                                  |
|------------------------------------|-----------------------------------------------------|-----------------------------------------------|---------------------------------------------------|--------------------------------------------------|
|                                    |                                                     | 2016                                          | Percentage change in counts between 2006 and 2016 | Percentage change in rates between 2006 and 2016 |
| Age-related and other hearing loss | 116,630.9<br>(112,964.3 to 119,989.2)               | 3,414.8<br>(2,376.2 to 4,765.3)               | 17.2%<br>(14.2% to 20.0%)                         | -2.1%<br>(-4.6% to 0.3%)                         |
| Other congenital anomalies         | 631.2<br>(438.2 to 885.7)                           | 55.5<br>(35.0 to 84.2)                        | 11.5%<br>(6.4% to 16.9%)                          | -6.8%<br>(-11.0% to -2.3%)                       |
| Otitis media                       | 764.9<br>(515.1 to 1,071.6)                         | 21.1<br>(11.8 to 34.9)                        | 8.9%<br>(3.4% to 14.8%)                           | -9.0%<br>(-13.6% to -4.0%)                       |
| Pneumococcal meningitis            | 26.9<br>(13.3 to 34.3)                              | 1.2<br>(0.2 to 1.8)                           | -11.6%<br>(-17.6% to -4.6%)                       | -26.1%<br>(-31.1% to -20.2%)                     |
| Other meningitis                   | 20.9<br>(10.4 to 26.5)                              | 0.9<br>(0.2 to 1.4)                           | 59.1%<br>(49.0% to 69.9%)                         | 33.0%<br>(24.5% to 42.0%)                        |
| Meningococcal infection            | 7.0<br>(3.4 to 9.3)                                 | 0.3<br>(0.1 to 0.5)                           | 6.9%<br>(0.8% to 14.1%)                           | -10.6%<br>(-15.7% to -4.6%)                      |
| H influenzae type B meningitis     | 5.4<br>(2.7 to 7.4)                                 | 0.2<br>(<0.05 to 0.4)                         | -48.5%<br>(-53.5% to -43.0%)                      | -57.0%<br>(-61.2% to -52.4%)                     |
| <b>All causes</b>                  | <b>118,087.2</b><br><b>(114,450.9 to 121,458.9)</b> | <b>3,494.0</b><br><b>(2,448.9 to 4,868.2)</b> | <b>17.0%</b><br><b>(14.1% to 19.7%)</b>           | <b>-2.2%</b><br><b>(-4.6% to 0.1%)</b>           |

SR Table 13e: Global prevalence and years lived with disability (YLDs) for 2016, percentage change of YLD counts and rates between 2006 and 2016 of hearing loss by cause, ages 75-79 years

| Cause                              | Prevalence in thousands (95% uncertainty interval) | YLDs in thousands (95% uncertainty interval)  |                                                   |                                                  |
|------------------------------------|----------------------------------------------------|-----------------------------------------------|---------------------------------------------------|--------------------------------------------------|
|                                    |                                                    | 2016                                          | Percentage change in counts between 2006 and 2016 | Percentage change in rates between 2006 and 2016 |
| Age-related and other hearing loss | 95,820.4<br>(93,893.6 to 97,633.7)                 | 3,288.2<br>(2,328.3 to 4,450.3)               | 23.1%<br>(19.7% to 26.9%)                         | -1.0%<br>(-3.8% to 2.0%)                         |
| Other congenital anomalies         | 447.0<br>(309.1 to 628.3)                          | 38.4<br>(24.4 to 58.3)                        | 17.9%<br>(12.5% to 24.0%)                         | -5.2%<br>(-9.5% to -0.3%)                        |
| Otitis media                       | 556.6<br>(402.3 to 730.5)                          | 15.1<br>(9.1 to 23.8)                         | 14.5%<br>(8.7% to 20.8%)                          | -7.9%<br>(-12.6% to -2.9%)                       |
| Pneumococcal meningitis            | 20.6<br>(9.4 to 25.9)                              | 1.0<br>(0.2 to 1.5)                           | -5.8%<br>(-12.7% to 2.0%)                         | -24.2%<br>(-29.8% to -18.0%)                     |
| Other meningitis                   | 16.2<br>(7.5 to 20.1)                              | 0.8<br>(0.1 to 1.2)                           | 65.8%<br>(55.0% to 77.3%)                         | 33.3%<br>(24.6% to 42.6%)                        |
| Meningococcal infection            | 5.5<br>(2.5 to 7.1)                                | 0.3<br>(<0.05 to 0.4)                         | 12.0%<br>(5.8% to 18.7%)                          | -9.9%<br>(-14.9% to -4.5%)                       |
| H influenzae type B meningitis     | 4.0<br>(1.8 to 5.4)                                | 0.2<br>(<0.05 to 0.3)                         | -44.9%<br>(-50.3% to -39.3%)                      | -55.7%<br>(-60.0% to -51.2%)                     |
| <b>All causes</b>                  | <b>96,870.3</b><br><b>(95,023.7 to 98,655.8)</b>   | <b>3,343.9</b><br><b>(2,376.7 to 4,516.6)</b> | <b>23.0%</b><br><b>(19.6% to 26.7%)</b>           | <b>-1.1%</b><br><b>(-3.8% to 1.9%)</b>           |

SR Table 13e: Global prevalence and years lived with disability (YLDs) for 2016, percentage change of YLD counts and rates between 2006 and 2016 of hearing loss by cause, ages 80-84

| Cause                              | Prevalence in thousands (95% uncertainty interval) | YLDs in thousands (95% uncertainty interval)  |                                                   |                                                  |
|------------------------------------|----------------------------------------------------|-----------------------------------------------|---------------------------------------------------|--------------------------------------------------|
|                                    |                                                    | 2016                                          | Percentage change in counts between 2006 and 2016 | Percentage change in rates between 2006 and 2016 |
| Age-related and other hearing loss | 63,451.7<br>(62,326.0 to 64,381.4)                 | 2,491.2<br>(1,783.3 to 3,312.2)               | 30.7%<br>(26.3% to 34.8%)                         | -0.2%<br>(-3.6% to 2.9%)                         |
| Other congenital anomalies         | 264.6<br>(182.6 to 371.9)                          | 22.5<br>(14.4 to 34.4)                        | 26.3%<br>(20.5% to 32.6%)                         | -3.6%<br>(-8.0% to 1.3%)                         |
| Otitis media                       | 363.4<br>(249.1 to 516.9)                          | 9.7<br>(5.5 to 16.3)                          | 22.0%<br>(15.8% to 28.8%)                         | -6.8%<br>(-11.6% to -1.6%)                       |
| Pneumococcal meningitis            | 13.2<br>(5.8 to 16.6)                              | 0.7<br>(0.1 to 1.1)                           | 2.9%<br>(-3.7% to 10.6%)                          | -21.4%<br>(-26.5% to -15.6%)                     |
| Other meningitis                   | 10.4<br>(4.6 to 12.8)                              | 0.5<br>(0.1 to 0.8)                           | 70.9%<br>(59.8% to 82.6%)                         | 30.5%<br>(22.0% to 39.4%)                        |
| Meningococcal infection            | 3.3<br>(1.5 to 4.2)                                | 0.2<br>(<0.05 to 0.3)                         | 19.4%<br>(12.2% to 27.0%)                         | -8.9%<br>(-14.3% to -3.0%)                       |
| H influenzae type B meningitis     | 2.4<br>(1.0 to 3.2)                                | 0.1<br>(<0.05 to 0.2)                         | -40.7%<br>(-46.5% to -34.1%)                      | -54.7%<br>(-59.2% to -49.7%)                     |
| <b>All causes</b>                  | <b>64,108.9</b><br><b>(62,995.5 to 64,999.0)</b>   | <b>2,524.9</b><br><b>(1,810.3 to 3,345.7)</b> | <b>30.6%</b><br><b>(26.3% to 34.6%)</b>           | <b>-0.3%</b><br><b>(-3.6% to 2.8%)</b>           |

SR Table 13e: Global prevalence and years lived with disability (YLDs) for 2016, percentage change of YLD counts and rates between 2006 and 2016 of hearing loss by cause, ages 85-89

| Cause                              | Prevalence in thousands (95% uncertainty interval) | YLDs in thousands (95% uncertainty interval)  |                                                   |                                                  |
|------------------------------------|----------------------------------------------------|-----------------------------------------------|---------------------------------------------------|--------------------------------------------------|
|                                    |                                                    | 2016                                          | Percentage change in counts between 2006 and 2016 | Percentage change in rates between 2006 and 2016 |
| Age-related and other hearing loss | 35,574.4<br>(35,135.0 to 35,962.3)                 | 1,568.4<br>(1,134.7 to 2,077.8)               | 60.4%<br>(54.8% to 66.2%)                         | -0.1%<br>(-3.5% to 3.5%)                         |
| Other congenital anomalies         | 132.3<br>(90.9 to 187.9)                           | 11.1<br>(7.0 to 17.2)                         | 50.8%<br>(44.0% to 57.7%)                         | -6.0%<br>(-10.3% to -1.7%)                       |
| Otitis media                       | 214.9<br>(157.9 to 288.8)                          | 5.6<br>(3.3 to 8.9)                           | 49.0%<br>(41.3% to 57.5%)                         | -7.2%<br>(-12.0% to -1.9%)                       |
| Pneumococcal meningitis            | 7.0<br>(2.9 to 8.7)                                | 0.4<br>(0.1 to 0.6)                           | 17.6%<br>(9.9% to 25.7%)                          | -26.7%<br>(-31.5% to -21.7%)                     |
| Other meningitis                   | 5.4<br>(2.3 to 6.6)                                | 0.3<br>(<0.05 to 0.5)                         | 88.0%<br>(76.4% to 101.1%)                        | 17.2%<br>(9.9% to 25.3%)                         |
| Meningococcal infection            | 1.8<br>(0.8 to 2.2)                                | 0.1<br>(<0.05 to 0.2)                         | 38.8%<br>(30.4% to 47.4%)                         | -13.5%<br>(-18.7% to -8.2%)                      |
| H influenzae type B meningitis     | 1.2<br>(0.5 to 1.6)                                | 0.1<br>(<0.05 to 0.1)                         | -33.0%<br>(-39.1% to -26.2%)                      | -58.3%<br>(-62.1% to -54.0%)                     |
| <b>All causes</b>                  | <b>35,936.9</b><br><b>(35,510.5 to 36,314.7)</b>   | <b>1,586.0</b><br><b>(1,151.6 to 2,098.3)</b> | <b>60.2%</b><br><b>(54.7% to 66.0%)</b>           | <b>-0.2%</b><br><b>(-3.6% to 3.4%)</b>           |

SR Table 13e: Global prevalence and years lived with disability (YLDs) for 2016, percentage change of YLD counts and rates between 2006 and 2016 of hearing loss by cause, ages 90-94

| Cause                              | Prevalence in thousands (95% uncertainty interval) | YLDs in thousands (95% uncertainty interval) |                                                   |                                                  |
|------------------------------------|----------------------------------------------------|----------------------------------------------|---------------------------------------------------|--------------------------------------------------|
|                                    |                                                    | 2016                                         | Percentage change in counts between 2006 and 2016 | Percentage change in rates between 2006 and 2016 |
| Age-related and other hearing loss | 13,091.3<br>(12,906.7 to 13,262.2)                 | 637.8<br>(460.7 to 834.0)                    | 66.8%<br>(60.8% to 72.9%)                         | -0.3%<br>(-3.9% to 3.3%)                         |
| Other congenital anomalies         | 43.7<br>(29.9 to 62.1)                             | 3.6<br>(2.3 to 5.6)                          | 57.3%<br>(49.3% to 65.0%)                         | -6.0%<br>(-10.8% to -1.4%)                       |
| Otitis media                       | 83.8<br>(57.1 to 114.4)                            | 2.2<br>(1.2 to 3.4)                          | 57.3%<br>(47.9% to 67.1%)                         | -6.0%<br>(-11.6% to -0.2%)                       |
| Pneumococcal meningitis            | 2.5<br>(1.0 to 3.1)                                | 0.1<br>(<0.05 to 0.2)                        | 26.0%<br>(18.3% to 34.6%)                         | -24.7%<br>(-29.3% to -19.6%)                     |
| Other meningitis                   | 1.9<br>(0.8 to 2.2)                                | 0.1<br>(<0.05 to 0.2)                        | 90.3%<br>(78.2% to 102.6%)                        | 13.7%<br>(6.5% to 21.1%)                         |
| Meningococcal infection            | 0.6<br>(0.3 to 0.8)                                | <0.05<br>(<0.05 to 0.1)                      | 44.0%<br>(36.1% to 52.2%)                         | -13.9%<br>(-18.7% to -9.1%)                      |
| H influenzae type B meningitis     | 0.4<br>(0.2 to 0.5)                                | <0.05<br>(<0.05 to <0.05)                    | -28.8%<br>(-35.1% to -21.3%)                      | -57.5%<br>(-61.2% to -53.0%)                     |
| <b>All causes</b>                  | <b>13,224.2</b><br><b>(13,047.7 to 13,397.6)</b>   | <b>643.9</b><br><b>(465.1 to 840.2)</b>      | <b>66.7%</b><br><b>(60.8% to 72.8%)</b>           | <b>-0.4%</b><br><b>(-4.0% to 3.2%)</b>           |



SR Table 13e: Global prevalence and years lived with disability (YLDs) for 2016, percentage change of YLD counts and rates between 2006 and 2016 of hearing loss by cause, ages 95+ years

| Cause                              | Prevalence in thousands (95% uncertainty interval) | YLDs in thousands (95% uncertainty interval) |                                                   |                                                  |
|------------------------------------|----------------------------------------------------|----------------------------------------------|---------------------------------------------------|--------------------------------------------------|
|                                    |                                                    | 2016                                         | Percentage change in counts between 2006 and 2016 | Percentage change in rates between 2006 and 2016 |
| Age-related and other hearing loss | 2,093.2<br>(1,954.0 to 2,221.4)                    | 83.7<br>(59.4 to 113.1)                      | 57.2%<br>(52.7% to 62.0%)                         | 0.3%<br>(-2.5% to 3.4%)                          |
| Other congenital anomalies         | 8.8<br>(5.9 to 12.7)                               | 0.7<br>(0.5 to 1.1)                          | 51.7%<br>(43.8% to 60.0%)                         | -3.2%<br>(-8.3% to 2.1%)                         |
| Otitis media                       | 18.7<br>(12.6 to 26.7)                             | 0.5<br>(0.3 to 0.8)                          | 51.1%<br>(42.8% to 60.0%)                         | -3.6%<br>(-8.9% to 2.1%)                         |
| Pneumococcal meningitis            | 0.6<br>(0.2 to 0.7)                                | <0.05<br>(<0.05 to <0.05)                    | 33.1%<br>(25.7% to 41.4%)                         | -15.1%<br>(-19.8% to -9.8%)                      |
| Other meningitis                   | 0.4<br>(0.2 to 0.5)                                | <0.05<br>(<0.05 to <0.05)                    | 87.0%<br>(77.0% to 97.8%)                         | 19.3%<br>(13.0% to 26.2%)                        |
| Meningococcal infection            | 0.1<br>(0.1 to 0.2)                                | <0.05<br>(<0.05 to <0.05)                    | 45.0%<br>(38.2% to 52.5%)                         | -7.5%<br>(-11.8% to -2.7%)                       |
| H influenzae type B meningitis     | 0.1<br>(<0.05 to 0.1)                              | <0.05<br>(<0.05 to <0.05)                    | -24.2%<br>(-30.3% to -17.1%)                      | -51.6%<br>(-55.5% to -47.1%)                     |
| <b>All causes</b>                  | <b>2,121.9</b><br><b>(1,983.5 to 2,252.2)</b>      | <b>85.0</b><br><b>(60.4 to 114.8)</b>        | <b>57.1%</b><br><b>(52.7% to 61.8%)</b>           | <b>0.3%</b><br><b>(-2.6% to 3.2%)</b>            |

SR Table 13f: Global prevalence and years lived with disability (YLDs) for 2016, percentage change of YLD counts and rates between 2006 and 2016 of heart failure by cause, ages 0-6 days

| Cause                                             | Prevalence in thousands (95% uncertainty interval) | YLDs in thousands (95% uncertainty interval) |                                                   |                                                  |
|---------------------------------------------------|----------------------------------------------------|----------------------------------------------|---------------------------------------------------|--------------------------------------------------|
|                                                   | 2016                                               | 2016                                         | Percentage change in counts between 2006 and 2016 | Percentage change in rates between 2006 and 2016 |
| Congenital heart anomalies                        | 0.1<br>(<0.05 to 0.2)                              | <0.05<br>(<0.05 to 0.1)                      | -14.7%<br>(-24.9% to -8.1%)                       | -14.3%<br>(-24.5% to -7.6%)                      |
| Zika virus disease                                | <0.05<br>(<0.05 to 0.1)                            | <0.05<br>(<0.05 to <0.05)                    | --                                                | --                                               |
| Endocarditis                                      | <0.05<br>(<0.05 to <0.05)                          | <0.05<br>(<0.05 to <0.05)                    | 11.4%<br>(8.4% to 14.9%)                          | 12.0%<br>(8.9% to 15.5%)                         |
| Endocrine, metabolic, blood, and immune disorders | <0.05<br>(<0.05 to <0.05)                          | <0.05<br>(<0.05 to <0.05)                    | 1.0%<br>(-0.8% to 2.8%)                           | 1.6%<br>(-0.3% to 3.3%)                          |
| Iron-deficiency anaemia                           | <0.05<br>(<0.05 to <0.05)                          | <0.05<br>(<0.05 to <0.05)                    | -2.0%<br>(-15.6% to 13.1%)                        | -1.5%<br>(-15.2% to 13.7%)                       |
| <b>All causes</b>                                 | <b>0.2</b><br><b>(0.1 to 0.3)</b>                  | <b>0.1</b><br><b>(&lt;0.05 to 0.1)</b>       | <b>64.6%</b><br><b>(25.0% to 238.8%)</b>          | <b>65.5%</b><br><b>(25.6% to 240.6%)</b>         |

SR Table 13f: Global prevalence and years lived with disability (YLDs) for 2016, percentage change of YLD counts and rates between 2006 and 2016 of heart failure by cause, ages 7-27 days

| Cause                                             | Prevalence in thousands (95% uncertainty interval) | YLDs in thousands (95% uncertainty interval) |                                                   |                                                  |
|---------------------------------------------------|----------------------------------------------------|----------------------------------------------|---------------------------------------------------|--------------------------------------------------|
|                                                   | 2016                                               | 2016                                         | Percentage change in counts between 2006 and 2016 | Percentage change in rates between 2006 and 2016 |
| Congenital heart anomalies                        | 0.5<br>(0.2 to 0.7)                                | 0.1<br>(<0.05 to 0.2)                        | -13.3%<br>(-22.5% to -6.6%)                       | -13.1%<br>(-22.3% to -6.5%)                      |
| Zika virus disease                                | 0.1<br>(0.1 to 0.3)                                | 0.1<br>(<0.05 to 0.1)                        | --                                                | --                                               |
| Endocarditis                                      | <0.05<br>(<0.05 to <0.05)                          | <0.05<br>(<0.05 to <0.05)                    | 11.1%<br>(8.0% to 14.3%)                          | 11.3%<br>(8.2% to 14.5%)                         |
| Endocrine, metabolic, blood, and immune disorders | <0.05<br>(<0.05 to <0.05)                          | <0.05<br>(<0.05 to <0.05)                    | 2.2%<br>(0.7% to 3.5%)                            | 2.3%<br>(0.9% to 3.7%)                           |
| Iron-deficiency anaemia                           | <0.05<br>(<0.05 to <0.05)                          | <0.05<br>(<0.05 to <0.05)                    | -1.5%<br>(-14.9% to 13.0%)                        | -1.3%<br>(-14.7% to 13.2%)                       |
| <b>All causes</b>                                 | <b>0.6</b><br><b>(0.3 to 0.8)</b>                  | <b>0.2</b><br><b>(0.1 to 0.3)</b>            | <b>65.7%</b><br><b>(26.5% to 223.7%)</b>          | <b>66.0%</b><br><b>(26.7% to 224.2%)</b>         |

SR Table 13f: Global prevalence and years lived with disability (YLDs) for 2016, percentage change of YLD counts and rates between 2006 and 2016 of heart failure by cause, ages 28-364 days

| Cause                                             | Prevalence in thousands (95% uncertainty interval) | YLDs in thousands (95% uncertainty interval) |                                          |                                                   |
|---------------------------------------------------|----------------------------------------------------|----------------------------------------------|------------------------------------------|---------------------------------------------------|
|                                                   |                                                    | 2016                                         | 2016                                     | Percentage change in counts between 2006 and 2016 |
| Congenital heart anomalies                        | 10.4<br>(6.9 to 13.5)                              | 1.7<br>(0.9 to 2.7)                          | -5.9%<br>(-11.0% to -1.6%)               | -6.6%<br>(-11.8% to -2.4%)                        |
| Zika virus disease                                | 2.2<br>(1.5 to 4.7)                                | 1.3<br>(0.8 to 2.3)                          | --                                       | --                                                |
| Endocarditis                                      | 0.3<br>(0.2 to 0.5)                                | <0.05<br>(<0.05 to <0.05)                    | 1.7%<br>(-0.1% to 3.3%)                  | 0.9%<br>(-0.9% to 2.5%)                           |
| Endocrine, metabolic, blood, and immune disorders | <0.05<br>(<0.05 to 0.1)                            | <0.05<br>(<0.05 to <0.05)                    | 3.7%<br>(2.4% to 4.8%)                   | 2.9%<br>(1.6% to 4.0%)                            |
| Chagas disease                                    | <0.05<br>(<0.05 to <0.05)                          | <0.05<br>(<0.05 to <0.05)                    | -18.3%<br>(-23.4% to -11.5%)             | -19.0%<br>(-24.0% to -12.2%)                      |
| Iron-deficiency anaemia                           | <0.05<br>(<0.05 to <0.05)                          | <0.05<br>(<0.05 to <0.05)                    | 2.3%<br>(-9.1% to 14.6%)                 | 1.5%<br>(-9.8% to 13.7%)                          |
| <b>All causes</b>                                 | <b>13.0</b><br><b>(9.2 to 16.5)</b>                | <b>3.1</b><br><b>(2.0 to 4.4)</b>            | <b>63.0%</b><br><b>(30.2% to 144.5%)</b> | <b>61.7%</b><br><b>(29.2% to 142.5%)</b>          |

SR Table 13f: Global prevalence and years lived with disability (YLDs) for 2016, percentage change of YLD counts and rates between 2006 and 2016 of heart failure by cause, ages 1-4 years

| Cause                                               | Prevalence in thousands (95% uncertainty interval) | YLDs in thousands (95% uncertainty interval) |                                      |                                                  |
|-----------------------------------------------------|----------------------------------------------------|----------------------------------------------|--------------------------------------|--------------------------------------------------|
|                                                     |                                                    | 2016                                         | 2016                                 | Percentage change in rates between 2006 and 2016 |
| Congenital heart anomalies                          | 48.8<br>(36.7 to 60.9)                             | 7.5<br>(4.6 to 10.7)                         | 2.5%<br>(0.3% to 4.6%)               | -2.9%<br>(-5.0% to -0.9%)                        |
| Other cardiomyopathy                                | 45.2<br>(31.5 to 62.4)                             | 4.1<br>(2.4 to 6.3)                          | 8.0%<br>(5.8% to 10.2%)              | 2.3%<br>(0.2% to 4.4%)                           |
| Myocarditis                                         | 12.1<br>(8.5 to 16.7)                              | 1.1<br>(0.6 to 1.7)                          | 5.8%<br>(4.2% to 7.4%)               | 0.2%<br>(-1.3% to 1.8%)                          |
| Other cardiovascular and circulatory diseases       | 11.7<br>(8.4 to 15.8)                              | 1.0<br>(0.6 to 1.6)                          | 14.2%<br>(12.3% to 16.1%)            | 8.2%<br>(6.3% to 10.0%)                          |
| Endocarditis                                        | 6.2<br>(4.4 to 8.3)                                | 0.6<br>(0.3 to 0.9)                          | 10.5%<br>(8.6% to 12.3%)             | 4.6%<br>(2.8% to 6.4%)                           |
| Zika virus disease                                  | 0.4<br>(0.3 to 0.7)                                | 0.3<br>(0.1 to 0.5)                          | --                                   | --                                               |
| Thalassemias                                        | 1.5<br>(1.1 to 2.0)                                | 0.1<br>(0.1 to 0.2)                          | 10.9%<br>(6.5% to 15.2%)             | 5.1%<br>(0.9% to 9.1%)                           |
| Endocrine, metabolic, blood, and immune disorders   | 1.1<br>(0.8 to 1.5)                                | 0.1<br>(0.1 to 0.2)                          | 4.4%<br>(3.3% to 5.5%)               | -1.1%<br>(-2.2% to -0.1%)                        |
| Ischaemic heart disease                             | 0.2<br>(0.1 to 0.4)                                | <0.05<br>(<0.05 to <0.05)                    | 26.3%<br>(15.0% to 34.2%)            | 19.7%<br>(8.9% to 27.1%)                         |
| Hypertensive heart disease                          | 0.1<br>(<0.05 to 0.1)                              | <0.05<br>(<0.05 to <0.05)                    | 24.2%<br>(18.6% to 30.4%)            | 17.7%<br>(12.3% to 23.6%)                        |
| Other haemoglobinopathies and haemolytic anaemias   | <0.05<br>(<0.05 to <0.05)                          | <0.05<br>(<0.05 to <0.05)                    | 19.8%<br>(14.6% to 25.0%)            | 13.5%<br>(8.5% to 18.4%)                         |
| Iron-deficiency anaemia                             | <0.05<br>(<0.05 to <0.05)                          | <0.05<br>(<0.05 to <0.05)                    | 8.3%<br>(4.6% to 11.3%)              | 2.6%<br>(-0.9% to 5.5%)                          |
| Rheumatic heart disease                             | <0.05<br>(<0.05 to <0.05)                          | <0.05<br>(<0.05 to <0.05)                    | 15.1%<br>(6.6% to 22.6%)             | 9.1%<br>(1.0% to 16.1%)                          |
| Chagas disease                                      | <0.05<br>(<0.05 to <0.05)                          | <0.05<br>(<0.05 to <0.05)                    | -21.9%<br>(-26.6% to -17.6%)         | -26.0%<br>(-30.4% to -22.0%)                     |
| Interstitial lung disease and pulmonary sarcoidosis | <0.05<br>(<0.05 to <0.05)                          | <0.05<br>(<0.05 to <0.05)                    | 9.5%<br>(-2.0% to 22.8%)             | 3.7%<br>(-7.2% to 16.4%)                         |
| Chronic obstructive pulmonary disease               | <0.05<br>(<0.05 to <0.05)                          | <0.05<br>(<0.05 to <0.05)                    | 10.7%<br>(-0.6% to 24.2%)            | 4.8%<br>(-5.8% to 17.6%)                         |
| <b>All causes</b>                                   | <b>127.5</b><br><b>(103.0 to 156.7)</b>            | <b>14.7</b><br><b>(9.5 to 21.1)</b>          | <b>7.3%</b><br><b>(5.5% to 9.6%)</b> | <b>1.7%</b><br><b>(-0.1% to 3.8%)</b>            |

SR Table 13f: Global prevalence and years lived with disability (YLDs) for 2016, percentage change of YLD counts and rates between 2006 and 2016 of heart failure by cause, ages 5-9 years

| Cause                                               | Prevalence in thousands (95% uncertainty interval) | YLDs in thousands (95% uncertainty interval) |                                                   |                                                  |
|-----------------------------------------------------|----------------------------------------------------|----------------------------------------------|---------------------------------------------------|--------------------------------------------------|
|                                                     |                                                    | 2016                                         | Percentage change in counts between 2006 and 2016 | Percentage change in rates between 2006 and 2016 |
| Myocarditis                                         | 65.8<br>(43.5 to 95.3)                             | 5.9<br>(3.4 to 9.8)                          | 8.3%<br>(6.1% to 10.4%)                           | 0.6%<br>(-1.4% to 2.6%)                          |
| Other cardiomyopathy                                | 30.3<br>(20.1 to 43.8)                             | 2.7<br>(1.6 to 4.5)                          | 9.0%<br>(7.4% to 10.4%)                           | 1.2%<br>(-0.3% to 2.5%)                          |
| Congenital heart anomalies                          | 19.1<br>(13.1 to 26.2)                             | 2.5<br>(1.5 to 3.9)                          | 11.0%<br>(9.2% to 12.6%)                          | 3.1%<br>(1.4% to 4.6%)                           |
| Other cardiovascular and circulatory diseases       | 14.3<br>(9.1 to 21.1)                              | 1.3<br>(0.7 to 2.1)                          | 16.6%<br>(14.3% to 18.6%)                         | 8.3%<br>(6.1% to 10.1%)                          |
| Endocrine, metabolic, blood, and immune disorders   | 2.1<br>(1.4 to 2.9)                                | 0.2<br>(0.1 to 0.3)                          | 5.2%<br>(3.7% to 6.5%)                            | -2.3%<br>(-3.7% to -1.1%)                        |
| Ischaemic heart disease                             | 0.2<br>(0.1 to 0.4)                                | <0.05<br>(<0.05 to <0.05)                    | 25.8%<br>(17.3% to 33.4%)                         | 16.8%<br>(9.0% to 23.9%)                         |
| Other haemoglobinopathies and haemolytic anaemias   | 0.1<br>(0.1 to 0.2)                                | <0.05<br>(<0.05 to <0.05)                    | 10.8%<br>(7.0% to 14.2%)                          | 2.9%<br>(-0.6% to 6.1%)                          |
| Iron-deficiency anaemia                             | 0.1<br>(0.1 to 0.2)                                | <0.05<br>(<0.05 to <0.05)                    | 7.5%<br>(4.2% to 10.6%)                           | -0.1%<br>(-3.2% to 2.7%)                         |
| Hypertensive heart disease                          | 0.1<br>(<0.05 to 0.1)                              | <0.05<br>(<0.05 to <0.05)                    | 24.2%<br>(18.4% to 30.8%)                         | 15.3%<br>(9.9% to 21.5%)                         |
| Chagas disease                                      | 0.1<br>(<0.05 to 0.1)                              | <0.05<br>(<0.05 to <0.05)                    | -25.9%<br>(-30.4% to -22.3%)                      | -31.2%<br>(-35.4% to -27.8%)                     |
| Rheumatic heart disease                             | <0.05<br>(<0.05 to <0.05)                          | <0.05<br>(<0.05 to <0.05)                    | 16.4%<br>(9.8% to 22.3%)                          | 8.1%<br>(1.9% to 13.6%)                          |
| Interstitial lung disease and pulmonary sarcoidosis | <0.05<br>(<0.05 to <0.05)                          | <0.05<br>(<0.05 to <0.05)                    | 12.0%<br>(-2.0% to 27.2%)                         | 4.0%<br>(-8.9% to 18.2%)                         |
| Chronic obstructive pulmonary disease               | <0.05<br>(<0.05 to <0.05)                          | <0.05<br>(<0.05 to <0.05)                    | 6.9%<br>(-7.9% to 24.9%)                          | -0.7%<br>(-14.5% to 16.0%)                       |
| <b>All causes</b>                                   | <b>132.2</b><br><b>(94.1 to 179.5)</b>             | <b>12.6</b><br><b>(7.6 to 19.9)</b>          | <b>9.7%</b><br><b>(8.5% to 11.0%)</b>             | <b>1.9%</b><br><b>(0.8% to 3.1%)</b>             |

SR Table 13f: Global prevalence and years lived with disability (YLDs) for 2016, percentage change of YLD counts and rates between 2006 and 2016 of heart failure by cause, ages 10-14 years

| Cause                                               | Prevalence in thousands (95% uncertainty interval) | YLDs in thousands (95% uncertainty interval) |                                                   |                                                  |
|-----------------------------------------------------|----------------------------------------------------|----------------------------------------------|---------------------------------------------------|--------------------------------------------------|
|                                                     |                                                    | 2016                                         | Percentage change in counts between 2006 and 2016 | Percentage change in rates between 2006 and 2016 |
| Myocarditis                                         | 79.8<br>(55.3 to 108.4)                            | 7.1<br>(4.1 to 11.4)                         | -2.0%<br>(-5.6% to 1.4%)                          | -2.8%<br>(-6.4% to 0.6%)                         |
| Other cardiomyopathy                                | 44.5<br>(31.1 to 60.3)                             | 4.0<br>(2.3 to 6.4)                          | 0.6%<br>(-1.3% to 2.4%)                           | -0.2%<br>(-2.1% to 1.6%)                         |
| Congenital heart anomalies                          | 13.5<br>(9.5 to 18.5)                              | 1.8<br>(1.1 to 2.7)                          | -3.7%<br>(-5.5% to -2.1%)                         | -4.5%<br>(-6.3% to -2.9%)                        |
| Other cardiovascular and circulatory diseases       | 7.9<br>(5.0 to 11.4)                               | 0.7<br>(0.4 to 1.2)                          | 7.6%<br>(4.8% to 10.7%)                           | 6.8%<br>(3.9% to 9.8%)                           |
| Endocarditis                                        | 7.1<br>(4.6 to 10.1)                               | 0.6<br>(0.4 to 1.0)                          | 7.6%<br>(5.2% to 10.1%)                           | 6.7%<br>(4.3% to 9.2%)                           |
| Endocrine, metabolic, blood, and immune disorders   | 1.3<br>(0.9 to 1.8)                                | 0.1<br>(0.1 to 0.2)                          | 0.4%<br>(-1.1% to 2.2%)                           | -0.4%<br>(-2.0% to 1.4%)                         |
| Thalassemias                                        | 1.2<br>(0.8 to 1.6)                                | 0.1<br>(0.1 to 0.2)                          | -6.8%<br>(-9.8% to -3.7%)                         | -7.5%<br>(-10.5% to -4.5%)                       |
| Chagas disease                                      | 0.4<br>(0.2 to 0.7)                                | <0.05<br>(<0.05 to <0.05)                    | -19.4%<br>(-24.1% to -16.0%)                      | -20.1%<br>(-24.7% to -16.7%)                     |
| Other haemoglobinopathies and haemolytic anaemias   | 0.2<br>(0.1 to 0.3)                                | <0.05<br>(<0.05 to <0.05)                    | -2.4%<br>(-5.0% to 0.4%)                          | -3.2%<br>(-5.8% to -0.5%)                        |
| Ischaemic heart disease                             | 0.1<br>(<0.05 to 0.3)                              | <0.05<br>(<0.05 to <0.05)                    | 24.9%<br>(15.0% to 31.7%)                         | 23.9%<br>(14.1% to 30.7%)                        |
| Iron-deficiency anaemia                             | 0.1<br>(0.1 to 0.1)                                | <0.05<br>(<0.05 to <0.05)                    | 5.3%<br>(2.2% to 8.0%)                            | 4.4%<br>(1.4% to 7.1%)                           |
| Hypertensive heart disease                          | 0.1<br>(<0.05 to 0.1)                              | <0.05<br>(<0.05 to <0.05)                    | 22.9%<br>(17.0% to 29.8%)                         | 21.9%<br>(16.0% to 28.8%)                        |
| Rheumatic heart disease                             | <0.05<br>(<0.05 to <0.05)                          | <0.05<br>(<0.05 to <0.05)                    | 13.4%<br>(6.9% to 21.9%)                          | 12.4%<br>(6.0% to 20.9%)                         |
| Interstitial lung disease and pulmonary sarcoidosis | <0.05<br>(<0.05 to <0.05)                          | <0.05<br>(<0.05 to <0.05)                    | 9.9%<br>(-7.4% to 30.2%)                          | 9.0%<br>(-8.2% to 29.2%)                         |
| Chronic obstructive pulmonary disease               | <0.05<br>(<0.05 to <0.05)                          | <0.05<br>(<0.05 to <0.05)                    | 9.4%<br>(-6.3% to 28.0%)                          | 8.5%<br>(-7.1% to 26.9%)                         |
| <b>All causes</b>                                   | <b>156.2</b><br><b>(113.5 to 206.5)</b>            | <b>14.5</b><br><b>(8.7 to 22.4)</b>          | <b>-0.7%</b><br><b>(-2.6% to 1.2%)</b>            | <b>-1.5%</b><br><b>(-3.4% to 0.4%)</b>           |

SR Table 13f: Global prevalence and years lived with disability (YLDs) for 2016, percentage change of YLD counts and rates between 2006 and 2016 of heart failure by cause, ages 15-19 years

| Cause                                               | Prevalence in thousands (95% uncertainty interval) | YLDs in thousands (95% uncertainty interval) |                                                   |                                                  |
|-----------------------------------------------------|----------------------------------------------------|----------------------------------------------|---------------------------------------------------|--------------------------------------------------|
|                                                     |                                                    | 2016                                         | Percentage change in counts between 2006 and 2016 | Percentage change in rates between 2006 and 2016 |
| Myocarditis                                         | 104.9<br>(80.1 to 134.9)                           | 9.3<br>(5.8 to 14.5)                         | -9.6%<br>(-14.5% to -4.7%)                        | -4.3%<br>(-9.5% to 0.9%)                         |
| Other cardiomyopathy                                | 92.1<br>(70.5 to 118.0)                            | 8.2<br>(5.1 to 12.8)                         | -5.9%<br>(-9.7% to -2.0%)                         | -0.4%<br>(-4.4% to 3.7%)                         |
| Congenital heart anomalies                          | 12.1<br>(9.3 to 15.4)                              | 1.6<br>(1.0 to 2.3)                          | -17.6%<br>(-19.0% to -16.3%)                      | -12.8%<br>(-14.3% to -11.4%)                     |
| Other cardiovascular and circulatory diseases       | 15.7<br>(11.1 to 21.0)                             | 1.4<br>(0.8 to 2.2)                          | 3.5%<br>(0.3% to 6.6%)                            | 9.6%<br>(6.2% to 12.9%)                          |
| Endocarditis                                        | 5.3<br>(3.8 to 7.1)                                | 0.5<br>(0.3 to 0.7)                          | 7.4%<br>(4.9% to 9.9%)                            | 13.7%<br>(11.1% to 16.3%)                        |
| Endocrine, metabolic, blood, and immune disorders   | 1.5<br>(1.1 to 2.0)                                | 0.1<br>(0.1 to 0.2)                          | -4.2%<br>(-5.7% to -2.7%)                         | 1.4%<br>(-0.2% to 3.0%)                          |
| Thalassaemias                                       | 1.1<br>(0.8 to 1.5)                                | 0.1<br>(0.1 to 0.2)                          | -13.4%<br>(-16.0% to -10.7%)                      | -8.4%<br>(-11.1% to -5.5%)                       |
| Chagas disease                                      | 1.5<br>(0.9 to 2.5)                                | 0.1<br>(<0.05 to 0.1)                        | -16.4%<br>(-26.8% to -6.5%)                       | -11.5%<br>(-22.5% to -1.1%)                      |
| Other haemoglobinopathies and haemolytic anaemias   | 0.9<br>(0.6 to 1.1)                                | 0.1<br>(<0.05 to 0.1)                        | -5.4%<br>(-9.9% to -0.4%)                         | 0.1%<br>(-4.6% to 5.4%)                          |
| Iron-deficiency anaemia                             | 0.2<br>(0.2 to 0.3)                                | <0.05<br>(<0.05 to <0.05)                    | 8.6%<br>(5.7% to 11.3%)                           | 15.0%<br>(11.9% to 17.8%)                        |
| Ischaemic heart disease                             | 0.1<br>(<0.05 to 0.3)                              | <0.05<br>(<0.05 to <0.05)                    | 19.7%<br>(8.8% to 26.8%)                          | 26.7%<br>(15.2% to 34.2%)                        |
| Hypertensive heart disease                          | 0.1<br>(<0.05 to 0.1)                              | <0.05<br>(<0.05 to <0.05)                    | 18.4%<br>(12.5% to 25.4%)                         | 25.3%<br>(19.1% to 32.7%)                        |
| Rheumatic heart disease                             | <0.05<br>(<0.05 to <0.05)                          | <0.05<br>(<0.05 to <0.05)                    | 8.7%<br>(0.7% to 18.7%)                           | 15.0%<br>(6.5% to 25.6%)                         |
| Alcoholic cardiomyopathy                            | <0.05<br>(<0.05 to <0.05)                          | <0.05<br>(<0.05 to <0.05)                    | 3.2%<br>(-8.6% to 15.7%)                          | 9.3%<br>(-3.2% to 22.5%)                         |
| Chronic obstructive pulmonary disease               | <0.05<br>(<0.05 to <0.05)                          | <0.05<br>(<0.05 to <0.05)                    | -1.8%<br>(-14.2% to 11.4%)                        | 3.9%<br>(-9.2% to 17.9%)                         |
| Interstitial lung disease and pulmonary sarcoidosis | <0.05<br>(<0.05 to <0.05)                          | <0.05<br>(<0.05 to <0.05)                    | 2.0%<br>(-13.8% to 19.2%)                         | 8.0%<br>(-8.7% to 26.2%)                         |
| <b>All causes</b>                                   | <b>235.5</b><br><b>(183.3 to 298.9)</b>            | <b>21.4</b><br><b>(13.6 to 32.7)</b>         | <b>-7.7%</b><br><b>(-10.3% to -5.2%)</b>          | <b>-2.3%</b><br><b>(-5.1% to 0.4%)</b>           |



SR Table 13f: Global prevalence and years lived with disability (YLDs) for 2016, percentage change of YLD counts and rates between 2006 and 2016 of heart failure by cause, ages 20-24 years

| Cause                                               | Prevalence in thousands (95% uncertainty interval) | YLDs in thousands (95% uncertainty interval) |                                                   |                                                  |
|-----------------------------------------------------|----------------------------------------------------|----------------------------------------------|---------------------------------------------------|--------------------------------------------------|
|                                                     |                                                    | 2016                                         | Percentage change in counts between 2006 and 2016 | Percentage change in rates between 2006 and 2016 |
| Other cardiomyopathy                                | 190.4<br>(147.9 to 241.8)                          | 16.7<br>(10.4 to 25.0)                       | 4.5%<br>(-1.8% to 11.5%)                          | -0.4%<br>(-6.4% to 6.3%)                         |
| Myocarditis                                         | 122.2<br>(94.5 to 155.1)                           | 10.8<br>(6.7 to 16.5)                        | 4.7%<br>(-1.9% to 11.6%)                          | -0.2%<br>(-6.4% to 6.5%)                         |
| Other cardiovascular and circulatory diseases       | 16.2<br>(11.6 to 21.4)                             | 1.5<br>(0.9 to 2.3)                          | 7.4%<br>(4.8% to 9.8%)                            | 2.5%<br>(-0.0% to 4.7%)                          |
| Congenital heart anomalies                          | 10.5<br>(8.2 to 13.4)                              | 1.4<br>(0.9 to 2.0)                          | 3.8%<br>(2.4% to 5.2%)                            | -1.0%<br>(-2.3% to 0.4%)                         |
| Endocarditis                                        | 14.9<br>(10.8 to 19.6)                             | 1.3<br>(0.8 to 2.1)                          | 9.7%<br>(7.6% to 11.8%)                           | 4.6%<br>(2.7% to 6.6%)                           |
| Other haemoglobinopathies and haemolytic anaemias   | 3.2<br>(2.3 to 4.2)                                | 0.3<br>(0.2 to 0.4)                          | 6.5%<br>(3.7% to 9.4%)                            | 1.6%<br>(-1.1% to 4.3%)                          |
| Endocrine, metabolic, blood, and immune disorders   | 2.6<br>(1.9 to 3.4)                                | 0.2<br>(0.1 to 0.4)                          | 4.1%<br>(2.3% to 5.8%)                            | -0.7%<br>(-2.4% to 0.9%)                         |
| Chagas disease                                      | 4.2<br>(2.4 to 6.7)                                | 0.2<br>(0.1 to 0.4)                          | -15.7%<br>(-29.4% to -0.5%)                       | -19.6%<br>(-32.6% to -5.1%)                      |
| Iron-deficiency anaemia                             | 0.3<br>(0.2 to 0.4)                                | <0.05<br>(<0.05 to <0.05)                    | 16.4%<br>(12.9% to 19.6%)                         | 11.0%<br>(7.7% to 14.1%)                         |
| Ischaemic heart disease                             | 0.3<br>(0.1 to 0.5)                                | <0.05<br>(<0.05 to <0.1)                     | 21.6%<br>(16.0% to 26.8%)                         | 16.0%<br>(10.6% to 21.0%)                        |
| Hypertensive heart disease                          | 0.2<br>(0.1 to 0.4)                                | <0.05<br>(<0.05 to <0.05)                    | 17.7%<br>(12.6% to 22.8%)                         | 12.3%<br>(7.4% to 17.2%)                         |
| Rheumatic heart disease                             | <0.05<br>(<0.05 to <0.05)                          | <0.05<br>(<0.05 to <0.05)                    | 15.2%<br>(11.3% to 19.5%)                         | 9.8%<br>(6.2% to 14.0%)                          |
| Alcoholic cardiomyopathy                            | <0.05<br>(<0.05 to <0.05)                          | <0.05<br>(<0.05 to <0.05)                    | 8.3%<br>(-1.3% to 18.3%)                          | 3.3%<br>(-5.8% to 12.8%)                         |
| Interstitial lung disease and pulmonary sarcoidosis | <0.05<br>(<0.05 to <0.05)                          | <0.05<br>(<0.05 to <0.05)                    | 8.2%<br>(-4.2% to 21.9%)                          | 3.2%<br>(-8.6% to 16.3%)                         |
| Chronic obstructive pulmonary disease               | <0.05<br>(<0.05 to <0.05)                          | <0.05<br>(<0.05 to <0.05)                    | 10.8%<br>(-2.7% to 25.6%)                         | 5.7%<br>(-7.2% to 19.8%)                         |
| <b>All causes</b>                                   | <b>365.2</b><br><b>(286.8 to 459.0)</b>            | <b>32.5</b><br><b>(20.0 to 48.8)</b>         | <b>4.7%</b><br><b>(0.3% to 8.9%)</b>              | <b>-0.1%</b><br><b>(-4.3% to 3.9%)</b>           |

SR Table 13f: Global prevalence and years lived with disability (YLDs) for 2016, percentage change of YLD counts and rates between 2006 and 2016 of heart failure by cause, ages 25-29 years

| Cause                                               | Prevalence in thousands (95% uncertainty interval) | YLDs in thousands (95% uncertainty interval) |                                         |                                                  |
|-----------------------------------------------------|----------------------------------------------------|----------------------------------------------|-----------------------------------------|--------------------------------------------------|
|                                                     |                                                    | 2016                                         | 2016                                    | Percentage change in rates between 2006 and 2016 |
| Other cardiomyopathy                                | 273.7<br>(201.1 to 357.3)                          | 23.8<br>(14.0 to 36.8)                       | 18.0%<br>(10.7% to 25.8%)               | -0.6%<br>(-6.8% to 6.0%)                         |
| Myocarditis                                         | 195.8<br>(144.1 to 256.6)                          | 17.2<br>(10.3 to 26.7)                       | 24.3%<br>(15.5% to 33.3%)               | 4.7%<br>(-2.7% to 12.3%)                         |
| Endocarditis                                        | 30.9<br>(20.6 to 42.5)                             | 2.8<br>(1.5 to 4.5)                          | 17.5%<br>(15.0% to 20.0%)               | -1.0%<br>(-3.2% to 1.1%)                         |
| Other cardiovascular and circulatory diseases       | 16.2<br>(10.7 to 22.5)                             | 1.5<br>(0.8 to 2.4)                          | 20.6%<br>(17.9% to 23.1%)               | 1.6%<br>(-0.7% to 3.7%)                          |
| Congenital heart anomalies                          | 8.4<br>(6.4 to 10.8)                               | 1.1<br>(0.7 to 1.7)                          | 19.4%<br>(17.7% to 21.2%)               | 0.6%<br>(-0.8% to 2.1%)                          |
| Chagas disease                                      | 8.9<br>(5.3 to 14.0)                               | 0.5<br>(0.2 to 0.8)                          | -10.8%<br>(-22.0% to 2.6%)              | -24.9%<br>(-34.3% to -13.5%)                     |
| Endocrine, metabolic, blood, and immune disorders   | 2.8<br>(1.9 to 3.8)                                | 0.3<br>(0.1 to 0.4)                          | 15.9%<br>(13.7% to 17.9%)               | -2.4%<br>(-4.2% to -0.7%)                        |
| Other haemoglobinopathies and haemolytic anaemias   | 2.7<br>(1.8 to 3.7)                                | 0.2<br>(0.1 to 0.4)                          | 25.2%<br>(22.4% to 28.0%)               | 5.4%<br>(3.1% to 7.8%)                           |
| Hypertensive heart disease                          | 0.8<br>(0.4 to 1.3)                                | 0.1<br>(<0.05 to 0.1)                        | 20.5%<br>(12.6% to 27.5%)               | 1.5%<br>(-5.1% to 7.4%)                          |
| Ischaemic heart disease                             | 0.7<br>(0.3 to 1.5)                                | 0.1<br>(<0.05 to 0.1)                        | 26.5%<br>(19.9% to 32.0%)               | 6.5%<br>(1.0% to 11.2%)                          |
| Iron-deficiency anaemia                             | 0.2<br>(0.1 to 0.3)                                | <0.05<br>(<0.05 to <0.05)                    | 28.0%<br>(24.8% to 31.3%)               | 7.8%<br>(5.1% to 10.6%)                          |
| Rheumatic heart disease                             | 0.1<br>(0.1 to 0.2)                                | <0.05<br>(<0.05 to <0.05)                    | 23.7%<br>(19.5% to 27.0%)               | 4.2%<br>(0.7% to 7.0%)                           |
| Thalassemias                                        | 0.1<br>(0.1 to 0.1)                                | <0.05<br>(<0.05 to <0.05)                    | 15.0%<br>(11.4% to 18.7%)               | -3.1%<br>(-6.2% to -0.0%)                        |
| Alcoholic cardiomyopathy                            | <0.05<br>(<0.05 to <0.05)                          | <0.05<br>(<0.05 to <0.05)                    | 3.0%<br>(-6.5% to 13.5%)                | -13.3%<br>(-21.2% to -4.4%)                      |
| Interstitial lung disease and pulmonary sarcoidosis | <0.05<br>(<0.05 to <0.05)                          | <0.05<br>(<0.05 to <0.05)                    | 2.2%<br>(-10.4% to 17.5%)               | -13.9%<br>(-24.5% to -1.0%)                      |
| Chronic obstructive pulmonary disease               | <0.05<br>(<0.05 to <0.05)                          | <0.05<br>(<0.05 to <0.05)                    | 3.2%<br>(-10.2% to 18.7%)               | -13.1%<br>(-24.4% to 0.0%)                       |
| <b>All causes</b>                                   | <b>541.2</b><br><b>(401.4 to 695.7)</b>            | <b>47.4</b><br><b>(28.6 to 73.0)</b>         | <b>19.9%</b><br><b>(15.0% to 24.8%)</b> | <b>1.0%</b><br><b>(-3.1% to 5.1%)</b>            |

SR Table 13f: Global prevalence and years lived with disability (YLDs) for 2016, percentage change of YLD counts and rates between 2006 and 2016 of heart failure by cause, ages 30-34 years

| Cause                                               | Prevalence in thousands (95% uncertainty interval) | YLDs in thousands (95% uncertainty interval) |                                                   |                                                  |
|-----------------------------------------------------|----------------------------------------------------|----------------------------------------------|---------------------------------------------------|--------------------------------------------------|
|                                                     |                                                    | 2016                                         | Percentage change in counts between 2006 and 2016 | Percentage change in rates between 2006 and 2016 |
| Ischaemic heart disease                             | 203.0<br>(155.6 to 254.9)                          | 17.6<br>(10.8 to 26.2)                       | 17.5%<br>(9.5% to 27.3%)                          | 4.1%<br>(-3.0% to 12.7%)                         |
| Other cardiomyopathy                                | 201.1<br>(152.5 to 253.1)                          | 17.5<br>(10.7 to 26.3)                       | 13.4%<br>(6.9% to 20.8%)                          | 0.4%<br>(-5.3% to 7.0%)                          |
| Hypertensive heart disease                          | 167.6<br>(119.2 to 221.1)                          | 14.6<br>(8.7 to 22.8)                        | 12.9%<br>(4.3% to 21.7%)                          | 0.0%<br>(-7.6% to 7.8%)                          |
| Myocarditis                                         | 99.3<br>(74.3 to 125.4)                            | 8.7<br>(5.3 to 13.4)                         | 7.0%<br>(-0.4% to 14.4%)                          | -5.2%<br>(-11.8% to -1.4%)                       |
| Alcoholic cardiomyopathy                            | 37.6<br>(28.4 to 47.1)                             | 3.3<br>(2.0 to 5.0)                          | 7.6%<br>(-6.9% to 22.2%)                          | -4.7%<br>(-17.6% to 8.2%)                        |
| Rheumatic heart disease                             | 29.1<br>(21.7 to 38.2)                             | 2.6<br>(1.5 to 4.0)                          | 12.2%<br>(6.4% to 17.9%)                          | -0.6%<br>(-5.7% to 4.4%)                         |
| Chronic obstructive pulmonary disease               | 3.8<br>(2.6 to 5.2)                                | 1.7<br>(1.1 to 2.7)                          | 1.9%<br>(-0.2% to 4.4%)                           | -9.7%<br>(-11.6% to -7.5%)                       |
| Other cardiovascular and circulatory diseases       | 16.3<br>(10.2 to 23.9)                             | 1.5<br>(0.8 to 2.4)                          | 14.7%<br>(11.7% to 17.6%)                         | 1.6%<br>(-1.0% to 4.1%)                          |
| Congenital heart anomalies                          | 5.8<br>(4.5 to 7.2)                                | 0.8<br>(0.5 to 1.1)                          | 6.1%<br>(4.6% to 7.4%)                            | -6.1%<br>(-7.4% to -4.9%)                        |
| Chagas disease                                      | 14.6<br>(8.9 to 22.6)                              | 0.8<br>(0.4 to 1.3)                          | -1.8%<br>(-11.5% to 8.9%)                         | -13.0%<br>(-21.6% to -3.5%)                      |
| Endocarditis                                        | 7.8<br>(5.0 to 11.5)                               | 0.7<br>(0.4 to 1.1)                          | 14.7%<br>(12.2% to 17.1%)                         | 1.5%<br>(-0.7% to 3.7%)                          |
| Interstitial lung disease and pulmonary sarcoidosis | 0.9<br>(0.6 to 1.2)                                | 0.4<br>(0.2 to 0.6)                          | 11.6%<br>(9.8% to 13.4%)                          | -1.2%<br>(-2.7% to 0.4%)                         |
| Other haemoglobinopathies and haemolytic anaemias   | 2.9<br>(1.9 to 4.3)                                | 0.3<br>(0.1 to 0.4)                          | 7.8%<br>(5.0% to 10.3%)                           | -4.6%<br>(-7.0% to -2.3%)                        |
| Endocrine, metabolic, blood, and immune disorders   | 2.3<br>(1.5 to 3.3)                                | 0.2<br>(0.1 to 0.3)                          | 10.7%<br>(8.5% to 12.6%)                          | -2.0%<br>(-3.9% to -0.3%)                        |
| Iron-deficiency anaemia                             | 0.2<br>(0.1 to 0.2)                                | <0.05<br>(<0.05 to <0.05)                    | 21.5%<br>(17.5% to 25.5%)                         | 7.6%<br>(4.1% to 11.1%)                          |
| Iodine deficiency                                   | <0.05<br>(<0.05 to <0.05)                          | <0.05<br>(<0.05 to <0.05)                    | 36.6%<br>(29.3% to 43.3%)                         | 20.9%<br>(14.5% to 26.9%)                        |
| Thalassemias                                        | <0.05<br>(<0.05 to 0.1)                            | <0.05<br>(<0.05 to <0.05)                    | -9.6%<br>(-14.0% to -4.8%)                        | -19.9%<br>(-23.8% to -15.7%)                     |
| <b>All causes</b>                                   | <b>792.2</b><br><b>(619.6 to 976.6)</b>            | <b>70.7</b><br><b>(43.9 to 105.2)</b>        | <b>12.5%</b><br><b>(9.1% to 15.9%)</b>            | <b>-0.3%</b><br><b>(-3.4% to 2.6%)</b>           |

SR Table 13f: Global prevalence and years lived with disability (YLDs) for 2016, percentage change of YLD counts and rates between 2006 and 2016 of heart failure by cause, ages 35-39 years

| Cause                                               | Prevalence in thousands (95% uncertainty interval) | YLDs in thousands (95% uncertainty interval) |                                      |                                                   |
|-----------------------------------------------------|----------------------------------------------------|----------------------------------------------|--------------------------------------|---------------------------------------------------|
|                                                     |                                                    | 2016                                         | 2016                                 | Percentage change in counts between 2006 and 2016 |
| Hypertensive heart disease                          | 412.0<br>(305.8 to 547.1)                          | 35.2<br>(21.5 to 53.6)                       | 4.4%<br>(-1.2% to 10.2%)             | -1.3%<br>(-6.6% to 4.2%)                          |
| Ischaemic heart disease                             | 384.0<br>(293.0 to 504.0)                          | 32.9<br>(19.8 to 49.2)                       | 8.0%<br>(2.1% to 14.1%)              | 2.1%<br>(-3.5% to 7.9%)                           |
| Other cardiomyopathy                                | 117.3<br>(86.0 to 155.4)                           | 10.2<br>(6.0 to 15.5)                        | 6.5%<br>(0.6% to 12.8%)              | 0.7%<br>(-4.9% to 6.6%)                           |
| Myocarditis                                         | 69.7<br>(51.1 to 93.0)                             | 6.1<br>(3.6 to 9.3)                          | -0.4%<br>(-7.4% to 6.8%)             | -5.9%<br>(-12.4% to 0.9%)                         |
| Rheumatic heart disease                             | 64.8<br>(48.8 to 84.9)                             | 5.6<br>(3.4 to 8.8)                          | 5.0%<br>(-6.1% to 16.3%)             | -0.7%<br>(-11.3% to 9.9%)                         |
| Chronic obstructive pulmonary disease               | 9.3<br>(6.4 to 13.3)                               | 4.3<br>(2.5 to 6.5)                          | -9.3%<br>(-11.6% to -7.0%)           | -14.3%<br>(-16.4% to -12.0%)                      |
| Alcoholic cardiomyopathy                            | 47.8<br>(34.8 to 64.0)                             | 4.2<br>(2.4 to 6.6)                          | 4.2%<br>(-8.4% to 19.3%)             | -1.5%<br>(-13.4% to 12.8%)                        |
| Other cardiovascular and circulatory diseases       | 14.6<br>(9.9 to 20.6)                              | 1.3<br>(0.7 to 2.1)                          | 6.9%<br>(4.4% to 9.8%)               | 1.1%<br>(-1.3% to 3.8%)                           |
| Chagas disease                                      | 19.9<br>(12.2 to 30.4)                             | 1.0<br>(0.5 to 1.8)                          | 2.2%<br>(-7.3% to 12.0%)             | -3.4%<br>(-12.4% to 5.9%)                         |
| Interstitial lung disease and pulmonary sarcoidosis | 1.7<br>(1.1 to 2.4)                                | 0.8<br>(0.4 to 1.2)                          | 3.2%<br>(1.5% to 4.8%)               | -2.5%<br>(-4.0% to -0.9%)                         |
| Congenital heart anomalies                          | 5.7<br>(4.3 to 7.4)                                | 0.7<br>(0.5 to 1.1)                          | 1.6%<br>(-0.3% to 3.3%)              | -4.0%<br>(-5.7% to -2.4%)                         |
| Endocarditis                                        | 2.3<br>(1.6 to 3.2)                                | 0.2<br>(0.1 to 0.3)                          | 10.8%<br>(8.0% to 13.8%)             | 4.7%<br>(2.1% to 7.6%)                            |
| Endocrine, metabolic, blood, and immune disorders   | 2.3<br>(1.6 to 3.2)                                | 0.2<br>(0.1 to 0.3)                          | 3.8%<br>(1.2% to 6.0%)               | -1.9%<br>(-4.3% to 0.2%)                          |
| Other haemoglobinopathies and haemolytic anaemias   | 2.3<br>(1.6 to 3.2)                                | 0.2<br>(0.1 to 0.3)                          | -2.6%<br>(-5.0% to -0.4%)            | -8.0%<br>(-10.2% to -5.8%)                        |
| Coal workers pneumoconiosis                         | 0.1<br>(<0.05 to 0.1)                              | <0.05<br>(<0.05 to <0.05)                    | -29.8%<br>(-33.2% to -26.5%)         | -33.6%<br>(-36.9% to -30.5%)                      |
| Other pneumoconiosis                                | 0.1<br>(<0.05 to 0.1)                              | <0.05<br>(<0.05 to <0.05)                    | -20.9%<br>(-24.0% to -17.6%)         | -25.2%<br>(-28.1% to -22.1%)                      |
| Iron-deficiency anaemia                             | 0.1<br>(0.1 to 0.2)                                | <0.05<br>(<0.05 to <0.05)                    | 15.9%<br>(12.1% to 19.5%)            | 9.5%<br>(6.0% to 12.9%)                           |
| Thalassemias                                        | 0.1<br>(<0.05 to 0.1)                              | <0.05<br>(<0.05 to <0.05)                    | -10.9%<br>(-14.2% to -7.7%)          | -15.8%<br>(-18.9% to -12.7%)                      |
| <b>All causes</b>                                   | <b>1,154.0</b><br><b>(893.3 to 1,496.5)</b>        | <b>103.0</b><br><b>(62.6 to 153.2)</b>       | <b>4.7%</b><br><b>(1.8% to 7.7%)</b> | <b>-1.0%</b><br><b>(-3.8% to 1.8%)</b>            |

SR Table 13f: Global prevalence and years lived with disability (YLDs) for 2016, percentage change of YLD counts and rates between 2006 and 2016 of heart failure by cause, ages 40-44 years

| Cause                                               | Prevalence in thousands (95% uncertainty interval) | YLDs in thousands (95% uncertainty interval) |                                                   |                                                  |
|-----------------------------------------------------|----------------------------------------------------|----------------------------------------------|---------------------------------------------------|--------------------------------------------------|
|                                                     |                                                    | 2016                                         | Percentage change in counts between 2006 and 2016 | Percentage change in rates between 2006 and 2016 |
| Hypertensive heart disease                          | 646.6<br>(499.1 to 833.7)                          | 54.8<br>(33.7 to 81.4)                       | 15.6%<br>(10.6% to 21.0%)                         | 1.5%<br>(-2.8% to 6.2%)                          |
| Ischaemic heart disease                             | 640.8<br>(502.2 to 823.2)                          | 54.4<br>(33.3 to 79.5)                       | 17.3%<br>(12.4% to 22.4%)                         | 3.0%<br>(-1.2% to 7.5%)                          |
| Chronic obstructive pulmonary disease               | 24.9<br>(18.1 to 33.7)                             | 11.4<br>(7.1 to 16.9)                        | 8.2%<br>(3.0% to 13.3%)                           | -4.9%<br>(-9.5% to -0.5%)                        |
| Other cardiomyopathy                                | 119.3<br>(86.3 to 160.9)                           | 10.3<br>(6.0 to 15.6)                        | 12.4%<br>(6.0% to 18.7%)                          | -1.3%<br>(-6.9% to 4.2%)                         |
| Rheumatic heart disease                             | 98.9<br>(79.0 to 123.4)                            | 8.6<br>(5.3 to 12.5)                         | 12.3%<br>(2.0% to 23.3%)                          | -1.4%<br>(-10.4% to 8.3%)                        |
| Myocarditis                                         | 66.9<br>(47.6 to 91.6)                             | 5.9<br>(3.4 to 9.1)                          | 15.3%<br>(9.0% to 22.0%)                          | 1.3%<br>(-4.2% to 7.1%)                          |
| Alcoholic cardiomyopathy                            | 55.8<br>(41.6 to 74.1)                             | 4.9<br>(2.8 to 7.5)                          | 2.0%<br>(-12.3% to 19.9%)                         | -10.4%<br>(-23.0% to 5.3%)                       |
| Interstitial lung disease and pulmonary sarcoidosis | 3.5<br>(2.5 to 4.6)                                | 1.6<br>(1.0 to 2.3)                          | 8.6%<br>(7.1% to 10.1%)                           | -4.6%<br>(-6.0% to -3.3%)                        |
| Other cardiovascular and circulatory diseases       | 15.7<br>(10.7 to 22.2)                             | 1.4<br>(0.8 to 2.2)                          | 11.8%<br>(9.5% to 14.3%)                          | -1.8%<br>(-3.8% to 0.4%)                         |
| Chagas disease                                      | 23.9<br>(14.7 to 36.1)                             | 1.2<br>(0.6 to 2.1)                          | -1.1%<br>(-11.1% to 9.5%)                         | -13.1%<br>(-21.9% to -3.8%)                      |
| Congenital heart anomalies                          | 5.1<br>(3.9 to 6.5)                                | 0.7<br>(0.4 to 1.0)                          | 9.7%<br>(8.0% to 11.3%)                           | -3.7%<br>(-5.2% to -2.2%)                        |
| Endocarditis                                        | 7.3<br>(5.0 to 10.2)                               | 0.7<br>(0.4 to 1.0)                          | 13.8%<br>(8.9% to 18.5%)                          | -0.1%<br>(-4.4% to 4.1%)                         |
| Other haemoglobinopathies and haemolytic anaemias   | 3.1<br>(2.1 to 4.4)                                | 0.3<br>(0.2 to 0.4)                          | 11.5%<br>(9.2% to 13.7%)                          | -2.0%<br>(-4.1% to -0.2%)                        |
| Endocrine, metabolic, blood, and immune disorders   | 2.4<br>(1.7 to 3.4)                                | 0.2<br>(0.1 to 0.3)                          | 6.4%<br>(4.1% to 8.6%)                            | -6.6%<br>(-8.6% to -4.6%)                        |
| Other pneumoconiosis                                | <0.05<br>(<0.05 to 0.1)                            | <0.05<br>(<0.05 to <0.05)                    | 2.1%<br>(-1.2% to 5.5%)                           | -10.3%<br>(-13.3% to -7.4%)                      |
| Iron-deficiency anaemia                             | 0.1<br>(0.1 to 0.1)                                | <0.05<br>(<0.05 to <0.05)                    | 20.2%<br>(17.2% to 23.3%)                         | 5.6%<br>(2.9% to 8.3%)                           |
| Thalassemias                                        | <0.05<br>(<0.05 to <0.05)                          | <0.05<br>(<0.05 to <0.05)                    | 9.5%<br>(5.2% to 13.8%)                           | -3.8%<br>(-7.6% to -0.0%)                        |
| Iodine deficiency                                   | <0.05<br>(<0.05 to <0.05)                          | <0.05<br>(<0.05 to <0.05)                    | 32.8%<br>(25.8% to 39.2%)                         | 16.7%<br>(10.5% to 22.3%)                        |
| <b>All causes</b>                                   | <b>1,714.5</b><br><b>(1,359.7 to 2,183.1)</b>      | <b>156.3</b><br><b>(97.2 to 228.3)</b>       | <b>14.4%</b><br><b>(11.6% to 17.2%)</b>           | <b>0.5%</b><br><b>(-2.0% to 3.0%)</b>            |

SR Table 13f: Global prevalence and years lived with disability (YLDs) for 2016, percentage change of YLD counts and rates between 2006 and 2016 of heart failure by cause, ages 45-49 years

| Cause                                               | Prevalence in thousands (95% uncertainty interval) | YLDs in thousands (95% uncertainty interval) |                                         |                                                  |
|-----------------------------------------------------|----------------------------------------------------|----------------------------------------------|-----------------------------------------|--------------------------------------------------|
|                                                     |                                                    | 2016                                         | 2016                                    | Percentage change in rates between 2006 and 2016 |
| Ischaemic heart disease                             | 1,113.2<br>(920.3 to 1,345.2)                      | 93.9<br>(62.2 to 134.5)                      | 30.2%<br>(25.9% to 34.7%)               | 4.4%<br>(0.9% to 8.0%)                           |
| Hypertensive heart disease                          | 997.0<br>(797.8 to 1,215.1)                        | 83.9<br>(54.5 to 119.9)                      | 29.6%<br>(24.9% to 33.9%)               | 3.9%<br>(0.2% to 7.4%)                           |
| Chronic obstructive pulmonary disease               | 83.6<br>(59.5 to 113.9)                            | 36.6<br>(22.2 to 54.1)                       | 25.0%<br>(15.5% to 35.4%)               | 0.3%<br>(-7.4% to 8.6%)                          |
| Other cardiomyopathy                                | 191.2<br>(147.5 to 239.8)                          | 16.3<br>(10.0 to 24.1)                       | 19.7%<br>(13.1% to 26.2%)               | -4.0%<br>(-9.3% to 1.2%)                         |
| Rheumatic heart disease                             | 137.3<br>(110.8 to 166.1)                          | 11.7<br>(7.6 to 16.6)                        | 23.8%<br>(14.5% to 33.7%)               | -0.7%<br>(-8.2% to 7.2%)                         |
| Alcoholic cardiomyopathy                            | 126.0<br>(99.2 to 156.3)                           | 10.8<br>(6.6 to 15.9)                        | 5.9%<br>(-3.9% to 17.5%)                | -15.1%<br>(-22.9% to -5.8%)                      |
| Myocarditis                                         | 70.8<br>(53.8 to 89.6)                             | 6.2<br>(3.8 to 9.2)                          | 29.3%<br>(21.0% to 38.4%)               | 3.7%<br>(-3.0% to 11.0%)                         |
| Other cardiovascular and circulatory diseases       | 34.8<br>(25.5 to 47.1)                             | 3.1<br>(1.9 to 4.7)                          | 23.3%<br>(19.9% to 26.7%)               | -1.1%<br>(-3.9% to 1.6%)                         |
| Interstitial lung disease and pulmonary sarcoidosis | 6.7<br>(4.8 to 8.9)                                | 3.1<br>(1.9 to 4.6)                          | 15.7%<br>(13.8% to 17.6%)               | -7.2%<br>(-8.7% to -5.7%)                        |
| Chagas disease                                      | 28.4<br>(17.8 to 42.2)                             | 1.4<br>(0.8 to 2.5)                          | 3.8%<br>(-5.3% to 14.8%)                | -16.8%<br>(-24.0% to -7.9%)                      |
| Endocarditis                                        | 14.2<br>(10.5 to 18.8)                             | 1.3<br>(0.8 to 1.9)                          | 18.7%<br>(14.7% to 22.9%)               | -4.8%<br>(-8.0% to -1.4%)                        |
| Other haemoglobinopathies and haemolytic anaemias   | 6.8<br>(5.0 to 9.1)                                | 0.6<br>(0.4 to 0.9)                          | 32.8%<br>(30.4% to 35.2%)               | 6.5%<br>(4.6% to 8.4%)                           |
| Endocrine, metabolic, blood, and immune disorders   | 5.0<br>(3.7 to 6.6)                                | 0.5<br>(0.3 to 0.7)                          | 16.7%<br>(13.4% to 19.8%)               | -6.5%<br>(-9.1% to -3.9%)                        |
| Congenital heart anomalies                          | 3.1<br>(2.5 to 3.8)                                | 0.4<br>(0.3 to 0.6)                          | 15.0%<br>(12.8% to 17.2%)               | -7.8%<br>(-9.5% to -6.0%)                        |
| G6PD deficiency                                     | 1.0<br>(0.7 to 1.4)                                | 0.1<br>(0.1 to 0.1)                          | 35.1%<br>(32.2% to 38.4%)               | 8.4%<br>(6.0% to 10.9%)                          |
| Coal workers pneumoconiosis                         | 0.1<br>(0.1 to 0.1)                                | <0.05<br>(<0.05 to <0.05)                    | 26.0%<br>(20.1% to 32.2%)               | 1.0%<br>(-3.7% to 6.0%)                          |
| Iron-deficiency anaemia                             | 0.1<br>(0.1 to 0.2)                                | <0.05<br>(<0.05 to <0.05)                    | 34.3%<br>(30.8% to 37.7%)               | 7.7%<br>(4.9% to 10.4%)                          |
| Thalassemias                                        | <0.05<br>(<0.05 to <0.05)                          | <0.05<br>(<0.05 to <0.05)                    | 16.9%<br>(12.4% to 21.4%)               | -6.3%<br>(-9.9% to -2.6%)                        |
| Iodine deficiency                                   | <0.05<br>(<0.05 to <0.05)                          | <0.05<br>(<0.05 to <0.05)                    | 35.3%<br>(28.3% to 41.9%)               | 8.5%<br>(2.9% to 13.8%)                          |
| <b>All causes</b>                                   | <b>2,819.4</b><br><b>(2,367.7 to 3,346.1)</b>      | <b>270.0</b><br><b>(177.6 to 380.9)</b>      | <b>26.6%</b><br><b>(23.9% to 29.3%)</b> | <b>1.5%</b><br><b>(-0.6% to 3.7%)</b>            |

SR Table 13f: Global prevalence and years lived with disability (YLDs) for 2016, percentage change of YLD counts and rates between 2006 and 2016 of heart failure by cause, ages 50-54 years

| Cause                                               | Prevalence in thousands (95% uncertainty interval) | YLDs in thousands (95% uncertainty interval) |                                         |                                                   |
|-----------------------------------------------------|----------------------------------------------------|----------------------------------------------|-----------------------------------------|---------------------------------------------------|
|                                                     |                                                    | 2016                                         | 2016                                    | Percentage change in counts between 2006 and 2016 |
| Ischaemic heart disease                             | 1,510.6<br>(1,214.1 to 1,860.1)                    | 126.3<br>(82.2 to 184.1)                     | 30.0%<br>(26.4% to 33.7%)               | 4.3%<br>(1.5% to 7.4%)                            |
| Hypertensive heart disease                          | 1,264.3<br>(981.5 to 1,582.1)                      | 105.8<br>(68.6 to 153.6)                     | 26.2%<br>(22.2% to 30.3%)               | 1.3%<br>(-1.9% to 4.6%)                           |
| Chronic obstructive pulmonary disease               | 209.4<br>(153.4 to 273.1)                          | 88.1<br>(56.6 to 130.6)                      | 17.8%<br>(11.4% to 24.6%)               | -5.4%<br>(-10.5% to 0.1%)                         |
| Other cardiomyopathy                                | 250.6<br>(186.0 to 323.4)                          | 21.1<br>(13.0 to 31.0)                       | 23.2%<br>(16.7% to 29.5%)               | -1.1%<br>(-6.3% to 3.9%)                          |
| Alcoholic cardiomyopathy                            | 175.6<br>(134.4 to 225.2)                          | 14.9<br>(9.3 to 21.9)                        | 20.0%<br>(9.3% to 31.3%)                | -3.7%<br>(-12.2% to 5.4%)                         |
| Rheumatic heart disease                             | 158.1<br>(118.9 to 198.6)                          | 13.4<br>(8.4 to 19.6)                        | 17.3%<br>(7.9% to 26.0%)                | -5.8%<br>(-13.3% to 1.2%)                         |
| Interstitial lung disease and pulmonary sarcoidosis | 11.1<br>(8.3 to 14.0)                              | 5.1<br>(3.3 to 7.4)                          | 19.5%<br>(16.8% to 22.1%)               | -4.1%<br>(-6.2% to -2.0%)                         |
| Myocarditis                                         | 58.1<br>(42.7 to 76.4)                             | 5.1<br>(3.0 to 7.7)                          | 20.3%<br>(12.1% to 28.9%)               | -3.4%<br>(-10.0% to 3.5%)                         |
| Other cardiovascular and circulatory diseases       | 57.4<br>(40.9 to 77.0)                             | 5.1<br>(3.1 to 7.9)                          | 23.1%<br>(15.8% to 30.0%)               | -1.1%<br>(-7.0% to 4.4%)                          |
| Chagas disease                                      | 33.2<br>(21.1 to 48.8)                             | 1.7<br>(0.9 to 2.8)                          | 12.2%<br>(2.5% to 21.9%)                | -9.9%<br>(-17.7% to -2.1%)                        |
| Endocarditis                                        | 18.4<br>(13.2 to 24.4)                             | 1.6<br>(1.0 to 2.5)                          | 23.2%<br>(19.4% to 27.1%)               | -1.1%<br>(-4.2% to 2.1%)                          |
| Other haemoglobinopathies and haemolytic anaemias   | 10.9<br>(7.8 to 14.7)                              | 1.0<br>(0.6 to 1.5)                          | 27.5%<br>(25.0% to 29.7%)               | 2.4%<br>(0.4% to 4.1%)                            |
| Endocrine, metabolic, blood, and immune disorders   | 8.6<br>(6.2 to 11.4)                               | 0.8<br>(0.5 to 1.2)                          | 19.9%<br>(16.9% to 22.5%)               | -3.7%<br>(-6.1% to -1.6%)                         |
| Congenital heart anomalies                          | 2.6<br>(2.1 to 3.2)                                | 0.4<br>(0.2 to 0.5)                          | 18.3%<br>(16.2% to 20.3%)               | -5.0%<br>(-6.7% to -3.4%)                         |
| Silicosis                                           | 0.4<br>(0.3 to 0.5)                                | 0.2<br>(0.1 to 0.3)                          | 7.9%<br>(3.8% to 11.8%)                 | -13.4%<br>(-16.6% to -10.2%)                      |
| G6PD deficiency                                     | 1.6<br>(1.1 to 2.2)                                | 0.1<br>(0.1 to 0.2)                          | 34.7%<br>(31.6% to 37.7%)               | 8.1%<br>(5.7% to 10.6%)                           |
| Coal workers pneumoconiosis                         | 0.1<br>(0.1 to 0.1)                                | <0.05<br>(<0.05 to 0.1)                      | 12.7%<br>(8.8% to 16.7%)                | -9.5%<br>(-12.6% to -6.3%)                        |
| Asbestosis                                          | 0.1<br>(0.1 to 0.1)                                | <0.05<br>(<0.05 to <0.05)                    | 19.1%<br>(17.0% to 21.3%)               | -4.4%<br>(-6.0% to -2.6%)                         |
| Iron-deficiency anaemia                             | 0.2<br>(0.1 to 0.2)                                | <0.05<br>(<0.05 to <0.05)                    | 32.5%<br>(29.2% to 35.8%)               | 6.4%<br>(3.7% to 9.1%)                            |
| Thalassemias                                        | <0.05<br>(<0.05 to 0.1)                            | <0.05<br>(<0.05 to <0.05)                    | -2.0%<br>(-6.8% to 3.1%)                | -21.3%<br>(-25.2% to -17.2%)                      |
| Iodine deficiency                                   | <0.05<br>(<0.05 to <0.05)                          | <0.05<br>(<0.05 to <0.05)                    | 39.8%<br>(32.6% to 45.9%)               | 12.3%<br>(6.5% to 17.1%)                          |
| <b>All causes</b>                                   | <b>3,771.2</b><br><b>(3,085.0 to 4,526.7)</b>      | <b>390.8</b><br><b>(256.5 to 558.4)</b>      | <b>24.3%</b><br><b>(21.8% to 26.8%)</b> | <b>-0.2%</b><br><b>(-2.2% to 1.8%)</b>            |

SR Table 13f: Global prevalence and years lived with disability (YLDs) for 2016, percentage change of YLD counts and rates between 2006 and 2016 of heart failure by cause, ages 55-59 years

| Cause                                               | Prevalence in thousands (95% uncertainty interval) | YLDs in thousands (95% uncertainty interval) |                                         |                                                   |
|-----------------------------------------------------|----------------------------------------------------|----------------------------------------------|-----------------------------------------|---------------------------------------------------|
|                                                     |                                                    | 2016                                         | 2016                                    | Percentage change in counts between 2006 and 2016 |
| Chronic obstructive pulmonary disease               | 373.9<br>(264.9 to 514.6)                          | 153.2<br>(93.5 to 232.1)                     | 25.2%<br>(20.0% to 30.5%)               | -4.0%<br>(-8.1% to 0.0%)                          |
| Ischaemic heart disease                             | 1,780.6<br>(1,377.3 to 2,205.3)                    | 147.4<br>(95.3 to 216.9)                     | 32.8%<br>(29.2% to 36.4%)               | 1.8%<br>(-1.0% to 4.6%)                           |
| Hypertensive heart disease                          | 1,399.6<br>(1,081.8 to 1,790.0)                    | 116.0<br>(74.1 to 171.3)                     | 32.3%<br>(28.3% to 36.1%)               | 1.4%<br>(-1.7% to 4.3%)                           |
| Other cardiomyopathy                                | 237.1<br>(177.5 to 309.9)                          | 19.8<br>(12.3 to 29.9)                       | 24.0%<br>(18.1% to 29.5%)               | -5.0%<br>(-9.5% to -0.7%)                         |
| Rheumatic heart disease                             | 186.0<br>(139.4 to 234.4)                          | 15.6<br>(10.0 to 22.9)                       | 25.4%<br>(17.4% to 33.9%)               | -3.9%<br>(-10.0% to 2.6%)                         |
| Alcoholic cardiomyopathy                            | 155.0<br>(117.7 to 199.6)                          | 13.0<br>(8.1 to 19.7)                        | 29.9%<br>(16.6% to 43.7%)               | -0.4%<br>(-10.6% to 10.1%)                        |
| Interstitial lung disease and pulmonary sarcoidosis | 15.8<br>(11.9 to 20.5)                             | 7.3<br>(4.6 to 10.6)                         | 22.3%<br>(16.5% to 26.5%)               | -6.2%<br>(-10.7% to -3.0%)                        |
| Other cardiovascular and circulatory diseases       | 71.5<br>(50.9 to 98.9)                             | 6.2<br>(3.7 to 9.7)                          | 25.5%<br>(17.9% to 33.4%)               | -3.8%<br>(-9.7% to -2.2%)                         |
| Myocarditis                                         | 55.8<br>(40.9 to 74.1)                             | 4.9<br>(3.0 to 7.4)                          | 19.0%<br>(11.7% to 27.2%)               | -8.8%<br>(-14.4% to -2.5%)                        |
| Endocarditis                                        | 20.6<br>(14.8 to 28.2)                             | 1.8<br>(1.1 to 2.9)                          | 24.9%<br>(18.9% to 30.7%)               | -4.3%<br>(-8.9% to 0.2%)                          |
| Chagas disease                                      | 35.4<br>(22.8 to 52.1)                             | 1.8<br>(0.9 to 3.0)                          | 19.4%<br>(8.5% to 31.2%)                | -8.5%<br>(-16.8% to 0.5%)                         |
| Other haemoglobinopathies and haemolytic anaemias   | 12.8<br>(9.0 to 17.8)                              | 1.2<br>(0.7 to 1.9)                          | 25.3%<br>(22.7% to 27.9%)               | -4.0%<br>(-6.0% to -2.0%)                         |
| Endocrine, metabolic, blood, and immune disorders   | 11.4<br>(8.3 to 15.5)                              | 1.0<br>(0.6 to 1.6)                          | 21.4%<br>(18.1% to 24.8%)               | -7.0%<br>(-9.5% to -4.4%)                         |
| Congenital heart anomalies                          | 2.3<br>(1.8 to 2.9)                                | 0.3<br>(0.2 to 0.4)                          | 17.1%<br>(14.8% to 19.5%)               | -10.2%<br>(-12.0% to -8.4%)                       |
| G6PD deficiency                                     | 2.6<br>(1.9 to 3.6)                                | 0.2<br>(0.1 to 0.4)                          | 36.7%<br>(33.0% to 40.6%)               | 4.7%<br>(1.9% to 7.8%)                            |
| Coal workers pneumoconiosis                         | 0.1<br>(0.1 to 0.2)                                | 0.1<br>(<0.05 to 0.1)                        | 13.0%<br>(8.9% to 16.6%)                | -13.4%<br>(-16.5% to -10.6%)                      |
| Asbestosis                                          | 0.1<br>(0.1 to 0.1)                                | 0.1<br>(<0.05 to 0.1)                        | 18.1%<br>(14.8% to 21.2%)               | -9.5%<br>(-12.0% to -7.1%)                        |
| Other pneumoconiosis                                | 0.1<br>(<0.05 to 0.1)                              | <0.05<br>(<0.05 to <0.05)                    | 14.8%<br>(9.5% to 19.8%)                | -12.0%<br>(-16.1% to -8.2%)                       |
| Iron-deficiency anaemia                             | 0.2<br>(0.1 to 0.3)                                | <0.05<br>(<0.05 to <0.05)                    | 39.6%<br>(36.0% to 43.1%)               | 7.0%<br>(4.2% to 9.7%)                            |
| Iodine deficiency                                   | <0.05<br>(<0.05 to <0.05)                          | <0.05<br>(<0.05 to <0.05)                    | 48.4%<br>(42.5% to 53.5%)               | 13.7%<br>(9.2% to 17.6%)                          |
| Thalassemias                                        | <0.05<br>(<0.05 to 0.1)                            | <0.05<br>(<0.05 to <0.05)                    | -20.2%<br>(-24.5% to -15.6%)            | -38.8%<br>(-42.1% to -35.3%)                      |
| <b>All causes</b>                                   | <b>4,361.0</b><br><b>(3,443.6 to 5,338.0)</b>      | <b>489.8</b><br><b>(320.7 to 702.5)</b>      | <b>29.0%</b><br><b>(26.3% to 31.6%)</b> | <b>-1.1%</b><br><b>(-3.2% to 0.9%)</b>            |



SR Table 13f: Global prevalence and years lived with disability (YLDs) for 2016, percentage change of YLD counts and rates between 2006 and 2016 of heart failure by cause, ages 60-64 years

| Cause                                               | Prevalence in thousands (95% uncertainty interval) | YLDs in thousands (95% uncertainty interval) |                                         |                                                   |                                                  |
|-----------------------------------------------------|----------------------------------------------------|----------------------------------------------|-----------------------------------------|---------------------------------------------------|--------------------------------------------------|
|                                                     |                                                    | 2016                                         | 2016                                    | Percentage change in counts between 2006 and 2016 | Percentage change in rates between 2006 and 2016 |
| Chronic obstructive pulmonary disease               | 764.1<br>(587.7 to 978.6)                          | 307.3<br>(203.5 to 440.9)                    | 46.8%<br>(42.0% to 51.5%)               | -2.6%<br>(-5.8% to 0.5%)                          |                                                  |
| Ischaemic heart disease                             | 2,409.4<br>(1,944.1 to 2,924.6)                    | 197.2<br>(131.2 to 282.8)                    | 50.9%<br>(46.8% to 54.4%)               | 0.1%<br>(-2.6% to 2.4%)                           |                                                  |
| Hypertensive heart disease                          | 1,796.2<br>(1,394.0 to 2,276.0)                    | 147.3<br>(95.3 to 214.4)                     | 53.4%<br>(49.4% to 57.2%)               | 1.7%<br>(-0.9% to 4.3%)                           |                                                  |
| Other cardiomyopathy                                | 280.7<br>(204.5 to 370.6)                          | 23.2<br>(14.5 to 36.3)                       | 39.0%<br>(33.1% to 45.2%)               | -7.8%<br>(-11.7% to -3.7%)                        |                                                  |
| Rheumatic heart disease                             | 240.9<br>(183.1 to 298.4)                          | 19.9<br>(12.6 to 28.9)                       | 49.0%<br>(40.8% to 57.9%)               | -1.2%<br>(-6.6% to 4.8%)                          |                                                  |
| Alcoholic cardiomyopathy                            | 165.8<br>(124.1 to 216.7)                          | 13.7<br>(8.6 to 21.1)                        | 59.0%<br>(45.9% to 73.8%)               | 5.5%<br>(-3.2% to 15.3%)                          |                                                  |
| Interstitial lung disease and pulmonary sarcoidosis | 22.4<br>(17.3 to 27.6)                             | 10.1<br>(6.7 to 14.4)                        | 37.8%<br>(31.4% to 44.0%)               | -8.6%<br>(-12.9% to -4.5%)                        |                                                  |
| Other cardiovascular and circulatory diseases       | 115.1<br>(83.5 to 154.8)                           | 9.7<br>(6.0 to 14.9)                         | 43.9%<br>(35.0% to 53.8%)               | -4.5%<br>(-10.5% to 2.0%)                         |                                                  |
| Myocarditis                                         | 38.1<br>(27.3 to 51.2)                             | 3.3<br>(2.0 to 5.3)                          | 48.6%<br>(39.9% to 57.8%)               | -1.4%<br>(-7.2% to 4.7%)                          |                                                  |
| Endocarditis                                        | 27.9<br>(20.3 to 37.1)                             | 2.5<br>(1.5 to 3.8)                          | 38.6%<br>(30.8% to 47.0%)               | -8.0%<br>(-13.3% to -2.5%)                        |                                                  |
| Other haemoglobinopathies and haemolytic anaemias   | 20.3<br>(14.5 to 27.4)                             | 1.8<br>(1.1 to 2.8)                          | 45.2%<br>(39.6% to 50.8%)               | -3.7%<br>(-7.4% to 0.0%)                          |                                                  |
| Chagas disease                                      | 36.0<br>(23.4 to 52.2)                             | 1.8<br>(1.0 to 3.0)                          | 25.8%<br>(16.2% to 35.7%)               | -16.6%<br>(-22.9% to -10.0%)                      |                                                  |
| Endocrine, metabolic, blood, and immune disorders   | 16.7<br>(12.3 to 21.9)                             | 1.5<br>(0.9 to 2.2)                          | 35.9%<br>(30.8% to 41.2%)               | -9.8%<br>(-13.3% to -6.4%)                        |                                                  |
| Silicosis                                           | 0.7<br>(0.5 to 0.8)                                | 0.3<br>(0.2 to 0.4)                          | 30.5%<br>(26.2% to 35.3%)               | -13.4%<br>(-16.3% to -10.3%)                      |                                                  |
| Congenital heart anomalies                          | 2.3<br>(1.9 to 2.8)                                | 0.3<br>(0.2 to 0.4)                          | 35.1%<br>(32.5% to 38.1%)               | -10.4%<br>(-12.1% to -8.4%)                       |                                                  |
| Coal workers pneumoconiosis                         | 0.3<br>(0.2 to 0.4)                                | 0.1<br>(0.1 to 0.2)                          | 35.1%<br>(30.5% to 40.0%)               | -10.4%<br>(-13.5% to -7.2%)                       |                                                  |
| Asbestosis                                          | 0.2<br>(0.2 to 0.3)                                | 0.1<br>(0.1 to 0.2)                          | 32.3%<br>(28.1% to 36.2%)               | -12.2%<br>(-15.0% to -9.7%)                       |                                                  |
| Other pneumoconiosis                                | 0.2<br>(0.1 to 0.2)                                | 0.1<br>(0.1 to 0.1)                          | 34.5%<br>(29.8% to 39.1%)               | -10.8%<br>(-13.9% to -7.8%)                       |                                                  |
| G6PD deficiency                                     | 0.7<br>(0.5 to 0.9)                                | 0.1<br>(<0.05 to 0.1)                        | 53.2%<br>(49.0% to 57.2%)               | 1.6%<br>(-1.1% to 4.3%)                           |                                                  |
| Iron-deficiency anaemia                             | 0.2<br>(0.2 to 0.3)                                | <0.05<br>(<0.05 to <0.05)                    | 55.2%<br>(51.2% to 59.4%)               | 2.9%<br>(0.3% to 5.8%)                            |                                                  |
| Iodine deficiency                                   | <0.05<br>(<0.05 to <0.05)                          | <0.05<br>(<0.05 to <0.05)                    | 52.7%<br>(47.4% to 58.0%)               | 1.3%<br>(-2.3% to 4.8%)                           |                                                  |
| Thalassemias                                        | <0.05<br>(<0.05 to <0.05)                          | <0.05<br>(<0.05 to <0.05)                    | 6.9%<br>(0.8% to 13.9%)                 | -29.1%<br>(-33.1% to -24.5%)                      |                                                  |
| <b>All causes</b>                                   | <b>5,938.1</b><br><b>(4,925.3 to 7,001.4)</b>      | <b>740.2</b><br><b>(512.2 to 1,028.0)</b>    | <b>48.8%</b><br><b>(46.0% to 51.6%)</b> | <b>-1.3%</b><br><b>(-3.2% to 0.5%)</b>            |                                                  |

SR Table 13f: Global prevalence and years lived with disability (YLDs) for 2016, percentage change of YLD counts and rates between 2006 and 2016 of heart failure by cause, ages 65-69 years

| Cause                                               | Prevalence in thousands (95% uncertainty interval) | YLDs in thousands (95% uncertainty interval) |                                         |                                                   |                                                  |
|-----------------------------------------------------|----------------------------------------------------|----------------------------------------------|-----------------------------------------|---------------------------------------------------|--------------------------------------------------|
|                                                     |                                                    | 2016                                         | 2016                                    | Percentage change in counts between 2006 and 2016 | Percentage change in rates between 2006 and 2016 |
| Chronic obstructive pulmonary disease               | 1,425.1<br>(1,099.6 to 1,786.0)                    | 559.4<br>(385.0 to 741.1)                    | 32.0%<br>(28.9% to 35.1%)               | -0.4%<br>(-2.7% to 1.9%)                          |                                                  |
| Ischaemic heart disease                             | 3,359.9<br>(2,775.8 to 4,007.6)                    | 270.8<br>(184.0 to 374.9)                    | 26.9%<br>(23.6% to 30.0%)               | -4.2%<br>(-6.7% to -1.9%)                         |                                                  |
| Hypertensive heart disease                          | 2,142.6<br>(1,681.2 to 2,682.4)                    | 173.2<br>(112.7 to 248.4)                    | 31.2%<br>(28.2% to 34.3%)               | -1.0%<br>(-3.2% to 1.3%)                          |                                                  |
| Other cardiomyopathy                                | 361.7<br>(275.7 to 462.7)                          | 29.4<br>(19.1 to 43.1)                       | 30.1%<br>(24.6% to 35.5%)               | -1.8%<br>(-6.0% to 2.3%)                          |                                                  |
| Rheumatic heart disease                             | 262.2<br>(209.3 to 312.0)                          | 21.2<br>(13.7 to 30.0)                       | 45.1%<br>(37.3% to 53.0%)               | 9.5%<br>(3.6% to 15.4%)                           |                                                  |
| Other cardiovascular and circulatory diseases       | 198.7<br>(147.2 to 258.1)                          | 16.2<br>(10.2 to 25.0)                       | 28.8%<br>(21.3% to 36.6%)               | -2.8%<br>(-8.4% to 3.1%)                          |                                                  |
| Interstitial lung disease and pulmonary sarcoidosis | 31.5<br>(22.7 to 40.8)                             | 13.6<br>(8.7 to 19.8)                        | 32.6%<br>(25.8% to 40.4%)               | 0.1%<br>(-5.0% to 5.9%)                           |                                                  |
| Alcoholic cardiomyopathy                            | 155.6<br>(119.4 to 199.0)                          | 12.7<br>(8.2 to 18.6)                        | 16.8%<br>(6.4% to 28.7%)                | -11.8%<br>(-19.7% to -2.9%)                       |                                                  |
| Myocarditis                                         | 42.6<br>(32.3 to 55.2)                             | 3.6<br>(2.3 to 5.4)                          | 30.6%<br>(21.4% to 39.4%)               | -1.4%<br>(-8.4% to 5.2%)                          |                                                  |
| Endocarditis                                        | 35.2<br>(26.2 to 45.6)                             | 3.0<br>(1.9 to 4.7)                          | 29.1%<br>(18.5% to 40.2%)               | -2.6%<br>(-10.6% to 5.8%)                         |                                                  |
| Other haemoglobinopathies and haemolytic anaemias   | 34.9<br>(25.6 to 46.0)                             | 3.0<br>(1.8 to 4.7)                          | 27.5%<br>(16.9% to 38.2%)               | -3.7%<br>(-11.7% to 4.3%)                         |                                                  |
| Endocrine, metabolic, blood, and immune disorders   | 32.2<br>(24.2 to 41.3)                             | 2.7<br>(1.7 to 4.2)                          | 30.5%<br>(19.0% to 43.1%)               | -1.5%<br>(-10.2% to 8.0%)                         |                                                  |
| Chagas disease                                      | 33.1<br>(21.8 to 47.2)                             | 1.6<br>(0.9 to 2.6)                          | 20.8%<br>(12.2% to 30.2%)               | -8.8%<br>(-15.3% to -1.7%)                        |                                                  |
| Silicosis                                           | 2.1<br>(1.7 to 2.6)                                | 1.0<br>(0.7 to 1.4)                          | 15.1%<br>(10.5% to 19.8%)               | -13.1%<br>(-16.6% to -9.6%)                       |                                                  |
| Congenital heart anomalies                          | 2.3<br>(1.9 to 2.8)                                | 0.3<br>(0.2 to 0.4)                          | 30.3%<br>(27.9% to 32.8%)               | -1.7%<br>(-3.5% to 0.2%)                          |                                                  |
| G6PD deficiency                                     | 2.7<br>(1.9 to 3.5)                                | 0.2<br>(0.1 to 0.4)                          | 35.2%<br>(28.9% to 41.3%)               | 2.0%<br>(-2.7% to 6.7%)                           |                                                  |
| Coal workers pneumoconiosis                         | 0.5<br>(0.4 to 0.6)                                | 0.2<br>(0.2 to 0.3)                          | 31.6%<br>(25.3% to 38.0%)               | -0.7%<br>(-5.4% to 4.2%)                          |                                                  |
| Asbestosis                                          | 0.5<br>(0.4 to 0.6)                                | 0.2<br>(0.1 to 0.3)                          | 28.0%<br>(25.0% to 30.6%)               | -3.4%<br>(-5.6% to -1.4%)                         |                                                  |
| Other pneumoconiosis                                | 0.3<br>(0.3 to 0.4)                                | 0.2<br>(0.1 to 0.2)                          | 22.2%<br>(19.1% to 25.4%)               | -7.7%<br>(-10.1% to -5.4%)                        |                                                  |
| Iron-deficiency anaemia                             | 0.3<br>(0.2 to 0.4)                                | <0.05<br>(<0.05 to <0.05)                    | 36.8%<br>(32.0% to 41.7%)               | 3.2%<br>(-0.4% to 7.0%)                           |                                                  |
| Iodine deficiency                                   | 0.1<br>(<0.05 to 0.1)                              | <0.05<br>(<0.05 to <0.05)                    | 32.8%<br>(28.4% to 37.2%)               | 0.3%<br>(-3.1% to 3.6%)                           |                                                  |
| Thalassemias                                        | <0.05<br>(<0.05 to <0.05)                          | <0.05<br>(<0.05 to <0.05)                    | 9.6%<br>(1.3% to 17.8%)                 | -17.3%<br>(-23.5% to -11.1%)                      |                                                  |
| <b>All causes</b>                                   | <b>8,124.3</b><br><b>(6,978.1 to 9,474.2)</b>      | <b>1,112.7</b><br><b>(805.8 to 1,462.9)</b>  | <b>30.5%</b><br><b>(28.6% to 32.4%)</b> | <b>-1.5%</b><br><b>(-2.9% to -0.1%)</b>           |                                                  |

SR Table 13f: Global prevalence and years lived with disability (YLDs) for 2016, percentage change of YLD counts and rates between 2006 and 2016 of heart failure by cause, ages 70-74 years

| Cause                                               | Prevalence in thousands (95% uncertainty interval) | YLDs in thousands (95% uncertainty interval) |                                                   |                                                  |
|-----------------------------------------------------|----------------------------------------------------|----------------------------------------------|---------------------------------------------------|--------------------------------------------------|
|                                                     |                                                    | 2016                                         | Percentage change in counts between 2006 and 2016 | Percentage change in rates between 2006 and 2016 |
| Chronic obstructive pulmonary disease               | 1,700.4<br>(1,356.9 to 2,104.1)                    | 651.5<br>(477.7 to 820.0)                    | 20.3%<br>(17.3% to 23.2%)                         | 0.5%<br>(-1.9% to 3.0%)                          |
| Ischaemic heart disease                             | 3,603.8<br>(2,925.1 to 4,406.2)                    | 286.1<br>(191.4 to 405.5)                    | 16.0%<br>(13.2% to 18.7%)                         | -3.0%<br>(-5.4% to -0.8%)                        |
| Hypertensive heart disease                          | 2,133.7<br>(1,622.3 to 2,735.3)                    | 169.8<br>(108.6 to 245.0)                    | 18.1%<br>(15.2% to 20.9%)                         | -1.3%<br>(-3.7% to 1.0%)                         |
| Other cardiomyopathy                                | 350.8<br>(247.4 to 472.1)                          | 28.1<br>(17.8 to 41.4)                       | 13.1%<br>(8.2% to 18.2%)                          | -5.5%<br>(-9.6% to -1.2%)                        |
| Other cardiovascular and circulatory diseases       | 279.9<br>(207.9 to 366.4)                          | 22.4<br>(14.3 to 34.3)                       | 13.9%<br>(8.6% to 19.3%)                          | -4.8%<br>(-9.2% to -0.3%)                        |
| Rheumatic heart disease                             | 206.7<br>(162.7 to 249.2)                          | 16.4<br>(10.4 to 23.4)                       | 41.2%<br>(33.3% to 50.6%)                         | 18.0%<br>(11.4% to 25.9%)                        |
| Interstitial lung disease and pulmonary sarcoidosis | 33.9<br>(23.0 to 44.7)                             | 13.9<br>(8.5 to 20.9)                        | 24.3%<br>(17.2% to 32.7%)                         | 3.9%<br>(-2.0% to 10.9%)                         |
| Alcoholic cardiomyopathy                            | 100.6<br>(71.2 to 133.9)                           | 8.1<br>(5.0 to 12.0)                         | 9.3%<br>(0.1% to 20.1%)                           | -8.7%<br>(-16.3% to 0.4%)                        |
| Endocrine, metabolic, blood, and immune disorders   | 44.4<br>(33.7 to 56.7)                             | 3.7<br>(2.3 to 5.6)                          | 17.3%<br>(7.8% to 28.1%)                          | -2.0%<br>(-9.9% to 7.1%)                         |
| Myocarditis                                         | 42.0<br>(29.1 to 57.1)                             | 3.5<br>(2.2 to 5.2)                          | 13.6%<br>(5.4% to 21.4%)                          | -5.1%<br>(-11.9% to 1.5%)                        |
| Endocarditis                                        | 41.8<br>(31.2 to 53.8)                             | 3.5<br>(2.2 to 5.4)                          | 17.0%<br>(7.6% to 26.9%)                          | -2.2%<br>(-10.1% to 6.1%)                        |
| Other haemoglobinopathies and haemolytic anaemias   | 19.6<br>(14.6 to 25.8)                             | 1.7<br>(1.0 to 2.6)                          | 13.8%<br>(2.9% to 25.3%)                          | -4.9%<br>(-14.0% to 4.8%)                        |
| Chagas disease                                      | 29.0<br>(19.4 to 40.7)                             | 1.4<br>(0.8 to 2.2)                          | 17.5%<br>(9.6% to 26.5%)                          | -1.8%<br>(-8.4% to 5.7%)                         |
| Silicosis                                           | 1.8<br>(1.5 to 2.2)                                | 0.8<br>(0.6 to 1.2)                          | 4.7%<br>(-2.4% to 12.1%)                          | -12.5%<br>(-18.4% to -6.3%)                      |
| Coal workers pneumoconiosis                         | 1.0<br>(0.8 to 1.2)                                | 0.4<br>(0.3 to 0.6)                          | 15.0%<br>(3.8% to 27.2%)                          | -3.9%<br>(-13.3% to 6.3%)                        |
| Asbestosis                                          | 0.7<br>(0.6 to 0.8)                                | 0.3<br>(0.2 to 0.4)                          | 20.2%<br>(18.2% to 22.2%)                         | 0.5%<br>(-1.2% to 2.1%)                          |
| Other pneumoconiosis                                | 0.5<br>(0.4 to 0.6)                                | 0.2<br>(0.2 to 0.3)                          | 15.4%<br>(12.6% to 18.2%)                         | -3.5%<br>(-5.9% to -1.2%)                        |
| GGPD deficiency                                     | 0.7<br>(0.5 to 1.0)                                | 0.1<br>(<0.05 to 0.1)                        | 18.2%<br>(15.1% to 21.6%)                         | -1.2%<br>(-3.8% to 1.6%)                         |
| Iron-deficiency anaemia                             | 0.6<br>(0.5 to 0.8)                                | 0.1<br>(<0.05 to 0.1)                        | 25.6%<br>(21.4% to 29.8%)                         | 4.9%<br>(1.5% to 8.5%)                           |
| Congenital heart anomalies                          | 0.2<br>(0.1 to 0.2)                                | <0.05<br>(<0.05 to <0.05)                    | 26.6%<br>(22.1% to 29.1%)                         | 5.8%<br>(2.1% to 7.9%)                           |
| Iodine deficiency                                   | 0.1<br>(<0.05 to 0.1)                              | <0.05<br>(<0.05 to <0.05)                    | 33.6%<br>(27.3% to 39.2%)                         | 11.6%<br>(6.4% to 16.3%)                         |
| Thalassemias                                        | <0.05<br>(<0.05 to <0.05)                          | <0.05<br>(<0.05 to <0.05)                    | 3.7%<br>(-4.9% to 13.3%)                          | -13.3%<br>(-20.5% to -5.3%)                      |
| <b>All causes</b>                                   | <b>8,592.2</b><br><b>(7,191.7 to 10,196.2)</b>     | <b>1,212.0</b><br><b>(896.7 to 1,555.2)</b>  | <b>18.8%</b><br><b>(17.1% to 20.5%)</b>           | <b>-0.7%</b><br><b>(-2.2% to 0.7%)</b>           |

SR Table 13f: Global prevalence and years lived with disability (YLDs) for 2016, percentage change of YLD counts and rates between 2006 and 2016 of heart failure by cause, ages 75-79 years

| Cause                                               | Prevalence in thousands (95% uncertainty interval) | YLDs in thousands (95% uncertainty interval) |                                         |                                                   |                                                  |
|-----------------------------------------------------|----------------------------------------------------|----------------------------------------------|-----------------------------------------|---------------------------------------------------|--------------------------------------------------|
|                                                     |                                                    | 2016                                         | 2016                                    | Percentage change in counts between 2006 and 2016 | Percentage change in rates between 2006 and 2016 |
| Chronic obstructive pulmonary disease               | 1,638.0<br>(1,272.3 to 2,049.9)                    | 613.9<br>(463.2 to 748.1)                    | 26.0%<br>(22.6% to 29.4%)               | 1.3%<br>(-1.4% to 4.0%)                           |                                                  |
| Ischaemic heart disease                             | 3,836.7<br>(3,023.3 to 4,704.9)                    | 299.9<br>(199.2 to 424.2)                    | 20.6%<br>(17.0% to 23.8%)               | -3.0%<br>(-5.9% to -0.5%)                         |                                                  |
| Hypertensive heart disease                          | 2,120.6<br>(1,572.9 to 2,749.4)                    | 166.1<br>(107.1 to 246.4)                    | 24.3%<br>(21.0% to 27.4%)               | -0.1%<br>(-2.7% to 2.4%)                          |                                                  |
| Other cardiomyopathy                                | 350.2<br>(258.5 to 455.0)                          | 27.5<br>(17.3 to 41.2)                       | 10.6%<br>(5.5% to 15.8%)                | -11.0%<br>(-15.1% to -6.9%)                       |                                                  |
| Other cardiovascular and circulatory diseases       | 302.1<br>(220.2 to 403.7)                          | 23.8<br>(15.0 to 36.2)                       | 14.3%<br>(9.3% to 19.2%)                | -8.1%<br>(-12.1% to -4.1%)                        |                                                  |
| Interstitial lung disease and pulmonary sarcoidosis | 33.7<br>(23.0 to 44.9)                             | 13.5<br>(8.4 to 20.1)                        | 23.7%<br>(16.1% to 31.5%)               | -0.5%<br>(-6.6% to 5.7%)                          |                                                  |
| Rheumatic heart disease                             | 147.9<br>(123.6 to 170.3)                          | 11.6<br>(7.9 to 15.9)                        | 39.9%<br>(30.4% to 50.2%)               | 12.5%<br>(4.8% to 20.8%)                          |                                                  |
| Alcoholic cardiomyopathy                            | 81.6<br>(59.7 to 106.1)                            | 6.4<br>(4.0 to 9.7)                          | 21.8%<br>(8.7% to 36.5%)                | -2.0%<br>(-12.6% to 9.8%)                         |                                                  |
| Endocarditis                                        | 62.5<br>(45.9 to 83.1)                             | 5.0<br>(3.1 to 7.7)                          | 13.9%<br>(5.9% to 22.2%)                | -8.4%<br>(-14.9% to -1.7%)                        |                                                  |
| Endocrine, metabolic, blood, and immune disorders   | 40.3<br>(30.1 to 53.1)                             | 3.3<br>(2.1 to 5.0)                          | 12.2%<br>(3.5% to 21.6%)                | -9.8%<br>(-16.8% to -2.2%)                        |                                                  |
| Myocarditis                                         | 35.1<br>(25.2 to 46.4)                             | 2.9<br>(1.8 to 4.4)                          | 15.4%<br>(5.1% to 25.6%)                | -7.2%<br>(-15.5% to 1.0%)                         |                                                  |
| Chagas disease                                      | 24.2<br>(16.4 to 33.1)                             | 1.1<br>(0.7 to 1.8)                          | 16.2%<br>(9.2% to 23.7%)                | -6.5%<br>(-12.2% to -0.5%)                        |                                                  |
| Other haemoglobinopathies and haemolytic anaemias   | 12.0<br>(8.6 to 16.1)                              | 1.0<br>(0.6 to 1.6)                          | 15.1%<br>(3.7% to 26.3%)                | -7.5%<br>(-16.6% to 1.6%)                         |                                                  |
| Silicosis                                           | 1.1<br>(0.9 to 1.3)                                | 0.5<br>(0.3 to 0.7)                          | 13.8%<br>(6.0% to 21.9%)                | -8.5%<br>(-14.7% to -2.0%)                        |                                                  |
| Coal workers pneumoconiosis                         | 0.9<br>(0.7 to 1.1)                                | 0.4<br>(0.3 to 0.6)                          | 18.5%<br>(6.6% to 31.9%)                | -4.7%<br>(-14.3% to 6.1%)                         |                                                  |
| Asbestosis                                          | 0.8<br>(0.6 to 0.9)                                | 0.4<br>(0.2 to 0.5)                          | 12.8%<br>(10.4% to 15.1%)               | -9.3%<br>(-11.2% to -7.5%)                        |                                                  |
| Other pneumoconiosis                                | 0.5<br>(0.4 to 0.6)                                | 0.2<br>(0.1 to 0.3)                          | 23.8%<br>(21.1% to 26.7%)               | -0.4%<br>(-2.6% to 1.9%)                          |                                                  |
| G6PD deficiency                                     | 1.9<br>(1.3 to 2.6)                                | 0.2<br>(0.1 to 0.3)                          | 28.8%<br>(24.1% to 33.4%)               | 3.6%<br>(-0.2% to 7.3%)                           |                                                  |
| Iron-deficiency anaemia                             | 0.7<br>(0.5 to 0.9)                                | 0.1<br>(<0.05 to 0.1)                        | 24.4%<br>(11.4% to 38.7%)               | 0.0%<br>(-10.4% to 11.6%)                         |                                                  |
| Congenital heart anomalies                          | 0.1<br>(0.1 to 0.2)                                | <0.05<br>(<0.05 to <0.05)                    | 28.9%<br>(23.9% to 31.7%)               | 3.6%<br>(-0.4% to 5.9%)                           |                                                  |
| Iodine deficiency                                   | <0.05<br>(<0.05 to <0.05)                          | <0.05<br>(<0.05 to <0.05)                    | 34.6%<br>(30.0% to 38.4%)               | 8.3%<br>(4.5% to 11.3%)                           |                                                  |
| Thalassemias                                        | <0.05<br>(<0.05 to <0.05)                          | <0.05<br>(<0.05 to <0.05)                    | 0.6%<br>(-8.1% to 10.0%)                | -19.1%<br>(-26.1% to -11.5%)                      |                                                  |
| <b>All causes</b>                                   | <b>8,690.7</b><br><b>(7,049.3 to 10,485.7)</b>     | <b>1,177.7</b><br><b>(868.7 to 1,487.6)</b>  | <b>23.6%</b><br><b>(21.5% to 25.6%)</b> | <b>-0.6%</b><br><b>(-2.3% to 1.0%)</b>            |                                                  |

SR Table 13f: Global prevalence and years lived with disability (YLDs) for 2016, percentage change of YLD counts and rates between 2006 and 2016 of heart failure by cause, ages 80-84

| Cause                                               | Prevalence in thousands (95% uncertainty interval) | YLDs in thousands (95% uncertainty interval) |                                                   |                                                  |
|-----------------------------------------------------|----------------------------------------------------|----------------------------------------------|---------------------------------------------------|--------------------------------------------------|
|                                                     |                                                    | 2016                                         | Percentage change in counts between 2006 and 2016 | Percentage change in rates between 2006 and 2016 |
| Chronic obstructive pulmonary disease               | 1,296.6<br>(988.8 to 1,639.3)                      | 473.5<br>(385.7 to 546.3)                    | 35.1%<br>(30.6% to 40.2%)                         | 3.1%<br>(-0.3% to 7.1%)                          |
| Ischaemic heart disease                             | 3,220.1<br>(2,624.1 to 3,870.8)                    | 247.8<br>(166.8 to 342.4)                    | 24.2%<br>(20.4% to 27.7%)                         | -5.2%<br>(-8.1% to -2.5%)                        |
| Hypertensive heart disease                          | 1,821.4<br>(1,365.0 to 2,326.1)                    | 140.3<br>(93.8 to 207.8)                     | 31.4%<br>(28.2% to 34.9%)                         | 0.3%<br>(-2.1% to 3.0%)                          |
| Other cardiomyopathy                                | 333.8<br>(245.4 to 439.4)                          | 25.8<br>(16.7 to 38.4)                       | 17.9%<br>(12.2% to 23.7%)                         | -10.0%<br>(-14.3% to -5.6%)                      |
| Other cardiovascular and circulatory diseases       | 309.0<br>(229.8 to 407.4)                          | 23.9<br>(15.0 to 35.7)                       | 18.8%<br>(13.8% to 24.1%)                         | -9.3%<br>(-13.1% to -5.3%)                       |
| Interstitial lung disease and pulmonary sarcoidosis | 28.4<br>(19.1 to 39.0)                             | 11.0<br>(6.9 to 16.7)                        | 32.7%<br>(25.2% to 41.5%)                         | 1.3%<br>(-4.4% to 8.1%)                          |
| Rheumatic heart disease                             | 84.0<br>(73.4 to 94.9)                             | 6.5<br>(4.5 to 8.8)                          | 32.5%<br>(24.6% to 41.5%)                         | 1.2%<br>(-4.9% to 8.1%)                          |
| Endocarditis                                        | 46.9<br>(34.9 to 61.5)                             | 3.7<br>(2.3 to 5.5)                          | 20.2%<br>(11.4% to 28.5%)                         | -8.2%<br>(-14.9% to -1.9%)                       |
| Endocrine, metabolic, blood, and immune disorders   | 41.1<br>(30.9 to 53.6)                             | 3.2<br>(2.0 to 4.8)                          | 17.4%<br>(9.2% to 26.1%)                          | -10.4%<br>(-16.6% to -3.7%)                      |
| Alcoholic cardiomyopathy                            | 40.9<br>(29.8 to 54.7)                             | 3.2<br>(2.0 to 4.8)                          | 16.0%<br>(3.0% to 31.0%)                          | -11.4%<br>(-21.4% to 0.1%)                       |
| Myocarditis                                         | 30.6<br>(22.1 to 40.7)                             | 2.4<br>(1.5 to 3.7)                          | 25.3%<br>(14.6% to 36.6%)                         | -4.3%<br>(-12.5% to 4.3%)                        |
| Other haemoglobinopathies and haemolytic anaemias   | 23.1<br>(17.1 to 30.8)                             | 1.9<br>(1.2 to 2.8)                          | 27.5%<br>(18.3% to 37.9%)                         | -2.6%<br>(-9.7% to 5.3%)                         |
| Chagas disease                                      | 18.3<br>(12.7 to 24.6)                             | 0.9<br>(0.5 to 1.3)                          | 26.6%<br>(18.7% to 35.4%)                         | -3.3%<br>(-9.4% to 3.4%)                         |
| Silicosis                                           | 1.1<br>(0.9 to 1.3)                                | 0.5<br>(0.3 to 0.7)                          | 34.5%<br>(23.6% to 46.0%)                         | 2.7%<br>(-5.6% to 11.5%)                         |
| Asbestosis                                          | 0.7<br>(0.6 to 0.8)                                | 0.3<br>(0.2 to 0.4)                          | 15.9%<br>(10.7% to 21.4%)                         | -11.5%<br>(-15.5% to -7.3%)                      |
| Coal workers pneumoconiosis                         | 0.6<br>(0.5 to 0.7)                                | 0.3<br>(0.2 to 0.4)                          | 23.5%<br>(11.3% to 36.1%)                         | -5.7%<br>(-15.0% to 3.9%)                        |
| Other pneumoconiosis                                | 0.5<br>(0.4 to 0.6)                                | 0.2<br>(0.2 to 0.3)                          | 36.6%<br>(33.2% to 39.8%)                         | 4.3%<br>(1.7% to 6.7%)                           |
| G6PD deficiency                                     | 1.0<br>(0.7 to 1.3)                                | 0.1<br>(0.1 to 0.1)                          | 31.9%<br>(27.6% to 36.1%)                         | 0.7%<br>(-2.6% to 4.0%)                          |
| Iron-deficiency anaemia                             | 0.7<br>(0.5 to 1.0)                                | 0.1<br>(<0.05 to 0.1)                        | 36.3%<br>(25.4% to 48.1%)                         | 4.1%<br>(-4.3% to 13.1%)                         |
| Congenital heart anomalies                          | 0.1<br>(<0.05 to 0.1)                              | <0.05<br>(<0.05 to <0.05)                    | 34.1%<br>(27.9% to 37.4%)                         | 2.4%<br>(-2.4% to 4.9%)                          |
| Iodine deficiency                                   | <0.05<br>(<0.05 to <0.05)                          | <0.05<br>(<0.05 to <0.05)                    | 29.9%<br>(21.9% to 37.1%)                         | -0.8%<br>(-6.9% to 4.7%)                         |
| Thalassemias                                        | <0.05<br>(<0.05 to <0.05)                          | <0.05<br>(<0.05 to <0.05)                    | 10.8%<br>(0.4% to 21.6%)                          | -15.4%<br>(-23.4% to -7.2%)                      |
| <b>All causes</b>                                   | <b>7,298.8</b><br><b>(6,171.6 to 8,603.9)</b>      | <b>945.5</b><br><b>(729.1 to 1,139.5)</b>    | <b>30.3%</b><br><b>(27.9% to 32.8%)</b>           | <b>-0.5%</b><br><b>(-2.4% to 1.4%)</b>           |

SR Table 13f: Global prevalence and years lived with disability (YLDs) for 2016, percentage change of YLD counts and rates between 2006 and 2016 of heart failure by cause, ages 85-89

| Cause                                               | Prevalence in thousands (95% uncertainty interval) | YLDs in thousands (95% uncertainty interval) |                                                   |                                                  |
|-----------------------------------------------------|----------------------------------------------------|----------------------------------------------|---------------------------------------------------|--------------------------------------------------|
|                                                     |                                                    | 2016                                         | Percentage change in counts between 2006 and 2016 | Percentage change in rates between 2006 and 2016 |
| Chronic obstructive pulmonary disease               | 775.2<br>(556.1 to 999.6)                          | 276.6<br>(233.4 to 316.6)                    | 59.8%<br>(53.5% to 65.8%)                         | -0.4%<br>(-4.4% to 3.3%)                         |
| Ischaemic heart disease                             | 2,612.0<br>(2,183.9 to 3,133.7)                    | 198.1<br>(136.6 to 274.0)                    | 60.9%<br>(57.6% to 64.0%)                         | 0.2%<br>(-1.8% to 2.2%)                          |
| Hypertensive heart disease                          | 1,427.3<br>(1,112.2 to 1,802.9)                    | 108.4<br>(71.3 to 155.6)                     | 60.6%<br>(57.1% to 63.8%)                         | 0.1%<br>(-2.1% to 2.1%)                          |
| Other cardiomyopathy                                | 319.0<br>(244.6 to 414.7)                          | 24.2<br>(16.0 to 36.0)                       | 50.8%<br>(45.0% to 56.8%)                         | -6.1%<br>(-9.7% to -2.3%)                        |
| Other cardiovascular and circulatory diseases       | 290.7<br>(216.9 to 376.0)                          | 22.1<br>(14.1 to 32.4)                       | 45.2%<br>(40.6% to 49.8%)                         | -9.5%<br>(-12.4% to -6.7%)                       |
| Interstitial lung disease and pulmonary sarcoidosis | 19.6<br>(13.7 to 26.5)                             | 7.4<br>(4.7 to 10.8)                         | 61.0%<br>(52.8% to 70.7%)                         | 0.3%<br>(-4.8% to 6.4%)                          |
| Endocarditis                                        | 45.9<br>(34.4 to 59.9)                             | 3.5<br>(2.2 to 5.2)                          | 45.2%<br>(37.1% to 53.2%)                         | -9.5%<br>(-14.6% to -4.5%)                       |
| Rheumatic heart disease                             | 38.7<br>(34.2 to 43.2)                             | 3.0<br>(2.1 to 4.1)                          | 47.1%<br>(39.1% to 55.2%)                         | -8.3%<br>(-13.3% to -3.3%)                       |
| Endocrine, metabolic, blood, and immune disorders   | 37.5<br>(28.2 to 48.3)                             | 2.9<br>(1.8 to 4.2)                          | 43.0%<br>(34.6% to 50.7%)                         | -10.9%<br>(-16.1% to -6.1%)                      |
| Alcoholic cardiomyopathy                            | 20.8<br>(15.7 to 27.2)                             | 1.6<br>(1.0 to 2.4)                          | 82.4%<br>(62.2% to 104.6%)                        | 13.6%<br>(1.1% to 27.5%)                         |
| Other haemoglobinopathies and haemolytic anaemias   | 6.9<br>(5.1 to 9.1)                                | 0.5<br>(0.3 to 0.8)                          | 59.4%<br>(43.2% to 76.9%)                         | -0.7%<br>(-10.8% to 10.2%)                       |
| Chagas disease                                      | 11.1<br>(7.8 to 14.7)                              | 0.5<br>(0.3 to 0.8)                          | 41.0%<br>(31.1% to 51.6%)                         | -12.2%<br>(-18.3% to -5.6%)                      |
| Silicosis                                           | 1.0<br>(0.8 to 1.2)                                | 0.4<br>(0.3 to 0.6)                          | 73.9%<br>(51.9% to 99.3%)                         | 8.3%<br>(-5.3% to 24.2%)                         |
| Asbestosis                                          | 0.5<br>(0.4 to 0.6)                                | 0.2<br>(0.2 to 0.3)                          | 40.0%<br>(31.3% to 49.9%)                         | -12.7%<br>(-18.2% to -6.6%)                      |
| Coal workers pneumoconiosis                         | 0.4<br>(0.3 to 0.5)                                | 0.2<br>(0.1 to 0.2)                          | 50.9%<br>(37.4% to 66.0%)                         | -6.0%<br>(-14.4% to 3.4%)                        |
| Other pneumoconiosis                                | 0.3<br>(0.3 to 0.4)                                | 0.2<br>(0.1 to 0.2)                          | 67.6%<br>(64.4% to 71.1%)                         | 4.4%<br>(2.4% to 6.6%)                           |
| Iron-deficiency anaemia                             | 0.7<br>(0.5 to 0.9)                                | 0.1<br>(<0.05 to 0.1)                        | 61.9%<br>(43.6% to 83.4%)                         | 0.9%<br>(-10.5% to 14.2%)                        |
| G6PD deficiency                                     | 0.1<br>(0.1 to 0.2)                                | <0.05<br>(<0.05 to <0.05)                    | 52.0%<br>(43.2% to 61.3%)                         | -5.3%<br>(-10.8% to 0.5%)                        |
| Congenital heart anomalies                          | <0.05<br>(<0.05 to 0.1)                            | <0.05<br>(<0.05 to <0.05)                    | 67.4%<br>(58.4% to 71.3%)                         | 4.3%<br>(-1.3% to 6.7%)                          |
| Myocarditis                                         | <0.05<br>(<0.05 to <0.05)                          | <0.05<br>(<0.05 to <0.05)                    | 5.8%<br>(-4.4% to 16.2%)                          | -34.1%<br>(-40.4% to -27.6%)                     |
| Iodine deficiency                                   | <0.05<br>(<0.05 to <0.05)                          | <0.05<br>(<0.05 to <0.05)                    | 68.2%<br>(49.6% to 81.8%)                         | 4.8%<br>(-6.8% to 13.3%)                         |
| Thalassemias                                        | <0.05<br>(<0.05 to <0.05)                          | <0.05<br>(<0.05 to <0.05)                    | 46.0%<br>(35.8% to 56.0%)                         | -9.1%<br>(-15.4% to -2.8%)                       |
| <b>All causes</b>                                   | <b>5,607.8</b><br><b>(4,827.6 to 6,549.0)</b>      | <b>649.7</b><br><b>(522.2 to 784.7)</b>      | <b>59.2%</b><br><b>(56.1% to 62.0%)</b>           | <b>-0.8%</b><br><b>(-2.8% to 0.9%)</b>           |

SR Table 13f: Global prevalence and years lived with disability (YLDs) for 2016, percentage change of YLD counts and rates between 2006 and 2016 of heart failure by cause, ages 90-94

| Cause                                               | Prevalence in thousands (95% uncertainty interval) | YLDs in thousands (95% uncertainty interval) |                                                   |                                                  |
|-----------------------------------------------------|----------------------------------------------------|----------------------------------------------|---------------------------------------------------|--------------------------------------------------|
|                                                     |                                                    | 2016                                         | Percentage change in counts between 2006 and 2016 | Percentage change in rates between 2006 and 2016 |
| Chronic obstructive pulmonary disease               | 279.2<br>(194.4 to 371.5)                          | 97.9<br>(81.3 to 114.3)                      | 70.1%<br>(63.2% to 76.5%)                         | 1.6%<br>(-2.5% to 5.4%)                          |
| Ischaemic heart disease                             | 1,212.8<br>(964.2 to 1,516.4)                      | 90.9<br>(61.3 to 127.2)                      | 67.6%<br>(63.8% to 71.3%)                         | 0.1%<br>(-2.1% to 2.4%)                          |
| Hypertensive heart disease                          | 678.2<br>(502.5 to 882.9)                          | 50.9<br>(32.2 to 74.2)                       | 69.4%<br>(64.8% to 73.2%)                         | 1.2%<br>(-1.5% to 3.5%)                          |
| Other cardiomyopathy                                | 173.7<br>(125.3 to 232.7)                          | 13.0<br>(8.3 to 19.3)                        | 66.7%<br>(59.6% to 74.1%)                         | -0.4%<br>(-4.6% to 4.0%)                         |
| Other cardiovascular and circulatory diseases       | 159.4<br>(115.8 to 213.8)                          | 11.9<br>(7.6 to 17.7)                        | 60.2%<br>(54.7% to 66.0%)                         | -4.3%<br>(-7.6% to -0.8%)                        |
| Interstitial lung disease and pulmonary sarcoidosis | 8.6<br>(6.0 to 11.3)                               | 3.1<br>(2.0 to 4.6)                          | 76.7%<br>(65.5% to 88.5%)                         | 5.5%<br>(-1.1% to 12.6%)                         |
| Endocrine, metabolic, blood, and immune disorders   | 19.7<br>(14.5 to 26.2)                             | 1.5<br>(1.0 to 2.2)                          | 57.7%<br>(49.0% to 66.8%)                         | -5.8%<br>(-11.0% to -0.3%)                       |
| Other haemoglobinopathies and haemolytic anaemias   | 16.6<br>(12.0 to 22.4)                             | 1.2<br>(0.8 to 1.9)                          | 59.8%<br>(48.3% to 70.7%)                         | -4.6%<br>(-11.4% to 2.0%)                        |
| Endocarditis                                        | 13.7<br>(10.0 to 18.4)                             | 1.0<br>(0.7 to 1.6)                          | 61.4%<br>(50.3% to 72.1%)                         | -3.6%<br>(-10.2% to 2.8%)                        |
| Rheumatic heart disease                             | 11.9<br>(10.5 to 13.3)                             | 0.9<br>(0.6 to 1.2)                          | 63.6%<br>(53.7% to 74.4%)                         | -2.3%<br>(-8.2% to 4.2%)                         |
| Chagas disease                                      | 4.6<br>(3.3 to 6.0)                                | 0.2<br>(0.1 to 0.3)                          | 58.1%<br>(47.7% to 68.5%)                         | -5.5%<br>(-11.7% to 0.7%)                        |
| Alcoholic cardiomyopathy                            | 2.1<br>(1.5 to 2.8)                                | 0.2<br>(0.1 to 0.2)                          | 60.2%<br>(26.2% to 102.3%)                        | -4.3%<br>(-24.6% to 20.8%)                       |
| Asbestosis                                          | 0.2<br>(0.2 to 0.3)                                | 0.1<br>(0.1 to 0.1)                          | 67.5%<br>(54.7% to 81.8%)                         | 0.1%<br>(-7.6% to 8.6%)                          |
| Other pneumoconiosis                                | 0.1<br>(0.1 to 0.2)                                | 0.1<br>(<0.05 to 0.1)                        | 72.4%<br>(66.3% to 78.5%)                         | 3.0%<br>(-0.6% to 6.7%)                          |
| Coal workers pneumoconiosis                         | 0.1<br>(0.1 to 0.1)                                | <0.05<br>(<0.05 to 0.1)                      | 62.7%<br>(48.7% to 80.2%)                         | -2.8%<br>(-11.2% to 7.6%)                        |
| Iron-deficiency anaemia                             | 0.3<br>(0.2 to 0.5)                                | <0.05<br>(<0.05 to <0.05)                    | 64.8%<br>(54.9% to 75.2%)                         | -1.5%<br>(-7.4% to 4.7%)                         |
| G6PD deficiency                                     | 0.1<br>(0.1 to 0.1)                                | <0.05<br>(<0.05 to <0.05)                    | 64.3%<br>(59.8% to 68.7%)                         | -1.8%<br>(-4.5% to 0.8%)                         |
| Congenital heart anomalies                          | <0.05<br>(<0.05 to <0.05)                          | <0.05<br>(<0.05 to <0.05)                    | 76.3%<br>(62.4% to 80.5%)                         | 5.4%<br>(-3.0% to 7.9%)                          |
| Myocarditis                                         | <0.05<br>(<0.05 to <0.05)                          | <0.05<br>(<0.05 to <0.05)                    | 36.7%<br>(10.4% to 69.8%)                         | -18.3%<br>(-34.0% to 1.4%)                       |
| Silicosis                                           | <0.05<br>(<0.05 to <0.05)                          | <0.05<br>(<0.05 to <0.05)                    | 58.3%<br>(36.2% to 83.1%)                         | -5.4%<br>(-18.6% to 9.4%)                        |
| Thalassemias                                        | <0.05<br>(<0.05 to <0.05)                          | <0.05<br>(<0.05 to <0.05)                    | 49.8%<br>(40.1% to 60.3%)                         | -10.5%<br>(-16.3% to -4.3%)                      |
| Iodine deficiency                                   | <0.05<br>(<0.05 to <0.05)                          | <0.05<br>(<0.05 to <0.05)                    | 71.7%<br>(47.8% to 96.4%)                         | 2.6%<br>(-11.7% to 17.3%)                        |
| <b>All causes</b>                                   | <b>2,581.2</b><br><b>(2,124.4 to 3,119.3)</b>      | <b>273.0</b><br><b>(211.5 to 337.2)</b>      | <b>68.4%</b><br><b>(65.2% to 71.1%)</b>           | <b>0.6%</b><br><b>(-1.3% to 2.2%)</b>            |

SR Table 13f: Global prevalence and years lived with disability (YLDs) for 2016, percentage change of YLD counts and rates between 2006 and 2016 of heart failure by cause, ages 95+ years

| Cause                                               | Prevalence in thousands (95% uncertainty interval) | YLDs in thousands (95% uncertainty interval) |                                                   |                                                  |
|-----------------------------------------------------|----------------------------------------------------|----------------------------------------------|---------------------------------------------------|--------------------------------------------------|
|                                                     |                                                    | 2016                                         | Percentage change in counts between 2006 and 2016 | Percentage change in rates between 2006 and 2016 |
| Ischaemic heart disease                             | 303.6<br>(228.4 to 394.6)                          | 22.8<br>(14.9 to 32.8)                       | 55.8%<br>(51.0% to 60.1%)                         | -0.6%<br>(-3.6% to 2.2%)                         |
| Hypertensive heart disease                          | 181.5<br>(125.2 to 253.1)                          | 13.6<br>(8.2 to 21.2)                        | 61.1%<br>(56.1% to 65.6%)                         | 2.8%<br>(-0.4% to 5.7%)                          |
| Other cardiovascular and circulatory diseases       | 44.8<br>(29.9 to 64.2)                             | 3.4<br>(2.0 to 5.2)                          | 46.5%<br>(40.4% to 52.2%)                         | -6.5%<br>(-10.4% to -2.9%)                       |
| Other cardiomyopathy                                | 42.5<br>(26.3 to 62.4)                             | 3.2<br>(1.8 to 5.1)                          | 43.9%<br>(36.9% to 51.3%)                         | -8.2%<br>(-12.6% to -3.4%)                       |
| Interstitial lung disease and pulmonary sarcoidosis | 2.1<br>(1.5 to 2.9)                                | 0.8<br>(0.5 to 1.1)                          | 68.2%<br>(58.1% to 79.3%)                         | 7.3%<br>(0.9% to 14.4%)                          |
| Endocrine, metabolic, blood, and immune disorders   | 6.8<br>(4.6 to 9.7)                                | 0.5<br>(0.3 to 0.8)                          | 54.4%<br>(46.5% to 61.9%)                         | -1.5%<br>(-6.5% to 3.3%)                         |
| Endocarditis                                        | 6.0<br>(3.9 to 8.5)                                | 0.4<br>(0.3 to 0.7)                          | 51.8%<br>(42.6% to 60.9%)                         | -3.1%<br>(-9.0% to 2.7%)                         |
| Rheumatic heart disease                             | 2.3<br>(1.9 to 2.7)                                | 0.2<br>(0.1 to 0.2)                          | 68.0%<br>(56.0% to 81.4%)                         | 7.2%<br>(-0.5% to 15.7%)                         |
| Chagas disease                                      | 1.9<br>(1.6 to 2.3)                                | 0.1<br>(0.1 to 0.1)                          | 55.2%<br>(46.4% to 63.5%)                         | -0.9%<br>(-6.6% to 4.3%)                         |
| Iron-deficiency anaemia                             | 0.3<br>(0.2 to 0.4)                                | <0.05<br>(<0.05 to <0.05)                    | 52.0%<br>(22.7% to 87.3%)                         | -3.0%<br>(-21.7% to 19.5%)                       |
| Asbestosis                                          | <0.05<br>(<0.05 to <0.05)                          | <0.05<br>(<0.05 to <0.05)                    | 76.8%<br>(65.9% to 87.6%)                         | 12.8%<br>(5.9% to 19.7%)                         |
| Congenital heart anomalies                          | <0.05<br>(<0.05 to <0.05)                          | <0.05<br>(<0.05 to <0.05)                    | 64.9%<br>(52.4% to 69.9%)                         | 5.2%<br>(-2.8% to 8.4%)                          |
| Alcoholic cardiomyopathy                            | <0.05<br>(<0.05 to <0.05)                          | <0.05<br>(<0.05 to <0.05)                    | 43.4%<br>(-29.5% to 199.5%)                       | -8.5%<br>(-55.0% to 91.1%)                       |
| Other haemoglobinopathies and haemolytic anaemias   | <0.05<br>(<0.05 to <0.05)                          | <0.05<br>(<0.05 to <0.05)                    | 48.7%<br>(-19.3% to 245.2%)                       | -5.1%<br>(-48.5% to 120.3%)                      |
| Myocarditis                                         | <0.05<br>(<0.05 to <0.05)                          | <0.05<br>(<0.05 to <0.05)                    | 40.7%<br>(-6.0% to 115.1%)                        | -10.2%<br>(-40.0% to 37.3%)                      |
| Other pneumoconiosis                                | <0.05<br>(<0.05 to <0.05)                          | <0.05<br>(<0.05 to <0.05)                    | 93.5%<br>(48.6% to 160.8%)                        | 23.5%<br>(-5.2% to 66.4%)                        |
| Silicosis                                           | <0.05<br>(<0.05 to <0.05)                          | <0.05<br>(<0.05 to <0.05)                    | 55.6%<br>(32.5% to 82.3%)                         | -0.7%<br>(-15.5% to 16.4%)                       |
| Thalassaemias                                       | <0.05<br>(<0.05 to <0.05)                          | <0.05<br>(<0.05 to <0.05)                    | 41.9%<br>(31.8% to 53.6%)                         | -9.5%<br>(-15.9% to -2.0%)                       |
| G6PD deficiency                                     | <0.05<br>(<0.05 to <0.05)                          | <0.05<br>(<0.05 to <0.05)                    | 49.5%<br>(30.4% to 72.3%)                         | -4.6%<br>(-16.8% to 9.9%)                        |
| Iodine deficiency                                   | <0.05<br>(<0.05 to <0.05)                          | <0.05<br>(<0.05 to <0.05)                    | 77.2%<br>(32.3% to 138.7%)                        | 13.1%<br>(-15.6% to 52.3%)                       |
| <b>All causes</b>                                   | <b>591.9</b><br><b>(457.6 to 752.9)</b>            | <b>45.0</b><br><b>(29.4 to 64.6)</b>         | <b>55.9%</b><br><b>(52.9% to 58.9%)</b>           | <b>-0.5%</b><br><b>(-2.4% to 1.4%)</b>           |



| SR Table 13: Global prevalence and years lived with disability (YLDs) for 2016, percentage change of YLD counts and rates between 2006 and 2016 of infertility by cause, ages 0-6 days |                                                    |                                              |                                                   |                                                  |
|----------------------------------------------------------------------------------------------------------------------------------------------------------------------------------------|----------------------------------------------------|----------------------------------------------|---------------------------------------------------|--------------------------------------------------|
| Cause                                                                                                                                                                                  | Prevalence in thousands (95% uncertainty interval) | YLDs in thousands (95% uncertainty interval) |                                                   |                                                  |
|                                                                                                                                                                                        |                                                    | 2016                                         | Percentage change in counts between 2006 and 2016 | Percentage change in rates between 2006 and 2016 |
| Urogenital congenital anomalies                                                                                                                                                        | 0.8<br>(0.5 to 1.1)                                | <0.05<br>(<0.05 to <0.05)                    | -5.5%<br>(-10.2% to -0.7%)                        | -5.0%<br>(-9.7% to -0.2%)                        |
| All causes                                                                                                                                                                             | 0.8<br>(0.5 to 1.1)                                | <0.05<br>(<0.05 to <0.05)                    | -5.5%<br>(-10.2% to -0.7%)                        | -5.0%<br>(-9.7% to -0.2%)                        |

| SR Table 13g: Global prevalence and years lived with disability (YLDs) for 2016, percentage change of YLD counts and rates between 2006 and 2016 of infertility by cause, ages 7-27 days |                                                    |                                              |                                                   |                                                  |
|------------------------------------------------------------------------------------------------------------------------------------------------------------------------------------------|----------------------------------------------------|----------------------------------------------|---------------------------------------------------|--------------------------------------------------|
| Cause                                                                                                                                                                                    | Prevalence in thousands (95% uncertainty interval) | YLDs in thousands (95% uncertainty interval) |                                                   |                                                  |
|                                                                                                                                                                                          |                                                    | 2016                                         | Percentage change in counts between 2006 and 2016 | Percentage change in rates between 2006 and 2016 |
| Urogenital congenital anomalies                                                                                                                                                          | 2.3<br>(1.5 to 3.2)                                | <0.05<br>(<0.05 to 0.1)                      | -5.1%<br>(-10.0% to 0.3%)                         | -5.0%<br>(-9.8% to 0.5%)                         |
| All causes                                                                                                                                                                               | 2.3<br>(1.5 to 3.2)                                | <0.05<br>(<0.05 to 0.1)                      | -5.1%<br>(-10.0% to 0.3%)                         | -5.0%<br>(-9.8% to 0.5%)                         |

| SR Table 13g: Global prevalence and years lived with disability (YLDs) for 2016, percentage change of YLD counts and rates between 2006 and 2016 of infertility by cause, ages 28-364 days |                                                    |                                              |                                                   |                                                  |
|--------------------------------------------------------------------------------------------------------------------------------------------------------------------------------------------|----------------------------------------------------|----------------------------------------------|---------------------------------------------------|--------------------------------------------------|
| Cause                                                                                                                                                                                      | Prevalence in thousands (95% uncertainty interval) | YLDs in thousands (95% uncertainty interval) |                                                   |                                                  |
|                                                                                                                                                                                            |                                                    | 2016                                         | Percentage change in counts between 2006 and 2016 | Percentage change in rates between 2006 and 2016 |
| Urogenital congenital anomalies                                                                                                                                                            | 33.7<br>(22.1 to 47.6)                             | 0.4<br>(0.2 to 0.9)                          | -4.2%<br>(-9.1% to 0.7%)                          | -5.0%<br>(-9.8% to -0.1%)                        |
| All causes                                                                                                                                                                                 | 33.7<br>(22.1 to 47.6)                             | 0.4<br>(0.2 to 0.9)                          | -4.2%<br>(-9.1% to 0.7%)                          | -5.0%<br>(-9.8% to -0.1%)                        |

| SR Table 13g: Global prevalence and years lived with disability (YLDs) for 2016, percentage change of YLD counts and rates between 2006 and 2016 of infertility by cause, ages 1-4 years |                                                    |                                              |                                                   |                                                  |
|------------------------------------------------------------------------------------------------------------------------------------------------------------------------------------------|----------------------------------------------------|----------------------------------------------|---------------------------------------------------|--------------------------------------------------|
| Cause                                                                                                                                                                                    | Prevalence in thousands (95% uncertainty interval) | YLDs in thousands (95% uncertainty interval) |                                                   |                                                  |
|                                                                                                                                                                                          |                                                    | 2016                                         | Percentage change in counts between 2006 and 2016 | Percentage change in rates between 2006 and 2016 |
| Urogenital congenital anomalies                                                                                                                                                          | 114.5<br>(75.3 to 160.1)                           | 1.5<br>(0.6 to 3.2)                          | 0.2%<br>(-4.0% to 4.6%)                           | -5.1%<br>(-9.1% to -0.9%)                        |
| All causes                                                                                                                                                                               | 114.5<br>(75.3 to 160.1)                           | 1.5<br>(0.6 to 3.2)                          | 0.2%<br>(-4.0% to 4.6%)                           | -5.1%<br>(-9.1% to -0.9%)                        |

| SR Table 13g: Global prevalence and years lived with disability (YLDs) for 2016, percentage change of YLD counts and rates between 2006 and 2016 of infertility by cause, ages 5-9 years |                                                    |                                              |                                                   |                                                  |
|------------------------------------------------------------------------------------------------------------------------------------------------------------------------------------------|----------------------------------------------------|----------------------------------------------|---------------------------------------------------|--------------------------------------------------|
| Cause                                                                                                                                                                                    | Prevalence in thousands (95% uncertainty interval) | YLDs in thousands (95% uncertainty interval) |                                                   |                                                  |
|                                                                                                                                                                                          |                                                    | 2016                                         | Percentage change in counts between 2006 and 2016 | Percentage change in rates between 2006 and 2016 |
| Urogenital congenital anomalies                                                                                                                                                          | 104.3<br>(69.3 to 144.3)                           | 1.3<br>(0.5 to 2.9)                          | 3.3%<br>(-0.7% to 8.0%)                           | -4.1%<br>(-7.8% to 0.3%)                         |
| All causes                                                                                                                                                                               | 104.3<br>(69.3 to 144.3)                           | 1.3<br>(0.5 to 2.9)                          | 3.3%<br>(-0.7% to 8.0%)                           | -4.1%<br>(-7.8% to 0.3%)                         |

SR Table 13g: Global prevalence and years lived with disability (YLDs) for 2016, percentage change of YLD counts and rates between 2006 and 2016 of infertility by cause, ages 10-14 years

| Cause                                                  | Prevalence in thousands (95% uncertainty interval) | YLDs in thousands (95% uncertainty interval) |                                                   |                                                  |
|--------------------------------------------------------|----------------------------------------------------|----------------------------------------------|---------------------------------------------------|--------------------------------------------------|
|                                                        |                                                    | 2016                                         | Percentage change in counts between 2006 and 2016 | Percentage change in rates between 2006 and 2016 |
| Urogenital congenital anomalies                        | 74.8<br>(50.1 to 102.7)                            | 1.0<br>(0.4 to 2.0)                          | -3.3%<br>(-5.4% to -1.1%)                         | -4.1%<br>(-6.2% to -2.0%)                        |
| Maternal sepsis and other pregnancy related infections | 0.9<br>(0.6 to 1.4)                                | <0.05<br>(<0.05 to <0.05)                    | 14.0%<br>(8.1% to 23.6%)                          | 13.1%<br>(7.2% to 22.6%)                         |
| All causes                                             | 75.7<br>(51.1 to 103.4)                            | 1.0<br>(0.4 to 2.1)                          | -3.3%<br>(-5.3% to -1.1%)                         | -4.1%<br>(-6.1% to -1.9%)                        |

SR Table 13g: Global prevalence and years lived with disability (YLDs) for 2016, percentage change of YLD counts and rates between 2006 and 2016 of infertility by cause, ages 15-19 years

| Cause                                                  | Prevalence in thousands (95% uncertainty interval) | YLDs in thousands (95% uncertainty interval) |                                                   |                                                  |
|--------------------------------------------------------|----------------------------------------------------|----------------------------------------------|---------------------------------------------------|--------------------------------------------------|
|                                                        |                                                    | 2016                                         | Percentage change in counts between 2006 and 2016 | Percentage change in rates between 2006 and 2016 |
| Male infertility                                       | 1,041.5<br>(628.3 to 1,600.0)                      | 7.3<br>(2.7 to 16.2)                         | 12.2%<br>(1.5% to 22.2%)                          | 18.7%<br>(7.5% to 29.3%)                         |
| Female infertility                                     | 1,021.7<br>(505.1 to 1,775.6)                      | 6.8<br>(2.2 to 15.4)                         | 24.2%<br>(-29.0% to 74.8%)                        | 31.4%<br>(-24.8% to 85.1%)                       |
| Turner syndrome                                        | 294.7<br>(257.7 to 336.1)                          | 6.1<br>(3.1 to 9.9)                          | -6.3%<br>(-14.6% to 2.1%)                         | -0.8%<br>(-9.6% to 8.1%)                         |
| Other sexually transmitted diseases                    | 384.7<br>(277.5 to 495.4)                          | 2.5<br>(1.0 to 5.2)                          | -5.8%<br>(-11.7% to 0.1%)                         | -0.3%<br>(-6.6% to 6.0%)                         |
| Chlamydial infection                                   | 305.1<br>(234.5 to 376.1)                          | 2.0<br>(0.8 to 4.2)                          | -0.6%<br>(-7.7% to 6.8%)                          | 5.2%<br>(-2.3% to 13.1%)                         |
| Endometriosis                                          | 11.9<br>(7.5 to 17.8)                              | 1.2<br>(0.7 to 2.0)                          | -17.4%<br>(-22.0% to -11.6%)                      | -12.6%<br>(-17.4% to -6.4%)                      |
| Polycystic ovarian syndrome                            | 57.4<br>(30.8 to 96.3)                             | 0.8<br>(0.3 to 1.7)                          | -4.3%<br>(-15.9% to 9.0%)                         | 1.3%<br>(-11.0% to 15.4%)                        |
| Urogenital congenital anomalies                        | 58.4<br>(39.3 to 79.8)                             | 0.7<br>(0.3 to 1.6)                          | -9.8%<br>(-12.2% to -7.5%)                        | -4.5%<br>(-7.0% to -2.1%)                        |
| Gonococcal infection                                   | 72.8<br>(53.5 to 93.4)                             | 0.5<br>(0.2 to 1.0)                          | -0.9%<br>(-12.2% to 11.7%)                        | 4.9%<br>(-7.1% to 18.2%)                         |
| Maternal sepsis and other pregnancy related infections | 12.6<br>(9.4 to 15.9)                              | 0.1<br>(<0.05 to 0.1)                        | 2.2%<br>(-17.8% to 28.5%)                         | 8.2%<br>(-13.0% to 36.0%)                        |
| <b>All causes</b>                                      | <b>3,260.8</b><br><b>(2,140.8 to 4,771.7)</b>      | <b>28.0</b><br><b>(13.2 to 53.6)</b>         | <b>4.3%</b><br><b>(-11.3% to 15.1%)</b>           | <b>10.4%</b><br><b>(-6.1% to 21.8%)</b>          |

SR Table 13g: Global prevalence and years lived with disability (YLDs) for 2016, percentage change of YLD counts and rates between 2006 and 2016 of infertility by cause, ages 20-24 years

| Cause                                                  | Prevalence in thousands (95% uncertainty interval) | YLDs in thousands (95% uncertainty interval) |                                                   |                                                  |
|--------------------------------------------------------|----------------------------------------------------|----------------------------------------------|---------------------------------------------------|--------------------------------------------------|
|                                                        |                                                    | 2016                                         | Percentage change in counts between 2006 and 2016 | Percentage change in rates between 2006 and 2016 |
| Female infertility                                     | 6,529.8<br>(3,772.0 to 9,869.6)                    | 41.0<br>(14.8 to 93.6)                       | 30.1%<br>(19.8% to 41.9%)                         | 24.1%<br>(14.3% to 35.4%)                        |
| Male infertility                                       | 4,431.7<br>(2,994.6 to 6,293.7)                    | 29.4<br>(10.9 to 62.3)                       | 21.2%<br>(13.6% to 28.3%)                         | 15.6%<br>(8.3% to 22.4%)                         |
| Other sexually transmitted diseases                    | 1,827.0<br>(1,638.4 to 2,011.9)                    | 11.1<br>(4.6 to 22.3)                        | 6.5%<br>(2.4% to 10.0%)                           | 1.6%<br>(-2.3% to 5.0%)                          |
| Chlamydial infection                                   | 981.8<br>(864.4 to 1,081.9)                        | 6.0<br>(2.5 to 11.9)                         | 9.1%<br>(4.5% to 13.7%)                           | 4.1%<br>(-0.3% to 8.5%)                          |
| Turner syndrome                                        | 284.3<br>(248.6 to 323.3)                          | 5.9<br>(3.0 to 9.6)                          | 2.2%<br>(-7.1% to 11.9%)                          | -2.5%<br>(-11.4% to 6.7%)                        |
| Klinefelter syndrome                                   | 353.6<br>(305.8 to 407.4)                          | 3.6<br>(1.7 to 6.9)                          | 5.2%<br>(-0.4% to 10.7%)                          | 0.3%<br>(-5.0% to 5.6%)                          |
| Endometriosis                                          | 33.0<br>(23.8 to 45.6)                             | 3.4<br>(2.0 to 5.2)                          | -0.9%<br>(-4.7% to 3.7%)                          | -5.5%<br>(-9.1% to -1.1%)                        |
| Polycystic ovarian syndrome                            | 226.7<br>(150.6 to 333.4)                          | 2.6<br>(1.1 to 5.5)                          | 5.0%<br>(-2.3% to 12.5%)                          | 0.2%<br>(-6.8% to 7.3%)                          |
| Gonococcal infection                                   | 294.0<br>(261.5 to 327.6)                          | 1.8<br>(0.7 to 3.6)                          | 9.2%<br>(2.1% to 17.0%)                           | 4.2%<br>(-2.6% to 11.6%)                         |
| Urogenital congenital anomalies                        | 51.5<br>(34.9 to 69.7)                             | 0.7<br>(0.3 to 1.4)                          | 4.1%<br>(2.0% to 6.1%)                            | -0.7%<br>(-2.7% to 1.2%)                         |
| Maternal sepsis and other pregnancy related infections | 55.1<br>(43.0 to 67.8)                             | 0.3<br>(0.1 to 0.6)                          | 3.6%<br>(-10.1% to 17.7%)                         | -1.1%<br>(-14.2% to 12.3%)                       |
| <b>All causes</b>                                      | <b>15,068.4</b><br><b>(10,654.0 to 20,202.6)</b>   | <b>105.7</b><br><b>(45.0 to 216.3)</b>       | <b>18.4%</b><br><b>(11.5% to 24.2%)</b>           | <b>12.9%</b><br><b>(6.3% to 18.5%)</b>           |



SR Table 13g: Global prevalence and years lived with disability (YLDs) for 2016, percentage change of YLD counts and rates between 2006 and 2016 of infertility by cause, ages 25-29 years

| Cause                                                  | Prevalence in thousands (95% uncertainty interval) | YLDs in thousands (95% uncertainty interval) |                                                   |                                                  |
|--------------------------------------------------------|----------------------------------------------------|----------------------------------------------|---------------------------------------------------|--------------------------------------------------|
|                                                        |                                                    | 2016                                         | Percentage change in counts between 2006 and 2016 | Percentage change in rates between 2006 and 2016 |
| Female infertility                                     | 7,382.6<br>(3,316.0 to 13,874.7)                   | 42.7<br>(12.2 to 113.4)                      | 55.0%<br>(42.0% to 80.1%)                         | 30.5%<br>(19.6% to 51.7%)                        |
| Male infertility                                       | 5,256.9<br>(3,526.7 to 7,573.8)                    | 31.9<br>(11.7 to 71.7)                       | 32.9%<br>(25.5% to 39.0%)                         | 11.9%<br>(5.7% to 17.1%)                         |
| Other sexually transmitted diseases                    | 4,226.3<br>(3,728.7 to 4,749.0)                    | 24.1<br>(9.9 to 49.1)                        | 21.1%<br>(15.8% to 25.9%)                         | 2.0%<br>(-2.4% to 6.0%)                          |
| Chlamydial infection                                   | 1,812.7<br>(1,588.8 to 2,019.8)                    | 10.4<br>(4.3 to 21.1)                        | 22.0%<br>(16.1% to 27.5%)                         | 2.8%<br>(-2.2% to 7.4%)                          |
| Turner syndrome                                        | 267.3<br>(232.3 to 303.5)                          | 5.5<br>(2.8 to 8.9)                          | 16.3%<br>(5.5% to 26.7%)                          | -2.0%<br>(-11.1% to 6.7%)                        |
| Gonococcal infection                                   | 642.3<br>(557.5 to 716.5)                          | 3.7<br>(1.5 to 7.6)                          | 22.3%<br>(14.4% to 29.3%)                         | 3.0%<br>(-3.6% to 8.9%)                          |
| Endometriosis                                          | 34.5<br>(25.0 to 46.8)                             | 3.6<br>(2.1 to 5.5)                          | 21.9%<br>(15.1% to 29.5%)                         | 2.7%<br>(-3.0% to 9.1%)                          |
| Polycystic ovarian syndrome                            | 327.8<br>(212.2 to 483.8)                          | 3.3<br>(1.3 to 7.2)                          | 19.9%<br>(11.9% to 28.3%)                         | 1.0%<br>(-5.7% to 8.1%)                          |
| Klinefelter syndrome                                   | 309.1<br>(267.6 to 355.7)                          | 3.1<br>(1.4 to 6.0)                          | 16.1%<br>(9.8% to 23.0%)                          | -2.2%<br>(-7.5% to 3.6%)                         |
| Urogenital congenital anomalies                        | 47.0<br>(31.8 to 63.4)                             | 0.6<br>(0.2 to 1.3)                          | 20.9%<br>(18.3% to 23.7%)                         | 1.9%<br>(-0.4% to 4.2%)                          |
| Maternal sepsis and other pregnancy related infections | 98.8<br>(80.9 to 117.9)                            | 0.5<br>(0.2 to 1.1)                          | 14.3%<br>(3.5% to 25.1%)                          | -3.7%<br>(-12.8% to 5.4%)                        |
| <b>All causes</b>                                      | <b>20,405.4</b><br><b>(14,010.6 to 29,483.7)</b>   | <b>129.6</b><br><b>(52.9 to 278.0)</b>       | <b>33.3%</b><br><b>(26.8% to 39.2%)</b>           | <b>12.3%</b><br><b>(6.9% to 17.3%)</b>           |

SR Table 13g: Global prevalence and years lived with disability (YLDs) for 2016, percentage change of YLD counts and rates between 2006 and 2016 of infertility by cause, ages 30-34 years

| Cause                                                  | Prevalence in thousands (95% uncertainty interval) | YLDs in thousands (95% uncertainty interval) |                                                   |                                                  |
|--------------------------------------------------------|----------------------------------------------------|----------------------------------------------|---------------------------------------------------|--------------------------------------------------|
|                                                        |                                                    | 2016                                         | Percentage change in counts between 2006 and 2016 | Percentage change in rates between 2006 and 2016 |
| Female infertility                                     | 7,124.9<br>(2,363.7 to 14,286.5)                   | 39.3<br>(9.1 to 106.4)                       | 46.8%<br>(31.0% to 95.0%)                         | 30.0%<br>(16.0% to 72.7%)                        |
| Other sexually transmitted diseases                    | 6,709.5<br>(5,751.4 to 7,678.4)                    | 36.9<br>(15.2 to 78.1)                       | 12.0%<br>(7.5% to 17.3%)                          | -0.8%<br>(-4.8% to 3.9%)                         |
| Male infertility                                       | 5,747.5<br>(3,794.3 to 8,283.2)                    | 33.0<br>(12.5 to 72.6)                       | 21.7%<br>(15.8% to 26.8%)                         | 7.8%<br>(2.6% to 12.3%)                          |
| Chlamydial infection                                   | 2,586.1<br>(2,208.8 to 2,953.7)                    | 14.3<br>(5.9 to 30.1)                        | 18.4%<br>(13.0% to 24.1%)                         | 4.8%<br>(0.1% to 9.9%)                           |
| Gonococcal infection                                   | 996.7<br>(837.0 to 1,143.3)                        | 5.5<br>(2.3 to 11.6)                         | 17.6%<br>(11.0% to 24.8%)                         | 4.2%<br>(-1.7% to 10.5%)                         |
| Turner syndrome                                        | 220.2<br>(190.9 to 250.9)                          | 4.5<br>(2.3 to 7.2)                          | 14.4%<br>(3.4% to 26.4%)                          | 1.3%<br>(-8.4% to 12.0%)                         |
| Polycystic ovarian syndrome                            | 398.9<br>(259.5 to 574.2)                          | 3.8<br>(1.5 to 8.3)                          | 17.8%<br>(10.6% to 26.0%)                         | 4.3%<br>(-2.1% to 11.6%)                         |
| Endometriosis                                          | 24.7<br>(18.1 to 34.0)                             | 2.6<br>(1.5 to 4.0)                          | 9.3%<br>(5.4% to 14.2%)                           | -3.2%<br>(-6.7% to 1.2%)                         |
| Klinefelter syndrome                                   | 230.8<br>(198.1 to 269.2)                          | 2.3<br>(1.1 to 4.5)                          | 13.6%<br>(6.6% to 20.3%)                          | 0.6%<br>(-5.6% to 6.5%)                          |
| Maternal sepsis and other pregnancy related infections | 126.9<br>(108.3 to 146.8)                          | 0.6<br>(0.2 to 1.4)                          | 19.1%<br>(10.5% to 29.5%)                         | 5.5%<br>(-2.1% to 14.7%)                         |
| Urogenital congenital anomalies                        | 38.4<br>(25.9 to 51.5)                             | 0.5<br>(0.2 to 1.0)                          | 13.1%<br>(10.5% to 15.5%)                         | 0.2%<br>(-2.1% to 2.3%)                          |
| <b>All causes</b>                                      | <b>24,204.6</b><br><b>(16,138.7 to 35,203.3)</b>   | <b>143.5</b><br><b>(57.4 to 309.5)</b>       | <b>23.4%</b><br><b>(18.4% to 28.3%)</b>           | <b>9.3%</b><br><b>(4.8% to 13.6%)</b>            |

SR Table 13g: Global prevalence and years lived with disability (YLDs) for 2016, percentage change of YLD counts and rates between 2006 and 2016 of infertility by cause, ages 35-39 years

| Cause                                                  | Prevalence in thousands (95% uncertainty interval) | YLDs in thousands (95% uncertainty interval) |                                       |                                                  |
|--------------------------------------------------------|----------------------------------------------------|----------------------------------------------|---------------------------------------|--------------------------------------------------|
|                                                        |                                                    | 2016                                         | 2016                                  | Percentage change in rates between 2006 and 2016 |
| Other sexually transmitted diseases                    | 8,569.9<br>(6,533.8 to 10,072.1)                   | 46.2<br>(18.3 to 94.7)                       | 2.5%<br>(-0.9% to 6.1%)               | -3.1%<br>(-6.3% to 0.3%)                         |
| Male infertility                                       | 5,534.0<br>(3,396.4 to 8,685.7)                    | 30.6<br>(11.3 to 64.4)                       | 8.8%<br>(3.5% to 13.3%)               | 2.9%<br>(-2.1% to 7.1%)                          |
| Female infertility                                     | 5,312.6<br>(1,115.6 to 14,738.0)                   | 27.9<br>(4.6 to 82.3)                        | 25.8%<br>(8.0% to 60.4%)              | 18.9%<br>(2.1% to 51.6%)                         |
| Chlamydial infection                                   | 3,097.1<br>(2,345.5 to 3,676.1)                    | 16.8<br>(6.8 to 33.9)                        | 12.6%<br>(8.5% to 17.3%)              | 6.4%<br>(2.5% to 10.9%)                          |
| Gonococcal infection                                   | 1,183.2<br>(891.7 to 1,419.3)                      | 6.4<br>(2.5 to 12.9)                         | 10.6%<br>(5.3% to 15.3%)              | 4.5%<br>(-0.4% to 9.0%)                          |
| Polycystic ovarian syndrome                            | 542.7<br>(345.9 to 777.4)                          | 4.9<br>(1.9 to 10.2)                         | 13.4%<br>(6.4% to 22.6%)              | 7.2%<br>(0.6% to 15.9%)                          |
| Turner syndrome                                        | 169.5<br>(147.1 to 193.8)                          | 3.5<br>(1.8 to 5.6)                          | 9.4%<br>(-0.6% to 21.2%)              | 3.4%<br>(-6.1% to 14.6%)                         |
| Endometriosis                                          | 23.4<br>(16.5 to 31.9)                             | 2.4<br>(1.4 to 3.8)                          | -6.6%<br>(-16.9% to 5.9%)             | -11.7%<br>(-21.4% to 0.1%)                       |
| Klinefelter syndrome                                   | 154.6<br>(133.1 to 181.3)                          | 1.6<br>(0.7 to 3.0)                          | 6.9%<br>(0.4% to 13.9%)               | 1.1%<br>(-5.1% to 7.7%)                          |
| Maternal sepsis and other pregnancy related infections | 136.3<br>(118.4 to 154.9)                          | 0.7<br>(0.3 to 1.4)                          | 17.0%<br>(8.5% to 25.6%)              | 10.6%<br>(2.6% to 18.7%)                         |
| Urogenital congenital anomalies                        | 31.4<br>(21.1 to 42.0)                             | 0.4<br>(0.2 to 0.9)                          | 3.2%<br>(0.7% to 5.5%)                | -2.4%<br>(-4.8% to -0.3%)                        |
| <b>All causes</b>                                      | <b>24,754.7</b><br><b>(15,240.8 to 39,347.8)</b>   | <b>141.2</b><br><b>(53.1 to 293.8)</b>       | <b>9.9%</b><br><b>(4.9% to 14.3%)</b> | <b>3.9%</b><br><b>(-0.9% to 8.1%)</b>            |

SR Table 13g: Global prevalence and years lived with disability (YLDs) for 2016, percentage change of YLD counts and rates between 2006 and 2016 of infertility by cause, ages 40-44 years

| Cause                                                  | Prevalence in thousands (95% uncertainty interval) | YLDs in thousands (95% uncertainty interval) |                                                   |                                                  |
|--------------------------------------------------------|----------------------------------------------------|----------------------------------------------|---------------------------------------------------|--------------------------------------------------|
|                                                        |                                                    | 2016                                         | Percentage change in counts between 2006 and 2016 | Percentage change in rates between 2006 and 2016 |
| Other sexually transmitted diseases                    | 10,530.5<br>(7,426.1 to 12,650.4)                  | 56.2<br>(21.8 to 114.7)                      | 13.9%<br>(9.4% to 19.4%)                          | 0.1%<br>(-3.9% to 4.9%)                          |
| Male infertility                                       | 5,486.8<br>(3,676.0 to 7,917.3)                    | 30.1<br>(11.1 to 65.4)                       | 15.4%<br>(9.2% to 20.8%)                          | 1.3%<br>(-4.1% to 6.1%)                          |
| Female infertility                                     | 3,887.0<br>(1,557.8 to 10,320.0)                   | 20.9<br>(5.3 to 62.1)                        | 35.5%<br>(15.7% to 61.6%)                         | 19.0%<br>(1.7% to 42.0%)                         |
| Chlamydial infection                                   | 3,557.3<br>(2,581.1 to 4,286.1)                    | 19.2<br>(7.3 to 40.2)                        | 17.7%<br>(11.9% to 23.5%)                         | 3.4%<br>(-1.7% to 8.5%)                          |
| Gonococcal infection                                   | 1,324.1<br>(981.1 to 1,591.5)                      | 7.1<br>(2.7 to 14.5)                         | 15.6%<br>(8.8% to 21.2%)                          | 1.5%<br>(-4.5% to 6.5%)                          |
| Polycystic ovarian syndrome                            | 438.4<br>(270.1 to 639.5)                          | 3.9<br>(1.5 to 8.1)                          | 20.3%<br>(12.6% to 29.2%)                         | 5.7%<br>(-1.1% to 13.5%)                         |
| Endometriosis                                          | 31.0<br>(19.5 to 44.4)                             | 3.1<br>(1.7 to 5.1)                          | 15.4%<br>(1.0% to 33.3%)                          | 1.4%<br>(-11.3% to 17.1%)                        |
| Turner syndrome                                        | 135.6<br>(118.0 to 154.7)                          | 2.8<br>(1.4 to 4.5)                          | 16.5%<br>(4.4% to 29.4%)                          | 2.3%<br>(-8.3% to 13.6%)                         |
| Klinefelter syndrome                                   | 102.3<br>(86.3 to 119.8)                           | 1.0<br>(0.5 to 2.0)                          | 10.5%<br>(3.5% to 17.9%)                          | -3.0%<br>(-9.1% to 3.6%)                         |
| Maternal sepsis and other pregnancy related infections | 135.4<br>(120.0 to 152.5)                          | 0.7<br>(0.3 to 1.5)                          | 12.6%<br>(5.3% to 20.2%)                          | -1.1%<br>(-7.5% to 5.6%)                         |
| Urogenital congenital anomalies                        | 29.0<br>(19.4 to 38.7)                             | 0.4<br>(0.1 to 0.8)                          | 11.5%<br>(8.5% to 14.5%)                          | -2.1%<br>(-4.7% to 0.6%)                         |
| <b>All causes</b>                                      | <b>25,657.4</b><br><b>(17,162.9 to 37,055.0)</b>   | <b>145.2</b><br><b>(56.2 to 311.3)</b>       | <b>17.7%</b><br><b>(11.7% to 23.0%)</b>           | <b>3.4%</b><br><b>(-1.9% to 8.1%)</b>            |

SR Table 13g: Global prevalence and years lived with disability (YLDs) for 2016, percentage change of YLD counts and rates between 2006 and 2016 of infertility by cause, ages 45-49 years

| Cause                                                  | Prevalence in thousands (95% uncertainty interval) | YLDs in thousands (95% uncertainty interval) |                                                   |                                                  |
|--------------------------------------------------------|----------------------------------------------------|----------------------------------------------|---------------------------------------------------|--------------------------------------------------|
|                                                        |                                                    | 2016                                         | Percentage change in counts between 2006 and 2016 | Percentage change in rates between 2006 and 2016 |
| Other sexually transmitted diseases                    | 1,469.5<br>(857.2 to 2,234.3)                      | 7.8<br>(2.7 to 18.0)                         | 30.6%<br>(18.8% to 41.4%)                         | 4.7%<br>(-4.7% to 13.4%)                         |
| Chlamydial infection                                   | 531.3<br>(318.3 to 795.5)                          | 2.8<br>(1.0 to 6.2)                          | 27.9%<br>(14.2% to 40.7%)                         | 2.5%<br>(-8.4% to 12.8%)                         |
| Male infertility                                       | 545.9<br>(296.2 to 885.8)                          | 2.8<br>(0.9 to 6.5)                          | 23.0%<br>(9.6% to 34.1%)                          | -1.3%<br>(-12.1% to 7.5%)                        |
| Turner syndrome                                        | 104.5<br>(91.1 to 120.0)                           | 2.2<br>(1.1 to 3.5)                          | 25.1%<br>(12.1% to 39.2%)                         | 0.3%<br>(-10.1% to 11.6%)                        |
| Female infertility                                     | 218.3<br>(127.6 to 369.0)                          | 1.3<br>(0.5 to 2.8)                          | 29.9%<br>(16.5% to 42.4%)                         | 4.1%<br>(-6.6% to 14.2%)                         |
| Gonococcal infection                                   | 209.3<br>(126.3 to 314.2)                          | 1.1<br>(0.4 to 2.4)                          | 25.5%<br>(11.3% to 37.5%)                         | 0.6%<br>(-10.7% to 10.2%)                        |
| Klinefelter syndrome                                   | 64.9<br>(54.3 to 76.5)                             | 0.7<br>(0.3 to 1.2)                          | 19.0%<br>(10.5% to 27.6%)                         | -4.6%<br>(-11.4% to 2.4%)                        |
| Maternal sepsis and other pregnancy related infections | 127.5<br>(113.6 to 143.5)                          | 0.6<br>(0.2 to 1.3)                          | 11.1%<br>(4.0% to 18.7%)                          | -10.9%<br>(-16.6% to -4.8%)                      |
| Endometriosis                                          | 4.0<br>(2.0 to 6.5)                                | 0.4<br>(0.2 to 0.8)                          | 42.4%<br>(34.6% to 50.1%)                         | 14.2%<br>(7.9% to 20.4%)                         |
| Urogenital congenital anomalies                        | 26.8<br>(17.9 to 35.9)                             | 0.3<br>(0.1 to 0.7)                          | 23.6%<br>(20.1% to 27.0%)                         | -0.9%<br>(-3.7% to 1.9%)                         |
| Polycystic ovarian syndrome                            | 4.5<br>(2.3 to 7.6)                                | <0.05<br>(<0.05 to 0.1)                      | 22.9%<br>(7.4% to 41.9%)                          | -1.5%<br>(-13.9% to 13.8%)                       |
| <b>All causes</b>                                      | <b>3,306.4</b><br><b>(2,152.1 to 4,899.9)</b>      | <b>20.0</b><br><b>(8.3 to 41.6)</b>          | <b>27.2%</b><br><b>(18.6% to 35.9%)</b>           | <b>2.0%</b><br><b>(-4.9% to 9.0%)</b>            |

SR Table 13g: Global prevalence and years lived with disability (YLDs) for 2016, percentage change of YLD counts and rates between 2006 and 2016 of infertility by cause, ages 50-54 years

| Cause                                                  | Prevalence in thousands (95% uncertainty interval) | YLDs in thousands (95% uncertainty interval) |                                                   |                                                  |
|--------------------------------------------------------|----------------------------------------------------|----------------------------------------------|---------------------------------------------------|--------------------------------------------------|
|                                                        |                                                    | 2016                                         | Percentage change in counts between 2006 and 2016 | Percentage change in rates between 2006 and 2016 |
| Maternal sepsis and other pregnancy related infections | 118.7<br>(105.7 to 133.4)                          | 0.6<br>(0.2 to 1.3)                          | 17.6%<br>(8.9% to 25.5%)                          | -5.6%<br>(-12.6% to 0.8%)                        |
| Urogenital congenital anomalies                        | 23.8<br>(15.9 to 31.9)                             | 0.3<br>(0.1 to 0.6)                          | 27.3%<br>(23.7% to 30.9%)                         | 2.2%<br>(-0.7% to 5.1%)                          |
| <b>All causes</b>                                      | <b>142.5</b><br><b>(127.6 to 158.9)</b>            | <b>0.9</b><br><b>(0.4 to 1.8)</b>            | <b>20.7%</b><br><b>(14.3% to 26.3%)</b>           | <b>-3.1%</b><br><b>(-8.2% to 1.4%)</b>           |

| SR Table 13g: Global prevalence and years lived with disability (YLDs) for 2016, percentage change of YLD counts and rates between 2006 and 2016 of infertility by cause, ages 55-59 years |                                                    |                                              |                                                   |                                                  |
|--------------------------------------------------------------------------------------------------------------------------------------------------------------------------------------------|----------------------------------------------------|----------------------------------------------|---------------------------------------------------|--------------------------------------------------|
| Cause                                                                                                                                                                                      | Prevalence in thousands (95% uncertainty interval) | YLDs in thousands (95% uncertainty interval) |                                                   |                                                  |
|                                                                                                                                                                                            |                                                    | 2016                                         | Percentage change in counts between 2006 and 2016 | Percentage change in rates between 2006 and 2016 |
| Urogenital congenital anomalies                                                                                                                                                            | 20.0<br>(13.4 to 26.9)                             | 0.3<br>(0.1 to 0.5)                          | 34.0%<br>(30.0% to 38.0%)                         | 2.7%<br>(-0.4% to 5.7%)                          |
| All causes                                                                                                                                                                                 | 20.0<br>(13.4 to 26.9)                             | 0.3<br>(0.1 to 0.5)                          | 34.0%<br>(30.0% to 38.0%)                         | 2.7%<br>(-0.4% to 5.7%)                          |

| SR Table 13: Global prevalence and years lived with disability (YLDs) for 2016, percentage change of YLD counts and rates between 2006 and 2016 of infertility by cause, ages 60-64 years |                                                    |                                              |                                                   |                                                  |
|-------------------------------------------------------------------------------------------------------------------------------------------------------------------------------------------|----------------------------------------------------|----------------------------------------------|---------------------------------------------------|--------------------------------------------------|
| Cause                                                                                                                                                                                     | Prevalence in thousands (95% uncertainty interval) | YLDs in thousands (95% uncertainty interval) |                                                   |                                                  |
|                                                                                                                                                                                           |                                                    | 2016                                         | Percentage change in counts between 2006 and 2016 | Percentage change in rates between 2006 and 2016 |
| Urogenital congenital anomalies                                                                                                                                                           | 17.4<br>(11.7 to 23.4)                             | 0.2<br>(0.1 to 0.5)                          | 59.4%<br>(54.8% to 64.3%)                         | 5.7%<br>(2.6% to 9.0%)                           |
| All causes                                                                                                                                                                                | 17.4<br>(11.7 to 23.4)                             | 0.2<br>(0.1 to 0.5)                          | 59.4%<br>(54.8% to 64.3%)                         | 5.7%<br>(2.6% to 9.0%)                           |



| SR Table 13g: Global prevalence and years lived with disability (YLDs) for 2016, percentage change of YLD counts and rates between 2006 and 2016 of infertility by cause, ages 65-69 years |                                                    |                                              |                                                   |                                                  |
|--------------------------------------------------------------------------------------------------------------------------------------------------------------------------------------------|----------------------------------------------------|----------------------------------------------|---------------------------------------------------|--------------------------------------------------|
| Cause                                                                                                                                                                                      | Prevalence in thousands (95% uncertainty interval) | YLDs in thousands (95% uncertainty interval) |                                                   |                                                  |
|                                                                                                                                                                                            |                                                    | 2016                                         | Percentage change in counts between 2006 and 2016 | Percentage change in rates between 2006 and 2016 |
| Urogenital congenital anomalies                                                                                                                                                            | 13.3<br>(8.9 to 17.9)                              | 0.2<br>(0.1 to 0.4)                          | 38.5%<br>(33.9% to 42.8%)                         | 4.5%<br>(1.0% to 7.8%)                           |
| All causes                                                                                                                                                                                 | 13.3<br>(8.9 to 17.9)                              | 0.2<br>(0.1 to 0.4)                          | 38.5%<br>(33.9% to 42.8%)                         | 4.5%<br>(1.0% to 7.8%)                           |

| SR Table 13g: Global prevalence and years lived with disability (YLDs) for 2016, percentage change of YLD counts and rates between 2006 and 2016 of infertility by cause, ages 70-74 years |                                                    |                                              |                                                   |                                                  |
|--------------------------------------------------------------------------------------------------------------------------------------------------------------------------------------------|----------------------------------------------------|----------------------------------------------|---------------------------------------------------|--------------------------------------------------|
| Cause                                                                                                                                                                                      | Prevalence in thousands (95% uncertainty interval) | YLDs in thousands (95% uncertainty interval) |                                                   |                                                  |
|                                                                                                                                                                                            |                                                    | 2016                                         | Percentage change in counts between 2006 and 2016 | Percentage change in rates between 2006 and 2016 |
| Urogenital congenital anomalies                                                                                                                                                            | 9.4<br>(6.3 to 12.6)                               | 0.1<br>(<0.05 to 0.3)                        | 25.6%<br>(21.5% to 29.7%)                         | 4.9%<br>(1.6% to 8.4%)                           |
| All causes                                                                                                                                                                                 | 9.4<br>(6.3 to 12.6)                               | 0.1<br>(<0.05 to 0.3)                        | 25.6%<br>(21.5% to 29.7%)                         | 4.9%<br>(1.6% to 8.4%)                           |

| SR Table 13g: Global prevalence and years lived with disability (YLDs) for 2016, percentage change of YLD counts and rates between 2006 and 2016 of infertility by cause, ages 75-79 years |                                                    |                                              |                                                   |                                                  |
|--------------------------------------------------------------------------------------------------------------------------------------------------------------------------------------------|----------------------------------------------------|----------------------------------------------|---------------------------------------------------|--------------------------------------------------|
| Cause                                                                                                                                                                                      | Prevalence in thousands (95% uncertainty interval) | YLDs in thousands (95% uncertainty interval) |                                                   |                                                  |
|                                                                                                                                                                                            |                                                    | 2016                                         | Percentage change in counts between 2006 and 2016 | Percentage change in rates between 2006 and 2016 |
| Urogenital congenital anomalies                                                                                                                                                            | 7.3<br>(4.9 to 9.8)                                | 0.1<br>(<0.05 to 0.2)                        | 28.5%<br>(24.2% to 33.2%)                         | 3.3%<br>(-0.2% to 7.1%)                          |
| All causes                                                                                                                                                                                 | 7.3<br>(4.9 to 9.8)                                | 0.1<br>(<0.05 to 0.2)                        | 28.5%<br>(24.2% to 33.2%)                         | 3.3%<br>(-0.2% to 7.1%)                          |

SR Table 13g: Global prevalence and years lived with disability (YLDs) for 2016, percentage change of YLD counts and rates between 2006 and 2016 of infertility by cause, ages 80-84

| Cause                           | Prevalence in thousands (95% uncertainty interval) | YLDs in thousands (95% uncertainty interval) |                                                   |                                                  |
|---------------------------------|----------------------------------------------------|----------------------------------------------|---------------------------------------------------|--------------------------------------------------|
|                                 | 2016                                               | 2016                                         | Percentage change in counts between 2006 and 2016 | Percentage change in rates between 2006 and 2016 |
| Urogenital congenital anomalies | 4.6<br>(3.1 to 6.2)                                | 0.1<br>(<0.05 to 0.1)                        | 31.3%<br>(27.2% to 35.5%)                         | 0.2%<br>(-2.9% to 3.5%)                          |
| All causes                      | 4.6<br>(3.1 to 6.2)                                | 0.1<br>(<0.05 to 0.1)                        | 31.3%<br>(27.2% to 35.5%)                         | 0.2%<br>(-2.9% to 3.5%)                          |

| SR Table 13g: Global prevalence and years lived with disability (YLDs) for 2016, percentage change of YLD counts and rates between 2006 and 2016 of infertility by cause, ages 85-89 |                                                    |                                              |                           |                                                  |
|--------------------------------------------------------------------------------------------------------------------------------------------------------------------------------------|----------------------------------------------------|----------------------------------------------|---------------------------|--------------------------------------------------|
| Cause                                                                                                                                                                                | Prevalence in thousands (95% uncertainty interval) | YLDs in thousands (95% uncertainty interval) |                           |                                                  |
|                                                                                                                                                                                      |                                                    | 2016                                         | 2016                      | Percentage change in rates between 2006 and 2016 |
| Urogenital congenital anomalies                                                                                                                                                      | 2.7<br>(1.8 to 3.6)                                | <0.05<br>(<0.05 to 0.1)                      | 66.9%<br>(62.2% to 72.4%) | 4.0%<br>(1.1% to 7.4%)                           |
| All causes                                                                                                                                                                           | 2.7<br>(1.8 to 3.6)                                | <0.05<br>(<0.05 to 0.1)                      | 66.9%<br>(62.2% to 72.4%) | 4.0%<br>(1.1% to 7.4%)                           |

SR Table 13g: Global prevalence and years lived with disability (YLDs) for 2016, percentage change of YLD counts and rates between 2006 and 2016 of infertility by cause, ages 90-94

| Cause                           | Prevalence in thousands (95% uncertainty interval) | YLDs in thousands (95% uncertainty interval) |                                                   |                                                  |
|---------------------------------|----------------------------------------------------|----------------------------------------------|---------------------------------------------------|--------------------------------------------------|
|                                 | 2016                                               | 2016                                         | Percentage change in counts between 2006 and 2016 | Percentage change in rates between 2006 and 2016 |
| Urogenital congenital anomalies | 1.0<br>(0.7 to 1.4)                                | <0.05<br>(<0.05 to <0.05)                    | 77.8%<br>(72.9% to 82.8%)                         | 6.2%<br>(3.3% to 9.2%)                           |
| All causes                      | 1.0<br>(0.7 to 1.4)                                | <0.05<br>(<0.05 to <0.05)                    | 77.8%<br>(72.9% to 82.8%)                         | 6.2%<br>(3.3% to 9.2%)                           |

| SR Table 13g: Global prevalence and years lived with disability (YLDs) for 2016, percentage change of YLD counts and rates between 2006 and 2016 of infertility by cause, ages 95+ years |                                                    |                                              |                           |                                                  |
|------------------------------------------------------------------------------------------------------------------------------------------------------------------------------------------|----------------------------------------------------|----------------------------------------------|---------------------------|--------------------------------------------------|
| Cause                                                                                                                                                                                    | Prevalence in thousands (95% uncertainty interval) | YLDs in thousands (95% uncertainty interval) |                           |                                                  |
|                                                                                                                                                                                          |                                                    | 2016                                         | 2016                      | Percentage change in rates between 2006 and 2016 |
| Urogenital congenital anomalies                                                                                                                                                          | 0.2<br>(0.2 to 0.3)                                | <0.05<br>(<0.05 to <0.05)                    | 58.4%<br>(54.6% to 62.5%) | 1.1%<br>(-1.4% to 3.7%)                          |
| All causes                                                                                                                                                                               | 0.2<br>(0.2 to 0.3)                                | <0.05<br>(<0.05 to <0.05)                    | 58.4%<br>(54.6% to 62.5%) | 1.1%<br>(-1.4% to 3.7%)                          |

SR Table 13h: Global prevalence and years lived with disability (YLDs) for 2016, percentage change of YLD counts and rates between 2006 and 2016 of pelvic inflammatory disease by cause, ages 10-14 years

| Cause                               | Prevalence in thousands (95% uncertainty interval) | YLDs in thousands (95% uncertainty interval) |                                                   |                                                  |
|-------------------------------------|----------------------------------------------------|----------------------------------------------|---------------------------------------------------|--------------------------------------------------|
|                                     | 2016                                               | 2016                                         | Percentage change in counts between 2006 and 2016 | Percentage change in rates between 2006 and 2016 |
| Other sexually transmitted diseases | 20.7<br>(15.0 to 28.1)                             | 2.8<br>(1.7 to 4.4)                          | -0.1%<br>(-12.3% to 13.5%)                        | -0.9%<br>(-13.1% to 12.6%)                       |
| Chlamydial infection                | 12.2<br>(8.7 to 16.8)                              | 1.7<br>(1.0 to 2.7)                          | 2.8%<br>(0.3% to 5.8%)                            | 2.0%<br>(-0.5% to 4.9%)                          |
| Gonococcal infection                | 3.2<br>(2.3 to 4.4)                                | 0.4<br>(0.3 to 0.7)                          | 4.2%<br>(1.6% to 7.1%)                            | 3.3%<br>(0.8% to 6.2%)                           |
| <b>All causes</b>                   | <b>36.1</b><br><b>(26.8 to 48.5)</b>               | <b>4.9</b><br><b>(3.0 to 7.7)</b>            | <b>1.3%</b><br><b>(-6.2% to 9.5%)</b>             | <b>0.4%</b><br><b>(-7.0% to 8.6%)</b>            |



SR Table 13h: Global prevalence and years lived with disability (YLDs) for 2016, percentage change of YLD counts and rates between 2006 and 2016 of pelvic inflammatory disease by cause, ages 15-19 years

| Cause                               | Prevalence in thousands (95% uncertainty interval) | YLDs in thousands (95% uncertainty interval) |                                                   |                                                  |
|-------------------------------------|----------------------------------------------------|----------------------------------------------|---------------------------------------------------|--------------------------------------------------|
|                                     |                                                    | 2016                                         | Percentage change in counts between 2006 and 2016 | Percentage change in rates between 2006 and 2016 |
| Other sexually transmitted diseases | 91.0<br>(66.8 to 122.3)                            | 12.2<br>(7.4 to 19.1)                        | -8.3%<br>(-15.3% to 0.4%)                         | -3.0%<br>(-10.4% to 6.2%)                        |
| Chlamydial infection                | 48.7<br>(35.2 to 68.1)                             | 6.5<br>(3.9 to 10.4)                         | -2.7%<br>(-14.4% to 9.6%)                         | 3.0%<br>(-9.3% to 16.1%)                         |
| Gonococcal infection                | 15.4<br>(10.9 to 21.5)                             | 2.1<br>(1.2 to 3.3)                          | -2.5%<br>(-14.8% to 10.7%)                        | 3.2%<br>(-9.8% to 17.2%)                         |
| <b>All causes</b>                   | <b>155.1</b><br><b>(115.3 to 211.5)</b>            | <b>20.8</b><br><b>(12.5 to 33.0)</b>         | <b>-6.0%</b><br><b>(-11.7% to 0.3%)</b>           | <b>-0.5%</b><br><b>(-6.6% to 6.2%)</b>           |

SR Table 13h: Global prevalence and years lived with disability (YLDs) for 2016, percentage change of YLD counts and rates between 2006 and 2016 of pelvic inflammatory disease by cause, ages 20-24 years

| Cause                               | Prevalence in thousands (95% uncertainty interval) | YLDs in thousands (95% uncertainty interval) |                                                   |                                                  |
|-------------------------------------|----------------------------------------------------|----------------------------------------------|---------------------------------------------------|--------------------------------------------------|
|                                     |                                                    | 2016                                         | Percentage change in counts between 2006 and 2016 | Percentage change in rates between 2006 and 2016 |
| Other sexually transmitted diseases | 207.0<br>(164.5 to 257.4)                          | 27.4<br>(17.7 to 40.6)                       | 0.3%<br>(-6.4% to 7.9%)                           | -4.3%<br>(-10.8% to 3.0%)                        |
| Chlamydial infection                | 90.8<br>(70.0 to 117.6)                            | 12.1<br>(7.7 to 18.2)                        | 3.1%<br>(-5.2% to 11.9%)                          | -1.7%<br>(-9.6% to 6.8%)                         |
| Gonococcal infection                | 34.3<br>(26.4 to 43.6)                             | 4.6<br>(2.9 to 7.0)                          | 3.3%<br>(-6.4% to 13.2%)                          | -1.4%<br>(-10.7% to 8.0%)                        |
| <b>All causes</b>                   | <b>332.1</b><br><b>(264.9 to 415.2)</b>            | <b>44.2</b><br><b>(28.8 to 65.4)</b>         | <b>1.3%</b><br><b>(-3.6% to 7.0%)</b>             | <b>-3.3%</b><br><b>(-8.1% to 2.1%)</b>           |

SR Table 13h: Global prevalence and years lived with disability (YLDs) for 2016, percentage change of YLD counts and rates between 2006 and 2016 of pelvic inflammatory disease by cause, ages 25-29 years

| Cause                               | Prevalence in thousands (95% uncertainty interval) | YLDs in thousands (95% uncertainty interval) |                                                   |                                                  |
|-------------------------------------|----------------------------------------------------|----------------------------------------------|---------------------------------------------------|--------------------------------------------------|
|                                     |                                                    | 2016                                         | Percentage change in counts between 2006 and 2016 | Percentage change in rates between 2006 and 2016 |
| Other sexually transmitted diseases | 399.4<br>(299.6 to 537.0)                          | 52.6<br>(33.3 to 81.3)                       | 12.6%<br>(6.2% to 19.2%)                          | -5.2%<br>(-10.5% to 0.4%)                        |
| Chlamydial infection                | 126.8<br>(92.6 to 171.2)                           | 16.8<br>(10.2 to 25.7)                       | 13.2%<br>(4.1% to 22.8%)                          | -4.6%<br>(-12.3% to 3.5%)                        |
| Gonococcal infection                | 58.5<br>(42.6 to 79.7)                             | 7.8<br>(4.7 to 12.1)                         | 13.7%<br>(4.0% to 25.7%)                          | -4.2%<br>(-12.4% to 5.9%)                        |
| <b>All causes</b>                   | <b>584.8</b><br><b>(443.2 to 788.0)</b>            | <b>77.1</b><br><b>(49.0 to 118.2)</b>        | <b>12.8%</b><br><b>(8.0% to 18.0%)</b>            | <b>-5.0%</b><br><b>(-9.1% to -0.6%)</b>          |

SR Table 13h: Global prevalence and years lived with disability (YLDs) for 2016, percentage change of YLD counts and rates between 2006 and 2016 of pelvic inflammatory disease by cause, ages 30-34 years

| Cause                               | Prevalence in thousands (95% uncertainty interval) | YLDs in thousands (95% uncertainty interval) |                                                   |                                                  |
|-------------------------------------|----------------------------------------------------|----------------------------------------------|---------------------------------------------------|--------------------------------------------------|
|                                     |                                                    | 2016                                         | Percentage change in counts between 2006 and 2016 | Percentage change in rates between 2006 and 2016 |
| Other sexually transmitted diseases | 491.5<br>(381.8 to 633.9)                          | 64.1<br>(41.5 to 95.2)                       | 5.5%<br>(0.6% to 11.1%)                           | -6.5%<br>(-10.9% to -1.6%)                       |
| Chlamydial infection                | 135.7<br>(101.7 to 181.0)                          | 17.9<br>(10.8 to 27.2)                       | 10.9%<br>(2.7% to 20.4%)                          | -1.8%<br>(-9.1% to 6.6%)                         |
| Gonococcal infection                | 63.8<br>(47.7 to 86.1)                             | 8.5<br>(5.1 to 13.0)                         | 11.0%<br>(1.8% to 21.6%)                          | -1.7%<br>(-9.8% to 7.7%)                         |
| <b>All causes</b>                   | <b>691.0</b><br><b>(537.4 to 886.6)</b>            | <b>90.4</b><br><b>(58.5 to 136.2)</b>        | <b>7.1%</b><br><b>(2.9% to 11.5%)</b>             | <b>-5.2%</b><br><b>(-8.9% to -1.3%)</b>          |

SR Table 13h: Global prevalence and years lived with disability (YLDs) for 2016, percentage change of YLD counts and rates between 2006 and 2016 of pelvic inflammatory disease by cause, ages 35-39 years

| Cause                               | Prevalence in thousands (95% uncertainty interval) | YLDs in thousands (95% uncertainty interval) |                                                   |                                                  |
|-------------------------------------|----------------------------------------------------|----------------------------------------------|---------------------------------------------------|--------------------------------------------------|
|                                     |                                                    | 2016                                         | Percentage change in counts between 2006 and 2016 | Percentage change in rates between 2006 and 2016 |
| Other sexually transmitted diseases | 480.3<br>(369.6 to 612.8)                          | 62.2<br>(39.3 to 90.4)                       | -5.8%<br>(-10.3% to -0.3%)                        | -10.9%<br>(-15.2% to -5.8%)                      |
| Chlamydial infection                | 142.6<br>(106.6 to 188.5)                          | 18.7<br>(11.7 to 28.5)                       | 3.1%<br>(-3.3% to 11.1%)                          | -2.6%<br>(-8.6% to 5.0%)                         |
| Gonococcal infection                | 53.0<br>(38.8 to 69.4)                             | 7.0<br>(4.3 to 10.7)                         | 2.0%<br>(-7.6% to 12.4%)                          | -3.6%<br>(-12.7% to 6.3%)                        |
| <b>All causes</b>                   | <b>675.9</b><br><b>(524.5 to 857.2)</b>            | <b>88.0</b><br><b>(54.8 to 128.1)</b>        | <b>-3.4%</b><br><b>(-7.1% to 1.0%)</b>            | <b>-8.7%</b><br><b>(-12.2% to -4.6%)</b>         |

SR Table 13h: Global prevalence and years lived with disability (YLDs) for 2016, percentage change of YLD counts and rates between 2006 and 2016 of pelvic inflammatory disease by cause, ages 40-44 years

| Cause                               | Prevalence in thousands (95% uncertainty interval) | YLDs in thousands (95% uncertainty interval) |                                                   |                                                  |
|-------------------------------------|----------------------------------------------------|----------------------------------------------|---------------------------------------------------|--------------------------------------------------|
|                                     |                                                    | 2016                                         | Percentage change in counts between 2006 and 2016 | Percentage change in rates between 2006 and 2016 |
| Other sexually transmitted diseases | 448.4<br>(331.5 to 588.0)                          | 57.8<br>(35.5 to 85.3)                       | 5.9%<br>(0.4% to 12.2%)                           | -7.0%<br>(-11.8% to -1.5%)                       |
| Chlamydial infection                | 142.9<br>(102.5 to 190.1)                          | 18.7<br>(11.0 to 28.8)                       | 8.9%<br>(2.2% to 17.0%)                           | -4.4%<br>(-10.2% to 2.8%)                        |
| Gonococcal infection                | 39.4<br>(27.8 to 53.5)                             | 5.2<br>(3.0 to 8.0)                          | 8.7%<br>(-2.6% to 21.4%)                          | -4.5%<br>(-14.4% to 6.7%)                        |
| <b>All causes</b>                   | <b>630.7</b><br><b>(462.1 to 822.2)</b>            | <b>81.6</b><br><b>(50.2 to 119.6)</b>        | <b>6.7%</b><br><b>(2.0% to 11.8%)</b>             | <b>-6.3%</b><br><b>(-10.4% to -1.8%)</b>         |

SR Table 13h: Global prevalence and years lived with disability (YLDs) for 2016, percentage change of YLD counts and rates between 2006 and 2016 of pelvic inflammatory disease by cause, ages 45-49 years

| Cause                               | Prevalence in thousands (95% uncertainty interval) | YLDs in thousands (95% uncertainty interval) |                                                   |                                                  |
|-------------------------------------|----------------------------------------------------|----------------------------------------------|---------------------------------------------------|--------------------------------------------------|
|                                     |                                                    | 2016                                         | Percentage change in counts between 2006 and 2016 | Percentage change in rates between 2006 and 2016 |
| Other sexually transmitted diseases | 304.9<br>(239.6 to 380.0)                          | 39.1<br>(25.6 to 55.7)                       | 20.1%<br>(13.0% to 27.9%)                         | -3.7%<br>(-9.4% to 2.5%)                         |
| Chlamydial infection                | 109.6<br>(83.2 to 140.5)                           | 14.3<br>(9.0 to 21.0)                        | 18.7%<br>(10.6% to 27.8%)                         | -4.8%<br>(-11.3% to 2.5%)                        |
| Gonococcal infection                | 21.4<br>(16.2 to 27.2)                             | 2.9<br>(1.8 to 4.2)                          | 18.1%<br>(5.5% to 31.0%)                          | -5.3%<br>(-15.4% to 5.1%)                        |
| <b>All causes</b>                   | <b>436.0</b><br><b>(339.4 to 541.7)</b>            | <b>56.3</b><br><b>(36.4 to 81.2)</b>         | <b>19.7%</b><br><b>(14.2% to 25.7%)</b>           | <b>-4.0%</b><br><b>(-8.4% to 0.8%)</b>           |

SR Table 13h: Global prevalence and years lived with disability (YLDs) for 2016, percentage change of YLD counts and rates between 2006 and 2016 of pelvic inflammatory disease by cause, ages 50-54 years

| Cause                               | Prevalence in thousands (95% uncertainty interval) | YLDs in thousands (95% uncertainty interval) |                                                   |                                                  |
|-------------------------------------|----------------------------------------------------|----------------------------------------------|---------------------------------------------------|--------------------------------------------------|
|                                     |                                                    | 2016                                         | Percentage change in counts between 2006 and 2016 | Percentage change in rates between 2006 and 2016 |
| Other sexually transmitted diseases | 191.2<br>(136.1 to 262.9)                          | 24.5<br>(14.9 to 37.9)                       | 12.0%<br>(4.4% to 20.5%)                          | -10.1%<br>(-16.2% to -3.2%)                      |
| Chlamydial infection                | 63.0<br>(42.9 to 88.2)                             | 8.2<br>(4.9 to 13.1)                         | 14.9%<br>(6.1% to 25.5%)                          | -7.7%<br>(-14.8% to 0.8%)                        |
| Gonococcal infection                | 11.0<br>(7.4 to 15.3)                              | 1.5<br>(0.9 to 2.3)                          | 13.6%<br>(9.6% to 18.1%)                          | -8.8%<br>(-12.0% to -5.1%)                       |
| <b>All causes</b>                   | <b>265.1</b><br><b>(187.8 to 363.4)</b>            | <b>34.2</b><br><b>(20.9 to 53.0)</b>         | <b>12.7%</b><br><b>(6.5% to 19.9%)</b>            | <b>-9.5%</b><br><b>(-14.5% to -3.7%)</b>         |



SR Table 13h: Global prevalence and years lived with disability (YLDs) for 2016, percentage change of YLD counts and rates between 2006 and 2016 of pelvic inflammatory disease by cause, ages 55-59 years

| Cause                               | Prevalence in thousands (95% uncertainty interval) | YLDs in thousands (95% uncertainty interval) |                                         |                                                  |
|-------------------------------------|----------------------------------------------------|----------------------------------------------|-----------------------------------------|--------------------------------------------------|
|                                     |                                                    | 2016                                         | 2016                                    | Percentage change in rates between 2006 and 2016 |
| Other sexually transmitted diseases | 132.7<br>(106.3 to 165.4)                          | 16.9<br>(11.3 to 24.1)                       | 24.2%<br>(15.7% to 33.7%)               | -4.8%<br>(-11.4% to 2.5%)                        |
| Chlamydial infection                | 29.3<br>(22.9 to 36.7)                             | 3.8<br>(2.4 to 5.6)                          | 26.3%<br>(13.5% to 41.2%)               | -3.2%<br>(-13.0% to 8.2%)                        |
| Gonococcal infection                | 6.1<br>(4.7 to 7.8)                                | 0.8<br>(0.5 to 1.2)                          | 24.2%<br>(21.3% to 27.2%)               | -4.8%<br>(-7.1% to -2.5%)                        |
| <b>All causes</b>                   | <b>168.1</b><br><b>(134.0 to 209.6)</b>            | <b>21.6</b><br><b>(14.3 to 30.9)</b>         | <b>24.6%</b><br><b>(17.8% to 32.6%)</b> | <b>-4.5%</b><br><b>(-9.7% to 1.6%)</b>           |

SR Table 13h: Global prevalence and years lived with disability (YLDs) for 2016, percentage change of YLD counts and rates between 2006 and 2016 of pelvic inflammatory disease by cause, ages 60-64 years

| Cause                               | Prevalence in thousands (95% uncertainty interval) | YLDs in thousands (95% uncertainty interval) |                                         |                                                  |
|-------------------------------------|----------------------------------------------------|----------------------------------------------|-----------------------------------------|--------------------------------------------------|
|                                     |                                                    | 2016                                         | 2016                                    | Percentage change in rates between 2006 and 2016 |
|                                     | 81.2<br>(62.4 to 104.4)                            | 10.3<br>(6.5 to 15.2)                        | 55.8%<br>(43.4% to 72.1%)               | 3.3%<br>(-4.9% to 14.1%)                         |
| Other sexually transmitted diseases |                                                    |                                              |                                         |                                                  |
| Chlamydial infection                | 13.1<br>(9.8 to 17.3)                              | 1.7<br>(1.1 to 2.7)                          | 50.2%<br>(32.7% to 71.8%)               | -0.4%<br>(-12.0% to 13.9%)                       |
| Gonococcal infection                | 3.1<br>(2.3 to 4.2)                                | 0.4<br>(0.3 to 0.7)                          | 50.7%<br>(45.6% to 57.0%)               | -0.1%<br>(-3.5% to 4.1%)                         |
| <b>All causes</b>                   | <b>97.5</b><br><b>(75.0 to 125.4)</b>              | <b>12.5</b><br><b>(7.8 to 18.4)</b>          | <b>54.8%</b><br><b>(44.4% to 68.9%)</b> | <b>2.7%</b><br><b>(-4.2% to 12.1%)</b>           |

SR Table 13h: Global prevalence and years lived with disability (YLDs) for 2016, percentage change of YLD counts and rates between 2006 and 2016 of pelvic inflammatory disease by cause, ages 65-69 years

| Cause                               | Prevalence in thousands (95% uncertainty interval) | YLDs in thousands (95% uncertainty interval) |                                                   |                                                  |
|-------------------------------------|----------------------------------------------------|----------------------------------------------|---------------------------------------------------|--------------------------------------------------|
|                                     | 2016                                               | 2016                                         | Percentage change in counts between 2006 and 2016 | Percentage change in rates between 2006 and 2016 |
| Other sexually transmitted diseases | 22.5<br>(17.1 to 28.8)                             | 2.9<br>(1.8 to 4.2)                          | 34.8%<br>(22.6% to 50.4%)                         | 1.8%<br>(-7.4% to 13.5%)                         |
| Chlamydial infection                | 3.4<br>(2.6 to 4.5)                                | 0.5<br>(0.3 to 0.7)                          | 30.0%<br>(25.5% to 35.7%)                         | -1.9%<br>(-5.3% to 2.4%)                         |
| Gonococcal infection                | 0.8<br>(0.6 to 1.1)                                | 0.1<br>(0.1 to 0.2)                          | 30.8%<br>(26.4% to 36.7%)                         | -1.3%<br>(-4.6% to 3.1%)                         |
| <b>All causes</b>                   | <b>26.7</b><br><b>(20.4 to 34.2)</b>               | <b>3.5</b><br><b>(2.2 to 5.0)</b>            | <b>34.0%</b><br><b>(23.6% to 47.5%)</b>           | <b>1.1%</b><br><b>(-6.7% to 11.3%)</b>           |

SR Table 13h: Global prevalence and years lived with disability (YLDs) for 2016, percentage change of YLD counts and rates between 2006 and 2016 of pelvic inflammatory disease by cause, ages 70-74 years

| Cause                               | Prevalence in thousands (95% uncertainty interval) | YLDs in thousands (95% uncertainty interval) |                                         |                                                  |
|-------------------------------------|----------------------------------------------------|----------------------------------------------|-----------------------------------------|--------------------------------------------------|
|                                     |                                                    | 2016                                         | 2016                                    | Percentage change in rates between 2006 and 2016 |
| Other sexually transmitted diseases | 0.3<br>(0.2 to 0.3)                                | <0.05<br>(<0.05 to 0.1)                      | 15.7%<br>(11.1% to 21.8%)               | -3.3%<br>(-7.1% to 1.8%)                         |
| Chlamydial infection                | <0.05<br>(<0.05 to <0.05)                          | <0.05<br>(<0.05 to <0.05)                    | 14.8%<br>(11.3% to 19.4%)               | -4.1%<br>(-7.0% to -0.2%)                        |
| Gonococcal infection                | <0.05<br>(<0.05 to <0.05)                          | <0.05<br>(<0.05 to <0.05)                    | 14.8%<br>(11.3% to 19.5%)               | -4.1%<br>(-7.0% to -0.1%)                        |
| <b>All causes</b>                   | <b>0.3</b><br><b>(0.2 to 0.4)</b>                  | <b>&lt;0.05</b><br><b>(&lt;0.05 to 0.1)</b>  | <b>15.6%</b><br><b>(11.2% to 21.3%)</b> | <b>-3.4%</b><br><b>(-7.0% to 1.4%)</b>           |

SR Table 13h: Global prevalence and years lived with disability (YLDs) for 2016, percentage change of YLD counts and rates between 2006 and 2016 of pelvic inflammatory disease by cause, ages 75-79 years

| Cause                               | Prevalence in thousands (95% uncertainty interval) | YLDs in thousands (95% uncertainty interval) |                                                   |                                                  |
|-------------------------------------|----------------------------------------------------|----------------------------------------------|---------------------------------------------------|--------------------------------------------------|
|                                     | 2016                                               | 2016                                         | Percentage change in counts between 2006 and 2016 | Percentage change in rates between 2006 and 2016 |
| Other sexually transmitted diseases | <0.05<br>(<0.05 to <0.05)                          | <0.05<br>(<0.05 to <0.05)                    | 19.5%<br>(-43.4% to 65.1%)                        | -3.9%<br>(-54.5% to 32.7%)                       |
| Chlamydial infection                | <0.05<br>(<0.05 to <0.05)                          | <0.05<br>(<0.05 to <0.05)                    | 20.5%<br>(-35.2% to 72.5%)                        | -3.1%<br>(-47.9% to 38.7%)                       |
| Gonococcal infection                | <0.05<br>(<0.05 to <0.05)                          | <0.05<br>(<0.05 to <0.05)                    | 18.7%<br>(-40.6% to 59.1%)                        | -4.5%<br>(-52.2% to 27.9%)                       |
| All causes                          | <0.05<br>(<0.05 to <0.05)                          | <0.05<br>(<0.05 to <0.05)                    | 19.6%<br>(-42.3% to 66.0%)                        | -3.9%<br>(-53.6% to 33.5%)                       |

| SR Table 13h: Global prevalence and years lived with disability (YLDs) for 2016, percentage change of YLD counts and rates between 2006 and 2016 of pelvic inflammatory disease by cause, ages 80-84 |                                                    |                                                  |                                                   |                                                  |
|------------------------------------------------------------------------------------------------------------------------------------------------------------------------------------------------------|----------------------------------------------------|--------------------------------------------------|---------------------------------------------------|--------------------------------------------------|
| Cause                                                                                                                                                                                                | Prevalence in thousands (95% uncertainty interval) | YLDs in thousands (95% uncertainty interval)     |                                                   |                                                  |
|                                                                                                                                                                                                      |                                                    | 2016                                             | Percentage change in counts between 2006 and 2016 | Percentage change in rates between 2006 and 2016 |
| Other sexually transmitted diseases                                                                                                                                                                  | <0.05<br>(<0.05 to <0.05)                          | <0.05<br>(<0.05 to <0.05)                        | 25.7%<br>(-40.3% to 123.2%)                       | -4.0%<br>(-54.4% to 70.4%)                       |
| Chlamydial infection                                                                                                                                                                                 | <0.05<br>(<0.05 to <0.05)                          | <0.05<br>(<0.05 to <0.05)                        | 26.1%<br>(-33.6% to 131.3%)                       | -3.7%<br>(-49.3% to 76.6%)                       |
| Gonococcal infection                                                                                                                                                                                 | <0.05<br>(<0.05 to <0.05)                          | <0.05<br>(<0.05 to <0.05)                        | 23.1%<br>(-37.2% to 124.7%)                       | -6.0%<br>(-52.0% to 71.6%)                       |
| <b>All causes</b>                                                                                                                                                                                    | <b>&lt;0.05</b><br><b>(&lt;0.05 to &lt;0.05)</b>   | <b>&lt;0.05</b><br><b>(&lt;0.05 to &lt;0.05)</b> | <b>25.7%</b><br><b>(-39.9% to 127.3%)</b>         | <b>-4.0%</b><br><b>(-54.1% to 73.5%)</b>         |

| SR Table 13h: Global prevalence and years lived with disability (YLDs) for 2016, percentage change of YLD counts and rates between 2006 and 2016 of pelvic inflammatory disease by cause, ages 85-89 |                                                    |                                              |                                                   |                                                  |
|------------------------------------------------------------------------------------------------------------------------------------------------------------------------------------------------------|----------------------------------------------------|----------------------------------------------|---------------------------------------------------|--------------------------------------------------|
| Cause                                                                                                                                                                                                | Prevalence in thousands (95% uncertainty interval) | YLDs in thousands (95% uncertainty interval) |                                                   |                                                  |
|                                                                                                                                                                                                      |                                                    | 2016                                         | Percentage change in counts between 2006 and 2016 | Percentage change in rates between 2006 and 2016 |
| Other sexually transmitted diseases                                                                                                                                                                  | <0.05<br>(<0.05 to <0.05)                          | <0.05<br>(<0.05 to <0.05)                    | --                                                | --                                               |
| Chlamydial infection                                                                                                                                                                                 | <0.05<br>(<0.05 to <0.05)                          | <0.05<br>(<0.05 to <0.05)                    | --                                                | --                                               |
| Gonococcal infection                                                                                                                                                                                 | <0.05<br>(<0.05 to <0.05)                          | <0.05<br>(<0.05 to <0.05)                    | --                                                | --                                               |
| All causes                                                                                                                                                                                           | <0.05<br>(<0.05 to <0.05)                          | <0.05<br>(<0.05 to <0.05)                    | --                                                | --                                               |

| SR Table 13h: Global prevalence and years lived with disability (YLDs) for 2016, percentage change of YLD counts and rates between 2006 and 2016 of pelvic inflammatory disease by cause, ages 90-94 |                                                    |                                              |                                                   |                                                  |
|------------------------------------------------------------------------------------------------------------------------------------------------------------------------------------------------------|----------------------------------------------------|----------------------------------------------|---------------------------------------------------|--------------------------------------------------|
| Cause                                                                                                                                                                                                | Prevalence in thousands (95% uncertainty interval) | YLDs in thousands (95% uncertainty interval) |                                                   |                                                  |
|                                                                                                                                                                                                      |                                                    | 2016                                         | Percentage change in counts between 2006 and 2016 | Percentage change in rates between 2006 and 2016 |
| Other sexually transmitted diseases                                                                                                                                                                  | <0.05<br>(<0.05 to <0.05)                          | <0.05<br>(<0.05 to <0.05)                    | --                                                | --                                               |
| Chlamydial infection                                                                                                                                                                                 | <0.05<br>(<0.05 to <0.05)                          | <0.05<br>(<0.05 to <0.05)                    | --                                                | --                                               |
| Gonococcal infection                                                                                                                                                                                 | <0.05<br>(<0.05 to <0.05)                          | <0.05<br>(<0.05 to <0.05)                    | --                                                | --                                               |
| All causes                                                                                                                                                                                           | <0.05<br>(<0.05 to <0.05)                          | <0.05<br>(<0.05 to <0.05)                    | --                                                | --                                               |



SR Table 13h: Global prevalence and years lived with disability (YLDs) for 2016, percentage change of YLD counts and rates between 2006 and 2016 of vision loss by cause, ages 0-6 days

| Cause                                                    | Prevalence in thousands (95% uncertainty interval) | YLDs in thousands (95% uncertainty interval) |                                         |                                                  |
|----------------------------------------------------------|----------------------------------------------------|----------------------------------------------|-----------------------------------------|--------------------------------------------------|
|                                                          |                                                    | 2016                                         | 2016                                    | Percentage change in rates between 2006 and 2016 |
| Neonatal sepsis and other neonatal infections            | 8.3<br>(3.6 to 18.3)                               | 4.3<br>(1.8 to 10.1)                         | -4.8%<br>(-8.2% to -1.2%)               | -4.3%<br>(-7.7% to -0.7%)                        |
| Refraction and accommodation disorders                   | 54.4<br>(49.1 to 59.7)                             | 0.6<br>(0.3 to 1.1)                          | -6.4%<br>(-8.0% to -4.7%)               | -5.9%<br>(-7.6% to -4.3%)                        |
| Near vision impairment                                   | 53.1<br>(47.9 to 58.2)                             | 0.6<br>(0.3 to 1.0)                          | -6.1%<br>(-7.8% to -4.5%)               | -5.6%<br>(-7.3% to -4.0%)                        |
| Other vision loss                                        | 9.5<br>(5.4 to 15.5)                               | 0.5<br>(0.3 to 0.9)                          | -8.5%<br>(-14.0% to -4.1%)              | -8.0%<br>(-13.5% to -3.6%)                       |
| Neonatal preterm birth complications                     | 2.9<br>(2.1 to 3.9)                                | 0.4<br>(0.2 to 0.5)                          | -1.7%<br>(-8.7% to 4.7%)                | -1.2%<br>(-8.2% to 5.3%)                         |
| Neonatal encephalopathy due to birth asphyxia and trauma | 0.1<br>(0.1 to 0.2)                                | <0.05<br>(<0.05 to 0.1)                      | -9.1%<br>(-19.7% to 0.4%)               | -8.7%<br>(-19.3% to 0.9%)                        |
| Haemolytic disease and other neonatal jaundice           | <0.05<br>(<0.05 to <0.05)                          | <0.05<br>(<0.05 to <0.05)                    | -1.9%<br>(-15.4% to 9.9%)               | -1.4%<br>(-15.0% to 10.5%)                       |
| Other meningitis                                         | <0.05<br>(<0.05 to <0.05)                          | <0.05<br>(<0.05 to <0.05)                    | 46.8%<br>(10.6% to 97.1%)               | 47.5%<br>(11.2% to 98.1%)                        |
| Encephalitis                                             | <0.05<br>(<0.05 to <0.05)                          | <0.05<br>(<0.05 to <0.05)                    | -23.1%<br>(-41.8% to 1.1%)              | -22.7%<br>(-41.5% to 1.7%)                       |
| Meningococcal infection                                  | <0.05<br>(<0.05 to <0.05)                          | <0.05<br>(<0.05 to <0.05)                    | -8.5%<br>(-31.8% to 22.7%)              | -8.0%<br>(-31.4% to 23.3%)                       |
| Pneumococcal meningitis                                  | <0.05<br>(<0.05 to <0.05)                          | <0.05<br>(<0.05 to <0.05)                    | -31.6%<br>(-47.2% to -12.0%)            | -31.3%<br>(-46.9% to -11.5%)                     |
| H influenzae type B meningitis                           | <0.05<br>(<0.05 to <0.05)                          | <0.05<br>(<0.05 to <0.05)                    | -53.4%<br>(-62.8% to -42.9%)            | -53.2%<br>(-62.6% to -42.6%)                     |
| Tetanus                                                  | <0.05<br>(<0.05 to <0.05)                          | <0.05<br>(<0.05 to <0.05)                    | -28.6%<br>(-38.9% to -19.0%)            | -28.2%<br>(-38.6% to -18.6%)                     |
| <b>All causes</b>                                        | <b>75.4</b><br><b>(66.1 to 88.2)</b>               | <b>5.8</b><br><b>(3.1 to 11.5)</b>           | <b>-5.1%</b><br><b>(-7.6% to -2.7%)</b> | <b>-4.6%</b><br><b>(-7.2% to -2.1%)</b>          |

SR Table 13h: Global prevalence and years lived with disability (YLDs) for 2016, percentage change of YLD counts and rates between 2006 and 2016 of vision loss by cause, ages 7-27 days

| Cause                                                    | Prevalence in thousands (95% uncertainty interval) | YLDs in thousands (95% uncertainty interval) |                                                   |                                                  |
|----------------------------------------------------------|----------------------------------------------------|----------------------------------------------|---------------------------------------------------|--------------------------------------------------|
|                                                          |                                                    | 2016                                         | Percentage change in counts between 2006 and 2016 | Percentage change in rates between 2006 and 2016 |
| Neonatal sepsis and other neonatal infections            | 23.8<br>(10.2 to 52.9)                             | 12.3<br>(5.2 to 28.1)                        | -3.2%<br>(-6.8% to 0.7%)                          | -3.0%<br>(-6.6% to 0.9%)                         |
| Refraction and accommodation disorders                   | 170.6<br>(153.5 to 187.4)                          | 2.1<br>(1.1 to 3.9)                          | -6.7%<br>(-8.5% to -4.9%)                         | -6.5%<br>(-8.3% to -4.8%)                        |
| Near vision impairment                                   | 158.0<br>(142.5 to 173.0)                          | 1.7<br>(0.8 to 3.1)                          | -5.8%<br>(-7.6% to -4.2%)                         | -5.6%<br>(-7.4% to -4.0%)                        |
| Other vision loss                                        | 21.3<br>(12.8 to 33.4)                             | 1.3<br>(0.7 to 2.2)                          | -7.4%<br>(-12.8% to -2.5%)                        | -7.3%<br>(-12.6% to -2.3%)                       |
| Neonatal preterm birth complications                     | 8.7<br>(6.3 to 11.4)                               | 1.0<br>(0.7 to 1.5)                          | -1.2%<br>(-8.4% to 5.2%)                          | -1.1%<br>(-8.3% to 5.4%)                         |
| Neonatal encephalopathy due to birth asphyxia and trauma | 0.3<br>(0.2 to 0.6)                                | 0.1<br>(0.1 to 0.2)                          | -8.0%<br>(-18.2% to 1.4%)                         | -7.9%<br>(-18.0% to 1.6%)                        |
| Haemolytic disease and other neonatal jaundice           | 0.1<br>(<0.05 to 0.1)                              | <0.05<br>(<0.05 to <0.05)                    | -1.7%<br>(-14.7% to 9.7%)                         | -1.5%<br>(-14.5% to 9.9%)                        |
| Other meningitis                                         | <0.05<br>(<0.05 to 0.1)                            | <0.05<br>(<0.05 to <0.05)                    | 49.7%<br>(12.0% to 98.8%)                         | 50.0%<br>(12.2% to 99.1%)                        |
| Meningococcal infection                                  | <0.05<br>(<0.05 to 0.1)                            | <0.05<br>(<0.05 to <0.05)                    | -7.5%<br>(-31.8% to 22.5%)                        | -7.3%<br>(-31.7% to 22.7%)                       |
| Encephalitis                                             | <0.05<br>(<0.05 to 0.1)                            | <0.05<br>(<0.05 to <0.05)                    | -22.5%<br>(-39.9% to -0.1%)                       | -22.3%<br>(-39.8% to 0.1%)                       |
| Pneumococcal meningitis                                  | <0.05<br>(<0.05 to <0.05)                          | <0.05<br>(<0.05 to <0.05)                    | -31.9%<br>(-47.7% to -12.9%)                      | -31.7%<br>(-47.6% to -12.8%)                     |
| H influenzae type B meningitis                           | <0.05<br>(<0.05 to <0.05)                          | <0.05<br>(<0.05 to <0.05)                    | -52.1%<br>(-61.1% to -42.7%)                      | -52.0%<br>(-61.1% to -42.6%)                     |
| Tetanus                                                  | <0.05<br>(<0.05 to <0.05)                          | <0.05<br>(<0.05 to <0.05)                    | -29.0%<br>(-39.0% to -20.0%)                      | -28.9%<br>(-38.9% to -19.8%)                     |
| Malaria                                                  | <0.05<br>(<0.05 to <0.05)                          | <0.05<br>(<0.05 to <0.05)                    | 0.7%<br>(-12.5% to 14.0%)                         | 0.9%<br>(-12.3% to 14.3%)                        |
| <b>All causes</b>                                        | <b>224.9</b><br><b>(198.0 to 262.2)</b>            | <b>16.9</b><br><b>(9.0 to 32.9)</b>          | <b>-3.9%</b><br><b>(-6.6% to -1.2%)</b>           | <b>-3.7%</b><br><b>(-6.4% to -1.0%)</b>          |

SR Table 13h: Global prevalence and years lived with disability (YLDs) for 2016, percentage change of YLD counts and rates between 2006 and 2016 of vision loss by cause, ages 28-364 days

| Cause                                                    | Prevalence in thousands (95% uncertainty interval) | YLDs in thousands (95% uncertainty interval) |                                                   |                                                  |
|----------------------------------------------------------|----------------------------------------------------|----------------------------------------------|---------------------------------------------------|--------------------------------------------------|
|                                                          |                                                    | 2016                                         | Percentage change in counts between 2006 and 2016 | Percentage change in rates between 2006 and 2016 |
| Neonatal sepsis and other neonatal infections            | 267.3<br>(110.4 to 613.9)                          | 137.7<br>(55.9 to 328.4)                     | 5.6%<br>(0.2% to 12.7%)                           | 4.7%<br>(-0.6% to 11.8%)                         |
| Refraction and accommodation disorders                   | 3,008.3<br>(2,728.1 to 3,299.8)                    | 43.6<br>(24.5 to 76.0)                       | -5.8%<br>(-7.5% to -4.2%)                         | -6.6%<br>(-8.3% to -4.9%)                        |
| Near vision impairment                                   | 2,532.5<br>(2,303.2 to 2,763.0)                    | 26.6<br>(12.7 to 49.2)                       | -4.9%<br>(-6.6% to -3.2%)                         | -5.7%<br>(-7.4% to -4.0%)                        |
| Neonatal preterm birth complications                     | 140.7<br>(103.1 to 182.9)                          | 17.9<br>(12.6 to 24.8)                       | -1.5%<br>(-7.7% to 5.2%)                          | -2.3%<br>(-8.5% to 4.4%)                         |
| Other vision loss                                        | 92.7<br>(62.4 to 131.3)                            | 5.1<br>(2.9 to 8.2)                          | -5.0%<br>(-11.6% to 1.5%)                         | -5.8%<br>(-12.4% to 0.6%)                        |
| Neonatal encephalopathy due to birth asphyxia and trauma | 5.6<br>(3.0 to 9.6)                                | 2.4<br>(1.2 to 4.4)                          | 3.4%<br>(-7.6% to 15.6%)                          | 2.6%<br>(-8.4% to 14.7%)                         |
| Haemolytic disease and other neonatal jaundice           | 1.5<br>(1.1 to 2.1)                                | 0.6<br>(0.4 to 0.9)                          | 0.6%<br>(-10.2% to 10.2%)                         | -0.2%<br>(-10.9% to 9.2%)                        |
| Other meningitis                                         | 3.2<br>(1.7 to 5.0)                                | 0.1<br>(0.1 to 0.2)                          | 64.4%<br>(29.0% to 109.1%)                        | 63.1%<br>(28.0% to 107.4%)                       |
| Meningococcal infection                                  | 2.1<br>(1.1 to 3.4)                                | 0.1<br>(<0.05 to 0.2)                        | -3.1%<br>(-25.5% to 26.4%)                        | -3.9%<br>(-26.1% to 25.4%)                       |
| Encephalitis                                             | 2.0<br>(1.1 to 3.2)                                | 0.1<br>(<0.05 to 0.1)                        | -18.8%<br>(-34.9% to 0.9%)                        | -19.5%<br>(-35.5% to 0.1%)                       |
| Pneumococcal meningitis                                  | 2.0<br>(1.2 to 3.2)                                | 0.1<br>(<0.05 to 0.1)                        | -30.1%<br>(-42.8% to -16.3%)                      | -30.7%<br>(-43.3% to -17.0%)                     |
| Malaria                                                  | 0.1<br>(0.1 to 0.1)                                | <0.05<br>(<0.05 to 0.1)                      | 4.1%<br>(-7.4% to 16.5%)                          | 3.2%<br>(-8.2% to 15.5%)                         |
| H influenzae type B meningitis                           | 1.0<br>(0.4 to 1.8)                                | <0.05<br>(<0.05 to <0.05)                    | -47.9%<br>(-56.6% to -38.8%)                      | -48.3%<br>(-56.9% to -39.3%)                     |
| Tetanus                                                  | <0.05<br>(<0.05 to <0.05)                          | <0.05<br>(<0.05 to <0.05)                    | -24.8%<br>(-34.2% to -15.5%)                      | -25.4%<br>(-34.7% to -16.2%)                     |
| <b>All causes</b>                                        | <b>3,526.5</b><br><b>(3,173.1 to 3,992.3)</b>      | <b>207.7</b><br><b>(118.0 to 394.8)</b>      | <b>2.0%</b><br><b>(-2.0% to 6.4%)</b>             | <b>1.2%</b><br><b>(-2.8% to 5.5%)</b>            |

SR Table 13h: Global prevalence and years lived with disability (YLDs) for 2016, percentage change of YLD counts and rates between 2006 and 2016 of vision loss by cause, ages 1-4 years

| Cause                                                    | Prevalence in thousands (95% uncertainty interval) | YLDs in thousands (95% uncertainty interval) |                                                   |                                                  |
|----------------------------------------------------------|----------------------------------------------------|----------------------------------------------|---------------------------------------------------|--------------------------------------------------|
|                                                          |                                                    | 2016                                         | Percentage change in counts between 2006 and 2016 | Percentage change in rates between 2006 and 2016 |
| Refraction and accommodation disorders                   | 18,253.6<br>(16,391.3 to 20,497.9)                 | 370.2<br>(218.5 to 603.3)                    | 0.6%<br>(-1.0% to 2.0%)                           | -4.7%<br>(-6.2% to -3.4%)                        |
| Near vision impairment                                   | 11,379.1<br>(10,581.6 to 12,174.6)                 | 119.4<br>(56.1 to 220.1)                     | -0.7%<br>(-2.2% to 1.0%)                          | -5.9%<br>(-7.4% to -4.4%)                        |
| Neonatal sepsis and other neonatal infections            | 591.5<br>(222.7 to 1,408.7)                        | 306.3<br>(107.8 to 742.2)                    | 25.7%<br>(16.5% to 39.7%)                         | 19.0%<br>(10.3% to 32.3%)                        |
| Neonatal preterm birth complications                     | 647.8<br>(486.9 to 828.6)                          | 91.9<br>(65.9 to 123.9)                      | 3.4%<br>(-3.5% to 10.8%)                          | -2.0%<br>(-8.6% to 5.0%)                         |
| Vitamin A deficiency                                     | 1,369.9<br>(876.3 to 2,029.0)                      | 59.6<br>(33.9 to 97.2)                       | 4.6%<br>(-0.6% to 9.9%)                           | -0.9%<br>(-5.8% to 4.1%)                         |
| Other vision loss                                        | 368.3<br>(265.3 to 502.9)                          | 17.9<br>(10.9 to 27.3)                       | 3.4%<br>(-1.5% to 8.7%)                           | -2.1%<br>(-6.7% to 3.0%)                         |
| Neonatal encephalopathy due to birth asphyxia and trauma | 20.7<br>(3.9 to 53.5)                              | 9.1<br>(1.6 to 23.7)                         | 32.1%<br>(11.6% to 88.4%)                         | 25.1%<br>(5.7% to 78.4%)                         |
| Haemolytic disease and other neonatal jaundice           | 9.7<br>(7.0 to 13.1)                               | 4.3<br>(2.8 to 6.1)                          | 3.7%<br>(-5.2% to 13.2%)                          | -1.8%<br>(-10.2% to 7.3%)                        |
| Malaria                                                  | 6.1<br>(4.0 to 8.8)                                | 2.9<br>(1.7 to 4.5)                          | 4.5%<br>(-6.8% to 15.0%)                          | -1.0%<br>(-11.7% to 8.9%)                        |
| Encephalitis                                             | 37.5<br>(20.1 to 62.4)                             | 1.1<br>(0.6 to 1.9)                          | -8.4%<br>(-25.7% to 13.5%)                        | -13.2%<br>(-29.6% to 7.5%)                       |
| Other meningitis                                         | 34.4<br>(18.4 to 53.2)                             | 0.9<br>(0.5 to 1.6)                          | 85.0%<br>(51.4% to 128.0%)                        | 75.3%<br>(43.4% to 115.9%)                       |
| Meningococcal infection                                  | 20.6<br>(11.6 to 32.3)                             | 0.8<br>(0.4 to 1.3)                          | 8.8%<br>(-14.1% to 36.7%)                         | 3.0%<br>(-18.6% to 29.5%)                        |
| Pneumococcal meningitis                                  | 24.2<br>(14.5 to 38.7)                             | 0.6<br>(0.3 to 1.0)                          | -22.7%<br>(-35.8% to -8.0%)                       | -26.8%<br>(-39.1% to -12.9%)                     |
| H influenzae type B meningitis                           | 11.4<br>(4.9 to 20.5)                              | 0.2<br>(0.1 to 0.4)                          | -44.9%<br>(-54.9% to -33.8%)                      | -47.8%<br>(-57.3% to -37.2%)                     |
| Tetanus                                                  | <0.05<br>(<0.05 to <0.05)                          | <0.05<br>(<0.05 to <0.05)                    | -23.0%<br>(-35.6% to -11.1%)                      | -27.1%<br>(-39.0% to -15.8%)                     |
| <b>All causes</b>                                        | <b>21,395.8</b><br><b>(19,111.9 to 24,304.2)</b>   | <b>865.8</b><br><b>(558.7 to 1,378.7)</b>    | <b>9.3%</b><br><b>(4.7% to 15.2%)</b>             | <b>3.5%</b><br><b>(-0.8% to 9.1%)</b>            |

SR Table 13h: Global prevalence and years lived with disability (YLDs) for 2016, percentage change of YLD counts and rates between 2006 and 2016 of vision loss by cause, ages 5-9 years

| Cause                                                    | Prevalence in thousands (95% uncertainty interval) | YLDs in thousands (95% uncertainty interval) |                                                   |                                                  |
|----------------------------------------------------------|----------------------------------------------------|----------------------------------------------|---------------------------------------------------|--------------------------------------------------|
|                                                          |                                                    | 2016                                         | Percentage change in counts between 2006 and 2016 | Percentage change in rates between 2006 and 2016 |
| Refraction and accommodation disorders                   | 27,796.1<br>(24,550.7 to 31,481.0)                 | 622.6<br>(373.6 to 990.0)                    | 3.5%<br>(1.9% to 4.9%)                            | -3.9%<br>(-5.3% to -2.6%)                        |
| Near vision impairment                                   | 15,338.2<br>(14,201.5 to 16,502.9)                 | 160.9<br>(76.1 to 301.9)                     | 0.8%<br>(-0.8% to 2.3%)                           | -6.4%<br>(-7.9% to -5.0%)                        |
| Neonatal sepsis and other neonatal infections            | 492.1<br>(152.3 to 1,253.4)                        | 253.2<br>(74.2 to 664.4)                     | 32.7%<br>(20.9% to 51.7%)                         | 23.2%<br>(12.3% to 40.9%)                        |
| Neonatal preterm birth complications                     | 854.6<br>(655.4 to 1,078.3)                        | 140.7<br>(99.8 to 191.0)                     | 10.3%<br>(1.5% to 19.1%)                          | 2.5%<br>(-5.7% to 10.6%)                         |
| Vitamin A deficiency                                     | 1,047.7<br>(640.9 to 1,585.9)                      | 43.3<br>(24.2 to 74.6)                       | 8.3%<br>(1.8% to 15.1%)                           | 0.6%<br>(-5.5% to 6.9%)                          |
| Other vision loss                                        | 467.4<br>(316.6 to 653.7)                          | 21.5<br>(12.4 to 32.6)                       | 8.1%<br>(2.8% to 13.8%)                           | 0.4%<br>(-4.5% to 5.7%)                          |
| Neonatal encephalopathy due to birth asphyxia and trauma | 30.5<br>(5.2 to 85.8)                              | 13.9<br>(2.2 to 40.4)                        | 42.3%<br>(19.8% to 98.1%)                         | 32.1%<br>(11.3% to 84.0%)                        |
| Malaria                                                  | 24.7<br>(18.7 to 31.0)                             | 12.2<br>(8.1 to 16.4)                        | 14.4%<br>(5.7% to 21.7%)                          | 6.2%<br>(-1.8% to 13.1%)                         |
| Haemolytic disease and other neonatal jaundice           | 16.7<br>(12.5 to 21.0)                             | 7.7<br>(5.2 to 10.6)                         | 9.9%<br>(0.1% to 18.4%)                           | 2.0%<br>(-7.1% to 10.0%)                         |
| Encephalitis                                             | 102.5<br>(51.7 to 175.2)                           | 2.8<br>(1.4 to 5.0)                          | -2.6%<br>(-20.6% to 18.3%)                        | -9.6%<br>(-26.2% to 9.9%)                        |
| Other meningitis                                         | 56.2<br>(29.3 to 89.3)                             | 1.4<br>(0.7 to 2.5)                          | 88.4%<br>(55.3% to 126.9%)                        | 75.0%<br>(44.2% to 110.8%)                       |
| Meningococcal infection                                  | 31.5<br>(17.8 to 49.6)                             | 1.1<br>(0.6 to 1.8)                          | 12.1%<br>(-11.4% to 42.1%)                        | 4.1%<br>(-17.7% to 32.0%)                        |
| Pneumococcal meningitis                                  | 43.9<br>(25.9 to 71.1)                             | 1.0<br>(0.5 to 1.7)                          | -20.6%<br>(-33.0% to -6.3%)                       | -26.3%<br>(-37.8% to -13.0%)                     |
| H influenzae type B meningitis                           | 19.4<br>(8.3 to 34.7)                              | 0.3<br>(0.1 to 0.7)                          | -46.5%<br>(-56.7% to -35.7%)                      | -50.3%<br>(-59.7% to -40.2%)                     |
| Tetanus                                                  | <0.05<br>(<0.05 to <0.05)                          | <0.05<br>(<0.05 to <0.05)                    | -27.5%<br>(-48.4% to -1.1%)                       | -32.7%<br>(-52.1% to -8.1%)                      |
| <b>All causes</b>                                        | <b>30,983.2</b><br><b>(27,274.8 to 35,214.3)</b>   | <b>1,121.8</b><br><b>(741.4 to 1,699.6)</b>  | <b>10.7%</b><br><b>(6.8% to 16.7%)</b>            | <b>2.8%</b><br><b>(-0.8% to 8.4%)</b>            |

SR Table 13i: Global prevalence and years lived with disability (YLDs) for 2016, percentage change of YLD counts and rates between 2006 and 2016 of vision loss by cause, ages 10-14 years

| Cause                                                    | Prevalence in thousands (95% uncertainty interval) | YLDs in thousands (95% uncertainty interval) |                                      |                                                   |
|----------------------------------------------------------|----------------------------------------------------|----------------------------------------------|--------------------------------------|---------------------------------------------------|
|                                                          |                                                    | 2016                                         | 2016                                 | Percentage change in counts between 2006 and 2016 |
| Refraction and accommodation disorders                   | 27,645.7<br>(24,412.8 to 31,110.6)                 | 608.8<br>(371.9 to 960.1)                    | -1.8%<br>(-3.1% to -0.3%)            | -2.6%<br>(-3.9% to -1.2%)                         |
| Near vision impairment                                   | 16,119.0<br>(14,907.8 to 17,451.4)                 | 168.8<br>(79.5 to 317.7)                     | -3.6%<br>(-5.1% to -2.0%)            | -4.4%<br>(-5.8% to -2.8%)                         |
| Neonatal sepsis and other neonatal infections            | 401.9<br>(118.1 to 1,031.4)                        | 205.1<br>(55.9 to 555.5)                     | 26.1%<br>(15.8% to 41.5%)            | 25.0%<br>(14.8% to 40.3%)                         |
| Neonatal preterm birth complications                     | 832.2<br>(639.6 to 1,050.1)                        | 143.9<br>(100.7 to 195.0)                    | 5.4%<br>(-4.4% to 16.0%)             | 4.5%<br>(-5.2% to 15.1%)                          |
| Vitamin A deficiency                                     | 589.4<br>(383.0 to 870.1)                          | 25.4<br>(14.2 to 41.6)                       | 5.6%<br>(-1.3% to 12.8%)             | 4.8%<br>(-2.2% to 11.9%)                          |
| Other vision loss                                        | 450.4<br>(313.0 to 621.1)                          | 22.0<br>(13.0 to 34.2)                       | -0.1%<br>(-6.4% to 6.6%)             | -0.9%<br>(-7.2% to 5.8%)                          |
| Malaria                                                  | 31.2<br>(25.4 to 37.3)                             | 15.5<br>(11.0 to 20.1)                       | 17.9%<br>(6.9% to 27.1%)             | 16.9%<br>(6.0% to 26.0%)                          |
| Neonatal encephalopathy due to birth asphyxia and trauma | 31.4<br>(6.1 to 87.6)                              | 14.6<br>(2.6 to 41.6)                        | 31.3%<br>(16.5% to 62.8%)            | 30.2%<br>(15.5% to 61.4%)                         |
| Haemolytic disease and other neonatal jaundice           | 17.6<br>(13.8 to 21.6)                             | 8.2<br>(5.7 to 11.0)                         | 5.7%<br>(-1.9% to 12.5%)             | 4.9%<br>(-2.7% to 11.6%)                          |
| Encephalitis                                             | 133.8<br>(64.6 to 241.0)                           | 3.6<br>(1.8 to 6.3)                          | -9.8%<br>(-23.4% to 8.0%)            | -10.5%<br>(-24.0% to 7.1%)                        |
| Other meningitis                                         | 55.1<br>(28.8 to 89.4)                             | 1.4<br>(0.7 to 2.5)                          | 86.6%<br>(58.0% to 122.6%)           | 85.0%<br>(56.7% to 120.8%)                        |
| Meningococcal infection                                  | 28.6<br>(16.2 to 45.3)                             | 1.0<br>(0.6 to 1.7)                          | 10.8%<br>(-10.5% to 39.1%)           | 9.9%<br>(-11.3% to 38.0%)                         |
| Pneumococcal meningitis                                  | 47.1<br>(27.8 to 75.8)                             | 1.0<br>(0.5 to 1.8)                          | -20.2%<br>(-32.1% to -7.3%)          | -20.9%<br>(-32.7% to -8.1%)                       |
| H influenzae type B meningitis                           | 19.5<br>(8.2 to 34.9)                              | 0.3<br>(0.1 to 0.7)                          | -46.5%<br>(-56.1% to -35.3%)         | -47.0%<br>(-56.4% to -35.9%)                      |
| Onchocerciasis                                           | <0.05<br>(<0.05 to 0.1)                            | <0.05<br>(<0.05 to <0.05)                    | -53.0%<br>(-60.8% to -43.0%)         | -53.4%<br>(-61.2% to -43.5%)                      |
| Tetanus                                                  | <0.05<br>(<0.05 to <0.05)                          | <0.05<br>(<0.05 to <0.05)                    | -48.7%<br>(-70.3% to -11.9%)         | -49.2%<br>(-70.5% to -12.6%)                      |
| <b>All causes</b>                                        | <b>30,284.0</b><br><b>(26,811.8 to 34,102.7)</b>   | <b>1,050.7</b><br><b>(704.3 to 1,549.3)</b>  | <b>4.6%</b><br><b>(1.0% to 9.9%)</b> | <b>3.7%</b><br><b>(0.2% to 9.0%)</b>              |

SR Table 13i: Global prevalence and years lived with disability (YLDs) for 2016, percentage change of YLD counts and rates between 2006 and 2016 of vision loss by cause, ages 15-19 years

| Cause                                                    | Prevalence in thousands (95% uncertainty interval) | YLDs in thousands (95% uncertainty interval) |                                                   |                                                  |
|----------------------------------------------------------|----------------------------------------------------|----------------------------------------------|---------------------------------------------------|--------------------------------------------------|
|                                                          |                                                    | 2016                                         | Percentage change in counts between 2006 and 2016 | Percentage change in rates between 2006 and 2016 |
| Refraction and accommodation disorders                   | 27,886.2<br>(24,961.7 to 30,919.3)                 | 595.7<br>(369.6 to 930.6)                    | -6.9%<br>(-8.1% to -5.7%)                         | -1.5%<br>(-2.8% to -0.1%)                        |
| Near vision impairment                                   | 17,461.9<br>(15,994.3 to 19,183.7)                 | 182.1<br>(86.9 to 342.9)                     | -8.4%<br>(-9.7% to -6.8%)                         | -3.0%<br>(-4.4% to -1.4%)                        |
| Neonatal sepsis and other neonatal infections            | 356.3<br>(110.6 to 916.4)                          | 179.8<br>(50.0 to 476.8)                     | 18.9%<br>(9.8% to 31.9%)                          | 25.9%<br>(16.2% to 39.6%)                        |
| Neonatal preterm birth complications                     | 841.6<br>(649.8 to 1,054.6)                        | 144.5<br>(102.0 to 195.5)                    | -0.4%<br>(-9.1% to 9.2%)                          | 5.4%<br>(-3.8% to 15.6%)                         |
| Other vision loss                                        | 513.5<br>(360.7 to 719.1)                          | 32.1<br>(18.4 to 49.9)                       | -8.0%<br>(-14.6% to -1.2%)                        | -2.6%<br>(-9.6% to 4.6%)                         |
| Vitamin A deficiency                                     | 392.3<br>(263.5 to 571.4)                          | 18.5<br>(11.0 to 29.7)                       | 1.9%<br>(-4.7% to 9.0%)                           | 7.9%<br>(0.9% to 15.4%)                          |
| Malaria                                                  | 29.4<br>(23.7 to 34.8)                             | 14.3<br>(10.3 to 18.4)                       | 15.7%<br>(4.7% to 26.2%)                          | 22.5%<br>(10.9% to 33.5%)                        |
| Neonatal encephalopathy due to birth asphyxia and trauma | 31.0<br>(7.0 to 81.9)                              | 14.1<br>(2.9 to 38.2)                        | 18.0%<br>(6.5% to 37.0%)                          | 24.9%<br>(12.8% to 45.0%)                        |
| Haemolytic disease and other neonatal jaundice           | 17.5<br>(13.7 to 21.5)                             | 8.0<br>(5.5 to 10.5)                         | 0.4%<br>(-6.7% to 6.6%)                           | 6.3%<br>(-1.3% to 12.9%)                         |
| Encephalitis                                             | 152.9<br>(68.5 to 287.1)                           | 4.2<br>(2.1 to 7.4)                          | -15.9%<br>(-26.9% to -1.8%)                       | -11.0%<br>(-22.6% to 4.0%)                       |
| Other meningitis                                         | 53.6<br>(27.4 to 85.6)                             | 1.4<br>(0.7 to 2.5)                          | 80.3%<br>(53.2% to 110.2%)                        | 90.8%<br>(62.2% to 122.4%)                       |
| Pneumococcal meningitis                                  | 48.3<br>(28.7 to 76.3)                             | 1.1<br>(0.5 to 1.9)                          | -21.8%<br>(-32.2% to -9.9%)                       | -17.2%<br>(-28.2% to -4.6%)                      |
| Meningococcal infection                                  | 26.5<br>(15.2 to 41.3)                             | 1.0<br>(0.6 to 1.7)                          | 6.8%<br>(-12.4% to 30.0%)                         | 13.0%<br>(-7.2% to 37.6%)                        |
| H influenzae type B meningitis                           | 18.7<br>(7.9 to 33.6)                              | 0.3<br>(0.1 to 0.7)                          | -47.4%<br>(-56.7% to -36.3%)                      | -44.3%<br>(-54.2% to -32.6%)                     |
| Trachoma                                                 | 5.5<br>(1.5 to 13.2)                               | 0.3<br>(0.1 to 0.6)                          | -40.9%<br>(-62.9% to -12.5%)                      | -37.4%<br>(-60.7% to -7.4%)                      |
| Onchocerciasis                                           | 0.6<br>(0.4 to 0.9)                                | <0.05<br>(<0.05 to 0.1)                      | -56.9%<br>(-78.9% to -25.0%)                      | -54.4%<br>(-77.6% to -20.6%)                     |
| Tetanus                                                  | <0.05<br>(<0.05 to <0.05)                          | <0.05<br>(<0.05 to <0.05)                    | -36.1%<br>(-74.4% to 63.0%)                       | -32.4%<br>(-72.9% to 72.5%)                      |
| <b>All causes</b>                                        | <b>30,373.9</b><br><b>(27,242.6 to 33,637.9)</b>   | <b>1,015.3</b><br><b>(692.7 to 1,475.0)</b>  | <b>-1.5%</b><br><b>(-4.5% to 3.0%)</b>            | <b>4.2%</b><br><b>(1.1% to 9.0%)</b>             |

SR Table 13i: Global prevalence and years lived with disability (YLDs) for 2016, percentage change of YLD counts and rates between 2006 and 2016 of vision loss by cause, ages 20-24 years

| Cause                                                    | Prevalence in thousands (95% uncertainty interval) | YLDs in thousands (95% uncertainty interval) |                                      |                                                   |
|----------------------------------------------------------|----------------------------------------------------|----------------------------------------------|--------------------------------------|---------------------------------------------------|
|                                                          |                                                    | 2016                                         | 2016                                 | Percentage change in counts between 2006 and 2016 |
| Refraction and accommodation disorders                   | 29,592.7<br>(26,527.3 to 33,263.9)                 | 617.9<br>(381.6 to 961.3)                    | 0.9%<br>(-0.3% to 2.2%)              | -3.7%<br>(-4.9% to -2.6%)                         |
| Near vision impairment                                   | 19,611.7<br>(17,959.2 to 21,492.1)                 | 204.3<br>(95.4 to 374.4)                     | -0.0%<br>(-1.5% to 1.4%)             | -4.7%<br>(-6.0% to -3.3%)                         |
| Neonatal sepsis and other neonatal infections            | 318.4<br>(104.4 to 838.5)                          | 160.2<br>(46.7 to 431.4)                     | 27.3%<br>(17.1% to 42.9%)            | 21.5%<br>(11.7% to 36.4%)                         |
| Neonatal preterm birth complications                     | 909.1<br>(714.8 to 1,128.3)                        | 159.7<br>(111.7 to 217.8)                    | 9.0%<br>(0.2% to 18.8%)              | 4.0%<br>(-4.4% to 13.3%)                          |
| Other vision loss                                        | 674.5<br>(480.7 to 917.2)                          | 51.5<br>(29.7 to 81.7)                       | 1.2%<br>(-6.2% to 8.0%)              | -3.5%<br>(-10.5% to 3.0%)                         |
| Neonatal encephalopathy due to birth asphyxia and trauma | 36.2<br>(10.3 to 87.9)                             | 16.2<br>(4.4 to 41.2)                        | 24.5%<br>(13.4% to 44.4%)            | 18.8%<br>(8.2% to 37.7%)                          |
| Vitamin A deficiency                                     | 299.4<br>(195.8 to 443.2)                          | 15.6<br>(9.4 to 25.0)                        | 8.5%<br>(1.5% to 16.1%)              | 3.5%<br>(-3.2% to 10.8%)                          |
| Malaria                                                  | 24.2<br>(19.7 to 28.6)                             | 11.6<br>(8.3 to 15.0)                        | 13.4%<br>(4.4% to 21.6%)             | 8.2%<br>(-0.4% to 16.0%)                          |
| Haemolytic disease and other neonatal jaundice           | 19.4<br>(15.1 to 23.9)                             | 8.7<br>(6.0 to 11.6)                         | 9.9%<br>(2.0% to 16.6%)              | 4.8%<br>(-2.7% to 11.2%)                          |
| Encephalitis                                             | 173.9<br>(76.6 to 326.4)                           | 5.2<br>(2.7 to 8.9)                          | -5.5%<br>(-17.6% to 9.4%)            | -9.9%<br>(-21.4% to 4.3%)                         |
| Cataract                                                 | 33.5<br>(20.6 to 49.3)                             | 3.6<br>(1.8 to 6.5)                          | -2.6%<br>(-13.4% to 5.5%)            | -7.0%<br>(-17.4% to 0.6%)                         |
| Other meningitis                                         | 52.7<br>(26.8 to 83.2)                             | 1.5<br>(0.8 to 2.6)                          | 87.5%<br>(62.2% to 115.9%)           | 78.9%<br>(54.7% to 105.9%)                        |
| Pneumococcal meningitis                                  | 49.0<br>(29.9 to 76.4)                             | 1.1<br>(0.6 to 1.9)                          | -20.5%<br>(-30.9% to -10.1%)         | -24.2%<br>(-34.1% to -14.2%)                      |
| Meningococcal infection                                  | 25.4<br>(14.3 to 39.5)                             | 1.1<br>(0.6 to 1.9)                          | 8.6%<br>(-9.0% to 29.0%)             | 3.6%<br>(-13.2% to 23.1%)                         |
| Trachoma                                                 | 10.4<br>(3.6 to 24.3)                              | 0.9<br>(0.4 to 1.6)                          | -36.7%<br>(-54.7% to -15.4%)         | -39.7%<br>(-56.8% to -19.3%)                      |
| H influenzae type B meningitis                           | 17.4<br>(7.5 to 31.0)                              | 0.3<br>(0.1 to 0.6)                          | -47.3%<br>(-56.1% to -37.4%)         | -49.7%<br>(-58.1% to -40.3%)                      |
| Diabetes mellitus                                        | 4.2<br>(2.6 to 6.2)                                | 0.3<br>(0.2 to 0.5)                          | 12.0%<br>(5.0% to 18.7%)             | 6.8%<br>(0.1% to 13.3%)                           |
| Onchocerciasis                                           | 3.8<br>(2.4 to 6.2)                                | 0.3<br>(0.2 to 0.4)                          | -48.4%<br>(-61.7% to -33.5%)         | -50.8%<br>(-63.5% to -36.6%)                      |
| Tetanus                                                  | <0.05<br>(<0.05 to <0.05)                          | <0.05<br>(<0.05 to <0.05)                    | -25.7%<br>(-79.3% to 222.9%)         | -29.1%<br>(-80.2% to 208.0%)                      |
| <b>All causes</b>                                        | <b>32,243.9</b><br><b>(28,882.2 to 36,207.8)</b>   | <b>1,055.6</b><br><b>(731.0 to 1,508.9)</b>  | <b>6.0%</b><br><b>(3.2% to 9.8%)</b> | <b>1.1%</b><br><b>(-1.5% to 4.8%)</b>             |



SR Table 13i: Global prevalence and years lived with disability (YLDs) for 2016, percentage change of YLD counts and rates between 2006 and 2016 of vision loss by cause, ages 25-29 years

| Cause                                                    | Prevalence in thousands (95% uncertainty interval) | YLDs in thousands (95% uncertainty interval) |                                         |                                                   |
|----------------------------------------------------------|----------------------------------------------------|----------------------------------------------|-----------------------------------------|---------------------------------------------------|
|                                                          |                                                    | 2016                                         | 2016                                    | Percentage change in counts between 2006 and 2016 |
| Refraction and accommodation disorders                   | 32,619.4<br>(29,605.3 to 36,081.6)                 | 664.8<br>(408.4 to 1,047.7)                  | 12.9%<br>(11.5% to 14.3%)               | -4.9%<br>(-6.1% to -3.7%)                         |
| Near vision impairment                                   | 22,570.2<br>(20,563.3 to 24,852.5)                 | 234.8<br>(108.6 to 435.1)                    | 11.9%<br>(10.3% to 13.3%)               | -5.8%<br>(-7.0% to -4.5%)                         |
| Neonatal preterm birth complications                     | 953.3<br>(752.8 to 1,161.8)                        | 168.8<br>(119.7 to 229.7)                    | 23.5%<br>(13.5% to 34.8%)               | 4.0%<br>(-4.4% to 13.6%)                          |
| Neonatal sepsis and other neonatal infections            | 299.8<br>(98.8 to 791.2)                           | 150.1<br>(44.4 to 403.1)                     | 42.0%<br>(29.6% to 64.4%)               | 19.7%<br>(9.2% to 38.5%)                          |
| Other vision loss                                        | 869.0<br>(631.4 to 1,166.5)                        | 71.5<br>(43.7 to 110.9)                      | 15.2%<br>(8.4% to 21.7%)                | -3.0%<br>(-8.7% to 2.6%)                          |
| Cataract                                                 | 205.4<br>(135.7 to 291.7)                          | 22.9<br>(12.0 to 38.2)                       | 10.6%<br>(0.1% to 19.4%)                | -6.9%<br>(-15.6% to 0.5%)                         |
| Neonatal encephalopathy due to birth asphyxia and trauma | 39.6<br>(13.0 to 92.1)                             | 17.6<br>(5.5 to 40.7)                        | 40.3%<br>(26.4% to 64.7%)               | 18.2%<br>(6.5% to 38.7%)                          |
| Vitamin A deficiency                                     | 264.5<br>(181.1 to 368.5)                          | 14.8<br>(8.9 to 23.3)                        | 20.2%<br>(12.3% to 28.3%)               | 1.3%<br>(-5.4% to 8.1%)                           |
| Malaria                                                  | 19.4<br>(15.7 to 22.9)                             | 9.2<br>(6.7 to 11.8)                         | 16.5%<br>(10.4% to 21.2%)               | -1.9%<br>(-7.0% to 2.1%)                          |
| Haemolytic disease and other neonatal jaundice           | 20.0<br>(15.6 to 24.8)                             | 8.9<br>(6.1 to 11.7)                         | 24.6%<br>(15.9% to 31.8%)               | 4.9%<br>(-2.4% to 11.1%)                          |
| Encephalitis                                             | 192.6<br>(85.3 to 355.5)                           | 6.1<br>(3.3 to 10.3)                         | 7.6%<br>(-7.0% to 21.9%)                | -9.4%<br>(-21.6% to 2.7%)                         |
| Diabetes mellitus                                        | 28.3<br>(18.1 to 41.0)                             | 2.2<br>(1.2 to 3.7)                          | 23.3%<br>(14.6% to 31.8%)               | 3.9%<br>(-3.5% to 11.0%)                          |
| Other meningitis                                         | 52.0<br>(27.3 to 81.8)                             | 1.6<br>(0.9 to 2.7)                          | 99.7%<br>(73.3% to 127.8%)              | 68.2%<br>(46.0% to 91.9%)                         |
| Trachoma                                                 | 11.3<br>(5.2 to 22.1)                              | 1.2<br>(0.6 to 2.1)                          | -26.7%<br>(-45.8% to -5.8%)             | -38.2%<br>(-54.3% to -20.6%)                      |
| Pneumococcal meningitis                                  | 49.3<br>(30.7 to 75.9)                             | 1.2<br>(0.6 to 2.0)                          | -15.2%<br>(-26.0% to -3.8%)             | -28.6%<br>(-37.6% to -18.9%)                      |
| Meningococcal infection                                  | 24.5<br>(14.3 to 38.1)                             | 1.1<br>(0.6 to 1.8)                          | 15.7%<br>(-2.8% to 36.7%)               | -2.5%<br>(-18.1% to 15.1%)                        |
| Onchocerciasis                                           | 10.9<br>(7.2 to 16.5)                              | 0.8<br>(0.5 to 1.1)                          | -51.5%<br>(-60.8% to -40.2%)            | -59.2%<br>(-67.0% to -49.6%)                      |
| H influenzae type B meningitis                           | 16.2<br>(7.0 to 28.4)                              | 0.3<br>(0.1 to 0.6)                          | -44.6%<br>(-53.3% to -34.8%)            | -53.3%<br>(-60.7% to -45.1%)                      |
| Tetanus                                                  | <0.05<br>(<0.05 to <0.05)                          | <0.05<br>(<0.05 to <0.05)                    | -22.8%<br>(-82.8% to 327.5%)            | -35.0%<br>(-85.5% to 260.1%)                      |
| <b>All causes</b>                                        | <b>35,675.4</b><br><b>(32,454.9 to 39,497.0)</b>   | <b>1,142.9</b><br><b>(799.2 to 1,603.6)</b>  | <b>18.0%</b><br><b>(15.4% to 22.0%)</b> | <b>-0.6%</b><br><b>(-2.8% to 2.7%)</b>            |

SR Table 13i: Global prevalence and years lived with disability (YLDs) for 2016, percentage change of YLD counts and rates between 2006 and 2016 of vision loss by cause, ages 30-34 years

| Cause                                                    | Prevalence in thousands (95% uncertainty interval) | YLDs in thousands (95% uncertainty interval) |                                         |                                                   |
|----------------------------------------------------------|----------------------------------------------------|----------------------------------------------|-----------------------------------------|---------------------------------------------------|
|                                                          |                                                    | 2016                                         | 2016                                    | Percentage change in counts between 2006 and 2016 |
| Refraction and accommodation disorders                   | 35,052.5<br>(31,632.2 to 38,923.7)                 | 690.5<br>(423.1 to 1,079.2)                  | 11.7%<br>(10.4% to 13.1%)               | -1.1%<br>(-2.2% to 0.2%)                          |
| Near vision impairment                                   | 25,346.1<br>(22,875.5 to 28,237.3)                 | 262.9<br>(122.8 to 489.8)                    | 10.0%<br>(8.4% to 11.5%)                | -2.6%<br>(-4.0% to -1.3%)                         |
| Neonatal preterm birth complications                     | 881.3<br>(710.5 to 1,074.6)                        | 152.7<br>(108.3 to 206.1)                    | 20.6%<br>(9.5% to 32.0%)                | 6.8%<br>(-3.0% to 16.9%)                          |
| Neonatal sepsis and other neonatal infections            | 268.4<br>(90.0 to 718.4)                           | 133.1<br>(40.5 to 360.6)                     | 42.7%<br>(31.0% to 58.9%)               | 26.4%<br>(16.0% to 40.7%)                         |
| Other vision loss                                        | 1,038.2<br>(789.0 to 1,352.2)                      | 88.9<br>(56.5 to 132.6)                      | 13.7%<br>(7.6% to 19.4%)                | 0.7%<br>(-4.7% to 5.8%)                           |
| Cataract                                                 | 511.1<br>(365.8 to 680.1)                          | 54.2<br>(31.1 to 85.3)                       | 11.9%<br>(4.1% to 19.0%)                | -0.9%<br>(-7.8% to 5.3%)                          |
| Neonatal encephalopathy due to birth asphyxia and trauma | 36.0<br>(12.5 to 79.6)                             | 15.7<br>(5.1 to 35.8)                        | 34.4%<br>(22.3% to 54.9%)               | 19.0%<br>(8.3% to 37.1%)                          |
| Vitamin A deficiency                                     | 225.9<br>(157.3 to 309.4)                          | 13.3<br>(8.1 to 20.2)                        | 20.5%<br>(12.7% to 29.2%)               | 6.7%<br>(-0.2% to 14.4%)                          |
| Haemolytic disease and other neonatal jaundice           | 18.0<br>(14.1 to 21.9)                             | 7.9<br>(5.6 to 10.4)                         | 22.6%<br>(14.4% to 29.6%)               | 8.5%<br>(1.3% to 14.8%)                           |
| Malaria                                                  | 15.5<br>(12.8 to 18.4)                             | 7.2<br>(5.2 to 9.3)                          | 21.9%<br>(15.4% to 26.8%)               | 7.9%<br>(2.2% to 12.3%)                           |
| Encephalitis                                             | 188.6<br>(83.1 to 348.0)                           | 6.3<br>(3.4 to 10.3)                         | 2.4%<br>(-8.8% to 14.3%)                | -9.3%<br>(-19.2% to 1.2%)                         |
| Diabetes mellitus                                        | 71.3<br>(50.0 to 100.4)                            | 5.7<br>(3.3 to 9.2)                          | 29.1%<br>(20.5% to 38.3%)               | 14.4%<br>(6.7% to 22.5%)                          |
| Onchocerciasis                                           | 23.3<br>(16.5 to 35.1)                             | 1.7<br>(1.1 to 2.6)                          | -43.8%<br>(-55.2% to -30.1%)            | -50.3%<br>(-60.3% to -38.1%)                      |
| Trachoma                                                 | 13.0<br>(6.8 to 24.0)                              | 1.6<br>(0.9 to 2.7)                          | -19.8%<br>(-38.0% to 2.2%)              | -28.9%<br>(-45.1% to -9.5%)                       |
| Other meningitis                                         | 49.7<br>(26.1 to 77.9)                             | 1.6<br>(0.9 to 2.6)                          | 98.7%<br>(74.3% to 126.3%)              | 76.0%<br>(54.4% to 100.4%)                        |
| Pneumococcal meningitis                                  | 48.0<br>(30.4 to 73.3)                             | 1.2<br>(0.6 to 1.9)                          | -10.0%<br>(-21.5% to 1.4%)              | -20.3%<br>(-30.5% to -10.2%)                      |
| Meningococcal infection                                  | 22.9<br>(13.3 to 35.0)                             | 1.1<br>(0.6 to 1.7)                          | 22.0%<br>(4.7% to 43.7%)                | 8.0%<br>(-7.3% to 27.3%)                          |
| H influenzae type B meningitis                           | 14.8<br>(6.5 to 25.6)                              | 0.3<br>(0.1 to 0.5)                          | -42.6%<br>(-51.8% to -32.0%)            | -49.2%<br>(-57.3% to -39.8%)                      |
| Tetanus                                                  | <0.05<br>(<0.05 to <0.05)                          | <0.05<br>(<0.05 to <0.05)                    | -12.5%<br>(-82.8% to 454.9%)            | -22.5%<br>(-84.8% to 391.4%)                      |
| <b>All causes</b>                                        | <b>38,478.7</b><br><b>(34,829.6 to 42,799.5)</b>   | <b>1,182.9</b><br><b>(823.8 to 1,665.9)</b>  | <b>16.1%</b><br><b>(13.5% to 20.0%)</b> | <b>2.8%</b><br><b>(0.6% to 6.3%)</b>              |

SR Table 13i: Global prevalence and years lived with disability (YLDs) for 2016, percentage change of YLD counts and rates between 2006 and 2016 of vision loss by cause, ages 35-39 years

| Cause                                                    | Prevalence in thousands (95% uncertainty interval) | YLDs in thousands (95% uncertainty interval) |                                                   |                                                  |
|----------------------------------------------------------|----------------------------------------------------|----------------------------------------------|---------------------------------------------------|--------------------------------------------------|
|                                                          |                                                    | 2016                                         | Percentage change in counts between 2006 and 2016 | Percentage change in rates between 2006 and 2016 |
| Refraction and accommodation disorders                   | 41,163.6<br>(37,159.2 to 45,739.3)                 | 769.7<br>(476.1 to 1,210.0)                  | 7.6%<br>(6.3% to 8.8%)                            | 1.7%<br>(0.5% to 2.9%)                           |
| Near vision impairment                                   | 31,337.8<br>(27,918.4 to 35,015.5)                 | 324.2<br>(148.6 to 614.6)                    | 6.7%<br>(5.1% to 8.2%)                            | 0.8%<br>(-0.6% to 2.3%)                          |
| Neonatal preterm birth complications                     | 768.6<br>(611.8 to 926.7)                          | 129.5<br>(92.4 to 179.5)                     | 13.9%<br>(3.4% to 25.5%)                          | 7.7%<br>(-2.3% to 18.6%)                         |
| Neonatal sepsis and other neonatal infections            | 228.4<br>(78.7 to 604.5)                           | 112.5<br>(35.3 to 300.5)                     | 36.9%<br>(26.0% to 53.5%)                         | 29.4%<br>(19.2% to 45.1%)                        |
| Other vision loss                                        | 1,257.4<br>(944.5 to 1,623.4)                      | 109.6<br>(68.0 to 166.1)                     | 8.9%<br>(4.5% to 13.4%)                           | 3.0%<br>(-1.3% to 7.2%)                          |
| Cataract                                                 | 1,054.1<br>(788.7 to 1,407.6)                      | 99.4<br>(61.2 to 149.7)                      | 9.3%<br>(4.0% to 14.1%)                           | 3.3%<br>(-1.7% to 7.8%)                          |
| Neonatal encephalopathy due to birth asphyxia and trauma | 31.3<br>(11.4 to 68.5)                             | 13.6<br>(4.7 to 30.2)                        | 25.5%<br>(15.1% to 43.5%)                         | 18.6%<br>(8.8% to 35.6%)                         |
| Vitamin A deficiency                                     | 198.4<br>(141.8 to 269.0)                          | 11.8<br>(7.2 to 17.7)                        | 17.0%<br>(8.8% to 26.2%)                          | 10.6%<br>(2.9% to 19.3%)                         |
| Diabetes mellitus                                        | 127.7<br>(94.6 to 171.4)                           | 10.2<br>(6.1 to 15.2)                        | 26.6%<br>(19.0% to 35.0%)                         | 19.6%<br>(12.5% to 27.6%)                        |
| Haemolytic disease and other neonatal jaundice           | 15.2<br>(12.0 to 18.5)                             | 6.7<br>(4.7 to 8.7)                          | 17.1%<br>(9.3% to 23.6%)                          | 10.7%<br>(3.3% to 16.9%)                         |
| Encephalitis                                             | 184.8<br>(86.1 to 337.2)                           | 6.5<br>(3.7 to 10.5)                         | -2.8%<br>(-12.5% to 9.2%)                         | -8.1%<br>(-17.3% to 3.2%)                        |
| Malaria                                                  | 11.7<br>(9.7 to 14.0)                              | 5.5<br>(4.0 to 7.1)                          | 25.3%<br>(19.0% to 30.2%)                         | 18.5%<br>(12.5% to 23.1%)                        |
| Onchocerciasis                                           | 40.3<br>(29.3 to 59.2)                             | 3.1<br>(1.9 to 4.6)                          | -31.0%<br>(-43.5% to -15.8%)                      | -34.8%<br>(-46.6% to -20.4%)                     |
| Trachoma                                                 | 19.1<br>(10.7 to 32.7)                             | 2.6<br>(1.4 to 4.4)                          | -13.7%<br>(-29.5% to 3.4%)                        | -18.5%<br>(-33.3% to -2.3%)                      |
| Other meningitis                                         | 46.1<br>(24.5 to 71.6)                             | 1.5<br>(0.8 to 2.5)                          | 90.3%<br>(69.8% to 116.1%)                        | 79.9%<br>(60.5% to 104.2%)                       |
| Pneumococcal meningitis                                  | 44.4<br>(28.0 to 67.0)                             | 1.1<br>(0.6 to 1.8)                          | -9.6%<br>(-19.7% to 1.3%)                         | -14.6%<br>(-24.1% to -4.2%)                      |
| Meningococcal infection                                  | 20.7<br>(12.3 to 31.4)                             | 1.0<br>(0.6 to 1.6)                          | 23.5%<br>(5.7% to 44.0%)                          | 16.7%<br>(-0.0% to 36.1%)                        |
| H influenzae type B meningitis                           | 12.9<br>(5.7 to 22.2)                              | 0.2<br>(0.1 to 0.5)                          | -43.4%<br>(-51.7% to -33.8%)                      | -46.5%<br>(-54.4% to -37.4%)                     |
| Tetanus                                                  | <0.05<br>(<0.05 to <0.05)                          | <0.05<br>(<0.05 to <0.05)                    | -10.5%<br>(-84.7% to 581.2%)                      | -15.4%<br>(-85.6% to 543.9%)                     |
| <b>All causes</b>                                        | <b>45,224.7</b><br><b>(40,867.9 to 50,115.7)</b>   | <b>1,284.4</b><br><b>(899.6 to 1,798.6)</b>  | <b>10.8%</b><br><b>(8.7% to 14.0%)</b>            | <b>4.7%</b><br><b>(2.8% to 7.8%)</b>             |

SR Table 13i: Global prevalence and years lived with disability (YLDs) for 2016, percentage change of YLD counts and rates between 2006 and 2016 of vision loss by cause, ages 40-44 years

| Cause                                                    | Prevalence in thousands (95% uncertainty interval) | YLDs in thousands (95% uncertainty interval)  |                                         |                                                   |
|----------------------------------------------------------|----------------------------------------------------|-----------------------------------------------|-----------------------------------------|---------------------------------------------------|
|                                                          |                                                    | 2016                                          | 2016                                    | Percentage change in counts between 2006 and 2016 |
| Refraction and accommodation disorders                   | 54,652.6<br>(49,001.9 to 60,756.7)                 | 954.0<br>(590.1 to 1,536.7)                   | 10.7%<br>(9.3% to 11.9%)                | -2.7%<br>(-4.0% to -1.7%)                         |
| Near vision impairment                                   | 44,002.7<br>(39,109.7 to 49,602.3)                 | 452.9<br>(209.7 to 852.8)                     | 10.7%<br>(9.2% to 12.1%)                | -2.8%<br>(-4.1% to -1.5%)                         |
| Cataract                                                 | 1,798.2<br>(1,333.3 to 2,385.5)                    | 155.0<br>(97.3 to 227.6)                      | 14.6%<br>(10.9% to 18.1%)               | 0.7%<br>(-2.6% to 3.7%)                           |
| Other vision loss                                        | 1,643.8<br>(1,255.7 to 2,105.4)                    | 143.3<br>(92.0 to 206.6)                      | 17.1%<br>(13.1% to 21.1%)               | 2.9%<br>(-0.7% to 6.3%)                           |
| Neonatal preterm birth complications                     | 694.3<br>(555.0 to 842.3)                          | 113.2<br>(80.2 to 156.4)                      | 23.0%<br>(11.4% to 35.4%)               | 8.0%<br>(-2.1% to 18.9%)                          |
| Neonatal sepsis and other neonatal infections            | 197.9<br>(69.1 to 506.0)                           | 96.7<br>(31.7 to 256.9)                       | 36.9%<br>(26.7% to 53.5%)               | 20.3%<br>(11.3% to 34.8%)                         |
| Diabetes mellitus                                        | 192.2<br>(138.3 to 259.7)                          | 15.2<br>(9.5 to 22.6)                         | 27.5%<br>(21.1% to 34.2%)               | 12.0%<br>(6.3% to 17.9%)                          |
| Neonatal encephalopathy due to birth asphyxia and trauma | 28.0<br>(10.9 to 59.5)                             | 12.2<br>(4.5 to 26.0)                         | 30.3%<br>(19.8% to 49.6%)               | 14.5%<br>(5.2% to 31.4%)                          |
| Vitamin A deficiency                                     | 177.1<br>(121.3 to 244.3)                          | 10.5<br>(6.4 to 15.8)                         | 22.6%<br>(14.4% to 31.3%)               | 7.7%<br>(0.5% to 15.4%)                           |
| Encephalitis                                             | 198.3<br>(92.0 to 362.3)                           | 7.3<br>(4.2 to 11.6)                          | 5.0%<br>(-4.8% to 15.6%)                | -7.8%<br>(-16.4% to 1.5%)                         |
| Haemolytic disease and other neonatal jaundice           | 13.1<br>(10.4 to 16.0)                             | 5.8<br>(4.0 to 7.5)                           | 25.4%<br>(17.4% to 32.2%)               | 10.1%<br>(3.1% to 16.1%)                          |
| Trachoma                                                 | 38.6<br>(22.9 to 68.4)                             | 5.4<br>(2.9 to 8.9)                           | -7.4%<br>(-21.4% to 9.2%)               | -18.7%<br>(-31.0% to -4.1%)                       |
| Onchocerciasis                                           | 57.5<br>(40.7 to 87.5)                             | 4.4<br>(2.9 to 6.6)                           | -19.5%<br>(-32.0% to -3.4%)             | -29.3%<br>(-40.3% to -15.2%)                      |
| Malaria                                                  | 8.4<br>(6.9 to 10.1)                               | 4.0<br>(2.9 to 5.1)                           | 24.6%<br>(18.2% to 29.7%)               | 9.5%<br>(3.8% to 13.9%)                           |
| Other meningitis                                         | 42.6<br>(22.6 to 65.3)                             | 1.5<br>(0.8 to 2.4)                           | 86.6%<br>(67.4% to 109.0%)              | 63.9%<br>(47.0% to 83.6%)                         |
| Pneumococcal meningitis                                  | 40.5<br>(25.3 to 60.5)                             | 1.1<br>(0.6 to 1.7)                           | -10.3%<br>(-19.5% to -0.8%)             | -21.2%<br>(-29.3% to -12.9%)                      |
| Meningococcal infection                                  | 18.4<br>(10.9 to 28.0)                             | 0.9<br>(0.6 to 1.4)                           | 20.3%<br>(6.1% to 36.8%)                | 5.7%<br>(-6.8% to 20.2%)                          |
| H influenzae type B meningitis                           | 11.1<br>(5.0 to 19.1)                              | 0.2<br>(0.1 to 0.4)                           | -44.7%<br>(-52.1% to -35.7%)            | -51.4%<br>(-57.9% to -43.5%)                      |
| Tetanus                                                  | <0.05<br>(<0.05 to <0.05)                          | <0.05<br>(<0.05 to <0.05)                     | -18.8%<br>(-88.0% to 607.5%)            | -28.7%<br>(-89.4% to 521.4%)                      |
| <b>All causes</b>                                        | <b>59,812.8</b><br><b>(53,868.0 to 66,515.5)</b>   | <b>1,530.6</b><br><b>(1,044.2 to 2,226.3)</b> | <b>14.2%</b><br><b>(12.6% to 16.4%)</b> | <b>0.3%</b><br><b>(-1.1% to 2.2%)</b>             |

SR Table 13i: Global prevalence and years lived with disability (YLDs) for 2016, percentage change of YLD counts and rates between 2006 and 2016 of vision loss by cause, ages 45-49 years

| Cause                                                    | Prevalence in thousands (95% uncertainty interval) | YLDs in thousands (95% uncertainty interval)  |                                         |                                                   |                                                  |
|----------------------------------------------------------|----------------------------------------------------|-----------------------------------------------|-----------------------------------------|---------------------------------------------------|--------------------------------------------------|
|                                                          |                                                    | 2016                                          | 2016                                    | Percentage change in counts between 2006 and 2016 | Percentage change in rates between 2006 and 2016 |
| Refraction and accommodation disorders                   | 69,627.4<br>(62,891.5 to 76,737.0)                 | 1,146.5<br>(689.4 to 1,856.6)                 | 16.2%<br>(14.6% to 17.6%)               | -6.8%<br>(-8.1% to -5.7%)                         |                                                  |
| Near vision impairment                                   | 58,040.7<br>(51,821.9 to 64,709.4)                 | 594.2<br>(282.4 to 1,117.5)                   | 17.0%<br>(15.3% to 18.7%)               | -6.2%<br>(-7.5% to -4.8%)                         |                                                  |
| Cataract                                                 | 2,756.6<br>(2,051.5 to 3,583.5)                    | 218.7<br>(143.1 to 321.9)                     | 22.2%<br>(19.3% to 25.2%)               | -2.0%<br>(-4.4% to 0.4%)                          |                                                  |
| Other vision loss                                        | 2,109.4<br>(1,633.3 to 2,670.7)                    | 177.9<br>(116.6 to 266.5)                     | 27.2%<br>(23.6% to 30.7%)               | 2.0%<br>(-0.9% to 4.8%)                           |                                                  |
| Neonatal preterm birth complications                     | 633.7<br>(515.6 to 767.4)                          | 100.0<br>(69.6 to 137.1)                      | 36.8%<br>(24.1% to 50.4%)               | 9.7%<br>(-0.5% to 20.6%)                          |                                                  |
| Neonatal sepsis and other neonatal infections            | 167.9<br>(59.3 to 418.6)                           | 81.4<br>(27.1 to 215.3)                       | 42.6%<br>(31.5% to 62.0%)               | 14.4%<br>(5.4% to 29.9%)                          |                                                  |
| Diabetes mellitus                                        | 253.3<br>(189.4 to 335.0)                          | 19.8<br>(12.7 to 30.0)                        | 33.8%<br>(26.7% to 40.9%)               | 7.3%<br>(1.6% to 13.0%)                           |                                                  |
| Neonatal encephalopathy due to birth asphyxia and trauma | 25.0<br>(10.3 to 51.4)                             | 10.9<br>(4.2 to 22.5)                         | 39.3%<br>(27.7% to 60.6%)               | 11.7%<br>(2.4% to 28.8%)                          |                                                  |
| Vitamin A deficiency                                     | 161.0<br>(113.2 to 219.6)                          | 9.5<br>(5.9 to 14.4)                          | 30.5%<br>(21.6% to 40.6%)               | 4.6%<br>(-2.5% to 12.7%)                          |                                                  |
| Trachoma                                                 | 61.8<br>(34.1 to 117.2)                            | 7.8<br>(4.4 to 12.8)                          | -3.6%<br>(-17.4% to 11.8%)              | -22.7%<br>(-33.7% to -10.4%)                      |                                                  |
| Encephalitis                                             | 207.1<br>(98.8 to 374.2)                           | 7.7<br>(4.5 to 12.3)                          | 13.3%<br>(4.1% to 23.4%)                | -9.2%<br>(-16.6% to -1.0%)                        |                                                  |
| Onchocerciasis                                           | 74.4<br>(53.4 to 112.1)                            | 5.8<br>(3.7 to 8.5)                           | -8.9%<br>(-20.9% to 8.0%)               | -26.9%<br>(-36.6% to -13.4%)                      |                                                  |
| Haemolytic disease and other neonatal jaundice           | 11.3<br>(8.8 to 13.5)                              | 5.0<br>(3.5 to 6.5)                           | 36.1%<br>(27.7% to 43.3%)               | 9.2%<br>(2.4% to 14.9%)                           |                                                  |
| Malaria                                                  | 6.0<br>(4.9 to 7.2)                                | 2.9<br>(2.1 to 3.7)                           | 22.8%<br>(16.3% to 28.1%)               | -1.5%<br>(-6.8% to 2.7%)                          |                                                  |
| Glaucoma                                                 | 24.1<br>(15.9 to 34.4)                             | 2.8<br>(1.5 to 4.6)                           | 26.6%<br>(19.6% to 33.3%)               | 1.5%<br>(-4.1% to 6.9%)                           |                                                  |
| Macular degeneration                                     | 22.6<br>(13.8 to 32.8)                             | 2.6<br>(1.4 to 4.4)                           | 29.5%<br>(26.8% to 32.3%)               | 3.9%<br>(1.6% to 6.1%)                            |                                                  |
| Other meningitis                                         | 39.2<br>(21.4 to 59.7)                             | 1.4<br>(0.8 to 2.2)                           | 88.6%<br>(70.9% to 108.6%)              | 51.3%<br>(37.0% to 67.3%)                         |                                                  |
| Pneumococcal meningitis                                  | 36.9<br>(23.7 to 54.8)                             | 1.0<br>(0.6 to 1.6)                           | -7.9%<br>(-16.9% to 0.8%)               | -26.2%<br>(-33.3% to -19.1%)                      |                                                  |
| Meningococcal infection                                  | 16.4<br>(10.4 to 24.9)                             | 0.8<br>(0.5 to 1.3)                           | 18.0%<br>(6.5% to 32.7%)                | -5.4%<br>(-14.6% to 6.4%)                         |                                                  |
| H influenzae type B meningitis                           | 9.6<br>(4.3 to 16.4)                               | 0.2<br>(0.1 to 0.3)                           | -44.6%<br>(-52.5% to -36.2%)            | -55.5%<br>(-61.9% to -48.8%)                      |                                                  |
| Tetanus                                                  | <0.05<br>(<0.05 to <0.05)                          | <0.05<br>(<0.05 to <0.05)                     | -12.1%<br>(-90.8% to 893.2%)            | -29.5%<br>(-92.6% to 696.5%)                      |                                                  |
| <b>All causes</b>                                        | <b>76,243.7</b><br><b>(69,134.3 to 83,525.7)</b>   | <b>1,802.7</b><br><b>(1,246.4 to 2,647.9)</b> | <b>20.2%</b><br><b>(18.6% to 22.3%)</b> | <b>-3.6%</b><br><b>(-4.9% to -2.0%)</b>           |                                                  |

SR Table 13i: Global prevalence and years lived with disability (YLDs) for 2016, percentage change of YLD counts and rates between 2006 and 2016 of vision loss by cause, ages 50-54 years

| Cause                                                    | Prevalence in thousands (95% uncertainty interval) | YLDs in thousands (95% uncertainty interval)  |                                                   |                                                  |
|----------------------------------------------------------|----------------------------------------------------|-----------------------------------------------|---------------------------------------------------|--------------------------------------------------|
|                                                          |                                                    | 2016                                          | Percentage change in counts between 2006 and 2016 | Percentage change in rates between 2006 and 2016 |
| Refraction and accommodation disorders                   | 80,296.9<br>(73,390.2 to 87,613.1)                 | 1,278.8<br>(752.8 to 2,055.3)                 | 16.1%<br>(14.1% to 17.7%)                         | -6.8%<br>(-8.4% to -5.5%)                        |
| Near vision impairment                                   | 68,011.5<br>(61,950.3 to 74,468.0)                 | 693.5<br>(326.0 to 1,309.1)                   | 18.1%<br>(16.5% to 19.8%)                         | -5.1%<br>(-6.5% to -3.8%)                        |
| Cataract                                                 | 4,135.9<br>(3,111.1 to 5,395.1)                    | 302.9<br>(199.9 to 440.1)                     | 24.2%<br>(21.4% to 27.2%)                         | -0.3%<br>(-2.5% to 2.1%)                         |
| Other vision loss                                        | 2,478.9<br>(1,904.5 to 3,209.3)                    | 201.8<br>(130.2 to 297.6)                     | 25.3%<br>(21.8% to 28.8%)                         | 0.6%<br>(-2.2% to 3.4%)                          |
| Neonatal preterm birth complications                     | 543.2<br>(431.8 to 660.6)                          | 81.5<br>(56.4 to 110.6)                       | 36.4%<br>(24.1% to 50.0%)                         | 9.5%<br>(-0.4% to 20.4%)                         |
| Neonatal sepsis and other neonatal infections            | 137.0<br>(50.0 to 345.9)                           | 66.1<br>(22.9 to 174.6)                       | 48.2%<br>(35.3% to 68.2%)                         | 19.0%<br>(8.7% to 35.0%)                         |
| Diabetes mellitus                                        | 299.6<br>(221.2 to 394.2)                          | 23.2<br>(14.4 to 35.0)                        | 36.9%<br>(30.3% to 43.4%)                         | 9.9%<br>(4.6% to 15.2%)                          |
| Glaucoma                                                 | 183.1<br>(124.9 to 251.4)                          | 19.5<br>(11.1 to 31.1)                        | 27.0%<br>(19.0% to 35.4%)                         | 2.0%<br>(-4.5% to 8.8%)                          |
| Macular degeneration                                     | 181.1<br>(128.0 to 253.5)                          | 16.0<br>(9.3 to 25.5)                         | 27.6%<br>(18.3% to 36.8%)                         | 2.5%<br>(-5.0% to 9.8%)                          |
| Trachoma                                                 | 111.0<br>(47.7 to 227.0)                           | 10.9<br>(5.6 to 19.6)                         | -0.4%<br>(-13.1% to 12.7%)                        | -20.0%<br>(-30.2% to -9.5%)                      |
| Neonatal encephalopathy due to birth asphyxia and trauma | 21.6<br>(9.3 to 42.9)                              | 9.5<br>(3.8 to 19.1)                          | 42.7%<br>(30.1% to 67.8%)                         | 14.6%<br>(4.5% to 34.7%)                         |
| Vitamin A deficiency                                     | 141.2<br>(99.4 to 197.7)                           | 8.2<br>(5.2 to 12.5)                          | 28.2%<br>(19.0% to 38.0%)                         | 3.0%<br>(-4.4% to 10.8%)                         |
| Encephalitis                                             | 202.0<br>(99.6 to 357.7)                           | 7.5<br>(4.5 to 12.0)                          | 11.0%<br>(2.3% to 20.5%)                          | -10.9%<br>(-17.9% to -3.2%)                      |
| Onchocerciasis                                           | 87.4<br>(61.8 to 135.4)                            | 6.6<br>(4.2 to 9.9)                           | -3.3%<br>(-16.0% to 13.3%)                        | -22.4%<br>(-32.5% to -9.0%)                      |
| Haemolytic disease and other neonatal jaundice           | 9.2<br>(7.2 to 11.0)                               | 4.1<br>(2.8 to 5.4)                           | 34.9%<br>(26.5% to 41.9%)                         | 8.3%<br>(1.5% to 14.0%)                          |
| Malaria                                                  | 4.3<br>(3.5 to 5.2)                                | 2.1<br>(1.5 to 2.7)                           | 24.5%<br>(18.0% to 30.0%)                         | -0.1%<br>(-5.2% to 4.4%)                         |
| Other meningitis                                         | 36.0<br>(20.3 to 54.1)                             | 1.3<br>(0.8 to 2.0)                           | 88.0%<br>(71.3% to 106.9%)                        | 51.0%<br>(37.6% to 66.1%)                        |
| Pneumococcal meningitis                                  | 33.8<br>(21.9 to 50.3)                             | 0.9<br>(0.5 to 1.5)                           | -3.1%<br>(-11.3% to 6.1%)                         | -22.2%<br>(-28.8% to -14.8%)                     |
| Meningococcal infection                                  | 15.3<br>(9.6 to 22.8)                              | 0.8<br>(0.5 to 1.2)                           | 21.8%<br>(9.6% to 34.8%)                          | -2.2%<br>(-12.0% to 8.2%)                        |
| H influenzae type B meningitis                           | 8.4<br>(3.7 to 14.2)                               | 0.1<br>(0.1 to 0.3)                           | -43.1%<br>(-50.8% to -34.5%)                      | -54.3%<br>(-60.5% to -47.4%)                     |
| Tetanus                                                  | <0.05<br>(<0.05 to <0.05)                          | <0.05<br>(<0.05 to <0.05)                     | 14.0%<br>(-89.1% to 1,696.6%)                     | -8.4%<br>(-91.2% to 1,342.6%)                    |
| <b>All causes</b>                                        | <b>88,925.8</b><br><b>(81,340.4 to 96,872.9)</b>   | <b>2,041.8</b><br><b>(1,378.7 to 3,063.1)</b> | <b>20.0%</b><br><b>(18.4% to 22.0%)</b>           | <b>-3.6%</b><br><b>(-4.9% to -2.1%)</b>          |

SR Table 13i: Global prevalence and years lived with disability (YLDs) for 2016, percentage change of YLD counts and rates between 2006 and 2016 of vision loss by cause, ages 55-59 years

| Cause                                                    | Prevalence in thousands (95% uncertainty interval) | YLDs in thousands (95% uncertainty interval)  |                                         |                                                   |                                                  |
|----------------------------------------------------------|----------------------------------------------------|-----------------------------------------------|-----------------------------------------|---------------------------------------------------|--------------------------------------------------|
|                                                          |                                                    | 2016                                          | 2016                                    | Percentage change in counts between 2006 and 2016 | Percentage change in rates between 2006 and 2016 |
| Refraction and accommodation disorders                   | 84,473.4<br>(77,821.9 to 90,640.9)                 | 1,354.2<br>(807.6 to 2,173.3)                 | 23.2%<br>(21.1% to 25.0%)               | -5.6%<br>(-7.2% to -4.2%)                         |                                                  |
| Near vision impairment                                   | 71,310.6<br>(65,610.9 to 77,211.4)                 | 722.3<br>(337.9 to 1,324.5)                   | 25.9%<br>(24.3% to 27.4%)               | -3.5%<br>(-4.7% to -2.4%)                         |                                                  |
| Cataract                                                 | 6,560.4<br>(4,970.2 to 8,396.7)                    | 453.2<br>(301.0 to 656.2)                     | 36.2%<br>(32.8% to 39.5%)               | 4.4%<br>(1.8% to 6.9%)                            |                                                  |
| Other vision loss                                        | 2,819.1<br>(2,158.4 to 3,658.7)                    | 222.5<br>(141.1 to 320.3)                     | 32.8%<br>(29.3% to 36.2%)               | 1.8%<br>(-0.9% to 4.4%)                           |                                                  |
| Neonatal preterm birth complications                     | 435.0<br>(342.3 to 535.1)                          | 60.8<br>(42.4 to 83.6)                        | 45.0%<br>(32.2% to 59.7%)               | 11.1%<br>(1.3% to 22.4%)                          |                                                  |
| Glaucoma                                                 | 479.7<br>(372.9 to 615.1)                          | 49.0<br>(30.2 to 74.0)                        | 35.2%<br>(29.6% to 41.1%)               | 3.6%<br>(-0.7% to 8.1%)                           |                                                  |
| Neonatal sepsis and other neonatal infections            | 100.5<br>(38.2 to 261.9)                           | 48.3<br>(17.2 to 125.7)                       | 56.9%<br>(43.6% to 76.4%)               | 20.3%<br>(10.1% to 35.2%)                         |                                                  |
| Macular degeneration                                     | 546.5<br>(409.9 to 705.9)                          | 38.8<br>(24.6 to 56.8)                        | 34.4%<br>(27.8% to 40.4%)               | 3.0%<br>(-2.1% to 7.6%)                           |                                                  |
| Diabetes mellitus                                        | 329.1<br>(247.6 to 421.5)                          | 24.9<br>(15.6 to 36.3)                        | 44.6%<br>(38.1% to 51.4%)               | 10.8%<br>(5.9% to 16.0%)                          |                                                  |
| Trachoma                                                 | 260.9<br>(125.5 to 452.6)                          | 20.3<br>(11.3 to 34.6)                        | 5.7%<br>(-7.4% to 17.5%)                | -19.0%<br>(-29.1% to -10.0%)                      |                                                  |
| Onchocerciasis                                           | 105.4<br>(74.6 to 161.9)                           | 7.6<br>(5.0 to 11.0)                          | 0.3%<br>(-11.7% to 17.0%)               | -23.1%<br>(-32.3% to -10.3%)                      |                                                  |
| Neonatal encephalopathy due to birth asphyxia and trauma | 17.2<br>(7.5 to 33.4)                              | 7.6<br>(3.1 to 15.4)                          | 47.9%<br>(35.8% to 68.0%)               | 13.3%<br>(4.1% to 28.7%)                          |                                                  |
| Encephalitis                                             | 195.2<br>(99.0 to 336.6)                           | 7.4<br>(4.5 to 11.6)                          | 18.5%<br>(9.2% to 28.7%)                | -9.2%<br>(-16.3% to -1.4%)                        |                                                  |
| Vitamin A deficiency                                     | 122.6<br>(88.1 to 167.3)                           | 7.0<br>(4.5 to 10.4)                          | 36.4%<br>(26.4% to 47.5%)               | 4.5%<br>(-3.1% to 13.0%)                          |                                                  |
| Haemolytic disease and other neonatal jaundice           | 6.9<br>(5.3 to 8.3)                                | 3.1<br>(2.1 to 4.1)                           | 45.5%<br>(36.8% to 52.8%)               | 11.5%<br>(4.8% to 17.1%)                          |                                                  |
| Malaria                                                  | 2.9<br>(2.3 to 3.4)                                | 1.4<br>(1.0 to 1.8)                           | 30.2%<br>(22.8% to 36.9%)               | -0.2%<br>(-5.9% to 4.9%)                          |                                                  |
| Other meningitis                                         | 32.5<br>(18.9 to 48.2)                             | 1.2<br>(0.7 to 1.8)                           | 93.4%<br>(75.6% to 112.4%)              | 48.2%<br>(34.6% to 62.8%)                         |                                                  |
| Pneumococcal meningitis                                  | 30.0<br>(19.5 to 44.3)                             | 0.8<br>(0.5 to 1.3)                           | 1.7%<br>(-7.1% to 10.6%)                | -22.0%<br>(-28.8% to -15.2%)                      |                                                  |
| Meningococcal infection                                  | 14.2<br>(9.0 to 21.0)                              | 0.7<br>(0.4 to 1.1)                           | 26.1%<br>(12.5% to 40.8%)               | -3.3%<br>(-13.8% to 7.9%)                         |                                                  |
| H influenzae type B meningitis                           | 7.1<br>(3.1 to 11.9)                               | 0.1<br>(0.1 to 0.2)                           | -40.1%<br>(-48.2% to -31.4%)            | -54.1%<br>(-60.3% to -47.4%)                      |                                                  |
| Tetanus                                                  | <0.05<br>(<0.05 to <0.05)                          | <0.05<br>(<0.05 to <0.05)                     | 25.0%<br>(-90.8% to 2,392.3%)           | -4.2%<br>(-92.9% to 1,809.9%)                     |                                                  |
| <b>All causes</b>                                        | <b>96,538.6</b><br><b>(88,944.5 to 104,062.9)</b>  | <b>2,309.1</b><br><b>(1,576.1 to 3,440.9)</b> | <b>28.1%</b><br><b>(26.3% to 29.9%)</b> | <b>-1.9%</b><br><b>(-3.2% to -0.5%)</b>           |                                                  |

SR Table 13i: Global prevalence and years lived with disability (YLDs) for 2016, percentage change of YLD counts and rates between 2006 and 2016 of vision loss by cause, ages 60-64 years

| Cause                                                    | Prevalence in thousands (95% uncertainty interval) | YLDs in thousands (95% uncertainty interval)  |                                         |                                                  |
|----------------------------------------------------------|----------------------------------------------------|-----------------------------------------------|-----------------------------------------|--------------------------------------------------|
|                                                          |                                                    | 2016                                          | 2016                                    | Percentage change in rates between 2006 and 2016 |
| Refraction and accommodation disorders                   | 86,303.7<br>(79,232.9 to 92,573.4)                 | 1,399.1<br>(865.7 to 2,241.6)                 | 40.5%<br>(37.6% to 42.8%)               | -6.8%<br>(-8.8% to -5.3%)                        |
| Near vision impairment                                   | 72,596.6<br>(66,225.3 to 78,010.5)                 | 729.5<br>(339.3 to 1,330.0)                   | 46.3%<br>(44.5% to 48.0%)               | -2.9%<br>(-4.2% to -1.9%)                        |
| Cataract                                                 | 9,940.8<br>(7,725.8 to 12,484.9)                   | 665.2<br>(444.0 to 948.2)                     | 48.0%<br>(44.3% to 51.9%)               | -1.8%<br>(-4.3% to 0.7%)                         |
| Other vision loss                                        | 3,180.3<br>(2,430.0 to 4,082.2)                    | 241.9<br>(158.5 to 341.9)                     | 53.9%<br>(49.9% to 57.9%)               | 2.1%<br>(-0.6% to 4.7%)                          |
| Glaucoma                                                 | 821.7<br>(643.8 to 1,031.0)                        | 80.8<br>(51.2 to 119.5)                       | 54.5%<br>(49.7% to 59.5%)               | 2.5%<br>(-0.7% to 5.8%)                          |
| Macular degeneration                                     | 1,064.4<br>(798.6 to 1,380.0)                      | 66.8<br>(43.6 to 97.1)                        | 55.9%<br>(48.8% to 62.8%)               | 3.4%<br>(-1.3% to 8.0%)                          |
| Neonatal preterm birth complications                     | 355.2<br>(281.6 to 437.8)                          | 45.4<br>(31.7 to 62.4)                        | 67.9%<br>(53.2% to 85.0%)               | 11.4%<br>(1.6% to 22.7%)                         |
| Neonatal sepsis and other neonatal infections            | 70.4<br>(25.9 to 182.2)                            | 33.9<br>(11.6 to 89.4)                        | 80.5%<br>(65.5% to 106.7%)              | 19.8%<br>(9.8% to 37.1%)                         |
| Trachoma                                                 | 456.6<br>(247.1 to 753.1)                          | 33.0<br>(19.6 to 53.8)                        | 10.3%<br>(-0.8% to 20.7%)               | -26.8%<br>(-34.2% to -20.0%)                     |
| Diabetes mellitus                                        | 340.7<br>(255.6 to 435.8)                          | 24.7<br>(15.9 to 35.1)                        | 55.9%<br>(49.5% to 62.2%)               | 3.4%<br>(-0.9% to 7.6%)                          |
| Onchocerciasis                                           | 113.6<br>(78.1 to 178.5)                           | 7.8<br>(5.1 to 11.4)                          | 3.5%<br>(-7.3% to 19.9%)                | -31.3%<br>(-38.5% to -20.4%)                     |
| Encephalitis                                             | 191.2<br>(99.4 to 325.1)                           | 7.2<br>(4.5 to 11.2)                          | 33.3%<br>(22.8% to 44.0%)               | -11.6%<br>(-18.5% to -4.5%)                      |
| Neonatal encephalopathy due to birth asphyxia and trauma | 13.2<br>(5.9 to 25.7)                              | 5.9<br>(2.5 to 11.8)                          | 80.3%<br>(63.7% to 106.5%)              | 19.6%<br>(8.6% to 36.9%)                         |
| Vitamin A deficiency                                     | 99.2<br>(69.3 to 138.5)                            | 5.6<br>(3.6 to 8.4)                           | 46.1%<br>(35.6% to 57.6%)               | -3.1%<br>(-10.1% to 4.5%)                        |
| Haemolytic disease and other neonatal jaundice           | 5.1<br>(3.8 to 6.2)                                | 2.4<br>(1.5 to 3.1)                           | 70.4%<br>(60.5% to 78.9%)               | 13.0%<br>(6.5% to 18.7%)                         |
| Other meningitis                                         | 28.1<br>(16.5 to 42.0)                             | 1.0<br>(0.6 to 1.6)                           | 95.3%<br>(79.5% to 114.1%)              | 29.5%<br>(19.1% to 42.0%)                        |
| Malaria                                                  | 1.7<br>(1.4 to 2.0)                                | 0.8<br>(0.6 to 1.1)                           | 34.1%<br>(24.4% to 41.0%)               | -11.0%<br>(-17.5% to -6.5%)                      |
| Pneumococcal meningitis                                  | 25.4<br>(16.5 to 37.2)                             | 0.7<br>(0.4 to 1.1)                           | 3.2%<br>(-4.9% to 11.7%)                | -31.6%<br>(-36.9% to -25.9%)                     |
| Meningococcal infection                                  | 12.4<br>(7.8 to 18.3)                              | 0.6<br>(0.4 to 1.0)                           | 28.4%<br>(16.6% to 42.3%)               | -14.8%<br>(-22.7% to -5.6%)                      |
| H influenzae type B meningitis                           | 5.8<br>(2.5 to 9.7)                                | 0.1<br>(<0.05 to <0.05)                       | -39.0%<br>(-47.3% to -30.0%)            | -59.5%<br>(-65.0% to -53.5%)                     |
| Tetanus                                                  | <0.05<br>(<0.05 to <0.05)                          | <0.05<br>(<0.05 to <0.05)                     | 68.9%<br>(-90.0% to 3,819.2%)           | 12.0%<br>(-93.4% to 2,499.6%)                    |
| <b>All causes</b>                                        | <b>103,029.5</b><br><b>(95,130.6 to 111,444.0)</b> | <b>2,623.0</b><br><b>(1,790.7 to 3,783.9)</b> | <b>44.6%</b><br><b>(42.7% to 46.5%)</b> | <b>-4.1%</b><br><b>(-5.3% to -2.8%)</b>          |



SR Table 13i: Global prevalence and years lived with disability (YLDs) for 2016, percentage change of YLD counts and rates between 2006 and 2016 of vision loss by cause, ages 65-69 years

| Cause                                                    | Prevalence in thousands (95% uncertainty interval) | YLDs in thousands (95% uncertainty interval)  |                                         |                                                   |                                                  |
|----------------------------------------------------------|----------------------------------------------------|-----------------------------------------------|-----------------------------------------|---------------------------------------------------|--------------------------------------------------|
|                                                          |                                                    | 2016                                          | 2016                                    | Percentage change in counts between 2006 and 2016 | Percentage change in rates between 2006 and 2016 |
| Refraction and accommodation disorders                   | 73,712.8<br>(68,471.2 to 79,251.5)                 | 1,217.5<br>(762.5 to 1,922.6)                 | 21.2%<br>(18.6% to 23.2%)               | -8.5%<br>(-10.5% to -7.0%)                        |                                                  |
| Near vision impairment                                   | 61,307.5<br>(56,571.6 to 65,857.2)                 | 608.5<br>(279.9 to 1,110.4)                   | 28.0%<br>(26.5% to 29.3%)               | -3.4%<br>(-4.6% to -2.4%)                         |                                                  |
| Cataract                                                 | 12,568.3<br>(10,138.2 to 15,284.8)                 | 835.4<br>(578.1 to 1,170.8)                   | 30.3%<br>(27.6% to 32.8%)               | -1.7%<br>(-3.7% to 0.2%)                          |                                                  |
| Other vision loss                                        | 3,066.8<br>(2,426.5 to 3,882.0)                    | 227.7<br>(149.5 to 315.7)                     | 33.0%<br>(29.8% to 36.0%)               | 0.4%<br>(-2.0% to 2.6%)                           |                                                  |
| Glaucoma                                                 | 924.3<br>(731.5 to 1,155.6)                        | 88.1<br>(56.5 to 126.4)                       | 34.2%<br>(30.2% to 38.1%)               | 1.3%<br>(-1.7% to 4.2%)                           |                                                  |
| Macular degeneration                                     | 1,252.2<br>(966.1 to 1,603.8)                      | 75.3<br>(49.3 to 105.2)                       | 39.5%<br>(34.6% to 44.5%)               | 5.3%<br>(1.6% to 9.1%)                            |                                                  |
| Trachoma                                                 | 609.7<br>(381.7 to 930.3)                          | 42.3<br>(26.1 to 63.5)                        | -1.2%<br>(-10.9% to 7.9%)               | -25.4%<br>(-32.7% to -18.5%)                      |                                                  |
| Neonatal preterm birth complications                     | 256.4<br>(203.2 to 318.3)                          | 29.3<br>(20.4 to 40.4)                        | 48.7%<br>(37.2% to 62.4%)               | 12.3%<br>(3.5% to 22.6%)                          |                                                  |
| Diabetes mellitus                                        | 317.4<br>(247.0 to 409.1)                          | 22.3<br>(14.4 to 31.1)                        | 39.0%<br>(33.6% to 44.8%)               | 4.9%<br>(0.9% to 9.3%)                            |                                                  |
| Neonatal sepsis and other neonatal infections            | 39.6<br>(13.2 to 110.1)                            | 19.0<br>(5.8 to 52.5)                         | 54.9%<br>(39.5% to 85.6%)               | 16.9%<br>(5.3% to 40.1%)                          |                                                  |
| Onchocerciasis                                           | 107.6<br>(74.1 to 172.1)                           | 7.1<br>(4.7 to 10.3)                          | 5.9%<br>(-5.2% to 21.8%)                | -20.1%<br>(-28.4% to -8.1%)                       |                                                  |
| Encephalitis                                             | 157.7<br>(86.8 to 266.2)                           | 6.0<br>(3.8 to 9.2)                           | 14.5%<br>(4.6% to 25.2%)                | -13.6%<br>(-21.1% to -5.5%)                       |                                                  |
| Vitamin A deficiency                                     | 70.6<br>(49.8 to 97.6)                             | 3.9<br>(2.5 to 5.9)                           | 31.8%<br>(21.8% to 42.0%)               | -0.5%<br>(-8.1% to 7.2%)                          |                                                  |
| Neonatal encephalopathy due to birth asphyxia and trauma | 7.0<br>(3.0 to 13.6)                               | 3.2<br>(1.3 to 6.4)                           | 53.7%<br>(42.2% to 75.9%)               | 16.0%<br>(7.3% to 32.8%)                          |                                                  |
| Haemolytic disease and other neonatal jaundice           | 3.1<br>(2.3 to 3.8)                                | 1.4<br>(0.9 to 1.9)                           | 49.8%<br>(42.5% to 56.9%)               | 13.1%<br>(7.5% to 18.4%)                          |                                                  |
| Other meningitis                                         | 22.5<br>(13.3 to 33.1)                             | 0.8<br>(0.5 to 1.3)                           | 77.4%<br>(61.4% to 93.7%)               | 33.9%<br>(21.8% to 46.2%)                         |                                                  |
| Pneumococcal meningitis                                  | 19.5<br>(12.9 to 28.4)                             | 0.6<br>(0.3 to 0.9)                           | -6.5%<br>(-14.8% to 1.8%)               | -29.4%<br>(-35.7% to -23.1%)                      |                                                  |
| Meningococcal infection                                  | 10.0<br>(6.5 to 14.4)                              | 0.5<br>(0.3 to 0.8)                           | 16.8%<br>(5.3% to 28.8%)                | -11.9%<br>(-20.5% to -2.8%)                       |                                                  |
| Malaria                                                  | 0.9<br>(0.7 to 1.0)                                | 0.4<br>(0.3 to 0.5)                           | 34.6%<br>(24.6% to 39.7%)               | 1.6%<br>(-6.0% to 5.5%)                           |                                                  |
| H influenzae type B meningitis                           | 4.3<br>(1.9 to 7.2)                                | 0.1<br>(<0.05 to 0.2)                         | -43.7%<br>(-51.4% to -35.5%)            | -57.5%<br>(-63.3% to -51.4%)                      |                                                  |
| Tetanus                                                  | <0.05<br>(<0.05 to <0.05)                          | <0.05<br>(<0.05 to <0.05)                     | 28.5%<br>(-90.2% to 2,393.9%)           | -3.0%<br>(-92.6% to 1,782.2%)                     |                                                  |
| <b>All causes</b>                                        | <b>93,150.7</b><br><b>(86,350.5 to 100,498.3)</b>  | <b>2,581.0</b><br><b>(1,782.5 to 3,700.7)</b> | <b>26.1%</b><br><b>(24.3% to 27.4%)</b> | <b>-4.9%</b><br><b>(-6.2% to -3.8%)</b>           |                                                  |

SR Table 13i: Global prevalence and years lived with disability (YLDs) for 2016, percentage change of YLD counts and rates between 2006 and 2016 of vision loss by cause, ages 70-74 years

| Cause                                                    | Prevalence in thousands (95% uncertainty interval) | YLDs in thousands (95% uncertainty interval)  |                                         |                                                   |
|----------------------------------------------------------|----------------------------------------------------|-----------------------------------------------|-----------------------------------------|---------------------------------------------------|
|                                                          |                                                    | 2016                                          | 2016                                    | Percentage change in counts between 2006 and 2016 |
| Refraction and accommodation disorders                   | 57,386.5<br>(53,243.7 to 61,783.3)                 | 950.7<br>(594.7 to 1,506.9)                   | 9.8%<br>(7.5% to 11.8%)                 | -8.2%<br>(-10.2% to -6.6%)                        |
| Near vision impairment                                   | 47,579.8<br>(44,131.5 to 51,492.2)                 | 465.9<br>(219.4 to 841.2)                     | 15.4%<br>(14.3% to 16.6%)               | -3.5%<br>(-4.4% to -2.5%)                         |
| Cataract                                                 | 13,267.6<br>(10,550.8 to 16,203.0)                 | 885.8<br>(617.2 to 1,218.2)                   | 20.2%<br>(17.6% to 22.5%)               | 0.5%<br>(-1.7% to 2.4%)                           |
| Other vision loss                                        | 2,580.0<br>(2,021.5 to 3,266.9)                    | 190.8<br>(127.8 to 262.7)                     | 17.4%<br>(14.7% to 20.2%)               | -1.9%<br>(-4.2% to 0.4%)                          |
| Glaucoma                                                 | 799.8<br>(633.7 to 992.7)                          | 75.9<br>(49.5 to 107.1)                       | 20.8%<br>(17.8% to 23.8%)               | 0.9%<br>(-1.6% to 3.5%)                           |
| Macular degeneration                                     | 1,064.4<br>(811.5 to 1,386.9)                      | 65.2<br>(42.8 to 90.7)                        | 22.9%<br>(19.1% to 26.8%)               | 2.8%<br>(-0.4% to 6.0%)                           |
| Trachoma                                                 | 634.4<br>(390.2 to 981.8)                          | 43.0<br>(26.4 to 64.9)                        | -7.4%<br>(-17.6% to 1.7%)               | -22.6%<br>(-31.2% to -15.0%)                      |
| Diabetes mellitus                                        | 262.8<br>(203.9 to 339.8)                          | 18.4<br>(12.0 to 25.3)                        | 27.1%<br>(21.8% to 32.5%)               | 6.2%<br>(1.8% to 10.7%)                           |
| Neonatal preterm birth complications                     | 173.2<br>(135.8 to 215.4)                          | 17.7<br>(12.2 to 24.2)                        | 32.4%<br>(23.0% to 43.0%)               | 10.7%<br>(2.8% to 19.5%)                          |
| Neonatal sepsis and other neonatal infections            | 19.1<br>(5.2 to 58.9)                              | 9.3<br>(2.2 to 27.5)                          | 45.9%<br>(32.9% to 74.4%)               | 21.9%<br>(11.1% to 45.7%)                         |
| Onchocerciasis                                           | 84.2<br>(56.7 to 137.5)                            | 5.4<br>(3.5 to 8.0)                           | 10.2%<br>(-1.5% to 26.1%)               | -7.9%<br>(-17.7% to 5.4%)                         |
| Encephalitis                                             | 119.4<br>(65.1 to 201.7)                           | 4.6<br>(2.9 to 7.0)                           | 5.2%<br>(-4.3% to 15.1%)                | -12.1%<br>(-20.0% to -3.8%)                       |
| Vitamin A deficiency                                     | 45.9<br>(32.9 to 63.5)                             | 2.6<br>(1.6 to 3.8)                           | 22.8%<br>(14.0% to 32.1%)               | 2.7%<br>(-4.7% to 10.4%)                          |
| Neonatal encephalopathy due to birth asphyxia and trauma | 2.7<br>(1.0 to 5.5)                                | 1.2<br>(0.4 to 2.7)                           | 50.6%<br>(38.3% to 73.3%)               | 25.8%<br>(15.6% to 44.9%)                         |
| Haemolytic disease and other neonatal jaundice           | 1.6<br>(1.1 to 1.9)                                | 0.7<br>(0.5 to 1.0)                           | 39.1%<br>(32.1% to 45.7%)               | 16.2%<br>(10.4% to 21.8%)                         |
| Other meningitis                                         | 16.7<br>(9.9 to 24.5)                              | 0.6<br>(0.4 to 1.0)                           | 67.3%<br>(52.0% to 85.3%)               | 39.8%<br>(27.0% to 54.9%)                         |
| Pneumococcal meningitis                                  | 14.3<br>(9.6 to 20.6)                              | 0.4<br>(0.3 to 0.7)                           | -8.8%<br>(-16.3% to -0.4%)              | -23.8%<br>(-30.1% to -16.8%)                      |
| Meningococcal infection                                  | 7.4<br>(4.9 to 10.6)                               | 0.4<br>(0.2 to 0.6)                           | 13.3%<br>(1.9% to 26.0%)                | -5.3%<br>(-14.9% to 5.3%)                         |
| Malaria                                                  | 0.4<br>(0.3 to 0.4)                                | 0.2<br>(0.1 to 0.2)                           | 37.5%<br>(30.6% to 42.2%)               | 15.0%<br>(9.1% to 18.8%)                          |
| H influenzae type B meningitis                           | 3.1<br>(1.4 to 5.2)                                | 0.1<br>(<0.05 to 0.1)                         | -45.1%<br>(-52.2% to -37.2%)            | -54.1%<br>(-60.1% to -47.5%)                      |
| Tetanus                                                  | <0.05<br>(<0.05 to <0.05)                          | <0.05<br>(<0.05 to <0.05)                     | -18.6%<br>(-89.8% to 488.3%)            | -31.9%<br>(-91.4% to 391.7%)                      |
| <b>All causes</b>                                        | <b>76,483.4</b><br><b>(70,186.5 to 83,407.1)</b>   | <b>2,272.9</b><br><b>(1,583.3 to 3,218.9)</b> | <b>15.1%</b><br><b>(13.4% to 16.5%)</b> | <b>-3.8%</b><br><b>(-5.2% to -2.6%)</b>           |

SR Table 13i: Global prevalence and years lived with disability (YLDs) for 2016, percentage change of YLD counts and rates between 2006 and 2016 of vision loss by cause, ages 75-79 years

| Cause                                                    | Prevalence in thousands (95% uncertainty interval) | YLDs in thousands (95% uncertainty interval)  |                                                   |                                                  |
|----------------------------------------------------------|----------------------------------------------------|-----------------------------------------------|---------------------------------------------------|--------------------------------------------------|
|                                                          |                                                    | 2016                                          | Percentage change in counts between 2006 and 2016 | Percentage change in rates between 2006 and 2016 |
| Cataract                                                 | 12,702.0<br>(10,616.8 to 15,104.0)                 | 847.4<br>(597.7 to 1,160.7)                   | 26.1%<br>(23.9% to 28.1%)                         | 1.4%<br>(-0.4% to 3.0%)                          |
| Refraction and accommodation disorders                   | 46,940.8<br>(43,823.6 to 50,388.4)                 | 770.9<br>(485.3 to 1,202.2)                   | 18.4%<br>(16.3% to 20.2%)                         | -4.8%<br>(-6.5% to -3.4%)                        |
| Near vision impairment                                   | 39,015.3<br>(36,202.9 to 41,849.4)                 | 377.2<br>(179.8 to 672.6)                     | 23.7%<br>(22.4% to 25.2%)                         | -0.5%<br>(-1.6% to 0.6%)                         |
| Other vision loss                                        | 2,294.8<br>(1,824.4 to 2,821.6)                    | 168.3<br>(114.2 to 231.3)                     | 24.4%<br>(21.8% to 27.0%)                         | 0.0%<br>(-2.1% to 2.1%)                          |
| Glaucoma                                                 | 679.5<br>(551.4 to 833.3)                          | 64.4<br>(42.2 to 92.0)                        | 27.0%<br>(23.8% to 30.1%)                         | 2.1%<br>(-0.5% to 4.6%)                          |
| Macular degeneration                                     | 868.3<br>(689.2 to 1,114.6)                        | 55.8<br>(37.0 to 78.7)                        | 27.0%<br>(23.3% to 30.1%)                         | 2.1%<br>(-0.9% to 4.6%)                          |
| Trachoma                                                 | 541.6<br>(360.0 to 766.6)                          | 36.9<br>(23.3 to 54.4)                        | -3.3%<br>(-13.4% to 7.1%)                         | -22.2%<br>(-30.4% to -13.8%)                     |
| Diabetes mellitus                                        | 216.6<br>(167.4 to 274.0)                          | 15.1<br>(9.9 to 21.1)                         | 30.5%<br>(25.7% to 35.8%)                         | 4.9%<br>(1.0% to 9.2%)                           |
| Neonatal preterm birth complications                     | 121.9<br>(95.4 to 153.7)                           | 10.9<br>(7.5 to 15.0)                         | 35.7%<br>(26.9% to 44.8%)                         | 9.1%<br>(2.0% to 16.4%)                          |
| Neonatal sepsis and other neonatal infections            | 8.8<br>(1.8 to 26.5)                               | 4.3<br>(0.8 to 13.0)                          | 59.3%<br>(47.0% to 91.0%)                         | 28.1%<br>(18.2% to 53.6%)                        |
| Encephalitis                                             | 92.9<br>(51.1 to 155.9)                            | 3.6<br>(2.2 to 5.3)                           | 13.3%<br>(2.6% to 25.7%)                          | -8.9%<br>(-17.5% to 1.1%)                        |
| Onchocerciasis                                           | 46.5<br>(31.8 to 74.7)                             | 3.0<br>(1.9 to 4.3)                           | 7.8%<br>(-4.2% to 24.9%)                          | -13.3%<br>(-22.9% to 0.4%)                       |
| Vitamin A deficiency                                     | 27.2<br>(20.1 to 36.2)                             | 1.6<br>(1.0 to 2.3)                           | 30.5%<br>(20.4% to 40.5%)                         | 4.9%<br>(-3.2% to 13.0%)                         |
| Other meningitis                                         | 11.9<br>(7.2 to 17.2)                              | 0.5<br>(0.3 to 0.7)                           | 73.1%<br>(54.9% to 94.3%)                         | 39.2%<br>(24.6% to 56.2%)                        |
| Neonatal encephalopathy due to birth asphyxia and trauma | 0.9<br>(0.2 to 2.2)                                | 0.4<br>(0.1 to 1.1)                           | 74.2%<br>(55.3% to 105.4%)                        | 40.1%<br>(24.9% to 65.2%)                        |
| Haemolytic disease and other neonatal jaundice           | 0.7<br>(0.5 to 0.9)                                | 0.3<br>(0.2 to 0.5)                           | 50.1%<br>(40.3% to 58.3%)                         | 20.7%<br>(12.8% to 27.3%)                        |
| Pneumococcal meningitis                                  | 10.0<br>(6.7 to 14.4)                              | 0.3<br>(0.2 to 0.5)                           | -4.1%<br>(-12.5% to 5.0%)                         | -22.9%<br>(-29.6% to -15.6%)                     |
| Meningococcal infection                                  | 5.2<br>(3.4 to 7.4)                                | 0.3<br>(0.2 to 0.4)                           | 17.3%<br>(5.2% to 31.6%)                          | -5.7%<br>(-15.4% to 5.8%)                        |
| Malaria                                                  | 0.1<br>(0.1 to 0.1)                                | <0.05<br>(<0.05 to 0.1)                       | 46.8%<br>(40.8% to 51.7%)                         | 18.0%<br>(13.2% to 22.0%)                        |
| H influenzae type B meningitis                           | 2.1<br>(0.9 to 3.5)                                | <0.05<br>(<0.05 to 0.1)                       | -41.7%<br>(-49.3% to -33.3%)                      | -53.1%<br>(-59.2% to -46.4%)                     |
| Tetanus                                                  | <0.05<br>(<0.05 to <0.05)                          | <0.05<br>(<0.05 to <0.05)                     | -21.9%<br>(-87.7% to 305.9%)                      | -37.2%<br>(-90.1% to 226.4%)                     |
| <b>All causes</b>                                        | <b>64,571.7</b><br><b>(59,908.1 to 69,570.1)</b>   | <b>1,983.9</b><br><b>(1,401.9 to 2,736.9)</b> | <b>22.3%</b><br><b>(20.9% to 23.5%)</b>           | <b>-1.6%</b><br><b>(-2.7% to -0.7%)</b>          |

SR Table 13i: Global prevalence and years lived with disability (YLDs) for 2016, percentage change of YLD counts and rates between 2006 and 2016 of vision loss by cause, ages 80-84

| Cause                                                    | Prevalence in thousands (95% uncertainty interval) | YLDs in thousands (95% uncertainty interval) |                                         |                                                   |
|----------------------------------------------------------|----------------------------------------------------|----------------------------------------------|-----------------------------------------|---------------------------------------------------|
|                                                          |                                                    | 2016                                         | 2016                                    | Percentage change in counts between 2006 and 2016 |
| Cataract                                                 | 9,384.7<br>(7,595.0 to 11,391.8)                   | 637.0<br>(450.3 to 886.2)                    | 33.3%<br>(31.4% to 35.1%)               | 1.8%<br>(0.3% to 3.2%)                            |
| Refraction and accommodation disorders                   | 31,227.6<br>(28,991.8 to 33,762.2)                 | 505.7<br>(318.9 to 781.8)                    | 27.4%<br>(25.3% to 29.0%)               | -2.7%<br>(-4.3% to -1.5%)                         |
| Near vision impairment                                   | 26,042.1<br>(24,012.0 to 27,960.0)                 | 248.2<br>(117.3 to 433.1)                    | 32.3%<br>(30.9% to 33.6%)               | 1.0%<br>(-0.1% to 2.0%)                           |
| Other vision loss                                        | 1,672.6<br>(1,313.1 to 2,086.0)                    | 123.0<br>(83.8 to 166.8)                     | 33.0%<br>(30.4% to 35.5%)               | 1.5%<br>(-0.4% to 3.4%)                           |
| Glaucoma                                                 | 458.5<br>(367.8 to 564.2)                          | 43.3<br>(29.2 to 61.8)                       | 35.4%<br>(32.1% to 38.5%)               | 3.4%<br>(0.9% to 5.7%)                            |
| Macular degeneration                                     | 597.6<br>(464.7 to 768.4)                          | 41.9<br>(28.1 to 60.0)                       | 33.7%<br>(29.9% to 37.4%)               | 2.1%<br>(-0.8% to 4.9%)                           |
| Trachoma                                                 | 339.0<br>(217.9 to 490.6)                          | 23.4<br>(14.9 to 35.0)                       | 2.8%<br>(-7.6% to 13.2%)                | -21.5%<br>(-29.4% to -13.6%)                      |
| Diabetes mellitus                                        | 149.7<br>(114.7 to 191.8)                          | 10.4<br>(7.0 to 14.6)                        | 38.9%<br>(33.7% to 43.9%)               | 6.0%<br>(2.1% to 9.9%)                            |
| Neonatal preterm birth complications                     | 73.3<br>(56.9 to 93.7)                             | 5.9<br>(4.1 to 8.2)                          | 42.3%<br>(31.5% to 52.7%)               | 8.7%<br>(0.4% to 16.6%)                           |
| Encephalitis                                             | 58.7<br>(31.4 to 100.4)                            | 2.3<br>(1.5 to 3.4)                          | 21.5%<br>(7.5% to 37.7%)                | -7.3%<br>(-17.9% to 5.1%)                         |
| Neonatal sepsis and other neonatal infections            | 2.7<br>(0.5 to 8.2)                                | 1.3<br>(0.2 to 4.3)                          | 76.1%<br>(62.2% to 121.5%)              | 34.4%<br>(23.9% to 69.1%)                         |
| Onchocerciasis                                           | 17.6<br>(11.8 to 29.5)                             | 1.1<br>(0.7 to 1.6)                          | 12.5%<br>(0.6% to 31.0%)                | -14.1%<br>(-23.2% to 0.1%)                        |
| Vitamin A deficiency                                     | 13.6<br>(9.8 to 18.4)                              | 0.8<br>(0.5 to 1.2)                          | 40.5%<br>(29.1% to 52.2%)               | 7.3%<br>(-1.4% to 16.2%)                          |
| Other meningitis                                         | 7.0<br>(4.1 to 10.1)                               | 0.3<br>(0.2 to 0.4)                          | 79.0%<br>(56.5% to 104.4%)              | 36.7%<br>(19.5% to 56.0%)                         |
| Pneumococcal meningitis                                  | 6.0<br>(3.9 to 8.7)                                | 0.2<br>(0.1 to 0.3)                          | 3.5%<br>(-7.2% to 14.5%)                | -21.0%<br>(-29.1% to -12.6%)                      |
| Meningococcal infection                                  | 2.8<br>(1.8 to 4.0)                                | 0.1<br>(0.1 to 0.2)                          | 23.3%<br>(7.9% to 39.8%)                | -5.8%<br>(-17.7% to 6.7%)                         |
| Neonatal encephalopathy due to birth asphyxia and trauma | 0.2<br>(<0.05 to 0.6)                              | 0.1<br>(<0.05 to 0.3)                        | 86.4%<br>(60.8% to 140.0%)              | 42.3%<br>(22.7% to 83.3%)                         |
| Haemolytic disease and other neonatal jaundice           | 0.2<br>(0.1 to 0.3)                                | 0.1<br>(0.1 to 0.1)                          | 59.9%<br>(44.9% to 72.4%)               | 22.1%<br>(10.7% to 31.6%)                         |
| H influenzae type B meningitis                           | 1.2<br>(0.5 to 2.0)                                | <0.05<br>(<0.05 to <0.05)                    | -37.5%<br>(-46.1% to -28.4%)            | -52.3%<br>(-58.8% to -45.3%)                      |
| Malaria                                                  | <0.05<br>(<0.05 to <0.05)                          | <0.05<br>(<0.05 to <0.05)                    | 60.5%<br>(53.7% to 67.8%)               | 22.5%<br>(17.4% to 28.1%)                         |
| Tetanus                                                  | <0.05<br>(<0.05 to <0.05)                          | <0.05<br>(<0.05 to <0.05)                    | -8.6%<br>(-85.0% to 463.2%)             | -30.2%<br>(-88.5% to 330.1%)                      |
| <b>All causes</b>                                        | <b>44,013.1</b><br><b>(40,412.4 to 47,834.3)</b>   | <b>1,397.1</b><br><b>(986.5 to 1,899.2)</b>  | <b>30.6%</b><br><b>(29.3% to 31.7%)</b> | <b>-0.3%</b><br><b>(-1.3% to 0.5%)</b>            |

SR Table 13i: Global prevalence and years lived with disability (YLDs) for 2016, percentage change of YLD counts and rates between 2006 and 2016 of vision loss by cause, ages 85-89

| Cause                                                    | Prevalence in thousands (95% uncertainty interval) | YLDs in thousands (95% uncertainty interval) |                                         |                                                   |                                                  |
|----------------------------------------------------------|----------------------------------------------------|----------------------------------------------|-----------------------------------------|---------------------------------------------------|--------------------------------------------------|
|                                                          |                                                    | 2016                                         | 2016                                    | Percentage change in counts between 2006 and 2016 | Percentage change in rates between 2006 and 2016 |
| Cataract                                                 | 5,773.9<br>(4,834.1 to 6,814.8)                    | 397.4<br>(283.0 to 543.1)                    | 55.5%<br>(53.4% to 57.5%)               | -3.1%<br>(-4.4% to -1.9%)                         |                                                  |
| Refraction and accommodation disorders                   | 18,091.9<br>(16,861.2 to 19,500.3)                 | 282.9<br>(177.1 to 434.3)                    | 56.5%<br>(54.3% to 58.4%)               | -2.5%<br>(-3.9% to -1.3%)                         |                                                  |
| Near vision impairment                                   | 15,251.1<br>(14,197.0 to 16,539.2)                 | 143.5<br>(67.5 to 254.8)                     | 61.5%<br>(59.7% to 63.2%)               | 0.6%<br>(-0.5% to 1.7%)                           |                                                  |
| Other vision loss                                        | 1,062.1<br>(817.3 to 1,330.2)                      | 78.6<br>(53.6 to 109.1)                      | 62.8%<br>(59.9% to 66.0%)               | 1.5%<br>(-0.4% to 3.4%)                           |                                                  |
| Macular degeneration                                     | 358.6<br>(289.0 to 446.8)                          | 28.5<br>(19.5 to 40.0)                       | 59.7%<br>(55.4% to 64.1%)               | -0.5%<br>(-3.2% to 2.3%)                          |                                                  |
| Glaucoma                                                 | 265.5<br>(214.3 to 322.7)                          | 25.2<br>(16.9 to 36.4)                       | 64.9%<br>(61.1% to 69.1%)               | 2.7%<br>(0.4% to 5.4%)                            |                                                  |
| Trachoma                                                 | 162.2<br>(110.6 to 225.4)                          | 11.3<br>(7.4 to 16.5)                        | 11.3%<br>(0.6% to 22.7%)                | -30.7%<br>(-37.3% to -23.5%)                      |                                                  |
| Diabetes mellitus                                        | 90.1<br>(70.3 to 113.5)                            | 6.3<br>(4.3 to 8.9)                          | 63.4%<br>(57.3% to 70.0%)               | 1.8%<br>(-2.0% to 5.9%)                           |                                                  |
| Neonatal preterm birth complications                     | 38.8<br>(29.7 to 49.8)                             | 3.0<br>(2.0 to 4.1)                          | 69.1%<br>(57.4% to 82.9%)               | 5.4%<br>(-1.9% to 14.0%)                          |                                                  |
| Encephalitis                                             | 31.7<br>(16.6 to 53.9)                             | 1.2<br>(0.8 to 1.8)                          | 45.1%<br>(25.6% to 68.6%)               | -9.6%<br>(-21.7% to 5.1%)                         |                                                  |
| Onchocerciasis                                           | 6.4<br>(4.2 to 10.7)                               | 0.4<br>(0.3 to 0.6)                          | 12.0%<br>(-1.0% to 31.8%)               | -30.2%<br>(-38.3% to -17.9%)                      |                                                  |
| Vitamin A deficiency                                     | 5.4<br>(3.9 to 7.2)                                | 0.3<br>(0.2 to 0.5)                          | 55.0%<br>(43.7% to 66.6%)               | -3.4%<br>(-10.5% to 3.8%)                         |                                                  |
| Neonatal sepsis and other neonatal infections            | 0.6<br>(0.1 to 1.9)                                | 0.3<br>(<0.05 to 1.0)                        | 138.6%<br>(115.9% to 233.9%)            | 48.7%<br>(34.5% to 108.0%)                        |                                                  |
| Other meningitis                                         | 3.4<br>(2.0 to 5.0)                                | 0.1<br>(0.1 to 0.2)                          | 99.5%<br>(74.7% to 127.2%)              | 24.3%<br>(8.8% to 41.6%)                          |                                                  |
| Pneumococcal meningitis                                  | 3.0<br>(2.0 to 4.3)                                | 0.1<br>(0.1 to 0.1)                          | 17.9%<br>(5.3% to 31.5%)                | -26.5%<br>(-34.4% to -18.0%)                      |                                                  |
| Meningococcal infection                                  | 1.4<br>(0.9 to 2.0)                                | 0.1<br>(<0.05 to 0.1)                        | 42.3%<br>(22.6% to 64.8%)               | -11.4%<br>(-23.6% to 2.7%)                        |                                                  |
| Neonatal encephalopathy due to birth asphyxia and trauma | <0.05<br>(<0.05 to 0.1)                            | <0.05<br>(<0.05 to 0.1)                      | 156.9%<br>(99.9% to 287.4%)             | 60.1%<br>(24.5% to 141.4%)                        |                                                  |
| Haemolytic disease and other neonatal jaundice           | <0.05<br>(<0.05 to 0.1)                            | <0.05<br>(<0.05 to <0.05)                    | 93.5%<br>(58.0% to 117.1%)              | 20.6%<br>(-1.6% to 35.3%)                         |                                                  |
| H influenzae type B meningitis                           | 0.6<br>(0.2 to 0.9)                                | <0.05<br>(<0.05 to <0.05)                    | -28.9%<br>(-38.1% to -18.9%)            | -55.7%<br>(-61.4% to -49.5%)                      |                                                  |
| Malaria                                                  | <0.05<br>(<0.05 to <0.05)                          | <0.05<br>(<0.05 to <0.05)                    | 80.9%<br>(70.2% to 91.5%)               | 12.7%<br>(6.1% to 19.3%)                          |                                                  |
| Tetanus                                                  | <0.05<br>(<0.05 to <0.05)                          | <0.05<br>(<0.05 to <0.05)                    | 8.0%<br>(-84.0% to 798.4%)              | -32.7%<br>(-90.0% to 459.7%)                      |                                                  |
| <b>All causes</b>                                        | <b>25,895.5</b><br><b>(23,974.9 to 27,912.5)</b>   | <b>835.7</b><br><b>(598.7 to 1,135.2)</b>    | <b>56.1%</b><br><b>(54.6% to 57.6%)</b> | <b>-2.7%</b><br><b>(-3.7% to -1.8%)</b>           |                                                  |

SR Table 13i: Global prevalence and years lived with disability (YLDs) for 2016, percentage change of YLD counts and rates between 2006 and 2016 of vision loss by cause, ages 90-94

| Cause                                                    | Prevalence in thousands (95% uncertainty interval) | YLDs in thousands (95% uncertainty interval) |                                         |                                                  |
|----------------------------------------------------------|----------------------------------------------------|----------------------------------------------|-----------------------------------------|--------------------------------------------------|
|                                                          |                                                    | 2016                                         | 2016                                    | Percentage change in rates between 2006 and 2016 |
| Cataract                                                 | 2,332.2<br>(1,916.7 to 2,815.5)                    | 166.2<br>(116.3 to 227.0)                    | 62.8%<br>(60.9% to 64.8%)               | -2.7%<br>(-3.9% to -1.5%)                        |
| Refraction and accommodation disorders                   | 6,778.8<br>(6,249.8 to 7,353.1)                    | 102.5<br>(63.8 to 155.3)                     | 62.2%<br>(60.4% to 63.9%)               | -3.1%<br>(-4.1% to -2.1%)                        |
| Near vision impairment                                   | 5,766.7<br>(5,308.2 to 6,276.1)                    | 53.7<br>(25.6 to 95.5)                       | 64.5%<br>(62.7% to 66.3%)               | -1.7%<br>(-2.8% to -0.6%)                        |
| Other vision loss                                        | 454.5<br>(348.6 to 590.8)                          | 34.1<br>(23.2 to 47.6)                       | 67.8%<br>(64.7% to 71.1%)               | 0.2%<br>(-1.6% to 2.2%)                          |
| Macular degeneration                                     | 152.5<br>(120.7 to 188.7)                          | 14.0<br>(9.7 to 19.9)                        | 68.5%<br>(63.3% to 74.2%)               | 0.6%<br>(-2.4% to 4.1%)                          |
| Glaucoma                                                 | 101.1<br>(80.1 to 126.3)                           | 9.7<br>(6.7 to 13.9)                         | 71.1%<br>(66.5% to 75.8%)               | 2.2%<br>(-0.5% to 5.0%)                          |
| Trachoma                                                 | 51.4<br>(34.0 to 75.7)                             | 3.6<br>(2.3 to 5.3)                          | 18.1%<br>(6.7% to 29.9%)                | -29.5%<br>(-36.2% to -22.4%)                     |
| Diabetes mellitus                                        | 37.6<br>(28.7 to 48.1)                             | 2.7<br>(1.8 to 3.8)                          | 78.1%<br>(70.5% to 85.9%)               | 6.4%<br>(1.9% to 11.1%)                          |
| Neonatal preterm birth complications                     | 13.8<br>(10.3 to 17.9)                             | 1.0<br>(0.7 to 1.4)                          | 73.8%<br>(59.9% to 88.2%)               | 3.8%<br>(-4.5% to 12.4%)                         |
| Encephalitis                                             | 10.9<br>(5.5 to 18.8)                              | 0.4<br>(0.3 to 0.6)                          | 51.0%<br>(28.5% to 79.1%)               | -9.8%<br>(-23.2% to 7.0%)                        |
| Onchocerciasis                                           | 1.6<br>(1.1 to 2.7)                                | 0.1<br>(0.1 to 0.2)                          | 10.7%<br>(-2.5% to 31.4%)               | -33.9%<br>(-41.7% to -21.5%)                     |
| Vitamin A deficiency                                     | 1.4<br>(0.9 to 1.9)                                | 0.1<br>(0.1 to 0.1)                          | 66.1%<br>(54.5% to 77.5%)               | -0.8%<br>(-7.7% to 6.0%)                         |
| Other meningitis                                         | 1.1<br>(0.6 to 1.6)                                | <0.05<br>(<0.05 to 0.1)                      | 100.2%<br>(71.7% to 134.2%)             | 19.6%<br>(2.6% to 39.9%)                         |
| Pneumococcal meningitis                                  | 1.0<br>(0.7 to 1.5)                                | <0.05<br>(<0.05 to <0.05)                    | 26.3%<br>(11.5% to 44.5%)               | -24.5%<br>(-33.4% to -13.7%)                     |
| Neonatal sepsis and other neonatal infections            | 0.1<br>(<0.05 to 0.2)                              | <0.05<br>(<0.05 to 0.1)                      | 178.2%<br>(142.8% to 353.3%)            | 66.2%<br>(45.1% to 170.8%)                       |
| Meningococcal infection                                  | 0.5<br>(0.3 to 0.6)                                | <0.05<br>(<0.05 to <0.05)                    | 47.9%<br>(24.4% to 76.9%)               | -11.7%<br>(-25.7% to 5.7%)                       |
| H influenzae type B meningitis                           | 0.2<br>(0.1 to 0.3)                                | <0.05<br>(<0.05 to <0.05)                    | -24.2%<br>(-32.8% to -15.3%)            | -54.7%<br>(-59.9% to -49.4%)                     |
| Neonatal encephalopathy due to birth asphyxia and trauma | <0.05<br>(<0.05 to <0.05)                          | <0.05<br>(<0.05 to <0.05)                    | 190.1%<br>(83.2% to 447.3%)             | 73.3%<br>(9.4% to 227.0%)                        |
| Haemolytic disease and other neonatal jaundice           | <0.05<br>(<0.05 to <0.05)                          | <0.05<br>(<0.05 to <0.05)                    | 89.3%<br>(17.7% to 132.2%)              | 13.1%<br>(-29.7% to 38.7%)                       |
| Malaria                                                  | <0.05<br>(<0.05 to <0.05)                          | <0.05<br>(<0.05 to <0.05)                    | 104.0%<br>(87.3% to 121.8%)             | 21.9%<br>(11.9% to 32.5%)                        |
| Tetanus                                                  | <0.05<br>(<0.05 to <0.05)                          | <0.05<br>(<0.05 to <0.05)                    | 24.8%<br>(-85.1% to 1,325.1%)           | -25.4%<br>(-91.1% to 751.4%)                     |
| <b>All causes</b>                                        | <b>9,938.6</b><br><b>(9,094.9 to 10,902.4)</b>     | <b>334.4</b><br><b>(237.9 to 456.6)</b>      | <b>63.0%</b><br><b>(61.6% to 64.3%)</b> | <b>-2.6%</b><br><b>(-3.5% to -1.8%)</b>          |

SR Table 13h: Global prevalence and years lived with disability (YLDs) for 2016, percentage change of YLD counts and rates between 2006 and 2016 of vision loss by cause, ages 95+ years

| Cause                                                    | Prevalence in thousands (95% uncertainty interval) | YLDs in thousands (95% uncertainty interval) |                                         |                                                   |
|----------------------------------------------------------|----------------------------------------------------|----------------------------------------------|-----------------------------------------|---------------------------------------------------|
|                                                          |                                                    | 2016                                         | 2016                                    | Percentage change in counts between 2006 and 2016 |
| Cataract                                                 | 603.8<br>(483.0 to 738.3)                          | 44.9<br>(30.6 to 62.5)                       | 59.1%<br>(57.1% to 61.1%)               | 1.5%<br>(0.3% to 2.8%)                            |
| Refraction and accommodation disorders                   | 1,563.3<br>(1,400.2 to 1,756.2)                    | 23.2<br>(14.2 to 36.4)                       | 56.7%<br>(54.7% to 58.5%)               | -0.0%<br>(-1.3% to 1.1%)                          |
| Near vision impairment                                   | 1,344.8<br>(1,203.0 to 1,535.1)                    | 12.6<br>(5.9 to 22.2)                        | 58.0%<br>(55.9% to 59.8%)               | 0.8%<br>(-0.5% to 2.0%)                           |
| Other vision loss                                        | 124.7<br>(85.8 to 173.2)                           | 9.5<br>(6.1 to 13.8)                         | 65.5%<br>(62.0% to 69.0%)               | 5.6%<br>(3.4% to 7.8%)                            |
| Macular degeneration                                     | 38.6<br>(29.7 to 48.6)                             | 3.8<br>(2.4 to 5.7)                          | 52.2%<br>(46.6% to 58.1%)               | -2.9%<br>(-6.4% to 0.9%)                          |
| Glaucoma                                                 | 24.1<br>(18.4 to 30.2)                             | 2.3<br>(1.5 to 3.5)                          | 65.7%<br>(61.3% to 70.5%)               | 5.8%<br>(2.9% to 8.8%)                            |
| Trachoma                                                 | 11.0<br>(6.6 to 16.2)                              | 0.8<br>(0.4 to 1.2)                          | 26.3%<br>(12.0% to 41.4%)               | -19.4%<br>(-28.5% to -9.7%)                       |
| Diabetes mellitus                                        | 9.8<br>(7.2 to 12.8)                               | 0.7<br>(0.5 to 1.0)                          | 73.7%<br>(65.7% to 82.0%)               | 10.8%<br>(5.7% to 16.1%)                          |
| Neonatal preterm birth complications                     | 3.0<br>(2.2 to 4.0)                                | 0.2<br>(0.1 to 0.3)                          | 65.5%<br>(51.5% to 81.0%)               | 5.6%<br>(-3.3% to 15.5%)                          |
| Encephalitis                                             | 2.5<br>(1.2 to 4.2)                                | 0.1<br>(0.1 to 0.2)                          | 54.4%<br>(29.3% to 84.0%)               | -1.4%<br>(-17.5% to 17.4%)                        |
| Onchocerciasis                                           | 0.3<br>(0.2 to 0.5)                                | <0.05<br>(<0.05 to <0.05)                    | 9.9%<br>(-4.2% to 31.6%)                | -29.9%<br>(-38.8% to -16.1%)                      |
| Vitamin A deficiency                                     | 0.2<br>(0.1 to 0.4)                                | <0.05<br>(<0.05 to <0.05)                    | 75.9%<br>(64.4% to 88.2%)               | 12.3%<br>(4.9% to 20.1%)                          |
| Other meningitis                                         | 0.2<br>(0.1 to 0.3)                                | <0.05<br>(<0.05 to <0.05)                    | 94.0%<br>(67.3% to 125.4%)              | 23.8%<br>(6.7% to 43.8%)                          |
| Pneumococcal meningitis                                  | 0.2<br>(0.1 to 0.3)                                | <0.05<br>(<0.05 to <0.05)                    | 30.8%<br>(15.5% to 48.5%)               | -16.5%<br>(-26.3% to -5.2%)                       |
| Meningococcal infection                                  | 0.1<br>(0.1 to 0.1)                                | <0.05<br>(<0.05 to <0.05)                    | 46.8%<br>(24.5% to 74.0%)               | -6.3%<br>(-20.6% to 11.1%)                        |
| H influenzae type B meningitis                           | <0.05<br>(<0.05 to 0.1)                            | <0.05<br>(<0.05 to <0.05)                    | -21.7%<br>(-29.9% to -13.0%)            | -50.0%<br>(-55.3% to -44.5%)                      |
| Neonatal sepsis and other neonatal infections            | <0.05<br>(<0.05 to <0.05)                          | <0.05<br>(<0.05 to <0.05)                    | 194.5%<br>(148.8% to 473.7%)            | 87.9%<br>(58.7% to 266.1%)                        |
| Neonatal encephalopathy due to birth asphyxia and trauma | <0.05<br>(<0.05 to <0.05)                          | <0.05<br>(<0.05 to <0.05)                    | 180.9%<br>(28.5% to 717.6%)             | 79.3%<br>(-18.0% to 421.7%)                       |
| Haemolytic disease and other neonatal jaundice           | <0.05<br>(<0.05 to <0.05)                          | <0.05<br>(<0.05 to <0.05)                    | 91.7%<br>(-11.6% to 191.8%)             | 22.3%<br>(-43.6% to 86.2%)                        |
| Malaria                                                  | <0.05<br>(<0.05 to <0.05)                          | <0.05<br>(<0.05 to <0.05)                    | 125.6%<br>(100.4% to 158.3%)            | 44.0%<br>(27.9% to 64.8%)                         |
| Tetanus                                                  | <0.05<br>(<0.05 to <0.05)                          | <0.05<br>(<0.05 to <0.05)                    | --                                      | --                                                |
| <b>All causes</b>                                        | <b>2,381.8</b><br><b>(2,148.8 to 2,644.2)</b>      | <b>85.6</b><br><b>(60.5 to 117.4)</b>        | <b>58.7%</b><br><b>(57.3% to 60.1%)</b> | <b>1.3%</b><br><b>(0.4% to 2.2%)</b>              |

SR Table 14: Prevalence, incidence, and YLDs for 2016, percentage change of YLD counts and percentage change of age-standardised YLD rates between 2006 and 2016 by cause and impairments, for all ages, Afghanistan.

| Cause                                                                                | Prevalence in thousands (95% UI)          | Incidence in thousands (95% UI)               | YLDs in thousands (95% UI)             |                                                   |                                                     |
|--------------------------------------------------------------------------------------|-------------------------------------------|-----------------------------------------------|----------------------------------------|---------------------------------------------------|-----------------------------------------------------|
|                                                                                      | 2016 counts                               | 2016 counts                                   | 2016 counts                            | Percentage change in counts between 2006 and 2016 | Percentage change in age-standardised rates between |
| <b>All causes</b>                                                                    | <b>32,880.5</b><br>(32,768.8 to 32,985.8) | <b>258,504.1†</b><br>(243,454.8 to 275,600.5) | <b>3,553.7</b><br>(2,636.9 to 4,583.4) | <b>35.2</b><br>(31.1 to 39.3)                     | <b>-2.7</b><br>(-5.0 to -0.7)                       |
| <b>Communicable, maternal, neonatal, and nutritional disorders</b>                   | <b>28,883.2</b><br>(28,250.4 to 29,618.5) | <b>163,881.9†</b><br>(150,223.0 to 178,594.5) | <b>627.9</b><br>(435.6 to 865.4)       | <b>22.6</b><br>(15.5 to 31.4)                     | <b>-11.8</b><br>(-16.9 to -5.7)                     |
| <b>HIV/AIDS and tuberculosis</b>                                                     | <b>8,844.9</b><br>(7,698.1 to 9,676.8)    | <b>49.2†</b><br>(40.8 to 58.8)                | <b>6.5</b><br>(4.1 to 9.5)             | <b>13.5</b><br>(-6.9 to 36.7)                     | <b>-19.5</b><br>(-31.8 to -5.7)                     |
| Tuberculosis                                                                         | 8,133.7<br>(6,999.9 to 9,209.1)           | 48.6†<br>(40.2 to 58.1)                       | 6.1<br>(3.8 to 8.7)                    | 9.0<br>(-11.1 to 28.0)                            | -22.2<br>(-33.8 to -11.5)                           |
| Drug-susceptible tuberculosis                                                        | 18.7<br>(14.9 to 23.2)                    | 45.3<br>(36.3 to 54.4)                        | 5.6<br>(3.5 to 8.1)                    | 8.1<br>(-15.7 to 36.9)                            | -22.8<br>(-38.1 to -4.8)                            |
| Multidrug-resistant tuberculosis without extensive drug resistance                   | 1.3<br>(0.3 to 3.9)                       | 3.1<br>(0.6 to 9.3)                           | 0.4<br>(0.1 to 1.3)                    | 18.8<br>(-84.4 to 598.9)                          | -14.8<br>(-88.9 to 432.1)                           |
| Extensively drug-resistant tuberculosis                                              | < 0.05<br>(< 0.05 to 0.1)                 | 0.1<br>(< 0.05 to 0.3)                        | < 0.05<br>(< 0.05 to < 0.05)           | 166.3<br>(-64.2 to 1,466.2)                       | 89.7<br>(-74.7 to 1,029.6)                          |
| Latent tuberculosis infection                                                        | 8,113.7<br>(6,980.2 to 9,188.0)           | --                                            | --                                     | --                                                | --                                                  |
| HIV/AIDS                                                                             | 3.6<br>(0.4 to 13.6)                      | 0.6^<br>(< 0.05 to 2.4)                       | 0.5<br>(< 0.05 to 1.7)                 | 144.8<br>(-22.0 to 450.0)                         | 49.8<br>(-58.6 to 275.2)                            |
| Drug-susceptible HIV/AIDS - Tuberculosis                                             | < 0.05<br>(< 0.05 to < 0.05)              | < 0.05<br>(< 0.05 to 0.1)                     | < 0.05<br>(< 0.05 to < 0.05)           | 29.6<br>(2.4 to 59.3)                             | -16.3<br>(-33.9 to 2.9)                             |
| Multidrug-resistant HIV/AIDS - Tuberculosis without extensive drug resistance        | < 0.05<br>(< 0.05 to < 0.05)              | < 0.05<br>(< 0.05 to < 0.05)                  | < 0.05<br>(< 0.05 to < 0.05)           | 42.0<br>(-81.3 to 724.5)                          | -8.3<br>(-87.9 to 432.9)                            |
| Extensively drug-resistant HIV/AIDS - Tuberculosis                                   | < 0.05<br>(< 0.05 to < 0.05)              | < 0.05<br>(< 0.05 to < 0.05)                  | < 0.05<br>(< 0.05 to < 0.05)           | 222.4<br>(-57.5 to 1,772.6)                       | 108.3<br>(-72.5 to 1,110.3)                         |
| HIV/AIDS resulting in other diseases                                                 | 3.6<br>(0.4 to 13.6)                      | 0.6<br>(< 0.05 to 2.4)                        | 0.5<br>(< 0.05 to 1.7)                 | 148.7<br>(-28.0 to 475.2)                         | 51.8<br>(-62.5 to 287.4)                            |
| <b>Diarrhoea, lower respiratory infections, and other common infectious diseases</b> | <b>2,630.6</b><br>(2,498.0 to 2,784.6)    | <b>136,705.0†</b><br>(123,213.4 to 150,164.6) | <b>146.1</b><br>(101.8 to 197.8)       | <b>23.6</b><br>(19.2 to 28.1)                     | <b>-7.0</b><br>(-9.8 to -4.1)                       |
| Diarrhoeal diseases                                                                  | 591.1<br>(537.5 to 647.2)                 | 38,012.5<br>(34,569.2 to 41,717.2)            | 67.2<br>(45.8 to 94.1)                 | 22.3<br>(14.6 to 30.1)                            | -5.7<br>(-10.6 to -0.6)                             |
| Intestinal infectious diseases                                                       | 1.6<br>(1.3 to 1.9)                       | 29.9†<br>(25.4 to 35.5)                       | 0.3<br>(0.2 to 0.4)                    | -10.6<br>(-25.4 to 7.8)                           | -34.9<br>(-43.3 to -25.1)                           |
| Typhoid fever                                                                        | 1.6<br>(1.3 to 1.9)                       | 24.7<br>(20.8 to 29.5)                        | 0.2<br>(0.1 to 0.4)                    | -10.5<br>(-26.2 to 9.3)                           | -34.8<br>(-43.9 to -24.6)                           |
| Paratyphoid fever                                                                    | 0.2<br>(0.2 to 0.3)                       | 5.2<br>(4.3 to 6.4)                           | < 0.05<br>(< 0.05 to < 0.05)           | -5.0<br>(-21.9 to 16.0)                           | -31.2<br>(-41.1 to -18.8)                           |
| Other intestinal infectious diseases                                                 | --                                        | --                                            | < 0.05<br>(< 0.05 to < 0.05)           | -36.6<br>(-51.9 to -17.2)                         | -50.1<br>(-57.9 to -41.0)                           |
| Lower respiratory infections                                                         | 64.6<br>(57.0 to 72.9)                    | 2,628.7<br>(2,308.6 to 2,970.0)               | 3.9<br>(2.6 to 5.8)                    | 32.0<br>(16.8 to 50.4)                            | -1.4<br>(-9.9 to 8.4)                               |
| Upper respiratory infections                                                         | 1,208.6<br>(1,048.3 to 1,384.1)           | 91,304.4<br>(78,850.2 to 105,108.3)           | 30.1<br>(17.8 to 47.2)                 | 34.9<br>(26.9 to 43.3)                            | -1.0<br>(-6.6 to 4.3)                               |
| Otitis media                                                                         | 715.0<br>(637.3 to 797.7)                 | 3,432.9<br>(2,682.9 to 4,316.4)               | 24.7<br>(15.7 to 36.9)                 | 19.8<br>(10.9 to 28.6)                            | -11.2<br>(-17.1 to -5.3)                            |
| Meningitis                                                                           | 98.0<br>(81.4 to 117.6)                   | 22.8<br>(19.2 to 27.8)                        | 9.1<br>(6.4 to 12.2)                   | 18.4<br>(11.0 to 26.2)                            | -13.5<br>(-18.5 to -7.9)                            |
| Pneumococcal meningitis                                                              | 27.0<br>(21.7 to 34.3)                    | 3.0<br>(2.1 to 4.1)                           | 3.0<br>(2.0 to 4.0)                    | 8.4<br>(-1.5 to 19.8)                             | -21.4<br>(-28.2 to -13.2)                           |
| H influenzae type B meningitis                                                       | 24.9<br>(16.6 to 35.7)                    | 6.2<br>(3.6 to 9.1)                           | 2.4<br>(1.6 to 3.2)                    | 2.3<br>(-12.2 to 16.7)                            | -25.3<br>(-35.4 to -14.9)                           |
| Meningococcal infection                                                              | 17.9<br>(12.2 to 25.8)                    | 5.6<br>(3.9 to 8.0)                           | 1.6<br>(1.1 to 2.2)                    | 15.6<br>(4.9 to 26.4)                             | -16.0<br>(-24.0 to -8.0)                            |
| Other meningitis                                                                     | 28.0<br>(19.2 to 40.2)                    | 8.0<br>(5.5 to 11.1)                          | 2.2<br>(1.5 to 3.2)                    | 70.0<br>(47.7 to 95.4)                            | 27.2<br>(12.3 to 45.3)                              |
| Encephalitis                                                                         | 84.8<br>(54.5 to 127.5)                   | 37.6<br>(32.2 to 43.5)                        | 8.6<br>(6.0 to 11.4)                   | 25.9<br>(9.5 to 42.0)                             | -10.1<br>(-19.8 to 0.4)                             |
| Diphtheria                                                                           | < 0.05<br>(< 0.05 to < 0.05)              | 0.1<br>(0.1 to 0.2)                           | < 0.05<br>(< 0.05 to < 0.05)           | -86.1<br>(-93.2 to -71.7)                         | -89.0<br>(-93.9 to -80.0)                           |
| Whooping cough                                                                       | 24.3<br>(18.7 to 30.8)                    | 177.2<br>(136.8 to 224.9)                     | 1.2<br>(0.7 to 1.9)                    | -26.1<br>(-34.8 to -16.6)                         | -42.1<br>(-49.0 to -34.6)                           |
| Tetanus                                                                              | 0.2<br>(0.2 to 0.3)                       | 1.2<br>(0.3 to 2.9)                           | < 0.05<br>(< 0.05 to < 0.05)           | -52.9<br>(-78.3 to 2.9)                           | -60.1<br>(-79.1 to -21.3)                           |
| Measles                                                                              | 0.5<br>(0.1 to 1.1)                       | 16.7<br>(5.5 to 38.5)                         | < 0.05<br>(< 0.05 to 0.1)              | -77.6<br>(-87.7 to -56.7)                         | -82.5<br>(-90.4 to -65.6)                           |
| Varicella and herpes zoster                                                          | 32.8<br>(30.9 to 35.0)                    | 1,041.0<br>(995.5 to 1,093.5)                 | 0.9<br>(0.5 to 1.4)                    | 38.8<br>(19.0 to 63.6)                            | -0.1<br>(-10.4 to 12.7)                             |
| <b>Neglected tropical diseases and malaria</b>                                       | <b>16,497.4</b><br>(14,457.4 to 19,211.0) | <b>682.6†</b><br>(364.3 to 992.5)             | <b>199.8</b><br>(125.0 to 297.2)       | <b>28.0</b><br>(10.2 to 53.6)                     | <b>-8.3</b><br>(-19.7 to 9.6)                       |
| Malaria                                                                              | 23.9<br>(8.0 to 44.7)                     | 406.1<br>(128.8 to 647.5)                     | 0.7<br>(0.3 to 1.2)                    | -48.5<br>(-76.3 to -2.6)                          | -62.3<br>(-82.3 to -27.2)                           |
| Chagas disease                                                                       | --                                        | --                                            | --                                     | --                                                | --                                                  |
| Leishmaniasis                                                                        | 2,728.9<br>(2,177.8 to 3,376.1)           | 140.0<br>(49.3 to 270.2)                      | 156.8<br>(96.4 to 237.2)               | 33.2<br>(15.0 to 61.6)                            | -5.2<br>(-15.7 to 15.8)                             |
| Visceral leishmaniasis                                                               | < 0.05<br>(< 0.05 to < 0.05)              | < 0.05<br>(< 0.05 to < 0.05)                  | < 0.05<br>(< 0.05 to < 0.05)           | -56.8<br>(-74.3 to -23.7)                         | -70.4<br>(-85.4 to -37.0)                           |
| Cutaneous and mucocutaneous leishmaniasis                                            | 2,481.0<br>(1,880.5 to 3,308.9)           | 139.9<br>(49.3 to 270.2)                      | 156.8<br>(96.4 to 237.2)               | 33.2<br>(15.0 to 61.6)                            | -5.1<br>(-15.7 to 15.8)                             |
| African trypanosomiasis                                                              | --                                        | --                                            | --                                     | --                                                | --                                                  |
| Schistosomiasis                                                                      | --                                        | --                                            | --                                     | --                                                | --                                                  |
| Cysticercosis                                                                        | --                                        | --                                            | --                                     | --                                                | --                                                  |
| Cystic echinococcosis                                                                | 82.5<br>(24.6 to 259.3)                   | 17.3<br>(5.3 to 52.6)                         | 7.7<br>(2.0 to 24.7)                   | -32.4<br>(-88.1 to 222.6)                         | -51.8<br>(-91.0 to 105.3)                           |
| Lymphatic filariasis                                                                 | --                                        | --                                            | --                                     | --                                                | --                                                  |
| Onchocerciasis                                                                       | --                                        | --                                            | --                                     | --                                                | --                                                  |
| Trachoma                                                                             | 20.5<br>(14.2 to 28.6)                    | --                                            | 1.6<br>(1.1 to 2.4)                    | 17.1<br>(-8.9 to 51.2)                            | -18.4<br>(-40.1 to 12.2)                            |
| Dengue                                                                               | 7.1<br>(2.8 to 14.7)                      | 119.2<br>(48.4 to 235.7)                      | 1.2<br>(0.4 to 2.6)                    | 191.2<br>(103.2 to 579.5)                         | 106.9<br>(50.6 to 379.5)                            |
| Yellow fever                                                                         | --                                        | --                                            | --                                     | --                                                | --                                                  |
| Rabies                                                                               | < 0.05<br>(< 0.05 to < 0.05)              | < 0.05<br>(< 0.05 to < 0.05)                  | < 0.05<br>(< 0.05 to < 0.05)           | -31.0<br>(-61.8 to 28.9)                          | -47.8<br>(-75.3 to 7.7)                             |
| Intestinal nematode infections                                                       | 15,225.1<br>(12,866.4 to 18,335.5)        | --                                            | 24.7<br>(13.3 to 41.5)                 | 36.1<br>(-1.6 to 89.6)                            | 0.1<br>(-32.2 to 49.3)                              |
| Ascariasis                                                                           | 12,452.6<br>(9,852.7 to 15,797.1)         | --                                            | 23.7<br>(12.7 to 39.9)                 | 35.8<br>(-2.7 to 92.2)                            | -0.1<br>(-34.0 to 51.2)                             |



| Cause                                                                   | Prevalence in thousands (95% UI)                 | Incidence in thousands (95% UI)                   | YLDs in thousands (95% UI)                    |                                                   |                                                     |
|-------------------------------------------------------------------------|--------------------------------------------------|---------------------------------------------------|-----------------------------------------------|---------------------------------------------------|-----------------------------------------------------|
|                                                                         | 2016 counts                                      | 2016 counts                                       | 2016 counts                                   | Percentage change in counts between 2006 and 2016 | Percentage change in age-standardised rates between |
| Trichuriasis                                                            | 3,165.5<br>(2,393.5 to 4,263.9)                  | --                                                | 0.4<br>(0.2 to 0.8)                           | 35.6<br>(-23.1 to 142.3)                          | 0.3<br>(-47.7 to 91.5)                              |
| Hookworm disease                                                        | 251.6<br>(192.7 to 323.8)                        | --                                                | 0.5<br>(0.3 to 0.8)                           | 48.4<br>(6.6 to 104.6)                            | 8.9<br>(-23.4 to 53.2)                              |
| Food-borne trematodiasis                                                | --                                               | --                                                | --                                            | --                                                | --                                                  |
| Leprosy                                                                 | 0.1<br>(0.1 to 0.2)                              | < 0.05<br>(< 0.05 to < 0.05)                      | < 0.05<br>(< 0.05 to < 0.05)                  | 16.7<br>(1.7 to 36.6)                             | -16.0<br>(-26.4 to -1.1)                            |
| Ebola virus disease                                                     | --                                               | --                                                | --                                            | --                                                | --                                                  |
| Zika virus disease                                                      | --                                               | --                                                | --                                            | --                                                | --                                                  |
| Guinea worm disease                                                     | --                                               | --                                                | --                                            | --                                                | --                                                  |
| Other neglected tropical diseases                                       | 261.2<br>(240.2 to 284.0)                        | --                                                | 7.2<br>(4.5 to 11.0)                          | 24.1<br>(7.6 to 42.6)                             | -4.7<br>(-16.3 to 9.2)                              |
| <b>Maternal disorders</b>                                               | <b>48.1</b><br><b>(38.7 to 62.1)</b>             | <b>629.4†</b><br><b>(541.2 to 727.3)</b>          | <b>5.0</b><br><b>(3.4 to 6.9)</b>             | <b>4.5</b><br><b>(-14.0 to 30.4)</b>              | <b>-28.5</b><br><b>(-40.7 to -11.5)</b>             |
| Maternal haemorrhage                                                    | 12.8<br>(9.7 to 17.1)                            | 77.4<br>(50.3 to 114.4)                           | 0.5<br>(0.3 to 0.8)                           | 25.2<br>(-12.9 to 77.2)                           | -13.2<br>(-39.3 to 21.1)                            |
| Maternal sepsis and other pregnancy related infections                  | 13.8<br>(7.6 to 22.4)                            | 151.4<br>(109.9 to 205.7)                         | 0.6<br>(0.3 to 1.2)                           | 26.6<br>(-41.5 to 170.4)                          | -11.4<br>(-58.0 to 85.4)                            |
| Maternal hypertensive disorders                                         | 15.5<br>(8.6 to 24.3)                            | 77.8<br>(53.2 to 106.8)                           | 0.8<br>(0.4 to 1.3)                           | 75.7<br>(1.7 to 205.4)                            | 20.5<br>(-30.3 to 107.7)                            |
| Maternal obstructed labour and uterine rupture                          | 6.8<br>(5.4 to 8.3)                              | 69.7<br>(50.1 to 95.3)                            | 2.1<br>(1.3 to 3.2)                           | -15.1<br>(-35.7 to 9.4)                           | -40.9<br>(-54.7 to -24.2)                           |
| Maternal abortion, miscarriage, and ectopic pregnancy                   | 2.1<br>(1.3 to 3.0)                              | 253.2<br>(193.3 to 332.3)                         | 0.2<br>(0.1 to 0.4)                           | 25.6<br>(-35.5 to 133.7)                          | -13.8<br>(-54.8 to 63.9)                            |
| Other maternal disorders                                                | --                                               | --                                                | 0.8<br>(0.5 to 1.1)                           | -0.2<br>(-18.1 to 24.7)                           | -31.8<br>(-43.5 to -15.7)                           |
| <b>Neonatal disorders</b>                                               | <b>414.6</b><br><b>(330.3 to 532.0)</b>          | --                                                | <b>66.4</b><br><b>(42.2 to 124.6)</b>         | <b>54.4</b><br><b>(25.4 to 91.2)</b>              | <b>16.2</b><br><b>(-5.6 to 43.4)</b>                |
| Neonatal preterm birth complications                                    | 315.2<br>(234.8 to 427.8)                        | --                                                | 27.2<br>(17.0 to 40.7)                        | 44.4<br>(12.7 to 81.6)                            | 8.1<br>(-15.8 to 35.5)                              |
| Neonatal encephalopathy due to birth asphyxia and trauma                | 69.6<br>(35.1 to 123.7)                          | --                                                | 6.4<br>(1.4 to 19.7)                          | 80.4<br>(-3.8 to 257.3)                           | 34.9<br>(-31.6 to 171.9)                            |
| Neonatal sepsis and other neonatal infections                           | 44.1<br>(12.2 to 136.5)                          | --                                                | 19.0<br>(3.9 to 67.4)                         | 88.2<br>(1.4 to 399.2)                            | 47.5<br>(-22.1 to 344.4)                            |
| Hemolytic disease and other neonatal jaundice                           | 28.8<br>(24.9 to 32.8)                           | --                                                | 9.5<br>(7.0 to 12.1)                          | 30.6<br>(12.2 to 50.8)                            | -3.2<br>(-15.3 to 10.4)                             |
| Other neonatal disorders                                                | --                                               | --                                                | 4.4<br>(2.5 to 8.6)                           | 32.6<br>(5.5 to 68.0)                             | 4.2<br>(-17.3 to 32.1)                              |
| <b>Nutritional deficiencies</b>                                         | <b>17,836.3</b><br><b>(16,559.3 to 19,164.4)</b> | <b>21,047.3†</b><br><b>(16,644.5 to 25,900.1)</b> | <b>178.7</b><br><b>(119.9 to 257.4)</b>       | <b>7.5</b><br><b>(0.1 to 16.3)</b>                | <b>-26.8</b><br><b>(-31.2 to -21.9)</b>             |
| Protein-energy malnutrition                                             | 468.3<br>(376.8 to 575.0)                        | 220.6<br>(178.3 to 267.9)                         | 20.7<br>(12.9 to 30.8)                        | 37.0<br>(2.4 to 83.6)                             | 8.3<br>(-19.5 to 46.1)                              |
| Iodine deficiency                                                       | 1,000.3<br>(792.1 to 1,237.2)                    | 40.5<br>(32.4 to 50.0)                            | 26.7<br>(16.2 to 39.8)                        | -36.2<br>(-45.0 to -27.7)                         | -54.6<br>(-60.0 to -49.1)                           |
| Vitamin A deficiency                                                    | 14,404.8<br>(12,436.7 to 16,582.7)               | 20,786.2<br>(16,397.1 to 25,603.1)                | 3.4<br>(2.0 to 5.7)                           | 26.4<br>(3.5 to 55.2)                             | -5.7<br>(-21.3 to 14.4)                             |
| Iron-deficiency anaemia                                                 | 4,782.7<br>(4,513.8 to 5,095.8)                  | --                                                | 127.3<br>(83.2 to 187.5)                      | 19.9<br>(10.5 to 30.6)                            | -14.9<br>(-20.2 to -9.1)                            |
| Other nutritional deficiencies                                          | --                                               | --                                                | 0.7<br>(0.4 to 1.1)                           | 39.3<br>(2.7 to 89.2)                             | 10.2<br>(-18.9 to 50.4)                             |
| <b>Other communicable, maternal, neonatal, and nutritional diseases</b> | <b>6,451.7</b><br><b>(5,890.1 to 7,039.8)</b>    | <b>4,768.4</b><br><b>(3,965.5 to 5,739.5)</b>     | <b>25.3</b><br><b>(16.1 to 39.2)</b>          | <b>39.6</b><br><b>(31.2 to 49.0)</b>              | <b>-0.6</b><br><b>(-6.5 to 5.6)</b>                 |
| Sexually transmitted diseases excluding HIV                             | 3,619.0<br>(3,327.0 to 3,897.3)                  | 3,760.4<br>(3,127.7 to 4,470.0)                   | 18.3<br>(11.3 to 29.0)                        | 44.2<br>(33.5 to 55.8)                            | 0.8<br>(-6.3 to 8.3)                                |
| Syphilis                                                                | 179.0<br>(144.5 to 219.2)                        | 127.4<br>(101.2 to 158.4)                         | 0.2<br>(0.1 to 0.3)                           | 37.7<br>(20.4 to 54.2)                            | -2.9<br>(-14.0 to 8.6)                              |
| Chlamydial infection                                                    | 288.1<br>(194.2 to 405.0)                        | 238.6<br>(165.3 to 337.9)                         | 1.9<br>(1.1 to 3.0)                           | 41.7<br>(21.8 to 64.0)                            | -0.9<br>(-13.8 to 13.1)                             |
| Gonococcal infection                                                    | 734.8<br>(576.3 to 918.7)                        | 2,655.1<br>(2,060.4 to 3,345.6)                   | 9.3<br>(5.4 to 15.2)                          | 45.2<br>(31.1 to 60.5)                            | 1.7<br>(-7.9 to 12.5)                               |
| Trichomoniasis                                                          | 421.0<br>(333.9 to 523.9)                        | 368.0<br>(292.0 to 459.4)                         | 0.5<br>(0.2 to 1.0)                           | 43.3<br>(30.8 to 56.9)                            | 0.3<br>(-7.2 to 9.0)                                |
| Genital herpes                                                          | 2,155.8<br>(1,824.1 to 2,549.1)                  | 227.1<br>(189.7 to 272.7)                         | 0.6<br>(0.2 to 1.3)                           | 43.5<br>(30.9 to 57.2)                            | 0.2<br>(-6.1 to 6.5)                                |
| Other sexually transmitted diseases                                     | 127.3<br>(105.0 to 146.6)                        | 144.2<br>(109.9 to 185.0)                         | 5.9<br>(3.7 to 8.9)                           | 43.9<br>(32.5 to 56.1)                            | 0.2<br>(-7.3 to 8.9)                                |
| Hepatitis                                                               | 2,976.9<br>(2,260.7 to 3,833.0)                  | 1,008.0<br>(572.6 to 1,550.0)                     | 0.9<br>(0.5 to 1.4)                           | -2.8<br>(-26.8 to 30.1)                           | -23.4<br>(-38.3 to -3.9)                            |
| Acute hepatitis A                                                       | 35.5<br>(5.8 to 76.1)                            | 461.1<br>(75.8 to 989.0)                          | 0.2<br>(0.1 to 0.4)                           | -6.2<br>(-67.2 to 178.3)                          | -24.0<br>(-66.0 to 79.1)                            |
| Hepatitis B                                                             | 2,731.6<br>(2,000.5 to 3,594.9)                  | 499.1<br>(371.2 to 661.6)                         | 0.6<br>(0.3 to 1.0)                           | -2.4<br>(-22.7 to 23.7)                           | -23.7<br>(-39.4 to -5.1)                            |
| Hepatitis C                                                             | 207.3<br>(184.2 to 231.2)                        | 14.5<br>(13.1 to 16.0)                            | < 0.05<br>(< 0.05 to < 0.05)                  | 22.9<br>(21.7 to 24.2)                            | -8.0<br>(-8.7 to -7.4)                              |
| Acute hepatitis E                                                       | 2.6<br>(2.1 to 3.1)                              | 33.2<br>(27.3 to 41.0)                            | 0.1<br>(< 0.05 to 0.1)                        | 1.1<br>(-10.6 to 13.1)                            | -19.8<br>(-32.1 to -6.0)                            |
| Other infectious diseases                                               | 197.8<br>(182.8 to 214.4)                        | < 0.05<br>(< 0.05 to 0.1)                         | 6.2<br>(3.9 to 9.3)                           | 35.0<br>(19.6 to 53.7)                            | 0.0<br>(-10.1 to 12.1)                              |
| <b>Non-communicable diseases</b>                                        | <b>30,313.1</b><br><b>(29,877.6 to 30,870.9)</b> | <b>92,260.7†</b><br><b>(85,613.1 to 99,509.0)</b> | <b>2,562.8</b><br><b>(1,879.8 to 3,352.4)</b> | <b>41.7</b><br><b>(38.1 to 45.7)</b>              | <b>0.2</b><br><b>(-1.5 to 2.0)</b>                  |
| <b>Neoplasms</b>                                                        | <b>23.6</b><br><b>(16.1 to 31.4)</b>             | <b>18.8</b><br><b>(13.1 to 23.3)</b>              | <b>6.2</b><br><b>(3.5 to 9.0)</b>             | <b>31.9</b><br><b>(24.7 to 42.0)</b>              | <b>-4.9</b><br><b>(-9.9 to 0.7)</b>                 |
| Lip and oral cavity cancer                                              | 0.7<br>(0.5 to 1.1)                              | 0.2<br>(0.2 to 0.3)                               | 0.1<br>(< 0.05 to 0.1)                        | 46.0<br>(27.5 to 68.0)                            | 2.5<br>(-10.4 to 17.4)                              |
| Nasopharynx cancer                                                      | 0.6<br>(0.3 to 1.0)                              | 0.2<br>(0.1 to 0.3)                               | 0.1<br>(< 0.05 to 0.1)                        | 25.2<br>(7.0 to 49.2)                             | -12.9<br>(-26.1 to 2.8)                             |
| Other pharynx cancer                                                    | 0.2<br>(0.1 to 0.3)                              | 0.1<br>(< 0.05 to 0.2)                            | < 0.05<br>(< 0.05 to 0.1)                     | 30.7<br>(15.2 to 58.2)                            | -6.7<br>(-17.4 to 9.7)                              |
| Oesophageal cancer                                                      | 0.4<br>(0.4 to 0.5)                              | 0.4<br>(0.3 to 0.5)                               | 0.1<br>(0.1 to 0.1)                           | 30.6<br>(16.6 to 45.8)                            | -7.2<br>(-19.8 to 6.7)                              |
| Stomach cancer                                                          | 3.1<br>(2.6 to 3.6)                              | 2.2<br>(1.8 to 2.5)                               | 0.5<br>(0.4 to 0.7)                           | 21.1<br>(4.4 to 40.3)                             | -14.0<br>(-26.6 to 1.1)                             |
| Colon and rectum cancer                                                 | 3.4<br>(1.7 to 6.0)                              | 1.3<br>(0.7 to 2.3)                               | 0.4<br>(0.2 to 0.8)                           | 39.5<br>(19.0 to 73.3)                            | -0.3<br>(-15.6 to 21.6)                             |
| Liver cancer                                                            | 0.2<br>(0.2 to 0.5)                              | 0.7<br>(0.5 to 1.1)                               | 0.1<br>(0.1 to 0.3)                           | 42.4<br>(23.7 to 65.7)                            | 0.2<br>(-11.6 to 15.1)                              |
| Liver cancer due to hepatitis B                                         | 0.2<br>(0.1 to 0.4)                              | 0.2<br>(0.1 to 0.5)                               | 0.1<br>(< 0.05 to 0.1)                        | 41.4<br>(21.1 to 65.6)                            | 0.2<br>(-13.0 to 17.0)                              |

| Cause                                              | Prevalence in thousands (95% UI)              | Incidence in thousands (95% UI)          | YLDs in thousands (95% UI)             |                                                   |                                                     |
|----------------------------------------------------|-----------------------------------------------|------------------------------------------|----------------------------------------|---------------------------------------------------|-----------------------------------------------------|
|                                                    | 2016 counts                                   | 2016 counts                              | 2016 counts                            | Percentage change in counts between 2006 and 2016 | Percentage change in age-standardised rates between |
| Liver cancer due to hepatitis C                    | 0.2<br>(0.1 to 0.3)                           | 0.2<br>(0.1 to 0.4)                      | < 0.05<br>(< 0.05 to 0.1)              | 42.0<br>(22.1 to 67.1)                            | -0.5<br>(-14.5 to 15.8)                             |
| Liver cancer due to alcohol use                    | < 0.05<br>(< 0.05 to 0.1)                     | < 0.05<br>(< 0.05 to 0.1)                | < 0.05<br>(< 0.05 to < 0.05)           | 54.2<br>(32.2 to 86.8)                            | 6.7<br>(-8.0 to 27.8)                               |
| Liver cancer due to other causes                   | 0.1<br>(0.1 to 0.2)                           | 0.1<br>(0.1 to 0.3)                      | < 0.05<br>(< 0.05 to 0.1)              | 41.0<br>(19.8 to 69.0)                            | -0.6<br>(-15.3 to 17.8)                             |
| Gallbladder and biliary tract cancer               | 0.2<br>(0.1 to 0.4)                           | 0.3<br>(0.1 to 0.5)                      | 0.1<br>(< 0.05 to 0.1)                 | 29.6<br>(15.6 to 53.7)                            | -8.1<br>(-17.5 to 6.2)                              |
| Pancreatic cancer                                  | 0.2<br>(0.2 to 0.3)                           | 0.4<br>(0.3 to 0.4)                      | 0.1<br>(< 0.05 to 0.1)                 | 53.4<br>(41.3 to 66.7)                            | 6.9<br>(-1.0 to 15.7)                               |
| Larynx cancer                                      | 0.8<br>(0.5 to 1.0)                           | 0.3<br>(0.2 to 0.4)                      | 0.1<br>(0.1 to 0.2)                    | 31.7<br>(16.7 to 49.0)                            | -6.7<br>(-17.6 to 4.8)                              |
| Tracheal, bronchus, and lung cancer                | 2.3<br>(1.3 to 3.6)                           | 2.1<br>(1.2 to 3.3)                      | 0.5<br>(0.2 to 0.9)                    | 42.4<br>(14.0 to 87.4)                            | 0.5<br>(-18.5 to 29.0)                              |
| Malignant skin melanoma                            | 0.1<br>(0.1 to 0.3)                           | < 0.05<br>(< 0.05 to 0.1)                | < 0.05<br>(< 0.05 to < 0.05)           | 41.3<br>(21.0 to 70.4)                            | 0.5<br>(-12.8 to 17.9)                              |
| Non-melanoma skin cancer                           | 0.1<br>(0.1 to 0.2)                           | 0.8<br>(0.5 to 1.2)                      | < 0.05<br>(< 0.05 to < 0.05)           | 55.1<br>(13.8 to 110.2)                           | 3.9<br>(-29.9 to 43.0)                              |
| Non-melanoma skin cancer (squamous-cell carcinoma) | 0.1<br>(0.1 to 0.2)                           | 0.2<br>(0.1 to 0.2)                      | < 0.05<br>(< 0.05 to < 0.05)           | 56.0<br>(5.4 to 121.0)                            | 3.7<br>(-35.3 to 48.1)                              |
| Non-melanoma skin cancer (basal-cell carcinoma)    | 0.1<br>(< 0.05 to 0.1)                        | 0.6<br>(0.4 to 1.1)                      | < 0.05<br>(< 0.05 to < 0.05)           | 49.7<br>(35.6 to 64.3)                            | 4.8<br>(-4.2 to 14.6)                               |
| Breast cancer                                      | 11.1<br>(3.7 to 21.1)                         | 2.8<br>(0.9 to 5.2)                      | 1.2<br>(0.4 to 2.3)                    | 40.4<br>(13.0 to 84.0)                            | -1.1<br>(-18.6 to 25.1)                             |
| Cervical cancer                                    | 3.8<br>(1.2 to 5.7)                           | 1.1<br>(0.4 to 1.6)                      | 0.4<br>(0.1 to 0.7)                    | 21.9<br>(-9.9 to 56.3)                            | -14.3<br>(-37.6 to 11.9)                            |
| Uterine cancer                                     | 1.2<br>(0.6 to 1.6)                           | 0.3<br>(0.1 to 0.4)                      | 0.1<br>(< 0.05 to 0.2)                 | 30.9<br>(6.6 to 64.9)                             | -7.3<br>(-23.7 to 17.5)                             |
| Ovarian cancer                                     | 0.7<br>(0.5 to 1.2)                           | 0.2<br>(0.2 to 0.5)                      | 0.1<br>(0.1 to 0.2)                    | 52.7<br>(30.1 to 83.1)                            | 6.6<br>(-15.6 to 36.5)                              |
| Prostate cancer                                    | 1.1<br>(0.8 to 2.1)                           | 0.4<br>(0.3 to 0.7)                      | 0.2<br>(0.1 to 0.4)                    | 45.1<br>(14.7 to 86.2)                            | -0.1<br>(-17.7 to 23.3)                             |
| Testicular cancer                                  | 0.3<br>(0.2 to 0.4)                           | 0.1<br>(0.1 to 0.1)                      | < 0.05<br>(< 0.05 to < 0.05)           | 21.6<br>(-2.9 to 52.4)                            | -14.3<br>(-29.2 to 5.5)                             |
| Kidney cancer                                      | 0.9<br>(0.7 to 1.2)                           | 0.2<br>(0.2 to 0.3)                      | 0.1<br>(0.1 to 0.1)                    | 49.3<br>(24.5 to 77.8)                            | 12.4<br>(-0.6 to 26.6)                              |
| Bladder cancer                                     | 1.2<br>(0.8 to 2.0)                           | 0.4<br>(0.3 to 0.7)                      | 0.1<br>(0.1 to 0.3)                    | 43.5<br>(26.3 to 67.2)                            | 0.1<br>(-13.1 to 16.9)                              |
| Brain and nervous system cancer                    | 1.3<br>(0.9 to 1.5)                           | 0.6<br>(0.4 to 0.7)                      | 0.2<br>(0.1 to 0.3)                    | 40.6<br>(27.3 to 54.5)                            | 3.4<br>(-7.0 to 20.4)                               |
| Thyroid cancer                                     | 0.8<br>(0.4 to 1.2)                           | 0.2<br>(0.1 to 0.3)                      | 0.1<br>(< 0.05 to 0.1)                 | 27.0<br>(4.9 to 59.2)                             | -10.1<br>(-26.9 to 14.4)                            |
| Mesothelioma                                       | 0.1<br>(0.1 to 0.2)                           | 0.1<br>(< 0.05 to 0.1)                   | < 0.05<br>(< 0.05 to < 0.05)           | 16.1<br>(-3.4 to 35.6)                            | -19.7<br>(-33.1 to -7.2)                            |
| Hodgkin lymphoma                                   | 1.1<br>(0.8 to 1.7)                           | 0.4<br>(0.3 to 0.6)                      | 0.2<br>(0.1 to 0.3)                    | 8.1<br>(-3.1 to 20.7)                             | -22.3<br>(-29.2 to -14.1)                           |
| Non-Hodgkin's lymphoma                             | 1.2<br>(1.0 to 1.7)                           | 0.5<br>(0.4 to 0.6)                      | 0.1<br>(0.1 to 0.2)                    | 40.3<br>(26.3 to 57.1)                            | 0.8<br>(-9.8 to 12.8)                               |
| Multiple myeloma                                   | 0.2<br>(0.1 to 0.4)                           | 0.1<br>(0.1 to 0.2)                      | 0.1<br>(< 0.05 to 0.1)                 | 44.4<br>(25.7 to 64.7)                            | 1.8<br>(-10.5 to 15.8)                              |
| Leukaemia                                          | 7.3<br>(4.0 to 10.8)                          | 1.8<br>(1.1 to 2.6)                      | 0.9<br>(0.4 to 1.5)                    | 17.5<br>(3.6 to 47.8)                             | -11.0<br>(-21.0 to 7.9)                             |
| Acute lymphoid leukaemia                           | 0.8<br>(0.5 to 1.8)                           | 0.2<br>(0.1 to 0.4)                      | 0.1<br>(< 0.05 to 0.2)                 | 22.1<br>(-11.8 to 90.7)                           | -5.7<br>(-27.9 to 35.2)                             |
| Chronic lymphoid leukaemia                         | 0.4<br>(0.2 to 1.0)                           | 0.1<br>(< 0.05 to 0.2)                   | 0.1<br>(< 0.05 to 0.1)                 | 38.9<br>(14.6 to 90.1)                            | -1.6<br>(-18.8 to 31.8)                             |
| Acute myeloid leukaemia                            | 0.3<br>(0.2 to 0.7)                           | 0.2<br>(0.1 to 0.3)                      | < 0.05<br>(< 0.05 to 0.1)              | 45.1<br>(14.4 to 96.1)                            | 10.3<br>(-8.4 to 40.5)                              |
| Chronic myeloid leukaemia                          | 0.6<br>(0.3 to 1.2)                           | 0.2<br>(0.1 to 0.4)                      | 0.1<br>(< 0.05 to 0.1)                 | 28.8<br>(5.4 to 65.2)                             | -7.8<br>(-24.2 to 17.5)                             |
| Other leukaemia                                    | 5.2<br>(2.5 to 8.1)                           | 1.2<br>(0.6 to 1.8)                      | 0.6<br>(0.3 to 1.1)                    | 12.4<br>(-2.4 to 42.2)                            | -13.7<br>(-25.9 to 5.2)                             |
| Other neoplasms                                    | 2.3<br>(1.8 to 3.1)                           | 0.8<br>(0.6 to 1.0)                      | 0.2<br>(0.2 to 0.4)                    | 31.8<br>(14.7 to 50.9)                            | -3.3<br>(-15.2 to 10.3)                             |
| <b>Cardiovascular diseases</b>                     | <b>1,376.4</b><br><b>(1,316.2 to 1,432.8)</b> | <b>183.6†</b><br><b>(175.4 to 192.7)</b> | <b>76.7</b><br><b>(55.5 to 100.1)</b>  | <b>39.2</b><br><b>(34.3 to 44.2)</b>              | <b>-1.2</b><br><b>(-4.6 to 2.1)</b>                 |
| Rheumatic heart disease                            | 168.7<br>(148.6 to 191.3)                     | 7.9<br>(7.0 to 9.0)                      | 8.0<br>(5.0 to 11.7)                   | 23.3<br>(12.5 to 35.4)                            | -12.8<br>(-20.0 to -5.7)                            |
| Ischaemic heart disease                            | 635.7<br>(597.4 to 677.1)                     | 107.4<br>(100.3 to 115.7)                | 22.1<br>(15.1 to 30.4)                 | 42.9<br>(36.5 to 50.2)                            | 0.1<br>(-3.6 to 4.2)                                |
| Cerebrovascular disease                            | 149.0<br>(138.5 to 160.0)                     | 27.0‡<br>(24.9 to 29.3)                  | 21.8<br>(15.7 to 27.8)                 | 37.2<br>(27.8 to 47.2)                            | -1.8<br>(-8.4 to 5.1)                               |
| Ischaemic stroke                                   | 129.4<br>(115.7 to 145.2)                     | 18.6‡<br>(16.6 to 20.9)                  | 18.1<br>(13.0 to 23.3)                 | 38.9<br>(28.2 to 50.4)                            | -0.6<br>(-8.4 to 7.6)                               |
| Hemorrhagic stroke                                 | 26.6<br>(23.6 to 29.6)                        | 8.4‡<br>(7.6 to 9.3)                     | 3.8<br>(2.6 to 4.8)                    | 29.5<br>(15.9 to 44.5)                            | -8.2<br>(-17.7 to 2.1)                              |
| Hypertensive heart disease                         | 19.9<br>(16.9 to 23.2)                        | --                                       | 1.6<br>(1.1 to 2.2)                    | 45.3<br>(28.4 to 65.3)                            | 1.4<br>(-8.6 to 12.8)                               |
| Cardiomyopathy and myocarditis                     | 7.8<br>(6.9 to 8.9)                           | 10.4†<br>(8.9 to 12.1)                   | 0.9<br>(0.6 to 1.4)                    | 41.5<br>(22.9 to 62.8)                            | 0.4<br>(-10.7 to 12.7)                              |
| Myocarditis                                        | 5.5<br>(4.8 to 6.2)                           | 10.4<br>(8.9 to 12.1)                    | 0.4<br>(0.2 to 0.6)                    | 40.6<br>(23.8 to 57.9)                            | 0.5<br>(-11.7 to 13.0)                              |
| Alcoholic cardiomyopathy                           | 0.7<br>(0.6 to 0.8)                           | --                                       | 0.1<br>(< 0.05 to 0.1)                 | 43.3<br>(21.0 to 68.8)                            | 0.7<br>(-18.4 to 22.6)                              |
| Other cardiomyopathy                               | 5.7<br>(4.8 to 6.8)                           | --                                       | 0.5<br>(0.3 to 0.7)                    | 42.1<br>(13.6 to 79.3)                            | 0.4<br>(-14.9 to 19.8)                              |
| Atrial fibrillation and flutter                    | 52.7<br>(45.9 to 60.4)                        | 4.8<br>(4.1 to 5.7)                      | 4.0<br>(2.7 to 5.6)                    | 45.0<br>(33.6 to 57.4)                            | -0.1<br>(-6.3 to 6.1)                               |
| Peripheral vascular disease                        | 196.1<br>(167.4 to 230.2)                     | 21.5<br>(18.4 to 25.4)                   | 1.1<br>(0.5 to 2.0)                    | 43.8<br>(30.6 to 56.9)                            | -0.9<br>(-8.9 to 7.5)                               |
| Endocarditis                                       | 0.8<br>(0.7 to 0.9)                           | 4.5<br>(3.8 to 5.1)                      | 0.1<br>(< 0.05 to 0.1)                 | 42.9<br>(32.6 to 54.5)                            | 1.7<br>(-12.6 to 19.9)                              |
| Other cardiovascular and circulatory diseases      | 328.0<br>(272.8 to 388.3)                     | --                                       | 17.1<br>(11.3 to 24.4)                 | 43.2<br>(31.7 to 56.6)                            | 0.6<br>(-5.9 to 8.2)                                |
| <b>Chronic respiratory diseases</b>                | <b>2,519.5</b><br><b>(2,397.8 to 2,657.0)</b> | <b>479.5†</b><br><b>(443.8 to 518.1)</b> | <b>104.3</b><br><b>(74.5 to 141.5)</b> | <b>42.9</b><br><b>(36.4 to 49.5)</b>              | <b>3.4</b><br><b>(-0.4 to 7.7)</b>                  |
| Chronic obstructive pulmonary disease              | 569.0<br>(545.3 to 592.9)                     | 41.7<br>(39.9 to 43.4)                   | 22.8<br>(18.8 to 26.7)                 | 45.9<br>(33.0 to 58.9)                            | 3.0<br>(-4.9 to 11.7)                               |
| Pneumoconiosis                                     | 1.0<br>(0.9 to 1.1)                           | 0.1<br>(0.1 to 0.1)                      | 0.2<br>(0.1 to 0.2)                    | 49.3<br>(43.1 to 56.5)                            | 5.0<br>(0.5 to 9.5)                                 |
| Silicosis                                          | 0.2<br>(0.2 to 0.3)                           | < 0.05<br>(< 0.05 to < 0.05)             | < 0.05<br>(< 0.05 to 0.1)              | 48.1<br>(39.5 to 56.0)                            | 4.1<br>(-1.0 to 9.2)                                |



| Cause                                                          | Prevalence in thousands (95% UI)           | Incidence in thousands (95% UI)          | YLDs in thousands (95% UI)        |                                                   |                                                     |
|----------------------------------------------------------------|--------------------------------------------|------------------------------------------|-----------------------------------|---------------------------------------------------|-----------------------------------------------------|
|                                                                | 2016 counts                                | 2016 counts                              | 2016 counts                       | Percentage change in counts between 2006 and 2016 | Percentage change in age-standardised rates between |
| Asbestosis                                                     | 0.3<br>(0.2 to 0.3)                        | < 0.05<br>(< 0.05 to < 0.05)             | < 0.05<br>(< 0.05 to 0.1)         | 45.1<br>(37.8 to 52.6)                            | 1.2<br>(-3.4 to 5.9)                                |
| Coal workers pneumoconiosis                                    | --                                         | --                                       | --                                | --                                                | --                                                  |
| Other pneumoconiosis                                           | 0.5<br>(0.4 to 0.6)                        | < 0.05<br>(< 0.05 to 0.1)                | 0.1<br>(0.1 to 0.1)               | 52.3<br>(40.5 to 65.6)                            | 7.8<br>(-0.0 to 16.9)                               |
| Asthma                                                         | 2,002.5<br>(1,844.2 to 2,169.1)            | 437.2<br>(401.6 to 475.6)                | 78.0<br>(51.4 to 113.2)           | 40.8<br>(33.5 to 48.2)                            | 2.9<br>(-1.2 to 7.1)                                |
| Interstitial lung disease and pulmonary sarcoidosis            | 5.1<br>(4.5 to 5.6)                        | 0.6<br>(0.5 to 0.6)                      | 0.6<br>(0.4 to 0.8)               | 47.9<br>(33.5 to 63.3)                            | 4.2<br>(-8.2 to 18.3)                               |
| Other chronic respiratory diseases                             | --                                         | --                                       | 2.8<br>(2.2 to 3.4)               | 89.3<br>(49.7 to 143.0)                           | 36.0<br>(16.1 to 61.1)                              |
| <b>Cirrhosis and other chronic liver diseases</b>              | <b>84.2<br/>(79.5 to 89.2)</b>             | <b>6.0<br/>(5.7 to 6.3)</b>              | <b>5.1<br/>(3.4 to 7.1)</b>       | <b>40.0<br/>(22.7 to 60.1)</b>                    | <b>2.8<br/>(-6.4 to 13.1)</b>                       |
| Cirrhosis and other chronic liver diseases due to hepatitis B  | 20.5<br>(16.8 to 24.4)                     | 1.6<br>(1.3 to 1.9)                      | 0.8<br>(0.5 to 1.2)               | 46.5<br>(18.3 to 80.9)                            | 3.4<br>(-12.0 to 21.9)                              |
| Cirrhosis and other chronic liver diseases due to hepatitis C  | 22.0<br>(17.5 to 27.1)                     | 1.7<br>(1.4 to 2.1)                      | 0.9<br>(0.6 to 1.3)               | 42.1<br>(16.6 to 76.1)                            | 0.4<br>(-13.6 to 18.7)                              |
| Cirrhosis and other chronic liver diseases due to alcohol use  | 4.3<br>(3.6 to 5.0)                        | 0.4<br>(0.3 to 0.4)                      | 0.2<br>(0.1 to 0.3)               | 56.4<br>(22.8 to 101.7)                           | 10.4<br>(-14.7 to 42.9)                             |
| Cirrhosis and other chronic liver diseases due to other causes | 37.5<br>(34.3 to 40.9)                     | 2.3<br>(2.1 to 2.5)                      | 3.2<br>(2.1 to 4.7)               | 37.1<br>(12.2 to 67.2)                            | 3.0<br>(-12.1 to 21.2)                              |
| <b>Digestive diseases</b>                                      | <b>1,034.0<br/>(970.6 to 1,103.1)</b>      | <b>580.3†<br/>(546.2 to 618.2)</b>       | <b>38.9<br/>(27.6 to 52.5)</b>    | <b>38.2<br/>(29.7 to 46.9)</b>                    | <b>-1.2<br/>(-6.4 to 4.0)</b>                       |
| Peptic ulcer disease                                           | 265.8<br>(240.9 to 294.2)                  | 35.5<br>(32.1 to 39.2)                   | 6.5<br>(4.3 to 9.5)               | 57.0<br>(42.6 to 73.4)                            | 8.8<br>(0.1 to 17.8)                                |
| Gastritis and duodenitis                                       | 255.8<br>(228.6 to 285.5)                  | 231.2<br>(203.1 to 262.6)                | 5.3<br>(3.5 to 7.7)               | 57.9<br>(43.0 to 72.2)                            | 11.1<br>(2.4 to 20.2)                               |
| Appendicitis                                                   | 5.0<br>(4.5 to 5.5)                        | 131.1<br>(119.3 to 144.4)                | 1.5<br>(1.0 to 2.3)               | 38.2<br>(-0.7 to 107.1)                           | -2.6<br>(-25.1 to 33.9)                             |
| Paralytic ileus and intestinal obstruction                     | 0.3<br>(0.3 to 0.4)                        | 8.2<br>(7.0 to 9.6)                      | 0.1<br>(0.1 to 0.1)               | 44.7<br>(39.8 to 49.9)                            | 6.5<br>(2.2 to 10.8)                                |
| Inguinal, femoral, and abdominal hernia                        | 505.5<br>(448.4 to 571.5)                  | 54.8<br>(48.1 to 62.1)                   | 21.4<br>(14.5 to 29.7)            | 28.9<br>(19.0 to 40.6)                            | -8.2<br>(-14.3 to -2.0)                             |
| Inflammatory bowel disease                                     | 2.3<br>(1.7 to 3.1)                        | 21.0<br>(15.0 to 27.8)                   | 0.4<br>(0.2 to 0.6)               | 46.5<br>(38.1 to 54.6)                            | 3.4<br>(-1.7 to 8.6)                                |
| Vascular intestinal disorders                                  | 0.2<br>(0.1 to 0.2)                        | 0.9<br>(0.8 to 1.1)                      | 0.1<br>(< 0.05 to 0.1)            | 44.1<br>(37.8 to 51.1)                            | 7.7<br>(3.8 to 11.9)                                |
| Gallbladder and biliary diseases                               | 38.0<br>(33.1 to 43.0)                     | 92.7<br>(79.8 to 106.9)                  | 0.5<br>(0.3 to 0.7)               | 47.1<br>(26.6 to 69.6)                            | 4.1<br>(-11.8 to 23.4)                              |
| Pancreatitis                                                   | 0.5<br>(0.5 to 0.6)                        | 4.9<br>(4.3 to 5.5)                      | 0.1<br>(< 0.05 to 0.1)            | 53.5<br>(48.0 to 59.6)                            | 9.8<br>(6.4 to 13.6)                                |
| Other digestive diseases                                       | --                                         | --                                       | 3.2<br>(2.3 to 4.4)               | 40.4<br>(29.9 to 52.1)                            | 2.8<br>(-2.4 to 8.1)                                |
| <b>Neurological disorders</b>                                  | <b>12,607.3<br/>(12,012.1 to 13,279.0)</b> | <b>6,732.3<br/>(5,689.1 to 7,920.2)</b>  | <b>302.6<br/>(197.7 to 420.8)</b> | <b>43.4<br/>(17.1 to 77.3)</b>                    | <b>0.8<br/>(-12.7 to 17.2)</b>                      |
| Alzheimer's disease and other dementias                        | 65.6<br>(54.9 to 77.8)                     | 11.2<br>(9.2 to 13.6)                    | 8.7<br>(6.1 to 11.5)              | 44.9<br>(37.9 to 52.2)                            | -0.7<br>(-4.5 to 3.3)                               |
| Parkinson's disease                                            | 5.8<br>(4.6 to 7.3)                        | 0.7<br>(0.6 to 0.9)                      | 0.7<br>(0.4 to 0.9)               | 59.8<br>(39.2 to 86.6)                            | 10.8<br>(-1.9 to 25.0)                              |
| Epilepsy                                                       | 81.8<br>(16.6 to 158.2)                    | 11.9<br>(2.4 to 23.0)                    | 36.9<br>(7.5 to 79.3)             | 36.6<br>(-75.3 to 718.5)                          | 0.2<br>(-81.9 to 512.6)                             |
| Multiple sclerosis                                             | 6.3<br>(5.6 to 7.1)                        | 0.4<br>(0.3 to 0.4)                      | 1.7<br>(1.2 to 2.3)               | 51.0<br>(29.5 to 76.6)                            | 6.5<br>(-9.1 to 24.7)                               |
| Motor neuron disease                                           | 0.5<br>(0.4 to 0.6)                        | 0.1<br>(0.1 to 0.1)                      | 0.1<br>(0.1 to 0.1)               | 43.7<br>(35.5 to 52.3)                            | 4.9<br>(0.9 to 9.4)                                 |
| Migraine                                                       | 4,841.2<br>(4,533.6 to 5,141.7)            | 618.1<br>(572.5 to 665.8)                | 209.0<br>(134.1 to 294.1)         | 43.4<br>(37.6 to 49.5)                            | 0.5<br>(-3.1 to 4.1)                                |
| Tension-type headache                                          | 9,939.1<br>(8,934.8 to 11,103.5)           | 6,089.7<br>(5,046.7 to 7,293.6)          | 35.9<br>(22.6 to 53.7)            | 44.1<br>(37.2 to 52.2)                            | 1.0<br>(-3.5 to 5.8)                                |
| Other neurological disorders                                   | 0.1<br>(0.1 to 0.1)                        | 0.2<br>(0.1 to 0.3)                      | 9.7<br>(2.5 to 20.0)              | 68.2<br>(-62.5 to 701.9)                          | 19.2<br>(-65.7 to 333.7)                            |
| <b>Mental and substance use disorders</b>                      | <b>5,310.2<br/>(5,052.1 to 5,584.3)</b>    | <b>2,005.0†<br/>(1,825.8 to 2,214.1)</b> | <b>701.3<br/>(509.9 to 905.8)</b> | <b>42.8<br/>(39.0 to 46.8)</b>                    | <b>0.8<br/>(-1.7 to 3.5)</b>                        |
| Schizophrenia                                                  | 35.8<br>(30.9 to 41.0)                     | 3.3<br>(2.9 to 3.8)                      | 22.2<br>(16.3 to 28.2)            | 46.6<br>(30.4 to 64.0)                            | 2.9<br>(-6.9 to 12.8)                               |
| Alcohol use disorders                                          | 169.5<br>(141.2 to 199.7)                  | 95.9<br>(80.3 to 112.2)                  | 16.8<br>(11.3 to 23.7)            | 46.0<br>(31.1 to 61.3)                            | 2.2<br>(-6.9 to 12.2)                               |
| Drug use disorders                                             | 333.0<br>(290.8 to 383.4)                  | 41.9<br>(36.1 to 48.5)                   | 110.8<br>(75.2 to 151.9)          | 51.7<br>(38.5 to 66.1)                            | 6.8<br>(-1.9 to 15.8)                               |
| Opioid use disorders                                           | 258.3<br>(206.1 to 320.1)                  | 27.3<br>(22.2 to 33.5)                   | 105.1<br>(70.2 to 144.4)          | 52.1<br>(38.1 to 67.2)                            | 7.0<br>(-2.3 to 16.3)                               |
| Cocaine use disorders                                          | 12.2<br>(10.1 to 14.5)                     | 1.5<br>(1.3 to 1.9)                      | 1.7<br>(0.9 to 2.6)               | 46.9<br>(1.8 to 107.6)                            | 2.6<br>(-24.0 to 36.0)                              |
| Amphetamine use disorders                                      | 2.3<br>(1.6 to 3.1)                        | 0.4<br>(0.3 to 0.6)                      | 0.3<br>(0.2 to 0.5)               | 45.3<br>(33.8 to 56.1)                            | 2.9<br>(-4.6 to 10.1)                               |
| Cannabis use disorders                                         | 52.3<br>(41.0 to 66.1)                     | 10.6<br>(8.4 to 13.2)                    | 1.5<br>(0.9 to 2.4)               | 43.1<br>(14.5 to 79.8)                            | -0.1<br>(-18.1 to 20.6)                             |
| Other drug use disorders                                       | 9.4<br>(8.2 to 10.6)                       | 2.1<br>(1.8 to 2.4)                      | 2.3<br>(1.4 to 3.3)               | 48.3<br>(17.4 to 88.0)                            | 4.2<br>(-14.8 to 27.4)                              |
| Depressive disorders                                           | 1,086.0<br>(1,011.0 to 1,175.8)            | 1,379.7<br>(1,209.0 to 1,574.4)          | 196.2<br>(135.0 to 266.6)         | 43.0<br>(35.8 to 50.0)                            | -0.1<br>(-5.2 to 4.5)                               |
| Major depressive disorder                                      | 852.8<br>(747.3 to 968.5)                  | 1,330.8<br>(1,161.6 to 1,523.6)          | 172.6<br>(118.2 to 238.2)         | 43.0<br>(34.8 to 51.1)                            | -0.2<br>(-5.8 to 5.2)                               |
| Dysthymia                                                      | 249.2<br>(217.1 to 287.8)                  | 48.9<br>(42.5 to 56.1)                   | 23.6<br>(15.8 to 34.4)            | 43.4<br>(36.7 to 50.1)                            | 0.2<br>(-3.5 to 3.9)                                |
| Bipolar disorder                                               | 218.6<br>(182.2 to 263.0)                  | 26.9<br>(22.3 to 32.5)                   | 44.2<br>(27.1 to 66.4)            | 44.6<br>(35.0 to 54.8)                            | 0.5<br>(-5.1 to 6.4)                                |
| Anxiety disorders                                              | 1,481.6<br>(1,292.6 to 1,701.1)            | 243.5<br>(211.5 to 278.0)                | 141.9<br>(97.8 to 194.6)          | 42.5<br>(33.4 to 51.9)                            | 0.4<br>(-5.8 to 6.3)                                |
| Eating disorders                                               | 32.0<br>(25.7 to 39.4)                     | 25.5<br>(18.0 to 34.8)                   | 6.4<br>(3.9 to 9.3)               | 69.1<br>(43.2 to 97.5)                            | 17.9<br>(1.1 to 36.2)                               |
| Anorexia nervosa                                               | 6.2<br>(4.5 to 8.2)                        | 3.3<br>(2.4 to 4.4)                      | 1.3<br>(0.7 to 2.1)               | 61.8<br>(16.4 to 127.8)                           | 13.3<br>(-17.1 to 57.8)                             |
| Bulimia nervosa                                                | 24.2<br>(17.6 to 32.9)                     | 22.2<br>(14.7 to 31.7)                   | 5.0<br>(3.0 to 7.7)               | 71.1<br>(42.4 to 104.3)                           | 19.0<br>(-0.4 to 42.0)                              |
| Autistic spectrum disorders                                    | 307.9<br>(275.5 to 350.6)                  | 3.3<br>(2.2 to 4.7)                      | 42.9<br>(28.9 to 60.5)            | 38.2<br>(31.2 to 45.8)                            | 0.8<br>(-3.7 to 5.7)                                |
| Autism                                                         | 79.0<br>(67.9 to 91.7)                     | 0.4<br>(0.2 to 0.6)                      | 20.1<br>(12.7 to 29.4)            | 39.1<br>(25.9 to 53.7)                            | 1.8<br>(-7.1 to 11.6)                               |
| Asperger syndrome and other autistic spectrum disorders        | 227.9<br>(190.7 to 274.4)                  | 2.9<br>(1.9 to 4.4)                      | 22.8<br>(15.0 to 33.0)            | 37.3<br>(30.1 to 44.6)                            | -0.0<br>(-4.4 to 4.7)                               |

| Cause                                                      | Prevalence in thousands (95% UI)                 | Incidence in thousands (95% UI)                   | YLDs in thousands (95% UI)              |                                                   |                                                     |
|------------------------------------------------------------|--------------------------------------------------|---------------------------------------------------|-----------------------------------------|---------------------------------------------------|-----------------------------------------------------|
|                                                            | 2016 counts                                      | 2016 counts                                       | 2016 counts                             | Percentage change in counts between 2006 and 2016 | Percentage change in age-standardised rates between |
| Attention-deficit/hyperactivity disorder                   | 415.9<br>(336.0 to 511.7)                        | 23.5<br>(18.7 to 29.5)                            | 5.0<br>(2.9 to 8.0)                     | 39.1<br>(28.7 to 51.1)                            | 0.2<br>(-6.5 to 7.3)                                |
| Conduct disorder                                           | 390.1<br>(315.3 to 462.6)                        | 137.3<br>(109.1 to 166.5)                         | 47.1<br>(28.4 to 71.4)                  | 39.6<br>(30.3 to 48.9)                            | 0.2<br>(-6.2 to 6.4)                                |
| Idiopathic developmental intellectual disability           | 956.1<br>(584.5 to 1,362.6)                      | --                                                | 35.7<br>(16.6 to 63.1)                  | 20.2<br>(10.0 to 31.0)                            | -13.5<br>(-20.6 to -6.0)                            |
| Other mental and substance use disorders                   | 439.5<br>(383.9 to 510.1)                        | 24.1<br>(21.1 to 28.0)                            | 32.2<br>(22.1 to 46.4)                  | 43.8<br>(35.6 to 53.3)                            | 0.5<br>(-4.2 to 6.0)                                |
| <b>Diabetes, urogenital, blood, and endocrine diseases</b> | <b>15,480.3</b><br><b>(13,661.2 to 18,047.8)</b> | <b>3,295.4†</b><br><b>(3,071.4 to 3,524.7)</b>    | <b>299.1</b><br><b>(211.1 to 412.7)</b> | <b>44.6</b><br><b>(39.5 to 49.6)</b>              | <b>4.0</b><br><b>(0.7 to 7.7)</b>                   |
| Diabetes mellitus                                          | 1,496.6<br>(1,345.7 to 1,646.7)                  | 112.0<br>(100.3 to 123.4)                         | 129.1<br>(88.5 to 182.0)                | 56.4<br>(47.6 to 65.5)                            | 11.1<br>(4.8 to 17.7)                               |
| Acute glomerulonephritis                                   | 0.3<br>(0.2 to 0.3)                              | 4.2<br>(3.6 to 4.9)                               | < 0.05<br>(< 0.05 to < 0.05)            | 39.5<br>(31.9 to 47.0)                            | 0.1<br>(-4.1 to 4.5)                                |
| Chronic kidney disease                                     | 1,191.5<br>(1,076.2 to 1,322.4)                  | 95.7<br>(85.4 to 107.3)                           | 49.7<br>(37.0 to 63.8)                  | 39.0<br>(30.4 to 47.4)                            | -2.9<br>(-7.6 to 1.9)                               |
| Chronic kidney disease due to diabetes mellitus            | 478.3<br>(410.7 to 557.8)                        | 35.8<br>(29.4 to 43.1)                            | 18.2<br>(13.0 to 23.9)                  | 41.4<br>(30.6 to 53.2)                            | -1.6<br>(-8.2 to 5.4)                               |
| Chronic kidney disease due to hypertension                 | 179.7<br>(152.3 to 209.8)                        | 18.1<br>(14.8 to 22.1)                            | 6.0<br>(4.2 to 8.0)                     | 41.7<br>(23.3 to 63.5)                            | -1.9<br>(-11.6 to 10.6)                             |
| Chronic kidney disease due to glomerulonephritis           | 177.5<br>(150.0 to 208.5)                        | 11.0<br>(8.9 to 13.5)                             | 9.8<br>(6.7 to 13.4)                    | 37.6<br>(21.3 to 56.7)                            | -3.4<br>(-12.4 to 6.6)                              |
| Chronic kidney disease due to other causes                 | 356.0<br>(300.4 to 416.9)                        | 30.8<br>(26.0 to 35.8)                            | 15.8<br>(11.3 to 20.9)                  | 36.2<br>(23.9 to 50.2)                            | -5.0<br>(-11.7 to 3.1)                              |
| Urinary diseases and male infertility                      | 484.4<br>(426.8 to 544.4)                        | 1,677.6†<br>(1,501.3 to 1,873.2)                  | 12.6<br>(8.2 to 18.2)                   | 29.5<br>(15.4 to 44.1)                            | -9.1<br>(-18.7 to 1.0)                              |
| Interstitial nephritis and urinary tract infections        | 26.3<br>(23.0 to 29.9)                           | 1,376.8<br>(1,203.7 to 1,563.7)                   | 0.9<br>(0.5 to 1.3)                     | 41.5<br>(19.3 to 68.4)                            | 1.8<br>(-12.3 to 18.4)                              |
| Urolithiasis                                               | 9.9<br>(8.7 to 11.5)                             | 264.3<br>(231.7 to 306.0)                         | 0.7<br>(0.5 to 1.0)                     | 44.0<br>(24.1 to 68.2)                            | 1.7<br>(-14.9 to 22.7)                              |
| Benign prostatic hyperplasia                               | 297.2<br>(248.8 to 357.3)                        | 36.4<br>(30.4 to 43.4)                            | 9.5<br>(6.0 to 14.1)                    | 27.3<br>(9.3 to 45.3)                             | -10.0<br>(-21.2 to 1.1)                             |
| Male infertility                                           | 131.9<br>(103.3 to 170.3)                        | --                                                | 0.8<br>(0.3 to 1.6)                     | 44.9<br>(35.1 to 55.9)                            | 1.2<br>(-5.4 to 8.8)                                |
| Other urinary diseases                                     | --                                               | --                                                | 0.6<br>(0.4 to 0.9)                     | 16.6<br>(3.4 to 32.7)                             | -14.9<br>(-24.0 to -4.1)                            |
| Gynecological diseases                                     | 3,160.2<br>(3,004.8 to 3,295.7)                  | 1,357.5†<br>(1,255.2 to 1,465.7)                  | 38.3<br>(26.1 to 54.1)                  | 40.1<br>(34.3 to 46.3)                            | -3.2<br>(-6.8 to 0.7)                               |
| Uterine fibroids                                           | 207.3<br>(182.4 to 233.7)                        | 26.5<br>(22.9 to 30.4)                            | 3.2<br>(1.9 to 5.2)                     | 30.6<br>(19.6 to 41.5)                            | -9.7<br>(-16.7 to -2.7)                             |
| Polycystic ovarian syndrome                                | 22.6<br>(16.8 to 29.8)                           | 23.7<br>(17.1 to 30.3)                            | 0.2<br>(0.1 to 0.4)                     | 45.1<br>(25.4 to 69.8)                            | 0.2<br>(-13.0 to 16.7)                              |
| Female infertility                                         | 80.8<br>(42.8 to 136.4)                          | --                                                | 0.5<br>(0.2 to 1.1)                     | 42.2<br>(22.0 to 63.9)                            | -0.1<br>(-15.6 to 16.4)                             |
| Endometriosis                                              | 5.4<br>(4.4 to 6.5)                              | 22.0<br>(17.7 to 28.2)                            | 0.5<br>(0.3 to 0.8)                     | 44.6<br>(8.9 to 97.0)                             | 0.5<br>(-22.6 to 31.1)                              |
| Genital prolapse                                           | 934.9<br>(812.2 to 1,054.6)                      | 83.0<br>(71.4 to 96.7)                            | 2.9<br>(1.4 to 5.2)                     | 24.7<br>(16.9 to 33.1)                            | -12.1<br>(-18.0 to -6.5)                            |
| Premenstrual syndrome                                      | 1,920.2<br>(1,775.3 to 2,072.8)                  | 760.2<br>(691.9 to 830.6)                         | 15.8<br>(10.0 to 23.9)                  | 43.1<br>(32.5 to 54.5)                            | -0.7<br>(-7.8 to 6.6)                               |
| Other gynecological diseases                               | 447.8<br>(382.0 to 524.2)                        | 442.0<br>(363.7 to 532.6)                         | 15.3<br>(10.0 to 21.9)                  | 42.1<br>(32.9 to 52.4)                            | -0.8<br>(-6.8 to 6.0)                               |
| Hemoglobinopathies and hemolytic anaemias                  | 12,254.2<br>(10,031.2 to 15,230.6)               | --                                                | 57.7<br>(34.3 to 97.4)                  | 35.0<br>(22.9 to 48.6)                            | 0.6<br>(-6.8 to 8.3)                                |
| Thalassemias                                               | 3.0<br>(2.7 to 3.2)                              | --                                                | 0.2<br>(0.1 to 0.3)                     | 20.4<br>(-10.2 to 60.0)                           | -5.2<br>(-29.7 to 27.2)                             |
| Thalassaemias trait                                        | 1,953.7<br>(1,839.5 to 2,066.9)                  | --                                                | 27.9<br>(18.2 to 41.1)                  | 36.3<br>(24.8 to 49.8)                            | 1.8<br>(-5.3 to 9.2)                                |
| Sickle cell disorders                                      | 40.1<br>(5.4 to 129.6)                           | --                                                | 3.1<br>(0.4 to 10.7)                    | 36.0<br>(0.7 to 94.3)                             | 4.9<br>(-21.7 to 49.2)                              |
| Sickle cell trait                                          | 6,297.5<br>(2,633.6 to 11,887.7)                 | --                                                | 21.8<br>(8.4 to 46.1)                   | 37.6<br>(19.9 to 57.6)                            | 2.8<br>(-9.2 to 17.2)                               |
| G6PD deficiency                                            | 1,449.0<br>(1,210.1 to 1,716.0)                  | --                                                | 0.2<br>(0.1 to 0.2)                     | 33.4<br>(16.5 to 53.6)                            | 0.7<br>(-8.7 to 11.7)                               |
| G6PD trait                                                 | 4,403.3<br>(4,105.5 to 4,724.0)                  | --                                                | < 0.05<br>(< 0.05 to < 0.05)            | 42.2<br>(29.2 to 57.0)                            | 4.5<br>(-3.5 to 12.8)                               |
| Other hemoglobinopathies and hemolytic anaemias            | 220.8<br>(203.9 to 238.3)                        | --                                                | 4.6<br>(3.1 to 7.0)                     | 17.9<br>(2.8 to 35.2)                             | -16.2<br>(-24.2 to -7.5)                            |
| Endocrine, metabolic, blood, and immune disorders          | 388.2<br>(364.4 to 411.7)                        | 48.5<br>(43.4 to 53.8)                            | 11.6<br>(7.8 to 16.2)                   | 35.2<br>(25.1 to 47.2)                            | 0.6<br>(-5.0 to 6.3)                                |
| <b>Musculoskeletal disorders</b>                           | <b>3,806.5</b><br><b>(3,500.8 to 4,091.4)</b>    | <b>2,354.7</b><br><b>(2,112.4 to 2,610.3)</b>     | <b>422.0</b><br><b>(292.0 to 565.4)</b> | <b>48.3</b><br><b>(42.0 to 53.9)</b>              | <b>2.1</b><br><b>(-0.7 to 5.0)</b>                  |
| Rheumatoid arthritis                                       | 65.4<br>(58.4 to 73.6)                           | 4.6<br>(4.1 to 5.1)                               | 15.0<br>(10.4 to 20.0)                  | 49.9<br>(37.9 to 63.0)                            | 6.7<br>(-0.5 to 14.8)                               |
| Osteoarthritis                                             | 504.1<br>(471.5 to 539.9)                        | 29.7<br>(27.4 to 32.2)                            | 30.2<br>(21.5 to 40.8)                  | 49.6<br>(43.5 to 56.1)                            | 4.5<br>(0.6 to 8.4)                                 |
| Low back and neck pain                                     | 2,604.4<br>(2,408.8 to 2,812.2)                  | 1,128.5<br>(1,006.4 to 1,263.5)                   | 296.4<br>(210.5 to 392.2)               | 43.6<br>(39.1 to 48.4)                            | 0.2<br>(-2.6 to 3.2)                                |
| Low back pain                                              | 1,851.2<br>(1,628.0 to 2,125.8)                  | 914.2<br>(797.9 to 1,047.9)                       | 204.0<br>(144.1 to 273.0)               | 43.8<br>(37.3 to 50.8)                            | 0.3<br>(-3.8 to 4.8)                                |
| Neck pain                                                  | 945.3<br>(816.3 to 1,089.9)                      | 214.3<br>(183.5 to 250.9)                         | 92.3<br>(62.0 to 130.6)                 | 43.2<br>(39.8 to 46.6)                            | 0.1<br>(-1.7 to 1.8)                                |
| Gout                                                       | 57.2<br>(50.4 to 65.0)                           | 12.2<br>(10.7 to 13.8)                            | 1.8<br>(1.2 to 2.5)                     | 42.8<br>(21.1 to 67.6)                            | -0.3<br>(-13.6 to 14.7)                             |
| Other musculoskeletal disorders                            | 924.0<br>(598.5 to 1,311.9)                      | 1,179.7<br>(981.0 to 1,396.5)                     | 78.6<br>(40.7 to 129.3)                 | 68.5<br>(39.0 to 116.5)                           | 8.5<br>(-4.5 to 29.1)                               |
| <b>Other non-communicable diseases</b>                     | <b>24,020.8</b><br><b>(23,356.9 to 24,613.6)</b> | <b>76,605.0†</b><br><b>(70,032.0 to 83,524.4)</b> | <b>606.6</b><br><b>(417.2 to 847.2)</b> | <b>34.8</b><br><b>(32.5 to 37.1)</b>              | <b>-4.4</b><br><b>(-5.8 to -3.0)</b>                |
| Congenital anomalies                                       | 706.3<br>(634.6 to 805.1)                        | --                                                | 85.1<br>(59.2 to 116.5)                 | 29.3<br>(22.1 to 36.3)                            | -4.9<br>(-9.9 to 0.2)                               |
| Neural tube defects                                        | 45.1<br>(40.3 to 50.9)                           | --                                                | 13.4<br>(9.2 to 18.0)                   | 26.7<br>(11.7 to 43.6)                            | -7.3<br>(-17.5 to 3.8)                              |
| Congenital heart anomalies                                 | 159.3<br>(134.4 to 187.5)                        | --                                                | 7.4<br>(3.2 to 12.8)                    | 26.0<br>(11.6 to 42.8)                            | -2.6<br>(-13.0 to 9.6)                              |
| Orofacial clefts                                           | 17.5<br>(15.3 to 20.0)                           | --                                                | 0.3<br>(0.2 to 0.5)                     | 30.7<br>(16.0 to 47.0)                            | -4.5<br>(-15.3 to 7.5)                              |
| Down's syndrome                                            | 17.4<br>(14.7 to 20.6)                           | --                                                | 1.5<br>(1.0 to 2.2)                     | 42.0<br>(30.6 to 55.6)                            | 4.7<br>(-3.1 to 13.5)                               |
| Turner syndrome                                            | 25.9<br>(21.7 to 31.0)                           | --                                                | 0.4<br>(0.2 to 0.7)                     | 30.4<br>(-4.4 to 77.6)                            | -3.8<br>(-28.9 to 29.0)                             |
| Klinefelter syndrome                                       | 22.4<br>(18.9 to 26.3)                           | --                                                | 0.1<br>(0.1 to 0.2)                     | 35.6<br>(3.7 to 78.8)                             | -1.3<br>(-23.6 to 28.8)                             |



| Cause                                         | Prevalence in thousands (95% UI)               | Incidence in thousands (95% UI)                           | YLDs in thousands (95% UI)              |                                                   |                                                     |
|-----------------------------------------------|------------------------------------------------|-----------------------------------------------------------|-----------------------------------------|---------------------------------------------------|-----------------------------------------------------|
|                                               | 2016 counts                                    | 2016 counts                                               | 2016 counts                             | Percentage change in counts between 2006 and 2016 | Percentage change in age-standardised rates between |
| Other chromosomal abnormalities               | 140.8<br>(116.7 to 170.2)                      | --                                                        | 13.1<br>(8.8 to 18.5)                   | 32.9<br>(19.1 to 47.9)                            | -0.2<br>(-10.5 to 11.4)                             |
| Congenital musculoskeletal and limb anomalies | 65.2<br>(58.8 to 72.0)                         | --                                                        | 9.7<br>(6.6 to 13.6)                    | 38.8<br>(24.3 to 54.8)                            | 1.8<br>(-7.8 to 12.2)                               |
| Urogenital congenital anomalies               | 48.7<br>(42.5 to 55.8)                         | --                                                        | 1.5<br>(0.9 to 2.4)                     | 34.8<br>(23.3 to 46.5)                            | 0.3<br>(-7.9 to 8.6)                                |
| Digestive congenital anomalies                | 41.9<br>(37.2 to 47.2)                         | --                                                        | 1.7<br>(1.1 to 2.5)                     | 38.3<br>(13.8 to 67.1)                            | 1.2<br>(-14.9 to 19.0)                              |
| Other congenital anomalies                    | 210.9<br>(130.3 to 324.7)                      | --                                                        | 35.9<br>(21.4 to 56.8)                  | 26.3<br>(14.9 to 38.8)                            | -7.6<br>(-16.2 to 1.2)                              |
| Skin and subcutaneous diseases                | 8,783.4<br>(8,462.1 to 9,107.7)                | 17,356.4<br>(16,438.6 to 18,387.2)                        | 241.5<br>(159.2 to 350.9)               | 41.2<br>(37.7 to 44.9)                            | 2.2<br>(0.2 to 4.3)                                 |
| Dermatitis                                    | 1,735.4<br>(1,456.4 to 2,015.5)                | 1,910.0<br>(1,743.1 to 2,084.4)                           | 68.0<br>(38.4 to 113.4)                 | 35.4<br>(30.0 to 41.1)                            | 0.3<br>(-2.9 to 3.8)                                |
| Psoriasis                                     | 131.3<br>(124.0 to 139.6)                      | 22.2<br>(21.0 to 23.6)                                    | 11.4<br>(8.1 to 15.4)                   | 52.6<br>(32.3 to 73.5)                            | 8.7<br>(-1.8 to 21.0)                               |
| Cellulitis                                    | 15.3<br>(14.1 to 16.7)                         | 308.0<br>(285.3 to 332.0)                                 | 0.9<br>(0.6 to 1.2)                     | 39.0<br>(4.5 to 81.7)                             | 0.9<br>(-18.7 to 23.3)                              |
| Pyoderma                                      | 64.8<br>(62.4 to 67.4)                         | 1,426.6<br>(1,371.9 to 1,481.5)                           | 0.4<br>(0.1 to 0.8)                     | 38.1<br>(25.7 to 52.2)                            | 0.9<br>(-6.4 to 8.7)                                |
| Scabies                                       | 480.4<br>(400.7 to 579.6)                      | 1,469.6<br>(1,231.3 to 1,785.4)                           | 12.4<br>(6.9 to 20.4)                   | 29.1<br>(22.8 to 35.4)                            | -5.5<br>(-9.4 to -1.6)                              |
| Fungal skin diseases                          | 1,912.9<br>(1,706.9 to 2,151.6)                | 6,371.3<br>(5,675.1 to 7,110.4)                           | 10.8<br>(4.3 to 22.4)                   | 36.8<br>(34.1 to 39.4)                            | 0.1<br>(-1.1 to 1.3)                                |
| Viral skin diseases                           | 1,018.6<br>(961.4 to 1,075.3)                  | 1,427.5<br>(1,342.5 to 1,517.3)                           | 31.2<br>(19.5 to 46.4)                  | 36.9<br>(31.7 to 42.0)                            | 0.3<br>(-2.9 to 3.5)                                |
| Acne vulgaris                                 | 2,793.4<br>(2,386.9 to 3,256.6)                | 2,061.2<br>(1,604.0 to 2,727.3)                           | 71.5<br>(46.9 to 105.0)                 | 53.2<br>(44.1 to 62.7)                            | 6.0<br>(0.2 to 12.0)                                |
| Alopecia areata                               | 54.9<br>(51.2 to 58.5)                         | 98.3<br>(91.7 to 104.7)                                   | 1.8<br>(1.1 to 2.7)                     | 40.7<br>(24.6 to 60.2)                            | -0.2<br>(-9.6 to 10.6)                              |
| Pruritus                                      | 220.6<br>(193.1 to 251.0)                      | 182.0<br>(160.7 to 206.2)                                 | 2.3<br>(1.1 to 4.2)                     | 40.9<br>(32.4 to 50.2)                            | 1.9<br>(-3.2 to 7.6)                                |
| Urticaria                                     | 388.0<br>(330.7 to 459.7)                      | 700.5<br>(596.3 to 822.7)                                 | 23.4<br>(14.8 to 34.0)                  | 33.5<br>(25.2 to 42.1)                            | 0.1<br>(-5.2 to 5.4)                                |
| Decubitus ulcer                               | 5.0<br>(4.5 to 5.5)                            | 18.0<br>(16.2 to 19.9)                                    | 0.8<br>(0.6 to 1.1)                     | 44.9<br>(33.6 to 57.3)                            | 5.4<br>(-6.4 to 19.0)                               |
| Other skin and subcutaneous diseases          | 1,229.7<br>(1,191.6 to 1,271.7)                | 1,361.3<br>(1,316.9 to 1,409.7)                           | 6.7<br>(3.2 to 12.3)                    | 49.6<br>(44.6 to 54.8)                            | 6.9<br>(4.1 to 9.7)                                 |
| Sense organ diseases                          | 6,265.4<br>(6,021.7 to 6,557.9)                | 2,863.3 <sup>†</sup><br>(2,658.2 to 3,092.9)              | 224.7<br>(156.7 to 315.2)               | 28.9<br>(24.6 to 33.2)                            | -8.0<br>(-10.1 to -5.9)                             |
| Glaucoma                                      | 15.3<br>(12.4 to 18.4)                         | --                                                        | 1.6<br>(1.0 to 2.3)                     | 35.3<br>(19.9 to 50.8)                            | -5.7<br>(-15.4 to 4.0)                              |
| Cataract                                      | 211.9<br>(186.8 to 238.8)                      | --                                                        | 16.9<br>(12.1 to 23.0)                  | 22.9<br>(15.4 to 31.1)                            | -14.3<br>(-19.5 to -9.3)                            |
| Macular degeneration                          | 18.4<br>(15.0 to 22.0)                         | --                                                        | 1.5<br>(1.0 to 2.0)                     | 34.4<br>(20.1 to 49.9)                            | -6.4<br>(-15.3 to 2.7)                              |
| Refraction and accommodation disorders        | 4,512.9<br>(4,177.9 to 4,866.4)                | --                                                        | 74.5<br>(45.0 to 119.2)                 | 23.1<br>(17.8 to 28.7)                            | -12.1<br>(-16.2 to -7.9)                            |
| Age-related and other hearing loss            | 2,471.2<br>(2,270.7 to 2,686.7)                | --                                                        | 105.3<br>(71.7 to 147.9)                | 32.0<br>(24.0 to 40.0)                            | -5.0<br>(-8.3 to -2.1)                              |
| Other vision loss                             | 97.8<br>(86.5 to 110.5)                        | --                                                        | 8.8<br>(5.9 to 12.0)                    | 31.4<br>(20.4 to 43.1)                            | -7.3<br>(-13.7 to -0.8)                             |
| Other sense organ diseases                    | 544.1<br>(503.9 to 584.0)                      | 2,863.3<br>(2,658.2 to 3,092.9)                           | 16.2<br>(10.2 to 24.7)                  | 43.1<br>(35.3 to 51.6)                            | 1.4<br>(-2.4 to 5.6)                                |
| Oral disorders                                | 18,602.6<br>(17,387.2 to 19,580.5)             | 56,385.2 <sup>†</sup><br>(49,898.5 to 63,134.3)           | 55.2<br>(32.9 to 85.3)                  | 42.0<br>(39.3 to 45.0)                            | 0.4<br>(-1.3 to 2.2)                                |
| Caries of deciduous teeth                     | 3,931.6<br>(2,984.7 to 4,913.4)                | 15,331.6<br>(10,280.7 to 20,924.5)                        | 0.9<br>(0.4 to 1.9)                     | 24.8<br>(10.8 to 39.6)                            | -0.6<br>(-11.5 to 11.2)                             |
| Caries of permanent teeth                     | 13,652.4<br>(12,323.6 to 15,006.1)             | 40,732.9<br>(36,369.3 to 44,862.2)                        | 8.0<br>(3.5 to 15.3)                    | 36.3<br>(30.2 to 42.3)                            | -3.0<br>(-6.6 to 0.8)                               |
| Periodontal disease                           | 2,063.2<br>(1,693.3 to 2,499.3)                | 262.7<br>(212.2 to 322.9)                                 | 13.3<br>(5.3 to 28.1)                   | 43.3<br>(38.4 to 49.0)                            | 0.3<br>(-2.9 to 3.7)                                |
| Edentulism and severe tooth loss              | 686.5<br>(586.6 to 788.4)                      | 57.9<br>(48.5 to 67.1)                                    | 18.6<br>(12.2 to 26.4)                  | 45.1<br>(40.2 to 50.2)                            | 1.1<br>(-1.9 to 4.3)                                |
| Other oral disorders                          | 493.9<br>(470.3 to 520.1)                      | --                                                        | 14.4<br>(8.9 to 21.5)                   | 41.2<br>(35.6 to 47.2)                            | 0.3<br>(-3.0 to 3.4)                                |
| <b>Injuries</b>                               | <b>9,640.8</b><br><b>(6,700.3 to 13,456.8)</b> | <b>2,361.6<sup>†</sup></b><br><b>(2,209.1 to 2,523.1)</b> | <b>363.1</b><br><b>(178.2 to 665.3)</b> | <b>18.0</b><br><b>(6.3 to 42.3)</b>               | <b>-9.8</b><br><b>(-15.9 to 3.8)</b>                |
| <b>Transport injuries</b>                     | <b>458.2</b><br><b>(418.5 to 499.9)</b>        | <b>225.3</b><br><b>(196.6 to 255.3)</b>                   | <b>32.0</b><br><b>(15.3 to 61.1)</b>    | <b>51.1</b><br><b>(34.1 to 73.7)</b>              | <b>7.5</b><br><b>(-0.7 to 18.6)</b>                 |
| Road injuries                                 | 321.1<br>(296.0 to 348.3)                      | 177.7<br>(152.0 to 205.0)                                 | 21.7<br>(10.2 to 41.8)                  | 54.7<br>(37.1 to 78.6)                            | 9.6<br>(1.0 to 20.8)                                |
| Pedestrian road injuries                      | 61.2<br>(53.0 to 70.7)                         | 24.0<br>(18.8 to 30.0)                                    | 4.3<br>(1.9 to 8.8)                     | 53.2<br>(36.5 to 79.1)                            | 9.7<br>(1.8 to 20.9)                                |
| Cyclist road injuries                         | 46.2<br>(37.4 to 55.2)                         | 29.0<br>(21.5 to 37.6)                                    | 2.8<br>(1.4 to 5.2)                     | 69.0<br>(48.0 to 98.1)                            | 21.5<br>(10.2 to 36.6)                              |
| Motorcyclist road injuries                    | 50.9<br>(42.2 to 61.7)                         | 18.8<br>(14.7 to 23.8)                                    | 3.3<br>(1.5 to 6.6)                     | 50.9<br>(31.4 to 80.7)                            | 7.0<br>(-2.7 to 21.3)                               |
| Motor vehicle road injuries                   | 138.2<br>(117.1 to 158.7)                      | 88.7<br>(73.8 to 104.5)                                   | 9.8<br>(4.7 to 18.3)                    | 56.0<br>(39.5 to 77.3)                            | 10.2<br>(1.7 to 20.8)                               |
| Other road injuries                           | 24.6<br>(20.7 to 29.6)                         | 17.3<br>(12.6 to 23.0)                                    | 1.5<br>(0.7 to 2.8)                     | 36.6<br>(22.5 to 54.6)                            | -4.6<br>(-11.4 to 3.8)                              |
| Other transport injuries                      | 137.1<br>(111.9 to 167.4)                      | 47.6<br>(38.7 to 59.7)                                    | 10.3<br>(4.9 to 19.7)                   | 44.0<br>(28.4 to 64.8)                            | 2.4<br>(-5.5 to 13.5)                               |
| <b>Unintentional injuries</b>                 | <b>3,020.0</b><br><b>(2,769.1 to 3,273.4)</b>  | <b>2,025.3</b><br><b>(1,877.8 to 2,181.1)</b>             | <b>125.7</b><br><b>(66.3 to 219.5)</b>  | <b>35.2</b><br><b>(21.7 to 50.9)</b>              | <b>-3.3</b><br><b>(-10.3 to 5.0)</b>                |
| Falls                                         | 1,123.2<br>(948.0 to 1,313.7)                  | 691.7<br>(592.2 to 814.6)                                 | 52.9<br>(27.6 to 94.3)                  | 37.6<br>(23.1 to 54.6)                            | -1.5<br>(-9.0 to 7.7)                               |
| Drowning                                      | 12.4<br>(10.6 to 14.5)                         | 3.7<br>(3.2 to 4.2)                                       | 0.9<br>(0.4 to 1.8)                     | 17.1<br>(3.9 to 34.5)                             | -15.6<br>(-22.8 to -5.9)                            |
| Fire, heat, and hot substances                | 219.2<br>(181.4 to 267.3)                      | 42.5<br>(33.1 to 52.9)                                    | 7.7<br>(3.4 to 15.2)                    | 55.4<br>(32.2 to 87.2)                            | 10.3<br>(-1.3 to 27.1)                              |
| Poisonings                                    | 11.2<br>(9.2 to 13.7)                          | 23.1<br>(17.8 to 29.6)                                    | 1.2<br>(0.6 to 2.2)                     | 58.8<br>(41.8 to 83.6)                            | 13.9<br>(6.6 to 24.3)                               |
| Exposure to mechanical forces                 | 451.1<br>(385.3 to 551.3)                      | 260.9<br>(219.9 to 300.7)                                 | 14.4<br>(7.3 to 27.2)                   | 45.2<br>(32.1 to 61.5)                            | 3.5<br>(-3.3 to 11.6)                               |
| Unintentional firearm injuries                | 15.3<br>(12.4 to 18.9)                         | 5.9<br>(4.1 to 8.4)                                       | 0.9<br>(0.4 to 1.7)                     | 55.1<br>(39.0 to 77.7)                            | 10.9<br>(2.6 to 22.3)                               |
| Unintentional suffocation                     | 21.3<br>(15.8 to 27.5)                         | 6.9<br>(4.8 to 9.7)                                       | 1.0<br>(0.4 to 2.0)                     | 34.9<br>(19.4 to 58.9)                            | -1.9<br>(-10.8 to 13.1)                             |
| Other exposure to mechanical forces           | 414.6<br>(349.2 to 511.6)                      | 248.1<br>(209.1 to 287.4)                                 | 12.6<br>(6.5 to 23.7)                   | 45.4<br>(33.2 to 61.2)                            | 3.3<br>(-3.1 to 10.9)                               |

| Cause                                                                               | Prevalence in thousands (95% UI)              | Incidence in thousands (95% UI)         | YLDs in thousands (95% UI)             |                                                   |                                                     |
|-------------------------------------------------------------------------------------|-----------------------------------------------|-----------------------------------------|----------------------------------------|---------------------------------------------------|-----------------------------------------------------|
|                                                                                     | 2016 counts                                   | 2016 counts                             | 2016 counts                            | Percentage change in counts between 2006 and 2016 | Percentage change in age-standardised rates between |
| Adverse effects of medical treatment                                                | 10.5<br>(8.3 to 12.9)                         | 137.4<br>(119.9 to 155.8)               | 1.4<br>(0.9 to 2.1)                    | 17.2<br>(10.8 to 23.6)                            | -15.9<br>(-18.9 to -12.9)                           |
| Animal contact                                                                      | 173.0<br>(150.0 to 204.8)                     | 291.8<br>(235.6 to 353.2)               | 6.5<br>(3.9 to 10.7)                   | 41.6<br>(30.6 to 54.3)                            | -0.4<br>(-4.9 to 5.2)                               |
| Venomous animal contact                                                             | 57.2<br>(46.9 to 69.0)                        | 111.3<br>(82.7 to 144.3)                | 4.0<br>(2.2 to 7.1)                    | 47.7<br>(32.2 to 68.9)                            | 5.0<br>(-1.6 to 13.4)                               |
| Non-venomous animal contact                                                         | 115.8<br>(94.2 to 143.0)                      | 180.5<br>(142.5 to 222.6)               | 2.4<br>(1.5 to 3.7)                    | 32.5<br>(25.6 to 39.4)                            | -7.0<br>(-10.8 to -3.2)                             |
| Foreign body                                                                        | 181.6<br>(149.7 to 217.8)                     | 163.9<br>(139.9 to 192.0)               | 9.2<br>(4.6 to 17.4)                   | 28.9<br>(17.0 to 43.8)                            | -8.0<br>(-14.3 to 0.3)                              |
| Pulmonary aspiration and foreign body in airway                                     | 61.2<br>(44.6 to 84.0)                        | 32.0<br>(25.6 to 39.6)                  | 3.7<br>(1.8 to 7.2)                    | 28.1<br>(16.9 to 42.9)                            | -6.8<br>(-13.0 to 1.9)                              |
| Foreign body in eyes                                                                | 12.1<br>(6.3 to 18.9)                         | 69.0<br>(52.1 to 92.5)                  | 0.7<br>(0.3 to 1.2)                    | 40.3<br>(33.2 to 48.0)                            | 0.7<br>(-3.9 to 5.0)                                |
| Foreign body in other body part                                                     | 108.3<br>(87.4 to 140.8)                      | 62.9<br>(51.9 to 75.7)                  | 4.8<br>(2.4 to 9.2)                    | 27.9<br>(14.8 to 44.0)                            | -9.9<br>(-16.4 to -1.5)                             |
| Environmental heat and cold exposure                                                | 197.8<br>(165.5 to 233.8)                     | 80.5<br>(65.6 to 99.6)                  | 10.1<br>(4.7 to 19.8)                  | 10.6<br>(-1.0 to 25.8)                            | -21.4<br>(-26.8 to -13.9)                           |
| Other unintentional injuries                                                        | 639.9<br>(522.6 to 773.8)                     | 329.9<br>(284.0 to 386.8)               | 21.4<br>(11.3 to 37.5)                 | 33.0<br>(21.8 to 47.7)                            | -3.6<br>(-9.7 to 4.5)                               |
| <b>Self-harm and interpersonal violence</b>                                         | <b>896.4</b><br><b>(808.6 to 982.5)</b>       | <b>109.6†</b><br><b>(92.1 to 128.7)</b> | <b>13.9</b><br><b>(8.9 to 21.2)</b>    | <b>27.6</b><br><b>(19.1 to 36.4)</b>              | <b>-9.2</b><br><b>(-14.1 to -3.9)</b>               |
| Self-harm                                                                           | 13.4<br>(11.3 to 15.5)                        | 7.3<br>(6.1 to 8.9)                     | 0.9<br>(0.4 to 1.8)                    | 50.6<br>(32.9 to 76.8)                            | 4.7<br>(-2.3 to 14.6)                               |
| Self-harm by firearm                                                                | 0.8<br>(0.7 to 1.0)                           | 0.3<br>(0.2 to 0.5)                     | < 0.05<br>(< 0.05 to 0.1)              | 22.8<br>(6.2 to 45.2)                             | -17.8<br>(-25.2 to -7.3)                            |
| Self-harm by other specified means                                                  | 12.6<br>(10.5 to 14.7)                        | 7.0<br>(5.8 to 8.5)                     | 0.9<br>(0.4 to 1.7)                    | 52.3<br>(34.6 to 79.0)                            | 6.0<br>(-1.1 to 15.8)                               |
| Interpersonal violence                                                              | 883.0<br>(795.9 to 969.2)                     | 102.3†<br>(84.8 to 120.2)               | 13.0<br>(8.4 to 19.8)                  | 26.2<br>(18.0 to 34.5)                            | -10.3<br>(-15.2 to -5.1)                            |
| Assault by firearm                                                                  | 8.0<br>(6.6 to 9.6)                           | 3.8<br>(2.8 to 5.1)                     | 0.5<br>(0.2 to 0.9)                    | 12.9<br>(0.6 to 30.7)                             | -20.9<br>(-27.5 to -11.7)                           |
| Assault by sharp object                                                             | 48.9<br>(39.8 to 59.0)                        | 30.1<br>(23.2 to 38.6)                  | 2.0<br>(1.0 to 3.7)                    | 36.1<br>(21.0 to 55.1)                            | -4.0<br>(-12.3 to 6.1)                              |
| Sexual violence                                                                     | 743.4<br>(657.3 to 829.9)                     | --                                      | 6.4<br>(4.3 to 9.1)                    | 22.4<br>(14.8 to 29.6)                            | -13.4<br>(-18.2 to -8.9)                            |
| Assault by other means                                                              | 82.7<br>(69.8 to 99.1)                        | 68.4<br>(56.5 to 82.0)                  | 4.2<br>(2.1 to 7.6)                    | 29.5<br>(15.2 to 48.4)                            | -8.3<br>(-16.0 to 1.8)                              |
| <b>Forces of nature, conflict and terrorism, and executions and police conflict</b> | <b>6,009.7</b><br><b>(3,014.1 to 9,850.6)</b> | <b>1.3†</b><br><b>(0.8 to 2.5)</b>      | <b>191.5</b><br><b>(83.4 to 351.7)</b> | <b>4.9</b><br><b>(-6.0 to 32.4)</b>               | <b>-15.3</b><br><b>(-21.1 to 1.0)</b>               |
| Exposure to forces of nature                                                        | 52.6<br>(24.0 to 91.1)                        | --                                      | 2.6<br>(0.5 to 7.5)                    | -5.1<br>(-17.7 to 6.4)                            | -20.8<br>(-28.2 to -12.2)                           |
| Conflict and terrorism                                                              | 5,954.2<br>(2,971.1 to 9,789.2)               | --                                      | 188.8<br>(82.6 to 345.6)               | 5.0<br>(-6.0 to 33.2)                             | -15.2<br>(-21.1 to 1.2)                             |
| Executions and police conflict                                                      | 2.8<br>(1.5 to 8.0)                           | 1.3<br>(0.8 to 2.5)                     | 0.1<br>(< 0.05 to 0.4)                 | 37.5<br>(20.4 to 59.6)                            | 0.4<br>(-16.5 to 21.1)                              |
| <b>Impairments</b>                                                                  | --                                            | --                                      | --                                     | --                                                | --                                                  |
| Anaemia                                                                             | 8,586.9<br>(7,878.4 to 9,557.9)               | --                                      | 258.8<br>(175.0 to 368.7)              | 28.2<br>(20.0 to 37.8)                            | -6.1<br>(-10.7 to -1.0)                             |
| Developmental intellectual disability                                               | 1,591.2<br>(1,205.2 to 2,001.7)               | --                                      | 134.6<br>(94.2 to 195.8)               | 32.2<br>(22.5 to 49.3)                            | -3.5<br>(-9.9 to 8.4)                               |
| Epilepsy                                                                            | 169.5<br>(87.7 to 270.9)                      | --                                      | 75.1<br>(36.2 to 131.3)                | 48.2<br>(-30.1 to 226.9)                          | 8.8<br>(-51.2 to 151.5)                             |
| Guillain-Barre syndrome                                                             | 0.3<br>(0.2 to 0.4)                           | --                                      | 0.1<br>(0.1 to 0.1)                    | 38.7<br>(36.7 to 40.5)                            | 0.0<br>(-0.1 to 0.1)                                |
| Hearing loss                                                                        | 3,226.7<br>(3,034.1 to 3,450.4)               | --                                      | 156.4<br>(109.2 to 211.8)              | 28.1<br>(22.9 to 33.1)                            | -6.3<br>(-8.7 to -3.9)                              |
| Heart failure                                                                       | 109.9<br>(96.8 to 124.7)                      | --                                      | 11.2<br>(8.2 to 14.6)                  | 47.2<br>(37.6 to 58.2)                            | 2.6<br>(-4.0 to 9.9)                                |
| Infertility                                                                         | 426.5<br>(342.1 to 535.3)                     | --                                      | 2.8<br>(1.2 to 5.4)                    | 43.4<br>(35.4 to 52.1)                            | -0.1<br>(-5.2 to 5.7)                               |
| Pelvic inflammatory disease                                                         | 14.3<br>(11.0 to 18.2)                        | --                                      | 1.8<br>(1.2 to 2.8)                    | 39.1<br>(18.1 to 63.5)                            | -3.0<br>(-17.0 to 13.5)                             |
| Vision loss                                                                         | 5,078.1<br>(4,719.6 to 5,448.1)               | --                                      | 134.2<br>(91.3 to 198.8)               | 30.2<br>(22.9 to 43.5)                            | -9.9<br>(-13.7 to -5.0)                             |

We did not calculate incidence for the nine impairments, certain NTDs, and causes with only birth prevalence. Blank cells mean that no estimate is available.

† Incidence for aggregate causes represents the sum of the incidence of the causes below the aggregate.

‡ Incidence estimates for stroke represent first-ever stroke only.

^ Incidence of HIV/AIDS represents new infections of HIV only and does not include new infections of Tuberculosis in HIV positive cases.

SR Table 14: Prevalence, incidence, and YLDs for 2016, percentage change of YLD counts and percentage change of age-standardised YLD rates between 2006 and 2016 by cause and impairments, for all ages, Albania.

| Cause                                                                                | Prevalence in thousands (95% UI)       | Incidence in thousands (95% UI)            | YLDs in thousands (95% UI)          |                                                   |                                                     |
|--------------------------------------------------------------------------------------|----------------------------------------|--------------------------------------------|-------------------------------------|---------------------------------------------------|-----------------------------------------------------|
|                                                                                      | 2016 counts                            | 2016 counts                                | 2016 counts                         | Percentage change in counts between 2006 and 2016 | Percentage change in age-standardised rates between |
| <b>All causes</b>                                                                    | <b>2,745.2</b><br>(2,734.3 to 2,757.3) | <b>14,455.1†</b><br>(13,799.5 to 15,134.8) | <b>332.4</b><br>(246.2 to 430.3)    | <b>5.9</b><br>(3.7 to 8.2)                        | <b>-0.1</b><br>(-2.3 to 2.1)                        |
| <b>Communicable, maternal, neonatal, and nutritional disorders</b>                   | <b>1,197.8</b><br>(1,165.0 to 1,231.8) | <b>5,649.5†</b><br>(5,166.0 to 6,148.0)    | <b>17.3</b><br>(12.3 to 23.6)       | <b>-13.8</b><br>(-18.7 to -7.7)                   | <b>-5.4</b><br>(-10.9 to 1.6)                       |
| <b>HIV/AIDS and tuberculosis</b>                                                     | <b>491.3</b><br>(453.6 to 523.5)       | <b>0.4†</b><br>(0.3 to 0.5)                | <b>0.1</b><br>(< 0.05 to 0.1)       | <b>-10.4</b><br>(-25.3 to 8.1)                    | <b>-14.7</b><br>(-28.6 to 2.1)                      |
| Tuberculosis                                                                         | 461.6<br>(428.6 to 500.1)              | 0.4†<br>(0.3 to 0.4)                       | 0.1<br>(< 0.05 to 0.1)              | -10.7<br>(-27.0 to 9.5)                           | -15.3<br>(-30.6 to 3.0)                             |
| Drug-susceptible tuberculosis                                                        | 0.2<br>(0.2 to 0.2)                    | 0.4<br>(0.3 to 0.4)                        | 0.1<br>(< 0.05 to 0.1)              | -10.7<br>(-27.1 to 9.7)                           | -15.3<br>(-30.8 to 3.0)                             |
| Multidrug-resistant tuberculosis without extensive drug resistance                   | < 0.05<br>(< 0.05 to < 0.05)           | < 0.05<br>(< 0.05 to < 0.05)               | < 0.05<br>(< 0.05 to < 0.05)        | -23.1<br>(-88.6 to 418.2)                         | -27.7<br>(-89.5 to 389.8)                           |
| Extensively drug-resistant tuberculosis                                              | < 0.05<br>(< 0.05 to < 0.05)           | < 0.05<br>(< 0.05 to < 0.05)               | < 0.05<br>(< 0.05 to < 0.05)        | 137.2<br>(-64.7 to 1,497.5)                       | 122.9<br>(-67.7 to 1,409.6)                         |
| Latent tuberculosis infection                                                        | 461.4<br>(428.4 to 499.9)              | --                                         | --                                  | --                                                | --                                                  |
| HIV/AIDS                                                                             | < 0.05<br>(< 0.05 to 0.1)              | < 0.05^<br>(< 0.05 to < 0.05)              | < 0.05<br>(< 0.05 to < 0.05)        | -6.9<br>(-18.9 to 4.5)                            | -7.7<br>(-20.7 to 3.6)                              |
| Drug-susceptible HIV/AIDS - Tuberculosis                                             | < 0.05<br>(< 0.05 to < 0.05)           | < 0.05<br>(< 0.05 to < 0.05)               | < 0.05<br>(< 0.05 to < 0.05)        | -25.9<br>(-30.9 to -20.6)                         | -26.8<br>(-31.7 to -21.5)                           |
| Multidrug-resistant HIV/AIDS - Tuberculosis without extensive drug resistance        | < 0.05<br>(< 0.05 to < 0.05)           | < 0.05<br>(< 0.05 to < 0.05)               | < 0.05<br>(< 0.05 to < 0.05)        | -34.1<br>(-90.1 to 340.5)                         | -34.9<br>(-90.2 to 335.5)                           |
| Extensively drug-resistant HIV/AIDS - Tuberculosis                                   | < 0.05<br>(< 0.05 to < 0.05)           | < 0.05<br>(< 0.05 to < 0.05)               | < 0.05<br>(< 0.05 to < 0.05)        | 103.1<br>(-69.3 to 1,258.7)                       | 100.7<br>(-69.7 to 1,243.1)                         |
| HIV/AIDS resulting in other diseases                                                 | < 0.05<br>(< 0.05 to 0.1)              | < 0.05<br>(< 0.05 to < 0.05)               | < 0.05<br>(< 0.05 to < 0.05)        | 2.9<br>(-14.6 to 39.0)                            | 2.3<br>(-15.2 to 35.5)                              |
| <b>Diarrhoea, lower respiratory infections, and other common infectious diseases</b> | <b>108.1</b><br>(102.2 to 114.5)       | <b>5,354.6†</b><br>(4,859.4 to 5,854.2)    | <b>4.9</b><br>(3.3 to 6.7)          | <b>-9.1</b><br>(-12.4 to -5.8)                    | <b>1.2</b><br>(-2.2 to 4.9)                         |
| Diarrhoeal diseases                                                                  | 14.4<br>(13.2 to 15.9)                 | 936.0<br>(856.7 to 1,032.2)                | 1.6<br>(1.1 to 2.2)                 | -0.3<br>(-7.1 to 7.9)                             | 12.2<br>(5.0 to 21.1)                               |
| Intestinal infectious diseases                                                       | < 0.05<br>(< 0.05 to < 0.05)           | < 0.05†<br>(< 0.05 to < 0.05)              | < 0.05<br>(< 0.05 to < 0.05)        | -0.2<br>(-13.7 to 14.3)                           | -5.2<br>(-16.7 to 8.1)                              |
| Typhoid fever                                                                        | < 0.05<br>(< 0.05 to < 0.05)           | < 0.05<br>(< 0.05 to < 0.05)               | < 0.05<br>(< 0.05 to < 0.05)        | 7.2<br>(-11.0 to 30.7)                            | 3.4<br>(-13.2 to 24.9)                              |
| Paratyphoid fever                                                                    | < 0.05<br>(< 0.05 to < 0.05)           | < 0.05<br>(< 0.05 to < 0.05)               | < 0.05<br>(< 0.05 to < 0.05)        | -4.5<br>(-19.8 to 13.6)                           | -9.2<br>(-22.7 to 7.2)                              |
| Other intestinal infectious diseases                                                 | --                                     | --                                         | < 0.05<br>(< 0.05 to < 0.05)        | -25.4<br>(-43.8 to -0.2)                          | -33.6<br>(-51.1 to -10.9)                           |
| Lower respiratory infections                                                         | 4.5<br>(4.1 to 4.9)                    | 182.3<br>(166.5 to 201.8)                  | 0.3<br>(0.2 to 0.4)                 | 7.6<br>(-2.4 to 19.8)                             | 10.3<br>(0.2 to 22.1)                               |
| Upper respiratory infections                                                         | 54.6<br>(48.2 to 61.5)                 | 4,056.5<br>(3,565.7 to 4,571.7)            | 1.4<br>(0.8 to 2.1)                 | -9.4<br>(-14.8 to -4.0)                           | 0.5<br>(-4.5 to 5.9)                                |
| Otitis media                                                                         | 33.0<br>(29.6 to 36.6)                 | 134.2<br>(110.0 to 165.1)                  | 1.0<br>(0.6 to 1.4)                 | -22.9<br>(-28.4 to -16.2)                         | -10.2<br>(-16.1 to -3.6)                            |
| Meningitis                                                                           | 2.2<br>(2.0 to 2.5)                    | 0.3<br>(0.3 to 0.4)                        | 0.3<br>(0.2 to 0.4)                 | -12.6<br>(-15.6 to -9.8)                          | -8.1<br>(-11.3 to -4.9)                             |
| Pneumococcal meningitis                                                              | 0.8<br>(0.7 to 1.0)                    | < 0.05<br>(< 0.05 to 0.1)                  | 0.1<br>(0.1 to 0.1)                 | -19.1<br>(-24.5 to -14.3)                         | -15.4<br>(-21.4 to -10.0)                           |
| H influenzae type B meningitis                                                       | 0.2<br>(0.2 to 0.2)                    | < 0.05<br>(< 0.05 to < 0.05)               | < 0.05<br>(< 0.05 to 0.1)           | -18.2<br>(-23.5 to -13.1)                         | -12.6<br>(-18.2 to -7.0)                            |
| Meningococcal infection                                                              | 0.4<br>(0.3 to 0.5)                    | 0.1<br>(0.1 to 0.1)                        | < 0.05<br>(< 0.05 to 0.1)           | -13.8<br>(-18.2 to -9.5)                          | -9.4<br>(-14.1 to -4.6)                             |
| Other meningitis                                                                     | 0.8<br>(0.6 to 1.0)                    | 0.2<br>(0.2 to 0.2)                        | 0.1<br>(0.1 to 0.1)                 | 3.4<br>(-2.5 to 11.0)                             | 8.9<br>(2.8 to 16.0)                                |
| Encephalitis                                                                         | 2.6<br>(1.7 to 3.8)                    | 1.2<br>(1.1 to 1.3)                        | 0.3<br>(0.2 to 0.4)                 | -12.3<br>(-20.9 to -2.0)                          | -12.3<br>(-21.4 to -2.1)                            |
| Diphtheria                                                                           | < 0.05<br>(< 0.05 to < 0.05)           | < 0.05<br>(< 0.05 to < 0.05)               | < 0.05<br>(< 0.05 to < 0.05)        | -31.6<br>(-61.4 to 18.9)                          | -25.1<br>(-58.6 to 34.2)                            |
| Whooping cough                                                                       | < 0.05<br>(< 0.05 to < 0.05)           | 0.1<br>(0.1 to 0.2)                        | < 0.05<br>(< 0.05 to < 0.05)        | -65.1<br>(-78.0 to -42.8)                         | -62.2<br>(-76.3 to -38.6)                           |
| Tetanus                                                                              | < 0.05<br>(< 0.05 to < 0.05)           | < 0.05<br>(< 0.05 to < 0.05)               | < 0.05<br>(< 0.05 to < 0.05)        | -13.2<br>(-22.4 to -3.9)                          | -5.9<br>(-15.9 to 4.2)                              |
| Measles                                                                              | < 0.05<br>(< 0.05 to < 0.05)           | 0.2<br>(0.2 to 0.2)                        | < 0.05<br>(< 0.05 to < 0.05)        | 3,222.9<br>(1,753.6 to 13,230.4)                  | 3,712.8<br>(2,027.0 to 15,196.1)                    |
| Varicella and herpes zoster                                                          | 2.2<br>(2.0 to 2.4)                    | 43.5<br>(42.5 to 44.8)                     | 0.1<br>(0.1 to 0.1)                 | 7.5<br>(-6.5 to 24.5)                             | -0.1<br>(-12.1 to 15.4)                             |
| <b>Neglected tropical diseases and malaria</b>                                       | <b>0.3</b><br>(0.1 to 1.3)             | <b>0.2†</b><br>(0.1 to 0.3)                | <b>&lt; 0.05</b><br>(< 0.05 to 0.1) | <b>-49.5</b><br>(-92.9 to 214.2)                  | <b>-50.4</b><br>(-93.0 to 197.0)                    |
| Malaria                                                                              | --                                     | --                                         | --                                  | --                                                | --                                                  |
| Chagas disease                                                                       | --                                     | --                                         | --                                  | --                                                | --                                                  |
| Leishmaniasis                                                                        | < 0.05<br>(< 0.05 to < 0.05)           | 0.1<br>(0.1 to 0.1)                        | < 0.05<br>(< 0.05 to < 0.05)        | -33.3<br>(-61.3 to 13.2)                          | -43.0<br>(-67.5 to -2.0)                            |
| Visceral leishmaniasis                                                               | < 0.05<br>(< 0.05 to < 0.05)           | 0.1<br>(0.1 to 0.1)                        | < 0.05<br>(< 0.05 to < 0.05)        | -40.3<br>(-59.2 to -16.3)                         | -52.6<br>(-66.9 to -34.1)                           |
| Cutaneous and mucocutaneous leishmaniasis                                            | < 0.05<br>(< 0.05 to < 0.05)           | < 0.05<br>(< 0.05 to 0.1)                  | < 0.05<br>(< 0.05 to < 0.05)        | -5.3<br>(-93.7 to 473.4)                          | -1.8<br>(-93.6 to 486.0)                            |
| African trypanosomiasis                                                              | --                                     | --                                         | --                                  | --                                                | --                                                  |
| Schistosomiasis                                                                      | --                                     | --                                         | --                                  | --                                                | --                                                  |
| Cysticercosis                                                                        | --                                     | --                                         | --                                  | --                                                | --                                                  |
| Cystic echinococcosis                                                                | 0.3<br>(0.1 to 1.1)                    | 0.1<br>(< 0.05 to 0.2)                     | < 0.05<br>(< 0.05 to 0.1)           | -50.6<br>(-94.2 to 237.7)                         | -50.8<br>(-94.5 to 229.4)                           |
| Lymphatic filariasis                                                                 | --                                     | --                                         | --                                  | --                                                | --                                                  |
| Onchocerciasis                                                                       | --                                     | --                                         | --                                  | --                                                | --                                                  |
| Trachoma                                                                             | --                                     | --                                         | --                                  | --                                                | --                                                  |
| Dengue                                                                               | --                                     | --                                         | --                                  | --                                                | --                                                  |
| Yellow fever                                                                         | --                                     | --                                         | --                                  | --                                                | --                                                  |
| Rabies                                                                               | < 0.05<br>(< 0.05 to < 0.05)           | < 0.05<br>(< 0.05 to < 0.05)               | < 0.05<br>(< 0.05 to < 0.05)        | -35.4<br>(-55.2 to -5.0)                          | -52.1<br>(-67.9 to -25.9)                           |
| Intestinal nematode infections                                                       | --                                     | --                                         | --                                  | --                                                | --                                                  |
| Ascariasis                                                                           | --                                     | --                                         | --                                  | --                                                | --                                                  |



| Cause                                                                   | Prevalence in thousands (95% UI)              | Incidence in thousands (95% UI)                | YLDs in thousands (95% UI)              |                                                   |                                                     |
|-------------------------------------------------------------------------|-----------------------------------------------|------------------------------------------------|-----------------------------------------|---------------------------------------------------|-----------------------------------------------------|
|                                                                         | 2016 counts                                   | 2016 counts                                    | 2016 counts                             | Percentage change in counts between 2006 and 2016 | Percentage change in age-standardised rates between |
| Trichuriasis                                                            | --                                            | --                                             | --                                      | --                                                | --                                                  |
| Hookworm disease                                                        | --                                            | --                                             | --                                      | --                                                | --                                                  |
| Food-borne trematodiasis                                                | --                                            | --                                             | --                                      | --                                                | --                                                  |
| Leprosy                                                                 | < 0.05<br>(< 0.05 to < 0.05)                  | --                                             | < 0.05<br>(< 0.05 to < 0.05)            | -25.9<br>(-27.7 to -24.1)                         | -37.6<br>(-39.6 to -35.7)                           |
| Ebola virus disease                                                     | --                                            | --                                             | --                                      | --                                                | --                                                  |
| Zika virus disease                                                      | --                                            | --                                             | --                                      | --                                                | --                                                  |
| Guinea worm disease                                                     | --                                            | --                                             | --                                      | --                                                | --                                                  |
| Other neglected tropical diseases                                       | --                                            | --                                             | < 0.05<br>(< 0.05 to < 0.05)            | --                                                | --                                                  |
| <b>Maternal disorders</b>                                               | <b>2.1</b><br><b>(1.6 to 2.6)</b>             | <b>43.2†</b><br><b>(35.1 to 53.6)</b>          | <b>0.1</b><br><b>(0.1 to 0.2)</b>       | <b>1.1</b><br><b>(-24.0 to 32.2)</b>              | <b>-5.0</b><br><b>(-28.4 to 23.5)</b>               |
| Maternal haemorrhage                                                    | 0.7<br>(0.5 to 0.9)                           | 7.6<br>(5.5 to 10.1)                           | < 0.05<br>(< 0.05 to 0.1)               | 2.6<br>(-39.3 to 71.6)                            | -4.4<br>(-43.3 to 61.6)                             |
| Maternal sepsis and other pregnancy related infections                  | 0.7<br>(0.4 to 0.9)                           | 5.3<br>(3.8 to 7.3)                            | < 0.05<br>(< 0.05 to < 0.05)            | 4.9<br>(-51.5 to 132.1)                           | -1.2<br>(-53.9 to 116.1)                            |
| Maternal hypertensive disorders                                         | 0.7<br>(0.4 to 1.0)                           | 2.6<br>(1.9 to 3.6)                            | < 0.05<br>(< 0.05 to 0.1)               | 1.0<br>(-41.2 to 80.5)                            | -5.1<br>(-45.3 to 72.3)                             |
| Maternal obstructed labour and uterine rupture                          | < 0.05<br>(< 0.05 to < 0.05)                  | 1.2<br>(0.7 to 2.0)                            | < 0.05<br>(< 0.05 to < 0.05)            | 3.3<br>(-44.8 to 99.4)                            | -3.2<br>(-48.0 to 84.6)                             |
| Maternal abortion, miscarriage, and ectopic pregnancy                   | 0.2<br>(0.1 to 0.3)                           | 26.4<br>(19.5 to 36.2)                         | < 0.05<br>(< 0.05 to < 0.05)            | -0.7<br>(-47.1 to 95.1)                           | -5.6<br>(-49.6 to 83.4)                             |
| Other maternal disorders                                                | --                                            | --                                             | < 0.05<br>(< 0.05 to < 0.05)            | -3.2<br>(-27.5 to 26.8)                           | -8.9<br>(-31.3 to 18.7)                             |
| <b>Neonatal disorders</b>                                               | <b>29.2</b><br><b>(22.7 to 37.6)</b>          | --                                             | <b>4.9</b><br><b>(3.1 to 7.7)</b>       | <b>-3.7</b><br><b>(-17.5 to 17.7)</b>             | <b>6.4</b><br><b>(-9.0 to 29.5)</b>                 |
| Neonatal preterm birth complications                                    | 18.6<br>(14.2 to 25.6)                        | --                                             | 1.9<br>(1.2 to 2.7)                     | -18.0<br>(-35.9 to 3.6)                           | -9.0<br>(-28.9 to 15.1)                             |
| Neonatal encephalopathy due to birth asphyxia and trauma                | 11.8<br>(5.3 to 20.8)                         | --                                             | 2.0<br>(0.6 to 4.1)                     | 19.4<br>(-14.9 to 251.9)                          | 31.7<br>(-6.1 to 276.6)                             |
| Neonatal sepsis and other neonatal infections                           | 1.3<br>(0.5 to 2.9)                           | --                                             | 0.5<br>(0.2 to 1.2)                     | -7.3<br>(-26.9 to 46.9)                           | 3.0<br>(-17.3 to 60.0)                              |
| Hemolytic disease and other neonatal jaundice                           | 1.5<br>(1.3 to 1.8)                           | --                                             | 0.5<br>(0.3 to 0.6)                     | -11.0<br>(-22.9 to 3.3)                           | -2.8<br>(-15.4 to 13.2)                             |
| Other neonatal disorders                                                | --                                            | --                                             | 0.1<br>(0.1 to 0.2)                     | -4.2<br>(-21.7 to 21.5)                           | 3.9<br>(-15.2 to 31.2)                              |
| <b>Nutritional deficiencies</b>                                         | <b>376.8</b><br><b>(354.8 to 394.2)</b>       | <b>12.8†</b><br><b>(9.8 to 16.5)</b>           | <b>6.3</b><br><b>(4.1 to 9.2)</b>       | <b>-23.8</b><br><b>(-30.9 to -15.2)</b>           | <b>-16.1</b><br><b>(-25.2 to -5.6)</b>              |
| Protein-energy malnutrition                                             | 16.9<br>(11.4 to 24.6)                        | 7.7<br>(5.2 to 11.1)                           | 0.8<br>(0.5 to 1.3)                     | -21.1<br>(-48.5 to 23.0)                          | -15.4<br>(-44.6 to 32.4)                            |
| Iodine deficiency                                                       | 26.8<br>(19.3 to 36.6)                        | 0.4<br>(0.3 to 0.6)                            | 0.7<br>(0.4 to 1.1)                     | -1.5<br>(-13.1 to 11.0)                           | -1.2<br>(-12.8 to 11.9)                             |
| Vitamin A deficiency                                                    | 5.7<br>(4.0 to 7.4)                           | 4.8<br>(3.4 to 6.3)                            | --                                      | --                                                | --                                                  |
| Iron-deficiency anaemia                                                 | 327.5<br>(306.4 to 349.9)                     | --                                             | 4.8<br>(3.0 to 7.3)                     | -26.6<br>(-33.3 to -18.3)                         | -17.7<br>(-25.6 to -7.2)                            |
| Other nutritional deficiencies                                          | --                                            | --                                             | < 0.05<br>(< 0.05 to < 0.05)            | -22.3<br>(-49.8 to 22.3)                          | -16.3<br>(-46.1 to 33.0)                            |
| <b>Other communicable, maternal, neonatal, and nutritional diseases</b> | <b>474.9</b><br><b>(445.7 to 507.9)</b>       | <b>238.3</b><br><b>(202.7 to 283.7)</b>        | <b>1.0</b><br><b>(0.6 to 1.5)</b>       | <b>-5.9</b><br><b>(-11.9 to 0.4)</b>              | <b>-3.5</b><br><b>(-9.8 to 3.1)</b>                 |
| Sexually transmitted diseases excluding HIV                             | 358.4<br>(333.1 to 390.0)                     | 228.5<br>(192.6 to 274.3)                      | 0.8<br>(0.5 to 1.2)                     | -2.5<br>(-9.5 to 4.3)                             | -2.6<br>(-9.7 to 4.3)                               |
| Syphilis                                                                | 1.2<br>(1.1 to 1.5)                           | 0.5<br>(0.4 to 0.6)                            | 0.1<br>(0.1 to 0.1)                     | 9.5<br>(-8.4 to 28.4)                             | -6.9<br>(-21.5 to 8.6)                              |
| Chlamydial infection                                                    | 31.4<br>(20.2 to 46.9)                        | 26.1<br>(17.4 to 39.9)                         | 0.1<br>(0.1 to 0.2)                     | -2.9<br>(-16.4 to 11.2)                           | -1.6<br>(-14.8 to 12.5)                             |
| Gonococcal infection                                                    | 34.8<br>(25.9 to 46.1)                        | 122.0<br>(88.6 to 164.3)                       | 0.1<br>(0.1 to 0.2)                     | -5.1<br>(-17.1 to 8.2)                            | -0.9<br>(-13.8 to 12.2)                             |
| Trichomoniasis                                                          | 64.0<br>(55.6 to 73.2)                        | 54.3<br>(46.7 to 62.6)                         | 0.1<br>(< 0.05 to 0.1)                  | 1.2<br>(-5.9 to 8.6)                              | 0.5<br>(-6.3 to 7.5)                                |
| Genital herpes                                                          | 236.8<br>(202.8 to 280.4)                     | 12.4<br>(10.5 to 14.9)                         | 0.1<br>(< 0.05 to 0.1)                  | 6.1<br>(-1.5 to 13.9)                             | 0.0<br>(-6.8 to 7.5)                                |
| Other sexually transmitted diseases                                     | 9.3<br>(7.6 to 11.3)                          | 13.1<br>(11.0 to 15.7)                         | 0.2<br>(0.1 to 0.4)                     | -8.1<br>(-19.9 to 3.4)                            | -3.8<br>(-16.8 to 8.2)                              |
| Hepatitis                                                               | 127.5<br>(110.8 to 149.7)                     | 9.9<br>(7.2 to 12.2)                           | < 0.05<br>(< 0.05 to < 0.05)            | -40.3<br>(-54.1 to -22.9)                         | -39.9<br>(-53.4 to -22.3)                           |
| Acute hepatitis A                                                       | 0.3<br>(0.1 to 0.5)                           | 4.5<br>(1.9 to 6.3)                            | < 0.05<br>(< 0.05 to < 0.05)            | -47.6<br>(-69.2 to -12.1)                         | -44.6<br>(-65.9 to -6.2)                            |
| Hepatitis B                                                             | 81.1<br>(65.3 to 102.1)                       | 4.6<br>(3.6 to 5.9)                            | < 0.05<br>(< 0.05 to < 0.05)            | -33.5<br>(-43.8 to -21.1)                         | -39.0<br>(-47.8 to -28.3)                           |
| Hepatitis C                                                             | 46.1<br>(41.3 to 50.9)                        | 0.6<br>(0.5 to 0.7)                            | < 0.05<br>(< 0.05 to < 0.05)            | -11.6<br>(-13.1 to -10.3)                         | -5.8<br>(-7.3 to -4.7)                              |
| Acute hepatitis E                                                       | < 0.05<br>(< 0.05 to < 0.05)                  | 0.2<br>(0.2 to 0.3)                            | < 0.05<br>(< 0.05 to < 0.05)            | -39.1<br>(-46.3 to -31.7)                         | -39.3<br>(-44.7 to -34.0)                           |
| Other infectious diseases                                               | 10.3<br>(9.5 to 11.3)                         | < 0.05<br>(< 0.05 to < 0.05)                   | 0.2<br>(0.1 to 0.3)                     | -15.5<br>(-26.9 to -1.7)                          | -4.4<br>(-18.2 to 13.2)                             |
| <b>Non-communicable diseases</b>                                        | <b>2,658.3</b><br><b>(2,642.2 to 2,675.4)</b> | <b>8,409.1†</b><br><b>(7,956.6 to 8,874.1)</b> | <b>276.5</b><br><b>(204.6 to 357.5)</b> | <b>6.7</b><br><b>(4.1 to 9.4)</b>                 | <b>-0.2</b><br><b>(-2.7 to 2.5)</b>                 |
| <b>Neoplasms</b>                                                        | <b>11.7</b><br><b>(11.0 to 12.3)</b>          | <b>6.3</b><br><b>(5.8 to 6.9)</b>              | <b>1.8</b><br><b>(1.3 to 2.3)</b>       | <b>20.9</b><br><b>(13.8 to 28.7)</b>              | <b>-0.8</b><br><b>(-6.6 to 6.0)</b>                 |
| Lip and oral cavity cancer                                              | 0.3<br>(0.3 to 0.3)                           | 0.1<br>(0.1 to 0.1)                            | < 0.05<br>(< 0.05 to < 0.05)            | 18.5<br>(1.3 to 37.1)                             | -7.1<br>(-20.6 to 7.2)                              |
| Nasopharynx cancer                                                      | 0.1<br>(< 0.05 to 0.1)                        | < 0.05<br>(< 0.05 to < 0.05)                   | < 0.05<br>(< 0.05 to < 0.05)            | 7.8<br>(-9.8 to 27.8)                             | -7.1<br>(-22.5 to 10.5)                             |
| Other pharynx cancer                                                    | 0.1<br>(0.1 to 0.1)                           | < 0.05<br>(< 0.05 to < 0.05)                   | < 0.05<br>(< 0.05 to < 0.05)            | 21.2<br>(0.1 to 41.8)                             | -2.8<br>(-19.7 to 13.1)                             |
| Oesophageal cancer                                                      | 0.1<br>(0.1 to 0.1)                           | 0.1<br>(0.1 to 0.1)                            | < 0.05<br>(< 0.05 to < 0.05)            | 12.3<br>(2.6 to 24.5)                             | -12.0<br>(-19.5 to -2.6)                            |
| Stomach cancer                                                          | 0.7<br>(0.7 to 0.8)                           | 0.5<br>(0.4 to 0.5)                            | 0.1<br>(0.1 to 0.1)                     | 4.4<br>(-12.7 to 25.2)                            | -17.4<br>(-30.5 to -1.3)                            |
| Colon and rectum cancer                                                 | 1.1<br>(1.0 to 1.3)                           | 0.4<br>(0.3 to 0.4)                            | 0.1<br>(0.1 to 0.2)                     | 32.5<br>(13.9 to 56.0)                            | 5.1<br>(-9.3 to 23.2)                               |
| Liver cancer                                                            | 0.1<br>(0.1 to 0.1)                           | 0.3<br>(0.3 to 0.4)                            | 0.1<br>(< 0.05 to 0.1)                  | 17.9<br>(2.8 to 35.5)                             | -8.5<br>(-19.9 to 4.4)                              |
| Liver cancer due to hepatitis B                                         | 0.1<br>(0.1 to 0.1)                           | 0.1<br>(0.1 to 0.1)                            | < 0.05<br>(< 0.05 to < 0.05)            | 15.6<br>(-0.2 to 31.9)                            | -8.2<br>(-20.2 to 4.8)                              |



| Cause                                              | Prevalence in thousands (95% UI)        | Incidence in thousands (95% UI)       | YLDs in thousands (95% UI)           |                                                   |                                                     |
|----------------------------------------------------|-----------------------------------------|---------------------------------------|--------------------------------------|---------------------------------------------------|-----------------------------------------------------|
|                                                    | 2016 counts                             | 2016 counts                           | 2016 counts                          | Percentage change in counts between 2006 and 2016 | Percentage change in age-standardised rates between |
| Liver cancer due to hepatitis C                    | 0.1<br>(0.1 to 0.1)                     | 0.1<br>(0.1 to 0.1)                   | < 0.05<br>(< 0.05 to < 0.05)         | 21.2<br>(3.3 to 42.5)                             | -8.9<br>(-22.2 to 6.4)                              |
| Liver cancer due to alcohol use                    | 0.1<br>(< 0.05 to 0.1)                  | 0.1<br>(0.1 to 0.1)                   | < 0.05<br>(< 0.05 to < 0.05)         | 19.2<br>(2.2 to 38.7)                             | -8.3<br>(-20.9 to 6.6)                              |
| Liver cancer due to other causes                   | 0.1<br>(0.1 to 0.1)                     | 0.1<br>(0.1 to 0.1)                   | < 0.05<br>(< 0.05 to < 0.05)         | 16.4<br>(-0.3 to 35.2)                            | -8.8<br>(-21.6 to 5.2)                              |
| Gallbladder and biliary tract cancer               | < 0.05<br>(< 0.05 to < 0.05)            | < 0.05<br>(< 0.05 to 0.1)             | < 0.05<br>(< 0.05 to < 0.05)         | 21.2<br>(6.3 to 35.2)                             | -8.2<br>(-19.5 to 3.3)                              |
| Pancreatic cancer                                  | 0.2<br>(0.2 to 0.2)                     | 0.2<br>(0.2 to 0.2)                   | < 0.05<br>(< 0.05 to 0.1)            | 31.8<br>(15.6 to 48.9)                            | 2.9<br>(-10.0 to 16.7)                              |
| Larynx cancer                                      | 0.4<br>(0.3 to 0.4)                     | 0.1<br>(0.1 to 0.1)                   | < 0.05<br>(< 0.05 to 0.1)            | 18.2<br>(-1.4 to 41.7)                            | -6.0<br>(-21.2 to 12.7)                             |
| Tracheal, bronchus, and lung cancer                | 1.1<br>(1.0 to 1.2)                     | 1.0<br>(0.9 to 1.1)                   | 0.2<br>(0.1 to 0.3)                  | 16.5<br>(-3.0 to 40.5)                            | -8.8<br>(-23.6 to 9.4)                              |
| Malignant skin melanoma                            | 0.2<br>(0.2 to 0.3)                     | < 0.05<br>(< 0.05 to 0.1)             | < 0.05<br>(< 0.05 to < 0.05)         | 48.8<br>(24.3 to 76.1)                            | 23.7<br>(4.2 to 45.3)                               |
| Non-melanoma skin cancer                           | 0.4<br>(0.2 to 0.6)                     | 0.9<br>(0.5 to 1.3)                   | < 0.05<br>(< 0.05 to < 0.05)         | -1.7<br>(-42.7 to 90.3)                           | -26.3<br>(-57.1 to 44.7)                            |
| Non-melanoma skin cancer (squamous-cell carcinoma) | 0.3<br>(0.1 to 0.5)                     | 0.3<br>(0.1 to 0.5)                   | < 0.05<br>(< 0.05 to < 0.05)         | -3.5<br>(-44.1 to 94.7)                           | -27.8<br>(-58.4 to 47.7)                            |
| Non-melanoma skin cancer (basal-cell carcinoma)    | 0.1<br>(< 0.05 to 0.2)                  | 0.6<br>(0.3 to 1.0)                   | < 0.05<br>(< 0.05 to < 0.05)         | 34.5<br>(-1.4 to 83.9)                            | 5.9<br>(-22.8 to 44.2)                              |
| Breast cancer                                      | 2.6<br>(2.1 to 3.0)                     | 0.5<br>(0.4 to 0.6)                   | 0.2<br>(0.2 to 0.4)                  | 20.8<br>(-3.0 to 48.4)                            | 6.9<br>(-13.1 to 30.4)                              |
| Cervical cancer                                    | 0.5<br>(0.4 to 0.6)                     | 0.1<br>(0.1 to 0.1)                   | < 0.05<br>(< 0.05 to 0.1)            | -5.4<br>(-23.9 to 24.4)                           | -11.1<br>(-28.4 to 16.8)                            |
| Uterine cancer                                     | 0.7<br>(0.6 to 0.8)                     | 0.1<br>(0.1 to 0.2)                   | 0.1<br>(< 0.05 to 0.1)               | 36.6<br>(7.4 to 73.2)                             | 17.9<br>(-6.7 to 49.8)                              |
| Ovarian cancer                                     | 0.3<br>(0.2 to 0.3)                     | 0.1<br>(0.1 to 0.1)                   | < 0.05<br>(< 0.05 to 0.1)            | 25.6<br>(-0.7 to 53.3)                            | 10.2<br>(-12.1 to 34.5)                             |
| Prostate cancer                                    | 2.2<br>(1.5 to 4.3)                     | 0.6<br>(0.4 to 1.1)                   | 0.2<br>(0.1 to 0.5)                  | 43.8<br>(16.9 to 75.3)                            | 7.2<br>(-12.4 to 30.3)                              |
| Testicular cancer                                  | 0.1<br>(0.1 to 0.2)                     | < 0.05<br>(< 0.05 to < 0.05)          | < 0.05<br>(< 0.05 to < 0.05)         | 13.0<br>(-22.3 to 63.9)                           | 5.2<br>(-29.4 to 55.0)                              |
| Kidney cancer                                      | 0.7<br>(0.6 to 0.8)                     | 0.2<br>(0.2 to 0.2)                   | 0.1<br>(< 0.05 to 0.1)               | 27.7<br>(8.5 to 49.6)                             | 7.0<br>(-9.1 to 25.7)                               |
| Bladder cancer                                     | 0.2<br>(0.2 to 0.2)                     | 0.1<br>(< 0.05 to 0.1)                | < 0.05<br>(< 0.05 to < 0.05)         | 38.9<br>(19.1 to 64.7)                            | 4.8<br>(-10.5 to 23.3)                              |
| Brain and nervous system cancer                    | 0.5<br>(0.4 to 0.6)                     | 0.2<br>(0.2 to 0.3)                   | 0.1<br>(0.1 to 0.1)                  | 9.2<br>(-3.1 to 22.7)                             | -2.1<br>(-12.4 to 8.4)                              |
| Thyroid cancer                                     | 0.3<br>(0.3 to 0.4)                     | 0.1<br>(0.1 to 0.1)                   | < 0.05<br>(< 0.05 to < 0.05)         | 34.3<br>(4.4 to 72.4)                             | 20.2<br>(-6.6 to 52.7)                              |
| Mesothelioma                                       | < 0.05<br>(< 0.05 to < 0.05)            | < 0.05<br>(< 0.05 to < 0.05)          | < 0.05<br>(< 0.05 to < 0.05)         | 22.8<br>(4.5 to 39.1)                             | -0.2<br>(-15.1 to 12.8)                             |
| Hodgkin lymphoma                                   | 0.1<br>(0.1 to 0.1)                     | < 0.05<br>(< 0.05 to < 0.05)          | < 0.05<br>(< 0.05 to < 0.05)         | -8.3<br>(-21.7 to 4.0)                            | -15.1<br>(-27.3 to -3.0)                            |
| Non-Hodgkin's lymphoma                             | 0.2<br>(0.2 to 0.3)                     | 0.1<br>(0.1 to 0.1)                   | < 0.05<br>(< 0.05 to < 0.05)         | 28.1<br>(13.7 to 45.4)                            | 9.1<br>(-2.5 to 23.4)                               |
| Multiple myeloma                                   | 0.1<br>(< 0.05 to 0.1)                  | < 0.05<br>(< 0.05 to < 0.05)          | < 0.05<br>(< 0.05 to < 0.05)         | 31.5<br>(18.0 to 44.5)                            | 5.7<br>(-4.2 to 16.0)                               |
| Leukaemia                                          | 0.6<br>(0.5 to 0.8)                     | 0.1<br>(0.1 to 0.2)                   | 0.1<br>(0.1 to 0.1)                  | 3.9<br>(-8.8 to 20.2)                             | -6.2<br>(-18.2 to 9.7)                              |
| Acute lymphoid leukaemia                           | < 0.05<br>(< 0.05 to 0.1)               | < 0.05<br>(< 0.05 to < 0.05)          | < 0.05<br>(< 0.05 to < 0.05)         | -5.5<br>(-26.0 to 18.1)                           | -1.5<br>(-23.2 to 25.8)                             |
| Chronic lymphoid leukaemia                         | < 0.05<br>(< 0.05 to 0.1)               | < 0.05<br>(< 0.05 to < 0.05)          | < 0.05<br>(< 0.05 to < 0.05)         | 19.6<br>(0.7 to 41.9)                             | 0.6<br>(-14.7 to 20.5)                              |
| Acute myeloid leukaemia                            | < 0.05<br>(< 0.05 to < 0.05)            | < 0.05<br>(< 0.05 to < 0.05)          | < 0.05<br>(< 0.05 to < 0.05)         | 11.8<br>(-1.4 to 28.6)                            | 1.4<br>(-10.8 to 16.1)                              |
| Chronic myeloid leukaemia                          | < 0.05<br>(< 0.05 to < 0.05)            | < 0.05<br>(< 0.05 to < 0.05)          | < 0.05<br>(< 0.05 to < 0.05)         | 8.4<br>(-8.7 to 27.9)                             | -9.2<br>(-22.7 to 7.3)                              |
| Other leukaemia                                    | 0.5<br>(0.4 to 0.6)                     | 0.1<br>(0.1 to 0.1)                   | 0.1<br>(< 0.05 to 0.1)               | 2.6<br>(-12.3 to 21.0)                            | -7.8<br>(-21.8 to 10.6)                             |
| Other neoplasms                                    | 0.9<br>(0.8 to 1.1)                     | 0.3<br>(0.3 to 0.4)                   | 0.1<br>(0.1 to 0.1)                  | 16.0<br>(0.6 to 33.4)                             | -1.8<br>(-15.2 to 12.7)                             |
| <b>Cardiovascular diseases</b>                     | <b>312.2</b><br><b>(298.2 to 325.5)</b> | <b>28.1†</b><br><b>(26.8 to 29.6)</b> | <b>23.9</b><br><b>(17.4 to 31.2)</b> | <b>27.6</b><br><b>(22.7 to 33.0)</b>              | <b>2.1</b><br><b>(-1.4 to 6.0)</b>                  |
| Rheumatic heart disease                            | 24.6<br>(22.1 to 27.6)                  | 0.5<br>(0.5 to 0.6)                   | 1.2<br>(0.8 to 1.7)                  | 3.1<br>(-5.8 to 12.7)                             | 4.7<br>(-4.2 to 14.7)                               |
| Ischaemic heart disease                            | 83.9<br>(77.9 to 90.0)                  | 9.5<br>(8.8 to 10.3)                  | 5.1<br>(3.6 to 7.0)                  | 32.0<br>(26.1 to 38.1)                            | 4.6<br>(-0.1 to 9.2)                                |
| Cerebrovascular disease                            | 38.7<br>(36.2 to 41.7)                  | 8.4‡<br>(7.8 to 9.1)                  | 7.8<br>(5.4 to 10.1)                 | 36.3<br>(26.4 to 47.8)                            | 5.1<br>(-2.6 to 13.4)                               |
| Ischaemic stroke                                   | 28.5<br>(25.2 to 33.2)                  | 5.0‡<br>(4.5 to 5.6)                  | 5.5<br>(3.8 to 7.2)                  | 46.6<br>(32.9 to 61.8)                            | 12.7<br>(2.0 to 25.1)                               |
| Hemorrhagic stroke                                 | 12.2<br>(10.9 to 13.6)                  | 3.4‡<br>(3.1 to 3.7)                  | 2.3<br>(1.7 to 3.0)                  | 16.9<br>(5.3 to 29.2)                             | -8.9<br>(-17.4 to -0.0)                             |
| Hypertensive heart disease                         | 5.5<br>(4.5 to 6.6)                     | --                                    | 0.4<br>(0.3 to 0.6)                  | 32.2<br>(17.9 to 48.4)                            | -1.8<br>(-12.2 to 9.6)                              |
| Cardiomyopathy and myocarditis                     | 10.2<br>(9.0 to 11.5)                   | 1.1†<br>(1.0 to 1.3)                  | 0.8<br>(0.6 to 1.2)                  | 26.2<br>(15.1 to 38.4)                            | 1.6<br>(-6.8 to 10.9)                               |
| Myocarditis                                        | 4.8<br>(4.1 to 5.7)                     | 1.1<br>(1.0 to 1.3)                   | 0.4<br>(0.3 to 0.6)                  | 20.8<br>(7.7 to 35.5)                             | 1.6<br>(-9.0 to 14.0)                               |
| Alcoholic cardiomyopathy                           | 0.6<br>(0.5 to 0.7)                     | --                                    | < 0.05<br>(< 0.05 to 0.1)            | 19.4<br>(-7.0 to 50.9)                            | -1.7<br>(-22.1 to 23.1)                             |
| Other cardiomyopathy                               | 5.0<br>(4.2 to 5.9)                     | --                                    | 0.4<br>(0.3 to 0.6)                  | 32.9<br>(19.2 to 49.1)                            | 1.9<br>(-7.9 to 13.5)                               |
| Atrial fibrillation and flutter                    | 25.8<br>(22.5 to 29.7)                  | 2.1<br>(1.8 to 2.5)                   | 2.0<br>(1.4 to 2.8)                  | 34.6<br>(26.2 to 43.9)                            | 0.5<br>(-5.6 to 7.0)                                |
| Peripheral vascular disease                        | 64.2<br>(55.7 to 74.1)                  | 6.0<br>(5.1 to 7.0)                   | 0.3<br>(0.1 to 0.5)                  | 29.4<br>(19.5 to 38.9)                            | -5.9<br>(-12.4 to 0.6)                              |
| Endocarditis                                       | 0.2<br>(0.1 to 0.2)                     | 0.4<br>(0.4 to 0.5)                   | < 0.05<br>(< 0.05 to < 0.05)         | 21.6<br>(6.3 to 38.7)                             | -2.8<br>(-14.9 to 11.2)                             |
| Other cardiovascular and circulatory diseases      | 120.2<br>(103.7 to 139.6)               | --                                    | 6.2<br>(4.2 to 8.7)                  | 17.9<br>(9.0 to 27.5)                             | -2.6<br>(-9.7 to 5.1)                               |
| <b>Chronic respiratory diseases</b>                | <b>170.1</b><br><b>(164.1 to 176.5)</b> | <b>25.1†</b><br><b>(23.8 to 26.5)</b> | <b>6.6</b><br><b>(5.0 to 8.5)</b>    | <b>4.8</b><br><b>(-0.8 to 10.8)</b>               | <b>1.6</b><br><b>(-3.0 to 6.3)</b>                  |
| Chronic obstructive pulmonary disease              | 73.9<br>(70.1 to 78.0)                  | 4.5<br>(4.3 to 4.8)                   | 2.3<br>(1.9 to 2.8)                  | 20.2<br>(5.8 to 34.2)                             | -0.9<br>(-12.5 to 10.1)                             |
| Pneumoconiosis                                     | 0.7<br>(0.6 to 0.7)                     | < 0.05<br>(< 0.05 to < 0.05)          | 0.1<br>(0.1 to 0.1)                  | 20.2<br>(2.9 to 41.6)                             | -3.9<br>(-17.8 to 12.8)                             |
| Silicosis                                          | 0.2<br>(0.1 to 0.2)                     | < 0.05<br>(< 0.05 to < 0.05)          | < 0.05<br>(< 0.05 to < 0.05)         | 3.8<br>(-25.6 to 45.7)                            | -17.2<br>(-40.7 to 15.9)                            |

| Cause                                                          | Prevalence in thousands (95% UI)              | Incidence in thousands (95% UI)          | YLDs in thousands (95% UI)           |                                                   |                                                     |
|----------------------------------------------------------------|-----------------------------------------------|------------------------------------------|--------------------------------------|---------------------------------------------------|-----------------------------------------------------|
|                                                                | 2016 counts                                   | 2016 counts                              | 2016 counts                          | Percentage change in counts between 2006 and 2016 | Percentage change in age-standardised rates between |
| Asbestosis                                                     | 0.1<br>(0.1 to 0.1)                           | < 0.05<br>(< 0.05 to < 0.05)             | < 0.05<br>(< 0.05 to < 0.05)         | 16.4<br>(8.4 to 24.3)                             | -4.1<br>(-10.4 to 2.2)                              |
| Coal workers pneumoconiosis                                    | 0.2<br>(0.2 to 0.2)                           | < 0.05<br>(< 0.05 to < 0.05)             | < 0.05<br>(< 0.05 to < 0.05)         | 29.7<br>(-6.2 to 81.8)                            | 4.3<br>(-24.6 to 46.4)                              |
| Other pneumoconiosis                                           | 0.2<br>(0.2 to 0.2)                           | < 0.05<br>(< 0.05 to < 0.05)             | < 0.05<br>(< 0.05 to < 0.05)         | 32.3<br>(-10.2 to 93.2)                           | 3.7<br>(-29.8 to 49.9)                              |
| Asthma                                                         | 97.9<br>(92.2 to 104.5)                       | 20.3<br>(19.1 to 21.7)                   | 3.8<br>(2.5 to 5.4)                  | -3.8<br>(-8.7 to 1.2)                             | 2.2<br>(-2.3 to 7.5)                                |
| Interstitial lung disease and pulmonary sarcoidosis            | 3.2<br>(2.9 to 3.5)                           | 0.2<br>(0.1 to 0.2)                      | 0.3<br>(0.2 to 0.5)                  | 12.5<br>(-2.1 to 27.5)                            | 0.7<br>(-11.5 to 13.2)                              |
| Other chronic respiratory diseases                             | --                                            | --                                       | 0.1<br>(0.1 to 0.1)                  | 10.2<br>(1.0 to 20.1)                             | 32.3<br>(21.9 to 43.4)                              |
| <b>Cirrhosis and other chronic liver diseases</b>              | <b>25.9</b><br><b>(24.6 to 27.4)</b>          | <b>0.6</b><br><b>(0.6 to 0.6)</b>        | <b>0.6</b><br><b>(0.4 to 0.9)</b>    | <b>15.5</b><br><b>(4.3 to 27.8)</b>               | <b>8.9</b><br><b>(-1.7 to 20.2)</b>                 |
| Cirrhosis and other chronic liver diseases due to hepatitis B  | 4.2<br>(3.6 to 5.0)                           | 0.1<br>(0.1 to 0.1)                      | 0.1<br>(0.1 to 0.1)                  | 24.2<br>(-0.9 to 57.9)                            | 9.9<br>(-12.6 to 39.1)                              |
| Cirrhosis and other chronic liver diseases due to hepatitis C  | 6.3<br>(4.8 to 8.1)                           | 0.1<br>(0.1 to 0.2)                      | 0.1<br>(0.1 to 0.2)                  | 26.0<br>(2.3 to 54.2)                             | 10.8<br>(-9.1 to 34.6)                              |
| Cirrhosis and other chronic liver diseases due to alcohol use  | 8.2<br>(6.7 to 9.8)                           | 0.2<br>(0.2 to 0.2)                      | 0.2<br>(0.1 to 0.3)                  | 26.5<br>(6.4 to 51.7)                             | 9.8<br>(-6.5 to 30.9)                               |
| Cirrhosis and other chronic liver diseases due to other causes | 7.2<br>(6.4 to 8.1)                           | 0.1<br>(0.1 to 0.2)                      | 0.2<br>(0.1 to 0.3)                  | -0.7<br>(-17.1 to 20.4)                           | 6.8<br>(-10.8 to 28.0)                              |
| <b>Digestive diseases</b>                                      | <b>110.1</b><br><b>(104.9 to 115.7)</b>       | <b>150.5†</b><br><b>(139.1 to 162.3)</b> | <b>4.4</b><br><b>(3.1 to 5.9)</b>    | <b>8.6</b><br><b>(2.6 to 15.6)</b>                | <b>1.8</b><br><b>(-3.8 to 8.4)</b>                  |
| Peptic ulcer disease                                           | 33.6<br>(30.3 to 37.3)                        | 3.2<br>(2.9 to 3.7)                      | 0.4<br>(0.3 to 0.6)                  | 36.0<br>(19.7 to 55.4)                            | 21.8<br>(8.2 to 38.4)                               |
| Gastritis and duodenitis                                       | 35.9<br>(31.8 to 40.2)                        | 32.6<br>(29.0 to 36.6)                   | 0.5<br>(0.3 to 0.7)                  | 27.2<br>(14.0 to 42.4)                            | 18.2<br>(7.2 to 31.3)                               |
| Appendicitis                                                   | 0.2<br>(0.2 to 0.2)                           | 4.5<br>(4.1 to 4.9)                      | 0.1<br>(< 0.05 to 0.1)               | -17.7<br>(-42.6 to 15.3)                          | -2.7<br>(-30.3 to 34.8)                             |
| Paralytic ileus and intestinal obstruction                     | < 0.05<br>(< 0.05 to < 0.05)                  | 1.1<br>(0.9 to 1.2)                      | < 0.05<br>(< 0.05 to < 0.05)         | 17.5<br>(12.3 to 23.5)                            | 5.0<br>(2.0 to 7.9)                                 |
| Inguinal, femoral, and abdominal hernia                        | 28.9<br>(26.0 to 32.0)                        | 58.4<br>(49.9 to 67.2)                   | 2.1<br>(1.4 to 2.9)                  | -0.4<br>(-8.6 to 9.2)                             | -5.2<br>(-12.7 to 3.8)                              |
| Inflammatory bowel disease                                     | 5.2<br>(4.1 to 6.6)                           | 2.7<br>(2.1 to 3.3)                      | 0.7<br>(0.5 to 1.1)                  | 9.2<br>(-4.7 to 23.2)                             | 0.9<br>(-11.3 to 12.9)                              |
| Vascular intestinal disorders                                  | < 0.05<br>(< 0.05 to < 0.05)                  | 0.2<br>(0.2 to 0.3)                      | < 0.05<br>(< 0.05 to < 0.05)         | 22.5<br>(15.1 to 29.2)                            | 10.3<br>(5.5 to 14.8)                               |
| Gallbladder and biliary diseases                               | 9.0<br>(7.9 to 10.3)                          | 44.7<br>(38.4 to 51.8)                   | 0.2<br>(0.1 to 0.3)                  | 25.4<br>(3.7 to 53.5)                             | 12.4<br>(-6.2 to 36.6)                              |
| Pancreatitis                                                   | 0.3<br>(0.3 to 0.4)                           | 3.0<br>(2.6 to 3.3)                      | < 0.05<br>(< 0.05 to 0.1)            | 35.3<br>(29.4 to 41.7)                            | 22.7<br>(18.3 to 27.0)                              |
| Other digestive diseases                                       | --                                            | --                                       | 0.4<br>(0.2 to 0.5)                  | 12.1<br>(5.2 to 20.4)                             | 5.4<br>(-1.4 to 13.4)                               |
| <b>Neurological disorders</b>                                  | <b>1,073.8</b><br><b>(1,033.8 to 1,124.2)</b> | <b>461.4</b><br><b>(395.1 to 536.3)</b>  | <b>32.7</b><br><b>(22.0 to 45.5)</b> | <b>-0.8</b><br><b>(-18.4 to 18.7)</b>             | <b>-1.3</b><br><b>(-19.5 to 19.1)</b>               |
| Alzheimer's disease and other dementias                        | 18.1<br>(15.1 to 21.7)                        | 3.1<br>(2.6 to 3.8)                      | 2.6<br>(1.8 to 3.5)                  | 46.5<br>(38.5 to 54.3)                            | -0.7<br>(-5.4 to 4.2)                               |
| Parkinson's disease                                            | 4.1<br>(3.1 to 5.2)                           | 0.5<br>(0.4 to 0.6)                      | 0.5<br>(0.3 to 0.7)                  | 42.4<br>(27.1 to 59.0)                            | 3.9<br>(-6.4 to 15.1)                               |
| Epilepsy                                                       | 11.1<br>(2.6 to 21.1)                         | 1.2<br>(0.3 to 2.2)                      | 3.0<br>(0.5 to 7.1)                  | -18.6<br>(-86.4 to 410.0)                         | -12.4<br>(-85.7 to 454.5)                           |
| Multiple sclerosis                                             | 1.7<br>(1.4 to 2.0)                           | 0.1<br>(0.1 to 0.1)                      | 0.5<br>(0.3 to 0.6)                  | 16.9<br>(-0.5 to 39.0)                            | 12.4<br>(-4.8 to 33.9)                              |
| Motor neuron disease                                           | 0.1<br>(0.1 to 0.1)                           | < 0.05<br>(< 0.05 to < 0.05)             | < 0.05<br>(< 0.05 to < 0.05)         | 7.8<br>(3.3 to 12.5)                              | 5.1<br>(1.4 to 9.0)                                 |
| Migraine                                                       | 470.2<br>(443.4 to 497.2)                     | 48.2<br>(45.0 to 51.7)                   | 21.7<br>(13.9 to 30.5)               | -2.5<br>(-5.9 to 1.2)                             | -0.1<br>(-3.5 to 3.4)                               |
| Tension-type headache                                          | 751.9<br>(672.4 to 842.1)                     | 408.4<br>(343.5 to 481.8)                | 3.7<br>(2.4 to 5.5)                  | -0.7<br>(-6.2 to 5.5)                             | -1.0<br>(-6.0 to 4.4)                               |
| Other neurological disorders                                   | < 0.05<br>(< 0.05 to < 0.05)                  | < 0.05<br>(< 0.05 to < 0.05)             | 0.7<br>(0.2 to 1.4)                  | -6.6<br>(-74.2 to 262.2)                          | 7.0<br>(-72.7 to 318.0)                             |
| <b>Mental and substance use disorders</b>                      | <b>396.0</b><br><b>(381.3 to 410.9)</b>       | <b>130.2†</b><br><b>(122.2 to 138.9)</b> | <b>50.8</b><br><b>(36.8 to 66.0)</b> | <b>-1.0</b><br><b>(-3.6 to 1.2)</b>               | <b>0.6</b><br><b>(-1.8 to 2.6)</b>                  |
| Schizophrenia                                                  | 6.8<br>(5.7 to 8.1)                           | 0.4<br>(0.3 to 0.5)                      | 4.3<br>(3.1 to 5.6)                  | 3.6<br>(-5.5 to 13.3)                             | 1.3<br>(-7.8 to 10.9)                               |
| Alcohol use disorders                                          | 48.1<br>(41.6 to 55.1)                        | 26.5<br>(22.8 to 30.4)                   | 4.8<br>(3.3 to 6.8)                  | 8.3<br>(1.0 to 16.3)                              | 7.4<br>(0.4 to 14.7)                                |
| Drug use disorders                                             | 18.8<br>(17.2 to 20.1)                        | 2.7<br>(2.5 to 3.0)                      | 3.4<br>(2.4 to 4.5)                  | 5.2<br>(-3.4 to 15.2)                             | 1.6<br>(-6.8 to 11.2)                               |
| Opioid use disorders                                           | 5.2<br>(4.4 to 6.1)                           | 0.8<br>(0.7 to 0.9)                      | 2.1<br>(1.5 to 2.9)                  | 7.1<br>(-4.9 to 20.6)                             | 0.5<br>(-11.1 to 13.7)                              |
| Cocaine use disorders                                          | 1.7<br>(1.5 to 2.0)                           | 0.1<br>(0.1 to 0.2)                      | 0.2<br>(0.1 to 0.4)                  | 1.3<br>(-21.9 to 29.3)                            | 1.6<br>(-21.6 to 30.7)                              |
| Amphetamine use disorders                                      | 2.0<br>(1.4 to 2.9)                           | 0.2<br>(0.1 to 0.3)                      | 0.3<br>(0.1 to 0.5)                  | 3.7<br>(-21.0 to 37.2)                            | 4.8<br>(-20.0 to 37.5)                              |
| Cannabis use disorders                                         | 8.8<br>(7.3 to 10.7)                          | 1.3<br>(1.1 to 1.6)                      | 0.3<br>(0.2 to 0.4)                  | -4.1<br>(-18.3 to 13.0)                           | 0.6<br>(-14.2 to 17.1)                              |
| Other drug use disorders                                       | 1.7<br>(1.5 to 1.9)                           | 0.3<br>(0.3 to 0.4)                      | 0.5<br>(0.3 to 0.7)                  | 5.4<br>(-13.8 to 30.6)                            | 5.1<br>(-14.2 to 30.3)                              |
| Depressive disorders                                           | 75.1<br>(70.3 to 80.6)                        | 74.1<br>(67.0 to 82.0)                   | 12.0<br>(8.2 to 16.2)                | 4.7<br>(-0.2 to 10.3)                             | -0.4<br>(-4.6 to 4.4)                               |
| Major depressive disorder                                      | 44.7<br>(40.5 to 49.6)                        | 68.5<br>(61.5 to 76.4)                   | 9.0<br>(6.2 to 12.3)                 | 4.0<br>(-2.3 to 10.8)                             | -0.8<br>(-6.1 to 5.4)                               |
| Dysthymia                                                      | 31.2<br>(27.4 to 35.7)                        | 5.5<br>(4.8 to 6.3)                      | 3.0<br>(2.0 to 4.3)                  | 6.9<br>(1.7 to 11.8)                              | 0.6<br>(-3.8 to 4.7)                                |
| Bipolar disorder                                               | 19.7<br>(17.1 to 22.7)                        | 1.5<br>(1.3 to 1.7)                      | 4.0<br>(2.5 to 5.9)                  | -0.5<br>(-6.6 to 6.3)                             | -0.1<br>(-6.0 to 6.2)                               |
| Anxiety disorders                                              | 102.6<br>(93.5 to 111.8)                      | 15.2<br>(14.0 to 16.4)                   | 9.8<br>(6.8 to 13.2)                 | -2.7<br>(-8.8 to 4.0)                             | 0.3<br>(-5.7 to 6.9)                                |
| Eating disorders                                               | 3.0<br>(2.4 to 3.7)                           | 1.7<br>(1.2 to 2.2)                      | 0.6<br>(0.4 to 0.9)                  | 5.4<br>(-9.1 to 21.9)                             | 15.1<br>(-0.5 to 31.2)                              |
| Anorexia nervosa                                               | 0.7<br>(0.5 to 0.9)                           | 0.3<br>(0.2 to 0.4)                      | 0.1<br>(0.1 to 0.2)                  | -2.0<br>(-26.8 to 29.6)                           | 10.5<br>(-15.9 to 43.2)                             |
| Bulimia nervosa                                                | 2.2<br>(1.7 to 3.0)                           | 1.4<br>(1.0 to 2.0)                      | 0.5<br>(0.3 to 0.7)                  | 7.9<br>(-9.3 to 29.1)                             | 16.5<br>(-1.2 to 38.0)                              |
| Autistic spectrum disorders                                    | 24.4<br>(21.8 to 27.4)                        | 0.1<br>(0.1 to 0.2)                      | 3.6<br>(2.5 to 5.1)                  | -8.1<br>(-12.5 to -3.2)                           | -0.2<br>(-5.1 to 4.8)                               |
| Autism                                                         | 7.8<br>(6.7 to 9.1)                           | < 0.05<br>(< 0.05 to < 0.05)             | 2.0<br>(1.3 to 2.9)                  | -7.5<br>(-14.8 to 0.7)                            | -0.2<br>(-8.0 to 8.2)                               |
| Asperger syndrome and other autistic spectrum disorders        | 16.5<br>(13.8 to 19.9)                        | 0.1<br>(0.1 to 0.1)                      | 1.6<br>(1.1 to 2.4)                  | -8.8<br>(-13.0 to -4.1)                           | -0.3<br>(-4.7 to 4.6)                               |



| Cause                                                      | Prevalence in thousands (95% UI)        | Incidence in thousands (95% UI)          | YLDs in thousands (95% UI)     |                                                   |                                                     |
|------------------------------------------------------------|-----------------------------------------|------------------------------------------|--------------------------------|---------------------------------------------------|-----------------------------------------------------|
|                                                            | 2016 counts                             | 2016 counts                              | 2016 counts                    | Percentage change in counts between 2006 and 2016 | Percentage change in age-standardised rates between |
| Attention-deficit/hyperactivity disorder                   | 20.5<br>(18.4 to 22.9)                  | 0.7<br>(0.6 to 0.8)                      | 0.2<br>(0.1 to 0.4)            | -18.6<br>(-25.7 to -11.0)                         | 0.3<br>(-8.2 to 9.1)                                |
| Conduct disorder                                           | 18.6<br>(15.3 to 21.9)                  | 5.6<br>(4.4 to 6.7)                      | 2.3<br>(1.4 to 3.5)            | -31.8<br>(-36.1 to -26.8)                         | 0.3<br>(-5.8 to 7.5)                                |
| Idiopathic developmental intellectual disability           | 28.5<br>(15.3 to 41.8)                  | --                                       | 1.2<br>(0.5 to 2.0)            | -19.5<br>(-26.1 to -13.4)                         | -13.5<br>(-20.8 to -6.8)                            |
| Other mental and substance use disorders                   | 60.0<br>(53.1 to 69.0)                  | 1.9<br>(1.7 to 2.1)                      | 4.4<br>(3.1 to 6.3)            | 5.0<br>(0.2 to 10.0)                              | -0.2<br>(-5.0 to 4.7)                               |
| <b>Diabetes, urogenital, blood, and endocrine diseases</b> | <b>948.4<br/>(927.4 to 972.2)</b>       | <b>376.2†<br/>(354.1 to 401.5)</b>       | <b>20.0<br/>(14.2 to 27.2)</b> | <b>11.8<br/>(7.9 to 15.8)</b>                     | <b>0.6<br/>(-2.7 to 4.0)</b>                        |
| Diabetes mellitus                                          | 75.6<br>(66.7 to 85.9)                  | 3.7<br>(3.3 to 4.2)                      | 6.6<br>(4.5 to 9.2)            | 23.7<br>(14.1 to 34.8)                            | 3.5<br>(-4.6 to 12.5)                               |
| Acute glomerulonephritis                                   | 0.1<br>(< 0.05 to 0.1)                  | 0.8<br>(0.7 to 0.9)                      | < 0.05<br>(< 0.05 to < 0.05)   | -7.7<br>(-14.0 to -1.2)                           | -3.6<br>(-9.5 to 2.5)                               |
| Chronic kidney disease                                     | 95.9<br>(86.1 to 105.9)                 | 6.6<br>(5.7 to 7.5)                      | 2.4<br>(1.8 to 3.2)            | 25.2<br>(16.0 to 35.5)                            | 2.1<br>(-4.6 to 9.3)                                |
| Chronic kidney disease due to diabetes mellitus            | 19.4<br>(17.2 to 22.1)                  | 1.4<br>(1.1 to 1.6)                      | 0.5<br>(0.4 to 0.7)            | 1.7<br>(-14.5 to 21.3)                            | -16.9<br>(-29.4 to -1.7)                            |
| Chronic kidney disease due to hypertension                 | 18.3<br>(16.3 to 20.3)                  | 1.7<br>(1.5 to 1.9)                      | 0.3<br>(0.2 to 0.4)            | 33.2<br>(11.8 to 58.5)                            | -3.1<br>(-18.9 to 15.6)                             |
| Chronic kidney disease due to glomerulonephritis           | 15.5<br>(13.8 to 17.4)                  | 0.7<br>(0.5 to 0.8)                      | 0.6<br>(0.5 to 0.8)            | 26.4<br>(7.3 to 48.9)                             | 7.1<br>(-9.1 to 25.8)                               |
| Chronic kidney disease due to other causes                 | 42.6<br>(38.0 to 47.4)                  | 2.9<br>(2.5 to 3.4)                      | 1.0<br>(0.8 to 1.3)            | 37.6<br>(18.4 to 60.3)                            | 12.4<br>(-2.0 to 29.4)                              |
| Urinary diseases and male infertility                      | 80.4<br>(72.0 to 89.8)                  | 219.6†<br>(200.1 to 242.4)               | 2.5<br>(1.6 to 3.6)            | 16.1<br>(9.5 to 23.0)                             | -4.9<br>(-9.9 to 0.2)                               |
| Interstitial nephritis and urinary tract infections        | 3.1<br>(2.8 to 3.5)                     | 162.3<br>(143.4 to 182.7)                | 0.1<br>(0.1 to 0.2)            | -4.2<br>(-16.3 to 9.4)                            | 0.0<br>(-12.5 to 13.4)                              |
| Urolithiasis                                               | 1.9<br>(1.6 to 2.1)                     | 49.1<br>(43.2 to 55.5)                   | 0.1<br>(0.1 to 0.2)            | 9.3<br>(-7.9 to 28.7)                             | -0.3<br>(-15.3 to 16.7)                             |
| Benign prostatic hyperplasia                               | 65.8<br>(55.9 to 77.1)                  | 8.3<br>(6.8 to 9.9)                      | 2.1<br>(1.4 to 3.1)            | 19.9<br>(12.1 to 28.0)                            | -5.2<br>(-10.8 to 1.0)                              |
| Male infertility                                           | 7.0<br>(5.5 to 9.0)                     | --                                       | < 0.05<br>(< 0.05 to 0.1)      | 9.8<br>(-11.6 to 33.4)                            | 12.9<br>(-8.4 to 36.9)                              |
| Other urinary diseases                                     | --                                      | --                                       | 0.1<br>(0.1 to 0.1)            | -17.5<br>(-26.0 to -7.8)                          | -18.1<br>(-26.0 to -8.8)                            |
| Gynecological diseases                                     | 342.5<br>(326.2 to 361.1)               | 131.1†<br>(121.4 to 142.0)               | 4.2<br>(2.9 to 6.0)            | -2.9<br>(-7.1 to 1.4)                             | 0.4<br>(-3.9 to 4.6)                                |
| Uterine fibroids                                           | 33.1<br>(29.2 to 38.0)                  | 3.1<br>(2.7 to 3.6)                      | 0.4<br>(0.2 to 0.7)            | -3.4<br>(-11.5 to 5.2)                            | 0.0<br>(-7.9 to 8.8)                                |
| Polycystic ovarian syndrome                                | 2.7<br>(2.0 to 3.6)                     | 1.3<br>(1.0 to 1.7)                      | < 0.05<br>(< 0.05 to < 0.05)   | -6.8<br>(-19.8 to 7.6)                            | 1.4<br>(-12.7 to 16.7)                              |
| Female infertility                                         | 1.7<br>(0.7 to 3.7)                     | --                                       | < 0.05<br>(< 0.05 to < 0.05)   | 66.4<br>(-23.0 to 243.0)                          | 66.5<br>(-18.2 to 246.3)                            |
| Endometriosis                                              | 1.4<br>(1.1 to 1.7)                     | 6.0<br>(4.5 to 7.9)                      | 0.1<br>(0.1 to 0.2)            | -0.5<br>(-22.7 to 27.6)                           | -2.6<br>(-24.2 to 25.9)                             |
| Genital prolapse                                           | 105.0<br>(90.1 to 121.8)                | 5.1<br>(4.3 to 6.1)                      | 0.3<br>(0.2 to 0.6)            | 30.6<br>(17.8 to 45.2)                            | 7.2<br>(-3.3 to 18.7)                               |
| Premenstrual syndrome                                      | 184.7<br>(173.4 to 195.8)               | 64.8<br>(60.2 to 69.5)                   | 1.6<br>(1.0 to 2.4)            | -7.7<br>(-14.5 to -0.5)                           | -0.7<br>(-7.9 to 7.0)                               |
| Other gynecological diseases                               | 50.5<br>(43.4 to 58.5)                  | 50.7<br>(42.2 to 60.2)                   | 1.7<br>(1.2 to 2.5)            | -3.3<br>(-9.4 to 3.6)                             | 0.5<br>(-5.7 to 7.7)                                |
| Hemoglobinopathies and hemolytic anaemias                  | 450.8<br>(428.4 to 476.4)               | --                                       | 1.3<br>(0.8 to 2.0)            | -2.9<br>(-12.4 to 8.9)                            | 1.0<br>(-9.6 to 14.3)                               |
| Thalassemias                                               | < 0.05<br>(< 0.05 to 0.1)               | --                                       | < 0.05<br>(< 0.05 to < 0.05)   | 14.2<br>(-20.0 to 60.1)                           | 36.7<br>(-5.6 to 93.5)                              |
| Thalassaemias trait                                        | 118.0<br>(108.8 to 127.8)               | --                                       | 0.9<br>(0.6 to 1.4)            | -1.8<br>(-13.0 to 11.8)                           | 3.7<br>(-8.5 to 19.9)                               |
| Sickle cell disorders                                      | < 0.05<br>(< 0.05 to < 0.05)            | --                                       | < 0.05<br>(< 0.05 to < 0.05)   | -10.2<br>(-15.9 to -3.8)                          | 6.8<br>(-0.8 to 15.3)                               |
| Sickle cell trait                                          | 50.9<br>(49.3 to 52.4)                  | --                                       | 0.1<br>(0.1 to 0.1)            | -3.4<br>(-18.1 to 15.7)                           | 5.6<br>(-11.2 to 27.3)                              |
| G6PD deficiency                                            | 57.4<br>(49.9 to 65.9)                  | --                                       | < 0.05<br>(< 0.05 to < 0.05)   | -6.9<br>(-17.5 to 5.7)                            | -11.7<br>(-21.6 to 0.8)                             |
| G6PD trait                                                 | 226.7<br>(205.8 to 250.1)               | --                                       | < 0.05<br>(< 0.05 to < 0.05)   | 9.9<br>(-3.6 to 27.1)                             | 11.9<br>(-2.7 to 32.6)                              |
| Other hemoglobinopathies and hemolytic anaemias            | 19.7<br>(18.3 to 21.2)                  | --                                       | 0.3<br>(0.2 to 0.4)            | -6.4<br>(-16.6 to 6.5)                            | -9.4<br>(-18.9 to 2.7)                              |
| Endocrine, metabolic, blood, and immune disorders          | 91.3<br>(83.8 to 99.6)                  | 14.3<br>(12.8 to 16.0)                   | 3.0<br>(2.0 to 4.1)            | 6.5<br>(0.4 to 12.5)                              | -1.9<br>(-6.9 to 3.1)                               |
| <b>Musculoskeletal disorders</b>                           | <b>598.1<br/>(570.9 to 628.7)</b>       | <b>263.1<br/>(233.3 to 297.9)</b>        | <b>70.8<br/>(50.5 to 92.4)</b> | <b>10.1<br/>(6.4 to 13.8)</b>                     | <b>-0.6<br/>(-3.5 to 2.2)</b>                       |
| Rheumatoid arthritis                                       | 10.2<br>(9.0 to 11.5)                   | 0.5<br>(0.5 to 0.6)                      | 2.4<br>(1.6 to 3.2)            | 22.0<br>(12.3 to 32.9)                            | 5.8<br>(-2.2 to 15.1)                               |
| Osteoarthritis                                             | 143.9<br>(134.2 to 153.5)               | 6.5<br>(6.0 to 7.0)                      | 8.8<br>(6.2 to 12.0)           | 27.7<br>(23.5 to 32.7)                            | 5.0<br>(1.6 to 8.8)                                 |
| Low back and neck pain                                     | 474.5<br>(442.5 to 506.9)               | 229.5<br>(200.7 to 261.7)                | 56.9<br>(40.2 to 74.6)         | 7.7<br>(3.4 to 12.0)                              | -1.6<br>(-4.9 to 1.9)                               |
| Low back pain                                              | 398.9<br>(355.5 to 447.8)               | 203.9<br>(175.3 to 236.6)                | 45.0<br>(31.9 to 59.0)         | 7.4<br>(2.2 to 12.8)                              | -2.1<br>(-6.2 to 2.3)                               |
| Neck pain                                                  | 120.4<br>(103.5 to 139.5)               | 25.6<br>(22.2 to 29.9)                   | 11.9<br>(8.1 to 16.9)          | 8.6<br>(4.7 to 12.6)                              | 0.5<br>(-1.7 to 2.6)                                |
| Gout                                                       | 13.0<br>(11.4 to 14.8)                  | 2.6<br>(2.2 to 2.9)                      | 0.4<br>(0.3 to 0.6)            | 16.6<br>(0.9 to 34.0)                             | -1.3<br>(-14.1 to 13.8)                             |
| Other musculoskeletal disorders                            | 27.4<br>(20.9 to 36.0)                  | 24.0<br>(17.6 to 34.6)                   | 2.3<br>(1.5 to 3.5)            | 2.4<br>(-11.3 to 17.7)                            | -1.9<br>(-15.6 to 12.5)                             |
| <b>Other non-communicable diseases</b>                     | <b>2,228.9<br/>(2,187.4 to 2,272.4)</b> | <b>6,967.6†<br/>(6,502.7 to 7,443.5)</b> | <b>64.9<br/>(44.6 to 92.1)</b> | <b>5.5<br/>(4.0 to 7.3)</b>                       | <b>-1.1<br/>(-2.4 to 0.2)</b>                       |
| Congenital anomalies                                       | 32.2<br>(29.5 to 35.7)                  | --                                       | 4.0<br>(2.9 to 5.3)            | -9.8<br>(-14.8 to -4.7)                           | -1.6<br>(-6.9 to 3.8)                               |
| Neural tube defects                                        | 2.9<br>(2.6 to 3.2)                     | --                                       | 0.9<br>(0.6 to 1.2)            | -11.4<br>(-21.3 to 0.4)                           | -5.9<br>(-16.5 to 6.4)                              |
| Congenital heart anomalies                                 | 5.4<br>(4.7 to 6.2)                     | --                                       | 0.3<br>(0.1 to 0.5)            | -15.2<br>(-27.8 to -2.0)                          | -5.1<br>(-19.6 to 9.3)                              |
| Orofacial clefts                                           | 1.4<br>(1.2 to 1.6)                     | --                                       | < 0.05<br>(< 0.05 to < 0.05)   | -14.6<br>(-23.8 to -4.1)                          | -9.1<br>(-18.9 to 2.0)                              |
| Down's syndrome                                            | 1.4<br>(1.2 to 1.6)                     | --                                       | 0.1<br>(0.1 to 0.2)            | -7.0<br>(-15.4 to 2.2)                            | 1.8<br>(-7.2 to 12.1)                               |
| Turner syndrome                                            | 1.5<br>(1.3 to 1.7)                     | --                                       | < 0.05<br>(< 0.05 to < 0.05)   | -8.6<br>(-32.1 to 21.6)                           | 1.7<br>(-23.3 to 34.0)                              |
| Klinefelter syndrome                                       | 1.3<br>(1.1 to 1.6)                     | --                                       | < 0.05<br>(< 0.05 to < 0.05)   | -5.8<br>(-26.4 to 23.4)                           | 1.2<br>(-20.6 to 32.3)                              |

| Cause                                         | Prevalence in thousands (95% UI)              | Incidence in thousands (95% UI)          | YLDs in thousands (95% UI)           |                                                   |                                                     |
|-----------------------------------------------|-----------------------------------------------|------------------------------------------|--------------------------------------|---------------------------------------------------|-----------------------------------------------------|
|                                               | 2016 counts                                   | 2016 counts                              | 2016 counts                          | Percentage change in counts between 2006 and 2016 | Percentage change in age-standardised rates between |
| Other chromosomal abnormalities               | 2.5<br>(2.1 to 3.0)                           | --                                       | 0.3<br>(0.2 to 0.4)                  | -21.6<br>(-32.3 to -9.9)                          | 2.5<br>(-11.9 to 17.6)                              |
| Congenital musculoskeletal and limb anomalies | 6.8<br>(6.1 to 7.5)                           | --                                       | 0.9<br>(0.6 to 1.2)                  | -0.6<br>(-10.0 to 10.8)                           | 4.0<br>(-6.1 to 15.5)                               |
| Urogenital congenital anomalies               | 3.6<br>(3.1 to 4.1)                           | --                                       | 0.1<br>(0.1 to 0.2)                  | -17.5<br>(-29.3 to -3.2)                          | 6.6<br>(-9.2 to 26.7)                               |
| Digestive congenital anomalies                | 4.0<br>(3.5 to 4.5)                           | --                                       | 0.2<br>(0.1 to 0.3)                  | -3.9<br>(-16.0 to 11.0)                           | 2.6<br>(-10.8 to 18.6)                              |
| Other congenital anomalies                    | 8.8<br>(5.8 to 13.0)                          | --                                       | 1.2<br>(0.8 to 1.8)                  | -10.2<br>(-19.0 to -1.3)                          | -4.3<br>(-13.3 to 5.3)                              |
| Skin and subcutaneous diseases                | 833.4<br>(812.3 to 856.1)                     | 2,088.3<br>(1,968.1 to 2,218.1)          | 18.3<br>(12.4 to 26.4)               | -7.5<br>(-9.8 to -5.3)                            | 2.1<br>(0.0 to 4.3)                                 |
| Dermatitis                                    | 78.2<br>(73.4 to 83.7)                        | 128.6<br>(117.5 to 140.5)                | 2.7<br>(1.7 to 4.2)                  | -8.5<br>(-13.0 to -3.7)                           | 1.5<br>(-3.4 to 6.8)                                |
| Psoriasis                                     | 28.0<br>(26.7 to 29.4)                        | 3.8<br>(3.6 to 4.0)                      | 2.4<br>(1.7 to 3.2)                  | 5.2<br>(-2.7 to 13.2)                             | 5.0<br>(-2.9 to 12.3)                               |
| Cellulitis                                    | 1.2<br>(1.1 to 1.3)                           | 23.2<br>(21.7 to 24.8)                   | 0.1<br>(< 0.05 to 0.1)               | -2.5<br>(-22.1 to 22.3)                           | 0.1<br>(-19.8 to 25.3)                              |
| Pyoderma                                      | 12.5<br>(12.1 to 13.0)                        | 330.6<br>(318.2 to 344.0)                | 0.1<br>(< 0.05 to 0.1)               | 12.3<br>(6.5 to 18.4)                             | 0.5<br>(-4.5 to 5.8)                                |
| Scabies                                       | 23.3<br>(20.5 to 26.6)                        | 70.1<br>(61.2 to 79.8)                   | 0.6<br>(0.3 to 1.0)                  | -15.5<br>(-20.5 to -10.3)                         | -5.7<br>(-10.5 to -0.8)                             |
| Fungal skin diseases                          | 258.8<br>(232.1 to 286.4)                     | 953.4<br>(842.9 to 1,079.5)              | 1.4<br>(0.6 to 3.0)                  | 2.5<br>(-0.5 to 5.3)                              | -0.0<br>(-1.1 to 1.1)                               |
| Viral skin diseases                           | 68.4<br>(65.5 to 71.5)                        | 102.3<br>(97.8 to 107.1)                 | 2.1<br>(1.3 to 3.1)                  | -13.7<br>(-16.7 to -10.6)                         | 0.1<br>(-3.4 to 3.6)                                |
| Acne vulgaris                                 | 209.0<br>(186.0 to 234.0)                     | 133.6<br>(110.7 to 165.0)                | 5.4<br>(3.6 to 7.8)                  | -14.6<br>(-19.4 to -9.8)                          | 3.6<br>(-1.9 to 9.0)                                |
| Alopecia areata                               | 5.5<br>(5.3 to 5.7)                           | 9.8<br>(9.4 to 10.2)                     | 0.2<br>(0.1 to 0.3)                  | -1.5<br>(-11.8 to 10.3)                           | -0.1<br>(-10.8 to 11.5)                             |
| Pruritus                                      | 28.0<br>(24.7 to 31.7)                        | 22.3<br>(19.9 to 25.2)                   | 0.3<br>(0.1 to 0.6)                  | 4.9<br>(-1.3 to 11.6)                             | 2.0<br>(-3.2 to 7.2)                                |
| Urticaria                                     | 26.5<br>(23.4 to 30.0)                        | 47.3<br>(41.8 to 53.8)                   | 1.6<br>(1.0 to 2.3)                  | -11.8<br>(-17.4 to -5.9)                          | 0.0<br>(-5.1 to 5.7)                                |
| Decubitus ulcer                               | 1.0<br>(0.9 to 1.2)                           | 3.7<br>(3.2 to 4.3)                      | 0.2<br>(0.1 to 0.2)                  | 24.6<br>(8.6 to 42.1)                             | 2.3<br>(-10.0 to 16.0)                              |
| Other skin and subcutaneous diseases          | 222.2<br>(215.8 to 228.9)                     | 259.7<br>(250.9 to 268.7)                | 1.2<br>(0.6 to 2.2)                  | 14.6<br>(11.8 to 17.8)                            | 6.3<br>(4.0 to 9.0)                                 |
| Sense organ diseases                          | 874.6<br>(846.2 to 907.0)                     | 292.1†<br>(275.4 to 310.9)               | 32.0<br>(22.1 to 44.9)               | 14.0<br>(11.4 to 17.1)                            | -3.5<br>(-5.5 to -1.4)                              |
| Glaucoma                                      | 2.5<br>(2.0 to 3.0)                           | --                                       | 0.2<br>(0.1 to 0.2)                  | 36.7<br>(20.4 to 56.1)                            | 0.4<br>(-11.1 to 14.1)                              |
| Cataract                                      | 41.7<br>(35.0 to 48.6)                        | --                                       | 1.9<br>(1.3 to 2.7)                  | 30.8<br>(23.7 to 37.9)                            | -4.0<br>(-8.9 to 0.9)                               |
| Macular degeneration                          | 1.4<br>(1.1 to 1.8)                           | --                                       | 0.1<br>(< 0.05 to 0.1)               | 39.8<br>(21.5 to 61.6)                            | 2.0<br>(-10.6 to 16.9)                              |
| Refraction and accommodation disorders        | 422.4<br>(356.4 to 489.4)                     | --                                       | 7.1<br>(4.2 to 11.4)                 | 4.4<br>(-2.4 to 12.9)                             | -5.3<br>(-11.4 to 2.2)                              |
| Age-related and other hearing loss            | 638.1<br>(610.4 to 667.4)                     | --                                       | 18.8<br>(13.2 to 26.0)               | 15.8<br>(12.9 to 18.7)                            | -3.7<br>(-5.8 to -1.5)                              |
| Other vision loss                             | 16.4<br>(14.2 to 18.9)                        | --                                       | 0.9<br>(0.6 to 1.2)                  | 21.9<br>(13.2 to 31.3)                            | -0.4<br>(-7.0 to 6.3)                               |
| Other sense organ diseases                    | 100.7<br>(92.6 to 109.1)                      | 292.1<br>(275.4 to 310.9)                | 3.1<br>(2.0 to 4.7)                  | 14.9<br>(10.6 to 19.7)                            | 0.8<br>(-2.9 to 5.0)                                |
| Oral disorders                                | 1,695.0<br>(1,612.5 to 1,765.5)               | 4,587.2†<br>(4,156.0 to 5,023.0)         | 10.5<br>(6.6 to 15.8)                | 15.1<br>(11.6 to 19.0)                            | 0.2<br>(-1.7 to 2.4)                                |
| Caries of deciduous teeth                     | 162.8<br>(140.2 to 190.7)                     | 646.5<br>(506.4 to 819.5)                | < 0.05<br>(< 0.05 to 0.1)            | -28.3<br>(-36.0 to -19.7)                         | -0.5<br>(-9.7 to 10.5)                              |
| Caries of permanent teeth                     | 1,277.2<br>(1,179.5 to 1,391.8)               | 3,885.8<br>(3,469.0 to 4,280.7)          | 0.8<br>(0.3 to 1.4)                  | -9.6<br>(-13.8 to -5.4)                           | -5.3<br>(-8.8 to -1.6)                              |
| Periodontal disease                           | 293.1<br>(241.2 to 347.4)                     | 36.9<br>(28.8 to 45.5)                   | 1.9<br>(0.8 to 3.9)                  | 10.1<br>(5.4 to 15.1)                             | -0.5<br>(-3.8 to 3.0)                               |
| Edentulism and severe tooth loss              | 225.6<br>(196.2 to 255.2)                     | 18.0<br>(15.1 to 21.2)                   | 6.2<br>(4.0 to 8.8)                  | 26.7<br>(22.5 to 31.2)                            | 1.4<br>(-1.6 to 4.8)                                |
| Other oral disorders                          | 55.8<br>(53.4 to 58.1)                        | --                                       | 1.6<br>(1.0 to 2.4)                  | -0.6<br>(-4.1 to 2.6)                             | 0.2<br>(-3.2 to 3.5)                                |
| <b>Injuries</b>                               | <b>1,135.9</b><br><b>(1,055.4 to 1,248.8)</b> | <b>396.5†</b><br><b>(370.0 to 426.2)</b> | <b>38.7</b><br><b>(26.2 to 54.5)</b> | <b>11.2</b><br><b>(8.8 to 13.7)</b>               | <b>3.2</b><br><b>(1.5 to 4.9)</b>                   |
| <b>Transport injuries</b>                     | <b>129.9</b><br><b>(120.3 to 140.4)</b>       | <b>38.2</b><br><b>(33.8 to 42.8)</b>     | <b>6.3</b><br><b>(4.2 to 9.0)</b>    | <b>28.8</b><br><b>(26.1 to 31.2)</b>              | <b>18.5</b><br><b>(16.5 to 20.3)</b>                |
| Road injuries                                 | 123.4<br>(113.9 to 133.6)                     | 37.0<br>(32.6 to 41.6)                   | 6.0<br>(4.0 to 8.6)                  | 30.2<br>(27.7 to 32.6)                            | 19.7<br>(17.7 to 21.5)                              |
| Pedestrian road injuries                      | 23.6<br>(20.6 to 27.2)                        | 5.0<br>(4.2 to 6.0)                      | 1.1<br>(0.7 to 1.6)                  | 34.5<br>(31.6 to 37.3)                            | 23.2<br>(20.9 to 25.3)                              |
| Cyclist road injuries                         | 34.7<br>(29.1 to 40.8)                        | 11.3<br>(9.5 to 13.3)                    | 1.6<br>(1.1 to 2.3)                  | 27.5<br>(24.9 to 29.9)                            | 17.7<br>(15.6 to 19.7)                              |
| Motorcyclist road injuries                    | 15.6<br>(13.2 to 19.0)                        | 3.0<br>(2.4 to 3.8)                      | 0.7<br>(0.5 to 1.0)                  | 15.7<br>(13.3 to 18.0)                            | 6.8<br>(4.7 to 8.6)                                 |
| Motor vehicle road injuries                   | 44.9<br>(37.6 to 51.7)                        | 16.0<br>(13.6 to 18.5)                   | 2.4<br>(1.6 to 3.4)                  | 37.3<br>(34.5 to 39.9)                            | 25.7<br>(23.5 to 27.8)                              |
| Other road injuries                           | 4.5<br>(3.9 to 5.3)                           | 1.7<br>(1.3 to 2.1)                      | 0.2<br>(0.1 to 0.3)                  | 11.3<br>(8.9 to 13.6)                             | 2.8<br>(0.9 to 4.6)                                 |
| Other transport injuries                      | 6.5<br>(5.6 to 7.6)                           | 1.2<br>(1.0 to 1.4)                      | 0.3<br>(0.2 to 0.4)                  | 4.1<br>(1.5 to 6.7)                               | -1.4<br>(-3.6 to 0.7)                               |
| <b>Unintentional injuries</b>                 | <b>943.9</b><br><b>(867.4 to 1,051.7)</b>     | <b>344.1</b><br><b>(319.1 to 373.6)</b>  | <b>30.2</b><br><b>(20.6 to 42.4)</b> | <b>10.2</b><br><b>(8.1 to 12.5)</b>               | <b>1.9</b><br><b>(0.2 to 3.6)</b>                   |
| Falls                                         | 542.9<br>(477.7 to 627.7)                     | 205.5<br>(183.4 to 231.7)                | 20.4<br>(14.0 to 28.1)               | 18.7<br>(16.4 to 21.2)                            | 8.4<br>(6.5 to 10.2)                                |
| Drowning                                      | 1.1<br>(1.0 to 1.2)                           | 0.2<br>(0.1 to 0.2)                      | < 0.05<br>(< 0.05 to 0.1)            | 0.9<br>(-3.0 to 4.7)                              | -5.3<br>(-8.4 to -2.2)                              |
| Fire, heat, and hot substances                | 45.7<br>(39.6 to 53.8)                        | 4.7<br>(3.9 to 5.5)                      | 1.1<br>(0.7 to 1.6)                  | 16.1<br>(11.3 to 20.1)                            | 11.8<br>(7.9 to 15.3)                               |
| Poisonings                                    | 2.6<br>(2.2 to 3.1)                           | 3.0<br>(2.4 to 3.6)                      | 0.2<br>(0.1 to 0.3)                  | 38.8<br>(28.7 to 49.7)                            | 40.9<br>(30.6 to 51.3)                              |
| Exposure to mechanical forces                 | 226.6<br>(194.0 to 277.4)                     | 73.7<br>(65.1 to 83.6)                   | 4.9<br>(3.2 to 7.1)                  | -9.7<br>(-11.7 to -8.0)                           | -15.9<br>(-17.6 to -14.2)                           |
| Unintentional firearm injuries                | 1.9<br>(1.6 to 2.2)                           | 0.4<br>(0.3 to 0.5)                      | 0.1<br>(< 0.05 to 0.1)               | -2.6<br>(-5.1 to 0.1)                             | -8.8<br>(-11.0 to -6.8)                             |
| Unintentional suffocation                     | 2.8<br>(2.1 to 3.5)                           | 0.4<br>(0.3 to 0.5)                      | 0.1<br>(0.1 to 0.1)                  | -8.6<br>(-11.3 to -5.6)                           | -8.2<br>(-10.6 to -6.0)                             |
| Other exposure to mechanical forces           | 222.0<br>(189.8 to 272.6)                     | 72.9<br>(64.5 to 82.7)                   | 4.7<br>(3.1 to 6.9)                  | -9.8<br>(-11.8 to -8.1)                           | -16.1<br>(-17.9 to -14.5)                           |

| Cause                                                                               | Prevalence in thousands (95% UI)     | Incidence in thousands (95% UI)       | YLDs in thousands (95% UI)           |                                                   |                                                     |
|-------------------------------------------------------------------------------------|--------------------------------------|---------------------------------------|--------------------------------------|---------------------------------------------------|-----------------------------------------------------|
|                                                                                     | 2016 counts                          | 2016 counts                           | 2016 counts                          | Percentage change in counts between 2006 and 2016 | Percentage change in age-standardised rates between |
| Adverse effects of medical treatment                                                | 0.5<br>(0.4 to 0.7)                  | 6.9<br>(6.0 to 7.8)                   | 0.1<br>( $< 0.05$ to 0.1)            | 17.3<br>(11.7 to 23.1)                            | 7.5<br>(3.6 to 11.3)                                |
| Animal contact                                                                      | 12.9<br>(11.3 to 15.2)               | 12.1<br>(9.9 to 14.7)                 | 0.4<br>(0.2 to 0.5)                  | -10.1<br>(-15.0 to -5.3)                          | -9.5<br>(-14.3 to -4.8)                             |
| Venomous animal contact                                                             | 4.7<br>(3.9 to 5.7)                  | 4.7<br>(3.6 to 6.0)                   | 0.3<br>(0.2 to 0.4)                  | -8.3<br>(-15.4 to -1.1)                           | -5.6<br>(-12.7 to 1.4)                              |
| Non-venomous animal contact                                                         | 8.3<br>(7.0 to 10.2)                 | 7.4<br>(5.9 to 9.2)                   | 0.1<br>(0.1 to 0.2)                  | -13.8<br>(-16.6 to -11.3)                         | -17.5<br>(-19.6 to -15.7)                           |
| Foreign body                                                                        | 22.1<br>(18.8 to 25.4)               | 15.2<br>(13.0 to 18.0)                | 0.7<br>(0.5 to 1.1)                  | 5.6<br>(2.8 to 8.5)                               | 2.8<br>(0.3 to 5.1)                                 |
| Pulmonary aspiration and foreign body in airway                                     | 11.3<br>(9.0 to 14.1)                | 3.2<br>(2.7 to 3.9)                   | 0.4<br>(0.2 to 0.6)                  | 5.7<br>(2.2 to 9.3)                               | 3.1<br>(0.2 to 5.8)                                 |
| Foreign body in eyes                                                                | 2.0<br>(1.2 to 2.8)                  | 9.2<br>(7.2 to 12.0)                  | 0.1<br>(0.1 to 0.2)                  | 6.4<br>(1.4 to 12.5)                              | 3.9<br>(0.7 to 6.8)                                 |
| Foreign body in other body part                                                     | 8.9<br>(7.4 to 11.0)                 | 2.7<br>(2.3 to 3.2)                   | 0.2<br>(0.1 to 0.3)                  | 4.9<br>(1.5 to 8.4)                               | 1.7<br>(-1.4 to 4.5)                                |
| Environmental heat and cold exposure                                                | 23.6<br>(20.1 to 27.8)               | 4.9<br>(4.0 to 5.8)                   | 0.8<br>(0.5 to 1.1)                  | 15.2<br>(12.2 to 18.3)                            | 10.3<br>(7.9 to 12.4)                               |
| Other unintentional injuries                                                        | 65.8<br>(53.4 to 79.8)               | 18.1<br>(15.3 to 21.2)                | 1.8<br>(1.1 to 2.6)                  | -10.3<br>(-12.3 to -8.2)                          | -14.0<br>(-16.4 to -11.2)                           |
| <b>Self-harm and interpersonal violence</b>                                         | <b>76.0</b><br><b>(69.3 to 83.0)</b> | <b>14.1†</b><br><b>(12.2 to 16.1)</b> | <b>1.6</b><br><b>(1.1 to 2.2)</b>    | <b>-6.5</b><br><b>(-8.3 to -4.6)</b>              | <b>-9.0</b><br><b>(-10.5 to -7.5)</b>               |
| Self-harm                                                                           | 5.5<br>(4.6 to 6.4)                  | 2.0<br>(1.7 to 2.3)                   | 0.2<br>(0.1 to 0.3)                  | 19.9<br>(15.8 to 24.5)                            | 12.6<br>(8.7 to 16.4)                               |
| Self-harm by firearm                                                                | 0.3<br>(0.2 to 0.3)                  | 0.1<br>( $< 0.05$ to 0.1)             | $< 0.05$<br>( $< 0.05$ to $< 0.05$ ) | -19.9<br>(-22.3 to -17.6)                         | -26.0<br>(-28.1 to -24.1)                           |
| Self-harm by other specified means                                                  | 5.2<br>(4.3 to 6.1)                  | 1.9<br>(1.7 to 2.2)                   | 0.2<br>(0.1 to 0.3)                  | 22.1<br>(17.7 to 26.9)                            | 14.7<br>(10.7 to 18.8)                              |
| Interpersonal violence                                                              | 70.6<br>(64.1 to 77.4)               | 12.1†<br>(10.3 to 14.1)               | 1.3<br>(0.9 to 1.9)                  | -9.7<br>(-11.5 to -7.9)                           | -11.7<br>(-13.2 to -10.0)                           |
| Assault by firearm                                                                  | 0.8<br>(0.7 to 0.9)                  | 0.2<br>(0.1 to 0.3)                   | $< 0.05$<br>( $< 0.05$ to $< 0.05$ ) | -33.8<br>(-35.6 to -32.0)                         | -38.7<br>(-40.3 to -37.2)                           |
| Assault by sharp object                                                             | 4.7<br>(3.9 to 5.6)                  | 1.4<br>(1.0 to 1.8)                   | 0.1<br>(0.1 to 0.2)                  | -8.2<br>(-10.8 to -5.7)                           | -12.1<br>(-14.2 to -10.1)                           |
| Sexual violence                                                                     | 40.9<br>(35.8 to 46.7)               | --                                    | 0.3<br>(0.2 to 0.5)                  | -12.8<br>(-17.0 to -8.6)                          | -4.5<br>(-8.3 to -0.9)                              |
| Assault by other means                                                              | 24.2<br>(20.1 to 29.2)               | 10.6<br>(8.9 to 12.4)                 | 0.9<br>(0.6 to 1.2)                  | -7.5<br>(-9.4 to -5.8)                            | -13.1<br>(-14.8 to -11.5)                           |
| <b>Forces of nature, conflict and terrorism, and executions and police conflict</b> | <b>26.9</b><br><b>(8.0 to 53.0)</b>  | <b>0.1†</b><br><b>(0.1 to 0.1)</b>    | <b>0.6</b><br><b>(0.1 to 1.9)</b>    | <b>-22.0</b><br><b>(-26.4 to -18.8)</b>           | <b>-21.7</b><br><b>(-25.7 to -18.9)</b>             |
| Exposure to forces of nature                                                        | 2.4<br>(1.3 to 3.8)                  | --                                    | 0.1<br>( $< 0.05$ to 0.2)            | -25.8<br>(-27.9 to -23.5)                         | -27.7<br>(-29.7 to -25.5)                           |
| Conflict and terrorism                                                              | 24.3<br>(5.3 to 49.9)                | --                                    | 0.6<br>(0.1 to 1.7)                  | -21.7<br>(-26.6 to -18.2)                         | -21.2<br>(-25.7 to -18.2)                           |
| Executions and police conflict                                                      | 0.3<br>(0.2 to 0.4)                  | 0.1<br>(0.1 to 0.1)                   | $< 0.05$<br>( $< 0.05$ to $< 0.05$ ) | 10.6<br>(-0.2 to 18.4)                            | 13.0<br>(5.0 to 22.9)                               |
| <b>Impairments</b>                                                                  | --                                   | --                                    | --                                   | --                                                | --                                                  |
| Anaemia                                                                             | 535.0<br>(501.3 to 571.7)            | --                                    | 9.4<br>(6.2 to 14.1)                 | -11.6<br>(-18.8 to -2.9)                          | -9.0<br>(-16.6 to 1.0)                              |
| Developmental intellectual disability                                               | 56.8<br>(43.8 to 70.1)               | --                                    | 6.1<br>(4.5 to 8.0)                  | -13.3<br>(-17.1 to -9.0)                          | -5.5<br>(-9.7 to -0.8)                              |
| Epilepsy                                                                            | 17.2<br>(8.5 to 27.5)                | --                                    | 5.2<br>(2.4 to 9.3)                  | -14.7<br>(-64.7 to 119.8)                         | -8.1<br>(-62.0 to 138.9)                            |
| Guillain-Barre syndrome                                                             | $< 0.05$<br>( $< 0.05$ to $< 0.05$ ) | --                                    | $< 0.05$<br>( $< 0.05$ to $< 0.05$ ) | 0.5<br>(-5.5 to 6.6)                              | -0.1<br>(-0.3 to 0.0)                               |
| Hearing loss                                                                        | 672.9<br>(645.3 to 702.4)            | --                                    | 20.5<br>(14.4 to 28.3)               | 11.8<br>(8.9 to 14.3)                             | -4.3<br>(-6.4 to -2.5)                              |
| Heart failure                                                                       | 47.3<br>(41.1 to 54.4)               | --                                    | 4.5<br>(3.3 to 5.9)                  | 34.3<br>(25.4 to 43.8)                            | 2.1<br>(-4.5 to 9.2)                                |
| Infertility                                                                         | 24.6<br>(19.7 to 30.9)               | --                                    | 0.2<br>(0.1 to 0.3)                  | 5.8<br>(-11.2 to 23.6)                            | 11.5<br>(-6.8 to 31.3)                              |
| Pelvic inflammatory disease                                                         | 1.3<br>(1.1 to 1.6)                  | --                                    | 0.2<br>(0.1 to 0.2)                  | -14.8<br>(-28.9 to 1.8)                           | -11.9<br>(-27.3 to 4.5)                             |
| Vision loss                                                                         | 489.3<br>(424.1 to 559.7)            | --                                    | 11.2<br>(7.5 to 16.6)                | 8.8<br>(3.5 to 15.1)                              | -4.0<br>(-8.4 to 1.0)                               |

We did not calculate incidence for the nine impairments, certain NTDs, and causes with only birth prevalence. Blank cells mean that no estimate is available.

† Incidence for aggregate causes represents the sum of the incidence of the causes below the aggregate.

‡ Incidence estimates for stroke represent first-ever stroke only.

^ Incidence of HIV/AIDS represents new infections of HIV only and does not include new infections of Tuberculosis in HIV positive cases.



SR Table 14: Prevalence, incidence, and YLDs for 2016, percentage change of YLD counts and percentage change of age-standardised YLD rates between 2006 and 2016 by cause and impairments, for all ages, Algeria.

| Cause                                                                                | Prevalence in thousands (95% UI)          | Incidence in thousands (95% UI)               | YLDs in thousands (95% UI)             |                                                   |                                                     |
|--------------------------------------------------------------------------------------|-------------------------------------------|-----------------------------------------------|----------------------------------------|---------------------------------------------------|-----------------------------------------------------|
|                                                                                      | 2016 counts                               | 2016 counts                                   | 2016 counts                            | Percentage change in counts between 2006 and 2016 | Percentage change in age-standardised rates between |
| <b>All causes</b>                                                                    | <b>38,219.7</b><br>(38,015.6 to 38,418.2) | <b>247,653.6†</b><br>(233,865.1 to 263,595.3) | <b>4,476.7</b><br>(3,326.2 to 5,808.8) | <b>21.6</b><br>(19.2 to 24.1)                     | <b>-0.5</b><br>(-2.1 to 1.3)                        |
| <b>Communicable, maternal, neonatal, and nutritional disorders</b>                   | <b>21,459.4</b><br>(20,623.5 to 22,298.1) | <b>136,106.1†</b><br>(124,372.6 to 150,083.7) | <b>435.6</b><br>(302.2 to 605.4)       | <b>-2.1</b><br>(-11.1 to 7.2)                     | <b>-9.0</b><br>(-16.8 to -1.1)                      |
| <b>HIV/AIDS and tuberculosis</b>                                                     | <b>5,717.1</b><br>(4,974.6 to 6,316.0)    | <b>20.2†</b><br>(16.6 to 24.3)                | <b>3.1</b><br>(2.0 to 4.4)             | <b>8.7</b><br>(-13.1 to 34.3)                     | <b>-10.4</b><br>(-26.3 to 7.7)                      |
| Tuberculosis                                                                         | 5,180.8<br>(4,497.6 to 5,912.5)           | 19.7†<br>(16.1 to 23.8)                       | 2.5<br>(1.5 to 3.6)                    | -3.2<br>(-25.2 to 21.7)                           | -19.6<br>(-35.3 to -2.0)                            |
| Drug-susceptible tuberculosis                                                        | 7.9<br>(6.4 to 9.6)                       | 19.3<br>(15.6 to 23.3)                        | 2.4<br>(1.4 to 3.6)                    | -3.7<br>(-26.7 to 21.3)                           | -20.1<br>(-36.8 to -1.7)                            |
| Multidrug-resistant tuberculosis without extensive drug resistance                   | 0.2<br>(< 0.05 to 0.7)                    | 0.4<br>(< 0.05 to 1.8)                        | 0.1<br>(< 0.05 to 0.2)                 | 27.5<br>(-83.0 to 458.0)                          | 5.3<br>(-86.2 to 355.4)                             |
| Extensively drug-resistant tuberculosis                                              | < 0.05<br>(< 0.05 to < 0.05)              | < 0.05<br>(< 0.05 to 0.1)                     | < 0.05<br>(< 0.05 to < 0.05)           | 189.7<br>(-61.4 to 1,166.5)                       | 139.1<br>(-68.6 to 933.6)                           |
| Latent tuberculosis infection                                                        | 5,172.7<br>(4,490.9 to 5,903.2)           | --                                            | --                                     | --                                                | --                                                  |
| HIV/AIDS                                                                             | 7.0<br>(5.1 to 9.1)                       | 0.5 <sup>a</sup><br>(< 0.05 to 0.8)           | 0.7<br>(0.4 to 1.0)                    | 101.1<br>(13.1 to 248.6)                          | 60.2<br>(-13.1 to 192.3)                            |
| Drug-susceptible HIV/AIDS - Tuberculosis                                             | 0.1<br>(< 0.05 to 0.1)                    | 0.1<br>(0.1 to 0.2)                           | < 0.05<br>(< 0.05 to < 0.05)           | -38.6<br>(-46.3 to -30.9)                         | -48.5<br>(-55.0 to -42.0)                           |
| Multidrug-resistant HIV/AIDS - Tuberculosis without extensive drug resistance        | < 0.05<br>(< 0.05 to < 0.05)              | < 0.05<br>(< 0.05 to < 0.05)                  | < 0.05<br>(< 0.05 to < 0.05)           | -19.2<br>(-89.4 to 249.4)                         | -32.2<br>(-91.0 to 193.4)                           |
| Extensively drug-resistant HIV/AIDS - Tuberculosis                                   | < 0.05<br>(< 0.05 to < 0.05)              | < 0.05<br>(< 0.05 to < 0.05)                  | < 0.05<br>(< 0.05 to < 0.05)           | 83.5<br>(-75.9 to 693.0)                          | 53.9<br>(-79.7 to 565.6)                            |
| HIV/AIDS resulting in other diseases                                                 | 6.9<br>(5.0 to 9.1)                       | 0.5<br>(< 0.05 to 0.8)                        | 0.6<br>(0.4 to 1.0)                    | 119.7<br>(17.1 to 324.4)                          | 73.8<br>(-10.5 to 257.5)                            |
| <b>Diarrhoea, lower respiratory infections, and other common infectious diseases</b> | <b>2,351.0</b><br>(2,235.0 to 2,505.4)    | <b>129,072.3†</b><br>(117,171.4 to 142,988.1) | <b>112.6</b><br>(78.1 to 156.9)        | <b>7.9</b><br>(4.4 to 11.6)                       | <b>0.3</b><br>(-2.6 to 3.4)                         |
| Diarrhoeal diseases                                                                  | 359.9<br>(337.0 to 385.0)                 | 23,676.3<br>(22,165.0 to 25,432.7)            | 40.8<br>(28.3 to 56.3)                 | 7.8<br>(1.0 to 15.2)                              | 5.3<br>(-0.5 to 11.8)                               |
| Intestinal infectious diseases                                                       | 0.9<br>(0.8 to 1.1)                       | 17.6†<br>(15.3 to 20.3)                       | 0.1<br>(0.1 to 0.2)                    | -21.9<br>(-33.0 to -8.6)                          | -27.0<br>(-36.6 to -15.7)                           |
| Typhoid fever                                                                        | 0.9<br>(0.8 to 1.1)                       | 14.4<br>(12.5 to 16.6)                        | 0.1<br>(0.1 to 0.2)                    | -21.8<br>(-33.8 to -7.7)                          | -27.0<br>(-37.0 to -15.0)                           |
| Paratyphoid fever                                                                    | 0.1<br>(0.1 to 0.2)                       | 3.2<br>(2.7 to 3.8)                           | < 0.05<br>(< 0.05 to < 0.05)           | -15.7<br>(-29.4 to -0.5)                          | -22.9<br>(-34.4 to -10.1)                           |
| Other intestinal infectious diseases                                                 | --                                        | --                                            | < 0.05<br>(< 0.05 to < 0.05)           | -43.9<br>(-55.8 to -29.3)                         | -44.2<br>(-53.4 to -33.7)                           |
| Lower respiratory infections                                                         | 52.8<br>(48.4 to 57.5)                    | 2,314.8<br>(2,093.4 to 2,551.2)               | 3.1<br>(2.1 to 4.5)                    | 7.9<br>(-3.7 to 20.8)                             | -6.2<br>(-14.8 to 3.3)                              |
| Upper respiratory infections                                                         | 1,312.7<br>(1,163.6 to 1,492.1)           | 98,828.6<br>(87,000.4 to 113,145.1)           | 32.7<br>(19.2 to 50.9)                 | 8.1<br>(1.8 to 14.8)                              | -0.4<br>(-5.5 to 5.1)                               |
| Otitis media                                                                         | 547.9<br>(488.5 to 612.5)                 | 3,206.9<br>(2,535.6 to 4,026.7)               | 15.6<br>(9.8 to 23.5)                  | 0.6<br>(-6.4 to 8.7)                              | -4.5<br>(-11.1 to 2.7)                              |
| Meningitis                                                                           | 74.8<br>(65.3 to 85.7)                    | 13.1<br>(11.1 to 15.7)                        | 8.1<br>(5.7 to 10.6)                   | 13.0<br>(5.0 to 21.1)                             | -0.5<br>(-7.3 to 6.1)                               |
| Pneumococcal meningitis                                                              | 34.7<br>(28.5 to 42.4)                    | 3.2<br>(2.4 to 4.2)                           | 3.4<br>(2.3 to 4.6)                    | 15.3<br>(-2.5 to 34.8)                            | 0.9<br>(-13.9 to 16.8)                              |
| H influenzae type B meningitis                                                       | 13.6<br>(10.7 to 17.7)                    | 2.6<br>(1.4 to 4.0)                           | 1.8<br>(1.2 to 2.5)                    | 1.3<br>(-5.7 to 7.5)                              | -10.0<br>(-16.3 to -4.8)                            |
| Meningococcal infection                                                              | 12.3<br>(9.1 to 16.4)                     | 3.7<br>(2.7 to 4.9)                           | 1.3<br>(0.9 to 1.8)                    | 12.7<br>(7.1 to 19.4)                             | -1.6<br>(-6.4 to 4.1)                               |
| Other meningitis                                                                     | 14.3<br>(10.8 to 18.7)                    | 3.6<br>(2.5 to 5.0)                           | 1.6<br>(1.1 to 2.2)                    | 24.5<br>(14.1 to 36.4)                            | 10.4<br>(2.5 to 20.0)                               |
| Encephalitis                                                                         | 97.4<br>(68.1 to 138.3)                   | 50.1<br>(44.8 to 56.2)                        | 10.7<br>(7.5 to 14.0)                  | 15.6<br>(3.6 to 30.2)                             | -4.0<br>(-13.5 to 7.2)                              |
| Diphtheria                                                                           | < 0.05<br>(< 0.05 to < 0.05)              | < 0.05<br>(< 0.05 to < 0.05)                  | < 0.05<br>(< 0.05 to < 0.05)           | -29.1<br>(-63.4 to 38.8)                          | -30.4<br>(-61.7 to 29.3)                            |
| Whooping cough                                                                       | 1.3<br>(1.0 to 1.8)                       | 9.8<br>(7.1 to 13.3)                          | 0.1<br>(< 0.05 to 0.1)                 | -57.6<br>(-74.0 to -29.9)                         | -51.9<br>(-70.2 to -22.0)                           |
| Tetanus                                                                              | < 0.05<br>(< 0.05 to 0.1)                 | < 0.05<br>(< 0.05 to < 0.05)                  | < 0.05<br>(< 0.05 to < 0.05)           | 9.0<br>(-2.5 to 19.8)                             | -1.8<br>(-11.2 to 8.0)                              |
| Measles                                                                              | 0.3<br>(0.1 to 0.7)                       | 11.4<br>(4.0 to 26.3)                         | < 0.05<br>(< 0.05 to 0.1)              | 27.5<br>(-8.8 to 81.1)                            | 40.7<br>(0.6 to 99.8)                               |
| Varicella and herpes zoster                                                          | 38.7<br>(35.9 to 41.6)                    | 943.8<br>(907.6 to 987.3)                     | 1.3<br>(0.8 to 2.0)                    | 23.7<br>(8.4 to 40.4)                             | -0.1<br>(-10.6 to 12.4)                             |
| <b>Neglected tropical diseases and malaria</b>                                       | <b>4,118.9</b><br>(3,785.6 to 4,464.6)    | <b>141.9†</b><br>(121.0 to 171.7)             | <b>14.8</b><br>(9.0 to 23.6)           | <b>-9.8</b><br>(-31.0 to 16.1)                    | <b>-22.3</b><br>(-39.5 to -1.5)                     |
| Malaria                                                                              | 0.4<br>(0.3 to 0.6)                       | < 0.05<br>(< 0.05 to < 0.05)                  | 0.1<br>(0.1 to 0.2)                    | 13.7<br>(4.9 to 23.5)                             | 0.2<br>(-7.8 to 8.5)                                |
| Chagas disease                                                                       | --                                        | --                                            | --                                     | --                                                | --                                                  |
| Leishmaniasis                                                                        | 16.7<br>(9.3 to 27.4)                     | 26.9<br>(9.5 to 52.7)                         | 0.9<br>(0.3 to 1.8)                    | -58.4<br>(-87.3 to 1.7)                           | -63.0<br>(-88.8 to -10.7)                           |
| Visceral leishmaniasis                                                               | < 0.05<br>(< 0.05 to < 0.05)              | 0.1<br>(< 0.05 to 0.1)                        | < 0.05<br>(< 0.05 to < 0.05)           | -65.0<br>(-71.8 to -56.0)                         | -74.8<br>(-80.9 to -66.5)                           |
| Cutaneous and mucocutaneous leishmaniasis                                            | 13.4<br>(4.7 to 26.3)                     | 26.8<br>(9.5 to 52.6)                         | 0.9<br>(0.3 to 1.8)                    | -58.4<br>(-87.3 to 1.8)                           | -63.0<br>(-88.8 to -10.5)                           |
| African trypanosomiasis                                                              | --                                        | --                                            | --                                     | --                                                | --                                                  |
| Schistosomiasis                                                                      | 344.3<br>(307.7 to 376.8)                 | 113.0<br>(102.2 to 123.2)                     | 2.2<br>(0.9 to 4.6)                    | 25.6<br>(15.2 to 36.6)                            | 1.3<br>(-6.9 to 10.8)                               |
| Cysticercosis                                                                        | --                                        | --                                            | --                                     | --                                                | --                                                  |
| Cystic echinococcosis                                                                | 9.5<br>(1.9 to 33.0)                      | 2.0<br>(0.4 to 6.8)                           | 0.9<br>(0.2 to 3.3)                    | -30.9<br>(-91.1 to 389.9)                         | -43.0<br>(-93.2 to 283.3)                           |
| Lymphatic filariasis                                                                 | --                                        | --                                            | --                                     | --                                                | --                                                  |
| Onchocerciasis                                                                       | --                                        | --                                            | --                                     | --                                                | --                                                  |
| Trachoma                                                                             | 45.4<br>(27.2 to 72.5)                    | --                                            | 3.0<br>(1.7 to 4.8)                    | 10.2<br>(-19.4 to 51.9)                           | -24.9<br>(-47.0 to 8.1)                             |
| Dengue                                                                               | --                                        | --                                            | --                                     | --                                                | --                                                  |
| Yellow fever                                                                         | --                                        | --                                            | --                                     | --                                                | --                                                  |
| Rabies                                                                               | < 0.05<br>(< 0.05 to < 0.05)              | < 0.05<br>(< 0.05 to < 0.05)                  | < 0.05<br>(< 0.05 to < 0.05)           | -17.6<br>(-62.7 to 76.6)                          | -33.4<br>(-71.4 to 52.3)                            |
| Intestinal nematode infections                                                       | 3,476.3<br>(3,157.4 to 3,802.5)           | --                                            | 0.6<br>(0.3 to 1.2)                    | 11.1<br>(-52.7 to 164.2)                          | -3.8<br>(-58.6 to 127.4)                            |
| Ascariasis                                                                           | 2,460.1<br>(2,138.1 to 2,801.5)           | --                                            | 0.5<br>(0.2 to 1.1)                    | 9.9<br>(-64.0 to 242.0)                           | -4.1<br>(-69.2 to 202.7)                            |

| Cause                                                                   | Prevalence in thousands (95% UI)                 | Incidence in thousands (95% UI)                      | YLDs in thousands (95% UI)                    |                                                                      |                                                                        |
|-------------------------------------------------------------------------|--------------------------------------------------|------------------------------------------------------|-----------------------------------------------|----------------------------------------------------------------------|------------------------------------------------------------------------|
|                                                                         | 2016 counts<br>(930.0 to 1,215.9)                | 2016 counts                                          | 2016 counts<br>(0.1 to 0.2)                   | Percentage change in counts between 2006 and 2016<br>(-21.9 to 70.8) | Percentage change in age-standardised rates between<br>(-33.5 to 40.4) |
| Trichuriasis                                                            | 1,065.8<br>(930.0 to 1,215.9)                    | --                                                   | < 0.05<br>(< 0.05 to 0.1)                     | 17.3<br>(-82.5 to 765.1)                                             | 0.7<br>(-85.8 to 658.2)                                                |
| Hookworm disease                                                        | 28.0<br>(23.8 to 32.5)                           | --                                                   | 0.1<br>(0.1 to 0.2)                           | 15.1<br>(-21.9 to 70.8)                                              | -3.3<br>(-33.5 to 40.4)                                                |
| Food-borne trematodiasis                                                | --                                               | --                                                   | --                                            | --                                                                   | --                                                                     |
| Leprosy                                                                 | --                                               | --                                                   | --                                            | --                                                                   | --                                                                     |
| Ebola virus disease                                                     | --                                               | --                                                   | --                                            | --                                                                   | --                                                                     |
| Zika virus disease                                                      | --                                               | --                                                   | --                                            | --                                                                   | --                                                                     |
| Guinea worm disease                                                     | --                                               | --                                                   | --                                            | --                                                                   | --                                                                     |
| Other neglected tropical diseases                                       | 301.6<br>(240.6 to 371.7)                        | --                                                   | 7.2<br>(3.9 to 12.2)                          | -9.9<br>(-33.8 to 24.3)                                              | -11.6<br>(-34.7 to 18.2)                                               |
| <b>Maternal disorders</b>                                               | <b>46.6</b><br><b>(34.9 to 62.2)</b>             | <b>531.6†</b><br><b>(456.8 to 613.8)</b>             | <b>2.9</b><br><b>(1.8 to 4.4)</b>             | <b>10.4</b><br><b>(-20.5 to 53.3)</b>                                | <b>-6.9</b><br><b>(-32.4 to 27.8)</b>                                  |
| Maternal haemorrhage                                                    | 8.1<br>(5.2 to 12.2)                             | 55.3<br>(36.5 to 79.8)                               | 0.3<br>(0.2 to 0.5)                           | -16.5<br>(-47.2 to 32.2)                                             | -29.6<br>(-55.1 to 10.7)                                               |
| Maternal sepsis and other pregnancy related infections                  | 10.8<br>(6.5 to 16.7)                            | 105.8<br>(78.5 to 148.3)                             | 0.4<br>(0.2 to 0.8)                           | -17.4<br>(-63.0 to 68.6)                                             | -29.4<br>(-68.3 to 44.5)                                               |
| Maternal hypertensive disorders                                         | 27.2<br>(16.9 to 41.0)                           | 124.7<br>(92.1 to 164.8)                             | 1.3<br>(0.7 to 2.3)                           | 58.2<br>(-8.0 to 181.5)                                              | 32.1<br>(-23.3 to 135.9)                                               |
| Maternal obstructed labour and uterine rupture                          | 0.6<br>(0.3 to 1.1)                              | 46.3<br>(32.3 to 66.2)                               | 0.2<br>(0.1 to 0.4)                           | -17.4<br>(-64.0 to 101.9)                                            | -29.4<br>(-69.3 to 65.7)                                               |
| Maternal abortion, miscarriage, and ectopic pregnancy                   | 1.6<br>(1.0 to 2.4)                              | 199.6<br>(151.6 to 258.5)                            | 0.2<br>(0.1 to 0.3)                           | -15.9<br>(-61.5 to 88.0)                                             | -31.2<br>(-68.2 to 52.7)                                               |
| Other maternal disorders                                                | --                                               | --                                                   | 0.4<br>(0.3 to 0.7)                           | 4.9<br>(-24.9 to 45.4)                                               | -11.0<br>(-35.4 to 22.2)                                               |
| <b>Neonatal disorders</b>                                               | <b>422.2</b><br><b>(339.1 to 627.1)</b>          | --                                                   | <b>94.4</b><br><b>(56.5 to 185.1)</b>         | <b>3.0</b><br><b>(-11.3 to 25.2)</b>                                 | <b>-4.0</b><br><b>(-17.2 to 17.0)</b>                                  |
| Neonatal preterm birth complications                                    | 302.8<br>(230.0 to 391.4)                        | --                                                   | 37.5<br>(22.5 to 60.2)                        | 6.6<br>(-18.6 to 43.9)                                               | -2.3<br>(-25.1 to 31.7)                                                |
| Neonatal encephalopathy due to birth asphyxia and trauma                | 46.1<br>(21.4 to 84.9)                           | --                                                   | 6.4<br>(1.0 to 17.6)                          | 33.5<br>(-14.1 to 107.1)                                             | 22.4<br>(-20.5 to 92.9)                                                |
| Neonatal sepsis and other neonatal infections                           | 89.0<br>(32.2 to 266.4)                          | --                                                   | 39.1<br>(12.0 to 129.8)                       | -2.3<br>(-18.8 to 33.9)                                              | -8.8<br>(-24.7 to 26.9)                                                |
| Hemolytic disease and other neonatal jaundice                           | 26.6<br>(23.4 to 30.5)                           | --                                                   | 7.7<br>(5.8 to 10.0)                          | 9.4<br>(-6.5 to 27.9)                                                | -1.2<br>(-14.9 to 13.7)                                                |
| Other neonatal disorders                                                | --                                               | --                                                   | 3.7<br>(2.1 to 7.2)                           | -20.8<br>(-33.9 to -0.7)                                             | -9.7<br>(-24.7 to 13.2)                                                |
| <b>Nutritional deficiencies</b>                                         | <b>8,192.9</b><br><b>(7,208.5 to 9,156.5)</b>    | <b>1,019.4†</b><br><b>(610.4 to 1,404.1)</b>         | <b>172.3</b><br><b>(106.0 to 262.4)</b>       | <b>-12.0</b><br><b>(-27.3 to 5.7)</b>                                | <b>-16.2</b><br><b>(-29.9 to -0.2)</b>                                 |
| Protein-energy malnutrition                                             | 229.1<br>(174.5 to 296.6)                        | 117.0<br>(91.1 to 147.4)                             | 11.4<br>(7.1 to 17.4)                         | -35.8<br>(-52.1 to -14.3)                                            | -26.3<br>(-44.6 to -1.7)                                               |
| Iodine deficiency                                                       | 811.1<br>(637.1 to 1,024.9)                      | 19.2<br>(15.3 to 24.0)                               | 18.4<br>(10.6 to 28.1)                        | 15.1<br>(3.2 to 29.4)                                                | -4.6<br>(-14.4 to 5.6)                                                 |
| Vitamin A deficiency                                                    | 1,074.8<br>(600.4 to 1,480.6)                    | 883.2<br>(480.6 to 1,260.0)                          | 4.2<br>(2.4 to 7.1)                           | 2.0<br>(-13.6 to 21.9)                                               | -2.6<br>(-17.2 to 15.1)                                                |
| Iron-deficiency anaemia                                                 | 6,188.9<br>(5,061.3 to 7,503.3)                  | --                                                   | 138.0<br>(82.4 to 219.7)                      | -12.3<br>(-30.2 to 9.6)                                              | -17.2<br>(-33.1 to 2.8)                                                |
| Other nutritional deficiencies                                          | --                                               | --                                                   | 0.4<br>(0.2 to 0.6)                           | -36.9<br>(-54.2 to -14.5)                                            | -28.0<br>(-47.6 to -2.7)                                               |
| <b>Other communicable, maternal, neonatal, and nutritional diseases</b> | <b>8,365.4</b><br><b>(7,805.1 to 8,966.9)</b>    | <b>5,320.7</b><br><b>(4,518.6 to 6,215.0)</b>        | <b>33.9</b><br><b>(21.2 to 53.2)</b>          | <b>16.0</b><br><b>(6.8 to 25.4)</b>                                  | <b>-1.6</b><br><b>(-9.1 to 5.6)</b>                                    |
| Sexually transmitted diseases excluding HIV                             | 6,147.2<br>(5,683.6 to 6,623.6)                  | 4,822.8<br>(4,047.6 to 5,645.5)                      | 27.3<br>(16.6 to 43.8)                        | 21.9<br>(12.9 to 31.6)                                               | 0.1<br>(-7.2 to 7.5)                                                   |
| Syphilis                                                                | 138.4<br>(112.2 to 171.7)                        | 97.3<br>(75.7 to 122.8)                              | 0.5<br>(0.3 to 0.6)                           | 44.1<br>(27.6 to 61.0)                                               | 2.9<br>(-7.9 to 15.6)                                                  |
| Chlamydial infection                                                    | 369.5<br>(283.9 to 472.2)                        | 288.8<br>(227.5 to 360.5)                            | 2.7<br>(1.6 to 4.5)                           | 13.2<br>(-2.9 to 31.8)                                               | -0.6<br>(-13.7 to 15.2)                                                |
| Gonococcal infection                                                    | 942.8<br>(759.1 to 1,168.1)                      | 3,410.0<br>(2,657.7 to 4,217.6)                      | 13.6<br>(7.8 to 22.5)                         | 22.9<br>(10.6 to 36.3)                                               | 0.3<br>(-9.7 to 10.7)                                                  |
| Trichomoniasis                                                          | 648.6<br>(513.6 to 802.7)                        | 548.1<br>(434.3 to 682.0)                            | 0.7<br>(0.3 to 1.5)                           | 21.3<br>(10.8 to 33.9)                                               | 0.5<br>(-7.5 to 9.6)                                                   |
| Genital herpes                                                          | 4,259.0<br>(3,612.1 to 4,988.6)                  | 276.4<br>(234.3 to 330.6)                            | 1.1<br>(0.4 to 2.5)                           | 26.3<br>(16.0 to 34.4)                                               | 0.1<br>(-5.5 to 5.9)                                                   |
| Other sexually transmitted diseases                                     | 205.7<br>(163.9 to 250.0)                        | 202.4<br>(155.7 to 257.7)                            | 8.7<br>(5.5 to 13.5)                          | 21.8<br>(11.2 to 32.6)                                               | -0.4<br>(-8.5 to 8.2)                                                  |
| Hepatitis                                                               | 2,471.0<br>(2,069.3 to 2,973.8)                  | 497.8<br>(300.6 to 821.0)                            | 0.5<br>(0.3 to 0.7)                           | -11.2<br>(-37.1 to 23.9)                                             | -21.2<br>(-39.2 to 2.4)                                                |
| Acute hepatitis A                                                       | 16.0<br>(2.2 to 38.7)                            | 207.5<br>(28.5 to 502.7)                             | 0.1<br>(< 0.05 to 0.2)                        | -15.4<br>(-74.9 to 204.2)                                            | -18.1<br>(-70.3 to 144.3)                                              |
| Hepatitis B                                                             | 1,951.8<br>(1,565.8 to 2,448.2)                  | 253.4<br>(200.4 to 321.4)                            | 0.3<br>(0.2 to 0.5)                           | -11.6<br>(-29.8 to 11.5)                                             | -23.6<br>(-39.8 to -3.8)                                               |
| Hepatitis C                                                             | 501.9<br>(442.9 to 566.2)                        | 19.7<br>(17.1 to 22.5)                               | < 0.05<br>(< 0.05 to < 0.05)                  | -2.1<br>(-4.2 to 0.2)                                                | -4.7<br>(-5.6 to -3.9)                                                 |
| Acute hepatitis E                                                       | 1.3<br>(1.1 to 1.7)                              | 17.2<br>(13.6 to 21.5)                               | < 0.05<br>(< 0.05 to < 0.05)                  | 9.0<br>(-3.8 to 21.5)                                                | -9.6<br>(-17.2 to -1.2)                                                |
| Other infectious diseases                                               | 237.2<br>(190.6 to 289.7)                        | 0.1<br>(< 0.05 to 0.1)                               | 6.1<br>(3.4 to 9.9)                           | -2.9<br>(-24.7 to 25.0)                                              | -6.6<br>(-27.4 to 17.8)                                                |
| <b>Non-communicable diseases</b>                                        | <b>36,211.0</b><br><b>(35,890.7 to 36,495.2)</b> | <b>108,690.3†</b><br><b>(101,685.1 to 115,887.6)</b> | <b>3,799.9</b><br><b>(2,787.7 to 4,924.6)</b> | <b>24.8</b><br><b>(22.4 to 27.2)</b>                                 | <b>0.4</b><br><b>(-1.2 to 2.0)</b>                                     |
| <b>Neoplasms</b>                                                        | <b>59.8</b><br><b>(54.1 to 65.0)</b>             | <b>26.9</b><br><b>(24.8 to 28.2)</b>                 | <b>9.1</b><br><b>(6.5 to 12.0)</b>            | <b>59.9</b><br><b>(49.5 to 70.9)</b>                                 | <b>12.8</b><br><b>(5.7 to 20.1)</b>                                    |
| Lip and oral cavity cancer                                              | 1.2<br>(1.1 to 1.4)                              | 0.3<br>(0.3 to 0.4)                                  | 0.1<br>(0.1 to 0.2)                           | 47.8<br>(26.9 to 73.9)                                               | 1.3<br>(-13.6 to 19.8)                                                 |
| Nasopharynx cancer                                                      | 2.2<br>(1.9 to 2.7)                              | 0.6<br>(0.5 to 0.8)                                  | 0.3<br>(0.2 to 0.4)                           | 20.1<br>(-0.3 to 46.1)                                               | -9.1<br>(-24.3 to 10.4)                                                |
| Other pharynx cancer                                                    | 0.4<br>(0.3 to 0.4)                              | 0.1<br>(0.1 to 0.1)                                  | < 0.05<br>(< 0.05 to 0.1)                     | 69.5<br>(47.5 to 91.9)                                               | 17.0<br>(1.7 to 32.7)                                                  |
| Oesophageal cancer                                                      | 0.3<br>(0.2 to 0.3)                              | 0.3<br>(0.2 to 0.3)                                  | 0.1<br>(< 0.05 to 0.1)                        | 58.2<br>(40.1 to 74.6)                                               | 6.5<br>(-5.4 to 17.9)                                                  |
| Stomach cancer                                                          | 1.8<br>(1.6 to 1.9)                              | 1.2<br>(1.1 to 1.3)                                  | 0.3<br>(0.2 to 0.4)                           | 28.8<br>(15.0 to 43.7)                                               | -11.9<br>(-22.4 to -1.1)                                               |
| Colon and rectum cancer                                                 | 8.5<br>(7.3 to 9.4)                              | 2.6<br>(2.2 to 2.9)                                  | 0.9<br>(0.6 to 1.2)                           | 75.4<br>(48.2 to 101.7)                                              | 20.9<br>(2.4 to 39.2)                                                  |
| Liver cancer                                                            | 0.2<br>(0.2 to 0.3)                              | 0.6<br>(0.5 to 0.7)                                  | 0.1<br>(0.1 to 0.2)                           | 62.2<br>(37.9 to 89.0)                                               | 9.8<br>(-7.0 to 28.0)                                                  |
| Liver cancer due to hepatitis B                                         | 0.2<br>(0.1 to 0.2)                              | 0.2<br>(0.1 to 0.3)                                  | < 0.05<br>(< 0.05 to 0.1)                     | 60.9<br>(34.2 to 88.8)                                               | 10.2<br>(-7.8 to 28.7)                                                 |

| Cause                                              | Prevalence in thousands (95% UI)              | Incidence in thousands (95% UI)          | YLDs in thousands (95% UI)              |                                                   |                                                     |
|----------------------------------------------------|-----------------------------------------------|------------------------------------------|-----------------------------------------|---------------------------------------------------|-----------------------------------------------------|
|                                                    | 2016 counts                                   | 2016 counts                              | 2016 counts                             | Percentage change in counts between 2006 and 2016 | Percentage change in age-standardised rates between |
| Liver cancer due to hepatitis C                    | 0.2<br>(0.1 to 0.2)                           | 0.2<br>(0.1 to 0.3)                      | < 0.05<br>(< 0.05 to 0.1)               | 64.7<br>(37.1 to 94.0)                            | 9.5<br>(-8.7 to 29.8)                               |
| Liver cancer due to alcohol use                    | < 0.05<br>(< 0.05 to 0.1)                     | < 0.05<br>(< 0.05 to 0.1)                | < 0.05<br>(< 0.05 to < 0.05)            | 59.8<br>(29.0 to 93.5)                            | 8.7<br>(-12.6 to 31.4)                              |
| Liver cancer due to other causes                   | 0.1<br>(0.1 to 0.2)                           | 0.1<br>(0.1 to 0.2)                      | < 0.05<br>(< 0.05 to < 0.05)            | 61.4<br>(34.4 to 95.4)                            | 9.9<br>(-9.2 to 33.3)                               |
| Gallbladder and biliary tract cancer               | 0.6<br>(0.5 to 0.7)                           | 0.8<br>(0.7 to 0.9)                      | 0.2<br>(0.1 to 0.2)                     | 36.9<br>(25.5 to 50.7)                            | -7.8<br>(-15.5 to 1.3)                              |
| Pancreatic cancer                                  | 0.7<br>(0.6 to 0.7)                           | 0.9<br>(0.8 to 1.0)                      | 0.2<br>(0.1 to 0.2)                     | 66.7<br>(52.1 to 82.8)                            | 12.0<br>(2.0 to 23.4)                               |
| Larynx cancer                                      | 1.2<br>(1.1 to 1.4)                           | 0.4<br>(0.3 to 0.4)                      | 0.1<br>(0.1 to 0.2)                     | 49.7<br>(29.6 to 75.0)                            | 2.4<br>(-12.0 to 19.9)                              |
| Tracheal, bronchus, and lung cancer                | 2.1<br>(1.8 to 2.3)                           | 1.8<br>(1.6 to 2.0)                      | 0.4<br>(0.3 to 0.6)                     | 39.6<br>(8.8 to 77.2)                             | -4.8<br>(-26.9 to 22.7)                             |
| Malignant skin melanoma                            | 0.6<br>(0.5 to 0.8)                           | 0.1<br>(0.1 to 0.2)                      | < 0.05<br>(< 0.05 to 0.1)               | 103.0<br>(73.8 to 138.9)                          | 39.0<br>(19.2 to 65.1)                              |
| Non-melanoma skin cancer                           | 0.3<br>(0.2 to 0.4)                           | 1.0<br>(0.8 to 1.2)                      | < 0.05<br>(< 0.05 to < 0.05)            | 43.5<br>(17.6 to 75.6)                            | -5.3<br>(-23.4 to 16.0)                             |
| Non-melanoma skin cancer (squamous-cell carcinoma) | 0.3<br>(0.2 to 0.4)                           | 0.3<br>(0.2 to 0.4)                      | < 0.05<br>(< 0.05 to < 0.05)            | 45.9<br>(16.9 to 80.9)                            | -3.9<br>(-23.4 to 19.6)                             |
| Non-melanoma skin cancer (basal-cell carcinoma)    | 0.1<br>(0.1 to 0.2)                           | 0.7<br>(0.5 to 0.9)                      | < 0.05<br>(< 0.05 to < 0.05)            | 20.0<br>(-2.1 to 45.5)                            | -19.6<br>(-34.2 to -1.4)                            |
| Breast cancer                                      | 26.1<br>(18.8 to 31.0)                        | 5.5<br>(4.1 to 6.6)                      | 2.3<br>(1.5 to 3.2)                     | 80.9<br>(42.2 to 124.5)                           | 26.8<br>(-0.2 to 56.0)                              |
| Cervical cancer                                    | 4.0<br>(2.6 to 4.9)                           | 1.1<br>(0.7 to 1.3)                      | 0.4<br>(0.2 to 0.6)                     | 22.5<br>(1.0 to 48.2)                             | -15.2<br>(-29.8 to 2.6)                             |
| Uterine cancer                                     | 1.8<br>(1.5 to 2.1)                           | 0.4<br>(0.3 to 0.5)                      | 0.1<br>(0.1 to 0.2)                     | 106.7<br>(55.7 to 162.0)                          | 37.9<br>(3.6 to 74.9)                               |
| Ovarian cancer                                     | 1.6<br>(1.4 to 1.8)                           | 0.5<br>(0.5 to 0.6)                      | 0.2<br>(0.2 to 0.3)                     | 59.4<br>(36.9 to 82.6)                            | 12.6<br>(-3.1 to 29.9)                              |
| Prostate cancer                                    | 5.5<br>(4.0 to 7.3)                           | 1.4<br>(1.1 to 1.9)                      | 0.6<br>(0.4 to 0.8)                     | 98.1<br>(49.8 to 153.4)                           | 29.7<br>(-0.5 to 64.5)                              |
| Testicular cancer                                  | 0.4<br>(0.3 to 0.5)                           | 0.1<br>(0.1 to 0.1)                      | < 0.05<br>(< 0.05 to < 0.05)            | 82.7<br>(40.3 to 137.0)                           | 40.9<br>(8.9 to 80.9)                               |
| Kidney cancer                                      | 2.1<br>(1.9 to 2.4)                           | 0.6<br>(0.5 to 0.6)                      | 0.2<br>(0.1 to 0.3)                     | 81.3<br>(55.9 to 110.6)                           | 33.0<br>(14.0 to 55.4)                              |
| Bladder cancer                                     | 3.3<br>(2.8 to 3.7)                           | 0.8<br>(0.7 to 0.9)                      | 0.3<br>(0.2 to 0.5)                     | 73.2<br>(48.1 to 100.0)                           | 16.5<br>(-0.6 to 34.6)                              |
| Brain and nervous system cancer                    | 1.4<br>(1.0 to 1.8)                           | 0.7<br>(0.5 to 0.8)                      | 0.2<br>(0.1 to 0.3)                     | 44.9<br>(23.6 to 76.7)                            | 11.9<br>(-4.0 to 37.1)                              |
| Thyroid cancer                                     | 5.7<br>(4.6 to 6.8)                           | 1.1<br>(0.9 to 1.3)                      | 0.4<br>(0.2 to 0.5)                     | 141.7<br>(89.2 to 208.3)                          | 69.0<br>(36.4 to 112.8)                             |
| Mesothelioma                                       | 0.1<br>(0.1 to 0.1)                           | 0.1<br>(< 0.05 to 0.1)                   | < 0.05<br>(< 0.05 to < 0.05)            | 56.2<br>(35.4 to 75.5)                            | 10.2<br>(-4.7 to 24.6)                              |
| Hodgkin lymphoma                                   | 1.2<br>(0.5 to 1.6)                           | 0.4<br>(0.2 to 0.5)                      | 0.1<br>(0.1 to 0.2)                     | 17.3<br>(2.1 to 31.0)                             | -1.6<br>(-12.4 to 10.1)                             |
| Non-Hodgkin's lymphoma                             | 3.3<br>(2.7 to 3.6)                           | 1.1<br>(1.0 to 1.2)                      | 0.4<br>(0.2 to 0.5)                     | 46.3<br>(30.0 to 66.7)                            | 8.8<br>(-3.6 to 23.3)                               |
| Multiple myeloma                                   | 0.6<br>(0.3 to 0.7)                           | 0.3<br>(0.2 to 0.4)                      | 0.1<br>(0.1 to 0.2)                     | 69.2<br>(44.6 to 99.8)                            | 15.7<br>(-0.9 to 36.0)                              |
| Leukaemia                                          | 3.3<br>(2.6 to 3.7)                           | 0.9<br>(0.8 to 1.0)                      | 0.4<br>(0.3 to 0.6)                     | 23.8<br>(12.4 to 35.0)                            | -2.6<br>(-11.3 to 5.2)                              |
| Acute lymphoid leukaemia                           | 0.5<br>(0.4 to 0.6)                           | 0.1<br>(0.1 to 0.1)                      | 0.1<br>(< 0.05 to 0.1)                  | 9.0<br>(-7.7 to 27.6)                             | -3.0<br>(-16.2 to 10.8)                             |
| Chronic lymphoid leukaemia                         | 0.5<br>(0.4 to 0.6)                           | 0.1<br>(0.1 to 0.1)                      | 0.1<br>(< 0.05 to 0.1)                  | 57.6<br>(37.4 to 79.8)                            | 9.9<br>(-3.9 to 24.9)                               |
| Acute myeloid leukaemia                            | 0.3<br>(0.3 to 0.4)                           | 0.2<br>(0.2 to 0.3)                      | 0.1<br>(< 0.05 to 0.1)                  | 34.2<br>(15.7 to 53.4)                            | 8.9<br>(-5.2 to 23.3)                               |
| Chronic myeloid leukaemia                          | 0.3<br>(0.2 to 0.4)                           | 0.1<br>(0.1 to 0.1)                      | < 0.05<br>(< 0.05 to 0.1)               | 31.5<br>(13.3 to 53.6)                            | -5.6<br>(-18.7 to 9.6)                              |
| Other leukaemia                                    | 1.7<br>(1.3 to 2.0)                           | 0.4<br>(0.3 to 0.5)                      | 0.2<br>(0.1 to 0.3)                     | 16.6<br>(0.6 to 32.2)                             | -8.4<br>(-20.5 to 3.9)                              |
| Other neoplasms                                    | 3.5<br>(3.2 to 3.8)                           | 1.2<br>(1.1 to 1.3)                      | 0.4<br>(0.2 to 0.5)                     | 34.9<br>(19.5 to 53.7)                            | 4.2<br>(-8.4 to 20.9)                               |
| <b>Cardiovascular diseases</b>                     | <b>2,454.7</b><br><b>(2,359.8 to 2,551.1)</b> | <b>271.3†</b><br><b>(257.4 to 285.7)</b> | <b>144.8</b><br><b>(106.3 to 188.8)</b> | <b>37.9</b><br><b>(33.2 to 43.0)</b>              | <b>-2.4</b><br><b>(-5.6 to 1.0)</b>                 |
| Rheumatic heart disease                            | 140.9<br>(125.3 to 158.1)                     | 4.3<br>(3.8 to 4.9)                      | 6.7<br>(4.3 to 9.9)                     | 20.6<br>(9.5 to 33.0)                             | -0.2<br>(-9.1 to 9.2)                               |
| Ischaemic heart disease                            | 1,085.1<br>(1,023.0 to 1,149.4)               | 140.5<br>(129.7 to 152.7)                | 41.0<br>(28.4 to 56.1)                  | 46.7<br>(40.7 to 53.5)                            | 1.7<br>(-2.2 to 5.7)                                |
| Cerebrovascular disease                            | 289.1<br>(270.1 to 306.8)                     | 44.6‡<br>(40.6 to 48.8)                  | 45.1<br>(32.3 to 57.1)                  | 37.0<br>(27.0 to 47.5)                            | -6.6<br>(-13.4 to 0.6)                              |
| Ischaemic stroke                                   | 253.8<br>(228.2 to 281.0)                     | 33.3‡<br>(29.5 to 37.5)                  | 38.1<br>(27.3 to 48.4)                  | 38.0<br>(26.5 to 49.8)                            | -6.6<br>(-14.5 to 1.6)                              |
| Hemorrhagic stroke                                 | 47.6<br>(43.2 to 52.5)                        | 11.3‡<br>(10.2 to 12.5)                  | 7.1<br>(5.1 to 9.1)                     | 32.1<br>(18.7 to 48.4)                            | -6.7<br>(-16.6 to 4.9)                              |
| Hypertensive heart disease                         | 55.4<br>(47.2 to 65.4)                        | --                                       | 4.4<br>(3.0 to 6.1)                     | 49.9<br>(34.0 to 66.4)                            | 0.7<br>(-8.9 to 11.3)                               |
| Cardiomyopathy and myocarditis                     | 22.2<br>(19.7 to 24.5)                        | 14.1†<br>(12.3 to 16.1)                  | 2.2<br>(1.5 to 3.2)                     | 28.0<br>(12.6 to 45.3)                            | 2.6<br>(-8.0 to 14.6)                               |
| Myocarditis                                        | 7.9<br>(7.0 to 8.8)                           | 14.1<br>(12.3 to 16.1)                   | 0.6<br>(0.4 to 0.8)                     | 17.6<br>(6.0 to 31.5)                             | 2.0<br>(-7.0 to 12.9)                               |
| Alcoholic cardiomyopathy                           | 2.3<br>(1.9 to 2.8)                           | --                                       | 0.2<br>(0.1 to 0.3)                     | 50.4<br>(28.4 to 76.2)                            | 2.4<br>(-14.1 to 21.6)                              |
| Other cardiomyopathy                               | 17.9<br>(15.5 to 20.6)                        | --                                       | 1.5<br>(1.0 to 2.1)                     | 29.8<br>(7.5 to 54.9)                             | 2.9<br>(-11.3 to 19.0)                              |
| Atrial fibrillation and flutter                    | 149.1<br>(130.6 to 170.9)                     | 12.5<br>(10.8 to 14.5)                   | 11.5<br>(7.7 to 15.9)                   | 48.0<br>(38.5 to 59.3)                            | -1.6<br>(-7.6 to 5.0)                               |
| Peripheral vascular disease                        | 501.3<br>(434.2 to 579.0)                     | 48.6<br>(41.6 to 56.3)                   | 2.3<br>(1.1 to 4.3)                     | 44.8<br>(33.2 to 57.5)                            | -4.7<br>(-12.1 to 3.0)                              |
| Endocarditis                                       | 2.9<br>(2.5 to 3.3)                           | 6.8<br>(6.1 to 7.6)                      | 0.2<br>(0.1 to 0.3)                     | 35.5<br>(18.2 to 56.8)                            | -1.5<br>(-16.7 to 17.2)                             |
| Other cardiovascular and circulatory diseases      | 606.4<br>(525.5 to 702.5)                     | --                                       | 31.4<br>(21.5 to 44.4)                  | 28.7<br>(19.7 to 38.6)                            | -1.9<br>(-8.3 to 5.4)                               |
| <b>Chronic respiratory diseases</b>                | <b>3,572.5</b><br><b>(3,414.5 to 3,738.6)</b> | <b>630.8†</b><br><b>(587.8 to 675.5)</b> | <b>149.3</b><br><b>(108.7 to 199.1)</b> | <b>28.0</b><br><b>(22.9 to 34.4)</b>              | <b>4.6</b><br><b>(0.3 to 9.4)</b>                   |
| Chronic obstructive pulmonary disease              | 989.8<br>(947.7 to 1,034.9)                   | 60.2<br>(57.4 to 62.8)                   | 39.6<br>(33.2 to 45.6)                  | 37.3<br>(26.4 to 49.1)                            | -1.1<br>(-8.9 to 6.7)                               |
| Pneumoconiosis                                     | 2.1<br>(1.9 to 2.3)                           | 0.1<br>(0.1 to 0.1)                      | 0.3<br>(0.2 to 0.5)                     | 43.8<br>(37.4 to 50.2)                            | 2.7<br>(-2.1 to 7.5)                                |
| Silicosis                                          | 0.5<br>(0.4 to 0.5)                           | < 0.05<br>(< 0.05 to < 0.05)             | 0.1<br>(< 0.05 to 0.1)                  | 37.3<br>(31.0 to 44.9)                            | 2.0<br>(-2.3 to 7.0)                                |



| Cause                                                          | Prevalence in thousands (95% UI)           | Incidence in thousands (95% UI)          | YLDs in thousands (95% UI)          |                                                   |                                                     |
|----------------------------------------------------------------|--------------------------------------------|------------------------------------------|-------------------------------------|---------------------------------------------------|-----------------------------------------------------|
|                                                                | 2016 counts                                | 2016 counts                              | 2016 counts                         | Percentage change in counts between 2006 and 2016 | Percentage change in age-standardised rates between |
| Asbestosis                                                     | 0.6<br>(0.5 to 0.7)                        | < 0.05<br>(< 0.05 to < 0.05)             | 0.1<br>(0.1 to 0.1)                 | 43.6<br>(36.8 to 50.3)                            | 1.0<br>(-3.3 to 5.1)                                |
| Coal workers pneumoconiosis                                    | --                                         | --                                       | --                                  | --                                                | --                                                  |
| Other pneumoconiosis                                           | 1.1<br>(0.9 to 1.2)                        | 0.1<br>(0.1 to 0.1)                      | 0.2<br>(0.1 to 0.2)                 | 46.9<br>(34.4 to 58.7)                            | 4.1<br>(-5.2 to 13.6)                               |
| Asthma                                                         | 2,702.1<br>(2,509.1 to 2,915.9)            | 569.1<br>(525.8 to 614.6)                | 105.1<br>(69.1 to 150.7)            | 24.2<br>(18.4 to 31.2)                            | 6.8<br>(2.0 to 12.8)                                |
| Interstitial lung disease and pulmonary sarcoidosis            | 12.7<br>(11.4 to 14.1)                     | 1.4<br>(1.2 to 1.5)                      | 1.4<br>(0.9 to 2.0)                 | 42.6<br>(29.8 to 55.2)                            | 0.9<br>(-9.3 to 12.6)                               |
| Other chronic respiratory diseases                             | --                                         | --                                       | 2.9<br>(2.3 to 3.5)                 | 48.8<br>(23.8 to 81.7)                            | 31.6<br>(10.5 to 57.7)                              |
| <b>Cirrhosis and other chronic liver diseases</b>              | <b>174.9<br/>(165.4 to 185.3)</b>          | <b>8.6<br/>(8.2 to 9.1)</b>              | <b>8.1<br/>(5.6 to 11.2)</b>        | <b>29.4<br/>(16.2 to 43.6)</b>                    | <b>5.4<br/>(-3.9 to 14.6)</b>                       |
| Cirrhosis and other chronic liver diseases due to hepatitis B  | 50.3<br>(41.9 to 59.4)                     | 2.6<br>(2.1 to 3.1)                      | 2.0<br>(1.3 to 2.9)                 | 46.3<br>(22.8 to 74.8)                            | 6.0<br>(-9.1 to 23.6)                               |
| Cirrhosis and other chronic liver diseases due to hepatitis C  | 55.4<br>(44.7 to 67.4)                     | 2.8<br>(2.2 to 3.4)                      | 2.2<br>(1.4 to 3.1)                 | 47.1<br>(21.6 to 76.4)                            | 6.7<br>(-9.2 to 24.4)                               |
| Cirrhosis and other chronic liver diseases due to alcohol use  | 11.0<br>(9.3 to 12.7)                      | 0.6<br>(0.5 to 0.7)                      | 0.4<br>(0.3 to 0.6)                 | 48.2<br>(17.4 to 86.2)                            | 5.1<br>(-17.5 to 33.4)                              |
| Cirrhosis and other chronic liver diseases due to other causes | 58.2<br>(52.2 to 64.5)                     | 2.6<br>(2.4 to 2.9)                      | 3.5<br>(2.4 to 5.0)                 | 12.2<br>(-6.5 to 33.9)                            | 4.1<br>(-11.5 to 22.2)                              |
| <b>Digestive diseases</b>                                      | <b>1,453.9<br/>(1,325.9 to 1,624.7)</b>    | <b>971.8†<br/>(912.6 to 1,039.4)</b>     | <b>45.9<br/>(31.7 to 64.3)</b>      | <b>33.8<br/>(16.3 to 55.2)</b>                    | <b>1.6<br/>(-10.6 to 17.2)</b>                      |
| Peptic ulcer disease                                           | 462.7<br>(375.9 to 586.5)                  | 35.9<br>(31.5 to 40.8)                   | 10.8<br>(6.2 to 17.8)               | 45.8<br>(10.0 to 98.1)                            | 2.2<br>(-21.4 to 37.4)                              |
| Gastritis and duodenitis                                       | 503.3<br>(423.1 to 601.0)                  | 403.8<br>(355.5 to 461.1)                | 9.8<br>(5.8 to 15.6)                | 48.8<br>(14.4 to 96.1)                            | 6.0<br>(-16.6 to 37.1)                              |
| Appendicitis                                                   | 4.8<br>(4.5 to 5.3)                        | 126.6<br>(116.6 to 138.2)                | 1.5<br>(0.9 to 2.2)                 | 4.2<br>(-24.1 to 45.3)                            | -2.4<br>(-26.7 to 30.6)                             |
| Paralytic ileus and intestinal obstruction                     | 0.5<br>(0.5 to 0.6)                        | 13.8<br>(12.2 to 15.6)                   | 0.2<br>(0.1 to 0.2)                 | 27.2<br>(21.9 to 32.7)                            | 2.0<br>(-2.1 to 6.1)                                |
| Inguinal, femoral, and abdominal hernia                        | 448.7<br>(396.8 to 507.0)                  | 169.0<br>(146.7 to 193.0)                | 17.7<br>(11.8 to 24.7)              | 23.0<br>(10.5 to 37.1)                            | -1.9<br>(-10.6 to 7.8)                              |
| Inflammatory bowel disease                                     | 7.1<br>(5.4 to 9.2)                        | 28.0<br>(20.4 to 36.5)                   | 1.1<br>(0.7 to 1.7)                 | 30.6<br>(7.1 to 57.8)                             | 3.0<br>(-15.0 to 24.8)                              |
| Vascular intestinal disorders                                  | 0.4<br>(0.4 to 0.5)                        | 2.1<br>(1.9 to 2.4)                      | 0.1<br>(0.1 to 0.2)                 | 31.5<br>(24.0 to 40.6)                            | -1.1<br>(-7.9 to 6.6)                               |
| Gallbladder and biliary diseases                               | 68.7<br>(60.1 to 77.4)                     | 182.6<br>(157.6 to 208.9)                | 1.0<br>(0.6 to 1.4)                 | 41.8<br>(17.2 to 69.2)                            | 4.7<br>(-14.1 to 27.4)                              |
| Pancreatitis                                                   | 1.1<br>(1.0 to 1.2)                        | 9.9<br>(8.8 to 11.2)                     | 0.1<br>(0.1 to 0.2)                 | 39.5<br>(34.7 to 44.8)                            | 4.9<br>(2.1 to 8.4)                                 |
| Other digestive diseases                                       | --                                         | --                                       | 3.5<br>(2.4 to 4.9)                 | 36.5<br>(19.9 to 57.0)                            | 5.6<br>(-6.7 to 20.2)                               |
| <b>Neurological disorders</b>                                  | <b>16,041.0<br/>(15,434.5 to 16,709.8)</b> | <b>7,823.8<br/>(6,607.9 to 9,195.1)</b>  | <b>467.9<br/>(314.7 to 637.7)</b>   | <b>20.8<br/>(6.6 to 39.1)</b>                     | <b>0.8<br/>(-9.9 to 14.1)</b>                       |
| Alzheimer's disease and other dementias                        | 223.2<br>(188.3 to 265.4)                  | 36.8<br>(30.8 to 44.5)                   | 31.5<br>(22.1 to 42.1)              | 56.8<br>(49.6 to 64.3)                            | -1.2<br>(-5.0 to 3.2)                               |
| Parkinson's disease                                            | 24.2<br>(19.2 to 30.0)                     | 2.9<br>(2.3 to 3.7)                      | 2.8<br>(1.8 to 3.9)                 | 73.8<br>(54.7 to 94.3)                            | 13.8<br>(2.2 to 26.2)                               |
| Epilepsy                                                       | 144.0<br>(52.3 to 210.5)                   | 18.9<br>(6.9 to 27.7)                    | 51.1<br>(15.5 to 93.0)              | 9.4<br>(-62.7 to 234.3)                           | -1.0<br>(-66.0 to 203.4)                            |
| Multiple sclerosis                                             | 15.3<br>(13.6 to 17.3)                     | 0.6<br>(0.5 to 0.7)                      | 4.0<br>(2.8 to 5.5)                 | 43.1<br>(19.0 to 74.9)                            | 9.2<br>(-8.4 to 31.6)                               |
| Motor neuron disease                                           | 0.9<br>(0.8 to 1.1)                        | 0.1<br>(0.1 to 0.2)                      | 0.2<br>(0.1 to 0.3)                 | 23.0<br>(17.4 to 29.2)                            | 2.2<br>(-1.1 to 6.0)                                |
| Migraine                                                       | 6,651.3<br>(6,217.7 to 7,093.7)            | 727.2<br>(671.9 to 786.8)                | 309.2<br>(199.2 to 431.3)           | 18.9<br>(14.7 to 23.6)                            | 0.5<br>(-2.5 to 3.8)                                |
| Tension-type headache                                          | 12,127.5<br>(10,825.4 to 13,521.1)         | 7,036.9<br>(5,802.8 to 8,414.7)          | 56.5<br>(35.7 to 85.0)              | 22.4<br>(15.8 to 29.9)                            | 1.3<br>(-3.3 to 6.6)                                |
| Other neurological disorders                                   | 0.1<br>(0.1 to 0.2)                        | 0.3<br>(0.2 to 0.4)                      | 12.6<br>(4.7 to 21.9)               | 29.8<br>(-47.6 to 241.4)                          | 19.7<br>(-48.8 to 189.7)                            |
| <b>Mental and substance use disorders</b>                      | <b>6,267.6<br/>(6,012.5 to 6,534.1)</b>    | <b>2,370.0†<br/>(2,172.7 to 2,599.4)</b> | <b>880.1<br/>(635.6 to 1,136.0)</b> | <b>17.3<br/>(14.6 to 20.1)</b>                    | <b>0.6<br/>(-1.6 to 2.6)</b>                        |
| Schizophrenia                                                  | 75.5<br>(65.3 to 86.2)                     | 5.1<br>(4.4 to 5.8)                      | 48.0<br>(35.4 to 60.5)              | 30.2<br>(18.5 to 43.4)                            | 0.2<br>(-8.1 to 9.3)                                |
| Alcohol use disorders                                          | 244.5<br>(206.2 to 287.2)                  | 133.7<br>(113.1 to 154.7)                | 24.4<br>(16.3 to 34.4)              | 20.4<br>(9.6 to 32.8)                             | 2.3<br>(-6.6 to 11.6)                               |
| Drug use disorders                                             | 354.3<br>(316.7 to 396.4)                  | 40.6<br>(36.1 to 46.0)                   | 115.6<br>(79.2 to 155.2)            | 26.7<br>(16.3 to 38.6)                            | 5.3<br>(-2.5 to 14.2)                               |
| Opioid use disorders                                           | 260.0<br>(214.8 to 315.9)                  | 24.8<br>(20.8 to 30.1)                   | 107.5<br>(72.3 to 145.6)            | 27.8<br>(16.2 to 41.1)                            | 5.6<br>(-2.8 to 15.2)                               |
| Cocaine use disorders                                          | 16.2<br>(13.8 to 18.9)                     | 1.5<br>(1.2 to 1.8)                      | 2.2<br>(1.3 to 3.4)                 | 12.9<br>(-18.6 to 52.6)                           | 2.6<br>(-22.8 to 35.5)                              |
| Amphetamine use disorders                                      | 3.1<br>(2.2 to 4.2)                        | 0.5<br>(0.4 to 0.7)                      | 0.4<br>(0.2 to 0.7)                 | 13.4<br>(3.6 to 23.7)                             | 2.3<br>(-5.2 to 9.9)                                |
| Cannabis use disorders                                         | 63.8<br>(52.4 to 77.6)                     | 10.6<br>(8.8 to 12.7)                    | 1.9<br>(1.1 to 2.8)                 | 3.4<br>(-16.1 to 28.1)                            | -0.9<br>(-17.8 to 21.5)                             |
| Other drug use disorders                                       | 16.7<br>(14.6 to 18.8)                     | 3.2<br>(2.8 to 3.6)                      | 3.6<br>(2.3 to 5.0)                 | 20.5<br>(-3.0 to 50.0)                            | 3.2<br>(-15.9 to 26.5)                              |
| Depressive disorders                                           | 1,434.3<br>(1,330.0 to 1,550.1)            | 1,698.0<br>(1,511.7 to 1,915.1)          | 252.5<br>(174.2 to 346.5)           | 19.8<br>(13.9 to 26.3)                            | -0.5<br>(-5.0 to 3.9)                               |
| Major depressive disorder                                      | 1,046.0<br>(925.3 to 1,189.0)              | 1,624.7<br>(1,439.4 to 1,841.1)          | 213.0<br>(143.8 to 291.7)           | 18.9<br>(12.1 to 26.5)                            | -0.6<br>(-6.0 to 4.6)                               |
| Dysthymia                                                      | 413.4<br>(360.6 to 476.7)                  | 73.3<br>(64.0 to 83.9)                   | 39.5<br>(26.9 to 58.3)              | 25.1<br>(19.5 to 30.7)                            | -0.1<br>(-3.5 to 3.5)                               |
| Bipolar disorder                                               | 330.2<br>(284.4 to 385.7)                  | 25.4<br>(22.1 to 29.6)                   | 67.2<br>(41.5 to 98.9)              | 13.6<br>(6.9 to 21.4)                             | 0.1<br>(-5.0 to 5.9)                                |
| Anxiety disorders                                              | 1,994.1<br>(1,756.6 to 2,257.5)            | 285.4<br>(250.4 to 323.3)                | 191.7<br>(130.8 to 263.6)           | 14.8<br>(10.6 to 19.2)                            | -0.0<br>(-3.1 to 2.8)                               |
| Eating disorders                                               | 76.4<br>(61.3 to 92.3)                     | 33.8<br>(24.9 to 44.7)                   | 15.1<br>(9.2 to 22.2)               | 14.0<br>(0.8 to 29.2)                             | 7.7<br>(-4.3 to 21.2)                               |
| Anorexia nervosa                                               | 10.9<br>(8.0 to 14.7)                      | 4.6<br>(3.4 to 6.0)                      | 2.3<br>(1.3 to 3.6)                 | 3.9<br>(-19.6 to 36.5)                            | 6.2<br>(-17.4 to 37.3)                              |
| Bulimia nervosa                                                | 60.7<br>(45.1 to 81.4)                     | 29.2<br>(20.7 to 39.9)                   | 12.7<br>(7.5 to 19.0)               | 16.0<br>(0.9 to 34.1)                             | 8.0<br>(-5.3 to 23.4)                               |
| Autistic spectrum disorders                                    | 363.5<br>(321.8 to 409.9)                  | 2.8<br>(1.9 to 4.1)                      | 52.1<br>(35.0 to 73.4)              | 11.0<br>(5.9 to 16.3)                             | 0.1<br>(-4.2 to 4.6)                                |
| Autism                                                         | 102.3<br>(87.2 to 119.8)                   | 0.3<br>(0.2 to 0.5)                      | 26.0<br>(16.4 to 38.3)              | 11.9<br>(2.3 to 22.0)                             | 0.2<br>(-7.7 to 9.0)                                |
| Asperger syndrome and other autistic spectrum disorders        | 261.1<br>(218.6 to 312.9)                  | 2.5<br>(1.6 to 3.8)                      | 26.1<br>(17.0 to 38.2)              | 10.1<br>(4.8 to 15.7)                             | -0.1<br>(-4.8 to 4.6)                               |

| Cause                                                      | Prevalence in thousands (95% UI)                 | Incidence in thousands (95% UI)                              | YLDs in thousands (95% UI)                |                                                   |                                                     |
|------------------------------------------------------------|--------------------------------------------------|--------------------------------------------------------------|-------------------------------------------|---------------------------------------------------|-----------------------------------------------------|
|                                                            | 2016 counts                                      | 2016 counts                                                  | 2016 counts                               | Percentage change in counts between 2006 and 2016 | Percentage change in age-standardised rates between |
| Attention-deficit/hyperactivity disorder                   | 425.0<br>(346.2 to 523.9)                        | 19.8<br>(15.8 to 24.9)                                       | 5.1<br>(2.9 to 8.3)                       | 5.8<br>(-1.2 to 14.3)                             | 0.1<br>(-6.4 to 7.5)                                |
| Conduct disorder                                           | 286.1<br>(232.0 to 339.4)                        | 100.5<br>(79.8 to 122.1)                                     | 34.8<br>(21.3 to 52.8)                    | -9.6<br>(-15.8 to -3.2)                           | 0.1<br>(-6.4 to 6.7)                                |
| Idiopathic developmental intellectual disability           | 549.0<br>(300.8 to 819.7)                        | --                                                           | 19.3<br>(7.8 to 35.4)                     | 6.0<br>(-1.7 to 13.9)                             | -5.4<br>(-12.9 to 1.6)                              |
| Other mental and substance use disorders                   | 735.4<br>(647.3 to 849.0)                        | 24.8<br>(22.1 to 28.1)                                       | 54.4<br>(37.2 to 77.5)                    | 25.7<br>(19.3 to 32.8)                            | 0.0<br>(-4.7 to 5.0)                                |
| <b>Diabetes, urogenital, blood, and endocrine diseases</b> | <b>14,558.9</b><br><b>(14,297.6 to 14,834.4)</b> | <b>4,713.7<sup>+</sup></b><br><b>(4,420.1 to 5,014.5)</b>    | <b>443.7</b><br><b>(316.0 to 604.6)</b>   | <b>39.0</b><br><b>(33.0 to 45.6)</b>              | <b>3.3</b><br><b>(-0.8 to 7.8)</b>                  |
| Diabetes mellitus                                          | 2,567.6<br>(2,297.5 to 2,852.1)                  | 155.2<br>(138.0 to 174.6)                                    | 233.1<br>(156.7 to 335.3)                 | 56.0<br>(47.1 to 66.1)                            | 11.2<br>(4.8 to 18.5)                               |
| Acute glomerulonephritis                                   | 0.4<br>(0.3 to 0.4)                              | 5.7<br>(4.9 to 6.5)                                          | < 0.05<br>(< 0.05 to < 0.05)              | 18.6<br>(12.3 to 25.6)                            | 0.5<br>(-3.6 to 4.8)                                |
| Chronic kidney disease                                     | 2,071.1<br>(1,884.4 to 2,266.0)                  | 144.2<br>(127.8 to 161.9)                                    | 71.8<br>(53.8 to 92.0)                    | 30.8<br>(21.6 to 41.4)                            | -6.9<br>(-13.6 to 0.5)                              |
| Chronic kidney disease due to diabetes mellitus            | 863.0<br>(734.8 to 1,000.7)                      | 60.2<br>(50.0 to 72.0)                                       | 27.9<br>(20.2 to 36.6)                    | 32.0<br>(19.8 to 46.6)                            | -8.8<br>(-16.9 to 1.1)                              |
| Chronic kidney disease due to hypertension                 | 322.7<br>(273.0 to 373.6)                        | 21.5<br>(17.6 to 26.2)                                       | 10.9<br>(7.7 to 14.2)                     | 38.4<br>(20.3 to 57.9)                            | -7.8<br>(-19.7 to 5.1)                              |
| Chronic kidney disease due to glomerulonephritis           | 308.8<br>(260.4 to 361.2)                        | 20.8<br>(16.8 to 25.3)                                       | 12.0<br>(8.4 to 16.1)                     | 28.0<br>(12.0 to 47.0)                            | -0.2<br>(-11.5 to 13.1)                             |
| Chronic kidney disease due to other causes                 | 576.6<br>(486.0 to 676.0)                        | 41.7<br>(34.8 to 49.5)                                       | 21.1<br>(15.1 to 28.6)                    | 27.1<br>(14.6 to 40.7)                            | -6.9<br>(-15.6 to 2.4)                              |
| Urinary diseases and male infertility                      | 911.7<br>(806.5 to 1,022.8)                      | 2,381.8 <sup>+</sup><br>(2,147.7 to 2,632.0)                 | 26.0<br>(16.7 to 38.0)                    | 29.0<br>(14.9 to 43.1)                            | -10.5<br>(-19.9 to -0.4)                            |
| Interstitial nephritis and urinary tract infections        | 35.5<br>(30.9 to 40.2)                           | 1,848.2<br>(1,623.5 to 2,088.3)                              | 1.2<br>(0.7 to 1.8)                       | 15.4<br>(-2.4 to 35.5)                            | 2.0<br>(-13.1 to 17.9)                              |
| Urolithiasis                                               | 17.3<br>(15.1 to 20.0)                           | 456.9<br>(398.6 to 526.7)                                    | 1.3<br>(0.8 to 1.8)                       | 31.1<br>(12.8 to 53.9)                            | 1.1<br>(-13.9 to 19.5)                              |
| Benign prostatic hyperplasia                               | 663.4<br>(560.0 to 789.7)                        | 76.7<br>(64.2 to 90.7)                                       | 21.7<br>(13.7 to 32.1)                    | 31.7<br>(14.0 to 49.3)                            | -11.7<br>(-22.8 to -0.4)                            |
| Male infertility                                           | 162.7<br>(126.9 to 211.7)                        | --                                                           | 1.0<br>(0.4 to 2.0)                       | 21.4<br>(3.1 to 44.4)                             | 6.2<br>(-9.6 to 24.3)                               |
| Other urinary diseases                                     | --                                               | --                                                           | 0.9<br>(0.6 to 1.3)                       | 1.6<br>(-9.7 to 14.6)                             | -15.1<br>(-23.8 to -4.8)                            |
| Gynecological diseases                                     | 4,666.4<br>(4,401.2 to 4,926.9)                  | 1,936.8 <sup>+</sup><br>(1,781.2 to 2,120.7)                 | 61.1<br>(41.5 to 87.8)                    | 18.9<br>(13.0 to 25.1)                            | -3.1<br>(-7.5 to 1.8)                               |
| Uterine fibroids                                           | 417.1<br>(366.4 to 470.9)                        | 48.9<br>(42.0 to 56.6)                                       | 6.8<br>(3.9 to 11.2)                      | 40.7<br>(16.9 to 66.0)                            | 5.2<br>(-12.3 to 24.4)                              |
| Polycystic ovarian syndrome                                | 36.0<br>(26.7 to 46.6)                           | 45.9<br>(32.0 to 61.4)                                       | 0.3<br>(0.1 to 0.6)                       | 22.9<br>(5.7 to 45.0)                             | 2.2<br>(-12.1 to 19.1)                              |
| Female infertility                                         | 79.8<br>(42.5 to 147.5)                          | --                                                           | 0.5<br>(0.1 to 1.1)                       | 19.2<br>(-15.5 to 104.0)                          | 21.1<br>(-11.5 to 100.8)                            |
| Endometriosis                                              | 9.2<br>(7.4 to 11.1)                             | 24.9<br>(20.5 to 31.1)                                       | 0.9<br>(0.5 to 1.3)                       | 11.8<br>(-18.5 to 55.5)                           | 0.3<br>(-24.2 to 36.4)                              |
| Genital prolapse                                           | 1,355.4<br>(1,183.4 to 1,540.9)                  | 94.2<br>(80.7 to 110.3)                                      | 4.2<br>(2.0 to 7.7)                       | 5.7<br>(-2.4 to 13.9)                             | -24.4<br>(-30.1 to -18.4)                           |
| Premenstrual syndrome                                      | 2,655.0<br>(2,468.0 to 2,858.7)                  | 964.6<br>(888.6 to 1,046.4)                                  | 22.0<br>(13.7 to 33.5)                    | 11.4<br>(3.0 to 20.6)                             | -2.6<br>(-10.0 to 5.0)                              |
| Other gynecological diseases                               | 772.4<br>(654.3 to 904.2)                        | 758.4<br>(622.2 to 917.9)                                    | 26.5<br>(17.2 to 38.4)                    | 23.5<br>(14.3 to 32.9)                            | -0.4<br>(-7.5 to 6.5)                               |
| Hemoglobinopathies and hemolytic anaemias                  | 7,526.3<br>(7,313.1 to 7,775.8)                  | --                                                           | 32.8<br>(19.4 to 52.1)                    | 17.9<br>(-6.4 to 46.1)                            | 0.3<br>(-18.8 to 22.5)                              |
| Thalassemias                                               | 1.3<br>(1.2 to 1.4)                              | --                                                           | 0.1<br>(0.1 to 0.1)                       | -8.0<br>(-30.0 to 26.5)                           | -1.9<br>(-24.6 to 32.5)                             |
| Thalassaemias trait                                        | 1,630.0<br>(1,521.6 to 1,761.4)                  | --                                                           | 23.2<br>(13.6 to 36.8)                    | 21.2<br>(-4.8 to 52.4)                            | 0.0<br>(-19.4 to 24.0)                              |
| Sickle cell disorders                                      | 1.2<br>(1.0 to 1.5)                              | --                                                           | 0.2<br>(0.1 to 0.2)                       | 7.5<br>(-4.2 to 21.6)                             | 4.4<br>(-6.2 to 16.9)                               |
| Sickle cell trait                                          | 1,065.1<br>(999.5 to 1,126.3)                    | --                                                           | 3.2<br>(1.8 to 5.3)                       | 32.8<br>(2.1 to 71.0)                             | 16.6<br>(-9.1 to 48.6)                              |
| G6PD deficiency                                            | 926.6<br>(856.2 to 1,003.8)                      | --                                                           | 0.1<br>(0.1 to 0.2)                       | 34.1<br>(-2.1 to 80.6)                            | 12.3<br>(-15.8 to 47.2)                             |
| G6PD trait                                                 | 4,115.4<br>(3,956.6 to 4,312.0)                  | --                                                           | < 0.05<br>(< 0.05 to < 0.05)              | 24.0<br>(-12.1 to 71.3)                           | 3.5<br>(-25.7 to 40.9)                              |
| Other hemoglobinopathies and hemolytic anaemias            | 316.1<br>(255.8 to 385.1)                        | --                                                           | 5.9<br>(3.5 to 9.3)                       | 1.3<br>(-21.7 to 28.4)                            | -5.8<br>(-24.4 to 17.8)                             |
| Endocrine, metabolic, blood, and immune disorders          | 631.7<br>(575.7 to 695.7)                        | 90.0<br>(81.4 to 99.8)                                       | 18.8<br>(12.5 to 26.1)                    | 22.2<br>(10.2 to 35.2)                            | 0.0<br>(-7.4 to 7.6)                                |
| <b>Musculoskeletal disorders</b>                           | <b>7,379.4</b><br><b>(7,019.8 to 7,723.1)</b>    | <b>4,021.1</b><br><b>(3,632.7 to 4,439.1)</b>                | <b>835.8</b><br><b>(602.7 to 1,093.3)</b> | <b>33.6</b><br><b>(29.8 to 37.4)</b>              | <b>1.6</b><br><b>(-1.0 to 4.1)</b>                  |
| Rheumatoid arthritis                                       | 115.6<br>(103.3 to 130.3)                        | 6.9<br>(6.1 to 7.7)                                          | 26.9<br>(18.5 to 36.0)                    | 44.3<br>(32.2 to 56.7)                            | 6.3<br>(-1.5 to 14.7)                               |
| Osteoarthritis                                             | 1,530.6<br>(1,428.7 to 1,631.0)                  | 81.5<br>(75.4 to 88.0)                                       | 93.4<br>(66.3 to 127.4)                   | 66.4<br>(59.8 to 72.8)                            | 13.7<br>(9.5 to 17.8)                               |
| Low back and neck pain                                     | 4,414.7<br>(4,115.9 to 4,752.2)                  | 1,864.7<br>(1,655.2 to 2,076.9)                              | 516.7<br>(365.2 to 676.1)                 | 31.9<br>(27.2 to 36.3)                            | 0.2<br>(-2.9 to 3.2)                                |
| Low back pain                                              | 3,009.6<br>(2,661.4 to 3,412.2)                  | 1,486.5<br>(1,286.3 to 1,697.3)                              | 338.0<br>(237.1 to 447.2)                 | 30.8<br>(23.7 to 37.3)                            | 0.4<br>(-4.2 to 4.8)                                |
| Neck pain                                                  | 1,806.2<br>(1,562.8 to 2,079.3)                  | 378.2<br>(327.6 to 448.5)                                    | 178.7<br>(120.3 to 250.4)                 | 34.1<br>(30.5 to 37.6)                            | -0.1<br>(-2.0 to 1.7)                               |
| Gout                                                       | 125.6<br>(111.6 to 141.8)                        | 25.7<br>(22.5 to 29.0)                                       | 3.9<br>(2.7 to 5.5)                       | 42.0<br>(22.9 to 64.1)                            | -0.1<br>(-13.3 to 14.4)                             |
| Other musculoskeletal disorders                            | 2,289.6<br>(1,946.8 to 2,667.6)                  | 2,042.4<br>(1,697.2 to 2,430.2)                              | 194.9<br>(132.1 to 274.3)                 | 24.8<br>(15.9 to 34.6)                            | -1.4<br>(-7.7 to 5.4)                               |
| <b>Other non-communicable diseases</b>                     | <b>28,850.2</b><br><b>(28,141.1 to 29,482.5)</b> | <b>87,852.2<sup>†</sup></b><br><b>(80,793.7 to 94,637.1)</b> | <b>815.1</b><br><b>(566.3 to 1,132.1)</b> | <b>17.1</b><br><b>(15.5 to 18.9)</b>              | <b>-3.0</b><br><b>(-4.1 to -1.8)</b>                |
| Congenital anomalies                                       | 552.9<br>(496.6 to 614.4)                        | --                                                           | 75.3<br>(53.4 to 100.5)                   | 5.2<br>(0.0 to 11.2)                              | -2.3<br>(-7.2 to 3.0)                               |
| Neural tube defects                                        | 64.8<br>(57.0 to 74.2)                           | --                                                           | 19.3<br>(13.5 to 25.9)                    | 9.3<br>(-1.9 to 22.4)                             | -2.1<br>(-11.7 to 9.4)                              |
| Congenital heart anomalies                                 | 99.7<br>(85.6 to 115.2)                          | --                                                           | 4.7<br>(2.0 to 8.0)                       | 8.6<br>(-3.0 to 21.6)                             | 3.6<br>(-6.7 to 15.4)                               |
| Orofacial clefts                                           | 16.7<br>(14.7 to 19.1)                           | --                                                           | 0.2<br>(0.2 to 0.4)                       | 4.2<br>(-7.1 to 16.2)                             | -5.8<br>(-15.8 to 5.0)                              |
| Down's syndrome                                            | 16.9<br>(14.5 to 19.8)                           | --                                                           | 1.5<br>(1.0 to 2.1)                       | 9.8<br>(1.5 to 18.4)                              | 2.4<br>(-5.3 to 10.0)                               |
| Turner syndrome                                            | 13.7<br>(11.6 to 15.8)                           | --                                                           | 0.2<br>(0.1 to 0.4)                       | 1.4<br>(-32.1 to 47.7)                            | -5.1<br>(-35.6 to 35.8)                             |
| Klinefelter syndrome                                       | 17.2<br>(14.5 to 20.3)                           | --                                                           | 0.1<br>(< 0.05 to 0.2)                    | 8.7<br>(-16.2 to 43.4)                            | -0.2<br>(-22.9 to 30.5)                             |



| Cause                                         | Prevalence in thousands (95% UI)              | Incidence in thousands (95% UI)                | YLDs in thousands (95% UI)              |                                                   |                                                     |
|-----------------------------------------------|-----------------------------------------------|------------------------------------------------|-----------------------------------------|---------------------------------------------------|-----------------------------------------------------|
|                                               | 2016 counts                                   | 2016 counts                                    | 2016 counts                             | Percentage change in counts between 2006 and 2016 | Percentage change in age-standardised rates between |
| Other chromosomal abnormalities               | 111.7<br>(94.0 to 133.0)                      | --                                             | 10.8<br>(7.2 to 15.0)                   | -4.5<br>(-15.4 to 8.0)                            | 2.3<br>(-9.2 to 15.4)                               |
| Congenital musculoskeletal and limb anomalies | 74.7<br>(67.9 to 82.3)                        | --                                             | 11.2<br>(7.5 to 15.4)                   | 11.3<br>(1.1 to 22.7)                             | -0.3<br>(-9.0 to 9.3)                               |
| Urogenital congenital anomalies               | 39.1<br>(34.0 to 44.5)                        | --                                             | 1.3<br>(0.8 to 2.1)                     | -3.2<br>(-15.0 to 10.7)                           | -0.3<br>(-12.4 to 13.7)                             |
| Digestive congenital anomalies                | 50.4<br>(44.1 to 57.0)                        | --                                             | 2.1<br>(1.4 to 3.1)                     | 9.6<br>(-6.5 to 29.2)                             | -1.2<br>(-15.0 to 15.6)                             |
| Other congenital anomalies                    | 144.0<br>(86.3 to 226.2)                      | --                                             | 23.9<br>(15.0 to 37.1)                  | 3.5<br>(-5.6 to 13.5)                             | -6.6<br>(-14.5 to 2.2)                              |
| Skin and subcutaneous diseases                | 11,114.4<br>(10,825.7 to 11,437.9)            | 23,130.8<br>(22,093.1 to 24,301.0)             | 281.2<br>(189.9 to 405.8)               | 7.1<br>(4.3 to 9.7)                               | 2.2<br>(0.1 to 4.5)                                 |
| Dermatitis                                    | 1,796.9<br>(1,676.6 to 1,937.0)               | 2,573.4<br>(2,357.1 to 2,800.8)                | 67.4<br>(39.8 to 109.2)                 | 7.2<br>(1.5 to 13.0)                              | -0.8<br>(-5.9 to 4.1)                               |
| Psoriasis                                     | 292.1<br>(274.9 to 310.9)                     | 42.3<br>(39.8 to 44.8)                         | 25.3<br>(18.0 to 33.2)                  | 32.8<br>(21.5 to 45.5)                            | 10.3<br>(1.9 to 19.2)                               |
| Cellulitis                                    | 19.5<br>(18.1 to 21.0)                        | 411.6<br>(384.5 to 439.8)                      | 1.1<br>(0.7 to 1.6)                     | 14.0<br>(-8.3 to 44.0)                            | 0.7<br>(-18.0 to 24.0)                              |
| Pyoderma                                      | 91.1<br>(87.9 to 94.1)                        | 2,076.6<br>(2,006.6 to 2,152.7)                | 0.5<br>(0.2 to 1.1)                     | 19.0<br>(10.3 to 29.5)                            | 0.3<br>(-6.2 to 7.7)                                |
| Scabies                                       | 452.3<br>(386.4 to 537.7)                     | 1,379.0<br>(1,164.7 to 1,642.2)                | 11.7<br>(6.5 to 18.7)                   | 3.2<br>(-2.6 to 9.1)                              | -2.1<br>(-6.6 to 2.3)                               |
| Fungal skin diseases                          | 2,514.0<br>(2,271.6 to 2,789.2)               | 8,862.1<br>(7,961.6 to 9,822.1)                | 14.1<br>(5.6 to 29.0)                   | 18.1<br>(15.3 to 21.1)                            | 0.0<br>(-1.2 to 1.3)                                |
| Viral skin diseases                           | 1,077.7<br>(1,023.5 to 1,137.0)               | 1,550.8<br>(1,466.6 to 1,635.5)                | 33.0<br>(20.5 to 48.9)                  | 7.8<br>(4.0 to 11.6)                              | 0.1<br>(-2.9 to 3.4)                                |
| Acne vulgaris                                 | 3,162.0<br>(2,809.3 to 3,525.9)               | 2,139.5<br>(1,730.8 to 2,698.8)                | 81.4<br>(54.3 to 118.4)                 | -3.6<br>(-8.2 to 1.4)                             | 5.1<br>(0.5 to 10.0)                                |
| Alopecia areata                               | 78.1<br>(73.0 to 83.4)                        | 138.2<br>(128.9 to 147.4)                      | 2.6<br>(1.7 to 3.9)                     | 17.9<br>(4.7 to 31.8)                             | -0.2<br>(-10.6 to 10.8)                             |
| Pruritus                                      | 341.6<br>(300.7 to 384.1)                     | 273.8<br>(243.3 to 308.9)                      | 3.6<br>(1.7 to 6.6)                     | 21.4<br>(14.0 to 28.7)                            | 0.6<br>(-4.7 to 5.8)                                |
| Urticaria                                     | 415.8<br>(361.1 to 481.4)                     | 743.5<br>(645.5 to 865.2)                      | 25.1<br>(15.8 to 36.0)                  | 5.5<br>(-0.6 to 12.4)                             | 0.1<br>(-4.9 to 5.6)                                |
| Decubitus ulcer                               | 11.8<br>(10.6 to 13.1)                        | 43.1<br>(38.6 to 48.4)                         | 1.9<br>(1.3 to 2.5)                     | 39.5<br>(25.2 to 55.3)                            | 0.5<br>(-12.0 to 13.4)                              |
| Other skin and subcutaneous diseases          | 2,527.1<br>(2,456.9 to 2,595.4)               | 2,897.2<br>(2,809.5 to 2,984.7)                | 13.8<br>(6.6 to 25.6)                   | 26.3<br>(23.1 to 30.0)                            | 2.4<br>(0.2 to 4.8)                                 |
| Sense organ diseases                          | 8,677.8<br>(8,446.1 to 8,961.6)               | 3,783.6†<br>(3,549.1 to 4,055.0)               | 356.0<br>(248.5 to 492.2)               | 24.8<br>(21.8 to 27.9)                            | -6.8<br>(-8.6 to -5.1)                              |
| Glaucoma                                      | 52.9<br>(42.3 to 65.0)                        | --                                             | 4.9<br>(3.1 to 7.0)                     | 47.1<br>(31.8 to 62.2)                            | -2.4<br>(-12.3 to 7.6)                              |
| Cataract                                      | 596.0<br>(502.2 to 702.3)                     | --                                             | 41.5<br>(28.7 to 58.2)                  | 38.3<br>(31.0 to 45.8)                            | -8.2<br>(-12.8 to -3.3)                             |
| Macular degeneration                          | 58.8<br>(44.3 to 76.9)                        | --                                             | 3.9<br>(2.5 to 5.7)                     | 52.8<br>(38.2 to 68.1)                            | 1.3<br>(-8.0 to 10.8)                               |
| Refraction and accommodation disorders        | 4,662.0<br>(4,301.8 to 5,063.3)               | --                                             | 91.4<br>(57.0 to 141.6)                 | 10.6<br>(6.0 to 15.2)                             | -12.1<br>(-16.0 to -8.7)                            |
| Age-related and other hearing loss            | 5,007.0<br>(4,707.4 to 5,341.6)               | --                                             | 165.6<br>(115.7 to 232.2)               | 27.7<br>(22.6 to 32.7)                            | -5.7<br>(-8.4 to -3.2)                              |
| Other vision loss                             | 241.0<br>(204.2 to 276.9)                     | --                                             | 18.0<br>(12.2 to 24.7)                  | 29.3<br>(19.3 to 38.8)                            | -3.2<br>(-10.2 to 3.1)                              |
| Other sense organ diseases                    | 1,002.9<br>(923.0 to 1,082.8)                 | 3,783.6<br>(3,549.1 to 4,055.0)                | 30.8<br>(19.1 to 46.5)                  | 32.6<br>(26.6 to 38.5)                            | 1.4<br>(-2.4 to 5.2)                                |
| Oral disorders                                | 21,432.4<br>(20,328.2 to 22,499.0)            | 60,937.7†<br>(54,030.6 to 67,556.1)            | 102.5<br>(62.4 to 159.3)                | 34.1<br>(31.2 to 37.2)                            | 0.3<br>(-1.5 to 2.1)                                |
| Caries of deciduous teeth                     | 3,397.7<br>(2,611.2 to 4,289.9)               | 13,192.1<br>(8,922.8 to 17,567.4)              | 0.8<br>(0.3 to 1.6)                     | 6.3<br>(-6.6 to 20.7)                             | -0.7<br>(-12.0 to 11.9)                             |
| Caries of permanent teeth                     | 14,900.5<br>(13,458.0 to 16,514.2)            | 47,116.9<br>(41,539.5 to 52,422.4)             | 8.7<br>(3.8 to 17.0)                    | 14.3<br>(8.4 to 20.3)                             | -1.3<br>(-5.1 to 2.9)                               |
| Periodontal disease                           | 4,100.5<br>(3,419.2 to 4,889.7)               | 500.4<br>(406.1 to 612.9)                      | 26.7<br>(10.5 to 54.8)                  | 37.4<br>(32.3 to 42.9)                            | 0.2<br>(-3.0 to 3.7)                                |
| Edentulism and severe tooth loss              | 1,662.7<br>(1,430.8 to 1,898.4)               | 128.4<br>(107.0 to 150.1)                      | 45.7<br>(29.6 to 65.0)                  | 44.9<br>(40.5 to 49.7)                            | 0.7<br>(-2.1 to 3.9)                                |
| Other oral disorders                          | 704.6<br>(672.2 to 737.2)                     | --                                             | 20.6<br>(12.7 to 30.9)                  | 20.5<br>(16.1 to 24.9)                            | 0.0<br>(-3.1 to 3.2)                                |
| <b>Injuries</b>                               | <b>6,594.7</b><br><b>(6,180.7 to 7,044.5)</b> | <b>2,857.2†</b><br><b>(2,703.5 to 3,036.8)</b> | <b>241.2</b><br><b>(162.3 to 344.9)</b> | <b>26.1</b><br><b>(22.9 to 29.0)</b>              | <b>0.5</b><br><b>(-1.5 to 2.3)</b>                  |
| <b>Transport injuries</b>                     | <b>1,015.6</b><br><b>(943.8 to 1,091.2)</b>   | <b>360.5</b><br><b>(324.4 to 394.2)</b>        | <b>53.7</b><br><b>(36.4 to 75.9)</b>    | <b>23.8</b><br><b>(20.9 to 26.6)</b>              | <b>-4.8</b><br><b>(-6.8 to -3.0)</b>                |
| Road injuries                                 | 746.0<br>(696.3 to 800.9)                     | 292.2<br>(259.1 to 324.8)                      | 39.6<br>(26.8 to 56.1)                  | 25.6<br>(22.8 to 28.3)                            | -4.9<br>(-6.8 to -3.1)                              |
| Pedestrian road injuries                      | 157.4<br>(140.0 to 177.6)                     | 44.7<br>(37.8 to 52.2)                         | 8.2<br>(5.6 to 11.7)                    | 22.3<br>(19.4 to 24.9)                            | -8.6<br>(-10.5 to -6.8)                             |
| Cyclist road injuries                         | 120.1<br>(101.0 to 141.6)                     | 49.2<br>(39.2 to 59.4)                         | 5.9<br>(4.0 to 8.4)                     | 27.9<br>(24.7 to 31.0)                            | -0.5<br>(-2.6 to 1.4)                               |
| Motorcyclist road injuries                    | 104.6<br>(88.9 to 126.5)                      | 25.9<br>(20.4 to 32.4)                         | 5.2<br>(3.5 to 7.5)                     | 32.2<br>(28.7 to 35.7)                            | 2.2<br>(0.1 to 4.2)                                 |
| Motor vehicle road injuries                   | 298.8<br>(256.6 to 339.1)                     | 140.5<br>(121.4 to 159.0)                      | 17.1<br>(11.7 to 23.8)                  | 23.4<br>(20.7 to 26.2)                            | -7.3<br>(-9.1 to -5.5)                              |
| Other road injuries                           | 65.2<br>(55.8 to 75.9)                        | 31.9<br>(24.9 to 40.2)                         | 3.2<br>(2.1 to 4.6)                     | 32.6<br>(29.5 to 35.5)                            | 0.4<br>(-1.6 to 2.2)                                |
| Other transport injuries                      | 269.6<br>(227.6 to 320.1)                     | 68.3<br>(58.9 to 80.4)                         | 14.1<br>(9.5 to 20.0)                   | 19.0<br>(15.4 to 22.5)                            | -4.4<br>(-7.0 to -2.0)                              |
| <b>Unintentional injuries</b>                 | <b>5,157.5</b><br><b>(4,759.2 to 5,549.5)</b> | <b>2,419.5</b><br><b>(2,269.2 to 2,597.3)</b>  | <b>168.5</b><br><b>(113.9 to 239.1)</b> | <b>29.5</b><br><b>(26.6 to 32.3)</b>              | <b>3.3</b><br><b>(1.4 to 5.2)</b>                   |
| Falls                                         | 1,781.9<br>(1,528.2 to 2,037.5)               | 796.0<br>(691.2 to 936.3)                      | 68.9<br>(48.1 to 96.6)                  | 32.3<br>(29.2 to 35.2)                            | 3.8<br>(1.6 to 5.8)                                 |
| Drowning                                      | 13.4<br>(11.6 to 15.4)                        | 2.7<br>(2.3 to 3.1)                            | 0.7<br>(0.4 to 1.0)                     | 23.6<br>(19.8 to 27.5)                            | -2.0<br>(-4.9 to 0.6)                               |
| Fire, heat, and hot substances                | 566.7<br>(484.5 to 673.1)                     | 76.0<br>(64.1 to 87.2)                         | 15.0<br>(10.1 to 21.8)                  | 21.4<br>(16.1 to 26.3)                            | -3.8<br>(-7.6 to -0.5)                              |
| Poisonings                                    | 25.8<br>(21.7 to 30.5)                        | 38.1<br>(30.2 to 47.0)                         | 2.3<br>(1.5 to 3.4)                     | 36.7<br>(27.4 to 47.7)                            | 16.4<br>(9.0 to 25.1)                               |
| Exposure to mechanical forces                 | 808.2<br>(686.6 to 993.8)                     | 334.5<br>(280.5 to 393.1)                      | 19.6<br>(12.8 to 28.6)                  | 37.8<br>(34.2 to 41.1)                            | 7.4<br>(4.9 to 9.5)                                 |
| Unintentional firearm injuries                | 39.4<br>(32.1 to 48.0)                        | 10.4<br>(7.2 to 14.5)                          | 1.6<br>(1.0 to 2.4)                     | 42.0<br>(38.2 to 46.0)                            | 9.8<br>(7.0 to 12.3)                                |
| Unintentional suffocation                     | 29.6<br>(23.3 to 37.3)                        | 6.7<br>(4.6 to 9.6)                            | 1.0<br>(0.6 to 1.5)                     | 25.6<br>(21.8 to 29.5)                            | 4.7<br>(2.2 to 7.0)                                 |
| Other exposure to mechanical forces           | 739.2<br>(619.7 to 924.6)                     | 317.4<br>(265.8 to 373.5)                      | 16.9<br>(11.1 to 24.6)                  | 38.2<br>(34.5 to 41.5)                            | 7.3<br>(4.8 to 9.5)                                 |

| Cause                                                                               | Prevalence in thousands (95% UI)        | Incidence in thousands (95% UI)       | YLDs in thousands (95% UI)          |                                                   |                                                     |
|-------------------------------------------------------------------------------------|-----------------------------------------|---------------------------------------|-------------------------------------|---------------------------------------------------|-----------------------------------------------------|
|                                                                                     | 2016 counts                             | 2016 counts                           | 2016 counts                         | Percentage change in counts between 2006 and 2016 | Percentage change in age-standardised rates between |
| Adverse effects of medical treatment                                                | 13.5<br>(10.7 to 16.7)                  | 177.1<br>(155.2 to 199.3)             | 1.8<br>(1.1 to 2.7)                 | 15.1<br>(10.0 to 21.3)                            | -1.8<br>(-5.8 to 2.8)                               |
| Animal contact                                                                      | 222.5<br>(195.3 to 258.1)               | 273.4<br>(225.9 to 325.5)             | 7.0<br>(4.6 to 9.8)                 | 8.0<br>(2.1 to 13.8)                              | -9.0<br>(-13.4 to -4.7)                             |
| Venomous animal contact                                                             | 93.9<br>(77.4 to 112.3)                 | 117.2<br>(91.2 to 149.6)              | 5.0<br>(3.3 to 7.1)                 | 5.5<br>(-1.5 to 13.3)                             | -9.6<br>(-15.5 to -3.8)                             |
| Non-venomous animal contact                                                         | 128.6<br>(106.4 to 159.1)               | 156.2<br>(124.9 to 191.4)             | 2.0<br>(1.3 to 3.1)                 | 14.6<br>(10.3 to 18.2)                            | -7.5<br>(-10.5 to -5.1)                             |
| Foreign body                                                                        | 315.4<br>(264.6 to 379.0)               | 214.1<br>(185.3 to 249.0)             | 10.5<br>(6.8 to 15.4)               | 24.2<br>(20.5 to 28.0)                            | 2.3<br>(-0.5 to 4.8)                                |
| Pulmonary aspiration and foreign body in airway                                     | 85.8<br>(64.5 to 112.7)                 | 33.4<br>(27.0 to 42.0)                | 3.5<br>(2.2 to 5.3)                 | 22.0<br>(18.1 to 26.0)                            | 2.6<br>(-0.4 to 5.5)                                |
| Foreign body in eyes                                                                | 17.6<br>(10.0 to 26.2)                  | 90.1<br>(69.1 to 119.1)               | 1.0<br>(0.5 to 1.7)                 | 22.1<br>(17.2 to 28.4)                            | 1.1<br>(-1.5 to 3.7)                                |
| Foreign body in other body part                                                     | 212.0<br>(174.2 to 270.2)               | 90.6<br>(76.3 to 107.9)               | 6.0<br>(3.9 to 8.7)                 | 25.9<br>(21.3 to 30.4)                            | 2.3<br>(-1.0 to 5.4)                                |
| Environmental heat and cold exposure                                                | 332.5<br>(279.7 to 390.7)               | 94.1<br>(76.6 to 115.7)               | 12.0<br>(7.9 to 17.2)               | 22.8<br>(19.6 to 26.1)                            | -1.0<br>(-3.2 to 1.1)                               |
| Other unintentional injuries                                                        | 1,077.7<br>(871.9 to 1,310.3)           | 413.5<br>(343.9 to 493.0)             | 30.7<br>(20.4 to 44.4)              | 33.9<br>(31.1 to 36.6)                            | 8.6<br>(6.7 to 10.3)                                |
| <b>Self-harm and interpersonal violence</b>                                         | <b>886.6</b><br><b>(788.5 to 991.1)</b> | <b>76.1†</b><br><b>(64.8 to 88.8)</b> | <b>12.3</b><br><b>(8.5 to 16.9)</b> | <b>10.7</b><br><b>(6.4 to 14.8)</b>               | <b>-5.0</b><br><b>(-7.3 to -2.6)</b>                |
| Self-harm                                                                           | 28.7<br>(24.6 to 33.2)                  | 11.0<br>(9.0 to 13.1)                 | 1.4<br>(0.9 to 2.0)                 | 27.0<br>(22.6 to 31.6)                            | 1.4<br>(-1.8 to 4.4)                                |
| Self-harm by firearm                                                                | 1.8<br>(1.5 to 2.2)                     | 0.3<br>(0.2 to 0.5)                   | 0.1<br>( $< 0.05$ to 0.1)           | 19.9<br>(15.6 to 24.4)                            | 2.1<br>(-1.1 to 5.1)                                |
| Self-harm by other specified means                                                  | 26.8<br>(22.7 to 31.2)                  | 10.6<br>(8.7 to 12.6)                 | 1.3<br>(0.8 to 1.9)                 | 27.4<br>(22.8 to 32.1)                            | 1.4<br>(-1.9 to 4.5)                                |
| Interpersonal violence                                                              | 857.9<br>(757.5 to 962.9)               | 65.2†<br>(53.7 to 77.7)               | 10.9<br>(7.5 to 15.1)               | 8.9<br>(4.7 to 13.3)                              | -5.8<br>(-8.2 to -3.4)                              |
| Assault by firearm                                                                  | 5.3<br>(4.6 to 6.2)                     | 1.7<br>(1.2 to 2.4)                   | 0.2<br>(0.2 to 0.4)                 | 32.9<br>(28.2 to 37.6)                            | 6.1<br>(3.1 to 9.0)                                 |
| Assault by sharp object                                                             | 41.2<br>(33.4 to 49.4)                  | 16.1<br>(11.7 to 21.2)                | 1.2<br>(0.8 to 1.7)                 | 25.8<br>(21.8 to 29.6)                            | 1.9<br>(-0.7 to 4.2)                                |
| Sexual violence                                                                     | 726.1<br>(626.8 to 831.9)               | --                                    | 6.0<br>(4.0 to 8.7)                 | -4.1<br>(-8.4 to 0.6)                             | -13.2<br>(-16.4 to -9.9)                            |
| Assault by other means                                                              | 85.3<br>(72.5 to 101.4)                 | 47.4<br>(38.7 to 56.7)                | 3.4<br>(2.3 to 4.9)                 | 32.7<br>(29.6 to 35.8)                            | 4.8<br>(2.7 to 6.7)                                 |
| <b>Forces of nature, conflict and terrorism, and executions and police conflict</b> | <b>261.0</b><br><b>(156.8 to 417.1)</b> | <b>1.0†</b><br><b>(0.7 to 1.4)</b>    | <b>6.7</b><br><b>(1.7 to 17.8)</b>  | <b>-1.0</b><br><b>(-5.7 to 2.5)</b>               | <b>-13.4</b><br><b>(-16.9 to -10.6)</b>             |
| Exposure to forces of nature                                                        | 25.5<br>(12.3 to 43.4)                  | --                                    | 0.8<br>(0.2 to 2.1)                 | -14.7<br>(-17.1 to -11.3)                         | -29.2<br>(-31.1 to -26.4)                           |
| Conflict and terrorism                                                              | 232.8<br>(134.0 to 387.9)               | --                                    | 5.8<br>(1.5 to 15.5)                | 1.1<br>(-4.5 to 4.9)                              | -10.5<br>(-14.5 to -7.6)                            |
| Executions and police conflict                                                      | 2.7<br>(1.7 to 4.3)                     | 1.0<br>(0.7 to 1.4)                   | 0.1<br>( $< 0.05$ to 0.2)           | 29.1<br>(20.3 to 34.6)                            | 14.9<br>(8.2 to 20.0)                               |
| <b>Impairments</b>                                                                  | --                                      | --                                    | --                                  | --                                                | --                                                  |
| Anaemia                                                                             | 10,423.5<br>(8,657.9 to 12,547.8)       | --                                    | 270.6<br>(175.0 to 404.2)           | 2.0<br>(-15.8 to 23.5)                            | -10.7<br>(-24.3 to 5.4)                             |
| Developmental intellectual disability                                               | 1,122.5<br>(862.6 to 1,413.9)           | --                                    | 130.5<br>(90.5 to 220.9)            | 4.9<br>(-3.6 to 14.0)                             | -4.4<br>(-11.3 to 4.0)                              |
| Epilepsy                                                                            | 278.6<br>(166.3 to 449.1)               | --                                    | 107.5<br>(56.4 to 200.8)            | 5.3<br>(-34.6 to 73.3)                            | -4.0<br>(-41.3 to 60.4)                             |
| Guillain-Barre syndrome                                                             | 0.4<br>(0.3 to 0.5)                     | --                                    | 0.1<br>(0.1 to 0.2)                 | 20.0<br>(14.4 to 25.5)                            | 0.0<br>(-0.0 to 0.1)                                |
| Hearing loss                                                                        | 5,533.9<br>(5,233.8 to 5,848.4)         | --                                    | 194.8<br>(137.4 to 268.0)           | 22.3<br>(17.9 to 26.6)                            | -6.2<br>(-8.6 to -3.9)                              |
| Heart failure                                                                       | 269.7<br>(237.5 to 308.5)               | --                                    | 27.0<br>(19.6 to 35.5)              | 50.4<br>(40.8 to 61.1)                            | 2.2<br>(-4.4 to 9.4)                                |
| Infertility                                                                         | 573.2<br>(448.6 to 729.9)               | --                                    | 3.6<br>(1.6 to 6.9)                 | 26.7<br>(8.5 to 49.2)                             | 8.8<br>(-6.5 to 27.3)                               |
| Pelvic inflammatory disease                                                         | 20.2<br>(15.7 to 25.6)                  | --                                    | 2.6<br>(1.7 to 3.9)                 | 14.0<br>(-4.7 to 35.6)                            | -7.3<br>(-21.6 to 9.6)                              |
| Vision loss                                                                         | 5,964.1<br>(5,496.3 to 6,460.1)         | --                                    | 213.8<br>(149.5 to 314.0)           | 15.8<br>(6.7 to 22.7)                             | -9.0<br>(-12.8 to -5.2)                             |

We did not calculate incidence for the nine impairments, certain NTDs, and causes with only birth prevalence. Blank cells mean that no estimate is available.

† Incidence for aggregate causes represents the sum of the incidence of the causes below the aggregate.

‡ Incidence estimates for stroke represent first-ever stroke only.

^ Incidence of HIV/AIDS represents new infections of HIV only and does not include new infections of Tuberculosis in HIV positive cases.

SR Table 14: Prevalence, incidence, and YLDs for 2016, percentage change of YLD counts and percentage change of age-standardised YLD rates between 2006 and 2016 by cause and impairments, for all ages, American Samoa.

| Cause                                                                                | Prevalence in thousands (95% UI) | Incidence in thousands (95% UI)      | YLDs in thousands (95% UI)             |                                                   |                                                     |
|--------------------------------------------------------------------------------------|----------------------------------|--------------------------------------|----------------------------------------|---------------------------------------------------|-----------------------------------------------------|
|                                                                                      | 2016 counts                      | 2016 counts                          | 2016 counts                            | Percentage change in counts between 2006 and 2016 | Percentage change in age-standardised rates between |
| <b>All causes</b>                                                                    | <b>75.5</b><br>(75.0 to 76.0)    | <b>483.9†</b><br>(456.1 to 515.0)    | <b>7.8</b><br>(5.8 to 10.2)            | <b>29.2</b><br>(26.5 to 31.9)                     | <b>0.6</b><br>(-1.1 to 2.3)                         |
| <b>Communicable, maternal, neonatal, and nutritional disorders</b>                   | <b>48.7</b><br>(47.2 to 50.0)    | <b>291.2†</b><br>(266.0 to 320.6)    | <b>1.0</b><br>(0.7 to 1.4)             | <b>20.6</b><br>(12.3 to 29.6)                     | <b>-1.0</b><br>(-6.5 to 5.2)                        |
| <b>HIV/AIDS and tuberculosis</b>                                                     | <b>21.6</b><br>(20.0 to 22.9)    | <b>&lt; 0.05†</b><br>(< 0.05 to 0.1) | <b>&lt; 0.05</b><br>(< 0.05 to < 0.05) | <b>53.4</b><br>(1.7 to 158.8)                     | <b>20.7</b><br>(-16.9 to 97.8)                      |
| Tuberculosis                                                                         | 20.3<br>(19.0 to 21.9)           | < 0.05†<br>(< 0.05 to < 0.05)        | < 0.05<br>(< 0.05 to < 0.05)           | 15.1<br>(-7.0 to 42.4)                            | -7.7<br>(-23.0 to 10.4)                             |
| Drug-susceptible tuberculosis                                                        | < 0.05<br>(< 0.05 to < 0.05)     | < 0.05<br>(< 0.05 to < 0.05)         | < 0.05<br>(< 0.05 to < 0.05)           | 15.5<br>(-8.0 to 45.4)                            | -7.4<br>(-24.0 to 12.4)                             |
| Multidrug-resistant tuberculosis without extensive drug resistance                   | < 0.05<br>(< 0.05 to < 0.05)     | < 0.05<br>(< 0.05 to < 0.05)         | < 0.05<br>(< 0.05 to < 0.05)           | -16.7<br>(-98.1 to 2,335.8)                       | -33.1<br>(-98.5 to 1,851.7)                         |
| Extensively drug-resistant tuberculosis                                              | < 0.05<br>(< 0.05 to < 0.05)     | < 0.05<br>(< 0.05 to < 0.05)         | < 0.05<br>(< 0.05 to < 0.05)           | 174.3<br>(-93.8 to 7,918.4)                       | 120.1<br>(-95.0 to 6,325.3)                         |
| Latent tuberculosis infection                                                        | 20.3<br>(19.0 to 21.9)           | --                                   | --                                     | --                                                | --                                                  |
| HIV/AIDS                                                                             | < 0.05<br>(< 0.05 to 0.3)        | < 0.05^<br>(< 0.05 to < 0.05)        | < 0.05<br>(< 0.05 to < 0.05)           | 133.8<br>(2.7 to 691.3)                           | 83.7<br>(-18.8 to 531.7)                            |
| Drug-susceptible HIV/AIDS - Tuberculosis                                             | < 0.05<br>(< 0.05 to < 0.05)     | < 0.05<br>(< 0.05 to < 0.05)         | < 0.05<br>(< 0.05 to < 0.05)           | 66.1<br>(50.1 to 87.0)                            | 35.4<br>(22.4 to 52.4)                              |
| Multidrug-resistant HIV/AIDS - Tuberculosis without extensive drug resistance        | < 0.05<br>(< 0.05 to < 0.05)     | < 0.05<br>(< 0.05 to < 0.05)         | < 0.05<br>(< 0.05 to < 0.05)           | 20.2<br>(-97.2 to 3,352.1)                        | -2.0<br>(-97.8 to 2,712.7)                          |
| Extensively drug-resistant HIV/AIDS - Tuberculosis                                   | < 0.05<br>(< 0.05 to < 0.05)     | < 0.05<br>(< 0.05 to < 0.05)         | < 0.05<br>(< 0.05 to < 0.05)           | 295.6<br>(-90.9 to 11,260.9)                      | 222.5<br>(-92.6 to 9,156.5)                         |
| HIV/AIDS resulting in other diseases                                                 | < 0.05<br>(< 0.05 to 0.3)        | < 0.05<br>(< 0.05 to < 0.05)         | < 0.05<br>(< 0.05 to < 0.05)           | 139.9<br>(-6.8 to 1,171.5)                        | 87.9<br>(-27.4 to 891.7)                            |
| <b>Diarrhoea, lower respiratory infections, and other common infectious diseases</b> | <b>5.0</b><br>(4.7 to 5.3)       | <b>277.2†</b><br>(252.0 to 305.9)    | <b>0.3</b><br>(0.2 to 0.4)             | <b>31.0</b><br>(26.8 to 35.6)                     | <b>7.9</b><br>(4.8 to 11.5)                         |
| Diarrhoeal diseases                                                                  | 1.2<br>(1.1 to 1.3)              | 79.2<br>(73.1 to 85.4)               | 0.1<br>(0.1 to 0.2)                    | 37.8<br>(30.1 to 46.4)                            | 14.7<br>(8.7 to 20.9)                               |
| Intestinal infectious diseases                                                       | < 0.05<br>(< 0.05 to < 0.05)     | 0.1†<br>(0.1 to 0.1)                 | < 0.05<br>(< 0.05 to < 0.05)           | -3.4<br>(-22.8 to 21.7)                           | -22.4<br>(-34.7 to -7.4)                            |
| Typhoid fever                                                                        | < 0.05<br>(< 0.05 to < 0.05)     | 0.1<br>(0.1 to 0.1)                  | < 0.05<br>(< 0.05 to < 0.05)           | -3.1<br>(-24.0 to 25.4)                           | -22.2<br>(-35.8 to -5.7)                            |
| Paratyphoid fever                                                                    | < 0.05<br>(< 0.05 to < 0.05)     | < 0.05<br>(< 0.05 to < 0.05)         | < 0.05<br>(< 0.05 to < 0.05)           | 0.2<br>(-18.1 to 21.1)                            | -19.9<br>(-32.1 to -6.0)                            |
| Other intestinal infectious diseases                                                 | --                               | --                                   | < 0.05<br>(< 0.05 to < 0.05)           | -42.0<br>(-53.5 to -26.6)                         | -42.5<br>(-52.3 to -31.2)                           |
| Lower respiratory infections                                                         | 0.1<br>(0.1 to 0.1)              | 5.3<br>(4.7 to 5.9)                  | < 0.05<br>(< 0.05 to < 0.05)           | 38.5<br>(23.8 to 55.6)                            | 12.3<br>(2.4 to 22.9)                               |
| Upper respiratory infections                                                         | 2.5<br>(2.2 to 2.9)              | 186.8<br>(162.5 to 216.3)            | 0.1<br>(< 0.05 to 0.1)                 | 21.5<br>(14.7 to 28.2)                            | -0.2<br>(-4.8 to 5.0)                               |
| Otitis media                                                                         | 0.9<br>(0.8 to 1.0)              | 3.6<br>(2.8 to 4.5)                  | < 0.05<br>(< 0.05 to < 0.05)           | 20.4<br>(10.1 to 30.9)                            | 0.8<br>(-7.1 to 8.8)                                |
| Meningitis                                                                           | 0.2<br>(0.2 to 0.3)              | < 0.05<br>(< 0.05 to < 0.05)         | < 0.05<br>(< 0.05 to < 0.05)           | 29.7<br>(18.7 to 40.6)                            | 3.1<br>(-4.8 to 10.9)                               |
| Pneumococcal meningitis                                                              | 0.2<br>(0.1 to 0.2)              | < 0.05<br>(< 0.05 to < 0.05)         | < 0.05<br>(< 0.05 to < 0.05)           | 31.6<br>(14.8 to 49.8)                            | 4.3<br>(-7.5 to 16.7)                               |
| H influenzae type B meningitis                                                       | < 0.05<br>(< 0.05 to 0.1)        | < 0.05<br>(< 0.05 to < 0.05)         | < 0.05<br>(< 0.05 to < 0.05)           | 27.1<br>(22.1 to 32.3)                            | 1.9<br>(-2.0 to 6.3)                                |
| Meningococcal infection                                                              | < 0.05<br>(< 0.05 to < 0.05)     | < 0.05<br>(< 0.05 to < 0.05)         | < 0.05<br>(< 0.05 to < 0.05)           | 27.0<br>(21.7 to 32.0)                            | 1.0<br>(-3.2 to 4.8)                                |
| Other meningitis                                                                     | < 0.05<br>(< 0.05 to < 0.05)     | < 0.05<br>(< 0.05 to < 0.05)         | < 0.05<br>(< 0.05 to < 0.05)           | 25.3<br>(17.8 to 33.2)                            | -0.2<br>(-5.2 to 5.5)                               |
| Encephalitis                                                                         | 0.2<br>(0.1 to 0.3)              | 0.1<br>(0.1 to 0.1)                  | < 0.05<br>(< 0.05 to < 0.05)           | 35.4<br>(19.6 to 54.0)                            | 5.8<br>(-5.6 to 18.6)                               |
| Diphtheria                                                                           | < 0.05<br>(< 0.05 to < 0.05)     | < 0.05<br>(< 0.05 to < 0.05)         | < 0.05<br>(< 0.05 to < 0.05)           | 11.0<br>(-37.7 to 95.3)                           | -10.7<br>(-50.6 to 57.7)                            |
| Whooping cough                                                                       | < 0.05<br>(< 0.05 to < 0.05)     | < 0.05<br>(< 0.05 to < 0.05)         | < 0.05<br>(< 0.05 to < 0.05)           | -14.7<br>(-42.6 to 25.1)                          | -10.0<br>(-40.0 to 32.7)                            |
| Tetanus                                                                              | < 0.05<br>(< 0.05 to < 0.05)     | < 0.05<br>(< 0.05 to < 0.05)         | < 0.05<br>(< 0.05 to < 0.05)           | 17.6<br>(5.4 to 31.6)                             | 3.1<br>(-6.3 to 14.1)                               |
| Measles                                                                              | < 0.05<br>(< 0.05 to < 0.05)     | 0.2<br>(< 0.05 to 0.4)               | < 0.05<br>(< 0.05 to < 0.05)           | --                                                | --                                                  |
| Varicella and herpes zoster                                                          | 0.1<br>(0.1 to 0.1)              | 1.9<br>(1.8 to 2.0)                  | < 0.05<br>(< 0.05 to < 0.05)           | 29.0<br>(13.5 to 47.5)                            | 0.1<br>(-9.2 to 10.5)                               |
| <b>Neglected tropical diseases and malaria</b>                                       | <b>3.5</b><br>(2.8 to 4.2)       | <b>5.0†</b><br>(3.7 to 7.2)          | <b>0.2</b><br>(0.1 to 0.3)             | <b>35.6</b><br>(19.9 to 52.1)                     | <b>2.3</b><br>(-9.3 to 14.0)                        |
| Malaria                                                                              | --                               | --                                   | --                                     | --                                                | --                                                  |
| Chagas disease                                                                       | --                               | --                                   | --                                     | --                                                | --                                                  |
| Leishmaniasis                                                                        | --                               | --                                   | --                                     | --                                                | --                                                  |
| Visceral leishmaniasis                                                               | --                               | --                                   | --                                     | --                                                | --                                                  |
| Cutaneous and mucocutaneous leishmaniasis                                            | --                               | --                                   | --                                     | --                                                | --                                                  |
| African trypanosomiasis                                                              | --                               | --                                   | --                                     | --                                                | --                                                  |
| Schistosomiasis                                                                      | --                               | --                                   | --                                     | --                                                | --                                                  |
| Cysticercosis                                                                        | < 0.05<br>(< 0.05 to < 0.05)     | --                                   | < 0.05<br>(< 0.05 to < 0.05)           | -15.2<br>(-67.4 to 109.1)                         | -36.4<br>(-74.7 to 56.7)                            |
| Cystic echinococcosis                                                                | < 0.05<br>(< 0.05 to < 0.05)     | < 0.05<br>(< 0.05 to < 0.05)         | < 0.05<br>(< 0.05 to < 0.05)           | 2.4<br>(-92.5 to 1,435.7)                         | -20.8<br>(-93.2 to 1,060.4)                         |
| Lymphatic filariasis                                                                 | 3.1<br>(2.3 to 4.0)              | 1.8<br>(1.3 to 2.3)                  | 0.1<br>(0.1 to 0.2)                    | 24.2<br>(9.5 to 32.9)                             | -5.8<br>(-16.6 to 0.3)                              |
| Onchocerciasis                                                                       | --                               | --                                   | --                                     | --                                                | --                                                  |
| Trachoma                                                                             | --                               | --                                   | --                                     | --                                                | --                                                  |
| Dengue                                                                               | 0.1<br>(0.1 to 0.2)              | 2.2<br>(1.4 to 3.3)                  | < 0.05<br>(< 0.05 to < 0.05)           | 252.0<br>(170.6 to 729.3)                         | 182.6<br>(121.4 to 560.3)                           |
| Yellow fever                                                                         | --                               | --                                   | --                                     | --                                                | --                                                  |
| Rabies                                                                               | < 0.05<br>(< 0.05 to < 0.05)     | < 0.05<br>(< 0.05 to < 0.05)         | < 0.05<br>(< 0.05 to < 0.05)           | 6.8<br>(-34.6 to 74.4)                            | -16.6<br>(-47.3 to 35.9)                            |
| Intestinal nematode infections                                                       | --                               | --                                   | --                                     | --                                                | --                                                  |
| Ascariasis                                                                           | --                               | --                                   | --                                     | --                                                | --                                                  |



| Cause                                                                   | Prevalence in thousands (95% UI)        | Incidence in thousands (95% UI)          | YLDs in thousands (95% UI)                          |                                                   |                                                     |
|-------------------------------------------------------------------------|-----------------------------------------|------------------------------------------|-----------------------------------------------------|---------------------------------------------------|-----------------------------------------------------|
|                                                                         | 2016 counts                             | 2016 counts                              | 2016 counts                                         | Percentage change in counts between 2006 and 2016 | Percentage change in age-standardised rates between |
| Trichuriasis                                                            | --                                      | --                                       | --                                                  | --                                                | --                                                  |
| Hookworm disease                                                        | --                                      | --                                       | --                                                  | --                                                | --                                                  |
| Food-borne trematodiasis                                                | --                                      | --                                       | --                                                  | --                                                | --                                                  |
| Leprosy                                                                 | --                                      | --                                       | --                                                  | --                                                | --                                                  |
| Ebola virus disease                                                     | --                                      | --                                       | --                                                  | --                                                | --                                                  |
| Zika virus disease                                                      | < 0.05<br>(< 0.05 to < 0.05)            | 0.9<br>(0.4 to 2.9)                      | < 0.05<br>(< 0.05 to < 0.05)                        | --                                                | --                                                  |
| Guinea worm disease                                                     | --                                      | --                                       | --                                                  | --                                                | --                                                  |
| Other neglected tropical diseases                                       | --                                      | --                                       | < 0.05<br>(< 0.05 to < 0.05)                        | --                                                | --                                                  |
| <b>Maternal disorders</b>                                               | <b>0.1</b><br><b>(&lt; 0.05 to 0.1)</b> | <b>1.0†</b><br><b>(0.9 to 1.2)</b>       | <b>&lt; 0.05</b><br><b>(&lt; 0.05 to &lt; 0.05)</b> | <b>-0.4</b><br><b>(-24.7 to 30.4)</b>             | <b>-16.2</b><br><b>(-36.5 to 9.8)</b>               |
| Maternal haemorrhage                                                    | < 0.05<br>(< 0.05 to < 0.05)            | 0.1<br>(0.1 to 0.2)                      | < 0.05<br>(< 0.05 to < 0.05)                        | -13.1<br>(-42.0 to 32.3)                          | -27.1<br>(-51.7 to 13.2)                            |
| Maternal sepsis and other pregnancy related infections                  | < 0.05<br>(< 0.05 to < 0.05)            | 0.1<br>(< 0.05 to 0.1)                   | < 0.05<br>(< 0.05 to < 0.05)                        | -10.6<br>(-62.6 to 112.5)                         | -23.0<br>(-68.0 to 82.3)                            |
| Maternal hypertensive disorders                                         | < 0.05<br>(< 0.05 to < 0.05)            | 0.1<br>(0.1 to 0.1)                      | < 0.05<br>(< 0.05 to < 0.05)                        | 29.1<br>(-23.8 to 121.0)                          | 7.5<br>(-36.2 to 84.8)                              |
| Maternal obstructed labour and uterine rupture                          | < 0.05<br>(< 0.05 to < 0.05)            | 0.1<br>(0.1 to 0.1)                      | < 0.05<br>(< 0.05 to < 0.05)                        | -6.6<br>(-65.5 to 135.9)                          | -20.0<br>(-70.8 to 110.8)                           |
| Maternal abortion, miscarriage, and ectopic pregnancy                   | < 0.05<br>(< 0.05 to < 0.05)            | 0.6<br>(0.5 to 0.8)                      | < 0.05<br>(< 0.05 to < 0.05)                        | -11.2<br>(-53.9 to 69.2)                          | -25.9<br>(-60.3 to 40.5)                            |
| Other maternal disorders                                                | --                                      | --                                       | < 0.05<br>(< 0.05 to < 0.05)                        | -6.5<br>(-29.5 to 22.4)                           | -20.9<br>(-39.9 to 3.8)                             |
| <b>Neonatal disorders</b>                                               | <b>1.0</b><br><b>(0.8 to 1.2)</b>       | <b>--</b>                                | <b>0.1</b><br><b>(0.1 to 0.2)</b>                   | <b>25.3</b><br><b>(4.9 to 55.5)</b>               | <b>3.4</b><br><b>(-13.6 to 27.7)</b>                |
| Neonatal preterm birth complications                                    | 0.9<br>(0.7 to 1.2)                     | --                                       | 0.1<br>(0.1 to 0.2)                                 | 29.5<br>(2.3 to 70.2)                             | 5.7<br>(-16.5 to 38.3)                              |
| Neonatal encephalopathy due to birth asphyxia and trauma                | 0.1<br>(< 0.05 to 0.1)                  | --                                       | < 0.05<br>(< 0.05 to < 0.05)                        | 24.2<br>(-11.0 to 63.5)                           | 1.6<br>(-26.4 to 31.8)                              |
| Neonatal sepsis and other neonatal infections                           | < 0.05<br>(< 0.05 to 0.1)               | --                                       | < 0.05<br>(< 0.05 to < 0.05)                        | 10.7<br>(-11.8 to 39.6)                           | -9.5<br>(-26.6 to 12.6)                             |
| Hemolytic disease and other neonatal jaundice                           | < 0.05<br>(< 0.05 to < 0.05)            | --                                       | < 0.05<br>(< 0.05 to < 0.05)                        | 23.5<br>(14.3 to 34.0)                            | 0.1<br>(-7.3 to 8.6)                                |
| Other neonatal disorders                                                | --                                      | --                                       | < 0.05<br>(< 0.05 to < 0.05)                        | -7.5<br>(-27.4 to 21.4)                           | 1.9<br>(-19.9 to 33.6)                              |
| <b>Nutritional deficiencies</b>                                         | <b>17.5</b><br><b>(15.4 to 19.1)</b>    | <b>1.3†</b><br><b>(0.9 to 1.8)</b>       | <b>0.4</b><br><b>(0.2 to 0.6)</b>                   | <b>7.3</b><br><b>(-8.0 to 24.3)</b>               | <b>-9.3</b><br><b>(-20.2 to 2.8)</b>                |
| Protein-energy malnutrition                                             | 0.4<br>(0.3 to 0.6)                     | 0.1<br>(0.1 to 0.2)                      | < 0.05<br>(< 0.05 to < 0.05)                        | 5.3<br>(-35.8 to 72.8)                            | 15.8<br>(-29.4 to 88.6)                             |
| Iodine deficiency                                                       | < 0.05<br>(< 0.05 to < 0.05)            | < 0.05<br>(< 0.05 to < 0.05)             | < 0.05<br>(< 0.05 to < 0.05)                        | 29.6<br>(17.2 to 43.7)                            | -1.1<br>(-11.3 to 10.5)                             |
| Vitamin A deficiency                                                    | 1.5<br>(0.9 to 2.1)                     | 1.2<br>(0.7 to 1.7)                      | --                                                  | --                                                | --                                                  |
| Iron-deficiency anaemia                                                 | 15.2<br>(13.3 to 17.4)                  | --                                       | 0.4<br>(0.2 to 0.6)                                 | 7.3<br>(-8.4 to 24.1)                             | -10.4<br>(-21.9 to 1.4)                             |
| Other nutritional deficiencies                                          | --                                      | --                                       | < 0.05<br>(< 0.05 to < 0.05)                        | 4.9<br>(-37.4 to 76.0)                            | 15.4<br>(-30.9 to 93.7)                             |
| <b>Other communicable, maternal, neonatal, and nutritional diseases</b> | <b>21.9</b><br><b>(20.5 to 23.2)</b>    | <b>6.7</b><br><b>(5.8 to 7.6)</b>        | <b>&lt; 0.05</b><br><b>(&lt; 0.05 to 0.1)</b>       | <b>20.7</b><br><b>(9.7 to 30.5)</b>               | <b>-3.6</b><br><b>(-10.1 to 2.7)</b>                |
| Sexually transmitted diseases excluding HIV                             | 15.8<br>(14.7 to 17.0)                  | 6.2<br>(5.4 to 7.2)                      | < 0.05<br>(< 0.05 to < 0.05)                        | 29.7<br>(21.0 to 38.3)                            | -1.7<br>(-7.8 to 4.0)                               |
| Syphilis                                                                | 2.2<br>(1.4 to 3.1)                     | 1.3<br>(0.8 to 2.0)                      | < 0.05<br>(< 0.05 to < 0.05)                        | 31.4<br>(19.0 to 43.9)                            | -2.1<br>(-12.1 to 9.6)                              |
| Chlamydial infection                                                    | 1.2<br>(0.8 to 1.6)                     | 0.9<br>(0.7 to 1.3)                      | < 0.05<br>(< 0.05 to < 0.05)                        | 25.6<br>(11.6 to 41.4)                            | -1.4<br>(-12.6 to 10.3)                             |
| Gonococcal infection                                                    | 0.2<br>(0.1 to 0.3)                     | 0.5<br>(0.3 to 0.8)                      | < 0.05<br>(< 0.05 to < 0.05)                        | 26.8<br>(4.4 to 53.9)                             | -1.4<br>(-17.7 to 18.0)                             |
| Trichomoniasis                                                          | 2.1<br>(1.7 to 2.6)                     | 1.9<br>(1.5 to 2.2)                      | < 0.05<br>(< 0.05 to < 0.05)                        | 29.6<br>(18.8 to 39.9)                            | 0.5<br>(-6.8 to 7.5)                                |
| Genital herpes                                                          | 11.4<br>(9.8 to 13.2)                   | 0.7<br>(0.6 to 0.9)                      | < 0.05<br>(< 0.05 to < 0.05)                        | 30.2<br>(20.0 to 40.5)                            | -0.1<br>(-7.1 to 7.7)                               |
| Other sexually transmitted diseases                                     | 0.9<br>(0.7 to 1.0)                     | 0.9<br>(0.7 to 1.1)                      | < 0.05<br>(< 0.05 to < 0.05)                        | 31.4<br>(17.6 to 45.7)                            | -2.8<br>(-12.5 to 7.3)                              |
| Hepatitis                                                               | 7.4<br>(6.2 to 8.8)                     | 0.5<br>(0.4 to 0.6)                      | < 0.05<br>(< 0.05 to < 0.05)                        | 37.0<br>(13.1 to 65.4)                            | 16.2<br>(-2.8 to 37.2)                              |
| Acute hepatitis A                                                       | < 0.05<br>(< 0.05 to < 0.05)            | 0.1<br>(0.1 to 0.1)                      | < 0.05<br>(< 0.05 to < 0.05)                        | 38.1<br>(-15.0 to 125.7)                          | 17.4<br>(-23.7 to 83.7)                             |
| Hepatitis B                                                             | 5.6<br>(4.5 to 7.0)                     | 0.3<br>(0.2 to 0.4)                      | < 0.05<br>(< 0.05 to < 0.05)                        | 52.2<br>(20.6 to 92.2)                            | 18.1<br>(-5.6 to 46.3)                              |
| Hepatitis C                                                             | 1.8<br>(1.6 to 2.0)                     | < 0.05<br>(< 0.05 to 0.1)                | < 0.05<br>(< 0.05 to < 0.05)                        | -6.1<br>(-29.1 to 26.0)                           | 1.7<br>(-23.0 to 36.4)                              |
| Acute hepatitis E                                                       | < 0.05<br>(< 0.05 to < 0.05)            | < 0.05<br>(< 0.05 to < 0.05)             | < 0.05<br>(< 0.05 to < 0.05)                        | 43.7<br>(25.5 to 62.1)                            | 22.2<br>(10.9 to 34.0)                              |
| Other infectious diseases                                               | 0.6<br>(0.5 to 0.7)                     | < 0.05<br>(< 0.05 to < 0.05)             | < 0.05<br>(< 0.05 to < 0.05)                        | 6.4<br>(-15.1 to 29.2)                            | -8.0<br>(-23.6 to 8.1)                              |
| <b>Non-communicable diseases</b>                                        | <b>70.0</b><br><b>(69.3 to 70.6)</b>    | <b>187.7†</b><br><b>(174.9 to 200.7)</b> | <b>6.4</b><br><b>(4.7 to 8.3)</b>                   | <b>30.1</b><br><b>(27.4 to 33.2)</b>              | <b>0.4</b><br><b>(-1.4 to 2.3)</b>                  |
| <b>Neoplasms</b>                                                        | <b>0.3</b><br><b>(0.3 to 0.3)</b>       | <b>0.1</b><br><b>(0.1 to 0.1)</b>        | <b>&lt; 0.05</b><br><b>(&lt; 0.05 to &lt; 0.05)</b> | <b>55.8</b><br><b>(46.4 to 65.8)</b>              | <b>14.5</b><br><b>(8.2 to 21.6)</b>                 |
| Lip and oral cavity cancer                                              | < 0.05<br>(< 0.05 to < 0.05)            | < 0.05<br>(< 0.05 to < 0.05)             | < 0.05<br>(< 0.05 to < 0.05)                        | 43.3<br>(18.1 to 73.5)                            | 8.0<br>(-8.7 to 27.4)                               |
| Nasopharynx cancer                                                      | < 0.05<br>(< 0.05 to < 0.05)            | < 0.05<br>(< 0.05 to < 0.05)             | < 0.05<br>(< 0.05 to < 0.05)                        | 55.5<br>(32.6 to 81.1)                            | 13.4<br>(-0.6 to 30.1)                              |
| Other pharynx cancer                                                    | < 0.05<br>(< 0.05 to < 0.05)            | < 0.05<br>(< 0.05 to < 0.05)             | < 0.05<br>(< 0.05 to < 0.05)                        | 77.6<br>(49.3 to 109.4)                           | 28.8<br>(9.2 to 49.8)                               |
| Oesophageal cancer                                                      | < 0.05<br>(< 0.05 to < 0.05)            | < 0.05<br>(< 0.05 to < 0.05)             | < 0.05<br>(< 0.05 to < 0.05)                        | 29.0<br>(16.4 to 43.8)                            | -0.4<br>(-11.6 to 12.5)                             |
| Stomach cancer                                                          | < 0.05<br>(< 0.05 to < 0.05)            | < 0.05<br>(< 0.05 to < 0.05)             | < 0.05<br>(< 0.05 to < 0.05)                        | 28.2<br>(12.7 to 45.2)                            | -2.9<br>(-16.5 to 11.3)                             |
| Colon and rectum cancer                                                 | < 0.05<br>(< 0.05 to < 0.05)            | < 0.05<br>(< 0.05 to < 0.05)             | < 0.05<br>(< 0.05 to < 0.05)                        | 58.0<br>(36.3 to 83.1)                            | 19.4<br>(3.2 to 37.3)                               |
| Liver cancer                                                            | < 0.05<br>(< 0.05 to < 0.05)            | < 0.05<br>(< 0.05 to < 0.05)             | < 0.05<br>(< 0.05 to < 0.05)                        | 34.2<br>(21.7 to 47.5)                            | 1.4<br>(-7.5 to 11.1)                               |
| Liver cancer due to hepatitis B                                         | < 0.05<br>(< 0.05 to < 0.05)            | < 0.05<br>(< 0.05 to < 0.05)             | < 0.05<br>(< 0.05 to < 0.05)                        | 35.7<br>(22.6 to 50.0)                            | 1.7<br>(-7.8 to 12.1)                               |

| Cause                                              | Prevalence in thousands (95% UI)  | Incidence in thousands (95% UI)    | YLDs in thousands (95% UI)        |                                                   |                                                     |
|----------------------------------------------------|-----------------------------------|------------------------------------|-----------------------------------|---------------------------------------------------|-----------------------------------------------------|
|                                                    | 2016 counts                       | 2016 counts                        | 2016 counts                       | Percentage change in counts between 2006 and 2016 | Percentage change in age-standardised rates between |
| Liver cancer due to hepatitis C                    | < 0.05<br>(< 0.05 to < 0.05)      | < 0.05<br>(< 0.05 to < 0.05)       | < 0.05<br>(< 0.05 to < 0.05)      | 32.0<br>(19.5 to 47.2)                            | 2.9<br>(-7.4 to 14.3)                               |
| Liver cancer due to alcohol use                    | < 0.05<br>(< 0.05 to < 0.05)      | < 0.05<br>(< 0.05 to < 0.05)       | < 0.05<br>(< 0.05 to < 0.05)      | 36.0<br>(21.1 to 50.8)                            | 2.2<br>(-8.0 to 13.5)                               |
| Liver cancer due to other causes                   | < 0.05<br>(< 0.05 to < 0.05)      | < 0.05<br>(< 0.05 to < 0.05)       | < 0.05<br>(< 0.05 to < 0.05)      | 31.1<br>(17.2 to 46.7)                            | -0.9<br>(-11.5 to 9.7)                              |
| Gallbladder and biliary tract cancer               | < 0.05<br>(< 0.05 to < 0.05)      | < 0.05<br>(< 0.05 to < 0.05)       | < 0.05<br>(< 0.05 to < 0.05)      | 49.7<br>(27.7 to 69.7)                            | 10.4<br>(-3.2 to 23.4)                              |
| Pancreatic cancer                                  | < 0.05<br>(< 0.05 to < 0.05)      | < 0.05<br>(< 0.05 to < 0.05)       | < 0.05<br>(< 0.05 to < 0.05)      | 26.5<br>(14.8 to 39.1)                            | -3.1<br>(-12.4 to 7.1)                              |
| Larynx cancer                                      | < 0.05<br>(< 0.05 to < 0.05)      | < 0.05<br>(< 0.05 to < 0.05)       | < 0.05<br>(< 0.05 to < 0.05)      | 40.8<br>(24.7 to 58.7)                            | 6.0<br>(-8.9 to 22.9)                               |
| Tracheal, bronchus, and lung cancer                | < 0.05<br>(< 0.05 to < 0.05)      | < 0.05<br>(< 0.05 to < 0.05)       | < 0.05<br>(< 0.05 to < 0.05)      | 28.4<br>(8.0 to 53.7)                             | 2.1<br>(-14.1 to 22.2)                              |
| Malignant skin melanoma                            | < 0.05<br>(< 0.05 to < 0.05)      | < 0.05<br>(< 0.05 to < 0.05)       | < 0.05<br>(< 0.05 to < 0.05)      | 44.1<br>(16.8 to 79.4)                            | 7.9<br>(-10.9 to 30.8)                              |
| Non-melanoma skin cancer                           | < 0.05<br>(< 0.05 to < 0.05)      | < 0.05<br>(< 0.05 to < 0.05)       | < 0.05<br>(< 0.05 to < 0.05)      | -7.8<br>(-55.3 to 64.2)                           | -26.4<br>(-65.3 to 36.5)                            |
| Non-melanoma skin cancer (squamous-cell carcinoma) | < 0.05<br>(< 0.05 to < 0.05)      | < 0.05<br>(< 0.05 to < 0.05)       | < 0.05<br>(< 0.05 to < 0.05)      | -7.9<br>(-55.4 to 64.3)                           | -26.4<br>(-65.3 to 36.5)                            |
| Non-melanoma skin cancer (basal-cell carcinoma)    | < 0.05<br>(< 0.05 to < 0.05)      | < 0.05<br>(< 0.05 to < 0.05)       | < 0.05<br>(< 0.05 to < 0.05)      | 32.4<br>(17.8 to 56.0)                            | -0.4<br>(-8.9 to 14.3)                              |
| Breast cancer                                      | 0.1<br>(0.1 to 0.1)               | < 0.05<br>(< 0.05 to < 0.05)       | < 0.05<br>(< 0.05 to < 0.05)      | 82.5<br>(47.2 to 123.6)                           | 30.3<br>(9.5 to 55.3)                               |
| Cervical cancer                                    | < 0.05<br>(< 0.05 to < 0.05)      | < 0.05<br>(< 0.05 to < 0.05)       | < 0.05<br>(< 0.05 to < 0.05)      | 48.4<br>(16.4 to 85.3)                            | 4.2<br>(-16.9 to 28.9)                              |
| Uterine cancer                                     | < 0.05<br>(< 0.05 to < 0.05)      | < 0.05<br>(< 0.05 to < 0.05)       | < 0.05<br>(< 0.05 to < 0.05)      | 84.7<br>(47.4 to 130.2)                           | 29.2<br>(6.1 to 54.9)                               |
| Ovarian cancer                                     | < 0.05<br>(< 0.05 to < 0.05)      | < 0.05<br>(< 0.05 to < 0.05)       | < 0.05<br>(< 0.05 to < 0.05)      | 50.0<br>(11.8 to 97.3)                            | 11.2<br>(-14.5 to 45.4)                             |
| Prostate cancer                                    | 0.1<br>(< 0.05 to 0.1)            | < 0.05<br>(< 0.05 to < 0.05)       | < 0.05<br>(< 0.05 to < 0.05)      | 42.5<br>(20.1 to 65.5)                            | 9.6<br>(-6.4 to 27.0)                               |
| Testicular cancer                                  | < 0.05<br>(< 0.05 to < 0.05)      | < 0.05<br>(< 0.05 to < 0.05)       | < 0.05<br>(< 0.05 to < 0.05)      | 79.2<br>(45.6 to 121.7)                           | 47.4<br>(20.7 to 80.4)                              |
| Kidney cancer                                      | < 0.05<br>(< 0.05 to < 0.05)      | < 0.05<br>(< 0.05 to < 0.05)       | < 0.05<br>(< 0.05 to < 0.05)      | 31.9<br>(10.3 to 59.6)                            | -0.3<br>(-15.0 to 18.1)                             |
| Bladder cancer                                     | < 0.05<br>(< 0.05 to < 0.05)      | < 0.05<br>(< 0.05 to < 0.05)       | < 0.05<br>(< 0.05 to < 0.05)      | 64.6<br>(43.0 to 91.9)                            | 20.6<br>(6.1 to 37.6)                               |
| Brain and nervous system cancer                    | < 0.05<br>(< 0.05 to < 0.05)      | < 0.05<br>(< 0.05 to < 0.05)       | < 0.05<br>(< 0.05 to < 0.05)      | 42.0<br>(26.0 to 64.2)                            | 9.8<br>(-1.7 to 28.0)                               |
| Thyroid cancer                                     | < 0.05<br>(< 0.05 to < 0.05)      | < 0.05<br>(< 0.05 to < 0.05)       | < 0.05<br>(< 0.05 to < 0.05)      | 79.3<br>(41.4 to 126.4)                           | 25.8<br>(3.1 to 52.6)                               |
| Mesothelioma                                       | < 0.05<br>(< 0.05 to < 0.05)      | < 0.05<br>(< 0.05 to < 0.05)       | < 0.05<br>(< 0.05 to < 0.05)      | 41.9<br>(25.3 to 60.1)                            | 6.7<br>(-5.6 to 20.4)                               |
| Hodgkin lymphoma                                   | < 0.05<br>(< 0.05 to < 0.05)      | < 0.05<br>(< 0.05 to < 0.05)       | < 0.05<br>(< 0.05 to < 0.05)      | 76.6<br>(47.8 to 115.9)                           | 36.1<br>(18.3 to 59.7)                              |
| Non-Hodgkin's lymphoma                             | < 0.05<br>(< 0.05 to < 0.05)      | < 0.05<br>(< 0.05 to < 0.05)       | < 0.05<br>(< 0.05 to < 0.05)      | 65.0<br>(42.4 to 87.2)                            | 27.2<br>(9.1 to 46.0)                               |
| Multiple myeloma                                   | < 0.05<br>(< 0.05 to < 0.05)      | < 0.05<br>(< 0.05 to < 0.05)       | < 0.05<br>(< 0.05 to < 0.05)      | 80.6<br>(38.9 to 128.0)                           | 32.6<br>(-2.3 to 72.4)                              |
| Leukaemia                                          | < 0.05<br>(< 0.05 to < 0.05)      | < 0.05<br>(< 0.05 to < 0.05)       | < 0.05<br>(< 0.05 to < 0.05)      | 32.7<br>(19.7 to 47.8)                            | 5.2<br>(-4.0 to 14.9)                               |
| Acute lymphoid leukaemia                           | < 0.05<br>(< 0.05 to < 0.05)      | < 0.05<br>(< 0.05 to < 0.05)       | < 0.05<br>(< 0.05 to < 0.05)      | 29.3<br>(3.2 to 66.6)                             | 8.1<br>(-10.0 to 31.4)                              |
| Chronic lymphoid leukaemia                         | < 0.05<br>(< 0.05 to < 0.05)      | < 0.05<br>(< 0.05 to < 0.05)       | < 0.05<br>(< 0.05 to < 0.05)      | 30.1<br>(8.5 to 56.9)                             | -0.4<br>(-17.6 to 20.1)                             |
| Acute myeloid leukaemia                            | < 0.05<br>(< 0.05 to < 0.05)      | < 0.05<br>(< 0.05 to < 0.05)       | < 0.05<br>(< 0.05 to < 0.05)      | 26.0<br>(5.3 to 50.6)                             | 3.7<br>(-11.4 to 19.8)                              |
| Chronic myeloid leukaemia                          | < 0.05<br>(< 0.05 to < 0.05)      | < 0.05<br>(< 0.05 to < 0.05)       | < 0.05<br>(< 0.05 to < 0.05)      | 27.7<br>(8.0 to 49.0)                             | -1.6<br>(-16.5 to 14.1)                             |
| Other leukaemia                                    | < 0.05<br>(< 0.05 to < 0.05)      | < 0.05<br>(< 0.05 to < 0.05)       | < 0.05<br>(< 0.05 to < 0.05)      | 47.5<br>(22.9 to 71.7)                            | 14.7<br>(-3.6 to 34.9)                              |
| Other neoplasms                                    | < 0.05<br>(< 0.05 to < 0.05)      | < 0.05<br>(< 0.05 to < 0.05)       | < 0.05<br>(< 0.05 to < 0.05)      | 63.6<br>(43.4 to 87.0)                            | 26.4<br>(11.7 to 43.0)                              |
| <b>Cardiovascular diseases</b>                     | <b>4.3</b><br><b>(4.1 to 4.5)</b> | <b>0.4†</b><br><b>(0.4 to 0.4)</b> | <b>0.3</b><br><b>(0.2 to 0.4)</b> | <b>29.5</b><br><b>(24.7 to 34.0)</b>              | <b>-1.6</b><br><b>(-5.1 to 1.7)</b>                 |
| Rheumatic heart disease                            | 1.4<br>(1.3 to 1.6)               | < 0.05<br>(< 0.05 to 0.1)          | 0.1<br>(< 0.05 to 0.1)            | 34.2<br>(22.5 to 44.8)                            | 3.2<br>(-5.7 to 11.4)                               |
| Ischaemic heart disease                            | 0.9<br>(0.9 to 1.0)               | 0.1<br>(0.1 to 0.1)                | < 0.05<br>(< 0.05 to 0.1)         | 32.2<br>(25.4 to 39.7)                            | 0.1<br>(-3.6 to 4.2)                                |
| Cerebrovascular disease                            | 0.5<br>(0.5 to 0.6)               | 0.1‡<br>(0.1 to 0.1)               | 0.1<br>(0.1 to 0.1)               | 26.0<br>(16.9 to 34.1)                            | -4.6<br>(-11.2 to 1.4)                              |
| Ischaemic stroke                                   | 0.4<br>(0.4 to 0.5)               | < 0.05‡<br>(< 0.05 to 0.1)         | 0.1<br>(0.1 to 0.1)               | 27.3<br>(16.4 to 37.4)                            | -4.4<br>(-12.9 to 3.1)                              |
| Hemorrhagic stroke                                 | 0.1<br>(0.1 to 0.1)               | < 0.05‡<br>(< 0.05 to < 0.05)      | < 0.05<br>(< 0.05 to < 0.05)      | 22.1<br>(8.8 to 35.8)                             | -5.4<br>(-14.3 to 4.1)                              |
| Hypertensive heart disease                         | 0.1<br>(0.1 to 0.1)               | --                                 | < 0.05<br>(< 0.05 to < 0.05)      | 33.5<br>(18.7 to 50.6)                            | 0.7<br>(-8.4 to 9.9)                                |
| Cardiomyopathy and myocarditis                     | 0.1<br>(0.1 to 0.1)               | < 0.05†<br>(< 0.05 to < 0.05)      | < 0.05<br>(< 0.05 to < 0.05)      | 30.9<br>(15.2 to 47.6)                            | 2.3<br>(-8.3 to 12.6)                               |
| Myocarditis                                        | < 0.05<br>(< 0.05 to < 0.05)      | < 0.05<br>(< 0.05 to < 0.05)       | < 0.05<br>(< 0.05 to < 0.05)      | 30.2<br>(21.0 to 39.5)                            | 2.3<br>(-7.9 to 13.6)                               |
| Alcoholic cardiomyopathy                           | < 0.05<br>(< 0.05 to < 0.05)      | --                                 | < 0.05<br>(< 0.05 to < 0.05)      | 38.1<br>(24.2 to 53.5)                            | 2.1<br>(-11.3 to 16.0)                              |
| Other cardiomyopathy                               | 0.1<br>(< 0.05 to 0.1)            | --                                 | < 0.05<br>(< 0.05 to < 0.05)      | 30.7<br>(12.1 to 51.1)                            | 2.3<br>(-9.8 to 14.3)                               |
| Atrial fibrillation and flutter                    | 0.2<br>(0.2 to 0.2)               | < 0.05<br>(< 0.05 to < 0.05)       | < 0.05<br>(< 0.05 to < 0.05)      | 28.4<br>(17.9 to 40.0)                            | -0.8<br>(-7.3 to 5.9)                               |
| Peripheral vascular disease                        | 0.7<br>(0.6 to 0.8)               | 0.1<br>(0.1 to 0.1)                | < 0.05<br>(< 0.05 to < 0.05)      | 23.8<br>(14.3 to 33.6)                            | -1.4<br>(-8.2 to 5.7)                               |
| Endocarditis                                       | < 0.05<br>(< 0.05 to < 0.05)      | < 0.05<br>(< 0.05 to < 0.05)       | < 0.05<br>(< 0.05 to < 0.05)      | 25.7<br>(14.8 to 38.4)                            | 0.8<br>(-12.5 to 17.1)                              |
| Other cardiovascular and circulatory diseases      | 0.7<br>(0.6 to 0.8)               | --                                 | < 0.05<br>(< 0.05 to 0.1)         | 27.8<br>(17.3 to 39.2)                            | -0.5<br>(-7.6 to 7.5)                               |
| <b>Chronic respiratory diseases</b>                | <b>8.9</b><br><b>(8.4 to 9.3)</b> | <b>1.9†</b><br><b>(1.8 to 2.1)</b> | <b>0.5</b><br><b>(0.4 to 0.6)</b> | <b>53.6</b><br><b>(47.0 to 60.6)</b>              | <b>15.7</b><br><b>(10.6 to 20.9)</b>                |
| Chronic obstructive pulmonary disease              | 2.1<br>(2.0 to 2.2)               | 0.1<br>(0.1 to 0.2)                | 0.2<br>(0.1 to 0.2)               | 29.6<br>(21.9 to 38.5)                            | -2.7<br>(-8.2 to 3.1)                               |
| Pneumoconiosis                                     | < 0.05<br>(< 0.05 to < 0.05)      | < 0.05<br>(< 0.05 to < 0.05)       | < 0.05<br>(< 0.05 to < 0.05)      | 24.2<br>(1.9 to 50.6)                             | -7.0<br>(-23.8 to 14.9)                             |
| Silicosis                                          | < 0.05<br>(< 0.05 to < 0.05)      | < 0.05<br>(< 0.05 to < 0.05)       | < 0.05<br>(< 0.05 to < 0.05)      | 23.4<br>(-9.6 to 67.8)                            | -7.7<br>(-32.5 to 28.4)                             |

| Cause                                                          | Prevalence in thousands (95% UI)  | Incidence in thousands (95% UI)               | YLDs in thousands (95% UI)                    |                                                                     |                                                                      |
|----------------------------------------------------------------|-----------------------------------|-----------------------------------------------|-----------------------------------------------|---------------------------------------------------------------------|----------------------------------------------------------------------|
|                                                                | 2016 counts<br>(< 0.05 to < 0.05) | 2016 counts<br>(< 0.05 to < 0.05)             | 2016 counts<br>(< 0.05 to < 0.05)             | Percentage change in counts between 2006 and 2016<br>(20.8 to 36.7) | Percentage change in age-standardised rates between<br>(-8.9 to 3.8) |
| Asbestosis                                                     | < 0.05<br>(< 0.05 to < 0.05)      | < 0.05<br>(< 0.05 to < 0.05)                  | < 0.05<br>(< 0.05 to < 0.05)                  | 28.8<br>(20.8 to 36.7)                                              | -2.8<br>(-8.9 to 3.8)                                                |
| Coal workers pneumoconiosis                                    | --                                | --                                            | --                                            | --                                                                  | --                                                                   |
| Other pneumoconiosis                                           | < 0.05<br>(< 0.05 to < 0.05)      | < 0.05<br>(< 0.05 to < 0.05)                  | < 0.05<br>(< 0.05 to < 0.05)                  | 22.6<br>(-1.8 to 46.6)                                              | -8.1<br>(-29.7 to 17.2)                                              |
| Asthma                                                         | 7.1<br>(6.6 to 7.7)               | 1.8<br>(1.6 to 1.9)                           | 0.3<br>(0.2 to 0.4)                           | 70.8<br>(62.1 to 80.9)                                              | 37.9<br>(31.7 to 45.0)                                               |
| Interstitial lung disease and pulmonary sarcoidosis            | < 0.05<br>(< 0.05 to 0.1)         | < 0.05<br>(< 0.05 to < 0.05)                  | < 0.05<br>(< 0.05 to < 0.05)                  | 30.8<br>(16.1 to 47.5)                                              | 0.7<br>(-10.2 to 12.2)                                               |
| Other chronic respiratory diseases                             | --                                | --                                            | < 0.05<br>(< 0.05 to < 0.05)                  | 72.2<br>(43.2 to 105.4)                                             | 32.0<br>(14.9 to 50.2)                                               |
| <b>Cirrhosis and other chronic liver diseases</b>              | <b>0.3<br/>(0.3 to 0.4)</b>       | <b>&lt; 0.05<br/>(&lt; 0.05 to &lt; 0.05)</b> | <b>&lt; 0.05<br/>(&lt; 0.05 to &lt; 0.05)</b> | <b>34.5<br/>(18.6 to 51.8)</b>                                      | <b>6.4<br/>(-4.2 to 17.3)</b>                                        |
| Cirrhosis and other chronic liver diseases due to hepatitis B  | 0.1<br>(0.1 to 0.1)               | < 0.05<br>(< 0.05 to < 0.05)                  | < 0.05<br>(< 0.05 to < 0.05)                  | 41.7<br>(15.3 to 70.8)                                              | 5.9<br>(-10.4 to 25.2)                                               |
| Cirrhosis and other chronic liver diseases due to hepatitis C  | < 0.05<br>(< 0.05 to 0.1)         | < 0.05<br>(< 0.05 to < 0.05)                  | < 0.05<br>(< 0.05 to < 0.05)                  | 42.0<br>(4.8 to 86.9)                                               | 5.8<br>(-17.3 to 34.2)                                               |
| Cirrhosis and other chronic liver diseases due to alcohol use  | < 0.05<br>(< 0.05 to < 0.05)      | < 0.05<br>(< 0.05 to < 0.05)                  | < 0.05<br>(< 0.05 to < 0.05)                  | 47.2<br>(8.7 to 97.5)                                               | 7.6<br>(-16.5 to 38.7)                                               |
| Cirrhosis and other chronic liver diseases due to other causes | 0.1<br>(0.1 to 0.1)               | < 0.05<br>(< 0.05 to < 0.05)                  | < 0.05<br>(< 0.05 to < 0.05)                  | 28.9<br>(6.4 to 56.0)                                               | 6.6<br>(-9.4 to 25.7)                                                |
| <b>Digestive diseases</b>                                      | <b>1.2<br/>(1.2 to 1.4)</b>       | <b>1.6†<br/>(1.5 to 1.7)</b>                  | <b>&lt; 0.05<br/>(&lt; 0.05 to 0.1)</b>       | <b>40.6<br/>(27.2 to 55.6)</b>                                      | <b>-0.1<br/>(-8.0 to 8.2)</b>                                        |
| Peptic ulcer disease                                           | 0.4<br>(0.4 to 0.5)               | 0.1<br>(0.1 to 0.1)                           | < 0.05<br>(< 0.05 to < 0.05)                  | 47.7<br>(24.1 to 73.4)                                              | 0.2<br>(-13.5 to 14.4)                                               |
| Gastritis and duodenitis                                       | 0.6<br>(0.5 to 0.7)               | 0.5<br>(0.4 to 0.6)                           | < 0.05<br>(< 0.05 to < 0.05)                  | 51.8<br>(27.1 to 77.2)                                              | 1.2<br>(-12.8 to 16.2)                                               |
| Appendicitis                                                   | < 0.05<br>(< 0.05 to < 0.05)      | 0.3<br>(0.3 to 0.3)                           | < 0.05<br>(< 0.05 to < 0.05)                  | 29.2<br>(-5.3 to 73.4)                                              | 0.1<br>(-21.9 to 28.2)                                               |
| Paralytic ileus and intestinal obstruction                     | < 0.05<br>(< 0.05 to < 0.05)      | < 0.05<br>(< 0.05 to < 0.05)                  | < 0.05<br>(< 0.05 to < 0.05)                  | 24.9<br>(20.1 to 29.0)                                              | -0.9<br>(-4.6 to 2.5)                                                |
| Inguinal, femoral, and abdominal hernia                        | 0.1<br>(0.1 to 0.1)               | 0.2<br>(0.1 to 0.2)                           | < 0.05<br>(< 0.05 to < 0.05)                  | 39.6<br>(16.3 to 68.2)                                              | 5.8<br>(-7.3 to 21.6)                                                |
| Inflammatory bowel disease                                     | < 0.05<br>(< 0.05 to < 0.05)      | < 0.05<br>(< 0.05 to < 0.05)                  | < 0.05<br>(< 0.05 to < 0.05)                  | 5.2<br>(-13.5 to 26.3)                                              | -22.1<br>(-34.6 to -7.7)                                             |
| Vascular intestinal disorders                                  | < 0.05<br>(< 0.05 to < 0.05)      | < 0.05<br>(< 0.05 to < 0.05)                  | < 0.05<br>(< 0.05 to < 0.05)                  | 26.1<br>(18.4 to 34.6)                                              | 1.4<br>(-3.0 to 5.7)                                                 |
| Gallbladder and biliary diseases                               | 0.1<br>(0.1 to 0.1)               | 0.4<br>(0.3 to 0.4)                           | < 0.05<br>(< 0.05 to < 0.05)                  | 40.5<br>(10.9 to 78.7)                                              | 3.2<br>(-15.8 to 28.5)                                               |
| Pancreatitis                                                   | < 0.05<br>(< 0.05 to < 0.05)      | < 0.05<br>(< 0.05 to < 0.05)                  | < 0.05<br>(< 0.05 to < 0.05)                  | 21.0<br>(16.5 to 25.7)                                              | -9.0<br>(-12.3 to -5.1)                                              |
| Other digestive diseases                                       | --                                | --                                            | < 0.05<br>(< 0.05 to < 0.05)                  | 45.4<br>(30.8 to 62.0)                                              | 3.8<br>(-4.4 to 12.0)                                                |
| <b>Neurological disorders</b>                                  | <b>22.4<br/>(21.5 to 23.5)</b>    | <b>10.1<br/>(8.6 to 11.8)</b>                 | <b>0.6<br/>(0.4 to 0.8)</b>                   | <b>29.4<br/>(3.0 to 64.5)</b>                                       | <b>1.0<br/>(-16.6 to 23.1)</b>                                       |
| Alzheimer's disease and other dementias                        | 0.2<br>(0.1 to 0.2)               | < 0.05<br>(< 0.05 to < 0.05)                  | < 0.05<br>(< 0.05 to < 0.05)                  | 20.9<br>(14.6 to 27.7)                                              | 0.3<br>(-4.5 to 5.2)                                                 |
| Parkinson's disease                                            | < 0.05<br>(< 0.05 to < 0.05)      | < 0.05<br>(< 0.05 to < 0.05)                  | < 0.05<br>(< 0.05 to < 0.05)                  | 33.9<br>(15.1 to 55.1)                                              | 4.3<br>(-7.7 to 18.3)                                                |
| Epilepsy                                                       | 0.3<br>(0.1 to 0.5)               | < 0.05<br>(< 0.05 to 0.1)                     | 0.1<br>(< 0.05 to 0.2)                        | 27.4<br>(-62.9 to 351.8)                                            | 2.0<br>(-69.4 to 255.5)                                              |
| Multiple sclerosis                                             | < 0.05<br>(< 0.05 to < 0.05)      | < 0.05<br>(< 0.05 to < 0.05)                  | < 0.05<br>(< 0.05 to < 0.05)                  | 49.4<br>(43.4 to 54.6)                                              | 11.1<br>(7.1 to 14.5)                                                |
| Motor neuron disease                                           | < 0.05<br>(< 0.05 to < 0.05)      | < 0.05<br>(< 0.05 to < 0.05)                  | < 0.05<br>(< 0.05 to < 0.05)                  | 28.7<br>(23.4 to 34.1)                                              | 0.3<br>(-3.1 to 3.8)                                                 |
| Migraine                                                       | 8.4<br>(7.9 to 8.9)               | 1.0<br>(0.9 to 1.1)                           | 0.4<br>(0.2 to 0.5)                           | 29.2<br>(23.9 to 34.6)                                              | -0.0<br>(-3.7 to 3.9)                                                |
| Tension-type headache                                          | 16.4<br>(14.4 to 18.4)            | 9.1<br>(7.6 to 10.7)                          | 0.1<br>(< 0.05 to 0.1)                        | 29.2<br>(21.9 to 37.9)                                              | -0.3<br>(-5.3 to 5.3)                                                |
| Other neurological disorders                                   | < 0.05<br>(< 0.05 to < 0.05)      | < 0.05<br>(< 0.05 to < 0.05)                  | < 0.05<br>(< 0.05 to < 0.05)                  | 54.2<br>(-49.1 to 390.9)                                            | 22.1<br>(-56.9 to 249.8)                                             |
| <b>Mental and substance use disorders</b>                      | <b>9.6<br/>(9.2 to 9.9)</b>       | <b>3.0†<br/>(2.8 to 3.2)</b>                  | <b>1.2<br/>(0.9 to 1.6)</b>                   | <b>27.0<br/>(23.9 to 29.9)</b>                                      | <b>-0.1<br/>(-2.2 to 2.0)</b>                                        |
| Schizophrenia                                                  | 0.2<br>(0.2 to 0.3)               | < 0.05<br>(< 0.05 to < 0.05)                  | 0.1<br>(0.1 to 0.2)                           | 29.5<br>(19.2 to 41.0)                                              | -1.5<br>(-9.0 to 6.5)                                                |
| Alcohol use disorders                                          | 0.6<br>(0.5 to 0.7)               | 0.3<br>(0.3 to 0.4)                           | 0.1<br>(< 0.05 to 0.1)                        | 27.5<br>(16.6 to 39.4)                                              | 0.4<br>(-7.3 to 9.1)                                                 |
| Drug use disorders                                             | 0.5<br>(0.5 to 0.6)               | 0.1<br>(0.1 to 0.1)                           | 0.1<br>(0.1 to 0.1)                           | 24.3<br>(12.7 to 37.0)                                              | 2.2<br>(-6.8 to 12.2)                                                |
| Opioid use disorders                                           | 0.1<br>(0.1 to 0.2)               | < 0.05<br>(< 0.05 to < 0.05)                  | 0.1<br>(< 0.05 to 0.1)                        | 26.4<br>(11.1 to 43.0)                                              | 1.6<br>(-10.3 to 15.1)                                               |
| Cocaine use disorders                                          | < 0.05<br>(< 0.05 to < 0.05)      | < 0.05<br>(< 0.05 to < 0.05)                  | < 0.05<br>(< 0.05 to < 0.05)                  | 25.0<br>(10.2 to 42.2)                                              | 0.5<br>(-11.6 to 15.1)                                               |
| Amphetamine use disorders                                      | < 0.05<br>(< 0.05 to 0.1)         | < 0.05<br>(< 0.05 to < 0.05)                  | < 0.05<br>(< 0.05 to < 0.05)                  | 19.0<br>(-11.8 to 59.7)                                             | 8.0<br>(-20.2 to 45.5)                                               |
| Cannabis use disorders                                         | 0.3<br>(0.2 to 0.4)               | < 0.05<br>(< 0.05 to 0.1)                     | < 0.05<br>(< 0.05 to < 0.05)                  | 15.7<br>(1.6 to 31.7)                                               | 0.8<br>(-11.0 to 14.7)                                               |
| Other drug use disorders                                       | < 0.05<br>(< 0.05 to < 0.05)      | < 0.05<br>(< 0.05 to < 0.05)                  | < 0.05<br>(< 0.05 to < 0.05)                  | 23.8<br>(-0.6 to 54.9)                                              | 3.8<br>(-16.2 to 29.6)                                               |
| Depressive disorders                                           | 2.0<br>(1.9 to 2.2)               | 1.7<br>(1.5 to 1.9)                           | 0.3<br>(0.2 to 0.4)                           | 27.6<br>(21.8 to 33.6)                                              | -0.2<br>(-3.8 to 3.7)                                                |
| Major depressive disorder                                      | 1.0<br>(0.9 to 1.1)               | 1.5<br>(1.3 to 1.7)                           | 0.2<br>(0.1 to 0.3)                           | 24.9<br>(16.8 to 33.5)                                              | -0.5<br>(-6.0 to 5.4)                                                |
| Dysthymia                                                      | 1.1<br>(0.9 to 1.2)               | 0.2<br>(0.1 to 0.2)                           | 0.1<br>(0.1 to 0.1)                           | 33.2<br>(28.4 to 38.3)                                              | 0.5<br>(-2.4 to 3.4)                                                 |
| Bipolar disorder                                               | 0.3<br>(0.3 to 0.4)               | < 0.05<br>(< 0.05 to < 0.05)                  | 0.1<br>(< 0.05 to 0.1)                        | 27.0<br>(17.2 to 38.0)                                              | 0.0<br>(-6.7 to 7.7)                                                 |
| Anxiety disorders                                              | 2.6<br>(2.3 to 2.8)               | 0.5<br>(0.4 to 0.5)                           | 0.2<br>(0.2 to 0.3)                           | 28.6<br>(20.5 to 37.7)                                              | 0.4<br>(-5.3 to 7.0)                                                 |
| Eating disorders                                               | 0.1<br>(0.1 to 0.1)               | 0.1<br>(< 0.05 to 0.1)                        | < 0.05<br>(< 0.05 to < 0.05)                  | 18.0<br>(3.1 to 35.4)                                               | -2.8<br>(-14.3 to 11.1)                                              |
| Anorexia nervosa                                               | < 0.05<br>(< 0.05 to < 0.05)      | < 0.05<br>(< 0.05 to < 0.05)                  | < 0.05<br>(< 0.05 to < 0.05)                  | 15.8<br>(-7.6 to 47.8)                                              | -2.1<br>(-21.5 to 23.3)                                              |
| Bulimia nervosa                                                | 0.1<br>(< 0.05 to 0.1)            | < 0.05<br>(< 0.05 to 0.1)                     | < 0.05<br>(< 0.05 to < 0.05)                  | 19.0<br>(0.4 to 40.5)                                               | -3.1<br>(-17.2 to 13.0)                                              |
| Autistic spectrum disorders                                    | 0.7<br>(0.6 to 0.8)               | < 0.05<br>(< 0.05 to < 0.05)                  | 0.1<br>(0.1 to 0.1)                           | 22.9<br>(16.5 to 29.4)                                              | -0.5<br>(-5.2 to 4.3)                                                |
| Autism                                                         | 0.2<br>(0.2 to 0.2)               | < 0.05<br>(< 0.05 to < 0.05)                  | < 0.05<br>(< 0.05 to 0.1)                     | 23.2<br>(12.8 to 34.9)                                              | -0.5<br>(-8.5 to 8.3)                                                |
| Asperger syndrome and other autistic spectrum disorders        | 0.5<br>(0.4 to 0.6)               | < 0.05<br>(< 0.05 to < 0.05)                  | < 0.05<br>(< 0.05 to 0.1)                     | 22.5<br>(16.4 to 29.1)                                              | -0.5<br>(-4.9 to 4.0)                                                |



| Cause                                                      | Prevalence in thousands (95% UI)     | Incidence in thousands (95% UI)          | YLDs in thousands (95% UI)        |                                                   |                                                     |
|------------------------------------------------------------|--------------------------------------|------------------------------------------|-----------------------------------|---------------------------------------------------|-----------------------------------------------------|
|                                                            | 2016 counts                          | 2016 counts                              | 2016 counts                       | Percentage change in counts between 2006 and 2016 | Percentage change in age-standardised rates between |
| Attention-deficit/hyperactivity disorder                   | 0.7<br>(0.6 to 0.8)                  | < 0.05<br>(< 0.05 to 0.1)                | < 0.05<br>(< 0.05 to < 0.05)      | 24.7<br>(14.0 to 36.3)                            | 0.1<br>(-7.9 to 8.8)                                |
| Conduct disorder                                           | 0.7<br>(0.6 to 0.8)                  | 0.3<br>(0.2 to 0.4)                      | 0.1<br>(0.1 to 0.1)               | 23.2<br>(15.1 to 32.1)                            | -0.1<br>(-6.7 to 6.7)                               |
| Idiopathic developmental intellectual disability           | 0.5<br>(0.2 to 0.8)                  | --                                       | < 0.05<br>(< 0.05 to < 0.05)      | 24.9<br>(14.4 to 37.0)                            | 0.2<br>(-7.6 to 9.1)                                |
| Other mental and substance use disorders                   | 1.3<br>(1.1 to 1.5)                  | < 0.05<br>(< 0.05 to < 0.05)             | 0.1<br>(0.1 to 0.1)               | 29.3<br>(23.0 to 36.5)                            | -0.3<br>(-4.7 to 4.6)                               |
| <b>Diabetes, urogenital, blood, and endocrine diseases</b> | <b>31.7</b><br><b>(30.8 to 32.5)</b> | <b>8.8†</b><br><b>(8.3 to 9.5)</b>       | <b>1.2</b><br><b>(0.8 to 1.6)</b> | <b>31.3</b><br><b>(25.5 to 36.7)</b>              | <b>-1.2</b><br><b>(-5.1 to 2.5)</b>                 |
| Diabetes mellitus                                          | 12.7<br>(11.6 to 14.0)               | 1.1<br>(0.9 to 1.2)                      | 0.9<br>(0.6 to 1.2)               | 31.2<br>(23.5 to 38.9)                            | -1.3<br>(-6.2 to 3.7)                               |
| Acute glomerulonephritis                                   | < 0.05<br>(< 0.05 to < 0.05)         | < 0.05<br>(< 0.05 to < 0.05)             | < 0.05<br>(< 0.05 to < 0.05)      | 25.1<br>(18.5 to 31.6)                            | -3.4<br>(-8.1 to 1.8)                               |
| Chronic kidney disease                                     | 2.1<br>(1.9 to 2.3)                  | 0.2<br>(0.2 to 0.2)                      | 0.1<br>(0.1 to 0.1)               | 39.1<br>(28.4 to 50.1)                            | 2.2<br>(-4.7 to 9.7)                                |
| Chronic kidney disease due to diabetes mellitus            | 1.2<br>(1.1 to 1.4)                  | 0.1<br>(0.1 to 0.1)                      | 0.1<br>(< 0.05 to 0.1)            | 41.4<br>(28.4 to 56.3)                            | 3.1<br>(-5.2 to 13.0)                               |
| Chronic kidney disease due to hypertension                 | 0.3<br>(0.3 to 0.4)                  | < 0.05<br>(< 0.05 to < 0.05)             | < 0.05<br>(< 0.05 to < 0.05)      | 32.6<br>(16.0 to 51.8)                            | -1.8<br>(-11.7 to 10.0)                             |
| Chronic kidney disease due to glomerulonephritis           | 0.4<br>(0.3 to 0.4)                  | < 0.05<br>(< 0.05 to < 0.05)             | < 0.05<br>(< 0.05 to < 0.05)      | 39.1<br>(21.4 to 59.2)                            | 7.5<br>(-4.2 to 20.1)                               |
| Chronic kidney disease due to other causes                 | 0.2<br>(0.2 to 0.2)                  | < 0.05<br>(< 0.05 to < 0.05)             | < 0.05<br>(< 0.05 to < 0.05)      | 40.3<br>(24.6 to 57.9)                            | 5.0<br>(-5.3 to 16.3)                               |
| Urinary diseases and male infertility                      | 0.9<br>(0.8 to 1.0)                  | 4.1†<br>(3.6 to 4.6)                     | < 0.05<br>(< 0.05 to < 0.05)      | 22.2<br>(15.1 to 30.0)                            | -6.3<br>(-11.9 to -0.9)                             |
| Interstitial nephritis and urinary tract infections        | 0.1<br>(0.1 to 0.1)                  | 3.6<br>(3.2 to 4.2)                      | < 0.05<br>(< 0.05 to < 0.05)      | 19.6<br>(1.0 to 39.2)                             | -4.4<br>(-17.4 to 9.9)                              |
| Urolithiasis                                               | < 0.05<br>(< 0.05 to < 0.05)         | 0.4<br>(0.3 to 0.4)                      | < 0.05<br>(< 0.05 to < 0.05)      | 33.2<br>(21.4 to 45.8)                            | -1.7<br>(-12.8 to 11.7)                             |
| Benign prostatic hyperplasia                               | 0.3<br>(0.3 to 0.4)                  | < 0.05<br>(< 0.05 to 0.1)                | < 0.05<br>(< 0.05 to < 0.05)      | 23.9<br>(14.0 to 34.1)                            | -6.6<br>(-13.3 to 0.5)                              |
| Male infertility                                           | 0.4<br>(0.3 to 0.6)                  | --                                       | < 0.05<br>(< 0.05 to < 0.05)      | 26.3<br>(17.2 to 35.1)                            | 0.1<br>(-6.1 to 5.8)                                |
| Other urinary diseases                                     | --                                   | --                                       | < 0.05<br>(< 0.05 to < 0.05)      | 1.8<br>(-10.5 to 14.7)                            | -19.5<br>(-28.1 to -10.1)                           |
| Gynecological diseases                                     | 8.1<br>(7.6 to 8.6)                  | 3.2†<br>(3.0 to 3.5)                     | 0.1<br>(0.1 to 0.2)               | 33.6<br>(26.8 to 41.2)                            | -0.8<br>(-5.4 to 4.5)                               |
| Uterine fibroids                                           | 1.2<br>(1.0 to 1.4)                  | 0.1<br>(0.1 to 0.2)                      | < 0.05<br>(< 0.05 to < 0.05)      | 43.7<br>(23.2 to 63.5)                            | 1.1<br>(-12.0 to 14.5)                              |
| Polycystic ovarian syndrome                                | 0.1<br>(0.1 to 0.1)                  | 0.1<br>(< 0.05 to 0.1)                   | < 0.05<br>(< 0.05 to < 0.05)      | 35.2<br>(17.6 to 57.0)                            | 1.1<br>(-11.8 to 16.2)                              |
| Female infertility                                         | 0.4<br>(0.1 to 0.8)                  | --                                       | < 0.05<br>(< 0.05 to < 0.05)      | 8.3<br>(-19.3 to 37.9)                            | -12.1<br>(-30.1 to 9.9)                             |
| Endometriosis                                              | < 0.05<br>(< 0.05 to < 0.05)         | 0.1<br>(0.1 to 0.1)                      | < 0.05<br>(< 0.05 to < 0.05)      | 32.4<br>(-0.8 to 80.5)                            | 1.7<br>(-22.5 to 37.3)                              |
| Genital prolapse                                           | 1.6<br>(1.4 to 1.8)                  | 0.1<br>(0.1 to 0.2)                      | < 0.05<br>(< 0.05 to < 0.05)      | 15.0<br>(4.9 to 25.4)                             | -14.3<br>(-22.0 to -6.2)                            |
| Premenstrual syndrome                                      | 4.8<br>(4.5 to 5.1)                  | 1.7<br>(1.6 to 1.9)                      | < 0.05<br>(< 0.05 to 0.1)         | 31.6<br>(21.8 to 42.4)                            | 1.2<br>(-6.4 to 9.3)                                |
| Other gynecological diseases                               | 1.2<br>(1.1 to 1.4)                  | 1.1<br>(0.9 to 1.3)                      | < 0.05<br>(< 0.05 to 0.1)         | 35.0<br>(24.1 to 46.6)                            | -0.1<br>(-7.9 to 7.6)                               |
| Hemoglobinopathies and hemolytic anaemias                  | 15.6<br>(14.8 to 16.5)               | --                                       | < 0.05<br>(< 0.05 to < 0.05)      | 22.8<br>(-16.3 to 53.6)                           | -2.9<br>(-33.2 to 17.4)                             |
| Thalassemias                                               | < 0.05<br>(< 0.05 to < 0.05)         | --                                       | < 0.05<br>(< 0.05 to < 0.05)      | 24.9<br>(-5.6 to 66.6)                            | 12.9<br>(-17.2 to 52.9)                             |
| Thalassaemias trait                                        | 1.0<br>(0.5 to 2.0)                  | --                                       | < 0.05<br>(< 0.05 to < 0.05)      | 25.8<br>(-53.5 to 82.2)                           | -4.0<br>(-66.0 to 35.8)                             |
| Sickle cell disorders                                      | < 0.05<br>(< 0.05 to < 0.05)         | --                                       | < 0.05<br>(< 0.05 to < 0.05)      | 28.7<br>(14.1 to 48.3)                            | 7.2<br>(-4.6 to 22.6)                               |
| Sickle cell trait                                          | 0.1<br>(0.1 to 0.1)                  | --                                       | < 0.05<br>(< 0.05 to < 0.05)      | 67.3<br>(26.7 to 119.4)                           | 38.1<br>(11.9 to 70.6)                              |
| G6PD deficiency                                            | 3.4<br>(3.0 to 3.9)                  | --                                       | < 0.05<br>(< 0.05 to < 0.05)      | 69.7<br>(35.3 to 111.3)                           | 30.0<br>(7.9 to 54.3)                               |
| G6PD trait                                                 | 10.9<br>(10.5 to 11.3)               | --                                       | < 0.05<br>(< 0.05 to < 0.05)      | 63.5<br>(25.0 to 106.9)                           | 17.2<br>(-6.0 to 44.5)                              |
| Other hemoglobinopathies and hemolytic anaemias            | 0.8<br>(0.7 to 0.9)                  | --                                       | < 0.05<br>(< 0.05 to < 0.05)      | 18.5<br>(-3.2 to 46.0)                            | -3.8<br>(-17.8 to 12.8)                             |
| Endocrine, metabolic, blood, and immune disorders          | 1.9<br>(1.7 to 2.1)                  | 0.2<br>(0.2 to 0.3)                      | 0.1<br>(< 0.05 to 0.1)            | 23.1<br>(14.9 to 32.4)                            | -4.2<br>(-9.5 to 1.7)                               |
| <b>Musculoskeletal disorders</b>                           | <b>12.1</b><br><b>(11.5 to 12.7)</b> | <b>5.8</b><br><b>(5.3 to 6.4)</b>        | <b>1.3</b><br><b>(0.9 to 1.7)</b> | <b>31.6</b><br><b>(27.9 to 35.3)</b>              | <b>-1.1</b><br><b>(-3.4 to 1.2)</b>                 |
| Rheumatoid arthritis                                       | 0.1<br>(0.1 to 0.1)                  | < 0.05<br>(< 0.05 to < 0.05)             | < 0.05<br>(< 0.05 to < 0.05)      | 37.3<br>(23.3 to 53.9)                            | 3.3<br>(-6.0 to 13.7)                               |
| Osteoarthritis                                             | 3.5<br>(3.3 to 3.8)                  | 0.2<br>(0.2 to 0.2)                      | 0.2<br>(0.1 to 0.3)               | 34.9<br>(29.8 to 40.4)                            | -1.2<br>(-4.5 to 2.7)                               |
| Low back and neck pain                                     | 6.6<br>(6.0 to 7.2)                  | 2.8<br>(2.4 to 3.1)                      | 0.8<br>(0.5 to 1.0)               | 33.6<br>(29.1 to 38.6)                            | 0.2<br>(-2.6 to 3.3)                                |
| Low back pain                                              | 4.4<br>(3.9 to 5.1)                  | 2.1<br>(1.8 to 2.5)                      | 0.5<br>(0.4 to 0.7)               | 32.0<br>(25.5 to 39.3)                            | 0.1<br>(-4.0 to 4.6)                                |
| Neck pain                                                  | 2.6<br>(2.2 to 3.0)                  | 0.6<br>(0.5 to 0.7)                      | 0.3<br>(0.2 to 0.4)               | 37.0<br>(33.1 to 41.0)                            | 0.4<br>(-1.7 to 2.6)                                |
| Gout                                                       | 0.2<br>(0.2 to 0.3)                  | < 0.05<br>(< 0.05 to 0.1)                | < 0.05<br>(< 0.05 to < 0.05)      | 32.3<br>(12.8 to 57.1)                            | -2.0<br>(-14.3 to 13.5)                             |
| Other musculoskeletal disorders                            | 3.3<br>(2.8 to 3.9)                  | 2.8<br>(2.3 to 3.3)                      | 0.3<br>(0.2 to 0.4)               | 23.7<br>(14.8 to 33.7)                            | -4.9<br>(-11.3 to 2.1)                              |
| <b>Other non-communicable diseases</b>                     | <b>53.9</b><br><b>(52.6 to 55.0)</b> | <b>155.9†</b><br><b>(143.3 to 169.0)</b> | <b>1.3</b><br><b>(0.9 to 1.8)</b> | <b>23.5</b><br><b>(21.8 to 25.3)</b>              | <b>-0.8</b><br><b>(-1.8 to 0.4)</b>                 |
| Congenital anomalies                                       | 0.7<br>(0.6 to 0.8)                  | --                                       | 0.1<br>(0.1 to 0.1)               | 25.3<br>(18.1 to 33.6)                            | 1.9<br>(-4.0 to 8.3)                                |
| Neural tube defects                                        | < 0.05<br>(< 0.05 to < 0.05)         | --                                       | < 0.05<br>(< 0.05 to < 0.05)      | 30.9<br>(11.7 to 54.3)                            | 5.5<br>(-8.4 to 22.1)                               |
| Congenital heart anomalies                                 | 0.2<br>(0.1 to 0.2)                  | --                                       | < 0.05<br>(< 0.05 to < 0.05)      | 30.8<br>(15.2 to 48.4)                            | 6.1<br>(-5.4 to 19.3)                               |
| Orofacial clefts                                           | < 0.05<br>(< 0.05 to < 0.05)         | --                                       | < 0.05<br>(< 0.05 to < 0.05)      | 20.7<br>(7.7 to 35.2)                             | -1.8<br>(-12.3 to 10.2)                             |
| Down's syndrome                                            | < 0.05<br>(< 0.05 to < 0.05)         | --                                       | < 0.05<br>(< 0.05 to < 0.05)      | 25.9<br>(16.1 to 36.7)                            | 3.0<br>(-5.0 to 12.1)                               |
| Turner syndrome                                            | < 0.05<br>(< 0.05 to < 0.05)         | --                                       | < 0.05<br>(< 0.05 to < 0.05)      | 33.8<br>(-6.5 to 83.6)                            | 9.1<br>(-21.2 to 46.8)                              |
| Klinefelter syndrome                                       | < 0.05<br>(< 0.05 to < 0.05)         | --                                       | < 0.05<br>(< 0.05 to < 0.05)      | 22.3<br>(-10.5 to 67.9)                           | 4.2<br>(-23.2 to 40.0)                              |

| Cause                                         | Prevalence in thousands (95% UI)     | Incidence in thousands (95% UI)    | YLDs in thousands (95% UI)        |                                                   |                                                     |
|-----------------------------------------------|--------------------------------------|------------------------------------|-----------------------------------|---------------------------------------------------|-----------------------------------------------------|
|                                               | 2016 counts                          | 2016 counts                        | 2016 counts                       | Percentage change in counts between 2006 and 2016 | Percentage change in age-standardised rates between |
| Other chromosomal abnormalities               | < 0.05<br>(< 0.05 to < 0.05)         | --                                 | < 0.05<br>(< 0.05 to < 0.05)      | 18.1<br>(-4.1 to 42.5)                            | 4.2<br>(-16.0 to 25.2)                              |
| Congenital musculoskeletal and limb anomalies | 0.1<br>(0.1 to 0.1)                  | --                                 | < 0.05<br>(< 0.05 to < 0.05)      | 34.1<br>(18.8 to 50.4)                            | 7.4<br>(-3.6 to 19.0)                               |
| Urogenital congenital anomalies               | 0.1<br>(0.1 to 0.1)                  | --                                 | < 0.05<br>(< 0.05 to < 0.05)      | 16.4<br>(6.6 to 27.0)                             | -0.9<br>(-8.9 to 7.5)                               |
| Digestive congenital anomalies                | 0.1<br>(0.1 to 0.1)                  | --                                 | < 0.05<br>(< 0.05 to < 0.05)      | 28.5<br>(9.1 to 51.9)                             | 4.0<br>(-9.8 to 20.3)                               |
| Other congenital anomalies                    | 0.3<br>(0.2 to 0.4)                  | --                                 | < 0.05<br>(< 0.05 to 0.1)         | 20.8<br>(8.5 to 35.3)                             | -1.9<br>(-11.6 to 9.6)                              |
| Skin and subcutaneous diseases                | 24.6<br>(23.9 to 25.2)               | 51.0<br>(48.4 to 54.0)             | 0.6<br>(0.4 to 0.9)               | 20.4<br>(18.1 to 23.1)                            | -0.3<br>(-2.0 to 1.7)                               |
| Dermatitis                                    | 3.8<br>(3.5 to 4.1)                  | 4.3<br>(4.0 to 4.6)                | 0.1<br>(0.1 to 0.2)               | 20.6<br>(15.7 to 25.7)                            | 0.0<br>(-3.3 to 3.6)                                |
| Psoriasis                                     | 0.5<br>(0.5 to 0.5)                  | 0.1<br>(0.1 to 0.1)                | < 0.05<br>(< 0.05 to 0.1)         | 35.4<br>(23.2 to 49.2)                            | 5.7<br>(-2.3 to 14.5)                               |
| Cellulitis                                    | < 0.05<br>(< 0.05 to < 0.05)         | 0.4<br>(0.4 to 0.5)                | < 0.05<br>(< 0.05 to < 0.05)      | 20.8<br>(2.0 to 42.9)                             | -4.8<br>(-19.7 to 12.7)                             |
| Pyoderma                                      | 0.1<br>(0.1 to 0.1)                  | 2.2<br>(2.1 to 2.3)                | < 0.05<br>(< 0.05 to < 0.05)      | 27.1<br>(15.5 to 40.2)                            | -0.9<br>(-8.2 to 7.0)                               |
| Scabies                                       | 2.6<br>(2.2 to 2.9)                  | 8.0<br>(6.9 to 9.1)                | 0.1<br>(< 0.05 to 0.1)            | 4.2<br>(-2.9 to 11.1)                             | -9.6<br>(-14.5 to -4.7)                             |
| Fungal skin diseases                          | 6.0<br>(5.4 to 6.8)                  | 20.1<br>(17.9 to 22.5)             | < 0.05<br>(< 0.05 to 0.1)         | 24.6<br>(22.4 to 27.1)                            | -0.1<br>(-1.2 to 1.0)                               |
| Viral skin diseases                           | 2.4<br>(2.2 to 2.5)                  | 3.3<br>(3.1 to 3.6)                | 0.1<br>(< 0.05 to 0.1)            | 23.8<br>(19.6 to 28.1)                            | 0.1<br>(-3.1 to 3.2)                                |
| Acne vulgaris                                 | 7.1<br>(6.4 to 7.9)                  | 5.3<br>(4.2 to 6.8)                | 0.2<br>(0.1 to 0.3)               | 21.4<br>(15.9 to 27.6)                            | 2.4<br>(-2.0 to 7.6)                                |
| Alopecia areata                               | 0.1<br>(0.1 to 0.1)                  | 0.2<br>(0.2 to 0.3)                | < 0.05<br>(< 0.05 to < 0.05)      | 25.9<br>(12.0 to 42.8)                            | -0.2<br>(-10.2 to 11.6)                             |
| Pruritus                                      | 0.7<br>(0.6 to 0.7)                  | 0.5<br>(0.5 to 0.6)                | < 0.05<br>(< 0.05 to < 0.05)      | 26.7<br>(19.2 to 34.1)                            | -0.1<br>(-5.1 to 5.1)                               |
| Urticaria                                     | 0.7<br>(0.6 to 0.9)                  | 1.3<br>(1.1 to 1.5)                | < 0.05<br>(< 0.05 to 0.1)         | 17.4<br>(9.8 to 25.4)                             | 0.3<br>(-5.0 to 6.3)                                |
| Decubitus ulcer                               | < 0.05<br>(< 0.05 to < 0.05)         | 0.1<br>(0.1 to 0.1)                | < 0.05<br>(< 0.05 to < 0.05)      | 22.1<br>(-1.9 to 51.6)                            | -6.1<br>(-19.9 to 8.2)                              |
| Other skin and subcutaneous diseases          | 4.6<br>(4.5 to 4.8)                  | 5.2<br>(5.1 to 5.4)                | < 0.05<br>(< 0.05 to < 0.05)      | 24.7<br>(21.3 to 28.3)                            | -1.9<br>(-4.3 to 0.5)                               |
| Sense organ diseases                          | 14.1<br>(13.6 to 14.5)               | 7.5†<br>(7.0 to 8.1)               | 0.5<br>(0.3 to 0.7)               | 26.1<br>(23.1 to 29.0)                            | -1.6<br>(-3.3 to 0.2)                               |
| Glaucoma                                      | < 0.05<br>(< 0.05 to < 0.05)         | --                                 | < 0.05<br>(< 0.05 to < 0.05)      | 27.2<br>(8.5 to 48.8)                             | 0.3<br>(-12.7 to 14.4)                              |
| Cataract                                      | 0.3<br>(0.3 to 0.4)                  | --                                 | < 0.05<br>(< 0.05 to < 0.05)      | 22.5<br>(13.8 to 31.6)                            | -3.0<br>(-8.5 to 2.9)                               |
| Macular degeneration                          | < 0.05<br>(< 0.05 to < 0.05)         | --                                 | < 0.05<br>(< 0.05 to < 0.05)      | 28.9<br>(10.5 to 51.3)                            | 2.1<br>(-11.2 to 16.6)                              |
| Refraction and accommodation disorders        | 6.1<br>(5.8 to 6.4)                  | --                                 | 0.1<br>(0.1 to 0.2)               | 23.7<br>(19.7 to 27.9)                            | -3.4<br>(-6.0 to -0.6)                              |
| Age-related and other hearing loss            | 8.9<br>(8.3 to 9.6)                  | --                                 | 0.3<br>(0.2 to 0.4)               | 26.4<br>(21.8 to 30.8)                            | -1.2<br>(-3.7 to 1.3)                               |
| Other vision loss                             | 0.2<br>(0.2 to 0.2)                  | --                                 | < 0.05<br>(< 0.05 to < 0.05)      | 28.6<br>(17.7 to 40.6)                            | -1.1<br>(-8.3 to 6.4)                               |
| Other sense organ diseases                    | 1.7<br>(1.6 to 1.9)                  | 7.5<br>(7.0 to 8.1)                | 0.1<br>(< 0.05 to 0.1)            | 30.4<br>(24.3 to 37.1)                            | 1.0<br>(-3.1 to 4.8)                                |
| Oral disorders                                | 35.7<br>(33.6 to 37.4)               | 97.4†<br>(85.7 to 109.9)           | 0.1<br>(0.1 to 0.1)               | 31.1<br>(28.0 to 34.1)                            | 0.4<br>(-1.6 to 2.5)                                |
| Caries of deciduous teeth                     | 5.3<br>(3.7 to 6.8)                  | 25.7<br>(15.8 to 36.8)             | < 0.05<br>(< 0.05 to < 0.05)      | 21.8<br>(5.5 to 41.8)                             | -0.2<br>(-12.4 to 14.3)                             |
| Caries of permanent teeth                     | 28.4<br>(26.1 to 30.6)               | 71.5<br>(64.8 to 78.8)             | < 0.05<br>(< 0.05 to < 0.05)      | 29.7<br>(24.9 to 34.5)                            | 2.5<br>(-1.1 to 5.9)                                |
| Periodontal disease                           | 1.0<br>(0.8 to 1.2)                  | 0.1<br>(0.1 to 0.1)                | < 0.05<br>(< 0.05 to < 0.05)      | 36.5<br>(29.8 to 43.4)                            | 0.5<br>(-3.4 to 4.8)                                |
| Edentulism and severe tooth loss              | 1.3<br>(1.1 to 1.5)                  | 0.1<br>(0.1 to 0.1)                | < 0.05<br>(< 0.05 to 0.1)         | 33.0<br>(27.6 to 38.5)                            | 0.1<br>(-3.2 to 3.8)                                |
| Other oral disorders                          | 1.4<br>(1.3 to 1.4)                  | --                                 | < 0.05<br>(< 0.05 to 0.1)         | 29.6<br>(25.0 to 34.2)                            | 0.1<br>(-3.0 to 3.2)                                |
| <b>Injuries</b>                               | <b>10.5</b><br><b>(10.0 to 11.1)</b> | <b>5.0†</b><br><b>(4.8 to 5.3)</b> | <b>0.4</b><br><b>(0.3 to 0.6)</b> | <b>39.0</b><br><b>(35.4 to 42.9)</b>              | <b>7.5</b><br><b>(5.2 to 10.1)</b>                  |
| <b>Transport injuries</b>                     | <b>1.8</b><br><b>(1.6 to 1.9)</b>    | <b>0.6</b><br><b>(0.6 to 0.7)</b>  | <b>0.1</b><br><b>(0.1 to 0.1)</b> | <b>48.0</b><br><b>(44.3 to 51.8)</b>              | <b>14.0</b><br><b>(11.5 to 16.5)</b>                |
| Road injuries                                 | 1.1<br>(1.0 to 1.1)                  | 0.4<br>(0.4 to 0.5)                | 0.1<br>(< 0.05 to 0.1)            | 66.5<br>(62.5 to 70.5)                            | 25.9<br>(23.4 to 28.5)                              |
| Pedestrian road injuries                      | 0.2<br>(0.2 to 0.2)                  | 0.1<br>(< 0.05 to 0.1)             | < 0.05<br>(< 0.05 to < 0.05)      | 74.1<br>(70.0 to 78.3)                            | 31.3<br>(28.6 to 34.1)                              |
| Cyclist road injuries                         | 0.2<br>(0.1 to 0.2)                  | 0.1<br>(0.1 to 0.1)                | < 0.05<br>(< 0.05 to < 0.05)      | 75.0<br>(70.8 to 79.6)                            | 32.3<br>(29.7 to 35.2)                              |
| Motorcyclist road injuries                    | 0.3<br>(0.2 to 0.3)                  | 0.1<br>(0.1 to 0.1)                | < 0.05<br>(< 0.05 to < 0.05)      | 77.4<br>(73.1 to 81.9)                            | 33.6<br>(30.9 to 36.4)                              |
| Motor vehicle road injuries                   | 0.3<br>(0.3 to 0.4)                  | 0.1<br>(0.1 to 0.2)                | < 0.05<br>(< 0.05 to < 0.05)      | 49.4<br>(45.4 to 53.4)                            | 13.3<br>(10.8 to 15.9)                              |
| Other road injuries                           | 0.1<br>(0.1 to 0.2)                  | 0.1<br>(0.1 to 0.1)                | < 0.05<br>(< 0.05 to < 0.05)      | 76.1<br>(71.8 to 80.2)                            | 33.3<br>(30.7 to 35.9)                              |
| Other transport injuries                      | 0.7<br>(0.6 to 0.8)                  | 0.2<br>(0.2 to 0.2)                | < 0.05<br>(< 0.05 to 0.1)         | 26.7<br>(23.0 to 30.5)                            | -1.1<br>(-3.4 to 1.3)                               |
| <b>Unintentional injuries</b>                 | <b>7.5</b><br><b>(7.0 to 8.0)</b>    | <b>3.9</b><br><b>(3.7 to 4.2)</b>  | <b>0.2</b><br><b>(0.2 to 0.4)</b> | <b>34.8</b><br><b>(32.1 to 37.8)</b>              | <b>4.8</b><br><b>(3.1 to 6.6)</b>                   |
| Falls                                         | 1.7<br>(1.5 to 2.0)                  | 0.8<br>(0.7 to 1.0)                | 0.1<br>(< 0.05 to 0.1)            | 56.0<br>(52.7 to 59.6)                            | 20.8<br>(18.8 to 23.1)                              |
| Drowning                                      | 0.1<br>(0.1 to 0.1)                  | < 0.05<br>(< 0.05 to < 0.05)       | < 0.05<br>(< 0.05 to < 0.05)      | 25.4<br>(21.1 to 29.7)                            | -4.2<br>(-7.2 to -1.0)                              |
| Fire, heat, and hot substances                | 0.8<br>(0.7 to 1.0)                  | 0.1<br>(0.1 to 0.1)                | < 0.05<br>(< 0.05 to < 0.05)      | 39.6<br>(33.8 to 45.9)                            | 6.5<br>(2.6 to 10.6)                                |
| Poisonings                                    | < 0.05<br>(< 0.05 to < 0.05)         | 0.1<br>(< 0.05 to 0.1)             | < 0.05<br>(< 0.05 to < 0.05)      | 38.5<br>(27.2 to 50.5)                            | 9.1<br>(1.9 to 16.5)                                |
| Exposure to mechanical forces                 | 1.5<br>(1.2 to 1.8)                  | 0.7<br>(0.6 to 0.8)                | < 0.05<br>(< 0.05 to 0.1)         | 47.2<br>(44.0 to 50.4)                            | 11.9<br>(9.9 to 14.1)                               |
| Unintentional firearm injuries                | 0.1<br>(< 0.05 to 0.1)               | < 0.05<br>(< 0.05 to < 0.05)       | < 0.05<br>(< 0.05 to < 0.05)      | 34.1<br>(30.5 to 37.6)                            | 2.3<br>(0.0 to 4.6)                                 |
| Unintentional suffocation                     | 0.1<br>(0.1 to 0.1)                  | < 0.05<br>(< 0.05 to < 0.05)       | < 0.05<br>(< 0.05 to < 0.05)      | 29.4<br>(25.7 to 33.1)                            | 1.1<br>(-1.2 to 3.5)                                |
| Other exposure to mechanical forces           | 1.3<br>(1.1 to 1.6)                  | 0.6<br>(0.5 to 0.7)                | < 0.05<br>(< 0.05 to < 0.05)      | 50.6<br>(47.3 to 53.9)                            | 13.9<br>(11.8 to 16.2)                              |

| Cause                                                                               | Prevalence in thousands (95% UI)  | Incidence in thousands (95% UI)                      | YLDs in thousands (95% UI)                          |                                                   |                                                     |
|-------------------------------------------------------------------------------------|-----------------------------------|------------------------------------------------------|-----------------------------------------------------|---------------------------------------------------|-----------------------------------------------------|
|                                                                                     | 2016 counts                       | 2016 counts                                          | 2016 counts                                         | Percentage change in counts between 2006 and 2016 | Percentage change in age-standardised rates between |
| Adverse effects of medical treatment                                                | < 0.05<br>(< 0.05 to 0.1)         | 0.5<br>(0.5 to 0.6)                                  | < 0.05<br>(< 0.05 to < 0.05)                        | 11.5<br>(5.5 to 19.0)                             | -3.0<br>(-7.6 to 2.0)                               |
| Animal contact                                                                      | 0.3<br>(0.3 to 0.4)               | 0.5<br>(0.4 to 0.6)                                  | < 0.05<br>(< 0.05 to < 0.05)                        | 32.2<br>(24.1 to 40.4)                            | 4.4<br>(-0.6 to 9.5)                                |
| Venomous animal contact                                                             | 0.1<br>(0.1 to 0.2)               | 0.2<br>(0.2 to 0.3)                                  | < 0.05<br>(< 0.05 to < 0.05)                        | 33.6<br>(23.2 to 44.8)                            | 5.9<br>(-0.7 to 13.1)                               |
| Non-venomous animal contact                                                         | 0.2<br>(0.1 to 0.2)               | 0.2<br>(0.2 to 0.3)                                  | < 0.05<br>(< 0.05 to < 0.05)                        | 27.9<br>(23.5 to 31.9)                            | 0.3<br>(-2.3 to 2.8)                                |
| Foreign body                                                                        | 0.5<br>(0.4 to 0.6)               | 0.3<br>(0.3 to 0.3)                                  | < 0.05<br>(< 0.05 to < 0.05)                        | 13.8<br>(10.3 to 17.3)                            | -9.8<br>(-11.9 to -7.7)                             |
| Pulmonary aspiration and foreign body in airway                                     | 0.4<br>(0.3 to 0.5)               | 0.1<br>(0.1 to 0.2)                                  | < 0.05<br>(< 0.05 to < 0.05)                        | 10.7<br>(7.0 to 14.2)                             | -12.1<br>(-14.2 to -10.0)                           |
| Foreign body in eyes                                                                | < 0.05<br>(< 0.05 to < 0.05)      | 0.1<br>(0.1 to 0.1)                                  | < 0.05<br>(< 0.05 to < 0.05)                        | 28.0<br>(22.3 to 34.8)                            | 0.1<br>(-3.2 to 3.5)                                |
| Foreign body in other body part                                                     | 0.1<br>(0.1 to 0.2)               | 0.1<br>(0.1 to 0.1)                                  | < 0.05<br>(< 0.05 to < 0.05)                        | 23.5<br>(19.2 to 28.0)                            | -2.5<br>(-5.2 to 0.1)                               |
| Environmental heat and cold exposure                                                | 1.2<br>(1.0 to 1.4)               | 0.4<br>(0.3 to 0.5)                                  | < 0.05<br>(< 0.05 to 0.1)                           | 22.6<br>(19.8 to 25.7)                            | -5.1<br>(-6.9 to -3.2)                              |
| Other unintentional injuries                                                        | 1.3<br>(1.1 to 1.6)               | 0.5<br>(0.4 to 0.7)                                  | < 0.05<br>(< 0.05 to 0.1)                           | 24.7<br>(22.0 to 27.6)                            | -2.5<br>(-4.2 to -0.7)                              |
| <b>Self-harm and interpersonal violence</b>                                         | <b>2.6</b><br><b>(2.3 to 2.9)</b> | <b>0.5†</b><br><b>(0.4 to 0.6)</b>                   | <b>&lt; 0.05</b><br><b>(&lt; 0.05 to 0.1)</b>       | <b>24.9</b><br><b>(21.9 to 28.0)</b>              | <b>-3.7</b><br><b>(-5.6 to -1.9)</b>                |
| Self-harm                                                                           | 0.1<br>(0.1 to 0.1)               | < 0.05<br>(< 0.05 to < 0.05)                         | < 0.05<br>(< 0.05 to < 0.05)                        | 27.4<br>(23.5 to 32.0)                            | -2.7<br>(-5.2 to 0.2)                               |
| Self-harm by firearm                                                                | < 0.05<br>(< 0.05 to < 0.05)      | < 0.05<br>(< 0.05 to < 0.05)                         | < 0.05<br>(< 0.05 to < 0.05)                        | 32.6<br>(27.9 to 36.9)                            | 2.0<br>(-1.3 to 5.1)                                |
| Self-harm by other specified means                                                  | 0.1<br>(0.1 to 0.1)               | < 0.05<br>(< 0.05 to < 0.05)                         | < 0.05<br>(< 0.05 to < 0.05)                        | 27.2<br>(23.2 to 32.0)                            | -2.9<br>(-5.5 to -0.0)                              |
| Interpersonal violence                                                              | 2.5<br>(2.2 to 2.8)               | 0.5†<br>(0.4 to 0.6)                                 | < 0.05<br>(< 0.05 to 0.1)                           | 24.7<br>(21.6 to 28.0)                            | -3.8<br>(-5.8 to -1.9)                              |
| Assault by firearm                                                                  | < 0.05<br>(< 0.05 to < 0.05)      | < 0.05<br>(< 0.05 to < 0.05)                         | < 0.05<br>(< 0.05 to < 0.05)                        | 17.2<br>(13.3 to 21.5)                            | -10.6<br>(-13.2 to -7.9)                            |
| Assault by sharp object                                                             | 0.1<br>(0.1 to 0.2)               | 0.1<br>(< 0.05 to 0.1)                               | < 0.05<br>(< 0.05 to < 0.05)                        | 20.8<br>(17.1 to 24.7)                            | -8.1<br>(-10.5 to -5.5)                             |
| Sexual violence                                                                     | 1.7<br>(1.4 to 1.9)               | --                                                   | < 0.05<br>(< 0.05 to < 0.05)                        | 16.5<br>(11.4 to 22.3)                            | -6.2<br>(-9.5 to -2.6)                              |
| Assault by other means                                                              | 0.7<br>(0.6 to 0.8)               | 0.4<br>(0.4 to 0.5)                                  | < 0.05<br>(< 0.05 to < 0.05)                        | 30.4<br>(27.1 to 33.7)                            | -2.0<br>(-4.2 to 0.2)                               |
| <b>Forces of nature, conflict and terrorism, and executions and police conflict</b> | <b>0.4</b><br><b>(0.2 to 0.5)</b> | <b>&lt; 0.05†</b><br><b>(&lt; 0.05 to &lt; 0.05)</b> | <b>&lt; 0.05</b><br><b>(&lt; 0.05 to &lt; 0.05)</b> | <b>359.1</b><br><b>(246.9 to 404.8)</b>           | <b>253.1</b><br><b>(173.7 to 286.3)</b>             |
| Exposure to forces of nature                                                        | 0.2<br>(0.1 to 0.2)               | --                                                   | < 0.05<br>(< 0.05 to < 0.05)                        | 462.4<br>(229.6 to 604.0)                         | 367.3<br>(179.0 to 478.4)                           |
| Conflict and terrorism                                                              | 0.2<br>(0.1 to 0.3)               | --                                                   | < 0.05<br>(< 0.05 to < 0.05)                        | 299.6<br>(274.9 to 331.7)                         | 188.5<br>(170.1 to 209.5)                           |
| Executions and police conflict                                                      | < 0.05<br>(< 0.05 to < 0.05)      | < 0.05<br>(< 0.05 to < 0.05)                         | < 0.05<br>(< 0.05 to < 0.05)                        | 49.6<br>(42.1 to 54.4)                            | 19.3<br>(13.9 to 22.5)                              |
| <b>Impairments</b>                                                                  | --                                | --                                                   | --                                                  | --                                                | --                                                  |
| Anaemia                                                                             | 19.9<br>(17.4 to 22.6)            | --                                                   | 0.5<br>(0.4 to 0.8)                                 | 14.1<br>(-1.1 to 30.3)                            | -6.8<br>(-17.2 to 3.6)                              |
| Developmental intellectual disability                                               | 1.3<br>(1.0 to 1.6)               | --                                                   | 0.1<br>(0.1 to 0.2)                                 | 23.9<br>(18.1 to 29.8)                            | -0.1<br>(-4.3 to 4.4)                               |
| Epilepsy                                                                            | 0.5<br>(0.3 to 0.6)               | --                                                   | 0.2<br>(0.1 to 0.3)                                 | 25.4<br>(-34.2 to 155.6)                          | 0.8<br>(-48.8 to 112.8)                             |
| Guillain-Barre syndrome                                                             | < 0.05<br>(< 0.05 to < 0.05)      | --                                                   | < 0.05<br>(< 0.05 to < 0.05)                        | 54.8<br>(36.1 to 118.2)                           | 20.5<br>(7.5 to 62.9)                               |
| Hearing loss                                                                        | 9.9<br>(9.3 to 10.6)              | --                                                   | 0.3<br>(0.2 to 0.5)                                 | 25.1<br>(21.0 to 28.7)                            | -1.3<br>(-3.6 to 0.9)                               |
| Heart failure                                                                       | 0.3<br>(0.3 to 0.3)               | --                                                   | < 0.05<br>(< 0.05 to < 0.05)                        | 30.0<br>(20.3 to 39.8)                            | 0.7<br>(-6.2 to 7.8)                                |
| Infertility                                                                         | 2.0<br>(1.5 to 2.6)               | --                                                   | < 0.05<br>(< 0.05 to < 0.05)                        | 28.6<br>(19.8 to 37.4)                            | -2.3<br>(-7.8 to 3.8)                               |
| Pelvic inflammatory disease                                                         | 0.1<br>(0.1 to 0.1)               | --                                                   | < 0.05<br>(< 0.05 to < 0.05)                        | 28.9<br>(11.2 to 49.0)                            | -5.0<br>(-17.1 to 9.1)                              |
| Vision loss                                                                         | 6.9<br>(6.5 to 7.2)               | --                                                   | 0.2<br>(0.1 to 0.3)                                 | 23.7<br>(20.1 to 27.5)                            | -2.8<br>(-5.0 to -0.5)                              |

We did not calculate incidence for the nine impairments, certain NTDs, and causes with only birth prevalence. Blank cells mean that no estimate is available.

† Incidence for aggregate causes represents the sum of the incidence of the causes below the aggregate.

‡ Incidence estimates for stroke represent first-ever stroke only.

^ Incidence of HIV/AIDS represents new infections of HIV only and does not include new infections of Tuberculosis in HIV positive cases.



SR Table 14: Prevalence, incidence, and YLDs for 2016, percentage change of YLD counts and percentage change of age-standardised YLD rates between 2006 and 2016 by cause and impairments, for all ages, Andorra.

| Cause                                                                                | Prevalence in thousands (95% UI)            | Incidence in thousands (95% UI)                        | YLDs in thousands (95% UI)                            |                                                   |                                                     |
|--------------------------------------------------------------------------------------|---------------------------------------------|--------------------------------------------------------|-------------------------------------------------------|---------------------------------------------------|-----------------------------------------------------|
|                                                                                      | 2016 counts                                 | 2016 counts                                            | 2016 counts                                           | Percentage change in counts between 2006 and 2016 | Percentage change in age-standardised rates between |
| <b>All causes</b>                                                                    | <b>75.2</b><br>(74.8 to 75.6)               | <b>524.5†</b><br>(493.0 to 560.6)                      | <b>10.8</b><br>(8.1 to 14.0)                          | <b>11.5</b><br>(9.8 to 13.1)                      | <b>-0.1</b><br>(-1.6 to 1.3)                        |
| <b>Communicable, maternal, neonatal, and nutritional disorders</b>                   | <b>25.1</b><br>(23.6 to 26.6)               | <b>290.5†</b><br>(260.2 to 320.8)                      | <b>0.3</b><br>(0.2 to 0.4)                            | <b>8.7</b><br>(2.5 to 15.8)                       | <b>1.8</b><br>(-4.0 to 8.2)                         |
| <b>HIV/AIDS and tuberculosis</b>                                                     | <b>8.7</b><br>(7.2 to 10.1)                 | <b>&lt; 0.05†</b><br>( <b>&lt; 0.05 to &lt; 0.05</b> ) | <b>&lt; 0.05</b><br>( <b>&lt; 0.05 to &lt; 0.05</b> ) | <b>19.2</b><br>(-9.9 to 56.7)                     | <b>5.6</b><br>(-23.7 to 48.3)                       |
| Tuberculosis                                                                         | 7.7<br>(6.2 to 9.3)                         | < 0.05†<br>( <b>&lt; 0.05 to &lt; 0.05</b> )           | < 0.05<br>( <b>&lt; 0.05 to &lt; 0.05</b> )           | -9.7<br>(-25.2 to 7.6)                            | -16.4<br>(-31.9 to 2.1)                             |
| Drug-susceptible tuberculosis                                                        | < 0.05<br>( <b>&lt; 0.05 to &lt; 0.05</b> ) | < 0.05<br>( <b>&lt; 0.05 to &lt; 0.05</b> )            | < 0.05<br>( <b>&lt; 0.05 to &lt; 0.05</b> )           | -9.7<br>(-25.2 to 7.6)                            | -16.4<br>(-31.9 to 2.1)                             |
| Multidrug-resistant tuberculosis without extensive drug resistance                   | < 0.05<br>( <b>&lt; 0.05 to &lt; 0.05</b> ) | < 0.05<br>( <b>&lt; 0.05 to &lt; 0.05</b> )            | < 0.05<br>( <b>&lt; 0.05 to &lt; 0.05</b> )           | -14.8<br>(-45.4 to 35.6)                          | -21.1<br>(-49.7 to 23.8)                            |
| Extensively drug-resistant tuberculosis                                              | < 0.05<br>( <b>&lt; 0.05 to &lt; 0.05</b> ) | < 0.05<br>( <b>&lt; 0.05 to &lt; 0.05</b> )            | < 0.05<br>( <b>&lt; 0.05 to &lt; 0.05</b> )           | 83.2<br>(17.4 to 191.9)                           | 69.8<br>(8.1 to 166.2)                              |
| Latent tuberculosis infection                                                        | 7.7<br>(6.2 to 9.3)                         | --                                                     | --                                                    | --                                                | --                                                  |
| HIV/AIDS                                                                             | 0.1<br>( <b>&lt; 0.05 to 0.4</b> )          | < 0.05^<br>( <b>&lt; 0.05 to &lt; 0.05</b> )           | < 0.05<br>( <b>&lt; 0.05 to &lt; 0.05</b> )           | 24.9<br>(-9.2 to 77.4)                            | 10.4<br>(-25.0 to 67.5)                             |
| Drug-susceptible HIV/AIDS - Tuberculosis                                             | < 0.05<br>( <b>&lt; 0.05 to &lt; 0.05</b> ) | < 0.05<br>( <b>&lt; 0.05 to &lt; 0.05</b> )            | < 0.05<br>( <b>&lt; 0.05 to &lt; 0.05</b> )           | -13.7<br>(-20.4 to -6.9)                          | -23.8<br>(-29.7 to -17.8)                           |
| Multidrug-resistant HIV/AIDS - Tuberculosis without extensive drug resistance        | < 0.05<br>( <b>&lt; 0.05 to &lt; 0.05</b> ) | < 0.05<br>( <b>&lt; 0.05 to &lt; 0.05</b> )            | < 0.05<br>( <b>&lt; 0.05 to &lt; 0.05</b> )           | -17.5<br>(-47.1 to 31.3)                          | -27.1<br>(-53.3 to 15.9)                            |
| Extensively drug-resistant HIV/AIDS - Tuberculosis                                   | < 0.05<br>( <b>&lt; 0.05 to &lt; 0.05</b> ) | < 0.05<br>( <b>&lt; 0.05 to &lt; 0.05</b> )            | < 0.05<br>( <b>&lt; 0.05 to &lt; 0.05</b> )           | 77.5<br>(13.7 to 182.7)                           | 56.8<br>(0.4 to 149.5)                              |
| HIV/AIDS resulting in other diseases                                                 | 0.1<br>( <b>&lt; 0.05 to 0.4</b> )          | < 0.05<br>( <b>&lt; 0.05 to &lt; 0.05</b> )            | < 0.05<br>( <b>&lt; 0.05 to &lt; 0.05</b> )           | 25.9<br>(-9.2 to 80.7)                            | 11.3<br>(-25.0 to 73.0)                             |
| <b>Diarrhoea, lower respiratory infections, and other common infectious diseases</b> | <b>4.5</b><br>(4.2 to 4.8)                  | <b>287.7†</b><br>(257.6 to 318.1)                      | <b>0.1</b><br>(0.1 to 0.2)                            | <b>8.1</b><br>(4.4 to 12.6)                       | <b>0.9</b><br>(-2.4 to 4.6)                         |
| Diarrhoeal diseases                                                                  | 0.2<br>(0.2 to 0.2)                         | 11.6<br>(10.9 to 12.5)                                 | < 0.05<br>( <b>&lt; 0.05 to &lt; 0.05</b> )           | 11.0<br>(2.4 to 19.8)                             | 2.3<br>(-6.0 to 11.3)                               |
| Intestinal infectious diseases                                                       | < 0.05<br>( <b>&lt; 0.05 to &lt; 0.05</b> ) | < 0.05†<br>( <b>&lt; 0.05 to &lt; 0.05</b> )           | < 0.05<br>( <b>&lt; 0.05 to &lt; 0.05</b> )           | 14.0<br>(-4.8 to 39.1)                            | 2.1<br>(-15.0 to 23.4)                              |
| Typhoid fever                                                                        | < 0.05<br>( <b>&lt; 0.05 to &lt; 0.05</b> ) | < 0.05<br>( <b>&lt; 0.05 to &lt; 0.05</b> )            | < 0.05<br>( <b>&lt; 0.05 to &lt; 0.05</b> )           | 24.3<br>(0.3 to 55.6)                             | 12.7<br>(-9.3 to 40.5)                              |
| Paratyphoid fever                                                                    | < 0.05<br>( <b>&lt; 0.05 to &lt; 0.05</b> ) | < 0.05<br>( <b>&lt; 0.05 to &lt; 0.05</b> )            | < 0.05<br>( <b>&lt; 0.05 to &lt; 0.05</b> )           | 0.8<br>(-19.2 to 25.2)                            | -8.7<br>(-26.7 to 14.6)                             |
| Other intestinal infectious diseases                                                 | --                                          | --                                                     | < 0.05<br>( <b>&lt; 0.05 to &lt; 0.05</b> )           | -7.2<br>(-26.5 to 18.9)                           | -25.7<br>(-44.4 to -0.3)                            |
| Lower respiratory infections                                                         | 0.1<br>(0.1 to 0.1)                         | 2.5<br>(2.2 to 2.7)                                    | < 0.05<br>( <b>&lt; 0.05 to &lt; 0.05</b> )           | 19.8<br>(6.4 to 35.0)                             | 1.6<br>(-10.6 to 15.4)                              |
| Upper respiratory infections                                                         | 3.5<br>(3.1 to 3.9)                         | 268.3<br>(238.4 to 299.6)                              | 0.1<br>(0.1 to 0.1)                                   | 6.2<br>(1.3 to 11.7)                              | 0.2<br>(-4.3 to 5.4)                                |
| Otitis media                                                                         | 0.7<br>(0.6 to 0.8)                         | 4.2<br>(3.0 to 6.3)                                    | < 0.05<br>( <b>&lt; 0.05 to &lt; 0.05</b> )           | 10.0<br>(2.5 to 18.3)                             | 3.1<br>(-4.0 to 10.8)                               |
| Meningitis                                                                           | < 0.05<br>( <b>&lt; 0.05 to &lt; 0.05</b> ) | < 0.05<br>( <b>&lt; 0.05 to &lt; 0.05</b> )            | < 0.05<br>( <b>&lt; 0.05 to &lt; 0.05</b> )           | 18.6<br>(1.0 to 188.6)                            | 1.1<br>(-6.8 to 57.2)                               |
| Pneumococcal meningitis                                                              | < 0.05<br>( <b>&lt; 0.05 to &lt; 0.05</b> ) | < 0.05<br>( <b>&lt; 0.05 to &lt; 0.05</b> )            | < 0.05<br>( <b>&lt; 0.05 to &lt; 0.05</b> )           | -3.2<br>(-10.0 to 2.9)                            | -11.2<br>(-17.6 to -5.5)                            |
| H influenzae type B meningitis                                                       | < 0.05<br>( <b>&lt; 0.05 to &lt; 0.05</b> ) | < 0.05<br>( <b>&lt; 0.05 to &lt; 0.05</b> )            | < 0.05<br>( <b>&lt; 0.05 to &lt; 0.05</b> )           | 4.7<br>(-0.6 to 9.9)                              | -3.5<br>(-8.9 to 1.5)                               |
| Meningococcal infection                                                              | < 0.05<br>( <b>&lt; 0.05 to &lt; 0.05</b> ) | < 0.05<br>( <b>&lt; 0.05 to &lt; 0.05</b> )            | < 0.05<br>( <b>&lt; 0.05 to &lt; 0.05</b> )           | 94.2<br>(-0.6 to 1,030.0)                         | 27.6<br>(-9.2 to 350.4)                             |
| Other meningitis                                                                     | < 0.05<br>( <b>&lt; 0.05 to &lt; 0.05</b> ) | < 0.05<br>( <b>&lt; 0.05 to &lt; 0.05</b> )            | < 0.05<br>( <b>&lt; 0.05 to &lt; 0.05</b> )           | 7.7<br>(3.0 to 12.6)                              | 0.0<br>(-4.6 to 4.5)                                |
| Encephalitis                                                                         | < 0.05<br>( <b>&lt; 0.05 to &lt; 0.05</b> ) | < 0.05<br>( <b>&lt; 0.05 to &lt; 0.05</b> )            | < 0.05<br>( <b>&lt; 0.05 to &lt; 0.05</b> )           | 10.2<br>(6.5 to 13.7)                             | 0.6<br>(-2.5 to 3.6)                                |
| Diphtheria                                                                           | < 0.05<br>( <b>&lt; 0.05 to &lt; 0.05</b> ) | < 0.05<br>( <b>&lt; 0.05 to &lt; 0.05</b> )            | < 0.05<br>( <b>&lt; 0.05 to &lt; 0.05</b> )           | 1.9<br>(-47.6 to 99.5)                            | -5.4<br>(-49.1 to 75.9)                             |
| Whooping cough                                                                       | < 0.05<br>( <b>&lt; 0.05 to &lt; 0.05</b> ) | < 0.05<br>( <b>&lt; 0.05 to &lt; 0.05</b> )            | < 0.05<br>( <b>&lt; 0.05 to &lt; 0.05</b> )           | -25.9<br>(-49.4 to 7.9)                           | -27.1<br>(-50.8 to 7.7)                             |
| Tetanus                                                                              | < 0.05<br>( <b>&lt; 0.05 to &lt; 0.05</b> ) | < 0.05<br>( <b>&lt; 0.05 to &lt; 0.05</b> )            | < 0.05<br>( <b>&lt; 0.05 to &lt; 0.05</b> )           | 7.9<br>(-10.6 to 29.5)                            | 2.2<br>(-13.8 to 20.7)                              |
| Measles                                                                              | < 0.05<br>(0.0 to < 0.05)                   | < 0.05<br>(0.0 to < 0.05)                              | < 0.05<br>(0.0 to < 0.05)                             | --                                                | --                                                  |
| Varicella and herpes zoster                                                          | 0.1<br>(0.1 to 0.1)                         | 1.1<br>(1.0 to 1.1)                                    | < 0.05<br>( <b>&lt; 0.05 to &lt; 0.05</b> )           | 13.0<br>(-0.8 to 28.7)                            | 0.0<br>(-12.5 to 15.1)                              |
| <b>Neglected tropical diseases and malaria</b>                                       | <b>0.1</b><br>( <b>&lt; 0.05 to 0.1</b> )   | <b>&lt; 0.05†</b><br>( <b>&lt; 0.05 to &lt; 0.05</b> ) | <b>&lt; 0.05</b><br>( <b>&lt; 0.05 to &lt; 0.05</b> ) | <b>34.7</b><br>(-46.1 to 215.2)                   | <b>19.9</b><br>(-57.2 to 194.7)                     |
| Malaria                                                                              | --                                          | --                                                     | --                                                    | --                                                | --                                                  |
| Chagas disease                                                                       | < 0.05<br>( <b>&lt; 0.05 to 0.1</b> )       | --                                                     | < 0.05<br>( <b>&lt; 0.05 to &lt; 0.05</b> )           | 54.7<br>(-7.0 to 157.2)                           | 39.2<br>(-10.9 to 125.2)                            |
| Leishmaniasis                                                                        | --                                          | --                                                     | --                                                    | --                                                | --                                                  |
| Visceral leishmaniasis                                                               | --                                          | --                                                     | --                                                    | --                                                | --                                                  |
| Cutaneous and mucocutaneous leishmaniasis                                            | --                                          | --                                                     | --                                                    | --                                                | --                                                  |
| African trypanosomiasis                                                              | --                                          | --                                                     | --                                                    | --                                                | --                                                  |
| Schistosomiasis                                                                      | --                                          | --                                                     | --                                                    | --                                                | --                                                  |
| Cysticercosis                                                                        | --                                          | --                                                     | --                                                    | --                                                | --                                                  |
| Cystic echinococcosis                                                                | < 0.05<br>( <b>&lt; 0.05 to &lt; 0.05</b> ) | < 0.05<br>( <b>&lt; 0.05 to &lt; 0.05</b> )            | < 0.05<br>( <b>&lt; 0.05 to &lt; 0.05</b> )           | -3.1<br>(-89.9 to 784.9)                          | -12.1<br>(-91.0 to 742.3)                           |
| Lymphatic filariasis                                                                 | --                                          | --                                                     | --                                                    | --                                                | --                                                  |
| Onchocerciasis                                                                       | --                                          | --                                                     | --                                                    | --                                                | --                                                  |
| Trachoma                                                                             | --                                          | --                                                     | --                                                    | --                                                | --                                                  |
| Dengue                                                                               | --                                          | --                                                     | --                                                    | --                                                | --                                                  |
| Yellow fever                                                                         | --                                          | --                                                     | --                                                    | --                                                | --                                                  |
| Rabies                                                                               | < 0.05<br>( <b>&lt; 0.05 to &lt; 0.05</b> ) | < 0.05<br>( <b>&lt; 0.05 to &lt; 0.05</b> )            | < 0.05<br>( <b>&lt; 0.05 to &lt; 0.05</b> )           | 26.5<br>(-16.2 to 88.2)                           | 5.8<br>(-28.1 to 56.8)                              |
| Intestinal nematode infections                                                       | --                                          | --                                                     | --                                                    | --                                                | --                                                  |
| Ascariasis                                                                           | --                                          | --                                                     | --                                                    | --                                                | --                                                  |

| Cause                                                                   | Prevalence in thousands (95% UI)              | Incidence in thousands (95% UI)          | YLDs in thousands (95% UI)                          |                                                   |                                                     |
|-------------------------------------------------------------------------|-----------------------------------------------|------------------------------------------|-----------------------------------------------------|---------------------------------------------------|-----------------------------------------------------|
|                                                                         | 2016 counts                                   | 2016 counts                              | 2016 counts                                         | Percentage change in counts between 2006 and 2016 | Percentage change in age-standardised rates between |
| Trichuriasis                                                            | --                                            | --                                       | --                                                  | --                                                | --                                                  |
| Hookworm disease                                                        | --                                            | --                                       | --                                                  | --                                                | --                                                  |
| Food-borne trematodiasis                                                | --                                            | --                                       | --                                                  | --                                                | --                                                  |
| Leprosy                                                                 | --                                            | --                                       | --                                                  | --                                                | --                                                  |
| Ebola virus disease                                                     | --                                            | --                                       | --                                                  | --                                                | --                                                  |
| Zika virus disease                                                      | --                                            | --                                       | --                                                  | --                                                | --                                                  |
| Guinea worm disease                                                     | --                                            | --                                       | --                                                  | --                                                | --                                                  |
| Other neglected tropical diseases                                       | --                                            | --                                       | < 0.05<br>(< 0.05 to < 0.05)                        | --                                                | --                                                  |
| <b>Maternal disorders</b>                                               | <b>&lt; 0.05</b><br><b>(&lt; 0.05 to 0.1)</b> | <b>0.4†</b><br><b>(0.4 to 0.6)</b>       | <b>&lt; 0.05</b><br><b>(&lt; 0.05 to &lt; 0.05)</b> | <b>-4.2</b><br><b>(-32.5 to 39.8)</b>             | <b>-3.5</b><br><b>(-31.8 to 41.0)</b>               |
| Maternal haemorrhage                                                    | < 0.05<br>(< 0.05 to < 0.05)                  | < 0.05<br>(< 0.05 to 0.1)                | < 0.05<br>(< 0.05 to < 0.05)                        | -14.8<br>(-50.7 to 43.1)                          | -13.0<br>(-49.7 to 45.2)                            |
| Maternal sepsis and other pregnancy related infections                  | < 0.05<br>(< 0.05 to < 0.05)                  | 0.1<br>(< 0.05 to 0.1)                   | < 0.05<br>(< 0.05 to < 0.05)                        | -0.8<br>(-51.0 to 109.9)                          | -1.7<br>(-53.2 to 112.8)                            |
| Maternal hypertensive disorders                                         | < 0.05<br>(< 0.05 to < 0.05)                  | 0.1<br>(0.1 to 0.1)                      | < 0.05<br>(< 0.05 to < 0.05)                        | -1.5<br>(-40.7 to 74.3)                           | -0.8<br>(-40.4 to 77.0)                             |
| Maternal obstructed labour and uterine rupture                          | < 0.05<br>(< 0.05 to < 0.05)                  | < 0.05<br>(< 0.05 to < 0.05)             | < 0.05<br>(< 0.05 to < 0.05)                        | -2.4<br>(-47.7 to 87.9)                           | -1.6<br>(-47.6 to 88.8)                             |
| Maternal abortion, miscarriage, and ectopic pregnancy                   | < 0.05<br>(< 0.05 to < 0.05)                  | 0.2<br>(0.1 to 0.3)                      | < 0.05<br>(< 0.05 to < 0.05)                        | -6.8<br>(-56.0 to 89.0)                           | -6.0<br>(-55.9 to 90.4)                             |
| Other maternal disorders                                                | --                                            | --                                       | < 0.05<br>(< 0.05 to < 0.05)                        | -8.2<br>(-35.0 to 33.9)                           | -7.6<br>(-34.3 to 35.1)                             |
| <b>Neonatal disorders</b>                                               | <b>0.6</b><br><b>(0.5 to 0.7)</b>             | --                                       | <b>0.1</b><br><b>(0.1 to 0.1)</b>                   | <b>14.9</b><br><b>(-0.2 to 34.8)</b>              | <b>9.2</b><br><b>(-5.6 to 28.7)</b>                 |
| Neonatal preterm birth complications                                    | 0.5<br>(0.4 to 0.6)                           | --                                       | 0.1<br>(< 0.05 to 0.1)                              | 16.9<br>(-11.5 to 52.3)                           | 11.8<br>(-16.2 to 46.3)                             |
| Neonatal encephalopathy due to birth asphyxia and trauma                | 0.2<br>(0.1 to 0.3)                           | --                                       | < 0.05<br>(< 0.05 to 0.1)                           | 13.7<br>(-4.9 to 50.0)                            | 7.3<br>(-10.2 to 42.1)                              |
| Neonatal sepsis and other neonatal infections                           | < 0.05<br>(< 0.05 to 0.1)                     | --                                       | < 0.05<br>(< 0.05 to < 0.05)                        | 11.8<br>(-6.1 to 34.3)                            | 5.4<br>(-12.2 to 27.9)                              |
| Hemolytic disease and other neonatal jaundice                           | < 0.05<br>(< 0.05 to < 0.05)                  | --                                       | < 0.05<br>(< 0.05 to < 0.05)                        | 7.0<br>(-0.6 to 14.8)                             | 1.3<br>(-6.2 to 8.7)                                |
| Other neonatal disorders                                                | --                                            | --                                       | < 0.05<br>(< 0.05 to < 0.05)                        | 12.7<br>(-10.0 to 42.3)                           | 9.5<br>(-12.5 to 38.1)                              |
| <b>Nutritional deficiencies</b>                                         | <b>3.4</b><br><b>(3.0 to 3.9)</b>             | <b>0.2†</b><br><b>(0.2 to 0.3)</b>       | <b>0.1</b><br><b>(&lt; 0.05 to 0.1)</b>             | <b>-1.3</b><br><b>(-13.7 to 12.3)</b>             | <b>-8.2</b><br><b>(-19.7 to 5.1)</b>                |
| Protein-energy malnutrition                                             | < 0.05<br>(< 0.05 to < 0.05)                  | < 0.05<br>(< 0.05 to < 0.05)             | < 0.05<br>(< 0.05 to < 0.05)                        | 2.5<br>(-10.1 to 16.1)                            | -0.5<br>(-12.7 to 12.7)                             |
| Iodine deficiency                                                       | 1.3<br>(1.0 to 1.7)                           | < 0.05<br>(< 0.05 to < 0.05)             | < 0.05<br>(< 0.05 to < 0.05)                        | 4.6<br>(-6.0 to 15.6)                             | -4.0<br>(-13.8 to 6.2)                              |
| Vitamin A deficiency                                                    | 0.2<br>(0.2 to 0.3)                           | 0.2<br>(0.2 to 0.3)                      | --                                                  | --                                                | --                                                  |
| Iron-deficiency anaemia                                                 | 1.8<br>(1.3 to 2.2)                           | --                                       | < 0.05<br>(< 0.05 to < 0.05)                        | -10.9<br>(-36.2 to 24.3)                          | -15.6<br>(-38.0 to 17.4)                            |
| Other nutritional deficiencies                                          | --                                            | --                                       | < 0.05<br>(< 0.05 to < 0.05)                        | 2.4<br>(-10.6 to 16.6)                            | -0.8<br>(-13.3 to 13.0)                             |
| <b>Other communicable, maternal, neonatal, and nutritional diseases</b> | <b>12.5</b><br><b>(11.4 to 13.5)</b>          | <b>2.1</b><br><b>(1.8 to 2.5)</b>        | <b>&lt; 0.05</b><br><b>(&lt; 0.05 to &lt; 0.05)</b> | <b>6.1</b><br><b>(-1.4 to 14.2)</b>               | <b>-0.5</b><br><b>(-6.8 to 7.4)</b>                 |
| Sexually transmitted diseases excluding HIV                             | 10.6<br>(9.7 to 11.7)                         | 1.9<br>(1.6 to 2.4)                      | < 0.05<br>(< 0.05 to < 0.05)                        | 5.6<br>(-3.3 to 16.0)                             | -1.2<br>(-9.6 to 8.6)                               |
| Syphilis                                                                | 0.1<br>(< 0.05 to 0.1)                        | < 0.05<br>(< 0.05 to 0.1)                | < 0.05<br>(< 0.05 to < 0.05)                        | 18.5<br>(5.3 to 36.1)                             | 1.4<br>(-10.0 to 16.3)                              |
| Chlamydial infection                                                    | 0.4<br>(0.2 to 0.7)                           | 0.2<br>(0.1 to 0.5)                      | < 0.05<br>(< 0.05 to < 0.05)                        | 1.5<br>(-18.8 to 31.7)                            | -1.0<br>(-20.6 to 28.3)                             |
| Gonococcal infection                                                    | 0.1<br>(< 0.05 to 0.2)                        | 0.2<br>(< 0.05 to 0.6)                   | < 0.05<br>(< 0.05 to < 0.05)                        | -6.9<br>(-20.0 to 11.8)                           | -9.5<br>(-20.6 to 8.7)                              |
| Trichomoniasis                                                          | 1.4<br>(1.1 to 1.6)                           | 1.1<br>(0.9 to 1.3)                      | < 0.05<br>(< 0.05 to < 0.05)                        | 6.5<br>(-1.9 to 15.9)                             | 0.1<br>(-8.5 to 9.8)                                |
| Genital herpes                                                          | 8.9<br>(7.7 to 10.5)                          | 0.3<br>(0.3 to 0.4)                      | < 0.05<br>(< 0.05 to < 0.05)                        | 10.0<br>(3.4 to 17.1)                             | -0.3<br>(-6.5 to 6.6)                               |
| Other sexually transmitted diseases                                     | 0.1<br>(0.1 to 0.1)                           | < 0.05<br>(< 0.05 to < 0.05)             | < 0.05<br>(< 0.05 to < 0.05)                        | 0.3<br>(-13.6 to 19.6)                            | -2.1<br>(-16.0 to 16.4)                             |
| Hepatitis                                                               | 2.3<br>(2.0 to 2.6)                           | 0.1<br>(0.1 to 0.2)                      | < 0.05<br>(< 0.05 to < 0.05)                        | 2.7<br>(-10.4 to 18.0)                            | -6.7<br>(-19.5 to 7.5)                              |
| Acute hepatitis A                                                       | < 0.05<br>(< 0.05 to < 0.05)                  | 0.1<br>(0.1 to 0.1)                      | < 0.05<br>(< 0.05 to < 0.05)                        | 1.7<br>(-16.6 to 24.6)                            | -6.8<br>(-24.8 to 17.8)                             |
| Hepatitis B                                                             | 0.9<br>(0.7 to 1.2)                           | 0.1<br>(0.1 to 0.1)                      | < 0.05<br>(< 0.05 to < 0.05)                        | 3.2<br>(-16.1 to 25.9)                            | -8.3<br>(-25.7 to 11.9)                             |
| Hepatitis C                                                             | 1.3<br>(1.2 to 1.5)                           | < 0.05<br>(< 0.05 to < 0.05)             | < 0.05<br>(< 0.05 to < 0.05)                        | 4.5<br>(3.8 to 5.2)                               | -0.9<br>(-1.2 to -0.4)                              |
| Acute hepatitis E                                                       | < 0.05<br>(< 0.05 to < 0.05)                  | < 0.05<br>(< 0.05 to < 0.05)             | < 0.05<br>(< 0.05 to < 0.05)                        | 9.7<br>(2.9 to 17.5)                              | -5.0<br>(-10.2 to 0.6)                              |
| Other infectious diseases                                               | < 0.05<br>(< 0.05 to 0.1)                     | < 0.05<br>(< 0.05 to < 0.05)             | < 0.05<br>(< 0.05 to < 0.05)                        | 7.9<br>(0.0 to 16.5)                              | 2.0<br>(-8.4 to 13.1)                               |
| <b>Non-communicable diseases</b>                                        | <b>74.0</b><br><b>(73.4 to 74.5)</b>          | <b>225.7†</b><br><b>(210.6 to 240.1)</b> | <b>9.7</b><br><b>(7.2 to 12.4)</b>                  | <b>11.2</b><br><b>(9.3 to 12.9)</b>               | <b>-0.5</b><br><b>(-2.1 to 1.1)</b>                 |
| <b>Neoplasms</b>                                                        | <b>1.9</b><br><b>(1.8 to 2.0)</b>             | <b>0.5</b><br><b>(0.5 to 0.6)</b>        | <b>0.2</b><br><b>(0.1 to 0.2)</b>                   | <b>29.5</b><br><b>(23.2 to 35.9)</b>              | <b>8.8</b><br><b>(3.6 to 14.1)</b>                  |
| Lip and oral cavity cancer                                              | < 0.05<br>(< 0.05 to < 0.05)                  | < 0.05<br>(< 0.05 to < 0.05)             | < 0.05<br>(< 0.05 to < 0.05)                        | 18.1<br>(1.8 to 38.0)                             | -1.0<br>(-14.6 to 16.1)                             |
| Nasopharynx cancer                                                      | < 0.05<br>(< 0.05 to < 0.05)                  | < 0.05<br>(< 0.05 to < 0.05)             | < 0.05<br>(< 0.05 to < 0.05)                        | 13.5<br>(-5.9 to 40.8)                            | -3.3<br>(-19.5 to 18.0)                             |
| Other pharynx cancer                                                    | < 0.05<br>(< 0.05 to < 0.05)                  | < 0.05<br>(< 0.05 to < 0.05)             | < 0.05<br>(< 0.05 to < 0.05)                        | 22.4<br>(1.6 to 49.1)                             | 4.0<br>(-14.1 to 26.8)                              |
| Oesophageal cancer                                                      | < 0.05<br>(< 0.05 to < 0.05)                  | < 0.05<br>(< 0.05 to < 0.05)             | < 0.05<br>(< 0.05 to < 0.05)                        | 29.0<br>(4.2 to 61.5)                             | 7.0<br>(-13.4 to 33.3)                              |
| Stomach cancer                                                          | < 0.05<br>(< 0.05 to < 0.05)                  | < 0.05<br>(< 0.05 to < 0.05)             | < 0.05<br>(< 0.05 to < 0.05)                        | 29.5<br>(6.2 to 55.5)                             | 6.8<br>(-12.0 to 27.8)                              |
| Colon and rectum cancer                                                 | 0.2<br>(0.2 to 0.3)                           | 0.1<br>(< 0.05 to 0.1)                   | < 0.05<br>(< 0.05 to < 0.05)                        | 30.2<br>(13.1 to 48.9)                            | 7.6<br>(-6.4 to 23.7)                               |
| Liver cancer                                                            | < 0.05<br>(< 0.05 to < 0.05)                  | < 0.05<br>(< 0.05 to < 0.05)             | < 0.05<br>(< 0.05 to < 0.05)                        | 33.7<br>(9.1 to 64.5)                             | 11.6<br>(-8.6 to 37.5)                              |
| Liver cancer due to hepatitis B                                         | < 0.05<br>(< 0.05 to < 0.05)                  | < 0.05<br>(< 0.05 to < 0.05)             | < 0.05<br>(< 0.05 to < 0.05)                        | 34.8<br>(9.0 to 71.2)                             | 14.4<br>(-7.4 to 45.7)                              |

| Cause                                              | Prevalence in thousands (95% UI)     | Incidence in thousands (95% UI)    | YLDs in thousands (95% UI)        |                                                   |                                                     |
|----------------------------------------------------|--------------------------------------|------------------------------------|-----------------------------------|---------------------------------------------------|-----------------------------------------------------|
|                                                    | 2016 counts                          | 2016 counts                        | 2016 counts                       | Percentage change in counts between 2006 and 2016 | Percentage change in age-standardised rates between |
| Liver cancer due to hepatitis C                    | < 0.05<br>(< 0.05 to < 0.05)         | < 0.05<br>(< 0.05 to < 0.05)       | < 0.05<br>(< 0.05 to < 0.05)      | 40.0<br>(12.1 to 74.0)                            | 15.0<br>(-7.6 to 42.2)                              |
| Liver cancer due to alcohol use                    | < 0.05<br>(< 0.05 to < 0.05)         | < 0.05<br>(< 0.05 to < 0.05)       | < 0.05<br>(< 0.05 to < 0.05)      | 24.1<br>(-1.2 to 57.9)                            | 4.3<br>(-17.0 to 32.9)                              |
| Liver cancer due to other causes                   | < 0.05<br>(< 0.05 to < 0.05)         | < 0.05<br>(< 0.05 to < 0.05)       | < 0.05<br>(< 0.05 to < 0.05)      | 47.7<br>(17.5 to 91.8)                            | 23.6<br>(-1.8 to 60.9)                              |
| Gallbladder and biliary tract cancer               | < 0.05<br>(< 0.05 to < 0.05)         | < 0.05<br>(< 0.05 to < 0.05)       | < 0.05<br>(< 0.05 to < 0.05)      | 15.6<br>(-14.6 to 63.0)                           | -5.2<br>(-28.7 to 26.9)                             |
| Pancreatic cancer                                  | < 0.05<br>(< 0.05 to < 0.05)         | < 0.05<br>(< 0.05 to < 0.05)       | < 0.05<br>(< 0.05 to < 0.05)      | 27.5<br>(5.1 to 55.3)                             | 4.2<br>(-12.5 to 24.2)                              |
| Larynx cancer                                      | < 0.05<br>(< 0.05 to < 0.05)         | < 0.05<br>(< 0.05 to < 0.05)       | < 0.05<br>(< 0.05 to < 0.05)      | 22.2<br>(-1.2 to 50.9)                            | 2.4<br>(-17.4 to 27.2)                              |
| Tracheal, bronchus, and lung cancer                | 0.1<br>(0.1 to 0.1)                  | < 0.05<br>(< 0.05 to < 0.05)       | < 0.05<br>(< 0.05 to < 0.05)      | 29.5<br>(6.3 to 58.7)                             | 7.3<br>(-12.3 to 31.7)                              |
| Malignant skin melanoma                            | 0.1<br>(0.1 to 0.1)                  | < 0.05<br>(< 0.05 to < 0.05)       | < 0.05<br>(< 0.05 to < 0.05)      | 25.8<br>(10.8 to 44.2)                            | 9.4<br>(-4.3 to 26.1)                               |
| Non-melanoma skin cancer                           | < 0.05<br>(< 0.05 to < 0.05)         | < 0.05<br>(< 0.05 to 0.1)          | < 0.05<br>(< 0.05 to < 0.05)      | 14.5<br>(-31.4 to 87.4)                           | -7.0<br>(-41.6 to 49.0)                             |
| Non-melanoma skin cancer (squamous-cell carcinoma) | < 0.05<br>(< 0.05 to < 0.05)         | < 0.05<br>(< 0.05 to < 0.05)       | < 0.05<br>(< 0.05 to < 0.05)      | 14.4<br>(-34.0 to 95.7)                           | -7.3<br>(-44.1 to 55.1)                             |
| Non-melanoma skin cancer (basal-cell carcinoma)    | < 0.05<br>(< 0.05 to < 0.05)         | < 0.05<br>(< 0.05 to 0.1)          | < 0.05<br>(< 0.05 to < 0.05)      | 16.1<br>(-16.0 to 55.8)                           | -2.8<br>(-28.5 to 30.0)                             |
| Breast cancer                                      | 0.3<br>(0.2 to 0.5)                  | 0.1<br>(< 0.05 to 0.1)             | < 0.05<br>(< 0.05 to < 0.05)      | 23.5<br>(11.1 to 35.7)                            | 4.3<br>(-6.9 to 15.0)                               |
| Cervical cancer                                    | < 0.05<br>(< 0.05 to < 0.05)         | < 0.05<br>(< 0.05 to < 0.05)       | < 0.05<br>(< 0.05 to < 0.05)      | 7.5<br>(-13.9 to 37.3)                            | -1.9<br>(-24.4 to 27.9)                             |
| Uterine cancer                                     | < 0.05<br>(< 0.05 to 0.1)            | < 0.05<br>(< 0.05 to < 0.05)       | < 0.05<br>(< 0.05 to < 0.05)      | 41.2<br>(10.4 to 85.0)                            | 19.1<br>(-6.9 to 58.4)                              |
| Ovarian cancer                                     | < 0.05<br>(< 0.05 to < 0.05)         | < 0.05<br>(< 0.05 to < 0.05)       | < 0.05<br>(< 0.05 to < 0.05)      | 15.9<br>(-7.8 to 50.5)                            | -1.4<br>(-22.4 to 29.0)                             |
| Prostate cancer                                    | 0.4<br>(0.3 to 0.5)                  | 0.1<br>(0.1 to 0.1)                | < 0.05<br>(< 0.05 to < 0.05)      | 40.1<br>(20.1 to 59.1)                            | 16.2<br>(-0.6 to 33.1)                              |
| Testicular cancer                                  | < 0.05<br>(< 0.05 to < 0.05)         | < 0.05<br>(< 0.05 to < 0.05)       | < 0.05<br>(< 0.05 to < 0.05)      | 18.3<br>(-13.6 to 58.5)                           | 13.8<br>(-18.6 to 52.2)                             |
| Kidney cancer                                      | < 0.05<br>(< 0.05 to < 0.05)         | < 0.05<br>(< 0.05 to < 0.05)       | < 0.05<br>(< 0.05 to < 0.05)      | 26.0<br>(8.0 to 48.8)                             | 6.9<br>(-8.6 to 25.7)                               |
| Bladder cancer                                     | 0.1<br>(0.1 to 0.1)                  | < 0.05<br>(< 0.05 to < 0.05)       | < 0.05<br>(< 0.05 to < 0.05)      | 27.9<br>(11.3 to 47.5)                            | 5.1<br>(-9.0 to 21.9)                               |
| Brain and nervous system cancer                    | < 0.05<br>(< 0.05 to < 0.05)         | < 0.05<br>(< 0.05 to < 0.05)       | < 0.05<br>(< 0.05 to < 0.05)      | 31.2<br>(4.8 to 67.6)                             | 16.4<br>(-6.7 to 47.8)                              |
| Thyroid cancer                                     | < 0.05<br>(< 0.05 to < 0.05)         | < 0.05<br>(< 0.05 to < 0.05)       | < 0.05<br>(< 0.05 to < 0.05)      | 35.4<br>(14.8 to 62.7)                            | 19.5<br>(0.5 to 44.2)                               |
| Mesothelioma                                       | < 0.05<br>(< 0.05 to < 0.05)         | < 0.05<br>(< 0.05 to < 0.05)       | < 0.05<br>(< 0.05 to < 0.05)      | 31.2<br>(-8.1 to 84.7)                            | 9.6<br>(-23.2 to 51.5)                              |
| Hodgkin lymphoma                                   | < 0.05<br>(< 0.05 to < 0.05)         | < 0.05<br>(< 0.05 to < 0.05)       | < 0.05<br>(< 0.05 to < 0.05)      | 20.3<br>(-1.7 to 46.5)                            | 12.2<br>(-10.0 to 40.7)                             |
| Non-Hodgkin's lymphoma                             | 0.1<br>(0.1 to 0.1)                  | < 0.05<br>(< 0.05 to < 0.05)       | < 0.05<br>(< 0.05 to < 0.05)      | 33.7<br>(14.6 to 57.9)                            | 13.8<br>(-2.5 to 33.1)                              |
| Multiple myeloma                                   | < 0.05<br>(< 0.05 to < 0.05)         | < 0.05<br>(< 0.05 to < 0.05)       | < 0.05<br>(< 0.05 to < 0.05)      | 33.0<br>(3.4 to 72.2)                             | 11.2<br>(-14.6 to 43.9)                             |
| Leukaemia                                          | 0.1<br>(< 0.05 to 0.1)               | < 0.05<br>(< 0.05 to < 0.05)       | < 0.05<br>(< 0.05 to < 0.05)      | 31.1<br>(13.7 to 54.5)                            | 7.9<br>(-7.0 to 26.8)                               |
| Acute lymphoid leukaemia                           | < 0.05<br>(< 0.05 to < 0.05)         | < 0.05<br>(< 0.05 to < 0.05)       | < 0.05<br>(< 0.05 to < 0.05)      | 13.8<br>(-14.5 to 49.0)                           | 3.7<br>(-31.0 to 49.9)                              |
| Chronic lymphoid leukaemia                         | < 0.05<br>(< 0.05 to < 0.05)         | < 0.05<br>(< 0.05 to < 0.05)       | < 0.05<br>(< 0.05 to < 0.05)      | 37.7<br>(9.4 to 76.1)                             | 12.9<br>(-10.7 to 44.7)                             |
| Acute myeloid leukaemia                            | < 0.05<br>(< 0.05 to < 0.05)         | < 0.05<br>(< 0.05 to < 0.05)       | < 0.05<br>(< 0.05 to < 0.05)      | 30.3<br>(4.5 to 62.5)                             | 8.0<br>(-12.0 to 32.0)                              |
| Chronic myeloid leukaemia                          | < 0.05<br>(< 0.05 to < 0.05)         | < 0.05<br>(< 0.05 to < 0.05)       | < 0.05<br>(< 0.05 to < 0.05)      | 21.3<br>(-1.2 to 49.0)                            | 0.5<br>(-17.8 to 22.0)                              |
| Other leukaemia                                    | < 0.05<br>(< 0.05 to < 0.05)         | < 0.05<br>(< 0.05 to < 0.05)       | < 0.05<br>(< 0.05 to < 0.05)      | 33.6<br>(1.8 to 77.3)                             | 7.7<br>(-16.7 to 40.2)                              |
| Other neoplasms                                    | 0.1<br>(0.1 to 0.1)                  | < 0.05<br>(< 0.05 to < 0.05)       | < 0.05<br>(< 0.05 to < 0.05)      | 29.9<br>(9.6 to 54.5)                             | 10.8<br>(-5.5 to 28.7)                              |
| <b>Cardiovascular diseases</b>                     | <b>10.9</b><br><b>(10.5 to 11.4)</b> | <b>1.0†</b><br><b>(0.9 to 1.1)</b> | <b>0.7</b><br><b>(0.5 to 0.9)</b> | <b>13.5</b><br><b>(9.6 to 17.5)</b>               | <b>-4.7</b><br><b>(-7.9 to -1.4)</b>                |
| Rheumatic heart disease                            | < 0.05<br>(< 0.05 to < 0.05)         | < 0.05<br>(< 0.05 to < 0.05)       | < 0.05<br>(< 0.05 to < 0.05)      | 14.5<br>(-1.8 to 32.8)                            | -1.9<br>(-12.9 to 10.3)                             |
| Ischaemic heart disease                            | 2.7<br>(2.5 to 2.9)                  | 0.3<br>(0.3 to 0.4)                | 0.1<br>(0.1 to 0.2)               | 11.4<br>(6.5 to 16.4)                             | -6.6<br>(-10.6 to -2.3)                             |
| Cerebrovascular disease                            | 1.4<br>(1.2 to 1.4)                  | 0.2‡<br>(0.2 to 0.2)               | 0.2<br>(0.1 to 0.3)               | 20.5<br>(12.9 to 28.9)                            | 1.2<br>(-5.3 to 7.8)                                |
| Ischaemic stroke                                   | 1.1<br>(1.0 to 1.2)                  | 0.1‡<br>(0.1 to 0.1)               | 0.2<br>(0.1 to 0.2)               | 18.9<br>(9.2 to 28.6)                             | -0.7<br>(-8.8 to 7.2)                               |
| Hemorrhagic stroke                                 | 0.3<br>(0.3 to 0.4)                  | 0.1‡<br>(0.1 to 0.1)               | 0.1<br>(< 0.05 to 0.1)            | 26.2<br>(14.0 to 39.9)                            | 7.2<br>(-3.1 to 18.5)                               |
| Hypertensive heart disease                         | 0.2<br>(0.2 to 0.3)                  | --                                 | < 0.05<br>(< 0.05 to < 0.05)      | 10.6<br>(-0.7 to 23.5)                            | -8.7<br>(-17.8 to 1.9)                              |
| Cardiomyopathy and myocarditis                     | 0.2<br>(0.2 to 0.2)                  | < 0.05†<br>(< 0.05 to 0.1)         | < 0.05<br>(< 0.05 to < 0.05)      | 8.9<br>(-1.2 to 19.6)                             | -7.5<br>(-16.1 to 1.4)                              |
| Myocarditis                                        | < 0.05<br>(< 0.05 to < 0.05)         | < 0.05<br>(< 0.05 to 0.1)          | < 0.05<br>(< 0.05 to < 0.05)      | 2.2<br>(-11.4 to 18.4)                            | -6.5<br>(-18.8 to 7.4)                              |
| Alcoholic cardiomyopathy                           | < 0.05<br>(< 0.05 to < 0.05)         | --                                 | < 0.05<br>(< 0.05 to < 0.05)      | 7.5<br>(-12.4 to 30.2)                            | -6.9<br>(-24.7 to 12.7)                             |
| Other cardiomyopathy                               | 0.1<br>(0.1 to 0.1)                  | --                                 | < 0.05<br>(< 0.05 to < 0.05)      | 10.8<br>(-0.9 to 24.3)                            | -8.1<br>(-18.7 to 3.8)                              |
| Atrial fibrillation and flutter                    | 1.3<br>(1.1 to 1.5)                  | 0.1<br>(0.1 to 0.1)                | 0.1<br>(0.1 to 0.1)               | 17.2<br>(10.6 to 24.3)                            | -3.2<br>(-8.8 to 2.9)                               |
| Peripheral vascular disease                        | 3.7<br>(3.3 to 4.2)                  | 0.3<br>(0.2 to 0.3)                | < 0.05<br>(< 0.05 to < 0.05)      | 13.8<br>(6.2 to 22.0)                             | -6.2<br>(-12.1 to 0.5)                              |
| Endocarditis                                       | < 0.05<br>(< 0.05 to < 0.05)         | < 0.05<br>(< 0.05 to < 0.05)       | < 0.05<br>(< 0.05 to < 0.05)      | 9.3<br>(-10.0 to 33.7)                            | -9.1<br>(-24.4 to 10.0)                             |
| Other cardiovascular and circulatory diseases      | 4.2<br>(3.6 to 4.8)                  | --                                 | 0.2<br>(0.1 to 0.3)               | 7.5<br>(0.4 to 15.0)                              | -8.4<br>(-14.2 to -2.2)                             |
| <b>Chronic respiratory diseases</b>                | <b>9.8</b><br><b>(9.5 to 10.1)</b>   | <b>0.7†</b><br><b>(0.7 to 0.8)</b> | <b>0.4</b><br><b>(0.3 to 0.5)</b> | <b>8.2</b><br><b>(2.0 to 14.3)</b>                | <b>-2.1</b><br><b>(-6.9 to 2.3)</b>                 |
| Chronic obstructive pulmonary disease              | 4.5<br>(4.3 to 4.8)                  | 0.3<br>(0.2 to 0.3)                | 0.1<br>(0.1 to 0.1)               | 10.3<br>(-5.6 to 27.9)                            | -5.9<br>(-19.5 to 8.1)                              |
| Pneumoconiosis                                     | < 0.05<br>(< 0.05 to < 0.05)         | < 0.05<br>(< 0.05 to < 0.05)       | < 0.05<br>(< 0.05 to < 0.05)      | 24.8<br>(17.9 to 31.8)                            | 6.0<br>(0.1 to 12.4)                                |
| Silicosis                                          | < 0.05<br>(< 0.05 to < 0.05)         | < 0.05<br>(< 0.05 to < 0.05)       | < 0.05<br>(< 0.05 to < 0.05)      | 28.1<br>(20.3 to 36.4)                            | 8.8<br>(2.2 to 16.0)                                |



| Cause                                                          | Prevalence in thousands (95% UI)     | Incidence in thousands (95% UI)      | YLDs in thousands (95% UI)         |                                                             |                                                               |
|----------------------------------------------------------------|--------------------------------------|--------------------------------------|------------------------------------|-------------------------------------------------------------|---------------------------------------------------------------|
|                                                                | 2016 counts<br>(<br>)                | 2016 counts<br>(<br>)                | 2016 counts<br>(<br>)              | Percentage change in counts between 2006 and 2016<br>(<br>) | Percentage change in age-standardised rates between<br>(<br>) |
| Asbestosis                                                     | < 0.05<br>(<br>)                     | < 0.05<br>(<br>)                     | < 0.05<br>(<br>)                   | 8.3<br>(-3.8 to 21.7)                                       | -7.4<br>(-18.4 to 4.8)                                        |
| Coal workers pneumoconiosis                                    | --                                   | --                                   | --                                 | --                                                          | --                                                            |
| Other pneumoconiosis                                           | < 0.05<br>(<br>)                     | < 0.05<br>(<br>)                     | < 0.05<br>(<br>)                   | 10.3<br>(0.4 to 20.2)                                       | -9.1<br>(-17.9 to -1.2)                                       |
| Asthma                                                         | 5.7<br>(5.4 to 6.1)                  | 0.5<br>(0.4 to 0.5)                  | 0.2<br>(0.1 to 0.3)                | 6.4<br>(2.8 to 10.4)                                        | -1.2<br>(-4.8 to 2.8)                                         |
| Interstitial lung disease and pulmonary sarcoidosis            | 0.1<br>(<br>)                        | < 0.05<br>(<br>)                     | < 0.05<br>(<br>)                   | 22.3<br>(8.0 to 41.0)                                       | 2.2<br>(-8.9 to 16.1)                                         |
| Other chronic respiratory diseases                             | --                                   | --                                   | < 0.05<br>(<br>)                   | 34.6<br>(14.2 to 55.8)                                      | 27.2<br>(5.9 to 51.8)                                         |
| <b>Cirrhosis and other chronic liver diseases</b>              | <b>0.8</b><br><b>(0.8 to 0.8)</b>    | <b>&lt; 0.05</b><br><b>(<br/>)</b>   | <b>&lt; 0.05</b><br><b>(<br/>)</b> | <b>22.2</b><br><b>(11.9 to 34.0)</b>                        | <b>8.0</b><br><b>(-1.7 to 19.1)</b>                           |
| Cirrhosis and other chronic liver diseases due to hepatitis B  | 0.1<br>(0.1 to 0.1)                  | < 0.05<br>(<br>)                     | < 0.05<br>(<br>)                   | 25.2<br>(-2.2 to 58.7)                                      | 10.3<br>(-14.0 to 41.3)                                       |
| Cirrhosis and other chronic liver diseases due to hepatitis C  | 0.2<br>(0.2 to 0.3)                  | < 0.05<br>(<br>)                     | < 0.05<br>(<br>)                   | 29.3<br>(7.7 to 55.8)                                       | 14.0<br>(-5.9 to 38.2)                                        |
| Cirrhosis and other chronic liver diseases due to alcohol use  | 0.4<br>(0.3 to 0.4)                  | < 0.05<br>(<br>)                     | < 0.05<br>(<br>)                   | 20.5<br>(4.1 to 37.8)                                       | 5.0<br>(-9.6 to 21.1)                                         |
| Cirrhosis and other chronic liver diseases due to other causes | 0.1<br>(0.1 to 0.1)                  | < 0.05<br>(<br>)                     | < 0.05<br>(<br>)                   | 12.4<br>(-10.1 to 39.7)                                     | 6.0<br>(-15.8 to 31.0)                                        |
| <b>Digestive diseases</b>                                      | <b>1.9</b><br><b>(1.8 to 2.0)</b>    | <b>2.6†</b><br><b>(2.4 to 2.8)</b>   | <b>0.1</b><br><b>(<br/>)</b>       | <b>12.8</b><br><b>(3.7 to 22.4)</b>                         | <b>-0.3</b><br><b>(-8.1 to 7.9)</b>                           |
| Peptic ulcer disease                                           | 0.4<br>(0.4 to 0.5)                  | 0.1<br>(0.1 to 0.1)                  | < 0.05<br>(<br>)                   | 14.3<br>(-12.7 to 50.6)                                     | -1.5<br>(-26.9 to 32.5)                                       |
| Gastritis and duodenitis                                       | 0.7<br>(0.6 to 0.9)                  | 0.5<br>(0.5 to 0.6)                  | < 0.05<br>(<br>)                   | 28.0<br>(0.2 to 65.0)                                       | 10.9<br>(-14.2 to 42.2)                                       |
| Appendicitis                                                   | < 0.05<br>(<br>)                     | 0.1<br>(0.1 to 0.1)                  | < 0.05<br>(<br>)                   | 4.5<br>(-13.3 to 25.7)                                      | 0.7<br>(-21.0 to 29.2)                                        |
| Paralytic ileus and intestinal obstruction                     | < 0.05<br>(<br>)                     | 0.1<br>(<br>)                        | < 0.05<br>(<br>)                   | 22.0<br>(12.6 to 32.2)                                      | 4.5<br>(-0.2 to 9.4)                                          |
| Inguinal, femoral, and abdominal hernia                        | 0.5<br>(0.4 to 0.5)                  | 1.1<br>(1.0 to 1.3)                  | < 0.05<br>(<br>)                   | 19.3<br>(7.6 to 30.5)                                       | 5.1<br>(-5.4 to 15.4)                                         |
| Inflammatory bowel disease                                     | 0.1<br>(0.1 to 0.2)                  | < 0.05<br>(<br>)                     | < 0.05<br>(<br>)                   | -0.8<br>(-18.8 to 18.1)                                     | -10.6<br>(-26.5 to 4.1)                                       |
| Vascular intestinal disorders                                  | < 0.05<br>(<br>)                     | < 0.05<br>(<br>)                     | < 0.05<br>(<br>)                   | 24.7<br>(-8.0 to 64.8)                                      | 4.7<br>(-19.7 to 34.1)                                        |
| Gallbladder and biliary diseases                               | 0.2<br>(0.1 to 0.2)                  | 0.6<br>(0.5 to 0.7)                  | < 0.05<br>(<br>)                   | 16.4<br>(-5.5 to 44.3)                                      | 1.6<br>(-16.6 to 24.3)                                        |
| Pancreatitis                                                   | < 0.05<br>(<br>)                     | < 0.05<br>(<br>)                     | < 0.05<br>(<br>)                   | 12.7<br>(8.7 to 16.8)                                       | -1.9<br>(-5.2 to 1.5)                                         |
| Other digestive diseases                                       | --                                   | --                                   | < 0.05<br>(<br>)                   | 20.0<br>(10.4 to 30.0)                                      | 4.8<br>(-3.4 to 13.5)                                         |
| <b>Neurological disorders</b>                                  | <b>31.0</b><br><b>(30.0 to 32.2)</b> | <b>11.7</b><br><b>(10.2 to 13.4)</b> | <b>1.1</b><br><b>(0.7 to 1.4)</b>  | <b>10.2</b><br><b>(0.7 to 20.4)</b>                         | <b>-0.4</b><br><b>(-10.2 to 10.6)</b>                         |
| Alzheimer's disease and other dementias                        | 1.2<br>(1.1 to 1.5)                  | 0.2<br>(0.2 to 0.3)                  | 0.2<br>(0.1 to 0.3)                | 25.9<br>(20.6 to 31.5)                                      | -2.3<br>(-6.6 to 2.1)                                         |
| Parkinson's disease                                            | 0.1<br>(0.1 to 0.2)                  | < 0.05<br>(<br>)                     | < 0.05<br>(<br>)                   | 25.9<br>(13.6 to 39.5)                                      | 3.8<br>(-7.0 to 15.8)                                         |
| Epilepsy                                                       | 0.2<br>(0.1 to 0.4)                  | < 0.05<br>(<br>)                     | < 0.05<br>(<br>)                   | 4.1<br>(-79.1 to 510.5)                                     | -4.4<br>(-80.9 to 456.6)                                      |
| Multiple sclerosis                                             | 0.1<br>(0.1 to 0.1)                  | < 0.05<br>(<br>)                     | < 0.05<br>(<br>)                   | 15.3<br>(-0.4 to 32.7)                                      | 4.2<br>(-9.7 to 20.4)                                         |
| Motor neuron disease                                           | < 0.05<br>(<br>)                     | < 0.05<br>(<br>)                     | < 0.05<br>(<br>)                   | 17.9<br>(11.7 to 24.4)                                      | 3.1<br>(-1.4 to 7.5)                                          |
| Migraine                                                       | 15.2<br>(14.3 to 16.0)               | 1.3<br>(1.2 to 1.4)                  | 0.7<br>(0.4 to 0.9)                | 6.4<br>(2.9 to 10.1)                                        | -0.3<br>(-3.5 to 3.2)                                         |
| Tension-type headache                                          | 20.0<br>(17.9 to 22.3)               | 10.1<br>(8.7 to 11.8)                | 0.1<br>(0.1 to 0.1)                | 7.7<br>(1.7 to 13.9)                                        | -0.1<br>(-5.5 to 5.5)                                         |
| Other neurological disorders                                   | < 0.05<br>(<br>)                     | < 0.05<br>(<br>)                     | < 0.05<br>(<br>)                   | 21.6<br>(-42.1 to 171.1)                                    | 14.4<br>(-53.6 to 194.2)                                      |
| <b>Mental and substance use disorders</b>                      | <b>13.2</b><br><b>(12.6 to 13.8)</b> | <b>4.5†</b><br><b>(4.2 to 4.9)</b>   | <b>1.9</b><br><b>(1.4 to 2.4)</b>  | <b>7.1</b><br><b>(5.1 to 9.3)</b>                           | <b>-0.1</b><br><b>(-2.0 to 1.8)</b>                           |
| Schizophrenia                                                  | 0.2<br>(0.2 to 0.3)                  | < 0.05<br>(<br>)                     | 0.1<br>(0.1 to 0.2)                | 8.5<br>(-0.0 to 17.7)                                       | -0.5<br>(-8.1 to 7.6)                                         |
| Alcohol use disorders                                          | 0.8<br>(0.7 to 1.0)                  | 0.4<br>(0.3 to 0.4)                  | 0.1<br>(0.1 to 0.1)                | 7.0<br>(-1.4 to 17.0)                                       | 1.8<br>(-6.5 to 11.2)                                         |
| Drug use disorders                                             | 0.7<br>(0.6 to 0.7)                  | 0.1<br>(0.1 to 0.1)                  | 0.1<br>(0.1 to 0.2)                | 5.8<br>(-2.6 to 14.8)                                       | 1.5<br>(-7.0 to 10.5)                                         |
| Opioid use disorders                                           | 0.2<br>(0.2 to 0.3)                  | < 0.05<br>(<br>)                     | 0.1<br>(0.1 to 0.1)                | 6.7<br>(-4.0 to 18.7)                                       | 2.2<br>(-8.7 to 13.8)                                         |
| Cocaine use disorders                                          | 0.1<br>(0.1 to 0.1)                  | < 0.05<br>(<br>)                     | < 0.05<br>(<br>)                   | 6.0<br>(-13.8 to 30.3)                                      | 0.7<br>(-18.3 to 24.0)                                        |
| Amphetamine use disorders                                      | 0.1<br>(<br>)                        | < 0.05<br>(<br>)                     | < 0.05<br>(<br>)                   | 1.3<br>(-21.9 to 29.2)                                      | -0.5<br>(-23.9 to 28.9)                                       |
| Cannabis use disorders                                         | 0.2<br>(0.2 to 0.3)                  | < 0.05<br>(<br>)                     | < 0.05<br>(<br>)                   | 1.5<br>(-10.7 to 17.5)                                      | 0.2<br>(-12.7 to 16.8)                                        |
| Other drug use disorders                                       | 0.1<br>(0.1 to 0.1)                  | < 0.05<br>(<br>)                     | < 0.05<br>(<br>)                   | 4.4<br>(-13.8 to 24.6)                                      | -0.1<br>(-18.4 to 21.4)                                       |
| Depressive disorders                                           | 3.4<br>(3.2 to 3.6)                  | 3.3<br>(2.9 to 3.6)                  | 0.5<br>(0.4 to 0.8)                | 8.0<br>(3.6 to 12.8)                                        | -0.7<br>(-4.9 to 3.6)                                         |
| Major depressive disorder                                      | 2.0<br>(1.8 to 2.2)                  | 3.1<br>(2.7 to 3.4)                  | 0.4<br>(0.3 to 0.6)                | 7.5<br>(1.8 to 13.8)                                        | -0.9<br>(-6.2 to 4.7)                                         |
| Dysthymia                                                      | 1.4<br>(1.3 to 1.7)                  | 0.2<br>(0.2 to 0.2)                  | 0.1<br>(0.1 to 0.2)                | 9.7<br>(6.2 to 13.3)                                        | -0.2<br>(-3.4 to 3.0)                                         |
| Bipolar disorder                                               | 0.9<br>(0.6 to 1.3)                  | 0.1<br>(<br>)                        | 0.2<br>(0.1 to 0.3)                | 8.0<br>(2.9 to 13.5)                                        | 0.0<br>(-4.4 to 4.6)                                          |
| Anxiety disorders                                              | 4.2<br>(3.7 to 4.7)                  | 0.5<br>(0.5 to 0.6)                  | 0.4<br>(0.3 to 0.5)                | 7.4<br>(3.4 to 11.6)                                        | -0.1<br>(-3.8 to 3.7)                                         |
| Eating disorders                                               | 0.3<br>(0.2 to 0.4)                  | 0.1<br>(0.1 to 0.1)                  | 0.1<br>(<br>)                      | -3.6<br>(-12.4 to 5.1)                                      | -3.2<br>(-12.0 to 5.5)                                        |
| Anorexia nervosa                                               | 0.1<br>(0.1 to 0.1)                  | < 0.05<br>(<br>)                     | < 0.05<br>(<br>)                   | -3.4<br>(-17.3 to 13.7)                                     | -3.1<br>(-16.4 to 13.9)                                       |
| Bulimia nervosa                                                | 0.2<br>(0.2 to 0.3)                  | 0.1<br>(<br>)                        | < 0.05<br>(<br>)                   | -3.6<br>(-14.7 to 7.5)                                      | -3.2<br>(-13.6 to 7.9)                                        |
| Autistic spectrum disorders                                    | 0.6<br>(0.5 to 0.7)                  | < 0.05<br>(<br>)                     | 0.1<br>(0.1 to 0.1)                | 7.2<br>(2.0 to 12.6)                                        | 0.2<br>(-5.0 to 5.1)                                          |
| Autism                                                         | 0.2<br>(0.2 to 0.3)                  | < 0.05<br>(<br>)                     | 0.1<br>(<br>)                      | 7.4<br>(-0.1 to 15.4)                                       | 0.1<br>(-7.4 to 7.6)                                          |
| Asperger syndrome and other autistic spectrum disorders        | 0.4<br>(0.3 to 0.4)                  | < 0.05<br>(<br>)                     | < 0.05<br>(<br>)                   | 7.0<br>(1.6 to 12.6)                                        | 0.4<br>(-4.8 to 5.9)                                          |

| Cause                                                      | Prevalence in thousands (95% UI)     | Incidence in thousands (95% UI)          | YLDs in thousands (95% UI)        |                                                   |                                                     |
|------------------------------------------------------------|--------------------------------------|------------------------------------------|-----------------------------------|---------------------------------------------------|-----------------------------------------------------|
|                                                            | 2016 counts                          | 2016 counts                              | 2016 counts                       | Percentage change in counts between 2006 and 2016 | Percentage change in age-standardised rates between |
| Attention-deficit/hyperactivity disorder                   | 0.5<br>(0.4 to 0.7)                  | < 0.05<br>(< 0.05 to < 0.05)             | < 0.05<br>(< 0.05 to < 0.05)      | 1.8<br>(-5.9 to 10.2)                             | -0.0<br>(-7.3 to 7.8)                               |
| Conduct disorder                                           | 0.4<br>(0.3 to 0.5)                  | 0.1<br>(0.1 to 0.1)                      | < 0.05<br>(< 0.05 to 0.1)         | -1.0<br>(-7.1 to 5.7)                             | 0.1<br>(-6.0 to 6.7)                                |
| Idiopathic developmental intellectual disability           | 0.4<br>(0.1 to 0.7)                  | --                                       | < 0.05<br>(< 0.05 to < 0.05)      | 8.0<br>(-1.3 to 20.1)                             | 1.0<br>(-7.9 to 12.3)                               |
| Other mental and substance use disorders                   | 1.9<br>(1.7 to 2.2)                  | < 0.05<br>(< 0.05 to < 0.05)             | 0.1<br>(0.1 to 0.2)               | 9.6<br>(4.9 to 14.2)                              | 0.2<br>(-4.3 to 4.6)                                |
| <b>Diabetes, urogenital, blood, and endocrine diseases</b> | <b>28.8</b><br><b>(26.1 to 32.1)</b> | <b>7.3†</b><br><b>(6.9 to 7.8)</b>       | <b>0.6</b><br><b>(0.4 to 0.8)</b> | <b>16.6</b><br><b>(12.1 to 21.2)</b>              | <b>1.0</b><br><b>(-3.5 to 4.9)</b>                  |
| Diabetes mellitus                                          | 3.4<br>(3.0 to 3.9)                  | 0.2<br>(0.1 to 0.2)                      | 0.3<br>(0.2 to 0.4)               | 17.8<br>(10.7 to 25.4)                            | 0.5<br>(-5.6 to 7.0)                                |
| Acute glomerulonephritis                                   | < 0.05<br>(< 0.05 to < 0.05)         | < 0.05<br>(< 0.05 to < 0.05)             | < 0.05<br>(< 0.05 to < 0.05)      | 10.3<br>(5.6 to 15.4)                             | 0.2<br>(-3.7 to 4.3)                                |
| Chronic kidney disease                                     | 2.8<br>(2.5 to 3.2)                  | 0.2<br>(0.2 to 0.3)                      | 0.1<br>(0.1 to 0.1)               | 26.6<br>(17.0 to 37.2)                            | 6.3<br>(-1.1 to 14.1)                               |
| Chronic kidney disease due to diabetes mellitus            | 1.0<br>(0.8 to 1.2)                  | 0.1<br>(0.1 to 0.1)                      | < 0.05<br>(< 0.05 to < 0.05)      | 28.3<br>(13.8 to 44.8)                            | 8.3<br>(-4.6 to 22.7)                               |
| Chronic kidney disease due to hypertension                 | 0.5<br>(0.5 to 0.6)                  | < 0.05<br>(< 0.05 to 0.1)                | < 0.05<br>(< 0.05 to < 0.05)      | 32.8<br>(14.0 to 54.6)                            | 5.3<br>(-8.9 to 21.6)                               |
| Chronic kidney disease due to glomerulonephritis           | 0.5<br>(0.4 to 0.6)                  | < 0.05<br>(< 0.05 to < 0.05)             | < 0.05<br>(< 0.05 to < 0.05)      | 22.7<br>(10.5 to 37.4)                            | 5.8<br>(-3.6 to 16.4)                               |
| Chronic kidney disease due to other causes                 | 0.8<br>(0.7 to 1.0)                  | 0.1<br>(0.1 to 0.1)                      | < 0.05<br>(< 0.05 to < 0.05)      | 24.8<br>(12.2 to 38.7)                            | 4.9<br>(-4.8 to 15.7)                               |
| Urinary diseases and male infertility                      | 2.5<br>(2.2 to 2.8)                  | 4.1†<br>(3.7 to 4.6)                     | 0.1<br>(0.1 to 0.1)               | 19.3<br>(12.1 to 27.1)                            | 1.1<br>(-5.0 to 8.0)                                |
| Interstitial nephritis and urinary tract infections        | 0.1<br>(< 0.05 to 0.1)               | 2.9<br>(2.5 to 3.3)                      | < 0.05<br>(< 0.05 to < 0.05)      | 6.0<br>(-10.2 to 24.7)                            | 1.2<br>(-14.5 to 19.2)                              |
| Urolithiasis                                               | < 0.05<br>(< 0.05 to < 0.05)         | 1.0<br>(0.8 to 1.1)                      | < 0.05<br>(< 0.05 to < 0.05)      | 12.4<br>(-6.2 to 35.1)                            | 0.4<br>(-14.9 to 18.3)                              |
| Benign prostatic hyperplasia                               | 2.1<br>(1.8 to 2.5)                  | 0.2<br>(0.2 to 0.3)                      | 0.1<br>(< 0.05 to 0.1)            | 21.4<br>(13.5 to 30.0)                            | 2.0<br>(-5.5 to 9.9)                                |
| Male infertility                                           | 0.2<br>(0.1 to 0.3)                  | --                                       | < 0.05<br>(< 0.05 to < 0.05)      | -6.7<br>(-14.6 to 2.5)                            | -5.7<br>(-13.7 to 3.6)                              |
| Other urinary diseases                                     | --                                   | --                                       | < 0.05<br>(< 0.05 to < 0.05)      | -8.7<br>(-19.3 to 3.4)                            | -15.3<br>(-25.2 to -5.0)                            |
| Gynecological diseases                                     | 9.5<br>(8.8 to 10.1)                 | 2.4†<br>(2.2 to 2.6)                     | 0.1<br>(0.1 to 0.1)               | 5.5<br>(0.4 to 10.9)                              | -0.7<br>(-5.7 to 4.4)                               |
| Uterine fibroids                                           | 0.7<br>(0.6 to 0.8)                  | 0.1<br>(0.1 to 0.1)                      | < 0.05<br>(< 0.05 to < 0.05)      | 4.1<br>(-8.4 to 15.2)                             | -5.3<br>(-16.6 to 6.1)                              |
| Polycystic ovarian syndrome                                | < 0.05<br>(< 0.05 to < 0.05)         | 0.1<br>(0.1 to 0.1)                      | < 0.05<br>(< 0.05 to < 0.05)      | -2.1<br>(-22.8 to 22.1)                           | -0.1<br>(-22.1 to 25.1)                             |
| Female infertility                                         | 0.3<br>(0.2 to 0.5)                  | --                                       | < 0.05<br>(< 0.05 to < 0.05)      | 3.0<br>(-6.7 to 14.3)                             | 4.1<br>(-5.4 to 15.1)                               |
| Endometriosis                                              | < 0.05<br>(< 0.05 to 0.1)            | 0.1<br>(0.1 to 0.1)                      | < 0.05<br>(< 0.05 to < 0.05)      | 1.6<br>(-18.5 to 25.5)                            | 0.1<br>(-20.1 to 24.0)                              |
| Genital prolapse                                           | 4.5<br>(3.9 to 5.3)                  | 0.2<br>(0.2 to 0.2)                      | < 0.05<br>(< 0.05 to < 0.05)      | 13.1<br>(1.7 to 24.0)                             | -3.0<br>(-12.4 to 6.3)                              |
| Premenstrual syndrome                                      | 4.0<br>(3.8 to 4.3)                  | 1.3<br>(1.2 to 1.5)                      | < 0.05<br>(< 0.05 to 0.1)         | 4.3<br>(-3.7 to 13.2)                             | -0.2<br>(-8.1 to 8.5)                               |
| Other gynecological diseases                               | 0.6<br>(0.5 to 0.7)                  | 0.6<br>(0.5 to 0.7)                      | < 0.05<br>(< 0.05 to < 0.05)      | 4.4<br>(-5.2 to 15.1)                             | -0.0<br>(-9.0 to 9.8)                               |
| Hemoglobinopathies and hemolytic anaemias                  | 15.2<br>(11.7 to 19.5)               | --                                       | < 0.05<br>(< 0.05 to 0.1)         | 9.1<br>(-19.0 to 44.9)                            | 0.8<br>(-25.7 to 36.9)                              |
| Thalassemias                                               | < 0.05<br>(< 0.05 to < 0.05)         | --                                       | < 0.05<br>(< 0.05 to < 0.05)      | 9.9<br>(-30.2 to 79.0)                            | 7.6<br>(-33.9 to 82.0)                              |
| Thalassaemias trait                                        | 5.8<br>(1.8 to 12.3)                 | --                                       | < 0.05<br>(< 0.05 to 0.1)         | 9.8<br>(-20.1 to 49.5)                            | 1.3<br>(-26.1 to 41.2)                              |
| Sickle cell disorders                                      | < 0.05<br>(< 0.05 to < 0.05)         | --                                       | < 0.05<br>(< 0.05 to < 0.05)      | 8.4<br>(-9.5 to 36.1)                             | 6.8<br>(-9.2 to 31.6)                               |
| Sickle cell trait                                          | 1.0<br>(0.6 to 1.5)                  | --                                       | < 0.05<br>(< 0.05 to < 0.05)      | 10.1<br>(-24.9 to 56.6)                           | 5.4<br>(-27.7 to 52.1)                              |
| G6PD deficiency                                            | 1.5<br>(1.2 to 1.8)                  | --                                       | < 0.05<br>(< 0.05 to < 0.05)      | 32.6<br>(-8.0 to 97.1)                            | 21.4<br>(-15.1 to 79.8)                             |
| G6PD trait                                                 | 7.6<br>(7.0 to 8.2)                  | --                                       | < 0.05<br>(< 0.05 to < 0.05)      | 39.2<br>(-17.4 to 138.0)                          | 15.8<br>(-30.5 to 93.4)                             |
| Other hemoglobinopathies and hemolytic anaemias            | 0.1<br>(0.1 to 0.1)                  | --                                       | < 0.05<br>(< 0.05 to < 0.05)      | -0.1<br>(-18.5 to 23.4)                           | -15.6<br>(-30.6 to 2.8)                             |
| Endocrine, metabolic, blood, and immune disorders          | 2.0<br>(1.8 to 2.2)                  | 0.4<br>(0.4 to 0.5)                      | 0.1<br>(< 0.05 to 0.1)            | 17.8<br>(11.6 to 23.9)                            | 1.2<br>(-4.3 to 6.8)                                |
| <b>Musculoskeletal disorders</b>                           | <b>25.0</b><br><b>(22.8 to 27.2)</b> | <b>14.2</b><br><b>(11.2 to 18.6)</b>     | <b>2.9</b><br><b>(2.0 to 3.9)</b> | <b>10.6</b><br><b>(6.2 to 14.8)</b>               | <b>-1.4</b><br><b>(-5.1 to 2.3)</b>                 |
| Rheumatoid arthritis                                       | 0.4<br>(0.4 to 0.5)                  | < 0.05<br>(< 0.05 to < 0.05)             | 0.1<br>(0.1 to 0.1)               | 12.8<br>(4.7 to 21.8)                             | -1.6<br>(-9.0 to 6.1)                               |
| Osteoarthritis                                             | 5.8<br>(5.3 to 6.5)                  | 0.2<br>(0.2 to 0.3)                      | 0.2<br>(0.1 to 0.3)               | 17.4<br>(13.2 to 21.6)                            | -0.4<br>(-4.0 to 3.0)                               |
| Low back and neck pain                                     | 19.6<br>(16.8 to 22.7)               | 9.7<br>(6.8 to 13.9)                     | 2.3<br>(1.6 to 3.3)               | 9.9<br>(4.3 to 15.0)                              | -1.6<br>(-6.1 to 3.1)                               |
| Low back pain                                              | 15.7<br>(11.7 to 20.6)               | 8.8<br>(5.9 to 13.0)                     | 1.8<br>(1.2 to 2.6)               | 9.3<br>(2.2 to 16.0)                              | -2.0<br>(-7.9 to 4.0)                               |
| Neck pain                                                  | 5.4<br>(4.7 to 6.2)                  | 0.9<br>(0.8 to 1.1)                      | 0.5<br>(0.4 to 0.8)               | 12.1<br>(9.8 to 14.4)                             | -0.1<br>(-1.9 to 1.7)                               |
| Gout                                                       | 0.9<br>(0.8 to 1.1)                  | 0.1<br>(0.1 to 0.2)                      | < 0.05<br>(< 0.05 to < 0.05)      | 16.7<br>(4.6 to 29.0)                             | 0.6<br>(-10.5 to 11.8)                              |
| Other musculoskeletal disorders                            | 3.1<br>(2.4 to 3.8)                  | 4.0<br>(3.4 to 4.8)                      | 0.3<br>(0.2 to 0.4)               | 10.4<br>(0.1 to 21.7)                             | -0.3<br>(-9.2 to 9.5)                               |
| <b>Other non-communicable diseases</b>                     | <b>61.6</b><br><b>(60.4 to 62.9)</b> | <b>183.1†</b><br><b>(168.7 to 196.8)</b> | <b>1.9</b><br><b>(1.3 to 2.8)</b> | <b>13.1</b><br><b>(11.6 to 14.8)</b>              | <b>0.8</b><br><b>(-0.5 to 2.0)</b>                  |
| Congenital anomalies                                       | 0.8<br>(0.8 to 0.9)                  | --                                       | 0.1<br>(0.1 to 0.1)               | 9.6<br>(4.5 to 14.8)                              | 2.6<br>(-2.0 to 7.7)                                |
| Neural tube defects                                        | < 0.05<br>(< 0.05 to < 0.05)         | --                                       | < 0.05<br>(< 0.05 to < 0.05)      | 12.6<br>(-2.0 to 30.7)                            | 4.3<br>(-8.8 to 20.2)                               |
| Congenital heart anomalies                                 | 0.2<br>(0.2 to 0.2)                  | --                                       | < 0.05<br>(< 0.05 to < 0.05)      | 7.7<br>(-2.2 to 17.8)                             | 1.1<br>(-8.3 to 11.1)                               |
| Orofacial clefts                                           | < 0.05<br>(< 0.05 to < 0.05)         | --                                       | < 0.05<br>(< 0.05 to < 0.05)      | 6.8<br>(-4.3 to 20.4)                             | -0.7<br>(-10.9 to 11.6)                             |
| Down's syndrome                                            | < 0.05<br>(< 0.05 to < 0.05)         | --                                       | < 0.05<br>(< 0.05 to < 0.05)      | 8.0<br>(-2.8 to 18.5)                             | 3.6<br>(-6.3 to 13.9)                               |
| Turner syndrome                                            | < 0.05<br>(< 0.05 to < 0.05)         | --                                       | < 0.05<br>(< 0.05 to < 0.05)      | 7.6<br>(-22.8 to 46.5)                            | 3.2<br>(-25.7 to 42.1)                              |
| Klinefelter syndrome                                       | 0.1<br>(< 0.05 to 0.1)               | --                                       | < 0.05<br>(< 0.05 to < 0.05)      | 3.2<br>(-15.2 to 25.5)                            | 1.6<br>(-16.3 to 24.6)                              |



| Cause                                         | Prevalence in thousands (95% UI)     | Incidence in thousands (95% UI)    | YLDs in thousands (95% UI)        |                                                   |                                                     |
|-----------------------------------------------|--------------------------------------|------------------------------------|-----------------------------------|---------------------------------------------------|-----------------------------------------------------|
|                                               | 2016 counts                          | 2016 counts                        | 2016 counts                       | Percentage change in counts between 2006 and 2016 | Percentage change in age-standardised rates between |
| Other chromosomal abnormalities               | 0.1<br>(0.1 to 0.1)                  | --                                 | < 0.05<br>(< 0.05 to < 0.05)      | 3.5<br>(-8.6 to 16.9)                             | 2.9<br>(-9.4 to 16.2)                               |
| Congenital musculoskeletal and limb anomalies | 0.2<br>(0.2 to 0.2)                  | --                                 | < 0.05<br>(< 0.05 to < 0.05)      | 9.2<br>(0.9 to 19.0)                              | 0.9<br>(-7.0 to 10.1)                               |
| Urogenital congenital anomalies               | 0.1<br>(0.1 to 0.1)                  | --                                 | < 0.05<br>(< 0.05 to < 0.05)      | 5.0<br>(-2.6 to 13.7)                             | 0.2<br>(-7.7 to 9.8)                                |
| Digestive congenital anomalies                | 0.1<br>(0.1 to 0.1)                  | --                                 | < 0.05<br>(< 0.05 to < 0.05)      | 9.4<br>(-3.2 to 24.6)                             | 1.7<br>(-10.2 to 16.4)                              |
| Other congenital anomalies                    | 0.1<br>(< 0.05 to 0.2)               | --                                 | < 0.05<br>(< 0.05 to < 0.05)      | 14.0<br>(3.7 to 26.9)                             | 5.3<br>(-4.4 to 17.7)                               |
| Skin and subcutaneous diseases                | 28.9<br>(28.2 to 29.6)               | 66.6<br>(62.8 to 70.7)             | 0.7<br>(0.5 to 1.1)               | 7.2<br>(5.5 to 9.1)                               | 0.6<br>(-1.1 to 2.4)                                |
| Dermatitis                                    | 4.9<br>(4.3 to 5.6)                  | 5.7<br>(5.0 to 6.6)                | 0.2<br>(0.1 to 0.3)               | 6.7<br>(4.0 to 9.5)                               | -0.0<br>(-2.8 to 2.8)                               |
| Psoriasis                                     | 1.7<br>(1.6 to 1.8)                  | 0.1<br>(0.1 to 0.2)                | 0.1<br>(0.1 to 0.2)               | 12.1<br>(6.2 to 18.4)                             | 1.8<br>(-3.9 to 7.6)                                |
| Cellulitis                                    | < 0.05<br>(< 0.05 to < 0.05)         | 0.7<br>(0.7 to 0.8)                | < 0.05<br>(< 0.05 to < 0.05)      | 10.2<br>(-7.6 to 31.3)                            | -0.8<br>(-17.5 to 21.1)                             |
| Pyoderma                                      | 0.4<br>(0.3 to 0.4)                  | 9.4<br>(9.1 to 9.7)                | < 0.05<br>(< 0.05 to < 0.05)      | 12.8<br>(7.1 to 18.8)                             | 0.2<br>(-5.4 to 6.1)                                |
| Scabies                                       | 0.1<br>(0.1 to 0.1)                  | 0.2<br>(0.1 to 0.3)                | < 0.05<br>(< 0.05 to < 0.05)      | 4.2<br>(-7.2 to 17.0)                             | -0.4<br>(-11.6 to 11.4)                             |
| Fungal skin diseases                          | 6.5<br>(5.8 to 7.2)                  | 25.9<br>(22.4 to 29.7)             | < 0.05<br>(< 0.05 to 0.1)         | 14.8<br>(13.3 to 16.4)                            | 0.0<br>(-1.2 to 1.3)                                |
| Viral skin diseases                           | 2.2<br>(1.9 to 2.5)                  | 2.9<br>(2.5 to 3.4)                | 0.1<br>(< 0.05 to 0.1)            | 5.5<br>(2.6 to 8.6)                               | -0.1<br>(-2.8 to 2.6)                               |
| Acne vulgaris                                 | 7.1<br>(6.5 to 7.7)                  | 5.3<br>(4.3 to 6.7)                | 0.2<br>(0.1 to 0.3)               | 1.1<br>(-2.3 to 4.8)                              | 1.0<br>(-2.4 to 5.0)                                |
| Alopecia areata                               | 0.2<br>(0.2 to 0.2)                  | 0.4<br>(0.4 to 0.4)                | < 0.05<br>(< 0.05 to < 0.05)      | 5.9<br>(-2.1 to 14.5)                             | -0.3<br>(-8.4 to 8.6)                               |
| Pruritus                                      | 0.8<br>(0.7 to 0.9)                  | 0.6<br>(0.6 to 0.7)                | < 0.05<br>(< 0.05 to < 0.05)      | 10.2<br>(5.0 to 15.5)                             | -0.8<br>(-5.5 to 4.3)                               |
| Urticaria                                     | 0.5<br>(0.4 to 0.5)                  | 0.8<br>(0.8 to 1.0)                | < 0.05<br>(< 0.05 to < 0.05)      | 6.6<br>(0.4 to 13.5)                              | -0.3<br>(-6.2 to 6.1)                               |
| Decubitus ulcer                               | 0.1<br>(< 0.05 to 0.1)               | 0.2<br>(0.2 to 0.2)                | < 0.05<br>(< 0.05 to < 0.05)      | 21.1<br>(7.5 to 36.2)                             | 0.1<br>(-10.2 to 10.8)                              |
| Other skin and subcutaneous diseases          | 10.8<br>(10.5 to 11.1)               | 14.2<br>(13.7 to 14.8)             | 0.1<br>(< 0.05 to 0.1)            | 13.2<br>(11.0 to 15.5)                            | -0.3<br>(-2.3 to 1.9)                               |
| Sense organ diseases                          | 23.8<br>(22.4 to 25.1)               | 8.7†<br>(8.2 to 9.3)               | 0.7<br>(0.5 to 1.1)               | 19.3<br>(16.0 to 23.4)                            | 1.3<br>(-1.4 to 4.2)                                |
| Glaucoma                                      | 0.1<br>(< 0.05 to 0.1)               | --                                 | < 0.05<br>(< 0.05 to < 0.05)      | 19.3<br>(1.4 to 39.9)                             | -1.3<br>(-17.1 to 16.8)                             |
| Cataract                                      | 0.5<br>(0.3 to 0.7)                  | --                                 | < 0.05<br>(< 0.05 to 0.1)         | 20.2<br>(10.0 to 31.1)                            | -3.5<br>(-11.8 to 4.8)                              |
| Macular degeneration                          | 0.1<br>(0.1 to 0.1)                  | --                                 | < 0.05<br>(< 0.05 to < 0.05)      | 22.4<br>(7.3 to 39.1)                             | -1.0<br>(-14.0 to 13.1)                             |
| Refraction and accommodation disorders        | 6.0<br>(5.4 to 6.7)                  | --                                 | 0.1<br>(0.1 to 0.2)               | 10.9<br>(6.0 to 16.4)                             | -1.9<br>(-6.4 to 3.1)                               |
| Age-related and other hearing loss            | 19.8<br>(17.5 to 22.0)               | --                                 | 0.4<br>(0.3 to 0.7)               | 22.7<br>(17.6 to 29.9)                            | 3.2<br>(-1.0 to 8.2)                                |
| Other vision loss                             | 0.2<br>(0.2 to 0.3)                  | --                                 | < 0.05<br>(< 0.05 to < 0.05)      | 14.5<br>(3.7 to 26.6)                             | -1.8<br>(-11.5 to 8.9)                              |
| Other sense organ diseases                    | 3.4<br>(3.1 to 3.7)                  | 8.7<br>(8.2 to 9.3)                | 0.1<br>(0.1 to 0.2)               | 15.6<br>(11.3 to 19.9)                            | 0.5<br>(-3.5 to 4.4)                                |
| Oral disorders                                | 44.5<br>(42.2 to 46.6)               | 107.7†<br>(93.9 to 121.0)          | 0.4<br>(0.2 to 0.6)               | 14.5<br>(12.0 to 17.3)                            | -0.2<br>(-2.3 to 2.1)                               |
| Caries of deciduous teeth                     | 2.6<br>(1.7 to 3.5)                  | 10.3<br>(6.2 to 14.8)              | < 0.05<br>(< 0.05 to < 0.05)      | 4.7<br>(-8.9 to 19.1)                             | 0.7<br>(-11.6 to 14.1)                              |
| Caries of permanent teeth                     | 29.6<br>(26.7 to 32.6)               | 95.3<br>(81.2 to 107.2)            | < 0.05<br>(< 0.05 to < 0.05)      | 10.1<br>(5.5 to 15.3)                             | 1.9<br>(-2.6 to 6.7)                                |
| Periodontal disease                           | 13.5<br>(10.1 to 17.3)               | 1.6<br>(1.2 to 1.9)                | 0.1<br>(< 0.05 to 0.2)            | 12.4<br>(6.9 to 18.3)                             | -0.3<br>(-5.5 to 4.6)                               |
| Edentulism and severe tooth loss              | 8.6<br>(7.4 to 9.8)                  | 0.6<br>(0.5 to 0.8)                | 0.2<br>(0.1 to 0.3)               | 16.9<br>(13.5 to 21.1)                            | -0.5<br>(-3.4 to 3.0)                               |
| Other oral disorders                          | 1.6<br>(1.5 to 1.7)                  | --                                 | < 0.05<br>(< 0.05 to 0.1)         | 8.6<br>(5.3 to 11.8)                              | -0.1<br>(-3.3 to 3.1)                               |
| <b>Injuries</b>                               | <b>26.9</b><br><b>(25.2 to 29.0)</b> | <b>8.3†</b><br><b>(7.9 to 8.9)</b> | <b>0.8</b><br><b>(0.6 to 1.2)</b> | <b>17.1</b><br><b>(15.9 to 18.5)</b>              | <b>3.1</b><br><b>(1.9 to 4.3)</b>                   |
| <b>Transport injuries</b>                     | <b>3.8</b><br><b>(3.5 to 4.1)</b>    | <b>0.8</b><br><b>(0.7 to 0.9)</b>  | <b>0.2</b><br><b>(0.1 to 0.2)</b> | <b>17.6</b><br><b>(15.8 to 19.5)</b>              | <b>4.7</b><br><b>(3.0 to 6.5)</b>                   |
| Road injuries                                 | 3.4<br>(3.2 to 3.7)                  | 0.8<br>(0.7 to 0.9)                | 0.2<br>(0.1 to 0.2)               | 17.4<br>(15.5 to 19.3)                            | 4.6<br>(2.8 to 6.4)                                 |
| Pedestrian road injuries                      | 0.6<br>(0.5 to 0.6)                  | 0.1<br>(0.1 to 0.1)                | < 0.05<br>(< 0.05 to < 0.05)      | 24.4<br>(22.3 to 26.4)                            | 10.6<br>(8.7 to 12.5)                               |
| Cyclist road injuries                         | 1.0<br>(0.8 to 1.2)                  | 0.3<br>(0.2 to 0.3)                | < 0.05<br>(< 0.05 to 0.1)         | 18.1<br>(16.3 to 19.9)                            | 4.9<br>(3.1 to 6.6)                                 |
| Motorcyclist road injuries                    | 0.7<br>(0.6 to 0.8)                  | 0.1<br>(0.1 to 0.1)                | < 0.05<br>(< 0.05 to < 0.05)      | 13.1<br>(11.0 to 15.2)                            | 1.2<br>(-0.8 to 3.2)                                |
| Motor vehicle road injuries                   | 1.0<br>(0.8 to 1.2)                  | 0.3<br>(0.2 to 0.3)                | < 0.05<br>(< 0.05 to 0.1)         | 15.9<br>(13.9 to 18.0)                            | 3.3<br>(1.3 to 5.2)                                 |
| Other road injuries                           | 0.2<br>(0.2 to 0.3)                  | < 0.05<br>(< 0.05 to 0.1)          | < 0.05<br>(< 0.05 to < 0.05)      | 18.3<br>(15.8 to 20.8)                            | 6.0<br>(3.6 to 8.3)                                 |
| Other transport injuries                      | 0.4<br>(0.3 to 0.4)                  | < 0.05<br>(< 0.05 to 0.1)          | < 0.05<br>(< 0.05 to < 0.05)      | 19.9<br>(18.3 to 21.4)                            | 6.4<br>(4.9 to 7.9)                                 |
| <b>Unintentional injuries</b>                 | <b>22.2</b><br><b>(20.5 to 24.1)</b> | <b>7.2</b><br><b>(6.7 to 7.7)</b>  | <b>0.6</b><br><b>(0.4 to 0.9)</b> | <b>17.2</b><br><b>(16.0 to 18.6)</b>              | <b>2.7</b><br><b>(1.5 to 3.9)</b>                   |
| Falls                                         | 11.6<br>(10.2 to 13.0)               | 4.0<br>(3.6 to 4.4)                | 0.4<br>(0.3 to 0.6)               | 17.6<br>(16.1 to 19.3)                            | 2.3<br>(1.0 to 3.7)                                 |
| Drowning                                      | < 0.05<br>(< 0.05 to < 0.05)         | < 0.05<br>(< 0.05 to < 0.05)       | < 0.05<br>(< 0.05 to < 0.05)      | 20.7<br>(14.6 to 27.2)                            | 8.2<br>(2.4 to 14.8)                                |
| Fire, heat, and hot substances                | 2.0<br>(1.8 to 2.4)                  | 0.1<br>(0.1 to 0.1)                | < 0.05<br>(< 0.05 to 0.1)         | 15.0<br>(12.5 to 17.9)                            | 3.3<br>(0.9 to 6.0)                                 |
| Poisonings                                    | 0.1<br>(0.1 to 0.1)                  | 0.1<br>(0.1 to 0.1)                | < 0.05<br>(< 0.05 to < 0.05)      | 8.4<br>(-0.6 to 17.7)                             | 0.1<br>(-8.8 to 9.9)                                |
| Exposure to mechanical forces                 | 4.5<br>(3.8 to 5.7)                  | 1.0<br>(0.8 to 1.2)                | 0.1<br>(0.1 to 0.1)               | 17.4<br>(15.9 to 18.9)                            | 4.8<br>(3.4 to 6.1)                                 |
| Unintentional firearm injuries                | 0.1<br>(0.1 to 0.2)                  | < 0.05<br>(< 0.05 to < 0.05)       | < 0.05<br>(< 0.05 to < 0.05)      | 16.0<br>(14.0 to 18.2)                            | 3.4<br>(1.5 to 5.3)                                 |
| Unintentional suffocation                     | 0.1<br>(< 0.05 to 0.1)               | < 0.05<br>(< 0.05 to < 0.05)       | < 0.05<br>(< 0.05 to < 0.05)      | 18.6<br>(16.9 to 20.4)                            | 4.8<br>(3.1 to 6.6)                                 |
| Other exposure to mechanical forces           | 4.3<br>(3.6 to 5.5)                  | 1.0<br>(0.8 to 1.2)                | 0.1<br>(< 0.05 to 0.1)            | 17.4<br>(15.9 to 18.9)                            | 4.8<br>(3.4 to 6.2)                                 |

| Cause                                                                               | Prevalence in thousands (95% UI)                    | Incidence in thousands (95% UI)                      | YLDs in thousands (95% UI)                          |                                                   |                                                     |
|-------------------------------------------------------------------------------------|-----------------------------------------------------|------------------------------------------------------|-----------------------------------------------------|---------------------------------------------------|-----------------------------------------------------|
|                                                                                     | 2016 counts                                         | 2016 counts                                          | 2016 counts                                         | Percentage change in counts between 2006 and 2016 | Percentage change in age-standardised rates between |
| Adverse effects of medical treatment                                                | < 0.05<br>(< 0.05 to < 0.05)                        | 0.4<br>(0.4 to 0.5)                                  | < 0.05<br>(< 0.05 to < 0.05)                        | 18.1<br>(13.2 to 23.5)                            | 1.8<br>(-1.7 to 5.1)                                |
| Animal contact                                                                      | 0.3<br>(0.3 to 0.3)                                 | 0.1<br>(0.1 to 0.2)                                  | < 0.05<br>(< 0.05 to < 0.05)                        | 15.0<br>(10.9 to 18.9)                            | 3.0<br>(-1.1 to 7.3)                                |
| Venomous animal contact                                                             | < 0.05<br>(< 0.05 to 0.1)                           | < 0.05<br>(< 0.05 to 0.1)                            | < 0.05<br>(< 0.05 to < 0.05)                        | 11.8<br>(3.6 to 20.4)                             | 2.5<br>(-5.4 to 11.2)                               |
| Non-venomous animal contact                                                         | 0.2<br>(0.2 to 0.3)                                 | 0.1<br>(0.1 to 0.1)                                  | < 0.05<br>(< 0.05 to < 0.05)                        | 17.2<br>(15.0 to 19.3)                            | 3.4<br>(1.5 to 5.2)                                 |
| Foreign body                                                                        | 0.5<br>(0.4 to 0.6)                                 | 0.3<br>(0.3 to 0.4)                                  | < 0.05<br>(< 0.05 to < 0.05)                        | 16.3<br>(14.6 to 18.1)                            | 3.6<br>(2.1 to 5.2)                                 |
| Pulmonary aspiration and foreign body in airway                                     | 0.1<br>(0.1 to 0.1)                                 | 0.1<br>(0.1 to 0.1)                                  | < 0.05<br>(< 0.05 to < 0.05)                        | 19.3<br>(17.2 to 21.7)                            | 3.7<br>(1.8 to 5.6)                                 |
| Foreign body in eyes                                                                | < 0.05<br>(< 0.05 to 0.1)                           | 0.2<br>(0.1 to 0.2)                                  | < 0.05<br>(< 0.05 to < 0.05)                        | 17.3<br>(13.6 to 21.5)                            | 6.4<br>(3.2 to 9.8)                                 |
| Foreign body in other body part                                                     | 0.4<br>(0.3 to 0.5)                                 | 0.1<br>(0.1 to 0.1)                                  | < 0.05<br>(< 0.05 to < 0.05)                        | 15.3<br>(13.5 to 17.1)                            | 2.5<br>(0.8 to 4.2)                                 |
| Environmental heat and cold exposure                                                | 0.2<br>(0.2 to 0.3)                                 | 0.1<br>(< 0.05 to 0.1)                               | < 0.05<br>(< 0.05 to < 0.05)                        | 21.7<br>(17.3 to 26.7)                            | 5.0<br>(1.0 to 9.3)                                 |
| Other unintentional injuries                                                        | 2.9<br>(2.4 to 3.4)                                 | 1.1<br>(0.9 to 1.2)                                  | 0.1<br>(< 0.05 to 0.1)                              | 16.6<br>(15.3 to 18.0)                            | 2.0<br>(0.9 to 3.3)                                 |
| <b>Self-harm and interpersonal violence</b>                                         | <b>1.9</b><br><b>(1.7 to 2.0)</b>                   | <b>0.4†</b><br><b>(0.3 to 0.4)</b>                   | <b>&lt; 0.05</b><br><b>(&lt; 0.05 to 0.1)</b>       | <b>12.9</b><br><b>(10.6 to 15.0)</b>              | <b>2.6</b><br><b>(0.6 to 4.5)</b>                   |
| Self-harm                                                                           | 0.2<br>(0.2 to 0.3)                                 | 0.1<br>(0.1 to 0.2)                                  | < 0.05<br>(< 0.05 to < 0.05)                        | 11.3<br>(5.7 to 17.1)                             | 0.0<br>(-5.3 to 5.4)                                |
| Self-harm by firearm                                                                | < 0.05<br>(< 0.05 to < 0.05)                        | < 0.05<br>(< 0.05 to < 0.05)                         | < 0.05<br>(< 0.05 to < 0.05)                        | 15.5<br>(13.3 to 17.7)                            | 4.1<br>(2.1 to 6.5)                                 |
| Self-harm by other specified means                                                  | 0.2<br>(0.2 to 0.3)                                 | 0.1<br>(0.1 to 0.2)                                  | < 0.05<br>(< 0.05 to < 0.05)                        | 11.3<br>(5.7 to 17.1)                             | 0.0<br>(-5.3 to 5.5)                                |
| Interpersonal violence                                                              | 1.7<br>(1.5 to 1.8)                                 | 0.2‡<br>(0.2 to 0.2)                                 | < 0.05<br>(< 0.05 to < 0.05)                        | 13.3<br>(11.2 to 15.4)                            | 3.3<br>(1.4 to 5.1)                                 |
| Assault by firearm                                                                  | 0.1<br>(< 0.05 to 0.1)                              | < 0.05<br>(< 0.05 to < 0.05)                         | < 0.05<br>(< 0.05 to < 0.05)                        | 20.7<br>(18.8 to 22.7)                            | 8.0<br>(6.2 to 10.0)                                |
| Assault by sharp object                                                             | 0.1<br>(0.1 to 0.2)                                 | < 0.05<br>(< 0.05 to < 0.05)                         | < 0.05<br>(< 0.05 to < 0.05)                        | 19.8<br>(17.8 to 21.7)                            | 7.5<br>(5.6 to 9.4)                                 |
| Sexual violence                                                                     | 0.9<br>(0.8 to 1.0)                                 | --                                                   | < 0.05<br>(< 0.05 to < 0.05)                        | 2.1<br>(-1.2 to 6.1)                              | -1.8<br>(-5.5 to 2.5)                               |
| Assault by other means                                                              | 0.6<br>(0.5 to 0.7)                                 | 0.1<br>(0.1 to 0.2)                                  | < 0.05<br>(< 0.05 to < 0.05)                        | 18.0<br>(16.2 to 19.7)                            | 6.0<br>(4.5 to 7.7)                                 |
| <b>Forces of nature, conflict and terrorism, and executions and police conflict</b> | <b>&lt; 0.05</b><br><b>(&lt; 0.05 to &lt; 0.05)</b> | <b>&lt; 0.05†</b><br><b>(&lt; 0.05 to &lt; 0.05)</b> | <b>&lt; 0.05</b><br><b>(&lt; 0.05 to &lt; 0.05)</b> | <b>39.9</b><br><b>(29.3 to 44.2)</b>              | <b>24.2</b><br><b>(16.3 to 27.8)</b>                |
| Exposure to forces of nature                                                        | --                                                  | --                                                   | --                                                  | --                                                | --                                                  |
| Conflict and terrorism                                                              | --                                                  | --                                                   | --                                                  | --                                                | --                                                  |
| Executions and police conflict                                                      | < 0.05<br>(< 0.05 to < 0.05)                        | < 0.05<br>(< 0.05 to < 0.05)                         | < 0.05<br>(< 0.05 to < 0.05)                        | 39.9<br>(29.3 to 44.2)                            | 24.2<br>(16.3 to 27.8)                              |
| <b>Impairments</b>                                                                  | --                                                  | --                                                   | --                                                  | --                                                | --                                                  |
| Anaemia                                                                             | 6.2<br>(4.3 to 9.2)                                 | --                                                   | 0.1<br>(0.1 to 0.2)                                 | 16.1<br>(-5.6 to 42.8)                            | 0.2<br>(-18.9 to 23.8)                              |
| Developmental intellectual disability                                               | 1.1<br>(0.9 to 1.4)                                 | --                                                   | 0.1<br>(0.1 to 0.2)                                 | 8.5<br>(3.9 to 13.8)                              | 1.8<br>(-2.6 to 6.8)                                |
| Epilepsy                                                                            | 0.4<br>(0.2 to 0.5)                                 | --                                                   | 0.1<br>(< 0.05 to 0.2)                              | 8.0<br>(-48.6 to 140.5)                           | 0.4<br>(-51.8 to 121.5)                             |
| Guillain-Barre syndrome                                                             | < 0.05<br>(< 0.05 to < 0.05)                        | --                                                   | < 0.05<br>(< 0.05 to < 0.05)                        | 12.1<br>(10.1 to 14.0)                            | 0.1<br>(0.0 to 0.2)                                 |
| Hearing loss                                                                        | 20.3<br>(18.1 to 22.6)                              | --                                                   | 0.5<br>(0.3 to 0.7)                                 | 21.9<br>(17.2 to 28.7)                            | 3.1<br>(-0.7 to 7.8)                                |
| Heart failure                                                                       | 1.6<br>(1.4 to 1.8)                                 | --                                                   | 0.2<br>(0.1 to 0.2)                                 | 12.4<br>(5.0 to 20.3)                             | -6.9<br>(-13.0 to -0.4)                             |
| Infertility                                                                         | 0.7<br>(0.5 to 1.0)                                 | --                                                   | < 0.05<br>(< 0.05 to < 0.05)                        | 0.8<br>(-5.3 to 7.8)                              | 0.6<br>(-5.3 to 7.2)                                |
| Pelvic inflammatory disease                                                         | < 0.05<br>(< 0.05 to < 0.05)                        | --                                                   | < 0.05<br>(< 0.05 to < 0.05)                        | 0.2<br>(-23.9 to 30.0)                            | -2.0<br>(-27.1 to 28.8)                             |
| Vision loss                                                                         | 7.0<br>(6.3 to 7.8)                                 | --                                                   | 0.2<br>(0.1 to 0.3)                                 | 13.7<br>(9.3 to 18.1)                             | -0.9<br>(-4.8 to 3.3)                               |

We did not calculate incidence for the nine impairments, certain NTDs, and causes with only birth prevalence. Blank cells mean that no estimate is available.

† Incidence for aggregate causes represents the sum of the incidence of the causes below the aggregate.

‡ Incidence estimates for stroke represent first-ever stroke only.

^ Incidence of HIV/AIDS represents new infections of HIV only and does not include new infections of Tuberculosis in HIV positive cases.

SR Table 14: Prevalence, incidence, and YLDs for 2016, percentage change of YLD counts and percentage change of age-standardised YLD rates between 2006 and 2016 by cause and impairments, for all ages, Angola.

| Cause                                                                                | Prevalence in thousands (95% UI)          | Incidence in thousands (95% UI)               | YLDs in thousands (95% UI)             |                                                   |                                                     |
|--------------------------------------------------------------------------------------|-------------------------------------------|-----------------------------------------------|----------------------------------------|---------------------------------------------------|-----------------------------------------------------|
|                                                                                      | 2016 counts                               | 2016 counts                                   | 2016 counts                            | Percentage change in counts between 2006 and 2016 | Percentage change in age-standardised rates between |
| <b>All causes</b>                                                                    | <b>25,338.2</b><br>(25,279.9 to 25,392.2) | <b>196,155.6†</b><br>(183,262.7 to 210,712.1) | <b>2,335.3</b><br>(1,721.8 to 3,068.2) | <b>35.6</b><br>(32.0 to 39.5)                     | <b>-3.0</b><br>(-4.8 to -1.1)                       |
| <b>Communicable, maternal, neonatal, and nutritional disorders</b>                   | <b>21,619.9</b><br>(21,308.2 to 21,920.3) | <b>133,152.9†</b><br>(120,716.2 to 145,739.7) | <b>577.8</b><br>(402.5 to 791.6)       | <b>25.6</b><br>(19.1 to 32.0)                     | <b>-12.2</b><br>(-16.5 to -8.0)                     |
| <b>HIV/AIDS and tuberculosis</b>                                                     | <b>5,866.3</b><br>(5,341.6 to 6,301.2)    | <b>87.5†</b><br>(70.7 to 112.2)               | <b>42.0</b><br>(23.2 to 70.0)          | <b>31.6</b><br>(-1.9 to 71.0)                     | <b>-7.1</b><br>(-31.8 to 20.6)                      |
| Tuberculosis                                                                         | 5,355.1<br>(4,826.5 to 5,913.2)           | 69.1†<br>(59.1 to 80.2)                       | 11.3<br>(7.3 to 15.8)                  | 6.5<br>(-3.8 to 19.0)                             | -23.2<br>(-29.3 to -16.3)                           |
| Drug-susceptible tuberculosis                                                        | 36.4<br>(31.0 to 42.6)                    | 68.6<br>(58.7 to 79.5)                        | 11.2<br>(7.2 to 15.7)                  | 6.6<br>(-4.0 to 19.1)                             | -23.2<br>(-29.4 to -16.4)                           |
| Multidrug-resistant tuberculosis without extensive drug resistance                   | 0.3<br>(0.1 to 0.5)                       | 0.5<br>(0.3 to 0.9)                           | 0.1<br>(< 0.05 to 0.2)                 | 1.9<br>(-42.3 to 84.0)                            | -26.8<br>(-58.7 to 33.5)                            |
| Extensively drug-resistant tuberculosis                                              | < 0.05<br>(< 0.05 to < 0.05)              | < 0.05<br>(< 0.05 to < 0.05)                  | < 0.05<br>(< 0.05 to < 0.05)           | 210.6<br>(75.7 to 460.8)                          | 123.2<br>(25.8 to 307.1)                            |
| Latent tuberculosis infection                                                        | 5,318.4<br>(4,785.9 to 5,877.3)           | --                                            | --                                     | --                                                | --                                                  |
| HIV/AIDS                                                                             | 267.6<br>(157.5 to 423.8)                 | 18.4^<br>(5.9 to 40.1)                        | 30.8<br>(13.9 to 56.4)                 | 44.0<br>(-5.0 to 112.8)                           | 1.2<br>(-34.9 to 52.1)                              |
| Drug-susceptible HIV/AIDS - Tuberculosis                                             | 4.7<br>(2.8 to 7.3)                       | 8.8<br>(5.2 to 13.9)                          | 1.8<br>(0.9 to 3.1)                    | -8.6<br>(-25.9 to 10.1)                           | -31.1<br>(-44.0 to -16.6)                           |
| Multidrug-resistant HIV/AIDS - Tuberculosis without extensive drug resistance        | < 0.05<br>(< 0.05 to 0.1)                 | 0.1<br>(< 0.05 to 0.2)                        | < 0.05<br>(< 0.05 to < 0.05)           | -12.3<br>(-51.2 to 58.6)                          | -34.1<br>(-63.3 to 19.2)                            |
| Extensively drug-resistant HIV/AIDS - Tuberculosis                                   | < 0.05<br>(< 0.05 to < 0.05)              | < 0.05<br>(< 0.05 to < 0.05)                  | < 0.05<br>(< 0.05 to < 0.05)           | 167.3<br>(48.6 to 382.8)                          | 100.9<br>(11.7 to 262.9)                            |
| HIV/AIDS resulting in other diseases                                                 | 262.9<br>(152.7 to 420.5)                 | 18.4<br>(5.9 to 40.1)                         | 28.9<br>(12.5 to 54.7)                 | 49.4<br>(-5.2 to 132.9)                           | 4.2<br>(-35.3 to 66.8)                              |
| <b>Diarrhoea, lower respiratory infections, and other common infectious diseases</b> | <b>2,164.7</b><br>(2,055.5 to 2,304.8)    | <b>122,097.6†</b><br>(109,406.4 to 134,610.6) | <b>120.0</b><br>(83.0 to 163.5)        | <b>20.3</b><br>(15.5 to 25.2)                     | <b>-12.7</b><br>(-15.3 to -10.0)                    |
| Diarrhoeal diseases                                                                  | 503.9<br>(461.2 to 556.4)                 | 33,455.3<br>(30,599.6 to 36,913.9)            | 57.1<br>(39.2 to 79.8)                 | 10.5<br>(3.6 to 19.3)                             | -18.2<br>(-22.2 to -14.1)                           |
| Intestinal infectious diseases                                                       | 1.6<br>(1.2 to 2.2)                       | 29.1†<br>(22.6 to 38.1)                       | 0.3<br>(0.2 to 0.4)                    | -1.3<br>(-19.6 to 22.2)                           | -31.4<br>(-41.5 to -18.4)                           |
| Typhoid fever                                                                        | 1.6<br>(1.2 to 2.2)                       | 25.6<br>(20.0 to 33.5)                        | 0.2<br>(0.1 to 0.4)                    | -1.0<br>(-20.3 to 23.9)                           | -31.2<br>(-41.8 to -17.8)                           |
| Paratyphoid fever                                                                    | 0.1<br>(0.1 to 0.2)                       | 3.5<br>(2.5 to 4.8)                           | < 0.05<br>(< 0.05 to < 0.05)           | 6.5<br>(-15.4 to 35.3)                            | -26.4<br>(-39.2 to -10.6)                           |
| Other intestinal infectious diseases                                                 | --                                        | --                                            | < 0.05<br>(< 0.05 to < 0.05)           | -24.8<br>(-45.5 to 4.6)                           | -46.0<br>(-56.8 to -32.1)                           |
| Lower respiratory infections                                                         | 38.4<br>(34.5 to 42.7)                    | 1,625.6<br>(1,441.4 to 1,834.3)               | 2.3<br>(1.5 to 3.4)                    | 17.1<br>(2.7 to 34.1)                             | -10.1<br>(-18.2 to 0.0)                             |
| Upper respiratory infections                                                         | 1,099.6<br>(950.4 to 1,255.8)             | 83,418.8<br>(71,574.3 to 95,730.3)            | 27.5<br>(16.1 to 42.8)                 | 39.9<br>(33.1 to 47.1)                            | -0.6<br>(-5.1 to 4.3)                               |
| Otitis media                                                                         | 460.4<br>(408.9 to 519.6)                 | 2,600.4<br>(2,006.7 to 3,342.9)               | 14.2<br>(8.8 to 21.5)                  | 23.3<br>(12.7 to 35.1)                            | -13.4<br>(-20.1 to -6.7)                            |
| Meningitis                                                                           | 129.5<br>(110.3 to 150.9)                 | 39.7<br>(34.0 to 47.8)                        | 13.0<br>(9.2 to 17.2)                  | 31.0<br>(20.9 to 42.2)                            | -8.4<br>(-15.1 to -1.1)                             |
| Pneumococcal meningitis                                                              | 66.9<br>(55.9 to 80.0)                    | 10.3<br>(8.2 to 13.1)                         | 7.1<br>(4.9 to 9.5)                    | 19.6<br>(3.8 to 37.4)                             | -17.2<br>(-27.3 to -6.3)                            |
| H influenzae type B meningitis                                                       | 15.5<br>(12.3 to 19.4)                    | 5.1<br>(3.6 to 7.0)                           | 2.0<br>(1.4 to 2.8)                    | 11.8<br>(-1.2 to 27.5)                            | -22.4<br>(-31.2 to -11.6)                           |
| Meningococcal infection                                                              | 5.3<br>(3.9 to 7.2)                       | 2.6<br>(1.9 to 3.6)                           | 0.6<br>(0.4 to 0.8)                    | 33.4<br>(25.9 to 40.3)                            | -6.1<br>(-11.4 to -1.2)                             |
| Other meningitis                                                                     | 41.8<br>(30.5 to 54.7)                    | 21.6<br>(18.1 to 26.4)                        | 3.3<br>(2.2 to 4.5)                    | 89.3<br>(70.5 to 109.5)                           | 35.8<br>(22.3 to 49.8)                              |
| Encephalitis                                                                         | 36.6<br>(24.6 to 53.4)                    | 25.1<br>(21.4 to 29.1)                        | 4.2<br>(2.9 to 5.6)                    | 36.8<br>(20.5 to 55.6)                            | -2.9<br>(-13.3 to 8.8)                              |
| Diphtheria                                                                           | < 0.05<br>(< 0.05 to < 0.05)              | < 0.05<br>(< 0.05 to < 0.05)                  | < 0.05<br>(< 0.05 to < 0.05)           | -85.6<br>(-94.8 to -63.6)                         | -88.5<br>(-94.7 to -75.9)                           |
| Whooping cough                                                                       | 14.4<br>(11.2 to 18.1)                    | 105.0<br>(82.0 to 132.1)                      | 0.7<br>(0.4 to 1.1)                    | -34.9<br>(-45.1 to -23.6)                         | -52.6<br>(-60.1 to -44.3)                           |
| Tetanus                                                                              | 0.3<br>(0.2 to 0.3)                       | 0.3<br>(0.1 to 0.6)                           | < 0.05<br>(< 0.05 to < 0.05)           | -31.2<br>(-55.4 to 2.8)                           | -54.5<br>(-69.5 to -28.2)                           |
| Measles                                                                              | 0.6<br>(0.2 to 1.5)                       | 22.4<br>(7.5 to 53.6)                         | 0.1<br>(< 0.05 to 0.1)                 | -61.3<br>(-75.3 to -27.7)                         | -72.1<br>(-82.0 to -49.1)                           |
| Varicella and herpes zoster                                                          | 24.4<br>(22.8 to 26.2)                    | 775.9<br>(717.2 to 838.1)                     | 0.7<br>(0.4 to 1.1)                    | 40.4<br>(17.4 to 63.8)                            | 0.0<br>(-12.2 to 13.0)                              |
| <b>Neglected tropical diseases and malaria</b>                                       | <b>13,384.8</b><br>(12,640.7 to 14,247.5) | <b>4,783.8†</b><br>(3,362.8 to 6,581.5)       | <b>120.1</b><br>(81.8 to 170.7)        | <b>17.3</b><br>(10.5 to 24.0)                     | <b>-14.8</b><br>(-19.5 to -10.7)                    |
| Malaria                                                                              | 2,166.7<br>(1,799.7 to 2,590.4)           | 3,494.2<br>(2,104.3 to 5,281.7)               | 32.6<br>(24.3 to 42.5)                 | -4.8<br>(-16.6 to 7.9)                            | -29.0<br>(-36.4 to -20.4)                           |
| Chagas disease                                                                       | --                                        | --                                            | --                                     | --                                                | --                                                  |
| Leishmaniasis                                                                        | --                                        | --                                            | --                                     | --                                                | --                                                  |
| Visceral leishmaniasis                                                               | --                                        | --                                            | --                                     | --                                                | --                                                  |
| Cutaneous and mucocutaneous leishmaniasis                                            | --                                        | --                                            | --                                     | --                                                | --                                                  |
| African trypanosomiasis                                                              | 0.1<br>(< 0.05 to 0.1)                    | 0.1<br>(< 0.05 to 0.1)                        | < 0.05<br>(< 0.05 to < 0.05)           | -94.3<br>(-96.1 to -91.6)                         | -96.0<br>(-97.7 to -92.7)                           |
| Schistosomiasis                                                                      | 2,499.7<br>(2,226.3 to 2,791.4)           | 990.8<br>(895.0 to 1,090.5)                   | 17.7<br>(8.6 to 34.1)                  | 19.3<br>(13.4 to 24.6)                            | -15.3<br>(-19.3 to -11.7)                           |
| Cysticercosis                                                                        | 19.0<br>(10.1 to 27.5)                    | --                                            | 3.6<br>(1.5 to 6.1)                    | 13.4<br>(-39.6 to 63.9)                           | -17.9<br>(-55.2 to 17.1)                            |
| Cystic echinococcosis                                                                | 4.5<br>(0.8 to 17.1)                      | 0.9<br>(0.2 to 3.6)                           | 0.4<br>(0.1 to 1.7)                    | -51.2<br>(-93.7 to 231.9)                         | -65.2<br>(-94.8 to 122.5)                           |
| Lymphatic filariasis                                                                 | 749.9<br>(452.2 to 1,189.6)               | 121.2<br>(66.6 to 204.6)                      | 26.8<br>(10.8 to 49.2)                 | 41.7<br>(35.5 to 47.9)                            | 0.6<br>(-2.8 to 3.9)                                |
| Onchocerciasis                                                                       | 114.7<br>(62.1 to 219.2)                  | 32.0<br>(15.3 to 61.5)                        | 6.8<br>(3.1 to 12.1)                   | -6.7<br>(-23.3 to 5.8)                            | -33.0<br>(-43.6 to -24.3)                           |
| Trachoma                                                                             | --                                        | --                                            | --                                     | --                                                | --                                                  |
| Dengue                                                                               | 6.8<br>(2.9 to 13.0)                      | 113.8<br>(51.7 to 208.9)                      | 1.1<br>(0.4 to 2.4)                    | 194.5<br>(97.3 to 584.9)                          | 105.6<br>(48.8 to 361.6)                            |
| Yellow fever                                                                         | 0.8<br>(0.2 to 2.2)                       | 30.6<br>(8.6 to 80.8)                         | < 0.05<br>(< 0.05 to 0.1)              | 187.1<br>(96.5 to 341.7)                          | 103.4<br>(46.6 to 185.3)                            |
| Rabies                                                                               | < 0.05<br>(< 0.05 to < 0.05)              | < 0.05<br>(< 0.05 to < 0.05)                  | < 0.05<br>(< 0.05 to < 0.05)           | -55.6<br>(-81.7 to 1.9)                           | -63.2<br>(-81.3 to -32.9)                           |
| Intestinal nematode infections                                                       | 10,125.5<br>(9,171.9 to 11,278.0)         | --                                            | 19.0<br>(11.1 to 30.5)                 | 36.7<br>(23.9 to 48.7)                            | -1.9<br>(-11.8 to 8.1)                              |
| Ascariasis                                                                           | 4,009.2<br>(3,215.7 to 4,874.2)           | --                                            | 2.6<br>(1.4 to 4.4)                    | 39.5<br>(22.1 to 59.2)                            | -0.6<br>(-15.1 to 15.4)                             |



| Cause                                                                   | Prevalence in thousands (95% UI)           | Incidence in thousands (95% UI)             | YLDs in thousands (95% UI)              |                                                   |                                                     |
|-------------------------------------------------------------------------|--------------------------------------------|---------------------------------------------|-----------------------------------------|---------------------------------------------------|-----------------------------------------------------|
|                                                                         | 2016 counts                                | 2016 counts                                 | 2016 counts                             | Percentage change in counts between 2006 and 2016 | Percentage change in age-standardised rates between |
| Trichuriasis                                                            | 3,683.0<br>(2,941.1 to 4,660.7)            | --                                          | 1.4<br>(0.8 to 2.4)                     | 39.9<br>(15.5 to 71.9)                            | -0.7<br>(-20.2 to 25.1)                             |
| Hookworm disease                                                        | 4,229.0<br>(3,547.2 to 5,067.5)            | --                                          | 14.9<br>(8.7 to 24.2)                   | 35.9<br>(20.0 to 51.6)                            | -2.2<br>(-14.3 to 10.3)                             |
| Food-borne trematodiasis                                                | --                                         | --                                          | --                                      | --                                                | --                                                  |
| Leprosy                                                                 | 2.5<br>(2.3 to 2.6)                        | 0.2<br>(0.2 to 0.2)                         | 0.1<br>(0.1 to 0.2)                     | -0.8<br>(-19.2 to 21.8)                           | -21.8<br>(-33.9 to -7.2)                            |
| Ebola virus disease                                                     | --                                         | --                                          | --                                      | --                                                | --                                                  |
| Zika virus disease                                                      | --                                         | --                                          | --                                      | --                                                | --                                                  |
| Guinea worm disease                                                     | --                                         | --                                          | --                                      | --                                                | --                                                  |
| Other neglected tropical diseases                                       | 385.6<br>(347.6 to 418.1)                  | --                                          | 11.9<br>(7.5 to 17.7)                   | 43.2<br>(22.2 to 64.8)                            | -1.1<br>(-14.2 to 12.8)                             |
| <b>Maternal disorders</b>                                               | <b>85.3<br/>(65.7 to 111.3)</b>            | <b>639.9†<br/>(565.5 to 724.9)</b>          | <b>6.0<br/>(3.8 to 8.6)</b>             | <b>13.4<br/>(-12.4 to 49.5)</b>                   | <b>-21.4<br/>(-38.8 to 3.1)</b>                     |
| Maternal haemorrhage                                                    | 11.8<br>(8.8 to 15.6)                      | 77.0<br>(56.4 to 103.3)                     | 0.5<br>(0.3 to 0.8)                     | 24.1<br>(-16.8 to 79.1)                           | -12.8<br>(-41.1 to 24.6)                            |
| Maternal sepsis and other pregnancy related infections                  | 10.9<br>(8.4 to 14.2)                      | 61.8<br>(45.5 to 83.1)                      | 0.3<br>(0.1 to 0.5)                     | 31.4<br>(-36.0 to 173.8)                          | -6.9<br>(-53.5 to 85.8)                             |
| Maternal hypertensive disorders                                         | 58.8<br>(37.2 to 83.1)                     | 257.9<br>(211.7 to 304.3)                   | 2.8<br>(1.5 to 4.7)                     | 33.0<br>(-17.7 to 114.5)                          | -6.1<br>(-41.6 to 51.4)                             |
| Maternal obstructed labour and uterine rupture                          | 3.9<br>(3.1 to 4.8)                        | 35.2<br>(25.0 to 48.2)                      | 1.3<br>(0.8 to 1.9)                     | -17.6<br>(-38.4 to 8.6)                           | -42.0<br>(-55.6 to -25.0)                           |
| Maternal abortion, miscarriage, and ectopic pregnancy                   | 1.7<br>(1.1 to 2.5)                        | 208.0<br>(159.5 to 271.0)                   | 0.2<br>(0.1 to 0.3)                     | 31.7<br>(-30.1 to 151.0)                          | -7.5<br>(-50.8 to 72.5)                             |
| Other maternal disorders                                                | --                                         | --                                          | 0.9<br>(0.6 to 1.4)                     | 8.3<br>(-16.6 to 43.1)                            | -24.9<br>(-41.6 to -1.6)                            |
| <b>Neonatal disorders</b>                                               | <b>322.8<br/>(262.0 to 400.3)</b>          | <b>--</b>                                   | <b>45.6<br/>(24.3 to 81.9)</b>          | <b>69.0<br/>(30.8 to 106.2)</b>                   | <b>24.9<br/>(-5.0 to 55.3)</b>                      |
| Neonatal preterm birth complications                                    | 204.9<br>(149.6 to 275.2)                  | --                                          | 10.0<br>(6.7 to 14.6)                   | 27.4<br>(0.9 to 58.6)                             | -5.8<br>(-26.0 to 19.4)                             |
| Neonatal encephalopathy due to birth asphyxia and trauma                | 94.6<br>(49.9 to 159.1)                    | --                                          | 11.0<br>(2.2 to 29.2)                   | 101.8<br>(-13.9 to 258.2)                         | 49.3<br>(-38.3 to 176.1)                            |
| Neonatal sepsis and other neonatal infections                           | 44.9<br>(13.7 to 105.9)                    | --                                          | 17.8<br>(3.7 to 48.1)                   | 100.1<br>(35.9 to 243.6)                          | 52.6<br>(-1.0 to 188.2)                             |
| Hemolytic disease and other neonatal jaundice                           | 8.1<br>(6.9 to 9.5)                        | --                                          | 2.6<br>(1.9 to 3.4)                     | 36.7<br>(14.7 to 63.1)                            | -1.9<br>(-14.0 to 13.3)                             |
| Other neonatal disorders                                                | --                                         | --                                          | 4.2<br>(2.5 to 7.3)                     | 45.3<br>(18.2 to 72.3)                            | 6.3<br>(-13.9 to 26.5)                              |
| <b>Nutritional deficiencies</b>                                         | <b>7,391.5<br/>(7,083.7 to 7,735.1)</b>    | <b>1,276.4†<br/>(1,086.2 to 1,570.4)</b>    | <b>222.8<br/>(147.3 to 324.0)</b>       | <b>24.8<br/>(14.2 to 35.5)</b>                    | <b>-16.7<br/>(-22.0 to -11.3)</b>                   |
| Protein-energy malnutrition                                             | 406.4<br>(339.4 to 480.8)                  | 287.1<br>(241.8 to 335.2)                   | 20.1<br>(12.2 to 30.3)                  | 8.8<br>(-20.5 to 44.4)                            | -21.6<br>(-43.1 to 4.4)                             |
| Iodine deficiency                                                       | 983.1<br>(728.4 to 1,260.1)                | 43.2<br>(32.3 to 55.5)                      | 25.5<br>(15.8 to 38.5)                  | 3.6<br>(-7.2 to 15.3)                             | -26.0<br>(-33.4 to -17.3)                           |
| Vitamin A deficiency                                                    | 1,100.4<br>(884.3 to 1,431.9)              | 946.1<br>(767.1 to 1,244.7)                 | 2.7<br>(1.6 to 4.3)                     | 24.6<br>(-1.7 to 49.9)                            | -12.4<br>(-30.1 to 5.7)                             |
| Iron-deficiency anaemia                                                 | 5,927.4<br>(5,499.9 to 6,318.2)            | --                                          | 173.8<br>(112.0 to 255.8)               | 31.1<br>(17.2 to 45.6)                            | -13.7<br>(-20.4 to -6.5)                            |
| Other nutritional deficiencies                                          | --                                         | --                                          | 0.7<br>(0.4 to 1.0)                     | 8.3<br>(-21.7 to 45.3)                            | -22.0<br>(-43.5 to 5.3)                             |
| <b>Other communicable, maternal, neonatal, and nutritional diseases</b> | <b>8,735.8<br/>(8,123.8 to 9,425.4)</b>    | <b>4,267.7<br/>(3,463.3 to 5,667.6)</b>     | <b>212.2<br/>(13.6 to 32.0)</b>         | <b>40.1<br/>(30.6 to 49.4)</b>                    | <b>-2.6<br/>(-7.4 to 2.1)</b>                       |
| Sexually transmitted diseases excluding HIV                             | 5,530.4<br>(5,153.8 to 5,892.3)            | 2,929.8<br>(2,610.8 to 3,317.7)             | 11.5<br>(7.0 to 17.7)                   | 39.7<br>(31.6 to 47.5)                            | -0.8<br>(-6.0 to 4.4)                               |
| Syphilis                                                                | 880.9<br>(665.4 to 1,131.6)                | 634.1<br>(447.8 to 860.1)                   | 0.7<br>(0.5 to 1.1)                     | 41.1<br>(27.1 to 57.2)                            | 1.1<br>(-10.8 to 14.3)                              |
| Chlamydial infection                                                    | 245.5<br>(204.3 to 294.5)                  | 212.3<br>(180.2 to 250.8)                   | 2.2<br>(1.3 to 3.3)                     | 38.8<br>(22.7 to 57.3)                            | -1.7<br>(-12.4 to 10.8)                             |
| Gonococcal infection                                                    | 245.4<br>(191.7 to 312.3)                  | 802.4<br>(598.3 to 1,076.1)                 | 2.5<br>(1.4 to 3.8)                     | 40.2<br>(25.7 to 56.4)                            | -0.1<br>(-9.5 to 10.9)                              |
| Trichomoniasis                                                          | 567.7<br>(480.2 to 656.6)                  | 506.9<br>(426.6 to 592.3)                   | 0.6<br>(0.2 to 1.3)                     | 41.3<br>(31.0 to 52.7)                            | 0.3<br>(-6.5 to 7.6)                                |
| Genital herpes                                                          | 4,259.2<br>(3,671.8 to 4,939.0)            | 523.2<br>(430.2 to 643.0)                   | 1.2<br>(0.4 to 2.6)                     | 42.9<br>(28.8 to 56.2)                            | 1.3<br>(-6.3 to 9.3)                                |
| Other sexually transmitted diseases                                     | 232.7<br>(186.7 to 271.9)                  | 250.8<br>(209.7 to 305.7)                   | 4.4<br>(2.9 to 6.6)                     | 38.5<br>(27.0 to 51.5)                            | -2.0<br>(-9.8 to 6.7)                               |
| Hepatitis                                                               | 3,835.8<br>(2,958.7 to 4,883.2)            | 1,337.9<br>(677.7 to 2,690.7)               | 1.0<br>(0.6 to 1.5)                     | -15.7<br>(-37.2 to 12.8)                          | -31.1<br>(-44.8 to -14.0)                           |
| Acute hepatitis A                                                       | 46.5<br>(2.4 to 148.6)                     | 605.1<br>(31.4 to 1,932.3)                  | 0.1<br>(< 0.05 to 0.4)                  | -22.2<br>(-82.9 to 311.5)                         | -34.5<br>(-78.8 to 132.2)                           |
| Hepatitis B                                                             | 3,146.1<br>(2,276.9 to 4,173.6)            | 633.4<br>(465.9 to 859.4)                   | 0.7<br>(0.4 to 1.2)                     | -16.2<br>(-33.5 to 7.4)                           | -31.5<br>(-45.1 to -15.1)                           |
| Hepatitis C                                                             | 639.8<br>(560.4 to 723.2)                  | 54.7<br>(48.5 to 61.6)                      | 0.1<br>(< 0.05 to 0.1)                  | 26.0<br>(-27.5 to 118.3)                          | -11.9<br>(-35.0 to 20.5)                            |
| Acute hepatitis E                                                       | 3.5<br>(3.0 to 4.1)                        | 44.9<br>(38.4 to 52.8)                      | 0.1<br>(< 0.05 to 0.1)                  | -14.8<br>(-38.5 to 18.6)                          | -28.1<br>(-44.1 to -9.6)                            |
| Other infectious diseases                                               | 274.2<br>(249.4 to 295.6)                  | < 0.05<br>(< 0.05 to < 0.05)                | 8.8<br>(5.5 to 12.9)                    | 52.0<br>(31.6 to 73.2)                            | 2.3<br>(-9.2 to 14.9)                               |
| <b>Non-communicable diseases</b>                                        | <b>23,088.1<br/>(22,917.7 to 23,264.0)</b> | <b>60,925.2†<br/>(56,314.8 to 66,120.8)</b> | <b>1,609.2<br/>(1,183.6 to 2,090.1)</b> | <b>39.9<br/>(35.4 to 44.7)</b>                    | <b>-0.6<br/>(-2.8 to 1.6)</b>                       |
| <b>Neoplasms</b>                                                        | <b>22.3<br/>(20.3 to 24.2)</b>             | <b>13.3<br/>(12.2 to 14.2)</b>              | <b>4.2<br/>(3.0 to 5.5)</b>             | <b>28.9<br/>(16.3 to 48.9)</b>                    | <b>-4.9<br/>(-12.7 to 5.4)</b>                      |
| Lip and oral cavity cancer                                              | 1.0<br>(0.9 to 1.0)                        | 0.3<br>(0.2 to 0.3)                         | 0.1<br>(0.1 to 0.1)                     | 39.7<br>(20.2 to 60.6)                            | 0.1<br>(-13.8 to 14.0)                              |
| Nasopharynx cancer                                                      | 0.2<br>(0.2 to 0.3)                        | 0.1<br>(0.1 to 0.1)                         | < 0.05<br>(< 0.05 to < 0.05)            | 27.4<br>(2.0 to 59.1)                             | -8.7<br>(-25.1 to 10.1)                             |
| Other pharynx cancer                                                    | 0.1<br>(0.1 to 0.2)                        | 0.1<br>(0.1 to 0.1)                         | < 0.05<br>(< 0.05 to < 0.05)            | 40.6<br>(14.3 to 68.8)                            | 1.1<br>(-17.4 to 19.2)                              |
| Oesophageal cancer                                                      | 0.6<br>(0.5 to 0.6)                        | 0.5<br>(0.5 to 0.6)                         | 0.1<br>(0.1 to 0.2)                     | 25.9<br>(3.4 to 53.5)                             | -8.6<br>(-26.6 to 12.3)                             |
| Stomach cancer                                                          | 0.8<br>(0.8 to 0.9)                        | 0.6<br>(0.5 to 0.6)                         | 0.1<br>(0.1 to 0.2)                     | 4.8<br>(-6.9 to 18.5)                             | -22.9<br>(-33.2 to -10.2)                           |
| Colon and rectum cancer                                                 | 1.9<br>(1.7 to 2.2)                        | 0.7<br>(0.6 to 0.8)                         | 0.2<br>(0.2 to 0.3)                     | 41.2<br>(14.7 to 73.2)                            | 2.2<br>(-17.8 to 24.5)                              |
| Liver cancer                                                            | 0.4<br>(0.3 to 0.5)                        | 1.0<br>(0.8 to 1.2)                         | 0.2<br>(0.1 to 0.3)                     | 42.4<br>(21.1 to 65.2)                            | 1.7<br>(-12.6 to 16.4)                              |
| Liver cancer due to hepatitis B                                         | 0.3<br>(0.3 to 0.4)                        | 0.4<br>(0.3 to 0.5)                         | 0.1<br>(0.1 to 0.1)                     | 39.4<br>(18.0 to 63.0)                            | -0.5<br>(-15.7 to 16.2)                             |

| Cause                                              | Prevalence in thousands (95% UI)              | Incidence in thousands (95% UI)          | YLDs in thousands (95% UI)            |                                                   |                                                     |
|----------------------------------------------------|-----------------------------------------------|------------------------------------------|---------------------------------------|---------------------------------------------------|-----------------------------------------------------|
|                                                    | 2016 counts                                   | 2016 counts                              | 2016 counts                           | Percentage change in counts between 2006 and 2016 | Percentage change in age-standardised rates between |
| Liver cancer due to hepatitis C                    | 0.3<br>(0.2 to 0.3)                           | 0.3<br>(0.2 to 0.4)                      | 0.1<br>( $< 0.05$ to 0.1)             | 37.8<br>(16.0 to 60.2)                            | -1.7<br>(-16.5 to 13.0)                             |
| Liver cancer due to alcohol use                    | 0.1<br>(0.1 to 0.2)                           | 0.1<br>(0.1 to 0.2)                      | $< 0.05$<br>( $< 0.05$ to $< 0.05$ )  | 80.6<br>(52.0 to 112.7)                           | 28.6<br>(9.3 to 50.4)                               |
| Liver cancer due to other causes                   | 0.2<br>(0.1 to 0.2)                           | 0.2<br>(0.1 to 0.2)                      | $< 0.05$<br>( $< 0.05$ to 0.1)        | 33.4<br>(13.2 to 56.5)                            | -4.7<br>(-18.9 to 10.2)                             |
| Gallbladder and biliary tract cancer               | 0.1<br>(0.1 to 0.1)                           | 0.1<br>(0.1 to 0.1)                      | $< 0.05$<br>( $< 0.05$ to $< 0.05$ )  | 22.3<br>(2.2 to 46.6)                             | -11.6<br>(-25.5 to 3.9)                             |
| Pancreatic cancer                                  | 0.2<br>(0.2 to 0.3)                           | 0.4<br>(0.3 to 0.4)                      | 0.1<br>( $< 0.05$ to 0.1)             | 51.1<br>(37.9 to 64.9)                            | 8.0<br>(-1.0 to 17.4)                               |
| Larynx cancer                                      | 0.3<br>(0.3 to 0.4)                           | 0.1<br>(0.1 to 0.1)                      | $< 0.05$<br>( $< 0.05$ to 0.1)        | 31.4<br>(13.2 to 53.6)                            | -5.1<br>(-18.2 to 10.4)                             |
| Tracheal, bronchus, and lung cancer                | 0.8<br>(0.8 to 0.9)                           | 0.8<br>(0.7 to 0.8)                      | 0.2<br>(0.1 to 0.2)                   | 50.2<br>(22.5 to 83.1)                            | 8.5<br>(-12.7 to 33.6)                              |
| Malignant skin melanoma                            | 0.3<br>(0.2 to 0.3)                           | 0.1<br>(0.1 to 0.1)                      | $< 0.05$<br>( $< 0.05$ to $< 0.05$ )  | 58.2<br>(28.8 to 84.0)                            | 11.6<br>(-6.5 to 29.3)                              |
| Non-melanoma skin cancer                           | 0.1<br>(0.1 to 0.2)                           | 1.0<br>(0.6 to 1.5)                      | $< 0.05$<br>( $< 0.05$ to $< 0.05$ )  | 62.8<br>(28.8 to 117.1)                           | 14.4<br>(-14.8 to 60.8)                             |
| Non-melanoma skin cancer (squamous-cell carcinoma) | 0.1<br>(0.1 to 0.2)                           | 0.2<br>(0.1 to 0.2)                      | $< 0.05$<br>( $< 0.05$ to $< 0.05$ )  | 66.7<br>(24.2 to 132.6)                           | 16.3<br>(-18.3 to 74.2)                             |
| Non-melanoma skin cancer (basal-cell carcinoma)    | 0.1<br>(0.1 to 0.2)                           | 0.8<br>(0.5 to 1.3)                      | $< 0.05$<br>( $< 0.05$ to $< 0.05$ )  | 46.8<br>(34.7 to 61.2)                            | 4.3<br>(-4.2 to 15.1)                               |
| Breast cancer                                      | 5.2<br>(3.9 to 6.5)                           | 1.3<br>(1.0 to 1.6)                      | 0.6<br>(0.4 to 0.8)                   | 37.5<br>(4.2 to 84.8)                             | -1.4<br>(-24.8 to 28.9)                             |
| Cervical cancer                                    | 8.8<br>(5.5 to 11.2)                          | 2.5<br>(1.6 to 3.1)                      | 0.9<br>(0.5 to 1.3)                   | 10.0<br>(-14.6 to 50.9)                           | -20.9<br>(-37.8 to 4.7)                             |
| Uterine cancer                                     | 0.8<br>(0.6 to 0.9)                           | 0.2<br>(0.1 to 0.2)                      | 0.1<br>( $< 0.05$ to 0.1)             | 27.1<br>(-0.6 to 62.4)                            | -9.8<br>(-28.1 to 14.2)                             |
| Ovarian cancer                                     | 0.8<br>(0.6 to 1.1)                           | 0.3<br>(0.2 to 0.4)                      | 0.1<br>(0.1 to 0.2)                   | 46.6<br>(12.1 to 90.0)                            | 4.1<br>(-22.1 to 40.5)                              |
| Prostate cancer                                    | 2.1<br>(1.2 to 2.7)                           | 0.7<br>(0.4 to 0.9)                      | 0.3<br>(0.2 to 0.5)                   | 53.2<br>(20.9 to 91.8)                            | 7.0<br>(-13.7 to 29.4)                              |
| Testicular cancer                                  | 0.1<br>(0.1 to 0.1)                           | $< 0.05$<br>( $< 0.05$ to $< 0.05$ )     | $< 0.05$<br>( $< 0.05$ to $< 0.05$ )  | 5.6<br>(-21.6 to 43.6)                            | -24.7<br>(-41.6 to -1.4)                            |
| Kidney cancer                                      | 1.1<br>(0.9 to 1.4)                           | 0.3<br>(0.2 to 0.3)                      | 0.1<br>(0.1 to 0.1)                   | 43.5<br>(-1.4 to 98.1)                            | 15.3<br>(-4.8 to 37.3)                              |
| Bladder cancer                                     | 0.8<br>(0.7 to 0.9)                           | 0.2<br>(0.2 to 0.3)                      | 0.1<br>(0.1 to 0.1)                   | 51.9<br>(27.9 to 80.2)                            | 7.8<br>(-9.0 to 28.2)                               |
| Brain and nervous system cancer                    | 0.8<br>(0.6 to 1.0)                           | 0.3<br>(0.2 to 0.4)                      | 0.1<br>(0.1 to 0.1)                   | 31.9<br>(4.8 to 53.8)                             | 0.6<br>(-8.0 to 8.5)                                |
| Thyroid cancer                                     | 0.3<br>(0.3 to 0.4)                           | 0.1<br>(0.1 to 0.1)                      | $< 0.05$<br>( $< 0.05$ to $< 0.05$ )  | 28.4<br>(5.8 to 59.2)                             | -12.7<br>(-28.7 to 7.6)                             |
| Mesothelioma                                       | $< 0.05$<br>( $< 0.05$ to $< 0.05$ )          | $< 0.05$<br>( $< 0.05$ to $< 0.05$ )     | $< 0.05$<br>( $< 0.05$ to $< 0.05$ )  | 28.3<br>(8.3 to 50.3)                             | -6.8<br>(-21.0 to 7.9)                              |
| Hodgkin lymphoma                                   | 0.2<br>(0.1 to 0.2)                           | 0.1<br>( $< 0.05$ to 0.1)                | $< 0.05$<br>( $< 0.05$ to $< 0.05$ )  | -2.7<br>(-17.5 to 19.0)                           | -26.9<br>(-35.1 to -16.8)                           |
| Non-Hodgkin's lymphoma                             | 1.1<br>(1.0 to 1.2)                           | 0.4<br>(0.4 to 0.4)                      | 0.1<br>(0.1 to 0.2)                   | 38.1<br>(10.5 to 60.2)                            | 2.2<br>(-9.6 to 13.5)                               |
| Multiple myeloma                                   | 0.2<br>(0.1 to 0.2)                           | 0.1<br>(0.1 to 0.1)                      | $< 0.05$<br>( $< 0.05$ to 0.1)        | 43.7<br>(27.9 to 61.1)                            | 3.6<br>(-7.7 to 15.8)                               |
| Leukaemia                                          | 1.8<br>(1.5 to 2.1)                           | 0.5<br>(0.4 to 0.6)                      | 0.2<br>(0.1 to 0.3)                   | 7.5<br>(-21.4 to 48.1)                            | -15.9<br>(-30.2 to -0.2)                            |
| Acute lymphoid leukaemia                           | 0.5<br>(0.4 to 0.7)                           | 0.1<br>(0.1 to 0.2)                      | 0.1<br>( $< 0.05$ to 0.1)             | 12.1<br>(-30.6 to 69.0)                           | -13.8<br>(-42.5 to 12.9)                            |
| Chronic lymphoid leukaemia                         | 0.1<br>(0.1 to 0.1)                           | $< 0.05$<br>( $< 0.05$ to $< 0.05$ )     | $< 0.05$<br>( $< 0.05$ to $< 0.05$ )  | 35.5<br>(9.1 to 66.2)                             | -3.6<br>(-20.2 to 16.0)                             |
| Acute myeloid leukaemia                            | 0.3<br>(0.2 to 0.4)                           | 0.1<br>(0.1 to 0.2)                      | $< 0.05$<br>( $< 0.05$ to 0.1)        | 35.6<br>(-7.7 to 75.5)                            | 4.6<br>(-16.9 to 21.3)                              |
| Chronic myeloid leukaemia                          | 0.1<br>(0.1 to 0.1)                           | $< 0.05$<br>( $< 0.05$ to 0.1)           | $< 0.05$<br>( $< 0.05$ to $< 0.05$ )  | 15.3<br>(-5.4 to 50.5)                            | -15.8<br>(-29.3 to 4.8)                             |
| Other leukaemia                                    | 0.8<br>(0.5 to 1.0)                           | 0.2<br>(0.1 to 0.2)                      | 0.1<br>(0.1 to 0.1)                   | -8.4<br>(-39.4 to 41.2)                           | -24.9<br>(-41.1 to -5.8)                            |
| Other neoplasms                                    | 2.7<br>(2.3 to 3.1)                           | 0.9<br>(0.8 to 0.9)                      | 0.3<br>(0.2 to 0.4)                   | 29.8<br>(-8.5 to 60.3)                            | -3.5<br>(-17.1 to 10.2)                             |
| <b>Cardiovascular diseases</b>                     | <b>992.0</b><br><b>(937.2 to 1,047.5)</b>     | <b>79.2†</b><br><b>(75.6 to 82.7)</b>    | <b>54.8</b><br><b>(39.6 to 72.9)</b>  | <b>45.8</b><br><b>(39.6 to 51.6)</b>              | <b>2.9</b><br><b>(-0.9 to 6.6)</b>                  |
| Rheumatic heart disease                            | 327.3<br>(290.7 to 365.3)                     | 15.7<br>(13.9 to 17.5)                   | 15.7<br>(10.0 to 22.9)                | 45.6<br>(33.8 to 57.1)                            | 4.2<br>(-3.6 to 11.9)                               |
| Ischaemic heart disease                            | 164.6<br>(156.0 to 173.7)                     | 24.6<br>(22.9 to 26.5)                   | 7.0<br>(4.8 to 9.7)                   | 45.5<br>(37.4 to 54.2)                            | 3.8<br>(-0.8 to 8.5)                                |
| Cerebrovascular disease                            | 69.7<br>(65.1 to 74.2)                        | 12.1‡<br>(11.1 to 13.2)                  | 10.1<br>(7.3 to 12.9)                 | 42.2<br>(31.7 to 53.6)                            | 2.3<br>(-5.1 to 10.3)                               |
| Ischaemic stroke                                   | 59.5<br>(53.8 to 65.5)                        | 7.8‡<br>(6.9 to 8.8)                     | 8.2<br>(5.8 to 10.4)                  | 44.9<br>(32.3 to 58.2)                            | 3.9<br>(-5.0 to 13.0)                               |
| Hemorrhagic stroke                                 | 14.1<br>(12.6 to 15.8)                        | 4.3‡<br>(3.9 to 4.8)                     | 1.9<br>(1.4 to 2.5)                   | 32.2<br>(16.8 to 51.5)                            | -4.3<br>(-15.6 to 8.7)                              |
| Hypertensive heart disease                         | 13.5<br>(10.8 to 16.5)                        | --                                       | 1.1<br>(0.7 to 1.5)                   | 38.6<br>(22.2 to 57.7)                            | -2.3<br>(-12.5 to 8.2)                              |
| Cardiomyopathy and myocarditis                     | 12.0<br>(10.4 to 13.7)                        | 5.3†<br>(4.6 to 6.0)                     | 1.2<br>(0.8 to 1.7)                   | 45.4<br>(30.4 to 63.0)                            | 3.0<br>(-8.2 to 16.8)                               |
| Myocarditis                                        | 3.3<br>(2.9 to 3.7)                           | 5.3<br>(4.6 to 6.0)                      | 0.2<br>(0.2 to 0.4)                   | 44.8<br>(35.3 to 54.8)                            | 2.7<br>(-6.7 to 13.4)                               |
| Alcoholic cardiomyopathy                           | 1.4<br>(1.1 to 1.8)                           | --                                       | 0.1<br>(0.1 to 0.2)                   | 45.4<br>(6.6 to 97.8)                             | 3.3<br>(-22.8 to 39.0)                              |
| Other cardiomyopathy                               | 9.7<br>(7.9 to 11.7)                          | --                                       | 0.8<br>(0.5 to 1.2)                   | 45.7<br>(25.6 to 68.7)                            | 3.0<br>(-10.6 to 18.9)                              |
| Atrial fibrillation and flutter                    | 37.5<br>(32.7 to 42.7)                        | 3.4<br>(2.9 to 4.0)                      | 2.9<br>(2.0 to 4.1)                   | 42.1<br>(30.0 to 55.5)                            | 1.0<br>(-5.2 to 8.3)                                |
| Peripheral vascular disease                        | 152.1<br>(131.4 to 175.6)                     | 14.7<br>(12.6 to 17.3)                   | 0.8<br>(0.4 to 1.4)                   | 39.9<br>(29.4 to 52.5)                            | -0.7<br>(-7.9 to 8.1)                               |
| Endocarditis                                       | 1.0<br>(0.8 to 1.2)                           | 3.5<br>(3.0 to 3.9)                      | 0.1<br>(0.1 to 0.1)                   | 48.2<br>(34.1 to 63.5)                            | 1.2<br>(-14.0 to 19.2)                              |
| Other cardiovascular and circulatory diseases      | 301.8<br>(241.0 to 368.8)                     | --                                       | 16.0<br>(10.3 to 23.0)                | 50.0<br>(37.1 to 65.2)                            | 3.8<br>(-5.1 to 14.0)                               |
| <b>Chronic respiratory diseases</b>                | <b>1,971.9</b><br><b>(1,845.2 to 2,100.0)</b> | <b>409.9†</b><br><b>(372.9 to 449.8)</b> | <b>90.4</b><br><b>(65.6 to 122.0)</b> | <b>49.5</b><br><b>(42.6 to 56.9)</b>              | <b>5.8</b><br><b>(2.0 to 10.2)</b>                  |
| Chronic obstructive pulmonary disease              | 257.7<br>(246.1 to 268.7)                     | 19.0<br>(18.2 to 19.8)                   | 19.8<br>(17.2 to 22.1)                | 45.8<br>(35.5 to 56.3)                            | 4.9<br>(-1.4 to 12.0)                               |
| Pneumoconiosis                                     | 0.2<br>(0.2 to 0.2)                           | $< 0.05$<br>( $< 0.05$ to $< 0.05$ )     | $< 0.05$<br>( $< 0.05$ to 0.1)        | 44.2<br>(36.3 to 52.3)                            | 3.4<br>(-2.4 to 9.7)                                |
| Silicosis                                          | $< 0.05$<br>( $< 0.05$ to $< 0.05$ )          | $< 0.05$<br>( $< 0.05$ to $< 0.05$ )     | $< 0.05$<br>( $< 0.05$ to $< 0.05$ )  | 42.7<br>(32.5 to 56.0)                            | 2.5<br>(-3.5 to 9.4)                                |



| Cause                                                          | Prevalence in thousands (95% UI)        | Incidence in thousands (95% UI)                     | YLDs in thousands (95% UI)        |                                                   |                                                     |
|----------------------------------------------------------------|-----------------------------------------|-----------------------------------------------------|-----------------------------------|---------------------------------------------------|-----------------------------------------------------|
|                                                                | 2016 counts                             | 2016 counts                                         | 2016 counts                       | Percentage change in counts between 2006 and 2016 | Percentage change in age-standardised rates between |
| Asbestosis                                                     | 0.1<br>(0.1 to 0.1)                     | < 0.05<br>(< 0.05 to < 0.05)                        | < 0.05<br>(< 0.05 to < 0.05)      | 42.1<br>(31.0 to 53.0)                            | 1.5<br>(-4.6 to 7.4)                                |
| Coal workers pneumoconiosis                                    | --                                      | --                                                  | --                                | --                                                | --                                                  |
| Other pneumoconiosis                                           | 0.1<br>(0.1 to 0.1)                     | < 0.05<br>(< 0.05 to < 0.05)                        | < 0.05<br>(< 0.05 to < 0.05)      | 46.1<br>(33.9 to 60.5)                            | 4.9<br>(-4.3 to 16.0)                               |
| Asthma                                                         | 1,720.7<br>(1,568.1 to 1,889.8)         | 390.7<br>(353.6 to 430.5)                           | 67.8<br>(44.4 to 98.5)            | 49.4<br>(41.4 to 58.0)                            | 5.8<br>(1.4 to 10.3)                                |
| Interstitial lung disease and pulmonary sarcoidosis            | 1.8<br>(1.6 to 2.0)                     | 0.2<br>(0.1 to 0.2)                                 | 0.2<br>(0.1 to 0.3)               | 44.0<br>(39.2 to 49.0)                            | 2.5<br>(-2.8 to 8.0)                                |
| Other chronic respiratory diseases                             | --                                      | --                                                  | 2.6<br>(2.0 to 3.2)               | 90.1<br>(43.4 to 148.6)                           | 34.7<br>(11.8 to 61.3)                              |
| <b>Cirrhosis and other chronic liver diseases</b>              | <b>46.6<br/>(44.1 to 49.0)</b>          | <b>5.1<br/>(4.8 to 5.4)</b>                         | <b>4.5<br/>(3.1 to 6.3)</b>       | <b>39.3<br/>(24.0 to 57.3)</b>                    | <b>-0.4<br/>(-8.1 to 8.3)</b>                       |
| Cirrhosis and other chronic liver diseases due to hepatitis B  | 11.9<br>(10.7 to 13.1)                  | 1.4<br>(1.3 to 1.5)                                 | 0.9<br>(0.6 to 1.3)               | 40.0<br>(17.7 to 70.4)                            | -0.0<br>(-13.6 to 15.7)                             |
| Cirrhosis and other chronic liver diseases due to hepatitis C  | 9.7<br>(8.7 to 10.7)                    | 1.1<br>(1.0 to 1.2)                                 | 0.7<br>(0.5 to 1.1)               | 31.3<br>(7.9 to 60.3)                             | -6.6<br>(-19.9 to 9.9)                              |
| Cirrhosis and other chronic liver diseases due to alcohol use  | 7.5<br>(6.8 to 8.2)                     | 1.0<br>(0.9 to 1.1)                                 | 0.6<br>(0.4 to 0.8)               | 50.1<br>(20.4 to 82.9)                            | 7.2<br>(-10.4 to 26.5)                              |
| Cirrhosis and other chronic liver diseases due to other causes | 17.6<br>(16.3 to 18.8)                  | 1.6<br>(1.5 to 1.7)                                 | 2.3<br>(1.5 to 3.3)               | 39.3<br>(13.0 to 71.5)                            | -0.4<br>(-16.6 to 18.8)                             |
| <b>Digestive diseases</b>                                      | <b>350.5<br/>(324.8 to 377.2)</b>       | <b>408.9<sup>†</sup><br/>(389.7 to 430.0)</b>       | <b>10.8<br/>(7.6 to 14.6)</b>     | <b>28.9<br/>(16.7 to 41.9)</b>                    | <b>-5.2<br/>(-10.8 to 1.1)</b>                      |
| Peptic ulcer disease                                           | 73.6<br>(67.3 to 80.8)                  | 32.2<br>(29.0 to 35.7)                              | 1.5<br>(1.0 to 2.1)               | 43.9<br>(29.0 to 60.6)                            | 3.4<br>(-5.2 to 11.9)                               |
| Gastritis and duodenitis                                       | 115.9<br>(101.5 to 130.9)               | 122.3<br>(109.3 to 136.9)                           | 1.7<br>(1.1 to 2.4)               | 46.4<br>(31.3 to 64.3)                            | 8.1<br>(-0.5 to 17.9)                               |
| Appendicitis                                                   | 4.2<br>(3.9 to 4.5)                     | 110.9<br>(102.1 to 120.3)                           | 1.3<br>(0.8 to 1.9)               | 35.6<br>(-2.5 to 89.6)                            | -4.6<br>(-25.3 to 23.3)                             |
| Paralytic ileus and intestinal obstruction                     | 0.5<br>(0.4 to 0.5)                     | 12.5<br>(11.3 to 14.0)                              | 0.1<br>(0.1 to 0.2)               | 42.3<br>(34.7 to 49.6)                            | 0.9<br>(-11.1 to 14.2)                              |
| Inguinal, femoral, and abdominal hernia                        | 151.1<br>(125.5 to 183.5)               | 51.3<br>(45.5 to 58.5)                              | 4.6<br>(3.1 to 6.6)               | 16.2<br>(-1.7 to 37.0)                            | -15.5<br>(-24.0 to -5.7)                            |
| Inflammatory bowel disease                                     | 1.2<br>(1.1 to 1.2)                     | 8.3<br>(8.0 to 8.7)                                 | 0.2<br>(0.1 to 0.2)               | 53.2<br>(48.0 to 59.1)                            | 10.9<br>(7.2 to 14.5)                               |
| Vascular intestinal disorders                                  | 0.1<br>(0.1 to 0.2)                     | 0.9<br>(0.8 to 1.0)                                 | < 0.05<br>(< 0.05 to 0.1)         | 46.8<br>(39.6 to 54.9)                            | 6.5<br>(2.3 to 11.0)                                |
| Gallbladder and biliary diseases                               | 14.9<br>(13.2 to 16.7)                  | 66.9<br>(58.2 to 76.3)                              | 0.4<br>(0.3 to 0.6)               | 40.6<br>(15.8 to 70.1)                            | 1.1<br>(-19.2 to 25.6)                              |
| Pancreatitis                                                   | 0.4<br>(0.3 to 0.5)                     | 3.6<br>(3.1 to 4.1)                                 | 0.1<br>(< 0.05 to 0.1)            | 46.3<br>(40.9 to 51.8)                            | 5.4<br>(1.8 to 9.3)                                 |
| Other digestive diseases                                       | --                                      | --                                                  | 1.0<br>(0.7 to 1.3)               | 29.1<br>(12.5 to 47.3)                            | -2.3<br>(-8.6 to 4.5)                               |
| <b>Neurological disorders</b>                                  | <b>7,142.0<br/>(6,770.3 to 7,513.8)</b> | <b>3,573.4<br/>(3,033.3 to 4,184.4)</b>             | <b>163.2<br/>(104.5 to 235.2)</b> | <b>42.4<br/>(4.8 to 94.3)</b>                     | <b>0.5<br/>(-19.3 to 26.0)</b>                      |
| Alzheimer's disease and other dementias                        | 36.9<br>(30.7 to 43.9)                  | 6.5<br>(5.4 to 7.9)                                 | 5.1<br>(3.6 to 6.8)               | 41.4<br>(34.0 to 49.3)                            | -0.6<br>(-4.7 to 4.1)                               |
| Parkinson's disease                                            | 2.6<br>(2.0 to 3.3)                     | 0.3<br>(0.3 to 0.4)                                 | 0.3<br>(0.2 to 0.4)               | 55.0<br>(30.4 to 85.0)                            | 10.0<br>(-4.0 to 27.1)                              |
| Epilepsy                                                       | 71.9<br>(13.4 to 143.9)                 | 10.5<br>(2.0 to 21.3)                               | 28.8<br>(4.7 to 62.9)             | 42.1<br>(-76.8 to 716.4)                          | 1.2<br>(-83.3 to 470.6)                             |
| Multiple sclerosis                                             | 0.9<br>(0.8 to 1.1)                     | 0.1<br>(< 0.05 to 0.1)                              | 0.3<br>(0.2 to 0.4)               | 58.8<br>(52.6 to 64.3)                            | 13.7<br>(9.4 to 17.5)                               |
| Motor neuron disease                                           | 0.3<br>(0.2 to 0.3)                     | 0.1<br>(0.1 to 0.1)                                 | 0.1<br>(< 0.05 to 0.1)            | 46.4<br>(40.1 to 53.4)                            | 5.2<br>(2.0 to 8.9)                                 |
| Migraine                                                       | 2,487.2<br>(2,343.5 to 2,633.5)         | 333.4<br>(314.5 to 352.9)                           | 104.5<br>(66.0 to 146.9)          | 41.0<br>(34.7 to 48.0)                            | -0.2<br>(-4.1 to 3.8)                               |
| Tension-type headache                                          | 5,461.2<br>(4,866.5 to 6,175.2)         | 3,222.4<br>(2,684.1 to 3,825.9)                     | 17.0<br>(10.6 to 25.7)            | 39.9<br>(33.3 to 48.1)                            | -0.6<br>(-4.8 to 4.5)                               |
| Other neurological disorders                                   | 0.1<br>(< 0.05 to 0.1)                  | 0.1<br>(0.1 to 0.2)                                 | 7.2<br>(1.3 to 15.6)              | 75.5<br>(-68.6 to 768.1)                          | 20.3<br>(-73.3 to 381.8)                            |
| <b>Mental and substance use disorders</b>                      | <b>3,386.7<br/>(3,225.3 to 3,517.9)</b> | <b>1,477.1<sup>†</sup><br/>(1,352.9 to 1,612.6)</b> | <b>426.3<br/>(306.5 to 553.3)</b> | <b>40.2<br/>(36.8 to 43.6)</b>                    | <b>-0.6<br/>(-2.9 to 1.8)</b>                       |
| Schizophrenia                                                  | 31.9<br>(27.8 to 36.6)                  | 2.9<br>(2.5 to 3.3)                                 | 20.4<br>(14.7 to 25.7)            | 45.3<br>(32.0 to 61.2)                            | 3.3<br>(-5.3 to 13.3)                               |
| Alcohol use disorders                                          | 284.8<br>(240.8 to 333.8)               | 155.3<br>(131.5 to 180.9)                           | 28.5<br>(19.4 to 40.7)            | 43.9<br>(32.8 to 55.7)                            | 2.1<br>(-5.7 to 9.7)                                |
| Drug use disorders                                             | 98.2<br>(87.9 to 110.0)                 | 17.5<br>(15.3 to 19.9)                              | 22.9<br>(15.6 to 31.4)            | 44.2<br>(28.8 to 62.3)                            | 2.5<br>(-7.3 to 14.0)                               |
| Opioid use disorders                                           | 47.7<br>(38.5 to 59.8)                  | 6.6<br>(5.4 to 8.0)                                 | 19.9<br>(13.1 to 27.7)            | 44.2<br>(27.1 to 64.7)                            | 2.5<br>(-8.3 to 15.5)                               |
| Cocaine use disorders                                          | 2.9<br>(2.4 to 3.5)                     | 0.4<br>(0.4 to 0.5)                                 | 0.4<br>(0.2 to 0.6)               | 44.0<br>(36.5 to 52.9)                            | 2.8<br>(-2.3 to 8.3)                                |
| Amphetamine use disorders                                      | 1.7<br>(1.1 to 2.3)                     | 0.3<br>(0.2 to 0.4)                                 | 0.2<br>(0.1 to 0.4)               | 44.9<br>(32.3 to 57.2)                            | 3.3<br>(-4.9 to 12.1)                               |
| Cannabis use disorders                                         | 43.3<br>(35.8 to 52.7)                  | 8.9<br>(7.2 to 11.1)                                | 1.3<br>(0.8 to 1.9)               | 41.6<br>(13.8 to 78.9)                            | 0.4<br>(-16.7 to 24.2)                              |
| Other drug use disorders                                       | 6.2<br>(5.4 to 7.2)                     | 1.3<br>(1.2 to 1.5)                                 | 1.1<br>(0.7 to 1.6)               | 46.3<br>(24.3 to 73.5)                            | 4.4<br>(-10.1 to 22.8)                              |
| Depressive disorders                                           | 815.2<br>(764.9 to 882.5)               | 982.9<br>(867.2 to 1,113.9)                         | 145.6<br>(100.3 to 199.2)         | 38.5<br>(31.9 to 45.8)                            | -1.6<br>(-5.8 to 3.1)                               |
| Major depressive disorder                                      | 601.9<br>(533.3 to 684.9)               | 941.0<br>(824.9 to 1,072.0)                         | 123.9<br>(84.4 to 169.3)          | 38.0<br>(30.4 to 46.1)                            | -2.0<br>(-7.0 to 3.5)                               |
| Dysthymia                                                      | 225.7<br>(194.3 to 262.2)               | 41.9<br>(36.6 to 48.3)                              | 21.8<br>(14.5 to 31.6)            | 41.4<br>(35.3 to 47.7)                            | 0.2<br>(-3.2 to 3.9)                                |
| Bipolar disorder                                               | 123.3<br>(103.4 to 145.5)               | 14.9<br>(12.5 to 17.8)                              | 25.3<br>(15.2 to 38.1)            | 41.7<br>(31.2 to 52.7)                            | 0.3<br>(-5.9 to 6.8)                                |
| Anxiety disorders                                              | 709.6<br>(637.6 to 791.7)               | 134.9<br>(121.7 to 149.0)                           | 69.1<br>(47.3 to 93.6)            | 41.6<br>(30.9 to 52.0)                            | 0.1<br>(-6.0 to 6.6)                                |
| Eating disorders                                               | 29.4<br>(23.9 to 35.5)                  | 20.4<br>(15.0 to 27.3)                              | 6.0<br>(3.7 to 8.8)               | 73.1<br>(48.8 to 99.8)                            | 22.4<br>(5.9 to 41.5)                               |
| Anorexia nervosa                                               | 7.9<br>(5.7 to 10.8)                    | 3.5<br>(2.5 to 4.7)                                 | 1.7<br>(1.0 to 2.6)               | 69.7<br>(25.7 to 131.8)                           | 19.8<br>(-10.8 to 58.9)                             |
| Bulimia nervosa                                                | 20.4<br>(14.9 to 27.3)                  | 17.0<br>(11.6 to 23.9)                              | 4.3<br>(2.6 to 6.5)               | 74.6<br>(46.9 to 106.8)                           | 23.4<br>(4.6 to 46.4)                               |
| Autistic spectrum disorders                                    | 216.0<br>(191.7 to 244.2)               | 3.1<br>(2.2 to 4.4)                                 | 30.9<br>(20.4 to 43.3)            | 41.8<br>(33.6 to 50.6)                            | 0.5<br>(-4.7 to 5.7)                                |
| Autism                                                         | 59.0<br>(51.0 to 68.7)                  | 0.5<br>(0.2 to 0.7)                                 | 15.1<br>(9.6 to 22.4)             | 41.9<br>(27.8 to 58.3)                            | 0.5<br>(-8.8 to 10.5)                               |
| Asperger syndrome and other autistic spectrum disorders        | 156.6<br>(128.4 to 190.4)               | 2.7<br>(1.7 to 3.9)                                 | 15.7<br>(10.2 to 23.0)            | 41.7<br>(34.0 to 49.6)                            | 0.5<br>(-4.0 to 5.3)                                |

| Cause                                                      | Prevalence in thousands (95% UI)                 | Incidence in thousands (95% UI)                   | YLDs in thousands (95% UI)              |                                                   |                                                     |
|------------------------------------------------------------|--------------------------------------------------|---------------------------------------------------|-----------------------------------------|---------------------------------------------------|-----------------------------------------------------|
|                                                            | 2016 counts                                      | 2016 counts                                       | 2016 counts                             | Percentage change in counts between 2006 and 2016 | Percentage change in age-standardised rates between |
| Attention-deficit/hyperactivity disorder                   | 345.2<br>(307.8 to 389.6)                        | 24.7<br>(21.4 to 28.9)                            | 4.2<br>(2.5 to 6.7)                     | 42.6<br>(32.5 to 54.1)                            | 0.6<br>(-5.9 to 7.9)                                |
| Conduct disorder                                           | 278.9<br>(228.7 to 331.2)                        | 103.3<br>(82.4 to 124.7)                          | 33.7<br>(20.4 to 51.7)                  | 43.3<br>(34.4 to 53.5)                            | 0.3<br>(-5.8 to 7.5)                                |
| Idiopathic developmental intellectual disability           | 435.0<br>(255.9 to 617.0)                        | --                                                | 16.5<br>(7.2 to 29.4)                   | 14.1<br>(3.9 to 22.1)                             | -19.3<br>(-26.6 to -14.0)                           |
| Other mental and substance use disorders                   | 313.4<br>(273.7 to 363.6)                        | 17.1<br>(15.0 to 19.9)                            | 23.4<br>(16.0 to 33.6)                  | 41.4<br>(33.7 to 50.1)                            | 0.4<br>(-4.5 to 5.4)                                |
| <b>Diabetes, urogenital, blood, and endocrine diseases</b> | <b>12,695.6</b><br><b>(12,490.8 to 12,917.6)</b> | <b>2,177.8†</b><br><b>(2,036.1 to 2,332.9)</b>    | <b>132.4</b><br><b>(93.6 to 180.4)</b>  | <b>41.1</b><br><b>(36.3 to 46.5)</b>              | <b>2.2</b><br><b>(-0.5 to 5.5)</b>                  |
| Diabetes mellitus                                          | 509.4<br>(454.9 to 569.8)                        | 35.5<br>(31.8 to 39.5)                            | 39.9<br>(27.3 to 56.1)                  | 55.3<br>(46.8 to 65.0)                            | 10.8<br>(4.7 to 17.7)                               |
| Acute glomerulonephritis                                   | 0.2<br>(0.2 to 0.2)                              | 3.1<br>(2.6 to 3.7)                               | < 0.05<br>(< 0.05 to < 0.05)            | 40.1<br>(33.7 to 46.9)                            | -0.7<br>(-4.5 to 3.3)                               |
| Chronic kidney disease                                     | 742.3<br>(663.7 to 826.3)                        | 58.4<br>(51.5 to 65.4)                            | 20.8<br>(14.8 to 26.9)                  | 43.4<br>(34.8 to 52.6)                            | 1.3<br>(-3.8 to 6.4)                                |
| Chronic kidney disease due to diabetes mellitus            | 230.1<br>(192.7 to 271.9)                        | 16.7<br>(13.8 to 20.2)                            | 6.0<br>(4.2 to 7.9)                     | 45.5<br>(32.6 to 60.0)                            | 2.3<br>(-5.1 to 10.7)                               |
| Chronic kidney disease due to hypertension                 | 158.4<br>(135.4 to 181.1)                        | 15.6<br>(13.1 to 18.5)                            | 3.1<br>(2.2 to 4.2)                     | 41.7<br>(28.7 to 56.0)                            | -1.0<br>(-9.2 to 8.2)                               |
| Chronic kidney disease due to glomerulonephritis           | 146.2<br>(125.6 to 167.5)                        | 8.6<br>(6.8 to 10.5)                              | 5.6<br>(3.9 to 7.7)                     | 43.8<br>(28.9 to 60.2)                            | 2.8<br>(-5.6 to 12.2)                               |
| Chronic kidney disease due to other causes                 | 207.6<br>(173.0 to 244.7)                        | 17.5<br>(14.6 to 20.5)                            | 6.0<br>(4.2 to 8.0)                     | 41.9<br>(28.2 to 57.2)                            | 0.5<br>(-7.2 to 8.8)                                |
| Urinary diseases and male infertility                      | 340.0<br>(298.9 to 384.6)                        | 1,121.0†<br>(999.9 to 1,265.5)                    | 7.7<br>(5.0 to 11.3)                    | 39.0<br>(28.9 to 48.0)                            | -0.8<br>(-7.4 to 5.2)                               |
| Interstitial nephritis and urinary tract infections        | 18.9<br>(16.6 to 21.4)                           | 985.3<br>(864.7 to 1,125.7)                       | 0.6<br>(0.4 to 1.0)                     | 43.1<br>(17.7 to 71.7)                            | 2.5<br>(-12.5 to 20.0)                              |
| Urolithiasis                                               | 4.2<br>(3.7 to 4.9)                              | 112.8<br>(99.5 to 129.0)                          | 0.3<br>(0.2 to 0.5)                     | 42.6<br>(32.9 to 53.0)                            | 1.9<br>(-5.7 to 10.4)                               |
| Benign prostatic hyperplasia                               | 174.8<br>(148.0 to 203.4)                        | 22.9<br>(19.2 to 27.0)                            | 5.7<br>(3.6 to 8.3)                     | 39.5<br>(27.5 to 50.7)                            | -0.8<br>(-8.1 to 6.1)                               |
| Male infertility                                           | 125.7<br>(95.8 to 163.6)                         | --                                                | 0.7<br>(0.3 to 1.4)                     | 44.2<br>(34.5 to 54.2)                            | 2.4<br>(-4.6 to 9.7)                                |
| Other urinary diseases                                     | --                                               | --                                                | 0.4<br>(0.2 to 0.5)                     | 15.9<br>(1.1 to 31.7)                             | -15.1<br>(-23.2 to -6.4)                            |
| Gynecological diseases                                     | 2,519.4<br>(2,370.2 to 2,649.8)                  | 945.0†<br>(869.6 to 1,022.1)                      | 28.4<br>(19.4 to 40.9)                  | 35.6<br>(29.3 to 42.2)                            | -3.8<br>(-7.6 to 0.3)                               |
| Uterine fibroids                                           | 159.8<br>(140.7 to 180.0)                        | 20.2<br>(17.4 to 23.2)                            | 3.0<br>(1.8 to 4.7)                     | 23.5<br>(12.0 to 35.6)                            | -12.0<br>(-20.1 to -3.7)                            |
| Polycystic ovarian syndrome                                | 21.3<br>(15.8 to 27.7)                           | 36.1<br>(25.4 to 49.3)                            | 0.2<br>(0.1 to 0.4)                     | 41.3<br>(22.6 to 61.5)                            | -0.4<br>(-12.6 to 14.4)                             |
| Female infertility                                         | 46.6<br>(16.6 to 120.3)                          | --                                                | 0.2<br>(0.1 to 0.8)                     | 30.2<br>(-13.7 to 78.8)                           | -9.1<br>(-40.0 to 23.5)                             |
| Endometriosis                                              | 4.6<br>(3.9 to 5.6)                              | 19.5<br>(15.6 to 25.0)                            | 0.4<br>(0.3 to 0.7)                     | 40.8<br>(2.2 to 93.9)                             | -0.0<br>(-24.8 to 31.7)                             |
| Genital prolapse                                           | 1,211.4<br>(1,080.8 to 1,347.2)                  | 121.0<br>(101.3 to 144.0)                         | 3.8<br>(1.8 to 6.8)                     | 35.6<br>(28.3 to 44.5)                            | -3.2<br>(-8.8 to 3.9)                               |
| Premenstrual syndrome                                      | 1,133.3<br>(1,031.0 to 1,228.4)                  | 436.0<br>(393.6 to 474.5)                         | 9.5<br>(5.9 to 14.4)                    | 40.3<br>(26.4 to 54.0)                            | -1.0<br>(-9.8 to 8.1)                               |
| Other gynecological diseases                               | 332.0<br>(284.1 to 384.2)                        | 312.1<br>(255.1 to 375.8)                         | 11.3<br>(7.4 to 16.4)                   | 35.0<br>(26.2 to 44.9)                            | -3.3<br>(-9.4 to 3.9)                               |
| Hemoglobinopathies and hemolytic anaemias                  | 10,622.0<br>(10,405.8 to 10,844.1)               | --                                                | 26.6<br>(17.3 to 38.2)                  | 28.7<br>(16.3 to 43.0)                            | -9.9<br>(-16.6 to -2.2)                             |
| Thalassemias                                               | < 0.05<br>(< 0.05 to < 0.05)                     | --                                                | < 0.05<br>(< 0.05 to < 0.05)            | 36.8<br>(16.0 to 67.7)                            | -0.9<br>(-15.8 to 21.1)                             |
| Thalassaemias trait                                        | 116.9<br>(108.8 to 125.0)                        | --                                                | 1.6<br>(1.0 to 2.3)                     | 32.4<br>(15.5 to 51.9)                            | -0.5<br>(-11.2 to 12.1)                             |
| Sickle cell disorders                                      | 51.7<br>(46.0 to 56.7)                           | --                                                | 3.9<br>(2.6 to 5.5)                     | 35.4<br>(14.2 to 59.5)                            | -0.2<br>(-15.9 to 16.9)                             |
| Sickle cell trait                                          | 4,448.5<br>(4,230.4 to 4,609.1)                  | --                                                | 14.2<br>(9.1 to 20.6)                   | 23.4<br>(9.7 to 38.5)                             | -10.8<br>(-18.8 to -1.6)                            |
| G6PD deficiency                                            | 2,874.4<br>(2,678.5 to 3,099.9)                  | --                                                | 0.2<br>(0.1 to 0.2)                     | 16.7<br>(-15.1 to 64.5)                           | -10.1<br>(-27.6 to 12.2)                            |
| G6PD trait                                                 | 4,615.2<br>(4,536.7 to 4,698.3)                  | --                                                | < 0.05<br>(< 0.05 to < 0.05)            | 30.4<br>(12.8 to 49.1)                            | -4.4<br>(-13.9 to 6.8)                              |
| Other hemoglobinopathies and hemolytic anaemias            | 250.6<br>(232.7 to 267.6)                        | --                                                | 6.8<br>(4.3 to 10.0)                    | 36.5<br>(18.6 to 57.0)                            | -14.4<br>(-22.2 to -5.2)                            |
| Endocrine, metabolic, blood, and immune disorders          | 300.4<br>(280.9 to 318.8)                        | 14.8<br>(13.2 to 16.6)                            | 9.0<br>(5.9 to 13.0)                    | 39.4<br>(24.6 to 56.4)                            | -3.3<br>(-9.5 to 4.2)                               |
| <b>Musculoskeletal disorders</b>                           | <b>2,216.5</b><br><b>(2,089.7 to 2,338.0)</b>    | <b>1,078.3</b><br><b>(965.3 to 1,190.8)</b>       | <b>246.2</b><br><b>(175.0 to 326.3)</b> | <b>40.4</b><br><b>(35.6 to 45.3)</b>              | <b>-0.2</b><br><b>(-3.1 to 2.7)</b>                 |
| Rheumatoid arthritis                                       | 33.9<br>(29.8 to 38.3)                           | 2.4<br>(2.1 to 2.7)                               | 8.0<br>(5.4 to 10.8)                    | 44.1<br>(30.0 to 59.9)                            | 3.0<br>(-5.6 to 12.2)                               |
| Osteoarthritis                                             | 350.0<br>(327.7 to 373.5)                        | 20.8<br>(19.2 to 22.3)                            | 21.5<br>(15.1 to 28.9)                  | 50.0<br>(44.0 to 56.1)                            | 6.6<br>(2.5 to 10.5)                                |
| Low back and neck pain                                     | 1,591.6<br>(1,478.6 to 1,703.2)                  | 736.6<br>(652.6 to 824.4)                         | 182.7<br>(128.3 to 239.7)               | 37.5<br>(32.5 to 42.9)                            | -2.2<br>(-5.4 to 1.1)                               |
| Low back pain                                              | 1,262.9<br>(1,117.0 to 1,433.9)                  | 633.8<br>(553.4 to 721.8)                         | 142.1<br>(100.4 to 189.0)               | 36.6<br>(30.3 to 43.3)                            | -3.0<br>(-7.0 to 1.3)                               |
| Neck pain                                                  | 406.4<br>(351.0 to 470.2)                        | 102.8<br>(88.7 to 120.2)                          | 40.6<br>(27.3 to 57.9)                  | 40.7<br>(36.5 to 45.1)                            | 0.2<br>(-2.0 to 2.7)                                |
| Gout                                                       | 44.5<br>(39.4 to 50.1)                           | 9.3<br>(8.1 to 10.5)                              | 1.4<br>(1.0 to 2.0)                     | 41.8<br>(22.0 to 66.0)                            | 0.9<br>(-11.7 to 16.1)                              |
| Other musculoskeletal disorders                            | 376.6<br>(283.7 to 478.1)                        | 309.3<br>(235.0 to 390.1)                         | 32.6<br>(19.9 to 48.2)                  | 50.5<br>(33.4 to 79.8)                            | 5.4<br>(-5.8 to 21.5)                               |
| <b>Other non-communicable diseases</b>                     | <b>17,679.3</b><br><b>(17,306.2 to 18,082.5)</b> | <b>51,702.2†</b><br><b>(47,221.1 to 56,873.6)</b> | <b>476.2</b><br><b>(323.3 to 673.2)</b> | <b>36.4</b><br><b>(34.4 to 38.6)</b>              | <b>-3.8</b><br><b>(-4.9 to -2.8)</b>                |
| Congenital anomalies                                       | 332.1<br>(279.9 to 409.6)                        | --                                                | 53.2<br>(37.0 to 74.5)                  | 29.1<br>(20.4 to 39.2)                            | -8.2<br>(-13.9 to -1.3)                             |
| Neural tube defects                                        | 48.3<br>(42.5 to 54.0)                           | --                                                | 14.4<br>(10.0 to 19.4)                  | 35.4<br>(19.6 to 52.0)                            | -3.6<br>(-13.4 to 6.8)                              |
| Congenital heart anomalies                                 | 38.6<br>(32.3 to 46.2)                           | --                                                | 1.9<br>(0.9 to 3.0)                     | 27.6<br>(8.2 to 47.9)                             | -5.0<br>(-18.1 to 9.4)                              |
| Orofacial clefts                                           | 8.7<br>(7.6 to 9.9)                              | --                                                | 0.1<br>(0.1 to 0.2)                     | 30.3<br>(15.6 to 47.0)                            | -7.3<br>(-17.9 to 4.5)                              |
| Down's syndrome                                            | 4.4<br>(3.7 to 5.3)                              | --                                                | 0.4<br>(0.3 to 0.6)                     | 43.3<br>(33.2 to 55.6)                            | 2.2<br>(-4.9 to 11.0)                               |
| Turner syndrome                                            | 16.6<br>(13.9 to 19.7)                           | --                                                | 0.3<br>(0.1 to 0.5)                     | 30.5<br>(-8.6 to 87.3)                            | -5.7<br>(-31.5 to 31.7)                             |
| Klinefelter syndrome                                       | 15.4<br>(13.1 to 18.0)                           | --                                                | 0.1<br>(< 0.05 to 0.1)                  | 38.6<br>(5.2 to 83.0)                             | -1.3<br>(-23.2 to 30.0)                             |



| Cause                                         | Prevalence in thousands (95% UI)              | Incidence in thousands (95% UI)                | YLDs in thousands (95% UI)             |                                                   |                                                     |
|-----------------------------------------------|-----------------------------------------------|------------------------------------------------|----------------------------------------|---------------------------------------------------|-----------------------------------------------------|
|                                               | 2016 counts                                   | 2016 counts                                    | 2016 counts                            | Percentage change in counts between 2006 and 2016 | Percentage change in age-standardised rates between |
| Other chromosomal abnormalities               | 5.8<br>(4.9 to 6.8)                           | --                                             | 1.1<br>(0.7 to 1.7)                    | 39.7<br>(-1.6 to 99.0)                            | 0.8<br>(-27.3 to 39.8)                              |
| Congenital musculoskeletal and limb anomalies | 23.7<br>(20.7 to 27.0)                        | --                                             | 3.5<br>(2.3 to 4.9)                    | 35.3<br>(16.5 to 56.5)                            | -2.3<br>(-13.6 to 10.3)                             |
| Urogenital congenital anomalies               | 23.1<br>(20.2 to 26.2)                        | --                                             | 0.6<br>(0.3 to 0.9)                    | 38.8<br>(26.8 to 52.1)                            | -1.5<br>(-8.9 to 6.9)                               |
| Digestive congenital anomalies                | 20.5<br>(18.0 to 23.1)                        | --                                             | 0.9<br>(0.6 to 1.3)                    | 43.0<br>(13.9 to 76.8)                            | 1.4<br>(-16.7 to 22.3)                              |
| Other congenital anomalies                    | 183.7<br>(130.8 to 265.3)                     | --                                             | 30.0<br>(19.2 to 46.5)                 | 24.6<br>(12.4 to 37.9)                            | -11.6<br>(-19.8 to -2.4)                            |
| Skin and subcutaneous diseases                | 8,670.7<br>(8,372.0 to 9,037.1)               | 19,008.3<br>(17,850.0 to 20,458.7)             | 210.2<br>(138.2 to 309.2)              | 44.7<br>(41.2 to 48.1)                            | 2.7<br>(0.6 to 4.9)                                 |
| Dermatitis                                    | 1,483.1<br>(1,339.9 to 1,626.2)               | 1,113.7<br>(1,026.9 to 1,207.6)                | 60.7<br>(34.6 to 101.2)                | 41.2<br>(35.6 to 47.1)                            | 0.1<br>(-3.2 to 3.5)                                |
| Psoriasis                                     | 131.0<br>(124.5 to 137.9)                     | 20.9<br>(19.9 to 21.9)                         | 11.5<br>(8.1 to 15.3)                  | 57.4<br>(39.6 to 77.5)                            | 11.6<br>(2.2 to 22.4)                               |
| Cellulitis                                    | 9.5<br>(8.7 to 10.3)                          | 160.2<br>(147.4 to 173.8)                      | 0.5<br>(0.3 to 0.8)                    | 41.2<br>(9.0 to 80.7)                             | 2.4<br>(-18.4 to 25.0)                              |
| Pyoderma                                      | 161.5<br>(154.1 to 169.7)                     | 3,113.8<br>(2,979.8 to 3,259.1)                | 0.9<br>(0.4 to 1.9)                    | 44.1<br>(35.3 to 53.2)                            | 2.4<br>(-2.7 to 7.7)                                |
| Scabies                                       | 346.4<br>(294.0 to 404.2)                     | 1,070.9<br>(907.5 to 1,262.1)                  | 9.0<br>(5.0 to 14.5)                   | 41.4<br>(34.8 to 49.0)                            | 0.2<br>(-3.8 to 4.7)                                |
| Fungal skin diseases                          | 3,412.8<br>(2,949.8 to 3,992.0)               | 8,644.4<br>(7,537.4 to 9,935.5)                | 19.4<br>(7.7 to 40.2)                  | 41.1<br>(39.4 to 42.9)                            | 0.1<br>(-0.8 to 1.1)                                |
| Viral skin diseases                           | 717.6<br>(671.5 to 764.2)                     | 1,018.9<br>(947.8 to 1,085.6)                  | 22.1<br>(13.8 to 33.0)                 | 41.4<br>(35.6 to 47.2)                            | 0.0<br>(-3.2 to 3.6)                                |
| Acne vulgaris                                 | 2,286.7<br>(2,007.1 to 2,596.9)               | 1,682.8<br>(1,346.8 to 2,108.0)                | 58.9<br>(38.9 to 86.0)                 | 49.5<br>(40.7 to 58.5)                            | 4.8<br>(-0.9 to 10.7)                               |
| Alopecia areata                               | 38.1<br>(36.6 to 39.6)                        | 68.2<br>(65.5 to 70.9)                         | 1.2<br>(0.8 to 1.9)                    | 41.9<br>(24.0 to 61.3)                            | 0.4<br>(-10.3 to 12.3)                              |
| Pruritus                                      | 180.2<br>(157.7 to 204.5)                     | 146.5<br>(129.7 to 165.5)                      | 1.9<br>(0.9 to 3.5)                    | 44.0<br>(34.9 to 53.6)                            | 2.2<br>(-3.1 to 7.5)                                |
| Urticaria                                     | 275.2<br>(231.2 to 327.3)                     | 498.9<br>(417.7 to 589.9)                      | 16.6<br>(10.6 to 24.3)                 | 40.6<br>(31.4 to 50.2)                            | 0.2<br>(-5.4 to 6.4)                                |
| Decubitus ulcer                               | 2.3<br>(2.1 to 2.6)                           | 8.4<br>(7.5 to 9.3)                            | 0.4<br>(0.3 to 0.5)                    | 44.3<br>(28.8 to 60.4)                            | 4.8<br>(-10.4 to 22.1)                              |
| Other skin and subcutaneous diseases          | 1,279.0<br>(1,240.3 to 1,322.3)               | 1,460.7<br>(1,415.4 to 1,513.2)                | 7.1<br>(3.4 to 12.9)                   | 52.9<br>(48.4 to 57.5)                            | 8.3<br>(5.8 to 10.9)                                |
| Sense organ diseases                          | 5,450.1<br>(5,313.4 to 5,588.6)               | 2,342.0†<br>(2,162.9 to 2,529.0)               | 175.2<br>(119.0 to 246.7)              | 29.1<br>(25.4 to 32.9)                            | -7.0<br>(-8.6 to -5.4)                              |
| Glaucoma                                      | 6.5<br>(5.3 to 7.9)                           | --                                             | 0.6<br>(0.4 to 0.8)                    | 42.7<br>(26.0 to 62.9)                            | 1.1<br>(-9.4 to 13.4)                               |
| Cataract                                      | 85.4<br>(74.4 to 96.6)                        | --                                             | 7.7<br>(5.4 to 10.4)                   | 33.0<br>(26.1 to 40.7)                            | -5.2<br>(-9.6 to -0.6)                              |
| Macular degeneration                          | 7.5<br>(5.9 to 9.4)                           | --                                             | 0.5<br>(0.4 to 0.8)                    | 46.7<br>(27.7 to 67.2)                            | 4.0<br>(-7.4 to 16.0)                               |
| Refraction and accommodation disorders        | 3,640.9<br>(3,510.5 to 3,774.4)               | --                                             | 48.8<br>(26.7 to 82.8)                 | 22.0<br>(18.5 to 26.1)                            | -12.6<br>(-14.9 to -10.1)                           |
| Age-related and other hearing loss            | 2,577.3<br>(2,416.3 to 2,748.8)               | --                                             | 100.5<br>(68.4 to 140.3)               | 30.2<br>(23.9 to 36.0)                            | -6.2<br>(-9.0 to -3.7)                              |
| Other vision loss                             | 58.4<br>(51.3 to 66.0)                        | --                                             | 4.4<br>(3.0 to 6.0)                    | 39.5<br>(28.3 to 51.7)                            | -0.2<br>(-7.2 to 6.5)                               |
| Other sense organ diseases                    | 421.6<br>(391.6 to 453.3)                     | 2,342.0<br>(2,162.9 to 2,529.0)                | 12.7<br>(8.0 to 19.4)                  | 43.5<br>(35.4 to 51.8)                            | 1.8<br>(-2.0 to 5.6)                                |
| Oral disorders                                | 10,811.9<br>(10,092.0 to 11,474.7)            | 30,352.0†<br>(25,922.7 to 35,258.4)            | 37.5<br>(22.7 to 57.8)                 | 39.8<br>(36.6 to 43.2)                            | -0.3<br>(-2.1 to 1.8)                               |
| Caries of deciduous teeth                     | 2,995.2<br>(2,319.0 to 3,647.0)               | 11,623.0<br>(7,853.6 to 16,001.9)              | 0.7<br>(0.3 to 1.4)                    | 37.4<br>(21.8 to 54.6)                            | -1.9<br>(-13.3 to 10.5)                             |
| Caries of permanent teeth                     | 6,361.9<br>(5,717.2 to 7,076.3)               | 18,523.5<br>(16,355.7 to 21,076.8)             | 3.8<br>(1.6 to 7.1)                    | 30.1<br>(24.0 to 36.2)                            | -7.7<br>(-11.2 to -4.1)                             |
| Periodontal disease                           | 1,379.9<br>(1,100.2 to 1,696.3)               | 175.8<br>(137.5 to 219.8)                      | 9.0<br>(3.6 to 19.0)                   | 40.5<br>(35.8 to 45.6)                            | 0.1<br>(-3.2 to 3.3)                                |
| Edentulism and severe tooth loss              | 478.2<br>(410.2 to 550.0)                     | 29.8<br>(25.4 to 34.2)                         | 13.4<br>(8.7 to 19.5)                  | 41.3<br>(35.1 to 47.4)                            | 0.6<br>(-2.7 to 4.1)                                |
| Other oral disorders                          | 363.1<br>(345.7 to 382.4)                     | --                                             | 10.7<br>(6.5 to 16.2)                  | 41.2<br>(35.0 to 47.5)                            | 0.1<br>(-3.2 to 3.4)                                |
| <b>Injuries</b>                               | <b>3,455.4</b><br><b>(3,107.8 to 3,926.0)</b> | <b>2,077.5†</b><br><b>(1,959.0 to 2,205.7)</b> | <b>148.4</b><br><b>(94.8 to 216.9)</b> | <b>32.9</b><br><b>(24.0 to 43.5)</b>              | <b>-2.5</b><br><b>(-6.8 to 2.5)</b>                 |
| <b>Transport injuries</b>                     | <b>442.5</b><br><b>(411.2 to 476.4)</b>       | <b>226.8</b><br><b>(199.7 to 256.4)</b>        | <b>27.5</b><br><b>(17.6 to 39.7)</b>   | <b>45.7</b><br><b>(37.5 to 54.0)</b>              | <b>4.9</b><br><b>(1.1 to 8.5)</b>                   |
| Road injuries                                 | 344.0<br>(321.4 to 370.6)                     | 188.7<br>(163.3 to 219.2)                      | 20.9<br>(13.5 to 30.6)                 | 48.7<br>(40.5 to 56.4)                            | 7.0<br>(3.3 to 10.4)                                |
| Pedestrian road injuries                      | 102.8<br>(89.3 to 117.9)                      | 43.6<br>(35.1 to 53.3)                         | 6.4<br>(4.0 to 9.2)                    | 43.8<br>(35.8 to 51.9)                            | 3.8<br>(0.2 to 7.2)                                 |
| Cyclist road injuries                         | 62.2<br>(52.1 to 73.2)                        | 41.4<br>(32.4 to 52.2)                         | 3.5<br>(2.3 to 5.1)                    | 55.7<br>(46.9 to 64.0)                            | 12.3<br>(8.3 to 16.4)                               |
| Motorcyclist road injuries                    | 69.6<br>(59.2 to 85.7)                        | 27.2<br>(21.7 to 34.4)                         | 4.1<br>(2.6 to 6.0)                    | 43.5<br>(35.2 to 51.4)                            | 2.8<br>(-1.1 to 6.6)                                |
| Motor vehicle road injuries                   | 88.0<br>(74.8 to 100.6)                       | 60.5<br>(49.2 to 72.7)                         | 5.8<br>(3.8 to 8.4)                    | 53.1<br>(44.8 to 60.4)                            | 10.2<br>(6.4 to 13.4)                               |
| Other road injuries                           | 21.3<br>(18.2 to 25.2)                        | 15.9<br>(11.8 to 21.0)                         | 1.2<br>(0.8 to 1.7)                    | 53.5<br>(45.3 to 60.9)                            | 10.2<br>(6.4 to 13.7)                               |
| Other transport injuries                      | 98.5<br>(82.3 to 118.4)                       | 38.1<br>(31.9 to 46.7)                         | 6.5<br>(4.1 to 9.4)                    | 37.0<br>(28.0 to 47.1)                            | -2.6<br>(-6.9 to 1.9)                               |
| <b>Unintentional injuries</b>                 | <b>2,436.3</b><br><b>(2,253.9 to 2,640.9)</b> | <b>1,753.3</b><br><b>(1,641.3 to 1,879.1)</b>  | <b>94.8</b><br><b>(63.3 to 134.0)</b>  | <b>41.9</b><br><b>(33.9 to 50.0)</b>              | <b>1.1</b><br><b>(-2.4 to 4.8)</b>                  |
| Falls                                         | 867.0<br>(753.3 to 980.2)                     | 595.9<br>(516.2 to 693.9)                      | 39.4<br>(26.8 to 54.5)                 | 46.2<br>(37.0 to 55.9)                            | 4.2<br>(0.2 to 8.3)                                 |
| Drowning                                      | 10.3<br>(8.8 to 11.9)                         | 3.3<br>(2.7 to 3.9)                            | 0.7<br>(0.4 to 1.0)                    | 36.5<br>(25.2 to 47.2)                            | -1.4<br>(-6.6 to 3.3)                               |
| Fire, heat, and hot substances                | 280.6<br>(234.5 to 345.0)                     | 61.7<br>(50.1 to 75.1)                         | 9.0<br>(6.0 to 12.6)                   | 36.4<br>(24.4 to 48.5)                            | -2.2<br>(-7.9 to 3.8)                               |
| Poisonings                                    | 8.3<br>(6.6 to 10.1)                          | 17.7<br>(13.9 to 22.0)                         | 0.9<br>(0.5 to 1.3)                    | 53.0<br>(37.7 to 69.4)                            | 8.8<br>(1.8 to 16.7)                                |
| Exposure to mechanical forces                 | 487.1<br>(414.3 to 589.7)                     | 295.0<br>(246.6 to 349.2)                      | 13.7<br>(8.8 to 19.9)                  | 40.2<br>(32.6 to 47.7)                            | -0.2<br>(-4.1 to 3.6)                               |
| Unintentional firearm injuries                | 15.5<br>(12.8 to 19.3)                        | 6.2<br>(4.3 to 8.5)                            | 0.8<br>(0.5 to 1.2)                    | 42.3<br>(33.1 to 51.3)                            | 1.0<br>(-3.9 to 5.8)                                |
| Unintentional suffocation                     | 38.0<br>(26.8 to 51.9)                        | 14.8<br>(9.8 to 21.2)                          | 1.4<br>(0.8 to 2.2)                    | 44.0<br>(31.9 to 57.2)                            | 2.2<br>(-4.9 to 10.1)                               |
| Other exposure to mechanical forces           | 433.5<br>(362.9 to 531.9)                     | 274.1<br>(230.5 to 321.3)                      | 11.6<br>(7.5 to 16.6)                  | 39.6<br>(32.3 to 46.9)                            | -0.5<br>(-4.3 to 3.1)                               |



| Cause                                                                               | Prevalence in thousands (95% UI)          | Incidence in thousands (95% UI)        | YLDs in thousands (95% UI)          |                                                   |                                                     |
|-------------------------------------------------------------------------------------|-------------------------------------------|----------------------------------------|-------------------------------------|---------------------------------------------------|-----------------------------------------------------|
|                                                                                     | 2016 counts                               | 2016 counts                            | 2016 counts                         | Percentage change in counts between 2006 and 2016 | Percentage change in age-standardised rates between |
| Adverse effects of medical treatment                                                | 10.8<br>(8.2 to 13.7)                     | 140.8<br>(118.0 to 168.0)              | 1.4<br>(0.9 to 2.2)                 | 35.7<br>(26.0 to 47.0)                            | -2.6<br>(-6.9 to 1.9)                               |
| Animal contact                                                                      | 130.3<br>(115.1 to 151.7)                 | 235.9<br>(198.2 to 277.0)              | 4.9<br>(3.2 to 6.8)                 | 22.7<br>(15.5 to 29.9)                            | -14.0<br>(-17.3 to -10.6)                           |
| Venomous animal contact                                                             | 54.6<br>(45.5 to 66.0)                    | 102.7<br>(80.1 to 127.7)               | 3.4<br>(2.2 to 4.8)                 | 26.2<br>(16.2 to 36.7)                            | -11.2<br>(-16.0 to -6.3)                            |
| Non-venomous animal contact                                                         | 75.7<br>(63.6 to 92.3)                    | 133.2<br>(108.5 to 162.3)              | 1.5<br>(1.0 to 2.2)                 | 15.3<br>(9.9 to 19.8)                             | -18.6<br>(-21.4 to -16.2)                           |
| Foreign body                                                                        | 171.9<br>(137.1 to 207.2)                 | 148.0<br>(128.1 to 171.1)              | 8.2<br>(5.2 to 12.2)                | 40.6<br>(31.5 to 48.9)                            | 0.4<br>(-3.8 to 4.5)                                |
| Pulmonary aspiration and foreign body in airway                                     | 104.0<br>(75.2 to 142.0)                  | 64.7<br>(52.4 to 81.8)                 | 5.5<br>(3.4 to 8.3)                 | 39.8<br>(31.1 to 47.9)                            | 0.1<br>(-3.9 to 4.1)                                |
| Foreign body in eyes                                                                | 7.7<br>(3.9 to 12.2)                      | 44.6<br>(33.2 to 60.4)                 | 0.4<br>(0.2 to 0.8)                 | 40.6<br>(34.7 to 46.4)                            | 0.3<br>(-2.8 to 3.5)                                |
| Foreign body in other body part                                                     | 60.2<br>(47.1 to 78.6)                    | 38.6<br>(30.9 to 48.0)                 | 2.2<br>(1.4 to 3.3)                 | 42.4<br>(31.0 to 53.7)                            | 1.0<br>(-4.6 to 6.7)                                |
| Environmental heat and cold exposure                                                | 142.1<br>(118.6 to 168.1)                 | 63.6<br>(51.4 to 78.6)                 | 6.4<br>(4.0 to 9.4)                 | 40.8<br>(31.9 to 50.5)                            | -2.0<br>(-6.0 to 2.1)                               |
| Other unintentional injuries                                                        | 328.1<br>(259.4 to 418.7)                 | 191.5<br>(158.6 to 231.2)              | 10.3<br>(6.7 to 15.0)               | 45.6<br>(36.9 to 53.2)                            | 2.4<br>(-1.2 to 5.6)                                |
| <b>Self-harm and interpersonal violence</b>                                         | <b>935.1</b><br><b>(826.5 to 1,055.5)</b> | <b>94.8†</b><br><b>(80.2 to 111.0)</b> | <b>13.2</b><br><b>(9.1 to 18.2)</b> | <b>31.4</b><br><b>(27.0 to 35.6)</b>              | <b>-4.6</b><br><b>(-7.1 to -2.2)</b>                |
| Self-harm                                                                           | 17.9<br>(15.5 to 20.4)                    | 11.9<br>(9.9 to 14.1)                  | 1.0<br>(0.6 to 1.6)                 | 50.1<br>(43.1 to 57.6)                            | 6.5<br>(3.5 to 9.6)                                 |
| Self-harm by firearm                                                                | 1.2<br>(1.1 to 1.4)                       | 0.6<br>(0.4 to 1.0)                    | 0.1<br>(< 0.05 to 0.1)              | 24.6<br>(18.9 to 30.9)                            | -13.1<br>(-15.8 to -9.9)                            |
| Self-harm by other specified means                                                  | 16.7<br>(14.3 to 19.2)                    | 11.2<br>(9.3 to 13.5)                  | 1.0<br>(0.6 to 1.5)                 | 51.9<br>(44.7 to 59.7)                            | 8.0<br>(4.9 to 11.3)                                |
| Interpersonal violence                                                              | 917.2<br>(809.3 to 1,037.4)               | 83.0†<br>(68.8 to 99.2)                | 12.2<br>(8.4 to 16.6)               | 30.0<br>(25.4 to 34.4)                            | -6.0<br>(-8.5 to -3.4)                              |
| Assault by firearm                                                                  | 4.0<br>(3.4 to 4.7)                       | 1.9<br>(1.3 to 2.7)                    | 0.2<br>(0.1 to 0.3)                 | 43.8<br>(34.5 to 54.4)                            | 1.8<br>(-3.2 to 7.8)                                |
| Assault by sharp object                                                             | 41.0<br>(33.5 to 49.3)                    | 25.3<br>(19.3 to 32.6)                 | 1.5<br>(1.0 to 2.2)                 | 45.0<br>(35.8 to 54.5)                            | 3.6<br>(-1.4 to 8.6)                                |
| Sexual violence                                                                     | 805.4<br>(697.1 to 923.1)                 | --                                     | 7.3<br>(4.9 to 10.5)                | 21.4<br>(15.9 to 27.5)                            | -14.1<br>(-17.6 to -10.4)                           |
| Assault by other means                                                              | 66.8<br>(56.1 to 80.7)                    | 55.7<br>(45.5 to 67.4)                 | 3.1<br>(2.0 to 4.5)                 | 45.7<br>(37.4 to 54.3)                            | 3.9<br>(-0.3 to 8.5)                                |
| <b>Forces of nature, conflict and terrorism, and executions and police conflict</b> | <b>446.8</b><br><b>(140.4 to 888.0)</b>   | <b>2.5†</b><br><b>(0.7 to 4.6)</b>     | <b>12.9</b><br><b>(3.1 to 30.0)</b> | <b>-19.2</b><br><b>(-29.3 to -10.5)</b>           | <b>-26.9</b><br><b>(-34.7 to -20.7)</b>             |
| Exposure to forces of nature                                                        | 1.5<br>(0.3 to 3.1)                       | 2.1<br>(0.3 to 4.2)                    | 0.1<br>(< 0.05 to 0.2)              | 465.5<br>(307.4 to 1,691.0)                       | 292.5<br>(200.9 to 968.8)                           |
| Conflict and terrorism                                                              | 444.4<br>(139.3 to 885.8)                 | --                                     | 12.8<br>(3.1 to 29.8)               | -19.7<br>(-30.1 to -11.1)                         | -27.2<br>(-35.1 to -21.0)                           |
| Executions and police conflict                                                      | 0.9<br>(0.5 to 1.8)                       | 0.4<br>(0.3 to 0.7)                    | < 0.05<br>(< 0.05 to 0.1)           | 32.7<br>(19.1 to 51.2)                            | -1.4<br>(-8.5 to 8.8)                               |
| <b>Impairments</b>                                                                  | --                                        | --                                     | --                                  | --                                                | --                                                  |
| Anaemia                                                                             | 9,326.6<br>(8,715.5 to 9,930.6)           | --                                     | 304.6<br>(201.7 to 432.4)           | 27.8<br>(15.9 to 40.4)                            | -10.9<br>(-18.4 to -3.7)                            |
| Developmental intellectual disability                                               | 771.8<br>(592.2 to 959.7)                 | --                                     | 84.4<br>(59.8 to 120.3)             | 38.2<br>(27.0 to 54.1)                            | -3.0<br>(-10.1 to 7.6)                              |
| Epilepsy                                                                            | 176.0<br>(99.7 to 263.6)                  | --                                     | 67.4<br>(33.2 to 111.5)             | 50.9<br>(-25.3 to 187.5)                          | 5.3<br>(-49.9 to 110.1)                             |
| Guillain-Barre syndrome                                                             | 0.2<br>(0.1 to 0.2)                       | --                                     | 0.1<br>(< 0.05 to 0.1)              | 41.1<br>(40.6 to 41.6)                            | 0.0<br>(0.0 to 0.1)                                 |
| Hearing loss                                                                        | 3,102.4<br>(2,939.5 to 3,277.8)           | --                                     | 137.8<br>(95.7 to 187.2)            | 27.2<br>(22.7 to 31.6)                            | -7.7<br>(-10.0 to -5.6)                             |
| Heart failure                                                                       | 54.4<br>(48.1 to 61.3)                    | --                                     | 5.8<br>(4.2 to 7.8)                 | 41.7<br>(31.2 to 52.8)                            | 1.3<br>(-6.9 to 9.3)                                |
| Infertility                                                                         | 540.6<br>(411.6 to 698.4)                 | --                                     | 3.1<br>(1.3 to 6.3)                 | 39.1<br>(30.4 to 47.2)                            | -1.7<br>(-8.0 to 4.2)                               |
| Pelvic inflammatory disease                                                         | 24.9<br>(21.0 to 29.9)                    | --                                     | 3.2<br>(2.2 to 4.6)                 | 36.9<br>(17.7 to 56.1)                            | -3.2<br>(-15.8 to 10.1)                             |
| Vision loss                                                                         | 3,959.5<br>(3,817.3 to 4,110.6)           | --                                     | 86.3<br>(56.3 to 129.9)             | 34.6<br>(25.7 to 48.4)                            | -6.6<br>(-10.2 to -1.4)                             |

We did not calculate incidence for the nine impairments, certain NTDs, and causes with only birth prevalence. Blank cells mean that no estimate is available.

† Incidence for aggregate causes represents the sum of the incidence of the causes below the aggregate.

‡ Incidence estimates for stroke represent first-ever stroke only.

^ Incidence of HIV/AIDS represents new infections of HIV only and does not include new infections of Tuberculosis in HIV positive cases.

SR Table 14: Prevalence, incidence, and YLDs for 2016, percentage change of YLD counts and percentage change of age-standardised YLD rates between 2006 and 2016 by cause and impairments, for all ages, Antigua and Barbuda.

| Cause                                                                                | Prevalence in thousands (95% UI)            | Incidence in thousands (95% UI)                        | YLDs in thousands (95% UI)                            |                                                   |                                                     |
|--------------------------------------------------------------------------------------|---------------------------------------------|--------------------------------------------------------|-------------------------------------------------------|---------------------------------------------------|-----------------------------------------------------|
|                                                                                      | 2016 counts                                 | 2016 counts                                            | 2016 counts                                           | Percentage change in counts between 2006 and 2016 | Percentage change in age-standardised rates between |
| <b>All causes</b>                                                                    | <b>88.3</b><br>(88.0 to 88.6)               | <b>578.3†</b><br>(549.1 to 610.2)                      | <b>9.8</b><br>(7.2 to 12.7)                           | <b>16.4</b><br>(13.6 to 19.2)                     | <b>-0.2</b><br>(-2.5 to 2.2)                        |
| <b>Communicable, maternal, neonatal, and nutritional disorders</b>                   | <b>55.7</b><br>(53.8 to 57.4)               | <b>314.4†</b><br>(288.6 to 342.9)                      | <b>1.1</b><br>(0.8 to 1.5)                            | <b>7.5</b><br>(-0.1 to 15.7)                      | <b>0.5</b><br>(-6.3 to 8.2)                         |
| <b>HIV/AIDS and tuberculosis</b>                                                     | <b>21.4</b><br>(19.2 to 23.2)               | <b>&lt; 0.05†</b><br>( <b>&lt; 0.05 to &lt; 0.05</b> ) | <b>&lt; 0.05</b><br>( <b>&lt; 0.05 to &lt; 0.05</b> ) | <b>-22.4</b><br>(-33.9 to -12.3)                  | <b>-31.7</b><br>(-42.3 to -22.0)                    |
| Tuberculosis                                                                         | 19.9<br>(17.8 to 22.2)                      | < 0.05†<br>( <b>&lt; 0.05 to &lt; 0.05</b> )           | < 0.05<br>( <b>&lt; 0.05 to &lt; 0.05</b> )           | -0.5<br>(-7.8 to 6.8)                             | -13.6<br>(-18.9 to -8.3)                            |
| Drug-susceptible tuberculosis                                                        | < 0.05<br>( <b>&lt; 0.05 to &lt; 0.05</b> ) | < 0.05<br>( <b>&lt; 0.05 to &lt; 0.05</b> )            | < 0.05<br>( <b>&lt; 0.05 to &lt; 0.05</b> )           | -0.3<br>(-7.6 to 7.3)                             | -13.5<br>(-19.0 to -7.6)                            |
| Multidrug-resistant tuberculosis without extensive drug resistance                   | < 0.05<br>( <b>&lt; 0.05 to &lt; 0.05</b> ) | < 0.05<br>( <b>&lt; 0.05 to &lt; 0.05</b> )            | < 0.05<br>( <b>&lt; 0.05 to &lt; 0.05</b> )           | -26.3<br>(-86.9 to 331.4)                         | -36.1<br>(-88.5 to 270.6)                           |
| Extensively drug-resistant tuberculosis                                              | < 0.05<br>( <b>&lt; 0.05 to &lt; 0.05</b> ) | < 0.05<br>( <b>&lt; 0.05 to &lt; 0.05</b> )            | < 0.05<br>( <b>&lt; 0.05 to &lt; 0.05</b> )           | 96.2<br>(-65.2 to 1,048.7)                        | 70.2<br>(-69.3 to 886.4)                            |
| Latent tuberculosis infection                                                        | 19.9<br>(17.8 to 22.1)                      | --                                                     | --                                                    | --                                                | --                                                  |
| HIV/AIDS                                                                             | 0.1<br>(0.1 to 0.2)                         | < 0.05^<br>( <b>&lt; 0.05 to &lt; 0.05</b> )           | < 0.05<br>( <b>&lt; 0.05 to &lt; 0.05</b> )           | -23.7<br>(-36.6 to -12.7)                         | -32.8<br>(-44.8 to -22.4)                           |
| Drug-susceptible HIV/AIDS - Tuberculosis                                             | < 0.05<br>( <b>&lt; 0.05 to &lt; 0.05</b> ) | < 0.05<br>( <b>&lt; 0.05 to &lt; 0.05</b> )            | < 0.05<br>( <b>&lt; 0.05 to &lt; 0.05</b> )           | -18.0<br>(-24.6 to -11.2)                         | -25.9<br>(-31.9 to -19.8)                           |
| Multidrug-resistant HIV/AIDS - Tuberculosis without extensive drug resistance        | < 0.05<br>( <b>&lt; 0.05 to &lt; 0.05</b> ) | < 0.05<br>( <b>&lt; 0.05 to &lt; 0.05</b> )            | < 0.05<br>( <b>&lt; 0.05 to &lt; 0.05</b> )           | -39.0<br>(-89.3 to 252.3)                         | -44.9<br>(-90.3 to 218.0)                           |
| Extensively drug-resistant HIV/AIDS - Tuberculosis                                   | < 0.05<br>( <b>&lt; 0.05 to &lt; 0.05</b> ) | < 0.05<br>( <b>&lt; 0.05 to &lt; 0.05</b> )            | < 0.05<br>( <b>&lt; 0.05 to &lt; 0.05</b> )           | 62.6<br>(-71.5 to 838.6)                          | 46.6<br>(-74.2 to 747.1)                            |
| HIV/AIDS resulting in other diseases                                                 | 0.1<br>(0.1 to 0.2)                         | < 0.05<br>( <b>&lt; 0.05 to &lt; 0.05</b> )            | < 0.05<br>( <b>&lt; 0.05 to &lt; 0.05</b> )           | -23.8<br>(-36.9 to -12.6)                         | -32.9<br>(-45.4 to -22.3)                           |
| <b>Diarrhoea, lower respiratory infections, and other common infectious diseases</b> | <b>5.0</b><br>(4.7 to 5.3)                  | <b>296.6†</b><br>(270.3 to 324.6)                      | <b>0.2</b><br>(0.2 to 0.3)                            | <b>16.2</b><br>(12.2 to 21.1)                     | <b>7.5</b><br>(4.0 to 11.4)                         |
| Diarrhoeal diseases                                                                  | 1.0<br>(0.9 to 1.0)                         | 64.3<br>(60.4 to 68.6)                                 | 0.1<br>(0.1 to 0.1)                                   | 27.3<br>(19.8 to 34.8)                            | 17.4<br>(11.1 to 23.8)                              |
| Intestinal infectious diseases                                                       | < 0.05<br>( <b>&lt; 0.05 to &lt; 0.05</b> ) | < 0.05†<br>( <b>&lt; 0.05 to &lt; 0.05</b> )           | < 0.05<br>( <b>&lt; 0.05 to &lt; 0.05</b> )           | 6.7<br>(-7.4 to 22.6)                             | -10.7<br>(-22.2 to 1.5)                             |
| Typhoid fever                                                                        | < 0.05<br>( <b>&lt; 0.05 to &lt; 0.05</b> ) | < 0.05<br>( <b>&lt; 0.05 to &lt; 0.05</b> )            | < 0.05<br>( <b>&lt; 0.05 to &lt; 0.05</b> )           | 8.2<br>(-6.5 to 25.2)                             | -9.8<br>(-22.0 to 2.9)                              |
| Paratyphoid fever                                                                    | < 0.05<br>( <b>&lt; 0.05 to &lt; 0.05</b> ) | < 0.05<br>( <b>&lt; 0.05 to &lt; 0.05</b> )            | < 0.05<br>( <b>&lt; 0.05 to &lt; 0.05</b> )           | 38.2<br>(9.0 to 80.5)                             | 14.2<br>(-8.9 to 45.4)                              |
| Other intestinal infectious diseases                                                 | --                                          | --                                                     | < 0.05<br>( <b>&lt; 0.05 to &lt; 0.05</b> )           | -35.9<br>(-52.9 to -11.8)                         | -36.5<br>(-53.1 to -12.3)                           |
| Lower respiratory infections                                                         | 0.1<br>(0.1 to 0.1)                         | 5.3<br>(4.9 to 5.8)                                    | < 0.05<br>( <b>&lt; 0.05 to &lt; 0.05</b> )           | 25.4<br>(13.8 to 38.1)                            | 14.2<br>(4.4 to 25.4)                               |
| Upper respiratory infections                                                         | 2.9<br>(2.6 to 3.3)                         | 220.6<br>(194.5 to 248.5)                              | 0.1<br>( <b>&lt; 0.05 to 0.1</b> )                    | 7.7<br>(1.4 to 14.3)                              | -0.1<br>(-5.5 to 5.2)                               |
| Otitis media                                                                         | 1.0<br>(0.9 to 1.1)                         | 4.7<br>(3.8 to 5.8)                                    | < 0.05<br>( <b>&lt; 0.05 to &lt; 0.05</b> )           | 3.7<br>(-4.2 to 12.1)                             | -2.3<br>(-9.3 to 5.4)                               |
| Meningitis                                                                           | 0.1<br>(0.1 to 0.1)                         | < 0.05<br>( <b>&lt; 0.05 to &lt; 0.05</b> )            | < 0.05<br>( <b>&lt; 0.05 to &lt; 0.05</b> )           | 8.8<br>(6.0 to 11.6)                              | -2.6<br>(-5.3 to -0.2)                              |
| Pneumococcal meningitis                                                              | < 0.05<br>( <b>&lt; 0.05 to &lt; 0.05</b> ) | < 0.05<br>( <b>&lt; 0.05 to &lt; 0.05</b> )            | < 0.05<br>( <b>&lt; 0.05 to &lt; 0.05</b> )           | 8.7<br>(4.5 to 12.8)                              | -3.0<br>(-6.6 to 0.7)                               |
| H influenzae type B meningitis                                                       | < 0.05<br>( <b>&lt; 0.05 to &lt; 0.05</b> ) | < 0.05<br>( <b>&lt; 0.05 to &lt; 0.05</b> )            | < 0.05<br>( <b>&lt; 0.05 to &lt; 0.05</b> )           | 9.1<br>(4.8 to 13.4)                              | -1.4<br>(-5.3 to 2.5)                               |
| Meningococcal infection                                                              | < 0.05<br>( <b>&lt; 0.05 to &lt; 0.05</b> ) | < 0.05<br>( <b>&lt; 0.05 to &lt; 0.05</b> )            | < 0.05<br>( <b>&lt; 0.05 to &lt; 0.05</b> )           | 10.6<br>(6.0 to 15.8)                             | -2.5<br>(-6.5 to 2.0)                               |
| Other meningitis                                                                     | < 0.05<br>( <b>&lt; 0.05 to &lt; 0.05</b> ) | < 0.05<br>( <b>&lt; 0.05 to &lt; 0.05</b> )            | < 0.05<br>( <b>&lt; 0.05 to &lt; 0.05</b> )           | 8.5<br>(4.6 to 12.8)                              | -2.6<br>(-6.3 to 1.2)                               |
| Encephalitis                                                                         | 0.1<br>( <b>&lt; 0.05 to 0.1</b> )          | < 0.05<br>( <b>&lt; 0.05 to &lt; 0.05</b> )            | < 0.05<br>( <b>&lt; 0.05 to &lt; 0.05</b> )           | 12.2<br>(-6.9 to 35.9)                            | -0.8<br>(-16.4 to 18.2)                             |
| Diphtheria                                                                           | < 0.05<br>( <b>&lt; 0.05 to &lt; 0.05</b> ) | < 0.05<br>( <b>&lt; 0.05 to &lt; 0.05</b> )            | < 0.05<br>( <b>&lt; 0.05 to &lt; 0.05</b> )           | 4.2<br>(-41.9 to 88.2)                            | -10.7<br>(-49.7 to 67.2)                            |
| Whooping cough                                                                       | < 0.05<br>( <b>&lt; 0.05 to &lt; 0.05</b> ) | < 0.05<br>( <b>&lt; 0.05 to &lt; 0.05</b> )            | < 0.05<br>( <b>&lt; 0.05 to &lt; 0.05</b> )           | -54.2<br>(-71.6 to -23.2)                         | -51.0<br>(-69.8 to -17.1)                           |
| Tetanus                                                                              | < 0.05<br>( <b>&lt; 0.05 to &lt; 0.05</b> ) | < 0.05<br>( <b>&lt; 0.05 to &lt; 0.05</b> )            | < 0.05<br>( <b>&lt; 0.05 to &lt; 0.05</b> )           | -39.4<br>(-57.8 to -13.7)                         | -49.4<br>(-64.4 to -27.2)                           |
| Measles                                                                              | < 0.05<br>(0.0 to < 0.05)                   | < 0.05<br>(0.0 to < 0.05)                              | < 0.05<br>(0.0 to < 0.05)                             | --                                                | --                                                  |
| Varicella and herpes zoster                                                          | 0.1<br>(0.1 to 0.1)                         | 1.6<br>(1.6 to 1.7)                                    | < 0.05<br>( <b>&lt; 0.05 to &lt; 0.05</b> )           | 19.8<br>(6.0 to 35.7)                             | 0.1<br>(-11.1 to 12.2)                              |
| <b>Neglected tropical diseases and malaria</b>                                       | <b>5.0</b><br>(1.4 to 6.2)                  | <b>8.8†</b><br>(5.8 to 14.8)                           | <b>0.1</b><br>( <b>&lt; 0.05 to 0.1</b> )             | <b>58.5</b><br>(29.9 to 112.8)                    | <b>44.1</b><br>(17.3 to 98.4)                       |
| Malaria                                                                              | --                                          | --                                                     | --                                                    | --                                                | --                                                  |
| Chagas disease                                                                       | < 0.05<br>( <b>&lt; 0.05 to &lt; 0.05</b> ) | --                                                     | < 0.05<br>( <b>&lt; 0.05 to &lt; 0.05</b> )           | 11.7<br>(-6.2 to 33.5)                            | -9.5<br>(-24.4 to 8.1)                              |
| Leishmaniasis                                                                        | --                                          | --                                                     | --                                                    | --                                                | --                                                  |
| Visceral leishmaniasis                                                               | --                                          | --                                                     | --                                                    | --                                                | --                                                  |
| Cutaneous and mucocutaneous leishmaniasis                                            | --                                          | --                                                     | --                                                    | --                                                | --                                                  |
| African trypanosomiasis                                                              | --                                          | --                                                     | --                                                    | --                                                | --                                                  |
| Schistosomiasis                                                                      | 3.1<br>( <b>&lt; 0.05 to 5.2</b> )          | 0.9<br>(0.1 to 1.4)                                    | < 0.05<br>( <b>&lt; 0.05 to 0.1</b> )                 | --                                                | --                                                  |
| Cysticercosis                                                                        | < 0.05<br>( <b>&lt; 0.05 to &lt; 0.05</b> ) | --                                                     | < 0.05<br>( <b>&lt; 0.05 to &lt; 0.05</b> )           | -8.1<br>(-77.8 to 308.5)                          | -25.1<br>(-82.5 to 229.6)                           |
| Cystic echinococcosis                                                                | --                                          | --                                                     | --                                                    | --                                                | --                                                  |
| Lymphatic filariasis                                                                 | --                                          | --                                                     | --                                                    | --                                                | --                                                  |
| Onchocerciasis                                                                       | --                                          | --                                                     | --                                                    | --                                                | --                                                  |
| Trachoma                                                                             | --                                          | --                                                     | --                                                    | --                                                | --                                                  |
| Dengue                                                                               | 0.2<br>(0.1 to 0.3)                         | 3.5<br>(2.2 to 5.0)                                    | < 0.05<br>( <b>&lt; 0.05 to 0.1</b> )                 | 283.3<br>(201.4 to 696.6)                         | 248.9<br>(175.1 to 629.9)                           |
| Yellow fever                                                                         | --                                          | --                                                     | --                                                    | --                                                | --                                                  |
| Rabies                                                                               | < 0.05<br>( <b>&lt; 0.05 to &lt; 0.05</b> ) | < 0.05<br>( <b>&lt; 0.05 to &lt; 0.05</b> )            | < 0.05<br>( <b>&lt; 0.05 to &lt; 0.05</b> )           | 43.8<br>(-1.4 to 113.7)                           | 40.7<br>(-3.0 to 104.2)                             |
| Intestinal nematode infections                                                       | 0.2<br>(0.2 to 0.3)                         | --                                                     | < 0.05<br>( <b>&lt; 0.05 to &lt; 0.05</b> )           | 17.9<br>(-30.6 to 104.4)                          | 1.4<br>(-41.0 to 74.9)                              |
| Ascariasis                                                                           | 0.1<br>(0.1 to 0.1)                         | --                                                     | --                                                    | --                                                | --                                                  |

| Cause                                                                   | Prevalence in thousands (95% UI)     | Incidence in thousands (95% UI)          | YLDs in thousands (95% UI)                                                                 |                                                   |                                                     |
|-------------------------------------------------------------------------|--------------------------------------|------------------------------------------|--------------------------------------------------------------------------------------------|---------------------------------------------------|-----------------------------------------------------|
|                                                                         | 2016 counts                          | 2016 counts                              | 2016 counts                                                                                | Percentage change in counts between 2006 and 2016 | Percentage change in age-standardised rates between |
| Trichuriasis                                                            | 0.1<br>( $< 0.05$ to 0.1)            | --                                       | --                                                                                         | --                                                | --                                                  |
| Hookworm disease                                                        | 0.1<br>(0.1 to 0.1)                  | --                                       | $< 0.05$<br>( $< 0.05$ to $< 0.05$ )                                                       | 17.9<br>(-30.6 to 104.4)                          | 1.4<br>(-41.0 to 74.9)                              |
| Food-borne trematodiasis                                                | --                                   | --                                       | --                                                                                         | --                                                | --                                                  |
| Leprosy                                                                 | --                                   | --                                       | --                                                                                         | --                                                | --                                                  |
| Ebola virus disease                                                     | --                                   | --                                       | --                                                                                         | --                                                | --                                                  |
| Zika virus disease                                                      | 0.1<br>( $< 0.05$ to 0.2)            | 4.4<br>(2.1 to 9.7)                      | $< 0.05$<br>( $< 0.05$ to $< 0.05$ )                                                       | --                                                | --                                                  |
| Guinea worm disease                                                     | --                                   | --                                       | --                                                                                         | --                                                | --                                                  |
| Other neglected tropical diseases                                       | 0.9<br>(0.8 to 1.0)                  | --                                       | $< 0.05$<br>( $< 0.05$ to $< 0.05$ )                                                       | -4.1<br>(-21.3 to 14.4)                           | -2.1<br>(-20.1 to 16.9)                             |
| <b>Maternal disorders</b>                                               | <b>0.1</b><br><b>(0.1 to 0.1)</b>    | <b>1.7†</b><br><b>(1.4 to 2.1)</b>       | <b><math>&lt; 0.05</math></b><br><b>(<math>&lt; 0.05</math> to <math>&lt; 0.05</math>)</b> | <b>-8.2</b><br><b>(-32.0 to 26.5)</b>             | <b>-15.2</b><br><b>(-37.2 to 16.2)</b>              |
| Maternal haemorrhage                                                    | $< 0.05$<br>( $< 0.05$ to $< 0.05$ ) | 0.1<br>(0.1 to 0.1)                      | $< 0.05$<br>( $< 0.05$ to $< 0.05$ )                                                       | -11.3<br>(-38.0 to 24.6)                          | -16.6<br>(-42.3 to 18.6)                            |
| Maternal sepsis and other pregnancy related infections                  | $< 0.05$<br>( $< 0.05$ to $< 0.05$ ) | 0.2<br>(0.1 to 0.2)                      | $< 0.05$<br>( $< 0.05$ to $< 0.05$ )                                                       | -4.4<br>(-55.7 to 94.6)                           | -13.0<br>(-60.0 to 78.8)                            |
| Maternal hypertensive disorders                                         | 0.1<br>( $< 0.05$ to 0.1)            | 0.3<br>(0.2 to 0.3)                      | $< 0.05$<br>( $< 0.05$ to $< 0.05$ )                                                       | -7.5<br>(-41.8 to 51.8)                           | -14.4<br>(-46.2 to 38.6)                            |
| Maternal obstructed labour and uterine rupture                          | $< 0.05$<br>( $< 0.05$ to $< 0.05$ ) | 0.1<br>( $< 0.05$ to 0.1)                | $< 0.05$<br>( $< 0.05$ to $< 0.05$ )                                                       | -6.7<br>(-50.7 to 73.5)                           | -14.3<br>(-54.4 to 60.7)                            |
| Maternal abortion, miscarriage, and ectopic pregnancy                   | $< 0.05$<br>( $< 0.05$ to $< 0.05$ ) | 1.1<br>(0.8 to 1.5)                      | $< 0.05$<br>( $< 0.05$ to $< 0.05$ )                                                       | -8.2<br>(-51.6 to 71.5)                           | -14.9<br>(-55.2 to 57.1)                            |
| Other maternal disorders                                                | --                                   | --                                       | $< 0.05$<br>( $< 0.05$ to $< 0.05$ )                                                       | -12.2<br>(-35.0 to 21.2)                          | -19.3<br>(-40.5 to 10.6)                            |
| <b>Neonatal disorders</b>                                               | <b>1.3</b><br><b>(1.1 to 1.6)</b>    | <b>0.2</b><br><b>--</b>                  | <b>0.2</b><br><b>(0.1 to 0.3)</b>                                                          | <b>15.0</b><br><b>(-2.9 to 40.4)</b>              | <b>7.0</b><br><b>(-9.9 to 30.3)</b>                 |
| Neonatal preterm birth complications                                    | 1.2<br>(0.9 to 1.6)                  | --                                       | 0.1<br>(0.1 to 0.2)                                                                        | 15.4<br>(-11.4 to 54.2)                           | 7.1<br>(-18.0 to 43.2)                              |
| Neonatal encephalopathy due to birth asphyxia and trauma                | 0.1<br>( $< 0.05$ to 0.1)            | --                                       | $< 0.05$<br>( $< 0.05$ to $< 0.05$ )                                                       | 42.6<br>(-13.7 to 188.9)                          | 31.0<br>(-20.7 to 161.2)                            |
| Neonatal sepsis and other neonatal infections                           | 0.1<br>(0.1 to 0.3)                  | --                                       | 0.1<br>( $< 0.05$ to 0.1)                                                                  | 13.1<br>(-2.6 to 34.5)                            | 4.8<br>(-9.9 to 24.9)                               |
| Hemolytic disease and other neonatal jaundice                           | $< 0.05$<br>( $< 0.05$ to $< 0.05$ ) | --                                       | $< 0.05$<br>( $< 0.05$ to $< 0.05$ )                                                       | 9.0<br>(1.3 to 17.1)                              | -0.3<br>(-7.3 to 7.0)                               |
| Other neonatal disorders                                                | --                                   | --                                       | $< 0.05$<br>( $< 0.05$ to $< 0.05$ )                                                       | -3.3<br>(-22.7 to 21.5)                           | 3.7<br>(-17.1 to 30.3)                              |
| <b>Nutritional deficiencies</b>                                         | <b>23.6</b><br><b>(21.4 to 25.3)</b> | <b>1.6†</b><br><b>(1.0 to 2.4)</b>       | <b>0.5</b><br><b>(0.3 to 0.7)</b>                                                          | <b>-2.0</b><br><b>(-14.7 to 10.0)</b>             | <b>-7.4</b><br><b>(-18.9 to 3.7)</b>                |
| Protein-energy malnutrition                                             | 0.1<br>(0.1 to 0.2)                  | 0.1<br>(0.1 to 0.1)                      | $< 0.05$<br>( $< 0.05$ to $< 0.05$ )                                                       | -12.4<br>(-38.1 to 27.2)                          | -6.0<br>(-33.5 to 36.4)                             |
| Iodine deficiency                                                       | 0.3<br>(0.3 to 0.4)                  | $< 0.05$<br>( $< 0.05$ to $< 0.05$ )     | $< 0.05$<br>( $< 0.05$ to $< 0.05$ )                                                       | 16.4<br>(0.2 to 37.4)                             | -0.5<br>(-14.0 to 15.8)                             |
| Vitamin A deficiency                                                    | 1.9<br>(1.1 to 2.8)                  | 1.6<br>(0.9 to 2.3)                      | $< 0.05$<br>( $< 0.05$ to $< 0.05$ )                                                       | 5.1<br>(-11.1 to 25.0)                            | -1.0<br>(-16.4 to 17.3)                             |
| Iron-deficiency anaemia                                                 | 21.1<br>(19.0 to 23.4)               | --                                       | 0.5<br>(0.3 to 0.7)                                                                        | -2.2<br>(-15.3 to 10.4)                           | -7.5<br>(-19.5 to 4.2)                              |
| Other nutritional deficiencies                                          | --                                   | --                                       | $< 0.05$<br>( $< 0.05$ to $< 0.05$ )                                                       | -13.8<br>(-40.4 to 26.6)                          | -7.6<br>(-36.0 to 35.6)                             |
| <b>Other communicable, maternal, neonatal, and nutritional diseases</b> | <b>24.5</b><br><b>(22.7 to 26.2)</b> | <b>5.6</b><br><b>(5.1 to 6.1)</b>        | <b><math>&lt; 0.05</math></b><br><b>(<math>&lt; 0.05</math> to 0.1)</b>                    | <b>7.4</b><br><b>(-0.8 to 16.0)</b>               | <b>0.6</b><br><b>(-7.4 to 9.3)</b>                  |
| Sexually transmitted diseases excluding HIV                             | 21.6<br>(19.9 to 23.4)               | 5.3<br>(4.8 to 5.8)                      | $< 0.05$<br>( $< 0.05$ to $< 0.05$ )                                                       | 12.4<br>(5.0 to 20.1)                             | -0.1<br>(-6.5 to 6.2)                               |
| Syphilis                                                                | 0.3<br>(0.3 to 0.4)                  | 0.2<br>(0.2 to 0.3)                      | $< 0.05$<br>( $< 0.05$ to $< 0.05$ )                                                       | 20.2<br>(6.0 to 36.0)                             | -4.6<br>(-15.9 to 9.3)                              |
| Chlamydial infection                                                    | 0.8<br>(0.7 to 1.1)                  | 0.6<br>(0.5 to 0.8)                      | $< 0.05$<br>( $< 0.05$ to $< 0.05$ )                                                       | 9.3<br>(-7.2 to 28.2)                             | 0.4<br>(-14.4 to 17.1)                              |
| Gonococcal infection                                                    | 0.1<br>(0.1 to 0.1)                  | 0.4<br>(0.3 to 0.5)                      | $< 0.05$<br>( $< 0.05$ to $< 0.05$ )                                                       | 8.9<br>(-20.8 to 49.1)                            | 5.2<br>(-24.2 to 45.1)                              |
| Trichomoniasis                                                          | 3.2<br>(2.8 to 3.7)                  | 2.8<br>(2.4 to 3.2)                      | $< 0.05$<br>( $< 0.05$ to $< 0.05$ )                                                       | 15.4<br>(6.0 to 23.7)                             | 0.7<br>(-5.8 to 6.6)                                |
| Genital herpes                                                          | 18.5<br>(16.1 to 21.4)               | 1.1<br>(1.0 to 1.4)                      | $< 0.05$<br>( $< 0.05$ to $< 0.05$ )                                                       | 17.9<br>(11.1 to 25.0)                            | 0.4<br>(-5.2 to 6.2)                                |
| Other sexually transmitted diseases                                     | 0.2<br>(0.2 to 0.2)                  | 0.2<br>(0.1 to 0.2)                      | $< 0.05$<br>( $< 0.05$ to $< 0.05$ )                                                       | 5.1<br>(-7.7 to 19.6)                             | -0.6<br>(-12.7 to 12.0)                             |
| Hepatitis                                                               | 3.3<br>(3.0 to 3.8)                  | 0.3<br>(0.2 to 0.4)                      | $< 0.05$<br>( $< 0.05$ to $< 0.05$ )                                                       | -24.4<br>(-43.7 to 1.1)                           | -34.8<br>(-50.8 to -13.9)                           |
| Acute hepatitis A                                                       | $< 0.05$<br>( $< 0.05$ to $< 0.05$ ) | 0.1<br>( $< 0.05$ to 0.1)                | $< 0.05$<br>( $< 0.05$ to $< 0.05$ )                                                       | -25.8<br>(-73.0 to 110.0)                         | -35.9<br>(-76.3 to 75.2)                            |
| Hepatitis B                                                             | 1.4<br>(1.1 to 1.8)                  | 0.1<br>(0.1 to 0.2)                      | $< 0.05$<br>( $< 0.05$ to $< 0.05$ )                                                       | -25.2<br>(-37.8 to -10.2)                         | -37.6<br>(-47.5 to -25.9)                           |
| Hepatitis C                                                             | 1.9<br>(1.7 to 2.2)                  | $< 0.05$<br>( $< 0.05$ to $< 0.05$ )     | $< 0.05$<br>( $< 0.05$ to $< 0.05$ )                                                       | -10.0<br>(-29.8 to 12.8)                          | -10.8<br>(-32.0 to 13.5)                            |
| Acute hepatitis E                                                       | $< 0.05$<br>( $< 0.05$ to $< 0.05$ ) | $< 0.05$<br>( $< 0.05$ to $< 0.05$ )     | $< 0.05$<br>( $< 0.05$ to $< 0.05$ )                                                       | -27.0<br>(-33.5 to -19.6)                         | -36.9<br>(-42.0 to -31.5)                           |
| Other infectious diseases                                               | 0.8<br>(0.7 to 0.8)                  | $< 0.05$<br>( $< 0.05$ to $< 0.05$ )     | $< 0.05$<br>( $< 0.05$ to $< 0.05$ )                                                       | 3.0<br>(-12.3 to 19.9)                            | 2.4<br>(-12.7 to 19.3)                              |
| <b>Non-communicable diseases</b>                                        | <b>84.4</b><br><b>(84.0 to 84.9)</b> | <b>257.5†</b><br><b>(244.7 to 271.5)</b> | <b>8.2</b><br><b>(6.0 to 10.6)</b>                                                         | <b>17.3</b><br><b>(14.2 to 20.3)</b>              | <b>-0.5</b><br><b>(-2.9 to 1.9)</b>                 |
| <b>Neoplasms</b>                                                        | <b>0.7</b><br><b>(0.7 to 0.8)</b>    | <b>0.2</b><br><b>(0.2 to 0.2)</b>        | <b>0.1</b><br><b>(0.1 to 0.1)</b>                                                          | <b>41.9</b><br><b>(34.6 to 49.9)</b>              | <b>11.6</b><br><b>(5.3 to 18.2)</b>                 |
| Lip and oral cavity cancer                                              | $< 0.05$<br>( $< 0.05$ to $< 0.05$ ) | $< 0.05$<br>( $< 0.05$ to $< 0.05$ )     | $< 0.05$<br>( $< 0.05$ to $< 0.05$ )                                                       | 33.1<br>(16.9 to 53.2)                            | 0.2<br>(-12.9 to 15.7)                              |
| Nasopharynx cancer                                                      | $< 0.05$<br>( $< 0.05$ to $< 0.05$ ) | $< 0.05$<br>( $< 0.05$ to $< 0.05$ )     | $< 0.05$<br>( $< 0.05$ to $< 0.05$ )                                                       | 33.2<br>(21.0 to 49.3)                            | 6.2<br>(-2.9 to 18.1)                               |
| Other pharynx cancer                                                    | $< 0.05$<br>( $< 0.05$ to $< 0.05$ ) | $< 0.05$<br>( $< 0.05$ to $< 0.05$ )     | $< 0.05$<br>( $< 0.05$ to $< 0.05$ )                                                       | 37.4<br>(16.1 to 62.5)                            | -1.8<br>(-16.9 to 16.7)                             |
| Oesophageal cancer                                                      | $< 0.05$<br>( $< 0.05$ to $< 0.05$ ) | $< 0.05$<br>( $< 0.05$ to $< 0.05$ )     | $< 0.05$<br>( $< 0.05$ to $< 0.05$ )                                                       | 7.5<br>(-1.4 to 16.7)                             | -17.3<br>(-24.3 to -9.9)                            |
| Stomach cancer                                                          | $< 0.05$<br>( $< 0.05$ to $< 0.05$ ) | $< 0.05$<br>( $< 0.05$ to $< 0.05$ )     | $< 0.05$<br>( $< 0.05$ to $< 0.05$ )                                                       | 34.1<br>(15.5 to 56.0)                            | 4.9<br>(-10.2 to 23.2)                              |
| Colon and rectum cancer                                                 | 0.1<br>(0.1 to 0.1)                  | $< 0.05$<br>( $< 0.05$ to $< 0.05$ )     | $< 0.05$<br>( $< 0.05$ to $< 0.05$ )                                                       | 56.5<br>(38.3 to 78.0)                            | 22.4<br>(8.0 to 39.0)                               |
| Liver cancer                                                            | $< 0.05$<br>( $< 0.05$ to $< 0.05$ ) | $< 0.05$<br>( $< 0.05$ to $< 0.05$ )     | $< 0.05$<br>( $< 0.05$ to $< 0.05$ )                                                       | 26.0<br>(18.0 to 34.8)                            | -1.4<br>(-8.2 to 5.9)                               |
| Liver cancer due to hepatitis B                                         | $< 0.05$<br>( $< 0.05$ to $< 0.05$ ) | $< 0.05$<br>( $< 0.05$ to $< 0.05$ )     | $< 0.05$<br>( $< 0.05$ to $< 0.05$ )                                                       | 28.5<br>(18.6 to 39.3)                            | -1.2<br>(-8.9 to 6.6)                               |



| Cause                                              | Prevalence in thousands (95% UI)   | Incidence in thousands (95% UI)    | YLDs in thousands (95% UI)        |                                                   |                                                     |
|----------------------------------------------------|------------------------------------|------------------------------------|-----------------------------------|---------------------------------------------------|-----------------------------------------------------|
|                                                    | 2016 counts                        | 2016 counts                        | 2016 counts                       | Percentage change in counts between 2006 and 2016 | Percentage change in age-standardised rates between |
| Liver cancer due to hepatitis C                    | < 0.05<br>(< 0.05 to < 0.05)       | < 0.05<br>(< 0.05 to < 0.05)       | < 0.05<br>(< 0.05 to < 0.05)      | 23.3<br>(13.5 to 34.4)                            | -1.0<br>(-8.6 to 8.0)                               |
| Liver cancer due to alcohol use                    | < 0.05<br>(< 0.05 to < 0.05)       | < 0.05<br>(< 0.05 to < 0.05)       | < 0.05<br>(< 0.05 to < 0.05)      | 30.0<br>(18.9 to 42.4)                            | -0.4<br>(-8.6 to 9.3)                               |
| Liver cancer due to other causes                   | < 0.05<br>(< 0.05 to < 0.05)       | < 0.05<br>(< 0.05 to < 0.05)       | < 0.05<br>(< 0.05 to < 0.05)      | 21.9<br>(12.7 to 32.5)                            | -3.1<br>(-10.6 to 5.7)                              |
| Gallbladder and biliary tract cancer               | < 0.05<br>(< 0.05 to < 0.05)       | < 0.05<br>(< 0.05 to < 0.05)       | < 0.05<br>(< 0.05 to < 0.05)      | 20.0<br>(12.0 to 28.1)                            | -5.9<br>(-12.2 to 0.9)                              |
| Pancreatic cancer                                  | < 0.05<br>(< 0.05 to < 0.05)       | < 0.05<br>(< 0.05 to < 0.05)       | < 0.05<br>(< 0.05 to < 0.05)      | 24.5<br>(14.5 to 36.1)                            | -2.8<br>(-11.1 to 6.9)                              |
| Larynx cancer                                      | < 0.05<br>(< 0.05 to < 0.05)       | < 0.05<br>(< 0.05 to < 0.05)       | < 0.05<br>(< 0.05 to < 0.05)      | 37.8<br>(16.8 to 62.5)                            | 1.6<br>(-14.8 to 20.5)                              |
| Tracheal, bronchus, and lung cancer                | < 0.05<br>(< 0.05 to < 0.05)       | < 0.05<br>(< 0.05 to < 0.05)       | < 0.05<br>(< 0.05 to < 0.05)      | 25.2<br>(2.4 to 53.1)                             | -5.3<br>(-23.4 to 17.9)                             |
| Malignant skin melanoma                            | < 0.05<br>(< 0.05 to < 0.05)       | < 0.05<br>(< 0.05 to < 0.05)       | < 0.05<br>(< 0.05 to < 0.05)      | 48.5<br>(23.3 to 76.1)                            | 18.5<br>(-1.4 to 40.3)                              |
| Non-melanoma skin cancer                           | < 0.05<br>(< 0.05 to < 0.05)       | < 0.05<br>(< 0.05 to < 0.05)       | < 0.05<br>(< 0.05 to < 0.05)      | -27.1<br>(-59.3 to 25.5)                          | -42.4<br>(-67.9 to 0.7)                             |
| Non-melanoma skin cancer (squamous-cell carcinoma) | < 0.05<br>(< 0.05 to < 0.05)       | < 0.05<br>(< 0.05 to < 0.05)       | < 0.05<br>(< 0.05 to < 0.05)      | -28.4<br>(-60.3 to 25.0)                          | -43.2<br>(-68.7 to 1.1)                             |
| Non-melanoma skin cancer (basal-cell carcinoma)    | < 0.05<br>(< 0.05 to < 0.05)       | < 0.05<br>(< 0.05 to < 0.05)       | < 0.05<br>(< 0.05 to < 0.05)      | 26.2<br>(10.9 to 45.3)                            | -2.7<br>(-12.7 to 8.2)                              |
| Breast cancer                                      | 0.2<br>(0.1 to 0.2)                | < 0.05<br>(< 0.05 to < 0.05)       | < 0.05<br>(< 0.05 to < 0.05)      | 49.1<br>(28.5 to 71.6)                            | 13.9<br>(-0.9 to 30.4)                              |
| Cervical cancer                                    | < 0.05<br>(< 0.05 to < 0.05)       | < 0.05<br>(< 0.05 to < 0.05)       | < 0.05<br>(< 0.05 to < 0.05)      | 22.4<br>(1.6 to 47.1)                             | -2.1<br>(-17.9 to 17.0)                             |
| Uterine cancer                                     | < 0.05<br>(< 0.05 to < 0.05)       | < 0.05<br>(< 0.05 to < 0.05)       | < 0.05<br>(< 0.05 to < 0.05)      | 55.1<br>(26.6 to 90.2)                            | 15.7<br>(-6.2 to 42.8)                              |
| Ovarian cancer                                     | < 0.05<br>(< 0.05 to < 0.05)       | < 0.05<br>(< 0.05 to < 0.05)       | < 0.05<br>(< 0.05 to < 0.05)      | 25.7<br>(-10.0 to 72.7)                           | -5.9<br>(-31.4 to 29.3)                             |
| Prostate cancer                                    | 0.3<br>(0.2 to 0.3)                | 0.1<br>(0.1 to 0.1)                | < 0.05<br>(< 0.05 to < 0.05)      | 35.9<br>(19.6 to 53.5)                            | 9.6<br>(-3.6 to 24.5)                               |
| Testicular cancer                                  | < 0.05<br>(< 0.05 to < 0.05)       | < 0.05<br>(< 0.05 to < 0.05)       | < 0.05<br>(< 0.05 to < 0.05)      | -4.0<br>(-32.2 to 35.8)                           | -18.8<br>(-42.2 to 13.1)                            |
| Kidney cancer                                      | < 0.05<br>(< 0.05 to < 0.05)       | < 0.05<br>(< 0.05 to < 0.05)       | < 0.05<br>(< 0.05 to < 0.05)      | 43.2<br>(25.3 to 64.6)                            | 12.1<br>(-1.6 to 27.7)                              |
| Bladder cancer                                     | < 0.05<br>(< 0.05 to < 0.05)       | < 0.05<br>(< 0.05 to < 0.05)       | < 0.05<br>(< 0.05 to < 0.05)      | 30.1<br>(15.3 to 46.7)                            | 2.9<br>(-9.2 to 16.7)                               |
| Brain and nervous system cancer                    | < 0.05<br>(< 0.05 to < 0.05)       | < 0.05<br>(< 0.05 to < 0.05)       | < 0.05<br>(< 0.05 to < 0.05)      | 20.9<br>(9.3 to 37.3)                             | -1.9<br>(-11.6 to 11.3)                             |
| Thyroid cancer                                     | < 0.05<br>(< 0.05 to < 0.05)       | < 0.05<br>(< 0.05 to < 0.05)       | < 0.05<br>(< 0.05 to < 0.05)      | 125.8<br>(78.1 to 186.6)                          | 87.7<br>(50.1 to 132.3)                             |
| Mesothelioma                                       | < 0.05<br>(< 0.05 to < 0.05)       | < 0.05<br>(< 0.05 to < 0.05)       | < 0.05<br>(< 0.05 to < 0.05)      | 33.7<br>(23.4 to 44.2)                            | 3.2<br>(-4.9 to 10.9)                               |
| Hodgkin lymphoma                                   | < 0.05<br>(< 0.05 to < 0.05)       | < 0.05<br>(< 0.05 to < 0.05)       | < 0.05<br>(< 0.05 to < 0.05)      | 35.4<br>(20.5 to 50.5)                            | 12.4<br>(0.5 to 23.8)                               |
| Non-Hodgkin's lymphoma                             | < 0.05<br>(< 0.05 to < 0.05)       | < 0.05<br>(< 0.05 to < 0.05)       | < 0.05<br>(< 0.05 to < 0.05)      | 41.4<br>(25.2 to 58.4)                            | 10.9<br>(-0.6 to 23.7)                              |
| Multiple myeloma                                   | < 0.05<br>(< 0.05 to < 0.05)       | < 0.05<br>(< 0.05 to < 0.05)       | < 0.05<br>(< 0.05 to < 0.05)      | 65.4<br>(34.4 to 100.8)                           | 22.1<br>(-1.8 to 51.1)                              |
| Leukaemia                                          | < 0.05<br>(< 0.05 to < 0.05)       | < 0.05<br>(< 0.05 to < 0.05)       | < 0.05<br>(< 0.05 to < 0.05)      | 27.6<br>(17.2 to 39.7)                            | 6.2<br>(-3.6 to 17.5)                               |
| Acute lymphoid leukaemia                           | < 0.05<br>(< 0.05 to < 0.05)       | < 0.05<br>(< 0.05 to < 0.05)       | < 0.05<br>(< 0.05 to < 0.05)      | 34.5<br>(8.6 to 65.6)                             | 30.8<br>(3.9 to 62.8)                               |
| Chronic lymphoid leukaemia                         | < 0.05<br>(< 0.05 to < 0.05)       | < 0.05<br>(< 0.05 to < 0.05)       | < 0.05<br>(< 0.05 to < 0.05)      | 46.4<br>(21.3 to 76.2)                            | 12.4<br>(-6.7 to 35.8)                              |
| Acute myeloid leukaemia                            | < 0.05<br>(< 0.05 to < 0.05)       | < 0.05<br>(< 0.05 to < 0.05)       | < 0.05<br>(< 0.05 to < 0.05)      | 45.9<br>(30.2 to 63.8)                            | 25.5<br>(11.2 to 41.2)                              |
| Chronic myeloid leukaemia                          | < 0.05<br>(< 0.05 to < 0.05)       | < 0.05<br>(< 0.05 to < 0.05)       | < 0.05<br>(< 0.05 to < 0.05)      | 30.6<br>(12.7 to 52.1)                            | 1.9<br>(-12.8 to 18.4)                              |
| Other leukaemia                                    | < 0.05<br>(< 0.05 to < 0.05)       | < 0.05<br>(< 0.05 to < 0.05)       | < 0.05<br>(< 0.05 to < 0.05)      | 22.1<br>(9.5 to 37.5)                             | 0.6<br>(-10.6 to 14.3)                              |
| Other neoplasms                                    | 0.1<br>(0.1 to 0.1)                | < 0.05<br>(< 0.05 to < 0.05)       | < 0.05<br>(< 0.05 to < 0.05)      | 87.3<br>(61.1 to 117.6)                           | 50.9<br>(29.7 to 74.1)                              |
| <b>Cardiovascular diseases</b>                     | <b>5.9</b><br><b>(5.7 to 6.2)</b>  | <b>0.6†</b><br><b>(0.5 to 0.6)</b> | <b>0.3</b><br><b>(0.2 to 0.5)</b> | <b>21.1</b><br><b>(17.1 to 25.3)</b>              | <b>-1.8</b><br><b>(-4.7 to 1.4)</b>                 |
| Rheumatic heart disease                            | < 0.05<br>(< 0.05 to < 0.05)       | < 0.05<br>(< 0.05 to < 0.05)       | < 0.05<br>(< 0.05 to < 0.05)      | 10.5<br>(-3.7 to 27.1)                            | -11.0<br>(-24.7 to 5.0)                             |
| Ischaemic heart disease                            | 1.9<br>(1.8 to 2.0)                | 0.2<br>(0.2 to 0.3)                | 0.1<br>(0.1 to 0.1)               | 24.3<br>(18.7 to 29.8)                            | -1.7<br>(-5.7 to 2.3)                               |
| Cerebrovascular disease                            | 0.8<br>(0.8 to 0.9)                | 0.1‡<br>(0.1 to 0.1)               | 0.1<br>(0.1 to 0.1)               | 17.4<br>(9.5 to 25.4)                             | -4.3<br>(-10.7 to 2.0)                              |
| Ischaemic stroke                                   | 0.7<br>(0.6 to 0.7)                | 0.1‡<br>(0.1 to 0.1)               | 0.1<br>(< 0.05 to 0.1)            | 17.5<br>(8.1 to 26.6)                             | -4.0<br>(-11.9 to 3.9)                              |
| Hemorrhagic stroke                                 | 0.2<br>(0.2 to 0.2)                | < 0.05‡<br>(< 0.05 to < 0.05)      | < 0.05<br>(< 0.05 to < 0.05)      | 17.0<br>(5.9 to 30.7)                             | -5.0<br>(-14.4 to 6.0)                              |
| Hypertensive heart disease                         | 0.3<br>(0.2 to 0.3)                | --                                 | < 0.05<br>(< 0.05 to < 0.05)      | 21.1<br>(11.2 to 32.7)                            | -0.9<br>(-8.7 to 7.5)                               |
| Cardiomyopathy and myocarditis                     | 0.1<br>(0.1 to 0.1)                | < 0.05†<br>(< 0.05 to < 0.05)      | < 0.05<br>(< 0.05 to < 0.05)      | 20.5<br>(7.6 to 34.2)                             | -0.3<br>(-10.9 to 11.0)                             |
| Myocarditis                                        | < 0.05<br>(< 0.05 to < 0.05)       | < 0.05<br>(< 0.05 to < 0.05)       | < 0.05<br>(< 0.05 to < 0.05)      | 18.8<br>(5.0 to 33.4)                             | 0.0<br>(-12.3 to 14.1)                              |
| Alcoholic cardiomyopathy                           | < 0.05<br>(< 0.05 to < 0.05)       | --                                 | < 0.05<br>(< 0.05 to < 0.05)      | 31.3<br>(9.0 to 55.4)                             | -1.1<br>(-19.6 to 19.9)                             |
| Other cardiomyopathy                               | < 0.05<br>(< 0.05 to 0.1)          | --                                 | < 0.05<br>(< 0.05 to < 0.05)      | 20.3<br>(3.0 to 40.7)                             | -0.4<br>(-13.9 to 15.2)                             |
| Atrial fibrillation and flutter                    | 0.6<br>(0.5 to 0.6)                | < 0.05<br>(< 0.05 to 0.1)          | < 0.05<br>(< 0.05 to 0.1)         | 23.1<br>(15.5 to 31.7)                            | 0.6<br>(-5.2 to 7.0)                                |
| Peripheral vascular disease                        | 1.4<br>(1.2 to 1.6)                | 0.1<br>(0.1 to 0.1)                | < 0.05<br>(< 0.05 to < 0.05)      | 17.4<br>(7.5 to 27.4)                             | -3.6<br>(-10.8 to 4.1)                              |
| Endocarditis                                       | < 0.05<br>(< 0.05 to < 0.05)       | < 0.05<br>(< 0.05 to < 0.05)       | < 0.05<br>(< 0.05 to < 0.05)      | 20.8<br>(4.6 to 38.8)                             | -0.4<br>(-15.3 to 16.9)                             |
| Other cardiovascular and circulatory diseases      | 1.8<br>(1.5 to 2.1)                | --                                 | 0.1<br>(0.1 to 0.1)               | 21.2<br>(12.4 to 31.1)                            | -0.9<br>(-7.5 to 6.3)                               |
| <b>Chronic respiratory diseases</b>                | <b>9.5</b><br><b>(9.0 to 10.0)</b> | <b>1.5†</b><br><b>(1.4 to 1.6)</b> | <b>0.3</b><br><b>(0.2 to 0.5)</b> | <b>13.5</b><br><b>(8.4 to 18.6)</b>               | <b>5.1</b><br><b>(0.6 to 9.8)</b>                   |
| Chronic obstructive pulmonary disease              | 2.1<br>(2.0 to 2.3)                | 0.1<br>(0.1 to 0.1)                | < 0.05<br>(< 0.05 to < 0.05)      | 25.1<br>(6.5 to 45.1)                             | -1.4<br>(-15.4 to 14.3)                             |
| Pneumoconiosis                                     | < 0.05<br>(< 0.05 to < 0.05)       | < 0.05<br>(< 0.05 to < 0.05)       | < 0.05<br>(< 0.05 to < 0.05)      | 16.1<br>(1.8 to 32.0)                             | -5.8<br>(-17.9 to 8.2)                              |
| Silicosis                                          | < 0.05<br>(< 0.05 to < 0.05)       | < 0.05<br>(< 0.05 to < 0.05)       | < 0.05<br>(< 0.05 to < 0.05)      | 30.8<br>(25.4 to 36.5)                            | 0.3<br>(-3.7 to 4.5)                                |

| Cause                                                          | Prevalence in thousands (95% UI)     | Incidence in thousands (95% UI)                     | YLDs in thousands (95% UI)                          |                                                   |                                                     |
|----------------------------------------------------------------|--------------------------------------|-----------------------------------------------------|-----------------------------------------------------|---------------------------------------------------|-----------------------------------------------------|
|                                                                | 2016 counts                          | 2016 counts                                         | 2016 counts                                         | Percentage change in counts between 2006 and 2016 | Percentage change in age-standardised rates between |
| Asbestosis                                                     | < 0.05<br>(< 0.05 to < 0.05)         | < 0.05<br>(< 0.05 to < 0.05)                        | < 0.05<br>(< 0.05 to < 0.05)                        | 11.0<br>(-9.8 to 37.5)                            | -5.2<br>(-23.0 to 18.0)                             |
| Coal workers pneumoconiosis                                    | --                                   | --                                                  | --                                                  | --                                                | --                                                  |
| Other pneumoconiosis                                           | < 0.05<br>(< 0.05 to < 0.05)         | < 0.05<br>(< 0.05 to < 0.05)                        | < 0.05<br>(< 0.05 to < 0.05)                        | 13.1<br>(-10.9 to 43.1)                           | -8.6<br>(-27.9 to 17.3)                             |
| Asthma                                                         | 7.5<br>(6.9 to 8.2)                  | 1.4<br>(1.3 to 1.5)                                 | 0.3<br>(0.2 to 0.4)                                 | 11.8<br>(6.5 to 17.1)                             | 5.8<br>(0.8 to 11.0)                                |
| Interstitial lung disease and pulmonary sarcoidosis            | < 0.05<br>(< 0.05 to < 0.05)         | < 0.05<br>(< 0.05 to < 0.05)                        | < 0.05<br>(< 0.05 to < 0.05)                        | 19.6<br>(9.5 to 30.0)                             | 3.0<br>(-6.8 to 12.8)                               |
| Other chronic respiratory diseases                             | --                                   | --                                                  | < 0.05<br>(< 0.05 to < 0.05)                        | 43.2<br>(14.8 to 80.4)                            | 37.5<br>(10.6 to 72.4)                              |
| <b>Cirrhosis and other chronic liver diseases</b>              | <b>0.7</b><br><b>(0.7 to 0.8)</b>    | <b>&lt; 0.05</b><br><b>(&lt; 0.05 to &lt; 0.05)</b> | <b>&lt; 0.05</b><br><b>(&lt; 0.05 to &lt; 0.05)</b> | <b>27.6</b><br><b>(15.1 to 41.6)</b>              | <b>4.5</b><br><b>(-4.7 to 15.0)</b>                 |
| Cirrhosis and other chronic liver diseases due to hepatitis B  | 0.1<br>(0.1 to 0.1)                  | < 0.05<br>(< 0.05 to < 0.05)                        | < 0.05<br>(< 0.05 to < 0.05)                        | 32.6<br>(4.1 to 67.1)                             | 3.5<br>(-18.1 to 30.3)                              |
| Cirrhosis and other chronic liver diseases due to hepatitis C  | 0.2<br>(0.2 to 0.2)                  | < 0.05<br>(< 0.05 to < 0.05)                        | < 0.05<br>(< 0.05 to < 0.05)                        | 33.7<br>(11.7 to 63.6)                            | 3.7<br>(-13.0 to 24.2)                              |
| Cirrhosis and other chronic liver diseases due to alcohol use  | 0.2<br>(0.2 to 0.3)                  | < 0.05<br>(< 0.05 to < 0.05)                        | < 0.05<br>(< 0.05 to < 0.05)                        | 34.1<br>(13.5 to 61.3)                            | 4.6<br>(-10.0 to 22.8)                              |
| Cirrhosis and other chronic liver diseases due to other causes | 0.2<br>(0.1 to 0.2)                  | < 0.05<br>(< 0.05 to < 0.05)                        | < 0.05<br>(< 0.05 to < 0.05)                        | 16.0<br>(-4.5 to 42.5)                            | 5.4<br>(-12.3 to 29.2)                              |
| <b>Digestive diseases</b>                                      | <b>2.9</b><br><b>(2.7 to 3.1)</b>    | <b>2.6†</b><br><b>(2.4 to 2.8)</b>                  | <b>0.1</b><br><b>(0.1 to 0.1)</b>                   | <b>27.4</b><br><b>(16.3 to 40.0)</b>              | <b>7.8</b><br><b>(-0.9 to 16.5)</b>                 |
| Peptic ulcer disease                                           | 1.1<br>(1.0 to 1.2)                  | 0.1<br>(0.1 to 0.1)                                 | < 0.05<br>(< 0.05 to < 0.05)                        | 31.4<br>(6.7 to 63.0)                             | 8.0<br>(-9.5 to 29.5)                               |
| Gastritis and duodenitis                                       | 1.1<br>(1.0 to 1.2)                  | 0.6<br>(0.5 to 0.6)                                 | < 0.05<br>(< 0.05 to < 0.05)                        | 47.6<br>(25.9 to 76.1)                            | 22.2<br>(5.3 to 43.2)                               |
| Appendicitis                                                   | < 0.05<br>(< 0.05 to < 0.05)         | 0.2<br>(0.2 to 0.2)                                 | < 0.05<br>(< 0.05 to < 0.05)                        | 4.5<br>(-24.4 to 45.1)                            | -0.7<br>(-27.4 to 35.4)                             |
| Paralytic ileus and intestinal obstruction                     | < 0.05<br>(< 0.05 to < 0.05)         | < 0.05<br>(< 0.05 to < 0.05)                        | < 0.05<br>(< 0.05 to < 0.05)                        | 17.6<br>(12.3 to 22.6)                            | 4.3<br>(1.1 to 7.7)                                 |
| Inguinal, femoral, and abdominal hernia                        | 0.6<br>(0.6 to 0.7)                  | 0.7<br>(0.6 to 0.8)                                 | < 0.05<br>(< 0.05 to 0.1)                           | 18.4<br>(5.7 to 33.2)                             | 2.0<br>(-8.2 to 12.7)                               |
| Inflammatory bowel disease                                     | < 0.05<br>(< 0.05 to < 0.05)         | < 0.05<br>(< 0.05 to < 0.05)                        | < 0.05<br>(< 0.05 to < 0.05)                        | 23.3<br>(11.0 to 37.5)                            | 1.4<br>(-11.6 to 15.8)                              |
| Vascular intestinal disorders                                  | < 0.05<br>(< 0.05 to < 0.05)         | < 0.05<br>(< 0.05 to < 0.05)                        | < 0.05<br>(< 0.05 to < 0.05)                        | 23.9<br>(15.8 to 32.9)                            | 9.1<br>(4.2 to 15.2)                                |
| Gallbladder and biliary diseases                               | 0.1<br>(0.1 to 0.2)                  | 1.0<br>(0.8 to 1.1)                                 | < 0.05<br>(< 0.05 to < 0.05)                        | 38.3<br>(11.5 to 70.2)                            | 10.0<br>(-8.7 to 31.7)                              |
| Pancreatitis                                                   | < 0.05<br>(< 0.05 to < 0.05)         | < 0.05<br>(< 0.05 to < 0.05)                        | < 0.05<br>(< 0.05 to < 0.05)                        | 37.4<br>(31.7 to 43.9)                            | 12.5<br>(9.2 to 16.1)                               |
| Other digestive diseases                                       | --                                   | --                                                  | < 0.05<br>(< 0.05 to < 0.05)                        | 28.9<br>(17.7 to 41.6)                            | 12.1<br>(3.5 to 21.4)                               |
| <b>Neurological disorders</b>                                  | <b>36.2</b><br><b>(34.7 to 37.9)</b> | <b>16.9</b><br><b>(14.6 to 19.4)</b>                | <b>1.0</b><br><b>(0.7 to 1.4)</b>                   | <b>12.8</b><br><b>(-8.0 to 37.7)</b>              | <b>-1.0</b><br><b>(-19.5 to 21.4)</b>               |
| Alzheimer's disease and other dementias                        | 0.4<br>(0.3 to 0.4)                  | 0.1<br>(0.1 to 0.1)                                 | 0.1<br>(< 0.05 to 0.1)                              | 10.1<br>(4.7 to 16.1)                             | -0.7<br>(-5.4 to 4.2)                               |
| Parkinson's disease                                            | 0.1<br>(< 0.05 to 0.1)               | < 0.05<br>(< 0.05 to < 0.05)                        | < 0.05<br>(< 0.05 to < 0.05)                        | 26.4<br>(11.5 to 43.1)                            | 3.6<br>(-7.8 to 16.8)                               |
| Epilepsy                                                       | 0.4<br>(0.1 to 0.7)                  | < 0.05<br>(< 0.05 to 0.1)                           | 0.1<br>(< 0.05 to 0.3)                              | 3.7<br>(-79.4 to 406.8)                           | -7.6<br>(-81.7 to 351.2)                            |
| Multiple sclerosis                                             | < 0.05<br>(< 0.05 to < 0.05)         | < 0.05<br>(< 0.05 to < 0.05)                        | < 0.05<br>(< 0.05 to < 0.05)                        | 20.7<br>(9.8 to 33.5)                             | 2.0<br>(-6.7 to 12.3)                               |
| Motor neuron disease                                           | < 0.05<br>(< 0.05 to < 0.05)         | < 0.05<br>(< 0.05 to < 0.05)                        | < 0.05<br>(< 0.05 to < 0.05)                        | 17.6<br>(12.7 to 22.8)                            | 1.4<br>(-1.8 to 4.8)                                |
| Migraine                                                       | 13.7<br>(12.9 to 14.5)               | 1.5<br>(1.4 to 1.6)                                 | 0.6<br>(0.4 to 0.9)                                 | 14.1<br>(10.0 to 18.5)                            | -0.2<br>(-3.4 to 3.4)                               |
| Tension-type headache                                          | 27.5<br>(24.8 to 30.7)               | 15.3<br>(13.0 to 17.7)                              | 0.1<br>(0.1 to 0.2)                                 | 14.2<br>(7.6 to 21.5)                             | -0.8<br>(-5.3 to 4.4)                               |
| Other neurological disorders                                   | < 0.05<br>(< 0.05 to < 0.05)         | < 0.05<br>(< 0.05 to < 0.05)                        | < 0.05<br>(< 0.05 to 0.1)                           | 24.1<br>(-68.1 to 391.1)                          | 10.6<br>(-71.2 to 323.2)                            |
| <b>Mental and substance use disorders</b>                      | <b>14.5</b><br><b>(14.0 to 15.0)</b> | <b>5.1†</b><br><b>(4.8 to 5.5)</b>                  | <b>1.9</b><br><b>(1.4 to 2.4)</b>                   | <b>14.3</b><br><b>(11.9 to 16.6)</b>              | <b>-0.3</b><br><b>(-2.3 to 1.5)</b>                 |
| Schizophrenia                                                  | 0.2<br>(0.2 to 0.2)                  | < 0.05<br>(< 0.05 to < 0.05)                        | 0.1<br>(0.1 to 0.2)                                 | 16.6<br>(6.4 to 28.0)                             | 0.1<br>(-8.0 to 8.7)                                |
| Alcohol use disorders                                          | 1.8<br>(1.6 to 2.1)                  | 0.9<br>(0.8 to 1.0)                                 | 0.2<br>(0.1 to 0.2)                                 | 10.2<br>(0.3 to 20.6)                             | -5.0<br>(-12.9 to 3.6)                              |
| Drug use disorders                                             | 0.7<br>(0.6 to 0.7)                  | 0.1<br>(0.1 to 0.1)                                 | 0.1<br>(0.1 to 0.2)                                 | 13.9<br>(4.4 to 24.0)                             | 0.3<br>(-8.1 to 9.2)                                |
| Opioid use disorders                                           | 0.2<br>(0.2 to 0.3)                  | < 0.05<br>(< 0.05 to < 0.05)                        | 0.1<br>(0.1 to 0.1)                                 | 14.6<br>(3.0 to 28.0)                             | 1.2<br>(-8.8 to 12.7)                               |
| Cocaine use disorders                                          | 0.1<br>(0.1 to 0.1)                  | < 0.05<br>(< 0.05 to < 0.05)                        | < 0.05<br>(< 0.05 to < 0.05)                        | 12.3<br>(-6.4 to 36.8)                            | -2.2<br>(-18.7 to 19.1)                             |
| Amphetamine use disorders                                      | < 0.05<br>(< 0.05 to < 0.05)         | < 0.05<br>(< 0.05 to < 0.05)                        | < 0.05<br>(< 0.05 to < 0.05)                        | 13.8<br>(-20.0 to 62.3)                           | 0.2<br>(-30.3 to 42.8)                              |
| Cannabis use disorders                                         | 0.3<br>(0.2 to 0.3)                  | < 0.05<br>(< 0.05 to 0.1)                           | < 0.05<br>(< 0.05 to < 0.05)                        | 10.0<br>(-8.5 to 31.4)                            | -3.1<br>(-19.4 to 14.6)                             |
| Other drug use disorders                                       | < 0.05<br>(< 0.05 to < 0.05)         | < 0.05<br>(< 0.05 to < 0.05)                        | < 0.05<br>(< 0.05 to < 0.05)                        | 13.2<br>(-11.3 to 42.9)                           | -0.8<br>(-22.0 to 24.4)                             |
| Depressive disorders                                           | 2.9<br>(2.6 to 3.1)                  | 3.1<br>(2.8 to 3.5)                                 | 0.5<br>(0.3 to 0.7)                                 | 19.1<br>(13.0 to 24.8)                            | 0.2<br>(-4.1 to 4.4)                                |
| Major depressive disorder                                      | 1.9<br>(1.7 to 2.1)                  | 2.9<br>(2.6 to 3.3)                                 | 0.4<br>(0.3 to 0.5)                                 | 18.8<br>(11.4 to 26.1)                            | 0.2<br>(-5.0 to 5.6)                                |
| Dysthymia                                                      | 1.0<br>(0.9 to 1.2)                  | 0.2<br>(0.2 to 0.2)                                 | 0.1<br>(0.1 to 0.1)                                 | 19.9<br>(14.7 to 25.9)                            | 0.1<br>(-3.8 to 4.2)                                |
| Bipolar disorder                                               | 0.9<br>(0.7 to 1.0)                  | 0.1<br>(0.1 to 0.1)                                 | 0.2<br>(0.1 to 0.3)                                 | 14.8<br>(8.5 to 21.6)                             | -0.1<br>(-5.4 to 5.4)                               |
| Anxiety disorders                                              | 4.0<br>(3.6 to 4.4)                  | 0.6<br>(0.5 to 0.6)                                 | 0.4<br>(0.3 to 0.5)                                 | 14.0<br>(9.9 to 18.0)                             | 0.1<br>(-3.2 to 3.3)                                |
| Eating disorders                                               | 0.2<br>(0.1 to 0.2)                  | 0.1<br>(0.1 to 0.1)                                 | < 0.05<br>(< 0.05 to 0.1)                           | 8.3<br>(-4.3 to 22.8)                             | 3.4<br>(-8.5 to 16.9)                               |
| Anorexia nervosa                                               | < 0.05<br>(< 0.05 to < 0.05)         | < 0.05<br>(< 0.05 to < 0.05)                        | < 0.05<br>(< 0.05 to < 0.05)                        | 11.0<br>(-12.8 to 45.4)                           | 2.7<br>(-19.2 to 34.3)                              |
| Bulimia nervosa                                                | 0.1<br>(0.1 to 0.2)                  | 0.1<br>(< 0.05 to 0.1)                              | < 0.05<br>(< 0.05 to < 0.05)                        | 7.6<br>(-6.4 to 24.4)                             | 3.6<br>(-9.7 to 18.8)                               |
| Autistic spectrum disorders                                    | 0.8<br>(0.7 to 0.8)                  | < 0.05<br>(< 0.05 to < 0.05)                        | 0.1<br>(0.1 to 0.2)                                 | 10.1<br>(4.9 to 15.8)                             | 0.1<br>(-4.6 to 5.2)                                |
| Autism                                                         | 0.2<br>(0.2 to 0.3)                  | < 0.05<br>(< 0.05 to < 0.05)                        | 0.1<br>(< 0.05 to 0.1)                              | 10.3<br>(2.0 to 19.6)                             | -0.0<br>(-7.4 to 8.4)                               |
| Asperger syndrome and other autistic spectrum disorders        | 0.5<br>(0.4 to 0.6)                  | < 0.05<br>(< 0.05 to < 0.05)                        | 0.1<br>(< 0.05 to 0.1)                              | 9.8<br>(4.5 to 15.6)                              | 0.1<br>(-4.6 to 5.2)                                |

| Cause                                                      | Prevalence in thousands (95% UI)     | Incidence in thousands (95% UI)          | YLDs in thousands (95% UI)        |                                                   |                                                     |
|------------------------------------------------------------|--------------------------------------|------------------------------------------|-----------------------------------|---------------------------------------------------|-----------------------------------------------------|
|                                                            | 2016 counts                          | 2016 counts                              | 2016 counts                       | Percentage change in counts between 2006 and 2016 | Percentage change in age-standardised rates between |
| Attention-deficit/hyperactivity disorder                   | 1.7<br>(1.5 to 1.9)                  | 0.1<br>(0.1 to 0.1)                      | < 0.05<br>(< 0.05 to < 0.05)      | 6.4<br>(0.3 to 12.6)                              | 0.4<br>(-5.3 to 6.4)                                |
| Conduct disorder                                           | 0.6<br>(0.5 to 0.7)                  | 0.2<br>(0.1 to 0.2)                      | 0.1<br>(< 0.05 to 0.1)            | 3.2<br>(-4.1 to 10.6)                             | 1.0<br>(-6.4 to 7.9)                                |
| Idiopathic developmental intellectual disability           | 0.4<br>(0.2 to 0.7)                  | --                                       | < 0.05<br>(< 0.05 to < 0.05)      | 10.1<br>(1.7 to 19.1)                             | -0.6<br>(-7.9 to 7.0)                               |
| Other mental and substance use disorders                   | 1.8<br>(1.6 to 2.1)                  | 0.1<br>(0.1 to 0.1)                      | 0.1<br>(0.1 to 0.2)               | 17.0<br>(11.3 to 23.3)                            | -0.0<br>(-4.7 to 5.1)                               |
| <b>Diabetes, urogenital, blood, and endocrine diseases</b> | <b>37.6</b><br><b>(36.6 to 38.6)</b> | <b>10.8†</b><br><b>(10.1 to 11.5)</b>    | <b>1.0</b><br><b>(0.7 to 1.3)</b> | <b>21.1</b><br><b>(15.5 to 26.8)</b>              | <b>-3.8</b><br><b>(-8.3 to 0.8)</b>                 |
| Diabetes mellitus                                          | 6.8<br>(6.2 to 7.6)                  | 0.4<br>(0.4 to 0.5)                      | 0.6<br>(0.4 to 0.8)               | 24.8<br>(16.0 to 34.2)                            | -5.2<br>(-12.0 to 1.9)                              |
| Acute glomerulonephritis                                   | < 0.05<br>(< 0.05 to < 0.05)         | < 0.05<br>(< 0.05 to < 0.05)             | < 0.05<br>(< 0.05 to < 0.05)      | 13.7<br>(8.2 to 19.9)                             | 0.2<br>(-3.6 to 4.1)                                |
| Chronic kidney disease                                     | 3.6<br>(3.2 to 3.9)                  | 0.3<br>(0.2 to 0.3)                      | 0.1<br>(0.1 to 0.1)               | 22.3<br>(13.8 to 32.8)                            | 0.2<br>(-7.0 to 8.5)                                |
| Chronic kidney disease due to diabetes mellitus            | 1.3<br>(1.1 to 1.5)                  | 0.1<br>(0.1 to 0.1)                      | < 0.05<br>(< 0.05 to 0.1)         | 33.5<br>(20.9 to 48.4)                            | 4.6<br>(-4.8 to 15.7)                               |
| Chronic kidney disease due to hypertension                 | 0.8<br>(0.7 to 0.9)                  | 0.1<br>(0.1 to 0.1)                      | < 0.05<br>(< 0.05 to < 0.05)      | 16.7<br>(3.1 to 31.8)                             | -1.2<br>(-13.2 to 11.7)                             |
| Chronic kidney disease due to glomerulonephritis           | 0.7<br>(0.6 to 0.8)                  | < 0.05<br>(< 0.05 to < 0.05)             | < 0.05<br>(< 0.05 to < 0.05)      | 17.7<br>(5.4 to 30.9)                             | -2.1<br>(-11.4 to 7.4)                              |
| Chronic kidney disease due to other causes                 | 0.8<br>(0.6 to 0.9)                  | 0.1<br>(< 0.05 to 0.1)                   | < 0.05<br>(< 0.05 to < 0.05)      | 15.8<br>(4.4 to 29.1)                             | -2.8<br>(-11.6 to 6.9)                              |
| Urinary diseases and male infertility                      | 1.6<br>(1.4 to 1.7)                  | 6.4†<br>(5.7 to 7.1)                     | < 0.05<br>(< 0.05 to 0.1)         | 25.2<br>(17.2 to 33.6)                            | -3.8<br>(-9.6 to 2.3)                               |
| Interstitial nephritis and urinary tract infections        | 0.1<br>(0.1 to 0.1)                  | 5.9<br>(5.2 to 6.5)                      | < 0.05<br>(< 0.05 to < 0.05)      | 15.9<br>(0.6 to 33.5)                             | 3.1<br>(-9.6 to 17.2)                               |
| Urolithiasis                                               | < 0.05<br>(< 0.05 to < 0.05)         | 0.4<br>(0.3 to 0.4)                      | < 0.05<br>(< 0.05 to < 0.05)      | 21.2<br>(14.3 to 28.3)                            | 1.5<br>(-2.4 to 5.3)                                |
| Benign prostatic hyperplasia                               | 0.9<br>(0.8 to 1.1)                  | 0.1<br>(0.1 to 0.1)                      | < 0.05<br>(< 0.05 to < 0.05)      | 32.5<br>(22.9 to 43.7)                            | -4.0<br>(-11.1 to 3.8)                              |
| Male infertility                                           | 0.4<br>(0.3 to 0.5)                  | --                                       | < 0.05<br>(< 0.05 to < 0.05)      | -5.5<br>(-14.5 to 4.0)                            | -3.4<br>(-10.2 to 3.6)                              |
| Other urinary diseases                                     | --                                   | --                                       | < 0.05<br>(< 0.05 to < 0.05)      | -4.8<br>(-15.3 to 7.0)                            | -15.3<br>(-24.1 to -5.7)                            |
| Gynecological diseases                                     | 11.1<br>(10.6 to 11.7)               | 3.5†<br>(3.3 to 3.7)                     | 0.1<br>(0.1 to 0.2)               | 13.3<br>(7.9 to 19.6)                             | -1.0<br>(-5.5 to 3.9)                               |
| Uterine fibroids                                           | 1.0<br>(0.9 to 1.1)                  | 0.1<br>(0.1 to 0.1)                      | < 0.05<br>(< 0.05 to < 0.05)      | 22.4<br>(4.7 to 43.0)                             | 0.1<br>(-12.5 to 13.0)                              |
| Polycystic ovarian syndrome                                | < 0.05<br>(< 0.05 to < 0.05)         | 0.1<br>(0.1 to 0.1)                      | < 0.05<br>(< 0.05 to < 0.05)      | -10.4<br>(-38.2 to 27.1)                          | -1.2<br>(-30.8 to 40.3)                             |
| Female infertility                                         | 1.0<br>(0.7 to 1.4)                  | --                                       | < 0.05<br>(< 0.05 to < 0.05)      | -2.4<br>(-11.7 to 9.4)                            | 2.7<br>(-4.9 to 10.7)                               |
| Endometriosis                                              | < 0.05<br>(< 0.05 to < 0.05)         | < 0.05<br>(< 0.05 to < 0.05)             | < 0.05<br>(< 0.05 to < 0.05)      | 22.1<br>(-9.8 to 63.0)                            | 1.7<br>(-22.7 to 31.7)                              |
| Genital prolapse                                           | 3.1<br>(2.6 to 3.5)                  | 0.2<br>(0.2 to 0.2)                      | < 0.05<br>(< 0.05 to < 0.05)      | 19.1<br>(9.7 to 29.7)                             | -10.5<br>(-17.0 to -2.5)                            |
| Premenstrual syndrome                                      | 6.4<br>(6.0 to 6.8)                  | 2.2<br>(2.1 to 2.4)                      | 0.1<br>(< 0.05 to 0.1)            | 11.2<br>(3.1 to 20.0)                             | -0.6<br>(-7.6 to 6.9)                               |
| Other gynecological diseases                               | 1.1<br>(0.9 to 1.2)                  | 0.8<br>(0.7 to 1.0)                      | < 0.05<br>(< 0.05 to < 0.05)      | 13.4<br>(1.4 to 26.1)                             | 0.3<br>(-9.5 to 10.3)                               |
| Hemoglobinopathies and hemolytic anaemias                  | 21.9<br>(20.7 to 23.2)               | --                                       | < 0.05<br>(< 0.05 to 0.1)         | 2.0<br>(-9.1 to 13.8)                             | -5.1<br>(-15.3 to 6.1)                              |
| Thalassemias                                               | < 0.05<br>(< 0.05 to < 0.05)         | --                                       | < 0.05<br>(< 0.05 to < 0.05)      | -10.7<br>(-27.3 to 8.9)                           | -4.5<br>(-22.6 to 17.0)                             |
| Thalassaemias trait                                        | 0.1<br>(0.1 to 0.2)                  | --                                       | < 0.05<br>(< 0.05 to < 0.05)      | 9.2<br>(-10.0 to 31.1)                            | 0.8<br>(-15.9 to 21.6)                              |
| Sickle cell disorders                                      | < 0.05<br>(< 0.05 to 0.1)            | --                                       | < 0.05<br>(< 0.05 to < 0.05)      | 13.4<br>(-1.8 to 30.3)                            | 8.8<br>(-5.9 to 24.7)                               |
| Sickle cell trait                                          | 7.7<br>(6.7 to 8.6)                  | --                                       | < 0.05<br>(< 0.05 to < 0.05)      | -1.4<br>(-16.1 to 14.8)                           | -7.6<br>(-21.2 to 7.4)                              |
| G6PD deficiency                                            | 4.2<br>(3.6 to 4.7)                  | --                                       | < 0.05<br>(< 0.05 to < 0.05)      | 30.2<br>(8.8 to 54.7)                             | 17.9<br>(-2.6 to 39.7)                              |
| G6PD trait                                                 | 10.4<br>(9.7 to 11.1)                | --                                       | < 0.05<br>(< 0.05 to < 0.05)      | 6.8<br>(-11.9 to 30.4)                            | -3.2<br>(-19.9 to 16.1)                             |
| Other hemoglobinopathies and hemolytic anaemias            | 1.2<br>(1.1 to 1.4)                  | --                                       | < 0.05<br>(< 0.05 to < 0.05)      | 2.5<br>(-10.4 to 16.6)                            | -5.7<br>(-17.1 to 6.9)                              |
| Endocrine, metabolic, blood, and immune disorders          | 1.8<br>(1.6 to 1.9)                  | 0.2<br>(0.2 to 0.2)                      | < 0.05<br>(< 0.05 to 0.1)         | 15.3<br>(7.4 to 23.4)                             | -0.2<br>(-6.7 to 6.8)                               |
| <b>Musculoskeletal disorders</b>                           | <b>14.9</b><br><b>(14.2 to 15.6)</b> | <b>7.6</b><br><b>(6.9 to 8.5)</b>        | <b>1.6</b><br><b>(1.2 to 2.1)</b> | <b>22.8</b><br><b>(18.6 to 27.2)</b>              | <b>-0.1</b><br><b>(-2.7 to 2.8)</b>                 |
| Rheumatoid arthritis                                       | 0.4<br>(0.3 to 0.4)                  | < 0.05<br>(< 0.05 to < 0.05)             | 0.1<br>(0.1 to 0.1)               | 33.9<br>(23.4 to 46.0)                            | 5.6<br>(-2.1 to 14.0)                               |
| Osteoarthritis                                             | 3.2<br>(3.0 to 3.5)                  | 0.2<br>(0.2 to 0.2)                      | 0.2<br>(0.1 to 0.3)               | 34.3<br>(29.0 to 39.6)                            | 2.3<br>(-1.5 to 6.1)                                |
| Low back and neck pain                                     | 7.8<br>(7.2 to 8.4)                  | 3.0<br>(2.7 to 3.3)                      | 0.9<br>(0.6 to 1.2)               | 23.1<br>(17.9 to 28.1)                            | 1.0<br>(-1.9 to 3.9)                                |
| Low back pain                                              | 4.7<br>(4.2 to 5.4)                  | 2.2<br>(1.9 to 2.6)                      | 0.5<br>(0.4 to 0.7)               | 22.0<br>(15.0 to 29.2)                            | 1.5<br>(-3.2 to 6.2)                                |
| Neck pain                                                  | 3.5<br>(3.0 to 4.1)                  | 0.8<br>(0.7 to 0.9)                      | 0.4<br>(0.2 to 0.5)               | 24.7<br>(18.3 to 31.1)                            | 0.2<br>(-1.9 to 2.4)                                |
| Gout                                                       | 0.3<br>(0.2 to 0.3)                  | 0.1<br>(< 0.05 to 0.1)                   | < 0.05<br>(< 0.05 to < 0.05)      | 24.0<br>(4.8 to 45.8)                             | -1.4<br>(-15.2 to 14.7)                             |
| Other musculoskeletal disorders                            | 5.0<br>(4.3 to 5.8)                  | 4.4<br>(3.7 to 5.2)                      | 0.4<br>(0.3 to 0.6)               | 15.8<br>(6.2 to 27.2)                             | -4.4<br>(-11.4 to 3.5)                              |
| <b>Other non-communicable diseases</b>                     | <b>67.9</b><br><b>(66.7 to 69.0)</b> | <b>212.2†</b><br><b>(199.4 to 226.1)</b> | <b>1.9</b><br><b>(1.2 to 2.6)</b> | <b>15.1</b><br><b>(13.6 to 16.5)</b>              | <b>-0.7</b><br><b>(-1.7 to 0.4)</b>                 |
| Congenital anomalies                                       | 0.7<br>(0.6 to 0.8)                  | --                                       | 0.1<br>(0.1 to 0.1)               | 9.6<br>(3.2 to 16.7)                              | 0.3<br>(-5.3 to 6.9)                                |
| Neural tube defects                                        | < 0.05<br>(< 0.05 to < 0.05)         | --                                       | < 0.05<br>(< 0.05 to < 0.05)      | 11.4<br>(-5.0 to 32.2)                            | 0.5<br>(-14.0 to 18.8)                              |
| Congenital heart anomalies                                 | 0.2<br>(0.1 to 0.2)                  | --                                       | < 0.05<br>(< 0.05 to < 0.05)      | 14.1<br>(1.3 to 28.2)                             | 5.4<br>(-6.2 to 18.7)                               |
| Orofacial clefts                                           | 0.1<br>(< 0.05 to 0.1)               | --                                       | < 0.05<br>(< 0.05 to < 0.05)      | 6.8<br>(-4.2 to 20.2)                             | -3.0<br>(-13.1 to 9.3)                              |
| Down's syndrome                                            | < 0.05<br>(< 0.05 to 0.1)            | --                                       | < 0.05<br>(< 0.05 to < 0.05)      | 14.8<br>(5.5 to 24.5)                             | 5.2<br>(-3.2 to 14.3)                               |
| Turner syndrome                                            | < 0.05<br>(< 0.05 to < 0.05)         | --                                       | < 0.05<br>(< 0.05 to < 0.05)      | 8.6<br>(-6.3 to 26.4)                             | 1.8<br>(-13.2 to 19.5)                              |
| Klinefelter syndrome                                       | < 0.05<br>(< 0.05 to < 0.05)         | --                                       | < 0.05<br>(< 0.05 to < 0.05)      | 6.7<br>(-20.4 to 46.2)                            | 1.3<br>(-24.8 to 40.5)                              |



| Cause                                         | Prevalence in thousands (95% UI)     | Incidence in thousands (95% UI)    | YLDs in thousands (95% UI)        |                                                   |                                                     |
|-----------------------------------------------|--------------------------------------|------------------------------------|-----------------------------------|---------------------------------------------------|-----------------------------------------------------|
|                                               | 2016 counts                          | 2016 counts                        | 2016 counts                       | Percentage change in counts between 2006 and 2016 | Percentage change in age-standardised rates between |
| Other chromosomal abnormalities               | 0.1<br>(0.1 to 0.1)                  | --                                 | < 0.05<br>(< 0.05 to < 0.05)      | -2.2<br>(-17.6 to 15.6)                           | -0.6<br>(-16.2 to 18.0)                             |
| Congenital musculoskeletal and limb anomalies | 0.1<br>(0.1 to 0.1)                  | --                                 | < 0.05<br>(< 0.05 to < 0.05)      | 13.9<br>(3.1 to 26.2)                             | 1.3<br>(-8.0 to 12.2)                               |
| Urogenital congenital anomalies               | 0.1<br>(0.1 to 0.1)                  | --                                 | < 0.05<br>(< 0.05 to < 0.05)      | -0.5<br>(-13.0 to 15.7)                           | -0.5<br>(-13.3 to 15.4)                             |
| Digestive congenital anomalies                | 0.1<br>(0.1 to 0.1)                  | --                                 | < 0.05<br>(< 0.05 to < 0.05)      | 13.7<br>(-5.7 to 35.5)                            | 3.0<br>(-13.9 to 22.6)                              |
| Other congenital anomalies                    | 0.3<br>(0.2 to 0.4)                  | --                                 | < 0.05<br>(< 0.05 to < 0.05)      | 9.2<br>(-3.2 to 24.2)                             | -1.8<br>(-12.6 to 11.2)                             |
| Skin and subcutaneous diseases                | 30.2<br>(29.4 to 31.1)               | 70.6<br>(66.5 to 75.0)             | 0.7<br>(0.5 to 1.1)               | 9.6<br>(7.5 to 11.9)                              | 0.5<br>(-1.2 to 2.5)                                |
| Dermatitis                                    | 4.4<br>(4.1 to 4.7)                  | 4.9<br>(4.6 to 5.3)                | 0.2<br>(0.1 to 0.3)               | 5.0<br>(1.5 to 8.8)                               | -0.1<br>(-3.2 to 3.4)                               |
| Psoriasis                                     | 0.9<br>(0.9 to 1.0)                  | 0.1<br>(0.1 to 0.1)                | 0.1<br>(0.1 to 0.1)               | 19.8<br>(11.3 to 29.3)                            | 3.5<br>(-3.2 to 11.2)                               |
| Cellulitis                                    | < 0.05<br>(< 0.05 to < 0.05)         | 0.6<br>(0.6 to 0.7)                | < 0.05<br>(< 0.05 to < 0.05)      | 12.8<br>(-8.9 to 39.7)                            | 1.3<br>(-18.1 to 24.6)                              |
| Pyoderma                                      | 0.3<br>(0.2 to 0.3)                  | 6.2<br>(6.0 to 6.5)                | < 0.05<br>(< 0.05 to < 0.05)      | 21.9<br>(13.8 to 30.0)                            | 0.7<br>(-5.3 to 6.8)                                |
| Scabies                                       | 1.6<br>(1.4 to 1.9)                  | 5.0<br>(4.3 to 5.7)                | < 0.05<br>(< 0.05 to 0.1)         | 4.1<br>(-0.2 to 8.6)                              | -3.6<br>(-7.1 to 0.1)                               |
| Fungal skin diseases                          | 9.6<br>(8.7 to 10.6)                 | 33.9<br>(30.0 to 38.4)             | 0.1<br>(< 0.05 to 0.1)            | 12.9<br>(10.4 to 15.4)                            | 0.0<br>(-1.0 to 1.0)                                |
| Viral skin diseases                           | 2.6<br>(2.4 to 2.7)                  | 3.8<br>(3.6 to 4.0)                | 0.1<br>(< 0.05 to 0.1)            | 7.4<br>(4.0 to 11.2)                              | -0.1<br>(-3.1 to 2.9)                               |
| Acne vulgaris                                 | 7.5<br>(6.7 to 8.3)                  | 5.0<br>(4.2 to 6.2)                | 0.2<br>(0.1 to 0.3)               | 9.6<br>(4.2 to 15.0)                              | 1.4<br>(-3.6 to 6.4)                                |
| Alopecia areata                               | 0.2<br>(0.2 to 0.2)                  | 0.3<br>(0.3 to 0.3)                | < 0.05<br>(< 0.05 to < 0.05)      | 11.3<br>(-1.0 to 24.4)                            | -0.2<br>(-10.9 to 11.3)                             |
| Pruritus                                      | 0.8<br>(0.8 to 1.0)                  | 0.7<br>(0.6 to 0.8)                | < 0.05<br>(< 0.05 to < 0.05)      | 16.3<br>(9.3 to 23.6)                             | 0.5<br>(-4.5 to 5.8)                                |
| Urticaria                                     | 0.8<br>(0.7 to 0.9)                  | 1.4<br>(1.2 to 1.6)                | < 0.05<br>(< 0.05 to 0.1)         | 5.5<br>(-1.0 to 12.6)                             | -0.1<br>(-5.6 to 5.5)                               |
| Decubitus ulcer                               | < 0.05<br>(< 0.05 to 0.1)            | 0.2<br>(0.1 to 0.2)                | < 0.05<br>(< 0.05 to < 0.05)      | 16.1<br>(3.0 to 30.0)                             | -0.9<br>(-12.5 to 11.8)                             |
| Other skin and subcutaneous diseases          | 7.2<br>(7.0 to 7.4)                  | 8.5<br>(8.2 to 8.8)                | < 0.05<br>(< 0.05 to 0.1)         | 20.7<br>(17.6 to 23.7)                            | 0.9<br>(-1.5 to 3.1)                                |
| Sense organ diseases                          | 22.1<br>(21.6 to 22.7)               | 8.8†<br>(8.2 to 9.3)               | 0.7<br>(0.5 to 1.0)               | 18.6<br>(16.3 to 20.9)                            | -2.2<br>(-3.6 to -0.6)                              |
| Glaucoma                                      | 0.1<br>(0.1 to 0.1)                  | --                                 | < 0.05<br>(< 0.05 to < 0.05)      | 24.6<br>(12.8 to 37.7)                            | -1.8<br>(-10.8 to 8.4)                              |
| Cataract                                      | 0.8<br>(0.7 to 0.9)                  | --                                 | 0.1<br>(< 0.05 to 0.1)            | 13.6<br>(8.6 to 19.2)                             | -3.7<br>(-7.8 to 0.8)                               |
| Macular degeneration                          | < 0.05<br>(< 0.05 to < 0.05)         | --                                 | < 0.05<br>(< 0.05 to < 0.05)      | 24.9<br>(7.2 to 45.6)                             | 0.1<br>(-13.9 to 16.3)                              |
| Refraction and accommodation disorders        | 9.3<br>(8.9 to 9.8)                  | --                                 | 0.1<br>(0.1 to 0.2)               | 14.1<br>(10.6 to 17.7)                            | -5.2<br>(-7.9 to -2.2)                              |
| Age-related and other hearing loss            | 15.4<br>(14.5 to 16.4)               | --                                 | 0.4<br>(0.3 to 0.6)               | 19.9<br>(15.8 to 23.6)                            | -1.5<br>(-3.7 to 0.8)                               |
| Other vision loss                             | 0.2<br>(0.2 to 0.2)                  | --                                 | < 0.05<br>(< 0.05 to < 0.05)      | 20.2<br>(9.9 to 31.3)                             | -2.0<br>(-9.6 to 5.5)                               |
| Other sense organ diseases                    | 2.6<br>(2.5 to 2.9)                  | 8.8<br>(8.2 to 9.3)                | 0.1<br>(0.1 to 0.1)               | 22.7<br>(17.9 to 27.6)                            | 0.6<br>(-3.2 to 4.2)                                |
| Oral disorders                                | 48.2<br>(46.4 to 50.1)               | 132.9†<br>(121.1 to 145.0)         | 0.3<br>(0.2 to 0.5)               | 22.5<br>(20.1 to 25.7)                            | 0.0<br>(-1.5 to 1.7)                                |
| Caries of deciduous teeth                     | 5.7<br>(4.6 to 6.9)                  | 19.5<br>(13.5 to 26.4)             | < 0.05<br>(< 0.05 to < 0.05)      | -8.2<br>(-18.0 to 1.9)                            | -0.9<br>(-11.0 to 9.5)                              |
| Caries of permanent teeth                     | 30.9<br>(28.9 to 33.2)               | 111.2<br>(100.5 to 121.4)          | < 0.05<br>(< 0.05 to 0.1)         | 12.7<br>(8.4 to 17.0)                             | -1.0<br>(-4.1 to 2.3)                               |
| Periodontal disease                           | 15.4<br>(13.1 to 18.0)               | 1.8<br>(1.5 to 2.1)                | 0.1<br>(< 0.05 to 0.2)            | 21.2<br>(16.8 to 25.8)                            | -0.7<br>(-3.6 to 2.0)                               |
| Edentulism and severe tooth loss              | 4.9<br>(4.3 to 5.5)                  | 0.4<br>(0.4 to 0.5)                | 0.1<br>(0.1 to 0.2)               | 29.8<br>(25.5 to 34.4)                            | 0.6<br>(-2.0 to 3.6)                                |
| Other oral disorders                          | 1.7<br>(1.7 to 1.8)                  | --                                 | 0.1<br>(< 0.05 to 0.1)            | 15.5<br>(11.3 to 19.7)                            | 0.1<br>(-3.1 to 3.4)                                |
| <b>Injuries</b>                               | <b>16.1</b><br><b>(15.1 to 17.6)</b> | <b>6.4†</b><br><b>(6.0 to 6.8)</b> | <b>0.6</b><br><b>(0.4 to 0.8)</b> | <b>22.2</b><br><b>(19.7 to 24.3)</b>              | <b>3.1</b><br><b>(1.2 to 4.7)</b>                   |
| <b>Transport injuries</b>                     | <b>1.5</b><br><b>(1.4 to 1.6)</b>    | <b>0.5</b><br><b>(0.5 to 0.6)</b>  | <b>0.1</b><br><b>(0.1 to 0.1)</b> | <b>27.0</b><br><b>(23.9 to 29.8)</b>              | <b>5.7</b><br><b>(3.4 to 8.0)</b>                   |
| Road injuries                                 | 1.4<br>(1.3 to 1.5)                  | 0.5<br>(0.4 to 0.6)                | 0.1<br>(< 0.05 to 0.1)            | 28.9<br>(25.7 to 31.7)                            | 7.1<br>(4.7 to 9.3)                                 |
| Pedestrian road injuries                      | 0.2<br>(0.2 to 0.2)                  | < 0.05<br>(< 0.05 to 0.1)          | < 0.05<br>(< 0.05 to < 0.05)      | 40.4<br>(36.8 to 43.7)                            | 17.0<br>(14.3 to 19.4)                              |
| Cyclist road injuries                         | 0.4<br>(0.3 to 0.5)                  | 0.1<br>(0.1 to 0.2)                | < 0.05<br>(< 0.05 to < 0.05)      | 36.6<br>(33.0 to 40.0)                            | 14.1<br>(11.5 to 16.6)                              |
| Motorcyclist road injuries                    | 0.3<br>(0.2 to 0.3)                  | 0.1<br>(0.1 to 0.1)                | < 0.05<br>(< 0.05 to < 0.05)      | 23.5<br>(20.2 to 26.5)                            | 2.9<br>(0.4 to 5.1)                                 |
| Motor vehicle road injuries                   | 0.4<br>(0.4 to 0.5)                  | 0.2<br>(0.1 to 0.2)                | < 0.05<br>(< 0.05 to < 0.05)      | 23.8<br>(20.8 to 26.8)                            | 2.4<br>(0.0 to 4.7)                                 |
| Other road injuries                           | 0.2<br>(0.1 to 0.2)                  | 0.1<br>(0.1 to 0.1)                | < 0.05<br>(< 0.05 to < 0.05)      | 24.8<br>(21.9 to 27.5)                            | 3.1<br>(0.9 to 5.2)                                 |
| Other transport injuries                      | 0.1<br>(0.1 to 0.1)                  | < 0.05<br>(< 0.05 to < 0.05)       | < 0.05<br>(< 0.05 to < 0.05)      | 5.1<br>(2.1 to 7.9)                               | -10.3<br>(-12.8 to -8.1)                            |
| <b>Unintentional injuries</b>                 | <b>14.0</b><br><b>(13.0 to 15.4)</b> | <b>5.6</b><br><b>(5.2 to 6.0)</b>  | <b>0.5</b><br><b>(0.3 to 0.6)</b> | <b>22.0</b><br><b>(19.3 to 24.2)</b>              | <b>2.8</b><br><b>(0.9 to 4.5)</b>                   |
| Falls                                         | 4.8<br>(4.1 to 5.5)                  | 2.0<br>(1.8 to 2.4)                | 0.2<br>(0.1 to 0.3)               | 32.8<br>(30.1 to 35.3)                            | 9.6<br>(7.4 to 11.6)                                |
| Drowning                                      | 0.1<br>(0.1 to 0.1)                  | < 0.05<br>(< 0.05 to < 0.05)       | < 0.05<br>(< 0.05 to < 0.05)      | 11.5<br>(8.2 to 14.6)                             | -6.4<br>(-9.1 to -3.9)                              |
| Fire, heat, and hot substances                | 1.5<br>(1.2 to 1.9)                  | 0.2<br>(0.1 to 0.2)                | < 0.05<br>(< 0.05 to 0.1)         | 12.8<br>(8.0 to 17.7)                             | -2.9<br>(-7.0 to 0.9)                               |
| Poisonings                                    | < 0.05<br>(< 0.05 to < 0.05)         | < 0.05<br>(< 0.05 to 0.1)          | < 0.05<br>(< 0.05 to < 0.05)      | 29.0<br>(18.7 to 39.5)                            | 13.4<br>(4.8 to 21.9)                               |
| Exposure to mechanical forces                 | 3.8<br>(3.3 to 4.5)                  | 1.4<br>(1.2 to 1.6)                | 0.1<br>(0.1 to 0.1)               | 17.4<br>(14.5 to 20.0)                            | -2.3<br>(-4.7 to -0.3)                              |
| Unintentional firearm injuries                | 0.4<br>(0.4 to 0.6)                  | 0.1<br>(0.1 to 0.1)                | < 0.05<br>(< 0.05 to < 0.05)      | 10.8<br>(7.6 to 13.5)                             | -8.7<br>(-11.1 to -6.5)                             |
| Unintentional suffocation                     | 0.1<br>(0.1 to 0.1)                  | < 0.05<br>(< 0.05 to < 0.05)       | < 0.05<br>(< 0.05 to < 0.05)      | 11.1<br>(8.0 to 14.1)                             | -2.5<br>(-5.1 to -0.0)                              |
| Other exposure to mechanical forces           | 3.3<br>(2.8 to 4.0)                  | 1.3<br>(1.1 to 1.4)                | 0.1<br>(< 0.05 to 0.1)            | 19.4<br>(16.4 to 22.2)                            | -0.6<br>(-3.1 to 1.4)                               |

| Cause                                                                               | Prevalence in thousands (95% UI)                    | Incidence in thousands (95% UI)                      | YLDs in thousands (95% UI)                          |                                                   |                                                     |
|-------------------------------------------------------------------------------------|-----------------------------------------------------|------------------------------------------------------|-----------------------------------------------------|---------------------------------------------------|-----------------------------------------------------|
|                                                                                     | 2016 counts                                         | 2016 counts                                          | 2016 counts                                         | Percentage change in counts between 2006 and 2016 | Percentage change in age-standardised rates between |
| Adverse effects of medical treatment                                                | < 0.05<br>(< 0.05 to < 0.05)                        | 0.4<br>(0.4 to 0.5)                                  | < 0.05<br>(< 0.05 to < 0.05)                        | 10.9<br>(5.3 to 17.7)                             | 4.0<br>(-1.3 to 10.6)                               |
| Animal contact                                                                      | 0.3<br>(0.2 to 0.3)                                 | 0.3<br>(0.2 to 0.3)                                  | < 0.05<br>(< 0.05 to < 0.05)                        | 9.5<br>(2.7 to 16.2)                              | -4.5<br>(-10.1 to 1.1)                              |
| Venomous animal contact                                                             | 0.1<br>(0.1 to 0.2)                                 | 0.1<br>(0.1 to 0.2)                                  | < 0.05<br>(< 0.05 to < 0.05)                        | 10.5<br>(2.3 to 19.2)                             | -3.0<br>(-10.0 to 3.9)                              |
| Non-venomous animal contact                                                         | 0.1<br>(0.1 to 0.1)                                 | 0.1<br>(0.1 to 0.2)                                  | < 0.05<br>(< 0.05 to < 0.05)                        | 5.5<br>(1.7 to 9.0)                               | -9.7<br>(-12.5 to -7.2)                             |
| Foreign body                                                                        | 0.6<br>(0.5 to 0.7)                                 | 0.5<br>(0.4 to 0.6)                                  | < 0.05<br>(< 0.05 to < 0.05)                        | 7.7<br>(4.6 to 10.6)                              | -5.5<br>(-8.0 to -3.1)                              |
| Pulmonary aspiration and foreign body in airway                                     | 0.4<br>(0.3 to 0.5)                                 | 0.1<br>(0.1 to 0.1)                                  | < 0.05<br>(< 0.05 to < 0.05)                        | 6.0<br>(2.6 to 9.2)                               | -6.2<br>(-9.1 to -3.6)                              |
| Foreign body in eyes                                                                | 0.1<br>(< 0.05 to 0.1)                              | 0.3<br>(0.2 to 0.4)                                  | < 0.05<br>(< 0.05 to < 0.05)                        | 22.3<br>(17.7 to 27.6)                            | 4.3<br>(1.8 to 7.2)                                 |
| Foreign body in other body part                                                     | 0.2<br>(0.1 to 0.2)                                 | 0.1<br>(0.1 to 0.1)                                  | < 0.05<br>(< 0.05 to < 0.05)                        | 4.3<br>(0.9 to 7.5)                               | -9.2<br>(-12.0 to -6.6)                             |
| Environmental heat and cold exposure                                                | 1.2<br>(1.0 to 1.4)                                 | 0.3<br>(0.2 to 0.4)                                  | < 0.05<br>(< 0.05 to 0.1)                           | 14.8<br>(12.0 to 17.2)                            | -2.0<br>(-4.3 to -0.1)                              |
| Other unintentional injuries                                                        | 1.7<br>(1.3 to 2.1)                                 | 0.5<br>(0.4 to 0.6)                                  | < 0.05<br>(< 0.05 to 0.1)                           | 18.2<br>(15.6 to 20.7)                            | 2.6<br>(0.7 to 4.4)                                 |
| <b>Self-harm and interpersonal violence</b>                                         | <b>2.5</b><br><b>(2.2 to 2.8)</b>                   | <b>0.2†</b><br><b>(0.2 to 0.3)</b>                   | <b>&lt; 0.05</b><br><b>(&lt; 0.05 to 0.1)</b>       | <b>15.2</b><br><b>(11.6 to 18.5)</b>              | <b>0.9</b><br><b>(-1.4 to 3.2)</b>                  |
| Self-harm                                                                           | 0.1<br>(< 0.05 to 0.1)                              | < 0.05<br>(< 0.05 to < 0.05)                         | < 0.05<br>(< 0.05 to < 0.05)                        | 27.2<br>(23.1 to 31.1)                            | 5.3<br>(2.1 to 8.3)                                 |
| Self-harm by firearm                                                                | < 0.05<br>(< 0.05 to < 0.05)                        | < 0.05<br>(< 0.05 to < 0.05)                         | < 0.05<br>(< 0.05 to < 0.05)                        | 16.2<br>(12.5 to 19.8)                            | -3.2<br>(-6.1 to -0.5)                              |
| Self-harm by other specified means                                                  | < 0.05<br>(< 0.05 to 0.1)                           | < 0.05<br>(< 0.05 to < 0.05)                         | < 0.05<br>(< 0.05 to < 0.05)                        | 28.3<br>(24.1 to 32.4)                            | 6.2<br>(2.8 to 9.3)                                 |
| Interpersonal violence                                                              | 2.5<br>(2.2 to 2.8)                                 | 0.2†<br>(0.2 to 0.3)                                 | < 0.05<br>(< 0.05 to < 0.05)                        | 14.4<br>(10.7 to 17.8)                            | 0.6<br>(-1.8 to 2.9)                                |
| Assault by firearm                                                                  | < 0.05<br>(< 0.05 to 0.1)                           | < 0.05<br>(< 0.05 to < 0.05)                         | < 0.05<br>(< 0.05 to < 0.05)                        | 35.3<br>(31.1 to 39.6)                            | 14.4<br>(11.2 to 17.7)                              |
| Assault by sharp object                                                             | 0.2<br>(0.2 to 0.2)                                 | 0.1<br>(0.1 to 0.1)                                  | < 0.05<br>(< 0.05 to < 0.05)                        | 30.6<br>(27.0 to 33.8)                            | 10.7<br>(7.9 to 13.1)                               |
| Sexual violence                                                                     | 1.9<br>(1.7 to 2.2)                                 | --                                                   | < 0.05<br>(< 0.05 to < 0.05)                        | 1.7<br>(-3.0 to 6.1)                              | -6.9<br>(-10.2 to -3.4)                             |
| Assault by other means                                                              | 0.3<br>(0.2 to 0.3)                                 | 0.1<br>(0.1 to 0.2)                                  | < 0.05<br>(< 0.05 to < 0.05)                        | 25.9<br>(22.8 to 28.8)                            | 5.6<br>(3.2 to 7.7)                                 |
| <b>Forces of nature, conflict and terrorism, and executions and police conflict</b> | <b>&lt; 0.05</b><br><b>(&lt; 0.05 to &lt; 0.05)</b> | <b>&lt; 0.05†</b><br><b>(&lt; 0.05 to &lt; 0.05)</b> | <b>&lt; 0.05</b><br><b>(&lt; 0.05 to &lt; 0.05)</b> | <b>-3.3</b><br><b>(-7.4 to 3.6)</b>               | <b>-15.6</b><br><b>(-18.9 to -9.0)</b>              |
| Exposure to forces of nature                                                        | --                                                  | --                                                   | --                                                  | --                                                | --                                                  |
| Conflict and terrorism                                                              | < 0.05<br>(< 0.05 to < 0.05)                        | --                                                   | < 0.05<br>(< 0.05 to < 0.05)                        | -16.0<br>(-19.2 to -12.5)                         | -26.9<br>(-29.7 to -24.0)                           |
| Executions and police conflict                                                      | < 0.05<br>(< 0.05 to < 0.05)                        | < 0.05<br>(< 0.05 to < 0.05)                         | < 0.05<br>(< 0.05 to < 0.05)                        | 20.3<br>(3.8 to 27.8)                             | 5.8<br>(-8.1 to 12.1)                               |
| <b>Impairments</b>                                                                  | --                                                  | --                                                   | --                                                  | --                                                | --                                                  |
| Anaemia                                                                             | 29.7<br>(26.7 to 32.6)                              | --                                                   | 0.7<br>(0.5 to 1.1)                                 | 1.7<br>(-9.7 to 13.3)                             | -5.9<br>(-16.5 to 4.4)                              |
| Developmental intellectual disability                                               | 1.3<br>(1.0 to 1.6)                                 | --                                                   | 0.2<br>(0.1 to 0.3)                                 | 12.7<br>(5.4 to 21.5)                             | 3.3<br>(-3.8 to 11.6)                               |
| Epilepsy                                                                            | 0.7<br>(0.4 to 1.0)                                 | --                                                   | 0.2<br>(0.1 to 0.4)                                 | 7.8<br>(-49.6 to 148.9)                           | -2.7<br>(-54.7 to 126.2)                            |
| Guillain-Barre syndrome                                                             | < 0.05<br>(< 0.05 to < 0.05)                        | --                                                   | < 0.05<br>(< 0.05 to < 0.05)                        | 85.9<br>(45.5 to 176.3)                           | 59.1<br>(27.4 to 133.3)                             |
| Hearing loss                                                                        | 16.4<br>(15.6 to 17.4)                              | --                                                   | 0.5<br>(0.3 to 0.6)                                 | 18.0<br>(14.5 to 21.3)                            | -1.8<br>(-3.8 to 0.4)                               |
| Heart failure                                                                       | 0.6<br>(0.5 to 0.7)                                 | --                                                   | 0.1<br>(< 0.05 to 0.1)                              | 19.9<br>(10.9 to 29.7)                            | -0.6<br>(-8.2 to 7.4)                               |
| Infertility                                                                         | 1.8<br>(1.4 to 2.3)                                 | --                                                   | < 0.05<br>(< 0.05 to < 0.05)                        | -2.8<br>(-9.8 to 5.1)                             | 0.5<br>(-4.4 to 5.9)                                |
| Pelvic inflammatory disease                                                         | < 0.05<br>(< 0.05 to < 0.05)                        | --                                                   | < 0.05<br>(< 0.05 to < 0.05)                        | 5.8<br>(-14.6 to 29.5)                            | -4.9<br>(-23.2 to 15.2)                             |
| Vision loss                                                                         | 10.9<br>(10.4 to 11.3)                              | --                                                   | 0.3<br>(0.2 to 0.5)                                 | 14.5<br>(10.6 to 18.4)                            | -2.6<br>(-5.6 to 0.8)                               |

We did not calculate incidence for the nine impairments, certain NTDs, and causes with only birth prevalence. Blank cells mean that no estimate is available.

† Incidence for aggregate causes represents the sum of the incidence of the causes below the aggregate.

‡ Incidence estimates for stroke represent first-ever stroke only.

^ Incidence of HIV/AIDS represents new infections of HIV only and does not include new infections of Tuberculosis in HIV positive cases.



SR Table 14: Prevalence, incidence, and YLDs for 2016, percentage change of YLD counts and percentage change of age-standardised YLD rates between 2006 and 2016 by cause and impairments, for all ages, Argentina.

| Cause                                                                                | Prevalence in thousands (95% UI)          | Incidence in thousands (95% UI)               | YLDs in thousands (95% UI)             |                                                   |                                                     |
|--------------------------------------------------------------------------------------|-------------------------------------------|-----------------------------------------------|----------------------------------------|---------------------------------------------------|-----------------------------------------------------|
|                                                                                      | 2016 counts                               | 2016 counts                                   | 2016 counts                            | Percentage change in counts between 2006 and 2016 | Percentage change in age-standardised rates between |
| <b>All causes</b>                                                                    | <b>40,542.2</b><br>(40,346.7 to 40,724.4) | <b>245,016.0†</b><br>(230,958.9 to 260,691.0) | <b>4,711.4</b><br>(3,478.3 to 6,100.9) | <b>13.8</b><br>(12.2 to 15.4)                     | <b>-0.1</b><br>(-1.5 to 1.2)                        |
| <b>Communicable, maternal, neonatal, and nutritional disorders</b>                   | <b>18,655.4</b><br>(18,134.9 to 19,161.6) | <b>134,354.4†</b><br>(121,247.6 to 148,820.4) | <b>238.3</b><br>(167.8 to 330.2)       | <b>5.1</b><br>(0.1 to 10.5)                       | <b>-4.6</b><br>(-9.3 to 0.2)                        |
| <b>HIV/AIDS and tuberculosis</b>                                                     | <b>3,661.5</b><br>(3,340.1 to 3,926.6)    | <b>13.7†</b><br>(10.1 to 17.9)                | <b>17.7</b><br>(8.5 to 33.1)           | <b>40.5</b><br>(22.0 to 57.5)                     | <b>22.7</b><br>(6.7 to 37.3)                        |
| Tuberculosis                                                                         | 3,327.3<br>(3,023.2 to 3,686.8)           | 5.6†<br>(4.6 to 6.9)                          | 1.1<br>(0.7 to 1.6)                    | -1.2<br>(-22.1 to 26.6)                           | -11.8<br>(-30.4 to 13.3)                            |
| Drug-susceptible tuberculosis                                                        | 3.2<br>(2.6 to 3.9)                       | 5.4<br>(4.4 to 6.7)                           | 1.0<br>(0.6 to 1.6)                    | -1.4<br>(-23.7 to 27.8)                           | -12.0<br>(-31.8 to 14.1)                            |
| Multidrug-resistant tuberculosis without extensive drug resistance                   | 0.1<br>(< 0.05 to 0.3)                    | 0.1<br>(< 0.05 to 0.5)                        | < 0.05<br>(< 0.05 to 0.1)              | -1.3<br>(-83.2 to 258.6)                          | -12.0<br>(-85.1 to 220.3)                           |
| Extensively drug-resistant tuberculosis                                              | < 0.05<br>(< 0.05 to < 0.05)              | < 0.05<br>(< 0.05 to 0.1)                     | < 0.05<br>(< 0.05 to < 0.05)           | 112.3<br>(-64.0 to 670.8)                         | 89.3<br>(-68.0 to 588.5)                            |
| Latent tuberculosis infection                                                        | 3,324.0<br>(3,019.9 to 3,683.5)           | --                                            | --                                     | --                                                | --                                                  |
| HIV/AIDS                                                                             | 154.2<br>(93.3 to 235.6)                  | 8.1^<br>(4.7 to 12.1)                         | 16.6<br>(7.7 to 31.8)                  | 44.4<br>(24.9 to 61.5)                            | 25.8<br>(8.6 to 41.0)                               |
| Drug-susceptible HIV/AIDS - Tuberculosis                                             | 2.3<br>(1.7 to 3.0)                       | 3.8<br>(2.8 to 5.0)                           | 0.9<br>(0.5 to 1.4)                    | -2.6<br>(-29.4 to 34.8)                           | -14.6<br>(-38.0 to 18.1)                            |
| Multidrug-resistant HIV/AIDS - Tuberculosis without extensive drug resistance        | 0.1<br>(< 0.05 to 0.2)                    | 0.1<br>(< 0.05 to 0.4)                        | < 0.05<br>(< 0.05 to 0.1)              | -1.4<br>(-83.2 to 259.5)                          | -13.5<br>(-85.3 to 215.3)                           |
| Extensively drug-resistant HIV/AIDS - Tuberculosis                                   | < 0.05<br>(< 0.05 to < 0.05)              | < 0.05<br>(< 0.05 to < 0.05)                  | < 0.05<br>(< 0.05 to < 0.05)           | 112.0<br>(-63.8 to 673.1)                         | 85.9<br>(-68.3 to 578.1)                            |
| HIV/AIDS resulting in other diseases                                                 | 151.8<br>(91.0 to 233.0)                  | 8.1<br>(4.7 to 12.1)                          | 15.7<br>(6.8 to 30.6)                  | 48.8<br>(29.6 to 67.3)                            | 29.5<br>(12.6 to 45.8)                              |
| <b>Diarrhoea, lower respiratory infections, and other common infectious diseases</b> | <b>2,150.7</b><br>(2,016.9 to 2,291.5)    | <b>130,130.8†</b><br>(116,978.6 to 144,684.6) | <b>77.8</b><br>(51.6 to 111.4)         | <b>9.1</b><br>(5.3 to 13.0)                       | <b>0.1</b><br>(-3.3 to 3.5)                         |
| Diarrhoeal diseases                                                                  | 179.4<br>(163.4 to 196.4)                 | 11,667.7<br>(10,582.5 to 12,808.3)            | 20.5<br>(13.8 to 28.5)                 | 10.5<br>(1.9 to 19.6)                             | 3.1<br>(-5.1 to 11.5)                               |
| Intestinal infectious diseases                                                       | < 0.05<br>(< 0.05 to < 0.05)              | 0.2†<br>(0.1 to 0.2)                          | < 0.05<br>(< 0.05 to < 0.05)           | -6.1<br>(-24.4 to 17.9)                           | -15.4<br>(-32.1 to 7.5)                             |
| Typhoid fever                                                                        | < 0.05<br>(< 0.05 to < 0.05)              | 0.1<br>(0.1 to 0.2)                           | < 0.05<br>(< 0.05 to < 0.05)           | -1.5<br>(-22.1 to 24.2)                           | -11.3<br>(-29.8 to 12.0)                            |
| Paratyphoid fever                                                                    | < 0.05<br>(< 0.05 to < 0.05)              | < 0.05<br>(< 0.05 to 0.1)                     | < 0.05<br>(< 0.05 to < 0.05)           | 15.2<br>(-7.6 to 43.9)                            | 2.8<br>(-17.5 to 28.4)                              |
| Other intestinal infectious diseases                                                 | --                                        | --                                            | < 0.05<br>(< 0.05 to < 0.05)           | -54.6<br>(-73.9 to -21.0)                         | -56.9<br>(-75.1 to -24.6)                           |
| Lower respiratory infections                                                         | 43.5<br>(40.8 to 46.6)                    | 1,876.1<br>(1,743.5 to 2,025.5)               | 2.6<br>(1.7 to 3.8)                    | 43.3<br>(28.4 to 60.8)                            | 25.9<br>(12.6 to 41.4)                              |
| Upper respiratory infections                                                         | 1,505.6<br>(1,339.0 to 1,690.9)           | 113,610.1<br>(100,556.8 to 128,475.3)         | 37.6<br>(22.1 to 58.6)                 | 9.7<br>(4.3 to 14.6)                              | -0.0<br>(-4.7 to 4.3)                               |
| Otitis media                                                                         | 411.3<br>(370.7 to 451.7)                 | 2,074.3<br>(1,682.7 to 2,561.5)               | 12.2<br>(7.7 to 18.0)                  | 0.7<br>(-7.0 to 8.5)                              | -6.7<br>(-13.8 to 0.5)                              |
| Meningitis                                                                           | 7.6<br>(6.7 to 8.6)                       | 1.5<br>(1.3 to 1.7)                           | 1.2<br>(0.8 to 1.6)                    | 1.2<br>(-2.8 to 5.0)                              | -9.1<br>(-12.7 to -5.6)                             |
| Pneumococcal meningitis                                                              | 2.6<br>(2.2 to 3.0)                       | 0.1<br>(0.1 to 0.1)                           | 0.5<br>(0.3 to 0.6)                    | -3.6<br>(-9.9 to 2.7)                             | -13.2<br>(-18.8 to -7.6)                            |
| H influenzae type B meningitis                                                       | 0.6<br>(0.5 to 0.7)                       | 0.1<br>(< 0.05 to 0.1)                        | 0.1<br>(0.1 to 0.2)                    | 1.7<br>(-6.2 to 8.0)                              | -8.9<br>(-16.0 to -3.1)                             |
| Meningococcal infection                                                              | 1.5<br>(1.1 to 1.9)                       | 0.5<br>(0.4 to 0.6)                           | 0.2<br>(0.1 to 0.2)                    | -9.1<br>(-16.8 to -1.1)                           | -18.5<br>(-25.4 to -11.1)                           |
| Other meningitis                                                                     | 3.0<br>(2.4 to 3.6)                       | 0.8<br>(0.7 to 1.0)                           | 0.4<br>(0.3 to 0.6)                    | 13.0<br>(7.9 to 18.7)                             | 1.5<br>(-3.1 to 6.7)                                |
| Encephalitis                                                                         | 13.4<br>(9.6 to 18.7)                     | 6.0<br>(5.3 to 6.9)                           | 1.8<br>(1.3 to 2.4)                    | 11.9<br>(8.3 to 15.4)                             | -0.7<br>(-4.0 to 2.5)                               |
| Diphtheria                                                                           | < 0.05<br>(< 0.05 to < 0.05)              | < 0.05<br>(< 0.05 to < 0.05)                  | < 0.05<br>(< 0.05 to < 0.05)           | -16.8<br>(-50.4 to 36.2)                          | -24.4<br>(-55.2 to 24.6)                            |
| Whooping cough                                                                       | 4.2<br>(3.3 to 5.4)                       | 30.9<br>(23.9 to 39.2)                        | 0.2<br>(0.1 to 0.4)                    | -22.5<br>(-39.9 to 0.9)                           | -25.1<br>(-42.0 to -2.5)                            |
| Tetanus                                                                              | < 0.05<br>(< 0.05 to < 0.05)              | < 0.05<br>(< 0.05 to < 0.05)                  | < 0.05<br>(< 0.05 to < 0.05)           | -40.4<br>(-50.7 to -27.7)                         | -47.9<br>(-57.0 to -36.6)                           |
| Measles                                                                              | < 0.05<br>(0.0 to < 0.05)                 | < 0.05<br>(0.0 to < 0.05)                     | < 0.05<br>(0.0 to < 0.05)              | -91.7<br>(-100.0 to 1.5e+75)                      | -92.0<br>(-100.0 to 1.4e+75)                        |
| Varicella and herpes zoster                                                          | 43.8<br>(39.9 to 47.6)                    | 864.0<br>(835.6 to 896.7)                     | 1.7<br>(1.0 to 2.6)                    | 14.9<br>(1.5 to 30.8)                             | 0.3<br>(-11.4 to 14.0)                              |
| <b>Neglected tropical diseases and malaria</b>                                       | <b>6,404.6</b><br>(5,927.4 to 6,832.0)    | <b>360.8†</b><br>(173.3 to 731.0)             | <b>16.9</b><br>(10.9 to 24.9)          | <b>-1.4</b><br>(-18.6 to 17.7)                    | <b>-13.1</b><br>(-28.7 to 4.1)                      |
| Malaria                                                                              | --                                        | --                                            | --                                     | --                                                | --                                                  |
| Chagas disease                                                                       | 928.1<br>(773.6 to 1,103.8)               | 19.6<br>(16.2 to 23.7)                        | 7.8<br>(5.1 to 11.2)                   | -17.1<br>(-25.3 to -7.8)                          | -28.8<br>(-35.9 to -20.9)                           |
| Leishmaniasis                                                                        | 0.4<br>(0.2 to 0.6)                       | 0.8<br>(0.5 to 1.2)                           | < 0.05<br>(< 0.05 to < 0.05)           | -17.9<br>(-58.4 to 57.1)                          | -26.4<br>(-62.6 to 41.1)                            |
| Visceral leishmaniasis                                                               | < 0.05<br>(< 0.05 to < 0.05)              | < 0.05<br>(< 0.05 to < 0.05)                  | < 0.05<br>(< 0.05 to < 0.05)           | 176.2<br>(18.6 to 608.7)                          | 135.2<br>(1.2 to 531.6)                             |
| Cutaneous and mucocutaneous leishmaniasis                                            | 0.4<br>(0.2 to 0.6)                       | 0.7<br>(0.4 to 1.1)                           | < 0.05<br>(< 0.05 to < 0.05)           | -19.0<br>(-59.4 to 55.8)                          | -27.4<br>(-63.6 to 40.0)                            |
| African trypanosomiasis                                                              | --                                        | --                                            | --                                     | --                                                | --                                                  |
| Schistosomiasis                                                                      | --                                        | --                                            | --                                     | --                                                | --                                                  |
| Cysticercosis                                                                        | --                                        | --                                            | --                                     | --                                                | --                                                  |
| Cystic echinococcosis                                                                | 6.6<br>(1.3 to 23.7)                      | 1.4<br>(0.3 to 4.5)                           | 0.6<br>(0.1 to 2.3)                    | -38.2<br>(-92.4 to 357.7)                         | -45.5<br>(-92.9 to 295.4)                           |
| Lymphatic filariasis                                                                 | --                                        | --                                            | --                                     | --                                                | --                                                  |
| Onchocerciasis                                                                       | --                                        | --                                            | --                                     | --                                                | --                                                  |
| Trachoma                                                                             | --                                        | --                                            | --                                     | --                                                | --                                                  |
| Dengue                                                                               | 12.5<br>(4.8 to 25.9)                     | 209.2<br>(84.4 to 415.5)                      | 2.0<br>(0.6 to 4.8)                    | 136.2<br>(65.1 to 556.1)                          | 113.0<br>(48.2 to 489.0)                            |
| Yellow fever                                                                         | < 0.05<br>(< 0.05 to 0.1)                 | 1.1<br>(0.3 to 3.3)                           | < 0.05<br>(< 0.05 to < 0.05)           | -35.0<br>(-68.8 to 32.4)                          | -41.0<br>(-71.2 to 20.5)                            |
| Rabies                                                                               | < 0.05<br>(< 0.05 to < 0.05)              | < 0.05<br>(< 0.05 to < 0.05)                  | < 0.05<br>(< 0.05 to < 0.05)           | -0.7<br>(-20.0 to 21.0)                           | -15.8<br>(-32.2 to 2.7)                             |
| Intestinal nematode infections                                                       | 5,487.0<br>(4,997.9 to 5,934.3)           | --                                            | 4.4<br>(2.3 to 7.7)                    | 14.7<br>(-25.8 to 71.5)                           | 2.8<br>(-33.4 to 53.4)                              |
| Ascariasis                                                                           | 3,207.6<br>(2,808.0 to 3,669.0)           | --                                            | 0.6<br>(0.3 to 1.3)                    | 8.9<br>(-49.8 to 136.8)                           | -2.0<br>(-54.6 to 113.6)                            |

| Cause                                                                   | Prevalence in thousands (95% UI)           | Incidence in thousands (95% UI)                | YLDs in thousands (95% UI)              |                                                   |                                                     |
|-------------------------------------------------------------------------|--------------------------------------------|------------------------------------------------|-----------------------------------------|---------------------------------------------------|-----------------------------------------------------|
|                                                                         | 2016 counts                                | 2016 counts                                    | 2016 counts                             | Percentage change in counts between 2006 and 2016 | Percentage change in age-standardised rates between |
| Trichuriasis                                                            | 987.2<br>(857.8 to 1,134.6)                | --                                             | < 0.05<br>(< 0.05 to < 0.05)            | 7.6<br>(-54.6 to 146.0)                           | -2.9<br>(-58.4 to 120.0)                            |
| Hookworm disease                                                        | 1,529.7<br>(1,377.3 to 1,698.7)            | --                                             | 3.8<br>(2.0 to 6.7)                     | 15.7<br>(-27.4 to 81.5)                           | 3.7<br>(-34.6 to 62.1)                              |
| Food-borne trematodiasis                                                | --                                         | --                                             | --                                      | --                                                | --                                                  |
| Leprosy                                                                 | 1.4<br>(1.2 to 1.7)                        | 0.1<br>(0.1 to 0.1)                            | 0.1<br>(0.1 to 0.1)                     | -3.5<br>(-23.3 to 24.2)                           | -18.3<br>(-35.3 to 5.3)                             |
| Ebola virus disease                                                     | --                                         | --                                             | --                                      | --                                                | --                                                  |
| Zika virus disease                                                      | 2.1<br>(0.6 to 7.0)                        | 128.7<br>(34.7 to 421.6)                       | < 0.05<br>(< 0.05 to 0.2)               | --                                                | --                                                  |
| Guinea worm disease                                                     | --                                         | --                                             | --                                      | --                                                | --                                                  |
| Other neglected tropical diseases                                       | 123.2<br>(105.5 to 143.0)                  | --                                             | 1.9<br>(1.1 to 3.2)                     | -2.0<br>(-23.8 to 29.1)                           | -7.7<br>(-28.6 to 22.4)                             |
| <b>Maternal disorders</b>                                               | <b>46.1<br/>(36.7 to 58.3)</b>             | <b>1,395.2†<br/>(1,216.4 to 1,540.7)</b>       | <b>3.3<br/>(2.1 to 4.9)</b>             | <b>1.6<br/>(-25.3 to 38.1)</b>                    | <b>-6.7<br/>(-31.5 to 26.9)</b>                     |
| Maternal haemorrhage                                                    | 4.4<br>(3.3 to 5.8)                        | 39.8<br>(29.4 to 52.2)                         | 0.2<br>(0.1 to 0.3)                     | 10.0<br>(-23.4 to 63.6)                           | 0.5<br>(-29.6 to 47.4)                              |
| Maternal sepsis and other pregnancy related infections                  | 16.1<br>(11.2 to 23.1)                     | 125.3<br>(96.0 to 165.8)                       | 0.5<br>(0.2 to 1.0)                     | 1.4<br>(-52.9 to 110.2)                           | -5.7<br>(-55.6 to 94.7)                             |
| Maternal hypertensive disorders                                         | 18.0<br>(11.2 to 26.0)                     | 73.5<br>(56.5 to 92.7)                         | 0.9<br>(0.4 to 1.5)                     | 12.4<br>(-31.2 to 90.8)                           | 2.4<br>(-37.2 to 75.0)                              |
| Maternal obstructed labour and uterine rupture                          | 0.6<br>(0.3 to 0.9)                        | 40.1<br>(29.2 to 52.9)                         | 0.2<br>(0.1 to 0.3)                     | 3.8<br>(-46.7 to 125.0)                           | -4.5<br>(-50.6 to 104.1)                            |
| Maternal abortion, miscarriage, and ectopic pregnancy                   | 9.2<br>(6.0 to 12.7)                       | 1,116.4<br>(938.1 to 1,252.1)                  | 1.0<br>(0.5 to 1.6)                     | -5.7<br>(-47.6 to 61.6)                           | -13.5<br>(-52.0 to 48.2)                            |
| Other maternal disorders                                                | --                                         | --                                             | 0.5<br>(0.3 to 0.8)                     | -3.3<br>(-28.7 to 31.0)                           | -11.0<br>(-34.5 to 20.8)                            |
| <b>Neonatal disorders</b>                                               | <b>295.8<br/>(251.5 to 358.7)</b>          | <b>--</b>                                      | <b>54.0<br/>(38.0 to 74.4)</b>          | <b>5.9<br/>(-7.2 to 21.0)</b>                     | <b>-3.3<br/>(-15.2 to 10.7)</b>                     |
| Neonatal preterm birth complications                                    | 271.0<br>(213.6 to 348.9)                  | --                                             | 31.1<br>(20.6 to 44.7)                  | 5.0<br>(-16.5 to 29.3)                            | -4.2<br>(-23.8 to 18.0)                             |
| Neonatal encephalopathy due to birth asphyxia and trauma                | 38.0<br>(19.0 to 63.1)                     | --                                             | 7.1<br>(1.7 to 14.9)                    | 12.9<br>(-23.1 to 66.7)                           | 2.9<br>(-30.1 to 52.0)                              |
| Neonatal sepsis and other neonatal infections                           | 17.7<br>(8.1 to 39.1)                      | --                                             | 7.4<br>(2.9 to 18.2)                    | 3.3<br>(-14.6 to 24.6)                            | -5.5<br>(-21.9 to 14.2)                             |
| Hemolytic disease and other neonatal jaundice                           | 22.6<br>(19.6 to 25.9)                     | --                                             | 7.1<br>(5.3 to 9.3)                     | 8.0<br>(-6.2 to 22.9)                             | -1.9<br>(-14.6 to 11.8)                             |
| Other neonatal disorders                                                | --                                         | --                                             | 1.3<br>(0.9 to 1.9)                     | -3.1<br>(-21.7 to 19.4)                           | -6.5<br>(-24.5 to 15.2)                             |
| <b>Nutritional deficiencies</b>                                         | <b>4,107.7<br/>(3,872.0 to 4,327.9)</b>    | <b>362.6†<br/>(279.0 to 449.7)</b>             | <b>59.6<br/>(38.4 to 91.9)</b>          | <b>-5.1<br/>(-14.3 to 5.5)</b>                    | <b>-13.9<br/>(-22.3 to -3.9)</b>                    |
| Protein-energy malnutrition                                             | 65.7<br>(53.1 to 83.8)                     | 41.3<br>(33.6 to 52.6)                         | 1.0<br>(0.5 to 1.8)                     | -2.6<br>(-49.8 to 89.3)                           | -6.0<br>(-51.5 to 82.7)                             |
| Iodine deficiency                                                       | 202.8<br>(179.2 to 234.0)                  | 4.5<br>(4.0 to 5.1)                            | 5.2<br>(3.5 to 7.4)                     | 10.6<br>(-2.9 to 25.2)                            | -2.2<br>(-14.7 to 10.8)                             |
| Vitamin A deficiency                                                    | 400.0<br>(299.7 to 511.9)                  | 316.8<br>(235.4 to 405.6)                      | --                                      | --                                                | --                                                  |
| Iron-deficiency anaemia                                                 | 3,424.1<br>(3,145.0 to 3,730.3)            | --                                             | 53.4<br>(33.7 to 83.7)                  | -6.5<br>(-16.3 to 4.6)                            | -15.0<br>(-24.2 to -4.5)                            |
| Other nutritional deficiencies                                          | --                                         | --                                             | < 0.05<br>(< 0.05 to 0.1)               | -2.8<br>(-51.0 to 93.1)                           | -6.3<br>(-52.7 to 86.0)                             |
| <b>Other communicable, maternal, neonatal, and nutritional diseases</b> | <b>6,734.7<br/>(6,272.5 to 7,251.8)</b>    | <b>2,091.3<br/>(1,922.1 to 2,272.6)</b>        | <b>8.0<br/>(4.7 to 13.4)</b>            | <b>7.9<br/>(1.5 to 14.3)</b>                      | <b>-3.9<br/>(-9.5 to 2.0)</b>                       |
| Sexually transmitted diseases excluding HIV                             | 5,700.7<br>(5,300.7 to 6,210.3)            | 1,737.6<br>(1,577.1 to 1,907.3)                | 5.2<br>(3.0 to 9.2)                     | 13.7<br>(7.2 to 21.0)                             | -0.5<br>(-6.2 to 5.8)                               |
| Syphilis                                                                | 256.3<br>(206.3 to 308.7)                  | 217.1<br>(164.7 to 285.0)                      | 0.4<br>(0.3 to 0.6)                     | 35.1<br>(16.0 to 68.5)                            | 14.5<br>(-2.1 to 43.7)                              |
| Chlamydial infection                                                    | 487.5<br>(375.9 to 616.9)                  | 386.7<br>(295.3 to 496.6)                      | 0.9<br>(0.5 to 1.7)                     | 7.8<br>(-6.3 to 24.9)                             | -3.4<br>(-16.4 to 11.7)                             |
| Gonococcal infection                                                    | 31.9<br>(28.9 to 35.1)                     | 54.2<br>(46.1 to 64.0)                         | 0.4<br>(0.3 to 0.6)                     | 20.3<br>(-4.1 to 49.3)                            | 4.8<br>(-16.6 to 29.6)                              |
| Trichomoniasis                                                          | 898.7<br>(777.2 to 1,026.2)                | 762.2<br>(653.8 to 876.8)                      | 1.0<br>(0.4 to 2.2)                     | 10.9<br>(1.9 to 19.7)                             | -1.6<br>(-9.5 to 5.9)                               |
| Genital herpes                                                          | 4,248.6<br>(3,629.1 to 4,950.8)            | 237.1<br>(202.3 to 280.1)                      | 1.1<br>(0.3 to 2.4)                     | 13.1<br>(2.1 to 22.7)                             | -1.8<br>(-10.8 to 6.7)                              |
| Other sexually transmitted diseases                                     | 75.2<br>(66.4 to 83.8)                     | 80.4<br>(67.2 to 95.3)                         | 1.4<br>(0.8 to 2.2)                     | 12.8<br>(-2.7 to 31.4)                            | -2.1<br>(-15.7 to 14.0)                             |
| Hepatitis                                                               | 1,165.2<br>(1,032.4 to 1,313.3)            | 353.6<br>(296.9 to 401.6)                      | 0.5<br>(0.3 to 0.8)                     | -20.6<br>(-36.3 to -2.7)                          | -28.3<br>(-42.4 to -12.1)                           |
| Acute hepatitis A                                                       | 18.3<br>(14.1 to 21.2)                     | 237.8<br>(183.0 to 276.0)                      | 0.4<br>(0.2 to 0.6)                     | -22.2<br>(-43.2 to 4.4)                           | -28.7<br>(-47.9 to -4.2)                            |
| Hepatitis B                                                             | 526.3<br>(414.6 to 674.9)                  | 91.1<br>(71.5 to 116.5)                        | 0.1<br>(0.1 to 0.2)                     | -18.0<br>(-32.3 to -2.2)                          | -28.9<br>(-41.3 to -15.1)                           |
| Hepatitis C                                                             | 620.1<br>(555.4 to 691.4)                  | 19.2<br>(17.2 to 21.5)                         | < 0.05<br>(< 0.05 to < 0.05)            | -7.1<br>(-8.5 to -5.7)                            | -14.6<br>(-16.4 to -12.9)                           |
| Acute hepatitis E                                                       | 0.4<br>(0.4 to 0.5)                        | 5.5<br>(4.5 to 6.7)                            | < 0.05<br>(< 0.05 to < 0.05)            | -17.0<br>(-22.2 to -11.4)                         | -27.4<br>(-31.9 to -22.2)                           |
| Other infectious diseases                                               | 100.2<br>(88.0 to 114.4)                   | 0.1<br>(< 0.05 to 0.1)                         | 2.3<br>(1.4 to 3.6)                     | 4.4<br>(-8.6 to 21.6)                             | -3.6<br>(-15.7 to 12.7)                             |
| <b>Non-communicable diseases</b>                                        | <b>38,803.3<br/>(38,545.2 to 39,020.1)</b> | <b>106,806.1†<br/>(101,714.9 to 112,472.8)</b> | <b>4,181.4<br/>(3,075.5 to 5,400.3)</b> | <b>13.9<br/>(12.2 to 15.7)</b>                    | <b>-0.2<br/>(-1.7 to 1.5)</b>                       |
| <b>Neoplasms</b>                                                        | <b>311.9<br/>(300.7 to 325.5)</b>          | <b>118.7<br/>(116.2 to 122.1)</b>              | <b>38.4<br/>(28.4 to 49.9)</b>          | <b>24.0<br/>(19.1 to 29.1)</b>                    | <b>4.4<br/>(0.3 to 8.7)</b>                         |
| Lip and oral cavity cancer                                              | 5.9<br>(5.6 to 6.3)                        | 1.6<br>(1.5 to 1.7)                            | 0.6<br>(0.4 to 0.8)                     | 18.1<br>(6.1 to 31.7)                             | -1.1<br>(-11.1 to 10.5)                             |
| Nasopharynx cancer                                                      | 0.5<br>(0.4 to 0.5)                        | 0.1<br>(0.1 to 0.1)                            | 0.1<br>(< 0.05 to 0.1)                  | 6.1<br>(-2.4 to 15.4)                             | -8.9<br>(-16.5 to -0.9)                             |
| Other pharynx cancer                                                    | 1.0<br>(0.9 to 1.1)                        | 0.3<br>(0.3 to 0.4)                            | 0.1<br>(0.1 to 0.2)                     | 28.7<br>(8.4 to 53.4)                             | 9.0<br>(-8.3 to 30.2)                               |
| Oesophageal cancer                                                      | 2.4<br>(2.3 to 2.6)                        | 2.3<br>(2.2 to 2.5)                            | 0.6<br>(0.4 to 0.8)                     | 9.1<br>(-11.0 to 33.8)                            | -8.8<br>(-25.7 to 11.9)                             |
| Stomach cancer                                                          | 8.0<br>(7.5 to 8.4)                        | 5.2<br>(4.9 to 5.5)                            | 1.3<br>(0.9 to 1.7)                     | 7.5<br>(-8.3 to 26.3)                             | -10.2<br>(-23.7 to 5.4)                             |
| Colon and rectum cancer                                                 | 47.2<br>(44.4 to 50.2)                     | 14.0<br>(13.2 to 14.8)                         | 4.8<br>(3.5 to 6.3)                     | 30.7<br>(16.4 to 47.3)                            | 9.0<br>(-3.0 to 23.1)                               |
| Liver cancer                                                            | 0.9<br>(0.8 to 1.0)                        | 2.1<br>(1.9 to 2.2)                            | 0.5<br>(0.3 to 0.6)                     | 19.0<br>(8.8 to 30.7)                             | -0.2<br>(-8.8 to 9.5)                               |
| Liver cancer due to hepatitis B                                         | 0.2<br>(0.2 to 0.3)                        | 0.2<br>(0.2 to 0.3)                            | 0.1<br>(< 0.05 to 0.1)                  | 15.3<br>(4.1 to 27.4)                             | -2.6<br>(-12.3 to 7.6)                              |

| Cause                                              | Prevalence in thousands (95% UI)              | Incidence in thousands (95% UI)          | YLDs in thousands (95% UI)              |                                                   |                                                     |
|----------------------------------------------------|-----------------------------------------------|------------------------------------------|-----------------------------------------|---------------------------------------------------|-----------------------------------------------------|
|                                                    | 2016 counts                                   | 2016 counts                              | 2016 counts                             | Percentage change in counts between 2006 and 2016 | Percentage change in age-standardised rates between |
| Liver cancer due to hepatitis C                    | 0.8<br>(0.8 to 0.9)                           | 1.0<br>(0.9 to 1.1)                      | 0.2<br>(0.1 to 0.3)                     | 18.7<br>(6.8 to 32.1)                             | -1.0<br>(-10.8 to 9.7)                              |
| Liver cancer due to alcohol use                    | 0.5<br>(0.4 to 0.6)                           | 0.6<br>(0.5 to 0.7)                      | 0.1<br>(0.1 to 0.2)                     | 22.8<br>(8.9 to 38.4)                             | 3.4<br>(-8.3 to 16.8)                               |
| Liver cancer due to other causes                   | 0.2<br>(0.2 to 0.3)                           | 0.3<br>(0.2 to 0.3)                      | 0.1<br>( $< 0.05$ to 0.1)               | 15.5<br>(3.5 to 27.7)                             | -3.0<br>(-13.0 to 7.2)                              |
| Gallbladder and biliary tract cancer               | 2.2<br>(2.0 to 2.3)                           | 2.8<br>(2.7 to 3.0)                      | 0.6<br>(0.4 to 0.8)                     | 10.9<br>(-2.7 to 24.9)                            | -7.7<br>(-18.3 to 3.4)                              |
| Pancreatic cancer                                  | 3.3<br>(3.2 to 3.5)                           | 4.6<br>(4.3 to 4.8)                      | 0.9<br>(0.6 to 1.2)                     | 19.7<br>(1.7 to 40.2)                             | -0.2<br>(-15.1 to 16.7)                             |
| Larynx cancer                                      | 5.3<br>(4.9 to 5.7)                           | 1.6<br>(1.4 to 1.7)                      | 0.6<br>(0.4 to 0.8)                     | 9.2<br>(-11.7 to 35.8)                            | -8.2<br>(-25.8 to 14.6)                             |
| Tracheal, bronchus, and lung cancer                | 12.6<br>(11.9 to 13.4)                        | 11.0<br>(10.3 to 11.7)                   | 2.5<br>(1.8 to 3.3)                     | 13.8<br>(-3.8 to 35.1)                            | -4.5<br>(-19.6 to 13.4)                             |
| Malignant skin melanoma                            | 7.1<br>(6.0 to 8.2)                           | 1.6<br>(1.4 to 1.8)                      | 0.5<br>(0.4 to 0.7)                     | 50.4<br>(27.5 to 75.0)                            | 27.4<br>(7.8 to 48.6)                               |
| Non-melanoma skin cancer                           | 2.1<br>(1.7 to 2.5)                           | 6.1<br>(5.4 to 6.8)                      | 0.1<br>(0.1 to 0.1)                     | 34.6<br>(13.5 to 57.4)                            | 10.8<br>(-6.5 to 29.7)                              |
| Non-melanoma skin cancer (squamous-cell carcinoma) | 1.9<br>(1.5 to 2.4)                           | 1.9<br>(1.7 to 2.3)                      | 0.1<br>(0.1 to 0.1)                     | 36.4<br>(13.6 to 61.3)                            | 12.1<br>(-6.8 to 32.2)                              |
| Non-melanoma skin cancer (basal-cell carcinoma)    | 0.6<br>(0.4 to 0.9)                           | 4.1<br>(3.5 to 4.8)                      | $< 0.05$<br>( $< 0.05$ to $< 0.05$ )    | 14.1<br>(-3.8 to 35.1)                            | -4.4<br>(-18.5 to 12.2)                             |
| Breast cancer                                      | 77.2<br>(71.5 to 83.3)                        | 16.6<br>(15.3 to 17.8)                   | 7.4<br>(5.3 to 9.9)                     | 23.8<br>(10.6 to 39.0)                            | 3.8<br>(-7.6 to 16.9)                               |
| Cervical cancer                                    | 27.8<br>(25.5 to 30.1)                        | 7.0<br>(6.4 to 7.5)                      | 2.5<br>(1.7 to 3.4)                     | 12.7<br>(-9.6 to 37.2)                            | -4.4<br>(-23.3 to 16.3)                             |
| Uterine cancer                                     | 12.5<br>(11.3 to 13.8)                        | 2.7<br>(2.4 to 3.0)                      | 1.0<br>(0.7 to 1.4)                     | 43.6<br>(19.0 to 71.8)                            | 20.9<br>(-0.1 to 45.2)                              |
| Ovarian cancer                                     | 6.3<br>(5.5 to 7.2)                           | 2.0<br>(1.8 to 2.3)                      | 0.9<br>(0.6 to 1.3)                     | 13.1<br>(-14.4 to 47.9)                           | -3.9<br>(-28.1 to 26.0)                             |
| Prostate cancer                                    | 48.3<br>(42.0 to 60.9)                        | 12.8<br>(11.4 to 15.7)                   | 5.0<br>(3.6 to 6.8)                     | 33.5<br>(14.6 to 54.1)                            | 11.5<br>(-4.5 to 29.1)                              |
| Testicular cancer                                  | 9.0<br>(7.4 to 10.8)                          | 1.8<br>(1.4 to 2.1)                      | 0.6<br>(0.4 to 0.9)                     | 72.7<br>(28.0 to 129.4)                           | 55.2<br>(15.0 to 106.0)                             |
| Kidney cancer                                      | 18.2<br>(16.8 to 19.4)                        | 5.0<br>(4.7 to 5.4)                      | 1.7<br>(1.2 to 2.2)                     | 31.2<br>(14.3 to 50.6)                            | 11.8<br>(-2.5 to 28.6)                              |
| Bladder cancer                                     | 14.2<br>(13.1 to 15.2)                        | 3.6<br>(3.3 to 3.9)                      | 1.4<br>(1.0 to 1.8)                     | 24.4<br>(7.2 to 42.3)                             | 3.8<br>(-10.6 to 19.2)                              |
| Brain and nervous system cancer                    | 3.3<br>(2.9 to 3.6)                           | 1.6<br>(1.4 to 1.7)                      | 0.5<br>(0.3 to 0.7)                     | 22.9<br>(9.5 to 35.8)                             | 6.0<br>(-5.5 to 17.1)                               |
| Thyroid cancer                                     | 5.9<br>(5.4 to 6.4)                           | 1.1<br>(1.0 to 1.2)                      | 0.4<br>(0.3 to 0.5)                     | 56.0<br>(28.1 to 89.1)                            | 32.5<br>(8.6 to 61.9)                               |
| Mesothelioma                                       | 0.4<br>(0.4 to 0.4)                           | 0.3<br>(0.2 to 0.3)                      | 0.1<br>(0.1 to 0.1)                     | 33.4<br>(24.1 to 43.3)                            | 13.0<br>(5.0 to 21.6)                               |
| Hodgkin lymphoma                                   | 1.5<br>(1.3 to 1.9)                           | 0.4<br>(0.4 to 0.5)                      | 0.2<br>(0.1 to 0.2)                     | 31.4<br>(19.3 to 44.4)                            | 15.1<br>(4.4 to 26.4)                               |
| Non-Hodgkin's lymphoma                             | 7.9<br>(7.4 to 8.6)                           | 2.5<br>(2.4 to 2.8)                      | 0.8<br>(0.6 to 1.1)                     | 26.9<br>(13.5 to 42.3)                            | 8.1<br>(-3.3 to 21.2)                               |
| Multiple myeloma                                   | 1.7<br>(1.5 to 2.2)                           | 0.9<br>(0.8 to 1.2)                      | 0.4<br>(0.3 to 0.6)                     | 28.4<br>(11.1 to 48.3)                            | 8.2<br>(-5.8 to 24.2)                               |
| Leukaemia                                          | 9.0<br>(8.5 to 9.6)                           | 2.6<br>(2.5 to 2.8)                      | 1.2<br>(0.8 to 1.6)                     | 10.9<br>(1.3 to 20.8)                             | -4.9<br>(-13.1 to 3.5)                              |
| Acute lymphoid leukaemia                           | 1.5<br>(1.3 to 1.7)                           | 0.4<br>(0.4 to 0.4)                      | 0.2<br>(0.1 to 0.2)                     | 14.7<br>(1.4 to 31.3)                             | 5.6<br>(-7.0 to 21.6)                               |
| Chronic lymphoid leukaemia                         | 2.0<br>(1.8 to 2.4)                           | 0.5<br>(0.4 to 0.6)                      | 0.3<br>(0.2 to 0.4)                     | 15.8<br>(-6.2 to 41.5)                            | -3.3<br>(-21.1 to 17.2)                             |
| Acute myeloid leukaemia                            | 1.0<br>(0.9 to 1.1)                           | 0.7<br>(0.6 to 0.7)                      | 0.2<br>(0.1 to 0.2)                     | 15.6<br>(6.7 to 25.6)                             | 0.6<br>(-7.1 to 9.2)                                |
| Chronic myeloid leukaemia                          | 0.5<br>(0.5 to 0.6)                           | 0.2<br>(0.2 to 0.2)                      | 0.1<br>( $< 0.05$ to 0.1)               | -14.0<br>(-22.9 to -3.8)                          | -27.5<br>(-34.8 to -18.9)                           |
| Other leukaemia                                    | 4.0<br>(3.6 to 4.3)                           | 0.9<br>(0.8 to 1.0)                      | 0.5<br>(0.4 to 0.7)                     | 9.7<br>(-8.0 to 30.8)                             | -7.5<br>(-22.1 to 9.2)                              |
| Other neoplasms                                    | 13.9<br>(13.1 to 14.7)                        | 4.6<br>(4.4 to 4.9)                      | 1.3<br>(1.0 to 1.8)                     | 25.3<br>(12.7 to 40.8)                            | 6.9<br>(-3.8 to 20.3)                               |
| <b>Cardiovascular diseases</b>                     | <b>3,002.9</b><br><b>(2,879.8 to 3,131.5)</b> | <b>323.1†</b><br><b>(306.6 to 340.7)</b> | <b>187.9</b><br><b>(137.7 to 245.2)</b> | <b>13.8</b><br><b>(9.3 to 18.6)</b>               | <b>-4.7</b><br><b>(-8.5 to -0.7)</b>                |
| Rheumatic heart disease                            | 8.1<br>(7.4 to 8.9)                           | 4.1<br>(3.9 to 4.3)                      | 0.6<br>(0.4 to 0.9)                     | 10.1<br>(-9.0 to 31.8)                            | -6.9<br>(-22.9 to 11.7)                             |
| Ischaemic heart disease                            | 881.1<br>(831.5 to 935.7)                     | 122.6<br>(113.2 to 132.9)                | 32.2<br>(22.3 to 43.7)                  | 14.4<br>(8.6 to 20.7)                             | -4.0<br>(-9.0 to 1.4)                               |
| Cerebrovascular disease                            | 430.4<br>(402.3 to 460.9)                     | 59.6‡<br>(55.2 to 64.3)                  | 70.2<br>(50.1 to 90.2)                  | 10.9<br>(1.8 to 20.9)                             | -7.2<br>(-14.8 to 1.2)                              |
| Ischaemic stroke                                   | 354.9<br>(319.8 to 391.8)                     | 41.2‡<br>(37.0 to 45.8)                  | 55.7<br>(39.3 to 72.2)                  | 10.1<br>(-0.5 to 23.0)                            | -8.1<br>(-17.0 to 2.7)                              |
| Hemorrhagic stroke                                 | 95.4<br>(86.8 to 104.4)                       | 18.4‡<br>(16.7 to 20.1)                  | 14.5<br>(10.5 to 18.6)                  | 14.0<br>(2.5 to 27.1)                             | -3.9<br>(-13.9 to 7.4)                              |
| Hypertensive heart disease                         | 123.5<br>(102.7 to 147.2)                     | --                                       | 9.9<br>(6.7 to 13.9)                    | 11.8<br>(-0.1 to 25.3)                            | -7.9<br>(-17.7 to 3.8)                              |
| Cardiomyopathy and myocarditis                     | 51.7<br>(44.9 to 58.6)                        | 9.8†<br>(8.5 to 11.1)                    | 4.4<br>(2.8 to 6.3)                     | 26.9<br>(13.3 to 42.2)                            | 8.2<br>(-3.4 to 21.8)                               |
| Myocarditis                                        | 6.2<br>(5.2 to 7.2)                           | 9.8<br>(8.5 to 11.1)                     | 0.5<br>(0.3 to 0.7)                     | 21.0<br>(10.6 to 34.3)                            | 7.8<br>(-1.6 to 19.3)                               |
| Alcoholic cardiomyopathy                           | 4.2<br>(3.2 to 5.4)                           | --                                       | 0.4<br>(0.2 to 0.5)                     | 38.1<br>(-0.6 to 95.2)                            | 18.0<br>(-15.3 to 67.9)                             |
| Other cardiomyopathy                               | 44.0<br>(36.0 to 52.6)                        | --                                       | 3.6<br>(2.3 to 5.2)                     | 26.6<br>(12.1 to 42.7)                            | 7.3<br>(-5.2 to 21.2)                               |
| Atrial fibrillation and flutter                    | 405.0<br>(352.8 to 469.2)                     | 33.1<br>(28.1 to 38.6)                   | 31.9<br>(21.7 to 44.8)                  | 18.2<br>(11.5 to 25.7)                            | -1.9<br>(-7.6 to 4.3)                               |
| Peripheral vascular disease                        | 985.3<br>(855.6 to 1,129.8)                   | 85.1<br>(73.4 to 98.7)                   | 4.2<br>(2.0 to 7.9)                     | 13.9<br>(5.5 to 22.7)                             | -6.1<br>(-13.1 to 1.1)                              |
| Endocarditis                                       | 5.4<br>(4.6 to 6.5)                           | 8.8<br>(8.1 to 9.6)                      | 0.4<br>(0.3 to 0.6)                     | 14.9<br>(-1.7 to 36.7)                            | -4.4<br>(-17.7 to 12.9)                             |
| Other cardiovascular and circulatory diseases      | 655.7<br>(539.1 to 785.4)                     | --                                       | 34.1<br>(22.3 to 49.2)                  | 14.3<br>(3.6 to 25.6)                             | -2.7<br>(-12.0 to 7.0)                              |
| <b>Chronic respiratory diseases</b>                | <b>4,356.7</b><br><b>(4,153.4 to 4,571.3)</b> | <b>520.1†</b><br><b>(486.6 to 554.9)</b> | <b>144.6</b><br><b>(104.6 to 193.2)</b> | <b>16.1</b><br><b>(10.8 to 22.6)</b>              | <b>3.9</b><br><b>(-0.8 to 9.6)</b>                  |
| Chronic obstructive pulmonary disease              | 1,531.7<br>(1,407.2 to 1,705.2)               | 101.2<br>(93.5 to 111.9)                 | 27.1<br>(22.2 to 33.1)                  | 22.9<br>(7.6 to 40.0)                             | 4.0<br>(-8.9 to 18.7)                               |
| Pneumoconiosis                                     | 1.2<br>(1.1 to 1.4)                           | 0.2<br>(0.1 to 0.2)                      | 0.2<br>(0.1 to 0.3)                     | 28.2<br>(22.8 to 34.4)                            | 7.7<br>(3.2 to 12.9)                                |
| Silicosis                                          | 0.8<br>(0.7 to 1.0)                           | 0.1<br>(0.1 to 0.1)                      | 0.1<br>(0.1 to 0.2)                     | 37.4<br>(30.3 to 46.3)                            | 15.2<br>(9.1 to 22.9)                               |



| Cause                                                          | Prevalence in thousands (95% UI)           | Incidence in thousands (95% UI)                     | YLDs in thousands (95% UI)            |                                                   |                                                     |
|----------------------------------------------------------------|--------------------------------------------|-----------------------------------------------------|---------------------------------------|---------------------------------------------------|-----------------------------------------------------|
|                                                                | 2016 counts                                | 2016 counts                                         | 2016 counts                           | Percentage change in counts between 2006 and 2016 | Percentage change in age-standardised rates between |
| Asbestosis                                                     | 0.1<br>(0.1 to 0.2)                        | < 0.05<br>(< 0.05 to < 0.05)                        | < 0.05<br>(< 0.05 to < 0.05)          | 15.6<br>(7.2 to 24.4)                             | -2.6<br>(-9.6 to 4.9)                               |
| Coal workers pneumoconiosis                                    | 0.1<br>(0.1 to 0.1)                        | < 0.05<br>(< 0.05 to < 0.05)                        | < 0.05<br>(< 0.05 to < 0.05)          | 8.9<br>(-4.5 to 23.9)                             | -8.1<br>(-19.3 to 4.6)                              |
| Other pneumoconiosis                                           | 0.2<br>(0.1 to 0.2)                        | < 0.05<br>(< 0.05 to < 0.05)                        | < 0.05<br>(< 0.05 to < 0.05)          | 15.2<br>(4.0 to 29.5)                             | -3.6<br>(-12.4 to 7.6)                              |
| Asthma                                                         | 2,904.0<br>(2,704.6 to 3,130.4)            | 416.4<br>(384.5 to 451.5)                           | 114.1<br>(75.0 to 164.1)              | 14.2<br>(8.2 to 20.5)                             | 3.6<br>(-1.9 to 9.5)                                |
| Interstitial lung disease and pulmonary sarcoidosis            | 18.6<br>(16.8 to 20.5)                     | 2.4<br>(2.2 to 2.6)                                 | 2.0<br>(1.3 to 2.9)                   | 25.6<br>(12.3 to 40.6)                            | 5.8<br>(-5.5 to 18.7)                               |
| Other chronic respiratory diseases                             | --                                         | --                                                  | 1.2<br>(0.9 to 1.4)                   | 49.7<br>(32.6 to 68.7)                            | 35.2<br>(19.5 to 52.4)                              |
| <b>Cirrhosis and other chronic liver diseases</b>              | <b>366.1<br/>(348.6 to 384.6)</b>          | <b>9.6<br/>(9.2 to 9.9)</b>                         | <b>7.4<br/>(5.1 to 10.2)</b>          | <b>26.0<br/>(14.2 to 39.7)</b>                    | <b>9.7<br/>(-1.0 to 21.8)</b>                       |
| Cirrhosis and other chronic liver diseases due to hepatitis B  | 57.7<br>(50.2 to 65.8)                     | 1.6<br>(1.4 to 1.8)                                 | 1.1<br>(0.7 to 1.6)                   | 27.8<br>(2.1 to 61.1)                             | 9.2<br>(-12.8 to 38.5)                              |
| Cirrhosis and other chronic liver diseases due to hepatitis C  | 119.2<br>(108.3 to 131.2)                  | 3.1<br>(2.8 to 3.4)                                 | 2.2<br>(1.5 to 3.1)                   | 29.2<br>(7.9 to 54.2)                             | 10.8<br>(-7.4 to 32.9)                              |
| Cirrhosis and other chronic liver diseases due to alcohol use  | 121.8<br>(110.2 to 134.3)                  | 3.3<br>(3.0 to 3.6)                                 | 2.1<br>(1.4 to 3.0)                   | 28.6<br>(9.3 to 53.5)                             | 9.2<br>(-7.7 to 31.0)                               |
| Cirrhosis and other chronic liver diseases due to other causes | 67.4<br>(60.9 to 74.9)                     | 1.6<br>(1.5 to 1.8)                                 | 2.0<br>(1.3 to 2.8)                   | 19.4<br>(-2.9 to 49.8)                            | 9.2<br>(-11.7 to 36.9)                              |
| <b>Digestive diseases</b>                                      | <b>726.4<br/>(692.8 to 760.2)</b>          | <b>1,046.1<sup>†</sup><br/>(978.0 to 1,116.9)</b>   | <b>24.9<br/>(17.8 to 33.2)</b>        | <b>20.1<br/>(11.8 to 28.3)</b>                    | <b>3.7<br/>(-3.4 to 11.0)</b>                       |
| Peptic ulcer disease                                           | 265.9<br>(242.6 to 292.8)                  | 27.3<br>(24.6 to 30.3)                              | 2.9<br>(1.8 to 4.4)                   | 42.1<br>(25.8 to 61.0)                            | 21.9<br>(7.7 to 38.7)                               |
| Gastritis and duodenitis                                       | 201.2<br>(180.4 to 222.7)                  | 172.8<br>(152.0 to 195.2)                           | 2.8<br>(1.8 to 4.1)                   | 44.5<br>(28.9 to 62.5)                            | 24.6<br>(10.8 to 40.1)                              |
| Appendicitis                                                   | 3.8<br>(3.5 to 4.1)                        | 100.4<br>(92.8 to 108.4)                            | 1.2<br>(0.8 to 1.7)                   | 10.4<br>(-18.6 to 48.3)                           | 0.6<br>(-25.8 to 34.1)                              |
| Paralytic ileus and intestinal obstruction                     | 0.8<br>(0.7 to 0.9)                        | 23.6<br>(21.5 to 25.8)                              | 0.2<br>(0.2 to 0.4)                   | 24.5<br>(9.2 to 40.9)                             | 5.8<br>(-6.1 to 18.5)                               |
| Inguinal, femoral, and abdominal hernia                        | 188.1<br>(167.4 to 210.7)                  | 444.6<br>(387.1 to 500.8)                           | 11.8<br>(8.0 to 16.5)                 | 12.5<br>(0.7 to 25.1)                             | -3.0<br>(-13.3 to 8.1)                              |
| Inflammatory bowel disease                                     | 12.9<br>(12.0 to 14.0)                     | 16.1<br>(15.3 to 16.8)                              | 1.9<br>(1.3 to 2.7)                   | 11.6<br>(-7.1 to 32.5)                            | -3.2<br>(-19.7 to 15.0)                             |
| Vascular intestinal disorders                                  | 1.0<br>(0.9 to 1.1)                        | 4.4<br>(4.0 to 4.9)                                 | 0.3<br>(0.2 to 0.4)                   | 25.8<br>(2.5 to 53.2)                             | 6.6<br>(-12.4 to 28.5)                              |
| Gallbladder and biliary diseases                               | 75.9<br>(67.4 to 85.4)                     | 230.2<br>(200.3 to 264.3)                           | 1.4<br>(0.9 to 2.1)                   | 23.4<br>(0.4 to 53.9)                             | 5.7<br>(-14.2 to 32.3)                              |
| Pancreatitis                                                   | 3.0<br>(2.7 to 3.3)                        | 26.7<br>(24.1 to 29.5)                              | 0.4<br>(0.3 to 0.6)                   | 21.0<br>(15.8 to 26.7)                            | 3.5<br>(-1.0 to 8.2)                                |
| Other digestive diseases                                       | --                                         | --                                                  | 2.0<br>(1.4 to 2.7)                   | 24.4<br>(15.6 to 33.4)                            | 7.5<br>(-0.3 to 15.7)                               |
| <b>Neurological disorders</b>                                  | <b>15,955.7<br/>(15,359.5 to 16,695.6)</b> | <b>7,108.1<br/>(6,100.7 to 8,280.5)</b>             | <b>427.1<br/>(284.2 to 577.3)</b>     | <b>14.7<br/>(1.4 to 30.0)</b>                     | <b>0.8<br/>(-11.0 to 14.2)</b>                      |
| Alzheimer's disease and other dementias                        | 243.6<br>(205.0 to 290.4)                  | 43.7<br>(36.0 to 53.1)                              | 37.1<br>(25.6 to 49.8)                | 23.9<br>(18.0 to 29.9)                            | -1.5<br>(-5.9 to 3.1)                               |
| Parkinson's disease                                            | 68.0<br>(52.6 to 85.2)                     | 8.1<br>(6.2 to 10.3)                                | 7.9<br>(5.0 to 11.3)                  | 26.9<br>(16.6 to 39.1)                            | 5.9<br>(-3.1 to 16.1)                               |
| Epilepsy                                                       | 101.9<br>(27.9 to 174.8)                   | 14.0<br>(3.8 to 24.1)                               | 31.7<br>(6.8 to 70.4)                 | 13.5<br>(-78.9 to 523.9)                          | 2.8<br>(-81.0 to 462.9)                             |
| Multiple sclerosis                                             | 20.2<br>(17.5 to 23.4)                     | 0.6<br>(0.6 to 0.7)                                 | 5.4<br>(3.6 to 7.3)                   | 22.9<br>(3.6 to 47.8)                             | 5.7<br>(-11.0 to 27.6)                              |
| Motor neuron disease                                           | 2.9<br>(2.6 to 3.2)                        | 0.4<br>(0.4 to 0.5)                                 | 0.6<br>(0.4 to 0.8)                   | 23.0<br>(18.7 to 27.5)                            | 7.8<br>(4.2 to 11.6)                                |
| Migraine                                                       | 7,110.3<br>(6,764.6 to 7,449.7)            | 702.3<br>(665.3 to 740.5)                           | 295.7<br>(188.9 to 414.8)             | 13.0<br>(9.2 to 17.1)                             | 0.2<br>(-3.1 to 3.8)                                |
| Tension-type headache                                          | 11,317.6<br>(10,167.1 to 12,619.3)         | 6,338.5<br>(5,324.1 to 7,509.5)                     | 40.9<br>(26.1 to 60.2)                | 14.0<br>(8.4 to 19.9)                             | 0.2<br>(-4.6 to 5.3)                                |
| Other neurological disorders                                   | 0.2<br>(0.1 to 0.2)                        | 0.3<br>(0.2 to 0.5)                                 | 7.8<br>(2.8 to 15.5)                  | 33.1<br>(-57.0 to 310.1)                          | 21.4<br>(-61.3 to 272.2)                            |
| <b>Mental and substance use disorders</b>                      | <b>7,602.5<br/>(7,365.2 to 7,866.6)</b>    | <b>2,555.1<sup>†</sup><br/>(2,390.8 to 2,732.4)</b> | <b>1,025.4<br/>(733.8 to 1,333.3)</b> | <b>10.0<br/>(7.3 to 12.8)</b>                     | <b>-1.6<br/>(-4.1 to 1.0)</b>                       |
| Schizophrenia                                                  | 84.2<br>(73.8 to 95.1)                     | 4.8<br>(4.2 to 5.5)                                 | 54.0<br>(40.5 to 67.6)                | 15.6<br>(5.6 to 27.0)                             | 0.2<br>(-8.5 to 9.8)                                |
| Alcohol use disorders                                          | 733.3<br>(622.0 to 851.5)                  | 338.3<br>(284.3 to 389.4)                           | 73.7<br>(50.2 to 102.6)               | -7.4<br>(-19.8 to 4.8)                            | -16.7<br>(-27.8 to -5.8)                            |
| Drug use disorders                                             | 534.3<br>(497.5 to 575.0)                  | 60.8<br>(54.4 to 68.2)                              | 108.6<br>(76.4 to 144.6)              | 10.8<br>(1.3 to 20.0)                             | 0.0<br>(-8.5 to 8.6)                                |
| Opioid use disorders                                           | 122.2<br>(101.5 to 146.6)                  | 13.6<br>(11.5 to 15.9)                              | 50.4<br>(34.2 to 68.2)                | 19.2<br>(8.0 to 31.2)                             | 5.4<br>(-4.5 to 16.2)                               |
| Cocaine use disorders                                          | 131.7<br>(115.2 to 150.6)                  | 7.9<br>(6.6 to 9.7)                                 | 17.9<br>(11.2 to 26.1)                | 3.7<br>(-11.2 to 19.8)                            | -5.9<br>(-19.5 to 8.6)                              |
| Amphetamine use disorders                                      | 94.7<br>(66.3 to 133.8)                    | 8.1<br>(5.5 to 11.7)                                | 12.5<br>(6.8 to 20.2)                 | 2.4<br>(-16.5 to 23.5)                            | -4.2<br>(-22.0 to 15.4)                             |
| Cannabis use disorders                                         | 169.4<br>(138.0 to 205.4)                  | 25.8<br>(20.9 to 31.7)                              | 4.9<br>(3.0 to 7.4)                   | 8.9<br>(-11.2 to 32.3)                            | 1.2<br>(-17.5 to 23.4)                              |
| Other drug use disorders                                       | 29.1<br>(25.9 to 32.4)                     | 5.4<br>(4.8 to 6.0)                                 | 22.9<br>(14.5 to 34.2)                | 5.4<br>(-18.6 to 34.5)                            | -3.8<br>(-25.7 to 22.4)                             |
| Depressive disorders                                           | 1,581.2<br>(1,476.3 to 1,706.4)            | 1,586.7<br>(1,434.1 to 1,751.1)                     | 260.7<br>(180.5 to 354.8)             | 11.5<br>(6.4 to 17.0)                             | -1.0<br>(-5.5 to 3.8)                               |
| Major depressive disorder                                      | 977.3<br>(882.1 to 1,086.1)                | 1,486.5<br>(1,330.9 to 1,651.7)                     | 200.8<br>(137.2 to 272.1)             | 10.7<br>(4.1 to 17.5)                             | -1.2<br>(-7.1 to 4.7)                               |
| Dysthymia                                                      | 623.5<br>(543.8 to 713.5)                  | 100.2<br>(88.0 to 114.6)                            | 60.0<br>(39.7 to 87.0)                | 14.1<br>(10.2 to 17.8)                            | -0.2<br>(-3.6 to 3.0)                               |
| Bipolar disorder                                               | 367.9<br>(317.9 to 421.9)                  | 29.8<br>(25.9 to 34.4)                              | 75.0<br>(46.7 to 109.4)               | 12.5<br>(6.5 to 18.9)                             | -0.2<br>(-5.3 to 5.4)                               |
| Anxiety disorders                                              | 2,591.2<br>(2,361.3 to 2,832.9)            | 330.9<br>(304.8 to 359.6)                           | 250.2<br>(175.5 to 339.2)             | 11.7<br>(5.0 to 18.5)                             | -0.3<br>(-6.0 to 6.0)                               |
| Eating disorders                                               | 104.9<br>(84.7 to 126.1)                   | 40.7<br>(30.2 to 53.6)                              | 21.4<br>(13.8 to 31.2)                | 21.0<br>(8.9 to 35.1)                             | 10.7<br>(-0.4 to 23.8)                              |
| Anorexia nervosa                                               | 25.7<br>(18.9 to 34.7)                     | 7.2<br>(5.2 to 9.5)                                 | 5.5<br>(3.3 to 8.3)                   | 17.1<br>(-4.2 to 41.5)                            | 9.7<br>(-10.1 to 32.6)                              |
| Bulimia nervosa                                                | 75.8<br>(57.3 to 99.7)                     | 33.5<br>(23.4 to 45.9)                              | 15.9<br>(9.8 to 23.8)                 | 22.4<br>(8.1 to 38.8)                             | 11.1<br>(-1.6 to 25.6)                              |
| Autistic spectrum disorders                                    | 359.4<br>(320.4 to 400.5)                  | 2.2<br>(1.5 to 3.1)                                 | 57.0<br>(38.5 to 81.0)                | 10.5<br>(5.4 to 15.8)                             | 0.2<br>(-4.5 to 5.0)                                |
| Autism                                                         | 136.7<br>(117.4 to 160.2)                  | 0.3<br>(0.1 to 0.5)                                 | 34.8<br>(22.8 to 50.9)                | 10.7<br>(2.6 to 19.6)                             | 0.2<br>(-7.0 to 8.1)                                |
| Asperger syndrome and other autistic spectrum disorders        | 222.1<br>(185.1 to 268.3)                  | 1.9<br>(1.2 to 2.7)                                 | 22.2<br>(14.6 to 32.1)                | 10.1<br>(4.4 to 16.0)                             | 0.1<br>(-5.1 to 5.5)                                |

| Cause                                                      | Prevalence in thousands (95% UI)                 | Incidence in thousands (95% UI)                   | YLDs in thousands (95% UI)                  |                                                   |                                                     |
|------------------------------------------------------------|--------------------------------------------------|---------------------------------------------------|---------------------------------------------|---------------------------------------------------|-----------------------------------------------------|
|                                                            | 2016 counts                                      | 2016 counts                                       | 2016 counts                                 | Percentage change in counts between 2006 and 2016 | Percentage change in age-standardised rates between |
| Attention-deficit/hyperactivity disorder                   | 539.5<br>(484.4 to 604.8)                        | 27.1<br>(23.5 to 31.7)                            | 6.5<br>(3.9 to 10.3)                        | 7.2<br>(0.2 to 14.6)                              | 0.1<br>(-6.5 to 7.1)                                |
| Conduct disorder                                           | 310.2<br>(255.8 to 368.3)                        | 105.6<br>(82.7 to 127.0)                          | 37.7<br>(23.1 to 57.4)                      | 3.2<br>(-3.6 to 9.7)                              | -0.2<br>(-6.8 to 6.1)                               |
| Idiopathic developmental intellectual disability           | 289.9<br>(140.3 to 441.3)                        | --                                                | 14.2<br>(6.5 to 24.5)                       | 7.8<br>(-1.3 to 17.8)                             | -2.5<br>(-11.0 to 6.5)                              |
| Other mental and substance use disorders                   | 893.3<br>(776.7 to 1,032.1)                      | 28.1<br>(24.7 to 32.2)                            | 66.4<br>(45.3 to 94.2)                      | 14.7<br>(9.5 to 19.9)                             | 0.1<br>(-4.4 to 4.7)                                |
| <b>Diabetes, urogenital, blood, and endocrine diseases</b> | <b>11,728.1</b><br><b>(11,470.2 to 12,003.2)</b> | <b>4,339.2†</b><br><b>(4,085.4 to 4,603.6)</b>    | <b>316.4</b><br><b>(227.0 to 421.7)</b>     | <b>16.5</b><br><b>(11.5 to 22.4)</b>              | <b>-0.5</b><br><b>(-4.8 to 4.5)</b>                 |
| Diabetes mellitus                                          | 1,967.4<br>(1,777.6 to 2,167.5)                  | 107.6<br>(97.0 to 118.9)                          | 152.1<br>(105.7 to 210.8)                   | 18.2<br>(8.1 to 29.7)                             | 0.1<br>(-8.4 to 9.9)                                |
| Acute glomerulonephritis                                   | 0.4<br>(0.4 to 0.5)                              | 6.2<br>(5.4 to 7.1)                               | < 0.05<br>(< 0.05 to < 0.05)                | 13.7<br>(8.8 to 17.9)                             | 0.1<br>(-3.9 to 3.5)                                |
| Chronic kidney disease                                     | 1,736.0<br>(1,554.5 to 1,917.5)                  | 144.4<br>(126.5 to 162.6)                         | 59.4<br>(44.9 to 74.5)                      | 21.0<br>(13.1 to 28.4)                            | 2.3<br>(-4.2 to 8.5)                                |
| Chronic kidney disease due to diabetes mellitus            | 581.0<br>(476.2 to 682.3)                        | 50.9<br>(40.9 to 61.1)                            | 19.7<br>(14.3 to 25.7)                      | 22.6<br>(11.3 to 35.7)                            | 3.6<br>(-6.0 to 14.8)                               |
| Chronic kidney disease due to hypertension                 | 322.7<br>(271.2 to 374.2)                        | 18.0<br>(14.2 to 22.3)                            | 11.0<br>(7.7 to 14.4)                       | 20.1<br>(6.7 to 35.6)                             | -1.7<br>(-13.0 to 10.9)                             |
| Chronic kidney disease due to glomerulonephritis           | 280.0<br>(235.6 to 324.5)                        | 29.7<br>(23.2 to 36.6)                            | 9.2<br>(6.6 to 12.1)                        | 21.5<br>(8.8 to 36.2)                             | 5.1<br>(-5.5 to 18.3)                               |
| Chronic kidney disease due to other causes                 | 552.2<br>(456.5 to 653.4)                        | 45.9<br>(37.1 to 55.8)                            | 19.5<br>(14.2 to 25.6)                      | 19.6<br>(8.3 to 31.3)                             | 1.9<br>(-7.7 to 11.7)                               |
| Urinary diseases and male infertility                      | 1,172.9<br>(1,035.0 to 1,311.6)                  | 2,592.2†<br>(2,355.4 to 2,846.1)                  | 36.5<br>(23.4 to 52.8)                      | 12.7<br>(0.5 to 22.9)                             | -4.1<br>(-14.7 to 4.7)                              |
| Interstitial nephritis and urinary tract infections        | 41.2<br>(36.7 to 45.9)                           | 2,154.3<br>(1,920.8 to 2,401.9)                   | 1.4<br>(0.8 to 2.0)                         | 16.1<br>(1.1 to 33.9)                             | 3.1<br>(-10.2 to 18.9)                              |
| Urolithiasis                                               | 12.0<br>(10.5 to 13.8)                           | 317.6<br>(277.5 to 364.3)                         | 0.9<br>(0.6 to 1.3)                         | 17.6<br>(4.5 to 32.1)                             | 1.3<br>(-10.1 to 14.0)                              |
| Benign prostatic hyperplasia                               | 999.1<br>(842.7 to 1,164.1)                      | 120.2<br>(99.4 to 144.6)                          | 32.9<br>(20.9 to 48.0)                      | 12.8<br>(-0.6 to 24.6)                            | -4.3<br>(-16.0 to 5.7)                              |
| Male infertility                                           | 82.7<br>(63.4 to 107.5)                          | --                                                | 0.5<br>(0.2 to 1.0)                         | 16.4<br>(5.7 to 27.9)                             | 0.7<br>(-8.2 to 10.1)                               |
| Other urinary diseases                                     | --                                               | --                                                | 0.8<br>(0.5 to 1.1)                         | -3.5<br>(-12.9 to 7.1)                            | -14.9<br>(-23.2 to -5.5)                            |
| Gynecological diseases                                     | 4,653.4<br>(4,416.5 to 4,915.0)                  | 1,372.1†<br>(1,295.4 to 1,452.4)                  | 44.7<br>(30.0 to 64.4)                      | 9.3<br>(4.4 to 14.6)                              | -3.6<br>(-8.1 to 1.1)                               |
| Uterine fibroids                                           | 292.0<br>(255.2 to 332.6)                        | 31.0<br>(26.8 to 35.9)                            | 4.3<br>(2.5 to 7.4)                         | 11.6<br>(1.8 to 21.5)                             | -4.6<br>(-13.1 to 4.2)                              |
| Polycystic ovarian syndrome                                | 48.7<br>(37.0 to 63.5)                           | 25.2<br>(18.0 to 33.2)                            | 0.4<br>(0.2 to 0.8)                         | 16.2<br>(2.8 to 33.0)                             | -0.5<br>(-11.8 to 13.7)                             |
| Female infertility                                         | 68.2<br>(28.1 to 127.3)                          | --                                                | 0.4<br>(0.1 to 0.9)                         | -1.7<br>(-20.0 to 16.7)                           | -14.9<br>(-30.9 to 1.9)                             |
| Endometriosis                                              | 15.9<br>(12.9 to 18.9)                           | 49.2<br>(39.6 to 61.0)                            | 1.5<br>(0.9 to 2.2)                         | 10.5<br>(-16.4 to 42.7)                           | 0.1<br>(-23.9 to 28.6)                              |
| Genital prolapse                                           | 1,780.2<br>(1,530.1 to 2,058.6)                  | 88.3<br>(74.9 to 103.9)                           | 5.5<br>(2.6 to 9.9)                         | 9.4<br>(-0.2 to 18.8)                             | -7.0<br>(-15.2 to 0.8)                              |
| Premenstrual syndrome                                      | 2,460.0<br>(2,314.9 to 2,599.6)                  | 866.4<br>(808.3 to 926.0)                         | 20.5<br>(12.6 to 32.2)                      | 8.4<br>(-0.1 to 16.6)                             | -3.1<br>(-10.8 to 4.2)                              |
| Other gynecological diseases                               | 371.9<br>(325.5 to 425.6)                        | 311.9<br>(261.1 to 371.6)                         | 11.9<br>(7.7 to 17.2)                       | 10.3<br>(0.8 to 21.2)                             | -2.7<br>(-10.9 to 6.6)                              |
| Hemoglobinopathies and hemolytic anaemias                  | 4,110.2<br>(3,984.3 to 4,254.6)                  | --                                                | 4.2<br>(2.6 to 6.2)                         | 13.2<br>(0.8 to 28.1)                             | 1.1<br>(-10.6 to 15.0)                              |
| Thalassemias                                               | 0.6<br>(0.4 to 0.8)                              | --                                                | < 0.05<br>(< 0.05 to < 0.05)                | 18.1<br>(-10.3 to 58.8)                           | 14.1<br>(-13.9 to 54.3)                             |
| Thalassaemias trait                                        | 113.8<br>(100.4 to 125.9)                        | --                                                | 1.2<br>(0.7 to 1.8)                         | 33.8<br>(7.5 to 67.6)                             | 18.5<br>(-4.9 to 48.1)                              |
| Sickle cell disorders                                      | 0.3<br>(0.3 to 0.3)                              | --                                                | < 0.05<br>(< 0.05 to 0.1)                   | 10.9<br>(2.1 to 20.2)                             | 2.9<br>(-5.2 to 11.9)                               |
| Sickle cell trait                                          | 477.5<br>(456.8 to 499.1)                        | --                                                | 0.7<br>(0.5 to 1.2)                         | 23.2<br>(-0.6 to 52.6)                            | 11.6<br>(-10.1 to 40.4)                             |
| G6PD deficiency                                            | 460.2<br>(431.3 to 497.3)                        | --                                                | 0.1<br>(< 0.05 to 0.1)                      | 6.2<br>(-11.4 to 30.3)                            | -5.2<br>(-21.5 to 17.7)                             |
| G6PD trait                                                 | 2,998.8<br>(2,891.5 to 3,115.7)                  | --                                                | < 0.05<br>(< 0.05 to < 0.05)                | 23.2<br>(7.7 to 54.1)                             | 10.0<br>(-4.4 to 40.2)                              |
| Other hemoglobinopathies and hemolytic anaemias            | 143.2<br>(130.2 to 156.7)                        | --                                                | 2.1<br>(1.3 to 3.3)                         | 1.9<br>(-9.7 to 15.6)                             | -9.3<br>(-20.0 to 3.2)                              |
| Endocrine, metabolic, blood, and immune disorders          | 621.2<br>(574.3 to 677.6)                        | 116.7<br>(104.9 to 130.5)                         | 19.6<br>(13.2 to 27.1)                      | 16.6<br>(10.3 to 23.7)                            | 0.2<br>(-5.3 to 6.4)                                |
| <b>Musculoskeletal disorders</b>                           | <b>10,179.1</b><br><b>(9,724.4 to 10,628.4)</b>  | <b>5,960.4</b><br><b>(5,430.4 to 6,537.3)</b>     | <b>1,128.8</b><br><b>(818.3 to 1,468.4)</b> | <b>17.0</b><br><b>(13.8 to 20.1)</b>              | <b>1.3</b><br><b>(-1.2 to 4.1)</b>                  |
| Rheumatoid arthritis                                       | 284.3<br>(253.2 to 317.1)                        | 14.3<br>(12.8 to 16.0)                            | 66.8<br>(45.9 to 89.8)                      | 24.8<br>(17.6 to 34.0)                            | 6.7<br>(0.3 to 14.7)                                |
| Osteoarthritis                                             | 2,321.9<br>(2,180.4 to 2,472.1)                  | 106.8<br>(99.1 to 115.0)                          | 81.8<br>(53.8 to 118.5)                     | 21.2<br>(17.1 to 25.4)                            | 2.0<br>(-1.5 to 5.6)                                |
| Low back and neck pain                                     | 5,913.2<br>(5,521.1 to 6,340.0)                  | 2,632.1<br>(2,331.5 to 2,957.3)                   | 701.0<br>(492.1 to 921.0)                   | 15.1<br>(11.5 to 18.9)                            | -0.3<br>(-3.4 to 3.0)                               |
| Low back pain                                              | 4,656.0<br>(4,160.9 to 5,246.4)                  | 2,285.0<br>(1,986.2 to 2,598.9)                   | 528.8<br>(370.1 to 700.7)                   | 14.7<br>(10.1 to 19.5)                            | -0.3<br>(-4.3 to 3.8)                               |
| Neck pain                                                  | 1,727.4<br>(1,495.7 to 1,986.0)                  | 347.1<br>(301.9 to 408.8)                         | 172.2<br>(116.8 to 243.8)                   | 16.6<br>(13.8 to 19.2)                            | -0.1<br>(-2.3 to 2.0)                               |
| Gout                                                       | 316.6<br>(278.2 to 357.7)                        | 55.1<br>(47.9 to 63.1)                            | 10.0<br>(6.6 to 13.7)                       | 18.4<br>(5.0 to 33.4)                             | 0.4<br>(-10.9 to 13.4)                              |
| Other musculoskeletal disorders                            | 3,119.9<br>(2,667.7 to 3,616.1)                  | 3,152.0<br>(2,698.7 to 3,653.6)                   | 269.2<br>(183.7 to 375.5)                   | 18.7<br>(10.9 to 27.3)                            | 4.2<br>(-2.6 to 11.6)                               |
| <b>Other non-communicable diseases</b>                     | <b>31,670.9</b><br><b>(31,175.0 to 32,085.5)</b> | <b>84,825.8†</b><br><b>(79,809.8 to 89,975.8)</b> | <b>880.4</b><br><b>(599.1 to 1,247.7)</b>   | <b>12.5</b><br><b>(11.2 to 13.8)</b>              | <b>-0.7</b><br><b>(-1.9 to 0.4)</b>                 |
| Congenital anomalies                                       | 268.6<br>(242.8 to 300.8)                        | --                                                | 41.3<br>(29.7 to 54.7)                      | 7.2<br>(0.8 to 14.4)                              | -2.4<br>(-8.2 to 4.1)                               |
| Neural tube defects                                        | 36.6<br>(32.8 to 40.7)                           | --                                                | 10.9<br>(7.7 to 14.9)                       | 3.4<br>(-9.9 to 18.2)                             | -6.7<br>(-18.7 to 6.7)                              |
| Congenital heart anomalies                                 | 58.8<br>(51.5 to 67.4)                           | --                                                | 2.9<br>(1.2 to 4.9)                         | 10.1<br>(-3.2 to 24.1)                            | 1.2<br>(-11.1 to 14.1)                              |
| Orofacial clefts                                           | 23.3<br>(20.3 to 26.6)                           | --                                                | 0.3<br>(0.2 to 0.4)                         | 3.6<br>(-7.8 to 16.7)                             | -6.0<br>(-16.4 to 5.8)                              |
| Down's syndrome                                            | 25.3<br>(21.5 to 29.9)                           | --                                                | 2.2<br>(1.5 to 3.1)                         | 11.4<br>(-0.6 to 26.5)                            | 2.8<br>(-8.2 to 16.6)                               |
| Turner syndrome                                            | 8.3<br>(7.1 to 9.8)                              | --                                                | 0.1<br>(0.1 to 0.2)                         | 6.4<br>(-30.3 to 67.2)                            | -2.6<br>(-36.4 to 51.4)                             |
| Klinefelter syndrome                                       | 12.1<br>(10.2 to 14.2)                           | --                                                | 0.1<br>(< 0.05 to 0.1)                      | 10.6<br>(-18.0 to 47.7)                           | 1.1<br>(-25.0 to 34.4)                              |



| Cause                                         | Prevalence in thousands (95% UI)               | Incidence in thousands (95% UI)                           | YLDs in thousands (95% UI)              |                                                   |                                                     |
|-----------------------------------------------|------------------------------------------------|-----------------------------------------------------------|-----------------------------------------|---------------------------------------------------|-----------------------------------------------------|
|                                               | 2016 counts                                    | 2016 counts                                               | 2016 counts                             | Percentage change in counts between 2006 and 2016 | Percentage change in age-standardised rates between |
| Other chromosomal abnormalities               | 21.6<br>(18.2 to 25.6)                         | --                                                        | 2.6<br>(1.8 to 3.7)                     | 12.3<br>(-9.4 to 38.5)                            | 8.0<br>(-12.9 to 33.4)                              |
| Congenital musculoskeletal and limb anomalies | 35.4<br>(32.3 to 38.5)                         | --                                                        | 5.3<br>(3.6 to 7.4)                     | 12.3<br>(1.9 to 23.8)                             | 1.1<br>(-8.4 to 11.5)                               |
| Urogenital congenital anomalies               | 23.5<br>(21.0 to 26.2)                         | --                                                        | 0.6<br>(0.4 to 1.0)                     | 6.5<br>(-0.6 to 14.5)                             | 0.7<br>(-6.1 to 8.3)                                |
| Digestive congenital anomalies                | 63.9<br>(56.8 to 71.4)                         | --                                                        | 2.8<br>(1.8 to 4.0)                     | 11.5<br>(-3.8 to 29.0)                            | 0.9<br>(-13.0 to 16.1)                              |
| Other congenital anomalies                    | 80.6<br>(51.7 to 122.5)                        | --                                                        | 13.5<br>(8.7 to 19.9)                   | 5.4<br>(-4.2 to 17.1)                             | -4.4<br>(-13.2 to 6.2)                              |
| Skin and subcutaneous diseases                | 14,432.5<br>(14,136.9 to 14,740.2)             | 28,281.5<br>(26,758.0 to 30,062.3)                        | 374.5<br>(255.7 to 534.9)               | 11.1<br>(8.9 to 13.4)                             | 1.9<br>(-0.1 to 4.0)                                |
| Dermatitis                                    | 2,341.9<br>(2,222.9 to 2,467.7)                | 2,963.2<br>(2,744.7 to 3,197.8)                           | 85.6<br>(50.8 to 137.0)                 | 10.1<br>(5.6 to 14.6)                             | 0.9<br>(-3.1 to 5.2)                                |
| Psoriasis                                     | 516.3<br>(491.5 to 542.5)                      | 54.1<br>(51.4 to 56.8)                                    | 44.9<br>(32.3 to 59.3)                  | 20.0<br>(11.9 to 28.2)                            | 6.1<br>(-0.9 to 13.5)                               |
| Cellulitis                                    | 20.1<br>(18.9 to 21.5)                         | 378.5<br>(355.1 to 401.7)                                 | 1.1<br>(0.7 to 1.7)                     | 15.1<br>(-6.2 to 41.5)                            | 2.4<br>(-17.0 to 26.3)                              |
| Pyoderma                                      | 95.0<br>(91.9 to 98.0)                         | 2,127.1<br>(2,054.7 to 2,205.4)                           | 0.5<br>(0.2 to 1.1)                     | 14.4<br>(6.8 to 22.7)                             | 0.6<br>(-6.2 to 7.9)                                |
| Scabies                                       | 103.1<br>(90.5 to 118.1)                       | 310.9<br>(270.4 to 355.4)                                 | 2.7<br>(1.5 to 4.3)                     | 8.1<br>(0.1 to 16.2)                              | -0.0<br>(-7.5 to 7.4)                               |
| Fungal skin diseases                          | 2,744.1<br>(2,455.4 to 3,041.5)                | 10,419.7<br>(9,161.5 to 11,841.8)                         | 15.3<br>(6.1 to 32.1)                   | 15.0<br>(13.4 to 16.6)                            | 0.0<br>(-1.3 to 1.3)                                |
| Viral skin diseases                           | 1,330.3<br>(1,274.8 to 1,392.1)                | 1,740.5<br>(1,654.1 to 1,820.9)                           | 40.9<br>(25.3 to 61.2)                  | 8.0<br>(4.8 to 11.1)                              | -0.1<br>(-2.9 to 2.9)                               |
| Acne vulgaris                                 | 5,033.0<br>(4,620.6 to 5,434.1)                | 4,088.4<br>(3,297.8 to 5,211.6)                           | 129.7<br>(87.3 to 187.2)                | 8.1<br>(3.9 to 12.4)                              | 2.0<br>(-1.9 to 6.0)                                |
| Alopecia areata                               | 142.0<br>(136.5 to 147.5)                      | 251.3<br>(241.5 to 260.9)                                 | 4.7<br>(3.0 to 7.0)                     | 12.4<br>(3.3 to 21.4)                             | -0.2<br>(-8.3 to 7.8)                               |
| Pruritus                                      | 368.3<br>(326.7 to 415.2)                      | 292.7<br>(261.9 to 328.4)                                 | 3.9<br>(1.8 to 7.2)                     | 14.5<br>(8.5 to 20.9)                             | 0.9<br>(-4.4 to 6.5)                                |
| Urticaria                                     | 346.0<br>(305.4 to 394.5)                      | 614.8<br>(541.7 to 702.6)                                 | 20.8<br>(13.4 to 29.7)                  | 8.6<br>(2.6 to 15.2)                              | -0.2<br>(-5.7 to 5.9)                               |
| Decubitus ulcer                               | 14.6<br>(12.9 to 16.5)                         | 53.6<br>(47.0 to 61.2)                                    | 2.2<br>(1.6 to 3.1)                     | 28.8<br>(11.8 to 48.0)                            | 4.9<br>(-8.7 to 20.2)                               |
| Other skin and subcutaneous diseases          | 4,044.6<br>(3,936.2 to 4,154.6)                | 4,986.7<br>(4,826.5 to 5,149.8)                           | 22.2<br>(10.7 to 40.4)                  | 20.7<br>(18.1 to 23.1)                            | 5.0<br>(2.8 to 7.2)                                 |
| Sense organ diseases                          | 9,642.2<br>(9,452.9 to 9,851.7)                | 4,298.7 <sup>+</sup><br>(4,052.5 to 4,582.3)              | 336.0<br>(232.3 to 473.2)               | 13.5<br>(11.2 to 15.6)                            | -3.6<br>(-5.6 to -1.8)                              |
| Glaucoma                                      | 33.1<br>(27.6 to 38.6)                         | --                                                        | 3.2<br>(2.1 to 4.4)                     | 20.1<br>(6.3 to 35.3)                             | -0.6<br>(-12.0 to 12.6)                             |
| Cataract                                      | 236.6<br>(202.7 to 276.3)                      | --                                                        | 17.0<br>(12.0 to 23.4)                  | 18.7<br>(10.9 to 26.9)                            | -4.0<br>(-10.1 to 2.6)                              |
| Macular degeneration                          | 26.3<br>(21.8 to 31.4)                         | --                                                        | 2.1<br>(1.4 to 3.0)                     | 24.7<br>(9.0 to 41.1)                             | 1.8<br>(-11.3 to 15.2)                              |
| Refraction and accommodation disorders        | 4,386.1<br>(4,206.6 to 4,557.7)                | --                                                        | 75.5<br>(46.0 to 120.2)                 | 11.1<br>(7.5 to 14.9)                             | -3.1<br>(-6.3 to 0.1)                               |
| Age-related and other hearing loss            | 6,297.6<br>(5,990.4 to 6,617.3)                | --                                                        | 182.6<br>(126.7 to 256.3)               | 12.7<br>(8.6 to 16.1)                             | -5.1<br>(-8.6 to -2.2)                              |
| Other vision loss                             | 177.2<br>(157.4 to 197.8)                      | --                                                        | 13.6<br>(9.5 to 18.4)                   | 17.2<br>(8.5 to 26.3)                             | -0.9<br>(-8.3 to 6.8)                               |
| Other sense organ diseases                    | 1,346.9<br>(1,244.4 to 1,449.2)                | 4,298.7<br>(4,052.5 to 4,582.3)                           | 42.1<br>(26.4 to 64.0)                  | 17.7<br>(13.5 to 21.9)                            | 1.2<br>(-2.4 to 4.9)                                |
| Oral disorders                                | 22,025.6<br>(21,214.1 to 22,728.9)             | 52,245.6 <sup>+</sup><br>(47,653.0 to 56,988.8)           | 128.6<br>(77.8 to 201.5)                | 15.8<br>(13.9 to 17.9)                            | -0.5<br>(-2.2 to 1.2)                               |
| Caries of deciduous teeth                     | 2,205.7<br>(1,617.9 to 2,692.3)                | 6,824.5<br>(3,965.8 to 10,309.3)                          | 0.8<br>(0.4 to 1.7)                     | -0.7<br>(-16.4 to 13.1)                           | -5.4<br>(-20.3 to 7.7)                              |
| Caries of permanent teeth                     | 16,302.8<br>(15,323.0 to 17,230.7)             | 44,756.1<br>(41,109.2 to 48,259.6)                        | 16.0<br>(7.1 to 30.2)                   | 9.5<br>(6.7 to 12.7)                              | -2.9<br>(-5.3 to -0.0)                              |
| Periodontal disease                           | 4,583.4<br>(3,830.1 to 5,433.2)                | 510.7<br>(407.6 to 619.6)                                 | 30.0<br>(11.9 to 62.5)                  | 17.1<br>(13.2 to 21.4)                            | -0.1<br>(-3.5 to 3.5)                               |
| Edentulism and severe tooth loss              | 2,104.3<br>(1,828.8 to 2,388.3)                | 154.4<br>(131.3 to 180.8)                                 | 58.4<br>(38.1 to 82.5)                  | 18.6<br>(15.1 to 22.4)                            | -0.0<br>(-3.0 to 3.1)                               |
| Other oral disorders                          | 798.9<br>(764.2 to 837.3)                      | --                                                        | 23.4<br>(14.4 to 35.6)                  | 12.8<br>(9.3 to 16.3)                             | -0.1<br>(-3.4 to 2.8)                               |
| <b>Injuries</b>                               | <b>9,572.5</b><br><b>(8,999.8 to 10,279.4)</b> | <b>3,855.6<sup>+</sup></b><br><b>(3,656.3 to 4,061.6)</b> | <b>291.7</b><br><b>(192.3 to 417.9)</b> | <b>20.6</b><br><b>(18.3 to 22.7)</b>              | <b>4.5</b><br><b>(2.6 to 6.2)</b>                   |
| <b>Transport injuries</b>                     | <b>994.5</b><br><b>(924.7 to 1,067.7)</b>      | <b>304.7</b><br><b>(278.8 to 332.9)</b>                   | <b>46.6</b><br><b>(30.6 to 67.3)</b>    | <b>19.9</b><br><b>(17.4 to 22.2)</b>              | <b>3.5</b><br><b>(1.3 to 5.4)</b>                   |
| Road injuries                                 | 832.1<br>(773.8 to 893.7)                      | 276.7<br>(251.5 to 304.5)                                 | 40.5<br>(26.7 to 58.1)                  | 21.4<br>(18.7 to 23.7)                            | 4.5<br>(2.2 to 6.5)                                 |
| Pedestrian road injuries                      | 141.1<br>(125.7 to 160.1)                      | 29.5<br>(24.9 to 35.0)                                    | 7.5<br>(4.9 to 10.8)                    | 8.6<br>(6.4 to 10.7)                              | -6.8<br>(-8.6 to -5.1)                              |
| Cyclist road injuries                         | 160.5<br>(135.2 to 191.4)                      | 65.5<br>(53.7 to 77.3)                                    | 7.1<br>(4.6 to 10.4)                    | 22.0<br>(19.2 to 24.4)                            | 5.6<br>(3.2 to 7.7)                                 |
| Motorcyclist road injuries                    | 156.4<br>(132.6 to 187.0)                      | 32.2<br>(26.6 to 38.4)                                    | 7.8<br>(5.2 to 11.2)                    | 30.1<br>(26.6 to 33.0)                            | 12.5<br>(9.5 to 15.0)                               |
| Motor vehicle road injuries                   | 292.9<br>(246.0 to 334.6)                      | 118.1<br>(103.5 to 133.5)                                 | 14.9<br>(9.9 to 21.2)                   | 23.9<br>(21.2 to 26.3)                            | 6.2<br>(4.0 to 8.2)                                 |
| Other road injuries                           | 81.2<br>(69.9 to 94.7)                         | 31.4<br>(24.9 to 39.0)                                    | 3.3<br>(2.1 to 4.8)                     | 21.9<br>(19.2 to 24.4)                            | 5.1<br>(2.8 to 7.2)                                 |
| Other transport injuries                      | 162.3<br>(133.9 to 195.8)                      | 28.0<br>(23.7 to 33.0)                                    | 6.2<br>(3.9 to 9.2)                     | 11.2<br>(8.6 to 13.6)                             | -2.7<br>(-5.1 to -0.7)                              |
| <b>Unintentional injuries</b>                 | <b>7,925.5</b><br><b>(7,368.7 to 8,634.6)</b>  | <b>3,310.2</b><br><b>(3,114.6 to 3,522.8)</b>             | <b>220.2</b><br><b>(146.3 to 314.8)</b> | <b>22.2</b><br><b>(19.9 to 24.1)</b>              | <b>5.8</b><br><b>(3.7 to 7.4)</b>                   |
| Falls                                         | 2,803.8<br>(2,473.8 to 3,142.3)                | 1,166.0<br>(1,036.3 to 1,317.3)                           | 106.5<br>(73.7 to 147.2)                | 25.6<br>(23.0 to 28.0)                            | 7.9<br>(5.7 to 9.8)                                 |
| Drowning                                      | 17.6<br>(15.5 to 19.9)                         | 2.5<br>(2.1 to 2.8)                                       | 0.8<br>(0.5 to 1.2)                     | 4.7<br>(-0.3 to 10.1)                             | -8.6<br>(-13.1 to -3.9)                             |
| Fire, heat, and hot substances                | 891.2<br>(759.6 to 1,050.7)                    | 68.8<br>(57.4 to 79.8)                                    | 15.9<br>(9.0 to 26.1)                   | 29.4<br>(26.0 to 32.7)                            | 13.0<br>(10.0 to 15.9)                              |
| Poisonings                                    | 24.3<br>(20.1 to 29.9)                         | 32.5<br>(25.9 to 39.8)                                    | 2.0<br>(1.3 to 3.0)                     | 25.5<br>(14.2 to 37.7)                            | 11.8<br>(1.7 to 22.6)                               |
| Exposure to mechanical forces                 | 2,386.1<br>(2,019.9 to 3,001.5)                | 767.3<br>(662.0 to 872.1)                                 | 44.2<br>(28.2 to 67.7)                  | 20.1<br>(17.9 to 21.9)                            | 4.2<br>(2.3 to 5.7)                                 |
| Unintentional firearm injuries                | 171.3<br>(137.0 to 219.5)                      | 23.0<br>(16.4 to 31.4)                                    | 2.7<br>(1.5 to 4.4)                     | 1.3<br>(-1.3 to 3.5)                              | -12.2<br>(-14.4 to -10.3)                           |
| Unintentional suffocation                     | 30.5<br>(22.5 to 40.5)                         | 4.8<br>(3.1 to 7.2)                                       | 0.7<br>(0.4 to 1.1)                     | 14.6<br>(11.9 to 17.2)                            | 1.7<br>(-0.7 to 4.2)                                |
| Other exposure to mechanical forces           | 2,184.4<br>(1,816.1 to 2,789.2)                | 739.6<br>(639.4 to 841.9)                                 | 40.9<br>(26.2 to 62.2)                  | 21.7<br>(19.4 to 23.6)                            | 5.5<br>(3.5 to 7.1)                                 |

| Cause                                                                               | Prevalence in thousands (95% UI)              | Incidence in thousands (95% UI)          | YLDs in thousands (95% UI)           |                                                   |                                                     |
|-------------------------------------------------------------------------------------|-----------------------------------------------|------------------------------------------|--------------------------------------|---------------------------------------------------|-----------------------------------------------------|
|                                                                                     | 2016 counts                                   | 2016 counts                              | 2016 counts                          | Percentage change in counts between 2006 and 2016 | Percentage change in age-standardised rates between |
| Adverse effects of medical treatment                                                | 29.6<br>(23.7 to 35.9)                        | 386.6<br>(349.9 to 427.2)                | 3.9<br>(2.5 to 5.8)                  | 22.7<br>(17.6 to 28.8)                            | 6.0<br>(1.5 to 10.9)                                |
| Animal contact                                                                      | 233.6<br>(201.6 to 277.1)                     | 150.1<br>(123.4 to 181.4)                | 5.3<br>(3.3 to 7.8)                  | 5.9<br>(0.4 to 11.3)                              | -6.5<br>(-11.4 to -1.8)                             |
| Venomous animal contact                                                             | 35.9<br>(29.4 to 43.2)                        | 42.1<br>(30.7 to 55.7)                   | 2.6<br>(1.7 to 3.8)                  | 5.7<br>(-4.0 to 16.7)                             | -5.6<br>(-14.3 to 4.1)                              |
| Non-venomous animal contact                                                         | 197.7<br>(167.0 to 239.5)                     | 108.0<br>(87.7 to 131.1)                 | 2.6<br>(1.5 to 4.3)                  | 6.2<br>(3.7 to 8.3)                               | -7.5<br>(-9.5 to -5.6)                              |
| Foreign body                                                                        | 402.7<br>(336.6 to 478.3)                     | 255.8<br>(228.7 to 289.2)                | 11.9<br>(7.5 to 17.7)                | 10.3<br>(7.2 to 13.2)                             | -2.9<br>(-5.6 to -0.4)                              |
| Pulmonary aspiration and foreign body in airway                                     | 105.9<br>(80.7 to 138.6)                      | 102.1<br>(90.7 to 115.3)                 | 2.9<br>(1.8 to 4.4)                  | 1.6<br>(-1.3 to 4.4)                              | -10.1<br>(-12.7 to -7.8)                            |
| Foreign body in eyes                                                                | 18.8<br>(11.8 to 26.8)                        | 84.8<br>(64.9 to 112.4)                  | 1.3<br>(0.8 to 2.0)                  | 17.4<br>(13.7 to 21.2)                            | 3.3<br>(0.4 to 6.5)                                 |
| Foreign body in other body part                                                     | 278.0<br>(226.0 to 352.5)                     | 68.9<br>(58.6 to 81.6)                   | 7.7<br>(4.9 to 11.6)                 | 12.8<br>(9.1 to 16.2)                             | -0.9<br>(-4.2 to 2.1)                               |
| Environmental heat and cold exposure                                                | 133.0<br>(112.4 to 164.1)                     | 28.0<br>(22.9 to 33.6)                   | 4.4<br>(2.8 to 6.6)                  | 10.7<br>(6.6 to 14.9)                             | -3.3<br>(-6.9 to 0.4)                               |
| Other unintentional injuries                                                        | 1,003.7<br>(826.8 to 1,200.6)                 | 452.6<br>(386.3 to 525.1)                | 25.2<br>(16.2 to 37.7)               | 20.2<br>(17.7 to 22.3)                            | 4.8<br>(2.6 to 6.7)                                 |
| <b>Self-harm and interpersonal violence</b>                                         | <b>1,228.7</b><br><b>(1,119.0 to 1,350.7)</b> | <b>238.7†</b><br><b>(210.7 to 270.6)</b> | <b>21.9</b><br><b>(14.8 to 31.2)</b> | <b>13.8</b><br><b>(11.0 to 16.3)</b>              | <b>0.4</b><br><b>(-1.8 to 2.4)</b>                  |
| Self-harm                                                                           | 56.0<br>(47.2 to 65.7)                        | 47.8<br>(41.2 to 54.8)                   | 2.9<br>(1.9 to 4.2)                  | 23.8<br>(15.5 to 32.2)                            | 8.1<br>(1.1 to 15.5)                                |
| Self-harm by firearm                                                                | 2.0<br>(1.6 to 2.4)                           | 0.4<br>(0.2 to 0.6)                      | < 0.05<br>(< 0.05 to 0.1)            | -5.8<br>(-8.3 to -3.5)                            | -17.5<br>(-19.8 to -15.5)                           |
| Self-harm by other specified means                                                  | 54.0<br>(45.2 to 63.7)                        | 47.5<br>(40.8 to 54.4)                   | 2.9<br>(1.9 to 4.1)                  | 24.4<br>(15.8 to 32.8)                            | 8.6<br>(1.4 to 16.0)                                |
| Interpersonal violence                                                              | 1,172.7<br>(1,060.9 to 1,295.0)               | 190.8†<br>(163.5 to 222.3)               | 19.0<br>(12.8 to 26.8)               | 12.4<br>(9.6 to 14.9)                             | -0.7<br>(-2.9 to 1.3)                               |
| Assault by firearm                                                                  | 41.8<br>(33.3 to 51.6)                        | 8.3<br>(6.3 to 10.9)                     | 1.1<br>(0.7 to 1.7)                  | 20.1<br>(17.0 to 23.1)                            | 4.1<br>(1.5 to 6.7)                                 |
| Assault by sharp object                                                             | 154.4<br>(126.4 to 186.5)                     | 58.4<br>(45.5 to 73.2)                   | 3.3<br>(2.1 to 5.0)                  | 12.6<br>(9.8 to 15.1)                             | -2.5<br>(-4.8 to -0.4)                              |
| Sexual violence                                                                     | 708.4<br>(615.8 to 816.9)                     | --                                       | 6.0<br>(4.0 to 8.7)                  | 2.4<br>(-1.7 to 7.3)                              | -5.5<br>(-9.2 to -1.2)                              |
| Assault by other means                                                              | 268.1<br>(221.4 to 328.6)                     | 124.1<br>(104.2 to 146.3)                | 8.5<br>(5.6 to 12.6)                 | 19.5<br>(16.8 to 21.7)                            | 3.2<br>(0.9 to 5.1)                                 |
| <b>Forces of nature, conflict and terrorism, and executions and police conflict</b> | <b>132.2</b><br><b>(67.3 to 210.8)</b>        | <b>2.0†</b><br><b>(1.2 to 6.9)</b>       | <b>3.0</b><br><b>(0.5 to 8.8)</b>    | <b>-14.7</b><br><b>(-17.8 to -8.6)</b>            | <b>-26.3</b><br><b>(-29.0 to -20.6)</b>             |
| Exposure to forces of nature                                                        | 6.0<br>(1.0 to 12.4)                          | --                                       | 0.1<br>(< 0.05 to 0.4)               | -0.2<br>(-3.6 to 3.0)                             | -12.2<br>(-15.2 to -9.3)                            |
| Conflict and terrorism                                                              | 52.2<br>(17.2 to 100.9)                       | --                                       | 1.0<br>(0.2 to 3.4)                  | -16.0<br>(-19.0 to -13.5)                         | -27.4<br>(-30.1 to -25.4)                           |
| Executions and police conflict                                                      | 74.1<br>(19.7 to 123.5)                       | 2.0<br>(1.2 to 6.9)                      | 1.8<br>(0.3 to 5.0)                  | -14.8<br>(-18.5 to -3.4)                          | -26.5<br>(-29.7 to -15.6)                           |
| <b>Impairments</b>                                                                  | --                                            | --                                       | --                                   | --                                                | --                                                  |
| Anaemia                                                                             | 5,577.9<br>(5,166.1 to 6,006.6)               | --                                       | 127.4<br>(86.8 to 182.6)             | 9.2<br>(0.8 to 18.7)                              | -3.8<br>(-11.4 to 4.6)                              |
| Developmental intellectual disability                                               | 633.1<br>(485.9 to 785.2)                     | --                                       | 83.9<br>(62.4 to 109.4)              | 8.2<br>(3.5 to 13.0)                              | -1.7<br>(-6.0 to 2.7)                               |
| Epilepsy                                                                            | 170.4<br>(92.3 to 250.1)                      | --                                       | 59.1<br>(29.4 to 100.8)              | 9.5<br>(-48.5 to 126.4)                           | -0.7<br>(-53.1 to 104.9)                            |
| Guillain-Barre syndrome                                                             | 0.5<br>(0.4 to 0.6)                           | --                                       | 0.1<br>(0.1 to 0.2)                  | 16.3<br>(12.6 to 27.0)                            | 3.7<br>(1.0 to 13.4)                                |
| Hearing loss                                                                        | 6,678.7<br>(6,368.8 to 6,989.0)               | --                                       | 202.0<br>(141.9 to 282.7)            | 11.4<br>(7.7 to 14.6)                             | -5.5<br>(-8.6 to -2.8)                              |
| Heart failure                                                                       | 423.9<br>(371.0 to 486.4)                     | --                                       | 44.5<br>(33.4 to 56.6)               | 19.2<br>(10.5 to 27.7)                            | -1.2<br>(-8.3 to 5.8)                               |
| Infertility                                                                         | 299.1<br>(232.8 to 382.2)                     | --                                       | 2.0<br>(0.9 to 3.9)                  | 11.5<br>(4.5 to 18.8)                             | -3.7<br>(-9.4 to 2.6)                               |
| Pelvic inflammatory disease                                                         | 8.5<br>(7.2 to 10.0)                          | --                                       | 1.1<br>(0.7 to 1.6)                  | 11.4<br>(-8.9 to 35.9)                            | -3.5<br>(-21.0 to 17.2)                             |
| Vision loss                                                                         | 4,942.7<br>(4,743.3 to 5,139.8)               | --                                       | 126.7<br>(88.7 to 182.8)             | 12.5<br>(9.7 to 15.5)                             | -3.0<br>(-5.4 to -0.4)                              |

We did not calculate incidence for the nine impairments, certain NTDs, and causes with only birth prevalence. Blank cells mean that no estimate is available.

† Incidence for aggregate causes represents the sum of the incidence of the causes below the aggregate.

‡ Incidence estimates for stroke represent first-ever stroke only.

^ Incidence of HIV/AIDS represents new infections of HIV only and does not include new infections of Tuberculosis in HIV positive cases.

SR Table 14: Prevalence, incidence, and YLDs for 2016, percentage change of YLD counts and percentage change of age-standardised YLD rates between 2006 and 2016 by cause and impairments, for all ages, Armenia.

| Cause                                                                                | Prevalence in thousands (95% UI)       | Incidence in thousands (95% UI)            | YLDs in thousands (95% UI)       |                                                   |                                                     |
|--------------------------------------------------------------------------------------|----------------------------------------|--------------------------------------------|----------------------------------|---------------------------------------------------|-----------------------------------------------------|
|                                                                                      | 2016 counts                            | 2016 counts                                | 2016 counts                      | Percentage change in counts between 2006 and 2016 | Percentage change in age-standardised rates between |
| <b>All causes</b>                                                                    | <b>2,904.4</b><br>(2,893.2 to 2,917.0) | <b>15,880.0†</b><br>(15,227.9 to 16,615.2) | <b>346.4</b><br>(259.4 to 447.1) | <b>7.6</b><br>(5.5 to 9.7)                        | <b>-1.0</b><br>(-2.9 to 1.0)                        |
| <b>Communicable, maternal, neonatal, and nutritional disorders</b>                   | <b>1,577.1</b><br>(1,535.0 to 1,621.6) | <b>7,044.5†</b><br>(6,455.1 to 7,671.1)    | <b>22.6</b><br>(16.3 to 30.8)    | <b>-13.9</b><br>(-18.4 to -8.9)                   | <b>-14.8</b><br>(-19.4 to -10.1)                    |
| <b>HIV/AIDS and tuberculosis</b>                                                     | <b>629.4</b><br>(580.7 to 670.6)       | <b>1.2†</b><br>(1.1 to 1.4)                | <b>0.2</b><br>(0.2 to 0.4)       | <b>-7.1</b><br>(-25.5 to 13.9)                    | <b>-12.7</b><br>(-28.8 to 5.9)                      |
| Tuberculosis                                                                         | 592.8<br>(547.7 to 645.6)              | 1.1†<br>(1.0 to 1.3)                       | 0.2<br>(0.1 to 0.3)              | -26.9<br>(-41.5 to -9.4)                          | -31.2<br>(-44.9 to -16.1)                           |
| Drug-susceptible tuberculosis                                                        | 0.5<br>(0.4 to 0.6)                    | 1.0<br>(0.8 to 1.2)                        | 0.2<br>(0.1 to 0.2)              | -28.5<br>(-50.8 to -5.8)                          | -32.6<br>(-53.0 to -12.0)                           |
| Multidrug-resistant tuberculosis without extensive drug resistance                   | 0.1<br>(< 0.05 to 0.1)                 | 0.1<br>(< 0.05 to 0.3)                     | < 0.05<br>(< 0.05 to 0.1)        | -23.9<br>(-85.5 to 171.4)                         | -28.7<br>(-86.4 to 154.8)                           |
| Extensively drug-resistant tuberculosis                                              | < 0.05<br>(< 0.05 to < 0.05)           | < 0.05<br>(< 0.05 to 0.1)                  | < 0.05<br>(< 0.05 to < 0.05)     | 134.4<br>(-55.3 to 735.9)                         | 119.7<br>(-58.1 to 685.6)                           |
| Latent tuberculosis infection                                                        | 592.2<br>(547.0 to 645.0)              | --                                         | --                               | --                                                | --                                                  |
| HIV/AIDS                                                                             | 0.7<br>(0.4 to 1.1)                    | 0.1 <sup>a</sup><br>(< 0.05 to 0.1)        | 0.1<br>(< 0.05 to 0.1)           | 185.3<br>(77.3 to 352.4)                          | 164.3<br>(64.1 to 321.4)                            |
| Drug-susceptible HIV/AIDS - Tuberculosis                                             | < 0.05<br>(< 0.05 to < 0.05)           | < 0.05<br>(< 0.05 to 0.1)                  | < 0.05<br>(< 0.05 to < 0.05)     | 56.1<br>(9.9 to 100.7)                            | 44.1<br>(1.3 to 85.3)                               |
| Multidrug-resistant HIV/AIDS - Tuberculosis without extensive drug resistance        | < 0.05<br>(< 0.05 to < 0.05)           | < 0.05<br>(< 0.05 to < 0.05)               | < 0.05<br>(< 0.05 to < 0.05)     | 64.1<br>(-68.7 to 525.5)                          | 51.4<br>(-71.1 to 478.2)                            |
| Extensively drug-resistant HIV/AIDS - Tuberculosis                                   | < 0.05<br>(< 0.05 to < 0.05)           | < 0.05<br>(< 0.05 to < 0.05)               | < 0.05<br>(< 0.05 to < 0.05)     | 405.8<br>(-3.6 to 1,827.4)                        | 366.6<br>(-11.0 to 1,681.5)                         |
| HIV/AIDS resulting in other diseases                                                 | 0.7<br>(0.4 to 1.1)                    | 0.1<br>(< 0.05 to 0.1)                     | 0.1<br>(< 0.05 to 0.1)           | 233.4<br>(82.4 to 574.7)                          | 209.5<br>(68.7 to 535.8)                            |
| <b>Diarrhoea, lower respiratory infections, and other common infectious diseases</b> | <b>130.6</b><br>(123.6 to 138.0)       | <b>6,681.9†</b><br>(6,102.2 to 7,329.8)    | <b>6.4</b><br>(4.5 to 8.9)       | <b>-2.9</b><br>(-5.9 to 0.4)                      | <b>-4.7</b><br>(-7.7 to -1.4)                       |
| Diarrhoeal diseases                                                                  | 21.1<br>(19.7 to 22.6)                 | 1,370.2<br>(1,280.1 to 1,476.0)            | 2.4<br>(1.6 to 3.3)              | -0.4<br>(-6.3 to 6.2)                             | -4.1<br>(-9.7 to 2.1)                               |
| Intestinal infectious diseases                                                       | < 0.05<br>(< 0.05 to < 0.05)           | < 0.05†<br>(< 0.05 to < 0.05)              | < 0.05<br>(< 0.05 to < 0.05)     | -7.0<br>(-21.9 to 11.2)                           | -15.7<br>(-27.9 to -0.2)                            |
| Typhoid fever                                                                        | < 0.05<br>(< 0.05 to < 0.05)           | < 0.05<br>(< 0.05 to < 0.05)               | < 0.05<br>(< 0.05 to < 0.05)     | -9.1<br>(-24.5 to 10.9)                           | -17.0<br>(-29.6 to -0.4)                            |
| Paratyphoid fever                                                                    | < 0.05<br>(< 0.05 to < 0.05)           | < 0.05<br>(< 0.05 to < 0.05)               | < 0.05<br>(< 0.05 to < 0.05)     | 38.6<br>(10.7 to 77.5)                            | 24.6<br>(0.2 to 59.0)                               |
| Other intestinal infectious diseases                                                 | --                                     | --                                         | < 0.05<br>(< 0.05 to < 0.05)     | -23.6<br>(-41.4 to 2.0)                           | -37.3<br>(-52.8 to -14.9)                           |
| Lower respiratory infections                                                         | 4.4<br>(4.0 to 4.7)                    | 189.8<br>(174.1 to 206.4)                  | 0.3<br>(0.2 to 0.4)              | 16.7<br>(4.1 to 29.4)                             | 8.3<br>(-3.5 to 20.6)                               |
| Upper respiratory infections                                                         | 66.0<br>(58.2 to 74.1)                 | 4,917.5<br>(4,320.2 to 5,540.0)            | 1.6<br>(1.0 to 2.6)              | -2.2<br>(-8.2 to 4.6)                             | -2.0<br>(-7.6 to 3.5)                               |
| Otitis media                                                                         | 36.9<br>(33.0 to 41.0)                 | 151.0<br>(123.9 to 185.3)                  | 1.1<br>(0.7 to 1.6)              | -13.8<br>(-20.5 to -6.6)                          | -12.3<br>(-18.3 to -6.1)                            |
| Meningitis                                                                           | 6.9<br>(6.0 to 7.9)                    | 1.0<br>(0.9 to 1.1)                        | 0.7<br>(0.5 to 0.9)              | -2.4<br>(-9.3 to 4.7)                             | -3.5<br>(-10.1 to 3.6)                              |
| Pneumococcal meningitis                                                              | 2.6<br>(2.2 to 3.1)                    | 0.1<br>(0.1 to 0.2)                        | 0.3<br>(0.2 to 0.4)              | -9.7<br>(-22.4 to 5.4)                            | -11.1<br>(-23.2 to 2.8)                             |
| H influenzae type B meningitis                                                       | 0.8<br>(0.7 to 1.0)                    | 0.1<br>(0.1 to 0.1)                        | 0.1<br>(0.1 to 0.2)              | -16.4<br>(-22.2 to -10.6)                         | -16.0<br>(-22.4 to -9.8)                            |
| Meningococcal infection                                                              | 1.3<br>(1.0 to 1.8)                    | 0.3<br>(0.2 to 0.3)                        | 0.1<br>(0.1 to 0.2)              | -0.7<br>(-4.9 to 3.6)                             | -2.1<br>(-6.3 to 2.1)                               |
| Other meningitis                                                                     | 2.1<br>(1.6 to 2.7)                    | 0.5<br>(0.4 to 0.6)                        | 0.2<br>(0.1 to 0.2)              | 28.9<br>(19.9 to 40.8)                            | 26.7<br>(18.2 to 37.9)                              |
| Encephalitis                                                                         | 2.0<br>(1.4 to 2.8)                    | 0.8<br>(0.7 to 0.8)                        | 0.2<br>(0.2 to 0.3)              | 2.1<br>(-8.9 to 14.5)                             | -2.8<br>(-13.1 to 8.2)                              |
| Diphtheria                                                                           | < 0.05<br>(< 0.05 to < 0.05)           | < 0.05<br>(< 0.05 to < 0.05)               | < 0.05<br>(< 0.05 to < 0.05)     | -34.5<br>(-63.6 to 19.1)                          | -40.2<br>(-66.6 to 7.7)                             |
| Whooping cough                                                                       | 0.2<br>(0.1 to 0.2)                    | 1.3<br>(1.0 to 1.7)                        | < 0.05<br>(< 0.05 to < 0.05)     | -31.8<br>(-49.9 to -7.3)                          | -41.5<br>(-57.1 to -20.2)                           |
| Tetanus                                                                              | < 0.05<br>(< 0.05 to < 0.05)           | < 0.05<br>(< 0.05 to < 0.05)               | < 0.05<br>(< 0.05 to < 0.05)     | -42.1<br>(-59.6 to -19.6)                         | -45.1<br>(-62.3 to -23.5)                           |
| Measles                                                                              | < 0.05<br>(< 0.05 to < 0.05)           | < 0.05<br>(< 0.05 to < 0.05)               | < 0.05<br>(< 0.05 to < 0.05)     | -93.5<br>(-95.9 to -81.8)                         | -94.3<br>(-96.4 to -84.2)                           |
| Varicella and herpes zoster                                                          | 2.5<br>(2.3 to 2.7)                    | 50.3<br>(49.1 to 51.6)                     | 0.1<br>(0.1 to 0.1)              | 10.6<br>(-3.6 to 27.4)                            | -0.1<br>(-12.4 to 14.5)                             |
| <b>Neglected tropical diseases and malaria</b>                                       | <b>36.5</b><br>(31.7 to 43.3)          | <b>0.1†</b><br>(0.1 to 0.3)                | <b>0.3</b><br>(0.2 to 0.5)       | <b>-25.4</b><br>(-46.2 to -0.2)                   | <b>-28.7</b><br>(-46.8 to -6.4)                     |
| Malaria                                                                              | --                                     | --                                         | --                               | --                                                | --                                                  |
| Chagas disease                                                                       | --                                     | --                                         | --                               | --                                                | --                                                  |
| Leishmaniasis                                                                        | < 0.05<br>(< 0.05 to < 0.05)           | < 0.05<br>(< 0.05 to 0.1)                  | < 0.05<br>(< 0.05 to < 0.05)     | 224.9<br>(77.5 to 512.6)                          | 190.4<br>(53.8 to 490.3)                            |
| Visceral leishmaniasis                                                               | < 0.05<br>(< 0.05 to < 0.05)           | < 0.05<br>(< 0.05 to 0.1)                  | < 0.05<br>(< 0.05 to < 0.05)     | 232.9<br>(85.9 to 516.0)                          | 197.3<br>(58.9 to 490.3)                            |
| Cutaneous and mucocutaneous leishmaniasis                                            | < 0.05<br>(0.0 to < 0.05)              | < 0.05<br>(0.0 to < 0.05)                  | < 0.05<br>(0.0 to < 0.05)        | --                                                | --                                                  |
| African trypanosomiasis                                                              | --                                     | --                                         | --                               | --                                                | --                                                  |
| Schistosomiasis                                                                      | --                                     | --                                         | --                               | --                                                | --                                                  |
| Cysticercosis                                                                        | --                                     | --                                         | --                               | --                                                | --                                                  |
| Cystic echinococcosis                                                                | 0.3<br>(0.1 to 1.1)                    | 0.1<br>(< 0.05 to 0.2)                     | < 0.05<br>(< 0.05 to 0.1)        | -52.5<br>(-94.2 to 226.8)                         | -55.6<br>(-94.0 to 216.7)                           |
| Lymphatic filariasis                                                                 | --                                     | --                                         | --                               | --                                                | --                                                  |
| Onchocerciasis                                                                       | --                                     | --                                         | --                               | --                                                | --                                                  |
| Trachoma                                                                             | --                                     | --                                         | --                               | --                                                | --                                                  |
| Dengue                                                                               | --                                     | --                                         | --                               | --                                                | --                                                  |
| Yellow fever                                                                         | --                                     | --                                         | --                               | --                                                | --                                                  |
| Rabies                                                                               | < 0.05<br>(< 0.05 to < 0.05)           | < 0.05<br>(< 0.05 to < 0.05)               | < 0.05<br>(< 0.05 to < 0.05)     | -67.1<br>(-78.3 to -49.0)                         | -66.3<br>(-77.3 to -47.3)                           |
| Intestinal nematode infections                                                       | 23.4<br>(18.8 to 29.9)                 | --                                         | < 0.05<br>(< 0.05 to < 0.05)     | 3.0<br>(-37.4 to 72.9)                            | -2.4<br>(-40.2 to 62.4)                             |
| Ascariasis                                                                           | 16.8<br>(11.8 to 23.7)                 | --                                         | < 0.05<br>(< 0.05 to < 0.05)     | 0.1<br>(-83.2 to 430.0)                           | -1.3<br>(-82.3 to 404.3)                            |



| Cause                                                                   | Prevalence in thousands (95% UI)              | Incidence in thousands (95% UI)                | YLDs in thousands (95% UI)              |                                                   |                                                     |
|-------------------------------------------------------------------------|-----------------------------------------------|------------------------------------------------|-----------------------------------------|---------------------------------------------------|-----------------------------------------------------|
|                                                                         | 2016 counts                                   | 2016 counts                                    | 2016 counts                             | Percentage change in counts between 2006 and 2016 | Percentage change in age-standardised rates between |
| Trichuriasis                                                            | 3.4<br>(2.4 to 4.8)                           | --                                             | --                                      | --                                                | --                                                  |
| Hookworm disease                                                        | 2.7<br>(1.8 to 3.9)                           | --                                             | < 0.05<br>(< 0.05 to < 0.05)            | 3.0<br>(-37.3 to 72.9)                            | -2.4<br>(-40.1 to 62.5)                             |
| Food-borne trematodiasis                                                | --                                            | --                                             | --                                      | --                                                | --                                                  |
| Leprosy                                                                 | --                                            | --                                             | --                                      | --                                                | --                                                  |
| Ebola virus disease                                                     | --                                            | --                                             | --                                      | --                                                | --                                                  |
| Zika virus disease                                                      | --                                            | --                                             | --                                      | --                                                | --                                                  |
| Guinea worm disease                                                     | --                                            | --                                             | --                                      | --                                                | --                                                  |
| Other neglected tropical diseases                                       | 13.7<br>(12.1 to 15.4)                        | --                                             | 0.3<br>(0.2 to 0.4)                     | -21.7<br>(-34.4 to -6.3)                          | -25.6<br>(-38.3 to -10.5)                           |
| <b>Maternal disorders</b>                                               | <b>2.8</b><br><b>(2.3 to 3.6)</b>             | <b>44.0†</b><br><b>(22.9 to 73.3)</b>          | <b>0.1</b><br><b>(0.1 to 0.2)</b>       | <b>9.0</b><br><b>(-21.6 to 49.4)</b>              | <b>9.1</b><br><b>(-20.7 to 48.1)</b>                |
| Maternal haemorrhage                                                    | 0.7<br>(0.5 to 1.0)                           | 2.6<br>(1.8 to 3.6)                            | < 0.05<br>(< 0.05 to < 0.05)            | 32.9<br>(-14.2 to 98.5)                           | 34.1<br>(-11.2 to 99.6)                             |
| Maternal sepsis and other pregnancy related infections                  | 1.2<br>(0.9 to 1.7)                           | 7.4<br>(5.3 to 10.0)                           | < 0.05<br>(< 0.05 to 0.1)               | 3.1<br>(-49.8 to 109.5)                           | 7.6<br>(-47.3 to 116.8)                             |
| Maternal hypertensive disorders                                         | 0.7<br>(0.4 to 1.1)                           | 3.0<br>(2.2 to 4.0)                            | < 0.05<br>(< 0.05 to 0.1)               | 3.7<br>(-41.3 to 90.1)                            | 1.2<br>(-42.5 to 84.3)                              |
| Maternal obstructed labour and uterine rupture                          | < 0.05<br>(< 0.05 to < 0.05)                  | 1.2<br>(0.8 to 1.7)                            | < 0.05<br>(< 0.05 to < 0.05)            | 19.5<br>(-37.6 to 118.0)                          | 15.4<br>(-38.6 to 108.9)                            |
| Maternal abortion, miscarriage, and ectopic pregnancy                   | 0.2<br>(0.1 to 0.5)                           | 29.8<br>(9.7 to 59.9)                          | < 0.05<br>(< 0.05 to 0.1)               | 13.9<br>(-51.2 to 132.8)                          | 11.1<br>(-51.1 to 122.5)                            |
| Other maternal disorders                                                | --                                            | --                                             | < 0.05<br>(< 0.05 to < 0.05)            | 2.0<br>(-26.7 to 39.5)                            | 3.3<br>(-25.1 to 40.6)                              |
| <b>Neonatal disorders</b>                                               | <b>31.4</b><br><b>(25.0 to 39.4)</b>          | --                                             | <b>5.9</b><br><b>(3.7 to 8.9)</b>       | <b>-12.0</b><br><b>(-24.3 to 1.1)</b>             | <b>-12.0</b><br><b>(-24.3 to 1.2)</b>               |
| Neonatal preterm birth complications                                    | 20.8<br>(16.2 to 26.8)                        | --                                             | 2.1<br>(1.4 to 3.1)                     | -17.9<br>(-36.1 to 5.0)                           | -16.4<br>(-34.6 to 7.7)                             |
| Neonatal encephalopathy due to birth asphyxia and trauma                | 9.8<br>(4.7 to 16.1)                          | --                                             | 1.6<br>(0.3 to 3.3)                     | 6.0<br>(-40.0 to 60.9)                            | 6.2<br>(-40.7 to 59.0)                              |
| Neonatal sepsis and other neonatal infections                           | 4.2<br>(1.7 to 9.3)                           | --                                             | 1.7<br>(0.6 to 4.1)                     | -20.4<br>(-41.8 to -0.2)                          | -20.6<br>(-42.2 to -0.8)                            |
| Hemolytic disease and other neonatal jaundice                           | 1.3<br>(1.1 to 1.5)                           | --                                             | 0.4<br>(0.3 to 0.5)                     | -1.8<br>(-15.9 to 14.0)                           | -1.2<br>(-15.8 to 14.3)                             |
| Other neonatal disorders                                                | --                                            | --                                             | 0.2<br>(0.1 to 0.2)                     | 0.3<br>(-16.9 to 18.8)                            | -16.2<br>(-30.6 to -0.7)                            |
| <b>Nutritional deficiencies</b>                                         | <b>400.2</b><br><b>(375.1 to 422.6)</b>       | <b>8.1†</b><br><b>(6.6 to 10.1)</b>            | <b>8.0</b><br><b>(5.4 to 11.7)</b>      | <b>-23.1</b><br><b>(-29.7 to -15.6)</b>           | <b>-23.5</b><br><b>(-30.5 to -15.6)</b>             |
| Protein-energy malnutrition                                             | 8.1<br>(5.7 to 11.3)                          | 3.2<br>(2.3 to 4.5)                            | 0.5<br>(0.2 to 0.8)                     | -0.8<br>(-42.0 to 74.8)                           | -17.0<br>(-51.5 to 46.4)                            |
| Iodine deficiency                                                       | 78.9<br>(68.7 to 89.4)                        | 1.1<br>(0.9 to 1.2)                            | 2.0<br>(1.3 to 2.9)                     | -2.5<br>(-11.6 to 7.4)                            | -5.3<br>(-14.1 to 4.3)                              |
| Vitamin A deficiency                                                    | 4.5<br>(3.2 to 6.4)                           | 3.8<br>(2.7 to 5.5)                            | --                                      | --                                                | --                                                  |
| Iron-deficiency anaemia                                                 | 310.2<br>(283.0 to 339.8)                     | --                                             | 5.6<br>(3.6 to 8.4)                     | -29.8<br>(-37.8 to -20.8)                         | -28.3<br>(-36.1 to -19.1)                           |
| Other nutritional deficiencies                                          | --                                            | --                                             | < 0.05<br>(< 0.05 to < 0.05)            | -2.6<br>(-44.0 to 73.4)                           | -18.6<br>(-53.3 to 45.0)                            |
| <b>Other communicable, maternal, neonatal, and nutritional diseases</b> | <b>824.0</b><br><b>(774.4 to 874.2)</b>       | <b>309.3</b><br><b>(275.3 to 346.5)</b>        | <b>1.5</b><br><b>(1.0 to 2.3)</b>       | <b>-3.0</b><br><b>(-9.8 to 3.6)</b>               | <b>-7.3</b><br><b>(-13.8 to -1.5)</b>               |
| Sexually transmitted diseases excluding HIV                             | 495.8<br>(462.7 to 535.9)                     | 280.9<br>(246.7 to 320.3)                      | 1.2<br>(0.8 to 1.9)                     | 1.5<br>(-6.9 to 9.7)                              | -3.2<br>(-10.8 to 3.8)                              |
| Syphilis                                                                | 2.3<br>(2.0 to 2.6)                           | 1.1<br>(0.9 to 1.4)                            | 0.1<br>(0.1 to 0.2)                     | 1.8<br>(-14.1 to 19.4)                            | -13.1<br>(-26.4 to 1.6)                             |
| Chlamydial infection                                                    | 56.3<br>(43.8 to 71.2)                        | 45.1<br>(34.9 to 57.2)                         | 0.3<br>(0.1 to 0.4)                     | 6.4<br>(-7.2 to 20.7)                             | -2.7<br>(-14.9 to 10.5)                             |
| Gonococcal infection                                                    | 37.6<br>(29.4 to 48.0)                        | 124.3<br>(95.9 to 160.4)                       | 0.2<br>(0.1 to 0.4)                     | -13.0<br>(-25.9 to 1.1)                           | -6.4<br>(-19.4 to 6.9)                              |
| Trichomoniasis                                                          | 88.8<br>(76.9 to 101.7)                       | 75.3<br>(64.3 to 87.1)                         | 0.1<br>(< 0.05 to 0.3)                  | 11.8<br>(4.5 to 19.8)                             | 6.0<br>(-0.1 to 12.2)                               |
| Genital herpes                                                          | 336.0<br>(291.1 to 391.5)                     | 17.2<br>(14.5 to 21.1)                         | 0.1<br>(< 0.05 to 0.2)                  | 12.7<br>(6.1 to 18.8)                             | 1.4<br>(-4.2 to 7.0)                                |
| Other sexually transmitted diseases                                     | 14.1<br>(11.1 to 17.6)                        | 17.9<br>(15.0 to 21.4)                         | 0.4<br>(0.2 to 0.6)                     | 2.6<br>(-9.1 to 15.7)                             | -1.1<br>(-13.0 to 10.9)                             |
| Hepatitis                                                               | 399.6<br>(350.2 to 458.4)                     | 28.3<br>(20.9 to 34.8)                         | < 0.05<br>(< 0.05 to < 0.05)            | -37.2<br>(-49.9 to -21.6)                         | -36.9<br>(-50.1 to -19.7)                           |
| Acute hepatitis A                                                       | 0.9<br>(0.4 to 1.3)                           | 12.1<br>(5.4 to 17.2)                          | < 0.05<br>(< 0.05 to < 0.05)            | -44.0<br>(-65.4 to -5.8)                          | -40.6<br>(-64.1 to 3.4)                             |
| Hepatitis B                                                             | 215.3<br>(173.2 to 266.1)                     | 11.6<br>(8.9 to 15.0)                          | < 0.05<br>(< 0.05 to < 0.05)            | -42.9<br>(-53.7 to -29.9)                         | -44.4<br>(-54.1 to -32.5)                           |
| Hepatitis C                                                             | 183.3<br>(163.7 to 204.9)                     | 4.3<br>(3.7 to 4.9)                            | < 0.05<br>(< 0.05 to < 0.05)            | 9.6<br>(-39.3 to 90.8)                            | -5.8<br>(-48.8 to 68.0)                             |
| Acute hepatitis E                                                       | < 0.05<br>(< 0.05 to < 0.05)                  | 0.4<br>(0.3 to 0.5)                            | < 0.05<br>(< 0.05 to < 0.05)            | -38.6<br>(-44.3 to -32.1)                         | -32.5<br>(-38.2 to -26.2)                           |
| Other infectious diseases                                               | 11.9<br>(10.6 to 13.4)                        | < 0.05<br>(< 0.05 to < 0.05)                   | 0.3<br>(0.2 to 0.4)                     | -16.1<br>(-28.2 to -1.5)                          | -17.8<br>(-29.2 to -4.5)                            |
| <b>Non-communicable diseases</b>                                        | <b>2,789.5</b><br><b>(2,772.5 to 2,809.2)</b> | <b>8,515.0†</b><br><b>(8,148.4 to 8,917.8)</b> | <b>288.2</b><br><b>(213.7 to 372.8)</b> | <b>9.5</b><br><b>(7.1 to 11.9)</b>                | <b>0.5</b><br><b>(-1.7 to 2.7)</b>                  |
| <b>Neoplasms</b>                                                        | <b>20.8</b><br><b>(19.5 to 22.1)</b>          | <b>9.2</b><br><b>(8.5 to 10.1)</b>             | <b>2.5</b><br><b>(1.9 to 3.3)</b>       | <b>15.7</b><br><b>(8.5 to 23.6)</b>               | <b>-0.5</b><br><b>(-6.5 to 5.8)</b>                 |
| Lip and oral cavity cancer                                              | 0.3<br>(0.3 to 0.3)                           | 0.1<br>(0.1 to 0.1)                            | < 0.05<br>(< 0.05 to < 0.05)            | 12.2<br>(-3.7 to 28.7)                            | -6.5<br>(-18.7 to 6.8)                              |
| Nasopharynx cancer                                                      | < 0.05<br>(< 0.05 to 0.1)                     | < 0.05<br>(< 0.05 to < 0.05)                   | < 0.05<br>(< 0.05 to < 0.05)            | -12.5<br>(-23.5 to 0.8)                           | -22.5<br>(-32.1 to -10.3)                           |
| Other pharynx cancer                                                    | 0.1<br>(0.1 to 0.1)                           | < 0.05<br>(< 0.05 to < 0.05)                   | < 0.05<br>(< 0.05 to < 0.05)            | -3.8<br>(-19.5 to 15.3)                           | -23.9<br>(-36.3 to -9.5)                            |
| Oesophageal cancer                                                      | 0.1<br>(0.1 to 0.1)                           | 0.1<br>(0.1 to 0.1)                            | < 0.05<br>(< 0.05 to < 0.05)            | 9.2<br>(-0.4 to 19.7)                             | -7.6<br>(-15.7 to 0.2)                              |
| Stomach cancer                                                          | 0.8<br>(0.7 to 0.8)                           | 0.5<br>(0.5 to 0.5)                            | 0.1<br>(0.1 to 0.2)                     | -6.1<br>(-22.4 to 12.7)                           | -19.6<br>(-32.9 to -4.6)                            |
| Colon and rectum cancer                                                 | 2.4<br>(2.2 to 2.6)                           | 0.7<br>(0.7 to 0.8)                            | 0.2<br>(0.2 to 0.3)                     | 25.3<br>(7.7 to 46.1)                             | 7.4<br>(-7.6 to 24.4)                               |
| Liver cancer                                                            | 0.1<br>(0.1 to 0.1)                           | 0.4<br>(0.4 to 0.4)                            | 0.1<br>(0.1 to 0.1)                     | 18.4<br>(6.7 to 32.3)                             | 0.8<br>(-9.1 to 12.2)                               |
| Liver cancer due to hepatitis B                                         | 0.1<br>(0.1 to 0.1)                           | 0.1<br>(0.1 to 0.1)                            | < 0.05<br>(< 0.05 to < 0.05)            | 18.3<br>(4.1 to 34.4)                             | 0.7<br>(-10.2 to 12.3)                              |

| Cause                                              | Prevalence in thousands (95% UI)        | Incidence in thousands (95% UI)       | YLDs in thousands (95% UI)           |                                                   |                                                     |
|----------------------------------------------------|-----------------------------------------|---------------------------------------|--------------------------------------|---------------------------------------------------|-----------------------------------------------------|
|                                                    | 2016 counts                             | 2016 counts                           | 2016 counts                          | Percentage change in counts between 2006 and 2016 | Percentage change in age-standardised rates between |
| Liver cancer due to hepatitis C                    | 0.1<br>(0.1 to 0.1)                     | 0.1<br>(0.1 to 0.2)                   | < 0.05<br>(< 0.05 to < 0.05)         | 19.9<br>(6.6 to 36.1)                             | 0.2<br>(-10.7 to 13.5)                              |
| Liver cancer due to alcohol use                    | 0.1<br>(0.1 to 0.1)                     | 0.1<br>(0.1 to 0.1)                   | < 0.05<br>(< 0.05 to < 0.05)         | 17.5<br>(4.3 to 33.3)                             | 2.9<br>(-8.8 to 16.2)                               |
| Liver cancer due to other causes                   | 0.1<br>(< 0.05 to 0.1)                  | 0.1<br>(0.1 to 0.1)                   | < 0.05<br>(< 0.05 to < 0.05)         | 16.5<br>(2.9 to 33.2)                             | 0.1<br>(-11.2 to 13.6)                              |
| Gallbladder and biliary tract cancer               | < 0.05<br>(< 0.05 to < 0.05)            | < 0.05<br>(< 0.05 to 0.1)             | < 0.05<br>(< 0.05 to < 0.05)         | 101.3<br>(56.1 to 124.4)                          | 68.0<br>(33.2 to 86.5)                              |
| Pancreatic cancer                                  | 0.3<br>(0.2 to 0.3)                     | 0.4<br>(0.3 to 0.4)                   | 0.1<br>(< 0.05 to 0.1)               | 18.1<br>(-2.5 to 44.5)                            | -2.3<br>(-18.5 to 17.5)                             |
| Larynx cancer                                      | 0.5<br>(0.4 to 0.5)                     | 0.1<br>(0.1 to 0.2)                   | 0.1<br>(< 0.05 to 0.1)               | 3.6<br>(-17.1 to 30.6)                            | -15.0<br>(-31.7 to 7.0)                             |
| Tracheal, bronchus, and lung cancer                | 1.3<br>(1.2 to 1.4)                     | 1.1<br>(1.1 to 1.2)                   | 0.3<br>(0.2 to 0.3)                  | -1.5<br>(-18.3 to 17.2)                           | -17.2<br>(-30.9 to -1.4)                            |
| Malignant skin melanoma                            | 0.2<br>(0.1 to 0.2)                     | < 0.05<br>(< 0.05 to < 0.05)          | < 0.05<br>(< 0.05 to < 0.05)         | 143.0<br>(41.5 to 209.2)                          | 105.0<br>(21.0 to 159.7)                            |
| Non-melanoma skin cancer                           | 1.1<br>(0.7 to 1.7)                     | 1.6<br>(1.0 to 2.4)                   | < 0.05<br>(< 0.05 to 0.1)            | 52.5<br>(1.7 to 140.1)                            | 30.6<br>(-12.1 to 106.0)                            |
| Non-melanoma skin cancer (squamous-cell carcinoma) | 0.9<br>(0.5 to 1.5)                     | 0.8<br>(0.4 to 1.4)                   | < 0.05<br>(< 0.05 to 0.1)            | 53.5<br>(0.9 to 148.3)                            | 31.7<br>(-12.3 to 110.3)                            |
| Non-melanoma skin cancer (basal-cell carcinoma)    | 0.1<br>(0.1 to 0.2)                     | 0.8<br>(0.4 to 1.4)                   | < 0.05<br>(< 0.05 to < 0.05)         | 27.5<br>(-11.9 to 78.0)                           | 5.2<br>(-23.9 to 42.3)                              |
| Breast cancer                                      | 6.0<br>(5.4 to 6.8)                     | 1.3<br>(1.2 to 1.4)                   | 0.5<br>(0.4 to 0.7)                  | 11.9<br>(-3.8 to 33.2)                            | -4.1<br>(-16.9 to 13.8)                             |
| Cervical cancer                                    | 1.2<br>(1.1 to 1.4)                     | 0.3<br>(0.3 to 0.4)                   | 0.1<br>(0.1 to 0.2)                  | -9.5<br>(-27.3 to 12.7)                           | -19.6<br>(-35.1 to -0.2)                            |
| Uterine cancer                                     | 1.3<br>(1.2 to 1.5)                     | 0.3<br>(0.2 to 0.3)                   | 0.1<br>(0.1 to 0.1)                  | 73.5<br>(38.6 to 119.9)                           | 43.3<br>(15.4 to 81.7)                              |
| Ovarian cancer                                     | 0.5<br>(0.5 to 0.6)                     | 0.2<br>(0.1 to 0.2)                   | 0.1<br>(0.1 to 0.1)                  | 11.1<br>(-24.9 to 58.9)                           | -2.2<br>(-33.7 to 36.6)                             |
| Prostate cancer                                    | 2.0<br>(1.0 to 2.3)                     | 0.5<br>(0.3 to 0.5)                   | 0.2<br>(0.1 to 0.3)                  | 59.6<br>(16.1 to 97.0)                            | 43.5<br>(4.5 to 77.6)                               |
| Testicular cancer                                  | 0.1<br>(0.1 to 0.1)                     | < 0.05<br>(< 0.05 to < 0.05)          | < 0.05<br>(< 0.05 to < 0.05)         | 101.4<br>(51.2 to 163.2)                          | 95.4<br>(48.2 to 155.8)                             |
| Kidney cancer                                      | 0.6<br>(0.6 to 0.7)                     | 0.2<br>(0.2 to 0.2)                   | 0.1<br>(< 0.05 to 0.1)               | 223.9<br>(180.0 to 272.6)                         | 180.7<br>(141.2 to 223.3)                           |
| Bladder cancer                                     | 1.5<br>(1.4 to 1.7)                     | 0.4<br>(0.4 to 0.4)                   | 0.1<br>(0.1 to 0.2)                  | 12.9<br>(-3.1 to 32.2)                            | -3.1<br>(-16.4 to 13.9)                             |
| Brain and nervous system cancer                    | 0.5<br>(0.4 to 0.5)                     | 0.2<br>(0.2 to 0.3)                   | 0.1<br>(< 0.05 to 0.1)               | 16.2<br>(-3.2 to 31.3)                            | 0.1<br>(-16.0 to 13.5)                              |
| Thyroid cancer                                     | 0.3<br>(0.3 to 0.4)                     | 0.1<br>(0.1 to 0.1)                   | < 0.05<br>(< 0.05 to < 0.05)         | 216.1<br>(154.5 to 293.6)                         | 174.5<br>(120.8 to 237.3)                           |
| Mesothelioma                                       | < 0.05<br>(< 0.05 to < 0.05)            | < 0.05<br>(< 0.05 to < 0.05)          | < 0.05<br>(< 0.05 to < 0.05)         | -3.2<br>(-12.6 to 5.6)                            | -16.5<br>(-24.1 to -9.3)                            |
| Hodgkin lymphoma                                   | 0.1<br>(< 0.05 to 0.1)                  | < 0.05<br>(< 0.05 to < 0.05)          | < 0.05<br>(< 0.05 to < 0.05)         | 164.8<br>(0.2 to 238.9)                           | 146.4<br>(-5.9 to 218.0)                            |
| Non-Hodgkin's lymphoma                             | 0.3<br>(0.2 to 0.3)                     | 0.1<br>(0.1 to 0.1)                   | < 0.05<br>(< 0.05 to < 0.05)         | 17.3<br>(3.0 to 37.2)                             | 3.4<br>(-9.1 to 20.8)                               |
| Multiple myeloma                                   | 0.1<br>(< 0.05 to 0.1)                  | < 0.05<br>(< 0.05 to < 0.05)          | < 0.05<br>(< 0.05 to < 0.05)         | 50.9<br>(18.6 to 73.2)                            | 26.7<br>(0.6 to 44.7)                               |
| Leukaemia                                          | 0.8<br>(0.7 to 0.8)                     | 0.2<br>(0.2 to 0.2)                   | 0.1<br>(0.1 to 0.1)                  | -14.2<br>(-23.6 to -3.2)                          | -22.5<br>(-30.8 to -12.6)                           |
| Acute lymphoid leukaemia                           | 0.1<br>(0.1 to 0.1)                     | < 0.05<br>(< 0.05 to < 0.05)          | < 0.05<br>(< 0.05 to < 0.05)         | -12.8<br>(-25.7 to 1.2)                           | -15.7<br>(-29.0 to -1.2)                            |
| Chronic lymphoid leukaemia                         | 0.2<br>(0.1 to 0.3)                     | < 0.05<br>(< 0.05 to 0.1)             | < 0.05<br>(< 0.05 to < 0.05)         | -3.8<br>(-19.0 to 15.6)                           | -16.4<br>(-29.1 to -0.4)                            |
| Acute myeloid leukaemia                            | 0.1<br>(0.1 to 0.1)                     | < 0.05<br>(< 0.05 to 0.1)             | < 0.05<br>(< 0.05 to < 0.05)         | -2.0<br>(-13.5 to 11.3)                           | -12.6<br>(-22.7 to -0.8)                            |
| Chronic myeloid leukaemia                          | < 0.05<br>(< 0.05 to 0.1)               | < 0.05<br>(< 0.05 to < 0.05)          | < 0.05<br>(< 0.05 to < 0.05)         | -19.6<br>(-31.9 to -2.8)                          | -34.0<br>(-44.2 to -20.7)                           |
| Other leukaemia                                    | 0.3<br>(0.3 to 0.4)                     | 0.1<br>(0.1 to 0.1)                   | < 0.05<br>(< 0.05 to 0.1)            | -21.8<br>(-35.4 to -3.8)                          | -28.8<br>(-40.1 to -12.7)                           |
| Other neoplasms                                    | 1.1<br>(1.0 to 1.2)                     | 0.4<br>(0.3 to 0.4)                   | 0.1<br>(0.1 to 0.1)                  | 4.8<br>(-10.6 to 22.2)                            | -9.4<br>(-21.9 to 4.7)                              |
| <b>Cardiovascular diseases</b>                     | <b>239.3</b><br><b>(229.0 to 248.9)</b> | <b>28.0†</b><br><b>(26.6 to 29.6)</b> | <b>18.9</b><br><b>(13.9 to 24.5)</b> | <b>14.4</b><br><b>(9.5 to 19.3)</b>               | <b>-2.8</b><br><b>(-6.7 to 1.5)</b>                 |
| Rheumatic heart disease                            | 0.6<br>(0.5 to 0.6)                     | 0.2<br>(0.1 to 0.2)                   | < 0.05<br>(< 0.05 to 0.1)            | 11.2<br>(-13.2 to 40.3)                           | -5.7<br>(-24.9 to 17.5)                             |
| Ischaemic heart disease                            | 99.8<br>(93.4 to 106.5)                 | 11.1<br>(10.4 to 11.9)                | 6.3<br>(4.5 to 8.6)                  | 21.8<br>(16.2 to 27.5)                            | 3.3<br>(-1.2 to 7.9)                                |
| Cerebrovascular disease                            | 38.3<br>(35.3 to 41.0)                  | 6.6‡<br>(6.1 to 7.2)                  | 7.6<br>(5.3 to 9.7)                  | 7.7<br>(-0.8 to 16.7)                             | -9.1<br>(-16.3 to -1.6)                             |
| Ischaemic stroke                                   | 32.6<br>(28.9 to 36.3)                  | 4.7‡<br>(4.2 to 5.2)                  | 6.3<br>(4.4 to 8.1)                  | 7.5<br>(-2.8 to 18.0)                             | -9.4<br>(-18.0 to -0.4)                             |
| Hemorrhagic stroke                                 | 7.0<br>(6.2 to 7.9)                     | 1.9‡<br>(1.7 to 2.1)                  | 1.3<br>(1.0 to 1.7)                  | 8.8<br>(-3.5 to 22.9)                             | -7.5<br>(-17.5 to 4.2)                              |
| Hypertensive heart disease                         | 12.8<br>(10.6 to 15.2)                  | --                                    | 1.0<br>(0.7 to 1.4)                  | 19.4<br>(7.1 to 33.5)                             | 0.4<br>(-8.6 to 10.6)                               |
| Cardiomyopathy and myocarditis                     | 3.0<br>(2.6 to 3.3)                     | 0.6†<br>(0.5 to 0.7)                  | 0.3<br>(0.2 to 0.4)                  | 9.0<br>(-3.8 to 23.6)                             | 0.5<br>(-10.8 to 13.7)                              |
| Myocarditis                                        | 0.6<br>(0.5 to 0.7)                     | 0.6<br>(0.5 to 0.7)                   | < 0.05<br>(< 0.05 to 0.1)            | 2.5<br>(-16.8 to 28.9)                            | 2.0<br>(-16.3 to 25.8)                              |
| Alcoholic cardiomyopathy                           | 0.9<br>(0.7 to 1.1)                     | --                                    | 0.1<br>(< 0.05 to 0.1)               | 13.8<br>(-9.2 to 42.3)                            | -1.7<br>(-20.2 to 21.6)                             |
| Other cardiomyopathy                               | 1.9<br>(1.7 to 2.2)                     | --                                    | 0.2<br>(0.1 to 0.2)                  | 8.9<br>(-8.9 to 29.5)                             | 0.9<br>(-15.4 to 19.2)                              |
| Atrial fibrillation and flutter                    | 26.4<br>(23.0 to 30.5)                  | 2.1<br>(1.8 to 2.5)                   | 2.0<br>(1.4 to 2.9)                  | 19.7<br>(11.7 to 27.9)                            | 0.9<br>(-5.5 to 7.3)                                |
| Peripheral vascular disease                        | 74.7<br>(64.8 to 86.4)                  | 7.1<br>(6.0 to 8.3)                   | 0.3<br>(0.2 to 0.6)                  | 16.0<br>(3.9 to 29.1)                             | -4.3<br>(-11.5 to 2.9)                              |
| Endocarditis                                       | 0.1<br>(0.1 to 0.1)                     | 0.3<br>(0.3 to 0.3)                   | < 0.05<br>(< 0.05 to < 0.05)         | 17.5<br>(10.0 to 25.0)                            | 1.3<br>(-3.7 to 7.3)                                |
| Other cardiovascular and circulatory diseases      | 23.9<br>(20.3 to 27.9)                  | --                                    | 1.2<br>(0.8 to 1.8)                  | 11.4<br>(0.3 to 24.0)                             | 0.8<br>(-8.0 to 10.3)                               |
| <b>Chronic respiratory diseases</b>                | <b>239.1</b><br><b>(231.7 to 246.8)</b> | <b>32.9†</b><br><b>(31.1 to 34.7)</b> | <b>8.9</b><br><b>(6.6 to 11.5)</b>   | <b>13.9</b><br><b>(8.7 to 19.5)</b>               | <b>7.1</b><br><b>(2.5 to 12.2)</b>                  |
| Chronic obstructive pulmonary disease              | 98.0<br>(93.0 to 103.1)                 | 6.0<br>(5.7 to 6.3)                   | 2.5<br>(2.0 to 3.1)                  | 15.0<br>(0.5 to 30.9)                             | -1.3<br>(-13.2 to 12.1)                             |
| Pneumoconiosis                                     | 0.3<br>(0.2 to 0.3)                     | < 0.05<br>(< 0.05 to < 0.05)          | < 0.05<br>(< 0.05 to 0.1)            | 33.0<br>(10.1 to 61.1)                            | 12.6<br>(-5.4 to 34.4)                              |
| Silicosis                                          | < 0.05<br>(< 0.05 to < 0.05)            | < 0.05<br>(< 0.05 to < 0.05)          | < 0.05<br>(< 0.05 to < 0.05)         | 40.8<br>(31.6 to 50.3)                            | 22.4<br>(15.7 to 29.9)                              |

| Cause                                                          | Prevalence in thousands (95% UI)              | Incidence in thousands (95% UI)          | YLDs in thousands (95% UI)           |                                                   |                                                     |
|----------------------------------------------------------------|-----------------------------------------------|------------------------------------------|--------------------------------------|---------------------------------------------------|-----------------------------------------------------|
|                                                                | 2016 counts                                   | 2016 counts                              | 2016 counts                          | Percentage change in counts between 2006 and 2016 | Percentage change in age-standardised rates between |
| Asbestosis                                                     | 0.1<br>(0.1 to 0.1)                           | < 0.05<br>(< 0.05 to < 0.05)             | < 0.05<br>(< 0.05 to < 0.05)         | 12.5<br>(5.7 to 20.5)                             | -5.3<br>(-11.0 to 1.7)                              |
| Coal workers pneumoconiosis                                    | --                                            | --                                       | --                                   | --                                                | --                                                  |
| Other pneumoconiosis                                           | 0.2<br>(0.2 to 0.2)                           | < 0.05<br>(< 0.05 to < 0.05)             | < 0.05<br>(< 0.05 to < 0.05)         | 40.1<br>(5.2 to 87.0)                             | 18.3<br>(-9.8 to 55.5)                              |
| Asthma                                                         | 146.0<br>(137.0 to 155.7)                     | 26.6<br>(24.8 to 28.4)                   | 5.7<br>(3.8 to 8.0)                  | 13.1<br>(8.1 to 18.6)                             | 10.3<br>(5.9 to 15.3)                               |
| Interstitial lung disease and pulmonary sarcoidosis            | 4.4<br>(4.0 to 4.8)                           | 0.3<br>(0.2 to 0.3)                      | 0.5<br>(0.3 to 0.7)                  | 12.0<br>(-3.0 to 27.8)                            | 1.3<br>(-11.6 to 16.3)                              |
| Other chronic respiratory diseases                             | --                                            | --                                       | 0.2<br>(0.1 to 0.2)                  | 29.0<br>(13.1 to 47.4)                            | 36.6<br>(18.0 to 58.0)                              |
| <b>Cirrhosis and other chronic liver diseases</b>              | <b>26.0</b><br><b>(24.7 to 27.4)</b>          | <b>1.3</b><br><b>(1.3 to 1.4)</b>        | <b>1.0</b><br><b>(0.7 to 1.4)</b>    | <b>26.3</b><br><b>(15.7 to 37.0)</b>              | <b>17.5</b><br><b>(7.3 to 27.4)</b>                 |
| Cirrhosis and other chronic liver diseases due to hepatitis B  | 8.6<br>(7.9 to 9.3)                           | 0.5<br>(0.4 to 0.5)                      | 0.3<br>(0.2 to 0.4)                  | 35.3<br>(15.9 to 58.5)                            | 18.7<br>(2.3 to 38.1)                               |
| Cirrhosis and other chronic liver diseases due to hepatitis C  | 4.8<br>(4.2 to 5.3)                           | 0.2<br>(0.2 to 0.3)                      | 0.2<br>(0.1 to 0.2)                  | 33.2<br>(8.0 to 63.0)                             | 16.2<br>(-4.7 to 42.4)                              |
| Cirrhosis and other chronic liver diseases due to alcohol use  | 6.4<br>(5.8 to 7.1)                           | 0.4<br>(0.3 to 0.4)                      | 0.2<br>(0.1 to 0.3)                  | 41.9<br>(17.9 to 71.5)                            | 21.8<br>(2.2 to 45.9)                               |
| Cirrhosis and other chronic liver diseases due to other causes | 6.3<br>(5.9 to 6.8)                           | 0.3<br>(0.2 to 0.3)                      | 0.3<br>(0.2 to 0.5)                  | 9.0<br>(-7.2 to 28.4)                             | 15.2<br>(-1.6 to 34.5)                              |
| <b>Digestive diseases</b>                                      | <b>110.6</b><br><b>(104.9 to 116.0)</b>       | <b>127.3†</b><br><b>(118.8 to 136.5)</b> | <b>4.5</b><br><b>(3.2 to 6.1)</b>    | <b>21.8</b><br><b>(12.4 to 32.9)</b>              | <b>10.6</b><br><b>(2.8 to 20.4)</b>                 |
| Peptic ulcer disease                                           | 30.5<br>(28.0 to 33.5)                        | 4.8<br>(4.4 to 5.3)                      | 0.7<br>(0.4 to 1.0)                  | 82.9<br>(61.7 to 107.7)                           | 63.5<br>(45.5 to 83.9)                              |
| Gastritis and duodenitis                                       | 42.3<br>(37.6 to 47.4)                        | 34.4<br>(30.9 to 38.3)                   | 0.9<br>(0.6 to 1.3)                  | 67.2<br>(47.8 to 88.8)                            | 54.1<br>(36.8 to 73.2)                              |
| Appendicitis                                                   | 0.4<br>(0.4 to 0.4)                           | 10.2<br>(9.4 to 11.0)                    | 0.1<br>(0.1 to 0.2)                  | -13.8<br>(-36.4 to 16.5)                          | -1.5<br>(-27.6 to 33.5)                             |
| Paralytic ileus and intestinal obstruction                     | < 0.05<br>(< 0.05 to < 0.05)                  | 1.1<br>(1.0 to 1.2)                      | < 0.05<br>(< 0.05 to < 0.05)         | 17.9<br>(12.3 to 23.7)                            | 6.1<br>(2.5 to 9.8)                                 |
| Inguinal, femoral, and abdominal hernia                        | 28.7<br>(25.6 to 31.7)                        | 38.1<br>(32.4 to 43.9)                   | 2.0<br>(1.4 to 2.8)                  | -0.5<br>(-9.6 to 10.6)                            | -10.0<br>(-17.6 to -2.1)                            |
| Inflammatory bowel disease                                     | 1.5<br>(1.4 to 1.7)                           | 1.4<br>(1.4 to 1.5)                      | 0.2<br>(0.1 to 0.3)                  | 17.4<br>(-1.4 to 40.5)                            | 6.0<br>(-10.0 to 25.6)                              |
| Vascular intestinal disorders                                  | < 0.05<br>(< 0.05 to 0.1)                     | 0.3<br>(0.3 to 0.4)                      | < 0.05<br>(< 0.05 to < 0.05)         | 20.3<br>(12.0 to 30.3)                            | 3.3<br>(-3.0 to 10.3)                               |
| Gallbladder and biliary diseases                               | 10.0<br>(8.9 to 11.3)                         | 35.6<br>(30.9 to 41.6)                   | 0.2<br>(0.1 to 0.3)                  | 38.5<br>(11.7 to 72.5)                            | 19.2<br>(-3.8 to 47.5)                              |
| Pancreatitis                                                   | 0.1<br>(0.1 to 0.2)                           | 1.4<br>(1.2 to 1.5)                      | < 0.05<br>(< 0.05 to < 0.05)         | 49.4<br>(41.1 to 58.1)                            | 28.3<br>(24.3 to 32.8)                              |
| Other digestive diseases                                       | --                                            | --                                       | 0.4<br>(0.3 to 0.5)                  | 27.5<br>(17.9 to 40.3)                            | 13.5<br>(4.5 to 24.2)                               |
| <b>Neurological disorders</b>                                  | <b>1,198.3</b><br><b>(1,146.3 to 1,257.1)</b> | <b>541.9</b><br><b>(461.7 to 633.6)</b>  | <b>32.3</b><br><b>(21.9 to 44.2)</b> | <b>6.2</b><br><b>(-9.3 to 26.7)</b>               | <b>1.1</b><br><b>(-14.3 to 21.9)</b>                |
| Alzheimer's disease and other dementias                        | 18.5<br>(15.4 to 22.2)                        | 3.2<br>(2.6 to 3.9)                      | 2.7<br>(1.9 to 3.6)                  | 33.2<br>(23.9 to 43.6)                            | -0.7<br>(-5.7 to 4.7)                               |
| Parkinson's disease                                            | 3.7<br>(2.9 to 4.6)                           | 0.4<br>(0.3 to 0.5)                      | 0.4<br>(0.3 to 0.6)                  | 23.3<br>(8.6 to 39.7)                             | 4.9<br>(-5.8 to 17.2)                               |
| Epilepsy                                                       | 9.6<br>(2.1 to 18.7)                          | 1.0<br>(0.2 to 2.0)                      | 2.9<br>(0.6 to 6.5)                  | -3.9<br>(-84.4 to 505.2)                          | -3.5<br>(-84.4 to 502.1)                            |
| Multiple sclerosis                                             | 0.8<br>(0.7 to 0.9)                           | < 0.05<br>(< 0.05 to < 0.05)             | 0.2<br>(0.1 to 0.3)                  | 36.1<br>(14.0 to 60.5)                            | 22.1<br>(3.0 to 43.8)                               |
| Motor neuron disease                                           | 0.1<br>(0.1 to 0.1)                           | < 0.05<br>(< 0.05 to < 0.05)             | < 0.05<br>(< 0.05 to < 0.05)         | 11.2<br>(6.5 to 16.5)                             | 4.3<br>(0.6 to 8.0)                                 |
| Migraine                                                       | 504.6<br>(474.3 to 536.1)                     | 48.1<br>(45.0 to 51.5)                   | 21.9<br>(14.0 to 30.5)               | 4.4<br>(0.7 to 8.2)                               | 1.3<br>(-2.2 to 4.7)                                |
| Tension-type headache                                          | 872.7<br>(778.0 to 971.4)                     | 489.1<br>(409.3 to 581.1)                | 3.5<br>(2.2 to 5.0)                  | 6.0<br>(0.5 to 12.4)                              | 0.8<br>(-3.8 to 5.9)                                |
| Other neurological disorders                                   | < 0.05<br>(< 0.05 to < 0.05)                  | < 0.05<br>(< 0.05 to < 0.05)             | 0.6<br>(0.2 to 1.3)                  | 10.6<br>(-70.8 to 345.6)                          | 17.3<br>(-70.9 to 385.7)                            |
| <b>Mental and substance use disorders</b>                      | <b>410.8</b><br><b>(396.9 to 425.0)</b>       | <b>152.2†</b><br><b>(141.2 to 163.0)</b> | <b>55.1</b><br><b>(40.1 to 71.3)</b> | <b>4.5</b><br><b>(1.9 to 7.1)</b>                 | <b>1.3</b><br><b>(-0.9 to 3.5)</b>                  |
| Schizophrenia                                                  | 7.2<br>(6.3 to 8.2)                           | 0.4<br>(0.4 to 0.5)                      | 4.6<br>(3.4 to 5.8)                  | 13.3<br>(4.0 to 23.1)                             | 1.8<br>(-6.8 to 11.0)                               |
| Alcohol use disorders                                          | 52.8<br>(46.3 to 59.9)                        | 28.1<br>(24.4 to 31.8)                   | 5.3<br>(3.6 to 7.4)                  | 7.6<br>(-0.3 to 17.0)                             | 0.5<br>(-6.6 to 8.9)                                |
| Drug use disorders                                             | 21.6<br>(20.0 to 23.2)                        | 2.9<br>(2.6 to 3.1)                      | 5.0<br>(3.6 to 6.4)                  | 12.9<br>(3.3 to 23.6)                             | 4.9<br>(-3.6 to 14.7)                               |
| Opioid use disorders                                           | 8.7<br>(7.5 to 10.1)                          | 1.2<br>(1.0 to 1.4)                      | 3.6<br>(2.5 to 4.7)                  | 16.8<br>(4.7 to 30.2)                             | 4.7<br>(-6.2 to 16.2)                               |
| Cocaine use disorders                                          | 2.2<br>(1.9 to 2.5)                           | 0.1<br>(0.1 to 0.2)                      | 0.3<br>(0.2 to 0.5)                  | 4.7<br>(-16.1 to 34.9)                            | 4.3<br>(-16.5 to 33.4)                              |
| Amphetamine use disorders                                      | 2.1<br>(1.4 to 2.9)                           | 0.2<br>(0.1 to 0.2)                      | 0.3<br>(0.1 to 0.5)                  | 1.7<br>(-23.8 to 35.8)                            | 7.0<br>(-20.2 to 39.9)                              |
| Cannabis use disorders                                         | 7.1<br>(6.0 to 8.5)                           | 1.0<br>(0.9 to 1.2)                      | 0.2<br>(0.1 to 0.3)                  | -8.7<br>(-23.6 to 10.4)                           | -0.6<br>(-17.0 to 19.5)                             |
| Other drug use disorders                                       | 1.9<br>(1.7 to 2.2)                           | 0.4<br>(0.3 to 0.4)                      | 0.6<br>(0.4 to 0.8)                  | 9.7<br>(-12.1 to 39.1)                            | 7.9<br>(-13.3 to 36.7)                              |
| Depressive disorders                                           | 98.9<br>(92.5 to 106.5)                       | 96.4<br>(86.7 to 106.8)                  | 15.7<br>(10.7 to 21.2)               | 10.7<br>(5.0 to 16.0)                             | 3.3<br>(-1.4 to 8.0)                                |
| Major depressive disorder                                      | 58.1<br>(52.3 to 64.4)                        | 89.5<br>(79.7 to 99.8)                   | 11.7<br>(8.0 to 15.9)                | 10.6<br>(2.9 to 17.8)                             | 4.1<br>(-2.2 to 10.5)                               |
| Dysthymia                                                      | 42.2<br>(37.2 to 48.4)                        | 6.9<br>(6.0 to 8.0)                      | 4.0<br>(2.7 to 5.9)                  | 11.0<br>(6.6 to 15.5)                             | 1.0<br>(-2.6 to 4.5)                                |
| Bipolar disorder                                               | 20.8<br>(17.9 to 23.9)                        | 1.4<br>(1.2 to 1.7)                      | 4.2<br>(2.7 to 6.2)                  | 2.4<br>(-4.0 to 9.7)                              | 0.8<br>(-5.1 to 7.7)                                |
| Anxiety disorders                                              | 83.2<br>(75.6 to 90.8)                        | 13.4<br>(12.4 to 14.6)                   | 8.0<br>(5.6 to 10.9)                 | 2.9<br>(-4.0 to 10.3)                             | 1.6<br>(-5.2 to 8.7)                                |
| Eating disorders                                               | 2.9<br>(2.4 to 3.6)                           | 1.5<br>(1.1 to 2.0)                      | 0.6<br>(0.4 to 0.9)                  | 18.1<br>(0.5 to 39.8)                             | 24.9<br>(7.2 to 44.8)                               |
| Anorexia nervosa                                               | 0.6<br>(0.5 to 0.8)                           | 0.3<br>(0.2 to 0.3)                      | 0.1<br>(0.1 to 0.2)                  | 2.5<br>(-24.1 to 38.1)                            | 20.4<br>(-9.1 to 59.3)                              |
| Bulimia nervosa                                                | 2.2<br>(1.6 to 3.0)                           | 1.2<br>(0.9 to 1.7)                      | 0.5<br>(0.3 to 0.7)                  | 23.5<br>(3.0 to 48.6)                             | 26.3<br>(6.9 to 50.0)                               |
| Autistic spectrum disorders                                    | 24.1<br>(21.7 to 27.1)                        | 0.1<br>(0.1 to 0.2)                      | 3.5<br>(2.4 to 5.0)                  | -4.0<br>(-8.6 to 0.9)                             | -3.0<br>(-7.7 to 2.1)                               |
| Autism                                                         | 7.4<br>(6.4 to 8.7)                           | < 0.05<br>(< 0.05 to < 0.05)             | 1.9<br>(1.2 to 2.7)                  | -3.2<br>(-10.7 to 5.5)                            | -2.4<br>(-10.3 to 6.0)                              |
| Asperger syndrome and other autistic spectrum disorders        | 16.6<br>(13.8 to 20.0)                        | 0.1<br>(0.1 to 0.2)                      | 1.7<br>(1.1 to 2.4)                  | -4.8<br>(-9.2 to -0.2)                            | -3.6<br>(-8.0 to 1.1)                               |



| Cause                                                      | Prevalence in thousands (95% UI)        | Incidence in thousands (95% UI)          | YLDs in thousands (95% UI)      |                                                                      |                                                                      |
|------------------------------------------------------------|-----------------------------------------|------------------------------------------|---------------------------------|----------------------------------------------------------------------|----------------------------------------------------------------------|
|                                                            | 2016 counts<br>(18.3 to 22.5)           | 2016 counts<br>(0.7 to 1.0)              | 2016 counts<br>(0.1 to 0.4)     | Percentage change in counts between 2006 and 2016<br>(-21.6 to -7.1) | Percentage change in age-standardised rates between<br>(-9.9 to 6.5) |
| Attention-deficit/hyperactivity disorder                   | 20.2<br>(18.3 to 22.5)                  | 0.8<br>(0.7 to 1.0)                      | 0.2<br>(0.1 to 0.4)             | -14.5<br>(-21.6 to -7.1)                                             | -1.9<br>(-9.9 to 6.5)                                                |
| Conduct disorder                                           | 15.6<br>(12.9 to 18.4)                  | 5.3<br>(4.2 to 6.4)                      | 1.9<br>(1.2 to 2.9)             | -34.1<br>(-38.5 to -29.3)                                            | -1.2<br>(-7.5 to 5.8)                                                |
| Idiopathic developmental intellectual disability           | 30.4<br>(16.5 to 44.4)                  | --                                       | 1.3<br>(0.6 to 2.2)             | -15.6<br>(-21.9 to -9.3)                                             | -13.5<br>(-19.8 to -7.3)                                             |
| Other mental and substance use disorders                   | 63.8<br>(56.5 to 73.4)                  | 1.7<br>(1.5 to 1.9)                      | 4.7<br>(3.2 to 6.8)             | 8.8<br>(3.9 to 14.4)                                                 | -0.9<br>(-5.0 to 3.9)                                                |
| <b>Diabetes, urogenital, blood, and endocrine diseases</b> | <b>1,042.7<br/>(1,022.1 to 1,062.7)</b> | <b>491.2†<br/>(457.9 to 530.6)</b>       | <b>29.3<br/>(20.9 to 39.7)</b>  | <b>18.1<br/>(13.5 to 23.0)</b>                                       | <b>4.7<br/>(0.6 to 9.0)</b>                                          |
| Diabetes mellitus                                          | 146.3<br>(132.1 to 161.4)               | 8.2<br>(7.4 to 9.0)                      | 12.6<br>(8.6 to 17.3)           | 22.9<br>(13.1 to 32.7)                                               | 3.8<br>(-4.8 to 12.1)                                                |
| Acute glomerulonephritis                                   | 0.1<br>(0.1 to 0.1)                     | 0.9<br>(0.8 to 1.0)                      | < 0.05<br>(< 0.05 to < 0.05)    | -1.2<br>(-7.8 to 6.0)                                                | -5.4<br>(-10.6 to -0.1)                                              |
| Chronic kidney disease                                     | 221.9<br>(199.9 to 243.5)               | 16.6<br>(14.3 to 19.3)                   | 6.2<br>(4.6 to 8.0)             | 23.0<br>(14.4 to 32.0)                                               | 6.6<br>(-0.2 to 13.7)                                                |
| Chronic kidney disease due to diabetes mellitus            | 98.4<br>(84.7 to 114.5)                 | 7.5<br>(6.1 to 9.1)                      | 2.6<br>(1.9 to 3.4)             | 17.9<br>(8.0 to 30.1)                                                | 2.6<br>(-5.2 to 12.4)                                                |
| Chronic kidney disease due to hypertension                 | 30.2<br>(25.4 to 35.6)                  | 3.5<br>(2.8 to 4.3)                      | 0.5<br>(0.4 to 0.7)             | 36.7<br>(20.0 to 57.3)                                               | 7.7<br>(-4.0 to 20.9)                                                |
| Chronic kidney disease due to glomerulonephritis           | 35.0<br>(29.7 to 40.5)                  | 1.3<br>(0.9 to 1.6)                      | 1.4<br>(1.0 to 1.9)             | 24.6<br>(12.2 to 38.6)                                               | 11.2<br>(1.9 to 22.6)                                                |
| Chronic kidney disease due to other causes                 | 58.3<br>(47.5 to 70.4)                  | 4.3<br>(3.4 to 5.4)                      | 1.7<br>(1.2 to 2.3)             | 25.9<br>(14.7 to 39.7)                                               | 8.7<br>(0.1 to 18.2)                                                 |
| Urinary diseases and male infertility                      | 70.7<br>(63.1 to 78.7)                  | 327.4†<br>(295.0 to 367.9)               | 2.1<br>(1.4 to 3.0)             | 8.8<br>(-0.5 to 17.4)                                                | -7.2<br>(-14.8 to -0.9)                                              |
| Interstitial nephritis and urinary tract infections        | 5.4<br>(4.8 to 6.2)                     | 279.2<br>(247.5 to 318.6)                | 0.2<br>(0.1 to 0.3)             | 11.9<br>(-1.2 to 29.0)                                               | 8.7<br>(-3.1 to 23.8)                                                |
| Urolithiasis                                               | 1.6<br>(1.4 to 1.8)                     | 41.6<br>(36.6 to 47.5)                   | 0.1<br>(0.1 to 0.2)             | 15.8<br>(-2.8 to 37.7)                                               | 3.2<br>(-11.5 to 21.0)                                               |
| Benign prostatic hyperplasia                               | 51.8<br>(44.0 to 60.5)                  | 6.6<br>(5.5 to 7.9)                      | 1.7<br>(1.1 to 2.5)             | 8.6<br>(-2.8 to 18.9)                                                | -9.8<br>(-18.9 to -2.6)                                              |
| Male infertility                                           | 9.4<br>(7.0 to 12.2)                    | --                                       | 0.1<br>(< 0.05 to 0.1)          | 25.5<br>(0.4 to 57.5)                                                | 17.6<br>(-5.4 to 46.5)                                               |
| Other urinary diseases                                     | --                                      | --                                       | 0.1<br>(0.1 to 0.1)             | -5.4<br>(-14.8 to 5.6)                                               | -12.2<br>(-20.4 to -3.0)                                             |
| Gynecological diseases                                     | 381.2<br>(360.9 to 396.1)               | 130.9†<br>(121.1 to 141.0)               | 4.4<br>(3.0 to 6.3)             | 4.8<br>(-0.2 to 9.4)                                                 | 3.5<br>(-0.9 to 8.0)                                                 |
| Uterine fibroids                                           | 57.3<br>(50.2 to 64.7)                  | 5.1<br>(4.4 to 6.0)                      | 0.6<br>(0.3 to 1.0)             | -0.6<br>(-8.0 to 5.9)                                                | -7.0<br>(-13.7 to -0.9)                                              |
| Polycystic ovarian syndrome                                | 3.4<br>(2.5 to 4.5)                     | 1.2<br>(0.9 to 1.6)                      | < 0.05<br>(< 0.05 to 0.1)       | 13.4<br>(-0.6 to 30.0)                                               | 8.2<br>(-4.9 to 23.9)                                                |
| Female infertility                                         | 4.5<br>(1.8 to 8.9)                     | --                                       | < 0.05<br>(< 0.05 to 0.1)       | 168.3<br>(21.8 to 413.1)                                             | 161.7<br>(30.2 to 378.6)                                             |
| Endometriosis                                              | 1.5<br>(1.2 to 1.8)                     | 4.2<br>(3.3 to 5.3)                      | 0.1<br>(0.1 to 0.2)             | 7.9<br>(-16.9 to 38.2)                                               | 7.5<br>(-16.1 to 38.6)                                               |
| Genital prolapse                                           | 104.5<br>(89.4 to 121.2)                | 4.9<br>(4.2 to 5.8)                      | 0.3<br>(0.1 to 0.6)             | 33.0<br>(20.8 to 46.1)                                               | 9.4<br>(-0.4 to 19.9)                                                |
| Premenstrual syndrome                                      | 208.4<br>(196.3 to 220.4)               | 70.5<br>(65.9 to 75.6)                   | 1.8<br>(1.1 to 2.7)             | -0.4<br>(-7.1 to 6.8)                                                | 5.0<br>(-2.1 to 12.5)                                                |
| Other gynecological diseases                               | 45.2<br>(38.3 to 53.0)                  | 44.9<br>(37.0 to 53.9)                   | 1.6<br>(1.0 to 2.3)             | 6.9<br>(-1.8 to 16.3)                                                | 3.4<br>(-4.3 to 11.7)                                                |
| Hemoglobinopathies and hemolytic anaemias                  | 431.4<br>(414.5 to 447.2)               | --                                       | 2.5<br>(1.6 to 3.7)             | 25.3<br>(10.7 to 43.1)                                               | 21.8<br>(6.3 to 39.5)                                                |
| Thalassemias                                               | < 0.05<br>(< 0.05 to < 0.05)            | --                                       | < 0.05<br>(< 0.05 to < 0.05)    | 52.0<br>(12.5 to 94.1)                                               | 40.4<br>(4.4 to 78.4)                                                |
| Thalassaemias trait                                        | 85.6<br>(66.8 to 103.9)                 | --                                       | 1.8<br>(1.1 to 2.7)             | 33.4<br>(16.9 to 52.6)                                               | 28.1<br>(11.2 to 47.9)                                               |
| Sickle cell disorders                                      | < 0.05<br>(< 0.05 to < 0.05)            | --                                       | < 0.05<br>(< 0.05 to < 0.05)    | 10.8<br>(3.2 to 19.1)                                                | 19.9<br>(11.9 to 28.9)                                               |
| Sickle cell trait                                          | 58.1<br>(55.5 to 60.7)                  | --                                       | 0.3<br>(0.2 to 0.4)             | 62.7<br>(33.1 to 95.5)                                               | 59.2<br>(28.5 to 93.0)                                               |
| G6PD deficiency                                            | 31.5<br>(30.0 to 33.2)                  | --                                       | < 0.05<br>(< 0.05 to < 0.05)    | 73.0<br>(48.4 to 103.6)                                              | 62.9<br>(38.5 to 92.8)                                               |
| G6PD trait                                                 | 254.5<br>(248.6 to 260.4)               | --                                       | < 0.05<br>(< 0.05 to < 0.05)    | 60.8<br>(42.2 to 84.4)                                               | 55.4<br>(36.6 to 79.8)                                               |
| Other hemoglobinopathies and hemolytic anaemias            | 19.8<br>(17.5 to 22.3)                  | --                                       | 0.4<br>(0.2 to 0.5)             | -16.7<br>(-28.8 to -0.5)                                             | -16.9<br>(-28.5 to -2.1)                                             |
| Endocrine, metabolic, blood, and immune disorders          | 46.1<br>(42.3 to 50.6)                  | 7.3<br>(6.5 to 8.2)                      | 1.4<br>(0.9 to 1.9)             | 8.1<br>(0.4 to 16.0)                                                 | -1.6<br>(-8.2 to 5.2)                                                |
| <b>Musculoskeletal disorders</b>                           | <b>562.6<br/>(536.6 to 592.0)</b>       | <b>236.2<br/>(210.3 to 263.2)</b>        | <b>63.9<br/>(46.2 to 83.8)</b>  | <b>12.7<br/>(8.6 to 16.8)</b>                                        | <b>-1.0<br/>(-3.5 to 1.4)</b>                                        |
| Rheumatoid arthritis                                       | 9.8<br>(8.7 to 11.0)                    | 0.5<br>(0.4 to 0.6)                      | 2.3<br>(1.6 to 3.1)             | 28.5<br>(18.2 to 39.9)                                               | 11.7<br>(2.5 to 21.2)                                                |
| Osteoarthritis                                             | 159.7<br>(149.5 to 171.5)               | 7.4<br>(6.9 to 8.1)                      | 9.8<br>(6.9 to 13.3)            | 27.3<br>(22.8 to 32.0)                                               | 6.3<br>(2.4 to 10.1)                                                 |
| Low back and neck pain                                     | 411.2<br>(384.4 to 440.9)               | 190.8<br>(167.4 to 216.2)                | 48.6<br>(34.2 to 64.6)          | 9.5<br>(4.7 to 14.7)                                                 | -2.9<br>(-6.0 to 0.1)                                                |
| Low back pain                                              | 319.2<br>(283.8 to 362.5)               | 163.6<br>(140.3 to 188.3)                | 35.9<br>(25.2 to 47.4)          | 8.6<br>(2.1 to 15.2)                                                 | -4.1<br>(-8.1 to -0.3)                                               |
| Neck pain                                                  | 128.3<br>(109.7 to 148.6)               | 27.3<br>(23.7 to 32.1)                   | 12.7<br>(8.7 to 18.0)           | 12.3<br>(7.2 to 17.9)                                                | 0.5<br>(-1.6 to 2.8)                                                 |
| Gout                                                       | 13.8<br>(12.2 to 15.7)                  | 2.7<br>(2.3 to 3.1)                      | 0.4<br>(0.3 to 0.6)             | 14.0<br>(-1.2 to 32.5)                                               | -2.8<br>(-15.2 to 11.7)                                              |
| Other musculoskeletal disorders                            | 31.7<br>(22.9 to 43.0)                  | 34.7<br>(24.2 to 48.9)                   | 2.7<br>(1.7 to 4.3)             | 13.5<br>(-4.3 to 37.1)                                               | 2.5<br>(-12.2 to 22.6)                                               |
| <b>Other non-communicable diseases</b>                     | <b>2,329.9<br/>(2,295.6 to 2,366.9)</b> | <b>6,894.9†<br/>(6,533.7 to 7,302.3)</b> | <b>71.9<br/>(50.1 to 101.1)</b> | <b>6.3<br/>(4.9 to 7.7)</b>                                          | <b>-1.3<br/>(-2.4 to -0.3)</b>                                       |
| Congenital anomalies                                       | 32.5<br>(29.8 to 36.0)                  | --                                       | 4.3<br>(3.2 to 5.6)             | -2.4<br>(-8.2 to 3.5)                                                | -3.8<br>(-9.2 to 1.8)                                                |
| Neural tube defects                                        | 3.8<br>(3.4 to 4.3)                     | --                                       | 1.1<br>(0.8 to 1.5)             | -8.9<br>(-19.0 to 3.5)                                               | -10.5<br>(-20.3 to 1.5)                                              |
| Congenital heart anomalies                                 | 8.6<br>(7.6 to 9.8)                     | --                                       | 0.4<br>(0.2 to 0.8)             | 10.6<br>(0.1 to 22.2)                                                | 10.5<br>(-0.3 to 21.8)                                               |
| Orofacial clefts                                           | 1.3<br>(1.2 to 1.5)                     | --                                       | < 0.05<br>(< 0.05 to < 0.05)    | -13.8<br>(-25.3 to -2.4)                                             | -16.3<br>(-27.7 to -4.4)                                             |
| Down's syndrome                                            | 2.4<br>(2.1 to 2.8)                     | --                                       | 0.2<br>(0.2 to 0.3)             | 8.9<br>(-2.8 to 20.5)                                                | 7.4<br>(-3.9 to 19.4)                                                |
| Turner syndrome                                            | 2.0<br>(1.7 to 2.4)                     | --                                       | < 0.05<br>(< 0.05 to 0.1)       | 3.6<br>(-20.6 to 34.0)                                               | 7.5<br>(-17.9 to 39.3)                                               |
| Klinefelter syndrome                                       | 1.6<br>(1.4 to 1.9)                     | --                                       | < 0.05<br>(< 0.05 to < 0.05)    | -6.4<br>(-25.6 to 17.7)                                              | -5.7<br>(-24.2 to 17.5)                                              |

| Cause                                         | Prevalence in thousands (95% UI)            | Incidence in thousands (95% UI)          | YLDs in thousands (95% UI)           |                                                   |                                                     |
|-----------------------------------------------|---------------------------------------------|------------------------------------------|--------------------------------------|---------------------------------------------------|-----------------------------------------------------|
|                                               | 2016 counts                                 | 2016 counts                              | 2016 counts                          | Percentage change in counts between 2006 and 2016 | Percentage change in age-standardised rates between |
| Other chromosomal abnormalities               | 1.2<br>(1.0 to 1.4)                         | --                                       | 0.2<br>(0.1 to 0.3)                  | 1.8<br>(-18.2 to 25.6)                            | 3.2<br>(-16.9 to 26.6)                              |
| Congenital musculoskeletal and limb anomalies | 3.6<br>(3.3 to 4.0)                         | --                                       | 0.5<br>(0.4 to 0.7)                  | -0.6<br>(-10.4 to 10.2)                           | -2.5<br>(-11.9 to 7.5)                              |
| Urogenital congenital anomalies               | 2.8<br>(2.4 to 3.2)                         | --                                       | 0.1<br>(0.1 to 0.1)                  | -6.8<br>(-17.6 to 4.2)                            | 0.9<br>(-11.4 to 13.5)                              |
| Digestive congenital anomalies                | 4.2<br>(3.7 to 4.7)                         | --                                       | 0.2<br>(0.1 to 0.3)                  | -3.3<br>(-16.5 to 11.1)                           | -4.7<br>(-17.2 to 9.6)                              |
| Other congenital anomalies                    | 9.3<br>(6.0 to 13.8)                        | --                                       | 1.4<br>(1.0 to 2.1)                  | -2.8<br>(-11.9 to 6.8)                            | -5.6<br>(-13.8 to 3.2)                              |
| Skin and subcutaneous diseases                | 855.2<br>(833.6 to 877.2)                   | 1,967.3<br>(1,847.3 to 2,097.0)          | 19.2<br>(12.9 to 28.1)               | -3.7<br>(-6.1 to -1.2)                            | 2.5<br>(0.7 to 4.7)                                 |
| Dermatitis                                    | 89.9<br>(82.2 to 98.1)                      | 136.5<br>(124.9 to 149.2)                | 3.2<br>(1.9 to 5.2)                  | 0.4<br>(-3.8 to 4.9)                              | 0.4<br>(-3.7 to 4.7)                                |
| Psoriasis                                     | 30.6<br>(29.3 to 32.1)                      | 4.1<br>(3.9 to 4.3)                      | 2.6<br>(1.9 to 3.5)                  | 13.1<br>(4.9 to 22.5)                             | 7.0<br>(-0.6 to 15.6)                               |
| Cellulitis                                    | 1.2<br>(1.1 to 1.2)                         | 21.7<br>(20.2 to 23.1)                   | 0.1<br>(< 0.05 to 0.1)               | 5.5<br>(-14.6 to 31.3)                            | 1.7<br>(-16.9 to 24.9)                              |
| Pyoderma                                      | 6.5<br>(6.3 to 6.8)                         | 138.5<br>(133.3 to 143.9)                | < 0.05<br>(< 0.05 to 0.1)            | 9.0<br>(1.6 to 17.4)                              | -0.4<br>(-7.0 to 7.2)                               |
| Scabies                                       | 30.6<br>(26.9 to 34.9)                      | 91.3<br>(79.9 to 103.8)                  | 0.8<br>(0.4 to 1.3)                  | -7.4<br>(-13.2 to -1.8)                           | -3.0<br>(-7.4 to 1.6)                               |
| Fungal skin diseases                          | 270.6<br>(243.3 to 298.9)                   | 1,001.5<br>(889.0 to 1,128.1)            | 1.5<br>(0.6 to 3.1)                  | 7.3<br>(4.5 to 10.3)                              | -0.1<br>(-1.2 to 1.1)                               |
| Viral skin diseases                           | 72.0<br>(69.0 to 75.0)                      | 108.0<br>(103.4 to 113.3)                | 2.2<br>(1.4 to 3.2)                  | -3.1<br>(-6.5 to 0.4)                             | 1.5<br>(-1.8 to 4.8)                                |
| Acne vulgaris                                 | 198.5<br>(181.6 to 217.4)                   | 122.9<br>(104.4 to 145.8)                | 5.1<br>(3.5 to 7.4)                  | -20.8<br>(-24.8 to -16.2)                         | 3.6<br>(-0.9 to 8.7)                                |
| Alopecia areata                               | 6.0<br>(5.8 to 6.2)                         | 10.6<br>(10.2 to 11.0)                   | 0.2<br>(0.1 to 0.3)                  | 6.3<br>(-4.3 to 19.2)                             | 0.2<br>(-9.9 to 12.0)                               |
| Pruritus                                      | 29.5<br>(26.1 to 33.4)                      | 23.4<br>(20.8 to 26.5)                   | 0.3<br>(0.1 to 0.6)                  | 11.0<br>(4.1 to 18.4)                             | 2.6<br>(-2.6 to 8.0)                                |
| Urticaria                                     | 28.4<br>(25.1 to 32.4)                      | 50.7<br>(44.8 to 57.8)                   | 1.7<br>(1.1 to 2.4)                  | 3.3<br>(-2.8 to 10.1)                             | 0.7<br>(-4.4 to 6.2)                                |
| Decubitus ulcer                               | 1.0<br>(0.9 to 1.1)                         | 3.5<br>(3.1 to 4.0)                      | 0.1<br>(0.1 to 0.2)                  | 16.0<br>(0.7 to 34.9)                             | 1.9<br>(-10.7 to 16.8)                              |
| Other skin and subcutaneous diseases          | 220.1<br>(213.5 to 226.6)                   | 254.7<br>(245.8 to 263.1)                | 1.2<br>(0.6 to 2.2)                  | 19.0<br>(15.8 to 22.5)                            | 8.4<br>(5.8 to 11.2)                                |
| Sense organ diseases                          | 917.5<br>(900.6 to 937.0)                   | 309.9†<br>(291.8 to 328.7)               | 36.2<br>(25.2 to 50.9)               | 10.8<br>(8.9 to 12.8)                             | -4.0<br>(-5.3 to -2.6)                              |
| Glaucoma                                      | 4.7<br>(4.0 to 5.5)                         | --                                       | 0.5<br>(0.3 to 0.7)                  | 20.0<br>(8.7 to 33.7)                             | 0.1<br>(-9.2 to 10.9)                               |
| Cataract                                      | 60.2<br>(51.3 to 69.6)                      | --                                       | 3.2<br>(2.2 to 4.5)                  | 16.9<br>(9.9 to 24.1)                             | -3.7<br>(-8.6 to 1.2)                               |
| Macular degeneration                          | 1.9<br>(1.6 to 2.4)                         | --                                       | 0.1<br>(0.1 to 0.2)                  | 26.2<br>(10.1 to 46.3)                            | 3.6<br>(-9.4 to 18.5)                               |
| Refraction and accommodation disorders        | 489.9<br>(466.8 to 513.1)                   | --                                       | 8.6<br>(5.3 to 13.7)                 | 6.5<br>(3.3 to 10.2)                              | -6.0<br>(-8.4 to -3.1)                              |
| Age-related and other hearing loss            | 646.0<br>(616.1 to 678.9)                   | --                                       | 19.0<br>(13.4 to 26.6)               | 10.4<br>(6.9 to 13.6)                             | -4.4<br>(-6.7 to -2.4)                              |
| Other vision loss                             | 23.7<br>(20.9 to 27.1)                      | --                                       | 1.5<br>(1.1 to 2.1)                  | 18.2<br>(10.2 to 27.2)                            | 0.7<br>(-5.7 to 7.1)                                |
| Other sense organ diseases                    | 105.2<br>(96.6 to 113.8)                    | 309.9<br>(291.8 to 328.7)                | 3.3<br>(2.0 to 4.9)                  | 14.4<br>(9.7 to 19.3)                             | 1.2<br>(-2.4 to 5.0)                                |
| Oral disorders                                | 1,755.2<br>(1,693.3 to 1,813.5)             | 4,617.6†<br>(4,286.7 to 4,983.2)         | 12.2<br>(7.7 to 18.1)                | 14.9<br>(12.1 to 18.0)                            | 0.6<br>(-1.1 to 2.5)                                |
| Caries of deciduous teeth                     | 192.1<br>(159.0 to 226.6)                   | 773.8<br>(602.6 to 981.3)                | < 0.05<br>(< 0.05 to 0.1)            | 10.0<br>(-1.6 to 21.7)                            | 0.0<br>(-10.3 to 10.5)                              |
| Caries of permanent teeth                     | 1,287.5<br>(1,221.8 to 1,354.2)             | 3,782.6<br>(3,506.8 to 4,085.9)          | 0.8<br>(0.3 to 1.4)                  | -6.2<br>(-9.4 to -2.9)                            | -5.9<br>(-8.7 to -3.0)                              |
| Periodontal disease                           | 292.3<br>(243.1 to 346.5)                   | 38.6<br>(30.3 to 47.2)                   | 1.9<br>(0.8 to 3.9)                  | 14.9<br>(8.7 to 20.6)                             | -0.7<br>(-4.2 to 2.9)                               |
| Edentulism and severe tooth loss              | 281.2<br>(245.5 to 315.2)                   | 22.8<br>(18.9 to 26.6)                   | 7.7<br>(5.1 to 11.0)                 | 19.8<br>(15.7 to 24.3)                            | 1.7<br>(-0.7 to 4.5)                                |
| Other oral disorders                          | 59.4<br>(56.8 to 62.0)                      | --                                       | 1.7<br>(1.1 to 2.6)                  | 5.7<br>(2.1 to 9.5)                               | 0.7<br>(-2.4 to 3.9)                                |
| <b>Injuries</b>                               | <b>1,029.5</b><br><b>(944.2 to 1,132.2)</b> | <b>320.6†</b><br><b>(300.8 to 340.9)</b> | <b>35.6</b><br><b>(23.2 to 52.2)</b> | <b>9.2</b><br><b>(3.9 to 15.1)</b>                | <b>-0.8</b><br><b>(-5.5 to 4.4)</b>                 |
| <b>Transport injuries</b>                     | <b>84.3</b><br><b>(78.3 to 90.9)</b>        | <b>24.6</b><br><b>(22.1 to 27.4)</b>     | <b>4.3</b><br><b>(2.8 to 6.2)</b>    | <b>21.9</b><br><b>(17.5 to 26.2)</b>              | <b>9.0</b><br><b>(5.3 to 12.6)</b>                  |
| Road injuries                                 | 76.8<br>(71.1 to 82.9)                      | 23.3<br>(20.8 to 26.1)                   | 3.9<br>(2.6 to 5.6)                  | 23.1<br>(18.9 to 27.2)                            | 9.8<br>(6.2 to 13.2)                                |
| Pedestrian road injuries                      | 17.5<br>(15.5 to 19.9)                      | 3.8<br>(3.2 to 4.5)                      | 0.9<br>(0.6 to 1.2)                  | 19.7<br>(15.2 to 24.0)                            | 7.0<br>(3.1 to 10.5)                                |
| Cyclist road injuries                         | 13.6<br>(11.4 to 16.0)                      | 4.4<br>(3.5 to 5.3)                      | 0.6<br>(0.4 to 0.9)                  | 34.3<br>(28.6 to 40.0)                            | 21.0<br>(16.3 to 25.7)                              |
| Motorcyclist road injuries                    | 11.4<br>(9.7 to 14.1)                       | 2.3<br>(1.8 to 2.8)                      | 0.5<br>(0.4 to 0.8)                  | 25.0<br>(20.4 to 29.2)                            | 11.4<br>(7.5 to 15.0)                               |
| Motor vehicle road injuries                   | 29.1<br>(24.3 to 33.7)                      | 10.8<br>(9.2 to 12.4)                    | 1.6<br>(1.1 to 2.3)                  | 24.0<br>(20.0 to 27.7)                            | 9.9<br>(6.6 to 12.9)                                |
| Other road injuries                           | 5.2<br>(4.4 to 6.1)                         | 2.0<br>(1.6 to 2.6)                      | 0.2<br>(0.2 to 0.4)                  | 2.7<br>(-0.5 to 5.7)                              | -7.9<br>(-10.9 to -5.3)                             |
| Other transport injuries                      | 7.5<br>(6.3 to 8.8)                         | 1.3<br>(1.1 to 1.6)                      | 0.4<br>(0.2 to 0.5)                  | 10.4<br>(4.6 to 16.6)                             | 1.6<br>(-3.5 to 7.0)                                |
| <b>Unintentional injuries</b>                 | <b>796.0</b><br><b>(737.5 to 874.7)</b>     | <b>281.4</b><br><b>(261.9 to 301.1)</b>  | <b>26.3</b><br><b>(17.7 to 36.9)</b> | <b>12.7</b><br><b>(8.1 to 17.2)</b>               | <b>2.6</b><br><b>(-1.5 to 6.5)</b>                  |
| Falls                                         | 386.1<br>(336.6 to 446.7)                   | 144.0<br>(127.5 to 161.9)                | 15.1<br>(10.5 to 20.7)               | 12.0<br>(7.9 to 16.2)                             | 1.1<br>(-2.8 to 4.8)                                |
| Drowning                                      | 2.6<br>(2.3 to 3.0)                         | 0.4<br>(0.3 to 0.4)                      | 0.1<br>(0.1 to 0.2)                  | -8.4<br>(-13.3 to -3.4)                           | -15.4<br>(-20.0 to -11.0)                           |
| Fire, heat, and hot substances                | 90.5<br>(77.0 to 109.0)                     | 8.6<br>(7.3 to 9.8)                      | 2.2<br>(1.4 to 3.3)                  | 13.5<br>(5.5 to 20.6)                             | 5.1<br>(-1.9 to 11.6)                               |
| Poisonings                                    | 2.6<br>(2.2 to 3.1)                         | 3.2<br>(2.6 to 3.8)                      | 0.2<br>(0.1 to 0.3)                  | 41.3<br>(33.5 to 50.4)                            | 35.9<br>(28.2 to 44.6)                              |
| Exposure to mechanical forces                 | 145.7<br>(125.2 to 178.7)                   | 46.6<br>(40.5 to 53.5)                   | 3.4<br>(2.2 to 5.0)                  | 19.6<br>(14.1 to 25.0)                            | 9.0<br>(4.0 to 13.7)                                |
| Unintentional firearm injuries                | 4.4<br>(3.5 to 5.4)                         | 0.9<br>(0.7 to 1.2)                      | 0.2<br>(0.1 to 0.3)                  | 5.7<br>(1.2 to 10.3)                              | -3.8<br>(-7.6 to 0.0)                               |
| Unintentional suffocation                     | 10.4<br>(8.3 to 12.7)                       | 1.9<br>(1.4 to 2.5)                      | 0.3<br>(0.2 to 0.5)                  | 12.4<br>(7.4 to 17.6)                             | 3.6<br>(-0.8 to 8.1)                                |
| Other exposure to mechanical forces           | 130.9<br>(110.6 to 163.0)                   | 43.8<br>(38.1 to 50.3)                   | 2.9<br>(1.9 to 4.2)                  | 21.5<br>(16.0 to 26.9)                            | 10.6<br>(5.5 to 15.4)                               |

| Cause                                                                               | Prevalence in thousands (95% UI)       | Incidence in thousands (95% UI)          | YLDs in thousands (95% UI)        |                                                   |                                                     |
|-------------------------------------------------------------------------------------|----------------------------------------|------------------------------------------|-----------------------------------|---------------------------------------------------|-----------------------------------------------------|
|                                                                                     | 2016 counts                            | 2016 counts                              | 2016 counts                       | Percentage change in counts between 2006 and 2016 | Percentage change in age-standardised rates between |
| Adverse effects of medical treatment                                                | 1.0<br>(0.8 to 1.2)                    | 12.6<br>(11.2 to 14.1)                   | 0.1<br>(0.1 to 0.2)               | 14.7<br>(8.5 to 21.7)                             | -0.6<br>(-5.1 to 4.1)                               |
| Animal contact                                                                      | 15.3<br>(13.4 to 17.8)                 | 14.4<br>(12.1 to 17.0)                   | 0.5<br>(0.3 to 0.7)               | -8.9<br>(-13.3 to -4.8)                           | -12.8<br>(-16.9 to -8.9)                            |
| Venomous animal contact                                                             | 5.7<br>(4.7 to 6.8)                    | 5.7<br>(4.4 to 7.3)                      | 0.3<br>(0.2 to 0.5)               | -3.5<br>(-9.2 to 2.6)                             | -6.1<br>(-11.6 to -0.5)                             |
| Non-venomous animal contact                                                         | 9.6<br>(8.1 to 11.9)                   | 8.7<br>(7.1 to 10.6)                     | 0.1<br>(0.1 to 0.2)               | -18.9<br>(-23.6 to -14.4)                         | -25.1<br>(-29.6 to -21.2)                           |
| Foreign body                                                                        | 42.8<br>(35.9 to 49.6)                 | 21.5<br>(19.3 to 24.5)                   | 1.4<br>(0.9 to 2.2)               | 6.9<br>(1.1 to 13.1)                              | -0.6<br>(-6.1 to 5.0)                               |
| Pulmonary aspiration and foreign body in airway                                     | 18.2<br>(14.0 to 23.7)                 | 5.2<br>(4.5 to 6.2)                      | 0.7<br>(0.4 to 1.1)               | -0.2<br>(-5.5 to 5.3)                             | -5.5<br>(-10.3 to -0.7)                             |
| Foreign body in eyes                                                                | 1.7<br>(1.1 to 2.4)                    | 8.0<br>(6.2 to 10.5)                     | 0.1<br>(0.1 to 0.2)               | 8.3<br>(2.8 to 14.1)                              | -0.1<br>(-3.3 to 3.2)                               |
| Foreign body in other body part                                                     | 22.9<br>(19.2 to 28.3)                 | 8.3<br>(7.2 to 9.5)                      | 0.6<br>(0.4 to 1.0)               | 16.1<br>(7.7 to 24.6)                             | 5.8<br>(-1.7 to 13.4)                               |
| Environmental heat and cold exposure                                                | 32.5<br>(28.4 to 37.2)                 | 7.6<br>(6.5 to 8.8)                      | 1.1<br>(0.8 to 1.7)               | 3.7<br>(-1.1 to 8.2)                              | -5.6<br>(-9.7 to -1.8)                              |
| Other unintentional injuries                                                        | 76.8<br>(63.4 to 91.4)                 | 22.5<br>(19.5 to 26.0)                   | 2.1<br>(1.4 to 3.1)               | 22.1<br>(18.2 to 26.0)                            | 12.3<br>(8.7 to 15.9)                               |
| <b>Self-harm and interpersonal violence</b>                                         | <b>74.3</b><br><b>(68.1 to 80.8)</b>   | <b>14.5†</b><br><b>(12.4 to 16.7)</b>    | <b>1.6</b><br><b>(1.1 to 2.3)</b> | <b>9.9</b><br><b>(6.8 to 13.0)</b>                | <b>2.6</b><br><b>(-0.1 to 5.2)</b>                  |
| Self-harm                                                                           | 4.9<br>(4.2 to 5.7)                    | 1.8<br>(1.6 to 2.1)                      | 0.2<br>(0.1 to 0.3)               | 31.9<br>(25.2 to 38.7)                            | 19.5<br>(13.9 to 25.1)                              |
| Self-harm by firearm                                                                | 0.1<br>(0.1 to 0.2)                    | < 0.05<br>(< 0.05 to 0.1)                | < 0.05<br>(< 0.05 to < 0.05)      | -21.0<br>(-24.9 to -17.4)                         | -27.8<br>(-31.1 to -24.6)                           |
| Self-harm by other specified means                                                  | 4.8<br>(4.0 to 5.5)                    | 1.8<br>(1.5 to 2.0)                      | 0.2<br>(0.1 to 0.3)               | 34.0<br>(27.1 to 41.0)                            | 21.3<br>(15.7 to 27.2)                              |
| Interpersonal violence                                                              | 69.4<br>(63.1 to 76.0)                 | 12.7†<br>(10.6 to 14.8)                  | 1.4<br>(1.0 to 2.0)               | 7.2<br>(4.1 to 10.3)                              | 0.6<br>(-2.0 to 3.0)                                |
| Assault by firearm                                                                  | 0.5<br>(0.4 to 0.6)                    | 0.1<br>(0.1 to 0.2)                      | < 0.05<br>(< 0.05 to < 0.05)      | 6.5<br>(2.1 to 10.9)                              | -2.2<br>(-6.0 to 1.7)                               |
| Assault by sharp object                                                             | 6.5<br>(5.2 to 7.8)                    | 1.9<br>(1.4 to 2.5)                      | 0.2<br>(0.1 to 0.2)               | 10.3<br>(5.1 to 15.2)                             | 1.5<br>(-2.9 to 5.7)                                |
| Sexual violence                                                                     | 38.1<br>(33.5 to 43.3)                 | --                                       | 0.3<br>(0.2 to 0.4)               | -12.0<br>(-16.3 to -7.2)                          | -7.5<br>(-11.0 to -4.1)                             |
| Assault by other means                                                              | 24.3<br>(20.2 to 29.5)                 | 10.6<br>(8.8 to 12.6)                    | 0.9<br>(0.6 to 1.3)               | 15.0<br>(10.8 to 18.8)                            | 4.0<br>(0.2 to 7.4)                                 |
| <b>Forces of nature, conflict and terrorism, and executions and police conflict</b> | <b>113.0</b><br><b>(47.9 to 187.2)</b> | <b>0.1†</b><br><b>(&lt; 0.05 to 0.1)</b> | <b>3.4</b><br><b>(1.0 to 7.4)</b> | <b>-20.4</b><br><b>(-26.3 to -15.6)</b>           | <b>-28.2</b><br><b>(-33.2 to -24.4)</b>             |
| Exposure to forces of nature                                                        | 107.8<br>(43.4 to 180.7)               | --                                       | 3.3<br>(1.0 to 7.0)               | -21.4<br>(-27.2 to -17.0)                         | -29.4<br>(-33.9 to -25.9)                           |
| Conflict and terrorism                                                              | 3.4<br>(1.7 to 5.8)                    | --                                       | 0.1<br>(< 0.05 to 0.3)            | 61.0<br>(48.4 to 81.4)                            | 56.6<br>(43.9 to 75.3)                              |
| Executions and police conflict                                                      | 1.9<br>(0.3 to 3.3)                    | 0.1<br>(< 0.05 to 0.1)                   | < 0.05<br>(< 0.05 to 0.1)         | -20.9<br>(-58.5 to -5.8)                          | -27.0<br>(-58.8 to -14.3)                           |
| <b>Impairments</b>                                                                  | --                                     | --                                       | --                                | --                                                | --                                                  |
| Anaemia                                                                             | 630.9<br>(585.1 to 684.9)              | --                                       | 16.0<br>(11.0 to 22.4)            | -2.2<br>(-10.6 to 6.7)                            | -7.9<br>(-15.5 to 0.4)                              |
| Developmental intellectual disability                                               | 65.8<br>(51.6 to 80.3)                 | --                                       | 7.6<br>(5.5 to 10.4)              | -11.4<br>(-16.7 to -6.1)                          | -10.7<br>(-16.2 to -5.3)                            |
| Epilepsy                                                                            | 17.6<br>(9.3 to 27.2)                  | --                                       | 6.0<br>(2.9 to 10.4)              | -11.7<br>(-55.1 to 78.2)                          | -11.2<br>(-54.5 to 77.8)                            |
| Guillain-Barre syndrome                                                             | < 0.05<br>(< 0.05 to < 0.05)           | --                                       | < 0.05<br>(< 0.05 to < 0.05)      | 5.7<br>(-0.6 to 14.6)                             | -0.5<br>(-0.7 to -0.2)                              |
| Hearing loss                                                                        | 685.0<br>(654.9 to 717.5)              | --                                       | 20.9<br>(14.7 to 28.8)            | 7.8<br>(4.6 to 10.8)                              | -5.4<br>(-7.5 to -3.5)                              |
| Heart failure                                                                       | 59.0<br>(51.3 to 67.1)                 | --                                       | 5.6<br>(4.2 to 7.3)               | 20.8<br>(13.0 to 29.7)                            | 1.7<br>(-4.4 to 8.5)                                |
| Infertility                                                                         | 37.9<br>(29.3 to 48.8)                 | --                                       | 0.2<br>(0.1 to 0.5)               | 31.3<br>(9.5 to 59.0)                             | 25.4<br>(5.7 to 50.3)                               |
| Pelvic inflammatory disease                                                         | 1.8<br>(1.5 to 2.1)                    | --                                       | 0.2<br>(0.1 to 0.3)               | 4.0<br>(-11.9 to 22.1)                            | -4.2<br>(-18.9 to 11.9)                             |
| Vision loss                                                                         | 590.1<br>(562.2 to 617.8)              | --                                       | 16.1<br>(11.3 to 23.1)            | 6.7<br>(2.2 to 10.5)                              | -6.2<br>(-9.5 to -3.3)                              |

We did not calculate incidence for the nine impairments, certain NTDs, and causes with only birth prevalence. Blank cells mean that no estimate is available.

† Incidence for aggregate causes represents the sum of the incidence of the causes below the aggregate.

‡ Incidence estimates for stroke represent first-ever stroke only.

^ Incidence of HIV/AIDS represents new infections of HIV only and does not include new infections of Tuberculosis in HIV positive cases.



SR Table 14: Prevalence, incidence, and YLDs for 2016, percentage change of YLD counts and percentage change of age-standardised YLD rates between 2006 and 2016 by cause and impairments, for all ages, Australia.

| Cause                                                                                | Prevalence in thousands (95% UI)          | Incidence in thousands (95% UI)               | YLDs in thousands (95% UI)             |                                                   |                                                     |
|--------------------------------------------------------------------------------------|-------------------------------------------|-----------------------------------------------|----------------------------------------|---------------------------------------------------|-----------------------------------------------------|
|                                                                                      | 2016 counts                               | 2016 counts                                   | 2016 counts                            | Percentage change in counts between 2006 and 2016 | Percentage change in age-standardised rates between |
| <b>All causes</b>                                                                    | <b>22,122.4</b><br>(22,005.0 to 22,214.9) | <b>130,523.8†</b><br>(121,938.1 to 139,955.6) | <b>2,962.4</b><br>(2,199.5 to 3,825.6) | <b>20.5</b><br>(18.8 to 22.1)                     | <b>-0.2</b><br>(-1.7 to 1.1)                        |
| <b>Communicable, maternal, neonatal, and nutritional disorders</b>                   | <b>8,186.3</b><br>(7,809.6 to 8,556.8)    | <b>77,828.8†</b><br>(69,440.3 to 86,411.8)    | <b>82.7</b><br>(59.1 to 111.5)         | <b>15.4</b><br>(9.4 to 22.7)                      | <b>-1.4</b><br>(-6.6 to 4.9)                        |
| <b>HIV/AIDS and tuberculosis</b>                                                     | <b>2,064.9</b><br>(1,875.1 to 2,231.9)    | <b>2.4†</b><br>(1.8 to 3.2)                   | <b>3.3</b><br>(1.6 to 5.9)             | <b>42.5</b><br>(24.2 to 59.4)                     | <b>18.9</b><br>(3.6 to 32.6)                        |
| Tuberculosis                                                                         | 1,900.8<br>(1,716.5 to 2,108.7)           | 1.2†<br>(1.0 to 1.3)                          | 0.3<br>(0.2 to 0.4)                    | 2.0<br>(-5.0 to 9.0)                              | -15.1<br>(-20.9 to -9.2)                            |
| Drug-susceptible tuberculosis                                                        | 0.9<br>(0.8 to 1.1)                       | 1.1<br>(1.0 to 1.3)                           | 0.3<br>(0.2 to 0.4)                    | 1.7<br>(-5.8 to 9.8)                              | -15.4<br>(-21.7 to -8.6)                            |
| Multidrug-resistant tuberculosis without extensive drug resistance                   | < 0.05<br>(< 0.05 to < 0.05)              | < 0.05<br>(< 0.05 to < 0.05)                  | < 0.05<br>(< 0.05 to < 0.05)           | 11.6<br>(-66.8 to 342.8)                          | -7.1<br>(-72.4 to 265.9)                            |
| Extensively drug-resistant tuberculosis                                              | < 0.05<br>(< 0.05 to < 0.05)              | < 0.05<br>(< 0.05 to < 0.05)                  | < 0.05<br>(< 0.05 to < 0.05)           | 140.0<br>(-28.4 to 852.1)                         | 99.7<br>(-40.6 to 686.7)                            |
| Latent tuberculosis infection                                                        | 1,899.9<br>(1,715.4 to 2,107.8)           | --                                            | --                                     | --                                                | --                                                  |
| HIV/AIDS                                                                             | 34.8<br>(17.5 to 58.2)                    | 1.3^<br>(0.7 to 2.0)                          | 3.0<br>(1.4 to 5.6)                    | 48.5<br>(28.8 to 67.3)                            | 24.1<br>(7.4 to 39.7)                               |
| Drug-susceptible HIV/AIDS - Tuberculosis                                             | < 0.05<br>(< 0.05 to < 0.05)              | < 0.05<br>(< 0.05 to 0.1)                     | < 0.05<br>(< 0.05 to < 0.05)           | -23.7<br>(-30.2 to -16.1)                         | -36.6<br>(-42.0 to -30.2)                           |
| Multidrug-resistant HIV/AIDS - Tuberculosis without extensive drug resistance        | < 0.05<br>(< 0.05 to < 0.05)              | < 0.05<br>(< 0.05 to < 0.05)                  | < 0.05<br>(< 0.05 to < 0.05)           | -16.0<br>(-75.0 to 231.7)                         | -30.2<br>(-79.2 to 175.8)                           |
| Extensively drug-resistant HIV/AIDS - Tuberculosis                                   | < 0.05<br>(< 0.05 to < 0.05)              | < 0.05<br>(< 0.05 to < 0.05)                  | < 0.05<br>(< 0.05 to < 0.05)           | 80.8<br>(-46.2 to 613.6)                          | 50.2<br>(-55.3 to 493.4)                            |
| HIV/AIDS resulting in other diseases                                                 | 34.8<br>(17.5 to 58.2)                    | 1.3<br>(0.7 to 2.0)                           | 3.0<br>(1.4 to 5.6)                    | 49.0<br>(29.0 to 67.8)                            | 24.5<br>(7.7 to 40.3)                               |
| <b>Diarrhoea, lower respiratory infections, and other common infectious diseases</b> | <b>1,184.6</b><br>(1,098.1 to 1,274.4)    | <b>76,444.0†</b><br>(68,091.9 to 85,049.0)    | <b>35.0</b><br>(22.6 to 51.5)          | <b>17.9</b><br>(13.3 to 24.7)                     | <b>0.5</b><br>(-3.3 to 5.2)                         |
| Diarrhoeal diseases                                                                  | 23.7<br>(22.2 to 25.4)                    | 1,593.8<br>(1,485.1 to 1,705.1)               | 2.7<br>(1.8 to 3.8)                    | 8.1<br>(-4.4 to 21.6)                             | -5.9<br>(-17.7 to 5.8)                              |
| Intestinal infectious diseases                                                       | < 0.05<br>(< 0.05 to < 0.05)              | < 0.05†<br>(< 0.05 to < 0.05)                 | < 0.05<br>(< 0.05 to < 0.05)           | 17.7<br>(-0.1 to 37.9)                            | -6.0<br>(-20.9 to 10.0)                             |
| Typhoid fever                                                                        | < 0.05<br>(< 0.05 to < 0.05)              | < 0.05<br>(< 0.05 to < 0.05)                  | < 0.05<br>(< 0.05 to < 0.05)           | 28.9<br>(5.3 to 56.6)                             | 5.7<br>(-13.0 to 27.8)                              |
| Paratyphoid fever                                                                    | < 0.05<br>(< 0.05 to < 0.05)              | < 0.05<br>(< 0.05 to < 0.05)                  | < 0.05<br>(< 0.05 to < 0.05)           | 17.5<br>(-3.4 to 43.3)                            | -5.7<br>(-22.1 to 14.6)                             |
| Other intestinal infectious diseases                                                 | --                                        | --                                            | < 0.05<br>(< 0.05 to < 0.05)           | -31.2<br>(-50.6 to -3.5)                          | -43.3<br>(-60.8 to -17.1)                           |
| Lower respiratory infections                                                         | 25.5<br>(23.5 to 27.6)                    | 1,122.7<br>(1,034.7 to 1,221.2)               | 1.5<br>(1.0 to 2.1)                    | 48.6<br>(33.4 to 66.0)                            | 20.7<br>(7.5 to 36.2)                               |
| Upper respiratory infections                                                         | 954.2<br>(850.7 to 1,062.0)               | 72,459.0<br>(64,213.5 to 81,161.1)            | 23.7<br>(14.0 to 36.8)                 | 16.7<br>(10.8 to 22.8)                            | 0.1<br>(-4.9 to 5.3)                                |
| Otitis media                                                                         | 151.0<br>(135.7 to 166.0)                 | 854.3<br>(702.1 to 1,044.4)                   | 4.2<br>(2.7 to 6.4)                    | 18.8<br>(9.9 to 29.0)                             | 1.8<br>(-6.5 to 10.9)                               |
| Meningitis                                                                           | 3.3<br>(2.3 to 13.2)                      | 0.1<br>(0.1 to 0.1)                           | 0.6<br>(0.3 to 2.1)                    | 50.4<br>(15.6 to 427.8)                           | 16.0<br>(-2.0 to 195.9)                             |
| Pneumococcal meningitis                                                              | 1.2<br>(1.1 to 1.4)                       | < 0.05<br>(< 0.05 to < 0.05)                  | 0.2<br>(0.1 to 0.3)                    | 19.6<br>(14.6 to 24.6)                            | 1.5<br>(-2.9 to 5.9)                                |
| H influenzae type B meningitis                                                       | 0.2<br>(0.2 to 0.3)                       | < 0.05<br>(< 0.05 to < 0.05)                  | < 0.05<br>(< 0.05 to 0.1)              | 19.3<br>(11.5 to 26.1)                            | 0.5<br>(-6.5 to 6.4)                                |
| Meningococcal infection                                                              | 1.0<br>(0.2 to 10.6)                      | < 0.05<br>(< 0.05 to < 0.05)                  | 0.2<br>(< 0.05 to 1.6)                 | 327.6<br>(11.3 to 3,183.3)                        | 154.4<br>(-6.2 to 1,631.5)                          |
| Other meningitis                                                                     | 0.8<br>(0.7 to 1.0)                       | 0.1<br>(< 0.05 to 0.1)                        | 0.2<br>(0.1 to 0.2)                    | 19.0<br>(14.0 to 24.3)                            | 0.8<br>(-3.7 to 5.5)                                |
| Encephalitis                                                                         | 10.8<br>(7.1 to 16.1)                     | 7.1<br>(6.3 to 7.9)                           | 1.2<br>(0.8 to 1.6)                    | 20.1<br>(15.9 to 24.1)                            | 0.7<br>(-2.8 to 4.1)                                |
| Diphtheria                                                                           | < 0.05<br>(< 0.05 to < 0.05)              | < 0.05<br>(< 0.05 to < 0.05)                  | < 0.05<br>(< 0.05 to < 0.05)           | -10.4<br>(-47.8 to 54.5)                          | -23.5<br>(-54.9 to 28.1)                            |
| Whooping cough                                                                       | 1.3<br>(1.0 to 1.6)                       | 9.2<br>(7.1 to 11.9)                          | 0.1<br>(< 0.05 to 0.1)                 | -9.1<br>(-32.4 to 24.1)                           | -21.7<br>(-41.8 to 7.2)                             |
| Tetanus                                                                              | < 0.05<br>(< 0.05 to < 0.05)              | < 0.05<br>(< 0.05 to < 0.05)                  | < 0.05<br>(< 0.05 to < 0.05)           | -25.3<br>(-39.1 to -9.5)                          | -37.0<br>(-48.8 to -24.1)                           |
| Measles                                                                              | < 0.05<br>(< 0.05 to < 0.05)              | 0.1<br>(0.1 to 0.1)                           | < 0.05<br>(< 0.05 to < 0.05)           | 406.1<br>(202.6 to 1,024.5)                       | 334.0<br>(159.5 to 864.3)                           |
| Varicella and herpes zoster                                                          | 23.9<br>(21.6 to 26.4)                    | 397.6<br>(385.0 to 411.5)                     | 1.0<br>(0.6 to 1.6)                    | 18.3<br>(2.3 to 35.7)                             | -3.0<br>(-16.0 to 11.6)                             |
| <b>Neglected tropical diseases and malaria</b>                                       | <b>9.2</b><br>(6.4 to 13.7)               | <b>11.3†</b><br>(6.9 to 17.1)                 | <b>0.5</b><br>(0.3 to 0.7)             | <b>10.2</b><br>(-27.9 to 70.7)                    | <b>-12.6</b><br>(-40.4 to 30.4)                     |
| Malaria                                                                              | --                                        | --                                            | --                                     | --                                                | --                                                  |
| Chagas disease                                                                       | 3.4<br>(2.8 to 4.1)                       | --                                            | < 0.05<br>(< 0.05 to 0.1)              | 14.8<br>(4.2 to 26.2)                             | -6.2<br>(-14.7 to 2.9)                              |
| Leishmaniasis                                                                        | --                                        | --                                            | --                                     | --                                                | --                                                  |
| Visceral leishmaniasis                                                               | --                                        | --                                            | --                                     | --                                                | --                                                  |
| Cutaneous and mucocutaneous leishmaniasis                                            | --                                        | --                                            | --                                     | --                                                | --                                                  |
| African trypanosomiasis                                                              | --                                        | --                                            | --                                     | --                                                | --                                                  |
| Schistosomiasis                                                                      | --                                        | --                                            | --                                     | --                                                | --                                                  |
| Cysticercosis                                                                        | --                                        | --                                            | --                                     | --                                                | --                                                  |
| Cystic echinococcosis                                                                | 0.2<br>(< 0.05 to 1.1)                    | < 0.05<br>(< 0.05 to 0.2)                     | < 0.05<br>(< 0.05 to 0.1)              | -23.8<br>(-94.2 to 797.6)                         | -36.3<br>(-95.4 to 642.8)                           |
| Lymphatic filariasis                                                                 | --                                        | --                                            | --                                     | --                                                | --                                                  |
| Onchocerciasis                                                                       | --                                        | --                                            | --                                     | --                                                | --                                                  |
| Trachoma                                                                             | 4.7<br>(2.3 to 9.3)                       | --                                            | 0.3<br>(0.1 to 0.5)                    | 11.2<br>(-39.7 to 110.5)                          | -16.4<br>(-52.9 to 49.6)                            |
| Dengue                                                                               | 0.7<br>(0.4 to 1.1)                       | 11.3<br>(6.9 to 17.1)                         | 0.1<br>(0.1 to 0.2)                    | 15.5<br>(-5.3 to 159.5)                           | -2.4<br>(-19.9 to 118.8)                            |
| Yellow fever                                                                         | --                                        | --                                            | --                                     | --                                                | --                                                  |
| Rabies                                                                               | < 0.05<br>(< 0.05 to < 0.05)              | < 0.05<br>(< 0.05 to < 0.05)                  | < 0.05<br>(< 0.05 to < 0.05)           | 61.3<br>(16.2 to 125.4)                           | 41.8<br>(-4.9 to 115.8)                             |
| Intestinal nematode infections                                                       | --                                        | --                                            | --                                     | --                                                | --                                                  |
| Ascariasis                                                                           | --                                        | --                                            | --                                     | --                                                | --                                                  |

| Cause                                                                   | Prevalence in thousands (95% UI)                 | Incidence in thousands (95% UI)                   | YLDs in thousands (95% UI)                    |                                                   |                                                     |
|-------------------------------------------------------------------------|--------------------------------------------------|---------------------------------------------------|-----------------------------------------------|---------------------------------------------------|-----------------------------------------------------|
|                                                                         | 2016 counts                                      | 2016 counts                                       | 2016 counts                                   | Percentage change in counts between 2006 and 2016 | Percentage change in age-standardised rates between |
| Trichuriasis                                                            | --                                               | --                                                | --                                            | --                                                | --                                                  |
| Hookworm disease                                                        | --                                               | --                                                | --                                            | --                                                | --                                                  |
| Food-borne trematodiasis                                                | --                                               | --                                                | --                                            | --                                                | --                                                  |
| Leprosy                                                                 | < 0.05<br>(< 0.05 to 0.1)                        | < 0.05<br>(< 0.05 to < 0.05)                      | < 0.05<br>(< 0.05 to < 0.05)                  | 0.1<br>(-17.1 to 54.1)                            | -21.2<br>(-35.8 to 24.0)                            |
| Ebola virus disease                                                     | --                                               | --                                                | --                                            | --                                                | --                                                  |
| Zika virus disease                                                      | --                                               | --                                                | --                                            | --                                                | --                                                  |
| Guinea worm disease                                                     | --                                               | --                                                | --                                            | --                                                | --                                                  |
| Other neglected tropical diseases                                       | --                                               | --                                                | < 0.05<br>(< 0.05 to < 0.05)                  | --                                                | --                                                  |
| <b>Maternal disorders</b>                                               | <b>29.0</b><br><b>(22.3 to 35.6)</b>             | <b>273.0†</b><br><b>(226.2 to 337.1)</b>          | <b>1.2</b><br><b>(0.7 to 1.8)</b>             | <b>17.9</b><br><b>(-12.1 to 53.6)</b>             | <b>-0.7</b><br><b>(-26.0 to 30.0)</b>               |
| Maternal haemorrhage                                                    | 15.0<br>(10.8 to 21.0)                           | 23.4<br>(17.9 to 30.4)                            | 0.3<br>(0.2 to 0.4)                           | 29.9<br>(-9.0 to 79.5)                            | 9.8<br>(-23.2 to 51.9)                              |
| Maternal sepsis and other pregnancy related infections                  | 3.4<br>(2.6 to 4.6)                              | 19.3<br>(14.3 to 26.8)                            | 0.1<br>(< 0.05 to 0.2)                        | 29.9<br>(-40.8 to 192.7)                          | 8.7<br>(-50.7 to 148.4)                             |
| Maternal hypertensive disorders                                         | 9.5<br>(6.3 to 13.0)                             | 39.7<br>(35.2 to 45.8)                            | 0.5<br>(0.2 to 0.8)                           | 14.3<br>(-32.3 to 94.7)                           | -3.9<br>(-43.3 to 63.7)                             |
| Maternal obstructed labour and uterine rupture                          | 0.1<br>(< 0.05 to 0.1)                           | 6.7<br>(4.6 to 9.4)                               | < 0.05<br>(< 0.05 to 0.1)                     | 16.2<br>(-37.0 to 119.4)                          | -2.4<br>(-47.3 to 84.4)                             |
| Maternal abortion, miscarriage, and ectopic pregnancy                   | 1.5<br>(0.9 to 2.2)                              | 183.9<br>(137.4 to 245.3)                         | 0.2<br>(0.1 to 0.3)                           | 10.7<br>(-43.1 to 112.0)                          | -6.3<br>(-51.1 to 81.0)                             |
| Other maternal disorders                                                | --                                               | --                                                | 0.2<br>(0.1 to 0.3)                           | 12.5<br>(-16.5 to 46.9)                           | -5.4<br>(-29.4 to 24.1)                             |
| <b>Neonatal disorders</b>                                               | <b>180.0</b><br><b>(154.6 to 218.5)</b>          | --                                                | <b>27.6</b><br><b>(19.3 to 38.8)</b>          | <b>15.9</b><br><b>(0.5 to 33.7)</b>               | <b>-0.5</b><br><b>(-13.9 to 14.8)</b>               |
| Neonatal preterm birth complications                                    | 167.1<br>(135.6 to 212.2)                        | --                                                | 17.9<br>(12.0 to 26.2)                        | 16.2<br>(-5.8 to 41.0)                            | -0.0<br>(-19.3 to 21.9)                             |
| Neonatal encephalopathy due to birth asphyxia and trauma                | 17.0<br>(11.7 to 23.8)                           | --                                                | 3.2<br>(1.8 to 5.2)                           | 42.8<br>(17.8 to 79.3)                            | 22.2<br>(-0.1 to 54.2)                              |
| Neonatal sepsis and other neonatal infections                           | 13.5<br>(6.4 to 28.3)                            | --                                                | 5.5<br>(2.3 to 12.9)                          | 3.8<br>(-12.5 to 21.3)                            | -10.7<br>(-24.4 to 4.0)                             |
| Hemolytic disease and other neonatal jaundice                           | 1.2<br>(1.1 to 1.4)                              | --                                                | 0.4<br>(0.2 to 0.5)                           | 18.6<br>(10.0 to 28.3)                            | 1.6<br>(-5.7 to 9.7)                                |
| Other neonatal disorders                                                | --                                               | --                                                | 0.5<br>(0.4 to 0.8)                           | 13.3<br>(-10.2 to 41.1)                           | -4.2<br>(-24.1 to 19.3)                             |
| <b>Nutritional deficiencies</b>                                         | <b>710.1</b><br><b>(654.5 to 765.0)</b>          | <b>45.9†</b><br><b>(34.6 to 59.3)</b>             | <b>10.8</b><br><b>(7.1 to 16.3)</b>           | <b>1.7</b><br><b>(-6.8 to 11.5)</b>               | <b>-11.7</b><br><b>(-19.7 to -2.1)</b>              |
| Protein-energy malnutrition                                             | 18.0<br>(12.3 to 26.0)                           | 11.9<br>(8.1 to 17.8)                             | 1.3<br>(0.8 to 2.0)                           | 20.4<br>(-9.3 to 61.9)                            | 1.9<br>(-23.1 to 37.1)                              |
| Iodine deficiency                                                       | 115.6<br>(102.3 to 130.8)                        | 2.0<br>(1.8 to 2.2)                               | 2.9<br>(2.0 to 4.2)                           | 18.8<br>(4.5 to 35.1)                             | -0.6<br>(-13.3 to 13.7)                             |
| Vitamin A deficiency                                                    | 37.5<br>(26.0 to 53.1)                           | 31.9<br>(21.5 to 44.0)                            | --                                            | --                                                | --                                                  |
| Iron-deficiency anaemia                                                 | 525.8<br>(467.1 to 602.2)                        | --                                                | 6.5<br>(3.9 to 10.6)                          | -7.2<br>(-18.3 to 4.3)                            | -17.9<br>(-28.0 to -6.2)                            |
| Other nutritional deficiencies                                          | --                                               | --                                                | < 0.05<br>(< 0.05 to 0.1)                     | 20.1<br>(-10.2 to 63.6)                           | 1.4<br>(-24.1 to 38.3)                              |
| <b>Other communicable, maternal, neonatal, and nutritional diseases</b> | <b>5,275.4</b><br><b>(4,853.2 to 5,686.4)</b>    | <b>1,052.2</b><br><b>(974.6 to 1,136.1)</b>       | <b>4.3</b><br><b>(2.5 to 7.5)</b>             | <b>15.8</b><br><b>(9.8 to 22.1)</b>               | <b>-1.4</b><br><b>(-6.7 to 4.5)</b>                 |
| Sexually transmitted diseases excluding HIV                             | 4,333.1<br>(3,961.1 to 4,731.0)                  | 941.4<br>(867.6 to 1,026.5)                       | 3.3<br>(1.8 to 6.1)                           | 19.2<br>(12.1 to 27.4)                            | 0.7<br>(-5.6 to 8.3)                                |
| Syphilis                                                                | 46.1<br>(41.0 to 51.6)                           | 26.8<br>(23.0 to 30.6)                            | 0.2<br>(0.1 to 0.2)                           | 33.3<br>(20.4 to 51.1)                            | 5.9<br>(-4.6 to 20.0)                               |
| Chlamydial infection                                                    | 97.1<br>(84.6 to 110.4)                          | 80.4<br>(68.3 to 93.3)                            | 0.5<br>(0.3 to 0.8)                           | 15.0<br>(-4.3 to 39.7)                            | -1.5<br>(-18.1 to 19.9)                             |
| Gonococcal infection                                                    | 43.2<br>(40.0 to 46.7)                           | 131.5<br>(113.3 to 147.9)                         | 0.4<br>(0.2 to 0.6)                           | 35.4<br>(8.4 to 66.7)                             | 16.1<br>(-7.7 to 43.8)                              |
| Trichomoniasis                                                          | 606.8<br>(528.5 to 694.0)                        | 508.7<br>(439.7 to 584.7)                         | 0.7<br>(0.3 to 1.6)                           | 16.4<br>(8.6 to 24.4)                             | -1.9<br>(-8.8 to 5.0)                               |
| Genital herpes                                                          | 3,683.5<br>(3,160.9 to 4,299.8)                  | 163.5<br>(138.1 to 194.9)                         | 0.9<br>(0.3 to 2.1)                           | 15.6<br>(4.6 to 27.1)                             | -4.1<br>(-13.4 to 6.4)                              |
| Other sexually transmitted diseases                                     | 33.8<br>(26.4 to 40.0)                           | 30.7<br>(25.7 to 36.7)                            | 0.6<br>(0.4 to 1.0)                           | 19.2<br>(1.7 to 38.0)                             | 3.0<br>(-12.6 to 18.7)                              |
| Hepatitis                                                               | 1,238.2<br>(1,100.1 to 1,410.0)                  | 110.8<br>(91.6 to 132.6)                          | 0.2<br>(0.1 to 0.3)                           | -26.5<br>(-42.4 to -5.5)                          | -38.6<br>(-51.8 to -21.8)                           |
| Acute hepatitis A                                                       | 1.9<br>(1.3 to 2.6)                              | 25.0<br>(16.6 to 33.8)                            | 0.1<br>(< 0.05 to 0.1)                        | -32.0<br>(-62.4 to 25.5)                          | -43.9<br>(-68.2 to 0.4)                             |
| Hepatitis B                                                             | 585.3<br>(474.1 to 737.1)                        | 67.2<br>(50.7 to 86.5)                            | 0.1<br>(0.1 to 0.2)                           | -25.3<br>(-42.7 to 0.1)                           | -38.1<br>(-52.6 to -17.7)                           |
| Hepatitis C                                                             | 650.7<br>(582.5 to 722.2)                        | 14.8<br>(13.1 to 16.7)                            | < 0.05<br>(< 0.05 to < 0.05)                  | -7.4<br>(-21.1 to 8.3)                            | -16.5<br>(-31.4 to 1.2)                             |
| Acute hepatitis E                                                       | 0.3<br>(0.2 to 0.4)                              | 3.7<br>(2.5 to 5.2)                               | < 0.05<br>(< 0.05 to < 0.05)                  | -27.5<br>(-33.3 to -21.8)                         | -42.0<br>(-45.8 to -38.0)                           |
| Other infectious diseases                                               | 16.0<br>(13.1 to 19.8)                           | < 0.05<br>(< 0.05 to < 0.05)                      | 0.8<br>(0.5 to 1.2)                           | 18.7<br>(9.6 to 28.7)                             | 3.2<br>(-5.8 to 13.5)                               |
| <b>Non-communicable diseases</b>                                        | <b>21,476.5</b><br><b>(21,341.5 to 21,579.6)</b> | <b>50,394.7†</b><br><b>(48,031.2 to 52,772.0)</b> | <b>2,672.8</b><br><b>(1,968.9 to 3,450.4)</b> | <b>20.3</b><br><b>(18.5 to 22.0)</b>              | <b>-0.4</b><br><b>(-1.9 to 1.2)</b>                 |
| <b>Neoplasms</b>                                                        | <b>608.2</b><br><b>(571.2 to 649.2)</b>          | <b>251.1</b><br><b>(209.3 to 287.3)</b>           | <b>54.3</b><br><b>(39.8 to 71.3)</b>          | <b>37.4</b><br><b>(31.0 to 44.1)</b>              | <b>6.0</b><br><b>(1.0 to 11.3)</b>                  |
| Lip and oral cavity cancer                                              | 7.9<br>(7.0 to 8.9)                              | 2.0<br>(1.7 to 2.2)                               | 0.7<br>(0.5 to 1.0)                           | 22.6<br>(3.3 to 45.8)                             | -5.6<br>(-20.4 to 12.8)                             |
| Nasopharynx cancer                                                      | 0.8<br>(0.8 to 0.9)                              | 0.3<br>(0.2 to 0.3)                               | 0.1<br>(0.1 to 0.1)                           | 10.6<br>(-1.0 to 24.6)                            | -12.1<br>(-21.3 to -1.0)                            |
| Other pharynx cancer                                                    | 2.4<br>(2.3 to 2.6)                              | 0.7<br>(0.7 to 0.8)                               | 0.3<br>(0.2 to 0.4)                           | 38.0<br>(19.7 to 59.3)                            | 7.1<br>(-7.1 to 24.1)                               |
| Oesophageal cancer                                                      | 2.5<br>(2.2 to 2.9)                              | 1.7<br>(1.6 to 1.9)                               | 0.5<br>(0.3 to 0.6)                           | 32.2<br>(7.2 to 63.3)                             | 1.2<br>(-17.7 to 24.7)                              |
| Stomach cancer                                                          | 9.3<br>(8.7 to 10.0)                             | 4.0<br>(3.8 to 4.3)                               | 1.1<br>(0.8 to 1.4)                           | 50.6<br>(29.1 to 74.2)                            | 15.0<br>(-0.9 to 32.7)                              |
| Colon and rectum cancer                                                 | 75.0<br>(69.8 to 80.8)                           | 18.6<br>(17.4 to 20.0)                            | 6.6<br>(4.8 to 8.7)                           | 26.1<br>(14.7 to 39.5)                            | -3.8<br>(-12.8 to 6.8)                              |
| Liver cancer                                                            | 1.9<br>(1.4 to 2.2)                              | 2.0<br>(1.8 to 2.3)                               | 0.5<br>(0.3 to 0.7)                           | 78.3<br>(51.9 to 109.3)                           | 38.8<br>(18.6 to 61.8)                              |
| Liver cancer due to hepatitis B                                         | 0.6<br>(0.4 to 0.8)                              | 0.4<br>(0.3 to 0.5)                               | 0.1<br>(0.1 to 0.1)                           | 72.8<br>(47.6 to 101.1)                           | 36.9<br>(16.7 to 59.5)                              |



| Cause                                              | Prevalence in thousands (95% UI)              | Incidence in thousands (95% UI)          | YLDs in thousands (95% UI)             |                                                   |                                                     |
|----------------------------------------------------|-----------------------------------------------|------------------------------------------|----------------------------------------|---------------------------------------------------|-----------------------------------------------------|
|                                                    | 2016 counts                                   | 2016 counts                              | 2016 counts                            | Percentage change in counts between 2006 and 2016 | Percentage change in age-standardised rates between |
| Liver cancer due to hepatitis C                    | 1.0<br>(0.7 to 1.2)                           | 0.6<br>(0.5 to 0.7)                      | 0.1<br>(0.1 to 0.2)                    | 75.9<br>(45.6 to 111.8)                           | 35.2<br>(12.5 to 61.9)                              |
| Liver cancer due to alcohol use                    | 1.3<br>(1.0 to 1.6)                           | 0.8<br>(0.7 to 1.0)                      | 0.2<br>(0.1 to 0.3)                    | 82.7<br>(53.5 to 116.4)                           | 42.0<br>(19.3 to 68.6)                              |
| Liver cancer due to other causes                   | 0.4<br>(0.3 to 0.5)                           | 0.2<br>(0.2 to 0.3)                      | 0.1<br>(< 0.05 to 0.1)                 | 78.9<br>(46.5 to 117.0)                           | 39.9<br>(15.1 to 69.2)                              |
| Gallbladder and biliary tract cancer               | 0.7<br>(0.7 to 0.8)                           | 0.8<br>(0.7 to 0.8)                      | 0.2<br>(0.1 to 0.2)                    | 12.9<br>(1.5 to 24.9)                             | -14.6<br>(-22.3 to -6.6)                            |
| Pancreatic cancer                                  | 3.6<br>(3.2 to 4.0)                           | 3.4<br>(3.1 to 3.6)                      | 0.7<br>(0.5 to 0.9)                    | 42.0<br>(22.5 to 64.9)                            | 7.3<br>(-7.0 to 24.0)                               |
| Larynx cancer                                      | 3.0<br>(2.8 to 3.3)                           | 0.8<br>(0.7 to 0.8)                      | 0.3<br>(0.2 to 0.4)                    | 26.6<br>(10.1 to 45.7)                            | -2.4<br>(-15.1 to 12.1)                             |
| Tracheal, bronchus, and lung cancer                | 24.0<br>(22.7 to 25.4)                        | 13.4<br>(12.7 to 14.1)                   | 3.3<br>(2.4 to 4.2)                    | 41.9<br>(24.7 to 62.4)                            | 8.9<br>(-4.8 to 25.1)                               |
| Malignant skin melanoma                            | 88.0<br>(73.5 to 98.8)                        | 17.7<br>(14.8 to 19.8)                   | 5.5<br>(3.8 to 7.6)                    | 50.4<br>(34.3 to 68.0)                            | 18.7<br>(6.3 to 32.5)                               |
| Non-melanoma skin cancer                           | 102.2<br>(70.1 to 131.2)                      | 103.0<br>(61.6 to 137.7)                 | 3.7<br>(1.7 to 6.1)                    | 32.9<br>(-25.2 to 86.8)                           | 0.0<br>(-42.5 to 40.8)                              |
| Non-melanoma skin cancer (squamous-cell carcinoma) | 86.2<br>(44.2 to 120.6)                       | 79.2<br>(41.1 to 108.6)                  | 3.6<br>(1.7 to 6.1)                    | 33.1<br>(-25.5 to 87.5)                           | 0.1<br>(-42.8 to 41.3)                              |
| Non-melanoma skin cancer (basal-cell carcinoma)    | 3.1<br>(1.7 to 5.5)                           | 23.7<br>(12.5 to 37.5)                   | < 0.05<br>(< 0.05 to 0.1)              | 16.2<br>(-12.5 to 54.5)                           | -7.8<br>(-29.3 to 21.7)                             |
| Breast cancer                                      | 77.8<br>(71.4 to 84.9)                        | 15.7<br>(14.5 to 17.2)                   | 7.0<br>(4.9 to 9.3)                    | 24.5<br>(12.7 to 38.2)                            | -1.6<br>(-11.5 to 9.3)                              |
| Cervical cancer                                    | 3.2<br>(2.9 to 3.6)                           | 0.8<br>(0.7 to 0.9)                      | 0.3<br>(0.2 to 0.4)                    | 10.8<br>(-7.6 to 30.3)                            | -8.3<br>(-24.2 to 9.1)                              |
| Uterine cancer                                     | 12.7<br>(11.4 to 14.2)                        | 2.7<br>(2.4 to 3.0)                      | 1.0<br>(0.7 to 1.3)                    | 45.1<br>(19.1 to 78.1)                            | 12.7<br>(-7.9 to 38.4)                              |
| Ovarian cancer                                     | 5.0<br>(4.5 to 5.5)                           | 1.6<br>(1.4 to 1.7)                      | 0.7<br>(0.5 to 0.9)                    | 24.8<br>(-3.7 to 59.0)                            | -1.9<br>(-24.6 to 25.2)                             |
| Prostate cancer                                    | 118.3<br>(91.7 to 152.3)                      | 28.5<br>(23.4 to 35.1)                   | 9.9<br>(6.6 to 13.6)                   | 41.7<br>(20.1 to 67.7)                            | 5.6<br>(-10.8 to 25.4)                              |
| Testicular cancer                                  | 4.3<br>(3.5 to 5.2)                           | 0.8<br>(0.7 to 1.0)                      | 0.3<br>(0.2 to 0.4)                    | 37.1<br>(3.9 to 82.1)                             | 16.1<br>(-12.5 to 56.0)                             |
| Kidney cancer                                      | 11.6<br>(10.5 to 12.7)                        | 3.0<br>(2.8 to 3.3)                      | 1.0<br>(0.7 to 1.3)                    | 27.3<br>(12.3 to 44.8)                            | -0.2<br>(-12.0 to 13.4)                             |
| Bladder cancer                                     | 14.7<br>(13.5 to 16.0)                        | 3.5<br>(3.2 to 3.8)                      | 1.3<br>(1.0 to 1.8)                    | 36.8<br>(19.8 to 56.2)                            | 3.8<br>(-9.3 to 19.0)                               |
| Brain and nervous system cancer                    | 4.0<br>(3.1 to 4.5)                           | 1.8<br>(1.4 to 2.0)                      | 0.6<br>(0.4 to 0.8)                    | 27.5<br>(12.5 to 42.7)                            | 2.3<br>(-9.4 to 14.3)                               |
| Thyroid cancer                                     | 10.1<br>(9.1 to 11.1)                         | 1.9<br>(1.7 to 2.1)                      | 0.6<br>(0.4 to 0.9)                    | 47.9<br>(27.0 to 72.2)                            | 20.9<br>(3.6 to 42.2)                               |
| Mesothelioma                                       | 1.4<br>(1.3 to 1.6)                           | 0.9<br>(0.8 to 1.1)                      | 0.3<br>(0.2 to 0.4)                    | 31.0<br>(0.3 to 69.9)                             | 0.0<br>(-23.8 to 29.9)                              |
| Hodgkin lymphoma                                   | 3.7<br>(3.3 to 4.1)                           | 0.8<br>(0.7 to 0.9)                      | 0.3<br>(0.2 to 0.4)                    | 42.6<br>(20.0 to 70.3)                            | 17.2<br>(-2.2 to 42.0)                              |
| Non-Hodgkin's lymphoma                             | 26.2<br>(23.8 to 31.0)                        | 6.4<br>(5.8 to 7.5)                      | 2.0<br>(1.4 to 2.8)                    | 57.2<br>(39.3 to 78.0)                            | 22.9<br>(8.5 to 39.4)                               |
| Multiple myeloma                                   | 6.7<br>(5.0 to 7.6)                           | 2.0<br>(1.5 to 2.2)                      | 1.1<br>(0.7 to 1.5)                    | 54.0<br>(26.2 to 87.6)                            | 18.7<br>(-3.3 to 45.7)                              |
| Leukaemia                                          | 20.6<br>(19.3 to 22.1)                        | 6.2<br>(5.8 to 6.6)                      | 2.6<br>(1.9 to 3.4)                    | 36.4<br>(21.1 to 54.0)                            | 5.0<br>(-7.4 to 19.5)                               |
| Acute lymphoid leukaemia                           | 3.8<br>(3.1 to 4.3)                           | 1.0<br>(0.8 to 1.1)                      | 0.4<br>(0.3 to 0.6)                    | 49.2<br>(15.7 to 85.7)                            | 18.6<br>(-13.1 to 56.1)                             |
| Chronic lymphoid leukaemia                         | 10.0<br>(9.0 to 11.5)                         | 2.3<br>(2.1 to 2.6)                      | 1.2<br>(0.8 to 1.6)                    | 32.5<br>(8.7 to 62.4)                             | -0.3<br>(-18.5 to 23.0)                             |
| Acute myeloid leukaemia                            | 2.5<br>(2.1 to 2.8)                           | 1.8<br>(1.4 to 2.0)                      | 0.5<br>(0.3 to 0.6)                    | 37.0<br>(15.2 to 61.0)                            | 5.2<br>(-11.1 to 23.0)                              |
| Chronic myeloid leukaemia                          | 1.8<br>(1.5 to 2.1)                           | 0.6<br>(0.5 to 0.7)                      | 0.2<br>(0.1 to 0.3)                    | 24.8<br>(3.8 to 49.2)                             | -3.5<br>(-19.4 to 15.3)                             |
| Other leukaemia                                    | 2.5<br>(2.1 to 2.8)                           | 0.6<br>(0.5 to 0.6)                      | 0.3<br>(0.2 to 0.4)                    | 43.9<br>(17.2 to 76.2)                            | 7.5<br>(-12.0 to 31.5)                              |
| Other neoplasms                                    | 25.3<br>(22.3 to 27.8)                        | 6.4<br>(5.6 to 6.9)                      | 1.9<br>(1.3 to 2.5)                    | 70.7<br>(48.3 to 97.2)                            | 34.1<br>(17.3 to 54.8)                              |
| <b>Cardiovascular diseases</b>                     | <b>2,001.3</b><br><b>(1,923.2 to 2,091.1)</b> | <b>209.9†</b><br><b>(198.3 to 221.9)</b> | <b>122.6</b><br><b>(90.0 to 159.7)</b> | <b>20.1</b><br><b>(15.6 to 24.8)</b>              | <b>-6.7</b><br><b>(-10.2 to -3.1)</b>               |
| Rheumatic heart disease                            | 2.4<br>(2.1 to 2.6)                           | 0.7<br>(0.6 to 0.7)                      | 0.2<br>(0.1 to 0.3)                    | 23.1<br>(7.9 to 38.9)                             | -0.5<br>(-11.5 to 10.8)                             |
| Ischaemic heart disease                            | 610.0<br>(577.0 to 645.4)                     | 79.7<br>(73.0 to 87.7)                   | 26.5<br>(18.7 to 36.1)                 | 16.0<br>(10.5 to 21.7)                            | -9.9<br>(-14.2 to -5.6)                             |
| Cerebrovascular disease                            | 247.1<br>(230.4 to 262.4)                     | 37.1‡<br>(34.3 to 40.1)                  | 41.4<br>(29.3 to 52.8)                 | 23.8<br>(14.9 to 34.7)                            | -4.0<br>(-11.1 to 4.2)                              |
| Ischaemic stroke                                   | 197.2<br>(176.7 to 218.5)                     | 24.7‡<br>(22.0 to 27.5)                  | 31.7<br>(22.3 to 40.8)                 | 25.4<br>(13.8 to 39.1)                            | -3.0<br>(-12.3 to 7.7)                              |
| Hemorrhagic stroke                                 | 60.4<br>(54.5 to 66.6)                        | 12.4‡<br>(11.2 to 13.7)                  | 9.7<br>(6.9 to 12.4)                   | 19.0<br>(7.0 to 31.1)                             | -7.1<br>(-16.6 to 2.0)                              |
| Hypertensive heart disease                         | 30.8<br>(25.9 to 36.6)                        | --                                       | 2.5<br>(1.7 to 3.5)                    | 39.5<br>(22.5 to 59.5)                            | 4.0<br>(-9.1 to 19.1)                               |
| Cardiomyopathy and myocarditis                     | 40.8<br>(36.4 to 46.2)                        | 9.4†<br>(8.2 to 10.7)                    | 3.6<br>(2.4 to 5.0)                    | 14.3<br>(2.6 to 26.6)                             | -8.6<br>(-18.1 to 1.0)                              |
| Myocarditis                                        | 7.1<br>(6.4 to 7.9)                           | 9.4<br>(8.2 to 10.7)                     | 0.5<br>(0.4 to 0.8)                    | 11.2<br>(-5.9 to 31.7)                            | -6.5<br>(-20.6 to 9.7)                              |
| Alcoholic cardiomyopathy                           | 14.5<br>(12.1 to 17.4)                        | --                                       | 1.2<br>(0.8 to 1.7)                    | 13.4<br>(-4.2 to 35.5)                            | -9.5<br>(-23.5 to 7.9)                              |
| Other cardiomyopathy                               | 22.7<br>(19.5 to 26.5)                        | --                                       | 1.9<br>(1.2 to 2.6)                    | 15.8<br>(2.3 to 32.2)                             | -8.8<br>(-20.0 to 4.8)                              |
| Atrial fibrillation and flutter                    | 293.2<br>(255.0 to 339.8)                     | 23.2<br>(19.7 to 27.1)                   | 23.1<br>(15.4 to 32.1)                 | 25.8<br>(18.1 to 33.2)                            | -3.1<br>(-9.1 to 2.9)                               |
| Peripheral vascular disease                        | 669.3<br>(583.9 to 760.2)                     | 55.5<br>(48.0 to 64.6)                   | 2.3<br>(1.0 to 4.2)                    | 23.6<br>(15.0 to 33.0)                            | -6.9<br>(-13.1 to 0.2)                              |
| Endocarditis                                       | 2.7<br>(2.4 to 3.2)                           | 4.3<br>(3.9 to 4.8)                      | 0.2<br>(0.1 to 0.3)                    | 16.0<br>(-3.2 to 37.6)                            | -9.4<br>(-24.0 to 7.3)                              |
| Other cardiovascular and circulatory diseases      | 442.0<br>(377.5 to 520.4)                     | --                                       | 22.9<br>(15.7 to 32.5)                 | 12.6<br>(3.4 to 22.5)                             | -10.7<br>(-18.0 to -3.2)                            |
| <b>Chronic respiratory diseases</b>                | <b>3,458.0</b><br><b>(3,333.3 to 3,596.0)</b> | <b>331.0†</b><br><b>(311.9 to 352.0)</b> | <b>134.7</b><br><b>(96.4 to 181.0)</b> | <b>9.6</b><br><b>(4.7 to 15.5)</b>                | <b>-7.0</b><br><b>(-11.7 to -1.8)</b>               |
| Chronic obstructive pulmonary disease              | 920.5<br>(876.9 to 968.3)                     | 55.9<br>(53.2 to 58.9)                   | 27.9<br>(22.6 to 33.8)                 | 17.6<br>(2.6 to 33.3)                             | -7.5<br>(-19.2 to 5.0)                              |
| Pneumoconiosis                                     | 0.8<br>(0.7 to 0.9)                           | 0.1<br>(0.1 to 0.1)                      | 0.1<br>(0.1 to 0.2)                    | 23.6<br>(10.9 to 37.5)                            | -4.5<br>(-14.4 to 6.2)                              |
| Silicosis                                          | < 0.05<br>(< 0.05 to 0.1)                     | < 0.05<br>(< 0.05 to < 0.05)             | < 0.05<br>(< 0.05 to < 0.05)           | 18.7<br>(10.4 to 27.9)                            | -8.8<br>(-15.1 to -1.8)                             |

| Cause                                                          | Prevalence in thousands (95% UI)               | Incidence in thousands (95% UI)                | YLDs in thousands (95% UI)              |                                                   |                                                     |
|----------------------------------------------------------------|------------------------------------------------|------------------------------------------------|-----------------------------------------|---------------------------------------------------|-----------------------------------------------------|
|                                                                | 2016 counts                                    | 2016 counts                                    | 2016 counts                             | Percentage change in counts between 2006 and 2016 | Percentage change in age-standardised rates between |
| Asbestosis                                                     | 0.7<br>(0.6 to 0.8)                            | 0.1<br>(0.1 to 0.1)                            | 0.1<br>(0.1 to 0.2)                     | 32.4<br>(18.4 to 48.0)                            | 2.7<br>(-8.1 to 14.6)                               |
| Coal workers pneumoconiosis                                    | < 0.05<br>(< 0.05 to 0.1)                      | < 0.05<br>(< 0.05 to < 0.05)                   | < 0.05<br>(< 0.05 to < 0.05)            | -39.1<br>(-60.2 to -14.2)                         | -53.0<br>(-69.3 to -33.3)                           |
| Other pneumoconiosis                                           | < 0.05<br>(< 0.05 to < 0.05)                   | < 0.05<br>(< 0.05 to < 0.05)                   | < 0.05<br>(< 0.05 to < 0.05)            | 22.8<br>(8.8 to 37.0)                             | -5.4<br>(-15.5 to 4.0)                              |
| Asthma                                                         | 2,667.9<br>(2,501.9 to 2,856.3)                | 273.1<br>(254.3 to 293.6)                      | 104.1<br>(69.0 to 147.6)                | 7.1<br>(1.5 to 12.9)                              | -7.3<br>(-12.6 to -1.8)                             |
| Interstitial lung disease and pulmonary sarcoidosis            | 15.4<br>(13.8 to 17.1)                         | 1.9<br>(1.8 to 2.1)                            | 1.7<br>(1.1 to 2.4)                     | 38.0<br>(22.6 to 55.5)                            | 7.3<br>(-3.9 to 20.0)                               |
| Other chronic respiratory diseases                             | --                                             | --                                             | 0.9<br>(0.7 to 1.1)                     | 46.9<br>(30.2 to 67.3)                            | 27.6<br>(12.5 to 45.5)                              |
| <b>Cirrhosis and other chronic liver diseases</b>              | <b>195.3</b><br><b>(185.2 to 205.2)</b>        | <b>2.6</b><br><b>(2.5 to 2.7)</b>              | <b>2.7</b><br><b>(1.9 to 3.8)</b>       | <b>30.4</b><br><b>(15.1 to 47.7)</b>              | <b>7.2</b><br><b>(-5.8 to 21.7)</b>                 |
| Cirrhosis and other chronic liver diseases due to hepatitis B  | 55.4<br>(50.1 to 61.1)                         | 0.8<br>(0.7 to 0.8)                            | 0.7<br>(0.5 to 1.1)                     | 31.8<br>(2.2 to 68.2)                             | 7.3<br>(-17.5 to 37.0)                              |
| Cirrhosis and other chronic liver diseases due to hepatitis C  | 53.2<br>(48.1 to 58.4)                         | 0.7<br>(0.6 to 0.7)                            | 0.7<br>(0.4 to 1.0)                     | 29.3<br>(-0.3 to 63.6)                            | 5.5<br>(-19.0 to 34.3)                              |
| Cirrhosis and other chronic liver diseases due to alcohol use  | 52.4<br>(47.3 to 58.0)                         | 0.7<br>(0.7 to 0.8)                            | 0.7<br>(0.4 to 1.0)                     | 33.9<br>(4.3 to 69.8)                             | 8.9<br>(-15.3 to 38.5)                              |
| Cirrhosis and other chronic liver diseases due to other causes | 34.2<br>(31.3 to 37.7)                         | 0.5<br>(0.4 to 0.5)                            | 0.7<br>(0.4 to 0.9)                     | 26.7<br>(-2.9 to 62.0)                            | 7.2<br>(-19.3 to 39.6)                              |
| <b>Digestive diseases</b>                                      | <b>530.4</b><br><b>(491.3 to 570.2)</b>        | <b>601.7*</b><br><b>(562.4 to 642.7)</b>       | <b>15.6</b><br><b>(11.1 to 21.2)</b>    | <b>26.8</b><br><b>(18.3 to 35.8)</b>              | <b>4.4</b><br><b>(-3.1 to 12.4)</b>                 |
| Peptic ulcer disease                                           | 191.2<br>(169.1 to 217.3)                      | 18.2<br>(16.1 to 20.5)                         | 2.3<br>(1.4 to 3.7)                     | 38.3<br>(19.4 to 60.1)                            | 18.5<br>(2.3 to 37.8)                               |
| Gastritis and duodenitis                                       | 208.8<br>(185.6 to 235.3)                      | 137.2<br>(120.5 to 156.0)                      | 2.1<br>(1.3 to 3.3)                     | 40.1<br>(23.4 to 59.4)                            | 18.4<br>(4.0 to 35.4)                               |
| Appendicitis                                                   | 1.1<br>(1.0 to 1.2)                            | 29.4<br>(27.1 to 31.7)                         | 0.4<br>(0.2 to 0.5)                     | 15.8<br>(-0.5 to 33.4)                            | -0.1<br>(-16.6 to 18.5)                             |
| Paralytic ileus and intestinal obstruction                     | 0.5<br>(0.4 to 0.5)                            | 13.6<br>(12.2 to 15.0)                         | 0.1<br>(0.1 to 0.2)                     | 39.8<br>(27.3 to 54.7)                            | 12.1<br>(4.8 to 20.4)                               |
| Inguinal, femoral, and abdominal hernia                        | 93.9<br>(84.1 to 104.0)                        | 164.2<br>(140.8 to 186.9)                      | 6.2<br>(4.2 to 8.7)                     | 20.8<br>(7.9 to 35.2)                             | -2.7<br>(-14.1 to 9.6)                              |
| Inflammatory bowel disease                                     | 12.0<br>(11.3 to 12.7)                         | 6.8<br>(6.6 to 7.1)                            | 1.7<br>(1.2 to 2.5)                     | 18.4<br>(-2.3 to 42.9)                            | -1.4<br>(-19.2 to 19.6)                             |
| Vascular intestinal disorders                                  | 0.7<br>(0.7 to 0.8)                            | 3.0<br>(2.7 to 3.4)                            | 0.2<br>(0.1 to 0.3)                     | 34.4<br>(4.4 to 72.4)                             | 4.8<br>(-16.0 to 31.7)                              |
| Gallbladder and biliary diseases                               | 34.2<br>(30.5 to 38.1)                         | 209.8<br>(183.4 to 237.8)                      | 1.0<br>(0.6 to 1.4)                     | 26.2<br>(0.8 to 55.9)                             | 2.3<br>(-18.7 to 27.0)                              |
| Pancreatitis                                                   | 2.2<br>(2.0 to 2.5)                            | 19.4<br>(17.3 to 21.5)                         | 0.3<br>(0.2 to 0.4)                     | 28.4<br>(23.1 to 33.3)                            | 3.2<br>(-0.5 to 6.8)                                |
| Other digestive diseases                                       | --                                             | --                                             | 1.2<br>(0.9 to 1.7)                     | 31.7<br>(22.8 to 41.4)                            | 7.0<br>(-0.9 to 15.3)                               |
| <b>Neurological disorders</b>                                  | <b>9,622.2</b><br><b>(9,295.5 to 10,044.1)</b> | <b>4,288.8</b><br><b>(3,655.6 to 5,020.3)</b>  | <b>272.3</b><br><b>(184.6 to 371.1)</b> | <b>18.5</b><br><b>(8.9 to 30.1)</b>               | <b>-0.6</b><br><b>(-9.2 to 10.4)</b>                |
| Alzheimer's disease and other dementias                        | 211.2<br>(183.1 to 240.6)                      | 39.6<br>(33.9 to 46.1)                         | 32.5<br>(22.4 to 42.8)                  | 30.9<br>(25.6 to 37.1)                            | -2.7<br>(-7.0 to 1.7)                               |
| Parkinson's disease                                            | 41.0<br>(32.6 to 50.8)                         | 4.6<br>(3.6 to 5.9)                            | 4.8<br>(3.0 to 6.8)                     | 24.4<br>(11.1 to 39.1)                            | -4.5<br>(-15.0 to 6.8)                              |
| Epilepsy                                                       | 55.7<br>(14.4 to 97.9)                         | 6.1<br>(1.5 to 10.7)                           | 13.0<br>(2.8 to 32.6)                   | 20.6<br>(-74.6 to 582.1)                          | 1.8<br>(-79.0 to 483.7)                             |
| Multiple sclerosis                                             | 22.3<br>(19.9 to 25.0)                         | 0.6<br>(0.5 to 0.7)                            | 5.7<br>(4.0 to 7.7)                     | 22.7<br>(6.2 to 42.1)                             | 2.1<br>(-11.3 to 18.1)                              |
| Motor neuron disease                                           | 4.2<br>(3.9 to 4.6)                            | 0.9<br>(0.8 to 0.9)                            | 0.9<br>(0.6 to 1.2)                     | 30.8<br>(24.6 to 37.6)                            | 5.0<br>(0.4 to 10.0)                                |
| Migraine                                                       | 4,543.2<br>(4,330.3 to 4,756.1)                | 398.3<br>(375.8 to 422.9)                      | 186.8<br>(119.1 to 263.4)               | 16.1<br>(12.5 to 19.8)                            | -0.9<br>(-4.1 to 2.3)                               |
| Tension-type headache                                          | 6,841.9<br>(6,181.7 to 7,597.5)                | 3,838.5<br>(3,205.7 to 4,580.7)                | 25.0<br>(15.8 to 37.0)                  | 17.4<br>(11.5 to 23.8)                            | -0.4<br>(-5.2 to 4.9)                               |
| Other neurological disorders                                   | 0.1<br>(0.1 to 0.1)                            | 0.1<br>(0.1 to 0.2)                            | 3.5<br>(1.7 to 7.0)                     | 35.2<br>(-39.6 to 226.7)                          | 18.2<br>(-52.1 to 214.8)                            |
| <b>Mental and substance use disorders</b>                      | <b>4,757.9</b><br><b>(4,638.7 to 4,873.8)</b>  | <b>1,771.1*</b><br><b>(1,657.8 to 1,915.3)</b> | <b>714.9</b><br><b>(515.8 to 921.2)</b> | <b>16.6</b><br><b>(13.7 to 19.7)</b>              | <b>-0.9</b><br><b>(-3.3 to 1.8)</b>                 |
| Schizophrenia                                                  | 90.5<br>(80.5 to 100.2)                        | 4.1<br>(3.6 to 4.6)                            | 57.8<br>(42.9 to 71.7)                  | 18.1<br>(9.9 to 27.4)                             | -0.6<br>(-7.6 to 7.5)                               |
| Alcohol use disorders                                          | 312.0<br>(271.0 to 354.9)                      | 154.2<br>(132.8 to 176.8)                      | 31.1<br>(21.3 to 43.5)                  | 24.5<br>(13.8 to 36.0)                            | 5.1<br>(-4.1 to 15.3)                               |
| Drug use disorders                                             | 510.2<br>(480.1 to 538.6)                      | 46.6<br>(42.4 to 51.3)                         | 99.3<br>(71.0 to 130.8)                 | 25.6<br>(15.7 to 36.9)                            | 5.5<br>(-3.2 to 15.4)                               |
| Opioid use disorders                                           | 110.0<br>(95.5 to 125.4)                       | 11.4<br>(9.9 to 13.3)                          | 45.6<br>(31.2 to 59.5)                  | 18.5<br>(6.8 to 31.8)                             | -2.4<br>(-12.5 to 9.0)                              |
| Cocaine use disorders                                          | 64.5<br>(56.3 to 73.0)                         | 2.9<br>(2.4 to 3.4)                            | 8.7<br>(5.4 to 12.6)                    | 15.5<br>(0.8 to 33.6)                             | -2.4<br>(-15.5 to 13.2)                             |
| Amphetamine use disorders                                      | 138.8<br>(117.7 to 158.3)                      | 6.9<br>(5.8 to 8.1)                            | 18.2<br>(11.0 to 27.0)                  | 47.9<br>(25.6 to 71.3)                            | 25.8<br>(6.9 to 45.9)                               |
| Cannabis use disorders                                         | 169.6<br>(143.3 to 198.4)                      | 20.4<br>(16.7 to 24.8)                         | 4.9<br>(3.2 to 7.3)                     | 15.2<br>(-1.7 to 35.1)                            | -2.7<br>(-17.5 to 14.3)                             |
| Other drug use disorders                                       | 41.5<br>(38.1 to 45.4)                         | 5.0<br>(4.6 to 5.6)                            | 21.9<br>(14.1 to 31.2)                  | 33.0<br>(6.1 to 64.8)                             | 13.4<br>(-10.2 to 41.3)                             |
| Depressive disorders                                           | 1,152.2<br>(1,084.3 to 1,224.9)                | 1,269.3<br>(1,159.0 to 1,409.6)                | 199.6<br>(136.7 to 271.0)               | 12.1<br>(6.5 to 18.8)                             | -5.2<br>(-10.3 to 0.4)                              |
| Major depressive disorder                                      | 800.1<br>(733.7 to 880.7)                      | 1,210.7<br>(1,100.8 to 1,350.4)                | 163.6<br>(111.8 to 223.3)               | 10.4<br>(3.6 to 18.1)                             | -6.4<br>(-12.3 to -0.2)                             |
| Dysthymia                                                      | 375.4<br>(329.4 to 430.5)                      | 58.6<br>(51.6 to 67.2)                         | 36.0<br>(24.3 to 52.5)                  | 20.6<br>(12.3 to 29.5)                            | 0.7<br>(-6.4 to 7.8)                                |
| Bipolar disorder                                               | 328.6<br>(299.0 to 359.5)                      | 21.4<br>(19.1 to 24.1)                         | 67.0<br>(41.7 to 98.2)                  | 17.6<br>(12.8 to 22.5)                            | 0.2<br>(-4.2 to 4.4)                                |
| Anxiety disorders                                              | 1,462.6<br>(1,328.8 to 1,598.4)                | 180.7<br>(167.5 to 196.5)                      | 140.5<br>(97.5 to 189.3)                | 14.0<br>(6.0 to 21.9)                             | -2.5<br>(-9.2 to 4.4)                               |
| Eating disorders                                               | 79.4<br>(64.3 to 99.0)                         | 22.2<br>(16.7 to 29.1)                         | 15.9<br>(10.0 to 23.2)                  | 20.3<br>(8.3 to 32.2)                             | 4.4<br>(-6.1 to 14.8)                               |
| Anorexia nervosa                                               | 12.5<br>(9.2 to 16.5)                          | 3.9<br>(2.9 to 5.2)                            | 2.6<br>(1.6 to 4.1)                     | 19.9<br>(-1.2 to 45.3)                            | 3.8<br>(-14.2 to 25.8)                              |
| Bulimia nervosa                                                | 63.3<br>(47.9 to 84.2)                         | 18.4<br>(13.0 to 25.1)                         | 13.3<br>(8.0 to 20.0)                   | 20.4<br>(6.6 to 34.1)                             | 4.5<br>(-6.7 to 16.3)                               |
| Autistic spectrum disorders                                    | 215.0<br>(194.1 to 234.7)                      | 0.7<br>(0.5 to 0.9)                            | 36.3<br>(24.1 to 51.3)                  | 17.2<br>(11.5 to 22.7)                            | 0.0<br>(-4.9 to 4.9)                                |
| Autism                                                         | 98.0<br>(84.5 to 112.9)                        | 0.1<br>(0.1 to 0.3)                            | 24.7<br>(16.1 to 36.1)                  | 17.3<br>(9.7 to 25.0)                             | -0.0<br>(-6.7 to 7.0)                               |
| Asperger syndrome and other autistic spectrum disorders        | 116.5<br>(97.3 to 140.0)                       | 0.6<br>(0.4 to 0.8)                            | 11.6<br>(7.5 to 17.0)                   | 17.1<br>(11.1 to 22.9)                            | 0.1<br>(-4.9 to 5.3)                                |



| Cause                                                      | Prevalence in thousands (95% UI)                 | Incidence in thousands (95% UI)                   | YLDs in thousands (95% UI)              |                                                   |                                                     |
|------------------------------------------------------------|--------------------------------------------------|---------------------------------------------------|-----------------------------------------|---------------------------------------------------|-----------------------------------------------------|
|                                                            | 2016 counts                                      | 2016 counts                                       | 2016 counts                             | Percentage change in counts between 2006 and 2016 | Percentage change in age-standardised rates between |
| Attention-deficit/hyperactivity disorder                   | 377.5<br>(334.9 to 430.4)                        | 15.6<br>(13.4 to 18.3)                            | 4.5<br>(2.7 to 7.2)                     | 11.1<br>(1.1 to 21.9)                             | -1.4<br>(-10.3 to 8.5)                              |
| Conduct disorder                                           | 127.9<br>(106.0 to 149.1)                        | 42.1<br>(34.0 to 50.4)                            | 15.5<br>(9.6 to 23.5)                   | 6.6<br>(-1.8 to 15.4)                             | 0.7<br>(-7.2 to 9.3)                                |
| Idiopathic developmental intellectual disability           | 106.4<br>(41.1 to 169.6)                         | --                                                | 5.4<br>(2.4 to 9.4)                     | 23.7<br>(14.1 to 35.3)                            | 6.1<br>(-2.5 to 16.2)                               |
| Other mental and substance use disorders                   | 566.6<br>(507.8 to 630.4)                        | 14.2<br>(12.8 to 15.8)                            | 41.9<br>(29.0 to 59.7)                  | 20.2<br>(15.1 to 26.1)                            | 0.1<br>(-4.3 to 5.2)                                |
| <b>Diabetes, urogenital, blood, and endocrine diseases</b> | <b>5,860.4</b><br><b>(5,725.4 to 6,004.9)</b>    | <b>2,430.4†</b><br><b>(2,295.8 to 2,591.1)</b>    | <b>152.2</b><br><b>(108.9 to 204.8)</b> | <b>24.9</b><br><b>(19.4 to 30.0)</b>              | <b>0.3</b><br><b>(-3.9 to 4.2)</b>                  |
| Diabetes mellitus                                          | 1,033.2<br>(930.3 to 1,140.5)                    | 54.2<br>(48.4 to 60.8)                            | 79.3<br>(55.1 to 109.3)                 | 25.6<br>(15.9 to 35.3)                            | -0.6<br>(-8.2 to 7.0)                               |
| Acute glomerulonephritis                                   | 0.2<br>(0.2 to 0.2)                              | 2.9<br>(2.5 to 3.3)                               | < 0.05<br>(< 0.05 to < 0.05)            | 19.3<br>(14.3 to 24.5)                            | 0.5<br>(-3.7 to 5.1)                                |
| Chronic kidney disease                                     | 928.5<br>(827.7 to 1,026.7)                      | 85.5<br>(75.0 to 96.6)                            | 22.3<br>(16.6 to 28.3)                  | 33.8<br>(24.7 to 44.4)                            | 6.0<br>(-0.6 to 14.1)                               |
| Chronic kidney disease due to diabetes mellitus            | 497.1<br>(442.5 to 554.0)                        | 48.2<br>(41.9 to 55.1)                            | 11.9<br>(8.9 to 15.3)                   | 49.2<br>(35.4 to 66.0)                            | 17.2<br>(6.4 to 30.2)                               |
| Chronic kidney disease due to hypertension                 | 132.3<br>(117.2 to 147.3)                        | 12.6<br>(11.2 to 14.2)                            | 2.6<br>(1.9 to 3.4)                     | 27.4<br>(11.8 to 44.9)                            | -3.6<br>(-15.3 to 9.9)                              |
| Chronic kidney disease due to glomerulonephritis           | 147.5<br>(131.2 to 163.1)                        | 11.0<br>(9.2 to 13.0)                             | 4.0<br>(3.0 to 5.2)                     | 12.2<br>(0.8 to 25.6)                             | -7.3<br>(-16.6 to 3.3)                              |
| Chronic kidney disease due to other causes                 | 151.5<br>(133.7 to 169.9)                        | 13.6<br>(11.9 to 15.5)                            | 3.7<br>(2.8 to 4.8)                     | 23.2<br>(10.3 to 36.2)                            | -0.9<br>(-10.6 to 8.8)                              |
| Urinary diseases and male infertility                      | 404.8<br>(363.8 to 453.9)                        | 1,443.5†<br>(1,318.8 to 1,595.0)                  | 13.0<br>(8.4 to 18.8)                   | 26.2<br>(19.5 to 33.6)                            | -0.8<br>(-5.9 to 4.9)                               |
| Interstitial nephritis and urinary tract infections        | 21.7<br>(19.3 to 24.6)                           | 1,135.9<br>(1,008.9 to 1,288.4)                   | 0.7<br>(0.4 to 1.1)                     | 18.5<br>(3.1 to 36.4)                             | -0.1<br>(-13.5 to 15.3)                             |
| Urolithiasis                                               | 10.0<br>(8.8 to 11.3)                            | 264.0<br>(231.9 to 299.3)                         | 0.7<br>(0.5 to 1.1)                     | 23.9<br>(7.4 to 43.5)                             | 1.3<br>(-11.0 to 15.3)                              |
| Benign prostatic hyperplasia                               | 335.4<br>(284.4 to 396.7)                        | 43.6<br>(36.1 to 52.4)                            | 10.9<br>(6.9 to 16.1)                   | 28.6<br>(20.7 to 37.3)                            | 0.1<br>(-6.0 to 7.1)                                |
| Male infertility                                           | 25.2<br>(18.4 to 34.0)                           | --                                                | 0.1<br>(0.1 to 0.3)                     | 10.3<br>(-4.1 to 25.0)                            | -4.3<br>(-16.1 to 8.1)                              |
| Other urinary diseases                                     | --                                               | --                                                | 0.5<br>(0.3 to 0.7)                     | 1.1<br>(-8.0 to 11.7)                             | -15.9<br>(-23.7 to -7.2)                            |
| Gynecological diseases                                     | 2,333.3<br>(2,227.0 to 2,434.9)                  | 771.0†<br>(727.4 to 818.6)                        | 23.0<br>(15.5 to 33.0)                  | 14.7<br>(9.0 to 20.1)                             | -1.2<br>(-6.1 to 3.7)                               |
| Uterine fibroids                                           | 101.9<br>(89.4 to 115.8)                         | 9.9<br>(8.6 to 11.4)                              | 1.1<br>(0.5 to 1.9)                     | 7.3<br>(-3.3 to 18.5)                             | -6.7<br>(-15.9 to 3.2)                              |
| Polycystic ovarian syndrome                                | 38.9<br>(29.2 to 51.1)                           | 16.4<br>(11.9 to 21.6)                            | 0.4<br>(0.1 to 0.7)                     | 15.9<br>(4.5 to 28.4)                             | 0.2<br>(-9.9 to 10.9)                               |
| Female infertility                                         | 7.0<br>(2.7 to 20.6)                             | --                                                | < 0.05<br>(< 0.05 to 0.1)               | 33.7<br>(-16.0 to 123.1)                          | 16.1<br>(-27.0 to 96.2)                             |
| Endometriosis                                              | 15.2<br>(12.2 to 18.4)                           | 56.1<br>(42.6 to 74.4)                            | 1.4<br>(0.9 to 2.1)                     | 18.3<br>(-3.8 to 46.6)                            | 0.2<br>(-18.8 to 23.8)                              |
| Genital prolapse                                           | 746.2<br>(637.8 to 854.9)                        | 33.9<br>(28.8 to 39.5)                            | 2.3<br>(1.1 to 4.2)                     | 19.4<br>(8.6 to 31.2)                             | -4.7<br>(-13.1 to 4.7)                              |
| Premenstrual syndrome                                      | 1,403.5<br>(1,329.4 to 1,480.4)                  | 483.0<br>(450.4 to 514.0)                         | 11.7<br>(7.3 to 17.9)                   | 13.8<br>(5.8 to 22.3)                             | -0.6<br>(-7.5 to 7.1)                               |
| Other gynecological diseases                               | 176.1<br>(149.9 to 204.7)                        | 171.6<br>(143.4 to 203.4)                         | 6.1<br>(3.9 to 8.8)                     | 15.1<br>(3.2 to 27.8)                             | -1.0<br>(-11.1 to 9.7)                              |
| Hemoglobinopathies and hemolytic anaemias                  | 1,824.4<br>(1,788.8 to 1,863.2)                  | --                                                | 2.7<br>(1.7 to 4.3)                     | 24.5<br>(9.7 to 41.2)                             | 3.1<br>(-10.1 to 18.3)                              |
| Thalassemias                                               | 0.7<br>(0.6 to 0.8)                              | --                                                | < 0.05<br>(< 0.05 to 0.1)               | 19.1<br>(-20.2 to 78.3)                           | 3.8<br>(-32.0 to 58.5)                              |
| Thalassaemias trait                                        | 149.7<br>(140.7 to 158.5)                        | --                                                | 1.7<br>(1.1 to 2.7)                     | 32.5<br>(14.5 to 53.2)                            | 9.9<br>(-5.5 to 28.9)                               |
| Sickle cell disorders                                      | 0.1<br>(0.1 to 0.2)                              | --                                                | < 0.05<br>(< 0.05 to < 0.05)            | 54.0<br>(41.9 to 66.5)                            | 33.4<br>(22.7 to 44.8)                              |
| Sickle cell trait                                          | 227.0<br>(218.3 to 237.0)                        | --                                                | 0.6<br>(0.3 to 0.9)                     | 21.8<br>(-0.4 to 49.9)                            | -0.4<br>(-20.4 to 24.7)                             |
| G6PD deficiency                                            | 285.1<br>(269.7 to 303.5)                        | --                                                | < 0.05<br>(< 0.05 to < 0.05)            | 5.8<br>(-11.4 to 27.8)                            | -13.5<br>(-30.9 to 8.6)                             |
| G6PD trait                                                 | 1,168.1<br>(1,142.8 to 1,197.2)                  | --                                                | < 0.05<br>(< 0.05 to < 0.05)            | 6.2<br>(-9.4 to 24.4)                             | -11.3<br>(-26.1 to 5.2)                             |
| Other hemoglobinopathies and hemolytic anaemias            | 22.4<br>(20.2 to 25.3)                           | --                                                | 0.4<br>(0.2 to 0.6)                     | -0.7<br>(-12.3 to 13.8)                           | -19.4<br>(-31.7 to -5.2)                            |
| Endocrine, metabolic, blood, and immune disorders          | 341.8<br>(312.5 to 375.1)                        | 73.3<br>(65.8 to 81.3)                            | 11.9<br>(7.9 to 16.5)                   | 25.4<br>(17.6 to 33.7)                            | 0.8<br>(-5.9 to 7.0)                                |
| <b>Musculoskeletal disorders</b>                           | <b>6,369.0</b><br><b>(6,086.0 to 6,668.7)</b>    | <b>3,910.7</b><br><b>(3,552.8 to 4,337.1)</b>     | <b>700.9</b><br><b>(511.1 to 908.9)</b> | <b>23.0</b><br><b>(19.1 to 27.0)</b>              | <b>1.1</b><br><b>(-2.2 to 4.5)</b>                  |
| Rheumatoid arthritis                                       | 141.1<br>(126.5 to 157.5)                        | 7.0<br>(6.2 to 7.8)                               | 33.1<br>(22.4 to 44.1)                  | 25.1<br>(16.0 to 35.1)                            | 0.9<br>(-6.6 to 8.6)                                |
| Osteoarthritis                                             | 1,560.5<br>(1,461.7 to 1,660.1)                  | 70.6<br>(65.6 to 76.0)                            | 54.8<br>(36.3 to 79.5)                  | 31.7<br>(27.0 to 36.5)                            | 3.8<br>(0.1 to 7.6)                                 |
| Low back and neck pain                                     | 3,597.6<br>(3,352.9 to 3,880.5)                  | 1,607.5<br>(1,420.7 to 1,812.0)                   | 426.9<br>(298.6 to 563.4)               | 23.5<br>(18.9 to 28.1)                            | 2.1<br>(-1.7 to 6.0)                                |
| Low back pain                                              | 2,776.8<br>(2,468.3 to 3,146.5)                  | 1,387.8<br>(1,201.7 to 1,595.1)                   | 314.4<br>(221.8 to 415.2)               | 24.4<br>(18.2 to 30.6)                            | 2.9<br>(-2.3 to 8.1)                                |
| Neck pain                                                  | 1,132.2<br>(982.1 to 1,307.3)                    | 219.7<br>(190.7 to 257.9)                         | 112.5<br>(76.4 to 159.4)                | 21.0<br>(18.0 to 24.0)                            | 0.0<br>(-2.2 to 2.2)                                |
| Gout                                                       | 268.9<br>(236.6 to 304.6)                        | 44.5<br>(38.6 to 50.8)                            | 8.4<br>(5.7 to 11.6)                    | 26.0<br>(13.7 to 40.0)                            | 0.8<br>(-9.3 to 12.5)                               |
| Other musculoskeletal disorders                            | 2,091.4<br>(1,808.6 to 2,415.7)                  | 2,181.1<br>(1,869.5 to 2,536.5)                   | 177.7<br>(122.8 to 251.2)               | 19.0<br>(8.0 to 29.9)                             | -1.8<br>(-10.6 to 6.9)                              |
| <b>Other non-communicable diseases</b>                     | <b>15,989.8</b><br><b>(15,745.5 to 16,233.1)</b> | <b>36,597.2†</b><br><b>(34,496.4 to 38,736.0)</b> | <b>502.5</b><br><b>(340.9 to 715.7)</b> | <b>23.2</b><br><b>(21.5 to 25.0)</b>              | <b>1.2</b><br><b>(-0.1 to 2.6)</b>                  |
| Congenital anomalies                                       | 199.7<br>(187.6 to 213.2)                        | --                                                | 22.1<br>(16.0 to 28.9)                  | 16.8<br>(10.6 to 23.5)                            | -0.7<br>(-5.9 to 5.2)                               |
| Neural tube defects                                        | 13.3<br>(11.8 to 15.0)                           | --                                                | 4.0<br>(2.8 to 5.4)                     | 28.8<br>(10.1 to 53.7)                            | 9.4<br>(-7.0 to 30.8)                               |
| Congenital heart anomalies                                 | 66.2<br>(58.5 to 74.7)                           | --                                                | 3.5<br>(1.4 to 6.1)                     | 12.5<br>(0.9 to 26.9)                             | -4.8<br>(-14.8 to 7.9)                              |
| Orofacial clefts                                           | 17.0<br>(14.9 to 19.4)                           | --                                                | 0.2<br>(0.1 to 0.2)                     | 13.0<br>(-1.6 to 30.1)                            | -4.3<br>(-16.9 to 10.7)                             |
| Down's syndrome                                            | 9.0<br>(7.7 to 10.3)                             | --                                                | 0.8<br>(0.5 to 1.1)                     | 6.6<br>(-4.9 to 19.6)                             | -7.1<br>(-17.4 to 4.9)                              |
| Turner syndrome                                            | 6.3<br>(5.4 to 7.4)                              | --                                                | 0.1<br>(0.1 to 0.2)                     | 11.8<br>(-21.6 to 59.8)                           | -3.1<br>(-32.8 to 37.5)                             |
| Klinefelter syndrome                                       | 17.1<br>(14.4 to 20.1)                           | --                                                | 0.1<br>(0.1 to 0.2)                     | 17.9<br>(-4.5 to 45.8)                            | 1.2<br>(-18.2 to 25.0)                              |

| Cause                                         | Prevalence in thousands (95% UI)              | Incidence in thousands (95% UI)                           | YLDs in thousands (95% UI)              |                                                   |                                                     |
|-----------------------------------------------|-----------------------------------------------|-----------------------------------------------------------|-----------------------------------------|---------------------------------------------------|-----------------------------------------------------|
|                                               | 2016 counts                                   | 2016 counts                                               | 2016 counts                             | Percentage change in counts between 2006 and 2016 | Percentage change in age-standardised rates between |
| Other chromosomal abnormalities               | 21.6<br>(18.3 to 25.7)                        | --                                                        | 2.3<br>(1.5 to 3.1)                     | 12.3<br>(-2.2 to 29.1)                            | 1.1<br>(-12.6 to 16.0)                              |
| Congenital musculoskeletal and limb anomalies | 25.4<br>(23.2 to 27.8)                        | --                                                        | 3.7<br>(2.5 to 5.1)                     | 20.6<br>(8.5 to 33.3)                             | 2.0<br>(-7.9 to 13.1)                               |
| Urogenital congenital anomalies               | 23.4<br>(20.4 to 26.8)                        | --                                                        | 0.8<br>(0.5 to 1.2)                     | -12.2<br>(-27.3 to 4.8)                           | -24.4<br>(-38.4 to -8.7)                            |
| Digestive congenital anomalies                | 31.6<br>(28.0 to 35.7)                        | --                                                        | 1.4<br>(0.9 to 2.0)                     | 10.0<br>(-4.9 to 28.5)                            | -6.5<br>(-19.6 to 9.5)                              |
| Other congenital anomalies                    | 31.3<br>(21.9 to 46.2)                        | --                                                        | 5.3<br>(3.7 to 7.3)                     | 20.8<br>(11.0 to 32.6)                            | 1.9<br>(-6.4 to 12.0)                               |
| Skin and subcutaneous diseases                | 8,773.6<br>(8,564.5 to 8,990.2)               | 21,140.5<br>(19,840.4 to 22,500.7)                        | 204.8<br>(138.8 to 294.1)               | 17.6<br>(15.6 to 19.6)                            | 1.0<br>(-0.8 to 2.7)                                |
| Dermatitis                                    | 1,293.0<br>(1,228.1 to 1,362.3)               | 1,728.7<br>(1,599.7 to 1,871.8)                           | 46.2<br>(27.8 to 74.3)                  | 17.5<br>(13.3 to 21.3)                            | 0.5<br>(-3.4 to 4.1)                                |
| Psoriasis                                     | 356.2<br>(342.2 to 370.0)                     | 33.8<br>(32.3 to 35.2)                                    | 30.7<br>(21.9 to 40.3)                  | 21.9<br>(15.1 to 29.2)                            | 2.0<br>(-3.7 to 8.3)                                |
| Cellulitis                                    | 23.4<br>(22.0 to 24.8)                        | 594.4<br>(559.9 to 630.2)                                 | 1.3<br>(0.8 to 1.9)                     | 22.2<br>(6.5 to 41.9)                             | 0.7<br>(-12.7 to 19.2)                              |
| Pyoderma                                      | 90.5<br>(87.9 to 93.3)                        | 2,425.5<br>(2,349.1 to 2,500.9)                           | 0.5<br>(0.2 to 1.1)                     | 21.9<br>(15.2 to 28.9)                            | 0.7<br>(-5.0 to 6.9)                                |
| Scabies                                       | 89.2<br>(78.7 to 102.2)                       | 267.6<br>(235.1 to 304.7)                                 | 2.3<br>(1.3 to 3.7)                     | 12.8<br>(6.2 to 20.8)                             | -3.7<br>(-10.0 to 3.0)                              |
| Fungal skin diseases                          | 2,592.9<br>(2,317.2 to 2,909.7)               | 9,289.3<br>(8,093.3 to 10,591.0)                          | 14.4<br>(5.7 to 30.0)                   | 22.8<br>(21.1 to 24.5)                            | 0.0<br>(-1.0 to 1.1)                                |
| Viral skin diseases                           | 656.0<br>(630.4 to 684.2)                     | 884.6<br>(842.3 to 923.9)                                 | 20.1<br>(12.5 to 29.9)                  | 15.0<br>(11.6 to 18.4)                            | -0.0<br>(-2.9 to 2.9)                               |
| Acne vulgaris                                 | 2,247.1<br>(2,080.6 to 2,415.3)               | 1,667.1<br>(1,375.0 to 2,063.4)                           | 57.6<br>(38.5 to 83.9)                  | 13.0<br>(8.8 to 17.7)                             | 1.5<br>(-2.3 to 5.7)                                |
| Alopecia areata                               | 80.7<br>(77.6 to 83.8)                        | 142.3<br>(136.8 to 147.8)                                 | 2.6<br>(1.7 to 4.0)                     | 18.5<br>(9.0 to 27.7)                             | -0.0<br>(-8.1 to 8.4)                               |
| Pruritus                                      | 227.2<br>(200.4 to 257.0)                     | 179.3<br>(160.3 to 202.4)                                 | 2.4<br>(1.1 to 4.5)                     | 20.9<br>(15.0 to 27.4)                            | 0.1<br>(-4.8 to 5.7)                                |
| Urticaria                                     | 164.5<br>(145.3 to 185.0)                     | 291.4<br>(258.0 to 330.5)                                 | 9.8<br>(6.4 to 13.9)                    | 17.0<br>(10.4 to 24.6)                            | 0.0<br>(-5.5 to 6.6)                                |
| Decubitus ulcer                               | 9.4<br>(8.2 to 10.7)                          | 34.8<br>(30.2 to 39.6)                                    | 1.5<br>(1.0 to 2.0)                     | 28.2<br>(11.0 to 48.3)                            | -0.8<br>(-13.0 to 13.8)                             |
| Other skin and subcutaneous diseases          | 2,817.1<br>(2,739.0 to 2,894.8)               | 3,601.8<br>(3,480.6 to 3,726.8)                           | 15.4<br>(7.4 to 27.9)                   | 26.2<br>(23.5 to 28.7)                            | 2.8<br>(0.6 to 4.8)                                 |
| Sense organ diseases                          | 5,665.3<br>(5,542.9 to 5,790.8)               | 2,521.1 <sup>†</sup><br>(2,376.7 to 2,681.5)              | 178.6<br>(121.4 to 253.6)               | 25.3<br>(22.1 to 28.6)                            | -1.1<br>(-3.5 to 1.4)                               |
| Glaucoma                                      | 18.6<br>(15.7 to 21.6)                        | --                                                        | 1.8<br>(1.2 to 2.6)                     | 31.1<br>(14.5 to 49.7)                            | -0.6<br>(-13.4 to 14.3)                             |
| Cataract                                      | 96.4<br>(82.1 to 112.6)                       | --                                                        | 5.7<br>(4.0 to 7.9)                     | 26.4<br>(17.4 to 35.7)                            | -3.9<br>(-11.1 to 3.5)                              |
| Macular degeneration                          | 18.6<br>(15.8 to 21.7)                        | --                                                        | 1.7<br>(1.2 to 2.4)                     | 32.3<br>(16.7 to 49.1)                            | -1.0<br>(-13.6 to 12.1)                             |
| Refraction and accommodation disorders        | 2,031.7<br>(1,915.8 to 2,142.5)               | --                                                        | 32.2<br>(19.1 to 51.5)                  | 19.3<br>(14.9 to 23.6)                            | -2.6<br>(-6.1 to 0.7)                               |
| Age-related and other hearing loss            | 4,115.8<br>(3,926.1 to 4,324.5)               | --                                                        | 102.6<br>(68.8 to 145.9)                | 27.0<br>(21.6 to 32.6)                            | -0.9<br>(-5.1 to 3.2)                               |
| Other vision loss                             | 85.2<br>(75.8 to 95.1)                        | --                                                        | 6.3<br>(4.4 to 8.5)                     | 23.4<br>(14.3 to 33.8)                            | -1.6<br>(-9.1 to 7.1)                               |
| Other sense organ diseases                    | 899.9<br>(830.6 to 970.3)                     | 2,521.1<br>(2,376.7 to 2,681.5)                           | 28.2<br>(17.7 to 42.8)                  | 25.8<br>(21.0 to 30.5)                            | 0.9<br>(-2.8 to 4.8)                                |
| Oral disorders                                | 8,608.3<br>(8,240.2 to 8,953.9)               | 12,935.6 <sup>†</sup><br>(11,363.1 to 14,552.0)           | 97.0<br>(60.9 to 143.1)                 | 34.1<br>(29.3 to 39.0)                            | 7.3<br>(3.9 to 10.7)                                |
| Caries of deciduous teeth                     | 655.5<br>(400.4 to 849.2)                     | 2,382.2<br>(1,014.2 to 3,754.6)                           | 0.2<br>(0.1 to 0.5)                     | 61.6<br>(-0.1 to 110.0)                           | 42.7<br>(-12.1 to 85.7)                             |
| Caries of permanent teeth                     | 4,390.3<br>(4,080.9 to 4,715.3)               | 10,128.2<br>(9,374.6 to 10,987.9)                         | 4.3<br>(1.9 to 8.2)                     | 11.4<br>(6.5 to 16.5)                             | -5.8<br>(-10.1 to -1.4)                             |
| Periodontal disease                           | 2,201.6<br>(1,825.8 to 2,622.6)               | 249.2<br>(197.6 to 305.2)                                 | 14.4<br>(5.7 to 29.7)                   | 18.6<br>(14.3 to 22.9)                            | -2.0<br>(-5.6 to 1.5)                               |
| Edentulism and severe tooth loss              | 2,318.3<br>(2,019.3 to 2,594.6)               | 175.9<br>(147.6 to 206.6)                                 | 64.4<br>(42.0 to 91.6)                  | 44.1<br>(37.8 to 50.7)                            | 13.2<br>(8.5 to 18.4)                               |
| Other oral disorders                          | 468.9<br>(448.8 to 491.0)                     | --                                                        | 13.7<br>(8.4 to 20.8)                   | 18.7<br>(15.2 to 22.5)                            | 0.0<br>(-3.1 to 3.3)                                |
| <b>Injuries</b>                               | <b>6,644.9</b><br><b>(6,225.8 to 7,135.3)</b> | <b>2,300.4<sup>†</sup></b><br><b>(2,177.1 to 2,441.2)</b> | <b>207.0</b><br><b>(136.5 to 296.0)</b> | <b>25.1</b><br><b>(23.7 to 26.7)</b>              | <b>2.0</b><br><b>(0.7 to 3.2)</b>                   |
| <b>Transport injuries</b>                     | <b>1,084.6</b><br><b>(998.1 to 1,173.5)</b>   | <b>259.2</b><br><b>(236.1 to 286.2)</b>                   | <b>47.8</b><br><b>(31.3 to 68.9)</b>    | <b>15.1</b><br><b>(13.2 to 17.1)</b>              | <b>-5.5</b><br><b>(-7.2 to -3.7)</b>                |
| Road injuries                                 | 882.7<br>(811.8 to 959.3)                     | 228.8<br>(206.1 to 254.0)                                 | 40.6<br>(26.7 to 58.5)                  | 14.0<br>(12.0 to 16.1)                            | -6.4<br>(-8.2 to -4.6)                              |
| Pedestrian road injuries                      | 135.5<br>(117.5 to 158.0)                     | 21.4<br>(17.5 to 26.5)                                    | 6.7<br>(4.4 to 9.8)                     | 19.5<br>(17.5 to 21.4)                            | -2.0<br>(-3.9 to -0.3)                              |
| Cyclist road injuries                         | 188.8<br>(154.8 to 227.3)                     | 57.8<br>(47.1 to 69.4)                                    | 7.7<br>(5.0 to 11.4)                    | 24.4<br>(22.3 to 26.6)                            | 2.4<br>(0.6 to 4.4)                                 |
| Motorcyclist road injuries                    | 165.5<br>(138.6 to 198.5)                     | 26.5<br>(21.7 to 32.1)                                    | 7.8<br>(5.1 to 11.2)                    | 12.5<br>(10.2 to 14.9)                            | -7.5<br>(-9.5 to -5.4)                              |
| Motor vehicle road injuries                   | 357.5<br>(300.9 to 413.2)                     | 113.4<br>(99.0 to 128.7)                                  | 17.1<br>(11.4 to 24.3)                  | 8.2<br>(6.2 to 10.3)                              | -11.4<br>(-13.1 to -9.5)                            |
| Other road injuries                           | 35.4<br>(30.2 to 41.6)                        | 9.7<br>(7.4 to 12.4)                                      | 1.3<br>(0.8 to 1.9)                     | 20.5<br>(18.3 to 22.9)                            | -1.2<br>(-3.2 to 0.8)                               |
| Other transport injuries                      | 201.9<br>(165.9 to 236.9)                     | 30.4<br>(26.5 to 34.9)                                    | 7.2<br>(4.6 to 10.5)                    | 21.9<br>(20.3 to 23.5)                            | -0.1<br>(-1.5 to 1.4)                               |
| <b>Unintentional injuries</b>                 | <b>5,263.1</b><br><b>(4,879.8 to 5,736.5)</b> | <b>1,916.6</b><br><b>(1,797.2 to 2,056.1)</b>             | <b>147.4</b><br><b>(97.8 to 213.1)</b>  | <b>29.3</b><br><b>(27.8 to 31.0)</b>              | <b>4.9</b><br><b>(3.7 to 6.2)</b>                   |
| Falls                                         | 2,357.4<br>(2,064.9 to 2,658.0)               | 881.5<br>(788.3 to 993.4)                                 | 84.2<br>(57.5 to 117.8)                 | 31.6<br>(29.7 to 33.8)                            | 5.7<br>(4.2 to 7.3)                                 |
| Drowning                                      | 11.1<br>(9.8 to 12.5)                         | 1.2<br>(1.0 to 1.4)                                       | 0.5<br>(0.3 to 0.8)                     | 20.5<br>(14.4 to 26.3)                            | -0.8<br>(-6.1 to 4.5)                               |
| Fire, heat, and hot substances                | 524.7<br>(446.8 to 629.9)                     | 30.9<br>(24.9 to 36.7)                                    | 9.1<br>(5.0 to 15.1)                    | 28.3<br>(25.1 to 31.8)                            | 6.4<br>(3.9 to 9.5)                                 |
| Poisonings                                    | 26.9<br>(22.0 to 33.3)                        | 26.5<br>(21.4 to 32.1)                                    | 2.4<br>(1.5 to 3.3)                     | 23.9<br>(14.2 to 35.0)                            | 4.6<br>(-4.5 to 14.8)                               |
| Exposure to mechanical forces                 | 1,278.8<br>(1,072.5 to 1,635.8)               | 332.3<br>(280.6 to 388.4)                                 | 23.1<br>(14.4 to 35.4)                  | 26.5<br>(24.9 to 28.2)                            | 4.2<br>(2.8 to 5.6)                                 |
| Unintentional firearm injuries                | 49.0<br>(39.8 to 62.2)                        | 4.9<br>(3.3 to 6.9)                                       | 0.7<br>(0.4 to 1.2)                     | 24.1<br>(21.9 to 26.6)                            | 2.4<br>(0.4 to 4.4)                                 |
| Unintentional suffocation                     | 18.4<br>(14.5 to 22.7)                        | 3.8<br>(2.7 to 5.2)                                       | 0.5<br>(0.3 to 0.7)                     | 22.4<br>(20.5 to 24.3)                            | -0.5<br>(-2.4 to 1.2)                               |
| Other exposure to mechanical forces           | 1,211.4<br>(1,006.8 to 1,565.0)               | 323.7<br>(273.6 to 378.2)                                 | 21.9<br>(13.8 to 33.5)                  | 26.7<br>(25.1 to 28.4)                            | 4.4<br>(3.0 to 5.8)                                 |

| Cause                                                                               | Prevalence in thousands (95% UI)        | Incidence in thousands (95% UI)          | YLDs in thousands (95% UI)          |                                                   |                                                     |
|-------------------------------------------------------------------------------------|-----------------------------------------|------------------------------------------|-------------------------------------|---------------------------------------------------|-----------------------------------------------------|
|                                                                                     | 2016 counts                             | 2016 counts                              | 2016 counts                         | Percentage change in counts between 2006 and 2016 | Percentage change in age-standardised rates between |
| Adverse effects of medical treatment                                                | 13.0<br>(10.4 to 15.9)                  | 169.6<br>(151.4 to 191.1)                | 1.7<br>(1.1 to 2.6)                 | 24.6<br>(19.4 to 30.1)                            | 0.4<br>(-3.6 to 4.3)                                |
| Animal contact                                                                      | 154.5<br>(134.7 to 183.5)               | 87.9<br>(71.6 to 107.7)                  | 2.9<br>(1.9 to 4.5)                 | 17.8<br>(13.7 to 22.1)                            | -2.4<br>(-6.2 to 1.8)                               |
| Venomous animal contact                                                             | 21.9<br>(18.6 to 25.6)                  | 25.7<br>(18.6 to 33.9)                   | 1.2<br>(0.8 to 1.8)                 | 16.4<br>(7.9 to 26.4)                             | -2.0<br>(-9.9 to 6.7)                               |
| Non-venomous animal contact                                                         | 132.6<br>(113.1 to 157.8)               | 62.1<br>(49.7 to 75.9)                   | 1.7<br>(1.0 to 2.8)                 | 18.8<br>(16.9 to 20.6)                            | -2.7<br>(-4.4 to -1.0)                              |
| Foreign body                                                                        | 160.8<br>(137.4 to 193.0)               | 111.2<br>(96.3 to 131.3)                 | 4.7<br>(2.9 to 7.0)                 | 23.4<br>(21.6 to 25.1)                            | 1.3<br>(-0.3 to 2.8)                                |
| Pulmonary aspiration and foreign body in airway                                     | 21.8<br>(17.5 to 26.4)                  | 23.0<br>(19.9 to 26.5)                   | 0.6<br>(0.4 to 0.9)                 | 26.6<br>(24.4 to 29.0)                            | 2.6<br>(0.7 to 4.6)                                 |
| Foreign body in eyes                                                                | 14.6<br>(9.6 to 20.2)                   | 59.7<br>(46.4 to 78.4)                   | 1.0<br>(0.6 to 1.5)                 | 21.2<br>(17.5 to 25.3)                            | 0.7<br>(-2.4 to 3.8)                                |
| Foreign body in other body part                                                     | 124.5<br>(103.4 to 156.9)               | 28.5<br>(24.0 to 33.6)                   | 3.1<br>(1.9 to 4.7)                 | 23.5<br>(21.5 to 25.4)                            | 1.2<br>(-0.5 to 2.9)                                |
| Environmental heat and cold exposure                                                | 102.4<br>(87.9 to 120.8)                | 20.2<br>(17.0 to 23.7)                   | 3.4<br>(2.2 to 5.0)                 | 23.3<br>(19.4 to 27.2)                            | 0.2<br>(-3.3 to 3.5)                                |
| Other unintentional injuries                                                        | 633.6<br>(522.3 to 752.5)               | 255.5<br>(213.5 to 301.0)                | 15.5<br>(9.9 to 22.9)               | 29.3<br>(27.9 to 30.8)                            | 5.7<br>(4.4 to 7.0)                                 |
| <b>Self-harm and interpersonal violence</b>                                         | <b>613.9</b><br><b>(560.4 to 670.5)</b> | <b>122.7†</b><br><b>(109.8 to 135.6)</b> | <b>11.5</b><br><b>(7.7 to 16.2)</b> | <b>18.9</b><br><b>(16.4 to 21.3)</b>              | <b>-0.7</b><br><b>(-2.8 to 1.4)</b>                 |
| Self-harm                                                                           | 75.4<br>(61.9 to 89.2)                  | 57.5<br>(49.6 to 64.9)                   | 3.2<br>(2.1 to 4.6)                 | 19.7<br>(13.9 to 26.6)                            | -0.9<br>(-6.1 to 5.4)                               |
| Self-harm by firearm                                                                | 1.2<br>(0.9 to 1.5)                     | 0.1<br>(0.1 to 0.2)                      | < 0.05<br>(< 0.05 to < 0.05)        | 19.1<br>(16.4 to 21.6)                            | 0.1<br>(-2.3 to 2.4)                                |
| Self-harm by other specified means                                                  | 74.2<br>(60.8 to 88.0)                  | 57.4<br>(49.5 to 64.7)                   | 3.2<br>(2.1 to 4.6)                 | 19.7<br>(13.9 to 26.6)                            | -1.0<br>(-6.2 to 5.4)                               |
| Interpersonal violence                                                              | 538.5<br>(487.7 to 593.2)               | 65.2†<br>(55.1 to 75.6)                  | 8.2<br>(5.6 to 11.7)                | 18.5<br>(16.4 to 20.6)                            | -0.6<br>(-2.4 to 1.2)                               |
| Assault by firearm                                                                  | 10.7<br>(8.9 to 12.8)                   | 1.5<br>(1.1 to 2.0)                      | 0.2<br>(0.1 to 0.4)                 | 33.6<br>(31.3 to 36.0)                            | 10.2<br>(8.1 to 12.4)                               |
| Assault by sharp object                                                             | 48.9<br>(40.0 to 58.7)                  | 13.2<br>(10.0 to 16.9)                   | 0.9<br>(0.6 to 1.4)                 | 22.5<br>(20.6 to 24.6)                            | 1.4<br>(-0.2 to 3.2)                                |
| Sexual violence                                                                     | 325.9<br>(284.4 to 373.9)               | --                                       | 2.7<br>(1.8 to 3.9)                 | 11.4<br>(7.2 to 15.9)                             | -3.4<br>(-7.3 to 0.8)                               |
| Assault by other means                                                              | 153.0<br>(126.4 to 185.5)               | 50.6<br>(42.4 to 59.5)                   | 4.4<br>(2.8 to 6.5)                 | 21.8<br>(19.9 to 23.8)                            | 0.8<br>(-0.9 to 2.4)                                |
| <b>Forces of nature, conflict and terrorism, and executions and police conflict</b> | <b>9.3</b><br><b>(5.8 to 14.3)</b>      | <b>1.9†</b><br><b>(1.2 to 2.9)</b>       | <b>0.2</b><br><b>(0.1 to 0.6)</b>   | <b>37.8</b><br><b>(31.3 to 43.3)</b>              | <b>13.1</b><br><b>(7.6 to 18.5)</b>                 |
| Exposure to forces of nature                                                        | 2.1<br>(0.8 to 3.6)                     | --                                       | < 0.05<br>(< 0.05 to 0.1)           | 32.7<br>(30.3 to 35.9)                            | 8.0<br>(5.8 to 10.8)                                |
| Conflict and terrorism                                                              | --                                      | --                                       | --                                  | --                                                | --                                                  |
| Executions and police conflict                                                      | 7.2<br>(3.9 to 11.6)                    | 1.9<br>(1.2 to 2.9)                      | 0.2<br>(0.1 to 0.5)                 | 39.2<br>(31.2 to 45.6)                            | 14.5<br>(7.6 to 20.6)                               |
| <b>Impairments</b>                                                                  | --                                      | --                                       | --                                  | --                                                | --                                                  |
| Anaemia                                                                             | 1,503.0<br>(1,374.5 to 1,652.0)         | --                                       | 31.8<br>(22.1 to 44.7)              | 23.0<br>(13.0 to 33.8)                            | 0.9<br>(-7.2 to 9.7)                                |
| Developmental intellectual disability                                               | 338.4<br>(269.7 to 406.0)               | --                                       | 47.4<br>(35.7 to 62.3)              | 17.3<br>(12.4 to 22.0)                            | 0.1<br>(-4.1 to 4.2)                                |
| Epilepsy                                                                            | 89.8<br>(47.4 to 134.5)                 | --                                       | 25.8<br>(13.9 to 47.1)              | 18.0<br>(-41.8 to 149.8)                          | 0.1<br>(-50.4 to 109.5)                             |
| Guillain-Barre syndrome                                                             | 0.2<br>(0.2 to 0.3)                     | --                                       | 0.1<br>(< 0.05 to 0.1)              | 21.6<br>(19.0 to 24.4)                            | 0.1<br>(0.0 to 0.2)                                 |
| Hearing loss                                                                        | 4,252.2<br>(4,063.7 to 4,457.8)         | --                                       | 109.0<br>(73.5 to 154.5)            | 26.3<br>(21.1 to 31.4)                            | -1.0<br>(-4.8 to 2.9)                               |
| Heart failure                                                                       | 286.8<br>(250.1 to 327.2)               | --                                       | 33.3<br>(26.4 to 40.9)              | 21.3<br>(13.0 to 30.4)                            | -7.4<br>(-13.7 to -0.5)                             |
| Infertility                                                                         | 111.3<br>(87.4 to 141.9)                | --                                       | 0.8<br>(0.4 to 1.6)                 | 17.2<br>(8.1 to 27.9)                             | 1.3<br>(-6.9 to 10.6)                               |
| Pelvic inflammatory disease                                                         | 4.1<br>(3.4 to 4.8)                     | --                                       | 0.5<br>(0.4 to 0.8)                 | 10.2<br>(-10.7 to 35.5)                           | -5.4<br>(-23.6 to 16.2)                             |
| Vision loss                                                                         | 2,299.7<br>(2,176.5 to 2,420.5)         | --                                       | 56.5<br>(38.7 to 81.4)              | 19.9<br>(16.2 to 23.4)                            | -3.0<br>(-6.0 to -0.1)                              |

We did not calculate incidence for the nine impairments, certain NTDs, and causes with only birth prevalence. Blank cells mean that no estimate is available.

† Incidence for aggregate causes represents the sum of the incidence of the causes below the aggregate.

‡ Incidence estimates for stroke represent first-ever stroke only.

^ Incidence of HIV/AIDS represents new infections of HIV only and does not include new infections of Tuberculosis in HIV positive cases.



SR Table 14: Prevalence, incidence, and YLDs for 2016, percentage change of YLD counts and percentage change of age-standardised YLD rates between 2006 and 2016 by cause and impairments, for all ages, Austria.

| Cause                                                                                | Prevalence in thousands (95% UI)       | Incidence in thousands (95% UI)            | YLDs in thousands (95% UI)             |                                                   |                                                     |
|--------------------------------------------------------------------------------------|----------------------------------------|--------------------------------------------|----------------------------------------|---------------------------------------------------|-----------------------------------------------------|
|                                                                                      | 2016 counts                            | 2016 counts                                | 2016 counts                            | Percentage change in counts between 2006 and 2016 | Percentage change in age-standardised rates between |
| <b>All causes</b>                                                                    | <b>8,249.6</b><br>(8,210.8 to 8,281.3) | <b>58,103.4†</b><br>(54,587.0 to 62,127.2) | <b>1,127.8</b><br>(840.3 to 1,452.2)   | <b>9.4</b><br>(8.0 to 10.9)                       | <b>0.0</b><br>(-1.4 to 1.5)                         |
| <b>Communicable, maternal, neonatal, and nutritional disorders</b>                   | <b>2,883.5</b><br>(2,723.1 to 3,046.3) | <b>32,294.1†</b><br>(29,023.9 to 35,843.4) | <b>38.1</b><br>(27.0 to 51.9)          | <b>1.9</b><br>(-3.5 to 7.4)                       | <b>-2.0</b><br>(-7.0 to 3.9)                        |
| <b>HIV/AIDS and tuberculosis</b>                                                     | <b>1,113.5</b><br>(918.5 to 1,289.6)   | <b>1.5†</b><br>(1.0 to 2.3)                | <b>2.2</b><br>(1.0 to 3.9)             | <b>46.2</b><br>(23.6 to 66.9)                     | <b>35.0</b><br>(12.9 to 53.9)                       |
| Tuberculosis                                                                         | 980.3<br>(786.4 to 1,180.6)            | 0.6†<br>(0.5 to 0.8)                       | 0.2<br>(0.1 to 0.2)                    | -11.7<br>(-29.0 to 12.6)                          | -15.9<br>(-32.0 to 5.8)                             |
| Drug-susceptible tuberculosis                                                        | 0.5<br>(0.4 to 0.6)                    | 0.6<br>(0.5 to 0.8)                        | 0.2<br>(0.1 to 0.2)                    | -12.4<br>(-30.0 to 11.5)                          | -16.6<br>(-32.6 to 5.9)                             |
| Multidrug-resistant tuberculosis without extensive drug resistance                   | < 0.05<br>(< 0.05 to < 0.05)           | < 0.05<br>(< 0.05 to < 0.05)               | < 0.05<br>(< 0.05 to < 0.05)           | 11.2<br>(-23.9 to 56.2)                           | 6.2<br>(-27.2 to 48.4)                              |
| Extensively drug-resistant tuberculosis                                              | < 0.05<br>(< 0.05 to < 0.05)           | < 0.05<br>(< 0.05 to < 0.05)               | < 0.05<br>(< 0.05 to < 0.05)           | 139.1<br>(63.5 to 235.7)                          | 128.3<br>(56.5 to 219.5)                            |
| Latent tuberculosis infection                                                        | 979.8<br>(786.0 to 1,180.2)            | --                                         | --                                     | --                                                | --                                                  |
| HIV/AIDS                                                                             | 24.4<br>(11.0 to 42.6)                 | 0.9 <sup>a</sup><br>(0.4 to 1.6)           | 2.0<br>(0.9 to 3.7)                    | 54.5<br>(28.7 to 77.0)                            | 42.6<br>(17.7 to 64.6)                              |
| Drug-susceptible HIV/AIDS - Tuberculosis                                             | < 0.05<br>(< 0.05 to < 0.05)           | < 0.05<br>(< 0.05 to < 0.05)               | < 0.05<br>(< 0.05 to < 0.05)           | -38.6<br>(-45.0 to -31.8)                         | -43.4<br>(-49.1 to -37.1)                           |
| Multidrug-resistant HIV/AIDS - Tuberculosis without extensive drug resistance        | < 0.05<br>(< 0.05 to < 0.05)           | < 0.05<br>(< 0.05 to < 0.05)               | < 0.05<br>(< 0.05 to < 0.05)           | -19.3<br>(-45.5 to 14.3)                          | -25.6<br>(-49.8 to 5.8)                             |
| Extensively drug-resistant HIV/AIDS - Tuberculosis                                   | < 0.05<br>(< 0.05 to < 0.05)           | < 0.05<br>(< 0.05 to < 0.05)               | < 0.05<br>(< 0.05 to < 0.05)           | 73.5<br>(17.2 to 145.7)                           | 60.0<br>(8.0 to 127.4)                              |
| HIV/AIDS resulting in other diseases                                                 | 24.4<br>(11.0 to 42.6)                 | 0.9<br>(0.4 to 1.6)                        | 2.0<br>(0.9 to 3.7)                    | 55.5<br>(29.8 to 78.8)                            | 43.6<br>(18.7 to 65.8)                              |
| <b>Diarrhoea, lower respiratory infections, and other common infectious diseases</b> | <b>500.8</b><br>(465.7 to 534.5)       | <b>31,908.4†</b><br>(28,630.1 to 35,449.3) | <b>15.8</b><br>(10.4 to 23.0)          | <b>-0.7</b><br>(-3.9 to 2.6)                      | <b>-4.9</b><br>(-8.1 to -1.8)                       |
| Diarrhoeal diseases                                                                  | 25.4<br>(23.7 to 27.2)                 | 1,683.3<br>(1,567.1 to 1,803.7)            | 2.9<br>(1.9 to 3.9)                    | -13.4<br>(-19.2 to -7.4)                          | -17.7<br>(-23.3 to -11.6)                           |
| Intestinal infectious diseases                                                       | < 0.05<br>(< 0.05 to < 0.05)           | < 0.05†<br>(< 0.05 to < 0.05)              | < 0.05<br>(< 0.05 to < 0.05)           | 19.8<br>(3.9 to 41.2)                             | 9.5<br>(-4.8 to 28.1)                               |
| Typhoid fever                                                                        | < 0.05<br>(< 0.05 to < 0.05)           | < 0.05<br>(< 0.05 to < 0.05)               | < 0.05<br>(< 0.05 to < 0.05)           | 43.5<br>(18.7 to 72.2)                            | 33.7<br>(11.1 to 61.2)                              |
| Paratyphoid fever                                                                    | < 0.05<br>(< 0.05 to < 0.05)           | < 0.05<br>(< 0.05 to < 0.05)               | < 0.05<br>(< 0.05 to < 0.05)           | -4.2<br>(-21.1 to 17.7)                           | -11.0<br>(-26.5 to 7.9)                             |
| Other intestinal infectious diseases                                                 | --                                     | --                                         | < 0.05<br>(< 0.05 to < 0.05)           | -11.3<br>(-33.7 to 15.5)                          | -24.8<br>(-46.2 to 5.7)                             |
| Lower respiratory infections                                                         | 3.7<br>(3.4 to 4.0)                    | 170.6<br>(156.8 to 185.8)                  | 0.2<br>(0.1 to 0.3)                    | -0.2<br>(-12.6 to 14.6)                           | -9.3<br>(-21.0 to 4.1)                              |
| Upper respiratory infections                                                         | 385.2<br>(344.4 to 429.1)              | 29,434.3<br>(26,158.4 to 32,963.9)         | 9.5<br>(5.7 to 14.7)                   | 3.0<br>(-2.0 to 7.8)                              | 0.0<br>(-4.5 to 4.6)                                |
| Otitis media                                                                         | 81.3<br>(70.6 to 96.2)                 | 487.3<br>(341.2 to 756.4)                  | 2.1<br>(1.3 to 3.1)                    | 1.0<br>(-6.5 to 8.3)                              | -2.6<br>(-10.1 to 4.2)                              |
| Meningitis                                                                           | 1.8<br>(1.6 to 2.1)                    | 0.4<br>(0.4 to 0.4)                        | 0.2<br>(0.1 to 0.2)                    | 0.9<br>(-2.2 to 4.0)                              | -4.6<br>(-7.5 to -1.7)                              |
| Pneumococcal meningitis                                                              | 0.6<br>(0.5 to 0.8)                    | 0.1<br>(< 0.05 to 0.1)                     | < 0.05<br>(< 0.05 to 0.1)              | 0.9<br>(-3.4 to 5.3)                              | -5.1<br>(-9.0 to -0.9)                              |
| H influenzae type B meningitis                                                       | 0.2<br>(0.1 to 0.2)                    | < 0.05<br>(< 0.05 to < 0.05)               | < 0.05<br>(< 0.05 to < 0.05)           | -0.3<br>(-5.9 to 4.9)                             | -6.0<br>(-11.7 to -0.7)                             |
| Meningococcal infection                                                              | 0.3<br>(0.2 to 0.4)                    | 0.1<br>(0.1 to 0.1)                        | < 0.05<br>(< 0.05 to < 0.05)           | 3.1<br>(-2.4 to 9.1)                              | -4.0<br>(-9.3 to 1.3)                               |
| Other meningitis                                                                     | 0.7<br>(0.6 to 0.9)                    | 0.2<br>(0.1 to 0.2)                        | 0.1<br>(0.1 to 0.1)                    | 0.4<br>(-4.1 to 4.6)                              | -4.2<br>(-8.8 to 0.1)                               |
| Encephalitis                                                                         | 4.5<br>(3.0 to 6.6)                    | 3.6<br>(3.6 to 3.7)                        | 0.5<br>(0.3 to 0.6)                    | 4.8<br>(1.7 to 8.2)                               | -2.4<br>(-5.2 to 0.7)                               |
| Diphtheria                                                                           | < 0.05<br>(< 0.05 to < 0.05)           | < 0.05<br>(< 0.05 to < 0.05)               | < 0.05<br>(< 0.05 to < 0.05)           | -48.8<br>(-73.6 to -4.2)                          | -54.6<br>(-74.3 to -18.5)                           |
| Whooping cough                                                                       | 0.6<br>(0.5 to 0.8)                    | 4.4<br>(3.4 to 5.5)                        | < 0.05<br>(< 0.05 to < 0.05)           | -42.0<br>(-53.4 to -27.8)                         | -43.8<br>(-55.1 to -29.9)                           |
| Tetanus                                                                              | < 0.05<br>(< 0.05 to < 0.05)           | < 0.05<br>(< 0.05 to < 0.05)               | < 0.05<br>(< 0.05 to < 0.05)           | -40.1<br>(-52.4 to -27.3)                         | -43.4<br>(-54.5 to -31.9)                           |
| Measles                                                                              | < 0.05<br>(< 0.05 to < 0.05)           | 0.3<br>(0.3 to 0.4)                        | < 0.05<br>(< 0.05 to < 0.05)           | 2,328.6<br>(1,400.4 to 5,992.6)                   | 2,287.5<br>(1,375.0 to 5,889.6)                     |
| Varicella and herpes zoster                                                          | 8.9<br>(8.0 to 9.9)                    | 124.1<br>(118.4 to 130.3)                  | 0.4<br>(0.2 to 0.6)                    | 11.2<br>(-1.9 to 25.7)                            | 0.3<br>(-11.6 to 14.5)                              |
| <b>Neglected tropical diseases and malaria</b>                                       | <b>0.4</b><br>(0.3 to 0.5)             | <b>&lt; 0.05†</b><br>(< 0.05 to < 0.05)    | <b>&lt; 0.05</b><br>(< 0.05 to < 0.05) | <b>-19.3</b><br>(-80.8 to 184.4)                  | <b>-26.4</b><br>(-84.7 to 177.6)                    |
| Malaria                                                                              | --                                     | --                                         | --                                     | --                                                | --                                                  |
| Chagas disease                                                                       | 0.3<br>(0.3 to 0.4)                    | --                                         | < 0.05<br>(< 0.05 to < 0.05)           | -1.8<br>(-16.3 to 17.8)                           | -9.7<br>(-22.1 to 6.0)                              |
| Leishmaniasis                                                                        | --                                     | --                                         | --                                     | --                                                | --                                                  |
| Visceral leishmaniasis                                                               | --                                     | --                                         | --                                     | --                                                | --                                                  |
| Cutaneous and mucocutaneous leishmaniasis                                            | --                                     | --                                         | --                                     | --                                                | --                                                  |
| African trypanosomiasis                                                              | --                                     | --                                         | --                                     | --                                                | --                                                  |
| Schistosomiasis                                                                      | --                                     | --                                         | --                                     | --                                                | --                                                  |
| Cysticercosis                                                                        | --                                     | --                                         | --                                     | --                                                | --                                                  |
| Cystic echinococcosis                                                                | < 0.05<br>(< 0.05 to 0.1)              | < 0.05<br>(< 0.05 to < 0.05)               | < 0.05<br>(< 0.05 to < 0.05)           | -33.5<br>(-95.6 to 717.5)                         | -38.1<br>(-96.1 to 673.3)                           |
| Lymphatic filariasis                                                                 | --                                     | --                                         | --                                     | --                                                | --                                                  |
| Onchocerciasis                                                                       | --                                     | --                                         | --                                     | --                                                | --                                                  |
| Trachoma                                                                             | --                                     | --                                         | --                                     | --                                                | --                                                  |
| Dengue                                                                               | --                                     | --                                         | --                                     | --                                                | --                                                  |
| Yellow fever                                                                         | --                                     | --                                         | --                                     | --                                                | --                                                  |
| Rabies                                                                               | < 0.05<br>(< 0.05 to < 0.05)           | < 0.05<br>(< 0.05 to < 0.05)               | < 0.05<br>(< 0.05 to < 0.05)           | -0.0<br>(-20.6 to 27.7)                           | -21.7<br>(-37.0 to 0.0)                             |
| Intestinal nematode infections                                                       | --                                     | --                                         | --                                     | --                                                | --                                                  |
| Ascariasis                                                                           | --                                     | --                                         | --                                     | --                                                | --                                                  |

| Cause                                                                   | Prevalence in thousands (95% UI)              | Incidence in thousands (95% UI)                   | YLDs in thousands (95% UI)                |                                                   |                                                     |
|-------------------------------------------------------------------------|-----------------------------------------------|---------------------------------------------------|-------------------------------------------|---------------------------------------------------|-----------------------------------------------------|
|                                                                         | 2016 counts                                   | 2016 counts                                       | 2016 counts                               | Percentage change in counts between 2006 and 2016 | Percentage change in age-standardised rates between |
| Trichuriasis                                                            | --                                            | --                                                | --                                        | --                                                | --                                                  |
| Hookworm disease                                                        | --                                            | --                                                | --                                        | --                                                | --                                                  |
| Food-borne trematodiasis                                                | --                                            | --                                                | --                                        | --                                                | --                                                  |
| Leprosy                                                                 | --                                            | --                                                | --                                        | --                                                | --                                                  |
| Ebola virus disease                                                     | --                                            | --                                                | --                                        | --                                                | --                                                  |
| Zika virus disease                                                      | --                                            | --                                                | --                                        | --                                                | --                                                  |
| Guinea worm disease                                                     | --                                            | --                                                | --                                        | --                                                | --                                                  |
| Other neglected tropical diseases                                       | --                                            | --                                                | < 0.05<br>(< 0.05 to < 0.05)              | --                                                | --                                                  |
| <b>Maternal disorders</b>                                               | <b>3.8</b><br><b>(3.0 to 4.8)</b>             | <b>99.2†</b><br><b>(91.0 to 108.0)</b>            | <b>0.2</b><br><b>(0.2 to 0.3)</b>         | <b>-11.5</b><br><b>(-31.9 to 15.5)</b>            | <b>-14.8</b><br><b>(-34.7 to 12.4)</b>              |
| Maternal haemorrhage                                                    | 1.0<br>(0.6 to 1.7)                           | 8.3<br>(7.6 to 9.5)                               | < 0.05<br>(< 0.05 to 0.1)                 | -15.2<br>(-46.6 to 36.6)                          | -18.7<br>(-48.7 to 29.9)                            |
| Maternal sepsis and other pregnancy related infections                  | 1.6<br>(1.2 to 2.0)                           | 9.0<br>(8.4 to 9.7)                               | < 0.05<br>(< 0.05 to 0.1)                 | -8.0<br>(-55.0 to 92.8)                           | -13.3<br>(-58.6 to 83.9)                            |
| Maternal hypertensive disorders                                         | 0.9<br>(0.6 to 1.2)                           | 3.8<br>(3.4 to 4.2)                               | < 0.05<br>(< 0.05 to 0.1)                 | -11.9<br>(-49.8 to 58.8)                          | -15.2<br>(-51.7 to 54.3)                            |
| Maternal obstructed labour and uterine rupture                          | < 0.05<br>(< 0.05 to < 0.05)                  | 2.2<br>(1.8 to 2.8)                               | < 0.05<br>(< 0.05 to < 0.05)              | -28.3<br>(-61.1 to 33.8)                          | -31.4<br>(-63.1 to 27.4)                            |
| Maternal abortion, miscarriage, and ectopic pregnancy                   | 0.6<br>(0.4 to 0.8)                           | 75.8<br>(67.9 to 84.4)                            | 0.1<br>(< 0.05 to 0.1)                    | -4.9<br>(-48.1 to 73.4)                           | -6.6<br>(-49.6 to 70.4)                             |
| Other maternal disorders                                                | --                                            | --                                                | < 0.05<br>(< 0.05 to 0.1)                 | -16.1<br>(-35.5 to 10.3)                          | -19.4<br>(-38.0 to 6.5)                             |
| <b>Neonatal disorders</b>                                               | <b>76.6</b><br><b>(65.4 to 89.5)</b>          | <b>12.1</b><br><b>--</b>                          | <b>12.1</b><br><b>(8.5 to 16.9)</b>       | <b>5.4</b><br><b>(-5.8 to 19.4)</b>               | <b>2.4</b><br><b>(-8.4 to 16.4)</b>                 |
| Neonatal preterm birth complications                                    | 58.8<br>(47.0 to 76.5)                        | --                                                | 6.0<br>(4.0 to 8.7)                       | 4.6<br>(-14.8 to 27.7)                            | 2.0<br>(-17.3 to 24.8)                              |
| Neonatal encephalopathy due to birth asphyxia and trauma                | 22.7<br>(13.4 to 35.1)                        | --                                                | 4.3<br>(2.3 to 7.3)                       | 6.1<br>(-7.1 to 28.8)                             | 2.5<br>(-10.2 to 25.1)                              |
| Neonatal sepsis and other neonatal infections                           | 3.5<br>(1.6 to 7.4)                           | --                                                | 1.4<br>(0.6 to 3.3)                       | 7.6<br>(-9.4 to 31.9)                             | 4.4<br>(-12.8 to 28.1)                              |
| Hemolytic disease and other neonatal jaundice                           | 0.6<br>(0.5 to 0.7)                           | --                                                | 0.2<br>(0.1 to 0.2)                       | 2.0<br>(-6.0 to 9.7)                              | -1.4<br>(-9.0 to 6.3)                               |
| Other neonatal disorders                                                | --                                            | --                                                | 0.2<br>(0.1 to 0.3)                       | 3.1<br>(-15.0 to 25.1)                            | 0.0<br>(-17.6 to 21.4)                              |
| <b>Nutritional deficiencies</b>                                         | <b>461.7</b><br><b>(382.1 to 541.6)</b>       | <b>39.7†</b><br><b>(30.6 to 49.1)</b>             | <b>6.5</b><br><b>(4.2 to 10.1)</b>        | <b>-6.0</b><br><b>(-22.6 to 15.2)</b>             | <b>-7.5</b><br><b>(-23.4 to 13.7)</b>               |
| Protein-energy malnutrition                                             | 3.8<br>(3.7 to 3.9)                           | 2.4<br>(2.3 to 2.4)                               | 0.4<br>(0.3 to 0.6)                       | 1.8<br>(-10.0 to 15.0)                            | -1.2<br>(-12.7 to 11.6)                             |
| Iodine deficiency                                                       | 109.2<br>(84.1 to 141.9)                      | 1.3<br>(1.1 to 1.7)                               | 2.8<br>(1.7 to 4.2)                       | 0.0<br>(-9.3 to 10.9)                             | -6.3<br>(-15.3 to 3.6)                              |
| Vitamin A deficiency                                                    | 43.8<br>(33.3 to 54.8)                        | 36.0<br>(26.9 to 45.6)                            | --                                        | --                                                | --                                                  |
| Iron-deficiency anaemia                                                 | 281.5<br>(211.1 to 365.5)                     | --                                                | 3.3<br>(1.8 to 5.8)                       | -11.3<br>(-37.2 to 27.7)                          | -9.3<br>(-36.3 to 28.1)                             |
| Other nutritional deficiencies                                          | --                                            | --                                                | < 0.05<br>(< 0.05 to < 0.05)              | 1.4<br>(-10.9 to 15.0)                            | -1.5<br>(-13.4 to 11.6)                             |
| <b>Other communicable, maternal, neonatal, and nutritional diseases</b> | <b>1,313.8</b><br><b>(1,206.3 to 1,427.0)</b> | <b>245.3</b><br><b>(211.2 to 294.9)</b>           | <b>1.4</b><br><b>(0.8 to 2.3)</b>         | <b>-4.2</b><br><b>(-11.5 to 2.7)</b>              | <b>-6.0</b><br><b>(-13.2 to 1.4)</b>                |
| Sexually transmitted diseases excluding HIV                             | 1,106.2<br>(1,009.3 to 1,213.1)               | 235.1<br>(200.6 to 284.3)                         | 1.0<br>(0.6 to 1.8)                       | -5.8<br>(-14.7 to 2.9)                            | -8.6<br>(-17.4 to -0.4)                             |
| Syphilis                                                                | 5.9<br>(4.0 to 8.8)                           | 5.3<br>(3.1 to 8.2)                               | 0.1<br>(0.1 to 0.1)                       | 17.3<br>(3.2 to 32.8)                             | 1.7<br>(-10.5 to 15.2)                              |
| Chlamydial infection                                                    | 40.2<br>(19.4 to 78.0)                        | 32.7<br>(17.0 to 58.7)                            | 0.2<br>(0.1 to 0.5)                       | -10.1<br>(-25.7 to 9.9)                           | -8.3<br>(-25.2 to 11.5)                             |
| Gonococcal infection                                                    | 9.1<br>(4.7 to 20.6)                          | 24.2<br>(8.6 to 67.7)                             | 0.1<br>(< 0.05 to 0.1)                    | -17.6<br>(-33.9 to 5.7)                           | -17.0<br>(-34.2 to 7.8)                             |
| Trichomoniasis                                                          | 150.1<br>(127.7 to 176.4)                     | 123.9<br>(105.3 to 145.8)                         | 0.1<br>(0.1 to 0.3)                       | 4.2<br>(-5.2 to 14.4)                             | -0.4<br>(-9.6 to 8.8)                               |
| Genital herpes                                                          | 919.4<br>(794.0 to 1,077.0)                   | 33.0<br>(27.9 to 39.1)                            | 0.2<br>(0.1 to 0.5)                       | 6.7<br>(-1.8 to 15.1)                             | -1.4<br>(-9.3 to 7.0)                               |
| Other sexually transmitted diseases                                     | 11.2<br>(9.6 to 13.2)                         | 16.0<br>(13.3 to 18.9)                            | 0.3<br>(0.2 to 0.4)                       | -17.2<br>(-30.8 to -3.9)                          | -16.1<br>(-30.0 to -1.9)                            |
| Hepatitis                                                               | 246.3<br>(219.3 to 277.0)                     | 10.2<br>(9.0 to 11.9)                             | < 0.05<br>(< 0.05 to < 0.05)              | -25.1<br>(-34.9 to -13.2)                         | -25.1<br>(-37.2 to -11.6)                           |
| Acute hepatitis A                                                       | 0.2<br>(0.2 to 0.3)                           | 3.3<br>(2.6 to 3.9)                               | < 0.05<br>(< 0.05 to < 0.05)              | -25.3<br>(-41.1 to -4.7)                          | -24.2<br>(-43.9 to -0.1)                            |
| Hepatitis B                                                             | 105.5<br>(84.7 to 131.5)                      | 5.4<br>(4.3 to 6.8)                               | < 0.05<br>(< 0.05 to < 0.05)              | -29.6<br>(-40.8 to -16.8)                         | -35.6<br>(-45.4 to -24.3)                           |
| Hepatitis C                                                             | 140.6<br>(126.4 to 155.4)                     | 1.3<br>(1.1 to 1.5)                               | < 0.05<br>(< 0.05 to < 0.05)              | -4.0<br>(-5.3 to -2.7)                            | -4.2<br>(-5.1 to -3.4)                              |
| Acute hepatitis E                                                       | < 0.05<br>(< 0.05 to < 0.05)                  | 0.2<br>(0.2 to 0.3)                               | < 0.05<br>(< 0.05 to < 0.05)              | -23.9<br>(-28.5 to -18.9)                         | -29.0<br>(-33.4 to -23.2)                           |
| Other infectious diseases                                               | 7.9<br>(6.0 to 10.3)                          | < 0.05<br>(< 0.05 to < 0.05)                      | 0.3<br>(0.2 to 0.5)                       | 3.0<br>(-8.6 to 15.2)                             | 2.4<br>(-13.2 to 20.4)                              |
| <b>Non-communicable diseases</b>                                        | <b>8,084.4</b><br><b>(8,038.8 to 8,122.7)</b> | <b>24,803.7†</b><br><b>(23,171.4 to 26,287.8)</b> | <b>990.5</b><br><b>(736.9 to 1,272.4)</b> | <b>9.7</b><br><b>(8.1 to 11.4)</b>                | <b>0.3</b><br><b>(-1.3 to 2.0)</b>                  |
| <b>Neoplasms</b>                                                        | <b>165.2</b><br><b>(159.3 to 172.1)</b>       | <b>51.2</b><br><b>(48.6 to 53.7)</b>              | <b>17.0</b><br><b>(12.5 to 22.2)</b>      | <b>21.0</b><br><b>(15.6 to 26.6)</b>              | <b>1.8</b><br><b>(-2.9 to 6.5)</b>                  |
| Lip and oral cavity cancer                                              | 2.2<br>(1.9 to 2.4)                           | 0.6<br>(0.5 to 0.7)                               | 0.2<br>(0.2 to 0.3)                       | 9.9<br>(-4.5 to 25.9)                             | -7.7<br>(-19.7 to 6.7)                              |
| Nasopharynx cancer                                                      | 0.4<br>(0.3 to 0.4)                           | 0.1<br>(0.1 to 0.1)                               | < 0.05<br>(< 0.05 to 0.1)                 | 10.5<br>(-9.9 to 35.9)                            | -4.5<br>(-21.3 to 17.7)                             |
| Other pharynx cancer                                                    | 2.0<br>(1.8 to 2.1)                           | 0.5<br>(0.5 to 0.6)                               | 0.2<br>(0.1 to 0.3)                       | 28.5<br>(5.0 to 54.6)                             | 8.4<br>(-12.2 to 30.7)                              |
| Oesophageal cancer                                                      | 0.7<br>(0.6 to 0.8)                           | 0.5<br>(0.4 to 0.5)                               | 0.1<br>(0.1 to 0.2)                       | 17.0<br>(-5.6 to 43.8)                            | -2.1<br>(-20.7 to 19.7)                             |
| Stomach cancer                                                          | 4.3<br>(3.8 to 4.8)                           | 2.0<br>(1.8 to 2.2)                               | 0.5<br>(0.4 to 0.7)                       | 17.9<br>(-2.2 to 39.2)                            | -2.1<br>(-17.5 to 15.0)                             |
| Colon and rectum cancer                                                 | 22.3<br>(20.6 to 24.8)                        | 5.8<br>(5.4 to 6.4)                               | 2.0<br>(1.5 to 2.7)                       | 12.5<br>(0.9 to 26.4)                             | -7.2<br>(-17.5 to 4.3)                              |
| Liver cancer                                                            | 1.2<br>(0.9 to 1.6)                           | 1.2<br>(1.1 to 1.4)                               | 0.3<br>(0.2 to 0.4)                       | 34.8<br>(10.9 to 61.6)                            | 12.9<br>(-6.7 to 35.5)                              |
| Liver cancer due to hepatitis B                                         | 0.1<br>(0.1 to 0.2)                           | 0.1<br>(0.1 to 0.1)                               | < 0.05<br>(< 0.05 to < 0.05)              | 29.7<br>(6.2 to 56.3)                             | 10.0<br>(-9.5 to 33.0)                              |

| Cause                                              | Prevalence in thousands (95% UI)              | Incidence in thousands (95% UI)          | YLDs in thousands (95% UI)            |                                                   |                                                     |
|----------------------------------------------------|-----------------------------------------------|------------------------------------------|---------------------------------------|---------------------------------------------------|-----------------------------------------------------|
|                                                    | 2016 counts                                   | 2016 counts                              | 2016 counts                           | Percentage change in counts between 2006 and 2016 | Percentage change in age-standardised rates between |
| Liver cancer due to hepatitis C                    | 0.7<br>(0.5 to 0.9)                           | 0.4<br>(0.3 to 0.5)                      | 0.1<br>(0.1 to 0.1)                   | 34.5<br>(9.0 to 63.5)                             | 11.8<br>(-9.1 to 36.5)                              |
| Liver cancer due to alcohol use                    | 0.8<br>(0.6 to 1.1)                           | 0.5<br>(0.4 to 0.6)                      | 0.1<br>(0.1 to 0.2)                   | 35.4<br>(7.6 to 67.0)                             | 13.5<br>(-9.1 to 39.0)                              |
| Liver cancer due to other causes                   | 0.4<br>(0.2 to 0.5)                           | 0.2<br>(0.2 to 0.3)                      | 0.1<br>( $< 0.05$ to 0.1)             | 36.5<br>(7.6 to 70.3)                             | 14.6<br>(-9.2 to 42.7)                              |
| Gallbladder and biliary tract cancer               | 0.8<br>(0.6 to 1.2)                           | 0.7<br>(0.5 to 0.9)                      | 0.2<br>(0.1 to 0.2)                   | 19.5<br>(-8.1 to 61.2)                            | -1.2<br>(-23.0 to 33.4)                             |
| Pancreatic cancer                                  | 1.9<br>(1.6 to 2.3)                           | 1.9<br>(1.7 to 2.1)                      | 0.4<br>(0.3 to 0.5)                   | 29.2<br>(6.9 to 55.8)                             | 7.2<br>(-9.8 to 27.3)                               |
| Larynx cancer                                      | 1.2<br>(1.1 to 1.4)                           | 0.3<br>(0.3 to 0.4)                      | 0.1<br>(0.1 to 0.2)                   | 6.0<br>(-9.0 to 25.6)                             | -11.4<br>(-24.4 to 5.5)                             |
| Tracheal, bronchus, and lung cancer                | 8.7<br>(7.7 to 9.8)                           | 5.3<br>(4.9 to 5.8)                      | 1.3<br>(0.9 to 1.7)                   | 25.1<br>(7.1 to 47.1)                             | 5.1<br>(-10.2 to 24.3)                              |
| Malignant skin melanoma                            | 9.1<br>(6.8 to 10.2)                          | 1.9<br>(1.4 to 2.1)                      | 0.6<br>(0.4 to 0.8)                   | 34.0<br>(17.2 to 50.9)                            | 16.8<br>(2.2 to 31.9)                               |
| Non-melanoma skin cancer                           | 0.9<br>(0.6 to 1.3)                           | 1.7<br>(1.4 to 2.1)                      | $< 0.05$<br>( $< 0.05$ to 0.1)        | 47.0<br>(-3.5 to 136.0)                           | 19.7<br>(-20.9 to 92.5)                             |
| Non-melanoma skin cancer (squamous-cell carcinoma) | 0.8<br>(0.5 to 1.3)                           | 0.7<br>(0.5 to 1.1)                      | $< 0.05$<br>( $< 0.05$ to 0.1)        | 51.9<br>(-2.1 to 147.7)                           | 23.7<br>(-19.4 to 102.2)                            |
| Non-melanoma skin cancer (basal-cell carcinoma)    | 0.1<br>(0.1 to 0.2)                           | 1.0<br>(0.7 to 1.3)                      | $< 0.05$<br>( $< 0.05$ to $< 0.05$ )  | -18.6<br>(-36.0 to 3.4)                           | -32.4<br>(-45.3 to -15.5)                           |
| Breast cancer                                      | 28.3<br>(26.3 to 31.1)                        | 5.9<br>(5.4 to 6.5)                      | 2.7<br>(1.9 to 3.6)                   | 12.0<br>(1.6 to 23.6)                             | -4.6<br>(-13.8 to 6.0)                              |
| Cervical cancer                                    | 2.2<br>(1.9 to 2.6)                           | 0.6<br>(0.5 to 0.6)                      | 0.2<br>(0.1 to 0.3)                   | -4.4<br>(-21.2 to 13.3)                           | -13.4<br>(-29.3 to 3.6)                             |
| Uterine cancer                                     | 7.7<br>(6.7 to 8.9)                           | 1.6<br>(1.4 to 1.9)                      | 0.6<br>(0.4 to 0.8)                   | 13.8<br>(-8.1 to 39.9)                            | -3.5<br>(-22.1 to 18.7)                             |
| Ovarian cancer                                     | 2.7<br>(2.3 to 3.1)                           | 0.9<br>(0.7 to 1.0)                      | 0.4<br>(0.2 to 0.5)                   | 8.9<br>(-18.4 to 41.6)                            | -7.4<br>(-31.0 to 22.4)                             |
| Prostate cancer                                    | 34.2<br>(28.1 to 41.1)                        | 8.3<br>(7.1 to 9.7)                      | 2.9<br>(1.9 to 4.1)                   | 23.1<br>(6.4 to 45.1)                             | 0.9<br>(-13.4 to 18.1)                              |
| Testicular cancer                                  | 1.9<br>(1.6 to 2.4)                           | 0.4<br>(0.3 to 0.5)                      | 0.1<br>(0.1 to 0.2)                   | 3.4<br>(-22.5 to 38.2)                            | 0.1<br>(-25.7 to 36.3)                              |
| Kidney cancer                                      | 4.2<br>(3.8 to 4.7)                           | 1.2<br>(1.1 to 1.3)                      | 0.4<br>(0.3 to 0.5)                   | 15.5<br>(-0.7 to 34.8)                            | -2.6<br>(-16.1 to 13.1)                             |
| Bladder cancer                                     | 8.9<br>(8.0 to 9.7)                           | 2.1<br>(1.9 to 2.3)                      | 0.8<br>(0.6 to 1.1)                   | 21.1<br>(5.5 to 37.7)                             | 0.0<br>(-12.8 to 14.3)                              |
| Brain and nervous system cancer                    | 1.9<br>(1.4 to 2.5)                           | 0.8<br>(0.6 to 1.0)                      | 0.3<br>(0.2 to 0.4)                   | 18.9<br>(-3.5 to 46.5)                            | 5.1<br>(-14.5 to 29.0)                              |
| Thyroid cancer                                     | 3.9<br>(3.5 to 4.4)                           | 0.7<br>(0.7 to 0.8)                      | 0.2<br>(0.2 to 0.4)                   | 11.7<br>(-4.5 to 32.4)                            | -1.3<br>(-15.9 to 17.1)                             |
| Mesothelioma                                       | 0.2<br>(0.2 to 0.3)                           | 0.1<br>(0.1 to 0.2)                      | $< 0.05$<br>( $< 0.05$ to 0.1)        | 26.5<br>(11.7 to 39.8)                            | 6.0<br>(-6.5 to 17.0)                               |
| Hodgkin lymphoma                                   | 0.8<br>(0.7 to 1.3)                           | 0.2<br>(0.2 to 0.3)                      | 0.1<br>( $< 0.05$ to 0.1)             | 0.2<br>(-17.3 to 22.7)                            | -6.6<br>(-24.6 to 15.9)                             |
| Non-Hodgkin's lymphoma                             | 7.3<br>(6.3 to 8.2)                           | 1.9<br>(1.6 to 2.1)                      | 0.6<br>(0.4 to 0.8)                   | 32.8<br>(14.5 to 54.1)                            | 13.0<br>(-2.3 to 29.7)                              |
| Multiple myeloma                                   | 1.6<br>(1.2 to 1.9)                           | 0.6<br>(0.4 to 0.7)                      | 0.3<br>(0.2 to 0.4)                   | 38.2<br>(6.8 to 75.5)                             | 14.8<br>(-11.1 to 44.4)                             |
| Leukaemia                                          | 6.1<br>(5.4 to 7.0)                           | 1.8<br>(1.6 to 2.0)                      | 0.8<br>(0.6 to 1.1)                   | 56.0<br>(34.1 to 82.3)                            | 26.5<br>(9.0 to 48.8)                               |
| Acute lymphoid leukaemia                           | 0.6<br>(0.5 to 0.7)                           | 0.1<br>(0.1 to 0.2)                      | 0.1<br>( $< 0.05$ to 0.1)             | 39.1<br>(1.9 to 96.3)                             | 29.3<br>(-14.1 to 105.4)                            |
| Chronic lymphoid leukaemia                         | 3.5<br>(3.0 to 4.1)                           | 0.8<br>(0.7 to 0.9)                      | 0.4<br>(0.3 to 0.6)                   | 62.3<br>(31.2 to 107.2)                           | 29.5<br>(4.1 to 65.7)                               |
| Acute myeloid leukaemia                            | 0.6<br>(0.4 to 0.7)                           | 0.4<br>(0.3 to 0.5)                      | 0.1<br>(0.1 to 0.2)                   | 60.6<br>(34.4 to 89.6)                            | 29.7<br>(9.0 to 51.7)                               |
| Chronic myeloid leukaemia                          | 0.5<br>(0.5 to 0.7)                           | 0.2<br>(0.2 to 0.2)                      | 0.1<br>( $< 0.05$ to 0.1)             | 41.6<br>(18.9 to 67.2)                            | 17.0<br>(-0.7 to 36.9)                              |
| Other leukaemia                                    | 0.9<br>(0.7 to 1.1)                           | 0.2<br>(0.2 to 0.3)                      | 0.1<br>(0.1 to 0.1)                   | 49.6<br>(17.8 to 87.5)                            | 15.9<br>(-7.6 to 41.6)                              |
| Other neoplasms                                    | 6.8<br>(5.7 to 7.9)                           | 1.8<br>(1.6 to 2.1)                      | 0.5<br>(0.4 to 0.7)                   | 70.9<br>(42.9 to 99.3)                            | 46.1<br>(23.1 to 71.5)                              |
| <b>Cardiovascular diseases</b>                     | <b>1,157.6</b><br><b>(1,110.5 to 1,199.8)</b> | <b>110.8†</b><br><b>(105.0 to 117.1)</b> | <b>78.1</b><br><b>(56.7 to 102.0)</b> | <b>8.2</b><br><b>(3.5 to 13.2)</b>                | <b>-8.8</b><br><b>(-12.7 to -4.7)</b>               |
| Rheumatic heart disease                            | 0.8<br>(0.8 to 0.9)                           | 0.4<br>(0.4 to 0.4)                      | 0.1<br>( $< 0.05$ to 0.1)             | -14.3<br>(-27.7 to 1.8)                           | -24.8<br>(-35.0 to -13.4)                           |
| Ischaemic heart disease                            | 313.7<br>(288.4 to 338.9)                     | 32.6<br>(30.2 to 35.0)                   | 16.6<br>(11.7 to 22.1)                | 12.9<br>(7.3 to 19.4)                             | -5.5<br>(-10.0 to -0.2)                             |
| Cerebrovascular disease                            | 154.3<br>(141.8 to 169.1)                     | 23.7‡<br>(21.9 to 25.6)                  | 24.4<br>(16.8 to 31.4)                | 17.7<br>(8.4 to 28.1)                             | -0.5<br>(-7.8 to 7.8)                               |
| Ischaemic stroke                                   | 127.0<br>(111.9 to 146.8)                     | 16.6‡<br>(14.9 to 18.4)                  | 19.5<br>(13.2 to 25.5)                | 15.5<br>(5.1 to 28.0)                             | -2.8<br>(-11.4 to 7.3)                              |
| Hemorrhagic stroke                                 | 32.8<br>(28.8 to 36.9)                        | 7.1‡<br>(6.4 to 7.9)                     | 4.9<br>(3.6 to 6.4)                   | 27.6<br>(14.2 to 43.2)                            | 8.9<br>(-1.9 to 20.9)                               |
| Hypertensive heart disease                         | 42.0<br>(36.1 to 49.1)                        | --                                       | 3.3<br>(2.3 to 4.5)                   | 4.2<br>(-5.7 to 16.2)                             | -14.6<br>(-22.7 to -5.3)                            |
| Cardiomyopathy and myocarditis                     | 33.9<br>(30.0 to 38.1)                        | 6.5†<br>(5.8 to 7.2)                     | 2.7<br>(1.9 to 3.8)                   | 5.5<br>(-4.7 to 16.9)                             | -11.8<br>(-20.0 to -3.3)                            |
| Myocarditis                                        | 3.9<br>(3.6 to 4.3)                           | 6.5<br>(5.8 to 7.2)                      | 0.3<br>(0.2 to 0.4)                   | -2.7<br>(-15.2 to 12.8)                           | -8.6<br>(-19.6 to 4.2)                              |
| Alcoholic cardiomyopathy                           | 5.4<br>(4.6 to 6.2)                           | --                                       | 0.4<br>(0.3 to 0.6)                   | -2.4<br>(-17.6 to 16.6)                           | -16.8<br>(-30.1 to 0.2)                             |
| Other cardiomyopathy                               | 25.1<br>(21.3 to 29.9)                        | --                                       | 2.0<br>(1.3 to 2.8)                   | 8.8<br>(-3.7 to 22.0)                             | -11.1<br>(-20.4 to -0.9)                            |
| Atrial fibrillation and flutter                    | 151.7<br>(131.9 to 173.7)                     | 12.1<br>(10.3 to 14.1)                   | 11.8<br>(8.1 to 16.4)                 | 1.2<br>(-11.0 to 12.7)                            | -16.0<br>(-26.2 to -6.0)                            |
| Peripheral vascular disease                        | 411.4<br>(360.7 to 467.9)                     | 33.2<br>(28.4 to 38.7)                   | 1.5<br>(0.7 to 2.9)                   | 11.7<br>(3.3 to 21.0)                             | -7.6<br>(-14.3 to -0.4)                             |
| Endocarditis                                       | 1.5<br>(1.3 to 1.7)                           | 2.3<br>(2.1 to 2.6)                      | 0.1<br>(0.1 to 0.2)                   | -0.7<br>(-19.1 to 22.6)                           | -15.6<br>(-29.8 to 1.2)                             |
| Other cardiovascular and circulatory diseases      | 339.3<br>(297.3 to 385.4)                     | --                                       | 17.5<br>(11.9 to 24.2)                | -1.3<br>(-8.7 to 7.3)                             | -14.8<br>(-21.0 to -7.3)                            |
| <b>Chronic respiratory diseases</b>                | <b>1,133.2</b><br><b>(1,086.3 to 1,180.0)</b> | <b>83.9†</b><br><b>(80.1 to 88.0)</b>    | <b>34.8</b><br><b>(25.8 to 45.4)</b>  | <b>4.2</b><br><b>(-1.5 to 10.5)</b>               | <b>-2.0</b><br><b>(-6.7 to 2.9)</b>                 |
| Chronic obstructive pulmonary disease              | 592.8<br>(554.6 to 637.8)                     | 32.9<br>(30.7 to 35.4)                   | 10.7<br>(8.2 to 13.6)                 | 4.7<br>(-12.8 to 22.8)                            | -9.4<br>(-24.0 to 5.6)                              |
| Pneumoconiosis                                     | 0.4<br>(0.3 to 0.4)                           | $< 0.05$<br>( $< 0.05$ to $< 0.05$ )     | 0.1<br>( $< 0.05$ to 0.1)             | 1.7<br>(-20.7 to 28.4)                            | -16.0<br>(-33.2 to 4.4)                             |
| Silicosis                                          | 0.1<br>(0.1 to 0.1)                           | $< 0.05$<br>( $< 0.05$ to $< 0.05$ )     | $< 0.05$<br>( $< 0.05$ to $< 0.05$ )  | 27.9<br>(19.2 to 38.0)                            | 7.4<br>(0.1 to 15.5)                                |



| Cause                                                          | Prevalence in thousands (95% UI)              | Incidence in thousands (95% UI)               | YLDs in thousands (95% UI)              |                                                   |                                                     |
|----------------------------------------------------------------|-----------------------------------------------|-----------------------------------------------|-----------------------------------------|---------------------------------------------------|-----------------------------------------------------|
|                                                                | 2016 counts                                   | 2016 counts                                   | 2016 counts                             | Percentage change in counts between 2006 and 2016 | Percentage change in age-standardised rates between |
| Asbestosis                                                     | < 0.05<br>(< 0.05 to < 0.05)                  | < 0.05<br>(< 0.05 to < 0.05)                  | < 0.05<br>(< 0.05 to < 0.05)            | 22.6<br>(3.0 to 46.2)                             | 4.0<br>(-13.5 to 25.1)                              |
| Coal workers pneumoconiosis                                    | --                                            | --                                            | --                                      | --                                                | --                                                  |
| Other pneumoconiosis                                           | 0.3<br>(0.3 to 0.4)                           | < 0.05<br>(< 0.05 to < 0.05)                  | < 0.05<br>(< 0.05 to 0.1)               | -3.5<br>(-28.6 to 28.7)                           | -20.7<br>(-40.5 to 3.9)                             |
| Asthma                                                         | 597.5<br>(562.8 to 636.1)                     | 50.5<br>(47.3 to 53.9)                        | 23.2<br>(15.3 to 32.8)                  | 3.4<br>(-0.6 to 7.6)                              | -0.1<br>(-4.2 to 4.3)                               |
| Interstitial lung disease and pulmonary sarcoidosis            | 4.6<br>(4.1 to 5.1)                           | 0.5<br>(0.4 to 0.5)                           | 0.5<br>(0.3 to 0.7)                     | 21.2<br>(7.7 to 38.1)                             | 2.6<br>(-7.6 to 14.9)                               |
| Other chronic respiratory diseases                             | --                                            | --                                            | 0.3<br>(0.3 to 0.4)                     | 29.1<br>(10.5 to 52.5)                            | 28.7<br>(7.9 to 55.9)                               |
| <b>Cirrhosis and other chronic liver diseases</b>              | <b>127.6</b><br><b>(121.7 to 133.4)</b>       | <b>2.3</b><br><b>(2.2 to 2.4)</b>             | <b>2.3</b><br><b>(1.6 to 3.2)</b>       | <b>11.2</b><br><b>(1.6 to 21.7)</b>               | <b>0.6</b><br><b>(-8.6 to 10.5)</b>                 |
| Cirrhosis and other chronic liver diseases due to hepatitis B  | 16.0<br>(12.7 to 19.9)                        | 0.3<br>(0.2 to 0.4)                           | 0.3<br>(0.2 to 0.4)                     | 13.4<br>(-13.4 to 43.9)                           | 1.7<br>(-22.6 to 29.9)                              |
| Cirrhosis and other chronic liver diseases due to hepatitis C  | 39.6<br>(30.6 to 50.2)                        | 0.7<br>(0.5 to 0.9)                           | 0.7<br>(0.4 to 1.0)                     | 13.0<br>(-5.5 to 34.3)                            | 1.0<br>(-15.6 to 21.1)                              |
| Cirrhosis and other chronic liver diseases due to alcohol use  | 61.6<br>(52.5 to 70.9)                        | 1.2<br>(1.0 to 1.3)                           | 1.1<br>(0.7 to 1.5)                     | 11.6<br>(-1.9 to 26.9)                            | -1.4<br>(-13.9 to 12.3)                             |
| Cirrhosis and other chronic liver diseases due to other causes | 10.4<br>(8.0 to 13.5)                         | 0.2<br>(0.1 to 0.2)                           | 0.3<br>(0.2 to 0.4)                     | 4.8<br>(-15.4 to 30.1)                            | 3.8<br>(-16.8 to 30.2)                              |
| <b>Digestive diseases</b>                                      | <b>389.7</b><br><b>(361.8 to 422.5)</b>       | <b>426.9†</b><br><b>(401.5 to 452.8)</b>      | <b>9.4</b><br><b>(6.6 to 12.7)</b>      | <b>4.9</b><br><b>(-5.1 to 16.7)</b>               | <b>-4.8</b><br><b>(-14.2 to 6.5)</b>                |
| Peptic ulcer disease                                           | 83.9<br>(73.7 to 99.3)                        | 15.2<br>(13.7 to 16.9)                        | 0.8<br>(0.5 to 1.4)                     | 7.3<br>(-27.7 to 63.0)                            | 0.9<br>(-33.9 to 61.1)                              |
| Gastritis and duodenitis                                       | 213.9<br>(186.5 to 242.7)                     | 152.3<br>(136.1 to 169.8)                     | 1.3<br>(0.8 to 2.1)                     | 12.4<br>(-18.1 to 53.0)                           | 2.8<br>(-27.3 to 46.6)                              |
| Appendicitis                                                   | 0.4<br>(0.4 to 0.5)                           | 10.8<br>(10.1 to 11.7)                        | 0.1<br>(0.1 to 0.2)                     | -1.2<br>(-22.8 to 28.1)                           | -2.2<br>(-28.6 to 35.4)                             |
| Paralytic ileus and intestinal obstruction                     | 0.2<br>(0.2 to 0.2)                           | 5.5<br>(4.8 to 6.0)                           | 0.1<br>(< 0.05 to 0.1)                  | 25.5<br>(13.7 to 39.6)                            | 11.0<br>(2.5 to 20.2)                               |
| Inguinal, femoral, and abdominal hernia                        | 71.6<br>(66.5 to 77.3)                        | 113.9<br>(99.4 to 127.3)                      | 4.6<br>(3.2 to 6.3)                     | 1.8<br>(-8.3 to 12.4)                             | -8.2<br>(-17.4 to 1.2)                              |
| Inflammatory bowel disease                                     | 7.0<br>(6.6 to 7.5)                           | 2.4<br>(2.3 to 2.5)                           | 1.0<br>(0.7 to 1.4)                     | 5.1<br>(-10.1 to 22.2)                            | -3.1<br>(-17.4 to 14.3)                             |
| Vascular intestinal disorders                                  | 0.4<br>(0.4 to 0.5)                           | 1.8<br>(1.6 to 2.0)                           | 0.1<br>(0.1 to 0.2)                     | 16.8<br>(-10.4 to 53.6)                           | 0.6<br>(-19.0 to 26.1)                              |
| Gallbladder and biliary diseases                               | 23.4<br>(21.8 to 25.1)                        | 116.0<br>(102.6 to 127.3)                     | 0.5<br>(0.3 to 0.7)                     | 1.7<br>(-18.2 to 24.5)                            | -8.4<br>(-25.9 to 12.2)                             |
| Pancreatitis                                                   | 1.0<br>(0.9 to 1.1)                           | 9.0<br>(8.1 to 9.9)                           | 0.1<br>(0.1 to 0.2)                     | 2.1<br>(-5.8 to 9.8)                              | -9.1<br>(-15.1 to -3.3)                             |
| Other digestive diseases                                       | --                                            | --                                            | 0.8<br>(0.5 to 1.0)                     | 10.1<br>(0.2 to 21.1)                             | -1.5<br>(-10.6 to 9.4)                              |
| <b>Neurological disorders</b>                                  | <b>3,565.4</b><br><b>(3,437.9 to 3,704.6)</b> | <b>1,324.6</b><br><b>(1,146.1 to 1,521.7)</b> | <b>119.1</b><br><b>(80.9 to 161.4)</b>  | <b>7.3</b><br><b>(-1.6 to 17.0)</b>               | <b>-0.1</b><br><b>(-9.3 to 9.9)</b>                 |
| Alzheimer's disease and other dementias                        | 126.9<br>(106.6 to 151.1)                     | 24.8<br>(20.3 to 29.8)                        | 19.3<br>(13.3 to 25.9)                  | 24.4<br>(18.2 to 31.0)                            | -2.0<br>(-6.5 to 2.6)                               |
| Parkinson's disease                                            | 15.9<br>(12.4 to 19.9)                        | 2.0<br>(1.5 to 2.5)                           | 1.8<br>(1.2 to 2.6)                     | 25.4<br>(12.9 to 39.0)                            | 4.3<br>(-6.2 to 16.1)                               |
| Epilepsy                                                       | 23.4<br>(4.8 to 42.1)                         | 2.2<br>(0.5 to 4.0)                           | 5.4<br>(0.9 to 13.5)                    | 1.7<br>(-85.8 to 494.0)                           | -4.4<br>(-85.4 to 450.4)                            |
| Multiple sclerosis                                             | 11.0<br>(9.9 to 12.2)                         | 0.2<br>(0.2 to 0.3)                           | 2.8<br>(2.0 to 3.7)                     | 20.0<br>(4.1 to 37.8)                             | 11.0<br>(-4.0 to 28.4)                              |
| Motor neuron disease                                           | 1.3<br>(1.2 to 1.4)                           | 0.2<br>(0.2 to 0.2)                           | 0.3<br>(0.2 to 0.4)                     | 19.4<br>(15.2 to 23.8)                            | 7.3<br>(3.3 to 11.3)                                |
| Migraine                                                       | 1,819.9<br>(1,746.9 to 1,893.5)               | 145.9<br>(138.4 to 153.8)                     | 77.4<br>(50.0 to 108.1)                 | 3.5<br>(0.7 to 6.7)                               | -0.2<br>(-3.1 to 3.0)                               |
| Tension-type headache                                          | 2,282.4<br>(2,039.3 to 2,542.3)               | 1,149.2<br>(972.1 to 1,344.0)                 | 10.6<br>(6.6 to 15.5)                   | 4.6<br>(-0.5 to 10.9)                             | 0.0<br>(-4.8 to 5.9)                                |
| Other neurological disorders                                   | < 0.05<br>(< 0.05 to 0.1)                     | 0.1<br>(0.1 to 0.1)                           | 1.5<br>(0.8 to 2.9)                     | 20.1<br>(-46.3 to 176.1)                          | 15.8<br>(-58.7 to 212.2)                            |
| <b>Mental and substance use disorders</b>                      | <b>1,462.6</b><br><b>(1,406.1 to 1,520.1)</b> | <b>444.8†</b><br><b>(415.8 to 476.2)</b>      | <b>206.4</b><br><b>(149.2 to 267.3)</b> | <b>4.5</b><br><b>(2.5 to 6.7)</b>                 | <b>-0.4</b><br><b>(-2.3 to 1.7)</b>                 |
| Schizophrenia                                                  | 26.0<br>(21.6 to 31.0)                        | 1.2<br>(1.0 to 1.4)                           | 16.5<br>(11.9 to 21.2)                  | 7.0<br>(-1.2 to 16.3)                             | 0.4<br>(-7.5 to 9.0)                                |
| Alcohol use disorders                                          | 153.0<br>(134.6 to 173.8)                     | 54.1<br>(46.0 to 62.1)                        | 15.3<br>(10.5 to 21.2)                  | -0.7<br>(-9.9 to 8.8)                             | -6.0<br>(-14.8 to 3.0)                              |
| Drug use disorders                                             | 75.9<br>(72.3 to 79.9)                        | 9.3<br>(8.7 to 9.9)                           | 18.7<br>(13.5 to 23.6)                  | 12.6<br>(4.2 to 22.2)                             | 7.7<br>(-0.3 to 17.2)                               |
| Opioid use disorders                                           | 32.9<br>(32.5 to 33.4)                        | 3.7<br>(3.6 to 3.9)                           | 13.7<br>(9.8 to 17.4)                   | 17.5<br>(7.2 to 29.2)                             | 12.0<br>(1.6 to 23.2)                               |
| Cocaine use disorders                                          | 10.0<br>(8.7 to 11.4)                         | 0.6<br>(0.5 to 0.7)                           | 1.3<br>(0.8 to 2.0)                     | -0.7<br>(-17.4 to 21.2)                           | -4.8<br>(-22.1 to 17.6)                             |
| Amphetamine use disorders                                      | 6.1<br>(4.2 to 8.3)                           | 0.6<br>(0.4 to 0.8)                           | 0.8<br>(0.4 to 1.3)                     | -1.3<br>(-25.8 to 28.7)                           | -3.6<br>(-28.3 to 27.6)                             |
| Cannabis use disorders                                         | 20.6<br>(17.5 to 24.3)                        | 3.2<br>(2.7 to 3.8)                           | 0.6<br>(0.4 to 0.9)                     | 4.8<br>(-11.9 to 23.2)                            | 5.0<br>(-12.7 to 25.1)                              |
| Other drug use disorders                                       | 8.2<br>(7.4 to 9.0)                           | 1.2<br>(1.1 to 1.4)                           | 2.3<br>(1.5 to 3.2)                     | 2.4<br>(-16.2 to 26.7)                            | -1.2<br>(-20.6 to 22.1)                             |
| Depressive disorders                                           | 330.9<br>(310.0 to 354.7)                     | 291.0<br>(264.9 to 320.8)                     | 50.7<br>(35.3 to 68.9)                  | 3.3<br>(-0.8 to 7.9)                              | -3.5<br>(-7.5 to 0.8)                               |
| Major depressive disorder                                      | 175.7<br>(159.9 to 193.1)                     | 269.8<br>(244.1 to 299.8)                     | 35.5<br>(24.3 to 48.2)                  | 1.6<br>(-4.1 to 8.1)                              | -4.7<br>(-10.1 to 1.4)                              |
| Dysthymia                                                      | 159.8<br>(140.1 to 183.8)                     | 21.2<br>(18.6 to 24.4)                        | 15.2<br>(10.2 to 22.4)                  | 7.6<br>(4.2 to 11.0)                              | -0.2<br>(-3.3 to 3.0)                               |
| Bipolar disorder                                               | 101.8<br>(67.2 to 144.3)                      | 6.2<br>(4.3 to 8.5)                           | 20.5<br>(11.2 to 33.5)                  | 5.8<br>(0.4 to 11.6)                              | -0.0<br>(-4.8 to 4.7)                               |
| Anxiety disorders                                              | 461.1<br>(407.2 to 519.5)                     | 56.4<br>(49.2 to 64.0)                        | 44.0<br>(30.3 to 60.2)                  | 4.5<br>(0.9 to 8.6)                               | -0.2<br>(-3.6 to 3.7)                               |
| Eating disorders                                               | 36.2<br>(29.9 to 44.2)                        | 7.7<br>(5.9 to 10.0)                          | 7.4<br>(4.8 to 10.9)                    | 2.9<br>(-5.4 to 12.3)                             | 5.3<br>(-3.1 to 14.6)                               |
| Anorexia nervosa                                               | 8.5<br>(6.2 to 11.2)                          | 1.4<br>(1.0 to 1.9)                           | 1.8<br>(1.1 to 2.7)                     | 3.1<br>(-13.1 to 19.8)                            | 4.2<br>(-11.4 to 21.1)                              |
| Bulimia nervosa                                                | 26.9<br>(20.4 to 35.2)                        | 6.3<br>(4.5 to 8.5)                           | 5.6<br>(3.5 to 8.5)                     | 2.8<br>(-7.6 to 14.9)                             | 5.7<br>(-4.4 to 17.5)                               |
| Autistic spectrum disorders                                    | 63.7<br>(57.0 to 72.0)                        | 0.2<br>(0.2 to 0.3)                           | 10.2<br>(6.9 to 14.3)                   | 4.3<br>(-0.8 to 9.9)                              | 0.3<br>(-4.7 to 5.7)                                |
| Autism                                                         | 25.3<br>(21.5 to 29.7)                        | < 0.05<br>(< 0.05 to < 0.05)                  | 6.3<br>(4.1 to 9.2)                     | 4.5<br>(-2.7 to 12.8)                             | 0.2<br>(-7.4 to 8.2)                                |
| Asperger syndrome and other autistic spectrum disorders        | 38.7<br>(32.0 to 46.5)                        | 0.2<br>(0.1 to 0.3)                           | 3.8<br>(2.5 to 5.7)                     | 4.0<br>(-1.4 to 9.8)                              | 0.4<br>(-4.7 to 5.7)                                |

| Cause                                                      | Prevalence in thousands (95% UI)              | Incidence in thousands (95% UI)                   | YLDs in thousands (95% UI)              |                                                   |                                                     |
|------------------------------------------------------------|-----------------------------------------------|---------------------------------------------------|-----------------------------------------|---------------------------------------------------|-----------------------------------------------------|
|                                                            | 2016 counts                                   | 2016 counts                                       | 2016 counts                             | Percentage change in counts between 2006 and 2016 | Percentage change in age-standardised rates between |
| Attention-deficit/hyperactivity disorder                   | 53.7<br>(39.5 to 72.0)                        | 2.0<br>(1.4 to 3.0)                               | 0.7<br>(0.4 to 1.1)                     | -2.9<br>(-10.6 to 5.2)                            | 0.0<br>(-7.8 to 8.3)                                |
| Conduct disorder                                           | 39.2<br>(29.6 to 49.2)                        | 12.1<br>(9.0 to 15.1)                             | 4.8<br>(2.9 to 7.4)                     | -9.6<br>(-14.9 to -3.6)                           | -0.1<br>(-5.9 to 6.2)                               |
| Idiopathic developmental intellectual disability           | 44.9<br>(16.3 to 77.9)                        | --                                                | 2.2<br>(0.8 to 4.1)                     | -0.1<br>(-9.9 to 10.4)                            | -3.8<br>(-13.3 to 6.0)                              |
| Other mental and substance use disorders                   | 210.8<br>(183.9 to 243.6)                     | 4.6<br>(4.1 to 5.2)                               | 15.5<br>(10.8 to 22.1)                  | 7.7<br>(3.1 to 12.5)                              | 0.3<br>(-4.3 to 5.2)                                |
| <b>Diabetes, urogenital, blood, and endocrine diseases</b> | <b>3,091.9</b><br><b>(3,019.3 to 3,170.8)</b> | <b>936.7†</b><br><b>(878.8 to 996.1)</b>          | <b>73.2</b><br><b>(52.5 to 97.3)</b>    | <b>17.3</b><br><b>(13.3 to 21.5)</b>              | <b>2.5</b><br><b>(-1.0 to 6.2)</b>                  |
| Diabetes mellitus                                          | 369.8<br>(332.3 to 410.1)                     | 20.1<br>(18.1 to 22.5)                            | 27.8<br>(19.3 to 38.2)                  | 19.3<br>(10.4 to 29.5)                            | 2.0<br>(-5.4 to 10.8)                               |
| Acute glomerulonephritis                                   | 0.1<br>(0.1 to 0.1)                           | 1.9<br>(1.7 to 2.1)                               | < 0.05<br>(< 0.05 to < 0.05)            | 16.9<br>(11.2 to 24.6)                            | 9.1<br>(3.9 to 16.3)                                |
| Chronic kidney disease                                     | 397.6<br>(350.9 to 437.9)                     | 35.1<br>(30.2 to 39.7)                            | 10.1<br>(7.5 to 12.9)                   | 24.6<br>(14.5 to 34.5)                            | 6.6<br>(-1.5 to 14.8)                               |
| Chronic kidney disease due to diabetes mellitus            | 143.7<br>(126.1 to 159.2)                     | 13.4<br>(11.3 to 15.1)                            | 3.8<br>(2.8 to 4.9)                     | 24.5<br>(11.4 to 39.0)                            | 6.9<br>(-4.8 to 19.7)                               |
| Chronic kidney disease due to hypertension                 | 77.1<br>(67.4 to 85.6)                        | 6.8<br>(5.9 to 7.7)                               | 1.5<br>(1.1 to 2.1)                     | 52.9<br>(30.0 to 78.1)                            | 24.1<br>(7.3 to 42.3)                               |
| Chronic kidney disease due to glomerulonephritis           | 71.9<br>(62.6 to 80.2)                        | 5.7<br>(4.7 to 6.9)                               | 2.2<br>(1.6 to 2.8)                     | 11.5<br>(-0.5 to 25.8)                            | -1.3<br>(-11.7 to 10.5)                             |
| Chronic kidney disease due to other causes                 | 104.9<br>(92.0 to 117.0)                      | 9.2<br>(8.0 to 10.6)                              | 2.7<br>(2.0 to 3.5)                     | 23.3<br>(8.7 to 38.8)                             | 6.7<br>(-5.2 to 19.4)                               |
| Urinary diseases and male infertility                      | 384.1<br>(360.5 to 406.0)                     | 530.4†<br>(476.8 to 586.9)                        | 11.7<br>(7.8 to 16.5)                   | 19.5<br>(13.4 to 25.5)                            | 1.8<br>(-3.3 to 7.0)                                |
| Interstitial nephritis and urinary tract infections        | 7.5<br>(6.5 to 8.6)                           | 393.8<br>(341.0 to 448.6)                         | 0.2<br>(0.1 to 0.4)                     | 2.1<br>(-12.8 to 19.9)                            | -1.3<br>(-16.1 to 16.2)                             |
| Urolithiasis                                               | 3.9<br>(3.4 to 4.5)                           | 103.5<br>(90.8 to 117.7)                          | 0.3<br>(0.2 to 0.4)                     | 11.0<br>(-7.7 to 32.2)                            | 0.7<br>(-14.2 to 18.0)                              |
| Benign prostatic hyperplasia                               | 326.9<br>(303.6 to 348.2)                     | 33.1<br>(29.5 to 37.2)                            | 10.7<br>(7.2 to 15.2)                   | 22.1<br>(15.3 to 28.9)                            | 2.8<br>(-3.1 to 8.7)                                |
| Male infertility                                           | 42.5<br>(32.9 to 54.0)                        | --                                                | 0.2<br>(0.1 to 0.5)                     | -14.3<br>(-20.6 to -7.4)                          | -5.7<br>(-11.8 to 1.2)                              |
| Other urinary diseases                                     | --                                            | --                                                | 0.2<br>(0.1 to 0.3)                     | -11.3<br>(-21.3 to 0.6)                           | -16.3<br>(-25.7 to -5.5)                            |
| Gynecological diseases                                     | 1,094.8<br>(1,034.3 to 1,148.3)               | 288.9†<br>(271.6 to 306.0)                        | 10.3<br>(7.0 to 15.1)                   | -0.2<br>(-5.5 to 4.9)                             | -3.6<br>(-8.5 to 1.5)                               |
| Uterine fibroids                                           | 100.7<br>(92.2 to 109.3)                      | 8.7<br>(7.6 to 9.8)                               | 0.9<br>(0.5 to 1.6)                     | 1.1<br>(-13.2 to 13.2)                            | -5.4<br>(-18.5 to 6.2)                              |
| Polycystic ovarian syndrome                                | 4.2<br>(3.3 to 5.3)                           | 11.0<br>(7.6 to 14.9)                             | < 0.05<br>(< 0.05 to 0.1)               | -10.7<br>(-27.2 to 9.3)                           | -5.8<br>(-23.0 to 15.1)                             |
| Female infertility                                         | 83.8<br>(59.9 to 111.6)                       | --                                                | 0.5<br>(0.2 to 1.0)                     | -5.0<br>(-12.0 to 3.8)                            | 6.1<br>(-1.4 to 14.7)                               |
| Endometriosis                                              | 7.7<br>(6.6 to 9.0)                           | 15.9<br>(12.4 to 20.0)                            | 0.7<br>(0.5 to 1.0)                     | -3.6<br>(-19.5 to 16.4)                           | -4.4<br>(-20.5 to 16.1)                             |
| Genital prolapse                                           | 474.7<br>(427.8 to 531.0)                     | 20.9<br>(18.4 to 23.8)                            | 1.5<br>(0.7 to 2.7)                     | 13.6<br>(3.6 to 24.5)                             | -3.0<br>(-11.5 to 6.3)                              |
| Premenstrual syndrome                                      | 451.5<br>(421.4 to 482.3)                     | 148.3<br>(135.6 to 160.2)                         | 3.8<br>(2.3 to 5.8)                     | 0.2<br>(-7.8 to 8.6)                              | -0.8<br>(-9.0 to 7.3)                               |
| Other gynecological diseases                               | 86.9<br>(76.9 to 97.3)                        | 84.3<br>(73.7 to 95.2)                            | 3.0<br>(2.0 to 4.2)                     | -5.2<br>(-15.6 to 7.0)                            | -7.6<br>(-17.7 to 4.4)                              |
| Hemoglobinopathies and hemolytic anaemias                  | 1,257.4<br>(1,174.8 to 1,339.4)               | --                                                | 1.5<br>(0.8 to 2.4)                     | 13.1<br>(-15.6 to 51.8)                           | 11.1<br>(-18.2 to 52.0)                             |
| Thalassemias                                               | 0.1<br>(0.1 to 0.1)                           | --                                                | < 0.05<br>(< 0.05 to < 0.05)            | 36.5<br>(11.2 to 67.7)                            | 49.4<br>(16.7 to 88.0)                              |
| Thalassaemias trait                                        | 146.4<br>(136.9 to 157.1)                     | --                                                | 0.9<br>(0.5 to 1.5)                     | 20.7<br>(-13.1 to 68.6)                           | 18.0<br>(-14.2 to 65.8)                             |
| Sickle cell disorders                                      | 0.1<br>(0.1 to 0.1)                           | --                                                | < 0.05<br>(< 0.05 to < 0.05)            | 17.1<br>(4.6 to 33.1)                             | 19.2<br>(5.9 to 37.2)                               |
| Sickle cell trait                                          | 173.8<br>(144.5 to 221.9)                     | --                                                | 0.3<br>(0.1 to 0.5)                     | 13.2<br>(-29.8 to 80.6)                           | 13.4<br>(-26.6 to 73.2)                             |
| G6PD deficiency                                            | 154.7<br>(128.9 to 183.2)                     | --                                                | < 0.05<br>(< 0.05 to < 0.05)            | 7.0<br>(-24.2 to 43.1)                            | 10.6<br>(-24.2 to 56.2)                             |
| G6PD trait                                                 | 814.7<br>(750.4 to 884.1)                     | --                                                | < 0.05<br>(< 0.05 to < 0.05)            | -2.8<br>(-58.6 to 147.7)                          | -14.7<br>(-61.7 to 103.6)                           |
| Other hemoglobinopathies and hemolytic anaemias            | 11.6<br>(9.7 to 13.9)                         | --                                                | 0.2<br>(0.1 to 0.4)                     | -9.4<br>(-24.0 to 6.8)                            | -16.1<br>(-33.4 to 5.6)                             |
| Endocrine, metabolic, blood, and immune disorders          | 339.2<br>(317.5 to 364.1)                     | 60.2<br>(54.4 to 66.5)                            | 11.8<br>(8.1 to 16.2)                   | 23.4<br>(17.8 to 29.5)                            | 7.6<br>(2.6 to 12.8)                                |
| <b>Musculoskeletal disorders</b>                           | <b>2,265.0</b><br><b>(2,163.3 to 2,376.7)</b> | <b>1,097.8</b><br><b>(991.9 to 1,216.8)</b>       | <b>237.9</b><br><b>(172.9 to 307.4)</b> | <b>14.3</b><br><b>(10.6 to 18.6)</b>              | <b>4.5</b><br><b>(1.0 to 8.4)</b>                   |
| Rheumatoid arthritis                                       | 43.4<br>(38.9 to 48.7)                        | 2.0<br>(1.8 to 2.3)                               | 10.1<br>(6.7 to 13.4)                   | 10.8<br>(2.4 to 19.3)                             | -1.8<br>(-9.3 to 5.9)                               |
| Osteoarthritis                                             | 692.4<br>(631.7 to 764.7)                     | 30.2<br>(27.0 to 33.8)                            | 24.2<br>(15.7 to 34.8)                  | 17.4<br>(13.2 to 21.7)                            | 0.5<br>(-3.3 to 4.1)                                |
| Low back and neck pain                                     | 1,456.5<br>(1,371.6 to 1,552.3)               | 627.6<br>(554.7 to 706.1)                         | 173.1<br>(122.2 to 226.6)               | 14.0<br>(9.1 to 19.4)                             | 5.3<br>(0.8 to 10.3)                                |
| Low back pain                                              | 1,079.2<br>(963.3 to 1,214.7)                 | 534.6<br>(462.8 to 613.5)                         | 121.8<br>(85.7 to 159.7)                | 15.8<br>(9.3 to 23.3)                             | 7.7<br>(1.7 to 14.9)                                |
| Neck pain                                                  | 517.5<br>(448.4 to 594.9)                     | 93.1<br>(81.1 to 108.4)                           | 51.3<br>(34.7 to 71.9)                  | 9.9<br>(4.5 to 16.0)                              | -0.3<br>(-5.0 to 4.5)                               |
| Gout                                                       | 101.3<br>(88.9 to 114.8)                      | 16.1<br>(13.9 to 18.5)                            | 3.2<br>(2.2 to 4.3)                     | 16.1<br>(3.9 to 29.5)                             | 1.6<br>(-9.4 to 13.8)                               |
| Other musculoskeletal disorders                            | 322.3<br>(248.8 to 408.0)                     | 421.9<br>(347.9 to 513.0)                         | 27.4<br>(17.9 to 39.9)                  | 14.6<br>(2.4 to 28.8)                             | 5.4<br>(-4.7 to 16.4)                               |
| <b>Other non-communicable diseases</b>                     | <b>6,733.0</b><br><b>(6,587.7 to 6,868.8)</b> | <b>20,324.7†</b><br><b>(18,724.5 to 21,841.7)</b> | <b>212.3</b><br><b>(147.8 to 302.5)</b> | <b>10.0</b><br><b>(8.6 to 11.6)</b>               | <b>-0.2</b><br><b>(-1.4 to 1.0)</b>                 |
| Congenital anomalies                                       | 101.7<br>(96.8 to 106.7)                      | --                                                | 11.5<br>(8.3 to 15.2)                   | 2.2<br>(-2.8 to 7.2)                              | -1.8<br>(-6.4 to 3.1)                               |
| Neural tube defects                                        | 8.0<br>(7.3 to 8.9)                           | --                                                | 2.4<br>(1.7 to 3.2)                     | 4.8<br>(-7.6 to 19.7)                             | -0.1<br>(-11.9 to 14.5)                             |
| Congenital heart anomalies                                 | 22.3<br>(20.1 to 24.8)                        | --                                                | 1.2<br>(0.5 to 2.2)                     | -0.8<br>(-10.6 to 10.3)                           | -6.6<br>(-16.1 to 3.9)                              |
| Orofacial clefts                                           | 6.3<br>(5.6 to 7.1)                           | --                                                | 0.1<br>(< 0.05 to 0.1)                  | 0.7<br>(-11.0 to 13.2)                            | -3.8<br>(-14.9 to 7.8)                              |
| Down's syndrome                                            | 7.7<br>(7.0 to 8.6)                           | --                                                | 0.7<br>(0.5 to 1.0)                     | -4.4<br>(-14.0 to 5.4)                            | -4.5<br>(-14.4 to 5.9)                              |
| Turner syndrome                                            | 4.4<br>(3.9 to 4.9)                           | --                                                | 0.1<br>(< 0.05 to 0.1)                  | -17.4<br>(-36.1 to 6.0)                           | -17.9<br>(-37.0 to 6.3)                             |
| Klinefelter syndrome                                       | 5.4<br>(4.7 to 6.1)                           | --                                                | < 0.05<br>(< 0.05 to 0.1)               | -5.8<br>(-23.0 to 14.5)                           | -5.2<br>(-21.7 to 14.5)                             |



| Cause                                         | Prevalence in thousands (95% UI)              | Incidence in thousands (95% UI)              | YLDs in thousands (95% UI)            |                                                   |                                                     |
|-----------------------------------------------|-----------------------------------------------|----------------------------------------------|---------------------------------------|---------------------------------------------------|-----------------------------------------------------|
|                                               | 2016 counts                                   | 2016 counts                                  | 2016 counts                           | Percentage change in counts between 2006 and 2016 | Percentage change in age-standardised rates between |
| Other chromosomal abnormalities               | 9.5<br>(8.3 to 10.6)                          | --                                           | 1.0<br>(0.7 to 1.3)                   | -1.7<br>(-13.7 to 11.8)                           | 3.1<br>(-9.8 to 17.9)                               |
| Congenital musculoskeletal and limb anomalies | 19.8<br>(18.2 to 21.6)                        | --                                           | 2.7<br>(1.9 to 3.7)                   | 4.2<br>(-4.9 to 14.0)                             | -1.5<br>(-10.5 to 8.0)                              |
| Urogenital congenital anomalies               | 15.0<br>(13.5 to 16.6)                        | --                                           | 0.3<br>(0.1 to 0.5)                   | -13.9<br>(-21.2 to -6.8)                          | -16.1<br>(-23.5 to -8.8)                            |
| Digestive congenital anomalies                | 18.7<br>(16.7 to 20.6)                        | --                                           | 0.8<br>(0.5 to 1.2)                   | -1.5<br>(-11.7 to 12.5)                           | -6.0<br>(-16.8 to 7.5)                              |
| Other congenital anomalies                    | 9.5<br>(3.8 to 17.4)                          | --                                           | 2.2<br>(1.3 to 3.6)                   | 8.1<br>(-2.2 to 20.5)                             | 2.0<br>(-7.5 to 12.7)                               |
| Skin and subcutaneous diseases                | 3,006.5<br>(2,939.5 to 3,075.4)               | 7,376.5<br>(6,964.0 to 7,850.3)              | 71.5<br>(49.2 to 102.2)               | 4.7<br>(2.8 to 6.8)                               | 1.1<br>(-0.7 to 3.0)                                |
| Dermatitis                                    | 362.7<br>(338.1 to 390.6)                     | 610.9<br>(526.3 to 710.3)                    | 12.2<br>(7.4 to 18.9)                 | 4.6<br>(0.8 to 8.1)                               | 0.8<br>(-2.9 to 4.8)                                |
| Psoriasis                                     | 184.8<br>(173.7 to 196.2)                     | 16.1<br>(15.1 to 17.1)                       | 15.8<br>(11.2 to 21.0)                | 10.5<br>(4.7 to 16.4)                             | 2.5<br>(-3.2 to 8.2)                                |
| Cellulitis                                    | 4.6<br>(4.3 to 4.9)                           | 98.1<br>(92.8 to 104.2)                      | 0.2<br>(0.2 to 0.4)                   | 5.1<br>(-12.3 to 26.7)                            | -2.4<br>(-19.7 to 19.1)                             |
| Pyoderma                                      | 45.4<br>(43.9 to 46.9)                        | 1,304.2<br>(1,257.0 to 1,347.9)              | 0.2<br>(0.1 to 0.5)                   | 11.4<br>(5.8 to 17.2)                             | 0.6<br>(-4.9 to 6.1)                                |
| Scabies                                       | 7.5<br>(5.5 to 10.3)                          | 22.5<br>(16.5 to 30.9)                       | 0.2<br>(0.1 to 0.3)                   | 2.0<br>(-8.6 to 15.0)                             | 0.5<br>(-10.4 to 12.4)                              |
| Fungal skin diseases                          | 694.1<br>(615.2 to 779.2)                     | 2,749.8<br>(2,380.6 to 3,154.8)              | 3.8<br>(1.5 to 8.0)                   | 12.8<br>(11.3 to 14.5)                            | 0.1<br>(-1.2 to 1.3)                                |
| Viral skin diseases                           | 237.7<br>(204.7 to 275.4)                     | 319.4<br>(273.3 to 370.5)                    | 7.2<br>(4.5 to 10.9)                  | 1.7<br>(-1.7 to 5.4)                              | -0.2<br>(-3.1 to 2.6)                               |
| Acne vulgaris                                 | 768.7<br>(704.5 to 835.1)                     | 560.8<br>(461.6 to 702.5)                    | 19.7<br>(13.2 to 28.6)                | -2.6<br>(-6.3 to 1.7)                             | 1.3<br>(-2.4 to 5.7)                                |
| Alopecia areata                               | 26.9<br>(25.9 to 27.8)                        | 47.2<br>(45.6 to 48.9)                       | 0.9<br>(0.6 to 1.3)                   | 3.6<br>(-4.9 to 12.2)                             | -0.4<br>(-8.8 to 8.2)                               |
| Pruritus                                      | 85.8<br>(75.5 to 97.1)                        | 67.4<br>(59.8 to 76.7)                       | 0.9<br>(0.4 to 1.7)                   | 9.1<br>(3.1 to 15.5)                              | 0.2<br>(-5.1 to 5.8)                                |
| Urticaria                                     | 53.9<br>(47.6 to 60.8)                        | 95.2<br>(84.4 to 107.0)                      | 3.2<br>(2.1 to 4.5)                   | 4.3<br>(-2.4 to 11.3)                             | -0.1<br>(-6.1 to 5.7)                               |
| Decubitus ulcer                               | 5.8<br>(5.2 to 6.5)                           | 21.5<br>(19.0 to 24.2)                       | 0.9<br>(0.6 to 1.2)                   | 10.8<br>(-3.9 to 26.6)                            | -5.3<br>(-16.3 to 6.9)                              |
| Other skin and subcutaneous diseases          | 1,129.5<br>(1,097.2 to 1,161.9)               | 1,463.3<br>(1,407.3 to 1,517.0)              | 6.1<br>(3.0 to 11.1)                  | 14.9<br>(12.6 to 17.3)                            | 2.9<br>(0.8 to 5.0)                                 |
| Sense organ diseases                          | 2,642.2<br>(2,492.8 to 2,776.7)               | 950.3†<br>(896.4 to 1,008.4)                 | 82.9<br>(57.3 to 118.6)               | 14.6<br>(11.9 to 17.5)                            | -1.3<br>(-3.6 to 0.9)                               |
| Glaucoma                                      | 5.8<br>(4.3 to 7.7)                           | --                                           | 0.6<br>(0.3 to 0.8)                   | 20.5<br>(1.9 to 41.2)                             | -0.0<br>(-15.9 to 17.8)                             |
| Cataract                                      | 47.0<br>(33.9 to 64.1)                        | --                                           | 3.7<br>(2.4 to 5.4)                   | 17.8<br>(8.1 to 29.1)                             | -3.7<br>(-11.7 to 5.4)                              |
| Macular degeneration                          | 11.2<br>(8.2 to 15.1)                         | --                                           | 1.0<br>(0.6 to 1.5)                   | 23.7<br>(8.6 to 40.7)                             | 0.6<br>(-12.1 to 15.2)                              |
| Refraction and accommodation disorders        | 744.0<br>(688.4 to 805.8)                     | --                                           | 13.3<br>(8.0 to 21.3)                 | 7.4<br>(3.3 to 11.6)                              | -3.2<br>(-6.9 to 0.4)                               |
| Age-related and other hearing loss            | 2,156.2<br>(1,906.4 to 2,414.8)               | --                                           | 50.7<br>(34.1 to 73.9)                | 16.3<br>(12.2 to 20.7)                            | -1.1<br>(-4.5 to 2.5)                               |
| Other vision loss                             | 27.2<br>(21.0 to 34.2)                        | --                                           | 2.1<br>(1.4 to 3.0)                   | 13.7<br>(3.3 to 24.8)                             | -0.8<br>(-9.8 to 9.2)                               |
| Other sense organ diseases                    | 370.5<br>(341.0 to 399.5)                     | 950.3<br>(896.4 to 1,008.4)                  | 11.6<br>(7.3 to 17.5)                 | 14.2<br>(9.9 to 18.5)                             | 0.7<br>(-3.2 to 4.6)                                |
| Oral disorders                                | 4,926.5<br>(4,668.2 to 5,153.4)               | 11,997.9†<br>(10,458.7 to 13,410.2)          | 46.4<br>(29.1 to 70.0)                | 12.9<br>(10.3 to 15.6)                            | -0.7<br>(-2.6 to 1.3)                               |
| Caries of deciduous teeth                     | 278.5<br>(187.4 to 372.8)                     | 1,091.8<br>(674.1 to 1,549.9)                | 0.1<br>( $< 0.05$ to 0.2)             | -1.3<br>(-10.9 to 8.6)                            | 0.8<br>(-8.6 to 10.9)                               |
| Caries of permanent teeth                     | 3,336.8<br>(3,016.7 to 3,682.7)               | 10,659.7<br>(9,165.7 to 11,970.4)            | 3.2<br>(1.4 to 6.5)                   | 4.3<br>(-0.2 to 8.5)                              | -1.3<br>(-5.4 to 2.4)                               |
| Periodontal disease                           | 1,422.1<br>(1,034.4 to 1,835.6)               | 168.4<br>(123.0 to 215.3)                    | 9.3<br>(3.5 to 20.2)                  | 9.1<br>(2.9 to 14.8)                              | -0.9<br>(-6.1 to 3.8)                               |
| Edentulism and severe tooth loss              | 1,040.5<br>(914.1 to 1,166.0)                 | 78.0<br>(65.0 to 93.2)                       | 28.7<br>(18.7 to 40.8)                | 16.7<br>(13.1 to 20.5)                            | -0.6<br>(-3.6 to 2.6)                               |
| Other oral disorders                          | 175.8<br>(168.1 to 184.3)                     | --                                           | 5.1<br>(3.2 to 7.7)                   | 6.0<br>(2.9 to 9.5)                               | -0.1<br>(-3.2 to 3.1)                               |
| <b>Injuries</b>                               | <b>3,127.4</b><br><b>(2,910.2 to 3,374.2)</b> | <b>1,005.6†</b><br><b>(949.6 to 1,067.6)</b> | <b>99.1</b><br><b>(66.4 to 140.4)</b> | <b>9.2</b><br><b>(8.0 to 10.6)</b>                | <b>-2.3</b><br><b>(-3.5 to -1.2)</b>                |
| <b>Transport injuries</b>                     | <b>424.8</b><br><b>(393.6 to 457.2)</b>       | <b>92.8</b><br><b>(84.7 to 102.1)</b>        | <b>19.0</b><br><b>(12.4 to 27.4)</b>  | <b>-2.2</b><br><b>(-3.8 to -0.7)</b>              | <b>-11.5</b><br><b>(-13.1 to -9.8)</b>              |
| Road injuries                                 | 382.0<br>(354.2 to 412.5)                     | 87.1<br>(79.2 to 96.6)                       | 17.4<br>(11.5 to 25.2)                | -3.4<br>(-5.0 to -1.8)                            | -12.5<br>(-14.2 to -10.8)                           |
| Pedestrian road injuries                      | 59.8<br>(51.9 to 69.3)                        | 8.8<br>(7.4 to 10.7)                         | 3.0<br>(1.9 to 4.4)                   | 3.0<br>(1.3 to 4.7)                               | -6.3<br>(-8.2 to -4.4)                              |
| Cyclist road injuries                         | 108.5<br>(90.5 to 128.8)                      | 31.4<br>(26.4 to 36.7)                       | 4.5<br>(3.0 to 6.6)                   | 5.4<br>(3.8 to 7.1)                               | -4.8<br>(-6.5 to -3.2)                              |
| Motorcyclist road injuries                    | 80.7<br>(68.4 to 95.4)                        | 11.6<br>(9.6 to 14.1)                        | 3.8<br>(2.5 to 5.5)                   | -4.0<br>(-5.9 to -2.0)                            | -13.0<br>(-14.7 to -11.0)                           |
| Motor vehicle road injuries                   | 108.0<br>(90.6 to 125.5)                      | 29.8<br>(25.8 to 34.3)                       | 5.2<br>(3.5 to 7.4)                   | -13.4<br>(-15.0 to -11.7)                         | -21.7<br>(-23.4 to -19.9)                           |
| Other road injuries                           | 24.9<br>(20.9 to 29.6)                        | 5.5<br>(4.3 to 6.9)                          | 0.9<br>(0.6 to 1.3)                   | 3.4<br>(1.3 to 5.7)                               | -5.6<br>(-7.8 to -3.3)                              |
| Other transport injuries                      | 42.9<br>(35.2 to 50.8)                        | 5.6<br>(4.9 to 6.5)                          | 1.5<br>(1.0 to 2.2)                   | 13.4<br>(12.0 to 14.8)                            | 2.2<br>(0.9 to 3.6)                                 |
| <b>Unintentional injuries</b>                 | <b>2,584.6</b><br><b>(2,381.7 to 2,817.3)</b> | <b>869.6</b><br><b>(812.6 to 929.2)</b>      | <b>76.0</b><br><b>(51.1 to 107.9)</b> | <b>12.5</b><br><b>(11.1 to 14.0)</b>              | <b>0.1</b><br><b>(-1.0 to 1.3)</b>                  |
| Falls                                         | 1,417.1<br>(1,242.0 to 1,597.4)               | 502.4<br>(452.4 to 553.9)                    | 50.8<br>(35.1 to 70.0)                | 12.0<br>(10.3 to 13.8)                            | -1.2<br>(-2.6 to 0.1)                               |
| Drowning                                      | 3.5<br>(3.1 to 3.9)                           | 0.3<br>(0.3 to 0.4)                          | 0.2<br>(0.1 to 0.2)                   | 13.7<br>(8.4 to 20.0)                             | 4.1<br>(-1.5 to 10.8)                               |
| Fire, heat, and hot substances                | 221.3<br>(188.1 to 260.7)                     | 10.8<br>(8.9 to 12.7)                        | 3.8<br>(2.1 to 6.4)                   | 13.9<br>(11.5 to 16.9)                            | 4.7<br>(2.4 to 7.5)                                 |
| Poisonings                                    | 9.1<br>(7.5 to 11.3)                          | 7.5<br>(6.2 to 9.1)                          | 0.8<br>(0.5 to 1.1)                   | 10.9<br>(1.7 to 21.0)                             | 5.0<br>(-4.0 to 15.4)                               |
| Exposure to mechanical forces                 | 513.5<br>(431.0 to 655.0)                     | 117.9<br>(101.1 to 137.5)                    | 9.2<br>(5.8 to 14.3)                  | 9.3<br>(7.9 to 10.6)                              | -0.6<br>(-2.0 to 0.7)                               |
| Unintentional firearm injuries                | 16.2<br>(13.2 to 20.2)                        | 1.4<br>(1.0 to 1.9)                          | 0.2<br>(0.1 to 0.4)                   | 17.8<br>(15.4 to 20.0)                            | 6.8<br>(4.8 to 8.8)                                 |
| Unintentional suffocation                     | 5.9<br>(4.9 to 7.0)                           | 1.0<br>(0.7 to 1.4)                          | 0.1<br>(0.1 to 0.2)                   | 20.7<br>(19.1 to 22.5)                            | 8.4<br>(6.6 to 10.2)                                |
| Other exposure to mechanical forces           | 491.4<br>(408.6 to 630.5)                     | 115.6<br>(99.1 to 135.1)                     | 8.9<br>(5.6 to 13.7)                  | 8.9<br>(7.5 to 10.3)                              | -0.9<br>(-2.3 to 0.4)                               |

| Cause                                                                               | Prevalence in thousands (95% UI)        | Incidence in thousands (95% UI)       | YLDs in thousands (95% UI)              |                                                   |                                                     |
|-------------------------------------------------------------------------------------|-----------------------------------------|---------------------------------------|-----------------------------------------|---------------------------------------------------|-----------------------------------------------------|
|                                                                                     | 2016 counts                             | 2016 counts                           | 2016 counts                             | Percentage change in counts between 2006 and 2016 | Percentage change in age-standardised rates between |
| Adverse effects of medical treatment                                                | 3.9<br>(3.1 to 4.8)                     | 51.1<br>(45.5 to 57.1)                | 0.5<br>(0.3 to 0.8)                     | 17.2<br>(12.6 to 22.5)                            | 1.7<br>(-2.0 to 5.7)                                |
| Animal contact                                                                      | 35.7<br>(31.5 to 41.2)                  | 18.8<br>(15.3 to 22.9)                | 0.7<br>(0.4 to 1.0)                     | 7.3<br>(3.6 to 10.7)                              | -2.0<br>(-5.6 to 1.8)                               |
| Venomous animal contact                                                             | 5.5<br>(4.7 to 6.3)                     | 6.0<br>(4.4 to 7.9)                   | 0.3<br>(0.2 to 0.4)                     | 5.2<br>(-2.6 to 13.5)                             | -1.5<br>(-9.3 to 7.0)                               |
| Non-venomous animal contact                                                         | 30.2<br>(26.2 to 35.6)                  | 12.9<br>(10.3 to 15.9)                | 0.4<br>(0.2 to 0.7)                     | 8.7<br>(7.1 to 10.3)                              | -2.5<br>(-4.0 to -1.1)                              |
| Foreign body                                                                        | 55.8<br>(48.2 to 65.9)                  | 38.8<br>(33.6 to 45.7)                | 1.6<br>(1.0 to 2.4)                     | 15.7<br>(14.1 to 17.5)                            | 5.1<br>(3.7 to 6.6)                                 |
| Pulmonary aspiration and foreign body in airway                                     | 9.4<br>(7.5 to 11.4)                    | 9.3<br>(8.3 to 10.5)                  | 0.2<br>(0.1 to 0.4)                     | 20.2<br>(18.3 to 22.6)                            | 6.6<br>(4.7 to 8.8)                                 |
| Foreign body in eyes                                                                | 5.5<br>(3.8 to 7.5)                     | 21.4<br>(16.7 to 28.1)                | 0.4<br>(0.2 to 0.6)                     | 13.7<br>(10.2 to 18.1)                            | 5.3<br>(2.1 to 8.5)                                 |
| Foreign body in other body part                                                     | 40.9<br>(34.1 to 50.5)                  | 8.0<br>(6.6 to 9.6)                   | 1.0<br>(0.6 to 1.5)                     | 15.4<br>(13.7 to 17.1)                            | 4.7<br>(3.1 to 6.2)                                 |
| Environmental heat and cold exposure                                                | 26.3<br>(23.5 to 29.6)                  | 5.9<br>(5.0 to 6.9)                   | 0.9<br>(0.6 to 1.4)                     | 23.1<br>(18.9 to 28.0)                            | 7.8<br>(3.9 to 12.0)                                |
| Other unintentional injuries                                                        | 298.2<br>(251.6 to 351.8)               | 116.2<br>(98.1 to 135.3)              | 7.4<br>(4.8 to 11.1)                    | 17.7<br>(16.4 to 19.1)                            | 5.3<br>(4.2 to 6.5)                                 |
| <b>Self-harm and interpersonal violence</b>                                         | <b>211.4</b><br><b>(193.2 to 229.5)</b> | <b>42.9†</b><br><b>(38.4 to 48.3)</b> | <b>4.0</b><br><b>(2.7 to 5.8)</b>       | <b>8.8</b><br><b>(6.5 to 11.1)</b>                | <b>0.9</b><br><b>(-1.4 to 2.9)</b>                  |
| Self-harm                                                                           | 28.6<br>(23.4 to 34.1)                  | 21.7<br>(19.1 to 24.6)                | 1.1<br>(0.7 to 1.6)                     | 0.2<br>(-4.8 to 4.8)                              | -8.8<br>(-13.5 to -4.1)                             |
| Self-harm by firearm                                                                | 0.3<br>(0.2 to 0.3)                     | < 0.05<br>(< 0.05 to 0.1)             | < 0.05<br>(< 0.05 to < 0.05)            | -8.2<br>(-10.2 to -6.2)                           | -15.1<br>(-17.2 to -13.0)                           |
| Self-harm by other specified means                                                  | 28.4<br>(23.1 to 33.9)                  | 21.6<br>(19.1 to 24.6)                | 1.1<br>(0.7 to 1.6)                     | 0.2<br>(-4.8 to 4.8)                              | -8.8<br>(-13.5 to -4.1)                             |
| Interpersonal violence                                                              | 182.8<br>(165.9 to 200.7)               | 21.2†<br>(17.4 to 25.6)               | 2.9<br>(1.9 to 4.2)                     | 12.6<br>(9.7 to 14.9)                             | 4.5<br>(1.9 to 6.7)                                 |
| Assault by firearm                                                                  | 5.7<br>(4.7 to 6.9)                     | 0.7<br>(0.5 to 0.9)                   | 0.1<br>(0.1 to 0.2)                     | 25.1<br>(23.1 to 27.5)                            | 14.3<br>(12.4 to 16.4)                              |
| Assault by sharp object                                                             | 15.9<br>(12.9 to 19.3)                  | 3.7<br>(2.7 to 5.0)                   | 0.3<br>(0.2 to 0.5)                     | 20.8<br>(18.8 to 22.8)                            | 10.4<br>(8.4 to 12.5)                               |
| Sexual violence                                                                     | 100.5<br>(89.0 to 114.1)                | --                                    | 0.8<br>(0.5 to 1.2)                     | -2.6<br>(-6.9 to 1.6)                             | -3.9<br>(-8.5 to 0.2)                               |
| Assault by other means                                                              | 60.7<br>(49.9 to 74.7)                  | 16.9<br>(13.9 to 20.6)                | 1.7<br>(1.1 to 2.6)                     | 19.1<br>(17.4 to 21.0)                            | 9.3<br>(7.6 to 11.1)                                |
| <b>Forces of nature, conflict and terrorism, and executions and police conflict</b> | <b>7.1</b><br><b>(3.4 to 11.3)</b>      | <b>0.3†</b><br><b>(0.2 to 0.4)</b>    | <b>0.2</b><br><b>(&lt; 0.05 to 0.5)</b> | <b>32.1</b><br><b>(-34.3 to 67.9)</b>             | <b>14.9</b><br><b>(-44.5 to 49.5)</b>               |
| Exposure to forces of nature                                                        | 5.9<br>(2.4 to 10.1)                    | --                                    | 0.1<br>(< 0.05 to 0.4)                  | 32.9<br>(-42.4 to 78.7)                           | 14.4<br>(-52.3 to 58.4)                             |
| Conflict and terrorism                                                              | --                                      | --                                    | --                                      | --                                                | --                                                  |
| Executions and police conflict                                                      | 1.2<br>(0.7 to 1.9)                     | 0.3<br>(0.2 to 0.4)                   | < 0.05<br>(< 0.05 to 0.1)               | 28.2<br>(22.7 to 31.0)                            | 17.2<br>(13.3 to 19.5)                              |
| <b>Impairments</b>                                                                  | --                                      | --                                    | --                                      | --                                                | --                                                  |
| Anaemia                                                                             | 751.4<br>(603.6 to 901.8)               | --                                    | 15.2<br>(10.0 to 22.3)                  | 12.8<br>(-8.2 to 34.9)                            | 3.1<br>(-16.8 to 26.8)                              |
| Developmental intellectual disability                                               | 129.7<br>(98.2 to 165.5)                | --                                    | 16.1<br>(11.8 to 21.0)                  | 2.5<br>(-1.9 to 7.0)                              | -1.1<br>(-5.5 to 3.5)                               |
| Epilepsy                                                                            | 37.7<br>(18.4 to 56.3)                  | --                                    | 10.4<br>(5.5 to 18.7)                   | 3.1<br>(-52.2 to 130.4)                           | -2.0<br>(-53.8 to 118.4)                            |
| Guillain-Barre syndrome                                                             | 0.1<br>(0.1 to 0.1)                     | --                                    | < 0.05<br>(< 0.05 to 0.1)               | 4.7<br>(-3.4 to 13.1)                             | -3.2<br>(-10.2 to 4.0)                              |
| Hearing loss                                                                        | 2,219.8<br>(1,969.0 to 2,479.5)         | --                                    | 53.5<br>(36.3 to 77.9)                  | 15.4<br>(11.7 to 19.4)                            | -1.3<br>(-4.5 to 1.7)                               |
| Heart failure                                                                       | 209.1<br>(187.8 to 233.0)               | --                                    | 20.7<br>(15.6 to 26.3)                  | 8.6<br>(1.2 to 16.8)                              | -10.9<br>(-16.8 to -4.4)                            |
| Infertility                                                                         | 153.8<br>(121.7 to 191.0)               | --                                    | 1.0<br>(0.5 to 1.9)                     | -8.7<br>(-13.8 to -3.6)                           | -1.1<br>(-6.7 to 3.9)                               |
| Pelvic inflammatory disease                                                         | 1.7<br>(1.5 to 2.0)                     | --                                    | 0.2<br>(0.1 to 0.3)                     | -24.9<br>(-37.9 to -8.2)                          | -24.8<br>(-38.4 to -8.3)                            |
| Vision loss                                                                         | 850.7<br>(778.4 to 931.0)               | --                                    | 23.5<br>(16.4 to 33.7)                  | 10.3<br>(6.7 to 14.1)                             | -2.1<br>(-5.3 to 1.1)                               |

We did not calculate incidence for the nine impairments, certain NTDs, and causes with only birth prevalence. Blank cells mean that no estimate is available.

† Incidence for aggregate causes represents the sum of the incidence of the causes below the aggregate.

‡ Incidence estimates for stroke represent first-ever stroke only.

^ Incidence of HIV/AIDS represents new infections of HIV only and does not include new infections of Tuberculosis in HIV positive cases.

SR Table 14: Prevalence, incidence, and YLDs for 2016, percentage change of YLD counts and percentage change of age-standardised YLD rates between 2006 and 2016 by cause and impairments, for all ages, Azerbaijan.

| Cause                                                                                | Prevalence in thousands (95% UI)       | Incidence in thousands (95% UI)            | YLDs in thousands (95% UI)         |                                                   |                                                     |
|--------------------------------------------------------------------------------------|----------------------------------------|--------------------------------------------|------------------------------------|---------------------------------------------------|-----------------------------------------------------|
|                                                                                      | 2016 counts                            | 2016 counts                                | 2016 counts                        | Percentage change in counts between 2006 and 2016 | Percentage change in age-standardised rates between |
| <b>All causes</b>                                                                    | <b>9,350.1</b><br>(9,312.8 to 9,390.2) | <b>48,540.4†</b><br>(46,691.1 to 50,562.6) | <b>999.3</b><br>(738.9 to 1,303.3) | <b>20.6</b><br>(17.6 to 23.4)                     | <b>-0.1</b><br>(-2.4 to 2.2)                        |
| <b>Communicable, maternal, neonatal, and nutritional disorders</b>                   | <b>5,447.8</b><br>(5,312.6 to 5,602.1) | <b>19,964.7†</b><br>(18,464.7 to 21,630.3) | <b>86.7</b><br>(61.1 to 119.1)     | <b>-4.5</b><br>(-9.0 to 0.3)                      | <b>-14.5</b><br>(-18.4 to -10.5)                    |
| <b>HIV/AIDS and tuberculosis</b>                                                     | <b>1,954.5</b><br>(1,782.8 to 2,087.5) | <b>13.3†</b><br>(11.5 to 15.2)             | <b>1.9</b><br>(1.3 to 2.7)         | <b>-11.6</b><br>(-24.1 to 3.8)                    | <b>-23.7</b><br>(-34.1 to -11.8)                    |
| Tuberculosis                                                                         | 1,836.9<br>(1,686.7 to 1,999.6)        | 13.0†<br>(11.2 to 14.9)                    | 1.6<br>(1.1 to 2.3)                | -15.8<br>(-29.2 to -0.0)                          | -26.9<br>(-37.3 to -14.7)                           |
| Drug-susceptible tuberculosis                                                        | 4.3<br>(3.4 to 5.1)                    | 10.7<br>(8.6 to 12.8)                      | 1.3<br>(0.8 to 1.9)                | -16.5<br>(-40.4 to 22.1)                          | -27.5<br>(-47.7 to 5.8)                             |
| Multidrug-resistant tuberculosis without extensive drug resistance                   | 0.7<br>(0.4 to 1.3)                    | 1.8<br>(0.9 to 3.2)                        | 0.2<br>(0.1 to 0.4)                | -23.3<br>(-78.0 to 265.9)                         | -33.3<br>(-80.5 to 210.6)                           |
| Extensively drug-resistant tuberculosis                                              | 0.2<br>(0.1 to 0.3)                    | 0.4<br>(0.2 to 0.7)                        | 0.1<br>(< 0.05 to 0.1)             | 132.5<br>(-26.3 to 905.1)                         | 101.1<br>(-35.6 to 771.8)                           |
| Latent tuberculosis infection                                                        | 1,831.7<br>(1,681.5 to 1,994.3)        | --                                         | --                                 | --                                                | --                                                  |
| HIV/AIDS                                                                             | 3.1<br>(1.9 to 4.8)                    | 0.3^<br>(0.1 to 0.5)                       | 0.3<br>(0.2 to 0.5)                | 20.9<br>(-25.8 to 99.8)                           | 2.4<br>(-37.0 to 69.6)                              |
| Drug-susceptible HIV/AIDS - Tuberculosis                                             | < 0.05<br>(< 0.05 to 0.1)              | 0.1<br>(< 0.05 to 0.2)                     | < 0.05<br>(< 0.05 to < 0.05)       | -59.3<br>(-71.9 to -35.4)                         | -65.5<br>(-76.2 to -45.2)                           |
| Multidrug-resistant HIV/AIDS - Tuberculosis without extensive drug resistance        | < 0.05<br>(< 0.05 to < 0.05)           | < 0.05<br>(< 0.05 to < 0.05)               | < 0.05<br>(< 0.05 to < 0.05)       | -63.0<br>(-88.8 to 66.2)                          | -68.6<br>(-90.5 to 40.8)                            |
| Extensively drug-resistant HIV/AIDS - Tuberculosis                                   | < 0.05<br>(< 0.05 to < 0.05)           | < 0.05<br>(< 0.05 to < 0.05)               | < 0.05<br>(< 0.05 to < 0.05)       | 14.1<br>(-65.5 to 412.4)                          | -3.3<br>(-70.7 to 334.1)                            |
| HIV/AIDS resulting in other diseases                                                 | 3.1<br>(1.9 to 4.7)                    | 0.3<br>(0.1 to 0.5)                        | 0.3<br>(0.1 to 0.5)                | 39.6<br>(-22.5 to 188.8)                          | 18.2<br>(-34.7 to 147.0)                            |
| <b>Diarrhoea, lower respiratory infections, and other common infectious diseases</b> | <b>374.8</b><br>(356.9 to 394.4)       | <b>18,396.4†</b><br>(16,916.7 to 20,017.0) | <b>21.1</b><br>(14.7 to 28.3)      | <b>6.0</b><br>(2.1 to 9.9)                        | <b>-5.2</b><br>(-8.4 to -2.1)                       |
| Diarrhoeal diseases                                                                  | 84.1<br>(77.8 to 91.0)                 | 5,319.2<br>(4,908.9 to 5,757.6)            | 9.6<br>(6.6 to 13.3)               | 14.2<br>(7.6 to 21.2)                             | 1.0<br>(-5.0 to 6.9)                                |
| Intestinal infectious diseases                                                       | < 0.05<br>(< 0.05 to < 0.05)           | 0.1†<br>(< 0.05 to 0.1)                    | < 0.05<br>(< 0.05 to < 0.05)       | -3.1<br>(-18.9 to 16.6)                           | -21.3<br>(-33.0 to -6.3)                            |
| Typhoid fever                                                                        | < 0.05<br>(< 0.05 to < 0.05)           | < 0.05<br>(< 0.05 to 0.1)                  | < 0.05<br>(< 0.05 to < 0.05)       | -5.0<br>(-21.1 to 15.6)                           | -22.8<br>(-35.3 to -7.7)                            |
| Paratyphoid fever                                                                    | < 0.05<br>(< 0.05 to < 0.05)           | < 0.05<br>(< 0.05 to < 0.05)               | < 0.05<br>(< 0.05 to < 0.05)       | 54.1<br>(17.9 to 96.9)                            | 27.2<br>(-0.1 to 60.3)                              |
| Other intestinal infectious diseases                                                 | --                                     | --                                         | < 0.05<br>(< 0.05 to < 0.05)       | -28.9<br>(-48.5 to -0.5)                          | -41.8<br>(-56.4 to -20.6)                           |
| Lower respiratory infections                                                         | 14.1<br>(13.1 to 15.3)                 | 601.7<br>(549.9 to 655.4)                  | 0.9<br>(0.6 to 1.2)                | 6.5<br>(-4.0 to 19.2)                             | -5.2<br>(-13.8 to 5.1)                              |
| Upper respiratory infections                                                         | 157.8<br>(139.1 to 178.9)              | 11,690.3<br>(10,281.0 to 13,276.9)         | 3.9<br>(2.3 to 6.1)                | 8.9<br>(1.9 to 16.6)                              | -0.0<br>(-5.1 to 6.3)                               |
| Otitis media                                                                         | 112.8<br>(100.0 to 125.4)              | 574.8<br>(458.8 to 718.4)                  | 3.2<br>(2.0 to 4.8)                | -12.5<br>(-19.4 to -4.5)                          | -19.6<br>(-25.6 to -13.6)                           |
| Meningitis                                                                           | 20.3<br>(17.8 to 23.0)                 | 3.8<br>(3.3 to 4.4)                        | 2.3<br>(1.6 to 3.0)                | 3.1<br>(-4.2 to 10.6)                             | -7.8<br>(-14.1 to -1.5)                             |
| Pneumococcal meningitis                                                              | 7.9<br>(6.8 to 9.2)                    | 0.5<br>(0.4 to 0.7)                        | 0.9<br>(0.6 to 1.3)                | -1.5<br>(-16.5 to 15.6)                           | -12.7<br>(-25.4 to 1.7)                             |
| H influenzae type B meningitis                                                       | 2.8<br>(2.3 to 3.3)                    | 0.4<br>(0.3 to 0.6)                        | 0.4<br>(0.3 to 0.5)                | -15.5<br>(-23.2 to -8.0)                          | -23.4<br>(-30.5 to -16.6)                           |
| Meningococcal infection                                                              | 3.8<br>(2.9 to 4.9)                    | 1.1<br>(0.8 to 1.3)                        | 0.4<br>(0.3 to 0.6)                | 5.4<br>(0.7 to 10.2)                              | -6.0<br>(-10.4 to -1.7)                             |
| Other meningitis                                                                     | 5.9<br>(4.5 to 7.3)                    | 1.8<br>(1.5 to 2.0)                        | 0.5<br>(0.4 to 0.7)                | 34.7<br>(25.0 to 46.9)                            | 20.7<br>(12.3 to 31.1)                              |
| Encephalitis                                                                         | 6.2<br>(4.5 to 8.5)                    | 2.8<br>(2.5 to 3.1)                        | 0.8<br>(0.5 to 1.1)                | 8.0<br>(-4.0 to 21.5)                             | -7.5<br>(-17.6 to 3.5)                              |
| Diphtheria                                                                           | < 0.05<br>(< 0.05 to < 0.05)           | < 0.05<br>(< 0.05 to < 0.05)               | < 0.05<br>(< 0.05 to < 0.05)       | -90.4<br>(-94.8 to -81.2)                         | -91.9<br>(-95.7 to -83.9)                           |
| Whooping cough                                                                       | 2.6<br>(2.0 to 3.3)                    | 19.1<br>(14.9 to 24.1)                     | 0.1<br>(0.1 to 0.2)                | -41.8<br>(-51.2 to -30.0)                         | -54.6<br>(-61.9 to -45.4)                           |
| Tetanus                                                                              | < 0.05<br>(< 0.05 to < 0.05)           | < 0.05<br>(< 0.05 to < 0.05)               | < 0.05<br>(< 0.05 to < 0.05)       | -9.6<br>(-29.8 to 15.0)                           | -19.0<br>(-38.7 to 5.0)                             |
| Measles                                                                              | < 0.05<br>(0.0 to < 0.05)              | < 0.05<br>(< 0.05 to 0.1)                  | < 0.05<br>(0.0 to < 0.05)          | -85.4<br>(-100.0 to 4.4e+19)                      | -88.7<br>(-100.0 to 3.5e+19)                        |
| Varicella and herpes zoster                                                          | 7.8<br>(7.1 to 8.4)                    | 184.7<br>(179.0 to 190.1)                  | 0.3<br>(0.2 to 0.4)                | 22.8<br>(5.0 to 43.5)                             | -0.7<br>(-13.4 to 14.5)                             |
| <b>Neglected tropical diseases and malaria</b>                                       | <b>426.2</b><br>(332.2 to 555.9)       | <b>0.3†</b><br>(0.1 to 0.9)                | <b>1.4</b><br>(0.9 to 2.2)         | <b>-14.4</b><br>(-37.6 to 8.6)                    | <b>-24.6</b><br>(-44.0 to -5.9)                     |
| Malaria                                                                              | --                                     | --                                         | --                                 | --                                                | --                                                  |
| Chagas disease                                                                       | --                                     | --                                         | --                                 | --                                                | --                                                  |
| Leishmaniasis                                                                        | 1.6<br>(1.1 to 2.3)                    | 0.1<br>(0.1 to 0.2)                        | 0.1<br>(< 0.05 to 0.2)             | 1.7<br>(-22.7 to 42.9)                            | -16.6<br>(-35.3 to 14.4)                            |
| Visceral leishmaniasis                                                               | < 0.05<br>(< 0.05 to < 0.05)           | 0.1<br>(< 0.05 to 0.1)                     | < 0.05<br>(< 0.05 to < 0.05)       | 5.3<br>(-29.0 to 55.7)                            | -24.4<br>(-52.5 to 22.4)                            |
| Cutaneous and mucocutaneous leishmaniasis                                            | 1.3<br>(0.8 to 2.2)                    | 0.1<br>(< 0.05 to 0.2)                     | 0.1<br>(< 0.05 to 0.2)             | 1.7<br>(-23.2 to 43.7)                            | -16.5<br>(-35.7 to 15.5)                            |
| African trypanosomiasis                                                              | --                                     | --                                         | --                                 | --                                                | --                                                  |
| Schistosomiasis                                                                      | --                                     | --                                         | --                                 | --                                                | --                                                  |
| Cysticercosis                                                                        | --                                     | --                                         | --                                 | --                                                | --                                                  |
| Cystic echinococcosis                                                                | 0.9<br>(0.2 to 3.5)                    | 0.2<br>(< 0.05 to 0.8)                     | 0.1<br>(< 0.05 to 0.4)             | -61.8<br>(-95.3 to 207.9)                         | -67.8<br>(-95.8 to 142.2)                           |
| Lymphatic filariasis                                                                 | --                                     | --                                         | --                                 | --                                                | --                                                  |
| Onchocerciasis                                                                       | --                                     | --                                         | --                                 | --                                                | --                                                  |
| Trachoma                                                                             | --                                     | --                                         | --                                 | --                                                | --                                                  |
| Dengue                                                                               | --                                     | --                                         | --                                 | --                                                | --                                                  |
| Yellow fever                                                                         | --                                     | --                                         | --                                 | --                                                | --                                                  |
| Rabies                                                                               | < 0.05<br>(< 0.05 to < 0.05)           | < 0.05<br>(< 0.05 to < 0.05)               | < 0.05<br>(< 0.05 to < 0.05)       | -62.4<br>(-83.6 to -18.7)                         | -60.3<br>(-82.8 to -13.0)                           |
| Intestinal nematode infections                                                       | 376.7<br>(276.2 to 508.2)              | --                                         | 0.1<br>(< 0.05 to 0.1)             | 22.1<br>(-28.1 to 103.5)                          | 4.8<br>(-38.0 to 74.9)                              |
| Ascariasis                                                                           | 322.1<br>(227.6 to 447.3)              | --                                         | < 0.05<br>(< 0.05 to < 0.05)       | 10.0<br>(-60.5 to 205.8)                          | -2.5<br>(-64.3 to 166.2)                            |



| Cause                                                                   | Prevalence in thousands (95% UI)              | Incidence in thousands (95% UI)                   | YLDs in thousands (95% UI)                |                                                   |                                                     |
|-------------------------------------------------------------------------|-----------------------------------------------|---------------------------------------------------|-------------------------------------------|---------------------------------------------------|-----------------------------------------------------|
|                                                                         | 2016 counts                                   | 2016 counts                                       | 2016 counts                               | Percentage change in counts between 2006 and 2016 | Percentage change in age-standardised rates between |
| Trichuriasis                                                            | 7.0<br>(4.5 to 10.6)                          | --                                                | --                                        | --                                                | --                                                  |
| Hookworm disease                                                        | 8.2<br>(5.3 to 12.1)                          | --                                                | < 0.05<br>(< 0.05 to 0.1)                 | 30.6<br>(-23.4 to 122.6)                          | 9.9<br>(-36.0 to 88.3)                              |
| Food-borne trematodiasis                                                | --                                            | --                                                | --                                        | --                                                | --                                                  |
| Leprosy                                                                 | --                                            | --                                                | --                                        | --                                                | --                                                  |
| Ebola virus disease                                                     | --                                            | --                                                | --                                        | --                                                | --                                                  |
| Zika virus disease                                                      | --                                            | --                                                | --                                        | --                                                | --                                                  |
| Guinea worm disease                                                     | --                                            | --                                                | --                                        | --                                                | --                                                  |
| Other neglected tropical diseases                                       | 67.4<br>(62.1 to 73.1)                        | --                                                | 1.2<br>(0.8 to 1.9)                       | -9.2<br>(-22.3 to 6.2)                            | -19.3<br>(-30.8 to -6.6)                            |
| <b>Maternal disorders</b>                                               | <b>9.4</b><br><b>(7.4 to 11.8)</b>            | <b>179.9†</b><br><b>(94.7 to 301.2)</b>           | <b>0.5</b><br><b>(0.3 to 0.8)</b>         | <b>7.9</b><br><b>(-21.7 to 45.8)</b>              | <b>-1.3</b><br><b>(-27.9 to 34.6)</b>               |
| Maternal haemorrhage                                                    | 1.8<br>(1.3 to 2.4)                           | 11.3<br>(8.0 to 15.6)                             | 0.1<br>(< 0.05 to 0.1)                    | 12.7<br>(-23.3 to 62.0)                           | 3.0<br>(-30.2 to 46.8)                              |
| Maternal sepsis and other pregnancy related infections                  | 4.9<br>(3.6 to 6.8)                           | 33.4<br>(23.7 to 45.1)                            | 0.1<br>(0.1 to 0.3)                       | 11.3<br>(-45.6 to 130.5)                          | 5.2<br>(-48.1 to 116.7)                             |
| Maternal hypertensive disorders                                         | 2.0<br>(1.2 to 3.0)                           | 8.2<br>(5.9 to 11.2)                              | 0.1<br>(< 0.05 to 0.2)                    | 0.2<br>(-44.2 to 79.0)                            | -10.1<br>(-49.7 to 63.1)                            |
| Maternal obstructed labour and uterine rupture                          | 0.1<br>(< 0.05 to 0.1)                        | 4.9<br>(3.4 to 6.8)                               | < 0.05<br>(< 0.05 to < 0.05)              | 14.3<br>(-39.3 to 112.9)                          | 1.1<br>(-46.1 to 86.2)                              |
| Maternal abortion, miscarriage, and ectopic pregnancy                   | 1.0<br>(0.3 to 2.1)                           | 122.2<br>(38.4 to 246.0)                          | 0.1<br>(< 0.05 to 0.3)                    | 10.4<br>(-46.8 to 113.3)                          | -1.3<br>(-53.6 to 89.7)                             |
| Other maternal disorders                                                | --                                            | --                                                | 0.1<br>(< 0.05 to 0.1)                    | 2.6<br>(-26.0 to 38.5)                            | -5.2<br>(-31.0 to 29.0)                             |
| <b>Neonatal disorders</b>                                               | <b>88.0</b><br><b>(69.6 to 109.3)</b>         | --                                                | <b>12.9</b><br><b>(8.2 to 20.1)</b>       | <b>4.7</b><br><b>(-12.4 to 24.1)</b>              | <b>-4.8</b><br><b>(-20.0 to 12.7)</b>               |
| Neonatal preterm birth complications                                    | 63.8<br>(47.5 to 87.5)                        | --                                                | 5.4<br>(3.5 to 7.9)                       | -6.1<br>(-28.0 to 17.9)                           | -13.3<br>(-33.5 to 8.9)                             |
| Neonatal encephalopathy due to birth asphyxia and trauma                | 30.3<br>(15.0 to 53.7)                        | --                                                | 3.7<br>(0.6 to 9.4)                       | 6.8<br>(-27.4 to 92.8)                            | -2.7<br>(-33.9 to 75.3)                             |
| Neonatal sepsis and other neonatal infections                           | 4.2<br>(1.4 to 10.3)                          | --                                                | 1.8<br>(0.5 to 4.7)                       | 43.4<br>(4.6 to 180.3)                            | 29.8<br>(-5.1 to 149.3)                             |
| Hemolytic disease and other neonatal jaundice                           | 5.3<br>(4.6 to 6.1)                           | --                                                | 1.6<br>(1.2 to 2.1)                       | 3.8<br>(-11.1 to 21.8)                            | -5.2<br>(-19.1 to 11.2)                             |
| Other neonatal disorders                                                | --                                            | --                                                | 0.5<br>(0.3 to 0.7)                       | 24.2<br>(2.1 to 49.6)                             | -9.0<br>(-25.0 to 10.3)                             |
| <b>Nutritional deficiencies</b>                                         | <b>1,962.4</b><br><b>(1,843.0 to 2,057.1)</b> | <b>66.6†</b><br><b>(52.5 to 85.0)</b>             | <b>42.6</b><br><b>(27.8 to 61.5)</b>      | <b>-11.2</b><br><b>(-17.5 to -4.3)</b>            | <b>-20.6</b><br><b>(-26.1 to -14.6)</b>             |
| Protein-energy malnutrition                                             | 45.2<br>(32.7 to 62.1)                        | 16.4<br>(11.8 to 22.6)                            | 2.6<br>(1.4 to 4.4)                       | 10.5<br>(-35.0 to 80.6)                           | -18.8<br>(-51.7 to 33.1)                            |
| Iodine deficiency                                                       | 95.6<br>(83.6 to 110.2)                       | 1.7<br>(1.5 to 2.0)                               | 2.3<br>(1.3 to 3.4)                       | -7.4<br>(-18.8 to 5.5)                            | -19.4<br>(-29.0 to -8.5)                            |
| Vitamin A deficiency                                                    | 57.6<br>(42.2 to 79.2)                        | 48.5<br>(35.3 to 65.8)                            | --                                        | --                                                | --                                                  |
| Iron-deficiency anaemia                                                 | 1,794.5<br>(1,688.4 to 1,909.2)               | --                                                | 37.6<br>(24.5 to 55.0)                    | -12.6<br>(-19.1 to -5.6)                          | -20.7<br>(-26.2 to -14.7)                           |
| Other nutritional deficiencies                                          | --                                            | --                                                | 0.1<br>(< 0.05 to 0.1)                    | 10.8<br>(-35.9 to 84.9)                           | -19.2<br>(-53.0 to 34.8)                            |
| <b>Other communicable, maternal, neonatal, and nutritional diseases</b> | <b>2,594.9</b><br><b>(2,450.9 to 2,751.7)</b> | <b>1,308.2</b><br><b>(1,150.1 to 1,478.1)</b>     | <b>5.4</b><br><b>(3.4 to 8.3)</b>         | <b>6.6</b><br><b>(0.1 to 12.6)</b>                | <b>-6.9</b><br><b>(-12.3 to -2.0)</b>               |
| Sexually transmitted diseases excluding HIV                             | 1,515.5<br>(1,416.8 to 1,640.0)               | 961.4<br>(836.2 to 1,103.2)                       | 4.1<br>(2.5 to 6.3)                       | 13.3<br>(5.4 to 21.2)                             | -2.0<br>(-8.3 to 4.5)                               |
| Syphilis                                                                | 8.4<br>(6.8 to 10.3)                          | 5.1<br>(3.6 to 7.1)                               | 0.4<br>(0.3 to 0.6)                       | 39.7<br>(20.3 to 62.7)                            | 3.5<br>(-11.4 to 22.2)                              |
| Chlamydial infection                                                    | 190.2<br>(149.6 to 240.1)                     | 153.2<br>(119.0 to 193.2)                         | 0.9<br>(0.6 to 1.5)                       | 16.9<br>(2.3 to 32.8)                             | -2.1<br>(-13.6 to 11.1)                             |
| Gonococcal infection                                                    | 131.0<br>(102.5 to 167.3)                     | 434.0<br>(327.7 to 569.3)                         | 0.8<br>(0.5 to 1.3)                       | 2.4<br>(-12.3 to 18.6)                            | -2.3<br>(-15.3 to 13.6)                             |
| Trichomoniasis                                                          | 287.3<br>(246.6 to 331.7)                     | 245.4<br>(207.9 to 286.2)                         | 0.4<br>(0.1 to 0.8)                       | 16.3<br>(8.1 to 24.6)                             | -1.8<br>(-7.6 to 4.0)                               |
| Genital herpes                                                          | 978.5<br>(846.1 to 1,141.6)                   | 59.7<br>(50.2 to 72.8)                            | 0.2<br>(0.1 to 0.6)                       | 24.6<br>(16.1 to 32.1)                            | -0.4<br>(-6.1 to 5.6)                               |
| Other sexually transmitted diseases                                     | 50.5<br>(40.8 to 61.1)                        | 63.9<br>(53.5 to 76.4)                            | 1.3<br>(0.8 to 2.0)                       | 9.2<br>(-2.8 to 21.9)                             | -3.9<br>(-14.5 to 7.0)                              |
| Hepatitis                                                               | 1,271.8<br>(1,108.5 to 1,461.2)               | 346.8<br>(229.0 to 415.9)                         | 0.2<br>(0.1 to 0.3)                       | -29.5<br>(-42.9 to -12.5)                         | -33.4<br>(-46.1 to -19.1)                           |
| Acute hepatitis A                                                       | 18.8<br>(9.9 to 23.8)                         | 243.7<br>(129.2 to 309.7)                         | 0.1<br>(< 0.05 to 0.1)                    | -36.9<br>(-58.3 to -5.8)                          | -36.1<br>(-57.8 to -5.7)                            |
| Hepatitis B                                                             | 692.1<br>(555.2 to 871.4)                     | 78.5<br>(58.8 to 104.6)                           | 0.1<br>(< 0.05 to 0.1)                    | -25.9<br>(-40.8 to -5.5)                          | -33.9<br>(-46.3 to -17.8)                           |
| Hepatitis C                                                             | 560.6<br>(493.6 to 627.6)                     | 19.8<br>(17.5 to 22.4)                            | < 0.05<br>(< 0.05 to < 0.05)              | 19.9<br>(-30.1 to 87.3)                           | -8.8<br>(-46.6 to 41.6)                             |
| Acute hepatitis E                                                       | 0.4<br>(0.3 to 0.4)                           | 4.8<br>(4.1 to 5.6)                               | < 0.05<br>(< 0.05 to < 0.05)              | -39.4<br>(-56.1 to -17.5)                         | -34.5<br>(-50.2 to -14.3)                           |
| Other infectious diseases                                               | 57.2<br>(52.7 to 62.2)                        | < 0.05<br>(< 0.05 to < 0.05)                      | 1.1<br>(0.7 to 1.6)                       | -5.7<br>(-17.7 to 8.7)                            | -15.0<br>(-25.7 to -2.4)                            |
| <b>Non-communicable diseases</b>                                        | <b>8,881.0</b><br><b>(8,816.2 to 8,943.1)</b> | <b>27,532.1†</b><br><b>(26,241.6 to 28,911.2)</b> | <b>815.4</b><br><b>(604.5 to 1,055.6)</b> | <b>21.9</b><br><b>(18.6 to 25.4)</b>              | <b>0.1</b><br><b>(-2.4 to 2.8)</b>                  |
| <b>Neoplasms</b>                                                        | <b>39.7</b><br><b>(37.0 to 42.5)</b>          | <b>18.7</b><br><b>(17.0 to 20.8)</b>              | <b>5.2</b><br><b>(3.8 to 6.8)</b>         | <b>42.1</b><br><b>(31.0 to 56.7)</b>              | <b>5.0</b><br><b>(-3.0 to 15.0)</b>                 |
| Lip and oral cavity cancer                                              | 0.8<br>(0.7 to 1.0)                           | 0.2<br>(0.2 to 0.3)                               | 0.1<br>(0.1 to 0.1)                       | 48.6<br>(23.1 to 77.0)                            | 8.5<br>(-8.9 to 27.4)                               |
| Nasopharynx cancer                                                      | 0.2<br>(0.1 to 0.2)                           | < 0.05<br>(< 0.05 to 0.1)                         | < 0.05<br>(< 0.05 to < 0.05)              | 21.4<br>(-7.9 to 57.9)                            | 2.5<br>(-22.3 to 32.1)                              |
| Other pharynx cancer                                                    | 0.2<br>(0.2 to 0.3)                           | 0.1<br>(0.1 to 0.1)                               | < 0.05<br>(< 0.05 to < 0.05)              | 74.6<br>(25.8 to 120.9)                           | 21.3<br>(-11.5 to 51.9)                             |
| Oesophageal cancer                                                      | 0.7<br>(0.7 to 0.8)                           | 0.7<br>(0.6 to 0.7)                               | 0.2<br>(0.1 to 0.2)                       | 29.6<br>(2.1 to 61.9)                             | -8.4<br>(-28.0 to 12.1)                             |
| Stomach cancer                                                          | 2.5<br>(2.3 to 2.7)                           | 1.6<br>(1.5 to 1.7)                               | 0.4<br>(0.3 to 0.5)                       | 14.0<br>(-4.7 to 36.5)                            | -19.2<br>(-31.9 to -3.7)                            |
| Colon and rectum cancer                                                 | 3.9<br>(3.4 to 4.5)                           | 1.1<br>(1.0 to 1.3)                               | 0.4<br>(0.3 to 0.6)                       | 60.7<br>(33.9 to 98.1)                            | 14.5<br>(-4.9 to 41.6)                              |
| Liver cancer                                                            | 0.2<br>(0.2 to 0.3)                           | 0.7<br>(0.6 to 0.8)                               | 0.1<br>(0.1 to 0.2)                       | 37.2<br>(17.6 to 56.6)                            | -1.0<br>(-15.4 to 12.6)                             |
| Liver cancer due to hepatitis B                                         | 0.2<br>(0.1 to 0.2)                           | 0.2<br>(0.2 to 0.3)                               | < 0.05<br>(< 0.05 to 0.1)                 | 38.1<br>(15.7 to 60.7)                            | -0.2<br>(-14.7 to 14.1)                             |

| Cause                                              | Prevalence in thousands (95% UI)        | Incidence in thousands (95% UI)        | YLDs in thousands (95% UI)           |                                                   |                                                     |
|----------------------------------------------------|-----------------------------------------|----------------------------------------|--------------------------------------|---------------------------------------------------|-----------------------------------------------------|
|                                                    | 2016 counts                             | 2016 counts                            | 2016 counts                          | Percentage change in counts between 2006 and 2016 | Percentage change in age-standardised rates between |
| Liver cancer due to hepatitis C                    | 0.2<br>(0.2 to 0.3)                     | 0.2<br>(0.2 to 0.3)                    | 0.1<br>( $< 0.05$ to 0.1)            | 40.8<br>(17.8 to 63.5)                            | -1.1<br>(-17.2 to 13.7)                             |
| Liver cancer due to alcohol use                    | 0.1<br>(0.1 to 0.2)                     | 0.1<br>(0.1 to 0.2)                    | $< 0.05$<br>( $< 0.05$ to $< 0.05$ ) | 31.4<br>(9.3 to 53.5)                             | -3.5<br>(-19.8 to 11.8)                             |
| Liver cancer due to other causes                   | 0.1<br>(0.1 to 0.1)                     | 0.1<br>(0.1 to 0.1)                    | $< 0.05$<br>( $< 0.05$ to $< 0.05$ ) | 36.2<br>(15.9 to 59.6)                            | 1.1<br>(-12.2 to 18.5)                              |
| Gallbladder and biliary tract cancer               | 0.1<br>(0.1 to 0.2)                     | 0.2<br>(0.1 to 0.2)                    | $< 0.05$<br>( $< 0.05$ to 0.1)       | 26.6<br>(3.7 to 50.6)                             | -10.7<br>(-26.8 to 6.2)                             |
| Pancreatic cancer                                  | 0.4<br>(0.3 to 0.4)                     | 0.5<br>(0.4 to 0.5)                    | 0.1<br>(0.1 to 0.1)                  | 50.8<br>(34.6 to 67.0)                            | 7.4<br>(-4.1 to 18.9)                               |
| Larynx cancer                                      | 1.1<br>(1.0 to 1.4)                     | 0.3<br>(0.3 to 0.4)                    | 0.1<br>(0.1 to 0.2)                  | 50.2<br>(26.2 to 85.7)                            | 1.1<br>(-14.2 to 23.7)                              |
| Tracheal, bronchus, and lung cancer                | 2.0<br>(1.6 to 2.4)                     | 1.7<br>(1.4 to 2.0)                    | 0.4<br>(0.3 to 0.6)                  | 51.0<br>(12.5 to 99.9)                            | 6.5<br>(-19.6 to 37.7)                              |
| Malignant skin melanoma                            | 0.6<br>(0.5 to 0.8)                     | 0.1<br>(0.1 to 0.2)                    | $< 0.05$<br>( $< 0.05$ to 0.1)       | 112.1<br>(68.5 to 162.2)                          | 51.0<br>(20.1 to 82.4)                              |
| Non-melanoma skin cancer                           | 1.9<br>(1.4 to 2.6)                     | 3.4<br>(2.2 to 5.0)                    | 0.1<br>( $< 0.05$ to 0.1)            | 46.2<br>(-27.0 to 211.5)                          | 3.8<br>(-50.0 to 130.7)                             |
| Non-melanoma skin cancer (squamous-cell carcinoma) | 1.6<br>(1.0 to 2.4)                     | 1.4<br>(0.8 to 2.2)                    | 0.1<br>( $< 0.05$ to 0.1)            | 45.9<br>(-28.6 to 227.3)                          | 3.6<br>(-50.6 to 138.8)                             |
| Non-melanoma skin cancer (basal-cell carcinoma)    | 0.3<br>(0.1 to 0.5)                     | 2.1<br>(1.1 to 3.5)                    | $< 0.05$<br>( $< 0.05$ to $< 0.05$ ) | 55.5<br>(12.9 to 114.0)                           | 8.1<br>(-21.5 to 55.7)                              |
| Breast cancer                                      | 9.9<br>(7.7 to 12.4)                    | 2.1<br>(1.6 to 2.6)                    | 0.9<br>(0.6 to 1.3)                  | 43.3<br>(6.6 to 89.0)                             | 6.7<br>(-18.4 to 37.6)                              |
| Cervical cancer                                    | 2.6<br>(1.8 to 3.5)                     | 0.7<br>(0.5 to 0.9)                    | 0.2<br>(0.2 to 0.4)                  | 6.5<br>(-17.2 to 41.9)                            | -18.3<br>(-35.2 to 7.9)                             |
| Uterine cancer                                     | 2.6<br>(2.2 to 3.2)                     | 0.5<br>(0.5 to 0.7)                    | 0.2<br>(0.1 to 0.3)                  | 90.1<br>(48.8 to 148.9)                           | 27.2<br>(1.2 to 62.9)                               |
| Ovarian cancer                                     | 1.2<br>(1.0 to 1.4)                     | 0.4<br>(0.3 to 0.4)                    | 0.2<br>(0.1 to 0.2)                  | 45.5<br>(3.1 to 100.0)                            | 10.6<br>(-21.8 to 49.9)                             |
| Prostate cancer                                    | 2.9<br>(2.1 to 3.5)                     | 0.7<br>(0.5 to 0.9)                    | 0.3<br>(0.2 to 0.4)                  | 63.3<br>(24.5 to 105.5)                           | 20.6<br>(-5.7 to 50.0)                              |
| Testicular cancer                                  | 0.7<br>(0.5 to 1.0)                     | 0.1<br>(0.1 to 0.2)                    | $< 0.05$<br>( $< 0.05$ to 0.1)       | 105.0<br>(28.3 to 219.8)                          | 75.2<br>(9.4 to 173.1)                              |
| Kidney cancer                                      | 2.3<br>(2.0 to 2.6)                     | 0.6<br>(0.5 to 0.7)                    | 0.2<br>(0.1 to 0.3)                  | 59.4<br>(37.7 to 87.6)                            | 16.8<br>(2.0 to 36.5)                               |
| Bladder cancer                                     | 2.0<br>(1.7 to 2.4)                     | 0.5<br>(0.4 to 0.6)                    | 0.2<br>(0.1 to 0.3)                  | 67.6<br>(32.8 to 104.3)                           | 14.4<br>(-8.2 to 38.6)                              |
| Brain and nervous system cancer                    | 1.1<br>(0.9 to 1.2)                     | 0.5<br>(0.4 to 0.6)                    | 0.2<br>(0.1 to 0.2)                  | 30.5<br>(16.6 to 44.2)                            | 1.1<br>(-8.8 to 10.9)                               |
| Thyroid cancer                                     | 1.4<br>(1.2 to 1.7)                     | 0.3<br>(0.2 to 0.3)                    | 0.1<br>(0.1 to 0.1)                  | 110.8<br>(58.7 to 179.8)                          | 64.2<br>(25.7 to 114.3)                             |
| Mesothelioma                                       | $< 0.05$<br>( $< 0.05$ to $< 0.05$ )    | $< 0.05$<br>( $< 0.05$ to $< 0.05$ )   | $< 0.05$<br>( $< 0.05$ to $< 0.05$ ) | 21.8<br>(2.7 to 40.4)                             | -12.1<br>(-25.2 to 1.4)                             |
| Hodgkin lymphoma                                   | 0.5<br>(0.2 to 0.8)                     | 0.1<br>(0.1 to 0.2)                    | $< 0.05$<br>( $< 0.05$ to 0.1)       | 45.9<br>(9.9 to 106.5)                            | 22.0<br>(-9.8 to 79.3)                              |
| Non-Hodgkin's lymphoma                             | 0.9<br>(0.8 to 1.0)                     | 0.3<br>(0.2 to 0.3)                    | 0.1<br>(0.1 to 0.1)                  | 62.6<br>(42.0 to 85.9)                            | 28.3<br>(11.9 to 45.9)                              |
| Multiple myeloma                                   | 0.1<br>(0.1 to 0.2)                     | 0.1<br>(0.1 to 0.1)                    | $< 0.05$<br>( $< 0.05$ to $< 0.05$ ) | 71.2<br>(52.3 to 90.8)                            | 20.8<br>(8.9 to 33.9)                               |
| Leukaemia                                          | 2.2<br>(1.6 to 2.9)                     | 0.6<br>(0.4 to 0.7)                    | 0.3<br>(0.2 to 0.4)                  | 5.9<br>(-10.1 to 25.6)                            | -6.8<br>(-20.2 to 10.9)                             |
| Acute lymphoid leukaemia                           | 0.4<br>(0.3 to 0.5)                     | 0.1<br>(0.1 to 0.1)                    | $< 0.05$<br>( $< 0.05$ to 0.1)       | 19.9<br>(-15.6 to 66.5)                           | 11.7<br>(-18.9 to 52.0)                             |
| Chronic lymphoid leukaemia                         | 0.3<br>(0.2 to 0.4)                     | 0.1<br>(0.1 to 0.1)                    | $< 0.05$<br>( $< 0.05$ to 0.1)       | 23.0<br>(2.1 to 47.6)                             | -4.3<br>(-19.5 to 15.8)                             |
| Acute myeloid leukaemia                            | 0.2<br>(0.1 to 0.3)                     | 0.1<br>(0.1 to 0.1)                    | $< 0.05$<br>( $< 0.05$ to $< 0.05$ ) | 27.8<br>(7.6 to 54.9)                             | 11.3<br>(-5.7 to 33.2)                              |
| Chronic myeloid leukaemia                          | 0.1<br>(0.1 to 0.1)                     | $< 0.05$<br>( $< 0.05$ to $< 0.05$ )   | $< 0.05$<br>( $< 0.05$ to $< 0.05$ ) | 16.6<br>(-6.0 to 46.4)                            | -10.9<br>(-26.0 to 10.5)                            |
| Other leukaemia                                    | 1.2<br>(0.8 to 1.7)                     | 0.3<br>(0.2 to 0.4)                    | 0.1<br>(0.1 to 0.2)                  | -6.1<br>(-24.1 to 20.0)                           | -15.0<br>(-30.7 to 7.7)                             |
| Other neoplasms                                    | 2.0<br>(1.8 to 2.2)                     | 0.6<br>(0.5 to 0.7)                    | 0.2<br>(0.1 to 0.2)                  | 38.3<br>(19.0 to 59.1)                            | 12.2<br>(-2.9 to 29.4)                              |
| <b>Cardiovascular diseases</b>                     | <b>601.5</b><br><b>(579.1 to 625.2)</b> | <b>69.1†</b><br><b>(65.7 to 72.5)</b>  | <b>46.6</b><br><b>(34.0 to 60.1)</b> | <b>39.2</b><br><b>(33.7 to 44.3)</b>              | <b>2.9</b><br><b>(-0.8 to 6.6)</b>                  |
| Rheumatic heart disease                            | 83.9<br>(74.7 to 93.7)                  | 2.0<br>(1.8 to 2.2)                    | 4.0<br>(2.6 to 5.9)                  | 9.1<br>(0.4 to 18.5)                              | -5.9<br>(-13.5 to 1.9)                              |
| Ischaemic heart disease                            | 215.6<br>(202.9 to 228.3)               | 28.6<br>(26.8 to 30.4)                 | 13.6<br>(9.6 to 18.5)                | 46.2<br>(39.1 to 53.1)                            | 6.1<br>(1.2 to 10.8)                                |
| Cerebrovascular disease                            | 95.8<br>(89.3 to 102.5)                 | 17.2‡<br>(15.8 to 18.7)                | 18.9<br>(13.5 to 24.1)               | 44.4<br>(33.9 to 54.7)                            | 3.1<br>(-4.2 to 10.4)                               |
| Ischaemic stroke                                   | 74.8<br>(66.5 to 82.8)                  | 10.3‡<br>(9.0 to 11.6)                 | 14.1<br>(10.0 to 18.1)               | 47.3<br>(34.0 to 60.3)                            | 5.6<br>(-3.7 to 14.9)                               |
| Hemorrhagic stroke                                 | 25.5<br>(22.8 to 28.5)                  | 7.0‡<br>(6.2 to 7.8)                   | 4.8<br>(3.4 to 6.2)                  | 36.4<br>(21.9 to 52.2)                            | -4.0<br>(-13.2 to 6.3)                              |
| Hypertensive heart disease                         | 18.2<br>(15.2 to 21.6)                  | --                                     | 1.5<br>(1.0 to 2.0)                  | 39.0<br>(22.8 to 57.1)                            | 0.5<br>(-9.5 to 11.1)                               |
| Cardiomyopathy and myocarditis                     | 12.0<br>(10.5 to 13.6)                  | 1.4†<br>(1.2 to 1.6)                   | 1.1<br>(0.8 to 1.6)                  | 32.1<br>(16.2 to 50.3)                            | 4.2<br>(-7.5 to 16.8)                               |
| Myocarditis                                        | 3.1<br>(2.7 to 3.6)                     | 1.4<br>(1.2 to 1.6)                    | 0.3<br>(0.2 to 0.4)                  | 21.4<br>(-1.2 to 48.0)                            | 4.1<br>(-13.4 to 25.9)                              |
| Alcoholic cardiomyopathy                           | 3.8<br>(3.2 to 4.5)                     | --                                     | 0.3<br>(0.2 to 0.5)                  | 44.7<br>(16.4 to 78.3)                            | 3.7<br>(-13.2 to 24.3)                              |
| Other cardiomyopathy                               | 6.5<br>(5.7 to 7.5)                     | --                                     | 0.6<br>(0.4 to 0.8)                  | 31.0<br>(8.9 to 54.9)                             | 4.4<br>(-10.2 to 20.0)                              |
| Atrial fibrillation and flutter                    | 50.2<br>(43.9 to 57.6)                  | 4.3<br>(3.7 to 5.0)                    | 3.9<br>(2.6 to 5.5)                  | 41.0<br>(31.4 to 52.3)                            | 1.8<br>(-4.5 to 8.3)                                |
| Peripheral vascular disease                        | 148.2<br>(127.6 to 171.9)               | 14.6<br>(12.4 to 17.1)                 | 0.6<br>(0.3 to 1.2)                  | 34.4<br>(18.7 to 52.2)                            | -5.2<br>(-12.6 to 3.4)                              |
| Endocarditis                                       | 0.3<br>(0.3 to 0.4)                     | 0.9<br>(0.8 to 1.0)                    | $< 0.05$<br>( $< 0.05$ to $< 0.05$ ) | 34.2<br>(23.1 to 46.4)                            | 2.6<br>(-7.2 to 13.3)                               |
| Other cardiovascular and circulatory diseases      | 54.3<br>(46.2 to 64.1)                  | --                                     | 2.8<br>(1.9 to 4.1)                  | 30.2<br>(15.9 to 45.5)                            | 2.2<br>(-6.8 to 12.6)                               |
| <b>Chronic respiratory diseases</b>                | <b>698.9</b><br><b>(672.6 to 726.1)</b> | <b>99.8†</b><br><b>(94.2 to 105.7)</b> | <b>25.6</b><br><b>(18.9 to 33.6)</b> | <b>29.6</b><br><b>(23.0 to 37.0)</b>              | <b>10.6</b><br><b>(5.4 to 15.9)</b>                 |
| Chronic obstructive pulmonary disease              | 282.1<br>(266.8 to 297.9)               | 18.0<br>(16.9 to 19.1)                 | 7.1<br>(5.6 to 8.6)                  | 47.2<br>(28.1 to 67.0)                            | 8.3<br>(-5.4 to 22.7)                               |
| Pneumoconiosis                                     | 0.7<br>(0.6 to 0.7)                     | 0.1<br>( $< 0.05$ to 0.1)              | 0.1<br>(0.1 to 0.1)                  | 73.9<br>(43.3 to 109.7)                           | 24.4<br>(2.3 to 52.9)                               |
| Silicosis                                          | 0.1<br>(0.1 to 0.1)                     | $< 0.05$<br>( $< 0.05$ to $< 0.05$ )   | $< 0.05$<br>( $< 0.05$ to $< 0.05$ ) | 86.2<br>(73.8 to 99.8)                            | 35.3<br>(28.0 to 43.1)                              |

| Cause                                                          | Prevalence in thousands (95% UI)              | Incidence in thousands (95% UI)               | YLDs in thousands (95% UI)              |                                                   |                                                     |
|----------------------------------------------------------------|-----------------------------------------------|-----------------------------------------------|-----------------------------------------|---------------------------------------------------|-----------------------------------------------------|
|                                                                | 2016 counts                                   | 2016 counts                                   | 2016 counts                             | Percentage change in counts between 2006 and 2016 | Percentage change in age-standardised rates between |
| Asbestosis                                                     | 0.1<br>(0.1 to 0.2)                           | < 0.05<br>(< 0.05 to < 0.05)                  | < 0.05<br>(< 0.05 to < 0.05)            | 43.8<br>(34.6 to 53.6)                            | 1.8<br>(-4.7 to 8.5)                                |
| Coal workers pneumoconiosis                                    | --                                            | --                                            | --                                      | --                                                | --                                                  |
| Other pneumoconiosis                                           | 0.4<br>(0.4 to 0.5)                           | < 0.05<br>(< 0.05 to < 0.05)                  | 0.1<br>(< 0.05 to 0.1)                  | 86.1<br>(37.0 to 149.9)                           | 32.4<br>(-2.4 to 80.9)                              |
| Asthma                                                         | 429.4<br>(401.6 to 459.4)                     | 81.3<br>(75.9 to 87.4)                        | 16.7<br>(10.8 to 23.8)                  | 23.1<br>(17.1 to 29.7)                            | 11.2<br>(6.5 to 16.2)                               |
| Interstitial lung disease and pulmonary sarcoidosis            | 10.3<br>(9.3 to 11.3)                         | 0.5<br>(0.4 to 0.5)                           | 1.1<br>(0.7 to 1.6)                     | 27.0<br>(7.5 to 51.8)                             | 3.9<br>(-10.2 to 21.0)                              |
| Other chronic respiratory diseases                             | --                                            | --                                            | 0.6<br>(0.4 to 0.7)                     | 40.1<br>(18.7 to 67.0)                            | 38.0<br>(17.6 to 63.0)                              |
| <b>Cirrhosis and other chronic liver diseases</b>              | <b>84.8</b><br><b>(80.3 to 89.6)</b>          | <b>4.2</b><br><b>(4.0 to 4.5)</b>             | <b>3.2</b><br><b>(2.2 to 4.4)</b>       | <b>33.2</b><br><b>(22.8 to 45.1)</b>              | <b>8.3</b><br><b>(0.4 to 18.0)</b>                  |
| Cirrhosis and other chronic liver diseases due to hepatitis B  | 27.6<br>(25.4 to 30.1)                        | 1.4<br>(1.3 to 1.5)                           | 0.9<br>(0.6 to 1.3)                     | 44.8<br>(24.4 to 69.2)                            | 8.3<br>(-5.0 to 24.6)                               |
| Cirrhosis and other chronic liver diseases due to hepatitis C  | 15.6<br>(13.9 to 17.7)                        | 0.8<br>(0.7 to 0.9)                           | 0.5<br>(0.3 to 0.7)                     | 47.7<br>(20.9 to 80.7)                            | 9.2<br>(-8.7 to 30.3)                               |
| Cirrhosis and other chronic liver diseases due to alcohol use  | 20.2<br>(18.3 to 22.5)                        | 1.1<br>(1.0 to 1.2)                           | 0.6<br>(0.4 to 0.9)                     | 48.8<br>(23.6 to 76.8)                            | 7.1<br>(-8.6 to 25.6)                               |
| Cirrhosis and other chronic liver diseases due to other causes | 21.4<br>(19.8 to 23.3)                        | 0.9<br>(0.9 to 1.0)                           | 1.1<br>(0.8 to 1.6)                     | 14.0<br>(-1.9 to 32.9)                            | 8.7<br>(-5.7 to 25.1)                               |
| <b>Digestive diseases</b>                                      | <b>268.1</b><br><b>(254.6 to 282.5)</b>       | <b>360.2†</b><br><b>(335.9 to 385.1)</b>      | <b>9.7</b><br><b>(6.8 to 13.1)</b>      | <b>23.9</b><br><b>(14.1 to 35.0)</b>              | <b>0.1</b><br><b>(-7.3 to 8.0)</b>                  |
| Peptic ulcer disease                                           | 71.9<br>(65.0 to 79.6)                        | 13.0<br>(11.7 to 14.6)                        | 1.3<br>(0.8 to 1.9)                     | 84.4<br>(63.0 to 110.6)                           | 43.8<br>(28.7 to 60.8)                              |
| Gastritis and duodenitis                                       | 105.7<br>(92.6 to 119.0)                      | 99.1<br>(87.8 to 112.0)                       | 1.6<br>(1.0 to 2.3)                     | 51.2<br>(34.7 to 69.4)                            | 26.6<br>(15.1 to 39.8)                              |
| Appendicitis                                                   | 1.4<br>(1.2 to 1.5)                           | 35.2<br>(32.4 to 38.5)                        | 0.4<br>(0.3 to 0.6)                     | -2.4<br>(-28.1 to 34.2)                           | 1.8<br>(-25.1 to 37.9)                              |
| Paralytic ileus and intestinal obstruction                     | 0.1<br>(0.1 to 0.1)                           | 2.8<br>(2.5 to 3.1)                           | < 0.05<br>(< 0.05 to < 0.05)            | 32.9<br>(26.0 to 39.7)                            | 8.4<br>(5.4 to 11.6)                                |
| Inguinal, femoral, and abdominal hernia                        | 66.7<br>(59.3 to 74.4)                        | 118.4<br>(101.9 to 136.6)                     | 4.6<br>(3.1 to 6.4)                     | 5.4<br>(-5.5 to 19.6)                             | -16.3<br>(-24.2 to -7.0)                            |
| Inflammatory bowel disease                                     | 3.4<br>(3.1 to 3.7)                           | 4.7<br>(4.5 to 4.9)                           | 0.5<br>(0.3 to 0.7)                     | 52.9<br>(24.7 to 84.8)                            | 21.9<br>(2.1 to 46.9)                               |
| Vascular intestinal disorders                                  | 0.1<br>(0.1 to 0.1)                           | 0.5<br>(0.5 to 0.6)                           | < 0.05<br>(< 0.05 to < 0.05)            | 37.4<br>(28.3 to 47.1)                            | 9.9<br>(5.3 to 14.8)                                |
| Gallbladder and biliary diseases                               | 25.1<br>(21.9 to 28.7)                        | 82.7<br>(71.8 to 95.5)                        | 0.4<br>(0.2 to 0.6)                     | 50.8<br>(19.7 to 90.8)                            | 15.0<br>(-5.2 to 41.0)                              |
| Pancreatitis                                                   | 0.4<br>(0.4 to 0.5)                           | 3.9<br>(3.4 to 4.4)                           | 0.1<br>(< 0.05 to 0.1)                  | 71.3<br>(61.1 to 81.4)                            | 31.2<br>(26.8 to 35.5)                              |
| Other digestive diseases                                       | --                                            | --                                            | 0.8<br>(0.6 to 1.1)                     | 26.9<br>(16.2 to 38.6)                            | 1.4<br>(-6.7 to 10.0)                               |
| <b>Neurological disorders</b>                                  | <b>3,785.4</b><br><b>(3,633.9 to 3,969.8)</b> | <b>1,736.4</b><br><b>(1,464.2 to 2,018.6)</b> | <b>100.8</b><br><b>(66.8 to 139.7)</b>  | <b>14.6</b><br><b>(-6.4 to 40.9)</b>              | <b>-0.5</b><br><b>(-18.6 to 22.9)</b>               |
| Alzheimer's disease and other dementias                        | 30.8<br>(25.8 to 36.6)                        | 5.3<br>(4.4 to 6.4)                           | 4.5<br>(3.1 to 6.0)                     | 55.1<br>(43.9 to 66.8)                            | -0.1<br>(-4.8 to 4.9)                               |
| Parkinson's disease                                            | 7.3<br>(5.8 to 9.1)                           | 0.9<br>(0.7 to 1.1)                           | 0.8<br>(0.5 to 1.2)                     | 48.3<br>(29.3 to 67.2)                            | 7.1<br>(-3.9 to 18.8)                               |
| Epilepsy                                                       | 38.4<br>(9.5 to 70.5)                         | 4.2<br>(1.1 to 7.8)                           | 11.9<br>(2.6 to 28.1)                   | 5.0<br>(-79.3 to 446.9)                           | -3.3<br>(-81.1 to 404.2)                            |
| Multiple sclerosis                                             | 2.3<br>(2.0 to 2.7)                           | 0.1<br>(0.1 to 0.1)                           | 0.6<br>(0.4 to 0.9)                     | 54.2<br>(30.9 to 82.0)                            | 23.8<br>(6.6 to 44.1)                               |
| Motor neuron disease                                           | 0.2<br>(0.2 to 0.2)                           | < 0.05<br>(< 0.05 to < 0.05)                  | < 0.05<br>(< 0.05 to 0.1)               | 26.8<br>(20.8 to 33.7)                            | 7.4<br>(3.7 to 11.2)                                |
| Migraine                                                       | 1,600.9<br>(1,502.4 to 1,704.5)               | 158.7<br>(148.8 to 169.8)                     | 69.4<br>(44.7 to 96.7)                  | 13.4<br>(9.3 to 17.7)                             | -1.0<br>(-4.3 to 2.6)                               |
| Tension-type headache                                          | 2,774.2<br>(2,459.3 to 3,130.5)               | 1,567.1<br>(1,296.5 to 1,853.1)               | 10.8<br>(6.9 to 16.0)                   | 15.8<br>(9.8 to 22.6)                             | -0.8<br>(-5.2 to 4.0)                               |
| Other neurological disorders                                   | < 0.05<br>(< 0.05 to < 0.05)                  | 0.1<br>(< 0.05 to 0.1)                        | 2.7<br>(0.8 to 5.9)                     | 22.4<br>(-68.1 to 411.9)                          | 17.6<br>(-69.2 to 363.5)                            |
| <b>Mental and substance use disorders</b>                      | <b>1,346.0</b><br><b>(1,301.9 to 1,393.7)</b> | <b>473.8†</b><br><b>(441.7 to 508.7)</b>      | <b>179.0</b><br><b>(131.1 to 231.6)</b> | <b>16.3</b><br><b>(13.1 to 19.6)</b>              | <b>1.1</b><br><b>(-1.3 to 3.6)</b>                  |
| Schizophrenia                                                  | 23.0<br>(20.0 to 26.1)                        | 1.4<br>(1.2 to 1.6)                           | 14.8<br>(10.7 to 18.6)                  | 29.0<br>(18.1 to 40.9)                            | 3.6<br>(-4.9 to 12.6)                               |
| Alcohol use disorders                                          | 260.8<br>(227.8 to 295.5)                     | 127.9<br>(107.7 to 148.5)                     | 26.2<br>(17.6 to 35.9)                  | 22.7<br>(12.0 to 35.2)                            | 0.8<br>(-7.4 to 9.6)                                |
| Drug use disorders                                             | 75.1<br>(69.7 to 81.5)                        | 10.2<br>(9.3 to 11.2)                         | 17.5<br>(12.5 to 23.0)                  | 30.6<br>(19.3 to 43.6)                            | 10.0<br>(1.0 to 20.6)                               |
| Opioid use disorders                                           | 30.3<br>(25.7 to 36.0)                        | 4.2<br>(3.6 to 4.9)                           | 12.7<br>(8.8 to 17.1)                   | 34.5<br>(20.1 to 51.9)                            | 10.4<br>(-1.1 to 23.2)                              |
| Cocaine use disorders                                          | 7.5<br>(6.5 to 8.7)                           | 0.5<br>(0.4 to 0.6)                           | 1.0<br>(0.6 to 1.5)                     | 23.1<br>(-2.5 to 56.9)                            | 8.6<br>(-13.5 to 36.4)                              |
| Amphetamine use disorders                                      | 7.6<br>(5.2 to 10.4)                          | 0.6<br>(0.5 to 0.8)                           | 1.0<br>(0.6 to 1.6)                     | 21.4<br>(-5.8 to 60.6)                            | 12.3<br>(-11.8 to 48.4)                             |
| Cannabis use disorders                                         | 25.1<br>(20.8 to 29.9)                        | 3.7<br>(3.1 to 4.4)                           | 0.7<br>(0.5 to 1.1)                     | 4.5<br>(-13.1 to 23.8)                            | -0.1<br>(-16.0 to 17.3)                             |
| Other drug use disorders                                       | 6.2<br>(5.5 to 6.9)                           | 1.1<br>(1.0 to 1.3)                           | 2.0<br>(1.3 to 2.9)                     | 27.4<br>(0.6 to 59.3)                             | 11.5<br>(-11.4 to 38.7)                             |
| Depressive disorders                                           | 269.1<br>(251.4 to 288.8)                     | 251.5<br>(225.3 to 279.5)                     | 42.3<br>(29.5 to 57.7)                  | 21.0<br>(15.1 to 27.6)                            | 0.5<br>(-3.6 to 4.8)                                |
| Major depressive disorder                                      | 149.4<br>(133.8 to 167.4)                     | 230.6<br>(205.5 to 258.2)                     | 30.4<br>(20.9 to 41.3)                  | 20.0<br>(12.4 to 28.5)                            | 0.7<br>(-4.6 to 6.4)                                |
| Dysthymia                                                      | 122.9<br>(107.9 to 141.2)                     | 20.8<br>(18.1 to 24.1)                        | 11.8<br>(7.9 to 17.3)                   | 23.8<br>(18.1 to 29.9)                            | -0.2<br>(-3.8 to 3.7)                               |
| Bipolar disorder                                               | 64.3<br>(55.3 to 74.8)                        | 4.8<br>(4.2 to 5.6)                           | 13.2<br>(8.2 to 19.8)                   | 14.1<br>(6.8 to 21.6)                             | -0.1<br>(-5.8 to 5.9)                               |
| Anxiety disorders                                              | 255.9<br>(232.0 to 280.1)                     | 43.2<br>(39.7 to 47.1)                        | 24.7<br>(17.1 to 33.5)                  | 11.6<br>(3.6 to 19.4)                             | -0.4<br>(-7.0 to 6.0)                               |
| Eating disorders                                               | 12.4<br>(10.2 to 15.5)                        | 6.1<br>(4.6 to 8.1)                           | 2.5<br>(1.6 to 3.7)                     | 41.1<br>(21.0 to 63.1)                            | 35.8<br>(16.6 to 56.9)                              |
| Anorexia nervosa                                               | 2.6<br>(1.9 to 3.5)                           | 1.0<br>(0.7 to 1.3)                           | 0.6<br>(0.3 to 0.8)                     | 23.2<br>(-4.8 to 62.7)                            | 28.8<br>(0.0 to 66.8)                               |
| Bulimia nervosa                                                | 9.3<br>(7.0 to 12.3)                          | 5.1<br>(3.7 to 7.1)                           | 2.0<br>(1.2 to 3.0)                     | 47.1<br>(22.1 to 74.5)                            | 38.1<br>(15.9 to 62.9)                              |
| Autistic spectrum disorders                                    | 81.2<br>(72.6 to 92.5)                        | 0.6<br>(0.4 to 0.8)                           | 11.9<br>(8.0 to 16.7)                   | 10.0<br>(4.9 to 15.1)                             | 0.9<br>(-3.8 to 5.7)                                |
| Autism                                                         | 24.1<br>(20.6 to 28.2)                        | 0.1<br>(< 0.05 to 0.1)                        | 6.1<br>(4.0 to 9.0)                     | 9.8<br>(1.1 to 19.0)                              | 0.7<br>(-7.0 to 9.1)                                |
| Asperger syndrome and other autistic spectrum disorders        | 57.1<br>(47.4 to 68.8)                        | 0.5<br>(0.3 to 0.7)                           | 5.7<br>(3.7 to 8.4)                     | 10.2<br>(5.0 to 15.5)                             | 1.1<br>(-3.6 to 5.9)                                |



| Cause                                                      | Prevalence in thousands (95% UI)              | Incidence in thousands (95% UI)                   | YLDs in thousands (95% UI)              |                                                   |                                                     |
|------------------------------------------------------------|-----------------------------------------------|---------------------------------------------------|-----------------------------------------|---------------------------------------------------|-----------------------------------------------------|
|                                                            | 2016 counts                                   | 2016 counts                                       | 2016 counts                             | Percentage change in counts between 2006 and 2016 | Percentage change in age-standardised rates between |
| Attention-deficit/hyperactivity disorder                   | 72.3<br>(65.2 to 80.7)                        | 3.1<br>(2.7 to 3.7)                               | 0.9<br>(0.5 to 1.4)                     | -4.2<br>(-12.4 to 3.9)                            | 0.9<br>(-7.1 to 9.2)                                |
| Conduct disorder                                           | 57.9<br>(47.9 to 68.1)                        | 18.9<br>(15.1 to 22.7)                            | 7.1<br>(4.4 to 10.9)                    | -26.3<br>(-30.6 to -21.3)                         | 0.8<br>(-5.1 to 7.3)                                |
| Idiopathic developmental intellectual disability           | 84.4<br>(43.6 to 127.6)                       | --                                                | 3.4<br>(1.4 to 6.2)                     | -18.7<br>(-27.7 to -11.7)                         | -24.0<br>(-32.1 to -17.3)                           |
| Other mental and substance use disorders                   | 197.0<br>(173.6 to 227.2)                     | 6.0<br>(5.4 to 6.9)                               | 14.7<br>(10.2 to 21.2)                  | 23.7<br>(17.1 to 30.5)                            | 0.3<br>(-4.7 to 5.3)                                |
| <b>Diabetes, urogenital, blood, and endocrine diseases</b> | <b>3,244.0</b><br><b>(3,190.2 to 3,292.7)</b> | <b>1,540.7†</b><br><b>(1,434.3 to 1,664.3)</b>    | <b>78.5</b><br><b>(55.5 to 106.9)</b>   | <b>30.3</b><br><b>(25.1 to 35.8)</b>              | <b>1.9</b><br><b>(-1.8 to 6.0)</b>                  |
| Diabetes mellitus                                          | 353.9<br>(313.0 to 394.3)                     | 20.9<br>(18.4 to 23.7)                            | 30.1<br>(20.4 to 42.4)                  | 53.8<br>(40.3 to 70.5)                            | 10.7<br>(1.0 to 21.9)                               |
| Acute glomerulonephritis                                   | 0.2<br>(0.2 to 0.2)                           | 2.9<br>(2.5 to 3.3)                               | < 0.05<br>(< 0.05 to < 0.05)            | 6.7<br>(-1.3 to 15.1)                             | -8.0<br>(-13.8 to -2.8)                             |
| Chronic kidney disease                                     | 534.0<br>(482.4 to 588.1)                     | 41.9<br>(36.2 to 48.3)                            | 14.5<br>(10.6 to 18.8)                  | 29.5<br>(20.6 to 39.1)                            | -1.8<br>(-7.6 to 4.6)                               |
| Chronic kidney disease due to diabetes mellitus            | 237.5<br>(204.6 to 275.6)                     | 18.8<br>(15.4 to 22.9)                            | 6.1<br>(4.4 to 8.0)                     | 33.5<br>(19.8 to 48.0)                            | -1.0<br>(-8.7 to 7.8)                               |
| Chronic kidney disease due to hypertension                 | 84.6<br>(71.8 to 98.5)                        | 9.4<br>(7.6 to 11.5)                              | 1.0<br>(0.7 to 1.3)                     | 45.1<br>(27.0 to 64.8)                            | -0.4<br>(-11.1 to 11.6)                             |
| Chronic kidney disease due to glomerulonephritis           | 71.0<br>(60.4 to 81.8)                        | 2.6<br>(2.0 to 3.4)                               | 3.5<br>(2.5 to 4.8)                     | 25.1<br>(12.1 to 40.1)                            | -1.1<br>(-9.6 to 7.9)                               |
| Chronic kidney disease due to other causes                 | 140.9<br>(116.2 to 167.6)                     | 11.0<br>(8.8 to 13.5)                             | 3.9<br>(2.8 to 5.2)                     | 24.5<br>(12.4 to 39.1)                            | -3.8<br>(-10.9 to 4.3)                              |
| Urinary diseases and male infertility                      | 204.0<br>(180.3 to 230.7)                     | 1,019.6†<br>(920.1 to 1,134.3)                    | 5.7<br>(3.7 to 8.3)                     | 36.6<br>(27.0 to 50.8)                            | -1.1<br>(-7.0 to 6.8)                               |
| Interstitial nephritis and urinary tract infections        | 17.1<br>(15.1 to 19.3)                        | 883.9<br>(787.2 to 999.6)                         | 0.6<br>(0.4 to 0.9)                     | 10.4<br>(-1.9 to 24.1)                            | -2.3<br>(-12.5 to 9.6)                              |
| Urolithiasis                                               | 4.5<br>(3.9 to 5.1)                           | 118.7<br>(104.2 to 136.3)                         | 0.3<br>(0.2 to 0.5)                     | 31.8<br>(11.8 to 56.0)                            | 3.8<br>(-12.8 to 22.5)                              |
| Benign prostatic hyperplasia                               | 128.8<br>(107.5 to 152.6)                     | 17.0<br>(14.1 to 20.8)                            | 4.2<br>(2.6 to 6.1)                     | 45.9<br>(33.0 to 65.4)                            | -1.0<br>(-8.5 to 9.6)                               |
| Male infertility                                           | 45.2<br>(35.1 to 58.3)                        | --                                                | 0.3<br>(0.1 to 0.6)                     | 42.0<br>(17.9 to 66.8)                            | 25.2<br>(5.0 to 47.2)                               |
| Other urinary diseases                                     | --                                            | --                                                | 0.3<br>(0.2 to 0.5)                     | -2.6<br>(-11.7 to 7.2)                            | -17.9<br>(-25.4 to -9.9)                            |
| Gynecological diseases                                     | 1,203.3<br>(1,145.5 to 1,255.3)               | 432.6†<br>(401.7 to 465.7)                        | 15.7<br>(10.5 to 22.2)                  | 10.5<br>(5.3 to 15.1)                             | -4.2<br>(-8.0 to -0.4)                              |
| Uterine fibroids                                           | 169.4<br>(148.5 to 192.2)                     | 16.8<br>(14.4 to 19.6)                            | 2.6<br>(1.6 to 4.3)                     | 3.9<br>(-5.0 to 11.8)                             | -13.0<br>(-19.6 to -6.8)                            |
| Polycystic ovarian syndrome                                | 11.2<br>(8.2 to 14.8)                         | 3.8<br>(2.7 to 5.0)                               | 0.1<br>(< 0.05 to 0.2)                  | 9.8<br>(-5.8 to 25.2)                             | -1.2<br>(-15.0 to 12.6)                             |
| Female infertility                                         | 23.3<br>(10.6 to 41.6)                        | --                                                | 0.1<br>(< 0.05 to 0.3)                  | 80.2<br>(8.0 to 186.8)                            | 56.6<br>(-1.3 to 141.9)                             |
| Endometriosis                                              | 4.9<br>(4.0 to 5.9)                           | 13.9<br>(10.7 to 17.9)                            | 0.5<br>(0.3 to 0.7)                     | 12.1<br>(-16.1 to 46.5)                           | -1.2<br>(-27.1 to 29.2)                             |
| Genital prolapse                                           | 305.1<br>(263.4 to 350.8)                     | 19.1<br>(16.3 to 22.7)                            | 1.0<br>(0.5 to 1.7)                     | 49.1<br>(36.0 to 63.9)                            | 3.1<br>(-5.5 to 13.6)                               |
| Premenstrual syndrome                                      | 679.1<br>(640.6 to 715.6)                     | 233.1<br>(216.5 to 250.0)                         | 5.7<br>(3.6 to 8.7)                     | 5.6<br>(-1.7 to 13.6)                             | -2.5<br>(-9.2 to 4.6)                               |
| Other gynecological diseases                               | 167.7<br>(144.9 to 193.4)                     | 145.9<br>(120.1 to 175.1)                         | 5.7<br>(3.8 to 8.2)                     | 12.9<br>(4.6 to 21.9)                             | -3.8<br>(-10.1 to 3.2)                              |
| Hemoglobinopathies and hemolytic anaemias                  | 1,503.2<br>(1,472.5 to 1,529.7)               | --                                                | 7.7<br>(5.0 to 11.4)                    | 11.6<br>(2.0 to 22.7)                             | -3.5<br>(-10.8 to 5.5)                              |
| Thalassemias                                               | 0.3<br>(0.2 to 0.3)                           | --                                                | < 0.05<br>(< 0.05 to < 0.05)            | 31.9<br>(-5.5 to 84.5)                            | 10.0<br>(-19.5 to 50.9)                             |
| Thalassaemias trait                                        | 428.7<br>(402.0 to 454.4)                     | --                                                | 5.8<br>(3.8 to 8.4)                     | 16.3<br>(5.6 to 28.1)                             | 0.1<br>(-8.4 to 9.4)                                |
| Sickle cell disorders                                      | 0.1<br>(0.1 to 0.2)                           | --                                                | < 0.05<br>(< 0.05 to < 0.05)            | 1.7<br>(-7.7 to 12.8)                             | -2.6<br>(-11.0 to 7.2)                              |
| Sickle cell trait                                          | 195.4<br>(187.2 to 204.3)                     | --                                                | 0.4<br>(0.3 to 0.7)                     | 6.8<br>(-7.8 to 22.4)                             | -4.6<br>(-16.6 to 9.1)                              |
| G6PD deficiency                                            | 104.4<br>(99.8 to 110.1)                      | --                                                | < 0.05<br>(< 0.05 to < 0.05)            | 45.3<br>(28.1 to 66.4)                            | 22.7<br>(9.5 to 38.4)                               |
| G6PD trait                                                 | 768.4<br>(751.6 to 788.0)                     | --                                                | < 0.05<br>(< 0.05 to < 0.05)            | 26.3<br>(13.8 to 43.2)                            | 9.0<br>(-1.3 to 22.9)                               |
| Other hemoglobinopathies and hemolytic anaemias            | 91.8<br>(83.6 to 100.3)                       | --                                                | 1.4<br>(0.8 to 2.0)                     | -3.9<br>(-15.2 to 9.4)                            | -15.7<br>(-24.7 to -5.4)                            |
| Endocrine, metabolic, blood, and immune disorders          | 171.0<br>(158.7 to 184.5)                     | 22.8<br>(20.4 to 25.6)                            | 4.9<br>(3.3 to 6.8)                     | 14.7<br>(7.0 to 23.4)                             | -4.7<br>(-10.0 to 1.2)                              |
| <b>Musculoskeletal disorders</b>                           | <b>1,531.2</b><br><b>(1,458.2 to 1,616.0)</b> | <b>647.0</b><br><b>(575.5 to 724.8)</b>           | <b>173.3</b><br><b>(124.6 to 226.3)</b> | <b>28.5</b><br><b>(23.4 to 33.4)</b>              | <b>-1.2</b><br><b>(-3.8 to 1.2)</b>                 |
| Rheumatoid arthritis                                       | 25.9<br>(22.9 to 29.3)                        | 1.4<br>(1.3 to 1.6)                               | 6.1<br>(4.1 to 8.2)                     | 45.0<br>(32.3 to 58.4)                            | 10.0<br>(1.2 to 19.2)                               |
| Osteoarthritis                                             | 392.9<br>(367.4 to 420.2)                     | 21.4<br>(19.7 to 23.2)                            | 24.3<br>(17.1 to 33.0)                  | 50.0<br>(44.0 to 56.0)                            | 5.8<br>(2.0 to 9.6)                                 |
| Low back and neck pain                                     | 1,121.2<br>(1,047.7 to 1,204.1)               | 513.9<br>(451.5 to 584.4)                         | 132.7<br>(93.9 to 174.5)                | 26.3<br>(20.2 to 32.4)                            | -2.1<br>(-5.0 to 0.7)                               |
| Low back pain                                              | 845.5<br>(746.1 to 963.5)                     | 432.9<br>(371.8 to 503.1)                         | 96.1<br>(67.6 to 128.5)                 | 25.5<br>(17.2 to 33.8)                            | -2.8<br>(-6.5 to 1.2)                               |
| Neck pain                                                  | 366.0<br>(311.9 to 427.2)                     | 81.1<br>(69.7 to 96.4)                            | 36.6<br>(24.4 to 52.4)                  | 28.4<br>(21.9 to 35.8)                            | -0.1<br>(-2.3 to 2.0)                               |
| Gout                                                       | 36.5<br>(32.0 to 41.5)                        | 7.3<br>(6.3 to 8.3)                               | 1.2<br>(0.8 to 1.6)                     | 36.7<br>(15.4 to 61.5)                            | 0.1<br>(-13.8 to 15.1)                              |
| Other musculoskeletal disorders                            | 104.4<br>(74.1 to 144.1)                      | 102.9<br>(71.3 to 145.0)                          | 9.1<br>(5.3 to 14.2)                    | 6.4<br>(-10.4 to 25.6)                            | -14.5<br>(-26.7 to -1.4)                            |
| <b>Other non-communicable diseases</b>                     | <b>7,266.2</b><br><b>(7,140.8 to 7,382.2)</b> | <b>22,582.1†</b><br><b>(21,336.2 to 23,917.2)</b> | <b>193.7</b><br><b>(133.6 to 273.1)</b> | <b>17.6</b><br><b>(15.6 to 19.4)</b>              | <b>-2.1</b><br><b>(-3.2 to -1.0)</b>                |
| Congenital anomalies                                       | 102.4<br>(92.1 to 113.4)                      | --                                                | 13.1<br>(9.6 to 17.2)                   | 11.1<br>(4.6 to 17.8)                             | -0.9<br>(-6.7 to 4.9)                               |
| Neural tube defects                                        | 10.9<br>(9.6 to 12.3)                         | --                                                | 3.2<br>(2.2 to 4.4)                     | 11.2<br>(-2.5 to 26.5)                            | -0.9<br>(-12.1 to 12.4)                             |
| Congenital heart anomalies                                 | 26.9<br>(23.5 to 30.5)                        | --                                                | 1.3<br>(0.6 to 2.3)                     | 18.2<br>(5.4 to 32.5)                             | 7.5<br>(-3.7 to 20.1)                               |
| Orofacial clefts                                           | 4.3<br>(3.8 to 4.9)                           | --                                                | 0.1<br>(< 0.05 to 0.1)                  | 2.6<br>(-9.9 to 17.4)                             | -9.5<br>(-20.4 to 3.4)                              |
| Down's syndrome                                            | 8.6<br>(7.4 to 10.0)                          | --                                                | 0.8<br>(0.5 to 1.1)                     | 15.4<br>(4.0 to 28.8)                             | 3.8<br>(-6.2 to 14.8)                               |
| Turner syndrome                                            | 7.2<br>(6.2 to 8.5)                           | --                                                | 0.1<br>(0.1 to 0.2)                     | 1.9<br>(-21.4 to 35.5)                            | -3.7<br>(-25.8 to 26.4)                             |
| Klinefelter syndrome                                       | 6.2<br>(5.2 to 7.4)                           | --                                                | < 0.05<br>(< 0.05 to 0.1)               | 10.3<br>(-14.1 to 41.4)                           | 0.5<br>(-21.2 to 28.1)                              |

| Cause                                         | Prevalence in thousands (95% UI)              | Incidence in thousands (95% UI)              | YLDs in thousands (95% UI)            |                                                   |                                                     |
|-----------------------------------------------|-----------------------------------------------|----------------------------------------------|---------------------------------------|---------------------------------------------------|-----------------------------------------------------|
|                                               | 2016 counts                                   | 2016 counts                                  | 2016 counts                           | Percentage change in counts between 2006 and 2016 | Percentage change in age-standardised rates between |
| Other chromosomal abnormalities               | 4.3<br>(3.7 to 5.1)                           | --                                           | 0.8<br>(0.6 to 1.2)                   | 15.2<br>(-2.4 to 36.2)                            | 2.6<br>(-13.5 to 20.8)                              |
| Congenital musculoskeletal and limb anomalies | 9.8<br>(8.9 to 10.8)                          | --                                           | 1.4<br>(1.0 to 2.0)                   | 14.0<br>(2.7 to 26.2)                             | 1.6<br>(-8.2 to 11.9)                               |
| Urogenital congenital anomalies               | 10.1<br>(8.8 to 11.6)                         | --                                           | 0.4<br>(0.2 to 0.5)                   | 1.8<br>(-9.9 to 16.0)                             | 0.4<br>(-11.5 to 14.0)                              |
| Digestive congenital anomalies                | 11.3<br>(9.9 to 12.7)                         | --                                           | 0.5<br>(0.3 to 0.7)                   | 18.3<br>(0.5 to 40.0)                             | 5.8<br>(-9.7 to 24.5)                               |
| Other congenital anomalies                    | 30.3<br>(19.5 to 44.6)                        | --                                           | 4.5<br>(3.0 to 6.5)                   | 7.3<br>(-3.2 to 19.2)                             | -5.8<br>(-14.8 to 4.2)                              |
| Skin and subcutaneous diseases                | 2,656.4<br>(2,590.6 to 2,726.2)               | 5,690.4<br>(5,384.5 to 6,030.6)              | 61.6<br>(41.7 to 89.5)                | 6.3<br>(3.6 to 9.0)                               | 2.5<br>(0.5 to 4.6)                                 |
| Dermatitis                                    | 291.8<br>(264.8 to 319.9)                     | 425.7<br>(388.6 to 465.6)                    | 10.7<br>(6.4 to 17.0)                 | 9.7<br>(4.9 to 15.3)                              | -0.1<br>(-4.0 to 4.5)                               |
| Psoriasis                                     | 94.4<br>(90.2 to 99.2)                        | 12.9<br>(12.3 to 13.5)                       | 8.2<br>(5.8 to 10.8)                  | 27.7<br>(17.9 to 38.0)                            | 8.9<br>(1.4 to 17.2)                                |
| Cellulitis                                    | 3.7<br>(3.4 to 4.0)                           | 65.8<br>(61.6 to 70.3)                       | 0.2<br>(0.1 to 0.3)                   | 18.0<br>(-6.1 to 49.2)                            | 2.8<br>(-16.0 to 26.2)                              |
| Pyoderma                                      | 19.0<br>(18.3 to 19.7)                        | 401.5<br>(386.7 to 416.8)                    | 0.1<br>(< 0.05 to 0.2)                | 25.0<br>(15.8 to 36.2)                            | 1.6<br>(-5.6 to 9.6)                                |
| Scabies                                       | 69.9<br>(61.4 to 80.2)                        | 214.4<br>(186.9 to 245.6)                    | 1.8<br>(1.0 to 2.9)                   | -3.8<br>(-10.9 to 2.9)                            | -8.8<br>(-13.5 to -3.6)                             |
| Fungal skin diseases                          | 766.5<br>(689.0 to 848.1)                     | 2,723.4<br>(2,432.1 to 3,056.3)              | 4.3<br>(1.7 to 9.0)                   | 17.1<br>(13.8 to 20.4)                            | -0.0<br>(-1.2 to 1.1)                               |
| Viral skin diseases                           | 236.9<br>(226.6 to 247.2)                     | 350.9<br>(335.8 to 368.5)                    | 7.3<br>(4.5 to 10.8)                  | 3.2<br>(-0.4 to 7.0)                              | -0.4<br>(-3.5 to 2.8)                               |
| Acne vulgaris                                 | 671.0<br>(606.1 to 741.8)                     | 420.8<br>(355.7 to 504.0)                    | 17.3<br>(11.6 to 25.0)                | -10.8<br>(-15.7 to -5.8)                          | 3.3<br>(-1.4 to 8.1)                                |
| Alopecia areata                               | 19.6<br>(18.8 to 20.4)                        | 34.6<br>(33.2 to 36.1)                       | 0.6<br>(0.4 to 1.0)                   | 17.6<br>(5.5 to 30.4)                             | 0.1<br>(-9.5 to 10.8)                               |
| Pruritus                                      | 89.4<br>(78.5 to 101.7)                       | 71.0<br>(62.8 to 80.9)                       | 1.0<br>(0.4 to 1.7)                   | 24.8<br>(16.3 to 33.5)                            | 3.5<br>(-1.8 to 8.7)                                |
| Urticaria                                     | 98.0<br>(85.8 to 112.5)                       | 175.7<br>(154.0 to 202.3)                    | 5.9<br>(3.8 to 8.5)                   | 13.6<br>(6.9 to 20.9)                             | -0.1<br>(-4.9 to 5.4)                               |
| Decubitus ulcer                               | 2.3<br>(2.1 to 2.6)                           | 8.4<br>(7.4 to 9.5)                          | 0.4<br>(0.3 to 0.5)                   | 32.6<br>(17.1 to 49.8)                            | 3.4<br>(-9.9 to 18.3)                               |
| Other skin and subcutaneous diseases          | 681.2<br>(660.3 to 702.5)                     | 785.4<br>(759.0 to 812.0)                    | 3.7<br>(1.8 to 6.9)                   | 41.4<br>(37.7 to 45.4)                            | 14.1<br>(11.5 to 16.9)                              |
| Sense organ diseases                          | 2,455.6<br>(2,405.2 to 2,518.0)               | 934.4†<br>(877.4 to 997.0)                   | 87.3<br>(59.9 to 122.2)               | 23.4<br>(20.7 to 26.1)                            | -5.7<br>(-7.1 to -4.4)                              |
| Glaucoma                                      | 9.8<br>(8.3 to 11.3)                          | --                                           | 1.0<br>(0.7 to 1.4)                   | 41.3<br>(25.6 to 58.9)                            | -0.9<br>(-9.8 to 9.6)                               |
| Cataract                                      | 117.0<br>(100.8 to 136.1)                     | --                                           | 6.3<br>(4.4 to 8.8)                   | 36.9<br>(28.8 to 46.0)                            | -3.0<br>(-7.4 to 1.6)                               |
| Macular degeneration                          | 3.9<br>(3.1 to 4.8)                           | --                                           | 0.2<br>(0.1 to 0.3)                   | 46.9<br>(26.7 to 70.4)                            | 2.0<br>(-10.6 to 17.1)                              |
| Refraction and accommodation disorders        | 1,238.6<br>(1,181.3 to 1,300.2)               | --                                           | 22.7<br>(14.0 to 36.0)                | 18.2<br>(14.3 to 22.4)                            | -8.0<br>(-10.5 to -5.2)                             |
| Age-related and other hearing loss            | 1,617.7<br>(1,526.7 to 1,713.4)               | --                                           | 44.5<br>(30.8 to 63.0)                | 22.2<br>(16.8 to 27.0)                            | -6.6<br>(-9.3 to -4.1)                              |
| Other vision loss                             | 58.8<br>(51.7 to 67.4)                        | --                                           | 3.9<br>(2.7 to 5.3)                   | 32.3<br>(23.1 to 42.1)                            | -1.3<br>(-6.9 to 4.5)                               |
| Other sense organ diseases                    | 276.4<br>(254.5 to 299.3)                     | 934.4<br>(877.4 to 997.0)                    | 8.6<br>(5.4 to 13.1)                  | 29.7<br>(24.0 to 35.4)                            | 0.9<br>(-2.9 to 4.5)                                |
| Oral disorders                                | 5,468.8<br>(5,275.0 to 5,650.5)               | 15,957.3†<br>(14,777.5 to 17,243.9)          | 31.7<br>(19.8 to 47.7)                | 30.5<br>(27.0 to 34.6)                            | 0.2<br>(-1.5 to 2.1)                                |
| Caries of deciduous teeth                     | 722.7<br>(594.7 to 853.8)                     | 2,756.5<br>(2,088.4 to 3,509.5)              | 0.2<br>(0.1 to 0.3)                   | 18.0<br>(6.2 to 31.0)                             | -0.4<br>(-9.6 to 9.8)                               |
| Caries of permanent teeth                     | 4,004.2<br>(3,788.5 to 4,220.2)               | 13,035.8<br>(12,062.4 to 13,982.4)           | 2.4<br>(1.0 to 4.5)                   | -1.4<br>(-4.6 to 2.4)                             | -9.7<br>(-12.5 to -6.7)                             |
| Periodontal disease                           | 826.9<br>(678.7 to 989.1)                     | 107.4<br>(83.9 to 132.8)                     | 5.4<br>(2.1 to 11.2)                  | 33.3<br>(26.0 to 40.8)                            | -0.3<br>(-3.5 to 3.5)                               |
| Edentulism and severe tooth loss              | 660.9<br>(576.6 to 742.3)                     | 57.6<br>(48.1 to 67.6)                       | 18.4<br>(12.2 to 26.1)                | 40.7<br>(35.5 to 46.5)                            | 1.8<br>(-1.1 to 4.5)                                |
| Other oral disorders                          | 183.3<br>(175.0 to 191.6)                     | --                                           | 5.4<br>(3.3 to 8.1)                   | 16.1<br>(12.1 to 20.0)                            | -0.2<br>(-3.2 to 2.9)                               |
| <b>Injuries</b>                               | <b>2,781.3</b><br><b>(2,592.2 to 3,034.6)</b> | <b>1,043.6†</b><br><b>(983.2 to 1,112.1)</b> | <b>97.2</b><br><b>(64.9 to 138.9)</b> | <b>39.8</b><br><b>(34.5 to 44.9)</b>              | <b>14.7</b><br><b>(11.1 to 18.2)</b>                |
| <b>Transport injuries</b>                     | <b>233.4</b><br><b>(217.2 to 251.0)</b>       | <b>78.7</b><br><b>(69.8 to 88.3)</b>         | <b>12.2</b><br><b>(8.1 to 17.6)</b>   | <b>56.0</b><br><b>(51.3 to 60.8)</b>              | <b>23.7</b><br><b>(20.4 to 26.7)</b>                |
| Road injuries                                 | 210.5<br>(195.2 to 226.9)                     | 73.9<br>(64.9 to 83.3)                       | 11.0<br>(7.4 to 15.9)                 | 62.3<br>(57.7 to 66.9)                            | 27.8<br>(24.7 to 30.7)                              |
| Pedestrian road injuries                      | 44.5<br>(39.0 to 51.0)                        | 11.0<br>(9.1 to 13.3)                        | 2.3<br>(1.5 to 3.3)                   | 53.6<br>(48.5 to 59.1)                            | 21.6<br>(18.2 to 24.7)                              |
| Cyclist road injuries                         | 46.6<br>(39.1 to 55.0)                        | 17.6<br>(14.1 to 21.2)                       | 2.3<br>(1.5 to 3.3)                   | 51.5<br>(47.0 to 56.0)                            | 21.0<br>(17.8 to 23.8)                              |
| Motorcyclist road injuries                    | 32.8<br>(28.1 to 39.9)                        | 7.8<br>(6.2 to 9.6)                          | 1.6<br>(1.1 to 2.4)                   | 62.0<br>(57.1 to 67.0)                            | 26.7<br>(23.3 to 29.8)                              |
| Motor vehicle road injuries                   | 70.7<br>(59.9 to 81.5)                        | 30.4<br>(25.7 to 35.6)                       | 4.0<br>(2.7 to 5.8)                   | 72.6<br>(67.9 to 77.5)                            | 34.9<br>(31.7 to 38.0)                              |
| Other road injuries                           | 15.8<br>(13.4 to 18.7)                        | 7.1<br>(5.5 to 9.1)                          | 0.8<br>(0.5 to 1.1)                   | 74.4<br>(69.2 to 79.8)                            | 38.0<br>(34.4 to 41.5)                              |
| Other transport injuries                      | 23.0<br>(19.3 to 27.4)                        | 4.8<br>(4.0 to 5.8)                          | 1.2<br>(0.8 to 1.7)                   | 14.1<br>(9.7 to 19.0)                             | -5.5<br>(-9.0 to -2.1)                              |
| <b>Unintentional injuries</b>                 | <b>2,356.1</b><br><b>(2,177.0 to 2,598.5)</b> | <b>916.7</b><br><b>(856.1 to 985.1)</b>      | <b>77.7</b><br><b>(52.6 to 109.3)</b> | <b>41.6</b><br><b>(36.9 to 46.1)</b>              | <b>16.1</b><br><b>(12.7 to 19.0)</b>                |
| Falls                                         | 1,074.3<br>(931.3 to 1,246.2)                 | 440.2<br>(389.9 to 501.6)                    | 42.0<br>(29.5 to 57.9)                | 51.5<br>(46.8 to 56.1)                            | 22.4<br>(18.9 to 25.6)                              |
| Drowning                                      | 6.7<br>(5.8 to 7.7)                           | 1.1<br>(1.0 to 1.3)                          | 0.3<br>(0.2 to 0.5)                   | 4.9<br>(-0.4 to 10.3)                             | -12.5<br>(-16.7 to -8.4)                            |
| Fire, heat, and hot substances                | 313.9<br>(269.2 to 376.9)                     | 35.3<br>(30.6 to 39.9)                       | 8.0<br>(5.3 to 11.7)                  | 17.0<br>(10.5 to 22.6)                            | -1.7<br>(-6.5 to 2.5)                               |
| Poisonings                                    | 8.0<br>(6.9 to 9.4)                           | 11.6<br>(9.5 to 14.1)                        | 0.7<br>(0.4 to 1.0)                   | 75.8<br>(63.4 to 89.4)                            | 52.7<br>(43.1 to 63.3)                              |
| Exposure to mechanical forces                 | 466.9<br>(399.4 to 574.1)                     | 172.0<br>(149.9 to 195.9)                    | 11.1<br>(7.3 to 16.2)                 | 42.0<br>(36.6 to 47.2)                            | 15.6<br>(11.7 to 19.1)                              |
| Unintentional firearm injuries                | 15.5<br>(12.8 to 18.9)                        | 3.8<br>(2.8 to 5.0)                          | 0.6<br>(0.4 to 0.9)                   | 17.4<br>(13.3 to 21.7)                            | -5.9<br>(-8.7 to -3.2)                              |
| Unintentional suffocation                     | 35.8<br>(28.1 to 45.6)                        | 7.6<br>(5.8 to 10.0)                         | 1.2<br>(0.7 to 1.8)                   | 21.1<br>(16.9 to 25.1)                            | 0.0<br>(-3.0 to 2.7)                                |
| Other exposure to mechanical forces           | 415.6<br>(350.5 to 517.0)                     | 160.6<br>(140.0 to 183.8)                    | 9.3<br>(6.1 to 13.5)                  | 47.2<br>(41.8 to 52.4)                            | 19.8<br>(15.8 to 23.3)                              |

| Cause                                                                               | Prevalence in thousands (95% UI)        | Incidence in thousands (95% UI)       | YLDs in thousands (95% UI)        |                                                   |                                                     |
|-------------------------------------------------------------------------------------|-----------------------------------------|---------------------------------------|-----------------------------------|---------------------------------------------------|-----------------------------------------------------|
|                                                                                     | 2016 counts                             | 2016 counts                           | 2016 counts                       | Percentage change in counts between 2006 and 2016 | Percentage change in age-standardised rates between |
| Adverse effects of medical treatment                                                | 3.0<br>(2.4 to 3.8)                     | 39.6<br>(34.5 to 45.5)                | 0.4<br>(0.2 to 0.6)               | 36.2<br>(29.2 to 44.5)                            | 6.1<br>(1.5 to 11.4)                                |
| Animal contact                                                                      | 42.5<br>(36.9 to 50.5)                  | 44.1<br>(36.7 to 52.6)                | 1.4<br>(0.9 to 2.0)               | 2.1<br>(-3.3 to 7.5)                              | -11.8<br>(-16.2 to -7.4)                            |
| Venomous animal contact                                                             | 17.7<br>(14.5 to 21.6)                  | 18.7<br>(14.5 to 23.8)                | 1.0<br>(0.7 to 1.5)               | 11.1<br>(3.4 to 19.4)                             | -2.1<br>(-8.5 to 4.8)                               |
| Non-venomous animal contact                                                         | 24.8<br>(20.0 to 32.6)                  | 25.5<br>(20.6 to 31.3)                | 0.4<br>(0.2 to 0.6)               | -16.6<br>(-21.2 to -12.6)                         | -30.6<br>(-34.3 to -27.6)                           |
| Foreign body                                                                        | 141.0<br>(118.6 to 164.8)               | 80.9<br>(71.1 to 92.6)                | 4.7<br>(3.1 to 7.0)               | 21.1<br>(15.6 to 26.9)                            | 2.1<br>(-2.1 to 6.2)                                |
| Pulmonary aspiration and foreign body in airway                                     | 49.5<br>(37.7 to 65.1)                  | 16.8<br>(13.9 to 20.5)                | 2.0<br>(1.3 to 3.0)               | 18.4<br>(13.5 to 23.9)                            | 1.6<br>(-2.3 to 5.5)                                |
| Foreign body in eyes                                                                | 6.3<br>(3.7 to 9.1)                     | 31.5<br>(24.6 to 40.9)                | 0.4<br>(0.2 to 0.6)               | 45.9<br>(38.0 to 54.9)                            | 21.2<br>(17.6 to 24.8)                              |
| Foreign body in other body part                                                     | 85.2<br>(70.4 to 105.6)                 | 32.6<br>(28.3 to 37.7)                | 2.4<br>(1.5 to 3.5)               | 20.4<br>(14.2 to 26.8)                            | 0.1<br>(-4.7 to 5.0)                                |
| Environmental heat and cold exposure                                                | 91.5<br>(78.2 to 106.5)                 | 23.1<br>(19.0 to 27.4)                | 3.3<br>(2.1 to 4.7)               | 24.0<br>(19.4 to 28.8)                            | 2.4<br>(-1.0 to 5.6)                                |
| Other unintentional injuries                                                        | 208.2<br>(168.0 to 252.5)               | 68.7<br>(57.2 to 80.7)                | 5.8<br>(3.8 to 8.5)               | 61.5<br>(57.0 to 65.5)                            | 33.7<br>(30.6 to 36.7)                              |
| <b>Self-harm and interpersonal violence</b>                                         | <b>240.2</b><br><b>(219.3 to 262.9)</b> | <b>47.9†</b><br><b>(40.9 to 55.7)</b> | <b>5.0</b><br><b>(3.4 to 7.0)</b> | <b>18.9</b><br><b>(15.1 to 22.6)</b>              | <b>0.4</b><br><b>(-2.2 to 2.6)</b>                  |
| Self-harm                                                                           | 11.2<br>(9.4 to 12.9)                   | 4.4<br>(3.7 to 5.2)                   | 0.5<br>(0.3 to 0.7)               | 54.3<br>(47.8 to 61.4)                            | 24.4<br>(19.7 to 29.0)                              |
| Self-harm by firearm                                                                | 0.3<br>(0.3 to 0.4)                     | 0.1<br>(< 0.05 to 0.1)                | < 0.05<br>(< 0.05 to < 0.05)      | -8.6<br>(-12.6 to -4.7)                           | -29.2<br>(-32.0 to -26.7)                           |
| Self-harm by other specified means                                                  | 10.8<br>(9.1 to 12.6)                   | 4.4<br>(3.6 to 5.1)                   | 0.5<br>(0.3 to 0.7)               | 56.6<br>(49.8 to 63.8)                            | 26.5<br>(21.6 to 31.3)                              |
| Interpersonal violence                                                              | 229.0<br>(207.4 to 252.2)               | 43.5†<br>(36.4 to 51.4)               | 4.5<br>(3.1 to 6.3)               | 15.9<br>(12.2 to 19.6)                            | -1.8<br>(-4.3 to 0.4)                               |
| Assault by firearm                                                                  | 1.8<br>(1.5 to 2.1)                     | 0.5<br>(0.4 to 0.7)                   | 0.1<br>(0.1 to 0.1)               | 12.3<br>(7.6 to 16.9)                             | -8.6<br>(-11.7 to -5.4)                             |
| Assault by sharp object                                                             | 26.1<br>(21.3 to 31.4)                  | 9.8<br>(7.4 to 12.4)                  | 0.8<br>(0.5 to 1.1)               | 12.6<br>(8.0 to 17.2)                             | -8.3<br>(-11.6 to -5.2)                             |
| Sexual violence                                                                     | 137.3<br>(119.3 to 157.3)               | --                                    | 1.1<br>(0.8 to 1.6)               | -6.4<br>(-11.8 to -0.9)                           | -10.7<br>(-14.9 to -7.0)                            |
| Assault by other means                                                              | 63.9<br>(52.8 to 77.8)                  | 33.2<br>(27.4 to 38.9)                | 2.5<br>(1.7 to 3.6)               | 31.0<br>(27.0 to 34.9)                            | 5.5<br>(2.8 to 8.1)                                 |
| <b>Forces of nature, conflict and terrorism, and executions and police conflict</b> | <b>89.0</b><br><b>(41.5 to 153.9)</b>   | <b>0.3†</b><br><b>(0.2 to 0.5)</b>    | <b>2.3</b><br><b>(0.5 to 6.3)</b> | <b>-12.8</b><br><b>(-19.4 to -7.2)</b>            | <b>-25.2</b><br><b>(-30.5 to -20.8)</b>             |
| Exposure to forces of nature                                                        | 1.3<br>(0.6 to 2.1)                     | --                                    | < 0.05<br>(< 0.05 to 0.1)         | -18.4<br>(-22.3 to -14.0)                         | -30.9<br>(-34.2 to -27.1)                           |
| Conflict and terrorism                                                              | 85.1<br>(38.3 to 149.5)                 | --                                    | 2.2<br>(0.5 to 6.0)               | -12.9<br>(-19.6 to -7.1)                          | -25.3<br>(-30.7 to -20.7)                           |
| Executions and police conflict                                                      | 2.5<br>(0.8 to 4.5)                     | 0.3<br>(0.2 to 0.5)                   | 0.1<br>(< 0.05 to 0.2)            | -6.6<br>(-11.8 to 5.0)                            | -17.4<br>(-22.0 to -4.0)                            |
| <b>Impairments</b>                                                                  | --                                      | --                                    | --                                | --                                                | --                                                  |
| Anaemia                                                                             | 2,733.4<br>(2,583.7 to 2,895.4)         | --                                    | 66.4<br>(44.4 to 94.3)            | -1.6<br>(-8.0 to 5.4)                             | -13.4<br>(-18.7 to -7.8)                            |
| Developmental intellectual disability                                               | 190.6<br>(149.1 to 233.0)               | --                                    | 20.4<br>(14.8 to 26.8)            | -0.8<br>(-5.9 to 5.8)                             | -8.7<br>(-13.5 to -2.8)                             |
| Epilepsy                                                                            | 53.3<br>(23.4 to 86.4)                  | --                                    | 17.4<br>(7.7 to 33.4)             | 3.0<br>(-58.6 to 173.3)                           | -5.0<br>(-62.6 to 156.8)                            |
| Guillain-Barre syndrome                                                             | 0.1<br>(0.1 to 0.1)                     | --                                    | < 0.05<br>(< 0.05 to < 0.05)      | 17.6<br>(9.6 to 27.8)                             | 0.1<br>(0.0 to 0.2)                                 |
| Hearing loss                                                                        | 1,732.4<br>(1,643.1 to 1,830.7)         | --                                    | 50.2<br>(35.1 to 70.7)            | 17.4<br>(12.9 to 21.7)                            | -8.0<br>(-10.4 to -5.6)                             |
| Heart failure                                                                       | 118.7<br>(103.7 to 135.3)               | --                                    | 11.3<br>(8.2 to 14.8)             | 44.1<br>(33.6 to 55.1)                            | 5.6<br>(-1.4 to 12.9)                               |
| Infertility                                                                         | 154.3<br>(122.8 to 193.5)               | --                                    | 1.0<br>(0.5 to 2.0)               | 28.5<br>(9.7 to 47.7)                             | 14.3<br>(-1.2 to 31.1)                              |
| Pelvic inflammatory disease                                                         | 6.4<br>(5.3 to 7.6)                     | --                                    | 0.8<br>(0.5 to 1.2)               | 6.8<br>(-10.8 to 26.1)                            | -10.0<br>(-23.8 to 5.8)                             |
| Vision loss                                                                         | 1,449.9<br>(1,380.7 to 1,519.1)         | --                                    | 37.8<br>(25.8 to 55.4)            | 23.1<br>(19.4 to 27.3)                            | -5.0<br>(-7.4 to -2.1)                              |

We did not calculate incidence for the nine impairments, certain NTDs, and causes with only birth prevalence. Blank cells mean that no estimate is available.

† Incidence for aggregate causes represents the sum of the incidence of the causes below the aggregate.

‡ Incidence estimates for stroke represent first-ever stroke only.

^ Incidence of HIV/AIDS represents new infections of HIV only and does not include new infections of Tuberculosis in HIV positive cases.



SR Table 14: Prevalence, incidence, and YLDs for 2016, percentage change of YLD counts and percentage change of age-standardised YLD rates between 2006 and 2016 by cause and impairments, for all ages, Bahrain.

| Cause                                                                                | Prevalence in thousands (95% UI)       | Incidence in thousands (95% UI)                                     | YLDs in thousands (95% UI)           |                                                   |                                                     |
|--------------------------------------------------------------------------------------|----------------------------------------|---------------------------------------------------------------------|--------------------------------------|---------------------------------------------------|-----------------------------------------------------|
|                                                                                      | 2016 counts                            | 2016 counts                                                         | 2016 counts                          | Percentage change in counts between 2006 and 2016 | Percentage change in age-standardised rates between |
| <b>All causes</b>                                                                    | <b>1,348.3</b><br>(1,342.9 to 1,353.7) | <b>8,113.6†</b><br>(7,627.7 to 8,669.9)                             | <b>156.3</b><br>(115.3 to 203.8)     | <b>55.2</b><br>(52.1 to 58.2)                     | <b>-2.2</b><br>(-4.0 to -0.5)                       |
| <b>Communicable, maternal, neonatal, and nutritional disorders</b>                   | <b>877.3</b><br>(805.1 to 947.5)       | <b>4,524.0†</b><br>(4,091.2 to 5,019.5)                             | <b>13.8</b><br>(9.6 to 19.3)         | <b>43.8</b><br>(37.1 to 52.7)                     | <b>-4.4</b><br>(-8.8 to 1.4)                        |
| <b>HIV/AIDS and tuberculosis</b>                                                     | <b>570.5</b><br>(414.7 to 713.7)       | <b>0.4†</b><br>(0.2 to 0.5)                                         | <b>0.1</b><br>(0.1 to 0.2)           | <b>37.2</b><br>(5.7 to 73.2)                      | <b>-14.2</b><br>(-29.8 to 3.8)                      |
| Tuberculosis                                                                         | 487.5<br>(328.3 to 666.2)              | 0.3†<br>(0.2 to 0.5)                                                | 0.1<br>( $< 0.05$ to 0.1)            | 18.4<br>(-23.1 to 78.6)                           | -23.4<br>(-44.2 to 2.7)                             |
| Drug-susceptible tuberculosis                                                        | 0.2<br>(0.1 to 0.2)                    | 0.3<br>(0.2 to 0.5)                                                 | $< 0.05$<br>( $< 0.05$ to 0.1)       | 17.3<br>(-24.5 to 78.4)                           | -24.1<br>(-45.7 to 2.1)                             |
| Multidrug-resistant tuberculosis without extensive drug resistance                   | $< 0.05$<br>( $< 0.05$ to $< 0.05$ )   | $< 0.05$<br>( $< 0.05$ to $< 0.05$ )                                | $< 0.05$<br>( $< 0.05$ to $< 0.05$ ) | 76.9<br>(-67.7 to 1,234.4)                        | 13.8<br>(-79.3 to 779.9)                            |
| Extensively drug-resistant tuberculosis                                              | $< 0.05$<br>( $< 0.05$ to $< 0.05$ )   | $< 0.05$<br>( $< 0.05$ to $< 0.05$ )                                | $< 0.05$<br>( $< 0.05$ to $< 0.05$ ) | 301.7<br>(-26.4 to 2,930.2)                       | 158.4<br>(-53.0 to 1,897.7)                         |
| Latent tuberculosis infection                                                        | 487.3<br>(328.2 to 666.0)              | --                                                                  | --                                   | --                                                | --                                                  |
| HIV/AIDS                                                                             | 0.3<br>(0.1 to 0.5)                    | $< 0.05^{\wedge}$<br>( $< 0.05$ to $< 0.05$ )                       | $< 0.05$<br>( $< 0.05$ to 0.1)       | 67.6<br>(51.8 to 91.9)                            | 2.3<br>(-6.9 to 17.2)                               |
| Drug-susceptible HIV/AIDS - Tuberculosis                                             | $< 0.05$<br>( $< 0.05$ to $< 0.05$ )   | $< 0.05$<br>( $< 0.05$ to $< 0.05$ )                                | $< 0.05$<br>( $< 0.05$ to $< 0.05$ ) | 7.0<br>(-8.2 to 23.4)                             | -32.2<br>(-41.9 to -21.9)                           |
| Multidrug-resistant HIV/AIDS - Tuberculosis without extensive drug resistance        | $< 0.05$<br>( $< 0.05$ to $< 0.05$ )   | $< 0.05$<br>( $< 0.05$ to $< 0.05$ )                                | $< 0.05$<br>( $< 0.05$ to $< 0.05$ ) | 63.9<br>(-69.8 to 1,122.9)                        | 3.6<br>(-80.9 to 673.1)                             |
| Extensively drug-resistant HIV/AIDS - Tuberculosis                                   | $< 0.05$<br>( $< 0.05$ to $< 0.05$ )   | $< 0.05$<br>( $< 0.05$ to $< 0.05$ )                                | $< 0.05$<br>( $< 0.05$ to $< 0.05$ ) | 272.3<br>(-31.4 to 2,677.4)                       | 135.3<br>(-56.7 to 1,655.9)                         |
| HIV/AIDS resulting in other diseases                                                 | 0.3<br>(0.1 to 0.5)                    | $< 0.05$<br>( $< 0.05$ to $< 0.05$ )                                | $< 0.05$<br>( $< 0.05$ to 0.1)       | 72.6<br>(54.3 to 108.5)                           | 4.9<br>(-5.8 to 28.5)                               |
| <b>Diarrhoea, lower respiratory infections, and other common infectious diseases</b> | <b>72.2</b><br>(67.5 to 77.2)          | <b>4,205.7†</b><br>(3,765.5 to 4,692.8)                             | <b>3.4</b><br>(2.4 to 4.7)           | <b>50.0</b><br>(44.9 to 55.4)                     | <b>-0.3</b><br>(-3.3 to 2.7)                        |
| Diarrhoeal diseases                                                                  | 10.6<br>(9.7 to 11.5)                  | 705.8<br>(649.1 to 769.1)                                           | 1.2<br>(0.8 to 1.7)                  | 49.6<br>(39.7 to 60.1)                            | -0.9<br>(-6.7 to 5.3)                               |
| Intestinal infectious diseases                                                       | $< 0.05$<br>( $< 0.05$ to $< 0.05$ )   | 0.6†<br>(0.5 to 0.6)                                                | $< 0.05$<br>( $< 0.05$ to $< 0.05$ ) | 12.2<br>(-3.6 to 30.4)                            | -20.9<br>(-31.5 to -8.5)                            |
| Typhoid fever                                                                        | $< 0.05$<br>( $< 0.05$ to $< 0.05$ )   | 0.5<br>(0.4 to 0.5)                                                 | $< 0.05$<br>( $< 0.05$ to $< 0.05$ ) | 11.9<br>(-4.9 to 31.6)                            | -20.8<br>(-32.3 to -7.5)                            |
| Paratyphoid fever                                                                    | $< 0.05$<br>( $< 0.05$ to $< 0.05$ )   | 0.1<br>(0.1 to 0.1)                                                 | $< 0.05$<br>( $< 0.05$ to $< 0.05$ ) | 20.2<br>(0.7 to 43.3)                             | -16.5<br>(-29.2 to -2.7)                            |
| Other intestinal infectious diseases                                                 | --                                     | --                                                                  | $< 0.05$<br>( $< 0.05$ to $< 0.05$ ) | -8.3<br>(-24.7 to 11.0)                           | -39.7<br>(-48.9 to -28.4)                           |
| Lower respiratory infections                                                         | 1.3<br>(1.2 to 1.4)                    | 57.5<br>(52.0 to 63.5)                                              | 0.1<br>(0.1 to 0.1)                  | 64.1<br>(45.3 to 86.2)                            | 4.4<br>(-5.9 to 16.1)                               |
| Upper respiratory infections                                                         | 44.3<br>(38.7 to 50.7)                 | 3,330.5<br>(2,894.6 to 3,834.2)                                     | 1.1<br>(0.7 to 1.7)                  | 48.2<br>(39.9 to 57.0)                            | -0.1<br>(-5.1 to 5.1)                               |
| Otitis media                                                                         | 14.1<br>(12.5 to 15.7)                 | 84.8<br>(69.0 to 103.4)                                             | 0.4<br>(0.2 to 0.6)                  | 43.6<br>(32.2 to 57.5)                            | -2.2<br>(-9.6 to 5.9)                               |
| Meningitis                                                                           | 2.0<br>(1.8 to 2.3)                    | 0.3<br>(0.3 to 0.4)                                                 | 0.3<br>(0.2 to 0.4)                  | 49.6<br>(37.6 to 62.9)                            | -1.4<br>(-8.1 to 5.8)                               |
| Pneumococcal meningitis                                                              | 0.8<br>(0.6 to 0.9)                    | $< 0.05$<br>( $< 0.05$ to $< 0.05$ )                                | 0.1<br>(0.1 to 0.1)                  | 40.5<br>(14.5 to 72.4)                            | -8.1<br>(-22.1 to 9.4)                              |
| H influenzae type B meningitis                                                       | 0.4<br>(0.3 to 0.5)                    | $< 0.05$<br>( $< 0.05$ to 0.1)                                      | 0.1<br>( $< 0.05$ to 0.1)            | 54.1<br>(47.7 to 60.8)                            | 2.5<br>(-1.6 to 6.9)                                |
| Meningococcal infection                                                              | 0.3<br>(0.2 to 0.4)                    | 0.1<br>(0.1 to 0.1)                                                 | $< 0.05$<br>( $< 0.05$ to 0.1)       | 47.9<br>(40.3 to 55.2)                            | -3.1<br>(-7.9 to 1.6)                               |
| Other meningitis                                                                     | 0.6<br>(0.4 to 0.7)                    | 0.1<br>(0.1 to 0.2)                                                 | 0.1<br>( $< 0.05$ to 0.1)            | 64.1<br>(55.2 to 75.0)                            | 9.4<br>(2.7 to 17.2)                                |
| Encephalitis                                                                         | 2.8<br>(2.1 to 3.8)                    | 1.5<br>(1.3 to 1.7)                                                 | 0.4<br>(0.2 to 0.5)                  | 63.3<br>(41.8 to 88.4)                            | 4.5<br>(-7.8 to 18.2)                               |
| Diphtheria                                                                           | $< 0.05$<br>( $< 0.05$ to $< 0.05$ )   | $< 0.05$<br>( $< 0.05$ to $< 0.05$ )                                | $< 0.05$<br>( $< 0.05$ to $< 0.05$ ) | 9.5<br>(-40.1 to 94.2)                            | -33.2<br>(-63.6 to 19.4)                            |
| Whooping cough                                                                       | $< 0.05$<br>( $< 0.05$ to $< 0.05$ )   | 0.1<br>(0.1 to 0.2)                                                 | $< 0.05$<br>( $< 0.05$ to $< 0.05$ ) | -28.9<br>(-59.9 to 20.7)                          | -54.9<br>(-75.1 to -21.7)                           |
| Tetanus                                                                              | $< 0.05$<br>( $< 0.05$ to $< 0.05$ )   | $< 0.05$<br>( $< 0.05$ to $< 0.05$ )                                | $< 0.05$<br>( $< 0.05$ to $< 0.05$ ) | 55.2<br>(41.9 to 71.3)                            | 2.6<br>(-5.9 to 13.0)                               |
| Measles                                                                              | $< 0.05$<br>( $< 0.05$ to $< 0.05$ )   | 0.1<br>( $< 0.05$ to 0.2)                                           | $< 0.05$<br>( $< 0.05$ to $< 0.05$ ) | -30.8<br>(-41.9 to -18.6)                         | -56.6<br>(-63.6 to -48.9)                           |
| Varicella and herpes zoster                                                          | 1.1<br>(1.0 to 1.2)                    | 24.5<br>(23.8 to 25.3)                                              | $< 0.05$<br>( $< 0.05$ to 0.1)       | 59.5<br>(35.6 to 85.8)                            | -0.1<br>(-11.4 to 12.6)                             |
| <b>Neglected tropical diseases and malaria</b>                                       | <b>13.8</b><br>(12.8 to 14.8)          | <b><math>&lt; 0.05^{\dagger}</math></b><br>( $< 0.05$ to $< 0.05$ ) | <b>0.2</b><br>(0.1 to 0.3)           | <b>33.0</b><br>(13.8 to 53.0)                     | <b>-8.6</b><br>(-22.1 to 6.3)                       |
| Malaria                                                                              | --                                     | --                                                                  | --                                   | --                                                | --                                                  |
| Chagas disease                                                                       | --                                     | --                                                                  | --                                   | --                                                | --                                                  |
| Leishmaniasis                                                                        | --                                     | --                                                                  | --                                   | --                                                | --                                                  |
| Visceral leishmaniasis                                                               | --                                     | --                                                                  | --                                   | --                                                | --                                                  |
| Cutaneous and mucocutaneous leishmaniasis                                            | --                                     | --                                                                  | --                                   | --                                                | --                                                  |
| African trypanosomiasis                                                              | --                                     | --                                                                  | --                                   | --                                                | --                                                  |
| Schistosomiasis                                                                      | --                                     | --                                                                  | --                                   | --                                                | --                                                  |
| Cysticercosis                                                                        | --                                     | --                                                                  | --                                   | --                                                | --                                                  |
| Cystic echinococcosis                                                                | --                                     | --                                                                  | --                                   | --                                                | --                                                  |
| Lymphatic filariasis                                                                 | --                                     | --                                                                  | --                                   | --                                                | --                                                  |
| Onchocerciasis                                                                       | --                                     | --                                                                  | --                                   | --                                                | --                                                  |
| Trachoma                                                                             | --                                     | --                                                                  | --                                   | --                                                | --                                                  |
| Dengue                                                                               | --                                     | --                                                                  | --                                   | --                                                | --                                                  |
| Yellow fever                                                                         | --                                     | --                                                                  | --                                   | --                                                | --                                                  |
| Rabies                                                                               | $< 0.05$<br>( $< 0.05$ to $< 0.05$ )   | $< 0.05$<br>( $< 0.05$ to $< 0.05$ )                                | $< 0.05$<br>( $< 0.05$ to $< 0.05$ ) | 23.3<br>(-26.1 to 81.2)                           | -27.7<br>(-62.9 to 22.5)                            |
| Intestinal nematode infections                                                       | 3.3<br>(2.7 to 3.8)                    | --                                                                  | $< 0.05$<br>( $< 0.05$ to $< 0.05$ ) | 53.2<br>(12.6 to 111.1)                           | -3.0<br>(-28.4 to 31.4)                             |
| Ascariasis                                                                           | 1.1<br>(0.9 to 1.5)                    | --                                                                  | --                                   | --                                                | --                                                  |

| Cause                                                                   | Prevalence in thousands (95% UI)              | Incidence in thousands (95% UI)                | YLDs in thousands (95% UI)             |                                                   |                                                     |
|-------------------------------------------------------------------------|-----------------------------------------------|------------------------------------------------|----------------------------------------|---------------------------------------------------|-----------------------------------------------------|
|                                                                         | 2016 counts                                   | 2016 counts                                    | 2016 counts                            | Percentage change in counts between 2006 and 2016 | Percentage change in age-standardised rates between |
| Trichuriasis                                                            | 1.1<br>(0.8 to 1.5)                           | --                                             | --                                     | --                                                | --                                                  |
| Hookworm disease                                                        | 1.1<br>(0.9 to 1.4)                           | --                                             | < 0.05<br>(< 0.05 to < 0.05)           | 53.2<br>(12.6 to 111.1)                           | -3.0<br>(-28.4 to 31.4)                             |
| Food-borne trematodiasis                                                | --                                            | --                                             | --                                     | --                                                | --                                                  |
| Leprosy                                                                 | < 0.05<br>(< 0.05 to < 0.05)                  | < 0.05<br>(< 0.05 to < 0.05)                   | < 0.05<br>(< 0.05 to < 0.05)           | 175.7<br>(45.4 to 530.0)                          | 52.2<br>(-14.2 to 251.1)                            |
| Ebola virus disease                                                     | --                                            | --                                             | --                                     | --                                                | --                                                  |
| Zika virus disease                                                      | --                                            | --                                             | --                                     | --                                                | --                                                  |
| Guinea worm disease                                                     | --                                            | --                                             | --                                     | --                                                | --                                                  |
| Other neglected tropical diseases                                       | 10.3<br>(9.3 to 11.2)                         | --                                             | 0.2<br>(0.1 to 0.3)                    | 32.5<br>(13.1 to 53.3)                            | -8.8<br>(-22.6 to 6.4)                              |
| <b>Maternal disorders</b>                                               | <b>1.2</b><br><b>(0.9 to 1.6)</b>             | <b>19.2†</b><br><b>(16.2 to 22.6)</b>          | <b>0.1</b><br><b>(0.1 to 0.1)</b>      | <b>46.6</b><br><b>(7.2 to 104.8)</b>              | <b>2.1</b><br><b>(-24.8 to 42.5)</b>                |
| Maternal haemorrhage                                                    | 0.1<br>(0.1 to 0.2)                           | 1.2<br>(0.8 to 1.7)                            | < 0.05<br>(< 0.05 to < 0.05)           | 47.1<br>(-0.8 to 124.4)                           | 2.8<br>(-29.2 to 52.9)                              |
| Maternal sepsis and other pregnancy related infections                  | 0.2<br>(0.1 to 0.4)                           | 2.3<br>(1.7 to 3.1)                            | < 0.05<br>(< 0.05 to < 0.05)           | 37.2<br>(-36.6 to 201.9)                          | -4.3<br>(-55.8 to 109.3)                            |
| Maternal hypertensive disorders                                         | 0.8<br>(0.5 to 1.2)                           | 3.6<br>(2.8 to 4.6)                            | < 0.05<br>(< 0.05 to < 0.1)            | 56.4<br>(-5.2 to 167.7)                           | 8.9<br>(-34.1 to 86.4)                              |
| Maternal obstructed labour and uterine rupture                          | < 0.05<br>(< 0.05 to < 0.05)                  | 1.0<br>(0.7 to 1.4)                            | < 0.05<br>(< 0.05 to < 0.05)           | 33.0<br>(-28.7 to 143.0)                          | -7.3<br>(-50.0 to 71.0)                             |
| Maternal abortion, miscarriage, and ectopic pregnancy                   | 0.1<br>(0.1 to 0.1)                           | 11.0<br>(8.3 to 14.2)                          | < 0.05<br>(< 0.05 to < 0.05)           | 36.1<br>(-25.8 to 162.3)                          | -6.1<br>(-48.2 to 79.3)                             |
| Other maternal disorders                                                | --                                            | --                                             | < 0.05<br>(< 0.05 to < 0.05)           | 40.2<br>(2.7 to 95.7)                             | -2.0<br>(-27.8 to 36.6)                             |
| <b>Neonatal disorders</b>                                               | <b>10.1</b><br><b>(8.3 to 12.6)</b>           | <b>2.1</b><br><b>--</b>                        | <b>2.1</b><br><b>(1.3 to 3.6)</b>      | <b>40.9</b><br><b>(17.3 to 86.4)</b>              | <b>-5.6</b><br><b>(-20.6 to 24.1)</b>               |
| Neonatal preterm birth complications                                    | 8.7<br>(6.7 to 11.7)                          | --                                             | 1.2<br>(0.7 to 2.0)                    | 56.1<br>(15.4 to 126.7)                           | 4.9<br>(-22.0 to 50.9)                              |
| Neonatal encephalopathy due to birth asphyxia and trauma                | 1.3<br>(0.7 to 2.0)                           | --                                             | 0.2<br>(0.1 to 0.4)                    | 45.6<br>(12.3 to 88.3)                            | -2.4<br>(-25.0 to 26.2)                             |
| Neonatal sepsis and other neonatal infections                           | 1.4<br>(0.5 to 3.9)                           | --                                             | 0.6<br>(0.2 to 1.8)                    | 15.1<br>(-1.1 to 37.9)                            | -21.5<br>(-33.0 to -6.3)                            |
| Hemolytic disease and other neonatal jaundice                           | 0.2<br>(0.1 to 0.2)                           | --                                             | < 0.05<br>(< 0.05 to < 0.1)            | 47.8<br>(35.6 to 61.9)                            | -1.6<br>(-9.6 to 7.5)                               |
| Other neonatal disorders                                                | --                                            | --                                             | < 0.05<br>(< 0.05 to < 0.1)            | 53.7<br>(22.3 to 108.5)                           | -9.2<br>(-27.6 to 23.1)                             |
| <b>Nutritional deficiencies</b>                                         | <b>304.6</b><br><b>(288.3 to 318.2)</b>       | <b>21.5†</b><br><b>(14.0 to 32.5)</b>          | <b>6.3</b><br><b>(4.1 to 9.2)</b>      | <b>39.8</b><br><b>(30.3 to 50.3)</b>              | <b>-6.5</b><br><b>(-12.9 to 0.2)</b>                |
| Protein-energy malnutrition                                             | 5.5<br>(4.1 to 7.4)                           | 2.3<br>(1.8 to 3.1)                            | 0.4<br>(0.2 to 0.6)                    | 58.0<br>(14.4 to 119.1)                           | -6.5<br>(-32.1 to 30.2)                             |
| Iodine deficiency                                                       | 31.4<br>(24.7 to 39.5)                        | 0.6<br>(0.5 to 0.7)                            | 0.7<br>(0.4 to 1.1)                    | 48.5<br>(33.0 to 67.2)                            | -4.6<br>(-13.6 to 6.0)                              |
| Vitamin A deficiency                                                    | 22.4<br>(13.1 to 35.3)                        | 18.5<br>(11.2 to 29.4)                         | --                                     | --                                                | --                                                  |
| Iron-deficiency anaemia                                                 | 265.0<br>(246.8 to 282.9)                     | --                                             | 5.2<br>(3.4 to 7.8)                    | 37.6<br>(26.6 to 49.5)                            | -6.8<br>(-13.8 to 1.0)                              |
| Other nutritional deficiencies                                          | --                                            | --                                             | < 0.05<br>(< 0.05 to < 0.05)           | 58.7<br>(13.5 to 121.9)                           | -6.8<br>(-33.5 to 30.3)                             |
| <b>Other communicable, maternal, neonatal, and nutritional diseases</b> | <b>315.3</b><br><b>(295.6 to 334.4)</b>       | <b>277.3</b><br><b>(228.6 to 331.4)</b>        | <b>1.6</b><br><b>(1.0 to 2.6)</b>      | <b>53.9</b><br><b>(41.3 to 66.2)</b>              | <b>-0.0</b><br><b>(-7.6 to 7.0)</b>                 |
| Sexually transmitted diseases excluding HIV                             | 240.9<br>(222.2 to 259.4)                     | 262.6<br>(213.2 to 318.9)                      | 1.4<br>(0.8 to 2.3)                    | 55.6<br>(42.0 to 69.5)                            | 1.4<br>(-6.9 to 9.7)                                |
| Syphilis                                                                | 7.7<br>(5.6 to 10.1)                          | 5.3<br>(3.7 to 7.2)                            | < 0.05<br>(< 0.05 to < 0.05)           | 65.7<br>(46.8 to 86.6)                            | -8.0<br>(-19.1 to 4.5)                              |
| Chlamydial infection                                                    | 15.7<br>(10.7 to 22.9)                        | 11.7<br>(7.9 to 17.4)                          | 0.1<br>(0.1 to 0.2)                    | 51.2<br>(27.5 to 78.5)                            | 1.0<br>(-14.9 to 18.3)                              |
| Gonococcal infection                                                    | 58.1<br>(46.2 to 73.5)                        | 208.8<br>(158.9 to 263.5)                      | 0.8<br>(0.5 to 1.3)                    | 56.7<br>(39.2 to 73.0)                            | 2.3<br>(-8.9 to 12.6)                               |
| Trichomoniasis                                                          | 25.4<br>(19.8 to 31.7)                        | 21.3<br>(16.6 to 26.8)                         | < 0.05<br>(< 0.05 to < 0.05)           | 50.2<br>(36.2 to 66.5)                            | -2.5<br>(-10.4 to 6.6)                              |
| Genital herpes                                                          | 147.4<br>(125.3 to 172.5)                     | 9.7<br>(8.2 to 11.6)                           | < 0.05<br>(< 0.05 to < 0.1)            | 58.0<br>(47.0 to 68.2)                            | -0.6<br>(-5.9 to 5.1)                               |
| Other sexually transmitted diseases                                     | 6.6<br>(5.4 to 7.7)                           | 5.9<br>(4.5 to 7.4)                            | 0.4<br>(0.3 to 0.7)                    | 54.5<br>(40.1 to 68.8)                            | 1.1<br>(-7.5 to 9.8)                                |
| Hepatitis                                                               | 84.9<br>(71.1 to 101.3)                       | 14.7<br>(10.8 to 19.3)                         | < 0.05<br>(< 0.05 to < 0.05)           | 15.6<br>(-11.2 to 47.0)                           | -31.2<br>(-45.2 to -16.1)                           |
| Acute hepatitis A                                                       | 0.3<br>(0.1 to 0.6)                           | 3.7<br>(1.2 to 7.2)                            | < 0.05<br>(< 0.05 to < 0.05)           | 13.6<br>(-49.3 to 189.4)                          | -28.8<br>(-67.4 to 59.6)                            |
| Hepatitis B                                                             | 66.7<br>(53.5 to 83.6)                        | 9.8<br>(7.5 to 12.8)                           | < 0.05<br>(< 0.05 to < 0.05)           | 15.0<br>(-14.3 to 51.8)                           | -32.5<br>(-47.9 to -14.5)                           |
| Hepatitis C                                                             | 17.9<br>(15.8 to 20.1)                        | 0.7<br>(0.6 to 0.7)                            | < 0.05<br>(< 0.05 to < 0.05)           | 43.5<br>(40.0 to 46.5)                            | -19.4<br>(-20.7 to -17.9)                           |
| Acute hepatitis E                                                       | < 0.05<br>(< 0.05 to < 0.1)                   | 0.6<br>(0.4 to 0.8)                            | < 0.05<br>(< 0.05 to < 0.05)           | 18.4<br>(4.2 to 35.6)                             | -27.9<br>(-41.1 to -11.7)                           |
| Other infectious diseases                                               | 8.6<br>(7.8 to 9.3)                           | < 0.05<br>(< 0.05 to < 0.05)                   | 0.2<br>(0.1 to 0.3)                    | 46.3<br>(29.6 to 63.0)                            | -0.2<br>(-12.1 to 11.4)                             |
| <b>Non-communicable diseases</b>                                        | <b>1,299.0</b><br><b>(1,291.8 to 1,305.3)</b> | <b>3,483.4†</b><br><b>(3,242.6 to 3,739.5)</b> | <b>133.7</b><br><b>(98.6 to 173.4)</b> | <b>56.0</b><br><b>(52.7 to 59.4)</b>              | <b>-2.2</b><br><b>(-4.2 to -0.3)</b>                |
| <b>Neoplasms</b>                                                        | <b>2.5</b><br><b>(2.4 to 2.7)</b>             | <b>1.0</b><br><b>(1.0 to 1.1)</b>              | <b>0.4</b><br><b>(0.2 to 0.5)</b>      | <b>72.3</b><br><b>(58.7 to 87.7)</b>              | <b>-3.8</b><br><b>(-11.7 to 4.4)</b>                |
| Lip and oral cavity cancer                                              | 0.1<br>(0.1 to 0.1)                           | < 0.05<br>(< 0.05 to < 0.05)                   | < 0.05<br>(< 0.05 to < 0.05)           | 72.4<br>(51.5 to 96.2)                            | -2.4<br>(-15.7 to 13.6)                             |
| Nasopharynx cancer                                                      | < 0.05<br>(< 0.05 to < 0.05)                  | < 0.05<br>(< 0.05 to < 0.05)                   | < 0.05<br>(< 0.05 to < 0.05)           | 59.6<br>(33.2 to 92.0)                            | -3.8<br>(-16.8 to 12.1)                             |
| Other pharynx cancer                                                    | < 0.05<br>(< 0.05 to < 0.05)                  | < 0.05<br>(< 0.05 to < 0.05)                   | < 0.05<br>(< 0.05 to < 0.05)           | 98.6<br>(76.6 to 127.1)                           | 8.5<br>(-4.1 to 25.1)                               |
| Oesophageal cancer                                                      | < 0.05<br>(< 0.05 to < 0.05)                  | < 0.05<br>(< 0.05 to < 0.05)                   | < 0.05<br>(< 0.05 to < 0.05)           | 41.3<br>(25.8 to 60.7)                            | -22.9<br>(-33.4 to -8.9)                            |
| Stomach cancer                                                          | < 0.05<br>(< 0.05 to < 0.05)                  | < 0.05<br>(< 0.05 to < 0.05)                   | < 0.05<br>(< 0.05 to < 0.05)           | 44.4<br>(28.4 to 62.7)                            | -19.8<br>(-31.5 to -5.5)                            |
| Colon and rectum cancer                                                 | 0.3<br>(0.3 to 0.3)                           | 0.1<br>(0.1 to 0.1)                            | < 0.05<br>(< 0.05 to < 0.05)           | 93.1<br>(67.4 to 124.8)                           | 6.6<br>(-9.9 to 26.7)                               |
| Liver cancer                                                            | < 0.05<br>(< 0.05 to < 0.05)                  | < 0.05<br>(< 0.05 to < 0.05)                   | < 0.05<br>(< 0.05 to < 0.05)           | 64.2<br>(45.3 to 85.2)                            | -9.2<br>(-20.0 to 3.3)                              |
| Liver cancer due to hepatitis B                                         | < 0.05<br>(< 0.05 to < 0.05)                  | < 0.05<br>(< 0.05 to < 0.05)                   | < 0.05<br>(< 0.05 to < 0.05)           | 63.2<br>(42.3 to 87.2)                            | -9.9<br>(-21.3 to 2.9)                              |

| Cause                                              | Prevalence in thousands (95% UI)        | Incidence in thousands (95% UI)       | YLDs in thousands (95% UI)        |                                                   |                                                     |
|----------------------------------------------------|-----------------------------------------|---------------------------------------|-----------------------------------|---------------------------------------------------|-----------------------------------------------------|
|                                                    | 2016 counts                             | 2016 counts                           | 2016 counts                       | Percentage change in counts between 2006 and 2016 | Percentage change in age-standardised rates between |
| Liver cancer due to hepatitis C                    | < 0.05<br>(< 0.05 to < 0.05)            | < 0.05<br>(< 0.05 to < 0.05)          | < 0.05<br>(< 0.05 to < 0.05)      | 65.5<br>(44.5 to 90.7)                            | -8.7<br>(-20.4 to 5.7)                              |
| Liver cancer due to alcohol use                    | < 0.05<br>(< 0.05 to < 0.05)            | < 0.05<br>(< 0.05 to < 0.05)          | < 0.05<br>(< 0.05 to < 0.05)      | 61.3<br>(35.5 to 91.4)                            | -12.1<br>(-26.2 to 5.5)                             |
| Liver cancer due to other causes                   | < 0.05<br>(< 0.05 to < 0.05)            | < 0.05<br>(< 0.05 to < 0.05)          | < 0.05<br>(< 0.05 to < 0.05)      | 65.3<br>(42.0 to 93.2)                            | -7.6<br>(-21.2 to 9.0)                              |
| Gallbladder and biliary tract cancer               | < 0.05<br>(< 0.05 to < 0.05)            | < 0.05<br>(< 0.05 to < 0.05)          | < 0.05<br>(< 0.05 to < 0.05)      | 58.2<br>(41.0 to 75.4)                            | -13.1<br>(-22.6 to -2.8)                            |
| Pancreatic cancer                                  | < 0.05<br>(< 0.05 to < 0.05)            | < 0.05<br>(< 0.05 to < 0.05)          | < 0.05<br>(< 0.05 to < 0.05)      | 96.6<br>(79.7 to 113.0)                           | 7.2<br>(-4.1 to 18.9)                               |
| Larynx cancer                                      | < 0.05<br>(< 0.05 to < 0.05)            | < 0.05<br>(< 0.05 to < 0.05)          | < 0.05<br>(< 0.05 to < 0.05)      | 54.6<br>(36.4 to 79.3)                            | -17.2<br>(-27.4 to -4.3)                            |
| Tracheal, bronchus, and lung cancer                | 0.1<br>(0.1 to 0.1)                     | 0.1<br>(0.1 to 0.1)                   | < 0.05<br>(< 0.05 to < 0.05)      | 39.2<br>(17.0 to 66.4)                            | -20.6<br>(-35.3 to -1.4)                            |
| Malignant skin melanoma                            | < 0.05<br>(< 0.05 to < 0.05)            | < 0.05<br>(< 0.05 to < 0.05)          | < 0.05<br>(< 0.05 to < 0.05)      | 73.4<br>(48.1 to 106.9)                           | -3.5<br>(-18.9 to 19.3)                             |
| Non-melanoma skin cancer                           | < 0.05<br>(< 0.05 to < 0.05)            | < 0.05<br>(< 0.05 to < 0.05)          | < 0.05<br>(< 0.05 to < 0.05)      | 106.2<br>(49.0 to 182.7)                          | 7.4<br>(-30.1 to 58.9)                              |
| Non-melanoma skin cancer (squamous-cell carcinoma) | < 0.05<br>(< 0.05 to < 0.05)            | < 0.05<br>(< 0.05 to < 0.05)          | < 0.05<br>(< 0.05 to < 0.05)      | 106.2<br>(45.0 to 186.2)                          | 7.2<br>(-31.3 to 60.3)                              |
| Non-melanoma skin cancer (basal-cell carcinoma)    | < 0.05<br>(< 0.05 to < 0.05)            | < 0.05<br>(< 0.05 to < 0.05)          | < 0.05<br>(< 0.05 to < 0.05)      | 106.3<br>(64.6 to 145.5)                          | 11.1<br>(-8.7 to 31.4)                              |
| Breast cancer                                      | 1.1<br>(0.9 to 1.3)                     | 0.2<br>(0.2 to 0.3)                   | 0.1<br>(0.1 to 0.1)               | 78.2<br>(43.9 to 117.9)                           | -0.2<br>(-18.1 to 22.3)                             |
| Cervical cancer                                    | 0.1<br>(0.1 to 0.1)                     | < 0.05<br>(< 0.05 to < 0.05)          | < 0.05<br>(< 0.05 to < 0.05)      | 42.4<br>(18.8 to 74.2)                            | -22.7<br>(-35.2 to -5.2)                            |
| Uterine cancer                                     | 0.1<br>(0.1 to 0.1)                     | < 0.05<br>(< 0.05 to < 0.05)          | < 0.05<br>(< 0.05 to < 0.05)      | 87.6<br>(47.8 to 141.7)                           | -8.1<br>(-28.5 to 18.7)                             |
| Ovarian cancer                                     | 0.1<br>(0.1 to 0.1)                     | < 0.05<br>(< 0.05 to < 0.05)          | < 0.05<br>(< 0.05 to < 0.05)      | 59.1<br>(29.5 to 95.0)                            | -14.3<br>(-34.0 to 10.3)                            |
| Prostate cancer                                    | 0.3<br>(0.2 to 0.4)                     | 0.1<br>(0.1 to 0.1)                   | < 0.05<br>(< 0.05 to < 0.05)      | 107.5<br>(61.3 to 147.1)                          | 9.0<br>(-14.1 to 29.6)                              |
| Testicular cancer                                  | < 0.05<br>(< 0.05 to < 0.05)            | < 0.05<br>(< 0.05 to < 0.05)          | < 0.05<br>(< 0.05 to < 0.05)      | 72.8<br>(38.7 to 114.1)                           | 11.2<br>(-6.8 to 32.8)                              |
| Kidney cancer                                      | 0.1<br>(0.1 to 0.1)                     | < 0.05<br>(< 0.05 to < 0.05)          | < 0.05<br>(< 0.05 to < 0.05)      | 71.2<br>(46.5 to 97.6)                            | -3.1<br>(-16.8 to 10.8)                             |
| Bladder cancer                                     | 0.2<br>(0.2 to 0.2)                     | 0.1<br>(< 0.05 to 0.1)                | < 0.05<br>(< 0.05 to < 0.05)      | 75.3<br>(51.6 to 103.6)                           | -2.9<br>(-17.1 to 13.1)                             |
| Brain and nervous system cancer                    | < 0.05<br>(< 0.05 to 0.1)               | < 0.05<br>(< 0.05 to < 0.05)          | < 0.05<br>(< 0.05 to < 0.05)      | 67.5<br>(51.9 to 84.1)                            | -0.5<br>(-12.1 to 11.1)                             |
| Thyroid cancer                                     | 0.2<br>(0.1 to 0.2)                     | < 0.05<br>(< 0.05 to < 0.05)          | < 0.05<br>(< 0.05 to < 0.05)      | 94.2<br>(57.5 to 144.8)                           | 6.2<br>(-11.3 to 29.3)                              |
| Mesothelioma                                       | < 0.05<br>(< 0.05 to < 0.05)            | < 0.05<br>(< 0.05 to < 0.05)          | < 0.05<br>(< 0.05 to < 0.05)      | 74.7<br>(49.6 to 98.7)                            | -3.9<br>(-18.0 to 10.0)                             |
| Hodgkin lymphoma                                   | < 0.05<br>(< 0.05 to 0.1)               | < 0.05<br>(< 0.05 to < 0.05)          | < 0.05<br>(< 0.05 to < 0.05)      | 46.7<br>(35.0 to 69.2)                            | -12.3<br>(-19.6 to -0.2)                            |
| Non-Hodgkin's lymphoma                             | 0.1<br>(0.1 to 0.1)                     | < 0.05<br>(< 0.05 to < 0.05)          | < 0.05<br>(< 0.05 to < 0.05)      | 86.2<br>(64.1 to 109.8)                           | 8.6<br>(-5.6 to 23.9)                               |
| Multiple myeloma                                   | < 0.05<br>(< 0.05 to < 0.05)            | < 0.05<br>(< 0.05 to < 0.05)          | < 0.05<br>(< 0.05 to < 0.05)      | 106.2<br>(61.8 to 146.8)                          | 9.8<br>(-16.9 to 38.3)                              |
| Leukaemia                                          | 0.1<br>(0.1 to 0.2)                     | < 0.05<br>(< 0.05 to < 0.05)          | < 0.05<br>(< 0.05 to < 0.05)      | 42.6<br>(28.2 to 58.9)                            | -14.8<br>(-25.6 to -2.8)                            |
| Acute lymphoid leukaemia                           | < 0.05<br>(< 0.05 to < 0.05)            | < 0.05<br>(< 0.05 to < 0.05)          | < 0.05<br>(< 0.05 to < 0.05)      | 43.2<br>(16.5 to 71.8)                            | -6.1<br>(-24.6 to 11.9)                             |
| Chronic lymphoid leukaemia                         | < 0.05<br>(< 0.05 to < 0.05)            | < 0.05<br>(< 0.05 to < 0.05)          | < 0.05<br>(< 0.05 to < 0.05)      | 66.8<br>(40.0 to 97.9)                            | -8.6<br>(-25.9 to 10.8)                             |
| Acute myeloid leukaemia                            | < 0.05<br>(< 0.05 to < 0.05)            | < 0.05<br>(< 0.05 to < 0.05)          | < 0.05<br>(< 0.05 to < 0.05)      | 51.6<br>(33.5 to 75.2)                            | -6.8<br>(-17.6 to 6.0)                              |
| Chronic myeloid leukaemia                          | < 0.05<br>(< 0.05 to < 0.05)            | < 0.05<br>(< 0.05 to < 0.05)          | < 0.05<br>(< 0.05 to < 0.05)      | 31.7<br>(10.1 to 57.3)                            | -23.3<br>(-35.5 to -7.6)                            |
| Other leukaemia                                    | 0.1<br>(0.1 to 0.1)                     | < 0.05<br>(< 0.05 to < 0.05)          | < 0.05<br>(< 0.05 to < 0.05)      | 36.6<br>(17.9 to 58.0)                            | -17.5<br>(-31.4 to -0.3)                            |
| Other neoplasms                                    | 0.1<br>(0.1 to 0.1)                     | < 0.05<br>(< 0.05 to 0.1)             | < 0.05<br>(< 0.05 to < 0.05)      | 69.5<br>(48.0 to 89.7)                            | -0.2<br>(-14.7 to 15.6)                             |
| <b>Cardiovascular diseases</b>                     | <b>64.2</b><br><b>(60.9 to 67.4)</b>    | <b>7.0†</b><br><b>(6.6 to 7.6)</b>    | <b>3.6</b><br><b>(2.6 to 4.8)</b> | <b>69.9</b><br><b>(63.2 to 77.4)</b>              | <b>-2.3</b><br><b>(-5.8 to 1.2)</b>                 |
| Rheumatic heart disease                            | 0.1<br>(0.1 to 0.1)                     | < 0.05<br>(< 0.05 to < 0.05)          | < 0.05<br>(< 0.05 to < 0.05)      | 59.0<br>(45.2 to 75.5)                            | -7.7<br>(-19.7 to 7.5)                              |
| Ischaemic heart disease                            | 30.5<br>(28.5 to 32.4)                  | 3.9<br>(3.5 to 4.3)                   | 1.3<br>(0.9 to 1.7)               | 75.7<br>(66.0 to 86.1)                            | 0.1<br>(-3.7 to 4.2)                                |
| Cerebrovascular disease                            | 6.7<br>(6.2 to 7.1)                     | 0.9†<br>(0.8 to 1.0)                  | 1.0<br>(0.7 to 1.2)               | 71.1<br>(56.7 to 86.3)                            | -5.5<br>(-13.3 to 2.3)                              |
| Ischaemic stroke                                   | 5.8<br>(5.1 to 6.4)                     | 0.7†<br>(0.6 to 0.8)                  | 0.8<br>(0.6 to 1.0)               | 71.7<br>(54.0 to 89.9)                            | -5.5<br>(-14.4 to 3.6)                              |
| Hemorrhagic stroke                                 | 1.2<br>(1.1 to 1.3)                     | 0.2†<br>(0.2 to 0.2)                  | 0.2<br>(0.1 to 0.2)               | 68.3<br>(48.7 to 88.9)                            | -5.6<br>(-15.3 to 5.5)                              |
| Hypertensive heart disease                         | 1.0<br>(0.9 to 1.2)                     | --                                    | 0.1<br>(0.1 to 0.1)               | 75.8<br>(54.2 to 101.3)                           | -1.4<br>(-10.4 to 8.9)                              |
| Cardiomyopathy and myocarditis                     | 1.3<br>(1.2 to 1.5)                     | 0.5†<br>(0.4 to 0.6)                  | 0.1<br>(0.1 to 0.2)               | 58.4<br>(37.2 to 83.8)                            | -0.4<br>(-9.8 to 11.0)                              |
| Myocarditis                                        | 0.2<br>(0.2 to 0.3)                     | 0.5<br>(0.4 to 0.6)                   | < 0.05<br>(< 0.05 to < 0.05)      | 50.0<br>(39.8 to 61.1)                            | -0.6<br>(-8.6 to 8.3)                               |
| Alcoholic cardiomyopathy                           | 0.1<br>(0.1 to 0.1)                     | --                                    | < 0.05<br>(< 0.05 to < 0.05)      | 75.5<br>(50.0 to 105.8)                           | 0.5<br>(-17.9 to 21.5)                              |
| Other cardiomyopathy                               | 1.2<br>(1.0 to 1.3)                     | --                                    | 0.1<br>(0.1 to 0.1)               | 58.1<br>(32.6 to 88.9)                            | -0.5<br>(-11.6 to 12.3)                             |
| Atrial fibrillation and flutter                    | 3.1<br>(2.7 to 3.5)                     | 0.3<br>(0.2 to 0.3)                   | 0.2<br>(0.2 to 0.3)               | 78.4<br>(58.8 to 99.3)                            | -0.2<br>(-7.0 to 6.7)                               |
| Peripheral vascular disease                        | 11.8<br>(10.1 to 13.9)                  | 1.3<br>(1.1 to 1.5)                   | < 0.05<br>(< 0.05 to 0.1)         | 72.7<br>(58.0 to 87.4)                            | -7.8<br>(-13.7 to -1.9)                             |
| Endocarditis                                       | 0.1<br>(0.1 to 0.1)                     | 0.2<br>(0.2 to 0.2)                   | < 0.05<br>(< 0.05 to < 0.05)      | 63.7<br>(51.5 to 77.2)                            | -0.8<br>(-12.6 to 13.4)                             |
| Other cardiovascular and circulatory diseases      | 17.1<br>(14.5 to 20.2)                  | --                                    | 0.9<br>(0.6 to 1.3)               | 60.3<br>(45.8 to 76.0)                            | -1.7<br>(-8.9 to 5.5)                               |
| <b>Chronic respiratory diseases</b>                | <b>105.5</b><br><b>(101.0 to 110.6)</b> | <b>18.2†</b><br><b>(17.1 to 19.4)</b> | <b>4.4</b><br><b>(3.2 to 5.9)</b> | <b>56.2</b><br><b>(49.4 to 63.7)</b>              | <b>-2.8</b><br><b>(-6.9 to 1.2)</b>                 |
| Chronic obstructive pulmonary disease              | 33.1<br>(31.6 to 34.8)                  | 2.3<br>(2.2 to 2.4)                   | 1.3<br>(1.1 to 1.6)               | 60.0<br>(45.5 to 76.2)                            | -9.0<br>(-16.2 to -0.7)                             |
| Pneumoconiosis                                     | 0.1<br>(0.1 to 0.1)                     | < 0.05<br>(< 0.05 to < 0.05)          | < 0.05<br>(< 0.05 to < 0.05)      | 70.8<br>(63.1 to 79.6)                            | -0.6<br>(-4.8 to 3.8)                               |
| Silicosis                                          | < 0.05<br>(< 0.05 to < 0.05)            | < 0.05<br>(< 0.05 to < 0.05)          | < 0.05<br>(< 0.05 to < 0.05)      | 63.6<br>(54.2 to 72.5)                            | 0.2<br>(-4.8 to 4.6)                                |



| Cause                                                          | Prevalence in thousands (95% UI)        | Incidence in thousands (95% UI)         | YLDs in thousands (95% UI)           |                                                   |                                                     |
|----------------------------------------------------------------|-----------------------------------------|-----------------------------------------|--------------------------------------|---------------------------------------------------|-----------------------------------------------------|
|                                                                | 2016 counts                             | 2016 counts                             | 2016 counts                          | Percentage change in counts between 2006 and 2016 | Percentage change in age-standardised rates between |
| Asbestosis                                                     | < 0.05<br>(< 0.05 to < 0.05)            | < 0.05<br>(< 0.05 to < 0.05)            | < 0.05<br>(< 0.05 to < 0.05)         | 75.1<br>(65.5 to 85.5)                            | 0.4<br>(-4.4 to 5.4)                                |
| Coal workers pneumoconiosis                                    | --                                      | --                                      | --                                   | --                                                | --                                                  |
| Other pneumoconiosis                                           | < 0.05<br>(< 0.05 to < 0.05)            | < 0.05<br>(< 0.05 to < 0.05)            | < 0.05<br>(< 0.05 to < 0.05)         | 72.8<br>(58.0 to 90.6)                            | -1.7<br>(-8.9 to 7.6)                               |
| Asthma                                                         | 75.4<br>(70.2 to 81.6)                  | 15.9<br>(14.7 to 17.1)                  | 2.9<br>(1.9 to 4.2)                  | 53.4<br>(46.2 to 60.5)                            | 0.4<br>(-3.7 to 4.3)                                |
| Interstitial lung disease and pulmonary sarcoidosis            | 0.4<br>(0.3 to 0.4)                     | < 0.05<br>(< 0.05 to < 0.05)            | < 0.05<br>(< 0.05 to 0.1)            | 67.7<br>(57.1 to 79.3)                            | -0.8<br>(-10.9 to 9.6)                              |
| Other chronic respiratory diseases                             | --                                      | --                                      | 0.1<br>(0.1 to 0.1)                  | 88.9<br>(62.2 to 120.3)                           | 26.6<br>(7.2 to 49.6)                               |
| <b>Cirrhosis and other chronic liver diseases</b>              | <b>6.1</b><br><b>(5.7 to 6.5)</b>       | <b>0.2</b><br><b>(0.2 to 0.2)</b>       | <b>0.2</b><br><b>(0.2 to 0.3)</b>    | <b>65.2</b><br><b>(45.4 to 87.2)</b>              | <b>4.6</b><br><b>(-5.0 to 14.3)</b>                 |
| Cirrhosis and other chronic liver diseases due to hepatitis B  | 1.9<br>(1.5 to 2.2)                     | 0.1<br>(< 0.05 to 0.1)                  | 0.1<br>(< 0.05 to 0.1)               | 77.4<br>(36.6 to 130.3)                           | 5.1<br>(-10.3 to 24.3)                              |
| Cirrhosis and other chronic liver diseases due to hepatitis C  | 1.9<br>(1.5 to 2.5)                     | 0.1<br>(< 0.05 to 0.1)                  | 0.1<br>(< 0.05 to 0.1)               | 81.6<br>(40.6 to 138.4)                           | 7.3<br>(-10.0 to 28.1)                              |
| Cirrhosis and other chronic liver diseases due to alcohol use  | 0.4<br>(0.4 to 0.5)                     | < 0.05<br>(< 0.05 to < 0.05)            | < 0.05<br>(< 0.05 to < 0.05)         | 71.7<br>(33.3 to 126.6)                           | 0.2<br>(-20.4 to 28.4)                              |
| Cirrhosis and other chronic liver diseases due to other causes | 1.9<br>(1.6 to 2.1)                     | 0.1<br>(< 0.05 to 0.1)                  | 0.1<br>(0.1 to 0.1)                  | 49.2<br>(22.8 to 80.4)                            | 3.2<br>(-12.9 to 19.7)                              |
| <b>Digestive diseases</b>                                      | <b>41.5</b><br><b>(39.1 to 44.1)</b>    | <b>36.9†</b><br><b>(34.4 to 39.7)</b>   | <b>1.2</b><br><b>(0.8 to 1.7)</b>    | <b>61.7</b><br><b>(50.4 to 74.0)</b>              | <b>-1.4</b><br><b>(-7.0 to 4.9)</b>                 |
| Peptic ulcer disease                                           | 13.4<br>(12.0 to 15.1)                  | 1.4<br>(1.2 to 1.7)                     | 0.2<br>(0.1 to 0.4)                  | 57.0<br>(39.1 to 75.7)                            | -6.4<br>(-14.8 to 2.9)                              |
| Gastritis and duodenitis                                       | 14.5<br>(12.6 to 16.6)                  | 14.6<br>(12.7 to 16.8)                  | 0.2<br>(0.1 to 0.3)                  | 66.5<br>(49.7 to 85.8)                            | 1.8<br>(-6.9 to 11.2)                               |
| Appendicitis                                                   | 0.2<br>(0.2 to 0.2)                     | 4.7<br>(4.4 to 5.2)                     | 0.1<br>(< 0.05 to 0.1)               | 41.8<br>(-2.0 to 99.5)                            | -3.3<br>(-28.6 to 29.1)                             |
| Paralytic ileus and intestinal obstruction                     | < 0.05<br>(< 0.05 to < 0.05)            | 0.4<br>(0.4 to 0.5)                     | < 0.05<br>(< 0.05 to < 0.05)         | 58.1<br>(52.6 to 63.7)                            | -4.2<br>(-8.8 to 0.1)                               |
| Inguinal, femoral, and abdominal hernia                        | 11.5<br>(10.0 to 13.1)                  | 8.2<br>(7.0 to 9.6)                     | 0.5<br>(0.3 to 0.7)                  | 61.9<br>(42.0 to 86.3)                            | -1.3<br>(-11.7 to 9.8)                              |
| Inflammatory bowel disease                                     | 0.5<br>(0.4 to 0.7)                     | 0.7<br>(0.5 to 1.0)                     | 0.1<br>(< 0.05 to 0.1)               | 69.6<br>(31.7 to 118.5)                           | 6.3<br>(-13.7 to 30.5)                              |
| Vascular intestinal disorders                                  | < 0.05<br>(< 0.05 to < 0.05)            | < 0.05<br>(< 0.05 to 0.1)               | < 0.05<br>(< 0.05 to < 0.05)         | 38.6<br>(29.5 to 48.2)                            | -20.2<br>(-25.2 to -14.6)                           |
| Gallbladder and biliary diseases                               | 2.6<br>(2.2 to 2.9)                     | 6.4<br>(5.4 to 7.4)                     | < 0.05<br>(< 0.05 to 0.1)            | 66.8<br>(35.4 to 111.9)                           | -3.8<br>(-22.5 to 21.8)                             |
| Pancreatitis                                                   | < 0.05<br>(< 0.05 to < 0.05)            | 0.4<br>(0.3 to 0.4)                     | < 0.05<br>(< 0.05 to < 0.05)         | 63.6<br>(57.2 to 69.9)                            | -4.4<br>(-8.2 to -0.9)                              |
| Other digestive diseases                                       | --                                      | --                                      | 0.1<br>(0.1 to 0.1)                  | 69.4<br>(57.5 to 83.0)                            | 3.0<br>(-2.6 to 9.1)                                |
| <b>Neurological disorders</b>                                  | <b>585.7</b><br><b>(558.8 to 615.1)</b> | <b>280.0</b><br><b>(233.6 to 331.1)</b> | <b>16.1</b><br><b>(10.5 to 21.9)</b> | <b>52.5</b><br><b>(32.1 to 76.4)</b>              | <b>-0.9</b><br><b>(-15.1 to 15.6)</b>               |
| Alzheimer's disease and other dementias                        | 3.1<br>(2.6 to 3.6)                     | 0.5<br>(0.5 to 0.6)                     | 0.4<br>(0.3 to 0.6)                  | 74.0<br>(65.7 to 83.0)                            | -0.2<br>(-3.9 to 3.5)                               |
| Parkinson's disease                                            | 0.5<br>(0.4 to 0.6)                     | 0.1<br>(< 0.05 to 0.1)                  | 0.1<br>(< 0.05 to 0.1)               | 95.7<br>(66.2 to 127.5)                           | 7.7<br>(-3.0 to 19.9)                               |
| Epilepsy                                                       | 5.4<br>(1.9 to 7.9)                     | 0.6<br>(0.2 to 0.9)                     | 1.6<br>(0.5 to 3.2)                  | 34.5<br>(-66.7 to 383.1)                          | -9.6<br>(-77.8 to 215.6)                            |
| Multiple sclerosis                                             | 0.5<br>(0.5 to 0.6)                     | < 0.05<br>(< 0.05 to < 0.05)            | 0.1<br>(0.1 to 0.2)                  | 59.7<br>(33.5 to 89.9)                            | -0.6<br>(-14.8 to 15.4)                             |
| Motor neuron disease                                           | < 0.05<br>(< 0.05 to < 0.05)            | < 0.05<br>(< 0.05 to < 0.05)            | < 0.05<br>(< 0.05 to < 0.05)         | 60.0<br>(52.3 to 67.4)                            | 2.3<br>(-1.5 to 5.9)                                |
| Migraine                                                       | 240.1<br>(223.3 to 256.6)               | 26.4<br>(24.2 to 28.7)                  | 11.3<br>(7.2 to 15.8)                | 53.5<br>(47.8 to 59.5)                            | -0.1<br>(-3.4 to 3.2)                               |
| Tension-type headache                                          | 443.3<br>(390.8 to 499.4)               | 252.4<br>(206.7 to 304.1)               | 2.1<br>(1.3 to 3.2)                  | 56.0<br>(47.4 to 65.4)                            | 0.3<br>(-4.3 to 5.7)                                |
| Other neurological disorders                                   | < 0.05<br>(< 0.05 to < 0.05)            | < 0.05<br>(< 0.05 to < 0.05)            | 0.4<br>(0.1 to 0.7)                  | 63.9<br>(-47.1 to 392.5)                          | 10.1<br>(-62.3 to 203.9)                            |
| <b>Mental and substance use disorders</b>                      | <b>238.2</b><br><b>(229.4 to 248.1)</b> | <b>96.5†</b><br><b>(88.0 to 106.4)</b>  | <b>35.2</b><br><b>(25.6 to 45.6)</b> | <b>48.6</b><br><b>(44.5 to 52.9)</b>              | <b>-2.5</b><br><b>(-4.9 to -0.1)</b>                |
| Schizophrenia                                                  | 3.3<br>(2.8 to 3.8)                     | 0.2<br>(0.2 to 0.2)                     | 2.1<br>(1.5 to 2.7)                  | 60.9<br>(45.2 to 79.0)                            | 0.6<br>(-8.2 to 10.4)                               |
| Alcohol use disorders                                          | 11.3<br>(9.6 to 13.3)                   | 6.1<br>(5.1 to 7.1)                     | 1.1<br>(0.8 to 1.6)                  | 51.5<br>(36.3 to 68.2)                            | -1.0<br>(-10.1 to 9.1)                              |
| Drug use disorders                                             | 15.8<br>(13.9 to 18.2)                  | 1.6<br>(1.4 to 1.8)                     | 5.2<br>(3.6 to 7.0)                  | 50.7<br>(33.8 to 69.3)                            | -2.0<br>(-11.4 to 8.6)                              |
| Opioid use disorders                                           | 11.7<br>(9.5 to 14.2)                   | 1.0<br>(0.8 to 1.2)                     | 4.8<br>(3.3 to 6.6)                  | 50.6<br>(33.5 to 70.7)                            | -2.2<br>(-12.1 to 9.1)                              |
| Cocaine use disorders                                          | 0.7<br>(0.6 to 0.8)                     | 0.1<br>(< 0.05 to 0.1)                  | 0.1<br>(0.1 to 0.1)                  | 53.7<br>(6.7 to 123.3)                            | 2.9<br>(-24.4 to 44.5)                              |
| Amphetamine use disorders                                      | 0.1<br>(0.1 to 0.2)                     | < 0.05<br>(< 0.05 to < 0.05)            | < 0.05<br>(< 0.05 to < 0.05)         | 53.9<br>(39.5 to 68.5)                            | 4.3<br>(-4.7 to 13.7)                               |
| Cannabis use disorders                                         | 2.8<br>(2.3 to 3.4)                     | 0.4<br>(0.3 to 0.5)                     | 0.1<br>(< 0.05 to 0.1)               | 45.6<br>(15.7 to 82.4)                            | 0.8<br>(-19.1 to 26.1)                              |
| Other drug use disorders                                       | 0.7<br>(0.6 to 0.8)                     | 0.1<br>(0.1 to 0.1)                     | 0.1<br>(0.1 to 0.2)                  | 54.8<br>(25.9 to 96.0)                            | 1.6<br>(-17.0 to 26.0)                              |
| Depressive disorders                                           | 58.1<br>(54.4 to 63.4)                  | 71.5<br>(62.9 to 81.3)                  | 10.5<br>(7.2 to 14.5)                | 44.2<br>(36.4 to 53.4)                            | -6.8<br>(-11.2 to -2.1)                             |
| Major depressive disorder                                      | 44.8<br>(39.4 to 50.8)                  | 69.0<br>(60.5 to 78.8)                  | 9.2<br>(6.2 to 12.7)                 | 42.2<br>(33.6 to 52.4)                            | -7.8<br>(-12.7 to -2.4)                             |
| Dysthymia                                                      | 14.4<br>(12.4 to 16.7)                  | 2.6<br>(2.2 to 3.0)                     | 1.4<br>(0.9 to 2.0)                  | 58.9<br>(51.2 to 67.4)                            | -0.3<br>(-3.9 to 3.9)                               |
| Bipolar disorder                                               | 12.8<br>(10.8 to 15.0)                  | 0.9<br>(0.8 to 1.0)                     | 2.6<br>(1.6 to 3.9)                  | 51.5<br>(42.7 to 62.2)                            | -0.1<br>(-5.0 to 5.5)                               |
| Anxiety disorders                                              | 69.6<br>(61.0 to 79.3)                  | 10.4<br>(9.0 to 11.9)                   | 6.7<br>(4.6 to 9.3)                  | 49.8<br>(44.7 to 55.7)                            | -0.5<br>(-3.4 to 2.7)                               |
| Eating disorders                                               | 3.9<br>(3.1 to 4.8)                     | 1.5<br>(1.1 to 2.0)                     | 0.8<br>(0.5 to 1.1)                  | 47.5<br>(32.8 to 64.4)                            | 2.3<br>(-7.6 to 13.4)                               |
| Anorexia nervosa                                               | 0.5<br>(0.4 to 0.7)                     | 0.2<br>(0.1 to 0.2)                     | 0.1<br>(0.1 to 0.2)                  | 38.4<br>(10.5 to 74.9)                            | 0.4<br>(-19.5 to 25.3)                              |
| Bulimia nervosa                                                | 3.1<br>(2.4 to 4.2)                     | 1.3<br>(1.0 to 1.8)                     | 0.7<br>(0.4 to 1.0)                  | 49.0<br>(32.3 to 69.1)                            | 2.7<br>(-8.5 to 16.0)                               |
| Autistic spectrum disorders                                    | 14.5<br>(12.9 to 16.8)                  | 0.1<br>(< 0.05 to 0.1)                  | 2.1<br>(1.4 to 2.9)                  | 50.4<br>(42.8 to 58.2)                            | 0.8<br>(-3.7 to 5.5)                                |
| Autism                                                         | 4.1<br>(3.5 to 4.8)                     | < 0.05<br>(< 0.05 to < 0.05)            | 1.0<br>(0.7 to 1.5)                  | 50.3<br>(37.3 to 65.7)                            | 0.6<br>(-7.3 to 9.3)                                |
| Asperger syndrome and other autistic spectrum disorders        | 10.4<br>(8.7 to 12.4)                   | 0.1<br>(< 0.05 to 0.1)                  | 1.0<br>(0.7 to 1.5)                  | 50.4<br>(42.8 to 59.0)                            | 1.0<br>(-3.6 to 5.9)                                |

| Cause                                                      | Prevalence in thousands (95% UI)  | Incidence in thousands (95% UI)          | YLDs in thousands (95% UI)     |                                                   |                                                     |
|------------------------------------------------------------|-----------------------------------|------------------------------------------|--------------------------------|---------------------------------------------------|-----------------------------------------------------|
|                                                            | 2016 counts                       | 2016 counts                              | 2016 counts                    | Percentage change in counts between 2006 and 2016 | Percentage change in age-standardised rates between |
| Attention-deficit/hyperactivity disorder                   | 16.6<br>(13.4 to 20.5)            | 0.5<br>(0.4 to 0.6)                      | 0.2<br>(0.1 to 0.3)            | 42.9<br>(32.4 to 55.4)                            | 0.6<br>(-6.5 to 8.6)                                |
| Conduct disorder                                           | 8.6<br>(7.0 to 10.1)              | 2.8<br>(2.2 to 3.4)                      | 1.0<br>(0.6 to 1.6)            | 27.2<br>(19.1 to 35.7)                            | 0.5<br>(-5.7 to 7.2)                                |
| Idiopathic developmental intellectual disability           | 17.4<br>(9.5 to 25.7)             | --                                       | 0.6<br>(0.2 to 1.1)            | 44.5<br>(32.4 to 58.0)                            | -2.7<br>(-10.6 to 5.9)                              |
| Other mental and substance use disorders                   | 30.2<br>(26.5 to 34.9)            | 0.9<br>(0.8 to 1.1)                      | 2.2<br>(1.6 to 3.2)            | 58.4<br>(49.0 to 68.4)                            | 0.6<br>(-4.3 to 5.5)                                |
| <b>Diabetes, urogenital, blood, and endocrine diseases</b> | <b>764.7<br/>(754.9 to 776.3)</b> | <b>156.4†<br/>(146.3 to 167.0)</b>       | <b>19.2<br/>(13.6 to 26.3)</b> | <b>66.0<br/>(56.3 to 75.1)</b>                    | <b>-3.9<br/>(-8.9 to 0.9)</b>                       |
| Diabetes mellitus                                          | 127.8<br>(113.4 to 144.6)         | 11.5<br>(10.1 to 13.1)                   | 12.2<br>(8.2 to 17.2)          | 75.2<br>(59.9 to 90.1)                            | -2.9<br>(-10.0 to 4.3)                              |
| Acute glomerulonephritis                                   | < 0.05<br>(< 0.05 to < 0.05)      | 0.2<br>(0.2 to 0.2)                      | < 0.05<br>(< 0.05 to < 0.05)   | 52.8<br>(45.0 to 60.3)                            | 0.3<br>(-3.8 to 4.4)                                |
| Chronic kidney disease                                     | 48.7<br>(43.8 to 54.0)            | 3.7<br>(3.3 to 4.2)                      | 2.0<br>(1.4 to 2.6)            | 50.6<br>(39.5 to 62.7)                            | -9.6<br>(-15.2 to -3.9)                             |
| Chronic kidney disease due to diabetes mellitus            | 21.5<br>(18.5 to 25.0)            | 1.6<br>(1.3 to 1.9)                      | 0.8<br>(0.6 to 1.1)            | 57.9<br>(42.0 to 77.5)                            | -9.4<br>(-16.6 to -0.9)                             |
| Chronic kidney disease due to hypertension                 | 7.0<br>(5.9 to 8.1)               | 0.6<br>(0.5 to 0.7)                      | 0.2<br>(0.2 to 0.3)            | 57.2<br>(36.5 to 82.4)                            | -8.5<br>(-19.0 to 3.4)                              |
| Chronic kidney disease due to glomerulonephritis           | 6.5<br>(5.5 to 7.5)               | 0.4<br>(0.4 to 0.5)                      | 0.4<br>(0.2 to 0.5)            | 42.2<br>(21.5 to 66.0)                            | -10.1<br>(-19.4 to 0.3)                             |
| Chronic kidney disease due to other causes                 | 13.8<br>(11.5 to 16.3)            | 1.1<br>(0.9 to 1.3)                      | 0.6<br>(0.4 to 0.8)            | 44.0<br>(26.0 to 63.7)                            | -10.5<br>(-18.2 to -1.8)                            |
| Urinary diseases and male infertility                      | 36.7<br>(31.6 to 42.1)            | 81.2†<br>(72.9 to 90.3)                  | 0.9<br>(0.6 to 1.4)            | 80.9<br>(54.5 to 106.3)                           | -3.6<br>(-16.6 to 8.5)                              |
| Interstitial nephritis and urinary tract infections        | 1.2<br>(1.0 to 1.3)               | 60.9<br>(53.0 to 69.3)                   | < 0.05<br>(< 0.05 to 0.1)      | 49.2<br>(26.2 to 78.6)                            | -1.6<br>(-14.8 to 15.3)                             |
| Urolithiasis                                               | 0.7<br>(0.6 to 0.8)               | 17.2<br>(14.8 to 20.2)                   | < 0.05<br>(< 0.05 to 0.1)      | 60.2<br>(27.1 to 101.7)                           | -0.7<br>(-19.1 to 21.8)                             |
| Benign prostatic hyperplasia                               | 22.2<br>(17.6 to 27.8)            | 3.1<br>(2.4 to 3.9)                      | 0.7<br>(0.5 to 1.1)            | 93.8<br>(59.1 to 127.1)                           | -3.3<br>(-17.9 to 10.3)                             |
| Male infertility                                           | 11.0<br>(8.6 to 14.1)             | --                                       | 0.1<br>(< 0.05 to 0.1)         | 37.9<br>(28.5 to 48.4)                            | -6.2<br>(-12.8 to 0.7)                              |
| Other urinary diseases                                     | --                                | --                                       | < 0.05<br>(< 0.05 to < 0.05)   | 30.6<br>(12.5 to 52.1)                            | -17.1<br>(-27.3 to -4.2)                            |
| Gynecological diseases                                     | 128.3<br>(122.5 to 134.9)         | 56.8†<br>(52.2 to 62.1)                  | 1.9<br>(1.3 to 2.6)            | 51.1<br>(45.3 to 58.0)                            | -2.1<br>(-5.8 to 1.9)                               |
| Uterine fibroids                                           | 12.1<br>(10.6 to 13.7)            | 1.5<br>(1.3 to 1.7)                      | 0.2<br>(0.1 to 0.4)            | 68.3<br>(56.5 to 81.2)                            | 1.6<br>(-5.5 to 9.6)                                |
| Polycystic ovarian syndrome                                | 1.1<br>(0.8 to 1.4)               | 1.5<br>(1.1 to 2.1)                      | < 0.05<br>(< 0.05 to < 0.05)   | 45.2<br>(23.9 to 69.5)                            | -1.9<br>(-16.0 to 14.7)                             |
| Female infertility                                         | 2.9<br>(1.5 to 5.5)               | --                                       | < 0.05<br>(< 0.05 to < 0.05)   | 50.5<br>(25.0 to 91.5)                            | 9.2<br>(-7.3 to 33.9)                               |
| Endometriosis                                              | 0.3<br>(0.2 to 0.3)               | 0.7<br>(0.6 to 0.9)                      | < 0.05<br>(< 0.05 to < 0.05)   | 42.1<br>(9.7 to 89.4)                             | -3.0<br>(-24.8 to 28.7)                             |
| Genital prolapse                                           | 27.8<br>(24.0 to 31.8)            | 2.4<br>(2.0 to 2.8)                      | 0.1<br>(< 0.05 to 0.2)         | 64.9<br>(51.8 to 79.3)                            | -7.8<br>(-15.2 to 0.1)                              |
| Premenstrual syndrome                                      | 77.9<br>(72.4 to 83.5)            | 28.2<br>(25.8 to 30.7)                   | 0.6<br>(0.4 to 1.0)            | 44.0<br>(33.3 to 55.6)                            | -3.1<br>(-9.8 to 4.5)                               |
| Other gynecological diseases                               | 25.4<br>(22.0 to 29.3)            | 22.5<br>(18.4 to 27.2)                   | 0.8<br>(0.6 to 1.2)            | 51.3<br>(42.7 to 60.6)                            | -1.5<br>(-7.0 to 4.7)                               |
| Hemoglobinopathies and hemolytic anaemias                  | 606.5<br>(597.6 to 616.2)         | --                                       | 1.6<br>(1.0 to 2.2)            | 40.0<br>(29.8 to 51.3)                            | -6.2<br>(-12.5 to 0.6)                              |
| Thalassemias                                               | < 0.05<br>(< 0.05 to < 0.05)      | --                                       | < 0.05<br>(< 0.05 to < 0.05)   | 72.4<br>(33.1 to 127.0)                           | 19.9<br>(-8.9 to 62.5)                              |
| Thalassaemias trait                                        | 54.0<br>(49.7 to 58.1)            | --                                       | 0.4<br>(0.3 to 0.7)            | 38.7<br>(24.1 to 54.4)                            | -6.5<br>(-15.5 to 3.4)                              |
| Sickle cell disorders                                      | 4.9<br>(4.4 to 5.5)               | --                                       | 0.4<br>(0.3 to 0.6)            | 46.8<br>(30.4 to 66.1)                            | 0.2<br>(-10.7 to 13.3)                              |
| Sickle cell trait                                          | 273.9<br>(262.2 to 286.9)         | --                                       | 0.5<br>(0.3 to 0.7)            | 37.8<br>(25.4 to 52.1)                            | -6.5<br>(-15.2 to 2.9)                              |
| G6PD deficiency                                            | 175.4<br>(169.3 to 182.8)         | --                                       | < 0.05<br>(< 0.05 to < 0.05)   | 42.2<br>(19.9 to 66.5)                            | -5.7<br>(-19.1 to 9.1)                              |
| G6PD trait                                                 | 207.1<br>(204.6 to 209.8)         | --                                       | < 0.05<br>(< 0.05 to < 0.05)   | 42.6<br>(25.8 to 61.1)                            | -4.7<br>(-15.1 to 7.2)                              |
| Other hemoglobinopathies and hemolytic anaemias            | 12.4<br>(11.2 to 13.5)            | --                                       | 0.2<br>(0.1 to 0.3)            | 34.0<br>(23.0 to 45.7)                            | -13.4<br>(-19.2 to -6.8)                            |
| Endocrine, metabolic, blood, and immune disorders          | 23.1<br>(21.4 to 24.8)            | 3.0<br>(2.7 to 3.4)                      | 0.6<br>(0.4 to 0.9)            | 55.0<br>(45.1 to 66.5)                            | -3.6<br>(-8.6 to 1.8)                               |
| <b>Musculoskeletal disorders</b>                           | <b>256.1<br/>(241.2 to 269.6)</b> | <b>141.7<br/>(125.7 to 157.7)</b>        | <b>28.7<br/>(20.6 to 37.7)</b> | <b>61.6<br/>(56.4 to 67.0)</b>                    | <b>-1.8<br/>(-4.2 to 0.5)</b>                       |
| Rheumatoid arthritis                                       | 4.6<br>(4.1 to 5.2)               | 0.3<br>(0.3 to 0.4)                      | 1.1<br>(0.7 to 1.4)            | 73.2<br>(60.0 to 87.3)                            | 1.0<br>(-5.6 to 7.6)                                |
| Osteoarthritis                                             | 43.7<br>(40.7 to 47.0)            | 2.9<br>(2.7 to 3.2)                      | 2.7<br>(1.9 to 3.6)            | 83.1<br>(75.7 to 91.0)                            | 1.1<br>(-2.4 to 4.8)                                |
| Low back and neck pain                                     | 153.2<br>(141.4 to 166.6)         | 64.6<br>(57.0 to 73.1)                   | 17.8<br>(12.5 to 23.5)         | 63.6<br>(57.5 to 69.7)                            | -0.0<br>(-2.9 to 2.7)                               |
| Low back pain                                              | 104.0<br>(91.1 to 119.5)          | 51.0<br>(43.6 to 59.4)                   | 11.8<br>(8.2 to 15.7)          | 62.7<br>(54.1 to 71.8)                            | 0.2<br>(-3.8 to 4.4)                                |
| Neck pain                                                  | 60.5<br>(51.5 to 70.4)            | 13.6<br>(11.5 to 16.2)                   | 6.0<br>(4.0 to 8.6)            | 65.5<br>(60.2 to 71.1)                            | -0.4<br>(-2.3 to 1.5)                               |
| Gout                                                       | 4.4<br>(3.9 to 5.1)               | 0.9<br>(0.8 to 1.1)                      | 0.1<br>(0.1 to 0.2)            | 72.6<br>(43.1 to 111.4)                           | 0.8<br>(-12.2 to 16.0)                              |
| Other musculoskeletal disorders                            | 82.2<br>(68.9 to 97.7)            | 72.9<br>(59.6 to 88.5)                   | 7.0<br>(4.7 to 10.0)           | 48.6<br>(36.1 to 62.1)                            | -8.3<br>(-14.7 to -1.6)                             |
| <b>Other non-communicable diseases</b>                     | <b>965.2<br/>(937.6 to 988.9)</b> | <b>2,745.5†<br/>(2,495.6 to 2,980.4)</b> | <b>24.7<br/>(16.8 to 34.8)</b> | <b>53.5<br/>(50.8 to 56.1)</b>                    | <b>-1.6<br/>(-3.0 to -0.2)</b>                      |
| Congenital anomalies                                       | 16.7<br>(14.9 to 19.1)            | --                                       | 2.3<br>(1.6 to 3.1)            | 44.7<br>(36.0 to 53.9)                            | -2.5<br>(-8.0 to 3.5)                               |
| Neural tube defects                                        | 2.0<br>(1.8 to 2.3)               | --                                       | 0.6<br>(0.4 to 0.8)            | 37.5<br>(20.8 to 55.2)                            | -8.5<br>(-18.8 to 2.2)                              |
| Congenital heart anomalies                                 | 2.9<br>(2.5 to 3.3)               | --                                       | 0.1<br>(0.1 to 0.2)            | 56.7<br>(38.9 to 75.8)                            | 5.4<br>(-5.9 to 17.4)                               |
| Orofacial clefts                                           | 0.5<br>(0.5 to 0.6)               | --                                       | < 0.05<br>(< 0.05 to < 0.05)   | 44.6<br>(28.7 to 62.5)                            | -3.9<br>(-14.5 to 8.0)                              |
| Down's syndrome                                            | 0.5<br>(0.5 to 0.6)               | --                                       | < 0.05<br>(< 0.05 to 0.1)      | 51.2<br>(40.4 to 62.6)                            | 2.2<br>(-5.1 to 10.0)                               |
| Turner syndrome                                            | 0.3<br>(0.2 to 0.3)               | --                                       | < 0.05<br>(< 0.05 to < 0.05)   | 28.8<br>(-13.5 to 92.2)                           | -11.0<br>(-40.5 to 32.5)                            |
| Klinefelter syndrome                                       | 0.7<br>(0.6 to 0.8)               | --                                       | < 0.05<br>(< 0.05 to < 0.05)   | 49.4<br>(11.3 to 102.1)                           | 2.2<br>(-22.2 to 36.2)                              |



| Cause                                         | Prevalence in thousands (95% UI)        | Incidence in thousands (95% UI)         | YLDs in thousands (95% UI)         |                                                   |                                                     |
|-----------------------------------------------|-----------------------------------------|-----------------------------------------|------------------------------------|---------------------------------------------------|-----------------------------------------------------|
|                                               | 2016 counts                             | 2016 counts                             | 2016 counts                        | Percentage change in counts between 2006 and 2016 | Percentage change in age-standardised rates between |
| Other chromosomal abnormalities               | 2.6<br>(2.2 to 3.1)                     | --                                      | 0.2<br>(0.2 to 0.3)                | 39.6<br>(23.3 to 58.1)                            | 2.2<br>(-9.7 to 16.1)                               |
| Congenital musculoskeletal and limb anomalies | 2.8<br>(2.5 to 3.1)                     | --                                      | 0.4<br>(0.3 to 0.6)                | 44.0<br>(28.6 to 60.2)                            | -3.8<br>(-13.0 to 6.5)                              |
| Urogenital congenital anomalies               | 1.2<br>(1.0 to 1.3)                     | --                                      | < 0.05<br>(< 0.05 to 0.1)          | 38.1<br>(21.7 to 55.9)                            | -0.3<br>(-12.5 to 12.9)                             |
| Digestive congenital anomalies                | 1.6<br>(1.4 to 1.8)                     | --                                      | 0.1<br>(< 0.05 to 0.1)             | 46.2<br>(21.3 to 75.9)                            | -2.5<br>(-18.2 to 14.9)                             |
| Other congenital anomalies                    | 4.7<br>(2.8 to 7.4)                     | --                                      | 0.7<br>(0.4 to 1.1)                | 51.7<br>(35.1 to 70.3)                            | 0.3<br>(-10.2 to 11.4)                              |
| Skin and subcutaneous diseases                | 385.7<br>(374.7 to 396.3)               | 767.6<br>(733.0 to 805.6)               | 9.7<br>(6.5 to 13.9)               | 46.6<br>(43.3 to 49.8)                            | 0.5<br>(-1.4 to 2.4)                                |
| Dermatitis                                    | 62.6<br>(54.6 to 71.4)                  | 98.6<br>(89.3 to 108.2)                 | 2.3<br>(1.3 to 3.7)                | 46.6<br>(41.3 to 52.9)                            | -0.0<br>(-3.1 to 3.6)                               |
| Psoriasis                                     | 11.2<br>(10.5 to 12.0)                  | 1.6<br>(1.5 to 1.7)                     | 1.0<br>(0.7 to 1.3)                | 59.2<br>(45.3 to 75.6)                            | 2.6<br>(-5.2 to 10.9)                               |
| Cellulitis                                    | 0.7<br>(0.7 to 0.8)                     | 14.9<br>(13.8 to 16.0)                  | < 0.05<br>(< 0.05 to 0.1)          | 53.0<br>(20.5 to 95.0)                            | -2.2<br>(-18.4 to 18.0)                             |
| Pyoderma                                      | 3.1<br>(2.9 to 3.2)                     | 69.2<br>(66.5 to 72.0)                  | < 0.05<br>(< 0.05 to < 0.05)       | 55.2<br>(43.1 to 71.3)                            | -0.5<br>(-6.7 to 6.8)                               |
| Scabies                                       | 13.6<br>(11.5 to 16.2)                  | 41.3<br>(34.8 to 49.5)                  | 0.4<br>(0.2 to 0.6)                | 40.4<br>(32.3 to 49.3)                            | -3.3<br>(-8.2 to 1.6)                               |
| Fungal skin diseases                          | 77.7<br>(69.5 to 86.9)                  | 268.2<br>(238.5 to 300.4)               | 0.4<br>(0.2 to 0.9)                | 53.2<br>(50.0 to 56.7)                            | 0.2<br>(-1.0 to 1.5)                                |
| Viral skin diseases                           | 33.3<br>(31.6 to 35.2)                  | 48.0<br>(45.2 to 50.9)                  | 1.0<br>(0.6 to 1.5)                | 43.3<br>(38.3 to 48.7)                            | -0.5<br>(-3.6 to 2.9)                               |
| Acne vulgaris                                 | 116.4<br>(105.1 to 128.9)               | 74.5<br>(62.5 to 92.2)                  | 3.0<br>(2.0 to 4.3)                | 40.0<br>(33.1 to 46.8)                            | 2.2<br>(-2.4 to 7.0)                                |
| Alopecia areata                               | 3.1<br>(2.9 to 3.3)                     | 5.4<br>(5.0 to 5.9)                     | 0.1<br>(0.1 to 0.1)                | 53.1<br>(34.6 to 72.5)                            | 0.1<br>(-11.3 to 11.5)                              |
| Pruritus                                      | 11.8<br>(10.2 to 13.6)                  | 9.3<br>(8.2 to 10.7)                    | 0.1<br>(0.1 to 0.2)                | 57.4<br>(46.7 to 67.6)                            | 0.4<br>(-4.6 to 5.6)                                |
| Urticaria                                     | 12.7<br>(11.0 to 14.5)                  | 22.5<br>(19.6 to 25.8)                  | 0.8<br>(0.5 to 1.1)                | 50.5<br>(40.7 to 61.0)                            | 0.0<br>(-5.4 to 5.8)                                |
| Decubitus ulcer                               | 0.4<br>(0.4 to 0.5)                     | 1.5<br>(1.3 to 1.7)                     | 0.1<br>(< 0.05 to 0.1)             | 47.7<br>(30.7 to 69.4)                            | -15.3<br>(-24.1 to -5.3)                            |
| Other skin and subcutaneous diseases          | 97.8<br>(94.6 to 101.1)                 | 112.7<br>(108.6 to 116.7)               | 0.5<br>(0.3 to 1.0)                | 61.8<br>(56.8 to 66.2)                            | 0.4<br>(-1.7 to 2.6)                                |
| Sense organ diseases                          | 267.1<br>(257.0 to 278.4)               | 117.7†<br>(110.1 to 126.1)              | 9.3<br>(6.4 to 13.1)               | 59.2<br>(54.6 to 64.4)                            | -3.4<br>(-5.4 to -1.1)                              |
| Glaucoma                                      | 1.0<br>(0.8 to 1.2)                     | --                                      | 0.1<br>(0.1 to 0.1)                | 92.4<br>(71.4 to 116.2)                           | -1.0<br>(-11.1 to 10.0)                             |
| Cataract                                      | 12.3<br>(10.3 to 14.6)                  | --                                      | 0.9<br>(0.6 to 1.2)                | 69.0<br>(58.5 to 79.5)                            | -5.5<br>(-10.5 to -0.4)                             |
| Macular degeneration                          | 1.0<br>(0.8 to 1.4)                     | --                                      | 0.1<br>(< 0.05 to 0.1)             | 90.9<br>(69.7 to 114.5)                           | -0.1<br>(-8.9 to 9.7)                               |
| Refraction and accommodation disorders        | 129.1<br>(117.3 to 142.2)               | --                                      | 2.7<br>(1.7 to 4.2)                | 47.5<br>(40.6 to 54.9)                            | -7.3<br>(-11.1 to -3.5)                             |
| Age-related and other hearing loss            | 144.6<br>(132.7 to 156.9)               | --                                      | 4.0<br>(2.8 to 5.8)                | 63.0<br>(53.6 to 72.9)                            | -1.6<br>(-5.4 to 2.6)                               |
| Other vision loss                             | 7.5<br>(6.3 to 8.9)                     | --                                      | 0.6<br>(0.4 to 0.8)                | 63.1<br>(49.0 to 77.3)                            | -1.6<br>(-8.0 to 4.7)                               |
| Other sense organ diseases                    | 30.7<br>(28.2 to 33.2)                  | 117.7<br>(110.1 to 126.1)               | 1.0<br>(0.6 to 1.4)                | 65.4<br>(56.6 to 74.4)                            | 0.6<br>(-3.2 to 4.3)                                |
| Oral disorders                                | 687.1<br>(645.1 to 726.2)               | 1,860.1†<br>(1,617.5 to 2,095.3)        | 3.4<br>(2.0 to 5.3)                | 66.3<br>(62.2 to 70.6)                            | 0.4<br>(-1.5 to 2.2)                                |
| Caries of deciduous teeth                     | 80.8<br>(61.0 to 101.1)                 | 320.2<br>(220.8 to 422.2)               | < 0.05<br>(< 0.05 to < 0.05)       | 43.9<br>(26.2 to 63.3)                            | 0.1<br>(-11.0 to 12.7)                              |
| Caries of permanent teeth                     | 477.1<br>(423.5 to 530.9)               | 1,517.1<br>(1,294.1 to 1,727.0)         | 0.3<br>(0.1 to 0.6)                | 50.7<br>(43.4 to 59.1)                            | -0.2<br>(-4.2 to 4.2)                               |
| Periodontal disease                           | 154.4<br>(124.6 to 188.9)               | 18.9<br>(14.8 to 23.9)                  | 1.0<br>(0.4 to 2.2)                | 68.7<br>(60.2 to 76.3)                            | 0.3<br>(-3.3 to 4.0)                                |
| Edentulism and severe tooth loss              | 47.4<br>(40.2 to 55.1)                  | 3.9<br>(3.3 to 4.6)                     | 1.3<br>(0.8 to 1.9)                | 77.2<br>(68.9 to 84.9)                            | 0.8<br>(-2.4 to 3.9)                                |
| Other oral disorders                          | 25.5<br>(24.2 to 26.8)                  | --                                      | 0.8<br>(0.5 to 1.1)                | 53.3<br>(47.4 to 59.9)                            | -0.2<br>(-3.4 to 3.2)                               |
| <b>Injuries</b>                               | <b>273.0</b><br><b>(254.0 to 294.2)</b> | <b>106.2†</b><br><b>(99.9 to 113.5)</b> | <b>8.8</b><br><b>(5.9 to 12.8)</b> | <b>61.9</b><br><b>(58.5 to 65.1)</b>              | <b>1.8</b><br><b>(-0.1 to 3.6)</b>                  |
| <b>Transport injuries</b>                     | <b>37.5</b><br><b>(34.5 to 40.6)</b>    | <b>13.3</b><br><b>(12.0 to 14.7)</b>    | <b>1.8</b><br><b>(1.2 to 2.6)</b>  | <b>42.9</b><br><b>(39.3 to 46.5)</b>              | <b>-11.9</b><br><b>(-13.8 to -10.0)</b>             |
| Road injuries                                 | 27.3<br>(25.1 to 29.5)                  | 11.1<br>(9.8 to 12.5)                   | 1.4<br>(0.9 to 1.9)                | 44.1<br>(40.6 to 47.7)                            | -11.7<br>(-13.6 to -9.9)                            |
| Pedestrian road injuries                      | 4.4<br>(3.8 to 5.0)                     | 1.2<br>(0.9 to 1.4)                     | 0.2<br>(0.1 to 0.3)                | 59.1<br>(55.6 to 62.9)                            | -3.6<br>(-5.4 to -1.8)                              |
| Cyclist road injuries                         | 4.6<br>(3.8 to 5.5)                     | 1.9<br>(1.4 to 2.3)                     | 0.2<br>(0.1 to 0.3)                | 60.4<br>(56.8 to 64.5)                            | 0.5<br>(-1.3 to 2.5)                                |
| Motorcyclist road injuries                    | 4.8<br>(4.1 to 5.9)                     | 1.2<br>(1.0 to 1.6)                     | 0.2<br>(0.1 to 0.3)                | 67.4<br>(63.5 to 71.6)                            | 4.7<br>(2.7 to 6.7)                                 |
| Motor vehicle road injuries                   | 10.8<br>(9.2 to 12.4)                   | 5.4<br>(4.7 to 6.3)                     | 0.6<br>(0.4 to 0.8)                | 24.8<br>(21.4 to 28.1)                            | -23.8<br>(-25.5 to -22.1)                           |
| Other road injuries                           | 2.8<br>(2.3 to 3.3)                     | 1.4<br>(1.1 to 1.8)                     | 0.1<br>(0.1 to 0.2)                | 70.9<br>(67.1 to 75.3)                            | 5.3<br>(3.5 to 7.2)                                 |
| Other transport injuries                      | 10.2<br>(8.5 to 12.3)                   | 2.2<br>(1.8 to 2.6)                     | 0.5<br>(0.3 to 0.7)                | 39.6<br>(35.6 to 43.5)                            | -12.4<br>(-14.7 to -10.2)                           |
| <b>Unintentional injuries</b>                 | <b>222.6</b><br><b>(204.5 to 241.9)</b> | <b>88.3</b><br><b>(82.1 to 95.3)</b>    | <b>6.4</b><br><b>(4.2 to 9.2)</b>  | <b>69.4</b><br><b>(65.9 to 72.4)</b>              | <b>6.9</b><br><b>(5.0 to 8.6)</b>                   |
| Falls                                         | 69.3<br>(58.5 to 80.6)                  | 26.5<br>(22.5 to 31.6)                  | 2.4<br>(1.6 to 3.4)                | 72.4<br>(68.9 to 76.1)                            | 8.0<br>(6.0 to 10.0)                                |
| Drowning                                      | 0.9<br>(0.8 to 1.0)                     | 0.1<br>(0.1 to 0.2)                     | < 0.05<br>(< 0.05 to 0.1)          | 79.9<br>(75.2 to 84.7)                            | 15.0<br>(12.2 to 17.8)                              |
| Fire, heat, and hot substances                | 22.6<br>(18.8 to 28.3)                  | 2.6<br>(2.1 to 3.1)                     | 0.5<br>(0.3 to 0.8)                | 76.4<br>(69.0 to 83.4)                            | 12.1<br>(8.1 to 15.7)                               |
| Poisonings                                    | 1.1<br>(0.9 to 1.3)                     | 1.5<br>(1.2 to 1.8)                     | 0.1<br>(0.1 to 0.1)                | 69.2<br>(53.9 to 85.3)                            | 10.9<br>(2.7 to 20.0)                               |
| Exposure to mechanical forces                 | 39.9<br>(33.7 to 50.0)                  | 16.0<br>(13.1 to 19.4)                  | 0.8<br>(0.6 to 1.3)                | 84.9<br>(80.7 to 89.1)                            | 15.9<br>(13.6 to 18.0)                              |
| Unintentional firearm injuries                | 1.8<br>(1.4 to 2.2)                     | 0.5<br>(0.3 to 0.7)                     | 0.1<br>(< 0.05 to 0.1)             | 85.6<br>(80.8 to 90.8)                            | 15.8<br>(13.3 to 18.4)                              |
| Unintentional suffocation                     | 1.4<br>(1.0 to 1.7)                     | 0.2<br>(0.2 to 0.3)                     | < 0.05<br>(< 0.05 to 0.1)          | 53.8<br>(50.0 to 58.0)                            | -0.2<br>(-2.3 to 2.0)                               |
| Other exposure to mechanical forces           | 36.8<br>(30.5 to 46.8)                  | 15.3<br>(12.5 to 18.5)                  | 0.7<br>(0.5 to 1.1)                | 86.9<br>(82.6 to 91.1)                            | 16.9<br>(14.6 to 19.0)                              |

| Cause                                                                               | Prevalence in thousands (95% UI) | Incidence in thousands (95% UI) | YLDs in thousands (95% UI)        |                                                   |                                                     |
|-------------------------------------------------------------------------------------|----------------------------------|---------------------------------|-----------------------------------|---------------------------------------------------|-----------------------------------------------------|
|                                                                                     | 2016 counts                      | 2016 counts                     | 2016 counts                       | Percentage change in counts between 2006 and 2016 | Percentage change in age-standardised rates between |
| Adverse effects of medical treatment                                                | 0.4<br>(0.3 to 0.5)              | 4.7<br>(4.0 to 5.4)             | < 0.05<br>(< 0.05 to 0.1)         | 63.2<br>(56.0 to 70.5)                            | 2.2<br>(-1.9 to 6.7)                                |
| Animal contact                                                                      | 6.4<br>(5.6 to 7.5)              | 7.5<br>(6.0 to 9.2)             | 0.2<br>(0.1 to 0.3)               | 57.7<br>(47.2 to 68.7)                            | 2.1<br>(-3.9 to 8.0)                                |
| Venomous animal contact                                                             | 3.1<br>(2.5 to 3.7)              | 3.5<br>(2.6 to 4.6)             | 0.1<br>(0.1 to 0.2)               | 57.8<br>(43.8 to 72.0)                            | 3.2<br>(-4.7 to 11.1)                               |
| Non-venomous animal contact                                                         | 3.4<br>(2.8 to 4.3)              | 4.0<br>(3.1 to 5.1)             | < 0.05<br>(< 0.05 to 0.1)         | 57.3<br>(52.4 to 61.6)                            | -1.0<br>(-3.8 to 1.3)                               |
| Foreign body                                                                        | 12.7<br>(10.6 to 15.3)           | 7.9<br>(6.7 to 9.4)             | 0.4<br>(0.2 to 0.6)               | 58.5<br>(54.0 to 62.6)                            | 1.9<br>(-0.6 to 4.3)                                |
| Pulmonary aspiration and foreign body in airway                                     | 3.4<br>(2.5 to 4.6)              | 1.0<br>(0.8 to 1.2)             | 0.1<br>(0.1 to 0.2)               | 54.9<br>(49.7 to 59.7)                            | 0.5<br>(-2.5 to 3.3)                                |
| Foreign body in eyes                                                                | 0.7<br>(0.4 to 1.1)              | 3.9<br>(3.0 to 5.3)             | < 0.05<br>(< 0.05 to 0.1)         | 70.9<br>(64.5 to 79.4)                            | 8.9<br>(5.9 to 12.3)                                |
| Foreign body in other body part                                                     | 8.5<br>(6.9 to 11.0)             | 3.0<br>(2.5 to 3.6)             | 0.2<br>(0.1 to 0.3)               | 58.4<br>(53.1 to 63.0)                            | 1.5<br>(-1.6 to 4.2)                                |
| Environmental heat and cold exposure                                                | 19.9<br>(16.6 to 23.6)           | 5.1<br>(4.2 to 6.2)             | 0.6<br>(0.4 to 0.9)               | 60.2<br>(56.6 to 63.6)                            | 2.3<br>(0.3 to 4.1)                                 |
| Other unintentional injuries                                                        | 49.4<br>(39.1 to 60.9)           | 16.3<br>(13.5 to 19.6)          | 1.3<br>(0.8 to 1.9)               | 62.0<br>(58.8 to 64.9)                            | 2.1<br>(0.1 to 3.9)                                 |
| <b>Self-harm and interpersonal violence</b>                                         | <b>33.5<br/>(29.9 to 37.6)</b>   | <b>4.1†<br/>(3.6 to 4.7)</b>    | <b>0.5<br/>(0.3 to 0.7)</b>       | <b>44.9<br/>(41.0 to 48.4)</b>                    | <b>-6.2<br/>(-8.1 to -4.4)</b>                      |
| Self-harm                                                                           | 2.0<br>(1.7 to 2.4)              | 0.9<br>(0.8 to 1.1)             | 0.1<br>(0.1 to 0.1)               | 38.4<br>(33.2 to 43.3)                            | -14.0<br>(-16.6 to -11.7)                           |
| Self-harm by firearm                                                                | 0.1<br>(0.1 to 0.1)              | < 0.05<br>(< 0.05 to < 0.05)    | < 0.05<br>(< 0.05 to < 0.05)      | 61.9<br>(56.1 to 68.0)                            | 5.0<br>(1.9 to 8.3)                                 |
| Self-harm by other specified means                                                  | 1.9<br>(1.6 to 2.3)              | 0.9<br>(0.7 to 1.0)             | 0.1<br>(< 0.05 to 0.1)            | 37.6<br>(32.4 to 42.6)                            | -14.5<br>(-17.2 to -12.2)                           |
| Interpersonal violence                                                              | 31.5<br>(27.8 to 35.6)           | 3.2‡<br>(2.7 to 3.8)            | 0.4<br>(0.3 to 0.6)               | 46.2<br>(41.9 to 50.2)                            | -4.4<br>(-6.6 to -2.3)                              |
| Assault by firearm                                                                  | 0.3<br>(0.3 to 0.4)              | 0.1<br>(0.1 to 0.1)             | < 0.05<br>(< 0.05 to < 0.05)      | 66.2<br>(60.5 to 72.1)                            | 5.4<br>(2.5 to 8.4)                                 |
| Assault by sharp object                                                             | 2.0<br>(1.6 to 2.4)              | 0.8<br>(0.6 to 1.0)             | 0.1<br>(< 0.05 to 0.1)            | 59.5<br>(54.7 to 64.3)                            | 1.2<br>(-1.3 to 3.4)                                |
| Sexual violence                                                                     | 25.2<br>(21.5 to 29.1)           | --                              | 0.2<br>(0.1 to 0.3)               | 38.9<br>(33.1 to 45.2)                            | -4.8<br>(-8.8 to -1.0)                              |
| Assault by other means                                                              | 4.0<br>(3.4 to 4.8)              | 2.4<br>(1.9 to 2.8)             | 0.1<br>(0.1 to 0.2)               | 51.0<br>(47.3 to 54.7)                            | -6.3<br>(-8.1 to -4.5)                              |
| <b>Forces of nature, conflict and terrorism, and executions and police conflict</b> | <b>4.6<br/>(2.7 to 7.2)</b>      | <b>0.5†<br/>(0.3 to 0.8)</b>    | <b>0.1<br/>(&lt; 0.05 to 0.3)</b> | <b>94.5<br/>(76.3 to 107.4)</b>                   | <b>26.1<br/>(11.0 to 33.3)</b>                      |
| Exposure to forces of nature                                                        | --                               | --                              | --                                | --                                                | --                                                  |
| Conflict and terrorism                                                              | 2.1<br>(0.9 to 3.8)              | --                              | < 0.05<br>(< 0.05 to 0.1)         | 184.6<br>(171.8 to 197.8)                         | 91.7<br>(82.3 to 99.8)                              |
| Executions and police conflict                                                      | 2.5<br>(1.4 to 4.5)              | 0.5<br>(0.3 to 0.8)             | 0.1<br>(< 0.05 to 0.1)            | 50.8<br>(38.9 to 66.0)                            | -1.8<br>(-10.5 to 7.6)                              |
| <b>Impairments</b>                                                                  | --                               | --                              | --                                | --                                                | --                                                  |
| Anaemia                                                                             | 410.8<br>(383.4 to 439.3)        | --                              | 9.3<br>(6.2 to 13.4)              | 42.0<br>(32.0 to 53.1)                            | -6.5<br>(-12.5 to -0.2)                             |
| Developmental intellectual disability                                               | 33.4<br>(25.5 to 41.8)           | --                              | 3.6<br>(2.5 to 5.1)               | 41.2<br>(31.4 to 50.6)                            | -5.3<br>(-11.4 to 0.5)                              |
| Epilepsy                                                                            | 8.2<br>(4.6 to 11.7)             | --                              | 2.7<br>(1.3 to 4.5)               | 32.8<br>(-35.7 to 173.5)                          | -10.9<br>(-58.5 to 92.9)                            |
| Guillain-Barre syndrome                                                             | < 0.05<br>(< 0.05 to < 0.05)     | --                              | < 0.05<br>(< 0.05 to < 0.05)      | 55.9<br>(50.9 to 61.8)                            | 0.2<br>(-0.0 to 0.3)                                |
| Hearing loss                                                                        | 159.0<br>(147.2 to 170.6)        | --                              | 4.8<br>(3.3 to 6.7)               | 59.9<br>(52.4 to 67.6)                            | -1.7<br>(-5.0 to 1.9)                               |
| Heart failure                                                                       | 7.2<br>(6.4 to 8.2)              | --                              | 0.7<br>(0.5 to 0.9)               | 71.5<br>(59.4 to 84.1)                            | -2.2<br>(-8.4 to 4.2)                               |
| Infertility                                                                         | 24.6<br>(19.6 to 31.2)           | --                              | 0.1<br>(0.1 to 0.3)               | 44.7<br>(37.5 to 52.2)                            | -1.8<br>(-6.5 to 3.0)                               |
| Pelvic inflammatory disease                                                         | 0.6<br>(0.5 to 0.7)              | --                              | 0.1<br>(< 0.05 to 0.1)            | 44.7<br>(20.9 to 71.7)                            | -5.8<br>(-20.0 to 10.8)                             |
| Vision loss                                                                         | 157.3<br>(142.8 to 172.5)        | --                              | 5.3<br>(3.7 to 7.5)               | 50.6<br>(42.9 to 57.4)                            | -6.6<br>(-9.7 to -3.3)                              |

We did not calculate incidence for the nine impairments, certain NTDs, and causes with only birth prevalence. Blank cells mean that no estimate is available.

† Incidence for aggregate causes represents the sum of the incidence of the causes below the aggregate.

‡ Incidence estimates for stroke represent first-ever stroke only.

^ Incidence of HIV/AIDS represents new infections of HIV only and does not include new infections of Tuberculosis in HIV positive cases.

SR Table 14: Prevalence, incidence, and YLDs for 2016, percentage change of YLD counts and percentage change of age-standardised YLD rates between 2006 and 2016 by cause and impairments, for all ages, Bangladesh.

| Cause                                                                                | Prevalence in thousands (95% UI)             | Incidence in thousands (95% UI)                   | YLDs in thousands (95% UI)                |                                                   |                                                     |
|--------------------------------------------------------------------------------------|----------------------------------------------|---------------------------------------------------|-------------------------------------------|---------------------------------------------------|-----------------------------------------------------|
|                                                                                      | 2016 counts                                  | 2016 counts                                       | 2016 counts                               | Percentage change in counts between 2006 and 2016 | Percentage change in age-standardised rates between |
| <b>All causes</b>                                                                    | <b>158,683.6</b><br>(158,003.7 to 159,509.6) | <b>1,040,730.2†</b><br>(979,828.6 to 1,104,318.1) | <b>16,797.0</b><br>(12,441.5 to 21,868.4) | <b>12.7</b><br>(10.2 to 15.0)                     | <b>-5.2</b><br>(-6.9 to -3.6)                       |
| <b>Communicable, maternal, neonatal, and nutritional disorders</b>                   | <b>123,569.6</b><br>(118,709.7 to 129,299.9) | <b>618,972.8†</b><br>(565,682.8 to 676,484.4)     | <b>2,200.5</b><br>(1,543.9 to 3,056.1)    | <b>-17.5</b><br>(-23.1 to -12.4)                  | <b>-25.2</b><br>(-30.7 to -20.2)                    |
| <b>HIV/AIDS and tuberculosis</b>                                                     | <b>26,126.0</b><br>(24,201.2 to 27,647.4)    | <b>181.3†</b><br>(160.0 to 204.2)                 | <b>45.3</b><br>(29.9 to 62.7)             | <b>9.2</b><br>(-3.5 to 23.5)                      | <b>-8.7</b><br>(-17.6 to 0.8)                       |
| Tuberculosis                                                                         | 24,665.1<br>(23,003.4 to 26,537.4)           | 180.8†<br>(159.5 to 204.1)                        | 44.0<br>(29.1 to 60.8)                    | 7.6<br>(-4.7 to 22.5)                             | -9.7<br>(-18.4 to -0.6)                             |
| Drug-susceptible tuberculosis                                                        | 143.8<br>(125.6 to 164.0)                    | 176.7<br>(155.8 to 199.5)                         | 42.9<br>(28.3 to 59.3)                    | 7.5<br>(-4.9 to 22.6)                             | -9.8<br>(-18.7 to -0.5)                             |
| Multidrug-resistant tuberculosis without extensive drug resistance                   | 3.2<br>(2.5 to 4.1)                          | 4.0<br>(3.0 to 5.0)                               | 1.0<br>(0.6 to 1.5)                       | 9.2<br>(-18.7 to 48.7)                            | -8.4<br>(-34.1 to 28.2)                             |
| Extensively drug-resistant tuberculosis                                              | 0.1<br>(0.1 to 0.1)                          | 0.1<br>(0.1 to 0.1)                               | < 0.05<br>(< 0.05 to < 0.05)              | 188.9<br>(125.1 to 271.7)                         | 142.0<br>(88.3 to 213.5)                            |
| Latent tuberculosis infection                                                        | 24,518.0<br>(22,854.0 to 26,395.6)           | --                                                | --                                        | --                                                | --                                                  |
| HIV/AIDS                                                                             | 6.5<br>(1.6 to 20.3)                         | 0.5^<br>(0.1 to 1.9)                              | 1.3<br>(0.5 to 3.2)                       | 124.5<br>(72.7 to 255.5)                          | 93.0<br>(47.7 to 211.8)                             |
| Drug-susceptible HIV/AIDS - Tuberculosis                                             | 1.7<br>(0.9 to 3.0)                          | 2.1<br>(1.1 to 3.7)                               | 0.7<br>(0.4 to 1.3)                       | 100.2<br>(79.6 to 124.4)                          | 70.6<br>(53.1 to 91.2)                              |
| Multidrug-resistant HIV/AIDS - Tuberculosis without extensive drug resistance        | < 0.05<br>(< 0.05 to 0.1)                    | 0.1<br>(< 0.05 to 0.1)                            | < 0.05<br>(< 0.05 to < 0.05)              | 102.1<br>(56.1 to 166.0)                          | 72.2<br>(33.1 to 126.7)                             |
| Extensively drug-resistant HIV/AIDS - Tuberculosis                                   | < 0.05<br>(< 0.05 to < 0.05)                 | < 0.05<br>(< 0.05 to < 0.05)                      | < 0.05<br>(< 0.05 to < 0.05)              | 432.9<br>(311.4 to 601.6)                         | 354.2<br>(250.7 to 497.9)                           |
| HIV/AIDS resulting in other diseases                                                 | 4.7<br>(0.1 to 19.2)                         | 0.5<br>(0.1 to 1.9)                               | 0.6<br>(< 0.05 to 2.5)                    | 167.2<br>(-52.8 to 401.0)                         | 132.0<br>(-62.6 to 344.7)                           |
| <b>Diarrhoea, lower respiratory infections, and other common infectious diseases</b> | <b>12,256.9</b><br>(11,650.1 to 12,835.5)    | <b>589,084.1†</b><br>(535,661.7 to 645,744.6)     | <b>586.1</b><br>(406.9 to 801.9)          | <b>3.5</b><br>(0.0 to 7.0)                        | <b>-6.8</b><br>(-9.7 to -4.0)                       |
| Diarrhoeal diseases                                                                  | 1,804.5<br>(1,696.7 to 1,916.6)              | 123,468.4<br>(115,816.1 to 130,983.2)             | 201.0<br>(138.6 to 275.0)                 | 9.0<br>(3.0 to 14.7)                              | -5.2<br>(-9.6 to -0.8)                              |
| Intestinal infectious diseases                                                       | 62.4<br>(52.4 to 73.2)                       | 997.9†<br>(862.6 to 1,160.0)                      | 8.9<br>(5.6 to 13.2)                      | -16.2<br>(-35.5 to 9.4)                           | -20.0<br>(-37.0 to 2.6)                             |
| Typhoid fever                                                                        | 56.0<br>(46.6 to 67.5)                       | 882.5<br>(758.8 to 1,032.9)                       | 8.5<br>(5.4 to 12.7)                      | -16.2<br>(-36.1 to 10.6)                          | -19.9<br>(-37.5 to 3.6)                             |
| Paratyphoid fever                                                                    | 5.1<br>(4.1 to 6.1)                          | 115.4<br>(96.0 to 137.3)                          | 0.3<br>(0.2 to 0.5)                       | -2.6<br>(-19.4 to 16.4)                           | -11.8<br>(-26.1 to 2.8)                             |
| Other intestinal infectious diseases                                                 | --                                           | --                                                | 0.1<br>(0.1 to 0.1)                       | -42.9<br>(-57.9 to -21.2)                         | -42.1<br>(-55.4 to -25.1)                           |
| Lower respiratory infections                                                         | 123.7<br>(112.7 to 134.9)                    | 5,233.2<br>(4,731.3 to 5,762.2)                   | 7.6<br>(4.9 to 11.0)                      | -18.2<br>(-28.7 to -7.4)                          | -20.2<br>(-29.1 to -9.9)                            |
| Upper respiratory infections                                                         | 5,817.0<br>(5,147.3 to 6,511.4)              | 439,130.4<br>(386,105.7 to 493,248.5)             | 144.9<br>(86.2 to 227.2)                  | 6.7<br>(1.1 to 13.2)                              | -2.6<br>(-7.4 to 2.6)                               |
| Otitis media                                                                         | 3,935.9<br>(3,471.1 to 4,425.0)              | 16,477.8<br>(13,332.2 to 20,309.6)                | 110.8<br>(68.7 to 166.7)                  | -9.8<br>(-21.2 to -2.5)                           | -13.7<br>(-23.8 to -7.1)                            |
| Meningitis                                                                           | 794.4<br>(662.7 to 937.1)                    | 139.9<br>(120.2 to 161.5)                         | 65.9<br>(46.9 to 87.4)                    | 8.9<br>(0.6 to 18.2)                              | -5.4<br>(-12.4 to 2.3)                              |
| Pneumococcal meningitis                                                              | 348.1<br>(279.7 to 428.5)                    | 33.1<br>(26.2 to 41.9)                            | 29.8<br>(20.5 to 40.3)                    | -6.8<br>(-18.1 to 6.5)                            | -20.5<br>(-30.4 to -9.8)                            |
| H influenzae type B meningitis                                                       | 87.8<br>(67.7 to 114.0)                      | 13.5<br>(10.1 to 17.8)                            | 10.0<br>(6.9 to 13.4)                     | -13.7<br>(-22.0 to -5.5)                          | -24.6<br>(-32.5 to -17.3)                           |
| Meningococcal infection                                                              | 50.3<br>(35.4 to 69.7)                       | 14.2<br>(10.8 to 18.3)                            | 4.2<br>(2.9 to 5.7)                       | 11.9<br>(4.7 to 20.6)                             | -2.9<br>(-9.6 to 4.7)                               |
| Other meningitis                                                                     | 308.2<br>(223.6 to 406.3)                    | 79.1<br>(67.0 to 93.0)                            | 21.9<br>(14.7 to 30.7)                    | 65.6<br>(39.3 to 96.1)                            | 46.8<br>(24.2 to 72.2)                              |
| Encephalitis                                                                         | 378.0<br>(255.0 to 549.2)                    | 154.8<br>(137.8 to 173.8)                         | 40.7<br>(28.3 to 54.3)                    | 16.3<br>(3.3 to 31.4)                             | -2.0<br>(-12.3 to 9.6)                              |
| Diphtheria                                                                           | < 0.05<br>(< 0.05 to < 0.05)                 | < 0.05<br>(< 0.05 to < 0.05)                      | < 0.05<br>(< 0.05 to < 0.05)              | -56.9<br>(-78.1 to -11.5)                         | -57.9<br>(-78.3 to -14.9)                           |
| Whooping cough                                                                       | 18.2<br>(14.1 to 23.2)                       | 133.2<br>(103.2 to 169.3)                         | 0.9<br>(0.5 to 1.5)                       | -44.4<br>(-57.0 to -30.1)                         | -39.8<br>(-53.4 to -24.4)                           |
| Tetanus                                                                              | 3.7<br>(3.5 to 3.9)                          | 1.3<br>(0.4 to 2.5)                               | 0.1<br>(< 0.05 to 0.1)                    | 6.7<br>(-4.5 to 17.3)                             | -4.9<br>(-13.6 to 5.3)                              |
| Measles                                                                              | 1.7<br>(0.6 to 4.1)                          | 62.8<br>(21.4 to 148.1)                           | 0.2<br>(< 0.05 to 0.4)                    | -90.8<br>(-94.2 to -85.4)                         | -90.2<br>(-93.8 to -84.4)                           |
| Varicella and herpes zoster                                                          | 142.5<br>(131.7 to 153.5)                    | 3,284.4<br>(3,194.2 to 3,381.5)                   | 5.2<br>(3.1 to 7.9)                       | 20.5<br>(4.1 to 39.0)                             | 0.3<br>(-10.9 to 13.2)                              |
| <b>Neglected tropical diseases and malaria</b>                                       | <b>89,435.2</b><br>(80,479.0 to 99,422.3)    | <b>3,802.4†</b><br>(2,537.1 to 5,374.8)           | <b>356.2</b><br>(214.2 to 559.8)          | <b>-45.0</b><br>(-57.2 to -32.2)                  | <b>-52.3</b><br>(-64.0 to -40.3)                    |
| Malaria                                                                              | 10.8<br>(9.0 to 12.8)                        | 25.3<br>(11.0 to 39.9)                            | 3.0<br>(2.1 to 4.0)                       | -27.3<br>(-40.8 to -14.0)                         | -35.1<br>(-46.8 to -23.6)                           |
| Chagas disease                                                                       | --                                           | --                                                | --                                        | --                                                | --                                                  |
| Leishmaniasis                                                                        | 0.6<br>(0.5 to 0.7)                          | 2.2<br>(1.9 to 2.6)                               | < 0.05<br>(< 0.05 to 0.1)                 | -86.8<br>(-89.3 to -83.6)                         | -88.6<br>(-90.6 to -86.1)                           |
| Visceral leishmaniasis                                                               | 0.6<br>(0.5 to 0.7)                          | 2.2<br>(1.9 to 2.6)                               | < 0.05<br>(< 0.05 to 0.1)                 | -86.8<br>(-89.3 to -83.6)                         | -88.6<br>(-90.6 to -86.1)                           |
| Cutaneous and mucocutaneous leishmaniasis                                            | --                                           | --                                                | --                                        | --                                                | --                                                  |
| African trypanosomiasis                                                              | --                                           | --                                                | --                                        | --                                                | --                                                  |
| Schistosomiasis                                                                      | --                                           | --                                                | --                                        | --                                                | --                                                  |
| Cysticercosis                                                                        | 4.8<br>(3.2 to 6.5)                          | --                                                | 0.7<br>(0.4 to 1.3)                       | -23.6<br>(-49.9 to 2.6)                           | -38.2<br>(-59.2 to -17.2)                           |
| Cystic echinococcosis                                                                | 12.3<br>(2.3 to 50.0)                        | 2.6<br>(0.5 to 10.8)                              | 1.2<br>(0.2 to 4.8)                       | -45.4<br>(-94.2 to 436.9)                         | -54.1<br>(-95.0 to 325.4)                           |
| Lymphatic filariasis                                                                 | 62.6<br>(41.7 to 101.0)                      | 17.4<br>(14.9 to 19.9)                            | 4.4<br>(1.7 to 9.3)                       | -97.0<br>(-98.6 to -95.6)                         | -97.5<br>(-98.9 to -96.4)                           |
| Onchocerciasis                                                                       | --                                           | --                                                | --                                        | --                                                | --                                                  |
| Trachoma                                                                             | --                                           | --                                                | --                                        | --                                                | --                                                  |
| Dengue                                                                               | 224.6<br>(130.7 to 364.4)                    | 3,753.3<br>(2,484.9 to 5,334.2)                   | 36.6<br>(17.0 to 66.2)                    | 117.3<br>(64.4 to 429.6)                          | 95.0<br>(50.4 to 381.0)                             |
| Yellow fever                                                                         | --                                           | --                                                | --                                        | --                                                | --                                                  |
| Rabies                                                                               | < 0.05<br>(< 0.05 to 0.1)                    | 0.5<br>(0.3 to 2.2)                               | < 0.05<br>(< 0.05 to < 0.05)              | -39.8<br>(-63.4 to 18.6)                          | -23.4<br>(-68.6 to 94.2)                            |
| Intestinal nematode infections                                                       | 88,704.6<br>(79,723.5 to 98,806.6)           | --                                                | 277.2<br>(150.8 to 462.6)                 | -36.1<br>(-45.6 to -24.9)                         | -43.3<br>(-52.2 to -32.9)                           |
| Ascariasis                                                                           | 53,771.4<br>(43,697.8 to 66,926.1)           | --                                                | 113.8<br>(61.5 to 196.6)                  | -46.3<br>(-58.1 to -30.5)                         | -51.8<br>(-63.1 to -36.4)                           |



| Cause                                                                   | Prevalence in thousands (95% UI)              | Incidence in thousands (95% UI)                | YLDs in thousands (95% UI)                |                                                                      |                                                                       |
|-------------------------------------------------------------------------|-----------------------------------------------|------------------------------------------------|-------------------------------------------|----------------------------------------------------------------------|-----------------------------------------------------------------------|
|                                                                         | 2016 counts<br>(21,761.9 to 38,438.4)         | 2016 counts                                    | 2016 counts<br>(15.7 to 57.9)             | Percentage change in counts between 2006 and 2016<br>(-53.8 to 13.5) | Percentage change in age-standardised rates between<br>(-59.7 to 2.2) |
| Trichuriasis                                                            | 29,265.5<br>(21,761.9 to 38,438.4)            | --                                             | 31.8<br>(15.7 to 57.9)                    | -27.9<br>(-53.8 to 13.5)                                             | -35.9<br>(-59.7 to 2.2)                                               |
| Hookworm disease                                                        | 32,404.4<br>(25,540.2 to 41,201.4)            | --                                             | 131.6<br>(71.6 to 210.7)                  | -26.2<br>(-41.3 to -7.4)                                             | -35.4<br>(-49.3 to -18.0)                                             |
| Food-borne trematodiasis                                                | --                                            | --                                             | --                                        | --                                                                   | --                                                                    |
| Leprosy                                                                 | 18.3<br>(17.3 to 19.3)                        | 1.1<br>(1.0 to 1.1)                            | 1.1<br>(0.8 to 1.6)                       | -1.9<br>(-21.6 to 22.1)                                              | -22.9<br>(-36.5 to -6.9)                                              |
| Ebola virus disease                                                     | --                                            | --                                             | --                                        | --                                                                   | --                                                                    |
| Zika virus disease                                                      | --                                            | --                                             | --                                        | --                                                                   | --                                                                    |
| Guinea worm disease                                                     | --                                            | --                                             | --                                        | --                                                                   | --                                                                    |
| Other neglected tropical diseases                                       | 1,258.2<br>(1,157.2 to 1,362.2)               | --                                             | 32.0<br>(20.1 to 47.3)                    | -25.3<br>(-33.8 to -15.2)                                            | -23.3<br>(-31.7 to -13.0)                                             |
| <b>Maternal disorders</b>                                               | <b>104.2<br/>(84.5 to 128.7)</b>              | <b>787.8†<br/>(691.0 to 886.2)</b>             | <b>13.3<br/>(8.6 to 18.8)</b>             | <b>-28.7<br/>(-44.3 to -10.4)</b>                                    | <b>-40.1<br/>(-53.1 to -24.8)</b>                                     |
| Maternal haemorrhage                                                    | 10.5<br>(8.0 to 14.1)                         | 81.7<br>(57.0 to 113.2)                        | 0.6<br>(0.4 to 0.9)                       | -7.3<br>(-29.7 to 23.1)                                              | -18.0<br>(-37.2 to 7.8)                                               |
| Maternal sepsis and other pregnancy related infections                  | 35.1<br>(27.8 to 44.6)                        | 168.6<br>(121.9 to 236.2)                      | 0.8<br>(0.3 to 1.5)                       | -8.2<br>(-57.0 to 96.7)                                              | -17.6<br>(-60.1 to 72.5)                                              |
| Maternal hypertensive disorders                                         | 46.9<br>(28.3 to 69.3)                        | 306.4<br>(252.1 to 366.1)                      | 2.4<br>(1.3 to 4.1)                       | 35.3<br>(-19.6 to 136.3)                                             | 23.4<br>(-27.4 to 114.6)                                              |
| Maternal obstructed labour and uterine rupture                          | 22.4<br>(18.0 to 27.8)                        | 98.0<br>(70.8 to 131.2)                        | 7.3<br>(4.3 to 11.2)                      | -40.1<br>(-56.2 to -19.9)                                            | -50.0<br>(-63.4 to -34.1)                                             |
| Maternal abortion, miscarriage, and ectopic pregnancy                   | 1.1<br>(0.7 to 1.5)                           | 133.0<br>(104.4 to 168.6)                      | 0.1<br>(0.1 to 0.2)                       | -22.4<br>(-47.1 to 16.4)                                             | -31.9<br>(-53.4 to 1.8)                                               |
| Other maternal disorders                                                | --                                            | --                                             | 2.1<br>(1.3 to 2.9)                       | -31.5<br>(-46.5 to -13.8)                                            | -42.5<br>(-54.7 to -27.7)                                             |
| <b>Neonatal disorders</b>                                               | <b>1,967.9<br/>(1,624.0 to 2,453.7)</b>       | --                                             | <b>361.5<br/>(250.6 to 522.6)</b>         | <b>-1.0<br/>(-16.6 to 16.0)</b>                                      | <b>-7.7<br/>(-22.0 to 8.5)</b>                                        |
| Neonatal preterm birth complications                                    | 1,659.2<br>(1,266.5 to 2,215.8)               | --                                             | 218.5<br>(148.4 to 313.4)                 | -11.8<br>(-27.6 to 6.7)                                              | -18.2<br>(-32.8 to -1.1)                                              |
| Neonatal encephalopathy due to birth asphyxia and trauma                | 217.7<br>(93.0 to 473.0)                      | --                                             | 28.7<br>(4.0 to 99.6)                     | 26.7<br>(-33.4 to 139.3)                                             | 16.1<br>(-38.6 to 118.3)                                              |
| Neonatal sepsis and other neonatal infections                           | 204.7<br>(78.6 to 447.6)                      | --                                             | 80.5<br>(25.4 to 192.9)                   | 34.7<br>(-10.1 to 185.8)                                             | 25.1<br>(-16.0 to 171.8)                                              |
| Hemolytic disease and other neonatal jaundice                           | 65.6<br>(56.3 to 75.0)                        | --                                             | 19.8<br>(14.7 to 25.8)                    | 10.7<br>(-5.8 to 30.6)                                               | 0.5<br>(-13.9 to 16.9)                                                |
| Other neonatal disorders                                                | --                                            | --                                             | 14.0<br>(9.3 to 20.4)                     | -18.2<br>(-31.8 to -1.6)                                             | -12.0<br>(-26.5 to 5.7)                                               |
| <b>Nutritional deficiencies</b>                                         | <b>31,304.0<br/>(30,112.1 to 32,391.7)</b>    | <b>3,168.7†<br/>(2,720.2 to 3,749.1)</b>       | <b>753.5<br/>(487.0 to 1,082.4)</b>       | <b>-20.4<br/>(-25.7 to -14.5)</b>                                    | <b>-25.8<br/>(-30.5 to -20.7)</b>                                     |
| Protein-energy malnutrition                                             | 1,808.8<br>(1,550.9 to 2,145.6)               | 1,111.4<br>(960.4 to 1,299.2)                  | 56.3<br>(33.7 to 89.0)                    | -11.6<br>(-39.9 to 33.6)                                             | -4.8<br>(-35.3 to 43.8)                                               |
| Iodine deficiency                                                       | 1,121.5<br>(988.9 to 1,285.5)                 | 29.7<br>(26.4 to 33.8)                         | 30.1<br>(18.8 to 43.6)                    | -34.0<br>(-42.2 to -24.5)                                            | -43.7<br>(-49.9 to -36.5)                                             |
| Vitamin A deficiency                                                    | 2,405.4<br>(1,969.1 to 3,020.8)               | 2,027.5<br>(1,625.6 to 2,602.6)                | 6.9<br>(4.1 to 10.7)                      | 4.0<br>(-17.0 to 32.9)                                               | -1.7<br>(-20.8 to 24.4)                                               |
| Iron-deficiency anaemia                                                 | 27,992.3<br>(26,562.5 to 29,542.2)            | --                                             | 658.4<br>(423.7 to 967.1)                 | -20.6<br>(-25.7 to -14.2)                                            | -26.4<br>(-30.9 to -21.0)                                             |
| Other nutritional deficiencies                                          | --                                            | --                                             | 1.9<br>(1.1 to 3.0)                       | -12.2<br>(-41.1 to 34.9)                                             | -5.8<br>(-36.8 to 44.0)                                               |
| <b>Other communicable, maternal, neonatal, and nutritional diseases</b> | <b>24,216.0<br/>(22,515.3 to 26,157.7)</b>    | <b>21,948.5<br/>(15,994.2 to 29,290.3)</b>     | <b>84.6<br/>(53.3 to 130.7)</b>           | <b>3.0<br/>(-4.0 to 10.4)</b>                                        | <b>-8.4<br/>(-14.0 to -2.3)</b>                                       |
| Sexually transmitted diseases excluding HIV                             | 17,270.2<br>(15,803.8 to 19,025.8)            | 15,916.8<br>(10,432.7 to 22,579.1)             | 48.9<br>(30.1 to 77.6)                    | 19.7<br>(10.4 to 28.7)                                               | -3.3<br>(-10.6 to 3.8)                                                |
| Syphilis                                                                | 1,266.5<br>(1,030.1 to 1,528.2)               | 833.9<br>(664.1 to 1,045.2)                    | 4.2<br>(2.8 to 5.7)                       | 14.5<br>(-1.1 to 31.6)                                               | -14.3<br>(-26.8 to 0.2)                                               |
| Chlamydial infection                                                    | 1,034.6<br>(824.6 to 1,341.2)                 | 921.2<br>(751.2 to 1,145.5)                    | 7.2<br>(4.5 to 10.8)                      | 16.6<br>(0.8 to 34.5)                                                | -4.0<br>(-16.1 to 10.0)                                               |
| Gonococcal infection                                                    | 2,887.8<br>(1,413.9 to 4,753.5)               | 10,204.0<br>(4,650.1 to 16,914.7)              | 16.0<br>(7.7 to 29.9)                     | 21.6<br>(4.2 to 38.3)                                                | -0.1<br>(-14.6 to 13.1)                                               |
| Trichomoniasis                                                          | 2,869.7<br>(2,437.7 to 3,309.8)               | 2,449.7<br>(2,072.2 to 2,845.3)                | 3.0<br>(1.2 to 6.4)                       | 21.9<br>(12.1 to 32.3)                                               | 1.4<br>(-6.0 to 9.2)                                                  |
| Genital herpes                                                          | 9,912.1<br>(8,515.9 to 11,675.6)              | 754.6<br>(644.1 to 906.8)                      | 2.6<br>(0.8 to 5.8)                       | 26.4<br>(15.2 to 37.6)                                               | 0.4<br>(-7.5 to 8.3)                                                  |
| Other sexually transmitted diseases                                     | 542.8<br>(498.6 to 587.3)                     | 753.6<br>(636.2 to 901.5)                      | 15.9<br>(10.0 to 24.9)                    | 19.1<br>(6.3 to 34.0)                                                | -2.8<br>(-13.4 to 8.3)                                                |
| Hepatitis                                                               | 6,939.9<br>(5,627.4 to 8,419.3)               | 6,031.5<br>(3,931.7 to 8,776.7)                | 8.2<br>(5.2 to 12.5)                      | 24.4<br>(-5.5 to 68.3)                                               | 20.5<br>(-3.6 to 56.1)                                                |
| Acute hepatitis A                                                       | 182.7<br>(46.9 to 382.0)                      | 2,374.8<br>(610.0 to 4,966.0)                  | 2.2<br>(0.9 to 4.0)                       | 22.7<br>(-51.0 to 241.1)                                             | 19.7<br>(-45.9 to 189.3)                                              |
| Hepatitis B                                                             | 5,558.6<br>(4,252.9 to 7,046.7)               | 2,773.6<br>(2,051.2 to 3,698.8)                | 4.3<br>(2.5 to 7.1)                       | 25.7<br>(-2.8 to 60.4)                                               | 18.3<br>(-5.4 to 46.7)                                                |
| Hepatitis C                                                             | 1,139.0<br>(1,019.4 to 1,270.2)               | 108.2<br>(98.7 to 118.4)                       | 0.1<br>(< 0.05 to 0.2)                    | 38.7<br>(32.2 to 47.4)                                               | 33.5<br>(24.0 to 45.9)                                                |
| Acute hepatitis E                                                       | 59.6<br>(47.1 to 73.2)                        | 774.9<br>(611.7 to 952.2)                      | 1.7<br>(1.0 to 2.6)                       | 22.4<br>(-8.0 to 65.2)                                               | 27.7<br>(-3.3 to 68.0)                                                |
| Other infectious diseases                                               | 951.4<br>(881.8 to 1,023.1)                   | 0.2<br>(0.1 to 0.3)                            | 27.4<br>(17.1 to 41.3)                    | -20.8<br>(-29.1 to -10.8)                                            | -22.4<br>(-30.3 to -12.9)                                             |
| <b>Non-communicable diseases</b>                                        | <b>149,297.2<br/>(147,327.3 to 152,161.2)</b> | <b>407,714.0†<br/>(382,197.1 to 435,353.6)</b> | <b>13,522.4<br/>(9,894.3 to 17,506.4)</b> | <b>18.6<br/>(16.0 to 21.2)</b>                                       | <b>-2.3<br/>(-4.1 to -0.5)</b>                                        |
| <b>Neoplasms</b>                                                        | <b>220.9<br/>(207.8 to 236.9)</b>             | <b>124.2<br/>(114.0 to 135.9)</b>              | <b>39.4<br/>(28.1 to 52.7)</b>            | <b>45.8<br/>(38.7 to 53.6)</b>                                       | <b>14.2<br/>(8.5 to 20.3)</b>                                         |
| Lip and oral cavity cancer                                              | 55.1<br>(51.0 to 60.1)                        | 15.7<br>(14.5 to 17.0)                         | 5.7<br>(4.2 to 7.5)                       | 74.3<br>(51.8 to 100.3)                                              | 33.1<br>(15.2 to 52.8)                                                |
| Nasopharynx cancer                                                      | 4.0<br>(2.7 to 5.7)                           | 1.2<br>(0.8 to 1.7)                            | 0.5<br>(0.3 to 0.8)                       | 23.8<br>(5.2 to 43.8)                                                | -4.4<br>(-18.2 to 10.8)                                               |
| Other pharynx cancer                                                    | 9.0<br>(7.0 to 12.7)                          | 4.0<br>(3.1 to 5.6)                            | 1.3<br>(0.8 to 2.1)                       | 33.2<br>(7.3 to 57.6)                                                | 0.2<br>(-19.8 to 19.5)                                                |
| Oesophageal cancer                                                      | 2.9<br>(2.6 to 3.2)                           | 2.7<br>(2.5 to 3.0)                            | 0.7<br>(0.5 to 1.0)                       | 17.8<br>(5.6 to 29.9)                                                | -9.0<br>(-18.8 to 1.3)                                                |
| Stomach cancer                                                          | 10.8<br>(9.7 to 12.1)                         | 7.1<br>(6.4 to 8.0)                            | 1.9<br>(1.3 to 2.5)                       | 12.0<br>(-0.5 to 26.2)                                               | -15.4<br>(-26.0 to -3.8)                                              |
| Colon and rectum cancer                                                 | 28.1<br>(25.9 to 30.3)                        | 9.8<br>(9.1 to 10.6)                           | 3.4<br>(2.4 to 4.5)                       | 52.6<br>(32.6 to 75.1)                                               | 23.5<br>(6.9 to 42.4)                                                 |
| Liver cancer                                                            | 1.3<br>(0.9 to 1.6)                           | 3.3<br>(2.3 to 3.9)                            | 0.7<br>(0.4 to 1.0)                       | 36.4<br>(19.7 to 53.5)                                               | 3.0<br>(-10.1 to 16.0)                                                |
| Liver cancer due to hepatitis B                                         | 1.2<br>(0.8 to 1.5)                           | 1.3<br>(0.9 to 1.6)                            | 0.3<br>(0.2 to 0.4)                       | 37.5<br>(18.9 to 55.5)                                               | 3.7<br>(-10.1 to 17.9)                                                |

| Cause                                              | Prevalence in thousands (95% UI)                | Incidence in thousands (95% UI)                | YLDs in thousands (95% UI)              |                                                   |                                                     |
|----------------------------------------------------|-------------------------------------------------|------------------------------------------------|-----------------------------------------|---------------------------------------------------|-----------------------------------------------------|
|                                                    | 2016 counts                                     | 2016 counts                                    | 2016 counts                             | Percentage change in counts between 2006 and 2016 | Percentage change in age-standardised rates between |
| Liver cancer due to hepatitis C                    | 1.0<br>(0.7 to 1.2)                             | 1.1<br>(0.7 to 1.3)                            | 0.2<br>(0.1 to 0.3)                     | 36.7<br>(19.1 to 56.9)                            | 2.4<br>(-11.0 to 17.0)                              |
| Liver cancer due to alcohol use                    | 0.2<br>(0.1 to 0.2)                             | 0.2<br>(0.1 to 0.2)                            | < 0.05<br>(< 0.05 to 0.1)               | 36.4<br>(16.9 to 57.3)                            | 4.3<br>(-11.0 to 20.6)                              |
| Liver cancer due to other causes                   | 0.7<br>(0.5 to 0.9)                             | 0.8<br>(0.5 to 1.0)                            | 0.2<br>(0.1 to 0.2)                     | 34.1<br>(15.3 to 54.1)                            | 2.6<br>(-11.8 to 18.1)                              |
| Gallbladder and biliary tract cancer               | 1.9<br>(1.3 to 2.6)                             | 2.5<br>(1.6 to 3.3)                            | 0.6<br>(0.3 to 0.9)                     | 29.4<br>(12.3 to 46.6)                            | -3.5<br>(-15.7 to 9.2)                              |
| Pancreatic cancer                                  | 2.0<br>(1.7 to 2.2)                             | 2.7<br>(2.3 to 3.1)                            | 0.6<br>(0.4 to 0.8)                     | 42.9<br>(31.2 to 54.0)                            | 8.2<br>(-1.1 to 16.8)                               |
| Larynx cancer                                      | 9.1<br>(7.2 to 15.1)                            | 3.0<br>(2.4 to 5.0)                            | 1.2<br>(0.8 to 2.1)                     | 30.3<br>(12.4 to 50.5)                            | -0.3<br>(-14.6 to 16.6)                             |
| Tracheal, bronchus, and lung cancer                | 30.1<br>(27.0 to 33.1)                          | 27.9<br>(25.3 to 30.6)                         | 6.3<br>(4.4 to 8.1)                     | 95.9<br>(63.8 to 136.0)                           | 61.2<br>(33.0 to 95.8)                              |
| Malignant skin melanoma                            | 0.9<br>(0.6 to 1.5)                             | 0.2<br>(0.2 to 0.4)                            | 0.1<br>(< 0.05 to 0.1)                  | 52.4<br>(33.5 to 70.5)                            | 14.1<br>(0.3 to 27.2)                               |
| Non-melanoma skin cancer                           | 0.3<br>(0.1 to 0.5)                             | 0.7<br>(0.5 to 1.3)                            | < 0.05<br>(< 0.05 to < 0.05)            | 21.0<br>(-34.6 to 89.1)                           | -23.8<br>(-60.8 to 26.6)                            |
| Non-melanoma skin cancer (squamous-cell carcinoma) | 0.3<br>(0.1 to 0.4)                             | 0.5<br>(0.3 to 0.6)                            | < 0.05<br>(< 0.05 to < 0.05)            | 20.9<br>(-36.8 to 92.7)                           | -24.2<br>(-61.5 to 27.2)                            |
| Non-melanoma skin cancer (basal-cell carcinoma)    | < 0.05<br>(< 0.05 to 0.1)                       | 0.3<br>(0.1 to 0.8)                            | < 0.05<br>(< 0.05 to < 0.05)            | 25.4<br>(11.4 to 46.7)                            | -0.2<br>(-10.4 to 11.4)                             |
| Breast cancer                                      | 39.8<br>(33.2 to 45.6)                          | 9.2<br>(7.8 to 10.6)                           | 4.1<br>(2.8 to 5.6)                     | 54.1<br>(22.1 to 90.0)                            | 17.2<br>(-6.9 to 44.9)                              |
| Cervical cancer                                    | 23.9<br>(12.6 to 36.8)                          | 6.5<br>(3.5 to 9.9)                            | 2.4<br>(1.2 to 4.1)                     | 11.0<br>(-10.1 to 35.0)                           | -17.3<br>(-31.9 to 0.1)                             |
| Uterine cancer                                     | 3.6<br>(2.7 to 5.0)                             | 0.8<br>(0.6 to 1.1)                            | 0.3<br>(0.2 to 0.5)                     | 29.2<br>(-2.5 to 70.4)                            | -4.5<br>(-27.9 to 23.6)                             |
| Ovarian cancer                                     | 6.5<br>(4.2 to 9.9)                             | 2.2<br>(1.4 to 3.4)                            | 1.1<br>(0.6 to 1.6)                     | 47.6<br>(27.2 to 72.0)                            | 9.7<br>(-6.5 to 30.4)                               |
| Prostate cancer                                    | 9.8<br>(7.4 to 13.8)                            | 2.9<br>(2.3 to 4.0)                            | 1.3<br>(0.8 to 1.9)                     | 47.0<br>(10.6 to 85.9)                            | 4.8<br>(-19.7 to 31.3)                              |
| Testicular cancer                                  | 0.9<br>(0.8 to 1.0)                             | 0.3<br>(0.2 to 0.3)                            | 0.1<br>(0.1 to 0.1)                     | 116.0<br>(68.9 to 180.5)                          | 87.8<br>(33.9 to 158.8)                             |
| Kidney cancer                                      | 4.3<br>(2.7 to 5.7)                             | 1.3<br>(0.8 to 1.6)                            | 0.4<br>(0.2 to 0.7)                     | 46.6<br>(24.6 to 66.9)                            | 15.5<br>(-2.4 to 33.2)                              |
| Bladder cancer                                     | 7.2<br>(4.4 to 10.1)                            | 2.1<br>(1.3 to 3.0)                            | 0.8<br>(0.4 to 1.2)                     | 56.8<br>(28.0 to 84.9)                            | 17.7<br>(-6.7 to 40.5)                              |
| Brain and nervous system cancer                    | 5.3<br>(3.3 to 6.9)                             | 2.5<br>(1.5 to 3.4)                            | 0.8<br>(0.4 to 1.2)                     | 20.7<br>(8.6 to 37.2)                             | -0.4<br>(-10.2 to 16.8)                             |
| Thyroid cancer                                     | 6.5<br>(5.0 to 8.6)                             | 1.3<br>(1.0 to 1.8)                            | 0.5<br>(0.3 to 0.7)                     | 47.7<br>(19.9 to 81.4)                            | 8.1<br>(-12.5 to 33.0)                              |
| Mesothelioma                                       | 0.4<br>(0.2 to 0.6)                             | 0.3<br>(0.2 to 0.4)                            | 0.1<br>(< 0.05 to 0.1)                  | 30.8<br>(13.2 to 48.7)                            | -1.3<br>(-14.7 to 12.5)                             |
| Hodgkin lymphoma                                   | 1.7<br>(1.3 to 2.5)                             | 0.6<br>(0.5 to 0.9)                            | 0.2<br>(0.1 to 0.4)                     | -16.6<br>(-29.2 to -7.1)                          | -28.6<br>(-36.8 to -22.2)                           |
| Non-Hodgkin's lymphoma                             | 6.3<br>(3.9 to 8.0)                             | 2.3<br>(1.5 to 3.1)                            | 0.7<br>(0.4 to 1.1)                     | 29.5<br>(16.9 to 43.2)                            | 3.5<br>(-7.4 to 16.3)                               |
| Multiple myeloma                                   | 1.1<br>(0.8 to 1.4)                             | 0.7<br>(0.5 to 1.0)                            | 0.3<br>(0.2 to 0.5)                     | 38.4<br>(24.8 to 53.9)                            | 3.9<br>(-6.2 to 15.6)                               |
| Leukaemia                                          | 8.3<br>(7.0 to 11.3)                            | 2.6<br>(2.3 to 3.5)                            | 1.2<br>(0.8 to 1.6)                     | 12.5<br>(-5.1 to 26.9)                            | -4.4<br>(-16.3 to 6.2)                              |
| Acute lymphoid leukaemia                           | 2.1<br>(1.6 to 3.6)                             | 0.6<br>(0.5 to 1.0)                            | 0.3<br>(0.2 to 0.5)                     | -0.8<br>(-21.7 to 21.3)                           | -8.8<br>(-25.3 to 8.7)                              |
| Chronic lymphoid leukaemia                         | 2.0<br>(1.6 to 2.4)                             | 0.5<br>(0.4 to 0.6)                            | 0.3<br>(0.2 to 0.4)                     | 34.5<br>(16.1 to 58.6)                            | 5.1<br>(-9.2 to 24.4)                               |
| Acute myeloid leukaemia                            | 1.1<br>(0.8 to 1.6)                             | 0.7<br>(0.6 to 1.0)                            | 0.2<br>(0.1 to 0.3)                     | 24.2<br>(4.2 to 43.9)                             | 6.4<br>(-6.2 to 20.8)                               |
| Chronic myeloid leukaemia                          | 1.0<br>(0.7 to 1.5)                             | 0.4<br>(0.3 to 0.5)                            | 0.1<br>(0.1 to 0.2)                     | 13.3<br>(-2.7 to 35.1)                            | -10.5<br>(-22.9 to 5.8)                             |
| Other leukaemia                                    | 2.1<br>(1.6 to 3.1)                             | 0.5<br>(0.4 to 0.7)                            | 0.3<br>(0.2 to 0.4)                     | 2.4<br>(-13.9 to 19.7)                            | -13.1<br>(-25.7 to 0.6)                             |
| Other neoplasms                                    | 21.3<br>(14.0 to 25.4)                          | 7.6<br>(5.1 to 9.0)                            | 2.2<br>(1.2 to 3.2)                     | 33.5<br>(16.6 to 50.0)                            | 6.8<br>(-7.5 to 20.4)                               |
| <b>Cardiovascular diseases</b>                     | <b>7,098.8</b><br><b>(6,888.1 to 7,367.8)</b>   | <b>864.3†</b><br><b>(828.5 to 900.5)</b>       | <b>436.3</b><br><b>(313.5 to 571.7)</b> | <b>35.2</b><br><b>(31.0 to 40.1)</b>              | <b>4.0</b><br><b>(1.0 to 7.5)</b>                   |
| Rheumatic heart disease                            | 1,110.5<br>(987.2 to 1,245.4)                   | 35.9<br>(32.0 to 40.2)                         | 54.4<br>(34.5 to 79.7)                  | 4.2<br>(-4.1 to 13.9)                             | -13.0<br>(-19.7 to -5.4)                            |
| Ischaemic heart disease                            | 3,332.4<br>(3,157.7 to 3,503.5)                 | 423.9<br>(398.9 to 451.5)                      | 151.0<br>(103.1 to 207.2)               | 53.0<br>(46.4 to 60.0)                            | 15.8<br>(11.5 to 20.3)                              |
| Cerebrovascular disease                            | 918.9<br>(854.7 to 985.0)                       | 161.7‡<br>(149.0 to 173.6)                     | 139.4<br>(99.9 to 178.7)                | 33.8<br>(24.2 to 44.9)                            | -0.1<br>(-7.6 to 7.7)                               |
| Ischaemic stroke                                   | 797.1<br>(718.1 to 892.1)                       | 109.1‡<br>(97.3 to 121.1)                      | 116.8<br>(83.6 to 151.1)                | 35.6<br>(24.2 to 48.0)                            | 1.0<br>(-7.5 to 9.7)                                |
| Hemorrhagic stroke                                 | 153.6<br>(138.6 to 170.3)                       | 52.6‡<br>(47.8 to 57.5)                        | 22.6<br>(16.0 to 29.4)                  | 25.3<br>(11.5 to 40.9)                            | -6.0<br>(-16.5 to 5.8)                              |
| Hypertensive heart disease                         | 280.4<br>(239.9 to 330.8)                       | --                                             | 22.5<br>(15.7 to 31.0)                  | 37.4<br>(24.7 to 51.1)                            | 0.5<br>(-8.3 to 9.3)                                |
| Cardiomyopathy and myocarditis                     | 44.5<br>(37.6 to 51.8)                          | 37.7†<br>(33.1 to 42.9)                        | 5.1<br>(3.3 to 7.5)                     | 23.1<br>(4.5 to 43.7)                             | 6.0<br>(-7.7 to 21.2)                               |
| Myocarditis                                        | 32.4<br>(27.9 to 37.8)                          | 37.7<br>(33.1 to 42.9)                         | 2.5<br>(1.6 to 3.7)                     | 20.5<br>(-0.4 to 41.4)                            | 6.6<br>(-10.1 to 23.8)                              |
| Alcoholic cardiomyopathy                           | 1.4<br>(1.2 to 1.7)                             | --                                             | 0.1<br>(0.1 to 0.2)                     | 43.4<br>(31.8 to 56.0)                            | 1.2<br>(-7.1 to 10.1)                               |
| Other cardiomyopathy                               | 27.7<br>(22.8 to 33.1)                          | --                                             | 2.4<br>(1.5 to 3.6)                     | 25.0<br>(-5.2 to 61.8)                            | 5.9<br>(-15.5 to 29.6)                              |
| Atrial fibrillation and flutter                    | 557.8<br>(490.6 to 637.6)                       | 47.2<br>(40.5 to 54.9)                         | 43.3<br>(28.8 to 60.3)                  | 38.4<br>(29.0 to 49.0)                            | 2.2<br>(-4.2 to 9.0)                                |
| Peripheral vascular disease                        | 1,418.0<br>(1,231.5 to 1,633.9)                 | 139.7<br>(120.9 to 162.2)                      | 6.8<br>(3.1 to 12.4)                    | 28.9<br>(19.2 to 41.6)                            | -2.4<br>(-9.6 to 6.0)                               |
| Endocarditis                                       | 8.2<br>(7.1 to 9.4)                             | 18.1<br>(15.9 to 20.5)                         | 0.7<br>(0.4 to 1.0)                     | 30.3<br>(17.7 to 43.8)                            | 3.7<br>(-10.7 to 18.6)                              |
| Other cardiovascular and circulatory diseases      | 253.7<br>(218.1 to 293.3)                       | --                                             | 13.2<br>(8.8 to 18.6)                   | 32.1<br>(14.5 to 52.8)                            | 4.0<br>(-7.3 to 16.7)                               |
| <b>Chronic respiratory diseases</b>                | <b>10,208.7</b><br><b>(9,871.4 to 10,572.1)</b> | <b>1,793.9†</b><br><b>(1,703.7 to 1,884.1)</b> | <b>455.7</b><br><b>(360.8 to 561.8)</b> | <b>31.7</b><br><b>(23.3 to 40.3)</b>              | <b>4.9</b><br><b>(-2.3 to 12.1)</b>                 |
| Chronic obstructive pulmonary disease              | 4,737.7<br>(4,501.6 to 5,002.6)                 | 375.6<br>(356.3 to 395.7)                      | 203.3<br>(168.0 to 239.1)               | 23.2<br>(8.7 to 37.8)                             | -5.7<br>(-17.1 to 6.1)                              |
| Pneumoconiosis                                     | 4.5<br>(4.0 to 5.1)                             | 0.6<br>(0.6 to 0.7)                            | 0.7<br>(0.5 to 1.0)                     | 42.6<br>(33.5 to 51.7)                            | 8.6<br>(1.6 to 15.4)                                |
| Silicosis                                          | 0.3<br>(0.3 to 0.4)                             | 0.2<br>(0.1 to 0.2)                            | 0.1<br>(< 0.05 to 0.1)                  | 41.1<br>(33.3 to 49.1)                            | 4.9<br>(0.0 to 10.0)                                |



| Cause                                                          | Prevalence in thousands (95% UI)           | Incidence in thousands (95% UI)                       | YLDs in thousands (95% UI)              |                                                   |                                                     |
|----------------------------------------------------------------|--------------------------------------------|-------------------------------------------------------|-----------------------------------------|---------------------------------------------------|-----------------------------------------------------|
|                                                                | 2016 counts                                | 2016 counts                                           | 2016 counts                             | Percentage change in counts between 2006 and 2016 | Percentage change in age-standardised rates between |
| Asbestosis                                                     | 1.3<br>(1.0 to 1.5)                        | 0.1<br>(0.1 to 0.1)                                   | 0.2<br>(0.1 to 0.3)                     | 34.4<br>(26.2 to 45.3)                            | 3.5<br>(-1.7 to 10.1)                               |
| Coal workers pneumoconiosis                                    | --                                         | --                                                    | --                                      | --                                                | --                                                  |
| Other pneumoconiosis                                           | 2.9<br>(2.5 to 3.5)                        | 0.4<br>(0.3 to 0.4)                                   | 0.5<br>(0.3 to 0.7)                     | 46.6<br>(33.1 to 61.8)                            | 11.0<br>(0.9 to 22.0)                               |
| Asthma                                                         | 6,059.1<br>(5,711.2 to 6,465.9)            | 1,413.6<br>(1,325.5 to 1,502.3)                       | 233.2<br>(155.4 to 334.8)               | 39.2<br>(32.9 to 46.3)                            | 17.8<br>(12.8 to 22.8)                              |
| Interstitial lung disease and pulmonary sarcoidosis            | 35.1<br>(31.6 to 38.6)                     | 4.1<br>(3.7 to 4.5)                                   | 4.0<br>(2.6 to 5.8)                     | 33.7<br>(24.3 to 43.7)                            | 6.1<br>(-3.7 to 16.7)                               |
| Other chronic respiratory diseases                             | --                                         | --                                                    | 14.5<br>(11.8 to 17.6)                  | 46.4<br>(19.5 to 82.3)                            | 29.7<br>(9.6 to 56.5)                               |
| <b>Cirrhosis and other chronic liver diseases</b>              | <b>495.0<br/>(470.1 to 522.0)</b>          | <b>34.6<br/>(33.1 to 36.3)</b>                        | <b>44.6<br/>(30.5 to 61.5)</b>          | <b>8.6<br/>(-1.4 to 19.5)</b>                     | <b>-5.9<br/>(-13.5 to 2.1)</b>                      |
| Cirrhosis and other chronic liver diseases due to hepatitis B  | 164.8<br>(145.9 to 185.8)                  | 12.3<br>(11.0 to 13.8)                                | 13.1<br>(8.8 to 18.8)                   | 22.2<br>(4.6 to 43.9)                             | -3.0<br>(-15.6 to 11.9)                             |
| Cirrhosis and other chronic liver diseases due to hepatitis C  | 72.7<br>(59.9 to 86.7)                     | 5.3<br>(4.4 to 6.3)                                   | 5.8<br>(3.8 to 8.3)                     | 22.3<br>(-2.0 to 52.7)                            | -3.5<br>(-20.5 to 18.2)                             |
| Cirrhosis and other chronic liver diseases due to alcohol use  | 92.3<br>(75.8 to 110.5)                    | 7.7<br>(6.4 to 9.2)                                   | 7.4<br>(4.8 to 10.5)                    | 28.5<br>(6.1 to 55.1)                             | -2.1<br>(-17.1 to 15.6)                             |
| Cirrhosis and other chronic liver diseases due to other causes | 165.2<br>(149.5 to 183.9)                  | 9.2<br>(8.4 to 10.1)                                  | 18.3<br>(12.1 to 26.5)                  | -7.8<br>(-21.6 to 8.2)                            | -11.0<br>(-23.9 to 3.5)                             |
| <b>Digestive diseases</b>                                      | <b>3,215.6<br/>(3,043.2 to 3,415.9)</b>    | <b>3,475.3<sup>†</sup><br/>(3,297.2 to 3,676.3)</b>   | <b>94.8<br/>(67.1 to 126.8)</b>         | <b>20.3<br/>(11.2 to 30.1)</b>                    | <b>-1.6<br/>(-7.8 to 4.8)</b>                       |
| Peptic ulcer disease                                           | 1,070.9<br>(981.1 to 1,174.9)              | 290.0<br>(260.1 to 324.4)                             | 16.4<br>(10.5 to 24.5)                  | 36.4<br>(23.4 to 50.8)                            | 5.4<br>(-3.3 to 15.1)                               |
| Gastritis and duodenitis                                       | 912.6<br>(815.2 to 1,014.2)                | 1,447.4<br>(1,299.5 to 1,633.1)                       | 15.5<br>(10.1 to 22.4)                  | 44.9<br>(31.3 to 58.9)                            | 12.9<br>(2.6 to 22.9)                               |
| Appendicitis                                                   | 31.7<br>(29.3 to 34.2)                     | 836.7<br>(773.7 to 904.8)                             | 9.6<br>(6.1 to 13.5)                    | 8.6<br>(-17.4 to 44.9)                            | -3.6<br>(-23.9 to 23.9)                             |
| Paralytic ileus and intestinal obstruction                     | 3.9<br>(3.5 to 4.4)                        | 108.4<br>(97.2 to 120.3)                              | 1.3<br>(0.8 to 1.8)                     | 10.2<br>(5.4 to 15.3)                             | -10.3<br>(-14.1 to -6.5)                            |
| Inguinal, femoral, and abdominal hernia                        | 1,205.5<br>(1,042.5 to 1,379.4)            | 297.9<br>(260.5 to 339.6)                             | 38.8<br>(26.2 to 54.5)                  | 9.5<br>(-3.6 to 24.4)                             | -9.5<br>(-18.5 to 1.2)                              |
| Inflammatory bowel disease                                     | 18.7<br>(16.6 to 21.2)                     | 87.6<br>(79.6 to 96.7)                                | 2.8<br>(1.8 to 4.0)                     | 25.4<br>(7.3 to 45.8)                             | 0.4<br>(-17.4 to 20.4)                              |
| Vascular intestinal disorders                                  | 0.9<br>(0.8 to 1.1)                        | 5.7<br>(5.0 to 6.4)                                   | 0.3<br>(0.2 to 0.4)                     | 26.1<br>(19.7 to 33.3)                            | 4.4<br>(0.1 to 8.8)                                 |
| Gallbladder and biliary diseases                               | 84.3<br>(73.9 to 95.8)                     | 370.6<br>(320.0 to 425.2)                             | 2.1<br>(1.4 to 3.0)                     | 28.6<br>(17.1 to 41.1)                            | -1.4<br>(-10.8 to 8.6)                              |
| Pancreatitis                                                   | 3.3<br>(2.9 to 3.7)                        | 30.9<br>(27.4 to 34.7)                                | 0.4<br>(0.3 to 0.6)                     | 26.5<br>(21.8 to 31.6)                            | 0.6<br>(-2.8 to 4.2)                                |
| Other digestive diseases                                       | --                                         | --                                                    | 7.5<br>(5.3 to 10.1)                    | 22.5<br>(12.2 to 34.0)                            | 2.2<br>(-4.7 to 9.0)                                |
| <b>Neurological disorders</b>                                  | <b>67,687.3<br/>(64,833.2 to 70,776.9)</b> | <b>32,261.4<br/>(27,327.2 to 37,633.7)</b>            | <b>1,694.9<br/>(1,127.2 to 2,317.5)</b> | <b>18.9<br/>(4.0 to 35.8)</b>                     | <b>-0.8<br/>(-12.3 to 11.8)</b>                     |
| Alzheimer's disease and other dementias                        | 401.3<br>(337.8 to 477.0)                  | 68.5<br>(57.1 to 82.2)                                | 57.6<br>(40.7 to 76.9)                  | 44.2<br>(35.4 to 53.9)                            | -3.0<br>(-8.3 to 2.1)                               |
| Parkinson's disease                                            | 54.2<br>(42.5 to 67.5)                     | 6.5<br>(5.1 to 8.0)                                   | 6.3<br>(3.9 to 8.9)                     | 49.6<br>(31.5 to 69.1)                            | 10.1<br>(-2.5 to 23.4)                              |
| Epilepsy                                                       | 530.7<br>(176.8 to 816.1)                  | 59.9<br>(20.4 to 92.5)                                | 156.6<br>(45.1 to 304.9)                | 0.4<br>(-70.8 to 323.8)                           | -9.9<br>(-73.4 to 287.7)                            |
| Multiple sclerosis                                             | 22.4<br>(19.7 to 25.6)                     | 1.0<br>(0.9 to 1.1)                                   | 6.2<br>(4.3 to 8.5)                     | 39.6<br>(25.8 to 56.4)                            | 9.7<br>(-1.5 to 22.8)                               |
| Motor neuron disease                                           | 2.9<br>(2.5 to 3.3)                        | 0.5<br>(0.4 to 0.6)                                   | 0.6<br>(0.4 to 0.8)                     | 23.0<br>(17.9 to 28.5)                            | 4.9<br>(1.6 to 8.4)                                 |
| Migraine                                                       | 29,833.6<br>(28,066.4 to 31,671.8)         | 3,167.7<br>(2,959.3 to 3,399.8)                       | 1,251.2<br>(799.4 to 1,755.6)           | 20.2<br>(15.7 to 24.9)                            | 0.2<br>(-3.2 to 3.6)                                |
| Tension-type headache                                          | 49,777.2<br>(44,418.8 to 55,776.1)         | 28,956.2<br>(23,984.3 to 34,368.1)                    | 180.3<br>(112.2 to 265.7)               | 20.9<br>(14.8 to 28.0)                            | 0.4<br>(-4.2 to 5.6)                                |
| Other neurological disorders                                   | 0.6<br>(0.4 to 0.8)                        | 1.1<br>(0.7 to 1.6)                                   | 36.1<br>(12.3 to 68.0)                  | 21.2<br>(-59.0 to 351.8)                          | 9.5<br>(-60.6 to 255.5)                             |
| <b>Mental and substance use disorders</b>                      | <b>23,450.8<br/>(22,520.2 to 24,357.0)</b> | <b>10,487.0<sup>†</sup><br/>(9,669.4 to 11,401.8)</b> | <b>3,275.1<br/>(2,379.9 to 4,269.2)</b> | <b>18.1<br/>(15.0 to 21.2)</b>                    | <b>-1.6<br/>(-4.2 to 1.0)</b>                       |
| Schizophrenia                                                  | 370.9<br>(322.9 to 420.4)                  | 22.6<br>(19.9 to 25.5)                                | 237.2<br>(172.1 to 298.7)               | 28.6<br>(17.9 to 40.6)                            | 1.4<br>(-6.4 to 9.7)                                |
| Alcohol use disorders                                          | 2,382.7<br>(2,028.2 to 2,765.2)            | 1,276.7<br>(1,073.9 to 1,480.5)                       | 238.7<br>(161.6 to 334.6)               | 29.7<br>(19.8 to 40.8)                            | 6.9<br>(-0.7 to 15.1)                               |
| Drug use disorders                                             | 959.2<br>(847.7 to 1,072.1)                | 134.9<br>(118.6 to 151.7)                             | 242.1<br>(162.8 to 338.7)               | 23.1<br>(10.9 to 35.9)                            | 3.1<br>(-6.8 to 13.6)                               |
| Opioid use disorders                                           | 513.0<br>(405.2 to 651.1)                  | 56.3<br>(46.0 to 68.7)                                | 214.4<br>(140.7 to 307.8)               | 23.3<br>(9.6 to 38.5)                             | 3.1<br>(-8.1 to 14.9)                               |
| Cocaine use disorders                                          | 38.5<br>(32.9 to 45.6)                     | 4.3<br>(3.6 to 5.1)                                   | 5.5<br>(3.0 to 8.5)                     | 25.3<br>(-5.9 to 69.6)                            | 4.9<br>(-19.2 to 36.9)                              |
| Amphetamine use disorders                                      | 7.4<br>(5.1 to 10.2)                       | 1.4<br>(1.0 to 2.0)                                   | 1.0<br>(0.6 to 1.7)                     | 18.3<br>(7.3 to 30.1)                             | 1.7<br>(-7.3 to 10.8)                               |
| Cannabis use disorders                                         | 366.4<br>(300.7 to 443.8)                  | 61.4<br>(50.5 to 74.0)                                | 10.8<br>(6.4 to 16.4)                   | 14.2<br>(-5.6 to 39.1)                            | 0.2<br>(-16.8 to 20.4)                              |
| Other drug use disorders                                       | 56.4<br>(49.3 to 64.2)                     | 11.5<br>(10.0 to 13.0)                                | 10.4<br>(6.7 to 14.9)                   | 28.1<br>(5.7 to 55.2)                             | 5.7<br>(-12.0 to 26.2)                              |
| Depressive disorders                                           | 6,343.0<br>(5,954.9 to 6,823.8)            | 7,287.2<br>(6,499.2 to 8,164.3)                       | 1,101.9<br>(756.5 to 1,498.5)           | 17.2<br>(10.6 to 24.1)                            | -5.2<br>(-10.4 to 0.5)                              |
| Major depressive disorder                                      | 4,468.2<br>(3,985.5 to 5,003.0)            | 6,941.7<br>(6,141.5 to 7,820.3)                       | 909.4<br>(619.1 to 1,236.1)             | 15.8<br>(7.8 to 24.0)                             | -6.4<br>(-12.7 to 0.4)                              |
| Dysthymia                                                      | 2,003.6<br>(1,733.2 to 2,305.6)            | 345.5<br>(303.2 to 399.8)                             | 192.5<br>(129.3 to 282.4)               | 24.2<br>(19.0 to 29.3)                            | 0.5<br>(-2.8 to 3.8)                                |
| Bipolar disorder                                               | 849.6<br>(725.7 to 992.9)                  | 80.9<br>(69.5 to 94.5)                                | 173.9<br>(108.0 to 258.5)               | 20.4<br>(11.7 to 30.0)                            | 0.5<br>(-6.0 to 7.5)                                |
| Anxiety disorders                                              | 6,321.1<br>(5,743.3 to 6,939.2)            | 1,012.7<br>(930.4 to 1,105.5)                         | 609.9<br>(422.2 to 824.9)               | 18.5<br>(10.9 to 26.6)                            | -0.0<br>(-6.0 to 6.5)                               |
| Eating disorders                                               | 161.0<br>(131.1 to 196.6)                  | 109.3<br>(80.0 to 146.6)                              | 32.8<br>(20.5 to 48.1)                  | 32.7<br>(13.8 to 55.1)                            | 18.3<br>(1.5 to 37.7)                               |
| Anorexia nervosa                                               | 39.6<br>(29.1 to 53.2)                     | 17.9<br>(13.0 to 24.0)                                | 8.5<br>(4.9 to 13.2)                    | 24.4<br>(-8.4 to 69.6)                            | 14.5<br>(-15.3 to 55.2)                             |
| Bulimia nervosa                                                | 115.1<br>(86.1 to 154.4)                   | 91.4<br>(63.4 to 128.5)                               | 24.3<br>(14.3 to 36.6)                  | 35.9<br>(11.9 to 62.2)                            | 19.6<br>(-0.7 to 42.9)                              |
| Autistic spectrum disorders                                    | 1,388.1<br>(1,231.6 to 1,581.1)            | 10.3<br>(7.0 to 14.4)                                 | 195.5<br>(129.4 to 275.0)               | 11.6<br>(5.8 to 17.5)                             | 0.1<br>(-4.9 to 5.0)                                |
| Autism                                                         | 361.6<br>(310.3 to 419.7)                  | 1.1<br>(0.6 to 1.9)                                   | 92.3<br>(58.8 to 136.3)                 | 12.1<br>(1.6 to 23.0)                             | 0.4<br>(-8.6 to 9.4)                                |
| Asperger syndrome and other autistic spectrum disorders        | 1,030.2<br>(851.7 to 1,235.0)              | 9.2<br>(5.9 to 13.2)                                  | 103.2<br>(66.9 to 150.4)                | 11.3<br>(5.7 to 17.1)                             | -0.2<br>(-4.5 to 4.5)                               |

| Cause                                                      | Prevalence in thousands (95% UI)                    | Incidence in thousands (95% UI)                      | YLDs in thousands (95% UI)                    |                                                   |                                                     |
|------------------------------------------------------------|-----------------------------------------------------|------------------------------------------------------|-----------------------------------------------|---------------------------------------------------|-----------------------------------------------------|
|                                                            | 2016 counts                                         | 2016 counts                                          | 2016 counts                                   | Percentage change in counts between 2006 and 2016 | Percentage change in age-standardised rates between |
| Attention-deficit/hyperactivity disorder                   | 683.3<br>(592.6 to 791.8)                           | 31.5<br>(26.5 to 37.5)                               | 8.2<br>(4.7 to 13.4)                          | 6.3<br>(-8.2 to 23.5)                             | -0.8<br>(-14.1 to 14.9)                             |
| Conduct disorder                                           | 1,210.0<br>(988.7 to 1,448.8)                       | 407.5<br>(315.8 to 498.8)                            | 146.9<br>(89.2 to 221.6)                      | 1.7<br>(-4.9 to 9.2)                              | 0.5<br>(-6.0 to 7.8)                                |
| Idiopathic developmental intellectual disability           | 1,883.7<br>(971.6 to 2,798.9)                       | --                                                   | 74.4<br>(31.3 to 135.3)                       | -11.2<br>(-21.4 to -1.7)                          | -21.2<br>(-30.2 to -12.7)                           |
| Other mental and substance use disorders                   | 2,869.9<br>(2,520.2 to 3,319.7)                     | 113.4<br>(100.3 to 129.7)                            | 213.7<br>(147.8 to 307.4)                     | 24.3<br>(17.8 to 31.2)                            | 0.2<br>(-4.5 to 5.1)                                |
| <b>Diabetes, urogenital, blood, and endocrine diseases</b> | <b>80,850.5</b><br><b>(68,753.4 to 97,883.4)</b>    | <b>16,261.0†</b><br><b>(15,289.0 to 17,417.5)</b>    | <b>1,138.8</b><br><b>(790.2 to 1,612.0)</b>   | <b>20.9</b><br><b>(16.2 to 25.7)</b>              | <b>-2.4</b><br><b>(-5.9 to 1.2)</b>                 |
| Diabetes mellitus                                          | 7,389.7<br>(6,729.9 to 8,112.8)                     | 434.7<br>(396.0 to 477.5)                            | 493.7<br>(333.9 to 692.2)                     | 29.5<br>(20.6 to 38.9)                            | -0.1<br>(-6.9 to 7.0)                               |
| Acute glomerulonephritis                                   | 1.6<br>(1.3 to 1.8)                                 | 23.3<br>(20.3 to 26.7)                               | 0.1<br>(< 0.05 to 0.1)                        | 17.3<br>(11.2 to 24.6)                            | -1.2<br>(-5.9 to 3.8)                               |
| Chronic kidney disease                                     | 5,842.7<br>(5,324.6 to 6,378.6)                     | 418.8<br>(374.7 to 464.3)                            | 158.9<br>(117.5 to 204.6)                     | 27.2<br>(19.8 to 35.1)                            | -2.4<br>(-7.8 to 3.1)                               |
| Chronic kidney disease due to diabetes mellitus            | 2,045.0<br>(1,744.1 to 2,374.4)                     | 144.8<br>(119.1 to 172.2)                            | 49.5<br>(35.4 to 65.2)                        | 27.8<br>(16.8 to 41.1)                            | -4.5<br>(-12.3 to 4.1)                              |
| Chronic kidney disease due to hypertension                 | 1,105.2<br>(966.1 to 1,247.2)                       | 65.3<br>(54.7 to 77.1)                               | 36.0<br>(25.5 to 47.3)                        | 31.3<br>(15.8 to 48.5)                            | -2.2<br>(-13.3 to 10.2)                             |
| Chronic kidney disease due to glomerulonephritis           | 1,129.3<br>(983.4 to 1,284.6)                       | 91.3<br>(75.8 to 109.4)                              | 28.3<br>(19.8 to 38.5)                        | 23.2<br>(8.1 to 40.6)                             | 0.5<br>(-9.6 to 11.4)                               |
| Chronic kidney disease due to other causes                 | 1,563.2<br>(1,335.0 to 1,803.9)                     | 117.4<br>(99.8 to 136.7)                             | 45.1<br>(32.4 to 60.5)                        | 25.9<br>(14.5 to 38.9)                            | -1.2<br>(-8.7 to 7.6)                               |
| Urinary diseases and male infertility                      | 2,120.1<br>(1,906.7 to 2,356.8)                     | 9,290.7†<br>(8,378.0 to 10,346.6)                    | 61.8<br>(40.1 to 89.1)                        | 30.9<br>(21.3 to 40.8)                            | -1.1<br>(-8.0 to 5.8)                               |
| Interstitial nephritis and urinary tract infections        | 149.0<br>(131.6 to 169.9)                           | 7,764.1<br>(6,865.4 to 8,868.2)                      | 5.0<br>(3.0 to 7.6)                           | 14.2<br>(-2.2 to 35.7)                            | 0.4<br>(-12.7 to 17.3)                              |
| Urolithiasis                                               | 50.7<br>(44.8 to 57.8)                              | 1,346.7<br>(1,191.2 to 1,536.5)                      | 3.8<br>(2.5 to 5.4)                           | 32.4<br>(14.8 to 54.2)                            | 5.9<br>(-10.0 to 25.2)                              |
| Benign prostatic hyperplasia                               | 1,445.6<br>(1,218.7 to 1,702.3)                     | 179.9<br>(152.6 to 210.2)                            | 47.3<br>(29.5 to 69.3)                        | 36.1<br>(23.2 to 50.0)                            | -1.1<br>(-9.4 to 7.4)                               |
| Male infertility                                           | 426.7<br>(383.1 to 470.8)                           | --                                                   | 2.6<br>(1.1 to 5.3)                           | 28.5<br>(15.2 to 43.8)                            | 11.4<br>(-0.2 to 23.9)                              |
| Other urinary diseases                                     | --                                                  | --                                                   | 3.2<br>(2.1 to 4.6)                           | -1.0<br>(-11.5 to 11.8)                           | -15.0<br>(-23.8 to -4.1)                            |
| Gynecological diseases                                     | 18,312.4<br>(17,481.1 to 19,229.7)                  | 5,823.5†<br>(5,451.0 to 6,214.5)                     | 184.8<br>(123.6 to 270.6)                     | 18.2<br>(12.2 to 23.9)                            | -6.1<br>(-10.5 to -1.6)                             |
| Uterine fibroids                                           | 1,621.2<br>(1,424.5 to 1,833.3)                     | 195.0<br>(167.7 to 226.0)                            | 27.9<br>(16.6 to 45.6)                        | 16.5<br>(5.5 to 26.3)                             | -13.0<br>(-20.6 to -6.1)                            |
| Polycystic ovarian syndrome                                | 182.8<br>(137.6 to 237.4)                           | 236.9<br>(166.7 to 324.2)                            | 1.6<br>(0.7 to 3.0)                           | 18.3<br>(4.0 to 35.3)                             | -0.2<br>(-12.1 to 13.2)                             |
| Female infertility                                         | 786.8<br>(660.6 to 918.8)                           | --                                                   | 4.6<br>(1.9 to 9.5)                           | 62.0<br>(36.3 to 94.1)                            | 46.5<br>(23.8 to 75.1)                              |
| Endometriosis                                              | 53.8<br>(45.1 to 63.7)                              | 137.0<br>(112.0 to 171.0)                            | 5.0<br>(3.1 to 7.4)                           | 17.6<br>(-12.3 to 62.3)                           | 0.4<br>(-23.7 to 35.8)                              |
| Genital prolapse                                           | 5,802.8<br>(5,041.9 to 6,626.4)                     | 472.6<br>(400.8 to 557.4)                            | 18.0<br>(8.7 to 32.7)                         | 10.6<br>(2.0 to 19.7)                             | -17.6<br>(-24.4 to -10.3)                           |
| Premenstrual syndrome                                      | 10,800.2<br>(10,051.9 to 11,621.5)                  | 3,974.7<br>(3,635.7 to 4,305.0)                      | 90.0<br>(55.7 to 138.8)                       | 18.6<br>(9.4 to 28.6)                             | -1.5<br>(-8.7 to 6.5)                               |
| Other gynecological diseases                               | 1,253.7<br>(1,107.8 to 1,420.7)                     | 807.4<br>(654.0 to 981.7)                            | 37.7<br>(24.8 to 54.1)                        | 18.6<br>(6.9 to 30.6)                             | -5.9<br>(-14.9 to 3.1)                              |
| Hemoglobinopathies and hemolytic anaemias                  | 63,470.6<br>(48,525.4 to 83,501.2)                  | --                                                   | 176.7<br>(87.6 to 330.7)                      | 1.9<br>(-7.1 to 12.6)                             | -5.7<br>(-13.3 to 3.6)                              |
| Thalassemias                                               | 15.5<br>(12.8 to 18.4)                              | --                                                   | 1.1<br>(0.7 to 1.6)                           | -4.1<br>(-24.6 to 19.2)                           | 2.9<br>(-19.5 to 28.8)                              |
| Thalassaemias trait                                        | 11,320.6<br>(10,551.4 to 12,064.5)                  | --                                                   | 70.5<br>(45.6 to 104.6)                       | 7.1<br>(-0.9 to 15.9)                             | -0.6<br>(-7.4 to 7.0)                               |
| Sickle cell disorders                                      | 101.9<br>(1.5 to 467.8)                             | --                                                   | 6.3<br>(0.1 to 28.6)                          | 5.4<br>(-50.6 to 87.1)                            | 10.7<br>(-46.1 to 97.9)                             |
| Sickle cell trait                                          | 31,400.8<br>(5,186.7 to 68,098.7)                   | --                                                   | 76.4<br>(11.5 to 186.6)                       | 7.3<br>(-5.1 to 25.1)                             | -0.5<br>(-11.1 to 15.0)                             |
| G6PD deficiency                                            | 9,868.1<br>(9,030.5 to 10,997.2)                    | --                                                   | 0.6<br>(0.4 to 0.8)                           | -6.7<br>(-19.9 to 7.7)                            | -18.4<br>(-28.7 to -6.8)                            |
| G6PD trait                                                 | 22,512.9<br>(21,464.0 to 23,621.2)                  | --                                                   | < 0.05<br>(< 0.05 to < 0.05)                  | 17.0<br>(5.5 to 28.4)                             | 4.2<br>(-4.7 to 13.6)                               |
| Other hemoglobinopathies and hemolytic anaemias            | 1,138.3<br>(1,076.0 to 1,202.6)                     | --                                                   | 21.7<br>(13.8 to 32.4)                        | -24.1<br>(-31.5 to -15.0)                         | -30.6<br>(-36.6 to -23.5)                           |
| Endocrine, metabolic, blood, and immune disorders          | 2,171.9<br>(2,051.0 to 2,309.2)                     | 270.1<br>(241.9 to 299.4)                            | 62.8<br>(42.9 to 87.3)                        | 6.5<br>(-0.9 to 14.2)                             | -4.9<br>(-10.0 to 0.5)                              |
| <b>Musculoskeletal disorders</b>                           | <b>26,504.2</b><br><b>(25,176.6 to 27,791.1)</b>    | <b>16,378.0</b><br><b>(14,552.5 to 18,230.5)</b>     | <b>2,962.7</b><br><b>(2,156.5 to 3,863.0)</b> | <b>15.6</b><br><b>(10.3 to 20.9)</b>              | <b>-8.3</b><br><b>(-11.9 to -4.5)</b>               |
| Rheumatoid arthritis                                       | 410.3<br>(364.6 to 461.9)                           | 25.7<br>(22.9 to 28.8)                               | 96.6<br>(65.6 to 130.1)                       | 36.7<br>(25.8 to 49.1)                            | 5.6<br>(-2.3 to 14.0)                               |
| Osteoarthritis                                             | 3,717.1<br>(3,471.2 to 3,981.6)                     | 204.3<br>(189.8 to 221.0)                            | 228.2<br>(159.5 to 311.4)                     | 36.5<br>(31.3 to 42.5)                            | 1.5<br>(-2.3 to 5.5)                                |
| Low back and neck pain                                     | 14,170.0<br>(13,207.8 to 15,233.9)                  | 6,287.2<br>(5,574.8 to 7,077.5)                      | 1,634.3<br>(1,147.7 to 2,165.3)               | 14.2<br>(7.4 to 21.0)                             | -9.7<br>(-14.7 to -5.0)                             |
| Low back pain                                              | 11,318.5<br>(10,063.0 to 12,879.8)                  | 5,388.6<br>(4,690.7 to 6,190.4)                      | 1,276.8<br>(894.6 to 1,700.5)                 | 10.2<br>(1.9 to 18.5)                             | -12.1<br>(-18.4 to -6.4)                            |
| Neck pain                                                  | 3,587.8<br>(3,091.6 to 4,166.3)                     | 898.6<br>(775.8 to 1,058.7)                          | 357.5<br>(240.3 to 503.4)                     | 31.3<br>(27.0 to 35.7)                            | 0.4<br>(-2.1 to 2.7)                                |
| Gout                                                       | 460.4<br>(407.7 to 518.5)                           | 94.8<br>(82.5 to 107.6)                              | 14.6<br>(9.8 to 20.6)                         | 32.4<br>(14.1 to 55.4)                            | 0.5<br>(-12.0 to 16.0)                              |
| Other musculoskeletal disorders                            | 11,552.6<br>(9,917.4 to 13,213.3)                   | 9,765.9<br>(8,228.2 to 11,539.1)                     | 989.1<br>(671.3 to 1,382.9)                   | 12.1<br>(0.2 to 22.7)                             | -10.0<br>(-18.5 to -2.2)                            |
| <b>Other non-communicable diseases</b>                     | <b>116,096.6</b><br><b>(113,769.8 to 118,614.3)</b> | <b>326,034.3†</b><br><b>(301,440.9 to 353,401.1)</b> | <b>3,380.1</b><br><b>(2,326.4 to 4,706.1)</b> | <b>17.3</b><br><b>(14.9 to 19.3)</b>              | <b>0.0</b><br><b>(-1.6 to 1.4)</b>                  |
| Congenital anomalies                                       | 3,851.6<br>(3,138.7 to 4,649.3)                     | --                                                   | 416.3<br>(277.5 to 582.0)                     | 0.1<br>(-8.3 to 8.8)                              | -10.2<br>(-17.7 to -2.3)                            |
| Neural tube defects                                        | 126.0<br>(111.1 to 142.7)                           | --                                                   | 37.4<br>(25.7 to 50.4)                        | 13.3<br>(-0.9 to 31.9)                            | 0.9<br>(-10.5 to 16.5)                              |
| Congenital heart anomalies                                 | 218.5<br>(186.3 to 255.5)                           | --                                                   | 10.5<br>(4.3 to 18.2)                         | 9.3<br>(-5.7 to 26.9)                             | 7.8<br>(-6.5 to 23.9)                               |
| Orofacial clefts                                           | 35.5<br>(30.7 to 40.6)                              | --                                                   | 0.6<br>(0.4 to 0.9)                           | 2.2<br>(-9.5 to 14.6)                             | -7.6<br>(-18.3 to 3.5)                              |
| Down's syndrome                                            | 27.4<br>(22.8 to 32.5)                              | --                                                   | 2.4<br>(1.6 to 3.4)                           | 11.3<br>(3.1 to 20.6)                             | 3.7<br>(-4.0 to 12.0)                               |
| Turner syndrome                                            | 70.1<br>(59.1 to 82.3)                              | --                                                   | 1.2<br>(0.6 to 2.1)                           | 1.6<br>(-28.9 to 42.1)                            | -5.5<br>(-32.2 to 31.5)                             |
| Klinefelter syndrome                                       | 73.6<br>(62.1 to 85.8)                              | --                                                   | 0.4<br>(0.2 to 0.8)                           | 8.5<br>(-17.2 to 43.9)                            | -1.5<br>(-24.3 to 29.8)                             |



| Cause                                         | Prevalence in thousands (95% UI)                 | Incidence in thousands (95% UI)                   | YLDs in thousands (95% UI)                  |                                                   |                                                     |
|-----------------------------------------------|--------------------------------------------------|---------------------------------------------------|---------------------------------------------|---------------------------------------------------|-----------------------------------------------------|
|                                               | 2016 counts                                      | 2016 counts                                       | 2016 counts                                 | Percentage change in counts between 2006 and 2016 | Percentage change in age-standardised rates between |
| Other chromosomal abnormalities               | 31.6<br>(26.8 to 37.4)                           | --                                                | 6.6<br>(4.3 to 9.7)                         | -5.6<br>(-29.1 to 25.0)                           | -0.1<br>(-25.7 to 33.4)                             |
| Congenital musculoskeletal and limb anomalies | 152.2<br>(137.2 to 169.4)                        | --                                                | 22.9<br>(14.9 to 32.3)                      | 12.8<br>(-0.7 to 26.7)                            | 1.3<br>(-9.9 to 12.5)                               |
| Urogenital congenital anomalies               | 148.7<br>(131.2 to 167.4)                        | --                                                | 3.6<br>(2.1 to 5.9)                         | -0.1<br>(-8.3 to 8.8)                             | -1.1<br>(-9.2 to 7.6)                               |
| Digestive congenital anomalies                | 123.0<br>(107.8 to 139.2)                        | --                                                | 5.3<br>(3.4 to 7.7)                         | 13.9<br>(-7.4 to 41.3)                            | 2.1<br>(-16.0 to 24.9)                              |
| Other congenital anomalies                    | 3,098.8<br>(2,207.9 to 4,244.5)                  | --                                                | 325.3<br>(206.7 to 477.8)                   | -2.4<br>(-12.4 to 8.4)                            | -13.0<br>(-21.7 to -3.3)                            |
| Skin and subcutaneous diseases                | 45,118.8<br>(43,512.2 to 46,790.2)               | 97,631.8<br>(91,524.1 to 104,677.7)               | 1,134.1<br>(754.4 to 1,647.5)               | 11.5<br>(8.8 to 14.0)                             | 2.2<br>(0.2 to 4.3)                                 |
| Dermatitis                                    | 6,757.3<br>(5,841.8 to 7,730.2)                  | 8,911.4<br>(8,236.6 to 9,629.1)                   | 255.6<br>(146.0 to 418.0)                   | 6.7<br>(1.7 to 11.5)                              | 0.4<br>(-3.8 to 4.2)                                |
| Psoriasis                                     | 1,104.8<br>(1,042.0 to 1,182.5)                  | 162.2<br>(153.0 to 173.1)                         | 96.5<br>(68.1 to 127.9)                     | 29.3<br>(17.6 to 42.4)                            | 9.4<br>(0.7 to 18.8)                                |
| Cellulitis                                    | 49.4<br>(45.9 to 53.3)                           | 835.6<br>(779.6 to 896.0)                         | 2.9<br>(1.9 to 4.1)                         | 15.5<br>(4.1 to 28.3)                             | 2.3<br>(-9.2 to 15.2)                               |
| Pyoderma                                      | 379.8<br>(368.6 to 391.1)                        | 7,854.5<br>(7,592.9 to 8,121.1)                   | 2.1<br>(0.8 to 4.4)                         | 19.8<br>(10.6 to 30.0)                            | 2.4<br>(-4.2 to 9.4)                                |
| Scabies                                       | 3,334.5<br>(2,900.5 to 3,841.1)                  | 10,173.4<br>(8,736.8 to 11,782.0)                 | 86.1<br>(48.4 to 138.7)                     | 4.3<br>(-0.2 to 8.6)                              | -3.9<br>(-7.5 to -0.4)                              |
| Fungal skin diseases                          | 12,211.0<br>(10,532.7 to 14,138.1)               | 41,623.2<br>(35,819.4 to 47,943.8)                | 68.5<br>(27.6 to 144.3)                     | 14.6<br>(11.3 to 17.9)                            | 0.1<br>(-1.0 to 1.2)                                |
| Viral skin diseases                           | 4,305.7<br>(3,842.8 to 4,817.7)                  | 6,057.9<br>(5,326.2 to 6,822.0)                   | 132.0<br>(82.5 to 194.6)                    | 8.6<br>(4.6 to 12.5)                              | 0.6<br>(-2.7 to 4.0)                                |
| Acne vulgaris                                 | 12,504.4<br>(10,744.9 to 14,568.9)               | 8,384.9<br>(6,581.9 to 11,133.8)                  | 322.6<br>(210.0 to 469.8)                   | 12.1<br>(6.1 to 18.6)                             | 4.5<br>(-1.0 to 10.2)                               |
| Alopecia areata                               | 289.7<br>(277.8 to 302.4)                        | 514.3<br>(493.1 to 536.6)                         | 9.5<br>(5.9 to 14.1)                        | 18.5<br>(4.1 to 33.8)                             | 0.4<br>(-10.8 to 12.6)                              |
| Pruritus                                      | 1,311.6<br>(1,153.9 to 1,477.8)                  | 1,049.3<br>(932.3 to 1,182.0)                     | 14.0<br>(6.4 to 25.3)                       | 18.9<br>(11.7 to 26.3)                            | 0.8<br>(-4.3 to 5.9)                                |
| Urticaria                                     | 1,598.3<br>(1,390.1 to 1,848.5)                  | 2,840.3<br>(2,476.1 to 3,283.9)                   | 96.4<br>(60.4 to 139.3)                     | 6.6<br>(0.1 to 13.6)                              | 0.5<br>(-5.0 to 6.2)                                |
| Decubitus ulcer                               | 19.3<br>(17.2 to 21.4)                           | 69.7<br>(62.5 to 77.7)                            | 3.2<br>(2.2 to 4.4)                         | 31.9<br>(21.2 to 43.1)                            | 6.2<br>(-6.1 to 19.1)                               |
| Other skin and subcutaneous diseases          | 8,138.2<br>(7,896.9 to 8,398.7)                  | 9,155.1<br>(8,862.5 to 9,469.5)                   | 44.7<br>(21.5 to 82.0)                      | 28.2<br>(24.5 to 32.0)                            | 6.5<br>(3.9 to 9.2)                                 |
| Sense organ diseases                          | 39,313.6<br>(37,915.5 to 40,685.1)               | 14,278.2†<br>(13,367.6 to 15,289.6)               | 1,534.4<br>(1,063.8 to 2,126.4)             | 26.3<br>(23.4 to 29.2)                            | 1.0<br>(-1.0 to 3.0)                                |
| Glaucoma                                      | 58.6<br>(49.9 to 67.6)                           | --                                                | 5.8<br>(3.8 to 8.0)                         | 50.5<br>(30.9 to 74.1)                            | 15.4<br>(1.2 to 32.1)                               |
| Cataract                                      | 2,511.8<br>(2,326.0 to 2,697.1)                  | --                                                | 201.7<br>(143.8 to 271.2)                   | 56.3<br>(47.0 to 65.2)                            | 17.7<br>(10.4 to 24.8)                              |
| Macular degeneration                          | 85.3<br>(71.0 to 101.4)                          | --                                                | 6.3<br>(4.1 to 8.9)                         | 78.0<br>(56.3 to 102.8)                           | 36.9<br>(20.9 to 55.0)                              |
| Refraction and accommodation disorders        | 14,884.0<br>(14,282.9 to 15,527.3)               | --                                                | 295.0<br>(187.1 to 455.2)                   | 24.0<br>(19.3 to 29.3)                            | 1.2<br>(-2.6 to 5.7)                                |
| Age-related and other hearing loss            | 30,546.1<br>(28,624.0 to 32,518.5)               | --                                                | 877.6<br>(605.9 to 1,216.1)                 | 20.8<br>(16.2 to 25.0)                            | -4.1<br>(-6.8 to -1.6)                              |
| Other vision loss                             | 378.9<br>(345.5 to 413.7)                        | --                                                | 35.5<br>(24.4 to 48.3)                      | 42.2<br>(29.5 to 55.7)                            | 11.8<br>(3.2 to 21.3)                               |
| Other sense organ diseases                    | 3,645.9<br>(3,357.3 to 3,932.3)                  | 14,278.2<br>(13,367.6 to 15,289.6)                | 112.5<br>(70.8 to 168.6)                    | 26.1<br>(20.4 to 32.2)                            | 1.8<br>(-2.1 to 5.7)                                |
| Oral disorders                                | 81,924.0<br>(77,916.6 to 85,909.5)               | 214,124.2†<br>(190,682.3 to 239,784.6)            | 295.3<br>(157.7 to 497.4)                   | 26.3<br>(23.4 to 29.1)                            | 0.6<br>(-1.4 to 2.5)                                |
| Caries of deciduous teeth                     | 12,191.3<br>(9,427.4 to 14,938.3)                | 46,171.3<br>(31,607.2 to 64,038.0)                | 2.9<br>(1.2 to 5.8)                         | -5.1<br>(-16.2 to 7.5)                            | 0.5<br>(-10.9 to 13.5)                              |
| Caries of permanent teeth                     | 55,335.2<br>(50,601.0 to 60,278.5)               | 165,471.5<br>(146,807.1 to 184,073.5)             | 32.5<br>(14.0 to 61.8)                      | 11.1<br>(6.5 to 16.4)                             | -4.6<br>(-8.0 to -0.8)                              |
| Periodontal disease                           | 19,596.6<br>(16,576.7 to 22,940.4)               | 2,340.9<br>(1,924.5 to 2,790.0)                   | 128.1<br>(51.1 to 259.5)                    | 32.5<br>(27.4 to 37.1)                            | 0.0<br>(-3.4 to 3.0)                                |
| Edentulism and severe tooth loss              | 1,765.2<br>(1,532.5 to 1,979.7)                  | 140.5<br>(120.8 to 160.0)                         | 48.6<br>(32.1 to 68.5)                      | 39.0<br>(32.5 to 46.9)                            | 4.7<br>(0.4 to 9.8)                                 |
| Other oral disorders                          | 2,836.9<br>(2,704.8 to 2,975.1)                  | --                                                | 83.2<br>(51.5 to 125.0)                     | 19.3<br>(15.0 to 23.3)                            | 0.4<br>(-2.7 to 3.4)                                |
| <b>Injuries</b>                               | <b>25,734.3</b><br><b>(24,284.8 to 27,323.2)</b> | <b>14,043.3†</b><br><b>(13,140.6 to 14,919.4)</b> | <b>1,074.1</b><br><b>(726.2 to 1,520.9)</b> | <b>29.0</b><br><b>(25.2 to 32.5)</b>              | <b>5.4</b><br><b>(2.7 to 7.8)</b>                   |
| <b>Transport injuries</b>                     | <b>3,658.0</b><br><b>(3,370.5 to 3,950.3)</b>    | <b>1,300.3</b><br><b>(1,159.2 to 1,443.5)</b>     | <b>210.7</b><br><b>(142.5 to 300.0)</b>     | <b>37.3</b><br><b>(33.3 to 41.2)</b>              | <b>9.7</b><br><b>(6.9 to 12.3)</b>                  |
| Road injuries                                 | 2,285.8<br>(2,125.4 to 2,450.0)                  | 944.5<br>(817.3 to 1,085.2)                       | 130.4<br>(88.3 to 185.8)                    | 59.4<br>(55.2 to 63.5)                            | 25.5<br>(22.7 to 28.2)                              |
| Pedestrian road injuries                      | 681.2<br>(591.4 to 781.5)                        | 218.7<br>(178.2 to 264.6)                         | 39.6<br>(26.9 to 56.1)                      | 63.6<br>(59.0 to 68.1)                            | 29.0<br>(26.0 to 31.9)                              |
| Cyclist road injuries                         | 479.0<br>(398.9 to 574.9)                        | 233.1<br>(184.2 to 288.4)                         | 25.8<br>(17.4 to 37.0)                      | 53.8<br>(49.2 to 58.1)                            | 22.7<br>(19.7 to 25.5)                              |
| Motorcyclist road injuries                    | 536.8<br>(456.5 to 650.0)                        | 163.9<br>(131.2 to 204.8)                         | 30.0<br>(20.2 to 42.6)                      | 63.8<br>(59.2 to 68.1)                            | 28.5<br>(25.4 to 31.3)                              |
| Motor vehicle road injuries                   | 353.0<br>(303.0 to 404.9)                        | 190.5<br>(152.1 to 229.3)                         | 22.4<br>(15.0 to 32.1)                      | 64.5<br>(60.1 to 68.9)                            | 28.6<br>(25.7 to 31.3)                              |
| Other road injuries                           | 235.8<br>(202.8 to 273.7)                        | 138.2<br>(108.9 to 172.9)                         | 12.7<br>(8.5 to 18.2)                       | 42.0<br>(38.5 to 45.8)                            | 11.4<br>(9.0 to 13.8)                               |
| Other transport injuries                      | 1,372.2<br>(1,163.7 to 1,601.5)                  | 355.8<br>(311.4 to 406.8)                         | 80.4<br>(55.0 to 113.4)                     | 12.0<br>(8.4 to 15.5)                             | -9.1<br>(-11.7 to -6.8)                             |
| <b>Unintentional injuries</b>                 | <b>20,475.3</b><br><b>(19,170.8 to 21,941.0)</b> | <b>12,285.0</b><br><b>(11,420.7 to 13,144.6)</b>  | <b>757.8</b><br><b>(517.6 to 1,068.1)</b>   | <b>32.4</b><br><b>(29.1 to 35.7)</b>              | <b>7.4</b><br><b>(5.0 to 9.6)</b>                   |
| Falls                                         | 6,547.3<br>(5,753.5 to 7,338.8)                  | 3,293.3<br>(2,917.0 to 3,726.1)                   | 287.3<br>(201.9 to 394.7)                   | 36.2<br>(32.8 to 39.4)                            | 6.4<br>(3.9 to 8.6)                                 |
| Drowning                                      | 142.4<br>(122.3 to 167.8)                        | 28.4<br>(25.0 to 32.2)                            | 8.2<br>(5.5 to 11.8)                        | -8.3<br>(-11.8 to -4.8)                           | -21.9<br>(-24.5 to -19.4)                           |
| Fire, heat, and hot substances                | 1,704.6<br>(1,434.6 to 2,056.3)                  | 224.0<br>(178.0 to 267.8)                         | 49.5<br>(33.6 to 70.6)                      | 29.5<br>(21.8 to 36.7)                            | 7.0<br>(1.6 to 12.1)                                |
| Poisonings                                    | 48.5<br>(40.4 to 58.0)                           | 72.8<br>(56.6 to 91.3)                            | 4.6<br>(2.8 to 7.0)                         | 47.5<br>(38.1 to 57.7)                            | 25.3<br>(17.8 to 33.2)                              |
| Exposure to mechanical forces                 | 2,105.5<br>(1,790.8 to 2,575.0)                  | 889.1<br>(735.9 to 1,051.1)                       | 56.2<br>(36.6 to 82.6)                      | 35.0<br>(30.7 to 38.9)                            | 11.3<br>(8.3 to 14.0)                               |
| Unintentional firearm injuries                | 54.1<br>(45.6 to 64.7)                           | 14.8<br>(9.9 to 21.6)                             | 2.5<br>(1.6 to 3.6)                         | 38.6<br>(34.1 to 42.7)                            | 11.8<br>(8.7 to 14.7)                               |
| Unintentional suffocation                     | 103.9<br>(78.2 to 135.6)                         | 20.6<br>(14.0 to 29.3)                            | 3.8<br>(2.3 to 5.8)                         | 1.2<br>(-2.6 to 5.2)                              | -11.4<br>(-14.2 to -8.8)                            |
| Other exposure to mechanical forces           | 1,947.4<br>(1,639.3 to 2,423.9)                  | 853.7<br>(702.5 to 1,008.7)                       | 49.9<br>(32.8 to 73.0)                      | 38.2<br>(34.0 to 42.2)                            | 13.3<br>(10.2 to 16.2)                              |



| Cause                                                                               | Prevalence in thousands (95% UI)              | Incidence in thousands (95% UI)          | YLDs in thousands (95% UI)            |                                                   |                                                     |
|-------------------------------------------------------------------------------------|-----------------------------------------------|------------------------------------------|---------------------------------------|---------------------------------------------------|-----------------------------------------------------|
|                                                                                     | 2016 counts                                   | 2016 counts                              | 2016 counts                           | Percentage change in counts between 2006 and 2016 | Percentage change in age-standardised rates between |
| Adverse effects of medical treatment                                                | 70.6<br>(56.2 to 86.4)                        | 923.3<br>(816.4 to 1,036.3)              | 9.4<br>(5.9 to 14.0)                  | 4.7<br>(-0.5 to 10.1)                             | -11.4<br>(-15.6 to -7.2)                            |
| Animal contact                                                                      | 2,952.8<br>(2,591.4 to 3,445.4)               | 3,972.1<br>(3,259.1 to 4,714.4)          | 103.8<br>(70.7 to 143.0)              | 44.7<br>(38.3 to 52.1)                            | 19.9<br>(15.2 to 25.0)                              |
| Venomous animal contact                                                             | 1,805.5<br>(1,500.5 to 2,175.5)               | 2,180.2<br>(1,721.7 to 2,736.1)          | 84.4<br>(57.0 to 116.9)               | 50.2<br>(42.5 to 59.1)                            | 26.0<br>(20.1 to 32.1)                              |
| Non-venomous animal contact                                                         | 1,147.3<br>(949.2 to 1,378.6)                 | 1,792.0<br>(1,398.9 to 2,216.4)          | 19.4<br>(12.7 to 29.2)                | 24.8<br>(19.4 to 29.5)                            | 0.5<br>(-3.6 to 4.0)                                |
| Foreign body                                                                        | 1,184.6<br>(961.1 to 1,398.2)                 | 782.2<br>(674.9 to 924.2)                | 47.6<br>(30.7 to 70.8)                | 18.3<br>(14.0 to 22.4)                            | 0.9<br>(-2.4 to 3.9)                                |
| Pulmonary aspiration and foreign body in airway                                     | 504.6<br>(366.5 to 698.1)                     | 165.8<br>(134.0 to 205.7)                | 23.6<br>(14.6 to 35.9)                | 12.7<br>(8.1 to 17.1)                             | -2.7<br>(-6.2 to 0.4)                               |
| Foreign body in eyes                                                                | 72.8<br>(40.9 to 109.2)                       | 379.8<br>(290.6 to 500.7)                | 4.1<br>(2.0 to 7.0)                   | 17.9<br>(13.1 to 22.9)                            | -0.3<br>(-3.0 to 2.2)                               |
| Foreign body in other body part                                                     | 607.2<br>(484.6 to 778.2)                     | 236.6<br>(195.3 to 282.5)                | 20.0<br>(13.0 to 29.3)                | 25.8<br>(20.4 to 30.8)                            | 5.7<br>(1.6 to 9.4)                                 |
| Environmental heat and cold exposure                                                | 1,703.2<br>(1,446.1 to 1,998.1)               | 504.0<br>(410.2 to 606.9)                | 70.0<br>(46.5 to 100.9)               | 24.2<br>(20.5 to 27.9)                            | 3.2<br>(0.5 to 5.6)                                 |
| Other unintentional injuries                                                        | 4,015.9<br>(3,284.2 to 4,815.7)               | 1,595.7<br>(1,345.0 to 1,886.2)          | 121.1<br>(80.4 to 174.0)              | 31.8<br>(28.5 to 34.7)                            | 9.0<br>(6.9 to 11.0)                                |
| <b>Self-harm and interpersonal violence</b>                                         | <b>5,744.0</b><br><b>(5,051.7 to 6,463.2)</b> | <b>444.5†</b><br><b>(383.0 to 510.7)</b> | <b>78.7</b><br><b>(54.2 to 109.3)</b> | <b>6.1</b><br><b>(1.6 to 10.0)</b>                | <b>-9.5</b><br><b>(-12.4 to -7.0)</b>               |
| Self-harm                                                                           | 194.5<br>(163.7 to 229.6)                     | 97.3<br>(80.6 to 115.0)                  | 10.4<br>(6.7 to 15.3)                 | 14.7<br>(10.7 to 19.1)                            | -7.4<br>(-10.3 to -4.3)                             |
| Self-harm by firearm                                                                | 10.9<br>(9.1 to 12.8)                         | 3.0<br>(1.7 to 5.0)                      | 0.4<br>(0.3 to 0.6)                   | -1.6<br>(-5.9 to 2.6)                             | -20.0<br>(-22.9 to -17.1)                           |
| Self-harm by other specified means                                                  | 183.6<br>(152.4 to 218.0)                     | 94.3<br>(77.9 to 111.1)                  | 10.0<br>(6.4 to 14.7)                 | 15.6<br>(11.3 to 20.1)                            | -6.8<br>(-9.7 to -3.6)                              |
| Interpersonal violence                                                              | 5,549.5<br>(4,856.5 to 6,265.4)               | 347.2‡<br>(290.2 to 410.2)               | 68.2<br>(47.1 to 94.7)                | 4.9<br>(-0.1 to 9.1)                              | -9.8<br>(-13.1 to -7.1)                             |
| Assault by firearm                                                                  | 12.8<br>(11.0 to 15.1)                        | 4.3<br>(3.0 to 6.0)                      | 0.6<br>(0.4 to 0.9)                   | 25.3<br>(20.4 to 30.3)                            | 3.2<br>(0.0 to 6.4)                                 |
| Assault by sharp object                                                             | 132.3<br>(107.5 to 158.6)                     | 51.0<br>(37.4 to 68.7)                   | 4.1<br>(2.7 to 6.0)                   | 15.2<br>(10.7 to 19.5)                            | -4.0<br>(-7.1 to -1.1)                              |
| Sexual violence                                                                     | 4,887.4<br>(4,212.8 to 5,612.9)               | --                                       | 42.1<br>(28.0 to 60.3)                | -1.7<br>(-8.3 to 4.2)                             | -13.4<br>(-18.5 to -8.9)                            |
| Assault by other means                                                              | 517.0<br>(438.5 to 620.7)                     | 292.0<br>(243.3 to 347.2)                | 21.4<br>(14.4 to 30.8)                | 17.8<br>(14.4 to 20.6)                            | -4.9<br>(-7.2 to -2.9)                              |
| <b>Forces of nature, conflict and terrorism, and executions and police conflict</b> | <b>744.4</b><br><b>(315.5 to 1,286.9)</b>     | <b>13.5†</b><br><b>(3.8 to 21.4)</b>     | <b>26.9</b><br><b>(7.3 to 67.1)</b>   | <b>-18.1</b><br><b>(-21.9 to -14.9)</b>           | <b>-26.8</b><br><b>(-29.8 to -24.2)</b>             |
| Exposure to forces of nature                                                        | 725.7<br>(297.3 to 1,272.6)                   | --                                       | 26.3<br>(7.1 to 64.8)                 | -19.2<br>(-23.1 to -15.8)                         | -28.0<br>(-30.9 to -25.4)                           |
| Conflict and terrorism                                                              | --                                            | --                                       | --                                    | --                                                | --                                                  |
| Executions and police conflict                                                      | 18.7<br>(10.4 to 48.2)                        | 13.5<br>(3.8 to 21.4)                    | 0.7<br>(0.2 to 2.4)                   | 64.9<br>(22.8 to 120.4)                           | 24.7<br>(-10.3 to 75.2)                             |
| <b>Impairments</b>                                                                  | --                                            | --                                       | --                                    | --                                                | --                                                  |
| Anaemia                                                                             | 45,843.1<br>(41,788.6 to 51,224.5)            | --                                       | 1,132.1<br>(725.5 to 1,655.5)         | -12.5<br>(-17.9 to -6.1)                          | -19.4<br>(-23.9 to -14.3)                           |
| Developmental intellectual disability                                               | 3,703.4<br>(2,816.6 to 4,662.5)               | --                                       | 416.1<br>(297.7 to 566.3)             | 0.8<br>(-6.8 to 11.7)                             | -9.0<br>(-15.6 to 0.5)                              |
| Epilepsy                                                                            | 1,034.8<br>(662.3 to 1,413.4)                 | --                                       | 341.4<br>(200.5 to 529.4)             | 1.4<br>(-39.8 to 70.5)                            | -7.9<br>(-46.3 to 58.0)                             |
| Guillain-Barre syndrome                                                             | 1.5<br>(1.2 to 1.9)                           | --                                       | 0.4<br>(0.3 to 0.7)                   | 15.9<br>(12.0 to 20.3)                            | -0.1<br>(-0.1 to -0.0)                              |
| Hearing loss                                                                        | 36,829.8<br>(35,092.1 to 38,617.2)            | --                                       | 1,291.2<br>(906.8 to 1,773.9)         | 11.0<br>(6.4 to 15.2)                             | -7.0<br>(-9.7 to -4.3)                              |
| Heart failure                                                                       | 977.1<br>(858.8 to 1,107.1)                   | --                                       | 135.7<br>(108.0 to 164.1)             | 43.2<br>(33.2 to 54.0)                            | 8.2<br>(0.4 to 15.9)                                |
| Infertility                                                                         | 2,247.4<br>(2,086.4 to 2,426.0)               | --                                       | 14.2<br>(6.3 to 28.0)                 | 24.4<br>(15.2 to 33.8)                            | 6.2<br>(-1.6 to 14.1)                               |
| Pelvic inflammatory disease                                                         | 82.2<br>(69.8 to 97.0)                        | --                                       | 10.8<br>(7.0 to 15.2)                 | 22.1<br>(2.8 to 45.2)                             | -1.0<br>(-15.9 to 16.8)                             |
| Vision loss                                                                         | 18,702.0<br>(18,008.7 to 19,446.3)            | --                                       | 671.1<br>(480.8 to 923.2)             | 32.2<br>(26.0 to 39.9)                            | 8.9<br>(4.5 to 14.7)                                |

We did not calculate incidence for the nine impairments, certain NTDs, and causes with only birth prevalence. Blank cells mean that no estimate is available.

† Incidence for aggregate causes represents the sum of the incidence of the causes below the aggregate.

‡ Incidence estimates for stroke represent first-ever stroke only.

^ Incidence of HIV/AIDS represents new infections of HIV only and does not include new infections of Tuberculosis in HIV positive cases.

SR Table 14: Prevalence, incidence, and YLDs for 2016, percentage change of YLD counts and percentage change of age-standardised YLD rates between 2006 and 2016 by cause and impairments, for all ages, Barbados.

| Cause                                                                                | Prevalence in thousands (95% UI) | Incidence in thousands (95% UI)         | YLDs in thousands (95% UI)    |                                                   |                                                     |
|--------------------------------------------------------------------------------------|----------------------------------|-----------------------------------------|-------------------------------|---------------------------------------------------|-----------------------------------------------------|
|                                                                                      | 2016 counts                      | 2016 counts                             | 2016 counts                   | Percentage change in counts between 2006 and 2016 | Percentage change in age-standardised rates between |
| <b>All causes</b>                                                                    | <b>273.2</b><br>(272.5 to 274.1) | <b>1,770.2†</b><br>(1,684.4 to 1,864.2) | <b>34.3</b><br>(25.6 to 44.2) | <b>10.1</b><br>(8.2 to 12.0)                      | <b>0.7</b><br>(-1.1 to 2.6)                         |
| <b>Communicable, maternal, neonatal, and nutritional disorders</b>                   | <b>164.3</b><br>(158.8 to 170.2) | <b>961.1†</b><br>(885.1 to 1,043.7)     | <b>3.0</b><br>(2.1 to 4.0)    | <b>9.0</b><br>(1.8 to 17.5)                       | <b>6.7</b><br>(-0.9 to 15.4)                        |
| <b>HIV/AIDS and tuberculosis</b>                                                     | <b>73.4</b><br>(66.0 to 79.5)    | <b>0.1†</b><br>(0.1 to 0.1)             | <b>0.1</b><br>(0.1 to 0.2)    | <b>29.6</b><br>(-8.5 to 61.4)                     | <b>25.4</b><br>(-7.8 to 53.6)                       |
| Tuberculosis                                                                         | 67.6<br>(60.8 to 75.8)           | < 0.05†<br>(< 0.05 to < 0.05)           | < 0.05<br>(< 0.05 to < 0.05)  | -4.0<br>(-9.5 to 2.0)                             | -8.0<br>(-12.9 to -2.4)                             |
| Drug-susceptible tuberculosis                                                        | < 0.05<br>(< 0.05 to < 0.05)     | < 0.05<br>(< 0.05 to < 0.05)            | < 0.05<br>(< 0.05 to < 0.05)  | -4.0<br>(-9.6 to 2.0)                             | -8.0<br>(-12.9 to -2.5)                             |
| Multidrug-resistant tuberculosis without extensive drug resistance                   | < 0.05<br>(< 0.05 to < 0.05)     | < 0.05<br>(< 0.05 to < 0.05)            | < 0.05<br>(< 0.05 to < 0.05)  | -16.4<br>(-85.3 to 421.2)                         | -19.9<br>(-86.0 to 405.0)                           |
| Extensively drug-resistant tuberculosis                                              | < 0.05<br>(< 0.05 to < 0.05)     | < 0.05<br>(< 0.05 to < 0.05)            | < 0.05<br>(< 0.05 to < 0.05)  | 122.6<br>(-60.9 to 1,288.2)                       | 113.4<br>(-62.6 to 1,245.4)                         |
| Latent tuberculosis infection                                                        | 67.5<br>(60.7 to 75.8)           | --                                      | --                            | --                                                | --                                                  |
| HIV/AIDS                                                                             | 1.1<br>(0.8 to 1.5)              | 0.1 <sup>a</sup><br>(< 0.05 to 0.1)     | 0.1<br>(0.1 to 0.2)           | 32.0<br>(-8.7 to 68.3)                            | 27.9<br>(-7.9 to 59.9)                              |
| Drug-susceptible HIV/AIDS - Tuberculosis                                             | < 0.05<br>(< 0.05 to < 0.05)     | < 0.05<br>(< 0.05 to < 0.05)            | < 0.05<br>(< 0.05 to < 0.05)  | -23.3<br>(-28.6 to -17.4)                         | -26.3<br>(-31.4 to -20.6)                           |
| Multidrug-resistant HIV/AIDS - Tuberculosis without extensive drug resistance        | < 0.05<br>(< 0.05 to < 0.05)     | < 0.05<br>(< 0.05 to < 0.05)            | < 0.05<br>(< 0.05 to < 0.05)  | -33.3<br>(-88.6 to 316.4)                         | -35.9<br>(-89.0 to 300.4)                           |
| Extensively drug-resistant HIV/AIDS - Tuberculosis                                   | < 0.05<br>(< 0.05 to < 0.05)     | < 0.05<br>(< 0.05 to < 0.05)            | < 0.05<br>(< 0.05 to < 0.05)  | 77.6<br>(-69.6 to 1,008.6)                        | 70.7<br>(-70.8 to 966.1)                            |
| HIV/AIDS resulting in other diseases                                                 | 1.1<br>(0.8 to 1.5)              | 0.1<br>(< 0.05 to 0.1)                  | 0.1<br>(0.1 to 0.2)           | 32.9<br>(-8.7 to 70.0)                            | 28.8<br>(-7.7 to 61.8)                              |
| <b>Diarrhoea, lower respiratory infections, and other common infectious diseases</b> | <b>15.7</b><br>(14.9 to 16.4)    | <b>915.8†</b><br>(841.9 to 993.6)       | <b>0.8</b><br>(0.5 to 1.1)    | <b>12.7</b><br>(9.0 to 16.9)                      | <b>8.2</b><br>(4.9 to 12.0)                         |
| Diarrhoeal diseases                                                                  | 3.3<br>(3.1 to 3.6)              | 224.1<br>(210.1 to 239.1)               | 0.4<br>(0.3 to 0.5)           | 23.1<br>(16.5 to 29.9)                            | 16.0<br>(9.8 to 22.6)                               |
| Intestinal infectious diseases                                                       | < 0.05<br>(< 0.05 to < 0.05)     | < 0.05†<br>(< 0.05 to < 0.05)           | < 0.05<br>(< 0.05 to < 0.05)  | 8.6<br>(-4.9 to 23.1)                             | -3.2<br>(-14.7 to 9.9)                              |
| Typhoid fever                                                                        | < 0.05<br>(< 0.05 to < 0.05)     | < 0.05<br>(< 0.05 to < 0.05)            | < 0.05<br>(< 0.05 to < 0.05)  | 9.6<br>(-4.4 to 24.9)                             | -1.8<br>(-14.3 to 12.2)                             |
| Paratyphoid fever                                                                    | < 0.05<br>(< 0.05 to < 0.05)     | < 0.05<br>(< 0.05 to < 0.05)            | < 0.05<br>(< 0.05 to < 0.05)  | 42.1<br>(13.8 to 78.8)                            | 29.8<br>(3.6 to 61.1)                               |
| Other intestinal infectious diseases                                                 | --                               | --                                      | < 0.05<br>(< 0.05 to < 0.05)  | -29.2<br>(-45.2 to -8.9)                          | -36.3<br>(-53.9 to -11.0)                           |
| Lower respiratory infections                                                         | 0.7<br>(0.6 to 0.8)              | 28.6<br>(26.2 to 31.1)                  | < 0.05<br>(< 0.05 to 0.1)     | 41.0<br>(28.6 to 54.0)                            | 26.4<br>(14.4 to 39.0)                              |
| Upper respiratory infections                                                         | 8.6<br>(7.7 to 9.6)              | 645.9<br>(573.8 to 724.1)               | 0.2<br>(0.1 to 0.3)           | 1.2<br>(-4.1 to 6.8)                              | 0.2<br>(-4.8 to 5.5)                                |
| Otitis media                                                                         | 3.0<br>(2.7 to 3.3)              | 12.3<br>(10.1 to 15.1)                  | 0.1<br>(0.1 to 0.1)           | 2.2<br>(-5.7 to 10.7)                             | 1.3<br>(-6.3 to 9.3)                                |
| Meningitis                                                                           | 0.2<br>(0.2 to 0.2)              | < 0.05<br>(< 0.05 to < 0.05)            | < 0.05<br>(< 0.05 to < 0.05)  | -2.3<br>(-5.0 to 0.2)                             | -4.4<br>(-7.0 to -1.8)                              |
| Pneumococcal meningitis                                                              | 0.1<br>(0.1 to 0.1)              | < 0.05<br>(< 0.05 to < 0.05)            | < 0.05<br>(< 0.05 to < 0.05)  | -10.0<br>(-15.3 to -4.9)                          | -11.9<br>(-17.2 to -6.5)                            |
| H influenzae type B meningitis                                                       | < 0.05<br>(< 0.05 to < 0.05)     | < 0.05<br>(< 0.05 to < 0.05)            | < 0.05<br>(< 0.05 to < 0.05)  | -2.7<br>(-7.0 to 1.3)                             | -3.6<br>(-8.1 to 0.7)                               |
| Meningococcal infection                                                              | < 0.05<br>(< 0.05 to < 0.05)     | < 0.05<br>(< 0.05 to < 0.05)            | < 0.05<br>(< 0.05 to < 0.05)  | -0.5<br>(-4.5 to 4.2)                             | -3.8<br>(-7.6 to 0.2)                               |
| Other meningitis                                                                     | 0.1<br>(0.1 to 0.1)              | < 0.05<br>(< 0.05 to < 0.05)            | < 0.05<br>(< 0.05 to < 0.05)  | 9.9<br>(5.0 to 16.2)                              | 7.1<br>(2.4 to 12.7)                                |
| Encephalitis                                                                         | 0.2<br>(0.1 to 0.3)              | 0.1<br>(0.1 to 0.1)                     | < 0.05<br>(< 0.05 to < 0.05)  | 2.9<br>(-13.2 to 21.9)                            | -0.7<br>(-16.1 to 17.9)                             |
| Diphtheria                                                                           | < 0.05<br>(< 0.05 to < 0.05)     | < 0.05<br>(< 0.05 to < 0.05)            | < 0.05<br>(< 0.05 to < 0.05)  | -21.7<br>(-56.7 to 38.6)                          | -23.2<br>(-55.3 to 35.6)                            |
| Whooping cough                                                                       | < 0.05<br>(< 0.05 to < 0.05)     | 0.2<br>(0.1 to 0.2)                     | < 0.05<br>(< 0.05 to < 0.05)  | -29.2<br>(-43.2 to -10.5)                         | -23.4<br>(-39.0 to -2.8)                            |
| Tetanus                                                                              | < 0.05<br>(< 0.05 to < 0.05)     | < 0.05<br>(< 0.05 to < 0.05)            | < 0.05<br>(< 0.05 to < 0.05)  | -48.3<br>(-59.3 to -29.7)                         | -49.8<br>(-60.6 to -33.1)                           |
| Measles                                                                              | < 0.05<br>(0.0 to < 0.05)        | < 0.05<br>(0.0 to < 0.05)               | < 0.05<br>(0.0 to < 0.05)     | --                                                | --                                                  |
| Varicella and herpes zoster                                                          | 0.3<br>(0.3 to 0.3)              | 4.6<br>(4.4 to 4.8)                     | < 0.05<br>(< 0.05 to < 0.05)  | 13.3<br>(2.3 to 26.7)                             | 0.2<br>(-9.7 to 12.1)                               |
| <b>Neglected tropical diseases and malaria</b>                                       | <b>3.0</b><br>(2.7 to 3.4)       | <b>16.5†</b><br>(9.8 to 30.7)           | <b>0.1</b><br>(0.1 to 0.3)    | <b>123.9</b><br>(65.9 to 223.8)                   | <b>104.3</b><br>(51.4 to 187.4)                     |
| Malaria                                                                              | --                               | --                                      | --                            | --                                                | --                                                  |
| Chagas disease                                                                       | < 0.05<br>(< 0.05 to < 0.05)     | --                                      | < 0.05<br>(< 0.05 to < 0.05)  | 26.6<br>(13.1 to 43.4)                            | 13.1<br>(0.8 to 28.4)                               |
| Leishmaniasis                                                                        | --                               | --                                      | --                            | --                                                | --                                                  |
| Visceral leishmaniasis                                                               | --                               | --                                      | --                            | --                                                | --                                                  |
| Cutaneous and mucocutaneous leishmaniasis                                            | --                               | --                                      | --                            | --                                                | --                                                  |
| African trypanosomiasis                                                              | --                               | --                                      | --                            | --                                                | --                                                  |
| Schistosomiasis                                                                      | --                               | --                                      | --                            | --                                                | --                                                  |
| Cysticercosis                                                                        | --                               | --                                      | --                            | --                                                | --                                                  |
| Cystic echinococcosis                                                                | --                               | --                                      | --                            | --                                                | --                                                  |
| Lymphatic filariasis                                                                 | --                               | --                                      | --                            | --                                                | --                                                  |
| Onchocerciasis                                                                       | --                               | --                                      | --                            | --                                                | --                                                  |
| Trachoma                                                                             | --                               | --                                      | --                            | --                                                | --                                                  |
| Dengue                                                                               | 0.7<br>(0.4 to 1.2)              | 11.8<br>(7.4 to 17.5)                   | 0.1<br>(0.1 to 0.2)           | 247.5<br>(174.1 to 687.7)                         | 236.0<br>(164.6 to 660.4)                           |
| Yellow fever                                                                         | --                               | --                                      | --                            | --                                                | --                                                  |
| Rabies                                                                               | < 0.05<br>(< 0.05 to < 0.05)     | < 0.05<br>(< 0.05 to < 0.05)            | < 0.05<br>(< 0.05 to < 0.05)  | 48.4<br>(7.9 to 106.7)                            | 33.6<br>(-8.0 to 103.6)                             |
| Intestinal nematode infections                                                       | 0.7<br>(0.6 to 0.8)              | --                                      | < 0.05<br>(< 0.05 to < 0.05)  | 33.1<br>(-7.6 to 88.7)                            | 24.2<br>(-13.4 to 77.4)                             |
| Ascariasis                                                                           | 0.2<br>(0.2 to 0.3)              | --                                      | --                            | --                                                | --                                                  |

| Cause                                                                   | Prevalence in thousands (95% UI)  | Incidence in thousands (95% UI)    | YLDs in thousands (95% UI)                    |                                                   |                                                     |
|-------------------------------------------------------------------------|-----------------------------------|------------------------------------|-----------------------------------------------|---------------------------------------------------|-----------------------------------------------------|
|                                                                         | 2016 counts                       | 2016 counts                        | 2016 counts                                   | Percentage change in counts between 2006 and 2016 | Percentage change in age-standardised rates between |
| Trichuriasis                                                            | 0.2<br>(0.2 to 0.3)               | --                                 | --                                            | --                                                | --                                                  |
| Hookworm disease                                                        | 0.2<br>(0.2 to 0.3)               | --                                 | < 0.05<br>(< 0.05 to < 0.05)                  | 33.1<br>(-7.6 to 88.7)                            | 24.2<br>(-13.4 to 77.4)                             |
| Food-borne trematodiasis                                                | --                                | --                                 | --                                            | --                                                | --                                                  |
| Leprosy                                                                 | < 0.05<br>(< 0.05 to < 0.05)      | < 0.05<br>(< 0.05 to < 0.05)       | < 0.05<br>(< 0.05 to < 0.05)                  | 39.4<br>(31.7 to 50.6)                            | 20.3<br>(13.8 to 29.7)                              |
| Ebola virus disease                                                     | --                                | --                                 | --                                            | --                                                | --                                                  |
| Zika virus disease                                                      | 0.1<br>(< 0.05 to 0.3)            | 4.6<br>(1.7 to 18.6)               | < 0.05<br>(< 0.05 to < 0.05)                  | --                                                | --                                                  |
| Guinea worm disease                                                     | --                                | --                                 | --                                            | --                                                | --                                                  |
| Other neglected tropical diseases                                       | 1.6<br>(1.3 to 1.9)               | --                                 | < 0.05<br>(< 0.05 to 0.1)                     | -1.9<br>(-22.0 to 21.9)                           | -1.6<br>(-23.6 to 24.9)                             |
| <b>Maternal disorders</b>                                               | <b>0.3<br/>(0.2 to 0.3)</b>       | <b>6.1†<br/>(5.5 to 6.5)</b>       | <b>&lt; 0.05<br/>(&lt; 0.05 to &lt; 0.05)</b> | <b>-14.0<br/>(-35.9 to 17.9)</b>                  | <b>-8.8<br/>(-32.1 to 24.7)</b>                     |
| Maternal haemorrhage                                                    | < 0.05<br>(< 0.05 to < 0.05)      | 0.2<br>(0.1 to 0.2)                | < 0.05<br>(< 0.05 to < 0.05)                  | -11.6<br>(-37.3 to 22.7)                          | -5.2<br>(-33.5 to 31.7)                             |
| Maternal sepsis and other pregnancy related infections                  | 0.1<br>(0.1 to 0.1)               | 0.4<br>(0.3 to 0.5)                | < 0.05<br>(< 0.05 to < 0.05)                  | -11.0<br>(-56.2 to 76.9)                          | -6.1<br>(-54.5 to 88.2)                             |
| Maternal hypertensive disorders                                         | 0.2<br>(0.1 to 0.2)               | 0.7<br>(0.6 to 0.8)                | < 0.05<br>(< 0.05 to < 0.05)                  | -14.3<br>(-47.7 to 42.2)                          | -9.1<br>(-44.5 to 49.1)                             |
| Maternal obstructed labour and uterine rupture                          | < 0.05<br>(< 0.05 to < 0.05)      | 0.1<br>(0.1 to 0.2)                | < 0.05<br>(< 0.05 to < 0.05)                  | -13.0<br>(-52.8 to 60.3)                          | -7.8<br>(-50.1 to 70.4)                             |
| Maternal abortion, miscarriage, and ectopic pregnancy                   | < 0.05<br>(< 0.05 to 0.1)         | 4.6<br>(4.1 to 5.0)                | < 0.05<br>(< 0.05 to < 0.05)                  | -12.1<br>(-50.0 to 51.3)                          | -6.9<br>(-47.2 to 57.4)                             |
| Other maternal disorders                                                | --                                | --                                 | < 0.05<br>(< 0.05 to < 0.05)                  | -18.6<br>(-39.2 to 11.3)                          | -13.8<br>(-35.5 to 17.8)                            |
| <b>Neonatal disorders</b>                                               | <b>4.2<br/>(3.4 to 5.4)</b>       | <b>--</b>                          | <b>0.8<br/>(0.5 to 1.4)</b>                   | <b>8.3<br/>(-8.0 to 26.7)</b>                     | <b>9.5<br/>(-6.6 to 27.8)</b>                       |
| Neonatal preterm birth complications                                    | 3.4<br>(2.6 to 4.4)               | --                                 | 0.4<br>(0.2 to 0.6)                           | 4.0<br>(-16.8 to 34.0)                            | 5.6<br>(-15.8 to 36.8)                              |
| Neonatal encephalopathy due to birth asphyxia and trauma                | 0.1<br>(0.1 to 0.3)               | --                                 | < 0.05<br>(< 0.05 to < 0.05)                  | 8.5<br>(-29.8 to 92.7)                            | 8.6<br>(-28.7 to 95.6)                              |
| Neonatal sepsis and other neonatal infections                           | 0.9<br>(0.4 to 2.0)               | --                                 | 0.4<br>(0.1 to 1.0)                           | 13.9<br>(-9.8 to 36.4)                            | 14.4<br>(-8.1 to 36.2)                              |
| Hemolytic disease and other neonatal jaundice                           | 0.1<br>(0.1 to 0.1)               | --                                 | < 0.05<br>(< 0.05 to < 0.05)                  | 0.0<br>(-18.5 to 22.8)                            | -0.6<br>(-20.0 to 23.1)                             |
| Other neonatal disorders                                                | --                                | --                                 | < 0.05<br>(< 0.05 to < 0.05)                  | 0.1<br>(-16.9 to 18.9)                            | 7.7<br>(-10.5 to 27.9)                              |
| <b>Nutritional deficiencies</b>                                         | <b>50.4<br/>(44.6 to 55.5)</b>    | <b>4.3†<br/>(2.8 to 6.5)</b>       | <b>1.0<br/>(0.6 to 1.5)</b>                   | <b>-0.7<br/>(-13.1 to 14.9)</b>                   | <b>-3.5<br/>(-16.0 to 12.5)</b>                     |
| Protein-energy malnutrition                                             | 0.8<br>(0.6 to 1.0)               | 0.5<br>(0.4 to 0.7)                | < 0.05<br>(< 0.05 to < 0.05)                  | -9.5<br>(-34.7 to 29.8)                           | -2.1<br>(-29.3 to 39.9)                             |
| Iodine deficiency                                                       | 1.1<br>(1.0 to 1.2)               | < 0.05<br>(< 0.05 to < 0.05)       | < 0.05<br>(< 0.05 to < 0.05)                  | 1.5<br>(-13.3 to 19.8)                            | -5.5<br>(-18.9 to 11.3)                             |
| Vitamin A deficiency                                                    | 4.6<br>(2.8 to 7.1)               | 3.8<br>(2.3 to 6.0)                | < 0.05<br>(< 0.05 to < 0.05)                  | 0.7<br>(-15.3 to 22.1)                            | -0.5<br>(-17.4 to 21.6)                             |
| Iron-deficiency anaemia                                                 | 42.6<br>(37.3 to 48.5)            | --                                 | 0.9<br>(0.6 to 1.4)                           | -0.4<br>(-13.8 to 16.4)                           | -3.5<br>(-17.2 to 14.5)                             |
| Other nutritional deficiencies                                          | --                                | --                                 | < 0.05<br>(< 0.05 to < 0.05)                  | -10.5<br>(-36.7 to 28.9)                          | -3.5<br>(-31.6 to 39.8)                             |
| <b>Other communicable, maternal, neonatal, and nutritional diseases</b> | <b>82.1<br/>(75.3 to 88.4)</b>    | <b>18.4<br/>(16.8 to 20.2)</b>     | <b>0.1<br/>(0.1 to 0.2)</b>                   | <b>0.1<br/>(-6.8 to 7.2)</b>                      | <b>0.1<br/>(-8.1 to 8.7)</b>                        |
| Sexually transmitted diseases excluding HIV                             | 73.9<br>(67.8 to 80.2)            | 17.4<br>(15.8 to 19.1)             | 0.1<br>(< 0.05 to 0.1)                        | -0.3<br>(-6.4 to 6.1)                             | -0.3<br>(-6.4 to 6.6)                               |
| Syphilis                                                                | 1.0<br>(0.8 to 1.2)               | 0.7<br>(0.5 to 0.9)                | < 0.05<br>(< 0.05 to < 0.05)                  | 19.2<br>(5.1 to 36.2)                             | 1.2<br>(-10.6 to 15.0)                              |
| Chlamydial infection                                                    | 2.2<br>(1.8 to 2.8)               | 1.7<br>(1.3 to 2.1)                | < 0.05<br>(< 0.05 to < 0.05)                  | -7.6<br>(-21.6 to 9.5)                            | -1.1<br>(-16.4 to 17.2)                             |
| Gonococcal infection                                                    | 1.3<br>(1.0 to 1.6)               | 3.6<br>(2.8 to 4.5)                | < 0.05<br>(< 0.05 to < 0.05)                  | -7.0<br>(-23.8 to 11.3)                           | 0.4<br>(-18.2 to 20.2)                              |
| Trichomoniasis                                                          | 9.5<br>(8.3 to 10.9)              | 8.1<br>(7.0 to 9.3)                | < 0.05<br>(< 0.05 to < 0.05)                  | -0.1<br>(-6.0 to 6.3)                             | 0.4<br>(-5.5 to 7.5)                                |
| Genital herpes                                                          | 63.8<br>(54.9 to 73.5)            | 2.9<br>(2.4 to 3.4)                | < 0.05<br>(< 0.05 to < 0.05)                  | 6.5<br>(-0.8 to 15.0)                             | 0.0<br>(-7.0 to 8.7)                                |
| Other sexually transmitted diseases                                     | 0.6<br>(0.5 to 0.6)               | 0.5<br>(0.4 to 0.6)                | < 0.05<br>(< 0.05 to < 0.05)                  | -6.7<br>(-16.7 to 4.6)                            | -1.4<br>(-12.0 to 10.7)                             |
| Hepatitis                                                               | 11.3<br>(10.0 to 12.6)            | 1.0<br>(0.8 to 1.2)                | < 0.05<br>(< 0.05 to < 0.05)                  | -17.6<br>(-35.4 to 5.0)                           | -21.1<br>(-38.8 to 2.9)                             |
| Acute hepatitis A                                                       | < 0.05<br>(< 0.05 to < 0.05)      | 0.2<br>(0.1 to 0.4)                | < 0.05<br>(< 0.05 to < 0.05)                  | -19.6<br>(-65.2 to 114.0)                         | -21.6<br>(-69.0 to 114.8)                           |
| Hepatitis B                                                             | 4.4<br>(3.5 to 5.5)               | 0.5<br>(0.4 to 0.7)                | < 0.05<br>(< 0.05 to < 0.05)                  | -17.6<br>(-31.3 to -1.5)                          | -23.0<br>(-35.5 to -8.8)                            |
| Hepatitis C                                                             | 6.9<br>(6.1 to 7.6)               | 0.1<br>(0.1 to 0.1)                | < 0.05<br>(< 0.05 to < 0.05)                  | -9.2<br>(-25.4 to 7.8)                            | -6.2<br>(-27.5 to 17.8)                             |
| Acute hepatitis E                                                       | < 0.05<br>(< 0.05 to < 0.05)      | 0.1<br>(0.1 to 0.1)                | < 0.05<br>(< 0.05 to < 0.05)                  | -17.6<br>(-24.7 to -9.5)                          | -21.6<br>(-26.8 to -16.2)                           |
| Other infectious diseases                                               | 1.3<br>(1.1 to 1.6)               | < 0.05<br>(< 0.05 to < 0.05)       | < 0.05<br>(< 0.05 to < 0.05)                  | 2.1<br>(-15.2 to 21.8)                            | 2.1<br>(-17.2 to 24.4)                              |
| <b>Non-communicable diseases</b>                                        | <b>264.0<br/>(263.0 to 265.1)</b> | <b>790.5†<br/>(753.2 to 830.9)</b> | <b>29.5<br/>(21.8 to 38.1)</b>                | <b>9.7<br/>(7.7 to 11.8)</b>                      | <b>-0.3<br/>(-2.2 to 1.8)</b>                       |
| <b>Neoplasms</b>                                                        | <b>4.6<br/>(4.4 to 4.8)</b>       | <b>1.4<br/>(1.3 to 1.4)</b>        | <b>0.5<br/>(0.4 to 0.6)</b>                   | <b>31.7<br/>(24.6 to 38.4)</b>                    | <b>9.0<br/>(3.5 to 14.3)</b>                        |
| Lip and oral cavity cancer                                              | 0.1<br>(< 0.05 to 0.1)            | < 0.05<br>(< 0.05 to < 0.05)       | < 0.05<br>(< 0.05 to < 0.05)                  | 18.6<br>(3.2 to 34.7)                             | -2.4<br>(-14.6 to 10.3)                             |
| Nasopharynx cancer                                                      | < 0.05<br>(< 0.05 to < 0.05)      | < 0.05<br>(< 0.05 to < 0.05)       | < 0.05<br>(< 0.05 to < 0.05)                  | 13.8<br>(3.7 to 25.6)                             | 2.5<br>(-6.5 to 13.3)                               |
| Other pharynx cancer                                                    | < 0.05<br>(< 0.05 to < 0.05)      | < 0.05<br>(< 0.05 to < 0.05)       | < 0.05<br>(< 0.05 to < 0.05)                  | 24.1<br>(6.5 to 45.2)                             | 0.0<br>(-14.1 to 16.9)                              |
| Oesophageal cancer                                                      | < 0.05<br>(< 0.05 to < 0.05)      | < 0.05<br>(< 0.05 to < 0.05)       | < 0.05<br>(< 0.05 to < 0.05)                  | 13.2<br>(-5.0 to 31.9)                            | -9.1<br>(-23.1 to 6.0)                              |
| Stomach cancer                                                          | 0.1<br>(0.1 to 0.1)               | 0.1<br>(0.1 to 0.1)                | < 0.05<br>(< 0.05 to < 0.05)                  | 25.4<br>(7.0 to 45.9)                             | 1.9<br>(-13.2 to 18.2)                              |
| Colon and rectum cancer                                                 | 0.7<br>(0.7 to 0.7)               | 0.2<br>(0.2 to 0.2)                | 0.1<br>(< 0.05 to 0.1)                        | 41.4<br>(25.6 to 57.2)                            | 15.0<br>(2.4 to 27.7)                               |
| Liver cancer                                                            | < 0.05<br>(< 0.05 to < 0.05)      | < 0.05<br>(< 0.05 to < 0.05)       | < 0.05<br>(< 0.05 to < 0.05)                  | 21.5<br>(12.0 to 31.6)                            | -0.3<br>(-8.1 to 7.9)                               |
| Liver cancer due to hepatitis B                                         | < 0.05<br>(< 0.05 to < 0.05)      | < 0.05<br>(< 0.05 to < 0.05)       | < 0.05<br>(< 0.05 to < 0.05)                  | 21.0<br>(11.2 to 31.5)                            | 0.4<br>(-7.4 to 9.1)                                |



| Cause                                              | Prevalence in thousands (95% UI)     | Incidence in thousands (95% UI)    | YLDs in thousands (95% UI)        |                                                   |                                                     |
|----------------------------------------------------|--------------------------------------|------------------------------------|-----------------------------------|---------------------------------------------------|-----------------------------------------------------|
|                                                    | 2016 counts                          | 2016 counts                        | 2016 counts                       | Percentage change in counts between 2006 and 2016 | Percentage change in age-standardised rates between |
| Liver cancer due to hepatitis C                    | < 0.05<br>(< 0.05 to < 0.05)         | < 0.05<br>(< 0.05 to < 0.05)       | < 0.05<br>(< 0.05 to < 0.05)      | 21.0<br>(10.3 to 33.9)                            | -1.5<br>(-10.2 to 8.9)                              |
| Liver cancer due to alcohol use                    | < 0.05<br>(< 0.05 to < 0.05)         | < 0.05<br>(< 0.05 to < 0.05)       | < 0.05<br>(< 0.05 to < 0.05)      | 25.6<br>(14.8 to 38.1)                            | 1.5<br>(-7.2 to 12.1)                               |
| Liver cancer due to other causes                   | < 0.05<br>(< 0.05 to < 0.05)         | < 0.05<br>(< 0.05 to < 0.05)       | < 0.05<br>(< 0.05 to < 0.05)      | 18.8<br>(8.2 to 29.9)                             | -1.8<br>(-10.4 to 7.4)                              |
| Gallbladder and biliary tract cancer               | < 0.05<br>(< 0.05 to < 0.05)         | < 0.05<br>(< 0.05 to < 0.05)       | < 0.05<br>(< 0.05 to < 0.05)      | 19.4<br>(10.6 to 28.5)                            | -3.2<br>(-10.3 to 4.2)                              |
| Pancreatic cancer                                  | < 0.05<br>(< 0.05 to < 0.05)         | < 0.05<br>(< 0.05 to < 0.05)       | < 0.05<br>(< 0.05 to < 0.05)      | 27.4<br>(11.3 to 45.0)                            | 3.0<br>(-9.3 to 16.1)                               |
| Larynx cancer                                      | < 0.05<br>(< 0.05 to < 0.05)         | < 0.05<br>(< 0.05 to < 0.05)       | < 0.05<br>(< 0.05 to < 0.05)      | 30.6<br>(13.3 to 51.6)                            | 3.9<br>(-9.8 to 19.4)                               |
| Tracheal, bronchus, and lung cancer                | < 0.05<br>(< 0.05 to < 0.05)         | < 0.05<br>(< 0.05 to < 0.05)       | < 0.05<br>(< 0.05 to < 0.05)      | 28.2<br>(6.6 to 54.6)                             | 3.4<br>(-14.1 to 25.4)                              |
| Malignant skin melanoma                            | < 0.05<br>(< 0.05 to < 0.05)         | < 0.05<br>(< 0.05 to < 0.05)       | < 0.05<br>(< 0.05 to < 0.05)      | 33.3<br>(12.1 to 60.4)                            | 15.8<br>(-2.4 to 39.2)                              |
| Non-melanoma skin cancer                           | < 0.05<br>(< 0.05 to < 0.05)         | < 0.05<br>(< 0.05 to < 0.05)       | < 0.05<br>(< 0.05 to < 0.05)      | -22.0<br>(-63.4 to 74.4)                          | -35.7<br>(-69.7 to 42.8)                            |
| Non-melanoma skin cancer (squamous-cell carcinoma) | < 0.05<br>(< 0.05 to < 0.05)         | < 0.05<br>(< 0.05 to < 0.05)       | < 0.05<br>(< 0.05 to < 0.05)      | -23.8<br>(-64.9 to 77.5)                          | -37.3<br>(-71.0 to 44.8)                            |
| Non-melanoma skin cancer (basal-cell carcinoma)    | < 0.05<br>(< 0.05 to < 0.05)         | < 0.05<br>(< 0.05 to < 0.05)       | < 0.05<br>(< 0.05 to < 0.05)      | 25.6<br>(11.1 to 44.3)                            | 3.6<br>(-6.1 to 16.7)                               |
| Breast cancer                                      | 1.0<br>(0.9 to 1.0)                  | 0.2<br>(0.2 to 0.2)                | 0.1<br>(0.1 to 0.1)               | 28.0<br>(12.7 to 45.2)                            | 10.1<br>(-3.0 to 25.1)                              |
| Cervical cancer                                    | 0.1<br>(0.1 to 0.2)                  | < 0.05<br>(< 0.05 to < 0.05)       | < 0.05<br>(< 0.05 to < 0.05)      | 16.8<br>(-5.1 to 43.5)                            | 3.8<br>(-15.7 to 27.5)                              |
| Uterine cancer                                     | 0.4<br>(0.4 to 0.4)                  | 0.1<br>(0.1 to 0.1)                | < 0.05<br>(< 0.05 to < 0.05)      | 36.5<br>(14.3 to 62.8)                            | 9.0<br>(-7.8 to 30.2)                               |
| Ovarian cancer                                     | 0.1<br>(< 0.05 to 0.1)               | < 0.05<br>(< 0.05 to < 0.05)       | < 0.05<br>(< 0.05 to < 0.05)      | 19.0<br>(-13.4 to 61.1)                           | 0.7<br>(-26.2 to 37.1)                              |
| Prostate cancer                                    | 1.5<br>(1.2 to 1.7)                  | 0.4<br>(0.3 to 0.4)                | 0.1<br>(0.1 to 0.2)               | 32.8<br>(17.6 to 50.3)                            | 5.3<br>(-6.7 to 19.3)                               |
| Testicular cancer                                  | < 0.05<br>(< 0.05 to < 0.05)         | < 0.05<br>(< 0.05 to < 0.05)       | < 0.05<br>(< 0.05 to < 0.05)      | -11.1<br>(-23.9 to 3.8)                           | -11.3<br>(-25.3 to 4.8)                             |
| Kidney cancer                                      | 0.1<br>(0.1 to 0.1)                  | < 0.05<br>(< 0.05 to < 0.05)       | < 0.05<br>(< 0.05 to < 0.05)      | 35.6<br>(19.5 to 53.0)                            | 16.5<br>(3.2 to 31.7)                               |
| Bladder cancer                                     | 0.1<br>(0.1 to 0.1)                  | < 0.05<br>(< 0.05 to < 0.05)       | < 0.05<br>(< 0.05 to < 0.05)      | 26.5<br>(10.1 to 46.0)                            | 2.5<br>(-10.4 to 17.7)                              |
| Brain and nervous system cancer                    | < 0.05<br>(< 0.05 to < 0.05)         | < 0.05<br>(< 0.05 to < 0.05)       | < 0.05<br>(< 0.05 to < 0.05)      | 12.1<br>(3.3 to 25.6)                             | -1.7<br>(-8.8 to 8.9)                               |
| Thyroid cancer                                     | 0.1<br>(0.1 to 0.1)                  | < 0.05<br>(< 0.05 to < 0.05)       | < 0.05<br>(< 0.05 to < 0.05)      | 57.4<br>(29.4 to 90.6)                            | 44.7<br>(18.8 to 76.4)                              |
| Mesothelioma                                       | < 0.05<br>(< 0.05 to < 0.05)         | < 0.05<br>(< 0.05 to < 0.05)       | < 0.05<br>(< 0.05 to < 0.05)      | 12.9<br>(4.3 to 23.3)                             | -3.5<br>(-10.9 to 5.5)                              |
| Hodgkin lymphoma                                   | < 0.05<br>(< 0.05 to < 0.05)         | < 0.05<br>(< 0.05 to < 0.05)       | < 0.05<br>(< 0.05 to < 0.05)      | 19.2<br>(3.0 to 37.4)                             | 15.8<br>(-1.5 to 36.0)                              |
| Non-Hodgkin's lymphoma                             | 0.1<br>(0.1 to 0.1)                  | < 0.05<br>(< 0.05 to < 0.05)       | < 0.05<br>(< 0.05 to < 0.05)      | 24.8<br>(11.7 to 38.4)                            | 9.6<br>(-1.7 to 21.2)                               |
| Multiple myeloma                                   | 0.1<br>(< 0.05 to 0.1)               | < 0.05<br>(< 0.05 to < 0.05)       | < 0.05<br>(< 0.05 to < 0.05)      | 47.1<br>(17.2 to 88.2)                            | 19.0<br>(-5.5 to 52.3)                              |
| Leukaemia                                          | 0.1<br>(0.1 to 0.1)                  | < 0.05<br>(< 0.05 to < 0.05)       | < 0.05<br>(< 0.05 to < 0.05)      | 27.5<br>(16.3 to 39.3)                            | 10.7<br>(1.6 to 20.2)                               |
| Acute lymphoid leukaemia                           | < 0.05<br>(< 0.05 to < 0.05)         | < 0.05<br>(< 0.05 to < 0.05)       | < 0.05<br>(< 0.05 to < 0.05)      | 18.7<br>(1.1 to 41.5)                             | 19.7<br>(-3.1 to 50.9)                              |
| Chronic lymphoid leukaemia                         | < 0.05<br>(< 0.05 to < 0.05)         | < 0.05<br>(< 0.05 to < 0.05)       | < 0.05<br>(< 0.05 to < 0.05)      | 58.9<br>(30.3 to 90.4)                            | 26.9<br>(4.5 to 51.7)                               |
| Acute myeloid leukaemia                            | < 0.05<br>(< 0.05 to < 0.05)         | < 0.05<br>(< 0.05 to < 0.05)       | < 0.05<br>(< 0.05 to < 0.05)      | 41.1<br>(26.8 to 55.7)                            | 28.3<br>(15.0 to 43.3)                              |
| Chronic myeloid leukaemia                          | < 0.05<br>(< 0.05 to < 0.05)         | < 0.05<br>(< 0.05 to < 0.05)       | < 0.05<br>(< 0.05 to < 0.05)      | 25.1<br>(4.4 to 47.7)                             | 7.2<br>(-10.3 to 26.0)                              |
| Other leukaemia                                    | 0.1<br>(< 0.05 to 0.1)               | < 0.05<br>(< 0.05 to < 0.05)       | < 0.05<br>(< 0.05 to < 0.05)      | 15.0<br>(-0.5 to 32.2)                            | -0.5<br>(-13.1 to 12.7)                             |
| Other neoplasms                                    | 0.4<br>(0.4 to 0.4)                  | 0.1<br>(0.1 to 0.1)                | < 0.05<br>(< 0.05 to < 0.05)      | 40.1<br>(22.2 to 60.0)                            | 24.2<br>(9.0 to 42.5)                               |
| <b>Cardiovascular diseases</b>                     | <b>27.7</b><br><b>(26.7 to 28.9)</b> | <b>2.8†</b><br><b>(2.7 to 3.0)</b> | <b>1.6</b><br><b>(1.2 to 2.1)</b> | <b>20.9</b><br><b>(17.2 to 25.2)</b>              | <b>0.1</b><br><b>(-2.8 to 3.4)</b>                  |
| Rheumatic heart disease                            | < 0.05<br>(< 0.05 to < 0.05)         | < 0.05<br>(< 0.05 to < 0.05)       | < 0.05<br>(< 0.05 to < 0.05)      | 7.2<br>(-7.7 to 24.4)                             | -9.8<br>(-21.3 to 3.5)                              |
| Ischaemic heart disease                            | 9.6<br>(9.1 to 10.1)                 | 1.2<br>(1.1 to 1.3)                | 0.4<br>(0.3 to 0.6)               | 22.8<br>(17.9 to 28.1)                            | 1.1<br>(-2.9 to 5.5)                                |
| Cerebrovascular disease                            | 4.0<br>(3.7 to 4.2)                  | 0.6‡<br>(0.5 to 0.6)               | 0.4<br>(0.3 to 0.5)               | 19.8<br>(11.3 to 28.7)                            | -1.6<br>(-8.5 to 5.5)                               |
| Ischaemic stroke                                   | 3.3<br>(2.9 to 3.6)                  | 0.4‡<br>(0.3 to 0.4)               | 0.3<br>(0.2 to 0.4)               | 20.1<br>(10.0 to 30.6)                            | -1.6<br>(-9.8 to 6.8)                               |
| Hemorrhagic stroke                                 | 0.9<br>(0.8 to 1.0)                  | 0.2‡<br>(0.2 to 0.2)               | 0.1<br>(0.1 to 0.1)               | 18.7<br>(5.8 to 32.4)                             | -1.6<br>(-12.3 to 9.5)                              |
| Hypertensive heart disease                         | 1.0<br>(0.8 to 1.2)                  | --                                 | 0.1<br>(0.1 to 0.1)               | 21.4<br>(10.3 to 33.7)                            | -1.3<br>(-10.3 to 8.4)                              |
| Cardiomyopathy and myocarditis                     | 0.4<br>(0.3 to 0.4)                  | 0.1†<br>(0.1 to 0.1)               | < 0.05<br>(< 0.05 to < 0.05)      | 17.6<br>(4.3 to 32.1)                             | 0.9<br>(-10.7 to 12.8)                              |
| Myocarditis                                        | 0.1<br>(0.1 to 0.1)                  | 0.1<br>(0.1 to 0.1)                | < 0.05<br>(< 0.05 to < 0.05)      | 13.8<br>(-1.6 to 32.1)                            | 0.7<br>(-11.8 to 15.1)                              |
| Alcoholic cardiomyopathy                           | 0.1<br>(0.1 to 0.1)                  | --                                 | < 0.05<br>(< 0.05 to < 0.05)      | 24.4<br>(-2.2 to 55.2)                            | 1.9<br>(-19.5 to 26.6)                              |
| Other cardiomyopathy                               | 0.3<br>(0.2 to 0.3)                  | --                                 | < 0.05<br>(< 0.05 to < 0.05)      | 16.7<br>(0.5 to 34.6)                             | 0.7<br>(-13.0 to 17.1)                              |
| Atrial fibrillation and flutter                    | 2.9<br>(2.6 to 3.4)                  | 0.2<br>(0.2 to 0.3)                | 0.2<br>(0.1 to 0.3)               | 24.6<br>(17.4 to 32.3)                            | 1.1<br>(-4.4 to 7.7)                                |
| Peripheral vascular disease                        | 7.2<br>(6.3 to 8.3)                  | 0.7<br>(0.6 to 0.8)                | < 0.05<br>(< 0.05 to 0.1)         | 24.0<br>(15.5 to 32.7)                            | -2.7<br>(-9.0 to 4.0)                               |
| Endocarditis                                       | < 0.05<br>(< 0.05 to < 0.05)         | 0.1<br>(0.1 to 0.1)                | < 0.05<br>(< 0.05 to < 0.05)      | 21.0<br>(0.8 to 44.1)                             | 1.1<br>(-14.8 to 19.7)                              |
| Other cardiovascular and circulatory diseases      | 7.3<br>(6.3 to 8.5)                  | --                                 | 0.4<br>(0.3 to 0.5)               | 17.8<br>(9.8 to 27.7)                             | 0.7<br>(-5.7 to 8.3)                                |
| <b>Chronic respiratory diseases</b>                | <b>31.7</b><br><b>(30.1 to 33.3)</b> | <b>4.9†</b><br><b>(4.6 to 5.2)</b> | <b>1.1</b><br><b>(0.8 to 1.5)</b> | <b>8.5</b><br><b>(3.7 to 13.5)</b>                | <b>4.3</b><br><b>(-0.4 to 9.5)</b>                  |
| Chronic obstructive pulmonary disease              | 9.3<br>(8.6 to 10.2)                 | 0.5<br>(0.5 to 0.6)                | 0.2<br>(0.1 to 0.2)               | 16.0<br>(-0.8 to 34.8)                            | -1.8<br>(-15.9 to 13.7)                             |
| Pneumoconiosis                                     | < 0.05<br>(< 0.05 to < 0.05)         | < 0.05<br>(< 0.05 to < 0.05)       | < 0.05<br>(< 0.05 to < 0.05)      | 25.8<br>(12.1 to 40.3)                            | 2.1<br>(-7.5 to 12.4)                               |
| Silicosis                                          | < 0.05<br>(< 0.05 to < 0.05)         | < 0.05<br>(< 0.05 to < 0.05)       | < 0.05<br>(< 0.05 to < 0.05)      | 30.4<br>(24.2 to 37.7)                            | 4.8<br>(-0.1 to 10.0)                               |

| Cause                                                          | Prevalence in thousands (95% UI)        | Incidence in thousands (95% UI)       | YLDs in thousands (95% UI)              |                                                   |                                                     |
|----------------------------------------------------------------|-----------------------------------------|---------------------------------------|-----------------------------------------|---------------------------------------------------|-----------------------------------------------------|
|                                                                | 2016 counts                             | 2016 counts                           | 2016 counts                             | Percentage change in counts between 2006 and 2016 | Percentage change in age-standardised rates between |
| Asbestosis                                                     | < 0.05<br>(< 0.05 to < 0.05)            | < 0.05<br>(< 0.05 to < 0.05)          | < 0.05<br>(< 0.05 to < 0.05)            | 22.4<br>(-4.9 to 55.1)                            | 2.5<br>(-18.3 to 26.5)                              |
| Coal workers pneumoconiosis                                    | --                                      | --                                    | --                                      | --                                                | --                                                  |
| Other pneumoconiosis                                           | < 0.05<br>(< 0.05 to < 0.05)            | < 0.05<br>(< 0.05 to < 0.05)          | < 0.05<br>(< 0.05 to < 0.05)            | 26.2<br>(7.4 to 49.1)                             | 0.6<br>(-13.2 to 16.8)                              |
| Asthma                                                         | 23.0<br>(21.3 to 24.8)                  | 4.3<br>(4.0 to 4.6)                   | 0.9<br>(0.6 to 1.3)                     | 6.8<br>(1.8 to 11.8)                              | 4.9<br>(0.1 to 10.4)                                |
| Interstitial lung disease and pulmonary sarcoidosis            | 0.2<br>(0.1 to 0.2)                     | < 0.05<br>(< 0.05 to < 0.05)          | < 0.05<br>(< 0.05 to < 0.05)            | 19.9<br>(8.0 to 34.2)                             | 1.4<br>(-7.8 to 12.6)                               |
| Other chronic respiratory diseases                             | --                                      | --                                    | < 0.05<br>(< 0.05 to < 0.05)            | 36.2<br>(10.5 to 70.2)                            | 37.2<br>(8.8 to 74.5)                               |
| <b>Cirrhosis and other chronic liver diseases</b>              | <b>2.5</b><br><b>(2.3 to 2.6)</b>       | <b>0.1</b><br><b>(0.1 to 0.1)</b>     | <b>0.1</b><br><b>(&lt; 0.05 to 0.1)</b> | <b>23.0</b><br><b>(11.7 to 35.3)</b>              | <b>7.9</b><br><b>(-2.5 to 19.6)</b>                 |
| Cirrhosis and other chronic liver diseases due to hepatitis B  | 0.3<br>(0.2 to 0.3)                     | < 0.05<br>(< 0.05 to < 0.05)          | < 0.05<br>(< 0.05 to < 0.05)            | 26.0<br>(-0.2 to 60.4)                            | 7.1<br>(-14.8 to 34.9)                              |
| Cirrhosis and other chronic liver diseases due to hepatitis C  | 0.8<br>(0.7 to 0.8)                     | < 0.05<br>(< 0.05 to < 0.05)          | < 0.05<br>(< 0.05 to < 0.05)            | 25.4<br>(3.9 to 52.7)                             | 7.4<br>(-10.4 to 30.4)                              |
| Cirrhosis and other chronic liver diseases due to alcohol use  | 0.9<br>(0.8 to 1.0)                     | < 0.05<br>(< 0.05 to < 0.05)          | < 0.05<br>(< 0.05 to < 0.05)            | 28.0<br>(8.5 to 51.4)                             | 9.1<br>(-7.5 to 28.5)                               |
| Cirrhosis and other chronic liver diseases due to other causes | 0.5<br>(0.5 to 0.5)                     | < 0.05<br>(< 0.05 to < 0.05)          | < 0.05<br>(< 0.05 to < 0.05)            | 13.8<br>(-5.5 to 38.8)                            | 7.3<br>(-12.3 to 32.7)                              |
| <b>Digestive diseases</b>                                      | <b>10.8</b><br><b>(10.1 to 11.6)</b>    | <b>8.9†</b><br><b>(8.3 to 9.6)</b>    | <b>0.4</b><br><b>(0.3 to 0.5)</b>       | <b>8.2</b><br><b>(-4.4 to 20.4)</b>               | <b>-0.7</b><br><b>(-10.8 to 9.6)</b>                |
| Peptic ulcer disease                                           | 4.1<br>(3.7 to 4.6)                     | 0.3<br>(0.3 to 0.4)                   | 0.1<br>(< 0.05 to 0.1)                  | -10.6<br>(-28.9 to 12.0)                          | -17.6<br>(-33.8 to 1.6)                             |
| Gastritis and duodenitis                                       | 4.0<br>(3.5 to 4.6)                     | 1.9<br>(1.7 to 2.2)                   | 0.1<br>(< 0.05 to 0.1)                  | 7.4<br>(-13.4 to 30.1)                            | -2.3<br>(-19.9 to 16.1)                             |
| Appendicitis                                                   | < 0.05<br>(< 0.05 to < 0.05)            | 0.6<br>(0.6 to 0.6)                   | < 0.05<br>(< 0.05 to < 0.05)            | 5.2<br>(-20.5 to 38.5)                            | 1.9<br>(-27.3 to 40.6)                              |
| Paralytic ileus and intestinal obstruction                     | < 0.05<br>(< 0.05 to < 0.05)            | 0.1<br>(0.1 to 0.2)                   | < 0.05<br>(< 0.05 to < 0.05)            | 16.1<br>(10.9 to 21.6)                            | 4.1<br>(0.2 to 8.0)                                 |
| Inguinal, femoral, and abdominal hernia                        | 2.4<br>(2.1 to 2.6)                     | 2.4<br>(2.0 to 2.7)                   | 0.2<br>(0.1 to 0.2)                     | 18.1<br>(8.0 to 29.6)                             | 7.4<br>(-2.0 to 17.8)                               |
| Inflammatory bowel disease                                     | < 0.05<br>(< 0.05 to < 0.05)            | 0.1<br>(0.1 to 0.1)                   | < 0.05<br>(< 0.05 to < 0.05)            | 8.8<br>(3.1 to 14.8)                              | -4.3<br>(-8.9 to 0.3)                               |
| Vascular intestinal disorders                                  | < 0.05<br>(< 0.05 to < 0.05)            | < 0.05<br>(< 0.05 to < 0.05)          | < 0.05<br>(< 0.05 to < 0.05)            | 22.0<br>(15.6 to 29.0)                            | 8.3<br>(3.0 to 13.5)                                |
| Gallbladder and biliary diseases                               | 0.5<br>(0.5 to 0.6)                     | 3.3<br>(2.8 to 3.8)                   | < 0.05<br>(< 0.05 to < 0.05)            | 22.1<br>(-0.9 to 51.9)                            | 10.0<br>(-9.9 to 34.5)                              |
| Pancreatitis                                                   | < 0.05<br>(< 0.05 to < 0.05)            | 0.1<br>(0.1 to 0.2)                   | < 0.05<br>(< 0.05 to < 0.05)            | 26.7<br>(22.1 to 31.8)                            | 11.8<br>(8.5 to 15.7)                               |
| Other digestive diseases                                       | --                                      | --                                    | < 0.05<br>(< 0.05 to < 0.05)            | 15.9<br>(4.0 to 27.8)                             | 6.0<br>(-3.9 to 16.5)                               |
| <b>Neurological disorders</b>                                  | <b>112.2</b><br><b>(107.8 to 118.3)</b> | <b>50.7</b><br><b>(43.8 to 58.2)</b>  | <b>3.1</b><br><b>(2.1 to 4.3)</b>       | <b>4.1</b><br><b>(-10.4 to 21.1)</b>              | <b>-0.8</b><br><b>(-15.5 to 17.0)</b>               |
| Alzheimer's disease and other dementias                        | 2.2<br>(1.9 to 2.6)                     | 0.4<br>(0.3 to 0.5)                   | 0.3<br>(0.2 to 0.4)                     | 19.4<br>(13.8 to 25.1)                            | -0.8<br>(-5.4 to 4.0)                               |
| Parkinson's disease                                            | 0.3<br>(0.2 to 0.4)                     | < 0.05<br>(< 0.05 to < 0.05)          | < 0.05<br>(< 0.05 to 0.1)               | 28.2<br>(14.1 to 44.2)                            | 3.6<br>(-8.0 to 17.3)                               |
| Epilepsy                                                       | 1.1<br>(0.3 to 1.9)                     | 0.1<br>(< 0.05 to 0.2)                | 0.3<br>(0.1 to 0.7)                     | -1.6<br>(-79.1 to 398.2)                          | -5.6<br>(-80.0 to 386.7)                            |
| Multiple sclerosis                                             | < 0.05<br>(< 0.05 to < 0.05)            | < 0.05<br>(< 0.05 to < 0.05)          | < 0.05<br>(< 0.05 to < 0.05)            | 10.0<br>(-0.0 to 21.8)                            | 2.3<br>(-6.7 to 12.8)                               |
| Motor neuron disease                                           | < 0.05<br>(< 0.05 to < 0.05)            | < 0.05<br>(< 0.05 to < 0.05)          | < 0.05<br>(< 0.05 to < 0.05)            | 11.8<br>(7.5 to 16.4)                             | -1.0<br>(-4.4 to 2.7)                               |
| Migraine                                                       | 41.8<br>(39.3 to 44.2)                  | 4.4<br>(4.1 to 4.7)                   | 2.0<br>(1.3 to 2.8)                     | 2.2<br>(-1.3 to 5.8)                              | -0.5<br>(-3.8 to 2.9)                               |
| Tension-type headache                                          | 84.9<br>(76.3 to 94.3)                  | 45.8<br>(38.9 to 53.2)                | 0.4<br>(0.2 to 0.6)                     | 3.7<br>(-1.4 to 8.9)                              | -1.0<br>(-5.5 to 3.9)                               |
| Other neurological disorders                                   | < 0.05<br>(< 0.05 to < 0.05)            | < 0.05<br>(< 0.05 to < 0.05)          | 0.1<br>(< 0.05 to 0.1)                  | 14.5<br>(-64.2 to 298.7)                          | 13.7<br>(-67.6 to 316.9)                            |
| <b>Mental and substance use disorders</b>                      | <b>44.4</b><br><b>(43.0 to 45.7)</b>    | <b>16.6†</b><br><b>(15.5 to 18.0)</b> | <b>5.9</b><br><b>(4.2 to 7.6)</b>       | <b>4.0</b><br><b>(1.9 to 6.2)</b>                 | <b>0.4</b><br><b>(-1.4 to 2.3)</b>                  |
| Schizophrenia                                                  | 0.7<br>(0.6 to 0.8)                     | < 0.05<br>(< 0.05 to < 0.05)          | 0.5<br>(0.3 to 0.6)                     | 4.0<br>(-4.0 to 13.5)                             | -0.5<br>(-8.4 to 8.0)                               |
| Alcohol use disorders                                          | 4.2<br>(3.7 to 4.7)                     | 2.2<br>(1.9 to 2.4)                   | 0.4<br>(0.3 to 0.6)                     | 1.8<br>(-6.0 to 10.7)                             | 1.9<br>(-6.0 to 10.3)                               |
| Drug use disorders                                             | 1.9<br>(1.8 to 2.1)                     | 0.2<br>(0.2 to 0.3)                   | 0.4<br>(0.2 to 0.5)                     | 1.0<br>(-8.1 to 10.6)                             | 0.7<br>(-8.5 to 9.9)                                |
| Opioid use disorders                                           | 0.7<br>(0.5 to 0.8)                     | 0.1<br>(0.1 to 0.1)                   | 0.3<br>(0.2 to 0.4)                     | 4.1<br>(-6.6 to 16.4)                             | 3.4<br>(-7.7 to 15.5)                               |
| Cocaine use disorders                                          | 0.1<br>(0.1 to 0.1)                     | < 0.05<br>(< 0.05 to < 0.05)          | < 0.05<br>(< 0.05 to < 0.05)            | -0.5<br>(-24.0 to 30.0)                           | -2.1<br>(-26.5 to 29.2)                             |
| Amphetamine use disorders                                      | < 0.05<br>(< 0.05 to 0.1)               | < 0.05<br>(< 0.05 to < 0.05)          | < 0.05<br>(< 0.05 to < 0.05)            | -29.3<br>(-53.7 to 5.5)                           | -25.8<br>(-53.8 to 12.3)                            |
| Cannabis use disorders                                         | 1.0<br>(0.9 to 1.2)                     | 0.1<br>(0.1 to 0.2)                   | < 0.05<br>(< 0.05 to < 0.05)            | -10.0<br>(-24.3 to 6.2)                           | -7.0<br>(-22.1 to 10.3)                             |
| Other drug use disorders                                       | 0.1<br>(0.1 to 0.1)                     | < 0.05<br>(< 0.05 to < 0.05)          | < 0.05<br>(< 0.05 to < 0.05)            | -3.9<br>(-21.8 to 17.8)                           | -4.4<br>(-22.9 to 17.4)                             |
| Depressive disorders                                           | 10.3<br>(9.7 to 11.0)                   | 11.3<br>(10.2 to 12.6)                | 1.7<br>(1.2 to 2.4)                     | 8.9<br>(4.2 to 14.3)                              | 1.1<br>(-3.0 to 5.5)                                |
| Major depressive disorder                                      | 7.0<br>(6.3 to 7.8)                     | 10.7<br>(9.6 to 12.0)                 | 1.4<br>(1.0 to 1.9)                     | 9.0<br>(2.9 to 15.3)                              | 1.4<br>(-3.7 to 6.8)                                |
| Dysthymia                                                      | 3.5<br>(3.1 to 4.0)                     | 0.6<br>(0.5 to 0.7)                   | 0.3<br>(0.2 to 0.5)                     | 8.6<br>(3.9 to 13.5)                              | -0.1<br>(-3.9 to 3.9)                               |
| Bipolar disorder                                               | 2.6<br>(2.2 to 3.0)                     | 0.2<br>(0.2 to 0.2)                   | 0.5<br>(0.3 to 0.8)                     | 1.7<br>(-3.6 to 7.0)                              | -0.0<br>(-5.0 to 5.2)                               |
| Anxiety disorders                                              | 12.4<br>(11.2 to 13.6)                  | 1.7<br>(1.6 to 1.8)                   | 1.2<br>(0.8 to 1.6)                     | 2.7<br>(-0.7 to 6.1)                              | -0.2<br>(-3.3 to 3.2)                               |
| Eating disorders                                               | 0.5<br>(0.4 to 0.6)                     | 0.2<br>(0.1 to 0.2)                   | 0.1<br>(0.1 to 0.1)                     | -8.7<br>(-18.6 to 2.5)                            | -1.8<br>(-12.3 to 10.0)                             |
| Anorexia nervosa                                               | 0.1<br>(0.1 to 0.1)                     | < 0.05<br>(< 0.05 to < 0.05)          | < 0.05<br>(< 0.05 to < 0.05)            | -7.7<br>(-26.5 to 18.6)                           | -1.7<br>(-22.0 to 26.0)                             |
| Bulimia nervosa                                                | 0.4<br>(0.3 to 0.5)                     | 0.2<br>(0.1 to 0.2)                   | 0.1<br>(< 0.05 to 0.1)                  | -9.0<br>(-20.1 to 4.3)                            | -1.8<br>(-13.6 to 12.5)                             |
| Autistic spectrum disorders                                    | 2.3<br>(2.1 to 2.6)                     | < 0.05<br>(< 0.05 to < 0.05)          | 0.4<br>(0.2 to 0.5)                     | 1.7<br>(-3.3 to 6.7)                              | -0.1<br>(-4.9 to 5.0)                               |
| Autism                                                         | 0.8<br>(0.7 to 0.9)                     | < 0.05<br>(< 0.05 to < 0.05)          | 0.2<br>(0.1 to 0.3)                     | 1.7<br>(-5.8 to 10.2)                             | -0.3<br>(-7.9 to 8.2)                               |
| Asperger syndrome and other autistic spectrum disorders        | 1.6<br>(1.3 to 1.9)                     | < 0.05<br>(< 0.05 to < 0.05)          | 0.1<br>(0.1 to 0.2)                     | 1.7<br>(-3.5 to 7.1)                              | 0.2<br>(-4.8 to 5.5)                                |

| Cause                                                      | Prevalence in thousands (95% UI)        | Incidence in thousands (95% UI)          | YLDs in thousands (95% UI)           |                                                   |                                                     |
|------------------------------------------------------------|-----------------------------------------|------------------------------------------|--------------------------------------|---------------------------------------------------|-----------------------------------------------------|
|                                                            | 2016 counts                             | 2016 counts                              | 2016 counts                          | Percentage change in counts between 2006 and 2016 | Percentage change in age-standardised rates between |
| Attention-deficit/hyperactivity disorder                   | 4.5<br>(4.1 to 5.0)                     | 0.2<br>(0.1 to 0.2)                      | 0.1<br>( $< 0.05$ to 0.1)            | -3.1<br>(-8.0 to 1.7)                             | 0.1<br>(-5.0 to 5.5)                                |
| Conduct disorder                                           | 1.4<br>(1.2 to 1.8)                     | 0.5<br>(0.4 to 0.6)                      | 0.2<br>(0.1 to 0.3)                  | -3.0<br>(-9.5 to 3.6)                             | 0.4<br>(-6.3 to 7.4)                                |
| Idiopathic developmental intellectual disability           | 1.4<br>(0.6 to 2.2)                     | --                                       | 0.1<br>( $< 0.05$ to 0.1)            | 4.5<br>(-3.1 to 13.6)                             | 3.6<br>(-4.0 to 12.7)                               |
| Other mental and substance use disorders                   | 6.0<br>(5.3 to 6.9)                     | 0.1<br>(0.1 to 0.2)                      | 0.4<br>(0.3 to 0.6)                  | 5.4<br>(0.5 to 10.8)                              | -0.2<br>(-4.6 to 4.7)                               |
| <b>Diabetes, urogenital, blood, and endocrine diseases</b> | <b>124.4</b><br><b>(121.3 to 127.4)</b> | <b>35.2†</b><br><b>(33.1 to 37.6)</b>    | <b>3.9</b><br><b>(2.8 to 5.2)</b>    | <b>14.0</b><br><b>(8.3 to 19.7)</b>               | <b>-2.0</b><br><b>(-6.7 to 2.9)</b>                 |
| Diabetes mellitus                                          | 30.0<br>(27.6 to 32.8)                  | 1.7<br>(1.5 to 1.8)                      | 2.7<br>(1.9 to 3.6)                  | 16.3<br>(8.1 to 25.3)                             | -2.9<br>(-9.5 to 4.6)                               |
| Acute glomerulonephritis                                   | $< 0.05$<br>( $< 0.05$ to $< 0.05$ )    | 0.1<br>( $< 0.05$ to 0.1)                | $< 0.05$<br>( $< 0.05$ to $< 0.05$ ) | 8.2<br>(3.1 to 13.1)                              | 0.3<br>(-3.3 to 3.8)                                |
| Chronic kidney disease                                     | 15.5<br>(13.9 to 17.3)                  | 1.2<br>(1.0 to 1.3)                      | 0.4<br>(0.3 to 0.6)                  | 17.2<br>(8.4 to 26.7)                             | 0.4<br>(-7.1 to 8.3)                                |
| Chronic kidney disease due to diabetes mellitus            | 6.0<br>(5.1 to 7.0)                     | 0.5<br>(0.4 to 0.6)                      | 0.2<br>(0.1 to 0.2)                  | 19.7<br>(6.4 to 33.8)                             | 0.1<br>(-10.5 to 11.9)                              |
| Chronic kidney disease due to hypertension                 | 3.3<br>(2.9 to 3.8)                     | 0.3<br>(0.2 to 0.4)                      | 0.1<br>( $< 0.05$ to 0.1)            | 19.8<br>(5.1 to 36.0)                             | -0.8<br>(-13.2 to 12.3)                             |
| Chronic kidney disease due to glomerulonephritis           | 3.1<br>(2.6 to 3.6)                     | 0.2<br>(0.1 to 0.2)                      | 0.1<br>(0.1 to 0.2)                  | 13.6<br>(1.7 to 27.1)                             | 1.1<br>(-8.9 to 12.8)                               |
| Chronic kidney disease due to other causes                 | 3.1<br>(2.5 to 3.8)                     | 0.2<br>(0.2 to 0.3)                      | 0.1<br>(0.1 to 0.1)                  | 16.0<br>(4.4 to 29.1)                             | 0.8<br>(-9.0 to 11.6)                               |
| Urinary diseases and male infertility                      | 6.3<br>(5.6 to 7.0)                     | 21.9†<br>(19.8 to 24.3)                  | 0.2<br>(0.1 to 0.2)                  | 21.3<br>(13.8 to 29.1)                            | -0.9<br>(-6.5 to 5.2)                               |
| Interstitial nephritis and urinary tract infections        | 0.4<br>(0.3 to 0.4)                     | 19.9<br>(17.9 to 22.4)                   | $< 0.05$<br>( $< 0.05$ to $< 0.05$ ) | 4.6<br>(-7.3 to 18.0)                             | 0.4<br>(-11.3 to 14.2)                              |
| Urolithiasis                                               | 0.1<br>( $< 0.05$ to 0.1)               | 1.4<br>(1.2 to 1.6)                      | $< 0.05$<br>( $< 0.05$ to $< 0.05$ ) | 11.4<br>(5.7 to 17.3)                             | 1.1<br>(-3.4 to 5.4)                                |
| Benign prostatic hyperplasia                               | 4.3<br>(3.7 to 5.0)                     | 0.6<br>(0.5 to 0.7)                      | 0.1<br>(0.1 to 0.2)                  | 27.9<br>(18.8 to 38.0)                            | 0.2<br>(-6.8 to 8.1)                                |
| Male infertility                                           | 1.2<br>(1.0 to 1.6)                     | --                                       | $< 0.05$<br>( $< 0.05$ to $< 0.05$ ) | -11.8<br>(-17.7 to -5.4)                          | -3.9<br>(-10.2 to 3.2)                              |
| Other urinary diseases                                     | --                                      | --                                       | $< 0.05$<br>( $< 0.05$ to $< 0.05$ ) | -13.0<br>(-21.4 to -4.1)                          | -16.8<br>(-25.0 to -7.2)                            |
| Gynecological diseases                                     | 34.2<br>(32.5 to 35.6)                  | 9.6†<br>(9.0 to 10.1)                    | 0.4<br>(0.2 to 0.5)                  | -1.7<br>(-6.7 to 3.6)                             | 0.7<br>(-3.9 to 5.9)                                |
| Uterine fibroids                                           | 3.1<br>(2.8 to 3.6)                     | 0.3<br>(0.2 to 0.3)                      | 0.1<br>( $< 0.05$ to 0.1)            | 9.0<br>(-7.0 to 27.2)                             | 5.9<br>(-9.0 to 24.1)                               |
| Polycystic ovarian syndrome                                | $< 0.05$<br>( $< 0.05$ to $< 0.05$ )    | 0.2<br>(0.2 to 0.3)                      | $< 0.05$<br>( $< 0.05$ to $< 0.05$ ) | -9.2<br>(-35.6 to 28.3)                           | -0.9<br>(-29.1 to 38.9)                             |
| Female infertility                                         | 2.9<br>(2.0 to 4.1)                     | --                                       | $< 0.05$<br>( $< 0.05$ to $< 0.05$ ) | -5.2<br>(-12.3 to 2.6)                            | 3.5<br>(-4.3 to 11.6)                               |
| Endometriosis                                              | $< 0.05$<br>( $< 0.05$ to $< 0.05$ )    | 0.1<br>(0.1 to 0.1)                      | $< 0.05$<br>( $< 0.05$ to $< 0.05$ ) | -5.5<br>(-30.6 to 30.5)                           | -1.1<br>(-24.9 to 34.0)                             |
| Genital prolapse                                           | 11.6<br>(10.0 to 13.3)                  | 0.5<br>(0.4 to 0.6)                      | $< 0.05$<br>( $< 0.05$ to 0.1)       | 8.2<br>(-0.4 to 17.3)                             | -8.7<br>(-15.7 to -1.3)                             |
| Premenstrual syndrome                                      | 17.7<br>(16.8 to 18.6)                  | 6.1<br>(5.7 to 6.5)                      | 0.1<br>(0.1 to 0.2)                  | -6.3<br>(-12.8 to 0.5)                            | 0.1<br>(-6.9 to 7.4)                                |
| Other gynecological diseases                               | 2.9<br>(2.5 to 3.3)                     | 2.3<br>(1.9 to 2.8)                      | 0.1<br>(0.1 to 0.1)                  | -2.3<br>(-11.3 to 7.6)                            | 2.0<br>(-7.3 to 12.3)                               |
| Hemoglobinopathies and hemolytic anaemias                  | 68.7<br>(64.9 to 72.1)                  | --                                       | 0.1<br>(0.1 to 0.2)                  | -3.8<br>(-16.0 to 11.3)                           | -5.8<br>(-18.6 to 10.0)                             |
| Thalassemias                                               | $< 0.05$<br>( $< 0.05$ to $< 0.05$ )    | --                                       | $< 0.05$<br>( $< 0.05$ to $< 0.05$ ) | -3.2<br>(-22.9 to 18.6)                           | 3.5<br>(-18.1 to 27.1)                              |
| Thalassaemias trait                                        | 0.4<br>(0.3 to 0.6)                     | --                                       | $< 0.05$<br>( $< 0.05$ to $< 0.05$ ) | 8.9<br>(-17.3 to 221.1)                           | 4.4<br>(-21.4 to 199.6)                             |
| Sickle cell disorders                                      | 0.1<br>(0.1 to 0.1)                     | --                                       | $< 0.05$<br>( $< 0.05$ to $< 0.05$ ) | 5.7<br>(-7.9 to 19.9)                             | 10.6<br>(-4.0 to 26.5)                              |
| Sickle cell trait                                          | 24.1<br>(21.2 to 27.1)                  | --                                       | 0.1<br>( $< 0.05$ to 0.1)            | -8.7<br>(-23.4 to 9.2)                            | -7.7<br>(-23.1 to 11.9)                             |
| G6PD deficiency                                            | 13.8<br>(12.0 to 15.9)                  | --                                       | $< 0.05$<br>( $< 0.05$ to $< 0.05$ ) | -9.2<br>(-29.0 to 16.2)                           | -12.4<br>(-34.1 to 16.4)                            |
| G6PD trait                                                 | 33.0<br>(30.6 to 35.3)                  | --                                       | $< 0.05$<br>( $< 0.05$ to $< 0.05$ ) | -14.6<br>(-31.1 to 5.3)                           | -11.1<br>(-28.1 to 10.0)                            |
| Other hemoglobinopathies and hemolytic anaemias            | 2.5<br>(2.2 to 2.9)                     | --                                       | $< 0.05$<br>( $< 0.05$ to 0.1)       | 1.9<br>(-11.3 to 19.2)                            | -7.6<br>(-20.4 to 9.6)                              |
| Endocrine, metabolic, blood, and immune disorders          | 5.7<br>(5.2 to 6.2)                     | 0.9<br>(0.8 to 1.0)                      | 0.2<br>(0.1 to 0.2)                  | 16.3<br>(9.1 to 23.8)                             | 1.3<br>(-5.3 to 8.4)                                |
| <b>Musculoskeletal disorders</b>                           | <b>59.1</b><br><b>(56.9 to 61.5)</b>    | <b>29.6</b><br><b>(27.0 to 32.8)</b>     | <b>6.4</b><br><b>(4.6 to 8.3)</b>    | <b>10.6</b><br><b>(7.5 to 13.8)</b>               | <b>-1.5</b><br><b>(-4.0 to 1.2)</b>                 |
| Rheumatoid arthritis                                       | 1.6<br>(1.4 to 1.8)                     | 0.1<br>(0.1 to 0.1)                      | 0.4<br>(0.2 to 0.5)                  | 19.0<br>(10.5 to 28.1)                            | 1.7<br>(-5.1 to 9.5)                                |
| Osteoarthritis                                             | 16.3<br>(15.2 to 17.3)                  | 0.7<br>(0.7 to 0.8)                      | 1.0<br>(0.7 to 1.4)                  | 27.8<br>(23.7 to 32.5)                            | 4.9<br>(1.5 to 8.6)                                 |
| Low back and neck pain                                     | 28.2<br>(26.4 to 30.3)                  | 10.8<br>(9.7 to 12.0)                    | 3.2<br>(2.3 to 4.2)                  | 11.2<br>(7.8 to 15.1)                             | 0.7<br>(-2.2 to 3.6)                                |
| Low back pain                                              | 17.1<br>(15.2 to 19.3)                  | 8.1<br>(7.0 to 9.2)                      | 1.9<br>(1.4 to 2.5)                  | 11.4<br>(6.0 to 17.2)                             | 1.1<br>(-3.3 to 5.6)                                |
| Neck pain                                                  | 12.8<br>(11.0 to 14.9)                  | 2.7<br>(2.3 to 3.2)                      | 1.3<br>(0.9 to 1.8)                  | 11.1<br>(7.5 to 15.2)                             | -0.1<br>(-2.1 to 2.2)                               |
| Gout                                                       | 1.1<br>(1.0 to 1.3)                     | 0.2<br>(0.2 to 0.2)                      | $< 0.05$<br>( $< 0.05$ to $< 0.05$ ) | 16.6<br>(0.4 to 36.0)                             | 0.6<br>(-13.9 to 16.8)                              |
| Other musculoskeletal disorders                            | 21.2<br>(18.7 to 24.1)                  | 17.9<br>(15.4 to 20.8)                   | 1.8<br>(1.2 to 2.5)                  | 0.5<br>(-6.2 to 8.2)                              | -8.0<br>(-14.3 to -1.5)                             |
| <b>Other non-communicable diseases</b>                     | <b>216.1</b><br><b>(213.2 to 219.2)</b> | <b>640.3†</b><br><b>(602.1 to 680.8)</b> | <b>6.7</b><br><b>(4.5 to 9.5)</b>    | <b>11.1</b><br><b>(9.8 to 12.5)</b>               | <b>-0.2</b><br><b>(-1.2 to 0.9)</b>                 |
| Congenital anomalies                                       | 2.0<br>(1.7 to 2.4)                     | --                                       | 0.2<br>(0.2 to 0.3)                  | 4.7<br>(-1.1 to 11.0)                             | 2.3<br>(-3.2 to 7.9)                                |
| Neural tube defects                                        | 0.1<br>(0.1 to 0.1)                     | --                                       | $< 0.05$<br>( $< 0.05$ to $< 0.05$ ) | 8.1<br>(-6.8 to 25.5)                             | 4.5<br>(-10.2 to 21.1)                              |
| Congenital heart anomalies                                 | 0.5<br>(0.4 to 0.6)                     | --                                       | $< 0.05$<br>( $< 0.05$ to $< 0.05$ ) | 6.2<br>(-4.9 to 17.5)                             | 5.2<br>(-6.0 to 16.5)                               |
| Orofacial clefts                                           | 0.1<br>(0.1 to 0.2)                     | --                                       | $< 0.05$<br>( $< 0.05$ to $< 0.05$ ) | -6.4<br>(-16.0 to 3.6)                            | -9.1<br>(-18.6 to 0.6)                              |
| Down's syndrome                                            | 0.1<br>(0.1 to 0.1)                     | --                                       | $< 0.05$<br>( $< 0.05$ to $< 0.05$ ) | 5.6<br>(-2.1 to 13.4)                             | 6.3<br>(-1.7 to 14.1)                               |
| Turner syndrome                                            | $< 0.05$<br>( $< 0.05$ to $< 0.05$ )    | --                                       | $< 0.05$<br>( $< 0.05$ to $< 0.05$ ) | -0.4<br>(-13.5 to 14.3)                           | 2.7<br>(-10.6 to 18.2)                              |
| Klinefelter syndrome                                       | 0.1<br>( $< 0.05$ to 0.1)               | --                                       | $< 0.05$<br>( $< 0.05$ to $< 0.05$ ) | -3.8<br>(-28.5 to 29.9)                           | 2.8<br>(-24.7 to 38.5)                              |



| Cause                                         | Prevalence in thousands (95% UI)     | Incidence in thousands (95% UI)       | YLDs in thousands (95% UI)        |                                                   |                                                     |
|-----------------------------------------------|--------------------------------------|---------------------------------------|-----------------------------------|---------------------------------------------------|-----------------------------------------------------|
|                                               | 2016 counts                          | 2016 counts                           | 2016 counts                       | Percentage change in counts between 2006 and 2016 | Percentage change in age-standardised rates between |
| Other chromosomal abnormalities               | 0.1<br>(0.1 to 0.2)                  | --                                    | < 0.05<br>(< 0.05 to < 0.05)      | -2.2<br>(-16.4 to 14.4)                           | 2.4<br>(-13.3 to 21.5)                              |
| Congenital musculoskeletal and limb anomalies | 0.2<br>(0.2 to 0.2)                  | --                                    | < 0.05<br>(< 0.05 to < 0.05)      | 5.6<br>(-4.2 to 17.0)                             | 1.1<br>(-8.4 to 12.1)                               |
| Urogenital congenital anomalies               | 0.2<br>(0.2 to 0.2)                  | --                                    | < 0.05<br>(< 0.05 to < 0.05)      | -4.1<br>(-16.8 to 10.6)                           | -0.4<br>(-13.8 to 15.0)                             |
| Digestive congenital anomalies                | 0.3<br>(0.2 to 0.3)                  | --                                    | < 0.05<br>(< 0.05 to < 0.05)      | 5.6<br>(-10.3 to 23.9)                            | 2.6<br>(-12.9 to 20.9)                              |
| Other congenital anomalies                    | 0.9<br>(0.6 to 1.3)                  | --                                    | 0.1<br>(0.1 to 0.1)               | 5.1<br>(-5.3 to 17.2)                             | 1.5<br>(-8.7 to 13.1)                               |
| Skin and subcutaneous diseases                | 97.1<br>(94.3 to 100.0)              | 250.3<br>(233.3 to 269.2)             | 2.2<br>(1.5 to 3.2)               | 2.3<br>(0.4 to 4.2)                               | -0.1<br>(-1.9 to 1.8)                               |
| Dermatitis                                    | 12.7<br>(12.1 to 13.3)               | 15.4<br>(14.3 to 16.6)                | 0.5<br>(0.3 to 0.8)               | 2.2<br>(-2.2 to 6.7)                              | 0.7<br>(-3.9 to 5.2)                                |
| Psoriasis                                     | 3.2<br>(3.1 to 3.4)                  | 0.4<br>(0.4 to 0.4)                   | 0.3<br>(0.2 to 0.4)               | 8.6<br>(1.5 to 16.4)                              | 1.2<br>(-5.4 to 8.6)                                |
| Cellulitis                                    | 0.1<br>(0.1 to 0.1)                  | 2.1<br>(2.0 to 2.3)                   | < 0.05<br>(< 0.05 to < 0.05)      | 5.1<br>(-15.1 to 28.4)                            | -0.0<br>(-20.5 to 24.5)                             |
| Pyoderma                                      | 1.0<br>(1.0 to 1.1)                  | 25.4<br>(24.3 to 26.6)                | < 0.05<br>(< 0.05 to < 0.05)      | 16.2<br>(9.6 to 23.4)                             | 0.5<br>(-5.4 to 6.9)                                |
| Scabies                                       | 4.5<br>(4.0 to 5.1)                  | 13.9<br>(12.2 to 15.9)                | 0.1<br>(0.1 to 0.2)               | -2.5<br>(-6.4 to 1.4)                             | -2.6<br>(-6.5 to 1.1)                               |
| Fungal skin diseases                          | 34.8<br>(31.1 to 38.6)               | 128.8<br>(112.1 to 147.8)             | 0.2<br>(0.1 to 0.4)               | 9.6<br>(7.2 to 12.0)                              | 0.0<br>(-1.0 to 1.0)                                |
| Viral skin diseases                           | 7.4<br>(7.1 to 7.8)                  | 11.2<br>(10.6 to 11.8)                | 0.2<br>(0.1 to 0.3)               | 1.6<br>(-1.7 to 4.8)                              | -0.1<br>(-3.3 to 3.0)                               |
| Acne vulgaris                                 | 20.2<br>(18.3 to 22.2)               | 13.5<br>(11.2 to 16.5)                | 0.5<br>(0.4 to 0.8)               | -3.9<br>(-8.3 to 0.4)                             | 0.2<br>(-4.5 to 4.8)                                |
| Alopecia areata                               | 0.5<br>(0.5 to 0.5)                  | 0.9<br>(0.8 to 0.9)                   | < 0.05<br>(< 0.05 to < 0.05)      | 0.7<br>(-9.9 to 12.7)                             | -0.3<br>(-11.4 to 11.9)                             |
| Pruritus                                      | 2.9<br>(2.6 to 3.3)                  | 2.3<br>(2.0 to 2.6)                   | < 0.05<br>(< 0.05 to 0.1)         | 8.4<br>(2.4 to 14.3)                              | -0.3<br>(-5.5 to 4.6)                               |
| Urticaria                                     | 2.2<br>(2.0 to 2.5)                  | 4.0<br>(3.5 to 4.5)                   | 0.1<br>(0.1 to 0.2)               | 0.6<br>(-5.5 to 6.9)                              | -0.1<br>(-6.0 to 5.8)                               |
| Decubitus ulcer                               | 0.3<br>(0.3 to 0.4)                  | 1.1<br>(1.0 to 1.3)                   | < 0.05<br>(< 0.05 to 0.1)         | 4.8<br>(-6.6 to 17.3)                             | -12.0<br>(-21.3 to -1.5)                            |
| Other skin and subcutaneous diseases          | 26.0<br>(25.2 to 26.8)               | 31.3<br>(30.2 to 32.4)                | 0.1<br>(0.1 to 0.3)               | 11.2<br>(8.5 to 13.9)                             | -1.5<br>(-3.7 to 0.9)                               |
| Sense organ diseases                          | 85.4<br>(83.8 to 87.3)               | 29.9†<br>(28.2 to 31.8)               | 3.0<br>(2.1 to 4.2)               | 17.2<br>(15.4 to 19.4)                            | -0.6<br>(-2.1 to 1.2)                               |
| Glaucoma                                      | 0.4<br>(0.4 to 0.5)                  | --                                    | 0.1<br>(< 0.05 to 0.1)            | 26.9<br>(15.1 to 41.2)                            | -1.4<br>(-10.7 to 9.8)                              |
| Cataract                                      | 3.0<br>(2.6 to 3.4)                  | --                                    | 0.2<br>(0.2 to 0.4)               | 16.7<br>(11.2 to 22.2)                            | -3.6<br>(-8.3 to 1.2)                               |
| Macular degeneration                          | 0.1<br>(0.1 to 0.1)                  | --                                    | < 0.05<br>(< 0.05 to < 0.05)      | 27.1<br>(5.9 to 49.3)                             | 0.2<br>(-16.4 to 18.7)                              |
| Refraction and accommodation disorders        | 33.0<br>(31.6 to 34.2)               | --                                    | 0.4<br>(0.2 to 0.7)               | 9.4<br>(5.6 to 13.0)                              | -3.3<br>(-6.4 to -0.4)                              |
| Age-related and other hearing loss            | 66.7<br>(63.6 to 70.0)               | --                                    | 1.8<br>(1.3 to 2.5)               | 19.4<br>(16.6 to 22.3)                            | 0.5<br>(-1.5 to 3.0)                                |
| Other vision loss                             | 0.7<br>(0.6 to 0.7)                  | --                                    | 0.1<br>(< 0.05 to 0.1)            | 13.7<br>(3.7 to 23.0)                             | -2.1<br>(-10.4 to 6.3)                              |
| Other sense organ diseases                    | 10.8<br>(9.9 to 11.7)                | 29.9<br>(28.2 to 31.8)                | 0.3<br>(0.2 to 0.5)               | 16.2<br>(11.8 to 21.0)                            | -0.1<br>(-3.7 to 3.7)                               |
| Oral disorders                                | 152.2<br>(147.2 to 157.5)            | 360.1†<br>(328.4 to 395.9)            | 1.3<br>(0.8 to 2.0)               | 15.3<br>(12.2 to 18.5)                            | -0.1<br>(-1.8 to 1.8)                               |
| Caries of deciduous teeth                     | 14.8<br>(12.0 to 17.6)               | 52.7<br>(37.4 to 71.8)                | < 0.05<br>(< 0.05 to < 0.05)      | -3.7<br>(-12.2 to 5.2)                            | -0.1<br>(-8.8 to 8.9)                               |
| Caries of permanent teeth                     | 91.9<br>(85.2 to 98.7)               | 299.2<br>(270.8 to 327.6)             | 0.1<br>(< 0.05 to 0.2)            | 7.2<br>(3.4 to 11.2)                              | 2.6<br>(-1.1 to 6.1)                                |
| Periodontal disease                           | 54.3<br>(46.8 to 62.3)               | 6.2<br>(5.2 to 7.2)                   | 0.4<br>(0.1 to 0.7)               | 8.7<br>(5.0 to 12.6)                              | -0.5<br>(-3.2 to 2.7)                               |
| Edentulism and severe tooth loss              | 23.5<br>(20.5 to 26.6)               | 1.9<br>(1.6 to 2.3)                   | 0.7<br>(0.4 to 0.9)               | 24.0<br>(19.9 to 28.2)                            | -0.3<br>(-3.6 to 3.0)                               |
| Other oral disorders                          | 5.6<br>(5.3 to 5.8)                  | --                                    | 0.2<br>(0.1 to 0.2)               | 5.0<br>(1.8 to 8.4)                               | -0.1<br>(-3.2 to 3.1)                               |
| <b>Injuries</b>                               | <b>50.2</b><br><b>(47.3 to 54.1)</b> | <b>18.5†</b><br><b>(17.5 to 19.6)</b> | <b>1.9</b><br><b>(1.2 to 2.6)</b> | <b>17.6</b><br><b>(15.8 to 19.5)</b>              | <b>6.0</b><br><b>(4.4 to 7.7)</b>                   |
| <b>Transport injuries</b>                     | <b>5.9</b><br><b>(5.5 to 6.4)</b>    | <b>1.7</b><br><b>(1.5 to 1.9)</b>     | <b>0.3</b><br><b>(0.2 to 0.4)</b> | <b>18.0</b><br><b>(15.7 to 20.5)</b>              | <b>5.8</b><br><b>(3.8 to 7.9)</b>                   |
| Road injuries                                 | 5.6<br>(5.2 to 6.0)                  | 1.6<br>(1.5 to 1.8)                   | 0.3<br>(0.2 to 0.4)               | 18.6<br>(16.3 to 21.2)                            | 6.4<br>(4.3 to 8.5)                                 |
| Pedestrian road injuries                      | 0.8<br>(0.6 to 0.9)                  | 0.2<br>(0.1 to 0.2)                   | < 0.05<br>(< 0.05 to 0.1)         | 24.8<br>(22.3 to 27.4)                            | 11.2<br>(9.0 to 13.3)                               |
| Cyclist road injuries                         | 1.4<br>(1.2 to 1.7)                  | 0.4<br>(0.4 to 0.5)                   | 0.1<br>(< 0.05 to 0.1)            | 25.4<br>(22.7 to 28.4)                            | 14.0<br>(11.4 to 16.4)                              |
| Motorcyclist road injuries                    | 1.0<br>(0.9 to 1.2)                  | 0.2<br>(0.1 to 0.2)                   | 0.1<br>(< 0.05 to 0.1)            | 17.9<br>(15.4 to 20.5)                            | 6.6<br>(4.4 to 8.9)                                 |
| Motor vehicle road injuries                   | 1.8<br>(1.6 to 2.0)                  | 0.6<br>(0.5 to 0.7)                   | 0.1<br>(0.1 to 0.1)               | 12.8<br>(10.5 to 15.3)                            | 0.3<br>(-1.8 to 2.3)                                |
| Other road injuries                           | 0.6<br>(0.6 to 0.7)                  | 0.2<br>(0.2 to 0.3)                   | < 0.05<br>(< 0.05 to < 0.05)      | 18.2<br>(15.8 to 20.6)                            | 4.6<br>(2.5 to 6.7)                                 |
| Other transport injuries                      | 0.3<br>(0.3 to 0.4)                  | 0.1<br>(0.1 to 0.1)                   | < 0.05<br>(< 0.05 to < 0.05)      | 7.0<br>(4.6 to 9.3)                               | -2.9<br>(-5.1 to -0.6)                              |
| <b>Unintentional injuries</b>                 | <b>41.6</b><br><b>(38.6 to 45.2)</b> | <b>15.8</b><br><b>(14.8 to 16.9)</b>  | <b>1.4</b><br><b>(1.0 to 2.0)</b> | <b>18.4</b><br><b>(16.5 to 20.4)</b>              | <b>6.5</b><br><b>(4.8 to 8.2)</b>                   |
| Falls                                         | 17.6<br>(15.4 to 20.0)               | 6.7<br>(5.8 to 7.6)                   | 0.7<br>(0.5 to 1.0)               | 24.5<br>(22.4 to 26.5)                            | 9.7<br>(7.9 to 11.6)                                |
| Drowning                                      | 0.2<br>(0.2 to 0.2)                  | < 0.05<br>(< 0.05 to < 0.05)          | < 0.05<br>(< 0.05 to < 0.05)      | 9.8<br>(7.2 to 12.2)                              | -2.1<br>(-4.5 to -0.1)                              |
| Fire, heat, and hot substances                | 4.7<br>(3.9 to 5.8)                  | 0.5<br>(0.4 to 0.5)                   | 0.1<br>(0.1 to 0.2)               | 11.3<br>(7.0 to 15.6)                             | 4.0<br>(-0.1 to 8.0)                                |
| Poisonings                                    | 0.1<br>(0.1 to 0.1)                  | 0.1<br>(0.1 to 0.2)                   | < 0.05<br>(< 0.05 to < 0.05)      | 20.0<br>(10.7 to 29.9)                            | 13.9<br>(5.0 to 23.5)                               |
| Exposure to mechanical forces                 | 7.1<br>(6.1 to 8.6)                  | 2.0<br>(1.8 to 2.3)                   | 0.2<br>(0.1 to 0.2)               | 14.8<br>(12.7 to 17.0)                            | 5.3<br>(3.2 to 7.2)                                 |
| Unintentional firearm injuries                | 0.5<br>(0.4 to 0.7)                  | 0.1<br>(0.1 to 0.1)                   | < 0.05<br>(< 0.05 to < 0.05)      | 4.8<br>(2.5 to 6.9)                               | -4.4<br>(-6.4 to -2.5)                              |
| Unintentional suffocation                     | 0.2<br>(0.2 to 0.3)                  | < 0.05<br>(< 0.05 to < 0.05)          | < 0.05<br>(< 0.05 to < 0.05)      | 3.3<br>(0.9 to 5.6)                               | -1.5<br>(-4.2 to 0.9)                               |
| Other exposure to mechanical forces           | 6.3<br>(5.3 to 7.8)                  | 1.9<br>(1.7 to 2.2)                   | 0.1<br>(0.1 to 0.2)               | 17.3<br>(15.1 to 19.6)                            | 7.4<br>(5.2 to 9.4)                                 |



| Cause                                                                               | Prevalence in thousands (95% UI)                    | Incidence in thousands (95% UI)                      | YLDs in thousands (95% UI)                          |                                                   |                                                     |
|-------------------------------------------------------------------------------------|-----------------------------------------------------|------------------------------------------------------|-----------------------------------------------------|---------------------------------------------------|-----------------------------------------------------|
|                                                                                     | 2016 counts                                         | 2016 counts                                          | 2016 counts                                         | Percentage change in counts between 2006 and 2016 | Percentage change in age-standardised rates between |
| Adverse effects of medical treatment                                                | 0.1<br>(0.1 to 0.2)                                 | 1.9<br>(1.8 to 2.1)                                  | < 0.05<br>(< 0.05 to < 0.05)                        | 16.5<br>(11.0 to 22.8)                            | 4.2<br>(-0.6 to 9.9)                                |
| Animal contact                                                                      | 0.9<br>(0.8 to 1.1)                                 | 0.8<br>(0.7 to 1.0)                                  | < 0.05<br>(< 0.05 to < 0.05)                        | 7.1<br>(0.7 to 13.8)                              | 0.7<br>(-5.1 to 7.1)                                |
| Venomous animal contact                                                             | 0.5<br>(0.4 to 0.6)                                 | 0.4<br>(0.3 to 0.5)                                  | < 0.05<br>(< 0.05 to < 0.05)                        | 6.4<br>(-1.3 to 14.8)                             | 1.0<br>(-6.2 to 9.1)                                |
| Non-venomous animal contact                                                         | 0.4<br>(0.4 to 0.6)                                 | 0.4<br>(0.3 to 0.5)                                  | < 0.05<br>(< 0.05 to < 0.05)                        | 9.6<br>(6.4 to 12.5)                              | -0.2<br>(-3.2 to 2.3)                               |
| Foreign body                                                                        | 2.1<br>(1.7 to 2.4)                                 | 1.6<br>(1.4 to 1.9)                                  | 0.1<br>(0.1 to 0.1)                                 | 7.8<br>(5.3 to 10.3)                              | -0.6<br>(-3.1 to 1.7)                               |
| Pulmonary aspiration and foreign body in airway                                     | 1.3<br>(1.0 to 1.7)                                 | 0.4<br>(0.3 to 0.4)                                  | 0.1<br>(< 0.05 to 0.1)                              | 6.7<br>(3.9 to 9.4)                               | -0.5<br>(-3.4 to 2.3)                               |
| Foreign body in eyes                                                                | 0.2<br>(0.1 to 0.3)                                 | 1.1<br>(0.8 to 1.4)                                  | < 0.05<br>(< 0.05 to < 0.05)                        | 14.5<br>(10.6 to 18.8)                            | 1.1<br>(-1.8 to 3.9)                                |
| Foreign body in other body part                                                     | 0.6<br>(0.5 to 0.7)                                 | 0.2<br>(0.2 to 0.2)                                  | < 0.05<br>(< 0.05 to < 0.05)                        | 6.2<br>(3.4 to 8.8)                               | -2.3<br>(-5.1 to 0.1)                               |
| Environmental heat and cold exposure                                                | 3.2<br>(2.8 to 3.7)                                 | 0.7<br>(0.6 to 0.8)                                  | 0.1<br>(0.1 to 0.2)                                 | 12.1<br>(9.8 to 14.3)                             | 1.4<br>(-0.5 to 3.4)                                |
| Other unintentional injuries                                                        | 5.5<br>(4.3 to 6.8)                                 | 1.4<br>(1.2 to 1.7)                                  | 0.1<br>(0.1 to 0.2)                                 | 15.7<br>(13.6 to 17.8)                            | 5.7<br>(3.9 to 7.5)                                 |
| <b>Self-harm and interpersonal violence</b>                                         | <b>8.2</b><br><b>(7.5 to 9.0)</b>                   | <b>1.0†</b><br><b>(0.9 to 1.2)</b>                   | <b>0.1</b><br><b>(0.1 to 0.2)</b>                   | <b>9.0</b><br><b>(6.5 to 11.6)</b>                | <b>2.5</b><br><b>(0.5 to 4.6)</b>                   |
| Self-harm                                                                           | 0.3<br>(0.2 to 0.3)                                 | 0.1<br>(0.1 to 0.1)                                  | < 0.05<br>(< 0.05 to < 0.05)                        | 14.2<br>(10.7 to 17.4)                            | 1.9<br>(-0.9 to 4.6)                                |
| Self-harm by firearm                                                                | < 0.05<br>(< 0.05 to < 0.05)                        | < 0.05<br>(< 0.05 to < 0.05)                         | < 0.05<br>(< 0.05 to < 0.05)                        | 4.1<br>(1.2 to 7.1)                               | -4.2<br>(-6.8 to -1.7)                              |
| Self-harm by other specified means                                                  | 0.2<br>(0.2 to 0.3)                                 | 0.1<br>(0.1 to 0.1)                                  | < 0.05<br>(< 0.05 to < 0.05)                        | 14.9<br>(11.3 to 18.2)                            | 2.3<br>(-0.6 to 5.2)                                |
| Interpersonal violence                                                              | 8.0<br>(7.3 to 8.8)                                 | 0.9†<br>(0.8 to 1.1)                                 | 0.1<br>(0.1 to 0.2)                                 | 8.6<br>(6.0 to 11.3)                              | 2.6<br>(0.5 to 4.7)                                 |
| Assault by firearm                                                                  | 0.2<br>(0.1 to 0.2)                                 | < 0.05<br>(< 0.05 to 0.1)                            | < 0.05<br>(< 0.05 to < 0.05)                        | 22.2<br>(18.7 to 25.6)                            | 12.9<br>(9.8 to 16.1)                               |
| Assault by sharp object                                                             | 1.1<br>(0.9 to 1.3)                                 | 0.4<br>(0.3 to 0.4)                                  | < 0.05<br>(< 0.05 to < 0.05)                        | 20.4<br>(17.8 to 22.9)                            | 10.4<br>(8.0 to 12.7)                               |
| Sexual violence                                                                     | 5.6<br>(4.9 to 6.3)                                 | --                                                   | < 0.05<br>(< 0.05 to 0.1)                           | -6.2<br>(-9.3 to -2.7)                            | -4.5<br>(-7.7 to -0.9)                              |
| Assault by other means                                                              | 1.1<br>(1.0 to 1.3)                                 | 0.5<br>(0.5 to 0.6)                                  | < 0.05<br>(< 0.05 to 0.1)                           | 16.4<br>(14.1 to 18.7)                            | 5.0<br>(3.0 to 7.0)                                 |
| <b>Forces of nature, conflict and terrorism, and executions and police conflict</b> | <b>&lt; 0.05</b><br><b>(&lt; 0.05 to &lt; 0.05)</b> | <b>&lt; 0.05†</b><br><b>(&lt; 0.05 to &lt; 0.05)</b> | <b>&lt; 0.05</b><br><b>(&lt; 0.05 to &lt; 0.05)</b> | <b>25.9</b><br><b>(18.9 to 41.9)</b>              | <b>19.6</b><br><b>(12.2 to 37.5)</b>                |
| Exposure to forces of nature                                                        | < 0.05<br>(< 0.05 to < 0.05)                        | --                                                   | < 0.05<br>(< 0.05 to < 0.05)                        | -26.8<br>(-29.1 to -23.9)                         | -31.9<br>(-34.4 to -28.9)                           |
| Conflict and terrorism                                                              | --                                                  | --                                                   | --                                                  | --                                                | --                                                  |
| Executions and police conflict                                                      | < 0.05<br>(< 0.05 to < 0.05)                        | < 0.05<br>(< 0.05 to < 0.05)                         | < 0.05<br>(< 0.05 to < 0.05)                        | 48.2<br>(35.3 to 60.3)                            | 42.2<br>(28.5 to 57.0)                              |
| <b>Impairments</b>                                                                  | --                                                  | --                                                   | --                                                  | --                                                | --                                                  |
| Anaemia                                                                             | 70.2<br>(62.0 to 78.9)                              | --                                                   | 1.8<br>(1.2 to 2.6)                                 | 3.6<br>(-7.9 to 17.3)                             | -2.1<br>(-13.8 to 12.0)                             |
| Developmental intellectual disability                                               | 4.4<br>(3.4 to 5.6)                                 | --                                                   | 0.8<br>(0.5 to 1.3)                                 | 8.3<br>(-3.1 to 20.0)                             | 8.1<br>(-3.1 to 19.7)                               |
| Epilepsy                                                                            | 2.2<br>(1.2 to 3.5)                                 | --                                                   | 0.8<br>(0.4 to 1.4)                                 | 6.1<br>(-40.4 to 84.8)                            | 5.1<br>(-39.5 to 80.9)                              |
| Guillain-Barre syndrome                                                             | < 0.05<br>(< 0.05 to < 0.05)                        | --                                                   | < 0.05<br>(< 0.05 to < 0.05)                        | 32.0<br>(15.2 to 105.1)                           | 21.9<br>(7.1 to 89.9)                               |
| Hearing loss                                                                        | 70.0<br>(67.0 to 73.2)                              | --                                                   | 2.0<br>(1.4 to 2.7)                                 | 17.8<br>(15.3 to 20.5)                            | 0.5<br>(-1.5 to 2.5)                                |
| Heart failure                                                                       | 2.8<br>(2.5 to 3.2)                                 | --                                                   | 0.3<br>(0.2 to 0.4)                                 | 22.8<br>(13.6 to 32.8)                            | 0.6<br>(-7.2 to 8.9)                                |
| Infertility                                                                         | 5.1<br>(4.0 to 6.7)                                 | --                                                   | < 0.05<br>(< 0.05 to 0.1)                           | -7.5<br>(-12.1 to -2.6)                           | 0.8<br>(-4.2 to 6.1)                                |
| Pelvic inflammatory disease                                                         | 0.1<br>(< 0.05 to 0.1)                              | --                                                   | < 0.05<br>(< 0.05 to < 0.05)                        | -4.6<br>(-23.4 to 18.6)                           | -3.8<br>(-22.3 to 18.4)                             |
| Vision loss                                                                         | 38.5<br>(36.9 to 40.1)                              | --                                                   | 1.2<br>(0.8 to 1.8)                                 | 12.8<br>(5.8 to 19.6)                             | 2.5<br>(-5.0 to 11.8)                               |

We did not calculate incidence for the nine impairments, certain NTDs, and causes with only birth prevalence. Blank cells mean that no estimate is available.

† Incidence for aggregate causes represents the sum of the incidence of the causes below the aggregate.

‡ Incidence estimates for stroke represent first-ever stroke only.

^ Incidence of HIV/AIDS represents new infections of HIV only and does not include new infections of Tuberculosis in HIV positive cases.

SR Table 14: Prevalence, incidence, and YLDs for 2016, percentage change of YLD counts and percentage change of age-standardised YLD rates between 2006 and 2016 by cause and impairments, for all ages, Belarus.

| Cause                                                                                | Prevalence in thousands (95% UI)       | Incidence in thousands (95% UI)            | YLDs in thousands (95% UI)           |                                                   |                                                     |
|--------------------------------------------------------------------------------------|----------------------------------------|--------------------------------------------|--------------------------------------|---------------------------------------------------|-----------------------------------------------------|
|                                                                                      | 2016 counts                            | 2016 counts                                | 2016 counts                          | Percentage change in counts between 2006 and 2016 | Percentage change in age-standardised rates between |
| <b>All causes</b>                                                                    | <b>9,129.1</b><br>(9,097.1 to 9,166.1) | <b>62,475.2†</b><br>(57,747.0 to 67,974.4) | <b>1,268.6</b><br>(943.0 to 1,644.2) | <b>2.1</b><br>(0.8 to 3.5)                        | <b>-0.4</b><br>(-1.8 to 1.0)                        |
| <b>Communicable, maternal, neonatal, and nutritional disorders</b>                   | <b>5,312.6</b><br>(5,153.5 to 5,493.3) | <b>32,720.6†</b><br>(28,533.2 to 38,125.3) | <b>56.2</b><br>(41.1 to 75.8)        | <b>-1.6</b><br>(-6.6 to 4.6)                      | <b>-1.5</b><br>(-6.8 to 4.6)                        |
| <b>HIV/AIDS and tuberculosis</b>                                                     | <b>3,204.4</b><br>(2,946.0 to 3,412.9) | <b>5.8†</b><br>(4.8 to 7.2)                | <b>2.3</b><br>(1.2 to 4.4)           | <b>33.1</b><br>(6.6 to 63.7)                      | <b>32.6</b><br>(6.4 to 62.9)                        |
| Tuberculosis                                                                         | 3,013.1<br>(2,778.0 to 3,274.0)        | 3.7†<br>(3.2 to 4.3)                       | 0.6<br>(0.4 to 0.9)                  | -23.0<br>(-36.6 to -5.7)                          | -24.8<br>(-37.9 to -8.3)                            |
| Drug-susceptible tuberculosis                                                        | 1.3<br>(1.1 to 1.4)                    | 2.3<br>(1.9 to 2.7)                        | 0.4<br>(0.2 to 0.6)                  | -31.2<br>(-48.8 to -4.8)                          | -32.8<br>(-50.0 to -7.3)                            |
| Multidrug-resistant tuberculosis without extensive drug resistance                   | 0.6<br>(0.5 to 0.8)                    | 1.2<br>(1.0 to 1.4)                        | 0.2<br>(0.1 to 0.3)                  | -17.5<br>(-47.1 to 34.3)                          | -19.3<br>(-47.6 to 31.9)                            |
| Extensively drug-resistant tuberculosis                                              | 0.1<br>(0.1 to 0.2)                    | 0.3<br>(0.2 to 0.3)                        | < 0.05<br>(< 0.05 to 0.1)            | 155.7<br>(85.7 to 270.4)                          | 148.6<br>(80.7 to 264.1)                            |
| Latent tuberculosis infection                                                        | 3,011.0<br>(2,775.8 to 3,272.1)        | --                                         | --                                   | --                                                | --                                                  |
| HIV/AIDS                                                                             | 14.8<br>(9.2 to 23.8)                  | 2.0^<br>(1.1 to 3.4)                       | 1.7<br>(0.7 to 3.5)                  | 83.5<br>(42.6 to 156.6)                           | 81.3<br>(41.2 to 147.6)                             |
| Drug-susceptible HIV/AIDS - Tuberculosis                                             | < 0.05<br>(< 0.05 to 0.1)              | 0.1<br>(< 0.05 to 0.1)                     | < 0.05<br>(< 0.05 to < 0.05)         | -25.6<br>(-41.1 to 3.8)                           | -28.4<br>(-43.3 to -0.1)                            |
| Multidrug-resistant HIV/AIDS - Tuberculosis without extensive drug resistance        | < 0.05<br>(< 0.05 to < 0.05)           | 0.1<br>(< 0.05 to 0.1)                     | < 0.05<br>(< 0.05 to < 0.05)         | -6.2<br>(-33.0 to 51.5)                           | -9.6<br>(-35.4 to 45.5)                             |
| Extensively drug-resistant HIV/AIDS - Tuberculosis                                   | < 0.05<br>(< 0.05 to < 0.05)           | < 0.05<br>(< 0.05 to < 0.05)               | < 0.05<br>(< 0.05 to < 0.05)         | 189.1<br>(106.7 to 367.1)                         | 178.6<br>(99.1 to 348.7)                            |
| HIV/AIDS resulting in other diseases                                                 | 14.8<br>(9.1 to 23.7)                  | 2.0<br>(1.1 to 3.4)                        | 1.7<br>(0.7 to 3.5)                  | 87.4<br>(44.3 to 170.1)                           | 85.4<br>(43.3 to 162.0)                             |
| <b>Diarrhoea, lower respiratory infections, and other common infectious diseases</b> | <b>541.4</b><br>(494.0 to 590.4)       | <b>32,033.2†</b><br>(27,837.9 to 37,457.4) | <b>21.2</b><br>(14.4 to 30.0)        | <b>1.3</b><br>(-2.5 to 5.2)                       | <b>0.7</b><br>(-2.9 to 4.1)                         |
| Diarrhoeal diseases                                                                  | 48.4<br>(45.0 to 52.5)                 | 3,177.6<br>(2,958.8 to 3,443.7)            | 5.5<br>(3.7 to 7.5)                  | 18.9<br>(10.8 to 27.3)                            | 10.3<br>(2.5 to 19.3)                               |
| Intestinal infectious diseases                                                       | < 0.05<br>(< 0.05 to < 0.05)           | < 0.05†<br>(< 0.05 to 0.1)                 | < 0.05<br>(< 0.05 to < 0.05)         | 3.6<br>(-13.0 to 24.8)                            | 1.3<br>(-15.8 to 20.6)                              |
| Typhoid fever                                                                        | < 0.05<br>(< 0.05 to < 0.05)           | < 0.05<br>(< 0.05 to < 0.05)               | < 0.05<br>(< 0.05 to < 0.05)         | -1.7<br>(-20.0 to 22.4)                           | -0.1<br>(-19.6 to 23.1)                             |
| Paratyphoid fever                                                                    | < 0.05<br>(< 0.05 to < 0.05)           | < 0.05<br>(< 0.05 to 0.1)                  | < 0.05<br>(< 0.05 to < 0.05)         | 11.2<br>(-10.4 to 38.6)                           | 7.7<br>(-12.2 to 32.2)                              |
| Other intestinal infectious diseases                                                 | --                                     | --                                         | < 0.05<br>(< 0.05 to < 0.05)         | -15.0<br>(-35.2 to 13.5)                          | -29.8<br>(-49.2 to -0.0)                            |
| Lower respiratory infections                                                         | 15.5<br>(14.2 to 17.0)                 | 697.9<br>(634.1 to 766.2)                  | 0.9<br>(0.6 to 1.3)                  | 14.0<br>(2.4 to 26.8)                             | 7.7<br>(-3.2 to 20.9)                               |
| Upper respiratory infections                                                         | 363.0<br>(308.9 to 430.5)              | 27,584.1<br>(23,287.8 to 32,982.5)         | 9.0<br>(5.2 to 14.2)                 | -1.6<br>(-8.4 to 5.3)                             | 0.5<br>(-5.4 to 6.1)                                |
| Otitis media                                                                         | 98.8<br>(89.0 to 108.3)                | 417.6<br>(343.2 to 509.9)                  | 2.7<br>(1.7 to 4.1)                  | -13.4<br>(-19.8 to -6.5)                          | -11.8<br>(-18.2 to -5.3)                            |
| Meningitis                                                                           | 11.2<br>(9.8 to 12.7)                  | 1.6<br>(1.4 to 1.8)                        | 1.2<br>(0.8 to 1.6)                  | -6.6<br>(-9.1 to -4.3)                            | -4.5<br>(-7.0 to -1.8)                              |
| Pneumococcal meningitis                                                              | 5.4<br>(4.5 to 6.4)                    | 0.4<br>(0.3 to 0.5)                        | 0.5<br>(0.4 to 0.7)                  | -4.9<br>(-8.1 to -1.6)                            | -2.5<br>(-6.0 to 1.0)                               |
| H influenzae type B meningitis                                                       | 1.2<br>(1.0 to 1.4)                    | 0.1<br>(0.1 to 0.1)                        | 0.2<br>(0.1 to 0.3)                  | -17.7<br>(-23.9 to -12.1)                         | -15.2<br>(-21.8 to -9.4)                            |
| Meningococcal infection                                                              | 1.9<br>(1.4 to 2.4)                    | 0.4<br>(0.4 to 0.5)                        | 0.2<br>(0.1 to 0.3)                  | -7.4<br>(-11.0 to -3.7)                           | -5.3<br>(-9.0 to -1.5)                              |
| Other meningitis                                                                     | 2.7<br>(2.1 to 3.4)                    | 0.6<br>(0.5 to 0.7)                        | 0.3<br>(0.2 to 0.4)                  | -0.3<br>(-4.4 to 4.3)                             | 1.6<br>(-2.4 to 6.0)                                |
| Encephalitis                                                                         | 16.1<br>(10.6 to 23.6)                 | 9.4<br>(8.4 to 10.3)                       | 1.6<br>(1.1 to 2.0)                  | -4.5<br>(-16.4 to 9.1)                            | -5.2<br>(-16.8 to 8.2)                              |
| Diphtheria                                                                           | < 0.05<br>(< 0.05 to < 0.05)           | < 0.05<br>(< 0.05 to < 0.05)               | < 0.05<br>(< 0.05 to < 0.05)         | -34.0<br>(-65.0 to 29.7)                          | -35.0<br>(-63.3 to 20.3)                            |
| Whooping cough                                                                       | 0.1<br>(< 0.05 to 0.1)                 | 0.5<br>(0.3 to 0.7)                        | < 0.05<br>(< 0.05 to < 0.05)         | -51.6<br>(-69.9 to -19.8)                         | -60.1<br>(-75.5 to -33.1)                           |
| Tetanus                                                                              | < 0.05<br>(< 0.05 to < 0.05)           | < 0.05<br>(< 0.05 to < 0.05)               | < 0.05<br>(< 0.05 to < 0.05)         | -30.9<br>(-50.6 to -14.3)                         | -26.7<br>(-47.1 to -10.3)                           |
| Measles                                                                              | < 0.05<br>(0.0 to < 0.05)              | < 0.05<br>(0.0 to < 0.05)                  | < 0.05<br>(0.0 to < 0.05)            | --                                                | --                                                  |
| Varicella and herpes zoster                                                          | 8.1<br>(7.3 to 8.9)                    | 144.7<br>(140.4 to 149.2)                  | 0.3<br>(0.2 to 0.5)                  | 4.1<br>(-8.1 to 18.4)                             | -0.1<br>(-12.1 to 13.2)                             |
| <b>Neglected tropical diseases and malaria</b>                                       | <b>3.2</b><br>(1.4 to 6.8)             | <b>0.2†</b><br>(< 0.05 to 0.8)             | <b>0.4</b><br>(0.1 to 0.8)           | <b>-37.2</b><br>(-86.0 to 101.6)                  | <b>-40.1</b><br>(-87.0 to 89.4)                     |
| Malaria                                                                              | --                                     | --                                         | --                                   | --                                                | --                                                  |
| Chagas disease                                                                       | --                                     | --                                         | --                                   | --                                                | --                                                  |
| Leishmaniasis                                                                        | --                                     | --                                         | --                                   | --                                                | --                                                  |
| Visceral leishmaniasis                                                               | --                                     | --                                         | --                                   | --                                                | --                                                  |
| Cutaneous and mucocutaneous leishmaniasis                                            | --                                     | --                                         | --                                   | --                                                | --                                                  |
| African trypanosomiasis                                                              | --                                     | --                                         | --                                   | --                                                | --                                                  |
| Schistosomiasis                                                                      | --                                     | --                                         | --                                   | --                                                | --                                                  |
| Cysticercosis                                                                        | 2.0<br>(0.5 to 3.9)                    | --                                         | 0.3<br>(0.1 to 0.7)                  | -20.9<br>(-85.4 to 156.8)                         | -24.0<br>(-86.1 to 150.3)                           |
| Cystic echinococcosis                                                                | 0.9<br>(0.2 to 4.1)                    | 0.2<br>(< 0.05 to 0.8)                     | 0.1<br>(< 0.05 to 0.4)               | -61.5<br>(-95.8 to 224.6)                         | -62.1<br>(-96.0 to 206.8)                           |
| Lymphatic filariasis                                                                 | --                                     | --                                         | --                                   | --                                                | --                                                  |
| Onchocerciasis                                                                       | --                                     | --                                         | --                                   | --                                                | --                                                  |
| Trachoma                                                                             | --                                     | --                                         | --                                   | --                                                | --                                                  |
| Dengue                                                                               | --                                     | --                                         | --                                   | --                                                | --                                                  |
| Yellow fever                                                                         | --                                     | --                                         | --                                   | --                                                | --                                                  |
| Rabies                                                                               | < 0.05<br>(< 0.05 to < 0.05)           | < 0.05<br>(< 0.05 to < 0.05)               | < 0.05<br>(< 0.05 to < 0.05)         | -41.1<br>(-59.4 to -16.9)                         | -38.4<br>(-56.8 to -14.4)                           |
| Intestinal nematode infections                                                       | --                                     | --                                         | --                                   | --                                                | --                                                  |
| Ascariasis                                                                           | --                                     | --                                         | --                                   | --                                                | --                                                  |

| Cause                                                                   | Prevalence in thousands (95% UI)              | Incidence in thousands (95% UI)                   | YLDs in thousands (95% UI)                  |                                                   |                                                     |
|-------------------------------------------------------------------------|-----------------------------------------------|---------------------------------------------------|---------------------------------------------|---------------------------------------------------|-----------------------------------------------------|
|                                                                         | 2016 counts                                   | 2016 counts                                       | 2016 counts                                 | Percentage change in counts between 2006 and 2016 | Percentage change in age-standardised rates between |
| Trichuriasis                                                            | --                                            | --                                                | --                                          | --                                                | --                                                  |
| Hookworm disease                                                        | --                                            | --                                                | --                                          | --                                                | --                                                  |
| Food-borne trematodiasis                                                | --                                            | --                                                | --                                          | --                                                | --                                                  |
| Leprosy                                                                 | --                                            | --                                                | --                                          | --                                                | --                                                  |
| Ebola virus disease                                                     | --                                            | --                                                | --                                          | --                                                | --                                                  |
| Zika virus disease                                                      | --                                            | --                                                | --                                          | --                                                | --                                                  |
| Guinea worm disease                                                     | --                                            | --                                                | --                                          | --                                                | --                                                  |
| Other neglected tropical diseases                                       | --                                            | --                                                | < 0.05<br>(< 0.05 to < 0.05)                | --                                                | --                                                  |
| <b>Maternal disorders</b>                                               | <b>15.6</b><br><b>(12.7 to 19.2)</b>          | <b>126.2†</b><br><b>(110.7 to 145.3)</b>          | <b>0.7</b><br><b>(0.4 to 1.1)</b>           | <b>-10.0</b><br><b>(-34.5 to 22.4)</b>            | <b>-7.5</b><br><b>(-32.0 to 25.6)</b>               |
| Maternal haemorrhage                                                    | 5.0<br>(3.3 to 7.2)                           | 11.3<br>(8.7 to 14.7)                             | 0.1<br>(0.1 to 0.2)                         | -18.8<br>(-46.2 to 19.9)                          | -13.6<br>(-43.6 to 30.4)                            |
| Maternal sepsis and other pregnancy related infections                  | 5.3<br>(4.0 to 7.0)                           | 33.8<br>(26.9 to 39.9)                            | 0.1<br>(0.1 to 0.3)                         | 8.6<br>(-46.7 to 117.2)                           | 12.3<br>(-45.6 to 126.3)                            |
| Maternal hypertensive disorders                                         | 5.2<br>(3.4 to 7.2)                           | 20.8<br>(16.7 to 24.8)                            | 0.2<br>(0.1 to 0.4)                         | -15.1<br>(-50.8 to 46.4)                          | -14.1<br>(-50.1 to 46.3)                            |
| Maternal obstructed labour and uterine rupture                          | 0.1<br>(< 0.05 to 0.1)                        | 6.2<br>(4.6 to 8.3)                               | < 0.05<br>(< 0.05 to < 0.05)                | 0.3<br>(-48.2 to 79.1)                            | 2.0<br>(-47.0 to 82.5)                              |
| Maternal abortion, miscarriage, and ectopic pregnancy                   | 0.4<br>(0.3 to 0.6)                           | 54.2<br>(41.9 to 70.2)                            | < 0.05<br>(< 0.05 to 0.1)                   | 3.2<br>(-49.2 to 110.6)                           | 3.5<br>(-48.4 to 110.6)                             |
| Other maternal disorders                                                | --                                            | --                                                | 0.1<br>(0.1 to 0.2)                         | -15.5<br>(-38.5 to 15.4)                          | -12.3<br>(-35.5 to 19.0)                            |
| <b>Neonatal disorders</b>                                               | <b>97.2</b><br><b>(82.1 to 114.0)</b>         | --                                                | <b>17.1</b><br><b>(11.9 to 24.0)</b>        | <b>-4.5</b><br><b>(-14.2 to 12.0)</b>             | <b>-3.0</b><br><b>(-12.9 to 13.1)</b>               |
| Neonatal preterm birth complications                                    | 53.7<br>(43.2 to 68.6)                        | --                                                | 5.1<br>(3.3 to 7.4)                         | -15.8<br>(-33.5 to 4.4)                           | -12.6<br>(-31.4 to 8.5)                             |
| Neonatal encephalopathy due to birth asphyxia and trauma                | 46.6<br>(31.8 to 66.5)                        | --                                                | 8.3<br>(4.8 to 13.3)                        | 8.1<br>(-8.1 to 61.8)                             | 9.6<br>(-6.4 to 61.3)                               |
| Neonatal sepsis and other neonatal infections                           | 7.5<br>(3.6 to 16.0)                          | --                                                | 3.1<br>(1.3 to 7.3)                         | -13.6<br>(-26.8 to 14.5)                          | -12.4<br>(-25.9 to 14.9)                            |
| Hemolytic disease and other neonatal jaundice                           | 0.8<br>(0.7 to 0.9)                           | --                                                | 0.2<br>(0.2 to 0.3)                         | -7.7<br>(-14.6 to -0.6)                           | -5.0<br>(-12.1 to 2.4)                              |
| Other neonatal disorders                                                | --                                            | --                                                | 0.4<br>(0.3 to 0.6)                         | 14.0<br>(-3.5 to 36.6)                            | -9.2<br>(-23.1 to 8.8)                              |
| <b>Nutritional deficiencies</b>                                         | <b>765.0</b><br><b>(676.1 to 849.0)</b>       | <b>17.3†</b><br><b>(13.8 to 21.8)</b>             | <b>11.3</b><br><b>(7.1 to 17.2)</b>         | <b>-4.4</b><br><b>(-16.2 to 9.9)</b>              | <b>-4.8</b><br><b>(-18.4 to 12.3)</b>               |
| Protein-energy malnutrition                                             | 13.7<br>(10.9 to 17.0)                        | 6.7<br>(5.4 to 8.3)                               | 0.6<br>(0.3 to 0.9)                         | 10.8<br>(-24.7 to 61.2)                           | -11.2<br>(-39.6 to 29.0)                            |
| Iodine deficiency                                                       | 132.0<br>(113.6 to 152.9)                     | 1.7<br>(1.5 to 1.9)                               | 3.0<br>(1.9 to 4.3)                         | 7.3<br>(-4.4 to 21.7)                             | 6.5<br>(-5.2 to 20.2)                               |
| Vitamin A deficiency                                                    | 10.4<br>(6.7 to 15.5)                         | 8.9<br>(5.6 to 13.6)                              | --                                          | --                                                | --                                                  |
| Iron-deficiency anaemia                                                 | 581.4<br>(489.6 to 679.0)                     | --                                                | 7.7<br>(4.6 to 12.2)                        | -9.2<br>(-24.4 to 10.5)                           | -7.1<br>(-24.7 to 15.9)                             |
| Other nutritional deficiencies                                          | --                                            | --                                                | < 0.05<br>(< 0.05 to < 0.05)                | 10.3<br>(-26.3 to 64.1)                           | -12.0<br>(-41.1 to 31.2)                            |
| <b>Other communicable, maternal, neonatal, and nutritional diseases</b> | <b>2,443.0</b><br><b>(2,238.9 to 2,639.8)</b> | <b>537.8</b><br><b>(491.7 to 590.1)</b>           | <b>3.2</b><br><b>(2.1 to 5.0)</b>           | <b>-2.0</b><br><b>(-7.5 to 4.0)</b>               | <b>-2.6</b><br><b>(-8.4 to 3.4)</b>                 |
| Sexually transmitted diseases excluding HIV                             | 1,948.9<br>(1,781.3 to 2,146.7)               | 457.5<br>(418.3 to 499.4)                         | 2.7<br>(1.7 to 4.2)                         | -1.9<br>(-7.9 to 4.7)                             | -2.5<br>(-8.6 to 3.7)                               |
| Syphilis                                                                | 29.4<br>(23.9 to 35.5)                        | 21.4<br>(16.6 to 27.4)                            | 0.5<br>(0.4 to 0.7)                         | 7.3<br>(-10.9 to 27.0)                            | 0.0<br>(-16.6 to 17.9)                              |
| Chlamydial infection                                                    | 138.9<br>(110.4 to 173.1)                     | 107.0<br>(83.9 to 133.3)                          | 0.6<br>(0.3 to 1.0)                         | -3.5<br>(-14.8 to 8.8)                            | -2.4<br>(-13.4 to 10.9)                             |
| Gonococcal infection                                                    | 22.1<br>(19.2 to 25.4)                        | 67.8<br>(57.1 to 80.6)                            | 0.2<br>(0.1 to 0.3)                         | -12.1<br>(-28.0 to 5.3)                           | -5.7<br>(-22.8 to 13.6)                             |
| Trichomoniasis                                                          | 174.6<br>(151.4 to 200.2)                     | 144.2<br>(124.2 to 167.0)                         | 0.2<br>(0.1 to 0.4)                         | -2.8<br>(-10.8 to 5.4)                            | -0.8<br>(-8.3 to 7.4)                               |
| Genital herpes                                                          | 1,624.8<br>(1,396.9 to 1,899.4)               | 66.8<br>(56.2 to 81.4)                            | 0.4<br>(0.1 to 0.9)                         | 1.7<br>(-6.5 to 9.9)                              | -0.4<br>(-8.2 to 8.8)                               |
| Other sexually transmitted diseases                                     | 46.5<br>(38.1 to 56.1)                        | 50.4<br>(42.4 to 60.2)                            | 0.8<br>(0.5 to 1.3)                         | -5.1<br>(-15.5 to 5.9)                            | -4.1<br>(-14.5 to 7.4)                              |
| Hepatitis                                                               | 652.7<br>(566.4 to 754.8)                     | 80.2<br>(51.6 to 103.6)                           | 0.1<br>(< 0.05 to 0.1)                      | -31.7<br>(-44.6 to -15.6)                         | -32.8<br>(-46.4 to -13.7)                           |
| Acute hepatitis A                                                       | 3.5<br>(1.3 to 5.2)                           | 45.4<br>(17.2 to 66.9)                            | < 0.05<br>(< 0.05 to < 0.05)                | -36.6<br>(-60.6 to 7.4)                           | -35.9<br>(-61.9 to 15.1)                            |
| Hepatitis B                                                             | 408.9<br>(328.7 to 509.0)                     | 29.5<br>(23.1 to 37.7)                            | < 0.05<br>(< 0.05 to 0.1)                   | -30.6<br>(-44.3 to -14.7)                         | -33.2<br>(-46.3 to -18.1)                           |
| Hepatitis C                                                             | 240.2<br>(215.1 to 266.5)                     | 3.7<br>(3.2 to 4.2)                               | < 0.05<br>(< 0.05 to < 0.05)                | 6.0<br>(-16.5 to 34.9)                            | -6.6<br>(-29.2 to 23.5)                             |
| Acute hepatitis E                                                       | 0.1<br>(0.1 to 0.2)                           | 1.7<br>(1.3 to 2.3)                               | < 0.05<br>(< 0.05 to < 0.05)                | -33.9<br>(-41.7 to -25.4)                         | -30.5<br>(-36.2 to -24.1)                           |
| Other infectious diseases                                               | 18.9<br>(15.2 to 22.9)                        | < 0.05<br>(< 0.05 to < 0.05)                      | 0.5<br>(0.3 to 0.7)                         | 2.9<br>(-10.0 to 20.2)                            | 2.1<br>(-12.9 to 22.5)                              |
| <b>Non-communicable diseases</b>                                        | <b>8,791.3</b><br><b>(8,745.2 to 8,842.1)</b> | <b>28,039.6†</b><br><b>(26,678.9 to 29,419.8)</b> | <b>1,040.7</b><br><b>(774.3 to 1,340.1)</b> | <b>1.6</b><br><b>(0.1 to 3.1)</b>                 | <b>-0.9</b><br><b>(-2.4 to 0.8)</b>                 |
| <b>Neoplasms</b>                                                        | <b>92.8</b><br><b>(88.4 to 97.5)</b>          | <b>34.7</b><br><b>(32.9 to 36.8)</b>              | <b>10.6</b><br><b>(7.7 to 14.0)</b>         | <b>6.6</b><br><b>(-1.6 to 15.7)</b>               | <b>-1.4</b><br><b>(-9.3 to 7.4)</b>                 |
| Lip and oral cavity cancer                                              | 2.6<br>(2.2 to 3.1)                           | 0.8<br>(0.7 to 0.9)                               | 0.3<br>(0.2 to 0.4)                         | 10.2<br>(-14.8 to 39.9)                           | -0.3<br>(-22.5 to 26.0)                             |
| Nasopharynx cancer                                                      | 0.4<br>(0.3 to 0.5)                           | 0.1<br>(0.1 to 0.1)                               | < 0.05<br>(< 0.05 to 0.1)                   | -6.6<br>(-28.0 to 22.4)                           | -10.4<br>(-30.8 to 16.2)                            |
| Other pharynx cancer                                                    | 1.7<br>(1.5 to 2.0)                           | 0.6<br>(0.5 to 0.6)                               | 0.2<br>(0.1 to 0.3)                         | 37.7<br>(3.5 to 81.9)                             | 22.1<br>(-7.4 to 59.2)                              |
| Oesophageal cancer                                                      | 0.5<br>(0.5 to 0.6)                           | 0.5<br>(0.4 to 0.5)                               | 0.1<br>(0.1 to 0.2)                         | 8.1<br>(-24.9 to 52.4)                            | -4.3<br>(-32.7 to 34.9)                             |
| Stomach cancer                                                          | 4.3<br>(4.0 to 4.7)                           | 2.6<br>(2.4 to 2.7)                               | 0.6<br>(0.5 to 0.8)                         | -18.1<br>(-30.1 to -5.0)                          | -25.0<br>(-35.6 to -13.6)                           |
| Colon and rectum cancer                                                 | 14.0<br>(12.8 to 16.0)                        | 4.1<br>(3.8 to 4.7)                               | 1.4<br>(1.0 to 1.9)                         | 8.4<br>(-6.3 to 30.6)                             | -1.2<br>(-14.3 to 18.8)                             |
| Liver cancer                                                            | 0.2<br>(0.2 to 0.3)                           | 0.5<br>(0.4 to 0.5)                               | 0.1<br>(0.1 to 0.1)                         | 27.7<br>(9.6 to 47.1)                             | 15.4<br>(-1.2 to 32.5)                              |
| Liver cancer due to hepatitis B                                         | 0.2<br>(0.1 to 0.2)                           | 0.2<br>(0.1 to 0.2)                               | < 0.05<br>(< 0.05 to 0.1)                   | 25.4<br>(6.4 to 44.7)                             | 13.1<br>(-4.1 to 30.0)                              |



| Cause                                              | Prevalence in thousands (95% UI)          | Incidence in thousands (95% UI)          | YLDs in thousands (95% UI)            |                                                   |                                                     |
|----------------------------------------------------|-------------------------------------------|------------------------------------------|---------------------------------------|---------------------------------------------------|-----------------------------------------------------|
|                                                    | 2016 counts                               | 2016 counts                              | 2016 counts                           | Percentage change in counts between 2006 and 2016 | Percentage change in age-standardised rates between |
| Liver cancer due to hepatitis C                    | 0.1<br>( $< 0.05$ to 0.1)                 | 0.1<br>( $< 0.05$ to 0.1)                | $< 0.05$<br>( $< 0.05$ to $< 0.05$ )  | 32.3<br>(11.3 to 58.0)                            | 17.1<br>(-0.5 to 39.8)                              |
| Liver cancer due to alcohol use                    | 0.2<br>(0.2 to 0.2)                       | 0.2<br>(0.2 to 0.2)                      | $< 0.05$<br>( $< 0.05$ to 0.1)        | 32.5<br>(12.8 to 55.6)                            | 20.9<br>(2.9 to 40.9)                               |
| Liver cancer due to other causes                   | 0.1<br>(0.1 to 0.1)                       | 0.1<br>(0.1 to 0.1)                      | $< 0.05$<br>( $< 0.05$ to $< 0.05$ )  | 18.1<br>(0.9 to 36.3)                             | 6.7<br>(-8.7 to 22.4)                               |
| Gallbladder and biliary tract cancer               | 0.3<br>(0.2 to 0.3)                       | 0.4<br>(0.3 to 0.4)                      | 0.1<br>(0.1 to 0.1)                   | -4.1<br>(-12.2 to 6.6)                            | -13.7<br>(-21.0 to -4.3)                            |
| Pancreatic cancer                                  | 0.8<br>(0.7 to 0.8)                       | 1.0<br>(0.8 to 1.1)                      | 0.2<br>(0.1 to 0.3)                   | 14.8<br>(-5.0 to 30.7)                            | 4.2<br>(-13.7 to 18.7)                              |
| Larynx cancer                                      | 2.3<br>(2.1 to 2.5)                       | 0.7<br>(0.6 to 0.7)                      | 0.3<br>(0.2 to 0.4)                   | -9.3<br>(-29.0 to 16.3)                           | -19.0<br>(-36.1 to 3.2)                             |
| Tracheal, bronchus, and lung cancer                | 3.9<br>(3.6 to 4.2)                       | 3.4<br>(3.1 to 3.6)                      | 0.8<br>(0.5 to 1.0)                   | -9.8<br>(-25.1 to 9.7)                            | -18.4<br>(-32.2 to -1.1)                            |
| Malignant skin melanoma                            | 4.2<br>(3.1 to 4.9)                       | 0.9<br>(0.7 to 1.1)                      | 0.3<br>(0.2 to 0.4)                   | 33.6<br>(9.7 to 60.5)                             | 24.8<br>(2.6 to 50.0)                               |
| Non-melanoma skin cancer                           | 0.9<br>(0.7 to 1.1)                       | 3.5<br>(3.1 to 3.9)                      | $< 0.05$<br>( $< 0.05$ to 0.1)        | 39.2<br>(9.1 to 70.9)                             | 26.8<br>(0.4 to 54.5)                               |
| Non-melanoma skin cancer (squamous-cell carcinoma) | 0.6<br>(0.5 to 0.8)                       | 0.6<br>(0.5 to 0.8)                      | $< 0.05$<br>( $< 0.05$ to $< 0.05$ )  | 36.3<br>(3.5 to 70.7)                             | 24.1<br>(-5.1 to 54.5)                              |
| Non-melanoma skin cancer (basal-cell carcinoma)    | 0.4<br>(0.3 to 0.6)                       | 2.9<br>(2.5 to 3.3)                      | $< 0.05$<br>( $< 0.05$ to $< 0.05$ )  | 63.5<br>(14.8 to 135.7)                           | 49.7<br>(7.4 to 109.4)                              |
| Breast cancer                                      | 15.2<br>(13.8 to 17.8)                    | 3.2<br>(2.9 to 3.8)                      | 1.4<br>(1.0 to 1.9)                   | -4.5<br>(-18.8 to 14.0)                           | -11.9<br>(-24.6 to 4.2)                             |
| Cervical cancer                                    | 3.9<br>(3.3 to 4.7)                       | 1.0<br>(0.9 to 1.2)                      | 0.4<br>(0.3 to 0.5)                   | -15.2<br>(-31.1 to 4.6)                           | -19.5<br>(-34.5 to -0.4)                            |
| Uterine cancer                                     | 5.1<br>(4.3 to 6.1)                       | 1.1<br>(0.9 to 1.3)                      | 0.4<br>(0.3 to 0.6)                   | 15.9<br>(-9.3 to 53.5)                            | 3.8<br>(-18.9 to 36.6)                              |
| Ovarian cancer                                     | 2.4<br>(2.0 to 2.8)                       | 0.8<br>(0.7 to 0.9)                      | 0.4<br>(0.2 to 0.5)                   | -3.3<br>(-31.8 to 33.7)                           | -9.0<br>(-35.7 to 24.0)                             |
| Prostate cancer                                    | 12.0<br>(9.0 to 14.5)                     | 3.0<br>(2.3 to 3.5)                      | 1.2<br>(0.8 to 1.6)                   | 26.8<br>(-0.7 to 61.1)                            | 18.3<br>(-6.9 to 50.4)                              |
| Testicular cancer                                  | 0.7<br>(0.6 to 0.8)                       | 0.1<br>(0.1 to 0.2)                      | $< 0.05$<br>( $< 0.05$ to 0.1)        | -2.8<br>(-31.1 to 40.0)                           | -1.7<br>(-31.1 to 42.5)                             |
| Kidney cancer                                      | 4.3<br>(3.6 to 5.0)                       | 1.1<br>(1.0 to 1.3)                      | 0.4<br>(0.3 to 0.5)                   | 9.5<br>(-10.1 to 32.3)                            | 0.7<br>(-17.4 to 21.4)                              |
| Bladder cancer                                     | 3.7<br>(3.2 to 4.1)                       | 1.0<br>(0.8 to 1.1)                      | 0.4<br>(0.2 to 0.5)                   | 4.0<br>(-15.2 to 25.7)                            | -5.1<br>(-22.1 to 14.2)                             |
| Brain and nervous system cancer                    | 1.4<br>(1.1 to 1.5)                       | 0.6<br>(0.5 to 0.7)                      | 0.2<br>(0.1 to 0.3)                   | 18.5<br>(-6.7 to 38.6)                            | 11.6<br>(-12.0 to 29.8)                             |
| Thyroid cancer                                     | 3.0<br>(2.6 to 3.5)                       | 0.6<br>(0.5 to 0.7)                      | 0.2<br>(0.1 to 0.3)                   | 30.8<br>(5.4 to 65.2)                             | 22.6<br>(-1.0 to 56.6)                              |
| Mesothelioma                                       | 0.1<br>(0.1 to 0.1)                       | 0.1<br>( $< 0.05$ to 0.1)                | $< 0.05$<br>( $< 0.05$ to $< 0.05$ )  | -6.3<br>(-17.2 to 2.5)                            | -14.1<br>(-24.2 to -6.4)                            |
| Hodgkin lymphoma                                   | 0.6<br>(0.6 to 0.8)                       | 0.1<br>(0.1 to 0.2)                      | 0.1<br>( $< 0.05$ to 0.1)             | 9.5<br>(-4.5 to 28.7)                             | 11.9<br>(-3.0 to 32.7)                              |
| Non-Hodgkin's lymphoma                             | 2.9<br>(2.4 to 3.3)                       | 0.8<br>(0.7 to 0.9)                      | 0.3<br>(0.2 to 0.4)                   | 59.0<br>(31.8 to 85.8)                            | 48.9<br>(23.4 to 72.6)                              |
| Multiple myeloma                                   | 0.9<br>(0.7 to 1.1)                       | 0.4<br>(0.3 to 0.4)                      | 0.2<br>(0.1 to 0.3)                   | 34.5<br>(-1.0 to 77.1)                            | 22.5<br>(-8.2 to 58.4)                              |
| Leukaemia                                          | 3.7<br>(3.2 to 4.3)                       | 1.1<br>(0.9 to 1.2)                      | 0.5<br>(0.3 to 0.7)                   | 22.3<br>(1.4 to 45.5)                             | 18.6<br>(-3.5 to 43.6)                              |
| Acute lymphoid leukaemia                           | 0.8<br>(0.6 to 1.1)                       | 0.2<br>(0.1 to 0.2)                      | 0.1<br>(0.1 to 0.1)                   | 66.4<br>(19.1 to 127.7)                           | 71.9<br>(17.8 to 150.7)                             |
| Chronic lymphoid leukaemia                         | 2.0<br>(1.7 to 2.3)                       | 0.5<br>(0.4 to 0.5)                      | 0.3<br>(0.2 to 0.4)                   | 19.9<br>(-4.5 to 50.0)                            | 10.0<br>(-12.0 to 37.5)                             |
| Acute myeloid leukaemia                            | 0.4<br>(0.3 to 0.5)                       | 0.2<br>(0.2 to 0.3)                      | 0.1<br>( $< 0.05$ to 0.1)             | 19.2<br>(-2.0 to 44.8)                            | 12.1<br>(-10.4 to 42.4)                             |
| Chronic myeloid leukaemia                          | 0.3<br>(0.2 to 0.3)                       | 0.1<br>(0.1 to 0.1)                      | $< 0.05$<br>( $< 0.05$ to 0.1)        | -8.3<br>(-26.6 to 11.0)                           | -14.5<br>(-32.7 to 3.6)                             |
| Other leukaemia                                    | 0.3<br>(0.2 to 0.4)                       | 0.1<br>( $< 0.05$ to 0.1)                | $< 0.05$<br>( $< 0.05$ to 0.1)        | 10.4<br>(-14.9 to 45.2)                           | 0.3<br>(-22.5 to 34.4)                              |
| Other neoplasms                                    | 3.6<br>(2.9 to 4.4)                       | 1.1<br>(0.9 to 1.2)                      | 0.3<br>(0.2 to 0.4)                   | 26.7<br>(0.3 to 56.1)                             | 23.1<br>(-4.4 to 52.5)                              |
| <b>Cardiovascular diseases</b>                     | <b>979.2</b><br><b>(941.0 to 1,019.5)</b> | <b>165.6†</b><br><b>(157.6 to 173.5)</b> | <b>86.9</b><br><b>(63.8 to 111.1)</b> | <b>5.0</b><br><b>(0.1 to 10.0)</b>                | <b>-3.8</b><br><b>(-8.0 to 0.8)</b>                 |
| Rheumatic heart disease                            | 2.6<br>(2.3 to 2.9)                       | 0.5<br>(0.5 to 0.5)                      | 0.2<br>(0.1 to 0.3)                   | -3.4<br>(-23.8 to 22.0)                           | -11.4<br>(-28.5 to 10.0)                            |
| Ischaemic heart disease                            | 506.6<br>(464.5 to 557.5)                 | 89.2<br>(83.4 to 95.4)                   | 25.9<br>(18.1 to 34.9)                | 8.7<br>(4.1 to 14.0)                              | -0.3<br>(-4.4 to 4.2)                               |
| Cerebrovascular disease                            | 233.6<br>(217.2 to 249.0)                 | 37.9‡<br>(34.4 to 41.5)                  | 46.7<br>(32.9 to 59.6)                | 2.2<br>(-5.7 to 10.7)                             | -6.6<br>(-13.4 to 1.2)                              |
| Ischaemic stroke                                   | 212.6<br>(191.5 to 235.1)                 | 30.1‡<br>(26.8 to 33.7)                  | 41.2<br>(29.0 to 52.6)                | 2.6<br>(-6.3 to 11.6)                             | -6.4<br>(-14.0 to 1.9)                              |
| Hemorrhagic stroke                                 | 29.2<br>(26.1 to 32.9)                    | 7.8‡<br>(7.1 to 8.7)                     | 5.5<br>(4.0 to 7.2)                   | -0.6<br>(-12.4 to 11.4)                           | -7.9<br>(-18.3 to 2.5)                              |
| Hypertensive heart disease                         | 25.4<br>(21.0 to 30.4)                    | --                                       | 2.0<br>(1.4 to 2.8)                   | 9.1<br>(-2.9 to 22.4)                             | -0.2<br>(-10.5 to 11.0)                             |
| Cardiomyopathy and myocarditis                     | 10.8<br>(9.6 to 12.2)                     | 4.5†<br>(4.0 to 5.2)                     | 1.0<br>(0.7 to 1.4)                   | 2.7<br>(-9.9 to 16.9)                             | 0.7<br>(-10.8 to 13.2)                              |
| Myocarditis                                        | 2.4<br>(2.1 to 2.6)                       | 4.5<br>(4.0 to 5.2)                      | 0.2<br>(0.1 to 0.2)                   | -3.3<br>(-17.1 to 14.3)                           | 0.6<br>(-13.8 to 18.7)                              |
| Alcoholic cardiomyopathy                           | 4.8<br>(4.0 to 5.8)                       | --                                       | 0.4<br>(0.3 to 0.6)                   | 6.4<br>(-14.1 to 32.2)                            | 1.2<br>(-17.7 to 25.3)                              |
| Other cardiomyopathy                               | 5.3<br>(4.5 to 6.1)                       | --                                       | 0.4<br>(0.3 to 0.6)                   | 1.8<br>(-17.1 to 23.4)                            | 0.4<br>(-17.2 to 20.9)                              |
| Atrial fibrillation and flutter                    | 101.9<br>(88.2 to 117.8)                  | 8.2<br>(7.0 to 9.6)                      | 7.8<br>(5.3 to 10.9)                  | 10.1<br>(3.4 to 17.9)                             | 0.3<br>(-5.6 to 7.4)                                |
| Peripheral vascular disease                        | 259.1<br>(224.0 to 297.5)                 | 23.7<br>(20.3 to 27.7)                   | 1.1<br>(0.5 to 2.1)                   | 4.7<br>(-5.2 to 15.8)                             | -6.2<br>(-13.3 to 1.9)                              |
| Endocarditis                                       | 0.5<br>(0.4 to 0.6)                       | 1.6<br>(1.4 to 1.7)                      | $< 0.05$<br>( $< 0.05$ to 0.1)        | 7.7<br>(-1.1 to 16.9)                             | 0.8<br>(-6.5 to 8.1)                                |
| Other cardiovascular and circulatory diseases      | 40.0<br>(33.5 to 47.8)                    | --                                       | 2.0<br>(1.4 to 3.0)                   | 4.0<br>(-7.7 to 17.2)                             | -0.0<br>(-10.8 to 12.0)                             |
| <b>Chronic respiratory diseases</b>                | <b>919.7</b><br><b>(883.5 to 959.4)</b>   | <b>114.9†</b><br><b>(108.7 to 121.3)</b> | <b>30.2</b><br><b>(22.3 to 39.4)</b>  | <b>4.1</b><br><b>(-1.2 to 10.2)</b>               | <b>3.7</b><br><b>(-1.3 to 9.6)</b>                  |
| Chronic obstructive pulmonary disease              | 394.6<br>(369.3 to 426.8)                 | 22.8<br>(21.3 to 24.7)                   | 7.5<br>(5.9 to 9.5)                   | 0.1<br>(-13.5 to 17.8)                            | -6.2<br>(-18.5 to 10.3)                             |
| Pneumoconiosis                                     | 1.0<br>(0.9 to 1.2)                       | 0.1<br>(0.1 to 0.1)                      | 0.2<br>(0.1 to 0.2)                   | 10.1<br>(-9.3 to 31.4)                            | 1.3<br>(-16.3 to 21.7)                              |
| Silicosis                                          | 0.1<br>(0.1 to 0.2)                       | $< 0.05$<br>( $< 0.05$ to $< 0.05$ )     | $< 0.05$<br>( $< 0.05$ to $< 0.05$ )  | 12.0<br>(6.3 to 18.2)                             | 4.4<br>(-0.4 to 9.6)                                |

| Cause                                                          | Prevalence in thousands (95% UI)              | Incidence in thousands (95% UI)               | YLDs in thousands (95% UI)              |                                                   |                                                     |
|----------------------------------------------------------------|-----------------------------------------------|-----------------------------------------------|-----------------------------------------|---------------------------------------------------|-----------------------------------------------------|
|                                                                | 2016 counts                                   | 2016 counts                                   | 2016 counts                             | Percentage change in counts between 2006 and 2016 | Percentage change in age-standardised rates between |
| Asbestosis                                                     | 0.3<br>(0.2 to 0.3)                           | < 0.05<br>(< 0.05 to < 0.05)                  | < 0.05<br>(< 0.05 to 0.1)               | 7.3<br>(0.1 to 15.0)                              | -0.1<br>(-6.9 to 6.9)                               |
| Coal workers pneumoconiosis                                    | --                                            | --                                            | --                                      | --                                                | --                                                  |
| Other pneumoconiosis                                           | 0.6<br>(0.5 to 0.7)                           | < 0.05<br>(< 0.05 to 0.1)                     | 0.1<br>(0.1 to 0.1)                     | 10.9<br>(-21.1 to 51.2)                           | 1.2<br>(-27.7 to 37.8)                              |
| Asthma                                                         | 549.0<br>(514.8 to 584.5)                     | 91.6<br>(85.8 to 98.0)                        | 21.1<br>(14.0 to 30.2)                  | 5.3<br>(0.5 to 10.9)                              | 6.4<br>(1.4 to 12.6)                                |
| Interstitial lung disease and pulmonary sarcoidosis            | 10.0<br>(9.0 to 11.0)                         | 0.4<br>(0.3 to 0.4)                           | 1.0<br>(0.7 to 1.5)                     | 0.8<br>(-13.3 to 17.6)                            | -2.3<br>(-15.5 to 12.9)                             |
| Other chronic respiratory diseases                             | --                                            | --                                            | 0.4<br>(0.3 to 0.5)                     | 28.9<br>(17.3 to 42.5)                            | 36.1<br>(24.7 to 49.1)                              |
| <b>Cirrhosis and other chronic liver diseases</b>              | <b>112.4</b><br><b>(106.7 to 117.8)</b>       | <b>3.3</b><br><b>(3.2 to 3.5)</b>             | <b>3.0</b><br><b>(2.0 to 4.1)</b>       | <b>16.0</b><br><b>(5.9 to 27.3)</b>               | <b>11.1</b><br><b>(1.7 to 22.0)</b>                 |
| Cirrhosis and other chronic liver diseases due to hepatitis B  | 20.1<br>(18.0 to 22.5)                        | 0.6<br>(0.6 to 0.7)                           | 0.5<br>(0.3 to 0.7)                     | 18.1<br>(-4.3 to 46.0)                            | 11.9<br>(-9.8 to 37.6)                              |
| Cirrhosis and other chronic liver diseases due to hepatitis C  | 23.9<br>(21.5 to 26.5)                        | 0.7<br>(0.7 to 0.8)                           | 0.6<br>(0.4 to 0.8)                     | 18.2<br>(-3.2 to 45.2)                            | 11.8<br>(-9.0 to 36.9)                              |
| Cirrhosis and other chronic liver diseases due to alcohol use  | 40.0<br>(36.6 to 43.9)                        | 1.2<br>(1.1 to 1.3)                           | 1.0<br>(0.7 to 1.4)                     | 23.2<br>(4.9 to 42.3)                             | 15.6<br>(-1.6 to 33.1)                              |
| Cirrhosis and other chronic liver diseases due to other causes | 28.4<br>(26.2 to 31.0)                        | 0.8<br>(0.7 to 0.8)                           | 0.9<br>(0.6 to 1.3)                     | 7.1<br>(-8.2 to 25.5)                             | 7.5<br>(-8.9 to 24.8)                               |
| <b>Digestive diseases</b>                                      | <b>468.4</b><br><b>(434.7 to 499.9)</b>       | <b>541.1†</b><br><b>(504.3 to 579.9)</b>      | <b>14.5</b><br><b>(10.2 to 19.5)</b>    | <b>0.8</b><br><b>(-6.9 to 9.0)</b>                | <b>-3.9</b><br><b>(-11.5 to 4.8)</b>                |
| Peptic ulcer disease                                           | 150.5<br>(133.0 to 172.2)                     | 12.3<br>(11.1 to 13.7)                        | 2.2<br>(1.3 to 3.3)                     | 0.8<br>(-19.6 to 23.5)                            | -0.0<br>(-20.8 to 23.0)                             |
| Gastritis and duodenitis                                       | 196.0<br>(169.5 to 222.7)                     | 149.9<br>(133.9 to 167.8)                     | 2.5<br>(1.6 to 3.7)                     | -6.3<br>(-21.3 to 13.1)                           | -9.9<br>(-26.3 to 11.8)                             |
| Appendicitis                                                   | 0.7<br>(0.6 to 0.8)                           | 17.9<br>(16.5 to 19.4)                        | 0.2<br>(0.1 to 0.3)                     | -9.3<br>(-29.4 to 17.6)                           | 1.5<br>(-24.8 to 35.6)                              |
| Paralytic ileus and intestinal obstruction                     | 0.2<br>(0.1 to 0.2)                           | 4.6<br>(4.1 to 5.1)                           | 0.1<br>(< 0.05 to 0.1)                  | 12.3<br>(8.5 to 17.3)                             | 5.5<br>(2.6 to 8.7)                                 |
| Inguinal, femoral, and abdominal hernia                        | 75.3<br>(67.7 to 84.0)                        | 147.6<br>(125.2 to 171.3)                     | 5.4<br>(3.6 to 7.4)                     | 1.8<br>(-7.9 to 12.8)                             | -4.7<br>(-14.3 to 5.0)                              |
| Inflammatory bowel disease                                     | 13.7<br>(11.3 to 16.5)                        | 9.1<br>(7.8 to 10.5)                          | 1.9<br>(1.3 to 2.7)                     | -3.0<br>(-14.2 to 10.2)                           | -5.9<br>(-16.2 to 6.0)                              |
| Vascular intestinal disorders                                  | 0.2<br>(0.2 to 0.3)                           | 1.4<br>(1.3 to 1.6)                           | 0.1<br>(< 0.05 to 0.1)                  | 9.7<br>(-11.2 to 34.6)                            | 3.2<br>(-12.5 to 21.3)                              |
| Gallbladder and biliary diseases                               | 41.1<br>(36.4 to 46.2)                        | 177.8<br>(153.8 to 205.0)                     | 0.7<br>(0.5 to 1.0)                     | 17.3<br>(-3.1 to 40.7)                            | 9.9<br>(-7.6 to 30.9)                               |
| Pancreatitis                                                   | 2.3<br>(2.1 to 2.5)                           | 20.5<br>(18.6 to 22.5)                        | 0.3<br>(0.2 to 0.4)                     | 23.0<br>(3.1 to 47.5)                             | 17.4<br>(1.3 to 37.3)                               |
| Other digestive diseases                                       | --                                            | --                                            | 1.2<br>(0.8 to 1.6)                     | 7.2<br>(-0.7 to 15.8)                             | -1.2<br>(-9.4 to 8.1)                               |
| <b>Neurological disorders</b>                                  | <b>3,970.5</b><br><b>(3,817.5 to 4,163.2)</b> | <b>1,750.8</b><br><b>(1,507.2 to 2,049.4)</b> | <b>114.4</b><br><b>(75.5 to 156.1)</b>  | <b>-0.1</b><br><b>(-9.5 to 10.8)</b>              | <b>-0.4</b><br><b>(-11.0 to 11.4)</b>               |
| Alzheimer's disease and other dementias                        | 72.7<br>(60.7 to 87.2)                        | 12.5<br>(10.3 to 15.3)                        | 10.6<br>(7.3 to 14.3)                   | 20.5<br>(12.9 to 28.6)                            | -0.2<br>(-5.3 to 5.0)                               |
| Parkinson's disease                                            | 16.6<br>(12.9 to 20.7)                        | 1.8<br>(1.4 to 2.3)                           | 1.9<br>(1.2 to 2.7)                     | 14.5<br>(2.2 to 27.3)                             | 5.3<br>(-5.0 to 16.3)                               |
| Epilepsy                                                       | 22.0<br>(5.0 to 41.3)                         | 2.0<br>(0.5 to 3.8)                           | 6.0<br>(1.2 to 14.6)                    | -5.9<br>(-83.7 to 469.3)                          | -4.6<br>(-83.2 to 481.9)                            |
| Multiple sclerosis                                             | 4.8<br>(4.3 to 5.4)                           | 0.1<br>(0.1 to 0.2)                           | 1.3<br>(0.9 to 1.7)                     | 21.2<br>(1.3 to 42.3)                             | 18.3<br>(-0.7 to 38.6)                              |
| Motor neuron disease                                           | 0.3<br>(0.3 to 0.3)                           | 0.1<br>(< 0.05 to 0.1)                        | 0.1<br>(< 0.05 to 0.1)                  | 7.2<br>(3.2 to 11.6)                              | 5.2<br>(1.3 to 9.3)                                 |
| Migraine                                                       | 1,699.6<br>(1,594.0 to 1,807.8)               | 163.1<br>(146.2 to 181.3)                     | 78.8<br>(50.9 to 109.9)                 | -2.4<br>(-6.2 to 1.4)                             | -0.6<br>(-4.2 to 2.9)                               |
| Tension-type headache                                          | 2,902.2<br>(2,611.2 to 3,211.4)               | 1,571.0<br>(1,327.5 to 1,873.3)               | 14.3<br>(8.7 to 21.9)                   | -0.9<br>(-7.1 to 6.2)                             | -0.4<br>(-5.9 to 5.5)                               |
| Other neurological disorders                                   | < 0.05<br>(< 0.05 to 0.1)                     | 0.1<br>(0.1 to 0.1)                           | 1.4<br>(0.6 to 2.9)                     | 9.7<br>(-59.0 to 219.5)                           | 15.1<br>(-61.7 to 276.1)                            |
| <b>Mental and substance use disorders</b>                      | <b>1,667.6</b><br><b>(1,617.0 to 1,719.8)</b> | <b>794.0†</b><br><b>(739.5 to 859.8)</b>      | <b>234.3</b><br><b>(171.5 to 303.2)</b> | <b>-2.0</b><br><b>(-4.6 to 0.5)</b>               | <b>-0.8</b><br><b>(-3.2 to 1.6)</b>                 |
| Schizophrenia                                                  | 22.9<br>(19.9 to 25.8)                        | 1.2<br>(1.0 to 1.4)                           | 14.5<br>(10.6 to 18.2)                  | 4.0<br>(-4.3 to 14.2)                             | 2.3<br>(-6.3 to 12.2)                               |
| Alcohol use disorders                                          | 421.6<br>(376.9 to 470.8)                     | 207.1<br>(179.8 to 235.6)                     | 41.7<br>(28.7 to 56.9)                  | -0.2<br>(-8.3 to 8.8)                             | -0.2<br>(-8.2 to 8.6)                               |
| Drug use disorders                                             | 88.4<br>(82.8 to 94.0)                        | 10.4<br>(9.6 to 11.3)                         | 22.3<br>(15.8 to 28.7)                  | 5.1<br>(-3.4 to 14.1)                             | 6.7<br>(-2.1 to 16.1)                               |
| Opioid use disorders                                           | 40.0<br>(35.1 to 45.5)                        | 4.9<br>(4.2 to 5.5)                           | 16.4<br>(11.3 to 21.2)                  | 7.6<br>(-2.6 to 19.4)                             | 6.5<br>(-4.4 to 18.8)                               |
| Cocaine use disorders                                          | 9.3<br>(8.2 to 10.6)                          | 0.5<br>(0.4 to 0.5)                           | 1.3<br>(0.8 to 1.8)                     | 0.7<br>(-16.8 to 24.2)                            | 8.0<br>(-11.3 to 33.3)                              |
| Amphetamine use disorders                                      | 9.8<br>(7.1 to 13.1)                          | 0.7<br>(0.5 to 0.8)                           | 1.3<br>(0.7 to 2.1)                     | -4.7<br>(-23.9 to 18.8)                           | 7.2<br>(-15.0 to 33.9)                              |
| Cannabis use disorders                                         | 22.8<br>(19.1 to 26.9)                        | 3.0<br>(2.6 to 3.6)                           | 0.7<br>(0.4 to 1.0)                     | -13.7<br>(-26.2 to 3.0)                           | 0.4<br>(-14.2 to 18.5)                              |
| Other drug use disorders                                       | 9.0<br>(8.3 to 9.9)                           | 1.4<br>(1.3 to 1.6)                           | 2.6<br>(1.7 to 3.8)                     | 2.9<br>(-15.5 to 26.9)                            | 9.2<br>(-11.1 to 36.1)                              |
| Depressive disorders                                           | 478.2<br>(447.4 to 509.1)                     | 500.2<br>(452.0 to 555.1)                     | 78.9<br>(54.4 to 107.5)                 | -3.2<br>(-7.8 to 1.6)                             | -4.7<br>(-8.9 to -0.1)                              |
| Major depressive disorder                                      | 310.9<br>(281.8 to 342.3)                     | 474.2<br>(426.2 to 528.7)                     | 61.9<br>(42.4 to 83.7)                  | -4.6<br>(-10.4 to 1.4)                            | -5.8<br>(-11.0 to -0.1)                             |
| Dysthymia                                                      | 179.0<br>(156.0 to 205.5)                     | 25.9<br>(22.8 to 29.8)                        | 16.9<br>(11.3 to 24.4)                  | 2.2<br>(-1.2 to 5.8)                              | -0.1<br>(-3.3 to 3.2)                               |
| Bipolar disorder                                               | 64.0<br>(55.7 to 73.5)                        | 4.5<br>(3.9 to 5.1)                           | 12.9<br>(8.1 to 19.1)                   | -4.3<br>(-9.8 to 1.5)                             | -0.3<br>(-6.1 to 5.5)                               |
| Anxiety disorders                                              | 285.2<br>(259.2 to 311.5)                     | 44.5<br>(41.1 to 48.1)                        | 27.0<br>(18.7 to 36.5)                  | -3.0<br>(-7.4 to 1.7)                             | -0.1<br>(-4.5 to 4.5)                               |
| Eating disorders                                               | 10.3<br>(8.3 to 12.3)                         | 4.6<br>(3.5 to 6.0)                           | 2.1<br>(1.3 to 3.0)                     | 8.8<br>(-4.7 to 23.3)                             | 20.9<br>(6.6 to 36.2)                               |
| Anorexia nervosa                                               | 2.0<br>(1.5 to 2.8)                           | 0.8<br>(0.6 to 1.0)                           | 0.4<br>(0.3 to 0.7)                     | -1.6<br>(-23.7 to 24.6)                           | 17.6<br>(-8.1 to 47.4)                              |
| Bulimia nervosa                                                | 7.9<br>(5.9 to 10.5)                          | 3.8<br>(2.8 to 5.2)                           | 1.7<br>(1.0 to 2.5)                     | 11.9<br>(-3.1 to 29.8)                            | 22.0<br>(6.7 to 40.0)                               |
| Autistic spectrum disorders                                    | 74.8<br>(67.2 to 83.9)                        | 0.4<br>(0.2 to 0.5)                           | 10.9<br>(7.4 to 15.5)                   | -2.9<br>(-7.4 to 1.7)                             | 0.3<br>(-4.4 to 5.1)                                |
| Autism                                                         | 23.2<br>(19.8 to 27.2)                        | < 0.05<br>(< 0.05 to 0.1)                     | 5.8<br>(3.7 to 8.5)                     | -3.2<br>(-10.9 to 4.8)                            | 0.2<br>(-7.4 to 8.5)                                |
| Asperger syndrome and other autistic spectrum disorders        | 51.7<br>(43.0 to 62.0)                        | 0.3<br>(0.2 to 0.5)                           | 5.1<br>(3.3 to 7.5)                     | -2.7<br>(-6.9 to 2.2)                             | 0.4<br>(-4.4 to 5.3)                                |



| Cause                                                      | Prevalence in thousands (95% UI)              | Incidence in thousands (95% UI)                | YLDs in thousands (95% UI)              |                                                   |                                                     |
|------------------------------------------------------------|-----------------------------------------------|------------------------------------------------|-----------------------------------------|---------------------------------------------------|-----------------------------------------------------|
|                                                            | 2016 counts                                   | 2016 counts                                    | 2016 counts                             | Percentage change in counts between 2006 and 2016 | Percentage change in age-standardised rates between |
| Attention-deficit/hyperactivity disorder                   | 58.4<br>(52.9 to 64.9)                        | 2.2<br>(1.9 to 2.6)                            | 0.7<br>(0.4 to 1.1)                     | -11.0<br>(-18.2 to -3.4)                          | 0.1<br>(-7.9 to 9.1)                                |
| Conduct disorder                                           | 41.5<br>(34.4 to 49.1)                        | 14.3<br>(11.3 to 17.1)                         | 5.1<br>(3.1 to 7.7)                     | -26.0<br>(-30.9 to -20.9)                         | -0.1<br>(-6.5 to 6.1)                               |
| Idiopathic developmental intellectual disability           | 72.1<br>(33.7 to 110.0)                       | --                                             | 2.8<br>(1.1 to 5.1)                     | -18.1<br>(-25.9 to -12.9)                         | -13.7<br>(-21.8 to -8.1)                            |
| Other mental and substance use disorders                   | 212.0<br>(188.1 to 243.3)                     | 4.8<br>(4.2 to 5.4)                            | 15.5<br>(10.8 to 22.2)                  | 1.5<br>(-3.1 to 6.5)                              | 0.2<br>(-4.4 to 5.2)                                |
| <b>Diabetes, urogenital, blood, and endocrine diseases</b> | <b>3,244.3</b><br><b>(3,185.9 to 3,312.6)</b> | <b>1,823.8†</b><br><b>(1,710.9 to 1,946.7)</b> | <b>82.5</b><br><b>(58.5 to 111.7)</b>   | <b>3.1</b><br><b>(-1.0 to 7.6)</b>                | <b>-1.1</b><br><b>(-5.0 to 3.0)</b>                 |
| Diabetes mellitus                                          | 367.7<br>(327.3 to 418.7)                     | 17.2<br>(15.2 to 19.6)                         | 31.7<br>(21.7 to 43.5)                  | 7.7<br>(-1.9 to 18.3)                             | 0.3<br>(-8.6 to 10.2)                               |
| Acute glomerulonephritis                                   | 0.2<br>(0.2 to 0.2)                           | 3.1<br>(2.7 to 3.6)                            | < 0.05<br>(< 0.05 to < 0.05)            | -5.2<br>(-10.8 to 0.3)                            | -4.4<br>(-9.2 to 0.7)                               |
| Chronic kidney disease                                     | 658.1<br>(593.2 to 728.4)                     | 46.7<br>(40.4 to 54.0)                         | 12.2<br>(9.0 to 16.0)                   | 4.1<br>(-6.0 to 15.3)                             | -3.8<br>(-12.9 to 6.1)                              |
| Chronic kidney disease due to diabetes mellitus            | 176.2<br>(142.2 to 214.9)                     | 13.0<br>(10.1 to 16.3)                         | 3.0<br>(2.1 to 4.2)                     | 4.4<br>(-8.2 to 19.1)                             | -1.6<br>(-13.2 to 11.1)                             |
| Chronic kidney disease due to hypertension                 | 167.9<br>(138.4 to 199.1)                     | 19.4<br>(15.9 to 23.5)                         | 1.0<br>(0.7 to 1.4)                     | 14.2<br>(-3.7 to 35.0)                            | -3.8<br>(-18.2 to 11.9)                             |
| Chronic kidney disease due to glomerulonephritis           | 152.6<br>(128.1 to 181.1)                     | 3.0<br>(2.2 to 3.9)                            | 5.2<br>(3.7 to 7.0)                     | 1.6<br>(-10.1 to 14.9)                            | -4.9<br>(-15.1 to 6.9)                              |
| Chronic kidney disease due to other causes                 | 161.4<br>(130.1 to 195.6)                     | 11.3<br>(8.8 to 14.3)                          | 3.1<br>(2.1 to 4.2)                     | 5.1<br>(-6.7 to 19.2)                             | -4.1<br>(-14.9 to 8.0)                              |
| Urinary diseases and male infertility                      | 323.4<br>(290.9 to 358.7)                     | 1,185.2†<br>(1,081.7 to 1,299.0)               | 10.0<br>(6.5 to 14.2)                   | 5.0<br>(-1.4 to 10.9)                             | -2.6<br>(-8.1 to 2.2)                               |
| Interstitial nephritis and urinary tract infections        | 17.0<br>(15.1 to 19.1)                        | 883.6<br>(788.6 to 990.5)                      | 0.6<br>(0.4 to 0.9)                     | -10.0<br>(-19.1 to -0.0)                          | -5.7<br>(-15.6 to 4.5)                              |
| Urolithiasis                                               | 10.2<br>(9.0 to 11.5)                         | 269.9<br>(239.0 to 307.8)                      | 0.7<br>(0.5 to 1.0)                     | 7.5<br>(-9.7 to 27.8)                             | 2.3<br>(-13.0 to 20.9)                              |
| Benign prostatic hyperplasia                               | 248.2<br>(213.5 to 287.9)                     | 31.7<br>(26.4 to 37.6)                         | 8.0<br>(5.1 to 11.8)                    | 8.2<br>(0.1 to 15.3)                              | -1.1<br>(-8.3 to 4.9)                               |
| Male infertility                                           | 39.3<br>(30.5 to 50.1)                        | --                                             | 0.2<br>(0.1 to 0.5)                     | -10.8<br>(-18.2 to -3.2)                          | -8.6<br>(-15.6 to -1.4)                             |
| Other urinary diseases                                     | --                                            | --                                             | 0.4<br>(0.3 to 0.6)                     | -17.1<br>(-24.9 to -7.6)                          | -18.8<br>(-26.0 to -10.5)                           |
| Gynecological diseases                                     | 1,311.3<br>(1,252.0 to 1,378.0)               | 533.6†<br>(485.2 to 587.0)                     | 17.8<br>(12.3 to 25.4)                  | -4.8<br>(-8.4 to -0.8)                            | 0.2<br>(-3.3 to 4.1)                                |
| Uterine fibroids                                           | 181.1<br>(157.6 to 208.2)                     | 15.7<br>(13.2 to 18.4)                         | 1.7<br>(0.9 to 3.1)                     | 2.6<br>(-4.2 to 11.3)                             | 2.7<br>(-4.1 to 11.7)                               |
| Polycystic ovarian syndrome                                | 9.8<br>(7.4 to 12.8)                          | 3.8<br>(2.6 to 5.1)                            | 0.1<br>(< 0.05 to 0.2)                  | -4.4<br>(-16.4 to 9.4)                            | -0.9<br>(-13.2 to 13.8)                             |
| Female infertility                                         | 18.5<br>(7.3 to 36.4)                         | --                                             | 0.1<br>(< 0.05 to 0.3)                  | 13.2<br>(-12.3 to 51.6)                           | 16.1<br>(-4.7 to 52.7)                              |
| Endometriosis                                              | 7.4<br>(6.0 to 8.9)                           | 18.3<br>(13.8 to 24.0)                         | 0.7<br>(0.4 to 1.0)                     | -8.0<br>(-25.2 to 13.2)                           | -0.9<br>(-18.9 to 21.4)                             |
| Genital prolapse                                           | 422.1<br>(362.5 to 487.2)                     | 17.3<br>(14.5 to 20.6)                         | 1.3<br>(0.6 to 2.4)                     | 28.5<br>(17.4 to 42.1)                            | 17.7<br>(7.8 to 29.6)                               |
| Premenstrual syndrome                                      | 604.3<br>(571.4 to 636.1)                     | 201.9<br>(189.1 to 216.8)                      | 5.0<br>(3.1 to 7.8)                     | -10.9<br>(-17.2 to -4.3)                          | -1.5<br>(-8.6 to 5.6)                               |
| Other gynecological diseases                               | 251.1<br>(214.9 to 291.5)                     | 276.8<br>(232.2 to 328.4)                      | 8.9<br>(5.9 to 12.8)                    | -5.9<br>(-11.0 to -0.3)                           | -0.9<br>(-5.9 to 4.6)                               |
| Hemoglobinopathies and hemolytic anaemias                  | 1,137.1<br>(1,109.6 to 1,165.7)               | --                                             | 2.8<br>(1.8 to 4.3)                     | -13.6<br>(-28.3 to 2.9)                           | -14.8<br>(-31.0 to 5.1)                             |
| Thalassemias                                               | < 0.05<br>(< 0.05 to < 0.05)                  | --                                             | < 0.05<br>(< 0.05 to < 0.05)            | 11.1<br>(-11.7 to 36.7)                           | -2.7<br>(-22.0 to 19.8)                             |
| Thalassaemias trait                                        | 165.6<br>(151.3 to 181.5)                     | --                                             | 2.0<br>(1.3 to 3.1)                     | -16.3<br>(-32.4 to 0.9)                           | -17.4<br>(-34.5 to 2.5)                             |
| Sickle cell disorders                                      | 0.1<br>(0.1 to 0.1)                           | --                                             | < 0.05<br>(< 0.05 to < 0.05)            | 18.7<br>(9.4 to 29.4)                             | 26.9<br>(15.9 to 39.6)                              |
| Sickle cell trait                                          | 138.7<br>(132.8 to 144.9)                     | --                                             | 0.4<br>(0.2 to 0.6)                     | -15.2<br>(-35.6 to 9.4)                           | -17.2<br>(-39.0 to 12.6)                            |
| G6PD deficiency                                            | 108.9<br>(103.0 to 116.4)                     | --                                             | < 0.05<br>(< 0.05 to < 0.05)            | 11.2<br>(-9.8 to 39.3)                            | 11.8<br>(-11.2 to 39.2)                             |
| G6PD trait                                                 | 728.4<br>(709.4 to 749.9)                     | --                                             | < 0.05<br>(< 0.05 to < 0.05)            | -20.5<br>(-36.1 to -2.2)                          | -21.2<br>(-38.0 to -1.3)                            |
| Other hemoglobinopathies and hemolytic anaemias            | 33.4<br>(27.1 to 40.3)                        | --                                             | 0.4<br>(0.3 to 0.7)                     | 2.8<br>(-14.5 to 25.4)                            | 1.0<br>(-17.5 to 25.4)                              |
| Endocrine, metabolic, blood, and immune disorders          | 238.7<br>(212.1 to 267.6)                     | 37.9<br>(33.4 to 43.1)                         | 7.9<br>(5.2 to 11.2)                    | 7.9<br>(1.5 to 14.7)                              | 2.9<br>(-2.6 to 9.5)                                |
| <b>Musculoskeletal disorders</b>                           | <b>2,113.8</b><br><b>(2,023.0 to 2,216.8)</b> | <b>879.7</b><br><b>(781.0 to 986.2)</b>        | <b>243.1</b><br><b>(175.8 to 316.6)</b> | <b>4.2</b><br><b>(1.1 to 7.5)</b>                 | <b>-0.4</b><br><b>(-3.0 to 2.4)</b>                 |
| Rheumatoid arthritis                                       | 34.2<br>(30.3 to 38.4)                        | 1.6<br>(1.4 to 1.8)                            | 7.9<br>(5.4 to 10.6)                    | 16.1<br>(6.6 to 26.3)                             | 9.3<br>(0.9 to 18.7)                                |
| Osteoarthritis                                             | 605.3<br>(565.4 to 645.0)                     | 26.9<br>(24.8 to 29.0)                         | 36.7<br>(25.8 to 49.8)                  | 12.6<br>(8.6 to 17.0)                             | 3.6<br>(-0.0 to 7.5)                                |
| Low back and neck pain                                     | 1,596.0<br>(1,491.9 to 1,712.2)               | 767.9<br>(669.1 to 873.6)                      | 189.0<br>(133.9 to 248.0)               | 2.3<br>(-1.3 to 6.4)                              | -1.4<br>(-4.5 to 2.1)                               |
| Low back pain                                              | 1,297.9<br>(1,152.8 to 1,467.4)               | 674.1<br>(577.0 to 781.5)                      | 144.9<br>(102.6 to 190.2)               | 2.1<br>(-2.5 to 7.3)                              | -1.7<br>(-5.8 to 2.8)                               |
| Neck pain                                                  | 449.1<br>(385.3 to 523.6)                     | 93.9<br>(81.5 to 110.6)                        | 44.1<br>(30.0 to 62.6)                  | 3.1<br>(-0.3 to 6.8)                              | -0.1<br>(-2.3 to 2.2)                               |
| Gout                                                       | 47.8<br>(42.3 to 54.4)                        | 9.4<br>(8.1 to 10.6)                           | 1.5<br>(1.0 to 2.0)                     | 7.4<br>(-7.0 to 23.8)                             | 0.2<br>(-13.4 to 15.8)                              |
| Other musculoskeletal disorders                            | 94.0<br>(73.1 to 121.8)                       | 73.9<br>(58.8 to 98.4)                         | 8.0<br>(5.2 to 12.3)                    | 1.7<br>(-10.8 to 17.0)                            | -1.0<br>(-13.5 to 14.0)                             |
| <b>Other non-communicable diseases</b>                     | <b>7,144.0</b><br><b>(7,021.6 to 7,266.9)</b> | <b>2,931.7†</b><br><b>(2,554.4 to 2,328.6)</b> | <b>221.3</b><br><b>(152.7 to 309.2)</b> | <b>1.0</b><br><b>(-0.1 to 2.1)</b>                | <b>-1.3</b><br><b>(-2.3 to -0.2)</b>                |
| Congenital anomalies                                       | 133.3<br>(123.1 to 144.7)                     | --                                             | 15.8<br>(11.4 to 20.6)                  | -3.7<br>(-8.5 to 1.3)                             | -2.9<br>(-8.0 to 2.0)                               |
| Neural tube defects                                        | 10.8<br>(9.6 to 12.2)                         | --                                             | 3.2<br>(2.3 to 4.3)                     | -10.8<br>(-21.4 to 1.4)                           | -9.9<br>(-20.8 to 2.7)                              |
| Congenital heart anomalies                                 | 22.3<br>(19.7 to 25.2)                        | --                                             | 1.1<br>(0.5 to 2.0)                     | 7.1<br>(-3.6 to 19.9)                             | 6.2<br>(-4.9 to 19.3)                               |
| Orofacial clefts                                           | 5.4<br>(4.7 to 6.1)                           | --                                             | 0.1<br>(< 0.05 to 0.1)                  | -10.8<br>(-21.1 to 1.2)                           | -10.8<br>(-21.2 to 1.0)                             |
| Down's syndrome                                            | 6.2<br>(5.4 to 7.2)                           | --                                             | 0.6<br>(0.4 to 0.8)                     | -0.1<br>(-9.8 to 10.0)                            | 2.0<br>(-8.1 to 13.2)                               |
| Turner syndrome                                            | 6.3<br>(5.4 to 7.3)                           | --                                             | 0.1<br>(0.1 to 0.2)                     | -5.0<br>(-27.7 to 21.5)                           | 0.6<br>(-23.4 to 28.4)                              |
| Klinefelter syndrome                                       | 6.0<br>(5.1 to 7.1)                           | --                                             | < 0.05<br>(< 0.05 to 0.1)               | -2.3<br>(-22.0 to 21.6)                           | 3.1<br>(-17.4 to 28.8)                              |

| Cause                                         | Prevalence in thousands (95% UI)              | Incidence in thousands (95% UI)                | YLDs in thousands (95% UI)              |                                                   |                                                     |
|-----------------------------------------------|-----------------------------------------------|------------------------------------------------|-----------------------------------------|---------------------------------------------------|-----------------------------------------------------|
|                                               | 2016 counts                                   | 2016 counts                                    | 2016 counts                             | Percentage change in counts between 2006 and 2016 | Percentage change in age-standardised rates between |
| Other chromosomal abnormalities               | 8.6<br>(7.3 to 10.1)                          | --                                             | 1.2<br>(0.8 to 1.6)                     | 4.5<br>(-9.5 to 21.6)                             | 3.8<br>(-10.0 to 20.7)                              |
| Congenital musculoskeletal and limb anomalies | 28.2<br>(25.7 to 31.0)                        | --                                             | 4.0<br>(2.7 to 5.4)                     | -2.9<br>(-11.2 to 6.9)                            | -1.8<br>(-10.7 to 8.0)                              |
| Urogenital congenital anomalies               | 16.2<br>(14.4 to 18.1)                        | --                                             | 0.4<br>(0.2 to 0.6)                     | -1.1<br>(-10.1 to 8.4)                            | 0.4<br>(-9.2 to 11.3)                               |
| Digestive congenital anomalies                | 17.3<br>(15.2 to 19.6)                        | --                                             | 0.8<br>(0.5 to 1.1)                     | -4.8<br>(-17.0 to 8.6)                            | -3.7<br>(-16.6 to 9.4)                              |
| Other congenital anomalies                    | 31.5<br>(20.0 to 47.1)                        | --                                             | 4.3<br>(2.9 to 6.2)                     | -3.8<br>(-13.3 to 6.3)                            | -4.2<br>(-13.3 to 6.0)                              |
| Skin and subcutaneous diseases                | 2,841.4<br>(2,763.6 to 2,915.6)               | 7,398.1<br>(6,956.6 to 7,851.8)                | 62.3<br>(42.3 to 90.8)                  | -4.0<br>(-6.1 to -1.9)                            | 1.8<br>(-0.1 to 3.6)                                |
| Dermatitis                                    | 346.5<br>(311.6 to 383.9)                     | 452.0<br>(412.9 to 494.9)                      | 12.8<br>(7.5 to 20.5)                   | -0.5<br>(-4.3 to 4.0)                             | -0.0<br>(-3.5 to 4.0)                               |
| Psoriasis                                     | 109.0<br>(104.0 to 114.7)                     | 14.0<br>(13.3 to 14.7)                         | 9.3<br>(6.7 to 12.2)                    | 6.3<br>(-0.4 to 13.7)                             | 5.9<br>(-1.1 to 13.7)                               |
| Cellulitis                                    | 5.8<br>(5.4 to 6.2)                           | 130.4<br>(122.0 to 139.0)                      | 0.3<br>(0.2 to 0.5)                     | 3.5<br>(-14.8 to 25.3)                            | 2.3<br>(-15.7 to 25.6)                              |
| Pyoderma                                      | 46.1<br>(44.5 to 47.8)                        | 1,225.8<br>(1,179.5 to 1,278.5)                | 0.2<br>(0.1 to 0.5)                     | 5.5<br>(0.1 to 11.5)                              | 1.0<br>(-4.5 to 6.9)                                |
| Scabies                                       | 68.7<br>(60.5 to 78.1)                        | 208.7<br>(183.4 to 237.2)                      | 1.8<br>(1.0 to 2.8)                     | -7.4<br>(-12.3 to -2.2)                           | -2.4<br>(-7.0 to 2.3)                               |
| Fungal skin diseases                          | 907.8<br>(811.8 to 1,007.9)                   | 3,413.3<br>(3,000.8 to 3,867.6)                | 5.0<br>(2.0 to 10.5)                    | 3.9<br>(1.8 to 6.0)                               | -0.0<br>(-1.1 to 1.1)                               |
| Viral skin diseases                           | 214.7<br>(206.2 to 223.2)                     | 324.3<br>(310.8 to 340.0)                      | 6.5<br>(4.1 to 9.6)                     | -4.2<br>(-7.4 to -1.0)                            | -0.1<br>(-3.3 to 3.0)                               |
| Acne vulgaris                                 | 564.7<br>(515.7 to 614.4)                     | 355.8<br>(302.6 to 426.1)                      | 14.5<br>(9.8 to 21.0)                   | -19.6<br>(-23.1 to -15.7)                         | 2.5<br>(-1.9 to 6.8)                                |
| Alopecia areata                               | 18.8<br>(18.1 to 19.5)                        | 33.0<br>(31.7 to 34.3)                         | 0.6<br>(0.4 to 0.9)                     | -1.1<br>(-10.7 to 9.5)                            | -0.2<br>(-10.3 to 10.7)                             |
| Pruritus                                      | 101.2<br>(88.6 to 114.8)                      | 79.7<br>(70.6 to 90.4)                         | 1.1<br>(0.5 to 1.9)                     | 4.6<br>(-1.1 to 10.6)                             | 2.1<br>(-3.1 to 7.7)                                |
| Urticaria                                     | 84.7<br>(75.2 to 96.2)                        | 150.7<br>(133.3 to 170.3)                      | 5.0<br>(3.2 to 7.2)                     | 1.7<br>(-3.7 to 7.6)                              | -0.2<br>(-5.0 to 5.3)                               |
| Decubitus ulcer                               | 4.0<br>(3.5 to 4.5)                           | 14.3<br>(12.5 to 16.2)                         | 0.6<br>(0.4 to 0.8)                     | 9.3<br>(-8.6 to 28.8)                             | 2.6<br>(-11.8 to 18.1)                              |
| Other skin and subcutaneous diseases          | 841.6<br>(816.6 to 868.2)                     | 996.2<br>(961.5 to 1,032.6)                    | 4.5<br>(2.2 to 8.3)                     | 11.4<br>(8.6 to 14.3)                             | 7.7<br>(5.1 to 10.5)                                |
| Sense organ diseases                          | 2,950.0<br>(2,882.8 to 3,020.7)               | 1,023.6†<br>(965.1 to 1,086.0)                 | 106.4<br>(74.1 to 148.2)                | 3.4<br>(1.5 to 5.3)                               | -3.8<br>(-5.5 to -2.3)                              |
| Glaucoma                                      | 8.7<br>(7.2 to 10.2)                          | --                                             | 0.8<br>(0.5 to 1.1)                     | 9.6<br>(-4.5 to 26.8)                             | -1.4<br>(-13.8 to 13.7)                             |
| Cataract                                      | 124.9<br>(104.9 to 146.8)                     | --                                             | 6.2<br>(4.3 to 8.7)                     | 8.6<br>(1.7 to 16.6)                              | -3.6<br>(-9.0 to 2.5)                               |
| Macular degeneration                          | 4.4<br>(3.5 to 5.5)                           | --                                             | 0.2<br>(0.2 to 0.4)                     | 14.7<br>(-3.4 to 36.9)                            | 1.7<br>(-14.6 to 19.9)                              |
| Refraction and accommodation disorders        | 1,167.0<br>(1,078.6 to 1,269.6)               | --                                             | 19.2<br>(11.7 to 30.5)                  | -1.2<br>(-5.1 to 3.4)                             | -6.0<br>(-9.4 to -2.0)                              |
| Age-related and other hearing loss            | 2,337.4<br>(2,232.2 to 2,444.9)               | --                                             | 65.3<br>(46.0 to 90.7)                  | 3.5<br>(0.7 to 6.0)                               | -4.1<br>(-6.7 to -1.9)                              |
| Other vision loss                             | 49.0<br>(42.0 to 56.6)                        | --                                             | 3.0<br>(2.1 to 4.1)                     | 7.8<br>(-0.3 to 17.0)                             | -0.8<br>(-8.2 to 6.8)                               |
| Other sense organ diseases                    | 376.3<br>(345.7 to 406.5)                     | 1,023.6<br>(965.1 to 1,086.0)                  | 11.6<br>(7.3 to 17.5)                   | 6.1<br>(2.1 to 10.2)                              | 0.6<br>(-3.0 to 4.4)                                |
| Oral disorders                                | 5,061.0<br>(4,852.8 to 5,263.6)               | 13,510.0†<br>(12,239.1 to 14,817.7)            | 36.8<br>(23.1 to 54.9)                  | 5.5<br>(3.2 to 8.0)                               | 0.1<br>(-1.9 to 2.2)                                |
| Caries of deciduous teeth                     | 464.9<br>(382.7 to 548.7)                     | 1,832.8<br>(1,393.4 to 2,374.5)                | 0.1<br>(< 0.05 to 0.2)                  | 16.9<br>(4.9 to 30.0)                             | -2.0<br>(-11.7 to 9.0)                              |
| Caries of permanent teeth                     | 3,547.5<br>(3,290.0 to 3,837.6)               | 11,484.6<br>(10,236.2 to 12,650.0)             | 2.1<br>(0.9 to 4.0)                     | -9.7<br>(-13.4 to -6.0)                           | -7.3<br>(-10.9 to -3.7)                             |
| Periodontal disease                           | 1,045.3<br>(861.6 to 1,252.6)                 | 129.8<br>(103.2 to 159.6)                      | 6.8<br>(2.7 to 13.9)                    | 5.5<br>(1.0 to 9.3)                               | 0.1<br>(-3.4 to 3.4)                                |
| Edentulism and severe tooth loss              | 817.6<br>(710.5 to 921.6)                     | 62.9<br>(53.0 to 73.6)                         | 22.3<br>(14.5 to 31.6)                  | 8.9<br>(5.1 to 12.5)                              | 1.2<br>(-2.1 to 4.5)                                |
| Other oral disorders                          | 192.2<br>(183.8 to 200.4)                     | --                                             | 5.6<br>(3.4 to 8.4)                     | -0.6<br>(-3.8 to 2.6)                             | 0.1<br>(-3.0 to 3.2)                                |
| <b>Injuries</b>                               | <b>4,935.7</b><br><b>(4,617.4 to 5,376.1)</b> | <b>1,715.0†</b><br><b>(1,616.9 to 1,824.9)</b> | <b>171.7</b><br><b>(117.1 to 241.8)</b> | <b>7.2</b><br><b>(5.0 to 9.0)</b>                 | <b>3.0</b><br><b>(0.9 to 4.8)</b>                   |
| <b>Transport injuries</b>                     | <b>530.5</b><br><b>(490.9 to 575.5)</b>       | <b>145.5</b><br><b>(131.2 to 160.2)</b>        | <b>25.1</b><br><b>(16.7 to 36.3)</b>    | <b>10.1</b><br><b>(8.0 to 12.1)</b>               | <b>5.9</b><br><b>(4.0 to 7.7)</b>                   |
| Road injuries                                 | 499.3<br>(459.9 to 541.7)                     | 140.2<br>(125.8 to 155.0)                      | 23.8<br>(15.8 to 34.3)                  | 11.0<br>(8.9 to 12.9)                             | 6.7<br>(4.8 to 8.4)                                 |
| Pedestrian road injuries                      | 118.5<br>(104.8 to 135.6)                     | 24.6<br>(20.9 to 28.9)                         | 5.4<br>(3.6 to 7.8)                     | 6.4<br>(4.0 to 8.6)                               | 2.1<br>(-0.1 to 4.0)                                |
| Cyclist road injuries                         | 97.8<br>(81.9 to 114.9)                       | 30.1<br>(25.0 to 35.9)                         | 4.4<br>(2.9 to 6.3)                     | 16.0<br>(13.7 to 18.3)                            | 11.9<br>(9.8 to 14.0)                               |
| Motorcyclist road injuries                    | 51.1<br>(43.1 to 62.2)                        | 8.9<br>(7.1 to 10.9)                           | 2.3<br>(1.5 to 3.3)                     | 13.6<br>(11.3 to 15.8)                            | 9.9<br>(7.6 to 11.9)                                |
| Motor vehicle road injuries                   | 209.4<br>(172.6 to 243.3)                     | 68.7<br>(59.5 to 78.2)                         | 10.8<br>(7.2 to 15.3)                   | 10.7<br>(8.6 to 12.7)                             | 6.2<br>(4.3 to 8.0)                                 |
| Other road injuries                           | 22.6<br>(19.1 to 26.5)                        | 7.9<br>(6.2 to 10.0)                           | 1.0<br>(0.6 to 1.4)                     | 13.0<br>(10.7 to 15.0)                            | 9.1<br>(7.0 to 10.9)                                |
| Other transport injuries                      | 31.2<br>(26.6 to 36.5)                        | 5.3<br>(4.6 to 6.0)                            | 1.4<br>(0.9 to 2.0)                     | -3.3<br>(-6.0 to -0.6)                            | -5.2<br>(-7.7 to -2.7)                              |
| <b>Unintentional injuries</b>                 | <b>4,199.8</b><br><b>(3,893.1 to 4,627.0)</b> | <b>1,495.1</b><br><b>(1,397.8 to 1,604.2)</b>  | <b>138.8</b><br><b>(94.5 to 193.7)</b>  | <b>7.2</b><br><b>(5.0 to 9.1)</b>                 | <b>2.9</b><br><b>(0.7 to 4.8)</b>                   |
| Falls                                         | 2,445.0<br>(2,188.8 to 2,786.5)               | 952.0<br>(860.2 to 1,052.2)                    | 93.7<br>(65.1 to 129.6)                 | 6.8<br>(4.8 to 8.7)                               | 1.7<br>(-0.2 to 3.5)                                |
| Drowning                                      | 12.0<br>(10.5 to 13.7)                        | 1.9<br>(1.6 to 2.1)                            | 0.5<br>(0.3 to 0.7)                     | -25.5<br>(-28.9 to -22.7)                         | -28.1<br>(-31.2 to -25.6)                           |
| Fire, heat, and hot substances                | 362.1<br>(314.3 to 423.7)                     | 37.3<br>(32.9 to 41.3)                         | 8.1<br>(5.1 to 12.3)                    | 2.8<br>(-1.5 to 5.9)                              | -0.6<br>(-4.7 to 2.5)                               |
| Poisonings                                    | 9.9<br>(8.3 to 11.8)                          | 10.4<br>(8.9 to 12.2)                          | 0.8<br>(0.5 to 1.2)                     | 13.1<br>(6.5 to 20.2)                             | 14.2<br>(7.2 to 21.6)                               |
| Exposure to mechanical forces                 | 637.1<br>(545.2 to 785.1)                     | 189.1<br>(165.3 to 214.0)                      | 13.7<br>(9.0 to 20.4)                   | 14.7<br>(11.7 to 17.3)                            | 11.9<br>(9.0 to 14.4)                               |
| Unintentional firearm injuries                | 8.8<br>(7.3 to 10.6)                          | 1.6<br>(1.1 to 2.1)                            | 0.3<br>(0.2 to 0.5)                     | 8.7<br>(5.9 to 11.2)                              | 6.4<br>(3.8 to 8.8)                                 |
| Unintentional suffocation                     | 23.2<br>(18.3 to 29.0)                        | 3.4<br>(2.5 to 4.5)                            | 0.7<br>(0.4 to 1.1)                     | 5.1<br>(2.8 to 7.2)                               | 3.3<br>(1.0 to 5.3)                                 |
| Other exposure to mechanical forces           | 605.1<br>(511.5 to 751.9)                     | 184.2<br>(161.4 to 208.6)                      | 12.6<br>(8.3 to 18.9)                   | 15.4<br>(12.4 to 18.1)                            | 12.6<br>(9.7 to 15.1)                               |



| Cause                                                                               | Prevalence in thousands (95% UI)        | Incidence in thousands (95% UI)       | YLDs in thousands (95% UI)         |                                                   |                                                     |
|-------------------------------------------------------------------------------------|-----------------------------------------|---------------------------------------|------------------------------------|---------------------------------------------------|-----------------------------------------------------|
|                                                                                     | 2016 counts                             | 2016 counts                           | 2016 counts                        | Percentage change in counts between 2006 and 2016 | Percentage change in age-standardised rates between |
| Adverse effects of medical treatment                                                | 3.5<br>(2.8 to 4.2)                     | 45.3<br>(40.5 to 50.1)                | 0.5<br>(0.3 to 0.7)                | 12.2<br>(6.7 to 17.7)                             | 3.1<br>(-1.0 to 7.5)                                |
| Animal contact                                                                      | 67.3<br>(59.6 to 77.2)                  | 60.8<br>(51.7 to 71.4)                | 1.9<br>(1.2 to 2.7)                | -12.7<br>(-16.4 to -9.0)                          | -12.7<br>(-16.6 to -8.8)                            |
| Venomous animal contact                                                             | 26.5<br>(22.1 to 31.9)                  | 24.8<br>(19.6 to 31.2)                | 1.3<br>(0.9 to 1.9)                | -8.3<br>(-13.7 to -2.5)                           | -7.4<br>(-13.2 to -1.6)                             |
| Non-venomous animal contact                                                         | 40.8<br>(34.5 to 49.5)                  | 36.0<br>(29.6 to 43.3)                | 0.6<br>(0.4 to 0.9)                | -21.4<br>(-25.0 to -18.5)                         | -23.9<br>(-27.1 to -21.3)                           |
| Foreign body                                                                        | 159.0<br>(136.1 to 181.9)               | 70.3<br>(63.7 to 78.4)                | 5.1<br>(3.2 to 7.5)                | -2.6<br>(-5.7 to 0.5)                             | -5.2<br>(-8.3 to -2.3)                              |
| Pulmonary aspiration and foreign body in airway                                     | 103.9<br>(84.7 to 126.8)                | 34.1<br>(30.6 to 38.0)                | 3.6<br>(2.3 to 5.4)                | -5.7<br>(-8.4 to -2.9)                            | -8.6<br>(-11.4 to -6.1)                             |
| Foreign body in eyes                                                                | 4.9<br>(3.1 to 6.8)                     | 22.0<br>(17.3 to 28.4)                | 0.3<br>(0.1 to 0.5)                | 3.3<br>(-0.0 to 7.1)                              | 0.7<br>(-1.8 to 3.3)                                |
| Foreign body in other body part                                                     | 50.3<br>(41.3 to 62.5)                  | 14.2<br>(12.0 to 17.1)                | 1.2<br>(0.7 to 1.8)                | 6.9<br>(2.2 to 11.0)                              | 4.9<br>(0.3 to 9.0)                                 |
| Environmental heat and cold exposure                                                | 183.3<br>(161.3 to 209.6)               | 40.1<br>(34.4 to 46.0)                | 5.9<br>(3.9 to 8.6)                | 7.0<br>(3.9 to 9.9)                               | 3.1<br>(0.2 to 5.7)                                 |
| Other unintentional injuries                                                        | 320.5<br>(260.7 to 387.4)               | 88.0<br>(75.6 to 101.0)               | 8.7<br>(5.7 to 12.8)               | 19.6<br>(17.6 to 21.4)                            | 16.9<br>(14.9 to 18.9)                              |
| <b>Self-harm and interpersonal violence</b>                                         | <b>317.7</b><br><b>(291.0 to 346.0)</b> | <b>72.1†</b><br><b>(64.3 to 80.7)</b> | <b>7.4</b><br><b>(5.0 to 10.7)</b> | <b>-4.1</b><br><b>(-6.1 to -2.2)</b>              | <b>-5.2</b><br><b>(-7.0 to -3.7)</b>                |
| Self-harm                                                                           | 40.5<br>(33.8 to 47.5)                  | 15.6<br>(13.5 to 18.0)                | 1.5<br>(0.9 to 2.2)                | -5.2<br>(-8.5 to -2.0)                            | -8.1<br>(-11.1 to -5.3)                             |
| Self-harm by firearm                                                                | 0.7<br>(0.6 to 0.8)                     | 0.2<br>(0.1 to 0.3)                   | < 0.05<br>(< 0.05 to < 0.05)       | -48.4<br>(-50.7 to -45.9)                         | -47.5<br>(-49.8 to -45.0)                           |
| Self-harm by other specified means                                                  | 39.8<br>(33.2 to 46.9)                  | 15.4<br>(13.3 to 17.8)                | 1.4<br>(0.9 to 2.1)                | -4.1<br>(-7.3 to -0.9)                            | -7.1<br>(-10.1 to -4.2)                             |
| Interpersonal violence                                                              | 277.2<br>(252.9 to 307.4)               | 56.5†<br>(48.9 to 64.8)               | 6.0<br>(4.1 to 8.5)                | -3.8<br>(-5.8 to -1.9)                            | -4.5<br>(-6.2 to -3.0)                              |
| Assault by firearm                                                                  | 1.8<br>(1.6 to 2.1)                     | 0.4<br>(0.3 to 0.5)                   | 0.1<br>(< 0.05 to 0.1)             | -0.0<br>(-2.5 to 2.5)                             | -1.0<br>(-3.5 to 1.5)                               |
| Assault by sharp object                                                             | 30.8<br>(25.2 to 36.6)                  | 8.4<br>(6.5 to 10.7)                  | 0.8<br>(0.5 to 1.1)                | -7.9<br>(-10.7 to -5.3)                           | -9.3<br>(-11.9 to -7.0)                             |
| Sexual violence                                                                     | 126.7<br>(112.2 to 143.6)               | --                                    | 1.0<br>(0.7 to 1.4)                | -13.5<br>(-17.3 to -9.8)                          | -6.8<br>(-10.2 to -3.5)                             |
| Assault by other means                                                              | 117.9<br>(98.6 to 142.4)                | 47.8<br>(41.0 to 55.2)                | 4.1<br>(2.7 to 6.0)                | -0.3<br>(-2.5 to 1.6)                             | -2.9<br>(-4.7 to -1.2)                              |
| <b>Forces of nature, conflict and terrorism, and executions and police conflict</b> | <b>14.4</b><br><b>(8.2 to 21.2)</b>     | <b>2.3†</b><br><b>(0.5 to 3.5)</b>    | <b>0.4</b><br><b>(0.1 to 0.9)</b>  | <b>69.6</b><br><b>(49.0 to 80.5)</b>              | <b>71.0</b><br><b>(50.6 to 82.1)</b>                |
| Exposure to forces of nature                                                        | 4.4<br>(2.0 to 7.5)                     | --                                    | 0.1<br>(< 0.05 to 0.3)             | 335.2<br>(305.7 to 437.5)                         | 332.4<br>(302.2 to 434.1)                           |
| Conflict and terrorism                                                              | 1.6<br>(0.8 to 2.8)                     | --                                    | < 0.05<br>(< 0.05 to 0.1)          | 289.9<br>(269.2 to 355.7)                         | 283.0<br>(261.8 to 347.4)                           |
| Executions and police conflict                                                      | 8.4<br>(2.6 to 13.8)                    | 2.3<br>(0.5 to 3.5)                   | 0.2<br>(0.1 to 0.5)                | 10.7<br>(-3.6 to 18.8)                            | 6.8<br>(-5.5 to 15.7)                               |
| <b>Impairments</b>                                                                  | --                                      | --                                    | --                                 | --                                                | --                                                  |
| Anaemia                                                                             | 1,353.3<br>(1,165.2 to 1,536.6)         | --                                    | 28.5<br>(19.0 to 40.5)             | -1.2<br>(-12.8 to 12.5)                           | -4.2<br>(-16.2 to 8.9)                              |
| Developmental intellectual disability                                               | 176.0<br>(138.1 to 214.5)               | --                                    | 20.2<br>(14.8 to 26.8)             | -9.6<br>(-13.7 to -5.2)                           | -7.0<br>(-11.4 to -2.3)                             |
| Epilepsy                                                                            | 45.0<br>(26.9 to 64.9)                  | --                                    | 13.8<br>(7.7 to 23.5)              | -9.5<br>(-51.4 to 74.6)                           | -8.2<br>(-50.2 to 75.4)                             |
| Guillain-Barre syndrome                                                             | 0.1<br>(0.1 to 0.1)                     | --                                    | < 0.05<br>(< 0.05 to < 0.05)       | 2.2<br>(-1.9 to 7.5)                              | 0.1<br>(0.0 to 0.1)                                 |
| Hearing loss                                                                        | 2,446.7<br>(2,342.2 to 2,556.9)         | --                                    | 70.6<br>(49.9 to 98.7)             | 2.1<br>(-0.5 to 4.5)                              | -4.9<br>(-7.1 to -2.9)                              |
| Heart failure                                                                       | 184.8<br>(160.7 to 211.5)               | --                                    | 17.3<br>(12.8 to 22.5)             | 9.4<br>(1.4 to 17.3)                              | -0.5<br>(-7.3 to 6.1)                               |
| Infertility                                                                         | 139.5<br>(110.7 to 175.3)               | --                                    | 0.9<br>(0.4 to 1.8)                | -2.6<br>(-8.9 to 3.7)                             | 0.3<br>(-5.6 to 6.7)                                |
| Pelvic inflammatory disease                                                         | 5.1<br>(4.3 to 6.0)                     | --                                    | 0.7<br>(0.4 to 0.9)                | -8.5<br>(-21.2 to 7.0)                            | -7.7<br>(-20.6 to 7.8)                              |
| Vision loss                                                                         | 1,374.0<br>(1,275.2 to 1,484.2)         | --                                    | 33.7<br>(23.4 to 48.3)             | 0.4<br>(-3.2 to 4.4)                              | -5.6<br>(-8.9 to -1.9)                              |

We did not calculate incidence for the nine impairments, certain NTDs, and causes with only birth prevalence. Blank cells mean that no estimate is available.

† Incidence for aggregate causes represents the sum of the incidence of the causes below the aggregate.

‡ Incidence estimates for stroke represent first-ever stroke only.

^ Incidence of HIV/AIDS represents new infections of HIV only and does not include new infections of Tuberculosis in HIV positive cases.

SR Table 14: Prevalence, incidence, and YLDs for 2016, percentage change of YLD counts and percentage change of age-standardised YLD rates between 2006 and 2016 by cause and impairments, for all ages, Belgium.

| Cause                                                                                | Prevalence in thousands (95% UI)          | Incidence in thousands (95% UI)            | YLDs in thousands (95% UI)             |                                                   |                                                     |
|--------------------------------------------------------------------------------------|-------------------------------------------|--------------------------------------------|----------------------------------------|---------------------------------------------------|-----------------------------------------------------|
|                                                                                      | 2016 counts                               | 2016 counts                                | 2016 counts                            | Percentage change in counts between 2006 and 2016 | Percentage change in age-standardised rates between |
| <b>All causes</b>                                                                    | <b>10,594.2</b><br>(10,545.0 to 10,647.0) | <b>67,949.6†</b><br>(63,612.9 to 72,756.2) | <b>1,486.8</b><br>(1,111.6 to 1,917.5) | <b>7.9</b><br>(6.3 to 9.5)                        | <b>-1.7</b><br>(-3.4 to -0.1)                       |
| <b>Communicable, maternal, neonatal, and nutritional disorders</b>                   | <b>3,707.7</b><br>(3,510.7 to 3,905.1)    | <b>43,364.9†</b><br>(39,129.1 to 48,062.5) | <b>46.5</b><br>(32.8 to 63.6)          | <b>3.4</b><br>(-2.3 to 9.6)                       | <b>-3.6</b><br>(-9.5 to 2.3)                        |
| <b>HIV/AIDS and tuberculosis</b>                                                     | <b>1,315.4</b><br>(1,088.4 to 1,529.6)    | <b>2.0†</b><br>(1.3 to 2.8)                | <b>2.2</b><br>(1.1 to 3.8)             | <b>27.7</b><br>(9.3 to 46.3)                      | <b>16.1</b><br>(-1.9 to 34.4)                       |
| Tuberculosis                                                                         | 1,162.9<br>(935.4 to 1,425.0)             | 0.9†<br>(0.7 to 1.2)                       | 0.2<br>(0.1 to 0.3)                    | -9.0<br>(-26.8 to 14.9)                           | -14.6<br>(-31.9 to 7.4)                             |
| Drug-susceptible tuberculosis                                                        | 0.6<br>(0.5 to 0.8)                       | 0.9<br>(0.7 to 1.1)                        | 0.2<br>(0.1 to 0.3)                    | -9.0<br>(-27.3 to 15.5)                           | -14.5<br>(-32.0 to 8.0)                             |
| Multidrug-resistant tuberculosis without extensive drug resistance                   | < 0.05<br>(< 0.05 to < 0.05)              | < 0.05<br>(< 0.05 to < 0.05)               | < 0.05<br>(< 0.05 to < 0.05)           | -16.4<br>(-43.3 to 18.4)                          | -21.2<br>(-46.4 to 11.9)                            |
| Extensively drug-resistant tuberculosis                                              | < 0.05<br>(< 0.05 to < 0.05)              | < 0.05<br>(< 0.05 to < 0.05)               | < 0.05<br>(< 0.05 to < 0.05)           | 79.7<br>(22.1 to 154.9)                           | 69.5<br>(15.3 to 140.9)                             |
| Latent tuberculosis infection                                                        | 1,162.3<br>(934.8 to 1,424.4)             | --                                         | --                                     | --                                                | --                                                  |
| HIV/AIDS                                                                             | 23.2<br>(11.1 to 39.1)                    | 1.1 <sup>^</sup><br>(0.4 to 1.9)           | 2.0<br>(0.9 to 3.6)                    | 33.7<br>(13.1 to 56.7)                            | 21.3<br>(0.2 to 43.2)                               |
| Drug-susceptible HIV/AIDS - Tuberculosis                                             | < 0.05<br>(< 0.05 to 0.1)                 | 0.1<br>(< 0.05 to 0.1)                     | < 0.05<br>(< 0.05 to < 0.05)           | -28.7<br>(-35.0 to -20.0)                         | -35.3<br>(-41.1 to -27.4)                           |
| Multidrug-resistant HIV/AIDS - Tuberculosis without extensive drug resistance        | < 0.05<br>(< 0.05 to < 0.05)              | < 0.05<br>(< 0.05 to < 0.05)               | < 0.05<br>(< 0.05 to < 0.05)           | -31.8<br>(-54.2 to -1.2)                          | -38.1<br>(-58.5 to -10.5)                           |
| Extensively drug-resistant HIV/AIDS - Tuberculosis                                   | < 0.05<br>(< 0.05 to < 0.05)              | < 0.05<br>(< 0.05 to < 0.05)               | < 0.05<br>(< 0.05 to < 0.05)           | 46.8<br>(-1.4 to 112.4)                           | 33.0<br>(-10.7 to 92.4)                             |
| HIV/AIDS resulting in other diseases                                                 | 23.2<br>(11.0 to 39.1)                    | 1.1<br>(0.4 to 1.9)                        | 2.0<br>(0.8 to 3.6)                    | 34.6<br>(13.6 to 57.9)                            | 22.2<br>(0.7 to 45.4)                               |
| <b>Diarrhoea, lower respiratory infections, and other common infectious diseases</b> | <b>681.1</b><br>(635.2 to 726.7)          | <b>42,962.0†</b><br>(38,736.8 to 47,650.5) | <b>21.4</b><br>(14.1 to 31.4)          | <b>5.5</b><br>(2.1 to 8.9)                        | <b>-2.9</b><br>(-6.2 to 0.5)                        |
| Diarrhoeal diseases                                                                  | 34.2<br>(31.7 to 36.7)                    | 2,272.2<br>(2,117.9 to 2,445.9)            | 3.8<br>(2.6 to 5.2)                    | -2.1<br>(-9.0 to 5.2)                             | -12.7<br>(-19.8 to -5.5)                            |
| Intestinal infectious diseases                                                       | < 0.05<br>(< 0.05 to < 0.05)              | < 0.05†<br>(< 0.05 to < 0.05)              | < 0.05<br>(< 0.05 to < 0.05)           | -6.2<br>(-21.3 to 9.8)                            | -15.1<br>(-27.7 to -0.1)                            |
| Typhoid fever                                                                        | < 0.05<br>(< 0.05 to < 0.05)              | < 0.05<br>(< 0.05 to < 0.05)               | < 0.05<br>(< 0.05 to < 0.05)           | 0.1<br>(-18.2 to 21.0)                            | -7.4<br>(-23.6 to 12.3)                             |
| Paratyphoid fever                                                                    | < 0.05<br>(< 0.05 to < 0.05)              | < 0.05<br>(< 0.05 to < 0.05)               | < 0.05<br>(< 0.05 to < 0.05)           | -12.8<br>(-28.0 to 5.7)                           | -19.2<br>(-31.9 to -2.5)                            |
| Other intestinal infectious diseases                                                 | --                                        | --                                         | < 0.05<br>(< 0.05 to < 0.05)           | -39.7<br>(-57.7 to -16.5)                         | -50.6<br>(-67.2 to -25.7)                           |
| Lower respiratory infections                                                         | 9.2<br>(8.6 to 9.9)                       | 387.9<br>(357.5 to 423.1)                  | 0.5<br>(0.4 to 0.8)                    | 16.1<br>(2.3 to 30.9)                             | -0.4<br>(-12.0 to 12.4)                             |
| Upper respiratory infections                                                         | 514.9<br>(460.8 to 573.2)                 | 39,396.8<br>(35,056.4 to 44,119.4)         | 12.7<br>(7.6 to 19.8)                  | 7.2<br>(2.4 to 12.1)                              | 0.1<br>(-4.3 to 4.5)                                |
| Otitis media                                                                         | 119.0<br>(102.6 to 141.9)                 | 720.7<br>(494.9 to 1,157.0)                | 3.0<br>(1.9 to 4.6)                    | 5.6<br>(-1.6 to 12.7)                             | -1.9<br>(-9.1 to 5.0)                               |
| Meningitis                                                                           | 2.2<br>(1.8 to 2.5)                       | 0.5<br>(0.5 to 0.6)                        | 0.2<br>(0.2 to 0.3)                    | -2.6<br>(-6.7 to 1.3)                             | -9.6<br>(-13.5 to -5.6)                             |
| Pneumococcal meningitis                                                              | 0.5<br>(0.4 to 0.6)                       | < 0.05<br>(< 0.05 to < 0.05)               | 0.1<br>(< 0.05 to 0.1)                 | -16.1<br>(-24.6 to -8.8)                          | -22.1<br>(-30.5 to -15.0)                           |
| H influenzae type B meningitis                                                       | 0.2<br>(0.2 to 0.3)                       | < 0.05<br>(< 0.05 to < 0.05)               | < 0.05<br>(< 0.05 to < 0.05)           | 0.0<br>(-5.9 to 5.7)                              | -7.2<br>(-13.4 to -1.4)                             |
| Meningococcal infection                                                              | 0.5<br>(0.3 to 0.6)                       | 0.2<br>(0.1 to 0.2)                        | < 0.05<br>(< 0.05 to 0.1)              | -4.3<br>(-9.9 to 1.4)                             | -12.3<br>(-17.7 to -7.5)                            |
| Other meningitis                                                                     | 1.0<br>(0.7 to 1.2)                       | 0.3<br>(0.2 to 0.3)                        | 0.1<br>(0.1 to 0.1)                    | 6.1<br>(1.1 to 11.3)                              | -1.1<br>(-6.0 to 4.0)                               |
| Encephalitis                                                                         | 3.3<br>(2.6 to 4.2)                       | 1.6<br>(1.5 to 1.6)                        | 0.5<br>(0.4 to 0.7)                    | 9.6<br>(6.0 to 13.0)                              | 1.6<br>(-1.8 to 4.6)                                |
| Diphtheria                                                                           | < 0.05<br>(< 0.05 to < 0.05)              | < 0.05<br>(< 0.05 to < 0.05)               | < 0.05<br>(< 0.05 to < 0.05)           | -20.7<br>(-56.8 to 53.0)                          | -26.1<br>(-56.3 to 32.3)                            |
| Whooping cough                                                                       | 0.1<br>(0.1 to 0.2)                       | 0.9<br>(0.7 to 1.3)                        | < 0.05<br>(< 0.05 to < 0.05)           | -58.7<br>(-77.2 to -31.1)                         | -61.5<br>(-79.0 to -35.1)                           |
| Tetanus                                                                              | < 0.05<br>(< 0.05 to < 0.05)              | < 0.05<br>(< 0.05 to < 0.05)               | < 0.05<br>(< 0.05 to < 0.05)           | -46.9<br>(-56.3 to -34.8)                         | -49.3<br>(-58.3 to -38.3)                           |
| Measles                                                                              | < 0.05<br>(< 0.05 to < 0.05)              | < 0.05<br>(< 0.05 to 0.1)                  | < 0.05<br>(< 0.05 to < 0.05)           | 66.2<br>(4.5 to 187.9)                            | 54.1<br>(-3.1 to 167.0)                             |
| Varicella and herpes zoster                                                          | 12.1<br>(10.9 to 13.4)                    | 181.2<br>(174.0 to 189.2)                  | 0.5<br>(0.3 to 0.8)                    | 17.6<br>(2.0 to 35.3)                             | 4.9<br>(-9.0 to 20.9)                               |
| <b>Neglected tropical diseases and malaria</b>                                       | <b>0.1</b><br>(< 0.05 to 0.5)             | <b>&lt; 0.05†</b><br>(< 0.05 to 0.1)       | <b>&lt; 0.05</b><br>(< 0.05 to < 0.05) | <b>-32.5</b><br>(-94.5 to 717.3)                  | <b>-37.2</b><br>(-95.3 to 592.9)                    |
| Malaria                                                                              | --                                        | --                                         | --                                     | --                                                | --                                                  |
| Chagas disease                                                                       | --                                        | --                                         | --                                     | --                                                | --                                                  |
| Leishmaniasis                                                                        | --                                        | --                                         | --                                     | --                                                | --                                                  |
| Visceral leishmaniasis                                                               | --                                        | --                                         | --                                     | --                                                | --                                                  |
| Cutaneous and mucocutaneous leishmaniasis                                            | --                                        | --                                         | --                                     | --                                                | --                                                  |
| African trypanosomiasis                                                              | --                                        | --                                         | --                                     | --                                                | --                                                  |
| Schistosomiasis                                                                      | --                                        | --                                         | --                                     | --                                                | --                                                  |
| Cysticercosis                                                                        | --                                        | --                                         | --                                     | --                                                | --                                                  |
| Cystic echinococcosis                                                                | 0.1<br>(< 0.05 to 0.5)                    | < 0.05<br>(< 0.05 to 0.1)                  | < 0.05<br>(< 0.05 to < 0.05)           | -32.5<br>(-94.5 to 717.3)                         | -37.2<br>(-95.3 to 592.9)                           |
| Lymphatic filariasis                                                                 | --                                        | --                                         | --                                     | --                                                | --                                                  |
| Onchocerciasis                                                                       | --                                        | --                                         | --                                     | --                                                | --                                                  |
| Trachoma                                                                             | --                                        | --                                         | --                                     | --                                                | --                                                  |
| Dengue                                                                               | --                                        | --                                         | --                                     | --                                                | --                                                  |
| Yellow fever                                                                         | --                                        | --                                         | --                                     | --                                                | --                                                  |
| Rabies                                                                               | < 0.05<br>(< 0.05 to < 0.05)              | < 0.05<br>(< 0.05 to < 0.05)               | < 0.05<br>(< 0.05 to < 0.05)           | 27.8<br>(1.1 to 62.3)                             | 13.4<br>(-15.2 to 52.7)                             |
| Intestinal nematode infections                                                       | --                                        | --                                         | --                                     | --                                                | --                                                  |
| Ascariasis                                                                           | --                                        | --                                         | --                                     | --                                                | --                                                  |

| Cause                                                                   | Prevalence in thousands (95% UI)                 | Incidence in thousands (95% UI)                   | YLDs in thousands (95% UI)                  |                                                   |                                                     |
|-------------------------------------------------------------------------|--------------------------------------------------|---------------------------------------------------|---------------------------------------------|---------------------------------------------------|-----------------------------------------------------|
|                                                                         | 2016 counts                                      | 2016 counts                                       | 2016 counts                                 | Percentage change in counts between 2006 and 2016 | Percentage change in age-standardised rates between |
| Trichuriasis                                                            | --                                               | --                                                | --                                          | --                                                | --                                                  |
| Hookworm disease                                                        | --                                               | --                                                | --                                          | --                                                | --                                                  |
| Food-borne trematodiasis                                                | --                                               | --                                                | --                                          | --                                                | --                                                  |
| Leprosy                                                                 | --                                               | --                                                | --                                          | --                                                | --                                                  |
| Ebola virus disease                                                     | --                                               | --                                                | --                                          | --                                                | --                                                  |
| Zika virus disease                                                      | --                                               | --                                                | --                                          | --                                                | --                                                  |
| Guinea worm disease                                                     | --                                               | --                                                | --                                          | --                                                | --                                                  |
| Other neglected tropical diseases                                       | --                                               | --                                                | < 0.05<br>(< 0.05 to < 0.05)                | --                                                | --                                                  |
| <b>Maternal disorders</b>                                               | <b>12.8</b><br><b>(9.5 to 16.6)</b>              | <b>82.9†</b><br><b>(78.2 to 87.7)</b>             | <b>0.7</b><br><b>(0.4 to 1.1)</b>           | <b>6.5</b><br><b>(-27.3 to 54.5)</b>              | <b>-0.8</b><br><b>(-32.5 to 44.0)</b>               |
| Maternal haemorrhage                                                    | 1.7<br>(1.0 to 2.8)                              | 14.9<br>(13.2 to 17.2)                            | 0.1<br>(< 0.05 to 0.1)                      | 7.3<br>(-35.3 to 72.8)                            | -1.4<br>(-40.9 to 59.4)                             |
| Maternal sepsis and other pregnancy related infections                  | 1.3<br>(1.0 to 1.6)                              | 4.5<br>(2.2 to 6.5)                               | < 0.05<br>(< 0.05 to < 0.05)                | 22.4<br>(-40.6 to 168.0)                          | 16.1<br>(-45.5 to 164.2)                            |
| Maternal hypertensive disorders                                         | 9.7<br>(6.6 to 13.0)                             | 38.7<br>(38.5 to 38.9)                            | 0.5<br>(0.2 to 0.8)                         | 7.0<br>(-34.1 to 77.6)                            | -0.2<br>(-38.7 to 65.5)                             |
| Maternal obstructed labour and uterine rupture                          | 0.1<br>(< 0.05 to 0.1)                           | 5.9<br>(3.7 to 8.7)                               | < 0.05<br>(< 0.05 to < 0.05)                | 8.2<br>(-43.7 to 103.6)                           | 1.1<br>(-47.2 to 91.0)                              |
| Maternal abortion, miscarriage, and ectopic pregnancy                   | 0.2<br>(0.1 to 0.2)                              | 18.9<br>(17.1 to 21.7)                            | < 0.05<br>(< 0.05 to < 0.05)                | 0.9<br>(-48.8 to 104.9)                           | -5.0<br>(-52.0 to 93.3)                             |
| Other maternal disorders                                                | --                                               | --                                                | 0.1<br>(0.1 to 0.2)                         | 1.5<br>(-30.7 to 47.4)                            | -5.5<br>(-35.7 to 37.6)                             |
| <b>Neonatal disorders</b>                                               | <b>69.2</b><br><b>(57.6 to 85.8)</b>             | --                                                | <b>11.2</b><br><b>(7.8 to 15.5)</b>         | <b>1.2</b><br><b>(-14.1 to 18.1)</b>              | <b>-5.0</b><br><b>(-19.6 to 11.7)</b>               |
| Neonatal preterm birth complications                                    | 65.1<br>(50.5 to 85.5)                           | --                                                | 6.9<br>(4.4 to 9.9)                         | 1.0<br>(-21.8 to 26.2)                            | -4.8<br>(-26.4 to 19.3)                             |
| Neonatal encephalopathy due to birth asphyxia and trauma                | 9.3<br>(6.5 to 13.1)                             | --                                                | 2.0<br>(1.2 to 3.1)                         | 11.3<br>(-9.2 to 46.4)                            | 4.2<br>(-15.9 to 36.8)                              |
| Neonatal sepsis and other neonatal infections                           | 4.9<br>(2.4 to 10.1)                             | --                                                | 1.9<br>(0.8 to 4.2)                         | -7.2<br>(-23.0 to 10.8)                           | -13.4<br>(-29.5 to 3.2)                             |
| Hemolytic disease and other neonatal jaundice                           | 0.8<br>(0.6 to 0.9)                              | --                                                | 0.2<br>(0.2 to 0.3)                         | 5.3<br>(-2.7 to 14.3)                             | -1.0<br>(-8.7 to 7.4)                               |
| Other neonatal disorders                                                | --                                               | --                                                | 0.2<br>(0.1 to 0.3)                         | -1.4<br>(-22.1 to 24.5)                           | -8.6<br>(-27.7 to 15.6)                             |
| <b>Nutritional deficiencies</b>                                         | <b>640.4</b><br><b>(543.7 to 734.5)</b>          | <b>45.3†</b><br><b>(34.0 to 56.6)</b>             | <b>9.1</b><br><b>(5.8 to 14.1)</b>          | <b>-3.1</b><br><b>(-19.4 to 16.8)</b>             | <b>-6.7</b><br><b>(-22.9 to 12.9)</b>               |
| Protein-energy malnutrition                                             | 6.0<br>(5.8 to 6.1)                              | 3.6<br>(3.6 to 3.7)                               | 0.7<br>(0.4 to 0.9)                         | 6.9<br>(-5.4 to 19.9)                             | -0.8<br>(-12.2 to 11.3)                             |
| Iodine deficiency                                                       | 132.7<br>(100.7 to 172.6)                        | 1.9<br>(1.5 to 2.4)                               | 3.3<br>(2.1 to 5.2)                         | 5.1<br>(-6.4 to 18.2)                             | -2.7<br>(-13.8 to 10.1)                             |
| Vitamin A deficiency                                                    | 49.2<br>(36.3 to 63.1)                           | 39.8<br>(28.5 to 51.0)                            | --                                          | --                                                | --                                                  |
| Iron-deficiency anaemia                                                 | 412.2<br>(314.4 to 527.6)                        | --                                                | 5.1<br>(2.8 to 8.7)                         | -9.0<br>(-32.6 to 25.0)                           | -9.5<br>(-34.2 to 24.8)                             |
| Other nutritional deficiencies                                          | --                                               | --                                                | < 0.05<br>(< 0.05 to < 0.05)                | 6.6<br>(-6.0 to 20.2)                             | -1.1<br>(-12.8 to 11.5)                             |
| <b>Other communicable, maternal, neonatal, and nutritional diseases</b> | <b>1,736.0</b><br><b>(1,610.8 to 1,897.4)</b>    | <b>272.6</b><br><b>(249.7 to 298.1)</b>           | <b>1.8</b><br><b>(1.2 to 2.8)</b>           | <b>4.7</b><br><b>(-2.0 to 12.6)</b>               | <b>-2.6</b><br><b>(-9.6 to 5.6)</b>                 |
| Sexually transmitted diseases excluding HIV                             | 1,460.6<br>(1,331.9 to 1,616.5)                  | 234.4<br>(211.5 to 258.7)                         | 1.3<br>(0.8 to 2.0)                         | 2.5<br>(-5.9 to 11.4)                             | -5.9<br>(-13.7 to 2.0)                              |
| Syphilis                                                                | 13.8<br>(11.0 to 17.4)                           | 11.2<br>(8.0 to 15.6)                             | 0.4<br>(0.3 to 0.6)                         | 21.6<br>(4.2 to 43.5)                             | 7.9<br>(-6.8 to 26.8)                               |
| Chlamydial infection                                                    | 49.2<br>(35.5 to 66.0)                           | 35.8<br>(25.2 to 49.0)                            | 0.2<br>(0.1 to 0.3)                         | -7.3<br>(-24.3 to 10.9)                           | -10.5<br>(-28.6 to 8.2)                             |
| Gonococcal infection                                                    | 4.2<br>(3.8 to 4.7)                              | 3.4<br>(2.4 to 5.0)                               | < 0.05<br>(< 0.05 to 0.1)                   | -23.4<br>(-39.8 to -4.9)                          | -24.8<br>(-41.7 to -5.8)                            |
| Trichomoniasis                                                          | 154.6<br>(134.3 to 176.1)                        | 128.5<br>(111.2 to 146.4)                         | 0.1<br>(< 0.05 to 0.2)                      | 18.2<br>(6.4 to 31.2)                             | 12.3<br>(0.9 to 25.7)                               |
| Genital herpes                                                          | 1,253.9<br>(1,078.5 to 1,459.1)                  | 46.7<br>(39.7 to 55.5)                            | 0.3<br>(0.1 to 0.7)                         | 3.7<br>(-7.5 to 14.6)                             | -4.3<br>(-15.3 to 6.7)                              |
| Other sexually transmitted diseases                                     | 12.0<br>(10.9 to 13.0)                           | 8.8<br>(7.0 to 11.1)                              | 0.2<br>(0.1 to 0.3)                         | -18.7<br>(-32.1 to -3.0)                          | -20.1<br>(-33.4 to -4.1)                            |
| Hepatitis                                                               | 331.0<br>(295.4 to 369.2)                        | 38.2<br>(33.0 to 43.7)                            | 0.1<br>(< 0.05 to 0.1)                      | 8.3<br>(-9.9 to 30.9)                             | -6.0<br>(-20.0 to 10.1)                             |
| Acute hepatitis A                                                       | 1.1<br>(0.9 to 1.3)                              | 14.7<br>(11.6 to 17.4)                            | < 0.05<br>(< 0.05 to 0.1)                   | 5.2<br>(-27.6 to 50.3)                            | -8.2<br>(-32.0 to 24.1)                             |
| Hepatitis B                                                             | 121.2<br>(96.3 to 152.1)                         | 16.0<br>(12.1 to 20.5)                            | < 0.05<br>(< 0.05 to 0.1)                   | 9.6<br>(-13.2 to 36.5)                            | -4.5<br>(-21.4 to 14.2)                             |
| Hepatitis C                                                             | 208.5<br>(186.2 to 231.5)                        | 4.0<br>(3.6 to 4.6)                               | < 0.05<br>(< 0.05 to < 0.05)                | 9.6<br>(8.5 to 11.0)                              | -0.4<br>(-0.8 to 0.1)                               |
| Acute hepatitis E                                                       | 0.3<br>(0.1 to 0.4)                              | 3.5<br>(2.0 to 5.3)                               | < 0.05<br>(< 0.05 to < 0.05)                | 16.9<br>(-7.1 to 48.0)                            | -4.7<br>(-19.1 to 11.6)                             |
| Other infectious diseases                                               | 12.8<br>(9.5 to 17.2)                            | < 0.05<br>(< 0.05 to < 0.05)                      | 0.5<br>(0.3 to 0.7)                         | 10.8<br>(-3.1 to 25.4)                            | 5.8<br>(-11.1 to 24.5)                              |
| <b>Non-communicable diseases</b>                                        | <b>10,314.8</b><br><b>(10,257.3 to 10,368.5)</b> | <b>23,163.0†</b><br><b>(22,134.0 to 24,204.7)</b> | <b>1,309.7</b><br><b>(977.5 to 1,684.4)</b> | <b>8.7</b><br><b>(6.8 to 10.6)</b>                | <b>-1.0</b><br><b>(-2.9 to 0.9)</b>                 |
| <b>Neoplasms</b>                                                        | <b>237.0</b><br><b>(227.8 to 247.1)</b>          | <b>77.2</b><br><b>(73.4 to 83.2)</b>              | <b>24.1</b><br><b>(17.7 to 31.0)</b>        | <b>18.5</b><br><b>(13.7 to 24.1)</b>              | <b>1.9</b><br><b>(-2.3 to 6.5)</b>                  |
| Lip and oral cavity cancer                                              | 3.9<br>(3.4 to 4.4)                              | 1.0<br>(0.9 to 1.1)                               | 0.4<br>(0.3 to 0.5)                         | 11.0<br>(-6.7 to 31.7)                            | -4.9<br>(-20.9 to 12.7)                             |
| Nasopharynx cancer                                                      | 0.4<br>(0.4 to 0.5)                              | 0.1<br>(0.1 to 0.1)                               | 0.1<br>(< 0.05 to 0.1)                      | 4.1<br>(-9.6 to 21.2)                             | -7.8<br>(-20.6 to 8.3)                              |
| Other pharynx cancer                                                    | 2.2<br>(2.0 to 2.4)                              | 0.6<br>(0.5 to 0.7)                               | 0.2<br>(0.1 to 0.3)                         | 20.0<br>(3.8 to 36.9)                             | 4.3<br>(-10.0 to 19.2)                              |
| Oesophageal cancer                                                      | 1.3<br>(1.1 to 1.5)                              | 0.9<br>(0.8 to 1.0)                               | 0.2<br>(0.2 to 0.3)                         | 15.2<br>(-8.6 to 45.2)                            | -1.9<br>(-22.0 to 23.5)                             |
| Stomach cancer                                                          | 3.9<br>(3.4 to 4.5)                              | 1.9<br>(1.7 to 2.1)                               | 0.5<br>(0.4 to 0.7)                         | 15.2<br>(-3.9 to 38.6)                            | -2.1<br>(-17.2 to 15.9)                             |
| Colon and rectum cancer                                                 | 34.2<br>(31.4 to 37.5)                           | 8.9<br>(8.2 to 9.7)                               | 3.1<br>(2.3 to 4.1)                         | 16.0<br>(3.3 to 29.0)                             | -1.8<br>(-12.8 to 9.9)                              |
| Liver cancer                                                            | 0.9<br>(0.7 to 1.1)                              | 1.1<br>(0.9 to 1.2)                               | 0.2<br>(0.2 to 0.3)                         | 55.6<br>(27.8 to 88.4)                            | 33.3<br>(10.3 to 59.7)                              |
| Liver cancer due to hepatitis B                                         | 0.2<br>(0.1 to 0.3)                              | 0.1<br>(0.1 to 0.2)                               | < 0.05<br>(< 0.05 to 0.1)                   | 49.2<br>(22.5 to 80.3)                            | 28.9<br>(5.9 to 56.3)                               |



| Cause                                              | Prevalence in thousands (95% UI)              | Incidence in thousands (95% UI)          | YLDs in thousands (95% UI)            |                                                   |                                                     |
|----------------------------------------------------|-----------------------------------------------|------------------------------------------|---------------------------------------|---------------------------------------------------|-----------------------------------------------------|
|                                                    | 2016 counts                                   | 2016 counts                              | 2016 counts                           | Percentage change in counts between 2006 and 2016 | Percentage change in age-standardised rates between |
| Liver cancer due to hepatitis C                    | 0.4<br>(0.2 to 0.5)                           | 0.2<br>(0.2 to 0.3)                      | 0.1<br>( $< 0.05$ to 0.1)             | 56.5<br>(24.7 to 94.0)                            | 31.2<br>(6.2 to 58.4)                               |
| Liver cancer due to alcohol use                    | 0.8<br>(0.5 to 1.0)                           | 0.5<br>(0.4 to 0.6)                      | 0.1<br>(0.1 to 0.2)                   | 59.4<br>(30.9 to 95.7)                            | 37.5<br>(13.3 to 68.2)                              |
| Liver cancer due to other causes                   | 0.3<br>(0.2 to 0.4)                           | 0.2<br>(0.1 to 0.3)                      | $< 0.05$<br>( $< 0.05$ to 0.1)        | 50.3<br>(20.9 to 86.5)                            | 28.7<br>(4.2 to 60.4)                               |
| Gallbladder and biliary tract cancer               | 0.4<br>(0.3 to 0.7)                           | 0.4<br>(0.3 to 0.6)                      | 0.1<br>(0.1 to 0.1)                   | 0.6<br>(-21.6 to 30.9)                            | -16.1<br>(-34.1 to 6.8)                             |
| Pancreatic cancer                                  | 1.5<br>(1.3 to 1.8)                           | 1.8<br>(1.6 to 2.0)                      | 0.4<br>(0.2 to 0.5)                   | 25.4<br>(4.0 to 50.5)                             | 5.6<br>(-10.8 to 24.3)                              |
| Larynx cancer                                      | 2.6<br>(2.3 to 3.1)                           | 0.7<br>(0.6 to 0.8)                      | 0.3<br>(0.2 to 0.4)                   | 6.0<br>(-13.5 to 29.0)                            | -8.7<br>(-25.4 to 11.7)                             |
| Tracheal, bronchus, and lung cancer                | 13.6<br>(11.6 to 15.8)                        | 8.9<br>(8.1 to 9.9)                      | 2.1<br>(1.5 to 2.8)                   | 19.9<br>(2.6 to 40.5)                             | 3.3<br>(-11.7 to 21.3)                              |
| Malignant skin melanoma                            | 12.2<br>(9.5 to 13.8)                         | 2.5<br>(1.9 to 2.8)                      | 0.8<br>(0.5 to 1.1)                   | 33.6<br>(15.5 to 52.1)                            | 19.1<br>(2.9 to 36.5)                               |
| Non-melanoma skin cancer                           | 3.9<br>(2.1 to 7.2)                           | 6.9<br>(4.0 to 10.9)                     | 0.1<br>(0.1 to 0.3)                   | 185.7<br>(49.7 to 428.6)                          | 138.9<br>(26.1 to 348.2)                            |
| Non-melanoma skin cancer (squamous-cell carcinoma) | 2.9<br>(1.3 to 6.2)                           | 2.6<br>(1.1 to 5.3)                      | 0.1<br>( $< 0.05$ to 0.3)             | 191.9<br>(46.3 to 446.9)                          | 143.6<br>(24.3 to 360.3)                            |
| Non-melanoma skin cancer (basal-cell carcinoma)    | 0.6<br>(0.3 to 1.1)                           | 4.3<br>(2.2 to 7.0)                      | $< 0.05$<br>( $< 0.05$ to $< 0.05$ )  | 97.6<br>(24.1 to 190.6)                           | 74.9<br>(12.7 to 149.0)                             |
| Breast cancer                                      | 50.9<br>(47.4 to 55.6)                        | 10.5<br>(9.8 to 11.4)                    | 4.6<br>(3.3 to 6.0)                   | 9.6<br>(-0.0 to 21.4)                             | -5.2<br>(-13.9 to 5.4)                              |
| Cervical cancer                                    | 2.5<br>(2.0 to 2.9)                           | 0.6<br>(0.5 to 0.7)                      | 0.2<br>(0.2 to 0.3)                   | -6.5<br>(-22.4 to 12.7)                           | -15.4<br>(-31.6 to 3.8)                             |
| Uterine cancer                                     | 8.5<br>(7.4 to 9.8)                           | 1.8<br>(1.6 to 2.1)                      | 0.6<br>(0.4 to 0.9)                   | 24.4<br>(-0.8 to 55.4)                            | 7.7<br>(-14.3 to 34.3)                              |
| Ovarian cancer                                     | 3.3<br>(2.8 to 3.7)                           | 1.0<br>(0.9 to 1.2)                      | 0.5<br>(0.3 to 0.6)                   | 4.8<br>(-20.8 to 41.8)                            | -9.4<br>(-32.3 to 23.3)                             |
| Prostate cancer                                    | 40.9<br>(34.1 to 68.3)                        | 10.2<br>(8.8 to 15.6)                    | 3.6<br>(2.5 to 6.0)                   | 16.9<br>(0.2 to 40.8)                             | -1.0<br>(-15.5 to 20.2)                             |
| Testicular cancer                                  | 1.4<br>(1.1 to 1.8)                           | 0.3<br>(0.2 to 0.3)                      | 0.1<br>(0.1 to 0.1)                   | 17.8<br>(-16.3 to 64.9)                           | 10.2<br>(-23.1 to 57.3)                             |
| Kidney cancer                                      | 5.7<br>(5.1 to 6.3)                           | 1.6<br>(1.4 to 1.7)                      | 0.5<br>(0.4 to 0.7)                   | 11.2<br>(-4.2 to 28.1)                            | -3.2<br>(-16.6 to 11.0)                             |
| Bladder cancer                                     | 13.5<br>(12.3 to 14.8)                        | 3.2<br>(2.9 to 3.5)                      | 1.2<br>(0.8 to 1.6)                   | 19.8<br>(4.9 to 36.2)                             | 1.3<br>(-11.4 to 15.1)                              |
| Brain and nervous system cancer                    | 3.8<br>(2.9 to 5.0)                           | 1.4<br>(1.2 to 1.9)                      | 0.5<br>(0.3 to 0.7)                   | 32.4<br>(4.5 to 67.3)                             | 19.2<br>(-5.7 to 49.0)                              |
| Thyroid cancer                                     | 4.5<br>(4.0 to 5.0)                           | 0.8<br>(0.8 to 1.0)                      | 0.3<br>(0.2 to 0.4)                   | 31.1<br>(10.5 to 55.0)                            | 17.3<br>(-1.6 to 39.9)                              |
| Mesothelioma                                       | 0.5<br>(0.4 to 0.5)                           | 0.3<br>(0.3 to 0.3)                      | 0.1<br>(0.1 to 0.1)                   | 17.4<br>(-2.2 to 42.2)                            | 1.4<br>(-13.8 to 19.9)                              |
| Hodgkin lymphoma                                   | 1.7<br>(1.4 to 2.5)                           | 0.4<br>(0.3 to 0.5)                      | 0.1<br>(0.1 to 0.2)                   | 3.0<br>(-15.6 to 24.2)                            | -5.4<br>(-24.2 to 17.8)                             |
| Non-Hodgkin's lymphoma                             | 10.1<br>(8.8 to 11.5)                         | 2.5<br>(2.2 to 2.8)                      | 0.8<br>(0.6 to 1.1)                   | 34.2<br>(16.1 to 55.7)                            | 16.4<br>(0.5 to 33.8)                               |
| Multiple myeloma                                   | 2.5<br>(2.0 to 3.1)                           | 0.9<br>(0.7 to 1.1)                      | 0.4<br>(0.3 to 0.6)                   | 27.0<br>(1.3 to 60.8)                             | 9.2<br>(-13.7 to 37.7)                              |
| Leukaemia                                          | 8.4<br>(7.5 to 9.5)                           | 2.4<br>(2.2 to 2.7)                      | 1.1<br>(0.8 to 1.4)                   | 34.2<br>(16.3 to 55.3)                            | 11.6<br>(-3.4 to 29.8)                              |
| Acute lymphoid leukaemia                           | 0.9<br>(0.7 to 1.0)                           | 0.2<br>(0.2 to 0.2)                      | 0.1<br>(0.1 to 0.1)                   | 28.8<br>(-7.1 to 80.4)                            | 18.2<br>(-22.2 to 85.3)                             |
| Chronic lymphoid leukaemia                         | 3.2<br>(2.7 to 3.8)                           | 0.7<br>(0.6 to 0.9)                      | 0.4<br>(0.3 to 0.5)                   | 32.9<br>(5.0 to 66.9)                             | 9.7<br>(-12.5 to 37.6)                              |
| Acute myeloid leukaemia                            | 0.9<br>(0.7 to 1.0)                           | 0.6<br>(0.5 to 0.7)                      | 0.2<br>(0.1 to 0.2)                   | 42.9<br>(19.6 to 67.3)                            | 19.2<br>(0.2 to 37.9)                               |
| Chronic myeloid leukaemia                          | 0.6<br>(0.5 to 0.7)                           | 0.2<br>(0.2 to 0.2)                      | 0.1<br>(0.1 to 0.1)                   | 9.0<br>(-9.0 to 28.9)                             | -9.2<br>(-23.6 to 6.7)                              |
| Other leukaemia                                    | 2.9<br>(2.5 to 3.4)                           | 0.7<br>(0.6 to 0.8)                      | 0.4<br>(0.2 to 0.5)                   | 40.1<br>(13.9 to 72.0)                            | 11.7<br>(-7.9 to 36.2)                              |
| Other neoplasms                                    | 14.3<br>(11.9 to 16.8)                        | 3.7<br>(3.1 to 4.3)                      | 1.1<br>(0.8 to 1.4)                   | 34.5<br>(12.0 to 60.3)                            | 16.2<br>(-1.6 to 37.3)                              |
| <b>Cardiovascular diseases</b>                     | <b>1,554.9</b><br><b>(1,497.6 to 1,619.6)</b> | <b>156.9†</b><br><b>(147.7 to 166.8)</b> | <b>98.8</b><br><b>(72.1 to 129.9)</b> | <b>6.7</b><br><b>(2.2 to 11.3)</b>                | <b>-7.0</b><br><b>(-10.7 to -3.1)</b>               |
| Rheumatic heart disease                            | 1.0<br>(0.9 to 1.1)                           | 0.6<br>(0.6 to 0.6)                      | 0.1<br>(0.1 to 0.1)                   | 11.2<br>(-9.2 to 33.8)                            | -1.7<br>(-15.6 to 13.3)                             |
| Ischaemic heart disease                            | 469.0<br>(442.0 to 495.5)                     | 67.1<br>(60.0 to 73.9)                   | 20.7<br>(14.5 to 27.8)                | 7.7<br>(2.6 to 13.4)                              | -6.5<br>(-11.1 to -2.0)                             |
| Cerebrovascular disease                            | 191.4<br>(176.2 to 206.7)                     | 28.1‡<br>(25.7 to 30.5)                  | 30.4<br>(21.6 to 38.7)                | 3.0<br>(-6.9 to 14.5)                             | -10.3<br>(-18.1 to -0.6)                            |
| Ischaemic stroke                                   | 156.6<br>(136.6 to 176.4)                     | 19.7‡<br>(17.3 to 22.0)                  | 24.0<br>(16.8 to 31.0)                | 0.1<br>(-11.8 to 14.5)                            | -13.0<br>(-22.4 to -1.5)                            |
| Hemorrhagic stroke                                 | 42.6<br>(37.7 to 48.0)                        | 8.4‡<br>(8.0 to 8.9)                     | 6.4<br>(4.7 to 8.1)                   | 15.4<br>(3.4 to 29.8)                             | 0.5<br>(-9.7 to 12.3)                               |
| Hypertensive heart disease                         | 25.7<br>(21.8 to 30.3)                        | --                                       | 2.0<br>(1.4 to 2.8)                   | 12.0<br>(-0.4 to 27.6)                            | -5.5<br>(-15.8 to 7.0)                              |
| Cardiomyopathy and myocarditis                     | 27.7<br>(24.4 to 31.5)                        | 3.7+<br>(3.3 to 4.3)                     | 2.3<br>(1.6 to 3.2)                   | 11.4<br>(0.9 to 23.2)                             | -4.7<br>(-13.8 to 5.0)                              |
| Myocarditis                                        | 3.2<br>(2.9 to 3.5)                           | 3.7<br>(3.3 to 4.3)                      | 0.2<br>(0.2 to 0.3)                   | 2.5<br>(-11.1 to 19.1)                            | -5.1<br>(-17.8 to 9.1)                              |
| Alcoholic cardiomyopathy                           | 5.9<br>(4.9 to 6.9)                           | --                                       | 0.5<br>(0.3 to 0.7)                   | 8.5<br>(-10.8 to 32.6)                            | -3.3<br>(-20.5 to 18.6)                             |
| Other cardiomyopathy                               | 19.8<br>(16.8 to 23.3)                        | --                                       | 1.6<br>(1.1 to 2.2)                   | 13.9<br>(1.0 to 28.3)                             | -5.2<br>(-16.0 to 6.4)                              |
| Atrial fibrillation and flutter                    | 158.6<br>(139.7 to 178.7)                     | 12.5<br>(10.7 to 14.3)                   | 12.2<br>(8.3 to 17.0)                 | 14.5<br>(8.2 to 21.2)                             | -1.9<br>(-7.4 to 4.0)                               |
| Peripheral vascular disease                        | 515.5<br>(450.7 to 585.5)                     | 41.5<br>(35.8 to 48.2)                   | 1.9<br>(0.9 to 3.6)                   | 8.0<br>(0.9 to 15.6)                              | -8.1<br>(-14.1 to -1.7)                             |
| Endocarditis                                       | 3.5<br>(3.0 to 4.1)                           | 3.4<br>(3.1 to 3.7)                      | 0.3<br>(0.2 to 0.4)                   | 8.4<br>(-8.6 to 29.7)                             | -6.7<br>(-20.5 to 10.3)                             |
| Other cardiovascular and circulatory diseases      | 561.5<br>(490.5 to 634.0)                     | --                                       | 28.9<br>(19.9 to 40.4)                | 6.2<br>(-1.6 to 14.1)                             | -6.0<br>(-12.2 to 0.9)                              |
| <b>Chronic respiratory diseases</b>                | <b>1,315.9</b><br><b>(1,275.9 to 1,353.6)</b> | <b>105.4†</b><br><b>(101.0 to 110.0)</b> | <b>47.1</b><br><b>(35.8 to 59.2)</b>  | <b>8.0</b><br><b>(0.2 to 16.0)</b>                | <b>-1.0</b><br><b>(-7.3 to 5.5)</b>                 |
| Chronic obstructive pulmonary disease              | 753.0<br>(717.4 to 788.2)                     | 44.5<br>(42.1 to 46.8)                   | 21.3<br>(16.6 to 26.0)                | 5.2<br>(-10.0 to 21.6)                            | -7.6<br>(-20.7 to 6.1)                              |
| Pneumoconiosis                                     | 0.2<br>(0.2 to 0.2)                           | $< 0.05$<br>( $< 0.05$ to 0.1)           | $< 0.05$<br>( $< 0.05$ to 0.1)        | -1.3<br>(-7.5 to 5.8)                             | -13.4<br>(-19.2 to -6.6)                            |
| Silicosis                                          | 0.1<br>(0.1 to 0.1)                           | $< 0.05$<br>( $< 0.05$ to $< 0.05$ )     | $< 0.05$<br>( $< 0.05$ to $< 0.05$ )  | -5.9<br>(-13.0 to 2.0)                            | -16.9<br>(-23.2 to -9.7)                            |

| Cause                                                          | Prevalence in thousands (95% UI)        | Incidence in thousands (95% UI)               | YLDs in thousands (95% UI)        |                                                   |                                                     |
|----------------------------------------------------------------|-----------------------------------------|-----------------------------------------------|-----------------------------------|---------------------------------------------------|-----------------------------------------------------|
|                                                                | 2016 counts                             | 2016 counts                                   | 2016 counts                       | Percentage change in counts between 2006 and 2016 | Percentage change in age-standardised rates between |
| Asbestosis                                                     | 0.1<br>(0.1 to 0.1)                     | < 0.05<br>(< 0.05 to < 0.05)                  | < 0.05<br>(< 0.05 to < 0.05)      | 3.0<br>(-9.3 to 18.1)                             | -9.9<br>(-21.7 to 4.5)                              |
| Coal workers pneumoconiosis                                    | --                                      | --                                            | --                                | --                                                | --                                                  |
| Other pneumoconiosis                                           | < 0.05<br>(< 0.05 to < 0.05)            | < 0.05<br>(< 0.05 to < 0.05)                  | < 0.05<br>(< 0.05 to < 0.05)      | 8.2<br>(-4.4 to 23.0)                             | -8.0<br>(-18.1 to 3.1)                              |
| Asthma                                                         | 625.9<br>(589.6 to 663.5)               | 59.9<br>(56.2 to 64.0)                        | 24.2<br>(16.1 to 34.7)            | 9.8<br>(5.2 to 14.5)                              | 2.6<br>(-2.0 to 7.4)                                |
| Interstitial lung disease and pulmonary sarcoidosis            | 8.8<br>(8.0 to 9.7)                     | 0.9<br>(0.8 to 1.0)                           | 0.9<br>(0.6 to 1.4)               | 18.2<br>(4.0 to 34.7)                             | 2.2<br>(-8.6 to 14.1)                               |
| Other chronic respiratory diseases                             | --                                      | --                                            | 0.7<br>(0.5 to 0.8)               | 31.1<br>(12.2 to 53.5)                            | 24.1<br>(3.6 to 48.2)                               |
| <b>Cirrhosis and other chronic liver diseases</b>              | <b>117.4<br/>(111.9 to 122.7)</b>       | <b>2.7<br/>(2.6 to 2.8)</b>                   | <b>3.2<br/>(2.2 to 4.4)</b>       | <b>13.9<br/>(4.5 to 24.6)</b>                     | <b>3.5<br/>(-5.6 to 14.1)</b>                       |
| Cirrhosis and other chronic liver diseases due to hepatitis B  | 10.5<br>(8.6 to 12.8)                   | 0.2<br>(0.2 to 0.3)                           | 0.3<br>(0.2 to 0.4)               | 14.1<br>(-11.9 to 45.4)                           | 3.5<br>(-19.2 to 32.3)                              |
| Cirrhosis and other chronic liver diseases due to hepatitis C  | 30.8<br>(25.0 to 37.6)                  | 0.7<br>(0.6 to 0.8)                           | 0.8<br>(0.5 to 1.1)               | 15.3<br>(-4.1 to 38.6)                            | 4.7<br>(-13.6 to 26.9)                              |
| Cirrhosis and other chronic liver diseases due to alcohol use  | 64.1<br>(57.2 to 71.1)                  | 1.5<br>(1.4 to 1.7)                           | 1.6<br>(1.0 to 2.2)               | 14.7<br>(1.6 to 29.0)                             | 3.0<br>(-9.7 to 17.5)                               |
| Cirrhosis and other chronic liver diseases due to other causes | 12.0<br>(9.8 to 14.8)                   | 0.3<br>(0.3 to 0.4)                           | 0.6<br>(0.4 to 0.8)               | 10.1<br>(-10.8 to 34.9)                           | 3.4<br>(-17.7 to 26.7)                              |
| <b>Digestive diseases</b>                                      | <b>338.6<br/>(313.8 to 367.4)</b>       | <b>424.1<sup>†</sup><br/>(393.2 to 453.1)</b> | <b>12.2<br/>(8.6 to 16.4)</b>     | <b>7.0<br/>(-0.3 to 15.2)</b>                     | <b>-3.0<br/>(-9.8 to 4.5)</b>                       |
| Peptic ulcer disease                                           | 86.7<br>(75.0 to 102.1)                 | 13.5<br>(12.2 to 15.0)                        | 0.9<br>(0.5 to 1.5)               | 23.2<br>(-8.8 to 71.1)                            | 13.6<br>(-19.9 to 61.4)                             |
| Gastritis and duodenitis                                       | 104.9<br>(90.0 to 123.2)                | 80.3<br>(71.3 to 90.2)                        | 1.0<br>(0.6 to 1.5)               | 35.7<br>(4.4 to 76.9)                             | 22.4<br>(-5.4 to 60.6)                              |
| Appendicitis                                                   | 0.5<br>(0.5 to 0.6)                     | 13.7<br>(12.7 to 14.8)                        | 0.2<br>(0.1 to 0.2)               | 5.0<br>(-16.8 to 32.6)                            | -0.4<br>(-25.6 to 33.1)                             |
| Paralytic ileus and intestinal obstruction                     | 0.3<br>(0.3 to 0.4)                     | 9.6<br>(8.7 to 10.5)                          | 0.1<br>(0.1 to 0.1)               | 3.6<br>(-11.3 to 20.8)                            | -9.2<br>(-18.4 to 0.5)                              |
| Inguinal, femoral, and abdominal hernia                        | 112.8<br>(102.5 to 123.9)               | 182.1<br>(155.8 to 206.8)                     | 6.4<br>(4.4 to 8.8)               | 6.5<br>(-2.9 to 16.2)                             | -3.2<br>(-12.0 to 5.6)                              |
| Inflammatory bowel disease                                     | 13.2<br>(12.5 to 14.1)                  | 3.4<br>(3.3 to 3.5)                           | 1.9<br>(1.3 to 2.6)               | -8.7<br>(-18.8 to 2.3)                            | -15.6<br>(-25.8 to -5.0)                            |
| Vascular intestinal disorders                                  | 0.7<br>(0.7 to 0.8)                     | 3.0<br>(2.7 to 3.4)                           | 0.2<br>(0.1 to 0.3)               | 19.2<br>(-9.0 to 53.3)                            | 3.1<br>(-19.2 to 30.2)                              |
| Gallbladder and biliary diseases                               | 27.7<br>(24.7 to 30.8)                  | 109.4<br>(95.2 to 122.4)                      | 0.5<br>(0.4 to 0.7)               | 2.1<br>(-16.9 to 24.4)                            | -7.9<br>(-24.5 to 11.9)                             |
| Pancreatitis                                                   | 1.0<br>(0.9 to 1.1)                     | 9.2<br>(8.3 to 10.1)                          | 0.1<br>(0.1 to 0.2)               | 0.3<br>(-4.1 to 4.7)                              | -9.3<br>(-12.8 to -5.7)                             |
| Other digestive diseases                                       | --                                      | --                                            | 1.0<br>(0.7 to 1.3)               | 12.9<br>(5.4 to 21.2)                             | 1.2<br>(-6.2 to 8.7)                                |
| <b>Neurological disorders</b>                                  | <b>4,373.9<br/>(4,220.6 to 4,556.4)</b> | <b>1,670.8<br/>(1,460.6 to 1,911.7)</b>       | <b>151.0<br/>(102.2 to 203.6)</b> | <b>9.2<br/>(-2.8 to 22.5)</b>                     | <b>-0.2<br/>(-12.3 to 13.4)</b>                     |
| Alzheimer's disease and other dementias                        | 181.3<br>(153.2 to 215.5)               | 35.4<br>(29.1 to 42.7)                        | 27.4<br>(18.9 to 37.0)            | 23.9<br>(17.3 to 30.4)                            | -2.3<br>(-7.0 to 2.3)                               |
| Parkinson's disease                                            | 20.9<br>(16.4 to 26.2)                  | 2.5<br>(1.9 to 3.2)                           | 2.4<br>(1.5 to 3.4)               | 21.4<br>(9.5 to 35.7)                             | 3.9<br>(-6.2 to 15.6)                               |
| Epilepsy                                                       | 41.9<br>(10.4 to 74.0)                  | 3.9<br>(1.0 to 6.8)                           | 9.5<br>(2.0 to 21.7)              | 6.5<br>(-80.2 to 555.8)                           | -2.4<br>(-81.9 to 505.0)                            |
| Multiple sclerosis                                             | 14.8<br>(13.2 to 16.4)                  | 0.3<br>(0.3 to 0.4)                           | 3.8<br>(2.6 to 5.0)               | 13.3<br>(0.2 to 28.0)                             | 4.8<br>(-8.1 to 18.8)                               |
| Motor neuron disease                                           | 1.9<br>(1.7 to 2.0)                     | 0.3<br>(0.3 to 0.3)                           | 0.4<br>(0.3 to 0.5)               | 21.5<br>(17.2 to 26.6)                            | 8.6<br>(4.7 to 13.0)                                |
| Migraine                                                       | 2,124.8<br>(2,013.5 to 2,240.0)         | 185.7<br>(172.7 to 199.9)                     | 91.9<br>(59.3 to 127.9)           | 5.5<br>(2.0 to 9.3)                               | -0.3<br>(-3.6 to 3.3)                               |
| Tension-type headache                                          | 2,822.5<br>(2,533.0 to 3,131.0)         | 1,442.5<br>(1,234.1 to 1,684.0)               | 13.3<br>(8.4 to 19.9)             | 6.6<br>(1.4 to 12.6)                              | 0.0<br>(-4.8 to 5.4)                                |
| Other neurological disorders                                   | < 0.05<br>(< 0.05 to 0.1)               | 0.1<br>(0.1 to 0.1)                           | 2.3<br>(1.2 to 4.3)               | 21.5<br>(-48.4 to 191.9)                          | 15.9<br>(-56.9 to 225.9)                            |
| <b>Mental and substance use disorders</b>                      | <b>1,896.8<br/>(1,835.2 to 1,968.8)</b> | <b>734.1<sup>†</sup><br/>(682.3 to 795.3)</b> | <b>271.0<br/>(196.7 to 351.3)</b> | <b>9.0<br/>(6.3 to 11.7)</b>                      | <b>1.7<br/>(-0.7 to 4.4)</b>                        |
| Schizophrenia                                                  | 32.3<br>(26.4 to 38.6)                  | 1.5<br>(1.2 to 1.8)                           | 20.4<br>(14.6 to 26.3)            | 7.6<br>(-0.5 to 16.7)                             | 0.7<br>(-7.5 to 9.5)                                |
| Alcohol use disorders                                          | 141.9<br>(124.5 to 159.9)               | 57.1<br>(49.6 to 65.8)                        | 14.1<br>(9.8 to 19.2)             | 7.4<br>(-2.6 to 18.1)                             | 0.7<br>(-8.5 to 11.3)                               |
| Drug use disorders                                             | 87.8<br>(82.6 to 94.1)                  | 11.5<br>(10.6 to 12.6)                        | 16.9<br>(12.0 to 22.1)            | 7.8<br>(-1.2 to 16.5)                             | 0.4<br>(-7.9 to 9.2)                                |
| Opioid use disorders                                           | 26.1<br>(22.4 to 30.4)                  | 3.4<br>(2.9 to 3.9)                           | 10.7<br>(7.4 to 14.3)             | 10.0<br>(-0.6 to 22.3)                            | 2.2<br>(-8.0 to 13.9)                               |
| Cocaine use disorders                                          | 12.3<br>(10.7 to 14.0)                  | 0.8<br>(0.6 to 0.9)                           | 1.7<br>(1.0 to 2.5)               | 8.1<br>(-10.8 to 31.4)                            | 1.6<br>(-16.7 to 24.8)                              |
| Amphetamine use disorders                                      | 6.4<br>(4.6 to 8.7)                     | 0.7<br>(0.5 to 0.9)                           | 0.8<br>(0.5 to 1.4)               | -3.1<br>(-29.3 to 30.4)                           | -8.9<br>(-35.8 to 25.5)                             |
| Cannabis use disorders                                         | 35.4<br>(30.4 to 40.8)                  | 5.2<br>(4.4 to 6.1)                           | 1.0<br>(0.7 to 1.5)               | -0.6<br>(-16.8 to 17.9)                           | -5.8<br>(-21.9 to 14.1)                             |
| Other drug use disorders                                       | 10.0<br>(9.0 to 11.0)                   | 1.6<br>(1.4 to 1.7)                           | 2.7<br>(1.8 to 3.9)               | 6.4<br>(-11.3 to 29.1)                            | -0.0<br>(-18.0 to 22.4)                             |
| Depressive disorders                                           | 519.7<br>(489.4 to 553.6)               | 544.7<br>(494.1 to 603.1)                     | 87.3<br>(60.3 to 118.2)           | 12.8<br>(6.8 to 19.3)                             | 4.5<br>(-1.3 to 10.6)                               |
| Major depressive disorder                                      | 345.0<br>(314.6 to 378.3)               | 518.9<br>(467.5 to 577.1)                     | 69.7<br>(48.1 to 94.7)            | 13.9<br>(6.6 to 21.8)                             | 5.6<br>(-1.2 to 13.0)                               |
| Dysthymia                                                      | 185.9<br>(162.7 to 213.9)               | 25.8<br>(22.7 to 29.3)                        | 17.7<br>(11.9 to 25.5)            | 8.7<br>(1.9 to 16.2)                              | 0.5<br>(-5.8 to 7.5)                                |
| Bipolar disorder                                               | 127.0<br>(84.7 to 181.6)                | 7.9<br>(5.5 to 11.1)                          | 25.6<br>(14.0 to 41.6)            | 6.8<br>(2.2 to 12.2)                              | -0.0<br>(-4.6 to 5.0)                               |
| Anxiety disorders                                              | 572.3<br>(525.9 to 624.2)               | 73.3<br>(68.0 to 79.3)                        | 54.5<br>(37.9 to 73.4)            | 7.8<br>(2.2 to 13.7)                              | 0.7<br>(-4.5 to 6.4)                                |
| Eating disorders                                               | 38.6<br>(31.9 to 46.5)                  | 9.6<br>(7.2 to 12.4)                          | 8.0<br>(5.2 to 11.5)              | 7.2<br>(-1.3 to 16.4)                             | 4.0<br>(-4.4 to 12.8)                               |
| Anorexia nervosa                                               | 10.7<br>(7.9 to 14.2)                   | 1.9<br>(1.4 to 2.5)                           | 2.3<br>(1.4 to 3.4)               | 7.2<br>(-8.8 to 25.6)                             | 2.9<br>(-12.2 to 20.8)                              |
| Bulimia nervosa                                                | 27.3<br>(20.6 to 35.8)                  | 7.7<br>(5.4 to 10.5)                          | 5.7<br>(3.5 to 8.5)               | 7.2<br>(-2.8 to 18.0)                             | 4.4<br>(-5.4 to 14.7)                               |
| Autistic spectrum disorders                                    | 84.0<br>(75.8 to 93.3)                  | 0.4<br>(0.3 to 0.6)                           | 13.3<br>(9.0 to 19.0)             | 7.6<br>(2.9 to 12.7)                              | 0.4<br>(-4.3 to 5.5)                                |
| Autism                                                         | 33.0<br>(28.2 to 38.7)                  | < 0.05<br>(< 0.05 to 0.1)                     | 8.3<br>(5.2 to 12.0)              | 7.7<br>(0.5 to 15.6)                              | 0.3<br>(-6.7 to 8.4)                                |
| Asperger syndrome and other autistic spectrum disorders        | 51.0<br>(42.1 to 61.3)                  | 0.4<br>(0.2 to 0.5)                           | 5.0<br>(3.3 to 7.5)               | 7.5<br>(2.5 to 12.7)                              | 0.5<br>(-4.3 to 5.5)                                |



| Cause                                                      | Prevalence in thousands (95% UI)              | Incidence in thousands (95% UI)                   | YLDs in thousands (95% UI)              |                                                   |                                                     |
|------------------------------------------------------------|-----------------------------------------------|---------------------------------------------------|-----------------------------------------|---------------------------------------------------|-----------------------------------------------------|
|                                                            | 2016 counts                                   | 2016 counts                                       | 2016 counts                             | Percentage change in counts between 2006 and 2016 | Percentage change in age-standardised rates between |
| Attention-deficit/hyperactivity disorder                   | 73.7<br>(54.1 to 98.4)                        | 3.3<br>(2.3 to 4.8)                               | 0.9<br>(0.5 to 1.5)                     | 4.8<br>(-3.3 to 13.7)                             | 0.1<br>(-7.7 to 8.5)                                |
| Conduct disorder                                           | 57.8<br>(43.7 to 73.3)                        | 18.8<br>(13.9 to 23.4)                            | 7.0<br>(4.2 to 10.9)                    | 2.8<br>(-3.5 to 9.3)                              | 0.0<br>(-6.1 to 6.3)                                |
| Idiopathic developmental intellectual disability           | 70.0<br>(30.1 to 118.7)                       | --                                                | 3.5<br>(1.5 to 6.3)                     | 3.3<br>(-7.2 to 14.8)                             | -2.9<br>(-13.4 to 8.2)                              |
| Other mental and substance use disorders                   | 265.4<br>(231.5 to 306.7)                     | 6.0<br>(5.3 to 6.8)                               | 19.5<br>(13.6 to 27.7)                  | 8.2<br>(2.9 to 12.8)                              | 0.3<br>(-4.6 to 4.9)                                |
| <b>Diabetes, urogenital, blood, and endocrine diseases</b> | <b>3,865.7</b><br><b>(3,767.5 to 3,976.6)</b> | <b>1,122.1†</b><br><b>(1,065.2 to 1,188.4)</b>    | <b>94.4</b><br><b>(66.9 to 125.4)</b>   | <b>10.3</b><br><b>(5.5 to 15.3)</b>               | <b>-1.8</b><br><b>(-6.0 to 2.5)</b>                 |
| Diabetes mellitus                                          | 486.6<br>(435.3 to 541.7)                     | 25.0<br>(22.1 to 28.2)                            | 40.8<br>(28.1 to 56.5)                  | 10.2<br>(1.0 to 20.8)                             | -2.8<br>(-10.9 to 6.5)                              |
| Acute glomerulonephritis                                   | 0.1<br>(0.1 to 0.2)                           | 2.2<br>(2.0 to 2.5)                               | < 0.05<br>(< 0.05 to < 0.05)            | 4.3<br>(-0.8 to 9.3)                              | -2.7<br>(-7.5 to 2.5)                               |
| Chronic kidney disease                                     | 460.9<br>(408.9 to 511.6)                     | 39.4<br>(34.2 to 44.8)                            | 12.0<br>(9.0 to 15.3)                   | 16.2<br>(6.0 to 27.7)                             | 1.3<br>(-6.5 to 9.9)                                |
| Chronic kidney disease due to diabetes mellitus            | 141.3<br>(125.0 to 157.8)                     | 12.8<br>(11.0 to 14.6)                            | 3.8<br>(2.9 to 4.9)                     | 14.1<br>(1.3 to 28.3)                             | 0.4<br>(-10.9 to 12.6)                              |
| Chronic kidney disease due to hypertension                 | 85.9<br>(74.4 to 97.6)                        | 5.9<br>(5.1 to 6.7)                               | 2.1<br>(1.5 to 2.8)                     | 20.1<br>(2.4 to 41.5)                             | -2.0<br>(-15.6 to 13.8)                             |
| Chronic kidney disease due to glomerulonephritis           | 76.8<br>(66.2 to 86.9)                        | 7.4<br>(6.0 to 8.9)                               | 2.0<br>(1.5 to 2.6)                     | 2.2<br>(-9.0 to 16.4)                             | -7.3<br>(-16.1 to 3.9)                              |
| Chronic kidney disease due to other causes                 | 157.0<br>(138.4 to 174.8)                     | 13.4<br>(11.7 to 15.3)                            | 4.1<br>(3.1 to 5.2)                     | 24.6<br>(10.2 to 40.9)                            | 9.4<br>(-2.5 to 22.8)                               |
| Urinary diseases and male infertility                      | 462.4<br>(417.8 to 509.7)                     | 616.4†<br>(562.0 to 676.7)                        | 14.1<br>(9.4 to 20.2)                   | 15.1<br>(8.3 to 22.7)                             | 1.3<br>(-4.7 to 8.1)                                |
| Interstitial nephritis and urinary tract infections        | 7.8<br>(6.8 to 8.9)                           | 406.0<br>(354.6 to 462.6)                         | 0.3<br>(0.1 to 0.4)                     | 5.3<br>(-10.5 to 23.3)                            | -0.7<br>(-16.7 to 16.0)                             |
| Urolithiasis                                               | 6.3<br>(5.6 to 7.1)                           | 166.0<br>(147.7 to 186.5)                         | 0.5<br>(0.3 to 0.6)                     | -3.8<br>(-21.0 to 18.4)                           | -12.5<br>(-28.0 to 6.4)                             |
| Benign prostatic hyperplasia                               | 394.7<br>(342.4 to 450.2)                     | 44.3<br>(36.7 to 52.2)                            | 12.8<br>(8.6 to 18.6)                   | 17.6<br>(10.2 to 26.4)                            | 3.3<br>(-3.4 to 10.9)                               |
| Male infertility                                           | 44.5<br>(33.9 to 59.0)                        | --                                                | 0.3<br>(0.1 to 0.5)                     | -7.3<br>(-14.9 to -0.1)                           | -6.2<br>(-13.6 to 0.6)                              |
| Other urinary diseases                                     | --                                            | --                                                | 0.2<br>(0.2 to 0.3)                     | -16.8<br>(-27.7 to -5.0)                          | -22.4<br>(-32.4 to -11.6)                           |
| Gynecological diseases                                     | 1,474.4<br>(1,394.7 to 1,555.4)               | 368.5†<br>(346.9 to 391.9)                        | 13.2<br>(8.9 to 19.1)                   | 0.8<br>(-4.8 to 6.0)                              | -3.3<br>(-8.4 to 2.0)                               |
| Uterine fibroids                                           | 109.4<br>(100.0 to 117.8)                     | 9.7<br>(8.6 to 10.8)                              | 1.0<br>(0.5 to 1.9)                     | -1.4<br>(-13.4 to 12.2)                           | -5.2<br>(-16.5 to 8.7)                              |
| Polycystic ovarian syndrome                                | 3.3<br>(2.4 to 4.3)                           | 10.2<br>(7.2 to 13.7)                             | < 0.05<br>(< 0.05 to 0.1)               | 0.7<br>(-19.0 to 25.0)                            | -0.2<br>(-20.1 to 24.5)                             |
| Female infertility                                         | 89.0<br>(63.9 to 120.3)                       | --                                                | 0.5<br>(0.2 to 1.0)                     | 4.6<br>(-3.2 to 14.2)                             | 6.2<br>(-1.6 to 15.3)                               |
| Endometriosis                                              | 9.1<br>(7.5 to 10.6)                          | 20.1<br>(15.8 to 26.1)                            | 0.8<br>(0.5 to 1.2)                     | 4.2<br>(-14.4 to 26.0)                            | -0.1<br>(-17.8 to 20.6)                             |
| Genital prolapse                                           | 741.0<br>(650.0 to 837.8)                     | 31.6<br>(27.1 to 36.6)                            | 2.3<br>(1.1 to 4.2)                     | 11.7<br>(1.4 to 22.8)                             | -1.8<br>(-10.6 to 7.5)                              |
| Premenstrual syndrome                                      | 556.7<br>(519.7 to 594.7)                     | 186.2<br>(171.0 to 201.1)                         | 4.6<br>(2.9 to 7.1)                     | 1.7<br>(-6.3 to 10.3)                             | -0.4<br>(-8.1 to 7.8)                               |
| Other gynecological diseases                               | 112.7<br>(98.1 to 128.7)                      | 110.7<br>(95.2 to 128.2)                          | 3.9<br>(2.6 to 5.5)                     | -6.2<br>(-16.7 to 5.3)                            | -8.7<br>(-19.0 to 2.0)                              |
| Hemoglobinopathies and hemolytic anaemias                  | 1,565.8<br>(1,473.5 to 1,675.1)               | --                                                | 1.6<br>(1.0 to 2.6)                     | 25.1<br>(1.3 to 59.0)                             | 13.1<br>(-12.4 to 46.4)                             |
| Thalassemias                                               | 0.1<br>(0.1 to 0.1)                           | --                                                | < 0.05<br>(< 0.05 to < 0.05)            | 16.2<br>(-10.1 to 47.5)                           | 9.1<br>(-17.1 to 40.2)                              |
| Thalassaemias trait                                        | 102.2<br>(90.6 to 116.4)                      | --                                                | 0.7<br>(0.4 to 1.2)                     | 36.0<br>(3.5 to 81.7)                             | 20.7<br>(-10.2 to 68.5)                             |
| Sickle cell disorders                                      | 0.3<br>(0.3 to 0.4)                           | --                                                | < 0.05<br>(< 0.05 to < 0.05)            | 15.8<br>(5.7 to 26.9)                             | 8.8<br>(-0.5 to 19.3)                               |
| Sickle cell trait                                          | 258.9<br>(246.9 to 272.6)                     | --                                                | 0.4<br>(0.2 to 0.8)                     | 34.4<br>(-2.9 to 88.6)                            | 21.0<br>(-13.9 to 72.1)                             |
| G6PD deficiency                                            | 196.1<br>(163.5 to 232.0)                     | --                                                | < 0.05<br>(< 0.05 to < 0.05)            | 15.6<br>(-18.9 to 73.1)                           | 5.6<br>(-26.2 to 55.0)                              |
| G6PD trait                                                 | 1,041.3<br>(959.0 to 1,124.2)                 | --                                                | < 0.05<br>(< 0.05 to < 0.05)            | 704.5<br>(263.9 to 1,516.9)                       | 516.8<br>(175.2 to 1,165.9)                         |
| Other hemoglobinopathies and hemolytic anaemias            | 18.8<br>(15.9 to 22.5)                        | --                                                | 0.4<br>(0.3 to 0.6)                     | 2.1<br>(-14.6 to 21.2)                            | -7.8<br>(-25.5 to 12.7)                             |
| Endocrine, metabolic, blood, and immune disorders          | 370.3<br>(334.8 to 406.9)                     | 70.6<br>(63.3 to 79.0)                            | 12.7<br>(8.6 to 17.4)                   | 9.5<br>(3.5 to 15.8)                              | -4.6<br>(-10.0 to 1.2)                              |
| <b>Musculoskeletal disorders</b>                           | <b>3,020.9</b><br><b>(2,876.8 to 3,157.0)</b> | <b>1,457.7</b><br><b>(1,316.0 to 1,613.2)</b>     | <b>325.9</b><br><b>(237.6 to 425.9)</b> | <b>6.4</b><br><b>(2.3 to 10.3)</b>                | <b>-3.2</b><br><b>(-7.3 to 0.6)</b>                 |
| Rheumatoid arthritis                                       | 54.4<br>(48.9 to 60.9)                        | 2.6<br>(2.3 to 2.9)                               | 12.6<br>(8.6 to 16.6)                   | 8.6<br>(1.1 to 17.2)                              | -2.3<br>(-9.6 to 5.6)                               |
| Osteoarthritis                                             | 860.0<br>(783.0 to 946.5)                     | 36.8<br>(32.9 to 41.0)                            | 29.8<br>(19.4 to 43.0)                  | 12.7<br>(8.9 to 16.3)                             | -1.1<br>(-4.5 to 2.1)                               |
| Low back and neck pain                                     | 2,050.0<br>(1,920.3 to 2,197.9)               | 883.7<br>(779.7 to 992.1)                         | 245.7<br>(172.5 to 324.2)               | 4.0<br>(-1.3 to 9.1)                              | -5.0<br>(-10.0 to -0.3)                             |
| Low back pain                                              | 1,562.8<br>(1,393.6 to 1,754.2)               | 759.2<br>(657.7 to 869.6)                         | 175.6<br>(124.4 to 232.4)               | 2.1<br>(-4.7 to 8.7)                              | -6.8<br>(-13.5 to -0.4)                             |
| Neck pain                                                  | 710.2<br>(612.8 to 817.4)                     | 124.5<br>(108.0 to 145.2)                         | 70.0<br>(47.4 to 98.9)                  | 9.0<br>(3.6 to 14.5)                              | -0.1<br>(-5.0 to 4.8)                               |
| Gout                                                       | 127.9<br>(112.6 to 145.6)                     | 20.3<br>(17.5 to 23.3)                            | 4.0<br>(2.7 to 5.4)                     | 13.3<br>(1.5 to 26.2)                             | 1.0<br>(-10.4 to 13.0)                              |
| Other musculoskeletal disorders                            | 398.7<br>(309.0 to 506.4)                     | 514.4<br>(424.4 to 625.6)                         | 33.9<br>(22.0 to 49.1)                  | 18.3<br>(6.5 to 32.2)                             | 8.6<br>(-2.4 to 20.7)                               |
| <b>Other non-communicable diseases</b>                     | <b>8,259.4</b><br><b>(8,140.6 to 8,390.1)</b> | <b>17,411.9†</b><br><b>(16,443.2 to 18,428.2)</b> | <b>281.9</b><br><b>(195.3 to 397.5)</b> | <b>10.6</b><br><b>(9.3 to 11.9)</b>               | <b>-0.0</b><br><b>(-1.2 to 1.1)</b>                 |
| Congenital anomalies                                       | 122.0<br>(115.0 to 130.1)                     | --                                                | 12.6<br>(8.9 to 17.3)                   | 6.7<br>(1.5 to 12.3)                              | -0.8<br>(-5.7 to 4.5)                               |
| Neural tube defects                                        | 3.9<br>(3.5 to 4.3)                           | --                                                | 1.2<br>(0.8 to 1.6)                     | 0.0<br>(-12.1 to 15.2)                            | -7.0<br>(-18.4 to 7.0)                              |
| Congenital heart anomalies                                 | 23.5<br>(21.3 to 25.9)                        | --                                                | 1.3<br>(0.5 to 2.1)                     | 11.9<br>(0.4 to 23.5)                             | 4.0<br>(-6.6 to 15.1)                               |
| Orofacial clefts                                           | 7.2<br>(6.3 to 8.2)                           | --                                                | 0.1<br>(< 0.05 to 0.1)                  | 2.6<br>(-9.5 to 16.4)                             | -4.8<br>(-16.1 to 8.1)                              |
| Down's syndrome                                            | 4.0<br>(3.5 to 4.7)                           | --                                                | 0.4<br>(0.3 to 0.5)                     | 12.6<br>(1.1 to 24.2)                             | 6.6<br>(-4.3 to 17.6)                               |
| Turner syndrome                                            | 4.2<br>(3.6 to 4.9)                           | --                                                | 0.1<br>(< 0.05 to 0.1)                  | 7.3<br>(-22.3 to 49.1)                            | 2.7<br>(-26.9 to 41.8)                              |
| Klinefelter syndrome                                       | 12.6<br>(10.9 to 14.7)                        | --                                                | 0.1<br>(< 0.05 to 0.1)                  | 6.3<br>(-10.7 to 26.3)                            | 2.0<br>(-14.7 to 21.9)                              |

| Cause                                         | Prevalence in thousands (95% UI)              | Incidence in thousands (95% UI)                           | YLDs in thousands (95% UI)             |                                                   |                                                     |
|-----------------------------------------------|-----------------------------------------------|-----------------------------------------------------------|----------------------------------------|---------------------------------------------------|-----------------------------------------------------|
|                                               | 2016 counts                                   | 2016 counts                                               | 2016 counts                            | Percentage change in counts between 2006 and 2016 | Percentage change in age-standardised rates between |
| Other chromosomal abnormalities               | 6.8<br>(5.8 to 7.9)                           | --                                                        | 0.7<br>(0.5 to 1.0)                    | 8.5<br>(-9.5 to 30.6)                             | 2.6<br>(-14.6 to 23.2)                              |
| Congenital musculoskeletal and limb anomalies | 39.3<br>(36.0 to 42.8)                        | --                                                        | 5.1<br>(3.4 to 7.0)                    | 5.8<br>(-3.9 to 16.8)                             | -1.9<br>(-10.9 to 8.3)                              |
| Urogenital congenital anomalies               | 14.0<br>(12.7 to 15.5)                        | --                                                        | 0.3<br>(0.2 to 0.5)                    | 2.5<br>(-9.5 to 14.9)                             | -4.9<br>(-17.1 to 8.3)                              |
| Digestive congenital anomalies                | 20.1<br>(17.6 to 22.7)                        | --                                                        | 0.9<br>(0.6 to 1.3)                    | 5.0<br>(-9.2 to 19.1)                             | -2.4<br>(-15.7 to 11.7)                             |
| Other congenital anomalies                    | 15.4<br>(6.3 to 27.6)                         | --                                                        | 2.6<br>(1.3 to 4.7)                    | 9.2<br>(-1.6 to 23.5)                             | 0.8<br>(-9.7 to 13.6)                               |
| Skin and subcutaneous diseases                | 3,989.0<br>(3,908.4 to 4,067.7)               | 9,041.4<br>(8,528.4 to 9,612.3)                           | 99.7<br>(68.8 to 140.6)                | 8.0<br>(6.1 to 9.9)                               | 0.9<br>(-0.9 to 2.7)                                |
| Dermatitis                                    | 593.6<br>(559.8 to 630.3)                     | 785.9<br>(679.2 to 911.3)                                 | 21.2<br>(12.7 to 34.0)                 | 8.9<br>(5.3 to 12.8)                              | 1.3<br>(-2.5 to 5.4)                                |
| Psoriasis                                     | 237.0<br>(222.8 to 251.6)                     | 20.8<br>(19.6 to 22.1)                                    | 20.2<br>(14.4 to 26.7)                 | 11.1<br>(5.4 to 17.0)                             | 2.4<br>(-3.2 to 8.0)                                |
| Cellulitis                                    | 5.9<br>(5.5 to 6.3)                           | 122.0<br>(114.8 to 129.1)                                 | 0.3<br>(0.2 to 0.5)                    | 10.2<br>(-10.1 to 35.1)                           | -0.1<br>(-20.1 to 24.3)                             |
| Pyoderma                                      | 45.0<br>(43.6 to 46.4)                        | 1,145.5<br>(1,105.7 to 1,184.8)                           | 0.2<br>(0.1 to 0.5)                    | 11.4<br>(5.8 to 17.8)                             | 0.8<br>(-4.9 to 7.0)                                |
| Scabies                                       | 3.9<br>(3.4 to 4.4)                           | 11.2<br>(9.8 to 12.7)                                     | 0.1<br>(0.1 to 0.2)                    | 12.2<br>(-7.0 to 34.5)                            | 5.6<br>(-13.0 to 27.9)                              |
| Fungal skin diseases                          | 899.6<br>(799.9 to 1,008.1)                   | 3,569.3<br>(3,091.8 to 4,093.0)                           | 4.9<br>(2.0 to 10.3)                   | 13.1<br>(11.4 to 15.0)                            | 0.2<br>(-1.1 to 1.5)                                |
| Viral skin diseases                           | 320.6<br>(276.8 to 369.9)                     | 425.2<br>(365.8 to 491.9)                                 | 9.8<br>(6.1 to 14.6)                   | 7.1<br>(4.0 to 10.3)                              | 0.0<br>(-2.7 to 2.9)                                |
| Acne vulgaris                                 | 1,040.4<br>(960.5 to 1,119.4)                 | 784.9<br>(644.9 to 962.4)                                 | 26.7<br>(17.9 to 38.8)                 | 3.5<br>(-0.4 to 7.3)                              | 0.5<br>(-3.3 to 4.6)                                |
| Alopecia areata                               | 34.1<br>(33.0 to 35.3)                        | 60.0<br>(58.0 to 62.0)                                    | 1.1<br>(0.7 to 1.7)                    | 6.3<br>(-1.9 to 15.8)                             | 0.0<br>(-8.1 to 9.1)                                |
| Pruritus                                      | 109.5<br>(96.8 to 124.7)                      | 86.2<br>(76.5 to 97.5)                                    | 1.2<br>(0.5 to 2.1)                    | 9.6<br>(4.0 to 15.5)                              | 0.2<br>(-4.8 to 5.9)                                |
| Urticaria                                     | 70.9<br>(62.7 to 79.6)                        | 125.4<br>(111.4 to 140.9)                                 | 4.2<br>(2.7 to 5.9)                    | 7.2<br>(0.4 to 14.3)                              | -0.0<br>(-6.7 to 7.3)                               |
| Decubitus ulcer                               | 12.7<br>(11.3 to 14.2)                        | 47.5<br>(41.9 to 53.5)                                    | 1.9<br>(1.3 to 2.6)                    | 3.4<br>(-8.8 to 15.8)                             | -11.8<br>(-21.5 to -2.3)                            |
| Other skin and subcutaneous diseases          | 1,434.1<br>(1,392.5 to 1,473.9)               | 1,857.6<br>(1,787.6 to 1,925.5)                           | 7.8<br>(3.7 to 14.2)                   | 14.0<br>(11.6 to 16.2)                            | 2.7<br>(0.4 to 4.7)                                 |
| Sense organ diseases                          | 3,391.0<br>(3,206.4 to 3,563.3)               | 1,248.2 <sup>†</sup><br>(1,179.9 to 1,324.5)              | 111.3<br>(77.4 to 157.6)               | 13.4<br>(11.0 to 15.9)                            | -0.9<br>(-3.0 to 1.0)                               |
| Glaucoma                                      | 7.5<br>(5.5 to 9.9)                           | --                                                        | 0.7<br>(0.4 to 1.1)                    | 17.6<br>(1.4 to 38.5)                             | 0.2<br>(-14.6 to 19.3)                              |
| Cataract                                      | 60.3<br>(43.6 to 83.7)                        | --                                                        | 4.7<br>(3.1 to 7.0)                    | 16.7<br>(6.5 to 27.7)                             | -3.4<br>(-11.3 to 5.2)                              |
| Macular degeneration                          | 14.6<br>(10.5 to 19.7)                        | --                                                        | 1.3<br>(0.8 to 1.9)                    | 21.6<br>(9.2 to 37.0)                             | 0.5<br>(-10.5 to 13.5)                              |
| Refraction and accommodation disorders        | 978.2<br>(907.3 to 1,060.9)                   | --                                                        | 17.3<br>(10.4 to 28.0)                 | 7.5<br>(3.8 to 11.1)                              | -3.3<br>(-6.9 to 0.2)                               |
| Age-related and other hearing loss            | 2,757.2<br>(2,439.1 to 3,072.5)               | --                                                        | 69.8<br>(48.1 to 100.9)                | 14.7<br>(11.2 to 18.0)                            | -0.4<br>(-3.3 to 2.3)                               |
| Other vision loss                             | 35.1<br>(27.1 to 44.3)                        | --                                                        | 2.7<br>(1.8 to 3.8)                    | 13.6<br>(3.7 to 23.6)                             | 0.3<br>(-9.2 to 10.6)                               |
| Other sense organ diseases                    | 472.6<br>(435.2 to 509.5)                     | 1,248.2<br>(1,179.9 to 1,324.5)                           | 14.7<br>(9.2 to 22.1)                  | 12.9<br>(8.7 to 17.0)                             | 0.8<br>(-2.9 to 4.6)                                |
| Oral disorders                                | 5,232.9<br>(5,039.4 to 5,428.1)               | 7,122.4 <sup>†</sup><br>(6,386.1 to 7,945.8)              | 58.3<br>(36.1 to 87.2)                 | 10.7<br>(8.3 to 13.3)                             | -0.6<br>(-2.6 to 1.5)                               |
| Caries of deciduous teeth                     | 366.8<br>(259.2 to 458.5)                     | 1,191.8<br>(592.4 to 1,814.4)                             | 0.1<br>(0.1 to 0.3)                    | 56.1<br>(22.4 to 101.0)                           | 40.9<br>(10.0 to 82.2)                              |
| Caries of permanent teeth                     | 2,367.3<br>(2,200.5 to 2,545.5)               | 5,572.9<br>(5,101.7 to 6,055.4)                           | 2.3<br>(1.0 to 4.4)                    | 7.1<br>(3.1 to 10.9)                              | 0.0<br>(-3.8 to 3.6)                                |
| Periodontal disease                           | 2,236.7<br>(1,946.2 to 2,556.2)               | 263.0<br>(223.6 to 304.1)                                 | 14.6<br>(5.9 to 30.2)                  | 8.6<br>(5.4 to 12.2)                              | 0.1<br>(-2.6 to 3.4)                                |
| Edentulism and severe tooth loss              | 1,270.1<br>(1,117.4 to 1,418.0)               | 94.6<br>(79.4 to 111.9)                                   | 34.8<br>(22.7 to 48.5)                 | 12.3<br>(8.2 to 16.5)                             | -1.4<br>(-4.9 to 2.2)                               |
| Other oral disorders                          | 223.8<br>(214.2 to 234.2)                     | --                                                        | 6.5<br>(4.0 to 9.8)                    | 7.5<br>(4.3 to 10.8)                              | -0.0<br>(-3.1 to 3.1)                               |
| <b>Injuries</b>                               | <b>3,990.9</b><br><b>(3,717.7 to 4,288.1)</b> | <b>1,421.7<sup>†</sup></b><br><b>(1,338.0 to 1,512.0)</b> | <b>130.7</b><br><b>(88.1 to 183.2)</b> | <b>1.3</b><br><b>(-0.5 to 2.8)</b>                | <b>-8.6</b><br><b>(-10.3 to -7.2)</b>               |
| <b>Transport injuries</b>                     | <b>594.0</b><br><b>(551.2 to 638.8)</b>       | <b>139.1</b><br><b>(127.5 to 152.1)</b>                   | <b>26.6</b><br><b>(17.6 to 38.6)</b>   | <b>-3.1</b><br><b>(-4.7 to -1.5)</b>              | <b>-12.4</b><br><b>(-14.0 to -10.7)</b>             |
| Road injuries                                 | 544.3<br>(503.4 to 586.5)                     | 132.1<br>(120.5 to 144.7)                                 | 24.9<br>(16.5 to 36.0)                 | -3.5<br>(-5.1 to -1.8)                            | -12.7<br>(-14.3 to -11.1)                           |
| Pedestrian road injuries                      | 91.5<br>(80.8 to 104.9)                       | 14.7<br>(12.4 to 17.5)                                    | 4.6<br>(3.0 to 6.7)                    | -3.4<br>(-5.0 to -1.7)                            | -13.1<br>(-14.7 to -11.5)                           |
| Cyclist road injuries                         | 139.3<br>(116.7 to 165.1)                     | 42.9<br>(36.4 to 49.7)                                    | 5.8<br>(3.8 to 8.5)                    | 1.7<br>(0.0 to 3.3)                               | -8.4<br>(-10.0 to -6.8)                             |
| Motorcyclist road injuries                    | 113.1<br>(96.2 to 136.5)                      | 16.7<br>(13.8 to 20.1)                                    | 5.3<br>(3.5 to 7.7)                    | -2.8<br>(-4.7 to -0.9)                            | -11.7<br>(-13.5 to -9.8)                            |
| Motor vehicle road injuries                   | 171.3<br>(143.3 to 198.2)                     | 51.1<br>(44.7 to 57.8)                                    | 8.2<br>(5.4 to 11.7)                   | -7.9<br>(-9.6 to -6.2)                            | -16.6<br>(-18.3 to -14.8)                           |
| Other road injuries                           | 29.0<br>(24.3 to 34.3)                        | 6.8<br>(5.2 to 8.6)                                       | 1.1<br>(0.7 to 1.5)                    | 2.1<br>(-0.2 to 4.5)                              | -7.0<br>(-9.3 to -4.6)                              |
| Other transport injuries                      | 49.7<br>(41.3 to 58.2)                        | 7.0<br>(6.2 to 7.7)                                       | 1.7<br>(1.1 to 2.6)                    | 2.1<br>(0.5 to 3.7)                               | -7.1<br>(-8.7 to -5.5)                              |
| <b>Unintentional injuries</b>                 | <b>3,217.6</b><br><b>(2,968.9 to 3,504.1)</b> | <b>1,211.4</b><br><b>(1,127.2 to 1,305.7)</b>             | <b>97.9</b><br><b>(66.1 to 138.6)</b>  | <b>3.3</b><br><b>(0.9 to 5.1)</b>                 | <b>-7.0</b><br><b>(-9.1 to -5.3)</b>                |
| Falls                                         | 1,872.8<br>(1,661.1 to 2,083.0)               | 734.5<br>(658.0 to 819.7)                                 | 68.8<br>(48.1 to 94.5)                 | -0.5<br>(-3.1 to 1.6)                             | -10.9<br>(-13.1 to -9.1)                            |
| Drowning                                      | 4.0<br>(3.5 to 4.5)                           | 0.4<br>(0.4 to 0.5)                                       | 0.2<br>(0.1 to 0.3)                    | 12.7<br>(7.0 to 19.2)                             | 1.2<br>(-4.7 to 7.7)                                |
| Fire, heat, and hot substances                | 227.7<br>(195.8 to 264.9)                     | 12.7<br>(10.9 to 14.5)                                    | 3.9<br>(2.2 to 6.5)                    | 11.4<br>(8.7 to 14.1)                             | 1.6<br>(-1.1 to 4.3)                                |
| Poisonings                                    | 9.6<br>(7.8 to 11.8)                          | 8.6<br>(7.2 to 10.1)                                      | 0.8<br>(0.5 to 1.2)                    | 10.1<br>(0.7 to 21.0)                             | 2.2<br>(-7.7 to 12.9)                               |
| Exposure to mechanical forces                 | 603.7<br>(509.0 to 760.8)                     | 145.8<br>(125.5 to 165.8)                                 | 10.8<br>(6.8 to 16.6)                  | 5.6<br>(4.1 to 7.1)                               | -3.8<br>(-5.2 to -2.4)                              |
| Unintentional firearm injuries                | 17.5<br>(14.4 to 21.8)                        | 1.6<br>(1.2 to 2.2)                                       | 0.3<br>(0.1 to 0.4)                    | 17.5<br>(15.5 to 19.5)                            | 7.4<br>(5.4 to 9.4)                                 |
| Unintentional suffocation                     | 13.4<br>(11.2 to 16.0)                        | 2.2<br>(1.5 to 3.0)                                       | 0.3<br>(0.2 to 0.5)                    | 15.4<br>(13.4 to 17.7)                            | 3.3<br>(1.2 to 5.5)                                 |
| Other exposure to mechanical forces           | 572.8<br>(479.1 to 729.3)                     | 142.0<br>(122.5 to 161.7)                                 | 10.2<br>(6.4 to 15.7)                  | 5.1<br>(3.6 to 6.6)                               | -4.3<br>(-5.7 to -2.8)                              |



| Cause                                                                               | Prevalence in thousands (95% UI)        | Incidence in thousands (95% UI)       | YLDs in thousands (95% UI)              |                                                   |                                                     |
|-------------------------------------------------------------------------------------|-----------------------------------------|---------------------------------------|-----------------------------------------|---------------------------------------------------|-----------------------------------------------------|
|                                                                                     | 2016 counts                             | 2016 counts                           | 2016 counts                             | Percentage change in counts between 2006 and 2016 | Percentage change in age-standardised rates between |
| Adverse effects of medical treatment                                                | 4.8<br>(3.8 to 5.8)                     | 62.1<br>(56.2 to 69.0)                | 0.6<br>(0.4 to 0.9)                     | 28.8<br>(23.2 to 36.0)                            | 10.7<br>(6.7 to 15.2)                               |
| Animal contact                                                                      | 50.5<br>(44.4 to 58.8)                  | 27.7<br>(23.1 to 32.6)                | 0.9<br>(0.6 to 1.4)                     | -0.8<br>(-4.6 to 2.9)                             | -10.0<br>(-14.0 to -5.9)                            |
| Venomous animal contact                                                             | 5.6<br>(4.8 to 6.5)                     | 7.4<br>(5.5 to 9.5)                   | 0.3<br>(0.2 to 0.5)                     | -0.7<br>(-9.0 to 8.7)                             | -8.6<br>(-17.1 to 1.1)                              |
| Non-venomous animal contact                                                         | 44.9<br>(39.1 to 53.1)                  | 20.4<br>(16.8 to 24.2)                | 0.6<br>(0.3 to 1.0)                     | -0.8<br>(-2.6 to 1.0)                             | -10.9<br>(-12.6 to -9.2)                            |
| Foreign body                                                                        | 63.9<br>(56.2 to 74.0)                  | 64.2<br>(56.5 to 74.1)                | 2.0<br>(1.3 to 2.9)                     | 17.8<br>(15.1 to 20.3)                            | 4.8<br>(2.2 to 7.1)                                 |
| Pulmonary aspiration and foreign body in airway                                     | 17.1<br>(14.1 to 20.3)                  | 25.0<br>(22.8 to 27.8)                | 0.5<br>(0.3 to 0.7)                     | 31.9<br>(29.1 to 35.1)                            | 11.1<br>(9.0 to 13.3)                               |
| Foreign body in eyes                                                                | 7.7<br>(5.1 to 10.6)                    | 30.4<br>(23.2 to 39.9)                | 0.5<br>(0.3 to 0.8)                     | 0.3<br>(-3.7 to 4.2)                              | -6.8<br>(-11.0 to -2.4)                             |
| Foreign body in other body part                                                     | 39.2<br>(32.7 to 48.5)                  | 8.8<br>(7.5 to 10.3)                  | 1.0<br>(0.6 to 1.5)                     | 22.9<br>(20.7 to 25.1)                            | 10.4<br>(8.4 to 12.3)                               |
| Environmental heat and cold exposure                                                | 27.9<br>(25.1 to 31.3)                  | 7.2<br>(6.3 to 8.3)                   | 1.0<br>(0.6 to 1.5)                     | 26.3<br>(21.3 to 31.3)                            | 10.2<br>(5.9 to 14.8)                               |
| Other unintentional injuries                                                        | 352.7<br>(300.0 to 413.7)               | 148.1<br>(127.9 to 167.6)             | 8.9<br>(5.7 to 13.1)                    | 24.8<br>(23.0 to 26.5)                            | 12.8<br>(11.1 to 14.5)                              |
| <b>Self-harm and interpersonal violence</b>                                         | <b>298.2</b><br><b>(272.0 to 323.4)</b> | <b>70.9†</b><br><b>(64.0 to 78.5)</b> | <b>6.1</b><br><b>(4.0 to 8.8)</b>       | <b>-8.4</b><br><b>(-10.3 to -6.5)</b>             | <b>-14.9</b><br><b>(-16.7 to -12.9)</b>             |
| Self-harm                                                                           | 48.9<br>(39.8 to 58.7)                  | 37.0<br>(32.2 to 42.3)                | 1.9<br>(1.2 to 2.7)                     | -11.6<br>(-15.9 to -7.0)                          | -19.1<br>(-23.1 to -14.6)                           |
| Self-harm by firearm                                                                | 0.3<br>(0.2 to 0.4)                     | < 0.05<br>(< 0.05 to 0.1)             | < 0.05<br>(< 0.05 to < 0.05)            | -3.7<br>(-6.0 to -1.6)                            | -11.1<br>(-13.5 to -8.9)                            |
| Self-harm by other specified means                                                  | 48.6<br>(39.5 to 58.4)                  | 37.0<br>(32.2 to 42.3)                | 1.9<br>(1.2 to 2.7)                     | -11.7<br>(-15.9 to -7.0)                          | -19.1<br>(-23.1 to -14.6)                           |
| Interpersonal violence                                                              | 249.3<br>(226.2 to 273.4)               | 33.9†<br>(28.5 to 39.8)               | 4.2<br>(2.8 to 6.0)                     | -7.0<br>(-8.4 to -5.3)                            | -13.1<br>(-14.6 to -11.4)                           |
| Assault by firearm                                                                  | 7.5<br>(6.1 to 9.0)                     | 0.9<br>(0.6 to 1.2)                   | 0.2<br>(0.1 to 0.2)                     | -6.6<br>(-8.3 to -4.9)                            | -14.0<br>(-15.6 to -12.3)                           |
| Assault by sharp object                                                             | 22.8<br>(18.5 to 27.7)                  | 5.6<br>(4.2 to 7.3)                   | 0.4<br>(0.2 to 0.7)                     | -17.7<br>(-19.3 to -16.1)                         | -24.2<br>(-25.8 to -22.5)                           |
| Sexual violence                                                                     | 125.0<br>(110.6 to 142.0)               | --                                    | 1.0<br>(0.7 to 1.4)                     | 0.9<br>(-2.9 to 4.6)                              | -4.6<br>(-8.6 to -0.4)                              |
| Assault by other means                                                              | 94.0<br>(77.0 to 116.0)                 | 27.5<br>(22.9 to 32.3)                | 2.6<br>(1.7 to 3.9)                     | -7.9<br>(-9.4 to -6.4)                            | -15.1<br>(-16.5 to -13.6)                           |
| <b>Forces of nature, conflict and terrorism, and executions and police conflict</b> | <b>6.1</b><br><b>(3.1 to 9.9)</b>       | <b>0.4†</b><br><b>(0.2 to 0.5)</b>    | <b>0.1</b><br><b>(&lt; 0.05 to 0.3)</b> | <b>18.0</b><br><b>(15.8 to 21.0)</b>              | <b>4.0</b><br><b>(1.9 to 6.8)</b>                   |
| Exposure to forces of nature                                                        | --                                      | --                                    | --                                      | --                                                | --                                                  |
| Conflict and terrorism                                                              | 4.8<br>(1.9 to 8.5)                     | --                                    | 0.1<br>(< 0.05 to 0.2)                  | 10.9<br>(8.3 to 13.8)                             | -3.7<br>(-6.1 to -1.2)                              |
| Executions and police conflict                                                      | 1.3<br>(0.7 to 2.1)                     | 0.4<br>(0.2 to 0.5)                   | < 0.05<br>(< 0.05 to 0.1)               | 40.4<br>(29.8 to 44.7)                            | 25.3<br>(17.0 to 29.3)                              |
| <b>Impairments</b>                                                                  | --                                      | --                                    | --                                      | --                                                | --                                                  |
| Anaemia                                                                             | 952.0<br>(779.2 to 1,134.4)             | --                                    | 18.7<br>(12.3 to 27.4)                  | 14.0<br>(-5.5 to 39.0)                            | 2.6<br>(-16.0 to 25.8)                              |
| Developmental intellectual disability                                               | 161.7<br>(119.8 to 209.7)               | --                                    | 19.7<br>(14.3 to 25.8)                  | 4.3<br>(-0.6 to 9.3)                              | -2.4<br>(-7.3 to 2.7)                               |
| Epilepsy                                                                            | 57.6<br>(26.1 to 88.9)                  | --                                    | 15.5<br>(7.1 to 28.1)                   | 3.5<br>(-57.7 to 165.3)                           | -4.4<br>(-59.4 to 132.1)                            |
| Guillain-Barre syndrome                                                             | 0.1<br>(0.1 to 0.2)                     | --                                    | < 0.05<br>(< 0.05 to 0.1)               | 10.2<br>(8.2 to 12.3)                             | 0.1<br>(0.1 to 0.2)                                 |
| Hearing loss                                                                        | 2,851.1<br>(2,540.6 to 3,163.6)         | --                                    | 74.1<br>(50.9 to 107.2)                 | 14.1<br>(10.9 to 17.3)                            | -0.6<br>(-3.2 to 1.9)                               |
| Heart failure                                                                       | 241.9<br>(213.8 to 272.2)               | --                                    | 27.4<br>(21.8 to 33.0)                  | 9.9<br>(2.3 to 18.4)                              | -6.2<br>(-12.6 to 0.7)                              |
| Infertility                                                                         | 166.0<br>(131.1 to 208.5)               | --                                    | 1.1<br>(0.5 to 2.0)                     | 0.3<br>(-5.1 to 6.3)                              | 0.8<br>(-4.3 to 6.2)                                |
| Pelvic inflammatory disease                                                         | 1.0<br>(0.8 to 1.2)                     | --                                    | 0.1<br>(0.1 to 0.2)                     | -34.8<br>(-47.0 to -16.9)                         | -36.5<br>(-48.9 to -18.1)                           |
| Vision loss                                                                         | 1,113.8<br>(1,025.7 to 1,216.8)         | --                                    | 30.1<br>(21.0 to 43.1)                  | 9.2<br>(5.6 to 13.0)                              | -3.6<br>(-6.8 to -0.2)                              |

We did not calculate incidence for the nine impairments, certain NTDs, and causes with only birth prevalence. Blank cells mean that no estimate is available.

† Incidence for aggregate causes represents the sum of the incidence of the causes below the aggregate.

‡ Incidence estimates for stroke represent first-ever stroke only.

^ Incidence of HIV/AIDS represents new infections of HIV only and does not include new infections of Tuberculosis in HIV positive cases.

SR Table 14: Prevalence, incidence, and YLDs for 2016, percentage change of YLD counts and percentage change of age-standardised YLD rates between 2006 and 2016 by cause and impairments, for all ages, Belize.

| Cause                                                                                | Prevalence in thousands (95% UI) | Incidence in thousands (95% UI)         | YLDs in thousands (95% UI)    |                                                   |                                                     |
|--------------------------------------------------------------------------------------|----------------------------------|-----------------------------------------|-------------------------------|---------------------------------------------------|-----------------------------------------------------|
|                                                                                      | 2016 counts                      | 2016 counts                             | 2016 counts                   | Percentage change in counts between 2006 and 2016 | Percentage change in age-standardised rates between |
| <b>All causes</b>                                                                    | <b>357.4</b><br>(355.7 to 359.0) | <b>2,405.2†</b><br>(2,270.3 to 2,550.4) | <b>34.7</b><br>(25.5 to 45.0) | <b>35.0</b><br>(31.9 to 38.5)                     | <b>-0.4</b><br>(-2.2 to 1.6)                        |
| <b>Communicable, maternal, neonatal, and nutritional disorders</b>                   | <b>220.8</b><br>(213.9 to 227.2) | <b>1,384.2†</b><br>(1,262.1 to 1,520.7) | <b>4.9</b><br>(3.4 to 6.6)    | <b>23.4</b><br>(14.7 to 33.3)                     | <b>-1.0</b><br>(-7.6 to 6.5)                        |
| <b>HIV/AIDS and tuberculosis</b>                                                     | <b>84.9</b><br>(76.6 to 91.5)    | <b>0.3†</b><br>(0.2 to 0.4)             | <b>0.2</b><br>(0.1 to 0.4)    | <b>13.8</b><br>(-12.0 to 62.2)                    | <b>-16.6</b><br>(-38.7 to 24.4)                     |
| Tuberculosis                                                                         | 77.5<br>(69.6 to 85.9)           | 0.1†<br>(0.1 to 0.1)                    | < 0.05<br>(< 0.05 to < 0.05)  | 7.4<br>(-19.4 to 41.8)                            | -21.9<br>(-39.7 to -0.7)                            |
| Drug-susceptible tuberculosis                                                        | 0.1<br>(< 0.05 to 0.1)           | 0.1<br>(0.1 to 0.1)                     | < 0.05<br>(< 0.05 to < 0.05)  | 7.7<br>(-19.1 to 42.2)                            | -21.7<br>(-39.5 to 0.2)                             |
| Multidrug-resistant tuberculosis without extensive drug resistance                   | < 0.05<br>(< 0.05 to < 0.05)     | < 0.05<br>(< 0.05 to < 0.05)            | < 0.05<br>(< 0.05 to < 0.05)  | -25.7<br>(-88.4 to 361.0)                         | -46.6<br>(-91.7 to 234.0)                           |
| Extensively drug-resistant tuberculosis                                              | < 0.05<br>(< 0.05 to < 0.05)     | < 0.05<br>(< 0.05 to < 0.05)            | < 0.05<br>(< 0.05 to < 0.05)  | 97.8<br>(-69.0 to 1,127.2)                        | 42.3<br>(-77.8 to 789.1)                            |
| Latent tuberculosis infection                                                        | 77.5<br>(69.6 to 85.9)           | --                                      | --                            | --                                                | --                                                  |
| HIV/AIDS                                                                             | 2.4<br>(1.8 to 3.4)              | 0.2^<br>(0.1 to 0.2)                    | 0.2<br>(0.1 to 0.4)           | 14.3<br>(-13.0 to 69.8)                           | -16.2<br>(-39.4 to 32.0)                            |
| Drug-susceptible HIV/AIDS - Tuberculosis                                             | < 0.05<br>(< 0.05 to < 0.05)     | < 0.05<br>(< 0.05 to < 0.05)            | < 0.05<br>(< 0.05 to < 0.05)  | -6.5<br>(-16.3 to 7.5)                            | -28.3<br>(-36.3 to -18.3)                           |
| Multidrug-resistant HIV/AIDS - Tuberculosis without extensive drug resistance        | < 0.05<br>(< 0.05 to < 0.05)     | < 0.05<br>(< 0.05 to < 0.05)            | < 0.05<br>(< 0.05 to < 0.05)  | -36.8<br>(-90.0 to 308.1)                         | -51.6<br>(-92.3 to 209.5)                           |
| Extensively drug-resistant HIV/AIDS - Tuberculosis                                   | < 0.05<br>(< 0.05 to < 0.05)     | < 0.05<br>(< 0.05 to < 0.05)            | < 0.05<br>(< 0.05 to < 0.05)  | 68.3<br>(-73.4 to 986.0)                          | 28.8<br>(-79.6 to 723.8)                            |
| HIV/AIDS resulting in other diseases                                                 | 2.4<br>(1.7 to 3.4)              | 0.2<br>(0.1 to 0.2)                     | 0.2<br>(0.1 to 0.4)           | 15.0<br>(-13.1 to 75.1)                           | -15.8<br>(-39.6 to 35.8)                            |
| <b>Diarrhoea, lower respiratory infections, and other common infectious diseases</b> | <b>23.1</b><br>(21.7 to 24.6)    | <b>1,303.7†</b><br>(1,181.7 to 1,434.0) | <b>1.1</b><br>(0.7 to 1.5)    | <b>28.9</b><br>(24.4 to 33.7)                     | <b>5.2</b><br>(2.1 to 8.6)                          |
| Diarrhoeal diseases                                                                  | 4.2<br>(3.9 to 4.6)              | 277.4<br>(258.1 to 298.8)               | 0.5<br>(0.3 to 0.7)           | 37.7<br>(29.2 to 46.1)                            | 12.6<br>(7.0 to 18.3)                               |
| Intestinal infectious diseases                                                       | < 0.05<br>(< 0.05 to < 0.05)     | < 0.05†<br>(< 0.05 to < 0.05)           | < 0.05<br>(< 0.05 to < 0.05)  | 38.9<br>(22.2 to 58.5)                            | 1.2<br>(-10.3 to 14.0)                              |
| Typhoid fever                                                                        | < 0.05<br>(< 0.05 to < 0.05)     | < 0.05<br>(< 0.05 to < 0.05)            | < 0.05<br>(< 0.05 to < 0.05)  | 43.4<br>(24.0 to 65.6)                            | 2.6<br>(-10.3 to 17.6)                              |
| Paratyphoid fever                                                                    | < 0.05<br>(< 0.05 to < 0.05)     | < 0.05<br>(< 0.05 to < 0.05)            | < 0.05<br>(< 0.05 to < 0.05)  | 39.0<br>(14.1 to 69.6)                            | 2.1<br>(-14.7 to 23.2)                              |
| Other intestinal infectious diseases                                                 | --                               | --                                      | < 0.05<br>(< 0.05 to < 0.05)  | -16.6<br>(-42.0 to 23.8)                          | -27.0<br>(-44.4 to -4.3)                            |
| Lower respiratory infections                                                         | 0.5<br>(0.4 to 0.5)              | 20.5<br>(18.5 to 22.6)                  | < 0.05<br>(< 0.05 to < 0.05)  | 34.3<br>(19.0 to 52.5)                            | 9.5<br>(-0.8 to 20.3)                               |
| Upper respiratory infections                                                         | 12.8<br>(11.3 to 14.6)           | 968.0<br>(848.0 to 1,104.6)             | 0.3<br>(0.2 to 0.5)           | 23.9<br>(17.4 to 31.3)                            | -0.1<br>(-5.2 to 5.3)                               |
| Otitis media                                                                         | 5.7<br>(5.0 to 6.3)              | 27.7<br>(21.9 to 35.1)                  | 0.2<br>(0.1 to 0.2)           | 17.3<br>(8.7 to 26.8)                             | -2.0<br>(-8.5 to 5.0)                               |
| Meningitis                                                                           | 0.3<br>(0.3 to 0.4)              | 0.1<br>(0.1 to 0.1)                     | < 0.05<br>(< 0.05 to < 0.05)  | 25.7<br>(22.2 to 29.2)                            | -2.1<br>(-4.7 to 0.5)                               |
| Pneumococcal meningitis                                                              | 0.2<br>(0.1 to 0.2)              | < 0.05<br>(< 0.05 to < 0.05)            | < 0.05<br>(< 0.05 to < 0.05)  | 27.4<br>(22.4 to 32.6)                            | -1.4<br>(-5.1 to 2.5)                               |
| H influenzae type B meningitis                                                       | < 0.05<br>(< 0.05 to 0.1)        | < 0.05<br>(< 0.05 to < 0.05)            | < 0.05<br>(< 0.05 to < 0.05)  | 15.5<br>(8.7 to 23.0)                             | -7.9<br>(-12.8 to -2.7)                             |
| Meningococcal infection                                                              | < 0.05<br>(< 0.05 to < 0.05)     | < 0.05<br>(< 0.05 to < 0.05)            | < 0.05<br>(< 0.05 to < 0.05)  | 26.7<br>(20.3 to 32.7)                            | -2.6<br>(-7.0 to 1.6)                               |
| Other meningitis                                                                     | 0.1<br>(0.1 to 0.1)              | < 0.05<br>(< 0.05 to < 0.05)            | < 0.05<br>(< 0.05 to < 0.05)  | 29.8<br>(24.7 to 34.8)                            | 0.7<br>(-2.9 to 4.5)                                |
| Encephalitis                                                                         | 0.2<br>(0.2 to 0.3)              | 0.1<br>(0.1 to 0.1)                     | < 0.05<br>(< 0.05 to < 0.05)  | 27.8<br>(8.3 to 51.1)                             | -2.0<br>(-15.1 to 13.7)                             |
| Diphtheria                                                                           | < 0.05<br>(< 0.05 to < 0.05)     | < 0.05<br>(< 0.05 to < 0.05)            | < 0.05<br>(< 0.05 to < 0.05)  | -13.2<br>(-53.3 to 63.6)                          | -31.6<br>(-62.0 to 26.9)                            |
| Whooping cough                                                                       | 0.1<br>(0.1 to 0.2)              | 1.0<br>(0.8 to 1.2)                     | < 0.05<br>(< 0.05 to < 0.05)  | -1.9<br>(-19.1 to 17.4)                           | -15.3<br>(-30.1 to 1.4)                             |
| Tetanus                                                                              | < 0.05<br>(< 0.05 to < 0.05)     | < 0.05<br>(< 0.05 to < 0.05)            | < 0.05<br>(< 0.05 to < 0.05)  | -23.9<br>(-45.3 to 7.9)                           | -53.0<br>(-66.8 to -29.6)                           |
| Measles                                                                              | < 0.05<br>(0.0 to < 0.05)        | < 0.05<br>(0.0 to < 0.05)               | < 0.05<br>(0.0 to < 0.05)     | --                                                | --                                                  |
| Varicella and herpes zoster                                                          | 0.3<br>(0.3 to 0.4)              | 9.0<br>(8.6 to 9.4)                     | < 0.05<br>(< 0.05 to < 0.05)  | 37.1<br>(19.1 to 59.1)                            | 0.1<br>(-10.7 to 12.4)                              |
| <b>Neglected tropical diseases and malaria</b>                                       | <b>35.2</b><br>(29.7 to 41.4)    | <b>21.0†</b><br>(14.3 to 32.5)          | <b>0.3</b><br>(0.2 to 0.4)    | <b>26.3</b><br>(-5.0 to 70.5)                     | <b>-0.2</b><br>(-27.4 to 36.8)                      |
| Malaria                                                                              | < 0.05<br>(< 0.05 to < 0.05)     | < 0.05<br>(< 0.05 to < 0.05)            | < 0.05<br>(< 0.05 to < 0.05)  | -98.0<br>(-98.9 to -95.2)                         | -98.4<br>(-99.1 to -96.1)                           |
| Chagas disease                                                                       | < 0.05<br>(< 0.05 to < 0.05)     | < 0.05<br>(< 0.05 to < 0.05)            | < 0.05<br>(< 0.05 to < 0.05)  | 25.2<br>(7.8 to 48.0)                             | -17.9<br>(-29.2 to -4.0)                            |
| Leishmaniasis                                                                        | < 0.05<br>(< 0.05 to < 0.05)     | < 0.05<br>(0.0 to < 0.05)               | < 0.05<br>(< 0.05 to < 0.05)  | 105.2<br>(-100.0 to 1.6e+82)                      | 56.8<br>(-100.0 to 1.0e+82)                         |
| Visceral leishmaniasis                                                               | --                               | --                                      | --                            | --                                                | --                                                  |
| Cutaneous and mucocutaneous leishmaniasis                                            | < 0.05<br>(< 0.05 to < 0.05)     | < 0.05<br>(0.0 to < 0.05)               | < 0.05<br>(< 0.05 to < 0.05)  | 105.2<br>(-100.0 to 1.6e+82)                      | 56.8<br>(-100.0 to 1.0e+82)                         |
| African trypanosomiasis                                                              | --                               | --                                      | --                            | --                                                | --                                                  |
| Schistosomiasis                                                                      | --                               | --                                      | --                            | --                                                | --                                                  |
| Cysticercosis                                                                        | 0.1<br>(< 0.05 to 0.1)           | --                                      | < 0.05<br>(< 0.05 to < 0.05)  | 30.4<br>(-37.8 to 139.8)                          | -11.1<br>(-57.3 to 61.9)                            |
| Cystic echinococcosis                                                                | --                               | --                                      | --                            | --                                                | --                                                  |
| Lymphatic filariasis                                                                 | --                               | --                                      | --                            | --                                                | --                                                  |
| Onchocerciasis                                                                       | --                               | --                                      | --                            | --                                                | --                                                  |
| Trachoma                                                                             | --                               | --                                      | --                            | --                                                | --                                                  |
| Dengue                                                                               | 0.8<br>(0.5 to 1.2)              | 12.7<br>(8.7 to 17.7)                   | 0.1<br>(0.1 to 0.2)           | 510.7<br>(381.9 to 1,161.1)                       | 386.9<br>(291.0 to 890.5)                           |
| Yellow fever                                                                         | --                               | --                                      | --                            | --                                                | --                                                  |
| Rabies                                                                               | < 0.05<br>(< 0.05 to < 0.05)     | < 0.05<br>(< 0.05 to < 0.05)            | < 0.05<br>(< 0.05 to < 0.05)  | -7.9<br>(-48.9 to 84.6)                           | -9.0<br>(-40.9 to 42.5)                             |
| Intestinal nematode infections                                                       | 31.2<br>(25.7 to 37.7)           | --                                      | < 0.05<br>(< 0.05 to 0.1)     | -60.1<br>(-71.6 to -43.6)                         | -69.0<br>(-78.3 to -54.9)                           |
| Ascariasis                                                                           | 12.5<br>(8.2 to 17.7)            | --                                      | < 0.05<br>(< 0.05 to < 0.05)  | -49.3<br>(-76.4 to 4.2)                           | -61.4<br>(-82.9 to -18.4)                           |

| Cause                                                                   | Prevalence in thousands (95% UI)        | Incidence in thousands (95% UI)            | YLDs in thousands (95% UI)                    |                                                   |                                                     |
|-------------------------------------------------------------------------|-----------------------------------------|--------------------------------------------|-----------------------------------------------|---------------------------------------------------|-----------------------------------------------------|
|                                                                         | 2016 counts                             | 2016 counts                                | 2016 counts                                   | Percentage change in counts between 2006 and 2016 | Percentage change in age-standardised rates between |
| Trichuriasis                                                            | 11.5<br>(7.8 to 16.6)                   | --                                         | < 0.05<br>(< 0.05 to < 0.05)                  | -54.0<br>(-84.3 to 19.8)                          | -65.7<br>(-88.4 to -6.3)                            |
| Hookworm disease                                                        | 8.1<br>(5.8 to 11.1)                    | --                                         | < 0.05<br>(< 0.05 to 0.1)                     | -61.4<br>(-73.5 to -43.7)                         | -69.8<br>(-79.7 to -54.8)                           |
| Food-borne trematodiasis                                                | --                                      | --                                         | --                                            | --                                                | --                                                  |
| Leprosy                                                                 | < 0.05<br>(< 0.05 to < 0.05)            | --                                         | < 0.05<br>(< 0.05 to < 0.05)                  | -18.7<br>(-23.5 to -14.6)                         | -41.7<br>(-45.6 to -37.8)                           |
| Ebola virus disease                                                     | --                                      | --                                         | --                                            | --                                                | --                                                  |
| Zika virus disease                                                      | 0.1<br>(0.1 to 0.3)                     | 8.2<br>(3.7 to 19.1)                       | < 0.05<br>(< 0.05 to < 0.05)                  | --                                                | --                                                  |
| Guinea worm disease                                                     | --                                      | --                                         | --                                            | --                                                | --                                                  |
| Other neglected tropical diseases                                       | 3.4<br>(2.8 to 4.0)                     | --                                         | 0.1<br>(< 0.05 to 0.1)                        | 11.0<br>(-11.8 to 42.9)                           | -3.1<br>(-21.9 to 22.8)                             |
| <b>Maternal disorders</b>                                               | <b>0.7</b><br><b>(0.5 to 0.8)</b>       | <b>20.0†</b><br><b>(18.0 to 21.7)</b>      | <b>&lt; 0.05</b><br><b>(&lt; 0.05 to 0.1)</b> | <b>13.7</b><br><b>(-13.6 to 49.7)</b>             | <b>-12.7</b><br><b>(-33.2 to 14.7)</b>              |
| Maternal haemorrhage                                                    | 0.1<br>(0.1 to 0.1)                     | 0.6<br>(0.4 to 0.8)                        | < 0.05<br>(< 0.05 to < 0.05)                  | 13.2<br>(-25.1 to 66.2)                           | -13.3<br>(-42.3 to 27.7)                            |
| Maternal sepsis and other pregnancy related infections                  | 0.2<br>(0.1 to 0.2)                     | 1.4<br>(1.0 to 1.9)                        | < 0.05<br>(< 0.05 to < 0.05)                  | 17.5<br>(-43.0 to 145.6)                          | -9.9<br>(-55.6 to 87.3)                             |
| Maternal hypertensive disorders                                         | 0.3<br>(0.2 to 0.4)                     | 1.3<br>(1.0 to 1.6)                        | < 0.05<br>(< 0.05 to < 0.05)                  | 12.9<br>(-30.4 to 88.9)                           | -13.2<br>(-46.4 to 45.1)                            |
| Maternal obstructed labour and uterine rupture                          | < 0.05<br>(< 0.05 to < 0.05)            | 0.5<br>(0.4 to 0.7)                        | < 0.05<br>(< 0.05 to < 0.05)                  | 15.1<br>(-58.1 to 199.9)                          | -11.6<br>(-67.3 to 124.4)                           |
| Maternal abortion, miscarriage, and ectopic pregnancy                   | 0.1<br>(0.1 to 0.2)                     | 16.2<br>(14.1 to 17.7)                     | < 0.05<br>(< 0.05 to < 0.05)                  | 15.7<br>(-30.7 to 94.3)                           | -11.2<br>(-46.9 to 50.4)                            |
| Other maternal disorders                                                | --                                      | --                                         | < 0.05<br>(< 0.05 to < 0.05)                  | 8.4<br>(-17.5 to 42.6)                            | -16.8<br>(-36.6 to 9.3)                             |
| <b>Neonatal disorders</b>                                               | <b>7.4</b><br><b>(6.2 to 9.2)</b>       | <b>1.2</b><br><b>--</b>                    | <b>1.2</b><br><b>(0.8 to 1.9)</b>             | <b>22.6</b><br><b>(4.6 to 40.1)</b>               | <b>0.6</b><br><b>(-13.9 to 14.6)</b>                |
| Neonatal preterm birth complications                                    | 6.1<br>(4.9 to 8.1)                     | --                                         | 0.6<br>(0.4 to 0.8)                           | 17.7<br>(-4.8 to 43.1)                            | -4.1<br>(-22.0 to 17.2)                             |
| Neonatal encephalopathy due to birth asphyxia and trauma                | 0.3<br>(0.2 to 0.6)                     | --                                         | < 0.05<br>(< 0.05 to 0.1)                     | 55.6<br>(1.7 to 265.7)                            | 26.0<br>(-17.6 to 201.7)                            |
| Neonatal sepsis and other neonatal infections                           | 1.1<br>(0.4 to 2.5)                     | --                                         | 0.5<br>(0.1 to 1.1)                           | 28.0<br>(-3.3 to 61.3)                            | 5.7<br>(-20.9 to 34.0)                              |
| Hemolytic disease and other neonatal jaundice                           | 0.2<br>(0.1 to 0.2)                     | --                                         | < 0.05<br>(< 0.05 to 0.1)                     | 21.4<br>(0.6 to 47.3)                             | -2.9<br>(-18.1 to 16.7)                             |
| Other neonatal disorders                                                | --                                      | --                                         | < 0.05<br>(< 0.05 to 0.1)                     | 10.8<br>(-6.8 to 29.9)                            | -5.1<br>(-20.3 to 11.4)                             |
| <b>Nutritional deficiencies</b>                                         | <b>82.4</b><br><b>(73.4 to 89.9)</b>    | <b>6.2†</b><br><b>(5.1 to 7.6)</b>         | <b>1.9</b><br><b>(1.2 to 2.8)</b>             | <b>21.8</b><br><b>(4.1 to 43.3)</b>               | <b>-2.3</b><br><b>(-14.8 to 12.3)</b>               |
| Protein-energy malnutrition                                             | 1.6<br>(1.3 to 2.1)                     | 0.7<br>(0.6 to 0.9)                        | 0.1<br>(< 0.05 to 0.1)                        | 28.2<br>(-7.9 to 80.9)                            | 9.9<br>(-21.3 to 55.6)                              |
| Iodine deficiency                                                       | 1.5<br>(1.3 to 1.7)                     | < 0.05<br>(< 0.05 to 0.1)                  | < 0.05<br>(< 0.05 to 0.1)                     | 37.2<br>(16.5 to 59.0)                            | 0.5<br>(-12.9 to 13.9)                              |
| Vitamin A deficiency                                                    | 6.4<br>(5.2 to 8.0)                     | 5.4<br>(4.4 to 6.8)                        | < 0.05<br>(< 0.05 to < 0.05)                  | 21.4<br>(0.8 to 47.8)                             | 0.3<br>(-15.5 to 19.8)                              |
| Iron-deficiency anaemia                                                 | 72.1<br>(62.5 to 82.0)                  | --                                         | 1.7<br>(1.1 to 2.6)                           | 21.2<br>(2.3 to 44.0)                             | -2.8<br>(-15.9 to 12.8)                             |
| Other nutritional deficiencies                                          | --                                      | --                                         | < 0.05<br>(< 0.05 to < 0.05)                  | 26.1<br>(-11.6 to 82.9)                           | 8.1<br>(-24.2 to 56.5)                              |
| <b>Other communicable, maternal, neonatal, and nutritional diseases</b> | <b>86.4</b><br><b>(80.0 to 92.5)</b>    | <b>33.0</b><br><b>(26.5 to 42.1)</b>       | <b>0.2</b><br><b>(0.1 to 0.3)</b>             | <b>29.7</b><br><b>(16.8 to 43.7)</b>              | <b>1.0</b><br><b>(-7.2 to 9.9)</b>                  |
| Sexually transmitted diseases excluding HIV                             | 75.0<br>(68.9 to 81.2)                  | 30.6<br>(24.2 to 39.7)                     | 0.1<br>(0.1 to 0.2)                           | 38.1<br>(26.3 to 51.8)                            | 2.6<br>(-5.6 to 12.7)                               |
| Syphilis                                                                | 2.5<br>(1.5 to 3.8)                     | 1.9<br>(1.1 to 3.1)                        | < 0.05<br>(< 0.05 to < 0.05)                  | 55.4<br>(37.5 to 76.9)                            | 4.1<br>(-9.0 to 20.1)                               |
| Chlamydial infection                                                    | 3.6<br>(2.8 to 4.6)                     | 2.8<br>(2.2 to 3.6)                        | < 0.05<br>(< 0.05 to < 0.05)                  | 33.3<br>(12.8 to 55.9)                            | 0.7<br>(-14.4 to 16.6)                              |
| Gonococcal infection                                                    | 2.7<br>(1.1 to 5.0)                     | 9.4<br>(3.6 to 18.4)                       | < 0.05<br>(< 0.05 to 0.1)                     | 38.5<br>(14.7 to 69.3)                            | 5.3<br>(-13.1 to 27.8)                              |
| Trichomoniasis                                                          | 11.9<br>(10.1 to 13.7)                  | 10.5<br>(8.8 to 12.3)                      | < 0.05<br>(< 0.05 to < 0.05)                  | 39.5<br>(30.1 to 51.0)                            | 1.8<br>(-4.4 to 9.2)                                |
| Genital herpes                                                          | 59.9<br>(51.2 to 69.5)                  | 5.3<br>(4.5 to 6.4)                        | < 0.05<br>(< 0.05 to < 0.05)                  | 42.0<br>(30.5 to 52.7)                            | 0.6<br>(-5.7 to 7.4)                                |
| Other sexually transmitted diseases                                     | 0.7<br>(0.7 to 0.8)                     | 0.7<br>(0.6 to 0.8)                        | < 0.05<br>(< 0.05 to < 0.05)                  | 34.9<br>(20.0 to 52.0)                            | 2.0<br>(-8.9 to 14.4)                               |
| Hepatitis                                                               | 12.7<br>(11.1 to 14.5)                  | 2.4<br>(1.8 to 3.3)                        | < 0.05<br>(< 0.05 to < 0.05)                  | -4.6<br>(-30.9 to 34.1)                           | -28.7<br>(-44.3 to -6.5)                            |
| Acute hepatitis A                                                       | 0.1<br>(< 0.05 to 0.1)                  | 0.8<br>(0.3 to 1.6)                        | < 0.05<br>(< 0.05 to < 0.05)                  | -7.4<br>(-67.4 to 178.6)                          | -28.2<br>(-70.3 to 74.5)                            |
| Hepatitis B                                                             | 6.1<br>(4.7 to 7.7)                     | 1.1<br>(0.8 to 1.5)                        | < 0.05<br>(< 0.05 to < 0.05)                  | -4.6<br>(-21.2 to 14.1)                           | -30.7<br>(-42.0 to -18.3)                           |
| Hepatitis C                                                             | 6.5<br>(5.8 to 7.3)                     | 0.3<br>(0.2 to 0.3)                        | < 0.05<br>(< 0.05 to < 0.05)                  | 13.8<br>(-10.8 to 50.0)                           | -12.6<br>(-27.6 to 7.8)                             |
| Acute hepatitis E                                                       | < 0.05<br>(< 0.05 to < 0.05)            | 0.2<br>(0.1 to 0.2)                        | < 0.05<br>(< 0.05 to < 0.05)                  | -6.9<br>(-14.9 to 1.3)                            | -28.1<br>(-33.4 to -22.3)                           |
| Other infectious diseases                                               | 2.7<br>(2.2 to 3.1)                     | < 0.05<br>(< 0.05 to < 0.05)               | 0.1<br>(< 0.05 to 0.1)                        | 19.6<br>(-2.9 to 48.7)                            | 0.5<br>(-16.5 to 21.9)                              |
| <b>Non-communicable diseases</b>                                        | <b>337.9</b><br><b>(335.8 to 340.3)</b> | <b>994.5†</b><br><b>(939.4 to 1,055.8)</b> | <b>27.9</b><br><b>(20.5 to 36.2)</b>          | <b>36.7</b><br><b>(33.4 to 40.4)</b>              | <b>-0.6</b><br><b>(-2.6 to 1.6)</b>                 |
| <b>Neoplasms</b>                                                        | <b>0.8</b><br><b>(0.8 to 0.9)</b>       | <b>0.4</b><br><b>(0.4 to 0.4)</b>          | <b>0.1</b><br><b>(0.1 to 0.2)</b>             | <b>51.8</b><br><b>(44.5 to 59.7)</b>              | <b>0.5</b><br><b>(-4.4 to 5.7)</b>                  |
| Lip and oral cavity cancer                                              | < 0.05<br>(< 0.05 to < 0.05)            | < 0.05<br>(< 0.05 to < 0.05)               | < 0.05<br>(< 0.05 to < 0.05)                  | 52.6<br>(35.6 to 70.0)                            | -1.8<br>(-12.2 to 8.9)                              |
| Nasopharynx cancer                                                      | < 0.05<br>(< 0.05 to < 0.05)            | < 0.05<br>(< 0.05 to < 0.05)               | < 0.05<br>(< 0.05 to < 0.05)                  | 53.9<br>(37.8 to 71.6)                            | 6.2<br>(-3.1 to 15.1)                               |
| Other pharynx cancer                                                    | < 0.05<br>(< 0.05 to < 0.05)            | < 0.05<br>(< 0.05 to < 0.05)               | < 0.05<br>(< 0.05 to < 0.05)                  | 55.9<br>(40.4 to 72.3)                            | -4.5<br>(-14.4 to 6.1)                              |
| Oesophageal cancer                                                      | < 0.05<br>(< 0.05 to < 0.05)            | < 0.05<br>(< 0.05 to < 0.05)               | < 0.05<br>(< 0.05 to < 0.05)                  | 35.5<br>(21.6 to 50.9)                            | -13.6<br>(-23.2 to -3.0)                            |
| Stomach cancer                                                          | < 0.05<br>(< 0.05 to < 0.05)            | < 0.05<br>(< 0.05 to < 0.05)               | < 0.05<br>(< 0.05 to < 0.05)                  | 33.2<br>(15.1 to 54.1)                            | -13.4<br>(-26.4 to 1.9)                             |
| Colon and rectum cancer                                                 | 0.1<br>(0.1 to 0.1)                     | < 0.05<br>(< 0.05 to < 0.05)               | < 0.05<br>(< 0.05 to < 0.05)                  | 77.2<br>(53.4 to 103.3)                           | 14.9<br>(-0.8 to 33.1)                              |
| Liver cancer                                                            | < 0.05<br>(< 0.05 to < 0.05)            | < 0.05<br>(< 0.05 to < 0.05)               | < 0.05<br>(< 0.05 to < 0.05)                  | 45.9<br>(32.2 to 59.7)                            | -4.4<br>(-13.4 to 5.0)                              |
| Liver cancer due to hepatitis B                                         | < 0.05<br>(< 0.05 to < 0.05)            | < 0.05<br>(< 0.05 to < 0.05)               | < 0.05<br>(< 0.05 to < 0.05)                  | 45.3<br>(30.7 to 60.7)                            | -5.2<br>(-14.2 to 5.0)                              |



| Cause                                              | Prevalence in thousands (95% UI)     | Incidence in thousands (95% UI)    | YLDs in thousands (95% UI)        |                                                   |                                                     |
|----------------------------------------------------|--------------------------------------|------------------------------------|-----------------------------------|---------------------------------------------------|-----------------------------------------------------|
|                                                    | 2016 counts                          | 2016 counts                        | 2016 counts                       | Percentage change in counts between 2006 and 2016 | Percentage change in age-standardised rates between |
| Liver cancer due to hepatitis C                    | < 0.05<br>(< 0.05 to < 0.05)         | < 0.05<br>(< 0.05 to < 0.05)       | < 0.05<br>(< 0.05 to < 0.05)      | 44.7<br>(29.3 to 61.9)                            | -4.4<br>(-14.8 to 7.6)                              |
| Liver cancer due to alcohol use                    | < 0.05<br>(< 0.05 to < 0.05)         | < 0.05<br>(< 0.05 to < 0.05)       | < 0.05<br>(< 0.05 to < 0.05)      | 56.4<br>(39.3 to 73.2)                            | -1.6<br>(-11.8 to 9.7)                              |
| Liver cancer due to other causes                   | < 0.05<br>(< 0.05 to < 0.05)         | < 0.05<br>(< 0.05 to < 0.05)       | < 0.05<br>(< 0.05 to < 0.05)      | 37.6<br>(23.4 to 51.9)                            | -6.0<br>(-15.3 to 4.5)                              |
| Gallbladder and biliary tract cancer               | < 0.05<br>(< 0.05 to < 0.05)         | < 0.05<br>(< 0.05 to < 0.05)       | < 0.05<br>(< 0.05 to < 0.05)      | 40.8<br>(31.7 to 51.6)                            | -9.6<br>(-15.8 to -3.0)                             |
| Pancreatic cancer                                  | < 0.05<br>(< 0.05 to < 0.05)         | < 0.05<br>(< 0.05 to < 0.05)       | < 0.05<br>(< 0.05 to < 0.05)      | 51.2<br>(33.6 to 71.7)                            | -2.6<br>(-16.3 to 13.4)                             |
| Larynx cancer                                      | < 0.05<br>(< 0.05 to < 0.05)         | < 0.05<br>(< 0.05 to < 0.05)       | < 0.05<br>(< 0.05 to < 0.05)      | 57.5<br>(37.9 to 78.6)                            | -1.3<br>(-15.1 to 14.2)                             |
| Tracheal, bronchus, and lung cancer                | < 0.05<br>(< 0.05 to < 0.05)         | < 0.05<br>(< 0.05 to < 0.05)       | < 0.05<br>(< 0.05 to < 0.05)      | 50.3<br>(23.7 to 84.3)                            | -5.2<br>(-23.0 to 15.3)                             |
| Malignant skin melanoma                            | < 0.05<br>(< 0.05 to < 0.05)         | < 0.05<br>(< 0.05 to < 0.05)       | < 0.05<br>(< 0.05 to < 0.05)      | 64.8<br>(45.8 to 84.3)                            | 7.2<br>(-5.9 to 21.4)                               |
| Non-melanoma skin cancer                           | < 0.05<br>(< 0.05 to < 0.05)         | < 0.05<br>(< 0.05 to < 0.05)       | < 0.05<br>(< 0.05 to < 0.05)      | -17.1<br>(-51.0 to 73.9)                          | -47.5<br>(-68.8 to 15.8)                            |
| Non-melanoma skin cancer (squamous-cell carcinoma) | < 0.05<br>(< 0.05 to < 0.05)         | < 0.05<br>(< 0.05 to < 0.05)       | < 0.05<br>(< 0.05 to < 0.05)      | -19.3<br>(-52.0 to 75.6)                          | -48.6<br>(-69.5 to 16.5)                            |
| Non-melanoma skin cancer (basal-cell carcinoma)    | < 0.05<br>(< 0.05 to < 0.05)         | < 0.05<br>(< 0.05 to < 0.05)       | < 0.05<br>(< 0.05 to < 0.05)      | 59.7<br>(39.2 to 80.9)                            | 2.4<br>(-8.7 to 15.5)                               |
| Breast cancer                                      | 0.1<br>(0.1 to 0.1)                  | < 0.05<br>(< 0.05 to < 0.05)       | < 0.05<br>(< 0.05 to < 0.05)      | 68.8<br>(39.4 to 101.4)                           | 7.0<br>(-10.5 to 27.2)                              |
| Cervical cancer                                    | 0.2<br>(0.2 to 0.2)                  | 0.1<br>(0.1 to 0.1)                | < 0.05<br>(< 0.05 to < 0.05)      | 45.3<br>(17.6 to 80.0)                            | -3.1<br>(-19.7 to 16.5)                             |
| Uterine cancer                                     | 0.1<br>(0.1 to 0.1)                  | < 0.05<br>(< 0.05 to < 0.05)       | < 0.05<br>(< 0.05 to < 0.05)      | 57.4<br>(31.9 to 89.3)                            | -3.6<br>(-19.5 to 15.7)                             |
| Ovarian cancer                                     | < 0.05<br>(< 0.05 to < 0.05)         | < 0.05<br>(< 0.05 to < 0.05)       | < 0.05<br>(< 0.05 to < 0.05)      | 85.7<br>(55.7 to 122.3)                           | 19.1<br>(-4.1 to 49.8)                              |
| Prostate cancer                                    | 0.2<br>(0.2 to 0.2)                  | 0.1<br>(< 0.05 to 0.1)             | < 0.05<br>(< 0.05 to < 0.05)      | 50.5<br>(29.4 to 77.2)                            | 1.2<br>(-12.4 to 18.4)                              |
| Testicular cancer                                  | < 0.05<br>(< 0.05 to < 0.05)         | < 0.05<br>(< 0.05 to < 0.05)       | < 0.05<br>(< 0.05 to < 0.05)      | 9.9<br>(-7.9 to 29.9)                             | -20.6<br>(-32.0 to -8.9)                            |
| Kidney cancer                                      | < 0.05<br>(< 0.05 to < 0.05)         | < 0.05<br>(< 0.05 to < 0.05)       | < 0.05<br>(< 0.05 to < 0.05)      | 57.1<br>(38.4 to 77.7)                            | 8.4<br>(-3.5 to 21.6)                               |
| Bladder cancer                                     | < 0.05<br>(< 0.05 to < 0.05)         | < 0.05<br>(< 0.05 to < 0.05)       | < 0.05<br>(< 0.05 to < 0.05)      | 57.5<br>(38.8 to 79.1)                            | 3.1<br>(-10.4 to 18.0)                              |
| Brain and nervous system cancer                    | < 0.05<br>(< 0.05 to < 0.05)         | < 0.05<br>(< 0.05 to < 0.05)       | < 0.05<br>(< 0.05 to < 0.05)      | 26.5<br>(12.0 to 52.1)                            | -7.8<br>(-17.1 to 7.3)                              |
| Thyroid cancer                                     | < 0.05<br>(< 0.05 to < 0.05)         | < 0.05<br>(< 0.05 to < 0.05)       | < 0.05<br>(< 0.05 to < 0.05)      | 113.0<br>(78.8 to 153.1)                          | 35.4<br>(14.4 to 59.9)                              |
| Mesothelioma                                       | < 0.05<br>(< 0.05 to < 0.05)         | < 0.05<br>(< 0.05 to < 0.05)       | < 0.05<br>(< 0.05 to < 0.05)      | 58.6<br>(46.6 to 71.2)                            | 3.6<br>(-4.5 to 11.8)                               |
| Hodgkin lymphoma                                   | < 0.05<br>(< 0.05 to < 0.05)         | < 0.05<br>(< 0.05 to < 0.05)       | < 0.05<br>(< 0.05 to < 0.05)      | 30.5<br>(17.9 to 44.8)                            | -8.3<br>(-16.0 to -0.3)                             |
| Non-Hodgkin's lymphoma                             | < 0.05<br>(< 0.05 to < 0.05)         | < 0.05<br>(< 0.05 to < 0.05)       | < 0.05<br>(< 0.05 to < 0.05)      | 41.3<br>(27.1 to 56.7)                            | -3.3<br>(-13.9 to 7.9)                              |
| Multiple myeloma                                   | < 0.05<br>(< 0.05 to < 0.05)         | < 0.05<br>(< 0.05 to < 0.05)       | < 0.05<br>(< 0.05 to < 0.05)      | 85.5<br>(65.4 to 102.4)                           | 16.3<br>(3.3 to 26.9)                               |
| Leukaemia                                          | 0.1<br>(0.1 to 0.1)                  | < 0.05<br>(< 0.05 to < 0.05)       | < 0.05<br>(< 0.05 to < 0.05)      | 33.8<br>(23.2 to 46.0)                            | -1.8<br>(-10.9 to 8.1)                              |
| Acute lymphoid leukaemia                           | < 0.05<br>(< 0.05 to < 0.05)         | < 0.05<br>(< 0.05 to < 0.05)       | < 0.05<br>(< 0.05 to < 0.05)      | 43.9<br>(18.2 to 72.0)                            | 24.0<br>(2.1 to 43.5)                               |
| Chronic lymphoid leukaemia                         | < 0.05<br>(< 0.05 to < 0.05)         | < 0.05<br>(< 0.05 to < 0.05)       | < 0.05<br>(< 0.05 to < 0.05)      | 69.0<br>(42.5 to 100.0)                           | 8.2<br>(-10.5 to 30.6)                              |
| Acute myeloid leukaemia                            | < 0.05<br>(< 0.05 to < 0.05)         | < 0.05<br>(< 0.05 to < 0.05)       | < 0.05<br>(< 0.05 to < 0.05)      | 53.1<br>(34.4 to 74.5)                            | 19.0<br>(6.4 to 33.0)                               |
| Chronic myeloid leukaemia                          | < 0.05<br>(< 0.05 to < 0.05)         | < 0.05<br>(< 0.05 to < 0.05)       | < 0.05<br>(< 0.05 to < 0.05)      | 58.5<br>(35.4 to 86.9)                            | 6.4<br>(-8.0 to 24.8)                               |
| Other leukaemia                                    | < 0.05<br>(< 0.05 to < 0.05)         | < 0.05<br>(< 0.05 to < 0.05)       | < 0.05<br>(< 0.05 to < 0.05)      | 25.3<br>(13.2 to 39.0)                            | -7.9<br>(-18.7 to 4.0)                              |
| Other neoplasms                                    | 0.1<br>(0.1 to 0.1)                  | < 0.05<br>(< 0.05 to < 0.05)       | < 0.05<br>(< 0.05 to < 0.05)      | 55.1<br>(36.9 to 75.8)                            | 9.9<br>(-3.0 to 25.2)                               |
| <b>Cardiovascular diseases</b>                     | <b>16.3</b><br><b>(15.7 to 16.9)</b> | <b>1.5†</b><br><b>(1.4 to 1.6)</b> | <b>0.9</b><br><b>(0.6 to 1.2)</b> | <b>45.1</b><br><b>(40.2 to 49.8)</b>              | <b>-0.9</b><br><b>(-3.9 to 2.1)</b>                 |
| Rheumatic heart disease                            | 3.1<br>(2.8 to 3.5)                  | 0.1<br>(0.1 to 0.1)                | 0.1<br>(0.1 to 0.2)               | 39.8<br>(27.9 to 53.7)                            | 2.5<br>(-5.9 to 12.0)                               |
| Ischaemic heart disease                            | 4.5<br>(4.3 to 4.8)                  | 0.6<br>(0.6 to 0.7)                | 0.2<br>(0.1 to 0.3)               | 52.4<br>(44.7 to 61.0)                            | 0.1<br>(-4.0 to 4.3)                                |
| Cerebrovascular disease                            | 1.7<br>(1.6 to 1.9)                  | 0.3‡<br>(0.2 to 0.3)               | 0.2<br>(0.1 to 0.2)               | 44.6<br>(35.0 to 54.5)                            | -2.7<br>(-9.3 to 4.3)                               |
| Ischaemic stroke                                   | 1.4<br>(1.3 to 1.6)                  | 0.2‡<br>(0.1 to 0.2)               | 0.1<br>(0.1 to 0.2)               | 45.6<br>(34.1 to 58.2)                            | -2.8<br>(-10.3 to 6.3)                              |
| Hemorrhagic stroke                                 | 0.4<br>(0.4 to 0.5)                  | 0.1‡<br>(0.1 to 0.1)               | < 0.05<br>(< 0.05 to 0.1)         | 41.6<br>(28.5 to 56.6)                            | -2.5<br>(-12.2 to 9.0)                              |
| Hypertensive heart disease                         | 0.4<br>(0.4 to 0.5)                  | --                                 | < 0.05<br>(< 0.05 to < 0.05)      | 49.0<br>(34.5 to 64.7)                            | -1.9<br>(-10.8 to 7.3)                              |
| Cardiomyopathy and myocarditis                     | 0.2<br>(0.2 to 0.2)                  | 0.1†<br>(0.1 to 0.1)               | < 0.05<br>(< 0.05 to < 0.05)      | 40.6<br>(23.6 to 61.3)                            | -1.0<br>(-12.3 to 11.8)                             |
| Myocarditis                                        | 0.1<br>(0.1 to 0.1)                  | 0.1<br>(0.1 to 0.1)                | < 0.05<br>(< 0.05 to < 0.05)      | 33.6<br>(22.4 to 47.0)                            | -0.6<br>(-12.1 to 13.1)                             |
| Alcoholic cardiomyopathy                           | < 0.05<br>(< 0.05 to < 0.05)         | --                                 | < 0.05<br>(< 0.05 to < 0.05)      | 60.1<br>(37.0 to 84.1)                            | -1.1<br>(-16.8 to 16.5)                             |
| Other cardiomyopathy                               | 0.1<br>(0.1 to 0.2)                  | --                                 | < 0.05<br>(< 0.05 to < 0.05)      | 42.0<br>(17.6 to 70.4)                            | -1.1<br>(-15.2 to 15.5)                             |
| Atrial fibrillation and flutter                    | 1.2<br>(1.1 to 1.4)                  | 0.1<br>(0.1 to 0.1)                | 0.1<br>(0.1 to 0.1)               | 50.7<br>(40.0 to 61.9)                            | 0.5<br>(-5.4 to 6.5)                                |
| Peripheral vascular disease                        | 3.0<br>(2.6 to 3.5)                  | 0.3<br>(0.3 to 0.4)                | < 0.05<br>(< 0.05 to < 0.05)      | 44.5<br>(32.9 to 57.1)                            | -4.4<br>(-10.8 to 2.7)                              |
| Endocarditis                                       | < 0.05<br>(< 0.05 to < 0.05)         | < 0.05<br>(< 0.05 to 0.1)          | < 0.05<br>(< 0.05 to < 0.05)      | 38.0<br>(25.1 to 51.8)                            | -1.3<br>(-15.7 to 13.9)                             |
| Other cardiovascular and circulatory diseases      | 3.8<br>(3.2 to 4.5)                  | --                                 | 0.2<br>(0.1 to 0.3)               | 39.7<br>(28.4 to 52.0)                            | -1.9<br>(-9.2 to 5.9)                               |
| <b>Chronic respiratory diseases</b>                | <b>40.0</b><br><b>(37.6 to 42.4)</b> | <b>7.2†</b><br><b>(6.6 to 7.9)</b> | <b>1.5</b><br><b>(1.0 to 2.1)</b> | <b>27.1</b><br><b>(20.3 to 34.0)</b>              | <b>3.9</b><br><b>(-1.1 to 8.7)</b>                  |
| Chronic obstructive pulmonary disease              | 7.0<br>(6.5 to 7.5)                  | 0.5<br>(0.5 to 0.5)                | 0.1<br>(0.1 to 0.2)               | 42.7<br>(21.9 to 66.0)                            | -5.2<br>(-19.8 to 11.2)                             |
| Pneumoconiosis                                     | < 0.05<br>(< 0.05 to < 0.05)         | < 0.05<br>(< 0.05 to < 0.05)       | < 0.05<br>(< 0.05 to < 0.05)      | 48.0<br>(35.9 to 60.4)                            | -0.3<br>(-10.5 to 10.8)                             |
| Silicosis                                          | < 0.05<br>(< 0.05 to < 0.05)         | < 0.05<br>(< 0.05 to < 0.05)       | < 0.05<br>(< 0.05 to < 0.05)      | 61.8<br>(54.4 to 68.7)                            | 4.8<br>(0.3 to 9.5)                                 |

| Cause                                                          | Prevalence in thousands (95% UI)        | Incidence in thousands (95% UI)       | YLDs in thousands (95% UI)              |                                                   |                                                     |
|----------------------------------------------------------------|-----------------------------------------|---------------------------------------|-----------------------------------------|---------------------------------------------------|-----------------------------------------------------|
|                                                                | 2016 counts                             | 2016 counts                           | 2016 counts                             | Percentage change in counts between 2006 and 2016 | Percentage change in age-standardised rates between |
| Asbestosis                                                     | < 0.05<br>(< 0.05 to < 0.05)            | < 0.05<br>(< 0.05 to < 0.05)          | < 0.05<br>(< 0.05 to < 0.05)            | 41.9<br>(19.6 to 68.1)                            | 0.1<br>(-20.4 to 26.5)                              |
| Coal workers pneumoconiosis                                    | --                                      | --                                    | --                                      | --                                                | --                                                  |
| Other pneumoconiosis                                           | < 0.05<br>(< 0.05 to < 0.05)            | < 0.05<br>(< 0.05 to < 0.05)          | < 0.05<br>(< 0.05 to < 0.05)            | 45.4<br>(26.7 to 65.3)                            | -2.9<br>(-16.2 to 12.4)                             |
| Asthma                                                         | 33.2<br>(30.5 to 36.3)                  | 6.7<br>(6.1 to 7.4)                   | 1.3<br>(0.8 to 1.9)                     | 25.3<br>(18.5 to 32.5)                            | 5.3<br>(0.4 to 10.8)                                |
| Interstitial lung disease and pulmonary sarcoidosis            | 0.1<br>(0.1 to 0.1)                     | < 0.05<br>(< 0.05 to < 0.05)          | < 0.05<br>(< 0.05 to < 0.05)            | 43.0<br>(31.9 to 54.3)                            | 2.7<br>(-7.2 to 12.3)                               |
| Other chronic respiratory diseases                             | --                                      | --                                    | < 0.05<br>(< 0.05 to < 0.05)            | 57.1<br>(22.1 to 101.6)                           | 30.7<br>(5.2 to 62.6)                               |
| <b>Cirrhosis and other chronic liver diseases</b>              | <b>2.3</b><br><b>(2.2 to 2.4)</b>       | <b>0.1</b><br><b>(0.1 to 0.1)</b>     | <b>0.1</b><br><b>(&lt; 0.05 to 0.1)</b> | <b>44.0</b><br><b>(27.7 to 62.7)</b>              | <b>2.4</b><br><b>(-6.0 to 12.2)</b>                 |
| Cirrhosis and other chronic liver diseases due to hepatitis B  | 0.2<br>(0.2 to 0.3)                     | < 0.05<br>(< 0.05 to < 0.05)          | < 0.05<br>(< 0.05 to < 0.05)            | 55.8<br>(23.7 to 95.0)                            | 1.2<br>(-19.0 to 26.4)                              |
| Cirrhosis and other chronic liver diseases due to hepatitis C  | 0.6<br>(0.6 to 0.7)                     | < 0.05<br>(< 0.05 to < 0.05)          | < 0.05<br>(< 0.05 to < 0.05)            | 55.4<br>(28.7 to 92.3)                            | 0.8<br>(-14.6 to 19.9)                              |
| Cirrhosis and other chronic liver diseases due to alcohol use  | 0.8<br>(0.8 to 0.9)                     | < 0.05<br>(< 0.05 to < 0.05)          | < 0.05<br>(< 0.05 to < 0.05)            | 60.7<br>(35.0 to 90.3)                            | 3.2<br>(-10.0 to 17.7)                              |
| Cirrhosis and other chronic liver diseases due to other causes | 0.6<br>(0.6 to 0.7)                     | < 0.05<br>(< 0.05 to < 0.05)          | < 0.05<br>(< 0.05 to < 0.05)            | 27.1<br>(1.5 to 58.6)                             | 3.1<br>(-14.0 to 23.0)                              |
| <b>Digestive diseases</b>                                      | <b>9.7</b><br><b>(9.1 to 10.2)</b>      | <b>7.6†</b><br><b>(7.1 to 8.1)</b>    | <b>0.4</b><br><b>(0.3 to 0.5)</b>       | <b>36.4</b><br><b>(25.3 to 49.6)</b>              | <b>4.5</b><br><b>(-2.8 to 12.7)</b>                 |
| Peptic ulcer disease                                           | 3.1<br>(2.8 to 3.5)                     | 0.3<br>(0.3 to 0.4)                   | 0.1<br>(< 0.05 to 0.1)                  | 39.2<br>(10.1 to 74.9)                            | 2.1<br>(-16.1 to 23.0)                              |
| Gastritis and duodenitis                                       | 3.2<br>(2.9 to 3.6)                     | 1.6<br>(1.5 to 1.8)                   | 0.1<br>(< 0.05 to 0.1)                  | 55.6<br>(26.6 to 92.3)                            | 15.2<br>(-2.8 to 36.3)                              |
| Appendicitis                                                   | < 0.05<br>(< 0.05 to < 0.05)            | 0.7<br>(0.7 to 0.8)                   | < 0.05<br>(< 0.05 to < 0.05)            | 17.7<br>(-18.7 to 73.1)                           | -1.2<br>(-27.3 to 34.7)                             |
| Paralytic ileus and intestinal obstruction                     | < 0.05<br>(< 0.05 to < 0.05)            | 0.1<br>(0.1 to 0.2)                   | < 0.05<br>(< 0.05 to < 0.05)            | 32.7<br>(27.2 to 38.7)                            | 3.2<br>(-1.4 to 7.7)                                |
| Inguinal, femoral, and abdominal hernia                        | 3.1<br>(2.7 to 3.4)                     | 1.7<br>(1.5 to 2.0)                   | 0.2<br>(0.1 to 0.3)                     | 30.8<br>(19.2 to 44.5)                            | 1.3<br>(-6.3 to 10.1)                               |
| Inflammatory bowel disease                                     | < 0.05<br>(< 0.05 to < 0.05)            | 0.1<br>(0.1 to 0.1)                   | < 0.05<br>(< 0.05 to < 0.05)            | 45.1<br>(40.6 to 49.9)                            | 3.2<br>(0.0 to 6.4)                                 |
| Vascular intestinal disorders                                  | < 0.05<br>(< 0.05 to < 0.05)            | < 0.05<br>(< 0.05 to < 0.05)          | < 0.05<br>(< 0.05 to < 0.05)            | 36.3<br>(27.3 to 46.8)                            | 9.0<br>(4.0 to 13.8)                                |
| Gallbladder and biliary diseases                               | 0.5<br>(0.4 to 0.5)                     | 2.9<br>(2.5 to 3.3)                   | < 0.05<br>(< 0.05 to < 0.05)            | 61.6<br>(33.7 to 94.3)                            | 8.7<br>(-9.0 to 29.0)                               |
| Pancreatitis                                                   | < 0.05<br>(< 0.05 to < 0.05)            | 0.1<br>(0.1 to 0.1)                   | < 0.05<br>(< 0.05 to < 0.05)            | 56.6<br>(50.5 to 63.2)                            | 12.2<br>(8.9 to 15.8)                               |
| Other digestive diseases                                       | --                                      | --                                    | < 0.05<br>(< 0.05 to < 0.05)            | 35.8<br>(23.2 to 49.3)                            | 9.1<br>(1.2 to 17.5)                                |
| <b>Neurological disorders</b>                                  | <b>139.4</b><br><b>(133.2 to 145.9)</b> | <b>69.1</b><br><b>(58.8 to 80.4)</b>  | <b>3.3</b><br><b>(2.2 to 4.7)</b>       | <b>34.5</b><br><b>(11.2 to 64.7)</b>              | <b>-0.5</b><br><b>(-15.8 to 18.8)</b>               |
| Alzheimer's disease and other dementias                        | 0.7<br>(0.6 to 0.8)                     | 0.1<br>(0.1 to 0.1)                   | 0.1<br>(0.1 to 0.1)                     | 39.1<br>(31.3 to 47.1)                            | -0.8<br>(-5.5 to 4.1)                               |
| Parkinson's disease                                            | 0.1<br>(0.1 to 0.1)                     | < 0.05<br>(< 0.05 to < 0.05)          | < 0.05<br>(< 0.05 to < 0.05)            | 56.4<br>(36.8 to 78.8)                            | 5.1<br>(-7.4 to 18.5)                               |
| Epilepsy                                                       | 1.2<br>(0.3 to 2.2)                     | 0.2<br>(< 0.05 to 0.3)                | 0.4<br>(0.1 to 0.8)                     | 19.0<br>(-75.2 to 486.2)                          | -7.3<br>(-81.1 to 357.2)                            |
| Multiple sclerosis                                             | < 0.05<br>(< 0.05 to < 0.05)            | < 0.05<br>(< 0.05 to < 0.05)          | < 0.05<br>(< 0.05 to < 0.05)            | 57.2<br>(50.6 to 63.1)                            | 9.1<br>(4.8 to 13.1)                                |
| Motor neuron disease                                           | < 0.05<br>(< 0.05 to < 0.05)            | < 0.05<br>(< 0.05 to < 0.05)          | < 0.05<br>(< 0.05 to < 0.05)            | 35.1<br>(28.7 to 42.1)                            | 2.6<br>(-1.0 to 6.2)                                |
| Migraine                                                       | 50.8<br>(47.8 to 54.1)                  | 6.1<br>(5.7 to 6.5)                   | 2.3<br>(1.5 to 3.3)                     | 36.5<br>(31.3 to 41.9)                            | 0.2<br>(-3.0 to 3.9)                                |
| Tension-type headache                                          | 108.7<br>(97.2 to 122.0)                | 62.7<br>(52.1 to 74.0)                | 0.4<br>(0.3 to 0.6)                     | 36.1<br>(29.5 to 43.8)                            | -0.7<br>(-5.0 to 4.0)                               |
| Other neurological disorders                                   | < 0.05<br>(< 0.05 to < 0.05)            | < 0.05<br>(< 0.05 to < 0.05)          | 0.1<br>(< 0.05 to 0.2)                  | 44.1<br>(-66.1 to 520.1)                          | 11.8<br>(-70.8 to 305.5)                            |
| <b>Mental and substance use disorders</b>                      | <b>55.4</b><br><b>(53.6 to 57.2)</b>    | <b>20.1†</b><br><b>(18.7 to 21.7)</b> | <b>7.0</b><br><b>(5.0 to 9.2)</b>       | <b>34.2</b><br><b>(31.5 to 36.9)</b>              | <b>-0.4</b><br><b>(-2.3 to 1.5)</b>                 |
| Schizophrenia                                                  | 0.6<br>(0.5 to 0.7)                     | < 0.05<br>(< 0.05 to 0.1)             | 0.4<br>(0.3 to 0.5)                     | 42.8<br>(29.8 to 57.8)                            | 0.2<br>(-8.5 to 10.1)                               |
| Alcohol use disorders                                          | 5.9<br>(5.1 to 6.8)                     | 3.1<br>(2.6 to 3.5)                   | 0.6<br>(0.4 to 0.8)                     | 34.8<br>(22.3 to 47.9)                            | -2.3<br>(-11.1 to 7.2)                              |
| Drug use disorders                                             | 2.9<br>(2.6 to 3.2)                     | 0.4<br>(0.4 to 0.5)                   | 0.5<br>(0.4 to 0.7)                     | 36.7<br>(25.2 to 50.0)                            | 1.1<br>(-7.1 to 10.3)                               |
| Opioid use disorders                                           | 0.8<br>(0.7 to 1.0)                     | 0.1<br>(0.1 to 0.1)                   | 0.3<br>(0.2 to 0.5)                     | 39.7<br>(24.1 to 59.0)                            | 2.5<br>(-7.8 to 14.9)                               |
| Cocaine use disorders                                          | 0.4<br>(0.3 to 0.5)                     | < 0.05<br>(< 0.05 to < 0.05)          | 0.1<br>(< 0.05 to 0.1)                  | 36.1<br>(12.0 to 69.4)                            | 0.4<br>(-16.1 to 22.2)                              |
| Amphetamine use disorders                                      | < 0.05<br>(< 0.05 to 0.1)               | < 0.05<br>(< 0.05 to < 0.05)          | < 0.05<br>(< 0.05 to < 0.05)            | 34.7<br>(-1.0 to 86.1)                            | 1.1<br>(-22.7 to 34.3)                              |
| Cannabis use disorders                                         | 1.6<br>(1.3 to 1.9)                     | 0.2<br>(0.2 to 0.3)                   | < 0.05<br>(< 0.05 to 0.1)               | 18.2<br>(-3.1 to 42.7)                            | -9.0<br>(-25.0 to 8.6)                              |
| Other drug use disorders                                       | 0.1<br>(0.1 to 0.1)                     | < 0.05<br>(< 0.05 to < 0.05)          | 0.1<br>(< 0.05 to 0.1)                  | 37.5<br>(7.1 to 77.1)                             | 1.2<br>(-19.5 to 29.4)                              |
| Depressive disorders                                           | 10.5<br>(9.8 to 11.3)                   | 12.0<br>(10.7 to 13.5)                | 1.8<br>(1.3 to 2.5)                     | 37.8<br>(31.2 to 44.6)                            | -1.2<br>(-5.4 to 3.4)                               |
| Major depressive disorder                                      | 7.4<br>(6.5 to 8.3)                     | 11.4<br>(10.0 to 12.9)                | 1.5<br>(1.0 to 2.1)                     | 36.9<br>(28.9 to 45.0)                            | -1.5<br>(-6.6 to 4.1)                               |
| Dysthymia                                                      | 3.3<br>(2.9 to 3.8)                     | 0.6<br>(0.5 to 0.7)                   | 0.3<br>(0.2 to 0.5)                     | 42.0<br>(35.2 to 49.0)                            | 0.0<br>(-3.5 to 4.0)                                |
| Bipolar disorder                                               | 3.1<br>(2.6 to 3.6)                     | 0.3<br>(0.2 to 0.3)                   | 0.6<br>(0.4 to 1.0)                     | 35.7<br>(27.4 to 44.0)                            | 0.1<br>(-5.4 to 5.4)                                |
| Anxiety disorders                                              | 14.6<br>(13.2 to 16.1)                  | 2.3<br>(2.1 to 2.5)                   | 1.4<br>(1.0 to 1.9)                     | 33.9<br>(29.0 to 39.2)                            | 0.3<br>(-2.9 to 3.7)                                |
| Eating disorders                                               | 0.6<br>(0.5 to 0.8)                     | 0.3<br>(0.2 to 0.5)                   | 0.1<br>(0.1 to 0.2)                     | 33.5<br>(18.2 to 51.4)                            | 4.4<br>(-7.6 to 18.1)                               |
| Anorexia nervosa                                               | 0.1<br>(0.1 to 0.2)                     | 0.1<br>(< 0.05 to 0.1)                | < 0.05<br>(< 0.05 to < 0.05)            | 29.6<br>(1.8 to 68.3)                             | 3.2<br>(-18.7 to 32.8)                              |
| Bulimia nervosa                                                | 0.5<br>(0.4 to 0.6)                     | 0.3<br>(0.2 to 0.4)                   | 0.1<br>(0.1 to 0.1)                     | 34.5<br>(16.8 to 54.9)                            | 4.7<br>(-9.2 to 20.7)                               |
| Autistic spectrum disorders                                    | 3.2<br>(2.9 to 3.6)                     | < 0.05<br>(< 0.05 to < 0.05)          | 0.5<br>(0.3 to 0.7)                     | 25.8<br>(19.3 to 33.2)                            | -0.2<br>(-4.9 to 4.9)                               |
| Autism                                                         | 1.0<br>(0.9 to 1.2)                     | < 0.05<br>(< 0.05 to < 0.05)          | 0.3<br>(0.2 to 0.4)                     | 26.2<br>(15.3 to 38.8)                            | -0.1<br>(-8.0 to 8.8)                               |
| Asperger syndrome and other autistic spectrum disorders        | 2.2<br>(1.8 to 2.7)                     | < 0.05<br>(< 0.05 to < 0.05)          | 0.2<br>(0.1 to 0.3)                     | 25.4<br>(18.9 to 31.7)                            | -0.3<br>(-4.7 to 4.3)                               |

| Cause                                                      | Prevalence in thousands (95% UI)        | Incidence in thousands (95% UI)          | YLDs in thousands (95% UI)        |                                                   |                                                     |
|------------------------------------------------------------|-----------------------------------------|------------------------------------------|-----------------------------------|---------------------------------------------------|-----------------------------------------------------|
|                                                            | 2016 counts                             | 2016 counts                              | 2016 counts                       | Percentage change in counts between 2006 and 2016 | Percentage change in age-standardised rates between |
| Attention-deficit/hyperactivity disorder                   | 7.7<br>(6.9 to 8.5)                     | 0.4<br>(0.3 to 0.4)                      | 0.1<br>(0.1 to 0.1)               | 21.1<br>(14.8 to 28.5)                            | -0.3<br>(-5.3 to 5.4)                               |
| Conduct disorder                                           | 3.0<br>(2.4 to 3.6)                     | 1.0<br>(0.8 to 1.2)                      | 0.4<br>(0.2 to 0.6)               | 15.6<br>(7.8 to 23.7)                             | 0.0<br>(-6.8 to 7.2)                                |
| Idiopathic developmental intellectual disability           | 2.3<br>(1.0 to 3.6)                     | --                                       | 0.1<br>(< 0.05 to 0.2)            | 26.9<br>(16.6 to 38.0)                            | -0.5<br>(-8.3 to 7.6)                               |
| Other mental and substance use disorders                   | 6.1<br>(5.3 to 7.0)                     | 0.3<br>(0.2 to 0.3)                      | 0.5<br>(0.3 to 0.7)               | 40.4<br>(32.4 to 48.5)                            | -0.2<br>(-5.2 to 4.7)                               |
| <b>Diabetes, urogenital, blood, and endocrine diseases</b> | <b>140.2</b><br><b>(136.0 to 144.4)</b> | <b>40.9†</b><br><b>(38.0 to 44.0)</b>    | <b>2.9</b><br><b>(2.0 to 4.0)</b> | <b>44.5</b><br><b>(38.2 to 51.2)</b>              | <b>-3.3</b><br><b>(-7.6 to 0.9)</b>                 |
| Diabetes mellitus                                          | 19.7<br>(17.8 to 21.9)                  | 1.4<br>(1.3 to 1.6)                      | 1.7<br>(1.2 to 2.4)               | 51.8<br>(41.5 to 62.1)                            | -4.0<br>(-10.4 to 2.0)                              |
| Acute glomerulonephritis                                   | < 0.05<br>(< 0.05 to < 0.05)            | 0.1<br>(0.1 to 0.1)                      | < 0.05<br>(< 0.05 to < 0.05)      | 27.7<br>(20.5 to 35.8)                            | -2.0<br>(-6.1 to 3.0)                               |
| Chronic kidney disease                                     | 9.9<br>(9.0 to 10.8)                    | 0.8<br>(0.7 to 0.9)                      | 0.3<br>(0.2 to 0.4)               | 46.3<br>(33.8 to 59.9)                            | -1.6<br>(-9.6 to 6.5)                               |
| Chronic kidney disease due to diabetes mellitus            | 3.4<br>(2.9 to 4.0)                     | 0.3<br>(0.2 to 0.3)                      | 0.1<br>(0.1 to 0.1)               | 57.0<br>(38.8 to 76.5)                            | 0.7<br>(-9.5 to 12.2)                               |
| Chronic kidney disease due to hypertension                 | 2.2<br>(1.9 to 2.5)                     | 0.2<br>(0.2 to 0.3)                      | < 0.05<br>(< 0.05 to < 0.05)      | 43.0<br>(25.0 to 62.0)                            | -4.9<br>(-16.9 to 8.3)                              |
| Chronic kidney disease due to glomerulonephritis           | 2.1<br>(1.8 to 2.4)                     | 0.1<br>(0.1 to 0.1)                      | 0.1<br>(0.1 to 0.1)               | 41.8<br>(25.6 to 60.9)                            | -2.1<br>(-11.4 to 9.2)                              |
| Chronic kidney disease due to other causes                 | 2.2<br>(1.9 to 2.6)                     | 0.2<br>(0.2 to 0.2)                      | 0.1<br>(0.1 to 0.1)               | 41.8<br>(26.9 to 59.3)                            | -2.2<br>(-11.3 to 8.4)                              |
| Urinary diseases and male infertility                      | 4.0<br>(3.6 to 4.5)                     | 25.1†<br>(22.4 to 28.1)                  | 0.1<br>(0.1 to 0.1)               | 52.6<br>(42.4 to 63.6)                            | 1.0<br>(-5.4 to 7.8)                                |
| Interstitial nephritis and urinary tract infections        | 0.5<br>(0.4 to 0.5)                     | 23.6<br>(20.9 to 26.6)                   | < 0.05<br>(< 0.05 to < 0.05)      | 32.4<br>(15.1 to 53.2)                            | 1.4<br>(-10.9 to 16.8)                              |
| Urolithiasis                                               | < 0.05<br>(< 0.05 to 0.1)               | 1.2<br>(1.1 to 1.4)                      | < 0.05<br>(< 0.05 to < 0.05)      | 43.5<br>(37.0 to 50.0)                            | 1.9<br>(-1.9 to 5.9)                                |
| Benign prostatic hyperplasia                               | 2.2<br>(1.9 to 2.6)                     | 0.3<br>(0.3 to 0.4)                      | 0.1<br>(< 0.05 to 0.1)            | 68.1<br>(54.5 to 82.7)                            | 2.0<br>(-5.5 to 10.2)                               |
| Male infertility                                           | 1.1<br>(0.9 to 1.5)                     | --                                       | < 0.05<br>(< 0.05 to < 0.05)      | 28.3<br>(18.9 to 38.7)                            | -1.5<br>(-8.3 to 6.5)                               |
| Other urinary diseases                                     | --                                      | --                                       | < 0.05<br>(< 0.05 to < 0.05)      | 8.0<br>(-4.4 to 22.0)                             | -16.1<br>(-24.6 to -5.9)                            |
| Gynecological diseases                                     | 38.1<br>(36.4 to 39.9)                  | 13.0†<br>(12.1 to 13.8)                  | 0.4<br>(0.3 to 0.6)               | 39.5<br>(31.5 to 47.1)                            | -1.2<br>(-6.2 to 3.8)                               |
| Uterine fibroids                                           | 2.6<br>(2.3 to 3.0)                     | 0.3<br>(0.3 to 0.4)                      | 0.1<br>(< 0.05 to 0.1)            | 47.7<br>(26.0 to 68.7)                            | -3.6<br>(-17.2 to 10.5)                             |
| Polycystic ovarian syndrome                                | < 0.05<br>(< 0.05 to 0.1)               | 0.3<br>(0.2 to 0.4)                      | < 0.05<br>(< 0.05 to < 0.05)      | 31.7<br>(-5.4 to 84.9)                            | 2.5<br>(-26.3 to 43.3)                              |
| Female infertility                                         | 2.0<br>(1.4 to 3.0)                     | --                                       | < 0.05<br>(< 0.05 to < 0.05)      | 33.9<br>(21.1 to 46.6)                            | 3.3<br>(-6.4 to 12.8)                               |
| Endometriosis                                              | < 0.05<br>(< 0.05 to < 0.05)            | 0.1<br>(0.1 to 0.2)                      | < 0.05<br>(< 0.05 to < 0.05)      | 44.4<br>(9.8 to 91.9)                             | 2.3<br>(-24.0 to 37.8)                              |
| Genital prolapse                                           | 11.1<br>(9.7 to 12.6)                   | 0.9<br>(0.8 to 1.1)                      | < 0.05<br>(< 0.05 to 0.1)         | 40.1<br>(29.2 to 52.4)                            | -12.0<br>(-18.6 to -4.4)                            |
| Premenstrual syndrome                                      | 23.3<br>(21.8 to 24.9)                  | 8.7<br>(8.0 to 9.4)                      | 0.2<br>(0.1 to 0.3)               | 33.6<br>(22.7 to 44.9)                            | -0.7<br>(-8.5 to 7.2)                               |
| Other gynecological diseases                               | 3.5<br>(3.1 to 4.0)                     | 2.6<br>(2.2 to 3.1)                      | 0.1<br>(0.1 to 0.2)               | 46.9<br>(32.6 to 61.9)                            | 4.3<br>(-5.2 to 14.0)                               |
| Hemoglobinopathies and hemolytic anaemias                  | 91.9<br>(87.2 to 96.8)                  | --                                       | 0.2<br>(0.1 to 0.3)               | 12.0<br>(-4.4 to 31.2)                            | -8.3<br>(-20.5 to 5.6)                              |
| Thalassemias                                               | < 0.05<br>(< 0.05 to < 0.05)            | --                                       | < 0.05<br>(< 0.05 to < 0.05)      | 9.6<br>(-15.0 to 37.1)                            | -3.7<br>(-24.9 to 20.5)                             |
| Thalassaemias trait                                        | 0.6<br>(0.4 to 0.8)                     | --                                       | < 0.05<br>(< 0.05 to < 0.05)      | 20.6<br>(-19.7 to 59.7)                           | -3.4<br>(-35.1 to 24.0)                             |
| Sickle cell disorders                                      | 0.2<br>(0.2 to 0.3)                     | --                                       | < 0.05<br>(< 0.05 to < 0.05)      | 18.8<br>(-0.4 to 41.0)                            | 0.5<br>(-15.1 to 18.2)                              |
| Sickle cell trait                                          | 36.7<br>(32.2 to 41.2)                  | --                                       | 0.1<br>(0.1 to 0.2)               | 7.0<br>(-11.4 to 28.5)                            | -12.1<br>(-26.7 to 3.8)                             |
| G6PD deficiency                                            | 17.5<br>(15.2 to 19.9)                  | --                                       | < 0.05<br>(< 0.05 to < 0.05)      | 10.4<br>(-21.9 to 58.1)                           | -9.4<br>(-32.9 to 24.0)                             |
| G6PD trait                                                 | 41.0<br>(38.0 to 43.8)                  | --                                       | < 0.05<br>(< 0.05 to < 0.05)      | 11.6<br>(-9.9 to 41.0)                            | -9.3<br>(-25.6 to 12.3)                             |
| Other hemoglobinopathies and hemolytic anaemias            | 3.4<br>(2.9 to 4.0)                     | --                                       | 0.1<br>(< 0.05 to 0.1)            | 19.4<br>(-1.2 to 46.2)                            | -4.2<br>(-17.2 to 12.6)                             |
| Endocrine, metabolic, blood, and immune disorders          | 5.4<br>(5.0 to 5.9)                     | 0.6<br>(0.6 to 0.7)                      | 0.2<br>(0.1 to 0.2)               | 31.8<br>(19.7 to 44.8)                            | -1.1<br>(-7.3 to 5.9)                               |
| <b>Musculoskeletal disorders</b>                           | <b>46.9</b><br><b>(44.6 to 49.0)</b>    | <b>24.4</b><br><b>(22.0 to 27.1)</b>     | <b>5.0</b><br><b>(3.6 to 6.6)</b> | <b>46.6</b><br><b>(42.1 to 51.0)</b>              | <b>0.1</b><br><b>(-2.5 to 2.5)</b>                  |
| Rheumatoid arthritis                                       | 1.0<br>(0.9 to 1.1)                     | 0.1<br>(0.1 to 0.1)                      | 0.2<br>(0.2 to 0.3)               | 57.3<br>(43.6 to 71.7)                            | 4.5<br>(-2.9 to 12.5)                               |
| Osteoarthritis                                             | 8.4<br>(7.8 to 8.9)                     | 0.5<br>(0.5 to 0.5)                      | 0.5<br>(0.4 to 0.7)               | 59.8<br>(54.1 to 66.0)                            | 0.1<br>(-3.3 to 3.5)                                |
| Low back and neck pain                                     | 23.9<br>(22.2 to 25.7)                  | 9.5<br>(8.6 to 10.6)                     | 2.7<br>(1.9 to 3.6)               | 45.6<br>(40.2 to 51.0)                            | 0.3<br>(-2.5 to 3.2)                                |
| Low back pain                                              | 15.0<br>(13.2 to 17.1)                  | 7.1<br>(6.2 to 8.1)                      | 1.7<br>(1.2 to 2.3)               | 43.2<br>(35.9 to 51.4)                            | 0.4<br>(-3.9 to 4.9)                                |
| Neck pain                                                  | 10.0<br>(8.6 to 11.6)                   | 2.4<br>(2.0 to 2.8)                      | 1.0<br>(0.7 to 1.4)               | 49.7<br>(44.1 to 54.9)                            | 0.1<br>(-2.1 to 2.3)                                |
| Gout                                                       | 0.8<br>(0.7 to 0.9)                     | 0.2<br>(0.1 to 0.2)                      | < 0.05<br>(< 0.05 to < 0.05)      | 51.8<br>(28.5 to 80.1)                            | -0.0<br>(-13.8 to 16.1)                             |
| Other musculoskeletal disorders                            | 17.8<br>(15.2 to 20.3)                  | 14.2<br>(11.9 to 16.8)                   | 1.5<br>(1.1 to 2.2)               | 42.7<br>(32.3 to 54.5)                            | -0.9<br>(-7.9 to 6.3)                               |
| <b>Other non-communicable diseases</b>                     | <b>268.6</b><br><b>(262.8 to 273.9)</b> | <b>823.2†</b><br><b>(769.2 to 885.3)</b> | <b>6.6</b><br><b>(4.4 to 9.5)</b> | <b>31.5</b><br><b>(29.4 to 33.4)</b>              | <b>-1.0</b><br><b>(-1.9 to 0.0)</b>                 |
| Congenital anomalies                                       | 3.4<br>(2.9 to 3.9)                     | --                                       | 0.4<br>(0.3 to 0.5)               | 23.5<br>(15.2 to 31.6)                            | -0.8<br>(-7.5 to 5.8)                               |
| Neural tube defects                                        | 0.1<br>(0.1 to 0.1)                     | --                                       | < 0.05<br>(< 0.05 to 0.1)         | 26.5<br>(10.4 to 44.7)                            | -0.5<br>(-13.3 to 13.8)                             |
| Congenital heart anomalies                                 | 0.9<br>(0.7 to 1.0)                     | --                                       | < 0.05<br>(< 0.05 to 0.1)         | 26.9<br>(12.5 to 43.4)                            | 5.7<br>(-6.4 to 18.6)                               |
| Orofacial clefts                                           | 0.2<br>(0.2 to 0.2)                     | --                                       | < 0.05<br>(< 0.05 to < 0.05)      | 16.4<br>(2.8 to 30.8)                             | -7.7<br>(-18.5 to 3.7)                              |
| Down's syndrome                                            | 0.2<br>(0.2 to 0.2)                     | --                                       | < 0.05<br>(< 0.05 to < 0.05)      | 30.5<br>(19.0 to 42.1)                            | 4.4<br>(-4.5 to 13.0)                               |
| Turner syndrome                                            | 0.1<br>(0.1 to 0.1)                     | --                                       | < 0.05<br>(< 0.05 to < 0.05)      | 27.3<br>(-16.6 to 98.3)                           | 3.4<br>(-30.1 to 54.7)                              |
| Klinefelter syndrome                                       | 0.1<br>(0.1 to 0.1)                     | --                                       | < 0.05<br>(< 0.05 to < 0.05)      | 24.1<br>(-7.3 to 71.3)                            | -1.1<br>(-25.7 to 34.2)                             |



| Cause                                         | Prevalence in thousands (95% UI)     | Incidence in thousands (95% UI)       | YLDs in thousands (95% UI)        |                                                   |                                                     |
|-----------------------------------------------|--------------------------------------|---------------------------------------|-----------------------------------|---------------------------------------------------|-----------------------------------------------------|
|                                               | 2016 counts                          | 2016 counts                           | 2016 counts                       | Percentage change in counts between 2006 and 2016 | Percentage change in age-standardised rates between |
| Other chromosomal abnormalities               | 0.3<br>(0.2 to 0.3)                  | --                                    | < 0.05<br>(< 0.05 to < 0.05)      | 16.2<br>(-4.2 to 40.6)                            | 2.2<br>(-15.1 to 23.6)                              |
| Congenital musculoskeletal and limb anomalies | 0.3<br>(0.2 to 0.3)                  | --                                    | < 0.05<br>(< 0.05 to 0.1)         | 30.9<br>(18.1 to 44.9)                            | 1.9<br>(-7.5 to 12.2)                               |
| Urogenital congenital anomalies               | 0.4<br>(0.4 to 0.5)                  | --                                    | < 0.05<br>(< 0.05 to < 0.05)      | 14.4<br>(-0.0 to 33.2)                            | -0.1<br>(-12.8 to 15.9)                             |
| Digestive congenital anomalies                | 0.3<br>(0.3 to 0.4)                  | --                                    | < 0.05<br>(< 0.05 to < 0.05)      | 28.9<br>(7.7 to 56.3)                             | 1.9<br>(-13.9 to 20.9)                              |
| Other congenital anomalies                    | 1.4<br>(0.9 to 2.0)                  | --                                    | 0.2<br>(0.1 to 0.3)               | 21.9<br>(6.5 to 36.6)                             | -3.7<br>(-15.4 to 8.2)                              |
| Skin and subcutaneous diseases                | 120.0<br>(116.7 to 123.6)            | 263.4<br>(249.3 to 277.9)             | 3.1<br>(2.1 to 4.5)               | 24.5<br>(21.7 to 27.3)                            | 0.5<br>(-1.2 to 2.4)                                |
| Dermatitis                                    | 19.9<br>(18.3 to 21.5)               | 18.7<br>(17.3 to 20.2)                | 0.8<br>(0.5 to 1.3)               | 19.0<br>(14.4 to 23.6)                            | 0.0<br>(-3.6 to 3.3)                                |
| Psoriasis                                     | 2.8<br>(2.7 to 2.9)                  | 0.4<br>(0.4 to 0.4)                   | 0.2<br>(0.2 to 0.3)               | 39.5<br>(27.4 to 52.7)                            | 4.2<br>(-3.3 to 12.6)                               |
| Cellulitis                                    | 0.1<br>(0.1 to 0.2)                  | 2.6<br>(2.4 to 2.8)                   | < 0.05<br>(< 0.05 to < 0.05)      | 26.7<br>(-1.4 to 64.8)                            | 1.2<br>(-17.3 to 27.1)                              |
| Pyoderma                                      | 0.8<br>(0.8 to 0.8)                  | 19.1<br>(18.5 to 19.8)                | < 0.05<br>(< 0.05 to < 0.05)      | 37.5<br>(26.7 to 50.1)                            | 0.6<br>(-5.4 to 7.5)                                |
| Scabies                                       | 9.9<br>(8.6 to 11.4)                 | 30.2<br>(26.0 to 35.1)                | 0.3<br>(0.1 to 0.4)               | 14.7<br>(8.1 to 20.7)                             | -6.4<br>(-11.3 to -2.4)                             |
| Fungal skin diseases                          | 35.1<br>(31.4 to 38.8)               | 117.9<br>(105.3 to 131.8)             | 0.2<br>(0.1 to 0.4)               | 28.5<br>(25.7 to 31.6)                            | 0.0<br>(-0.9 to 0.9)                                |
| Viral skin diseases                           | 11.0<br>(10.5 to 11.6)               | 16.2<br>(15.3 to 17.1)                | 0.3<br>(0.2 to 0.5)               | 22.6<br>(18.6 to 27.1)                            | 0.2<br>(-2.8 to 3.6)                                |
| Acne vulgaris                                 | 33.9<br>(30.1 to 38.0)               | 23.8<br>(19.3 to 29.9)                | 0.9<br>(0.6 to 1.3)               | 27.3<br>(21.1 to 33.4)                            | 2.3<br>(-2.6 to 7.0)                                |
| Alopecia areata                               | 0.6<br>(0.6 to 0.7)                  | 1.1<br>(1.1 to 1.2)                   | < 0.05<br>(< 0.05 to < 0.05)      | 33.1<br>(18.7 to 50.5)                            | -0.2<br>(-10.1 to 11.8)                             |
| Pruritus                                      | 2.9<br>(2.5 to 3.3)                  | 2.3<br>(2.1 to 2.6)                   | < 0.05<br>(< 0.05 to 0.1)         | 34.2<br>(25.5 to 43.1)                            | 0.5<br>(-4.5 to 5.9)                                |
| Urticaria                                     | 3.7<br>(3.2 to 4.4)                  | 6.7<br>(5.8 to 7.8)                   | 0.2<br>(0.1 to 0.3)               | 21.2<br>(14.1 to 29.0)                            | 0.0<br>(-5.2 to 5.9)                                |
| Decubitus ulcer                               | 0.1<br>(0.1 to 0.1)                  | 0.3<br>(0.3 to 0.4)                   | < 0.05<br>(< 0.05 to < 0.05)      | 36.9<br>(24.1 to 50.6)                            | -0.7<br>(-12.3 to 11.5)                             |
| Other skin and subcutaneous diseases          | 20.9<br>(20.3 to 21.6)               | 23.9<br>(23.2 to 24.7)                | 0.1<br>(0.1 to 0.2)               | 38.7<br>(35.0 to 42.9)                            | 0.6<br>(-1.6 to 3.0)                                |
| Sense organ diseases                          | 70.0<br>(68.3 to 71.9)               | 33.7†<br>(31.5 to 36.1)               | 2.2<br>(1.5 to 3.1)               | 38.9<br>(35.6 to 42.1)                            | -2.5<br>(-3.9 to -1.0)                              |
| Glaucoma                                      | 0.2<br>(0.2 to 0.2)                  | --                                    | < 0.05<br>(< 0.05 to < 0.05)      | 54.3<br>(38.6 to 71.9)                            | -0.7<br>(-9.4 to 9.5)                               |
| Cataract                                      | 1.7<br>(1.5 to 1.9)                  | --                                    | 0.1<br>(0.1 to 0.2)               | 40.6<br>(33.8 to 48.1)                            | -3.8<br>(-8.0 to 0.4)                               |
| Macular degeneration                          | < 0.05<br>(< 0.05 to 0.1)            | --                                    | < 0.05<br>(< 0.05 to < 0.05)      | 55.6<br>(31.8 to 82.9)                            | 1.3<br>(-13.2 to 17.6)                              |
| Refraction and accommodation disorders        | 35.1<br>(33.7 to 36.6)               | --                                    | 0.5<br>(0.3 to 0.9)               | 30.9<br>(26.8 to 35.1)                            | -6.0<br>(-8.6 to -3.0)                              |
| Age-related and other hearing loss            | 41.4<br>(38.9 to 44.2)               | --                                    | 1.2<br>(0.8 to 1.7)               | 41.0<br>(35.3 to 46.3)                            | -1.7<br>(-3.8 to 0.5)                               |
| Other vision loss                             | 0.6<br>(0.6 to 0.7)                  | --                                    | 0.1<br>(< 0.05 to 0.1)            | 45.9<br>(32.2 to 61.2)                            | -0.7<br>(-8.0 to 7.7)                               |
| Other sense organ diseases                    | 7.8<br>(7.2 to 8.4)                  | 33.7<br>(31.5 to 36.1)                | 0.2<br>(0.1 to 0.4)               | 43.0<br>(36.0 to 50.7)                            | 0.5<br>(-3.3 to 4.6)                                |
| Oral disorders                                | 192.5<br>(183.5 to 201.2)            | 526.1†<br>(474.9 to 585.9)            | 0.9<br>(0.5 to 1.4)               | 45.3<br>(42.4 to 48.4)                            | -0.1<br>(-1.9 to 1.6)                               |
| Caries of deciduous teeth                     | 37.1<br>(30.4 to 43.9)               | 123.6<br>(89.8 to 165.2)              | < 0.05<br>(< 0.05 to < 0.05)      | 7.0<br>(-3.5 to 19.8)                             | -0.0<br>(-9.9 to 12.0)                              |
| Caries of permanent teeth                     | 122.6<br>(112.7 to 132.3)            | 395.9<br>(354.9 to 439.1)             | 0.1<br>(< 0.05 to 0.1)            | 31.1<br>(25.9 to 36.2)                            | -0.3<br>(-3.7 to 3.2)                               |
| Periodontal disease                           | 45.9<br>(38.8 to 54.0)               | 5.6<br>(4.6 to 6.7)                   | 0.3<br>(0.1 to 0.6)               | 46.9<br>(41.8 to 52.0)                            | -0.8<br>(-3.7 to 2.0)                               |
| Edentulism and severe tooth loss              | 11.2<br>(9.8 to 12.7)                | 1.1<br>(0.9 to 1.2)                   | 0.3<br>(0.2 to 0.4)               | 56.6<br>(51.0 to 62.6)                            | 0.3<br>(-2.8 to 3.2)                                |
| Other oral disorders                          | 6.2<br>(5.9 to 6.5)                  | --                                    | 0.2<br>(0.1 to 0.3)               | 34.4<br>(29.5 to 39.7)                            | 0.1<br>(-2.9 to 3.3)                                |
| <b>Injuries</b>                               | <b>49.0</b><br><b>(46.0 to 53.3)</b> | <b>26.5†</b><br><b>(25.0 to 28.2)</b> | <b>1.9</b><br><b>(1.3 to 2.7)</b> | <b>43.3</b><br><b>(40.0 to 46.3)</b>              | <b>3.5</b><br><b>(1.6 to 5.3)</b>                   |
| <b>Transport injuries</b>                     | <b>6.2</b><br><b>(5.8 to 6.7)</b>    | <b>2.7</b><br><b>(2.4 to 3.1)</b>     | <b>0.3</b><br><b>(0.2 to 0.5)</b> | <b>45.5</b><br><b>(41.9 to 48.9)</b>              | <b>3.6</b><br><b>(1.5 to 5.6)</b>                   |
| Road injuries                                 | 5.8<br>(5.4 to 6.2)                  | 2.6<br>(2.3 to 3.0)                   | 0.3<br>(0.2 to 0.5)               | 47.6<br>(43.8 to 51.2)                            | 5.0<br>(2.8 to 7.0)                                 |
| Pedestrian road injuries                      | 0.7<br>(0.6 to 0.8)                  | 0.2<br>(0.2 to 0.3)                   | < 0.05<br>(< 0.05 to 0.1)         | 45.9<br>(42.3 to 49.4)                            | 4.8<br>(2.8 to 6.6)                                 |
| Cyclist road injuries                         | 1.6<br>(1.3 to 1.9)                  | 0.8<br>(0.6 to 0.9)                   | 0.1<br>(0.1 to 0.1)               | 56.9<br>(52.6 to 61.1)                            | 13.1<br>(10.7 to 15.4)                              |
| Motorcyclist road injuries                    | 1.2<br>(1.0 to 1.5)                  | 0.4<br>(0.3 to 0.5)                   | 0.1<br>(< 0.05 to 0.1)            | 49.9<br>(46.1 to 53.9)                            | 5.6<br>(3.5 to 7.8)                                 |
| Motor vehicle road injuries                   | 1.8<br>(1.6 to 2.1)                  | 1.0<br>(0.8 to 1.1)                   | 0.1<br>(0.1 to 0.2)               | 38.6<br>(34.5 to 42.4)                            | -1.8<br>(-4.0 to 0.2)                               |
| Other road injuries                           | 0.5<br>(0.4 to 0.6)                  | 0.3<br>(0.2 to 0.4)                   | < 0.05<br>(< 0.05 to < 0.05)      | 59.3<br>(55.0 to 63.4)                            | 13.6<br>(11.2 to 15.8)                              |
| Other transport injuries                      | 0.4<br>(0.4 to 0.5)                  | 0.1<br>(0.1 to 0.1)                   | < 0.05<br>(< 0.05 to < 0.05)      | 22.4<br>(18.9 to 25.8)                            | -11.6<br>(-13.8 to -9.6)                            |
| <b>Unintentional injuries</b>                 | <b>39.6</b><br><b>(36.6 to 43.5)</b> | <b>22.1</b><br><b>(20.6 to 23.7)</b>  | <b>1.4</b><br><b>(0.9 to 2.0)</b> | <b>44.5</b><br><b>(41.0 to 47.6)</b>              | <b>4.0</b><br><b>(1.9 to 5.8)</b>                   |
| Falls                                         | 14.9<br>(12.8 to 17.2)               | 8.1<br>(6.9 to 9.4)                   | 0.6<br>(0.4 to 0.8)               | 55.3<br>(52.0 to 58.4)                            | 7.8<br>(5.8 to 9.7)                                 |
| Drowning                                      | 0.2<br>(0.2 to 0.2)                  | < 0.05<br>(< 0.05 to 0.1)             | < 0.05<br>(< 0.05 to < 0.05)      | 23.6<br>(19.6 to 27.4)                            | -11.7<br>(-14.3 to -9.4)                            |
| Fire, heat, and hot substances                | 4.2<br>(3.4 to 5.3)                  | 0.6<br>(0.5 to 0.8)                   | 0.1<br>(0.1 to 0.2)               | 43.8<br>(35.7 to 50.9)                            | 6.8<br>(1.8 to 11.0)                                |
| Poisonings                                    | 0.1<br>(0.1 to 0.1)                  | 0.2<br>(0.1 to 0.2)                   | < 0.05<br>(< 0.05 to < 0.05)      | 46.9<br>(34.3 to 59.9)                            | 10.7<br>(2.4 to 18.6)                               |
| Exposure to mechanical forces                 | 9.0<br>(7.8 to 10.8)                 | 4.3<br>(3.7 to 4.9)                   | 0.2<br>(0.1 to 0.3)               | 40.6<br>(36.9 to 43.9)                            | -0.8<br>(-2.8 to 1.2)                               |
| Unintentional firearm injuries                | 1.0<br>(0.8 to 1.3)                  | 0.3<br>(0.3 to 0.4)                   | < 0.05<br>(< 0.05 to 0.1)         | 24.9<br>(21.4 to 28.5)                            | -13.4<br>(-15.4 to -11.5)                           |
| Unintentional suffocation                     | 0.3<br>(0.2 to 0.4)                  | 0.1<br>(< 0.05 to 0.1)                | < 0.05<br>(< 0.05 to < 0.05)      | 25.0<br>(20.7 to 28.9)                            | -4.4<br>(-7.0 to -2.0)                              |
| Other exposure to mechanical forces           | 7.7<br>(6.5 to 9.5)                  | 3.9<br>(3.4 to 4.4)                   | 0.2<br>(0.1 to 0.2)               | 46.0<br>(42.3 to 49.4)                            | 3.1<br>(1.0 to 5.1)                                 |



| Cause                                                                               | Prevalence in thousands (95% UI)     | Incidence in thousands (95% UI)                      | YLDs in thousands (95% UI)                          |                                                   |                                                     |
|-------------------------------------------------------------------------------------|--------------------------------------|------------------------------------------------------|-----------------------------------------------------|---------------------------------------------------|-----------------------------------------------------|
|                                                                                     | 2016 counts                          | 2016 counts                                          | 2016 counts                                         | Percentage change in counts between 2006 and 2016 | Percentage change in age-standardised rates between |
| Adverse effects of medical treatment                                                | 0.2<br>(0.1 to 0.2)                  | 2.4<br>(2.1 to 2.7)                                  | < 0.05<br>(< 0.05 to < 0.05)                        | 26.3<br>(20.2 to 32.9)                            | -0.3<br>(-4.0 to 3.6)                               |
| Animal contact                                                                      | 1.2<br>(1.0 to 1.3)                  | 1.6<br>(1.4 to 1.9)                                  | < 0.05<br>(< 0.05 to 0.1)                           | 32.0<br>(23.9 to 39.9)                            | -2.2<br>(-7.0 to 2.5)                               |
| Venomous animal contact                                                             | 0.6<br>(0.5 to 0.7)                  | 0.8<br>(0.6 to 1.0)                                  | < 0.05<br>(< 0.05 to < 0.05)                        | 33.5<br>(23.3 to 44.2)                            | -0.2<br>(-6.6 to 6.1)                               |
| Non-venomous animal contact                                                         | 0.6<br>(0.5 to 0.7)                  | 0.8<br>(0.7 to 1.0)                                  | < 0.05<br>(< 0.05 to < 0.05)                        | 27.0<br>(22.2 to 31.4)                            | -7.8<br>(-10.7 to -5.3)                             |
| Foreign body                                                                        | 2.4<br>(1.9 to 2.9)                  | 2.0<br>(1.7 to 2.3)                                  | 0.1<br>(0.1 to 0.1)                                 | 16.9<br>(12.4 to 21.1)                            | -10.1<br>(-12.7 to -7.7)                            |
| Pulmonary aspiration and foreign body in airway                                     | 1.7<br>(1.3 to 2.2)                  | 0.8<br>(0.7 to 0.9)                                  | 0.1<br>(< 0.05 to 0.1)                              | 11.8<br>(7.2 to 16.3)                             | -13.5<br>(-16.3 to -11.1)                           |
| Foreign body in eyes                                                                | 0.2<br>(0.1 to 0.3)                  | 1.0<br>(0.8 to 1.3)                                  | < 0.05<br>(< 0.05 to < 0.05)                        | 35.3<br>(29.4 to 41.6)                            | 0.8<br>(-1.9 to 3.3)                                |
| Foreign body in other body part                                                     | 0.5<br>(0.4 to 0.7)                  | 0.2<br>(0.2 to 0.3)                                  | < 0.05<br>(< 0.05 to < 0.05)                        | 35.8<br>(30.2 to 41.1)                            | 2.0<br>(-1.4 to 5.1)                                |
| Environmental heat and cold exposure                                                | 2.5<br>(2.1 to 3.0)                  | 0.8<br>(0.7 to 1.0)                                  | 0.1<br>(0.1 to 0.1)                                 | 36.4<br>(32.8 to 39.7)                            | 0.8<br>(-1.5 to 2.8)                                |
| Other unintentional injuries                                                        | 4.9<br>(3.8 to 6.3)                  | 2.0<br>(1.7 to 2.5)                                  | 0.1<br>(0.1 to 0.2)                                 | 47.5<br>(43.8 to 51.0)                            | 9.9<br>(7.7 to 11.8)                                |
| <b>Self-harm and interpersonal violence</b>                                         | <b>12.0</b><br><b>(10.8 to 13.5)</b> | <b>1.7†</b><br><b>(1.5 to 2.0)</b>                   | <b>0.2</b><br><b>(0.1 to 0.3)</b>                   | <b>37.0</b><br><b>(32.6 to 41.1)</b>              | <b>2.6</b><br><b>(0.1 to 4.8)</b>                   |
| Self-harm                                                                           | 0.2<br>(0.2 to 0.2)                  | 0.1<br>(0.1 to 0.1)                                  | < 0.05<br>(< 0.05 to < 0.05)                        | 44.3<br>(39.5 to 48.8)                            | -0.2<br>(-2.9 to 2.2)                               |
| Self-harm by firearm                                                                | < 0.05<br>(< 0.05 to < 0.05)         | < 0.05<br>(< 0.05 to < 0.05)                         | < 0.05<br>(< 0.05 to < 0.05)                        | 22.4<br>(17.9 to 26.9)                            | -16.1<br>(-18.6 to -13.5)                           |
| Self-harm by other specified means                                                  | 0.2<br>(0.2 to 0.2)                  | 0.1<br>(0.1 to 0.1)                                  | < 0.05<br>(< 0.05 to < 0.05)                        | 46.2<br>(41.2 to 50.8)                            | 1.1<br>(-1.8 to 3.6)                                |
| Interpersonal violence                                                              | 11.8<br>(10.5 to 13.3)               | 1.6†<br>(1.4 to 1.9)                                 | 0.2<br>(0.1 to 0.3)                                 | 36.6<br>(32.1 to 40.8)                            | 2.7<br>(0.2 to 5.1)                                 |
| Assault by firearm                                                                  | 0.2<br>(0.2 to 0.3)                  | 0.1<br>(0.1 to 0.1)                                  | < 0.05<br>(< 0.05 to < 0.05)                        | 70.7<br>(64.8 to 76.7)                            | 20.8<br>(17.4 to 24.1)                              |
| Assault by sharp object                                                             | 1.2<br>(1.0 to 1.5)                  | 0.7<br>(0.6 to 0.8)                                  | < 0.05<br>(< 0.05 to 0.1)                           | 53.7<br>(48.7 to 58.3)                            | 10.0<br>(7.3 to 12.6)                               |
| Sexual violence                                                                     | 9.2<br>(8.0 to 10.6)                 | --                                                   | 0.1<br>(0.1 to 0.1)                                 | 20.2<br>(14.4 to 25.7)                            | -6.2<br>(-10.0 to -2.7)                             |
| Assault by other means                                                              | 1.2<br>(1.0 to 1.4)                  | 0.8<br>(0.7 to 1.0)                                  | 0.1<br>(< 0.05 to 0.1)                              | 48.3<br>(44.8 to 51.9)                            | 5.8<br>(3.7 to 7.9)                                 |
| <b>Forces of nature, conflict and terrorism, and executions and police conflict</b> | <b>0.4</b><br><b>(0.1 to 0.8)</b>    | <b>&lt; 0.05†</b><br><b>(&lt; 0.05 to &lt; 0.05)</b> | <b>&lt; 0.05</b><br><b>(&lt; 0.05 to &lt; 0.05)</b> | <b>-11.9</b><br><b>(-24.5 to -8.0)</b>            | <b>-28.8</b><br><b>(-37.8 to -26.0)</b>             |
| Exposure to forces of nature                                                        | 0.1<br>(< 0.05 to 0.3)               | --                                                   | < 0.05<br>(< 0.05 to < 0.05)                        | -15.4<br>(-41.1 to -8.8)                          | -34.4<br>(-52.4 to -30.3)                           |
| Conflict and terrorism                                                              | 0.3<br>(< 0.05 to 0.6)               | --                                                   | < 0.05<br>(< 0.05 to < 0.05)                        | -11.4<br>(-15.8 to -7.6)                          | -26.3<br>(-29.2 to -23.6)                           |
| Executions and police conflict                                                      | < 0.05<br>(< 0.05 to < 0.05)         | < 0.05<br>(< 0.05 to < 0.05)                         | < 0.05<br>(< 0.05 to < 0.05)                        | 45.7<br>(23.9 to 55.9)                            | 15.0<br>(0.2 to 21.8)                               |
| <b>Impairments</b>                                                                  | --                                   | --                                                   | --                                                  | --                                                | --                                                  |
| Anaemia                                                                             | 104.1<br>(91.3 to 117.4)             | --                                                   | 2.8<br>(1.8 to 4.1)                                 | 21.6<br>(5.8 to 41.6)                             | -4.5<br>(-14.9 to 8.5)                              |
| Developmental intellectual disability                                               | 6.7<br>(5.2 to 8.3)                  | --                                                   | 1.1<br>(0.7 to 1.7)                                 | 27.3<br>(14.7 to 40.9)                            | 2.3<br>(-7.4 to 13.0)                               |
| Epilepsy                                                                            | 2.8<br>(1.7 to 4.5)                  | --                                                   | 1.0<br>(0.6 to 1.8)                                 | 23.2<br>(-27.6 to 110.2)                          | -1.8<br>(-44.7 to 75.4)                             |
| Guillain-Barre syndrome                                                             | < 0.05<br>(< 0.05 to < 0.05)         | --                                                   | < 0.05<br>(< 0.05 to < 0.05)                        | 67.7<br>(43.5 to 121.4)                           | 27.6<br>(12.1 to 64.5)                              |
| Hearing loss                                                                        | 47.0<br>(44.4 to 49.8)               | --                                                   | 1.5<br>(1.1 to 2.1)                                 | 36.0<br>(31.2 to 40.3)                            | -2.0<br>(-3.9 to -0.2)                              |
| Heart failure                                                                       | 1.2<br>(1.0 to 1.3)                  | --                                                   | 0.1<br>(0.1 to 0.2)                                 | 46.1<br>(35.9 to 58.0)                            | -1.2<br>(-8.3 to 6.3)                               |
| Infertility                                                                         | 4.5<br>(3.6 to 5.8)                  | --                                                   | < 0.05<br>(< 0.05 to 0.1)                           | 32.2<br>(24.9 to 39.2)                            | 1.6<br>(-3.7 to 7.0)                                |
| Pelvic inflammatory disease                                                         | 0.1<br>(0.1 to 0.1)                  | --                                                   | < 0.05<br>(< 0.05 to < 0.05)                        | 32.9<br>(9.8 to 60.2)                             | -3.2<br>(-18.7 to 15.7)                             |
| Vision loss                                                                         | 39.7<br>(38.0 to 41.6)               | --                                                   | 1.3<br>(0.8 to 1.9)                                 | 31.4<br>(21.4 to 42.5)                            | -2.4<br>(-7.4 to 4.1)                               |

We did not calculate incidence for the nine impairments, certain NTDs, and causes with only birth prevalence. Blank cells mean that no estimate is available.

† Incidence for aggregate causes represents the sum of the incidence of the causes below the aggregate.

‡ Incidence estimates for stroke represent first-ever stroke only.

^ Incidence of HIV/AIDS represents new infections of HIV only and does not include new infections of Tuberculosis in HIV positive cases.

SR Table 14: Prevalence, incidence, and YLDs for 2016, percentage change of YLD counts and percentage change of age-standardised YLD rates between 2006 and 2016 by cause and impairments, for all ages, Benin.

| Cause                                                                                | Prevalence in thousands (95% UI)          | Incidence in thousands (95% UI)            | YLDs in thousands (95% UI)           |                                                   |                                                     |
|--------------------------------------------------------------------------------------|-------------------------------------------|--------------------------------------------|--------------------------------------|---------------------------------------------------|-----------------------------------------------------|
|                                                                                      | 2016 counts                               | 2016 counts                                | 2016 counts                          | Percentage change in counts between 2006 and 2016 | Percentage change in age-standardised rates between |
| <b>All causes</b>                                                                    | <b>11,147.2</b><br>(11,125.7 to 11,168.5) | <b>70,079.8†</b><br>(66,268.6 to 74,071.9) | <b>1,092.5</b><br>(804.2 to 1,456.4) | <b>30.8</b><br>(26.7 to 35.3)                     | <b>-4.1</b><br>(-6.5 to -1.4)                       |
| <b>Communicable, maternal, neonatal, and nutritional disorders</b>                   | <b>9,766.4</b><br>(9,645.5 to 9,885.5)    | <b>42,176.5†</b><br>(39,002.8 to 45,324.0) | <b>300.4</b><br>(208.3 to 413.6)     | <b>15.9</b><br>(9.6 to 21.7)                      | <b>-18.2</b><br>(-22.4 to -14.1)                    |
| <b>HIV/AIDS and tuberculosis</b>                                                     | <b>2,832.5</b><br>(2,458.6 to 3,155.8)    | <b>16.5†</b><br>(14.1 to 19.3)             | <b>9.8</b><br>(6.9 to 13.2)          | <b>-8.9</b><br>(-33.7 to 16.4)                    | <b>-33.6</b><br>(-53.6 to -12.0)                    |
| Tuberculosis                                                                         | 2,551.9<br>(2,211.4 to 2,923.3)           | 11.4†<br>(9.3 to 13.8)                     | 2.3<br>(1.5 to 3.3)                  | 17.5<br>(0.9 to 38.5)                             | -15.2<br>(-25.3 to -4.1)                            |
| Drug-susceptible tuberculosis                                                        | 7.6<br>(6.2 to 9.4)                       | 11.3<br>(9.2 to 13.7)                      | 2.3<br>(1.5 to 3.3)                  | 17.4<br>(0.8 to 37.8)                             | -15.4<br>(-25.2 to -4.1)                            |
| Multidrug-resistant tuberculosis without extensive drug resistance                   | 0.1<br>(< 0.05 to 0.2)                    | 0.1<br>(< 0.05 to 0.2)                     | < 0.05<br>(< 0.05 to 0.1)            | 35.1<br>(-55.1 to 290.7)                          | -3.2<br>(-68.1 to 180.4)                            |
| Extensively drug-resistant tuberculosis                                              | < 0.05<br>(< 0.05 to < 0.05)              | < 0.05<br>(< 0.05 to < 0.05)               | < 0.05<br>(< 0.05 to < 0.05)         | 311.6<br>(36.8 to 1,090.4)                        | 194.9<br>(-3.0 to 754.2)                            |
| Latent tuberculosis infection                                                        | 2,544.2<br>(2,203.2 to 2,915.7)           | --                                         | --                                   | --                                                | --                                                  |
| HIV/AIDS                                                                             | 79.3<br>(69.4 to 89.8)                    | 5.2^<br>(4.0 to 6.5)                       | 7.4<br>(5.2 to 10.1)                 | -14.9<br>(-41.4 to 14.6)                          | -38.2<br>(-60.1 to -11.1)                           |
| Drug-susceptible HIV/AIDS - Tuberculosis                                             | 0.9<br>(0.5 to 1.5)                       | 1.4<br>(0.8 to 2.2)                        | 0.4<br>(0.2 to 0.6)                  | -36.5<br>(-51.2 to -19.8)                         | -49.8<br>(-61.8 to -36.5)                           |
| Multidrug-resistant HIV/AIDS - Tuberculosis without extensive drug resistance        | < 0.05<br>(< 0.05 to < 0.05)              | < 0.05<br>(< 0.05 to < 0.05)               | < 0.05<br>(< 0.05 to < 0.05)         | -27.0<br>(-75.3 to 117.1)                         | -42.7<br>(-80.6 to 70.5)                            |
| Extensively drug-resistant HIV/AIDS - Tuberculosis                                   | < 0.05<br>(< 0.05 to < 0.05)              | < 0.05<br>(< 0.05 to < 0.05)               | < 0.05<br>(< 0.05 to < 0.05)         | 122.5<br>(-24.7 to 561.5)                         | 74.7<br>(-41.0 to 419.5)                            |
| HIV/AIDS resulting in other diseases                                                 | 78.4<br>(68.5 to 89.0)                    | 5.2<br>(4.0 to 6.5)                        | 7.1<br>(4.9 to 9.7)                  | -13.4<br>(-41.6 to 20.2)                          | -37.5<br>(-60.5 to -7.7)                            |
| <b>Diarrhoea, lower respiratory infections, and other common infectious diseases</b> | <b>741.8</b><br>(708.2 to 779.1)          | <b>33,342.9†</b><br>(30,393.2 to 36,365.7) | <b>41.9</b><br>(29.0 to 56.6)        | <b>28.9</b><br>(24.9 to 32.8)                     | <b>-4.0</b><br>(-6.7 to -1.4)                       |
| Diarrhoeal diseases                                                                  | 147.1<br>(135.9 to 159.4)                 | 9,814.5<br>(9,081.1 to 10,666.6)           | 16.6<br>(11.2 to 22.9)               | 28.7<br>(21.6 to 36.4)                            | -4.9<br>(-9.5 to -0.4)                              |
| Intestinal infectious diseases                                                       | 1.3<br>(0.9 to 1.9)                       | 21.1†<br>(13.8 to 31.3)                    | 0.2<br>(0.1 to 0.3)                  | -0.1<br>(-22.6 to 29.2)                           | -25.6<br>(-39.4 to -8.9)                            |
| Typhoid fever                                                                        | 1.2<br>(0.8 to 1.9)                       | 19.5<br>(12.7 to 28.9)                     | 0.2<br>(0.1 to 0.3)                  | 0.4<br>(-23.0 to 30.9)                            | -25.3<br>(-39.2 to -7.8)                            |
| Paratyphoid fever                                                                    | 0.1<br>(< 0.05 to 0.1)                    | 1.6<br>(1.0 to 2.6)                        | < 0.05<br>(< 0.05 to < 0.05)         | 4.7<br>(-17.7 to 30.9)                            | -22.3<br>(-36.1 to -5.7)                            |
| Other intestinal infectious diseases                                                 | --                                        | --                                         | < 0.05<br>(< 0.05 to < 0.05)         | -29.3<br>(-46.9 to -5.6)                          | -46.3<br>(-55.8 to -35.0)                           |
| Lower respiratory infections                                                         | 13.7<br>(12.6 to 14.8)                    | 599.2<br>(546.9 to 658.2)                  | 0.8<br>(0.6 to 1.2)                  | 8.5<br>(-5.6 to 23.9)                             | -12.9<br>(-21.2 to -3.8)                            |
| Upper respiratory infections                                                         | 286.8<br>(250.8 to 325.0)                 | 21,459.6<br>(18,709.3 to 24,377.9)         | 7.1<br>(4.3 to 11.3)                 | 30.1<br>(21.6 to 39.9)                            | -2.1<br>(-7.6 to 4.7)                               |
| Otitis media                                                                         | 261.1<br>(233.2 to 289.6)                 | 1,036.5<br>(803.5 to 1,328.0)              | 8.6<br>(5.3 to 12.7)                 | 28.8<br>(19.7 to 38.6)                            | -3.4<br>(-9.6 to 3.3)                               |
| Meningitis                                                                           | 42.9<br>(36.5 to 49.8)                    | 10.8<br>(9.1 to 12.9)                      | 4.9<br>(3.5 to 6.5)                  | 31.3<br>(22.4 to 40.6)                            | -3.4<br>(-9.7 to 3.2)                               |
| Pneumococcal meningitis                                                              | 13.7<br>(11.6 to 16.5)                    | 1.4<br>(1.0 to 1.9)                        | 1.8<br>(1.2 to 2.4)                  | 26.1<br>(8.0 to 46.4)                             | -8.7<br>(-20.7 to 5.2)                              |
| H influenzae type B meningitis                                                       | 6.5<br>(4.9 to 8.9)                       | 1.5<br>(0.8 to 2.4)                        | 0.9<br>(0.6 to 1.2)                  | 15.2<br>(1.9 to 30.5)                             | -15.1<br>(-24.4 to -5.1)                            |
| Meningococcal infection                                                              | 14.2<br>(10.0 to 19.3)                    | 5.3<br>(4.1 to 6.9)                        | 1.4<br>(1.0 to 1.9)                  | 32.4<br>(21.4 to 43.9)                            | -2.4<br>(-10.9 to 6.7)                              |
| Other meningitis                                                                     | 8.6<br>(6.3 to 11.4)                      | 2.6<br>(1.9 to 3.7)                        | 0.9<br>(0.6 to 1.2)                  | 66.2<br>(49.3 to 86.6)                            | 25.0<br>(13.8 to 40.1)                              |
| Encephalitis                                                                         | 26.3<br>(17.4 to 38.9)                    | 12.0<br>(10.4 to 13.8)                     | 3.0<br>(2.1 to 3.9)                  | 35.9<br>(21.1 to 51.5)                            | -0.1<br>(-10.1 to 10.6)                             |
| Diphtheria                                                                           | < 0.05<br>(< 0.05 to < 0.05)              | < 0.05<br>(< 0.05 to < 0.05)               | < 0.05<br>(< 0.05 to < 0.05)         | -34.4<br>(-73.2 to 64.1)                          | -47.0<br>(-75.3 to 13.1)                            |
| Whooping cough                                                                       | 6.3<br>(4.9 to 7.9)                       | 45.9<br>(35.8 to 57.6)                     | 0.3<br>(0.2 to 0.5)                  | 11.0<br>(-6.4 to 30.5)                            | -17.2<br>(-30.3 to -2.6)                            |
| Tetanus                                                                              | 0.2<br>(0.2 to 0.2)                       | 0.2<br>(0.1 to 0.3)                        | < 0.05<br>(< 0.05 to < 0.05)         | 0.8<br>(-25.7 to 22.7)                            | -24.9<br>(-38.4 to -12.4)                           |
| Measles                                                                              | 0.8<br>(0.3 to 1.9)                       | 30.5<br>(10.3 to 68.0)                     | 0.1<br>(< 0.05 to 0.2)               | 15.9<br>(-41.9 to 118.9)                          | -13.7<br>(-56.3 to 62.7)                            |
| Varicella and herpes zoster                                                          | 10.5<br>(9.8 to 11.2)                     | 312.7<br>(291.6 to 335.1)                  | 0.3<br>(0.2 to 0.5)                  | 36.5<br>(16.5 to 59.4)                            | 0.1<br>(-11.4 to 12.1)                              |
| <b>Neglected tropical diseases and malaria</b>                                       | <b>5,969.2</b><br>(5,728.0 to 6,195.2)    | <b>4,821.7†</b><br>(3,910.4 to 5,897.4)    | <b>77.7</b><br>(52.5 to 118.0)       | <b>-15.9</b><br>(-22.9 to -8.9)                   | <b>-40.9</b><br>(-45.9 to -36.2)                    |
| Malaria                                                                              | 2,409.5<br>(2,063.8 to 2,803.9)           | 3,374.9<br>(2,480.0 to 4,463.8)            | 28.4<br>(20.6 to 38.2)               | -5.0<br>(-15.1 to 6.3)                            | -30.5<br>(-37.4 to -22.3)                           |
| Chagas disease                                                                       | --                                        | --                                         | --                                   | --                                                | --                                                  |
| Leishmaniasis                                                                        | --                                        | --                                         | --                                   | --                                                | --                                                  |
| Visceral leishmaniasis                                                               | --                                        | --                                         | --                                   | --                                                | --                                                  |
| Cutaneous and mucocutaneous leishmaniasis                                            | --                                        | --                                         | --                                   | --                                                | --                                                  |
| African trypanosomiasis                                                              | --                                        | --                                         | --                                   | --                                                | --                                                  |
| Schistosomiasis                                                                      | 3,379.9<br>(3,162.2 to 3,578.7)           | 1,292.1<br>(1,215.1 to 1,371.7)            | 27.8<br>(13.9 to 51.4)               | -22.4<br>(-26.0 to -18.4)                         | -44.1<br>(-46.5 to -41.4)                           |
| Cysticercosis                                                                        | 21.7<br>(16.9 to 26.7)                    | --                                         | 4.1<br>(2.2 to 6.3)                  | 29.6<br>(9.8 to 50.2)                             | -5.5<br>(-19.2 to 7.9)                              |
| Cystic echinococcosis                                                                | 5.0<br>(1.1 to 17.5)                      | 1.0<br>(0.2 to 3.6)                        | 0.5<br>(0.1 to 1.6)                  | -16.0<br>(-88.6 to 515.5)                         | -38.7<br>(-90.4 to 282.9)                           |
| Lymphatic filariasis                                                                 | 89.5<br>(61.1 to 139.9)                   | 28.4<br>(24.5 to 32.8)                     | 5.4<br>(2.0 to 11.8)                 | -42.0<br>(-64.2 to -26.7)                         | -57.1<br>(-73.6 to -45.8)                           |
| Onchocerciasis                                                                       | 5.6<br>(2.5 to 9.9)                       | < 0.05<br>(< 0.05 to < 0.05)               | 0.5<br>(0.2 to 0.9)                  | -91.4<br>(-95.1 to -84.3)                         | -87.8<br>(-92.9 to -79.4)                           |
| Trachoma                                                                             | 8.6<br>(5.7 to 12.4)                      | --                                         | 0.9<br>(0.5 to 1.3)                  | 16.9<br>(-10.3 to 51.9)                           | -15.5<br>(-39.8 to 18.4)                            |
| Dengue                                                                               | 7.4<br>(4.3 to 12.1)                      | 124.1<br>(81.5 to 177.6)                   | 1.2<br>(0.6 to 2.2)                  | 196.5<br>(112.0 to 608.3)                         | 120.4<br>(61.6 to 413.9)                            |
| Yellow fever                                                                         | < 0.05<br>(< 0.05 to 0.1)                 | 1.1<br>(0.3 to 2.7)                        | < 0.05<br>(< 0.05 to < 0.05)         | -23.5<br>(-48.6 to 12.4)                          | -43.1<br>(-58.8 to -21.6)                           |
| Rabies                                                                               | < 0.05<br>(< 0.05 to < 0.05)              | 0.1<br>(< 0.05 to 0.1)                     | < 0.05<br>(< 0.05 to < 0.05)         | -5.4<br>(-48.4 to 87.0)                           | -26.2<br>(-53.1 to 25.8)                            |
| Intestinal nematode infections                                                       | 1,794.9<br>(1,536.4 to 2,134.2)           | --                                         | 2.1<br>(1.3 to 3.3)                  | 41.5<br>(21.8 to 65.2)                            | 4.9<br>(-9.7 to 23.3)                               |
| Ascariasis                                                                           | 957.8<br>(741.0 to 1,266.8)               | --                                         | 0.2<br>(0.1 to 0.4)                  | 33.5<br>(7.6 to 65.1)                             | -0.2<br>(-19.8 to 24.5)                             |

| Cause                                                                   | Prevalence in thousands (95% UI)                 | Incidence in thousands (95% UI)                   | YLDs in thousands (95% UI)              |                                                   |                                                     |
|-------------------------------------------------------------------------|--------------------------------------------------|---------------------------------------------------|-----------------------------------------|---------------------------------------------------|-----------------------------------------------------|
|                                                                         | 2016 counts                                      | 2016 counts                                       | 2016 counts                             | Percentage change in counts between 2006 and 2016 | Percentage change in age-standardised rates between |
| Trichuriasis                                                            | 264.3<br>(191.5 to 362.9)                        | --                                                | < 0.05<br>(< 0.05 to < 0.05)            | 31.3<br>(-7.5 to 83.4)                            | -1.2<br>(-35.5 to 46.8)                             |
| Hookworm disease                                                        | 661.3<br>(495.7 to 857.6)                        | --                                                | 1.9<br>(1.1 to 2.9)                     | 42.6<br>(20.9 to 69.4)                            | 5.5<br>(-10.6 to 26.0)                              |
| Food-borne trematodiasis                                                | --                                               | --                                                | --                                      | --                                                | --                                                  |
| Leprosy                                                                 | 2.5<br>(2.3 to 2.8)                              | 0.1<br>(0.1 to 0.1)                               | 0.2<br>(0.1 to 0.2)                     | -10.0<br>(-21.9 to 3.5)                           | -31.4<br>(-38.6 to -23.4)                           |
| Ebola virus disease                                                     | --                                               | --                                                | --                                      | --                                                | --                                                  |
| Zika virus disease                                                      | --                                               | --                                                | --                                      | --                                                | --                                                  |
| Guinea worm disease                                                     | < 0.05<br>(< 0.05 to < 0.05)                     | < 0.05<br>(< 0.05 to < 0.05)                      | < 0.05<br>(< 0.05 to < 0.05)            | 5.9e+20<br>(2.0e+20 to 1.0e+22)                   | 4.4e+20<br>(1.5e+20 to 7.8e+21)                     |
| Other neglected tropical diseases                                       | 188.5<br>(179.7 to 197.4)                        | --                                                | 6.7<br>(4.4 to 9.8)                     | 29.9<br>(19.3 to 41.5)                            | -0.8<br>(-8.2 to 7.5)                               |
| <b>Maternal disorders</b>                                               | <b>47.3</b><br><b>(37.2 to 60.0)</b>             | <b>324.1†</b><br><b>(284.7 to 374.9)</b>          | <b>5.5</b><br><b>(3.8 to 7.6)</b>       | <b>-3.0</b><br><b>(-17.6 to 16.2)</b>             | <b>-30.9</b><br><b>(-40.7 to -17.9)</b>             |
| Maternal haemorrhage                                                    | 3.6<br>(2.8 to 4.8)                              | 32.5<br>(20.7 to 49.7)                            | 0.2<br>(0.1 to 0.3)                     | 32.8<br>(-14.4 to 107.0)                          | -3.8<br>(-37.1 to 49.6)                             |
| Maternal sepsis and other pregnancy related infections                  | 5.5<br>(4.2 to 7.1)                              | 30.9<br>(23.0 to 42.3)                            | 0.1<br>(0.1 to 0.3)                     | 30.3<br>(-35.1 to 153.4)                          | -5.4<br>(-51.6 to 79.0)                             |
| Maternal hypertensive disorders                                         | 29.2<br>(19.5 to 39.5)                           | 128.7<br>(117.9 to 136.7)                         | 1.4<br>(0.8 to 2.3)                     | 23.9<br>(-24.4 to 104.2)                          | -9.9<br>(-44.6 to 47.5)                             |
| Maternal obstructed labour and uterine rupture                          | 8.7<br>(7.2 to 10.5)                             | 12.1<br>(9.2 to 16.0)                             | 2.8<br>(1.8 to 4.1)                     | -14.4<br>(-27.8 to 1.0)                           | -38.5<br>(-48.0 to -28.2)                           |
| Maternal abortion, miscarriage, and ectopic pregnancy                   | 1.0<br>(0.6 to 1.5)                              | 119.9<br>(84.0 to 168.8)                          | 0.1<br>(0.1 to 0.2)                     | 27.2<br>(-34.2 to 134.6)                          | -8.2<br>(-51.5 to 67.7)                             |
| Other maternal disorders                                                | --                                               | --                                                | 0.8<br>(0.6 to 1.2)                     | -7.4<br>(-21.4 to 11.2)                           | -34.1<br>(-43.4 to -21.6)                           |
| <b>Neonatal disorders</b>                                               | <b>148.7</b><br><b>(118.9 to 185.8)</b>          | --                                                | <b>19.8</b><br><b>(10.5 to 35.0)</b>    | <b>62.9</b><br><b>(25.1 to 99.6)</b>              | <b>24.5</b><br><b>(-6.4 to 55.6)</b>                |
| Neonatal preterm birth complications                                    | 100.5<br>(72.4 to 139.2)                         | --                                                | 5.6<br>(3.6 to 8.3)                     | 30.2<br>(0.1 to 65.5)                             | -2.2<br>(-26.1 to 25.3)                             |
| Neonatal encephalopathy due to birth asphyxia and trauma                | 42.5<br>(21.5 to 75.1)                           | --                                                | 4.7<br>(0.7 to 14.0)                    | 124.2<br>(10.3 to 378.6)                          | 73.1<br>(-21.9 to 278.7)                            |
| Neonatal sepsis and other neonatal infections                           | 18.4<br>(5.3 to 45.1)                            | --                                                | 7.0<br>(1.3 to 19.7)                    | 75.5<br>(-25.1 to 199.4)                          | 35.7<br>(-47.6 to 141.1)                            |
| Hemolytic disease and other neonatal jaundice                           | 2.2<br>(1.9 to 2.6)                              | --                                                | 0.8<br>(0.6 to 1.0)                     | 31.9<br>(16.4 to 49.9)                            | -1.4<br>(-11.3 to 9.6)                              |
| Other neonatal disorders                                                | --                                               | --                                                | 1.7<br>(1.1 to 2.9)                     | 44.8<br>(16.4 to 74.0)                            | 7.9<br>(-13.5 to 30.4)                              |
| <b>Nutritional deficiencies</b>                                         | <b>4,576.2</b><br><b>(4,406.1 to 4,817.6)</b>    | <b>2,043.8†</b><br><b>(1,670.1 to 2,542.5)</b>    | <b>135.6</b><br><b>(91.4 to 192.2)</b>  | <b>37.9</b><br><b>(31.1 to 45.8)</b>              | <b>3.9</b><br><b>(-0.2 to 8.2)</b>                  |
| Protein-energy malnutrition                                             | 222.2<br>(180.1 to 274.4)                        | 143.8<br>(117.3 to 174.5)                         | 15.0<br>(9.1 to 22.5)                   | 103.0<br>(52.7 to 169.6)                          | 50.8<br>(12.8 to 101.2)                             |
| Iodine deficiency                                                       | 181.7<br>(135.1 to 233.2)                        | 6.9<br>(5.2 to 8.8)                               | 5.3<br>(3.4 to 7.9)                     | 18.3<br>(3.8 to 32.3)                             | -12.8<br>(-22.4 to -3.3)                            |
| Vitamin A deficiency                                                    | 1,846.1<br>(1,556.0 to 2,212.7)                  | 1,893.1<br>(1,516.9 to 2,389.8)                   | 2.0<br>(1.2 to 3.0)                     | 29.2<br>(8.4 to 55.0)                             | -2.6<br>(-15.9 to 14.8)                             |
| Iron-deficiency anaemia                                                 | 3,302.5<br>(3,189.0 to 3,414.3)                  | --                                                | 112.8<br>(74.4 to 163.0)                | 33.2<br>(26.7 to 39.8)                            | 2.5<br>(-1.8 to 6.6)                                |
| Other nutritional deficiencies                                          | --                                               | --                                                | 0.5<br>(0.3 to 0.8)                     | 105.8<br>(53.3 to 176.5)                          | 52.7<br>(13.3 to 106.3)                             |
| <b>Other communicable, maternal, neonatal, and nutritional diseases</b> | <b>3,549.8</b><br><b>(3,231.2 to 3,889.1)</b>    | <b>1,627.4</b><br><b>(1,385.5 to 1,952.5)</b>     | <b>10.1</b><br><b>(6.6 to 14.7)</b>     | <b>35.4</b><br><b>(27.2 to 44.3)</b>              | <b>-1.1</b><br><b>(-6.6 to 5.0)</b>                 |
| Sexually transmitted diseases excluding HIV                             | 1,731.2<br>(1,606.5 to 1,876.0)                  | 954.0<br>(870.0 to 1,049.9)                       | 4.5<br>(2.8 to 6.8)                     | 35.7<br>(24.8 to 48.7)                            | -1.9<br>(-9.2 to 6.4)                               |
| Syphilis                                                                | 44.9<br>(36.5 to 54.2)                           | 31.3<br>(24.5 to 39.2)                            | 0.2<br>(0.1 to 0.3)                     | 45.5<br>(28.0 to 65.8)                            | 4.9<br>(-8.8 to 21.0)                               |
| Chlamydial infection                                                    | 121.3<br>(97.4 to 149.1)                         | 115.5<br>(96.4 to 137.7)                          | 1.0<br>(0.6 to 1.6)                     | 29.5<br>(12.7 to 48.8)                            | -6.1<br>(-18.1 to 7.2)                              |
| Gonococcal infection                                                    | 77.4<br>(64.2 to 93.3)                           | 279.3<br>(223.0 to 343.9)                         | 0.8<br>(0.5 to 1.3)                     | 42.9<br>(9.7 to 87.8)                             | 3.1<br>(-19.2 to 32.1)                              |
| Trichomoniasis                                                          | 320.8<br>(270.8 to 372.3)                        | 290.1<br>(242.0 to 342.0)                         | 0.4<br>(0.1 to 0.8)                     | 33.1<br>(23.6 to 43.3)                            | -3.5<br>(-9.9 to 2.6)                               |
| Genital herpes                                                          | 1,281.2<br>(1,100.2 to 1,496.9)                  | 128.2<br>(107.3 to 153.0)                         | 0.3<br>(0.1 to 0.8)                     | 37.7<br>(23.2 to 52.7)                            | -1.1<br>(-10.2 to 7.8)                              |
| Other sexually transmitted diseases                                     | 59.8<br>(55.3 to 64.3)                           | 109.7<br>(92.3 to 132.6)                          | 1.7<br>(1.1 to 2.4)                     | 35.4<br>(21.7 to 50.6)                            | -2.8<br>(-12.3 to 8.5)                              |
| Hepatitis                                                               | 2,056.0<br>(1,623.5 to 2,567.9)                  | 673.3<br>(445.8 to 973.5)                         | 0.7<br>(0.4 to 1.1)                     | 3.5<br>(-19.9 to 36.4)                            | -19.9<br>(-35.2 to 0.5)                             |
| Acute hepatitis A                                                       | 13.5<br>(1.8 to 34.1)                            | 175.5<br>(23.1 to 443.0)                          | 0.1<br>(< 0.05 to 0.2)                  | 1.5<br>(-76.2 to 317.9)                           | -20.4<br>(-74.6 to 169.2)                           |
| Hepatitis B                                                             | 1,656.9<br>(1,230.7 to 2,155.8)                  | 425.3<br>(297.6 to 610.1)                         | 0.5<br>(0.3 to 0.8)                     | 3.5<br>(-17.6 to 28.7)                            | -19.9<br>(-35.6 to -1.3)                            |
| Hepatitis C                                                             | 382.6<br>(337.3 to 431.7)                        | 32.5<br>(29.2 to 36.1)                            | < 0.05<br>(< 0.05 to 0.1)               | 26.9<br>(-19.8 to 96.9)                           | -6.8<br>(-30.2 to 23.8)                             |
| Acute hepatitis E                                                       | 3.1<br>(2.4 to 4.0)                              | 40.1<br>(31.3 to 52.2)                            | 0.1<br>(< 0.05 to 0.1)                  | -1.0<br>(-28.4 to 34.4)                           | -22.8<br>(-41.8 to 0.4)                             |
| Other infectious diseases                                               | 139.2<br>(133.2 to 145.2)                        | < 0.05<br>(< 0.05 to < 0.05)                      | 4.9<br>(3.2 to 7.2)                     | 41.4<br>(29.9 to 54.1)                            | 6.2<br>(-1.6 to 14.8)                               |
| <b>Non-communicable diseases</b>                                        | <b>10,222.0</b><br><b>(10,135.6 to 10,303.7)</b> | <b>27,091.8†</b><br><b>(24,683.1 to 29,417.7)</b> | <b>737.6</b><br><b>(540.1 to 966.7)</b> | <b>37.4</b><br><b>(31.8 to 44.1)</b>              | <b>0.3</b><br><b>(-2.6 to 3.6)</b>                  |
| <b>Neoplasms</b>                                                        | <b>8.3</b><br><b>(7.4 to 9.2)</b>                | <b>5.8</b><br><b>(5.4 to 6.1)</b>                 | <b>1.8</b><br><b>(1.3 to 2.4)</b>       | <b>41.5</b><br><b>(33.7 to 49.8)</b>              | <b>4.1</b><br><b>(-1.0 to 10.0)</b>                 |
| Lip and oral cavity cancer                                              | 0.3<br>(0.3 to 0.4)                              | 0.1<br>(0.1 to 0.1)                               | < 0.05<br>(< 0.05 to < 0.05)            | 51.8<br>(32.5 to 73.3)                            | 9.0<br>(-5.3 to 25.8)                               |
| Nasopharynx cancer                                                      | 0.1<br>(< 0.05 to 0.1)                           | < 0.05<br>(< 0.05 to < 0.05)                      | < 0.05<br>(< 0.05 to < 0.05)            | 49.1<br>(27.5 to 74.5)                            | 5.9<br>(-7.4 to 21.0)                               |
| Other pharynx cancer                                                    | 0.1<br>(0.1 to 0.1)                              | < 0.05<br>(< 0.05 to < 0.05)                      | < 0.05<br>(< 0.05 to < 0.05)            | 46.3<br>(31.9 to 62.2)                            | 7.5<br>(-2.4 to 18.7)                               |
| Oesophageal cancer                                                      | 0.2<br>(0.2 to 0.2)                              | 0.2<br>(0.1 to 0.2)                               | < 0.05<br>(< 0.05 to 0.1)               | 70.8<br>(49.1 to 94.6)                            | 23.6<br>(6.0 to 42.8)                               |
| Stomach cancer                                                          | 0.6<br>(0.6 to 0.7)                              | 0.4<br>(0.4 to 0.5)                               | 0.1<br>(0.1 to 0.1)                     | 37.1<br>(21.1 to 55.3)                            | 1.1<br>(-11.7 to 16.3)                              |
| Colon and rectum cancer                                                 | 0.7<br>(0.6 to 0.8)                              | 0.3<br>(0.2 to 0.3)                               | 0.1<br>(0.1 to 0.1)                     | 46.9<br>(30.5 to 66.3)                            | 6.9<br>(-6.7 to 23.0)                               |
| Liver cancer                                                            | 0.5<br>(0.4 to 0.6)                              | 0.8<br>(0.7 to 1.0)                               | 0.2<br>(0.1 to 0.2)                     | 28.9<br>(13.5 to 45.5)                            | -6.0<br>(-16.5 to 4.8)                              |
| Liver cancer due to hepatitis B                                         | 0.5<br>(0.4 to 0.6)                              | 0.5<br>(0.4 to 0.6)                               | 0.1<br>(0.1 to 0.1)                     | 29.2<br>(13.5 to 47.0)                            | -5.9<br>(-17.1 to 6.5)                              |



| Cause                                              | Prevalence in thousands (95% UI)        | Incidence in thousands (95% UI)          | YLDs in thousands (95% UI)           |                                                   |                                                     |
|----------------------------------------------------|-----------------------------------------|------------------------------------------|--------------------------------------|---------------------------------------------------|-----------------------------------------------------|
|                                                    | 2016 counts                             | 2016 counts                              | 2016 counts                          | Percentage change in counts between 2006 and 2016 | Percentage change in age-standardised rates between |
| Liver cancer due to hepatitis C                    | 0.1<br>( $< 0.05$ to 0.1)               | 0.1<br>( $< 0.05$ to 0.1)                | $< 0.05$<br>( $< 0.05$ to $< 0.05$ ) | 29.8<br>(12.0 to 48.7)                            | -4.7<br>(-17.2 to 8.8)                              |
| Liver cancer due to alcohol use                    | 0.1<br>(0.1 to 0.1)                     | 0.1<br>(0.1 to 0.1)                      | $< 0.05$<br>( $< 0.05$ to $< 0.05$ ) | 27.4<br>(10.9 to 46.0)                            | -7.3<br>(-19.0 to 4.8)                              |
| Liver cancer due to other causes                   | 0.2<br>(0.2 to 0.2)                     | 0.2<br>(0.2 to 0.2)                      | $< 0.05$<br>( $< 0.05$ to 0.1)       | 28.6<br>(12.2 to 46.3)                            | -6.0<br>(-17.5 to 6.1)                              |
| Gallbladder and biliary tract cancer               | $< 0.05$<br>( $< 0.05$ to 0.1)          | 0.1<br>( $< 0.05$ to 0.1)                | $< 0.05$<br>( $< 0.05$ to $< 0.05$ ) | 27.9<br>(13.5 to 41.0)                            | -6.4<br>(-16.7 to 3.2)                              |
| Pancreatic cancer                                  | 0.1<br>(0.1 to 0.1)                     | 0.2<br>(0.2 to 0.2)                      | $< 0.05$<br>( $< 0.05$ to 0.1)       | 51.5<br>(36.5 to 69.9)                            | 9.9<br>(-0.8 to 23.6)                               |
| Larynx cancer                                      | 0.1<br>(0.1 to 0.1)                     | $< 0.05$<br>( $< 0.05$ to 0.1)           | $< 0.05$<br>( $< 0.05$ to $< 0.05$ ) | 45.5<br>(27.5 to 65.3)                            | 5.1<br>(-7.6 to 19.0)                               |
| Tracheal, bronchus, and lung cancer                | 0.4<br>(0.3 to 0.4)                     | 0.3<br>(0.3 to 0.4)                      | 0.1<br>(0.1 to 0.1)                  | 48.9<br>(23.9 to 78.0)                            | 8.4<br>(-10.3 to 30.0)                              |
| Malignant skin melanoma                            | 0.1<br>(0.1 to 0.1)                     | $< 0.05$<br>( $< 0.05$ to $< 0.05$ )     | $< 0.05$<br>( $< 0.05$ to $< 0.05$ ) | 35.5<br>(22.2 to 52.3)                            | -1.4<br>(-12.1 to 9.9)                              |
| Non-melanoma skin cancer                           | 0.1<br>( $< 0.05$ to 0.1)               | 0.3<br>(0.2 to 0.4)                      | $< 0.05$<br>( $< 0.05$ to $< 0.05$ ) | 28.7<br>(-14.3 to 73.9)                           | -9.4<br>(-45.1 to 27.9)                             |
| Non-melanoma skin cancer (squamous-cell carcinoma) | $< 0.05$<br>( $< 0.05$ to 0.1)          | 0.1<br>( $< 0.05$ to 0.1)                | $< 0.05$<br>( $< 0.05$ to $< 0.05$ ) | 27.1<br>(-19.8 to 79.2)                           | -10.2<br>(-47.5 to 30.4)                            |
| Non-melanoma skin cancer (basal-cell carcinoma)    | $< 0.05$<br>( $< 0.05$ to 0.1)          | 0.2<br>(0.1 to 0.4)                      | $< 0.05$<br>( $< 0.05$ to $< 0.05$ ) | 40.8<br>(25.7 to 58.2)                            | 1.2<br>(-9.2 to 12.9)                               |
| Breast cancer                                      | 1.9<br>(1.6 to 2.2)                     | 0.5<br>(0.4 to 0.6)                      | 0.2<br>(0.1 to 0.3)                  | 48.0<br>(18.3 to 83.0)                            | 6.5<br>(-14.2 to 31.4)                              |
| Cervical cancer                                    | 3.1<br>(2.0 to 3.7)                     | 0.9<br>(0.5 to 1.0)                      | 0.3<br>(0.2 to 0.4)                  | 35.1<br>(6.8 to 73.0)                             | -2.7<br>(-22.3 to 22.6)                             |
| Uterine cancer                                     | 0.3<br>(0.2 to 0.4)                     | 0.1<br>(0.1 to 0.1)                      | $< 0.05$<br>( $< 0.05$ to $< 0.05$ ) | 47.2<br>(13.5 to 85.5)                            | 9.5<br>(-14.9 to 36.2)                              |
| Ovarian cancer                                     | 0.3<br>(0.2 to 0.3)                     | 0.1<br>(0.1 to 0.1)                      | $< 0.05$<br>( $< 0.05$ to 0.1)       | 40.3<br>(21.4 to 61.6)                            | 0.1<br>(-13.4 to 16.2)                              |
| Prostate cancer                                    | 1.0<br>(0.6 to 1.2)                     | 0.3<br>(0.2 to 0.4)                      | 0.2<br>(0.1 to 0.2)                  | 62.7<br>(27.0 to 102.9)                           | 17.2<br>(-6.7 to 43.9)                              |
| Testicular cancer                                  | $< 0.05$<br>( $< 0.05$ to $< 0.05$ )    | $< 0.05$<br>( $< 0.05$ to $< 0.05$ )     | $< 0.05$<br>( $< 0.05$ to $< 0.05$ ) | 21.8<br>(-14.5 to 55.1)                           | -10.6<br>(-37.6 to 13.7)                            |
| Kidney cancer                                      | 0.5<br>(0.4 to 0.6)                     | 0.1<br>(0.1 to 0.2)                      | $< 0.05$<br>( $< 0.05$ to 0.1)       | 50.2<br>(18.3 to 90.2)                            | 12.1<br>(-3.6 to 29.2)                              |
| Bladder cancer                                     | 0.3<br>(0.3 to 0.4)                     | 0.1<br>(0.1 to 0.1)                      | $< 0.05$<br>( $< 0.05$ to 0.1)       | 39.5<br>(24.6 to 56.8)                            | 1.4<br>(-9.9 to 13.6)                               |
| Brain and nervous system cancer                    | 0.3<br>(0.3 to 0.4)                     | 0.1<br>(0.1 to 0.2)                      | $< 0.05$<br>( $< 0.05$ to 0.1)       | 46.4<br>(35.5 to 62.2)                            | 7.9<br>(-1.6 to 19.3)                               |
| Thyroid cancer                                     | 0.1<br>(0.1 to 0.1)                     | $< 0.05$<br>( $< 0.05$ to $< 0.05$ )     | $< 0.05$<br>( $< 0.05$ to $< 0.05$ ) | 28.0<br>(13.3 to 44.9)                            | -7.4<br>(-18.0 to 3.8)                              |
| Mesothelioma                                       | $< 0.05$<br>( $< 0.05$ to $< 0.05$ )    | $< 0.05$<br>( $< 0.05$ to $< 0.05$ )     | $< 0.05$<br>( $< 0.05$ to $< 0.05$ ) | 34.6<br>(18.9 to 51.0)                            | -2.0<br>(-12.0 to 9.5)                              |
| Hodgkin lymphoma                                   | 0.1<br>(0.1 to 0.1)                     | $< 0.05$<br>( $< 0.05$ to $< 0.05$ )     | $< 0.05$<br>( $< 0.05$ to $< 0.05$ ) | 15.9<br>(3.1 to 31.1)                             | -11.1<br>(-17.9 to -1.8)                            |
| Non-Hodgkin's lymphoma                             | 0.6<br>(0.5 to 0.7)                     | 0.2<br>(0.2 to 0.2)                      | 0.1<br>( $< 0.05$ to 0.1)            | 34.2<br>(19.7 to 49.6)                            | 0.1<br>(-9.2 to 10.8)                               |
| Multiple myeloma                                   | 0.1<br>(0.1 to 0.1)                     | $< 0.05$<br>( $< 0.05$ to 0.1)           | $< 0.05$<br>( $< 0.05$ to $< 0.05$ ) | 39.5<br>(22.1 to 56.5)                            | 1.4<br>(-11.2 to 14.0)                              |
| Leukaemia                                          | 0.7<br>(0.5 to 0.8)                     | 0.2<br>(0.2 to 0.2)                      | 0.1<br>(0.1 to 0.1)                  | 33.6<br>(20.1 to 48.6)                            | 0.1<br>(-7.2 to 8.8)                                |
| Acute lymphoid leukaemia                           | 0.1<br>(0.1 to 0.2)                     | $< 0.05$<br>( $< 0.05$ to $< 0.05$ )     | $< 0.05$<br>( $< 0.05$ to $< 0.05$ ) | 23.9<br>(0.8 to 52.6)                             | -4.9<br>(-17.5 to 10.8)                             |
| Chronic lymphoid leukaemia                         | 0.1<br>(0.1 to 0.1)                     | $< 0.05$<br>( $< 0.05$ to $< 0.05$ )     | $< 0.05$<br>( $< 0.05$ to $< 0.05$ ) | 42.5<br>(20.3 to 70.2)                            | 3.7<br>(-13.0 to 25.4)                              |
| Acute myeloid leukaemia                            | 0.1<br>(0.1 to 0.2)                     | 0.1<br>(0.1 to 0.1)                      | $< 0.05$<br>( $< 0.05$ to $< 0.05$ ) | 37.9<br>(16.1 to 64.6)                            | 4.0<br>(-6.7 to 17.3)                               |
| Chronic myeloid leukaemia                          | 0.1<br>(0.1 to 0.1)                     | $< 0.05$<br>( $< 0.05$ to $< 0.05$ )     | $< 0.05$<br>( $< 0.05$ to $< 0.05$ ) | 33.5<br>(13.9 to 57.5)                            | -3.8<br>(-16.0 to 10.5)                             |
| Other leukaemia                                    | 0.2<br>(0.2 to 0.3)                     | 0.1<br>( $< 0.05$ to 0.1)                | $< 0.05$<br>( $< 0.05$ to $< 0.05$ ) | 32.8<br>(16.3 to 53.6)                            | -0.9<br>(-12.0 to 11.8)                             |
| Other neoplasms                                    | 1.0<br>(0.9 to 1.2)                     | 0.3<br>(0.3 to 0.4)                      | 0.1<br>(0.1 to 0.1)                  | 33.7<br>(10.0 to 58.8)                            | 0.2<br>(-11.2 to 12.0)                              |
| <b>Cardiovascular diseases</b>                     | <b>480.1</b><br><b>(451.8 to 509.8)</b> | <b>35.2†</b><br><b>(33.7 to 36.9)</b>    | <b>27.7</b><br><b>(19.8 to 37.0)</b> | <b>40.2</b><br><b>(34.5 to 46.5)</b>              | <b>1.4</b><br><b>(-2.2 to 5.6)</b>                  |
| Rheumatic heart disease                            | 83.0<br>(73.6 to 92.9)                  | 3.6<br>(3.2 to 4.0)                      | 4.0<br>(2.6 to 6.0)                  | 36.5<br>(23.7 to 50.5)                            | -0.5<br>(-9.0 to 9.2)                               |
| Ischaemic heart disease                            | 92.4<br>(85.8 to 99.4)                  | 12.6<br>(11.7 to 13.7)                   | 4.0<br>(2.6 to 5.6)                  | 39.7<br>(31.3 to 48.8)                            | 0.2<br>(-4.7 to 5.7)                                |
| Cerebrovascular disease                            | 38.4<br>(35.7 to 41.2)                  | 6.2‡<br>(5.7 to 6.7)                     | 5.5<br>(4.0 to 7.0)                  | 40.8<br>(30.7 to 52.3)                            | 2.0<br>(-5.4 to 9.7)                                |
| Ischaemic stroke                                   | 32.4<br>(29.3 to 36.2)                  | 3.9‡<br>(3.5 to 4.4)                     | 4.4<br>(3.2 to 5.6)                  | 41.6<br>(29.4 to 54.7)                            | 2.3<br>(-6.3 to 12.0)                               |
| Hemorrhagic stroke                                 | 8.1<br>(7.2 to 9.0)                     | 2.2‡<br>(2.0 to 2.5)                     | 1.1<br>(0.8 to 1.4)                  | 37.6<br>(22.1 to 54.9)                            | 0.6<br>(-11.3 to 13.7)                              |
| Hypertensive heart disease                         | 8.6<br>(7.0 to 10.5)                    | --                                       | 0.7<br>(0.5 to 1.0)                  | 33.4<br>(18.9 to 48.2)                            | -5.5<br>(-14.3 to 3.8)                              |
| Cardiomyopathy and myocarditis                     | 4.8<br>(4.1 to 5.6)                     | 2.4†<br>(2.1 to 2.7)                     | 0.5<br>(0.3 to 0.7)                  | 41.5<br>(26.4 to 56.9)                            | 0.1<br>(-10.4 to 12.0)                              |
| Myocarditis                                        | 1.4<br>(1.2 to 1.6)                     | 2.4<br>(2.1 to 2.7)                      | 0.1<br>(0.1 to 0.1)                  | 39.2<br>(26.5 to 55.1)                            | 0.9<br>(-10.6 to 16.3)                              |
| Alcoholic cardiomyopathy                           | 0.6<br>(0.5 to 0.8)                     | --                                       | 0.1<br>( $< 0.05$ to 0.1)            | 44.8<br>(7.7 to 95.7)                             | 1.0<br>(-22.2 to 33.7)                              |
| Other cardiomyopathy                               | 3.6<br>(2.9 to 4.5)                     | --                                       | 0.3<br>(0.2 to 0.4)                  | 41.8<br>(23.3 to 63.7)                            | -0.3<br>(-13.1 to 14.9)                             |
| Atrial fibrillation and flutter                    | 19.3<br>(16.8 to 22.1)                  | 1.7<br>(1.5 to 2.0)                      | 1.5<br>(1.0 to 2.1)                  | 38.9<br>(28.5 to 50.0)                            | 0.4<br>(-5.5 to 6.7)                                |
| Peripheral vascular disease                        | 70.1<br>(60.2 to 81.4)                  | 7.0<br>(6.0 to 8.2)                      | 0.4<br>(0.2 to 0.7)                  | 35.4<br>(24.4 to 47.2)                            | -0.9<br>(-8.0 to 7.0)                               |
| Endocarditis                                       | 0.7<br>(0.6 to 0.8)                     | 1.7<br>(1.5 to 1.9)                      | 0.1<br>( $< 0.05$ to 0.1)            | 40.8<br>(25.4 to 59.3)                            | 2.5<br>(-12.4 to 19.1)                              |
| Other cardiovascular and circulatory diseases      | 211.2<br>(172.8 to 254.8)               | --                                       | 11.1<br>(7.3 to 15.7)                | 42.1<br>(30.5 to 54.4)                            | 3.2<br>(-4.4 to 12.7)                               |
| <b>Chronic respiratory diseases</b>                | <b>625.4</b><br><b>(589.9 to 662.4)</b> | <b>129.6†</b><br><b>(118.6 to 141.4)</b> | <b>28.7</b><br><b>(21.1 to 38.4)</b> | <b>36.7</b><br><b>(30.4 to 43.2)</b>              | <b>0.9</b><br><b>(-3.1 to 5.0)</b>                  |
| Chronic obstructive pulmonary disease              | 114.2<br>(109.1 to 119.0)               | 8.3<br>(7.9 to 8.6)                      | 7.6<br>(6.6 to 8.6)                  | 39.5<br>(28.4 to 50.9)                            | 0.4<br>(-7.0 to 8.4)                                |
| Pneumoconiosis                                     | 0.1<br>(0.1 to 0.1)                     | $< 0.05$<br>( $< 0.05$ to $< 0.05$ )     | $< 0.05$<br>( $< 0.05$ to $< 0.05$ ) | 45.5<br>(37.5 to 54.6)                            | 4.3<br>(-1.5 to 11.3)                               |
| Silicosis                                          | $< 0.05$<br>( $< 0.05$ to $< 0.05$ )    | $< 0.05$<br>( $< 0.05$ to $< 0.05$ )     | $< 0.05$<br>( $< 0.05$ to $< 0.05$ ) | 43.1<br>(31.3 to 54.4)                            | 2.0<br>(-4.5 to 9.0)                                |

| Cause                                                          | Prevalence in thousands (95% UI)        | Incidence in thousands (95% UI)         | YLDs in thousands (95% UI)        |                                                   |                                                     |
|----------------------------------------------------------------|-----------------------------------------|-----------------------------------------|-----------------------------------|---------------------------------------------------|-----------------------------------------------------|
|                                                                | 2016 counts                             | 2016 counts                             | 2016 counts                       | Percentage change in counts between 2006 and 2016 | Percentage change in age-standardised rates between |
| Asbestosis                                                     | < 0.05<br>(< 0.05 to 0.1)               | < 0.05<br>(< 0.05 to < 0.05)            | < 0.05<br>(< 0.05 to < 0.05)      | 43.9<br>(33.5 to 55.0)                            | 3.2<br>(-2.6 to 9.6)                                |
| Coal workers pneumoconiosis                                    | --                                      | --                                      | --                                | --                                                | --                                                  |
| Other pneumoconiosis                                           | < 0.05<br>(< 0.05 to 0.1)               | < 0.05<br>(< 0.05 to < 0.05)            | < 0.05<br>(< 0.05 to < 0.05)      | 47.5<br>(34.3 to 64.6)                            | 5.7<br>(-4.7 to 19.6)                               |
| Asthma                                                         | 513.8<br>(471.4 to 559.0)               | 121.2<br>(110.1 to 133.3)               | 20.2<br>(13.2 to 29.0)            | 34.3<br>(27.5 to 41.9)                            | 0.3<br>(-4.0 to 5.0)                                |
| Interstitial lung disease and pulmonary sarcoidosis            | 0.8<br>(0.7 to 0.9)                     | 0.1<br>(0.1 to 0.1)                     | 0.1<br>(0.1 to 0.1)               | 38.1<br>(34.4 to 42.3)                            | -0.5<br>(-4.6 to 4.2)                               |
| Other chronic respiratory diseases                             | --                                      | --                                      | 0.8<br>(0.6 to 1.0)               | 79.0<br>(39.9 to 128.2)                           | 32.9<br>(12.1 to 57.5)                              |
| <b>Cirrhosis and other chronic liver diseases</b>              | <b>27.1<br/>(25.7 to 28.4)</b>          | <b>2.7<br/>(2.6 to 2.8)</b>             | <b>2.5<br/>(1.7 to 3.5)</b>       | <b>33.9<br/>(20.2 to 49.0)</b>                    | <b>-1.3<br/>(-9.2 to 7.4)</b>                       |
| Cirrhosis and other chronic liver diseases due to hepatitis B  | 9.8<br>(8.4 to 11.2)                    | 1.0<br>(0.8 to 1.1)                     | 0.7<br>(0.5 to 1.0)               | 36.8<br>(17.0 to 61.2)                            | -0.9<br>(-12.2 to 12.1)                             |
| Cirrhosis and other chronic liver diseases due to hepatitis C  | 3.8<br>(2.7 to 5.4)                     | 0.4<br>(0.3 to 0.6)                     | 0.3<br>(0.2 to 0.4)               | 34.1<br>(10.1 to 65.9)                            | -3.6<br>(-19.4 to 16.2)                             |
| Cirrhosis and other chronic liver diseases due to alcohol use  | 4.3<br>(3.7 to 4.9)                     | 0.5<br>(0.4 to 0.6)                     | 0.3<br>(0.2 to 0.4)               | 40.2<br>(12.1 to 71.5)                            | 0.1<br>(-16.5 to 19.6)                              |
| Cirrhosis and other chronic liver diseases due to other causes | 9.2<br>(8.4 to 10.0)                    | 0.8<br>(0.7 to 0.9)                     | 1.2<br>(0.8 to 1.7)               | 30.7<br>(8.6 to 58.8)                             | -1.5<br>(-16.8 to 16.4)                             |
| <b>Digestive diseases</b>                                      | <b>167.6<br/>(153.7 to 182.6)</b>       | <b>155.8†<br/>(148.3 to 164.1)</b>      | <b>5.3<br/>(3.7 to 7.1)</b>       | <b>34.5<br/>(23.0 to 46.6)</b>                    | <b>-1.6<br/>(-7.7 to 4.2)</b>                       |
| Peptic ulcer disease                                           | 26.9<br>(24.7 to 29.4)                  | 13.8<br>(12.4 to 15.4)                  | 0.5<br>(0.3 to 0.8)               | 30.3<br>(16.1 to 46.5)                            | -6.2<br>(-14.0 to 2.9)                              |
| Gastritis and duodenitis                                       | 51.6<br>(45.2 to 58.4)                  | 52.4<br>(46.7 to 58.8)                  | 0.7<br>(0.5 to 1.0)               | 38.4<br>(23.2 to 54.1)                            | 2.0<br>(-6.5 to 11.1)                               |
| Appendicitis                                                   | 1.4<br>(1.3 to 1.5)                     | 37.2<br>(34.3 to 40.3)                  | 0.4<br>(0.3 to 0.6)               | 36.3<br>(-3.4 to 88.2)                            | 0.1<br>(-21.7 to 24.9)                              |
| Paralytic ileus and intestinal obstruction                     | 0.2<br>(0.2 to 0.2)                     | 5.7<br>(5.2 to 6.3)                     | 0.1<br>(< 0.05 to 0.1)            | 32.8<br>(28.0 to 37.5)                            | -3.2<br>(-9.9 to 3.9)                               |
| Inguinal, femoral, and abdominal hernia                        | 86.1<br>(69.9 to 105.1)                 | 15.8<br>(14.0 to 17.9)                  | 2.8<br>(1.9 to 3.9)               | 33.5<br>(16.7 to 51.0)                            | -2.3<br>(-11.5 to 6.8)                              |
| Inflammatory bowel disease                                     | 0.5<br>(0.5 to 0.6)                     | 3.8<br>(3.6 to 4.0)                     | 0.1<br>(0.1 to 0.1)               | 30.5<br>(26.7 to 34.9)                            | -6.4<br>(-8.9 to -3.5)                              |
| Vascular intestinal disorders                                  | 0.1<br>(0.1 to 0.1)                     | 0.4<br>(0.3 to 0.4)                     | < 0.05<br>(< 0.05 to < 0.05)      | 38.2<br>(29.8 to 46.0)                            | 3.2<br>(-1.5 to 7.9)                                |
| Gallbladder and biliary diseases                               | 5.3<br>(4.6 to 5.9)                     | 24.5<br>(20.9 to 27.9)                  | 0.1<br>(0.1 to 0.2)               | 38.0<br>(24.3 to 52.8)                            | -0.2<br>(-11.7 to 11.6)                             |
| Pancreatitis                                                   | 0.2<br>(0.2 to 0.3)                     | 2.2<br>(2.0 to 2.5)                     | < 0.05<br>(< 0.05 to < 0.05)      | 41.2<br>(35.7 to 47.1)                            | 1.6<br>(-2.3 to 6.0)                                |
| Other digestive diseases                                       | --                                      | --                                      | 0.5<br>(0.3 to 0.7)               | 37.3<br>(22.1 to 53.5)                            | 2.1<br>(-4.8 to 9.3)                                |
| <b>Neurological disorders</b>                                  | <b>3,559.3<br/>(3,393.4 to 3,741.6)</b> | <b>1,825.8<br/>(1,540.4 to 2,147.7)</b> | <b>87.7<br/>(55.5 to 132.1)</b>   | <b>39.4<br/>(-3.5 to 104.4)</b>                   | <b>1.3<br/>(-24.7 to 37.9)</b>                      |
| Alzheimer's disease and other dementias                        | 11.0<br>(9.4 to 13.0)                   | 1.9<br>(1.6 to 2.2)                     | 1.5<br>(1.1 to 2.0)               | 32.8<br>(24.8 to 41.2)                            | -1.7<br>(-6.2 to 3.4)                               |
| Parkinson's disease                                            | 1.2<br>(0.9 to 1.5)                     | 0.2<br>(0.1 to 0.2)                     | 0.1<br>(0.1 to 0.2)               | 46.3<br>(23.6 to 73.4)                            | 6.0<br>(-8.5 to 23.3)                               |
| Epilepsy                                                       | 51.6<br>(11.4 to 100.0)                 | 7.8<br>(1.7 to 15.1)                    | 20.3<br>(4.1 to 44.1)             | 39.2<br>(-73.3 to 618.3)                          | 2.8<br>(-80.3 to 429.6)                             |
| Multiple sclerosis                                             | 0.4<br>(0.3 to 0.4)                     | < 0.05<br>(< 0.05 to < 0.05)            | 0.1<br>(0.1 to 0.1)               | 49.5<br>(44.3 to 54.1)                            | 7.1<br>(3.4 to 10.4)                                |
| Motor neuron disease                                           | 0.1<br>(0.1 to 0.1)                     | < 0.05<br>(< 0.05 to < 0.05)            | < 0.05<br>(< 0.05 to < 0.05)      | 38.1<br>(31.9 to 44.2)                            | 2.0<br>(-1.1 to 5.4)                                |
| Migraine                                                       | 1,272.2<br>(1,205.0 to 1,339.9)         | 158.7<br>(150.4 to 168.4)               | 52.5<br>(33.2 to 74.4)            | 37.4<br>(31.4 to 43.4)                            | 0.0<br>(-3.8 to 3.8)                                |
| Tension-type headache                                          | 2,743.5<br>(2,443.0 to 3,091.4)         | 1,657.2<br>(1,374.9 to 1,985.3)         | 8.2<br>(5.1 to 12.3)              | 38.2<br>(30.9 to 46.1)                            | 0.5<br>(-4.6 to 5.7)                                |
| Other neurological disorders                                   | < 0.05<br>(< 0.05 to < 0.05)            | 0.1<br>(< 0.05 to 0.1)                  | 4.9<br>(1.0 to 10.5)              | 72.1<br>(-64.9 to 744.2)                          | 24.0<br>(-72.8 to 451.4)                            |
| <b>Mental and substance use disorders</b>                      | <b>1,523.6<br/>(1,446.2 to 1,597.7)</b> | <b>564.1†<br/>(520.6 to 612.5)</b>      | <b>182.8<br/>(133.1 to 239.6)</b> | <b>37.7<br/>(34.5 to 41.1)</b>                    | <b>0.7<br/>(-1.5 to 3.3)</b>                        |
| Schizophrenia                                                  | 15.5<br>(13.5 to 17.7)                  | 1.4<br>(1.2 to 1.6)                     | 9.9<br>(7.1 to 12.4)              | 40.6<br>(28.3 to 55.0)                            | 0.9<br>(-7.2 to 9.5)                                |
| Alcohol use disorders                                          | 112.9<br>(95.4 to 131.7)                | 62.2<br>(52.3 to 72.1)                  | 11.3<br>(7.6 to 15.8)             | 39.9<br>(28.7 to 51.6)                            | 1.3<br>(-5.9 to 8.9)                                |
| Drug use disorders                                             | 43.8<br>(39.3 to 48.8)                  | 7.4<br>(6.6 to 8.3)                     | 11.9<br>(8.1 to 16.3)             | 50.0<br>(33.7 to 67.1)                            | 8.4<br>(-2.0 to 19.4)                               |
| Opioid use disorders                                           | 25.6<br>(21.2 to 31.1)                  | 3.3<br>(2.7 to 4.0)                     | 10.7<br>(7.2 to 14.7)             | 51.3<br>(32.9 to 70.8)                            | 9.2<br>(-2.4 to 22.1)                               |
| Cocaine use disorders                                          | 1.3<br>(1.1 to 1.6)                     | 0.2<br>(0.1 to 0.2)                     | 0.2<br>(0.1 to 0.3)               | 41.0<br>(33.8 to 48.2)                            | 3.2<br>(-1.8 to 8.2)                                |
| Amphetamine use disorders                                      | 0.7<br>(0.5 to 0.9)                     | 0.1<br>(0.1 to 0.2)                     | 0.1<br>(0.1 to 0.2)               | 39.9<br>(26.9 to 54.1)                            | 2.5<br>(-6.6 to 12.4)                               |
| Cannabis use disorders                                         | 15.2<br>(12.6 to 18.2)                  | 3.1<br>(2.6 to 3.8)                     | 0.4<br>(0.3 to 0.7)               | 38.0<br>(9.9 to 72.8)                             | 0.5<br>(-18.1 to 22.8)                              |
| Other drug use disorders                                       | 3.2<br>(2.8 to 3.6)                     | 0.7<br>(0.6 to 0.8)                     | 0.5<br>(0.4 to 0.8)               | 41.7<br>(19.2 to 68.3)                            | 2.6<br>(-12.4 to 19.4)                              |
| Depressive disorders                                           | 325.0<br>(303.9 to 350.2)               | 362.9<br>(322.2 to 407.2)               | 55.6<br>(38.3 to 75.5)            | 38.2<br>(31.4 to 44.6)                            | 0.2<br>(-4.4 to 4.7)                                |
| Major depressive disorder                                      | 220.4<br>(196.3 to 249.0)               | 343.1<br>(302.8 to 388.1)               | 45.0<br>(30.9 to 61.3)            | 38.1<br>(30.0 to 46.0)                            | 0.2<br>(-5.4 to 5.7)                                |
| Dysthymia                                                      | 109.6<br>(94.4 to 127.2)                | 19.8<br>(17.3 to 22.9)                  | 10.5<br>(7.1 to 15.2)             | 38.9<br>(33.4 to 44.7)                            | 0.2<br>(-3.0 to 3.6)                                |
| Bipolar disorder                                               | 59.1<br>(50.1 to 69.3)                  | 6.6<br>(5.5 to 7.8)                     | 12.1<br>(7.5 to 17.9)             | 37.9<br>(28.3 to 47.7)                            | 0.2<br>(-5.8 to 6.5)                                |
| Anxiety disorders                                              | 300.7<br>(269.9 to 333.6)               | 56.8<br>(51.6 to 62.7)                  | 29.2<br>(20.1 to 40.1)            | 36.3<br>(26.9 to 46.4)                            | 0.3<br>(-5.8 to 6.8)                                |
| Eating disorders                                               | 9.0<br>(7.2 to 11.1)                    | 7.2<br>(5.2 to 9.7)                     | 1.8<br>(1.2 to 2.6)               | 41.9<br>(20.0 to 67.4)                            | 4.5<br>(-10.5 to 21.7)                              |
| Anorexia nervosa                                               | 2.5<br>(1.8 to 3.4)                     | 1.2<br>(0.9 to 1.6)                     | 0.5<br>(0.3 to 0.8)               | 39.4<br>(3.3 to 85.0)                             | 3.2<br>(-23.2 to 35.1)                              |
| Bulimia nervosa                                                | 6.2<br>(4.6 to 8.3)                     | 6.0<br>(4.1 to 8.4)                     | 1.3<br>(0.8 to 2.0)               | 42.9<br>(18.0 to 73.5)                            | 5.0<br>(-13.0 to 26.2)                              |
| Autistic spectrum disorders                                    | 94.1<br>(83.5 to 107.2)                 | 1.2<br>(0.8 to 1.7)                     | 13.2<br>(8.9 to 18.8)             | 35.7<br>(28.5 to 42.9)                            | 1.0<br>(-3.7 to 6.1)                                |
| Autism                                                         | 24.9<br>(21.5 to 29.0)                  | 0.2<br>(0.1 to 0.3)                     | 6.4<br>(4.1 to 9.3)               | 35.7<br>(23.0 to 49.9)                            | 1.1<br>(-7.5 to 11.0)                               |
| Asperger syndrome and other autistic spectrum disorders        | 68.5<br>(56.5 to 83.2)                  | 1.1<br>(0.7 to 1.5)                     | 6.9<br>(4.4 to 10.2)              | 35.7<br>(28.4 to 43.4)                            | 1.0<br>(-3.6 to 5.9)                                |



| Cause                                                      | Prevalence in thousands (95% UI)              | Incidence in thousands (95% UI)                   | YLDs in thousands (95% UI)              |                                                   |                                                     |
|------------------------------------------------------------|-----------------------------------------------|---------------------------------------------------|-----------------------------------------|---------------------------------------------------|-----------------------------------------------------|
|                                                            | 2016 counts                                   | 2016 counts                                       | 2016 counts                             | Percentage change in counts between 2006 and 2016 | Percentage change in age-standardised rates between |
| Attention-deficit/hyperactivity disorder                   | 152.7<br>(136.8 to 170.8)                     | 9.9<br>(8.6 to 11.5)                              | 1.8<br>(1.1 to 2.9)                     | 33.7<br>(24.6 to 44.5)                            | 0.5<br>(-6.1 to 7.8)                                |
| Conduct disorder                                           | 113.2<br>(92.8 to 135.1)                      | 40.8<br>(32.4 to 49.1)                            | 13.7<br>(8.3 to 20.9)                   | 31.7<br>(23.0 to 40.9)                            | 0.3<br>(-6.3 to 7.2)                                |
| Idiopathic developmental intellectual disability           | 272.3<br>(169.8 to 379.6)                     | --                                                | 10.9<br>(5.1 to 18.9)                   | 29.8<br>(21.0 to 38.7)                            | -3.5<br>(-9.4 to 2.5)                               |
| Other mental and substance use disorders                   | 153.1<br>(134.0 to 177.5)                     | 7.7<br>(6.7 to 8.8)                               | 11.4<br>(7.8 to 16.5)                   | 39.5<br>(31.7 to 47.9)                            | 0.6<br>(-4.0 to 5.9)                                |
| <b>Diabetes, urogenital, blood, and endocrine diseases</b> | <b>5,837.1</b><br><b>(5,737.7 to 5,967.4)</b> | <b>1,207.3†</b><br><b>(1,129.2 to 1,292.8)</b>    | <b>76.3</b><br><b>(53.8 to 105.2)</b>   | <b>39.1</b><br><b>(35.3 to 42.9)</b>              | <b>1.7</b><br><b>(-1.0 to 4.2)</b>                  |
| Diabetes mellitus                                          | 222.9<br>(198.8 to 247.0)                     | 14.7<br>(13.2 to 16.2)                            | 15.5<br>(10.6 to 21.7)                  | 48.4<br>(39.2 to 57.6)                            | 6.4<br>(-0.3 to 13.2)                               |
| Acute glomerulonephritis                                   | 0.1<br>(0.1 to 0.1)                           | 1.4<br>(1.2 to 1.6)                               | < 0.05<br>(< 0.05 to < 0.05)            | 35.9<br>(30.0 to 41.8)                            | 0.3<br>(-3.3 to 3.7)                                |
| Chronic kidney disease                                     | 540.3<br>(485.6 to 601.6)                     | 41.4<br>(36.5 to 46.7)                            | 13.8<br>(9.9 to 18.0)                   | 40.3<br>(32.0 to 49.4)                            | 0.2<br>(-4.7 to 5.9)                                |
| Chronic kidney disease due to diabetes mellitus            | 155.0<br>(129.6 to 185.1)                     | 11.0<br>(9.0 to 13.5)                             | 3.8<br>(2.7 to 5.2)                     | 38.3<br>(26.7 to 51.2)                            | -1.7<br>(-8.8 to 6.4)                               |
| Chronic kidney disease due to hypertension                 | 119.7<br>(102.8 to 137.2)                     | 11.1<br>(9.4 to 13.2)                             | 2.4<br>(1.7 to 3.2)                     | 41.7<br>(26.9 to 58.5)                            | 1.0<br>(-8.7 to 11.7)                               |
| Chronic kidney disease due to glomerulonephritis           | 113.0<br>(97.0 to 129.1)                      | 6.7<br>(5.4 to 8.4)                               | 3.6<br>(2.5 to 4.9)                     | 40.0<br>(26.5 to 54.3)                            | 0.3<br>(-7.7 to 8.8)                                |
| Chronic kidney disease due to other causes                 | 152.7<br>(127.3 to 178.8)                     | 12.5<br>(10.4 to 14.7)                            | 4.0<br>(2.8 to 5.4)                     | 41.9<br>(29.2 to 55.7)                            | 1.8<br>(-5.7 to 10.2)                               |
| Urinary diseases and male infertility                      | 161.6<br>(147.6 to 175.7)                     | 699.0†<br>(626.8 to 780.9)                        | 4.0<br>(2.6 to 5.9)                     | 41.3<br>(31.5 to 50.8)                            | 2.1<br>(-4.7 to 8.4)                                |
| Interstitial nephritis and urinary tract infections        | 12.1<br>(10.7 to 13.6)                        | 632.6<br>(560.9 to 711.7)                         | 0.4<br>(0.2 to 0.6)                     | 34.3<br>(15.2 to 56.6)                            | -0.9<br>(-13.1 to 12.5)                             |
| Urolithiasis                                               | 2.0<br>(1.8 to 2.4)                           | 54.5<br>(48.0 to 62.5)                            | 0.2<br>(0.1 to 0.2)                     | 40.3<br>(31.1 to 49.8)                            | 1.6<br>(-5.5 to 9.1)                                |
| Benign prostatic hyperplasia                               | 89.7<br>(75.0 to 105.0)                       | 11.9<br>(9.8 to 14.0)                             | 2.9<br>(1.9 to 4.3)                     | 46.1<br>(33.5 to 57.9)                            | 3.6<br>(-4.4 to 10.9)                               |
| Male infertility                                           | 54.6<br>(49.4 to 60.4)                        | --                                                | 0.3<br>(0.1 to 0.6)                     | 34.6<br>(23.3 to 47.5)                            | -7.7<br>(-15.2 to 0.8)                              |
| Other urinary diseases                                     | --                                            | --                                                | 0.2<br>(0.1 to 0.3)                     | 10.4<br>(-1.8 to 24.1)                            | -17.1<br>(-24.3 to -9.3)                            |
| Gynecological diseases                                     | 1,183.2<br>(1,124.4 to 1,243.5)               | 443.1†<br>(409.6 to 477.9)                        | 14.4<br>(9.7 to 20.5)                   | 38.1<br>(33.0 to 43.3)                            | -1.3<br>(-4.6 to 2.1)                               |
| Uterine fibroids                                           | 80.9<br>(71.2 to 91.1)                        | 10.0<br>(8.6 to 11.5)                             | 2.0<br>(1.3 to 3.1)                     | 40.6<br>(31.5 to 50.5)                            | -0.3<br>(-6.4 to 6.9)                               |
| Polycystic ovarian syndrome                                | 9.3<br>(6.9 to 12.1)                          | 23.6<br>(17.1 to 33.0)                            | 0.1<br>(< 0.05 to 0.1)                  | 39.1<br>(20.7 to 60.6)                            | 0.4<br>(-12.2 to 15.4)                              |
| Female infertility                                         | 5.5<br>(4.3 to 8.3)                           | --                                                | < 0.05<br>(< 0.05 to 0.1)               | 60.3<br>(14.5 to 142.7)                           | 4.9<br>(-20.8 to 49.4)                              |
| Endometriosis                                              | 2.1<br>(1.8 to 2.5)                           | 8.8<br>(7.1 to 10.9)                              | 0.2<br>(0.1 to 0.3)                     | 38.4<br>(-0.7 to 94.2)                            | 0.4<br>(-25.1 to 36.0)                              |
| Genital prolapse                                           | 579.4<br>(513.8 to 646.1)                     | 55.3<br>(46.3 to 65.6)                            | 1.8<br>(0.9 to 3.2)                     | 32.0<br>(24.2 to 40.3)                            | -6.2<br>(-12.0 to 0.1)                              |
| Premenstrual syndrome                                      | 512.3<br>(469.4 to 551.7)                     | 194.6<br>(176.7 to 211.8)                         | 4.2<br>(2.6 to 6.5)                     | 36.0<br>(22.1 to 49.5)                            | -1.7<br>(-10.7 to 7.2)                              |
| Other gynecological diseases                               | 172.5<br>(149.2 to 198.1)                     | 150.9<br>(123.7 to 181.8)                         | 5.9<br>(4.0 to 8.5)                     | 40.8<br>(32.4 to 49.5)                            | 1.0<br>(-4.9 to 7.2)                                |
| Hemoglobinopathies and hemolytic anaemias                  | 4,814.6<br>(4,699.1 to 4,949.3)               | --                                                | 23.3<br>(15.7 to 33.7)                  | 34.2<br>(26.9 to 41.5)                            | -0.5<br>(-5.4 to 4.3)                               |
| Thalassemias                                               | 0.1<br>(< 0.05 to 0.4)                        | --                                                | < 0.05<br>(< 0.05 to < 0.05)            | 37.2<br>(11.9 to 65.8)                            | 2.7<br>(-16.2 to 24.0)                              |
| Thalassaemias trait                                        | 207.8<br>(87.8 to 389.8)                      | --                                                | 3.4<br>(1.2 to 6.8)                     | 32.7<br>(20.5 to 46.0)                            | 0.2<br>(-8.0 to 9.2)                                |
| Sickle cell disorders                                      | 70.1<br>(65.1 to 75.4)                        | --                                                | 5.4<br>(3.8 to 7.6)                     | 35.3<br>(23.1 to 49.6)                            | 2.9<br>(-6.4 to 13.9)                               |
| Sickle cell trait                                          | 2,636.9<br>(2,535.3 to 2,758.6)               | --                                                | 10.1<br>(6.7 to 14.7)                   | 35.2<br>(26.3 to 44.4)                            | -0.3<br>(-6.2 to 5.7)                               |
| G6PD deficiency                                            | 818.8<br>(756.9 to 892.4)                     | --                                                | 0.1<br>(0.1 to 0.1)                     | 26.4<br>(12.0 to 41.7)                            | -7.2<br>(-15.8 to 2.0)                              |
| G6PD trait                                                 | 1,838.6<br>(1,813.0 to 1,867.6)               | --                                                | < 0.05<br>(< 0.05 to < 0.05)            | 47.2<br>(36.3 to 59.4)                            | 8.1<br>(1.5 to 15.5)                                |
| Other hemoglobinopathies and hemolytic anaemias            | 148.1<br>(142.9 to 152.8)                     | --                                                | 4.3<br>(2.9 to 6.2)                     | 31.7<br>(21.9 to 43.2)                            | -4.3<br>(-9.8 to 1.9)                               |
| Endocrine, metabolic, blood, and immune disorders          | 162.7<br>(157.2 to 168.3)                     | 7.8<br>(7.0 to 8.7)                               | 5.3<br>(3.5 to 7.5)                     | 34.2<br>(25.5 to 43.7)                            | 2.5<br>(-2.5 to 7.8)                                |
| <b>Musculoskeletal disorders</b>                           | <b>1,137.3</b><br><b>(1,075.3 to 1,202.7)</b> | <b>537.2</b><br><b>(484.0 to 594.9)</b>           | <b>125.1</b><br><b>(90.0 to 164.6)</b>  | <b>38.7</b><br><b>(34.4 to 42.9)</b>              | <b>-0.2</b><br><b>(-2.9 to 2.6)</b>                 |
| Rheumatoid arthritis                                       | 10.8<br>(9.4 to 12.2)                         | 0.7<br>(0.6 to 0.8)                               | 2.6<br>(1.7 to 3.5)                     | 43.6<br>(27.7 to 61.0)                            | 3.3<br>(-6.3 to 13.3)                               |
| Osteoarthritis                                             | 195.3<br>(182.4 to 209.1)                     | 11.6<br>(10.7 to 12.5)                            | 12.0<br>(8.4 to 16.2)                   | 45.0<br>(39.1 to 50.9)                            | 3.3<br>(-0.6 to 7.2)                                |
| Low back and neck pain                                     | 802.6<br>(743.2 to 864.4)                     | 360.8<br>(322.5 to 404.3)                         | 92.2<br>(64.6 to 121.4)                 | 37.5<br>(32.4 to 42.4)                            | -1.1<br>(-4.5 to 2.1)                               |
| Low back pain                                              | 618.2<br>(547.0 to 702.8)                     | 306.1<br>(269.8 to 348.3)                         | 69.7<br>(49.2 to 92.6)                  | 36.6<br>(30.1 to 42.8)                            | -1.4<br>(-5.8 to 2.7)                               |
| Neck pain                                                  | 226.5<br>(195.5 to 261.6)                     | 54.6<br>(46.9 to 63.9)                            | 22.6<br>(15.2 to 31.9)                  | 40.4<br>(36.5 to 44.3)                            | -0.0<br>(-2.3 to 2.3)                               |
| Gout                                                       | 23.2<br>(20.6 to 26.2)                        | 4.8<br>(4.2 to 5.5)                               | 0.7<br>(0.5 to 1.0)                     | 41.9<br>(21.3 to 64.9)                            | 1.8<br>(-11.6 to 16.2)                              |
| Other musculoskeletal disorders                            | 203.6<br>(164.4 to 247.4)                     | 159.3<br>(125.9 to 196.1)                         | 17.6<br>(11.4 to 25.2)                  | 39.9<br>(26.5 to 54.5)                            | 0.8<br>(-8.3 to 10.6)                               |
| <b>Other non-communicable diseases</b>                     | <b>7,855.5</b><br><b>(7,628.8 to 8,085.1)</b> | <b>22,628.3†</b><br><b>(20,291.1 to 24,898.7)</b> | <b>199.8</b><br><b>(135.6 to 281.5)</b> | <b>34.8</b><br><b>(32.7 to 37.0)</b>              | <b>-0.8</b><br><b>(-2.2 to 0.7)</b>                 |
| Congenital anomalies                                       | 120.3<br>(104.4 to 141.1)                     | --                                                | 17.7<br>(12.6 to 23.9)                  | 30.0<br>(21.9 to 38.6)                            | -3.7<br>(-9.1 to 2.3)                               |
| Neural tube defects                                        | 16.4<br>(14.5 to 18.3)                        | --                                                | 4.9<br>(3.4 to 6.6)                     | 28.8<br>(14.9 to 45.2)                            | -4.3<br>(-13.9 to 6.6)                              |
| Congenital heart anomalies                                 | 28.1<br>(23.2 to 33.6)                        | --                                                | 1.4<br>(0.7 to 2.3)                     | 36.6<br>(19.6 to 55.9)                            | 2.7<br>(-8.9 to 16.4)                               |
| Orofacial clefts                                           | 3.2<br>(2.8 to 3.7)                           | --                                                | 0.1<br>(< 0.05 to 0.1)                  | 23.7<br>(9.2 to 40.4)                             | -7.8<br>(-18.5 to 5.4)                              |
| Down's syndrome                                            | 1.8<br>(1.5 to 2.1)                           | --                                                | 0.2<br>(0.1 to 0.2)                     | 35.3<br>(25.3 to 45.0)                            | 0.9<br>(-6.6 to 8.2)                                |
| Turner syndrome                                            | 6.4<br>(5.4 to 7.5)                           | --                                                | 0.1<br>(< 0.05 to 0.2)                  | 31.4<br>(-9.1 to 88.1)                            | -1.4<br>(-29.7 to 38.6)                             |
| Klinefelter syndrome                                       | 6.4<br>(5.4 to 7.5)                           | --                                                | < 0.05<br>(< 0.05 to 0.1)               | 34.1<br>(1.0 to 75.8)                             | -0.9<br>(-23.8 to 29.3)                             |

| Cause                                         | Prevalence in thousands (95% UI)              | Incidence in thousands (95% UI)          | YLDs in thousands (95% UI)           |                                                   |                                                     |
|-----------------------------------------------|-----------------------------------------------|------------------------------------------|--------------------------------------|---------------------------------------------------|-----------------------------------------------------|
|                                               | 2016 counts                                   | 2016 counts                              | 2016 counts                          | Percentage change in counts between 2006 and 2016 | Percentage change in age-standardised rates between |
| Other chromosomal abnormalities               | 2.1<br>(1.8 to 2.4)                           | --                                       | 0.4<br>(0.2 to 0.6)                  | 32.6<br>(-6.5 to 93.2)                            | -0.7<br>(-28.8 to 42.1)                             |
| Congenital musculoskeletal and limb anomalies | 10.6<br>(9.1 to 12.0)                         | --                                       | 1.5<br>(1.0 to 2.2)                  | 33.5<br>(15.8 to 53.3)                            | -0.9<br>(-12.0 to 12.1)                             |
| Urogenital congenital anomalies               | 8.3<br>(7.2 to 9.4)                           | --                                       | 0.2<br>(0.1 to 0.3)                  | 31.6<br>(19.3 to 44.6)                            | -1.2<br>(-9.7 to 7.6)                               |
| Digestive congenital anomalies                | 11.3<br>(10.1 to 12.8)                        | --                                       | 0.5<br>(0.3 to 0.7)                  | 34.5<br>(10.8 to 63.8)                            | -0.3<br>(-16.1 to 18.4)                             |
| Other congenital anomalies                    | 51.3<br>(33.6 to 76.6)                        | --                                       | 8.4<br>(5.4 to 12.7)                 | 28.5<br>(17.5 to 40.7)                            | -5.0<br>(-12.5 to 3.8)                              |
| Skin and subcutaneous diseases                | 3,754.6<br>(3,613.7 to 3,936.9)               | 8,945.8<br>(8,204.3 to 9,788.6)          | 87.1<br>(56.9 to 127.7)              | 36.1<br>(33.4 to 39.0)                            | 1.5<br>(-0.2 to 3.5)                                |
| Dermatitis                                    | 526.2<br>(437.9 to 627.1)                     | 489.5<br>(427.6 to 566.8)                | 20.9<br>(11.8 to 35.2)               | 33.7<br>(28.3 to 39.2)                            | 0.3<br>(-3.1 to 3.8)                                |
| Psoriasis                                     | 56.2<br>(53.1 to 59.9)                        | 8.8<br>(8.4 to 9.4)                      | 4.9<br>(3.4 to 6.5)                  | 45.7<br>(31.1 to 63.4)                            | 6.5<br>(-1.9 to 17.2)                               |
| Cellulitis                                    | 4.0<br>(3.7 to 4.3)                           | 68.8<br>(63.6 to 74.4)                   | 0.2<br>(0.1 to 0.3)                  | 35.8<br>(9.6 to 68.2)                             | 0.9<br>(-17.3 to 23.7)                              |
| Pyoderma                                      | 62.2<br>(59.1 to 65.4)                        | 1,224.2<br>(1,169.5 to 1,283.1)          | 0.4<br>(0.1 to 0.7)                  | 35.0<br>(26.8 to 43.8)                            | 0.9<br>(-4.3 to 6.1)                                |
| Scabies                                       | 196.4<br>(157.2 to 252.3)                     | 609.1<br>(488.3 to 779.6)                | 5.1<br>(2.7 to 8.5)                  | 30.1<br>(22.5 to 37.1)                            | -3.0<br>(-8.2 to 1.6)                               |
| Fungal skin diseases                          | 1,601.3<br>(1,348.0 to 1,885.5)               | 4,522.5<br>(3,812.3 to 5,318.9)          | 9.1<br>(3.6 to 19.4)                 | 34.3<br>(32.7 to 36.0)                            | 0.2<br>(-0.6 to 1.1)                                |
| Viral skin diseases                           | 329.8<br>(312.4 to 348.3)                     | 457.2<br>(431.8 to 487.4)                | 10.1<br>(6.3 to 15.0)                | 33.3<br>(28.5 to 38.0)                            | -0.1<br>(-3.2 to 3.2)                               |
| Acne vulgaris                                 | 981.4<br>(845.7 to 1,143.1)                   | 706.6<br>(554.1 to 937.1)                | 25.2<br>(16.7 to 36.6)               | 39.7<br>(33.0 to 47.1)                            | 3.9<br>(-0.9 to 9.1)                                |
| Alopecia areata                               | 18.6<br>(17.4 to 19.8)                        | 33.2<br>(31.1 to 35.2)                   | 0.6<br>(0.4 to 0.9)                  | 37.7<br>(22.4 to 54.4)                            | 0.4<br>(-9.3 to 10.6)                               |
| Pruritus                                      | 78.3<br>(68.5 to 88.5)                        | 63.8<br>(56.6 to 72.4)                   | 0.8<br>(0.4 to 1.5)                  | 36.9<br>(28.8 to 45.5)                            | 0.4<br>(-4.7 to 5.9)                                |
| Urticaria                                     | 114.5<br>(97.1 to 135.2)                      | 207.2<br>(174.9 to 243.0)                | 6.9<br>(4.4 to 10.2)                 | 34.3<br>(25.8 to 43.5)                            | 0.1<br>(-5.7 to 6.5)                                |
| Decubitus ulcer                               | 0.8<br>(0.7 to 0.9)                           | 3.0<br>(2.7 to 3.3)                      | 0.1<br>(0.1 to 0.2)                  | 40.0<br>(28.6 to 51.7)                            | 4.2<br>(-10.8 to 19.7)                              |
| Other skin and subcutaneous diseases          | 489.6<br>(474.5 to 504.7)                     | 551.8<br>(534.7 to 569.1)                | 2.7<br>(1.3 to 5.0)                  | 38.9<br>(34.5 to 43.1)                            | 1.4<br>(-1.0 to 3.8)                                |
| Sense organ diseases                          | 2,001.7<br>(1,913.3 to 2,086.5)               | 1,002.7+<br>(928.4 to 1,079.9)           | 76.0<br>(53.2 to 105.0)              | 33.6<br>(29.8 to 37.8)                            | -1.8<br>(-4.0 to 0.7)                               |
| Glaucoma                                      | 3.0<br>(2.4 to 3.6)                           | --                                       | 0.3<br>(0.2 to 0.5)                  | 45.7<br>(28.1 to 68.0)                            | 4.6<br>(-7.1 to 18.3)                               |
| Cataract                                      | 90.3<br>(78.8 to 102.0)                       | --                                       | 9.6<br>(6.7 to 13.4)                 | 41.8<br>(32.6 to 52.0)                            | 1.2<br>(-4.5 to 7.7)                                |
| Macular degeneration                          | 4.4<br>(3.2 to 5.9)                           | --                                       | 0.5<br>(0.3 to 0.7)                  | 48.0<br>(27.6 to 70.3)                            | 6.8<br>(-6.6 to 21.5)                               |
| Refraction and accommodation disorders        | 1,064.7<br>(961.2 to 1,179.4)                 | --                                       | 19.3<br>(12.0 to 30.5)               | 30.1<br>(22.4 to 38.1)                            | -4.3<br>(-10.0 to 1.2)                              |
| Age-related and other hearing loss            | 1,112.1<br>(1,036.6 to 1,194.6)               | --                                       | 36.0<br>(24.9 to 50.5)               | 31.2<br>(25.0 to 36.7)                            | -3.3<br>(-6.1 to -1.0)                              |
| Other vision loss                             | 37.3<br>(32.8 to 42.1)                        | --                                       | 4.2<br>(2.9 to 5.9)                  | 45.3<br>(32.7 to 60.4)                            | 4.9<br>(-3.1 to 14.6)                               |
| Other sense organ diseases                    | 197.7<br>(182.9 to 212.9)                     | 1,002.7<br>(928.4 to 1,079.9)            | 6.0<br>(3.8 to 9.0)                  | 38.8<br>(31.6 to 45.9)                            | 1.0<br>(-2.8 to 5.2)                                |
| Oral disorders                                | 5,351.6<br>(4,946.2 to 5,720.6)               | 12,679.8+<br>(10,574.4 to 14,908.6)      | 19.0<br>(10.6 to 33.0)               | 38.8<br>(35.5 to 42.2)                            | 0.3<br>(-1.9 to 2.4)                                |
| Caries of deciduous teeth                     | 1,270.8<br>(978.9 to 1,588.8)                 | 4,080.8<br>(2,658.8 to 5,723.0)          | 0.3<br>(0.1 to 0.6)                  | 30.8<br>(15.7 to 47.7)                            | -0.2<br>(-11.7 to 12.6)                             |
| Caries of permanent teeth                     | 3,121.7<br>(2,704.0 to 3,582.8)               | 8,453.8<br>(6,937.3 to 10,023.2)         | 1.8<br>(0.8 to 3.6)                  | 34.0<br>(27.6 to 40.9)                            | -1.4<br>(-5.6 to 2.8)                               |
| Periodontal disease                           | 1,145.0<br>(853.3 to 1,430.6)                 | 135.3<br>(100.8 to 173.0)                | 7.5<br>(2.9 to 16.2)                 | 40.4<br>(34.8 to 47.4)                            | 0.3<br>(-3.3 to 4.9)                                |
| Edentulism and severe tooth loss              | 158.4<br>(133.3 to 186.0)                     | 9.9<br>(8.3 to 11.6)                     | 4.4<br>(2.9 to 6.4)                  | 40.8<br>(33.7 to 48.1)                            | 0.8<br>(-3.5 to 4.9)                                |
| Other oral disorders                          | 168.5<br>(160.8 to 177.2)                     | --                                       | 5.0<br>(3.1 to 7.5)                  | 36.8<br>(31.3 to 42.2)                            | 0.2<br>(-3.2 to 3.7)                                |
| <b>Injuries</b>                               | <b>1,257.8</b><br><b>(1,181.1 to 1,341.4)</b> | <b>811.6+</b><br><b>(766.4 to 861.7)</b> | <b>54.5</b><br><b>(37.1 to 76.9)</b> | <b>37.7</b><br><b>(35.2 to 40.2)</b>              | <b>1.1</b><br><b>(-0.3 to 2.5)</b>                  |
| <b>Transport injuries</b>                     | <b>160.5</b><br><b>(149.5 to 171.7)</b>       | <b>77.8</b><br><b>(68.5 to 87.6)</b>     | <b>9.7</b><br><b>(6.5 to 14.0)</b>   | <b>39.1</b><br><b>(36.1 to 42.0)</b>              | <b>1.5</b><br><b>(-0.3 to 3.3)</b>                  |
| Road injuries                                 | 131.3<br>(122.9 to 140.1)                     | 67.5<br>(59.0 to 76.8)                   | 7.9<br>(5.2 to 11.3)                 | 38.6<br>(35.6 to 41.5)                            | 1.2<br>(-0.6 to 3.0)                                |
| Pedestrian road injuries                      | 29.0<br>(25.6 to 33.0)                        | 10.6<br>(8.6 to 13.1)                    | 1.8<br>(1.2 to 2.5)                  | 38.4<br>(35.5 to 41.4)                            | 1.3<br>(-0.6 to 3.1)                                |
| Cyclist road injuries                         | 22.1<br>(18.6 to 26.0)                        | 12.6<br>(9.8 to 15.8)                    | 1.2<br>(0.8 to 1.8)                  | 41.8<br>(38.6 to 45.1)                            | 3.5<br>(1.5 to 5.4)                                 |
| Motorcyclist road injuries                    | 20.9<br>(17.9 to 24.9)                        | 7.2<br>(5.8 to 9.0)                      | 1.2<br>(0.8 to 1.8)                  | 41.5<br>(38.4 to 44.3)                            | 3.0<br>(1.0 to 4.7)                                 |
| Motor vehicle road injuries                   | 36.8<br>(31.7 to 41.9)                        | 22.3<br>(18.5 to 26.4)                   | 2.4<br>(1.6 to 3.4)                  | 41.0<br>(37.8 to 44.5)                            | 3.2<br>(1.2 to 5.2)                                 |
| Other road injuries                           | 22.6<br>(19.4 to 26.4)                        | 14.8<br>(11.7 to 18.4)                   | 1.3<br>(0.8 to 1.8)                  | 29.2<br>(26.4 to 32.3)                            | -5.9<br>(-7.6 to -4.1)                              |
| Other transport injuries                      | 29.2<br>(24.3 to 35.6)                        | 10.3<br>(8.3 to 12.9)                    | 1.9<br>(1.2 to 2.7)                  | 41.1<br>(36.6 to 45.9)                            | 3.3<br>(1.0 to 5.7)                                 |
| <b>Unintentional injuries</b>                 | <b>1,059.0</b><br><b>(984.9 to 1,140.6)</b>   | <b>708.3</b><br><b>(665.3 to 756.7)</b>  | <b>40.6</b><br><b>(27.6 to 57.3)</b> | <b>38.1</b><br><b>(35.5 to 40.8)</b>              | <b>1.3</b><br><b>(-0.1 to 2.8)</b>                  |
| Falls                                         | 365.2<br>(317.5 to 414.4)                     | 233.5<br>(202.9 to 272.2)                | 16.3<br>(11.5 to 22.5)               | 39.3<br>(36.8 to 42.0)                            | 1.8<br>(0.3 to 3.5)                                 |
| Drowning                                      | 4.2<br>(3.6 to 4.9)                           | 1.2<br>(1.0 to 1.4)                      | 0.3<br>(0.2 to 0.4)                  | 27.4<br>(23.5 to 31.7)                            | -5.0<br>(-7.2 to -2.9)                              |
| Fire, heat, and hot substances                | 106.6<br>(89.8 to 129.4)                      | 20.8<br>(16.7 to 25.0)                   | 3.3<br>(2.3 to 4.7)                  | 33.5<br>(26.4 to 40.1)                            | -1.1<br>(-5.2 to 2.9)                               |
| Poisonings                                    | 3.5<br>(2.8 to 4.2)                           | 6.5<br>(5.1 to 8.2)                      | 0.4<br>(0.2 to 0.6)                  | 42.6<br>(30.5 to 55.6)                            | 5.2<br>(-2.2 to 12.9)                               |
| Exposure to mechanical forces                 | 177.8<br>(152.4 to 215.1)                     | 99.2<br>(83.6 to 115.2)                  | 4.9<br>(3.2 to 7.2)                  | 34.8<br>(31.4 to 38.1)                            | -1.2<br>(-3.0 to 0.6)                               |
| Unintentional firearm injuries                | 10.2<br>(8.4 to 12.4)                         | 3.8<br>(2.8 to 5.0)                      | 0.5<br>(0.3 to 0.7)                  | 41.3<br>(37.5 to 45.2)                            | 2.6<br>(0.5 to 4.8)                                 |
| Unintentional suffocation                     | 14.6<br>(10.5 to 19.6)                        | 5.0<br>(3.4 to 7.1)                      | 0.5<br>(0.3 to 0.8)                  | 33.2<br>(28.9 to 38.0)                            | -1.3<br>(-3.7 to 1.2)                               |
| Other exposure to mechanical forces           | 153.1<br>(128.2 to 188.7)                     | 90.4<br>(76.4 to 105.0)                  | 3.9<br>(2.6 to 5.7)                  | 34.2<br>(30.6 to 37.7)                            | -1.7<br>(-3.6 to 0.1)                               |



| Cause                                                                               | Prevalence in thousands (95% UI)        | Incidence in thousands (95% UI)       | YLDs in thousands (95% UI)                    |                                                   |                                                     |
|-------------------------------------------------------------------------------------|-----------------------------------------|---------------------------------------|-----------------------------------------------|---------------------------------------------------|-----------------------------------------------------|
|                                                                                     | 2016 counts                             | 2016 counts                           | 2016 counts                                   | Percentage change in counts between 2006 and 2016 | Percentage change in age-standardised rates between |
| Adverse effects of medical treatment                                                | 4.1<br>(3.2 to 5.1)                     | 53.2<br>(46.0 to 61.3)                | 0.5<br>(0.3 to 0.8)                           | 30.9<br>(23.8 to 38.7)                            | -2.1<br>(-6.6 to 2.3)                               |
| Animal contact                                                                      | 64.3<br>(56.5 to 74.6)                  | 107.8<br>(89.7 to 125.4)              | 2.3<br>(1.5 to 3.2)                           | 36.8<br>(30.2 to 43.8)                            | -1.1<br>(-4.8 to 2.7)                               |
| Venomous animal contact                                                             | 25.6<br>(21.3 to 30.8)                  | 45.6<br>(35.8 to 57.0)                | 1.6<br>(1.0 to 2.2)                           | 36.4<br>(27.0 to 46.1)                            | -1.2<br>(-6.5 to 4.2)                               |
| Non-venomous animal contact                                                         | 38.7<br>(32.4 to 47.5)                  | 62.2<br>(50.3 to 74.9)                | 0.7<br>(0.5 to 1.1)                           | 37.8<br>(33.2 to 42.4)                            | -0.8<br>(-3.7 to 1.8)                               |
| Foreign body                                                                        | 78.7<br>(63.7 to 94.0)                  | 64.7<br>(56.5 to 74.3)                | 3.6<br>(2.3 to 5.3)                           | 36.2<br>(31.7 to 40.8)                            | 0.8<br>(-1.8 to 3.0)                                |
| Pulmonary aspiration and foreign body in airway                                     | 45.1<br>(33.4 to 60.5)                  | 25.5<br>(20.8 to 31.3)                | 2.3<br>(1.5 to 3.4)                           | 31.6<br>(27.0 to 36.4)                            | -2.2<br>(-4.6 to 0.0)                               |
| Foreign body in eyes                                                                | 3.9<br>(2.0 to 6.1)                     | 22.2<br>(16.9 to 29.6)                | 0.2<br>(0.1 to 0.4)                           | 42.1<br>(36.6 to 47.7)                            | 4.5<br>(1.5 to 7.6)                                 |
| Foreign body in other body part                                                     | 29.7<br>(23.3 to 38.7)                  | 17.0<br>(13.7 to 21.0)                | 1.1<br>(0.7 to 1.6)                           | 46.1<br>(40.0 to 51.9)                            | 7.3<br>(4.1 to 10.3)                                |
| Environmental heat and cold exposure                                                | 99.0<br>(83.4 to 116.4)                 | 39.8<br>(32.7 to 48.1)                | 4.3<br>(2.8 to 6.1)                           | 45.2<br>(41.9 to 48.6)                            | 5.6<br>(3.8 to 7.4)                                 |
| Other unintentional injuries                                                        | 155.7<br>(123.7 to 196.4)               | 81.5<br>(68.1 to 98.6)                | 4.7<br>(3.1 to 6.8)                           | 38.0<br>(34.8 to 41.1)                            | 1.9<br>(0.3 to 3.5)                                 |
| <b>Self-harm and interpersonal violence</b>                                         | <b>317.1</b><br><b>(279.7 to 357.6)</b> | <b>25.3†</b><br><b>(21.4 to 29.3)</b> | <b>4.1</b><br><b>(2.9 to 5.7)</b>             | <b>30.9</b><br><b>(27.2 to 34.5)</b>              | <b>-3.0</b><br><b>(-5.2 to -0.8)</b>                |
| Self-harm                                                                           | 6.5<br>(5.6 to 7.4)                     | 4.1<br>(3.5 to 4.8)                   | 0.4<br>(0.2 to 0.5)                           | 40.1<br>(36.4 to 43.8)                            | 0.8<br>(-1.2 to 2.8)                                |
| Self-harm by firearm                                                                | 0.4<br>(0.4 to 0.5)                     | 0.2<br>(0.1 to 0.3)                   | < 0.05<br>(< 0.05 to < 0.05)                  | 33.6<br>(29.4 to 37.9)                            | -4.1<br>(-6.8 to -1.4)                              |
| Self-harm by other specified means                                                  | 6.1<br>(5.2 to 7.0)                     | 3.9<br>(3.3 to 4.6)                   | 0.4<br>(0.2 to 0.5)                           | 40.5<br>(36.6 to 44.3)                            | 1.1<br>(-1.0 to 3.2)                                |
| Interpersonal violence                                                              | 310.6<br>(273.7 to 351.2)               | 21.2†<br>(17.4 to 25.0)               | 3.8<br>(2.6 to 5.2)                           | 30.0<br>(26.2 to 34.0)                            | -3.6<br>(-6.0 to -1.2)                              |
| Assault by firearm                                                                  | 1.6<br>(1.3 to 1.9)                     | 0.7<br>(0.5 to 1.0)                   | 0.1<br>(0.1 to 0.1)                           | 41.1<br>(36.2 to 46.2)                            | 2.8<br>(0.0 to 5.8)                                 |
| Assault by sharp object                                                             | 12.6<br>(10.4 to 15.1)                  | 7.3<br>(5.5 to 9.4)                   | 0.5<br>(0.3 to 0.7)                           | 44.0<br>(40.2 to 47.6)                            | 5.1<br>(3.0 to 7.4)                                 |
| Sexual violence                                                                     | 279.6<br>(242.8 to 321.3)               | --                                    | 2.4<br>(1.6 to 3.5)                           | 22.9<br>(18.3 to 28.0)                            | -9.5<br>(-12.3 to -6.2)                             |
| Assault by other means                                                              | 16.9<br>(14.4 to 20.1)                  | 13.1<br>(10.5 to 15.8)                | 0.8<br>(0.5 to 1.1)                           | 46.9<br>(43.7 to 50.2)                            | 6.1<br>(4.1 to 8.2)                                 |
| <b>Forces of nature, conflict and terrorism, and executions and police conflict</b> | <b>0.8</b><br><b>(0.4 to 1.5)</b>       | <b>0.2†</b><br><b>(0.1 to 0.3)</b>    | <b>&lt; 0.05</b><br><b>(&lt; 0.05 to 0.1)</b> | <b>46.6</b><br><b>(29.6 to 77.3)</b>              | <b>12.1</b><br><b>(1.5 to 37.8)</b>                 |
| Exposure to forces of nature                                                        | 0.4<br>(0.2 to 0.6)                     | --                                    | < 0.05<br>(< 0.05 to < 0.05)                  | 60.5<br>(47.8 to 137.6)                           | 18.4<br>(9.1 to 77.7)                               |
| Conflict and terrorism                                                              | --                                      | --                                    | --                                            | --                                                | --                                                  |
| Executions and police conflict                                                      | 0.4<br>(0.2 to 1.1)                     | 0.2<br>(0.1 to 0.3)                   | < 0.05<br>(< 0.05 to < 0.05)                  | 35.2<br>(15.6 to 58.8)                            | 6.4<br>(-14.7 to 28.7)                              |
| <b>Impairments</b>                                                                  | --                                      | --                                    | --                                            | --                                                | --                                                  |
| Anaemia                                                                             | 5,551.6<br>(5,354.3 to 5,763.8)         | --                                    | 199.9<br>(135.7 to 283.7)                     | 22.0<br>(15.4 to 28.0)                            | -9.4<br>(-14.3 to -5.3)                             |
| Developmental intellectual disability                                               | 432.7<br>(330.4 to 535.9)               | --                                    | 41.5<br>(29.4 to 57.6)                        | 38.7<br>(28.6 to 51.5)                            | 2.7<br>(-4.0 to 11.8)                               |
| Epilepsy                                                                            | 113.3<br>(66.0 to 169.2)                | --                                    | 40.8<br>(21.0 to 68.5)                        | 43.9<br>(-28.5 to 192.1)                          | 5.5<br>(-48.6 to 114.9)                             |
| Guillain-Barre syndrome                                                             | 0.1<br>(0.1 to 0.1)                     | --                                    | < 0.05<br>(< 0.05 to < 0.05)                  | 35.2<br>(34.0 to 36.6)                            | 0.1<br>(-0.0 to 0.2)                                |
| Hearing loss                                                                        | 1,374.2<br>(1,298.1 to 1,457.8)         | --                                    | 50.1<br>(35.0 to 68.8)                        | 29.5<br>(25.0 to 33.5)                            | -3.9<br>(-6.4 to -1.8)                              |
| Heart failure                                                                       | 26.4<br>(23.3 to 29.6)                  | --                                    | 2.8<br>(2.0 to 3.7)                           | 33.2<br>(22.8 to 42.9)                            | -3.5<br>(-10.6 to 4.2)                              |
| Infertility                                                                         | 154.3<br>(143.8 to 166.6)               | --                                    | 0.9<br>(0.4 to 1.8)                           | 34.5<br>(25.3 to 45.0)                            | -7.5<br>(-13.8 to -0.4)                             |
| Pelvic inflammatory disease                                                         | 11.0<br>(9.2 to 13.1)                   | --                                    | 1.4<br>(1.0 to 2.0)                           | 37.3<br>(18.9 to 57.4)                            | -0.9<br>(-13.7 to 13.3)                             |
| Vision loss                                                                         | 1,271.2<br>(1,163.6 to 1,386.4)         | --                                    | 46.1<br>(32.5 to 63.7)                        | 34.2<br>(26.8 to 44.0)                            | -3.6<br>(-7.2 to 0.5)                               |

We did not calculate incidence for the nine impairments, certain NTDs, and causes with only birth prevalence. Blank cells mean that no estimate is available.

† Incidence for aggregate causes represents the sum of the incidence of the causes below the aggregate.

‡ Incidence estimates for stroke represent first-ever stroke only.

^ Incidence of HIV/AIDS represents new infections of HIV only and does not include new infections of Tuberculosis in HIV positive cases.

SR Table 14: Prevalence, incidence, and YLDs for 2016, percentage change of YLD counts and percentage change of age-standardised YLD rates between 2006 and 2016 by cause and impairments, for all ages, Bermuda.

| Cause                                                                                | Prevalence in thousands (95% UI) | Incidence in thousands (95% UI)         | YLDs in thousands (95% UI)             |                                                   |                                                     |
|--------------------------------------------------------------------------------------|----------------------------------|-----------------------------------------|----------------------------------------|---------------------------------------------------|-----------------------------------------------------|
|                                                                                      | 2016 counts                      | 2016 counts                             | 2016 counts                            | Percentage change in counts between 2006 and 2016 | Percentage change in age-standardised rates between |
| <b>All causes</b>                                                                    | <b>67.1</b><br>(66.8 to 67.3)    | <b>431.4†</b><br>(409.3 to 456.3)       | <b>7.2</b><br>(5.4 to 9.5)             | <b>16.8</b><br>(14.3 to 19.1)                     | <b>-1.4</b><br>(-3.3 to 0.5)                        |
| <b>Communicable, maternal, neonatal, and nutritional disorders</b>                   | <b>38.1</b><br>(36.7 to 39.5)    | <b>243.1†</b><br>(223.4 to 265.3)       | <b>0.6</b><br>(0.4 to 0.8)             | <b>9.2</b><br>(-0.4 to 21.4)                      | <b>-1.0</b><br>(-9.6 to 10.1)                       |
| <b>HIV/AIDS and tuberculosis</b>                                                     | <b>16.1</b><br>(14.5 to 17.4)    | <b>&lt; 0.05†</b><br>(< 0.05 to < 0.05) | <b>&lt; 0.05</b><br>(< 0.05 to 0.1)    | <b>-26.0</b><br>(-38.2 to -14.9)                  | <b>-37.4</b><br>(-47.3 to -27.9)                    |
| Tuberculosis                                                                         | 14.9<br>(13.3 to 16.5)           | < 0.05†<br>(< 0.05 to < 0.05)           | < 0.05<br>(< 0.05 to < 0.05)           | 4.7<br>(-2.2 to 12.8)                             | -8.2<br>(-13.9 to -1.9)                             |
| Drug-susceptible tuberculosis                                                        | < 0.05<br>(< 0.05 to < 0.05)     | < 0.05<br>(< 0.05 to < 0.05)            | < 0.05<br>(< 0.05 to < 0.05)           | 4.7<br>(-2.3 to 12.8)                             | -8.2<br>(-13.9 to -1.9)                             |
| Multidrug-resistant tuberculosis without extensive drug resistance                   | < 0.05<br>(< 0.05 to < 0.05)     | < 0.05<br>(< 0.05 to < 0.05)            | < 0.05<br>(< 0.05 to < 0.05)           | -9.3<br>(-84.2 to 419.7)                          | -20.6<br>(-86.1 to 358.0)                           |
| Extensively drug-resistant tuberculosis                                              | < 0.05<br>(< 0.05 to < 0.05)     | < 0.05<br>(< 0.05 to < 0.05)            | < 0.05<br>(< 0.05 to < 0.05)           | 141.4<br>(-57.9 to 1,284.5)                       | 111.5<br>(-62.9 to 1,119.3)                         |
| Latent tuberculosis infection                                                        | 14.9<br>(13.3 to 16.5)           | --                                      | --                                     | --                                                | --                                                  |
| HIV/AIDS                                                                             | 0.1<br>(0.1 to 0.2)              | < 0.05^<br>(< 0.05 to < 0.05)           | < 0.05<br>(< 0.05 to 0.1)              | -26.7<br>(-39.4 to -15.3)                         | -38.0<br>(-48.4 to -28.4)                           |
| Drug-susceptible HIV/AIDS - Tuberculosis                                             | < 0.05<br>(< 0.05 to < 0.05)     | < 0.05<br>(< 0.05 to < 0.05)            | < 0.05<br>(< 0.05 to < 0.05)           | -13.7<br>(-19.7 to -6.7)                          | -25.9<br>(-31.0 to -19.9)                           |
| Multidrug-resistant HIV/AIDS - Tuberculosis without extensive drug resistance        | < 0.05<br>(< 0.05 to < 0.05)     | < 0.05<br>(< 0.05 to < 0.05)            | < 0.05<br>(< 0.05 to < 0.05)           | -24.6<br>(-87.0 to 329.2)                         | -35.2<br>(-88.8 to 268.7)                           |
| Extensively drug-resistant HIV/AIDS - Tuberculosis                                   | < 0.05<br>(< 0.05 to < 0.05)     | < 0.05<br>(< 0.05 to < 0.05)            | < 0.05<br>(< 0.05 to < 0.05)           | 100.7<br>(-65.3 to 1,043.2)                       | 72.4<br>(-70.2 to 882.0)                            |
| HIV/AIDS resulting in other diseases                                                 | 0.1<br>(0.1 to 0.2)              | < 0.05<br>(< 0.05 to < 0.05)            | < 0.05<br>(< 0.05 to 0.1)              | -26.8<br>(-39.6 to -15.3)                         | -38.1<br>(-48.6 to -28.4)                           |
| <b>Diarrhoea, lower respiratory infections, and other common infectious diseases</b> | <b>3.8</b><br>(3.6 to 4.1)       | <b>234.8†</b><br>(214.9 to 258.0)       | <b>0.2</b><br>(0.1 to 0.3)             | <b>19.7</b><br>(15.9 to 24.5)                     | <b>8.3</b><br>(5.0 to 12.3)                         |
| Diarrhoeal diseases                                                                  | 0.8<br>(0.8 to 0.9)              | 53.6<br>(50.2 to 57.6)                  | 0.1<br>(0.1 to 0.1)                    | 30.9<br>(24.4 to 38.1)                            | 17.6<br>(11.8 to 24.0)                              |
| Intestinal infectious diseases                                                       | < 0.05<br>(< 0.05 to < 0.05)     | < 0.05†<br>(< 0.05 to < 0.05)           | < 0.05<br>(< 0.05 to < 0.05)           | -10.4<br>(-22.7 to 2.1)                           | -25.9<br>(-36.0 to -15.7)                           |
| Typhoid fever                                                                        | < 0.05<br>(< 0.05 to < 0.05)     | < 0.05<br>(< 0.05 to < 0.05)            | < 0.05<br>(< 0.05 to < 0.05)           | -27.0<br>(-40.7 to -13.9)                         | -39.4<br>(-51.2 to -28.4)                           |
| Paratyphoid fever                                                                    | < 0.05<br>(< 0.05 to < 0.05)     | < 0.05<br>(< 0.05 to < 0.05)            | < 0.05<br>(< 0.05 to < 0.05)           | 106.2<br>(72.2 to 153.4)                          | 67.1<br>(39.6 to 104.5)                             |
| Other intestinal infectious diseases                                                 | --                               | --                                      | < 0.05<br>(< 0.05 to < 0.05)           | -36.4<br>(-51.0 to -18.9)                         | -45.5<br>(-58.4 to -29.6)                           |
| Lower respiratory infections                                                         | 0.1<br>(0.1 to 0.1)              | 4.0<br>(3.7 to 4.4)                     | < 0.05<br>(< 0.05 to < 0.05)           | 31.4<br>(17.4 to 46.1)                            | 12.7<br>(0.8 to 24.7)                               |
| Upper respiratory infections                                                         | 2.3<br>(2.0 to 2.6)              | 172.2<br>(152.7 to 195.5)               | 0.1<br>(< 0.05 to 0.1)                 | 9.8<br>(4.4 to 15.3)                              | -0.1<br>(-5.0 to 4.7)                               |
| Otitis media                                                                         | 0.7<br>(0.6 to 0.7)              | 3.6<br>(2.9 to 4.4)                     | < 0.05<br>(< 0.05 to < 0.05)           | 5.3<br>(-2.3 to 14.0)                             | -1.6<br>(-8.3 to 6.6)                               |
| Meningitis                                                                           | 0.1<br>(< 0.05 to 0.1)           | < 0.05<br>(< 0.05 to < 0.05)            | < 0.05<br>(< 0.05 to < 0.05)           | 12.2<br>(9.3 to 15.0)                             | -0.3<br>(-2.9 to 2.3)                               |
| Pneumococcal meningitis                                                              | < 0.05<br>(< 0.05 to < 0.05)     | < 0.05<br>(< 0.05 to < 0.05)            | < 0.05<br>(< 0.05 to < 0.05)           | 12.1<br>(7.9 to 16.2)                             | -0.8<br>(-4.4 to 2.8)                               |
| H influenzae type B meningitis                                                       | < 0.05<br>(< 0.05 to < 0.05)     | < 0.05<br>(< 0.05 to < 0.05)            | < 0.05<br>(< 0.05 to < 0.05)           | 9.4<br>(4.5 to 14.4)                              | -1.8<br>(-6.0 to 2.6)                               |
| Meningococcal infection                                                              | < 0.05<br>(< 0.05 to < 0.05)     | < 0.05<br>(< 0.05 to < 0.05)            | < 0.05<br>(< 0.05 to < 0.05)           | 15.1<br>(8.9 to 26.7)                             | 1.2<br>(-4.4 to 14.3)                               |
| Other meningitis                                                                     | < 0.05<br>(< 0.05 to < 0.05)     | < 0.05<br>(< 0.05 to < 0.05)            | < 0.05<br>(< 0.05 to < 0.05)           | 14.0<br>(10.0 to 18.1)                            | 1.4<br>(-2.3 to 5.3)                                |
| Encephalitis                                                                         | < 0.05<br>(< 0.05 to < 0.05)     | < 0.05<br>(< 0.05 to < 0.05)            | < 0.05<br>(< 0.05 to < 0.05)           | 14.2<br>(-4.4 to 37.4)                            | 0.5<br>(-15.4 to 20.0)                              |
| Diphtheria                                                                           | < 0.05<br>(< 0.05 to < 0.05)     | < 0.05<br>(< 0.05 to < 0.05)            | < 0.05<br>(< 0.05 to < 0.05)           | -11.9<br>(-54.9 to 69.0)                          | -26.3<br>(-64.1 to 45.3)                            |
| Whooping cough                                                                       | < 0.05<br>(< 0.05 to < 0.05)     | < 0.05<br>(< 0.05 to < 0.05)            | < 0.05<br>(< 0.05 to < 0.05)           | -40.0<br>(-63.8 to 4.1)                           | -41.0<br>(-64.8 to 5.0)                             |
| Tetanus                                                                              | < 0.05<br>(< 0.05 to < 0.05)     | < 0.05<br>(< 0.05 to < 0.05)            | < 0.05<br>(< 0.05 to < 0.05)           | 15.5<br>(-1.2 to 33.7)                            | 3.5<br>(-10.6 to 18.5)                              |
| Measles                                                                              | < 0.05<br>(< 0.05 to < 0.05)     | < 0.05<br>(< 0.05 to 0.1)               | < 0.05<br>(< 0.05 to < 0.05)           | -24.1<br>(-42.2 to -4.9)                          | -24.9<br>(-43.9 to -4.5)                            |
| Varicella and herpes zoster                                                          | 0.1<br>(0.1 to 0.1)              | 1.2<br>(1.2 to 1.3)                     | < 0.05<br>(< 0.05 to < 0.05)           | 20.6<br>(6.0 to 35.0)                             | 0.1<br>(-11.2 to 11.7)                              |
| <b>Neglected tropical diseases and malaria</b>                                       | <b>0.6</b><br>(0.5 to 0.7)       | <b>&lt; 0.05†</b><br>(< 0.05 to < 0.05) | <b>&lt; 0.05</b><br>(< 0.05 to < 0.05) | <b>2.9</b><br>(-23.3 to 36.0)                     | <b>-1.1</b><br>(-25.7 to 30.1)                      |
| Malaria                                                                              | --                               | --                                      | --                                     | --                                                | --                                                  |
| Chagas disease                                                                       | < 0.05<br>(< 0.05 to < 0.05)     | --                                      | < 0.05<br>(< 0.05 to < 0.05)           | 29.9<br>(-16.0 to 106.5)                          | 4.2<br>(-34.0 to 68.5)                              |
| Leishmaniasis                                                                        | --                               | --                                      | --                                     | --                                                | --                                                  |
| Visceral leishmaniasis                                                               | --                               | --                                      | --                                     | --                                                | --                                                  |
| Cutaneous and mucocutaneous leishmaniasis                                            | --                               | --                                      | --                                     | --                                                | --                                                  |
| African trypanosomiasis                                                              | --                               | --                                      | --                                     | --                                                | --                                                  |
| Schistosomiasis                                                                      | --                               | --                                      | --                                     | --                                                | --                                                  |
| Cysticercosis                                                                        | --                               | --                                      | --                                     | --                                                | --                                                  |
| Cystic echinococcosis                                                                | < 0.05<br>(< 0.05 to < 0.05)     | < 0.05<br>(< 0.05 to < 0.05)            | < 0.05<br>(< 0.05 to < 0.05)           | -40.2<br>(-96.0 to 606.6)                         | -49.1<br>(-96.3 to 520.6)                           |
| Lymphatic filariasis                                                                 | --                               | --                                      | --                                     | --                                                | --                                                  |
| Onchocerciasis                                                                       | --                               | --                                      | --                                     | --                                                | --                                                  |
| Trachoma                                                                             | --                               | --                                      | --                                     | --                                                | --                                                  |
| Dengue                                                                               | --                               | --                                      | --                                     | --                                                | --                                                  |
| Yellow fever                                                                         | --                               | --                                      | --                                     | --                                                | --                                                  |
| Rabies                                                                               | < 0.05<br>(< 0.05 to < 0.05)     | < 0.05<br>(< 0.05 to < 0.05)            | < 0.05<br>(< 0.05 to < 0.05)           | 21.6<br>(-8.5 to 59.7)                            | -2.0<br>(-26.4 to 28.7)                             |
| Intestinal nematode infections                                                       | 0.2<br>(0.1 to 0.2)              | --                                      | < 0.05<br>(< 0.05 to < 0.05)           | 20.8<br>(-13.7 to 71.8)                           | 4.0<br>(-25.7 to 47.7)                              |
| Ascariasis                                                                           | 0.1<br>(< 0.05 to 0.1)           | --                                      | --                                     | --                                                | --                                                  |

| Cause                                                                   | Prevalence in thousands (95% UI) | Incidence in thousands (95% UI)    | YLDs in thousands (95% UI)                    |                                                   |                                                     |
|-------------------------------------------------------------------------|----------------------------------|------------------------------------|-----------------------------------------------|---------------------------------------------------|-----------------------------------------------------|
|                                                                         | 2016 counts<br>(< 0.05 to 0.1)   | 2016 counts                        | 2016 counts                                   | Percentage change in counts between 2006 and 2016 | Percentage change in age-standardised rates between |
| Trichuriasis                                                            | 0.1<br>(< 0.05 to 0.1)           | --                                 | --                                            | --                                                | --                                                  |
| Hookworm disease                                                        | 0.1<br>(< 0.05 to 0.1)           | --                                 | < 0.05<br>(< 0.05 to < 0.05)                  | 20.8<br>(-13.7 to 71.8)                           | 4.0<br>(-25.7 to 47.7)                              |
| Food-borne trematodiasis                                                | --                               | --                                 | --                                            | --                                                | --                                                  |
| Leprosy                                                                 | --                               | --                                 | --                                            | --                                                | --                                                  |
| Ebola virus disease                                                     | --                               | --                                 | --                                            | --                                                | --                                                  |
| Zika virus disease                                                      | --                               | --                                 | --                                            | --                                                | --                                                  |
| Guinea worm disease                                                     | --                               | --                                 | --                                            | --                                                | --                                                  |
| Other neglected tropical diseases                                       | 0.4<br>(0.4 to 0.5)              | --                                 | < 0.05<br>(< 0.05 to < 0.05)                  | 2.7<br>(-23.5 to 36.6)                            | -0.9<br>(-26.3 to 30.6)                             |
| <b>Maternal disorders</b>                                               | <b>0.1<br/>(0.1 to 0.1)</b>      | <b>1.9†<br/>(1.6 to 2.1)</b>       | <b>&lt; 0.05<br/>(&lt; 0.05 to &lt; 0.05)</b> | <b>1.8<br/>(-23.9 to 37.5)</b>                    | <b>-8.9<br/>(-31.9 to 23.7)</b>                     |
| Maternal haemorrhage                                                    | < 0.05<br>(< 0.05 to < 0.05)     | 0.1<br>(< 0.05 to 0.1)             | < 0.05<br>(< 0.05 to < 0.05)                  | -1.7<br>(-35.9 to 47.9)                           | -11.9<br>(-42.6 to 33.4)                            |
| Maternal sepsis and other pregnancy related infections                  | < 0.05<br>(< 0.05 to < 0.05)     | 0.1<br>(0.1 to 0.2)                | < 0.05<br>(< 0.05 to < 0.05)                  | 7.5<br>(-50.4 to 131.9)                           | -4.0<br>(-55.7 to 107.9)                            |
| Maternal hypertensive disorders                                         | < 0.05<br>(< 0.05 to 0.1)        | 0.2<br>(0.2 to 0.3)                | < 0.05<br>(< 0.05 to < 0.05)                  | 0.6<br>(-37.8 to 69.2)                            | -10.0<br>(-44.1 to 52.4)                            |
| Maternal obstructed labour and uterine rupture                          | < 0.05<br>(< 0.05 to < 0.05)     | < 0.05<br>(< 0.05 to 0.1)          | < 0.05<br>(< 0.05 to < 0.05)                  | 5.1<br>(-43.4 to 88.5)                            | -6.0<br>(-49.7 to 68.0)                             |
| Maternal abortion, miscarriage, and ectopic pregnancy                   | < 0.05<br>(< 0.05 to < 0.05)     | 1.4<br>(1.2 to 1.6)                | < 0.05<br>(< 0.05 to < 0.05)                  | 5.3<br>(-38.7 to 81.8)                            | -5.8<br>(-45.1 to 63.5)                             |
| Other maternal disorders                                                | --                               | --                                 | < 0.05<br>(< 0.05 to < 0.05)                  | -2.7<br>(-27.4 to 31.2)                           | -12.8<br>(-34.9 to 17.9)                            |
| <b>Neonatal disorders</b>                                               | <b>0.8<br/>(0.6 to 1.0)</b>      | <b>--</b>                          | <b>0.1<br/>(0.1 to 0.2)</b>                   | <b>23.4<br/>(-1.7 to 69.9)</b>                    | <b>12.8<br/>(-10.4 to 55.4)</b>                     |
| Neonatal preterm birth complications                                    | 0.7<br>(0.5 to 1.0)              | --                                 | 0.1<br>(< 0.05 to 0.1)                        | 26.3<br>(-8.2 to 91.4)                            | 15.5<br>(-16.2 to 75.2)                             |
| Neonatal encephalopathy due to birth asphyxia and trauma                | < 0.05<br>(< 0.05 to 0.1)        | --                                 | < 0.05<br>(< 0.05 to < 0.05)                  | 47.3<br>(8.5 to 141.0)                            | 33.3<br>(-1.8 to 116.7)                             |
| Neonatal sepsis and other neonatal infections                           | < 0.05<br>(< 0.05 to 0.1)        | --                                 | < 0.05<br>(< 0.05 to < 0.05)                  | 8.3<br>(-8.9 to 33.1)                             | -1.4<br>(-17.3 to 20.2)                             |
| Hemolytic disease and other neonatal jaundice                           | < 0.05<br>(< 0.05 to < 0.05)     | --                                 | < 0.05<br>(< 0.05 to < 0.05)                  | 10.4<br>(2.2 to 19.0)                             | -0.2<br>(-7.6 to 7.5)                               |
| Other neonatal disorders                                                | --                               | --                                 | < 0.05<br>(< 0.05 to < 0.05)                  | 12.9<br>(-15.1 to 58.2)                           | 11.8<br>(-16.0 to 56.5)                             |
| <b>Nutritional deficiencies</b>                                         | <b>11.6<br/>(10.1 to 12.9)</b>   | <b>0.7†<br/>(0.4 to 1.1)</b>       | <b>0.2<br/>(0.1 to 0.3)</b>                   | <b>0.5<br/>(-15.1 to 19.2)</b>                    | <b>-8.2<br/>(-22.0 to 8.1)</b>                      |
| Protein-energy malnutrition                                             | 0.1<br>(0.1 to 0.1)              | 0.1<br>(< 0.05 to 0.1)             | < 0.05<br>(< 0.05 to < 0.05)                  | -3.5<br>(-34.2 to 36.0)                           | -4.7<br>(-35.0 to 33.8)                             |
| Iodine deficiency                                                       | 0.3<br>(0.2 to 0.3)              | < 0.05<br>(< 0.05 to < 0.05)       | < 0.05<br>(< 0.05 to < 0.05)                  | 17.8<br>(2.2 to 35.7)                             | 1.0<br>(-12.3 to 15.4)                              |
| Vitamin A deficiency                                                    | 0.8<br>(0.5 to 1.3)              | 0.6<br>(0.4 to 1.1)                | --                                            | --                                                | --                                                  |
| Iron-deficiency anaemia                                                 | 10.0<br>(8.6 to 11.5)            | --                                 | 0.2<br>(0.1 to 0.3)                           | 0.1<br>(-15.9 to 19.8)                            | -8.6<br>(-23.2 to 8.8)                              |
| Other nutritional deficiencies                                          | --                               | --                                 | < 0.05<br>(< 0.05 to < 0.05)                  | -5.2<br>(-36.9 to 36.4)                           | -6.3<br>(-37.6 to 34.8)                             |
| <b>Other communicable, maternal, neonatal, and nutritional diseases</b> | <b>18.8<br/>(17.7 to 20.1)</b>   | <b>5.8<br/>(4.5 to 7.5)</b>        | <b>&lt; 0.05<br/>(&lt; 0.05 to &lt; 0.05)</b> | <b>14.8<br/>(4.3 to 25.1)</b>                     | <b>3.3<br/>(-5.9 to 12.8)</b>                       |
| Sexually transmitted diseases excluding HIV                             | 16.8<br>(15.6 to 18.1)           | 5.7<br>(4.4 to 7.4)                | < 0.05<br>(< 0.05 to < 0.05)                  | 15.8<br>(5.5 to 26.8)                             | 2.2<br>(-6.2 to 12.7)                               |
| Syphilis                                                                | 0.5<br>(0.3 to 0.7)              | 0.4<br>(0.2 to 0.6)                | < 0.05<br>(< 0.05 to < 0.05)                  | 28.8<br>(13.2 to 48.0)                            | 1.4<br>(-11.1 to 16.2)                              |
| Chlamydial infection                                                    | 0.7<br>(0.5 to 0.8)              | 0.5<br>(0.4 to 0.6)                | < 0.05<br>(< 0.05 to < 0.05)                  | 14.5<br>(-3.9 to 33.9)                            | 2.0<br>(-14.1 to 19.3)                              |
| Gonococcal infection                                                    | 0.5<br>(0.2 to 1.0)              | 1.8<br>(0.7 to 3.4)                | < 0.05<br>(< 0.05 to < 0.05)                  | 14.6<br>(-6.0 to 38.7)                            | 4.9<br>(-14.0 to 27.8)                              |
| Trichomoniasis                                                          | 2.4<br>(2.1 to 2.8)              | 2.1<br>(1.8 to 2.4)                | < 0.05<br>(< 0.05 to < 0.05)                  | 15.1<br>(8.2 to 22.6)                             | -0.1<br>(-5.7 to 6.3)                               |
| Genital herpes                                                          | 13.9<br>(12.1 to 16.0)           | 0.9<br>(0.7 to 1.1)                | < 0.05<br>(< 0.05 to < 0.05)                  | 19.0<br>(11.7 to 26.0)                            | 0.2<br>(-5.2 to 6.0)                                |
| Other sexually transmitted diseases                                     | 0.1<br>(0.1 to 0.2)              | 0.1<br>(0.1 to 0.1)                | < 0.05<br>(< 0.05 to < 0.05)                  | 12.4<br>(-1.3 to 26.6)                            | 2.0<br>(-9.7 to 14.9)                               |
| Hepatitis                                                               | 2.5<br>(2.2 to 2.8)              | 0.1<br>(0.1 to 0.1)                | < 0.05<br>(< 0.05 to < 0.05)                  | -18.0<br>(-33.5 to 0.6)                           | -26.8<br>(-40.5 to -10.4)                           |
| Acute hepatitis A                                                       | < 0.05<br>(< 0.05 to < 0.05)     | < 0.05<br>(< 0.05 to < 0.05)       | < 0.05<br>(< 0.05 to < 0.05)                  | -19.1<br>(-65.1 to 88.4)                          | -30.3<br>(-69.2 to 56.6)                            |
| Hepatitis B                                                             | 1.0<br>(0.8 to 1.3)              | 0.1<br>(< 0.05 to 0.1)             | < 0.05<br>(< 0.05 to < 0.05)                  | -27.8<br>(-38.7 to -15.9)                         | -41.8<br>(-50.6 to -32.1)                           |
| Hepatitis C                                                             | 1.5<br>(1.4 to 1.7)              | < 0.05<br>(< 0.05 to < 0.05)       | < 0.05<br>(< 0.05 to < 0.05)                  | -0.5<br>(-26.2 to 35.7)                           | -2.5<br>(-28.3 to 34.0)                             |
| Acute hepatitis E                                                       | < 0.05<br>(< 0.05 to < 0.05)     | < 0.05<br>(< 0.05 to < 0.05)       | < 0.05<br>(< 0.05 to < 0.05)                  | -22.5<br>(-27.8 to -16.4)                         | -35.5<br>(-41.0 to -29.0)                           |
| Other infectious diseases                                               | 0.3<br>(0.3 to 0.4)              | < 0.05<br>(< 0.05 to < 0.05)       | < 0.05<br>(< 0.05 to < 0.05)                  | 12.3<br>(-10.4 to 39.5)                           | 6.5<br>(-15.5 to 33.5)                              |
| <b>Non-communicable diseases</b>                                        | <b>64.2<br/>(63.9 to 64.6)</b>   | <b>183.6†<br/>(174.4 to 193.5)</b> | <b>6.2<br/>(4.6 to 8.1)</b>                   | <b>16.9<br/>(14.4 to 19.2)</b>                    | <b>-1.9<br/>(-3.8 to 0.1)</b>                       |
| <b>Neoplasms</b>                                                        | <b>0.9<br/>(0.8 to 0.9)</b>      | <b>0.3<br/>(0.2 to 0.3)</b>        | <b>0.1<br/>(0.1 to 0.1)</b>                   | <b>18.2<br/>(11.6 to 26.8)</b>                    | <b>-10.0<br/>(-15.2 to -3.4)</b>                    |
| Lip and oral cavity cancer                                              | < 0.05<br>(< 0.05 to < 0.05)     | < 0.05<br>(< 0.05 to < 0.05)       | < 0.05<br>(< 0.05 to < 0.05)                  | 13.4<br>(-1.2 to 32.9)                            | -14.3<br>(-25.3 to 0.5)                             |
| Nasopharynx cancer                                                      | < 0.05<br>(< 0.05 to < 0.05)     | < 0.05<br>(< 0.05 to < 0.05)       | < 0.05<br>(< 0.05 to < 0.05)                  | 2.2<br>(-9.2 to 15.7)                             | -19.5<br>(-28.5 to -8.2)                            |
| Other pharynx cancer                                                    | < 0.05<br>(< 0.05 to < 0.05)     | < 0.05<br>(< 0.05 to < 0.05)       | < 0.05<br>(< 0.05 to < 0.05)                  | 10.2<br>(-6.3 to 30.5)                            | -17.4<br>(-29.9 to -2.4)                            |
| Oesophageal cancer                                                      | < 0.05<br>(< 0.05 to < 0.05)     | < 0.05<br>(< 0.05 to < 0.05)       | < 0.05<br>(< 0.05 to < 0.05)                  | -6.4<br>(-28.1 to 19.5)                           | -29.8<br>(-46.3 to -9.5)                            |
| Stomach cancer                                                          | < 0.05<br>(< 0.05 to < 0.05)     | < 0.05<br>(< 0.05 to < 0.05)       | < 0.05<br>(< 0.05 to < 0.05)                  | 15.6<br>(-3.3 to 38.2)                            | -12.8<br>(-27.3 to 4.1)                             |
| Colon and rectum cancer                                                 | 0.1<br>(0.1 to 0.2)              | < 0.05<br>(< 0.05 to < 0.05)       | < 0.05<br>(< 0.05 to < 0.05)                  | 20.6<br>(6.2 to 39.8)                             | -9.1<br>(-19.8 to 5.3)                              |
| Liver cancer                                                            | < 0.05<br>(< 0.05 to < 0.05)     | < 0.05<br>(< 0.05 to < 0.05)       | < 0.05<br>(< 0.05 to < 0.05)                  | 14.3<br>(-1.3 to 33.0)                            | -13.4<br>(-25.2 to 0.7)                             |
| Liver cancer due to hepatitis B                                         | < 0.05<br>(< 0.05 to < 0.05)     | < 0.05<br>(< 0.05 to < 0.05)       | < 0.05<br>(< 0.05 to < 0.05)                  | 20.9<br>(4.4 to 41.3)                             | -7.6<br>(-20.4 to 8.1)                              |



| Cause                                              | Prevalence in thousands (95% UI)  | Incidence in thousands (95% UI)    | YLDs in thousands (95% UI)        |                                                   |                                                     |
|----------------------------------------------------|-----------------------------------|------------------------------------|-----------------------------------|---------------------------------------------------|-----------------------------------------------------|
|                                                    | 2016 counts                       | 2016 counts                        | 2016 counts                       | Percentage change in counts between 2006 and 2016 | Percentage change in age-standardised rates between |
| Liver cancer due to hepatitis C                    | < 0.05<br>(< 0.05 to < 0.05)      | < 0.05<br>(< 0.05 to < 0.05)       | < 0.05<br>(< 0.05 to < 0.05)      | 17.9<br>(-0.0 to 40.2)                            | -11.1<br>(-24.6 to 5.8)                             |
| Liver cancer due to alcohol use                    | < 0.05<br>(< 0.05 to < 0.05)      | < 0.05<br>(< 0.05 to < 0.05)       | < 0.05<br>(< 0.05 to < 0.05)      | -0.5<br>(-15.4 to 17.2)                           | -25.1<br>(-36.5 to -11.6)                           |
| Liver cancer due to other causes                   | < 0.05<br>(< 0.05 to < 0.05)      | < 0.05<br>(< 0.05 to < 0.05)       | < 0.05<br>(< 0.05 to < 0.05)      | 36.1<br>(17.1 to 59.4)                            | 4.0<br>(-10.5 to 22.0)                              |
| Gallbladder and biliary tract cancer               | < 0.05<br>(< 0.05 to < 0.05)      | < 0.05<br>(< 0.05 to < 0.05)       | < 0.05<br>(< 0.05 to < 0.05)      | -11.6<br>(-19.6 to -0.9)                          | -33.4<br>(-39.4 to -25.2)                           |
| Pancreatic cancer                                  | < 0.05<br>(< 0.05 to < 0.05)      | < 0.05<br>(< 0.05 to < 0.05)       | < 0.05<br>(< 0.05 to < 0.05)      | 10.2<br>(-10.0 to 34.4)                           | -16.9<br>(-32.5 to 1.7)                             |
| Larynx cancer                                      | < 0.05<br>(< 0.05 to < 0.05)      | < 0.05<br>(< 0.05 to < 0.05)       | < 0.05<br>(< 0.05 to < 0.05)      | 9.9<br>(-12.4 to 35.0)                            | -17.3<br>(-34.4 to 2.6)                             |
| Tracheal, bronchus, and lung cancer                | < 0.05<br>(< 0.05 to < 0.05)      | < 0.05<br>(< 0.05 to < 0.05)       | < 0.05<br>(< 0.05 to < 0.05)      | 2.6<br>(-13.8 to 21.8)                            | -22.6<br>(-34.6 to -8.1)                            |
| Malignant skin melanoma                            | < 0.05<br>(< 0.05 to < 0.05)      | < 0.05<br>(< 0.05 to < 0.05)       | < 0.05<br>(< 0.05 to < 0.05)      | 21.2<br>(2.9 to 46.1)                             | -6.7<br>(-20.6 to 13.8)                             |
| Non-melanoma skin cancer                           | < 0.05<br>(< 0.05 to < 0.05)      | < 0.05<br>(< 0.05 to < 0.05)       | < 0.05<br>(< 0.05 to < 0.05)      | -28.8<br>(-56.3 to 18.7)                          | -46.8<br>(-67.2 to -9.5)                            |
| Non-melanoma skin cancer (squamous-cell carcinoma) | < 0.05<br>(< 0.05 to < 0.05)      | < 0.05<br>(< 0.05 to < 0.05)       | < 0.05<br>(< 0.05 to < 0.05)      | -29.5<br>(-57.1 to 18.2)                          | -47.3<br>(-67.7 to -9.9)                            |
| Non-melanoma skin cancer (basal-cell carcinoma)    | < 0.05<br>(< 0.05 to < 0.05)      | < 0.05<br>(< 0.05 to < 0.05)       | < 0.05<br>(< 0.05 to < 0.05)      | 31.2<br>(14.8 to 49.9)                            | 0.9<br>(-11.6 to 15.9)                              |
| Breast cancer                                      | 0.1<br>(0.1 to 0.2)               | < 0.05<br>(< 0.05 to < 0.05)       | < 0.05<br>(< 0.05 to < 0.05)      | 0.0<br>(-12.9 to 18.7)                            | -23.7<br>(-33.4 to -9.1)                            |
| Cervical cancer                                    | < 0.05<br>(< 0.05 to < 0.05)      | < 0.05<br>(< 0.05 to < 0.05)       | < 0.05<br>(< 0.05 to < 0.05)      | 42.0<br>(19.3 to 71.9)                            | 13.9<br>(-4.7 to 38.6)                              |
| Uterine cancer                                     | 0.1<br>(< 0.05 to 0.1)            | < 0.05<br>(< 0.05 to < 0.05)       | < 0.05<br>(< 0.05 to < 0.05)      | 72.8<br>(37.6 to 121.0)                           | 29.1<br>(2.9 to 65.3)                               |
| Ovarian cancer                                     | < 0.05<br>(< 0.05 to < 0.05)      | < 0.05<br>(< 0.05 to < 0.05)       | < 0.05<br>(< 0.05 to < 0.05)      | -20.3<br>(-44.5 to 6.2)                           | -40.1<br>(-58.7 to -20.1)                           |
| Prostate cancer                                    | 0.2<br>(0.2 to 0.2)               | < 0.05<br>(< 0.05 to 0.1)          | < 0.05<br>(< 0.05 to < 0.05)      | 29.9<br>(14.0 to 49.3)                            | -2.6<br>(-14.5 to 11.9)                             |
| Testicular cancer                                  | < 0.05<br>(< 0.05 to < 0.05)      | < 0.05<br>(< 0.05 to < 0.05)       | < 0.05<br>(< 0.05 to < 0.05)      | 12.8<br>(-7.0 to 37.3)                            | -1.1<br>(-18.1 to 20.5)                             |
| Kidney cancer                                      | < 0.05<br>(< 0.05 to < 0.05)      | < 0.05<br>(< 0.05 to < 0.05)       | < 0.05<br>(< 0.05 to < 0.05)      | 24.5<br>(5.8 to 42.6)                             | -3.5<br>(-18.0 to 10.6)                             |
| Bladder cancer                                     | < 0.05<br>(< 0.05 to < 0.05)      | < 0.05<br>(< 0.05 to < 0.05)       | < 0.05<br>(< 0.05 to < 0.05)      | 21.4<br>(4.6 to 39.7)                             | -8.3<br>(-21.0 to 5.8)                              |
| Brain and nervous system cancer                    | < 0.05<br>(< 0.05 to < 0.05)      | < 0.05<br>(< 0.05 to < 0.05)       | < 0.05<br>(< 0.05 to < 0.05)      | 18.3<br>(-1.9 to 36.3)                            | -6.7<br>(-23.2 to 10.8)                             |
| Thyroid cancer                                     | < 0.05<br>(< 0.05 to < 0.05)      | < 0.05<br>(< 0.05 to < 0.05)       | < 0.05<br>(< 0.05 to < 0.05)      | 27.3<br>(2.7 to 60.2)                             | 0.8<br>(-18.1 to 26.0)                              |
| Mesothelioma                                       | < 0.05<br>(< 0.05 to < 0.05)      | < 0.05<br>(< 0.05 to < 0.05)       | < 0.05<br>(< 0.05 to < 0.05)      | -7.4<br>(-19.6 to 15.5)                           | -29.4<br>(-38.7 to -11.3)                           |
| Hodgkin lymphoma                                   | < 0.05<br>(< 0.05 to < 0.05)      | < 0.05<br>(< 0.05 to < 0.05)       | < 0.05<br>(< 0.05 to < 0.05)      | -9.4<br>(-23.0 to 17.1)                           | -24.3<br>(-34.9 to -2.8)                            |
| Non-Hodgkin's lymphoma                             | < 0.05<br>(< 0.05 to < 0.05)      | < 0.05<br>(< 0.05 to < 0.05)       | < 0.05<br>(< 0.05 to < 0.05)      | 22.4<br>(4.4 to 40.0)                             | -4.9<br>(-19.3 to 8.9)                              |
| Multiple myeloma                                   | < 0.05<br>(< 0.05 to < 0.05)      | < 0.05<br>(< 0.05 to < 0.05)       | < 0.05<br>(< 0.05 to < 0.05)      | 17.0<br>(-12.1 to 66.7)                           | -12.2<br>(-34.4 to 26.6)                            |
| Leukaemia                                          | < 0.05<br>(< 0.05 to < 0.05)      | < 0.05<br>(< 0.05 to < 0.05)       | < 0.05<br>(< 0.05 to < 0.05)      | 17.6<br>(2.2 to 34.8)                             | -7.1<br>(-19.5 to 7.6)                              |
| Acute lymphoid leukaemia                           | < 0.05<br>(< 0.05 to < 0.05)      | < 0.05<br>(< 0.05 to < 0.05)       | < 0.05<br>(< 0.05 to < 0.05)      | 58.1<br>(18.0 to 114.2)                           | 46.6<br>(6.5 to 105.2)                              |
| Chronic lymphoid leukaemia                         | < 0.05<br>(< 0.05 to < 0.05)      | < 0.05<br>(< 0.05 to < 0.05)       | < 0.05<br>(< 0.05 to < 0.05)      | 46.2<br>(8.4 to 102.5)                            | 10.3<br>(-19.2 to 52.7)                             |
| Acute myeloid leukaemia                            | < 0.05<br>(< 0.05 to < 0.05)      | < 0.05<br>(< 0.05 to < 0.05)       | < 0.05<br>(< 0.05 to < 0.05)      | 60.1<br>(24.1 to 92.0)                            | 29.6<br>(-0.5 to 57.1)                              |
| Chronic myeloid leukaemia                          | < 0.05<br>(< 0.05 to < 0.05)      | < 0.05<br>(< 0.05 to < 0.05)       | < 0.05<br>(< 0.05 to < 0.05)      | 28.2<br>(2.0 to 58.5)                             | -0.9<br>(-21.0 to 23.7)                             |
| Other leukaemia                                    | < 0.05<br>(< 0.05 to < 0.05)      | < 0.05<br>(< 0.05 to < 0.05)       | < 0.05<br>(< 0.05 to < 0.05)      | -4.6<br>(-21.1 to 15.6)                           | -25.5<br>(-39.0 to -9.5)                            |
| Other neoplasms                                    | 0.1<br>(0.1 to 0.1)               | < 0.05<br>(< 0.05 to < 0.05)       | < 0.05<br>(< 0.05 to < 0.05)      | 36.1<br>(12.1 to 58.8)                            | 6.9<br>(-12.1 to 24.6)                              |
| <b>Cardiovascular diseases</b>                     | <b>4.8</b><br><b>(4.7 to 5.0)</b> | <b>0.5†</b><br><b>(0.4 to 0.5)</b> | <b>0.3</b><br><b>(0.2 to 0.4)</b> | <b>23.6</b><br><b>(19.6 to 27.9)</b>              | <b>-3.5</b><br><b>(-6.6 to -0.2)</b>                |
| Rheumatic heart disease                            | < 0.05<br>(< 0.05 to < 0.05)      | < 0.05<br>(< 0.05 to < 0.05)       | < 0.05<br>(< 0.05 to < 0.05)      | 8.7<br>(-4.5 to 23.4)                             | -14.6<br>(-25.8 to -2.2)                            |
| Ischaemic heart disease                            | 1.7<br>(1.6 to 1.7)               | 0.2<br>(0.2 to 0.2)                | 0.1<br>(0.1 to 0.1)               | 25.2<br>(20.2 to 30.4)                            | -3.1<br>(-6.9 to 0.8)                               |
| Cerebrovascular disease                            | 0.7<br>(0.6 to 0.7)               | 0.1‡<br>(0.1 to 0.1)               | 0.1<br>(0.1 to 0.1)               | 20.8<br>(13.0 to 29.2)                            | -7.2<br>(-13.3 to -0.7)                             |
| Ischaemic stroke                                   | 0.6<br>(0.5 to 0.6)               | 0.1‡<br>(< 0.05 to 0.1)            | 0.1<br>(< 0.05 to 0.1)            | 23.0<br>(12.9 to 33.4)                            | -6.0<br>(-13.8 to 1.9)                              |
| Hemorrhagic stroke                                 | 0.1<br>(0.1 to 0.2)               | < 0.05‡<br>(< 0.05 to < 0.05)      | < 0.05<br>(< 0.05 to < 0.05)      | 12.7<br>(2.0 to 23.5)                             | -11.9<br>(-20.5 to -3.1)                            |
| Hypertensive heart disease                         | 0.1<br>(0.1 to 0.1)               | --                                 | < 0.05<br>(< 0.05 to < 0.05)      | 29.5<br>(16.6 to 45.4)                            | -1.2<br>(-10.8 to 10.9)                             |
| Cardiomyopathy and myocarditis                     | 0.1<br>(0.1 to 0.1)               | < 0.05†<br>(< 0.05 to < 0.05)      | < 0.05<br>(< 0.05 to < 0.05)      | 21.9<br>(8.7 to 38.5)                             | -1.0<br>(-11.5 to 11.9)                             |
| Myocarditis                                        | < 0.05<br>(< 0.05 to < 0.05)      | < 0.05<br>(< 0.05 to < 0.05)       | < 0.05<br>(< 0.05 to < 0.05)      | 15.8<br>(6.2 to 26.6)                             | -0.8<br>(-9.9 to 9.3)                               |
| Alcoholic cardiomyopathy                           | < 0.05<br>(< 0.05 to < 0.05)      | --                                 | < 0.05<br>(< 0.05 to < 0.05)      | 29.1<br>(9.7 to 51.7)                             | -1.0<br>(-16.9 to 17.1)                             |
| Other cardiomyopathy                               | 0.1<br>(< 0.05 to 0.1)            | --                                 | < 0.05<br>(< 0.05 to < 0.05)      | 22.4<br>(5.6 to 43.0)                             | -1.0<br>(-14.2 to 14.1)                             |
| Atrial fibrillation and flutter                    | 0.5<br>(0.4 to 0.6)               | < 0.05<br>(< 0.05 to < 0.05)       | < 0.05<br>(< 0.05 to 0.1)         | 31.5<br>(23.4 to 40.3)                            | 0.3<br>(-5.7 to 6.9)                                |
| Peripheral vascular disease                        | 1.1<br>(1.0 to 1.3)               | 0.1<br>(0.1 to 0.1)                | < 0.05<br>(< 0.05 to < 0.05)      | 25.9<br>(16.6 to 35.7)                            | -5.3<br>(-12.1 to 2.2)                              |
| Endocarditis                                       | < 0.05<br>(< 0.05 to < 0.05)      | < 0.05<br>(< 0.05 to < 0.05)       | < 0.05<br>(< 0.05 to < 0.05)      | 23.1<br>(8.0 to 40.7)                             | -2.0<br>(-14.3 to 12.6)                             |
| Other cardiovascular and circulatory diseases      | 1.4<br>(1.2 to 1.6)               | --                                 | 0.1<br>(0.1 to 0.1)               | 20.2<br>(11.6 to 29.1)                            | -2.4<br>(-9.2 to 4.1)                               |
| <b>Chronic respiratory diseases</b>                | <b>8.1</b><br><b>(7.7 to 8.5)</b> | <b>1.2†</b><br><b>(1.1 to 1.3)</b> | <b>0.3</b><br><b>(0.2 to 0.4)</b> | <b>11.1</b><br><b>(6.3 to 16.6)</b>               | <b>-0.2</b><br><b>(-4.6 to 4.5)</b>                 |
| Chronic obstructive pulmonary disease              | 2.3<br>(2.1 to 2.5)               | 0.1<br>(0.1 to 0.2)                | < 0.05<br>(< 0.05 to 0.1)         | 15.2<br>(-2.9 to 33.5)                            | -9.9<br>(-24.1 to 4.5)                              |
| Pneumoconiosis                                     | < 0.05<br>(< 0.05 to < 0.05)      | < 0.05<br>(< 0.05 to < 0.05)       | < 0.05<br>(< 0.05 to < 0.05)      | 21.2<br>(6.3 to 38.1)                             | -7.4<br>(-19.2 to 5.9)                              |
| Silicosis                                          | < 0.05<br>(< 0.05 to < 0.05)      | < 0.05<br>(< 0.05 to < 0.05)       | < 0.05<br>(< 0.05 to < 0.05)      | 9.2<br>(3.1 to 15.5)                              | -16.6<br>(-21.4 to -11.9)                           |

| Cause                                                          | Prevalence in thousands (95% UI)  | Incidence in thousands (95% UI)               | YLDs in thousands (95% UI)                    |                                                                    |                                                                        |
|----------------------------------------------------------------|-----------------------------------|-----------------------------------------------|-----------------------------------------------|--------------------------------------------------------------------|------------------------------------------------------------------------|
|                                                                | 2016 counts<br>(< 0.05 to < 0.05) | 2016 counts<br>(< 0.05 to < 0.05)             | 2016 counts<br>(< 0.05 to < 0.05)             | Percentage change in counts between 2006 and 2016<br>(1.4 to 56.1) | Percentage change in age-standardised rates between<br>(-22.1 to 21.0) |
| Asbestosis                                                     | < 0.05<br>(< 0.05 to < 0.05)      | < 0.05<br>(< 0.05 to < 0.05)                  | < 0.05<br>(< 0.05 to < 0.05)                  | 25.6<br>(1.4 to 56.1)                                              | -3.2<br>(-22.1 to 21.0)                                                |
| Coal workers pneumoconiosis                                    | --                                | --                                            | --                                            | --                                                                 | --                                                                     |
| Other pneumoconiosis                                           | < 0.05<br>(< 0.05 to < 0.05)      | < 0.05<br>(< 0.05 to < 0.05)                  | < 0.05<br>(< 0.05 to < 0.05)                  | 25.3<br>(-5.6 to 61.9)                                             | -5.0<br>(-28.9 to 23.3)                                                |
| Asthma                                                         | 5.9<br>(5.5 to 6.4)               | 1.1<br>(1.0 to 1.2)                           | 0.2<br>(0.1 to 0.3)                           | 10.0<br>(5.0 to 15.4)                                              | 1.5<br>(-3.1 to 6.7)                                                   |
| Interstitial lung disease and pulmonary sarcoidosis            | < 0.05<br>(< 0.05 to 0.1)         | < 0.05<br>(< 0.05 to < 0.05)                  | < 0.05<br>(< 0.05 to < 0.05)                  | 21.1<br>(9.4 to 34.0)                                              | -5.5<br>(-14.8 to 5.0)                                                 |
| Other chronic respiratory diseases                             | --                                | --                                            | < 0.05<br>(< 0.05 to < 0.05)                  | 40.6<br>(12.4 to 77.6)                                             | 30.0<br>(4.7 to 62.9)                                                  |
| <b>Cirrhosis and other chronic liver diseases</b>              | <b>0.6<br/>(0.5 to 0.6)</b>       | <b>&lt; 0.05<br/>(&lt; 0.05 to &lt; 0.05)</b> | <b>&lt; 0.05<br/>(&lt; 0.05 to &lt; 0.05)</b> | <b>21.4<br/>(9.7 to 34.0)</b>                                      | <b>-0.6<br/>(-9.7 to 9.7)</b>                                          |
| Cirrhosis and other chronic liver diseases due to hepatitis B  | 0.1<br>(< 0.05 to 0.1)            | < 0.05<br>(< 0.05 to < 0.05)                  | < 0.05<br>(< 0.05 to < 0.05)                  | 32.5<br>(5.2 to 66.8)                                              | 3.7<br>(-17.9 to 30.7)                                                 |
| Cirrhosis and other chronic liver diseases due to hepatitis C  | 0.1<br>(0.1 to 0.1)               | < 0.05<br>(< 0.05 to < 0.05)                  | < 0.05<br>(< 0.05 to < 0.05)                  | 41.8<br>(15.0 to 74.0)                                             | 11.5<br>(-8.8 to 36.5)                                                 |
| Cirrhosis and other chronic liver diseases due to alcohol use  | 0.2<br>(0.2 to 0.3)               | < 0.05<br>(< 0.05 to < 0.05)                  | < 0.05<br>(< 0.05 to < 0.05)                  | 17.4<br>(1.4 to 35.6)                                              | -8.8<br>(-20.3 to 4.6)                                                 |
| Cirrhosis and other chronic liver diseases due to other causes | 0.1<br>(0.1 to 0.1)               | < 0.05<br>(< 0.05 to < 0.05)                  | < 0.05<br>(< 0.05 to < 0.05)                  | 13.2<br>(-8.1 to 41.1)                                             | 1.6<br>(-16.9 to 24.9)                                                 |
| <b>Digestive diseases</b>                                      | <b>2.4<br/>(2.3 to 2.6)</b>       | <b>2.2<sup>†</sup><br/>(2.0 to 2.3)</b>       | <b>0.1<br/>(0.1 to 0.1)</b>                   | <b>32.0<br/>(19.9 to 46.7)</b>                                     | <b>8.7<br/>(-0.9 to 20.2)</b>                                          |
| Peptic ulcer disease                                           | 1.0<br>(0.9 to 1.1)               | 0.1<br>(0.1 to 0.1)                           | < 0.05<br>(< 0.05 to < 0.05)                  | 40.8<br>(15.5 to 75.0)                                             | 12.6<br>(-7.2 to 38.9)                                                 |
| Gastritis and duodenitis                                       | 1.0<br>(0.8 to 1.1)               | 0.4<br>(0.4 to 0.5)                           | < 0.05<br>(< 0.05 to < 0.05)                  | 53.6<br>(29.2 to 85.7)                                             | 23.1<br>(4.2 to 47.8)                                                  |
| Appendicitis                                                   | < 0.05<br>(< 0.05 to < 0.05)      | 0.2<br>(0.1 to 0.2)                           | < 0.05<br>(< 0.05 to < 0.05)                  | 6.7<br>(-24.1 to 46.1)                                             | -1.9<br>(-28.9 to 32.1)                                                |
| Paralytic ileus and intestinal obstruction                     | < 0.05<br>(< 0.05 to < 0.05)      | < 0.05<br>(< 0.05 to < 0.05)                  | < 0.05<br>(< 0.05 to < 0.05)                  | 21.1<br>(17.1 to 25.2)                                             | 4.7<br>(1.7 to 7.8)                                                    |
| Inguinal, femoral, and abdominal hernia                        | 0.4<br>(0.4 to 0.5)               | 0.7<br>(0.6 to 0.8)                           | < 0.05<br>(< 0.05 to < 0.05)                  | 18.1<br>(7.1 to 31.0)                                              | 0.2<br>(-8.9 to 10.5)                                                  |
| Inflammatory bowel disease                                     | < 0.05<br>(< 0.05 to < 0.05)      | < 0.05<br>(< 0.05 to < 0.05)                  | < 0.05<br>(< 0.05 to < 0.05)                  | 21.7<br>(5.2 to 39.2)                                              | -1.1<br>(-14.3 to 12.7)                                                |
| Vascular intestinal disorders                                  | < 0.05<br>(< 0.05 to < 0.05)      | < 0.05<br>(< 0.05 to < 0.05)                  | < 0.05<br>(< 0.05 to < 0.05)                  | 25.1<br>(18.9 to 31.8)                                             | 4.9<br>(0.2 to 10.0)                                                   |
| Gallbladder and biliary diseases                               | 0.1<br>(0.1 to 0.1)               | 0.7<br>(0.6 to 0.8)                           | < 0.05<br>(< 0.05 to < 0.05)                  | 32.0<br>(6.5 to 63.1)                                              | 6.8<br>(-13.5 to 30.9)                                                 |
| Pancreatitis                                                   | < 0.05<br>(< 0.05 to < 0.05)      | < 0.05<br>(< 0.05 to < 0.05)                  | < 0.05<br>(< 0.05 to < 0.05)                  | 28.3<br>(21.9 to 34.4)                                             | 3.2<br>(-2.1 to 8.3)                                                   |
| Other digestive diseases                                       | --                                | --                                            | < 0.05<br>(< 0.05 to < 0.05)                  | 35.5<br>(23.7 to 50.2)                                             | 12.2<br>(2.7 to 23.3)                                                  |
| <b>Neurological disorders</b>                                  | <b>27.1<br/>(25.9 to 28.3)</b>    | <b>12.6<br/>(10.9 to 14.5)</b>                | <b>0.7<br/>(0.5 to 1.0)</b>                   | <b>15.4<br/>(-1.3 to 35.5)</b>                                     | <b>-0.9<br/>(-15.5 to 16.2)</b>                                        |
| Alzheimer's disease and other dementias                        | 0.4<br>(0.3 to 0.4)               | 0.1<br>(0.1 to 0.1)                           | 0.1<br>(< 0.05 to 0.1)                        | 31.4<br>(25.1 to 38.5)                                             | -0.8<br>(-5.5 to 4.2)                                                  |
| Parkinson's disease                                            | 0.1<br>(< 0.05 to 0.1)            | < 0.05<br>(< 0.05 to < 0.05)                  | < 0.05<br>(< 0.05 to < 0.05)                  | 36.1<br>(20.6 to 52.9)                                             | 3.4<br>(-8.4 to 15.7)                                                  |
| Epilepsy                                                       | 0.3<br>(0.1 to 0.5)               | < 0.05<br>(< 0.05 to 0.1)                     | 0.1<br>(< 0.05 to 0.1)                        | 4.2<br>(-80.1 to 481.4)                                            | -8.6<br>(-82.6 to 409.8)                                               |
| Multiple sclerosis                                             | < 0.05<br>(< 0.05 to < 0.05)      | < 0.05<br>(< 0.05 to < 0.05)                  | < 0.05<br>(< 0.05 to < 0.05)                  | 27.2<br>(8.6 to 48.8)                                              | 5.5<br>(-10.2 to 23.1)                                                 |
| Motor neuron disease                                           | < 0.05<br>(< 0.05 to < 0.05)      | < 0.05<br>(< 0.05 to < 0.05)                  | < 0.05<br>(< 0.05 to < 0.05)                  | 14.1<br>(9.1 to 18.7)                                              | -4.2<br>(-8.0 to -0.4)                                                 |
| Migraine                                                       | 10.2<br>(9.6 to 10.8)             | 1.2<br>(1.1 to 1.2)                           | 0.5<br>(0.3 to 0.7)                           | 15.0<br>(10.9 to 19.0)                                             | -0.2<br>(-3.7 to 3.1)                                                  |
| Tension-type headache                                          | 20.5<br>(18.5 to 22.9)            | 11.4<br>(9.7 to 13.2)                         | 0.1<br>(0.1 to 0.1)                           | 15.3<br>(9.7 to 21.6)                                              | -0.7<br>(-5.3 to 4.0)                                                  |
| Other neurological disorders                                   | < 0.05<br>(< 0.05 to < 0.05)      | < 0.05<br>(< 0.05 to < 0.05)                  | < 0.05<br>(< 0.05 to < 0.05)                  | 24.8<br>(-63.9 to 382.4)                                           | 11.6<br>(-67.8 to 312.6)                                               |
| <b>Mental and substance use disorders</b>                      | <b>11.1<br/>(10.7 to 11.4)</b>    | <b>4.0<sup>†</sup><br/>(3.8 to 4.4)</b>       | <b>1.5<br/>(1.1 to 1.9)</b>                   | <b>14.0<br/>(11.7 to 16.2)</b>                                     | <b>-1.2<br/>(-3.1 to 0.7)</b>                                          |
| Schizophrenia                                                  | 0.1<br>(0.1 to 0.2)               | < 0.05<br>(< 0.05 to < 0.05)                  | 0.1<br>(0.1 to 0.1)                           | 19.1<br>(9.4 to 29.4)                                              | 0.4<br>(-7.6 to 8.9)                                                   |
| Alcohol use disorders                                          | 1.1<br>(0.9 to 1.2)               | 0.6<br>(0.5 to 0.7)                           | 0.1<br>(0.1 to 0.1)                           | 17.7<br>(9.2 to 26.9)                                              | 2.2<br>(-5.0 to 10.4)                                                  |
| Drug use disorders                                             | 0.6<br>(0.6 to 0.6)               | 0.1<br>(0.1 to 0.1)                           | 0.1<br>(0.1 to 0.2)                           | 12.6<br>(4.2 to 22.2)                                              | -4.6<br>(-11.3 to 3.2)                                                 |
| Opioid use disorders                                           | 0.2<br>(0.2 to 0.3)               | < 0.05<br>(< 0.05 to < 0.05)                  | 0.1<br>(0.1 to 0.1)                           | 13.4<br>(3.4 to 24.8)                                              | -5.2<br>(-13.3 to 4.2)                                                 |
| Cocaine use disorders                                          | 0.1<br>(0.1 to 0.1)               | < 0.05<br>(< 0.05 to < 0.05)                  | < 0.05<br>(< 0.05 to < 0.05)                  | 9.8<br>(-7.6 to 32.4)                                              | -4.0<br>(-18.9 to 14.7)                                                |
| Amphetamine use disorders                                      | < 0.05<br>(< 0.05 to < 0.05)      | < 0.05<br>(< 0.05 to < 0.05)                  | < 0.05<br>(< 0.05 to < 0.05)                  | 9.5<br>(-24.6 to 57.2)                                             | -3.7<br>(-33.1 to 37.0)                                                |
| Cannabis use disorders                                         | 0.2<br>(0.2 to 0.3)               | < 0.05<br>(< 0.05 to < 0.05)                  | < 0.05<br>(< 0.05 to < 0.05)                  | 9.5<br>(-5.9 to 28.1)                                              | -0.1<br>(-14.0 to 16.8)                                                |
| Other drug use disorders                                       | < 0.05<br>(< 0.05 to < 0.05)      | < 0.05<br>(< 0.05 to < 0.05)                  | < 0.05<br>(< 0.05 to < 0.05)                  | 11.5<br>(-10.6 to 41.1)                                            | -3.2<br>(-22.1 to 22.3)                                                |
| Depressive disorders                                           | 2.3<br>(2.2 to 2.5)               | 2.6<br>(2.3 to 2.9)                           | 0.4<br>(0.3 to 0.5)                           | 14.0<br>(8.8 to 19.8)                                              | -3.7<br>(-7.9 to 1.1)                                                  |
| Major depressive disorder                                      | 1.6<br>(1.4 to 1.8)               | 2.5<br>(2.2 to 2.7)                           | 0.3<br>(0.2 to 0.4)                           | 12.8<br>(6.4 to 19.7)                                              | -4.6<br>(-9.7 to 1.2)                                                  |
| Dysthymia                                                      | 0.8<br>(0.7 to 0.9)               | 0.1<br>(0.1 to 0.2)                           | 0.1<br>(< 0.05 to 0.1)                        | 19.8<br>(14.7 to 24.7)                                             | 0.1<br>(-3.8 to 4.0)                                                   |
| Bipolar disorder                                               | 0.7<br>(0.6 to 0.8)               | 0.1<br>(< 0.05 to 0.1)                        | 0.1<br>(0.1 to 0.2)                           | 14.1<br>(8.4 to 20.0)                                              | 0.1<br>(-4.7 to 4.9)                                                   |
| Anxiety disorders                                              | 3.0<br>(2.7 to 3.3)               | 0.4<br>(0.4 to 0.5)                           | 0.3<br>(0.2 to 0.4)                           | 14.4<br>(10.6 to 18.2)                                             | 0.0<br>(-3.2 to 3.2)                                                   |
| Eating disorders                                               | 0.2<br>(0.2 to 0.2)               | 0.1<br>(0.1 to 0.1)                           | < 0.05<br>(< 0.05 to 0.1)                     | 11.8<br>(0.9 to 24.2)                                              | 3.0<br>(-7.0 to 14.5)                                                  |
| Anorexia nervosa                                               | < 0.05<br>(< 0.05 to < 0.05)      | < 0.05<br>(< 0.05 to < 0.05)                  | < 0.05<br>(< 0.05 to < 0.05)                  | 9.8<br>(-8.9 to 34.6)                                              | 2.5<br>(-15.0 to 25.3)                                                 |
| Bulimia nervosa                                                | 0.2<br>(0.1 to 0.2)               | 0.1<br>(< 0.05 to 0.1)                        | < 0.05<br>(< 0.05 to < 0.05)                  | 12.3<br>(-0.5 to 26.6)                                             | 3.1<br>(-8.9 to 16.4)                                                  |
| Autistic spectrum disorders                                    | 0.6<br>(0.6 to 0.7)               | < 0.05<br>(< 0.05 to < 0.05)                  | 0.1<br>(0.1 to 0.1)                           | 11.6<br>(6.5 to 16.9)                                              | 0.3<br>(-4.1 to 4.9)                                                   |
| Autism                                                         | 0.2<br>(0.2 to 0.2)               | < 0.05<br>(< 0.05 to < 0.05)                  | 0.1<br>(< 0.05 to 0.1)                        | 11.9<br>(3.3 to 20.4)                                              | 0.3<br>(-7.3 to 7.8)                                                   |
| Asperger syndrome and other autistic spectrum disorders        | 0.4<br>(0.3 to 0.5)               | < 0.05<br>(< 0.05 to < 0.05)                  | < 0.05<br>(< 0.05 to 0.1)                     | 11.2<br>(6.1 to 16.8)                                              | 0.2<br>(-4.2 to 5.2)                                                   |

| Cause                                                      | Prevalence in thousands (95% UI)     | Incidence in thousands (95% UI)          | YLDs in thousands (95% UI)           |                                                   |                                                     |
|------------------------------------------------------------|--------------------------------------|------------------------------------------|--------------------------------------|---------------------------------------------------|-----------------------------------------------------|
|                                                            | 2016 counts                          | 2016 counts                              | 2016 counts                          | Percentage change in counts between 2006 and 2016 | Percentage change in age-standardised rates between |
| Attention-deficit/hyperactivity disorder                   | 1.3<br>(1.2 to 1.5)                  | 0.1<br>( $< 0.05$ to 0.1)                | $< 0.05$<br>( $< 0.05$ to $< 0.05$ ) | 6.9<br>(1.1 to 13.0)                              | 0.1<br>(-5.2 to 5.9)                                |
| Conduct disorder                                           | 0.5<br>(0.4 to 0.6)                  | 0.2<br>(0.1 to 0.2)                      | 0.1<br>( $< 0.05$ to 0.1)            | 1.0<br>(-5.9 to 8.3)                              | 0.1<br>(-6.7 to 7.4)                                |
| Idiopathic developmental intellectual disability           | 0.3<br>(0.1 to 0.4)                  | --                                       | $< 0.05$<br>( $< 0.05$ to $< 0.05$ ) | 12.1<br>(3.1 to 22.9)                             | 0.1<br>(-8.2 to 9.0)                                |
| Other mental and substance use disorders                   | 1.4<br>(1.2 to 1.6)                  | $< 0.05$<br>( $< 0.05$ to 0.1)           | 0.1<br>(0.1 to 0.1)                  | 18.9<br>(13.2 to 24.9)                            | 0.3<br>(-4.3 to 5.2)                                |
| <b>Diabetes, urogenital, blood, and endocrine diseases</b> | <b>25.9</b><br><b>(25.2 to 26.7)</b> | <b>7.5†</b><br><b>(7.0 to 8.1)</b>       | <b>0.6</b><br><b>(0.4 to 0.8)</b>    | <b>15.7</b><br><b>(10.2 to 22.4)</b>              | <b>-7.5</b><br><b>(-11.9 to -2.1)</b>               |
| Diabetes mellitus                                          | 4.0<br>(3.6 to 4.5)                  | 0.2<br>(0.2 to 0.2)                      | 0.4<br>(0.2 to 0.5)                  | 15.7<br>(7.3 to 26.0)                             | -9.7<br>(-16.5 to -1.8)                             |
| Acute glomerulonephritis                                   | $< 0.05$<br>( $< 0.05$ to $< 0.05$ ) | $< 0.05$<br>( $< 0.05$ to $< 0.05$ )     | $< 0.05$<br>( $< 0.05$ to $< 0.05$ ) | 16.2<br>(11.1 to 21.4)                            | 0.4<br>(-3.5 to 4.5)                                |
| Chronic kidney disease                                     | 2.4<br>(2.2 to 2.7)                  | 0.2<br>(0.2 to 0.2)                      | 0.1<br>( $< 0.05$ to 0.1)            | 25.6<br>(14.8 to 37.1)                            | -1.1<br>(-9.5 to 8.3)                               |
| Chronic kidney disease due to diabetes mellitus            | 0.9<br>(0.8 to 1.1)                  | 0.1<br>(0.1 to 0.1)                      | $< 0.05$<br>( $< 0.05$ to $< 0.05$ ) | 29.6<br>(14.9 to 45.2)                            | 0.0<br>(-11.1 to 12.0)                              |
| Chronic kidney disease due to hypertension                 | 0.5<br>(0.4 to 0.6)                  | $< 0.05$<br>( $< 0.05$ to 0.1)           | $< 0.05$<br>( $< 0.05$ to $< 0.05$ ) | 27.8<br>(10.2 to 47.1)                            | -3.0<br>(-16.6 to 12.4)                             |
| Chronic kidney disease due to glomerulonephritis           | 0.5<br>(0.4 to 0.6)                  | $< 0.05$<br>( $< 0.05$ to $< 0.05$ )     | $< 0.05$<br>( $< 0.05$ to $< 0.05$ ) | 21.6<br>(8.6 to 36.5)                             | -1.5<br>(-11.9 to 10.7)                             |
| Chronic kidney disease due to other causes                 | 0.5<br>(0.4 to 0.6)                  | $< 0.05$<br>( $< 0.05$ to $< 0.05$ )     | $< 0.05$<br>( $< 0.05$ to $< 0.05$ ) | 23.5<br>(10.8 to 37.1)                            | -1.2<br>(-10.8 to 10.1)                             |
| Urinary diseases and male infertility                      | 1.3<br>(1.2 to 1.4)                  | 4.5†<br>(4.1 to 5.0)                     | $< 0.05$<br>( $< 0.05$ to $< 0.05$ ) | 26.3<br>(18.7 to 35.5)                            | -2.1<br>(-7.9 to 4.4)                               |
| Interstitial nephritis and urinary tract infections        | 0.1<br>(0.1 to 0.1)                  | 4.1<br>(3.7 to 4.6)                      | $< 0.05$<br>( $< 0.05$ to $< 0.05$ ) | 14.2<br>(0.7 to 29.8)                             | 0.8<br>(-10.8 to 13.8)                              |
| Urolithiasis                                               | $< 0.05$<br>( $< 0.05$ to $< 0.05$ ) | 0.3<br>(0.3 to 0.3)                      | $< 0.05$<br>( $< 0.05$ to $< 0.05$ ) | 21.9<br>(16.8 to 27.0)                            | 0.9<br>(-2.7 to 5.0)                                |
| Benign prostatic hyperplasia                               | 0.8<br>(0.7 to 0.9)                  | 0.1<br>(0.1 to 0.1)                      | $< 0.05$<br>( $< 0.05$ to $< 0.05$ ) | 32.6<br>(22.9 to 43.3)                            | -1.2<br>(-8.4 to 6.6)                               |
| Male infertility                                           | 0.4<br>(0.3 to 0.5)                  | --                                       | $< 0.05$<br>( $< 0.05$ to $< 0.05$ ) | 0.9<br>(-7.1 to 9.0)                              | -7.3<br>(-14.2 to -0.1)                             |
| Other urinary diseases                                     | --                                   | --                                       | $< 0.05$<br>( $< 0.05$ to $< 0.05$ ) | -4.9<br>(-14.1 to 5.6)                            | -16.5<br>(-24.3 to -7.6)                            |
| Gynecological diseases                                     | 7.9<br>(7.5 to 8.3)                  | 2.4†<br>(2.3 to 2.6)                     | 0.1<br>(0.1 to 0.1)                  | 10.7<br>(5.6 to 16.3)                             | -3.9<br>(-8.4 to 1.0)                               |
| Uterine fibroids                                           | 0.7<br>(0.6 to 0.7)                  | 0.1<br>(0.1 to 0.1)                      | $< 0.05$<br>( $< 0.05$ to $< 0.05$ ) | 1.3<br>(-12.7 to 17.5)                            | -14.5<br>(-26.0 to -0.8)                            |
| Polycystic ovarian syndrome                                | $< 0.05$<br>( $< 0.05$ to $< 0.05$ ) | 0.1<br>( $< 0.05$ to 0.1)                | $< 0.05$<br>( $< 0.05$ to $< 0.05$ ) | 5.8<br>(-24.8 to 47.9)                            | -0.4<br>(-29.3 to 39.3)                             |
| Female infertility                                         | 0.8<br>(0.5 to 1.1)                  | --                                       | $< 0.05$<br>( $< 0.05$ to $< 0.05$ ) | 13.2<br>(4.5 to 23.0)                             | 4.8<br>(-2.8 to 13.7)                               |
| Endometriosis                                              | $< 0.05$<br>( $< 0.05$ to $< 0.05$ ) | $< 0.05$<br>( $< 0.05$ to $< 0.05$ )     | $< 0.05$<br>( $< 0.05$ to $< 0.05$ ) | 15.6<br>(-14.2 to 54.8)                           | -0.5<br>(-25.6 to 33.0)                             |
| Genital prolapse                                           | 2.2<br>(1.9 to 2.6)                  | 0.1<br>(0.1 to 0.1)                      | $< 0.05$<br>( $< 0.05$ to $< 0.05$ ) | 18.8<br>(9.7 to 29.0)                             | -7.5<br>(-14.7 to 0.2)                              |
| Premenstrual syndrome                                      | 4.4<br>(4.2 to 4.7)                  | 1.6<br>(1.5 to 1.7)                      | $< 0.05$<br>( $< 0.05$ to 0.1)       | 11.3<br>(3.6 to 19.5)                             | -0.9<br>(-7.7 to 6.5)                               |
| Other gynecological diseases                               | 0.7<br>(0.6 to 0.8)                  | 0.6<br>(0.5 to 0.7)                      | $< 0.05$<br>( $< 0.05$ to $< 0.05$ ) | 11.5<br>(0.2 to 23.3)                             | -3.6<br>(-13.1 to 6.1)                              |
| Hemoglobinopathies and hemolytic anaemias                  | 14.7<br>(13.8 to 15.5)               | --                                       | $< 0.05$<br>( $< 0.05$ to $< 0.05$ ) | 0.1<br>(-14.8 to 19.3)                            | -10.4<br>(-23.3 to 5.5)                             |
| Thalassemias                                               | $< 0.05$<br>( $< 0.05$ to $< 0.05$ ) | --                                       | $< 0.05$<br>( $< 0.05$ to $< 0.05$ ) | 0.1<br>(-19.9 to 26.3)                            | -3.0<br>(-23.5 to 24.4)                             |
| Thalassaemias trait                                        | 0.1<br>(0.1 to 0.1)                  | --                                       | $< 0.05$<br>( $< 0.05$ to $< 0.05$ ) | 12.8<br>(-9.5 to 53.6)                            | -0.1<br>(-19.0 to 37.8)                             |
| Sickle cell disorders                                      | $< 0.05$<br>( $< 0.05$ to $< 0.05$ ) | --                                       | $< 0.05$<br>( $< 0.05$ to $< 0.05$ ) | 11.3<br>(-3.1 to 28.8)                            | 4.0<br>(-9.4 to 20.0)                               |
| Sickle cell trait                                          | 5.5<br>(4.9 to 6.2)                  | --                                       | $< 0.05$<br>( $< 0.05$ to $< 0.05$ ) | -5.7<br>(-23.5 to 18.5)                           | -14.8<br>(-30.4 to 5.8)                             |
| G6PD deficiency                                            | 2.6<br>(2.2 to 2.9)                  | --                                       | $< 0.05$<br>( $< 0.05$ to $< 0.05$ ) | 58.0<br>(7.7 to 135.4)                            | 44.9<br>(-0.9 to 111.3)                             |
| G6PD trait                                                 | 7.0<br>(6.5 to 7.5)                  | --                                       | $< 0.05$<br>( $< 0.05$ to $< 0.05$ ) | 9.7<br>(-10.1 to 36.5)                            | -3.6<br>(-20.8 to 19.2)                             |
| Other hemoglobinopathies and hemolytic anaemias            | 0.5<br>(0.5 to 0.6)                  | --                                       | $< 0.05$<br>( $< 0.05$ to $< 0.05$ ) | 5.5<br>(-13.0 to 26.2)                            | -8.2<br>(-23.3 to 8.8)                              |
| Endocrine, metabolic, blood, and immune disorders          | 1.1<br>(1.0 to 1.2)                  | 0.2<br>(0.1 to 0.2)                      | $< 0.05$<br>( $< 0.05$ to $< 0.05$ ) | 15.8<br>(7.8 to 24.1)                             | -5.2<br>(-11.5 to 1.3)                              |
| <b>Musculoskeletal disorders</b>                           | <b>11.6</b><br><b>(11.1 to 12.1)</b> | <b>6.0</b><br><b>(5.4 to 6.7)</b>        | <b>1.2</b><br><b>(0.9 to 1.7)</b>    | <b>19.8</b><br><b>(16.3 to 23.3)</b>              | <b>-2.4</b><br><b>(-5.0 to 0.5)</b>                 |
| Rheumatoid arthritis                                       | 0.3<br>(0.3 to 0.3)                  | $< 0.05$<br>( $< 0.05$ to $< 0.05$ )     | 0.1<br>( $< 0.05$ to 0.1)            | 33.3<br>(23.5 to 43.4)                            | 6.0<br>(-1.6 to 13.8)                               |
| Osteoarthritis                                             | 2.7<br>(2.5 to 2.8)                  | 0.1<br>(0.1 to 0.1)                      | 0.2<br>(0.1 to 0.2)                  | 33.7<br>(29.1 to 38.5)                            | 2.7<br>(-0.8 to 6.4)                                |
| Low back and neck pain                                     | 5.7<br>(5.4 to 6.2)                  | 2.2<br>(2.0 to 2.5)                      | 0.7<br>(0.5 to 0.9)                  | 22.2<br>(18.4 to 26.0)                            | 0.3<br>(-2.7 to 3.0)                                |
| Low back pain                                              | 3.5<br>(3.1 to 3.9)                  | 1.7<br>(1.4 to 1.9)                      | 0.4<br>(0.3 to 0.5)                  | 21.2<br>(15.6 to 26.9)                            | 0.4<br>(-4.2 to 4.8)                                |
| Neck pain                                                  | 2.6<br>(2.2 to 3.0)                  | 0.6<br>(0.5 to 0.7)                      | 0.3<br>(0.2 to 0.4)                  | 23.6<br>(20.0 to 27.2)                            | 0.2<br>(-2.0 to 2.3)                                |
| Gout                                                       | 0.2<br>(0.2 to 0.2)                  | $< 0.05$<br>( $< 0.05$ to $< 0.05$ )     | $< 0.05$<br>( $< 0.05$ to $< 0.05$ ) | 25.6<br>(6.9 to 50.5)                             | -0.4<br>(-14.8 to 18.7)                             |
| Other musculoskeletal disorders                            | 4.2<br>(3.7 to 4.8)                  | 3.6<br>(3.0 to 4.2)                      | 0.4<br>(0.2 to 0.5)                  | 8.6<br>(0.2 to 17.0)                              | -10.3<br>(-17.1 to -3.7)                            |
| <b>Other non-communicable diseases</b>                     | <b>50.9</b><br><b>(50.0 to 51.7)</b> | <b>149.4†</b><br><b>(140.2 to 159.1)</b> | <b>1.4</b><br><b>(1.0 to 2.0)</b>    | <b>17.7</b><br><b>(16.3 to 19.1)</b>              | <b>-0.2</b><br><b>(-1.3 to 0.9)</b>                 |
| Congenital anomalies                                       | 0.5<br>(0.5 to 0.6)                  | --                                       | 0.1<br>( $< 0.05$ to 0.1)            | 12.6<br>(6.0 to 18.9)                             | 1.5<br>(-4.4 to 7.2)                                |
| Neural tube defects                                        | $< 0.05$<br>( $< 0.05$ to $< 0.05$ ) | --                                       | $< 0.05$<br>( $< 0.05$ to $< 0.05$ ) | 11.4<br>(-2.4 to 28.1)                            | -0.9<br>(-13.0 to 13.6)                             |
| Congenital heart anomalies                                 | 0.1<br>(0.1 to 0.1)                  | --                                       | $< 0.05$<br>( $< 0.05$ to $< 0.05$ ) | 17.8<br>(5.4 to 31.4)                             | 5.1<br>(-5.6 to 17.1)                               |
| Orofacial clefts                                           | $< 0.05$<br>( $< 0.05$ to $< 0.05$ ) | --                                       | $< 0.05$<br>( $< 0.05$ to $< 0.05$ ) | 1.6<br>(-9.6 to 13.5)                             | -9.2<br>(-19.2 to 1.5)                              |
| Down's syndrome                                            | $< 0.05$<br>( $< 0.05$ to $< 0.05$ ) | --                                       | $< 0.05$<br>( $< 0.05$ to $< 0.05$ ) | 16.1<br>(7.0 to 25.4)                             | 5.5<br>(-3.1 to 13.6)                               |
| Turner syndrome                                            | $< 0.05$<br>( $< 0.05$ to $< 0.05$ ) | --                                       | $< 0.05$<br>( $< 0.05$ to $< 0.05$ ) | 10.4<br>(-4.7 to 27.7)                            | 0.8<br>(-13.1 to 16.3)                              |
| Klinefelter syndrome                                       | $< 0.05$<br>( $< 0.05$ to $< 0.05$ ) | --                                       | $< 0.05$<br>( $< 0.05$ to $< 0.05$ ) | 9.9<br>(-19.1 to 47.8)                            | 0.9<br>(-26.1 to 35.2)                              |



| Cause                                         | Prevalence in thousands (95% UI)     | Incidence in thousands (95% UI)    | YLDs in thousands (95% UI)        |                                                   |                                                     |
|-----------------------------------------------|--------------------------------------|------------------------------------|-----------------------------------|---------------------------------------------------|-----------------------------------------------------|
|                                               | 2016 counts                          | 2016 counts                        | 2016 counts                       | Percentage change in counts between 2006 and 2016 | Percentage change in age-standardised rates between |
| Other chromosomal abnormalities               | < 0.05<br>(< 0.05 to 0.1)            | --                                 | < 0.05<br>(< 0.05 to < 0.05)      | 0.5<br>(-13.7 to 16.6)                            | -0.4<br>(-14.7 to 15.6)                             |
| Congenital musculoskeletal and limb anomalies | 0.1<br>(< 0.05 to 0.1)               | --                                 | < 0.05<br>(< 0.05 to < 0.05)      | 18.0<br>(6.7 to 31.0)                             | 3.6<br>(-6.1 to 15.3)                               |
| Urogenital congenital anomalies               | 0.1<br>(0.1 to 0.1)                  | --                                 | < 0.05<br>(< 0.05 to < 0.05)      | 2.4<br>(-12.0 to 20.3)                            | 0.4<br>(-13.6 to 17.5)                              |
| Digestive congenital anomalies                | 0.1<br>(< 0.05 to 0.1)               | --                                 | < 0.05<br>(< 0.05 to < 0.05)      | 17.4<br>(-4.2 to 41.1)                            | 4.6<br>(-14.4 to 25.4)                              |
| Other congenital anomalies                    | 0.2<br>(0.1 to 0.3)                  | --                                 | < 0.05<br>(< 0.05 to < 0.05)      | 13.0<br>(0.1 to 27.1)                             | 0.5<br>(-11.2 to 12.9)                              |
| Skin and subcutaneous diseases                | 24.2<br>(23.5 to 24.8)               | 56.6<br>(53.2 to 60.2)             | 0.6<br>(0.4 to 0.8)               | 10.4<br>(8.4 to 12.4)                             | 0.4<br>(-1.3 to 2.1)                                |
| Dermatitis                                    | 3.4<br>(3.1 to 3.6)                  | 3.7<br>(3.5 to 4.0)                | 0.1<br>(0.1 to 0.2)               | 7.8<br>(4.3 to 11.5)                              | -0.0<br>(-3.0 to 3.2)                               |
| Psoriasis                                     | 0.8<br>(0.7 to 0.8)                  | 0.1<br>(0.1 to 0.1)                | 0.1<br>(< 0.05 to 0.1)            | 19.0<br>(11.2 to 27.7)                            | 2.1<br>(-4.3 to 9.6)                                |
| Cellulitis                                    | < 0.05<br>(< 0.05 to < 0.05)         | 0.5<br>(0.5 to 0.5)                | < 0.05<br>(< 0.05 to < 0.05)      | 12.6<br>(-8.2 to 39.5)                            | 0.4<br>(-18.2 to 23.7)                              |
| Pyoderma                                      | 0.2<br>(0.2 to 0.2)                  | 5.0<br>(4.8 to 5.2)                | < 0.05<br>(< 0.05 to < 0.05)      | 23.2<br>(15.6 to 31.4)                            | 1.1<br>(-4.8 to 7.8)                                |
| Scabies                                       | 1.2<br>(1.0 to 1.3)                  | 3.6<br>(3.1 to 4.1)                | < 0.05<br>(< 0.05 to < 0.05)      | 6.9<br>(2.2 to 11.3)                              | -1.9<br>(-5.8 to 1.7)                               |
| Fungal skin diseases                          | 7.6<br>(6.9 to 8.4)                  | 27.1<br>(24.0 to 30.7)             | < 0.05<br>(< 0.05 to 0.1)         | 16.5<br>(14.6 to 18.3)                            | 0.1<br>(-0.8 to 1.0)                                |
| Viral skin diseases                           | 1.9<br>(1.9 to 2.0)                  | 2.9<br>(2.8 to 3.1)                | 0.1<br>(< 0.05 to 0.1)            | 9.1<br>(6.0 to 12.4)                              | -0.0<br>(-2.9 to 2.9)                               |
| Acne vulgaris                                 | 6.0<br>(5.4 to 6.7)                  | 4.1<br>(3.3 to 5.1)                | 0.2<br>(0.1 to 0.2)               | 6.3<br>(1.2 to 11.6)                              | 0.8<br>(-4.0 to 5.7)                                |
| Alopecia areata                               | 0.1<br>(0.1 to 0.1)                  | 0.2<br>(0.2 to 0.2)                | < 0.05<br>(< 0.05 to < 0.05)      | 14.2<br>(3.0 to 27.4)                             | 0.1<br>(-9.9 to 11.1)                               |
| Pruritus                                      | 0.7<br>(0.6 to 0.8)                  | 0.5<br>(0.5 to 0.6)                | < 0.05<br>(< 0.05 to < 0.05)      | 18.1<br>(11.9 to 24.6)                            | 0.6<br>(-4.1 to 5.8)                                |
| Urticaria                                     | 0.6<br>(0.5 to 0.7)                  | 1.1<br>(0.9 to 1.2)                | < 0.05<br>(< 0.05 to 0.1)         | 8.6<br>(2.6 to 15.1)                              | -0.0<br>(-5.5 to 5.6)                               |
| Decubitus ulcer                               | < 0.05<br>(< 0.05 to < 0.05)         | 0.1<br>(0.1 to 0.1)                | < 0.05<br>(< 0.05 to < 0.05)      | 26.3<br>(12.6 to 40.6)                            | -1.3<br>(-12.4 to 10.2)                             |
| Other skin and subcutaneous diseases          | 6.4<br>(6.2 to 6.6)                  | 7.7<br>(7.4 to 7.9)                | < 0.05<br>(< 0.05 to 0.1)         | 21.2<br>(18.5 to 24.0)                            | 0.7<br>(-1.4 to 2.9)                                |
| Sense organ diseases                          | 17.0<br>(16.7 to 17.4)               | 6.9†<br>(6.5 to 7.3)               | 0.6<br>(0.4 to 0.8)               | 24.0<br>(21.5 to 26.6)                            | -1.0<br>(-2.9 to 0.9)                               |
| Glaucoma                                      | 0.1<br>(0.1 to 0.1)                  | --                                 | < 0.05<br>(< 0.05 to < 0.05)      | 32.6<br>(19.6 to 46.4)                            | -0.4<br>(-10.1 to 10.1)                             |
| Cataract                                      | 0.7<br>(0.6 to 0.8)                  | --                                 | 0.1<br>(< 0.05 to 0.1)            | 26.8<br>(21.2 to 32.2)                            | -3.2<br>(-7.4 to 1.0)                               |
| Macular degeneration                          | < 0.05<br>(< 0.05 to < 0.05)         | --                                 | < 0.05<br>(< 0.05 to < 0.05)      | 34.8<br>(15.5 to 56.8)                            | 1.2<br>(-13.6 to 17.6)                              |
| Refraction and accommodation disorders        | 6.8<br>(6.5 to 7.1)                  | --                                 | 0.1<br>(0.1 to 0.2)               | 15.7<br>(12.1 to 19.4)                            | -3.7<br>(-6.5 to -0.7)                              |
| Age-related and other hearing loss            | 12.2<br>(11.6 to 12.9)               | --                                 | 0.3<br>(0.2 to 0.4)               | 26.4<br>(22.6 to 30.5)                            | 0.0<br>(-3.0 to 3.2)                                |
| Other vision loss                             | 0.2<br>(0.2 to 0.2)                  | --                                 | < 0.05<br>(< 0.05 to < 0.05)      | 22.2<br>(12.0 to 31.7)                            | -1.4<br>(-9.2 to 6.0)                               |
| Other sense organ diseases                    | 2.1<br>(1.9 to 2.3)                  | 6.9<br>(6.5 to 7.3)                | 0.1<br>(< 0.05 to 0.1)            | 24.1<br>(19.2 to 29.0)                            | 0.4<br>(-3.3 to 4.3)                                |
| Oral disorders                                | 34.1<br>(32.7 to 35.4)               | 85.9†<br>(77.4 to 95.0)            | 0.2<br>(0.1 to 0.4)               | 24.0<br>(21.5 to 26.9)                            | 0.0<br>(-1.7 to 1.9)                                |
| Caries of deciduous teeth                     | 4.4<br>(3.5 to 5.4)                  | 15.4<br>(10.8 to 21.4)             | < 0.05<br>(< 0.05 to < 0.05)      | -0.1<br>(-9.1 to 10.4)                            | 0.2<br>(-8.3 to 9.8)                                |
| Caries of permanent teeth                     | 19.7<br>(18.3 to 21.2)               | 68.8<br>(61.7 to 76.2)             | < 0.05<br>(< 0.05 to < 0.05)      | 13.6<br>(9.8 to 17.7)                             | -0.8<br>(-3.9 to 2.6)                               |
| Periodontal disease                           | 11.4<br>(9.7 to 13.2)                | 1.3<br>(1.1 to 1.6)                | 0.1<br>(< 0.05 to 0.1)            | 21.4<br>(17.7 to 25.4)                            | -0.5<br>(-3.3 to 2.4)                               |
| Edentulism and severe tooth loss              | 4.1<br>(3.6 to 4.6)                  | 0.4<br>(0.3 to 0.4)                | 0.1<br>(0.1 to 0.2)               | 31.6<br>(27.3 to 35.9)                            | 0.5<br>(-2.8 to 3.7)                                |
| Other oral disorders                          | 1.3<br>(1.3 to 1.4)                  | --                                 | < 0.05<br>(< 0.05 to 0.1)         | 15.9<br>(11.7 to 20.2)                            | 0.0<br>(-3.5 to 3.5)                                |
| <b>Injuries</b>                               | <b>11.9</b><br><b>(11.1 to 12.9)</b> | <b>4.7†</b><br><b>(4.4 to 5.1)</b> | <b>0.4</b><br><b>(0.3 to 0.6)</b> | <b>27.6</b><br><b>(25.6 to 29.5)</b>              | <b>6.5</b><br><b>(5.1 to 8.0)</b>                   |
| <b>Transport injuries</b>                     | <b>1.9</b><br><b>(1.7 to 2.0)</b>    | <b>0.6</b><br><b>(0.6 to 0.7)</b>  | <b>0.1</b><br><b>(0.1 to 0.1)</b> | <b>25.4</b><br><b>(22.8 to 28.2)</b>              | <b>4.0</b><br><b>(1.9 to 6.2)</b>                   |
| Road injuries                                 | 1.8<br>(1.6 to 1.9)                  | 0.6<br>(0.6 to 0.7)                | 0.1<br>(0.1 to 0.1)               | 26.1<br>(23.4 to 28.9)                            | 4.5<br>(2.4 to 6.7)                                 |
| Pedestrian road injuries                      | 0.2<br>(0.2 to 0.2)                  | < 0.05<br>(< 0.05 to 0.1)          | < 0.05<br>(< 0.05 to < 0.05)      | 49.7<br>(46.4 to 53.0)                            | 25.3<br>(22.8 to 27.9)                              |
| Cyclist road injuries                         | 0.4<br>(0.3 to 0.4)                  | 0.1<br>(0.1 to 0.2)                | < 0.05<br>(< 0.05 to < 0.05)      | 37.6<br>(34.3 to 40.9)                            | 14.9<br>(12.4 to 17.5)                              |
| Motorcyclist road injuries                    | 0.8<br>(0.7 to 0.9)                  | 0.2<br>(0.2 to 0.2)                | < 0.05<br>(< 0.05 to 0.1)         | 13.2<br>(10.7 to 15.9)                            | -6.8<br>(-8.8 to -4.7)                              |
| Motor vehicle road injuries                   | 0.3<br>(0.3 to 0.4)                  | 0.1<br>(0.1 to 0.2)                | < 0.05<br>(< 0.05 to < 0.05)      | 36.2<br>(32.8 to 39.7)                            | 13.6<br>(11.1 to 16.2)                              |
| Other road injuries                           | 0.1<br>(0.1 to 0.2)                  | 0.1<br>(0.1 to 0.1)                | < 0.05<br>(< 0.05 to < 0.05)      | 27.3<br>(24.5 to 30.1)                            | 5.1<br>(2.9 to 7.2)                                 |
| Other transport injuries                      | 0.1<br>(0.1 to 0.1)                  | < 0.05<br>(< 0.05 to < 0.05)       | < 0.05<br>(< 0.05 to < 0.05)      | 11.5<br>(8.9 to 14.1)                             | -6.7<br>(-8.9 to -4.6)                              |
| <b>Unintentional injuries</b>                 | <b>9.5</b><br><b>(8.8 to 10.4)</b>   | <b>3.9</b><br><b>(3.6 to 4.2)</b>  | <b>0.3</b><br><b>(0.2 to 0.4)</b> | <b>29.6</b><br><b>(27.6 to 31.4)</b>              | <b>8.0</b><br><b>(6.5 to 9.4)</b>                   |
| Falls                                         | 4.1<br>(3.6 to 4.7)                  | 1.8<br>(1.5 to 2.0)                | 0.1<br>(0.1 to 0.2)               | 31.7<br>(29.6 to 33.7)                            | 7.6<br>(6.0 to 9.2)                                 |
| Drowning                                      | 0.1<br>(< 0.05 to 0.1)               | < 0.05<br>(< 0.05 to < 0.05)       | < 0.05<br>(< 0.05 to < 0.05)      | 14.4<br>(11.8 to 16.8)                            | -5.1<br>(-7.2 to -3.1)                              |
| Fire, heat, and hot substances                | 1.2<br>(1.0 to 1.5)                  | 0.1<br>(0.1 to 0.2)                | < 0.05<br>(< 0.05 to < 0.05)      | 32.9<br>(28.9 to 37.3)                            | 14.8<br>(11.5 to 18.5)                              |
| Poisonings                                    | < 0.05<br>(< 0.05 to < 0.05)         | < 0.05<br>(< 0.05 to < 0.05)       | < 0.05<br>(< 0.05 to < 0.05)      | 32.8<br>(22.3 to 45.2)                            | 16.0<br>(7.0 to 26.4)                               |
| Exposure to mechanical forces                 | 1.7<br>(1.4 to 2.1)                  | 0.6<br>(0.5 to 0.7)                | < 0.05<br>(< 0.05 to 0.1)         | 28.4<br>(26.2 to 30.5)                            | 8.0<br>(6.2 to 9.7)                                 |
| Unintentional firearm injuries                | 0.1<br>(0.1 to 0.1)                  | < 0.05<br>(< 0.05 to < 0.05)       | < 0.05<br>(< 0.05 to < 0.05)      | 33.8<br>(30.8 to 36.5)                            | 11.9<br>(9.6 to 14.0)                               |
| Unintentional suffocation                     | 0.1<br>(< 0.05 to 0.1)               | < 0.05<br>(< 0.05 to < 0.05)       | < 0.05<br>(< 0.05 to < 0.05)      | 19.8<br>(16.6 to 22.9)                            | 5.0<br>(2.5 to 7.6)                                 |
| Other exposure to mechanical forces           | 1.5<br>(1.3 to 1.9)                  | 0.5<br>(0.5 to 0.6)                | < 0.05<br>(< 0.05 to < 0.05)      | 28.2<br>(26.0 to 30.3)                            | 7.6<br>(5.8 to 9.4)                                 |



| Cause                                                                               | Prevalence in thousands (95% UI)                    | Incidence in thousands (95% UI)                      | YLDs in thousands (95% UI)                          |                                                   |                                                     |
|-------------------------------------------------------------------------------------|-----------------------------------------------------|------------------------------------------------------|-----------------------------------------------------|---------------------------------------------------|-----------------------------------------------------|
|                                                                                     | 2016 counts                                         | 2016 counts                                          | 2016 counts                                         | Percentage change in counts between 2006 and 2016 | Percentage change in age-standardised rates between |
| Adverse effects of medical treatment                                                | < 0.05<br>(< 0.05 to < 0.05)                        | 0.3<br>(0.3 to 0.4)                                  | < 0.05<br>(< 0.05 to < 0.05)                        | 20.0<br>(14.0 to 26.4)                            | 3.2<br>(-2.5 to 9.0)                                |
| Animal contact                                                                      | 0.1<br>(0.1 to 0.2)                                 | 0.2<br>(0.1 to 0.2)                                  | < 0.05<br>(< 0.05 to < 0.05)                        | 15.3<br>(8.2 to 23.4)                             | -0.1<br>(-6.0 to 6.5)                               |
| Venomous animal contact                                                             | 0.1<br>(0.1 to 0.1)                                 | 0.1<br>(0.1 to 0.1)                                  | < 0.05<br>(< 0.05 to < 0.05)                        | 15.5<br>(7.2 to 25.0)                             | 0.6<br>(-6.4 to 8.4)                                |
| Non-venomous animal contact                                                         | 0.1<br>(0.1 to 0.1)                                 | 0.1<br>(0.1 to 0.1)                                  | < 0.05<br>(< 0.05 to < 0.05)                        | 14.2<br>(11.2 to 16.9)                            | -3.6<br>(-5.9 to -1.4)                              |
| Foreign body                                                                        | 0.5<br>(0.4 to 0.5)                                 | 0.4<br>(0.3 to 0.4)                                  | < 0.05<br>(< 0.05 to < 0.05)                        | 25.8<br>(23.0 to 28.4)                            | 7.5<br>(5.3 to 9.6)                                 |
| Pulmonary aspiration and foreign body in airway                                     | 0.3<br>(0.2 to 0.4)                                 | 0.1<br>(0.1 to 0.1)                                  | < 0.05<br>(< 0.05 to < 0.05)                        | 24.1<br>(20.7 to 27.5)                            | 7.0<br>(4.1 to 9.7)                                 |
| Foreign body in eyes                                                                | < 0.05<br>(< 0.05 to 0.1)                           | 0.2<br>(0.2 to 0.3)                                  | < 0.05<br>(< 0.05 to < 0.05)                        | 30.1<br>(26.3 to 34.7)                            | 8.0<br>(5.3 to 11.0)                                |
| Foreign body in other body part                                                     | 0.1<br>(0.1 to 0.2)                                 | < 0.05<br>(< 0.05 to 0.1)                            | < 0.05<br>(< 0.05 to < 0.05)                        | 27.6<br>(24.7 to 30.4)                            | 8.8<br>(6.6 to 11.1)                                |
| Environmental heat and cold exposure                                                | 0.6<br>(0.5 to 0.7)                                 | 0.1<br>(0.1 to 0.2)                                  | < 0.05<br>(< 0.05 to < 0.05)                        | 24.5<br>(22.3 to 26.7)                            | 4.9<br>(3.3 to 6.6)                                 |
| Other unintentional injuries                                                        | 1.2<br>(1.0 to 1.5)                                 | 0.4<br>(0.3 to 0.4)                                  | < 0.05<br>(< 0.05 to < 0.05)                        | 27.8<br>(25.6 to 30.0)                            | 8.7<br>(7.0 to 10.5)                                |
| <b>Self-harm and interpersonal violence</b>                                         | <b>1.9</b><br><b>(1.7 to 2.1)</b>                   | <b>0.2†</b><br><b>(0.2 to 0.2)</b>                   | <b>&lt; 0.05</b><br><b>(&lt; 0.05 to &lt; 0.05)</b> | <b>16.1</b><br><b>(13.2 to 18.8)</b>              | <b>0.9</b><br><b>(-1.2 to 3.0)</b>                  |
| Self-harm                                                                           | 0.1<br>(0.1 to 0.1)                                 | < 0.05<br>(< 0.05 to < 0.05)                         | < 0.05<br>(< 0.05 to < 0.05)                        | 15.2<br>(12.2 to 18.3)                            | -5.3<br>(-7.6 to -2.9)                              |
| Self-harm by firearm                                                                | < 0.05<br>(< 0.05 to < 0.05)                        | < 0.05<br>(< 0.05 to < 0.05)                         | < 0.05<br>(< 0.05 to < 0.05)                        | 18.7<br>(15.3 to 21.9)                            | 0.1<br>(-2.6 to 2.7)                                |
| Self-harm by other specified means                                                  | 0.1<br>(0.1 to 0.1)                                 | < 0.05<br>(< 0.05 to < 0.05)                         | < 0.05<br>(< 0.05 to < 0.05)                        | 14.9<br>(11.8 to 18.2)                            | -5.6<br>(-8.0 to -3.1)                              |
| Interpersonal violence                                                              | 1.8<br>(1.7 to 2.0)                                 | 0.2†<br>(0.1 to 0.2)                                 | < 0.05<br>(< 0.05 to < 0.05)                        | 16.1<br>(13.0 to 19.1)                            | 1.5<br>(-0.7 to 3.8)                                |
| Assault by firearm                                                                  | < 0.05<br>(< 0.05 to < 0.05)                        | < 0.05<br>(< 0.05 to < 0.05)                         | < 0.05<br>(< 0.05 to < 0.05)                        | 29.9<br>(26.3 to 33.8)                            | 9.6<br>(6.9 to 12.7)                                |
| Assault by sharp object                                                             | 0.2<br>(0.1 to 0.2)                                 | 0.1<br>(0.1 to 0.1)                                  | < 0.05<br>(< 0.05 to < 0.05)                        | 28.5<br>(25.8 to 31.0)                            | 8.8<br>(6.6 to 10.9)                                |
| Sexual violence                                                                     | 1.4<br>(1.2 to 1.6)                                 | --                                                   | < 0.05<br>(< 0.05 to < 0.05)                        | 4.4<br>(0.7 to 8.2)                               | -5.4<br>(-8.5 to -2.3)                              |
| Assault by other means                                                              | 0.2<br>(0.2 to 0.2)                                 | 0.1<br>(0.1 to 0.1)                                  | < 0.05<br>(< 0.05 to < 0.05)                        | 27.5<br>(25.2 to 30.0)                            | 7.2<br>(5.2 to 9.3)                                 |
| <b>Forces of nature, conflict and terrorism, and executions and police conflict</b> | <b>&lt; 0.05</b><br><b>(&lt; 0.05 to &lt; 0.05)</b> | <b>&lt; 0.05†</b><br><b>(&lt; 0.05 to &lt; 0.05)</b> | <b>&lt; 0.05</b><br><b>(&lt; 0.05 to &lt; 0.05)</b> | <b>-16.4</b><br><b>(-18.8 to -12.0)</b>           | <b>-28.4</b><br><b>(-30.5 to -24.2)</b>             |
| Exposure to forces of nature                                                        | < 0.05<br>(< 0.05 to < 0.05)                        | --                                                   | < 0.05<br>(< 0.05 to < 0.05)                        | -17.9<br>(-20.4 to -14.7)                         | -29.9<br>(-31.9 to -27.0)                           |
| Conflict and terrorism                                                              | --                                                  | --                                                   | --                                                  | --                                                | --                                                  |
| Executions and police conflict                                                      | < 0.05<br>(< 0.05 to < 0.05)                        | < 0.05<br>(< 0.05 to < 0.05)                         | < 0.05<br>(< 0.05 to < 0.05)                        | 35.6<br>(25.9 to 41.2)                            | 22.0<br>(14.7 to 26.6)                              |
| <b>Impairments</b>                                                                  | --                                                  | --                                                   | --                                                  | --                                                | --                                                  |
| Anaemia                                                                             | 15.7<br>(13.7 to 18.0)                              | --                                                   | 0.4<br>(0.2 to 0.6)                                 | 3.9<br>(-9.9 to 20.2)                             | -8.1<br>(-20.0 to 5.1)                              |
| Developmental intellectual disability                                               | 0.8<br>(0.7 to 1.0)                                 | --                                                   | 0.1<br>(0.1 to 0.1)                                 | 11.4<br>(5.8 to 16.9)                             | 0.3<br>(-4.7 to 5.3)                                |
| Epilepsy                                                                            | 0.4<br>(0.2 to 0.6)                                 | --                                                   | 0.1<br>(< 0.05 to 0.2)                              | 8.4<br>(-52.7 to 167.0)                           | -3.9<br>(-58.6 to 136.9)                            |
| Guillain-Barre syndrome                                                             | < 0.05<br>(< 0.05 to < 0.05)                        | --                                                   | < 0.05<br>(< 0.05 to < 0.05)                        | 15.9<br>(12.5 to 19.4)                            | 0.0<br>(0.0 to 0.1)                                 |
| Hearing loss                                                                        | 12.9<br>(12.3 to 13.6)                              | --                                                   | 0.3<br>(0.2 to 0.5)                                 | 24.3<br>(20.7 to 28.0)                            | -0.2<br>(-3.0 to 2.8)                               |
| Heart failure                                                                       | 0.5<br>(0.4 to 0.5)                                 | --                                                   | < 0.05<br>(< 0.05 to 0.1)                           | 25.9<br>(17.0 to 35.6)                            | -3.4<br>(-10.4 to 4.1)                              |
| Infertility                                                                         | 1.4<br>(1.1 to 1.8)                                 | --                                                   | < 0.05<br>(< 0.05 to < 0.05)                        | 8.8<br>(2.5 to 15.3)                              | 0.3<br>(-4.9 to 6.2)                                |
| Pelvic inflammatory disease                                                         | < 0.05<br>(< 0.05 to < 0.05)                        | --                                                   | < 0.05<br>(< 0.05 to < 0.05)                        | 10.3<br>(-10.2 to 35.9)                           | -3.6<br>(-21.5 to 18.8)                             |
| Vision loss                                                                         | 8.0<br>(7.7 to 8.3)                                 | --                                                   | 0.2<br>(0.2 to 0.3)                                 | 19.0<br>(15.7 to 22.7)                            | -2.8<br>(-5.2 to -0.1)                              |

We did not calculate incidence for the nine impairments, certain NTDs, and causes with only birth prevalence. Blank cells mean that no estimate is available.

† Incidence for aggregate causes represents the sum of the incidence of the causes below the aggregate.

‡ Incidence estimates for stroke represent first-ever stroke only.

^ Incidence of HIV/AIDS represents new infections of HIV only and does not include new infections of Tuberculosis in HIV positive cases.

SR Table 14: Prevalence, incidence, and YLDs for 2016, percentage change of YLD counts and percentage change of age-standardised YLD rates between 2006 and 2016 by cause and impairments, for all ages, Bhutan.

| Cause                                                                                | Prevalence in thousands (95% UI) | Incidence in thousands (95% UI)         | YLDs in thousands (95% UI)     |                                                   |                                                     |
|--------------------------------------------------------------------------------------|----------------------------------|-----------------------------------------|--------------------------------|---------------------------------------------------|-----------------------------------------------------|
|                                                                                      | 2016 counts                      | 2016 counts                             | 2016 counts                    | Percentage change in counts between 2006 and 2016 | Percentage change in age-standardised rates between |
| <b>All causes</b>                                                                    | <b>775.4</b><br>(771.1 to 780.6) | <b>5,891.1†</b><br>(5,626.6 to 6,199.4) | <b>87.8</b><br>(65.2 to 114.1) | <b>23.1</b><br>(21.0 to 25.6)                     | <b>-1.3</b><br>(-2.7 to 0.1)                        |
| <b>Communicable, maternal, neonatal, and nutritional disorders</b>                   | <b>558.6</b><br>(543.8 to 578.4) | <b>4,065.3†</b><br>(3,832.7 to 4,337.1) | <b>17.7</b><br>(12.3 to 24.5)  | <b>2.1</b><br>(-1.3 to 5.8)                       | <b>-6.8</b><br>(-9.7 to -3.9)                       |
| <b>HIV/AIDS and tuberculosis</b>                                                     | <b>120.1</b><br>(109.3 to 128.8) | <b>1.2†</b><br>(1.0 to 1.4)             | <b>0.3</b><br>(0.2 to 0.5)     | <b>23.7</b><br>(-3.8 to 69.8)                     | <b>-8.9</b><br>(-26.6 to 20.4)                      |
| Tuberculosis                                                                         | 112.0<br>(102.4 to 122.9)        | 1.1†<br>(1.0 to 1.3)                    | 0.2<br>(0.1 to 0.3)            | 7.3<br>(-6.5 to 21.5)                             | -18.2<br>(-26.7 to -8.8)                            |
| Drug-susceptible tuberculosis                                                        | 0.7<br>(0.6 to 0.8)              | 1.1<br>(0.9 to 1.3)                     | 0.2<br>(0.1 to 0.3)            | 7.0<br>(-6.9 to 21.5)                             | -18.3<br>(-27.1 to -8.7)                            |
| Multidrug-resistant tuberculosis without extensive drug resistance                   | < 0.05<br>(< 0.05 to < 0.05)     | < 0.05<br>(< 0.05 to < 0.05)            | < 0.05<br>(< 0.05 to < 0.05)   | 12.9<br>(-13.8 to 48.0)                           | -13.7<br>(-35.8 to 16.4)                            |
| Extensively drug-resistant tuberculosis                                              | < 0.05<br>(< 0.05 to < 0.05)     | < 0.05<br>(< 0.05 to < 0.05)            | < 0.05<br>(< 0.05 to < 0.05)   | 196.4<br>(128.1 to 282.3)                         | 125.0<br>(73.7 to 190.2)                            |
| Latent tuberculosis infection                                                        | 111.3<br>(101.7 to 122.2)        | --                                      | --                             | --                                                | --                                                  |
| HIV/AIDS                                                                             | 0.6<br>(0.1 to 2.2)              | 0.1 <sup>a</sup><br>(< 0.05 to 0.2)     | 0.1<br>(< 0.05 to 0.3)         | 99.2<br>(-19.2 to 337.6)                          | 40.2<br>(-44.4 to 233.6)                            |
| Drug-susceptible HIV/AIDS - Tuberculosis                                             | < 0.05<br>(< 0.05 to < 0.05)     | < 0.05<br>(< 0.05 to < 0.05)            | < 0.05<br>(< 0.05 to < 0.05)   | 45.2<br>(35.2 to 55.8)                            | 6.1<br>(-1.2 to 13.9)                               |
| Multidrug-resistant HIV/AIDS - Tuberculosis without extensive drug resistance        | < 0.05<br>(< 0.05 to < 0.05)     | < 0.05<br>(< 0.05 to < 0.05)            | < 0.05<br>(< 0.05 to < 0.05)   | 51.8<br>(16.0 to 95.1)                            | 10.9<br>(-15.3 to 42.6)                             |
| Extensively drug-resistant HIV/AIDS - Tuberculosis                                   | < 0.05<br>(< 0.05 to < 0.05)     | < 0.05<br>(< 0.05 to < 0.05)            | < 0.05<br>(< 0.05 to < 0.05)   | 300.3<br>(205.5 to 414.6)                         | 192.6<br>(123.3 to 276.4)                           |
| HIV/AIDS resulting in other diseases                                                 | 0.6<br>(0.1 to 2.2)              | 0.1<br>(< 0.05 to 0.2)                  | 0.1<br>(< 0.05 to 0.3)         | 101.0<br>(-22.6 to 387.5)                         | 41.3<br>(-46.2 to 279.6)                            |
| <b>Diarrhoea, lower respiratory infections, and other common infectious diseases</b> | <b>70.4</b><br>(67.7 to 73.6)    | <b>3,853.0†</b><br>(3,610.2 to 4,117.0) | <b>4.9</b><br>(3.4 to 6.6)     | <b>21.4</b><br>(17.4 to 25.6)                     | <b>7.2</b><br>(4.1 to 10.3)                         |
| Diarrhoeal diseases                                                                  | 29.3<br>(27.6 to 31.0)           | 1,943.7<br>(1,834.7 to 2,056.6)         | 3.3<br>(2.2 to 4.5)            | 31.7<br>(26.1 to 37.9)                            | 13.7<br>(9.5 to 18.1)                               |
| Intestinal infectious diseases                                                       | 0.2<br>(0.2 to 0.3)              | 4.3†<br>(3.7 to 5.1)                    | < 0.05<br>(< 0.05 to < 0.05)   | -22.9<br>(-40.1 to -1.7)                          | -26.2<br>(-41.2 to -7.4)                            |
| Typhoid fever                                                                        | 0.2<br>(0.2 to 0.2)              | 3.2<br>(2.7 to 3.9)                     | < 0.05<br>(< 0.05 to < 0.05)   | -23.2<br>(-41.9 to -0.2)                          | -26.1<br>(-42.9 to -4.9)                            |
| Paratyphoid fever                                                                    | < 0.05<br>(< 0.05 to 0.1)        | 1.1<br>(0.9 to 1.3)                     | < 0.05<br>(< 0.05 to < 0.05)   | -14.8<br>(-29.9 to 3.2)                           | -23.6<br>(-36.0 to -9.3)                            |
| Other intestinal infectious diseases                                                 | --                               | --                                      | < 0.05<br>(< 0.05 to < 0.05)   | -47.8<br>(-61.0 to -29.5)                         | -44.3<br>(-55.4 to -30.5)                           |
| Lower respiratory infections                                                         | 0.9<br>(0.8 to 1.0)              | 37.2<br>(32.9 to 42.3)                  | 0.1<br>(< 0.05 to 0.1)         | 15.0<br>(1.8 to 30.9)                             | 16.8<br>(5.2 to 30.4)                               |
| Upper respiratory infections                                                         | 23.5<br>(20.7 to 26.7)           | 1,764.2<br>(1,544.9 to 2,010.0)         | 0.6<br>(0.3 to 0.9)            | 10.0<br>(3.8 to 17.5)                             | -1.0<br>(-6.0 to 4.6)                               |
| Otitis media                                                                         | 15.9<br>(14.1 to 18.0)           | 84.5<br>(67.1 to 109.2)                 | 0.4<br>(0.3 to 0.7)            | -6.9<br>(-13.2 to -0.5)                           | -8.8<br>(-14.6 to -2.8)                             |
| Meningitis                                                                           | 2.5<br>(2.1 to 2.9)              | 0.4<br>(0.3 to 0.5)                     | 0.3<br>(0.2 to 0.4)            | 15.7<br>(8.3 to 24.0)                             | -2.6<br>(-8.4 to 4.0)                               |
| Pneumococcal meningitis                                                              | 1.3<br>(1.1 to 1.6)              | 0.1<br>(0.1 to 0.1)                     | 0.1<br>(0.1 to 0.2)            | 18.7<br>(3.4 to 35.7)                             | -1.3<br>(-12.7 to 12.0)                             |
| H influenzae type B meningitis                                                       | 0.3<br>(0.2 to 0.4)              | < 0.05<br>(< 0.05 to 0.1)               | < 0.05<br>(< 0.05 to 0.1)      | -7.4<br>(-16.8 to 1.7)                            | -20.5<br>(-28.9 to -12.6)                           |
| Meningococcal infection                                                              | 0.1<br>(0.1 to 0.2)              | < 0.05<br>(< 0.05 to 0.1)               | < 0.05<br>(< 0.05 to < 0.05)   | 15.2<br>(10.0 to 20.4)                            | -4.0<br>(-8.2 to 0.1)                               |
| Other meningitis                                                                     | 0.8<br>(0.6 to 1.0)              | 0.2<br>(0.2 to 0.2)                     | 0.1<br>(0.1 to 0.1)            | 29.9<br>(23.3 to 37.4)                            | 9.4<br>(3.9 to 15.5)                                |
| Encephalitis                                                                         | 1.8<br>(1.2 to 2.7)              | 1.0<br>(0.9 to 1.1)                     | 0.2<br>(0.1 to 0.3)            | 11.6<br>(-1.9 to 26.3)                            | -10.9<br>(-20.2 to -0.8)                            |
| Diphtheria                                                                           | < 0.05<br>(< 0.05 to < 0.05)     | < 0.05<br>(< 0.05 to < 0.05)            | < 0.05<br>(< 0.05 to < 0.05)   | -58.8<br>(-80.4 to -8.9)                          | -55.6<br>(-78.1 to -14.3)                           |
| Whooping cough                                                                       | 0.1<br>(0.1 to 0.1)              | 0.5<br>(0.4 to 0.6)                     | < 0.05<br>(< 0.05 to < 0.05)   | -56.1<br>(-67.7 to -41.4)                         | -46.8<br>(-60.5 to -29.2)                           |
| Tetanus                                                                              | < 0.05<br>(< 0.05 to < 0.05)     | < 0.05<br>(< 0.05 to < 0.05)            | < 0.05<br>(< 0.05 to < 0.05)   | -5.4<br>(-25.6 to 7.8)                            | -13.4<br>(-27.9 to -4.2)                            |
| Measles                                                                              | < 0.05<br>(< 0.05 to < 0.05)     | 0.7<br>(0.3 to 1.7)                     | < 0.05<br>(< 0.05 to < 0.05)   | -64.1<br>(-84.8 to -22.8)                         | -57.4<br>(-81.5 to -8.6)                            |
| Varicella and herpes zoster                                                          | 0.7<br>(0.7 to 0.8)              | 16.4<br>(16.0 to 16.9)                  | < 0.05<br>(< 0.05 to < 0.05)   | 26.2<br>(8.5 to 46.2)                             | -0.2<br>(-11.5 to 12.6)                             |
| <b>Neglected tropical diseases and malaria</b>                                       | <b>162.2</b><br>(130.8 to 204.2) | <b>5.1†</b><br>(2.8 to 8.4)             | <b>0.6</b><br>(0.4 to 0.9)     | <b>-7.2</b><br>(-16.7 to 3.8)                     | <b>-11.3</b><br>(-22.0 to -1.0)                     |
| Malaria                                                                              | 0.1<br>(0.1 to 0.1)              | < 0.05<br>(< 0.05 to < 0.05)            | < 0.05<br>(< 0.05 to < 0.05)   | -11.8<br>(-29.1 to 1.6)                           | -24.1<br>(-37.2 to -13.5)                           |
| Chagas disease                                                                       | --                               | --                                      | --                             | --                                                | --                                                  |
| Leishmaniasis                                                                        | < 0.05<br>(< 0.05 to < 0.05)     | < 0.05<br>(< 0.05 to < 0.05)            | < 0.05<br>(< 0.05 to < 0.05)   | -26.2<br>(-67.0 to 62.2)                          | -38.4<br>(-72.1 to 29.3)                            |
| Visceral leishmaniasis                                                               | < 0.05<br>(< 0.05 to < 0.05)     | < 0.05<br>(< 0.05 to < 0.05)            | < 0.05<br>(< 0.05 to < 0.05)   | -26.2<br>(-67.0 to 62.2)                          | -38.4<br>(-72.1 to 29.3)                            |
| Cutaneous and mucocutaneous leishmaniasis                                            | --                               | --                                      | --                             | --                                                | --                                                  |
| African trypanosomiasis                                                              | --                               | --                                      | --                             | --                                                | --                                                  |
| Schistosomiasis                                                                      | --                               | --                                      | --                             | --                                                | --                                                  |
| Cysticercosis                                                                        | 0.6<br>(0.3 to 0.9)              | --                                      | 0.1<br>(< 0.05 to 0.2)         | 10.5<br>(-52.7 to 75.8)                           | -20.0<br>(-65.1 to 27.8)                            |
| Cystic echinococcosis                                                                | < 0.05<br>(< 0.05 to 0.1)        | < 0.05<br>(< 0.05 to < 0.05)            | < 0.05<br>(< 0.05 to < 0.05)   | -40.7<br>(-93.7 to 422.7)                         | -52.9<br>(-94.7 to 288.1)                           |
| Lymphatic filariasis                                                                 | --                               | --                                      | --                             | --                                                | --                                                  |
| Onchocerciasis                                                                       | --                               | --                                      | --                             | --                                                | --                                                  |
| Trachoma                                                                             | --                               | --                                      | --                             | --                                                | --                                                  |
| Dengue                                                                               | 0.3<br>(0.1 to 0.5)              | 5.0<br>(2.7 to 8.3)                     | < 0.05<br>(< 0.05 to 0.1)      | 45.7<br>(-0.5 to 311.4)                           | 27.3<br>(-12.0 to 254.3)                            |
| Yellow fever                                                                         | --                               | --                                      | --                             | --                                                | --                                                  |
| Rabies                                                                               | < 0.05<br>(< 0.05 to < 0.05)     | < 0.05<br>(< 0.05 to < 0.05)            | < 0.05<br>(< 0.05 to < 0.05)   | -54.6<br>(-76.0 to -6.1)                          | -58.3<br>(-76.4 to -21.6)                           |
| Intestinal nematode infections                                                       | 150.8<br>(119.5 to 193.5)        | --                                      | 0.1<br>(< 0.05 to 0.1)         | 17.6<br>(-23.7 to 80.1)                           | 1.5<br>(-35.9 to 59.1)                              |
| Ascariasis                                                                           | 98.2<br>(68.1 to 139.1)          | --                                      | < 0.05<br>(< 0.05 to 0.1)      | 21.2<br>(-38.6 to 135.2)                          | 2.1<br>(-50.6 to 111.4)                             |

| Cause                                                                   | Prevalence in thousands (95% UI)        | Incidence in thousands (95% UI)                | YLDs in thousands (95% UI)              |                                                   |                                                     |
|-------------------------------------------------------------------------|-----------------------------------------|------------------------------------------------|-----------------------------------------|---------------------------------------------------|-----------------------------------------------------|
|                                                                         | 2016 counts                             | 2016 counts                                    | 2016 counts                             | Percentage change in counts between 2006 and 2016 | Percentage change in age-standardised rates between |
| Trichuriasis                                                            | 44.8<br>(29.8 to 66.7)                  | --                                             | < 0.05<br>(< 0.05 to < 0.05)            | 22.9<br>(-53.2 to 218.7)                          | 0.6<br>(-62.8 to 169.8)                             |
| Hookworm disease                                                        | 9.6<br>(6.7 to 13.7)                    | --                                             | < 0.05<br>(< 0.05 to < 0.05)            | 11.9<br>(-20.7 to 54.8)                           | 0.6<br>(-29.9 to 40.6)                              |
| Food-borne trematodiasis                                                | --                                      | --                                             | --                                      | --                                                | --                                                  |
| Leprosy                                                                 | 0.1<br>(0.1 to 0.2)                     | < 0.05<br>(< 0.05 to < 0.05)                   | < 0.05<br>(< 0.05 to < 0.05)            | -8.7<br>(-24.6 to 15.3)                           | -33.6<br>(-43.5 to -16.7)                           |
| Ebola virus disease                                                     | --                                      | --                                             | --                                      | --                                                | --                                                  |
| Zika virus disease                                                      | --                                      | --                                             | --                                      | --                                                | --                                                  |
| Guinea worm disease                                                     | --                                      | --                                             | --                                      | --                                                | --                                                  |
| Other neglected tropical diseases                                       | 14.0<br>(13.5 to 14.6)                  | --                                             | 0.4<br>(0.3 to 0.6)                     | -15.5<br>(-22.2 to -8.5)                          | -11.6<br>(-18.3 to -4.5)                            |
| <b>Maternal disorders</b>                                               | <b>0.5</b><br><b>(0.4 to 0.7)</b>       | <b>6.4†</b><br><b>(5.4 to 7.7)</b>             | <b>0.1</b><br><b>(&lt; 0.05 to 0.1)</b> | <b>-12.0</b><br><b>(-30.3 to 10.7)</b>            | <b>-34.5</b><br><b>(-48.3 to -17.0)</b>             |
| Maternal haemorrhage                                                    | 0.1<br>(< 0.05 to 0.1)                  | 0.5<br>(0.3 to 0.6)                            | < 0.05<br>(< 0.05 to < 0.05)            | -17.7<br>(-40.9 to 16.9)                          | -33.3<br>(-51.9 to -6.4)                            |
| Maternal sepsis and other pregnancy related infections                  | 0.2<br>(0.1 to 0.2)                     | 0.8<br>(0.6 to 1.1)                            | < 0.05<br>(< 0.05 to < 0.05)            | -24.2<br>(-64.5 to 60.2)                          | -37.1<br>(-69.2 to 30.7)                            |
| Maternal hypertensive disorders                                         | 0.2<br>(0.1 to 0.3)                     | 1.0<br>(0.7 to 1.4)                            | < 0.05<br>(< 0.05 to < 0.05)            | 36.7<br>(-24.4 to 157.7)                          | 15.4<br>(-36.0 to 115.3)                            |
| Maternal obstructed labour and uterine rupture                          | 0.1<br>(0.1 to 0.2)                     | 0.5<br>(0.4 to 0.7)                            | < 0.05<br>(< 0.05 to 0.1)               | -15.8<br>(-38.3 to 17.4)                          | -39.7<br>(-55.5 to -16.4)                           |
| Maternal abortion, miscarriage, and ectopic pregnancy                   | < 0.05<br>(< 0.05 to < 0.05)            | 3.6<br>(2.7 to 5.0)                            | < 0.05<br>(< 0.05 to < 0.05)            | -21.6<br>(-64.7 to 61.7)                          | -39.5<br>(-71.6 to 23.6)                            |
| Other maternal disorders                                                | --                                      | --                                             | < 0.05<br>(< 0.05 to < 0.05)            | -16.8<br>(-34.3 to 4.6)                           | -37.6<br>(-50.6 to -21.4)                           |
| <b>Neonatal disorders</b>                                               | <b>8.6</b><br><b>(7.2 to 10.2)</b>      | --                                             | <b>1.6</b><br><b>(1.1 to 2.4)</b>       | <b>1.0</b><br><b>(-12.6 to 16.0)</b>              | <b>-5.5</b><br><b>(-17.9 to 8.4)</b>                |
| Neonatal preterm birth complications                                    | 7.4<br>(5.7 to 9.9)                     | --                                             | 1.0<br>(0.7 to 1.4)                     | -7.6<br>(-23.3 to 11.5)                           | -15.1<br>(-29.5 to 2.6)                             |
| Neonatal encephalopathy due to birth asphyxia and trauma                | 0.7<br>(0.3 to 1.4)                     | --                                             | 0.1<br>(< 0.05 to 0.2)                  | 28.6<br>(-34.8 to 130.8)                          | 18.7<br>(-37.8 to 120.4)                            |
| Neonatal sepsis and other neonatal infections                           | 1.0<br>(0.2 to 2.3)                     | --                                             | 0.4<br>(0.1 to 1.0)                     | 32.8<br>(-1.3 to 98.6)                            | 25.1<br>(-5.4 to 103.3)                             |
| Hemolytic disease and other neonatal jaundice                           | 0.3<br>(0.3 to 0.4)                     | --                                             | 0.1<br>(0.1 to 0.1)                     | 14.0<br>(-2.4 to 31.7)                            | 1.6<br>(-11.8 to 16.0)                              |
| Other neonatal disorders                                                | --                                      | --                                             | 0.1<br>(< 0.05 to 0.1)                  | -25.7<br>(-37.0 to -12.8)                         | -9.8<br>(-23.3 to 5.9)                              |
| <b>Nutritional deficiencies</b>                                         | <b>332.9</b><br><b>(322.7 to 344.2)</b> | <b>45.6†</b><br><b>(28.2 to 79.0)</b>          | <b>9.6</b><br><b>(6.4 to 14.0)</b>      | <b>-5.1</b><br><b>(-9.7 to -0.3)</b>              | <b>-12.4</b><br><b>(-16.4 to -8.4)</b>              |
| Protein-energy malnutrition                                             | 5.2<br>(3.5 to 7.4)                     | 3.1<br>(2.2 to 4.3)                            | 0.2<br>(0.1 to 0.4)                     | -13.6<br>(-55.9 to 69.5)                          | 5.5<br>(-46.0 to 106.2)                             |
| Iodine deficiency                                                       | 4.0<br>(3.5 to 4.6)                     | 0.1<br>(0.1 to 0.1)                            | 0.1<br>(0.1 to 0.1)                     | -16.4<br>(-27.4 to -3.6)                          | -33.0<br>(-41.1 to -24.0)                           |
| Vitamin A deficiency                                                    | 48.7<br>(30.1 to 82.3)                  | 42.4<br>(24.9 to 76.0)                         | < 0.05<br>(< 0.05 to < 0.05)            | -0.5<br>(-20.3 to 22.6)                           | -7.1<br>(-24.1 to 12.1)                             |
| Iron-deficiency anaemia                                                 | 317.7<br>(307.6 to 327.6)               | --                                             | 9.3<br>(6.1 to 13.5)                    | -4.8<br>(-9.5 to -0.3)                            | -12.4<br>(-16.3 to -8.7)                            |
| Other nutritional deficiencies                                          | --                                      | --                                             | < 0.05<br>(< 0.05 to < 0.05)            | -14.4<br>(-57.5 to 76.3)                          | 4.1<br>(-48.4 to 112.1)                             |
| <b>Other communicable, maternal, neonatal, and nutritional diseases</b> | <b>145.7</b><br><b>(136.0 to 157.8)</b> | <b>154.1</b><br><b>(105.4 to 216.5)</b>        | <b>0.6</b><br><b>(0.4 to 0.9)</b>       | <b>2.2</b><br><b>(-6.7 to 10.6)</b>               | <b>-8.7</b><br><b>(-14.9 to -2.7)</b>               |
| Sexually transmitted diseases excluding HIV                             | 93.4<br>(85.5 to 102.4)                 | 83.2<br>(57.5 to 117.3)                        | 0.2<br>(0.1 to 0.4)                     | 39.3<br>(27.5 to 51.5)                            | -1.1<br>(-8.4 to 6.5)                               |
| Syphilis                                                                | 17.3<br>(12.9 to 23.1)                  | 11.5<br>(8.1 to 15.9)                          | < 0.05<br>(< 0.05 to < 0.05)            | 51.0<br>(33.0 to 73.5)                            | 6.3<br>(-7.2 to 22.3)                               |
| Chlamydial infection                                                    | 5.3<br>(4.3 to 6.8)                     | 4.1<br>(3.3 to 5.2)                            | < 0.05<br>(< 0.05 to 0.1)               | 31.4<br>(11.3 to 52.8)                            | -5.0<br>(-17.6 to 9.4)                              |
| Gonococcal infection                                                    | 13.8<br>(6.9 to 22.9)                   | 48.7<br>(22.9 to 83.1)                         | 0.1<br>(< 0.05 to 0.2)                  | 42.7<br>(20.5 to 68.1)                            | -0.2<br>(-14.1 to 15.6)                             |
| Trichomoniasis                                                          | 14.3<br>(12.1 to 16.6)                  | 12.1<br>(10.3 to 14.2)                         | < 0.05<br>(< 0.05 to < 0.05)            | 31.3<br>(20.3 to 42.7)                            | 0.7<br>(-6.7 to 8.5)                                |
| Genital herpes                                                          | 48.1<br>(41.4 to 56.7)                  | 3.8<br>(3.2 to 4.6)                            | < 0.05<br>(< 0.05 to < 0.05)            | 38.7<br>(27.4 to 51.5)                            | -0.2<br>(-7.5 to 7.9)                               |
| Other sexually transmitted diseases                                     | 3.1<br>(2.6 to 3.5)                     | 2.9<br>(2.5 to 3.5)                            | 0.1<br>(< 0.05 to 0.1)                  | 37.7<br>(22.3 to 53.2)                            | -3.7<br>(-13.5 to 6.5)                              |
| Hepatitis                                                               | 47.4<br>(39.3 to 56.9)                  | 70.9<br>(32.0 to 118.8)                        | < 0.05<br>(< 0.05 to 0.1)               | -38.5<br>(-59.1 to -4.5)                          | -37.9<br>(-56.6 to -10.5)                           |
| Acute hepatitis A                                                       | 3.7<br>(0.7 to 7.4)                     | 47.7<br>(8.7 to 96.4)                          | < 0.05<br>(< 0.05 to < 0.05)            | -44.6<br>(-79.4 to 71.0)                          | -41.9<br>(-76.8 to 61.3)                            |
| Hepatitis B                                                             | 37.6<br>(30.7 to 46.2)                  | 21.0<br>(15.9 to 27.3)                         | < 0.05<br>(< 0.05 to < 0.05)            | -34.2<br>(-48.4 to -16.0)                         | -35.9<br>(-47.4 to -22.3)                           |
| Hepatitis C                                                             | 6.0<br>(5.4 to 6.7)                     | 0.6<br>(0.6 to 0.7)                            | < 0.05<br>(< 0.05 to < 0.05)            | -17.7<br>(-21.1 to -13.5)                         | -21.4<br>(-24.1 to -18.7)                           |
| Acute hepatitis E                                                       | 0.1<br>(0.1 to 0.1)                     | 1.6<br>(1.3 to 1.8)                            | < 0.05<br>(< 0.05 to < 0.05)            | -27.1<br>(-49.0 to 4.4)                           | -28.6<br>(-46.7 to -4.4)                            |
| Other infectious diseases                                               | 11.2<br>(10.8 to 11.7)                  | < 0.05<br>(< 0.05 to < 0.05)                   | 0.3<br>(0.2 to 0.5)                     | -7.4<br>(-14.5 to -0.1)                           | -6.9<br>(-13.6 to -0.0)                             |
| <b>Non-communicable diseases</b>                                        | <b>723.2</b><br><b>(710.1 to 739.9)</b> | <b>1,750.6†</b><br><b>(1,638.9 to 1,874.9)</b> | <b>64.2</b><br><b>(47.4 to 83.0)</b>    | <b>29.5</b><br><b>(26.8 to 32.5)</b>              | <b>-0.1</b><br><b>(-1.9 to 1.7)</b>                 |
| <b>Neoplasms</b>                                                        | <b>0.9</b><br><b>(0.8 to 0.9)</b>       | <b>0.5</b><br><b>(0.4 to 0.5)</b>              | <b>0.1</b><br><b>(0.1 to 0.2)</b>       | <b>46.5</b><br><b>(37.6 to 54.9)</b>              | <b>3.4</b><br><b>(-2.6 to 9.7)</b>                  |
| Lip and oral cavity cancer                                              | 0.2<br>(0.1 to 0.2)                     | < 0.05<br>(< 0.05 to 0.1)                      | < 0.05<br>(< 0.05 to < 0.05)            | 51.9<br>(33.2 to 74.3)                            | 4.2<br>(-9.5 to 20.6)                               |
| Nasopharynx cancer                                                      | < 0.05<br>(< 0.05 to < 0.05)            | < 0.05<br>(< 0.05 to < 0.05)                   | < 0.05<br>(< 0.05 to < 0.05)            | 36.3<br>(15.3 to 60.1)                            | -2.7<br>(-15.3 to 11.4)                             |
| Other pharynx cancer                                                    | 0.1<br>(< 0.05 to 0.1)                  | < 0.05<br>(< 0.05 to < 0.05)                   | < 0.05<br>(< 0.05 to < 0.05)            | 55.4<br>(24.7 to 88.4)                            | 7.5<br>(-14.9 to 32.4)                              |
| Oesophageal cancer                                                      | < 0.05<br>(< 0.05 to < 0.05)            | < 0.05<br>(< 0.05 to < 0.05)                   | < 0.05<br>(< 0.05 to < 0.05)            | 33.8<br>(18.8 to 51.2)                            | -7.6<br>(-19.3 to 5.7)                              |
| Stomach cancer                                                          | < 0.05<br>(< 0.05 to < 0.05)            | < 0.05<br>(< 0.05 to < 0.05)                   | < 0.05<br>(< 0.05 to < 0.05)            | 21.8<br>(10.3 to 35.3)                            | -15.6<br>(-24.7 to -4.9)                            |
| Colon and rectum cancer                                                 | 0.1<br>(0.1 to 0.1)                     | < 0.05<br>(< 0.05 to < 0.05)                   | < 0.05<br>(< 0.05 to < 0.05)            | 63.9<br>(40.0 to 88.9)                            | 12.1<br>(-4.1 to 30.9)                              |
| Liver cancer                                                            | < 0.05<br>(< 0.05 to < 0.05)            | < 0.05<br>(< 0.05 to < 0.05)                   | < 0.05<br>(< 0.05 to < 0.05)            | 51.6<br>(30.6 to 75.2)                            | 4.5<br>(-10.1 to 21.9)                              |
| Liver cancer due to hepatitis B                                         | < 0.05<br>(< 0.05 to < 0.05)            | < 0.05<br>(< 0.05 to < 0.05)                   | < 0.05<br>(< 0.05 to < 0.05)            | 52.2<br>(29.9 to 76.9)                            | 4.9<br>(-10.4 to 22.3)                              |



| Cause                                              | Prevalence in thousands (95% UI)     | Incidence in thousands (95% UI)    | YLDs in thousands (95% UI)        |                                                   |                                                     |
|----------------------------------------------------|--------------------------------------|------------------------------------|-----------------------------------|---------------------------------------------------|-----------------------------------------------------|
|                                                    | 2016 counts                          | 2016 counts                        | 2016 counts                       | Percentage change in counts between 2006 and 2016 | Percentage change in age-standardised rates between |
| Liver cancer due to hepatitis C                    | < 0.05<br>(< 0.05 to < 0.05)         | < 0.05<br>(< 0.05 to < 0.05)       | < 0.05<br>(< 0.05 to < 0.05)      | 52.5<br>(30.7 to 76.8)                            | 4.0<br>(-11.1 to 20.7)                              |
| Liver cancer due to alcohol use                    | < 0.05<br>(< 0.05 to < 0.05)         | < 0.05<br>(< 0.05 to < 0.05)       | < 0.05<br>(< 0.05 to < 0.05)      | 43.2<br>(21.1 to 67.2)                            | -0.6<br>(-15.8 to 16.7)                             |
| Liver cancer due to other causes                   | < 0.05<br>(< 0.05 to < 0.05)         | < 0.05<br>(< 0.05 to < 0.05)       | < 0.05<br>(< 0.05 to < 0.05)      | 52.2<br>(29.5 to 80.4)                            | 6.2<br>(-9.6 to 26.6)                               |
| Gallbladder and biliary tract cancer               | < 0.05<br>(< 0.05 to < 0.05)         | < 0.05<br>(< 0.05 to < 0.05)       | < 0.05<br>(< 0.05 to < 0.05)      | 35.2<br>(20.9 to 50.1)                            | -7.2<br>(-15.8 to 2.2)                              |
| Pancreatic cancer                                  | < 0.05<br>(< 0.05 to < 0.05)         | < 0.05<br>(< 0.05 to < 0.05)       | < 0.05<br>(< 0.05 to < 0.05)      | 56.9<br>(45.2 to 70.9)                            | 6.2<br>(-2.1 to 15.8)                               |
| Larynx cancer                                      | < 0.05<br>(< 0.05 to < 0.05)         | < 0.05<br>(< 0.05 to < 0.05)       | < 0.05<br>(< 0.05 to < 0.05)      | 44.4<br>(24.7 to 65.1)                            | 0.1<br>(-14.0 to 15.7)                              |
| Tracheal, bronchus, and lung cancer                | < 0.05<br>(< 0.05 to < 0.05)         | < 0.05<br>(< 0.05 to < 0.05)       | < 0.05<br>(< 0.05 to < 0.05)      | 54.4<br>(26.7 to 85.8)                            | 6.4<br>(-14.3 to 30.4)                              |
| Malignant skin melanoma                            | < 0.05<br>(< 0.05 to < 0.05)         | < 0.05<br>(< 0.05 to < 0.05)       | < 0.05<br>(< 0.05 to < 0.05)      | 88.6<br>(64.0 to 118.2)                           | 27.8<br>(12.3 to 46.8)                              |
| Non-melanoma skin cancer                           | < 0.05<br>(< 0.05 to < 0.05)         | < 0.05<br>(< 0.05 to < 0.05)       | < 0.05<br>(< 0.05 to < 0.05)      | 45.3<br>(-5.5 to 114.4)                           | -16.0<br>(-47.4 to 31.8)                            |
| Non-melanoma skin cancer (squamous-cell carcinoma) | < 0.05<br>(< 0.05 to < 0.05)         | < 0.05<br>(< 0.05 to < 0.05)       | < 0.05<br>(< 0.05 to < 0.05)      | 45.5<br>(-6.8 to 115.6)                           | -16.2<br>(-47.8 to 32.2)                            |
| Non-melanoma skin cancer (basal-cell carcinoma)    | < 0.05<br>(< 0.05 to < 0.05)         | < 0.05<br>(< 0.05 to < 0.05)       | < 0.05<br>(< 0.05 to < 0.05)      | 40.1<br>(20.6 to 63.2)                            | 0.2<br>(-12.1 to 11.0)                              |
| Breast cancer                                      | 0.2<br>(0.1 to 0.4)                  | < 0.05<br>(< 0.05 to 0.1)          | < 0.05<br>(< 0.05 to < 0.05)      | 66.8<br>(18.5 to 121.9)                           | 13.6<br>(-19.2 to 50.0)                             |
| Cervical cancer                                    | 0.1<br>(0.1 to 0.2)                  | < 0.05<br>(< 0.05 to < 0.05)       | < 0.05<br>(< 0.05 to < 0.05)      | 16.5<br>(-5.2 to 46.8)                            | -20.6<br>(-34.9 to -1.1)                            |
| Uterine cancer                                     | < 0.05<br>(< 0.05 to < 0.05)         | < 0.05<br>(< 0.05 to < 0.05)       | < 0.05<br>(< 0.05 to < 0.05)      | 53.0<br>(16.5 to 102.9)                           | 4.1<br>(-19.6 to 36.4)                              |
| Ovarian cancer                                     | < 0.05<br>(< 0.05 to < 0.05)         | < 0.05<br>(< 0.05 to < 0.05)       | < 0.05<br>(< 0.05 to < 0.05)      | 63.8<br>(37.2 to 92.8)                            | 12.4<br>(-6.5 to 34.4)                              |
| Prostate cancer                                    | 0.1<br>(< 0.05 to 0.1)               | < 0.05<br>(< 0.05 to < 0.05)       | < 0.05<br>(< 0.05 to < 0.05)      | 83.3<br>(42.0 to 141.6)                           | 17.5<br>(-8.3 to 51.3)                              |
| Testicular cancer                                  | < 0.05<br>(< 0.05 to < 0.05)         | < 0.05<br>(< 0.05 to < 0.05)       | < 0.05<br>(< 0.05 to < 0.05)      | 55.8<br>(25.8 to 92.8)                            | 12.1<br>(-7.2 to 34.7)                              |
| Kidney cancer                                      | < 0.05<br>(< 0.05 to < 0.05)         | < 0.05<br>(< 0.05 to < 0.05)       | < 0.05<br>(< 0.05 to < 0.05)      | 59.7<br>(36.2 to 84.0)                            | 18.3<br>(1.0 to 41.8)                               |
| Bladder cancer                                     | < 0.05<br>(< 0.05 to < 0.05)         | < 0.05<br>(< 0.05 to < 0.05)       | < 0.05<br>(< 0.05 to < 0.05)      | 72.4<br>(48.4 to 97.8)                            | 14.0<br>(-2.2 to 31.3)                              |
| Brain and nervous system cancer                    | < 0.05<br>(< 0.05 to < 0.05)         | < 0.05<br>(< 0.05 to < 0.05)       | < 0.05<br>(< 0.05 to < 0.05)      | 30.0<br>(16.6 to 51.8)                            | 1.6<br>(-9.6 to 26.6)                               |
| Thyroid cancer                                     | < 0.05<br>(< 0.05 to 0.1)            | < 0.05<br>(< 0.05 to < 0.05)       | < 0.05<br>(< 0.05 to < 0.05)      | 96.7<br>(54.2 to 145.0)                           | 28.4<br>(3.2 to 56.8)                               |
| Mesothelioma                                       | < 0.05<br>(< 0.05 to < 0.05)         | < 0.05<br>(< 0.05 to < 0.05)       | < 0.05<br>(< 0.05 to < 0.05)      | 52.7<br>(32.2 to 82.9)                            | 6.4<br>(-8.9 to 29.2)                               |
| Hodgkin lymphoma                                   | < 0.05<br>(< 0.05 to < 0.05)         | < 0.05<br>(< 0.05 to < 0.05)       | < 0.05<br>(< 0.05 to < 0.05)      | -8.7<br>(-27.7 to 7.2)                            | -25.0<br>(-36.1 to -16.5)                           |
| Non-Hodgkin's lymphoma                             | < 0.05<br>(< 0.05 to < 0.05)         | < 0.05<br>(< 0.05 to < 0.05)       | < 0.05<br>(< 0.05 to < 0.05)      | 41.5<br>(27.3 to 60.5)                            | 5.3<br>(-6.9 to 23.2)                               |
| Multiple myeloma                                   | < 0.05<br>(< 0.05 to < 0.05)         | < 0.05<br>(< 0.05 to < 0.05)       | < 0.05<br>(< 0.05 to < 0.05)      | 62.4<br>(44.4 to 89.5)                            | 11.5<br>(-0.7 to 30.9)                              |
| Leukaemia                                          | 0.1<br>(< 0.05 to 0.1)               | < 0.05<br>(< 0.05 to < 0.05)       | < 0.05<br>(< 0.05 to < 0.05)      | 7.5<br>(-8.1 to 23.8)                             | -10.3<br>(-19.4 to -0.5)                            |
| Acute lymphoid leukaemia                           | < 0.05<br>(< 0.05 to < 0.05)         | < 0.05<br>(< 0.05 to < 0.05)       | < 0.05<br>(< 0.05 to < 0.05)      | -8.4<br>(-35.1 to 15.8)                           | -14.5<br>(-34.1 to 3.7)                             |
| Chronic lymphoid leukaemia                         | < 0.05<br>(< 0.05 to < 0.05)         | < 0.05<br>(< 0.05 to < 0.05)       | < 0.05<br>(< 0.05 to < 0.05)      | 45.0<br>(24.0 to 69.7)                            | 1.8<br>(-12.7 to 19.0)                              |
| Acute myeloid leukaemia                            | < 0.05<br>(< 0.05 to < 0.05)         | < 0.05<br>(< 0.05 to < 0.05)       | < 0.05<br>(< 0.05 to < 0.05)      | 18.6<br>(-0.3 to 38.8)                            | -0.8<br>(-13.1 to 12.0)                             |
| Chronic myeloid leukaemia                          | < 0.05<br>(< 0.05 to < 0.05)         | < 0.05<br>(< 0.05 to < 0.05)       | < 0.05<br>(< 0.05 to < 0.05)      | 19.9<br>(-3.8 to 47.5)                            | -14.6<br>(-29.5 to 1.8)                             |
| Other leukaemia                                    | < 0.05<br>(< 0.05 to < 0.05)         | < 0.05<br>(< 0.05 to < 0.05)       | < 0.05<br>(< 0.05 to < 0.05)      | -6.1<br>(-25.0 to 14.0)                           | -21.8<br>(-34.6 to -8.2)                            |
| Other neoplasms                                    | 0.1<br>(0.1 to 0.1)                  | < 0.05<br>(< 0.05 to < 0.05)       | < 0.05<br>(< 0.05 to < 0.05)      | 44.8<br>(27.1 to 61.7)                            | 9.3<br>(-4.9 to 26.1)                               |
| <b>Cardiovascular diseases</b>                     | <b>29.3</b><br><b>(28.2 to 30.5)</b> | <b>3.3†</b><br><b>(3.1 to 3.4)</b> | <b>1.8</b><br><b>(1.3 to 2.3)</b> | <b>45.0</b><br><b>(40.0 to 50.3)</b>              | <b>2.1</b><br><b>(-1.3 to 5.5)</b>                  |
| Rheumatic heart disease                            | 5.2<br>(4.6 to 5.8)                  | 0.2<br>(0.1 to 0.2)                | 0.2<br>(0.2 to 0.4)               | 13.4<br>(4.0 to 23.9)                             | -11.7<br>(-18.6 to -4.1)                            |
| Ischaemic heart disease                            | 11.6<br>(10.9 to 12.4)               | 1.3<br>(1.2 to 1.4)                | 0.6<br>(0.4 to 0.8)               | 57.1<br>(49.6 to 65.1)                            | 8.1<br>(3.5 to 12.9)                                |
| Cerebrovascular disease                            | 3.4<br>(3.2 to 3.7)                  | 0.6†<br>(0.5 to 0.6)               | 0.5<br>(0.4 to 0.7)               | 49.4<br>(38.3 to 61.1)                            | 2.2<br>(-5.5 to 10.6)                               |
| Ischaemic stroke                                   | 3.0<br>(2.7 to 3.3)                  | 0.4†<br>(0.4 to 0.5)               | 0.4<br>(0.3 to 0.6)               | 52.3<br>(39.1 to 67.0)                            | 3.6<br>(-5.5 to 13.1)                               |
| Hemorrhagic stroke                                 | 0.6<br>(0.6 to 0.7)                  | 0.2†<br>(0.2 to 0.2)               | 0.1<br>(0.1 to 0.1)               | 37.2<br>(20.7 to 54.1)                            | -4.3<br>(-16.1 to 7.9)                              |
| Hypertensive heart disease                         | 1.2<br>(1.1 to 1.4)                  | --                                 | 0.1<br>(0.1 to 0.1)               | 53.6<br>(39.1 to 69.5)                            | 1.8<br>(-6.7 to 11.2)                               |
| Cardiomyopathy and myocarditis                     | 0.2<br>(0.2 to 0.2)                  | 0.2†<br>(0.2 to 0.2)               | < 0.05<br>(< 0.05 to < 0.05)      | 28.2<br>(9.8 to 51.0)                             | 4.5<br>(-8.2 to 19.5)                               |
| Myocarditis                                        | 0.1<br>(0.1 to 0.2)                  | 0.2<br>(0.2 to 0.2)                | < 0.05<br>(< 0.05 to < 0.05)      | 22.1<br>(5.1 to 44.5)                             | 3.9<br>(-9.5 to 19.4)                               |
| Alcoholic cardiomyopathy                           | < 0.05<br>(< 0.05 to < 0.05)         | --                                 | < 0.05<br>(< 0.05 to < 0.05)      | 56.4<br>(41.9 to 71.8)                            | 4.2<br>(-5.0 to 13.8)                               |
| Other cardiomyopathy                               | 0.1<br>(0.1 to 0.2)                  | --                                 | < 0.05<br>(< 0.05 to < 0.05)      | 32.9<br>(0.4 to 73.1)                             | 5.1<br>(-16.3 to 31.0)                              |
| Atrial fibrillation and flutter                    | 2.8<br>(2.4 to 3.2)                  | 0.2<br>(0.2 to 0.3)                | 0.2<br>(0.1 to 0.3)               | 51.4<br>(41.1 to 63.4)                            | 0.2<br>(-5.9 to 6.7)                                |
| Peripheral vascular disease                        | 7.0<br>(6.1 to 8.2)                  | 0.7<br>(0.6 to 0.8)                | < 0.05<br>(< 0.05 to 0.1)         | 46.5<br>(34.7 to 59.4)                            | -2.0<br>(-9.5 to 5.8)                               |
| Endocarditis                                       | < 0.05<br>(< 0.05 to < 0.05)         | 0.1<br>(0.1 to 0.1)                | < 0.05<br>(< 0.05 to < 0.05)      | 37.7<br>(23.2 to 55.0)                            | 1.3<br>(-13.5 to 18.9)                              |
| Other cardiovascular and circulatory diseases      | 0.9<br>(0.8 to 1.1)                  | --                                 | < 0.05<br>(< 0.05 to 0.1)         | 40.5<br>(21.4 to 61.6)                            | 1.3<br>(-10.1 to 13.7)                              |
| <b>Chronic respiratory diseases</b>                | <b>49.6</b><br><b>(47.9 to 51.6)</b> | <b>8.9†</b><br><b>(8.5 to 9.4)</b> | <b>3.4</b><br><b>(2.8 to 3.9)</b> | <b>45.1</b><br><b>(38.4 to 53.0)</b>              | <b>6.5</b><br><b>(1.4 to 12.3)</b>                  |
| Chronic obstructive pulmonary disease              | 23.4<br>(22.4 to 24.3)               | 1.9<br>(1.8 to 1.9)                | 2.1<br>(1.8 to 2.3)               | 42.7<br>(33.6 to 53.7)                            | 0.5<br>(-5.8 to 8.6)                                |
| Pneumoconiosis                                     | < 0.05<br>(< 0.05 to < 0.05)         | < 0.05<br>(< 0.05 to < 0.05)       | < 0.05<br>(< 0.05 to < 0.05)      | 50.6<br>(40.9 to 60.7)                            | 5.3<br>(-1.7 to 13.3)                               |
| Silicosis                                          | < 0.05<br>(< 0.05 to < 0.05)         | < 0.05<br>(< 0.05 to < 0.05)       | < 0.05<br>(< 0.05 to < 0.05)      | 50.2<br>(42.2 to 59.1)                            | 2.7<br>(-2.0 to 8.2)                                |

| Cause                                                          | Prevalence in thousands (95% UI)  | Incidence in thousands (95% UI)   | YLDs in thousands (95% UI)        |                                                                     |                                                                      |
|----------------------------------------------------------------|-----------------------------------|-----------------------------------|-----------------------------------|---------------------------------------------------------------------|----------------------------------------------------------------------|
|                                                                | 2016 counts<br>(< 0.05 to < 0.05) | 2016 counts<br>(< 0.05 to < 0.05) | 2016 counts<br>(< 0.05 to < 0.05) | Percentage change in counts between 2006 and 2016<br>(34.2 to 52.6) | Percentage change in age-standardised rates between<br>(-4.9 to 5.5) |
| Asbestosis                                                     | < 0.05<br>(< 0.05 to < 0.05)      | < 0.05<br>(< 0.05 to < 0.05)      | < 0.05<br>(< 0.05 to < 0.05)      | 42.9<br>(34.2 to 52.6)                                              | -0.1<br>(-4.9 to 5.5)                                                |
| Coal workers pneumoconiosis                                    | --                                | --                                | --                                | --                                                                  | --                                                                   |
| Other pneumoconiosis                                           | < 0.05<br>(< 0.05 to < 0.05)      | < 0.05<br>(< 0.05 to < 0.05)      | < 0.05<br>(< 0.05 to < 0.05)      | 53.9<br>(40.7 to 68.9)                                              | 7.5<br>(-2.4 to 19.9)                                                |
| Asthma                                                         | 29.6<br>(27.9 to 31.6)            | 7.0<br>(6.6 to 7.5)               | 1.1<br>(0.8 to 1.6)               | 48.7<br>(40.8 to 56.6)                                              | 20.2<br>(14.6 to 26.1)                                               |
| Interstitial lung disease and pulmonary sarcoidosis            | 0.2<br>(0.2 to 0.2)               | < 0.05<br>(< 0.05 to < 0.05)      | < 0.05<br>(< 0.05 to < 0.05)      | 42.2<br>(33.0 to 52.0)                                              | 4.2<br>(-5.2 to 13.9)                                                |
| Other chronic respiratory diseases                             | --                                | --                                | 0.1<br>(0.1 to 0.2)               | 52.1<br>(28.5 to 77.4)                                              | 32.6<br>(15.5 to 52.5)                                               |
| <b>Cirrhosis and other chronic liver diseases</b>              | <b>2.4<br/>(2.3 to 2.6)</b>       | <b>0.2<br/>(0.2 to 0.2)</b>       | <b>0.2<br/>(0.1 to 0.3)</b>       | <b>22.4<br/>(10.7 to 34.0)</b>                                      | <b>-0.0<br/>(-8.1 to 8.6)</b>                                        |
| Cirrhosis and other chronic liver diseases due to hepatitis B  | 0.9<br>(0.8 to 1.0)               | 0.1<br>(0.1 to 0.1)               | 0.1<br>(< 0.05 to 0.1)            | 41.7<br>(21.6 to 65.8)                                              | 1.7<br>(-11.5 to 15.4)                                               |
| Cirrhosis and other chronic liver diseases due to hepatitis C  | 0.4<br>(0.4 to 0.5)               | < 0.05<br>(< 0.05 to < 0.05)      | < 0.05<br>(< 0.05 to 0.1)         | 47.1<br>(18.9 to 84.0)                                              | 6.3<br>(-12.3 to 28.8)                                               |
| Cirrhosis and other chronic liver diseases due to alcohol use  | 0.4<br>(0.3 to 0.5)               | < 0.05<br>(< 0.05 to < 0.05)      | < 0.05<br>(< 0.05 to < 0.05)      | 39.1<br>(13.8 to 69.8)                                              | -3.6<br>(-19.9 to 15.9)                                              |
| Cirrhosis and other chronic liver diseases due to other causes | 0.7<br>(0.7 to 0.8)               | < 0.05<br>(< 0.05 to < 0.05)      | 0.1<br>(0.1 to 0.1)               | -1.4<br>(-17.4 to 18.6)                                             | -3.1<br>(-17.7 to 14.5)                                              |
| <b>Digestive diseases</b>                                      | <b>15.1<br/>(14.3 to 16.0)</b>    | <b>16.9†<br/>(16.1 to 17.9)</b>   | <b>0.4<br/>(0.3 to 0.6)</b>       | <b>29.2<br/>(20.1 to 39.7)</b>                                      | <b>0.3<br/>(-5.4 to 6.6)</b>                                         |
| Peptic ulcer disease                                           | 5.3<br>(4.8 to 5.8)               | 1.4<br>(1.3 to 1.6)               | 0.1<br>(0.1 to 0.1)               | 39.7<br>(27.1 to 52.8)                                              | 3.1<br>(-4.9 to 11.2)                                                |
| Gastritis and duodenitis                                       | 4.5<br>(4.0 to 5.0)               | 7.0<br>(6.2 to 7.9)               | 0.1<br>(0.1 to 0.1)               | 44.5<br>(31.4 to 60.1)                                              | 10.1<br>(1.8 to 19.7)                                                |
| Appendicitis                                                   | 0.1<br>(0.1 to 0.1)               | 3.6<br>(3.4 to 3.9)               | < 0.05<br>(< 0.05 to 0.1)         | 13.5<br>(-15.8 to 53.1)                                             | -1.3<br>(-24.5 to 29.3)                                              |
| Paralytic ileus and intestinal obstruction                     | < 0.05<br>(< 0.05 to < 0.05)      | 0.6<br>(0.5 to 0.6)               | < 0.05<br>(< 0.05 to < 0.05)      | 25.9<br>(21.0 to 30.9)                                              | 0.2<br>(-3.5 to 4.0)                                                 |
| Inguinal, femoral, and abdominal hernia                        | 4.8<br>(4.1 to 5.5)               | 1.9<br>(1.7 to 2.2)               | 0.1<br>(0.1 to 0.2)               | 21.1<br>(5.7 to 39.1)                                               | -6.2<br>(-16.1 to 5.9)                                               |
| Inflammatory bowel disease                                     | 0.1<br>(0.1 to 0.1)               | 0.4<br>(0.4 to 0.5)               | < 0.05<br>(< 0.05 to < 0.05)      | 29.9<br>(6.2 to 58.3)                                               | -4.4<br>(-23.3 to 18.7)                                              |
| Vascular intestinal disorders                                  | < 0.05<br>(< 0.05 to < 0.05)      | < 0.05<br>(< 0.05 to < 0.05)      | < 0.05<br>(< 0.05 to < 0.05)      | 34.2<br>(26.6 to 42.0)                                              | 7.0<br>(2.9 to 11.3)                                                 |
| Gallbladder and biliary diseases                               | 0.8<br>(0.8 to 1.0)               | 1.8<br>(1.6 to 2.1)               | < 0.05<br>(< 0.05 to < 0.05)      | 39.3<br>(27.7 to 51.0)                                              | 0.7<br>(-8.7 to 9.9)                                                 |
| Pancreatitis                                                   | < 0.05<br>(< 0.05 to < 0.05)      | 0.2<br>(0.1 to 0.2)               | < 0.05<br>(< 0.05 to < 0.05)      | 40.0<br>(34.5 to 45.8)                                              | 3.4<br>(0.3 to 7.2)                                                  |
| Other digestive diseases                                       | --                                | --                                | < 0.05<br>(< 0.05 to < 0.05)      | 28.8<br>(18.1 to 39.7)                                              | 4.0<br>(-2.1 to 10.6)                                                |
| <b>Neurological disorders</b>                                  | <b>326.1<br/>(313.2 to 339.9)</b> | <b>153.7<br/>(130.6 to 179.7)</b> | <b>8.2<br/>(5.4 to 11.5)</b>      | <b>26.0<br/>(8.7 to 45.0)</b>                                       | <b>-1.1<br/>(-13.8 to 12.6)</b>                                      |
| Alzheimer's disease and other dementias                        | 1.7<br>(1.4 to 2.0)               | 0.3<br>(0.2 to 0.4)               | 0.2<br>(0.2 to 0.3)               | 63.3<br>(54.0 to 72.5)                                              | -0.6<br>(-5.2 to 4.3)                                                |
| Parkinson's disease                                            | 0.3<br>(0.2 to 0.4)               | < 0.05<br>(< 0.05 to < 0.05)      | < 0.05<br>(< 0.05 to < 0.05)      | 69.4<br>(48.2 to 95.3)                                              | 12.2<br>(-0.7 to 27.6)                                               |
| Epilepsy                                                       | 2.8<br>(0.9 to 4.5)               | 0.3<br>(0.1 to 0.5)               | 0.8<br>(0.2 to 1.6)               | 4.7<br>(-73.2 to 260.7)                                             | -8.9<br>(-76.7 to 216.2)                                             |
| Multiple sclerosis                                             | 0.1<br>(0.1 to 0.1)               | < 0.05<br>(< 0.05 to < 0.05)      | < 0.05<br>(< 0.05 to 0.1)         | 60.9<br>(41.6 to 82.5)                                              | 14.0<br>(-0.2 to 29.7)                                               |
| Motor neuron disease                                           | < 0.05<br>(< 0.05 to < 0.05)      | < 0.05<br>(< 0.05 to < 0.05)      | < 0.05<br>(< 0.05 to < 0.05)      | 29.7<br>(23.4 to 35.6)                                              | 4.8<br>(1.3 to 8.3)                                                  |
| Migraine                                                       | 143.3<br>(134.5 to 151.7)         | 15.2<br>(14.2 to 16.4)            | 6.0<br>(3.9 to 8.5)               | 27.8<br>(23.1 to 32.6)                                              | -0.6<br>(-3.8 to 2.9)                                                |
| Tension-type headache                                          | 238.0<br>(212.8 to 266.5)         | 137.8<br>(114.6 to 163.7)         | 0.9<br>(0.6 to 1.3)               | 29.0<br>(22.1 to 37.8)                                              | -0.2<br>(-4.9 to 5.4)                                                |
| Other neurological disorders                                   | < 0.05<br>(< 0.05 to < 0.05)      | < 0.05<br>(< 0.05 to < 0.05)      | 0.2<br>(0.1 to 0.4)               | 21.1<br>(-63.9 to 271.1)                                            | 10.0<br>(-65.0 to 216.2)                                             |
| <b>Mental and substance use disorders</b>                      | <b>118.2<br/>(113.7 to 122.9)</b> | <b>45.7†<br/>(42.5 to 49.3)</b>   | <b>15.9<br/>(11.6 to 20.7)</b>    | <b>28.4<br/>(25.5 to 31.4)</b>                                      | <b>0.2<br/>(-1.9 to 2.2)</b>                                         |
| Schizophrenia                                                  | 1.9<br>(1.7 to 2.2)               | 0.1<br>(0.1 to 0.1)               | 1.2<br>(0.9 to 1.6)               | 42.9<br>(30.4 to 56.5)                                              | 1.1<br>(-6.9 to 9.7)                                                 |
| Alcohol use disorders                                          | 19.8<br>(17.1 to 22.5)            | 9.5<br>(8.0 to 11.0)              | 2.0<br>(1.3 to 2.8)               | 38.8<br>(27.9 to 51.4)                                              | 4.1<br>(-3.0 to 12.6)                                                |
| Drug use disorders                                             | 5.2<br>(4.6 to 5.8)               | 0.7<br>(0.6 to 0.8)               | 1.4<br>(0.9 to 1.9)               | 36.4<br>(23.4 to 50.4)                                              | 2.8<br>(-5.9 to 12.2)                                                |
| Opioid use disorders                                           | 2.9<br>(2.3 to 3.6)               | 0.3<br>(0.2 to 0.4)               | 1.2<br>(0.8 to 1.7)               | 37.5<br>(22.6 to 53.2)                                              | 2.9<br>(-7.1 to 13.4)                                                |
| Cocaine use disorders                                          | 0.2<br>(0.2 to 0.2)               | < 0.05<br>(< 0.05 to < 0.05)      | < 0.05<br>(< 0.05 to < 0.05)      | 33.1<br>(-6.4 to 87.5)                                              | 4.0<br>(-23.2 to 37.6)                                               |
| Amphetamine use disorders                                      | < 0.05<br>(< 0.05 to 0.1)         | < 0.05<br>(< 0.05 to < 0.05)      | < 0.05<br>(< 0.05 to < 0.05)      | 27.2<br>(14.8 to 40.9)                                              | 1.2<br>(-7.1 to 9.9)                                                 |
| Cannabis use disorders                                         | 1.9<br>(1.6 to 2.3)               | 0.3<br>(0.2 to 0.4)               | 0.1<br>(< 0.05 to 0.1)            | 16.9<br>(-3.4 to 43.0)                                              | -1.5<br>(-18.2 to 19.5)                                              |
| Other drug use disorders                                       | 0.3<br>(0.2 to 0.3)               | 0.1<br>(0.1 to 0.1)               | 0.1<br>(< 0.05 to 0.1)            | 38.8<br>(12.5 to 70.9)                                              | 4.5<br>(-13.7 to 26.8)                                               |
| Depressive disorders                                           | 25.6<br>(23.9 to 27.3)            | 27.1<br>(24.2 to 30.4)            | 4.2<br>(2.9 to 5.7)               | 31.8<br>(25.7 to 38.1)                                              | -1.4<br>(-5.5 to 3.0)                                                |
| Major depressive disorder                                      | 16.3<br>(14.6 to 18.2)            | 25.5<br>(22.6 to 28.6)            | 3.3<br>(2.2 to 4.5)               | 31.3<br>(23.9 to 39.3)                                              | -1.7<br>(-6.9 to 3.8)                                                |
| Dysthymia                                                      | 9.8<br>(8.5 to 11.3)              | 1.7<br>(1.5 to 1.9)               | 0.9<br>(0.6 to 1.4)               | 33.8<br>(28.6 to 39.8)                                              | 0.0<br>(-3.1 to 3.3)                                                 |
| Bipolar disorder                                               | 4.2<br>(3.6 to 4.9)               | 0.4<br>(0.3 to 0.5)               | 0.9<br>(0.5 to 1.3)               | 27.7<br>(18.1 to 37.9)                                              | 0.2<br>(-6.2 to 6.3)                                                 |
| Anxiety disorders                                              | 28.6<br>(25.9 to 31.6)            | 4.8<br>(4.4 to 5.2)               | 2.8<br>(1.9 to 3.8)               | 25.3<br>(19.8 to 30.6)                                              | -0.0<br>(-3.6 to 3.4)                                                |
| Eating disorders                                               | 1.0<br>(0.8 to 1.3)               | 0.6<br>(0.5 to 0.8)               | 0.2<br>(0.1 to 0.3)               | 40.3<br>(21.7 to 63.0)                                              | 17.4<br>(2.1 to 34.9)                                                |
| Anorexia nervosa                                               | 0.2<br>(0.2 to 0.3)               | 0.1<br>(0.1 to 0.1)               | 0.1<br>(< 0.05 to 0.1)            | 26.1<br>(-1.4 to 67.1)                                              | 15.4<br>(-10.2 to 50.6)                                              |
| Bulimia nervosa                                                | 0.8<br>(0.6 to 1.0)               | 0.5<br>(0.4 to 0.7)               | 0.2<br>(0.1 to 0.2)               | 45.6<br>(23.5 to 73.4)                                              | 18.1<br>(1.5 to 37.1)                                                |
| Autistic spectrum disorders                                    | 7.1<br>(6.4 to 8.2)               | 0.1<br>(< 0.05 to 0.1)            | 1.0<br>(0.7 to 1.4)               | 14.7<br>(9.2 to 20.6)                                               | -0.1<br>(-4.5 to 4.6)                                                |
| Autism                                                         | 1.9<br>(1.6 to 2.2)               | < 0.05<br>(< 0.05 to < 0.05)      | 0.5<br>(0.3 to 0.7)               | 15.0<br>(5.1 to 25.9)                                               | -0.1<br>(-8.1 to 8.1)                                                |
| Asperger syndrome and other autistic spectrum disorders        | 5.2<br>(4.4 to 6.3)               | < 0.05<br>(< 0.05 to 0.1)         | 0.5<br>(0.3 to 0.8)               | 14.4<br>(9.2 to 20.1)                                               | -0.1<br>(-4.3 to 4.2)                                                |

| Cause                                                      | Prevalence in thousands (95% UI)        | Incidence in thousands (95% UI)                | YLDs in thousands (95% UI)          |                                                   |                                                     |
|------------------------------------------------------------|-----------------------------------------|------------------------------------------------|-------------------------------------|---------------------------------------------------|-----------------------------------------------------|
|                                                            | 2016 counts                             | 2016 counts                                    | 2016 counts                         | Percentage change in counts between 2006 and 2016 | Percentage change in age-standardised rates between |
| Attention-deficit/hyperactivity disorder                   | 3.1<br>(2.6 to 3.7)                     | 0.1<br>(0.1 to 0.2)                            | < 0.05<br>(< 0.05 to 0.1)           | 6.9<br>(-6.2 to 21.4)                             | -0.6<br>(-12.3 to 12.7)                             |
| Conduct disorder                                           | 5.4<br>(4.4 to 6.5)                     | 1.8<br>(1.4 to 2.2)                            | 0.7<br>(0.4 to 1.0)                 | -5.6<br>(-12.1 to 1.3)                            | -0.1<br>(-7.0 to 7.3)                               |
| Idiopathic developmental intellectual disability           | 12.0<br>(6.6 to 18.0)                   | --                                             | 0.5<br>(0.2 to 0.9)                 | 4.5<br>(-5.7 to 13.9)                             | -9.9<br>(-18.3 to -1.8)                             |
| Other mental and substance use disorders                   | 14.7<br>(12.9 to 17.0)                  | 0.6<br>(0.5 to 0.6)                            | 1.1<br>(0.8 to 1.6)                 | 36.8<br>(28.9 to 44.9)                            | 0.2<br>(-4.8 to 5.3)                                |
| <b>Diabetes, urogenital, blood, and endocrine diseases</b> | <b>371.2</b><br><b>(302.5 to 453.8)</b> | <b>81.3†</b><br><b>(76.2 to 87.3)</b>          | <b>6.7</b><br><b>(4.6 to 9.7)</b>   | <b>37.2</b><br><b>(31.4 to 43.0)</b>              | <b>6.2</b><br><b>(2.8 to 9.9)</b>                   |
| Diabetes mellitus                                          | 41.6<br>(37.0 to 46.5)                  | 2.5<br>(2.2 to 2.8)                            | 2.8<br>(1.9 to 4.0)                 | 74.2<br>(63.2 to 84.2)                            | 22.4<br>(15.2 to 29.6)                              |
| Acute glomerulonephritis                                   | < 0.05<br>(< 0.05 to < 0.05)            | 0.1<br>(0.1 to 0.1)                            | < 0.05<br>(< 0.05 to < 0.05)        | 22.0<br>(14.7 to 30.4)                            | -1.1<br>(-6.3 to 3.9)                               |
| Chronic kidney disease                                     | 27.8<br>(25.2 to 30.6)                  | 2.0<br>(1.8 to 2.2)                            | 0.9<br>(0.7 to 1.2)                 | 41.0<br>(33.0 to 50.0)                            | -1.1<br>(-6.1 to 4.7)                               |
| Chronic kidney disease due to diabetes mellitus            | 10.2<br>(8.7 to 11.9)                   | 0.7<br>(0.6 to 0.9)                            | 0.3<br>(0.2 to 0.4)                 | 47.0<br>(34.2 to 60.2)                            | 0.7<br>(-7.7 to 9.2)                                |
| Chronic kidney disease due to hypertension                 | 5.0<br>(4.4 to 5.7)                     | 0.3<br>(0.3 to 0.4)                            | 0.2<br>(0.1 to 0.3)                 | 45.1<br>(28.8 to 62.0)                            | -1.9<br>(-12.3 to 10.5)                             |
| Chronic kidney disease due to glomerulonephritis           | 5.3<br>(4.6 to 6.0)                     | 0.4<br>(0.4 to 0.5)                            | 0.1<br>(0.1 to 0.2)                 | 33.0<br>(16.5 to 51.1)                            | -2.4<br>(-11.2 to 7.8)                              |
| Chronic kidney disease due to other causes                 | 7.2<br>(6.2 to 8.4)                     | 0.5<br>(0.5 to 0.6)                            | 0.2<br>(0.2 to 0.3)                 | 36.0<br>(22.9 to 51.2)                            | -2.5<br>(-10.2 to 6.1)                              |
| Urinary diseases and male infertility                      | 11.7<br>(10.4 to 13.1)                  | 49.1†<br>(44.1 to 54.7)                        | 0.3<br>(0.2 to 0.5)                 | 37.6<br>(28.1 to 48.1)                            | -0.8<br>(-7.4 to 7.0)                               |
| Interstitial nephritis and urinary tract infections        | 0.8<br>(0.7 to 0.9)                     | 41.1<br>(36.1 to 46.4)                         | < 0.05<br>(< 0.05 to < 0.05)        | 16.4<br>(-0.9 to 36.3)                            | -2.1<br>(-15.4 to 13.2)                             |
| Urolithiasis                                               | 0.3<br>(0.2 to 0.3)                     | 7.2<br>(6.3 to 8.2)                            | < 0.05<br>(< 0.05 to < 0.05)        | 43.4<br>(20.9 to 69.3)                            | 4.1<br>(-14.1 to 25.7)                              |
| Benign prostatic hyperplasia                               | 7.3<br>(6.1 to 8.6)                     | 0.9<br>(0.8 to 1.0)                            | 0.2<br>(0.1 to 0.3)                 | 44.8<br>(33.1 to 59.9)                            | -0.1<br>(-7.6 to 9.4)                               |
| Male infertility                                           | 2.9<br>(2.3 to 3.7)                     | --                                             | < 0.05<br>(< 0.05 to < 0.05)        | 22.5<br>(11.1 to 36.3)                            | -1.4<br>(-9.1 to 7.4)                               |
| Other urinary diseases                                     | --                                      | --                                             | < 0.05<br>(< 0.05 to < 0.05)        | 3.5<br>(-8.3 to 17.3)                             | -16.6<br>(-25.7 to -6.6)                            |
| Gynecological diseases                                     | 84.8<br>(80.4 to 88.7)                  | 26.3†<br>(24.6 to 28.3)                        | 1.0<br>(0.7 to 1.5)                 | 25.7<br>(20.6 to 31.0)                            | -7.6<br>(-11.1 to -3.6)                             |
| Uterine fibroids                                           | 6.8<br>(6.0 to 7.7)                     | 0.8<br>(0.7 to 1.0)                            | 0.2<br>(0.1 to 0.3)                 | 42.5<br>(34.5 to 51.3)                            | -3.4<br>(-8.6 to 2.3)                               |
| Polycystic ovarian syndrome                                | 0.9<br>(0.7 to 1.1)                     | 1.1<br>(0.8 to 1.5)                            | < 0.05<br>(< 0.05 to < 0.05)        | 38.5<br>(21.6 to 58.2)                            | -0.8<br>(-12.9 to 12.8)                             |
| Female infertility                                         | 3.7<br>(2.2 to 5.7)                     | --                                             | < 0.05<br>(< 0.05 to 0.1)           | 19.0<br>(3.6 to 35.9)                             | 2.4<br>(-10.8 to 17.2)                              |
| Endometriosis                                              | 0.2<br>(0.2 to 0.3)                     | 0.6<br>(0.5 to 0.8)                            | < 0.05<br>(< 0.05 to < 0.05)        | 29.9<br>(-2.1 to 70.6)                            | 2.5<br>(-22.4 to 33.1)                              |
| Genital prolapse                                           | 27.2<br>(23.7 to 30.8)                  | 2.2<br>(1.9 to 2.6)                            | 0.1<br>(< 0.05 to 0.1)              | 2.4<br>(-5.4 to 9.8)                              | -28.5<br>(-34.5 to -23.2)                           |
| Premenstrual syndrome                                      | 48.5<br>(44.9 to 52.2)                  | 18.1<br>(16.5 to 19.7)                         | 0.4<br>(0.2 to 0.6)                 | 24.1<br>(14.2 to 34.6)                            | -3.8<br>(-10.8 to 4.0)                              |
| Other gynecological diseases                               | 8.2<br>(7.5 to 8.9)                     | 3.5<br>(2.8 to 4.2)                            | 0.3<br>(0.2 to 0.4)                 | 26.2<br>(16.8 to 36.2)                            | -4.7<br>(-11.1 to 2.1)                              |
| Hemoglobinopathies and hemolytic anaemias                  | 278.2<br>(190.6 to 372.7)               | --                                             | 1.2<br>(0.6 to 2.2)                 | 3.6<br>(-5.0 to 11.3)                             | -5.2<br>(-13.0 to 1.3)                              |
| Thalassemias                                               | < 0.05<br>(< 0.05 to < 0.05)            | --                                             | < 0.05<br>(< 0.05 to < 0.05)        | -16.0<br>(-28.2 to -2.1)                          | -0.7<br>(-14.9 to 15.3)                             |
| Thalassaemias trait                                        | 20.7<br>(13.9 to 29.1)                  | --                                             | 0.2<br>(0.1 to 0.4)                 | 3.9<br>(-6.1 to 14.7)                             | -5.9<br>(-14.3 to 3.2)                              |
| Sickle cell disorders                                      | 0.6<br>(< 0.05 to 2.5)                  | --                                             | < 0.05<br>(< 0.05 to 0.2)           | -0.4<br>(-40.2 to 56.2)                           | 12.5<br>(-32.8 to 79.2)                             |
| Sickle cell trait                                          | 161.0<br>(28.7 to 337.5)                | --                                             | 0.6<br>(0.1 to 1.3)                 | 11.0<br>(-3.2 to 26.9)                            | 2.0<br>(-10.5 to 16.3)                              |
| G6PD deficiency                                            | 29.2<br>(24.6 to 34.3)                  | --                                             | < 0.05<br>(< 0.05 to < 0.05)        | 16.2<br>(3.1 to 29.3)                             | 1.9<br>(-8.1 to 11.6)                               |
| G6PD trait                                                 | 86.4<br>(80.2 to 92.8)                  | --                                             | < 0.05<br>(< 0.05 to < 0.05)        | 18.7<br>(5.1 to 33.0)                             | 3.5<br>(-6.5 to 14.9)                               |
| Other hemoglobinopathies and hemolytic anaemias            | 15.9<br>(15.4 to 16.4)                  | --                                             | 0.4<br>(0.2 to 0.5)                 | -6.1<br>(-12.8 to 0.6)                            | -14.9<br>(-20.3 to -9.7)                            |
| Endocrine, metabolic, blood, and immune disorders          | 17.7<br>(17.1 to 18.4)                  | 1.3<br>(1.1 to 1.4)                            | 0.5<br>(0.4 to 0.7)                 | 5.0<br>(-0.7 to 11.5)                             | -6.2<br>(-10.6 to -1.7)                             |
| <b>Musculoskeletal disorders</b>                           | <b>121.9</b><br><b>(115.5 to 128.0)</b> | <b>70.9</b><br><b>(63.0 to 79.2)</b>           | <b>13.3</b><br><b>(9.7 to 17.5)</b> | <b>34.9</b><br><b>(30.9 to 38.8)</b>              | <b>-2.2</b><br><b>(-4.6 to 0.3)</b>                 |
| Rheumatoid arthritis                                       | 1.9<br>(1.7 to 2.2)                     | 0.1<br>(0.1 to 0.1)                            | 0.5<br>(0.3 to 0.6)                 | 45.4<br>(33.1 to 59.7)                            | 3.4<br>(-4.1 to 11.8)                               |
| Osteoarthritis                                             | 20.2<br>(18.9 to 21.6)                  | 1.1<br>(1.0 to 1.2)                            | 1.2<br>(0.9 to 1.7)                 | 51.9<br>(46.2 to 57.6)                            | 2.9<br>(-0.6 to 6.3)                                |
| Low back and neck pain                                     | 65.9<br>(61.0 to 71.3)                  | 29.2<br>(26.1 to 32.7)                         | 7.5<br>(5.3 to 9.9)                 | 35.7<br>(31.0 to 41.1)                            | -2.1<br>(-5.3 to 1.0)                               |
| Low back pain                                              | 51.7<br>(45.9 to 59.0)                  | 24.8<br>(21.6 to 28.4)                         | 5.8<br>(4.1 to 7.7)                 | 33.6<br>(27.7 to 40.2)                            | -2.8<br>(-6.7 to 1.3)                               |
| Neck pain                                                  | 17.4<br>(15.0 to 20.2)                  | 4.4<br>(3.8 to 5.2)                            | 1.7<br>(1.2 to 2.5)                 | 43.1<br>(38.5 to 47.9)                            | -0.0<br>(-2.8 to 2.6)                               |
| Gout                                                       | 2.3<br>(2.1 to 2.6)                     | 0.5<br>(0.4 to 0.5)                            | 0.1<br>(< 0.05 to 0.1)              | 47.3<br>(26.2 to 73.2)                            | 0.8<br>(-12.4 to 16.3)                              |
| Other musculoskeletal disorders                            | 47.3<br>(39.9 to 55.1)                  | 40.0<br>(32.9 to 48.2)                         | 4.0<br>(2.7 to 5.7)                 | 27.8<br>(18.9 to 37.6)                            | -4.8<br>(-10.6 to 1.5)                              |
| <b>Other non-communicable diseases</b>                     | <b>539.3</b><br><b>(526.7 to 551.5)</b> | <b>1,369.2†</b><br><b>(1,265.9 to 1,491.2)</b> | <b>14.1</b><br><b>(9.5 to 20.0)</b> | <b>20.3</b><br><b>(17.6 to 22.6)</b>              | <b>-2.8</b><br><b>(-4.1 to -1.7)</b>                |
| Congenital anomalies                                       | 10.2<br>(7.7 to 13.5)                   | --                                             | 1.1<br>(0.7 to 1.6)                 | 1.8<br>(-5.3 to 9.7)                              | -9.5<br>(-16.1 to -2.3)                             |
| Neural tube defects                                        | 0.6<br>(0.5 to 0.7)                     | --                                             | 0.2<br>(0.1 to 0.2)                 | 11.8<br>(-4.0 to 28.8)                            | -2.8<br>(-15.6 to 10.8)                             |
| Congenital heart anomalies                                 | 1.0<br>(0.8 to 1.1)                     | --                                             | < 0.05<br>(< 0.05 to 0.1)           | 9.4<br>(-4.6 to 25.7)                             | 9.0<br>(-4.7 to 24.9)                               |
| Orofacial clefts                                           | 0.2<br>(0.1 to 0.2)                     | --                                             | < 0.05<br>(< 0.05 to < 0.05)        | 2.7<br>(-8.7 to 16.1)                             | -8.0<br>(-18.2 to 4.0)                              |
| Down's syndrome                                            | 0.1<br>(0.1 to 0.2)                     | --                                             | < 0.05<br>(< 0.05 to < 0.05)        | 8.9<br>(0.7 to 17.4)                              | 0.2<br>(-7.5 to 7.9)                                |
| Turner syndrome                                            | 0.3<br>(0.3 to 0.4)                     | --                                             | < 0.05<br>(< 0.05 to < 0.05)        | 1.9<br>(-27.2 to 47.5)                            | -6.3<br>(-32.1 to 35.0)                             |
| Klinefelter syndrome                                       | 0.4<br>(0.3 to 0.4)                     | --                                             | < 0.05<br>(< 0.05 to < 0.05)        | 14.1<br>(-12.8 to 49.5)                           | -1.9<br>(-24.5 to 27.6)                             |



| Cause                                         | Prevalence in thousands (95% UI)        | Incidence in thousands (95% UI)       | YLDs in thousands (95% UI)        |                                                   |                                                     |
|-----------------------------------------------|-----------------------------------------|---------------------------------------|-----------------------------------|---------------------------------------------------|-----------------------------------------------------|
|                                               | 2016 counts                             | 2016 counts                           | 2016 counts                       | Percentage change in counts between 2006 and 2016 | Percentage change in age-standardised rates between |
| Other chromosomal abnormalities               | 0.1<br>(0.1 to 0.2)                     | --                                    | < 0.05<br>(< 0.05 to < 0.05)      | -14.5<br>(-38.6 to 16.5)                          | 0.6<br>(-27.1 to 35.5)                              |
| Congenital musculoskeletal and limb anomalies | 0.7<br>(0.7 to 0.8)                     | --                                    | 0.1<br>(0.1 to 0.1)               | 11.3<br>(-0.3 to 24.5)                            | -2.8<br>(-12.3 to 7.5)                              |
| Urogenital congenital anomalies               | 0.6<br>(0.5 to 0.7)                     | --                                    | < 0.05<br>(< 0.05 to < 0.05)      | -4.6<br>(-11.3 to 2.3)                            | -0.8<br>(-7.9 to 6.0)                               |
| Digestive congenital anomalies                | 0.7<br>(0.6 to 0.7)                     | --                                    | < 0.05<br>(< 0.05 to < 0.05)      | 11.7<br>(-8.1 to 36.0)                            | -1.9<br>(-17.9 to 17.2)                             |
| Other congenital anomalies                    | 6.9<br>(4.0 to 11.2)                    | --                                    | 0.7<br>(0.4 to 1.1)               | -2.0<br>(-11.2 to 10.0)                           | -14.2<br>(-22.3 to -3.8)                            |
| Skin and subcutaneous diseases                | 223.3<br>(216.1 to 231.2)               | 467.4<br>(437.6 to 501.7)             | 5.5<br>(3.7 to 8.1)               | 12.0<br>(8.9 to 15.2)                             | 2.7<br>(0.9 to 4.9)                                 |
| Dermatitis                                    | 32.9<br>(28.4 to 37.5)                  | 44.3<br>(41.0 to 47.9)                | 1.2<br>(0.7 to 2.0)               | 5.5<br>(0.8 to 10.6)                              | 0.1<br>(-3.4 to 3.6)                                |
| Psoriasis                                     | 6.0<br>(5.6 to 6.3)                     | 0.8<br>(0.8 to 0.9)                   | 0.5<br>(0.4 to 0.7)               | 40.1<br>(27.9 to 53.4)                            | 11.7<br>(2.7 to 20.7)                               |
| Cellulitis                                    | 0.2<br>(0.2 to 0.3)                     | 4.1<br>(3.8 to 4.4)                   | < 0.05<br>(< 0.05 to < 0.05)      | 18.1<br>(6.7 to 31.0)                             | 2.2<br>(-9.0 to 14.1)                               |
| Pyoderma                                      | 1.9<br>(1.9 to 2.0)                     | 39.4<br>(38.1 to 40.8)                | < 0.05<br>(< 0.05 to < 0.05)      | 23.8<br>(14.8 to 33.5)                            | 3.3<br>(-2.9 to 9.8)                                |
| Scabies                                       | 8.8<br>(7.6 to 10.1)                    | 27.6<br>(23.6 to 31.9)                | 0.2<br>(0.1 to 0.4)               | 3.1<br>(-2.3 to 9.2)                              | -4.7<br>(-8.8 to -0.0)                              |
| Fungal skin diseases                          | 60.2<br>(51.9 to 69.8)                  | 205.8<br>(176.9 to 237.4)             | 0.3<br>(0.1 to 0.7)               | 18.2<br>(13.6 to 22.7)                            | 0.1<br>(-1.0 to 1.2)                                |
| Viral skin diseases                           | 20.6<br>(18.4 to 22.9)                  | 28.9<br>(25.4 to 32.7)                | 0.6<br>(0.4 to 0.9)               | 8.8<br>(4.2 to 13.1)                              | 0.2<br>(-2.9 to 3.3)                                |
| Acne vulgaris                                 | 65.8<br>(57.5 to 75.5)                  | 43.3<br>(34.5 to 55.8)                | 1.7<br>(1.1 to 2.4)               | 9.9<br>(4.1 to 17.0)                              | 5.2<br>(0.4 to 11.0)                                |
| Alopecia areata                               | 1.5<br>(1.4 to 1.5)                     | 2.6<br>(2.5 to 2.7)                   | < 0.05<br>(< 0.05 to 0.1)         | 27.9<br>(14.2 to 43.5)                            | -0.1<br>(-10.2 to 11.2)                             |
| Pruritus                                      | 6.6<br>(5.8 to 7.5)                     | 5.3<br>(4.7 to 6.0)                   | 0.1<br>(< 0.05 to 0.1)            | 24.5<br>(17.1 to 32.5)                            | 0.3<br>(-4.6 to 6.0)                                |
| Urticaria                                     | 7.9<br>(6.9 to 9.2)                     | 14.1<br>(12.3 to 16.3)                | 0.5<br>(0.3 to 0.7)               | 4.4<br>(-2.4 to 12.2)                             | 0.2<br>(-5.3 to 6.1)                                |
| Decubitus ulcer                               | 0.1<br>(0.1 to 0.1)                     | 0.3<br>(0.3 to 0.4)                   | < 0.05<br>(< 0.05 to < 0.05)      | 38.1<br>(26.7 to 50.4)                            | 5.5<br>(-6.4 to 19.1)                               |
| Other skin and subcutaneous diseases          | 44.7<br>(43.4 to 46.1)                  | 50.7<br>(49.1 to 52.5)                | 0.2<br>(0.1 to 0.5)               | 34.0<br>(30.2 to 37.6)                            | 5.9<br>(3.5 to 8.3)                                 |
| Sense organ diseases                          | 174.3<br>(166.0 to 182.8)               | 70.9†<br>(66.2 to 76.0)               | 6.0<br>(4.1 to 8.3)               | 29.1<br>(25.2 to 32.7)                            | -5.8<br>(-7.7 to -4.0)                              |
| Glaucoma                                      | 0.2<br>(0.2 to 0.3)                     | --                                    | < 0.05<br>(< 0.05 to < 0.05)      | 45.8<br>(28.2 to 68.8)                            | -0.4<br>(-11.8 to 13.8)                             |
| Cataract                                      | 6.3<br>(5.5 to 7.2)                     | --                                    | 0.5<br>(0.4 to 0.7)               | 39.1<br>(32.8 to 45.7)                            | -7.3<br>(-11.4 to -3.1)                             |
| Macular degeneration                          | 0.2<br>(0.1 to 0.2)                     | --                                    | < 0.05<br>(< 0.05 to < 0.05)      | 52.7<br>(31.4 to 78.0)                            | 3.3<br>(-10.1 to 19.2)                              |
| Refraction and accommodation disorders        | 60.2<br>(53.9 to 67.5)                  | --                                    | 1.1<br>(0.7 to 1.8)               | 20.2<br>(14.7 to 25.7)                            | -11.0<br>(-15.0 to -7.1)                            |
| Age-related and other hearing loss            | 135.6<br>(124.3 to 147.5)               | --                                    | 3.5<br>(2.4 to 5.1)               | 29.1<br>(22.8 to 34.7)                            | -5.2<br>(-7.9 to -2.6)                              |
| Other vision loss                             | 1.8<br>(1.6 to 2.0)                     | --                                    | 0.2<br>(0.1 to 0.2)               | 43.0<br>(31.0 to 55.9)                            | -0.3<br>(-7.3 to 7.4)                               |
| Other sense organ diseases                    | 18.1<br>(16.7 to 19.5)                  | 70.9<br>(66.2 to 76.0)                | 0.6<br>(0.4 to 0.8)               | 35.6<br>(29.0 to 42.8)                            | 1.7<br>(-2.3 to 5.9)                                |
| Oral disorders                                | 359.1<br>(339.4 to 376.5)               | 830.9†<br>(725.2 to 947.9)            | 1.6<br>(0.9 to 2.6)               | 37.3<br>(34.1 to 40.7)                            | -0.2<br>(-2.0 to 1.7)                               |
| Caries of deciduous teeth                     | 61.2<br>(47.0 to 74.8)                  | 230.1<br>(160.9 to 306.7)             | < 0.05<br>(< 0.05 to < 0.05)      | -11.4<br>(-20.4 to -1.7)                          | -0.9<br>(-11.0 to 9.9)                              |
| Caries of permanent teeth                     | 214.1<br>(193.1 to 235.9)               | 587.9<br>(515.7 to 675.8)             | 0.1<br>(0.1 to 0.2)               | 13.6<br>(7.5 to 19.5)                             | -6.6<br>(-10.5 to -2.8)                             |
| Periodontal disease                           | 95.2<br>(80.5 to 111.5)                 | 11.8<br>(9.8 to 14.1)                 | 0.6<br>(0.2 to 1.3)               | 46.4<br>(41.6 to 51.0)                            | -0.0<br>(-2.9 to 2.8)                               |
| Edentulism and severe tooth loss              | 14.4<br>(11.8 to 16.9)                  | 1.1<br>(0.9 to 1.4)                   | 0.4<br>(0.2 to 0.6)               | 47.4<br>(41.3 to 53.8)                            | 0.9<br>(-2.8 to 5.2)                                |
| Other oral disorders                          | 13.9<br>(13.2 to 14.5)                  | --                                    | 0.4<br>(0.2 to 0.6)               | 27.3<br>(22.9 to 32.2)                            | 0.1<br>(-3.0 to 3.5)                                |
| <b>Injuries</b>                               | <b>140.8</b><br><b>(132.8 to 149.3)</b> | <b>75.2†</b><br><b>(71.2 to 79.3)</b> | <b>5.9</b><br><b>(4.0 to 8.2)</b> | <b>33.0</b><br><b>(30.0 to 35.8)</b>              | <b>0.6</b><br><b>(-1.5 to 2.4)</b>                  |
| <b>Transport injuries</b>                     | <b>22.3</b><br><b>(20.5 to 24.0)</b>    | <b>8.3</b><br><b>(7.4 to 9.3)</b>     | <b>1.2</b><br><b>(0.8 to 1.8)</b> | <b>39.1</b><br><b>(35.1 to 43.1)</b>              | <b>2.9</b><br><b>(0.3 to 5.3)</b>                   |
| Road injuries                                 | 16.8<br>(15.5 to 18.2)                  | 6.9<br>(6.0 to 7.9)                   | 0.9<br>(0.6 to 1.3)               | 42.0<br>(37.9 to 46.2)                            | 3.6<br>(1.0 to 6.1)                                 |
| Pedestrian road injuries                      | 4.3<br>(3.7 to 4.9)                     | 1.4<br>(1.1 to 1.6)                   | 0.2<br>(0.2 to 0.4)               | 40.3<br>(36.7 to 43.6)                            | 3.6<br>(1.3 to 5.6)                                 |
| Cyclist road injuries                         | 3.4<br>(2.8 to 4.0)                     | 1.6<br>(1.3 to 2.0)                   | 0.2<br>(0.1 to 0.3)               | 60.6<br>(56.0 to 65.0)                            | 19.3<br>(16.6 to 21.9)                              |
| Motorcyclist road injuries                    | 5.2<br>(4.4 to 6.4)                     | 1.8<br>(1.4 to 2.1)                   | 0.2<br>(0.2 to 0.4)               | 23.7<br>(17.3 to 30.1)                            | -11.4<br>(-15.8 to -7.0)                            |
| Motor vehicle road injuries                   | 2.8<br>(2.4 to 3.2)                     | 1.5<br>(1.2 to 1.8)                   | 0.2<br>(0.1 to 0.2)               | 51.7<br>(47.7 to 55.7)                            | 9.5<br>(7.1 to 11.8)                                |
| Other road injuries                           | 1.2<br>(1.0 to 1.4)                     | 0.7<br>(0.5 to 0.9)                   | 0.1<br>(< 0.05 to 0.1)            | 62.9<br>(58.8 to 67.1)                            | 19.5<br>(17.0 to 21.8)                              |
| Other transport injuries                      | 5.5<br>(4.6 to 6.5)                     | 1.4<br>(1.2 to 1.6)                   | 0.3<br>(0.2 to 0.5)               | 31.2<br>(27.4 to 35.0)                            | 1.0<br>(-1.7 to 3.4)                                |
| <b>Unintentional injuries</b>                 | <b>113.3</b><br><b>(105.8 to 120.9)</b> | <b>64.9</b><br><b>(61.1 to 69.1)</b>  | <b>4.2</b><br><b>(2.9 to 5.9)</b> | <b>33.2</b><br><b>(30.3 to 36.0)</b>              | <b>0.7</b><br><b>(-1.4 to 2.4)</b>                  |
| Falls                                         | 45.5<br>(40.3 to 50.5)                  | 23.5<br>(21.3 to 26.3)                | 2.0<br>(1.4 to 2.8)               | 36.8<br>(34.0 to 39.4)                            | 0.1<br>(-1.9 to 1.9)                                |
| Drowning                                      | 0.4<br>(0.4 to 0.5)                     | 0.1<br>(0.1 to 0.1)                   | < 0.05<br>(< 0.05 to < 0.05)      | 13.9<br>(10.2 to 17.5)                            | -12.5<br>(-15.2 to -10.1)                           |
| Fire, heat, and hot substances                | 8.8<br>(7.4 to 10.7)                    | 1.2<br>(0.9 to 1.4)                   | 0.2<br>(0.2 to 0.4)               | 35.9<br>(27.8 to 42.4)                            | 4.3<br>(-0.8 to 8.5)                                |
| Poisonings                                    | 0.3<br>(0.2 to 0.3)                     | 0.4<br>(0.3 to 0.5)                   | < 0.05<br>(< 0.05 to < 0.05)      | 34.3<br>(25.5 to 44.2)                            | 9.3<br>(2.9 to 16.4)                                |
| Exposure to mechanical forces                 | 12.6<br>(10.8 to 15.3)                  | 5.4<br>(4.6 to 6.3)                   | 0.3<br>(0.2 to 0.5)               | 31.7<br>(27.9 to 34.9)                            | -1.2<br>(-3.7 to 0.8)                               |
| Unintentional firearm injuries                | 0.3<br>(0.3 to 0.4)                     | 0.1<br>(0.1 to 0.1)                   | < 0.05<br>(< 0.05 to < 0.05)      | 37.1<br>(32.7 to 41.4)                            | 2.2<br>(-0.5 to 4.8)                                |
| Unintentional suffocation                     | 0.5<br>(0.4 to 0.7)                     | 0.1<br>(0.1 to 0.1)                   | < 0.05<br>(< 0.05 to < 0.05)      | 19.9<br>(16.2 to 23.7)                            | -1.3<br>(-3.6 to 1.0)                               |
| Other exposure to mechanical forces           | 11.7<br>(9.9 to 14.5)                   | 5.2<br>(4.4 to 6.1)                   | 0.3<br>(0.2 to 0.4)               | 32.3<br>(28.4 to 35.4)                            | -1.3<br>(-3.9 to 0.8)                               |



| Cause                                                                               | Prevalence in thousands (95% UI) | Incidence in thousands (95% UI)                | YLDs in thousands (95% UI)        |                                                   |                                                     |
|-------------------------------------------------------------------------------------|----------------------------------|------------------------------------------------|-----------------------------------|---------------------------------------------------|-----------------------------------------------------|
|                                                                                     | 2016 counts                      | 2016 counts                                    | 2016 counts                       | Percentage change in counts between 2006 and 2016 | Percentage change in age-standardised rates between |
| Adverse effects of medical treatment                                                | 0.4<br>(0.3 to 0.4)              | 4.7<br>(4.1 to 5.3)                            | < 0.05<br>(< 0.05 to 0.1)         | 7.3<br>(1.7 to 13.0)                              | -6.1<br>(-11.0 to -1.7)                             |
| Animal contact                                                                      | 11.3<br>(9.9 to 13.1)            | 15.2<br>(12.8 to 17.8)                         | 0.4<br>(0.3 to 0.5)               | 22.4<br>(16.9 to 28.4)                            | -3.1<br>(-6.8 to 1.1)                               |
| Venomous animal contact                                                             | 6.9<br>(5.7 to 8.4)              | 8.5<br>(6.8 to 10.6)                           | 0.3<br>(0.2 to 0.4)               | 23.3<br>(16.9 to 30.4)                            | -1.2<br>(-5.8 to 3.9)                               |
| Non-venomous animal contact                                                         | 4.3<br>(3.6 to 5.2)              | 6.8<br>(5.4 to 8.3)                            | 0.1<br>(< 0.05 to 0.1)            | 19.0<br>(13.8 to 23.8)                            | -9.8<br>(-13.2 to -6.9)                             |
| Foreign body                                                                        | 6.2<br>(5.0 to 7.3)              | 4.2<br>(3.6 to 5.0)                            | 0.2<br>(0.2 to 0.4)               | 23.5<br>(19.4 to 27.5)                            | 1.4<br>(-1.4 to 4.0)                                |
| Pulmonary aspiration and foreign body in airway                                     | 2.6<br>(1.9 to 3.6)              | 0.9<br>(0.7 to 1.1)                            | 0.1<br>(0.1 to 0.2)               | 13.9<br>(10.2 to 17.9)                            | -4.4<br>(-7.0 to -1.9)                              |
| Foreign body in eyes                                                                | 0.4<br>(0.2 to 0.6)              | 2.0<br>(1.5 to 2.7)                            | < 0.05<br>(< 0.05 to < 0.05)      | 28.6<br>(22.4 to 36.5)                            | 2.6<br>(-0.4 to 5.7)                                |
| Foreign body in other body part                                                     | 3.2<br>(2.6 to 4.1)              | 1.3<br>(1.0 to 1.5)                            | 0.1<br>(0.1 to 0.1)               | 35.8<br>(30.5 to 40.8)                            | 8.7<br>(5.0 to 12.0)                                |
| Environmental heat and cold exposure                                                | 7.1<br>(6.0 to 8.3)              | 2.1<br>(1.7 to 2.5)                            | 0.3<br>(0.2 to 0.4)               | 31.2<br>(27.5 to 34.5)                            | 2.2<br>(-0.1 to 4.3)                                |
| Other unintentional injuries                                                        | 20.9<br>(17.3 to 24.9)           | 8.2<br>(7.0 to 9.5)                            | 0.6<br>(0.4 to 0.9)               | 37.6<br>(34.7 to 40.3)                            | 4.7<br>(2.8 to 6.5)                                 |
| <b>Self-harm and interpersonal violence</b>                                         | <b>25.4<br/>(22.4 to 28.8)</b>   | <b>1.9†<br/>(1.6 to 2.2)</b>                   | <b>0.3<br/>(0.2 to 0.5)</b>       | <b>17.5<br/>(13.4 to 21.8)</b>                    | <b>-6.5<br/>(-8.7 to -4.2)</b>                      |
| Self-harm                                                                           | 0.9<br>(0.8 to 1.1)              | 0.5<br>(0.4 to 0.6)                            | < 0.05<br>(< 0.05 to 0.1)         | 34.7<br>(30.4 to 38.5)                            | -3.7<br>(-6.5 to -1.2)                              |
| Self-harm by firearm                                                                | 0.1<br>(0.1 to 0.1)              | < 0.05<br>(< 0.05 to < 0.05)                   | < 0.05<br>(< 0.05 to < 0.05)      | 20.4<br>(15.6 to 24.5)                            | -12.3<br>(-15.2 to -9.8)                            |
| Self-harm by other specified means                                                  | 0.8<br>(0.7 to 1.0)              | 0.4<br>(0.4 to 0.5)                            | < 0.05<br>(< 0.05 to 0.1)         | 35.5<br>(31.2 to 39.4)                            | -3.2<br>(-6.1 to -0.7)                              |
| Interpersonal violence                                                              | 24.5<br>(21.5 to 27.9)           | 1.4†<br>(1.2 to 1.7)                           | 0.3<br>(0.2 to 0.4)               | 15.2<br>(10.9 to 19.6)                            | -7.0<br>(-9.6 to -4.5)                              |
| Assault by firearm                                                                  | 0.1<br>(0.1 to 0.1)              | < 0.05<br>(< 0.05 to < 0.05)                   | < 0.05<br>(< 0.05 to < 0.05)      | 37.7<br>(32.5 to 43.0)                            | 4.8<br>(1.8 to 7.7)                                 |
| Assault by sharp object                                                             | 0.7<br>(0.6 to 0.9)              | 0.3<br>(0.2 to 0.4)                            | < 0.05<br>(< 0.05 to < 0.05)      | 34.5<br>(29.5 to 39.1)                            | 3.8<br>(0.9 to 6.3)                                 |
| Sexual violence                                                                     | 21.7<br>(18.7 to 25.0)           | --                                             | 0.2<br>(0.1 to 0.3)               | 5.7<br>(0.8 to 10.7)                              | -12.9<br>(-15.9 to -9.3)                            |
| Assault by other means                                                              | 2.0<br>(1.7 to 2.4)              | 1.1<br>(0.9 to 1.4)                            | 0.1<br>(0.1 to 0.1)               | 35.9<br>(32.5 to 39.3)                            | 2.1<br>(-0.2 to 4.1)                                |
| <b>Forces of nature, conflict and terrorism, and executions and police conflict</b> | <b>1.5<br/>(0.7 to 2.6)</b>      | <b>&lt; 0.05†<br/>(&lt; 0.05 to &lt; 0.05)</b> | <b>0.1<br/>(&lt; 0.05 to 0.1)</b> | <b>2.0<br/>(-2.7 to 14.5)</b>                     | <b>-15.8<br/>(-19.2 to -5.4)</b>                    |
| Exposure to forces of nature                                                        | 1.5<br>(0.7 to 2.6)              | --                                             | 0.1<br>(< 0.05 to 0.1)            | 1.7<br>(-3.0 to 14.3)                             | -16.0<br>(-19.5 to -5.3)                            |
| Conflict and terrorism                                                              | --                               | --                                             | --                                | --                                                | --                                                  |
| Executions and police conflict                                                      | < 0.05<br>(< 0.05 to 0.1)        | < 0.05<br>(< 0.05 to < 0.05)                   | < 0.05<br>(< 0.05 to < 0.05)      | 26.2<br>(17.1 to 34.2)                            | 0.7<br>(-10.7 to 13.9)                              |
| <b>Impairments</b>                                                                  | --                               | --                                             | --                                | --                                                | --                                                  |
| Anaemia                                                                             | 426.4<br>(403.4 to 456.1)        | --                                             | 12.8<br>(8.5 to 18.8)             | -1.3<br>(-5.9 to 3.1)                             | -10.1<br>(-14.0 to -6.5)                            |
| Developmental intellectual disability                                               | 20.2<br>(14.9 to 26.2)           | --                                             | 2.1<br>(1.6 to 2.9)               | 8.9<br>(2.1 to 16.8)                              | -3.9<br>(-9.9 to 3.6)                               |
| Epilepsy                                                                            | 5.8<br>(3.7 to 8.1)              | --                                             | 1.8<br>(1.0 to 2.8)               | 5.5<br>(-38.3 to 74.3)                            | -7.1<br>(-46.9 to 57.2)                             |
| Guillain-Barre syndrome                                                             | < 0.05<br>(< 0.05 to < 0.05)     | --                                             | < 0.05<br>(< 0.05 to < 0.05)      | 20.4<br>(14.0 to 26.9)                            | 0.0<br>(-0.1 to 0.1)                                |
| Hearing loss                                                                        | 154.2<br>(142.7 to 166.4)        | --                                             | 4.5<br>(3.1 to 6.3)               | 19.9<br>(15.2 to 24.6)                            | -6.8<br>(-9.2 to -4.5)                              |
| Heart failure                                                                       | 4.4<br>(3.9 to 5.1)              | --                                             | 0.7<br>(0.5 to 0.8)               | 58.2<br>(46.8 to 71.8)                            | 5.9<br>(-2.0 to 14.7)                               |
| Infertility                                                                         | 12.5<br>(9.9 to 15.6)            | --                                             | 0.1<br>(< 0.05 to 0.2)            | 27.2<br>(19.8 to 35.2)                            | -1.1<br>(-6.4 to 4.2)                               |
| Pelvic inflammatory disease                                                         | 0.3<br>(0.3 to 0.4)              | --                                             | < 0.05<br>(< 0.05 to 0.1)         | 25.8<br>(5.7 to 49.2)                             | -9.0<br>(-22.8 to 6.6)                              |
| Vision loss                                                                         | 71.8<br>(65.0 to 79.4)           | --                                             | 2.4<br>(1.7 to 3.3)               | 25.1<br>(19.9 to 31.1)                            | -6.5<br>(-9.8 to -2.1)                              |

We did not calculate incidence for the nine impairments, certain NTDs, and causes with only birth prevalence. Blank cells mean that no estimate is available.

† Incidence for aggregate causes represents the sum of the incidence of the causes below the aggregate.

‡ Incidence estimates for stroke represent first-ever stroke only.

^ Incidence of HIV/AIDS represents new infections of HIV only and does not include new infections of Tuberculosis in HIV positive cases.

SR Table 14: Prevalence, incidence, and YLDs for 2016, percentage change of YLD counts and percentage change of age-standardised YLD rates between 2006 and 2016 by cause and impairments, for all ages, Bolivia.

| Cause                                                                                | Prevalence in thousands (95% UI)          | Incidence in thousands (95% UI)            | YLDs in thousands (95% UI)           |                                                   |                                                     |
|--------------------------------------------------------------------------------------|-------------------------------------------|--------------------------------------------|--------------------------------------|---------------------------------------------------|-----------------------------------------------------|
|                                                                                      | 2016 counts                               | 2016 counts                                | 2016 counts                          | Percentage change in counts between 2006 and 2016 | Percentage change in age-standardised rates between |
| <b>All causes</b>                                                                    | <b>10,680.3</b><br>(10,649.3 to 10,715.0) | <b>74,745.5†</b><br>(71,041.2 to 78,950.8) | <b>1,067.5</b><br>(788.2 to 1,399.3) | <b>20.8</b><br>(18.5 to 23.0)                     | <b>-2.0</b><br>(-3.6 to -0.3)                       |
| <b>Communicable, maternal, neonatal, and nutritional disorders</b>                   | <b>7,350.0</b><br>(7,191.3 to 7,516.2)    | <b>41,273.1†</b><br>(37,935.6 to 44,849.2) | <b>151.2</b><br>(104.8 to 209.4)     | <b>1.6</b><br>(-2.8 to 6.2)                       | <b>-12.7</b><br>(-16.4 to -8.8)                     |
| <b>HIV/AIDS and tuberculosis</b>                                                     | <b>2,018.5</b><br>(1,848.0 to 2,153.8)    | <b>11.5†</b><br>(9.9 to 14.3)              | <b>2.6</b><br>(1.2 to 5.9)           | <b>3.8</b><br>(-38.2 to 61.4)                     | <b>-16.8</b><br>(-51.6 to 30.7)                     |
| Tuberculosis                                                                         | 1,885.9<br>(1,732.3 to 2,062.1)           | 10.3†<br>(9.2 to 11.4)                     | 1.2<br>(0.8 to 1.7)                  | -9.3<br>(-24.8 to 9.8)                            | -24.5<br>(-36.2 to -10.9)                           |
| Drug-susceptible tuberculosis                                                        | 3.7<br>(3.2 to 4.1)                       | 10.0<br>(8.9 to 11.1)                      | 1.1<br>(0.7 to 1.6)                  | -9.1<br>(-25.0 to 11.1)                           | -24.3<br>(-36.6 to -9.2)                            |
| Multidrug-resistant tuberculosis without extensive drug resistance                   | 0.1<br>(< 0.05 to 0.3)                    | 0.3<br>(0.1 to 0.8)                        | < 0.05<br>(< 0.05 to 0.1)            | -20.0<br>(-76.7 to 153.7)                         | -33.6<br>(-80.5 to 109.5)                           |
| Extensively drug-resistant tuberculosis                                              | < 0.05<br>(< 0.05 to < 0.05)              | < 0.05<br>(< 0.05 to 0.1)                  | < 0.05<br>(< 0.05 to < 0.05)         | 113.0<br>(-38.0 to 574.8)                         | 76.8<br>(-48.1 to 458.2)                            |
| Latent tuberculosis infection                                                        | 1,882.1<br>(1,728.4 to 2,058.2)           | --                                         | --                                   | --                                                | --                                                  |
| HIV/AIDS                                                                             | 13.0<br>(3.3 to 35.6)                     | 1.2^<br>(0.2 to 3.9)                       | 1.4<br>(0.3 to 4.7)                  | 18.0<br>(-58.2 to 144.8)                          | -9.2<br>(-68.5 to 98.4)                             |
| Drug-susceptible HIV/AIDS - Tuberculosis                                             | 0.1<br>(0.1 to 0.2)                       | 0.3<br>(0.2 to 0.5)                        | < 0.05<br>(< 0.05 to 0.1)            | -30.8<br>(-36.2 to -24.5)                         | -43.9<br>(-48.3 to -38.8)                           |
| Multidrug-resistant HIV/AIDS - Tuberculosis without extensive drug resistance        | < 0.05<br>(< 0.05 to < 0.05)              | < 0.05<br>(< 0.05 to < 0.05)               | < 0.05<br>(< 0.05 to < 0.05)         | -38.9<br>(-82.5 to 92.2)                          | -50.5<br>(-85.9 to 55.9)                            |
| Extensively drug-resistant HIV/AIDS - Tuberculosis                                   | < 0.05<br>(< 0.05 to < 0.05)              | < 0.05<br>(< 0.05 to < 0.05)               | < 0.05<br>(< 0.05 to < 0.05)         | 62.6<br>(-53.6 to 411.4)                          | 31.8<br>(-62.4 to 314.7)                            |
| HIV/AIDS resulting in other diseases                                                 | 12.9<br>(3.2 to 35.6)                     | 1.2<br>(0.2 to 3.9)                        | 1.4<br>(0.2 to 4.7)                  | 20.8<br>(-59.6 to 159.5)                          | -7.3<br>(-69.5 to 111.9)                            |
| <b>Diarrhoea, lower respiratory infections, and other common infectious diseases</b> | <b>711.2</b><br>(676.4 to 751.4)          | <b>39,770.1†</b><br>(36,435.2 to 43,361.5) | <b>36.6</b><br>(25.3 to 50.3)        | <b>5.5</b><br>(1.7 to 9.7)                        | <b>-7.0</b><br>(-9.7 to -3.7)                       |
| Diarrhoeal diseases                                                                  | 174.4<br>(161.4 to 189.3)                 | 11,502.1<br>(10,648.7 to 12,473.1)         | 19.7<br>(13.6 to 27.2)               | 0.1<br>(-5.5 to 6.5)                              | -10.7<br>(-15.1 to -5.8)                            |
| Intestinal infectious diseases                                                       | < 0.05<br>(< 0.05 to < 0.05)              | 0.2†<br>(0.2 to 0.3)                       | < 0.05<br>(< 0.05 to < 0.05)         | 4.8<br>(-8.3 to 20.5)                             | -15.6<br>(-25.4 to -3.2)                            |
| Typhoid fever                                                                        | < 0.05<br>(< 0.05 to < 0.05)              | 0.2<br>(0.2 to 0.3)                        | < 0.05<br>(< 0.05 to < 0.05)         | 6.1<br>(-7.3 to 22.4)                             | -14.8<br>(-24.8 to -2.2)                            |
| Paratyphoid fever                                                                    | < 0.05<br>(< 0.05 to < 0.05)              | < 0.05<br>(< 0.05 to < 0.05)               | < 0.05<br>(< 0.05 to < 0.05)         | 12.5<br>(-9.2 to 39.8)                            | -8.2<br>(-25.4 to 13.4)                             |
| Other intestinal infectious diseases                                                 | --                                        | --                                         | < 0.05<br>(< 0.05 to < 0.05)         | -26.1<br>(-44.8 to 4.9)                           | -36.5<br>(-48.7 to -19.9)                           |
| Lower respiratory infections                                                         | 19.1<br>(17.6 to 20.9)                    | 800.1<br>(726.0 to 880.2)                  | 1.1<br>(0.8 to 1.6)                  | 18.4<br>(6.7 to 31.4)                             | 4.3<br>(-5.0 to 13.7)                               |
| Upper respiratory infections                                                         | 350.4<br>(309.9 to 396.2)                 | 26,359.5<br>(23,194.5 to 29,962.0)         | 8.8<br>(5.2 to 13.7)                 | 16.7<br>(10.7 to 23.5)                            | 0.5<br>(-4.6 to 6.2)                                |
| Otitis media                                                                         | 176.6<br>(158.1 to 196.3)                 | 808.9<br>(640.0 to 1,018.9)                | 5.1<br>(3.1 to 7.5)                  | 4.8<br>(-2.2 to 11.7)                             | -7.2<br>(-13.0 to -1.3)                             |
| Meningitis                                                                           | 5.8<br>(5.1 to 6.6)                       | 1.1<br>(0.9 to 1.3)                        | 0.8<br>(0.5 to 1.0)                  | 12.1<br>(8.4 to 16.3)                             | -5.8<br>(-8.8 to -2.3)                              |
| Pneumococcal meningitis                                                              | 1.9<br>(1.7 to 2.2)                       | 0.1<br>(0.1 to 0.1)                        | 0.3<br>(0.2 to 0.4)                  | 6.8<br>(0.2 to 13.4)                              | -10.7<br>(-15.9 to -5.3)                            |
| H influenzae type B meningitis                                                       | 0.8<br>(0.6 to 0.9)                       | 0.1<br>(0.1 to 0.1)                        | 0.1<br>(0.1 to 0.2)                  | 12.0<br>(6.0 to 17.9)                             | -4.9<br>(-9.8 to -0.1)                              |
| Meningococcal infection                                                              | 0.7<br>(0.6 to 0.9)                       | 0.2<br>(0.1 to 0.3)                        | 0.1<br>(0.1 to 0.1)                  | 8.2<br>(2.0 to 14.1)                              | -8.7<br>(-13.7 to -4.0)                             |
| Other meningitis                                                                     | 2.4<br>(1.9 to 2.9)                       | 0.7<br>(0.6 to 0.8)                        | 0.3<br>(0.2 to 0.4)                  | 20.8<br>(15.8 to 26.5)                            | 1.5<br>(-2.3 to 5.9)                                |
| Encephalitis                                                                         | 5.5<br>(4.0 to 7.6)                       | 2.1<br>(1.9 to 2.4)                        | 0.7<br>(0.5 to 0.9)                  | 18.2<br>(13.5 to 22.7)                            | -2.3<br>(-6.5 to 1.7)                               |
| Diphtheria                                                                           | < 0.05<br>(< 0.05 to < 0.05)              | < 0.05<br>(< 0.05 to < 0.05)               | < 0.05<br>(< 0.05 to < 0.05)         | -41.9<br>(-73.8 to 37.0)                          | -45.2<br>(-73.5 to 15.3)                            |
| Whooping cough                                                                       | 2.4<br>(1.9 to 3.1)                       | 17.8<br>(13.9 to 22.7)                     | 0.1<br>(0.1 to 0.2)                  | -23.3<br>(-37.2 to -5.1)                          | -28.9<br>(-41.8 to -11.8)                           |
| Tetanus                                                                              | < 0.05<br>(< 0.05 to < 0.05)              | < 0.05<br>(< 0.05 to < 0.05)               | < 0.05<br>(< 0.05 to < 0.05)         | -32.6<br>(-52.6 to -6.9)                          | -46.0<br>(-61.0 to -24.5)                           |
| Measles                                                                              | < 0.05<br>(0.0 to < 0.05)                 | < 0.05<br>(0.0 to < 0.05)                  | < 0.05<br>(0.0 to < 0.05)            | --                                                | --                                                  |
| Varicella and herpes zoster                                                          | 10.8<br>(10.1 to 11.5)                    | 278.2<br>(267.4 to 290.5)                  | 0.4<br>(0.2 to 0.6)                  | 24.8<br>(9.8 to 42.8)                             | 0.2<br>(-10.8 to 13.0)                              |
| <b>Neglected tropical diseases and malaria</b>                                       | <b>3,168.4</b><br>(2,884.4 to 3,499.2)    | <b>139.2†</b><br>(96.0 to 199.1)           | <b>22.6</b><br>(14.6 to 32.6)        | <b>13.5</b><br>(-0.2 to 31.3)                     | <b>-9.8</b><br>(-20.6 to 4.8)                       |
| Malaria                                                                              | 0.6<br>(0.4 to 0.9)                       | 11.0<br>(8.8 to 13.7)                      | < 0.05<br>(< 0.05 to < 0.05)         | -58.6<br>(-72.9 to -43.6)                         | -64.5<br>(-76.9 to -51.9)                           |
| Chagas disease                                                                       | 463.7<br>(374.1 to 560.7)                 | 13.2<br>(10.5 to 16.3)                     | 3.3<br>(2.1 to 4.9)                  | -12.8<br>(-21.3 to -3.6)                          | -31.7<br>(-38.3 to -24.2)                           |
| Leishmaniasis                                                                        | 92.9<br>(72.1 to 117.9)                   | 6.8<br>(4.5 to 9.5)                        | 5.2<br>(3.1 to 8.3)                  | -5.0<br>(-9.6 to 3.7)                             | -25.5<br>(-28.9 to -18.6)                           |
| Visceral leishmaniasis                                                               | < 0.05<br>(0.0 to < 0.05)                 | < 0.05<br>(0.0 to < 0.05)                  | < 0.05<br>(0.0 to < 0.05)            | --                                                | --                                                  |
| Cutaneous and mucocutaneous leishmaniasis                                            | 83.0<br>(56.4 to 117.3)                   | 6.8<br>(4.5 to 9.5)                        | 5.2<br>(3.1 to 8.3)                  | -5.0<br>(-9.6 to 3.7)                             | -25.5<br>(-28.9 to -18.6)                           |
| African trypanosomiasis                                                              | --                                        | --                                         | --                                   | --                                                | --                                                  |
| Schistosomiasis                                                                      | --                                        | --                                         | --                                   | --                                                | --                                                  |
| Cysticercosis                                                                        | 8.0<br>(4.7 to 11.3)                      | --                                         | 1.2<br>(0.5 to 2.1)                  | -10.0<br>(-49.3 to 33.5)                          | -29.8<br>(-60.6 to 2.8)                             |
| Cystic echinococcosis                                                                | 0.3<br>(0.1 to 1.5)                       | 0.1<br>(< 0.05 to 0.3)                     | < 0.05<br>(< 0.05 to 0.1)            | -26.9<br>(-92.2 to 547.4)                         | -40.7<br>(-94.2 to 403.4)                           |
| Lymphatic filariasis                                                                 | --                                        | --                                         | --                                   | --                                                | --                                                  |
| Onchocerciasis                                                                       | --                                        | --                                         | --                                   | --                                                | --                                                  |
| Trachoma                                                                             | --                                        | --                                         | --                                   | --                                                | --                                                  |
| Dengue                                                                               | 5.6<br>(2.8 to 9.9)                       | 94.2<br>(52.6 to 151.4)                    | 0.9<br>(0.4 to 1.8)                  | 128.3<br>(65.2 to 492.8)                          | 94.1<br>(41.6 to 400.1)                             |
| Yellow fever                                                                         | < 0.05<br>(< 0.05 to < 0.05)              | 0.1<br>(< 0.05 to 0.2)                     | < 0.05<br>(< 0.05 to < 0.05)         | -40.0<br>(-51.9 to -23.8)                         | -49.0<br>(-58.4 to -36.6)                           |
| Rabies                                                                               | < 0.05<br>(< 0.05 to < 0.05)              | < 0.05<br>(< 0.05 to < 0.05)               | < 0.05<br>(< 0.05 to < 0.05)         | -52.8<br>(-76.6 to -16.5)                         | -59.2<br>(-79.0 to -32.7)                           |
| Intestinal nematode infections                                                       | 2,604.6<br>(2,317.3 to 2,962.1)           | --                                         | 6.8<br>(3.8 to 11.8)                 | 85.0<br>(18.1 to 189.0)                           | 57.0<br>(-4.1 to 154.2)                             |
| Ascariasis                                                                           | 640.1<br>(496.0 to 805.2)                 | --                                         | 0.2<br>(0.1 to 0.4)                  | 10.8<br>(-54.8 to 170.1)                          | -4.1<br>(-63.8 to 149.2)                            |

| Cause                                                                   | Prevalence in thousands (95% UI)                 | Incidence in thousands (95% UI)                   | YLDs in thousands (95% UI)                |                                                   |                                                     |
|-------------------------------------------------------------------------|--------------------------------------------------|---------------------------------------------------|-------------------------------------------|---------------------------------------------------|-----------------------------------------------------|
|                                                                         | 2016 counts                                      | 2016 counts                                       | 2016 counts                               | Percentage change in counts between 2006 and 2016 | Percentage change in age-standardised rates between |
| Trichuriasis                                                            | 779.8<br>(585.7 to 1,025.9)                      | --                                                | 0.1<br>( $< 0.05$ to 0.4)                 | 17.2<br>(-66.2 to 316.1)                          | -2.2<br>(-74.4 to 281.6)                            |
| Hookworm disease                                                        | 1,485.3<br>(1,198.3 to 1,801.9)                  | --                                                | 6.5<br>(3.6 to 11.2)                      | 91.0<br>(17.2 to 203.8)                           | 61.9<br>(-4.4 to 169.7)                             |
| Food-borne trematodiasis                                                | 87.4<br>(62.1 to 115.1)                          | 7.0<br>(5.1 to 8.9)                               | 2.1<br>(0.5 to 4.8)                       | 23.5<br>(-6.8 to 44.3)                            | -7.6<br>(-32.5 to 8.2)                              |
| Leprosy                                                                 | 0.1<br>(0.1 to 0.1)                              | $< 0.05$<br>( $< 0.05$ to $< 0.05$ )              | $< 0.05$<br>( $< 0.05$ to $< 0.05$ )      | 14.0<br>(4.8 to 23.5)                             | -14.8<br>(-22.3 to -6.7)                            |
| Ebola virus disease                                                     | --                                               | --                                                | --                                        | --                                                | --                                                  |
| Zika virus disease                                                      | 0.1<br>( $< 0.05$ to 0.4)                        | 7.0<br>(2.7 to 22.8)                              | $< 0.05$<br>( $< 0.05$ to $< 0.05$ )      | --                                                | --                                                  |
| Guinea worm disease                                                     | --                                               | --                                                | --                                        | --                                                | --                                                  |
| Other neglected tropical diseases                                       | 112.0<br>(104.9 to 119.5)                        | --                                                | 3.0<br>(1.9 to 4.4)                       | -13.2<br>(-22.4 to -3.8)                          | -20.4<br>(-28.2 to -12.5)                           |
| <b>Maternal disorders</b>                                               | <b>31.3</b><br><b>(23.8 to 40.3)</b>             | <b>440.1†</b><br><b>(376.9 to 521.9)</b>          | <b>1.9</b><br><b>(1.2 to 2.9)</b>         | <b>2.2</b><br><b>(-25.0 to 39.4)</b>              | <b>-15.4</b><br><b>(-37.8 to 15.4)</b>              |
| Maternal haemorrhage                                                    | 2.4<br>(1.9 to 3.1)                              | 21.2<br>(15.9 to 27.8)                            | 0.1<br>(0.1 to 0.2)                       | 12.1<br>(-22.8 to 63.7)                           | -7.8<br>(-36.2 to 35.0)                             |
| Maternal sepsis and other pregnancy related infections                  | 8.5<br>(5.5 to 12.2)                             | 74.4<br>(57.5 to 94.4)                            | 0.3<br>(0.1 to 0.6)                       | 9.0<br>(-45.5 to 123.3)                           | -9.5<br>(-55.1 to 86.0)                             |
| Maternal hypertensive disorders                                         | 18.6<br>(12.1 to 25.3)                           | 77.8<br>(68.5 to 85.5)                            | 0.9<br>(0.5 to 1.4)                       | -0.2<br>(-38.8 to 65.7)                           | -17.3<br>(-49.3 to 37.6)                            |
| Maternal obstructed labour and uterine rupture                          | 0.2<br>(0.1 to 0.4)                              | 16.8<br>(12.4 to 22.7)                            | 0.1<br>( $< 0.05$ to 0.1)                 | 6.0<br>(-59.3 to 168.1)                           | -11.8<br>(-65.2 to 117.4)                           |
| Maternal abortion, miscarriage, and ectopic pregnancy                   | 2.0<br>(1.3 to 3.0)                              | 249.8<br>(191.7 to 329.5)                         | 0.2<br>(0.1 to 0.4)                       | 3.6<br>(-41.3 to 77.1)                            | -15.3<br>(-52.1 to 46.5)                            |
| Other maternal disorders                                                | --                                               | --                                                | 0.3<br>(0.2 to 0.5)                       | -2.6<br>(-28.7 to 33.4)                           | -19.2<br>(-40.7 to 10.4)                            |
| <b>Neonatal disorders</b>                                               | <b>138.1</b><br><b>(116.5 to 169.5)</b>          | --                                                | <b>20.3</b><br><b>(12.6 to 33.3)</b>      | <b>14.0</b><br><b>(-2.9 to 32.0)</b>              | <b>-0.2</b><br><b>(-15.2 to 15.5)</b>               |
| Neonatal preterm birth complications                                    | 108.0<br>(83.5 to 144.3)                         | --                                                | 8.2<br>(5.5 to 11.8)                      | 6.7<br>(-13.9 to 31.4)                            | -7.7<br>(-26.0 to 13.4)                             |
| Neonatal encephalopathy due to birth asphyxia and trauma                | 19.2<br>(10.1 to 32.9)                           | --                                                | 1.6<br>(0.3 to 5.0)                       | 11.2<br>(-51.6 to 95.5)                           | -2.9<br>(-57.6 to 74.9)                             |
| Neonatal sepsis and other neonatal infections                           | 18.7<br>(5.3 to 42.5)                            | --                                                | 7.6<br>(1.7 to 19.5)                      | 26.3<br>(-12.3 to 71.4)                           | 11.7<br>(-21.6 to 53.8)                             |
| Hemolytic disease and other neonatal jaundice                           | 6.5<br>(5.6 to 7.5)                              | --                                                | 1.9<br>(1.3 to 2.4)                       | 13.9<br>(-2.5 to 31.6)                            | -2.2<br>(-15.7 to 12.3)                             |
| Other neonatal disorders                                                | --                                               | --                                                | 1.0<br>(0.6 to 1.6)                       | 0.4<br>(-15.7 to 19.9)                            | -6.9<br>(-21.8 to 11.2)                             |
| <b>Nutritional deficiencies</b>                                         | <b>2,460.2</b><br><b>(2,369.5 to 2,538.8)</b>    | <b>225.2†</b><br><b>(184.6 to 279.0)</b>          | <b>62.0</b><br><b>(41.4 to 90.8)</b>      | <b>-7.1</b><br><b>(-12.5 to -1.4)</b>             | <b>-19.4</b><br><b>(-23.5 to -15.2)</b>             |
| Protein-energy malnutrition                                             | 24.4<br>(14.8 to 39.2)                           | 13.7<br>(8.4 to 21.8)                             | 1.0<br>(0.5 to 1.8)                       | -12.9<br>(-51.5 to 58.6)                          | -19.2<br>(-55.1 to 47.2)                            |
| Iodine deficiency                                                       | 10.9<br>(9.2 to 12.6)                            | 0.4<br>(0.3 to 0.4)                               | 0.3<br>(0.2 to 0.4)                       | 9.3<br>(-13.9 to 54.2)                            | -13.7<br>(-32.2 to 20.8)                            |
| Vitamin A deficiency                                                    | 248.1<br>(202.2 to 310.7)                        | 211.1<br>(171.1 to 266.2)                         | 0.7<br>(0.4 to 1.0)                       | 12.8<br>(-4.1 to 33.3)                            | -0.3<br>(-14.3 to 16.4)                             |
| Iron-deficiency anaemia                                                 | 2,293.0<br>(2,183.5 to 2,406.1)                  | --                                                | 60.1<br>(39.3 to 87.6)                    | -7.3<br>(-12.7 to -1.6)                           | -19.6<br>(-23.7 to -15.3)                           |
| Other nutritional deficiencies                                          | --                                               | --                                                | $< 0.05$<br>( $< 0.05$ to 0.1)            | -13.6<br>(-53.9 to 59.3)                          | -19.9<br>(-57.1 to 47.6)                            |
| <b>Other communicable, maternal, neonatal, and nutritional diseases</b> | <b>2,486.8</b><br><b>(2,325.0 to 2,678.6)</b>    | <b>687.1</b><br><b>(602.4 to 793.5)</b>           | <b>4.6</b><br><b>(2.9 to 7.0)</b>         | <b>5.3</b><br><b>(-1.4 to 11.4)</b>               | <b>-9.3</b><br><b>(-14.4 to -4.8)</b>               |
| Sexually transmitted diseases excluding HIV                             | 2,026.9<br>(1,863.3 to 2,223.7)                  | 537.2<br>(491.0 to 585.3)                         | 2.0<br>(1.2 to 3.4)                       | 23.8<br>(14.8 to 33.0)                            | -1.3<br>(-8.0 to 5.5)                               |
| Syphilis                                                                | 115.4<br>(96.4 to 138.5)                         | 83.1<br>(66.4 to 101.7)                           | 0.2<br>(0.1 to 0.2)                       | 34.8<br>(19.5 to 52.2)                            | 1.5<br>(-10.1 to 15.0)                              |
| Chlamydial infection                                                    | 82.9<br>(62.0 to 110.8)                          | 63.9<br>(47.4 to 85.7)                            | 0.5<br>(0.3 to 0.8)                       | 20.3<br>(0.9 to 42.7)                             | -1.8<br>(-16.9 to 15.4)                             |
| Gonococcal infection                                                    | 18.2<br>(15.2 to 21.9)                           | 55.6<br>(43.4 to 70.4)                            | 0.2<br>(0.1 to 0.3)                       | 19.4<br>(-3.3 to 51.4)                            | -5.2<br>(-22.9 to 20.7)                             |
| Trichomoniasis                                                          | 201.2<br>(171.9 to 231.1)                        | 173.5<br>(147.8 to 200.9)                         | 0.2<br>(0.1 to 0.5)                       | 26.7<br>(15.1 to 40.7)                            | 2.2<br>(-6.8 to 12.6)                               |
| Genital herpes                                                          | 1,719.4<br>(1,483.3 to 2,019.3)                  | 138.9<br>(116.7 to 166.9)                         | 0.5<br>(0.1 to 1.0)                       | 27.5<br>(16.9 to 37.8)                            | 0.4<br>(-6.6 to 8.4)                                |
| Other sexually transmitted diseases                                     | 25.0<br>(22.4 to 27.1)                           | 22.3<br>(18.9 to 26.4)                            | 0.5<br>(0.3 to 0.8)                       | 20.4<br>(6.2 to 35.0)                             | -4.1<br>(-14.8 to 7.4)                              |
| Hepatitis                                                               | 522.3<br>(457.4 to 602.8)                        | 149.8<br>(84.8 to 252.1)                          | 0.1<br>(0.1 to 0.2)                       | -21.9<br>(-41.8 to 4.9)                           | -30.2<br>(-45.3 to -10.7)                           |
| Acute hepatitis A                                                       | 5.6<br>(0.8 to 13.3)                             | 73.2<br>(10.2 to 172.7)                           | $< 0.05$<br>( $< 0.05$ to 0.1)            | -28.7<br>(-74.9 to 127.6)                         | -34.3<br>(-72.6 to 82.2)                            |
| Hepatitis B                                                             | 282.4<br>(225.1 to 356.5)                        | 55.6<br>(44.0 to 70.6)                            | 0.1<br>( $< 0.05$ to 0.1)                 | -18.3<br>(-32.6 to -1.8)                          | -28.5<br>(-40.6 to -14.7)                           |
| Hepatitis C                                                             | 233.3<br>(206.9 to 262.2)                        | 9.6<br>(8.4 to 11.0)                              | $< 0.05$<br>( $< 0.05$ to $< 0.05$ )      | 3.0<br>(-18.0 to 29.1)                            | -9.3<br>(-24.7 to 9.3)                              |
| Acute hepatitis E                                                       | 0.9<br>(0.8 to 1.0)                              | 11.4<br>(9.9 to 13.1)                             | $< 0.05$<br>( $< 0.05$ to $< 0.05$ )      | -28.6<br>(-44.9 to -7.0)                          | -35.4<br>(-48.6 to -18.9)                           |
| Other infectious diseases                                               | 89.8<br>(84.7 to 95.0)                           | $< 0.05$<br>( $< 0.05$ to $< 0.05$ )              | 2.4<br>(1.5 to 3.6)                       | -5.0<br>(-13.7 to 3.8)                            | -14.9<br>(-22.2 to -8.2)                            |
| <b>Non-communicable diseases</b>                                        | <b>10,078.9</b><br><b>(10,016.5 to 10,143.4)</b> | <b>32,744.0†</b><br><b>(31,076.5 to 34,653.7)</b> | <b>859.2</b><br><b>(636.6 to 1,120.6)</b> | <b>24.4</b><br><b>(21.5 to 27.2)</b>              | <b>-0.4</b><br><b>(-2.3 to 1.5)</b>                 |
| <b>Neoplasms</b>                                                        | <b>27.4</b><br><b>(25.7 to 29.1)</b>             | <b>15.2</b><br><b>(13.6 to 16.6)</b>              | <b>4.4</b><br><b>(3.1 to 5.8)</b>         | <b>40.4</b><br><b>(33.0 to 48.1)</b>              | <b>3.8</b><br><b>(-1.8 to 9.6)</b>                  |
| Lip and oral cavity cancer                                              | 0.7<br>(0.6 to 0.8)                              | 0.2<br>(0.2 to 0.2)                               | 0.1<br>( $< 0.05$ to 0.1)                 | 39.2<br>(19.5 to 59.2)                            | 1.1<br>(-13.6 to 16.2)                              |
| Nasopharynx cancer                                                      | 0.1<br>(0.1 to 0.1)                              | $< 0.05$<br>( $< 0.05$ to $< 0.05$ )              | $< 0.05$<br>( $< 0.05$ to $< 0.05$ )      | 27.0<br>(12.2 to 44.9)                            | -1.8<br>(-12.8 to 10.3)                             |
| Other pharynx cancer                                                    | 0.2<br>(0.2 to 0.2)                              | 0.1<br>(0.1 to 0.1)                               | $< 0.05$<br>( $< 0.05$ to $< 0.05$ )      | 36.1<br>(19.4 to 54.6)                            | -0.9<br>(-13.5 to 13.1)                             |
| Oesophageal cancer                                                      | 0.1<br>(0.1 to 0.2)                              | 0.1<br>(0.1 to 0.2)                               | $< 0.05$<br>( $< 0.05$ to $< 0.05$ )      | 32.9<br>(18.1 to 48.2)                            | -5.7<br>(-16.3 to 5.5)                              |
| Stomach cancer                                                          | 3.2<br>(2.8 to 3.4)                              | 2.1<br>(1.9 to 2.3)                               | 0.5<br>(0.4 to 0.7)                       | 24.3<br>(8.2 to 42.5)                             | -10.7<br>(-22.2 to 2.5)                             |
| Colon and rectum cancer                                                 | 4.2<br>(3.3 to 5.0)                              | 1.2<br>(1.0 to 1.5)                               | 0.4<br>(0.3 to 0.6)                       | 60.8<br>(34.6 to 90.2)                            | 15.7<br>(-3.3 to 36.9)                              |
| Liver cancer                                                            | 0.2<br>(0.2 to 0.3)                              | 0.5<br>(0.4 to 0.7)                               | 0.1<br>(0.1 to 0.2)                       | 43.7<br>(27.1 to 61.9)                            | 3.1<br>(-9.0 to 16.7)                               |
| Liver cancer due to hepatitis B                                         | 0.2<br>(0.2 to 0.3)                              | 0.3<br>(0.2 to 0.4)                               | 0.1<br>( $< 0.05$ to 0.1)                 | 41.3<br>(24.7 to 59.5)                            | 2.3<br>(-9.7 to 16.3)                               |



| Cause                                              | Prevalence in thousands (95% UI)          | Incidence in thousands (95% UI)          | YLDs in thousands (95% UI)           |                                                   |                                                     |
|----------------------------------------------------|-------------------------------------------|------------------------------------------|--------------------------------------|---------------------------------------------------|-----------------------------------------------------|
|                                                    | 2016 counts                               | 2016 counts                              | 2016 counts                          | Percentage change in counts between 2006 and 2016 | Percentage change in age-standardised rates between |
| Liver cancer due to hepatitis C                    | 0.1<br>( $< 0.05$ to 0.1)                 | 0.1<br>(0.1 to 0.1)                      | $< 0.05$<br>( $< 0.05$ to $< 0.05$ ) | 51.0<br>(30.5 to 75.5)                            | 5.0<br>(-9.1 to 21.8)                               |
| Liver cancer due to alcohol use                    | 0.1<br>( $< 0.05$ to 0.1)                 | 0.1<br>(0.1 to 0.1)                      | $< 0.05$<br>( $< 0.05$ to $< 0.05$ ) | 46.2<br>(26.5 to 68.3)                            | 4.5<br>(-9.6 to 20.6)                               |
| Liver cancer due to other causes                   | 0.1<br>(0.1 to 0.1)                       | 0.1<br>(0.1 to 0.1)                      | $< 0.05$<br>( $< 0.05$ to $< 0.05$ ) | 42.7<br>(25.4 to 61.1)                            | 2.7<br>(-10.3 to 16.5)                              |
| Gallbladder and biliary tract cancer               | 0.3<br>(0.2 to 0.3)                       | 0.4<br>(0.3 to 0.5)                      | 0.1<br>( $< 0.05$ to 0.1)            | 28.2<br>(8.2 to 51.7)                             | -7.6<br>(-22.4 to 9.3)                              |
| Pancreatic cancer                                  | 0.3<br>(0.2 to 0.3)                       | 0.4<br>(0.3 to 0.5)                      | 0.1<br>(0.1 to 0.1)                  | 44.8<br>(29.1 to 62.9)                            | 4.2<br>(-7.5 to 17.2)                               |
| Larynx cancer                                      | 0.3<br>(0.2 to 0.3)                       | 0.1<br>(0.1 to 0.1)                      | $< 0.05$<br>( $< 0.05$ to 0.1)       | 34.6<br>(18.9 to 51.8)                            | -2.7<br>(-14.1 to 10.5)                             |
| Tracheal, bronchus, and lung cancer                | 0.9<br>(0.8 to 1.0)                       | 0.8<br>(0.7 to 0.9)                      | 0.2<br>(0.1 to 0.2)                  | 39.6<br>(16.5 to 68.0)                            | 1.1<br>(-15.9 to 21.7)                              |
| Malignant skin melanoma                            | 0.5<br>(0.4 to 0.6)                       | 0.1<br>(0.1 to 0.2)                      | $< 0.05$<br>( $< 0.05$ to 0.1)       | 57.3<br>(35.7 to 82.2)                            | 13.0<br>(-3.4 to 32.2)                              |
| Non-melanoma skin cancer                           | 0.5<br>(0.3 to 0.7)                       | 1.7<br>(1.0 to 2.5)                      | $< 0.05$<br>( $< 0.05$ to $< 0.05$ ) | 19.6<br>(-36.5 to 105.7)                          | -18.4<br>(-57.0 to 44.8)                            |
| Non-melanoma skin cancer (squamous-cell carcinoma) | 0.4<br>(0.2 to 0.6)                       | 0.4<br>(0.2 to 0.6)                      | $< 0.05$<br>( $< 0.05$ to $< 0.05$ ) | 17.9<br>(-41.3 to 114.2)                          | -19.9<br>(-60.9 to 50.0)                            |
| Non-melanoma skin cancer (basal-cell carcinoma)    | 0.2<br>(0.1 to 0.3)                       | 1.3<br>(0.7 to 2.1)                      | $< 0.05$<br>( $< 0.05$ to $< 0.05$ ) | 37.9<br>(8.4 to 77.8)                             | 0.1<br>(-22.4 to 29.0)                              |
| Breast cancer                                      | 4.9<br>(3.3 to 6.1)                       | 1.1<br>(0.7 to 1.4)                      | 0.5<br>(0.3 to 0.7)                  | 51.9<br>(23.0 to 88.7)                            | 13.4<br>(-7.9 to 39.8)                              |
| Cervical cancer                                    | 4.9<br>(3.5 to 5.9)                       | 1.4<br>(0.9 to 1.7)                      | 0.5<br>(0.3 to 0.7)                  | 21.2<br>(-3.0 to 48.5)                            | -8.6<br>(-27.2 to 11.4)                             |
| Uterine cancer                                     | 2.1<br>(1.5 to 2.6)                       | 0.5<br>(0.3 to 0.6)                      | 0.2<br>(0.1 to 0.2)                  | 69.1<br>(36.9 to 108.3)                           | 24.3<br>(-0.1 to 53.6)                              |
| Ovarian cancer                                     | 0.7<br>(0.6 to 0.9)                       | 0.2<br>(0.2 to 0.3)                      | 0.1<br>(0.1 to 0.2)                  | 42.3<br>(9.4 to 81.5)                             | 7.8<br>(-19.6 to 41.3)                              |
| Prostate cancer                                    | 5.4<br>(4.0 to 6.7)                       | 1.4<br>(1.0 to 1.7)                      | 0.6<br>(0.4 to 0.8)                  | 67.1<br>(40.9 to 99.6)                            | 14.6<br>(-2.8 to 35.9)                              |
| Testicular cancer                                  | 0.3<br>(0.2 to 0.5)                       | 0.1<br>(0.1 to 0.1)                      | $< 0.05$<br>( $< 0.05$ to $< 0.05$ ) | 45.4<br>(9.7 to 94.1)                             | 12.3<br>(-12.4 to 48.6)                             |
| Kidney cancer                                      | 1.1<br>(1.0 to 1.3)                       | 0.3<br>(0.3 to 0.4)                      | 0.1<br>(0.1 to 0.1)                  | 49.3<br>(31.2 to 69.5)                            | 16.1<br>(0.8 to 33.7)                               |
| Bladder cancer                                     | 0.7<br>(0.6 to 0.8)                       | 0.2<br>(0.2 to 0.2)                      | 0.1<br>(0.1 to 0.1)                  | 50.9<br>(32.5 to 69.8)                            | 6.5<br>(-6.4 to 20.4)                               |
| Brain and nervous system cancer                    | 0.7<br>(0.5 to 0.8)                       | 0.3<br>(0.2 to 0.4)                      | 0.1<br>(0.1 to 0.1)                  | 34.7<br>(15.9 to 70.8)                            | 9.3<br>(-6.5 to 40.3)                               |
| Thyroid cancer                                     | 1.3<br>(1.0 to 1.6)                       | 0.3<br>(0.2 to 0.3)                      | 0.1<br>(0.1 to 0.1)                  | 61.2<br>(32.0 to 95.3)                            | 17.8<br>(-3.5 to 41.6)                              |
| Mesothelioma                                       | $< 0.05$<br>( $< 0.05$ to $< 0.05$ )      | $< 0.05$<br>( $< 0.05$ to $< 0.05$ )     | $< 0.05$<br>( $< 0.05$ to $< 0.05$ ) | 30.5<br>(16.9 to 45.6)                            | -4.0<br>(-14.2 to 7.6)                              |
| Hodgkin lymphoma                                   | 0.1<br>(0.1 to 0.2)                       | 0.1<br>( $< 0.05$ to 0.1)                | $< 0.05$<br>( $< 0.05$ to $< 0.05$ ) | 4.4<br>(-7.3 to 15.6)                             | -17.8<br>(-27.1 to -9.3)                            |
| Non-Hodgkin's lymphoma                             | 1.1<br>(1.0 to 1.3)                       | 0.4<br>(0.4 to 0.5)                      | 0.1<br>(0.1 to 0.2)                  | 34.7<br>(19.5 to 50.7)                            | 2.8<br>(-10.0 to 16.8)                              |
| Multiple myeloma                                   | 0.2<br>(0.2 to 0.3)                       | 0.1<br>(0.1 to 0.2)                      | 0.1<br>( $< 0.05$ to 0.1)            | 39.5<br>(14.1 to 68.8)                            | 1.9<br>(-17.1 to 24.3)                              |
| Leukaemia                                          | 2.1<br>(1.7 to 2.4)                       | 0.6<br>(0.5 to 0.6)                      | 0.3<br>(0.2 to 0.4)                  | 12.8<br>(0.4 to 28.8)                             | -6.2<br>(-14.1 to 4.4)                              |
| Acute lymphoid leukaemia                           | 0.6<br>(0.4 to 0.7)                       | 0.1<br>(0.1 to 0.2)                      | 0.1<br>( $< 0.05$ to 0.1)            | 10.0<br>(-12.7 to 39.0)                           | -2.8<br>(-19.0 to 18.0)                             |
| Chronic lymphoid leukaemia                         | 0.2<br>(0.1 to 0.2)                       | $< 0.05$<br>( $< 0.05$ to $< 0.05$ )     | $< 0.05$<br>( $< 0.05$ to $< 0.05$ ) | 44.9<br>(26.2 to 64.1)                            | 8.4<br>(-5.6 to 23.6)                               |
| Acute myeloid leukaemia                            | 0.2<br>(0.1 to 0.2)                       | 0.1<br>(0.1 to 0.1)                      | $< 0.05$<br>( $< 0.05$ to $< 0.05$ ) | 29.5<br>(12.4 to 48.4)                            | 6.9<br>(-4.0 to 20.0)                               |
| Chronic myeloid leukaemia                          | 0.1<br>(0.1 to 0.1)                       | $< 0.05$<br>( $< 0.05$ to $< 0.05$ )     | $< 0.05$<br>( $< 0.05$ to $< 0.05$ ) | 22.1<br>(4.8 to 41.9)                             | -6.9<br>(-19.2 to 8.2)                              |
| Other leukaemia                                    | 1.1<br>(0.9 to 1.3)                       | 0.2<br>(0.2 to 0.3)                      | 0.1<br>(0.1 to 0.2)                  | 6.0<br>(-8.8 to 26.0)                             | -12.4<br>(-23.2 to 0.9)                             |
| Other neoplasms                                    | 1.4<br>(1.3 to 1.6)                       | 0.5<br>(0.4 to 0.6)                      | 0.1<br>(0.1 to 0.2)                  | 36.8<br>(21.5 to 54.5)                            | 5.9<br>(-6.5 to 20.2)                               |
| <b>Cardiovascular diseases</b>                     | <b>490.4</b><br><b>(468.3 to 512.5)</b>   | <b>53.5†</b><br><b>(51.0 to 56.2)</b>    | <b>26.2</b><br><b>(18.9 to 34.4)</b> | <b>41.8</b><br><b>(37.2 to 46.2)</b>              | <b>5.0</b><br><b>(1.5 to 8.3)</b>                   |
| Rheumatic heart disease                            | 89.9<br>(80.1 to 100.5)                   | 3.1<br>(2.7 to 3.4)                      | 4.3<br>(2.7 to 6.3)                  | 28.3<br>(16.5 to 39.5)                            | 3.9<br>(-5.3 to 12.7)                               |
| Ischaemic heart disease                            | 146.1<br>(138.2 to 154.0)                 | 19.4<br>(18.2 to 20.8)                   | 7.2<br>(4.9 to 9.9)                  | 43.0<br>(36.4 to 50.1)                            | 5.5<br>(0.8 to 10.8)                                |
| Cerebrovascular disease                            | 65.4<br>(60.9 to 69.8)                    | 10.3‡<br>(9.5 to 11.3)                   | 6.6<br>(4.7 to 8.4)                  | 35.8<br>(26.3 to 46.0)                            | -1.1<br>(-8.1 to 6.5)                               |
| Ischaemic stroke                                   | 55.2<br>(50.0 to 61.4)                    | 7.0‡<br>(6.2 to 7.9)                     | 5.3<br>(3.9 to 6.8)                  | 36.4<br>(25.0 to 48.6)                            | -1.3<br>(-9.6 to 7.8)                               |
| Hemorrhagic stroke                                 | 13.4<br>(12.0 to 14.8)                    | 3.3‡<br>(3.0 to 3.6)                     | 1.3<br>(0.9 to 1.6)                  | 33.0<br>(18.8 to 49.4)                            | -0.2<br>(-11.3 to 12.4)                             |
| Hypertensive heart disease                         | 9.2<br>(6.8 to 11.7)                      | --                                       | 0.7<br>(0.5 to 1.1)                  | 80.3<br>(53.9 to 119.1)                           | 23.3<br>(6.4 to 46.2)                               |
| Cardiomyopathy and myocarditis                     | 1.4<br>(1.2 to 1.8)                       | 2.2†<br>(1.9 to 2.5)                     | 0.2<br>(0.1 to 0.3)                  | 76.0<br>(53.7 to 104.6)                           | 39.2<br>(19.6 to 63.4)                              |
| Myocarditis                                        | 0.9<br>(0.7 to 1.1)                       | 2.2<br>(1.9 to 2.5)                      | 0.1<br>( $< 0.05$ to 0.1)            | 57.8<br>(34.9 to 84.6)                            | 27.7<br>(7.6 to 50.4)                               |
| Alcoholic cardiomyopathy                           | 0.1<br>( $< 0.05$ to 0.1)                 | --                                       | $< 0.05$<br>( $< 0.05$ to $< 0.05$ ) | 91.6<br>(64.3 to 135.7)                           | 38.9<br>(19.1 to 69.2)                              |
| Other cardiomyopathy                               | 1.1<br>(0.7 to 1.6)                       | --                                       | 0.1<br>(0.1 to 0.2)                  | 88.1<br>(57.6 to 130.7)                           | 46.5<br>(20.4 to 82.5)                              |
| Atrial fibrillation and flutter                    | 54.7<br>(48.0 to 62.6)                    | 4.3<br>(3.7 to 5.0)                      | 4.3<br>(2.9 to 6.0)                  | 40.6<br>(32.0 to 49.8)                            | -0.1<br>(-6.0 to 6.1)                               |
| Peripheral vascular disease                        | 132.4<br>(115.5 to 153.3)                 | 13.0<br>(11.2 to 15.2)                   | 0.7<br>(0.3 to 1.2)                  | 35.0<br>(24.9 to 45.8)                            | -5.1<br>(-12.0 to 2.1)                              |
| Endocarditis                                       | 0.3<br>(0.2 to 0.4)                       | 1.2<br>(1.1 to 1.3)                      | $< 0.05$<br>( $< 0.05$ to $< 0.05$ ) | 63.2<br>(45.4 to 82.7)                            | 24.0<br>(8.7 to 41.5)                               |
| Other cardiovascular and circulatory diseases      | 44.8<br>(29.1 to 64.5)                    | --                                       | 2.4<br>(1.3 to 3.8)                  | 86.4<br>(58.0 to 129.1)                           | 43.7<br>(22.8 to 72.4)                              |
| <b>Chronic respiratory diseases</b>                | <b>974.9</b><br><b>(923.3 to 1,030.0)</b> | <b>176.4†</b><br><b>(162.4 to 191.7)</b> | <b>34.0</b><br><b>(24.3 to 46.2)</b> | <b>17.2</b><br><b>(11.2 to 24.7)</b>              | <b>1.3</b><br><b>(-3.9 to 7.3)</b>                  |
| Chronic obstructive pulmonary disease              | 294.0<br>(273.8 to 320.1)                 | 19.7<br>(18.3 to 21.3)                   | 5.3<br>(4.2 to 6.6)                  | 28.6<br>(11.7 to 47.6)                            | -2.7<br>(-15.6 to 12.1)                             |
| Pneumoconiosis                                     | 0.2<br>(0.2 to 0.2)                       | $< 0.05$<br>( $< 0.05$ to $< 0.05$ )     | $< 0.05$<br>( $< 0.05$ to $< 0.05$ ) | 38.6<br>(31.7 to 45.8)                            | 0.3<br>(-4.6 to 5.3)                                |
| Silicosis                                          | 0.1<br>(0.1 to 0.1)                       | $< 0.05$<br>( $< 0.05$ to $< 0.05$ )     | $< 0.05$<br>( $< 0.05$ to $< 0.05$ ) | 38.3<br>(31.6 to 45.0)                            | 2.7<br>(-2.4 to 7.9)                                |

| Cause                                                          | Prevalence in thousands (95% UI)        | Incidence in thousands (95% UI)         | YLDs in thousands (95% UI)        |                                                   |                                                     |
|----------------------------------------------------------------|-----------------------------------------|-----------------------------------------|-----------------------------------|---------------------------------------------------|-----------------------------------------------------|
|                                                                | 2016 counts                             | 2016 counts                             | 2016 counts                       | Percentage change in counts between 2006 and 2016 | Percentage change in age-standardised rates between |
| Asbestosis                                                     | < 0.05<br>(< 0.05 to 0.1)               | < 0.05<br>(< 0.05 to < 0.05)            | < 0.05<br>(< 0.05 to < 0.05)      | 39.2<br>(29.8 to 49.5)                            | -1.3<br>(-7.8 to 5.5)                               |
| Coal workers pneumoconiosis                                    | --                                      | --                                      | --                                | --                                                | --                                                  |
| Other pneumoconiosis                                           | 0.1<br>(0.1 to 0.1)                     | < 0.05<br>(< 0.05 to < 0.05)            | < 0.05<br>(< 0.05 to < 0.05)      | 38.5<br>(25.9 to 52.2)                            | -0.6<br>(-9.5 to 9.3)                               |
| Asthma                                                         | 690.4<br>(635.9 to 753.1)               | 155.6<br>(141.4 to 171.1)               | 27.4<br>(17.9 to 39.5)            | 14.0<br>(7.9 to 21.7)                             | 1.8<br>(-3.1 to 7.9)                                |
| Interstitial lung disease and pulmonary sarcoidosis            | 6.8<br>(6.1 to 7.6)                     | 1.1<br>(1.0 to 1.2)                     | 0.7<br>(0.5 to 1.0)               | 51.1<br>(36.9 to 66.0)                            | 6.3<br>(-3.7 to 17.4)                               |
| Other chronic respiratory diseases                             | --                                      | --                                      | 0.6<br>(0.5 to 0.8)               | 49.1<br>(10.9 to 102.0)                           | 31.8<br>(1.5 to 72.3)                               |
| <b>Cirrhosis and other chronic liver diseases</b>              | <b>81.9<br/>(77.5 to 86.5)</b>          | <b>2.6<br/>(2.5 to 2.8)</b>             | <b>1.6<br/>(1.1 to 2.2)</b>       | <b>35.9<br/>(23.4 to 51.6)</b>                    | <b>8.0<br/>(-0.6 to 18.1)</b>                       |
| Cirrhosis and other chronic liver diseases due to hepatitis B  | 16.3<br>(14.3 to 18.4)                  | 0.6<br>(0.5 to 0.6)                     | 0.3<br>(0.2 to 0.4)               | 46.5<br>(21.1 to 78.2)                            | 9.1<br>(-9.1 to 31.5)                               |
| Cirrhosis and other chronic liver diseases due to hepatitis C  | 13.8<br>(12.3 to 15.4)                  | 0.5<br>(0.4 to 0.5)                     | 0.2<br>(0.1 to 0.3)               | 47.6<br>(22.0 to 77.3)                            | 10.9<br>(-8.7 to 35.2)                              |
| Cirrhosis and other chronic liver diseases due to alcohol use  | 28.4<br>(26.0 to 31.0)                  | 1.0<br>(0.9 to 1.1)                     | 0.5<br>(0.3 to 0.7)               | 47.0<br>(28.0 to 73.9)                            | 8.0<br>(-5.4 to 26.1)                               |
| Cirrhosis and other chronic liver diseases due to other causes | 23.5<br>(21.7 to 25.5)                  | 0.7<br>(0.6 to 0.7)                     | 0.7<br>(0.5 to 1.0)               | 22.9<br>(3.4 to 48.1)                             | 6.1<br>(-9.2 to 25.2)                               |
| <b>Digestive diseases</b>                                      | <b>353.5<br/>(337.2 to 370.5)</b>       | <b>309.4†<br/>(289.3 to 329.0)</b>      | <b>15.5<br/>(10.8 to 20.9)</b>    | <b>28.7<br/>(20.8 to 36.5)</b>                    | <b>4.2<br/>(-1.5 to 9.7)</b>                        |
| Peptic ulcer disease                                           | 145.9<br>(133.5 to 160.7)               | 10.4<br>(9.4 to 11.5)                   | 3.0<br>(1.9 to 4.4)               | 53.0<br>(39.5 to 67.8)                            | 16.5<br>(5.9 to 27.5)                               |
| Gastritis and duodenitis                                       | 90.2<br>(82.2 to 98.2)                  | 69.1<br>(62.3 to 76.8)                  | 2.3<br>(1.5 to 3.4)               | 56.3<br>(43.3 to 70.0)                            | 19.3<br>(9.8 to 29.2)                               |
| Appendicitis                                                   | 1.3<br>(1.2 to 1.4)                     | 35.4<br>(32.7 to 38.4)                  | 0.4<br>(0.3 to 0.6)               | 13.8<br>(-11.8 to 48.9)                           | -2.8<br>(-22.5 to 21.7)                             |
| Paralytic ileus and intestinal obstruction                     | 0.2<br>(0.2 to 0.2)                     | 5.9<br>(5.3 to 6.6)                     | 0.1<br>(< 0.05 to 0.1)            | 27.6<br>(20.1 to 37.1)                            | 5.5<br>(-3.2 to 16.2)                               |
| Inguinal, femoral, and abdominal hernia                        | 104.2<br>(93.4 to 115.5)                | 54.5<br>(47.7 to 61.6)                  | 7.6<br>(5.1 to 10.5)              | 15.2<br>(6.5 to 24.0)                             | -5.1<br>(-11.9 to 1.4)                              |
| Inflammatory bowel disease                                     | 0.6<br>(0.5 to 0.6)                     | 2.1<br>(2.0 to 2.2)                     | 0.1<br>(0.1 to 0.1)               | 38.0<br>(29.4 to 46.9)                            | 7.6<br>(-0.5 to 16.0)                               |
| Vascular intestinal disorders                                  | 0.1<br>(0.1 to 0.1)                     | 0.4<br>(0.4 to 0.4)                     | < 0.05<br>(< 0.05 to < 0.05)      | 31.6<br>(24.2 to 39.4)                            | 11.2<br>(5.8 to 16.7)                               |
| Gallbladder and biliary diseases                               | 22.8<br>(20.6 to 25.3)                  | 124.9<br>(109.1 to 140.8)               | 0.6<br>(0.4 to 0.8)               | 40.3<br>(17.4 to 64.7)                            | 8.4<br>(-9.9 to 27.7)                               |
| Pancreatitis                                                   | 0.7<br>(0.7 to 0.8)                     | 6.6<br>(6.0 to 7.2)                     | 0.1<br>(0.1 to 0.1)               | 45.8<br>(36.0 to 56.5)                            | 15.3<br>(6.5 to 25.3)                               |
| Other digestive diseases                                       | --                                      | --                                      | 1.4<br>(0.9 to 1.8)               | 28.1<br>(19.4 to 36.9)                            | 7.0<br>(1.2 to 13.1)                                |
| <b>Neurological disorders</b>                                  | <b>3,698.6<br/>(3,531.6 to 3,877.9)</b> | <b>1,731.5<br/>(1,479.9 to 1,997.7)</b> | <b>94.6<br/>(63.7 to 130.6)</b>   | <b>25.8<br/>(4.6 to 51.9)</b>                     | <b>0.6<br/>(-14.8 to 19.2)</b>                      |
| Alzheimer's disease and other dementias                        | 38.1<br>(31.8 to 45.4)                  | 6.5<br>(5.4 to 7.9)                     | 5.6<br>(3.8 to 7.4)               | 51.0<br>(43.1 to 58.6)                            | -1.5<br>(-6.3 to 3.1)                               |
| Parkinson's disease                                            | 5.1<br>(4.0 to 6.3)                     | 0.6<br>(0.5 to 0.7)                     | 0.6<br>(0.4 to 0.8)               | 50.5<br>(32.5 to 71.0)                            | 6.4<br>(-5.8 to 19.7)                               |
| Epilepsy                                                       | 32.5<br>(6.9 to 64.2)                   | 3.9<br>(0.8 to 7.7)                     | 10.0<br>(1.8 to 23.6)             | 26.4<br>(-80.1 to 600.0)                          | 4.3<br>(-83.6 to 488.4)                             |
| Multiple sclerosis                                             | 0.8<br>(0.7 to 0.9)                     | < 0.05<br>(< 0.05 to < 0.05)            | 0.2<br>(0.1 to 0.3)               | 43.1<br>(38.1 to 47.9)                            | 11.6<br>(7.8 to 15.4)                               |
| Motor neuron disease                                           | 0.2<br>(0.2 to 0.3)                     | < 0.05<br>(< 0.05 to 0.1)               | 0.1<br>(< 0.05 to 0.1)            | 28.1<br>(23.0 to 33.6)                            | 4.9<br>(1.5 to 8.6)                                 |
| Migraine                                                       | 1,385.0<br>(1,301.3 to 1,468.6)         | 166.8<br>(155.8 to 178.2)               | 64.0<br>(41.4 to 89.9)            | 23.3<br>(18.8 to 27.8)                            | -0.2<br>(-3.6 to 3.2)                               |
| Tension-type headache                                          | 2,772.1<br>(2,483.3 to 3,114.8)         | 1,553.4<br>(1,304.4 to 1,818.6)         | 11.8<br>(7.4 to 17.4)             | 23.5<br>(17.5 to 30.1)                            | -0.7<br>(-5.0 to 4.1)                               |
| Other neurological disorders                                   | < 0.05<br>(< 0.05 to 0.1)               | 0.1<br>(0.1 to 0.1)                     | 2.2<br>(0.5 to 5.1)               | 51.0<br>(-65.7 to 565.1)                          | 24.8<br>(-68.9 to 373.4)                            |
| <b>Mental and substance use disorders</b>                      | <b>1,561.8<br/>(1,503.2 to 1,620.3)</b> | <b>583.7†<br/>(545.1 to 628.4)</b>      | <b>213.0<br/>(153.2 to 275.7)</b> | <b>21.6<br/>(19.0 to 24.1)</b>                    | <b>-0.8<br/>(-2.8 to 1.2)</b>                       |
| Schizophrenia                                                  | 18.6<br>(16.2 to 21.0)                  | 1.4<br>(1.2 to 1.6)                     | 12.0<br>(8.7 to 15.0)             | 29.4<br>(16.8 to 41.8)                            | 1.3<br>(-7.9 to 10.6)                               |
| Alcohol use disorders                                          | 152.1<br>(131.2 to 176.6)               | 81.3<br>(69.6 to 93.4)                  | 15.3<br>(10.4 to 21.3)            | 25.0<br>(15.2 to 35.4)                            | 0.3<br>(-7.4 to 8.2)                                |
| Drug use disorders                                             | 99.5<br>(91.6 to 108.5)                 | 11.8<br>(10.6 to 13.3)                  | 23.2<br>(16.2 to 31.6)            | 19.4<br>(7.2 to 31.5)                             | -1.2<br>(-10.5 to 8.2)                              |
| Opioid use disorders                                           | 26.4<br>(21.9 to 32.3)                  | 3.3<br>(2.8 to 4.0)                     | 11.0<br>(7.4 to 15.1)             | 29.3<br>(15.7 to 45.2)                            | 3.8<br>(-6.4 to 15.6)                               |
| Cocaine use disorders                                          | 24.7<br>(21.1 to 28.6)                  | 1.7<br>(1.4 to 2.0)                     | 3.4<br>(2.0 to 5.0)               | 12.1<br>(-7.3 to 34.0)                            | -6.8<br>(-21.7 to 10.0)                             |
| Amphetamine use disorders                                      | 25.2<br>(17.2 to 36.1)                  | 2.4<br>(1.6 to 3.5)                     | 3.4<br>(1.8 to 5.6)               | 9.6<br>(-13.2 to 35.1)                            | -6.1<br>(-25.1 to 14.8)                             |
| Cannabis use disorders                                         | 21.3<br>(17.3 to 25.8)                  | 3.6<br>(2.9 to 4.3)                     | 0.6<br>(0.4 to 1.0)               | 17.1<br>(-9.0 to 46.9)                            | -2.6<br>(-22.9 to 19.8)                             |
| Other drug use disorders                                       | 4.0<br>(3.6 to 4.6)                     | 0.8<br>(0.7 to 0.9)                     | 4.8<br>(2.9 to 7.3)               | 12.3<br>(-14.7 to 45.3)                           | -5.5<br>(-27.6 to 22.0)                             |
| Depressive disorders                                           | 318.8<br>(298.2 to 342.4)               | 357.5<br>(322.3 to 398.7)               | 55.5<br>(38.6 to 74.4)            | 21.7<br>(15.8 to 28.1)                            | -3.2<br>(-7.9 to 1.8)                               |
| Major depressive disorder                                      | 224.5<br>(202.8 to 250.1)               | 339.2<br>(303.3 to 379.5)               | 45.9<br>(31.5 to 62.1)            | 20.7<br>(13.7 to 28.5)                            | -3.8<br>(-9.5 to 2.0)                               |
| Dysthymia                                                      | 99.8<br>(87.3 to 113.5)                 | 18.4<br>(16.2 to 21.1)                  | 9.6<br>(6.4 to 14.0)              | 26.8<br>(21.6 to 32.4)                            | 0.1<br>(-3.6 to 4.0)                                |
| Bipolar disorder                                               | 88.2<br>(74.5 to 103.8)                 | 8.3<br>(7.1 to 9.8)                     | 18.2<br>(11.2 to 27.0)            | 22.5<br>(16.0 to 29.4)                            | 0.1<br>(-4.7 to 5.5)                                |
| Anxiety disorders                                              | 427.2<br>(387.3 to 470.1)               | 66.7<br>(61.2 to 72.8)                  | 41.4<br>(28.9 to 55.8)            | 22.1<br>(18.0 to 26.7)                            | 0.2<br>(-3.0 to 3.3)                                |
| Eating disorders                                               | 18.9<br>(15.4 to 23.9)                  | 9.5<br>(6.9 to 12.9)                    | 3.8<br>(2.4 to 5.6)               | 34.8<br>(19.7 to 51.4)                            | 12.9<br>(0.1 to 26.6)                               |
| Anorexia nervosa                                               | 3.1<br>(2.2 to 4.1)                     | 1.4<br>(1.0 to 1.8)                     | 0.7<br>(0.4 to 1.0)               | 24.8<br>(-1.9 to 63.5)                            | 7.9<br>(-15.1 to 39.9)                              |
| Bulimia nervosa                                                | 14.8<br>(11.0 to 19.8)                  | 8.2<br>(5.6 to 11.4)                    | 3.1<br>(1.9 to 4.8)               | 37.1<br>(19.0 to 56.7)                            | 13.9<br>(-0.8 to 29.4)                              |
| Autistic spectrum disorders                                    | 93.3<br>(84.0 to 105.1)                 | 0.9<br>(0.6 to 1.2)                     | 13.8<br>(9.3 to 19.4)             | 17.7<br>(12.3 to 23.9)                            | 0.4<br>(-4.1 to 5.5)                                |
| Autism                                                         | 28.5<br>(24.5 to 33.0)                  | 0.1<br>(0.1 to 0.2)                     | 7.3<br>(4.6 to 10.5)              | 18.0<br>(9.4 to 28.2)                             | 0.6<br>(-7.2 to 9.0)                                |
| Asperger syndrome and other autistic spectrum disorders        | 65.2<br>(53.9 to 78.9)                  | 0.8<br>(0.5 to 1.1)                     | 6.5<br>(4.3 to 9.5)               | 17.3<br>(11.5 to 23.8)                            | 0.2<br>(-4.5 to 5.0)                                |



| Cause                                                      | Prevalence in thousands (95% UI)              | Incidence in thousands (95% UI)                   | YLDs in thousands (95% UI)              |                                                   |                                                     |
|------------------------------------------------------------|-----------------------------------------------|---------------------------------------------------|-----------------------------------------|---------------------------------------------------|-----------------------------------------------------|
|                                                            | 2016 counts                                   | 2016 counts                                       | 2016 counts                             | Percentage change in counts between 2006 and 2016 | Percentage change in age-standardised rates between |
| Attention-deficit/hyperactivity disorder                   | 124.2<br>(111.1 to 139.4)                     | 6.4<br>(5.5 to 7.5)                               | 1.5<br>(0.9 to 2.4)                     | 14.0<br>(6.0 to 22.3)                             | -0.1<br>(-7.1 to 7.0)                               |
| Conduct disorder                                           | 94.8<br>(77.4 to 111.8)                       | 32.5<br>(25.6 to 39.2)                            | 11.5<br>(7.1 to 17.6)                   | 9.7<br>(3.6 to 16.3)                              | 0.2<br>(-5.5 to 6.2)                                |
| Idiopathic developmental intellectual disability           | 78.7<br>(37.9 to 119.4)                       | --                                                | 3.4<br>(1.5 to 6.0)                     | 12.8<br>(4.1 to 22.7)                             | -4.5<br>(-11.6 to 3.4)                              |
| Other mental and substance use disorders                   | 181.5<br>(159.2 to 209.7)                     | 7.4<br>(6.6 to 8.5)                               | 13.5<br>(9.3 to 19.4)                   | 26.9<br>(20.2 to 33.7)                            | -0.0<br>(-4.9 to 4.9)                               |
| <b>Diabetes, urogenital, blood, and endocrine diseases</b> | <b>3,554.5</b><br><b>(3,496.2 to 3,607.6)</b> | <b>1,337.4†</b><br><b>(1,238.5 to 1,449.2)</b>    | <b>73.6</b><br><b>(52.1 to 100.1)</b>   | <b>30.3</b><br><b>(25.7 to 34.9)</b>              | <b>1.5</b><br><b>(-2.4 to 5.4)</b>                  |
| Diabetes mellitus                                          | 393.6<br>(353.8 to 437.0)                     | 23.3<br>(21.0 to 26.1)                            | 37.0<br>(25.3 to 51.7)                  | 38.4<br>(29.2 to 47.2)                            | 4.5<br>(-2.4 to 11.4)                               |
| Acute glomerulonephritis                                   | 0.1<br>(0.1 to 0.1)                           | 1.5<br>(1.2 to 1.7)                               | < 0.05<br>(< 0.05 to < 0.05)            | 21.3<br>(16.4 to 26.9)                            | 0.4<br>(-3.1 to 4.5)                                |
| Chronic kidney disease                                     | 299.7<br>(271.9 to 327.3)                     | 24.7<br>(21.9 to 27.6)                            | 9.5<br>(6.8 to 12.2)                    | 45.0<br>(36.7 to 53.4)                            | 7.4<br>(1.3 to 13.7)                                |
| Chronic kidney disease due to diabetes mellitus            | 103.9<br>(87.6 to 122.1)                      | 8.7<br>(7.1 to 10.4)                              | 3.1<br>(2.2 to 4.2)                     | 48.8<br>(36.6 to 61.8)                            | 9.1<br>(0.3 to 18.9)                                |
| Chronic kidney disease due to hypertension                 | 68.0<br>(58.5 to 77.0)                        | 7.1<br>(5.9 to 8.3)                               | 1.3<br>(0.9 to 1.8)                     | 54.1<br>(38.3 to 73.2)                            | 5.7<br>(-5.2 to 18.5)                               |
| Chronic kidney disease due to glomerulonephritis           | 62.3<br>(53.5 to 70.6)                        | 3.4<br>(2.7 to 4.2)                               | 2.9<br>(2.1 to 3.9)                     | 40.9<br>(28.8 to 54.4)                            | 7.8<br>(-0.8 to 17.5)                               |
| Chronic kidney disease due to other causes                 | 65.5<br>(53.8 to 77.9)                        | 5.5<br>(4.5 to 6.6)                               | 2.1<br>(1.5 to 2.9)                     | 40.0<br>(30.5 to 50.0)                            | 5.4<br>(-2.1 to 13.2)                               |
| Urinary diseases and male infertility                      | 136.7<br>(122.3 to 150.6)                     | 897.5†<br>(804.6 to 1,008.4)                      | 4.0<br>(2.6 to 5.8)                     | 31.2<br>(23.7 to 38.8)                            | -1.1<br>(-6.7 to 4.6)                               |
| Interstitial nephritis and urinary tract infections        | 16.2<br>(14.4 to 18.3)                        | 847.7<br>(756.9 to 957.8)                         | 0.5<br>(0.3 to 0.8)                     | 23.4<br>(9.9 to 39.5)                             | 2.6<br>(-7.8 to 15.2)                               |
| Urolithiasis                                               | 1.4<br>(1.2 to 1.6)                           | 37.4<br>(33.1 to 42.3)                            | 0.1<br>(0.1 to 0.1)                     | 29.3<br>(24.8 to 34.1)                            | 1.9<br>(-1.8 to 5.7)                                |
| Benign prostatic hyperplasia                               | 94.3<br>(79.7 to 110.4)                       | 12.4<br>(10.4 to 14.8)                            | 3.1<br>(1.9 to 4.5)                     | 34.8<br>(25.3 to 44.6)                            | -1.4<br>(-8.0 to 5.5)                               |
| Male infertility                                           | 19.3<br>(14.8 to 25.6)                        | --                                                | 0.1<br>(< 0.05 to 0.2)                  | 74.1<br>(37.2 to 125.2)                           | 35.9<br>(6.5 to 75.8)                               |
| Other urinary diseases                                     | --                                            | --                                                | 0.2<br>(0.1 to 0.4)                     | 0.8<br>(-9.3 to 12.1)                             | -15.2<br>(-23.0 to -6.9)                            |
| Gynecological diseases                                     | 1,152.4<br>(1,093.3 to 1,198.9)               | 372.9†<br>(348.7 to 398.0)                        | 12.3<br>(8.2 to 17.9)                   | 19.9<br>(14.2 to 25.3)                            | -5.2<br>(-9.2 to -1.2)                              |
| Uterine fibroids                                           | 110.3<br>(97.3 to 128.2)                      | 12.5<br>(10.6 to 14.8)                            | 2.0<br>(1.2 to 3.1)                     | 19.5<br>(10.7 to 28.4)                            | -9.1<br>(-15.8 to -2.2)                             |
| Polycystic ovarian syndrome                                | 2.6<br>(1.9 to 3.4)                           | 9.7<br>(6.7 to 13.2)                              | < 0.05<br>(< 0.05 to < 0.05)            | 24.2<br>(-5.0 to 60.7)                            | -1.1<br>(-23.6 to 26.9)                             |
| Female infertility                                         | 20.1<br>(7.5 to 40.8)                         | --                                                | 0.1<br>(< 0.05 to 0.3)                  | 170.9<br>(23.2 to 422.6)                          | 108.2<br>(-8.7 to 309.7)                            |
| Endometriosis                                              | 1.0<br>(0.8 to 1.2)                           | 4.6<br>(3.7 to 5.6)                               | 0.1<br>(0.1 to 0.1)                     | 22.6<br>(-12.2 to 70.3)                           | -0.4<br>(-28.1 to 37.4)                             |
| Genital prolapse                                           | 425.1<br>(371.9 to 480.8)                     | 29.4<br>(25.0 to 34.2)                            | 1.3<br>(0.7 to 2.4)                     | 20.2<br>(11.1 to 30.0)                            | -8.9<br>(-15.8 to -1.2)                             |
| Premenstrual syndrome                                      | 626.3<br>(577.1 to 671.3)                     | 233.6<br>(214.8 to 252.1)                         | 5.2<br>(3.2 to 8.1)                     | 18.2<br>(8.1 to 28.5)                             | -3.9<br>(-11.9 to 4.3)                              |
| Other gynecological diseases                               | 104.5<br>(92.2 to 118.1)                      | 83.1<br>(69.2 to 98.5)                            | 3.5<br>(2.4 to 5.1)                     | 20.4<br>(10.9 to 30.4)                            | -4.1<br>(-11.6 to 3.6)                              |
| Hemoglobinopathies and hemolytic anaemias                  | 2,121.0<br>(2,077.3 to 2,164.8)               | --                                                | 6.0<br>(4.0 to 8.7)                     | 7.8<br>(0.7 to 15.6)                              | -7.6<br>(-13.2 to -1.8)                             |
| Thalassemias                                               | 0.1<br>(0.1 to 0.1)                           | --                                                | < 0.05<br>(< 0.05 to < 0.05)            | 8.1<br>(-6.5 to 23.8)                             | 0.6<br>(-13.0 to 15.2)                              |
| Thalassaemias trait                                        | 34.2<br>(31.5 to 37.0)                        | --                                                | 0.5<br>(0.3 to 0.7)                     | 23.9<br>(9.2 to 42.6)                             | 6.2<br>(-5.7 to 19.8)                               |
| Sickle cell disorders                                      | 2.1<br>(1.7 to 2.5)                           | --                                                | 0.2<br>(0.1 to 0.3)                     | 20.4<br>(-1.7 to 48.6)                            | 9.0<br>(-9.5 to 32.7)                               |
| Sickle cell trait                                          | 658.0<br>(595.6 to 719.5)                     | --                                                | 2.6<br>(1.7 to 3.8)                     | 19.1<br>(6.9 to 31.4)                             | 2.6<br>(-6.8 to 12.3)                               |
| G6PD deficiency                                            | 221.5<br>(213.5 to 230.4)                     | --                                                | < 0.05<br>(< 0.05 to < 0.05)            | 36.0<br>(26.8 to 47.2)                            | 16.0<br>(8.6 to 23.7)                               |
| G6PD trait                                                 | 1,219.3<br>(1,199.9 to 1,241.0)               | --                                                | < 0.05<br>(< 0.05 to < 0.05)            | 31.0<br>(22.2 to 41.7)                            | 10.6<br>(3.6 to 18.9)                               |
| Other hemoglobinopathies and hemolytic anaemias            | 127.2<br>(121.6 to 133.1)                     | --                                                | 2.7<br>(1.8 to 3.9)                     | -4.0<br>(-12.0 to 4.7)                            | -18.0<br>(-23.9 to -11.6)                           |
| Endocrine, metabolic, blood, and immune disorders          | 165.8<br>(157.8 to 174.2)                     | 17.5<br>(15.8 to 19.2)                            | 4.8<br>(3.3 to 6.6)                     | 10.4<br>(3.1 to 17.4)                             | -7.1<br>(-12.3 to -2.0)                             |
| <b>Musculoskeletal disorders</b>                           | <b>1,469.1</b><br><b>(1,393.8 to 1,542.1)</b> | <b>693.7</b><br><b>(629.4 to 765.7)</b>           | <b>163.0</b><br><b>(118.6 to 213.1)</b> | <b>28.3</b><br><b>(24.9 to 31.8)</b>              | <b>-0.5</b><br><b>(-2.8 to 2.1)</b>                 |
| Rheumatoid arthritis                                       | 25.6<br>(22.9 to 28.7)                        | 1.5<br>(1.4 to 1.7)                               | 6.0<br>(4.1 to 8.1)                     | 33.8<br>(22.6 to 46.1)                            | 2.6<br>(-5.9 to 11.4)                               |
| Osteoarthritis                                             | 291.2<br>(273.5 to 310.3)                     | 14.6<br>(13.6 to 15.7)                            | 17.9<br>(12.7 to 24.0)                  | 39.4<br>(34.3 to 44.5)                            | 2.8<br>(-0.8 to 6.5)                                |
| Low back and neck pain                                     | 968.7<br>(902.3 to 1,040.5)                   | 409.8<br>(368.9 to 457.2)                         | 111.9<br>(79.4 to 147.6)                | 26.6<br>(22.4 to 30.9)                            | -1.4<br>(-4.6 to 1.7)                               |
| Low back pain                                              | 712.7<br>(626.6 to 812.3)                     | 336.9<br>(297.1 to 380.8)                         | 80.6<br>(56.6 to 106.4)                 | 25.1<br>(19.7 to 31.0)                            | -2.0<br>(-6.3 to 2.2)                               |
| Neck pain                                                  | 313.0<br>(269.5 to 360.2)                     | 72.9<br>(63.2 to 85.5)                            | 31.2<br>(21.1 to 44.4)                  | 30.5<br>(27.5 to 33.8)                            | 0.1<br>(-1.9 to 2.3)                                |
| Gout                                                       | 24.4<br>(21.7 to 27.5)                        | 5.0<br>(4.3 to 5.6)                               | 0.8<br>(0.5 to 1.1)                     | 33.3<br>(13.7 to 57.1)                            | 0.3<br>(-13.5 to 17.4)                              |
| Other musculoskeletal disorders                            | 306.4<br>(253.7 to 364.5)                     | 262.9<br>(214.3 to 319.6)                         | 26.5<br>(17.7 to 37.9)                  | 27.3<br>(17.1 to 38.6)                            | 0.6<br>(-7.4 to 9.0)                                |
| <b>Other non-communicable diseases</b>                     | <b>8,848.3</b><br><b>(8,716.5 to 8,966.9)</b> | <b>27,840.7†</b><br><b>(26,196.9 to 29,741.2)</b> | <b>233.3</b><br><b>(158.4 to 330.6)</b> | <b>20.9</b><br><b>(19.6 to 22.3)</b>              | <b>-2.5</b><br><b>(-3.4 to -1.6)</b>                |
| Congenital anomalies                                       | 87.0<br>(74.3 to 102.7)                       | --                                                | 10.8<br>(7.7 to 14.6)                   | 10.4<br>(4.2 to 17.5)                             | -5.1<br>(-10.3 to 0.8)                              |
| Neural tube defects                                        | 6.7<br>(6.0 to 7.5)                           | --                                                | 2.0<br>(1.4 to 2.7)                     | 10.6<br>(-4.0 to 26.7)                            | -6.2<br>(-18.4 to 7.1)                              |
| Congenital heart anomalies                                 | 14.0<br>(11.8 to 16.3)                        | --                                                | 0.6<br>(0.3 to 1.1)                     | 16.2<br>(2.4 to 31.8)                             | 4.5<br>(-7.8 to 18.1)                               |
| Orofacial clefts                                           | 10.6<br>(9.2 to 12.0)                         | --                                                | 0.2<br>(0.1 to 0.2)                     | 13.3<br>(0.1 to 29.3)                             | -3.5<br>(-14.2 to 8.8)                              |
| Down's syndrome                                            | 8.6<br>(7.4 to 10.0)                          | --                                                | 0.8<br>(0.5 to 1.1)                     | 21.4<br>(10.0 to 33.6)                            | 4.9<br>(-5.0 to 14.9)                               |
| Turner syndrome                                            | 2.1<br>(1.8 to 2.5)                           | --                                                | < 0.05<br>(< 0.05 to 0.1)               | 16.2<br>(-26.7 to 92.2)                           | 1.1<br>(-32.6 to 59.8)                              |
| Klinefelter syndrome                                       | 2.3<br>(2.0 to 2.8)                           | --                                                | < 0.05<br>(< 0.05 to < 0.05)            | 17.8<br>(-13.1 to 59.4)                           | 0.6<br>(-24.3 to 31.9)                              |



| Cause                                         | Prevalence in thousands (95% UI)              | Incidence in thousands (95% UI)          | YLDs in thousands (95% UI)           |                                                   |                                                     |
|-----------------------------------------------|-----------------------------------------------|------------------------------------------|--------------------------------------|---------------------------------------------------|-----------------------------------------------------|
|                                               | 2016 counts                                   | 2016 counts                              | 2016 counts                          | Percentage change in counts between 2006 and 2016 | Percentage change in age-standardised rates between |
| Other chromosomal abnormalities               | 8.3<br>(6.9 to 9.9)                           | --                                       | 0.9<br>(0.6 to 1.2)                  | 9.4<br>(-5.2 to 25.1)                             | 1.2<br>(-12.1 to 15.5)                              |
| Congenital musculoskeletal and limb anomalies | 7.1<br>(6.5 to 7.8)                           | --                                       | 1.0<br>(0.7 to 1.5)                  | 23.7<br>(11.9 to 36.1)                            | 4.9<br>(-4.4 to 15.4)                               |
| Urogenital congenital anomalies               | 8.2<br>(7.2 to 9.5)                           | --                                       | 0.3<br>(0.2 to 0.4)                  | 8.7<br>(0.8 to 17.4)                              | -0.6<br>(-7.8 to 7.3)                               |
| Digestive congenital anomalies                | 4.8<br>(4.3 to 5.4)                           | --                                       | 0.2<br>(0.1 to 0.3)                  | 16.6<br>(-7.0 to 43.7)                            | -0.8<br>(-19.2 to 19.8)                             |
| Other congenital anomalies                    | 41.3<br>(26.4 to 61.4)                        | --                                       | 4.8<br>(3.1 to 7.3)                  | 5.5<br>(-4.2 to 16.4)                             | -10.2<br>(-18.2 to -1.0)                            |
| Skin and subcutaneous diseases                | 3,918.6<br>(3,791.2 to 4,049.6)               | 8,978.9<br>(8,406.2 to 9,570.8)          | 96.7<br>(63.2 to 141.0)              | 16.9<br>(14.8 to 19.2)                            | 1.2<br>(-0.2 to 3.0)                                |
| Dermatitis                                    | 723.5<br>(658.8 to 787.8)                     | 567.9<br>(527.7 to 609.9)                | 29.6<br>(16.9 to 49.7)               | 12.8<br>(9.5 to 16.4)                             | 0.2<br>(-2.5 to 3.0)                                |
| Psoriasis                                     | 83.0<br>(79.1 to 87.2)                        | 12.1<br>(11.6 to 12.7)                   | 7.3<br>(5.2 to 9.6)                  | 31.0<br>(20.3 to 42.7)                            | 7.0<br>(-0.8 to 15.4)                               |
| Cellulitis                                    | 4.9<br>(4.5 to 5.3)                           | 98.4<br>(91.4 to 106.8)                  | 0.3<br>(0.2 to 0.4)                  | 18.2<br>(-4.7 to 46.7)                            | 1.7<br>(-16.4 to 24.6)                              |
| Pyoderma                                      | 27.7<br>(26.9 to 28.6)                        | 665.2<br>(642.9 to 686.7)                | 0.1<br>(0.1 to 0.3)                  | 26.0<br>(18.3 to 34.5)                            | 1.3<br>(-4.2 to 7.5)                                |
| Scabies                                       | 206.8<br>(179.7 to 237.6)                     | 637.6<br>(551.3 to 735.3)                | 5.4<br>(3.0 to 8.5)                  | 6.4<br>(2.0 to 11.3)                              | -7.4<br>(-11.0 to -3.9)                             |
| Fungal skin diseases                          | 1,567.1<br>(1,398.3 to 1,745.5)               | 4,875.5<br>(4,318.9 to 5,458.8)          | 8.8<br>(3.4 to 18.2)                 | 21.6<br>(20.0 to 23.4)                            | 0.1<br>(-0.7 to 0.9)                                |
| Viral skin diseases                           | 325.1<br>(309.5 to 340.7)                     | 476.5<br>(454.2 to 500.9)                | 10.0<br>(6.2 to 14.6)                | 15.0<br>(11.5 to 18.6)                            | 0.1<br>(-2.8 to 3.2)                                |
| Acne vulgaris                                 | 904.1<br>(807.7 to 1,008.6)                   | 611.8<br>(510.1 to 746.5)                | 23.3<br>(15.5 to 33.9)               | 18.6<br>(13.5 to 24.4)                            | 3.3<br>(-1.1 to 8.1)                                |
| Alopecia areata                               | 18.1<br>(17.4 to 18.9)                        | 32.2<br>(30.9 to 33.5)                   | 0.6<br>(0.4 to 0.9)                  | 22.6<br>(9.8 to 38.4)                             | 0.2<br>(-9.6 to 12.2)                               |
| Pruritus                                      | 88.4<br>(77.9 to 99.3)                        | 71.1<br>(63.6 to 79.7)                   | 0.9<br>(0.5 to 1.7)                  | 24.2<br>(17.1 to 31.2)                            | 1.4<br>(-3.7 to 6.6)                                |
| Urticaria                                     | 109.5<br>(94.8 to 127.4)                      | 196.6<br>(171.1 to 227.9)                | 6.6<br>(4.2 to 9.6)                  | 13.7<br>(7.1 to 20.4)                             | 0.2<br>(-5.3 to 5.9)                                |
| Decubitus ulcer                               | 1.9<br>(1.7 to 2.1)                           | 6.8<br>(6.0 to 7.7)                      | 0.3<br>(0.2 to 0.4)                  | 37.2<br>(22.1 to 53.6)                            | 4.9<br>(-9.2 to 20.3)                               |
| Other skin and subcutaneous diseases          | 633.6<br>(615.7 to 652.5)                     | 727.1<br>(705.2 to 750.7)                | 3.5<br>(1.7 to 6.4)                  | 30.2<br>(27.0 to 33.4)                            | 4.2<br>(1.9 to 6.5)                                 |
| Sense organ diseases                          | 2,645.0<br>(2,592.5 to 2,702.5)               | 1,038.0†<br>(970.4 to 1,114.3)           | 95.9<br>(66.8 to 133.3)              | 23.9<br>(22.0 to 26.0)                            | -5.6<br>(-7.0 to -4.3)                              |
| Glaucoma                                      | 9.2<br>(7.6 to 10.9)                          | --                                       | 0.9<br>(0.6 to 1.2)                  | 39.7<br>(26.7 to 54.0)                            | 0.3<br>(-8.9 to 10.6)                               |
| Cataract                                      | 131.2<br>(116.4 to 146.8)                     | --                                       | 10.0<br>(7.1 to 13.6)                | 36.3<br>(30.8 to 42.2)                            | -5.8<br>(-9.3 to -2.0)                              |
| Macular degeneration                          | 13.0<br>(10.3 to 16.1)                        | --                                       | 0.9<br>(0.6 to 1.2)                  | 42.5<br>(28.5 to 58.6)                            | 1.5<br>(-8.4 to 12.8)                               |
| Refraction and accommodation disorders        | 1,579.6<br>(1,517.0 to 1,644.1)               | --                                       | 26.1<br>(15.6 to 41.9)               | 14.1<br>(10.8 to 17.4)                            | -9.4<br>(-12.0 to -6.7)                             |
| Age-related and other hearing loss            | 1,549.0<br>(1,467.4 to 1,636.5)               | --                                       | 47.4<br>(33.4 to 65.6)               | 25.5<br>(21.8 to 29.0)                            | -5.2<br>(-7.4 to -3.0)                              |
| Other vision loss                             | 31.1<br>(27.8 to 35.0)                        | --                                       | 2.7<br>(1.9 to 3.6)                  | 31.8<br>(22.1 to 43.6)                            | 0.2<br>(-7.1 to 8.2)                                |
| Other sense organ diseases                    | 261.3<br>(241.1 to 280.5)                     | 1,038.0<br>(970.4 to 1,114.3)            | 8.1<br>(5.0 to 12.3)                 | 29.9<br>(24.8 to 35.1)                            | 1.0<br>(-2.6 to 4.9)                                |
| Oral disorders                                | 7,064.3<br>(6,839.4 to 7,257.6)               | 17,823.9†<br>(16,289.4 to 19,478.0)      | 29.9<br>(18.1 to 46.3)               | 30.0<br>(27.5 to 32.7)                            | 0.2<br>(-1.7 to 2.1)                                |
| Caries of deciduous teeth                     | 949.6<br>(766.6 to 1,157.6)                   | 3,388.0<br>(2,288.2 to 4,673.1)          | 0.2<br>(0.1 to 0.4)                  | 4.5<br>(-5.9 to 15.7)                             | -0.7<br>(-10.7 to 10.0)                             |
| Caries of permanent teeth                     | 5,619.1<br>(5,334.5 to 5,896.5)               | 14,250.1<br>(13,156.6 to 15,311.7)       | 3.3<br>(1.5 to 6.4)                  | 18.0<br>(14.6 to 21.5)                            | -1.8<br>(-4.3 to 0.8)                               |
| Periodontal disease                           | 1,156.6<br>(974.4 to 1,360.7)                 | 144.7<br>(119.0 to 174.6)                | 7.6<br>(3.0 to 15.7)                 | 31.2<br>(27.0 to 35.6)                            | 0.4<br>(-2.6 to 3.9)                                |
| Edentulism and severe tooth loss              | 486.2<br>(424.3 to 545.9)                     | 41.0<br>(34.9 to 47.6)                   | 13.4<br>(8.8 to 18.9)                | 36.5<br>(32.2 to 41.2)                            | 0.5<br>(-2.7 to 3.9)                                |
| Other oral disorders                          | 183.2<br>(174.9 to 191.8)                     | --                                       | 5.4<br>(3.3 to 8.1)                  | 22.7<br>(18.5 to 27.0)                            | 0.1<br>(-3.0 to 3.5)                                |
| <b>Injuries</b>                               | <b>1,416.5</b><br><b>(1,320.2 to 1,527.7)</b> | <b>728.4†</b><br><b>(689.7 to 773.7)</b> | <b>57.1</b><br><b>(38.6 to 80.7)</b> | <b>28.3</b><br><b>(25.5 to 31.0)</b>              | <b>2.3</b><br><b>(0.4 to 4.3)</b>                   |
| <b>Transport injuries</b>                     | <b>159.6</b><br><b>(149.5 to 170.6)</b>       | <b>66.0</b><br><b>(58.6 to 74.5)</b>     | <b>8.7</b><br><b>(5.8 to 12.5)</b>   | <b>40.9</b><br><b>(37.5 to 44.1)</b>              | <b>10.3</b><br><b>(7.9 to 12.7)</b>                 |
| Road injuries                                 | 152.9<br>(142.9 to 163.5)                     | 64.2<br>(56.7 to 72.6)                   | 8.3<br>(5.6 to 12.0)                 | 41.6<br>(38.3 to 44.8)                            | 10.8<br>(8.4 to 13.1)                               |
| Pedestrian road injuries                      | 36.0<br>(32.0 to 40.8)                        | 10.8<br>(9.0 to 12.9)                    | 1.9<br>(1.3 to 2.8)                  | 36.1<br>(32.6 to 39.5)                            | 7.1<br>(4.8 to 9.4)                                 |
| Cyclist road injuries                         | 23.7<br>(19.6 to 28.0)                        | 10.8<br>(8.3 to 13.6)                    | 1.2<br>(0.8 to 1.8)                  | 57.8<br>(53.4 to 62.2)                            | 26.2<br>(23.2 to 29.2)                              |
| Motorcyclist road injuries                    | 19.1<br>(16.3 to 22.2)                        | 5.4<br>(4.4 to 6.7)                      | 1.0<br>(0.7 to 1.4)                  | 46.2<br>(42.5 to 49.8)                            | 13.5<br>(10.8 to 15.9)                              |
| Motor vehicle road injuries                   | 58.1<br>(50.4 to 65.5)                        | 28.7<br>(24.6 to 33.1)                   | 3.4<br>(2.3 to 4.8)                  | 35.8<br>(32.8 to 39.0)                            | 5.7<br>(3.6 to 8.0)                                 |
| Other road injuries                           | 16.0<br>(13.9 to 18.7)                        | 8.5<br>(6.6 to 10.7)                     | 0.8<br>(0.5 to 1.2)                  | 55.0<br>(51.4 to 58.9)                            | 21.5<br>(18.9 to 24.1)                              |
| Other transport injuries                      | 6.7<br>(5.7 to 7.9)                           | 1.8<br>(1.6 to 2.1)                      | 0.4<br>(0.2 to 0.5)                  | 25.9<br>(22.2 to 29.9)                            | 0.0<br>(-2.8 to 2.8)                                |
| <b>Unintentional injuries</b>                 | <b>1,205.5</b><br><b>(1,112.1 to 1,314.0)</b> | <b>636.3</b><br><b>(598.9 to 679.5)</b>  | <b>44.0</b><br><b>(29.8 to 62.2)</b> | <b>27.7</b><br><b>(24.4 to 30.6)</b>              | <b>1.7</b><br><b>(-0.4 to 3.9)</b>                  |
| Falls                                         | 495.0<br>(433.9 to 561.0)                     | 261.3<br>(229.5 to 297.3)                | 21.1<br>(14.8 to 28.9)               | 37.3<br>(34.4 to 40.2)                            | 6.4<br>(4.2 to 8.5)                                 |
| Drowning                                      | 4.4<br>(3.9 to 5.0)                           | 1.0<br>(0.9 to 1.2)                      | 0.2<br>(0.2 to 0.3)                  | 4.0<br>(0.8 to 7.2)                               | -17.8<br>(-20.3 to -15.5)                           |
| Fire, heat, and hot substances                | 109.8<br>(91.1 to 137.2)                      | 16.5<br>(13.2 to 19.9)                   | 3.0<br>(2.0 to 4.4)                  | 19.5<br>(12.7 to 25.7)                            | -2.0<br>(-7.2 to 2.6)                               |
| Poisonings                                    | 3.5<br>(2.9 to 4.1)                           | 5.5<br>(4.5 to 6.7)                      | 0.3<br>(0.2 to 0.5)                  | 28.8<br>(19.2 to 38.1)                            | 6.7<br>(-0.3 to 14.2)                               |
| Exposure to mechanical forces                 | 203.0<br>(173.4 to 244.3)                     | 89.1<br>(76.7 to 102.5)                  | 5.0<br>(3.2 to 7.3)                  | 25.9<br>(22.4 to 29.4)                            | 0.5<br>(-2.1 to 3.1)                                |
| Unintentional firearm injuries                | 11.2<br>(9.2 to 13.6)                         | 3.3<br>(2.4 to 4.3)                      | 0.5<br>(0.3 to 0.7)                  | 21.1<br>(17.4 to 24.8)                            | -4.2<br>(-6.8 to -1.8)                              |
| Unintentional suffocation                     | 13.3<br>(9.4 to 18.0)                         | 3.4<br>(2.3 to 4.9)                      | 0.4<br>(0.2 to 0.7)                  | 5.8<br>(2.4 to 9.0)                               | -10.8<br>(-13.2 to -8.5)                            |
| Other exposure to mechanical forces           | 178.5<br>(150.7 to 218.8)                     | 82.4<br>(70.8 to 94.9)                   | 4.1<br>(2.7 to 5.9)                  | 28.9<br>(25.2 to 32.5)                            | 2.2<br>(-0.4 to 5.0)                                |

| Cause                                                                               | Prevalence in thousands (95% UI)  | Incidence in thousands (95% UI)    | YLDs in thousands (95% UI)        |                                                   |                                                     |
|-------------------------------------------------------------------------------------|-----------------------------------|------------------------------------|-----------------------------------|---------------------------------------------------|-----------------------------------------------------|
|                                                                                     | 2016 counts                       | 2016 counts                        | 2016 counts                       | Percentage change in counts between 2006 and 2016 | Percentage change in age-standardised rates between |
| Adverse effects of medical treatment                                                | 3.9<br>(3.0 to 4.8)               | 50.9<br>(44.1 to 58.5)             | 0.5<br>(0.3 to 0.8)               | 8.1<br>(1.9 to 15.1)                              | -6.9<br>(-11.4 to -2.1)                             |
| Animal contact                                                                      | 29.3<br>(25.8 to 33.8)            | 39.0<br>(31.8 to 47.1)             | 1.0<br>(0.6 to 1.4)               | 18.9<br>(12.9 to 24.7)                            | -3.6<br>(-7.8 to 0.9)                               |
| Venomous animal contact                                                             | 13.5<br>(11.3 to 16.0)            | 17.9<br>(13.8 to 22.9)             | 0.7<br>(0.5 to 1.1)               | 21.5<br>(13.3 to 29.3)                            | -0.7<br>(-6.7 to 5.7)                               |
| Non-venomous animal contact                                                         | 15.8<br>(13.1 to 20.2)            | 21.1<br>(16.7 to 26.1)             | 0.3<br>(0.2 to 0.4)               | 12.1<br>(7.4 to 16.1)                             | -10.6<br>(-14.1 to -7.6)                            |
| Foreign body                                                                        | 136.2<br>(107.4 to 165.1)         | 88.3<br>(78.3 to 99.9)             | 5.7<br>(3.6 to 8.3)               | 7.5<br>(3.6 to 11.4)                              | -10.5<br>(-13.5 to -7.5)                            |
| Pulmonary aspiration and foreign body in airway                                     | 101.6<br>(75.3 to 131.1)          | 42.9<br>(36.4 to 50.6)             | 4.5<br>(2.8 to 6.5)               | 3.8<br>(-0.2 to 7.6)                              | -13.1<br>(-15.9 to -10.2)                           |
| Foreign body in eyes                                                                | 6.1<br>(3.5 to 9.1)               | 31.6<br>(24.9 to 40.7)             | 0.3<br>(0.2 to 0.6)               | 30.3<br>(25.9 to 35.3)                            | 4.3<br>(1.8 to 7.0)                                 |
| Foreign body in other body part                                                     | 28.5<br>(22.4 to 36.2)            | 13.9<br>(11.6 to 16.5)             | 0.9<br>(0.6 to 1.3)               | 21.5<br>(16.4 to 26.1)                            | -2.1<br>(-5.8 to 1.5)                               |
| Environmental heat and cold exposure                                                | 78.2<br>(67.2 to 90.3)            | 25.2<br>(21.0 to 30.2)             | 3.0<br>(2.0 to 4.4)               | 20.5<br>(17.4 to 23.6)                            | -4.9<br>(-7.2 to -2.5)                              |
| Other unintentional injuries                                                        | 142.1<br>(114.3 to 175.1)         | 59.5<br>(50.6 to 71.1)             | 4.2<br>(2.7 to 6.1)               | 36.3<br>(33.5 to 39.1)                            | 7.4<br>(5.2 to 9.6)                                 |
| <b>Self-harm and interpersonal violence</b>                                         | <b>325.5<br/>(290.9 to 361.8)</b> | <b>26.1†<br/>(22.6 to 29.8)</b>    | <b>4.3<br/>(3.0 to 6.0)</b>       | <b>14.0<br/>(8.3 to 18.7)</b>                     | <b>-6.5<br/>(-10.8 to -3.0)</b>                     |
| Self-harm                                                                           | 5.4<br>(4.6 to 6.1)               | 2.6<br>(2.3 to 3.0)                | 0.3<br>(0.2 to 0.4)               | 23.4<br>(19.1 to 27.5)                            | -4.2<br>(-7.2 to -1.3)                              |
| Self-harm by firearm                                                                | 0.4<br>(0.3 to 0.4)               | 0.1<br>(0.1 to 0.2)                | < 0.05<br>(< 0.05 to < 0.05)      | -8.7<br>(-12.0 to -5.4)                           | -29.8<br>(-32.0 to -27.5)                           |
| Self-harm by other specified means                                                  | 5.0<br>(4.2 to 5.8)               | 2.5<br>(2.2 to 2.9)                | 0.2<br>(0.2 to 0.4)               | 25.7<br>(21.1 to 30.2)                            | -2.4<br>(-5.6 to 0.6)                               |
| Interpersonal violence                                                              | 320.2<br>(285.2 to 356.5)         | 23.4†<br>(20.0 to 27.2)            | 4.0<br>(2.8 to 5.6)               | 13.4<br>(7.5 to 18.4)                             | -6.6<br>(-11.2 to -2.9)                             |
| Assault by firearm                                                                  | 3.2<br>(2.7 to 3.8)               | 1.2<br>(0.9 to 1.6)                | 0.2<br>(0.1 to 0.2)               | 30.2<br>(25.9 to 34.5)                            | 1.6<br>(-1.3 to 4.5)                                |
| Assault by sharp object                                                             | 18.5<br>(15.2 to 22.1)            | 9.1<br>(7.2 to 11.4)               | 0.6<br>(0.4 to 0.9)               | 32.9<br>(28.8 to 36.7)                            | 5.6<br>(2.9 to 8.2)                                 |
| Sexual violence                                                                     | 278.4<br>(244.7 to 314.7)         | --                                 | 2.4<br>(1.6 to 3.5)               | 3.4<br>(-4.5 to 9.7)                              | -14.4<br>(-21.1 to -9.1)                            |
| Assault by other means                                                              | 20.0<br>(17.1 to 23.6)            | 13.1<br>(10.8 to 15.3)             | 0.9<br>(0.6 to 1.2)               | 33.3<br>(29.9 to 36.3)                            | 6.3<br>(3.9 to 8.6)                                 |
| <b>Forces of nature, conflict and terrorism, and executions and police conflict</b> | <b>4.4<br/>(0.8 to 8.9)</b>       | <b>0.1†<br/>(&lt; 0.05 to 0.1)</b> | <b>0.1<br/>(&lt; 0.05 to 0.4)</b> | <b>12.9<br/>(-20.6 to 19.9)</b>                   | <b>-3.5<br/>(-29.3 to 2.1)</b>                      |
| Exposure to forces of nature                                                        | 4.0<br>(0.7 to 8.4)               | --                                 | 0.1<br>(< 0.05 to 0.4)            | 14.1<br>(-22.7 to 21.4)                           | -2.9<br>(-31.0 to 3.0)                              |
| Conflict and terrorism                                                              | 0.2<br>(< 0.05 to 0.4)            | --                                 | < 0.05<br>(< 0.05 to < 0.05)      | -18.5<br>(-22.3 to -14.0)                         | -26.7<br>(-29.7 to -23.1)                           |
| Executions and police conflict                                                      | 0.1<br>(0.1 to 0.2)               | 0.1<br>(< 0.05 to 0.1)             | < 0.05<br>(< 0.05 to < 0.05)      | 31.5<br>(23.1 to 38.5)                            | 16.1<br>(9.8 to 21.7)                               |
| <b>Impairments</b>                                                                  | --                                | --                                 | --                                | --                                                | --                                                  |
| Anaemia                                                                             | 3,311.6<br>(3,169.0 to 3,465.5)   | --                                 | 92.7<br>(61.8 to 133.0)           | 1.0<br>(-4.8 to 6.9)                              | -12.7<br>(-17.0 to -8.2)                            |
| Developmental intellectual disability                                               | 183.3<br>(141.5 to 227.9)         | --                                 | 24.2<br>(16.2 to 36.7)            | 16.6<br>(7.9 to 27.6)                             | 0.2<br>(-7.1 to 9.9)                                |
| Epilepsy                                                                            | 66.9<br>(36.6 to 103.1)           | --                                 | 22.3<br>(11.0 to 38.2)            | 19.8<br>(-39.0 to 138.9)                          | 0.6<br>(-50.3 to 105.5)                             |
| Guillain-Barre syndrome                                                             | 0.1<br>(0.1 to 0.1)               | --                                 | < 0.05<br>(< 0.05 to < 0.05)      | 19.2<br>(15.9 to 22.9)                            | 0.8<br>(0.3 to 2.7)                                 |
| Hearing loss                                                                        | 1,723.6<br>(1,642.3 to 1,806.2)   | --                                 | 55.7<br>(39.0 to 76.2)            | 21.6<br>(18.5 to 24.6)                            | -5.8<br>(-7.8 to -3.9)                              |
| Heart failure                                                                       | 49.5<br>(43.2 to 56.4)            | --                                 | 5.1<br>(3.8 to 6.5)               | 52.4<br>(39.8 to 66.5)                            | 8.5<br>(-0.1 to 18.4)                               |
| Infertility                                                                         | 82.8<br>(63.9 to 110.4)           | --                                 | 0.5<br>(0.2 to 1.0)               | 53.3<br>(23.7 to 92.0)                            | 19.9<br>(-3.4 to 52.2)                              |
| Pelvic inflammatory disease                                                         | 2.2<br>(1.9 to 2.6)               | --                                 | 0.3<br>(0.2 to 0.4)               | 15.3<br>(-3.8 to 37.7)                            | -8.1<br>(-22.9 to 9.3)                              |
| Vision loss                                                                         | 1,812.5<br>(1,740.3 to 1,886.0)   | --                                 | 49.9<br>(34.3 to 71.5)            | 21.3<br>(16.8 to 27.6)                            | -5.5<br>(-8.4 to -1.1)                              |

We did not calculate incidence for the nine impairments, certain NTDs, and causes with only birth prevalence. Blank cells mean that no estimate is available.

† Incidence for aggregate causes represents the sum of the incidence of the causes below the aggregate.

‡ Incidence estimates for stroke represent first-ever stroke only.

^ Incidence of HIV/AIDS represents new infections of HIV only and does not include new infections of Tuberculosis in HIV positive cases.

SR Table 14: Prevalence, incidence, and YLDs for 2016, percentage change of YLD counts and percentage change of age-standardised YLD rates between 2006 and 2016 by cause and impairments, for all ages, Bosnia and Herzegovina.

| Cause                                                                                | Prevalence in thousands (95% UI)       | Incidence in thousands (95% UI)            | YLDs in thousands (95% UI)       |                                                   |                                                     |
|--------------------------------------------------------------------------------------|----------------------------------------|--------------------------------------------|----------------------------------|---------------------------------------------------|-----------------------------------------------------|
|                                                                                      | 2016 counts                            | 2016 counts                                | 2016 counts                      | Percentage change in counts between 2006 and 2016 | Percentage change in age-standardised rates between |
| <b>All causes</b>                                                                    | <b>3,672.9</b><br>(3,663.1 to 3,682.9) | <b>19,587.4†</b><br>(18,845.8 to 20,369.4) | <b>510.7</b><br>(382.4 to 660.7) | <b>8.0</b><br>(6.4 to 9.7)                        | <b>0.9</b><br>(-0.7 to 2.6)                         |
| <b>Communicable, maternal, neonatal, and nutritional disorders</b>                   | <b>1,818.5</b><br>(1,761.4 to 1,877.6) | <b>6,871.1†</b><br>(6,271.1 to 7,564.0)    | <b>25.7</b><br>(18.5 to 35.3)    | <b>-11.3</b><br>(-16.8 to -5.3)                   | <b>-6.6</b><br>(-12.2 to -0.4)                      |
| <b>HIV/AIDS and tuberculosis</b>                                                     | <b>869.0</b><br>(794.6 to 925.8)       | <b>1.2†</b><br>(1.0 to 1.3)                | <b>0.2</b><br>(0.1 to 0.3)       | <b>-14.2</b><br>(-30.6 to 6.9)                    | <b>-19.3</b><br>(-34.8 to 0.3)                      |
| Tuberculosis                                                                         | 816.9<br>(755.1 to 889.8)              | 1.1†<br>(1.0 to 1.3)                       | 0.2<br>(0.1 to 0.3)              | -15.2<br>(-32.1 to 7.0)                           | -20.7<br>(-36.3 to -0.5)                            |
| Drug-susceptible tuberculosis                                                        | 0.8<br>(0.7 to 0.9)                    | 1.1<br>(1.0 to 1.3)                        | 0.2<br>(0.1 to 0.3)              | -15.2<br>(-32.2 to 7.0)                           | -20.7<br>(-36.3 to -0.2)                            |
| Multidrug-resistant tuberculosis without extensive drug resistance                   | < 0.05<br>(< 0.05 to < 0.05)           | < 0.05<br>(< 0.05 to < 0.05)               | < 0.05<br>(< 0.05 to < 0.05)     | -31.6<br>(-82.9 to 109.4)                         | -36.7<br>(-84.1 to 92.1)                            |
| Extensively drug-resistant tuberculosis                                              | < 0.05<br>(< 0.05 to < 0.05)           | < 0.05<br>(< 0.05 to < 0.05)               | < 0.05<br>(< 0.05 to < 0.05)     | 110.8<br>(-47.4 to 545.3)                         | 95.1<br>(-50.9 to 492.3)                            |
| Latent tuberculosis infection                                                        | 816.1<br>(754.4 to 889.0)              | --                                         | --                               | --                                                | --                                                  |
| HIV/AIDS                                                                             | 0.1<br>(< 0.05 to 0.1)                 | < 0.05^<br>(< 0.05 to < 0.05)              | < 0.05<br>(< 0.05 to < 0.05)     | 9.1<br>(-2.3 to 23.0)                             | 12.4<br>(0.2 to 27.0)                               |
| Drug-susceptible HIV/AIDS - Tuberculosis                                             | < 0.05<br>(< 0.05 to < 0.05)           | < 0.05<br>(< 0.05 to < 0.05)               | < 0.05<br>(< 0.05 to < 0.05)     | -22.5<br>(-27.1 to -17.5)                         | -19.2<br>(-24.1 to -14.0)                           |
| Multidrug-resistant HIV/AIDS - Tuberculosis without extensive drug resistance        | < 0.05<br>(< 0.05 to < 0.05)           | < 0.05<br>(< 0.05 to < 0.05)               | < 0.05<br>(< 0.05 to < 0.05)     | -38.2<br>(-84.5 to 86.2)                          | -35.6<br>(-83.9 to 93.7)                            |
| Extensively drug-resistant HIV/AIDS - Tuberculosis                                   | < 0.05<br>(< 0.05 to < 0.05)           | < 0.05<br>(< 0.05 to < 0.05)               | < 0.05<br>(< 0.05 to < 0.05)     | 90.5<br>(-52.3 to 473.4)                          | 98.4<br>(-50.4 to 496.7)                            |
| HIV/AIDS resulting in other diseases                                                 | 0.1<br>(< 0.05 to 0.1)                 | < 0.05<br>(< 0.05 to < 0.05)               | < 0.05<br>(< 0.05 to < 0.05)     | 19.8<br>(3.0 to 57.1)                             | 23.4<br>(6.0 to 60.8)                               |
| <b>Diarrhoea, lower respiratory infections, and other common infectious diseases</b> | <b>131.3</b><br>(124.2 to 139.1)       | <b>6,528.7†</b><br>(5,919.1 to 7,204.0)    | <b>5.7</b><br>(3.9 to 7.9)       | <b>-2.0</b><br>(-5.3 to 1.4)                      | <b>1.4</b><br>(-2.0 to 5.2)                         |
| Diarrhoeal diseases                                                                  | 16.2<br>(15.1 to 17.5)                 | 1,062.8<br>(987.0 to 1,146.5)              | 1.8<br>(1.2 to 2.5)              | 6.7<br>(-0.4 to 14.2)                             | 7.6<br>(0.3 to 15.5)                                |
| Intestinal infectious diseases                                                       | < 0.05<br>(< 0.05 to < 0.05)           | < 0.05†<br>(< 0.05 to < 0.05)              | < 0.05<br>(< 0.05 to < 0.05)     | 3.3<br>(-11.8 to 19.6)                            | -3.3<br>(-16.2 to 11.4)                             |
| Typhoid fever                                                                        | < 0.05<br>(< 0.05 to < 0.05)           | < 0.05<br>(< 0.05 to < 0.05)               | < 0.05<br>(< 0.05 to < 0.05)     | 10.7<br>(-9.1 to 34.0)                            | 5.9<br>(-11.9 to 28.1)                              |
| Paratyphoid fever                                                                    | < 0.05<br>(< 0.05 to < 0.05)           | < 0.05<br>(< 0.05 to < 0.05)               | < 0.05<br>(< 0.05 to < 0.05)     | -1.3<br>(-19.6 to 18.3)                           | -7.7<br>(-23.4 to 9.0)                              |
| Other intestinal infectious diseases                                                 | --                                     | --                                         | < 0.05<br>(< 0.05 to < 0.05)     | -20.7<br>(-39.5 to 1.4)                           | -32.2<br>(-51.4 to -6.2)                            |
| Lower respiratory infections                                                         | 3.9<br>(3.5 to 4.2)                    | 173.1<br>(156.9 to 189.3)                  | 0.2<br>(0.1 to 0.3)              | 30.9<br>(16.6 to 46.8)                            | 25.9<br>(12.1 to 41.7)                              |
| Upper respiratory infections                                                         | 68.7<br>(60.9 to 77.9)                 | 5,094.7<br>(4,501.5 to 5,779.6)            | 1.7<br>(1.0 to 2.7)              | -4.7<br>(-9.6 to 0.5)                             | -0.2<br>(-5.3 to 4.7)                               |
| Otitis media                                                                         | 40.2<br>(36.2 to 44.4)                 | 144.6<br>(119.9 to 174.8)                  | 1.2<br>(0.7 to 1.7)              | -13.4<br>(-19.4 to -6.0)                          | -7.2<br>(-13.5 to -0.1)                             |
| Meningitis                                                                           | 3.3<br>(2.9 to 3.8)                    | 0.4<br>(0.3 to 0.4)                        | 0.4<br>(0.3 to 0.5)              | -5.0<br>(-7.4 to -2.6)                            | -3.0<br>(-5.5 to -0.6)                              |
| Pneumococcal meningitis                                                              | 1.6<br>(1.3 to 2.0)                    | 0.1<br>(0.1 to 0.1)                        | 0.2<br>(0.1 to 0.2)              | -4.6<br>(-7.9 to -1.0)                            | -2.8<br>(-6.3 to 0.7)                               |
| H influenzae type B meningitis                                                       | 0.3<br>(0.2 to 0.3)                    | < 0.05<br>(< 0.05 to < 0.05)               | 0.1<br>(< 0.05 to 0.1)           | -7.7<br>(-11.5 to -3.7)                           | -4.7<br>(-8.9 to -0.5)                              |
| Meningococcal infection                                                              | 0.6<br>(0.4 to 0.7)                    | 0.1<br>(0.1 to 0.1)                        | 0.1<br>(< 0.05 to 0.1)           | -5.9<br>(-9.7 to -2.2)                            | -4.2<br>(-8.1 to -0.4)                              |
| Other meningitis                                                                     | 0.9<br>(0.7 to 1.1)                    | 0.1<br>(0.1 to 0.2)                        | 0.1<br>(0.1 to 0.1)              | -3.5<br>(-6.7 to -0.3)                            | -1.5<br>(-4.9 to 1.8)                               |
| Encephalitis                                                                         | 3.2<br>(2.2 to 4.6)                    | 1.3<br>(1.1 to 1.4)                        | 0.3<br>(0.2 to 0.4)              | -4.0<br>(-15.7 to 9.0)                            | -4.9<br>(-15.8 to 7.1)                              |
| Diphtheria                                                                           | < 0.05<br>(< 0.05 to < 0.05)           | < 0.05<br>(< 0.05 to < 0.05)               | < 0.05<br>(< 0.05 to < 0.05)     | -21.7<br>(-60.2 to 50.1)                          | -21.9<br>(-57.5 to 37.5)                            |
| Whooping cough                                                                       | 0.2<br>(0.1 to 0.2)                    | 1.2<br>(0.9 to 1.6)                        | < 0.05<br>(< 0.05 to < 0.05)     | -19.3<br>(-39.6 to 7.1)                           | -18.6<br>(-39.3 to 8.4)                             |
| Tetanus                                                                              | < 0.05<br>(< 0.05 to < 0.05)           | < 0.05<br>(< 0.05 to < 0.05)               | < 0.05<br>(< 0.05 to < 0.05)     | -10.6<br>(-22.3 to 2.0)                           | -6.4<br>(-17.3 to 6.1)                              |
| Measles                                                                              | < 0.05<br>(< 0.05 to < 0.05)           | 1.7<br>(1.6 to 1.7)                        | < 0.05<br>(< 0.05 to < 0.05)     | 6,117.0<br>(3,171.7 to 11,725.3)                  | 6,201.8<br>(3,176.0 to 11,922.1)                    |
| Varicella and herpes zoster                                                          | 3.0<br>(2.7 to 3.3)                    | 48.9<br>(46.5 to 51.3)                     | 0.1<br>(0.1 to 0.2)              | 8.8<br>(-5.4 to 25.4)                             | 0.1<br>(-12.7 to 15.1)                              |
| <b>Neglected tropical diseases and malaria</b>                                       | <b>2.4</b><br>(0.9 to 7.2)             | <b>0.3†</b><br>(0.1 to 1.1)                | <b>0.2</b><br>(0.1 to 0.6)       | <b>-37.9</b><br>(-86.7 to 188.2)                  | <b>-40.4</b><br>(-87.8 to 171.3)                    |
| Malaria                                                                              | --                                     | --                                         | --                               | --                                                | --                                                  |
| Chagas disease                                                                       | --                                     | --                                         | --                               | --                                                | --                                                  |
| Leishmaniasis                                                                        | < 0.05<br>(< 0.05 to < 0.05)           | < 0.05<br>(< 0.05 to < 0.05)               | < 0.05<br>(< 0.05 to < 0.05)     | -70.6<br>(-100.0 to 1,047.9)                      | -74.1<br>(-100.0 to 730.0)                          |
| Visceral leishmaniasis                                                               | < 0.05<br>(< 0.05 to < 0.05)           | < 0.05<br>(< 0.05 to < 0.05)               | < 0.05<br>(< 0.05 to < 0.05)     | -59.6<br>(-100.0 to 1,028.6)                      | -64.7<br>(-100.0 to 716.4)                          |
| Cutaneous and mucocutaneous leishmaniasis                                            | < 0.05<br>(0.0 to < 0.05)              | < 0.05<br>(0.0 to < 0.05)                  | < 0.05<br>(0.0 to < 0.05)        | -84.4<br>(-100.0 to 1.3e+22)                      | -83.7<br>(-100.0 to 1.2e+22)                        |
| African trypanosomiasis                                                              | --                                     | --                                         | --                               | --                                                | --                                                  |
| Schistosomiasis                                                                      | --                                     | --                                         | --                               | --                                                | --                                                  |
| Cysticercosis                                                                        | 0.4<br>(< 0.05 to 0.8)                 | --                                         | 0.1<br>(< 0.05 to 0.1)           | 8.8<br>(-100.0 to 192.4)                          | 0.9<br>(-100.0 to 168.0)                            |
| Cystic echinococcosis                                                                | 1.5<br>(0.3 to 5.4)                    | 0.3<br>(0.1 to 1.1)                        | 0.1<br>(< 0.05 to 0.6)           | -46.4<br>(-92.3 to 253.6)                         | -47.4<br>(-92.3 to 238.5)                           |
| Lymphatic filariasis                                                                 | --                                     | --                                         | --                               | --                                                | --                                                  |
| Onchocerciasis                                                                       | --                                     | --                                         | --                               | --                                                | --                                                  |
| Trachoma                                                                             | --                                     | --                                         | --                               | --                                                | --                                                  |
| Dengue                                                                               | --                                     | --                                         | --                               | --                                                | --                                                  |
| Yellow fever                                                                         | --                                     | --                                         | --                               | --                                                | --                                                  |
| Rabies                                                                               | < 0.05<br>(< 0.05 to < 0.05)           | < 0.05<br>(< 0.05 to < 0.05)               | < 0.05<br>(< 0.05 to < 0.05)     | 22.4<br>(-34.1 to 40.7)                           | 5.2<br>(-39.2 to 25.3)                              |
| Intestinal nematode infections                                                       | --                                     | --                                         | --                               | --                                                | --                                                  |
| Ascariasis                                                                           | --                                     | --                                         | --                               | --                                                | --                                                  |



| Cause                                                                   | Prevalence in thousands (95% UI)              | Incidence in thousands (95% UI)                   | YLDs in thousands (95% UI)              |                                                   |                                                     |
|-------------------------------------------------------------------------|-----------------------------------------------|---------------------------------------------------|-----------------------------------------|---------------------------------------------------|-----------------------------------------------------|
|                                                                         | 2016 counts                                   | 2016 counts                                       | 2016 counts                             | Percentage change in counts between 2006 and 2016 | Percentage change in age-standardised rates between |
| Trichuriasis                                                            | --                                            | --                                                | --                                      | --                                                | --                                                  |
| Hookworm disease                                                        | --                                            | --                                                | --                                      | --                                                | --                                                  |
| Food-borne trematodiasis                                                | --                                            | --                                                | --                                      | --                                                | --                                                  |
| Leprosy                                                                 | --                                            | --                                                | --                                      | --                                                | --                                                  |
| Ebola virus disease                                                     | --                                            | --                                                | --                                      | --                                                | --                                                  |
| Zika virus disease                                                      | --                                            | --                                                | --                                      | --                                                | --                                                  |
| Guinea worm disease                                                     | --                                            | --                                                | --                                      | --                                                | --                                                  |
| Other neglected tropical diseases                                       | --                                            | --                                                | < 0.05<br>(< 0.05 to < 0.05)            | --                                                | --                                                  |
| <b>Maternal disorders</b>                                               | <b>2.9</b><br><b>(2.1 to 3.7)</b>             | <b>37.8†</b><br><b>(30.8 to 47.0)</b>             | <b>0.1</b><br><b>(0.1 to 0.2)</b>       | <b>-0.7</b><br><b>(-26.4 to 31.1)</b>             | <b>1.3</b><br><b>(-24.8 to 34.0)</b>                |
| Maternal haemorrhage                                                    | 1.3<br>(0.8 to 1.9)                           | 5.6<br>(4.1 to 7.8)                               | < 0.05<br>(< 0.05 to 0.1)               | 20.8<br>(-24.1 to 87.5)                           | 20.1<br>(-23.9 to 83.6)                             |
| Maternal sepsis and other pregnancy related infections                  | 0.5<br>(0.4 to 0.7)                           | 3.3<br>(2.4 to 4.6)                               | < 0.05<br>(< 0.05 to < 0.05)            | -19.5<br>(-63.5 to 72.9)                          | -14.3<br>(-62.0 to 83.6)                            |
| Maternal hypertensive disorders                                         | 0.9<br>(0.6 to 1.3)                           | 3.7<br>(2.8 to 4.8)                               | < 0.05<br>(< 0.05 to 0.1)               | -3.6<br>(-44.6 to 66.7)                           | -1.0<br>(-43.0 to 69.5)                             |
| Maternal obstructed labour and uterine rupture                          | < 0.05<br>(< 0.05 to < 0.05)                  | 1.0<br>(0.6 to 1.7)                               | < 0.05<br>(< 0.05 to < 0.05)            | -4.0<br>(-51.5 to 79.9)                           | -1.9<br>(-49.6 to 80.1)                             |
| Maternal abortion, miscarriage, and ectopic pregnancy                   | 0.2<br>(0.1 to 0.3)                           | 24.2<br>(17.9 to 33.2)                            | < 0.05<br>(< 0.05 to < 0.05)            | -5.2<br>(-53.2 to 88.4)                           | -3.7<br>(-51.6 to 89.5)                             |
| Other maternal disorders                                                | --                                            | --                                                | < 0.05<br>(< 0.05 to < 0.05)            | -7.7<br>(-31.7 to 21.8)                           | -5.3<br>(-29.6 to 25.0)                             |
| <b>Neonatal disorders</b>                                               | <b>38.2</b><br><b>(31.3 to 46.7)</b>          | --                                                | <b>7.3</b><br><b>(5.1 to 10.3)</b>      | <b>-5.4</b><br><b>(-15.2 to 9.2)</b>              | <b>-0.4</b><br><b>(-10.6 to 14.9)</b>               |
| Neonatal preterm birth complications                                    | 23.1<br>(17.9 to 30.7)                        | --                                                | 2.5<br>(1.6 to 3.6)                     | -14.8<br>(-32.5 to 7.2)                           | -9.2<br>(-28.7 to 14.7)                             |
| Neonatal encephalopathy due to birth asphyxia and trauma                | 16.6<br>(10.1 to 26.1)                        | --                                                | 3.2<br>(1.8 to 5.6)                     | 3.4<br>(-12.2 to 48.5)                            | 8.5<br>(-8.2 to 57.2)                               |
| Neonatal sepsis and other neonatal infections                           | 2.8<br>(1.3 to 5.7)                           | --                                                | 1.1<br>(0.5 to 2.6)                     | -5.1<br>(-20.4 to 16.8)                           | -0.7<br>(-16.6 to 21.6)                             |
| Hemolytic disease and other neonatal jaundice                           | 1.4<br>(1.2 to 1.5)                           | --                                                | 0.4<br>(0.3 to 0.5)                     | -7.7<br>(-21.5 to 10.1)                           | -2.9<br>(-18.0 to 16.4)                             |
| Other neonatal disorders                                                | --                                            | --                                                | 0.1<br>(0.1 to 0.2)                     | -0.1<br>(-16.6 to 20.4)                           | -3.5<br>(-19.3 to 16.2)                             |
| <b>Nutritional deficiencies</b>                                         | <b>607.3</b><br><b>(560.1 to 648.0)</b>       | <b>13.9†</b><br><b>(11.3 to 16.9)</b>             | <b>10.6</b><br><b>(6.9 to 15.6)</b>     | <b>-19.0</b><br><b>(-27.0 to -10.1)</b>           | <b>-13.4</b><br><b>(-22.7 to -2.4)</b>              |
| Protein-energy malnutrition                                             | 12.8<br>(8.9 to 18.0)                         | 5.5<br>(3.8 to 7.7)                               | 0.5<br>(0.3 to 0.9)                     | 9.8<br>(-30.0 to 68.8)                            | 8.4<br>(-30.2 to 65.6)                              |
| Iodine deficiency                                                       | 80.3<br>(70.9 to 90.6)                        | 0.9<br>(0.8 to 1.0)                               | 2.0<br>(1.4 to 2.9)                     | 2.2<br>(-5.7 to 9.6)                              | 2.3<br>(-5.9 to 9.9)                                |
| Vitamin A deficiency                                                    | 8.9<br>(6.7 to 11.3)                          | 7.5<br>(5.6 to 9.8)                               | --                                      | --                                                | --                                                  |
| Iron-deficiency anaemia                                                 | 505.1<br>(454.8 to 555.1)                     | --                                                | 8.1<br>(5.1 to 12.3)                    | -24.3<br>(-33.1 to -14.3)                         | -17.8<br>(-28.7 to -5.5)                            |
| Other nutritional deficiencies                                          | --                                            | --                                                | < 0.05<br>(< 0.05 to < 0.05)            | 7.4<br>(-32.8 to 69.5)                            | 5.4<br>(-33.9 to 64.1)                              |
| <b>Other communicable, maternal, neonatal, and nutritional diseases</b> | <b>683.0</b><br><b>(638.2 to 734.9)</b>       | <b>289.4</b><br><b>(247.6 to 338.2)</b>           | <b>1.4</b><br><b>(0.9 to 2.2)</b>       | <b>-5.0</b><br><b>(-10.7 to 1.0)</b>              | <b>-2.5</b><br><b>(-9.2 to 4.2)</b>                 |
| Sexually transmitted diseases excluding HIV                             | 521.7<br>(482.2 to 572.5)                     | 276.3<br>(235.1 to 325.1)                         | 1.0<br>(0.6 to 1.7)                     | -3.7<br>(-10.3 to 2.9)                            | -1.9<br>(-9.0 to 4.4)                               |
| Syphilis                                                                | 3.7<br>(2.5 to 5.7)                           | 2.3<br>(1.2 to 3.9)                               | 0.2<br>(0.1 to 0.2)                     | 14.0<br>(-5.8 to 36.6)                            | -0.1<br>(-17.5 to 19.4)                             |
| Chlamydial infection                                                    | 43.1<br>(28.6 to 63.5)                        | 33.0<br>(22.4 to 49.5)                            | 0.2<br>(0.1 to 0.3)                     | -6.9<br>(-19.1 to 6.5)                            | -3.0<br>(-15.5 to 11.5)                             |
| Gonococcal infection                                                    | 40.1<br>(30.2 to 52.7)                        | 137.4<br>(100.3 to 184.8)                         | 0.2<br>(0.1 to 0.3)                     | -10.7<br>(-22.8 to 2.6)                           | -0.4<br>(-13.7 to 13.9)                             |
| Trichomoniasis                                                          | 87.7<br>(75.9 to 100.3)                       | 72.9<br>(62.9 to 84.8)                            | 0.1<br>(< 0.05 to 0.2)                  | -2.4<br>(-9.5 to 5.5)                             | -0.3<br>(-7.3 to 7.5)                               |
| Genital herpes                                                          | 358.2<br>(305.6 to 425.2)                     | 14.5<br>(11.9 to 17.6)                            | 0.1<br>(< 0.05 to 0.2)                  | 4.6<br>(-3.1 to 12.2)                             | -0.5<br>(-7.9 to 6.6)                               |
| Other sexually transmitted diseases                                     | 15.1<br>(12.0 to 19.0)                        | 16.1<br>(13.6 to 19.2)                            | 0.3<br>(0.2 to 0.5)                     | -7.8<br>(-18.1 to 3.0)                            | -3.6<br>(-14.5 to 7.3)                              |
| Hepatitis                                                               | 177.1<br>(153.6 to 205.0)                     | 13.1<br>(11.1 to 15.3)                            | < 0.05<br>(< 0.05 to < 0.05)            | -27.8<br>(-42.5 to -8.6)                          | -26.6<br>(-44.5 to -2.8)                            |
| Acute hepatitis A                                                       | 0.4<br>(0.3 to 0.4)                           | 4.5<br>(3.5 to 5.4)                               | < 0.05<br>(< 0.05 to < 0.05)            | -33.1<br>(-57.1 to 9.9)                           | -28.3<br>(-57.9 to 21.8)                            |
| Hepatitis B                                                             | 110.2<br>(88.5 to 136.3)                      | 7.2<br>(5.6 to 9.3)                               | < 0.05<br>(< 0.05 to < 0.05)            | -23.2<br>(-36.4 to -7.9)                          | -27.0<br>(-38.7 to -13.3)                           |
| Hepatitis C                                                             | 66.5<br>(59.4 to 73.8)                        | 0.8<br>(0.7 to 0.9)                               | < 0.05<br>(< 0.05 to < 0.05)            | -5.9<br>(-7.7 to -4.3)                            | -6.2<br>(-7.2 to -5.3)                              |
| Acute hepatitis E                                                       | < 0.05<br>(< 0.05 to 0.1)                     | 0.5<br>(0.4 to 0.7)                               | < 0.05<br>(< 0.05 to < 0.05)            | -24.4<br>(-33.2 to -15.2)                         | -24.4<br>(-31.2 to -17.1)                           |
| Other infectious diseases                                               | 17.5<br>(15.7 to 19.4)                        | < 0.05<br>(< 0.05 to < 0.05)                      | 0.3<br>(0.2 to 0.5)                     | -7.3<br>(-19.2 to 7.4)                            | -2.1<br>(-17.2 to 16.1)                             |
| <b>Non-communicable diseases</b>                                        | <b>3,570.4</b><br><b>(3,557.0 to 3,584.8)</b> | <b>12,170.6†</b><br><b>(11,762.4 to 12,603.0)</b> | <b>421.3</b><br><b>(313.3 to 544.9)</b> | <b>8.1</b><br><b>(6.3 to 10.3)</b>                | <b>0.5</b><br><b>(-1.5 to 2.8)</b>                  |
| <b>Neoplasms</b>                                                        | <b>28.4</b><br><b>(27.2 to 29.7)</b>          | <b>13.4</b><br><b>(12.6 to 14.3)</b>              | <b>3.8</b><br><b>(2.8 to 5.0)</b>       | <b>22.3</b><br><b>(14.7 to 30.4)</b>              | <b>5.0</b><br><b>(-1.4 to 11.7)</b>                 |
| Lip and oral cavity cancer                                              | 0.6<br>(0.5 to 0.6)                           | 0.2<br>(0.1 to 0.2)                               | 0.1<br>(< 0.05 to 0.1)                  | 13.5<br>(-2.2 to 31.3)                            | -3.8<br>(-16.4 to 10.6)                             |
| Nasopharynx cancer                                                      | < 0.05<br>(< 0.05 to 0.1)                     | < 0.05<br>(< 0.05 to < 0.05)                      | < 0.05<br>(< 0.05 to < 0.05)            | 12.4<br>(-0.4 to 26.1)                            | -3.0<br>(-14.5 to 8.7)                              |
| Other pharynx cancer                                                    | 0.2<br>(0.2 to 0.3)                           | 0.1<br>(0.1 to 0.1)                               | < 0.05<br>(< 0.05 to < 0.05)            | 20.0<br>(-0.7 to 45.9)                            | 4.6<br>(-12.2 to 25.5)                              |
| Oesophageal cancer                                                      | 0.1<br>(0.1 to 0.2)                           | 0.1<br>(0.1 to 0.1)                               | < 0.05<br>(< 0.05 to < 0.05)            | 10.7<br>(-3.8 to 25.8)                            | -8.1<br>(-19.7 to 3.6)                              |
| Stomach cancer                                                          | 0.9<br>(0.9 to 1.0)                           | 0.6<br>(0.6 to 0.7)                               | 0.1<br>(0.1 to 0.2)                     | 5.0<br>(-12.1 to 27.2)                            | -10.1<br>(-23.7 to 7.8)                             |
| Colon and rectum cancer                                                 | 5.3<br>(4.9 to 5.7)                           | 1.7<br>(1.5 to 1.8)                               | 0.6<br>(0.4 to 0.7)                     | 29.3<br>(11.4 to 49.4)                            | 9.2<br>(-5.1 to 25.7)                               |
| Liver cancer                                                            | 0.2<br>(0.1 to 0.2)                           | 0.5<br>(0.4 to 0.5)                               | 0.1<br>(0.1 to 0.1)                     | 22.3<br>(6.1 to 40.0)                             | 2.2<br>(-11.0 to 16.1)                              |
| Liver cancer due to hepatitis B                                         | 0.1<br>(0.1 to 0.2)                           | 0.1<br>(0.1 to 0.2)                               | < 0.05<br>(< 0.05 to < 0.05)            | 20.4<br>(3.6 to 38.6)                             | 1.7<br>(-11.8 to 16.3)                              |

| Cause                                              | Prevalence in thousands (95% UI)        | Incidence in thousands (95% UI)       | YLDs in thousands (95% UI)           |                                                   |                                                     |
|----------------------------------------------------|-----------------------------------------|---------------------------------------|--------------------------------------|---------------------------------------------------|-----------------------------------------------------|
|                                                    | 2016 counts                             | 2016 counts                           | 2016 counts                          | Percentage change in counts between 2006 and 2016 | Percentage change in age-standardised rates between |
| Liver cancer due to hepatitis C                    | 0.1<br>(0.1 to 0.1)                     | 0.1<br>(0.1 to 0.2)                   | < 0.05<br>(< 0.05 to < 0.05)         | 26.3<br>(8.2 to 46.0)                             | 3.2<br>(-10.5 to 18.6)                              |
| Liver cancer due to alcohol use                    | 0.1<br>(0.1 to 0.1)                     | 0.1<br>(0.1 to 0.2)                   | < 0.05<br>(< 0.05 to < 0.05)         | 22.0<br>(4.0 to 42.5)                             | 2.5<br>(-12.2 to 19.0)                              |
| Liver cancer due to other causes                   | 0.1<br>(0.1 to 0.1)                     | 0.1<br>(0.1 to 0.1)                   | < 0.05<br>(< 0.05 to < 0.05)         | 20.7<br>(3.1 to 41.4)                             | 1.1<br>(-12.7 to 18.1)                              |
| Gallbladder and biliary tract cancer               | 0.1<br>(0.1 to 0.2)                     | 0.2<br>(0.2 to 0.3)                   | < 0.05<br>(< 0.05 to 0.1)            | 6.5<br>(-9.0 to 19.9)                             | -13.3<br>(-25.6 to -2.4)                            |
| Pancreatic cancer                                  | 0.4<br>(0.4 to 0.4)                     | 0.5<br>(0.5 to 0.6)                   | 0.1<br>(0.1 to 0.1)                  | 21.2<br>(0.5 to 46.5)                             | 1.2<br>(-16.1 to 22.2)                              |
| Larynx cancer                                      | 0.7<br>(0.6 to 0.7)                     | 0.2<br>(0.2 to 0.2)                   | 0.1<br>(0.1 to 0.1)                  | 13.7<br>(-8.3 to 42.5)                            | -3.8<br>(-22.8 to 20.1)                             |
| Tracheal, bronchus, and lung cancer                | 2.6<br>(2.4 to 2.9)                     | 2.3<br>(2.1 to 2.5)                   | 0.5<br>(0.4 to 0.7)                  | 15.3<br>(-4.6 to 37.8)                            | -2.1<br>(-19.2 to 17.1)                             |
| Malignant skin melanoma                            | 0.8<br>(0.7 to 1.0)                     | 0.2<br>(0.1 to 0.2)                   | 0.1<br>(< 0.05 to 0.1)               | 32.6<br>(10.9 to 58.9)                            | 17.3<br>(-0.9 to 38.7)                              |
| Non-melanoma skin cancer                           | 0.5<br>(0.3 to 0.7)                     | 1.4<br>(0.9 to 2.3)                   | < 0.05<br>(< 0.05 to < 0.05)         | 13.7<br>(-46.1 to 166.2)                          | -7.0<br>(-56.0 to 116.0)                            |
| Non-melanoma skin cancer (squamous-cell carcinoma) | 0.4<br>(0.2 to 0.6)                     | 0.3<br>(0.2 to 0.5)                   | < 0.05<br>(< 0.05 to < 0.05)         | 11.8<br>(-47.9 to 190.4)                          | -8.7<br>(-57.8 to 134.1)                            |
| Non-melanoma skin cancer (basal-cell carcinoma)    | 0.2<br>(0.1 to 0.3)                     | 1.1<br>(0.6 to 1.9)                   | < 0.05<br>(< 0.05 to < 0.05)         | 35.8<br>(-4.1 to 87.5)                            | 12.2<br>(-18.8 to 52.7)                             |
| Breast cancer                                      | 5.8<br>(3.9 to 6.7)                     | 1.3<br>(0.8 to 1.4)                   | 0.6<br>(0.4 to 0.8)                  | 23.7<br>(3.6 to 49.0)                             | 8.9<br>(-9.2 to 31.5)                               |
| Cervical cancer                                    | 1.2<br>(0.8 to 1.4)                     | 0.3<br>(0.2 to 0.4)                   | 0.1<br>(0.1 to 0.2)                  | -1.0<br>(-18.1 to 22.9)                           | -7.5<br>(-23.3 to 14.3)                             |
| Uterine cancer                                     | 1.5<br>(1.2 to 1.7)                     | 0.3<br>(0.3 to 0.4)                   | 0.1<br>(0.1 to 0.2)                  | 27.2<br>(-1.0 to 64.9)                            | 10.0<br>(-13.4 to 42.1)                             |
| Ovarian cancer                                     | 0.9<br>(0.8 to 1.0)                     | 0.3<br>(0.3 to 0.3)                   | 0.1<br>(0.1 to 0.2)                  | 24.1<br>(-11.4 to 70.9)                           | 11.2<br>(-18.9 to 49.4)                             |
| Prostate cancer                                    | 3.2<br>(2.4 to 4.1)                     | 0.9<br>(0.7 to 1.1)                   | 0.4<br>(0.2 to 0.5)                  | 47.2<br>(16.6 to 84.0)                            | 20.8<br>(-3.3 to 49.4)                              |
| Testicular cancer                                  | 0.2<br>(0.1 to 0.2)                     | < 0.05<br>(< 0.05 to < 0.05)          | < 0.05<br>(< 0.05 to < 0.05)         | 38.4<br>(0.3 to 91.2)                             | 40.3<br>(-1.9 to 102.7)                             |
| Kidney cancer                                      | 1.5<br>(1.4 to 1.7)                     | 0.4<br>(0.4 to 0.5)                   | 0.1<br>(0.1 to 0.2)                  | 24.0<br>(4.8 to 48.4)                             | 7.3<br>(-8.8 to 27.4)                               |
| Bladder cancer                                     | 1.7<br>(1.6 to 1.9)                     | 0.5<br>(0.4 to 0.5)                   | 0.2<br>(0.1 to 0.2)                  | 33.3<br>(12.9 to 57.3)                            | 9.6<br>(-6.7 to 28.4)                               |
| Brain and nervous system cancer                    | 0.8<br>(0.6 to 1.0)                     | 0.4<br>(0.3 to 0.5)                   | 0.1<br>(0.1 to 0.2)                  | 13.4<br>(-2.2 to 31.3)                            | 1.2<br>(-11.8 to 16.2)                              |
| Thyroid cancer                                     | 0.5<br>(0.4 to 0.6)                     | 0.1<br>(0.1 to 0.1)                   | < 0.05<br>(< 0.05 to < 0.05)         | 32.7<br>(5.2 to 68.8)                             | 19.9<br>(-5.2 to 52.4)                              |
| Mesothelioma                                       | < 0.05<br>(< 0.05 to < 0.05)            | < 0.05<br>(< 0.05 to < 0.05)          | < 0.05<br>(< 0.05 to < 0.05)         | 6.5<br>(-9.6 to 22.8)                             | -9.0<br>(-22.0 to 5.3)                              |
| Hodgkin lymphoma                                   | 0.1<br>(0.1 to 0.1)                     | < 0.05<br>(< 0.05 to < 0.05)          | < 0.05<br>(< 0.05 to < 0.05)         | -4.1<br>(-16.6 to 8.3)                            | -6.5<br>(-19.7 to 8.2)                              |
| Non-Hodgkin's lymphoma                             | 0.5<br>(0.5 to 0.6)                     | 0.2<br>(0.1 to 0.2)                   | 0.1<br>(< 0.05 to 0.1)               | 25.9<br>(11.2 to 43.0)                            | 11.7<br>(0.3 to 26.0)                               |
| Multiple myeloma                                   | 0.1<br>(0.1 to 0.1)                     | 0.1<br>(< 0.05 to 0.1)                | < 0.05<br>(< 0.05 to < 0.05)         | 28.2<br>(17.2 to 43.7)                            | 8.4<br>(-0.6 to 20.2)                               |
| Leukaemia                                          | 0.9<br>(0.8 to 1.1)                     | 0.3<br>(0.2 to 0.3)                   | 0.1<br>(0.1 to 0.2)                  | 15.8<br>(-1.0 to 34.2)                            | 1.6<br>(-12.3 to 17.0)                              |
| Acute lymphoid leukaemia                           | 0.1<br>(0.1 to 0.1)                     | < 0.05<br>(< 0.05 to < 0.05)          | < 0.05<br>(< 0.05 to < 0.05)         | 1.8<br>(-10.6 to 16.5)                            | 2.9<br>(-13.0 to 21.5)                              |
| Chronic lymphoid leukaemia                         | 0.5<br>(0.4 to 0.6)                     | 0.1<br>(0.1 to 0.1)                   | 0.1<br>(< 0.05 to 0.1)               | 26.0<br>(-3.2 to 58.1)                            | 6.8<br>(-17.0 to 32.8)                              |
| Acute myeloid leukaemia                            | 0.1<br>(< 0.05 to 0.1)                  | 0.1<br>(< 0.05 to 0.1)                | < 0.05<br>(< 0.05 to < 0.05)         | 17.4<br>(4.3 to 32.8)                             | 7.3<br>(-5.3 to 21.5)                               |
| Chronic myeloid leukaemia                          | 0.1<br>(< 0.05 to 0.1)                  | < 0.05<br>(< 0.05 to < 0.05)          | < 0.05<br>(< 0.05 to < 0.05)         | 7.2<br>(-10.3 to 27.2)                            | -4.7<br>(-19.9 to 12.7)                             |
| Other leukaemia                                    | 0.1<br>(0.1 to 0.3)                     | < 0.05<br>(< 0.05 to 0.1)             | < 0.05<br>(< 0.05 to < 0.05)         | -4.5<br>(-19.0 to 10.2)                           | -15.1<br>(-26.5 to -1.3)                            |
| Other neoplasms                                    | 1.1<br>(1.0 to 1.2)                     | 0.4<br>(0.3 to 0.4)                   | 0.1<br>(0.1 to 0.1)                  | 19.7<br>(3.5 to 39.8)                             | 4.0<br>(-9.4 to 19.3)                               |
| <b>Cardiovascular diseases</b>                     | <b>492.4</b><br><b>(473.2 to 512.4)</b> | <b>54.1†</b><br><b>(51.3 to 57.0)</b> | <b>41.1</b><br><b>(30.0 to 53.0)</b> | <b>18.7</b><br><b>(14.1 to 23.6)</b>              | <b>-1.2</b><br><b>(-5.0 to 2.4)</b>                 |
| Rheumatic heart disease                            | 0.4<br>(0.4 to 0.5)                     | 0.1<br>(0.1 to 0.1)                   | < 0.05<br>(< 0.05 to < 0.05)         | 19.4<br>(-3.0 to 45.0)                            | 4.3<br>(-13.7 to 23.8)                              |
| Ischaemic heart disease                            | 178.7<br>(168.2 to 189.0)               | 20.6<br>(19.1 to 22.1)                | 10.2<br>(7.1 to 13.8)                | 22.1<br>(17.2 to 27.4)                            | 3.0<br>(-0.9 to 7.3)                                |
| Cerebrovascular disease                            | 88.9<br>(82.7 to 95.0)                  | 16.7‡<br>(15.1 to 18.3)               | 17.5<br>(12.3 to 22.5)               | 20.9<br>(12.0 to 30.0)                            | -1.2<br>(-8.6 to 5.8)                               |
| Ischaemic stroke                                   | 79.7<br>(70.7 to 88.9)                  | 13.8‡<br>(12.2 to 15.3)               | 15.2<br>(10.7 to 19.6)               | 21.5<br>(11.3 to 31.5)                            | -1.5<br>(-9.9 to 6.5)                               |
| Hemorrhagic stroke                                 | 12.1<br>(10.8 to 13.4)                  | 2.9‡<br>(2.6 to 3.2)                  | 2.3<br>(1.6 to 2.9)                  | 17.2<br>(5.8 to 30.1)                             | 0.3<br>(-8.8 to 10.6)                               |
| Hypertensive heart disease                         | 9.8<br>(8.1 to 11.7)                    | --                                    | 0.8<br>(0.5 to 1.1)                  | 14.9<br>(2.8 to 29.7)                             | -6.9<br>(-16.1 to 4.2)                              |
| Cardiomyopathy and myocarditis                     | 11.8<br>(10.3 to 13.5)                  | 1.8†<br>(1.5 to 2.0)                  | 1.0<br>(0.7 to 1.4)                  | 11.5<br>(0.6 to 23.5)                             | -5.8<br>(-14.2 to 4.1)                              |
| Myocarditis                                        | 2.2<br>(1.9 to 2.5)                     | 1.8<br>(1.5 to 2.0)                   | 0.2<br>(0.1 to 0.2)                  | 0.1<br>(-14.3 to 17.8)                            | -4.1<br>(-17.6 to 10.8)                             |
| Alcoholic cardiomyopathy                           | 2.5<br>(2.1 to 3.0)                     | --                                    | 0.2<br>(0.1 to 0.3)                  | 5.4<br>(-10.8 to 26.4)                            | -6.4<br>(-20.6 to 11.7)                             |
| Other cardiomyopathy                               | 7.4<br>(6.2 to 8.8)                     | --                                    | 0.6<br>(0.4 to 0.8)                  | 17.5<br>(3.7 to 32.4)                             | -6.1<br>(-15.8 to 4.8)                              |
| Atrial fibrillation and flutter                    | 43.4<br>(37.9 to 50.3)                  | 3.6<br>(3.0 to 4.2)                   | 3.3<br>(2.3 to 4.6)                  | 25.7<br>(18.1 to 33.9)                            | 0.3<br>(-5.4 to 6.7)                                |
| Peripheral vascular disease                        | 117.2<br>(101.1 to 136.6)               | 10.9<br>(9.3 to 12.8)                 | 0.5<br>(0.2 to 0.9)                  | 21.8<br>(12.0 to 31.9)                            | -5.2<br>(-11.8 to 1.6)                              |
| Endocarditis                                       | 0.2<br>(0.1 to 0.2)                     | 0.6<br>(0.5 to 0.6)                   | < 0.05<br>(< 0.05 to < 0.05)         | 12.9<br>(4.5 to 22.9)                             | -3.4<br>(-10.0 to 4.4)                              |
| Other cardiovascular and circulatory diseases      | 153.3<br>(129.6 to 180.6)               | --                                    | 7.8<br>(5.2 to 11.0)                 | 8.7<br>(0.5 to 17.8)                              | -5.3<br>(-12.0 to 2.1)                              |
| <b>Chronic respiratory diseases</b>                | <b>292.1</b><br><b>(282.9 to 302.5)</b> | <b>38.5†</b><br><b>(36.5 to 40.5)</b> | <b>11.1</b><br><b>(8.4 to 13.9)</b>  | <b>8.1</b><br><b>(2.7 to 14.5)</b>                | <b>2.2</b><br><b>(-2.5 to 7.0)</b>                  |
| Chronic obstructive pulmonary disease              | 149.3<br>(141.2 to 157.1)               | 8.9<br>(8.5 to 9.4)                   | 4.6<br>(3.7 to 5.5)                  | 14.3<br>(0.9 to 27.8)                             | -1.0<br>(-12.4 to 9.9)                              |
| Pneumoconiosis                                     | 1.0<br>(0.9 to 1.1)                     | 0.1<br>(0.1 to 0.1)                   | 0.1<br>(0.1 to 0.2)                  | 27.3<br>(10.2 to 47.7)                            | 8.2<br>(-6.5 to 25.9)                               |
| Silicosis                                          | 0.3<br>(0.2 to 0.3)                     | < 0.05<br>(< 0.05 to < 0.05)          | < 0.05<br>(< 0.05 to 0.1)            | 26.6<br>(-6.5 to 74.9)                            | 6.9<br>(-21.4 to 48.0)                              |

| Cause                                                          | Prevalence in thousands (95% UI)              | Incidence in thousands (95% UI)          | YLDs in thousands (95% UI)           |                                                   |                                                     |
|----------------------------------------------------------------|-----------------------------------------------|------------------------------------------|--------------------------------------|---------------------------------------------------|-----------------------------------------------------|
|                                                                | 2016 counts                                   | 2016 counts                              | 2016 counts                          | Percentage change in counts between 2006 and 2016 | Percentage change in age-standardised rates between |
| Asbestosis                                                     | 0.2<br>(0.1 to 0.2)                           | < 0.05<br>(< 0.05 to < 0.05)             | < 0.05<br>(< 0.05 to < 0.05)         | 18.2<br>(10.6 to 25.7)                            | 2.6<br>(-3.6 to 8.9)                                |
| Coal workers pneumoconiosis                                    | 0.3<br>(0.2 to 0.4)                           | < 0.05<br>(< 0.05 to < 0.05)             | < 0.05<br>(< 0.05 to 0.1)            | 29.7<br>(-8.6 to 83.3)                            | 11.2<br>(-21.2 to 57.2)                             |
| Other pneumoconiosis                                           | 0.2<br>(0.2 to 0.3)                           | < 0.05<br>(< 0.05 to < 0.05)             | < 0.05<br>(< 0.05 to 0.1)            | 31.9<br>(5.1 to 68.2)                             | 10.3<br>(-11.4 to 41.1)                             |
| Asthma                                                         | 149.8<br>(140.7 to 160.0)                     | 29.2<br>(27.4 to 31.3)                   | 5.8<br>(3.8 to 8.2)                  | 2.7<br>(-1.6 to 7.3)                              | 3.3<br>(-1.1 to 8.1)                                |
| Interstitial lung disease and pulmonary sarcoidosis            | 4.3<br>(3.9 to 4.7)                           | 0.2<br>(0.2 to 0.2)                      | 0.5<br>(0.3 to 0.7)                  | 8.9<br>(-5.2 to 25.4)                             | -0.7<br>(-12.5 to 12.8)                             |
| Other chronic respiratory diseases                             | --                                            | --                                       | 0.2<br>(0.1 to 0.2)                  | 25.2<br>(14.1 to 38.9)                            | 33.8<br>(22.0 to 48.3)                              |
| <b>Cirrhosis and other chronic liver diseases</b>              | <b>38.1</b><br><b>(36.0 to 40.3)</b>          | <b>1.0</b><br><b>(1.0 to 1.1)</b>        | <b>0.9</b><br><b>(0.6 to 1.3)</b>    | <b>13.7</b><br><b>(3.5 to 25.4)</b>               | <b>7.0</b><br><b>(-2.8 to 18.7)</b>                 |
| Cirrhosis and other chronic liver diseases due to hepatitis B  | 5.6<br>(4.7 to 6.7)                           | 0.2<br>(0.1 to 0.2)                      | 0.1<br>(0.1 to 0.2)                  | 20.2<br>(-5.4 to 54.9)                            | 10.3<br>(-13.3 to 41.6)                             |
| Cirrhosis and other chronic liver diseases due to hepatitis C  | 6.5<br>(4.6 to 9.0)                           | 0.2<br>(0.1 to 0.2)                      | 0.1<br>(0.1 to 0.2)                  | 18.6<br>(-8.0 to 52.4)                            | 8.3<br>(-14.1 to 39.1)                              |
| Cirrhosis and other chronic liver diseases due to alcohol use  | 16.0<br>(13.2 to 18.6)                        | 0.5<br>(0.4 to 0.5)                      | 0.4<br>(0.2 to 0.5)                  | 18.2<br>(1.1 to 37.5)                             | 6.8<br>(-8.1 to 24.8)                               |
| Cirrhosis and other chronic liver diseases due to other causes | 10.0<br>(8.8 to 11.3)                         | 0.2<br>(0.2 to 0.3)                      | 0.3<br>(0.2 to 0.4)                  | 3.5<br>(-11.8 to 21.4)                            | 5.5<br>(-11.1 to 25.2)                              |
| <b>Digestive diseases</b>                                      | <b>183.3</b><br><b>(169.8 to 197.2)</b>       | <b>227.9†</b><br><b>(210.2 to 246.7)</b> | <b>8.0</b><br><b>(5.7 to 11.0)</b>   | <b>25.0</b><br><b>(14.5 to 38.7)</b>              | <b>14.7</b><br><b>(5.4 to 26.6)</b>                 |
| Peptic ulcer disease                                           | 63.4<br>(55.4 to 72.6)                        | 5.0<br>(4.5 to 5.6)                      | 1.6<br>(1.0 to 2.6)                  | 72.5<br>(39.5 to 115.5)                           | 61.6<br>(31.3 to 102.9)                             |
| Gastritis and duodenitis                                       | 60.9<br>(52.5 to 70.1)                        | 46.0<br>(40.8 to 51.7)                   | 1.4<br>(0.9 to 2.2)                  | 56.9<br>(30.5 to 90.9)                            | 41.8<br>(20.2 to 70.1)                              |
| Appendicitis                                                   | 0.2<br>(0.1 to 0.2)                           | 4.2<br>(4.0 to 4.6)                      | 0.1<br>(< 0.05 to 0.1)               | -8.0<br>(-28.3 to 19.8)                           | 2.2<br>(-26.0 to 43.0)                              |
| Paralytic ileus and intestinal obstruction                     | 0.1<br>(0.1 to 0.1)                           | 2.1<br>(1.9 to 2.4)                      | < 0.05<br>(< 0.05 to < 0.05)         | 18.2<br>(9.1 to 28.5)                             | 2.5<br>(-4.3 to 9.5)                                |
| Inguinal, femoral, and abdominal hernia                        | 43.5<br>(39.1 to 48.1)                        | 90.0<br>(76.3 to 103.7)                  | 3.1<br>(2.1 to 4.3)                  | 4.8<br>(-3.6 to 14.8)                             | -2.5<br>(-10.4 to 6.9)                              |
| Inflammatory bowel disease                                     | 5.3<br>(4.9 to 5.7)                           | 2.2<br>(2.2 to 2.3)                      | 0.7<br>(0.5 to 1.0)                  | 6.5<br>(-5.9 to 18.9)                             | 0.5<br>(-11.1 to 12.5)                              |
| Vascular intestinal disorders                                  | 0.1<br>(0.1 to 0.1)                           | 0.4<br>(0.4 to 0.5)                      | < 0.05<br>(< 0.05 to < 0.05)         | 21.4<br>(15.7 to 28.3)                            | 5.8<br>(1.5 to 10.2)                                |
| Gallbladder and biliary diseases                               | 14.8<br>(13.1 to 16.6)                        | 72.8<br>(63.1 to 83.9)                   | 0.3<br>(0.2 to 0.4)                  | 16.4<br>(-4.8 to 43.7)                            | 5.3<br>(-12.4 to 28.2)                              |
| Pancreatitis                                                   | 0.6<br>(0.5 to 0.6)                           | 5.0<br>(4.5 to 5.5)                      | 0.1<br>(< 0.05 to 0.1)               | 29.1<br>(11.7 to 50.0)                            | 17.2<br>(2.9 to 33.5)                               |
| Other digestive diseases                                       | --                                            | --                                       | 0.6<br>(0.5 to 0.9)                  | 31.2<br>(20.6 to 44.0)                            | 16.7<br>(6.8 to 27.8)                               |
| <b>Neurological disorders</b>                                  | <b>1,455.0</b><br><b>(1,399.2 to 1,527.1)</b> | <b>605.9</b><br><b>(521.1 to 699.8)</b>  | <b>44.8</b><br><b>(30.2 to 61.8)</b> | <b>1.3</b><br><b>(-11.2 to 16.3)</b>              | <b>-1.4</b><br><b>(-15.6 to 15.2)</b>               |
| Alzheimer's disease and other dementias                        | 31.8<br>(26.6 to 38.0)                        | 5.5<br>(4.5 to 6.7)                      | 4.6<br>(3.2 to 6.2)                  | 43.4<br>(33.6 to 54.4)                            | -0.9<br>(-5.5 to 4.2)                               |
| Parkinson's disease                                            | 6.6<br>(5.1 to 8.3)                           | 0.8<br>(0.6 to 1.0)                      | 0.8<br>(0.5 to 1.1)                  | 30.9<br>(17.2 to 47.4)                            | 4.1<br>(-5.8 to 16.4)                               |
| Epilepsy                                                       | 12.2<br>(2.8 to 22.4)                         | 1.2<br>(0.3 to 2.3)                      | 3.2<br>(0.6 to 8.0)                  | -10.7<br>(-85.0 to 371.5)                         | -9.7<br>(-85.2 to 380.9)                            |
| Multiple sclerosis                                             | 1.8<br>(1.6 to 2.0)                           | 0.1<br>(< 0.05 to 0.1)                   | 0.5<br>(0.3 to 0.6)                  | 15.7<br>(-4.6 to 40.1)                            | 10.6<br>(-8.8 to 33.2)                              |
| Motor neuron disease                                           | 0.1<br>(0.1 to 0.1)                           | < 0.05<br>(< 0.05 to < 0.05)             | < 0.05<br>(< 0.05 to < 0.05)         | 7.6<br>(3.6 to 12.1)                              | 3.7<br>(0.1 to 7.6)                                 |
| Migraine                                                       | 639.5<br>(600.4 to 677.9)                     | 62.6<br>(58.4 to 67.8)                   | 29.7<br>(19.4 to 41.7)               | -2.1<br>(-5.2 to 1.4)                             | -0.9<br>(-3.9 to 2.4)                               |
| Tension-type headache                                          | 1,013.6<br>(904.5 to 1,132.9)                 | 535.7<br>(451.1 to 630.4)                | 5.3<br>(3.3 to 7.8)                  | -0.8<br>(-5.6 to 4.5)                             | -1.4<br>(-5.8 to 3.4)                               |
| Other neurological disorders                                   | < 0.05<br>(< 0.05 to < 0.05)                  | < 0.05<br>(< 0.05 to < 0.05)             | 0.7<br>(0.3 to 1.5)                  | 2.1<br>(-66.4 to 230.5)                           | 9.4<br>(-70.1 to 292.9)                             |
| <b>Mental and substance use disorders</b>                      | <b>580.7</b><br><b>(560.9 to 600.8)</b>       | <b>205.3†</b><br><b>(190.5 to 221.6)</b> | <b>74.8</b><br><b>(54.5 to 96.4)</b> | <b>-1.7</b><br><b>(-4.0 to 0.8)</b>               | <b>-0.8</b><br><b>(-3.0 to 1.5)</b>                 |
| Schizophrenia                                                  | 10.1<br>(8.4 to 12.0)                         | 0.5<br>(0.4 to 0.6)                      | 6.4<br>(4.6 to 8.2)                  | 2.5<br>(-5.8 to 12.5)                             | 0.5<br>(-8.0 to 10.1)                               |
| Alcohol use disorders                                          | 116.5<br>(102.1 to 132.0)                     | 55.4<br>(47.5 to 64.2)                   | 11.6<br>(7.9 to 16.0)                | 2.2<br>(-5.7 to 10.9)                             | 4.8<br>(-3.1 to 13.3)                               |
| Drug use disorders                                             | 22.8<br>(21.2 to 24.3)                        | 3.0<br>(2.8 to 3.3)                      | 4.3<br>(3.1 to 5.6)                  | 0.3<br>(-8.3 to 9.7)                              | 4.2<br>(-4.8 to 14.1)                               |
| Opioid use disorders                                           | 6.7<br>(5.7 to 8.0)                           | 0.9<br>(0.8 to 1.1)                      | 2.8<br>(1.9 to 3.7)                  | 3.7<br>(-7.5 to 16.5)                             | 5.3<br>(-6.4 to 18.9)                               |
| Cocaine use disorders                                          | 2.2<br>(1.9 to 2.5)                           | 0.2<br>(0.1 to 0.2)                      | 0.3<br>(0.2 to 0.4)                  | -3.7<br>(-25.1 to 22.1)                           | 0.8<br>(-20.8 to 29.2)                              |
| Amphetamine use disorders                                      | 2.2<br>(1.6 to 3.1)                           | 0.2<br>(0.1 to 0.3)                      | 0.3<br>(0.2 to 0.5)                  | -9.0<br>(-29.8 to 18.7)                           | 3.8<br>(-20.6 to 34.4)                              |
| Cannabis use disorders                                         | 10.0<br>(8.4 to 11.8)                         | 1.3<br>(1.1 to 1.6)                      | 0.3<br>(0.2 to 0.4)                  | -10.9<br>(-22.2 to 3.1)                           | 0.3<br>(-12.6 to 16.0)                              |
| Other drug use disorders                                       | 2.4<br>(2.1 to 2.7)                           | 0.4<br>(0.4 to 0.5)                      | 0.6<br>(0.4 to 0.9)                  | -1.6<br>(-19.5 to 19.2)                           | 3.8<br>(-16.0 to 27.2)                              |
| Depressive disorders                                           | 113.8<br>(107.0 to 122.0)                     | 114.9<br>(102.8 to 127.7)                | 18.2<br>(12.6 to 24.6)               | -2.7<br>(-7.8 to 2.6)                             | -6.9<br>(-11.3 to -2.4)                             |
| Major depressive disorder                                      | 70.1<br>(62.9 to 78.7)                        | 107.1<br>(95.0 to 120.2)                 | 14.0<br>(9.5 to 19.1)                | -4.7<br>(-10.9 to 1.9)                            | -8.7<br>(-14.4 to -3.1)                             |
| Dysthymia                                                      | 45.5<br>(39.9 to 52.1)                        | 7.8<br>(6.8 to 8.9)                      | 4.3<br>(2.9 to 6.2)                  | 4.5<br>(-0.1 to 9.1)                              | -0.4<br>(-4.6 to 3.5)                               |
| Bipolar disorder                                               | 26.9<br>(23.5 to 30.7)                        | 1.8<br>(1.6 to 2.0)                      | 5.4<br>(3.3 to 8.0)                  | -2.2<br>(-8.6 to 4.5)                             | -0.0<br>(-6.1 to 6.8)                               |
| Anxiety disorders                                              | 139.4<br>(126.7 to 153.6)                     | 19.9<br>(18.5 to 21.6)                   | 13.2<br>(9.2 to 17.9)                | -1.3<br>(-7.5 to 5.3)                             | -0.2<br>(-6.5 to 5.8)                               |
| Eating disorders                                               | 3.4<br>(2.8 to 4.2)                           | 1.7<br>(1.3 to 2.2)                      | 0.7<br>(0.4 to 1.0)                  | 0.6<br>(-13.0 to 17.0)                            | 12.1<br>(-3.1 to 29.1)                              |
| Anorexia nervosa                                               | 0.7<br>(0.5 to 0.9)                           | 0.3<br>(0.2 to 0.4)                      | 0.1<br>(0.1 to 0.2)                  | -7.9<br>(-30.0 to 22.2)                           | 9.0<br>(-17.9 to 46.4)                              |
| Bulimia nervosa                                                | 2.6<br>(1.9 to 3.5)                           | 1.4<br>(1.0 to 1.9)                      | 0.6<br>(0.3 to 0.8)                  | 3.2<br>(-12.2 to 23.6)                            | 13.1<br>(-3.4 to 33.4)                              |
| Autistic spectrum disorders                                    | 31.8<br>(28.5 to 35.6)                        | 0.1<br>(0.1 to 0.2)                      | 4.7<br>(3.2 to 6.7)                  | -3.4<br>(-7.9 to 1.5)                             | 0.3<br>(-4.5 to 5.4)                                |
| Autism                                                         | 10.5<br>(8.9 to 12.3)                         | < 0.05<br>(< 0.05 to < 0.05)             | 2.6<br>(1.7 to 3.8)                  | -3.1<br>(-9.9 to 5.0)                             | 0.2<br>(-7.1 to 8.5)                                |
| Asperger syndrome and other autistic spectrum disorders        | 21.3<br>(17.8 to 25.5)                        | 0.1<br>(0.1 to 0.1)                      | 2.1<br>(1.4 to 3.1)                  | -3.8<br>(-8.6 to 0.9)                             | 0.3<br>(-4.7 to 5.2)                                |



| Cause                                                      | Prevalence in thousands (95% UI)              | Incidence in thousands (95% UI)                  | YLDs in thousands (95% UI)            |                                                   |                                                     |
|------------------------------------------------------------|-----------------------------------------------|--------------------------------------------------|---------------------------------------|---------------------------------------------------|-----------------------------------------------------|
|                                                            | 2016 counts                                   | 2016 counts                                      | 2016 counts                           | Percentage change in counts between 2006 and 2016 | Percentage change in age-standardised rates between |
| Attention-deficit/hyperactivity disorder                   | 23.1<br>(20.9 to 25.6)                        | 0.7<br>(0.6 to 0.9)                              | 0.3<br>(0.2 to 0.4)                   | -13.7<br>(-20.3 to -6.9)                          | 0.0<br>(-7.6 to 8.3)                                |
| Conduct disorder                                           | 16.8<br>(13.9 to 19.7)                        | 5.4<br>(4.3 to 6.4)                              | 2.0<br>(1.2 to 3.1)                   | -24.4<br>(-28.5 to -20.2)                         | 0.0<br>(-5.5 to 6.0)                                |
| Idiopathic developmental intellectual disability           | 36.9<br>(19.4 to 54.6)                        | --                                               | 1.5<br>(0.7 to 2.6)                   | -11.9<br>(-18.0 to -5.6)                          | -7.8<br>(-14.6 to -1.4)                             |
| Other mental and substance use disorders                   | 87.9<br>(78.0 to 100.8)                       | 1.9<br>(1.7 to 2.1)                              | 6.4<br>(4.4 to 9.2)                   | 3.0<br>(-1.6 to 7.9)                              | -0.1<br>(-4.6 to 4.7)                               |
| <b>Diabetes, urogenital, blood, and endocrine diseases</b> | <b>1,284.5</b><br><b>(1,251.7 to 1,314.4)</b> | <b>495.0†</b><br><b>(466.6 to 525.6)</b>         | <b>41.4</b><br><b>(29.3 to 55.1)</b>  | <b>18.6</b><br><b>(13.8 to 23.5)</b>              | <b>6.4</b><br><b>(2.6 to 10.6)</b>                  |
| Diabetes mellitus                                          | 242.1<br>(216.8 to 268.3)                     | 12.8<br>(11.5 to 14.2)                           | 21.1<br>(14.4 to 28.9)                | 28.3<br>(18.4 to 37.6)                            | 11.7<br>(3.4 to 19.9)                               |
| Acute glomerulonephritis                                   | 0.1<br>(0.1 to 0.1)                           | 1.0<br>(0.9 to 1.2)                              | < 0.05<br>(< 0.05 to < 0.05)          | -1.3<br>(-5.5 to 3.6)                             | 0.3<br>(-3.6 to 4.7)                                |
| Chronic kidney disease                                     | 151.6<br>(135.6 to 168.0)                     | 10.6<br>(9.2 to 12.0)                            | 5.6<br>(4.1 to 7.1)                   | 32.9<br>(23.7 to 43.1)                            | 11.7<br>(4.5 to 19.7)                               |
| Chronic kidney disease due to diabetes mellitus            | 50.6<br>(44.9 to 56.7)                        | 3.7<br>(3.1 to 4.2)                              | 1.9<br>(1.4 to 2.5)                   | 42.0<br>(26.1 to 59.6)                            | 21.9<br>(8.7 to 36.7)                               |
| Chronic kidney disease due to hypertension                 | 22.7<br>(19.7 to 25.8)                        | 2.1<br>(1.8 to 2.4)                              | 0.6<br>(0.4 to 0.8)                   | 98.0<br>(69.3 to 130.6)                           | 45.6<br>(26.5 to 66.6)                              |
| Chronic kidney disease due to glomerulonephritis           | 24.4<br>(21.5 to 27.4)                        | 1.1<br>(0.9 to 1.4)                              | 1.1<br>(0.8 to 1.4)                   | 4.9<br>(-5.8 to 16.5)                             | -7.9<br>(-17.1 to 1.8)                              |
| Chronic kidney disease due to other causes                 | 53.8<br>(47.9 to 59.9)                        | 3.7<br>(3.2 to 4.2)                              | 1.9<br>(1.5 to 2.5)                   | 30.9<br>(18.2 to 44.6)                            | 9.2<br>(-0.4 to 19.7)                               |
| Urinary diseases and male infertility                      | 123.3<br>(110.9 to 137.1)                     | 286.4†<br>(261.2 to 314.6)                       | 3.7<br>(2.5 to 5.3)                   | 15.4<br>(9.1 to 22.8)                             | 0.5<br>(-4.5 to 6.4)                                |
| Interstitial nephritis and urinary tract infections        | 3.9<br>(3.4 to 4.3)                           | 199.3<br>(176.3 to 223.9)                        | 0.1<br>(0.1 to 0.2)                   | -5.0<br>(-17.5 to 8.6)                            | -1.5<br>(-14.2 to 12.6)                             |
| Urolithiasis                                               | 2.8<br>(2.5 to 3.2)                           | 74.4<br>(65.4 to 84.9)                           | 0.2<br>(0.1 to 0.3)                   | 9.2<br>(-10.8 to 32.6)                            | 1.4<br>(-15.1 to 19.6)                              |
| Benign prostatic hyperplasia                               | 100.7<br>(85.8 to 117.2)                      | 12.7<br>(10.4 to 15.5)                           | 3.2<br>(2.1 to 4.7)                   | 19.1<br>(12.2 to 27.7)                            | 2.0<br>(-3.7 to 9.0)                                |
| Male infertility                                           | 11.8<br>(9.0 to 15.7)                         | --                                               | 0.1<br>(< 0.05 to 0.1)                | -14.3<br>(-21.8 to -6.0)                          | -10.1<br>(-17.6 to -2.0)                            |
| Other urinary diseases                                     | --                                            | --                                               | 0.1<br>(0.1 to 0.1)                   | -15.1<br>(-25.2 to -4.3)                          | -17.7<br>(-26.5 to -8.1)                            |
| Gynecological diseases                                     | 442.5<br>(422.6 to 462.8)                     | 165.6†<br>(152.8 to 180.3)                       | 5.4<br>(3.8 to 7.7)                   | -7.5<br>(-11.4 to -3.6)                           | -2.2<br>(-6.3 to 2.0)                               |
| Uterine fibroids                                           | 48.4<br>(42.6 to 55.5)                        | 4.4<br>(3.8 to 5.2)                              | 0.6<br>(0.3 to 1.0)                   | -11.5<br>(-22.7 to -1.1)                          | -10.5<br>(-21.6 to 0.2)                             |
| Polycystic ovarian syndrome                                | 3.7<br>(2.8 to 4.9)                           | 1.8<br>(1.3 to 2.5)                              | < 0.05<br>(< 0.05 to 0.1)             | -3.8<br>(-15.8 to 9.5)                            | 1.2<br>(-11.2 to 15.4)                              |
| Female infertility                                         | 3.6<br>(1.2 to 8.4)                           | --                                               | < 0.05<br>(< 0.05 to 0.1)             | 12.3<br>(-15.8 to 63.2)                           | 20.6<br>(-8.2 to 73.5)                              |
| Endometriosis                                              | 1.6<br>(1.3 to 1.9)                           | 5.8<br>(4.4 to 7.5)                              | 0.1<br>(0.1 to 0.2)                   | -10.3<br>(-31.1 to 15.3)                          | -0.1<br>(-23.2 to 28.5)                             |
| Genital prolapse                                           | 126.6<br>(108.2 to 147.5)                     | 5.3<br>(4.5 to 6.3)                              | 0.4<br>(0.2 to 0.7)                   | 13.3<br>(0.6 to 25.8)                             | -2.5<br>(-13.3 to 8.0)                              |
| Premenstrual syndrome                                      | 238.9<br>(226.6 to 252.7)                     | 81.1<br>(75.9 to 87.0)                           | 2.0<br>(1.2 to 3.0)                   | -8.7<br>(-15.3 to -1.6)                           | -0.1<br>(-7.1 to 7.4)                               |
| Other gynecological diseases                               | 66.5<br>(56.5 to 77.9)                        | 67.1<br>(55.7 to 80.5)                           | 2.3<br>(1.5 to 3.3)                   | -8.2<br>(-14.0 to -2.7)                           | -2.6<br>(-8.7 to 3.6)                               |
| Hemoglobinopathies and hemolytic anaemias                  | 486.6<br>(454.9 to 519.8)                     | --                                               | 1.7<br>(1.0 to 2.6)                   | 13.3<br>(-1.1 to 31.4)                            | 8.4<br>(-5.5 to 26.2)                               |
| Thalassemias                                               | < 0.05<br>(< 0.05 to < 0.05)                  | --                                               | < 0.05<br>(< 0.05 to < 0.05)          | -7.5<br>(-25.6 to 15.8)                           | -1.8<br>(-21.4 to 25.2)                             |
| Thalassaemias trait                                        | 47.6<br>(33.3 to 64.3)                        | --                                               | 0.9<br>(0.5 to 1.5)                   | 25.4<br>(3.6 to 53.4)                             | 18.6<br>(-0.9 to 44.9)                              |
| Sickle cell disorders                                      | < 0.05<br>(< 0.05 to < 0.05)                  | --                                               | < 0.05<br>(< 0.05 to < 0.05)          | -9.0<br>(-15.4 to -1.3)                           | 0.3<br>(-8.5 to 10.7)                               |
| Sickle cell trait                                          | 52.6<br>(51.0 to 54.5)                        | --                                               | 0.2<br>(0.1 to 0.3)                   | 27.8<br>(3.3 to 59.5)                             | 19.4<br>(-4.2 to 49.6)                              |
| G6PD deficiency                                            | 72.8<br>(62.7 to 83.8)                        | --                                               | < 0.05<br>(< 0.05 to < 0.05)          | 6.2<br>(-12.9 to 31.4)                            | 1.1<br>(-18.5 to 28.3)                              |
| G6PD trait                                                 | 291.6<br>(263.1 to 318.3)                     | --                                               | < 0.05<br>(< 0.05 to < 0.05)          | 101.2<br>(48.8 to 173.8)                          | 101.8<br>(53.3 to 170.0)                            |
| Other hemoglobinopathies and hemolytic anaemias            | 35.6<br>(32.0 to 39.0)                        | --                                               | 0.5<br>(0.3 to 0.8)                   | -6.0<br>(-18.3 to 8.3)                            | -7.3<br>(-19.7 to 8.4)                              |
| Endocrine, metabolic, blood, and immune disorders          | 121.7<br>(110.8 to 133.6)                     | 18.5<br>(16.3 to 20.9)                           | 3.9<br>(2.6 to 5.3)                   | 5.7<br>(-0.2 to 11.6)                             | -2.1<br>(-7.6 to 3.1)                               |
| <b>Musculoskeletal disorders</b>                           | <b>859.1</b><br><b>(819.3 to 898.0)</b>       | <b>367.2</b><br><b>(325.5 to 413.1)</b>          | <b>98.9</b><br><b>(71.3 to 128.7)</b> | <b>10.8</b><br><b>(6.7 to 15.6)</b>               | <b>1.5</b><br><b>(-2.2 to 5.4)</b>                  |
| Rheumatoid arthritis                                       | 15.0<br>(13.3 to 16.9)                        | 0.8<br>(0.7 to 0.8)                              | 3.5<br>(2.3 to 4.6)                   | 17.2<br>(5.5 to 30.0)                             | 3.9<br>(-6.4 to 15.3)                               |
| Osteoarthritis                                             | 235.3<br>(220.2 to 250.0)                     | 10.4<br>(9.6 to 11.2)                            | 14.3<br>(10.0 to 19.3)                | 18.2<br>(14.2 to 22.7)                            | 1.1<br>(-2.4 to 4.9)                                |
| Low back and neck pain                                     | 652.9<br>(610.2 to 695.2)                     | 313.3<br>(273.6 to 355.2)                        | 77.4<br>(54.7 to 101.2)               | 9.8<br>(4.5 to 15.8)                              | 1.8<br>(-2.7 to 6.6)                                |
| Low back pain                                              | 529.8<br>(467.9 to 596.3)                     | 274.5<br>(235.1 to 317.6)                        | 59.2<br>(41.7 to 77.6)                | 10.8<br>(4.0 to 18.6)                             | 2.4<br>(-3.4 to 8.6)                                |
| Neck pain                                                  | 184.9<br>(158.9 to 214.9)                     | 38.9<br>(33.7 to 45.8)                           | 18.2<br>(12.4 to 25.7)                | 6.5<br>(3.2 to 10.0)                              | -0.3<br>(-2.5 to 1.8)                               |
| Gout                                                       | 20.4<br>(18.0 to 22.9)                        | 4.0<br>(3.5 to 4.5)                              | 0.6<br>(0.4 to 0.9)                   | 15.2<br>(0.2 to 33.3)                             | 1.1<br>(-12.8 to 17.1)                              |
| Other musculoskeletal disorders                            | 37.8<br>(29.8 to 49.4)                        | 38.7<br>(28.2 to 55.7)                           | 3.2<br>(2.0 to 4.9)                   | -0.2<br>(-13.3 to 14.8)                           | -4.7<br>(-17.3 to 10.0)                             |
| <b>Other non-communicable diseases</b>                     | <b>3,088.9</b><br><b>(3,055.0 to 3,129.8)</b> | <b>10,162.3†</b><br><b>(9,756.2 to 10,596.0)</b> | <b>96.6</b><br><b>(66.7 to 136.7)</b> | <b>7.0</b><br><b>(5.7 to 8.2)</b>                 | <b>-1.3</b><br><b>(-2.3 to -0.3)</b>                |
| Congenital anomalies                                       | 42.0<br>(38.2 to 46.4)                        | --                                               | 5.2<br>(3.8 to 6.9)                   | -2.6<br>(-7.6 to 2.5)                             | 0.2<br>(-4.8 to 5.2)                                |
| Neural tube defects                                        | 3.7<br>(3.2 to 4.2)                           | --                                               | 1.1<br>(0.8 to 1.5)                   | -2.9<br>(-13.8 to 9.4)                            | -1.2<br>(-12.1 to 10.8)                             |
| Congenital heart anomalies                                 | 7.8<br>(6.9 to 8.9)                           | --                                               | 0.4<br>(0.2 to 0.7)                   | 2.7<br>(-7.4 to 14.4)                             | 6.8<br>(-3.5 to 19.0)                               |
| Orofacial clefts                                           | 1.8<br>(1.6 to 2.0)                           | --                                               | < 0.05<br>(< 0.05 to < 0.05)          | -11.7<br>(-21.5 to 0.1)                           | -10.2<br>(-20.1 to 1.6)                             |
| Down's syndrome                                            | 1.8<br>(1.5 to 2.0)                           | --                                               | 0.2<br>(0.1 to 0.2)                   | -2.1<br>(-10.8 to 6.4)                            | 2.4<br>(-6.8 to 11.6)                               |
| Turner syndrome                                            | 1.8<br>(1.6 to 2.1)                           | --                                               | < 0.05<br>(< 0.05 to 0.1)             | -6.8<br>(-29.0 to 22.3)                           | 0.7<br>(-24.8 to 33.0)                              |
| Klinefelter syndrome                                       | 1.6<br>(1.4 to 1.9)                           | --                                               | < 0.05<br>(< 0.05 to < 0.05)          | -8.1<br>(-28.2 to 15.0)                           | 1.5<br>(-20.7 to 25.9)                              |

| Cause                                         | Prevalence in thousands (95% UI)              | Incidence in thousands (95% UI)          | YLDs in thousands (95% UI)           |                                                   |                                                     |
|-----------------------------------------------|-----------------------------------------------|------------------------------------------|--------------------------------------|---------------------------------------------------|-----------------------------------------------------|
|                                               | 2016 counts                                   | 2016 counts                              | 2016 counts                          | Percentage change in counts between 2006 and 2016 | Percentage change in age-standardised rates between |
| Other chromosomal abnormalities               | 2.6<br>(2.2 to 3.1)                           | --                                       | 0.3<br>(0.2 to 0.4)                  | -11.4<br>(-23.2 to 2.2)                           | 4.2<br>(-10.3 to 20.8)                              |
| Congenital musculoskeletal and limb anomalies | 8.7<br>(7.9 to 9.6)                           | --                                       | 1.2<br>(0.8 to 1.6)                  | -1.0<br>(-8.8 to 7.5)                             | -0.1<br>(-7.9 to 9.0)                               |
| Urogenital congenital anomalies               | 3.3<br>(3.0 to 3.7)                           | --                                       | 0.1<br>(0.1 to 0.1)                  | -10.5<br>(-18.6 to -2.1)                          | 0.3<br>(-10.3 to 11.1)                              |
| Digestive congenital anomalies                | 7.2<br>(6.4 to 8.2)                           | --                                       | 0.3<br>(0.2 to 0.5)                  | -1.5<br>(-12.7 to 10.8)                           | 0.4<br>(-11.1 to 12.6)                              |
| Other congenital anomalies                    | 11.5<br>(7.3 to 17.0)                         | --                                       | 1.6<br>(1.1 to 2.3)                  | -2.7<br>(-13.0 to 7.6)                            | -1.7<br>(-11.8 to 8.0)                              |
| Skin and subcutaneous diseases                | 1,095.7<br>(1,066.4 to 1,125.2)               | 2,925.9<br>(2,744.1 to 3,115.9)          | 23.0<br>(15.5 to 33.5)               | -3.3<br>(-5.5 to -1.3)                            | 1.5<br>(-0.5 to 3.5)                                |
| Dermatitis                                    | 121.3<br>(112.9 to 130.4)                     | 181.1<br>(165.5 to 198.6)                | 4.3<br>(2.6 to 6.9)                  | -2.6<br>(-7.0 to 2.2)                             | 0.9<br>(-3.8 to 6.1)                                |
| Psoriasis                                     | 39.9<br>(38.1 to 42.0)                        | 5.3<br>(5.0 to 5.6)                      | 3.4<br>(2.4 to 4.5)                  | 6.2<br>(-1.3 to 14.5)                             | 4.0<br>(-3.4 to 11.9)                               |
| Cellulitis                                    | 1.6<br>(1.5 to 1.7)                           | 31.7<br>(29.7 to 33.8)                   | 0.1<br>(0.1 to 0.1)                  | 1.1<br>(-17.9 to 24.1)                            | 0.2<br>(-18.8 to 23.9)                              |
| Pyoderma                                      | 18.8<br>(18.1 to 19.4)                        | 501.7<br>(482.7 to 521.6)                | 0.1<br>(< 0.05 to 0.2)               | 11.3<br>(5.4 to 17.3)                             | 0.3<br>(-5.1 to 5.7)                                |
| Scabies                                       | 25.4<br>(22.5 to 28.8)                        | 76.8<br>(67.6 to 86.9)                   | 0.7<br>(0.4 to 1.0)                  | -9.4<br>(-13.9 to -4.6)                           | -2.8<br>(-7.3 to 2.1)                               |
| Fungal skin diseases                          | 368.1<br>(328.4 to 409.4)                     | 1,388.7<br>(1,218.5 to 1,574.7)          | 2.0<br>(0.8 to 4.2)                  | 7.4<br>(5.1 to 9.7)                               | -0.1<br>(-1.2 to 1.0)                               |
| Viral skin diseases                           | 82.9<br>(79.6 to 86.4)                        | 125.3<br>(119.9 to 130.9)                | 2.5<br>(1.6 to 3.7)                  | -7.0<br>(-10.0 to -3.8)                           | -0.2<br>(-3.3 to 3.3)                               |
| Acne vulgaris                                 | 206.9<br>(186.5 to 228.8)                     | 128.1<br>(109.0 to 154.2)                | 5.3<br>(3.5 to 7.7)                  | -14.9<br>(-18.7 to -11.3)                         | 2.6<br>(-1.9 to 6.9)                                |
| Alopecia areata                               | 7.5<br>(7.3 to 7.9)                           | 13.2<br>(12.7 to 13.8)                   | 0.2<br>(0.2 to 0.4)                  | -1.2<br>(-11.1 to 10.2)                           | 0.1<br>(-10.3 to 12.4)                              |
| Pruritus                                      | 40.1<br>(35.1 to 45.8)                        | 31.7<br>(28.0 to 36.1)                   | 0.4<br>(0.2 to 0.8)                  | 5.5<br>(-0.4 to 11.7)                             | 0.7<br>(-4.5 to 6.2)                                |
| Urticaria                                     | 32.3<br>(28.7 to 36.2)                        | 57.2<br>(50.5 to 64.9)                   | 1.9<br>(1.2 to 2.7)                  | -4.2<br>(-9.2 to 1.2)                             | -0.2<br>(-5.2 to 5.0)                               |
| Decubitus ulcer                               | 1.6<br>(1.4 to 1.9)                           | 5.9<br>(5.2 to 6.9)                      | 0.2<br>(0.2 to 0.4)                  | 22.3<br>(2.4 to 43.9)                             | 3.9<br>(-10.5 to 20.2)                              |
| Other skin and subcutaneous diseases          | 322.9<br>(312.9 to 333.1)                     | 379.2<br>(365.9 to 393.5)                | 1.7<br>(0.8 to 3.2)                  | 12.1<br>(9.5 to 15.0)                             | 4.0<br>(1.6 to 6.5)                                 |
| Sense organ diseases                          | 1,405.0<br>(1,379.7 to 1,435.6)               | 403.0†<br>(381.5 to 427.3)               | 50.8<br>(35.1 to 71.6)               | 12.5<br>(10.8 to 14.4)                            | -3.0<br>(-4.4 to -1.6)                              |
| Glaucoma                                      | 3.9<br>(3.2 to 4.7)                           | --                                       | 0.3<br>(0.2 to 0.4)                  | 24.9<br>(8.8 to 42.9)                             | -1.0<br>(-13.4 to 12.2)                             |
| Cataract                                      | 70.2<br>(59.1 to 82.9)                        | --                                       | 3.2<br>(2.2 to 4.6)                  | 23.1<br>(15.9 to 30.8)                            | -4.4<br>(-9.5 to 0.8)                               |
| Macular degeneration                          | 2.3<br>(1.8 to 2.9)                           | --                                       | 0.1<br>(0.1 to 0.2)                  | 29.0<br>(10.8 to 51.4)                            | 1.1<br>(-12.7 to 18.2)                              |
| Refraction and accommodation disorders        | 802.9<br>(759.9 to 840.2)                     | --                                       | 12.1<br>(7.1 to 19.6)                | 5.9<br>(2.7 to 9.5)                               | -4.8<br>(-7.4 to -1.9)                              |
| Age-related and other hearing loss            | 998.7<br>(955.6 to 1,044.0)                   | --                                       | 29.0<br>(20.4 to 40.2)               | 14.0<br>(11.4 to 16.6)                            | -2.7<br>(-5.0 to -0.7)                              |
| Other vision loss                             | 25.2<br>(21.8 to 29.2)                        | --                                       | 1.3<br>(0.9 to 1.8)                  | 17.4<br>(9.2 to 26.6)                             | -1.1<br>(-7.5 to 6.0)                               |
| Other sense organ diseases                    | 153.4<br>(140.8 to 166.1)                     | 403.0<br>(381.5 to 427.3)                | 4.7<br>(3.0 to 7.1)                  | 12.6<br>(8.6 to 17.1)                             | 0.3<br>(-3.0 to 4.1)                                |
| Oral disorders                                | 2,391.3<br>(2,329.5 to 2,458.9)               | 6,833.5†<br>(6,475.4 to 7,199.5)         | 17.6<br>(11.1 to 26.1)               | 9.9<br>(6.9 to 13.2)                              | -2.4<br>(-4.8 to -0.2)                              |
| Caries of deciduous teeth                     | 169.6<br>(143.4 to 196.0)                     | 665.6<br>(527.0 to 845.0)                | < 0.05<br>(< 0.05 to 0.1)            | -8.7<br>(-17.8 to 1.5)                            | -0.7<br>(-9.7 to 10.0)                              |
| Caries of permanent teeth                     | 1,861.5<br>(1,785.2 to 1,938.4)               | 6,077.4<br>(5,747.3 to 6,392.4)          | 1.1<br>(0.5 to 2.1)                  | -4.3<br>(-6.9 to -1.5)                            | -2.9<br>(-5.5 to -0.1)                              |
| Periodontal disease                           | 445.4<br>(365.2 to 533.6)                     | 57.4<br>(44.6 to 70.1)                   | 2.9<br>(1.1 to 6.0)                  | 10.3<br>(6.1 to 14.8)                             | 1.3<br>(-2.2 to 4.6)                                |
| Edentulism and severe tooth loss              | 416.1<br>(363.5 to 468.7)                     | 33.0<br>(27.6 to 38.9)                   | 11.4<br>(7.4 to 16.1)                | 13.7<br>(8.9 to 18.3)                             | -3.9<br>(-7.7 to -0.2)                              |
| Other oral disorders                          | 77.8<br>(74.4 to 81.1)                        | --                                       | 2.2<br>(1.4 to 3.4)                  | 0.3<br>(-2.6 to 3.2)                              | -0.1<br>(-3.1 to 2.8)                               |
| <b>Injuries</b>                               | <b>1,979.0</b><br><b>(1,815.7 to 2,181.8)</b> | <b>545.6†</b><br><b>(508.1 to 584.1)</b> | <b>63.7</b><br><b>(42.3 to 91.8)</b> | <b>17.6</b><br><b>(13.7 to 21.7)</b>              | <b>8.8</b><br><b>(5.2 to 12.7)</b>                  |
| <b>Transport injuries</b>                     | <b>183.9</b><br><b>(169.8 to 199.1)</b>       | <b>44.6</b><br><b>(40.0 to 50.1)</b>     | <b>8.7</b><br><b>(5.8 to 12.6)</b>   | <b>26.7</b><br><b>(23.6 to 29.7)</b>              | <b>18.9</b><br><b>(16.1 to 21.6)</b>                |
| Road injuries                                 | 174.7<br>(161.2 to 189.7)                     | 43.2<br>(38.6 to 48.8)                   | 8.3<br>(5.6 to 12.0)                 | 27.8<br>(24.6 to 30.9)                            | 19.9<br>(17.1 to 22.6)                              |
| Pedestrian road injuries                      | 32.9<br>(28.3 to 38.3)                        | 5.8<br>(4.8 to 6.9)                      | 1.5<br>(1.0 to 2.2)                  | 34.5<br>(30.9 to 37.8)                            | 26.0<br>(22.8 to 28.7)                              |
| Cyclist road injuries                         | 49.1<br>(41.1 to 58.0)                        | 13.3<br>(11.0 to 15.8)                   | 2.2<br>(1.5 to 3.2)                  | 25.1<br>(21.9 to 28.2)                            | 17.6<br>(14.8 to 20.3)                              |
| Motorcyclist road injuries                    | 23.3<br>(19.6 to 29.0)                        | 3.7<br>(3.0 to 4.5)                      | 1.0<br>(0.7 to 1.5)                  | 12.8<br>(9.7 to 15.8)                             | 6.4<br>(3.5 to 9.1)                                 |
| Motor vehicle road injuries                   | 62.6<br>(52.2 to 72.6)                        | 18.4<br>(15.7 to 21.2)                   | 3.3<br>(2.2 to 4.6)                  | 33.8<br>(30.7 to 36.9)                            | 25.3<br>(22.4 to 28.1)                              |
| Other road injuries                           | 6.9<br>(5.9 to 8.0)                           | 2.2<br>(1.7 to 2.8)                      | 0.3<br>(0.2 to 0.4)                  | 14.8<br>(12.0 to 17.5)                            | 7.3<br>(5.0 to 9.5)                                 |
| Other transport injuries                      | 9.2<br>(7.8 to 10.8)                          | 1.4<br>(1.2 to 1.6)                      | 0.4<br>(0.3 to 0.6)                  | 7.5<br>(4.3 to 10.6)                              | 2.1<br>(-0.7 to 5.0)                                |
| <b>Unintentional injuries</b>                 | <b>1,517.0</b><br><b>(1,397.3 to 1,687.9)</b> | <b>484.6</b><br><b>(448.4 to 524.4)</b>  | <b>47.8</b><br><b>(32.6 to 66.5)</b> | <b>20.8</b><br><b>(17.6 to 23.9)</b>              | <b>11.8</b><br><b>(8.9 to 14.5)</b>                 |
| Falls                                         | 850.8<br>(749.4 to 977.2)                     | 285.0<br>(252.7 to 320.3)                | 31.7<br>(22.1 to 43.3)               | 20.8<br>(17.7 to 24.0)                            | 10.7<br>(7.8 to 13.5)                               |
| Drowning                                      | 1.8<br>(1.5 to 2.0)                           | 0.2<br>(0.2 to 0.2)                      | 0.1<br>(< 0.05 to 0.1)               | 15.9<br>(10.5 to 20.5)                            | 10.3<br>(5.0 to 14.6)                               |
| Fire, heat, and hot substances                | 73.2<br>(63.1 to 86.1)                        | 6.3<br>(5.2 to 7.3)                      | 1.7<br>(1.0 to 2.5)                  | 15.3<br>(10.6 to 19.9)                            | 10.4<br>(5.3 to 15.1)                               |
| Poisonings                                    | 3.8<br>(3.2 to 4.4)                           | 3.6<br>(3.0 to 4.4)                      | 0.3<br>(0.2 to 0.4)                  | -17.5<br>(-22.6 to -12.1)                         | -16.9<br>(-22.4 to -11.5)                           |
| Exposure to mechanical forces                 | 387.2<br>(331.6 to 477.5)                     | 108.7<br>(94.9 to 123.7)                 | 8.3<br>(5.4 to 11.9)                 | 28.6<br>(24.9 to 32.2)                            | 20.7<br>(17.3 to 23.8)                              |
| Unintentional firearm injuries                | 4.1<br>(3.4 to 4.9)                           | 0.7<br>(0.5 to 1.0)                      | 0.1<br>(0.1 to 0.2)                  | 22.1<br>(18.8 to 25.4)                            | 14.6<br>(11.7 to 17.4)                              |
| Unintentional suffocation                     | 3.4<br>(2.8 to 4.2)                           | 0.4<br>(0.3 to 0.6)                      | 0.1<br>(0.1 to 0.2)                  | 5.9<br>(1.6 to 10.4)                              | 2.7<br>(-1.6 to 7.0)                                |
| Other exposure to mechanical forces           | 379.7<br>(324.5 to 469.7)                     | 107.5<br>(93.8 to 122.4)                 | 8.0<br>(5.2 to 11.6)                 | 29.1<br>(25.4 to 32.7)                            | 21.1<br>(17.8 to 24.2)                              |

| Cause                                                                               | Prevalence in thousands (95% UI)        | Incidence in thousands (95% UI)          | YLDs in thousands (95% UI)         |                                                   |                                                     |
|-------------------------------------------------------------------------------------|-----------------------------------------|------------------------------------------|------------------------------------|---------------------------------------------------|-----------------------------------------------------|
|                                                                                     | 2016 counts                             | 2016 counts                              | 2016 counts                        | Percentage change in counts between 2006 and 2016 | Percentage change in age-standardised rates between |
| Adverse effects of medical treatment                                                | 0.9<br>(0.7 to 1.2)                     | 12.2<br>(10.8 to 13.8)                   | 0.1<br>(0.1 to 0.2)                | 2.4<br>(-2.6 to 8.1)                              | -8.5<br>(-12.3 to -4.0)                             |
| Animal contact                                                                      | 18.6<br>(16.3 to 21.4)                  | 15.5<br>(12.8 to 18.6)                   | 0.5<br>(0.3 to 0.7)                | -5.9<br>(-10.2 to -1.6)                           | -7.3<br>(-11.7 to -3.0)                             |
| Venomous animal contact                                                             | 6.5<br>(5.5 to 7.8)                     | 5.9<br>(4.5 to 7.7)                      | 0.3<br>(0.2 to 0.5)                | -4.6<br>(-10.8 to 2.0)                            | -4.3<br>(-10.7 to 2.5)                              |
| Non-venomous animal contact                                                         | 12.0<br>(10.2 to 14.8)                  | 9.5<br>(7.7 to 11.7)                     | 0.2<br>(0.1 to 0.3)                | -8.5<br>(-10.8 to -6.2)                           | -13.6<br>(-15.8 to -11.7)                           |
| Foreign body                                                                        | 33.6<br>(28.8 to 38.2)                  | 19.4<br>(16.7 to 22.9)                   | 1.1<br>(0.7 to 1.6)                | -0.7<br>(-3.4 to 2.1)                             | -4.5<br>(-7.3 to -1.9)                              |
| Pulmonary aspiration and foreign body in airway                                     | 16.7<br>(13.2 to 20.7)                  | 4.2<br>(3.5 to 5.1)                      | 0.6<br>(0.4 to 0.9)                | 9.4<br>(5.8 to 12.9)                              | 4.8<br>(1.3 to 8.2)                                 |
| Foreign body in eyes                                                                | 2.5<br>(1.6 to 3.5)                     | 11.1<br>(8.7 to 14.3)                    | 0.1<br>(0.1 to 0.2)                | 9.2<br>(5.4 to 13.4)                              | 5.0<br>(2.2 to 8.2)                                 |
| Foreign body in other body part                                                     | 14.4<br>(12.1 to 17.6)                  | 4.1<br>(3.5 to 4.9)                      | 0.3<br>(0.2 to 0.5)                | -17.0<br>(-19.7 to -14.5)                         | -20.4<br>(-23.2 to -18.2)                           |
| Environmental heat and cold exposure                                                | 34.9<br>(29.9 to 41.1)                  | 6.3<br>(5.2 to 7.5)                      | 1.1<br>(0.7 to 1.6)                | 12.6<br>(9.3 to 15.8)                             | 6.7<br>(3.5 to 9.6)                                 |
| Other unintentional injuries                                                        | 112.3<br>(91.9 to 135.1)                | 27.4<br>(23.4 to 31.3)                   | 3.0<br>(1.9 to 4.4)                | 29.0<br>(25.7 to 31.9)                            | 22.4<br>(19.1 to 25.3)                              |
| <b>Self-harm and interpersonal violence</b>                                         | <b>106.1</b><br><b>(96.9 to 115.4)</b>  | <b>16.3†</b><br><b>(14.2 to 18.8)</b>    | <b>2.2</b><br><b>(1.5 to 3.1)</b>  | <b>9.5</b><br><b>(7.2 to 11.9)</b>                | <b>6.8</b><br><b>(4.8 to 8.9)</b>                   |
| Self-harm                                                                           | 7.6<br>(6.4 to 8.8)                     | 2.3<br>(2.0 to 2.6)                      | 0.3<br>(0.2 to 0.4)                | -3.2<br>(-6.4 to 0.0)                             | -8.1<br>(-11.1 to -5.2)                             |
| Self-harm by firearm                                                                | 0.2<br>(0.2 to 0.3)                     | < 0.05<br>(< 0.05 to 0.1)                | < 0.05<br>(< 0.05 to < 0.05)       | -17.6<br>(-20.3 to -15.0)                         | -20.9<br>(-23.6 to -18.5)                           |
| Self-harm by other specified means                                                  | 7.3<br>(6.1 to 8.6)                     | 2.2<br>(1.9 to 2.6)                      | 0.3<br>(0.2 to 0.4)                | -2.8<br>(-6.0 to 0.5)                             | -7.7<br>(-10.8 to -4.8)                             |
| Interpersonal violence                                                              | 98.5<br>(89.3 to 107.8)                 | 14.0†<br>(11.8 to 16.5)                  | 1.9<br>(1.3 to 2.6)                | 11.8<br>(9.1 to 14.3)                             | 9.4<br>(7.4 to 11.6)                                |
| Assault by firearm                                                                  | 0.7<br>(0.6 to 0.8)                     | 0.1<br>(0.1 to 0.2)                      | < 0.05<br>(< 0.05 to < 0.05)       | 21.7<br>(17.3 to 25.9)                            | 16.6<br>(12.6 to 20.5)                              |
| Assault by sharp object                                                             | 7.0<br>(5.7 to 8.4)                     | 1.6<br>(1.2 to 2.1)                      | 0.2<br>(0.1 to 0.2)                | 21.5<br>(18.1 to 25.2)                            | 16.8<br>(13.3 to 20.3)                              |
| Sexual violence                                                                     | 55.2<br>(48.4 to 62.4)                  | --                                       | 0.4<br>(0.3 to 0.6)                | -11.0<br>(-14.4 to -7.4)                          | -4.5<br>(-7.9 to -1.1)                              |
| Assault by other means                                                              | 35.6<br>(29.3 to 43.3)                  | 12.3<br>(10.3 to 14.4)                   | 1.2<br>(0.8 to 1.8)                | 21.3<br>(18.1 to 24.6)                            | 16.0<br>(12.9 to 19.0)                              |
| <b>Forces of nature, conflict and terrorism, and executions and police conflict</b> | <b>227.1</b><br><b>(130.6 to 359.1)</b> | <b>0.1†</b><br><b>(&lt; 0.05 to 0.1)</b> | <b>5.0</b><br><b>(1.6 to 11.2)</b> | <b>-12.2</b><br><b>(-19.5 to -6.8)</b>            | <b>-21.7</b><br><b>(-28.7 to -16.4)</b>             |
| Exposure to forces of nature                                                        | 0.2<br>(< 0.05 to 0.4)                  | --                                       | < 0.05<br>(< 0.05 to < 0.05)       | --                                                | --                                                  |
| Conflict and terrorism                                                              | 226.7<br>(130.2 to 358.7)               | --                                       | 5.0<br>(1.6 to 11.2)               | -12.4<br>(-19.6 to -6.9)                          | -21.9<br>(-28.8 to -16.6)                           |
| Executions and police conflict                                                      | 0.2<br>(0.1 to 0.4)                     | 0.1<br>(< 0.05 to 0.1)                   | < 0.05<br>(< 0.05 to < 0.05)       | 19.6<br>(11.0 to 24.4)                            | 20.0<br>(13.2 to 24.8)                              |
| <b>Impairments</b>                                                                  | --                                      | --                                       | --                                 | --                                                | --                                                  |
| Anaemia                                                                             | 817.8<br>(731.0 to 901.4)               | --                                       | 17.7<br>(11.7 to 25.6)             | -2.1<br>(-12.8 to 10.5)                           | -5.5<br>(-15.7 to 6.4)                              |
| Developmental intellectual disability                                               | 74.8<br>(57.8 to 92.2)                  | --                                       | 8.3<br>(6.1 to 10.9)               | -7.5<br>(-11.0 to -3.7)                           | -3.3<br>(-7.1 to 0.7)                               |
| Epilepsy                                                                            | 22.0<br>(11.7 to 33.0)                  | --                                       | 6.6<br>(3.5 to 11.7)               | -9.6<br>(-54.8 to 83.1)                           | -7.1<br>(-53.2 to 87.8)                             |
| Guillain-Barre syndrome                                                             | < 0.05<br>(< 0.05 to 0.1)               | --                                       | < 0.05<br>(< 0.05 to < 0.05)       | 4.5<br>(0.4 to 9.5)                               | 0.1<br>(0.0 to 0.2)                                 |
| Hearing loss                                                                        | 1,043.0<br>(999.2 to 1,087.9)           | --                                       | 31.1<br>(22.1 to 42.6)             | 11.8<br>(9.4 to 14.1)                             | -3.2<br>(-5.3 to -1.4)                              |
| Heart failure                                                                       | 74.0<br>(64.4 to 84.8)                  | --                                       | 7.1<br>(5.3 to 9.2)                | 20.4<br>(12.7 to 29.7)                            | -2.3<br>(-8.3 to 5.0)                               |
| Infertility                                                                         | 40.9<br>(31.7 to 53.6)                  | --                                       | 0.3<br>(0.1 to 0.5)                | -4.5<br>(-10.7 to 1.9)                            | 0.4<br>(-5.5 to 6.8)                                |
| Pelvic inflammatory disease                                                         | 1.6<br>(1.4 to 1.9)                     | --                                       | 0.2<br>(0.1 to 0.3)                | -12.0<br>(-25.9 to 4.2)                           | -9.6<br>(-23.9 to 7.4)                              |
| Vision loss                                                                         | 913.1<br>(864.6 to 957.6)               | --                                       | 18.8<br>(12.5 to 28.0)             | 8.5<br>(5.4 to 11.5)                              | -4.0<br>(-6.2 to -1.6)                              |

We did not calculate incidence for the nine impairments, certain NTDs, and causes with only birth prevalence. Blank cells mean that no estimate is available.

† Incidence for aggregate causes represents the sum of the incidence of the causes below the aggregate.

‡ Incidence estimates for stroke represent first-ever stroke only.

^ Incidence of HIV/AIDS represents new infections of HIV only and does not include new infections of Tuberculosis in HIV positive cases.



SR Table 14: Prevalence, incidence, and YLDs for 2016, percentage change of YLD counts and percentage change of age-standardised YLD rates between 2006 and 2016 by cause and impairments, for all ages, Botswana.

| Cause                                                                                | Prevalence in thousands (95% UI)       | Incidence in thousands (95% UI)            | YLDs in thousands (95% UI)       |                                                   |                                                  |
|--------------------------------------------------------------------------------------|----------------------------------------|--------------------------------------------|----------------------------------|---------------------------------------------------|--------------------------------------------------|
|                                                                                      | 2016 counts                            | 2016 counts                                | 2016 counts                      | Percentage change in counts between 2006 and 2016 | Percentage change in rates between 2006 and 2016 |
| <b>All causes</b>                                                                    | <b>2,238.1</b><br>(2,232.2 to 2,244.8) | <b>13,733.9†</b><br>(12,900.5 to 14,679.1) | <b>247.3</b><br>(183.8 to 321.6) | <b>14.4</b><br>(5.8 to 21.1)                      | <b>-9.9</b><br>(-17.7 to -4.3)                   |
| <b>Communicable, maternal, neonatal, and nutritional disorders</b>                   | <b>1,941.1</b><br>(1,911.9 to 1,966.1) | <b>8,047.5†</b><br>(7,350.6 to 8,812.7)    | <b>61.5</b><br>(44.0 to 83.0)    | <b>-13.2</b><br>(-31.9 to 4.3)                    | <b>-33.5</b><br>(-50.2 to -16.9)                 |
| <b>HIV/AIDS and tuberculosis</b>                                                     | <b>849.0</b><br>(788.2 to 914.3)       | <b>23.9†</b><br>(18.2 to 30.4)             | <b>31.7</b><br>(22.0 to 42.9)    | <b>-28.1</b><br>(-48.6 to -2.4)                   | <b>-45.6</b><br>(-62.5 to -23.9)                 |
| Tuberculosis                                                                         | 626.3<br>(542.6 to 716.8)              | 13.5†<br>(10.0 to 18.3)                    | 1.7<br>(1.0 to 2.5)              | -7.4<br>(-23.1 to 11.9)                           | -26.0<br>(-38.2 to -11.6)                        |
| Drug-susceptible tuberculosis                                                        | 5.2<br>(3.9 to 6.9)                    | 13.2<br>(9.8 to 18.1)                      | 1.6<br>(1.0 to 2.4)              | -7.8<br>(-23.7 to 11.1)                           | -26.4<br>(-38.6 to -11.7)                        |
| Multidrug-resistant tuberculosis without extensive drug resistance                   | 0.1<br>(< 0.05 to 0.2)                 | 0.2<br>(0.1 to 0.6)                        | < 0.05<br>(< 0.05 to 0.1)        | 22.5<br>(-63.8 to 238.3)                          | -2.3<br>(-71.0 to 170.1)                         |
| Extensively drug-resistant tuberculosis                                              | < 0.05<br>(< 0.05 to < 0.05)           | < 0.05<br>(< 0.05 to < 0.05)               | < 0.05<br>(< 0.05 to < 0.05)     | 279.1<br>(11.9 to 899.4)                          | 201.9<br>(-10.0 to 684.1)                        |
| Latent tuberculosis infection                                                        | 621.0<br>(536.0 to 711.7)              | --                                         | --                               | --                                                | --                                               |
| HIV/AIDS                                                                             | 355.3<br>(330.1 to 382.7)              | 10.4^<br>(6.5 to 15.1)                     | 30.1<br>(20.7 to 40.9)           | -28.9<br>(-49.9 to -2.3)                          | -46.3<br>(-63.5 to -23.6)                        |
| Drug-susceptible HIV/AIDS - Tuberculosis                                             | 4.5<br>(3.2 to 6.0)                    | 11.1<br>(8.0 to 14.7)                      | 1.7<br>(1.0 to 2.5)              | -46.9<br>(-55.8 to -37.5)                         | -57.5<br>(-63.9 to -50.3)                        |
| Multidrug-resistant HIV/AIDS - Tuberculosis without extensive drug resistance        | 0.1<br>(< 0.05 to 0.2)                 | 0.2<br>(0.1 to 0.6)                        | < 0.05<br>(< 0.05 to 0.1)        | -24.2<br>(-76.6 to 110.3)                         | -39.8<br>(-81.4 to 67.5)                         |
| Extensively drug-resistant HIV/AIDS - Tuberculosis                                   | < 0.05<br>(< 0.05 to < 0.05)           | < 0.05<br>(< 0.05 to < 0.05)               | < 0.05<br>(< 0.05 to < 0.05)     | 118.5<br>(-30.5 to 497.2)                         | 74.1<br>(-44.9 to 377.0)                         |
| HIV/AIDS resulting in other diseases                                                 | 350.7<br>(325.8 to 378.9)              | 10.4<br>(6.5 to 15.1)                      | 28.4<br>(19.5 to 39.1)           | -27.5<br>(-50.0 to 1.4)                           | -45.5<br>(-63.6 to -20.8)                        |
| <b>Diarrhoea, lower respiratory infections, and other common infectious diseases</b> | <b>132.5</b><br>(125.9 to 140.3)       | <b>7,219.1†</b><br>(6,513.6 to 7,950.5)    | <b>6.4</b><br>(4.4 to 8.8)       | <b>11.3</b><br>(7.6 to 15.0)                      | <b>-6.9</b><br>(-9.7 to -4.2)                    |
| Diarrhoeal diseases                                                                  | 22.1<br>(20.6 to 23.7)                 | 1,476.7<br>(1,378.0 to 1,582.9)            | 2.5<br>(1.7 to 3.4)              | 7.5<br>(1.2 to 14.7)                              | -11.5<br>(-16.2 to -6.4)                         |
| Intestinal infectious diseases                                                       | < 0.05<br>(< 0.05 to < 0.05)           | 0.1†<br>(< 0.05 to 0.1)                    | < 0.05<br>(< 0.05 to < 0.05)     | 16.3<br>(-1.4 to 37.2)                            | 1.2<br>(-12.7 to 17.2)                           |
| Typhoid fever                                                                        | < 0.05<br>(< 0.05 to < 0.05)           | 0.1<br>(< 0.05 to 0.1)                     | < 0.05<br>(< 0.05 to < 0.05)     | 18.7<br>(-0.7 to 40.7)                            | 3.0<br>(-11.8 to 19.9)                           |
| Paratyphoid fever                                                                    | < 0.05<br>(< 0.05 to < 0.05)           | < 0.05<br>(< 0.05 to < 0.05)               | < 0.05<br>(< 0.05 to < 0.05)     | 21.3<br>(0.1 to 46.7)                             | 3.7<br>(-12.2 to 22.9)                           |
| Other intestinal infectious diseases                                                 | --                                     | --                                         | < 0.05<br>(< 0.05 to < 0.05)     | -21.3<br>(-46.9 to 19.2)                          | -30.2<br>(-51.7 to 1.9)                          |
| Lower respiratory infections                                                         | 3.0<br>(2.7 to 3.2)                    | 131.3<br>(119.5 to 144.3)                  | 0.2<br>(0.1 to 0.3)              | 2.6<br>(-9.7 to 16.9)                             | -14.8<br>(-22.9 to -5.4)                         |
| Upper respiratory infections                                                         | 71.8<br>(62.8 to 81.5)                 | 5,392.2<br>(4,691.6 to 6,142.6)            | 1.8<br>(1.1 to 2.8)              | 18.4<br>(11.9 to 25.0)                            | -0.0<br>(-5.7 to 4.8)                            |
| Otitis media                                                                         | 33.0<br>(29.4 to 36.7)                 | 162.6<br>(128.5 to 202.6)                  | 0.9<br>(0.6 to 1.4)              | 7.1<br>(-1.2 to 15.8)                             | -6.0<br>(-12.7 to 1.1)                           |
| Meningitis                                                                           | 5.2<br>(4.4 to 6.2)                    | 1.2<br>(1.0 to 1.5)                        | 0.6<br>(0.4 to 0.8)              | 12.6<br>(4.0 to 22.4)                             | -5.6<br>(-12.3 to 1.9)                           |
| Pneumococcal meningitis                                                              | 2.2<br>(1.9 to 2.7)                    | 0.2<br>(0.2 to 0.3)                        | 0.3<br>(0.2 to 0.4)              | -1.4<br>(-15.9 to 16.6)                           | -18.4<br>(-29.4 to -5.4)                         |
| H influenzae type B meningitis                                                       | 0.6<br>(0.5 to 0.7)                    | 0.1<br>(0.1 to 0.1)                        | 0.1<br>(0.1 to 0.1)              | -5.6<br>(-15.5 to 4.3)                            | -20.3<br>(-29.4 to -10.9)                        |
| Meningococcal infection                                                              | 0.4<br>(0.3 to 0.5)                    | 0.1<br>(0.1 to 0.2)                        | < 0.05<br>(< 0.05 to 0.1)        | 14.3<br>(8.5 to 19.9)                             | -4.9<br>(-9.8 to -0.1)                           |
| Other meningitis                                                                     | 2.0<br>(1.5 to 2.6)                    | 0.8<br>(0.7 to 1.0)                        | 0.2<br>(0.1 to 0.2)              | 64.0<br>(49.1 to 82.1)                            | 39.2<br>(26.4 to 54.3)                           |
| Encephalitis                                                                         | 3.3<br>(2.2 to 4.8)                    | 2.1<br>(1.8 to 2.4)                        | 0.4<br>(0.2 to 0.5)              | 25.2<br>(9.8 to 42.9)                             | 2.5<br>(-8.4 to 14.9)                            |
| Diphtheria                                                                           | < 0.05<br>(< 0.05 to < 0.05)           | < 0.05<br>(< 0.05 to < 0.05)               | < 0.05<br>(< 0.05 to < 0.05)     | -20.8<br>(-65.6 to 70.8)                          | -35.8<br>(-73.6 to 46.6)                         |
| Whooping cough                                                                       | 0.1<br>(0.1 to 0.1)                    | 0.7<br>(0.5 to 0.9)                        | < 0.05<br>(< 0.05 to < 0.05)     | -45.8<br>(-66.0 to -16.1)                         | -52.4<br>(-70.1 to -26.2)                        |
| Tetanus                                                                              | < 0.05<br>(< 0.05 to < 0.05)           | < 0.05<br>(< 0.05 to < 0.05)               | < 0.05<br>(< 0.05 to < 0.05)     | -1.9<br>(-25.7 to 22.2)                           | -25.8<br>(-47.5 to 0.9)                          |
| Measles                                                                              | < 0.05<br>(< 0.05 to 0.1)              | 1.4<br>(0.5 to 3.2)                        | < 0.05<br>(< 0.05 to < 0.05)     | -83.8<br>(-88.8 to -74.6)                         | -85.8<br>(-90.2 to -77.7)                        |
| Varicella and herpes zoster                                                          | 2.0<br>(1.9 to 2.2)                    | 50.8<br>(48.8 to 52.9)                     | 0.1<br>(< 0.05 to 0.1)           | 27.4<br>(8.3 to 47.8)                             | 0.1<br>(-11.2 to 12.8)                           |
| <b>Neglected tropical diseases and malaria</b>                                       | <b>1,163.4</b><br>(1,081.7 to 1,246.8) | <b>146.4†</b><br>(114.3 to 185.1)          | <b>7.1</b><br>(4.4 to 11.4)      | <b>27.3</b><br>(9.2 to 45.7)                      | <b>1.5</b><br>(-14.9 to 18.1)                    |
| Malaria                                                                              | 0.9<br>(0.8 to 1.1)                    | 0.3<br>(0.3 to 0.3)                        | 0.3<br>(0.2 to 0.4)              | 7.4<br>(-8.9 to 26.6)                             | -5.3<br>(-18.8 to 10.9)                          |
| Chagas disease                                                                       | --                                     | --                                         | --                               | --                                                | --                                               |
| Leishmaniasis                                                                        | --                                     | --                                         | --                               | --                                                | --                                               |
| Visceral leishmaniasis                                                               | --                                     | --                                         | --                               | --                                                | --                                               |
| Cutaneous and mucocutaneous leishmaniasis                                            | --                                     | --                                         | --                               | --                                                | --                                               |
| African trypanosomiasis                                                              | --                                     | --                                         | --                               | --                                                | --                                               |
| Schistosomiasis                                                                      | 438.1<br>(325.7 to 572.6)              | 146.1<br>(114.0 to 184.7)                  | 3.1<br>(1.4 to 6.1)              | 47.2<br>(38.8 to 55.4)                            | 14.7<br>(8.9 to 20.3)                            |
| Cysticercosis                                                                        | 6.0<br>(2.3 to 8.9)                    | --                                         | 1.0<br>(0.3 to 1.9)              | 15.3<br>(-58.5 to 172.4)                          | -14.3<br>(-67.7 to 98.8)                         |
| Cystic echinococcosis                                                                | 0.1<br>(< 0.05 to 0.6)                 | < 0.05<br>(< 0.05 to 0.1)                  | < 0.05<br>(< 0.05 to 0.1)        | -37.6<br>(-94.3 to 462.6)                         | -50.4<br>(-94.6 to 275.9)                        |
| Lymphatic filariasis                                                                 | --                                     | --                                         | --                               | --                                                | --                                               |
| Onchocerciasis                                                                       | --                                     | --                                         | --                               | --                                                | --                                               |
| Trachoma                                                                             | 1.3<br>(0.8 to 1.8)                    | --                                         | 0.1<br>(0.1 to 0.1)              | 27.2<br>(-3.1 to 64.3)                            | -10.6<br>(-36.3 to 20.8)                         |
| Dengue                                                                               | --                                     | --                                         | --                               | --                                                | --                                               |
| Yellow fever                                                                         | --                                     | --                                         | --                               | --                                                | --                                               |
| Rabies                                                                               | < 0.05<br>(< 0.05 to < 0.05)           | < 0.05<br>(< 0.05 to < 0.05)               | < 0.05<br>(< 0.05 to < 0.05)     | -44.8<br>(-79.9 to 23.2)                          | -52.0<br>(-80.3 to 2.4)                          |
| Intestinal nematode infections                                                       | 893.6<br>(800.2 to 981.9)              | --                                         | 2.1<br>(1.2 to 3.4)              | 20.1<br>(-1.1 to 45.9)                            | 0.0<br>(-18.6 to 22.9)                           |
| Ascariasis                                                                           | 141.8<br>(112.7 to 182.3)              | --                                         | < 0.05<br>(< 0.05 to < 0.05)     | 17.1<br>(-28.0 to 88.0)                           | -0.5<br>(-40.6 to 66.3)                          |

| Cause                                                                   | Prevalence in thousands (95% UI)              | Incidence in thousands (95% UI)                | YLDs in thousands (95% UI)              |                                                   |                                                  |
|-------------------------------------------------------------------------|-----------------------------------------------|------------------------------------------------|-----------------------------------------|---------------------------------------------------|--------------------------------------------------|
|                                                                         | 2016 counts<br>(338.2 to 517.5)               | 2016 counts                                    | 2016 counts                             | Percentage change in counts between 2006 and 2016 | Percentage change in rates between 2006 and 2016 |
| Trichuriasis                                                            | 421.5<br>(338.2 to 517.5)                     | --                                             | 0.2<br>(0.1 to 0.4)                     | 17.8<br>(-22.4 to 74.3)                           | -0.4<br>(-35.6 to 52.8)                          |
| Hookworm disease                                                        | 478.4<br>(395.9 to 578.0)                     | --                                             | 1.8<br>(1.0 to 3.0)                     | 20.5<br>(-1.7 to 48.3)                            | 0.1<br>(-19.9 to 24.9)                           |
| Food-borne trematodiasis                                                | --                                            | --                                             | --                                      | --                                                | --                                               |
| Leprosy                                                                 | < 0.05<br>(< 0.05 to < 0.05)                  | < 0.05<br>(< 0.05 to < 0.05)                   | < 0.05<br>(< 0.05 to < 0.05)            | -1.0<br>(-13.8 to 21.9)                           | -23.5<br>(-32.6 to -6.0)                         |
| Ebola virus disease                                                     | --                                            | --                                             | --                                      | --                                                | --                                               |
| Zika virus disease                                                      | --                                            | --                                             | --                                      | --                                                | --                                               |
| Guinea worm disease                                                     | --                                            | --                                             | --                                      | --                                                | --                                               |
| Other neglected tropical diseases                                       | 16.6<br>(14.5 to 19.6)                        | --                                             | 0.5<br>(0.3 to 0.7)                     | 1.9<br>(-15.8 to 22.7)                            | -10.1<br>(-25.4 to 7.9)                          |
| <b>Maternal disorders</b>                                               | <b>4.3</b><br><b>(3.3 to 5.5)</b>             | <b>37.4†</b><br><b>(33.1 to 42.5)</b>          | <b>0.3</b><br><b>(0.2 to 0.4)</b>       | <b>2.3</b><br><b>(-23.4 to 37.5)</b>              | <b>-19.0</b><br><b>(-39.8 to 9.3)</b>            |
| Maternal haemorrhage                                                    | 0.5<br>(0.4 to 0.7)                           | 3.8<br>(2.7 to 5.1)                            | < 0.05<br>(< 0.05 to < 0.05)            | 7.8<br>(-27.1 to 64.4)                            | -11.6<br>(-39.4 to 33.6)                         |
| Maternal sepsis and other pregnancy related infections                  | 0.7<br>(0.6 to 0.8)                           | 2.7<br>(2.1 to 3.6)                            | < 0.05<br>(< 0.05 to < 0.05)            | 9.0<br>(-47.8 to 124.8)                           | -10.5<br>(-55.6 to 81.2)                         |
| Maternal hypertensive disorders                                         | 3.0<br>(1.9 to 4.1)                           | 14.1<br>(12.0 to 16.3)                         | 0.1<br>(0.1 to 0.2)                     | 13.8<br>(-30.2 to 87.9)                           | -7.6<br>(-43.4 to 52.0)                          |
| Maternal obstructed labour and uterine rupture                          | 0.1<br>(0.1 to 0.2)                           | 1.7<br>(1.3 to 2.3)                            | < 0.05<br>(< 0.05 to 0.1)               | -22.7<br>(-48.8 to 17.2)                          | -42.1<br>(-61.7 to -12.2)                        |
| Maternal abortion, miscarriage, and ectopic pregnancy                   | 0.1<br>(0.1 to 0.2)                           | 15.0<br>(11.5 to 19.7)                         | < 0.05<br>(< 0.05 to < 0.05)            | 8.8<br>(-50.4 to 128.7)                           | -13.3<br>(-59.1 to 76.0)                         |
| Other maternal disorders                                                | --                                            | --                                             | < 0.05<br>(< 0.05 to 0.1)               | -3.4<br>(-27.8 to 30.0)                           | -22.9<br>(-42.6 to 3.5)                          |
| <b>Neonatal disorders</b>                                               | <b>25.4</b><br><b>(21.4 to 30.2)</b>          | --                                             | <b>4.2</b><br><b>(2.8 to 6.3)</b>       | <b>19.9</b><br><b>(0.6 to 45.3)</b>               | <b>7.0</b><br><b>(-10.2 to 29.7)</b>             |
| Neonatal preterm birth complications                                    | 21.9<br>(16.9 to 27.9)                        | --                                             | 2.6<br>(1.7 to 4.0)                     | 14.9<br>(-9.6 to 44.6)                            | 2.0<br>(-19.1 to 28.3)                           |
| Neonatal encephalopathy due to birth asphyxia and trauma                | 3.5<br>(1.8 to 6.0)                           | --                                             | 0.5<br>(0.1 to 1.3)                     | 55.2<br>(-9.8 to 194.5)                           | 41.2<br>(-17.4 to 156.7)                         |
| Neonatal sepsis and other neonatal infections                           | 1.8<br>(0.7 to 3.7)                           | --                                             | 0.7<br>(0.2 to 1.7)                     | 27.9<br>(-16.1 to 166.6)                          | 17.0<br>(-24.0 to 144.8)                         |
| Hemolytic disease and other neonatal jaundice                           | 0.6<br>(0.5 to 0.7)                           | --                                             | 0.2<br>(0.1 to 0.2)                     | 6.7<br>(-9.3 to 25.7)                             | -6.5<br>(-19.9 to 9.2)                           |
| Other neonatal disorders                                                | --                                            | --                                             | 0.2<br>(0.1 to 0.3)                     | 7.8<br>(-11.4 to 31.5)                            | -6.4<br>(-23.2 to 14.2)                          |
| <b>Nutritional deficiencies</b>                                         | <b>472.9</b><br><b>(445.0 to 501.5)</b>       | <b>180.1†</b><br><b>(150.7 to 217.1)</b>       | <b>9.9</b><br><b>(6.4 to 14.2)</b>      | <b>-2.0</b><br><b>(-11.2 to 10.0)</b>             | <b>-19.9</b><br><b>(-26.6 to -11.0)</b>          |
| Protein-energy malnutrition                                             | 15.5<br>(11.8 to 20.3)                        | 7.9<br>(6.0 to 10.2)                           | 0.7<br>(0.4 to 1.3)                     | -5.0<br>(-46.1 to 63.1)                           | -17.1<br>(-52.9 to 42.5)                         |
| Iodine deficiency                                                       | 43.7<br>(38.4 to 49.4)                        | 1.2<br>(1.1 to 1.3)                            | 1.2<br>(0.7 to 1.6)                     | 10.1<br>(-0.5 to 21.1)                            | -11.4<br>(-18.7 to -3.6)                         |
| Vitamin A deficiency                                                    | 184.8<br>(155.3 to 221.0)                     | 171.1<br>(141.6 to 208.6)                      | 0.1<br>(< 0.05 to 0.1)                  | 18.3<br>(-2.6 to 41.5)                            | -1.6<br>(-18.6 to 16.5)                          |
| Iron-deficiency anaemia                                                 | 282.2<br>(255.8 to 314.5)                     | --                                             | 7.9<br>(5.0 to 11.6)                    | -3.4<br>(-14.1 to 10.8)                           | -21.6<br>(-29.8 to -10.9)                        |
| Other nutritional deficiencies                                          | --                                            | --                                             | < 0.05<br>(< 0.05 to < 0.05)            | -5.7<br>(-48.2 to 66.2)                           | -17.8<br>(-55.0 to 45.0)                         |
| <b>Other communicable, maternal, neonatal, and nutritional diseases</b> | <b>893.2</b><br><b>(850.2 to 938.6)</b>       | <b>440.6</b><br><b>(396.6 to 497.7)</b>        | <b>1.8</b><br><b>(1.2 to 2.8)</b>       | <b>22.2</b><br><b>(11.9 to 34.1)</b>              | <b>-3.4</b><br><b>(-11.0 to 5.3)</b>             |
| Sexually transmitted diseases excluding HIV                             | 742.5<br>(699.2 to 788.9)                     | 424.4<br>(379.7 to 481.5)                      | 1.4<br>(0.9 to 2.2)                     | 26.5<br>(14.1 to 40.9)                            | -2.8<br>(-11.6 to 7.6)                           |
| Syphilis                                                                | 117.8<br>(87.8 to 153.3)                      | 84.9<br>(59.6 to 114.8)                        | 0.1<br>(0.1 to 0.2)                     | 37.7<br>(18.1 to 58.0)                            | -2.3<br>(-16.5 to 13.6)                          |
| Chlamydial infection                                                    | 45.7<br>(36.0 to 57.0)                        | 38.4<br>(31.2 to 47.0)                         | 0.2<br>(0.1 to 0.3)                     | 21.7<br>(6.4 to 39.4)                             | -4.1<br>(-16.1 to 8.7)                           |
| Gonococcal infection                                                    | 41.2<br>(33.2 to 50.6)                        | 140.4<br>(110.2 to 175.0)                      | 0.4<br>(0.2 to 0.6)                     | 26.0<br>(-4.0 to 66.4)                            | -0.9<br>(-23.6 to 29.0)                          |
| Trichomoniasis                                                          | 88.0<br>(74.4 to 101.5)                       | 79.5<br>(66.6 to 93.5)                         | 0.1<br>(< 0.05 to 0.3)                  | 22.8<br>(13.6 to 32.3)                            | -2.8<br>(-8.8 to 3.1)                            |
| Genital herpes                                                          | 577.6<br>(502.3 to 668.3)                     | 54.3<br>(45.7 to 66.2)                         | 0.1<br>(< 0.05 to 0.4)                  | 22.2<br>(9.5 to 33.6)                             | -6.5<br>(-14.6 to 1.7)                           |
| Other sexually transmitted diseases                                     | 19.2<br>(14.6 to 25.2)                        | 26.9<br>(22.1 to 32.6)                         | 0.5<br>(0.3 to 0.7)                     | 29.3<br>(14.3 to 46.0)                            | -2.2<br>(-12.9 to 9.6)                           |
| Hepatitis                                                               | 230.2<br>(193.6 to 273.8)                     | 16.3<br>(13.0 to 20.3)                         | < 0.05<br>(< 0.05 to < 0.05)            | -5.6<br>(-26.5 to 17.2)                           | -25.9<br>(-39.6 to -10.6)                        |
| Acute hepatitis A                                                       | 0.1<br>(< 0.05 to 0.3)                        | 1.4<br>(0.4 to 3.3)                            | < 0.05<br>(< 0.05 to < 0.05)            | -14.5<br>(-71.5 to 216.2)                         | -26.1<br>(-70.4 to 116.2)                        |
| Hepatitis B                                                             | 165.4<br>(130.5 to 207.0)                     | 12.0<br>(9.2 to 15.5)                          | < 0.05<br>(< 0.05 to < 0.05)            | -6.5<br>(-27.9 to 18.1)                           | -27.9<br>(-43.3 to -11.4)                        |
| Hepatitis C                                                             | 64.7<br>(56.8 to 73.1)                        | 2.4<br>(2.1 to 2.8)                            | < 0.05<br>(< 0.05 to < 0.05)            | 11.3<br>(-50.0 to 136.0)                          | -7.7<br>(-54.1 to 76.2)                          |
| Acute hepatitis E                                                       | < 0.05<br>(< 0.05 to < 0.05)                  | 0.5<br>(0.4 to 0.6)                            | < 0.05<br>(< 0.05 to < 0.05)            | -9.0<br>(-17.3 to -0.2)                           | -22.4<br>(-31.1 to -11.9)                        |
| Other infectious diseases                                               | 11.9<br>(10.4 to 13.8)                        | < 0.05<br>(< 0.05 to < 0.05)                   | 0.4<br>(0.2 to 0.6)                     | 9.8<br>(-6.0 to 29.4)                             | -4.1<br>(-17.1 to 12.6)                          |
| <b>Non-communicable diseases</b>                                        | <b>2,032.9</b><br><b>(2,015.6 to 2,049.8)</b> | <b>5,515.5†</b><br><b>(5,060.6 to 5,999.3)</b> | <b>172.5</b><br><b>(126.2 to 222.5)</b> | <b>27.7</b><br><b>(23.2 to 32.7)</b>              | <b>-0.4</b><br><b>(-3.2 to 2.9)</b>              |
| <b>Neoplasms</b>                                                        | <b>5.7</b><br><b>(5.4 to 6.1)</b>             | <b>2.4</b><br><b>(2.2 to 2.7)</b>              | <b>0.8</b><br><b>(0.5 to 1.0)</b>       | <b>37.9</b><br><b>(24.9 to 55.1)</b>              | <b>-1.6</b><br><b>(-10.1 to 9.8)</b>             |
| Lip and oral cavity cancer                                              | 0.3<br>(0.2 to 0.3)                           | 0.1<br>(0.1 to 0.1)                            | < 0.05<br>(< 0.05 to < 0.05)            | 33.0<br>(8.0 to 66.3)                             | -5.5<br>(-23.1 to 19.0)                          |
| Nasopharynx cancer                                                      | < 0.05<br>(< 0.05 to < 0.05)                  | < 0.05<br>(< 0.05 to < 0.05)                   | < 0.05<br>(< 0.05 to < 0.05)            | 19.2<br>(-1.5 to 47.4)                            | -13.0<br>(-27.7 to 7.0)                          |
| Other pharynx cancer                                                    | < 0.05<br>(< 0.05 to < 0.05)                  | < 0.05<br>(< 0.05 to < 0.05)                   | < 0.05<br>(< 0.05 to < 0.05)            | 40.5<br>(9.1 to 82.5)                             | -1.0<br>(-21.8 to 27.8)                          |
| Oesophageal cancer                                                      | 0.1<br>(0.1 to 0.2)                           | 0.1<br>(0.1 to 0.1)                            | < 0.05<br>(< 0.05 to < 0.05)            | 24.7<br>(-3.2 to 60.1)                            | -11.2<br>(-29.8 to 13.3)                         |
| Stomach cancer                                                          | 0.1<br>(0.1 to 0.1)                           | 0.1<br>(0.1 to 0.1)                            | < 0.05<br>(< 0.05 to < 0.05)            | 7.7<br>(-4.8 to 21.7)                             | -22.6<br>(-33.1 to -11.0)                        |
| Colon and rectum cancer                                                 | 0.4<br>(0.3 to 0.4)                           | 0.1<br>(0.1 to 0.1)                            | < 0.05<br>(< 0.05 to 0.1)               | 46.7<br>(20.2 to 86.9)                            | 3.3<br>(-15.2 to 30.7)                           |
| Liver cancer                                                            | < 0.05<br>(< 0.05 to < 0.05)                  | 0.1<br>(0.1 to 0.1)                            | < 0.05<br>(< 0.05 to < 0.05)            | 41.3<br>(19.8 to 63.0)                            | 0.2<br>(-14.7 to 14.6)                           |
| Liver cancer due to hepatitis B                                         | < 0.05<br>(< 0.05 to < 0.05)                  | < 0.05<br>(< 0.05 to 0.1)                      | < 0.05<br>(< 0.05 to < 0.05)            | 41.4<br>(19.8 to 63.4)                            | 0.3<br>(-15.6 to 15.3)                           |

| Cause                                              | Prevalence in thousands (95% UI)        | Incidence in thousands (95% UI)       | YLDs in thousands (95% UI)          |                                                   |                                                  |
|----------------------------------------------------|-----------------------------------------|---------------------------------------|-------------------------------------|---------------------------------------------------|--------------------------------------------------|
|                                                    | 2016 counts                             | 2016 counts                           | 2016 counts                         | Percentage change in counts between 2006 and 2016 | Percentage change in rates between 2006 and 2016 |
| Liver cancer due to hepatitis C                    | < 0.05<br>(< 0.05 to < 0.05)            | < 0.05<br>(< 0.05 to < 0.05)          | < 0.05<br>(< 0.05 to < 0.05)        | 42.2<br>(18.9 to 66.3)                            | 0.0<br>(-15.6 to 15.8)                           |
| Liver cancer due to alcohol use                    | < 0.05<br>(< 0.05 to < 0.05)            | < 0.05<br>(< 0.05 to < 0.05)          | < 0.05<br>(< 0.05 to < 0.05)        | 41.8<br>(19.5 to 64.8)                            | -0.5<br>(-15.8 to 15.8)                          |
| Liver cancer due to other causes                   | < 0.05<br>(< 0.05 to < 0.05)            | < 0.05<br>(< 0.05 to < 0.05)          | < 0.05<br>(< 0.05 to < 0.05)        | 40.1<br>(17.6 to 61.2)                            | 0.6<br>(-14.5 to 15.2)                           |
| Gallbladder and biliary tract cancer               | < 0.05<br>(< 0.05 to < 0.05)            | < 0.05<br>(< 0.05 to < 0.05)          | < 0.05<br>(< 0.05 to < 0.05)        | 21.8<br>(4.4 to 42.0)                             | -14.3<br>(-25.8 to -1.2)                         |
| Pancreatic cancer                                  | < 0.05<br>(< 0.05 to < 0.05)            | 0.1<br>(0.1 to 0.1)                   | < 0.05<br>(< 0.05 to < 0.05)        | 45.1<br>(31.0 to 60.3)                            | 1.4<br>(-9.2 to 13.2)                            |
| Larynx cancer                                      | 0.1<br>(0.1 to 0.1)                     | < 0.05<br>(< 0.05 to < 0.05)          | < 0.05<br>(< 0.05 to < 0.05)        | 31.0<br>(5.7 to 67.0)                             | -6.3<br>(-24.5 to 18.9)                          |
| Tracheal, bronchus, and lung cancer                | 0.2<br>(0.2 to 0.2)                     | 0.2<br>(0.2 to 0.2)                   | < 0.05<br>(< 0.05 to 0.1)           | 19.5<br>(-7.5 to 54.4)                            | -15.0<br>(-33.3 to 8.7)                          |
| Malignant skin melanoma                            | 0.1<br>(0.1 to 0.2)                     | < 0.05<br>(< 0.05 to < 0.05)          | < 0.05<br>(< 0.05 to < 0.05)        | 70.5<br>(35.5 to 107.5)                           | 18.6<br>(-5.1 to 44.9)                           |
| Non-melanoma skin cancer                           | 0.1<br>(< 0.05 to 0.1)                  | 0.2<br>(0.1 to 0.3)                   | < 0.05<br>(< 0.05 to < 0.05)        | 48.8<br>(15.2 to 86.1)                            | 3.0<br>(-22.7 to 32.4)                           |
| Non-melanoma skin cancer (squamous-cell carcinoma) | < 0.05<br>(< 0.05 to 0.1)               | 0.1<br>(0.1 to 0.1)                   | < 0.05<br>(< 0.05 to < 0.05)        | 49.8<br>(12.8 to 91.1)                            | 3.4<br>(-23.4 to 35.6)                           |
| Non-melanoma skin cancer (basal-cell carcinoma)    | < 0.05<br>(< 0.05 to < 0.05)            | 0.1<br>(0.1 to 0.2)                   | < 0.05<br>(< 0.05 to < 0.05)        | 39.2<br>(21.9 to 57.0)                            | -1.5<br>(-15.7 to 15.6)                          |
| Breast cancer                                      | 1.2<br>(1.0 to 1.5)                     | 0.3<br>(0.2 to 0.3)                   | 0.1<br>(0.1 to 0.2)                 | 45.5<br>(13.4 to 86.8)                            | 0.4<br>(-20.4 to 27.2)                           |
| Cervical cancer                                    | 1.3<br>(0.7 to 1.8)                     | 0.4<br>(0.2 to 0.5)                   | 0.1<br>(0.1 to 0.2)                 | 17.4<br>(-9.7 to 56.4)                            | -19.4<br>(-35.9 to 3.7)                          |
| Uterine cancer                                     | 0.2<br>(0.1 to 0.2)                     | < 0.05<br>(< 0.05 to < 0.05)          | < 0.05<br>(< 0.05 to < 0.05)        | 56.5<br>(25.4 to 95.8)                            | 6.7<br>(-13.8 to 32.7)                           |
| Ovarian cancer                                     | 0.1<br>(0.1 to 0.2)                     | < 0.05<br>(< 0.05 to 0.1)             | < 0.05<br>(< 0.05 to < 0.05)        | 39.6<br>(8.1 to 80.4)                             | -0.9<br>(-25.9 to 32.7)                          |
| Prostate cancer                                    | 1.0<br>(0.6 to 1.2)                     | 0.3<br>(0.2 to 0.3)                   | 0.1<br>(0.1 to 0.2)                 | 81.3<br>(35.8 to 122.6)                           | 23.4<br>(-5.3 to 48.9)                           |
| Testicular cancer                                  | < 0.05<br>(< 0.05 to < 0.05)            | < 0.05<br>(< 0.05 to < 0.05)          | < 0.05<br>(< 0.05 to < 0.05)        | 42.1<br>(16.9 to 75.3)                            | 0.9<br>(-17.2 to 24.6)                           |
| Kidney cancer                                      | 0.2<br>(0.1 to 0.2)                     | < 0.05<br>(< 0.05 to 0.1)             | < 0.05<br>(< 0.05 to < 0.05)        | 45.9<br>(13.9 to 85.8)                            | 11.5<br>(-9.9 to 36.3)                           |
| Bladder cancer                                     | 0.2<br>(0.1 to 0.2)                     | < 0.05<br>(< 0.05 to 0.1)             | < 0.05<br>(< 0.05 to < 0.05)        | 46.9<br>(21.8 to 76.2)                            | 3.0<br>(-14.2 to 23.8)                           |
| Brain and nervous system cancer                    | 0.1<br>(0.1 to 0.1)                     | < 0.05<br>(< 0.05 to < 0.05)          | < 0.05<br>(< 0.05 to < 0.05)        | 32.4<br>(20.4 to 47.0)                            | 1.3<br>(-7.8 to 10.7)                            |
| Thyroid cancer                                     | 0.1<br>(0.1 to 0.1)                     | < 0.05<br>(< 0.05 to < 0.05)          | < 0.05<br>(< 0.05 to < 0.05)        | 72.0<br>(31.6 to 128.8)                           | 13.6<br>(-12.3 to 50.0)                          |
| Mesothelioma                                       | < 0.05<br>(< 0.05 to < 0.05)            | < 0.05<br>(< 0.05 to < 0.05)          | < 0.05<br>(< 0.05 to < 0.05)        | 29.0<br>(4.5 to 56.0)                             | -7.9<br>(-24.8 to 10.6)                          |
| Hodgkin lymphoma                                   | < 0.05<br>(< 0.05 to < 0.05)            | < 0.05<br>(< 0.05 to < 0.05)          | < 0.05<br>(< 0.05 to < 0.05)        | 17.9<br>(6.0 to 37.9)                             | -15.0<br>(-22.8 to -1.9)                         |
| Non-Hodgkin's lymphoma                             | 0.1<br>(0.1 to 0.1)                     | < 0.05<br>(< 0.05 to < 0.05)          | < 0.05<br>(< 0.05 to < 0.05)        | 47.0<br>(29.4 to 65.4)                            | 6.5<br>(-5.6 to 20.9)                            |
| Multiple myeloma                                   | < 0.05<br>(< 0.05 to < 0.05)            | < 0.05<br>(< 0.05 to < 0.05)          | < 0.05<br>(< 0.05 to < 0.05)        | 50.0<br>(31.1 to 75.1)                            | 5.5<br>(-9.5 to 25.6)                            |
| Leukaemia                                          | 0.2<br>(0.1 to 0.3)                     | 0.1<br>(< 0.05 to 0.1)                | < 0.05<br>(< 0.05 to < 0.05)        | 17.2<br>(0.5 to 35.2)                             | -11.4<br>(-23.6 to 2.7)                          |
| Acute lymphoid leukaemia                           | < 0.05<br>(< 0.05 to < 0.05)            | < 0.05<br>(< 0.05 to < 0.05)          | < 0.05<br>(< 0.05 to < 0.05)        | 14.1<br>(-17.1 to 48.7)                           | -2.6<br>(-26.0 to 21.4)                          |
| Chronic lymphoid leukaemia                         | < 0.05<br>(< 0.05 to < 0.05)            | < 0.05<br>(< 0.05 to < 0.05)          | < 0.05<br>(< 0.05 to < 0.05)        | 37.4<br>(12.8 to 63.3)                            | -3.4<br>(-20.1 to 15.8)                          |
| Acute myeloid leukaemia                            | < 0.05<br>(< 0.05 to < 0.05)            | < 0.05<br>(< 0.05 to < 0.05)          | < 0.05<br>(< 0.05 to < 0.05)        | 29.7<br>(12.3 to 51.9)                            | 3.9<br>(-7.7 to 18.3)                            |
| Chronic myeloid leukaemia                          | < 0.05<br>(< 0.05 to < 0.05)            | < 0.05<br>(< 0.05 to < 0.05)          | < 0.05<br>(< 0.05 to < 0.05)        | 16.9<br>(-2.7 to 43.5)                            | -15.4<br>(-28.2 to 1.5)                          |
| Other leukaemia                                    | 0.1<br>(< 0.05 to 0.1)                  | < 0.05<br>(< 0.05 to < 0.05)          | < 0.05<br>(< 0.05 to < 0.05)        | 11.2<br>(-8.6 to 33.8)                            | -16.7<br>(-32.4 to 2.5)                          |
| Other neoplasms                                    | 0.4<br>(0.3 to 0.5)                     | 0.1<br>(0.1 to 0.2)                   | < 0.05<br>(< 0.05 to 0.1)           | 34.4<br>(9.8 to 58.3)                             | 0.4<br>(-15.5 to 15.3)                           |
| <b>Cardiovascular diseases</b>                     | <b>76.8</b><br><b>(73.0 to 80.4)</b>    | <b>8.8†</b><br><b>(8.3 to 9.3)</b>    | <b>4.3</b><br><b>(3.1 to 5.7)</b>   | <b>37.4</b><br><b>(31.8 to 43.1)</b>              | <b>-0.8</b><br><b>(-4.0 to 2.6)</b>              |
| Rheumatic heart disease                            | 0.1<br>(0.1 to 0.2)                     | 0.1<br>(0.1 to 0.1)                   | < 0.05<br>(< 0.05 to < 0.05)        | 21.6<br>(4.0 to 40.5)                             | -10.0<br>(-26.0 to 8.6)                          |
| Ischaemic heart disease                            | 27.9<br>(26.1 to 29.8)                  | 3.6<br>(3.3 to 3.9)                   | 1.2<br>(0.8 to 1.7)                 | 39.3<br>(31.8 to 47.2)                            | -1.1<br>(-5.5 to 3.2)                            |
| Cerebrovascular disease                            | 10.2<br>(9.6 to 11.0)                   | 1.6†<br>(1.4 to 1.7)                  | 1.5<br>(1.1 to 1.9)                 | 39.8<br>(30.2 to 50.6)                            | -1.4<br>(-8.2 to 5.5)                            |
| Ischaemic stroke                                   | 9.1<br>(8.2 to 10.0)                    | 1.1†<br>(1.0 to 1.2)                  | 1.2<br>(0.9 to 1.6)                 | 39.9<br>(28.9 to 52.7)                            | -1.7<br>(-9.0 to 6.5)                            |
| Hemorrhagic stroke                                 | 1.7<br>(1.5 to 1.9)                     | 0.5†<br>(0.4 to 0.5)                  | 0.2<br>(0.2 to 0.3)                 | 39.1<br>(22.5 to 57.5)                            | -0.1<br>(-12.6 to 13.7)                          |
| Hypertensive heart disease                         | 1.1<br>(0.9 to 1.4)                     | --                                    | 0.1<br>(0.1 to 0.1)                 | 38.5<br>(20.4 to 60.0)                            | -5.3<br>(-16.0 to 6.0)                           |
| Cardiomyopathy and myocarditis                     | 2.0<br>(1.8 to 2.2)                     | 0.6†<br>(0.5 to 0.7)                  | 0.2<br>(0.1 to 0.3)                 | 35.1<br>(19.2 to 51.7)                            | -0.9<br>(-11.7 to 10.5)                          |
| Myocarditis                                        | 0.4<br>(0.3 to 0.4)                     | 0.6<br>(0.5 to 0.7)                   | < 0.05<br>(< 0.05 to < 0.05)        | 26.0<br>(17.7 to 34.2)                            | 0.3<br>(-6.8 to 7.7)                             |
| Alcoholic cardiomyopathy                           | 0.2<br>(0.2 to 0.3)                     | --                                    | < 0.05<br>(< 0.05 to < 0.05)        | 42.5<br>(7.7 to 84.6)                             | -1.1<br>(-22.4 to 26.9)                          |
| Other cardiomyopathy                               | 1.7<br>(1.4 to 2.0)                     | --                                    | 0.1<br>(0.1 to 0.2)                 | 36.0<br>(16.4 to 56.7)                            | -1.0<br>(-13.4 to 12.1)                          |
| Atrial fibrillation and flutter                    | 5.5<br>(4.8 to 6.2)                     | 0.5<br>(0.4 to 0.6)                   | 0.4<br>(0.3 to 0.6)                 | 44.7<br>(33.0 to 57.7)                            | 0.5<br>(-6.1 to 7.3)                             |
| Peripheral vascular disease                        | 24.1<br>(20.9 to 27.9)                  | 2.2<br>(1.9 to 2.6)                   | 0.1<br>(0.1 to 0.2)                 | 36.5<br>(25.9 to 48.7)                            | -4.9<br>(-12.0 to 3.6)                           |
| Endocarditis                                       | 0.1<br>(0.1 to 0.1)                     | 0.3<br>(0.2 to 0.3)                   | < 0.05<br>(< 0.05 to < 0.05)        | 27.5<br>(16.5 to 40.2)                            | 1.4<br>(-11.9 to 16.3)                           |
| Other cardiovascular and circulatory diseases      | 14.9<br>(11.9 to 18.5)                  | --                                    | 0.8<br>(0.5 to 1.1)                 | 27.7<br>(14.2 to 42.3)                            | 2.0<br>(-6.0 to 10.1)                            |
| <b>Chronic respiratory diseases</b>                | <b>198.9</b><br><b>(189.4 to 208.9)</b> | <b>34.9†</b><br><b>(32.5 to 37.3)</b> | <b>10.0</b><br><b>(7.6 to 12.9)</b> | <b>25.2</b><br><b>(20.6 to 30.3)</b>              | <b>-1.5</b><br><b>(-4.9 to 2.1)</b>              |
| Chronic obstructive pulmonary disease              | 44.8<br>(42.7 to 46.8)                  | 3.4<br>(3.2 to 3.5)                   | 3.6<br>(3.1 to 4.0)                 | 35.1<br>(27.4 to 44.0)                            | -3.4<br>(-8.7 to 2.6)                            |
| Pneumoconiosis                                     | 0.1<br>(0.1 to 0.1)                     | < 0.05<br>(< 0.05 to < 0.05)          | < 0.05<br>(< 0.05 to < 0.05)        | 36.6<br>(27.9 to 44.4)                            | -3.6<br>(-9.0 to 1.6)                            |
| Silicosis                                          | < 0.05<br>(< 0.05 to < 0.05)            | < 0.05<br>(< 0.05 to < 0.05)          | < 0.05<br>(< 0.05 to < 0.05)        | 35.4<br>(25.8 to 44.5)                            | -4.4<br>(-9.6 to 0.6)                            |



| Cause                                                          | Prevalence in thousands (95% UI)        | Incidence in thousands (95% UI)          | YLDs in thousands (95% UI)           |                                                   |                                                  |
|----------------------------------------------------------------|-----------------------------------------|------------------------------------------|--------------------------------------|---------------------------------------------------|--------------------------------------------------|
|                                                                | 2016 counts                             | 2016 counts                              | 2016 counts                          | Percentage change in counts between 2006 and 2016 | Percentage change in rates between 2006 and 2016 |
| Asbestosis                                                     | < 0.05<br>(< 0.05 to < 0.05)            | < 0.05<br>(< 0.05 to < 0.05)             | < 0.05<br>(< 0.05 to < 0.05)         | 39.6<br>(31.9 to 47.1)                            | -1.5<br>(-6.5 to 3.7)                            |
| Coal workers pneumoconiosis                                    | --                                      | --                                       | --                                   | --                                                | --                                               |
| Other pneumoconiosis                                           | < 0.05<br>(< 0.05 to < 0.05)            | < 0.05<br>(< 0.05 to < 0.05)             | < 0.05<br>(< 0.05 to < 0.05)         | 34.3<br>(20.2 to 48.3)                            | -5.3<br>(-14.7 to 4.4)                           |
| Asthma                                                         | 158.3<br>(146.9 to 171.2)               | 31.4<br>(29.1 to 33.9)                   | 6.2<br>(4.1 to 8.9)                  | 19.2<br>(13.6 to 25.1)                            | -0.5<br>(-4.6 to 3.6)                            |
| Interstitial lung disease and pulmonary sarcoidosis            | 0.4<br>(0.3 to 0.4)                     | 0.1<br>(< 0.05 to 0.1)                   | < 0.05<br>(< 0.05 to 0.1)            | 34.5<br>(24.0 to 47.2)                            | -0.8<br>(-11.5 to 11.6)                          |
| Other chronic respiratory diseases                             | --                                      | --                                       | 0.2<br>(0.2 to 0.3)                  | 59.6<br>(36.0 to 93.4)                            | 29.9<br>(14.1 to 50.9)                           |
| <b>Cirrhosis and other chronic liver diseases</b>              | <b>3.4</b><br><b>(3.2 to 3.6)</b>       | <b>0.3</b><br><b>(0.3 to 0.3)</b>        | <b>0.3</b><br><b>(0.2 to 0.4)</b>    | <b>25.7</b><br><b>(9.1 to 45.1)</b>               | <b>1.2</b><br><b>(-9.4 to 13.4)</b>              |
| Cirrhosis and other chronic liver diseases due to hepatitis B  | 0.9<br>(0.8 to 1.0)                     | 0.1<br>(0.1 to 0.1)                      | 0.1<br>(< 0.05 to 0.1)               | 37.9<br>(5.8 to 79.6)                             | 1.6<br>(-17.4 to 25.3)                           |
| Cirrhosis and other chronic liver diseases due to hepatitis C  | 0.4<br>(0.4 to 0.5)                     | < 0.05<br>(< 0.05 to < 0.05)             | < 0.05<br>(< 0.05 to < 0.05)         | 39.6<br>(12.1 to 69.6)                            | 3.1<br>(-19.9 to 29.8)                           |
| Cirrhosis and other chronic liver diseases due to alcohol use  | 0.9<br>(0.8 to 1.0)                     | 0.1<br>(0.1 to 0.1)                      | 0.1<br>(< 0.05 to 0.1)               | 39.3<br>(8.5 to 76.7)                             | -0.6<br>(-19.5 to 21.1)                          |
| Cirrhosis and other chronic liver diseases due to other causes | 1.2<br>(1.1 to 1.3)                     | 0.1<br>(0.1 to 0.1)                      | 0.1<br>(0.1 to 0.2)                  | 14.3<br>(-7.7 to 44.4)                            | 1.5<br>(-16.6 to 25.8)                           |
| <b>Digestive diseases</b>                                      | <b>31.0</b><br><b>(29.2 to 32.7)</b>    | <b>42.3†</b><br><b>(40.0 to 44.8)</b>    | <b>0.9</b><br><b>(0.6 to 1.2)</b>    | <b>34.1</b><br><b>(22.9 to 45.4)</b>              | <b>2.3</b><br><b>(-4.3 to 9.2)</b>               |
| Peptic ulcer disease                                           | 6.5<br>(5.9 to 7.2)                     | 1.9<br>(1.7 to 2.2)                      | 0.1<br>(0.1 to 0.2)                  | 52.8<br>(34.6 to 73.5)                            | 7.6<br>(-3.0 to 19.6)                            |
| Gastritis and duodenitis                                       | 12.6<br>(11.1 to 14.2)                  | 15.8<br>(14.0 to 17.8)                   | 0.2<br>(0.1 to 0.3)                  | 57.8<br>(40.5 to 77.4)                            | 17.0<br>(6.0 to 30.2)                            |
| Appendicitis                                                   | 0.3<br>(0.3 to 0.3)                     | 8.0<br>(7.4 to 8.8)                      | 0.1<br>(0.1 to 0.1)                  | 13.2<br>(-19.0 to 58.7)                           | -2.6<br>(-26.1 to 28.5)                          |
| Paralytic ileus and intestinal obstruction                     | < 0.05<br>(< 0.05 to < 0.05)            | 1.0<br>(0.9 to 1.1)                      | < 0.05<br>(< 0.05 to < 0.05)         | 29.4<br>(24.0 to 34.6)                            | 1.2<br>(-6.0 to 8.2)                             |
| Inguinal, femoral, and abdominal hernia                        | 10.7<br>(9.0 to 12.5)                   | 6.5<br>(5.7 to 7.3)                      | 0.3<br>(0.2 to 0.4)                  | 22.2<br>(4.9 to 42.0)                             | -7.8<br>(-19.1 to 5.2)                           |
| Inflammatory bowel disease                                     | 0.2<br>(0.2 to 0.2)                     | 0.9<br>(0.8 to 0.9)                      | < 0.05<br>(< 0.05 to < 0.05)         | 46.5<br>(39.7 to 54.3)                            | 14.2<br>(7.5 to 21.6)                            |
| Vascular intestinal disorders                                  | < 0.05<br>(< 0.05 to < 0.05)            | 0.1<br>(0.1 to 0.1)                      | < 0.05<br>(< 0.05 to < 0.05)         | 28.9<br>(22.2 to 36.5)                            | 2.5<br>(-1.8 to 6.9)                             |
| Gallbladder and biliary diseases                               | 1.8<br>(1.5 to 2.0)                     | 7.8<br>(6.7 to 9.0)                      | < 0.05<br>(< 0.05 to 0.1)            | 36.9<br>(12.6 to 65.5)                            | -2.2<br>(-21.5 to 20.6)                          |
| Pancreatitis                                                   | < 0.05<br>(< 0.05 to < 0.05)            | 0.3<br>(0.3 to 0.4)                      | < 0.05<br>(< 0.05 to < 0.05)         | 35.4<br>(30.1 to 41.2)                            | 1.5<br>(-1.7 to 5.0)                             |
| Other digestive diseases                                       | --                                      | --                                       | 0.1<br>(< 0.05 to 0.1)               | 36.3<br>(23.1 to 50.8)                            | 5.9<br>(-1.5 to 13.6)                            |
| <b>Neurological disorders</b>                                  | <b>720.4</b><br><b>(685.1 to 757.5)</b> | <b>338.4</b><br><b>(285.6 to 396.1)</b>  | <b>19.9</b><br><b>(12.5 to 28.4)</b> | <b>25.2</b><br><b>(-7.0 to 75.0)</b>              | <b>-0.4</b><br><b>(-24.2 to 34.7)</b>            |
| Alzheimer's disease and other dementias                        | 3.9<br>(3.3 to 4.6)                     | 0.7<br>(0.6 to 0.8)                      | 0.6<br>(0.4 to 0.7)                  | 42.9<br>(35.4 to 51.5)                            | -0.8<br>(-5.4 to 4.5)                            |
| Parkinson's disease                                            | 0.5<br>(0.4 to 0.6)                     | 0.1<br>(< 0.05 to 0.1)                   | 0.1<br>(< 0.05 to 0.1)               | 53.9<br>(31.9 to 80.3)                            | 7.1<br>(-6.9 to 22.5)                            |
| Epilepsy                                                       | 13.8<br>(4.8 to 21.4)                   | 1.2<br>(0.4 to 1.9)                      | 5.0<br>(1.5 to 9.4)                  | 16.2<br>(-63.1 to 333.2)                          | -4.5<br>(-69.4 to 261.3)                         |
| Multiple sclerosis                                             | 0.2<br>(0.2 to 0.2)                     | < 0.05<br>(< 0.05 to < 0.05)             | 0.1<br>(< 0.05 to 0.1)               | 50.0<br>(42.8 to 58.0)                            | 9.6<br>(4.0 to 15.8)                             |
| Motor neuron disease                                           | < 0.05<br>(< 0.05 to < 0.05)            | < 0.05<br>(< 0.05 to < 0.05)             | < 0.05<br>(< 0.05 to < 0.05)         | 27.7<br>(22.5 to 33.0)                            | 3.1<br>(-0.2 to 6.4)                             |
| Migraine                                                       | 263.4<br>(248.2 to 279.6)               | 31.4<br>(29.6 to 33.4)                   | 11.3<br>(7.3 to 16.0)                | 27.1<br>(21.8 to 32.5)                            | 0.4<br>(-3.4 to 4.2)                             |
| Tension-type headache                                          | 535.0<br>(471.1 to 607.2)               | 305.0<br>(252.9 to 362.0)                | 1.9<br>(1.2 to 2.8)                  | 28.4<br>(21.2 to 36.6)                            | -0.2<br>(-5.3 to 5.5)                            |
| Other neurological disorders                                   | < 0.05<br>(< 0.05 to < 0.05)            | < 0.05<br>(< 0.05 to < 0.05)             | 1.0<br>(0.3 to 1.9)                  | 35.9<br>(-54.7 to 366.8)                          | 13.9<br>(-60.9 to 270.9)                         |
| <b>Mental and substance use disorders</b>                      | <b>349.2</b><br><b>(336.3 to 361.6)</b> | <b>143.2†</b><br><b>(132.8 to 156.1)</b> | <b>46.7</b><br><b>(34.0 to 60.7)</b> | <b>23.8</b><br><b>(20.9 to 27.1)</b>              | <b>-0.9</b><br><b>(-3.2 to 1.5)</b>              |
| Schizophrenia                                                  | 4.2<br>(3.6 to 4.8)                     | 0.3<br>(0.3 to 0.4)                      | 2.6<br>(1.9 to 3.3)                  | 40.6<br>(28.2 to 55.6)                            | 2.6<br>(-6.1 to 12.3)                            |
| Alcohol use disorders                                          | 36.8<br>(31.5 to 42.6)                  | 18.9<br>(16.0 to 22.0)                   | 3.6<br>(2.5 to 5.1)                  | 27.0<br>(16.9 to 38.7)                            | -1.1<br>(-9.0 to 7.2)                            |
| Drug use disorders                                             | 17.4<br>(15.6 to 19.2)                  | 2.3<br>(2.1 to 2.6)                      | 5.1<br>(3.5 to 6.8)                  | 26.6<br>(14.0 to 40.6)                            | -1.0<br>(-10.3 to 8.8)                           |
| Opioid use disorders                                           | 11.3<br>(9.4 to 13.6)                   | 1.2<br>(1.0 to 1.4)                      | 4.7<br>(3.2 to 6.3)                  | 26.7<br>(13.2 to 42.3)                            | -1.3<br>(-11.2 to 9.6)                           |
| Cocaine use disorders                                          | 0.4<br>(0.4 to 0.5)                     | < 0.05<br>(< 0.05 to 0.1)                | 0.1<br>(< 0.05 to 0.1)               | 28.9<br>(21.8 to 36.6)                            | 1.1<br>(-4.2 to 7.1)                             |
| Amphetamine use disorders                                      | 0.3<br>(0.2 to 0.4)                     | < 0.05<br>(< 0.05 to 0.1)                | < 0.05<br>(< 0.05 to 0.1)            | 19.9<br>(-25.0 to 83.2)                           | 3.5<br>(-31.8 to 51.6)                           |
| Cannabis use disorders                                         | 5.3<br>(4.4 to 6.3)                     | 0.9<br>(0.7 to 1.1)                      | 0.1<br>(0.1 to 0.2)                  | 19.9<br>(-1.0 to 46.2)                            | 0.4<br>(-16.4 to 20.6)                           |
| Other drug use disorders                                       | 0.9<br>(0.8 to 1.0)                     | 0.2<br>(0.1 to 0.2)                      | 0.2<br>(0.1 to 0.2)                  | 32.3<br>(11.4 to 57.0)                            | 3.0<br>(-11.2 to 20.0)                           |
| Depressive disorders                                           | 84.0<br>(78.5 to 90.8)                  | 94.8<br>(84.8 to 107.1)                  | 14.5<br>(10.0 to 19.8)               | 25.3<br>(19.1 to 31.4)                            | -2.4<br>(-6.5 to 1.8)                            |
| Major depressive disorder                                      | 58.8<br>(52.4 to 66.4)                  | 90.2<br>(80.0 to 102.7)                  | 11.9<br>(8.1 to 16.4)                | 23.9<br>(16.7 to 31.2)                            | -3.0<br>(-7.8 to 2.0)                            |
| Dysthymia                                                      | 26.9<br>(23.3 to 31.3)                  | 4.7<br>(4.1 to 5.4)                      | 2.6<br>(1.7 to 3.8)                  | 32.0<br>(26.0 to 38.3)                            | 0.2<br>(-3.2 to 3.6)                             |
| Bipolar disorder                                               | 13.6<br>(11.6 to 15.9)                  | 1.4<br>(1.2 to 1.6)                      | 2.8<br>(1.7 to 4.1)                  | 24.4<br>(15.3 to 33.8)                            | 0.6<br>(-5.4 to 7.3)                             |
| Anxiety disorders                                              | 78.8<br>(70.5 to 87.6)                  | 13.5<br>(12.3 to 14.9)                   | 7.6<br>(5.2 to 10.4)                 | 22.1<br>(14.1 to 31.6)                            | -0.1<br>(-6.4 to 6.7)                            |
| Eating disorders                                               | 3.9<br>(3.2 to 4.7)                     | 2.0<br>(1.5 to 2.7)                      | 0.8<br>(0.5 to 1.2)                  | 33.0<br>(17.2 to 48.9)                            | 11.2<br>(-1.2 to 24.6)                           |
| Anorexia nervosa                                               | 0.9<br>(0.7 to 1.3)                     | 0.3<br>(0.2 to 0.5)                      | 0.2<br>(0.1 to 0.3)                  | 22.0<br>(-0.4 to 51.2)                            | 9.0<br>(-11.6 to 34.7)                           |
| Bulimia nervosa                                                | 2.8<br>(2.1 to 3.8)                     | 1.7<br>(1.2 to 2.3)                      | 0.6<br>(0.4 to 0.9)                  | 37.0<br>(18.4 to 58.0)                            | 12.0<br>(-2.9 to 27.7)                           |
| Autistic spectrum disorders                                    | 19.5<br>(17.5 to 22.0)                  | 0.2<br>(0.1 to 0.2)                      | 2.8<br>(1.9 to 4.0)                  | 17.4<br>(11.2 to 23.9)                            | 0.5<br>(-4.4 to 5.3)                             |
| Autism                                                         | 5.6<br>(4.9 to 6.5)                     | < 0.05<br>(< 0.05 to < 0.05)             | 1.4<br>(0.9 to 2.1)                  | 15.6<br>(5.8 to 26.7)                             | 0.4<br>(-7.9 to 9.6)                             |
| Asperger syndrome and other autistic spectrum disorders        | 13.8<br>(11.5 to 16.7)                  | 0.1<br>(0.1 to 0.2)                      | 1.4<br>(0.9 to 2.0)                  | 19.4<br>(13.2 to 25.4)                            | 0.5<br>(-4.0 to 5.2)                             |

| Cause                                                      | Prevalence in thousands (95% UI)              | Incidence in thousands (95% UI)                | YLDs in thousands (95% UI)           |                                                   |                                                  |
|------------------------------------------------------------|-----------------------------------------------|------------------------------------------------|--------------------------------------|---------------------------------------------------|--------------------------------------------------|
|                                                            | 2016 counts                                   | 2016 counts                                    | 2016 counts                          | Percentage change in counts between 2006 and 2016 | Percentage change in rates between 2006 and 2016 |
| Attention-deficit/hyperactivity disorder                   | 29.1<br>(26.1 to 32.7)                        | 1.4<br>(1.2 to 1.7)                            | 0.4<br>(0.2 to 0.6)                  | 13.5<br>(5.9 to 22.0)                             | 0.3<br>(-6.2 to 7.3)                             |
| Conduct disorder                                           | 19.5<br>(16.0 to 23.0)                        | 6.7<br>(5.4 to 8.1)                            | 2.4<br>(1.4 to 3.6)                  | 2.6<br>(-3.5 to 9.5)                              | 0.1<br>(-5.8 to 6.8)                             |
| Idiopathic developmental intellectual disability           | 36.1<br>(21.7 to 50.8)                        | --                                             | 1.4<br>(0.6 to 2.4)                  | 9.0<br>(1.8 to 15.9)                              | -8.4<br>(-14.6 to -2.8)                          |
| Other mental and substance use disorders                   | 38.7<br>(33.9 to 44.9)                        | 1.6<br>(1.4 to 1.8)                            | 2.9<br>(2.0 to 4.1)                  | 33.7<br>(26.6 to 41.5)                            | 0.7<br>(-4.0 to 5.8)                             |
| <b>Diabetes, urogenital, blood, and endocrine diseases</b> | <b>880.1</b><br><b>(865.6 to 893.3)</b>       | <b>249.5†</b><br><b>(233.4 to 266.6)</b>       | <b>16.8</b><br><b>(12.0 to 22.7)</b> | <b>37.8</b><br><b>(33.9 to 42.0)</b>              | <b>0.6</b><br><b>(-2.3 to 3.4)</b>               |
| Diabetes mellitus                                          | 104.4<br>(93.9 to 116.8)                      | 7.7<br>(6.9 to 8.6)                            | 8.3<br>(5.7 to 11.5)                 | 44.2<br>(37.9 to 50.6)                            | 2.3<br>(-2.2 to 6.9)                             |
| Acute glomerulonephritis                                   | < 0.05<br>(< 0.05 to < 0.05)                  | 0.3<br>(0.3 to 0.4)                            | < 0.05<br>(< 0.05 to < 0.05)         | 23.6<br>(16.6 to 30.1)                            | -1.0<br>(-5.6 to 3.8)                            |
| Chronic kidney disease                                     | 121.7<br>(108.5 to 135.3)                     | 9.5<br>(8.3 to 10.7)                           | 3.1<br>(2.3 to 4.0)                  | 41.0<br>(32.3 to 50.1)                            | 0.9<br>(-4.3 to 6.8)                             |
| Chronic kidney disease due to diabetes mellitus            | 38.8<br>(32.7 to 45.6)                        | 2.9<br>(2.4 to 3.6)                            | 0.9<br>(0.7 to 1.2)                  | 45.7<br>(31.7 to 61.4)                            | 2.0<br>(-5.7 to 10.5)                            |
| Chronic kidney disease due to hypertension                 | 25.2<br>(21.5 to 29.1)                        | 2.4<br>(2.0 to 2.9)                            | 0.5<br>(0.3 to 0.7)                  | 44.4<br>(29.7 to 61.4)                            | 0.3<br>(-9.4 to 10.8)                            |
| Chronic kidney disease due to glomerulonephritis           | 24.3<br>(20.9 to 27.8)                        | 1.5<br>(1.2 to 1.8)                            | 0.8<br>(0.6 to 1.2)                  | 39.2<br>(25.4 to 55.3)                            | 2.4<br>(-5.6 to 11.3)                            |
| Chronic kidney disease due to other causes                 | 33.5<br>(27.7 to 39.5)                        | 2.8<br>(2.3 to 3.2)                            | 0.9<br>(0.6 to 1.2)                  | 36.3<br>(22.0 to 51.9)                            | -1.2<br>(-8.9 to 7.2)                            |
| Urinary diseases and male infertility                      | 31.2<br>(27.7 to 34.9)                        | 120.8†<br>(106.9 to 135.9)                     | 0.9<br>(0.6 to 1.3)                  | 38.6<br>(29.3 to 47.9)                            | 0.2<br>(-5.9 to 7.2)                             |
| Interstitial nephritis and urinary tract infections        | 2.0<br>(1.7 to 2.3)                           | 104.1<br>(90.9 to 118.7)                       | 0.1<br>(< 0.05 to 0.1)               | 24.6<br>(3.8 to 47.2)                             | 1.2<br>(-14.4 to 17.1)                           |
| Urolithiasis                                               | 0.5<br>(0.5 to 0.6)                           | 13.9<br>(12.1 to 15.9)                         | < 0.05<br>(< 0.05 to 0.1)            | 37.8<br>(28.0 to 48.2)                            | 1.8<br>(-5.8 to 10.6)                            |
| Benign prostatic hyperplasia                               | 22.0<br>(18.7 to 25.5)                        | 2.9<br>(2.4 to 3.4)                            | 0.7<br>(0.5 to 1.0)                  | 42.6<br>(31.2 to 54.9)                            | 0.7<br>(-6.2 to 8.5)                             |
| Male infertility                                           | 5.6<br>(4.1 to 7.6)                           | --                                             | < 0.05<br>(< 0.05 to 0.1)            | 38.0<br>(23.2 to 54.6)                            | -0.1<br>(-10.1 to 11.3)                          |
| Other urinary diseases                                     | --                                            | --                                             | < 0.05<br>(< 0.05 to 0.1)            | 7.5<br>(-5.2 to 20.2)                             | -15.3<br>(-23.6 to -6.2)                         |
| Gynecological diseases                                     | 269.6<br>(257.0 to 281.2)                     | 107.7†<br>(99.5 to 116.2)                      | 3.1<br>(2.1 to 4.5)                  | 29.1<br>(22.9 to 35.1)                            | -3.6<br>(-7.7 to 0.5)                            |
| Uterine fibroids                                           | 20.7<br>(18.2 to 23.4)                        | 2.6<br>(2.3 to 3.0)                            | 0.2<br>(0.1 to 0.4)                  | 21.0<br>(8.7 to 31.9)                             | -16.4<br>(-24.7 to -9.3)                         |
| Polycystic ovarian syndrome                                | 2.5<br>(1.9 to 3.2)                           | 4.5<br>(3.1 to 6.1)                            | < 0.05<br>(< 0.05 to < 0.05)         | 38.0<br>(20.4 to 57.9)                            | 0.6<br>(-11.7 to 14.5)                           |
| Female infertility                                         | 1.6<br>(1.1 to 3.5)                           | --                                             | < 0.05<br>(< 0.05 to < 0.05)         | 44.5<br>(14.6 to 85.7)                            | 2.6<br>(-15.8 to 28.9)                           |
| Endometriosis                                              | 0.5<br>(0.5 to 0.6)                           | 2.0<br>(1.6 to 2.5)                            | < 0.05<br>(< 0.05 to 0.1)            | 26.5<br>(-3.5 to 70.7)                            | 0.9<br>(-22.0 to 34.5)                           |
| Genital prolapse                                           | 104.8<br>(91.3 to 117.8)                      | 8.8<br>(7.5 to 10.3)                           | 0.3<br>(0.2 to 0.6)                  | 30.9<br>(22.3 to 40.9)                            | -7.0<br>(-13.4 to 0.5)                           |
| Premenstrual syndrome                                      | 138.2<br>(130.0 to 146.6)                     | 51.1<br>(47.4 to 54.7)                         | 1.1<br>(0.7 to 1.8)                  | 26.1<br>(15.9 to 37.1)                            | -0.8<br>(-8.5 to 7.5)                            |
| Other gynecological diseases                               | 38.5<br>(32.5 to 45.4)                        | 38.8<br>(31.6 to 47.0)                         | 1.3<br>(0.9 to 1.9)                  | 33.0<br>(23.1 to 42.8)                            | -1.2<br>(-7.7 to 5.5)                            |
| Hemoglobinopathies and hemolytic anaemias                  | 554.7<br>(541.7 to 567.6)                     | --                                             | 0.5<br>(0.3 to 0.7)                  | 8.6<br>(-3.7 to 24.0)                             | -10.0<br>(-18.8 to 0.8)                          |
| Thalassemias                                               | < 0.05<br>(< 0.05 to < 0.05)                  | --                                             | < 0.05<br>(< 0.05 to < 0.05)         | 13.0<br>(-2.1 to 31.2)                            | 0.1<br>(-13.1 to 16.4)                           |
| Thalassaemias trait                                        | 9.5<br>(8.8 to 10.1)                          | --                                             | 0.1<br>(0.1 to 0.2)                  | 29.3<br>(11.1 to 48.8)                            | 4.9<br>(-8.0 to 18.4)                            |
| Sickle cell disorders                                      | < 0.05<br>(< 0.05 to < 0.05)                  | --                                             | < 0.05<br>(< 0.05 to < 0.05)         | 5.7<br>(-3.9 to 17.9)                             | -4.2<br>(-13.0 to 6.7)                           |
| Sickle cell trait                                          | 35.1<br>(29.9 to 40.3)                        | --                                             | 0.1<br>(0.1 to 0.1)                  | 20.6<br>(0.8 to 43.9)                             | 5.0<br>(-10.4 to 23.8)                           |
| G6PD deficiency                                            | 165.6<br>(156.3 to 176.8)                     | --                                             | < 0.05<br>(< 0.05 to < 0.05)         | 10.5<br>(-5.5 to 29.5)                            | -4.9<br>(-16.2 to 8.1)                           |
| G6PD trait                                                 | 359.7<br>(351.5 to 369.4)                     | --                                             | < 0.05<br>(< 0.05 to < 0.05)         | 21.1<br>(8.1 to 36.1)                             | 0.7<br>(-8.7 to 11.1)                            |
| Other hemoglobinopathies and hemolytic anaemias            | 10.6<br>(9.5 to 11.9)                         | --                                             | 0.3<br>(0.2 to 0.4)                  | -2.0<br>(-17.0 to 15.5)                           | -19.6<br>(-30.0 to -7.5)                         |
| Endocrine, metabolic, blood, and immune disorders          | 26.0<br>(23.8 to 28.3)                        | 3.4<br>(3.0 to 3.9)                            | 0.8<br>(0.6 to 1.2)                  | 22.4<br>(12.4 to 33.5)                            | -3.6<br>(-9.8 to 3.6)                            |
| <b>Musculoskeletal disorders</b>                           | <b>268.0</b><br><b>(253.7 to 281.5)</b>       | <b>132.2</b><br><b>(118.7 to 146.0)</b>        | <b>29.2</b><br><b>(21.1 to 38.1)</b> | <b>38.3</b><br><b>(34.2 to 42.9)</b>              | <b>1.2</b><br><b>(-1.2 to 3.9)</b>               |
| Rheumatoid arthritis                                       | 5.5<br>(4.9 to 6.2)                           | 0.4<br>(0.3 to 0.4)                            | 1.3<br>(0.9 to 1.7)                  | 40.9<br>(29.2 to 53.5)                            | 1.9<br>(-5.6 to 9.6)                             |
| Osteoarthritis                                             | 52.4<br>(48.9 to 56.1)                        | 3.1<br>(2.9 to 3.3)                            | 3.2<br>(2.2 to 4.3)                  | 60.5<br>(54.2 to 67.3)                            | 11.0<br>(6.9 to 15.5)                            |
| Low back and neck pain                                     | 170.0<br>(158.6 to 183.8)                     | 76.5<br>(68.3 to 85.9)                         | 19.4<br>(13.6 to 25.4)               | 36.5<br>(31.5 to 41.7)                            | 0.1<br>(-3.0 to 3.2)                             |
| Low back pain                                              | 127.2<br>(112.5 to 144.4)                     | 63.5<br>(55.4 to 73.1)                         | 14.2<br>(10.0 to 18.8)               | 35.4<br>(29.2 to 42.5)                            | 0.1<br>(-4.0 to 4.2)                             |
| Neck pain                                                  | 52.2<br>(44.8 to 60.8)                        | 13.0<br>(11.2 to 15.3)                         | 5.2<br>(3.5 to 7.4)                  | 39.7<br>(34.9 to 44.2)                            | 0.1<br>(-2.4 to 2.7)                             |
| Gout                                                       | 6.1<br>(5.4 to 6.8)                           | 1.2<br>(1.1 to 1.4)                            | 0.2<br>(0.1 to 0.3)                  | 43.2<br>(22.2 to 66.0)                            | 0.7<br>(-12.5 to 14.4)                           |
| Other musculoskeletal disorders                            | 60.6<br>(48.9 to 73.6)                        | 51.0<br>(40.4 to 63.1)                         | 5.2<br>(3.4 to 7.5)                  | 32.9<br>(20.2 to 46.2)                            | -2.2<br>(-10.5 to 6.5)                           |
| <b>Other non-communicable diseases</b>                     | <b>1,579.1</b><br><b>(1,539.7 to 1,616.4)</b> | <b>4,563.7†</b><br><b>(4,097.9 to 5,022.2)</b> | <b>43.6</b><br><b>(29.6 to 61.0)</b> | <b>22.5</b><br><b>(20.6 to 24.3)</b>              | <b>-1.1</b><br><b>(-2.3 to 0.2)</b>              |
| Congenital anomalies                                       | 20.7<br>(17.1 to 25.6)                        | --                                             | 3.1<br>(2.1 to 4.5)                  | 14.1<br>(5.8 to 23.4)                             | -4.4<br>(-11.2 to 3.0)                           |
| Neural tube defects                                        | 2.5<br>(2.2 to 2.8)                           | --                                             | 0.7<br>(0.5 to 1.0)                  | 19.2<br>(5.0 to 34.7)                             | -0.9<br>(-12.2 to 11.7)                          |
| Congenital heart anomalies                                 | 2.3<br>(1.9 to 2.6)                           | --                                             | 0.1<br>(< 0.05 to 0.2)               | 14.8<br>(-1.6 to 34.3)                            | 1.1<br>(-12.4 to 17.7)                           |
| Orofacial clefts                                           | 0.6<br>(0.6 to 0.7)                           | --                                             | < 0.05<br>(< 0.05 to < 0.05)         | 10.1<br>(-2.4 to 23.4)                            | -8.1<br>(-18.6 to 2.9)                           |
| Down's syndrome                                            | 0.5<br>(0.4 to 0.6)                           | --                                             | < 0.05<br>(< 0.05 to 0.1)            | 15.8<br>(7.7 to 25.5)                             | 0.5<br>(-6.5 to 8.6)                             |
| Turner syndrome                                            | 1.2<br>(1.0 to 1.4)                           | --                                             | < 0.05<br>(< 0.05 to < 0.05)         | 3.9<br>(-27.3 to 46.3)                            | -8.8<br>(-35.4 to 25.6)                          |
| Klinefelter syndrome                                       | 1.4<br>(1.1 to 1.6)                           | --                                             | < 0.05<br>(< 0.05 to < 0.05)         | 17.4<br>(-9.0 to 48.6)                            | 0.5<br>(-21.3 to 27.0)                           |



| Cause                                         | Prevalence in thousands (95% UI)        | Incidence in thousands (95% UI)          | YLDs in thousands (95% UI)          |                                                   |                                                  |
|-----------------------------------------------|-----------------------------------------|------------------------------------------|-------------------------------------|---------------------------------------------------|--------------------------------------------------|
|                                               | 2016 counts                             | 2016 counts                              | 2016 counts                         | Percentage change in counts between 2006 and 2016 | Percentage change in rates between 2006 and 2016 |
| Other chromosomal abnormalities               | 0.4<br>(0.3 to 0.5)                     | --                                       | 0.1<br>( $< 0.05$ to 0.1)           | 13.0<br>(-16.8 to 54.2)                           | 1.7<br>(-25.4 to 38.6)                           |
| Congenital musculoskeletal and limb anomalies | 2.8<br>(2.4 to 3.1)                     | --                                       | 0.4<br>(0.3 to 0.6)                 | 21.4<br>(7.1 to 37.7)                             | 0.8<br>(-9.6 to 13.3)                            |
| Urogenital congenital anomalies               | 1.5<br>(1.4 to 1.7)                     | --                                       | $< 0.05$<br>( $< 0.05$ to 0.1)      | 10.1<br>(1.9 to 19.1)                             | -0.2<br>(-7.8 to 7.7)                            |
| Digestive congenital anomalies                | 1.9<br>(1.6 to 2.1)                     | --                                       | 0.1<br>(0.1 to 0.1)                 | 23.1<br>(-0.1 to 52.1)                            | 2.9<br>(-15.1 to 24.3)                           |
| Other congenital anomalies                    | 10.5<br>(5.7 to 17.7)                   | --                                       | 1.6<br>(0.8 to 2.8)                 | 10.0<br>(-1.4 to 22.5)                            | -8.2<br>(-17.2 to 1.9)                           |
| Skin and subcutaneous diseases                | 802.8<br>(782.2 to 825.5)               | 1,745.0<br>(1,652.7 to 1,853.8)          | 20.1<br>(13.4 to 29.3)              | 16.9<br>(14.6 to 19.3)                            | 1.7<br>(0.1 to 3.6)                              |
| Dermatitis                                    | 136.2<br>(124.5 to 148.1)               | 111.0<br>(101.7 to 121.2)                | 5.5<br>(3.2 to 9.1)                 | 15.2<br>(11.3 to 19.5)                            | 0.2<br>(-2.9 to 3.5)                             |
| Psoriasis                                     | 18.7<br>(17.7 to 19.8)                  | 2.6<br>(2.4 to 2.7)                      | 1.6<br>(1.2 to 2.1)                 | 36.1<br>(24.4 to 49.6)                            | 7.7<br>(0.0 to 16.6)                             |
| Cellulitis                                    | 0.9<br>(0.9 to 1.0)                     | 15.8<br>(14.7 to 16.9)                   | 0.1<br>( $< 0.05$ to 0.1)           | 23.1<br>(-3.4 to 57.7)                            | 1.6<br>(-16.7 to 25.2)                           |
| Pyoderma                                      | 11.6<br>(11.2 to 12.0)                  | 232.8<br>(224.1 to 241.7)                | 0.1<br>( $< 0.05$ to 0.1)           | 19.7<br>(12.8 to 27.1)                            | 1.5<br>(-3.6 to 7.0)                             |
| Scabies                                       | 32.7<br>(28.4 to 38.0)                  | 100.2<br>(86.1 to 116.6)                 | 0.8<br>(0.5 to 1.4)                 | 11.2<br>(5.7 to 17.0)                             | -3.9<br>(-7.9 to 0.7)                            |
| Fungal skin diseases                          | 272.7<br>(244.0 to 307.8)               | 794.6<br>(711.4 to 889.4)                | 1.5<br>(0.6 to 3.1)                 | 20.1<br>(17.9 to 22.3)                            | 0.1<br>(-0.8 to 1.1)                             |
| Viral skin diseases                           | 62.5<br>(58.0 to 66.9)                  | 89.2<br>(82.7 to 96.2)                   | 1.9<br>(1.2 to 2.8)                 | 15.7<br>(11.6 to 19.9)                            | 0.1<br>(-3.0 to 3.2)                             |
| Acne vulgaris                                 | 239.6<br>(214.7 to 265.3)               | 170.5<br>(138.2 to 213.7)                | 6.2<br>(4.1 to 9.0)                 | 11.8<br>(6.9 to 17.3)                             | 3.5<br>(-1.1 to 8.3)                             |
| Alopecia areata                               | 4.2<br>(4.1 to 4.4)                     | 7.5<br>(7.2 to 7.9)                      | 0.1<br>(0.1 to 0.2)                 | 27.5<br>(12.7 to 42.6)                            | 0.3<br>(-10.1 to 11.0)                           |
| Pruritus                                      | 18.3<br>(16.0 to 20.7)                  | 14.5<br>(12.9 to 16.5)                   | 0.2<br>(0.1 to 0.4)                 | 27.7<br>(20.5 to 35.2)                            | 0.8<br>(-4.2 to 5.9)                             |
| Urticaria                                     | 20.4<br>(17.8 to 23.8)                  | 36.6<br>(31.6 to 42.5)                   | 1.2<br>(0.8 to 1.8)                 | 17.9<br>(11.2 to 26.4)                            | 0.3<br>(-5.2 to 6.8)                             |
| Decubitus ulcer                               | 0.4<br>(0.3 to 0.4)                     | 1.4<br>(1.2 to 1.5)                      | 0.1<br>( $< 0.05$ to 0.1)           | 33.6<br>(18.8 to 51.1)                            | -1.6<br>(-13.8 to 13.1)                          |
| Other skin and subcutaneous diseases          | 144.8<br>(140.5 to 149.1)               | 168.3<br>(163.1 to 173.7)                | 0.8<br>(0.4 to 1.5)                 | 33.0<br>(29.7 to 36.7)                            | 3.4<br>(1.3 to 5.8)                              |
| Sense organ diseases                          | 459.6<br>(446.4 to 472.0)               | 207.7†<br>(193.9 to 222.9)               | 15.4<br>(10.7 to 21.7)              | 28.7<br>(24.3 to 32.5)                            | -3.2<br>(-5.5 to -1.0)                           |
| Glaucoma                                      | 1.2<br>(1.0 to 1.4)                     | --                                       | 0.1<br>(0.1 to 0.1)                 | 47.7<br>(31.5 to 66.4)                            | 3.0<br>(-7.3 to 14.9)                            |
| Cataract                                      | 6.7<br>(5.9 to 7.5)                     | --                                       | 0.7<br>(0.5 to 1.0)                 | 38.9<br>(30.5 to 47.5)                            | -2.7<br>(-7.6 to 2.4)                            |
| Macular degeneration                          | 0.7<br>(0.5 to 0.8)                     | --                                       | $< 0.05$<br>( $< 0.05$ to 0.1)      | 50.0<br>(30.0 to 71.7)                            | 4.6<br>(-7.7 to 18.2)                            |
| Refraction and accommodation disorders        | 231.7<br>(220.6 to 243.7)               | --                                       | 3.6<br>(2.1 to 5.9)                 | 24.3<br>(20.3 to 29.1)                            | -5.0<br>(-8.0 to -1.9)                           |
| Age-related and other hearing loss            | 275.5<br>(256.8 to 296.5)               | --                                       | 8.8<br>(6.1 to 12.6)                | 27.9<br>(20.5 to 34.4)                            | -3.7<br>(-7.6 to -0.5)                           |
| Other vision loss                             | 8.9<br>(8.0 to 10.0)                    | --                                       | 0.7<br>(0.5 to 0.9)                 | 40.4<br>(30.6 to 51.5)                            | 1.6<br>(-4.2 to 8.6)                             |
| Other sense organ diseases                    | 48.5<br>(44.7 to 52.3)                  | 207.7<br>(193.9 to 222.9)                | 1.5<br>(0.9 to 2.2)                 | 33.8<br>(27.4 to 40.8)                            | 1.0<br>(-2.9 to 5.3)                             |
| Oral disorders                                | 965.1<br>(880.6 to 1,037.6)             | 2,611.0†<br>(2,170.4 to 3,069.7)         | 4.9<br>(3.2 to 7.2)                 | 34.7<br>(30.1 to 40.1)                            | 0.2<br>(-2.9 to 3.4)                             |
| Caries of deciduous teeth                     | 179.0<br>(140.1 to 219.4)               | 704.4<br>(485.7 to 971.0)                | $< 0.05$<br>( $< 0.05$ to 0.1)      | 12.5<br>(0.1 to 27.6)                             | -0.2<br>(-11.4 to 13.1)                          |
| Caries of permanent teeth                     | 640.9<br>(550.2 to 740.0)               | 1,895.8<br>(1,520.3 to 2,283.1)          | 0.4<br>(0.2 to 0.7)                 | 21.0<br>(13.5 to 29.2)                            | -2.4<br>(-6.9 to 2.6)                            |
| Periodontal disease                           | 46.6<br>(38.4 to 56.2)                  | 5.3<br>(4.3 to 6.4)                      | 0.3<br>(0.1 to 0.6)                 | 41.5<br>(35.7 to 47.5)                            | 0.5<br>(-3.3 to 4.3)                             |
| Edentulism and severe tooth loss              | 109.7<br>(94.3 to 127.5)                | 5.5<br>(4.7 to 6.4)                      | 3.1<br>(2.0 to 4.4)                 | 39.8<br>(32.3 to 47.3)                            | 0.5<br>(-4.1 to 4.7)                             |
| Other oral disorders                          | 38.8<br>(36.9 to 40.6)                  | --                                       | 1.1<br>(0.7 to 1.7)                 | 26.3<br>(21.3 to 31.4)                            | 0.1<br>(-3.4 to 3.4)                             |
| <b>Injuries</b>                               | <b>336.2</b><br><b>(317.2 to 358.6)</b> | <b>170.8†</b><br><b>(161.5 to 180.6)</b> | <b>13.3</b><br><b>(9.0 to 18.9)</b> | <b>30.9</b><br><b>(28.5 to 33.5)</b>              | <b>2.7</b><br><b>(1.2 to 4.5)</b>                |
| <b>Transport injuries</b>                     | <b>58.5</b><br><b>(53.7 to 63.5)</b>    | <b>25.5</b><br><b>(22.1 to 29.2)</b>     | <b>3.3</b><br><b>(2.2 to 4.7)</b>   | <b>36.2</b><br><b>(33.2 to 39.7)</b>              | <b>4.6</b><br><b>(2.7 to 6.9)</b>                |
| Road injuries                                 | 50.8<br>(46.4 to 55.3)                  | 23.3<br>(20.0 to 27.1)                   | 2.8<br>(1.9 to 4.1)                 | 36.7<br>(33.8 to 40.0)                            | 4.4<br>(2.4 to 6.6)                              |
| Pedestrian road injuries                      | 11.6<br>(9.8 to 13.6)                   | 3.7<br>(3.0 to 4.6)                      | 0.6<br>(0.4 to 0.9)                 | 25.0<br>(22.0 to 28.4)                            | -2.2<br>(-4.0 to -0.1)                           |
| Cyclist road injuries                         | 6.2<br>(5.1 to 7.4)                     | 3.0<br>(2.3 to 3.9)                      | 0.3<br>(0.2 to 0.5)                 | 47.5<br>(43.8 to 51.8)                            | 14.6<br>(12.2 to 17.4)                           |
| Motorcyclist road injuries                    | 4.6<br>(3.8 to 5.5)                     | 1.3<br>(1.0 to 1.7)                      | 0.2<br>(0.2 to 0.4)                 | 39.0<br>(35.5 to 42.9)                            | 6.8<br>(4.6 to 9.4)                              |
| Motor vehicle road injuries                   | 24.8<br>(20.9 to 28.7)                  | 13.2<br>(11.0 to 15.8)                   | 1.5<br>(1.0 to 2.0)                 | 38.6<br>(35.5 to 42.3)                            | 4.5<br>(2.3 to 7.0)                              |
| Other road injuries                           | 3.7<br>(3.1 to 4.3)                     | 2.1<br>(1.6 to 2.7)                      | 0.2<br>(0.1 to 0.3)                 | 46.6<br>(43.1 to 50.4)                            | 11.8<br>(9.7 to 14.3)                            |
| Other transport injuries                      | 7.7<br>(6.5 to 9.2)                     | 2.1<br>(1.8 to 2.6)                      | 0.5<br>(0.3 to 0.7)                 | 33.5<br>(29.3 to 38.2)                            | 6.5<br>(3.9 to 9.4)                              |
| <b>Unintentional injuries</b>                 | <b>249.1</b><br><b>(230.5 to 272.5)</b> | <b>127.9</b><br><b>(119.9 to 136.6)</b>  | <b>8.4</b><br><b>(5.6 to 11.9)</b>  | <b>28.6</b><br><b>(26.0 to 31.4)</b>              | <b>1.4</b><br><b>(-0.2 to 3.1)</b>               |
| Falls                                         | 57.6<br>(49.6 to 66.2)                  | 30.4<br>(25.7 to 36.2)                   | 2.4<br>(1.6 to 3.4)                 | 39.6<br>(36.8 to 42.5)                            | 6.8<br>(5.1 to 8.6)                              |
| Drowning                                      | 1.0<br>(0.9 to 1.2)                     | 0.2<br>(0.2 to 0.3)                      | 0.1<br>( $< 0.05$ to 0.1)           | 19.0<br>(15.2 to 22.8)                            | -6.8<br>(-9.4 to -4.2)                           |
| Fire, heat, and hot substances                | 40.9<br>(34.6 to 48.9)                  | 6.3<br>(5.3 to 7.4)                      | 1.1<br>(0.8 to 1.6)                 | 32.6<br>(27.2 to 39.0)                            | 4.5<br>(0.3 to 9.7)                              |
| Poisonings                                    | 1.1<br>(0.9 to 1.3)                     | 1.7<br>(1.4 to 2.0)                      | 0.1<br>(0.1 to 0.2)                 | 23.8<br>(14.6 to 33.3)                            | 0.2<br>(-6.6 to 7.3)                             |
| Exposure to mechanical forces                 | 59.6<br>(50.0 to 73.6)                  | 27.1<br>(22.9 to 31.7)                   | 1.5<br>(1.0 to 2.2)                 | 22.2<br>(19.0 to 25.4)                            | -4.0<br>(-5.8 to -2.0)                           |
| Unintentional firearm injuries                | 1.9<br>(1.6 to 2.4)                     | 0.6<br>(0.4 to 0.8)                      | 0.1<br>(0.1 to 0.1)                 | 32.3<br>(28.6 to 36.3)                            | 1.9<br>(-0.4 to 4.5)                             |
| Unintentional suffocation                     | 3.8<br>(3.0 to 4.9)                     | 1.0<br>(0.7 to 1.3)                      | 0.1<br>(0.1 to 0.2)                 | 24.2<br>(20.8 to 28.0)                            | -1.9<br>(-4.0 to 0.5)                            |
| Other exposure to mechanical forces           | 53.9<br>(44.6 to 67.5)                  | 25.5<br>(21.6 to 29.7)                   | 1.3<br>(0.9 to 1.9)                 | 21.3<br>(18.0 to 24.5)                            | -4.5<br>(-6.5 to -2.6)                           |

| Cause                                                                               | Prevalence in thousands (95% UI) | Incidence in thousands (95% UI)                | YLDs in thousands (95% UI)                    |                                                   |                                                  |
|-------------------------------------------------------------------------------------|----------------------------------|------------------------------------------------|-----------------------------------------------|---------------------------------------------------|--------------------------------------------------|
|                                                                                     | 2016 counts                      | 2016 counts                                    | 2016 counts                                   | Percentage change in counts between 2006 and 2016 | Percentage change in rates between 2006 and 2016 |
| Adverse effects of medical treatment                                                | 0.8<br>(0.6 to 1.0)              | 10.6<br>(9.0 to 12.3)                          | 0.1<br>(0.1 to 0.2)                           | 18.7<br>(12.4 to 25.3)                            | -3.8<br>(-7.9 to 0.6)                            |
| Animal contact                                                                      | 14.3<br>(12.4 to 16.8)           | 19.7<br>(16.4 to 23.0)                         | 0.5<br>(0.3 to 0.7)                           | 14.3<br>(8.9 to 19.6)                             | -9.8<br>(-13.5 to -6.3)                          |
| Venomous animal contact                                                             | 4.8<br>(3.9 to 5.8)              | 7.5<br>(5.9 to 9.5)                            | 0.3<br>(0.2 to 0.4)                           | 17.6<br>(9.5 to 25.5)                             | -5.5<br>(-11.2 to 0.4)                           |
| Non-venomous animal contact                                                         | 9.5<br>(7.8 to 11.7)             | 12.2<br>(10.0 to 14.5)                         | 0.2<br>(0.1 to 0.2)                           | 9.0<br>(4.8 to 13.1)                              | -15.9<br>(-18.8 to -13.4)                        |
| Foreign body                                                                        | 18.9<br>(15.3 to 22.5)           | 11.8<br>(10.3 to 13.7)                         | 0.8<br>(0.5 to 1.1)                           | 23.7<br>(19.7 to 27.6)                            | 0.7<br>(-1.7 to 3.3)                             |
| Pulmonary aspiration and foreign body in airway                                     | 9.3<br>(7.0 to 12.4)             | 3.9<br>(3.2 to 4.8)                            | 0.4<br>(0.3 to 0.7)                           | 23.6<br>(19.7 to 27.7)                            | 0.8<br>(-1.8 to 3.4)                             |
| Foreign body in eyes                                                                | 0.8<br>(0.4 to 1.2)              | 4.2<br>(3.2 to 5.7)                            | < 0.05<br>(< 0.05 to 0.1)                     | 28.9<br>(23.2 to 35.2)                            | 2.0<br>(-0.7 to 4.9)                             |
| Foreign body in other body part                                                     | 8.8<br>(6.8 to 11.5)             | 3.7<br>(3.0 to 4.6)                            | 0.3<br>(0.2 to 0.4)                           | 22.9<br>(18.1 to 27.9)                            | 0.4<br>(-2.7 to 3.5)                             |
| Environmental heat and cold exposure                                                | 20.0<br>(16.4 to 25.2)           | 6.2<br>(5.0 to 7.5)                            | 0.8<br>(0.5 to 1.2)                           | 26.7<br>(23.6 to 30.2)                            | 0.2<br>(-1.6 to 2.2)                             |
| Other unintentional injuries                                                        | 34.8<br>(26.9 to 44.7)           | 13.9<br>(11.3 to 17.1)                         | 1.0<br>(0.7 to 1.5)                           | 25.6<br>(23.1 to 28.5)                            | 0.3<br>(-1.3 to 2.0)                             |
| <b>Self-harm and interpersonal violence</b>                                         | <b>85.1<br/>(76.3 to 94.2)</b>   | <b>17.4†<br/>(14.7 to 20.3)</b>                | <b>1.7<br/>(1.1 to 2.3)</b>                   | <b>32.6<br/>(28.5 to 36.3)</b>                    | <b>5.7<br/>(3.6 to 7.8)</b>                      |
| Self-harm                                                                           | 3.3<br>(2.8 to 3.8)              | 1.9<br>(1.6 to 2.3)                            | 0.2<br>(0.1 to 0.2)                           | 36.3<br>(32.3 to 40.4)                            | 0.6<br>(-1.7 to 3.1)                             |
| Self-harm by firearm                                                                | 0.1<br>(0.1 to 0.2)              | 0.1<br>(< 0.05 to 0.1)                         | < 0.05<br>(< 0.05 to < 0.05)                  | 30.2<br>(25.6 to 35.9)                            | -2.9<br>(-5.8 to 0.7)                            |
| Self-harm by other specified means                                                  | 3.1<br>(2.6 to 3.7)              | 1.9<br>(1.5 to 2.3)                            | 0.2<br>(0.1 to 0.2)                           | 36.5<br>(32.5 to 40.8)                            | 0.8<br>(-1.6 to 3.3)                             |
| Interpersonal violence                                                              | 81.8<br>(73.1 to 90.9)           | 15.5†<br>(12.9 to 18.5)                        | 1.5<br>(1.0 to 2.1)                           | 32.2<br>(27.8 to 36.1)                            | 6.4<br>(4.1 to 8.8)                              |
| Assault by firearm                                                                  | 0.6<br>(0.6 to 0.8)              | 0.3<br>(0.2 to 0.4)                            | < 0.05<br>(< 0.05 to < 0.05)                  | 50.6<br>(45.4 to 56.0)                            | 15.2<br>(12.0 to 18.6)                           |
| Assault by sharp object                                                             | 10.7<br>(8.8 to 12.9)            | 5.7<br>(4.3 to 7.3)                            | 0.4<br>(0.2 to 0.5)                           | 44.5<br>(40.1 to 48.6)                            | 10.9<br>(8.6 to 13.5)                            |
| Sexual violence                                                                     | 56.6<br>(48.7 to 65.3)           | --                                             | 0.5<br>(0.3 to 0.7)                           | 8.2<br>(2.7 to 13.4)                              | -9.8<br>(-13.5 to -6.4)                          |
| Assault by other means                                                              | 13.9<br>(11.7 to 16.7)           | 9.6<br>(7.8 to 11.5)                           | 0.6<br>(0.4 to 0.9)                           | 51.0<br>(47.2 to 55.4)                            | 16.2<br>(13.5 to 19.5)                           |
| <b>Forces of nature, conflict and terrorism, and executions and police conflict</b> | <b>0.2<br/>(0.1 to 0.3)</b>      | <b>&lt; 0.05†<br/>(&lt; 0.05 to &lt; 0.05)</b> | <b>&lt; 0.05<br/>(&lt; 0.05 to &lt; 0.05)</b> | <b>23.1<br/>(16.5 to 34.0)</b>                    | <b>-0.7<br/>(-6.1 to 10.0)</b>                   |
| Exposure to forces of nature                                                        | 0.1<br>(< 0.05 to 0.1)           | --                                             | < 0.05<br>(< 0.05 to < 0.05)                  | 40.6<br>(32.9 to 64.8)                            | 13.0<br>(6.5 to 34.1)                            |
| Conflict and terrorism                                                              | --                               | --                                             | --                                            | --                                                | --                                               |
| Executions and police conflict                                                      | 0.1<br>(0.1 to 0.2)              | < 0.05<br>(< 0.05 to < 0.05)                   | < 0.05<br>(< 0.05 to < 0.05)                  | 10.3<br>(3.6 to 18.6)                             | -10.6<br>(-16.0 to -2.4)                         |
| <b>Impairments</b>                                                                  | --                               | --                                             | --                                            | --                                                | --                                               |
| Anaemia                                                                             | 825.1<br>(778.4 to 873.8)        | --                                             | 43.8<br>(30.3 to 59.1)                        | -20.5<br>(-40.8 to 0.8)                           | -39.2<br>(-56.2 to -20.3)                        |
| Developmental intellectual disability                                               | 59.2<br>(45.1 to 73.4)           | --                                             | 6.1<br>(4.4 to 8.1)                           | 14.4<br>(7.5 to 22.4)                             | -1.6<br>(-6.9 to 4.9)                            |
| Epilepsy                                                                            | 25.5<br>(15.8 to 35.0)           | --                                             | 8.2<br>(4.4 to 13.4)                          | 16.7<br>(-37.0 to 127.8)                          | -3.9<br>(-49.3 to 94.5)                          |
| Guillain-Barre syndrome                                                             | < 0.05<br>(< 0.05 to < 0.05)     | --                                             | < 0.05<br>(< 0.05 to < 0.05)                  | 22.6<br>(17.9 to 27.9)                            | -0.0<br>(-0.1 to 0.1)                            |
| Hearing loss                                                                        | 311.0<br>(292.8 to 331.7)        | --                                             | 10.9<br>(7.6 to 15.1)                         | 22.9<br>(17.5 to 28.0)                            | -4.6<br>(-7.7 to -1.8)                           |
| Heart failure                                                                       | 6.4<br>(5.6 to 7.3)              | --                                             | 0.7<br>(0.5 to 1.0)                           | 32.7<br>(22.5 to 43.7)                            | -6.6<br>(-13.8 to 1.4)                           |
| Infertility                                                                         | 37.2<br>(27.8 to 50.1)           | --                                             | 0.2<br>(0.1 to 0.4)                           | 38.7<br>(27.1 to 49.5)                            | 0.5<br>(-6.5 to 7.3)                             |
| Pelvic inflammatory disease                                                         | 2.7<br>(2.2 to 3.2)              | --                                             | 0.3<br>(0.2 to 0.5)                           | 28.7<br>(9.9 to 49.3)                             | -3.4<br>(-16.3 to 11.6)                          |
| Vision loss                                                                         | 259.1<br>(247.0 to 271.6)        | --                                             | 6.5<br>(4.5 to 9.2)                           | 27.9<br>(20.7 to 35.3)                            | -2.2<br>(-5.3 to 1.6)                            |

We did not calculate incidence for the nine impairments, certain NTDs, and causes with only birth prevalence. Blank cells mean that no estimate is available.

† Incidence for aggregate causes represents the sum of the incidence of the causes below the aggregate.

‡ Incidence estimates for stroke represent first-ever stroke only.

^ Incidence of HIV/AIDS represents new infections of HIV only and does not include new infections of Tuberculosis in HIV positive cases.

SR Table 14: Prevalence, incidence, and YLDs for 2016, percentage change of YLD counts and percentage change of age-standardised YLD rates between 2006 and 2016 by cause and impairments, for all ages, Brazil.

| Cause                                                                                | Prevalence in thousands (95% UI)             | Incidence in thousands (95% UI)                     | YLDs in thousands (95% UI)                |                                                   |                                                     |
|--------------------------------------------------------------------------------------|----------------------------------------------|-----------------------------------------------------|-------------------------------------------|---------------------------------------------------|-----------------------------------------------------|
|                                                                                      | 2016 counts                                  | 2016 counts                                         | 2016 counts                               | Percentage change in counts between 2006 and 2016 | Percentage change in age-standardised rates between |
| <b>All causes</b>                                                                    | <b>203,667.4</b><br>(203,429.6 to 203,885.5) | <b>1,461,587.1†</b><br>(1,400,119.8 to 1,530,968.8) | <b>23,020.9</b><br>(17,055.5 to 29,938.0) | <b>16.0</b><br>(15.1 to 17.0)                     | <b>-2.3</b><br>(-3.1 to -1.6)                       |
| <b>Communicable, maternal, neonatal, and nutritional disorders</b>                   | <b>146,401.2</b><br>(144,727.3 to 148,040.2) | <b>779,246.7†</b><br>(720,922.9 to 843,633.7)       | <b>2,219.4</b><br>(1,558.4 to 3,068.2)    | <b>5.9</b><br>(3.6 to 9.0)                        | <b>-1.7</b><br>(-4.0 to 1.2)                        |
| <b>HIV/AIDS and tuberculosis</b>                                                     | <b>50,102.3</b><br>(46,120.9 to 52,778.1)    | <b>98.1†</b><br>(85.1 to 114.0)                     | <b>58.5</b><br>(34.4 to 97.7)             | <b>30.8</b><br>(15.6 to 44.8)                     | <b>12.7</b><br>(-0.3 to 24.6)                       |
| Tuberculosis                                                                         | 46,983.7<br>(43,548.8 to 50,742.5)           | 63.7†<br>(54.9 to 72.9)                             | 7.9<br>(5.2 to 11.0)                      | -4.4<br>(-11.9 to 3.7)                            | -19.5<br>(-25.7 to -12.9)                           |
| Drug-susceptible tuberculosis                                                        | 24.9<br>(21.4 to 28.8)                       | 62.7<br>(54.0 to 71.8)                              | 7.8<br>(5.2 to 10.8)                      | -4.3<br>(-12.0 to 4.0)                            | -19.4<br>(-25.8 to -12.7)                           |
| Multidrug-resistant tuberculosis without extensive drug resistance                   | 0.4<br>(0.3 to 0.5)                          | 1.0<br>(0.8 to 1.1)                                 | 0.1<br>(0.1 to 0.2)                       | -14.0<br>(-19.5 to -7.5)                          | -28.2<br>(-33.0 to -23.0)                           |
| Extensively drug-resistant tuberculosis                                              | < 0.05<br>(< 0.05 to < 0.05)                 | 0.1<br>(0.1 to 0.1)                                 | < 0.05<br>(< 0.05 to < 0.05)              | 129.1<br>(114.3 to 146.2)                         | 91.2<br>(78.3 to 105.0)                             |
| Latent tuberculosis infection                                                        | 46,958.4<br>(43,522.2 to 50,715.1)           | --                                                  | --                                        | --                                                | --                                                  |
| HIV/AIDS                                                                             | 528.4<br>(389.3 to 733.1)                    | 34.4^<br>(25.4 to 46.7)                             | 50.6<br>(28.0 to 88.3)                    | 38.8<br>(18.0 to 59.5)                            | 20.6<br>(2.3 to 38.8)                               |
| Drug-susceptible HIV/AIDS - Tuberculosis                                             | 5.2<br>(3.3 to 7.8)                          | 13.2<br>(8.4 to 19.6)                               | 2.1<br>(1.2 to 3.5)                       | -6.7<br>(-13.0 to -0.8)                           | -18.2<br>(-23.7 to -13.1)                           |
| Multidrug-resistant HIV/AIDS - Tuberculosis without extensive drug resistance        | 0.1<br>(0.1 to 0.1)                          | 0.2<br>(0.1 to 0.4)                                 | < 0.05<br>(< 0.05 to 0.1)                 | -15.5<br>(-21.5 to -8.8)                          | -25.9<br>(-31.2 to -20.1)                           |
| Extensively drug-resistant HIV/AIDS - Tuberculosis                                   | < 0.05<br>(< 0.05 to < 0.05)                 | < 0.05<br>(< 0.05 to < 0.05)                        | < 0.05<br>(< 0.05 to < 0.05)              | 125.0<br>(109.2 to 142.9)                         | 97.2<br>(83.3 to 112.8)                             |
| HIV/AIDS resulting in other diseases                                                 | 523.0<br>(384.3 to 728.6)                    | 34.4<br>(25.4 to 46.7)                              | 48.4<br>(26.4 to 85.1)                    | 42.0<br>(19.0 to 66.9)                            | 23.2<br>(3.1 to 44.7)                               |
| <b>Diarrhoea, lower respiratory infections, and other common infectious diseases</b> | <b>12,349.7</b><br>(12,000.7 to 12,659.4)    | <b>740,660.2†</b><br>(683,251.2 to 805,334.5)       | <b>643.1</b><br>(444.3 to 883.8)          | <b>-2.9</b><br>(-4.5 to -1.2)                     | <b>-8.4</b><br>(-9.7 to -7.0)                       |
| Diarrhoeal diseases                                                                  | 3,210.0<br>(3,058.6 to 3,380.7)              | 212,429.4<br>(201,667.5 to 223,750.3)               | 361.6<br>(251.8 to 489.5)                 | -6.8<br>(-8.5 to -4.8)                            | -11.4<br>(-13.0 to -9.6)                            |
| Intestinal infectious diseases                                                       | 0.2<br>(0.2 to 0.3)                          | 3.7†<br>(2.9 to 4.9)                                | < 0.05<br>(< 0.05 to 0.1)                 | 12.9<br>(-0.6 to 27.7)                            | -6.3<br>(-16.6 to 4.5)                              |
| Typhoid fever                                                                        | 0.2<br>(0.2 to 0.3)                          | 3.7<br>(2.8 to 4.9)                                 | < 0.05<br>(< 0.05 to 0.1)                 | 13.6<br>(0.2 to 28.6)                             | -5.6<br>(-16.0 to 5.6)                              |
| Paratyphoid fever                                                                    | < 0.05<br>(< 0.05 to < 0.05)                 | < 0.05<br>(< 0.05 to 0.1)                           | < 0.05<br>(< 0.05 to < 0.05)              | 17.5<br>(-5.3 to 45.5)                            | -0.5<br>(-18.7 to 21.6)                             |
| Other intestinal infectious diseases                                                 | --                                           | --                                                  | < 0.05<br>(< 0.05 to < 0.05)              | -16.5<br>(-33.3 to 4.2)                           | -30.1<br>(-41.9 to -15.5)                           |
| Lower respiratory infections                                                         | 251.6<br>(238.8 to 265.9)                    | 11,095.5<br>(10,393.0 to 11,849.8)                  | 14.9<br>(9.9 to 21.0)                     | 15.4<br>(11.3 to 19.9)                            | 0.0<br>(-3.3 to 3.5)                                |
| Upper respiratory infections                                                         | 6,666.7<br>(5,940.2 to 7,497.8)              | 501,631.2<br>(444,307.6 to 567,119.1)               | 166.0<br>(97.5 to 257.2)                  | 6.3<br>(4.1 to 8.9)                               | -0.4<br>(-1.8 to 0.9)                               |
| Otitis media                                                                         | 2,377.4<br>(2,118.2 to 2,620.2)              | 11,649.6<br>(9,447.9 to 14,268.8)                   | 69.8<br>(43.7 to 104.0)                   | -1.6<br>(-4.9 to 1.7)                             | -4.1<br>(-7.0 to -0.8)                              |
| Meningitis                                                                           | 86.5<br>(75.8 to 96.9)                       | 12.8<br>(10.9 to 14.8)                              | 11.1<br>(7.7 to 14.7)                     | -12.5<br>(-14.7 to -10.3)                         | -21.3<br>(-23.2 to -19.4)                           |
| Pneumococcal meningitis                                                              | 33.1<br>(28.5 to 38.5)                       | 1.8<br>(1.4 to 2.2)                                 | 4.4<br>(3.0 to 6.0)                       | -14.5<br>(-18.3 to -10.8)                         | -23.3<br>(-26.4 to -20.3)                           |
| H influenzae type B meningitis                                                       | 2.7<br>(2.2 to 3.3)                          | 0.2<br>(0.1 to 0.3)                                 | 0.5<br>(0.3 to 0.7)                       | 12.1<br>(7.5 to 16.7)                             | 0.1<br>(-3.3 to 3.2)                                |
| Meningococcal infection                                                              | 18.4<br>(14.4 to 23.1)                       | 4.2<br>(3.3 to 5.1)                                 | 2.3<br>(1.5 to 3.1)                       | -18.0<br>(-21.2 to -14.8)                         | -26.3<br>(-29.1 to -23.5)                           |
| Other meningitis                                                                     | 32.2<br>(26.1 to 38.5)                       | 6.7<br>(5.6 to 7.8)                                 | 3.9<br>(2.7 to 5.4)                       | -9.0<br>(-11.8 to -6.3)                           | -17.9<br>(-20.3 to -15.6)                           |
| Encephalitis                                                                         | 81.7<br>(62.4 to 107.7)                      | 25.2<br>(23.2 to 27.3)                              | 11.5<br>(8.0 to 15.5)                     | -20.9<br>(-24.2 to -17.2)                         | -29.4<br>(-32.2 to -26.4)                           |
| Diphtheria                                                                           | < 0.05<br>(< 0.05 to < 0.05)                 | < 0.05<br>(< 0.05 to < 0.05)                        | < 0.05<br>(< 0.05 to < 0.05)              | -6.2<br>(-19.9 to 9.8)                            | -13.8<br>(-26.5 to 1.3)                             |
| Whooping cough                                                                       | 8.4<br>(6.4 to 11.1)                         | 61.5<br>(46.4 to 80.7)                              | 0.4<br>(0.2 to 0.7)                       | -9.7<br>(-18.9 to 0.5)                            | -3.5<br>(-13.2 to 7.5)                              |
| Tetanus                                                                              | 0.1<br>(0.1 to 0.2)                          | 0.2<br>(0.1 to 0.2)                                 | < 0.05<br>(< 0.05 to < 0.05)              | -8.2<br>(-27.6 to 12.2)                           | -22.9<br>(-39.5 to -5.1)                            |
| Measles                                                                              | < 0.05<br>(< 0.05 to < 0.05)                 | 0.2<br>(0.2 to 0.2)                                 | < 0.05<br>(< 0.05 to < 0.05)              | 2,080.1<br>(1,124.0 to 8,256.7)                   | 2,226.3<br>(1,205.9 to 8,816.9)                     |
| Varicella and herpes zoster                                                          | 193.9<br>(176.7 to 210.4)                    | 3,750.8<br>(3,624.6 to 3,887.4)                     | 7.8<br>(4.8 to 12.0)                      | 22.4<br>(17.0 to 27.3)                            | 0.1<br>(-3.4 to 3.7)                                |
| <b>Neglected tropical diseases and malaria</b>                                       | <b>60,588.7</b><br>(56,124.3 to 64,291.8)    | <b>10,807.4†</b><br>(8,985.3 to 13,087.4)           | <b>283.1</b><br>(182.4 to 425.7)          | <b>9.1</b><br>(0.3 to 20.9)                       | <b>-6.4</b><br>(-14.2 to 4.1)                       |
| Malaria                                                                              | 26.1<br>(16.8 to 39.1)                       | 398.8<br>(310.4 to 556.2)                           | 1.4<br>(0.9 to 1.8)                       | -52.0<br>(-61.2 to -40.8)                         | -55.5<br>(-63.7 to -45.2)                           |
| Chagas disease                                                                       | 2,887.3<br>(2,421.7 to 3,430.5)              | 79.9<br>(67.6 to 93.7)                              | 25.1<br>(16.4 to 36.2)                    | 15.8<br>(11.0 to 21.4)                            | -10.4<br>(-14.2 to -6.3)                            |
| Leishmaniasis                                                                        | 63.2<br>(48.0 to 78.5)                       | 76.8<br>(51.7 to 107.0)                             | 3.3<br>(2.0 to 5.2)                       | 4.0<br>(-28.8 to 53.2)                            | -8.8<br>(-37.6 to 32.7)                             |
| Visceral leishmaniasis                                                               | 1.2<br>(1.2 to 1.3)                          | 4.9<br>(4.7 to 5.1)                                 | 0.1<br>(0.1 to 0.1)                       | 1.6<br>(-7.8 to 11.5)                             | -5.5<br>(-15.3 to 5.5)                              |
| Cutaneous and mucocutaneous leishmaniasis                                            | 49.8<br>(36.2 to 66.8)                       | 71.9<br>(47.0 to 102.1)                             | 3.2<br>(2.0 to 5.0)                       | 4.1<br>(-29.6 to 54.7)                            | -8.9<br>(-38.5 to 34.2)                             |
| African trypanosomiasis                                                              | --                                           | --                                                  | --                                        | --                                                | --                                                  |
| Schistosomiasis                                                                      | 11,537.0<br>(10,995.5 to 12,202.2)           | 3,262.2<br>(3,115.2 to 3,433.5)                     | 84.5<br>(41.9 to 159.1)                   | -13.6<br>(-16.4 to -10.0)                         | -30.2<br>(-32.5 to -27.0)                           |
| Cysticercosis                                                                        | 80.8<br>(61.2 to 102.7)                      | --                                                  | 11.0<br>(6.7 to 16.5)                     | -18.6<br>(-38.9 to 5.9)                           | -34.3<br>(-50.8 to -13.9)                           |
| Cystic echinococcosis                                                                | 4.7<br>(2.6 to 9.6)                          | 1.0<br>(0.6 to 1.9)                                 | 0.5<br>(0.2 to 1.0)                       | -33.9<br>(-70.5 to 58.2)                          | -43.5<br>(-74.2 to 30.9)                            |
| Lymphatic filariasis                                                                 | 0.1<br>(< 0.05 to 0.2)                       | < 0.05<br>(< 0.05 to < 0.05)                        | < 0.05<br>(< 0.05 to < 0.05)              | -94.8<br>(-96.0 to -94.0)                         | -95.5<br>(-96.6 to -94.9)                           |
| Onchocerciasis                                                                       | 0.2<br>(< 0.05 to 0.8)                       | < 0.05<br>(< 0.05 to 0.1)                           | < 0.05<br>(< 0.05 to 0.1)                 | -91.5<br>(-97.1 to -84.4)                         | -92.2<br>(-97.3 to -85.5)                           |
| Trachoma                                                                             | 77.7<br>(54.4 to 107.5)                      | --                                                  | 5.8<br>(3.9 to 8.3)                       | -5.8<br>(-16.5 to 5.2)                            | -36.9<br>(-44.8 to -29.0)                           |
| Dengue                                                                               | 276.3<br>(162.7 to 441.7)                    | 4,617.4<br>(3,112.4 to 6,487.0)                     | 44.9<br>(21.4 to 80.8)                    | 188.1<br>(136.7 to 503.2)                         | 163.4<br>(117.1 to 451.8)                           |
| Yellow fever                                                                         | < 0.05<br>(< 0.05 to < 0.05)                 | 0.1<br>(< 0.05 to 0.3)                              | < 0.05<br>(< 0.05 to < 0.05)              | -41.1<br>(-46.6 to -35.7)                         | -45.2<br>(-50.2 to -40.2)                           |
| Rabies                                                                               | < 0.05<br>(< 0.05 to < 0.05)                 | < 0.05<br>(< 0.05 to < 0.05)                        | < 0.05<br>(< 0.05 to < 0.05)              | -79.9<br>(-83.5 to -73.6)                         | -81.5<br>(-84.8 to -75.8)                           |
| Intestinal nematode infections                                                       | 49,555.6<br>(44,077.6 to 53,828.9)           | --                                                  | 70.6<br>(40.8 to 113.8)                   | 11.1<br>(-3.3 to 27.8)                            | 0.7<br>(-12.1 to 15.4)                              |
| Ascariasis                                                                           | 26,255.1<br>(18,768.0 to 36,610.4)           | --                                                  | 22.7<br>(12.7 to 38.4)                    | 9.5<br>(-10.6 to 33.3)                            | -0.5<br>(-18.4 to 21.5)                             |



| Cause                                                                   | Prevalence in thousands (95% UI)              | Incidence in thousands (95% UI)                | YLDs in thousands (95% UI)                 |                                                   |                                                     |
|-------------------------------------------------------------------------|-----------------------------------------------|------------------------------------------------|--------------------------------------------|---------------------------------------------------|-----------------------------------------------------|
|                                                                         | 2016 counts                                   | 2016 counts                                    | 2016 counts                                | Percentage change in counts between 2006 and 2016 | Percentage change in age-standardised rates between |
| Trichuriasis                                                            | 14,471.9<br>(9,945.2 to 20,683.3)             | --                                             | 9.4<br>(5.0 to 16.1)                       | 10.6<br>(-21.2 to 57.7)                           | 0.9<br>(-27.8 to 42.8)                              |
| Hookworm disease                                                        | 11,667.8<br>(8,542.1 to 15,657.8)             | --                                             | 38.5<br>(22.2 to 61.6)                     | 12.2<br>(-8.3 to 38.2)                            | 1.3<br>(-17.2 to 24.1)                              |
| Food-borne trematodiasis                                                | --                                            | --                                             | --                                         | --                                                | --                                                  |
| Leprosy                                                                 | 67.8<br>(64.7 to 70.8)                        | 8.8<br>(8.4 to 9.1)                            | 4.1<br>(2.7 to 5.6)                        | 23.5<br>(17.4 to 29.6)                            | -6.8<br>(-11.0 to -2.4)                             |
| Ebola virus disease                                                     | --                                            | --                                             | --                                         | --                                                | --                                                  |
| Zika virus disease                                                      | 41.6<br>(28.3 to 66.4)                        | 2,362.3<br>(1,580.1 to 3,834.6)                | 2.3<br>(1.5 to 3.6)                        | --                                                | --                                                  |
| Guinea worm disease                                                     | --                                            | --                                             | --                                         | --                                                | --                                                  |
| Other neglected tropical diseases                                       | 1,406.2<br>(1,318.5 to 1,493.4)               | --                                             | 29.8<br>(18.7 to 45.5)                     | -3.5<br>(-7.3 to 0.3)                             | 0.0<br>(-3.9 to 4.0)                                |
| <b>Maternal disorders</b>                                               | <b>214.6<br/>(198.1 to 232.0)</b>             | <b>3,956.0†<br/>(3,745.1 to 4,187.0)</b>       | <b>13.5<br/>(8.7 to 19.2)</b>              | <b>24.4<br/>(-2.5 to 60.1)</b>                    | <b>20.0<br/>(-5.8 to 54.4)</b>                      |
| Maternal haemorrhage                                                    | 20.0<br>(17.0 to 23.7)                        | 196.1<br>(172.9 to 220.9)                      | 1.1<br>(0.7 to 1.5)                        | 23.2<br>(-11.1 to 65.6)                           | 19.3<br>(-13.7 to 60.4)                             |
| Maternal sepsis and other pregnancy related infections                  | 79.0<br>(63.2 to 99.0)                        | 417.8<br>(371.3 to 473.6)                      | 1.9<br>(0.9 to 3.3)                        | 41.4<br>(-24.2 to 156.6)                          | 37.0<br>(-26.1 to 149.9)                            |
| Maternal hypertensive disorders                                         | 103.9<br>(69.8 to 140.0)                      | 570.0<br>(534.0 to 605.3)                      | 5.2<br>(2.9 to 8.3)                        | 38.2<br>(-9.7 to 113.6)                           | 32.6<br>(-13.2 to 105.3)                            |
| Maternal obstructed labour and uterine rupture                          | 2.7<br>(1.7 to 3.9)                           | 196.5<br>(175.4 to 219.8)                      | 0.9<br>(0.5 to 1.4)                        | 3.0<br>(-42.9 to 86.3)                            | 0.9<br>(-44.3 to 82.5)                              |
| Maternal abortion, miscarriage, and ectopic pregnancy                   | 21.1<br>(14.5 to 28.8)                        | 2,575.6<br>(2,372.0 to 2,788.3)                | 2.3<br>(1.4 to 3.6)                        | 3.8<br>(-36.8 to 66.5)                            | -0.4<br>(-39.5 to 59.7)                             |
| Other maternal disorders                                                | --                                            | --                                             | 2.1<br>(1.3 to 3.0)                        | 18.5<br>(-7.2 to 52.2)                            | 14.8<br>(-10.0 to 47.7)                             |
| <b>Neonatal disorders</b>                                               | <b>2,047.6<br/>(1,899.2 to 2,223.3)</b>       | <b>--</b>                                      | <b>324.6<br/>(227.2 to 454.9)</b>          | <b>27.3<br/>(13.1 to 44.7)</b>                    | <b>20.2<br/>(6.9 to 36.8)</b>                       |
| Neonatal preterm birth complications                                    | 1,759.5<br>(1,522.5 to 2,047.7)               | --                                             | 198.3<br>(135.6 to 281.9)                  | 25.6<br>(4.2 to 52.9)                             | 18.2<br>(-2.0 to 43.7)                              |
| Neonatal encephalopathy due to birth asphyxia and trauma                | 308.2<br>(181.8 to 497.0)                     | --                                             | 44.2<br>(13.2 to 97.9)                     | 31.7<br>(8.3 to 65.9)                             | 23.7<br>(2.2 to 55.8)                               |
| Neonatal sepsis and other neonatal infections                           | 139.6<br>(63.8 to 303.9)                      | --                                             | 58.8<br>(23.5 to 137.0)                    | 37.0<br>(25.6 to 56.5)                            | 29.9<br>(18.9 to 49.3)                              |
| Hemolytic disease and other neonatal jaundice                           | 52.5<br>(46.5 to 59.0)                        | --                                             | 15.0<br>(11.3 to 19.1)                     | 13.9<br>(8.1 to 20.2)                             | 6.0<br>(0.2 to 12.2)                                |
| Other neonatal disorders                                                | --                                            | --                                             | 8.4<br>(5.7 to 12.0)                       | 11.1<br>(-2.4 to 28.4)                            | 17.7<br>(3.5 to 36.1)                               |
| <b>Nutritional deficiencies</b>                                         | <b>40,159.6<br/>(39,001.4 to 40,841.7)</b>    | <b>6,369.9†<br/>(5,465.9 to 7,677.0)</b>       | <b>809.5<br/>(538.6 to 1,188.4)</b>        | <b>4.2<br/>(2.0 to 6.8)</b>                       | <b>-1.4<br/>(-3.6 to 1.0)</b>                       |
| Protein-energy malnutrition                                             | 1,015.0<br>(920.1 to 1,127.5)                 | 579.8<br>(527.1 to 640.4)                      | 51.6<br>(33.2 to 73.4)                     | 91.0<br>(68.2 to 118.0)                           | 102.9<br>(78.4 to 131.3)                            |
| Iodine deficiency                                                       | 794.6<br>(701.5 to 907.1)                     | 17.8<br>(16.0 to 20.0)                         | 20.2<br>(13.5 to 28.7)                     | 15.0<br>(10.0 to 20.4)                            | -1.6<br>(-5.6 to 2.6)                               |
| Vitamin A deficiency                                                    | 6,518.7<br>(5,574.0 to 7,963.4)               | 5,772.4<br>(4,864.4 to 7,092.9)                | 5.9<br>(3.5 to 9.2)                        | -5.1<br>(-9.5 to 0.0)                             | -7.3<br>(-11.0 to -3.1)                             |
| Iron-deficiency anaemia                                                 | 34,054.1<br>(32,670.4 to 35,564.2)            | --                                             | 730.1<br>(482.3 to 1,087.5)                | 0.7<br>(-1.4 to 2.8)                              | -5.6<br>(-7.5 to -3.6)                              |
| Other nutritional deficiencies                                          | --                                            | --                                             | 1.7<br>(1.1 to 2.4)                        | 92.4<br>(68.1 to 121.2)                           | 103.9<br>(78.1 to 134.1)                            |
| <b>Other communicable, maternal, neonatal, and nutritional diseases</b> | <b>61,951.8<br/>(60,152.9 to 63,926.6)</b>    | <b>17,355.1<br/>(15,906.8 to 19,028.9)</b>     | <b>81.2<br/>(49.7 to 133.9)</b>            | <b>3.4<br/>(1.1 to 5.6)</b>                       | <b>-4.7<br/>(-6.6 to -2.7)</b>                      |
| Sexually transmitted diseases excluding HIV                             | 51,504.9<br>(49,313.3 to 53,997.5)            | 15,636.8<br>(14,291.7 to 17,148.2)             | 52.7<br>(31.0 to 90.7)                     | 5.0<br>(2.1 to 7.6)                               | -7.2<br>(-9.6 to -5.1)                              |
| Syphilis                                                                | 1,280.4<br>(963.9 to 1,674.5)                 | 964.1<br>(681.0 to 1,294.0)                    | 4.0<br>(2.8 to 5.4)                        | 36.3<br>(29.1 to 43.1)                            | 2.3<br>(-1.4 to 6.9)                                |
| Chlamydial infection                                                    | 3,417.7<br>(2,704.7 to 4,230.7)               | 2,600.9<br>(2,047.2 to 3,265.2)                | 10.9<br>(6.1 to 18.6)                      | -2.3<br>(-7.0 to 2.7)                             | -9.0<br>(-13.4 to -4.5)                             |
| Gonococcal infection                                                    | 880.1<br>(723.8 to 1,074.4)                   | 2,907.1<br>(2,288.9 to 3,642.1)                | 6.0<br>(3.5 to 9.7)                        | 3.0<br>(-3.5 to 9.8)                              | -6.3<br>(-11.9 to -0.7)                             |
| Trichomoniasis                                                          | 6,965.7<br>(6,054.1 to 7,929.2)               | 6,045.1<br>(5,182.8 to 6,947.8)                | 8.8<br>(3.4 to 18.7)                       | 10.5<br>(7.2 to 13.7)                             | -2.0<br>(-4.0 to 0.2)                               |
| Genital herpes                                                          | 42,843.3<br>(37,227.4 to 49,466.2)            | 2,682.7<br>(2,272.9 to 3,217.5)                | 11.0<br>(3.6 to 25.2)                      | 15.4<br>(9.6 to 21.3)                             | -3.7<br>(-7.9 to 1.1)                               |
| Other sexually transmitted diseases                                     | 539.5<br>(504.8 to 579.9)                     | 436.9<br>(390.2 to 487.0)                      | 12.0<br>(7.5 to 18.9)                      | -6.2<br>(-10.1 to -2.1)                           | -15.6<br>(-19.2 to -11.8)                           |
| Hepatitis                                                               | 13,724.8<br>(11,642.8 to 16,304.7)            | 1,718.0<br>(1,304.2 to 2,185.2)                | 2.0<br>(1.3 to 3.2)                        | -19.4<br>(-35.3 to 1.5)                           | -30.7<br>(-43.7 to -14.0)                           |
| Acute hepatitis A                                                       | 32.6<br>(10.0 to 62.9)                        | 424.5<br>(129.6 to 817.7)                      | 0.4<br>(0.2 to 0.8)                        | -32.6<br>(-72.6 to 76.5)                          | -36.5<br>(-73.5 to 61.3)                            |
| Hepatitis B                                                             | 10,426.6<br>(8,443.9 to 13,069.8)             | 1,181.9<br>(939.1 to 1,504.0)                  | 1.5<br>(0.9 to 2.4)                        | -14.8<br>(-28.4 to 0.5)                           | -29.1<br>(-39.9 to -17.1)                           |
| Hepatitis C                                                             | 3,262.9<br>(2,879.5 to 3,651.8)               | 77.2<br>(68.3 to 86.2)                         | 0.1<br>(< 0.05 to 0.1)                     | -14.6<br>(-16.6 to -12.8)                         | -19.4<br>(-21.9 to -17.1)                           |
| Acute hepatitis E                                                       | 2.6<br>(2.4 to 2.9)                           | 34.5<br>(31.4 to 37.9)                         | 0.1<br>(< 0.05 to 0.1)                     | -22.5<br>(-27.9 to -16.7)                         | -35.2<br>(-39.0 to -31.1)                           |
| Other infectious diseases                                               | 1,173.1<br>(1,109.6 to 1,236.2)               | 0.3<br>(0.2 to 0.4)                            | 26.5<br>(17.0 to 40.6)                     | 2.6<br>(-0.7 to 6.0)                              | 2.8<br>(-0.8 to 6.3)                                |
| <b>Non-communicable diseases</b>                                        | <b>193,608.9<br/>(193,235.0 to 193,966.6)</b> | <b>666,572.8†<br/>(644,221.8 to 692,224.4)</b> | <b>19,409.8<br/>(14,365.5 to 25,127.9)</b> | <b>16.5<br/>(15.4 to 17.6)</b>                    | <b>-2.9<br/>(-3.7 to -2.1)</b>                      |
| <b>Neoplasms</b>                                                        | <b>971.6<br/>(955.5 to 987.4)</b>             | <b>469.3<br/>(450.6 to 494.0)</b>              | <b>123.8<br/>(90.8 to 160.3)</b>           | <b>43.0<br/>(39.9 to 49.0)</b>                    | <b>2.5<br/>(0.1 to 7.0)</b>                         |
| Lip and oral cavity cancer                                              | 34.5<br>(33.5 to 35.6)                        | 9.7<br>(9.4 to 10.0)                           | 3.6<br>(2.6 to 4.8)                        | 33.7<br>(26.9 to 41.9)                            | -4.7<br>(-9.7 to 1.2)                               |
| Nasopharynx cancer                                                      | 2.9<br>(2.7 to 3.0)                           | 0.8<br>(0.8 to 0.8)                            | 0.3<br>(0.2 to 0.5)                        | 13.5<br>(9.0 to 17.9)                             | -8.3<br>(-11.9 to -4.8)                             |
| Other pharynx cancer                                                    | 13.1<br>(12.5 to 13.7)                        | 4.8<br>(4.6 to 5.0)                            | 1.7<br>(1.2 to 2.2)                        | 38.8<br>(30.9 to 47.9)                            | -0.6<br>(-6.1 to 5.5)                               |
| Oesophageal cancer                                                      | 11.6<br>(11.2 to 11.9)                        | 10.7<br>(10.4 to 11.0)                         | 2.7<br>(1.9 to 3.5)                        | 29.0<br>(18.5 to 39.7)                            | -9.5<br>(-16.8 to -1.8)                             |
| Stomach cancer                                                          | 40.5<br>(39.3 to 41.8)                        | 24.0<br>(23.4 to 24.7)                         | 6.1<br>(4.4 to 7.9)                        | 31.0<br>(23.8 to 39.0)                            | -9.2<br>(-14.3 to -3.7)                             |
| Colon and rectum cancer                                                 | 136.1<br>(130.4 to 141.9)                     | 38.4<br>(36.9 to 40.1)                         | 13.1<br>(9.7 to 16.8)                      | 58.9<br>(49.9 to 68.3)                            | 10.2<br>(3.9 to 16.7)                               |
| Liver cancer                                                            | 4.0<br>(3.8 to 4.3)                           | 10.6<br>(10.3 to 11.0)                         | 2.3<br>(1.6 to 3.0)                        | 50.5<br>(45.1 to 55.8)                            | 4.7<br>(0.9 to 8.4)                                 |
| Liver cancer due to hepatitis B                                         | 2.5<br>(1.9 to 3.0)                           | 2.9<br>(2.2 to 3.5)                            | 0.6<br>(0.4 to 0.9)                        | 46.9<br>(39.8 to 53.9)                            | 5.8<br>(1.5 to 10.1)                                |



| Cause                                              | Prevalence in thousands (95% UI)                 | Incidence in thousands (95% UI)                | YLDs in thousands (95% UI)              |                                                   |                                                     |
|----------------------------------------------------|--------------------------------------------------|------------------------------------------------|-----------------------------------------|---------------------------------------------------|-----------------------------------------------------|
|                                                    | 2016 counts                                      | 2016 counts                                    | 2016 counts                             | Percentage change in counts between 2006 and 2016 | Percentage change in age-standardised rates between |
| Liver cancer due to hepatitis C                    | 3.4<br>(3.1 to 3.7)                              | 4.0<br>(3.6 to 4.3)                            | 0.8<br>(0.6 to 1.1)                     | 57.4<br>(51.1 to 63.4)                            | 7.0<br>(2.7 to 11.2)                                |
| Liver cancer due to alcohol use                    | 2.0<br>(1.7 to 2.3)                              | 2.4<br>(2.0 to 2.7)                            | 0.5<br>(0.4 to 0.7)                     | 46.3<br>(39.5 to 52.6)                            | -0.5<br>(-4.9 to 3.8)                               |
| Liver cancer due to other causes                   | 1.3<br>(1.1 to 1.4)                              | 1.5<br>(1.3 to 1.6)                            | 0.3<br>(0.2 to 0.4)                     | 46.9<br>(40.3 to 53.1)                            | 5.2<br>(0.7 to 9.5)                                 |
| Gallbladder and biliary tract cancer               | 3.6<br>(3.4 to 3.7)                              | 4.8<br>(4.7 to 5.0)                            | 1.1<br>(0.7 to 1.4)                     | 25.2<br>(21.3 to 29.5)                            | -14.8<br>(-17.7 to -11.7)                           |
| Pancreatic cancer                                  | 8.0<br>(7.7 to 8.2)                              | 11.0<br>(10.8 to 11.3)                         | 2.2<br>(1.6 to 3.0)                     | 48.5<br>(41.6 to 55.4)                            | 1.8<br>(-3.2 to 7.0)                                |
| Larynx cancer                                      | 23.7<br>(23.0 to 24.4)                           | 7.2<br>(6.9 to 7.4)                            | 2.7<br>(2.0 to 3.6)                     | 38.1<br>(27.6 to 48.8)                            | -2.2<br>(-9.6 to 5.2)                               |
| Tracheal, bronchus, and lung cancer                | 34.0<br>(32.9 to 35.2)                           | 29.9<br>(28.9 to 30.9)                         | 6.9<br>(4.9 to 8.8)                     | 29.1<br>(20.8 to 37.6)                            | -9.9<br>(-15.5 to -3.9)                             |
| Malignant skin melanoma                            | 21.2<br>(17.6 to 25.1)                           | 4.9<br>(4.1 to 5.8)                            | 1.6<br>(1.1 to 2.2)                     | 61.0<br>(44.3 to 85.0)                            | 19.9<br>(8.0 to 37.6)                               |
| Non-melanoma skin cancer                           | 19.4<br>(17.0 to 22.4)                           | 102.6<br>(85.2 to 122.3)                       | 0.7<br>(0.5 to 1.1)                     | 71.4<br>(26.1 to 106.9)                           | 16.1<br>(-17.5 to 43.1)                             |
| Non-melanoma skin cancer (squamous-cell carcinoma) | 13.5<br>(11.0 to 17.4)                           | 13.8<br>(11.7 to 17.8)                         | 0.6<br>(0.4 to 1.0)                     | 73.5<br>(23.2 to 115.6)                           | 16.9<br>(-19.8 to 48.6)                             |
| Non-melanoma skin cancer (basal-cell carcinoma)    | 8.3<br>(5.5 to 12.6)                             | 88.8<br>(72.0 to 108.1)                        | 0.1<br>(< 0.05 to 0.2)                  | 57.1<br>(39.2 to 75.9)                            | 10.7<br>(-1.7 to 23.9)                              |
| Breast cancer                                      | 222.7<br>(210.9 to 235.0)                        | 47.5<br>(45.0 to 50.0)                         | 18.8<br>(13.6 to 24.6)                  | 40.2<br>(30.5 to 50.6)                            | 2.6<br>(-4.3 to 9.7)                                |
| Cervical cancer                                    | 74.0<br>(71.2 to 78.5)                           | 19.6<br>(18.9 to 20.5)                         | 7.1<br>(5.1 to 9.2)                     | 15.2<br>(8.5 to 22.9)                             | -12.0<br>(-17.2 to -6.0)                            |
| Uterine cancer                                     | 40.6<br>(38.6 to 43.0)                           | 8.7<br>(8.3 to 9.2)                            | 3.2<br>(2.3 to 4.3)                     | 73.2<br>(59.8 to 88.8)                            | 20.1<br>(10.6 to 31.0)                              |
| Ovarian cancer                                     | 20.7<br>(19.7 to 21.7)                           | 6.7<br>(6.5 to 7.0)                            | 3.1<br>(2.2 to 4.1)                     | 28.5<br>(17.0 to 41.1)                            | -4.0<br>(-13.2 to 5.8)                              |
| Prostate cancer                                    | 196.3<br>(183.9 to 270.7)                        | 47.7<br>(45.0 to 64.0)                         | 19.5<br>(14.0 to 26.3)                  | 60.4<br>(49.3 to 91.1)                            | 6.1<br>(-1.4 to 27.5)                               |
| Testicular cancer                                  | 8.9<br>(8.2 to 9.6)                              | 1.8<br>(1.7 to 1.9)                            | 0.6<br>(0.4 to 0.9)                     | 48.1<br>(27.6 to 72.2)                            | 32.8<br>(15.2 to 53.3)                              |
| Kidney cancer                                      | 33.4<br>(32.2 to 34.4)                           | 9.2<br>(8.9 to 9.4)                            | 3.1<br>(2.2 to 4.1)                     | 47.5<br>(40.9 to 54.2)                            | 11.6<br>(6.8 to 16.8)                               |
| Bladder cancer                                     | 34.7<br>(33.5 to 35.9)                           | 9.1<br>(8.8 to 9.5)                            | 3.4<br>(2.5 to 4.4)                     | 51.6<br>(43.5 to 59.7)                            | 3.2<br>(-2.6 to 8.9)                                |
| Brain and nervous system cancer                    | 22.3<br>(15.6 to 24.3)                           | 10.5<br>(7.6 to 11.4)                          | 3.3<br>(2.1 to 4.4)                     | 31.3<br>(20.7 to 40.2)                            | 3.5<br>(-5.1 to 10.7)                               |
| Thyroid cancer                                     | 19.4<br>(18.5 to 20.4)                           | 3.8<br>(3.6 to 4.0)                            | 1.3<br>(0.9 to 1.8)                     | 55.8<br>(43.6 to 70.2)                            | 14.6<br>(6.1 to 24.6)                               |
| Mesothelioma                                       | 1.5<br>(1.4 to 1.5)                              | 1.0<br>(0.9 to 1.0)                            | 0.3<br>(0.2 to 0.4)                     | 28.9<br>(21.9 to 34.0)                            | -8.1<br>(-12.9 to -4.5)                             |
| Hodgkin lymphoma                                   | 4.4<br>(4.1 to 4.6)                              | 1.3<br>(1.2 to 1.4)                            | 0.5<br>(0.4 to 0.7)                     | 22.8<br>(16.7 to 28.4)                            | 0.5<br>(-4.4 to 5.0)                                |
| Non-Hodgkin's lymphoma                             | 22.8<br>(21.2 to 24.2)                           | 7.7<br>(7.2 to 8.3)                            | 2.4<br>(1.8 to 3.2)                     | 33.1<br>(26.2 to 48.5)                            | -0.3<br>(-5.8 to 11.8)                              |
| Multiple myeloma                                   | 6.3<br>(4.6 to 6.9)                              | 3.5<br>(2.7 to 4.0)                            | 1.6<br>(1.1 to 2.1)                     | 55.6<br>(45.4 to 68.2)                            | 9.0<br>(1.2 to 18.3)                                |
| Leukaemia                                          | 29.6<br>(28.5 to 30.8)                           | 9.3<br>(9.1 to 9.5)                            | 4.0<br>(2.9 to 5.2)                     | 15.0<br>(11.8 to 19.0)                            | -8.2<br>(-11.0 to -5.0)                             |
| Acute lymphoid leukaemia                           | 6.3<br>(6.0 to 6.7)                              | 1.7<br>(1.6 to 1.8)                            | 0.8<br>(0.6 to 1.1)                     | -1.2<br>(-6.7 to 4.4)                             | -6.5<br>(-12.0 to -1.0)                             |
| Chronic lymphoid leukaemia                         | 6.7<br>(5.7 to 7.3)                              | 1.6<br>(1.3 to 1.7)                            | 0.9<br>(0.6 to 1.2)                     | 48.9<br>(39.4 to 59.2)                            | 2.0<br>(-4.9 to 9.7)                                |
| Acute myeloid leukaemia                            | 4.7<br>(4.3 to 5.0)                              | 3.1<br>(2.8 to 3.4)                            | 0.9<br>(0.6 to 1.2)                     | 19.4<br>(14.3 to 25.3)                            | -2.8<br>(-6.7 to 1.7)                               |
| Chronic myeloid leukaemia                          | 2.0<br>(1.9 to 2.2)                              | 0.7<br>(0.7 to 0.8)                            | 0.3<br>(0.2 to 0.4)                     | -11.4<br>(-16.0 to -6.5)                          | -32.1<br>(-35.8 to -28.4)                           |
| Other leukaemia                                    | 9.8<br>(9.3 to 10.5)                             | 2.2<br>(2.1 to 2.4)                            | 1.2<br>(0.9 to 1.6)                     | 13.0<br>(7.6 to 19.7)                             | -12.4<br>(-16.9 to -6.6)                            |
| Other neoplasms                                    | 79.4<br>(74.7 to 84.3)                           | 22.7<br>(21.6 to 23.9)                         | 6.7<br>(4.9 to 8.8)                     | 75.6<br>(65.5 to 88.0)                            | 33.2<br>(25.4 to 42.8)                              |
| <b>Cardiovascular diseases</b>                     | <b>12,644.6</b><br><b>(12,416.5 to 12,872.0)</b> | <b>1,325.6†</b><br><b>(1,263.5 to 1,392.9)</b> | <b>710.1</b><br><b>(515.2 to 932.0)</b> | <b>35.7</b><br><b>(33.4 to 37.9)</b>              | <b>-2.5</b><br><b>(-4.0 to -1.0)</b>                |
| Rheumatic heart disease                            | 490.4<br>(440.5 to 544.3)                        | 16.1<br>(14.8 to 17.7)                         | 23.5<br>(14.8 to 34.2)                  | 33.3<br>(27.3 to 39.7)                            | 16.5<br>(11.3 to 22.2)                              |
| Ischaemic heart disease                            | 4,761.4<br>(4,522.7 to 5,008.2)                  | 535.4<br>(502.0 to 573.4)                      | 226.1<br>(155.0 to 312.2)               | 37.4<br>(35.3 to 39.5)                            | 0.1<br>(-1.2 to 1.4)                                |
| Cerebrovascular disease                            | 1,888.0<br>(1,825.3 to 1,945.1)                  | 258.0‡<br>(237.6 to 278.5)                     | 186.8<br>(136.7 to 236.9)               | 31.7<br>(25.8 to 38.1)                            | -8.2<br>(-12.5 to -3.5)                             |
| Ischaemic stroke                                   | 1,598.5<br>(1,466.5 to 1,756.2)                  | 184.2‡<br>(164.8 to 204.5)                     | 152.2<br>(111.0 to 193.2)               | 33.6<br>(26.1 to 41.7)                            | -7.9<br>(-13.1 to -2.2)                             |
| Hemorrhagic stroke                                 | 370.2<br>(339.3 to 405.6)                        | 73.9‡<br>(66.8 to 81.2)                        | 34.7<br>(25.6 to 44.2)                  | 24.0<br>(16.6 to 32.4)                            | -9.5<br>(-15.0 to -3.5)                             |
| Hypertensive heart disease                         | 392.3<br>(331.3 to 459.0)                        | --                                             | 31.4<br>(21.7 to 43.7)                  | 44.1<br>(38.8 to 50.0)                            | -2.1<br>(-5.3 to 1.4)                               |
| Cardiomyopathy and myocarditis                     | 209.5<br>(192.1 to 228.4)                        | 54.6†<br>(47.8 to 62.4)                        | 17.9<br>(11.8 to 25.4)                  | 35.0<br>(29.0 to 42.2)                            | 2.6<br>(-1.3 to 6.8)                                |
| Myocarditis                                        | 22.2<br>(19.9 to 24.7)                           | 54.6<br>(47.8 to 62.4)                         | 1.4<br>(1.0 to 2.1)                     | 15.8<br>(11.9 to 20.2)                            | 1.4<br>(-2.0 to 4.7)                                |
| Alcoholic cardiomyopathy                           | 22.8<br>(18.1 to 28.6)                           | --                                             | 1.9<br>(1.2 to 2.9)                     | 40.4<br>(29.2 to 54.3)                            | 4.1<br>(-4.2 to 13.1)                               |
| Other cardiomyopathy                               | 176.7<br>(148.0 to 206.5)                        | --                                             | 14.5<br>(9.6 to 20.6)                   | 36.6<br>(29.4 to 44.8)                            | 2.5<br>(-1.7 to 7.4)                                |
| Atrial fibrillation and flutter                    | 1,472.5<br>(1,311.3 to 1,652.2)                  | 113.0<br>(98.7 to 129.5)                       | 116.2<br>(77.7 to 162.0)                | 43.1<br>(39.9 to 46.1)                            | -0.9<br>(-2.8 to 0.9)                               |
| Peripheral vascular disease                        | 3,391.3<br>(2,947.6 to 3,930.8)                  | 329.9<br>(284.9 to 385.1)                      | 15.4<br>(7.2 to 27.8)                   | 44.6<br>(40.9 to 48.6)                            | -4.3<br>(-6.6 to -2.0)                              |
| Endocarditis                                       | 7.4<br>(6.4 to 8.5)                              | 18.5<br>(17.1 to 20.0)                         | 0.6<br>(0.4 to 0.9)                     | 27.4<br>(23.0 to 32.5)                            | -2.5<br>(-5.5 to 0.6)                               |
| Other cardiovascular and circulatory diseases      | 1,772.1<br>(1,492.2 to 2,103.4)                  | --                                             | 92.2<br>(61.2 to 131.4)                 | 28.0<br>(22.9 to 33.4)                            | -2.1<br>(-5.1 to 1.0)                               |
| <b>Chronic respiratory diseases</b>                | <b>16,730.3</b><br><b>(16,103.4 to 17,457.6)</b> | <b>2,538.6†</b><br><b>(2,362.9 to 2,730.4)</b> | <b>472.6</b><br><b>(352.4 to 619.8)</b> | <b>-1.2</b><br><b>(-6.6 to 5.4)</b>               | <b>-11.3</b><br><b>(-15.9 to -6.4)</b>              |
| Chronic obstructive pulmonary disease              | 8,900.3<br>(8,362.5 to 9,650.6)                  | 607.5<br>(573.2 to 653.5)                      | 139.6<br>(106.0 to 181.9)               | 26.4<br>(8.6 to 45.3)                             | -6.0<br>(-18.9 to 8.3)                              |
| Pneumoconiosis                                     | 12.1<br>(10.9 to 13.6)                           | 1.3<br>(1.2 to 1.4)                            | 1.9<br>(1.3 to 2.6)                     | 22.6<br>(16.7 to 29.3)                            | -12.5<br>(-16.9 to -7.5)                            |
| Silicosis                                          | 1.8<br>(1.6 to 2.1)                              | 0.3<br>(0.3 to 0.4)                            | 0.3<br>(0.2 to 0.4)                     | 40.1<br>(36.3 to 44.0)                            | 1.2<br>(-1.4 to 3.6)                                |

| Cause                                                          | Prevalence in thousands (95% UI)           | Incidence in thousands (95% UI)                        | YLDs in thousands (95% UI)              |                                                   |                                                     |
|----------------------------------------------------------------|--------------------------------------------|--------------------------------------------------------|-----------------------------------------|---------------------------------------------------|-----------------------------------------------------|
|                                                                | 2016 counts                                | 2016 counts                                            | 2016 counts                             | Percentage change in counts between 2006 and 2016 | Percentage change in age-standardised rates between |
| Asbestosis                                                     | 1.5<br>(1.2 to 1.7)                        | 0.1<br>(0.1 to 0.2)                                    | 0.2<br>(0.1 to 0.3)                     | 34.0<br>(28.1 to 40.2)                            | -3.7<br>(-7.0 to -0.2)                              |
| Coal workers pneumoconiosis                                    | 2.5<br>(2.0 to 3.0)                        | 0.2<br>(0.2 to 0.2)                                    | 0.4<br>(0.2 to 0.6)                     | 46.4<br>(42.6 to 50.6)                            | 5.4<br>(2.8 to 8.0)                                 |
| Other pneumoconiosis                                           | 6.4<br>(5.3 to 7.6)                        | 0.6<br>(0.5 to 0.7)                                    | 1.0<br>(0.6 to 1.4)                     | 8.9<br>(-0.2 to 19.8)                             | -22.2<br>(-29.0 to -14.5)                           |
| Asthma                                                         | 7,959.2<br>(7,099.5 to 8,910.5)            | 1,920.1<br>(1,754.0 to 2,111.4)                        | 313.6<br>(202.5 to 458.6)               | -11.4<br>(-15.6 to -8.1)                          | -14.6<br>(-19.1 to -11.2)                           |
| Interstitial lung disease and pulmonary sarcoidosis            | 83.7<br>(76.0 to 92.3)                     | 9.7<br>(8.9 to 10.6)                                   | 8.8<br>(5.9 to 12.6)                    | 40.6<br>(34.5 to 47.1)                            | 4.6<br>(0.6 to 8.7)                                 |
| Other chronic respiratory diseases                             | --                                         | --                                                     | 8.7<br>(6.9 to 10.8)                    | 40.6<br>(26.6 to 56.2)                            | 30.7<br>(18.1 to 45.3)                              |
| <b>Cirrhosis and other chronic liver diseases</b>              | <b>1,540.7<br/>(1,469.2 to 1,617.4)</b>    | <b>44.4<br/>(43.0 to 45.9)</b>                         | <b>27.7<br/>(19.3 to 38.0)</b>          | <b>28.0<br/>(23.7 to 33.0)</b>                    | <b>1.6<br/>(-1.4 to 5.1)</b>                        |
| Cirrhosis and other chronic liver diseases due to hepatitis B  | 225.8<br>(205.2 to 247.4)                  | 6.7<br>(6.2 to 7.2)                                    | 3.6<br>(2.5 to 5.1)                     | 32.8<br>(22.8 to 43.3)                            | -0.4<br>(-7.3 to 6.8)                               |
| Cirrhosis and other chronic liver diseases due to hepatitis C  | 630.9<br>(591.5 to 671.6)                  | 17.9<br>(16.9 to 18.9)                                 | 9.9<br>(6.7 to 13.7)                    | 33.5<br>(25.2 to 42.1)                            | 1.1<br>(-4.6 to 6.9)                                |
| Cirrhosis and other chronic liver diseases due to alcohol use  | 476.7<br>(444.2 to 510.8)                  | 14.7<br>(13.9 to 15.6)                                 | 7.5<br>(5.2 to 10.3)                    | 32.7<br>(24.5 to 42.4)                            | -2.1<br>(-7.5 to 4.0)                               |
| Cirrhosis and other chronic liver diseases due to other causes | 207.3<br>(186.9 to 230.0)                  | 5.2<br>(4.7 to 5.7)                                    | 6.6<br>(4.5 to 9.3)                     | 14.3<br>(6.7 to 22.4)                             | 7.9<br>(0.7 to 15.2)                                |
| <b>Digestive diseases</b>                                      | <b>6,410.4<br/>(6,274.5 to 6,528.8)</b>    | <b>5,817.7<sup>+</sup><br/>(5,520.2 to 6,128.6)</b>    | <b>251.5<br/>(177.8 to 335.9)</b>       | <b>19.2<br/>(15.0 to 23.5)</b>                    | <b>-0.8<br/>(-3.1 to 1.5)</b>                       |
| Peptic ulcer disease                                           | 2,308.1<br>(2,116.4 to 2,511.4)            | 211.8<br>(194.2 to 232.0)                              | 42.0<br>(27.1 to 61.6)                  | 51.2<br>(44.9 to 57.7)                            | 16.4<br>(12.0 to 20.9)                              |
| Gastritis and duodenitis                                       | 2,231.0<br>(2,066.5 to 2,413.3)            | 1,432.2<br>(1,300.1 to 1,580.7)                        | 39.1<br>(25.7 to 56.2)                  | 34.2<br>(29.5 to 39.0)                            | 2.5<br>(-0.8 to 5.7)                                |
| Appendicitis                                                   | 5.7<br>(5.2 to 6.3)                        | 148.8<br>(135.4 to 164.4)                              | 1.8<br>(1.2 to 2.5)                     | 15.2<br>(13.2 to 17.3)                            | 6.1<br>(3.8 to 8.3)                                 |
| Paralytic ileus and intestinal obstruction                     | 2.4<br>(2.3 to 2.6)                        | 68.3<br>(63.8 to 73.6)                                 | 0.8<br>(0.5 to 1.1)                     | 6.2<br>(3.0 to 9.6)                               | -11.4<br>(-13.7 to -9.0)                            |
| Inguinal, femoral, and abdominal hernia                        | 1,665.1<br>(1,546.7 to 1,783.5)            | 1,568.4<br>(1,391.8 to 1,760.8)                        | 119.9<br>(81.4 to 165.1)                | 7.3<br>(3.1 to 11.7)                              | -5.4<br>(-8.0 to -2.5)                              |
| Inflammatory bowel disease                                     | 95.5<br>(87.8 to 104.5)                    | 73.6<br>(68.4 to 79.2)                                 | 13.7<br>(9.3 to 18.9)                   | 5.2<br>(-0.5 to 10.7)                             | -20.0<br>(-23.9 to -16.1)                           |
| Vascular intestinal disorders                                  | 1.6<br>(1.4 to 1.8)                        | 9.7<br>(8.8 to 10.8)                                   | 0.5<br>(0.3 to 0.7)                     | 37.6<br>(31.8 to 44.0)                            | 11.8<br>(8.5 to 15.0)                               |
| Gallbladder and biliary diseases                               | 327.9<br>(300.2 to 358.9)                  | 2,187.3<br>(2,006.8 to 2,400.2)                        | 10.1<br>(7.0 to 14.2)                   | 43.9<br>(34.6 to 54.9)                            | 11.2<br>(4.6 to 19.1)                               |
| Pancreatitis                                                   | 13.0<br>(12.0 to 14.1)                     | 117.7<br>(108.5 to 127.7)                              | 1.7<br>(1.1 to 2.3)                     | 43.2<br>(38.6 to 48.6)                            | 10.8<br>(6.7 to 15.5)                               |
| Other digestive diseases                                       | --                                         | --                                                     | 21.8<br>(15.3 to 29.2)                  | 18.4<br>(13.5 to 23.4)                            | 1.5<br>(-1.2 to 4.0)                                |
| <b>Neurological disorders</b>                                  | <b>95,886.7<br/>(93,435.4 to 98,207.2)</b> | <b>50,448.4<br/>(43,214.7 to 58,091.6)</b>             | <b>2,280.1<br/>(1,550.2 to 3,063.6)</b> | <b>17.5<br/>(11.8 to 24.0)</b>                    | <b>-0.3<br/>(-5.0 to 4.9)</b>                       |
| Alzheimer's disease and other dementias                        | 1,691.0<br>(1,441.0 to 1,983.5)            | 287.9<br>(241.7 to 343.4)                              | 243.4<br>(170.6 to 322.7)               | 61.3<br>(57.9 to 64.7)                            | 2.4<br>(0.4 to 4.4)                                 |
| Parkinson's disease                                            | 128.8<br>(102.5 to 159.4)                  | 14.8<br>(11.7 to 18.7)                                 | 15.1<br>(9.7 to 20.9)                   | 55.9<br>(49.6 to 62.7)                            | 5.7<br>(1.8 to 9.9)                                 |
| Epilepsy                                                       | 825.4<br>(581.0 to 1,060.1)                | 78.4<br>(56.7 to 101.7)                                | 229.8<br>(135.1 to 340.7)               | 3.8<br>(-30.5 to 55.9)                            | -6.8<br>(-37.9 to 39.4)                             |
| Multiple sclerosis                                             | 29.5<br>(25.9 to 33.7)                     | 1.3<br>(1.2 to 1.4)                                    | 8.2<br>(5.6 to 11.1)                    | 28.5<br>(22.1 to 35.4)                            | 4.0<br>(-0.9 to 9.3)                                |
| Motor neuron disease                                           | 7.9<br>(6.9 to 9.1)                        | 1.4<br>(1.3 to 1.6)                                    | 1.7<br>(1.2 to 2.3)                     | 27.9<br>(24.3 to 31.6)                            | 8.3<br>(6.9 to 9.8)                                 |
| Migraine                                                       | 33,392.5<br>(31,997.0 to 34,814.2)         | 3,454.8<br>(3,306.5 to 3,606.4)                        | 1,465.4<br>(941.2 to 2,043.6)           | 14.5<br>(13.3 to 15.8)                            | -0.3<br>(-1.2 to 0.6)                               |
| Tension-type headache                                          | 76,805.6<br>(69,918.2 to 84,431.5)         | 46,608.2<br>(39,387.1 to 54,253.6)                     | 264.8<br>(168.6 to 389.4)               | 15.4<br>(13.2 to 18.1)                            | -0.5<br>(-1.8 to 1.0)                               |
| Other neurological disorders                                   | 0.7<br>(0.5 to 1.0)                        | 1.5<br>(0.9 to 2.0)                                    | 51.7<br>(32.1 to 73.7)                  | 23.7<br>(-10.3 to 74.6)                           | 12.8<br>(-18.1 to 55.6)                             |
| <b>Mental and substance use disorders</b>                      | <b>38,149.5<br/>(37,666.7 to 38,604.3)</b> | <b>14,594.2<sup>+</sup><br/>(13,823.9 to 15,491.3)</b> | <b>5,312.4<br/>(3,832.4 to 6,870.6)</b> | <b>6.5<br/>(4.5 to 8.3)</b>                       | <b>-6.6<br/>(-8.3 to -5.1)</b>                      |
| Schizophrenia                                                  | 461.9<br>(404.1 to 522.1)                  | 29.1<br>(25.7 to 32.9)                                 | 296.2<br>(218.9 to 367.1)               | 21.0<br>(17.7 to 24.8)                            | 1.1<br>(-1.5 to 3.9)                                |
| Alcohol use disorders                                          | 6,054.5<br>(5,365.8 to 6,744.5)            | 2,964.8<br>(2,593.5 to 3,346.0)                        | 606.9<br>(419.2 to 845.2)               | 17.5<br>(12.6 to 22.6)                            | 2.9<br>(-1.5 to 7.0)                                |
| Drug use disorders                                             | 2,097.8<br>(2,037.6 to 2,159.3)            | 224.2<br>(205.6 to 244.3)                              | 446.4<br>(316.4 to 589.2)               | 19.5<br>(15.7 to 23.4)                            | 7.8<br>(4.6 to 11.2)                                |
| Opioid use disorders                                           | 503.6<br>(434.1 to 587.6)                  | 60.6<br>(52.4 to 70.7)                                 | 209.3<br>(144.9 to 278.6)               | 21.4<br>(17.1 to 25.7)                            | 6.1<br>(2.5 to 9.6)                                 |
| Cocaine use disorders                                          | 677.1<br>(600.4 to 765.8)                  | 33.4<br>(28.7 to 38.6)                                 | 92.3<br>(58.4 to 133.7)                 | 29.9<br>(24.6 to 35.6)                            | 17.5<br>(12.8 to 22.5)                              |
| Amphetamine use disorders                                      | 265.6<br>(186.3 to 364.1)                  | 26.5<br>(18.5 to 35.9)                                 | 35.1<br>(19.9 to 56.4)                  | -4.4<br>(-11.3 to 3.3)                            | -5.9<br>(-12.6 to 1.3)                              |
| Cannabis use disorders                                         | 611.5<br>(514.7 to 719.6)                  | 87.7<br>(73.8 to 103.7)                                | 17.8<br>(11.0 to 25.9)                  | 11.2<br>(3.6 to 20.2)                             | 3.9<br>(-3.2 to 12.1)                               |
| Other drug use disorders                                       | 83.7<br>(74.2 to 93.8)                     | 16.0<br>(14.2 to 18.0)                                 | 91.8<br>(60.5 to 130.2)                 | 18.7<br>(9.2 to 28.8)                             | 9.6<br>(1.1 to 18.4)                                |
| Depressive disorders                                           | 7,770.8<br>(7,572.0 to 7,987.1)            | 8,686.0<br>(8,015.6 to 9,446.0)                        | 1,341.1<br>(928.3 to 1,817.5)           | -6.2<br>(-9.4 to -3.0)                            | -19.7<br>(-22.1 to -17.1)                           |
| Major depressive disorder                                      | 5,380.2<br>(4,970.9 to 5,829.6)            | 8,246.8<br>(7,580.7 to 9,003.8)                        | 1,100.0<br>(752.7 to 1,488.4)           | -10.6<br>(-13.8 to -7.2)                          | -23.0<br>(-25.6 to -20.3)                           |
| Dysthymia                                                      | 2,509.9<br>(2,204.4 to 2,883.4)            | 439.2<br>(384.6 to 503.9)                              | 241.1<br>(164.8 to 353.6)               | 21.0<br>(18.2 to 23.9)                            | 0.1<br>(-1.5 to 1.9)                                |
| Bipolar disorder                                               | 2,375.4<br>(2,058.9 to 2,735.0)            | 186.2<br>(162.2 to 215.4)                              | 487.6<br>(304.3 to 725.1)               | 12.2<br>(9.9 to 14.6)                             | 0.2<br>(-1.5 to 1.9)                                |
| Anxiety disorders                                              | 13,034.3<br>(12,119.9 to 13,964.4)         | 1,659.2<br>(1,549.2 to 1,782.7)                        | 1,257.7<br>(883.1 to 1,698.0)           | 5.3<br>(1.3 to 9.7)                               | -7.5<br>(-10.8 to -3.8)                             |
| Eating disorders                                               | 383.2<br>(331.2 to 442.3)                  | 192.6<br>(142.2 to 255.0)                              | 77.0<br>(48.9 to 113.3)                 | 15.8<br>(11.4 to 20.5)                            | 9.9<br>(6.0 to 14.1)                                |
| Anorexia nervosa                                               | 69.6<br>(51.5 to 92.3)                     | 27.8<br>(20.6 to 36.7)                                 | 14.8<br>(9.1 to 22.2)                   | 10.1<br>(2.3 to 18.8)                             | 8.0<br>(0.6 to 15.9)                                |
| Bulimia nervosa                                                | 295.4<br>(222.8 to 392.0)                  | 164.8<br>(115.8 to 228.2)                              | 62.2<br>(37.9 to 93.4)                  | 17.3<br>(12.2 to 22.8)                            | 10.4<br>(6.0 to 15.4)                               |
| Autistic spectrum disorders                                    | 1,749.1<br>(1,671.1 to 1,839.3)            | 11.1<br>(7.5 to 15.4)                                  | 263.7<br>(178.8 to 373.4)               | 8.6<br>(7.0 to 10.4)                              | 0.3<br>(-1.2 to 1.7)                                |
| Autism                                                         | 579.0<br>(499.4 to 673.2)                  | 1.3<br>(0.7 to 2.2)                                    | 147.0<br>(94.4 to 212.1)                | 8.8<br>(6.1 to 11.6)                              | 0.2<br>(-2.3 to 2.7)                                |
| Asperger syndrome and other autistic spectrum disorders        | 1,167.7<br>(971.4 to 1,409.8)              | 9.8<br>(6.4 to 14.0)                                   | 116.7<br>(76.2 to 168.5)                | 8.4<br>(6.7 to 10.4)                              | 0.3<br>(-1.1 to 2.0)                                |



| Cause                                                      | Prevalence in thousands (95% UI)                    | Incidence in thousands (95% UI)                      | YLDs in thousands (95% UI)                    |                                                   |                                                     |
|------------------------------------------------------------|-----------------------------------------------------|------------------------------------------------------|-----------------------------------------------|---------------------------------------------------|-----------------------------------------------------|
|                                                            | 2016 counts                                         | 2016 counts                                          | 2016 counts                                   | Percentage change in counts between 2006 and 2016 | Percentage change in age-standardised rates between |
| Attention-deficit/hyperactivity disorder                   | 1,781.3<br>(1,657.4 to 1,934.9)                     | 66.5<br>(60.1 to 73.9)                               | 21.5<br>(13.1 to 33.7)                        | 4.1<br>(-0.4 to 9.6)                              | 1.4<br>(-3.1 to 6.8)                                |
| Conduct disorder                                           | 1,352.2<br>(1,144.6 to 1,557.0)                     | 447.7<br>(361.9 to 528.6)                            | 164.1<br>(100.7 to 245.7)                     | -0.5<br>(-5.6 to 4.7)                             | 1.2<br>(-3.9 to 6.4)                                |
| Idiopathic developmental intellectual disability           | 1,298.1<br>(649.2 to 1,949.6)                       | --                                                   | 56.1<br>(24.0 to 97.9)                        | 2.0<br>(-3.1 to 5.2)                              | -6.7<br>(-11.6 to -3.9)                             |
| Other mental and substance use disorders                   | 3,955.5<br>(3,437.0 to 4,585.2)                     | 126.8<br>(111.2 to 144.8)                            | 294.2<br>(199.3 to 419.8)                     | 19.5<br>(17.7 to 21.7)                            | 0.3<br>(-1.2 to 1.8)                                |
| <b>Diabetes, urogenital, blood, and endocrine diseases</b> | <b>70,214.3</b><br><b>(69,840.7 to 70,583.0)</b>    | <b>30,479.8†</b><br><b>(28,492.1 to 32,569.3)</b>    | <b>1,294.4</b><br><b>(914.2 to 1,766.8)</b>   | <b>23.5</b><br><b>(20.2 to 27.3)</b>              | <b>-3.1</b><br><b>(-5.6 to -0.3)</b>                |
| Diabetes mellitus                                          | 7,503.1<br>(6,712.8 to 8,381.9)                     | 446.3<br>(400.3 to 495.7)                            | 652.5<br>(440.8 to 914.8)                     | 28.6<br>(22.3 to 35.8)                            | -3.7<br>(-8.6 to 1.7)                               |
| Acute glomerulonephritis                                   | 3.1<br>(2.7 to 3.6)                                 | 46.0<br>(39.9 to 52.7)                               | 0.2<br>(0.1 to 0.2)                           | 8.4<br>(5.0 to 12.2)                              | -0.6<br>(-2.8 to 2.2)                               |
| Chronic kidney disease                                     | 6,104.7<br>(5,509.9 to 6,706.3)                     | 494.3<br>(436.7 to 553.4)                            | 185.2<br>(137.9 to 236.5)                     | 37.4<br>(32.2 to 42.5)                            | -0.1<br>(-3.4 to 3.2)                               |
| Chronic kidney disease due to diabetes mellitus            | 2,137.2<br>(1,794.0 to 2,508.0)                     | 176.7<br>(146.0 to 210.2)                            | 61.9<br>(45.4 to 80.9)                        | 41.8<br>(34.4 to 49.1)                            | 1.4<br>(-3.3 to 5.9)                                |
| Chronic kidney disease due to hypertension                 | 1,389.9<br>(1,198.6 to 1,589.1)                     | 138.9<br>(114.1 to 164.2)                            | 27.3<br>(18.9 to 35.5)                        | 48.8<br>(38.8 to 58.6)                            | -0.9<br>(-7.2 to 5.6)                               |
| Chronic kidney disease due to glomerulonephritis           | 1,260.8<br>(1,085.5 to 1,440.1)                     | 71.8<br>(56.2 to 87.3)                               | 54.9<br>(40.0 to 73.4)                        | 31.1<br>(25.1 to 37.2)                            | -0.4<br>(-4.3 to 3.8)                               |
| Chronic kidney disease due to other causes                 | 1,316.8<br>(1,084.3 to 1,570.5)                     | 106.9<br>(87.1 to 129.1)                             | 41.1<br>(29.4 to 55.1)                        | 32.7<br>(26.8 to 39.7)                            | -1.1<br>(-5.0 to 3.0)                               |
| Urinary diseases and male infertility                      | 2,401.2<br>(2,236.3 to 2,541.6)                     | 21,938.8†<br>(19,939.2 to 24,085.7)                  | 69.9<br>(46.5 to 99.0)                        | 21.9<br>(18.7 to 25.2)                            | -6.4<br>(-8.0 to -4.6)                              |
| Interstitial nephritis and urinary tract infections        | 389.5<br>(351.1 to 430.1)                           | 20,385.3<br>(18,430.4 to 22,488.0)                   | 12.8<br>(8.0 to 19.3)                         | 10.6<br>(6.6 to 15.1)                             | -1.5<br>(-5.0 to 2.0)                               |
| Urolithiasis                                               | 52.1<br>(46.6 to 58.5)                              | 1,376.0<br>(1,231.5 to 1,541.8)                      | 4.0<br>(2.6 to 5.5)                           | 16.6<br>(12.3 to 21.1)                            | -4.6<br>(-7.5 to -1.4)                              |
| Benign prostatic hyperplasia                               | 1,341.0<br>(1,191.9 to 1,504.2)                     | 177.5<br>(154.0 to 204.8)                            | 43.8<br>(28.4 to 63.8)                        | 34.3<br>(30.4 to 38.0)                            | -6.0<br>(-8.3 to -3.7)                              |
| Male infertility                                           | 559.8<br>(436.3 to 731.0)                           | --                                                   | 3.4<br>(1.4 to 6.7)                           | 7.2<br>(3.5 to 11.0)                              | -3.0<br>(-6.3 to 0.2)                               |
| Other urinary diseases                                     | --                                                  | --                                                   | 6.0<br>(3.9 to 8.8)                           | -9.8<br>(-12.7 to -6.6)                           | -20.0<br>(-22.3 to -17.7)                           |
| Gynecological diseases                                     | 22,738.0<br>(22,376.2 to 23,096.0)                  | 7,146.3†<br>(6,850.0 to 7,444.5)                     | 227.3<br>(154.3 to 332.2)                     | 7.2<br>(4.8 to 9.4)                               | -5.8<br>(-7.9 to -4.0)                              |
| Uterine fibroids                                           | 1,362.8<br>(1,247.2 to 1,490.9)                     | 144.7<br>(129.0 to 161.6)                            | 26.3<br>(16.1 to 41.6)                        | 18.8<br>(14.9 to 22.2)                            | -2.9<br>(-5.7 to -0.4)                              |
| Polycystic ovarian syndrome                                | 5.9<br>(4.5 to 7.7)                                 | 80.0<br>(61.3 to 101.1)                              | 0.1<br>(< 0.05 to 0.1)                        | 11.5<br>(3.1 to 20.3)                             | 0.6<br>(-6.7 to 8.5)                                |
| Female infertility                                         | 737.4<br>(375.9 to 1,243.5)                         | --                                                   | 4.2<br>(1.4 to 9.4)                           | 60.8<br>(37.0 to 130.3)                           | 44.0<br>(21.5 to 108.4)                             |
| Endometriosis                                              | 46.5<br>(40.7 to 52.5)                              | 222.1<br>(182.8 to 266.1)                            | 4.3<br>(2.9 to 6.1)                           | 28.9<br>(15.5 to 43.0)                            | 11.4<br>(0.1 to 23.6)                               |
| Genital prolapse                                           | 7,116.3<br>(6,408.9 to 7,846.8)                     | 449.2<br>(393.4 to 512.1)                            | 22.4<br>(10.9 to 40.5)                        | 13.5<br>(10.7 to 16.2)                            | -10.1<br>(-12.3 to -8.2)                            |
| Premenstrual syndrome                                      | 14,367.0<br>(13,762.2 to 15,015.9)                  | 5,133.1<br>(4,889.4 to 5,382.0)                      | 120.1<br>(74.2 to 184.2)                      | 9.3<br>(6.9 to 12.1)                              | -0.6<br>(-2.8 to 1.8)                               |
| Other gynecological diseases                               | 1,557.7<br>(1,424.6 to 1,683.6)                     | 1,117.3<br>(972.5 to 1,256.8)                        | 50.0<br>(33.8 to 69.2)                        | -8.0<br>(-11.8 to -3.9)                           | -18.9<br>(-22.2 to -15.5)                           |
| Hemoglobinopathies and hemolytic anaemias                  | 41,640.3<br>(41,404.1 to 41,898.1)                  | --                                                   | 75.2<br>(49.8 to 110.3)                       | 12.8<br>(10.2 to 15.8)                            | 2.0<br>(-0.1 to 4.2)                                |
| Thalassemias                                               | 1.3<br>(1.2 to 1.4)                                 | --                                                   | 0.1<br>(0.1 to 0.2)                           | -8.3<br>(-13.5 to -4.5)                           | -1.4<br>(-6.7 to 2.8)                               |
| Thalassaemia trait                                         | 1,759.3<br>(1,713.0 to 1,805.1)                     | --                                                   | 22.4<br>(14.6 to 32.5)                        | 17.6<br>(13.9 to 21.8)                            | 4.1<br>(1.2 to 7.2)                                 |
| Sickle cell disorders                                      | 18.5<br>(17.7 to 19.3)                              | --                                                   | 1.8<br>(1.3 to 2.4)                           | 10.6<br>(5.5 to 15.5)                             | 9.0<br>(4.5 to 13.8)                                |
| Sickle cell trait                                          | 7,138.2<br>(7,015.5 to 7,288.3)                     | --                                                   | 20.5<br>(13.5 to 30.2)                        | 14.4<br>(10.9 to 18.1)                            | 6.4<br>(3.4 to 9.5)                                 |
| G6PD deficiency                                            | 7,875.5<br>(7,648.4 to 8,143.7)                     | --                                                   | 0.7<br>(0.5 to 0.9)                           | 7.0<br>(3.6 to 10.9)                              | -1.6<br>(-4.5 to 1.7)                               |
| G6PD trait                                                 | 25,342.8<br>(25,011.4 to 25,730.4)                  | --                                                   | < 0.05<br>(< 0.05 to < 0.05)                  | 20.1<br>(16.9 to 23.4)                            | 7.6<br>(5.1 to 10.3)                                |
| Other hemoglobinopathies and hemolytic anaemias            | 1,888.7<br>(1,814.6 to 1,967.9)                     | --                                                   | 29.7<br>(19.5 to 44.8)                        | 8.9<br>(5.6 to 12.6)                              | -2.3<br>(-4.9 to 0.7)                               |
| Endocrine, metabolic, blood, and immune disorders          | 3,020.2<br>(2,879.0 to 3,170.5)                     | 407.9<br>(371.3 to 445.5)                            | 84.1<br>(57.4 to 115.2)                       | 20.4<br>(17.2 to 23.7)                            | 0.1<br>(-2.0 to 2.1)                                |
| <b>Musculoskeletal disorders</b>                           | <b>38,803.8</b><br><b>(37,989.0 to 39,553.4)</b>    | <b>19,357.9</b><br><b>(17,671.6 to 21,146.5)</b>     | <b>4,357.2</b><br><b>(3,156.5 to 5,710.9)</b> | <b>24.0</b><br><b>(22.2 to 25.8)</b>              | <b>-0.7</b><br><b>(-1.6 to 0.2)</b>                 |
| Rheumatoid arthritis                                       | 630.0<br>(567.4 to 704.1)                           | 35.4<br>(31.8 to 39.4)                               | 148.3<br>(100.8 to 195.8)                     | 32.0<br>(27.9 to 36.2)                            | 2.0<br>(-0.8 to 4.7)                                |
| Osteoarthritis                                             | 7,661.0<br>(7,187.8 to 8,142.1)                     | 394.4<br>(367.6 to 422.2)                            | 471.4<br>(335.3 to 638.1)                     | 45.2<br>(43.4 to 46.9)                            | 4.7<br>(3.5 to 5.8)                                 |
| Low back and neck pain                                     | 23,612.9<br>(22,657.5 to 24,407.6)                  | 10,115.6<br>(9,038.1 to 11,309.5)                    | 2,754.1<br>(1,931.3 to 3,631.5)               | 20.2<br>(18.0 to 22.2)                            | -2.6<br>(-3.6 to -1.5)                              |
| Low back pain                                              | 17,164.4<br>(15,252.5 to 19,371.6)                  | 8,203.4<br>(7,148.6 to 9,384.7)                      | 1,947.7<br>(1,370.1 to 2,585.2)               | 17.8<br>(15.0 to 20.6)                            | -3.6<br>(-5.0 to -2.2)                              |
| Neck pain                                                  | 8,080.1<br>(6,970.3 to 9,393.4)                     | 1,912.2<br>(1,648.7 to 2,264.8)                      | 806.4<br>(543.1 to 1,144.7)                   | 26.3<br>(24.2 to 28.5)                            | 0.2<br>(-0.5 to 0.8)                                |
| Gout                                                       | 601.8<br>(538.5 to 675.9)                           | 121.3<br>(106.3 to 136.3)                            | 19.3<br>(13.2 to 26.4)                        | 32.3<br>(25.2 to 39.4)                            | 0.5<br>(-4.2 to 5.6)                                |
| Other musculoskeletal disorders                            | 11,197.4<br>(9,966.0 to 12,622.1)                   | 8,691.2<br>(7,405.6 to 10,160.4)                     | 964.1<br>(660.1 to 1,349.2)                   | 25.1<br>(21.2 to 29.3)                            | 1.9<br>(-0.9 to 5.0)                                |
| <b>Other non-communicable diseases</b>                     | <b>159,231.7</b><br><b>(158,424.8 to 160,170.1)</b> | <b>541,496.8†</b><br><b>(519,620.5 to 564,504.5)</b> | <b>4,580.1</b><br><b>(3,100.2 to 6,560.1)</b> | <b>19.1</b><br><b>(18.1 to 20.0)</b>              | <b>-1.1</b><br><b>(-1.6 to -0.6)</b>                |
| Congenital anomalies                                       | 2,336.1<br>(2,246.9 to 2,433.5)                     | --                                                   | 285.6<br>(203.6 to 378.2)                     | 11.0<br>(8.3 to 13.8)                             | 2.5<br>(0.0 to 5.1)                                 |
| Neural tube defects                                        | 178.0<br>(161.6 to 195.6)                           | --                                                   | 52.4<br>(37.1 to 69.9)                        | 17.3<br>(12.1 to 22.8)                            | 6.7<br>(2.1 to 11.6)                                |
| Congenital heart anomalies                                 | 296.7<br>(269.4 to 325.9)                           | --                                                   | 15.2<br>(6.6 to 25.7)                         | 7.3<br>(3.6 to 11.6)                              | 1.9<br>(-1.6 to 5.7)                                |
| Orofacial clefts                                           | 232.6<br>(210.5 to 255.5)                           | --                                                   | 3.0<br>(2.0 to 4.4)                           | -2.3<br>(-12.3 to 9.0)                            | -10.9<br>(-20.0 to -0.7)                            |
| Down's syndrome                                            | 44.2<br>(38.1 to 50.8)                              | --                                                   | 4.1<br>(2.8 to 5.7)                           | 27.9<br>(23.3 to 33.2)                            | 20.3<br>(16.0 to 24.9)                              |
| Turner syndrome                                            | 33.6<br>(30.2 to 37.3)                              | --                                                   | 0.6<br>(0.3 to 1.0)                           | 10.1<br>(2.6 to 17.8)                             | 4.8<br>(-2.3 to 11.9)                               |
| Klinefelter syndrome                                       | 36.6<br>(31.8 to 42.2)                              | --                                                   | 0.2<br>(0.1 to 0.4)                           | 11.6<br>(3.1 to 20.1)                             | 8.4<br>(0.2 to 16.6)                                |

| Cause                                         | Prevalence in thousands (95% UI)                 | Incidence in thousands (95% UI)                   | YLDs in thousands (95% UI)                  |                                                   |                                                     |
|-----------------------------------------------|--------------------------------------------------|---------------------------------------------------|---------------------------------------------|---------------------------------------------------|-----------------------------------------------------|
|                                               | 2016 counts                                      | 2016 counts                                       | 2016 counts                                 | Percentage change in counts between 2006 and 2016 | Percentage change in age-standardised rates between |
| Other chromosomal abnormalities               | 169.8<br>(149.3 to 193.7)                        | --                                                | 18.7<br>(12.9 to 25.2)                      | 4.7<br>(-2.7 to 11.1)                             | 11.0<br>(3.4 to 17.8)                               |
| Congenital musculoskeletal and limb anomalies | 566.5<br>(525.6 to 609.0)                        | --                                                | 80.0<br>(54.4 to 109.7)                     | 13.6<br>(10.2 to 17.0)                            | 2.3<br>(-0.7 to 5.2)                                |
| Urogenital congenital anomalies               | 246.3<br>(228.6 to 266.2)                        | --                                                | 5.6<br>(3.2 to 9.1)                         | -1.7<br>(-4.8 to 1.3)                             | -0.6<br>(-3.6 to 2.2)                               |
| Digestive congenital anomalies                | 291.2<br>(264.0 to 318.9)                        | --                                                | 13.0<br>(8.5 to 18.6)                       | 12.0<br>(6.7 to 16.9)                             | 2.1<br>(-2.6 to 6.7)                                |
| Other congenital anomalies                    | 724.4<br>(515.0 to 1,027.3)                      | --                                                | 92.8<br>(63.4 to 132.3)                     | 8.1<br>(2.3 to 14.4)                              | -1.1<br>(-6.5 to 4.5)                               |
| Skin and subcutaneous diseases                | 70,065.9<br>(69,290.2 to 70,844.9)               | 178,855.3<br>(169,166.2 to 189,991.1)             | 1,651.1<br>(1,105.7 to 2,418.3)             | 8.5<br>(7.6 to 9.5)                               | 0.8<br>(0.1 to 1.6)                                 |
| Dermatitis                                    | 7,705.2<br>(7,377.1 to 8,084.0)                  | 11,306.5<br>(10,509.0 to 12,161.5)                | 285.1<br>(171.5 to 461.3)                   | 6.6<br>(4.6 to 8.7)                               | 1.3<br>(-0.4 to 3.0)                                |
| Psoriasis                                     | 2,113.9<br>(2,040.8 to 2,186.2)                  | 281.7<br>(272.0 to 290.8)                         | 183.7<br>(132.9 to 240.3)                   | 23.1<br>(20.4 to 25.7)                            | 5.7<br>(3.5 to 7.9)                                 |
| Cellulitis                                    | 89.2<br>(83.2 to 95.9)                           | 1,753.5<br>(1,637.8 to 1,874.3)                   | 5.1<br>(3.4 to 7.3)                         | 11.7<br>(5.0 to 18.9)                             | 5.6<br>(-0.5 to 12.3)                               |
| Pyoderma                                      | 745.9<br>(727.4 to 767.7)                        | 18,227.9<br>(17,575.6 to 18,895.4)                | 4.1<br>(1.7 to 8.5)                         | 32.7<br>(30.3 to 35.2)                            | 3.9<br>(2.1 to 5.6)                                 |
| Scabies                                       | 6,973.8<br>(6,148.9 to 7,976.9)                  | 21,857.3<br>(19,070.2 to 25,035.0)                | 179.9<br>(100.4 to 284.9)                   | -3.7<br>(-5.8 to -1.5)                            | -7.9<br>(-9.2 to -6.6)                              |
| Fungal skin diseases                          | 22,578.9<br>(20,359.8 to 24,970.2)               | 80,516.4<br>(71,292.2 to 90,444.2)                | 126.2<br>(50.7 to 264.4)                    | 16.4<br>(14.4 to 18.6)                            | 0.1<br>(-0.2 to 0.4)                                |
| Viral skin diseases                           | 5,746.4<br>(5,549.5 to 5,945.4)                  | 8,682.5<br>(8,328.9 to 9,013.5)                   | 175.8<br>(108.4 to 261.0)                   | 6.0<br>(5.0 to 7.1)                               | -0.0<br>(-0.9 to 0.9)                               |
| Acne vulgaris                                 | 17,047.8<br>(15,598.1 to 18,564.9)               | 11,339.3<br>(9,702.9 to 13,384.1)                 | 439.2<br>(297.3 to 631.6)                   | 5.1<br>(3.5 to 6.6)                               | 2.3<br>(0.7 to 3.7)                                 |
| Alopecia areata                               | 380.7<br>(365.2 to 395.9)                        | 672.3<br>(644.9 to 699.1)                         | 12.5<br>(8.0 to 18.8)                       | 12.9<br>(8.8 to 16.8)                             | 0.2<br>(-3.3 to 3.5)                                |
| Pruritus                                      | 2,040.5<br>(1,799.7 to 2,303.9)                  | 1,608.4<br>(1,433.9 to 1,819.2)                   | 21.7<br>(10.0 to 39.6)                      | 18.8<br>(15.8 to 21.6)                            | 1.2<br>(-0.4 to 2.9)                                |
| Urticaria                                     | 1,931.5<br>(1,703.7 to 2,213.2)                  | 3,431.8<br>(3,027.8 to 3,917.0)                   | 116.1<br>(74.4 to 165.1)                    | 4.4<br>(2.0 to 7.0)                               | 0.1<br>(-1.5 to 1.8)                                |
| Decubitus ulcer                               | 92.0<br>(83.7 to 100.8)                          | 335.0<br>(302.3 to 370.7)                         | 14.5<br>(10.2 to 19.4)                      | 57.2<br>(49.7 to 64.4)                            | 14.7<br>(9.6 to 19.8)                               |
| Other skin and subcutaneous diseases          | 15,936.7<br>(15,526.6 to 16,365.0)               | 18,842.8<br>(18,312.1 to 19,431.6)                | 87.3<br>(42.4 to 160.4)                     | 26.5<br>(25.4 to 27.7)                            | 3.2<br>(2.5 to 3.9)                                 |
| Sense organ diseases                          | 56,195.0<br>(55,648.2 to 56,643.5)               | 20,018.1†<br>(18,869.5 to 21,302.2)               | 1,901.1<br>(1,298.8 to 2,665.2)             | 28.5<br>(27.3 to 29.9)                            | -1.6<br>(-2.4 to -0.8)                              |
| Glaucoma                                      | 167.7<br>(139.8 to 198.4)                        | --                                                | 15.2<br>(10.3 to 21.0)                      | 50.2<br>(44.6 to 55.8)                            | 0.9<br>(-2.7 to 4.6)                                |
| Cataract                                      | 1,799.9<br>(1,575.3 to 2,043.8)                  | --                                                | 118.6<br>(84.9 to 161.8)                    | 45.9<br>(42.8 to 49.3)                            | -2.1<br>(-3.8 to -0.1)                              |
| Macular degeneration                          | 111.3<br>(89.9 to 137.3)                         | --                                                | 6.8<br>(4.6 to 9.5)                         | 54.7<br>(48.4 to 61.5)                            | 3.0<br>(-1.0 to 7.1)                                |
| Refraction and accommodation disorders        | 32,484.3<br>(31,350.2 to 33,724.2)               | --                                                | 552.6<br>(345.3 to 867.0)                   | 18.4<br>(16.2 to 20.4)                            | -2.4<br>(-3.6 to -1.3)                              |
| Age-related and other hearing loss            | 33,561.9<br>(31,991.5 to 35,316.2)               | --                                                | 954.8<br>(657.8 to 1,332.7)                 | 32.6<br>(30.4 to 34.7)                            | -1.6<br>(-3.0 to -0.4)                              |
| Other vision loss                             | 861.8<br>(749.0 to 987.5)                        | --                                                | 64.4<br>(44.8 to 87.4)                      | 29.4<br>(25.0 to 34.0)                            | -1.4<br>(-3.9 to 1.3)                               |
| Other sense organ diseases                    | 6,056.7<br>(5,624.6 to 6,463.1)                  | 20,018.1<br>(18,869.5 to 21,302.2)                | 188.7<br>(119.3 to 283.4)                   | 28.8<br>(27.0 to 30.6)                            | 1.0<br>(-0.2 to 2.1)                                |
| Oral disorders                                | 114,428.6<br>(112,040.9 to 116,420.1)            | 342,623.5†<br>(323,804.2 to 364,277.5)            | 742.2<br>(458.9 to 1,128.6)                 | 26.1<br>(24.6 to 27.6)                            | -4.7<br>(-6.5 to -2.9)                              |
| Caries of deciduous teeth                     | 10,967.9<br>(8,911.8 to 12,901.6)                | 38,849.4<br>(26,801.1 to 53,737.8)                | 2.6<br>(1.1 to 5.1)                         | 2.9<br>(-3.6 to 10.1)                             | 15.2<br>(8.4 to 22.7)                               |
| Caries of permanent teeth                     | 83,537.2<br>(79,559.6 to 87,384.0)               | 299,282.5<br>(283,397.4 to 315,432.0)             | 49.1<br>(22.1 to 93.6)                      | 10.5<br>(9.1 to 12.0)                             | -2.1<br>(-3.0 to -1.1)                              |
| Periodontal disease                           | 24,230.9<br>(20,383.6 to 28,628.1)               | 3,059.1<br>(2,500.3 to 3,641.6)                   | 159.0<br>(62.6 to 326.1)                    | 35.4<br>(32.5 to 38.3)                            | 7.9<br>(6.1 to 9.7)                                 |
| Edentulism and severe tooth loss              | 15,046.3<br>(13,131.1 to 16,936.4)               | 1,432.4<br>(1,201.4 to 1,691.6)                   | 416.0<br>(272.4 to 587.6)                   | 28.3<br>(26.3 to 30.9)                            | -9.6<br>(-10.8 to -8.0)                             |
| Other oral disorders                          | 3,944.5<br>(3,769.2 to 4,121.0)                  | --                                                | 115.6<br>(71.5 to 174.0)                    | 15.2<br>(13.9 to 16.6)                            | 0.1<br>(-0.9 to 1.1)                                |
| <b>Injuries</b>                               | <b>35,161.7</b><br><b>(32,779.7 to 38,000.8)</b> | <b>15,767.5†</b><br><b>(14,989.7 to 16,573.5)</b> | <b>1,391.7</b><br><b>(951.2 to 1,924.8)</b> | <b>28.3</b><br><b>(26.4 to 30.1)</b>              | <b>4.5</b><br><b>(3.0 to 5.8)</b>                   |
| <b>Transport injuries</b>                     | <b>4,352.6</b><br><b>(4,007.3 to 4,757.8)</b>    | <b>1,508.0</b><br><b>(1,364.6 to 1,658.6)</b>     | <b>224.8</b><br><b>(149.7 to 320.8)</b>     | <b>51.6</b><br><b>(48.6 to 54.6)</b>              | <b>23.5</b><br><b>(21.7 to 25.3)</b>                |
| Road injuries                                 | 4,216.1<br>(3,877.1 to 4,624.7)                  | 1,476.8<br>(1,334.4 to 1,628.8)                   | 218.0<br>(145.2 to 311.1)                   | 52.5<br>(49.5 to 55.5)                            | 24.3<br>(22.5 to 26.2)                              |
| Pedestrian road injuries                      | 987.2<br>(864.5 to 1,128.5)                      | 295.0<br>(258.2 to 337.5)                         | 51.4<br>(34.2 to 73.5)                      | 17.8<br>(15.5 to 20.2)                            | -3.7<br>(-5.1 to -2.3)                              |
| Cyclist road injuries                         | 531.2<br>(440.4 to 623.5)                        | 230.0<br>(191.4 to 273.6)                         | 25.9<br>(17.0 to 37.8)                      | 25.4<br>(23.2 to 27.7)                            | 5.0<br>(3.5 to 6.4)                                 |
| Motorcyclist road injuries                    | 1,903.3<br>(1,630.9 to 2,292.4)                  | 552.0<br>(475.8 to 632.6)                         | 96.2<br>(64.2 to 137.2)                     | 110.0<br>(105.2 to 115.0)                         | 71.6<br>(68.5 to 74.6)                              |
| Motor vehicle road injuries                   | 612.6<br>(527.6 to 693.9)                        | 304.8<br>(260.3 to 349.0)                         | 35.7<br>(23.9 to 51.1)                      | 34.5<br>(32.5 to 36.5)                            | 8.4<br>(6.9 to 9.6)                                 |
| Other road injuries                           | 181.9<br>(157.8 to 214.1)                        | 95.0<br>(75.3 to 117.5)                           | 8.8<br>(5.8 to 13.1)                        | 39.0<br>(36.5 to 41.6)                            | 14.8<br>(13.1 to 16.3)                              |
| Other transport injuries                      | 136.6<br>(118.0 to 158.0)                        | 31.2<br>(26.9 to 36.4)                            | 6.8<br>(4.5 to 9.9)                         | 27.1<br>(24.8 to 29.4)                            | 3.0<br>(1.1 to 4.7)                                 |
| <b>Unintentional injuries</b>                 | <b>29,047.7</b><br><b>(26,692.2 to 31,782.8)</b> | <b>13,440.6</b><br><b>(12,662.4 to 14,224.1)</b>  | <b>1,067.0</b><br><b>(739.8 to 1,472.4)</b> | <b>26.0</b><br><b>(24.0 to 28.0)</b>              | <b>2.1</b><br><b>(0.6 to 3.5)</b>                   |
| Falls                                         | 16,853.3<br>(14,868.4 to 19,138.9)               | 7,895.0<br>(7,339.9 to 8,464.9)                   | 687.4<br>(484.5 to 941.8)                   | 24.6<br>(22.5 to 26.7)                            | 0.1<br>(-1.3 to 1.5)                                |
| Drowning                                      | 73.4<br>(64.7 to 83.4)                           | 13.7<br>(12.2 to 15.3)                            | 3.6<br>(2.3 to 5.2)                         | 7.9<br>(5.4 to 10.2)                              | -12.5<br>(-14.3 to -10.7)                           |
| Fire, heat, and hot substances                | 1,543.8<br>(1,294.7 to 1,892.6)                  | 179.8<br>(150.9 to 208.8)                         | 39.4<br>(25.6 to 58.2)                      | -17.3<br>(-20.7 to -14.4)                         | -29.2<br>(-31.7 to -26.9)                           |
| Poisonings                                    | 25.1<br>(19.7 to 30.7)                           | 29.2<br>(21.8 to 37.7)                            | 2.4<br>(1.4 to 3.6)                         | 13.1<br>(8.7 to 17.4)                             | -0.3<br>(-4.3 to 3.5)                               |
| Exposure to mechanical forces                 | 2,817.6<br>(2,445.2 to 3,359.1)                  | 1,048.0<br>(910.9 to 1,183.0)                     | 65.7<br>(42.2 to 97.2)                      | 12.8<br>(10.3 to 15.1)                            | -7.0<br>(-8.7 to -5.5)                              |
| Unintentional firearm injuries                | 153.2<br>(122.3 to 190.6)                        | 36.8<br>(27.9 to 48.0)                            | 6.0<br>(3.8 to 9.0)                         | -1.0<br>(-3.0 to 1.0)                             | -18.5<br>(-19.9 to -17.2)                           |
| Unintentional suffocation                     | 146.8<br>(112.5 to 186.3)                        | 25.7<br>(17.0 to 37.3)                            | 4.5<br>(2.8 to 7.1)                         | 25.9<br>(22.3 to 29.9)                            | 9.8<br>(7.6 to 12.2)                                |
| Other exposure to mechanical forces           | 2,517.6<br>(2,142.3 to 3,053.8)                  | 985.5<br>(855.4 to 1,115.1)                       | 55.1<br>(35.7 to 81.1)                      | 13.5<br>(11.1 to 15.8)                            | -6.8<br>(-8.4 to -5.2)                              |

| Cause                                                                               | Prevalence in thousands (95% UI)              | Incidence in thousands (95% UI)          | YLDs in thousands (95% UI)            |                                                   |                                                     |
|-------------------------------------------------------------------------------------|-----------------------------------------------|------------------------------------------|---------------------------------------|---------------------------------------------------|-----------------------------------------------------|
|                                                                                     | 2016 counts                                   | 2016 counts                              | 2016 counts                           | Percentage change in counts between 2006 and 2016 | Percentage change in age-standardised rates between |
| Adverse effects of medical treatment                                                | 26.4<br>(21.2 to 32.1)                        | 345.0<br>(310.0 to 382.1)                | 3.5<br>(2.2 to 5.2)                   | 12.2<br>(8.5 to 16.3)                             | -10.8<br>(-13.3 to -8.1)                            |
| Animal contact                                                                      | 281.6<br>(252.0 to 323.1)                     | 341.2<br>(290.4 to 395.9)                | 9.3<br>(6.0 to 13.5)                  | -2.2<br>(-4.7 to 0.3)                             | -15.4<br>(-17.4 to -13.5)                           |
| Venomous animal contact                                                             | 165.6<br>(141.1 to 195.9)                     | 187.4<br>(153.9 to 226.8)                | 7.6<br>(4.9 to 10.8)                  | -2.6<br>(-5.2 to 0.3)                             | -15.0<br>(-17.1 to -12.7)                           |
| Non-venomous animal contact                                                         | 116.0<br>(99.8 to 140.2)                      | 153.8<br>(124.9 to 187.3)                | 1.8<br>(1.1 to 2.8)                   | -0.9<br>(-3.8 to 1.8)                             | -17.2<br>(-19.3 to -15.4)                           |
| Foreign body                                                                        | 941.0<br>(751.4 to 1,149.7)                   | 1,287.8<br>(897.7 to 1,771.0)            | 40.0<br>(25.0 to 60.6)                | 38.6<br>(30.4 to 51.5)                            | 16.5<br>(10.0 to 26.4)                              |
| Pulmonary aspiration and foreign body in airway                                     | 617.7<br>(471.7 to 807.9)                     | 203.3<br>(174.0 to 243.7)                | 25.0<br>(15.5 to 38.2)                | 23.5<br>(20.7 to 26.4)                            | 6.0<br>(3.9 to 7.9)                                 |
| Foreign body in eyes                                                                | 210.3<br>(117.5 to 331.4)                     | 1,040.9<br>(652.5 to 1,525.2)            | 11.9<br>(6.0 to 21.1)                 | 109.6<br>(78.8 to 138.7)                          | 64.9<br>(40.2 to 87.6)                              |
| Foreign body in other body part                                                     | 113.0<br>(92.8 to 146.2)                      | 43.6<br>(35.3 to 54.0)                   | 3.1<br>(1.9 to 4.8)                   | 6.1<br>(3.0 to 8.9)                               | -11.5<br>(-14.0 to -9.2)                            |
| Environmental heat and cold exposure                                                | 3,013.6<br>(2,659.1 to 3,470.4)               | 887.7<br>(782.4 to 1,007.4)              | 111.4<br>(74.0 to 159.5)              | 91.4<br>(87.2 to 95.6)                            | 53.9<br>(50.9 to 56.8)                              |
| Other unintentional injuries                                                        | 3,472.0<br>(2,910.6 to 4,049.7)               | 1,413.2<br>(1,271.1 to 1,569.2)          | 104.4<br>(69.4 to 150.2)              | 23.8<br>(21.8 to 25.7)                            | -0.1<br>(-1.4 to 1.1)                               |
| <b>Self-harm and interpersonal violence</b>                                         | <b>5,914.5</b><br><b>(5,309.4 to 6,521.2)</b> | <b>806.4†</b><br><b>(723.2 to 907.2)</b> | <b>98.5</b><br><b>(67.8 to 139.6)</b> | <b>11.0</b><br><b>(8.7 to 13.2)</b>               | <b>-4.6</b><br><b>(-5.6 to -3.4)</b>                |
| Self-harm                                                                           | 114.8<br>(100.4 to 130.5)                     | 51.5<br>(45.1 to 58.5)                   | 5.0<br>(3.2 to 7.4)                   | 26.5<br>(23.6 to 29.5)                            | 0.8<br>(-1.2 to 2.8)                                |
| Self-harm by firearm                                                                | 12.8<br>(11.1 to 14.7)                        | 3.7<br>(2.2 to 5.6)                      | 0.5<br>(0.3 to 0.7)                   | 12.0<br>(9.5 to 14.7)                             | -9.2<br>(-11.1 to -7.5)                             |
| Self-harm by other specified means                                                  | 102.0<br>(87.3 to 117.0)                      | 47.8<br>(41.7 to 54.6)                   | 4.5<br>(2.9 to 6.7)                   | 28.2<br>(25.1 to 31.4)                            | 1.9<br>(-0.3 to 4.0)                                |
| Interpersonal violence                                                              | 5,799.6<br>(5,205.7 to 6,401.8)               | 754.9†<br>(671.3 to 857.2)               | 93.5<br>(64.2 to 132.3)               | 10.2<br>(8.0 to 12.5)                             | -4.9<br>(-5.9 to -3.7)                              |
| Assault by firearm                                                                  | 288.4<br>(228.8 to 354.6)                     | 94.8<br>(75.8 to 117.9)                  | 13.0<br>(8.4 to 19.1)                 | 18.1<br>(16.0 to 20.1)                            | -2.7<br>(-4.3 to -1.3)                              |
| Assault by sharp object                                                             | 560.8<br>(456.9 to 672.9)                     | 237.9<br>(193.8 to 289.3)                | 15.9<br>(10.4 to 23.1)                | 19.5<br>(17.0 to 21.9)                            | -0.9<br>(-2.6 to 0.6)                               |
| Sexual violence                                                                     | 4,201.6<br>(3,659.8 to 4,813.4)               | --                                       | 35.1<br>(23.4 to 50.4)                | -1.2<br>(-3.0 to 0.6)                             | -8.6<br>(-9.5 to -7.6)                              |
| Assault by other means                                                              | 748.8<br>(632.5 to 896.1)                     | 422.2<br>(365.5 to 485.2)                | 29.5<br>(19.6 to 42.8)                | 18.1<br>(16.4 to 19.8)                            | -3.3<br>(-4.5 to -2.2)                              |
| <b>Forces of nature, conflict and terrorism, and executions and police conflict</b> | <b>48.5</b><br><b>(32.8 to 66.5)</b>          | <b>12.5†</b><br><b>(1.1 to 19.0)</b>     | <b>1.5</b><br><b>(0.5 to 3.5)</b>     | <b>45.6</b><br><b>(5.5 to 60.1)</b>               | <b>27.5</b><br><b>(-5.6 to 38.9)</b>                |
| Exposure to forces of nature                                                        | 29.4<br>(20.6 to 42.1)                        | --                                       | 0.9<br>(0.3 to 2.2)                   | 18.8<br>(-0.3 to 27.2)                            | 3.0<br>(-13.1 to 9.8)                               |
| Conflict and terrorism                                                              | --                                            | --                                       | --                                    | --                                                | --                                                  |
| Executions and police conflict                                                      | 19.1<br>(3.4 to 31.2)                         | 12.5<br>(1.1 to 19.0)                    | 0.5<br>(0.1 to 1.2)                   | 142.1<br>(16.2 to 248.6)                          | 124.9<br>(11.8 to 214.5)                            |
| <b>Impairments</b>                                                                  | --                                            | --                                       | --                                    | --                                                | --                                                  |
| Anaemia                                                                             | 50,768.4<br>(48,776.3 to 52,876.4)            | --                                       | 1,211.0<br>(805.5 to 1,740.1)         | 8.7<br>(6.6 to 11.1)                              | -2.2<br>(-3.9 to -0.4)                              |
| Developmental intellectual disability                                               | 2,997.7<br>(2,341.3 to 3,676.4)               | --                                       | 384.3<br>(281.6 to 513.2)             | 13.6<br>(10.2 to 18.7)                            | 6.1<br>(2.7 to 11.1)                                |
| Epilepsy                                                                            | 1,275.9<br>(1,014.9 to 1,545.4)               | --                                       | 382.2<br>(271.1 to 522.0)             | 9.8<br>(-14.4 to 40.8)                            | -0.6<br>(-22.7 to 28.5)                             |
| Guillain-Barre syndrome                                                             | 2.2<br>(1.7 to 2.8)                           | --                                       | 0.7<br>(0.4 to 1.0)                   | 45.9<br>(34.4 to 63.0)                            | 23.6<br>(14.9 to 37.4)                              |
| Hearing loss                                                                        | 36,042.7<br>(34,465.7 to 37,713.7)            | --                                       | 1,086.3<br>(753.0 to 1,510.2)         | 27.7<br>(25.7 to 29.5)                            | -2.1<br>(-3.2 to -0.9)                              |
| Heart failure                                                                       | 1,336.0<br>(1,185.7 to 1,513.2)               | --                                       | 142.6<br>(107.6 to 180.2)             | 45.1<br>(40.7 to 50.1)                            | 0.3<br>(-3.0 to 3.6)                                |
| Infertility                                                                         | 2,230.7<br>(1,741.2 to 2,873.7)               | --                                       | 13.6<br>(5.6 to 26.5)                 | 11.5<br>(8.2 to 14.8)                             | 0.4<br>(-2.4 to 3.2)                                |
| Pelvic inflammatory disease                                                         | 43.0<br>(38.5 to 48.1)                        | --                                       | 5.7<br>(3.9 to 7.9)                   | -15.7<br>(-21.6 to -9.7)                          | -25.4<br>(-30.4 to -20.4)                           |
| Vision loss                                                                         | 36,329.7<br>(35,021.2 to 37,691.9)            | --                                       | 886.0<br>(616.0 to 1,273.4)           | 23.9<br>(22.0 to 26.2)                            | -0.8<br>(-2.1 to 1.4)                               |

We did not calculate incidence for the nine impairments, certain NTDs, and causes with only birth prevalence. Blank cells mean that no estimate is available.

† Incidence for aggregate causes represents the sum of the incidence of the causes below the aggregate.

‡ Incidence estimates for stroke represent first-ever stroke only.

^ Incidence of HIV/AIDS represents new infections of HIV only and does not include new infections of Tuberculosis in HIV positive cases.



SR Table 14: Prevalence, incidence, and YLDs for 2016, percentage change of YLD counts and percentage change of age-standardised YLD rates between 2006 and 2016 by cause and impairments, for all ages, Brunei.

| Cause                                                                                | Prevalence in thousands (95% UI) | Incidence in thousands (95% UI)         | YLDs in thousands (95% UI)    |                                                   |                                                     |
|--------------------------------------------------------------------------------------|----------------------------------|-----------------------------------------|-------------------------------|---------------------------------------------------|-----------------------------------------------------|
|                                                                                      | 2016 counts                      | 2016 counts                             | 2016 counts                   | Percentage change in counts between 2006 and 2016 | Percentage change in age-standardised rates between |
| <b>All causes</b>                                                                    | <b>387.3</b><br>(385.0 to 389.5) | <b>2,411.1†</b><br>(2,236.7 to 2,609.1) | <b>41.3</b><br>(30.7 to 53.6) | <b>25.5</b><br>(23.2 to 28.0)                     | <b>-0.9</b><br>(-2.6 to 0.8)                        |
| <b>Communicable, maternal, neonatal, and nutritional disorders</b>                   | <b>152.2</b><br>(147.2 to 157.4) | <b>1,465.3†</b><br>(1,299.9 to 1,653.0) | <b>2.3</b><br>(1.6 to 3.2)    | <b>12.2</b><br>(5.7 to 18.9)                      | <b>1.9</b><br>(-3.8 to 7.8)                         |
| <b>HIV/AIDS and tuberculosis</b>                                                     | <b>40.6</b><br>(36.5 to 44.0)    | <b>0.3†</b><br>(0.3 to 0.4)             | <b>0.1</b><br>(0.1 to 0.2)    | <b>61.5</b><br>(34.0 to 88.4)                     | <b>25.0</b><br>(4.3 to 46.5)                        |
| Tuberculosis                                                                         | 37.0<br>(33.3 to 41.4)           | 0.2†<br>(0.2 to 0.3)                    | < 0.05<br>(< 0.05 to < 0.05)  | 0.0<br>(-19.4 to 23.6)                            | -22.1<br>(-34.9 to -6.3)                            |
| Drug-susceptible tuberculosis                                                        | 0.1<br>(0.1 to 0.1)              | 0.2<br>(0.2 to 0.3)                     | < 0.05<br>(< 0.05 to < 0.05)  | -0.0<br>(-19.4 to 23.6)                           | -22.2<br>(-34.9 to -6.4)                            |
| Multidrug-resistant tuberculosis without extensive drug resistance                   | < 0.05<br>(< 0.05 to < 0.05)     | < 0.05<br>(< 0.05 to < 0.05)            | < 0.05<br>(< 0.05 to < 0.05)  | 89.5<br>(14.8 to 209.2)                           | 46.4<br>(-10.9 to 139.2)                            |
| Extensively drug-resistant tuberculosis                                              | < 0.05<br>(< 0.05 to < 0.05)     | < 0.05<br>(< 0.05 to < 0.05)            | < 0.05<br>(< 0.05 to < 0.05)  | 307.6<br>(146.7 to 565.0)                         | 214.8<br>(91.5 to 414.7)                            |
| Latent tuberculosis infection                                                        | 36.9<br>(33.2 to 41.3)           | --                                      | --                            | --                                                | --                                                  |
| HIV/AIDS                                                                             | 1.2<br>(0.6 to 2.1)              | 0.1 <sup>a</sup><br>(< 0.05 to 0.1)     | 0.1<br>(< 0.05 to 0.2)        | 98.8<br>(67.4 to 133.2)                           | 61.9<br>(36.4 to 88.8)                              |
| Drug-susceptible HIV/AIDS - Tuberculosis                                             | < 0.05<br>(< 0.05 to < 0.05)     | < 0.05<br>(< 0.05 to < 0.05)            | < 0.05<br>(< 0.05 to < 0.05)  | 1.6<br>(-4.9 to 8.6)                              | -15.8<br>(-21.2 to -9.9)                            |
| Multidrug-resistant HIV/AIDS - Tuberculosis without extensive drug resistance        | < 0.05<br>(< 0.05 to < 0.05)     | < 0.05<br>(< 0.05 to < 0.05)            | < 0.05<br>(< 0.05 to < 0.05)  | 90.5<br>(16.4 to 212.3)                           | 58.0<br>(-3.5 to 158.9)                             |
| Extensively drug-resistant HIV/AIDS - Tuberculosis                                   | < 0.05<br>(< 0.05 to < 0.05)     | < 0.05<br>(< 0.05 to < 0.05)            | < 0.05<br>(< 0.05 to < 0.05)  | 309.8<br>(150.5 to 571.5)                         | 239.8<br>(107.7 to 456.7)                           |
| HIV/AIDS resulting in other diseases                                                 | 1.2<br>(0.6 to 2.1)              | 0.1<br>(< 0.05 to 0.1)                  | 0.1<br>(< 0.05 to 0.2)        | 99.5<br>(67.7 to 134.2)                           | 62.5<br>(36.7 to 89.5)                              |
| <b>Diarrhoea, lower respiratory infections, and other common infectious diseases</b> | <b>22.0</b><br>(20.3 to 23.7)    | <b>1,419.7†</b><br>(1,256.7 to 1,608.6) | <b>0.6</b><br>(0.4 to 1.0)    | <b>11.2</b><br>(7.0 to 15.9)                      | <b>1.2</b><br>(-2.1 to 5.6)                         |
| Diarrhoeal diseases                                                                  | 0.3<br>(0.3 to 0.4)              | 21.6<br>(20.0 to 23.5)                  | < 0.05<br>(< 0.05 to 0.1)     | 21.1<br>(5.5 to 39.4)                             | 15.1<br>(0.9 to 32.3)                               |
| Intestinal infectious diseases                                                       | < 0.05<br>(< 0.05 to < 0.05)     | < 0.05†<br>(< 0.05 to < 0.05)           | < 0.05<br>(< 0.05 to < 0.05)  | 15.9<br>(0.0 to 35.8)                             | -7.2<br>(-18.3 to 6.2)                              |
| Typhoid fever                                                                        | < 0.05<br>(< 0.05 to < 0.05)     | < 0.05<br>(< 0.05 to < 0.05)            | < 0.05<br>(< 0.05 to < 0.05)  | 17.9<br>(-1.2 to 42.8)                            | -7.8<br>(-21.6 to 9.3)                              |
| Paratyphoid fever                                                                    | < 0.05<br>(< 0.05 to < 0.05)     | < 0.05<br>(< 0.05 to < 0.05)            | < 0.05<br>(< 0.05 to < 0.05)  | 31.2<br>(8.9 to 59.0)                             | 3.8<br>(-11.5 to 22.8)                              |
| Other intestinal infectious diseases                                                 | --                               | --                                      | < 0.05<br>(< 0.05 to < 0.05)  | -36.9<br>(-56.7 to -8.2)                          | -35.0<br>(-54.5 to -7.8)                            |
| Lower respiratory infections                                                         | 0.3<br>(0.3 to 0.4)              | 14.9<br>(13.4 to 16.6)                  | < 0.05<br>(< 0.05 to < 0.05)  | 28.4<br>(12.7 to 47.6)                            | 15.2<br>(1.9 to 29.8)                               |
| Upper respiratory infections                                                         | 17.9<br>(15.8 to 20.3)           | 1,362.6<br>(1,199.1 to 1,553.2)         | 0.5<br>(0.3 to 0.7)           | 9.5<br>(4.2 to 15.6)                              | -0.2<br>(-4.5 to 4.6)                               |
| Otitis media                                                                         | 2.8<br>(2.5 to 3.1)              | 11.6<br>(9.6 to 14.2)                   | 0.1<br>(0.1 to 0.1)           | 6.8<br>(-2.0 to 16.7)                             | 0.2<br>(-7.5 to 9.0)                                |
| Meningitis                                                                           | < 0.05<br>(< 0.05 to 0.1)        | < 0.05<br>(< 0.05 to < 0.05)            | < 0.05<br>(< 0.05 to < 0.05)  | 22.0<br>(4.0 to 169.8)                            | 26.8<br>(-11.4 to 404.4)                            |
| Pneumococcal meningitis                                                              | < 0.05<br>(< 0.05 to < 0.05)     | < 0.05<br>(< 0.05 to < 0.05)            | < 0.05<br>(< 0.05 to < 0.05)  | 16.4<br>(8.8 to 25.4)                             | -0.2<br>(-7.0 to 7.3)                               |
| H influenzae type B meningitis                                                       | < 0.05<br>(< 0.05 to < 0.05)     | < 0.05<br>(< 0.05 to < 0.05)            | < 0.05<br>(< 0.05 to < 0.05)  | 14.2<br>(1.9 to 26.0)                             | -2.9<br>(-12.7 to 7.1)                              |
| Meningococcal infection                                                              | < 0.05<br>(< 0.05 to < 0.05)     | < 0.05<br>(< 0.05 to < 0.05)            | < 0.05<br>(< 0.05 to < 0.05)  | 147.4<br>(11.0 to 1,313.0)                        | 302.7<br>(-12.6 to 2,143.2)                         |
| Other meningitis                                                                     | < 0.05<br>(< 0.05 to < 0.05)     | < 0.05<br>(< 0.05 to < 0.05)            | < 0.05<br>(< 0.05 to < 0.05)  | -12.2<br>(-21.4 to -4.3)                          | -24.7<br>(-32.0 to -18.8)                           |
| Encephalitis                                                                         | 0.2<br>(0.1 to 0.3)              | 0.2<br>(0.1 to 0.2)                     | < 0.05<br>(< 0.05 to < 0.05)  | 23.8<br>(15.6 to 31.7)                            | -1.7<br>(-7.7 to 4.6)                               |
| Diphtheria                                                                           | < 0.05<br>(< 0.05 to < 0.05)     | < 0.05<br>(< 0.05 to < 0.05)            | < 0.05<br>(< 0.05 to < 0.05)  | 10.0<br>(-38.7 to 99.0)                           | -7.3<br>(-47.1 to 69.5)                             |
| Whooping cough                                                                       | < 0.05<br>(< 0.05 to < 0.05)     | 0.2<br>(0.1 to 0.2)                     | < 0.05<br>(< 0.05 to < 0.05)  | -42.9<br>(-60.8 to -18.7)                         | -37.5<br>(-56.9 to -11.4)                           |
| Tetanus                                                                              | < 0.05<br>(< 0.05 to < 0.05)     | < 0.05<br>(< 0.05 to < 0.05)            | < 0.05<br>(< 0.05 to < 0.05)  | -11.1<br>(-29.8 to 9.7)                           | -29.4<br>(-44.0 to -12.4)                           |
| Measles                                                                              | < 0.05<br>(0.0 to < 0.05)        | < 0.05<br>(0.0 to < 0.05)               | < 0.05<br>(0.0 to < 0.05)     | 51.8<br>(-100.0 to 9.3e+20)                       | 67.5<br>(-100.0 to 1.0e+21)                         |
| Varicella and herpes zoster                                                          | 0.5<br>(0.4 to 0.5)              | 8.5<br>(8.2 to 8.8)                     | < 0.05<br>(< 0.05 to < 0.05)  | 30.9<br>(14.2 to 48.3)                            | -0.0<br>(-11.1 to 11.1)                             |
| <b>Neglected tropical diseases and malaria</b>                                       | <b>1.1</b><br>(0.9 to 1.5)       | <b>12.6†</b><br>(8.2 to 18.3)           | <b>0.1</b><br>(0.1 to 0.2)    | <b>115.9</b><br>(71.8 to 367.0)                   | <b>87.8</b><br>(49.5 to 304.9)                      |
| Malaria                                                                              | --                               | --                                      | --                            | --                                                | --                                                  |
| Chagas disease                                                                       | --                               | --                                      | --                            | --                                                | --                                                  |
| Leishmaniasis                                                                        | --                               | --                                      | --                            | --                                                | --                                                  |
| Visceral leishmaniasis                                                               | --                               | --                                      | --                            | --                                                | --                                                  |
| Cutaneous and mucocutaneous leishmaniasis                                            | --                               | --                                      | --                            | --                                                | --                                                  |
| African trypanosomiasis                                                              | --                               | --                                      | --                            | --                                                | --                                                  |
| Schistosomiasis                                                                      | --                               | --                                      | --                            | --                                                | --                                                  |
| Cysticercosis                                                                        | < 0.05<br>(< 0.05 to < 0.05)     | --                                      | < 0.05<br>(< 0.05 to < 0.05)  | 16.8<br>(-76.1 to 464.7)                          | -10.8<br>(-81.8 to 332.5)                           |
| Cystic echinococcosis                                                                | --                               | --                                      | --                            | --                                                | --                                                  |
| Lymphatic filariasis                                                                 | 0.4<br>(0.3 to 0.6)              | 0.2<br>(0.1 to 0.2)                     | < 0.05<br>(< 0.05 to 0.1)     | 84.8<br>(32.5 to 140.9)                           | 46.2<br>(5.4 to 88.8)                               |
| Onchocerciasis                                                                       | --                               | --                                      | --                            | --                                                | --                                                  |
| Trachoma                                                                             | --                               | --                                      | --                            | --                                                | --                                                  |
| Dengue                                                                               | 0.8<br>(0.4 to 1.2)              | 12.5<br>(8.0 to 18.1)                   | 0.1<br>(0.1 to 0.2)           | 122.8<br>(70.4 to 493.3)                          | 97.5<br>(52.1 to 429.0)                             |
| Yellow fever                                                                         | --                               | --                                      | --                            | --                                                | --                                                  |
| Rabies                                                                               | < 0.05<br>(< 0.05 to < 0.05)     | < 0.05<br>(< 0.05 to < 0.05)            | < 0.05<br>(< 0.05 to < 0.05)  | 23.1<br>(-18.8 to 88.1)                           | 13.1<br>(-36.0 to 100.7)                            |
| Intestinal nematode infections                                                       | --                               | --                                      | --                            | --                                                | --                                                  |
| Ascariasis                                                                           | --                               | --                                      | --                            | --                                                | --                                                  |



| Cause                                                                   | Prevalence in thousands (95% UI)        | Incidence in thousands (95% UI)          | YLDs in thousands (95% UI)                          |                                                   |                                                     |
|-------------------------------------------------------------------------|-----------------------------------------|------------------------------------------|-----------------------------------------------------|---------------------------------------------------|-----------------------------------------------------|
|                                                                         | 2016 counts                             | 2016 counts                              | 2016 counts                                         | Percentage change in counts between 2006 and 2016 | Percentage change in age-standardised rates between |
| Trichuriasis                                                            | --                                      | --                                       | --                                                  | --                                                | --                                                  |
| Hookworm disease                                                        | --                                      | --                                       | --                                                  | --                                                | --                                                  |
| Food-borne trematodiasis                                                | --                                      | --                                       | --                                                  | --                                                | --                                                  |
| Leprosy                                                                 | < 0.05<br>(< 0.05 to < 0.05)            | < 0.05<br>(< 0.05 to < 0.05)             | < 0.05<br>(< 0.05 to < 0.05)                        | 44.1<br>(0.7 to 153.2)                            | -0.5<br>(-31.7 to 81.0)                             |
| Ebola virus disease                                                     | --                                      | --                                       | --                                                  | --                                                | --                                                  |
| Zika virus disease                                                      | --                                      | --                                       | --                                                  | --                                                | --                                                  |
| Guinea worm disease                                                     | --                                      | --                                       | --                                                  | --                                                | --                                                  |
| Other neglected tropical diseases                                       | --                                      | --                                       | < 0.05<br>(< 0.05 to < 0.05)                        | --                                                | --                                                  |
| <b>Maternal disorders</b>                                               | <b>0.2</b><br><b>(0.2 to 0.3)</b>       | <b>4.3†</b><br><b>(3.4 to 5.6)</b>       | <b>&lt; 0.05</b><br><b>(&lt; 0.05 to &lt; 0.05)</b> | <b>0.2</b><br><b>(-28.5 to 34.6)</b>              | <b>-6.2</b><br><b>(-33.4 to 26.1)</b>               |
| Maternal haemorrhage                                                    | < 0.05<br>(< 0.05 to 0.1)               | 0.1<br>(0.1 to 0.2)                      | < 0.05<br>(< 0.05 to < 0.05)                        | -9.1<br>(-38.4 to 39.3)                           | -15.3<br>(-42.7 to 27.4)                            |
| Maternal sepsis and other pregnancy related infections                  | 0.1<br>(0.1 to 0.1)                     | 0.4<br>(0.3 to 0.5)                      | < 0.05<br>(< 0.05 to < 0.05)                        | -0.9<br>(-54.0 to 103.0)                          | -8.9<br>(-57.5 to 85.5)                             |
| Maternal hypertensive disorders                                         | 0.1<br>(< 0.05 to 0.1)                  | 0.3<br>(0.2 to 0.4)                      | < 0.05<br>(< 0.05 to < 0.05)                        | 20.7<br>(-31.9 to 131.0)                          | 13.9<br>(-35.7 to 116.3)                            |
| Maternal obstructed labour and uterine rupture                          | < 0.05<br>(< 0.05 to < 0.05)            | 0.1<br>(0.1 to 0.2)                      | < 0.05<br>(< 0.05 to < 0.05)                        | -6.3<br>(-49.0 to 75.7)                           | -12.1<br>(-52.0 to 64.9)                            |
| Maternal abortion, miscarriage, and ectopic pregnancy                   | < 0.05<br>(< 0.05 to < 0.05)            | 3.4<br>(2.5 to 4.7)                      | < 0.05<br>(< 0.05 to < 0.05)                        | -10.0<br>(-52.8 to 73.0)                          | -15.4<br>(-55.7 to 58.0)                            |
| Other maternal disorders                                                | --                                      | --                                       | < 0.05<br>(< 0.05 to < 0.05)                        | -4.2<br>(-32.0 to 28.6)                           | -10.3<br>(-36.5 to 20.5)                            |
| <b>Neonatal disorders</b>                                               | <b>3.0</b><br><b>(2.5 to 3.6)</b>       | --                                       | <b>0.5</b><br><b>(0.3 to 0.7)</b>                   | <b>8.0</b><br><b>(-8.0 to 24.2)</b>               | <b>-1.9</b><br><b>(-16.7 to 12.4)</b>               |
| Neonatal preterm birth complications                                    | 2.8<br>(2.2 to 3.5)                     | --                                       | 0.3<br>(0.2 to 0.4)                                 | 8.9<br>(-13.3 to 30.2)                            | -2.2<br>(-21.6 to 17.6)                             |
| Neonatal encephalopathy due to birth asphyxia and trauma                | 0.3<br>(0.2 to 0.6)                     | --                                       | < 0.05<br>(< 0.05 to 0.1)                           | -2.7<br>(-71.5 to 119.4)                          | -12.8<br>(-74.1 to 95.9)                            |
| Neonatal sepsis and other neonatal infections                           | 0.3<br>(0.1 to 0.6)                     | --                                       | 0.1<br>(< 0.05 to 0.3)                              | 12.8<br>(-19.7 to 37.8)                           | 3.3<br>(-24.7 to 26.6)                              |
| Hemolytic disease and other neonatal jaundice                           | < 0.05<br>(< 0.05 to < 0.05)            | --                                       | < 0.05<br>(< 0.05 to < 0.05)                        | 6.8<br>(-2.0 to 16.4)                             | -5.4<br>(-13.2 to 3.0)                              |
| Other neonatal disorders                                                | --                                      | --                                       | < 0.05<br>(< 0.05 to < 0.05)                        | -11.5<br>(-30.7 to 10.8)                          | -1.6<br>(-23.0 to 22.9)                             |
| <b>Nutritional deficiencies</b>                                         | <b>46.3</b><br><b>(42.8 to 49.4)</b>    | <b>5.7†</b><br><b>(4.6 to 7.0)</b>       | <b>0.8</b><br><b>(0.5 to 1.2)</b>                   | <b>0.8</b><br><b>(-9.0 to 11.6)</b>               | <b>-6.2</b><br><b>(-15.7 to 3.4)</b>                |
| Protein-energy malnutrition                                             | 1.0<br>(0.7 to 1.4)                     | 0.8<br>(0.6 to 1.1)                      | < 0.05<br>(< 0.05 to 0.1)                           | -14.6<br>(-42.1 to 25.3)                          | -5.0<br>(-35.5 to 38.8)                             |
| Iodine deficiency                                                       | 3.3<br>(2.9 to 3.8)                     | 0.1<br>(0.1 to 0.1)                      | 0.1<br>(0.1 to 0.1)                                 | 21.0<br>(7.3 to 37.3)                             | -0.3<br>(-11.0 to 12.0)                             |
| Vitamin A deficiency                                                    | 6.0<br>(4.6 to 7.4)                     | 4.8<br>(3.8 to 6.1)                      | --                                                  | --                                                | --                                                  |
| Iron-deficiency anaemia                                                 | 36.9<br>(32.8 to 41.3)                  | --                                       | 0.7<br>(0.4 to 1.1)                                 | -0.0<br>(-11.4 to 11.8)                           | -7.0<br>(-18.1 to 4.3)                              |
| Other nutritional deficiencies                                          | --                                      | --                                       | < 0.05<br>(< 0.05 to < 0.05)                        | -14.9<br>(-42.8 to 26.4)                          | -5.2<br>(-36.2 to 40.7)                             |
| <b>Other communicable, maternal, neonatal, and nutritional diseases</b> | <b>69.1</b><br><b>(64.4 to 74.0)</b>    | <b>22.7</b><br><b>(20.1 to 25.9)</b>     | <b>0.1</b><br><b>(&lt; 0.05 to 0.1)</b>             | <b>12.3</b><br><b>(4.1 to 20.7)</b>               | <b>-1.2</b><br><b>(-8.2 to 6.5)</b>                 |
| Sexually transmitted diseases excluding HIV                             | 49.6<br>(45.5 to 54.0)                  | 18.8<br>(16.4 to 21.6)                   | < 0.05<br>(< 0.05 to 0.1)                           | 23.3<br>(14.8 to 33.5)                            | 4.7<br>(-2.3 to 12.8)                               |
| Syphilis                                                                | 0.2<br>(0.2 to 0.3)                     | 0.2<br>(0.2 to 0.3)                      | < 0.05<br>(< 0.05 to < 0.05)                        | 43.2<br>(28.7 to 59.9)                            | -3.8<br>(-13.6 to 7.0)                              |
| Chlamydial infection                                                    | 5.7<br>(4.3 to 7.3)                     | 4.3<br>(3.3 to 5.6)                      | < 0.05<br>(< 0.05 to < 0.05)                        | 16.2<br>(0.4 to 36.8)                             | 1.3<br>(-12.5 to 19.4)                              |
| Gonococcal infection                                                    | 1.2<br>(0.8 to 1.8)                     | 4.1<br>(2.6 to 6.4)                      | < 0.05<br>(< 0.05 to < 0.05)                        | 49.2<br>(21.1 to 81.3)                            | 35.2<br>(10.2 to 63.2)                              |
| Trichomoniasis                                                          | 9.2<br>(7.9 to 10.6)                    | 7.8<br>(6.6 to 9.0)                      | < 0.05<br>(< 0.05 to < 0.05)                        | 16.0<br>(6.9 to 26.1)                             | -1.7<br>(-8.6 to 5.8)                               |
| Genital herpes                                                          | 35.5<br>(30.2 to 41.5)                  | 2.2<br>(1.9 to 2.6)                      | < 0.05<br>(< 0.05 to < 0.05)                        | 28.2<br>(18.8 to 37.2)                            | 0.3<br>(-5.8 to 6.3)                                |
| Other sexually transmitted diseases                                     | 0.2<br>(0.2 to 0.3)                     | 0.1<br>(0.1 to 0.2)                      | < 0.05<br>(< 0.05 to < 0.05)                        | 23.2<br>(11.8 to 36.4)                            | 7.5<br>(-2.5 to 18.6)                               |
| Hepatitis                                                               | 21.8<br>(18.6 to 25.9)                  | 4.0<br>(2.9 to 4.9)                      | < 0.05<br>(< 0.05 to < 0.05)                        | -38.0<br>(-49.1 to -25.7)                         | -50.6<br>(-58.7 to -41.5)                           |
| Acute hepatitis A                                                       | 0.2<br>(0.1 to 0.2)                     | 2.3<br>(1.3 to 3.0)                      | < 0.05<br>(< 0.05 to < 0.05)                        | -43.0<br>(-60.1 to -18.2)                         | -51.8<br>(-65.1 to -33.6)                           |
| Hepatitis B                                                             | 15.1<br>(12.1 to 19.1)                  | 1.5<br>(1.1 to 2.0)                      | < 0.05<br>(< 0.05 to < 0.05)                        | -34.7<br>(-50.2 to -16.8)                         | -50.9<br>(-61.3 to -38.2)                           |
| Hepatitis C                                                             | 6.6<br>(5.8 to 7.3)                     | 0.2<br>(0.1 to 0.2)                      | < 0.05<br>(< 0.05 to < 0.05)                        | -16.8<br>(-18.4 to -15.4)                         | -27.7<br>(-30.4 to -24.8)                           |
| Acute hepatitis E                                                       | < 0.05<br>(< 0.05 to < 0.05)            | 0.1<br>(0.1 to 0.1)                      | < 0.05<br>(< 0.05 to < 0.05)                        | -37.6<br>(-45.3 to -29.9)                         | -51.8<br>(-55.7 to -47.5)                           |
| Other infectious diseases                                               | 1.1<br>(0.9 to 1.3)                     | < 0.05<br>(< 0.05 to < 0.05)             | < 0.05<br>(< 0.05 to < 0.05)                        | 7.4<br>(-5.8 to 24.1)                             | 4.4<br>(-9.7 to 22.6)                               |
| <b>Non-communicable diseases</b>                                        | <b>369.7</b><br><b>(367.1 to 372.2)</b> | <b>898.6†</b><br><b>(853.7 to 946.8)</b> | <b>35.2</b><br><b>(26.1 to 45.5)</b>                | <b>26.4</b><br><b>(23.7 to 29.2)</b>              | <b>-0.8</b><br><b>(-2.8 to 1.2)</b>                 |
| <b>Neoplasms</b>                                                        | <b>3.3</b><br><b>(3.1 to 3.4)</b>       | <b>1.1</b><br><b>(1.0 to 1.1)</b>        | <b>0.4</b><br><b>(0.3 to 0.5)</b>                   | <b>82.5</b><br><b>(74.5 to 91.5)</b>              | <b>20.4</b><br><b>(15.6 to 25.4)</b>                |
| Lip and oral cavity cancer                                              | 0.1<br>(0.1 to 0.1)                     | < 0.05<br>(< 0.05 to < 0.05)             | < 0.05<br>(< 0.05 to < 0.05)                        | 60.1<br>(40.0 to 81.8)                            | 5.3<br>(-8.3 to 20.3)                               |
| Nasopharynx cancer                                                      | < 0.05<br>(< 0.05 to < 0.05)            | < 0.05<br>(< 0.05 to < 0.05)             | < 0.05<br>(< 0.05 to < 0.05)                        | 32.2<br>(-1.0 to 74.6)                            | -4.7<br>(-23.9 to 17.1)                             |
| Other pharynx cancer                                                    | < 0.05<br>(< 0.05 to < 0.05)            | < 0.05<br>(< 0.05 to < 0.05)             | < 0.05<br>(< 0.05 to < 0.05)                        | 94.0<br>(64.6 to 130.4)                           | 12.1<br>(-5.2 to 33.3)                              |
| Oesophageal cancer                                                      | < 0.05<br>(< 0.05 to < 0.05)            | < 0.05<br>(< 0.05 to < 0.05)             | < 0.05<br>(< 0.05 to < 0.05)                        | 87.4<br>(68.1 to 108.9)                           | 9.2<br>(-2.2 to 22.5)                               |
| Stomach cancer                                                          | 0.1<br>(0.1 to 0.1)                     | 0.1<br>(0.1 to 0.1)                      | < 0.05<br>(< 0.05 to < 0.05)                        | 88.1<br>(59.8 to 119.6)                           | 15.5<br>(-2.0 to 35.6)                              |
| Colon and rectum cancer                                                 | 0.6<br>(0.6 to 0.7)                     | 0.2<br>(0.1 to 0.2)                      | 0.1<br>(< 0.05 to 0.1)                              | 101.7<br>(77.1 to 128.0)                          | 21.5<br>(7.8 to 36.0)                               |
| Liver cancer                                                            | < 0.05<br>(< 0.05 to < 0.05)            | < 0.05<br>(< 0.05 to < 0.05)             | < 0.05<br>(< 0.05 to < 0.05)                        | 122.6<br>(92.1 to 158.2)                          | 31.3<br>(14.1 to 50.9)                              |
| Liver cancer due to hepatitis B                                         | < 0.05<br>(< 0.05 to < 0.05)            | < 0.05<br>(< 0.05 to < 0.05)             | < 0.05<br>(< 0.05 to < 0.05)                        | 117.6<br>(85.4 to 156.5)                          | 33.2<br>(13.6 to 54.8)                              |

| Cause                                              | Prevalence in thousands (95% UI)     | Incidence in thousands (95% UI)    | YLDs in thousands (95% UI)        |                                                   |                                                     |
|----------------------------------------------------|--------------------------------------|------------------------------------|-----------------------------------|---------------------------------------------------|-----------------------------------------------------|
|                                                    | 2016 counts                          | 2016 counts                        | 2016 counts                       | Percentage change in counts between 2006 and 2016 | Percentage change in age-standardised rates between |
| Liver cancer due to hepatitis C                    | < 0.05<br>(< 0.05 to < 0.05)         | < 0.05<br>(< 0.05 to < 0.05)       | < 0.05<br>(< 0.05 to < 0.05)      | 128.7<br>(95.3 to 168.3)                          | 29.5<br>(8.3 to 53.1)                               |
| Liver cancer due to alcohol use                    | < 0.05<br>(< 0.05 to < 0.05)         | < 0.05<br>(< 0.05 to < 0.05)       | < 0.05<br>(< 0.05 to < 0.05)      | 126.5<br>(90.2 to 169.2)                          | 31.9<br>(9.4 to 56.0)                               |
| Liver cancer due to other causes                   | < 0.05<br>(< 0.05 to < 0.05)         | < 0.05<br>(< 0.05 to < 0.05)       | < 0.05<br>(< 0.05 to < 0.05)      | 123.2<br>(89.2 to 163.0)                          | 30.7<br>(10.6 to 53.1)                              |
| Gallbladder and biliary tract cancer               | < 0.05<br>(< 0.05 to < 0.05)         | < 0.05<br>(< 0.05 to < 0.05)       | < 0.05<br>(< 0.05 to < 0.05)      | 60.0<br>(46.7 to 75.1)                            | -5.0<br>(-15.0 to 6.9)                              |
| Pancreatic cancer                                  | < 0.05<br>(< 0.05 to < 0.05)         | < 0.05<br>(< 0.05 to < 0.05)       | < 0.05<br>(< 0.05 to < 0.05)      | 94.1<br>(77.7 to 113.6)                           | 16.3<br>(4.1 to 31.9)                               |
| Larynx cancer                                      | < 0.05<br>(< 0.05 to < 0.05)         | < 0.05<br>(< 0.05 to < 0.05)       | < 0.05<br>(< 0.05 to < 0.05)      | 77.6<br>(49.5 to 108.4)                           | 2.4<br>(-15.3 to 21.9)                              |
| Tracheal, bronchus, and lung cancer                | 0.2<br>(0.1 to 0.2)                  | 0.1<br>(0.1 to 0.1)                | < 0.05<br>(< 0.05 to < 0.05)      | 104.2<br>(75.0 to 140.1)                          | 23.1<br>(6.0 to 44.8)                               |
| Malignant skin melanoma                            | < 0.05<br>(< 0.05 to 0.1)            | < 0.05<br>(< 0.05 to < 0.05)       | < 0.05<br>(< 0.05 to < 0.05)      | 89.1<br>(50.7 to 131.6)                           | 35.4<br>(11.8 to 62.2)                              |
| Non-melanoma skin cancer                           | < 0.05<br>(< 0.05 to < 0.05)         | < 0.05<br>(< 0.05 to < 0.05)       | < 0.05<br>(< 0.05 to < 0.05)      | 29.2<br>(-28.0 to 102.1)                          | -23.0<br>(-63.3 to 29.2)                            |
| Non-melanoma skin cancer (squamous-cell carcinoma) | < 0.05<br>(< 0.05 to < 0.05)         | < 0.05<br>(< 0.05 to < 0.05)       | < 0.05<br>(< 0.05 to < 0.05)      | 27.1<br>(-32.0 to 108.1)                          | -24.1<br>(-64.3 to 32.0)                            |
| Non-melanoma skin cancer (basal-cell carcinoma)    | < 0.05<br>(< 0.05 to < 0.05)         | < 0.05<br>(< 0.05 to < 0.05)       | < 0.05<br>(< 0.05 to < 0.05)      | 54.3<br>(31.3 to 81.3)                            | 0.0<br>(-9.6 to 12.4)                               |
| Breast cancer                                      | 0.8<br>(0.7 to 0.9)                  | 0.2<br>(0.1 to 0.2)                | 0.1<br>(< 0.05 to 0.1)            | 73.2<br>(49.1 to 103.1)                           | 15.9<br>(1.0 to 32.7)                               |
| Cervical cancer                                    | 0.2<br>(0.1 to 0.2)                  | < 0.05<br>(< 0.05 to 0.1)          | < 0.05<br>(< 0.05 to < 0.05)      | 27.5<br>(-4.5 to 69.0)                            | -7.1<br>(-28.1 to 18.8)                             |
| Uterine cancer                                     | 0.1<br>(0.1 to 0.1)                  | < 0.05<br>(< 0.05 to < 0.05)       | < 0.05<br>(< 0.05 to < 0.05)      | 90.6<br>(40.8 to 150.3)                           | 20.6<br>(-8.1 to 55.3)                              |
| Ovarian cancer                                     | 0.1<br>(0.1 to 0.1)                  | < 0.05<br>(< 0.05 to < 0.05)       | < 0.05<br>(< 0.05 to < 0.05)      | 40.9<br>(3.2 to 89.6)                             | 2.7<br>(-21.5 to 34.6)                              |
| Prostate cancer                                    | 0.3<br>(0.2 to 0.4)                  | 0.1<br>(0.1 to 0.1)                | < 0.05<br>(< 0.05 to < 0.05)      | 122.4<br>(86.5 to 169.2)                          | 25.3<br>(5.6 to 50.5)                               |
| Testicular cancer                                  | 0.1<br>(0.1 to 0.1)                  | < 0.05<br>(< 0.05 to < 0.05)       | < 0.05<br>(< 0.05 to < 0.05)      | 53.1<br>(6.2 to 118.6)                            | 38.5<br>(-2.4 to 96.8)                              |
| Kidney cancer                                      | 0.1<br>(0.1 to 0.1)                  | < 0.05<br>(< 0.05 to < 0.05)       | < 0.05<br>(< 0.05 to < 0.05)      | 76.7<br>(54.1 to 104.5)                           | 16.0<br>(2.8 to 31.9)                               |
| Bladder cancer                                     | 0.1<br>(0.1 to 0.1)                  | < 0.05<br>(< 0.05 to < 0.05)       | < 0.05<br>(< 0.05 to < 0.05)      | 88.5<br>(62.4 to 117.2)                           | 12.5<br>(-3.4 to 30.4)                              |
| Brain and nervous system cancer                    | 0.1<br>(0.1 to 0.1)                  | < 0.05<br>(< 0.05 to < 0.05)       | < 0.05<br>(< 0.05 to < 0.05)      | 81.8<br>(49.1 to 121.7)                           | 40.1<br>(17.2 to 67.6)                              |
| Thyroid cancer                                     | 0.2<br>(0.1 to 0.2)                  | < 0.05<br>(< 0.05 to < 0.05)       | < 0.05<br>(< 0.05 to < 0.05)      | 83.0<br>(49.0 to 121.8)                           | 26.2<br>(5.8 to 49.7)                               |
| Mesothelioma                                       | < 0.05<br>(< 0.05 to < 0.05)         | < 0.05<br>(< 0.05 to < 0.05)       | < 0.05<br>(< 0.05 to < 0.05)      | 70.5<br>(54.1 to 87.5)                            | 4.7<br>(-5.7 to 15.7)                               |
| Hodgkin lymphoma                                   | < 0.05<br>(< 0.05 to 0.1)            | < 0.05<br>(< 0.05 to < 0.05)       | < 0.05<br>(< 0.05 to < 0.05)      | 78.8<br>(45.1 to 123.6)                           | 44.6<br>(21.0 to 77.0)                              |
| Non-Hodgkin's lymphoma                             | 0.2<br>(0.2 to 0.2)                  | < 0.05<br>(< 0.05 to 0.1)          | < 0.05<br>(< 0.05 to < 0.05)      | 112.9<br>(85.4 to 144.5)                          | 42.1<br>(22.8 to 63.4)                              |
| Multiple myeloma                                   | < 0.05<br>(< 0.05 to < 0.05)         | < 0.05<br>(< 0.05 to < 0.05)       | < 0.05<br>(< 0.05 to < 0.05)      | 112.5<br>(76.4 to 156.5)                          | 24.0<br>(-0.8 to 55.5)                              |
| Leukaemia                                          | 0.1<br>(0.1 to 0.1)                  | < 0.05<br>(< 0.05 to < 0.05)       | < 0.05<br>(< 0.05 to < 0.05)      | 79.9<br>(38.2 to 128.5)                           | 48.4<br>(18.7 to 85.7)                              |
| Acute lymphoid leukaemia                           | 0.1<br>(< 0.05 to 0.1)               | < 0.05<br>(< 0.05 to < 0.05)       | < 0.05<br>(< 0.05 to < 0.05)      | 97.2<br>(26.2 to 199.4)                           | 92.3<br>(25.7 to 191.6)                             |
| Chronic lymphoid leukaemia                         | < 0.05<br>(< 0.05 to < 0.05)         | < 0.05<br>(< 0.05 to < 0.05)       | < 0.05<br>(< 0.05 to < 0.05)      | 110.2<br>(71.2 to 160.6)                          | 30.5<br>(6.8 to 61.6)                               |
| Acute myeloid leukaemia                            | < 0.05<br>(< 0.05 to < 0.05)         | < 0.05<br>(< 0.05 to < 0.05)       | < 0.05<br>(< 0.05 to < 0.05)      | 67.1<br>(32.6 to 109.4)                           | 31.2<br>(8.3 to 60.1)                               |
| Chronic myeloid leukaemia                          | < 0.05<br>(< 0.05 to < 0.05)         | < 0.05<br>(< 0.05 to < 0.05)       | < 0.05<br>(< 0.05 to < 0.05)      | 49.9<br>(23.7 to 83.3)                            | 13.2<br>(-4.5 to 35.1)                              |
| Other leukaemia                                    | < 0.05<br>(< 0.05 to < 0.05)         | < 0.05<br>(< 0.05 to < 0.05)       | < 0.05<br>(< 0.05 to < 0.05)      | 61.3<br>(17.7 to 114.3)                           | 23.7<br>(-3.4 to 60.0)                              |
| Other neoplasms                                    | 0.2<br>(0.2 to 0.2)                  | < 0.05<br>(< 0.05 to 0.1)          | < 0.05<br>(< 0.05 to < 0.05)      | 96.2<br>(70.8 to 124.9)                           | 46.4<br>(30.1 to 65.7)                              |
| <b>Cardiovascular diseases</b>                     | <b>16.7</b><br><b>(15.9 to 17.5)</b> | <b>1.6†</b><br><b>(1.5 to 1.7)</b> | <b>1.2</b><br><b>(0.8 to 1.5)</b> | <b>48.5</b><br><b>(42.7 to 54.5)</b>              | <b>-6.5</b><br><b>(-9.9 to -2.9)</b>                |
| Rheumatic heart disease                            | < 0.05<br>(< 0.05 to < 0.05)         | < 0.05<br>(< 0.05 to < 0.05)       | < 0.05<br>(< 0.05 to < 0.05)      | 36.2<br>(19.4 to 54.8)                            | -7.5<br>(-22.7 to 9.2)                              |
| Ischaemic heart disease                            | 4.2<br>(4.0 to 4.4)                  | 0.5<br>(0.4 to 0.5)                | 0.2<br>(0.1 to 0.3)               | 45.9<br>(37.4 to 54.9)                            | -8.5<br>(-12.9 to -3.9)                             |
| Cerebrovascular disease                            | 3.2<br>(3.0 to 3.4)                  | 0.4‡<br>(0.4 to 0.4)               | 0.6<br>(0.4 to 0.7)               | 51.0<br>(41.0 to 61.5)                            | -6.9<br>(-13.0 to -0.7)                             |
| Ischaemic stroke                                   | 2.4<br>(2.2 to 2.7)                  | 0.2‡<br>(0.2 to 0.3)               | 0.4<br>(0.3 to 0.5)               | 54.6<br>(41.5 to 67.9)                            | -5.9<br>(-13.7 to 2.4)                              |
| Hemorrhagic stroke                                 | 0.9<br>(0.8 to 1.0)                  | 0.1‡<br>(0.1 to 0.2)               | 0.1<br>(0.1 to 0.2)               | 42.0<br>(28.2 to 57.8)                            | -9.8<br>(-17.7 to -0.9)                             |
| Hypertensive heart disease                         | 0.4<br>(0.3 to 0.5)                  | --                                 | < 0.05<br>(< 0.05 to < 0.05)      | 55.1<br>(37.5 to 73.6)                            | -5.4<br>(-14.3 to 3.9)                              |
| Cardiomyopathy and myocarditis                     | 0.6<br>(0.5 to 0.6)                  | 0.1†<br>(0.1 to 0.1)               | 0.1<br>(< 0.05 to 0.1)            | 32.2<br>(18.9 to 47.6)                            | -6.2<br>(-14.4 to 3.1)                              |
| Myocarditis                                        | 0.1<br>(0.1 to 0.1)                  | 0.1<br>(0.1 to 0.1)                | < 0.05<br>(< 0.05 to < 0.05)      | 14.0<br>(-1.8 to 32.0)                            | -6.1<br>(-18.2 to 7.2)                              |
| Alcoholic cardiomyopathy                           | 0.2<br>(0.2 to 0.3)                  | --                                 | < 0.05<br>(< 0.05 to < 0.05)      | 46.5<br>(22.2 to 75.4)                            | -6.7<br>(-19.2 to 8.8)                              |
| Other cardiomyopathy                               | 0.3<br>(0.3 to 0.3)                  | --                                 | < 0.05<br>(< 0.05 to < 0.05)      | 29.0<br>(11.6 to 49.6)                            | -5.9<br>(-16.0 to 5.7)                              |
| Atrial fibrillation and flutter                    | 1.5<br>(1.3 to 1.7)                  | 0.1<br>(0.1 to 0.2)                | 0.1<br>(0.1 to 0.2)               | 61.2<br>(48.2 to 74.7)                            | -2.6<br>(-8.6 to 3.6)                               |
| Peripheral vascular disease                        | 5.0<br>(4.3 to 5.7)                  | 0.4<br>(0.4 to 0.5)                | < 0.05<br>(< 0.05 to < 0.05)      | 68.1<br>(54.8 to 81.3)                            | -6.2<br>(-13.1 to 1.3)                              |
| Endocarditis                                       | < 0.05<br>(< 0.05 to < 0.05)         | 0.1<br>(0.1 to 0.1)                | < 0.05<br>(< 0.05 to < 0.05)      | 48.4<br>(26.7 to 73.8)                            | -6.7<br>(-23.2 to 13.5)                             |
| Other cardiovascular and circulatory diseases      | 3.5<br>(3.0 to 4.2)                  | --                                 | 0.2<br>(0.1 to 0.3)               | 39.7<br>(28.0 to 52.7)                            | -6.5<br>(-13.8 to 1.0)                              |
| <b>Chronic respiratory diseases</b>                | <b>32.4</b><br><b>(31.2 to 33.7)</b> | <b>4.1†</b><br><b>(3.9 to 4.4)</b> | <b>1.6</b><br><b>(1.2 to 2.1)</b> | <b>25.6</b><br><b>(20.2 to 32.1)</b>              | <b>-4.1</b><br><b>(-8.1 to -0.2)</b>                |
| Chronic obstructive pulmonary disease              | 9.8<br>(9.3 to 10.2)                 | 0.8<br>(0.7 to 0.8)                | 0.6<br>(0.5 to 0.7)               | 48.9<br>(38.9 to 60.7)                            | -6.8<br>(-13.1 to 0.1)                              |
| Pneumoconiosis                                     | < 0.05<br>(< 0.05 to < 0.05)         | < 0.05<br>(< 0.05 to < 0.05)       | < 0.05<br>(< 0.05 to < 0.05)      | 79.1<br>(70.6 to 89.1)                            | 2.8<br>(-1.8 to 8.3)                                |
| Silicosis                                          | < 0.05<br>(< 0.05 to < 0.05)         | < 0.05<br>(< 0.05 to < 0.05)       | < 0.05<br>(< 0.05 to < 0.05)      | 88.5<br>(77.7 to 100.3)                           | 5.1<br>(-1.1 to 11.6)                               |

| Cause                                                          | Prevalence in thousands (95% UI)  | Incidence in thousands (95% UI)         | YLDs in thousands (95% UI)        |                                                                     |                                                                        |
|----------------------------------------------------------------|-----------------------------------|-----------------------------------------|-----------------------------------|---------------------------------------------------------------------|------------------------------------------------------------------------|
|                                                                | 2016 counts<br>(< 0.05 to < 0.05) | 2016 counts<br>(< 0.05 to < 0.05)       | 2016 counts<br>(< 0.05 to < 0.05) | Percentage change in counts between 2006 and 2016<br>(33.3 to 78.1) | Percentage change in age-standardised rates between<br>(-12.1 to 10.1) |
| Asbestosis                                                     | < 0.05<br>(< 0.05 to < 0.05)      | < 0.05<br>(< 0.05 to < 0.05)            | < 0.05<br>(< 0.05 to < 0.05)      | 53.3<br>(33.3 to 78.1)                                              | -1.5<br>(-10.4 to 8.6)                                                 |
| Coal workers pneumoconiosis                                    | --                                | --                                      | --                                | --                                                                  | --                                                                     |
| Other pneumoconiosis                                           | < 0.05<br>(< 0.05 to < 0.05)      | < 0.05<br>(< 0.05 to < 0.05)            | < 0.05<br>(< 0.05 to < 0.05)      | 73.0<br>(55.0 to 95.7)                                              | -2.0<br>(-12.1 to 10.1)                                                |
| Asthma                                                         | 23.4<br>(21.8 to 25.1)            | 3.3<br>(3.1 to 3.6)                     | 0.9<br>(0.6 to 1.3)               | 12.3<br>(7.1 to 17.1)                                               | -2.4<br>(-6.4 to 1.7)                                                  |
| Interstitial lung disease and pulmonary sarcoidosis            | 0.1<br>(0.1 to 0.2)               | < 0.05<br>(< 0.05 to < 0.05)            | < 0.05<br>(< 0.05 to < 0.05)      | 52.7<br>(39.3 to 67.5)                                              | 1.8<br>(-9.6 to 14.2)                                                  |
| Other chronic respiratory diseases                             | --                                | --                                      | < 0.05<br>(< 0.05 to < 0.05)      | 54.0<br>(35.2 to 75.7)                                              | 26.9<br>(12.2 to 42.9)                                                 |
| <b>Cirrhosis and other chronic liver diseases</b>              | <b>2.8<br/>(2.6 to 2.9)</b>       | <b>&lt; 0.05<br/>(&lt; 0.05 to 0.1)</b> | <b>0.1<br/>(&lt; 0.05 to 0.1)</b> | <b>47.6<br/>(28.9 to 66.6)</b>                                      | <b>14.2<br/>(1.2 to 26.7)</b>                                          |
| Cirrhosis and other chronic liver diseases due to hepatitis B  | 1.1<br>(1.0 to 1.3)               | < 0.05<br>(< 0.05 to < 0.05)            | < 0.05<br>(< 0.05 to < 0.05)      | 55.7<br>(25.3 to 91.1)                                              | 14.9<br>(-3.4 to 37.9)                                                 |
| Cirrhosis and other chronic liver diseases due to hepatitis C  | 0.7<br>(0.5 to 0.9)               | < 0.05<br>(< 0.05 to < 0.05)            | < 0.05<br>(< 0.05 to < 0.05)      | 60.4<br>(20.0 to 112.2)                                             | 16.2<br>(-8.7 to 47.3)                                                 |
| Cirrhosis and other chronic liver diseases due to alcohol use  | 0.5<br>(0.4 to 0.6)               | < 0.05<br>(< 0.05 to < 0.05)            | < 0.05<br>(< 0.05 to < 0.05)      | 65.5<br>(21.8 to 119.1)                                             | 15.0<br>(-10.7 to 45.6)                                                |
| Cirrhosis and other chronic liver diseases due to other causes | 0.5<br>(0.4 to 0.5)               | < 0.05<br>(< 0.05 to < 0.05)            | < 0.05<br>(< 0.05 to < 0.05)      | 20.5<br>(-8.3 to 56.8)                                              | 11.0<br>(-14.7 to 42.4)                                                |
| <b>Digestive diseases</b>                                      | <b>22.3<br/>(20.4 to 24.4)</b>    | <b>8.6†<br/>(8.0 to 9.1)</b>            | <b>0.2<br/>(0.2 to 0.3)</b>       | <b>36.1<br/>(25.0 to 49.0)</b>                                      | <b>3.7<br/>(-3.6 to 11.3)</b>                                          |
| Peptic ulcer disease                                           | 2.3<br>(2.1 to 2.6)               | 0.4<br>(0.3 to 0.4)                     | < 0.05<br>(< 0.05 to 0.1)         | 50.8<br>(31.1 to 73.0)                                              | 9.1<br>(-3.3 to 22.7)                                                  |
| Gastritis and duodenitis                                       | 17.9<br>(15.4 to 20.6)            | 2.3<br>(2.0 to 2.7)                     | 0.1<br>(0.1 to 0.1)               | 32.2<br>(14.2 to 51.1)                                              | 2.9<br>(-8.2 to 14.7)                                                  |
| Appendicitis                                                   | < 0.05<br>(< 0.05 to < 0.05)      | 0.8<br>(0.7 to 0.8)                     | < 0.05<br>(< 0.05 to < 0.05)      | 15.1<br>(-12.8 to 51.8)                                             | 3.5<br>(-21.1 to 36.0)                                                 |
| Paralytic ileus and intestinal obstruction                     | < 0.05<br>(< 0.05 to < 0.05)      | 0.1<br>(0.1 to 0.2)                     | < 0.05<br>(< 0.05 to < 0.05)      | 46.1<br>(40.3 to 52.6)                                              | 9.6<br>(5.3 to 14.1)                                                   |
| Inguinal, femoral, and abdominal hernia                        | 1.4<br>(1.3 to 1.6)               | 2.5<br>(2.2 to 2.9)                     | 0.1<br>(< 0.05 to 0.1)            | 39.1<br>(19.0 to 61.6)                                              | 2.4<br>(-10.1 to 16.0)                                                 |
| Inflammatory bowel disease                                     | 0.1<br>(0.1 to 0.1)               | 0.2<br>(0.1 to 0.2)                     | < 0.05<br>(< 0.05 to < 0.05)      | 18.1<br>(-11.1 to 55.2)                                             | -5.2<br>(-25.6 to 20.5)                                                |
| Vascular intestinal disorders                                  | < 0.05<br>(< 0.05 to < 0.05)      | < 0.05<br>(< 0.05 to < 0.05)            | < 0.05<br>(< 0.05 to < 0.05)      | 54.2<br>(39.6 to 70.3)                                              | 10.4<br>(-7.0 to 30.2)                                                 |
| Gallbladder and biliary diseases                               | 0.7<br>(0.6 to 0.8)               | 2.1<br>(1.9 to 2.4)                     | < 0.05<br>(< 0.05 to < 0.05)      | 47.3<br>(21.7 to 76.4)                                              | 2.4<br>(-14.7 to 22.6)                                                 |
| Pancreatitis                                                   | < 0.05<br>(< 0.05 to < 0.05)      | 0.1<br>(< 0.05 to 0.1)                  | < 0.05<br>(< 0.05 to < 0.05)      | 48.9<br>(41.9 to 56.7)                                              | 3.4<br>(-0.4 to 7.0)                                                   |
| Other digestive diseases                                       | --                                | --                                      | < 0.05<br>(< 0.05 to < 0.05)      | 38.1<br>(25.3 to 51.9)                                              | 7.2<br>(-0.5 to 15.5)                                                  |
| <b>Neurological disorders</b>                                  | <b>156.6<br/>(149.9 to 164.0)</b> | <b>72.3<br/>(60.9 to 85.1)</b>          | <b>3.9<br/>(2.6 to 5.4)</b>       | <b>19.2<br/>(2.0 to 39.7)</b>                                       | <b>-1.2<br/>(-15.3 to 15.0)</b>                                        |
| Alzheimer's disease and other dementias                        | 1.3<br>(1.1 to 1.5)               | 0.2<br>(0.2 to 0.3)                     | 0.2<br>(0.1 to 0.2)               | 64.6<br>(57.5 to 72.5)                                              | -1.2<br>(-5.4 to 2.8)                                                  |
| Parkinson's disease                                            | 0.2<br>(0.1 to 0.2)               | < 0.05<br>(< 0.05 to < 0.05)            | < 0.05<br>(< 0.05 to < 0.05)      | 74.8<br>(53.0 to 101.4)                                             | 2.4<br>(-8.4 to 15.9)                                                  |
| Epilepsy                                                       | 1.2<br>(0.4 to 2.1)               | 0.2<br>(< 0.05 to 0.3)                  | 0.4<br>(0.1 to 0.8)               | 7.2<br>(-76.8 to 343.9)                                             | -4.7<br>(-79.1 to 299.1)                                               |
| Multiple sclerosis                                             | < 0.05<br>(< 0.05 to 0.1)         | < 0.05<br>(< 0.05 to < 0.05)            | < 0.05<br>(< 0.05 to < 0.05)      | 42.7<br>(36.0 to 49.7)                                              | 9.3<br>(4.8 to 14.2)                                                   |
| Motor neuron disease                                           | < 0.05<br>(< 0.05 to < 0.05)      | < 0.05<br>(< 0.05 to < 0.05)            | < 0.05<br>(< 0.05 to < 0.05)      | 33.3<br>(27.2 to 39.6)                                              | 4.3<br>(0.8 to 7.9)                                                    |
| Migraine                                                       | 67.0<br>(63.1 to 70.7)            | 6.6<br>(6.2 to 7.0)                     | 2.8<br>(1.8 to 3.9)               | 17.8<br>(13.6 to 22.8)                                              | -1.4<br>(-4.7 to 2.2)                                                  |
| Tension-type headache                                          | 115.1<br>(102.3 to 128.5)         | 65.3<br>(53.9 to 78.3)                  | 0.4<br>(0.2 to 0.6)               | 21.6<br>(15.5 to 28.7)                                              | -0.0<br>(-4.5 to 4.8)                                                  |
| Other neurological disorders                                   | < 0.05<br>(< 0.05 to < 0.05)      | < 0.05<br>(< 0.05 to < 0.05)            | 0.1<br>(< 0.05 to 0.2)            | 28.3<br>(-63.7 to 339.4)                                            | 14.4<br>(-65.4 to 257.7)                                               |
| <b>Mental and substance use disorders</b>                      | <b>55.9<br/>(54.1 to 57.7)</b>    | <b>18.5†<br/>(17.1 to 20.0)</b>         | <b>8.0<br/>(5.8 to 10.4)</b>      | <b>18.5<br/>(16.0 to 21.3)</b>                                      | <b>0.4<br/>(-1.4 to 2.4)</b>                                           |
| Schizophrenia                                                  | 1.2<br>(1.1 to 1.4)               | 0.1<br>(0.1 to 0.1)                     | 0.8<br>(0.6 to 1.0)               | 26.0<br>(15.3 to 37.3)                                              | -0.9<br>(-8.4 to 7.3)                                                  |
| Alcohol use disorders                                          | 3.5<br>(2.9 to 4.1)               | 1.9<br>(1.6 to 2.2)                     | 0.4<br>(0.2 to 0.5)               | 19.4<br>(8.6 to 31.7)                                               | 3.7<br>(-4.8 to 13.9)                                                  |
| Drug use disorders                                             | 4.5<br>(4.1 to 4.9)               | 0.5<br>(0.5 to 0.6)                     | 0.9<br>(0.6 to 1.2)               | 18.4<br>(8.3 to 29.3)                                               | 3.8<br>(-4.6 to 12.8)                                                  |
| Opioid use disorders                                           | 1.3<br>(1.0 to 1.6)               | 0.1<br>(0.1 to 0.2)                     | 0.5<br>(0.4 to 0.8)               | 21.1<br>(8.6 to 35.5)                                               | 5.2<br>(-5.5 to 16.4)                                                  |
| Cocaine use disorders                                          | 0.7<br>(0.6 to 0.8)               | < 0.05<br>(< 0.05 to 0.1)               | 0.1<br>(0.1 to 0.1)               | 17.2<br>(-1.1 to 39.1)                                              | 1.5<br>(-13.1 to 18.9)                                                 |
| Amphetamine use disorders                                      | 0.5<br>(0.4 to 0.7)               | < 0.05<br>(< 0.05 to 0.1)               | 0.1<br>(< 0.05 to 0.1)            | 10.6<br>(-10.5 to 38.2)                                             | 2.4<br>(-17.2 to 25.8)                                                 |
| Cannabis use disorders                                         | 1.8<br>(1.4 to 2.1)               | 0.3<br>(0.2 to 0.3)                     | 0.1<br>(< 0.05 to 0.1)            | 9.0<br>(-5.2 to 24.5)                                               | 0.1<br>(-12.2 to 14.1)                                                 |
| Other drug use disorders                                       | 0.3<br>(0.3 to 0.4)               | 0.1<br>(< 0.05 to 0.1)                  | 0.1<br>(0.1 to 0.2)               | 17.0<br>(-6.4 to 49.8)                                              | 2.6<br>(-17.8 to 30.7)                                                 |
| Depressive disorders                                           | 11.7<br>(10.9 to 12.5)            | 11.5<br>(10.2 to 12.9)                  | 1.9<br>(1.3 to 2.6)               | 22.5<br>(16.6 to 28.6)                                              | 0.5<br>(-3.6 to 4.9)                                                   |
| Major depressive disorder                                      | 6.9<br>(6.1 to 7.9)               | 10.7<br>(9.4 to 12.1)                   | 1.4<br>(1.0 to 2.0)               | 21.6<br>(14.0 to 29.6)                                              | 0.6<br>(-4.9 to 6.5)                                                   |
| Dysthymia                                                      | 4.9<br>(4.2 to 5.6)               | 0.9<br>(0.8 to 1.0)                     | 0.5<br>(0.3 to 0.7)               | 25.4<br>(19.3 to 32.0)                                              | 0.1<br>(-3.7 to 4.1)                                                   |
| Bipolar disorder                                               | 2.7<br>(2.3 to 3.1)               | 0.2<br>(0.2 to 0.3)                     | 0.6<br>(0.3 to 0.8)               | 21.1<br>(12.8 to 29.6)                                              | 0.1<br>(-6.0 to 6.5)                                                   |
| Anxiety disorders                                              | 15.3<br>(13.9 to 16.9)            | 2.4<br>(2.2 to 2.6)                     | 1.5<br>(1.0 to 2.0)               | 17.6<br>(13.0 to 22.7)                                              | 0.1<br>(-3.5 to 3.8)                                                   |
| Eating disorders                                               | 1.5<br>(1.2 to 1.8)               | 0.5<br>(0.4 to 0.6)                     | 0.3<br>(0.2 to 0.4)               | 8.2<br>(-1.8 to 18.6)                                               | 0.7<br>(-8.7 to 10.5)                                                  |
| Anorexia nervosa                                               | 0.4<br>(0.3 to 0.5)               | 0.1<br>(0.1 to 0.1)                     | 0.1<br>(< 0.05 to 0.1)            | 5.6<br>(-9.4 to 24.2)                                               | 0.6<br>(-13.8 to 18.9)                                                 |
| Bulimia nervosa                                                | 1.1<br>(0.8 to 1.4)               | 0.4<br>(0.3 to 0.5)                     | 0.2<br>(0.1 to 0.3)               | 9.2<br>(-3.5 to 22.1)                                               | 0.7<br>(-11.1 to 12.1)                                                 |
| Autistic spectrum disorders                                    | 3.8<br>(3.4 to 4.1)               | < 0.05<br>(< 0.05 to < 0.05)            | 0.6<br>(0.4 to 0.8)               | 13.6<br>(8.0 to 19.2)                                               | 0.5<br>(-4.2 to 5.6)                                                   |
| Autism                                                         | 1.4<br>(1.2 to 1.7)               | < 0.05<br>(< 0.05 to < 0.05)            | 0.4<br>(0.2 to 0.5)               | 14.3<br>(6.2 to 23.5)                                               | 0.6<br>(-6.1 to 8.4)                                                   |
| Asperger syndrome and other autistic spectrum disorders        | 2.3<br>(1.9 to 2.8)               | < 0.05<br>(< 0.05 to < 0.05)            | 0.2<br>(0.1 to 0.3)               | 12.4<br>(6.3 to 18.6)                                               | 0.2<br>(-4.9 to 5.3)                                                   |



| Cause                                                      | Prevalence in thousands (95% UI)        | Incidence in thousands (95% UI)          | YLDs in thousands (95% UI)         |                                                   |                                                     |
|------------------------------------------------------------|-----------------------------------------|------------------------------------------|------------------------------------|---------------------------------------------------|-----------------------------------------------------|
|                                                            | 2016 counts                             | 2016 counts                              | 2016 counts                        | Percentage change in counts between 2006 and 2016 | Percentage change in age-standardised rates between |
| Attention-deficit/hyperactivity disorder                   | 2.4<br>(2.1 to 2.6)                     | 0.1<br>(0.1 to 0.1)                      | < 0.05<br>(< 0.05 to < 0.05)       | 3.8<br>(-5.9 to 13.9)                             | 0.1<br>(-9.4 to 9.5)                                |
| Conduct disorder                                           | 2.6<br>(2.1 to 3.2)                     | 0.9<br>(0.7 to 1.1)                      | 0.3<br>(0.2 to 0.5)                | -0.5<br>(-7.3 to 6.7)                             | 0.2<br>(-6.7 to 7.3)                                |
| Idiopathic developmental intellectual disability           | 1.7<br>(0.6 to 2.7)                     | --                                       | 0.1<br>(< 0.05 to 0.1)             | -10.1<br>(-21.0 to 0.1)                           | -21.9<br>(-31.6 to -13.5)                           |
| Other mental and substance use disorders                   | 9.2<br>(8.0 to 10.6)                    | 0.3<br>(0.2 to 0.3)                      | 0.7<br>(0.5 to 1.0)                | 25.2<br>(19.1 to 31.5)                            | 0.1<br>(-4.2 to 4.6)                                |
| <b>Diabetes, urogenital, blood, and endocrine diseases</b> | <b>114.0</b><br><b>(111.1 to 116.9)</b> | <b>43.5†</b><br><b>(41.0 to 46.6)</b>    | <b>4.3</b><br><b>(3.1 to 5.9)</b>  | <b>36.7</b><br><b>(28.6 to 44.4)</b>              | <b>-6.0</b><br><b>(-11.0 to -1.0)</b>               |
| Diabetes mellitus                                          | 37.6<br>(34.1 to 42.0)                  | 2.6<br>(2.3 to 2.9)                      | 2.8<br>(1.9 to 4.0)                | 39.7<br>(27.2 to 51.9)                            | -7.0<br>(-14.3 to 0.4)                              |
| Acute glomerulonephritis                                   | < 0.05<br>(< 0.05 to < 0.05)            | 0.1<br>(0.1 to 0.1)                      | < 0.05<br>(< 0.05 to < 0.05)       | 19.5<br>(12.0 to 27.4)                            | -6.1<br>(-10.9 to -1.0)                             |
| Chronic kidney disease                                     | 9.6<br>(8.8 to 10.6)                    | 0.8<br>(0.7 to 0.9)                      | 0.6<br>(0.4 to 0.7)                | 43.0<br>(31.0 to 56.3)                            | -5.4<br>(-12.4 to 1.9)                              |
| Chronic kidney disease due to diabetes mellitus            | 6.1<br>(5.4 to 6.9)                     | 0.5<br>(0.5 to 0.6)                      | 0.4<br>(0.2 to 0.5)                | 47.8<br>(32.3 to 65.1)                            | -5.9<br>(-14.2 to 3.3)                              |
| Chronic kidney disease due to hypertension                 | 1.2<br>(1.0 to 1.4)                     | 0.1<br>(0.1 to 0.1)                      | < 0.05<br>(< 0.05 to 0.1)          | 53.3<br>(30.8 to 78.5)                            | -4.8<br>(-17.0 to 8.5)                              |
| Chronic kidney disease due to glomerulonephritis           | 1.1<br>(1.0 to 1.3)                     | 0.1<br>(0.1 to 0.1)                      | 0.1<br>(0.1 to 0.1)                | 28.2<br>(10.7 to 48.7)                            | -5.0<br>(-15.3 to 6.9)                              |
| Chronic kidney disease due to other causes                 | 1.2<br>(1.0 to 1.5)                     | 0.1<br>(0.1 to 0.1)                      | 0.1<br>(0.1 to 0.1)                | 37.4<br>(20.2 to 57.1)                            | -4.1<br>(-14.2 to 7.5)                              |
| Urinary diseases and male infertility                      | 6.5<br>(5.7 to 7.3)                     | 23.7†<br>(21.2 to 26.7)                  | 0.2<br>(0.1 to 0.3)                | 56.1<br>(45.8 to 66.2)                            | -2.8<br>(-8.8 to 2.7)                               |
| Interstitial nephritis and urinary tract infections        | 0.4<br>(0.3 to 0.4)                     | 18.6<br>(16.3 to 21.5)                   | < 0.05<br>(< 0.05 to < 0.05)       | 16.6<br>(-0.9 to 36.1)                            | 0.7<br>(-14.0 to 16.2)                              |
| Urolithiasis                                               | 0.2<br>(0.1 to 0.2)                     | 4.4<br>(3.9 to 5.1)                      | < 0.05<br>(< 0.05 to < 0.05)       | 31.6<br>(12.8 to 52.7)                            | -1.0<br>(-14.7 to 15.9)                             |
| Benign prostatic hyperplasia                               | 5.0<br>(4.2 to 5.9)                     | 0.7<br>(0.5 to 0.8)                      | 0.2<br>(0.1 to 0.2)                | 69.2<br>(55.5 to 82.7)                            | -2.5<br>(-9.4 to 4.2)                               |
| Male infertility                                           | 0.7<br>(0.5 to 1.0)                     | --                                       | < 0.05<br>(< 0.05 to < 0.05)       | 12.0<br>(-1.7 to 27.2)                            | -4.1<br>(-15.7 to 8.1)                              |
| Other urinary diseases                                     | --                                      | --                                       | < 0.05<br>(< 0.05 to < 0.05)       | 1.4<br>(-10.0 to 13.1)                            | -16.4<br>(-25.6 to -7.4)                            |
| Gynecological diseases                                     | 44.0<br>(41.6 to 46.4)                  | 15.3†<br>(14.2 to 16.5)                  | 0.5<br>(0.3 to 0.7)                | 15.6<br>(10.0 to 21.7)                            | -3.4<br>(-7.8 to 1.6)                               |
| Uterine fibroids                                           | 4.0<br>(3.2 to 5.0)                     | 0.5<br>(0.4 to 0.6)                      | 0.1<br>(< 0.05 to 0.1)             | 28.4<br>(15.4 to 42.7)                            | -2.6<br>(-11.2 to 7.0)                              |
| Polycystic ovarian syndrome                                | 1.9<br>(1.4 to 2.5)                     | 0.3<br>(0.2 to 0.4)                      | < 0.05<br>(< 0.05 to < 0.05)       | 9.6<br>(2.2 to 17.0)                              | -1.6<br>(-8.0 to 5.1)                               |
| Female infertility                                         | 1.2<br>(0.6 to 2.1)                     | --                                       | < 0.05<br>(< 0.05 to < 0.05)       | 14.9<br>(-9.1 to 49.7)                            | -3.7<br>(-24.2 to 28.6)                             |
| Endometriosis                                              | 0.2<br>(0.2 to 0.3)                     | 0.7<br>(0.5 to 0.9)                      | < 0.05<br>(< 0.05 to < 0.05)       | 7.0<br>(-17.2 to 36.7)                            | -1.6<br>(-24.4 to 26.2)                             |
| Genital prolapse                                           | 11.0<br>(9.5 to 12.6)                   | 0.8<br>(0.7 to 0.9)                      | < 0.05<br>(< 0.05 to 0.1)          | 40.3<br>(29.1 to 52.2)                            | -8.7<br>(-16.3 to -0.3)                             |
| Premenstrual syndrome                                      | 25.8<br>(23.7 to 28.0)                  | 9.1<br>(8.2 to 10.0)                     | 0.2<br>(0.1 to 0.3)                | 11.5<br>(2.8 to 22.3)                             | -3.7<br>(-11.0 to 5.7)                              |
| Other gynecological diseases                               | 4.6<br>(4.0 to 5.3)                     | 4.0<br>(3.3 to 4.7)                      | 0.1<br>(0.1 to 0.2)                | 14.5<br>(4.5 to 25.9)                             | -1.9<br>(-10.4 to 7.4)                              |
| Hemoglobinopathies and hemolytic anaemias                  | 32.4<br>(31.8 to 33.0)                  | --                                       | < 0.05<br>(< 0.05 to 0.1)          | 10.6<br>(-5.6 to 28.4)                            | -3.0<br>(-16.4 to 11.8)                             |
| Thalassemias                                               | < 0.05<br>(< 0.05 to < 0.05)            | --                                       | < 0.05<br>(< 0.05 to < 0.05)       | 16.9<br>(-10.8 to 51.4)                           | 27.6<br>(-3.4 to 66.3)                              |
| Thalassaemias trait                                        | 0.3<br>(0.2 to 0.4)                     | --                                       | < 0.05<br>(< 0.05 to < 0.05)       | 19.0<br>(-17.7 to 66.6)                           | 1.9<br>(-28.7 to 39.5)                              |
| Sickle cell disorders                                      | < 0.05<br>(< 0.05 to < 0.05)            | --                                       | < 0.05<br>(< 0.05 to < 0.05)       | 43.4<br>(30.0 to 59.1)                            | 32.4<br>(20.5 to 46.1)                              |
| Sickle cell trait                                          | 5.6<br>(5.4 to 5.8)                     | --                                       | < 0.05<br>(< 0.05 to < 0.05)       | 19.2<br>(-9.3 to 56.6)                            | 12.7<br>(-13.6 to 47.7)                             |
| G6PD deficiency                                            | 2.7<br>(2.6 to 2.8)                     | --                                       | < 0.05<br>(< 0.05 to < 0.05)       | 43.6<br>(4.9 to 105.9)                            | 14.1<br>(-13.7 to 58.4)                             |
| G6PD trait                                                 | 22.9<br>(22.4 to 23.5)                  | --                                       | < 0.05<br>(< 0.05 to < 0.05)       | 18.5<br>(-1.2 to 41.3)                            | 4.5<br>(-12.8 to 25.1)                              |
| Other hemoglobinopathies and hemolytic anaemias            | 1.4<br>(1.2 to 1.6)                     | --                                       | < 0.05<br>(< 0.05 to < 0.05)       | 2.7<br>(-13.2 to 20.6)                            | -13.2<br>(-26.1 to 0.2)                             |
| Endocrine, metabolic, blood, and immune disorders          | 6.2<br>(5.7 to 6.7)                     | 1.1<br>(1.0 to 1.2)                      | 0.2<br>(0.1 to 0.3)                | 31.2<br>(22.9 to 40.0)                            | -1.1<br>(-6.9 to 4.9)                               |
| <b>Musculoskeletal disorders</b>                           | <b>77.4</b><br><b>(73.1 to 81.7)</b>    | <b>44.5</b><br><b>(39.8 to 49.6)</b>     | <b>8.2</b><br><b>(5.9 to 10.7)</b> | <b>33.8</b><br><b>(28.9 to 38.7)</b>              | <b>1.4</b><br><b>(-1.4 to 4.4)</b>                  |
| Rheumatoid arthritis                                       | 1.2<br>(1.0 to 1.3)                     | 0.1<br>(0.1 to 0.1)                      | 0.3<br>(0.2 to 0.4)                | 41.4<br>(29.3 to 56.2)                            | 0.7<br>(-6.7 to 9.3)                                |
| Osteoarthritis                                             | 15.8<br>(14.7 to 16.9)                  | 1.0<br>(0.9 to 1.0)                      | 0.6<br>(0.4 to 0.8)                | 61.6<br>(55.7 to 68.5)                            | 1.4<br>(-1.8 to 5.0)                                |
| Low back and neck pain                                     | 47.3<br>(43.9 to 51.5)                  | 21.0<br>(18.5 to 23.9)                   | 5.5<br>(3.9 to 7.4)                | 31.2<br>(25.6 to 37.5)                            | 0.1<br>(-3.3 to 3.4)                                |
| Low back pain                                              | 37.5<br>(33.0 to 43.1)                  | 18.2<br>(15.7 to 21.1)                   | 4.3<br>(3.0 to 5.8)                | 29.3<br>(22.4 to 36.7)                            | 0.1<br>(-4.4 to 4.4)                                |
| Neck pain                                                  | 12.6<br>(10.7 to 14.6)                  | 2.8<br>(2.4 to 3.4)                      | 1.3<br>(0.8 to 1.8)                | 38.2<br>(32.7 to 44.1)                            | 0.1<br>(-2.3 to 2.6)                                |
| Gout                                                       | 2.5<br>(2.2 to 2.8)                     | 0.5<br>(0.4 to 0.5)                      | 0.1<br>(0.1 to 0.1)                | 49.2<br>(29.6 to 73.2)                            | 0.2<br>(-11.4 to 13.2)                              |
| Other musculoskeletal disorders                            | 19.9<br>(15.9 to 24.4)                  | 21.9<br>(18.0 to 26.6)                   | 1.7<br>(1.2 to 2.5)                | 32.7<br>(20.6 to 46.8)                            | 6.4<br>(-2.2 to 16.1)                               |
| <b>Other non-communicable diseases</b>                     | <b>275.6</b><br><b>(270.7 to 280.2)</b> | <b>704.4†</b><br><b>(660.4 to 750.6)</b> | <b>7.4</b><br><b>(5.0 to 10.5)</b> | <b>21.1</b><br><b>(18.9 to 23.0)</b>              | <b>0.3</b><br><b>(-0.9 to 1.5)</b>                  |
| Congenital anomalies                                       | 3.8<br>(3.5 to 4.1)                     | --                                       | 0.4<br>(0.3 to 0.5)                | 9.6<br>(4.2 to 15.1)                              | -0.6<br>(-5.5 to 4.3)                               |
| Neural tube defects                                        | 0.2<br>(0.1 to 0.2)                     | --                                       | < 0.05<br>(< 0.05 to 0.1)          | 14.4<br>(-1.8 to 31.4)                            | 0.2<br>(-13.1 to 14.2)                              |
| Congenital heart anomalies                                 | 1.1<br>(1.0 to 1.2)                     | --                                       | 0.1<br>(< 0.05 to 0.1)             | 8.3<br>(-1.9 to 20.8)                             | -0.3<br>(-9.5 to 11.0)                              |
| Orofacial clefts                                           | 0.3<br>(0.2 to 0.3)                     | --                                       | < 0.05<br>(< 0.05 to < 0.05)       | 11.9<br>(-0.3 to 26.0)                            | -0.2<br>(-11.2 to 12.4)                             |
| Down's syndrome                                            | 0.2<br>(0.1 to 0.2)                     | --                                       | < 0.05<br>(< 0.05 to < 0.05)       | 3.1<br>(-5.0 to 11.8)                             | -0.5<br>(-8.5 to 7.9)                               |
| Turner syndrome                                            | 0.3<br>(0.2 to 0.3)                     | --                                       | < 0.05<br>(< 0.05 to < 0.05)       | 10.7<br>(-17.7 to 47.8)                           | 3.2<br>(-22.7 to 39.0)                              |
| Klinefelter syndrome                                       | 0.3<br>(0.3 to 0.4)                     | --                                       | < 0.05<br>(< 0.05 to < 0.05)       | 7.0<br>(-13.2 to 31.2)                            | 0.6<br>(-17.9 to 22.7)                              |

| Cause                                         | Prevalence in thousands (95% UI)        | Incidence in thousands (95% UI)       | YLDs in thousands (95% UI)        |                                                   |                                                     |
|-----------------------------------------------|-----------------------------------------|---------------------------------------|-----------------------------------|---------------------------------------------------|-----------------------------------------------------|
|                                               | 2016 counts                             | 2016 counts                           | 2016 counts                       | Percentage change in counts between 2006 and 2016 | Percentage change in age-standardised rates between |
| Other chromosomal abnormalities               | 0.4<br>(0.3 to 0.5)                     | --                                    | < 0.05<br>(< 0.05 to 0.1)         | -7.0<br>(-20.5 to 9.7)                            | -1.2<br>(-15.5 to 16.5)                             |
| Congenital musculoskeletal and limb anomalies | 0.7<br>(0.7 to 0.8)                     | --                                    | 0.1<br>(0.1 to 0.1)               | 15.1<br>(4.3 to 27.4)                             | -0.8<br>(-9.3 to 9.1)                               |
| Urogenital congenital anomalies               | 0.3<br>(0.3 to 0.3)                     | --                                    | < 0.05<br>(< 0.05 to < 0.05)      | -1.6<br>(-11.9 to 9.1)                            | -0.3<br>(-10.5 to 10.2)                             |
| Digestive congenital anomalies                | 0.4<br>(0.3 to 0.4)                     | --                                    | < 0.05<br>(< 0.05 to < 0.05)      | 17.9<br>(-3.7 to 45.5)                            | 4.3<br>(-14.0 to 26.9)                              |
| Other congenital anomalies                    | 0.7<br>(0.4 to 1.1)                     | --                                    | 0.1<br>(0.1 to 0.2)               | 11.5<br>(-0.0 to 23.0)                            | -1.5<br>(-11.2 to 8.5)                              |
| Skin and subcutaneous diseases                | 144.7<br>(141.4 to 147.9)               | 261.7<br>(248.5 to 277.8)             | 3.9<br>(2.6 to 5.6)               | 10.9<br>(8.5 to 13.1)                             | 1.1<br>(-0.7 to 2.9)                                |
| Dermatitis                                    | 24.9<br>(23.2 to 26.7)                  | 30.4<br>(28.0 to 32.9)                | 0.9<br>(0.6 to 1.5)               | 6.1<br>(2.7 to 10.1)                              | -0.1<br>(-2.9 to 2.9)                               |
| Psoriasis                                     | 4.6<br>(4.3 to 4.8)                     | 0.5<br>(0.5 to 0.5)                   | 0.4<br>(0.3 to 0.5)               | 28.5<br>(18.9 to 39.2)                            | 4.6<br>(-2.6 to 12.8)                               |
| Cellulitis                                    | 0.2<br>(0.2 to 0.3)                     | 5.4<br>(5.1 to 5.8)                   | < 0.05<br>(< 0.05 to < 0.05)      | 18.2<br>(-4.2 to 48.7)                            | 1.0<br>(-16.1 to 23.3)                              |
| Pyoderma                                      | 0.8<br>(0.8 to 0.9)                     | 19.4<br>(18.6 to 20.2)                | < 0.05<br>(< 0.05 to < 0.05)      | 20.1<br>(9.9 to 31.5)                             | -0.1<br>(-7.3 to 7.8)                               |
| Scabies                                       | 1.0<br>(0.9 to 1.2)                     | 3.0<br>(2.6 to 3.4)                   | < 0.05<br>(< 0.05 to < 0.05)      | 6.7<br>(-1.5 to 15.3)                             | -0.1<br>(-7.1 to 7.2)                               |
| Fungal skin diseases                          | 22.1<br>(19.5 to 24.8)                  | 79.6<br>(70.0 to 89.5)                | 0.1<br>(< 0.05 to 0.3)            | 24.1<br>(20.1 to 27.8)                            | 0.1<br>(-1.2 to 1.4)                                |
| Viral skin diseases                           | 12.7<br>(12.1 to 13.2)                  | 16.7<br>(15.8 to 17.5)                | 0.4<br>(0.2 to 0.6)               | 5.1<br>(1.8 to 8.4)                               | -0.0<br>(-2.9 to 3.0)                               |
| Acne vulgaris                                 | 56.9<br>(52.3 to 61.5)                  | 45.9<br>(37.0 to 57.6)                | 1.5<br>(1.0 to 2.1)               | 8.0<br>(4.0 to 11.8)                              | 1.6<br>(-1.9 to 5.2)                                |
| Alopecia areata                               | 1.5<br>(1.5 to 1.6)                     | 2.7<br>(2.6 to 2.8)                   | 0.1<br>(< 0.05 to 0.1)            | 17.6<br>(8.4 to 27.3)                             | 0.3<br>(-6.8 to 7.8)                                |
| Pruritus                                      | 3.5<br>(3.1 to 4.0)                     | 2.8<br>(2.5 to 3.2)                   | < 0.05<br>(< 0.05 to 0.1)         | 22.3<br>(15.2 to 30.2)                            | -0.4<br>(-5.3 to 4.6)                               |
| Urticaria                                     | 3.3<br>(2.9 to 3.8)                     | 5.9<br>(5.2 to 6.8)                   | 0.2<br>(0.1 to 0.3)               | 6.4<br>(-0.3 to 14.0)                             | -0.1<br>(-5.6 to 6.1)                               |
| Decubitus ulcer                               | 0.1<br>(0.1 to 0.1)                     | 0.3<br>(0.3 to 0.3)                   | < 0.05<br>(< 0.05 to < 0.05)      | 40.8<br>(29.3 to 53.8)                            | 1.2<br>(-10.5 to 13.7)                              |
| Other skin and subcutaneous diseases          | 40.3<br>(39.1 to 41.6)                  | 49.1<br>(47.5 to 50.8)                | 0.2<br>(0.1 to 0.4)               | 31.3<br>(28.2 to 34.4)                            | 1.0<br>(-0.9 to 2.8)                                |
| Sense organ diseases                          | 71.5<br>(69.5 to 73.7)                  | 38.4†<br>(36.0 to 41.1)               | 2.1<br>(1.4 to 3.0)               | 38.6<br>(34.9 to 42.3)                            | -0.5<br>(-2.5 to 1.6)                               |
| Glaucoma                                      | 0.2<br>(0.2 to 0.2)                     | --                                    | < 0.05<br>(< 0.05 to < 0.05)      | 81.4<br>(57.8 to 109.2)                           | 1.6<br>(-10.2 to 15.3)                              |
| Cataract                                      | 0.9<br>(0.8 to 1.1)                     | --                                    | 0.1<br>(< 0.05 to 0.1)            | 59.8<br>(45.3 to 75.4)                            | 0.3<br>(-7.2 to 7.7)                                |
| Macular degeneration                          | 0.1<br>(0.1 to 0.2)                     | --                                    | < 0.05<br>(< 0.05 to < 0.05)      | 78.5<br>(52.6 to 107.6)                           | 2.2<br>(-9.9 to 15.8)                               |
| Refraction and accommodation disorders        | 32.6<br>(30.7 to 34.7)                  | --                                    | 0.6<br>(0.4 to 1.0)               | 21.8<br>(17.0 to 27.2)                            | -2.5<br>(-5.6 to 0.8)                               |
| Age-related and other hearing loss            | 39.1<br>(36.5 to 41.9)                  | --                                    | 0.9<br>(0.6 to 1.3)               | 49.2<br>(42.3 to 55.8)                            | -0.5<br>(-3.7 to 2.8)                               |
| Other vision loss                             | 1.5<br>(1.3 to 1.7)                     | --                                    | 0.1<br>(0.1 to 0.2)               | 45.3<br>(30.8 to 60.7)                            | 3.6<br>(-3.8 to 11.6)                               |
| Other sense organ diseases                    | 10.8<br>(10.0 to 11.7)                  | 38.4<br>(36.0 to 41.1)                | 0.3<br>(0.2 to 0.5)               | 39.1<br>(32.6 to 46.2)                            | 1.1<br>(-2.7 to 5.1)                                |
| Oral disorders                                | 153.3<br>(146.6 to 159.7)               | 404.3†<br>(363.7 to 446.8)            | 1.0<br>(0.6 to 1.5)               | 41.0<br>(37.2 to 45.0)                            | 0.1<br>(-1.8 to 1.8)                                |
| Caries of deciduous teeth                     | 23.7<br>(19.1 to 28.2)                  | 103.3<br>(72.8 to 137.7)              | < 0.05<br>(< 0.05 to < 0.05)      | -10.5<br>(-19.5 to 0.5)                           | 0.6<br>(-9.4 to 13.1)                               |
| Caries of permanent teeth                     | 91.6<br>(85.1 to 98.2)                  | 296.0<br>(269.2 to 324.8)             | 0.1<br>(< 0.05 to 0.1)            | 19.0<br>(13.7 to 24.7)                            | -0.8<br>(-4.9 to 3.3)                               |
| Periodontal disease                           | 29.2<br>(23.9 to 35.1)                  | 3.5<br>(2.7 to 4.3)                   | 0.2<br>(0.1 to 0.4)               | 44.2<br>(36.8 to 51.3)                            | 0.3<br>(-3.0 to 3.7)                                |
| Edentulism and severe tooth loss              | 17.1<br>(15.0 to 19.2)                  | 1.5<br>(1.2 to 1.7)                   | 0.5<br>(0.3 to 0.7)               | 56.4<br>(50.3 to 62.2)                            | 0.1<br>(-2.6 to 2.9)                                |
| Other oral disorders                          | 8.0<br>(7.6 to 8.4)                     | --                                    | 0.2<br>(0.1 to 0.4)               | 21.4<br>(17.3 to 25.8)                            | 0.0<br>(-3.0 to 3.2)                                |
| <b>Injuries</b>                               | <b>120.2</b><br><b>(111.8 to 130.3)</b> | <b>47.2†</b><br><b>(44.6 to 50.2)</b> | <b>3.9</b><br><b>(2.5 to 5.5)</b> | <b>26.3</b><br><b>(24.2 to 28.5)</b>              | <b>-3.4</b><br><b>(-4.7 to -2.1)</b>                |
| <b>Transport injuries</b>                     | <b>20.4</b><br><b>(18.7 to 22.1)</b>    | <b>6.9</b><br><b>(6.2 to 7.6)</b>     | <b>1.0</b><br><b>(0.6 to 1.4)</b> | <b>23.4</b><br><b>(21.1 to 25.9)</b>              | <b>-7.0</b><br><b>(-8.6 to -5.5)</b>                |
| Road injuries                                 | 16.5<br>(15.2 to 18.0)                  | 6.1<br>(5.5 to 6.8)                   | 0.8<br>(0.5 to 1.2)               | 24.2<br>(21.8 to 26.8)                            | -6.5<br>(-8.2 to -5.0)                              |
| Pedestrian road injuries                      | 2.6<br>(2.3 to 3.0)                     | 0.7<br>(0.6 to 0.8)                   | 0.1<br>(0.1 to 0.2)               | 37.3<br>(34.5 to 40.4)                            | 3.8<br>(2.3 to 5.2)                                 |
| Cyclist road injuries                         | 3.7<br>(3.1 to 4.4)                     | 1.8<br>(1.5 to 2.1)                   | 0.2<br>(0.1 to 0.2)               | 38.1<br>(35.3 to 41.5)                            | 5.0<br>(3.3 to 6.6)                                 |
| Motorcyclist road injuries                    | 4.4<br>(3.6 to 5.3)                     | 1.0<br>(0.8 to 1.2)                   | 0.2<br>(0.1 to 0.3)               | 30.2<br>(27.3 to 33.2)                            | -1.9<br>(-3.8 to -0.0)                              |
| Motor vehicle road injuries                   | 5.2<br>(4.3 to 6.2)                     | 2.4<br>(2.1 to 2.7)                   | 0.3<br>(0.2 to 0.4)               | 8.1<br>(5.6 to 10.5)                              | -19.8<br>(-21.5 to -18.2)                           |
| Other road injuries                           | 0.6<br>(0.5 to 0.7)                     | 0.2<br>(0.2 to 0.3)                   | < 0.05<br>(< 0.05 to < 0.05)      | 23.6<br>(21.0 to 26.3)                            | -7.8<br>(-9.4 to -6.2)                              |
| Other transport injuries                      | 3.9<br>(3.2 to 4.6)                     | 0.8<br>(0.7 to 0.9)                   | 0.1<br>(0.1 to 0.2)               | 19.4<br>(17.1 to 21.9)                            | -9.6<br>(-11.0 to -8.3)                             |
| <b>Unintentional injuries</b>                 | <b>96.4</b><br><b>(88.5 to 106.0)</b>   | <b>38.5</b><br><b>(35.9 to 41.6)</b>  | <b>2.7</b><br><b>(1.8 to 4.0)</b> | <b>27.6</b><br><b>(25.4 to 29.8)</b>              | <b>-2.2</b><br><b>(-3.6 to -0.9)</b>                |
| Falls                                         | 44.7<br>(38.5 to 51.7)                  | 18.1<br>(16.0 to 20.7)                | 1.6<br>(1.1 to 2.2)               | 27.5<br>(24.9 to 30.0)                            | -2.9<br>(-4.7 to -1.4)                              |
| Drowning                                      | 0.4<br>(0.3 to 0.4)                     | 0.1<br>(0.1 to 0.1)                   | < 0.05<br>(< 0.05 to < 0.05)      | 33.4<br>(28.0 to 38.8)                            | 0.5<br>(-2.5 to 3.4)                                |
| Fire, heat, and hot substances                | 11.0<br>(9.4 to 13.0)                   | 0.8<br>(0.7 to 1.0)                   | 0.2<br>(0.1 to 0.3)               | 24.9<br>(21.5 to 28.3)                            | -2.0<br>(-4.2 to 0.1)                               |
| Poisonings                                    | 0.5<br>(0.4 to 0.6)                     | 0.7<br>(0.6 to 0.9)                   | < 0.05<br>(< 0.05 to 0.1)         | 30.4<br>(20.7 to 41.7)                            | 9.2<br>(1.7 to 17.9)                                |
| Exposure to mechanical forces                 | 21.5<br>(18.0 to 27.3)                  | 7.8<br>(6.7 to 8.8)                   | 0.4<br>(0.2 to 0.6)               | 29.8<br>(27.6 to 31.9)                            | -2.9<br>(-4.2 to -1.7)                              |
| Unintentional firearm injuries                | 0.7<br>(0.6 to 0.9)                     | 0.1<br>(0.1 to 0.1)                   | < 0.05<br>(< 0.05 to < 0.05)      | 30.8<br>(28.2 to 33.5)                            | 1.4<br>(-0.4 to 3.0)                                |
| Unintentional suffocation                     | 0.2<br>(0.2 to 0.3)                     | < 0.05<br>(< 0.05 to 0.1)             | < 0.05<br>(< 0.05 to < 0.05)      | 25.1<br>(21.9 to 28.3)                            | 3.5<br>(1.5 to 5.3)                                 |
| Other exposure to mechanical forces           | 20.6<br>(17.1 to 26.3)                  | 7.6<br>(6.6 to 8.7)                   | 0.4<br>(0.2 to 0.6)               | 29.8<br>(27.6 to 31.9)                            | -3.1<br>(-4.4 to -1.9)                              |

| Cause                                                                               | Prevalence in thousands (95% UI) | Incidence in thousands (95% UI)                | YLDs in thousands (95% UI)                    |                                                   |                                                     |
|-------------------------------------------------------------------------------------|----------------------------------|------------------------------------------------|-----------------------------------------------|---------------------------------------------------|-----------------------------------------------------|
|                                                                                     | 2016 counts                      | 2016 counts                                    | 2016 counts                                   | Percentage change in counts between 2006 and 2016 | Percentage change in age-standardised rates between |
| Adverse effects of medical treatment                                                | 0.1<br>(0.1 to 0.2)              | 2.0<br>(1.7 to 2.3)                            | < 0.05<br>(< 0.05 to < 0.05)                  | 23.0<br>(17.0 to 28.9)                            | 2.3<br>(-0.9 to 5.4)                                |
| Animal contact                                                                      | 2.1<br>(1.8 to 2.5)              | 1.5<br>(1.2 to 1.8)                            | < 0.05<br>(< 0.05 to 0.1)                     | 21.7<br>(16.1 to 27.4)                            | -1.8<br>(-5.6 to 1.8)                               |
| Venomous animal contact                                                             | 0.4<br>(0.3 to 0.4)              | 0.5<br>(0.3 to 0.6)                            | < 0.05<br>(< 0.05 to < 0.05)                  | 16.3<br>(7.5 to 26.6)                             | -2.2<br>(-9.1 to 5.3)                               |
| Non-venomous animal contact                                                         | 1.7<br>(1.4 to 2.1)              | 1.0<br>(0.8 to 1.2)                            | < 0.05<br>(< 0.05 to < 0.05)                  | 27.7<br>(24.5 to 31.0)                            | -1.4<br>(-3.1 to 0.1)                               |
| Foreign body                                                                        | 3.7<br>(3.0 to 4.5)              | 2.2<br>(1.9 to 2.6)                            | 0.1<br>(0.1 to 0.2)                           | 15.6<br>(12.8 to 18.5)                            | -6.2<br>(-8.1 to -4.3)                              |
| Pulmonary aspiration and foreign body in airway                                     | 0.5<br>(0.3 to 0.6)              | 0.5<br>(0.4 to 0.5)                            | < 0.05<br>(< 0.05 to < 0.05)                  | 24.2<br>(20.8 to 27.7)                            | 2.2<br>(0.2 to 4.2)                                 |
| Foreign body in eyes                                                                | 0.2<br>(0.1 to 0.3)              | 1.1<br>(0.8 to 1.4)                            | < 0.05<br>(< 0.05 to < 0.05)                  | 21.9<br>(15.7 to 29.8)                            | -0.4<br>(-3.1 to 2.5)                               |
| Foreign body in other body part                                                     | 3.0<br>(2.4 to 3.8)              | 0.7<br>(0.6 to 0.8)                            | 0.1<br>(< 0.05 to 0.1)                        | 13.3<br>(10.2 to 16.6)                            | -8.4<br>(-10.6 to -6.4)                             |
| Environmental heat and cold exposure                                                | 2.5<br>(2.2 to 2.9)              | 0.6<br>(0.5 to 0.8)                            | 0.1<br>(0.1 to 0.1)                           | 39.5<br>(34.9 to 44.2)                            | 5.3<br>(2.5 to 8.2)                                 |
| Other unintentional injuries                                                        | 9.9<br>(8.0 to 12.1)             | 4.7<br>(3.9 to 5.7)                            | 0.2<br>(0.2 to 0.4)                           | 29.9<br>(27.5 to 32.3)                            | 0.9<br>(-0.6 to 2.2)                                |
| <b>Self-harm and interpersonal violence</b>                                         | <b>9.6<br/>(8.7 to 10.7)</b>     | <b>1.8†<br/>(1.6 to 2.0)</b>                   | <b>0.2<br/>(0.1 to 0.2)</b>                   | <b>21.6<br/>(17.8 to 25.1)</b>                    | <b>-0.6<br/>(-2.6 to 1.3)</b>                       |
| Self-harm                                                                           | 0.8<br>(0.6 to 0.9)              | 0.8<br>(0.7 to 0.9)                            | < 0.05<br>(< 0.05 to 0.1)                     | 42.6<br>(34.9 to 50.9)                            | 5.2<br>(0.6 to 9.8)                                 |
| Self-harm by firearm                                                                | < 0.05<br>(< 0.05 to < 0.05)     | < 0.05<br>(< 0.05 to < 0.05)                   | < 0.05<br>(< 0.05 to < 0.05)                  | 25.0<br>(22.1 to 28.1)                            | 0.3<br>(-2.0 to 2.5)                                |
| Self-harm by other specified means                                                  | 0.8<br>(0.6 to 0.9)              | 0.8<br>(0.7 to 0.9)                            | < 0.05<br>(< 0.05 to 0.1)                     | 42.8<br>(35.0 to 51.1)                            | 5.2<br>(0.6 to 9.8)                                 |
| Interpersonal violence                                                              | 8.9<br>(7.9 to 9.9)              | 1.0†<br>(0.8 to 1.2)                           | 0.1<br>(0.1 to 0.2)                           | 16.6<br>(12.8 to 20.2)                            | -2.2<br>(-4.3 to -0.3)                              |
| Assault by firearm                                                                  | 0.1<br>(0.1 to 0.2)              | < 0.05<br>(< 0.05 to < 0.05)                   | < 0.05<br>(< 0.05 to < 0.05)                  | 36.7<br>(33.5 to 40.1)                            | 7.6<br>(5.8 to 9.3)                                 |
| Assault by sharp object                                                             | 0.5<br>(0.4 to 0.6)              | 0.2<br>(0.1 to 0.2)                            | < 0.05<br>(< 0.05 to < 0.05)                  | 27.3<br>(24.1 to 30.1)                            | -1.6<br>(-3.3 to -0.1)                              |
| Sexual violence                                                                     | 6.4<br>(5.5 to 7.4)              | --                                             | 0.1<br>(< 0.05 to 0.1)                        | 4.1<br>(-0.1 to 9.0)                              | -4.2<br>(-7.9 to -0.0)                              |
| Assault by other means                                                              | 1.8<br>(1.5 to 2.2)              | 0.8<br>(0.6 to 0.9)                            | 0.1<br>(< 0.05 to 0.1)                        | 29.2<br>(26.8 to 31.5)                            | -0.9<br>(-2.5 to 0.5)                               |
| <b>Forces of nature, conflict and terrorism, and executions and police conflict</b> | <b>0.2<br/>(0.1 to 0.2)</b>      | <b>&lt; 0.05†<br/>(&lt; 0.05 to &lt; 0.05)</b> | <b>&lt; 0.05<br/>(&lt; 0.05 to &lt; 0.05)</b> | <b>49.7<br/>(26.7 to 57.5)</b>                    | <b>28.7<br/>(12.2 to 34.4)</b>                      |
| Exposure to forces of nature                                                        | < 0.05<br>(< 0.05 to 0.1)        | --                                             | < 0.05<br>(< 0.05 to < 0.05)                  | --                                                | --                                                  |
| Conflict and terrorism                                                              | --                               | --                                             | --                                            | --                                                | --                                                  |
| Executions and police conflict                                                      | 0.1<br>(< 0.05 to 0.2)           | < 0.05<br>(< 0.05 to < 0.05)                   | < 0.05<br>(< 0.05 to < 0.05)                  | 15.7<br>(6.9 to 23.3)                             | -1.7<br>(-6.7 to 5.1)                               |
| <b>Impairments</b>                                                                  | --                               | --                                             | --                                            | --                                                | --                                                  |
| Anaemia                                                                             | 57.7<br>(51.6 to 63.6)           | --                                             | 1.3<br>(0.8 to 1.9)                           | 16.9<br>(6.3 to 29.2)                             | -0.1<br>(-8.4 to 8.8)                               |
| Developmental intellectual disability                                               | 5.3<br>(4.2 to 6.5)              | --                                             | 0.8<br>(0.6 to 1.0)                           | 5.3<br>(-0.6 to 11.2)                             | -5.7<br>(-10.9 to -0.2)                             |
| Epilepsy                                                                            | 1.8<br>(0.8 to 2.6)              | --                                             | 0.6<br>(0.3 to 1.1)                           | 6.1<br>(-54.1 to 136.2)                           | -5.5<br>(-60.0 to 117.4)                            |
| Guillain-Barre syndrome                                                             | < 0.05<br>(< 0.05 to < 0.05)     | --                                             | < 0.05<br>(< 0.05 to < 0.05)                  | 23.7<br>(17.0 to 31.8)                            | -0.1<br>(-0.3 to -0.1)                              |
| Hearing loss                                                                        | 42.0<br>(39.2 to 44.7)           | --                                             | 1.1<br>(0.7 to 1.5)                           | 41.6<br>(35.6 to 47.5)                            | -0.8<br>(-3.6 to 2.2)                               |
| Heart failure                                                                       | 2.5<br>(2.2 to 2.8)              | --                                             | 0.3<br>(0.2 to 0.4)                           | 53.0<br>(42.3 to 64.3)                            | -6.7<br>(-13.5 to -0.1)                             |
| Infertility                                                                         | 3.2<br>(2.4 to 4.3)              | --                                             | < 0.05<br>(< 0.05 to < 0.05)                  | 12.9<br>(2.0 to 26.5)                             | -1.5<br>(-10.4 to 11.7)                             |
| Pelvic inflammatory disease                                                         | < 0.05<br>(< 0.05 to < 0.05)     | --                                             | < 0.05<br>(< 0.05 to < 0.05)                  | 13.0<br>(4.9 to 22.8)                             | -1.9<br>(-8.9 to 6.0)                               |
| Vision loss                                                                         | 36.5<br>(34.5 to 38.8)           | --                                             | 1.0<br>(0.7 to 1.5)                           | 25.7<br>(20.9 to 30.5)                            | -1.3<br>(-4.4 to 1.9)                               |

We did not calculate incidence for the nine impairments, certain NTDs, and causes with only birth prevalence. Blank cells mean that no estimate is available.

† Incidence for aggregate causes represents the sum of the incidence of the causes below the aggregate.

‡ Incidence estimates for stroke represent first-ever stroke only.

^ Incidence of HIV/AIDS represents new infections of HIV only and does not include new infections of Tuberculosis in HIV positive cases.



SR Table 14: Prevalence, incidence, and YLDs for 2016, percentage change of YLD counts and percentage change of age-standardised YLD rates between 2006 and 2016 by cause and impairments, for all ages, Bulgaria.

| Cause                                                                                | Prevalence in thousands (95% UI)       | Incidence in thousands (95% UI)            | YLDs in thousands (95% UI)           |                                                   |                                                     |
|--------------------------------------------------------------------------------------|----------------------------------------|--------------------------------------------|--------------------------------------|---------------------------------------------------|-----------------------------------------------------|
|                                                                                      | 2016 counts                            | 2016 counts                                | 2016 counts                          | Percentage change in counts between 2006 and 2016 | Percentage change in age-standardised rates between |
| <b>All causes</b>                                                                    | <b>6,989.9</b><br>(6,974.9 to 7,006.4) | <b>39,038.4†</b><br>(37,766.5 to 40,480.0) | <b>1,004.6</b><br>(748.0 to 1,296.2) | <b>0.2</b><br>(-1.2 to 1.7)                       | <b>0.1</b><br>(-1.6 to 1.8)                         |
| <b>Communicable, maternal, neonatal, and nutritional disorders</b>                   | <b>3,564.7</b><br>(3,448.4 to 3,698.6) | <b>13,474.6†</b><br>(12,342.7 to 14,718.7) | <b>39.5</b><br>(28.1 to 53.7)        | <b>-12.1</b><br>(-16.7 to -6.9)                   | <b>-5.5</b><br>(-11.1 to 0.7)                       |
| <b>HIV/AIDS and tuberculosis</b>                                                     | <b>1,835.9</b><br>(1,676.4 to 1,950.0) | <b>1.7†</b><br>(1.5 to 1.9)                | <b>0.5</b><br>(0.3 to 0.8)           | <b>-18.5</b><br>(-34.7 to -0.1)                   | <b>-15.8</b><br>(-32.7 to 3.5)                      |
| Tuberculosis                                                                         | 1,729.1<br>(1,601.5 to 1,873.5)        | 1.6†<br>(1.4 to 1.8)                       | 0.3<br>(0.2 to 0.4)                  | -28.2<br>(-44.3 to -7.4)                          | -27.7<br>(-44.0 to -6.6)                            |
| Drug-susceptible tuberculosis                                                        | 1.0<br>(0.8 to 1.1)                    | 1.5<br>(1.4 to 1.7)                        | 0.3<br>(0.2 to 0.4)                  | -28.4<br>(-45.3 to -6.7)                          | -27.9<br>(-44.9 to -5.9)                            |
| Multidrug-resistant tuberculosis without extensive drug resistance                   | < 0.05<br>(< 0.05 to 0.1)              | < 0.05<br>(< 0.05 to 0.1)                  | < 0.05<br>(< 0.05 to < 0.05)         | -31.9<br>(-88.0 to 346.0)                         | -31.9<br>(-88.0 to 341.8)                           |
| Extensively drug-resistant tuberculosis                                              | < 0.05<br>(< 0.05 to < 0.05)           | < 0.05<br>(< 0.05 to < 0.05)               | < 0.05<br>(< 0.05 to < 0.05)         | 109.8<br>(-63.0 to 1,275.5)                       | 109.8<br>(-63.1 to 1,262.4)                         |
| Latent tuberculosis infection                                                        | 1,728.1<br>(1,600.6 to 1,872.5)        | --                                         | --                                   | --                                                | --                                                  |
| HIV/AIDS                                                                             | 1.3<br>(0.8 to 2.1)                    | 0.1 <sup>a</sup><br>(< 0.05 to 0.1)        | 0.2<br>(0.1 to 0.5)                  | 3.1<br>(-25.7 to 26.1)                            | 11.4<br>(-19.6 to 37.8)                             |
| Drug-susceptible HIV/AIDS - Tuberculosis                                             | < 0.05<br>(< 0.05 to < 0.05)           | < 0.05<br>(< 0.05 to < 0.05)               | < 0.05<br>(< 0.05 to < 0.05)         | -44.6<br>(-50.0 to -38.2)                         | -39.6<br>(-45.4 to -32.5)                           |
| Multidrug-resistant HIV/AIDS - Tuberculosis without extensive drug resistance        | < 0.05<br>(< 0.05 to < 0.05)           | < 0.05<br>(< 0.05 to < 0.05)               | < 0.05<br>(< 0.05 to < 0.05)         | -47.1<br>(-91.1 to 252.8)                         | -42.3<br>(-90.2 to 285.7)                           |
| Extensively drug-resistant HIV/AIDS - Tuberculosis                                   | < 0.05<br>(< 0.05 to < 0.05)           | < 0.05<br>(< 0.05 to < 0.05)               | < 0.05<br>(< 0.05 to < 0.05)         | 62.9<br>(-72.5 to 986.6)                          | 77.9<br>(-69.9 to 1,087.9)                          |
| HIV/AIDS resulting in other diseases                                                 | 1.3<br>(0.8 to 2.1)                    | 0.1<br>(< 0.05 to 0.1)                     | 0.2<br>(0.1 to 0.5)                  | 3.6<br>(-25.6 to 26.6)                            | 12.0<br>(-19.4 to 37.9)                             |
| <b>Diarrhoea, lower respiratory infections, and other common infectious diseases</b> | <b>246.3</b><br>(232.7 to 260.9)       | <b>12,792.1†</b><br>(11,651.3 to 14,000.9) | <b>11.3</b><br>(7.7 to 15.5)         | <b>-6.1</b><br>(-8.7 to -3.0)                     | <b>-0.6</b><br>(-3.7 to 2.8)                        |
| Diarrhoeal diseases                                                                  | 38.0<br>(35.3 to 41.3)                 | 2,487.8<br>(2,318.2 to 2,709.8)            | 4.2<br>(2.9 to 5.9)                  | 0.4<br>(-5.1 to 6.2)                              | 3.9<br>(-2.5 to 10.5)                               |
| Intestinal infectious diseases                                                       | < 0.05<br>(< 0.05 to < 0.05)           | 0.1†<br>(0.1 to 0.2)                       | < 0.05<br>(< 0.05 to < 0.05)         | 8.6<br>(-4.4 to 23.5)                             | 6.3<br>(-6.2 to 20.0)                               |
| Typhoid fever                                                                        | < 0.05<br>(< 0.05 to < 0.05)           | < 0.05<br>(< 0.05 to < 0.05)               | < 0.05<br>(< 0.05 to < 0.05)         | 30.5<br>(7.8 to 56.4)                             | 33.1<br>(11.1 to 58.8)                              |
| Paratyphoid fever                                                                    | < 0.05<br>(< 0.05 to < 0.05)           | 0.1<br>(0.1 to 0.1)                        | < 0.05<br>(< 0.05 to < 0.05)         | 0.5<br>(-14.8 to 18.3)                            | -1.3<br>(-15.2 to 14.3)                             |
| Other intestinal infectious diseases                                                 | --                                     | --                                         | < 0.05<br>(< 0.05 to < 0.05)         | -31.1<br>(-47.5 to -12.1)                         | -40.8<br>(-58.6 to -17.4)                           |
| Lower respiratory infections                                                         | 7.9<br>(7.3 to 8.5)                    | 351.4<br>(321.9 to 382.7)                  | 0.5<br>(0.3 to 0.7)                  | 1.0<br>(-10.0 to 12.1)                            | -2.6<br>(-13.2 to 9.1)                              |
| Upper respiratory infections                                                         | 129.3<br>(114.6 to 145.7)              | 9,584.6<br>(8,479.8 to 10,830.9)           | 3.2<br>(1.9 to 5.0)                  | -7.6<br>(-12.2 to -1.8)                           | -0.3<br>(-5.2 to 5.3)                               |
| Otitis media                                                                         | 66.6<br>(60.1 to 73.4)                 | 268.9<br>(222.2 to 325.3)                  | 1.9<br>(1.2 to 2.8)                  | -16.2<br>(-22.5 to -9.7)                          | -8.4<br>(-15.0 to -1.6)                             |
| Meningitis                                                                           | 5.5<br>(4.8 to 6.2)                    | 0.7<br>(0.6 to 0.8)                        | 0.7<br>(0.5 to 0.9)                  | -11.1<br>(-13.4 to -8.8)                          | -5.5<br>(-8.0 to -3.0)                              |
| Pneumococcal meningitis                                                              | 2.1<br>(1.8 to 2.5)                    | 0.1<br>(0.1 to 0.1)                        | 0.3<br>(0.2 to 0.4)                  | -15.1<br>(-19.4 to -11.0)                         | -9.5<br>(-14.3 to -5.1)                             |
| H influenzae type B meningitis                                                       | 0.6<br>(0.5 to 0.7)                    | < 0.05<br>(< 0.05 to 0.1)                  | 0.1<br>(0.1 to 0.1)                  | -18.3<br>(-23.6 to -13.0)                         | -12.9<br>(-18.6 to -7.1)                            |
| Meningococcal infection                                                              | 0.8<br>(0.6 to 1.0)                    | 0.1<br>(0.1 to 0.1)                        | 0.1<br>(0.1 to 0.1)                  | -9.1<br>(-12.7 to -5.4)                           | -3.4<br>(-7.3 to 1.0)                               |
| Other meningitis                                                                     | 2.0<br>(1.6 to 2.5)                    | 0.4<br>(0.4 to 0.5)                        | 0.2<br>(0.1 to 0.3)                  | -1.0<br>(-5.2 to 4.7)                             | 4.7<br>(0.3 to 10.2)                                |
| Encephalitis                                                                         | 5.8<br>(4.0 to 8.3)                    | 2.6<br>(2.3 to 2.9)                        | 0.6<br>(0.4 to 0.8)                  | -7.6<br>(-18.5 to 5.3)                            | -3.8<br>(-14.6 to 8.9)                              |
| Diphtheria                                                                           | < 0.05<br>(< 0.05 to < 0.05)           | < 0.05<br>(< 0.05 to < 0.05)               | < 0.05<br>(< 0.05 to < 0.05)         | -25.1<br>(-61.2 to 37.8)                          | -21.1<br>(-55.8 to 33.2)                            |
| Whooping cough                                                                       | 0.4<br>(0.3 to 0.5)                    | 2.9<br>(2.2 to 3.6)                        | < 0.05<br>(< 0.05 to < 0.05)         | -11.1<br>(-31.6 to 15.5)                          | -6.6<br>(-28.3 to 21.7)                             |
| Tetanus                                                                              | < 0.05<br>(< 0.05 to < 0.05)           | < 0.05<br>(< 0.05 to < 0.05)               | < 0.05<br>(< 0.05 to < 0.05)         | -46.0<br>(-61.8 to -26.7)                         | -41.1<br>(-58.9 to -21.0)                           |
| Measles                                                                              | < 0.05<br>(0.0 to < 0.05)              | < 0.05<br>(0.0 to < 0.05)                  | < 0.05<br>(0.0 to < 0.05)            | -62.2<br>(-100.0 to 372.4)                        | -60.7<br>(-100.0 to 391.1)                          |
| Varicella and herpes zoster                                                          | 6.0<br>(5.3 to 6.7)                    | 93.0<br>(89.2 to 97.2)                     | 0.2<br>(0.1 to 0.4)                  | 1.4<br>(-10.6 to 15.4)                            | 0.4<br>(-11.8 to 15.3)                              |
| <b>Neglected tropical diseases and malaria</b>                                       | <b>2.2</b><br>(0.6 to 7.6)             | <b>0.3†</b><br>(0.1 to 1.1)                | <b>0.1</b><br>(< 0.05 to 0.5)        | <b>-56.0</b><br>(-94.4 to 175.7)                  | <b>-54.5</b><br>(-94.3 to 214.2)                    |
| Malaria                                                                              | --                                     | --                                         | --                                   | --                                                | --                                                  |
| Chagas disease                                                                       | --                                     | --                                         | --                                   | --                                                | --                                                  |
| Leishmaniasis                                                                        | < 0.05<br>(< 0.05 to < 0.05)           | < 0.05<br>(< 0.05 to < 0.05)               | < 0.05<br>(< 0.05 to < 0.05)         | -61.0<br>(-86.5 to -15.4)                         | -61.3<br>(-85.6 to -17.3)                           |
| Visceral leishmaniasis                                                               | < 0.05<br>(< 0.05 to < 0.05)           | < 0.05<br>(< 0.05 to < 0.05)               | < 0.05<br>(< 0.05 to < 0.05)         | -61.0<br>(-86.5 to -15.4)                         | -61.3<br>(-85.6 to -17.3)                           |
| Cutaneous and mucocutaneous leishmaniasis                                            | --                                     | --                                         | --                                   | --                                                | --                                                  |
| African trypanosomiasis                                                              | --                                     | --                                         | --                                   | --                                                | --                                                  |
| Schistosomiasis                                                                      | --                                     | --                                         | --                                   | --                                                | --                                                  |
| Cysticercosis                                                                        | --                                     | --                                         | --                                   | --                                                | --                                                  |
| Cystic echinococcosis                                                                | 1.4<br>(0.3 to 5.6)                    | 0.3<br>(0.1 to 1.1)                        | 0.1<br>(< 0.05 to 0.5)               | -56.0<br>(-94.4 to 177.0)                         | -54.5<br>(-94.3 to 214.7)                           |
| Lymphatic filariasis                                                                 | --                                     | --                                         | --                                   | --                                                | --                                                  |
| Onchocerciasis                                                                       | --                                     | --                                         | --                                   | --                                                | --                                                  |
| Trachoma                                                                             | --                                     | --                                         | --                                   | --                                                | --                                                  |
| Dengue                                                                               | --                                     | --                                         | --                                   | --                                                | --                                                  |
| Yellow fever                                                                         | --                                     | --                                         | --                                   | --                                                | --                                                  |
| Rabies                                                                               | < 0.05<br>(< 0.05 to < 0.05)           | < 0.05<br>(< 0.05 to < 0.05)               | < 0.05<br>(< 0.05 to < 0.05)         | -52.4<br>(-65.8 to -30.9)                         | -62.6<br>(-73.3 to -47.9)                           |
| Intestinal nematode infections                                                       | --                                     | --                                         | --                                   | --                                                | --                                                  |
| Ascariasis                                                                           | --                                     | --                                         | --                                   | --                                                | --                                                  |

| Cause                                                                   | Prevalence in thousands (95% UI)              | Incidence in thousands (95% UI)                   | YLDs in thousands (95% UI)                |                                                   |                                                     |
|-------------------------------------------------------------------------|-----------------------------------------------|---------------------------------------------------|-------------------------------------------|---------------------------------------------------|-----------------------------------------------------|
|                                                                         | 2016 counts                                   | 2016 counts                                       | 2016 counts                               | Percentage change in counts between 2006 and 2016 | Percentage change in age-standardised rates between |
| Trichuriasis                                                            | --                                            | --                                                | --                                        | --                                                | --                                                  |
| Hookworm disease                                                        | --                                            | --                                                | --                                        | --                                                | --                                                  |
| Food-borne trematodiasis                                                | --                                            | --                                                | --                                        | --                                                | --                                                  |
| Leprosy                                                                 | --                                            | --                                                | --                                        | --                                                | --                                                  |
| Ebola virus disease                                                     | --                                            | --                                                | --                                        | --                                                | --                                                  |
| Zika virus disease                                                      | --                                            | --                                                | --                                        | --                                                | --                                                  |
| Guinea worm disease                                                     | --                                            | --                                                | --                                        | --                                                | --                                                  |
| Other neglected tropical diseases                                       | --                                            | --                                                | < 0.05<br>(< 0.05 to < 0.05)              | --                                                | --                                                  |
| <b>Maternal disorders</b>                                               | <b>6.3</b><br><b>(4.9 to 7.8)</b>             | <b>72.7†</b><br><b>(61.1 to 87.6)</b>             | <b>0.3</b><br><b>(0.2 to 0.5)</b>         | <b>-9.8</b><br><b>(-31.0 to 19.2)</b>             | <b>2.7</b><br><b>(-21.5 to 35.0)</b>                |
| Maternal haemorrhage                                                    | 3.0<br>(1.8 to 4.7)                           | 11.5<br>(8.8 to 15.0)                             | 0.1<br>(0.1 to 0.2)                       | 0.6<br>(-29.8 to 46.9)                            | 16.2<br>(-19.7 to 69.4)                             |
| Maternal sepsis and other pregnancy related infections                  | 1.1<br>(0.8 to 1.5)                           | 7.3<br>(5.4 to 10.1)                              | < 0.05<br>(< 0.05 to 0.1)                 | -22.4<br>(-64.3 to 59.2)                          | -8.4<br>(-58.2 to 90.5)                             |
| Maternal hypertensive disorders                                         | 2.0<br>(1.2 to 2.8)                           | 8.0<br>(6.4 to 10.0)                              | 0.1<br>(< 0.05 to 0.2)                    | -11.6<br>(-47.1 to 54.8)                          | -1.0<br>(-40.0 to 71.4)                             |
| Maternal obstructed labour and uterine rupture                          | < 0.05<br>(< 0.05 to 0.1)                     | 2.0<br>(1.2 to 3.3)                               | < 0.05<br>(< 0.05 to < 0.05)              | -7.5<br>(-54.0 to 79.5)                           | 4.3<br>(-47.3 to 101.2)                             |
| Maternal abortion, miscarriage, and ectopic pregnancy                   | 0.4<br>(0.2 to 0.5)                           | 43.8<br>(33.1 to 58.6)                            | < 0.05<br>(< 0.05 to 0.1)                 | -8.1<br>(-47.8 to 71.8)                           | 2.0<br>(-42.4 to 89.5)                              |
| Other maternal disorders                                                | --                                            | --                                                | < 0.05<br>(< 0.05 to 0.1)                 | -15.9<br>(-35.9 to 11.2)                          | -3.9<br>(-26.5 to 26.4)                             |
| <b>Neonatal disorders</b>                                               | <b>61.0</b><br><b>(48.4 to 76.5)</b>          | --                                                | <b>11.2</b><br><b>(7.3 to 16.4)</b>       | <b>-10.1</b><br><b>(-20.5 to 2.0)</b>             | <b>-2.5</b><br><b>(-13.8 to 10.9)</b>               |
| Neonatal preterm birth complications                                    | 39.0<br>(30.8 to 52.7)                        | --                                                | 3.9<br>(2.5 to 5.7)                       | -13.0<br>(-32.0 to 9.7)                           | -4.9<br>(-26.3 to 20.5)                             |
| Neonatal encephalopathy due to birth asphyxia and trauma                | 28.3<br>(15.4 to 46.0)                        | --                                                | 5.1<br>(2.4 to 9.2)                       | -10.8<br>(-25.5 to 14.5)                          | -3.6<br>(-19.7 to 24.3)                             |
| Neonatal sepsis and other neonatal infections                           | 4.2<br>(1.9 to 8.9)                           | --                                                | 1.7<br>(0.7 to 4.1)                       | -0.4<br>(-16.7 to 36.5)                           | 7.8<br>(-10.0 to 46.7)                              |
| Hemolytic disease and other neonatal jaundice                           | 1.0<br>(0.8 to 1.1)                           | --                                                | 0.3<br>(0.2 to 0.4)                       | -11.5<br>(-17.7 to -3.6)                          | -4.2<br>(-11.1 to 4.9)                              |
| Other neonatal disorders                                                | --                                            | --                                                | 0.2<br>(0.1 to 0.3)                       | -8.1<br>(-23.8 to 11.9)                           | -6.0<br>(-22.1 to 14.5)                             |
| <b>Nutritional deficiencies</b>                                         | <b>909.3</b><br><b>(821.1 to 978.3)</b>       | <b>38.4†</b><br><b>(30.6 to 46.6)</b>             | <b>13.6</b><br><b>(8.7 to 20.6)</b>       | <b>-17.2</b><br><b>(-26.2 to -7.3)</b>            | <b>-10.9</b><br><b>(-22.4 to 2.1)</b>               |
| Protein-energy malnutrition                                             | 11.9<br>(7.5 to 19.2)                         | 6.5<br>(4.1 to 10.3)                              | 0.6<br>(0.4 to 1.1)                       | -12.0<br>(-50.9 to 48.4)                          | -9.9<br>(-49.6 to 51.5)                             |
| Iodine deficiency                                                       | 63.9<br>(56.1 to 72.8)                        | 0.7<br>(0.7 to 0.8)                               | 1.6<br>(1.1 to 2.3)                       | -6.6<br>(-15.8 to 3.8)                            | -2.3<br>(-12.4 to 8.3)                              |
| Vitamin A deficiency                                                    | 36.9<br>(29.1 to 46.4)                        | 31.2<br>(24.0 to 39.4)                            | --                                        | --                                                | --                                                  |
| Iron-deficiency anaemia                                                 | 771.2<br>(687.6 to 850.4)                     | --                                                | 11.3<br>(7.0 to 17.6)                     | -18.8<br>(-28.9 to -7.8)                          | -11.8<br>(-24.6 to 2.6)                             |
| Other nutritional deficiencies                                          | --                                            | --                                                | < 0.05<br>(< 0.05 to < 0.05)              | -12.1<br>(-52.3 to 52.0)                          | -10.4<br>(-51.3 to 55.0)                            |
| <b>Other communicable, maternal, neonatal, and nutritional diseases</b> | <b>1,533.2</b><br><b>(1,427.3 to 1,661.9)</b> | <b>569.4</b><br><b>(495.4 to 658.2)</b>           | <b>2.5</b><br><b>(1.6 to 4.0)</b>         | <b>-9.3</b><br><b>(-14.4 to -3.7)</b>             | <b>-2.9</b><br><b>(-8.9 to 3.1)</b>                 |
| Sexually transmitted diseases excluding HIV                             | 1,187.3<br>(1,094.2 to 1,311.3)               | 510.5<br>(441.8 to 597.9)                         | 1.9<br>(1.2 to 3.1)                       | -8.5<br>(-14.4 to -2.2)                           | -2.6<br>(-9.2 to 3.8)                               |
| Syphilis                                                                | 8.3<br>(6.8 to 10.0)                          | 5.0<br>(3.6 to 6.8)                               | 0.3<br>(0.2 to 0.5)                       | 3.7<br>(-13.7 to 24.5)                            | -0.7<br>(-16.1 to 16.8)                             |
| Chlamydial infection                                                    | 86.6<br>(67.2 to 109.2)                       | 66.7<br>(52.4 to 83.6)                            | 0.4<br>(0.2 to 0.6)                       | -12.2<br>(-22.4 to -0.6)                          | -3.0<br>(-14.4 to 9.5)                              |
| Gonococcal infection                                                    | 71.3<br>(53.7 to 93.5)                        | 242.4<br>(176.5 to 325.3)                         | 0.3<br>(0.1 to 0.5)                       | -13.2<br>(-24.1 to -0.2)                          | -1.1<br>(-14.0 to 13.3)                             |
| Trichomoniasis                                                          | 162.0<br>(141.1 to 185.5)                     | 134.2<br>(116.8 to 155.4)                         | 0.2<br>(0.1 to 0.4)                       | -8.0<br>(-14.6 to -1.0)                           | -2.0<br>(-9.1 to 5.3)                               |
| Genital herpes                                                          | 895.2<br>(768.6 to 1,059.4)                   | 32.1<br>(26.7 to 39.0)                            | 0.2<br>(0.1 to 0.5)                       | -1.1<br>(-7.7 to 5.7)                             | -0.1<br>(-7.0 to 7.2)                               |
| Other sexually transmitted diseases                                     | 27.4<br>(21.5 to 34.7)                        | 30.1<br>(25.3 to 35.5)                            | 0.6<br>(0.4 to 0.9)                       | -12.5<br>(-23.3 to -1.3)                          | -4.7<br>(-16.4 to 7.0)                              |
| Hepatitis                                                               | 410.4<br>(354.7 to 483.6)                     | 58.9<br>(39.8 to 74.0)                            | 0.1<br>(< 0.05 to 0.1)                    | -42.2<br>(-52.6 to -28.2)                         | -36.9<br>(-51.4 to -17.5)                           |
| Acute hepatitis A                                                       | 2.5<br>(1.1 to 3.6)                           | 32.9<br>(14.7 to 46.4)                            | < 0.05<br>(< 0.05 to < 0.05)              | -46.2<br>(-66.5 to -13.3)                         | -38.0<br>(-64.8 to 3.0)                             |
| Hepatitis B                                                             | 296.7<br>(243.2 to 367.8)                     | 23.1<br>(17.6 to 30.1)                            | < 0.05<br>(< 0.05 to < 0.05)              | -39.3<br>(-48.6 to -28.0)                         | -36.9<br>(-46.7 to -25.4)                           |
| Hepatitis C                                                             | 111.1<br>(99.7 to 123.1)                      | 1.4<br>(1.3 to 1.6)                               | < 0.05<br>(< 0.05 to < 0.05)              | -22.1<br>(-24.2 to -20.2)                         | -13.1<br>(-15.2 to -11.3)                           |
| Acute hepatitis E                                                       | 0.1<br>(0.1 to 0.1)                           | 1.5<br>(1.2 to 1.8)                               | < 0.05<br>(< 0.05 to < 0.05)              | -41.6<br>(-47.4 to -36.1)                         | -35.4<br>(-40.8 to -29.4)                           |
| Other infectious diseases                                               | 26.2<br>(22.9 to 29.1)                        | < 0.05<br>(< 0.05 to < 0.05)                      | 0.5<br>(0.3 to 0.8)                       | -6.5<br>(-18.8 to 8.6)                            | 1.7<br>(-14.3 to 21.2)                              |
| <b>Non-communicable diseases</b>                                        | <b>6,798.7</b><br><b>(6,775.2 to 6,823.4)</b> | <b>24,422.4†</b><br><b>(23,743.2 to 25,093.8)</b> | <b>834.9</b><br><b>(623.1 to 1,073.2)</b> | <b>0.3</b><br><b>(-1.3 to 2.2)</b>                | <b>0.1</b><br><b>(-1.9 to 2.3)</b>                  |
| <b>Neoplasms</b>                                                        | <b>97.6</b><br><b>(92.9 to 102.6)</b>         | <b>36.0</b><br><b>(35.0 to 37.2)</b>              | <b>10.7</b><br><b>(8.0 to 13.8)</b>       | <b>11.7</b><br><b>(6.1 to 17.4)</b>               | <b>7.1</b><br><b>(1.6 to 12.4)</b>                  |
| Lip and oral cavity cancer                                              | 1.9<br>(1.7 to 2.2)                           | 0.5<br>(0.5 to 0.6)                               | 0.2<br>(0.1 to 0.3)                       | -2.4<br>(-15.6 to 12.8)                           | -5.5<br>(-17.9 to 9.4)                              |
| Nasopharynx cancer                                                      | 0.1<br>(0.1 to 0.2)                           | < 0.05<br>(< 0.05 to 0.1)                         | < 0.05<br>(< 0.05 to < 0.05)              | -5.8<br>(-18.6 to 8.6)                            | -6.3<br>(-20.7 to 10.3)                             |
| Other pharynx cancer                                                    | 1.1<br>(0.9 to 1.3)                           | 0.3<br>(0.3 to 0.4)                               | 0.1<br>(0.1 to 0.2)                       | 30.0<br>(8.2 to 53.7)                             | 27.2<br>(5.9 to 49.2)                               |
| Oesophageal cancer                                                      | 0.3<br>(0.2 to 0.3)                           | 0.2<br>(0.2 to 0.3)                               | 0.1<br>(< 0.05 to 0.1)                    | 4.5<br>(-6.3 to 16.2)                             | -0.3<br>(-10.4 to 10.5)                             |
| Stomach cancer                                                          | 2.8<br>(2.3 to 3.4)                           | 1.6<br>(1.4 to 1.9)                               | 0.4<br>(0.3 to 0.6)                       | -17.4<br>(-33.8 to 2.8)                           | -22.5<br>(-36.4 to -4.4)                            |
| Colon and rectum cancer                                                 | 18.2<br>(16.7 to 19.8)                        | 5.1<br>(4.7 to 5.6)                               | 1.7<br>(1.3 to 2.2)                       | 16.4<br>(1.9 to 32.1)                             | 9.1<br>(-4.0 to 24.1)                               |
| Liver cancer                                                            | 0.3<br>(0.2 to 0.3)                           | 0.8<br>(0.7 to 0.9)                               | 0.2<br>(0.1 to 0.2)                       | 4.4<br>(-5.8 to 15.1)                             | -1.2<br>(-10.9 to 9.2)                              |
| Liver cancer due to hepatitis B                                         | 0.2<br>(0.2 to 0.3)                           | 0.2<br>(0.2 to 0.3)                               | 0.1<br>(< 0.05 to 0.1)                    | 4.1<br>(-7.6 to 17.1)                             | -0.5<br>(-11.1 to 11.5)                             |

| Cause                                              | Prevalence in thousands (95% UI)              | Incidence in thousands (95% UI)          | YLDs in thousands (95% UI)             |                                                   |                                                     |
|----------------------------------------------------|-----------------------------------------------|------------------------------------------|----------------------------------------|---------------------------------------------------|-----------------------------------------------------|
|                                                    | 2016 counts                                   | 2016 counts                              | 2016 counts                            | Percentage change in counts between 2006 and 2016 | Percentage change in age-standardised rates between |
| Liver cancer due to hepatitis C                    | 0.2<br>(0.1 to 0.2)                           | 0.2<br>(0.1 to 0.2)                      | < 0.05<br>(< 0.05 to 0.1)              | 5.2<br>(-6.5 to 18.1)                             | -2.1<br>(-12.8 to 9.2)                              |
| Liver cancer due to alcohol use                    | 0.2<br>(0.2 to 0.3)                           | 0.2<br>(0.2 to 0.3)                      | 0.1<br>(< 0.05 to 0.1)                 | 5.4<br>(-5.5 to 18.2)                             | -0.1<br>(-10.4 to 11.9)                             |
| Liver cancer due to other causes                   | 0.1<br>(0.1 to 0.1)                           | 0.1<br>(0.1 to 0.2)                      | < 0.05<br>(< 0.05 to < 0.05)           | 1.9<br>(-10.2 to 15.3)                            | -3.0<br>(-14.5 to 9.5)                              |
| Gallbladder and biliary tract cancer               | 0.2<br>(0.2 to 0.3)                           | 0.2<br>(0.2 to 0.3)                      | 0.1<br>(< 0.05 to 0.1)                 | -1.2<br>(-13.5 to 16.0)                           | -8.2<br>(-19.3 to 6.6)                              |
| Pancreatic cancer                                  | 0.9<br>(0.8 to 1.0)                           | 1.1<br>(1.1 to 1.2)                      | 0.2<br>(0.2 to 0.3)                    | 9.3<br>(-7.7 to 27.9)                             | 2.9<br>(-11.6 to 18.4)                              |
| Larynx cancer                                      | 2.2<br>(2.0 to 2.5)                           | 0.6<br>(0.6 to 0.7)                      | 0.2<br>(0.2 to 0.3)                    | -0.1<br>(-22.2 to 26.7)                           | -3.8<br>(-24.1 to 20.3)                             |
| Tracheal, bronchus, and lung cancer                | 4.5<br>(4.1 to 4.9)                           | 3.6<br>(3.3 to 3.9)                      | 0.8<br>(0.6 to 1.1)                    | -4.2<br>(-20.6 to 15.3)                           | -9.0<br>(-24.9 to 9.4)                              |
| Malignant skin melanoma                            | 2.8<br>(2.3 to 3.3)                           | 0.6<br>(0.5 to 0.7)                      | 0.2<br>(0.1 to 0.3)                    | 41.6<br>(17.4 to 68.0)                            | 36.5<br>(12.8 to 62.8)                              |
| Non-melanoma skin cancer                           | 1.0<br>(0.8 to 1.2)                           | 4.2<br>(3.7 to 4.6)                      | < 0.05<br>(< 0.05 to 0.1)              | 34.4<br>(20.7 to 50.4)                            | 22.2<br>(10.4 to 35.5)                              |
| Non-melanoma skin cancer (squamous-cell carcinoma) | 0.6<br>(0.6 to 0.7)                           | 0.6<br>(0.6 to 0.7)                      | < 0.05<br>(< 0.05 to < 0.05)           | 35.9<br>(20.9 to 53.4)                            | 23.3<br>(10.6 to 38.1)                              |
| Non-melanoma skin cancer (basal-cell carcinoma)    | 0.5<br>(0.4 to 0.8)                           | 3.6<br>(3.1 to 4.0)                      | < 0.05<br>(< 0.05 to < 0.05)           | 25.9<br>(-11.2 to 78.4)                           | 16.2<br>(-15.6 to 60.7)                             |
| Breast cancer                                      | 20.2<br>(18.2 to 22.7)                        | 4.2<br>(3.8 to 4.8)                      | 1.8<br>(1.3 to 2.3)                    | 9.5<br>(-4.2 to 25.6)                             | 4.4<br>(-8.9 to 19.6)                               |
| Cervical cancer                                    | 3.8<br>(3.3 to 4.4)                           | 1.0<br>(0.8 to 1.1)                      | 0.4<br>(0.2 to 0.5)                    | -14.8<br>(-30.1 to 4.5)                           | -15.0<br>(-31.3 to 6.2)                             |
| Uterine cancer                                     | 10.3<br>(9.0 to 11.9)                         | 2.2<br>(1.9 to 2.5)                      | 0.8<br>(0.5 to 1.1)                    | 32.9<br>(8.6 to 64.9)                             | 28.4<br>(4.6 to 57.2)                               |
| Ovarian cancer                                     | 2.1<br>(1.8 to 2.4)                           | 0.7<br>(0.6 to 0.8)                      | 0.3<br>(0.2 to 0.4)                    | -0.9<br>(-27.4 to 31.8)                           | -2.6<br>(-28.6 to 28.7)                             |
| Prostate cancer                                    | 8.8<br>(7.0 to 11.1)                          | 2.3<br>(1.9 to 2.8)                      | 0.9<br>(0.6 to 1.2)                    | 20.3<br>(-2.8 to 48.0)                            | 10.2<br>(-10.7 to 34.6)                             |
| Testicular cancer                                  | 1.3<br>(1.1 to 1.5)                           | 0.2<br>(0.2 to 0.3)                      | 0.1<br>(0.1 to 0.1)                    | 5.5<br>(-18.1 to 35.3)                            | 13.8<br>(-12.0 to 46.9)                             |
| Kidney cancer                                      | 2.4<br>(2.2 to 2.7)                           | 0.7<br>(0.6 to 0.7)                      | 0.2<br>(0.2 to 0.3)                    | 17.7<br>(2.7 to 34.6)                             | 15.5<br>(1.1 to 32.1)                               |
| Bladder cancer                                     | 6.0<br>(5.5 to 6.6)                           | 1.5<br>(1.4 to 1.6)                      | 0.5<br>(0.4 to 0.7)                    | 19.6<br>(1.6 to 39.1)                             | 12.5<br>(-3.7 to 29.1)                              |
| Brain and nervous system cancer                    | 1.5<br>(1.0 to 1.8)                           | 0.7<br>(0.5 to 0.8)                      | 0.2<br>(0.1 to 0.3)                    | 5.4<br>(-11.1 to 20.5)                            | 4.2<br>(-11.9 to 17.4)                              |
| Thyroid cancer                                     | 2.1<br>(1.9 to 2.4)                           | 0.4<br>(0.4 to 0.5)                      | 0.1<br>(0.1 to 0.2)                    | 21.6<br>(-0.3 to 48.6)                            | 22.4<br>(-0.5 to 49.8)                              |
| Mesothelioma                                       | < 0.05<br>(< 0.05 to < 0.05)                  | < 0.05<br>(< 0.05 to < 0.05)             | < 0.05<br>(< 0.05 to < 0.05)           | 1.2<br>(-7.9 to 9.9)                              | 0.3<br>(-8.3 to 9.0)                                |
| Hodgkin lymphoma                                   | 1.0<br>(0.8 to 1.3)                           | 0.2<br>(0.2 to 0.3)                      | 0.1<br>(0.1 to 0.1)                    | 14.0<br>(-8.6 to 42.8)                            | 25.4<br>(-3.6 to 64.1)                              |
| Non-Hodgkin's lymphoma                             | 3.8<br>(3.2 to 4.2)                           | 0.9<br>(0.8 to 1.0)                      | 0.3<br>(0.2 to 0.4)                    | 73.3<br>(48.7 to 100.9)                           | 69.1<br>(44.4 to 96.6)                              |
| Multiple myeloma                                   | 0.5<br>(0.4 to 0.6)                           | 0.2<br>(0.1 to 0.2)                      | 0.1<br>(0.1 to 0.1)                    | 36.3<br>(16.8 to 61.6)                            | 31.6<br>(11.4 to 56.6)                              |
| Leukaemia                                          | 2.5<br>(2.3 to 2.9)                           | 0.7<br>(0.7 to 0.8)                      | 0.3<br>(0.2 to 0.5)                    | 27.6<br>(13.5 to 45.0)                            | 23.4<br>(9.3 to 40.5)                               |
| Acute lymphoid leukaemia                           | 0.3<br>(0.2 to 0.4)                           | 0.1<br>(0.1 to 0.1)                      | < 0.05<br>(< 0.05 to 0.1)              | 55.9<br>(23.0 to 105.0)                           | 73.3<br>(23.4 to 158.7)                             |
| Chronic lymphoid leukaemia                         | 1.0<br>(0.8 to 1.2)                           | 0.2<br>(0.2 to 0.3)                      | 0.1<br>(0.1 to 0.2)                    | 27.0<br>(0.8 to 55.5)                             | 17.5<br>(-5.0 to 41.7)                              |
| Acute myeloid leukaemia                            | 0.3<br>(0.2 to 0.3)                           | 0.2<br>(0.2 to 0.2)                      | 0.1<br>(< 0.05 to 0.1)                 | 23.3<br>(9.3 to 41.6)                             | 17.3<br>(-1.0 to 43.9)                              |
| Chronic myeloid leukaemia                          | 0.2<br>(0.2 to 0.2)                           | 0.1<br>(0.1 to 0.1)                      | < 0.05<br>(< 0.05 to < 0.05)           | 1.0<br>(-16.5 to 20.1)                            | -3.8<br>(-19.2 to 13.6)                             |
| Other leukaemia                                    | 0.7<br>(0.6 to 0.9)                           | 0.2<br>(0.1 to 0.2)                      | 0.1<br>(0.1 to 0.1)                    | 30.8<br>(10.8 to 56.3)                            | 19.9<br>(2.2 to 40.8)                               |
| Other neoplasms                                    | 3.1<br>(2.8 to 3.4)                           | 0.9<br>(0.8 to 1.0)                      | 0.3<br>(0.2 to 0.4)                    | 17.3<br>(2.9 to 33.4)                             | 19.2<br>(3.4 to 37.2)                               |
| <b>Cardiovascular diseases</b>                     | <b>1,192.2</b><br><b>(1,143.6 to 1,242.4)</b> | <b>130.8†</b><br><b>(124.4 to 137.2)</b> | <b>102.0</b><br><b>(74.3 to 132.7)</b> | <b>4.7</b><br><b>(0.5 to 8.8)</b>                 | <b>-1.6</b><br><b>(-5.0 to 1.8)</b>                 |
| Rheumatic heart disease                            | 1.2<br>(1.1 to 1.3)                           | 0.3<br>(0.3 to 0.3)                      | 0.1<br>(0.1 to 0.1)                    | -10.8<br>(-30.8 to 13.0)                          | -13.6<br>(-30.7 to 6.7)                             |
| Ischaemic heart disease                            | 387.3<br>(362.2 to 412.8)                     | 56.6<br>(52.7 to 60.2)                   | 21.5<br>(15.0 to 28.9)                 | 7.5<br>(3.2 to 12.1)                              | 0.5<br>(-3.6 to 4.7)                                |
| Cerebrovascular disease                            | 204.5<br>(191.2 to 217.8)                     | 38.4‡<br>(34.9 to 41.9)                  | 41.1<br>(29.0 to 52.0)                 | 4.8<br>(-3.4 to 13.1)                             | -3.5<br>(-10.5 to 3.4)                              |
| Ischaemic stroke                                   | 178.8<br>(160.2 to 198.5)                     | 29.1‡<br>(25.8 to 32.5)                  | 34.6<br>(24.2 to 44.2)                 | 6.5<br>(-3.4 to 15.9)                             | -2.4<br>(-10.8 to 5.9)                              |
| Hemorrhagic stroke                                 | 34.4<br>(30.6 to 38.5)                        | 9.3‡<br>(8.3 to 10.2)                    | 6.5<br>(4.7 to 8.4)                    | -3.2<br>(-13.8 to 7.6)                            | -8.6<br>(-18.1 to 1.3)                              |
| Hypertensive heart disease                         | 75.0<br>(62.5 to 90.5)                        | --                                       | 5.9<br>(4.0 to 8.3)                    | 8.3<br>(-0.7 to 18.4)                             | -1.1<br>(-8.9 to 7.0)                               |
| Cardiomyopathy and myocarditis                     | 9.5<br>(8.2 to 10.8)                          | 3.6†<br>(3.1 to 4.1)                     | 0.8<br>(0.6 to 1.2)                    | 3.4<br>(-7.5 to 15.3)                             | 0.5<br>(-9.4 to 11.1)                               |
| Myocarditis                                        | 4.3<br>(3.7 to 4.8)                           | 3.6<br>(3.1 to 4.1)                      | 0.3<br>(0.2 to 0.5)                    | -3.5<br>(-17.8 to 13.4)                           | 0.5<br>(-14.2 to 16.8)                              |
| Alcoholic cardiomyopathy                           | 0.8<br>(0.7 to 1.0)                           | --                                       | 0.1<br>(< 0.05 to 0.1)                 | 4.1<br>(-12.8 to 26.0)                            | 0.2<br>(-13.4 to 16.7)                              |
| Other cardiomyopathy                               | 5.4<br>(4.5 to 6.4)                           | --                                       | 0.4<br>(0.3 to 0.6)                    | 9.0<br>(-6.0 to 24.5)                             | 0.7<br>(-12.3 to 14.8)                              |
| Atrial fibrillation and flutter                    | 99.3<br>(85.9 to 115.5)                       | 7.9<br>(6.7 to 9.3)                      | 7.6<br>(5.2 to 10.5)                   | 10.6<br>(3.9 to 17.6)                             | 0.3<br>(-5.8 to 6.4)                                |
| Peripheral vascular disease                        | 253.5<br>(218.4 to 292.3)                     | 22.7<br>(19.2 to 26.7)                   | 1.2<br>(0.5 to 2.2)                    | 5.8<br>(-2.7 to 15.3)                             | -5.2<br>(-12.6 to 2.2)                              |
| Endocarditis                                       | 0.7<br>(0.6 to 0.8)                           | 1.5<br>(1.3 to 1.7)                      | 0.1<br>(< 0.05 to 0.1)                 | 1.1<br>(-15.2 to 20.0)                            | -1.3<br>(-12.3 to 10.7)                             |
| Other cardiovascular and circulatory diseases      | 462.0<br>(396.0 to 535.8)                     | --                                       | 23.7<br>(16.1 to 33.8)                 | -0.4<br>(-6.5 to 6.2)                             | -1.0<br>(-6.6 to 4.9)                               |
| <b>Chronic respiratory diseases</b>                | <b>642.3</b><br><b>(620.0 to 665.6)</b>       | <b>78.6†</b><br><b>(74.6 to 83.2)</b>    | <b>23.8</b><br><b>(18.6 to 29.4)</b>   | <b>2.3</b><br><b>(-3.4 to 8.2)</b>                | <b>2.7</b><br><b>(-2.2 to 7.5)</b>                  |
| Chronic obstructive pulmonary disease              | 369.0<br>(350.3 to 388.1)                     | 20.7<br>(19.6 to 21.8)                   | 10.9<br>(9.0 to 12.8)                  | 2.7<br>(-8.8 to 14.8)                             | -1.9<br>(-12.1 to 9.2)                              |
| Pneumoconiosis                                     | 4.8<br>(4.3 to 5.2)                           | 0.3<br>(0.2 to 0.3)                      | 0.7<br>(0.5 to 1.0)                    | 20.5<br>(1.2 to 41.9)                             | 12.7<br>(-4.3 to 31.4)                              |
| Silicosis                                          | 3.2<br>(2.8 to 3.6)                           | 0.2<br>(0.2 to 0.2)                      | 0.4<br>(0.3 to 0.6)                    | 23.9<br>(-2.4 to 56.6)                            | 15.0<br>(-8.6 to 43.9)                              |



| Cause                                                          | Prevalence in thousands (95% UI)        | Incidence in thousands (95% UI)       | YLDs in thousands (95% UI)       |                                                   |                                                     |
|----------------------------------------------------------------|-----------------------------------------|---------------------------------------|----------------------------------|---------------------------------------------------|-----------------------------------------------------|
|                                                                | 2016 counts                             | 2016 counts                           | 2016 counts                      | Percentage change in counts between 2006 and 2016 | Percentage change in age-standardised rates between |
| Asbestosis                                                     | 0.3<br>(0.3 to 0.4)                     | < 0.05<br>(< 0.05 to < 0.05)          | 0.1<br>(< 0.05 to 0.1)           | 6.3<br>(-0.3 to 13.5)                             | 1.6<br>(-5.2 to 7.9)                                |
| Coal workers pneumoconiosis                                    | 0.6<br>(0.5 to 0.7)                     | < 0.05<br>(< 0.05 to < 0.05)          | 0.1<br>(< 0.05 to 0.1)           | 13.4<br>(-22.5 to 64.5)                           | 9.6<br>(-21.6 to 51.6)                              |
| Other pneumoconiosis                                           | 0.7<br>(0.6 to 0.8)                     | < 0.05<br>(< 0.05 to 0.1)             | 0.1<br>(0.1 to 0.1)              | 21.0<br>(-16.0 to 71.9)                           | 12.6<br>(-19.4 to 57.5)                             |
| Asthma                                                         | 290.8<br>(270.4 to 313.6)               | 57.3<br>(53.5 to 61.6)                | 11.1<br>(7.4 to 15.8)            | 0.5<br>(-4.2 to 5.3)                              | 4.7<br>(-0.1 to 10.0)                               |
| Interstitial lung disease and pulmonary sarcoidosis            | 7.6<br>(6.9 to 8.4)                     | 0.3<br>(0.3 to 0.4)                   | 0.8<br>(0.5 to 1.1)              | 2.5<br>(-11.6 to 19.0)                            | 0.8<br>(-11.7 to 15.1)                              |
| Other chronic respiratory diseases                             | --                                      | --                                    | 0.4<br>(0.3 to 0.4)              | 22.9<br>(12.7 to 33.8)                            | 31.7<br>(21.2 to 42.1)                              |
| <b>Cirrhosis and other chronic liver diseases</b>              | <b>73.1<br/>(69.7 to 76.6)</b>          | <b>2.4<br/>(2.3 to 2.5)</b>           | <b>1.8<br/>(1.3 to 2.5)</b>      | <b>9.3<br/>(-0.6 to 20.3)</b>                     | <b>9.7<br/>(-0.3 to 21.2)</b>                       |
| Cirrhosis and other chronic liver diseases due to hepatitis B  | 12.9<br>(10.8 to 15.2)                  | 0.4<br>(0.4 to 0.5)                   | 0.3<br>(0.2 to 0.5)              | 12.2<br>(-10.9 to 40.9)                           | 11.5<br>(-11.7 to 39.1)                             |
| Cirrhosis and other chronic liver diseases due to hepatitis C  | 17.6<br>(12.9 to 23.1)                  | 0.6<br>(0.4 to 0.8)                   | 0.4<br>(0.2 to 0.6)              | 10.8<br>(-9.5 to 35.1)                            | 10.1<br>(-9.7 to 34.1)                              |
| Cirrhosis and other chronic liver diseases due to alcohol use  | 24.7<br>(20.2 to 29.6)                  | 0.8<br>(0.7 to 1.0)                   | 0.6<br>(0.4 to 0.9)              | 14.3<br>(-3.5 to 33.5)                            | 12.5<br>(-5.2 to 33.2)                              |
| Cirrhosis and other chronic liver diseases due to other causes | 17.9<br>(15.8 to 20.3)                  | 0.5<br>(0.4 to 0.6)                   | 0.5<br>(0.3 to 0.7)              | 1.2<br>(-15.9 to 19.8)                            | 6.8<br>(-11.1 to 27.3)                              |
| <b>Digestive diseases</b>                                      | <b>363.2<br/>(340.1 to 389.6)</b>       | <b>491.8†<br/>(456.6 to 528.6)</b>    | <b>15.0<br/>(10.7 to 20.0)</b>   | <b>5.5<br/>(-3.2 to 15.7)</b>                     | <b>2.8<br/>(-5.3 to 12.6)</b>                       |
| Peptic ulcer disease                                           | 134.8<br>(118.5 to 153.0)               | 10.3<br>(9.3 to 11.4)                 | 3.0<br>(1.9 to 4.4)              | 19.6<br>(-3.6 to 48.1)                            | 14.7<br>(-8.3 to 42.4)                              |
| Gastritis and duodenitis                                       | 123.2<br>(107.6 to 140.6)               | 100.7<br>(90.3 to 112.2)              | 2.8<br>(1.8 to 3.9)              | 20.7<br>(1.7 to 43.9)                             | 12.2<br>(-4.9 to 33.4)                              |
| Appendicitis                                                   | 0.4<br>(0.4 to 0.4)                     | 10.4<br>(9.7 to 11.1)                 | 0.1<br>(0.1 to 0.2)              | -14.4<br>(-28.8 to 4.5)                           | -3.8<br>(-26.8 to 26.5)                             |
| Paralytic ileus and intestinal obstruction                     | 0.1<br>(0.1 to 0.2)                     | 4.3<br>(3.9 to 4.7)                   | < 0.05<br>(< 0.05 to 0.1)        | 14.0<br>(3.6 to 26.4)                             | 7.7<br>(0.5 to 15.4)                                |
| Inguinal, femoral, and abdominal hernia                        | 77.8<br>(69.8 to 86.4)                  | 205.2<br>(176.9 to 233.1)             | 5.6<br>(3.8 to 7.8)              | -6.0<br>(-14.6 to 3.5)                            | -6.1<br>(-14.1 to 3.4)                              |
| Inflammatory bowel disease                                     | 10.3<br>(8.2 to 12.8)                   | 8.6<br>(6.9 to 10.5)                  | 1.5<br>(0.9 to 2.1)              | -2.8<br>(-15.8 to 11.5)                           | -1.2<br>(-14.6 to 13.1)                             |
| Vascular intestinal disorders                                  | 0.1<br>(0.1 to 0.1)                     | 0.9<br>(0.8 to 1.0)                   | < 0.05<br>(< 0.05 to 0.1)        | 17.7<br>(11.8 to 23.4)                            | 11.2<br>(6.5 to 15.7)                               |
| Gallbladder and biliary diseases                               | 28.1<br>(24.7 to 32.1)                  | 140.6<br>(121.5 to 162.4)             | 0.6<br>(0.4 to 0.8)              | 13.4<br>(-6.5 to 36.7)                            | 10.1<br>(-8.7 to 32.0)                              |
| Pancreatitis                                                   | 1.2<br>(1.1 to 1.4)                     | 10.9<br>(9.9 to 12.0)                 | 0.1<br>(0.1 to 0.2)              | 22.9<br>(8.9 to 39.0)                             | 19.6<br>(9.8 to 30.3)                               |
| Other digestive diseases                                       | --                                      | --                                    | 1.2<br>(0.9 to 1.6)              | 12.3<br>(3.5 to 22.7)                             | 6.5<br>(-2.0 to 16.1)                               |
| <b>Neurological disorders</b>                                  | <b>2,666.6<br/>(2,567.1 to 2,788.2)</b> | <b>1,080.9<br/>(937.2 to 1,241.9)</b> | <b>87.7<br/>(58.8 to 118.1)</b>  | <b>-3.4<br/>(-14.7 to 11.1)</b>                   | <b>-0.9<br/>(-14.7 to 17.1)</b>                     |
| Alzheimer's disease and other dementias                        | 76.4<br>(63.0 to 92.4)                  | 13.0<br>(10.7 to 16.0)                | 11.1<br>(7.8 to 14.9)            | 18.5<br>(11.8 to 26.0)                            | -0.9<br>(-5.7 to 3.9)                               |
| Parkinson's disease                                            | 16.9<br>(13.1 to 21.4)                  | 1.9<br>(1.5 to 2.5)                   | 1.9<br>(1.2 to 2.8)              | 8.6<br>(-5.4 to 23.2)                             | -0.9<br>(-13.9 to 12.6)                             |
| Epilepsy                                                       | 22.4<br>(4.9 to 42.5)                   | 2.2<br>(0.5 to 4.1)                   | 6.3<br>(1.2 to 14.9)             | -8.6<br>(-85.3 to 443.6)                          | -3.7<br>(-84.5 to 490.1)                            |
| Multiple sclerosis                                             | 3.1<br>(2.8 to 3.5)                     | 0.1<br>(0.1 to 0.1)                   | 0.8<br>(0.6 to 1.1)              | 7.3<br>(-8.1 to 26.8)                             | 8.0<br>(-8.6 to 28.9)                               |
| Motor neuron disease                                           | 0.2<br>(0.2 to 0.3)                     | < 0.05<br>(< 0.05 to 0.1)             | 0.1<br>(< 0.05 to 0.1)           | -1.0<br>(-4.9 to 3.5)                             | -1.7<br>(-5.8 to 2.6)                               |
| Migraine                                                       | 1,181.7<br>(1,108.0 to 1,252.9)         | 114.4<br>(106.2 to 123.8)             | 56.0<br>(36.5 to 78.5)           | -6.5<br>(-9.6 to -3.4)                            | -1.0<br>(-4.1 to 2.3)                               |
| Tension-type headache                                          | 1,815.8<br>(1,625.3 to 2,016.5)         | 949.1<br>(808.6 to 1,105.7)           | 10.2<br>(6.4 to 15.0)            | -5.1<br>(-10.1 to -0.1)                           | -1.4<br>(-6.4 to 3.5)                               |
| Other neurological disorders                                   | < 0.05<br>(< 0.05 to < 0.05)            | 0.1<br>(< 0.05 to 0.1)                | 1.3<br>(0.5 to 2.7)              | 3.4<br>(-65.3 to 236.7)                           | 15.6<br>(-68.1 to 361.8)                            |
| <b>Mental and substance use disorders</b>                      | <b>1,037.8<br/>(1,003.5 to 1,070.7)</b> | <b>385.8†<br/>(360.1 to 413.2)</b>    | <b>136.5<br/>(99.8 to 176.7)</b> | <b>-5.9<br/>(-8.2 to -3.5)</b>                    | <b>-0.4<br/>(-2.7 to 1.9)</b>                       |
| Schizophrenia                                                  | 19.2<br>(16.9 to 21.7)                  | 0.9<br>(0.8 to 1.0)                   | 12.1<br>(8.9 to 15.0)            | -1.7<br>(-9.8 to 7.0)                             | 1.3<br>(-7.2 to 10.2)                               |
| Alcohol use disorders                                          | 122.2<br>(107.6 to 138.3)               | 66.1<br>(57.0 to 74.7)                | 12.1<br>(8.3 to 16.6)            | -3.7<br>(-11.1 to 4.0)                            | 3.5<br>(-4.2 to 11.8)                               |
| Drug use disorders                                             | 45.1<br>(42.2 to 48.1)                  | 5.4<br>(4.9 to 5.9)                   | 8.7<br>(6.2 to 11.4)             | -4.4<br>(-12.6 to 4.3)                            | 4.8<br>(-4.5 to 15.3)                               |
| Opioid use disorders                                           | 12.0<br>(10.1 to 14.2)                  | 1.6<br>(1.4 to 1.9)                   | 4.9<br>(3.4 to 6.6)              | -0.5<br>(-10.9 to 11.5)                           | 5.0<br>(-6.4 to 18.3)                               |
| Cocaine use disorders                                          | 6.2<br>(5.5 to 7.1)                     | 0.3<br>(0.3 to 0.4)                   | 0.8<br>(0.5 to 1.2)              | -11.8<br>(-27.9 to 7.3)                           | -3.1<br>(-21.6 to 19.6)                             |
| Amphetamine use disorders                                      | 6.5<br>(4.9 to 8.4)                     | 0.4<br>(0.3 to 0.6)                   | 0.9<br>(0.5 to 1.4)              | -9.9<br>(-28.0 to 11.6)                           | 8.4<br>(-14.7 to 35.8)                              |
| Cannabis use disorders                                         | 17.2<br>(14.9 to 19.8)                  | 2.2<br>(1.9 to 2.6)                   | 0.5<br>(0.3 to 0.7)              | -8.9<br>(-22.5 to 8.1)                            | 10.2<br>(-7.0 to 31.3)                              |
| Other drug use disorders                                       | 4.6<br>(4.1 to 5.1)                     | 0.8<br>(0.7 to 0.9)                   | 1.6<br>(1.1 to 2.3)              | -6.8<br>(-24.9 to 14.5)                           | 4.5<br>(-17.2 to 29.4)                              |
| Depressive disorders                                           | 250.8<br>(237.3 to 267.2)               | 256.0<br>(232.3 to 280.7)             | 40.3<br>(28.1 to 54.7)           | -5.4<br>(-10.5 to 0.0)                            | -4.0<br>(-8.7 to 0.9)                               |
| Major depressive disorder                                      | 157.6<br>(143.2 to 172.7)               | 240.0<br>(216.9 to 264.3)             | 31.1<br>(21.5 to 42.5)           | -6.8<br>(-12.9 to 0.0)                            | -5.4<br>(-11.1 to 0.6)                              |
| Dysthymia                                                      | 97.3<br>(85.6 to 110.9)                 | 15.9<br>(13.9 to 18.2)                | 9.2<br>(6.1 to 13.2)             | -0.2<br>(-6.8 to 7.2)                             | 1.3<br>(-5.1 to 8.5)                                |
| Bipolar disorder                                               | 44.1<br>(38.5 to 50.3)                  | 3.0<br>(2.6 to 3.4)                   | 8.9<br>(5.5 to 12.9)             | -7.0<br>(-12.6 to -0.7)                           | -0.2<br>(-6.3 to 6.5)                               |
| Anxiety disorders                                              | 271.6<br>(247.1 to 297.1)               | 37.6<br>(34.9 to 40.7)                | 25.7<br>(17.9 to 34.6)           | -6.4<br>(-12.3 to 0.2)                            | -0.6<br>(-6.7 to 6.1)                               |
| Eating disorders                                               | 7.2<br>(5.8 to 8.7)                     | 3.0<br>(2.3 to 3.9)                   | 1.4<br>(0.9 to 2.1)              | -2.9<br>(-15.9 to 11.2)                           | 13.4<br>(-0.4 to 30.1)                              |
| Anorexia nervosa                                               | 1.4<br>(1.0 to 1.8)                     | 0.5<br>(0.4 to 0.7)                   | 0.3<br>(0.2 to 0.5)              | -9.7<br>(-30.0 to 19.7)                           | 11.0<br>(-12.3 to 45.9)                             |
| Bulimia nervosa                                                | 5.5<br>(4.2 to 7.3)                     | 2.5<br>(1.8 to 3.3)                   | 1.2<br>(0.7 to 1.8)              | -1.0<br>(-16.1 to 16.5)                           | 14.1<br>(-2.4 to 33.6)                              |
| Autistic spectrum disorders                                    | 58.5<br>(52.3 to 65.6)                  | 0.2<br>(0.1 to 0.3)                   | 8.6<br>(5.9 to 12.2)             | -6.6<br>(-10.7 to -2.3)                           | 0.8<br>(-3.6 to 5.9)                                |
| Autism                                                         | 18.9<br>(16.1 to 22.1)                  | < 0.05<br>(< 0.05 to < 0.05)          | 4.7<br>(3.1 to 6.8)              | -6.5<br>(-13.0 to 0.2)                            | 0.7<br>(-6.2 to 8.3)                                |
| Asperger syndrome and other autistic spectrum disorders        | 39.6<br>(33.0 to 47.5)                  | 0.2<br>(0.1 to 0.3)                   | 3.9<br>(2.6 to 5.7)              | -6.7<br>(-10.8 to -2.4)                           | 0.9<br>(-3.8 to 5.7)                                |

| Cause                                                      | Prevalence in thousands (95% UI)              | Incidence in thousands (95% UI)                   | YLDs in thousands (95% UI)              |                                                   |                                                     |
|------------------------------------------------------------|-----------------------------------------------|---------------------------------------------------|-----------------------------------------|---------------------------------------------------|-----------------------------------------------------|
|                                                            | 2016 counts                                   | 2016 counts                                       | 2016 counts                             | Percentage change in counts between 2006 and 2016 | Percentage change in age-standardised rates between |
| Attention-deficit/hyperactivity disorder                   | 40.4<br>(36.6 to 44.8)                        | 1.3<br>(1.2 to 1.6)                               | 0.5<br>(0.3 to 0.8)                     | -14.7<br>(-20.9 to -7.4)                          | 0.4<br>(-6.3 to 8.3)                                |
| Conduct disorder                                           | 26.9<br>(22.3 to 31.8)                        | 9.1<br>(7.2 to 10.8)                              | 3.3<br>(2.0 to 5.0)                     | -27.9<br>(-32.2 to -23.6)                         | 0.4<br>(-4.9 to 5.9)                                |
| Idiopathic developmental intellectual disability           | 59.8<br>(31.6 to 88.9)                        | --                                                | 2.5<br>(1.1 to 4.3)                     | -16.3<br>(-22.2 to -10.6)                         | -8.9<br>(-15.4 to -2.9)                             |
| Other mental and substance use disorders                   | 169.6<br>(150.7 to 194.1)                     | 3.4<br>(3.0 to 3.8)                               | 12.4<br>(8.4 to 17.5)                   | -2.5<br>(-6.9 to 1.7)                             | 0.2<br>(-4.6 to 4.8)                                |
| <b>Diabetes, urogenital, blood, and endocrine diseases</b> | <b>2,713.9</b><br><b>(2,661.2 to 2,769.4)</b> | <b>918.4†</b><br><b>(867.7 to 976.6)</b>          | <b>75.1</b><br><b>(53.2 to 101.2)</b>   | <b>2.8</b><br><b>(-2.1 to 8.4)</b>                | <b>0.0</b><br><b>(-4.4 to 5.0)</b>                  |
| Diabetes mellitus                                          | 407.4<br>(365.5 to 455.8)                     | 19.0<br>(16.9 to 21.2)                            | 35.7<br>(24.8 to 49.6)                  | 3.8<br>(-5.8 to 15.3)                             | -0.6<br>(-10.0 to 10.9)                             |
| Acute glomerulonephritis                                   | 0.1<br>(0.1 to 0.1)                           | 1.9<br>(1.7 to 2.2)                               | < 0.05<br>(< 0.05 to < 0.05)            | -6.0<br>(-10.6 to -1.1)                           | -0.8<br>(-5.5 to 3.7)                               |
| Chronic kidney disease                                     | 347.5<br>(310.2 to 390.6)                     | 23.3<br>(20.1 to 26.5)                            | 10.7<br>(7.7 to 14.0)                   | 18.1<br>(8.0 to 29.1)                             | 9.1<br>(0.6 to 18.3)                                |
| Chronic kidney disease due to diabetes mellitus            | 117.1<br>(95.1 to 139.7)                      | 8.1<br>(6.5 to 10.0)                              | 3.4<br>(2.4 to 4.6)                     | 16.0<br>(3.5 to 30.8)                             | 8.8<br>(-2.2 to 21.5)                               |
| Chronic kidney disease due to hypertension                 | 61.2<br>(50.6 to 72.6)                        | 5.3<br>(4.2 to 6.5)                               | 1.4<br>(1.0 to 1.9)                     | 30.4<br>(12.3 to 52.0)                            | 11.0<br>(-2.8 to 26.9)                              |
| Chronic kidney disease due to glomerulonephritis           | 61.1<br>(50.3 to 72.5)                        | 2.7<br>(2.1 to 3.4)                               | 2.5<br>(1.8 to 3.4)                     | 15.4<br>(3.1 to 28.9)                             | 9.7<br>(-1.0 to 20.9)                               |
| Chronic kidney disease due to other causes                 | 108.2<br>(87.1 to 130.8)                      | 7.2<br>(5.8 to 8.9)                               | 3.3<br>(2.3 to 4.5)                     | 17.7<br>(5.4 to 32.8)                             | 8.3<br>(-1.9 to 19.9)                               |
| Urinary diseases and male infertility                      | 250.4<br>(222.9 to 277.9)                     | 547.1†<br>(504.4 to 599.7)                        | 7.6<br>(5.0 to 10.9)                    | 1.9<br>(-3.7 to 8.0)                              | -2.0<br>(-6.9 to 3.3)                               |
| Interstitial nephritis and urinary tract infections        | 7.2<br>(6.4 to 8.1)                           | 371.7<br>(332.6 to 418.5)                         | 0.2<br>(0.1 to 0.4)                     | -7.9<br>(-20.0 to 5.5)                            | -0.4<br>(-12.9 to 13.4)                             |
| Urolithiasis                                               | 5.7<br>(5.0 to 6.4)                           | 149.3<br>(131.5 to 170.2)                         | 0.4<br>(0.3 to 0.6)                     | 0.2<br>(-16.9 to 19.9)                            | -0.2<br>(-15.6 to 17.0)                             |
| Benign prostatic hyperplasia                               | 207.8<br>(176.8 to 241.1)                     | 26.1<br>(21.5 to 31.4)                            | 6.7<br>(4.3 to 9.7)                     | 3.7<br>(-2.6 to 10.6)                             | -1.0<br>(-7.0 to 5.2)                               |
| Male infertility                                           | 21.9<br>(16.7 to 29.1)                        | --                                                | 0.1<br>(< 0.05 to 0.3)                  | -14.9<br>(-22.3 to -7.4)                          | -8.9<br>(-16.6 to -0.6)                             |
| Other urinary diseases                                     | --                                            | --                                                | 0.2<br>(0.1 to 0.3)                     | -20.0<br>(-29.4 to -9.4)                          | -17.9<br>(-26.8 to -8.6)                            |
| Gynecological diseases                                     | 865.4<br>(820.0 to 910.9)                     | 289.0†<br>(267.4 to 314.9)                        | 9.8<br>(6.7 to 13.9)                    | -9.6<br>(-13.5 to -5.5)                           | -2.0<br>(-6.1 to 2.5)                               |
| Uterine fibroids                                           | 91.6<br>(80.6 to 105.0)                       | 8.2<br>(7.0 to 9.6)                               | 1.0<br>(0.6 to 1.8)                     | -6.1<br>(-16.8 to 5.0)                            | -4.5<br>(-15.7 to 7.4)                              |
| Polycystic ovarian syndrome                                | 6.8<br>(5.2 to 9.0)                           | 3.2<br>(2.2 to 4.3)                               | 0.1<br>(< 0.05 to 0.1)                  | -6.0<br>(-16.4 to 6.6)                            | -1.1<br>(-12.2 to 11.9)                             |
| Female infertility                                         | 6.6<br>(2.4 to 15.0)                          | --                                                | < 0.05<br>(< 0.05 to 0.1)               | 1.8<br>(-27.6 to 58.9)                            | 16.6<br>(-16.9 to 74.6)                             |
| Endometriosis                                              | 2.8<br>(2.3 to 3.4)                           | 10.3<br>(7.8 to 13.4)                             | 0.3<br>(0.2 to 0.4)                     | -13.5<br>(-32.5 to 10.9)                          | -1.1<br>(-23.1 to 26.7)                             |
| Genital prolapse                                           | 314.3<br>(266.8 to 364.0)                     | 10.7<br>(9.0 to 12.6)                             | 1.0<br>(0.5 to 1.8)                     | 8.2<br>(-4.0 to 21.6)                             | 3.7<br>(-7.6 to 16.1)                               |
| Premenstrual syndrome                                      | 413.4<br>(390.1 to 436.5)                     | 138.6<br>(128.8 to 148.8)                         | 3.5<br>(2.1 to 5.4)                     | -12.8<br>(-18.7 to -5.8)                          | -2.2<br>(-8.8 to 5.5)                               |
| Other gynecological diseases                               | 115.2<br>(97.5 to 135.5)                      | 118.0<br>(98.0 to 141.8)                          | 4.0<br>(2.6 to 5.8)                     | -11.0<br>(-16.7 to -4.6)                          | -2.3<br>(-8.7 to 4.6)                               |
| Hemoglobinopathies and hemolytic anaemias                  | 1,271.8<br>(1,241.9 to 1,306.6)               | --                                                | 3.6<br>(2.3 to 5.3)                     | -4.6<br>(-17.0 to 9.5)                            | -5.5<br>(-18.8 to 9.5)                              |
| Thalassemias                                               | < 0.05<br>(< 0.05 to < 0.05)                  | --                                                | < 0.05<br>(< 0.05 to < 0.05)            | 8.6<br>(-12.5 to 31.7)                            | 16.3<br>(-6.7 to 42.2)                              |
| Thalassaemias trait                                        | 126.0<br>(113.7 to 139.2)                     | --                                                | 2.3<br>(1.5 to 3.5)                     | -2.2<br>(-18.3 to 15.8)                           | -5.3<br>(-20.9 to 13.7)                             |
| Sickle cell disorders                                      | < 0.05<br>(< 0.05 to 0.1)                     | --                                                | < 0.05<br>(< 0.05 to < 0.05)            | -12.7<br>(-19.6 to -5.7)                          | 3.9<br>(-5.6 to 14.6)                               |
| Sickle cell trait                                          | 100.7<br>(97.8 to 104.2)                      | --                                                | 0.4<br>(0.2 to 0.6)                     | -8.6<br>(-25.2 to 12.5)                           | -8.1<br>(-25.8 to 14.2)                             |
| G6PD deficiency                                            | 216.3<br>(196.7 to 238.9)                     | --                                                | < 0.05<br>(< 0.05 to < 0.05)            | -8.0<br>(-23.5 to 11.0)                           | -7.7<br>(-26.7 to 17.9)                             |
| G6PD trait                                                 | 828.7<br>(808.1 to 851.6)                     | --                                                | < 0.05<br>(< 0.05 to < 0.05)            | 4.6<br>(-23.8 to 42.1)                            | 11.2<br>(-20.4 to 53.0)                             |
| Other hemoglobinopathies and hemolytic anaemias            | 56.6<br>(50.5 to 62.2)                        | --                                                | 0.8<br>(0.5 to 1.3)                     | -8.9<br>(-20.5 to 3.9)                            | -4.9<br>(-18.5 to 10.8)                             |
| Endocrine, metabolic, blood, and immune disorders          | 241.1<br>(216.2 to 265.8)                     | 38.1<br>(33.7 to 43.1)                            | 7.8<br>(5.2 to 10.7)                    | 2.4<br>(-3.3 to 8.0)                              | 1.3<br>(-4.1 to 6.7)                                |
| <b>Musculoskeletal disorders</b>                           | <b>1,713.1</b><br><b>(1,639.4 to 1,799.5)</b> | <b>711.5</b><br><b>(633.7 to 798.1)</b>           | <b>197.2</b><br><b>(140.4 to 256.7)</b> | <b>3.4</b><br><b>(0.4 to 6.4)</b>                 | <b>2.0</b><br><b>(-0.7 to 4.6)</b>                  |
| Rheumatoid arthritis                                       | 31.9<br>(28.2 to 36.0)                        | 1.4<br>(1.2 to 1.6)                               | 7.3<br>(5.0 to 9.7)                     | 7.5<br>(-1.4 to 16.3)                             | 4.0<br>(-4.8 to 13.1)                               |
| Osteoarthritis                                             | 506.6<br>(473.2 to 540.5)                     | 20.6<br>(19.0 to 22.3)                            | 30.7<br>(21.7 to 41.6)                  | 7.6<br>(4.0 to 11.3)                              | 1.9<br>(-1.6 to 5.4)                                |
| Low back and neck pain                                     | 1,278.9<br>(1,193.7 to 1,366.1)               | 619.0<br>(542.9 to 698.7)                         | 151.9<br>(106.4 to 199.0)               | 2.7<br>(-1.1 to 6.5)                              | 2.2<br>(-1.2 to 5.4)                                |
| Low back pain                                              | 1,038.6<br>(921.3 to 1,168.8)                 | 542.4<br>(466.4 to 626.2)                         | 115.8<br>(82.0 to 153.5)                | 3.6<br>(-1.5 to 8.6)                              | 2.9<br>(-1.5 to 7.3)                                |
| Neck pain                                                  | 368.5<br>(317.3 to 429.1)                     | 76.6<br>(66.7 to 89.9)                            | 36.1<br>(24.8 to 50.8)                  | 0.1<br>(-2.4 to 2.7)                              | -0.1<br>(-2.4 to 2.0)                               |
| Gout                                                       | 42.1<br>(36.8 to 48.0)                        | 8.2<br>(7.1 to 9.3)                               | 1.3<br>(0.9 to 1.8)                     | 4.5<br>(-9.4 to 20.5)                             | 0.6<br>(-13.1 to 16.0)                              |
| Other musculoskeletal disorders                            | 70.9<br>(56.1 to 90.6)                        | 62.2<br>(48.2 to 83.7)                            | 6.0<br>(4.0 to 8.9)                     | -4.4<br>(-15.1 to 7.7)                            | -3.0<br>(-15.2 to 10.6)                             |
| <b>Other non-communicable diseases</b>                     | <b>5,810.6</b><br><b>(5,755.6 to 5,871.0)</b> | <b>20,586.2†</b><br><b>(19,925.5 to 21,248.9)</b> | <b>185.1</b><br><b>(128.7 to 260.8)</b> | <b>-0.6</b><br><b>(-1.9 to 0.6)</b>               | <b>-1.1</b><br><b>(-2.2 to 0.1)</b>                 |
| Congenital anomalies                                       | 78.5<br>(71.6 to 86.2)                        | --                                                | 8.6<br>(6.2 to 11.4)                    | -8.1<br>(-13.1 to -3.6)                           | -1.7<br>(-6.9 to 3.0)                               |
| Neural tube defects                                        | 4.5<br>(4.0 to 5.1)                           | --                                                | 1.3<br>(0.9 to 1.8)                     | -17.0<br>(-27.2 to -4.9)                          | -12.2<br>(-23.5 to 0.8)                             |
| Congenital heart anomalies                                 | 30.0<br>(26.5 to 33.9)                        | --                                                | 1.6<br>(0.7 to 2.7)                     | -0.3<br>(-9.0 to 9.2)                             | 5.2<br>(-3.8 to 15.2)                               |
| Orofacial clefts                                           | 2.3<br>(2.0 to 2.6)                           | --                                                | < 0.05<br>(< 0.05 to < 0.05)            | -18.2<br>(-28.2 to -7.9)                          | -13.3<br>(-23.9 to -2.5)                            |
| Down's syndrome                                            | 3.1<br>(2.6 to 3.6)                           | --                                                | 0.3<br>(0.2 to 0.4)                     | -4.3<br>(-11.9 to 4.3)                            | 3.7<br>(-5.1 to 13.7)                               |
| Turner syndrome                                            | 2.7<br>(2.3 to 3.1)                           | --                                                | < 0.05<br>(< 0.05 to 0.1)               | -12.8<br>(-34.7 to 16.2)                          | -3.1<br>(-29.5 to 30.6)                             |
| Klinefelter syndrome                                       | 3.0<br>(2.6 to 3.5)                           | --                                                | < 0.05<br>(< 0.05 to < 0.05)            | -6.2<br>(-25.3 to 17.1)                           | 4.6<br>(-16.3 to 31.2)                              |



| Cause                                         | Prevalence in thousands (95% UI)              | Incidence in thousands (95% UI)                | YLDs in thousands (95% UI)             |                                                   |                                                     |
|-----------------------------------------------|-----------------------------------------------|------------------------------------------------|----------------------------------------|---------------------------------------------------|-----------------------------------------------------|
|                                               | 2016 counts                                   | 2016 counts                                    | 2016 counts                            | Percentage change in counts between 2006 and 2016 | Percentage change in age-standardised rates between |
| Other chromosomal abnormalities               | 4.2<br>(3.6 to 5.0)                           | --                                             | 0.5<br>(0.3 to 0.7)                    | -10.4<br>(-22.7 to 4.9)                           | 5.4<br>(-9.3 to 23.6)                               |
| Congenital musculoskeletal and limb anomalies | 10.0<br>(9.1 to 11.0)                         | --                                             | 1.4<br>(1.0 to 1.9)                    | -8.0<br>(-17.0 to 1.8)                            | -3.4<br>(-12.3 to 6.3)                              |
| Urogenital congenital anomalies               | 4.9<br>(4.4 to 5.5)                           | --                                             | 0.1<br>(0.1 to 0.2)                    | -9.3<br>(-17.7 to -0.8)                           | -0.3<br>(-10.6 to 11.1)                             |
| Digestive congenital anomalies                | 13.5<br>(11.9 to 15.3)                        | --                                             | 0.6<br>(0.4 to 0.8)                    | -8.4<br>(-19.4 to 3.0)                            | -3.0<br>(-14.6 to 9.2)                              |
| Other congenital anomalies                    | 19.4<br>(12.1 to 29.6)                        | --                                             | 2.7<br>(1.8 to 3.9)                    | -7.2<br>(-15.4 to 1.5)                            | -2.1<br>(-10.9 to 6.8)                              |
| Skin and subcutaneous diseases                | 2,177.7<br>(2,115.4 to 2,238.7)               | 6,037.9<br>(5,639.7 to 6,462.9)                | 44.4<br>(29.9 to 64.6)                 | -7.2<br>(-9.2 to -5.4)                            | 1.5<br>(-0.4 to 3.6)                                |
| Dermatitis                                    | 220.6<br>(206.1 to 237.7)                     | 347.2<br>(316.9 to 380.6)                      | 7.7<br>(4.7 to 12.0)                   | -5.0<br>(-9.2 to -0.4)                            | 1.2<br>(-3.6 to 7.1)                                |
| Psoriasis                                     | 88.9<br>(84.4 to 93.7)                        | 11.0<br>(10.5 to 11.6)                         | 7.6<br>(5.5 to 9.9)                    | 1.5<br>(-4.9 to 8.8)                              | 4.8<br>(-2.2 to 12.4)                               |
| Cellulitis                                    | 3.1<br>(2.9 to 3.3)                           | 62.6<br>(58.4 to 66.7)                         | 0.2<br>(0.1 to 0.2)                    | -3.0<br>(-22.1 to 20.3)                           | 1.2<br>(-19.8 to 27.1)                              |
| Pyoderma                                      | 40.0<br>(38.5 to 41.5)                        | 1,073.3<br>(1,029.5 to 1,118.0)                | 0.2<br>(0.1 to 0.5)                    | 3.4<br>(-1.7 to 8.8)                              | 0.8<br>(-4.3 to 5.6)                                |
| Scabies                                       | 45.9<br>(40.7 to 51.8)                        | 138.9<br>(123.2 to 156.5)                      | 1.2<br>(0.7 to 1.8)                    | -10.6<br>(-15.1 to -5.9)                          | -1.5<br>(-6.0 to 3.2)                               |
| Fungal skin diseases                          | 755.7<br>(671.2 to 843.5)                     | 2,895.2<br>(2,514.1 to 3,314.2)                | 4.1<br>(1.6 to 8.6)                    | 1.2<br>(-0.4 to 2.9)                              | -0.0<br>(-1.1 to 1.0)                               |
| Viral skin diseases                           | 154.2<br>(148.3 to 160.3)                     | 233.9<br>(224.3 to 243.9)                      | 4.7<br>(2.9 to 6.9)                    | -9.0<br>(-11.8 to -5.9)                           | -0.3<br>(-3.2 to 2.8)                               |
| Acne vulgaris                                 | 368.2<br>(341.5 to 397.5)                     | 221.4<br>(194.0 to 256.4)                      | 9.5<br>(6.3 to 13.7)                   | -21.4<br>(-25.3 to -17.4)                         | 1.5<br>(-3.2 to 6.5)                                |
| Alopecia areata                               | 14.1<br>(13.6 to 14.6)                        | 24.6<br>(23.7 to 25.6)                         | 0.5<br>(0.3 to 0.7)                    | -6.1<br>(-14.6 to 4.3)                            | -0.2<br>(-9.7 to 10.5)                              |
| Pruritus                                      | 81.5<br>(71.9 to 93.1)                        | 63.9<br>(56.2 to 73.0)                         | 0.8<br>(0.4 to 1.6)                    | 0.4<br>(-4.7 to 5.7)                              | 1.5<br>(-3.4 to 6.4)                                |
| Urticaria                                     | 60.7<br>(53.9 to 67.9)                        | 107.6<br>(95.0 to 121.9)                       | 3.6<br>(2.4 to 5.2)                    | -6.4<br>(-11.7 to -1.1)                           | -0.1<br>(-5.1 to 5.4)                               |
| Decubitus ulcer                               | 3.6<br>(3.1 to 4.2)                           | 13.1<br>(11.2 to 15.2)                         | 0.6<br>(0.4 to 0.8)                    | 9.3<br>(-8.6 to 30.9)                             | 2.7<br>(-11.2 to 18.1)                              |
| Other skin and subcutaneous diseases          | 706.9<br>(684.2 to 729.0)                     | 845.1<br>(814.0 to 875.5)                      | 3.8<br>(1.9 to 6.9)                    | 5.4<br>(2.9 to 8.0)                               | 5.1<br>(2.6 to 7.6)                                 |
| Sense organ diseases                          | 2,630.5<br>(2,556.6 to 2,705.2)               | 821.8†<br>(777.8 to 869.4)                     | 98.6<br>(68.6 to 139.2)                | 2.1<br>(0.2 to 4.2)                               | -3.3<br>(-5.1 to -1.4)                              |
| Glaucoma                                      | 9.0<br>(7.3 to 10.9)                          | --                                             | 0.6<br>(0.4 to 0.9)                    | 10.3<br>(-4.2 to 26.6)                            | 0.2<br>(-13.0 to 14.4)                              |
| Cataract                                      | 160.3<br>(134.5 to 188.9)                     | --                                             | 7.4<br>(5.1 to 10.5)                   | 7.0<br>(0.8 to 14.0)                              | -4.3<br>(-9.6 to 1.6)                               |
| Macular degeneration                          | 5.5<br>(4.4 to 7.0)                           | --                                             | 0.3<br>(0.2 to 0.4)                    | 14.2<br>(-2.1 to 34.2)                            | 2.9<br>(-11.6 to 19.8)                              |
| Refraction and accommodation disorders        | 1,124.9<br>(942.6 to 1,325.1)                 | --                                             | 19.2<br>(11.9 to 30.5)                 | -2.4<br>(-8.2 to 4.7)                             | -4.5<br>(-9.8 to 1.7)                               |
| Age-related and other hearing loss            | 2,095.7<br>(2,012.4 to 2,180.9)               | --                                             | 58.0<br>(40.5 to 80.8)                 | 2.5<br>(0.1 to 4.8)                               | -3.6<br>(-5.9 to -1.5)                              |
| Other vision loss                             | 54.4<br>(46.8 to 63.0)                        | --                                             | 2.9<br>(2.0 to 4.0)                    | 6.5<br>(-0.6 to 14.6)                             | -0.1<br>(-6.7 to 6.8)                               |
| Other sense organ diseases                    | 328.1<br>(302.4 to 355.7)                     | 821.8<br>(777.8 to 869.4)                      | 10.1<br>(6.4 to 15.3)                  | 3.7<br>(-0.3 to 7.7)                              | 0.5<br>(-3.4 to 4.5)                                |
| Oral disorders                                | 4,403.7<br>(4,302.5 to 4,504.8)               | 13,726.6†<br>(13,200.4 to 14,229.1)            | 33.5<br>(21.2 to 49.2)                 | 3.0<br>(0.9 to 5.4)                               | -0.1<br>(-1.7 to 1.8)                               |
| Caries of deciduous teeth                     | 319.9<br>(274.9 to 366.4)                     | 1,266.1<br>(999.1 to 1,594.4)                  | 0.1<br>(0.1 to 0.2)                    | -2.4<br>(-9.6 to 5.5)                             | -1.7<br>(-9.1 to 6.3)                               |
| Caries of permanent teeth                     | 3,527.6<br>(3,381.8 to 3,677.8)               | 12,320.8<br>(11,878.9 to 12,706.1)             | 3.4<br>(1.5 to 6.5)                    | -8.3<br>(-10.5 to -6.1)                           | -3.1<br>(-5.4 to -0.9)                              |
| Periodontal disease                           | 650.2<br>(535.4 to 779.8)                     | 80.6<br>(63.3 to 101.4)                        | 4.2<br>(1.7 to 8.7)                    | 1.5<br>(-2.4 to 5.3)                              | -0.3<br>(-3.9 to 3.2)                               |
| Edentulism and severe tooth loss              | 787.2<br>(684.4 to 892.4)                     | 59.0<br>(49.3 to 69.6)                         | 21.4<br>(14.0 to 30.1)                 | 7.2<br>(4.0 to 10.4)                              | 1.0<br>(-1.9 to 3.8)                                |
| Other oral disorders                          | 148.9<br>(142.5 to 155.5)                     | --                                             | 4.3<br>(2.7 to 6.5)                    | -4.5<br>(-7.5 to -1.7)                            | -0.2<br>(-3.5 to 3.1)                               |
| <b>Injuries</b>                               | <b>3,706.9</b><br><b>(3,453.6 to 4,056.9)</b> | <b>1,141.5†</b><br><b>(1,062.8 to 1,217.0)</b> | <b>130.2</b><br><b>(89.4 to 180.1)</b> | <b>3.5</b><br><b>(1.5 to 5.2)</b>                 | <b>2.9</b><br><b>(0.9 to 4.8)</b>                   |
| <b>Transport injuries</b>                     | <b>456.1</b><br><b>(420.0 to 494.3)</b>       | <b>105.5</b><br><b>(96.8 to 115.0)</b>         | <b>21.8</b><br><b>(14.5 to 31.4)</b>   | <b>9.4</b><br><b>(7.4 to 11.4)</b>                | <b>9.8</b><br><b>(7.8 to 11.8)</b>                  |
| Road injuries                                 | 436.8<br>(400.8 to 473.2)                     | 102.6<br>(93.9 to 112.2)                       | 20.9<br>(13.9 to 30.1)                 | 10.1<br>(8.1 to 12.1)                             | 10.6<br>(8.6 to 12.5)                               |
| Pedestrian road injuries                      | 79.0<br>(68.8 to 91.2)                        | 13.4<br>(11.5 to 15.8)                         | 3.7<br>(2.4 to 5.3)                    | 6.5<br>(4.2 to 8.8)                               | 7.5<br>(5.0 to 9.8)                                 |
| Cyclist road injuries                         | 112.2<br>(94.3 to 132.8)                      | 28.2<br>(24.0 to 32.8)                         | 5.0<br>(3.3 to 7.3)                    | 8.7<br>(6.6 to 10.7)                              | 9.3<br>(7.1 to 11.2)                                |
| Motorcyclist road injuries                    | 50.8<br>(42.8 to 62.7)                        | 7.4<br>(6.0 to 9.1)                            | 2.3<br>(1.5 to 3.3)                    | -0.5<br>(-2.5 to 1.6)                             | 0.3<br>(-1.9 to 2.3)                                |
| Motor vehicle road injuries                   | 179.8<br>(150.5 to 208.5)                     | 49.4<br>(43.6 to 55.5)                         | 9.3<br>(6.2 to 13.2)                   | 17.4<br>(15.2 to 19.4)                            | 17.7<br>(15.5 to 19.8)                              |
| Other road injuries                           | 15.0<br>(12.9 to 17.6)                        | 4.2<br>(3.3 to 5.3)                            | 0.7<br>(0.4 to 1.0)                    | -9.9<br>(-11.8 to -8.0)                           | -11.0<br>(-12.8 to -9.2)                            |
| Other transport injuries                      | 19.3<br>(16.4 to 22.5)                        | 2.9<br>(2.6 to 3.4)                            | 0.9<br>(0.6 to 1.2)                    | -5.0<br>(-7.7 to -2.3)                            | -4.2<br>(-6.8 to -1.7)                              |
| <b>Unintentional injuries</b>                 | <b>3,152.4</b><br><b>(2,905.6 to 3,485.5)</b> | <b>1,006.2</b><br><b>(931.4 to 1,081.3)</b>    | <b>104.3</b><br><b>(71.5 to 145.1)</b> | <b>3.0</b><br><b>(0.9 to 4.8)</b>                 | <b>2.1</b><br><b>(0.1 to 4.0)</b>                   |
| Falls                                         | 1,904.9<br>(1,692.0 to 2,179.6)               | 656.3<br>(587.1 to 725.1)                      | 73.7<br>(51.9 to 100.8)                | 3.6<br>(1.6 to 5.4)                               | 1.7<br>(-0.3 to 3.6)                                |
| Drowning                                      | 3.3<br>(2.9 to 3.8)                           | 0.4<br>(0.3 to 0.4)                            | 0.1<br>(0.1 to 0.2)                    | -11.3<br>(-14.6 to -8.3)                          | -10.6<br>(-13.8 to -7.8)                            |
| Fire, heat, and hot substances                | 142.3<br>(123.7 to 165.9)                     | 12.1<br>(10.5 to 13.7)                         | 3.2<br>(2.1 to 5.0)                    | 1.5<br>(-2.9 to 4.7)                              | 2.2<br>(-2.3 to 5.7)                                |
| Poisonings                                    | 6.4<br>(5.4 to 7.6)                           | 5.5<br>(4.5 to 6.8)                            | 0.5<br>(0.3 to 0.8)                    | 23.5<br>(16.0 to 31.8)                            | 29.5<br>(21.2 to 38.3)                              |
| Exposure to mechanical forces                 | 713.9<br>(612.6 to 872.7)                     | 192.0<br>(171.6 to 215.8)                      | 15.6<br>(10.3 to 22.6)                 | 13.0<br>(10.0 to 15.8)                            | 13.2<br>(10.5 to 15.7)                              |
| Unintentional firearm injuries                | 6.1<br>(5.1 to 7.2)                           | 1.0<br>(0.7 to 1.3)                            | 0.2<br>(0.1 to 0.3)                    | 2.5<br>(-0.1 to 4.9)                              | 3.2<br>(0.8 to 5.4)                                 |
| Unintentional suffocation                     | 7.1<br>(5.7 to 8.7)                           | 0.9<br>(0.6 to 1.2)                            | 0.2<br>(0.1 to 0.4)                    | -8.2<br>(-10.3 to -6.1)                           | -6.0<br>(-8.4 to -4.0)                              |
| Other exposure to mechanical forces           | 700.8<br>(600.0 to 859.4)                     | 190.2<br>(170.1 to 213.5)                      | 15.1<br>(10.0 to 21.9)                 | 13.6<br>(10.6 to 16.3)                            | 13.8<br>(11.1 to 16.3)                              |



| Cause                                                                               | Prevalence in thousands (95% UI)        | Incidence in thousands (95% UI)       | YLDs in thousands (95% UI)              |                                                   |                                                     |
|-------------------------------------------------------------------------------------|-----------------------------------------|---------------------------------------|-----------------------------------------|---------------------------------------------------|-----------------------------------------------------|
|                                                                                     | 2016 counts                             | 2016 counts                           | 2016 counts                             | Percentage change in counts between 2006 and 2016 | Percentage change in age-standardised rates between |
| Adverse effects of medical treatment                                                | 1.5<br>(1.2 to 1.9)                     | 19.9<br>(17.5 to 22.7)                | 0.2<br>(0.1 to 0.3)                     | 16.0<br>(11.3 to 20.9)                            | 11.3<br>(7.2 to 15.2)                               |
| Animal contact                                                                      | 31.7<br>(27.9 to 36.9)                  | 25.3<br>(21.0 to 31.0)                | 0.9<br>(0.6 to 1.3)                     | -14.7<br>(-18.4 to -11.0)                         | -11.4<br>(-15.5 to -7.3)                            |
| Venomous animal contact                                                             | 11.5<br>(9.7 to 13.9)                   | 9.9<br>(7.4 to 12.7)                  | 0.6<br>(0.4 to 0.8)                     | -12.3<br>(-17.5 to -6.4)                          | -7.9<br>(-13.7 to -1.8)                             |
| Non-venomous animal contact                                                         | 20.2<br>(17.1 to 24.8)                  | 15.5<br>(12.5 to 19.1)                | 0.3<br>(0.2 to 0.5)                     | -19.1<br>(-22.1 to -16.7)                         | -18.9<br>(-21.8 to -16.4)                           |
| Foreign body                                                                        | 65.4<br>(55.2 to 75.7)                  | 34.4<br>(29.6 to 40.5)                | 2.2<br>(1.4 to 3.2)                     | -9.2<br>(-12.2 to -6.5)                           | -7.6<br>(-10.7 to -4.8)                             |
| Pulmonary aspiration and foreign body in airway                                     | 37.5<br>(29.6 to 47.6)                  | 8.6<br>(7.5 to 10.0)                  | 1.3<br>(0.8 to 2.0)                     | -13.7<br>(-16.4 to -11.1)                         | -11.9<br>(-14.8 to -9.3)                            |
| Foreign body in eyes                                                                | 4.6<br>(3.0 to 6.4)                     | 19.7<br>(15.3 to 25.2)                | 0.3<br>(0.1 to 0.4)                     | 0.7<br>(-2.6 to 3.9)                              | 2.8<br>(0.2 to 5.5)                                 |
| Foreign body in other body part                                                     | 23.3<br>(19.6 to 28.7)                  | 6.2<br>(5.1 to 7.3)                   | 0.6<br>(0.4 to 0.8)                     | -1.4<br>(-5.4 to 2.1)                             | 0.0<br>(-4.1 to 3.6)                                |
| Environmental heat and cold exposure                                                | 70.2<br>(60.3 to 83.6)                  | 12.4<br>(10.8 to 14.3)                | 2.3<br>(1.5 to 3.3)                     | -4.2<br>(-6.7 to -1.7)                            | -2.9<br>(-5.4 to -0.4)                              |
| Other unintentional injuries                                                        | 212.8<br>(173.0 to 258.5)               | 47.8<br>(41.1 to 54.8)                | 5.6<br>(3.7 to 8.3)                     | -15.2<br>(-17.6 to -12.7)                         | -9.9<br>(-12.8 to -6.6)                             |
| <b>Self-harm and interpersonal violence</b>                                         | <b>188.5</b><br><b>(172.6 to 203.9)</b> | <b>29.6†</b><br><b>(26.1 to 33.4)</b> | <b>3.9</b><br><b>(2.6 to 5.6)</b>       | <b>-11.0</b><br><b>(-12.8 to -9.4)</b>            | <b>-8.0</b><br><b>(-9.6 to -6.5)</b>                |
| Self-harm                                                                           | 17.4<br>(14.8 to 20.1)                  | 5.7<br>(5.0 to 6.5)                   | 0.7<br>(0.4 to 1.0)                     | -9.7<br>(-13.1 to -6.5)                           | -9.0<br>(-12.3 to -5.7)                             |
| Self-harm by firearm                                                                | 0.5<br>(0.4 to 0.5)                     | 0.1<br>(0.1 to 0.2)                   | < 0.05<br>(< 0.05 to < 0.05)            | -42.0<br>(-44.4 to -39.7)                         | -37.2<br>(-39.9 to -34.8)                           |
| Self-harm by other specified means                                                  | 17.0<br>(14.3 to 19.7)                  | 5.6<br>(5.0 to 6.3)                   | 0.7<br>(0.4 to 1.0)                     | -8.7<br>(-12.1 to -5.5)                           | -8.1<br>(-11.5 to -4.8)                             |
| Interpersonal violence                                                              | 171.0<br>(155.9 to 187.5)               | 23.9†<br>(20.6 to 27.5)               | 3.2<br>(2.2 to 4.6)                     | -11.3<br>(-13.0 to -9.8)                          | -7.8<br>(-9.4 to -6.4)                              |
| Assault by firearm                                                                  | 1.2<br>(1.1 to 1.4)                     | 0.2<br>(0.2 to 0.3)                   | < 0.05<br>(< 0.05 to 0.1)               | -14.6<br>(-16.8 to -12.6)                         | -12.5<br>(-14.8 to -10.4)                           |
| Assault by sharp object                                                             | 12.4<br>(10.1 to 14.7)                  | 2.8<br>(2.1 to 3.5)                   | 0.3<br>(0.2 to 0.4)                     | -11.6<br>(-14.4 to -9.3)                          | -9.4<br>(-12.0 to -7.2)                             |
| Sexual violence                                                                     | 95.5<br>(84.5 to 107.8)                 | --                                    | 0.8<br>(0.5 to 1.1)                     | -14.8<br>(-17.9 to -11.7)                         | -5.7<br>(-9.1 to -2.6)                              |
| Assault by other means                                                              | 62.0<br>(51.8 to 74.6)                  | 20.9<br>(17.9 to 24.1)                | 2.2<br>(1.4 to 3.1)                     | -10.0<br>(-11.7 to -8.4)                          | -8.4<br>(-10.3 to -6.8)                             |
| <b>Forces of nature, conflict and terrorism, and executions and police conflict</b> | <b>5.4</b><br><b>(3.4 to 8.2)</b>       | <b>0.1†</b><br><b>(0.1 to 0.2)</b>    | <b>0.1</b><br><b>(&lt; 0.05 to 0.4)</b> | <b>-19.9</b><br><b>(-34.5 to -13.3)</b>           | <b>-24.6</b><br><b>(-40.5 to -17.5)</b>             |
| Exposure to forces of nature                                                        | 4.5<br>(2.5 to 7.2)                     | --                                    | 0.1<br>(< 0.05 to 0.3)                  | -21.5<br>(-37.3 to -14.4)                         | -26.6<br>(-43.6 to -18.8)                           |
| Conflict and terrorism                                                              | --                                      | --                                    | --                                      | --                                                | --                                                  |
| Executions and police conflict                                                      | 1.0<br>(0.6 to 1.6)                     | 0.1<br>(0.1 to 0.2)                   | < 0.05<br>(< 0.05 to 0.1)               | -8.1<br>(-11.6 to -3.3)                           | -10.3<br>(-13.7 to -3.9)                            |
| <b>Impairments</b>                                                                  | --                                      | --                                    | --                                      | --                                                | --                                                  |
| Anaemia                                                                             | 1,418.0<br>(1,263.4 to 1,566.4)         | --                                    | 30.5<br>(20.3 to 44.2)                  | -2.2<br>(-12.8 to 9.1)                            | -4.1<br>(-14.4 to 7.9)                              |
| Developmental intellectual disability                                               | 140.0<br>(112.0 to 167.8)               | --                                    | 14.7<br>(10.9 to 19.3)                  | -10.2<br>(-13.9 to -6.3)                          | -2.7<br>(-6.9 to 1.8)                               |
| Epilepsy                                                                            | 36.5<br>(18.8 to 57.3)                  | --                                    | 11.5<br>(5.8 to 20.7)                   | -10.2<br>(-59.3 to 113.5)                         | -4.2<br>(-55.6 to 123.3)                            |
| Guillain-Barre syndrome                                                             | 0.1<br>(0.1 to 0.1)                     | --                                    | < 0.05<br>(< 0.05 to < 0.05)            | -1.2<br>(-4.1 to 1.6)                             | 0.1<br>(0.0 to 0.2)                                 |
| Hearing loss                                                                        | 2,167.8<br>(2,084.5 to 2,250.2)         | --                                    | 61.4<br>(43.1 to 85.1)                  | 1.4<br>(-0.9 to 3.5)                              | -4.1<br>(-6.3 to -2.2)                              |
| Heart failure                                                                       | 206.4<br>(178.1 to 241.0)               | --                                    | 19.2<br>(14.1 to 25.5)                  | 8.9<br>(1.7 to 16.8)                              | -0.5<br>(-6.7 to 6.3)                               |
| Infertility                                                                         | 74.3<br>(57.0 to 97.5)                  | --                                    | 0.5<br>(0.2 to 0.9)                     | -7.2<br>(-13.8 to -0.6)                           | -0.7<br>(-7.5 to 6.5)                               |
| Pelvic inflammatory disease                                                         | 3.0<br>(2.6 to 3.5)                     | --                                    | 0.4<br>(0.3 to 0.6)                     | -16.8<br>(-29.8 to -1.0)                          | -10.5<br>(-24.8 to 7.2)                             |
| Vision loss                                                                         | 1,369.4<br>(1,185.2 to 1,580.7)         | --                                    | 33.3<br>(22.6 to 49.2)                  | 0.5<br>(-3.6 to 4.8)                              | -3.1<br>(-7.2 to 1.2)                               |

We did not calculate incidence for the nine impairments, certain NTDs, and causes with only birth prevalence. Blank cells mean that no estimate is available.

† Incidence for aggregate causes represents the sum of the incidence of the causes below the aggregate.

‡ Incidence estimates for stroke represent first-ever stroke only.

^ Incidence of HIV/AIDS represents new infections of HIV only and does not include new infections of Tuberculosis in HIV positive cases.

SR Table 14: Prevalence, incidence, and YLDs for 2016, percentage change of YLD counts and percentage change of age-standardised YLD rates between 2006 and 2016 by cause and impairments, for all ages, Burkina Faso.

| Cause                                                                                | Prevalence in thousands (95% UI)          | Incidence in thousands (95% UI)               | YLDs in thousands (95% UI)             |                                                   |                                                     |
|--------------------------------------------------------------------------------------|-------------------------------------------|-----------------------------------------------|----------------------------------------|---------------------------------------------------|-----------------------------------------------------|
|                                                                                      | 2016 counts                               | 2016 counts                                   | 2016 counts                            | Percentage change in counts between 2006 and 2016 | Percentage change in age-standardised rates between |
| <b>All causes</b>                                                                    | <b>18,483.0</b><br>(18,464.7 to 18,502.4) | <b>135,274.5†</b><br>(127,948.3 to 143,582.1) | <b>1,788.3</b><br>(1,308.3 to 2,386.8) | <b>25.0</b><br>(21.5 to 28.7)                     | <b>-7.1</b><br>(-9.3 to -4.8)                       |
| <b>Communicable, maternal, neonatal, and nutritional disorders</b>                   | <b>16,992.5</b><br>(16,801.2 to 17,173.2) | <b>89,373.9†</b><br>(82,974.6 to 96,535.7)    | <b>557.4</b><br>(385.4 to 771.5)       | <b>3.5</b><br>(-1.8 to 8.4)                       | <b>-27.3</b><br>(-32.2 to -23.2)                    |
| <b>HIV/AIDS and tuberculosis</b>                                                     | <b>5,300.4</b><br>(4,581.9 to 5,895.3)    | <b>30.0†</b><br>(24.4 to 37.0)                | <b>16.3</b><br>(11.0 to 22.5)          | <b>-30.2</b><br>(-50.4 to -7.8)                   | <b>-49.2</b><br>(-66.3 to -28.9)                    |
| Tuberculosis                                                                         | 4,784.1<br>(4,146.9 to 5,492.6)           | 24.6†<br>(20.2 to 30.1)                       | 5.3<br>(3.4 to 7.4)                    | 28.4<br>(10.1 to 52.9)                            | -7.3<br>(-17.9 to 6.4)                              |
| Drug-susceptible tuberculosis                                                        | 16.9<br>(13.8 to 21.0)                    | 24.2<br>(19.8 to 29.8)                        | 5.2<br>(3.3 to 7.3)                    | 28.8<br>(9.5 to 53.8)                             | -7.1<br>(-18.2 to 7.8)                              |
| Multidrug-resistant tuberculosis without extensive drug resistance                   | 0.3<br>(0.1 to 0.7)                       | 0.4<br>(0.1 to 1.0)                           | 0.1<br>(< 0.05 to 0.2)                 | 12.4<br>(-58.1 to 235.5)                          | -19.3<br>(-69.7 to 137.3)                           |
| Extensively drug-resistant tuberculosis                                              | < 0.05<br>(< 0.05 to < 0.05)              | < 0.05<br>(< 0.05 to < 0.05)                  | < 0.05<br>(< 0.05 to < 0.05)           | 242.2<br>(27.7 to 920.6)                          | 145.2<br>(-7.5 to 616.4)                            |
| Latent tuberculosis infection                                                        | 4,766.9<br>(4,127.1 to 5,476.4)           | --                                            | --                                     | --                                                | --                                                  |
| HIV/AIDS                                                                             | 102.3<br>(86.1 to 120.1)                  | 5.5^<br>(2.3 to 10.7)                         | 11.1<br>(7.3 to 15.9)                  | -42.7<br>(-61.4 to -19.5)                         | -58.5<br>(-74.2 to -37.0)                           |
| Drug-susceptible HIV/AIDS - Tuberculosis                                             | 2.8<br>(1.7 to 4.4)                       | 4.0<br>(2.4 to 6.3)                           | 1.1<br>(0.6 to 1.9)                    | -45.8<br>(-57.4 to -32.5)                         | -56.3<br>(-65.5 to -45.8)                           |
| Multidrug-resistant HIV/AIDS - Tuberculosis without extensive drug resistance        | 0.1<br>(< 0.05 to 0.1)                    | 0.1<br>(< 0.05 to 0.2)                        | < 0.05<br>(< 0.05 to 0.1)              | -52.4<br>(-82.2 to 37.0)                          | -61.7<br>(-85.7 to 10.4)                            |
| Extensively drug-resistant HIV/AIDS - Tuberculosis                                   | < 0.05<br>(< 0.05 to < 0.05)              | < 0.05<br>(< 0.05 to < 0.05)                  | < 0.05<br>(< 0.05 to < 0.05)           | 44.9<br>(-45.7 to 317.3)                          | 16.8<br>(-56.3 to 236.2)                            |
| HIV/AIDS resulting in other diseases                                                 | 99.4<br>(82.9 to 117.6)                   | 5.5<br>(2.3 to 10.7)                          | 9.9<br>(6.5 to 14.6)                   | -42.3<br>(-62.3 to -15.6)                         | -58.7<br>(-75.2 to -33.5)                           |
| <b>Diarrhoea, lower respiratory infections, and other common infectious diseases</b> | <b>1,404.2</b><br>(1,341.3 to 1,483.9)    | <b>65,062.7†</b><br>(59,240.6 to 71,394.3)    | <b>79.6</b><br>(56.5 to 106.8)         | <b>15.6</b><br>(11.1 to 20.2)                     | <b>-10.7</b><br>(-13.3 to -7.9)                     |
| Diarrhoeal diseases                                                                  | 294.3<br>(274.2 to 318.2)                 | 19,625.4<br>(18,300.9 to 21,283.7)            | 33.1<br>(22.7 to 45.4)                 | 0.5<br>(-6.0 to 7.8)                              | -17.9<br>(-21.8 to -13.8)                           |
| Intestinal infectious diseases                                                       | 5.3<br>(4.1 to 6.6)                       | 110.0†<br>(87.5 to 135.0)                     | 0.8<br>(0.5 to 1.2)                    | -4.2<br>(-29.3 to 30.2)                           | -28.6<br>(-43.5 to -9.5)                            |
| Typhoid fever                                                                        | 4.8<br>(3.6 to 6.2)                       | 75.5<br>(59.4 to 94.9)                        | 0.7<br>(0.5 to 1.1)                    | -3.9<br>(-32.2 to 36.6)                           | -28.6<br>(-45.1 to -7.8)                            |
| Paratyphoid fever                                                                    | 1.5<br>(1.1 to 2.1)                       | 34.4<br>(25.6 to 46.0)                        | 0.1<br>(0.1 to 0.1)                    | 2.9<br>(-18.6 to 29.5)                            | -24.1<br>(-37.4 to -8.6)                            |
| Other intestinal infectious diseases                                                 | --                                        | --                                            | < 0.05<br>(< 0.05 to < 0.05)           | -37.7<br>(-56.3 to -11.6)                         | -48.7<br>(-60.9 to -33.3)                           |
| Lower respiratory infections                                                         | 21.7<br>(19.9 to 23.6)                    | 951.6<br>(865.0 to 1,046.5)                   | 1.3<br>(0.9 to 1.9)                    | 14.5<br>(0.4 to 29.9)                             | -10.8<br>(-18.6 to -1.0)                            |
| Upper respiratory infections                                                         | 559.1<br>(487.2 to 635.9)                 | 41,979.8<br>(36,472.6 to 47,932.3)            | 13.9<br>(8.2 to 22.0)                  | 40.6<br>(31.1 to 51.9)                            | 2.7<br>(-3.5 to 10.1)                               |
| Otitis media                                                                         | 452.5<br>(404.6 to 503.8)                 | 1,759.5<br>(1,360.9 to 2,261.5)               | 15.2<br>(9.6 to 22.5)                  | 25.4<br>(16.7 to 35.1)                            | -6.2<br>(-12.2 to 0.1)                              |
| Meningitis                                                                           | 107.5<br>(89.2 to 128.4)                  | 30.3<br>(26.2 to 36.2)                        | 9.7<br>(6.9 to 12.8)                   | 25.9<br>(17.6 to 34.2)                            | -7.0<br>(-12.7 to -1.3)                             |
| Pneumococcal meningitis                                                              | 41.2<br>(32.7 to 52.2)                    | 6.2<br>(4.6 to 8.3)                           | 3.7<br>(2.6 to 4.9)                    | 11.0<br>(-2.8 to 27.1)                            | -18.8<br>(-27.6 to -7.7)                            |
| H influenzae type B meningitis                                                       | 11.8<br>(8.9 to 15.8)                     | 2.8<br>(1.9 to 4.2)                           | 1.4<br>(1.0 to 1.9)                    | 17.3<br>(4.4 to 29.8)                             | -13.8<br>(-21.9 to -5.9)                            |
| Meningococcal infection                                                              | 43.6<br>(29.8 to 59.3)                    | 18.9<br>(15.4 to 23.1)                        | 3.3<br>(2.2 to 4.5)                    | 41.2<br>(28.5 to 55.9)                            | 5.2<br>(-4.0 to 15.9)                               |
| Other meningitis                                                                     | 10.9<br>(8.6 to 13.8)                     | 2.4<br>(1.7 to 3.3)                           | 1.3<br>(0.9 to 1.9)                    | 53.6<br>(36.1 to 75.5)                            | 16.0<br>(6.1 to 28.9)                               |
| Encephalitis                                                                         | 41.7<br>(27.0 to 61.8)                    | 19.3<br>(16.5 to 22.4)                        | 4.7<br>(3.2 to 6.2)                    | 37.5<br>(20.7 to 57.4)                            | 0.7<br>(-9.8 to 12.9)                               |
| Diphtheria                                                                           | < 0.05<br>(< 0.05 to < 0.05)              | < 0.05<br>(< 0.05 to < 0.05)                  | < 0.05<br>(< 0.05 to < 0.05)           | -19.0<br>(-70.9 to 126.9)                         | -34.9<br>(-72.3 to 50.7)                            |
| Whooping cough                                                                       | 6.6<br>(5.2 to 8.4)                       | 48.3<br>(37.6 to 61.3)                        | 0.3<br>(0.2 to 0.5)                    | -5.7<br>(-25.3 to 17.8)                           | -24.2<br>(-40.1 to -4.5)                            |
| Tetanus                                                                              | 0.3<br>(0.3 to 0.3)                       | 0.6<br>(0.3 to 1.0)                           | < 0.05<br>(< 0.05 to < 0.05)           | -9.5<br>(-36.8 to 25.5)                           | -29.1<br>(-43.8 to -10.7)                           |
| Measles                                                                              | 0.3<br>(0.1 to 0.7)                       | 11.2<br>(3.8 to 26.4)                         | < 0.05<br>(< 0.05 to 0.1)              | -15.0<br>(-49.6 to 40.4)                          | -32.7<br>(-60.1 to 11.1)                            |
| Varicella and herpes zoster                                                          | 17.1<br>(16.0 to 18.4)                    | 526.7<br>(489.9 to 567.2)                     | 0.5<br>(0.3 to 0.8)                    | 36.5<br>(16.1 to 59.5)                            | 0.7<br>(-10.9 to 12.6)                              |
| <b>Neglected tropical diseases and malaria</b>                                       | <b>7,907.4</b><br>(7,484.6 to 8,350.0)    | <b>8,298.7†</b><br>(6,842.7 to 10,124.2)      | <b>119.1</b><br>(82.5 to 166.7)        | <b>-35.5</b><br>(-43.6 to -27.2)                  | <b>-59.3</b><br>(-65.3 to -53.2)                    |
| Malaria                                                                              | 6,325.1<br>(5,578.5 to 7,123.2)           | 7,904.6<br>(6,472.5 to 9,736.7)               | 72.1<br>(51.0 to 101.0)                | -7.5<br>(-15.8 to 1.6)                            | -33.7<br>(-39.6 to -27.1)                           |
| Chagas disease                                                                       | --                                        | --                                            | --                                     | --                                                | --                                                  |
| Leishmaniasis                                                                        | 65.6<br>(55.2 to 81.7)                    | 4.3<br>(1.7 to 7.9)                           | 3.8<br>(2.4 to 5.7)                    | 18.3<br>(5.2 to 36.7)                             | -9.3<br>(-18.1 to 4.3)                              |
| Visceral leishmaniasis                                                               | < 0.05<br>(< 0.05 to < 0.05)              | < 0.05<br>(< 0.05 to < 0.05)                  | < 0.05<br>(< 0.05 to < 0.05)           | -31.6<br>(-81.8 to 162.6)                         | -47.9<br>(-86.3 to 112.3)                           |
| Cutaneous and mucocutaneous leishmaniasis                                            | 60.0<br>(47.8 to 79.2)                    | 4.3<br>(1.7 to 7.9)                           | 3.8<br>(2.4 to 5.7)                    | 18.3<br>(5.2 to 36.7)                             | -9.3<br>(-18.1 to 4.3)                              |
| African trypanosomiasis                                                              | < 0.05<br>(< 0.05 to 0.1)                 | < 0.05<br>(< 0.05 to < 0.05)                  | < 0.05<br>(< 0.05 to < 0.05)           | --                                                | --                                                  |
| Schistosomiasis                                                                      | 618.9<br>(551.7 to 689.2)                 | 228.8<br>(208.1 to 251.4)                     | 8.2<br>(4.5 to 14.1)                   | -82.3<br>(-84.5 to -79.1)                         | -87.6<br>(-89.2 to -85.2)                           |
| Cysticercosis                                                                        | 6.5<br>(4.8 to 8.3)                       | --                                            | 1.2<br>(0.7 to 1.9)                    | 17.0<br>(-11.0 to 51.3)                           | -14.9<br>(-33.2 to 6.3)                             |
| Cystic echinococcosis                                                                | 13.4<br>(3.3 to 44.2)                     | 2.8<br>(0.7 to 9.6)                           | 1.2<br>(0.3 to 4.5)                    | -20.6<br>(-86.3 to 354.5)                         | -42.2<br>(-90.4 to 227.7)                           |
| Lymphatic filariasis                                                                 | 160.7<br>(113.1 to 220.8)                 | 50.1<br>(44.7 to 55.3)                        | 11.6<br>(5.4 to 20.4)                  | -70.2<br>(-84.7 to -57.4)                         | -76.6<br>(-87.2 to -67.2)                           |
| Onchocerciasis                                                                       | --                                        | --                                            | --                                     | --                                                | --                                                  |
| Trachoma                                                                             | 8.9<br>(5.8 to 13.1)                      | --                                            | 0.8<br>(0.5 to 1.3)                    | -49.9<br>(-60.4 to -37.3)                         | -60.8<br>(-70.6 to -46.8)                           |
| Dengue                                                                               | 6.3<br>(2.9 to 11.4)                      | 105.3<br>(54.6 to 178.6)                      | 1.0<br>(0.4 to 2.1)                    | 190.5<br>(95.0 to 594.6)                          | 114.2<br>(50.6 to 401.2)                            |
| Yellow fever                                                                         | 0.1<br>(< 0.05 to 0.2)                    | 2.5<br>(0.7 to 6.4)                           | < 0.05<br>(< 0.05 to < 0.05)           | -29.9<br>(-49.7 to -1.1)                          | -48.1<br>(-60.6 to -31.6)                           |
| Rabies                                                                               | < 0.05<br>(< 0.05 to < 0.05)              | 0.1<br>(< 0.05 to 0.4)                        | < 0.05<br>(< 0.05 to < 0.05)           | -32.4<br>(-59.8 to 34.7)                          | -51.3<br>(-67.9 to -8.8)                            |
| Intestinal nematode infections                                                       | 1,676.1<br>(1,410.6 to 1,992.9)           | --                                            | 3.4<br>(2.0 to 5.3)                    | 25.5<br>(4.0 to 50.7)                             | -8.0<br>(-25.2 to 10.7)                             |
| Ascariasis                                                                           | 266.2<br>(198.1 to 353.4)                 | --                                            | < 0.05<br>(< 0.05 to < 0.05)           | 5.7<br>(-21.8 to 42.3)                            | -20.6<br>(-43.9 to 14.1)                            |

| Cause                                                                   | Prevalence in thousands (95% UI)           | Incidence in thousands (95% UI)             | YLDs in thousands (95% UI)            |                                                                      |                                                     |
|-------------------------------------------------------------------------|--------------------------------------------|---------------------------------------------|---------------------------------------|----------------------------------------------------------------------|-----------------------------------------------------|
|                                                                         | 2016 counts<br>(207.7 to 383.3)            | 2016 counts                                 | 2016 counts<br>(2.0 to 5.3)           | Percentage change in counts between 2006 and 2016<br>(-27.0 to 61.7) | Percentage change in age-standardised rates between |
| Trichuriasis                                                            | 283.6<br>(207.7 to 383.3)                  | --                                          | < 0.05<br>(< 0.05 to < 0.05)          | 6.9<br>(-27.0 to 61.7)                                               | -20.6<br>(-49.5 to 27.1)                            |
| Hookworm disease                                                        | 1,136.8<br>(863.6 to 1,527.6)              | --                                          | 3.4<br>(2.0 to 5.3)                   | 25.5<br>(4.0 to 50.8)                                                | -8.0<br>(-25.2 to 10.8)                             |
| Food-borne trematodiasis                                                | --                                         | --                                          | --                                    | --                                                                   | --                                                  |
| Leprosy                                                                 | 1.9<br>(1.8 to 2.1)                        | 0.1<br>(0.1 to 0.1)                         | 0.1<br>(0.1 to 0.2)                   | 10.1<br>(-10.9 to 35.9)                                              | -16.4<br>(-29.0 to -1.3)                            |
| Ebola virus disease                                                     | --                                         | --                                          | --                                    | --                                                                   | --                                                  |
| Zika virus disease                                                      | --                                         | --                                          | --                                    | --                                                                   | --                                                  |
| Guinea worm disease                                                     | --                                         | --                                          | --                                    | --                                                                   | --                                                  |
| Other neglected tropical diseases                                       | 394.7<br>(381.3 to 406.9)                  | --                                          | 15.7<br>(10.5 to 22.7)                | 35.1<br>(25.5 to 44.6)                                               | 3.4<br>(-3.4 to 9.9)                                |
| <b>Maternal disorders</b>                                               | <b>58.9<br/>(46.1 to 74.9)</b>             | <b>462.2†<br/>(402.6 to 530.0)</b>          | <b>5.1<br/>(3.4 to 7.2)</b>           | <b>8.5<br/>(-13.3 to 36.6)</b>                                       | <b>-22.6<br/>(-37.5 to -3.9)</b>                    |
| Maternal haemorrhage                                                    | 6.5<br>(5.0 to 8.4)                        | 56.8<br>(38.1 to 82.9)                      | 0.3<br>(0.2 to 0.5)                   | 11.3<br>(-28.9 to 68.5)                                              | -19.2<br>(-48.1 to 21.0)                            |
| Maternal sepsis and other pregnancy related infections                  | 8.8<br>(6.7 to 11.7)                       | 52.5<br>(39.5 to 69.9)                      | 0.2<br>(0.1 to 0.4)                   | 19.8<br>(-39.4 to 143.3)                                             | -13.4<br>(-55.1 to 74.1)                            |
| Maternal hypertensive disorders                                         | 38.2<br>(24.1 to 53.8)                     | 168.1<br>(132.6 to 202.5)                   | 1.8<br>(1.0 to 3.0)                   | 23.2<br>(-23.3 to 102.4)                                             | -10.9<br>(-44.3 to 47.0)                            |
| Maternal obstructed labour and uterine rupture                          | 5.4<br>(4.5 to 6.5)                        | 30.1<br>(20.2 to 42.2)                      | 1.8<br>(1.1 to 2.6)                   | -3.5<br>(-22.8 to 21.3)                                              | -31.2<br>(-44.5 to -13.9)                           |
| Maternal abortion, miscarriage, and ectopic pregnancy                   | 1.3<br>(0.8 to 1.9)                        | 154.7<br>(112.4 to 205.3)                   | 0.1<br>(0.1 to 0.2)                   | 16.2<br>(-36.9 to 110.6)                                             | -16.6<br>(-54.2 to 52.6)                            |
| Other maternal disorders                                                | --                                         | --                                          | 0.8<br>(0.5 to 1.1)                   | 3.4<br>(-17.3 to 30.1)                                               | -26.1<br>(-40.4 to -8.3)                            |
| <b>Neonatal disorders</b>                                               | <b>235.9<br/>(193.2 to 288.4)</b>          | <b>--</b>                                   | <b>24.0<br/>(13.8 to 41.4)</b>        | <b>63.7<br/>(26.1 to 107.7)</b>                                      | <b>29.7<br/>(-2.3 to 69.4)</b>                      |
| Neonatal preterm birth complications                                    | 158.1<br>(114.8 to 227.2)                  | --                                          | 7.3<br>(5.0 to 10.7)                  | 35.7<br>(3.3 to 76.1)                                                | 4.8<br>(-21.2 to 39.2)                              |
| Neonatal encephalopathy due to birth asphyxia and trauma                | 68.7<br>(36.4 to 116.7)                    | --                                          | 4.4<br>(1.2 to 13.7)                  | 80.0<br>(-12.2 to 252.9)                                             | 42.3<br>(-35.4 to 200.4)                            |
| Neonatal sepsis and other neonatal infections                           | 23.6<br>(8.3 to 53.8)                      | --                                          | 8.4<br>(1.8 to 22.2)                  | 112.2<br>(22.4 to 257.2)                                             | 78.7<br>(-6.6 to 230.7)                             |
| Hemolytic disease and other neonatal jaundice                           | 4.3<br>(3.7 to 5.0)                        | --                                          | 1.5<br>(1.1 to 1.9)                   | 29.4<br>(13.4 to 49.1)                                               | -1.0<br>(-11.5 to 11.5)                             |
| Other neonatal disorders                                                | --                                         | --                                          | 2.4<br>(1.4 to 4.1)                   | 39.7<br>(14.1 to 71.4)                                               | 13.8<br>(-7.5 to 40.7)                              |
| <b>Nutritional deficiencies</b>                                         | <b>11,988.5<br/>(11,380.6 to 12,668.4)</b> | <b>12,182.0†<br/>(9,679.8 to 14,562.9)</b>  | <b>293.2<br/>(197.3 to 420.3)</b>     | <b>28.6<br/>(22.8 to 34.4)</b>                                       | <b>0.9<br/>(-2.7 to 4.2)</b>                        |
| Protein-energy malnutrition                                             | 417.5<br>(377.9 to 460.0)                  | 303.0<br>(274.7 to 331.7)                   | 17.4<br>(10.8 to 25.4)                | -36.6<br>(-50.9 to -21.4)                                            | -49.2<br>(-60.7 to -36.7)                           |
| Iodine deficiency                                                       | 218.9<br>(192.2 to 250.2)                  | 9.1<br>(8.0 to 10.4)                        | 6.9<br>(4.5 to 9.6)                   | 12.7<br>(0.1 to 26.4)                                                | -17.3<br>(-25.2 to -9.6)                            |
| Vitamin A deficiency                                                    | 8,181.9<br>(7,157.2 to 9,361.7)            | 11,869.9<br>(9,367.8 to 14,248.2)           | 1.4<br>(0.8 to 2.4)                   | 27.1<br>(-5.9 to 74.1)                                               | -4.6<br>(-27.2 to 24.7)                             |
| Iron-deficiency anaemia                                                 | 7,026.7<br>(6,842.2 to 7,213.1)            | --                                          | 267.0<br>(178.2 to 386.4)             | 38.7<br>(32.8 to 44.1)                                               | 6.0<br>(2.4 to 9.0)                                 |
| Other nutritional deficiencies                                          | --                                         | --                                          | 0.6<br>(0.4 to 0.8)                   | -38.1<br>(-52.7 to -22.3)                                            | -50.3<br>(-62.0 to -37.5)                           |
| <b>Other communicable, maternal, neonatal, and nutritional diseases</b> | <b>6,681.6<br/>(6,106.5 to 7,303.3)</b>    | <b>3,338.2<br/>(2,583.7 to 4,658.8)</b>     | <b>20.1<br/>(13.2 to 29.2)</b>        | <b>43.0<br/>(35.6 to 51.0)</b>                                       | <b>4.1<br/>(-0.6 to 9.2)</b>                        |
| Sexually transmitted diseases excluding HIV                             | 2,895.7<br>(2,696.8 to 3,129.0)            | 1,776.0<br>(1,607.0 to 1,961.7)             | 7.3<br>(4.6 to 11.6)                  | 40.1<br>(29.7 to 50.7)                                               | 1.2<br>(-6.2 to 8.7)                                |
| Syphilis                                                                | 190.1<br>(154.8 to 230.6)                  | 131.4<br>(104.3 to 163.2)                   | 0.4<br>(0.2 to 0.5)                   | 36.0<br>(19.6 to 55.8)                                               | -1.3<br>(-15.0 to 15.1)                             |
| Chlamydial infection                                                    | 187.9<br>(124.1 to 267.1)                  | 176.8<br>(128.6 to 244.8)                   | 1.4<br>(0.8 to 2.2)                   | 41.6<br>(22.3 to 63.1)                                               | 2.5<br>(-11.5 to 18.3)                              |
| Gonococcal infection                                                    | 115.9<br>(95.2 to 142.7)                   | 404.9<br>(319.8 to 509.5)                   | 1.3<br>(0.8 to 2.0)                   | 42.2<br>(22.0 to 64.1)                                               | 3.4<br>(-9.6 to 18.0)                               |
| Trichomoniasis                                                          | 719.5<br>(613.1 to 830.8)                  | 674.2<br>(563.1 to 796.5)                   | 1.0<br>(0.4 to 2.1)                   | 36.0<br>(28.6 to 44.4)                                               | -1.7<br>(-6.6 to 3.4)                               |
| Genital herpes                                                          | 1,936.0<br>(1,665.7 to 2,257.6)            | 206.6<br>(174.5 to 245.6)                   | 0.5<br>(0.2 to 1.1)                   | 37.4<br>(20.4 to 57.9)                                               | -0.9<br>(-11.8 to 11.7)                             |
| Other sexually transmitted diseases                                     | 119.4<br>(92.0 to 156.0)                   | 182.1<br>(151.3 to 218.0)                   | 2.7<br>(1.8 to 4.0)                   | 41.2<br>(23.3 to 59.6)                                               | 1.6<br>(-11.2 to 15.3)                              |
| Hepatitis                                                               | 4,309.1<br>(3,481.7 to 5,346.0)            | 1,562.2<br>(837.9 to 2,893.5)               | 1.2<br>(0.7 to 1.9)                   | 12.6<br>(-11.5 to 44.5)                                              | -11.2<br>(-25.9 to 7.0)                             |
| Acute hepatitis A                                                       | 51.6<br>(2.9 to 154.0)                     | 670.9<br>(37.7 to 2,002.1)                  | 0.2<br>(0.1 to 0.4)                   | 14.5<br>(-69.6 to 378.7)                                             | -9.1<br>(-66.4 to 164.2)                            |
| Hepatitis B                                                             | 3,119.0<br>(2,303.5 to 4,144.5)            | 728.6<br>(504.4 to 995.4)                   | 0.8<br>(0.5 to 1.4)                   | 11.0<br>(-9.3 to 37.4)                                               | -12.2<br>(-28.1 to 6.4)                             |
| Hepatitis C                                                             | 1,133.2<br>(985.2 to 1,286.0)              | 93.3<br>(82.0 to 104.9)                     | 0.1<br>(< 0.05 to 0.2)                | 24.7<br>(-16.5 to 82.1)                                              | -1.7<br>(-25.7 to 28.3)                             |
| Acute hepatitis E                                                       | 5.3<br>(4.5 to 6.5)                        | 69.4<br>(58.9 to 84.3)                      | 0.1<br>(0.1 to 0.2)                   | 13.2<br>(-18.1 to 58.4)                                              | -10.0<br>(-29.5 to 15.3)                            |
| Other infectious diseases                                               | 295.7<br>(286.4 to 304.8)                  | < 0.05<br>(< 0.05 to < 0.05)                | 11.6<br>(7.7 to 16.8)                 | 49.1<br>(37.9 to 60.0)                                               | 11.7<br>(4.6 to 19.2)                               |
| <b>Non-communicable diseases</b>                                        | <b>17,216.4<br/>(17,114.7 to 17,310.8)</b> | <b>44,556.0†<br/>(41,267.8 to 48,082.7)</b> | <b>1,147.2<br/>(844.9 to 1,498.8)</b> | <b>37.9<br/>(32.9 to 43.1)</b>                                       | <b>0.9<br/>(-1.5 to 3.6)</b>                        |
| <b>Neoplasms</b>                                                        | <b>11.9<br/>(10.2 to 13.2)</b>             | <b>8.5<br/>(7.7 to 9.1)</b>                 | <b>2.6<br/>(1.9 to 3.5)</b>           | <b>36.8<br/>(28.3 to 45.5)</b>                                       | <b>2.6<br/>(-3.3 to 8.5)</b>                        |
| Lip and oral cavity cancer                                              | 0.3<br>(0.3 to 0.4)                        | 0.1<br>(0.1 to 0.1)                         | < 0.05<br>(< 0.05 to 0.1)             | 40.6<br>(19.4 to 63.4)                                               | 3.8<br>(-15.0 to 26.5)                              |
| Nasopharynx cancer                                                      | 0.1<br>(0.1 to 0.1)                        | < 0.05<br>(< 0.05 to < 0.05)                | < 0.05<br>(< 0.05 to < 0.05)          | 53.1<br>(31.8 to 78.0)                                               | 8.3<br>(-4.3 to 23.6)                               |
| Other pharynx cancer                                                    | 0.1<br>(0.1 to 0.1)                        | 0.1<br>(< 0.05 to 0.1)                      | < 0.05<br>(< 0.05 to < 0.05)          | 36.2<br>(21.5 to 52.4)                                               | 2.8<br>(-8.1 to 14.5)                               |
| Oesophageal cancer                                                      | 0.3<br>(0.2 to 0.3)                        | 0.3<br>(0.2 to 0.3)                         | 0.1<br>(< 0.05 to 0.1)                | 40.8<br>(23.5 to 60.6)                                               | 5.3<br>(-9.9 to 22.9)                               |
| Stomach cancer                                                          | 1.0<br>(0.9 to 1.1)                        | 0.7<br>(0.6 to 0.8)                         | 0.2<br>(0.1 to 0.2)                   | 30.4<br>(13.6 to 49.9)                                               | -0.6<br>(-14.8 to 16.7)                             |
| Colon and rectum cancer                                                 | 1.1<br>(1.0 to 1.2)                        | 0.5<br>(0.4 to 0.5)                         | 0.1<br>(0.1 to 0.2)                   | 41.8<br>(22.3 to 63.4)                                               | 7.5<br>(-7.9 to 26.6)                               |
| Liver cancer                                                            | 0.7<br>(0.6 to 0.9)                        | 1.2<br>(1.0 to 1.6)                         | 0.3<br>(0.2 to 0.4)                   | 25.1<br>(9.9 to 43.8)                                                | -7.9<br>(-19.0 to 5.3)                              |
| Liver cancer due to hepatitis B                                         | 0.7<br>(0.5 to 0.9)                        | 0.7<br>(0.5 to 0.9)                         | 0.1<br>(0.1 to 0.2)                   | 27.0<br>(10.8 to 47.2)                                               | -6.8<br>(-19.1 to 7.4)                              |



| Cause                                              | Prevalence in thousands (95% UI)              | Incidence in thousands (95% UI)          | YLDs in thousands (95% UI)           |                                                   |                                                     |
|----------------------------------------------------|-----------------------------------------------|------------------------------------------|--------------------------------------|---------------------------------------------------|-----------------------------------------------------|
|                                                    | 2016 counts                                   | 2016 counts                              | 2016 counts                          | Percentage change in counts between 2006 and 2016 | Percentage change in age-standardised rates between |
| Liver cancer due to hepatitis C                    | 0.1<br>(0.1 to 0.1)                           | 0.1<br>(0.1 to 0.2)                      | < 0.05<br>(< 0.05 to < 0.05)         | 25.0<br>(8.5 to 46.7)                             | -5.4<br>(-18.1 to 11.3)                             |
| Liver cancer due to alcohol use                    | 0.2<br>(0.1 to 0.3)                           | 0.2<br>(0.1 to 0.3)                      | < 0.05<br>(< 0.05 to 0.1)            | 12.8<br>(-2.1 to 31.2)                            | -16.4<br>(-27.1 to -2.7)                            |
| Liver cancer due to other causes                   | 0.2<br>(0.2 to 0.4)                           | 0.2<br>(0.2 to 0.4)                      | 0.1<br>(< 0.05 to 0.1)               | 30.4<br>(13.2 to 49.7)                            | -3.9<br>(-15.5 to 11.1)                             |
| Gallbladder and biliary tract cancer               | 0.1<br>(0.1 to 0.1)                           | 0.1<br>(0.1 to 0.1)                      | < 0.05<br>(< 0.05 to < 0.05)         | 21.4<br>(6.6 to 36.0)                             | -7.5<br>(-18.7 to 3.5)                              |
| Pancreatic cancer                                  | 0.2<br>(0.2 to 0.2)                           | 0.2<br>(0.2 to 0.3)                      | 0.1<br>(< 0.05 to 0.1)               | 47.6<br>(32.5 to 65.3)                            | 11.4<br>(-0.3 to 25.2)                              |
| Larynx cancer                                      | 0.2<br>(0.1 to 0.2)                           | 0.1<br>(0.1 to 0.1)                      | < 0.05<br>(< 0.05 to < 0.05)         | 40.1<br>(19.0 to 62.6)                            | 4.3<br>(-11.1 to 21.4)                              |
| Tracheal, bronchus, and lung cancer                | 0.3<br>(0.3 to 0.3)                           | 0.3<br>(0.3 to 0.3)                      | 0.1<br>(< 0.05 to 0.1)               | 39.7<br>(18.9 to 65.5)                            | 4.7<br>(-13.2 to 27.1)                              |
| Malignant skin melanoma                            | 0.1<br>(0.1 to 0.1)                           | < 0.05<br>(< 0.05 to < 0.05)             | < 0.05<br>(< 0.05 to < 0.05)         | 29.0<br>(15.0 to 47.8)                            | -3.2<br>(-14.5 to 9.4)                              |
| Non-melanoma skin cancer                           | 0.1<br>(0.1 to 0.1)                           | 0.4<br>(0.3 to 0.6)                      | < 0.05<br>(< 0.05 to < 0.05)         | 24.6<br>(-10.0 to 63.1)                           | -9.1<br>(-40.7 to 24.2)                             |
| Non-melanoma skin cancer (squamous-cell carcinoma) | 0.1<br>(< 0.05 to 0.1)                        | 0.1<br>(0.1 to 0.1)                      | < 0.05<br>(< 0.05 to < 0.05)         | 22.2<br>(-14.9 to 65.6)                           | -10.1<br>(-43.1 to 26.6)                            |
| Non-melanoma skin cancer (basal-cell carcinoma)    | < 0.05<br>(< 0.05 to 0.1)                     | 0.3<br>(0.2 to 0.5)                      | < 0.05<br>(< 0.05 to < 0.05)         | 43.3<br>(30.9 to 58.3)                            | 4.2<br>(-4.9 to 13.2)                               |
| Breast cancer                                      | 2.3<br>(1.9 to 3.0)                           | 0.6<br>(0.5 to 0.8)                      | 0.3<br>(0.2 to 0.4)                  | 48.5<br>(14.1 to 86.7)                            | 8.6<br>(-17.0 to 37.0)                              |
| Cervical cancer                                    | 5.5<br>(3.1 to 6.8)                           | 1.6<br>(0.9 to 1.9)                      | 0.6<br>(0.3 to 0.8)                  | 33.5<br>(2.1 to 70.1)                             | -3.8<br>(-25.2 to 21.2)                             |
| Uterine cancer                                     | 0.5<br>(0.4 to 0.6)                           | 0.1<br>(0.1 to 0.1)                      | < 0.05<br>(< 0.05 to 0.1)            | 38.3<br>(7.4 to 76.8)                             | 6.4<br>(-17.7 to 34.2)                              |
| Ovarian cancer                                     | 0.4<br>(0.4 to 0.5)                           | 0.1<br>(0.1 to 0.2)                      | 0.1<br>(< 0.05 to 0.1)               | 47.3<br>(25.3 to 73.8)                            | 7.0<br>(-8.8 to 26.1)                               |
| Prostate cancer                                    | 1.2<br>(0.7 to 1.5)                           | 0.4<br>(0.2 to 0.5)                      | 0.2<br>(0.1 to 0.3)                  | 49.9<br>(13.4 to 93.7)                            | 14.8<br>(-11.5 to 43.0)                             |
| Testicular cancer                                  | 0.1<br>(< 0.05 to 0.1)                        | < 0.05<br>(< 0.05 to < 0.05)             | < 0.05<br>(< 0.05 to < 0.05)         | 28.8<br>(4.6 to 56.7)                             | -5.0<br>(-23.5 to 16.3)                             |
| Kidney cancer                                      | 0.7<br>(0.6 to 0.9)                           | 0.2<br>(0.1 to 0.2)                      | 0.1<br>(< 0.05 to 0.1)               | 53.0<br>(16.5 to 105.7)                           | 16.4<br>(-0.1 to 36.6)                              |
| Bladder cancer                                     | 0.4<br>(0.4 to 0.5)                           | 0.1<br>(0.1 to 0.1)                      | 0.1<br>(< 0.05 to 0.1)               | 33.9<br>(21.2 to 48.6)                            | 0.4<br>(-9.7 to 11.8)                               |
| Brain and nervous system cancer                    | 0.5<br>(0.4 to 0.7)                           | 0.2<br>(0.2 to 0.3)                      | 0.1<br>(< 0.05 to 0.1)               | 52.2<br>(35.0 to 81.0)                            | 12.6<br>(-0.7 to 36.8)                              |
| Thyroid cancer                                     | 0.1<br>(0.1 to 0.1)                           | < 0.05<br>(< 0.05 to < 0.05)             | < 0.05<br>(< 0.05 to < 0.05)         | 21.5<br>(6.5 to 38.1)                             | -9.8<br>(-20.1 to 2.1)                              |
| Mesothelioma                                       | < 0.05<br>(< 0.05 to < 0.05)                  | < 0.05<br>(< 0.05 to < 0.05)             | < 0.05<br>(< 0.05 to < 0.05)         | 27.5<br>(10.2 to 48.6)                            | -6.0<br>(-17.3 to 8.5)                              |
| Hodgkin lymphoma                                   | 0.1<br>(0.1 to 0.2)                           | < 0.05<br>(< 0.05 to 0.1)                | < 0.05<br>(< 0.05 to < 0.05)         | 16.1<br>(1.1 to 35.5)                             | -9.7<br>(-18.1 to 1.3)                              |
| Non-Hodgkin's lymphoma                             | 0.9<br>(0.8 to 1.1)                           | 0.3<br>(0.3 to 0.4)                      | 0.1<br>(0.1 to 0.1)                  | 34.8<br>(20.3 to 49.7)                            | 0.3<br>(-9.6 to 11.3)                               |
| Multiple myeloma                                   | 0.1<br>(0.1 to 0.1)                           | 0.1<br>(0.1 to 0.1)                      | < 0.05<br>(< 0.05 to < 0.05)         | 35.8<br>(17.2 to 57.9)                            | 1.9<br>(-12.0 to 18.9)                              |
| Leukaemia                                          | 0.8<br>(0.7 to 1.0)                           | 0.2<br>(0.2 to 0.3)                      | 0.1<br>(0.1 to 0.1)                  | 28.4<br>(18.1 to 42.1)                            | -2.6<br>(-10.1 to 6.6)                              |
| Acute lymphoid leukaemia                           | 0.1<br>(0.1 to 0.2)                           | < 0.05<br>(< 0.05 to 0.1)                | < 0.05<br>(< 0.05 to < 0.05)         | 21.8<br>(1.5 to 47.7)                             | -5.9<br>(-17.8 to 8.4)                              |
| Chronic lymphoid leukaemia                         | 0.1<br>(0.1 to 0.1)                           | < 0.05<br>(< 0.05 to < 0.05)             | < 0.05<br>(< 0.05 to < 0.05)         | 34.1<br>(11.8 to 61.6)                            | 1.9<br>(-14.9 to 22.8)                              |
| Acute myeloid leukaemia                            | 0.2<br>(0.1 to 0.2)                           | 0.1<br>(0.1 to 0.1)                      | < 0.05<br>(< 0.05 to < 0.05)         | 35.0<br>(13.9 to 62.9)                            | 3.8<br>(-6.9 to 16.4)                               |
| Chronic myeloid leukaemia                          | 0.1<br>(0.1 to 0.1)                           | < 0.05<br>(< 0.05 to < 0.05)             | < 0.05<br>(< 0.05 to < 0.05)         | 28.3<br>(8.2 to 51.2)                             | -7.6<br>(-20.6 to 7.3)                              |
| Other leukaemia                                    | 0.3<br>(0.2 to 0.4)                           | 0.1<br>(< 0.05 to 0.1)                   | < 0.05<br>(< 0.05 to 0.1)            | 25.8<br>(12.3 to 43.5)                            | -4.9<br>(-15.0 to 7.2)                              |
| Other neoplasms                                    | 1.7<br>(1.4 to 2.1)                           | 0.5<br>(0.5 to 0.6)                      | 0.1<br>(0.1 to 0.2)                  | 31.2<br>(6.2 to 57.3)                             | 1.2<br>(-11.5 to 16.7)                              |
| <b>Cardiovascular diseases</b>                     | <b>712.6</b><br><b>(669.1 to 756.1)</b>       | <b>52.8†</b><br><b>(50.6 to 55.1)</b>    | <b>40.3</b><br><b>(28.7 to 54.1)</b> | <b>37.1</b><br><b>(31.3 to 43.2)</b>              | <b>1.5</b><br><b>(-2.5 to 5.4)</b>                  |
| Rheumatic heart disease                            | 140.0<br>(124.0 to 159.3)                     | 6.6<br>(5.8 to 7.4)                      | 6.8<br>(4.3 to 10.0)                 | 32.4<br>(18.7 to 45.4)                            | -3.3<br>(-12.7 to 5.1)                              |
| Ischaemic heart disease                            | 134.6<br>(126.9 to 142.6)                     | 19.2<br>(18.1 to 20.5)                   | 6.1<br>(4.1 to 8.5)                  | 36.0<br>(28.1 to 44.8)                            | -0.4<br>(-5.2 to 4.5)                               |
| Cerebrovascular disease                            | 42.9<br>(40.1 to 46.4)                        | 8.0†<br>(7.3 to 8.8)                     | 6.3<br>(4.5 to 8.0)                  | 38.9<br>(27.1 to 51.2)                            | 4.8<br>(-3.7 to 13.9)                               |
| Ischaemic stroke                                   | 36.1<br>(32.6 to 40.1)                        | 5.1†<br>(4.5 to 5.9)                     | 5.0<br>(3.6 to 6.3)                  | 37.9<br>(24.4 to 51.6)                            | 4.2<br>(-5.2 to 14.6)                               |
| Hemorrhagic stroke                                 | 9.5<br>(8.5 to 10.6)                          | 2.9†<br>(2.6 to 3.2)                     | 1.3<br>(0.9 to 1.7)                  | 43.0<br>(25.7 to 65.8)                            | 7.1<br>(-5.5 to 25.3)                               |
| Hypertensive heart disease                         | 11.3<br>(9.2 to 13.7)                         | --                                       | 0.9<br>(0.6 to 1.3)                  | 28.6<br>(14.4 to 44.0)                            | -5.7<br>(-15.1 to 3.7)                              |
| Cardiomyopathy and myocarditis                     | 6.5<br>(5.6 to 7.5)                           | 3.7+<br>(3.2 to 4.2)                     | 0.6<br>(0.4 to 0.9)                  | 38.3<br>(22.7 to 54.6)                            | -0.6<br>(-12.7 to 12.5)                             |
| Myocarditis                                        | 2.2<br>(1.9 to 2.5)                           | 3.7<br>(3.2 to 4.2)                      | 0.2<br>(0.1 to 0.2)                  | 37.8<br>(24.9 to 51.5)                            | 0.3<br>(-11.7 to 13.4)                              |
| Alcoholic cardiomyopathy                           | 1.0<br>(0.8 to 1.3)                           | --                                       | 0.1<br>(0.1 to 0.1)                  | 45.2<br>(6.7 to 92.6)                             | 2.5<br>(-23.0 to 34.1)                              |
| Other cardiomyopathy                               | 4.7<br>(3.8 to 5.7)                           | --                                       | 0.4<br>(0.2 to 0.6)                  | 37.1<br>(16.9 to 59.1)                            | -1.4<br>(-16.1 to 15.4)                             |
| Atrial fibrillation and flutter                    | 27.5<br>(23.9 to 31.5)                        | 2.5<br>(2.1 to 2.9)                      | 2.2<br>(1.4 to 3.0)                  | 33.1<br>(22.9 to 45.2)                            | 0.8<br>(-5.9 to 8.4)                                |
| Peripheral vascular disease                        | 97.4<br>(83.8 to 113.3)                       | 9.8<br>(8.4 to 11.6)                     | 0.5<br>(0.2 to 0.9)                  | 29.7<br>(18.9 to 41.1)                            | 0.8<br>(-6.7 to 8.7)                                |
| Endocarditis                                       | 0.8<br>(0.7 to 1.0)                           | 2.9<br>(2.6 to 3.3)                      | 0.1<br>(< 0.05 to 0.1)               | 35.1<br>(21.2 to 51.4)                            | 2.3<br>(-12.5 to 20.8)                              |
| Other cardiovascular and circulatory diseases      | 319.8<br>(263.7 to 389.5)                     | --                                       | 16.9<br>(10.8 to 23.9)               | 40.1<br>(28.7 to 52.9)                            | 3.0<br>(-5.0 to 12.4)                               |
| <b>Chronic respiratory diseases</b>                | <b>1,121.4</b><br><b>(1,054.2 to 1,196.1)</b> | <b>230.8†</b><br><b>(210.1 to 251.8)</b> | <b>49.4</b><br><b>(35.4 to 67.6)</b> | <b>38.2</b><br><b>(31.8 to 45.0)</b>              | <b>2.0</b><br><b>(-2.1 to 6.0)</b>                  |
| Chronic obstructive pulmonary disease              | 143.3<br>(136.9 to 149.9)                     | 10.3<br>(9.8 to 10.7)                    | 9.7<br>(8.3 to 10.8)                 | 38.7<br>(26.7 to 52.3)                            | 1.9<br>(-5.5 to 10.2)                               |
| Pneumoconiosis                                     | 0.1<br>(0.1 to 0.1)                           | < 0.05<br>(< 0.05 to < 0.05)             | < 0.05<br>(< 0.05 to < 0.05)         | 43.2<br>(35.5 to 51.1)                            | 4.0<br>(-1.4 to 10.0)                               |
| Silicosis                                          | < 0.05<br>(< 0.05 to < 0.05)                  | < 0.05<br>(< 0.05 to < 0.05)             | < 0.05<br>(< 0.05 to < 0.05)         | 44.5<br>(31.5 to 57.8)                            | 2.7<br>(-5.2 to 10.3)                               |

| Cause                                                          | Prevalence in thousands (95% UI)              | Incidence in thousands (95% UI)               | YLDs in thousands (95% UI)              |                                                   |                                                     |
|----------------------------------------------------------------|-----------------------------------------------|-----------------------------------------------|-----------------------------------------|---------------------------------------------------|-----------------------------------------------------|
|                                                                | 2016 counts                                   | 2016 counts                                   | 2016 counts                             | Percentage change in counts between 2006 and 2016 | Percentage change in age-standardised rates between |
| Asbestosis                                                     | 0.1<br>(0.1 to 0.1)                           | < 0.05<br>(< 0.05 to < 0.05)                  | < 0.05<br>(< 0.05 to < 0.05)            | 41.1<br>(29.2 to 52.6)                            | 2.4<br>(-3.3 to 8.8)                                |
| Coal workers pneumoconiosis                                    | --                                            | --                                            | --                                      | --                                                | --                                                  |
| Other pneumoconiosis                                           | 0.1<br>(0.1 to 0.1)                           | < 0.05<br>(< 0.05 to < 0.05)                  | < 0.05<br>(< 0.05 to < 0.05)            | 45.3<br>(33.1 to 58.6)                            | 5.8<br>(-4.8 to 16.7)                               |
| Asthma                                                         | 974.3<br>(886.0 to 1,071.8)                   | 220.5<br>(199.8 to 241.5)                     | 38.3<br>(24.9 to 55.9)                  | 36.9<br>(29.7 to 44.9)                            | 1.3<br>(-3.0 to 6.0)                                |
| Interstitial lung disease and pulmonary sarcoidosis            | 1.1<br>(1.0 to 1.3)                           | 0.1<br>(0.1 to 0.1)                           | 0.1<br>(0.1 to 0.2)                     | 37.6<br>(34.1 to 41.3)                            | 0.2<br>(-3.0 to 3.7)                                |
| Other chronic respiratory diseases                             | --                                            | --                                            | 1.3<br>(1.0 to 1.7)                     | 83.3<br>(38.7 to 146.6)                           | 34.2<br>(10.1 to 65.5)                              |
| <b>Cirrhosis and other chronic liver diseases</b>              | <b>38.5</b><br><b>(36.4 to 40.6)</b>          | <b>3.8</b><br><b>(3.6 to 4.0)</b>             | <b>3.7</b><br><b>(2.5 to 5.1)</b>       | <b>37.3</b><br><b>(21.9 to 56.2)</b>              | <b>0.5</b><br><b>(-7.9 to 9.7)</b>                  |
| Cirrhosis and other chronic liver diseases due to hepatitis B  | 12.9<br>(10.8 to 14.8)                        | 1.3<br>(1.1 to 1.4)                           | 1.0<br>(0.6 to 1.4)                     | 39.6<br>(18.4 to 67.6)                            | 0.6<br>(-11.3 to 15.2)                              |
| Cirrhosis and other chronic liver diseases due to hepatitis C  | 5.4<br>(3.8 to 7.7)                           | 0.6<br>(0.4 to 0.8)                           | 0.4<br>(0.2 to 0.6)                     | 42.8<br>(16.7 to 78.5)                            | 2.9<br>(-14.5 to 26.0)                              |
| Cirrhosis and other chronic liver diseases due to alcohol use  | 5.9<br>(5.0 to 6.9)                           | 0.7<br>(0.6 to 0.8)                           | 0.4<br>(0.3 to 0.6)                     | 37.0<br>(10.1 to 70.6)                            | -1.9<br>(-17.7 to 17.2)                             |
| Cirrhosis and other chronic liver diseases due to other causes | 14.4<br>(13.2 to 15.6)                        | 1.2<br>(1.1 to 1.3)                           | 1.9<br>(1.3 to 2.7)                     | 35.2<br>(9.9 to 67.3)                             | 0.7<br>(-15.5 to 19.3)                              |
| <b>Digestive diseases</b>                                      | <b>269.2</b><br><b>(244.1 to 296.7)</b>       | <b>249.9†</b><br><b>(237.8 to 263.1)</b>      | <b>8.8</b><br><b>(6.1 to 12.1)</b>      | <b>30.5</b><br><b>(19.4 to 42.8)</b>              | <b>-2.9</b><br><b>(-8.6 to 3.3)</b>                 |
| Peptic ulcer disease                                           | 43.3<br>(39.4 to 47.2)                        | 23.4<br>(20.9 to 26.1)                        | 0.9<br>(0.6 to 1.3)                     | 27.1<br>(12.8 to 43.7)                            | -7.4<br>(-15.5 to 1.7)                              |
| Gastritis and duodenitis                                       | 80.3<br>(70.4 to 91.1)                        | 80.5<br>(71.9 to 90.5)                        | 1.2<br>(0.8 to 1.8)                     | 40.2<br>(23.9 to 58.2)                            | 4.6<br>(-4.2 to 14.3)                               |
| Appendicitis                                                   | 2.5<br>(2.3 to 2.7)                           | 66.3<br>(61.0 to 72.0)                        | 0.8<br>(0.5 to 1.1)                     | 32.2<br>(-6.2 to 85.1)                            | -2.0<br>(-22.1 to 24.2)                             |
| Paralytic ileus and intestinal obstruction                     | 0.4<br>(0.4 to 0.4)                           | 10.8<br>(9.8 to 12.0)                         | 0.1<br>(0.1 to 0.2)                     | 34.1<br>(25.8 to 42.5)                            | -1.2<br>(-13.6 to 12.6)                             |
| Inguinal, femoral, and abdominal hernia                        | 140.8<br>(111.8 to 177.2)                     | 22.4<br>(19.9 to 25.7)                        | 4.6<br>(3.1 to 6.5)                     | 27.8<br>(12.2 to 45.8)                            | -4.6<br>(-12.6 to 5.0)                              |
| Inflammatory bowel disease                                     | 0.8<br>(0.7 to 0.8)                           | 6.1<br>(5.8 to 6.4)                           | 0.1<br>(0.1 to 0.2)                     | 29.2<br>(25.4 to 33.1)                            | -8.3<br>(-11.0 to -5.6)                             |
| Vascular intestinal disorders                                  | 0.1<br>(0.1 to 0.1)                           | 0.6<br>(0.5 to 0.7)                           | < 0.05<br>(< 0.05 to < 0.05)            | 34.9<br>(27.4 to 42.3)                            | 3.2<br>(-1.1 to 7.6)                                |
| Gallbladder and biliary diseases                               | 7.9<br>(6.9 to 9.0)                           | 36.7<br>(31.2 to 42.0)                        | 0.2<br>(0.1 to 0.3)                     | 40.1<br>(27.2 to 54.0)                            | 1.9<br>(-8.9 to 14.0)                               |
| Pancreatitis                                                   | 0.3<br>(0.3 to 0.4)                           | 3.1<br>(2.8 to 3.5)                           | < 0.05<br>(< 0.05 to 0.1)               | 44.3<br>(39.0 to 50.2)                            | 4.7<br>(0.4 to 8.8)                                 |
| Other digestive diseases                                       | --                                            | --                                            | 0.8<br>(0.6 to 1.1)                     | 31.7<br>(16.6 to 47.4)                            | 0.6<br>(-5.9 to 7.3)                                |
| <b>Neurological disorders</b>                                  | <b>5,797.7</b><br><b>(5,508.0 to 6,116.4)</b> | <b>3,034.7</b><br><b>(2,558.1 to 3,592.1)</b> | <b>124.1</b><br><b>(77.5 to 179.1)</b>  | <b>39.6</b><br><b>(1.9 to 89.6)</b>               | <b>1.0</b><br><b>(-20.3 to 27.8)</b>                |
| Alzheimer's disease and other dementias                        | 15.6<br>(13.1 to 18.5)                        | 2.7<br>(2.2 to 3.2)                           | 2.1<br>(1.5 to 2.9)                     | 24.6<br>(17.7 to 32.6)                            | -1.0<br>(-5.8 to 4.3)                               |
| Parkinson's disease                                            | 1.5<br>(1.2 to 1.9)                           | 0.2<br>(0.2 to 0.3)                           | 0.2<br>(0.1 to 0.3)                     | 40.2<br>(18.3 to 68.1)                            | 7.7<br>(-7.1 to 25.3)                               |
| Epilepsy                                                       | 49.6<br>(8.0 to 120.4)                        | 7.7<br>(1.2 to 18.4)                          | 19.5<br>(2.9 to 49.6)                   | 41.7<br>(-79.0 to 792.3)                          | 4.9<br>(-84.3 to 557.2)                             |
| Multiple sclerosis                                             | 0.6<br>(0.5 to 0.7)                           | < 0.05<br>(< 0.05 to < 0.05)                  | 0.2<br>(0.1 to 0.2)                     | 52.4<br>(46.8 to 57.8)                            | 9.0<br>(5.0 to 12.4)                                |
| Motor neuron disease                                           | 0.2<br>(0.1 to 0.2)                           | < 0.05<br>(< 0.05 to 0.1)                     | < 0.05<br>(< 0.05 to 0.1)               | 39.6<br>(33.2 to 46.8)                            | 3.3<br>(-0.1 to 7.0)                                |
| Migraine                                                       | 2,043.3<br>(1,913.0 to 2,168.4)               | 263.3<br>(246.5 to 281.1)                     | 84.0<br>(53.4 to 119.0)                 | 38.1<br>(32.2 to 44.6)                            | -0.1<br>(-3.7 to 4.0)                               |
| Tension-type headache                                          | 4,536.8<br>(4,040.1 to 5,083.2)               | 2,760.6<br>(2,290.5 to 3,321.1)               | 13.2<br>(8.2 to 20.3)                   | 38.5<br>(31.5 to 46.6)                            | 0.2<br>(-4.3 to 5.4)                                |
| Other neurological disorders                                   | < 0.05<br>(< 0.05 to 0.1)                     | 0.1<br>(0.1 to 0.1)                           | 4.9<br>(0.8 to 12.1)                    | 75.0<br>(-71.5 to 895.5)                          | 25.6<br>(-74.4 to 509.9)                            |
| <b>Mental and substance use disorders</b>                      | <b>2,491.2</b><br><b>(2,350.7 to 2,617.8)</b> | <b>909.6†</b><br><b>(841.7 to 982.1)</b>      | <b>291.7</b><br><b>(212.1 to 382.2)</b> | <b>38.5</b><br><b>(35.1 to 41.6)</b>              | <b>1.1</b><br><b>(-1.2 to 3.5)</b>                  |
| Schizophrenia                                                  | 23.1<br>(19.9 to 26.4)                        | 2.2<br>(1.9 to 2.5)                           | 14.8<br>(10.7 to 18.5)                  | 42.8<br>(27.1 to 58.1)                            | 2.2<br>(-7.5 to 11.6)                               |
| Alcohol use disorders                                          | 178.8<br>(150.6 to 207.5)                     | 98.7<br>(82.9 to 115.1)                       | 17.9<br>(12.2 to 24.9)                  | 41.0<br>(30.2 to 54.5)                            | 2.2<br>(-5.2 to 10.9)                               |
| Drug use disorders                                             | 63.7<br>(56.0 to 72.2)                        | 11.5<br>(10.0 to 13.1)                        | 15.5<br>(10.6 to 21.4)                  | 45.8<br>(31.4 to 63.1)                            | 6.0<br>(-3.7 to 16.7)                               |
| Opioid use disorders                                           | 32.2<br>(25.3 to 41.2)                        | 4.5<br>(3.6 to 5.5)                           | 13.4<br>(8.8 to 19.0)                   | 46.7<br>(30.6 to 66.2)                            | 6.5<br>(-4.5 to 18.9)                               |
| Cocaine use disorders                                          | 2.0<br>(1.7 to 2.5)                           | 0.3<br>(0.2 to 0.4)                           | 0.3<br>(0.2 to 0.4)                     | 40.6<br>(32.8 to 49.3)                            | 3.1<br>(-2.0 to 9.0)                                |
| Amphetamine use disorders                                      | 1.1<br>(0.7 to 1.5)                           | 0.2<br>(0.1 to 0.3)                           | 0.1<br>(0.1 to 0.3)                     | 38.7<br>(25.4 to 53.2)                            | 2.8<br>(-6.2 to 13.3)                               |
| Cannabis use disorders                                         | 26.0<br>(21.4 to 31.6)                        | 5.4<br>(4.4 to 6.6)                           | 0.8<br>(0.4 to 1.2)                     | 39.8<br>(9.2 to 78.9)                             | 2.2<br>(-18.0 to 27.6)                              |
| Other drug use disorders                                       | 5.0<br>(4.3 to 5.7)                           | 1.1<br>(0.9 to 1.2)                           | 0.8<br>(0.6 to 1.2)                     | 41.8<br>(18.7 to 66.4)                            | 2.8<br>(-12.5 to 18.9)                              |
| Depressive disorders                                           | 510.8<br>(479.5 to 549.6)                     | 576.2<br>(512.4 to 644.7)                     | 88.0<br>(60.1 to 119.9)                 | 41.6<br>(34.6 to 49.6)                            | 2.4<br>(-2.5 to 7.5)                                |
| Major depressive disorder                                      | 350.0<br>(311.5 to 391.3)                     | 544.9<br>(482.2 to 614.1)                     | 71.6<br>(49.1 to 98.0)                  | 42.3<br>(33.5 to 52.0)                            | 2.8<br>(-3.1 to 9.0)                                |
| Dysthymia                                                      | 169.6<br>(146.3 to 197.2)                     | 31.3<br>(27.3 to 36.1)                        | 16.4<br>(11.0 to 23.9)                  | 39.0<br>(33.2 to 44.8)                            | 0.5<br>(-2.7 to 3.7)                                |
| Bipolar disorder                                               | 92.4<br>(77.9 to 109.3)                       | 11.0<br>(9.2 to 13.2)                         | 19.0<br>(11.7 to 28.1)                  | 38.6<br>(28.7 to 49.6)                            | 0.7<br>(-5.5 to 7.7)                                |
| Anxiety disorders                                              | 487.9<br>(436.5 to 542.3)                     | 93.9<br>(85.0 to 103.7)                       | 47.4<br>(32.6 to 64.7)                  | 38.0<br>(27.7 to 48.9)                            | 0.5<br>(-6.0 to 7.5)                                |
| Eating disorders                                               | 13.8<br>(11.2 to 16.6)                        | 11.7<br>(8.5 to 15.8)                         | 2.8<br>(1.8 to 4.2)                     | 48.4<br>(26.0 to 75.9)                            | 8.4<br>(-7.8 to 26.9)                               |
| Anorexia nervosa                                               | 3.9<br>(2.8 to 5.2)                           | 1.9<br>(1.4 to 2.6)                           | 0.8<br>(0.5 to 1.4)                     | 45.7<br>(6.5 to 95.4)                             | 7.4<br>(-20.5 to 43.1)                              |
| Bulimia nervosa                                                | 9.5<br>(7.0 to 12.9)                          | 9.8<br>(6.6 to 14.1)                          | 2.0<br>(1.2 to 3.0)                     | 49.6<br>(23.4 to 82.7)                            | 8.8<br>(-10.2 to 31.7)                              |
| Autistic spectrum disorders                                    | 154.0<br>(137.6 to 176.5)                     | 2.1<br>(1.5 to 2.9)                           | 21.7<br>(14.6 to 30.6)                  | 36.4<br>(28.3 to 44.8)                            | 1.5<br>(-3.7 to 6.9)                                |
| Autism                                                         | 40.9<br>(35.1 to 47.2)                        | 0.3<br>(0.2 to 0.5)                           | 10.4<br>(6.7 to 15.3)                   | 36.8<br>(23.3 to 52.1)                            | 1.6<br>(-7.2 to 11.5)                               |
| Asperger syndrome and other autistic spectrum disorders        | 113.0<br>(93.0 to 137.3)                      | 1.8<br>(1.2 to 2.6)                           | 11.3<br>(7.4 to 16.5)                   | 36.1<br>(28.7 to 43.9)                            | 1.4<br>(-3.4 to 6.3)                                |



| Cause                                                      | Prevalence in thousands (95% UI)                 | Incidence in thousands (95% UI)                   | YLDs in thousands (95% UI)              |                                                   |                                                     |
|------------------------------------------------------------|--------------------------------------------------|---------------------------------------------------|-----------------------------------------|---------------------------------------------------|-----------------------------------------------------|
|                                                            | 2016 counts                                      | 2016 counts                                       | 2016 counts                             | Percentage change in counts between 2006 and 2016 | Percentage change in age-standardised rates between |
| Attention-deficit/hyperactivity disorder                   | 258.7<br>(231.2 to 289.6)                        | 17.5<br>(15.2 to 20.4)                            | 3.1<br>(1.9 to 5.0)                     | 36.7<br>(26.6 to 47.6)                            | 0.7<br>(-6.0 to 7.9)                                |
| Conduct disorder                                           | 197.1<br>(161.4 to 235.3)                        | 72.1<br>(57.3 to 87.1)                            | 23.7<br>(14.5 to 36.4)                  | 36.2<br>(27.3 to 45.7)                            | 0.4<br>(-6.0 to 7.7)                                |
| Idiopathic developmental intellectual disability           | 484.0<br>(306.1 to 675.7)                        | --                                                | 20.1<br>(10.0 to 34.0)                  | 20.8<br>(13.1 to 28.2)                            | -11.1<br>(-16.5 to -6.1)                            |
| Other mental and substance use disorders                   | 236.4<br>(206.5 to 274.4)                        | 12.7<br>(11.1 to 14.7)                            | 17.7<br>(12.0 to 25.4)                  | 40.2<br>(32.4 to 48.6)                            | 1.2<br>(-3.9 to 5.9)                                |
| <b>Diabetes, urogenital, blood, and endocrine diseases</b> | <b>11,064.8</b><br><b>(10,936.0 to 11,209.2)</b> | <b>1,910.6†</b><br><b>(1,779.0 to 2,055.2)</b>    | <b>129.8</b><br><b>(90.9 to 178.4)</b>  | <b>36.1</b><br><b>(32.2 to 39.8)</b>              | <b>0.7</b><br><b>(-1.8 to 2.9)</b>                  |
| Diabetes mellitus                                          | 326.4<br>(291.9 to 363.2)                        | 22.4<br>(20.2 to 24.7)                            | 22.7<br>(15.5 to 31.6)                  | 46.5<br>(38.1 to 55.1)                            | 6.3<br>(0.3 to 12.6)                                |
| Acute glomerulonephritis                                   | 0.1<br>(0.1 to 0.2)                              | 2.2<br>(1.9 to 2.6)                               | < 0.05<br>(< 0.05 to < 0.05)            | 36.1<br>(30.4 to 41.6)                            | 0.3<br>(-3.3 to 3.9)                                |
| Chronic kidney disease                                     | 732.5<br>(658.5 to 811.3)                        | 56.8<br>(50.4 to 63.7)                            | 19.1<br>(13.8 to 25.1)                  | 36.5<br>(28.3 to 44.6)                            | -0.8<br>(-5.9 to 4.4)                               |
| Chronic kidney disease due to diabetes mellitus            | 219.2<br>(184.4 to 257.0)                        | 15.5<br>(12.8 to 18.9)                            | 5.5<br>(3.9 to 7.4)                     | 38.3<br>(27.1 to 50.3)                            | 0.4<br>(-6.7 to 7.9)                                |
| Chronic kidney disease due to hypertension                 | 160.8<br>(138.0 to 184.3)                        | 15.4<br>(13.0 to 18.2)                            | 3.2<br>(2.2 to 4.3)                     | 31.2<br>(18.2 to 45.2)                            | -2.0<br>(-11.5 to 8.1)                              |
| Chronic kidney disease due to glomerulonephritis           | 148.5<br>(128.3 to 169.8)                        | 8.7<br>(7.0 to 10.7)                              | 5.0<br>(3.6 to 6.9)                     | 37.3<br>(23.9 to 50.1)                            | -1.2<br>(-9.1 to 6.6)                               |
| Chronic kidney disease due to other causes                 | 203.9<br>(169.8 to 240.4)                        | 17.1<br>(14.3 to 20.1)                            | 5.4<br>(3.8 to 7.2)                     | 37.1<br>(24.6 to 49.8)                            | -1.1<br>(-8.5 to 6.8)                               |
| Urinary diseases and male infertility                      | 260.5<br>(225.8 to 296.7)                        | 1,108.5†<br>(995.9 to 1,250.7)                    | 5.7<br>(3.7 to 8.4)                     | 40.2<br>(30.4 to 50.6)                            | 2.5<br>(-3.7 to 9.3)                                |
| Interstitial nephritis and urinary tract infections        | 19.3<br>(17.2 to 21.8)                           | 1,009.0<br>(897.3 to 1,149.0)                     | 0.6<br>(0.4 to 1.0)                     | 36.1<br>(15.9 to 58.4)                            | 1.3<br>(-12.1 to 15.7)                              |
| Urolithiasis                                               | 3.1<br>(2.8 to 3.6)                              | 83.4<br>(73.5 to 96.0)                            | 0.2<br>(0.2 to 0.3)                     | 40.9<br>(32.1 to 49.7)                            | 2.2<br>(-5.1 to 9.8)                                |
| Benign prostatic hyperplasia                               | 119.0<br>(100.2 to 139.6)                        | 16.0<br>(13.4 to 18.9)                            | 3.9<br>(2.5 to 5.8)                     | 39.7<br>(28.2 to 52.8)                            | 2.0<br>(-4.9 to 10.2)                               |
| Male infertility                                           | 106.4<br>(82.4 to 141.0)                         | --                                                | 0.6<br>(0.2 to 1.2)                     | 74.7<br>(38.7 to 124.5)                           | 30.7<br>(2.3 to 71.8)                               |
| Other urinary diseases                                     | --                                               | --                                                | 0.3<br>(0.2 to 0.5)                     | 11.4<br>(-2.4 to 25.7)                            | -15.7<br>(-23.8 to -7.2)                            |
| Gynecological diseases                                     | 1,871.3<br>(1,771.9 to 1,964.3)                  | 709.2†<br>(653.3 to 767.4)                        | 24.0<br>(16.3 to 34.4)                  | 36.8<br>(31.3 to 43.0)                            | -3.3<br>(-6.7 to 0.4)                               |
| Uterine fibroids                                           | 124.4<br>(109.5 to 140.2)                        | 15.6<br>(13.5 to 18.0)                            | 3.7<br>(2.4 to 5.5)                     | 40.1<br>(30.8 to 50.0)                            | -2.8<br>(-9.4 to 3.7)                               |
| Polycystic ovarian syndrome                                | 15.1<br>(11.2 to 19.5)                           | 44.8<br>(33.0 to 60.1)                            | 0.1<br>(0.1 to 0.2)                     | 41.3<br>(23.4 to 63.0)                            | 1.1<br>(-11.6 to 16.4)                              |
| Female infertility                                         | 10.0<br>(7.0 to 17.6)                            | --                                                | 0.1<br>(< 0.05 to 0.1)                  | 81.3<br>(22.7 to 214.4)                           | 30.4<br>(-12.1 to 107.4)                            |
| Endometriosis                                              | 3.4<br>(2.9 to 4.1)                              | 14.3<br>(11.5 to 18.4)                            | 0.3<br>(0.2 to 0.5)                     | 37.0<br>(-1.6 to 91.0)                            | -0.9<br>(-26.0 to 33.0)                             |
| Genital prolapse                                           | 904.1<br>(804.9 to 1,006.6)                      | 88.5<br>(74.5 to 105.1)                           | 2.8<br>(1.4 to 5.1)                     | 24.4<br>(17.1 to 31.4)                            | -9.0<br>(-14.6 to -3.4)                             |
| Premenstrual syndrome                                      | 806.2<br>(733.6 to 873.9)                        | 307.7<br>(277.9 to 334.8)                         | 6.7<br>(4.2 to 10.3)                    | 33.2<br>(19.6 to 48.1)                            | -4.4<br>(-13.5 to 5.4)                              |
| Other gynecological diseases                               | 291.4<br>(255.2 to 332.1)                        | 238.2<br>(194.5 to 287.0)                         | 10.2<br>(6.8 to 14.5)                   | 41.8<br>(33.8 to 51.6)                            | 0.2<br>(-5.2 to 6.8)                                |
| Hemoglobinopathies and hemolytic anaemias                  | 9,761.0<br>(9,616.7 to 9,920.3)                  | --                                                | 46.7<br>(31.9 to 66.0)                  | 30.7<br>(24.5 to 36.8)                            | -2.0<br>(-6.1 to 1.9)                               |
| Thalassemias                                               | 0.1<br>(0.1 to 0.1)                              | --                                                | < 0.05<br>(< 0.05 to < 0.05)            | 26.4<br>(13.7 to 39.6)                            | 0.5<br>(-9.4 to 10.8)                               |
| Thalassaemia trait                                         | 310.8<br>(281.9 to 341.0)                        | --                                                | 5.5<br>(3.7 to 7.9)                     | 28.4<br>(18.4 to 39.5)                            | -2.6<br>(-8.9 to 4.3)                               |
| Sickle cell disorders                                      | 142.3<br>(133.2 to 151.1)                        | --                                                | 11.3<br>(7.9 to 15.5)                   | 33.2<br>(22.2 to 46.1)                            | 2.6<br>(-6.0 to 12.3)                               |
| Sickle cell trait                                          | 4,573.4<br>(4,410.6 to 4,749.4)                  | --                                                | 19.4<br>(13.0 to 28.2)                  | 30.2<br>(22.9 to 37.8)                            | -3.7<br>(-8.3 to 1.1)                               |
| G6PD deficiency                                            | 2,910.6<br>(2,746.2 to 3,117.2)                  | --                                                | 0.2<br>(0.1 to 0.3)                     | 20.1<br>(-13.3 to 59.9)                           | -4.3<br>(-22.7 to 15.3)                             |
| G6PD trait                                                 | 3,913.0<br>(3,843.3 to 3,987.1)                  | --                                                | < 0.05<br>(< 0.05 to < 0.05)            | 36.7<br>(27.5 to 46.4)                            | 2.5<br>(-3.1 to 8.3)                                |
| Other hemoglobinopathies and hemolytic anaemias            | 328.5<br>(319.4 to 337.6)                        | --                                                | 10.2<br>(6.9 to 14.7)                   | 30.3<br>(21.6 to 40.1)                            | -1.6<br>(-6.5 to 3.7)                               |
| Endocrine, metabolic, blood, and immune disorders          | 327.2<br>(318.4 to 335.6)                        | 11.7<br>(10.4 to 13.0)                            | 11.6<br>(7.9 to 16.6)                   | 36.3<br>(27.4 to 45.1)                            | 3.3<br>(-1.8 to 8.4)                                |
| <b>Musculoskeletal disorders</b>                           | <b>1,712.3</b><br><b>(1,614.9 to 1,800.2)</b>    | <b>828.2</b><br><b>(743.4 to 916.9)</b>           | <b>189.2</b><br><b>(135.5 to 248.3)</b> | <b>44.7</b><br><b>(38.9 to 51.3)</b>              | <b>2.9</b><br><b>(-0.6 to 6.6)</b>                  |
| Rheumatoid arthritis                                       | 15.7<br>(13.7 to 17.8)                           | 1.1<br>(1.0 to 1.2)                               | 3.7<br>(2.5 to 5.1)                     | 43.4<br>(27.4 to 60.7)                            | 4.4<br>(-5.7 to 14.7)                               |
| Osteoarthritis                                             | 250.0<br>(233.8 to 266.5)                        | 15.0<br>(13.9 to 16.2)                            | 15.4<br>(10.7 to 20.9)                  | 45.5<br>(39.7 to 51.3)                            | 6.0<br>(2.1 to 10.0)                                |
| Low back and neck pain                                     | 1,231.2<br>(1,138.3 to 1,325.8)                  | 554.4<br>(491.4 to 621.5)                         | 141.4<br>(99.9 to 186.3)                | 45.7<br>(38.5 to 54.4)                            | 2.7<br>(-1.9 to 7.6)                                |
| Low back pain                                              | 952.3<br>(841.0 to 1,084.7)                      | 471.2<br>(409.5 to 539.5)                         | 107.4<br>(76.1 to 143.2)                | 47.6<br>(38.1 to 59.4)                            | 3.6<br>(-2.5 to 10.1)                               |
| Neck pain                                                  | 340.6<br>(294.7 to 392.6)                        | 83.2<br>(71.5 to 97.4)                            | 34.0<br>(22.8 to 48.1)                  | 40.1<br>(36.1 to 44.1)                            | 0.2<br>(-2.1 to 2.3)                                |
| Gout                                                       | 32.3<br>(28.6 to 36.5)                           | 6.8<br>(5.9 to 7.7)                               | 1.0<br>(0.7 to 1.4)                     | 40.6<br>(20.7 to 65.4)                            | 1.8<br>(-11.0 to 17.5)                              |
| Other musculoskeletal disorders                            | 319.6<br>(255.2 to 389.1)                        | 250.9<br>(194.8 to 312.3)                         | 27.6<br>(18.1 to 40.0)                  | 40.0<br>(27.8 to 53.6)                            | 0.5<br>(-8.0 to 9.6)                                |
| <b>Other non-communicable diseases</b>                     | <b>13,063.4</b><br><b>(12,741.2 to 13,360.2)</b> | <b>37,327.1†</b><br><b>(34,138.8 to 40,740.0)</b> | <b>307.7</b><br><b>(208.6 to 433.6)</b> | <b>33.8</b><br><b>(31.3 to 35.9)</b>              | <b>-0.8</b><br><b>(-2.3 to 0.6)</b>                 |
| Congenital anomalies                                       | 221.1<br>(194.2 to 256.6)                        | --                                                | 32.2<br>(22.6 to 44.2)                  | 27.8<br>(19.3 to 36.8)                            | -4.6<br>(-10.1 to 1.4)                              |
| Neural tube defects                                        | 29.0<br>(25.6 to 32.4)                           | --                                                | 8.7<br>(6.0 to 11.8)                    | 31.3<br>(16.5 to 49.6)                            | -2.1<br>(-11.8 to 9.2)                              |
| Congenital heart anomalies                                 | 54.4<br>(44.3 to 65.2)                           | --                                                | 2.7<br>(1.3 to 4.5)                     | 28.5<br>(12.7 to 48.4)                            | 0.2<br>(-11.3 to 14.4)                              |
| Orofacial clefts                                           | 5.2<br>(4.6 to 6.0)                              | --                                                | 0.1<br>(0.1 to 0.1)                     | 30.0<br>(15.2 to 47.3)                            | -2.6<br>(-13.9 to 10.2)                             |
| Down's syndrome                                            | 3.2<br>(2.7 to 3.8)                              | --                                                | 0.3<br>(0.2 to 0.4)                     | 35.7<br>(24.9 to 45.5)                            | 1.6<br>(-5.9 to 8.9)                                |
| Turner syndrome                                            | 11.6<br>(9.8 to 13.6)                            | --                                                | 0.2<br>(0.1 to 0.3)                     | 30.5<br>(-6.6 to 83.2)                            | -2.1<br>(-28.5 to 33.3)                             |
| Klinefelter syndrome                                       | 11.5<br>(9.7 to 13.7)                            | --                                                | 0.1<br>(< 0.05 to 0.1)                  | 35.0<br>(2.9 to 74.8)                             | 0.9<br>(-21.8 to 30.0)                              |



| Cause                                         | Prevalence in thousands (95% UI)              | Incidence in thousands (95% UI)                | YLDs in thousands (95% UI)            |                                                   |                                                     |
|-----------------------------------------------|-----------------------------------------------|------------------------------------------------|---------------------------------------|---------------------------------------------------|-----------------------------------------------------|
|                                               | 2016 counts                                   | 2016 counts                                    | 2016 counts                           | Percentage change in counts between 2006 and 2016 | Percentage change in age-standardised rates between |
| Other chromosomal abnormalities               | 3.6<br>(3.1 to 4.3)                           | --                                             | 0.7<br>(0.4 to 1.1)                   | 29.6<br>(-11.9 to 84.7)                           | 2.0<br>(-29.5 to 42.7)                              |
| Congenital musculoskeletal and limb anomalies | 18.6<br>(16.1 to 21.1)                        | --                                             | 2.7<br>(1.8 to 3.9)                   | 36.9<br>(17.3 to 56.5)                            | 0.9<br>(-11.0 to 13.3)                              |
| Urogenital congenital anomalies               | 14.9<br>(13.0 to 17.1)                        | --                                             | 0.3<br>(0.2 to 0.5)                   | 29.6<br>(16.8 to 45.1)                            | -1.6<br>(-10.2 to 8.6)                              |
| Digestive congenital anomalies                | 19.2<br>(17.0 to 21.5)                        | --                                             | 0.8<br>(0.5 to 1.2)                   | 37.1<br>(11.2 to 69.2)                            | 2.2<br>(-14.6 to 22.3)                              |
| Other congenital anomalies                    | 92.8<br>(62.7 to 137.2)                       | --                                             | 15.6<br>(10.1 to 23.8)                | 23.7<br>(13.3 to 34.9)                            | -8.0<br>(-14.7 to -0.2)                             |
| Skin and subcutaneous diseases                | 6,147.1<br>(5,903.8 to 6,442.9)               | 14,645.1<br>(13,408.5 to 16,037.9)             | 143.5<br>(93.2 to 211.6)              | 37.5<br>(34.7 to 40.5)                            | 2.2<br>(0.4 to 4.0)                                 |
| Dermatitis                                    | 883.4<br>(730.6 to 1,058.2)                   | 786.3<br>(687.2 to 911.0)                      | 35.3<br>(19.9 to 59.7)                | 34.6<br>(28.6 to 40.3)                            | 0.5<br>(-3.3 to 4.0)                                |
| Psoriasis                                     | 82.3<br>(77.7 to 87.4)                        | 13.4<br>(12.6 to 14.2)                         | 7.2<br>(5.1 to 9.6)                   | 49.7<br>(31.8 to 69.3)                            | 9.2<br>(-0.8 to 20.6)                               |
| Cellulitis                                    | 6.5<br>(6.0 to 7.1)                           | 112.3<br>(103.8 to 121.5)                      | 0.4<br>(0.2 to 0.6)                   | 37.4<br>(9.7 to 77.2)                             | 2.2<br>(-16.6 to 27.4)                              |
| Pyoderma                                      | 103.8<br>(98.7 to 109.1)                      | 2,028.0<br>(1,924.3 to 2,126.5)                | 0.6<br>(0.2 to 1.2)                   | 35.0<br>(26.6 to 44.3)                            | 1.1<br>(-4.5 to 6.5)                                |
| Scabies                                       | 340.3<br>(271.9 to 437.0)                     | 1,055.2<br>(844.2 to 1,349.0)                  | 8.8<br>(4.8 to 14.9)                  | 30.9<br>(23.2 to 39.1)                            | -2.3<br>(-7.2 to 2.6)                               |
| Fungal skin diseases                          | 2,644.7<br>(2,202.7 to 3,126.5)               | 7,373.0<br>(6,195.9 to 8,728.5)                | 15.0<br>(5.9 to 32.4)                 | 34.8<br>(33.2 to 36.5)                            | 0.4<br>(-0.4 to 1.2)                                |
| Viral skin diseases                           | 556.0<br>(526.0 to 588.1)                     | 766.2<br>(722.4 to 818.2)                      | 17.0<br>(10.6 to 25.1)                | 35.2<br>(30.2 to 40.1)                            | 0.1<br>(-3.1 to 3.4)                                |
| Acne vulgaris                                 | 1,598.4<br>(1,364.9 to 1,858.2)               | 1,160.8<br>(898.8 to 1,549.1)                  | 41.1<br>(26.7 to 59.6)                | 43.0<br>(35.1 to 51.2)                            | 5.1<br>(-0.2 to 10.7)                               |
| Alopecia areata                               | 29.8<br>(27.8 to 31.7)                        | 53.2<br>(49.7 to 56.6)                         | 1.0<br>(0.6 to 1.5)                   | 38.2<br>(22.2 to 55.8)                            | 0.7<br>(-9.5 to 11.7)                               |
| Pruritus                                      | 124.6<br>(108.9 to 141.6)                     | 101.8<br>(89.9 to 115.4)                       | 1.3<br>(0.6 to 2.4)                   | 37.6<br>(28.7 to 46.5)                            | 1.2<br>(-4.0 to 6.8)                                |
| Urticaria                                     | 191.4<br>(162.1 to 226.5)                     | 346.0<br>(291.2 to 406.8)                      | 11.5<br>(7.3 to 16.8)                 | 32.7<br>(24.4 to 41.7)                            | 0.3<br>(-5.3 to 6.6)                                |
| Decubitus ulcer                               | 1.3<br>(1.2 to 1.4)                           | 4.7<br>(4.2 to 5.2)                            | 0.2<br>(0.1 to 0.3)                   | 36.9<br>(27.0 to 47.8)                            | 4.5<br>(-9.3 to 20.4)                               |
| Other skin and subcutaneous diseases          | 752.5<br>(729.3 to 775.7)                     | 844.2<br>(817.1 to 871.1)                      | 4.2<br>(2.0 to 7.6)                   | 39.8<br>(35.2 to 44.3)                            | 3.4<br>(0.8 to 6.0)                                 |
| Sense organ diseases                          | 2,579.3<br>(2,495.2 to 2,673.0)               | 1,627.8†<br>(1,509.3 to 1,756.4)               | 104.9<br>(73.2 to 146.5)              | 29.7<br>(25.7 to 33.3)                            | -2.3<br>(-4.4 to -0.1)                              |
| Glaucoma                                      | 4.3<br>(3.5 to 5.3)                           | --                                             | 0.5<br>(0.3 to 0.7)                   | 41.3<br>(21.2 to 63.1)                            | 8.5<br>(-5.3 to 23.7)                               |
| Cataract                                      | 117.5<br>(101.8 to 134.6)                     | --                                             | 10.8<br>(7.4 to 15.7)                 | 33.9<br>(24.6 to 42.9)                            | 2.3<br>(-4.5 to 9.4)                                |
| Macular degeneration                          | 5.0<br>(3.7 to 6.7)                           | --                                             | 0.4<br>(0.2 to 0.7)                   | 43.5<br>(23.5 to 66.9)                            | 11.0<br>(-3.6 to 26.4)                              |
| Refraction and accommodation disorders        | 997.6<br>(948.4 to 1,047.2)                   | --                                             | 22.3<br>(14.4 to 33.5)                | 25.8<br>(20.1 to 31.7)                            | -6.4<br>(-9.9 to -2.7)                              |
| Age-related and other hearing loss            | 1,656.0<br>(1,533.9 to 1,780.2)               | --                                             | 57.0<br>(38.9 to 80.8)                | 28.5<br>(22.1 to 34.3)                            | -3.7<br>(-6.5 to -1.1)                              |
| Other vision loss                             | 48.7<br>(42.2 to 55.7)                        | --                                             | 4.8<br>(3.2 to 6.8)                   | 37.3<br>(23.3 to 51.8)                            | 3.6<br>(-5.3 to 12.6)                               |
| Other sense organ diseases                    | 301.9<br>(280.0 to 324.2)                     | 1,627.8<br>(1,509.3 to 1,756.4)                | 9.1<br>(5.7 to 13.9)                  | 38.2<br>(30.7 to 46.6)                            | 1.7<br>(-2.5 to 6.0)                                |
| Oral disorders                                | 9,276.1<br>(8,745.9 to 9,735.1)               | 21,054.1†<br>(18,150.8 to 24,295.1)            | 27.1<br>(14.6 to 46.9)                | 38.9<br>(35.3 to 42.4)                            | 0.7<br>(-1.6 to 3.1)                                |
| Caries of deciduous teeth                     | 2,964.0<br>(2,500.6 to 3,405.3)               | 8,534.3<br>(6,107.3 to 11,421.2)               | 0.7<br>(0.3 to 1.4)                   | 19.5<br>(5.5 to 36.8)                             | -9.7<br>(-20.5 to 3.5)                              |
| Caries of permanent teeth                     | 4,959.6<br>(4,535.2 to 5,402.0)               | 12,303.1<br>(10,988.3 to 13,871.4)             | 2.9<br>(1.3 to 5.5)                   | 34.0<br>(26.6 to 42.3)                            | -3.2<br>(-7.1 to 0.9)                               |
| Periodontal disease                           | 1,741.5<br>(1,277.3 to 2,227.4)               | 207.1<br>(150.7 to 269.9)                      | 11.5<br>(4.3 to 25.2)                 | 40.6<br>(34.2 to 46.8)                            | 0.6<br>(-3.5 to 4.6)                                |
| Edentulism and severe tooth loss              | 145.7<br>(126.7 to 165.2)                     | 9.6<br>(8.3 to 10.9)                           | 4.1<br>(2.7 to 5.8)                   | 42.9<br>(35.0 to 51.9)                            | 3.4<br>(-1.0 to 8.5)                                |
| Other oral disorders                          | 269.8<br>(256.9 to 283.8)                     | --                                             | 7.9<br>(4.9 to 11.8)                  | 38.1<br>(32.6 to 43.7)                            | 0.4<br>(-2.9 to 3.9)                                |
| <b>Injuries</b>                               | <b>1,952.7</b><br><b>(1,821.2 to 2,095.1)</b> | <b>1,344.7†</b><br><b>(1,265.7 to 1,431.2)</b> | <b>83.8</b><br><b>(56.9 to 117.9)</b> | <b>38.6</b><br><b>(35.8 to 41.5)</b>              | <b>2.4</b><br><b>(0.9 to 3.9)</b>                   |
| <b>Transport injuries</b>                     | <b>217.0</b><br><b>(201.7 to 232.7)</b>       | <b>111.8</b><br><b>(99.1 to 125.8)</b>         | <b>13.3</b><br><b>(8.8 to 19.2)</b>   | <b>46.6</b><br><b>(43.3 to 49.8)</b>              | <b>7.2</b><br><b>(5.2 to 9.2)</b>                   |
| Road injuries                                 | 173.4<br>(162.8 to 185.1)                     | 95.7<br>(83.6 to 109.7)                        | 10.5<br>(7.0 to 15.1)                 | 46.9<br>(43.6 to 50.0)                            | 7.4<br>(5.3 to 9.3)                                 |
| Pedestrian road injuries                      | 37.7<br>(33.2 to 43.0)                        | 14.7<br>(11.8 to 18.2)                         | 2.3<br>(1.5 to 3.3)                   | 42.5<br>(39.3 to 45.6)                            | 4.7<br>(2.6 to 6.6)                                 |
| Cyclist road injuries                         | 30.2<br>(25.2 to 35.7)                        | 18.5<br>(14.1 to 23.2)                         | 1.7<br>(1.1 to 2.5)                   | 53.5<br>(49.7 to 57.2)                            | 13.1<br>(10.9 to 15.3)                              |
| Motorcyclist road injuries                    | 26.1<br>(22.3 to 31.0)                        | 9.6<br>(7.6 to 12.1)                           | 1.5<br>(1.0 to 2.2)                   | 48.6<br>(44.9 to 52.0)                            | 8.0<br>(5.9 to 10.1)                                |
| Motor vehicle road injuries                   | 50.8<br>(43.8 to 57.8)                        | 32.9<br>(27.3 to 39.1)                         | 3.3<br>(2.2 to 4.8)                   | 51.0<br>(47.4 to 54.6)                            | 10.3<br>(8.1 to 12.5)                               |
| Other road injuries                           | 28.7<br>(24.8 to 33.4)                        | 20.1<br>(16.0 to 25.0)                         | 1.6<br>(1.1 to 2.3)                   | 37.6<br>(34.5 to 40.6)                            | 0.3<br>(-1.6 to 2.2)                                |
| Other transport injuries                      | 43.6<br>(35.9 to 53.7)                        | 16.1<br>(12.9 to 20.4)                         | 2.8<br>(1.8 to 4.0)                   | 45.2<br>(40.3 to 50.4)                            | 6.3<br>(3.8 to 8.9)                                 |
| <b>Unintentional injuries</b>                 | <b>1,685.7</b><br><b>(1,556.8 to 1,829.5)</b> | <b>1,201.2</b><br><b>(1,125.3 to 1,285.0)</b>  | <b>64.8</b><br><b>(43.8 to 91.6)</b>  | <b>37.7</b><br><b>(34.9 to 40.7)</b>              | <b>1.7</b><br><b>(0.1 to 3.2)</b>                   |
| Falls                                         | 602.2<br>(521.3 to 687.2)                     | 406.2<br>(350.6 to 474.4)                      | 26.7<br>(18.7 to 36.7)                | 38.0<br>(35.1 to 40.7)                            | 1.6<br>(-0.0 to 3.2)                                |
| Drowning                                      | 6.1<br>(5.1 to 7.2)                           | 1.9<br>(1.6 to 2.2)                            | 0.4<br>(0.2 to 0.6)                   | 29.1<br>(25.1 to 33.4)                            | -4.2<br>(-6.4 to -2.1)                              |
| Fire, heat, and hot substances                | 181.7<br>(151.2 to 223.9)                     | 37.7<br>(30.7 to 45.7)                         | 5.6<br>(3.9 to 7.8)                   | 34.6<br>(27.1 to 42.1)                            | -0.5<br>(-4.7 to 4.0)                               |
| Poisonings                                    | 5.8<br>(4.5 to 7.0)                           | 11.2<br>(8.5 to 14.3)                          | 0.6<br>(0.4 to 1.0)                   | 50.8<br>(37.6 to 65.5)                            | 10.6<br>(3.2 to 19.0)                               |
| Exposure to mechanical forces                 | 284.1<br>(239.3 to 346.0)                     | 166.9<br>(137.7 to 197.9)                      | 7.9<br>(5.1 to 11.5)                  | 38.0<br>(34.2 to 42.1)                            | 1.6<br>(-0.5 to 3.6)                                |
| Unintentional firearm injuries                | 13.1<br>(10.7 to 16.1)                        | 5.2<br>(3.7 to 7.0)                            | 0.6<br>(0.4 to 0.9)                   | 50.7<br>(46.6 to 55.4)                            | 9.5<br>(7.0 to 12.0)                                |
| Unintentional suffocation                     | 31.3<br>(21.9 to 42.7)                        | 11.4<br>(7.9 to 16.3)                          | 1.1<br>(0.6 to 1.7)                   | 33.0<br>(27.9 to 38.2)                            | -0.9<br>(-3.4 to 1.7)                               |
| Other exposure to mechanical forces           | 239.7<br>(198.8 to 298.1)                     | 150.3<br>(123.4 to 177.8)                      | 6.2<br>(4.0 to 8.9)                   | 37.7<br>(33.6 to 42.0)                            | 1.2<br>(-1.0 to 3.3)                                |

| Cause                                                                               | Prevalence in thousands (95% UI)        | Incidence in thousands (95% UI)       | YLDs in thousands (95% UI)              |                                                   |                                                     |
|-------------------------------------------------------------------------------------|-----------------------------------------|---------------------------------------|-----------------------------------------|---------------------------------------------------|-----------------------------------------------------|
|                                                                                     | 2016 counts                             | 2016 counts                           | 2016 counts                             | Percentage change in counts between 2006 and 2016 | Percentage change in age-standardised rates between |
| Adverse effects of medical treatment                                                | 7.0<br>(5.5 to 8.8)                     | 91.6<br>(78.3 to 106.8)               | 0.9<br>(0.6 to 1.4)                     | 22.0<br>(14.8 to 29.8)                            | -5.4<br>(-9.2 to -1.5)                              |
| Animal contact                                                                      | 108.5<br>(95.4 to 126.3)                | 191.8<br>(162.0 to 225.3)             | 4.0<br>(2.6 to 5.6)                     | 28.3<br>(21.8 to 35.0)                            | -6.4<br>(-9.9 to -3.0)                              |
| Venomous animal contact                                                             | 41.6<br>(34.6 to 50.6)                  | 78.9<br>(62.3 to 98.2)                | 2.7<br>(1.8 to 3.9)                     | 28.9<br>(20.0 to 38.7)                            | -5.7<br>(-10.7 to -0.3)                             |
| Non-venomous animal contact                                                         | 66.8<br>(56.0 to 81.3)                  | 112.9<br>(92.5 to 135.4)              | 1.3<br>(0.8 to 1.9)                     | 27.1<br>(22.9 to 31.3)                            | -7.5<br>(-10.0 to -5.0)                             |
| Foreign body                                                                        | 136.3<br>(108.9 to 164.9)               | 117.9<br>(101.9 to 136.7)             | 6.3<br>(4.0 to 9.2)                     | 35.2<br>(30.1 to 40.3)                            | 0.5<br>(-1.9 to 3.0)                                |
| Pulmonary aspiration and foreign body in airway                                     | 81.9<br>(59.6 to 112.4)                 | 47.5<br>(38.5 to 59.6)                | 4.2<br>(2.7 to 6.2)                     | 34.4<br>(28.8 to 39.8)                            | -0.0<br>(-2.6 to 2.5)                               |
| Foreign body in eyes                                                                | 7.3<br>(3.7 to 11.3)                    | 41.8<br>(31.5 to 56.3)                | 0.4<br>(0.2 to 0.7)                     | 32.7<br>(27.7 to 37.4)                            | -1.8<br>(-4.5 to 1.1)                               |
| Foreign body in other body part                                                     | 47.2<br>(37.1 to 61.8)                  | 28.6<br>(23.0 to 35.1)                | 1.7<br>(1.1 to 2.5)                     | 38.0<br>(31.9 to 44.1)                            | 2.5<br>(-0.8 to 5.5)                                |
| Environmental heat and cold exposure                                                | 138.4<br>(114.6 to 164.4)               | 58.8<br>(47.2 to 73.0)                | 6.0<br>(3.9 to 8.7)                     | 50.4<br>(46.6 to 54.2)                            | 9.9<br>(7.8 to 11.8)                                |
| Other unintentional injuries                                                        | 215.7<br>(168.7 to 275.8)               | 117.2<br>(96.7 to 140.6)              | 6.5<br>(4.2 to 9.5)                     | 38.7<br>(35.4 to 42.1)                            | 3.8<br>(2.2 to 5.6)                                 |
| <b>Self-harm and interpersonal violence</b>                                         | <b>452.9</b><br><b>(400.4 to 510.7)</b> | <b>29.8†</b><br><b>(24.8 to 35.8)</b> | <b>5.4</b><br><b>(3.7 to 7.5)</b>       | <b>30.8</b><br><b>(26.6 to 35.3)</b>              | <b>-2.7</b><br><b>(-5.2 to 0.0)</b>                 |
| Self-harm                                                                           | 8.2<br>(7.1 to 9.2)                     | 5.4<br>(4.6 to 6.4)                   | 0.5<br>(0.3 to 0.7)                     | 41.6<br>(37.8 to 45.6)                            | 2.4<br>(0.1 to 4.6)                                 |
| Self-harm by firearm                                                                | 0.6<br>(0.5 to 0.7)                     | 0.3<br>(0.2 to 0.5)                   | < 0.05<br>(< 0.05 to < 0.05)            | 23.8<br>(19.4 to 28.4)                            | -11.5<br>(-14.1 to -8.7)                            |
| Self-harm by other specified means                                                  | 7.5<br>(6.5 to 8.6)                     | 5.1<br>(4.3 to 6.1)                   | 0.4<br>(0.3 to 0.7)                     | 42.8<br>(38.9 to 47.0)                            | 3.5<br>(1.1 to 5.8)                                 |
| Interpersonal violence                                                              | 444.7<br>(391.4 to 502.9)               | 24.4†<br>(19.4 to 30.5)               | 5.0<br>(3.4 to 6.8)                     | 29.9<br>(25.6 to 34.5)                            | -3.5<br>(-6.1 to -0.6)                              |
| Assault by firearm                                                                  | 1.2<br>(1.0 to 1.4)                     | 0.6<br>(0.4 to 0.8)                   | 0.1<br>(< 0.05 to 0.1)                  | 60.3<br>(54.4 to 66.5)                            | 18.5<br>(15.1 to 21.9)                              |
| Assault by sharp object                                                             | 12.8<br>(10.3 to 15.5)                  | 7.6<br>(5.5 to 10.4)                  | 0.5<br>(0.3 to 0.7)                     | 55.9<br>(51.6 to 60.0)                            | 14.5<br>(11.9 to 17.0)                              |
| Sexual violence                                                                     | 410.6<br>(357.6 to 468.1)               | --                                    | 3.5<br>(2.4 to 5.0)                     | 21.2<br>(16.4 to 25.7)                            | -11.6<br>(-14.3 to -8.7)                            |
| Assault by other means                                                              | 20.1<br>(17.3 to 23.7)                  | 16.2<br>(12.6 to 20.3)                | 0.9<br>(0.6 to 1.3)                     | 58.2<br>(54.1 to 62.1)                            | 15.1<br>(12.7 to 17.5)                              |
| <b>Forces of nature, conflict and terrorism, and executions and police conflict</b> | <b>7.7</b><br><b>(3.7 to 15.1)</b>      | <b>1.8†</b><br><b>(0.4 to 6.8)</b>    | <b>0.2</b><br><b>(&lt; 0.05 to 0.8)</b> | <b>45.2</b><br><b>(5.4 to 90.1)</b>               | <b>12.8</b><br><b>(-3.1 to 30.8)</b>                |
| Exposure to forces of nature                                                        | 0.3<br>(0.1 to 0.5)                     | --                                    | < 0.05<br>(< 0.05 to < 0.05)            | 231.0<br>(212.8 to 306.1)                         | 132.6<br>(119.5 to 186.1)                           |
| Conflict and terrorism                                                              | 3.2<br>(1.4 to 5.5)                     | --                                    | 0.1<br>(< 0.05 to 0.3)                  | 41.8<br>(35.6 to 59.2)                            | 10.1<br>(6.3 to 19.0)                               |
| Executions and police conflict                                                      | 4.2<br>(1.0 to 11.5)                    | 1.8<br>(0.4 to 6.8)                   | 0.1<br>(< 0.05 to 0.5)                  | 41.0<br>(-19.3 to 115.9)                          | 9.2<br>(-21.2 to 37.5)                              |
| <b>Impairments</b>                                                                  | --                                      | --                                    | --                                      | --                                                | --                                                  |
| Anaemia                                                                             | 11,096.7<br>(10,780.3 to 11,425.0)      | --                                    | 441.6<br>(295.7 to 633.9)               | 20.3<br>(14.2 to 25.4)                            | -12.2<br>(-18.4 to -8.1)                            |
| Developmental intellectual disability                                               | 760.3<br>(581.1 to 946.1)               | --                                    | 67.3<br>(48.8 to 90.8)                  | 33.9<br>(25.6 to 46.3)                            | -1.3<br>(-6.9 to 7.5)                               |
| Epilepsy                                                                            | 112.5<br>(66.2 to 186.7)                | --                                    | 43.6<br>(23.1 to 77.5)                  | 47.7<br>(-32.4 to 215.1)                          | 8.9<br>(-51.4 to 141.3)                             |
| Guillain-Barre syndrome                                                             | 0.1<br>(0.1 to 0.2)                     | --                                    | < 0.05<br>(< 0.05 to 0.1)               | 35.4<br>(34.3 to 36.5)                            | 0.1<br>(0.0 to 0.2)                                 |
| Hearing loss                                                                        | 2,124.5<br>(2,001.0 to 2,255.6)         | --                                    | 83.1<br>(58.1 to 114.2)                 | 26.1<br>(21.2 to 30.4)                            | -4.8<br>(-7.3 to -2.6)                              |
| Heart failure                                                                       | 34.1<br>(30.4 to 38.2)                  | --                                    | 3.6<br>(2.5 to 4.8)                     | 26.9<br>(17.0 to 37.4)                            | -3.6<br>(-12.1 to 4.5)                              |
| Infertility                                                                         | 304.4<br>(236.5 to 404.4)               | --                                    | 1.8<br>(0.7 to 3.5)                     | 67.2<br>(33.8 to 110.5)                           | 23.2<br>(-3.5 to 59.4)                              |
| Pelvic inflammatory disease                                                         | 18.1<br>(15.2 to 21.6)                  | --                                    | 2.4<br>(1.6 to 3.4)                     | 32.7<br>(15.8 to 53.9)                            | -5.2<br>(-16.8 to 9.1)                              |
| Vision loss                                                                         | 1,271.2<br>(1,207.5 to 1,335.8)         | --                                    | 53.8<br>(38.2 to 73.1)                  | 33.1<br>(24.8 to 45.9)                            | -3.4<br>(-7.5 to 1.7)                               |

We did not calculate incidence for the nine impairments, certain NTDs, and causes with only birth prevalence. Blank cells mean that no estimate is available.

† Incidence for aggregate causes represents the sum of the incidence of the causes below the aggregate.

‡ Incidence estimates for stroke represent first-ever stroke only.

^ Incidence of HIV/AIDS represents new infections of HIV only and does not include new infections of Tuberculosis in HIV positive cases.

SR Table 14: Prevalence, incidence, and YLDs for 2016, percentage change of YLD counts and percentage change of age-standardised YLD rates between 2006 and 2016 by cause and impairments, for all ages, Burundi.

| Cause                                                                                | Prevalence in thousands (95% UI)          | Incidence in thousands (95% UI)            | YLDs in thousands (95% UI)         |                                                   |                                                     |
|--------------------------------------------------------------------------------------|-------------------------------------------|--------------------------------------------|------------------------------------|---------------------------------------------------|-----------------------------------------------------|
|                                                                                      | 2016 counts                               | 2016 counts                                | 2016 counts                        | Percentage change in counts between 2006 and 2016 | Percentage change in age-standardised rates between |
| <b>All causes</b>                                                                    | <b>11,223.4</b><br>(11,185.3 to 11,263.2) | <b>75,772.8†</b><br>(71,807.7 to 80,060.0) | <b>951.5</b><br>(696.2 to 1,258.2) | <b>32.2</b><br>(27.9 to 36.6)                     | <b>-6.2</b><br>(-8.7 to -3.7)                       |
| <b>Communicable, maternal, neonatal, and nutritional disorders</b>                   | <b>9,169.7</b><br>(9,036.4 to 9,310.8)    | <b>43,754.1†</b><br>(40,732.3 to 46,823.2) | <b>193.5</b><br>(136.3 to 267.0)   | <b>5.6</b><br>(-1.2 to 12.2)                      | <b>-30.9</b><br>(-36.6 to -26.2)                    |
| <b>HIV/AIDS and tuberculosis</b>                                                     | <b>2,981.3</b><br>(2,613.8 to 3,291.3)    | <b>39.2†</b><br>(30.4 to 53.5)             | <b>17.2</b><br>(11.5 to 23.8)      | <b>-21.5</b><br>(-44.6 to 8.5)                    | <b>-46.6</b><br>(-62.3 to -24.5)                    |
| Tuberculosis                                                                         | 2,702.9<br>(2,370.3 to 3,115.1)           | 35.0†<br>(28.3 to 43.8)                    | 7.4<br>(4.7 to 10.6)               | 36.0<br>(19.2 to 57.4)                            | -7.8<br>(-17.1 to 2.9)                              |
| Drug-susceptible tuberculosis                                                        | 23.3<br>(18.7 to 29.2)                    | 34.3<br>(27.7 to 42.8)                     | 7.2<br>(4.6 to 10.4)               | 35.5<br>(18.4 to 57.8)                            | -8.1<br>(-18.0 to 3.5)                              |
| Multidrug-resistant tuberculosis without extensive drug resistance                   | 0.5<br>(0.1 to 1.2)                       | 0.7<br>(0.2 to 1.8)                        | 0.2<br>(< 0.05 to 0.4)             | 58.4<br>(-52.1 to 368.2)                          | 7.4<br>(-68.0 to 233.8)                             |
| Extensively drug-resistant tuberculosis                                              | < 0.05<br>(< 0.05 to < 0.05)              | < 0.05<br>(< 0.05 to < 0.05)               | < 0.05<br>(< 0.05 to < 0.05)       | 380.6<br>(54.2 to 1,323.2)                        | 223.7<br>(2.3 to 881.7)                             |
| Latent tuberculosis infection                                                        | 2,679.1<br>(2,348.7 to 3,086.9)           | --                                         | --                                 | --                                                | --                                                  |
| HIV/AIDS                                                                             | 86.9<br>(67.9 to 121.1)                   | 4.2^<br>(0.5 to 15.6)                      | 9.9<br>(6.4 to 14.9)               | -40.3<br>(-61.4 to -7.2)                          | -59.5<br>(-74.2 to -34.1)                           |
| Drug-susceptible HIV/AIDS - Tuberculosis                                             | 4.6<br>(2.8 to 7.2)                       | 6.8<br>(4.2 to 10.6)                       | 1.8<br>(0.9 to 3.0)                | -39.0<br>(-49.8 to -27.4)                         | -53.7<br>(-61.4 to -44.7)                           |
| Multidrug-resistant HIV/AIDS - Tuberculosis without extensive drug resistance        | 0.1<br>(< 0.05 to 0.3)                    | 0.2<br>(< 0.05 to 0.5)                     | < 0.05<br>(< 0.05 to 0.1)          | -27.9<br>(-78.2 to 111.7)                         | -45.4<br>(-83.5 to 60.8)                            |
| Extensively drug-resistant HIV/AIDS - Tuberculosis                                   | < 0.05<br>(< 0.05 to < 0.05)              | < 0.05<br>(< 0.05 to < 0.05)               | < 0.05<br>(< 0.05 to < 0.05)       | 119.6<br>(-33.7 to 545.3)                         | 66.4<br>(-49.7 to 390.3)                            |
| HIV/AIDS resulting in other diseases                                                 | 82.1<br>(63.2 to 116.6)                   | 4.2<br>(0.5 to 15.6)                       | 8.0<br>(5.0 to 12.3)               | -40.6<br>(-64.3 to 4.4)                           | -60.7<br>(-76.6 to -27.4)                           |
| <b>Diarrhoea, lower respiratory infections, and other common infectious diseases</b> | <b>815.1</b><br>(778.6 to 856.3)          | <b>36,819.2†</b><br>(33,832.7 to 39,869.6) | <b>52.6</b><br>(36.9 to 70.8)      | <b>36.0</b><br>(31.6 to 40.4)                     | <b>-5.7</b><br>(-8.4 to -2.9)                       |
| Diarrhoeal diseases                                                                  | 224.4<br>(209.5 to 239.4)                 | 14,862.1<br>(13,853.3 to 15,890.7)         | 25.6<br>(17.6 to 35.1)             | 30.3<br>(23.8 to 36.9)                            | -10.4<br>(-14.3 to -6.5)                            |
| Intestinal infectious diseases                                                       | 0.8<br>(0.5 to 1.1)                       | 13.3†<br>(9.4 to 18.7)                     | 0.1<br>(0.1 to 0.2)                | 31.8<br>(5.9 to 63.7)                             | -6.4<br>(-21.2 to 13.4)                             |
| Typhoid fever                                                                        | 0.8<br>(0.5 to 1.1)                       | 12.2<br>(8.6 to 17.2)                      | 0.1<br>(0.1 to 0.2)                | 33.3<br>(6.4 to 66.6)                             | -5.6<br>(-21.0 to 14.8)                             |
| Paratyphoid fever                                                                    | < 0.05<br>(< 0.05 to 0.1)                 | 1.1<br>(0.7 to 1.7)                        | < 0.05<br>(< 0.05 to < 0.05)       | 47.2<br>(8.8 to 98.9)                             | 3.6<br>(-20.7 to 33.1)                              |
| Other intestinal infectious diseases                                                 | --                                        | --                                         | < 0.05<br>(< 0.05 to < 0.05)       | -22.5<br>(-46.9 to 12.1)                          | -43.7<br>(-57.4 to -25.6)                           |
| Lower respiratory infections                                                         | 19.1<br>(17.1 to 21.4)                    | 818.7<br>(725.4 to 913.1)                  | 1.2<br>(0.8 to 1.7)                | 33.1<br>(17.8 to 50.4)                            | -7.1<br>(-15.5 to 1.7)                              |
| Upper respiratory infections                                                         | 263.1<br>(227.9 to 300.8)                 | 19,574.4<br>(16,896.8 to 22,505.7)         | 6.6<br>(3.9 to 10.4)               | 47.4<br>(38.1 to 57.4)                            | 2.1<br>(-3.0 to 7.7)                                |
| Otitis media                                                                         | 253.5<br>(225.8 to 282.6)                 | 1,130.5<br>(873.1 to 1,454.6)              | 8.6<br>(5.4 to 12.9)               | 39.5<br>(29.5 to 50.1)                            | -2.3<br>(-8.5 to 4.0)                               |
| Meningitis                                                                           | 68.2<br>(56.1 to 81.9)                    | 16.2<br>(13.9 to 19.1)                     | 6.7<br>(4.7 to 8.8)                | 39.8<br>(28.0 to 53.0)                            | -1.7<br>(-9.2 to 6.5)                               |
| Pneumococcal meningitis                                                              | 20.7<br>(17.1 to 25.1)                    | 2.4<br>(1.8 to 3.2)                        | 2.4<br>(1.7 to 3.2)                | 24.7<br>(5.4 to 47.5)                             | -13.7<br>(-25.5 to 0.4)                             |
| H influenzae type B meningitis                                                       | 11.3<br>(8.6 to 14.9)                     | 2.4<br>(1.6 to 3.4)                        | 1.4<br>(1.0 to 1.9)                | 39.6<br>(18.4 to 65.2)                            | -0.1<br>(-12.6 to 14.8)                             |
| Meningococcal infection                                                              | 4.9<br>(3.4 to 6.8)                       | 1.6<br>(1.2 to 2.2)                        | 0.5<br>(0.3 to 0.7)                | 46.5<br>(37.3 to 56.6)                            | 4.2<br>(-2.7 to 11.8)                               |
| Other meningitis                                                                     | 31.2<br>(22.3 to 41.5)                    | 9.8<br>(8.2 to 11.9)                       | 2.4<br>(1.6 to 3.2)                | 57.5<br>(36.7 to 78.8)                            | 11.3<br>(-0.8 to 23.5)                              |
| Encephalitis                                                                         | 32.2<br>(20.1 to 49.4)                    | 13.1<br>(11.3 to 15.0)                     | 3.4<br>(2.4 to 4.5)                | 45.4<br>(27.2 to 64.3)                            | 3.5<br>(-7.5 to 15.4)                               |
| Diphtheria                                                                           | < 0.05<br>(< 0.05 to < 0.05)              | < 0.05<br>(< 0.05 to < 0.05)               | < 0.05<br>(< 0.05 to < 0.05)       | 3.0<br>(-61.8 to 158.6)                           | -30.8<br>(-68.6 to 42.0)                            |
| Whooping cough                                                                       | 3.1<br>(2.4 to 4.0)                       | 22.7<br>(17.7 to 28.8)                     | 0.2<br>(0.1 to 0.2)                | 14.6<br>(-9.2 to 42.9)                            | -25.1<br>(-40.9 to -6.5)                            |
| Tetanus                                                                              | 0.2<br>(0.2 to 0.2)                       | 0.6<br>(0.3 to 1.1)                        | < 0.05<br>(< 0.05 to < 0.05)       | -18.2<br>(-45.2 to 23.4)                          | -41.3<br>(-54.8 to -18.4)                           |
| Measles                                                                              | 0.4<br>(0.1 to 0.8)                       | 13.4<br>(4.8 to 29.1)                      | < 0.05<br>(< 0.05 to 0.1)          | 289.9<br>(153.8 to 509.5)                         | 153.1<br>(66.2 to 291.8)                            |
| Varicella and herpes zoster                                                          | 11.2<br>(10.5 to 12.0)                    | 354.4<br>(329.1 to 381.9)                  | 0.3<br>(0.2 to 0.5)                | 42.7<br>(20.9 to 67.8)                            | 0.4<br>(-11.2 to 13.9)                              |
| <b>Neglected tropical diseases and malaria</b>                                       | <b>5,190.4</b><br>(4,980.4 to 5,419.1)    | <b>2,223.6†</b><br>(1,637.2 to 2,890.7)    | <b>47.7</b><br>(32.5 to 68.9)      | <b>-25.8</b><br>(-31.6 to -19.3)                  | <b>-49.0</b><br>(-53.2 to -44.2)                    |
| Malaria                                                                              | 800.0<br>(680.1 to 923.4)                 | 1,655.2<br>(1,085.6 to 2,345.1)            | 11.7<br>(8.6 to 15.6)              | -13.4<br>(-23.4 to -2.0)                          | -36.2<br>(-42.4 to -28.5)                           |
| Chagas disease                                                                       | --                                        | --                                         | --                                 | --                                                | --                                                  |
| Leishmaniasis                                                                        | --                                        | --                                         | --                                 | --                                                | --                                                  |
| Visceral leishmaniasis                                                               | --                                        | --                                         | --                                 | --                                                | --                                                  |
| Cutaneous and mucocutaneous leishmaniasis                                            | --                                        | --                                         | --                                 | --                                                | --                                                  |
| African trypanosomiasis                                                              | --                                        | --                                         | --                                 | --                                                | --                                                  |
| Schistosomiasis                                                                      | 1,024.6<br>(761.1 to 1,209.7)             | 457.5<br>(360.4 to 527.4)                  | 9.1<br>(4.5 to 16.9)               | -41.4<br>(-46.0 to -34.0)                         | -58.8<br>(-61.8 to -54.1)                           |
| Cysticercosis                                                                        | 4.8<br>(3.1 to 6.5)                       | --                                         | 0.9<br>(0.5 to 1.5)                | 9.8<br>(-30.1 to 50.5)                            | -23.4<br>(-50.0 to 3.0)                             |
| Cystic echinococcosis                                                                | 10.1<br>(2.7 to 35.7)                     | 2.1<br>(0.6 to 7.7)                        | 0.9<br>(0.2 to 3.2)                | -13.4<br>(-83.9 to 386.5)                         | -39.1<br>(-88.3 to 193.8)                           |
| Lymphatic filariasis                                                                 | --                                        | --                                         | --                                 | --                                                | --                                                  |
| Onchocerciasis                                                                       | 149.0<br>(105.1 to 217.5)                 | 45.9<br>(23.2 to 86.0)                     | 10.4<br>(5.2 to 17.7)              | -34.5<br>(-49.2 to -20.6)                         | -52.1<br>(-62.4 to -42.1)                           |
| Trachoma                                                                             | 1.5<br>(1.0 to 2.1)                       | --                                         | 0.1<br>(0.1 to 0.2)                | -5.2<br>(-27.9 to 24.3)                           | -31.8<br>(-51.7 to -3.9)                            |
| Dengue                                                                               | 3.5<br>(1.6 to 6.5)                       | 58.7<br>(28.8 to 103.1)                    | 0.6<br>(0.2 to 1.2)                | 203.8<br>(99.2 to 665.4)                          | 113.7<br>(48.6 to 405.7)                            |
| Yellow fever                                                                         | 0.1<br>(< 0.05 to 0.3)                    | 3.8<br>(1.1 to 10.4)                       | < 0.05<br>(< 0.05 to < 0.05)       | -17.9<br>(-55.5 to 42.3)                          | -41.9<br>(-64.4 to -8.5)                            |
| Rabies                                                                               | < 0.05<br>(< 0.05 to < 0.05)              | 0.1<br>(< 0.05 to 0.3)                     | < 0.05<br>(< 0.05 to < 0.05)       | 5.7<br>(-55.2 to 115.2)                           | -27.9<br>(-65.4 to 25.1)                            |
| Intestinal nematode infections                                                       | 3,921.5<br>(3,686.0 to 4,200.9)           | --                                         | 11.2<br>(6.6 to 17.9)              | -26.6<br>(-31.8 to -20.9)                         | -50.3<br>(-54.3 to -45.9)                           |
| Ascariasis                                                                           | 1,126.5<br>(958.3 to 1,324.6)             | --                                         | 0.6<br>(0.4 to 1.1)                | -26.5<br>(-34.5 to -17.6)                         | -50.9<br>(-56.7 to -44.4)                           |



| Cause                                                                   | Prevalence in thousands (95% UI)                 | Incidence in thousands (95% UI)                   | YLDs in thousands (95% UI)              |                                                   |                                                     |
|-------------------------------------------------------------------------|--------------------------------------------------|---------------------------------------------------|-----------------------------------------|---------------------------------------------------|-----------------------------------------------------|
|                                                                         | 2016 counts                                      | 2016 counts                                       | 2016 counts                             | Percentage change in counts between 2006 and 2016 | Percentage change in age-standardised rates between |
| Trichuriasis                                                            | 1,057.9<br>(909.6 to 1,252.8)                    | --                                                | 0.3<br>(0.2 to 0.5)                     | -27.3<br>(-38.6 to -13.6)                         | -51.2<br>(-59.1 to -41.7)                           |
| Hookworm disease                                                        | 2,374.1<br>(2,122.6 to 2,664.9)                  | --                                                | 10.3<br>(6.1 to 16.3)                   | -26.6<br>(-32.4 to -20.2)                         | -50.3<br>(-54.6 to -45.5)                           |
| Food-borne trematodiasis                                                | --                                               | --                                                | --                                      | --                                                | --                                                  |
| Leprosy                                                                 | 0.9<br>(0.8 to 1.0)                              | 0.1<br>(0.1 to 0.1)                               | 0.1<br>(< 0.05 to 0.1)                  | 66.3<br>(30.0 to 111.4)                           | 16.5<br>(-5.4 to 45.1)                              |
| Ebola virus disease                                                     | --                                               | --                                                | --                                      | --                                                | --                                                  |
| Zika virus disease                                                      | --                                               | --                                                | --                                      | --                                                | --                                                  |
| Guinea worm disease                                                     | --                                               | --                                                | --                                      | --                                                | --                                                  |
| Other neglected tropical diseases                                       | 100.6<br>(88.5 to 116.2)                         | --                                                | 2.7<br>(1.7 to 4.2)                     | 40.4<br>(20.9 to 62.5)                            | -5.9<br>(-18.8 to 8.2)                              |
| <b>Maternal disorders</b>                                               | <b>43.0</b><br><b>(35.8 to 50.8)</b>             | <b>590.9†</b><br><b>(398.4 to 848.6)</b>          | <b>6.0</b><br><b>(3.9 to 8.4)</b>       | <b>13.3</b><br><b>(-2.8 to 32.8)</b>              | <b>-26.2</b><br><b>(-36.7 to -13.6)</b>             |
| Maternal haemorrhage                                                    | 6.6<br>(4.9 to 8.9)                              | 44.1<br>(28.6 to 65.6)                            | 0.3<br>(0.1 to 0.4)                     | 68.1<br>(10.5 to 146.1)                           | 8.6<br>(-28.7 to 57.3)                              |
| Maternal sepsis and other pregnancy related infections                  | 5.1<br>(4.2 to 6.4)                              | 20.8<br>(15.5 to 28.6)                            | 0.1<br>(< 0.05 to 0.2)                  | 43.0<br>(-26.1 to 174.2)                          | -5.5<br>(-47.9 to 72.0)                             |
| Maternal hypertensive disorders                                         | 18.3<br>(11.4 to 26.5)                           | 76.3<br>(58.2 to 97.4)                            | 0.9<br>(0.4 to 1.5)                     | 44.1<br>(-10.8 to 137.5)                          | -7.5<br>(-43.2 to 55.4)                             |
| Maternal obstructed labour and uterine rupture                          | 10.6<br>(7.8 to 14.0)                            | 36.3<br>(25.0 to 50.6)                            | 3.5<br>(2.1 to 5.2)                     | 3.6<br>(-13.1 to 23.8)                            | -31.5<br>(-42.1 to -18.0)                           |
| Maternal abortion, miscarriage, and ectopic pregnancy                   | 3.4<br>(1.7 to 6.0)                              | 413.3<br>(218.4 to 662.2)                         | 0.4<br>(0.2 to 0.7)                     | 45.8<br>(-17.1 to 151.0)                          | -7.8<br>(-47.4 to 57.6)                             |
| Other maternal disorders                                                | --                                               | --                                                | 0.9<br>(0.6 to 1.3)                     | 7.5<br>(-7.6 to 26.3)                             | -29.6<br>(-39.4 to -17.6)                           |
| <b>Neonatal disorders</b>                                               | <b>141.8</b><br><b>(114.4 to 173.7)</b>          | --                                                | <b>14.6</b><br><b>(8.6 to 25.7)</b>     | <b>28.3</b><br><b>(-5.5 to 65.8)</b>              | <b>-10.7</b><br><b>(-35.4 to 16.2)</b>              |
| Neonatal preterm birth complications                                    | 103.7<br>(75.7 to 146.0)                         | --                                                | 5.8<br>(3.6 to 9.0)                     | 45.3<br>(7.7 to 92.7)                             | 1.5<br>(-25.4 to 35.2)                              |
| Neonatal encephalopathy due to birth asphyxia and trauma                | 44.4<br>(23.5 to 73.9)                           | --                                                | 2.6<br>(0.8 to 9.4)                     | -3.5<br>(-57.7 to 62.3)                           | -31.6<br>(-69.9 to 23.3)                            |
| Neonatal sepsis and other neonatal infections                           | 10.5<br>(3.6 to 29.5)                            | --                                                | 3.4<br>(0.6 to 12.0)                    | 29.6<br>(-41.5 to 122.8)                          | -9.5<br>(-64.7 to 61.2)                             |
| Hemolytic disease and other neonatal jaundice                           | 3.2<br>(2.8 to 3.8)                              | --                                                | 1.2<br>(0.9 to 1.5)                     | 40.1<br>(24.3 to 57.3)                            | -0.6<br>(-10.0 to 9.7)                              |
| Other neonatal disorders                                                | --                                               | --                                                | 1.6<br>(0.9 to 2.7)                     | 31.4<br>(0.2 to 65.6)                             | -14.7<br>(-35.5 to 8.2)                             |
| <b>Nutritional deficiencies</b>                                         | <b>2,825.7</b><br><b>(2,627.4 to 3,072.1)</b>    | <b>1,534.4†</b><br><b>(1,256.5 to 1,824.7)</b>    | <b>45.1</b><br><b>(29.1 to 65.8)</b>    | <b>30.7</b><br><b>(18.8 to 43.7)</b>              | <b>-13.5</b><br><b>(-20.1 to -6.6)</b>              |
| Protein-energy malnutrition                                             | 142.7<br>(101.1 to 199.5)                        | 104.6<br>(77.4 to 139.6)                          | 4.2<br>(2.6 to 6.6)                     | 26.6<br>(-7.8 to 75.5)                            | -18.1<br>(-41.0 to 13.5)                            |
| Iodine deficiency                                                       | 157.1<br>(138.2 to 179.0)                        | 6.2<br>(5.5 to 7.1)                               | 4.1<br>(2.7 to 5.8)                     | 6.7<br>(-2.9 to 17.6)                             | -23.2<br>(-29.0 to -16.0)                           |
| Vitamin A deficiency                                                    | 1,463.2<br>(1,218.6 to 1,743.2)                  | 1,423.5<br>(1,152.5 to 1,713.8)                   | 0.4<br>(0.2 to 0.7)                     | 44.2<br>(17.8 to 81.8)                            | 0.1<br>(-15.3 to 21.3)                              |
| Iron-deficiency anaemia                                                 | 1,390.6<br>(1,262.8 to 1,548.0)                  | --                                                | 36.3<br>(22.7 to 54.6)                  | 34.5<br>(20.4 to 50.4)                            | -10.9<br>(-18.8 to -1.8)                            |
| Other nutritional deficiencies                                          | --                                               | --                                                | 0.1<br>(0.1 to 0.2)                     | 26.1<br>(-9.6 to 76.4)                            | -18.6<br>(-42.1 to 13.8)                            |
| <b>Other communicable, maternal, neonatal, and nutritional diseases</b> | <b>3,419.0</b><br><b>(3,204.6 to 3,641.1)</b>    | <b>2,546.8</b><br><b>(2,032.2 to 3,224.8)</b>     | <b>10.3</b><br><b>(6.2 to 16.6)</b>     | <b>45.5</b><br><b>(35.5 to 56.5)</b>              | <b>-0.4</b><br><b>(-5.9 to 5.8)</b>                 |
| Sexually transmitted diseases excluding HIV                             | 2,728.6<br>(2,510.9 to 2,941.3)                  | 1,870.7<br>(1,449.5 to 2,455.2)                   | 7.5<br>(4.3 to 12.8)                    | 49.3<br>(37.4 to 62.8)                            | 1.9<br>(-4.6 to 9.4)                                |
| Syphilis                                                                | 113.5<br>(87.0 to 144.2)                         | 80.3<br>(59.7 to 107.4)                           | 0.3<br>(0.2 to 0.5)                     | 40.6<br>(20.2 to 64.0)                            | -2.2<br>(-16.9 to 15.3)                             |
| Chlamydial infection                                                    | 142.4<br>(104.3 to 189.5)                        | 136.8<br>(106.2 to 177.1)                         | 0.9<br>(0.5 to 1.5)                     | 55.2<br>(32.4 to 80.1)                            | 4.1<br>(-10.3 to 20.9)                              |
| Gonococcal infection                                                    | 229.4<br>(122.8 to 381.3)                        | 824.6<br>(431.4 to 1,392.0)                       | 2.6<br>(1.1 to 5.5)                     | 46.9<br>(27.2 to 70.7)                            | 1.0<br>(-10.5 to 14.5)                              |
| Trichomoniasis                                                          | 503.7<br>(407.6 to 606.9)                        | 477.9<br>(374.4 to 604.7)                         | 0.7<br>(0.3 to 1.5)                     | 44.4<br>(35.5 to 55.2)                            | 0.6<br>(-5.0 to 6.8)                                |
| Genital herpes                                                          | 2,140.7<br>(1,827.5 to 2,505.0)                  | 239.1<br>(196.6 to 291.7)                         | 0.6<br>(0.2 to 1.3)                     | 44.1<br>(31.4 to 57.8)                            | -0.1<br>(-6.9 to 8.1)                               |
| Other sexually transmitted diseases                                     | 48.1<br>(38.5 to 61.1)                           | 112.0<br>(91.9 to 134.9)                          | 2.4<br>(1.4 to 3.8)                     | 54.3<br>(38.9 to 72.3)                            | 4.1<br>(-5.1 to 15.0)                               |
| Hepatitis                                                               | 900.4<br>(746.6 to 1,076.2)                      | 676.1<br>(424.4 to 1,098.1)                       | 0.7<br>(0.4 to 1.1)                     | 11.1<br>(-14.6 to 45.1)                           | -18.1<br>(-32.5 to -1.4)                            |
| Acute hepatitis A                                                       | 19.0<br>(2.2 to 50.0)                            | 247.6<br>(29.3 to 649.9)                          | 0.1<br>(< 0.05 to 0.3)                  | 11.3<br>(-67.5 to 316.0)                          | -15.8<br>(-67.8 to 141.0)                           |
| Hepatitis B                                                             | 681.1<br>(532.0 to 846.0)                        | 372.5<br>(280.8 to 500.7)                         | 0.5<br>(0.3 to 0.8)                     | 12.1<br>(-10.1 to 38.8)                           | -18.7<br>(-33.4 to -0.9)                            |
| Hepatitis C                                                             | 197.5<br>(173.5 to 222.8)                        | 21.2<br>(19.2 to 23.4)                            | < 0.05<br>(< 0.05 to < 0.05)            | 36.1<br>(15.6 to 61.6)                            | -9.2<br>(-18.9 to 0.8)                              |
| Acute hepatitis E                                                       | 2.7<br>(2.2 to 3.3)                              | 34.8<br>(28.8 to 42.6)                            | 0.1<br>(< 0.05 to 0.1)                  | -1.9<br>(-29.7 to 39.4)                           | -19.9<br>(-36.8 to 2.9)                             |
| Other infectious diseases                                               | 70.0<br>(62.0 to 80.1)                           | < 0.05<br>(< 0.05 to < 0.05)                      | 2.1<br>(1.3 to 3.2)                     | 46.9<br>(28.2 to 69.4)                            | -1.4<br>(-12.7 to 11.7)                             |
| <b>Non-communicable diseases</b>                                        | <b>10,203.9</b><br><b>(10,081.0 to 10,328.8)</b> | <b>31,109.7†</b><br><b>(28,365.5 to 33,772.3)</b> | <b>689.4</b><br><b>(502.7 to 905.8)</b> | <b>41.6</b><br><b>(36.0 to 47.3)</b>              | <b>0.1</b><br><b>(-2.7 to 2.9)</b>                  |
| <b>Neoplasms</b>                                                        | <b>14.0</b><br><b>(12.8 to 15.1)</b>             | <b>7.0</b><br><b>(5.8 to 7.6)</b>                 | <b>2.4</b><br><b>(1.6 to 3.2)</b>       | <b>35.8</b><br><b>(24.8 to 48.4)</b>              | <b>-4.6</b><br><b>(-11.9 to 3.3)</b>                |
| Lip and oral cavity cancer                                              | 0.5<br>(0.4 to 0.5)                              | 0.1<br>(0.1 to 0.2)                               | 0.1<br>(< 0.05 to 0.1)                  | 44.8<br>(26.8 to 66.7)                            | -0.2<br>(-12.3 to 14.2)                             |
| Nasopharynx cancer                                                      | 0.2<br>(0.2 to 0.3)                              | 0.1<br>(0.1 to 0.1)                               | < 0.05<br>(< 0.05 to < 0.05)            | 37.4<br>(16.7 to 66.5)                            | -6.2<br>(-19.5 to 12.5)                             |
| Other pharynx cancer                                                    | 0.1<br>(0.1 to 0.2)                              | 0.1<br>(0.1 to 0.1)                               | < 0.05<br>(< 0.05 to < 0.05)            | 31.6<br>(15.3 to 53.1)                            | -10.2<br>(-20.9 to 3.7)                             |
| Oesophageal cancer                                                      | 0.4<br>(0.3 to 0.4)                              | 0.3<br>(0.3 to 0.4)                               | 0.1<br>(0.1 to 0.1)                     | 21.8<br>(-0.6 to 51.5)                            | -14.0<br>(-30.1 to 7.2)                             |
| Stomach cancer                                                          | 0.5<br>(0.4 to 0.5)                              | 0.3<br>(0.3 to 0.4)                               | 0.1<br>(0.1 to 0.1)                     | 19.7<br>(3.6 to 37.9)                             | -15.8<br>(-28.4 to -0.3)                            |
| Colon and rectum cancer                                                 | 0.8<br>(0.8 to 1.0)                              | 0.3<br>(0.3 to 0.4)                               | 0.1<br>(0.1 to 0.1)                     | 35.9<br>(14.7 to 63.3)                            | -2.9<br>(-17.7 to 16.5)                             |
| Liver cancer                                                            | 0.1<br>(0.1 to 0.2)                              | 0.4<br>(0.3 to 0.4)                               | 0.1<br>(0.1 to 0.1)                     | 39.1<br>(21.0 to 59.4)                            | -3.6<br>(-15.7 to 9.8)                              |
| Liver cancer due to hepatitis B                                         | 0.1<br>(0.1 to 0.1)                              | 0.1<br>(0.1 to 0.1)                               | < 0.05<br>(< 0.05 to < 0.05)            | 41.2<br>(20.6 to 62.9)                            | -3.5<br>(-16.6 to 10.7)                             |

| Cause                                              | Prevalence in thousands (95% UI)        | Incidence in thousands (95% UI)          | YLDs in thousands (95% UI)           |                                                   |                                                     |
|----------------------------------------------------|-----------------------------------------|------------------------------------------|--------------------------------------|---------------------------------------------------|-----------------------------------------------------|
|                                                    | 2016 counts                             | 2016 counts                              | 2016 counts                          | Percentage change in counts between 2006 and 2016 | Percentage change in age-standardised rates between |
| Liver cancer due to hepatitis C                    | 0.1<br>(0.1 to 0.1)                     | 0.1<br>(0.1 to 0.1)                      | < 0.05<br>(< 0.05 to < 0.05)         | 37.4<br>(18.0 to 61.2)                            | -3.9<br>(-16.5 to 11.1)                             |
| Liver cancer due to alcohol use                    | 0.1<br>(0.1 to 0.1)                     | 0.1<br>(0.1 to 0.1)                      | < 0.05<br>(< 0.05 to < 0.05)         | 37.6<br>(18.7 to 59.0)                            | -4.2<br>(-16.8 to 9.6)                              |
| Liver cancer due to other causes                   | 0.1<br>(< 0.05 to 0.1)                  | 0.1<br>(0.1 to 0.1)                      | < 0.05<br>(< 0.05 to < 0.05)         | 39.7<br>(19.6 to 59.6)                            | -2.6<br>(-15.2 to 10.8)                             |
| Gallbladder and biliary tract cancer               | < 0.05<br>(< 0.05 to < 0.05)            | < 0.05<br>(< 0.05 to < 0.05)             | < 0.05<br>(< 0.05 to < 0.05)         | 29.3<br>(15.5 to 45.7)                            | -10.5<br>(-19.2 to -0.1)                            |
| Pancreatic cancer                                  | 0.1<br>(0.1 to 0.1)                     | 0.1<br>(0.1 to 0.1)                      | < 0.05<br>(< 0.05 to < 0.05)         | 44.3<br>(33.0 to 56.4)                            | 0.7<br>(-6.7 to 8.5)                                |
| Larynx cancer                                      | 0.2<br>(0.2 to 0.2)                     | 0.1<br>(0.1 to 0.1)                      | < 0.05<br>(< 0.05 to < 0.05)         | 32.6<br>(14.1 to 56.7)                            | -8.6<br>(-20.6 to 6.9)                              |
| Tracheal, bronchus, and lung cancer                | 0.2<br>(0.2 to 0.2)                     | 0.2<br>(0.2 to 0.2)                      | < 0.05<br>(< 0.05 to 0.1)            | 45.4<br>(22.3 to 73.7)                            | 3.0<br>(-15.2 to 25.5)                              |
| Malignant skin melanoma                            | 0.2<br>(0.1 to 0.2)                     | 0.1<br>(< 0.05 to 0.1)                   | < 0.05<br>(< 0.05 to < 0.05)         | 43.5<br>(19.5 to 72.5)                            | -0.5<br>(-17.1 to 17.7)                             |
| Non-melanoma skin cancer                           | < 0.05<br>(< 0.05 to 0.1)               | 0.3<br>(0.2 to 0.4)                      | < 0.05<br>(< 0.05 to < 0.05)         | 49.1<br>(20.1 to 81.8)                            | 2.7<br>(-23.4 to 32.6)                              |
| Non-melanoma skin cancer (squamous-cell carcinoma) | < 0.05<br>(< 0.05 to < 0.05)            | 0.1<br>(0.1 to 0.1)                      | < 0.05<br>(< 0.05 to < 0.05)         | 47.3<br>(12.7 to 90.3)                            | 1.9<br>(-27.9 to 39.4)                              |
| Non-melanoma skin cancer (basal-cell carcinoma)    | < 0.05<br>(< 0.05 to 0.1)               | 0.2<br>(0.1 to 0.4)                      | < 0.05<br>(< 0.05 to < 0.05)         | 55.9<br>(37.6 to 75.6)                            | 6.9<br>(-6.2 to 19.6)                               |
| Breast cancer                                      | 1.9<br>(1.5 to 2.4)                     | 0.5<br>(0.4 to 0.6)                      | 0.2<br>(0.1 to 0.3)                  | 37.5<br>(5.0 to 82.0)                             | -4.7<br>(-26.7 to 23.5)                             |
| Cervical cancer                                    | 4.8<br>(3.0 to 5.8)                     | 1.4<br>(0.9 to 1.7)                      | 0.5<br>(0.3 to 0.7)                  | 26.2<br>(1.2 to 58.2)                             | -13.6<br>(-30.3 to 6.4)                             |
| Uterine cancer                                     | 0.4<br>(0.4 to 0.5)                     | 0.1<br>(0.1 to 0.1)                      | < 0.05<br>(< 0.05 to 0.1)            | 28.4<br>(3.3 to 63.0)                             | -11.1<br>(-27.9 to 10.8)                            |
| Ovarian cancer                                     | 0.5<br>(0.3 to 0.6)                     | 0.2<br>(0.1 to 0.2)                      | 0.1<br>(0.1 to 0.1)                  | 50.1<br>(11.8 to 104.2)                           | 2.8<br>(-24.6 to 41.2)                              |
| Prostate cancer                                    | 1.7<br>(0.6 to 2.3)                     | 0.6<br>(0.2 to 0.8)                      | 0.3<br>(0.1 to 0.4)                  | 52.9<br>(20.5 to 90.7)                            | 9.6<br>(-11.1 to 33.6)                              |
| Testicular cancer                                  | < 0.05<br>(< 0.05 to 0.1)               | < 0.05<br>(< 0.05 to < 0.05)             | < 0.05<br>(< 0.05 to < 0.05)         | 22.9<br>(0.2 to 54.4)                             | -13.3<br>(-30.2 to 9.1)                             |
| Kidney cancer                                      | 0.4<br>(0.3 to 0.6)                     | 0.1<br>(0.1 to 0.1)                      | < 0.05<br>(< 0.05 to 0.1)            | 52.8<br>(-2.2 to 129.5)                           | 3.5<br>(-15.4 to 24.9)                              |
| Bladder cancer                                     | 0.3<br>(0.3 to 0.3)                     | 0.1<br>(0.1 to 0.1)                      | < 0.05<br>(< 0.05 to 0.1)            | 39.3<br>(21.6 to 60.8)                            | -1.5<br>(-14.0 to 14.1)                             |
| Brain and nervous system cancer                    | 0.3<br>(0.2 to 0.4)                     | 0.1<br>(0.1 to 0.1)                      | < 0.05<br>(< 0.05 to 0.1)            | 48.0<br>(36.1 to 62.7)                            | 3.7<br>(-4.7 to 13.6)                               |
| Thyroid cancer                                     | 0.4<br>(0.2 to 0.4)                     | 0.1<br>(< 0.05 to 0.1)                   | < 0.05<br>(< 0.05 to < 0.05)         | 31.1<br>(6.5 to 67.0)                             | -9.8<br>(-26.3 to 11.9)                             |
| Mesothelioma                                       | < 0.05<br>(< 0.05 to < 0.05)            | < 0.05<br>(< 0.05 to < 0.05)             | < 0.05<br>(< 0.05 to < 0.05)         | 29.4<br>(14.6 to 49.0)                            | -10.0<br>(-20.9 to 3.2)                             |
| Hodgkin lymphoma                                   | 0.2<br>(0.1 to 0.3)                     | 0.1<br>(< 0.05 to 0.1)                   | < 0.05<br>(< 0.05 to < 0.05)         | 21.6<br>(6.8 to 46.8)                             | -13.6<br>(-21.5 to -2.1)                            |
| Non-Hodgkin's lymphoma                             | 1.4<br>(0.8 to 1.8)                     | 0.5<br>(0.3 to 0.6)                      | 0.1<br>(0.1 to 0.2)                  | 42.3<br>(18.1 to 73.7)                            | -0.6<br>(-13.0 to 12.2)                             |
| Multiple myeloma                                   | 0.1<br>(0.1 to 0.1)                     | 0.1<br>(< 0.05 to 0.1)                   | < 0.05<br>(< 0.05 to < 0.05)         | 45.4<br>(29.4 to 60.8)                            | -0.7<br>(-11.2 to 9.8)                              |
| Leukaemia                                          | 0.6<br>(0.5 to 0.7)                     | 0.2<br>(0.1 to 0.2)                      | 0.1<br>(0.1 to 0.1)                  | 28.7<br>(14.9 to 48.1)                            | -8.3<br>(-16.6 to 2.6)                              |
| Acute lymphoid leukaemia                           | 0.2<br>(0.1 to 0.2)                     | < 0.05<br>(< 0.05 to 0.1)                | < 0.05<br>(< 0.05 to < 0.05)         | 37.3<br>(11.9 to 69.8)                            | -3.8<br>(-16.5 to 11.7)                             |
| Chronic lymphoid leukaemia                         | 0.1<br>(< 0.05 to 0.1)                  | < 0.05<br>(< 0.05 to < 0.05)             | < 0.05<br>(< 0.05 to < 0.05)         | 33.3<br>(13.8 to 59.4)                            | -5.0<br>(-19.3 to 13.5)                             |
| Acute myeloid leukaemia                            | 0.1<br>(< 0.05 to 0.1)                  | < 0.05<br>(< 0.05 to < 0.05)             | < 0.05<br>(< 0.05 to < 0.05)         | 43.9<br>(22.4 to 69.1)                            | 2.8<br>(-9.1 to 16.0)                               |
| Chronic myeloid leukaemia                          | 0.1<br>(0.1 to 0.1)                     | < 0.05<br>(< 0.05 to < 0.05)             | < 0.05<br>(< 0.05 to < 0.05)         | 23.7<br>(4.9 to 51.1)                             | -14.4<br>(-26.1 to 3.1)                             |
| Other leukaemia                                    | 0.2<br>(0.2 to 0.3)                     | 0.1<br>(< 0.05 to 0.1)                   | < 0.05<br>(< 0.05 to < 0.05)         | 19.9<br>(3.8 to 42.7)                             | -11.8<br>(-22.5 to 1.8)                             |
| Other neoplasms                                    | 1.9<br>(1.7 to 2.1)                     | 0.7<br>(0.6 to 0.7)                      | 0.2<br>(0.1 to 0.3)                  | 37.1<br>(19.7 to 55.9)                            | -4.5<br>(-15.5 to 9.0)                              |
| <b>Cardiovascular diseases</b>                     | <b>463.7</b><br><b>(428.3 to 498.8)</b> | <b>37.2†</b><br><b>(35.6 to 39.0)</b>    | <b>25.4</b><br><b>(17.7 to 35.0)</b> | <b>43.6</b><br><b>(37.1 to 50.5)</b>              | <b>1.1</b><br><b>(-2.6 to 4.8)</b>                  |
| Rheumatic heart disease                            | 135.8<br>(120.2 to 152.7)               | 6.3<br>(5.6 to 7.1)                      | 6.5<br>(4.1 to 9.5)                  | 51.7<br>(38.4 to 64.8)                            | 6.4<br>(-2.5 to 15.6)                               |
| Ischaemic heart disease                            | 89.8<br>(83.5 to 96.4)                  | 13.4<br>(12.5 to 14.4)                   | 4.2<br>(2.9 to 5.9)                  | 41.9<br>(33.5 to 51.4)                            | -0.8<br>(-5.4 to 4.0)                               |
| Cerebrovascular disease                            | 26.1<br>(24.3 to 27.9)                  | 5.4†<br>(5.0 to 5.9)                     | 3.8<br>(2.7 to 4.8)                  | 40.4<br>(29.3 to 52.5)                            | -2.4<br>(-9.4 to 6.0)                               |
| Ischaemic stroke                                   | 22.7<br>(20.4 to 25.1)                  | 3.4†<br>(3.0 to 3.8)                     | 3.1<br>(2.2 to 4.0)                  | 43.6<br>(30.0 to 58.3)                            | -0.4<br>(-8.8 to 9.2)                               |
| Hemorrhagic stroke                                 | 4.8<br>(4.3 to 5.4)                     | 2.0†<br>(1.8 to 2.2)                     | 0.7<br>(0.5 to 0.9)                  | 27.2<br>(11.7 to 44.0)                            | -10.7<br>(-22.4 to 1.6)                             |
| Hypertensive heart disease                         | 6.7<br>(5.3 to 8.4)                     | --                                       | 0.6<br>(0.4 to 0.8)                  | 37.3<br>(22.3 to 54.6)                            | -2.0<br>(-11.3 to 8.2)                              |
| Cardiomyopathy and myocarditis                     | 4.8<br>(3.7 to 5.9)                     | 2.4†<br>(2.1 to 2.7)                     | 0.5<br>(0.3 to 0.7)                  | 43.8<br>(29.9 to 60.7)                            | 0.2<br>(-11.0 to 13.6)                              |
| Myocarditis                                        | 1.3<br>(1.1 to 1.6)                     | 2.4<br>(2.1 to 2.7)                      | 0.1<br>(0.1 to 0.1)                  | 41.0<br>(32.8 to 50.2)                            | -0.7<br>(-8.3 to 8.0)                               |
| Alcoholic cardiomyopathy                           | 0.9<br>(0.6 to 1.3)                     | --                                       | 0.1<br>(< 0.05 to 0.1)               | 46.5<br>(10.9 to 88.2)                            | 1.1<br>(-20.6 to 29.9)                              |
| Other cardiomyopathy                               | 3.5<br>(2.6 to 4.8)                     | --                                       | 0.3<br>(0.2 to 0.5)                  | 44.0<br>(26.8 to 64.5)                            | 0.1<br>(-13.3 to 16.6)                              |
| Atrial fibrillation and flutter                    | 17.3<br>(15.1 to 19.8)                  | 1.5<br>(1.3 to 1.8)                      | 1.4<br>(0.9 to 1.9)                  | 40.6<br>(29.5 to 52.5)                            | 0.7<br>(-5.6 to 7.2)                                |
| Peripheral vascular disease                        | 65.4<br>(56.2 to 76.4)                  | 6.7<br>(5.7 to 7.8)                      | 0.3<br>(0.2 to 0.6)                  | 37.8<br>(26.2 to 50.3)                            | -2.3<br>(-10.2 to 6.0)                              |
| Endocarditis                                       | 0.4<br>(0.3 to 0.5)                     | 1.5<br>(1.3 to 1.7)                      | < 0.05<br>(< 0.05 to < 0.05)         | 45.6<br>(33.3 to 60.7)                            | 0.8<br>(-11.9 to 16.2)                              |
| Other cardiovascular and circulatory diseases      | 152.5<br>(107.5 to 206.6)               | --                                       | 8.2<br>(4.8 to 12.8)                 | 41.2<br>(26.2 to 59.6)                            | 3.2<br>(-8.1 to 15.7)                               |
| <b>Chronic respiratory diseases</b>                | <b>745.1</b><br><b>(698.0 to 791.2)</b> | <b>160.0†</b><br><b>(145.2 to 175.2)</b> | <b>34.3</b><br><b>(24.5 to 46.3)</b> | <b>43.4</b><br><b>(36.4 to 50.5)</b>              | <b>1.3</b><br><b>(-2.7 to 5.4)</b>                  |
| Chronic obstructive pulmonary disease              | 96.5<br>(92.5 to 100.7)                 | 7.3<br>(7.0 to 7.6)                      | 7.5<br>(6.5 to 8.4)                  | 41.0<br>(31.1 to 52.5)                            | -1.6<br>(-7.5 to 5.4)                               |
| Pneumoconiosis                                     | 0.1<br>(0.1 to 0.1)                     | < 0.05<br>(< 0.05 to < 0.05)             | < 0.05<br>(< 0.05 to < 0.05)         | 44.2<br>(36.0 to 52.4)                            | -0.9<br>(-6.9 to 4.8)                               |
| Silicosis                                          | < 0.05<br>(< 0.05 to < 0.05)            | < 0.05<br>(< 0.05 to < 0.05)             | < 0.05<br>(< 0.05 to < 0.05)         | 44.3<br>(32.9 to 56.7)                            | -1.5<br>(-8.1 to 5.5)                               |



| Cause                                                          | Prevalence in thousands (95% UI)        | Incidence in thousands (95% UI)         | YLDs in thousands (95% UI)        |                                                                     |                                                                      |
|----------------------------------------------------------------|-----------------------------------------|-----------------------------------------|-----------------------------------|---------------------------------------------------------------------|----------------------------------------------------------------------|
|                                                                | 2016 counts<br>(< 0.05 to 0.1)          | 2016 counts<br>(< 0.05 to < 0.05)       | 2016 counts<br>(< 0.05 to < 0.05) | Percentage change in counts between 2006 and 2016<br>(35.4 to 57.8) | Percentage change in age-standardised rates between<br>(-5.2 to 6.3) |
| Asbestosis                                                     | < 0.05<br>(< 0.05 to 0.1)               | < 0.05<br>(< 0.05 to < 0.05)            | < 0.05<br>(< 0.05 to < 0.05)      | 45.8<br>(35.4 to 57.8)                                              | 0.6<br>(-5.2 to 6.3)                                                 |
| Coal workers pneumoconiosis                                    | --                                      | --                                      | --                                | --                                                                  | --                                                                   |
| Other pneumoconiosis                                           | 0.1<br>(< 0.05 to 0.1)                  | < 0.05<br>(< 0.05 to < 0.05)            | < 0.05<br>(< 0.05 to < 0.05)      | 43.0<br>(29.7 to 55.0)                                              | -1.9<br>(-12.1 to 7.6)                                               |
| Asthma                                                         | 649.0<br>(590.3 to 712.0)               | 152.6<br>(137.9 to 167.8)               | 25.7<br>(16.8 to 37.5)            | 42.9<br>(34.5 to 51.9)                                              | 2.4<br>(-2.6 to 7.5)                                                 |
| Interstitial lung disease and pulmonary sarcoidosis            | 0.7<br>(0.6 to 0.8)                     | 0.1<br>(0.1 to 0.1)                     | 0.1<br>(0.1 to 0.1)               | 40.4<br>(36.4 to 44.0)                                              | -1.7<br>(-5.7 to 2.6)                                                |
| Other chronic respiratory diseases                             | --                                      | --                                      | 1.0<br>(0.8 to 1.2)               | 84.5<br>(40.0 to 145.8)                                             | 31.2<br>(8.2 to 60.9)                                                |
| <b>Cirrhosis and other chronic liver diseases</b>              | <b>22.3<br/>(21.1 to 23.5)</b>          | <b>2.4<br/>(2.3 to 2.5)</b>             | <b>1.9<br/>(1.3 to 2.6)</b>       | <b>37.0<br/>(20.1 to 55.0)</b>                                      | <b>-4.1<br/>(-12.3 to 4.7)</b>                                       |
| Cirrhosis and other chronic liver diseases due to hepatitis B  | 4.9<br>(3.9 to 5.8)                     | 0.6<br>(0.5 to 0.7)                     | 0.3<br>(0.2 to 0.5)               | 39.8<br>(13.0 to 71.7)                                              | -3.9<br>(-19.0 to 13.8)                                              |
| Cirrhosis and other chronic liver diseases due to hepatitis C  | 3.1<br>(2.0 to 4.8)                     | 0.4<br>(0.2 to 0.6)                     | 0.2<br>(0.1 to 0.3)               | 41.6<br>(12.5 to 79.6)                                              | -3.0<br>(-22.1 to 19.7)                                              |
| Cirrhosis and other chronic liver diseases due to alcohol use  | 5.2<br>(4.5 to 6.0)                     | 0.7<br>(0.6 to 0.8)                     | 0.3<br>(0.2 to 0.5)               | 37.5<br>(14.5 to 65.8)                                              | -5.7<br>(-19.1 to 9.6)                                               |
| Cirrhosis and other chronic liver diseases due to other causes | 9.2<br>(8.4 to 10.0)                    | 0.8<br>(0.7 to 0.8)                     | 1.1<br>(0.7 to 1.5)               | 35.2<br>(10.4 to 65.2)                                              | -3.5<br>(-18.3 to 15.0)                                              |
| <b>Digestive diseases</b>                                      | <b>192.8<br/>(178.1 to 208.6)</b>       | <b>141.0†<br/>(133.9 to 148.9)</b>      | <b>6.4<br/>(4.5 to 8.7)</b>       | <b>50.6<br/>(38.2 to 63.1)</b>                                      | <b>4.3<br/>(-2.1 to 10.8)</b>                                        |
| Peptic ulcer disease                                           | 27.4<br>(25.0 to 30.2)                  | 13.2<br>(11.9 to 14.7)                  | 0.7<br>(0.4 to 1.0)               | 77.2<br>(58.3 to 98.8)                                              | 16.0<br>(5.8 to 26.8)                                                |
| Gastritis and duodenitis                                       | 63.3<br>(55.5 to 71.5)                  | 51.2<br>(45.9 to 57.1)                  | 0.9<br>(0.6 to 1.3)               | 85.1<br>(65.2 to 108.1)                                             | 25.1<br>(14.0 to 37.9)                                               |
| Appendicitis                                                   | 1.0<br>(1.0 to 1.1)                     | 27.4<br>(25.3 to 29.8)                  | 0.3<br>(0.2 to 0.5)               | 45.7<br>(5.0 to 97.2)                                               | 4.4<br>(-17.3 to 28.3)                                               |
| Paralytic ileus and intestinal obstruction                     | 0.2<br>(0.2 to 0.2)                     | 6.5<br>(5.9 to 7.2)                     | 0.1<br>(< 0.05 to 0.1)            | 45.9<br>(38.7 to 53.7)                                              | 1.8<br>(-8.4 to 13.5)                                                |
| Inguinal, femoral, and abdominal hernia                        | 98.6<br>(81.9 to 117.7)                 | 12.0<br>(10.6 to 13.7)                  | 3.6<br>(2.4 to 5.1)               | 40.7<br>(24.4 to 57.3)                                              | -3.7<br>(-11.5 to 5.1)                                               |
| Inflammatory bowel disease                                     | 0.4<br>(0.4 to 0.4)                     | 3.8<br>(3.6 to 3.9)                     | 0.1<br>(< 0.05 to 0.1)            | 40.4<br>(37.1 to 44.0)                                              | -0.8<br>(-3.0 to 1.6)                                                |
| Vascular intestinal disorders                                  | 0.1<br>(< 0.05 to 0.1)                  | 0.4<br>(0.3 to 0.4)                     | < 0.05<br>(< 0.05 to < 0.05)      | 51.8<br>(44.1 to 59.7)                                              | 5.5<br>(1.7 to 9.4)                                                  |
| Gallbladder and biliary diseases                               | 5.7<br>(5.0 to 6.4)                     | 25.2<br>(21.9 to 28.8)                  | 0.1<br>(0.1 to 0.2)               | 44.4<br>(24.9 to 65.8)                                              | -1.5<br>(-17.1 to 17.6)                                              |
| Pancreatitis                                                   | 0.1<br>(0.1 to 0.1)                     | 1.3<br>(1.1 to 1.4)                     | < 0.05<br>(< 0.05 to < 0.05)      | 46.1<br>(40.1 to 52.7)                                              | 1.7<br>(-1.9 to 5.6)                                                 |
| Other digestive diseases                                       | --                                      | --                                      | 0.6<br>(0.4 to 0.8)               | 55.2<br>(37.6 to 72.0)                                              | 7.6<br>(0.8 to 14.4)                                                 |
| <b>Neurological disorders</b>                                  | <b>3,175.9<br/>(3,012.9 to 3,353.7)</b> | <b>1,511.1<br/>(1,283.3 to 1,762.6)</b> | <b>76.2<br/>(46.0 to 111.1)</b>   | <b>43.8<br/>(1.4 to 99.4)</b>                                       | <b>1.4<br/>(-22.1 to 29.3)</b>                                       |
| Alzheimer's disease and other dementias                        | 12.4<br>(10.4 to 14.8)                  | 2.1<br>(1.8 to 2.6)                     | 1.8<br>(1.2 to 2.4)               | 30.9<br>(23.5 to 38.6)                                              | -1.1<br>(-5.8 to 3.7)                                                |
| Parkinson's disease                                            | 1.1<br>(0.9 to 1.4)                     | 0.1<br>(0.1 to 0.2)                     | 0.1<br>(0.1 to 0.2)               | 46.9<br>(24.7 to 72.2)                                              | 7.6<br>(-7.3 to 24.6)                                                |
| Epilepsy                                                       | 41.6<br>(8.4 to 79.2)                   | 6.5<br>(1.3 to 12.4)                    | 17.0<br>(3.2 to 36.8)             | 45.7<br>(-73.5 to 621.1)                                            | 2.6<br>(-81.3 to 411.6)                                              |
| Multiple sclerosis                                             | 0.3<br>(0.2 to 0.3)                     | < 0.05<br>(< 0.05 to < 0.05)            | 0.1<br>(0.1 to 0.1)               | 58.3<br>(52.3 to 64.5)                                              | 8.3<br>(4.5 to 12.2)                                                 |
| Motor neuron disease                                           | 0.1<br>(0.1 to 0.1)                     | < 0.05<br>(< 0.05 to < 0.05)            | < 0.05<br>(< 0.05 to < 0.05)      | 44.9<br>(38.0 to 51.6)                                              | 2.3<br>(-1.4 to 5.6)                                                 |
| Migraine                                                       | 1,059.0<br>(990.1 to 1,129.3)           | 139.5<br>(130.3 to 149.3)               | 45.4<br>(29.1 to 64.2)            | 41.6<br>(35.5 to 48.7)                                              | 0.6<br>(-3.2 to 4.6)                                                 |
| Tension-type headache                                          | 2,419.5<br>(2,147.3 to 2,748.2)         | 1,362.7<br>(1,132.6 to 1,617.0)         | 7.7<br>(4.8 to 11.5)              | 40.5<br>(33.3 to 48.9)                                              | -0.5<br>(-5.3 to 4.6)                                                |
| Other neurological disorders                                   | < 0.05<br>(< 0.05 to < 0.05)            | 0.1<br>(< 0.05 to 0.1)                  | 4.1<br>(0.8 to 9.0)               | 79.3<br>(-66.1 to 743.0)                                            | 24.4<br>(-72.9 to 423.6)                                             |
| <b>Mental and substance use disorders</b>                      | <b>1,651.8<br/>(1,561.4 to 1,735.7)</b> | <b>585.8†<br/>(541.9 to 636.0)</b>      | <b>192.0<br/>(138.7 to 252.4)</b> | <b>38.1<br/>(35.0 to 41.4)</b>                                      | <b>-1.6<br/>(-3.7 to 0.7)</b>                                        |
| Schizophrenia                                                  | 13.5<br>(11.7 to 15.5)                  | 1.3<br>(1.1 to 1.5)                     | 8.8<br>(6.2 to 11.1)              | 50.5<br>(35.6 to 67.1)                                              | 1.2<br>(-7.2 to 10.3)                                                |
| Alcohol use disorders                                          | 144.1<br>(122.0 to 168.2)               | 75.6<br>(63.3 to 88.2)                  | 14.5<br>(9.9 to 20.6)             | 46.0<br>(33.4 to 60.2)                                              | 0.2<br>(-6.9 to 8.4)                                                 |
| Drug use disorders                                             | 46.6<br>(41.6 to 52.3)                  | 8.2<br>(7.0 to 9.5)                     | 9.7<br>(6.7 to 13.3)              | 55.3<br>(38.7 to 72.8)                                              | 4.1<br>(-5.6 to 14.5)                                                |
| Opioid use disorders                                           | 19.5<br>(15.5 to 24.8)                  | 2.7<br>(2.2 to 3.3)                     | 8.2<br>(5.4 to 11.5)              | 57.6<br>(38.3 to 78.5)                                              | 4.5<br>(-6.8 to 17.1)                                                |
| Cocaine use disorders                                          | 1.3<br>(1.1 to 1.6)                     | 0.2<br>(0.1 to 0.2)                     | 0.2<br>(0.1 to 0.3)               | 46.3<br>(37.8 to 55.6)                                              | 2.9<br>(-2.4 to 8.7)                                                 |
| Amphetamine use disorders                                      | 0.7<br>(0.5 to 1.0)                     | 0.1<br>(0.1 to 0.2)                     | 0.1<br>(0.1 to 0.2)               | 44.5<br>(31.9 to 59.6)                                              | 2.0<br>(-6.4 to 11.6)                                                |
| Cannabis use disorders                                         | 23.9<br>(19.0 to 30.0)                  | 4.5<br>(3.5 to 5.7)                     | 0.7<br>(0.4 to 1.1)               | 38.3<br>(14.9 to 68.8)                                              | -0.1<br>(-16.1 to 19.5)                                              |
| Other drug use disorders                                       | 3.0<br>(2.6 to 3.3)                     | 0.7<br>(0.6 to 0.8)                     | 0.5<br>(0.3 to 0.7)               | 50.0<br>(26.0 to 77.2)                                              | 2.8<br>(-12.3 to 19.4)                                               |
| Depressive disorders                                           | 325.5<br>(304.2 to 351.6)               | 367.7<br>(324.6 to 415.3)               | 56.4<br>(38.3 to 76.7)            | 34.1<br>(27.9 to 41.0)                                              | -4.5<br>(-8.4 to -0.1)                                               |
| Major depressive disorder                                      | 223.1<br>(197.1 to 253.0)               | 348.2<br>(305.4 to 395.1)               | 46.1<br>(31.3 to 62.6)            | 32.0<br>(25.0 to 40.3)                                              | -5.5<br>(-10.2 to -0.3)                                              |
| Dysthymia                                                      | 107.0<br>(92.2 to 124.1)                | 19.5<br>(17.0 to 22.6)                  | 10.4<br>(6.9 to 15.2)             | 43.9<br>(37.9 to 50.4)                                              | 0.4<br>(-3.2 to 3.9)                                                 |
| Bipolar disorder                                               | 56.2<br>(47.4 to 66.6)                  | 6.6<br>(5.5 to 7.8)                     | 11.6<br>(7.1 to 17.2)             | 39.3<br>(28.9 to 50.2)                                              | 0.6<br>(-5.7 to 7.4)                                                 |
| Anxiety disorders                                              | 326.6<br>(290.4 to 366.3)               | 59.3<br>(53.0 to 66.1)                  | 32.0<br>(21.9 to 43.9)            | 38.8<br>(29.1 to 49.5)                                              | 0.4<br>(-5.7 to 7.9)                                                 |
| Eating disorders                                               | 7.1<br>(5.8 to 8.8)                     | 6.2<br>(4.4 to 8.2)                     | 1.4<br>(0.9 to 2.1)               | 45.3<br>(19.8 to 77.4)                                              | 5.2<br>(-12.9 to 27.2)                                               |
| Anorexia nervosa                                               | 2.0<br>(1.4 to 2.7)                     | 1.0<br>(0.7 to 1.3)                     | 0.4<br>(0.2 to 0.7)               | 37.5<br>(-1.0 to 91.2)                                              | 4.2<br>(-23.9 to 43.1)                                               |
| Bulimia nervosa                                                | 4.8<br>(3.5 to 6.5)                     | 5.2<br>(3.4 to 7.3)                     | 1.0<br>(0.6 to 1.6)               | 48.9<br>(19.6 to 88.9)                                              | 5.5<br>(-14.6 to 31.9)                                               |
| Autistic spectrum disorders                                    | 95.8<br>(85.3 to 107.3)                 | 1.4<br>(0.9 to 1.9)                     | 13.8<br>(9.2 to 19.4)             | 41.2<br>(33.9 to 49.9)                                              | 0.7<br>(-3.6 to 5.9)                                                 |
| Autism                                                         | 26.5<br>(22.9 to 30.7)                  | 0.2<br>(0.1 to 0.3)                     | 6.8<br>(4.4 to 10.0)              | 40.8<br>(27.8 to 55.6)                                              | 0.9<br>(-7.4 to 10.5)                                                |
| Asperger syndrome and other autistic spectrum disorders        | 69.4<br>(57.0 to 84.3)                  | 1.2<br>(0.8 to 1.7)                     | 7.0<br>(4.6 to 10.3)              | 41.6<br>(34.3 to 49.4)                                              | 0.4<br>(-4.1 to 5.0)                                                 |



| Cause                                                      | Prevalence in thousands (95% UI)              | Incidence in thousands (95% UI)                   | YLDs in thousands (95% UI)              |                                                   |                                                     |
|------------------------------------------------------------|-----------------------------------------------|---------------------------------------------------|-----------------------------------------|---------------------------------------------------|-----------------------------------------------------|
|                                                            | 2016 counts                                   | 2016 counts                                       | 2016 counts                             | Percentage change in counts between 2006 and 2016 | Percentage change in age-standardised rates between |
| Attention-deficit/hyperactivity disorder                   | 149.5<br>(133.7 to 168.3)                     | 10.6<br>(9.1 to 12.4)                             | 1.8<br>(1.1 to 2.9)                     | 36.0<br>(26.1 to 46.4)                            | 0.3<br>(-6.3 to 7.3)                                |
| Conduct disorder                                           | 111.4<br>(90.2 to 132.1)                      | 41.6<br>(32.3 to 50.8)                            | 13.5<br>(8.3 to 20.7)                   | 26.3<br>(18.4 to 34.4)                            | 0.5<br>(-5.6 to 7.1)                                |
| Idiopathic developmental intellectual disability           | 377.7<br>(249.8 to 508.3)                     | --                                                | 17.2<br>(9.0 to 28.2)                   | 30.8<br>(23.4 to 39.0)                            | -5.5<br>(-10.2 to -0.1)                             |
| Other mental and substance use disorders                   | 150.0<br>(131.1 to 174.0)                     | 7.6<br>(6.7 to 8.7)                               | 11.3<br>(7.6 to 16.4)                   | 47.0<br>(39.4 to 56.2)                            | 0.6<br>(-3.8 to 5.4)                                |
| <b>Diabetes, urogenital, blood, and endocrine diseases</b> | <b>4,496.7</b><br><b>(4,361.2 to 4,643.1)</b> | <b>1,035.0†</b><br><b>(968.2 to 1,106.3)</b>      | <b>51.1</b><br><b>(36.1 to 70.0)</b>    | <b>48.5</b><br><b>(43.6 to 53.1)</b>              | <b>2.6</b><br><b>(-0.7 to 5.7)</b>                  |
| Diabetes mellitus                                          | 184.2<br>(166.1 to 204.4)                     | 13.2<br>(12.0 to 14.5)                            | 17.2<br>(12.0 to 23.8)                  | 45.5<br>(36.2 to 54.6)                            | 0.6<br>(-5.4 to 7.1)                                |
| Acute glomerulonephritis                                   | 0.1<br>(0.1 to 0.1)                           | 1.4<br>(1.2 to 1.7)                               | < 0.05<br>(< 0.05 to < 0.05)            | 40.9<br>(35.0 to 47.8)                            | 0.1<br>(-3.7 to 4.0)                                |
| Chronic kidney disease                                     | 392.5<br>(350.0 to 436.2)                     | 30.3<br>(26.8 to 34.0)                            | 10.1<br>(7.3 to 13.5)                   | 57.6<br>(47.4 to 67.8)                            | 7.0<br>(1.6 to 12.9)                                |
| Chronic kidney disease due to diabetes mellitus            | 113.9<br>(94.6 to 135.1)                      | 8.2<br>(6.6 to 9.9)                               | 2.7<br>(1.9 to 3.7)                     | 60.0<br>(44.6 to 77.1)                            | 8.3<br>(-0.5 to 17.5)                               |
| Chronic kidney disease due to hypertension                 | 79.6<br>(68.1 to 90.8)                        | 8.3<br>(6.9 to 9.8)                               | 1.5<br>(1.1 to 2.1)                     | 46.4<br>(30.4 to 63.4)                            | 2.1<br>(-7.4 to 12.6)                               |
| Chronic kidney disease due to glomerulonephritis           | 86.0<br>(73.4 to 98.9)                        | 4.6<br>(3.6 to 5.7)                               | 2.9<br>(2.0 to 4.0)                     | 60.6<br>(42.6 to 79.5)                            | 9.1<br>(-0.1 to 18.8)                               |
| Chronic kidney disease due to other causes                 | 113.0<br>(94.4 to 132.6)                      | 9.3<br>(7.8 to 10.9)                              | 3.0<br>(2.1 to 4.1)                     | 59.0<br>(42.5 to 76.7)                            | 8.0<br>(-0.7 to 17.0)                               |
| Urinary diseases and male infertility                      | 129.7<br>(113.8 to 145.6)                     | 528.1†<br>(472.2 to 592.9)                        | 3.9<br>(2.5 to 5.7)                     | 48.3<br>(36.4 to 59.7)                            | 2.7<br>(-5.3 to 9.6)                                |
| Interstitial nephritis and urinary tract infections        | 8.8<br>(7.8 to 10.0)                          | 461.2<br>(405.1 to 524.4)                         | 0.3<br>(0.2 to 0.5)                     | 44.5<br>(22.3 to 71.2)                            | 2.2<br>(-11.5 to 18.1)                              |
| Urolithiasis                                               | 2.1<br>(1.8 to 2.4)                           | 54.8<br>(48.3 to 63.1)                            | 0.2<br>(0.1 to 0.2)                     | 48.1<br>(36.3 to 61.1)                            | 2.3<br>(-7.2 to 13.2)                               |
| Benign prostatic hyperplasia                               | 96.7<br>(80.5 to 113.8)                       | 12.1<br>(10.0 to 14.2)                            | 3.2<br>(2.0 to 4.7)                     | 48.9<br>(34.5 to 62.0)                            | 2.8<br>(-5.6 to 10.2)                               |
| Male infertility                                           | 17.8<br>(12.8 to 25.1)                        | --                                                | 0.1<br>(< 0.05 to 0.2)                  | 122.6<br>(75.5 to 176.2)                          | 52.1<br>(21.2 to 86.8)                              |
| Other urinary diseases                                     | --                                            | --                                                | 0.2<br>(0.1 to 0.2)                     | 20.9<br>(6.6 to 36.2)                             | -14.9<br>(-22.3 to -6.4)                            |
| Gynecological diseases                                     | 1,214.3<br>(1,157.2 to 1,273.5)               | 454.6†<br>(425.2 to 486.6)                        | 12.3<br>(8.3 to 17.6)                   | 44.8<br>(38.5 to 51.8)                            | 0.4<br>(-3.5 to 4.4)                                |
| Uterine fibroids                                           | 75.0<br>(66.0 to 84.3)                        | 9.5<br>(8.3 to 10.9)                              | 0.9<br>(0.5 to 1.5)                     | 57.5<br>(45.6 to 72.4)                            | 5.8<br>(-1.0 to 13.7)                               |
| Polycystic ovarian syndrome                                | 9.1<br>(6.7 to 11.8)                          | 24.6<br>(17.6 to 33.5)                            | 0.1<br>(< 0.05 to 0.1)                  | 55.9<br>(34.1 to 82.5)                            | 3.5<br>(-9.4 to 18.6)                               |
| Female infertility                                         | 3.6<br>(2.7 to 4.8)                           | --                                                | < 0.05<br>(< 0.05 to < 0.05)            | 122.7<br>(61.1 to 193.3)                          | 46.8<br>(8.6 to 90.7)                               |
| Endometriosis                                              | 2.2<br>(1.8 to 2.7)                           | 8.8<br>(7.1 to 10.9)                              | 0.2<br>(0.1 to 0.3)                     | 45.9<br>(5.0 to 105.7)                            | 2.5<br>(-22.0 to 37.2)                              |
| Genital prolapse                                           | 567.0<br>(505.2 to 633.6)                     | 54.9<br>(46.3 to 65.8)                            | 1.8<br>(0.9 to 3.3)                     | 40.3<br>(32.5 to 49.6)                            | -3.7<br>(-9.3 to 3.0)                               |
| Premenstrual syndrome                                      | 612.0<br>(567.8 to 658.3)                     | 233.4<br>(214.3 to 251.8)                         | 5.1<br>(3.2 to 8.0)                     | 39.4<br>(28.2 to 50.6)                            | 1.0<br>(-6.2 to 8.8)                                |
| Other gynecological diseases                               | 120.8<br>(101.2 to 141.8)                     | 123.4<br>(100.9 to 148.3)                         | 4.2<br>(2.8 to 6.1)                     | 51.0<br>(39.0 to 64.0)                            | 1.3<br>(-6.2 to 9.8)                                |
| Hemoglobinopathies and hemolytic anaemias                  | 3,375.6<br>(3,208.4 to 3,550.4)               | --                                                | 5.0<br>(3.1 to 7.5)                     | 55.6<br>(39.2 to 72.8)                            | 10.2<br>(0.7 to 19.9)                               |
| Thalassemias                                               | < 0.05<br>(< 0.05 to < 0.05)                  | --                                                | < 0.05<br>(< 0.05 to < 0.05)            | 55.8<br>(29.3 to 85.4)                            | 1.5<br>(-15.0 to 20.6)                              |
| Thalassaemias trait                                        | 66.1<br>(22.8 to 122.9)                       | --                                                | 0.9<br>(0.2 to 1.9)                     | 59.5<br>(33.0 to 88.5)                            | 15.7<br>(-1.5 to 33.2)                              |
| Sickle cell disorders                                      | 2.1<br>(1.8 to 2.5)                           | --                                                | 0.2<br>(0.1 to 0.2)                     | 47.0<br>(15.8 to 91.4)                            | 7.1<br>(-13.1 to 36.6)                              |
| Sickle cell trait                                          | 735.4<br>(680.1 to 802.5)                     | --                                                | 2.4<br>(1.5 to 3.6)                     | 64.1<br>(43.9 to 85.1)                            | 19.4<br>(6.3 to 32.2)                               |
| G6PD deficiency                                            | 870.6<br>(743.0 to 1,003.0)                   | --                                                | 0.1<br>(< 0.05 to 0.1)                  | 33.6<br>(4.1 to 70.5)                             | 7.8<br>(-11.3 to 29.5)                              |
| G6PD trait                                                 | 1,942.3<br>(1,844.5 to 2,039.6)               | --                                                | < 0.05<br>(< 0.05 to < 0.05)            | 71.0<br>(49.3 to 94.4)                            | 22.6<br>(9.1 to 37.4)                               |
| Other hemoglobinopathies and hemolytic anaemias            | 57.7<br>(52.2 to 63.9)                        | --                                                | 1.4<br>(0.9 to 2.1)                     | 42.6<br>(22.3 to 67.7)                            | -7.9<br>(-18.6 to 4.8)                              |
| Endocrine, metabolic, blood, and immune disorders          | 87.4<br>(80.5 to 94.9)                        | 7.4<br>(6.5 to 8.3)                               | 2.5<br>(1.6 to 3.6)                     | 40.0<br>(26.6 to 54.6)                            | -3.0<br>(-9.9 to 3.9)                               |
| <b>Musculoskeletal disorders</b>                           | <b>938.6</b><br><b>(884.5 to 994.5)</b>       | <b>461.1</b><br><b>(413.0 to 515.5)</b>           | <b>104.0</b><br><b>(74.0 to 136.9)</b>  | <b>46.0</b><br><b>(41.1 to 51.1)</b>              | <b>0.5</b><br><b>(-2.3 to 3.4)</b>                  |
| Rheumatoid arthritis                                       | 12.8<br>(11.2 to 14.5)                        | 0.9<br>(0.8 to 1.0)                               | 3.1<br>(2.1 to 4.1)                     | 43.0<br>(28.1 to 60.5)                            | -0.8<br>(-9.2 to 8.7)                               |
| Osteoarthritis                                             | 139.8<br>(130.2 to 149.5)                     | 8.1<br>(7.5 to 8.8)                               | 8.7<br>(6.0 to 11.8)                    | 43.4<br>(37.6 to 49.1)                            | -1.2<br>(-4.9 to 2.5)                               |
| Low back and neck pain                                     | 666.6<br>(619.9 to 720.0)                     | 306.5<br>(273.0 to 343.3)                         | 77.2<br>(54.0 to 102.1)                 | 44.7<br>(39.1 to 50.5)                            | 0.5<br>(-3.0 to 3.9)                                |
| Low back pain                                              | 522.5<br>(462.3 to 595.6)                     | 261.2<br>(228.4 to 299.0)                         | 59.4<br>(41.4 to 79.0)                  | 44.5<br>(37.1 to 52.1)                            | 0.5<br>(-4.0 to 5.0)                                |
| Neck pain                                                  | 176.9<br>(152.8 to 205.4)                     | 45.3<br>(39.0 to 52.9)                            | 17.8<br>(12.0 to 25.4)                  | 45.3<br>(39.9 to 50.7)                            | 0.4<br>(-2.0 to 2.9)                                |
| Gout                                                       | 21.7<br>(19.2 to 24.7)                        | 4.5<br>(4.0 to 5.2)                               | 0.7<br>(0.5 to 1.0)                     | 47.4<br>(26.7 to 72.0)                            | 1.3<br>(-11.6 to 16.4)                              |
| Other musculoskeletal disorders                            | 165.1<br>(119.3 to 208.5)                     | 141.0<br>(105.9 to 181.5)                         | 14.4<br>(8.7 to 21.7)                   | 55.5<br>(37.6 to 78.8)                            | 3.1<br>(-7.0 to 16.9)                               |
| <b>Other non-communicable diseases</b>                     | <b>8,134.0</b><br><b>(7,841.7 to 8,417.7)</b> | <b>27,169.0†</b><br><b>(24,516.7 to 29,915.2)</b> | <b>195.8</b><br><b>(131.5 to 281.6)</b> | <b>39.6</b><br><b>(37.3 to 41.9)</b>              | <b>-0.5</b><br><b>(-1.8 to 0.8)</b>                 |
| Congenital anomalies                                       | 135.2<br>(108.4 to 172.9)                     | --                                                | 18.4<br>(12.3 to 27.4)                  | 39.8<br>(30.2 to 49.4)                            | -2.1<br>(-8.5 to 4.1)                               |
| Neural tube defects                                        | 13.3<br>(11.8 to 14.9)                        | --                                                | 4.0<br>(2.8 to 5.4)                     | 40.9<br>(25.1 to 60.6)                            | -0.8<br>(-11.1 to 10.6)                             |
| Congenital heart anomalies                                 | 17.5<br>(14.3 to 20.7)                        | --                                                | 0.9<br>(0.4 to 1.4)                     | 49.9<br>(29.3 to 76.3)                            | 2.2<br>(-11.3 to 19.4)                              |
| Orofacial clefts                                           | 3.0<br>(2.6 to 3.4)                           | --                                                | 0.1<br>(< 0.05 to 0.1)                  | 37.9<br>(23.2 to 55.2)                            | -3.9<br>(-14.2 to 8.3)                              |
| Down's syndrome                                            | 2.1<br>(1.8 to 2.6)                           | --                                                | 0.2<br>(0.1 to 0.3)                     | 42.2<br>(31.5 to 54.5)                            | 0.3<br>(-7.1 to 9.0)                                |
| Turner syndrome                                            | 8.3<br>(6.9 to 9.8)                           | --                                                | 0.1<br>(0.1 to 0.2)                     | 36.9<br>(-3.6 to 92.6)                            | -1.4<br>(-28.8 to 36.8)                             |
| Klinefelter syndrome                                       | 7.5<br>(6.4 to 8.9)                           | --                                                | < 0.05<br>(< 0.05 to 0.1)               | 40.9<br>(8.1 to 84.0)                             | -2.0<br>(-23.7 to 24.8)                             |

| Cause                                         | Prevalence in thousands (95% UI)              | Incidence in thousands (95% UI)          | YLDs in thousands (95% UI)           |                                                   |                                                     |
|-----------------------------------------------|-----------------------------------------------|------------------------------------------|--------------------------------------|---------------------------------------------------|-----------------------------------------------------|
|                                               | 2016 counts                                   | 2016 counts                              | 2016 counts                          | Percentage change in counts between 2006 and 2016 | Percentage change in age-standardised rates between |
| Other chromosomal abnormalities               | 2.0<br>(1.7 to 2.3)                           | --                                       | 0.4<br>(0.2 to 0.6)                  | 46.9<br>(-0.3 to 114.9)                           | -1.3<br>(-31.7 to 42.6)                             |
| Congenital musculoskeletal and limb anomalies | 13.4<br>(11.8 to 15.2)                        | --                                       | 1.9<br>(1.3 to 2.8)                  | 41.0<br>(23.1 to 60.8)                            | 0.1<br>(-10.6 to 11.9)                              |
| Urogenital congenital anomalies               | 14.1<br>(12.3 to 16.2)                        | --                                       | 0.4<br>(0.2 to 0.6)                  | 41.5<br>(28.7 to 55.0)                            | -0.3<br>(-8.3 to 7.9)                               |
| Digestive congenital anomalies                | 6.0<br>(5.3 to 6.8)                           | --                                       | 0.3<br>(0.2 to 0.4)                  | 43.5<br>(10.0 to 88.5)                            | 0.9<br>(-19.3 to 26.4)                              |
| Other congenital anomalies                    | 70.7<br>(40.6 to 122.9)                       | --                                       | 10.2<br>(5.6 to 17.4)                | 37.9<br>(25.2 to 50.8)                            | -3.5<br>(-12.4 to 5.1)                              |
| Skin and subcutaneous diseases                | 3,920.0<br>(3,719.9 to 4,153.1)               | 9,637.2<br>(8,832.7 to 10,685.8)         | 97.4<br>(62.5 to 144.5)              | 39.5<br>(36.7 to 42.5)                            | 1.4<br>(-0.2 to 3.2)                                |
| Dermatitis                                    | 664.8<br>(513.5 to 827.8)                     | 492.9<br>(431.5 to 567.8)                | 27.4<br>(15.0 to 47.6)               | 42.5<br>(36.8 to 48.1)                            | 0.3<br>(-2.9 to 3.6)                                |
| Psoriasis                                     | 50.5<br>(48.0 to 53.0)                        | 8.4<br>(8.0 to 8.8)                      | 4.5<br>(3.2 to 5.9)                  | 50.4<br>(32.1 to 70.8)                            | 6.0<br>(-4.2 to 16.4)                               |
| Cellulitis                                    | 4.2<br>(3.8 to 4.6)                           | 72.0<br>(66.4 to 77.5)                   | 0.2<br>(0.1 to 0.4)                  | 42.1<br>(10.1 to 88.4)                            | 1.3<br>(-18.7 to 25.8)                              |
| Pyoderma                                      | 77.7<br>(73.6 to 82.0)                        | 1,495.2<br>(1,419.2 to 1,574.3)          | 0.4<br>(0.2 to 0.9)                  | 46.2<br>(37.5 to 55.4)                            | 1.8<br>(-3.4 to 7.0)                                |
| Scabies                                       | 281.1<br>(239.8 to 328.4)                     | 867.4<br>(735.3 to 1,022.2)              | 7.3<br>(4.0 to 11.7)                 | 35.7<br>(29.7 to 42.2)                            | -3.2<br>(-6.6 to 0.2)                               |
| Fungal skin diseases                          | 1,610.9<br>(1,318.9 to 1,972.3)               | 4,641.8<br>(3,849.3 to 5,595.0)          | 9.2<br>(3.6 to 19.4)                 | 42.8<br>(39.5 to 45.8)                            | 0.4<br>(-0.5 to 1.2)                                |
| Viral skin diseases                           | 388.6<br>(339.4 to 445.8)                     | 513.6<br>(442.4 to 588.8)                | 12.0<br>(7.5 to 18.0)                | 40.3<br>(35.1 to 45.7)                            | 0.3<br>(-2.6 to 3.4)                                |
| Acne vulgaris                                 | 972.6<br>(836.5 to 1,122.6)                   | 737.1<br>(557.1 to 999.4)                | 25.1<br>(16.5 to 36.8)               | 31.4<br>(25.1 to 38.5)                            | 4.1<br>(-0.3 to 9.2)                                |
| Alopecia areata                               | 18.2<br>(17.0 to 19.4)                        | 32.6<br>(30.3 to 34.7)                   | 0.6<br>(0.4 to 0.9)                  | 45.9<br>(29.0 to 67.3)                            | 0.3<br>(-9.7 to 12.2)                               |
| Pruritus                                      | 76.3<br>(66.8 to 86.3)                        | 62.9<br>(55.7 to 71.4)                   | 0.8<br>(0.4 to 1.5)                  | 45.2<br>(35.8 to 56.1)                            | 0.6<br>(-4.5 to 6.1)                                |
| Urticaria                                     | 120.1<br>(101.6 to 142.2)                     | 217.9<br>(183.9 to 257.1)                | 7.3<br>(4.6 to 10.7)                 | 47.2<br>(36.9 to 56.6)                            | 0.5<br>(-5.2 to 6.3)                                |
| Decubitus ulcer                               | 0.9<br>(0.8 to 1.0)                           | 3.4<br>(3.1 to 3.8)                      | 0.2<br>(0.1 to 0.2)                  | 40.1<br>(27.4 to 52.1)                            | 0.3<br>(-13.7 to 15.3)                              |
| Other skin and subcutaneous diseases          | 439.3<br>(425.4 to 454.2)                     | 492.0<br>(476.2 to 509.0)                | 2.4<br>(1.2 to 4.4)                  | 44.8<br>(40.0 to 49.6)                            | 1.1<br>(-1.3 to 3.6)                                |
| Sense organ diseases                          | 1,888.0<br>(1,798.2 to 1,988.8)               | 1,020.1†<br>(942.0 to 1,099.5)           | 64.7<br>(44.1 to 92.1)               | 38.8<br>(33.7 to 43.8)                            | -1.8<br>(-4.0 to 0.5)                               |
| Glaucoma                                      | 3.0<br>(2.5 to 3.5)                           | --                                       | 0.3<br>(0.2 to 0.5)                  | 53.0<br>(34.5 to 74.7)                            | 6.2<br>(-5.3 to 19.1)                               |
| Cataract                                      | 18.2<br>(16.0 to 20.5)                        | --                                       | 1.7<br>(1.2 to 2.4)                  | 40.8<br>(30.1 to 51.7)                            | 0.3<br>(-5.5 to 6.6)                                |
| Macular degeneration                          | 5.4<br>(4.3 to 6.7)                           | --                                       | 0.4<br>(0.2 to 0.5)                  | 53.5<br>(35.6 to 72.8)                            | 7.0<br>(-4.0 to 19.5)                               |
| Refraction and accommodation disorders        | 971.9<br>(866.6 to 1,101.4)                   | --                                       | 13.0<br>(7.2 to 22.4)                | 33.8<br>(24.4 to 45.8)                            | -5.4<br>(-12.1 to 3.3)                              |
| Age-related and other hearing loss            | 1,094.1<br>(1,010.9 to 1,186.4)               | --                                       | 41.8<br>(28.2 to 59.2)               | 38.7<br>(31.8 to 45.5)                            | -1.8<br>(-4.5 to 0.8)                               |
| Other vision loss                             | 19.8<br>(17.6 to 22.1)                        | --                                       | 1.6<br>(1.1 to 2.2)                  | 52.1<br>(38.9 to 66.9)                            | 5.9<br>(-1.7 to 13.7)                               |
| Other sense organ diseases                    | 191.9<br>(177.6 to 206.5)                     | 1,020.1<br>(942.0 to 1,099.5)            | 5.9<br>(3.7 to 8.9)                  | 45.5<br>(37.7 to 53.3)                            | 1.2<br>(-2.7 to 4.9)                                |
| Oral disorders                                | 5,739.5<br>(5,242.4 to 6,203.5)               | 16,511.7†<br>(13,947.7 to 19,036.1)      | 15.3<br>(8.5 to 25.8)                | 43.9<br>(39.8 to 49.3)                            | 0.2<br>(-2.6 to 3.6)                                |
| Caries of deciduous teeth                     | 1,545.2<br>(1,223.4 to 1,869.0)               | 5,801.5<br>(4,197.2 to 7,771.5)          | 0.4<br>(0.1 to 0.7)                  | 52.1<br>(36.6 to 70.3)                            | -0.5<br>(-11.1 to 11.5)                             |
| Caries of permanent teeth                     | 3,560.8<br>(3,032.6 to 4,129.6)               | 10,611.1<br>(8,753.3 to 12,426.5)        | 2.1<br>(0.9 to 4.1)                  | 37.9<br>(29.8 to 46.4)                            | -0.3<br>(-5.5 to 4.6)                               |
| Periodontal disease                           | 752.5<br>(455.1 to 1,085.2)                   | 92.0<br>(58.6 to 135.1)                  | 5.0<br>(1.8 to 11.0)                 | 46.0<br>(34.5 to 61.5)                            | 0.0<br>(-6.7 to 8.8)                                |
| Edentulism and severe tooth loss              | 104.9<br>(89.4 to 121.1)                      | 7.1<br>(6.0 to 8.2)                      | 3.0<br>(1.9 to 4.2)                  | 47.2<br>(40.0 to 55.0)                            | 0.7<br>(-3.4 to 4.8)                                |
| Other oral disorders                          | 167.1<br>(159.1 to 175.9)                     | --                                       | 4.9<br>(3.0 to 7.5)                  | 41.9<br>(36.4 to 47.1)                            | 0.3<br>(-2.6 to 3.1)                                |
| <b>Injuries</b>                               | <b>1,589.1</b><br><b>(1,437.8 to 1,783.0)</b> | <b>909.0†</b><br><b>(857.7 to 965.1)</b> | <b>68.5</b><br><b>(44.1 to 99.2)</b> | <b>37.6</b><br><b>(30.9 to 45.6)</b>              | <b>0.3</b><br><b>(-2.4 to 3.0)</b>                  |
| <b>Transport injuries</b>                     | <b>166.8</b><br><b>(155.3 to 179.8)</b>       | <b>84.0</b><br><b>(73.9 to 95.7)</b>     | <b>10.3</b><br><b>(6.7 to 15.0)</b>  | <b>52.8</b><br><b>(47.5 to 58.0)</b>              | <b>6.9</b><br><b>(4.6 to 9.2)</b>                   |
| Road injuries                                 | 142.3<br>(132.3 to 153.5)                     | 74.9<br>(65.4 to 87.1)                   | 8.7<br>(5.6 to 12.7)                 | 54.1<br>(49.3 to 58.9)                            | 7.5<br>(5.3 to 9.7)                                 |
| Pedestrian road injuries                      | 46.4<br>(40.4 to 53.0)                        | 18.2<br>(14.8 to 22.2)                   | 2.9<br>(1.8 to 4.2)                  | 48.3<br>(43.5 to 53.1)                            | 3.5<br>(1.3 to 5.7)                                 |
| Cyclist road injuries                         | 29.6<br>(25.0 to 35.1)                        | 18.0<br>(14.2 to 22.3)                   | 1.7<br>(1.1 to 2.5)                  | 60.0<br>(54.6 to 65.5)                            | 12.7<br>(10.2 to 15.1)                              |
| Motorcyclist road injuries                    | 15.3<br>(13.1 to 18.4)                        | 5.6<br>(4.5 to 7.1)                      | 0.9<br>(0.6 to 1.4)                  | 56.6<br>(51.2 to 62.1)                            | 8.5<br>(6.1 to 11.2)                                |
| Motor vehicle road injuries                   | 41.7<br>(35.6 to 47.8)                        | 26.7<br>(22.2 to 31.9)                   | 2.7<br>(1.8 to 4.0)                  | 55.8<br>(51.3 to 60.2)                            | 8.2<br>(6.0 to 10.4)                                |
| Other road injuries                           | 9.3<br>(7.9 to 11.1)                          | 6.4<br>(4.7 to 8.6)                      | 0.5<br>(0.3 to 0.8)                  | 56.7<br>(51.3 to 61.9)                            | 10.5<br>(8.0 to 13.1)                               |
| Other transport injuries                      | 24.6<br>(20.7 to 29.4)                        | 9.0<br>(7.5 to 11.1)                     | 1.6<br>(1.0 to 2.4)                  | 46.1<br>(37.9 to 55.3)                            | 2.6<br>(-0.8 to 6.2)                                |
| <b>Unintentional injuries</b>                 | <b>1,124.9</b><br><b>(1,038.2 to 1,229.8)</b> | <b>793.0</b><br><b>(743.1 to 845.9)</b>  | <b>44.5</b><br><b>(30.2 to 62.4)</b> | <b>46.3</b><br><b>(40.0 to 52.8)</b>              | <b>3.0</b><br><b>(0.6 to 5.1)</b>                   |
| Falls                                         | 438.3<br>(378.9 to 499.4)                     | 290.2<br>(252.2 to 337.0)                | 20.1<br>(13.9 to 27.9)               | 47.3<br>(41.0 to 54.1)                            | 3.8<br>(1.4 to 6.0)                                 |
| Drowning                                      | 4.5<br>(3.8 to 5.1)                           | 1.4<br>(1.2 to 1.6)                      | 0.3<br>(0.2 to 0.4)                  | 54.4<br>(43.9 to 65.8)                            | 8.7<br>(4.0 to 13.4)                                |
| Fire, heat, and hot substances                | 154.4<br>(128.2 to 192.3)                     | 32.3<br>(25.7 to 39.5)                   | 4.9<br>(3.3 to 6.9)                  | 46.0<br>(35.9 to 57.8)                            | 3.4<br>(-1.5 to 8.6)                                |
| Poisonings                                    | 3.4<br>(2.7 to 4.1)                           | 6.7<br>(5.2 to 8.5)                      | 0.4<br>(0.2 to 0.6)                  | 45.2<br>(32.7 to 59.4)                            | 3.2<br>(-3.7 to 10.8)                               |
| Exposure to mechanical forces                 | 163.5<br>(140.2 to 198.4)                     | 96.0<br>(81.1 to 112.4)                  | 4.7<br>(3.0 to 7.0)                  | 46.7<br>(40.9 to 52.3)                            | 2.2<br>(-0.3 to 4.5)                                |
| Unintentional firearm injuries                | 7.3<br>(6.0 to 8.9)                           | 2.8<br>(1.9 to 3.9)                      | 0.4<br>(0.2 to 0.5)                  | 48.2<br>(42.2 to 54.6)                            | 3.4<br>(0.5 to 6.4)                                 |
| Unintentional suffocation                     | 13.7<br>(9.8 to 18.3)                         | 5.3<br>(3.6 to 7.5)                      | 0.5<br>(0.3 to 0.8)                  | 50.0<br>(37.1 to 62.6)                            | 5.6<br>(0.4 to 10.5)                                |
| Other exposure to mechanical forces           | 142.6<br>(120.0 to 176.7)                     | 87.9<br>(74.4 to 102.8)                  | 3.9<br>(2.5 to 5.7)                  | 46.2<br>(40.9 to 51.4)                            | 1.8<br>(-0.7 to 4.0)                                |

| Cause                                                                               | Prevalence in thousands (95% UI)        | Incidence in thousands (95% UI)       | YLDs in thousands (95% UI)         |                                                   |                                                     |
|-------------------------------------------------------------------------------------|-----------------------------------------|---------------------------------------|------------------------------------|---------------------------------------------------|-----------------------------------------------------|
|                                                                                     | 2016 counts                             | 2016 counts                           | 2016 counts                        | Percentage change in counts between 2006 and 2016 | Percentage change in age-standardised rates between |
| Adverse effects of medical treatment                                                | 4.7<br>(3.6 to 5.9)                     | 60.8<br>(51.3 to 71.3)                | 0.6<br>(0.4 to 0.9)                | 42.2<br>(33.9 to 52.8)                            | -4.0<br>(-7.3 to 0.4)                               |
| Animal contact                                                                      | 75.6<br>(66.4 to 87.6)                  | 133.2<br>(114.6 to 153.6)             | 2.7<br>(1.8 to 3.8)                | 43.9<br>(37.6 to 51.0)                            | 1.5<br>(-1.8 to 5.0)                                |
| Venomous animal contact                                                             | 25.9<br>(21.7 to 31.4)                  | 52.3<br>(42.0 to 64.3)                | 1.7<br>(1.1 to 2.4)                | 44.5<br>(35.2 to 55.4)                            | 2.7<br>(-2.2 to 8.4)                                |
| Non-venomous animal contact                                                         | 49.7<br>(41.8 to 59.8)                  | 80.9<br>(67.6 to 96.0)                | 1.0<br>(0.7 to 1.4)                | 43.0<br>(38.1 to 47.6)                            | -0.2<br>(-3.1 to 2.5)                               |
| Foreign body                                                                        | 80.1<br>(64.0 to 97.1)                  | 68.6<br>(59.0 to 79.2)                | 3.8<br>(2.4 to 5.7)                | 43.9<br>(34.9 to 53.9)                            | 2.0<br>(-1.9 to 6.1)                                |
| Pulmonary aspiration and foreign body in airway                                     | 46.1<br>(33.5 to 63.7)                  | 28.1<br>(22.3 to 35.6)                | 2.5<br>(1.5 to 3.8)                | 42.6<br>(33.3 to 53.2)                            | 0.8<br>(-3.2 to 5.2)                                |
| Foreign body in eyes                                                                | 3.8<br>(2.0 to 6.0)                     | 21.9<br>(16.4 to 29.2)                | 0.2<br>(0.1 to 0.4)                | 47.9<br>(41.9 to 53.8)                            | 3.1<br>(0.3 to 5.9)                                 |
| Foreign body in other body part                                                     | 30.1<br>(23.8 to 39.9)                  | 18.5<br>(14.9 to 22.6)                | 1.1<br>(0.7 to 1.7)                | 46.0<br>(36.8 to 56.9)                            | 4.2<br>(-0.1 to 8.9)                                |
| Environmental heat and cold exposure                                                | 56.8<br>(46.7 to 68.9)                  | 24.0<br>(19.1 to 30.1)                | 2.5<br>(1.6 to 3.7)                | 45.6<br>(37.7 to 53.3)                            | 1.7<br>(-1.4 to 4.4)                                |
| Other unintentional injuries                                                        | 143.8<br>(114.1 to 183.5)               | 79.8<br>(66.6 to 96.5)                | 4.5<br>(2.9 to 6.5)                | 46.0<br>(39.7 to 52.6)                            | 1.5<br>(-0.7 to 3.6)                                |
| <b>Self-harm and interpersonal violence</b>                                         | <b>474.8</b><br><b>(419.3 to 541.5)</b> | <b>30.5†</b><br><b>(25.1 to 36.2)</b> | <b>6.0</b><br><b>(4.2 to 8.2)</b>  | <b>37.0</b><br><b>(31.5 to 42.2)</b>              | <b>-0.1</b><br><b>(-3.1 to 2.9)</b>                 |
| Self-harm                                                                           | 6.9<br>(6.0 to 7.8)                     | 4.5<br>(3.8 to 5.3)                   | 0.4<br>(0.2 to 0.6)                | 46.1<br>(41.6 to 50.4)                            | 2.4<br>(0.2 to 4.7)                                 |
| Self-harm by firearm                                                                | 0.8<br>(0.7 to 0.9)                     | 0.4<br>(0.2 to 0.5)                   | < 0.05<br>(< 0.05 to 0.1)          | 42.8<br>(38.5 to 47.7)                            | 1.3<br>(-1.4 to 4.3)                                |
| Self-harm by other specified means                                                  | 6.2<br>(5.3 to 7.0)                     | 4.1<br>(3.5 to 4.9)                   | 0.4<br>(0.2 to 0.6)                | 46.4<br>(41.7 to 51.0)                            | 2.5<br>(0.1 to 5.0)                                 |
| Interpersonal violence                                                              | 467.9<br>(412.4 to 534.8)               | 26.0†<br>(20.9 to 31.6)               | 5.6<br>(3.9 to 7.7)                | 36.4<br>(30.6 to 42.0)                            | -0.5<br>(-3.6 to 2.9)                               |
| Assault by firearm                                                                  | 1.0<br>(0.9 to 1.2)                     | 0.5<br>(0.3 to 0.7)                   | 0.1<br>(< 0.05 to 0.1)             | 67.8<br>(60.4 to 76.8)                            | 20.1<br>(16.4 to 23.9)                              |
| Assault by sharp object                                                             | 12.5<br>(10.0 to 15.1)                  | 7.0<br>(5.0 to 9.6)                   | 0.5<br>(0.3 to 0.7)                | 60.3<br>(53.5 to 67.4)                            | 14.2<br>(10.8 to 17.4)                              |
| Sexual violence                                                                     | 430.5<br>(374.6 to 497.0)               | --                                    | 4.0<br>(2.6 to 5.7)                | 26.8<br>(20.9 to 33.1)                            | -9.1<br>(-12.3 to -5.2)                             |
| Assault by other means                                                              | 24.0<br>(20.1 to 28.8)                  | 18.5<br>(14.7 to 23.0)                | 1.1<br>(0.7 to 1.6)                | 71.7<br>(65.3 to 78.3)                            | 22.6<br>(19.4 to 25.7)                              |
| <b>Forces of nature, conflict and terrorism, and executions and police conflict</b> | <b>253.0</b><br><b>(136.9 to 418.2)</b> | <b>1.6†</b><br><b>(1.0 to 2.4)</b>    | <b>7.8</b><br><b>(2.4 to 16.6)</b> | <b>-6.4</b><br><b>(-17.2 to 3.0)</b>              | <b>-18.8</b><br><b>(-26.3 to -13.0)</b>             |
| Exposure to forces of nature                                                        | 0.6<br>(0.3 to 0.9)                     | 1.1<br>(0.5 to 1.6)                   | < 0.05<br>(< 0.05 to 0.1)          | 753.7<br>(497.5 to 1,170.2)                       | 504.8<br>(331.8 to 735.9)                           |
| Conflict and terrorism                                                              | 250.1<br>(135.4 to 415.3)               | --                                    | 7.6<br>(2.4 to 16.2)               | -6.9<br>(-17.9 to 2.4)                            | -19.1<br>(-26.7 to -13.3)                           |
| Executions and police conflict                                                      | 2.3<br>(1.0 to 4.7)                     | 0.5<br>(0.2 to 1.3)                   | 0.1<br>(< 0.05 to 0.3)             | 9.0<br>(-6.0 to 29.3)                             | -14.4<br>(-22.7 to -2.3)                            |
| <b>Impairments</b>                                                                  | --                                      | --                                    | --                                 | --                                                | --                                                  |
| Anaemia                                                                             | 2,651.1<br>(2,444.1 to 2,900.8)         | --                                    | 79.8<br>(53.5 to 114.6)            | 8.6<br>(-6.8 to 22.0)                             | -27.9<br>(-40.6 to -17.5)                           |
| Developmental intellectual disability                                               | 527.8<br>(398.3 to 659.4)               | --                                    | 42.3<br>(29.9 to 58.4)             | 33.9<br>(24.0 to 43.4)                            | -4.0<br>(-9.9 to 1.7)                               |
| Epilepsy                                                                            | 75.5<br>(39.8 to 117.1)                 | --                                    | 29.9<br>(14.2 to 51.6)             | 37.0<br>(-38.8 to 173.3)                          | -3.0<br>(-58.8 to 101.8)                            |
| Guillain-Barre syndrome                                                             | 0.1<br>(0.1 to 0.1)                     | --                                    | < 0.05<br>(< 0.05 to < 0.05)       | 41.9<br>(38.0 to 46.2)                            | -0.1<br>(-0.1 to 0.0)                               |
| Hearing loss                                                                        | 1,369.3<br>(1,287.4 to 1,454.8)         | --                                    | 58.5<br>(40.6 to 80.5)             | 37.7<br>(32.6 to 42.6)                            | -2.4<br>(-4.6 to -0.2)                              |
| Heart failure                                                                       | 24.3<br>(21.4 to 27.6)                  | --                                    | 2.7<br>(1.9 to 3.6)                | 36.9<br>(28.2 to 46.5)                            | -0.2<br>(-6.5 to 7.1)                               |
| Infertility                                                                         | 98.2<br>(78.0 to 126.7)                 | --                                    | 0.6<br>(0.3 to 1.2)                | 98.9<br>(64.0 to 133.3)                           | 36.6<br>(13.6 to 61.4)                              |
| Pelvic inflammatory disease                                                         | 11.1<br>(9.2 to 13.4)                   | --                                    | 1.4<br>(0.9 to 2.1)                | 52.8<br>(32.4 to 77.5)                            | 1.8<br>(-10.9 to 17.9)                              |
| Vision loss                                                                         | 1,063.8<br>(957.0 to 1,197.3)           | --                                    | 23.1<br>(15.2 to 35.3)             | 34.5<br>(22.0 to 48.6)                            | -4.0<br>(-9.5 to 1.9)                               |

We did not calculate incidence for the nine impairments, certain NTDs, and causes with only birth prevalence. Blank cells mean that no estimate is available.

† Incidence for aggregate causes represents the sum of the incidence of the causes below the aggregate.

‡ Incidence estimates for stroke represent first-ever stroke only.

^ Incidence of HIV/AIDS represents new infections of HIV only and does not include new infections of Tuberculosis in HIV positive cases.



SR Table 14: Prevalence, incidence, and YLDs for 2016, percentage change of YLD counts and percentage change of age-standardised YLD rates between 2006 and 2016 by cause and impairments, for all ages, Cambodia.

| Cause                                                                                | Prevalence in thousands (95% UI)          | Incidence in thousands (95% UI)            | YLDs in thousands (95% UI)             |                                                   |                                                     |
|--------------------------------------------------------------------------------------|-------------------------------------------|--------------------------------------------|----------------------------------------|---------------------------------------------------|-----------------------------------------------------|
|                                                                                      | 2016 counts                               | 2016 counts                                | 2016 counts                            | Percentage change in counts between 2006 and 2016 | Percentage change in age-standardised rates between |
| <b>All causes</b>                                                                    | <b>15,413.3</b><br>(15,369.6 to 15,453.8) | <b>94,249.0†</b><br>(89,372.5 to 99,463.2) | <b>1,524.9</b><br>(1,123.3 to 1,990.2) | <b>16.0</b><br>(12.9 to 19.2)                     | <b>-6.0</b><br>(-8.1 to -3.8)                       |
| <b>Communicable, maternal, neonatal, and nutritional disorders</b>                   | <b>10,873.2</b><br>(10,663.9 to 11,079.9) | <b>53,365.0†</b><br>(49,068.2 to 58,113.5) | <b>264.9</b><br>(188.6 to 364.6)       | <b>-10.0</b><br>(-14.2 to -5.5)                   | <b>-25.6</b><br>(-29.3 to -21.8)                    |
| <b>HIV/AIDS and tuberculosis</b>                                                     | <b>4,707.6</b><br>(4,233.4 to 5,052.9)    | <b>31.6†</b><br>(27.5 to 36.5)             | <b>22.9</b><br>(15.0 to 33.0)          | <b>-25.2</b><br>(-39.0 to -8.3)                   | <b>-42.1</b><br>(-52.0 to -30.9)                    |
| Tuberculosis                                                                         | 4,385.7<br>(3,939.7 to 4,829.2)           | 30.8†<br>(26.7 to 35.6)                    | 14.7<br>(9.6 to 20.2)                  | -14.1<br>(-22.0 to -4.8)                          | -36.7<br>(-41.4 to -31.5)                           |
| Drug-susceptible tuberculosis                                                        | 47.9<br>(41.2 to 55.6)                    | 30.3<br>(26.0 to 35.1)                     | 14.4<br>(9.5 to 19.8)                  | -14.0<br>(-22.2 to -4.6)                          | -36.6<br>(-41.9 to -30.9)                           |
| Multidrug-resistant tuberculosis without extensive drug resistance                   | 0.7<br>(0.1 to 2.5)                       | 0.5<br>(0.1 to 1.5)                        | 0.2<br>(< 0.05 to 0.8)                 | -22.6<br>(-88.0 to 263.4)                         | -43.0<br>(-91.6 to 167.1)                           |
| Extensively drug-resistant tuberculosis                                              | 0.1<br>(< 0.05 to 0.2)                    | < 0.05<br>(< 0.05 to 0.1)                  | < 0.05<br>(< 0.05 to 0.1)              | 149.5<br>(-62.0 to 1,074.6)                       | 83.1<br>(-72.2 to 776.4)                            |
| Latent tuberculosis infection                                                        | 4,337.0<br>(3,890.8 to 4,783.9)           | --                                         | --                                     | --                                                | --                                                  |
| HIV/AIDS                                                                             | 66.4<br>(47.2 to 86.1)                    | 0.8^<br>(0.1 to 2.1)                       | 8.2<br>(4.7 to 14.5)                   | -39.2<br>(-57.8 to 0.1)                           | -50.7<br>(-65.6 to -19.2)                           |
| Drug-susceptible HIV/AIDS - Tuberculosis                                             | 3.2<br>(2.0 to 5.0)                       | 2.1<br>(1.2 to 3.3)                        | 1.3<br>(0.7 to 2.2)                    | -60.8<br>(-68.5 to -52.7)                         | -67.2<br>(-73.6 to -60.8)                           |
| Multidrug-resistant HIV/AIDS - Tuberculosis without extensive drug resistance        | 0.1<br>(< 0.05 to 0.2)                    | < 0.05<br>(< 0.05 to 0.1)                  | < 0.05<br>(< 0.05 to 0.1)              | -65.2<br>(-94.7 to 67.1)                          | -71.0<br>(-95.6 to 39.5)                            |
| Extensively drug-resistant HIV/AIDS - Tuberculosis                                   | < 0.05<br>(< 0.05 to < 0.05)              | < 0.05<br>(< 0.05 to < 0.05)               | < 0.05<br>(< 0.05 to < 0.05)           | 14.5<br>(-82.5 to 449.4)                          | -4.4<br>(-85.4 to 358.8)                            |
| HIV/AIDS resulting in other diseases                                                 | 63.0<br>(43.7 to 82.8)                    | 0.8<br>(0.1 to 2.1)                        | 6.9<br>(3.6 to 12.7)                   | -32.2<br>(-57.6 to 35.3)                          | -45.5<br>(-65.6 to 12.3)                            |
| <b>Diarrhoea, lower respiratory infections, and other common infectious diseases</b> | <b>930.8</b><br>(883.4 to 982.3)          | <b>49,190.0†</b><br>(44,968.9 to 53,850.2) | <b>53.3</b><br>(37.5 to 72.2)          | <b>2.4</b><br>(-1.4 to 6.5)                       | <b>-11.3</b><br>(-14.1 to -8.3)                     |
| Diarrhoeal diseases                                                                  | 212.6<br>(198.3 to 225.9)                 | 14,089.5<br>(13,175.5 to 15,047.6)         | 24.0<br>(16.7 to 33.3)                 | -2.4<br>(-7.7 to 3.0)                             | -15.5<br>(-19.6 to -11.4)                           |
| Intestinal infectious diseases                                                       | 3.6<br>(2.9 to 4.6)                       | 66.9†<br>(52.7 to 85.8)                    | 0.6<br>(0.3 to 0.8)                    | -11.1<br>(-32.5 to 15.5)                          | -18.1<br>(-35.5 to 2.7)                             |
| Typhoid fever                                                                        | 3.4<br>(2.6 to 4.4)                       | 53.3<br>(41.6 to 68.9)                     | 0.5<br>(0.3 to 0.8)                    | -11.3<br>(-34.1 to 17.8)                          | -18.1<br>(-36.8 to 4.9)                             |
| Paratyphoid fever                                                                    | 0.6<br>(0.5 to 0.8)                       | 13.6<br>(10.7 to 17.1)                     | < 0.05<br>(< 0.05 to 0.1)              | -4.0<br>(-21.3 to 15.3)                           | -13.7<br>(-27.3 to 1.8)                             |
| Other intestinal infectious diseases                                                 | --                                        | --                                         | < 0.05<br>(< 0.05 to < 0.05)           | -32.2<br>(-48.2 to -9.5)                          | -39.6<br>(-50.9 to -25.1)                           |
| Lower respiratory infections                                                         | 24.3<br>(22.6 to 26.2)                    | 976.7<br>(897.5 to 1,066.4)                | 1.5<br>(1.0 to 2.1)                    | -3.9<br>(-14.6 to 8.5)                            | -15.9<br>(-23.2 to -7.2)                            |
| Upper respiratory infections                                                         | 439.2<br>(385.6 to 497.4)                 | 32,862.1<br>(28,699.7 to 37,402.1)         | 11.0<br>(6.5 to 17.3)                  | 16.4<br>(8.3 to 25.6)                             | 1.0<br>(-5.2 to 7.7)                                |
| Otitis media                                                                         | 213.6<br>(190.8 to 237.8)                 | 773.9<br>(608.3 to 980.5)                  | 6.8<br>(4.2 to 10.1)                   | -1.0<br>(-8.8 to 7.4)                             | -12.0<br>(-18.1 to -5.5)                            |
| Meningitis                                                                           | 33.0<br>(27.9 to 38.2)                    | 5.6<br>(4.8 to 6.6)                        | 3.9<br>(2.7 to 5.1)                    | 3.2<br>(-3.3 to 9.7)                              | -11.4<br>(-17.1 to -6.1)                            |
| Pneumococcal meningitis                                                              | 11.9<br>(10.1 to 14.1)                    | 0.8<br>(0.7 to 1.1)                        | 1.6<br>(1.1 to 2.1)                    | -6.6<br>(-17.9 to 5.3)                            | -20.5<br>(-30.0 to -10.4)                           |
| H influenzae type B meningitis                                                       | 5.1<br>(4.2 to 6.2)                       | 0.7<br>(0.5 to 0.9)                        | 0.8<br>(0.5 to 1.1)                    | -11.8<br>(-20.8 to -1.1)                          | -23.6<br>(-31.8 to -14.0)                           |
| Meningococcal infection                                                              | 1.4<br>(1.1 to 1.9)                       | 0.4<br>(0.3 to 0.5)                        | 0.2<br>(0.1 to 0.2)                    | 4.7<br>(-1.6 to 10.8)                             | -10.5<br>(-15.6 to -5.4)                            |
| Other meningitis                                                                     | 14.5<br>(10.8 to 18.7)                    | 3.7<br>(3.2 to 4.4)                        | 1.3<br>(0.9 to 1.8)                    | 33.0<br>(23.3 to 44.1)                            | 14.4<br>(6.2 to 23.5)                               |
| Encephalitis                                                                         | 41.6<br>(27.8 to 62.2)                    | 16.1<br>(13.9 to 18.8)                     | 4.7<br>(3.4 to 6.3)                    | 8.1<br>(-5.5 to 23.7)                             | -8.5<br>(-18.9 to 3.4)                              |
| Diphtheria                                                                           | < 0.05<br>(< 0.05 to < 0.05)              | < 0.05<br>(< 0.05 to < 0.05)               | < 0.05<br>(< 0.05 to < 0.05)           | -61.0<br>(-78.7 to -27.2)                         | -64.7<br>(-79.7 to -37.5)                           |
| Whooping cough                                                                       | 3.5<br>(2.7 to 4.5)                       | 25.5<br>(19.9 to 32.5)                     | 0.2<br>(0.1 to 0.3)                    | -39.3<br>(-50.7 to -25.1)                         | -45.6<br>(-55.8 to -32.5)                           |
| Tetanus                                                                              | 0.2<br>(0.2 to 0.2)                       | 0.7<br>(0.4 to 1.2)                        | < 0.05<br>(< 0.05 to < 0.05)           | -68.0<br>(-79.0 to -47.1)                         | -75.6<br>(-84.8 to -55.3)                           |
| Measles                                                                              | 0.1<br>(< 0.05 to 0.3)                    | 5.1<br>(1.7 to 11.4)                       | < 0.05<br>(< 0.05 to < 0.05)           | -35.3<br>(-58.0 to -2.3)                          | -42.3<br>(-62.6 to -13.0)                           |
| Varicella and herpes zoster                                                          | 17.2<br>(15.8 to 18.6)                    | 367.9<br>(352.4 to 382.6)                  | 0.7<br>(0.4 to 1.0)                    | 26.6<br>(12.6 to 43.8)                            | 0.5<br>(-8.2 to 11.3)                               |
| <b>Neglected tropical diseases and malaria</b>                                       | <b>959.8</b><br>(920.1 to 1,000.3)        | <b>403.9†</b><br>(318.1 to 510.2)          | <b>20.4</b><br>(13.5 to 30.4)          | <b>-53.8</b><br>(-63.8 to -39.4)                  | <b>-64.4</b><br>(-72.7 to -51.8)                    |
| Malaria                                                                              | 9.5<br>(7.9 to 11.6)                      | 44.2<br>(33.9 to 55.5)                     | 0.5<br>(0.4 to 0.6)                    | -24.5<br>(-34.6 to -12.9)                         | -33.8<br>(-42.1 to -24.4)                           |
| Chagas disease                                                                       | --                                        | --                                         | --                                     | --                                                | --                                                  |
| Leishmaniasis                                                                        | --                                        | --                                         | --                                     | --                                                | --                                                  |
| Visceral leishmaniasis                                                               | --                                        | --                                         | --                                     | --                                                | --                                                  |
| Cutaneous and mucocutaneous leishmaniasis                                            | --                                        | --                                         | --                                     | --                                                | --                                                  |
| African trypanosomiasis                                                              | --                                        | --                                         | --                                     | --                                                | --                                                  |
| Schistosomiasis                                                                      | 578.8<br>(549.6 to 612.9)                 | 117.1<br>(98.0 to 141.8)                   | 7.8<br>(4.4 to 13.6)                   | -70.0<br>(-75.2 to -61.1)                         | -78.8<br>(-82.7 to -72.3)                           |
| Cysticercosis                                                                        | 8.8<br>(7.2 to 10.6)                      | --                                         | 1.6<br>(1.0 to 2.4)                    | -3.2<br>(-20.1 to 14.4)                           | -27.3<br>(-38.5 to -16.3)                           |
| Cystic echinococcosis                                                                | 0.2<br>(< 0.05 to 1.2)                    | < 0.05<br>(< 0.05 to 0.2)                  | < 0.05<br>(< 0.05 to 0.1)              | -46.4<br>(-96.1 to 47.4)                          | -56.8<br>(-96.1 to 362.9)                           |
| Lymphatic filariasis                                                                 | 13.3<br>(3.9 to 35.8)                     | --                                         | 1.5<br>(0.4 to 4.4)                    | 150.1<br>(29.8 to 278.0)                          | 101.5<br>(5.4 to 203.8)                             |
| Onchocerciasis                                                                       | --                                        | --                                         | --                                     | --                                                | --                                                  |
| Trachoma                                                                             | 11.2<br>(7.4 to 15.7)                     | --                                         | 0.9<br>(0.6 to 1.2)                    | -3.7<br>(-28.6 to 28.2)                           | -32.4<br>(-53.0 to -2.9)                            |
| Dengue                                                                               | 14.5<br>(8.4 to 23.6)                     | 242.4<br>(160.2 to 345.1)                  | 2.4<br>(1.1 to 4.3)                    | 4.2<br>(-17.8 to 113.6)                           | -9.2<br>(-27.3 to 82.9)                             |
| Yellow fever                                                                         | --                                        | --                                         | --                                     | --                                                | --                                                  |
| Rabies                                                                               | < 0.05<br>(< 0.05 to < 0.05)              | < 0.05<br>(< 0.05 to < 0.05)               | < 0.05<br>(< 0.05 to < 0.05)           | -81.1<br>(-91.3 to -63.1)                         | -83.9<br>(-92.6 to -70.0)                           |
| Intestinal nematode infections                                                       | 116.3<br>(91.6 to 152.5)                  | --                                         | 0.2<br>(0.1 to 0.3)                    | -97.0<br>(-97.9 to -95.4)                         | -97.3<br>(-98.2 to -95.8)                           |
| Ascariasis                                                                           | 72.3<br>(52.3 to 100.0)                   | --                                         | < 0.05<br>(< 0.05 to < 0.05)           | -99.5<br>(-99.8 to -99.0)                         | -99.6<br>(-99.8 to -99.2)                           |

| Cause                                                                   | Prevalence in thousands (95% UI)                 | Incidence in thousands (95% UI)                   | YLDs in thousands (95% UI)                  |                                                   |                                                     |
|-------------------------------------------------------------------------|--------------------------------------------------|---------------------------------------------------|---------------------------------------------|---------------------------------------------------|-----------------------------------------------------|
|                                                                         | 2016 counts                                      | 2016 counts                                       | 2016 counts                                 | Percentage change in counts between 2006 and 2016 | Percentage change in age-standardised rates between |
| Trichuriasis                                                            | 0.7<br>(0.4 to 1.1)                              | --                                                | --                                          | --                                                | --                                                  |
| Hookworm disease                                                        | 44.5<br>(33.5 to 57.9)                           | --                                                | 0.2<br>(0.1 to 0.3)                         | -96.9<br>(-97.8 to -95.2)                         | -97.2<br>(-98.1 to -95.6)                           |
| Food-borne trematodiasis                                                | --                                               | --                                                | --                                          | --                                                | --                                                  |
| Leprosy                                                                 | 3.8<br>(3.4 to 4.2)                              | 0.1<br>(0.1 to 0.1)                               | 0.2<br>(0.1 to 0.3)                         | -18.0<br>(-30.5 to -4.1)                          | -37.1<br>(-44.7 to -28.3)                           |
| Ebola virus disease                                                     | --                                               | --                                                | --                                          | --                                                | --                                                  |
| Zika virus disease                                                      | --                                               | --                                                | --                                          | --                                                | --                                                  |
| Guinea worm disease                                                     | --                                               | --                                                | --                                          | --                                                | --                                                  |
| Other neglected tropical diseases                                       | 224.0<br>(215.6 to 232.4)                        | --                                                | 5.4<br>(3.5 to 8.0)                         | -1.9<br>(-8.8 to 5.5)                             | -11.2<br>(-17.3 to -4.9)                            |
| <b>Maternal disorders</b>                                               | <b>27.1</b><br><b>(20.0 to 33.7)</b>             | <b>566.0†</b><br><b>(464.0 to 699.0)</b>          | <b>2.0</b><br><b>(1.2 to 3.0)</b>           | <b>29.1</b><br><b>(-3.6 to 73.6)</b>              | <b>-0.7</b><br><b>(-25.3 to 32.0)</b>               |
| Maternal haemorrhage                                                    | 3.9<br>(2.9 to 5.2)                              | 35.8<br>(26.5 to 48.5)                            | 0.2<br>(0.1 to 0.3)                         | 1.2<br>(-31.6 to 48.3)                            | -23.0<br>(-47.4 to 11.8)                            |
| Maternal sepsis and other pregnancy related infections                  | 3.6<br>(1.8 to 6.0)                              | 42.8<br>(30.7 to 59.6)                            | 0.2<br>(0.1 to 0.3)                         | 4.4<br>(-54.3 to 134.5)                           | -16.4<br>(-62.7 to 85.7)                            |
| Maternal hypertensive disorders                                         | 17.2<br>(10.8 to 24.4)                           | 82.0<br>(65.5 to 97.5)                            | 0.8<br>(0.4 to 1.4)                         | 81.4<br>(11.5 to 206.0)                           | 37.7<br>(-16.4 to 129.1)                            |
| Maternal obstructed labour and uterine rupture                          | 0.4<br>(0.2 to 0.6)                              | 28.1<br>(19.9 to 38.3)                            | 0.1<br>(< 0.05 to 0.2)                      | 5.7<br>(-56.6 to 185.7)                           | -17.7<br>(-65.2 to 110.1)                           |
| Maternal abortion, miscarriage, and ectopic pregnancy                   | 3.1<br>(1.9 to 4.7)                              | 377.2<br>(278.2 to 503.8)                         | 0.3<br>(0.2 to 0.6)                         | -0.4<br>(-45.9 to 75.1)                           | -23.9<br>(-58.5 to 34.4)                            |
| Other maternal disorders                                                | --                                               | --                                                | 0.3<br>(0.2 to 0.5)                         | 23.1<br>(-8.7 to 65.0)                            | -4.1<br>(-27.7 to 27.5)                             |
| <b>Neonatal disorders</b>                                               | <b>216.5</b><br><b>(177.1 to 285.0)</b>          | --                                                | <b>26.4</b><br><b>(18.5 to 36.8)</b>        | <b>17.4</b><br><b>(-3.0 to 40.3)</b>              | <b>4.5</b><br><b>(-14.0 to 25.0)</b>                |
| Neonatal preterm birth complications                                    | 198.2<br>(156.0 to 268.6)                        | --                                                | 18.8<br>(13.0 to 26.5)                      | 15.7<br>(-9.7 to 43.5)                            | 2.9<br>(-19.7 to 26.6)                              |
| Neonatal encephalopathy due to birth asphyxia and trauma                | 9.0<br>(3.5 to 19.1)                             | --                                                | 1.4<br>(0.2 to 4.6)                         | -1.8<br>(-51.2 to 117.2)                          | -12.1<br>(-57.0 to 91.6)                            |
| Neonatal sepsis and other neonatal infections                           | 7.7<br>(2.0 to 20.8)                             | --                                                | 3.2<br>(0.6 to 9.2)                         | 58.5<br>(-6.3 to 203.2)                           | 42.1<br>(-14.7 to 177.9)                            |
| Hemolytic disease and other neonatal jaundice                           | 5.5<br>(4.8 to 6.4)                              | --                                                | 1.9<br>(1.4 to 2.4)                         | 7.3<br>(-5.8 to 22.2)                             | -5.2<br>(-15.8 to 6.9)                              |
| Other neonatal disorders                                                | --                                               | --                                                | 1.1<br>(0.8 to 1.6)                         | 7.4<br>(-13.0 to 31.7)                            | -5.5<br>(-23.4 to 15.8)                             |
| <b>Nutritional deficiencies</b>                                         | <b>5,595.2</b><br><b>(5,438.3 to 5,746.8)</b>    | <b>1,166.4†</b><br><b>(957.2 to 1,430.4)</b>      | <b>127.7</b><br><b>(85.0 to 188.0)</b>      | <b>-2.7</b><br><b>(-7.4 to 2.3)</b>               | <b>-15.5</b><br><b>(-18.9 to -11.8)</b>             |
| Protein-energy malnutrition                                             | 176.7<br>(143.6 to 218.2)                        | 83.9<br>(69.1 to 102.1)                           | 6.5<br>(3.4 to 11.0)                        | -29.2<br>(-57.8 to 13.3)                          | -37.9<br>(-63.0 to -0.4)                            |
| Iodine deficiency                                                       | 82.3<br>(72.0 to 93.4)                           | 2.8<br>(2.5 to 3.1)                               | 2.1<br>(1.4 to 3.0)                         | -24.7<br>(-34.2 to -14.5)                         | -37.3<br>(-44.3 to -30.0)                           |
| Vitamin A deficiency                                                    | 1,188.3<br>(971.4 to 1,431.6)                    | 1,079.7<br>(873.4 to 1,346.9)                     | 0.6<br>(0.3 to 0.9)                         | 4.6<br>(-15.9 to 31.5)                            | -9.1<br>(-25.7 to 11.5)                             |
| Iron-deficiency anaemia                                                 | 4,944.4<br>(4,801.3 to 5,077.7)                  | --                                                | 118.2<br>(78.0 to 177.3)                    | -0.1<br>(-4.2 to 4.0)                             | -13.6<br>(-16.7 to -10.4)                           |
| Other nutritional deficiencies                                          | --                                               | --                                                | 0.2<br>(0.1 to 0.4)                         | -30.2<br>(-59.3 to 14.5)                          | -38.9<br>(-64.4 to 0.2)                             |
| <b>Other communicable, maternal, neonatal, and nutritional diseases</b> | <b>3,713.5</b><br><b>(3,479.3 to 3,938.2)</b>    | <b>2,007.0</b><br><b>(1,660.9 to 2,324.7)</b>     | <b>11.2</b><br><b>(7.4 to 16.4)</b>         | <b>7.0</b><br><b>(0.5 to 13.3)</b>                | <b>-12.6</b><br><b>(-17.8 to -7.7)</b>              |
| Sexually transmitted diseases excluding HIV                             | 2,220.2<br>(2,040.2 to 2,417.0)                  | 852.9<br>(761.5 to 952.7)                         | 5.5<br>(3.6 to 8.2)                         | 18.7<br>(7.9 to 28.9)                             | -10.4<br>(-18.5 to -3.2)                            |
| Syphilis                                                                | 10.6<br>(9.2 to 12.2)                            | 5.2<br>(4.2 to 6.2)                               | 0.4<br>(0.3 to 0.6)                         | -12.6<br>(-26.8 to 4.4)                           | -35.1<br>(-45.6 to -22.2)                           |
| Chlamydial infection                                                    | 268.4<br>(202.8 to 341.8)                        | 226.7<br>(175.5 to 291.4)                         | 1.6<br>(1.0 to 2.6)                         | 24.9<br>(6.6 to 42.3)                             | -3.0<br>(-16.1 to 9.9)                              |
| Gonococcal infection                                                    | 31.5<br>(20.7 to 46.5)                           | 85.8<br>(46.9 to 144.5)                           | 0.2<br>(0.1 to 0.3)                         | 19.2<br>(-4.0 to 48.4)                            | -6.7<br>(-24.9 to 16.3)                             |
| Trichomoniasis                                                          | 264.0<br>(218.7 to 313.1)                        | 225.9<br>(186.2 to 270.1)                         | 0.3<br>(0.1 to 0.6)                         | 24.9<br>(12.5 to 38.3)                            | -3.1<br>(-10.3 to 4.9)                              |
| Genital herpes                                                          | 1,669.3<br>(1,412.2 to 1,941.7)                  | 136.4<br>(115.2 to 163.2)                         | 0.4<br>(0.1 to 1.0)                         | 31.8<br>(19.1 to 43.9)                            | 0.4<br>(-7.1 to 8.2)                                |
| Other sexually transmitted diseases                                     | 121.1<br>(101.5 to 141.5)                        | 173.0<br>(146.8 to 202.6)                         | 2.5<br>(1.6 to 3.6)                         | 19.7<br>(5.0 to 34.4)                             | -7.9<br>(-18.7 to 3.0)                              |
| Hepatitis                                                               | 1,650.4<br>(1,434.2 to 1,922.9)                  | 1,154.1<br>(814.8 to 1,438.1)                     | 1.5<br>(0.9 to 2.3)                         | -16.2<br>(-31.2 to 0.6)                           | -27.1<br>(-37.4 to -16.1)                           |
| Acute hepatitis A                                                       | 41.8<br>(16.6 to 58.2)                           | 543.7<br>(216.5 to 756.9)                         | 0.5<br>(0.3 to 0.7)                         | -24.5<br>(-49.9 to 17.5)                          | -28.8<br>(-49.6 to 0.1)                             |
| Hepatitis B                                                             | 1,045.7<br>(846.6 to 1,307.6)                    | 524.3<br>(388.7 to 707.5)                         | 0.9<br>(0.5 to 1.5)                         | -11.3<br>(-28.9 to 10.0)                          | -26.9<br>(-40.4 to -12.3)                           |
| Hepatitis C                                                             | 559.7<br>(494.1 to 631.8)                        | 45.3<br>(41.0 to 49.6)                            | < 0.05<br>(< 0.05 to 0.1)                   | 6.1<br>(-26.3 to 50.4)                            | -11.7<br>(-33.5 to 18.7)                            |
| Acute hepatitis E                                                       | 3.1<br>(2.5 to 4.1)                              | 40.7<br>(31.8 to 53.8)                            | 0.1<br>(< 0.05 to 0.1)                      | -24.8<br>(-45.8 to 4.3)                           | -26.0<br>(-42.8 to -7.0)                            |
| Other infectious diseases                                               | 178.5<br>(172.1 to 184.7)                        | < 0.05<br>(< 0.05 to < 0.05)                      | 4.3<br>(2.8 to 6.4)                         | 4.2<br>(-3.3 to 11.9)                             | -7.2<br>(-13.4 to -1.0)                             |
| <b>Non-communicable diseases</b>                                        | <b>14,441.5</b><br><b>(14,355.3 to 14,530.3)</b> | <b>40,060.6†</b><br><b>(37,725.0 to 42,506.4)</b> | <b>1,172.0</b><br><b>(860.5 to 1,526.3)</b> | <b>23.9</b><br><b>(20.3 to 27.8)</b>              | <b>-1.2</b><br><b>(-3.4 to 1.1)</b>                 |
| <b>Neoplasms</b>                                                        | <b>22.5</b><br><b>(21.0 to 24.1)</b>             | <b>12.6</b><br><b>(11.6 to 13.5)</b>              | <b>4.2</b><br><b>(3.0 to 5.6)</b>           | <b>29.0</b><br><b>(20.1 to 40.3)</b>              | <b>-5.3</b><br><b>(-11.0 to 1.6)</b>                |
| Lip and oral cavity cancer                                              | 1.7<br>(1.5 to 1.9)                              | 0.5<br>(0.4 to 0.6)                               | 0.2<br>(0.1 to 0.2)                         | 41.5<br>(23.2 to 61.9)                            | -0.4<br>(-13.6 to 14.1)                             |
| Nasopharynx cancer                                                      | 0.7<br>(0.6 to 0.9)                              | 0.2<br>(0.2 to 0.3)                               | 0.1<br>(0.1 to 0.1)                         | 24.6<br>(5.4 to 51.7)                             | -7.6<br>(-20.0 to 8.2)                              |
| Other pharynx cancer                                                    | 0.3<br>(0.2 to 0.4)                              | 0.1<br>(0.1 to 0.2)                               | < 0.05<br>(< 0.05 to 0.1)                   | 35.5<br>(15.1 to 61.1)                            | -4.5<br>(-18.2 to 12.5)                             |
| Oesophageal cancer                                                      | 0.2<br>(0.2 to 0.2)                              | 0.2<br>(0.2 to 0.2)                               | < 0.05<br>(< 0.05 to 0.1)                   | 13.5<br>(1.7 to 25.7)                             | -19.8<br>(-27.7 to -11.2)                           |
| Stomach cancer                                                          | 1.2<br>(1.1 to 1.3)                              | 0.8<br>(0.8 to 0.9)                               | 0.2<br>(0.1 to 0.3)                         | 10.9<br>(-4.0 to 28.4)                            | -20.3<br>(-32.4 to -6.4)                            |
| Colon and rectum cancer                                                 | 2.8<br>(2.4 to 3.2)                              | 1.0<br>(0.8 to 1.2)                               | 0.3<br>(0.2 to 0.5)                         | 40.5<br>(15.3 to 68.8)                            | -0.8<br>(-17.9 to 19.7)                             |
| Liver cancer                                                            | 0.2<br>(0.2 to 0.3)                              | 0.6<br>(0.5 to 0.7)                               | 0.1<br>(0.1 to 0.2)                         | 37.2<br>(19.8 to 57.2)                            | -3.3<br>(-15.1 to 10.0)                             |
| Liver cancer due to hepatitis B                                         | 0.2<br>(0.1 to 0.2)                              | 0.2<br>(0.2 to 0.3)                               | < 0.05<br>(< 0.05 to 0.1)                   | 35.9<br>(17.8 to 56.8)                            | -3.2<br>(-15.0 to 10.9)                             |

| Cause                                              | Prevalence in thousands (95% UI)              | Incidence in thousands (95% UI)          | YLDs in thousands (95% UI)           |                                                   |                                                     |
|----------------------------------------------------|-----------------------------------------------|------------------------------------------|--------------------------------------|---------------------------------------------------|-----------------------------------------------------|
|                                                    | 2016 counts                                   | 2016 counts                              | 2016 counts                          | Percentage change in counts between 2006 and 2016 | Percentage change in age-standardised rates between |
| Liver cancer due to hepatitis C                    | 0.2<br>(0.1 to 0.2)                           | 0.2<br>(0.1 to 0.2)                      | < 0.05<br>(< 0.05 to 0.1)            | 37.6<br>(17.2 to 59.9)                            | -4.4<br>(-18.4 to 9.9)                              |
| Liver cancer due to alcohol use                    | 0.1<br>(< 0.05 to 0.1)                        | 0.1<br>(0.1 to 0.1)                      | < 0.05<br>(< 0.05 to < 0.05)         | 41.2<br>(20.6 to 66.7)                            | -1.0<br>(-15.6 to 16.3)                             |
| Liver cancer due to other causes                   | 0.1<br>(0.1 to 0.1)                           | 0.1<br>(0.1 to 0.1)                      | < 0.05<br>(< 0.05 to < 0.05)         | 36.1<br>(15.7 to 60.7)                            | -3.1<br>(-17.3 to 15.0)                             |
| Gallbladder and biliary tract cancer               | 0.1<br>(0.1 to 0.1)                           | 0.1<br>(0.1 to 0.2)                      | < 0.05<br>(< 0.05 to < 0.05)         | 24.2<br>(12.3 to 38.0)                            | -13.4<br>(-21.5 to -4.2)                            |
| Pancreatic cancer                                  | 0.2<br>(0.2 to 0.3)                           | 0.3<br>(0.3 to 0.4)                      | 0.1<br>(< 0.05 to 0.1)               | 48.0<br>(36.5 to 60.2)                            | 3.0<br>(-4.6 to 11.5)                               |
| Larynx cancer                                      | 0.5<br>(0.5 to 0.6)                           | 0.2<br>(0.2 to 0.2)                      | 0.1<br>(< 0.05 to 0.1)               | 31.5<br>(15.0 to 50.0)                            | -7.1<br>(-20.4 to 6.6)                              |
| Tracheal, bronchus, and lung cancer                | 1.9<br>(1.6 to 2.2)                           | 1.7<br>(1.5 to 2.0)                      | 0.4<br>(0.3 to 0.5)                  | 36.7<br>(12.5 to 66.2)                            | -2.6<br>(-19.2 to 17.2)                             |
| Malignant skin melanoma                            | 0.1<br>(0.1 to 0.1)                           | < 0.05<br>(< 0.05 to < 0.05)             | < 0.05<br>(< 0.05 to < 0.05)         | 45.7<br>(20.9 to 66.7)                            | 4.7<br>(-10.8 to 19.5)                              |
| Non-melanoma skin cancer                           | < 0.05<br>(< 0.05 to 0.1)                     | 0.3<br>(0.2 to 0.5)                      | < 0.05<br>(< 0.05 to < 0.05)         | 72.8<br>(34.2 to 131.1)                           | 18.6<br>(-9.3 to 62.9)                              |
| Non-melanoma skin cancer (squamous-cell carcinoma) | < 0.05<br>(< 0.05 to 0.1)                     | 0.1<br>(0.1 to 0.1)                      | < 0.05<br>(< 0.05 to < 0.05)         | 79.2<br>(33.8 to 148.7)                           | 21.7<br>(-9.5 to 74.4)                              |
| Non-melanoma skin cancer (basal-cell carcinoma)    | < 0.05<br>(< 0.05 to < 0.05)                  | 0.2<br>(0.1 to 0.3)                      | < 0.05<br>(< 0.05 to < 0.05)         | 39.3<br>(24.2 to 54.1)                            | -2.5<br>(-14.1 to 10.8)                             |
| Breast cancer                                      | 6.9<br>(4.3 to 9.0)                           | 1.6<br>(1.0 to 2.1)                      | 0.7<br>(0.4 to 1.0)                  | 36.5<br>(6.3 to 82.4)                             | -0.5<br>(-20.2 to 29.7)                             |
| Cervical cancer                                    | 5.2<br>(3.3 to 6.5)                           | 1.4<br>(0.9 to 1.7)                      | 0.5<br>(0.3 to 0.7)                  | 12.0<br>(-12.7 to 50.8)                           | -17.6<br>(-35.2 to 8.2)                             |
| Uterine cancer                                     | 1.0<br>(0.7 to 1.2)                           | 0.2<br>(0.2 to 0.3)                      | 0.1<br>(0.1 to 0.1)                  | 30.8<br>(1.9 to 70.1)                             | -8.3<br>(-27.4 to 16.2)                             |
| Ovarian cancer                                     | 1.1<br>(0.9 to 1.3)                           | 0.4<br>(0.3 to 0.4)                      | 0.2<br>(0.1 to 0.2)                  | 49.3<br>(8.5 to 108.8)                            | 8.4<br>(-22.4 to 53.4)                              |
| Prostate cancer                                    | 1.3<br>(0.8 to 1.7)                           | 0.4<br>(0.3 to 0.5)                      | 0.2<br>(0.1 to 0.3)                  | 63.1<br>(30.2 to 104.2)                           | 8.1<br>(-11.7 to 32.5)                              |
| Testicular cancer                                  | 0.1<br>(0.1 to 0.2)                           | < 0.05<br>(< 0.05 to < 0.05)             | < 0.05<br>(< 0.05 to < 0.05)         | 26.0<br>(2.6 to 56.2)                             | -7.0<br>(-23.3 to 12.7)                             |
| Kidney cancer                                      | 0.9<br>(0.7 to 1.0)                           | 0.2<br>(0.2 to 0.3)                      | 0.1<br>(0.1 to 0.1)                  | 48.1<br>(27.4 to 69.2)                            | 11.4<br>(-2.4 to 27.4)                              |
| Bladder cancer                                     | 0.8<br>(0.7 to 0.9)                           | 0.2<br>(0.2 to 0.3)                      | 0.1<br>(0.1 to 0.1)                  | 54.4<br>(32.3 to 79.8)                            | 6.1<br>(-9.5 to 24.0)                               |
| Brain and nervous system cancer                    | 0.6<br>(0.5 to 0.7)                           | 0.3<br>(0.2 to 0.3)                      | 0.1<br>(0.1 to 0.1)                  | 31.7<br>(20.4 to 46.7)                            | 4.3<br>(-5.4 to 20.9)                               |
| Thyroid cancer                                     | 0.6<br>(0.5 to 0.8)                           | 0.1<br>(0.1 to 0.2)                      | < 0.05<br>(< 0.05 to 0.1)            | 41.4<br>(13.3 to 78.9)                            | -2.8<br>(-21.2 to 20.6)                             |
| Mesothelioma                                       | < 0.05<br>(< 0.05 to < 0.05)                  | < 0.05<br>(< 0.05 to < 0.05)             | < 0.05<br>(< 0.05 to < 0.05)         | 24.5<br>(3.0 to 44.5)                             | -10.0<br>(-23.9 to 4.0)                             |
| Hodgkin lymphoma                                   | 0.2<br>(0.2 to 0.2)                           | 0.1<br>(0.1 to 0.1)                      | < 0.05<br>(< 0.05 to < 0.05)         | -11.8<br>(-23.2 to -1.9)                          | -32.1<br>(-42.4 to -24.4)                           |
| Non-Hodgkin's lymphoma                             | 0.8<br>(0.7 to 1.0)                           | 0.3<br>(0.3 to 0.4)                      | 0.1<br>(0.1 to 0.1)                  | 31.6<br>(16.5 to 47.1)                            | -0.9<br>(-12.8 to 12.8)                             |
| Multiple myeloma                                   | 0.1<br>(0.1 to 0.1)                           | 0.1<br>(0.1 to 0.1)                      | < 0.05<br>(< 0.05 to < 0.05)         | 48.2<br>(30.1 to 67.9)                            | 5.0<br>(-7.5 to 19.0)                               |
| Leukaemia                                          | 2.1<br>(1.7 to 2.7)                           | 0.6<br>(0.5 to 0.7)                      | 0.3<br>(0.2 to 0.4)                  | -3.1<br>(-15.8 to 13.2)                           | -19.4<br>(-28.2 to -10.0)                           |
| Acute lymphoid leukaemia                           | 0.5<br>(0.4 to 0.7)                           | 0.1<br>(0.1 to 0.2)                      | 0.1<br>(< 0.05 to 0.1)               | 6.6<br>(-21.3 to 32.2)                            | -9.8<br>(-28.2 to 6.1)                              |
| Chronic lymphoid leukaemia                         | 0.1<br>(0.1 to 0.2)                           | < 0.05<br>(< 0.05 to < 0.05)             | < 0.05<br>(< 0.05 to < 0.05)         | 21.5<br>(1.6 to 49.7)                             | -8.7<br>(-22.6 to 11.1)                             |
| Acute myeloid leukaemia                            | 0.1<br>(0.1 to 0.2)                           | 0.1<br>(0.1 to 0.1)                      | < 0.05<br>(< 0.05 to < 0.05)         | 16.9<br>(-4.0 to 37.6)                            | -2.8<br>(-17.3 to 10.5)                             |
| Chronic myeloid leukaemia                          | 0.1<br>(0.1 to 0.2)                           | < 0.05<br>(< 0.05 to 0.1)                | < 0.05<br>(< 0.05 to < 0.05)         | 0.3<br>(-15.6 to 18.6)                            | -24.6<br>(-35.9 to -12.1)                           |
| Other leukaemia                                    | 1.3<br>(1.0 to 1.6)                           | 0.3<br>(0.2 to 0.4)                      | 0.1<br>(0.1 to 0.2)                  | -10.7<br>(-23.7 to 8.9)                           | -24.6<br>(-34.4 to -11.3)                           |
| Other neoplasms                                    | 1.6<br>(1.4 to 1.8)                           | 0.6<br>(0.5 to 0.6)                      | 0.2<br>(0.1 to 0.2)                  | 25.1<br>(9.4 to 43.0)                             | -3.7<br>(-14.3 to 8.6)                              |
| <b>Cardiovascular diseases</b>                     | <b>620.0</b><br><b>(595.1 to 644.4)</b>       | <b>61.2†</b><br><b>(58.4 to 64.3)</b>    | <b>42.1</b><br><b>(30.8 to 54.7)</b> | <b>33.6</b><br><b>(28.7 to 38.5)</b>              | <b>-1.4</b><br><b>(-4.9 to 2.1)</b>                 |
| Rheumatic heart disease                            | 131.8<br>(117.4 to 148.6)                     | 4.5<br>(4.0 to 5.1)                      | 6.3<br>(4.0 to 9.3)                  | 18.4<br>(9.3 to 28.2)                             | -3.8<br>(-10.9 to 3.4)                              |
| Ischaemic heart disease                            | 165.3<br>(153.4 to 177.2)                     | 22.8<br>(21.1 to 24.8)                   | 7.8<br>(5.3 to 10.8)                 | 40.5<br>(32.7 to 49.1)                            | 0.5<br>(-4.2 to 5.5)                                |
| Cerebrovascular disease                            | 77.1<br>(72.0 to 82.5)                        | 14.6‡<br>(13.5 to 15.7)                  | 15.7<br>(11.2 to 20.3)               | 36.7<br>(27.5 to 46.1)                            | -3.1<br>(-9.1 to 3.4)                               |
| Ischaemic stroke                                   | 60.1<br>(53.8 to 66.9)                        | 8.4‡<br>(7.4 to 9.4)                     | 11.7<br>(8.3 to 15.2)                | 42.4<br>(30.6 to 54.3)                            | 0.4<br>(-7.5 to 8.9)                                |
| Hemorrhagic stroke                                 | 20.9<br>(18.7 to 23.3)                        | 6.2‡<br>(5.6 to 6.8)                     | 4.0<br>(2.9 to 5.2)                  | 22.4<br>(9.8 to 36.6)                             | -12.6<br>(-21.4 to -2.8)                            |
| Hypertensive heart disease                         | 20.3<br>(17.4 to 23.5)                        | --                                       | 1.7<br>(1.1 to 2.3)                  | 47.5<br>(31.4 to 64.5)                            | 4.1<br>(-5.7 to 14.1)                               |
| Cardiomyopathy and myocarditis                     | 4.2<br>(3.7 to 4.9)                           | 2.1†<br>(1.9 to 2.5)                     | 0.5<br>(0.4 to 0.8)                  | 37.1<br>(23.0 to 52.5)                            | 5.3<br>(-4.8 to 15.9)                               |
| Myocarditis                                        | 2.2<br>(1.9 to 2.6)                           | 2.1<br>(1.9 to 2.5)                      | 0.2<br>(0.1 to 0.3)                  | 26.9<br>(16.6 to 39.5)                            | 3.9<br>(-4.9 to 13.9)                               |
| Alcoholic cardiomyopathy                           | 0.9<br>(0.7 to 1.0)                           | --                                       | 0.1<br>(< 0.05 to 0.1)               | 51.5<br>(35.0 to 72.0)                            | 6.1<br>(-5.2 to 20.4)                               |
| Other cardiomyopathy                               | 3.3<br>(2.8 to 3.8)                           | --                                       | 0.3<br>(0.2 to 0.4)                  | 40.7<br>(17.8 to 67.8)                            | 5.7<br>(-10.3 to 24.7)                              |
| Atrial fibrillation and flutter                    | 44.5<br>(38.5 to 51.0)                        | 4.0<br>(3.4 to 4.7)                      | 3.5<br>(2.3 to 4.9)                  | 45.5<br>(34.1 to 58.0)                            | -0.1<br>(-6.4 to 7.1)                               |
| Peripheral vascular disease                        | 114.0<br>(98.3 to 132.1)                      | 11.2<br>(9.6 to 13.2)                    | 0.6<br>(0.3 to 1.1)                  | 37.8<br>(24.8 to 52.4)                            | -7.2<br>(-15.7 to 2.0)                              |
| Endocarditis                                       | 0.6<br>(0.6 to 0.7)                           | 2.0<br>(1.8 to 2.2)                      | 0.1<br>(< 0.05 to 0.1)               | 33.5<br>(24.9 to 42.8)                            | 1.2<br>(-7.2 to 9.8)                                |
| Other cardiovascular and circulatory diseases      | 113.5<br>(95.5 to 133.2)                      | --                                       | 6.0<br>(4.0 to 8.6)                  | 25.0<br>(13.0 to 37.9)                            | 1.7<br>(-6.5 to 10.1)                               |
| <b>Chronic respiratory diseases</b>                | <b>1,175.2</b><br><b>(1,121.8 to 1,228.4)</b> | <b>280.5†</b><br><b>(262.2 to 300.1)</b> | <b>68.4</b><br><b>(53.6 to 84.9)</b> | <b>34.6</b><br><b>(29.4 to 40.9)</b>              | <b>8.7</b><br><b>(5.1 to 12.5)</b>                  |
| Chronic obstructive pulmonary disease              | 315.0<br>(301.8 to 328.5)                     | 24.9<br>(23.8 to 26.1)                   | 30.7<br>(26.7 to 33.8)               | 51.0<br>(43.3 to 59.2)                            | 9.3<br>(4.4 to 14.7)                                |
| Pneumoconiosis                                     | 0.8<br>(0.8 to 1.0)                           | 0.1<br>(0.1 to 0.1)                      | 0.1<br>(0.1 to 0.2)                  | 45.7<br>(14.9 to 86.5)                            | 1.2<br>(-21.4 to 30.7)                              |
| Silicosis                                          | 0.7<br>(0.6 to 0.8)                           | 0.1<br>(0.1 to 0.1)                      | 0.1<br>(0.1 to 0.1)                  | 46.4<br>(7.5 to 101.4)                            | 1.6<br>(-27.0 to 41.8)                              |



| Cause                                                          | Prevalence in thousands (95% UI)        | Incidence in thousands (95% UI)               | YLDs in thousands (95% UI)        |                                                   |                                                     |
|----------------------------------------------------------------|-----------------------------------------|-----------------------------------------------|-----------------------------------|---------------------------------------------------|-----------------------------------------------------|
|                                                                | 2016 counts                             | 2016 counts                                   | 2016 counts                       | Percentage change in counts between 2006 and 2016 | Percentage change in age-standardised rates between |
| Asbestosis                                                     | 0.1<br>(0.1 to 0.1)                     | < 0.05<br>(< 0.05 to < 0.05)                  | < 0.05<br>(< 0.05 to < 0.05)      | 42.1<br>(33.8 to 50.9)                            | -1.1<br>(-6.6 to 4.7)                               |
| Coal workers pneumoconiosis                                    | --                                      | --                                            | --                                | --                                                | --                                                  |
| Other pneumoconiosis                                           | < 0.05<br>(< 0.05 to 0.1)               | < 0.05<br>(< 0.05 to < 0.05)                  | < 0.05<br>(< 0.05 to < 0.05)      | 45.5<br>(31.9 to 63.6)                            | 2.5<br>(-7.9 to 16.3)                               |
| Asthma                                                         | 883.7<br>(821.0 to 949.1)               | 254.8<br>(236.4 to 274.5)                     | 34.7<br>(22.6 to 50.3)            | 21.6<br>(15.4 to 28.5)                            | 6.5<br>(2.0 to 11.8)                                |
| Interstitial lung disease and pulmonary sarcoidosis            | 7.0<br>(6.2 to 7.9)                     | 0.6<br>(0.6 to 0.7)                           | 0.7<br>(0.5 to 1.0)               | 43.0<br>(25.9 to 62.4)                            | 3.8<br>(-8.1 to 17.3)                               |
| Other chronic respiratory diseases                             | --                                      | --                                            | 2.2<br>(1.8 to 2.6)               | 57.9<br>(33.2 to 89.1)                            | 41.7<br>(24.0 to 62.7)                              |
| <b>Cirrhosis and other chronic liver diseases</b>              | <b>81.0<br/>(76.7 to 85.7)</b>          | <b>5.7<br/>(5.5 to 6.0)</b>                   | <b>2.8<br/>(1.9 to 4.0)</b>       | <b>17.6<br/>(5.8 to 31.0)</b>                     | <b>-5.2<br/>(-12.9 to 3.1)</b>                      |
| Cirrhosis and other chronic liver diseases due to hepatitis B  | 21.8<br>(18.7 to 25.2)                  | 1.7<br>(1.4 to 1.9)                           | 0.6<br>(0.4 to 0.9)               | 32.2<br>(9.8 to 57.9)                             | -3.0<br>(-17.0 to 13.4)                             |
| Cirrhosis and other chronic liver diseases due to hepatitis C  | 14.4<br>(11.9 to 17.4)                  | 1.1<br>(0.9 to 1.3)                           | 0.4<br>(0.3 to 0.6)               | 32.4<br>(7.4 to 63.4)                             | -2.9<br>(-19.9 to 17.0)                             |
| Cirrhosis and other chronic liver diseases due to alcohol use  | 16.0<br>(13.2 to 19.0)                  | 1.3<br>(1.1 to 1.5)                           | 0.5<br>(0.3 to 0.7)               | 32.1<br>(8.1 to 61.6)                             | -4.2<br>(-19.7 to 14.2)                             |
| Cirrhosis and other chronic liver diseases due to other causes | 28.9<br>(26.2 to 31.6)                  | 1.8<br>(1.6 to 1.9)                           | 1.4<br>(0.9 to 1.9)               | 5.0<br>(-11.7 to 25.8)                            | -7.8<br>(-20.0 to 7.2)                              |
| <b>Digestive diseases</b>                                      | <b>169.6<br/>(161.1 to 179.2)</b>       | <b>222.2<sup>†</sup><br/>(211.6 to 233.8)</b> | <b>5.3<br/>(3.7 to 7.2)</b>       | <b>22.7<br/>(14.8 to 31.1)</b>                    | <b>-7.6<br/>(-12.1 to -2.9)</b>                     |
| Peptic ulcer disease                                           | 66.7<br>(62.3 to 72.0)                  | 39.9<br>(36.7 to 43.5)                        | 1.4<br>(0.9 to 2.0)               | 21.9<br>(12.7 to 32.8)                            | -13.3<br>(-18.9 to -7.0)                            |
| Gastritis and duodenitis                                       | 74.2<br>(66.0 to 82.5)                  | 80.5<br>(72.4 to 89.9)                        | 1.3<br>(0.8 to 1.8)               | 31.9<br>(20.9 to 44.2)                            | -3.0<br>(-9.3 to 3.8)                               |
| Appendicitis                                                   | 1.4<br>(1.2 to 1.4)                     | 35.7<br>(33.1 to 38.4)                        | 0.4<br>(0.3 to 0.6)               | 3.5<br>(-23.7 to 46.4)                            | -10.2<br>(-28.6 to 15.5)                            |
| Paralytic ileus and intestinal obstruction                     | 0.2<br>(0.1 to 0.2)                     | 4.9<br>(4.4 to 5.4)                           | 0.1<br>(< 0.05 to 0.1)            | 25.8<br>(19.5 to 32.6)                            | 1.1<br>(-9.4 to 12.7)                               |
| Inguinal, femoral, and abdominal hernia                        | 25.0<br>(21.6 to 28.6)                  | 16.0<br>(14.1 to 18.3)                        | 1.2<br>(0.8 to 1.7)               | 15.9<br>(-1.2 to 36.0)                            | -10.1<br>(-21.4 to 3.1)                             |
| Inflammatory bowel disease                                     | 1.3<br>(1.0 to 1.7)                     | 8.0<br>(6.0 to 10.4)                          | 0.2<br>(0.1 to 0.3)               | 39.5<br>(27.8 to 53.5)                            | 11.6<br>(2.1 to 21.7)                               |
| Vascular intestinal disorders                                  | 0.1<br>(0.1 to 0.1)                     | 0.6<br>(0.5 to 0.7)                           | < 0.05<br>(< 0.05 to < 0.05)      | 35.4<br>(27.8 to 43.3)                            | 8.9<br>(4.5 to 13.2)                                |
| Gallbladder and biliary diseases                               | 9.7<br>(8.6 to 10.8)                    | 31.8<br>(27.8 to 36.5)                        | 0.2<br>(0.1 to 0.3)               | 33.7<br>(9.0 to 65.2)                             | -0.5<br>(-20.1 to 25.4)                             |
| Pancreatitis                                                   | 0.5<br>(0.5 to 0.6)                     | 4.8<br>(4.4 to 5.4)                           | 0.1<br>(< 0.05 to 0.1)            | 39.3<br>(34.0 to 45.4)                            | 4.6<br>(1.7 to 8.0)                                 |
| Other digestive diseases                                       | --                                      | --                                            | 0.4<br>(0.3 to 0.6)               | 27.2<br>(17.3 to 37.6)                            | -4.5<br>(-9.3 to 0.7)                               |
| <b>Neurological disorders</b>                                  | <b>5,549.4<br/>(5,274.8 to 5,824.4)</b> | <b>2,686.3<br/>(2,274.8 to 3,159.3)</b>       | <b>127.5<br/>(81.4 to 180.4)</b>  | <b>24.7<br/>(-3.2 to 60.2)</b>                    | <b>1.1<br/>(-18.1 to 24.2)</b>                      |
| Alzheimer's disease and other dementias                        | 50.4<br>(42.6 to 59.6)                  | 8.4<br>(7.0 to 10.1)                          | 6.9<br>(4.8 to 9.3)               | 52.5<br>(44.9 to 59.8)                            | -0.1<br>(-4.3 to 3.7)                               |
| Parkinson's disease                                            | 5.8<br>(4.6 to 7.1)                     | 0.6<br>(0.5 to 0.8)                           | 0.7<br>(0.4 to 1.0)               | 60.4<br>(40.8 to 84.4)                            | 10.5<br>(-2.2 to 24.2)                              |
| Epilepsy                                                       | 58.8<br>(17.9 to 97.1)                  | 8.3<br>(2.5 to 13.9)                          | 22.7<br>(5.5 to 43.9)             | 21.0<br>(-71.2 to 422.2)                          | 4.9<br>(-75.1 to 358.1)                             |
| Multiple sclerosis                                             | 0.4<br>(0.4 to 0.5)                     | < 0.05<br>(< 0.05 to < 0.05)                  | 0.1<br>(0.1 to 0.2)               | 51.1<br>(44.4 to 57.3)                            | 16.5<br>(11.7 to 20.9)                              |
| Motor neuron disease                                           | 0.3<br>(0.3 to 0.4)                     | 0.1<br>(0.1 to 0.1)                           | 0.1<br>(< 0.05 to 0.1)            | 28.6<br>(22.6 to 34.8)                            | 5.6<br>(2.0 to 9.4)                                 |
| Migraine                                                       | 1,972.2<br>(1,850.6 to 2,098.6)         | 218.7<br>(204.3 to 234.8)                     | 79.8<br>(50.6 to 113.5)           | 23.0<br>(17.8 to 28.7)                            | -0.6<br>(-4.2 to 3.4)                               |
| Tension-type headache                                          | 4,282.4<br>(3,807.1 to 4,787.2)         | 2,450.1<br>(2,040.8 to 2,919.0)               | 12.0<br>(7.4 to 18.3)             | 22.1<br>(15.1 to 29.9)                            | -0.8<br>(-5.4 to 4.6)                               |
| Other neurological disorders                                   | < 0.05<br>(< 0.05 to 0.1)               | 0.1<br>(< 0.05 to 0.1)                        | 5.3<br>(1.6 to 10.2)              | 41.9<br>(-61.3 to 414.3)                          | 24.4<br>(-61.7 to 294.9)                            |
| <b>Mental and substance use disorders</b>                      | <b>2,021.6<br/>(1,941.3 to 2,110.4)</b> | <b>639.3<sup>†</sup><br/>(596.6 to 687.0)</b> | <b>259.2<br/>(187.7 to 337.2)</b> | <b>20.7<br/>(17.2 to 23.9)</b>                    | <b>-0.3<br/>(-2.6 to 1.9)</b>                       |
| Schizophrenia                                                  | 36.6<br>(31.8 to 42.1)                  | 2.6<br>(2.3 to 3.0)                           | 23.7<br>(16.9 to 30.0)            | 37.8<br>(24.6 to 50.7)                            | 3.3<br>(-5.2 to 12.1)                               |
| Alcohol use disorders                                          | 128.5<br>(111.2 to 146.2)               | 69.7<br>(59.7 to 79.6)                        | 12.9<br>(8.9 to 18.0)             | 30.7<br>(17.7 to 44.5)                            | 1.5<br>(-7.2 to 10.9)                               |
| Drug use disorders                                             | 125.9<br>(111.7 to 140.5)               | 18.1<br>(15.6 to 20.9)                        | 20.8<br>(14.7 to 28.2)            | 32.6<br>(19.2 to 46.7)                            | 6.3<br>(-3.3 to 16.7)                               |
| Opioid use disorders                                           | 29.9<br>(24.1 to 37.4)                  | 4.0<br>(3.3 to 4.8)                           | 12.5<br>(8.3 to 17.6)             | 41.3<br>(24.2 to 62.2)                            | 5.8<br>(-5.2 to 19.2)                               |
| Cocaine use disorders                                          | 2.3<br>(1.9 to 2.8)                     | 0.3<br>(0.2 to 0.4)                           | 0.3<br>(0.2 to 0.5)               | 32.3<br>(24.3 to 41.5)                            | 5.9<br>(0.3 to 12.1)                                |
| Amphetamine use disorders                                      | 23.1<br>(14.8 to 33.5)                  | 2.3<br>(1.5 to 3.4)                           | 3.1<br>(1.6 to 5.2)               | 21.0<br>(-6.7 to 54.5)                            | 9.7<br>(-14.4 to 36.9)                              |
| Cannabis use disorders                                         | 69.1<br>(55.2 to 86.3)                  | 10.3<br>(8.1 to 12.8)                         | 2.0<br>(1.2 to 3.0)               | 14.0<br>(-1.2 to 32.0)                            | 0.5<br>(-12.2 to 15.3)                              |
| Other drug use disorders                                       | 5.8<br>(5.1 to 6.6)                     | 1.2<br>(1.0 to 1.4)                           | 2.9<br>(1.7 to 4.5)               | 26.3<br>(-4.3 to 65.1)                            | 9.3<br>(-15.4 to 40.2)                              |
| Depressive disorders                                           | 441.2<br>(411.0 to 473.4)               | 383.4<br>(343.5 to 428.9)                     | 68.4<br>(47.2 to 93.6)            | 21.8<br>(15.3 to 28.8)                            | -1.9<br>(-5.6 to 2.3)                               |
| Major depressive disorder                                      | 232.1<br>(207.7 to 262.4)               | 348.8<br>(310.5 to 394.2)                     | 47.8<br>(32.7 to 65.0)            | 17.9<br>(9.6 to 26.7)                             | -2.9<br>(-8.5 to 3.0)                               |
| Dysthymia                                                      | 215.4<br>(187.6 to 246.4)               | 34.6<br>(30.4 to 39.6)                        | 20.6<br>(13.7 to 29.8)            | 32.2<br>(27.4 to 37.3)                            | 0.4<br>(-2.6 to 3.4)                                |
| Bipolar disorder                                               | 77.0<br>(65.4 to 90.2)                  | 7.6<br>(6.5 to 8.8)                           | 15.8<br>(9.8 to 23.4)             | 22.8<br>(13.0 to 32.8)                            | 0.4<br>(-5.8 to 7.2)                                |
| Anxiety disorders                                              | 519.6<br>(458.5 to 586.8)               | 86.3<br>(76.1 to 97.7)                        | 50.2<br>(34.0 to 69.5)            | 20.4<br>(12.1 to 29.1)                            | 0.3<br>(-6.3 to 7.1)                                |
| Eating disorders                                               | 13.3<br>(11.0 to 16.0)                  | 9.8<br>(7.3 to 13.1)                          | 2.7<br>(1.8 to 4.0)               | 38.2<br>(16.0 to 65.0)                            | 18.4<br>(0.1 to 39.0)                               |
| Anorexia nervosa                                               | 4.2<br>(3.1 to 5.6)                     | 2.0<br>(1.4 to 2.6)                           | 0.9<br>(0.5 to 1.4)               | 25.7<br>(-6.1 to 63.8)                            | 15.9<br>(-12.4 to 49.9)                             |
| Bulimia nervosa                                                | 8.7<br>(6.5 to 11.6)                    | 7.8<br>(5.4 to 11.0)                          | 1.8<br>(1.1 to 2.8)               | 45.4<br>(17.6 to 81.3)                            | 19.6<br>(-1.3 to 46.1)                              |
| Autistic spectrum disorders                                    | 128.6<br>(114.8 to 143.3)               | 1.2<br>(0.8 to 1.7)                           | 18.6<br>(12.4 to 26.0)            | 15.9<br>(9.9 to 22.2)                             | 1.2<br>(-3.5 to 6.1)                                |
| Autism                                                         | 36.4<br>(31.4 to 42.4)                  | 0.1<br>(0.1 to 0.2)                           | 9.3<br>(5.9 to 13.6)              | 15.6<br>(5.0 to 27.1)                             | 1.1<br>(-6.9 to 10.6)                               |
| Asperger syndrome and other autistic spectrum disorders        | 92.3<br>(76.3 to 111.4)                 | 1.1<br>(0.7 to 1.6)                           | 9.2<br>(6.1 to 13.6)              | 16.2<br>(10.3 to 22.9)                            | 1.2<br>(-3.6 to 6.3)                                |

| Cause                                                      | Prevalence in thousands (95% UI)                 | Incidence in thousands (95% UI)                   | YLDs in thousands (95% UI)              |                                                   |                                                     |
|------------------------------------------------------------|--------------------------------------------------|---------------------------------------------------|-----------------------------------------|---------------------------------------------------|-----------------------------------------------------|
|                                                            | 2016 counts                                      | 2016 counts                                       | 2016 counts                             | Percentage change in counts between 2006 and 2016 | Percentage change in age-standardised rates between |
| Attention-deficit/hyperactivity disorder                   | 88.0<br>(69.8 to 110.5)                          | 4.8<br>(3.5 to 6.3)                               | 1.1<br>(0.6 to 1.7)                     | 6.8<br>(-4.2 to 19.3)                             | 0.3<br>(-9.5 to 11.3)                               |
| Conduct disorder                                           | 131.0<br>(106.5 to 154.8)                        | 44.7<br>(35.4 to 54.4)                            | 15.9<br>(9.7 to 24.4)                   | -6.2<br>(-11.8 to 0.3)                            | 0.2<br>(-5.7 to 6.8)                                |
| Idiopathic developmental intellectual disability           | 219.9<br>(114.5 to 347.2)                        | --                                                | 9.5<br>(4.3 to 16.9)                    | -10.8<br>(-20.9 to -1.4)                          | -21.8<br>(-30.6 to -13.8)                           |
| Other mental and substance use disorders                   | 264.2<br>(231.4 to 306.1)                        | 11.1<br>(9.9 to 12.7)                             | 19.7<br>(13.6 to 28.4)                  | 32.6<br>(25.3 to 40.1)                            | 0.9<br>(-3.9 to 6.1)                                |
| <b>Diabetes, urogenital, blood, and endocrine diseases</b> | <b>7,412.8</b><br><b>(7,292.9 to 7,559.7)</b>    | <b>1,285.4†</b><br><b>(1,205.1 to 1,370.0)</b>    | <b>99.3</b><br><b>(69.0 to 138.3)</b>   | <b>29.4</b><br><b>(25.2 to 33.6)</b>              | <b>1.0</b><br><b>(-2.2 to 4.2)</b>                  |
| Diabetes mellitus                                          | 599.7<br>(536.1 to 665.6)                        | 35.6<br>(31.9 to 39.6)                            | 42.2<br>(28.4 to 59.2)                  | 45.7<br>(36.3 to 55.2)                            | 7.0<br>(0.4 to 13.9)                                |
| Acute glomerulonephritis                                   | 0.2<br>(0.2 to 0.2)                              | 2.8<br>(2.4 to 3.2)                               | < 0.05<br>(< 0.05 to < 0.05)            | 17.2<br>(11.4 to 23.6)                            | 0.7<br>(-3.5 to 4.5)                                |
| Chronic kidney disease                                     | 250.0<br>(226.0 to 277.0)                        | 18.0<br>(16.3 to 19.9)                            | 8.6<br>(6.4 to 11.2)                    | 30.4<br>(22.1 to 39.4)                            | -3.6<br>(-9.0 to -2.8)                              |
| Chronic kidney disease due to diabetes mellitus            | 141.4<br>(124.0 to 160.1)                        | 9.9<br>(8.6 to 11.4)                              | 4.7<br>(3.5 to 6.2)                     | 31.0<br>(19.0 to 45.1)                            | -5.2<br>(-13.0 to 3.4)                              |
| Chronic kidney disease due to hypertension                 | 41.3<br>(35.8 to 47.4)                           | 1.9<br>(1.5 to 2.2)                               | 2.3<br>(1.6 to 3.1)                     | 40.0<br>(26.1 to 55.3)                            | -1.1<br>(-10.4 to 9.1)                              |
| Chronic kidney disease due to glomerulonephritis           | 48.9<br>(41.8 to 57.2)                           | 4.6<br>(3.9 to 5.5)                               | 0.8<br>(0.6 to 1.2)                     | 15.6<br>(5.6 to 26.6)                             | -2.8<br>(-9.2 to 4.4)                               |
| Chronic kidney disease due to other causes                 | 18.4<br>(14.9 to 22.2)                           | 1.6<br>(1.3 to 1.9)                               | 0.8<br>(0.5 to 1.1)                     | 19.1<br>(9.0 to 29.5)                             | -2.9<br>(-8.9 to 4.2)                               |
| Urinary diseases and male infertility                      | 136.5<br>(118.4 to 155.1)                        | 692.5†<br>(618.9 to 771.6)                        | 3.1<br>(2.0 to 4.4)                     | 38.0<br>(29.2 to 47.6)                            | -1.6<br>(-7.2 to 4.2)                               |
| Interstitial nephritis and urinary tract infections        | 12.2<br>(10.9 to 13.8)                           | 639.9<br>(568.4 to 719.2)                         | 0.4<br>(0.2 to 0.6)                     | 27.3<br>(6.9 to 52.4)                             | 4.0<br>(-10.6 to 20.8)                              |
| Urolithiasis                                               | 1.7<br>(1.5 to 1.9)                              | 44.5<br>(39.0 to 51.0)                            | 0.1<br>(0.1 to 0.2)                     | 36.5<br>(27.8 to 45.6)                            | 0.5<br>(-7.6 to 9.8)                                |
| Benign prostatic hyperplasia                               | 62.5<br>(53.0 to 73.7)                           | 8.1<br>(6.8 to 9.7)                               | 2.0<br>(1.3 to 3.0)                     | 41.6<br>(30.9 to 52.6)                            | -3.0<br>(-9.5 to 3.5)                               |
| Male infertility                                           | 52.7<br>(40.2 to 69.8)                           | --                                                | 0.3<br>(0.1 to 0.6)                     | 60.0<br>(25.5 to 103.7)                           | 24.4<br>(-2.0 to 61.5)                              |
| Other urinary diseases                                     | --                                               | --                                                | 0.2<br>(0.1 to 0.3)                     | 7.1<br>(-7.9 to 24.5)                             | -14.5<br>(-24.1 to -3.4)                            |
| Gynecological diseases                                     | 1,577.2<br>(1,500.9 to 1,640.7)                  | 511.3†<br>(481.2 to 542.8)                        | 18.9<br>(12.7 to 27.5)                  | 19.9<br>(14.5 to 25.6)                            | -5.8<br>(-9.7 to -1.9)                              |
| Uterine fibroids                                           | 192.9<br>(169.4 to 219.3)                        | 21.7<br>(18.6 to 25.3)                            | 4.3<br>(2.7 to 6.8)                     | 21.0<br>(13.6 to 28.3)                            | -5.6<br>(-11.2 to -0.1)                             |
| Polycystic ovarian syndrome                                | 12.2<br>(9.0 to 15.7)                            | 9.3<br>(6.9 to 11.9)                              | 0.1<br>(< 0.05 to 0.2)                  | 22.9<br>(5.1 to 42.7)                             | -0.8<br>(-14.5 to 14.9)                             |
| Female infertility                                         | 39.5<br>(11.3 to 88.7)                           | --                                                | 0.2<br>(< 0.05 to 0.6)                  | 115.4<br>(-27.9 to 365.6)                         | 56.6<br>(-44.8 to 253.5)                            |
| Endometriosis                                              | 1.6<br>(1.3 to 1.9)                              | 12.0<br>(9.9 to 14.6)                             | 0.1<br>(0.1 to 0.2)                     | 17.9<br>(-17.4 to 63.6)                           | -4.5<br>(-32.2 to 29.0)                             |
| Genital prolapse                                           | 343.4<br>(297.9 to 391.5)                        | 23.6<br>(20.2 to 27.4)                            | 1.1<br>(0.5 to 2.0)                     | 16.0<br>(4.7 to 27.8)                             | -16.5<br>(-24.8 to -7.7)                            |
| Premenstrual syndrome                                      | 997.8<br>(931.8 to 1,063.9)                      | 362.7<br>(335.9 to 388.5)                         | 8.3<br>(5.2 to 13.0)                    | 18.7<br>(9.2 to 28.4)                             | -4.5<br>(-11.4 to 3.0)                              |
| Other gynecological diseases                               | 150.4<br>(137.6 to 163.6)                        | 81.9<br>(68.5 to 96.3)                            | 4.7<br>(3.2 to 6.6)                     | 19.7<br>(10.0 to 30.7)                            | -5.7<br>(-12.8 to 2.5)                              |
| Hemoglobinopathies and hemolytic anaemias                  | 5,888.8<br>(5,752.9 to 6,045.9)                  | --                                                | 18.2<br>(11.9 to 26.8)                  | 12.8<br>(7.2 to 18.4)                             | -3.2<br>(-7.2 to 1.4)                               |
| Thalassemias                                               | 9.5<br>(8.4 to 10.9)                             | --                                                | 0.6<br>(0.4 to 0.9)                     | 15.0<br>(-1.2 to 35.4)                            | 4.0<br>(-10.7 to 22.7)                              |
| Thalassaemias trait                                        | 1,847.9<br>(1,766.2 to 1,953.3)                  | --                                                | 12.1<br>(8.0 to 17.9)                   | 15.1<br>(8.4 to 22.1)                             | -1.6<br>(-6.7 to 3.9)                               |
| Sickle cell disorders                                      | < 0.05<br>(< 0.05 to < 0.05)                     | --                                                | < 0.05<br>(< 0.05 to < 0.05)            | 16.7<br>(0.7 to 32.8)                             | 5.3<br>(-9.0 to 19.3)                               |
| Sickle cell trait                                          | 67.8<br>(61.9 to 74.3)                           | --                                                | 0.2<br>(0.1 to 0.3)                     | 23.9<br>(0.1 to 49.1)                             | 6.7<br>(-12.0 to 26.4)                              |
| G6PD deficiency                                            | 1,683.5<br>(1,581.8 to 1,799.8)                  | --                                                | 0.1<br>(0.1 to 0.1)                     | -6.6<br>(-23.4 to 14.8)                           | -20.5<br>(-32.2 to -6.5)                            |
| G6PD trait                                                 | 2,836.5<br>(2,750.0 to 2,940.4)                  | --                                                | < 0.05<br>(< 0.05 to < 0.05)            | 17.6<br>(9.8 to 25.5)                             | -1.1<br>(-7.3 to 5.0)                               |
| Other hemoglobinopathies and hemolytic anaemias            | 254.0<br>(245.0 to 262.5)                        | --                                                | 5.2<br>(3.4 to 7.7)                     | 7.5<br>(0.2 to 15.0)                              | -6.7<br>(-11.6 to -1.4)                             |
| Endocrine, metabolic, blood, and immune disorders          | 303.8<br>(290.9 to 318.2)                        | 25.2<br>(22.3 to 28.4)                            | 8.3<br>(5.7 to 11.7)                    | 18.3<br>(11.8 to 25.0)                            | -1.8<br>(-6.2 to 2.6)                               |
| <b>Musculoskeletal disorders</b>                           | <b>2,201.6</b><br><b>(2,081.2 to 2,321.8)</b>    | <b>1,195.5</b><br><b>(1,073.4 to 1,323.0)</b>     | <b>245.7</b><br><b>(174.9 to 321.0)</b> | <b>31.8</b><br><b>(27.3 to 36.5)</b>              | <b>-0.9</b><br><b>(-4.1 to 2.3)</b>                 |
| Rheumatoid arthritis                                       | 14.6<br>(12.9 to 16.4)                           | 0.9<br>(0.8 to 1.0)                               | 3.5<br>(2.3 to 4.7)                     | 41.0<br>(25.9 to 59.2)                            | 6.3<br>(-3.1 to 18.3)                               |
| Osteoarthritis                                             | 321.3<br>(299.9 to 342.6)                        | 17.6<br>(16.2 to 18.9)                            | 19.8<br>(13.9 to 26.9)                  | 44.0<br>(38.2 to 50.9)                            | 1.9<br>(-2.0 to 6.3)                                |
| Low back and neck pain                                     | 1,480.4<br>(1,378.3 to 1,597.5)                  | 640.3<br>(568.3 to 719.0)                         | 172.2<br>(119.8 to 227.5)               | 30.0<br>(24.8 to 36.1)                            | -2.1<br>(-6.3 to 2.0)                               |
| Low back pain                                              | 1,171.7<br>(1,035.9 to 1,328.0)                  | 545.4<br>(474.4 to 625.1)                         | 132.7<br>(92.0 to 177.5)                | 28.9<br>(22.3 to 36.3)                            | -2.8<br>(-7.9 to 2.2)                               |
| Neck pain                                                  | 395.0<br>(341.1 to 457.4)                        | 94.9<br>(82.0 to 111.5)                           | 39.5<br>(26.4 to 56.0)                  | 33.8<br>(28.7 to 38.9)                            | 0.5<br>(-1.9 to 2.9)                                |
| Gout                                                       | 45.8<br>(40.6 to 51.9)                           | 9.4<br>(8.2 to 10.6)                              | 1.5<br>(1.0 to 2.0)                     | 41.2<br>(22.1 to 65.0)                            | 0.8<br>(-11.2 to 14.3)                              |
| Other musculoskeletal disorders                            | 565.1<br>(453.1 to 671.9)                        | 527.5<br>(434.8 to 631.1)                         | 48.8<br>(31.3 to 69.3)                  | 33.0<br>(20.9 to 49.6)                            | 1.6<br>(-6.5 to 12.3)                               |
| <b>Other non-communicable diseases</b>                     | <b>11,167.0</b><br><b>(10,953.9 to 11,380.8)</b> | <b>33,671.8†</b><br><b>(31,372.6 to 36,073.5)</b> | <b>317.4</b><br><b>(219.0 to 445.3)</b> | <b>16.0</b><br><b>(14.0 to 18.0)</b>              | <b>-5.1</b><br><b>(-6.6 to -3.6)</b>                |
| Congenital anomalies                                       | 152.7<br>(133.4 to 181.5)                        | --                                                | 18.3<br>(12.5 to 25.7)                  | 7.8<br>(0.6 to 15.7)                              | -6.5<br>(-12.7 to 0.3)                              |
| Neural tube defects                                        | 9.8<br>(8.6 to 11.0)                             | --                                                | 2.9<br>(2.0 to 3.9)                     | 13.9<br>(-2.5 to 31.3)                            | -2.7<br>(-16.3 to 11.4)                             |
| Congenital heart anomalies                                 | 44.7<br>(38.6 to 51.4)                           | --                                                | 1.9<br>(0.9 to 3.3)                     | 10.9<br>(-1.7 to 25.4)                            | 1.8<br>(-9.3 to 14.7)                               |
| Orofacial clefts                                           | 8.5<br>(7.5 to 9.6)                              | --                                                | 0.1<br>(0.1 to 0.2)                     | 16.2<br>(2.9 to 32.3)                             | -0.4<br>(-11.8 to 13.4)                             |
| Down's syndrome                                            | 4.7<br>(4.0 to 5.6)                              | --                                                | 0.4<br>(0.3 to 0.6)                     | 16.6<br>(7.8 to 26.4)                             | 2.6<br>(-5.2 to 11.3)                               |
| Turner syndrome                                            | 4.7<br>(4.0 to 5.5)                              | --                                                | 0.1<br>(< 0.05 to 0.1)                  | 12.5<br>(-27.0 to 76.0)                           | 0.7<br>(-32.3 to 49.9)                              |
| Klinefelter syndrome                                       | 4.5<br>(3.8 to 5.3)                              | --                                                | < 0.05<br>(< 0.05 to < 0.05)            | 18.8<br>(-14.1 to 61.8)                           | 1.7<br>(-25.1 to 37.4)                              |



| Cause                                         | Prevalence in thousands (95% UI)              | Incidence in thousands (95% UI)                     | YLDs in thousands (95% UI)            |                                                   |                                                     |
|-----------------------------------------------|-----------------------------------------------|-----------------------------------------------------|---------------------------------------|---------------------------------------------------|-----------------------------------------------------|
|                                               | 2016 counts                                   | 2016 counts                                         | 2016 counts                           | Percentage change in counts between 2006 and 2016 | Percentage change in age-standardised rates between |
| Other chromosomal abnormalities               | 3.7<br>(3.1 to 4.5)                           | --                                                  | 0.5<br>(0.3 to 0.7)                   | 6.0<br>(-16.8 to 36.6)                            | 0.8<br>(-20.3 to 30.2)                              |
| Congenital musculoskeletal and limb anomalies | 13.1<br>(11.9 to 14.5)                        | --                                                  | 1.9<br>(1.2 to 2.7)                   | 23.8<br>(9.2 to 38.8)                             | 7.2<br>(-3.7 to 18.9)                               |
| Urogenital congenital anomalies               | 13.6<br>(12.0 to 15.4)                        | --                                                  | 0.3<br>(0.1 to 0.5)                   | 5.6<br>(-4.6 to 17.8)                             | -1.5<br>(-10.8 to 9.5)                              |
| Digestive congenital anomalies                | 16.8<br>(14.7 to 18.8)                        | --                                                  | 0.8<br>(0.5 to 1.1)                   | 25.1<br>(5.2 to 49.7)                             | 8.2<br>(-6.9 to 27.2)                               |
| Other congenital anomalies                    | 63.6<br>(38.6 to 100.2)                       | --                                                  | 9.4<br>(5.5 to 15.0)                  | 1.4<br>(-9.0 to 13.4)                             | -13.0<br>(-21.6 to -3.1)                            |
| Skin and subcutaneous diseases                | 5,326.5<br>(5,137.1 to 5,525.5)               | 11,954.7<br>(11,109.4 to 13,035.9)                  | 137.1<br>(89.8 to 199.5)              | 11.8<br>(9.0 to 14.5)                             | 0.8<br>(-1.4 to 3.0)                                |
| Dermatitis                                    | 766.2<br>(683.9 to 853.2)                     | 871.2<br>(806.3 to 942.3)                           | 29.7<br>(17.2 to 48.5)                | 13.1<br>(8.9 to 17.6)                             | 0.3<br>(-3.2 to 3.5)                                |
| Psoriasis                                     | 85.8<br>(81.8 to 90.2)                        | 13.0<br>(12.5 to 13.6)                              | 7.5<br>(5.4 to 9.9)                   | 36.5<br>(22.3 to 52.6)                            | 12.0<br>(1.9 to 23.2)                               |
| Cellulitis                                    | 6.5<br>(6.0 to 7.0)                           | 134.9<br>(125.2 to 145.1)                           | 0.4<br>(0.2 to 0.6)                   | 17.8<br>(-9.2 to 54.5)                            | 1.9<br>(-18.8 to 29.3)                              |
| Pyoderma                                      | 13.5<br>(13.1 to 14.0)                        | 263.2<br>(254.2 to 272.2)                           | 0.1<br>(< 0.05 to 0.2)                | 26.7<br>(12.7 to 42.7)                            | 1.8<br>(-6.8 to 11.9)                               |
| Scabies                                       | 812.6<br>(644.8 to 1,073.5)                   | 2,599.1<br>(2,034.1 to 3,478.6)                     | 21.0<br>(11.2 to 35.4)                | 1.7<br>(-6.7 to 9.6)                              | -10.5<br>(-18.0 to -4.3)                            |
| Fungal skin diseases                          | 1,563.5<br>(1,392.1 to 1,745.0)               | 5,030.1<br>(4,475.7 to 5,600.0)                     | 8.8<br>(3.5 to 18.9)                  | 20.2<br>(17.3 to 23.1)                            | 0.4<br>(-0.6 to 1.3)                                |
| Viral skin diseases                           | 478.5<br>(429.0 to 527.8)                     | 671.3<br>(598.6 to 750.6)                           | 14.7<br>(9.2 to 21.7)                 | 11.2<br>(7.1 to 16.0)                             | 0.1<br>(-2.9 to 3.2)                                |
| Acne vulgaris                                 | 1,534.7<br>(1,340.5 to 1,738.8)               | 1,098.0<br>(861.6 to 1,445.2)                       | 39.6<br>(26.2 to 57.0)                | 7.8<br>(2.5 to 13.9)                              | 5.6<br>(0.9 to 10.7)                                |
| Alopecia areata                               | 29.4<br>(28.3 to 30.6)                        | 52.3<br>(50.3 to 54.3)                              | 1.0<br>(0.6 to 1.5)                   | 26.5<br>(12.5 to 42.2)                            | 0.4<br>(-9.6 to 11.7)                               |
| Pruritus                                      | 121.5<br>(106.5 to 136.8)                     | 98.3<br>(87.7 to 110.6)                             | 1.3<br>(0.6 to 2.4)                   | 26.2<br>(18.2 to 34.9)                            | 2.1<br>(-2.8 to 7.4)                                |
| Urticaria                                     | 143.9<br>(124.6 to 166.3)                     | 257.5<br>(224.1 to 297.5)                           | 8.7<br>(5.5 to 12.5)                  | 14.8<br>(7.3 to 22.3)                             | 0.4<br>(-5.2 to 6.2)                                |
| Decubitus ulcer                               | 1.0<br>(0.9 to 1.1)                           | 3.8<br>(3.4 to 4.2)                                 | 0.2<br>(0.1 to 0.2)                   | 47.7<br>(30.8 to 67.7)                            | 8.0<br>(-7.4 to 27.2)                               |
| Other skin and subcutaneous diseases          | 767.7<br>(745.3 to 791.1)                     | 861.9<br>(835.7 to 889.7)                           | 4.2<br>(2.0 to 7.8)                   | 35.6<br>(31.7 to 39.8)                            | 7.8<br>(5.3 to 10.5)                                |
| Sense organ diseases                          | 3,060.6<br>(2,920.8 to 3,212.0)               | 1,421.2 <sup>†</sup><br>(1,326.1 to 1,520.4)        | 139.4<br>(98.6 to 193.3)              | 19.7<br>(16.2 to 23.3)                            | -8.8<br>(-10.8 to -6.6)                             |
| Glaucoma                                      | 5.3<br>(4.5 to 6.3)                           | --                                                  | 0.6<br>(0.4 to 0.8)                   | 52.2<br>(31.2 to 76.1)                            | 3.7<br>(-9.6 to 18.0)                               |
| Cataract                                      | 194.0<br>(172.3 to 216.0)                     | --                                                  | 14.8<br>(10.6 to 20.0)                | 28.8<br>(20.3 to 37.1)                            | -11.3<br>(-16.7 to -5.7)                            |
| Macular degeneration                          | 2.0<br>(1.6 to 2.4)                           | --                                                  | 0.2<br>(0.1 to 0.2)                   | 55.5<br>(29.9 to 88.2)                            | 5.5<br>(-10.4 to 26.2)                              |
| Refraction and accommodation disorders        | 1,718.5<br>(1,521.9 to 1,940.0)               | --                                                  | 35.9<br>(22.9 to 53.8)                | 7.4<br>(1.2 to 14.0)                              | -16.8<br>(-21.5 to -12.2)                           |
| Age-related and other hearing loss            | 1,596.2<br>(1,490.3 to 1,719.9)               | --                                                  | 72.4<br>(50.5 to 99.2)                | 21.8<br>(16.1 to 28.0)                            | -6.1<br>(-9.0 to -3.3)                              |
| Other vision loss                             | 60.2<br>(54.0 to 66.5)                        | --                                                  | 4.9<br>(3.4 to 6.6)                   | 34.8<br>(22.7 to 48.1)                            | 0.3<br>(-7.3 to 8.3)                                |
| Other sense organ diseases                    | 341.7<br>(315.2 to 366.9)                     | 1,421.2<br>(1,326.1 to 1,520.4)                     | 10.5<br>(6.6 to 15.9)                 | 33.9<br>(27.5 to 40.6)                            | 1.9<br>(-2.0 to 6.2)                                |
| Oral disorders                                | 7,431.5<br>(7,073.7 to 7,761.6)               | 20,295.9 <sup>†</sup><br>(18,212.9 to 22,470.0)     | 22.6<br>(13.7 to 34.8)                | 29.0<br>(25.6 to 32.7)                            | -0.1<br>(-2.2 to 2.2)                               |
| Caries of deciduous teeth                     | 1,253.0<br>(981.0 to 1,488.7)                 | 4,473.9<br>(2,827.8 to 6,070.5)                     | 0.3<br>(0.1 to 0.6)                   | 4.1<br>(-11.0 to 18.6)                            | -6.2<br>(-20.2 to 7.3)                              |
| Caries of permanent teeth                     | 5,627.7<br>(5,213.6 to 6,043.9)               | 15,741.0<br>(14,278.9 to 17,204.6)                  | 3.3<br>(1.4 to 6.4)                   | 8.2<br>(3.8 to 13.0)                              | -7.1<br>(-10.2 to -4.0)                             |
| Periodontal disease                           | 466.5<br>(381.0 to 564.5)                     | 57.6<br>(45.6 to 70.5)                              | 3.0<br>(1.2 to 6.3)                   | 40.2<br>(34.0 to 46.2)                            | 0.7<br>(-3.0 to 4.4)                                |
| Edentulism and severe tooth loss              | 289.7<br>(235.5 to 345.6)                     | 23.5<br>(18.5 to 29.1)                              | 8.0<br>(5.1 to 11.6)                  | 43.8<br>(37.4 to 50.0)                            | 1.5<br>(-2.5 to 5.7)                                |
| Other oral disorders                          | 269.2<br>(256.2 to 282.2)                     | --                                                  | 7.9<br>(4.9 to 11.8)                  | 23.4<br>(18.9 to 28.2)                            | 0.3<br>(-2.9 to 3.7)                                |
| <b>Injuries</b>                               | <b>2,300.7</b><br><b>(1,938.0 to 2,788.3)</b> | <b>823.4<sup>†</sup></b><br><b>(781.3 to 865.7)</b> | <b>88.1</b><br><b>(52.8 to 136.1)</b> | <b>18.7</b><br><b>(8.5 to 31.2)</b>               | <b>-4.9</b><br><b>(-12.4 to 3.9)</b>                |
| <b>Transport injuries</b>                     | <b>312.1</b><br><b>(287.0 to 339.8)</b>       | <b>122.2</b><br><b>(109.0 to 137.4)</b>             | <b>18.4</b><br><b>(11.4 to 27.4)</b>  | <b>50.8</b><br><b>(38.5 to 65.8)</b>              | <b>18.6</b><br><b>(9.8 to 28.8)</b>                 |
| Road injuries                                 | 214.4<br>(199.5 to 231.1)                     | 96.0<br>(83.8 to 110.3)                             | 12.5<br>(7.7 to 18.7)                 | 72.3<br>(57.2 to 90.1)                            | 30.9<br>(21.0 to 42.1)                              |
| Pedestrian road injuries                      | 29.2<br>(26.0 to 33.2)                        | 9.7<br>(7.9 to 11.7)                                | 1.8<br>(1.1 to 2.7)                   | 65.4<br>(52.1 to 81.4)                            | 25.8<br>(17.3 to 35.2)                              |
| Cyclist road injuries                         | 34.7<br>(29.3 to 40.9)                        | 17.3<br>(13.6 to 21.5)                              | 1.9<br>(1.2 to 2.9)                   | 87.0<br>(71.8 to 105.1)                           | 43.0<br>(32.8 to 54.7)                              |
| Motorcyclist road injuries                    | 67.3<br>(57.8 to 81.8)                        | 21.1<br>(17.3 to 25.7)                              | 3.8<br>(2.4 to 5.7)                   | 69.0<br>(52.2 to 90.6)                            | 28.1<br>(16.9 to 41.5)                              |
| Motor vehicle road injuries                   | 53.2<br>(45.1 to 61.2)                        | 29.9<br>(24.9 to 35.5)                              | 3.4<br>(2.1 to 5.0)                   | 72.6<br>(58.2 to 88.5)                            | 31.2<br>(21.6 to 41.4)                              |
| Other road injuries                           | 30.1<br>(25.7 to 35.4)                        | 18.0<br>(14.1 to 22.4)                              | 1.6<br>(1.0 to 2.5)                   | 71.4<br>(58.2 to 86.1)                            | 29.9<br>(21.1 to 39.0)                              |
| Other transport injuries                      | 97.7<br>(80.2 to 120.3)                       | 26.2<br>(21.6 to 32.1)                              | 5.9<br>(3.7 to 8.7)                   | 19.1<br>(9.0 to 31.2)                             | -3.5<br>(-11.1 to 5.2)                              |
| <b>Unintentional injuries</b>                 | <b>1,203.6</b><br><b>(1,125.2 to 1,286.3)</b> | <b>629.9</b><br><b>(591.1 to 669.4)</b>             | <b>45.0</b><br><b>(28.7 to 65.1)</b>  | <b>33.3</b><br><b>(22.3 to 46.6)</b>              | <b>4.8</b><br><b>(-2.7 to 13.2)</b>                 |
| Falls                                         | 401.0<br>(353.7 to 447.3)                     | 218.2<br>(194.2 to 249.2)                           | 17.8<br>(11.6 to 25.2)                | 47.6<br>(34.4 to 62.8)                            | 12.0<br>(3.5 to 20.9)                               |
| Drowning                                      | 12.8<br>(11.1 to 14.9)                        | 2.9<br>(2.6 to 3.3)                                 | 0.8<br>(0.5 to 1.1)                   | -8.0<br>(-16.2 to 2.6)                            | -25.7<br>(-31.7 to -18.6)                           |
| Fire, heat, and hot substances                | 110.9<br>(94.4 to 133.6)                      | 16.2<br>(13.2 to 19.2)                              | 3.2<br>(2.0 to 4.9)                   | 4.5<br>(-7.0 to 18.7)                             | -18.3<br>(-26.1 to -8.7)                            |
| Poisonings                                    | 2.7<br>(2.3 to 3.2)                           | 5.5<br>(4.4 to 7.0)                                 | 0.2<br>(0.1 to 0.4)                   | 52.6<br>(39.0 to 67.6)                            | 21.7<br>(12.9 to 30.8)                              |
| Exposure to mechanical forces                 | 164.0<br>(140.4 to 200.9)                     | 78.4<br>(65.2 to 92.0)                              | 4.5<br>(2.8 to 6.9)                   | 58.2<br>(45.5 to 72.4)                            | 22.9<br>(14.0 to 32.3)                              |
| Unintentional firearm injuries                | 6.8<br>(5.6 to 8.4)                           | 2.0<br>(1.4 to 2.9)                                 | 0.3<br>(0.2 to 0.5)                   | 38.0<br>(26.1 to 51.8)                            | 7.7<br>(-1.0 to 17.4)                               |
| Unintentional suffocation                     | 10.6<br>(8.2 to 13.4)                         | 2.7<br>(1.9 to 3.9)                                 | 0.4<br>(0.2 to 0.6)                   | 23.6<br>(12.7 to 37.7)                            | 1.4<br>(-7.0 to 12.4)                               |
| Other exposure to mechanical forces           | 146.6<br>(123.3 to 184.1)                     | 73.6<br>(61.5 to 86.2)                              | 3.8<br>(2.4 to 5.8)                   | 64.9<br>(52.3 to 78.2)                            | 26.9<br>(18.4 to 36.0)                              |

| Cause                                                                               | Prevalence in thousands (95% UI)          | Incidence in thousands (95% UI)       | YLDs in thousands (95% UI)           |                                                   |                                                     |
|-------------------------------------------------------------------------------------|-------------------------------------------|---------------------------------------|--------------------------------------|---------------------------------------------------|-----------------------------------------------------|
|                                                                                     | 2016 counts                               | 2016 counts                           | 2016 counts                          | Percentage change in counts between 2006 and 2016 | Percentage change in age-standardised rates between |
| Adverse effects of medical treatment                                                | 3.9<br>(3.0 to 4.8)                       | 50.4<br>(43.1 to 58.1)                | 0.5<br>(0.3 to 0.8)                  | 8.8<br>(2.6 to 16.2)                              | -11.3<br>(-15.4 to -6.6)                            |
| Animal contact                                                                      | 49.1<br>(42.1 to 58.6)                    | 67.2<br>(54.7 to 80.9)                | 1.5<br>(1.0 to 2.2)                  | 23.4<br>(15.5 to 31.4)                            | -1.1<br>(-6.3 to 3.9)                               |
| Venomous animal contact                                                             | 12.4<br>(10.3 to 14.8)                    | 22.4<br>(16.8 to 29.4)                | 0.8<br>(0.5 to 1.3)                  | 36.7<br>(22.9 to 51.9)                            | 11.6<br>(1.9 to 21.9)                               |
| Non-venomous animal contact                                                         | 36.6<br>(30.1 to 46.6)                    | 44.7<br>(35.8 to 54.3)                | 0.7<br>(0.4 to 1.0)                  | 9.9<br>(3.7 to 16.2)                              | -12.7<br>(-17.3 to -8.1)                            |
| Foreign body                                                                        | 80.7<br>(64.9 to 97.4)                    | 48.1<br>(42.4 to 55.0)                | 3.6<br>(2.2 to 5.5)                  | 11.0<br>(2.3 to 20.2)                             | -8.3<br>(-14.8 to -1.4)                             |
| Pulmonary aspiration and foreign body in airway                                     | 54.2<br>(40.7 to 73.2)                    | 22.4<br>(18.9 to 27.4)                | 2.6<br>(1.6 to 4.0)                  | 8.1<br>(0.0 to 17.1)                              | -9.5<br>(-16.0 to -2.7)                             |
| Foreign body in eyes                                                                | 2.7<br>(1.5 to 4.0)                       | 14.3<br>(10.7 to 19.2)                | 0.1<br>(0.1 to 0.3)                  | 29.8<br>(22.9 to 37.3)                            | 3.0<br>(-2.0 to 6.9)                                |
| Foreign body in other body part                                                     | 23.8<br>(19.2 to 29.8)                    | 11.4<br>(9.6 to 13.8)                 | 0.8<br>(0.5 to 1.3)                  | 17.8<br>(7.5 to 29.0)                             | -6.5<br>(-13.5 to 0.5)                              |
| Environmental heat and cold exposure                                                | 142.3<br>(118.2 to 169.3)                 | 44.4<br>(36.0 to 55.1)                | 5.8<br>(3.6 to 8.8)                  | 24.6<br>(12.9 to 38.3)                            | -0.1<br>(-8.7 to 9.4)                               |
| Other unintentional injuries                                                        | 236.3<br>(189.3 to 290.2)                 | 98.5<br>(83.3 to 116.6)               | 7.1<br>(4.5 to 10.5)                 | 35.8<br>(25.1 to 47.6)                            | 6.5<br>(-1.0 to 14.7)                               |
| <b>Self-harm and interpersonal violence</b>                                         | <b>401.3</b><br><b>(359.1 to 446.5)</b>   | <b>70.8†</b><br><b>(59.4 to 83.7)</b> | <b>7.2</b><br><b>(4.9 to 10.3)</b>   | <b>26.8</b><br><b>(20.0 to 33.3)</b>              | <b>1.2</b><br><b>(-4.7 to 6.8)</b>                  |
| Self-harm                                                                           | 8.0<br>(6.8 to 9.2)                       | 4.0<br>(3.4 to 4.7)                   | 0.4<br>(0.3 to 0.7)                  | 30.3<br>(18.4 to 44.1)                            | -2.0<br>(-9.1 to 6.2)                               |
| Self-harm by firearm                                                                | 0.4<br>(0.3 to 0.4)                       | 0.1<br>( $< 0.05$ to 0.1)             | $< 0.05$<br>( $< 0.05$ to $< 0.05$ ) | 18.5<br>(7.2 to 31.5)                             | -7.1<br>(-15.2 to 1.8)                              |
| Self-harm by other specified means                                                  | 7.6<br>(6.5 to 8.8)                       | 3.9<br>(3.3 to 4.6)                   | 0.4<br>(0.2 to 0.7)                  | 30.7<br>(18.8 to 44.8)                            | -1.9<br>(-8.9 to 6.2)                               |
| Interpersonal violence                                                              | 393.4<br>(351.5 to 438.8)                 | 66.8†<br>(55.7 to 79.9)               | 6.8<br>(4.6 to 9.6)                  | 26.6<br>(19.8 to 32.8)                            | 1.5<br>(-4.3 to 7.0)                                |
| Assault by firearm                                                                  | 1.3<br>(1.2 to 1.5)                       | 0.5<br>(0.4 to 0.7)                   | 0.1<br>( $< 0.05$ to 0.1)            | 25.3<br>(13.8 to 38.9)                            | -3.7<br>(-11.7 to 5.6)                              |
| Assault by sharp object                                                             | 27.5<br>(22.1 to 33.3)                    | 13.5<br>(10.1 to 17.5)                | 0.9<br>(0.6 to 1.4)                  | 30.1<br>(17.3 to 44.2)                            | -0.1<br>(-9.1 to 10.4)                              |
| Sexual violence                                                                     | 287.9<br>(249.6 to 330.6)                 | --                                    | 2.4<br>(1.6 to 3.5)                  | 9.7<br>(2.6 to 18.1)                              | -4.9<br>(-9.9 to 2.0)                               |
| Assault by other means                                                              | 76.6<br>(63.6 to 93.7)                    | 52.8<br>(43.8 to 62.9)                | 3.4<br>(2.1 to 5.1)                  | 41.1<br>(28.5 to 56.0)                            | 6.0<br>(-2.6 to 16.1)                               |
| <b>Forces of nature, conflict and terrorism, and executions and police conflict</b> | <b>671.6</b><br><b>(336.0 to 1,146.6)</b> | <b>0.5†</b><br><b>(0.3 to 0.7)</b>    | <b>17.5</b><br><b>(6.6 to 33.6)</b>  | <b>-22.5</b><br><b>(-33.7 to -13.0)</b>           | <b>-33.2</b><br><b>(-42.1 to -25.9)</b>             |
| Exposure to forces of nature                                                        | 6.5<br>(3.3 to 10.2)                      | --                                    | 0.3<br>(0.1 to 0.7)                  | 16.4<br>(7.5 to 30.6)                             | -0.4<br>(-8.5 to 12.4)                              |
| Conflict and terrorism                                                              | 663.4<br>(329.9 to 1,136.8)               | --                                    | 17.2<br>(6.5 to 32.9)                | -22.9<br>(-34.1 to -13.5)                         | -33.5<br>(-42.3 to -26.3)                           |
| Executions and police conflict                                                      | 1.6<br>(0.8 to 2.7)                       | 0.5<br>(0.3 to 0.7)                   | 0.1<br>( $< 0.05$ to 0.1)            | 10.6<br>(1.2 to 22.6)                             | -12.0<br>(-19.4 to -1.2)                            |
| <b>Impairments</b>                                                                  | --                                        | --                                    | --                                   | --                                                | --                                                  |
| Anaemia                                                                             | 6,699.5<br>(6,509.2 to 6,874.6)           | --                                    | 172.9<br>(115.6 to 252.8)            | -2.9<br>(-8.9 to 2.1)                             | -17.5<br>(-23.4 to -12.9)                           |
| Developmental intellectual disability                                               | 390.9<br>(283.4 to 517.0)                 | --                                    | 37.9<br>(27.4 to 50.4)               | 4.7<br>(-2.0 to 12.7)                             | -8.1<br>(-13.8 to -1.0)                             |
| Epilepsy                                                                            | 102.5<br>(60.4 to 143.4)                  | --                                    | 38.2<br>(19.6 to 61.5)               | 16.7<br>(-45.3 to 137.4)                          | 1.2<br>(-52.9 to 106.7)                             |
| Guillain-Barre syndrome                                                             | 0.1<br>(0.1 to 0.1)                       | --                                    | $< 0.05$<br>( $< 0.05$ to $< 0.05$ ) | 20.1<br>(14.2 to 26.7)                            | 0.1<br>(-0.1 to 0.2)                                |
| Hearing loss                                                                        | 1,835.5<br>(1,731.4 to 1,952.2)           | --                                    | 86.6<br>(60.8 to 117.1)              | 16.9<br>(12.4 to 21.5)                            | -7.3<br>(-9.6 to -4.7)                              |
| Heart failure                                                                       | 50.9<br>(44.4 to 57.5)                    | --                                    | 5.7<br>(4.0 to 7.6)                  | 50.2<br>(38.9 to 62.3)                            | 5.3<br>(-2.2 to 13.1)                               |
| Infertility                                                                         | 255.1<br>(195.4 to 336.9)                 | --                                    | 1.5<br>(0.6 to 3.1)                  | 40.1<br>(11.8 to 77.8)                            | 9.0<br>(-14.5 to 41.5)                              |
| Pelvic inflammatory disease                                                         | 15.2<br>(12.9 to 17.8)                    | --                                    | 2.0<br>(1.3 to 2.8)                  | 13.9<br>(-2.3 to 31.8)                            | -12.4<br>(-24.3 to 0.1)                             |
| Vision loss                                                                         | 2,047.4<br>(1,843.1 to 2,276.1)           | --                                    | 65.4<br>(46.1 to 90.8)               | 15.8<br>(11.1 to 21.3)                            | -12.4<br>(-15.9 to -8.5)                            |

We did not calculate incidence for the nine impairments, certain NTDs, and causes with only birth prevalence. Blank cells mean that no estimate is available.

† Incidence for aggregate causes represents the sum of the incidence of the causes below the aggregate.

‡ Incidence estimates for stroke represent first-ever stroke only.

^ Incidence of HIV/AIDS represents new infections of HIV only and does not include new infections of Tuberculosis in HIV positive cases.

SR Table 14: Prevalence, incidence, and YLDs for 2016, percentage change of YLD counts and percentage change of age-standardised YLD rates between 2006 and 2016 by cause and impairments, for all ages, Cameroon.

| Cause                                                                                | Prevalence in thousands (95% UI)          | Incidence in thousands (95% UI)               | YLDs in thousands (95% UI)             |                                                   |                                                     |
|--------------------------------------------------------------------------------------|-------------------------------------------|-----------------------------------------------|----------------------------------------|---------------------------------------------------|-----------------------------------------------------|
|                                                                                      | 2016 counts                               | 2016 counts                                   | 2016 counts                            | Percentage change in counts between 2006 and 2016 | Percentage change in age-standardised rates between |
| <b>All causes</b>                                                                    | <b>23,516.3</b><br>(23,463.1 to 23,573.4) | <b>166,212.7†</b><br>(156,267.7 to 177,327.9) | <b>2,255.6</b><br>(1,660.8 to 2,967.2) | <b>20.9</b><br>(16.6 to 25.7)                     | <b>-7.0</b><br>(-9.7 to -4.0)                       |
| <b>Communicable, maternal, neonatal, and nutritional disorders</b>                   | <b>20,657.5</b><br>(20,354.3 to 20,933.6) | <b>110,458.5†</b><br>(101,864.8 to 119,628.3) | <b>621.1</b><br>(437.2 to 844.1)       | <b>-1.2</b><br>(-6.3 to 5.0)                      | <b>-26.2</b><br>(-30.4 to -20.7)                    |
| <b>HIV/AIDS and tuberculosis</b>                                                     | <b>6,863.4</b><br>(6,184.8 to 7,487.3)    | <b>71.0†</b><br>(58.0 to 86.3)                | <b>80.8</b><br>(54.5 to 115.9)         | <b>6.6</b><br>(-5.2 to 20.7)                      | <b>-20.9</b><br>(-30.4 to -9.2)                     |
| Tuberculosis                                                                         | 6,098.1<br>(5,391.4 to 6,931.8)           | 30.9†<br>(24.1 to 39.8)                       | 5.1<br>(3.1 to 7.3)                    | 15.4<br>(-1.6 to 36.0)                            | -15.8<br>(-25.7 to -4.4)                            |
| Drug-susceptible tuberculosis                                                        | 16.3<br>(12.5 to 21.0)                    | 30.4<br>(23.6 to 39.3)                        | 5.0<br>(3.1 to 7.2)                    | 15.6<br>(-2.3 to 36.3)                            | -15.7<br>(-25.6 to -4.0)                            |
| Multidrug-resistant tuberculosis without extensive drug resistance                   | 0.2<br>(0.1 to 0.7)                       | 0.5<br>(0.1 to 1.2)                           | 0.1<br>(< 0.05 to 0.2)                 | 4.5<br>(-64.7 to 206.4)                           | -24.4<br>(-74.3 to 123.9)                           |
| Extensively drug-resistant tuberculosis                                              | < 0.05<br>(< 0.05 to < 0.05)              | < 0.05<br>(< 0.05 to < 0.05)                  | < 0.05<br>(< 0.05 to < 0.05)           | 218.4<br>(7.5 to 833.1)                           | 130.5<br>(-21.6 to 582.6)                           |
| Latent tuberculosis infection                                                        | 6,081.5<br>(5,375.2 to 6,908.8)           | --                                            | --                                     | --                                                | --                                                  |
| HIV/AIDS                                                                             | 587.9<br>(533.7 to 641.5)                 | 40.1^<br>(29.9 to 53.8)                       | 75.7<br>(50.9 to 110.3)                | 6.1<br>(-6.2 to 21.0)                             | -21.2<br>(-31.2 to -8.7)                            |
| Drug-susceptible HIV/AIDS - Tuberculosis                                             | 8.9<br>(5.9 to 12.5)                      | 16.6<br>(11.2 to 23.0)                        | 3.4<br>(1.9 to 5.4)                    | -7.4<br>(-20.9 to 9.4)                            | -27.6<br>(-38.0 to -15.4)                           |
| Multidrug-resistant HIV/AIDS - Tuberculosis without extensive drug resistance        | 0.2<br>(< 0.05 to 0.5)                    | 0.3<br>(0.1 to 0.8)                           | 0.1<br>(< 0.05 to 0.2)                 | -15.3<br>(-72.0 to 148.6)                         | -33.9<br>(-78.1 to 93.0)                            |
| Extensively drug-resistant HIV/AIDS - Tuberculosis                                   | < 0.05<br>(< 0.05 to < 0.05)              | < 0.05<br>(< 0.05 to < 0.05)                  | < 0.05<br>(< 0.05 to < 0.05)           | 158.1<br>(-14.7 to 657.1)                         | 101.4<br>(-33.2 to 487.8)                           |
| HIV/AIDS resulting in other diseases                                                 | 578.8<br>(525.2 to 632.1)                 | 40.1<br>(29.9 to 53.8)                        | 72.3<br>(48.4 to 106.6)                | 6.9<br>(-6.0 to 22.8)                             | -20.9<br>(-31.2 to -7.5)                            |
| <b>Diarrhoea, lower respiratory infections, and other common infectious diseases</b> | <b>1,885.8</b><br>(1,798.6 to 1,989.3)    | <b>94,762.8†</b><br>(86,086.3 to 103,595.5)   | <b>100.4</b><br>(70.2 to 136.2)        | <b>19.8</b><br>(15.8 to 23.5)                     | <b>-8.1</b><br>(-10.7 to -5.7)                      |
| Diarrhoeal diseases                                                                  | 357.6<br>(327.5 to 388.4)                 | 23,977.9<br>(21,888.9 to 26,019.6)            | 40.4<br>(28.0 to 55.8)                 | 10.0<br>(3.3 to 16.1)                             | -15.2<br>(-19.3 to -11.4)                           |
| Intestinal infectious diseases                                                       | 2.9<br>(1.9 to 4.2)                       | 57.2†<br>(37.4 to 85.1)                       | 0.5<br>(0.2 to 0.8)                    | -7.7<br>(-26.5 to 17.0)                           | -29.2<br>(-41.1 to -13.7)                           |
| Typhoid fever                                                                        | 2.8<br>(1.8 to 4.2)                       | 43.6<br>(28.0 to 65.2)                        | 0.4<br>(0.2 to 0.7)                    | -7.8<br>(-28.6 to 19.9)                           | -29.3<br>(-42.3 to -12.0)                           |
| Paratyphoid fever                                                                    | 0.6<br>(0.3 to 1.0)                       | 13.6<br>(7.8 to 23.0)                         | < 0.05<br>(< 0.05 to 0.1)              | -0.2<br>(-22.9 to 26.1)                           | -23.8<br>(-39.1 to -6.8)                            |
| Other intestinal infectious diseases                                                 | --                                        | --                                            | < 0.05<br>(< 0.05 to < 0.05)           | -33.5<br>(-49.0 to -13.0)                         | -48.2<br>(-57.0 to -37.7)                           |
| Lower respiratory infections                                                         | 30.7<br>(28.3 to 33.2)                    | 1,344.5<br>(1,227.7 to 1,473.5)               | 1.9<br>(1.2 to 2.6)                    | 18.0<br>(4.0 to 34.8)                             | -8.7<br>(-18.2 to 0.9)                              |
| Upper respiratory infections                                                         | 879.1<br>(772.6 to 995.6)                 | 66,412.5<br>(57,999.1 to 75,529.1)            | 21.9<br>(13.1 to 34.4)                 | 32.8<br>(26.2 to 39.7)                            | 1.1<br>(-3.6 to 5.9)                                |
| Otitis media                                                                         | 540.7<br>(481.1 to 603.7)                 | 2,156.1<br>(1,671.9 to 2,762.6)               | 17.1<br>(10.6 to 25.2)                 | 25.3<br>(17.5 to 34.1)                            | -3.0<br>(-8.6 to 3.7)                               |
| Meningitis                                                                           | 128.0<br>(104.9 to 154.9)                 | 39.9<br>(33.4 to 49.4)                        | 11.7<br>(8.3 to 15.4)                  | 23.7<br>(15.6 to 32.1)                            | -5.7<br>(-11.4 to 0.4)                              |
| Pneumococcal meningitis                                                              | 34.6<br>(28.2 to 42.9)                    | 4.2<br>(3.0 to 5.9)                           | 3.9<br>(2.7 to 5.2)                    | 4.6<br>(-11.2 to 22.9)                            | -21.3<br>(-31.8 to -9.5)                            |
| H influenzae type B meningitis                                                       | 16.2<br>(11.5 to 22.9)                    | 4.2<br>(2.1 to 6.9)                           | 1.9<br>(1.3 to 2.6)                    | 1.2<br>(-12.4 to 15.3)                            | -23.5<br>(-34.0 to -13.1)                           |
| Meningococcal infection                                                              | 32.6<br>(22.2 to 45.5)                    | 13.5<br>(9.4 to 18.4)                         | 3.0<br>(2.1 to 4.1)                    | 25.4<br>(14.2 to 36.5)                            | -4.5<br>(-12.8 to 3.7)                              |
| Other meningitis                                                                     | 44.7<br>(29.9 to 62.0)                    | 18.0<br>(13.4 to 23.5)                        | 2.9<br>(2.0 to 4.1)                    | 96.5<br>(69.0 to 128.6)                           | 53.5<br>(32.3 to 77.5)                              |
| Encephalitis                                                                         | 50.6<br>(33.0 to 75.6)                    | 26.0<br>(22.6 to 29.9)                        | 5.6<br>(3.9 to 7.5)                    | 35.0<br>(19.4 to 54.6)                            | 3.0<br>(-7.3 to 15.3)                               |
| Diphtheria                                                                           | < 0.05<br>(< 0.05 to < 0.05)              | < 0.05<br>(< 0.05 to < 0.05)                  | < 0.05<br>(< 0.05 to < 0.05)           | -35.7<br>(-76.9 to 69.2)                          | -51.7<br>(-79.4 to 9.4)                             |
| Whooping cough                                                                       | 10.5<br>(8.2 to 13.2)                     | 76.7<br>(59.8 to 96.4)                        | 0.5<br>(0.3 to 0.8)                    | -15.4<br>(-29.9 to 1.2)                           | -35.3<br>(-46.4 to -22.2)                           |
| Tetanus                                                                              | 0.4<br>(0.4 to 0.4)                       | 0.3<br>(0.1 to 0.7)                           | < 0.05<br>(< 0.05 to < 0.05)           | -3.3<br>(-32.2 to 21.6)                           | -24.6<br>(-39.9 to -11.3)                           |
| Measles                                                                              | 0.7<br>(0.2 to 1.5)                       | 24.0<br>(8.0 to 54.5)                         | 0.1<br>(< 0.05 to 0.1)                 | 39.9<br>(-18.3 to 143.9)                          | 6.5<br>(-37.2 to 83.9)                              |
| Varicella and herpes zoster                                                          | 21.9<br>(20.5 to 23.5)                    | 647.7<br>(606.6 to 691.7)                     | 0.7<br>(0.4 to 1.0)                    | 31.1<br>(11.5 to 51.7)                            | 0.5<br>(-11.5 to 12.8)                              |
| <b>Neglected tropical diseases and malaria</b>                                       | <b>13,268.7</b><br>(12,482.0 to 14,108.6) | <b>7,255.5†</b><br>(5,638.3 to 9,512.2)       | <b>209.9</b><br>(137.3 to 306.2)       | <b>-26.6</b><br>(-35.6 to -13.7)                  | <b>-43.1</b><br>(-51.1 to -31.9)                    |
| Malaria                                                                              | 3,759.8<br>(3,239.0 to 4,383.2)           | 5,498.4<br>(3,894.9 to 7,644.4)               | 46.6<br>(33.6 to 62.8)                 | -14.1<br>(-22.7 to -3.8)                          | -30.5<br>(-36.7 to -23.4)                           |
| Chagas disease                                                                       | --                                        | --                                            | --                                     | --                                                | --                                                  |
| Leishmaniasis                                                                        | 2.8<br>(1.7 to 4.0)                       | 0.4<br>(< 0.05 to 2.2)                        | 0.1<br>(0.1 to 0.3)                    | 76.5<br>(-16.6 to 387.9)                          | 40.4<br>(-27.6 to 260.1)                            |
| Visceral leishmaniasis                                                               | < 0.05<br>(< 0.05 to < 0.05)              | < 0.05<br>(< 0.05 to 0.1)                     | < 0.05<br>(< 0.05 to < 0.05)           | 81.3<br>(-24.4 to 313.6)                          | 41.3<br>(-44.9 to 258.2)                            |
| Cutaneous and mucocutaneous leishmaniasis                                            | 2.3<br>(1.1 to 3.8)                       | 0.3<br>(< 0.05 to 2.1)                        | 0.1<br>(0.1 to 0.3)                    | 76.4<br>(-16.8 to 391.7)                          | 40.4<br>(-27.9 to 265.3)                            |
| African trypanosomiasis                                                              | < 0.05<br>(< 0.05 to 0.1)                 | < 0.05<br>(< 0.05 to < 0.05)                  | < 0.05<br>(< 0.05 to < 0.05)           | -45.9<br>(-64.7 to -13.5)                         | -58.8<br>(-76.5 to -21.7)                           |
| Schistosomiasis                                                                      | 2,723.1<br>(2,449.5 to 3,009.6)           | 1,162.9<br>(1,053.6 to 1,283.2)               | 22.2<br>(11.2 to 40.9)                 | -50.2<br>(-52.8 to -46.9)                         | -63.0<br>(-64.9 to -60.6)                           |
| Cysticercosis                                                                        | 44.4<br>(26.0 to 63.0)                    | --                                            | 8.2<br>(3.9 to 14.1)                   | 12.5<br>(-29.6 to 49.5)                           | -15.0<br>(-45.2 to 10.6)                            |
| Cystic echinococcosis                                                                | 6.0<br>(1.3 to 18.5)                      | 1.2<br>(0.3 to 4.1)                           | 0.6<br>(0.1 to 2.0)                    | -21.4<br>(-91.5 to 451.4)                         | -40.6<br>(-92.2 to 359.7)                           |
| Lymphatic filariasis                                                                 | 446.5<br>(335.2 to 614.4)                 | 151.9<br>(131.3 to 175.2)                     | 23.2<br>(10.2 to 45.9)                 | -20.6<br>(-48.3 to 3.4)                           | -39.0<br>(-60.1 to -19.9)                           |
| Onchocerciasis                                                                       | 929.1<br>(630.9 to 1,315.2)               | 235.8<br>(97.3 to 504.7)                      | 76.5<br>(32.3 to 141.2)                | -23.4<br>(-50.4 to 6.6)                           | -39.0<br>(-59.6 to -16.6)                           |
| Trachoma                                                                             | 7.2<br>(4.7 to 10.4)                      | --                                            | 0.6<br>(0.4 to 1.0)                    | -22.4<br>(-42.1 to 5.3)                           | -40.0<br>(-57.5 to -13.6)                           |
| Dengue                                                                               | 12.2<br>(6.7 to 20.4)                     | 204.2<br>(125.6 to 306.3)                     | 2.0<br>(0.9 to 4.0)                    | 188.8<br>(103.5 to 573.0)                         | 121.7<br>(58.8 to 401.0)                            |
| Yellow fever                                                                         | < 0.05<br>(< 0.05 to < 0.05)              | 0.5<br>(0.1 to 1.3)                           | < 0.05<br>(< 0.05 to < 0.05)           | -23.3<br>(-41.9 to 2.0)                           | -41.2<br>(-53.2 to -25.3)                           |
| Rabies                                                                               | < 0.05<br>(< 0.05 to < 0.05)              | 0.1<br>(< 0.05 to 0.2)                        | < 0.05<br>(< 0.05 to < 0.05)           | 4.3<br>(-43.7 to 79.6)                            | -22.6<br>(-51.0 to 18.4)                            |
| Intestinal nematode infections                                                       | 8,823.6<br>(7,756.9 to 10,036.3)          | --                                            | 20.9<br>(12.0 to 34.5)                 | -49.6<br>(-54.2 to -45.1)                         | -61.8<br>(-65.7 to -57.9)                           |
| Ascariasis                                                                           | 4,818.0<br>(3,825.6 to 6,057.9)           | --                                            | 9.6<br>(5.3 to 16.3)                   | -49.1<br>(-54.7 to -42.7)                         | -61.4<br>(-66.4 to -55.5)                           |



| Cause                                                                   | Prevalence in thousands (95% UI)                 | Incidence in thousands (95% UI)                   | YLDs in thousands (95% UI)                    |                                                   |                                                     |
|-------------------------------------------------------------------------|--------------------------------------------------|---------------------------------------------------|-----------------------------------------------|---------------------------------------------------|-----------------------------------------------------|
|                                                                         | 2016 counts                                      | 2016 counts                                       | 2016 counts                                   | Percentage change in counts between 2006 and 2016 | Percentage change in age-standardised rates between |
| Trichuriasis                                                            | 2,973.9<br>(2,307.8 to 3,851.3)                  | --                                                | 2.7<br>(1.5 to 4.6)                           | -52.1<br>(-59.8 to -42.7)                         | -63.4<br>(-70.6 to -54.5)                           |
| Hookworm disease                                                        | 2,400.3<br>(1,840.1 to 3,060.3)                  | --                                                | 8.7<br>(5.2 to 13.8)                          | -49.2<br>(-56.9 to -40.6)                         | -61.8<br>(-68.3 to -54.4)                           |
| Food-borne trematodiasis                                                | --                                               | --                                                | --                                            | --                                                | --                                                  |
| Leprosy                                                                 | 0.8<br>(0.7 to 0.9)                              | 0.1<br>(0.1 to 0.1)                               | < 0.05<br>(< 0.05 to 0.1)                     | 3.6<br>(-18.5 to 31.5)                            | -18.4<br>(-37.1 to 4.8)                             |
| Ebola virus disease                                                     | --                                               | --                                                | --                                            | --                                                | --                                                  |
| Zika virus disease                                                      | --                                               | --                                                | --                                            | --                                                | --                                                  |
| Guinea worm disease                                                     | --                                               | --                                                | --                                            | --                                                | --                                                  |
| Other neglected tropical diseases                                       | 272.8<br>(254.6 to 291.3)                        | --                                                | 8.9<br>(5.7 to 13.1)                          | 26.3<br>(13.1 to 40.1)                            | -1.6<br>(-11.2 to 8.5)                              |
| <b>Maternal disorders</b>                                               | <b>73.6</b><br><b>(58.0 to 96.4)</b>             | <b>553.6†</b><br><b>(484.6 to 629.3)</b>          | <b>7.3</b><br><b>(5.0 to 10.2)</b>            | <b>5.7</b><br><b>(-14.0 to 31.3)</b>              | <b>-23.0</b><br><b>(-36.7 to -5.8)</b>              |
| Maternal haemorrhage                                                    | 6.5<br>(5.2 to 8.2)                              | 37.8<br>(27.4 to 50.6)                            | 0.3<br>(0.1 to 0.4)                           | 31.6<br>(-6.5 to 89.3)                            | -0.6<br>(-28.4 to 39.2)                             |
| Maternal sepsis and other pregnancy related infections                  | 10.7<br>(8.2 to 13.9)                            | 61.8<br>(45.6 to 83.4)                            | 0.3<br>(0.1 to 0.5)                           | 23.4<br>(-39.6 to 149.2)                          | -6.1<br>(-51.8 to 84.6)                             |
| Maternal hypertensive disorders                                         | 47.4<br>(30.4 to 65.8)                           | 211.1<br>(174.8 to 243.8)                         | 2.3<br>(1.2 to 3.7)                           | 14.1<br>(-30.4 to 91.4)                           | -14.4<br>(-48.1 to 43.6)                            |
| Maternal obstructed labour and uterine rupture                          | 10.0<br>(8.3 to 12.0)                            | 65.5<br>(52.0 to 80.0)                            | 3.2<br>(2.1 to 4.7)                           | -1.1<br>(-18.8 to 21.3)                           | -28.8<br>(-40.8 to -13.0)                           |
| Maternal abortion, miscarriage, and ectopic pregnancy                   | 1.5<br>(0.9 to 2.2)                              | 177.4<br>(130.7 to 242.8)                         | 0.2<br>(0.1 to 0.3)                           | 22.4<br>(-39.9 to 145.3)                          | -9.0<br>(-54.5 to 78.7)                             |
| Other maternal disorders                                                | --                                               | --                                                | 1.1<br>(0.8 to 1.6)                           | 0.3<br>(-18.4 to 25.1)                            | -26.7<br>(-39.6 to -10.4)                           |
| <b>Neonatal disorders</b>                                               | <b>309.4</b><br><b>(247.6 to 379.2)</b>          | --                                                | <b>33.4</b><br><b>(19.2 to 59.6)</b>          | <b>54.4</b><br><b>(14.5 to 104.2)</b>             | <b>20.4</b><br><b>(-11.8 to 60.3)</b>               |
| Neonatal preterm birth complications                                    | 214.7<br>(154.5 to 302.6)                        | --                                                | 12.3<br>(8.1 to 18.3)                         | 31.0<br>(0.6 to 63.5)                             | 1.8<br>(-22.1 to 28.2)                              |
| Neonatal encephalopathy due to birth asphyxia and trauma                | 80.1<br>(44.1 to 138.6)                          | --                                                | 4.5<br>(1.4 to 15.0)                          | 32.0<br>(-30.0 to 103.4)                          | 3.3<br>(-47.7 to 65.2)                              |
| Neonatal sepsis and other neonatal infections                           | 32.2<br>(10.3 to 79.6)                           | --                                                | 11.8<br>(2.1 to 33.5)                         | 121.5<br>(-4.0 to 421.4)                          | 80.5<br>(-28.9 to 373.6)                            |
| Hemolytic disease and other neonatal jaundice                           | 4.9<br>(4.2 to 5.7)                              | --                                                | 1.6<br>(1.2 to 2.1)                           | 25.6<br>(8.6 to 45.1)                             | -2.4<br>(-13.1 to 10.5)                             |
| Other neonatal disorders                                                | --                                               | --                                                | 3.2<br>(1.9 to 5.5)                           | 43.3<br>(10.7 to 82.7)                            | 9.7<br>(-15.4 to 40.8)                              |
| <b>Nutritional deficiencies</b>                                         | <b>6,781.5</b><br><b>(6,463.1 to 7,141.9)</b>    | <b>2,626.6†</b><br><b>(2,148.1 to 3,178.9)</b>    | <b>168.4</b><br><b>(111.6 to 242.9)</b>       | <b>21.7</b><br><b>(14.1 to 29.0)</b>              | <b>-5.3</b><br><b>(-10.0 to -0.8)</b>               |
| Protein-energy malnutrition                                             | 218.3<br>(182.1 to 259.6)                        | 160.9<br>(138.7 to 186.1)                         | 9.3<br>(5.6 to 14.1)                          | -2.5<br>(-28.8 to 34.9)                           | -26.2<br>(-46.5 to 2.9)                             |
| Iodine deficiency                                                       | 345.5<br>(259.9 to 446.4)                        | 13.2<br>(10.0 to 17.1)                            | 10.2<br>(6.4 to 15.4)                         | 11.0<br>(-2.2 to 26.1)                            | -15.5<br>(-24.4 to -5.6)                            |
| Vitamin A deficiency                                                    | 2,597.4<br>(2,150.7 to 3,110.7)                  | 2,452.4<br>(1,981.6 to 3,001.7)                   | 0.8<br>(0.5 to 1.3)                           | 30.7<br>(-3.0 to 73.9)                            | 1.1<br>(-22.2 to 28.9)                              |
| Iron-deficiency anaemia                                                 | 4,604.6<br>(4,387.3 to 4,828.1)                  | --                                                | 147.8<br>(96.9 to 216.2)                      | 24.5<br>(16.1 to 32.6)                            | -3.1<br>(-8.5 to 1.8)                               |
| Other nutritional deficiencies                                          | --                                               | --                                                | 0.3<br>(0.2 to 0.5)                           | -4.7<br>(-31.6 to 34.7)                           | -27.8<br>(-48.5 to 2.5)                             |
| <b>Other communicable, maternal, neonatal, and nutritional diseases</b> | <b>8,562.5</b><br><b>(8,045.5 to 9,161.3)</b>    | <b>5,189.1</b><br><b>(4,382.6 to 6,273.7)</b>     | <b>20.9</b><br><b>(13.3 to 31.9)</b>          | <b>27.7</b><br><b>(20.4 to 34.5)</b>              | <b>-4.8</b><br><b>(-9.1 to -0.3)</b>                |
| Sexually transmitted diseases excluding HIV                             | 5,532.4<br>(5,170.9 to 5,915.4)                  | 3,397.5<br>(3,055.0 to 3,794.7)                   | 12.4<br>(7.7 to 19.8)                         | 34.2<br>(26.8 to 42.4)                            | -1.8<br>(-6.6 to 4.0)                               |
| Syphilis                                                                | 766.9<br>(563.6 to 1,026.7)                      | 537.2<br>(371.9 to 765.9)                         | 0.6<br>(0.4 to 0.9)                           | 36.2<br>(22.5 to 52.7)                            | 2.0<br>(-10.3 to 16.0)                              |
| Chlamydial infection                                                    | 429.4<br>(340.8 to 532.8)                        | 354.6<br>(290.5 to 430.7)                         | 2.7<br>(1.7 to 4.3)                           | 34.0<br>(17.7 to 51.6)                            | -2.5<br>(-13.4 to 10.5)                             |
| Gonococcal infection                                                    | 263.4<br>(207.3 to 338.9)                        | 854.9<br>(650.4 to 1,127.7)                       | 2.2<br>(1.3 to 3.7)                           | 36.5<br>(21.0 to 53.6)                            | 0.3<br>(-10.2 to 11.7)                              |
| Trichomoniasis                                                          | 1,017.6<br>(863.1 to 1,179.5)                    | 956.7<br>(797.5 to 1,134.6)                       | 1.5<br>(0.6 to 3.1)                           | 34.5<br>(26.8 to 43.1)                            | -0.1<br>(-5.2 to 5.5)                               |
| Genital herpes                                                          | 3,954.6<br>(3,445.4 to 4,560.8)                  | 442.7<br>(371.6 to 527.2)                         | 1.1<br>(0.4 to 2.5)                           | 34.8<br>(21.7 to 47.6)                            | 0.3<br>(-7.6 to 8.3)                                |
| Other sexually transmitted diseases                                     | 173.3<br>(160.2 to 186.0)                        | 251.4<br>(209.1 to 307.2)                         | 4.3<br>(2.8 to 6.3)                           | 32.7<br>(21.3 to 45.9)                            | -4.3<br>(-12.5 to 5.0)                              |
| Hepatitis                                                               | 3,838.2<br>(3,206.6 to 4,622.5)                  | 1,791.5<br>(1,156.9 to 2,802.2)                   | 1.7<br>(1.0 to 2.7)                           | -11.1<br>(-31.5 to 16.9)                          | -29.2<br>(-42.9 to -11.8)                           |
| Acute hepatitis A                                                       | 41.4<br>(3.8 to 115.9)                           | 537.5<br>(49.1 to 1,506.1)                        | 0.3<br>(0.1 to 0.6)                           | -12.5<br>(-82.3 to 353.9)                         | -30.1<br>(-79.8 to 167.1)                           |
| Hepatitis B                                                             | 2,686.8<br>(2,043.0 to 3,465.2)                  | 1,058.1<br>(772.4 to 1,458.0)                     | 1.2<br>(0.7 to 2.0)                           | -10.2<br>(-28.2 to 14.3)                          | -28.7<br>(-42.7 to -11.9)                           |
| Hepatitis C                                                             | 1,102.0<br>(967.2 to 1,257.2)                    | 92.0<br>(82.4 to 102.6)                           | 0.1<br>(< 0.05 to 0.2)                        | 16.5<br>(-22.0 to 72.5)                           | -13.4<br>(-34.3 to 14.0)                            |
| Acute hepatitis E                                                       | 8.0<br>(6.4 to 10.1)                             | 103.9<br>(83.7 to 131.5)                          | 0.2<br>(0.1 to 0.3)                           | -23.6<br>(-44.1 to 0.1)                           | -36.5<br>(-51.1 to -19.2)                           |
| Other infectious diseases                                               | 195.4<br>(183.3 to 207.9)                        | < 0.05<br>(< 0.05 to < 0.05)                      | 6.8<br>(4.4 to 9.9)                           | 30.6<br>(18.4 to 43.2)                            | -0.8<br>(-9.2 to 7.7)                               |
| <b>Non-communicable diseases</b>                                        | <b>21,274.4</b><br><b>(21,098.6 to 21,459.8)</b> | <b>53,993.1†</b><br><b>(49,199.9 to 58,866.3)</b> | <b>1,518.6</b><br><b>(1,124.5 to 1,995.0)</b> | <b>32.1</b><br><b>(25.5 to 39.1)</b>              | <b>0.4</b><br><b>(-3.1 to 4.2)</b>                  |
| <b>Neoplasms</b>                                                        | <b>20.8</b><br><b>(18.8 to 22.6)</b>             | <b>14.5</b><br><b>(12.7 to 15.9)</b>              | <b>4.5</b><br><b>(3.1 to 5.9)</b>             | <b>28.1</b><br><b>(20.8 to 36.3)</b>              | <b>0.0</b><br><b>(-5.5 to 6.5)</b>                  |
| Lip and oral cavity cancer                                              | 0.8<br>(0.7 to 1.0)                              | 0.2<br>(0.2 to 0.3)                               | 0.1<br>(0.1 to 0.1)                           | 34.0<br>(20.4 to 51.8)                            | 3.5<br>(-7.1 to 17.3)                               |
| Nasopharynx cancer                                                      | 0.1<br>(0.1 to 0.2)                              | < 0.05<br>(< 0.05 to < 0.05)                      | < 0.05<br>(< 0.05 to < 0.05)                  | 36.9<br>(17.7 to 62.1)                            | 0.7<br>(-11.3 to 15.7)                              |
| Other pharynx cancer                                                    | 0.2<br>(0.1 to 0.2)                              | 0.1<br>(0.1 to 0.1)                               | < 0.05<br>(< 0.05 to < 0.05)                  | 29.0<br>(17.6 to 43.0)                            | 1.2<br>(-7.5 to 12.1)                               |
| Oesophageal cancer                                                      | 0.5<br>(0.4 to 0.6)                              | 0.4<br>(0.4 to 0.5)                               | 0.1<br>(0.1 to 0.1)                           | 47.4<br>(26.0 to 72.6)                            | 16.0<br>(-2.5 to 37.1)                              |
| Stomach cancer                                                          | 1.4<br>(1.3 to 1.5)                              | 1.0<br>(0.9 to 1.1)                               | 0.2<br>(0.2 to 0.3)                           | 21.1<br>(4.7 to 41.3)                             | -3.9<br>(-17.4 to 13.1)                             |
| Colon and rectum cancer                                                 | 1.9<br>(1.6 to 2.2)                              | 0.7<br>(0.6 to 0.8)                               | 0.2<br>(0.2 to 0.3)                           | 32.3<br>(15.4 to 52.3)                            | 3.7<br>(-10.4 to 20.0)                              |
| Liver cancer                                                            | 1.2<br>(0.9 to 1.6)                              | 2.2<br>(1.8 to 2.8)                               | 0.5<br>(0.3 to 0.7)                           | 20.1<br>(5.6 to 36.4)                             | -7.5<br>(-18.3 to 3.5)                              |
| Liver cancer due to hepatitis B                                         | 1.2<br>(0.9 to 1.5)                              | 1.2<br>(0.9 to 1.5)                               | 0.2<br>(0.2 to 0.4)                           | 21.7<br>(5.2 to 39.8)                             | -7.1<br>(-19.0 to 6.5)                              |



| Cause                                              | Prevalence in thousands (95% UI)              | Incidence in thousands (95% UI)          | YLDs in thousands (95% UI)           |                                                   |                                                     |
|----------------------------------------------------|-----------------------------------------------|------------------------------------------|--------------------------------------|---------------------------------------------------|-----------------------------------------------------|
|                                                    | 2016 counts                                   | 2016 counts                              | 2016 counts                          | Percentage change in counts between 2006 and 2016 | Percentage change in age-standardised rates between |
| Liver cancer due to hepatitis C                    | 0.2<br>(0.1 to 0.3)                           | 0.2<br>(0.1 to 0.3)                      | < 0.05<br>(< 0.05 to 0.1)            | 18.8<br>(3.8 to 36.0)                             | -5.9<br>(-17.4 to 6.6)                              |
| Liver cancer due to alcohol use                    | 0.4<br>(0.3 to 0.5)                           | 0.4<br>(0.3 to 0.5)                      | 0.1<br>(0.1 to 0.1)                  | 16.1<br>(1.6 to 33.5)                             | -9.5<br>(-20.8 to 3.6)                              |
| Liver cancer due to other causes                   | 0.5<br>(0.3 to 0.6)                           | 0.5<br>(0.4 to 0.6)                      | 0.1<br>(0.1 to 0.1)                  | 20.4<br>(4.8 to 38.9)                             | -7.4<br>(-18.6 to 4.8)                              |
| Gallbladder and biliary tract cancer               | 0.1<br>(0.1 to 0.1)                           | 0.1<br>(0.1 to 0.2)                      | < 0.05<br>(< 0.05 to < 0.05)         | 12.1<br>(2.0 to 24.1)                             | -10.7<br>(-18.5 to -1.3)                            |
| Pancreatic cancer                                  | 0.3<br>(0.3 to 0.4)                           | 0.5<br>(0.4 to 0.6)                      | 0.1<br>(0.1 to 0.1)                  | 33.8<br>(23.1 to 44.8)                            | 5.7<br>(-3.2 to 14.3)                               |
| Larynx cancer                                      | 0.4<br>(0.3 to 0.4)                           | 0.1<br>(0.1 to 0.1)                      | 0.1<br>(< 0.05 to 0.1)               | 24.3<br>(8.4 to 43.0)                             | -1.4<br>(-14.1 to 13.3)                             |
| Tracheal, bronchus, and lung cancer                | 0.9<br>(0.8 to 1.1)                           | 0.8<br>(0.7 to 1.0)                      | 0.2<br>(0.1 to 0.3)                  | 23.6<br>(4.0 to 48.5)                             | -1.8<br>(-18.2 to 19.6)                             |
| Malignant skin melanoma                            | 0.2<br>(0.1 to 0.2)                           | < 0.05<br>(< 0.05 to 0.1)                | < 0.05<br>(< 0.05 to < 0.05)         | 27.6<br>(15.2 to 43.8)                            | -1.3<br>(-11.6 to 10.5)                             |
| Non-melanoma skin cancer                           | 0.1<br>(0.1 to 0.2)                           | 0.6<br>(0.4 to 1.0)                      | < 0.05<br>(< 0.05 to < 0.05)         | 2.4<br>(-60.5 to 63.2)                            | -22.1<br>(-73.2 to 31.7)                            |
| Non-melanoma skin cancer (squamous-cell carcinoma) | 0.1<br>(0.1 to 0.2)                           | 0.2<br>(0.1 to 0.2)                      | < 0.05<br>(< 0.05 to < 0.05)         | -0.4<br>(-63.9 to 65.7)                           | -23.6<br>(-74.8 to 33.8)                            |
| Non-melanoma skin cancer (basal-cell carcinoma)    | 0.1<br>(< 0.05 to 0.1)                        | 0.5<br>(0.3 to 0.8)                      | < 0.05<br>(< 0.05 to < 0.05)         | 35.8<br>(22.0 to 51.0)                            | 3.3<br>(-8.0 to 15.5)                               |
| Breast cancer                                      | 5.4<br>(4.2 to 6.7)                           | 1.3<br>(1.0 to 1.6)                      | 0.6<br>(0.4 to 0.8)                  | 32.1<br>(6.5 to 63.4)                             | 0.8<br>(-17.4 to 24.1)                              |
| Cervical cancer                                    | 6.8<br>(4.0 to 8.7)                           | 1.9<br>(1.1 to 2.4)                      | 0.7<br>(0.4 to 1.0)                  | 20.3<br>(-2.6 to 50.1)                            | -9.8<br>(-25.8 to 11.2)                             |
| Uterine cancer                                     | 0.8<br>(0.6 to 1.0)                           | 0.2<br>(0.1 to 0.2)                      | 0.1<br>(< 0.05 to 0.1)               | 28.2<br>(4.5 to 57.6)                             | 1.2<br>(-16.3 to 24.3)                              |
| Ovarian cancer                                     | 0.7<br>(0.6 to 0.9)                           | 0.2<br>(0.2 to 0.3)                      | 0.1<br>(0.1 to 0.2)                  | 27.7<br>(10.0 to 50.0)                            | -2.7<br>(-15.8 to 13.4)                             |
| Prostate cancer                                    | 3.0<br>(1.8 to 3.6)                           | 0.9<br>(0.6 to 1.1)                      | 0.4<br>(0.2 to 0.6)                  | 47.1<br>(15.2 to 84.9)                            | 16.5<br>(-7.5 to 42.4)                              |
| Testicular cancer                                  | 0.1<br>(< 0.05 to 0.1)                        | < 0.05<br>(< 0.05 to < 0.05)             | < 0.05<br>(< 0.05 to < 0.05)         | 16.8<br>(-5.8 to 43.6)                            | -12.4<br>(-28.9 to 8.4)                             |
| Kidney cancer                                      | 1.5<br>(1.2 to 2.1)                           | 0.4<br>(0.3 to 0.5)                      | 0.1<br>(0.1 to 0.2)                  | 40.3<br>(9.6 to 86.3)                             | 9.1<br>(-6.4 to 29.7)                               |
| Bladder cancer                                     | 1.0<br>(0.8 to 1.1)                           | 0.3<br>(0.2 to 0.3)                      | 0.1<br>(0.1 to 0.1)                  | 26.3<br>(11.0 to 44.6)                            | -1.2<br>(-13.6 to 13.6)                             |
| Brain and nervous system cancer                    | 0.9<br>(0.5 to 1.4)                           | 0.4<br>(0.2 to 0.6)                      | 0.1<br>(0.1 to 0.2)                  | 36.2<br>(25.6 to 52.9)                            | 4.4<br>(-3.6 to 14.1)                               |
| Thyroid cancer                                     | 0.2<br>(0.2 to 0.3)                           | 0.1<br>(< 0.05 to 0.1)                   | < 0.05<br>(< 0.05 to < 0.05)         | 20.7<br>(7.2 to 37.2)                             | -9.5<br>(-19.1 to 1.3)                              |
| Mesothelioma                                       | < 0.05<br>(< 0.05 to < 0.05)                  | < 0.05<br>(< 0.05 to < 0.05)             | < 0.05<br>(< 0.05 to < 0.05)         | 10.6<br>(-1.7 to 24.4)                            | -15.2<br>(-23.9 to -5.4)                            |
| Hodgkin lymphoma                                   | 0.1<br>(0.1 to 0.2)                           | < 0.05<br>(< 0.05 to 0.1)                | < 0.05<br>(< 0.05 to < 0.05)         | 7.8<br>(-4.6 to 20.9)                             | -15.1<br>(-22.0 to -6.4)                            |
| Non-Hodgkin's lymphoma                             | 1.4<br>(1.2 to 1.8)                           | 0.5<br>(0.4 to 0.6)                      | 0.1<br>(0.1 to 0.2)                  | 27.0<br>(14.4 to 42.3)                            | -1.4<br>(-10.5 to 9.0)                              |
| Multiple myeloma                                   | 0.2<br>(0.1 to 0.2)                           | 0.1<br>(0.1 to 0.2)                      | 0.1<br>(< 0.05 to 0.1)               | 24.0<br>(12.3 to 34.2)                            | -2.3<br>(-11.5 to 5.4)                              |
| Leukaemia                                          | 1.6<br>(1.3 to 1.9)                           | 0.5<br>(0.4 to 0.6)                      | 0.2<br>(0.1 to 0.3)                  | 24.8<br>(11.6 to 40.1)                            | -3.4<br>(-11.9 to 6.2)                              |
| Acute lymphoid leukaemia                           | 0.3<br>(0.2 to 0.4)                           | 0.1<br>(0.1 to 0.1)                      | < 0.05<br>(< 0.05 to 0.1)            | 18.9<br>(-3.2 to 49.2)                            | -6.4<br>(-20.1 to 10.2)                             |
| Chronic lymphoid leukaemia                         | 0.2<br>(0.2 to 0.3)                           | < 0.05<br>(< 0.05 to 0.1)                | < 0.05<br>(< 0.05 to < 0.05)         | 23.1<br>(4.6 to 45.4)                             | -1.9<br>(-17.0 to 16.2)                             |
| Acute myeloid leukaemia                            | 0.4<br>(0.3 to 0.5)                           | 0.2<br>(0.1 to 0.2)                      | 0.1<br>(< 0.05 to 0.1)               | 30.9<br>(12.2 to 57.3)                            | 2.3<br>(-8.5 to 15.9)                               |
| Chronic myeloid leukaemia                          | 0.2<br>(0.1 to 0.2)                           | 0.1<br>(0.1 to 0.1)                      | < 0.05<br>(< 0.05 to < 0.05)         | 24.8<br>(6.2 to 49.7)                             | -8.3<br>(-20.1 to 6.5)                              |
| Other leukaemia                                    | 0.5<br>(0.4 to 0.7)                           | 0.1<br>(0.1 to 0.2)                      | 0.1<br>(< 0.05 to 0.1)               | 24.0<br>(6.7 to 45.6)                             | -4.4<br>(-16.5 to 9.4)                              |
| Other neoplasms                                    | 2.4<br>(1.9 to 3.3)                           | 0.8<br>(0.6 to 1.0)                      | 0.2<br>(0.1 to 0.3)                  | 26.3<br>(6.2 to 52.1)                             | -1.6<br>(-12.4 to 11.2)                             |
| <b>Cardiovascular diseases</b>                     | <b>1,007.8</b><br><b>(956.8 to 1,057.7)</b>   | <b>74.0†</b><br><b>(70.6 to 77.4)</b>    | <b>58.4</b><br><b>(42.0 to 77.0)</b> | <b>30.8</b><br><b>(24.6 to 37.1)</b>              | <b>-0.2</b><br><b>(-4.7 to 4.0)</b>                 |
| Rheumatic heart disease                            | 175.3<br>(156.3 to 197.0)                     | 7.8<br>(6.9 to 8.7)                      | 8.6<br>(5.5 to 12.6)                 | 30.8<br>(19.5 to 43.4)                            | -3.2<br>(-10.7 to 5.2)                              |
| Ischaemic heart disease                            | 181.9<br>(168.7 to 195.3)                     | 25.8<br>(23.9 to 27.7)                   | 7.7<br>(5.1 to 10.6)                 | 29.1<br>(21.5 to 37.1)                            | -0.2<br>(-5.3 to 4.8)                               |
| Cerebrovascular disease                            | 74.5<br>(70.2 to 79.4)                        | 12.8‡<br>(11.7 to 13.9)                  | 11.0<br>(8.0 to 13.9)                | 26.7<br>(18.1 to 36.5)                            | -0.9<br>(-7.8 to 6.5)                               |
| Ischaemic stroke                                   | 63.4<br>(57.3 to 70.3)                        | 8.2‡<br>(7.2 to 9.2)                     | 8.8<br>(6.4 to 11.3)                 | 27.4<br>(16.9 to 38.8)                            | -0.5<br>(-8.9 to 8.8)                               |
| Hemorrhagic stroke                                 | 15.7<br>(13.9 to 17.5)                        | 4.6‡<br>(4.1 to 5.1)                     | 2.2<br>(1.6 to 2.8)                  | 24.0<br>(9.0 to 40.2)                             | -2.7<br>(-15.1 to 11.1)                             |
| Hypertensive heart disease                         | 13.7<br>(11.0 to 16.7)                        | --                                       | 1.1<br>(0.7 to 1.6)                  | 26.8<br>(5.3 to 50.6)                             | -1.9<br>(-17.8 to 15.6)                             |
| Cardiomyopathy and myocarditis                     | 10.0<br>(8.7 to 11.4)                         | 5.0†<br>(4.4 to 5.7)                     | 1.0<br>(0.6 to 1.4)                  | 29.8<br>(12.6 to 50.5)                            | -2.5<br>(-17.1 to 15.0)                             |
| Myocarditis                                        | 2.8<br>(2.5 to 3.2)                           | 5.0<br>(4.4 to 5.7)                      | 0.2<br>(0.1 to 0.3)                  | 34.4<br>(21.7 to 48.1)                            | 1.7<br>(-10.7 to 14.6)                              |
| Alcoholic cardiomyopathy                           | 1.8<br>(1.4 to 2.2)                           | --                                       | 0.1<br>(0.1 to 0.2)                  | 29.8<br>(-4.6 to 74.5)                            | -2.0<br>(-27.8 to 32.4)                             |
| Other cardiomyopathy                               | 7.3<br>(5.9 to 8.8)                           | --                                       | 0.6<br>(0.4 to 0.9)                  | 28.4<br>(6.5 to 52.5)                             | -3.5<br>(-20.2 to 16.3)                             |
| Atrial fibrillation and flutter                    | 43.8<br>(38.4 to 50.2)                        | 3.8<br>(3.3 to 4.4)                      | 3.4<br>(2.2 to 4.8)                  | 28.8<br>(19.0 to 38.7)                            | 0.7<br>(-5.7 to 7.6)                                |
| Peripheral vascular disease                        | 153.6<br>(132.8 to 177.4)                     | 15.1<br>(12.9 to 17.6)                   | 0.8<br>(0.4 to 1.5)                  | 22.9<br>(12.3 to 33.5)                            | -1.7<br>(-9.7 to 6.4)                               |
| Endocarditis                                       | 1.8<br>(1.5 to 2.1)                           | 3.8<br>(3.3 to 4.2)                      | 0.1<br>(0.1 to 0.2)                  | 28.9<br>(10.7 to 49.1)                            | -3.8<br>(-19.9 to 14.3)                             |
| Other cardiovascular and circulatory diseases      | 471.0<br>(398.4 to 557.0)                     | --                                       | 24.8<br>(16.3 to 34.9)               | 34.0<br>(21.1 to 48.1)                            | 1.2<br>(-8.9 to 12.4)                               |
| <b>Chronic respiratory diseases</b>                | <b>1,245.9</b><br><b>(1,168.0 to 1,328.1)</b> | <b>257.7†</b><br><b>(235.4 to 284.0)</b> | <b>58.2</b><br><b>(43.3 to 77.0)</b> | <b>31.8</b><br><b>(25.9 to 38.2)</b>              | <b>-0.2</b><br><b>(-4.2 to 4.0)</b>                 |
| Chronic obstructive pulmonary disease              | 256.9<br>(245.8 to 267.4)                     | 18.3<br>(17.5 to 19.0)                   | 17.1<br>(14.8 to 19.2)               | 25.0<br>(16.4 to 35.0)                            | -3.4<br>(-10.0 to 3.6)                              |
| Pneumoconiosis                                     | 0.2<br>(0.2 to 0.2)                           | < 0.05<br>(< 0.05 to < 0.05)             | < 0.05<br>(< 0.05 to < 0.05)         | 34.1<br>(26.9 to 42.7)                            | 2.2<br>(-3.3 to 8.3)                                |
| Silicosis                                          | < 0.05<br>(< 0.05 to < 0.05)                  | < 0.05<br>(< 0.05 to < 0.05)             | < 0.05<br>(< 0.05 to < 0.05)         | 37.1<br>(25.3 to 49.9)                            | 0.9<br>(-6.1 to 8.6)                                |

| Cause                                                          | Prevalence in thousands (95% UI)        | Incidence in thousands (95% UI)                     | YLDs in thousands (95% UI)        |                                                   |                                                     |
|----------------------------------------------------------------|-----------------------------------------|-----------------------------------------------------|-----------------------------------|---------------------------------------------------|-----------------------------------------------------|
|                                                                | 2016 counts                             | 2016 counts                                         | 2016 counts                       | Percentage change in counts between 2006 and 2016 | Percentage change in age-standardised rates between |
| Asbestosis                                                     | 0.1<br>(0.1 to 0.1)                     | < 0.05<br>(< 0.05 to < 0.05)                        | < 0.05<br>(< 0.05 to < 0.05)      | 34.3<br>(25.4 to 45.8)                            | 2.1<br>(-3.6 to 9.0)                                |
| Coal workers pneumoconiosis                                    | --                                      | --                                                  | --                                | --                                                | --                                                  |
| Other pneumoconiosis                                           | 0.1<br>(0.1 to 0.1)                     | < 0.05<br>(< 0.05 to < 0.05)                        | < 0.05<br>(< 0.05 to < 0.05)      | 33.6<br>(19.7 to 46.9)                            | 2.5<br>(-7.8 to 14.1)                               |
| Asthma                                                         | 991.6<br>(898.1 to 1,098.8)             | 239.3<br>(216.8 to 265.1)                           | 39.0<br>(25.4 to 56.9)            | 33.5<br>(26.3 to 42.3)                            | 1.9<br>(-2.6 to 6.9)                                |
| Interstitial lung disease and pulmonary sarcoidosis            | 1.7<br>(1.5 to 1.9)                     | 0.1<br>(0.1 to 0.2)                                 | 0.2<br>(0.1 to 0.3)               | 29.4<br>(24.9 to 33.7)                            | -2.2<br>(-7.3 to 2.7)                               |
| Other chronic respiratory diseases                             | --                                      | --                                                  | 1.8<br>(1.4 to 2.2)               | 68.8<br>(30.0 to 117.6)                           | 28.7<br>(7.4 to 54.8)                               |
| <b>Cirrhosis and other chronic liver diseases</b>              | <b>59.9<br/>(56.8 to 62.9)</b>          | <b>6.2<br/>(5.9 to 6.5)</b>                         | <b>5.5<br/>(3.8 to 7.7)</b>       | <b>29.1<br/>(16.5 to 43.3)</b>                    | <b>-1.2<br/>(-8.5 to 6.7)</b>                       |
| Cirrhosis and other chronic liver diseases due to hepatitis B  | 19.7<br>(16.6 to 22.8)                  | 2.1<br>(1.9 to 2.5)                                 | 1.4<br>(1.0 to 2.1)               | 30.0<br>(10.6 to 51.7)                            | -1.8<br>(-12.7 to 11.4)                             |
| Cirrhosis and other chronic liver diseases due to hepatitis C  | 7.3<br>(5.2 to 10.5)                    | 0.8<br>(0.6 to 1.2)                                 | 0.5<br>(0.3 to 0.8)               | 26.7<br>(1.6 to 56.1)                             | -4.1<br>(-20.9 to 14.3)                             |
| Cirrhosis and other chronic liver diseases due to alcohol use  | 11.1<br>(9.6 to 12.8)                   | 1.4<br>(1.2 to 1.6)                                 | 0.8<br>(0.5 to 1.1)               | 32.8<br>(12.1 to 57.4)                            | 0.2<br>(-13.3 to 16.1)                              |
| Cirrhosis and other chronic liver diseases due to other causes | 21.7<br>(19.8 to 23.6)                  | 1.8<br>(1.7 to 2.0)                                 | 2.8<br>(1.8 to 4.0)               | 28.1<br>(6.8 to 52.4)                             | -0.3<br>(-14.9 to 16.6)                             |
| <b>Digestive diseases</b>                                      | <b>344.3<br/>(318.3 to 374.0)</b>       | <b>337.2<sup>†</sup><br/>(320.4 to 354.8)</b>       | <b>10.9<br/>(7.7 to 14.8)</b>     | <b>32.2<br/>(21.2 to 44.0)</b>                    | <b>-0.0<br/>(-5.6 to 6.4)</b>                       |
| Peptic ulcer disease                                           | 61.0<br>(55.8 to 66.7)                  | 29.7<br>(26.6 to 33.1)                              | 1.2<br>(0.8 to 1.8)               | 34.6<br>(19.9 to 50.1)                            | 0.1<br>(-8.7 to 9.0)                                |
| Gastritis and duodenitis                                       | 112.6<br>(98.8 to 128.1)                | 110.6<br>(98.8 to 123.9)                            | 1.6<br>(1.1 to 2.4)               | 46.9<br>(31.7 to 63.8)                            | 12.3<br>(3.1 to 22.4)                               |
| Appendicitis                                                   | 3.1<br>(2.9 to 3.4)                     | 82.1<br>(75.5 to 89.2)                              | 1.0<br>(0.6 to 1.4)               | 22.5<br>(-12.6 to 76.0)                           | -6.0<br>(-24.5 to 20.5)                             |
| Paralytic ileus and intestinal obstruction                     | 0.4<br>(0.4 to 0.5)                     | 11.6<br>(10.4 to 12.9)                              | 0.1<br>(0.1 to 0.2)               | 28.1<br>(23.3 to 32.9)                            | -3.2<br>(-9.6 to 3.8)                               |
| Inguinal, femoral, and abdominal hernia                        | 163.5<br>(132.9 to 201.9)               | 37.0<br>(32.8 to 42.0)                              | 5.4<br>(3.5 to 7.6)               | 29.1<br>(13.7 to 47.5)                            | -3.0<br>(-12.2 to 7.4)                              |
| Inflammatory bowel disease                                     | 1.2<br>(1.1 to 1.2)                     | 8.0<br>(7.7 to 8.4)                                 | 0.2<br>(0.1 to 0.3)               | 29.8<br>(26.1 to 33.6)                            | -1.9<br>(-4.9 to 1.1)                               |
| Vascular intestinal disorders                                  | 0.1<br>(0.1 to 0.2)                     | 0.8<br>(0.7 to 0.9)                                 | < 0.05<br>(< 0.05 to 0.1)         | 32.4<br>(24.6 to 40.6)                            | 1.3<br>(-3.1 to 6.1)                                |
| Gallbladder and biliary diseases                               | 11.5<br>(10.0 to 12.8)                  | 52.5<br>(44.9 to 60.3)                              | 0.3<br>(0.2 to 0.4)               | 31.6<br>(19.0 to 47.1)                            | -1.5<br>(-13.0 to 12.6)                             |
| Pancreatitis                                                   | 0.5<br>(0.5 to 0.6)                     | 4.8<br>(4.4 to 5.4)                                 | 0.1<br>(< 0.05 to 0.1)            | 32.1<br>(26.5 to 37.6)                            | -1.1<br>(-5.4 to 3.1)                               |
| Other digestive diseases                                       | --                                      | --                                                  | 1.0<br>(0.7 to 1.4)               | 35.8<br>(20.8 to 52.4)                            | 3.7<br>(-3.4 to 11.3)                               |
| <b>Neurological disorders</b>                                  | <b>7,369.8<br/>(7,034.7 to 7,753.7)</b> | <b>3,761.9<br/>(3,185.2 to 4,452.6)</b>             | <b>182.5<br/>(113.8 to 273.4)</b> | <b>34.9<br/>(-9.3 to 103.5)</b>                   | <b>1.5<br/>(-26.5 to 42.3)</b>                      |
| Alzheimer's disease and other dementias                        | 26.8<br>(22.5 to 31.7)                  | 4.6<br>(3.9 to 5.6)                                 | 3.8<br>(2.6 to 5.0)               | 25.7<br>(18.2 to 32.9)                            | -1.2<br>(-6.2 to 3.4)                               |
| Parkinson's disease                                            | 3.1<br>(2.4 to 3.9)                     | 0.4<br>(0.3 to 0.5)                                 | 0.4<br>(0.2 to 0.5)               | 33.2<br>(14.7 to 56.0)                            | 4.7<br>(-8.9 to 21.5)                               |
| Epilepsy                                                       | 107.4<br>(20.1 to 229.1)                | 14.2<br>(2.8 to 29.9)                               | 41.2<br>(7.6 to 98.7)             | 33.4<br>(-76.6 to 699.0)                          | 2.0<br>(-81.7 to 502.9)                             |
| Multiple sclerosis                                             | 0.8<br>(0.7 to 0.9)                     | < 0.05<br>(< 0.05 to 0.1)                           | 0.2<br>(0.1 to 0.3)               | 43.1<br>(37.7 to 48.4)                            | 6.3<br>(2.4 to 10.1)                                |
| Motor neuron disease                                           | 0.2<br>(0.2 to 0.3)                     | 0.1<br>(< 0.05 to 0.1)                              | < 0.05<br>(< 0.05 to 0.1)         | 33.1<br>(27.6 to 39.1)                            | 2.2<br>(-1.0 to 5.4)                                |
| Migraine                                                       | 2,654.1<br>(2,491.0 to 2,813.6)         | 336.0<br>(315.6 to 357.5)                           | 110.0<br>(69.5 to 155.8)          | 33.8<br>(27.5 to 40.2)                            | 0.6<br>(-3.3 to 4.5)                                |
| Tension-type headache                                          | 5,632.7<br>(4,987.9 to 6,379.7)         | 3,406.5<br>(2,829.3 to 4,106.1)                     | 17.2<br>(10.7 to 26.0)            | 34.4<br>(27.3 to 42.3)                            | 1.0<br>(-3.6 to 6.1)                                |
| Other neurological disorders                                   | 0.1<br>(< 0.05 to 0.1)                  | 0.1<br>(0.1 to 0.2)                                 | 9.8<br>(1.9 to 23.2)              | 64.2<br>(-70.1 to 821.9)                          | 22.8<br>(-75.0 to 516.2)                            |
| <b>Mental and substance use disorders</b>                      | <b>3,204.4<br/>(3,052.3 to 3,343.8)</b> | <b>1,243.6<sup>†</sup><br/>(1,150.6 to 1,353.0)</b> | <b>395.6<br/>(287.4 to 516.3)</b> | <b>33.0<br/>(30.0 to 36.3)</b>                    | <b>0.8<br/>(-1.6 to 2.9)</b>                        |
| Schizophrenia                                                  | 32.2<br>(28.1 to 36.7)                  | 2.9<br>(2.5 to 3.4)                                 | 20.6<br>(15.2 to 25.9)            | 38.0<br>(25.4 to 51.8)                            | 1.3<br>(-6.8 to 10.3)                               |
| Alcohol use disorders                                          | 256.7<br>(218.2 to 297.2)               | 140.1<br>(118.1 to 163.5)                           | 25.6<br>(17.5 to 36.2)            | 36.6<br>(25.6 to 48.9)                            | 0.6<br>(-6.7 to 8.5)                                |
| Drug use disorders                                             | 102.4<br>(91.0 to 115.3)                | 16.6<br>(14.8 to 18.6)                              | 28.7<br>(19.7 to 39.6)            | 48.9<br>(33.5 to 67.0)                            | 9.3<br>(-0.6 to 20.8)                               |
| Opioid use disorders                                           | 62.4<br>(52.1 to 75.0)                  | 7.7<br>(6.5 to 9.2)                                 | 26.0<br>(17.5 to 36.1)            | 50.4<br>(33.2 to 70.9)                            | 10.1<br>(-0.9 to 22.9)                              |
| Cocaine use disorders                                          | 2.8<br>(2.3 to 3.4)                     | 0.4<br>(0.3 to 0.5)                                 | 0.4<br>(0.2 to 0.6)               | 36.2<br>(27.9 to 44.4)                            | 2.5<br>(-2.9 to 8.1)                                |
| Amphetamine use disorders                                      | 1.5<br>(1.0 to 2.1)                     | 0.3<br>(0.2 to 0.4)                                 | 0.2<br>(0.1 to 0.4)               | 36.4<br>(24.4 to 50.7)                            | 2.4<br>(-6.2 to 12.1)                               |
| Cannabis use disorders                                         | 32.9<br>(27.3 to 39.7)                  | 6.8<br>(5.5 to 8.3)                                 | 1.0<br>(0.6 to 1.5)               | 33.8<br>(4.1 to 67.2)                             | 0.4<br>(-19.6 to 22.3)                              |
| Other drug use disorders                                       | 6.7<br>(5.8 to 7.7)                     | 1.4<br>(1.3 to 1.7)                                 | 1.1<br>(0.8 to 1.6)               | 39.1<br>(17.8 to 64.2)                            | 2.8<br>(-11.7 to 20.4)                              |
| Depressive disorders                                           | 708.3<br>(665.5 to 767.5)               | 804.6<br>(714.9 to 910.1)                           | 122.4<br>(83.2 to 167.3)          | 31.9<br>(25.9 to 38.5)                            | -0.2<br>(-4.6 to 4.4)                               |
| Major depressive disorder                                      | 490.9<br>(437.1 to 555.7)               | 762.7<br>(674.1 to 867.5)                           | 100.2<br>(68.5 to 135.5)          | 31.5<br>(24.4 to 39.5)                            | -0.3<br>(-5.5 to 5.2)                               |
| Dysthymia                                                      | 230.6<br>(199.0 to 267.5)               | 41.9<br>(36.6 to 48.3)                              | 22.2<br>(14.8 to 32.3)            | 33.9<br>(28.6 to 39.5)                            | 0.5<br>(-2.8 to 3.8)                                |
| Bipolar disorder                                               | 124.1<br>(104.8 to 148.0)               | 14.2<br>(11.9 to 17.0)                              | 25.4<br>(15.7 to 37.7)            | 33.3<br>(23.8 to 43.6)                            | 0.7<br>(-5.4 to 7.0)                                |
| Anxiety disorders                                              | 639.0<br>(575.4 to 708.8)               | 121.1<br>(109.7 to 134.2)                           | 62.1<br>(42.8 to 85.6)            | 31.8<br>(22.8 to 42.0)                            | 0.6<br>(-5.5 to 7.3)                                |
| Eating disorders                                               | 21.9<br>(17.4 to 26.7)                  | 16.6<br>(12.2 to 22.4)                              | 4.5<br>(2.8 to 6.5)               | 38.5<br>(18.1 to 60.8)                            | 4.5<br>(-11.0 to 21.2)                              |
| Anorexia nervosa                                               | 5.9<br>(4.3 to 8.2)                     | 2.7<br>(2.0 to 3.7)                                 | 1.3<br>(0.7 to 2.0)               | 33.5<br>(0.5 to 76.2)                             | 3.1<br>(-21.5 to 35.2)                              |
| Bulimia nervosa                                                | 15.2<br>(11.1 to 20.5)                  | 13.8<br>(9.4 to 19.6)                               | 3.2<br>(1.9 to 4.9)               | 40.5<br>(17.5 to 68.2)                            | 5.0<br>(-12.0 to 24.9)                              |
| Autistic spectrum disorders                                    | 200.2<br>(178.3 to 226.4)               | 2.5<br>(1.8 to 3.5)                                 | 28.3<br>(19.1 to 40.0)            | 31.2<br>(24.2 to 38.6)                            | 0.6<br>(-4.0 to 5.7)                                |
| Autism                                                         | 53.6<br>(46.3 to 62.6)                  | 0.4<br>(0.2 to 0.6)                                 | 13.7<br>(8.7 to 19.8)             | 30.9<br>(18.4 to 45.0)                            | 0.6<br>(-7.9 to 10.1)                               |
| Asperger syndrome and other autistic spectrum disorders        | 145.6<br>(120.1 to 176.6)               | 2.2<br>(1.4 to 3.2)                                 | 14.6<br>(9.4 to 21.3)             | 31.4<br>(24.5 to 38.6)                            | 0.7<br>(-4.0 to 5.3)                                |



| Cause                                                      | Prevalence in thousands (95% UI)                 | Incidence in thousands (95% UI)                   | YLDs in thousands (95% UI)              |                                                   |                                                     |
|------------------------------------------------------------|--------------------------------------------------|---------------------------------------------------|-----------------------------------------|---------------------------------------------------|-----------------------------------------------------|
|                                                            | 2016 counts                                      | 2016 counts                                       | 2016 counts                             | Percentage change in counts between 2006 and 2016 | Percentage change in age-standardised rates between |
| Attention-deficit/hyperactivity disorder                   | 328.0<br>(293.4 to 366.8)                        | 21.0<br>(18.3 to 24.4)                            | 4.0<br>(2.4 to 6.2)                     | 29.6<br>(19.7 to 38.3)                            | 0.5<br>(-6.2 to 7.0)                                |
| Conduct disorder                                           | 242.7<br>(198.9 to 289.5)                        | 87.5<br>(69.5 to 105.5)                           | 29.4<br>(18.0 to 45.1)                  | 25.5<br>(17.3 to 34.4)                            | 0.4<br>(-6.1 to 7.4)                                |
| Idiopathic developmental intellectual disability           | 497.1<br>(301.7 to 695.3)                        | --                                                | 20.5<br>(9.6 to 35.4)                   | 25.2<br>(16.9 to 33.9)                            | -4.1<br>(-10.6 to 2.3)                              |
| Other mental and substance use disorders                   | 324.7<br>(283.6 to 376.4)                        | 16.6<br>(14.6 to 19.2)                            | 24.2<br>(16.4 to 35.0)                  | 36.0<br>(28.1 to 44.1)                            | 0.7<br>(-4.2 to 5.9)                                |
| <b>Diabetes, urogenital, blood, and endocrine diseases</b> | <b>11,207.8</b><br><b>(10,983.0 to 11,463.6)</b> | <b>2,665.0†</b><br><b>(2,477.9 to 2,869.9)</b>    | <b>143.3</b><br><b>(101.8 to 197.2)</b> | <b>34.4</b><br><b>(30.1 to 38.4)</b>              | <b>1.9</b><br><b>(-1.3 to 4.7)</b>                  |
| Diabetes mellitus                                          | 573.7<br>(518.3 to 632.9)                        | 38.4<br>(34.7 to 42.3)                            | 40.0<br>(27.2 to 55.4)                  | 40.7<br>(32.2 to 49.1)                            | 6.7<br>(-0.1 to 13.0)                               |
| Acute glomerulonephritis                                   | 0.2<br>(0.2 to 0.2)                              | 2.9<br>(2.5 to 3.4)                               | < 0.05<br>(< 0.05 to < 0.05)            | 31.1<br>(26.3 to 36.7)                            | 0.5<br>(-2.7 to 4.0)                                |
| Chronic kidney disease                                     | 991.8<br>(901.0 to 1,094.0)                      | 75.9<br>(68.1 to 84.1)                            | 25.4<br>(18.8 to 33.4)                  | 29.8<br>(22.0 to 38.6)                            | -2.1<br>(-7.1 to 3.6)                               |
| Chronic kidney disease due to diabetes mellitus            | 317.0<br>(271.7 to 368.4)                        | 22.6<br>(19.0 to 26.6)                            | 7.3<br>(5.2 to 9.7)                     | 31.3<br>(20.0 to 44.5)                            | -1.6<br>(-9.0 to 6.9)                               |
| Chronic kidney disease due to hypertension                 | 207.2<br>(180.5 to 234.9)                        | 19.4<br>(16.4 to 22.7)                            | 4.3<br>(3.0 to 5.7)                     | 26.8<br>(13.7 to 41.2)                            | -2.7<br>(-12.3 to 7.7)                              |
| Chronic kidney disease due to glomerulonephritis           | 200.6<br>(175.0 to 227.2)                        | 11.9<br>(9.6 to 14.4)                             | 6.7<br>(4.7 to 9.1)                     | 31.5<br>(18.8 to 45.6)                            | -1.0<br>(-9.0 to 7.5)                               |
| Chronic kidney disease due to other causes                 | 267.0<br>(225.5 to 312.7)                        | 22.0<br>(18.6 to 25.5)                            | 7.2<br>(5.2 to 9.8)                     | 28.7<br>(17.4 to 42.2)                            | -3.1<br>(-10.4 to 5.4)                              |
| Urinary diseases and male infertility                      | 399.6<br>(368.1 to 428.0)                        | 1,595.6†<br>(1,435.5 to 1,793.2)                  | 8.9<br>(5.8 to 12.9)                    | 25.5<br>(17.9 to 32.8)                            | -1.2<br>(-7.2 to 4.7)                               |
| Interstitial nephritis and urinary tract infections        | 27.9<br>(24.8 to 31.7)                           | 1,456.2<br>(1,296.3 to 1,647.9)                   | 0.9<br>(0.6 to 1.4)                     | 25.9<br>(7.3 to 45.8)                             | -4.4<br>(-15.5 to 7.8)                              |
| Urolithiasis                                               | 4.3<br>(3.8 to 5.0)                              | 115.1<br>(101.3 to 132.2)                         | 0.3<br>(0.2 to 0.5)                     | 35.4<br>(26.9 to 44.5)                            | 1.5<br>(-6.2 to 10.0)                               |
| Benign prostatic hyperplasia                               | 188.0<br>(158.5 to 217.5)                        | 24.3<br>(20.2 to 29.0)                            | 6.1<br>(3.9 to 9.0)                     | 27.3<br>(17.6 to 37.1)                            | 0.6<br>(-6.6 to 7.8)                                |
| Male infertility                                           | 172.6<br>(157.8 to 189.1)                        | --                                                | 1.0<br>(0.4 to 2.0)                     | 22.7<br>(13.5 to 32.6)                            | -13.1<br>(-19.5 to -6.7)                            |
| Other urinary diseases                                     | --                                               | --                                                | 0.5<br>(0.3 to 0.7)                     | 5.1<br>(-7.4 to 17.7)                             | -19.0<br>(-26.1 to -11.3)                           |
| Gynecological diseases                                     | 2,423.3<br>(2,308.3 to 2,551.4)                  | 934.9†<br>(864.8 to 1,011.6)                      | 28.4<br>(19.2 to 40.6)                  | 35.1<br>(29.5 to 40.9)                            | -0.9<br>(-4.4 to 2.6)                               |
| Uterine fibroids                                           | 161.1<br>(141.8 to 181.5)                        | 20.6<br>(17.7 to 23.6)                            | 3.2<br>(1.9 to 5.0)                     | 36.8<br>(26.7 to 47.3)                            | 2.2<br>(-4.5 to 9.3)                                |
| Polycystic ovarian syndrome                                | 20.7<br>(15.4 to 27.0)                           | 49.7<br>(35.7 to 66.5)                            | 0.2<br>(0.1 to 0.3)                     | 35.6<br>(20.1 to 53.1)                            | -2.4<br>(-13.0 to 8.9)                              |
| Female infertility                                         | 19.6<br>(13.2 to 28.7)                           | --                                                | 0.1<br>(< 0.05 to 0.2)                  | 57.2<br>(10.1 to 121.2)                           | 3.0<br>(-22.9 to 37.1)                              |
| Endometriosis                                              | 4.6<br>(3.9 to 5.6)                              | 18.8<br>(15.0 to 23.5)                            | 0.4<br>(0.3 to 0.7)                     | 34.9<br>(-4.6 to 93.6)                            | -0.3<br>(-25.6 to 35.7)                             |
| Genital prolapse                                           | 1,118.0<br>(988.2 to 1,253.3)                    | 103.1<br>(86.4 to 121.9)                          | 3.5<br>(1.7 to 6.3)                     | 25.2<br>(17.6 to 33.0)                            | -4.1<br>(-10.1 to 2.4)                              |
| Premenstrual syndrome                                      | 1,108.3<br>(1,025.1 to 1,190.5)                  | 423.7<br>(388.5 to 458.2)                         | 9.2<br>(5.7 to 14.4)                    | 35.4<br>(24.0 to 47.6)                            | -0.5<br>(-7.7 to 7.7)                               |
| Other gynecological diseases                               | 339.4<br>(289.4 to 393.6)                        | 319.0<br>(259.4 to 384.9)                         | 11.8<br>(7.7 to 16.8)                   | 37.5<br>(28.5 to 46.8)                            | -0.5<br>(-6.4 to 5.5)                               |
| Hemoglobinopathies and hemolytic anaemias                  | 8,941.3<br>(8,685.9 to 9,240.1)                  | --                                                | 32.8<br>(21.2 to 48.9)                  | 34.4<br>(25.4 to 44.2)                            | 3.6<br>(-2.7 to 9.7)                                |
| Thalassemias                                               | 0.2<br>(< 0.05 to 0.7)                           | --                                                | < 0.05<br>(< 0.05 to 0.1)               | 29.0<br>(8.4 to 63.3)                             | -1.2<br>(-17.1 to 24.9)                             |
| Thalassaemias trait                                        | 439.0<br>(186.3 to 794.6)                        | --                                                | 7.0<br>(2.5 to 14.0)                    | 34.2<br>(21.8 to 51.0)                            | 4.8<br>(-3.8 to 16.8)                               |
| Sickle cell disorders                                      | 50.9<br>(43.6 to 59.0)                           | --                                                | 4.3<br>(2.9 to 6.3)                     | 33.0<br>(13.1 to 53.7)                            | 3.9<br>(-11.0 to 19.5)                              |
| Sickle cell trait                                          | 4,455.5<br>(4,177.9 to 4,766.9)                  | --                                                | 16.1<br>(10.7 to 24.1)                  | 38.6<br>(27.3 to 50.1)                            | 7.4<br>(-0.6 to 15.2)                               |
| G6PD deficiency                                            | 1,268.5<br>(1,202.8 to 1,344.7)                  | --                                                | 0.1<br>(0.1 to 0.2)                     | 49.6<br>(34.5 to 67.6)                            | 9.5<br>(0.5 to 19.4)                                |
| G6PD trait                                                 | 3,967.2<br>(3,914.7 to 4,033.5)                  | --                                                | < 0.05<br>(< 0.05 to < 0.05)            | 52.1<br>(37.8 to 67.0)                            | 14.4<br>(6.0 to 23.0)                               |
| Other hemoglobinopathies and hemolytic anaemias            | 185.4<br>(176.2 to 194.9)                        | --                                                | 5.2<br>(3.5 to 7.6)                     | 23.7<br>(11.5 to 37.2)                            | -8.5<br>(-15.6 to -0.6)                             |
| Endocrine, metabolic, blood, and immune disorders          | 249.8<br>(238.1 to 261.3)                        | 17.4<br>(15.6 to 19.2)                            | 7.8<br>(5.2 to 11.1)                    | 27.3<br>(17.9 to 37.2)                            | -0.9<br>(-6.5 to 4.8)                               |
| <b>Musculoskeletal disorders</b>                           | <b>2,348.8</b><br><b>(2,219.9 to 2,465.6)</b>    | <b>1,121.7</b><br><b>(1,015.3 to 1,236.1)</b>     | <b>256.8</b><br><b>(183.2 to 334.8)</b> | <b>31.6</b><br><b>(27.8 to 35.6)</b>              | <b>-0.7</b><br><b>(-3.4 to 1.9)</b>                 |
| Rheumatoid arthritis                                       | 23.1<br>(20.3 to 26.2)                           | 1.6<br>(1.4 to 1.7)                               | 5.5<br>(3.8 to 7.5)                     | 36.7<br>(22.8 to 53.0)                            | 3.5<br>(-5.7 to 13.9)                               |
| Osteoarthritis                                             | 419.7<br>(392.1 to 447.2)                        | 23.9<br>(22.2 to 25.8)                            | 25.7<br>(18.1 to 35.1)                  | 35.8<br>(30.2 to 41.3)                            | 4.5<br>(0.7 to 8.5)                                 |
| Low back and neck pain                                     | 1,623.2<br>(1,507.2 to 1,740.4)                  | 731.6<br>(657.3 to 819.4)                         | 185.9<br>(130.2 to 245.2)               | 31.0<br>(26.4 to 35.7)                            | -1.4<br>(-4.5 to 1.8)                               |
| Low back pain                                              | 1,240.7<br>(1,098.8 to 1,411.1)                  | 618.1<br>(542.7 to 708.1)                         | 139.6<br>(98.4 to 184.5)                | 29.9<br>(23.8 to 36.0)                            | -2.0<br>(-6.3 to 2.3)                               |
| Neck pain                                                  | 465.4<br>(403.5 to 533.6)                        | 113.5<br>(97.8 to 132.7)                          | 46.4<br>(31.3 to 64.8)                  | 34.5<br>(30.7 to 38.2)                            | 0.5<br>(-1.8 to 2.5)                                |
| Gout                                                       | 49.0<br>(43.5 to 55.7)                           | 10.1<br>(8.9 to 11.4)                             | 1.6<br>(1.1 to 2.1)                     | 32.8<br>(15.5 to 53.8)                            | 1.1<br>(-11.1 to 16.1)                              |
| Other musculoskeletal disorders                            | 442.1<br>(355.3 to 534.4)                        | 354.4<br>(283.1 to 433.2)                         | 38.1<br>(24.9 to 54.9)                  | 31.1<br>(19.3 to 44.0)                            | -2.8<br>(-11.1 to 5.9)                              |
| <b>Other non-communicable diseases</b>                     | <b>16,179.8</b><br><b>(15,695.9 to 16,646.9)</b> | <b>44,511.4†</b><br><b>(39,940.1 to 49,363.4)</b> | <b>403.0</b><br><b>(271.2 to 576.1)</b> | <b>29.9</b><br><b>(27.8 to 32.0)</b>              | <b>0.1</b><br><b>(-1.2 to 1.4)</b>                  |
| Congenital anomalies                                       | 251.7<br>(219.6 to 292.0)                        | --                                                | 36.9<br>(26.2 to 49.9)                  | 28.9<br>(20.7 to 37.4)                            | -1.5<br>(-7.3 to 4.9)                               |
| Neural tube defects                                        | 35.7<br>(31.8 to 40.0)                           | --                                                | 10.7<br>(7.5 to 14.4)                   | 28.9<br>(13.9 to 44.9)                            | -1.4<br>(-12.3 to 9.9)                              |
| Congenital heart anomalies                                 | 58.2<br>(48.1 to 69.8)                           | --                                                | 2.9<br>(1.4 to 4.8)                     | 34.0<br>(17.6 to 53.1)                            | 3.4<br>(-8.6 to 16.8)                               |
| Orofacial clefts                                           | 6.6<br>(5.8 to 7.6)                              | --                                                | 0.1<br>(0.1 to 0.2)                     | 26.5<br>(11.2 to 43.1)                            | -3.2<br>(-14.5 to 9.7)                              |
| Down's syndrome                                            | 4.0<br>(3.4 to 4.8)                              | --                                                | 0.4<br>(0.2 to 0.5)                     | 33.9<br>(23.7 to 45.6)                            | 2.5<br>(-5.3 to 11.3)                               |
| Turner syndrome                                            | 14.1<br>(11.8 to 16.4)                           | --                                                | 0.2<br>(0.1 to 0.4)                     | 25.1<br>(-12.5 to 79.5)                           | -3.4<br>(-30.5 to 34.3)                             |
| Klinefelter syndrome                                       | 14.2<br>(11.9 to 16.7)                           | --                                                | 0.1<br>(< 0.05 to 0.1)                  | 33.1<br>(2.1 to 76.5)                             | 0.6<br>(-22.3 to 33.0)                              |

| Cause                                         | Prevalence in thousands (95% UI)              | Incidence in thousands (95% UI)                | YLDs in thousands (95% UI)             |                                                   |                                                     |
|-----------------------------------------------|-----------------------------------------------|------------------------------------------------|----------------------------------------|---------------------------------------------------|-----------------------------------------------------|
|                                               | 2016 counts                                   | 2016 counts                                    | 2016 counts                            | Percentage change in counts between 2006 and 2016 | Percentage change in age-standardised rates between |
| Other chromosomal abnormalities               | 4.6<br>(3.9 to 5.4)                           | --                                             | 0.9<br>(0.6 to 1.3)                    | 30.5<br>(-7.2 to 84.4)                            | 0.5<br>(-27.7 to 40.8)                              |
| Congenital musculoskeletal and limb anomalies | 23.2<br>(20.2 to 26.6)                        | --                                             | 3.4<br>(2.2 to 4.9)                    | 30.8<br>(14.3 to 50.4)                            | 0.3<br>(-10.7 to 12.5)                              |
| Urogenital congenital anomalies               | 17.5<br>(15.2 to 20.0)                        | --                                             | 0.4<br>(0.2 to 0.7)                    | 27.8<br>(17.7 to 40.7)                            | -1.1<br>(-8.5 to 7.7)                               |
| Digestive congenital anomalies                | 25.2<br>(22.3 to 28.2)                        | --                                             | 1.1<br>(0.7 to 1.7)                    | 32.8<br>(10.3 to 57.3)                            | 1.7<br>(-12.9 to 18.4)                              |
| Other congenital anomalies                    | 103.0<br>(66.3 to 153.4)                      | --                                             | 16.7<br>(10.7 to 25.1)                 | 27.4<br>(16.5 to 40.2)                            | -2.8<br>(-10.9 to 6.0)                              |
| Skin and subcutaneous diseases                | 8,045.1<br>(7,792.7 to 8,378.2)               | 18,615.1<br>(17,382.7 to 20,000.2)             | 191.7<br>(126.3 to 280.4)              | 30.6<br>(27.3 to 33.8)                            | 1.1<br>(-1.0 to 3.3)                                |
| Dermatitis                                    | 1,133.5<br>(1,034.6 to 1,247.4)               | 956.3<br>(880.3 to 1,043.4)                    | 45.7<br>(26.3 to 74.5)                 | 27.9<br>(18.9 to 36.9)                            | -1.0<br>(-7.0 to 4.5)                               |
| Psoriasis                                     | 133.5<br>(125.3 to 142.3)                     | 20.3<br>(19.2 to 21.6)                         | 11.7<br>(8.1 to 15.5)                  | 39.2<br>(24.7 to 55.0)                            | 5.6<br>(-3.1 to 15.5)                               |
| Cellulitis                                    | 8.5<br>(7.8 to 9.2)                           | 146.9<br>(135.8 to 158.9)                      | 0.5<br>(0.3 to 0.7)                    | 32.0<br>(5.7 to 66.9)                             | 1.6<br>(-17.1 to 24.1)                              |
| Pyoderma                                      | 132.1<br>(125.5 to 138.8)                     | 2,594.7<br>(2,472.8 to 2,728.5)                | 0.8<br>(0.3 to 1.6)                    | 31.0<br>(22.9 to 39.6)                            | 0.8<br>(-4.5 to 6.0)                                |
| Scabies                                       | 419.1<br>(336.6 to 533.5)                     | 1,297.8<br>(1,035.7 to 1,649.8)                | 10.8<br>(6.0 to 18.1)                  | 24.5<br>(18.2 to 32.1)                            | -4.4<br>(-8.7 to 0.6)                               |
| Fungal skin diseases                          | 3,252.2<br>(2,814.5 to 3,753.6)               | 9,132.8<br>(7,996.0 to 10,449.1)               | 18.4<br>(7.2 to 39.0)                  | 30.3<br>(28.6 to 32.0)                            | 0.4<br>(-0.5 to 1.3)                                |
| Viral skin diseases                           | 702.3<br>(664.6 to 742.7)                     | 973.6<br>(918.8 to 1,038.6)                    | 21.6<br>(13.4 to 31.8)                 | 29.9<br>(25.2 to 34.9)                            | 0.4<br>(-2.8 to 3.9)                                |
| Acne vulgaris                                 | 2,265.5<br>(2,022.2 to 2,534.5)               | 1,619.7<br>(1,320.9 to 2,007.8)                | 58.2<br>(38.8 to 84.9)                 | 32.0<br>(25.8 to 38.6)                            | 3.3<br>(-1.3 to 8.0)                                |
| Alopecia areata                               | 39.6<br>(37.1 to 42.2)                        | 70.8<br>(66.3 to 75.4)                         | 1.3<br>(0.8 to 1.9)                    | 34.6<br>(19.2 to 51.9)                            | 0.4<br>(-9.3 to 11.5)                               |
| Pruritus                                      | 167.6<br>(146.9 to 188.8)                     | 135.8<br>(120.1 to 153.4)                      | 1.8<br>(0.8 to 3.3)                    | 32.6<br>(24.5 to 41.1)                            | 0.6<br>(-4.7 to 6.0)                                |
| Urticaria                                     | 240.1<br>(204.5 to 283.1)                     | 433.4<br>(367.3 to 507.8)                      | 14.5<br>(9.2 to 21.3)                  | 31.5<br>(22.9 to 40.9)                            | 0.5<br>(-5.4 to 7.0)                                |
| Decubitus ulcer                               | 1.9<br>(1.7 to 2.1)                           | 6.9<br>(6.1 to 7.6)                            | 0.3<br>(0.2 to 0.4)                    | 32.8<br>(22.4 to 44.8)                            | 3.6<br>(-8.9 to 19.1)                               |
| Other skin and subcutaneous diseases          | 1,084.5<br>(1,050.8 to 1,120.1)               | 1,226.1<br>(1,186.9 to 1,265.8)                | 6.0<br>(2.9 to 10.9)                   | 32.8<br>(28.8 to 37.1)                            | 1.5<br>(-0.9 to 3.9)                                |
| Sense organ diseases                          | 3,874.1<br>(3,734.9 to 4,022.9)               | 2,152.6†<br>(1,998.6 to 2,317.1)               | 134.9<br>(94.6 to 188.5)               | 28.2<br>(24.9 to 31.7)                            | -0.4<br>(-2.3 to 1.6)                               |
| Glaucoma                                      | 6.8<br>(5.5 to 8.2)                           | --                                             | 0.8<br>(0.5 to 1.1)                    | 39.8<br>(23.0 to 59.6)                            | 10.9<br>(-1.8 to 25.8)                              |
| Cataract                                      | 128.5<br>(111.2 to 146.8)                     | --                                             | 11.1<br>(7.8 to 15.2)                  | 35.0<br>(26.8 to 43.4)                            | 4.0<br>(-1.9 to 9.9)                                |
| Macular degeneration                          | 8.0<br>(6.1 to 10.5)                          | --                                             | 0.7<br>(0.4 to 1.0)                    | 37.1<br>(19.9 to 56.6)                            | 9.4<br>(-3.4 to 23.5)                               |
| Refraction and accommodation disorders        | 1,892.1<br>(1,725.4 to 2,110.8)               | --                                             | 32.4<br>(19.7 to 52.2)                 | 27.0<br>(19.8 to 34.7)                            | -1.3<br>(-6.7 to 4.6)                               |
| Age-related and other hearing loss            | 2,285.2<br>(2,133.3 to 2,455.5)               | --                                             | 71.3<br>(49.4 to 99.7)                 | 25.7<br>(20.5 to 31.0)                            | -2.5<br>(-5.0 to -0.1)                              |
| Other vision loss                             | 61.2<br>(54.3 to 69.1)                        | --                                             | 5.8<br>(3.9 to 8.1)                    | 45.4<br>(32.5 to 58.1)                            | 11.2<br>(2.9 to 19.2)                               |
| Other sense organ diseases                    | 426.2<br>(395.6 to 458.1)                     | 2,152.6<br>(1,998.6 to 2,317.1)                | 13.0<br>(8.1 to 19.7)                  | 32.5<br>(26.0 to 38.6)                            | 1.2<br>(-2.7 to 4.8)                                |
| Oral disorders                                | 10,593.4<br>(9,731.4 to 11,386.9)             | 23,743.7†<br>(19,595.1 to 28,435.6)            | 39.5<br>(22.1 to 66.2)                 | 33.8<br>(30.6 to 36.8)                            | 0.6<br>(-1.7 to 2.7)                                |
| Caries of deciduous teeth                     | 2,647.5<br>(2,067.8 to 3,253.7)               | 8,815.4<br>(5,905.6 to 12,433.2)               | 0.6<br>(0.3 to 1.2)                    | 28.4<br>(14.2 to 45.1)                            | -0.8<br>(-12.0 to 12.1)                             |
| Caries of permanent teeth                     | 5,796.8<br>(4,942.6 to 6,735.3)               | 14,623.3<br>(11,731.2 to 17,866.9)             | 3.4<br>(1.5 to 6.7)                    | 31.3<br>(23.6 to 39.0)                            | 0.3<br>(-4.6 to 5.2)                                |
| Periodontal disease                           | 2,372.1<br>(1,762.5 to 3,010.0)               | 283.9<br>(207.6 to 369.1)                      | 15.6<br>(5.9 to 33.8)                  | 35.5<br>(29.2 to 41.7)                            | 0.5<br>(-3.8 to 4.6)                                |
| Edentulism and severe tooth loss              | 335.8<br>(283.0 to 394.2)                     | 21.2<br>(17.8 to 24.9)                         | 9.4<br>(6.1 to 13.6)                   | 33.8<br>(27.9 to 40.4)                            | 0.8<br>(-2.8 to 5.0)                                |
| Other oral disorders                          | 357.5<br>(340.7 to 376.2)                     | --                                             | 10.5<br>(6.4 to 15.7)                  | 32.6<br>(27.6 to 37.8)                            | 0.4<br>(-2.7 to 3.5)                                |
| <b>Injuries</b>                               | <b>2,764.7</b><br><b>(2,580.7 to 2,965.0)</b> | <b>1,761.0†</b><br><b>(1,660.2 to 1,870.1)</b> | <b>115.9</b><br><b>(78.1 to 164.0)</b> | <b>31.7</b><br><b>(29.1 to 34.0)</b>              | <b>-0.1</b><br><b>(-1.7 to 1.3)</b>                 |
| <b>Transport injuries</b>                     | <b>293.7</b><br><b>(271.4 to 315.9)</b>       | <b>142.7</b><br><b>(126.4 to 161.3)</b>        | <b>17.4</b><br><b>(11.5 to 25.0)</b>   | <b>31.8</b><br><b>(29.0 to 34.7)</b>              | <b>-0.1</b><br><b>(-2.0 to 1.6)</b>                 |
| Road injuries                                 | 231.8<br>(216.1 to 248.3)                     | 121.1<br>(105.8 to 138.8)                      | 13.6<br>(9.0 to 19.5)                  | 30.9<br>(28.1 to 33.6)                            | -0.8<br>(-2.6 to 0.9)                               |
| Pedestrian road injuries                      | 35.9<br>(31.4 to 41.3)                        | 13.2<br>(10.3 to 16.6)                         | 2.1<br>(1.4 to 3.1)                    | 36.6<br>(33.4 to 39.5)                            | 3.4<br>(1.4 to 5.3)                                 |
| Cyclist road injuries                         | 40.7<br>(34.0 to 48.0)                        | 23.5<br>(18.1 to 29.8)                         | 2.2<br>(1.4 to 3.2)                    | 37.4<br>(34.2 to 40.6)                            | 5.0<br>(2.9 to 6.9)                                 |
| Motorcyclist road injuries                    | 47.8<br>(41.2 to 56.3)                        | 16.9<br>(13.8 to 20.8)                         | 2.7<br>(1.8 to 3.9)                    | 21.6<br>(19.0 to 24.0)                            | -8.4<br>(-10.2 to -6.9)                             |
| Motor vehicle road injuries                   | 81.2<br>(70.3 to 92.2)                        | 50.1<br>(41.7 to 58.6)                         | 5.1<br>(3.4 to 7.3)                    | 28.7<br>(25.6 to 31.5)                            | -2.3<br>(-4.2 to -0.5)                              |
| Other road injuries                           | 26.2<br>(22.6 to 30.7)                        | 17.3<br>(13.2 to 22.2)                         | 1.4<br>(0.9 to 2.1)                    | 41.3<br>(38.1 to 44.4)                            | 8.1<br>(6.1 to 10.1)                                |
| Other transport injuries                      | 61.9<br>(51.0 to 76.1)                        | 21.6<br>(17.6 to 27.3)                         | 3.9<br>(2.5 to 5.6)                    | 35.1<br>(30.9 to 39.3)                            | 3.3<br>(0.8 to 5.7)                                 |
| <b>Unintentional injuries</b>                 | <b>2,357.9</b><br><b>(2,167.6 to 2,554.7)</b> | <b>1,562.3</b><br><b>(1,463.7 to 1,667.7)</b>  | <b>88.5</b><br><b>(59.9 to 125.3)</b>  | <b>32.8</b><br><b>(30.2 to 35.2)</b>              | <b>0.5</b><br><b>(-1.0 to 1.9)</b>                  |
| Falls                                         | 841.8<br>(728.5 to 953.1)                     | 536.8<br>(468.1 to 627.6)                      | 36.8<br>(25.9 to 50.9)                 | 31.4<br>(28.9 to 34.0)                            | -0.2<br>(-1.9 to 1.4)                               |
| Drowning                                      | 9.3<br>(7.8 to 11.1)                          | 2.7<br>(2.3 to 3.2)                            | 0.6<br>(0.4 to 0.8)                    | 25.6<br>(21.9 to 29.0)                            | -4.5<br>(-6.6 to -2.5)                              |
| Fire, heat, and hot substances                | 251.7<br>(209.8 to 306.6)                     | 49.4<br>(39.7 to 59.5)                         | 7.5<br>(5.1 to 10.6)                   | 34.2<br>(27.6 to 41.4)                            | 1.7<br>(-2.4 to 6.0)                                |
| Poisonings                                    | 8.5<br>(6.7 to 10.6)                          | 15.3<br>(11.8 to 19.4)                         | 0.9<br>(0.6 to 1.4)                    | 41.8<br>(31.2 to 53.4)                            | 7.9<br>(1.1 to 15.3)                                |
| Exposure to mechanical forces                 | 419.0<br>(355.6 to 511.0)                     | 231.2<br>(191.4 to 273.3)                      | 11.3<br>(7.4 to 16.3)                  | 34.7<br>(31.4 to 37.9)                            | 1.5<br>(-0.6 to 3.3)                                |
| Unintentional firearm injuries                | 21.2<br>(17.6 to 25.8)                        | 8.0<br>(5.9 to 10.7)                           | 1.0<br>(0.6 to 1.5)                    | 37.5<br>(33.5 to 41.0)                            | 3.6<br>(1.2 to 5.7)                                 |
| Unintentional suffocation                     | 40.1<br>(28.1 to 54.6)                        | 13.5<br>(8.9 to 19.2)                          | 1.4<br>(0.8 to 2.1)                    | 40.5<br>(36.4 to 44.5)                            | 6.7<br>(4.2 to 9.1)                                 |
| Other exposure to mechanical forces           | 357.6<br>(297.9 to 444.4)                     | 209.7<br>(173.7 to 246.5)                      | 8.9<br>(5.8 to 12.9)                   | 33.6<br>(30.0 to 36.9)                            | 0.7<br>(-1.5 to 2.6)                                |

| Cause                                                                               | Prevalence in thousands (95% UI)        | Incidence in thousands (95% UI)       | YLDs in thousands (95% UI)         |                                                   |                                                     |
|-------------------------------------------------------------------------------------|-----------------------------------------|---------------------------------------|------------------------------------|---------------------------------------------------|-----------------------------------------------------|
|                                                                                     | 2016 counts                             | 2016 counts                           | 2016 counts                        | Percentage change in counts between 2006 and 2016 | Percentage change in age-standardised rates between |
| Adverse effects of medical treatment                                                | 9.6<br>(7.5 to 12.1)                    | 125.7<br>(107.7 to 147.0)             | 1.3<br>(0.8 to 1.9)                | 27.2<br>(18.8 to 35.3)                            | -3.8<br>(-8.0 to 0.9)                               |
| Animal contact                                                                      | 130.0<br>(114.1 to 151.7)               | 216.4<br>(181.0 to 254.9)             | 4.8<br>(3.2 to 6.8)                | 29.6<br>(23.7 to 35.8)                            | -2.6<br>(-6.0 to 1.0)                               |
| Venomous animal contact                                                             | 54.1<br>(44.9 to 65.4)                  | 93.0<br>(73.0 to 116.0)               | 3.4<br>(2.2 to 4.8)                | 30.1<br>(22.0 to 38.7)                            | -2.3<br>(-6.9 to 3.0)                               |
| Non-venomous animal contact                                                         | 76.0<br>(63.5 to 93.7)                  | 123.3<br>(99.3 to 149.5)              | 1.4<br>(0.9 to 2.1)                | 28.6<br>(24.2 to 32.8)                            | -3.4<br>(-6.4 to -0.7)                              |
| Foreign body                                                                        | 194.2<br>(154.9 to 235.5)               | 151.0<br>(131.5 to 173.6)             | 8.8<br>(5.7 to 12.9)               | 34.1<br>(29.8 to 38.0)                            | 2.1<br>(-0.2 to 4.3)                                |
| Pulmonary aspiration and foreign body in airway                                     | 120.4<br>(87.5 to 164.1)                | 66.2<br>(53.7 to 83.2)                | 6.0<br>(3.8 to 8.9)                | 32.4<br>(27.8 to 36.6)                            | 0.6<br>(-1.8 to 2.8)                                |
| Foreign body in eyes                                                                | 8.5<br>(4.4 to 13.1)                    | 47.9<br>(36.6 to 63.6)                | 0.5<br>(0.2 to 0.9)                | 42.7<br>(38.2 to 48.1)                            | 8.3<br>(5.6 to 11.3)                                |
| Foreign body in other body part                                                     | 65.4<br>(51.1 to 85.2)                  | 37.0<br>(29.7 to 45.4)                | 2.3<br>(1.5 to 3.3)                | 36.9<br>(31.9 to 41.6)                            | 4.8<br>(1.7 to 7.8)                                 |
| Environmental heat and cold exposure                                                | 160.6<br>(133.9 to 189.1)               | 64.4<br>(52.5 to 78.3)                | 6.8<br>(4.5 to 9.8)                | 33.7<br>(30.7 to 36.5)                            | 1.1<br>(-0.8 to 2.7)                                |
| Other unintentional injuries                                                        | 333.1<br>(260.2 to 431.2)               | 169.5<br>(139.9 to 204.8)             | 9.8<br>(6.4 to 14.4)               | 34.7<br>(31.8 to 37.5)                            | 2.4<br>(0.8 to 3.7)                                 |
| <b>Self-harm and interpersonal violence</b>                                         | <b>695.3</b><br><b>(607.7 to 787.8)</b> | <b>55.6†</b><br><b>(47.4 to 64.4)</b> | <b>9.0</b><br><b>(6.2 to 12.4)</b> | <b>17.6</b><br><b>(10.9 to 23.7)</b>              | <b>-9.6</b><br><b>(-13.7 to -6.0)</b>               |
| Self-harm                                                                           | 15.6<br>(13.5 to 17.7)                  | 9.8<br>(8.3 to 11.5)                  | 0.9<br>(0.6 to 1.3)                | 30.1<br>(26.8 to 33.3)                            | -1.8<br>(-3.9 to 0.2)                               |
| Self-harm by firearm                                                                | 0.8<br>(0.7 to 1.0)                     | 0.4<br>(0.2 to 0.6)                   | < 0.05<br>(< 0.05 to 0.1)          | 24.8<br>(20.8 to 29.3)                            | -6.1<br>(-9.2 to -2.9)                              |
| Self-harm by other specified means                                                  | 14.7<br>(12.7 to 16.9)                  | 9.5<br>(8.0 to 11.1)                  | 0.8<br>(0.5 to 1.2)                | 30.3<br>(27.0 to 33.7)                            | -1.6<br>(-3.8 to 0.5)                               |
| Interpersonal violence                                                              | 679.8<br>(592.1 to 772.2)               | 45.8†<br>(38.0 to 54.6)               | 8.1<br>(5.6 to 11.3)               | 16.4<br>(9.3 to 22.9)                             | -10.8<br>(-15.3 to -6.7)                            |
| Assault by firearm                                                                  | 3.3<br>(2.8 to 4.0)                     | 1.6<br>(1.1 to 2.2)                   | 0.2<br>(0.1 to 0.3)                | 24.9<br>(20.4 to 29.4)                            | -6.8<br>(-9.7 to -4.1)                              |
| Assault by sharp object                                                             | 27.1<br>(21.7 to 32.4)                  | 16.0<br>(12.1 to 20.7)                | 1.0<br>(0.6 to 1.4)                | 29.4<br>(26.1 to 32.7)                            | -2.7<br>(-4.9 to -0.5)                              |
| Sexual violence                                                                     | 613.6<br>(528.4 to 706.8)               | --                                    | 5.4<br>(3.6 to 7.8)                | 10.1<br>(0.4 to 19.2)                             | -16.4<br>(-22.9 to -9.8)                            |
| Assault by other means                                                              | 35.7<br>(30.3 to 42.6)                  | 28.2<br>(22.5 to 34.5)                | 1.6<br>(1.1 to 2.3)                | 33.6<br>(30.4 to 36.9)                            | -0.1<br>(-2.2 to 2.0)                               |
| <b>Forces of nature, conflict and terrorism, and executions and police conflict</b> | <b>31.4</b><br><b>(19.4 to 47.7)</b>    | <b>0.4†</b><br><b>(0.2 to 0.6)</b>    | <b>1.0</b><br><b>(0.2 to 2.8)</b>  | <b>115.7</b><br><b>(102.7 to 171.7)</b>           | <b>41.7</b><br><b>(34.5 to 74.8)</b>                |
| Exposure to forces of nature                                                        | 5.0<br>(1.3 to 10.1)                    | --                                    | 0.2<br>(< 0.05 to 0.6)             | -25.8<br>(-28.2 to -23.0)                         | -31.6<br>(-33.7 to -29.2)                           |
| Conflict and terrorism                                                              | 25.6<br>(14.7 to 41.1)                  | --                                    | 0.7<br>(0.2 to 2.1)                | 335.9<br>(294.3 to 469.9)                         | 174.2<br>(149.6 to 257.9)                           |
| Executions and police conflict                                                      | 0.8<br>(0.4 to 1.7)                     | 0.4<br>(0.2 to 0.6)                   | < 0.05<br>(< 0.05 to 0.1)          | 34.0<br>(17.6 to 52.2)                            | 7.1<br>(-9.9 to 26.9)                               |
| <b>Impairments</b>                                                                  | --                                      | --                                    | --                                 | --                                                | --                                                  |
| Anaemia                                                                             | 8,684.2<br>(8,282.7 to 9,096.4)         | --                                    | 341.3<br>(235.8 to 473.2)          | 11.8<br>(5.1 to 18.4)                             | -14.2<br>(-20.2 to -9.3)                            |
| Developmental intellectual disability                                               | 837.4<br>(636.5 to 1,038.5)             | --                                    | 79.6<br>(56.9 to 109.4)            | 34.5<br>(23.5 to 52.5)                            | 2.3<br>(-5.3 to 14.7)                               |
| Epilepsy                                                                            | 222.3<br>(126.0 to 352.2)               | --                                    | 77.9<br>(39.8 to 141.1)            | 36.0<br>(-40.1 to 203.4)                          | 2.0<br>(-53.4 to 126.4)                             |
| Guillain-Barre syndrome                                                             | 0.2<br>(0.1 to 0.2)                     | --                                    | < 0.05<br>(< 0.05 to 0.1)          | 30.4<br>(29.1 to 32.0)                            | 0.0<br>(0.0 to 0.0)                                 |
| Hearing loss                                                                        | 2,833.5<br>(2,677.3 to 3,003.9)         | --                                    | 99.4<br>(69.5 to 137.0)            | 24.9<br>(21.0 to 28.6)                            | -3.0<br>(-5.2 to -0.9)                              |
| Heart failure                                                                       | 53.6<br>(47.6 to 60.1)                  | --                                    | 5.7<br>(4.1 to 7.6)                | 19.2<br>(10.1 to 28.5)                            | -7.4<br>(-15.2 to 0.5)                              |
| Infertility                                                                         | 465.4<br>(435.1 to 497.3)               | --                                    | 2.7<br>(1.2 to 5.5)                | 21.9<br>(14.2 to 29.6)                            | -14.5<br>(-19.6 to -9.3)                            |
| Pelvic inflammatory disease                                                         | 25.0<br>(20.9 to 30.1)                  | --                                    | 3.2<br>(2.2 to 4.6)                | 37.5<br>(19.8 to 56.9)                            | -0.3<br>(-13.2 to 13.5)                             |
| Vision loss                                                                         | 2,258.1<br>(2,077.2 to 2,475.6)         | --                                    | 72.9<br>(51.4 to 102.9)            | 32.4<br>(22.8 to 49.9)                            | -0.1<br>(-4.7 to 6.6)                               |

We did not calculate incidence for the nine impairments, certain NTDs, and causes with only birth prevalence. Blank cells mean that no estimate is available.

† Incidence for aggregate causes represents the sum of the incidence of the causes below the aggregate.

‡ Incidence estimates for stroke represent first-ever stroke only.

^ Incidence of HIV/AIDS represents new infections of HIV only and does not include new infections of Tuberculosis in HIV positive cases.



SR Table 14: Prevalence, incidence, and YLDs for 2016, percentage change of YLD counts and percentage change of age-standardised YLD rates between 2006 and 2016 by cause and impairments, for all ages, Canada.

| Cause                                                                                | Prevalence in thousands (95% UI)          | Incidence in thousands (95% UI)               | YLDs in thousands (95% UI)             |                                                   |                                                     |
|--------------------------------------------------------------------------------------|-------------------------------------------|-----------------------------------------------|----------------------------------------|---------------------------------------------------|-----------------------------------------------------|
|                                                                                      | 2016 counts                               | 2016 counts                                   | 2016 counts                            | Percentage change in counts between 2006 and 2016 | Percentage change in age-standardised rates between |
| <b>All causes</b>                                                                    | <b>33,745.1</b><br>(33,612.2 to 33,855.3) | <b>202,584.8†</b><br>(189,708.7 to 216,272.0) | <b>4,512.9</b><br>(3,365.8 to 5,796.0) | <b>17.3</b><br>(15.8 to 18.9)                     | <b>0.9</b><br>(-0.4 to 2.4)                         |
| <b>Communicable, maternal, neonatal, and nutritional disorders</b>                   | <b>10,566.6</b><br>(10,173.1 to 10,961.6) | <b>117,496.8†</b><br>(105,046.9 to 130,491.1) | <b>133.6</b><br>(95.1 to 180.1)        | <b>20.9</b><br>(13.3 to 31.1)                     | <b>9.8</b><br>(2.7 to 19.1)                         |
| <b>HIV/AIDS and tuberculosis</b>                                                     | <b>2,375.0</b><br>(2,267.2 to 2,467.0)    | <b>4.8†</b><br>(2.2 to 7.7)                   | <b>10.2</b><br>(4.7 to 18.7)           | <b>30.1</b><br>(6.3 to 50.5)                      | <b>13.4</b><br>(-9.5 to 31.9)                       |
| Tuberculosis                                                                         | 2,209.6<br>(2,105.6 to 2,322.7)           | 1.6†<br>(1.4 to 1.7)                          | 0.4<br>(0.2 to 0.5)                    | 12.1<br>(6.4 to 18.4)                             | -3.0<br>(-7.6 to 2.3)                               |
| Drug-susceptible tuberculosis                                                        | 1.1<br>(0.9 to 1.2)                       | 1.5<br>(1.4 to 1.7)                           | 0.4<br>(0.2 to 0.5)                    | 12.1<br>(6.4 to 18.4)                             | -3.0<br>(-7.5 to 2.4)                               |
| Multidrug-resistant tuberculosis without extensive drug resistance                   | < 0.05<br>(< 0.05 to < 0.05)              | < 0.05<br>(< 0.05 to < 0.05)                  | < 0.05<br>(< 0.05 to < 0.05)           | 6.0<br>(-11.7 to 26.9)                            | -8.2<br>(-23.3 to 10.4)                             |
| Extensively drug-resistant tuberculosis                                              | < 0.05<br>(< 0.05 to < 0.05)              | < 0.05<br>(< 0.05 to < 0.05)                  | < 0.05<br>(< 0.05 to < 0.05)           | 128.1<br>(89.8 to 172.7)                          | 97.5<br>(65.0 to 137.4)                             |
| Latent tuberculosis infection                                                        | 2,208.5<br>(2,104.4 to 2,321.6)           | --                                            | --                                     | --                                                | --                                                  |
| HIV/AIDS                                                                             | 115.4<br>(56.9 to 195.9)                  | 3.3^<br>(0.7 to 6.2)                          | 9.9<br>(4.4 to 18.3)                   | 30.9<br>(6.1 to 52.1)                             | 14.1<br>(-9.9 to 33.1)                              |
| Drug-susceptible HIV/AIDS - Tuberculosis                                             | 0.1<br>(0.1 to 0.2)                       | 0.2<br>(0.1 to 0.3)                           | < 0.05<br>(< 0.05 to 0.1)              | -19.1<br>(-25.2 to -13.3)                         | -29.6<br>(-34.9 to -24.5)                           |
| Multidrug-resistant HIV/AIDS - Tuberculosis without extensive drug resistance        | < 0.05<br>(< 0.05 to < 0.05)              | < 0.05<br>(< 0.05 to < 0.05)                  | < 0.05<br>(< 0.05 to < 0.05)           | -22.6<br>(-35.6 to -6.9)                          | -32.7<br>(-44.0 to -19.1)                           |
| Extensively drug-resistant HIV/AIDS - Tuberculosis                                   | < 0.05<br>(< 0.05 to < 0.05)              | < 0.05<br>(< 0.05 to < 0.05)                  | < 0.05<br>(< 0.05 to < 0.05)           | 66.6<br>(38.4 to 100.6)                           | 44.8<br>(20.4 to 74.2)                              |
| HIV/AIDS resulting in other diseases                                                 | 115.2<br>(56.8 to 195.8)                  | 3.3<br>(0.7 to 6.2)                           | 9.8<br>(4.4 to 18.2)                   | 31.3<br>(6.4 to 52.6)                             | 14.5<br>(-9.7 to 33.9)                              |
| <b>Diarrhoea, lower respiratory infections, and other common infectious diseases</b> | <b>1,832.6</b><br>(1,696.8 to 1,965.3)    | <b>115,688.7†</b><br>(103,319.7 to 128,751.3) | <b>54.8</b><br>(35.6 to 80.4)          | <b>11.5</b><br>(7.5 to 15.6)                      | <b>0.8</b><br>(-2.9 to 4.4)                         |
| Diarrhoeal diseases                                                                  | 47.8<br>(44.8 to 51.1)                    | 3,184.2<br>(2,979.1 to 3,401.2)               | 5.4<br>(3.8 to 7.4)                    | 19.9<br>(8.7 to 31.3)                             | 7.1<br>(-3.2 to 18.8)                               |
| Intestinal infectious diseases                                                       | < 0.05<br>(< 0.05 to < 0.05)              | < 0.05†<br>(< 0.05 to < 0.05)                 | < 0.05<br>(< 0.05 to < 0.05)           | -56.3<br>(-79.8 to -9.2)                          | -60.5<br>(-79.9 to -24.3)                           |
| Typhoid fever                                                                        | < 0.05<br>(< 0.05 to < 0.05)              | < 0.05<br>(< 0.05 to < 0.05)                  | < 0.05<br>(< 0.05 to < 0.05)           | -13.4<br>(-63.5 to 86.8)                          | -19.9<br>(-63.4 to 63.8)                            |
| Paratyphoid fever                                                                    | < 0.05<br>(< 0.05 to < 0.05)              | < 0.05<br>(< 0.05 to < 0.05)                  | < 0.05<br>(< 0.05 to < 0.05)           | -69.4<br>(-87.3 to -31.6)                         | -71.1<br>(-86.9 to -39.9)                           |
| Other intestinal infectious diseases                                                 | --                                        | --                                            | < 0.05<br>(< 0.05 to < 0.05)           | -69.3<br>(-84.0 to -45.6)                         | -73.4<br>(-86.3 to -52.1)                           |
| Lower respiratory infections                                                         | 27.2<br>(25.0 to 29.4)                    | 1,244.3<br>(1,142.3 to 1,349.3)               | 1.6<br>(1.1 to 2.4)                    | 17.1<br>(3.6 to 31.1)                             | 1.8<br>(-10.8 to 14.6)                              |
| Upper respiratory infections                                                         | 1,437.0<br>(1,283.0 to 1,600.7)           | 109,142.4<br>(96,759.7 to 122,219.2)          | 35.6<br>(21.1 to 55.7)                 | 9.8<br>(4.7 to 15.3)                              | 0.1<br>(-4.8 to 4.8)                                |
| Otitis media                                                                         | 274.7<br>(248.5 to 302.2)                 | 1,466.0<br>(1,243.2 to 1,741.4)               | 7.5<br>(4.7 to 11.3)                   | 7.6<br>(-0.9 to 16.2)                             | -1.4<br>(-9.3 to 6.7)                               |
| Meningitis                                                                           | 12.4<br>(10.4 to 14.6)                    | 2.1<br>(1.8 to 2.3)                           | 1.1<br>(0.8 to 1.5)                    | 28.6<br>(21.7 to 37.6)                            | 13.6<br>(7.8 to 20.5)                               |
| Pneumococcal meningitis                                                              | 10.2<br>(8.5 to 12.3)                     | 1.2<br>(1.0 to 1.4)                           | 0.9<br>(0.6 to 1.2)                    | 29.9<br>(22.5 to 38.1)                            | 15.3<br>(8.8 to 22.5)                               |
| H influenzae type B meningitis                                                       | 0.6<br>(0.4 to 0.8)                       | 0.2<br>(0.1 to 0.2)                           | 0.1<br>(< 0.05 to 0.1)                 | 27.0<br>(17.2 to 37.8)                            | 11.7<br>(2.5 to 21.8)                               |
| Meningococcal infection                                                              | 0.7<br>(0.5 to 1.0)                       | 0.4<br>(0.3 to 0.5)                           | 0.1<br>(< 0.05 to 0.1)                 | 35.7<br>(17.1 to 138.4)                           | 13.4<br>(1.2 to 63.2)                               |
| Other meningitis                                                                     | 0.9<br>(0.7 to 1.1)                       | 0.3<br>(0.3 to 0.4)                           | 0.1<br>(0.1 to 0.1)                    | 14.1<br>(6.9 to 21.8)                             | 0.7<br>(-5.8 to 7.4)                                |
| Encephalitis                                                                         | 18.2<br>(10.3 to 29.3)                    | 16.3<br>(14.5 to 18.1)                        | 1.5<br>(1.0 to 2.0)                    | 25.5<br>(18.9 to 32.9)                            | 9.7<br>(4.1 to 15.9)                                |
| Diphtheria                                                                           | < 0.05<br>(< 0.05 to < 0.05)              | < 0.05<br>(< 0.05 to < 0.05)                  | < 0.05<br>(< 0.05 to < 0.05)           | -23.8<br>(-58.9 to 34.8)                          | -30.3<br>(-59.5 to 16.7)                            |
| Whooping cough                                                                       | 4.9<br>(3.8 to 6.2)                       | 36.0<br>(28.0 to 45.3)                        | 0.2<br>(0.1 to 0.4)                    | -7.2<br>(-22.2 to 11.6)                           | -18.1<br>(-31.6 to -1.2)                            |
| Tetanus                                                                              | < 0.05<br>(< 0.05 to < 0.05)              | < 0.05<br>(< 0.05 to < 0.05)                  | < 0.05<br>(< 0.05 to < 0.05)           | 6.8<br>(-18.9 to 36.0)                            | -0.8<br>(-25.3 to 26.2)                             |
| Measles                                                                              | < 0.05<br>(< 0.05 to < 0.05)              | 0.2<br>(0.2 to 0.2)                           | < 0.05<br>(< 0.05 to < 0.05)           | 1,820.5<br>(994.0 to 7,272.4)                     | 1,612.9<br>(875.8 to 6,475.7)                       |
| Varicella and herpes zoster                                                          | 39.6<br>(35.5 to 44.2)                    | 597.2<br>(572.6 to 623.8)                     | 1.8<br>(1.1 to 2.8)                    | 21.1<br>(7.0 to 36.5)                             | 0.2<br>(-11.7 to 13.4)                              |
| <b>Neglected tropical diseases and malaria</b>                                       | <b>7.8</b><br>(6.7 to 9.2)                | <b>0.1†</b><br>(< 0.05 to 0.4)                | <b>0.1</b><br>(0.1 to 0.2)             | <b>-2.4</b><br>(-61.6 to 127.7)                   | <b>-16.3</b><br>(-68.3 to 110.7)                    |
| Malaria                                                                              | --                                        | --                                            | --                                     | --                                                | --                                                  |
| Chagas disease                                                                       | 7.1<br>(5.8 to 8.5)                       | --                                            | 0.1<br>(< 0.05 to 0.1)                 | 10.4<br>(3.5 to 17.8)                             | -6.4<br>(-12.0 to -0.3)                             |
| Leishmaniasis                                                                        | --                                        | --                                            | --                                     | --                                                | --                                                  |
| Visceral leishmaniasis                                                               | --                                        | --                                            | --                                     | --                                                | --                                                  |
| Cutaneous and mucocutaneous leishmaniasis                                            | --                                        | --                                            | --                                     | --                                                | --                                                  |
| African trypanosomiasis                                                              | --                                        | --                                            | --                                     | --                                                | --                                                  |
| Schistosomiasis                                                                      | --                                        | --                                            | --                                     | --                                                | --                                                  |
| Cysticercosis                                                                        | --                                        | --                                            | --                                     | --                                                | --                                                  |
| Cystic echinococcosis                                                                | 0.3<br>(< 0.05 to 1.7)                    | 0.1<br>(< 0.05 to 0.3)                        | < 0.05<br>(< 0.05 to 0.2)              | -25.7<br>(-94.3 to 705.6)                         | -34.9<br>(-94.8 to 611.0)                           |
| Lymphatic filariasis                                                                 | --                                        | --                                            | --                                     | --                                                | --                                                  |
| Onchocerciasis                                                                       | --                                        | --                                            | --                                     | --                                                | --                                                  |
| Trachoma                                                                             | --                                        | --                                            | --                                     | --                                                | --                                                  |
| Dengue                                                                               | --                                        | --                                            | --                                     | --                                                | --                                                  |
| Yellow fever                                                                         | --                                        | --                                            | --                                     | --                                                | --                                                  |
| Rabies                                                                               | < 0.05<br>(< 0.05 to < 0.05)              | < 0.05<br>(< 0.05 to < 0.05)                  | < 0.05<br>(< 0.05 to < 0.05)           | 41.7<br>(11.5 to 70.1)                            | 29.8<br>(2.5 to 61.5)                               |
| Intestinal nematode infections                                                       | --                                        | --                                            | --                                     | --                                                | --                                                  |
| Ascariasis                                                                           | --                                        | --                                            | --                                     | --                                                | --                                                  |



| Cause                                                                   | Prevalence in thousands (95% UI)           | Incidence in thousands (95% UI)             | YLDs in thousands (95% UI)              |                                                   |                                                     |
|-------------------------------------------------------------------------|--------------------------------------------|---------------------------------------------|-----------------------------------------|---------------------------------------------------|-----------------------------------------------------|
|                                                                         | 2016 counts                                | 2016 counts                                 | 2016 counts                             | Percentage change in counts between 2006 and 2016 | Percentage change in age-standardised rates between |
| Trichuriasis                                                            | --                                         | --                                          | --                                      | --                                                | --                                                  |
| Hookworm disease                                                        | --                                         | --                                          | --                                      | --                                                | --                                                  |
| Food-borne trematodiasis                                                | --                                         | --                                          | --                                      | --                                                | --                                                  |
| Leprosy                                                                 | < 0.05<br>(< 0.05 to < 0.05)               | < 0.05<br>(< 0.05 to < 0.05)                | < 0.05<br>(< 0.05 to < 0.05)            | 17.7<br>(15.4 to 20.4)                            | -4.8<br>(-6.7 to -2.9)                              |
| Ebola virus disease                                                     | --                                         | --                                          | --                                      | --                                                | --                                                  |
| Zika virus disease                                                      | < 0.05<br>(< 0.05 to < 0.05)               | < 0.05<br>(< 0.05 to < 0.05)                | < 0.05<br>(< 0.05 to < 0.05)            | --                                                | --                                                  |
| Guinea worm disease                                                     | --                                         | --                                          | --                                      | --                                                | --                                                  |
| Other neglected tropical diseases                                       | --                                         | --                                          | < 0.05<br>(< 0.05 to < 0.05)            | --                                                | --                                                  |
| <b>Maternal disorders</b>                                               | <b>10.2<br/>(8.0 to 12.7)</b>              | <b>153.8†<br/>(124.8 to 191.4)</b>          | <b>0.5<br/>(0.3 to 0.8)</b>             | <b>6.8<br/>(-27.1 to 48.1)</b>                    | <b>-3.6<br/>(-33.6 to 33.8)</b>                     |
| Maternal haemorrhage                                                    | 3.6<br>(2.5 to 5.0)                        | 11.7<br>(8.4 to 16.2)                       | 0.1<br>(0.1 to 0.1)                     | 6.1<br>(-29.4 to 61.1)                            | -4.4<br>(-36.0 to 45.8)                             |
| Maternal sepsis and other pregnancy related infections                  | 3.2<br>(2.7 to 3.6)                        | 3.5<br>(2.4 to 4.9)                         | < 0.05<br>(< 0.05 to 0.1)               | -19.6<br>(-81.5 to 80.3)                          | -25.7<br>(-83.1 to 73.1)                            |
| Maternal hypertensive disorders                                         | 3.6<br>(2.3 to 5.2)                        | 14.7<br>(11.3 to 18.6)                      | 0.2<br>(0.1 to 0.3)                     | 11.7<br>(-42.6 to 116.2)                          | 0.8<br>(-47.7 to 99.5)                              |
| Maternal obstructed labour and uterine rupture                          | 0.2<br>(0.1 to 0.3)                        | 11.8<br>(8.3 to 16.8)                       | 0.1<br>(< 0.05 to 0.1)                  | 17.8<br>(-38.8 to 119.3)                          | 5.0<br>(-45.6 to 96.5)                              |
| Maternal abortion, miscarriage, and ectopic pregnancy                   | 0.9<br>(0.6 to 1.3)                        | 112.0<br>(85.0 to 148.0)                    | 0.1<br>(< 0.05 to 0.2)                  | 8.6<br>(-53.0 to 122.2)                           | -2.3<br>(-57.8 to 102.7)                            |
| Other maternal disorders                                                | --                                         | --                                          | 0.1<br>(< 0.05 to 0.1)                  | 1.5<br>(-30.4 to 39.7)                            | -8.4<br>(-36.8 to 27.1)                             |
| <b>Neonatal disorders</b>                                               | <b>301.5<br/>(250.2 to 389.3)</b>          | <b>--</b>                                   | <b>44.2<br/>(31.1 to 61.8)</b>          | <b>36.8<br/>(12.5 to 67.0)</b>                    | <b>25.2<br/>(3.2 to 51.8)</b>                       |
| Neonatal preterm birth complications                                    | 277.0<br>(220.1 to 368.6)                  | --                                          | 31.5<br>(20.9 to 46.0)                  | 44.4<br>(12.1 to 82.5)                            | 33.0<br>(3.2 to 68.2)                               |
| Neonatal encephalopathy due to birth asphyxia and trauma                | 32.0<br>(21.4 to 45.7)                     | --                                          | 6.4<br>(3.4 to 10.7)                    | 35.8<br>(3.1 to 68.5)                             | 22.7<br>(-7.1 to 52.0)                              |
| Neonatal sepsis and other neonatal infections                           | 12.0<br>(5.5 to 25.1)                      | --                                          | 4.8<br>(2.0 to 10.9)                    | 4.4<br>(-14.0 to 27.8)                            | -4.2<br>(-21.2 to 18.4)                             |
| Hemolytic disease and other neonatal jaundice                           | 2.2<br>(1.9 to 2.6)                        | --                                          | 0.7<br>(0.5 to 0.9)                     | 32.9<br>(17.6 to 52.3)                            | 20.9<br>(7.2 to 38.4)                               |
| Other neonatal disorders                                                | --                                         | --                                          | 0.7<br>(0.5 to 1.1)                     | 21.7<br>(-6.7 to 54.5)                            | 6.0<br>(-18.8 to 34.5)                              |
| <b>Nutritional deficiencies</b>                                         | <b>1,320.4<br/>(1,221.2 to 1,425.8)</b>    | <b>233.8†<br/>(192.1 to 289.3)</b>          | <b>17.7<br/>(11.6 to 26.5)</b>          | <b>16.1<br/>(6.5 to 28.1)</b>                     | <b>8.4<br/>(-2.5 to 21.4)</b>                       |
| Protein-energy malnutrition                                             | 14.0<br>(12.2 to 16.4)                     | 8.6<br>(7.4 to 10.2)                        | 1.7<br>(1.1 to 2.5)                     | 19.5<br>(-6.4 to 52.5)                            | 4.1<br>(-18.4 to 33.0)                              |
| Iodine deficiency                                                       | 184.1<br>(163.8 to 209.0)                  | 2.8<br>(2.5 to 3.2)                         | 4.7<br>(3.1 to 6.6)                     | 12.3<br>(-1.0 to 27.8)                            | -1.5<br>(-13.6 to 13.1)                             |
| Vitamin A deficiency                                                    | 262.1<br>(216.4 to 330.4)                  | 222.4<br>(180.5 to 277.9)                   | --                                      | --                                                | --                                                  |
| Iron-deficiency anaemia                                                 | 853.6<br>(755.3 to 971.9)                  | --                                          | 11.2<br>(6.9 to 18.0)                   | 17.1<br>(4.2 to 34.2)                             | 12.7<br>(-2.0 to 31.0)                              |
| Other nutritional deficiencies                                          | --                                         | --                                          | 0.1<br>(< 0.05 to 0.1)                  | 19.2<br>(-7.9 to 53.5)                            | 3.8<br>(-19.8 to 33.8)                              |
| <b>Other communicable, maternal, neonatal, and nutritional diseases</b> | <b>6,050.7<br/>(5,594.2 to 6,464.1)</b>    | <b>1,415.6<br/>(1,290.5 to 1,567.1)</b>     | <b>5.8<br/>(3.5 to 9.6)</b>             | <b>13.9<br/>(8.8 to 19.7)</b>                     | <b>2.5<br/>(-2.0 to 7.7)</b>                        |
| Sexually transmitted diseases excluding HIV                             | 5,206.8<br>(4,779.4 to 5,606.0)            | 1,279.1<br>(1,156.4 to 1,427.2)             | 4.4<br>(2.6 to 7.6)                     | 14.0<br>(7.9 to 21.1)                             | 1.2<br>(-4.6 to 7.0)                                |
| Syphilis                                                                | 171.3<br>(127.4 to 226.9)                  | 175.0<br>(123.5 to 243.9)                   | 1.0<br>(0.7 to 1.3)                     | 29.6<br>(14.3 to 48.2)                            | 6.9<br>(-6.2 to 23.2)                               |
| Chlamydial infection                                                    | 73.1<br>(59.9 to 88.5)                     | 54.6<br>(44.4 to 66.7)                      | 0.3<br>(0.2 to 0.5)                     | -7.3<br>(-21.8 to 9.4)                            | -13.4<br>(-27.9 to 3.3)                             |
| Gonococcal infection                                                    | 17.5<br>(15.5 to 19.8)                     | 39.3<br>(32.5 to 47.3)                      | 0.2<br>(0.1 to 0.3)                     | 6.0<br>(-6.2 to 18.5)                             | 1.2<br>(-10.1 to 13.7)                              |
| Trichomoniasis                                                          | 952.5<br>(829.6 to 1,087.3)                | 800.9<br>(693.8 to 923.0)                   | 1.2<br>(0.5 to 2.5)                     | 11.7<br>(4.8 to 19.5)                             | 1.6<br>(-5.1 to 8.5)                                |
| Genital herpes                                                          | 4,144.2<br>(3,573.2 to 4,708.6)            | 164.3<br>(140.1 to 191.0)                   | 1.0<br>(0.3 to 2.4)                     | 21.4<br>(7.5 to 36.4)                             | 5.6<br>(-6.9 to 18.8)                               |
| Other sexually transmitted diseases                                     | 45.8<br>(37.5 to 54.6)                     | 45.1<br>(38.1 to 53.5)                      | 0.7<br>(0.5 to 1.1)                     | 2.9<br>(-13.7 to 24.0)                            | -2.3<br>(-17.8 to 16.4)                             |
| Hepatitis                                                               | 1,018.7<br>(880.9 to 1,202.0)              | 136.4<br>(117.8 to 159.6)                   | 0.3<br>(0.2 to 0.4)                     | -7.8<br>(-22.9 to 12.2)                           | -20.4<br>(-33.4 to -3.0)                            |
| Acute hepatitis A                                                       | 4.2<br>(3.4 to 5.0)                        | 54.3<br>(44.5 to 64.4)                      | 0.1<br>(0.1 to 0.2)                     | -9.6<br>(-33.4 to 29.4)                           | -19.9<br>(-40.6 to 12.3)                            |
| Hepatitis B                                                             | 723.1<br>(591.9 to 901.1)                  | 72.4<br>(55.9 to 94.1)                      | 0.1<br>(0.1 to 0.2)                     | -6.7<br>(-25.6 to 18.0)                           | -21.2<br>(-35.6 to -2.9)                            |
| Hepatitis C                                                             | 291.2<br>(260.7 to 324.2)                  | 5.4<br>(4.8 to 5.9)                         | < 0.05<br>(< 0.05 to < 0.05)            | 0.8<br>(-1.1 to 2.4)                              | -10.7<br>(-11.9 to -9.4)                            |
| Acute hepatitis E                                                       | 0.3<br>(0.2 to 0.4)                        | 4.3<br>(3.0 to 5.8)                         | < 0.05<br>(< 0.05 to < 0.05)            | -4.6<br>(-11.1 to 2.4)                            | -22.0<br>(-26.3 to -17.4)                           |
| Other infectious diseases                                               | 24.2<br>(19.7 to 30.6)                     | 0.1<br>(< 0.05 to 0.1)                      | 1.2<br>(0.7 to 1.8)                     | 19.7<br>(11.0 to 29.6)                            | 11.8<br>(1.5 to 25.3)                               |
| <b>Non-communicable diseases</b>                                        | <b>32,961.8<br/>(32,809.9 to 33,086.8)</b> | <b>80,999.3†<br/>(77,804.7 to 84,309.4)</b> | <b>4,013.4<br/>(2,973.0 to 5,157.9)</b> | <b>16.9<br/>(15.2 to 18.5)</b>                    | <b>0.6<br/>(-0.8 to 2.1)</b>                        |
| <b>Neoplasms</b>                                                        | <b>668.8<br/>(630.8 to 705.4)</b>          | <b>205.1<br/>(195.6 to 217.0)</b>           | <b>67.5<br/>(49.6 to 88.4)</b>          | <b>27.8<br/>(21.8 to 34.8)</b>                    | <b>0.0<br/>(-4.7 to 5.7)</b>                        |
| Lip and oral cavity cancer                                              | 8.5<br>(7.8 to 9.4)                        | 2.2<br>(2.0 to 2.5)                         | 0.8<br>(0.6 to 1.1)                     | 15.7<br>(0.5 to 31.6)                             | -10.6<br>(-21.9 to 1.3)                             |
| Nasopharynx cancer                                                      | 0.8<br>(0.6 to 1.0)                        | 0.2<br>(0.2 to 0.3)                         | 0.1<br>(0.1 to 0.1)                     | -0.9<br>(-21.2 to 24.4)                           | -15.5<br>(-34.4 to 7.7)                             |
| Other pharynx cancer                                                    | 2.9<br>(2.5 to 3.3)                        | 0.8<br>(0.7 to 0.9)                         | 0.3<br>(0.2 to 0.4)                     | 51.4<br>(25.0 to 82.5)                            | 16.4<br>(-3.1 to 39.1)                              |
| Oesophageal cancer                                                      | 2.8<br>(2.5 to 3.1)                        | 2.3<br>(2.0 to 2.6)                         | 0.6<br>(0.4 to 0.8)                     | 29.9<br>(3.9 to 60.7)                             | -0.5<br>(-21.3 to 24.2)                             |
| Stomach cancer                                                          | 13.7<br>(12.6 to 14.9)                     | 6.6<br>(6.2 to 7.0)                         | 1.8<br>(1.3 to 2.3)                     | 25.2<br>(8.2 to 45.0)                             | -3.4<br>(-16.9 to 12.5)                             |
| Colon and rectum cancer                                                 | 95.0<br>(88.2 to 105.2)                    | 24.3<br>(22.7 to 26.8)                      | 8.6<br>(6.3 to 11.5)                    | 23.9<br>(10.6 to 39.6)                            | -4.9<br>(-15.3 to 7.0)                              |
| Liver cancer                                                            | 2.6<br>(2.3 to 3.0)                        | 2.9<br>(2.6 to 3.1)                         | 0.7<br>(0.5 to 0.9)                     | 64.9<br>(44.8 to 84.5)                            | 28.4<br>(13.2 to 43.4)                              |
| Liver cancer due to hepatitis B                                         | 0.3<br>(0.2 to 0.4)                        | 0.2<br>(0.1 to 0.3)                         | < 0.05<br>(< 0.05 to 0.1)               | 67.1<br>(45.3 to 90.6)                            | 33.3<br>(16.9 to 51.4)                              |

| Cause                                              | Prevalence in thousands (95% UI)              | Incidence in thousands (95% UI)          | YLDs in thousands (95% UI)              |                                                   |                                                     |
|----------------------------------------------------|-----------------------------------------------|------------------------------------------|-----------------------------------------|---------------------------------------------------|-----------------------------------------------------|
|                                                    | 2016 counts                                   | 2016 counts                              | 2016 counts                             | Percentage change in counts between 2006 and 2016 | Percentage change in age-standardised rates between |
| Liver cancer due to hepatitis C                    | 0.6<br>(0.5 to 0.8)                           | 0.4<br>(0.3 to 0.5)                      | 0.1<br>(0.1 to 0.1)                     | 76.9<br>(53.3 to 102.1)                           | 34.6<br>(17.1 to 53.6)                              |
| Liver cancer due to alcohol use                    | 1.6<br>(1.3 to 1.9)                           | 1.0<br>(0.8 to 1.2)                      | 0.2<br>(0.2 to 0.3)                     | 58.2<br>(36.0 to 79.2)                            | 23.4<br>(7.0 to 39.5)                               |
| Liver cancer due to other causes                   | 1.9<br>(1.6 to 2.3)                           | 1.2<br>(1.1 to 1.4)                      | 0.3<br>(0.2 to 0.4)                     | 66.3<br>(41.6 to 92.6)                            | 29.8<br>(11.2 to 49.3)                              |
| Gallbladder and biliary tract cancer               | 1.2<br>(1.1 to 1.4)                           | 1.5<br>(1.4 to 1.7)                      | 0.3<br>(0.2 to 0.5)                     | 15.2<br>(4.4 to 26.8)                             | -12.8<br>(-20.4 to -4.7)                            |
| Pancreatic cancer                                  | 4.3<br>(3.8 to 4.9)                           | 5.2<br>(4.7 to 5.7)                      | 1.0<br>(0.7 to 1.4)                     | 27.7<br>(6.0 to 52.2)                             | -3.1<br>(-19.2 to 15.6)                             |
| Larynx cancer                                      | 5.0<br>(4.6 to 5.5)                           | 1.3<br>(1.2 to 1.4)                      | 0.6<br>(0.4 to 0.8)                     | 21.1<br>(3.3 to 42.2)                             | -7.5<br>(-20.9 to 8.3)                              |
| Tracheal, bronchus, and lung cancer                | 41.2<br>(37.3 to 45.6)                        | 26.3<br>(24.4 to 28.3)                   | 6.3<br>(4.5 to 8.1)                     | 22.6<br>(5.7 to 40.5)                             | -6.3<br>(-19.4 to 7.6)                              |
| Malignant skin melanoma                            | 34.6<br>(28.9 to 41.3)                        | 7.0<br>(5.9 to 8.3)                      | 2.2<br>(1.5 to 3.2)                     | 36.4<br>(17.4 to 56.9)                            | 12.2<br>(-2.7 to 29.2)                              |
| Non-melanoma skin cancer                           | 8.3<br>(5.6 to 12.6)                          | 9.0<br>(6.4 to 14.1)                     | 0.3<br>(0.2 to 0.6)                     | 122.0<br>(52.7 to 212.5)                          | 66.7<br>(15.7 to 132.4)                             |
| Non-melanoma skin cancer (squamous-cell carcinoma) | 7.2<br>(4.8 to 12.5)                          | 6.8<br>(4.8 to 11.6)                     | 0.3<br>(0.2 to 0.6)                     | 121.7<br>(52.4 to 215.5)                          | 66.4<br>(14.1 to 133.1)                             |
| Non-melanoma skin cancer (basal-cell carcinoma)    | 0.3<br>(0.2 to 0.6)                           | 2.2<br>(1.1 to 3.7)                      | < 0.05<br>(< 0.05 to < 0.05)            | 157.5<br>(114.9 to 232.7)                         | 102.7<br>(67.0 to 168.9)                            |
| Breast cancer                                      | 126.2<br>(109.8 to 146.5)                     | 25.6<br>(22.2 to 29.7)                   | 11.4<br>(8.1 to 15.5)                   | 19.6<br>(4.9 to 36.5)                             | -4.2<br>(-15.5 to 9.1)                              |
| Cervical cancer                                    | 7.9<br>(7.0 to 9.1)                           | 2.0<br>(1.8 to 2.2)                      | 0.7<br>(0.5 to 1.0)                     | 7.7<br>(-8.2 to 28.2)                             | -7.0<br>(-21.3 to 12.0)                             |
| Uterine cancer                                     | 28.7<br>(25.0 to 33.1)                        | 6.0<br>(5.3 to 7.0)                      | 2.1<br>(1.4 to 3.0)                     | 43.1<br>(15.1 to 73.4)                            | 10.3<br>(-11.0 to 34.8)                             |
| Ovarian cancer                                     | 8.9<br>(7.8 to 9.8)                           | 2.8<br>(2.5 to 3.1)                      | 1.2<br>(0.8 to 1.7)                     | 18.4<br>(-10.4 to 57.3)                           | -5.6<br>(-27.5 to 23.8)                             |
| Prostate cancer                                    | 118.2<br>(91.1 to 162.0)                      | 28.0<br>(22.6 to 36.4)                   | 10.1<br>(6.8 to 14.7)                   | 29.4<br>(6.0 to 60.6)                             | -3.2<br>(-21.0 to 21.1)                             |
| Testicular cancer                                  | 5.6<br>(4.7 to 6.7)                           | 1.1<br>(0.9 to 1.3)                      | 0.4<br>(0.2 to 0.5)                     | 23.5<br>(-3.7 to 62.6)                            | 13.3<br>(-13.9 to 51.5)                             |
| Kidney cancer                                      | 17.4<br>(15.5 to 19.5)                        | 4.8<br>(4.3 to 5.2)                      | 1.6<br>(1.1 to 2.1)                     | 20.9<br>(3.2 to 40.9)                             | -4.8<br>(-18.7 to 11.0)                             |
| Bladder cancer                                     | 32.0<br>(29.0 to 35.0)                        | 7.5<br>(6.8 to 8.2)                      | 2.8<br>(2.0 to 3.8)                     | 28.2<br>(12.8 to 45.2)                            | -2.5<br>(-14.2 to 10.7)                             |
| Brain and nervous system cancer                    | 8.7<br>(6.9 to 10.0)                          | 3.5<br>(2.8 to 4.0)                      | 1.1<br>(0.8 to 1.6)                     | 33.6<br>(16.3 to 49.6)                            | 12.6<br>(-1.9 to 26.4)                              |
| Thyroid cancer                                     | 15.0<br>(12.5 to 18.2)                        | 2.8<br>(2.4 to 3.4)                      | 0.9<br>(0.6 to 1.4)                     | 13.1<br>(-8.3 to 42.8)                            | -4.6<br>(-22.3 to 20.3)                             |
| Mesothelioma                                       | 1.1<br>(1.0 to 1.2)                           | 0.7<br>(0.6 to 0.8)                      | 0.2<br>(0.1 to 0.3)                     | 28.3<br>(4.7 to 57.5)                             | -1.6<br>(-19.7 to 20.9)                             |
| Hodgkin lymphoma                                   | 5.8<br>(5.1 to 6.6)                           | 1.2<br>(1.1 to 1.4)                      | 0.5<br>(0.3 to 0.7)                     | 19.3<br>(-1.4 to 43.9)                            | 7.1<br>(-13.0 to 30.9)                              |
| Non-Hodgkin's lymphoma                             | 46.2<br>(40.8 to 52.3)                        | 11.3<br>(10.0 to 12.8)                   | 3.6<br>(2.6 to 4.9)                     | 45.6<br>(26.4 to 66.8)                            | 15.0<br>(0.4 to 31.3)                               |
| Multiple myeloma                                   | 7.4<br>(6.2 to 9.2)                           | 2.6<br>(2.2 to 3.2)                      | 1.3<br>(0.9 to 1.8)                     | 36.8<br>(6.9 to 72.9)                             | 5.7<br>(-17.4 to 34.0)                              |
| Leukaemia                                          | 26.0<br>(23.1 to 28.9)                        | 7.2<br>(6.4 to 8.0)                      | 3.3<br>(2.2 to 4.3)                     | 40.6<br>(20.6 to 63.6)                            | 8.5<br>(-7.3 to 27.2)                               |
| Acute lymphoid leukaemia                           | 3.0<br>(2.5 to 3.5)                           | 0.7<br>(0.6 to 0.8)                      | 0.3<br>(0.2 to 0.5)                     | 21.5<br>(-8.2 to 65.2)                            | 6.2<br>(-26.3 to 56.2)                              |
| Chronic lymphoid leukaemia                         | 13.9<br>(11.7 to 16.1)                        | 3.2<br>(2.7 to 3.6)                      | 1.6<br>(1.1 to 2.2)                     | 47.8<br>(17.2 to 87.2)                            | 11.5<br>(-12.2 to 41.4)                             |
| Acute myeloid leukaemia                            | 2.4<br>(1.9 to 2.7)                           | 1.7<br>(1.4 to 1.9)                      | 0.5<br>(0.3 to 0.6)                     | 48.5<br>(27.0 to 72.5)                            | 15.7<br>(-0.2 to 33.8)                              |
| Chronic myeloid leukaemia                          | 1.1<br>(0.9 to 1.3)                           | 0.4<br>(0.3 to 0.4)                      | 0.1<br>(0.1 to 0.2)                     | 17.7<br>(-0.7 to 40.8)                            | -7.0<br>(-21.1 to 10.5)                             |
| Other leukaemia                                    | 5.7<br>(4.8 to 6.6)                           | 1.3<br>(1.1 to 1.5)                      | 0.7<br>(0.5 to 0.9)                     | 35.6<br>(9.1 to 66.7)                             | 3.1<br>(-16.8 to 25.6)                              |
| Other neoplasms                                    | 32.3<br>(27.8 to 36.5)                        | 8.2<br>(7.1 to 9.2)                      | 2.4<br>(1.7 to 3.3)                     | 45.4<br>(24.4 to 67.8)                            | 18.9<br>(2.8 to 36.1)                               |
| <b>Cardiovascular diseases</b>                     | <b>3,641.1</b><br><b>(3,457.5 to 3,818.5)</b> | <b>339.0†</b><br><b>(319.7 to 359.8)</b> | <b>240.8</b><br><b>(176.5 to 313.3)</b> | <b>20.7</b><br><b>(15.6 to 26.2)</b>              | <b>-5.4</b><br><b>(-9.4 to -1.4)</b>                |
| Rheumatic heart disease                            | 10.7<br>(9.6 to 11.8)                         | 1.7<br>(1.6 to 1.8)                      | 0.8<br>(0.5 to 1.1)                     | 19.5<br>(0.1 to 41.5)                             | -4.4<br>(-19.9 to 12.3)                             |
| Ischaemic heart disease                            | 800.6<br>(739.6 to 880.1)                     | 91.1<br>(83.1 to 100.5)                  | 38.6<br>(27.3 to 52.3)                  | 21.7<br>(14.1 to 29.1)                            | -6.0<br>(-11.7 to -0.4)                             |
| Cerebrovascular disease                            | 578.1<br>(531.2 to 621.6)                     | 80.7‡<br>(73.8 to 88.3)                  | 94.9<br>(66.3 to 120.3)                 | 23.2<br>(13.9 to 34.7)                            | -3.9<br>(-11.2 to 5.0)                              |
| Ischaemic stroke                                   | 491.0<br>(432.7 to 550.5)                     | 60.3‡<br>(53.9 to 67.3)                  | 78.2<br>(54.0 to 100.3)                 | 20.4<br>(10.0 to 34.2)                            | -6.5<br>(-14.7 to 4.0)                              |
| Hemorrhagic stroke                                 | 107.6<br>(95.8 to 122.2)                      | 20.4‡<br>(18.3 to 22.4)                  | 16.7<br>(12.1 to 21.5)                  | 38.3<br>(23.7 to 53.9)                            | 9.2<br>(-1.4 to 21.0)                               |
| Hypertensive heart disease                         | 52.2<br>(44.2 to 61.9)                        | --                                       | 4.2<br>(2.9 to 6.0)                     | 21.6<br>(8.6 to 35.9)                             | -5.1<br>(-15.6 to 6.3)                              |
| Cardiomyopathy and myocarditis                     | 60.1<br>(52.5 to 68.5)                        | 9.4†<br>(8.1 to 10.9)                    | 5.4<br>(3.6 to 7.6)                     | 17.4<br>(5.2 to 30.2)                             | -4.3<br>(-13.7 to 5.5)                              |
| Myocarditis                                        | 8.1<br>(7.2 to 9.0)                           | 9.4<br>(8.1 to 10.9)                     | 0.6<br>(0.4 to 0.9)                     | 7.4<br>(-7.2 to 24.6)                             | -4.6<br>(-18.1 to 11.4)                             |
| Alcoholic cardiomyopathy                           | 19.0<br>(15.6 to 22.7)                        | --                                       | 1.6<br>(1.0 to 2.3)                     | 21.9<br>(0.6 to 46.9)                             | -3.4<br>(-20.5 to 16.8)                             |
| Other cardiomyopathy                               | 38.4<br>(32.8 to 44.4)                        | --                                       | 3.2<br>(2.1 to 4.5)                     | 17.3<br>(3.3 to 33.5)                             | -4.6<br>(-16.4 to 8.4)                              |
| Atrial fibrillation and flutter                    | 506.6<br>(440.6 to 583.2)                     | 40.0<br>(34.1 to 46.8)                   | 39.8<br>(27.0 to 54.8)                  | 20.9<br>(9.4 to 30.5)                             | -6.7<br>(-15.6 to 1.1)                              |
| Peripheral vascular disease                        | 1,266.5<br>(1,108.5 to 1,440.8)               | 109.7<br>(95.1 to 128.4)                 | 4.3<br>(2.0 to 8.1)                     | 27.5<br>(18.3 to 37.3)                            | -4.6<br>(-11.4 to 2.6)                              |
| Endocarditis                                       | 5.8<br>(4.9 to 6.8)                           | 6.5<br>(5.8 to 7.1)                      | 0.5<br>(0.3 to 0.7)                     | 19.4<br>(0.1 to 43.3)                             | -6.6<br>(-21.3 to 11.0)                             |
| Other cardiovascular and circulatory diseases      | 1,005.3<br>(864.8 to 1,178.8)                 | --                                       | 52.3<br>(35.5 to 73.8)                  | 15.5<br>(7.2 to 24.1)                             | -6.9<br>(-13.7 to -0.3)                             |
| <b>Chronic respiratory diseases</b>                | <b>3,967.5</b><br><b>(3,807.6 to 4,144.8)</b> | <b>597.6†</b><br><b>(566.9 to 633.5)</b> | <b>146.0</b><br><b>(106.9 to 193.1)</b> | <b>7.1</b><br><b>(1.0 to 13.2)</b>                | <b>-7.4</b><br><b>(-12.6 to -2.5)</b>               |
| Chronic obstructive pulmonary disease              | 1,476.9<br>(1,385.9 to 1,579.0)               | 89.0<br>(84.0 to 94.7)                   | 38.6<br>(31.4 to 46.6)                  | 26.6<br>(8.4 to 43.7)                             | -0.5<br>(-14.5 to 12.1)                             |
| Pneumoconiosis                                     | 8.3<br>(7.6 to 9.2)                           | 0.6<br>(0.5 to 0.6)                      | 1.2<br>(0.8 to 1.7)                     | 31.7<br>(12.3 to 54.6)                            | 3.4<br>(-11.7 to 21.4)                              |
| Silicosis                                          | 0.4<br>(0.4 to 0.5)                           | < 0.05<br>(< 0.05 to < 0.05)             | 0.1<br>(< 0.05 to 0.1)                  | 15.3<br>(10.3 to 20.8)                            | -8.6<br>(-12.2 to -4.7)                             |



| Cause                                                          | Prevalence in thousands (95% UI)                 | Incidence in thousands (95% UI)                | YLDs in thousands (95% UI)                |                                                   |                                                     |
|----------------------------------------------------------------|--------------------------------------------------|------------------------------------------------|-------------------------------------------|---------------------------------------------------|-----------------------------------------------------|
|                                                                | 2016 counts                                      | 2016 counts                                    | 2016 counts                               | Percentage change in counts between 2006 and 2016 | Percentage change in age-standardised rates between |
| Asbestosis                                                     | 5.5<br>(4.8 to 6.3)                              | 0.4<br>(0.4 to 0.5)                            | 0.8<br>(0.5 to 1.1)                       | 37.5<br>(6.6 to 77.2)                             | 6.2<br>(-17.6 to 38.5)                              |
| Coal workers pneumoconiosis                                    | 1.4<br>(1.2 to 1.6)                              | 0.1<br>(0.1 to 0.1)                            | 0.2<br>(0.1 to 0.3)                       | 29.4<br>(23.6 to 35.4)                            | 2.2<br>(-2.3 to 6.8)                                |
| Other pneumoconiosis                                           | 1.0<br>(0.8 to 1.1)                              | < 0.05<br>(< 0.05 to < 0.05)                   | 0.2<br>(0.1 to 0.2)                       | 17.4<br>(8.1 to 26.9)                             | -1.3<br>(-9.1 to 7.0)                               |
| Asthma                                                         | 2,602.0<br>(2,442.2 to 2,779.5)                  | 504.3<br>(473.4 to 540.0)                      | 101.3<br>(67.4 to 145.1)                  | 0.0<br>(-5.5 to 5.4)                              | -9.5<br>(-14.8 to -4.5)                             |
| Interstitial lung disease and pulmonary sarcoidosis            | 34.5<br>(30.9 to 38.2)                           | 3.7<br>(3.4 to 4.0)                            | 3.8<br>(2.5 to 5.5)                       | 29.1<br>(14.4 to 46.9)                            | 3.0<br>(-8.0 to 16.1)                               |
| Other chronic respiratory diseases                             | --                                               | --                                             | 1.1<br>(0.9 to 1.4)                       | 51.8<br>(33.8 to 70.3)                            | 39.6<br>(21.4 to 59.4)                              |
| <b>Cirrhosis and other chronic liver diseases</b>              | <b>434.2</b><br><b>(414.5 to 453.5)</b>          | <b>6.6</b><br><b>(6.3 to 6.8)</b>              | <b>7.2</b><br><b>(5.1 to 10.1)</b>        | <b>23.7</b><br><b>(11.9 to 35.9)</b>              | <b>1.9</b><br><b>(-8.0 to 12.0)</b>                 |
| Cirrhosis and other chronic liver diseases due to hepatitis B  | 29.2<br>(26.4 to 32.5)                           | 0.5<br>(0.4 to 0.5)                            | 0.5<br>(0.3 to 0.8)                       | 24.2<br>(-4.5 to 61.3)                            | 2.6<br>(-19.3 to 31.2)                              |
| Cirrhosis and other chronic liver diseases due to hepatitis C  | 118.0<br>(108.3 to 128.3)                        | 1.8<br>(1.6 to 1.9)                            | 1.9<br>(1.3 to 2.7)                       | 23.6<br>(2.0 to 49.1)                             | 1.9<br>(-15.6 to 24.1)                              |
| Cirrhosis and other chronic liver diseases due to alcohol use  | 165.2<br>(150.9 to 179.9)                        | 2.7<br>(2.5 to 2.9)                            | 2.8<br>(1.9 to 3.9)                       | 25.5<br>(8.0 to 46.6)                             | 2.3<br>(-12.5 to 19.2)                              |
| Cirrhosis and other chronic liver diseases due to other causes | 121.8<br>(111.6 to 133.4)                        | 1.7<br>(1.6 to 1.8)                            | 2.0<br>(1.4 to 2.9)                       | 21.3<br>(1.1 to 44.1)                             | 1.3<br>(-16.2 to 22.5)                              |
| <b>Digestive diseases</b>                                      | <b>1,762.5</b><br><b>(1,665.9 to 1,859.6)</b>    | <b>1,438.7*</b><br><b>(1,343.7 to 1,536.7)</b> | <b>27.7</b><br><b>(19.6 to 37.8)</b>      | <b>16.9</b><br><b>(9.1 to 25.9)</b>               | <b>-0.2</b><br><b>(-6.4 to 7.3)</b>                 |
| Peptic ulcer disease                                           | 525.8<br>(478.2 to 580.6)                        | 38.5<br>(34.3 to 43.0)                         | 5.4<br>(3.3 to 8.7)                       | 14.3<br>(-0.7 to 33.3)                            | 1.6<br>(-12.0 to 19.4)                              |
| Gastritis and duodenitis                                       | 765.8<br>(664.5 to 877.5)                        | 575.5<br>(508.0 to 650.9)                      | 6.5<br>(4.0 to 10.2)                      | 14.2<br>(1.5 to 28.6)                             | -0.6<br>(-11.9 to 12.6)                             |
| Appendicitis                                                   | 1.2<br>(1.1 to 1.3)                              | 31.1<br>(28.9 to 33.5)                         | 0.4<br>(0.3 to 0.5)                       | 6.5<br>(3.8 to 9.2)                               | -2.9<br>(-5.3 to -0.1)                              |
| Paralytic ileus and intestinal obstruction                     | 1.7<br>(1.5 to 1.9)                              | 44.1<br>(39.6 to 49.4)                         | 0.5<br>(0.3 to 0.7)                       | 25.8<br>(5.0 to 50.1)                             | 2.7<br>(-12.3 to 20.4)                              |
| Inguinal, femoral, and abdominal hernia                        | 367.3<br>(319.3 to 418.9)                        | 148.1<br>(125.7 to 169.6)                      | 4.9<br>(3.3 to 6.9)                       | 17.6<br>(2.2 to 35.4)                             | -5.1<br>(-17.2 to 8.9)                              |
| Inflammatory bowel disease                                     | 24.5<br>(23.0 to 26.2)                           | 12.3<br>(11.9 to 12.6)                         | 3.6<br>(2.4 to 5.0)                       | 13.1<br>(-3.8 to 32.7)                            | -1.5<br>(-16.1 to 15.9)                             |
| Vascular intestinal disorders                                  | 2.7<br>(2.4 to 3.0)                              | 14.0<br>(12.2 to 16.0)                         | 0.8<br>(0.5 to 1.1)                       | 36.2<br>(6.3 to 71.2)                             | 7.1<br>(-15.3 to 34.9)                              |
| Gallbladder and biliary diseases                               | 116.0<br>(101.6 to 130.1)                        | 458.6<br>(404.8 to 514.5)                      | 1.9<br>(1.3 to 2.8)                       | 21.3<br>(-0.4 to 46.7)                            | 1.9<br>(-16.1 to 23.4)                              |
| Pancreatitis                                                   | 13.4<br>(12.0 to 15.0)                           | 116.5<br>(104.0 to 130.0)                      | 1.6<br>(1.0 to 2.3)                       | 22.1<br>(-1.6 to 53.0)                            | 2.5<br>(-15.3 to 24.1)                              |
| Other digestive diseases                                       | --                                               | --                                             | 2.1<br>(1.5 to 2.9)                       | 24.2<br>(16.6 to 32.3)                            | 3.7<br>(-2.3 to 10.8)                               |
| <b>Neurological disorders</b>                                  | <b>13,189.9</b><br><b>(12,681.7 to 13,819.1)</b> | <b>5,062.6</b><br><b>(4,367.5 to 5,855.0)</b>  | <b>411.1</b><br><b>(280.0 to 554.1)</b>   | <b>8.3</b><br><b>(-0.4 to 18.6)</b>               | <b>-4.6</b><br><b>(-13.3 to 5.2)</b>                |
| Alzheimer's disease and other dementias                        | 317.0<br>(280.9 to 352.5)                        | 56.3<br>(49.7 to 63.6)                         | 48.3<br>(34.1 to 63.1)                    | 31.8<br>(25.7 to 38.1)                            | -1.9<br>(-6.1 to 2.8)                               |
| Parkinson's disease                                            | 103.9<br>(78.5 to 126.7)                         | 12.0<br>(9.0 to 14.9)                          | 12.1<br>(7.7 to 17.4)                     | 35.5<br>(24.2 to 48.3)                            | 5.1<br>(-3.8 to 14.6)                               |
| Epilepsy                                                       | 84.8<br>(21.5 to 147.8)                          | 7.0<br>(1.8 to 12.2)                           | 20.0<br>(4.0 to 48.0)                     | 10.7<br>(-76.9 to 515.4)                          | -2.1<br>(-79.6 to 446.1)                            |
| Multiple sclerosis                                             | 79.4<br>(72.0 to 86.4)                           | 1.9<br>(1.7 to 2.1)                            | 20.4<br>(14.3 to 26.6)                    | 24.0<br>(9.1 to 39.6)                             | 6.7<br>(-6.2 to 20.5)                               |
| Motor neuron disease                                           | 10.0<br>(9.2 to 11.0)                            | 1.4<br>(1.3 to 1.4)                            | 2.1<br>(1.5 to 2.8)                       | 33.2<br>(25.7 to 41.8)                            | 11.3<br>(5.1 to 17.8)                               |
| Migraine                                                       | 6,301.1<br>(6,085.8 to 6,517.3)                  | 535.6<br>(512.6 to 559.1)                      | 264.8<br>(168.7 to 371.3)                 | 2.3<br>(-0.9 to 5.7)                              | -6.8<br>(-9.7 to -3.5)                              |
| Tension-type headache                                          | 8,696.1<br>(7,792.1 to 9,694.5)                  | 4,448.1<br>(3,748.0 to 5,233.9)                | 36.2<br>(23.2 to 53.0)                    | 8.7<br>(2.9 to 14.9)                              | -2.2<br>(-7.1 to 3.3)                               |
| Other neurological disorders                                   | 0.1<br>(0.1 to 0.2)                              | 0.3<br>(0.2 to 0.4)                            | 7.2<br>(4.2 to 11.9)                      | 27.4<br>(-30.8 to 145.6)                          | 16.9<br>(-43.2 to 156.7)                            |
| <b>Mental and substance use disorders</b>                      | <b>6,439.3</b><br><b>(6,252.9 to 6,626.4)</b>    | <b>2,073.8*</b><br><b>(1,953.5 to 2,209.3)</b> | <b>930.4</b><br><b>(674.1 to 1,194.4)</b> | <b>13.6</b><br><b>(10.9 to 16.1)</b>              | <b>2.8</b><br><b>(0.4 to 5.2)</b>                   |
| Schizophrenia                                                  | 128.0<br>(126.4 to 129.7)                        | 4.5<br>(4.3 to 4.8)                            | 81.6<br>(62.1 to 97.6)                    | 12.8<br>(6.2 to 19.9)                             | -0.0<br>(-6.1 to 6.4)                               |
| Alcohol use disorders                                          | 539.9<br>(475.6 to 608.0)                        | 286.4<br>(250.8 to 323.1)                      | 53.8<br>(36.8 to 74.0)                    | 12.4<br>(3.7 to 20.8)                             | 1.1<br>(-6.8 to 8.6)                                |
| Drug use disorders                                             | 710.6<br>(674.5 to 752.0)                        | 52.9<br>(48.2 to 58.1)                         | 146.9<br>(105.0 to 190.2)                 | 16.8<br>(7.9 to 26.7)                             | 5.1<br>(-3.2 to 14.1)                               |
| Opioid use disorders                                           | 231.6<br>(201.3 to 264.0)                        | 15.1<br>(13.0 to 17.4)                         | 96.1<br>(66.3 to 125.7)                   | 22.1<br>(10.1 to 34.6)                            | 9.4<br>(-2.0 to 21.3)                               |
| Cocaine use disorders                                          | 132.2<br>(117.2 to 148.0)                        | 4.9<br>(4.2 to 5.7)                            | 17.9<br>(11.2 to 26.2)                    | 11.7<br>(-2.1 to 26.5)                            | 0.9<br>(-11.9 to 14.8)                              |
| Amphetamine use disorders                                      | 41.2<br>(30.2 to 53.9)                           | 3.2<br>(2.4 to 4.1)                            | 5.4<br>(3.0 to 8.5)                       | 12.0<br>(-10.3 to 37.7)                           | 2.6<br>(-17.6 to 27.5)                              |
| Cannabis use disorders                                         | 284.6<br>(247.0 to 329.0)                        | 24.3<br>(20.2 to 29.3)                         | 8.3<br>(5.3 to 12.1)                      | -8.1<br>(-22.1 to 8.5)                            | -16.1<br>(-29.7 to 0.4)                             |
| Other drug use disorders                                       | 37.9<br>(34.5 to 41.8)                           | 5.5<br>(4.9 to 6.0)                            | 19.2<br>(12.5 to 27.8)                    | 11.9<br>(-10.6 to 39.6)                           | 1.7<br>(-19.2 to 27.6)                              |
| Depressive disorders                                           | 1,437.5<br>(1,353.7 to 1,548.1)                  | 1,338.7<br>(1,224.0 to 1,467.2)                | 228.6<br>(159.4 to 308.8)                 | 11.2<br>(6.2 to 16.8)                             | 0.7<br>(-4.1 to 5.8)                                |
| Major depressive disorder                                      | 812.8<br>(742.9 to 896.9)                        | 1,235.3<br>(1,125.1 to 1,363.0)                | 166.7<br>(114.0 to 227.4)                 | 10.3<br>(3.4 to 17.6)                             | 1.0<br>(-5.3 to 7.5)                                |
| Dysthymia                                                      | 645.3<br>(565.1 to 742.4)                        | 103.4<br>(90.3 to 118.5)                       | 61.8<br>(41.5 to 89.8)                    | 13.9<br>(10.2 to 18.0)                            | -0.0<br>(-3.1 to 3.2)                               |
| Bipolar disorder                                               | 304.9<br>(269.6 to 347.7)                        | 20.6<br>(18.2 to 23.6)                         | 62.0<br>(38.4 to 91.5)                    | 11.1<br>(5.8 to 17.2)                             | -0.1<br>(-5.1 to 5.4)                               |
| Anxiety disorders                                              | 1,935.5<br>(1,759.9 to 2,121.9)                  | 249.7<br>(230.7 to 270.6)                      | 185.4<br>(129.1 to 249.4)                 | 15.6<br>(8.2 to 23.7)                             | 4.7<br>(-1.8 to 12.4)                               |
| Eating disorders                                               | 89.4<br>(74.2 to 108.0)                          | 30.5<br>(22.8 to 39.3)                         | 18.4<br>(11.8 to 26.4)                    | 9.1<br>(-1.3 to 20.6)                             | 3.8<br>(-5.8 to 14.5)                               |
| Anorexia nervosa                                               | 26.1<br>(18.5 to 35.2)                           | 6.2<br>(4.6 to 8.4)                            | 5.5<br>(3.4 to 8.3)                       | 9.3<br>(-6.3 to 29.2)                             | 3.4<br>(-11.1 to 22.5)                              |
| Bulimia nervosa                                                | 61.3<br>(46.1 to 81.5)                           | 24.3<br>(17.0 to 33.2)                         | 12.9<br>(7.8 to 19.3)                     | 9.0<br>(-2.9 to 22.9)                             | 4.0<br>(-7.4 to 17.6)                               |
| Autistic spectrum disorders                                    | 316.6<br>(288.2 to 347.6)                        | 1.2<br>(0.8 to 1.6)                            | 50.1<br>(33.6 to 71.1)                    | 10.9<br>(5.8 to 16.4)                             | 0.6<br>(-4.0 to 5.8)                                |
| Autism                                                         | 122.0<br>(104.1 to 142.8)                        | 0.1<br>(0.1 to 0.2)                            | 30.7<br>(19.8 to 44.7)                    | 11.5<br>(3.8 to 19.6)                             | 0.9<br>(-6.4 to 8.8)                                |
| Asperger syndrome and other autistic spectrum disorders        | 194.7<br>(167.1 to 229.2)                        | 1.0<br>(0.7 to 1.5)                            | 19.4<br>(12.8 to 27.9)                    | 9.9<br>(5.0 to 15.0)                              | 0.0<br>(-4.5 to 5.0)                                |

| Cause                                                      | Prevalence in thousands (95% UI)                 | Incidence in thousands (95% UI)                   | YLDs in thousands (95% UI)                  |                                                   |                                                     |
|------------------------------------------------------------|--------------------------------------------------|---------------------------------------------------|---------------------------------------------|---------------------------------------------------|-----------------------------------------------------|
|                                                            | 2016 counts                                      | 2016 counts                                       | 2016 counts                                 | Percentage change in counts between 2006 and 2016 | Percentage change in age-standardised rates between |
| Attention-deficit/hyperactivity disorder                   | 328.3<br>(295.2 to 368.1)                        | 13.7<br>(11.9 to 16.1)                            | 4.0<br>(2.4 to 6.4)                         | 1.5<br>(-7.9 to 12.4)                             | -0.6<br>(-9.8 to 10.6)                              |
| Conduct disorder                                           | 173.1<br>(146.0 to 201.2)                        | 54.3<br>(44.6 to 63.8)                            | 21.0<br>(12.8 to 31.6)                      | -5.0<br>(-12.6 to 3.1)                            | -0.1<br>(-7.9 to 8.1)                               |
| Idiopathic developmental intellectual disability           | 225.3<br>(102.6 to 346.5)                        | --                                                | 11.4<br>(5.4 to 19.2)                       | 158.2<br>(124.9 to 257.8)                         | 139.5<br>(108.0 to 231.8)                           |
| Other mental and substance use disorders                   | 911.9<br>(803.1 to 1,035.6)                      | 21.3<br>(19.0 to 23.9)                            | 67.4<br>(46.7 to 95.8)                      | 14.1<br>(9.4 to 18.8)                             | -0.1<br>(-4.4 to 4.3)                               |
| <b>Diabetes, urogenital, blood, and endocrine diseases</b> | <b>11,129.7</b><br><b>(10,917.9 to 11,338.5)</b> | <b>4,590.4†</b><br><b>(4,312.8 to 4,896.8)</b>    | <b>326.5</b><br><b>(230.8 to 435.5)</b>     | <b>22.4</b><br><b>(16.9 to 29.6)</b>              | <b>-0.3</b><br><b>(-4.8 to 5.0)</b>                 |
| Diabetes mellitus                                          | 2,357.5<br>(2,133.3 to 2,598.2)                  | 126.1<br>(112.0 to 142.5)                         | 184.3<br>(126.6 to 253.0)                   | 24.7<br>(15.2 to 37.3)                            | -0.5<br>(-7.8 to 9.0)                               |
| Acute glomerulonephritis                                   | 0.4<br>(0.3 to 0.4)                              | 5.3<br>(4.6 to 6.0)                               | < 0.05<br>(< 0.05 to < 0.05)                | 16.2<br>(11.1 to 21.9)                            | 0.3<br>(-3.3 to 4.4)                                |
| Chronic kidney disease                                     | 1,601.7<br>(1,438.8 to 1,760.4)                  | 141.3<br>(123.9 to 158.9)                         | 45.0<br>(33.8 to 57.0)                      | 23.2<br>(15.4 to 31.4)                            | -0.9<br>(-6.9 to 5.8)                               |
| Chronic kidney disease due to diabetes mellitus            | 809.2<br>(700.3 to 924.5)                        | 73.9<br>(62.0 to 85.3)                            | 23.0<br>(17.1 to 29.5)                      | 21.6<br>(10.5 to 33.3)                            | -2.2<br>(-11.4 to 7.4)                              |
| Chronic kidney disease due to hypertension                 | 246.3<br>(208.8 to 287.7)                        | 12.4<br>(9.8 to 15.9)                             | 9.1<br>(6.5 to 12.0)                        | 30.6<br>(16.5 to 46.1)                            | -0.4<br>(-11.6 to 11.0)                             |
| Chronic kidney disease due to glomerulonephritis           | 291.3<br>(244.3 to 339.6)                        | 32.9<br>(26.7 to 40.7)                            | 5.1<br>(3.7 to 7.0)                         | 20.4<br>(7.5 to 34.8)                             | 2.2<br>(-9.4 to 14.9)                               |
| Chronic kidney disease due to other causes                 | 254.9<br>(204.1 to 311.2)                        | 22.1<br>(17.4 to 27.8)                            | 7.7<br>(5.6 to 10.2)                        | 21.9<br>(8.4 to 36.5)                             | 0.2<br>(-10.0 to 12.4)                              |
| Urinary diseases and male infertility                      | 1,031.7<br>(914.5 to 1,151.9)                    | 3,111.6†<br>(2,836.7 to 3,407.9)                  | 33.4<br>(21.7 to 47.9)                      | 29.7<br>(21.1 to 38.1)                            | 0.9<br>(-5.7 to 7.0)                                |
| Interstitial nephritis and urinary tract infections        | 44.3<br>(39.3 to 49.4)                           | 2,332.0<br>(2,070.7 to 2,609.4)                   | 1.4<br>(0.9 to 2.2)                         | 17.3<br>(3.8 to 33.3)                             | 0.9<br>(-11.8 to 15.0)                              |
| Urolithiasis                                               | 25.3<br>(22.3 to 28.9)                           | 667.1<br>(588.6 to 758.9)                         | 1.8<br>(1.2 to 2.6)                         | 18.9<br>(-1.7 to 45.7)                            | 0.6<br>(-15.9 to 21.9)                              |
| Benign prostatic hyperplasia                               | 876.6<br>(742.0 to 1,021.7)                      | 112.6<br>(93.7 to 134.7)                          | 28.7<br>(18.2 to 42.0)                      | 33.4<br>(23.4 to 42.8)                            | 2.1<br>(-5.6 to 9.4)                                |
| Male infertility                                           | 57.5<br>(45.4 to 74.1)                           | --                                                | 0.4<br>(0.1 to 0.8)                         | -3.7<br>(-12.8 to 5.8)                            | -7.0<br>(-15.3 to 1.7)                              |
| Other urinary diseases                                     | --                                               | --                                                | 1.1<br>(0.7 to 1.5)                         | -2.3<br>(-13.5 to 12.3)                           | -15.8<br>(-25.1 to -4.6)                            |
| Gynecological diseases                                     | 3,464.5<br>(3,324.6 to 3,622.1)                  | 1,050.4†<br>(993.2 to 1,107.0)                    | 33.9<br>(22.8 to 49.3)                      | 6.1<br>(1.0 to 11.2)                              | 0.6<br>(-4.2 to 5.5)                                |
| Uterine fibroids                                           | 198.7<br>(173.5 to 225.9)                        | 18.5<br>(16.2 to 21.1)                            | 2.0<br>(1.1 to 3.7)                         | 13.3<br>(3.8 to 25.8)                             | 7.9<br>(-1.7 to 20.4)                               |
| Polycystic ovarian syndrome                                | 238.4<br>(180.1 to 307.6)                        | 32.4<br>(23.3 to 43.2)                            | 2.1<br>(0.9 to 4.2)                         | 1.7<br>(-3.8 to 7.7)                              | 1.7<br>(-3.2 to 7.1)                                |
| Female infertility                                         | 21.3<br>(6.0 to 47.8)                            | --                                                | 0.1<br>(< 0.05 to 0.4)                      | 24.8<br>(-5.9 to 73.1)                            | 13.4<br>(-11.8 to 63.8)                             |
| Endometriosis                                              | 26.0<br>(21.5 to 31.3)                           | 61.2<br>(50.4 to 75.0)                            | 2.4<br>(1.6 to 3.5)                         | 5.2<br>(-14.9 to 26.6)                            | 1.9<br>(-17.0 to 22.9)                              |
| Genital prolapse                                           | 987.6<br>(848.2 to 1,145.8)                      | 42.2<br>(35.8 to 50.0)                            | 3.1<br>(1.5 to 5.6)                         | 20.9<br>(9.1 to 33.7)                             | -2.4<br>(-12.0 to 8.1)                              |
| Premenstrual syndrome                                      | 2,080.6<br>(1,968.2 to 2,185.5)                  | 710.4<br>(660.8 to 750.4)                         | 17.3<br>(10.8 to 26.3)                      | 3.4<br>(-4.3 to 10.6)                             | -0.6<br>(-7.7 to 6.3)                               |
| Other gynecological diseases                               | 197.2<br>(168.9 to 229.0)                        | 185.7<br>(155.8 to 220.2)                         | 6.7<br>(4.4 to 9.8)                         | 6.8<br>(-4.9 to 21.9)                             | 1.9<br>(-10.2 to 15.8)                              |
| Hemoglobinopathies and hemolytic anaemias                  | 4,347.8<br>(4,264.1 to 4,426.6)                  | --                                                | 4.9<br>(3.1 to 7.5)                         | 2.0<br>(-8.8 to 14.9)                             | -11.3<br>(-21.7 to 2.5)                             |
| Thalassemias                                               | 0.3<br>(0.3 to 0.3)                              | --                                                | < 0.05<br>(< 0.05 to < 0.05)                | 8.0<br>(0.4 to 17.0)                              | 3.6<br>(-4.6 to 13.0)                               |
| Thalassaemias trait                                        | 383.2<br>(365.8 to 401.7)                        | --                                                | 3.3<br>(2.0 to 5.2)                         | -0.6<br>(-13.1 to 14.5)                           | -13.6<br>(-24.9 to 1.3)                             |
| Sickle cell disorders                                      | 0.5<br>(0.5 to 0.5)                              | --                                                | 0.1<br>(0.1 to 0.1)                         | 25.9<br>(21.1 to 30.6)                            | 17.2<br>(11.9 to 22.1)                              |
| Sickle cell trait                                          | 393.2<br>(384.4 to 401.8)                        | --                                                | 0.8<br>(0.5 to 1.3)                         | -2.5<br>(-18.6 to 15.5)                           | -13.7<br>(-29.3 to 4.4)                             |
| G6PD deficiency                                            | 707.2<br>(674.6 to 743.4)                        | --                                                | < 0.05<br>(< 0.05 to 0.1)                   | 11.7<br>(-1.3 to 27.0)                            | -4.1<br>(-18.4 to 14.0)                             |
| G6PD trait                                                 | 2,941.0<br>(2,877.6 to 3,011.5)                  | --                                                | < 0.05<br>(< 0.05 to < 0.05)                | -7.1<br>(-19.4 to 8.8)                            | -17.3<br>(-29.0 to -3.0)                            |
| Other hemoglobinopathies and hemolytic anaemias            | 33.9<br>(30.4 to 38.1)                           | --                                                | 0.7<br>(0.5 to 1.0)                         | 20.9<br>(7.0 to 37.8)                             | 3.7<br>(-12.3 to 24.2)                              |
| Endocrine, metabolic, blood, and immune disorders          | 720.5<br>(654.2 to 794.0)                        | 155.8<br>(139.5 to 172.8)                         | 25.1<br>(16.9 to 34.9)                      | 26.1<br>(18.1 to 34.4)                            | 2.5<br>(-3.8 to 9.7)                                |
| <b>Musculoskeletal disorders</b>                           | <b>9,909.3</b><br><b>(9,538.6 to 10,360.7)</b>   | <b>5,743.7</b><br><b>(5,225.9 to 6,349.1)</b>     | <b>1,035.2</b><br><b>(758.6 to 1,339.9)</b> | <b>21.5</b><br><b>(17.4 to 25.5)</b>              | <b>3.3</b><br><b>(-0.1 to 6.9)</b>                  |
| Rheumatoid arthritis                                       | 190.8<br>(172.4 to 212.1)                        | 9.3<br>(8.3 to 10.4)                              | 44.6<br>(31.1 to 59.9)                      | 40.5<br>(28.5 to 52.6)                            | 14.9<br>(5.5 to 24.7)                               |
| Osteoarthritis                                             | 3,147.5<br>(2,952.4 to 3,341.3)                  | 141.0<br>(130.5 to 151.5)                         | 110.8<br>(72.5 to 159.4)                    | 26.2<br>(21.8 to 30.3)                            | 0.0<br>(-3.5 to 3.2)                                |
| Low back and neck pain                                     | 5,327.6<br>(4,968.2 to 5,727.7)                  | 2,409.6<br>(2,110.3 to 2,743.3)                   | 625.8<br>(443.1 to 827.9)                   | 22.7<br>(17.2 to 29.4)                            | 5.2<br>(0.7 to 10.8)                                |
| Low back pain                                              | 4,415.1<br>(3,916.0 to 4,974.0)                  | 2,151.0<br>(1,850.6 to 2,482.9)                   | 500.4<br>(352.5 to 661.4)                   | 24.1<br>(17.2 to 32.6)                            | 6.5<br>(1.0 to 14.1)                                |
| Neck pain                                                  | 1,263.6<br>(1,091.2 to 1,464.7)                  | 258.6<br>(226.0 to 302.9)                         | 125.4<br>(84.8 to 178.3)                    | 17.3<br>(13.6 to 21.2)                            | -0.2<br>(-2.8 to 2.3)                               |
| Gout                                                       | 410.5<br>(361.3 to 468.4)                        | 69.6<br>(59.9 to 80.1)                            | 12.9<br>(8.7 to 18.1)                       | 23.8<br>(10.5 to 38.4)                            | 1.2<br>(-9.5 to 12.9)                               |
| Other musculoskeletal disorders                            | 2,819.5<br>(2,400.0 to 3,278.5)                  | 3,114.1<br>(2,683.1 to 3,639.6)                   | 241.1<br>(164.2 to 335.7)                   | 13.7<br>(5.6 to 22.3)                             | -1.1<br>(-7.9 to 6.0)                               |
| <b>Other non-communicable diseases</b>                     | <b>25,851.9</b><br><b>(25,494.0 to 26,207.8)</b> | <b>60,941.9†</b><br><b>(58,004.1 to 63,977.6)</b> | <b>821.0</b><br><b>(562.8 to 1,153.8)</b>   | <b>17.8</b><br><b>(16.4 to 19.4)</b>              | <b>1.0</b><br><b>(-0.2 to 2.3)</b>                  |
| Congenital anomalies                                       | 282.9<br>(262.0 to 306.6)                        | --                                                | 33.8<br>(24.3 to 44.0)                      | 13.0<br>(6.7 to 20.4)                             | 1.1<br>(-4.5 to 7.6)                                |
| Neural tube defects                                        | 17.4<br>(15.6 to 19.4)                           | --                                                | 5.2<br>(3.6 to 7.0)                         | 26.9<br>(7.6 to 50.8)                             | 14.0<br>(-4.0 to 35.9)                              |
| Congenital heart anomalies                                 | 88.4<br>(78.4 to 99.9)                           | --                                                | 4.8<br>(2.0 to 8.3)                         | 9.0<br>(-3.0 to 22.1)                             | -2.5<br>(-13.7 to 9.6)                              |
| Orofacial clefts                                           | 28.7<br>(24.8 to 32.9)                           | --                                                | 0.3<br>(0.2 to 0.4)                         | 8.2<br>(-7.8 to 24.8)                             | -3.3<br>(-17.8 to 11.6)                             |
| Down's syndrome                                            | 18.2<br>(15.5 to 21.0)                           | --                                                | 1.6<br>(1.1 to 2.3)                         | -0.3<br>(-17.1 to 18.3)                           | -6.5<br>(-22.1 to 11.7)                             |
| Turner syndrome                                            | 6.2<br>(5.4 to 7.2)                              | --                                                | 0.1<br>(0.1 to 0.2)                         | 4.5<br>(-25.6 to 46.4)                            | -1.6<br>(-34.5 to 46.8)                             |
| Klinefelter syndrome                                       | 10.0<br>(8.4 to 11.8)                            | --                                                | 0.1<br>(< 0.05 to 0.1)                      | 6.0<br>(-19.6 to 38.3)                            | 0.2<br>(-24.8 to 32.4)                              |



| Cause                                         | Prevalence in thousands (95% UI)                 | Incidence in thousands (95% UI)                           | YLDs in thousands (95% UI)              |                                                   |                                                     |
|-----------------------------------------------|--------------------------------------------------|-----------------------------------------------------------|-----------------------------------------|---------------------------------------------------|-----------------------------------------------------|
|                                               | 2016 counts                                      | 2016 counts                                               | 2016 counts                             | Percentage change in counts between 2006 and 2016 | Percentage change in age-standardised rates between |
| Other chromosomal abnormalities               | 16.9<br>(14.3 to 20.1)                           | --                                                        | 1.9<br>(1.3 to 2.6)                     | 3.5<br>(-12.1 to 22.2)                            | 0.4<br>(-15.2 to 19.4)                              |
| Congenital musculoskeletal and limb anomalies | 46.4<br>(42.3 to 50.6)                           | --                                                        | 6.7<br>(4.6 to 9.4)                     | 13.1<br>(2.0 to 26.0)                             | 0.2<br>(-9.8 to 11.0)                               |
| Urogenital congenital anomalies               | 32.1<br>(28.3 to 36.0)                           | --                                                        | 0.9<br>(0.5 to 1.4)                     | -7.8<br>(-21.9 to 8.7)                            | -16.6<br>(-30.9 to 0.8)                             |
| Digestive congenital anomalies                | 48.7<br>(43.5 to 54.6)                           | --                                                        | 2.1<br>(1.4 to 3.1)                     | -1.0<br>(-15.0 to 14.7)                           | -10.9<br>(-23.5 to 3.0)                             |
| Other congenital anomalies                    | 61.4<br>(39.6 to 92.7)                           | --                                                        | 10.1<br>(6.8 to 14.4)                   | 19.1<br>(6.5 to 34.2)                             | 5.3<br>(-5.5 to 18.1)                               |
| Skin and subcutaneous diseases                | 12,763.8<br>(12,583.3 to 12,944.7)               | 21,626.6<br>(20,830.4 to 22,481.0)                        | 355.7<br>(242.2 to 502.5)               | 10.5<br>(8.7 to 12.3)                             | 0.9<br>(-0.8 to 2.6)                                |
| Dermatitis                                    | 2,690.4<br>(2,563.0 to 2,830.9)                  | 3,234.6<br>(2,960.6 to 3,533.9)                           | 94.9<br>(57.5 to 150.2)                 | 10.8<br>(7.7 to 14.1)                             | 0.0<br>(-3.2 to 3.5)                                |
| Psoriasis                                     | 650.6<br>(626.5 to 673.9)                        | 52.1<br>(50.2 to 54.0)                                    | 56.2<br>(40.3 to 73.8)                  | 17.7<br>(11.6 to 24.2)                            | 3.0<br>(-2.9 to 9.1)                                |
| Cellulitis                                    | 50.7<br>(47.8 to 54.0)                           | 1,339.1<br>(1,260.6 to 1,415.0)                           | 2.8<br>(1.8 to 4.0)                     | 16.1<br>(3.2 to 31.3)                             | 0.3<br>(-11.8 to 14.3)                              |
| Pyoderma                                      | 25.6<br>(24.8 to 26.4)                           | 485.1<br>(471.6 to 499.1)                                 | 0.1<br>(0.1 to 0.3)                     | 12.8<br>(0.4 to 26.9)                             | 0.5<br>(-11.5 to 13.9)                              |
| Scabies                                       | 165.9<br>(147.4 to 188.3)                        | 495.0<br>(436.3 to 559.6)                                 | 4.3<br>(2.4 to 6.8)                     | 8.7<br>(3.2 to 14.6)                              | 0.1<br>(-4.9 to 5.2)                                |
| Fungal skin diseases                          | 1,160.1<br>(1,037.2 to 1,295.8)                  | 4,403.9<br>(3,884.5 to 4,962.0)                           | 6.4<br>(2.6 to 13.4)                    | 19.7<br>(16.9 to 22.5)                            | -0.1<br>(-1.9 to 1.8)                               |
| Viral skin diseases                           | 1,024.9<br>(993.9 to 1,058.0)                    | 1,277.6<br>(1,237.2 to 1,322.1)                           | 31.3<br>(19.3 to 46.1)                  | 7.1<br>(4.1 to 10.2)                              | -0.1<br>(-2.9 to 2.9)                               |
| Acne vulgaris                                 | 4,077.2<br>(3,887.8 to 4,265.7)                  | 3,140.4<br>(2,693.3 to 3,677.2)                           | 104.5<br>(70.0 to 151.7)                | 3.8<br>(0.3 to 7.6)                               | 1.1<br>(-2.3 to 4.9)                                |
| Alopecia areata                               | 143.6<br>(138.5 to 148.8)                        | 253.7<br>(244.6 to 263.0)                                 | 4.7<br>(3.0 to 7.0)                     | 11.7<br>(3.8 to 20.1)                             | -0.2<br>(-7.5 to 7.3)                               |
| Pruritus                                      | 339.9<br>(299.9 to 385.6)                        | 273.0<br>(242.2 to 310.8)                                 | 3.6<br>(1.7 to 6.7)                     | 17.2<br>(11.5 to 23.7)                            | 0.7<br>(-4.2 to 6.0)                                |
| Urticaria                                     | 306.0<br>(269.1 to 344.0)                        | 543.5<br>(480.3 to 613.0)                                 | 18.3<br>(11.9 to 25.9)                  | 10.3<br>(4.7 to 16.5)                             | 0.0<br>(-5.2 to 5.4)                                |
| Decubitus ulcer                               | 21.7<br>(19.1 to 24.6)                           | 80.0<br>(69.9 to 91.1)                                    | 3.4<br>(2.3 to 4.6)                     | 29.9<br>(12.7 to 49.5)                            | 0.8<br>(-12.2 to 16.1)                              |
| Other skin and subcutaneous diseases          | 4,653.5<br>(4,527.2 to 4,791.8)                  | 6,048.6<br>(5,831.4 to 6,279.8)                           | 25.4<br>(12.2 to 46.6)                  | 23.0<br>(20.4 to 25.7)                            | 2.8<br>(0.7 to 5.0)                                 |
| Sense organ diseases                          | 8,876.2<br>(8,654.9 to 9,099.5)                  | 3,796.1 <sup>†</sup><br>(3,597.6 to 4,016.9)              | 289.0<br>(199.4 to 400.3)               | 27.2<br>(23.5 to 30.9)                            | 1.7<br>(-0.9 to 4.7)                                |
| Glaucoma                                      | 21.2<br>(17.9 to 24.6)                           | --                                                        | 2.4<br>(1.5 to 3.4)                     | 31.5<br>(14.5 to 52.4)                            | -1.0<br>(-14.5 to 15.1)                             |
| Cataract                                      | 102.4<br>(88.5 to 119.3)                         | --                                                        | 7.3<br>(5.1 to 9.9)                     | 28.3<br>(18.9 to 39.0)                            | -2.5<br>(-10.0 to 5.8)                              |
| Macular degeneration                          | 18.8<br>(16.0 to 22.0)                           | --                                                        | 1.8<br>(1.2 to 2.6)                     | 34.3<br>(16.9 to 54.2)                            | -0.1<br>(-13.7 to 15.2)                             |
| Refraction and accommodation disorders        | 2,047.2<br>(1,965.9 to 2,129.9)                  | --                                                        | 32.0<br>(19.3 to 51.6)                  | 17.7<br>(14.0 to 21.5)                            | 1.0<br>(-2.3 to 4.2)                                |
| Age-related and other hearing loss            | 7,177.2<br>(6,804.8 to 7,550.0)                  | --                                                        | 193.7<br>(134.2 to 271.1)               | 30.2<br>(25.0 to 36.0)                            | 2.8<br>(-1.2 to 7.3)                                |
| Other vision loss                             | 89.3<br>(79.2 to 99.6)                           | --                                                        | 7.3<br>(5.1 to 9.8)                     | 16.7<br>(6.4 to 27.2)                             | -6.4<br>(-14.6 to 2.9)                              |
| Other sense organ diseases                    | 1,416.9<br>(1,308.3 to 1,518.5)                  | 3,796.1<br>(3,597.6 to 4,016.9)                           | 44.5<br>(27.8 to 66.4)                  | 22.9<br>(18.1 to 28.0)                            | 0.5<br>(-3.5 to 4.8)                                |
| Oral disorders                                | 15,980.3<br>(15,393.2 to 16,554.7)               | 35,519.3 <sup>†</sup><br>(32,541.5 to 38,550.9)           | 142.6<br>(87.9 to 220.9)                | 21.1<br>(18.4 to 24.3)                            | 0.1<br>(-2.0 to 2.1)                                |
| Caries of deciduous teeth                     | 942.9<br>(633.6 to 1,176.0)                      | 3,585.0<br>(1,856.8 to 5,339.9)                           | 0.4<br>(0.1 to 0.7)                     | 31.2<br>(9.0 to 68.9)                             | 22.8<br>(1.9 to 57.4)                               |
| Caries of permanent teeth                     | 9,578.9<br>(9,019.7 to 10,150.2)                 | 31,156.6<br>(28,793.2 to 33,573.6)                        | 9.3<br>(4.1 to 17.8)                    | 11.4<br>(7.9 to 15.1)                             | -0.6<br>(-3.8 to 2.7)                               |
| Periodontal disease                           | 5,164.3<br>(4,349.9 to 6,061.9)                  | 588.6<br>(468.5 to 712.0)                                 | 33.7<br>(13.4 to 70.9)                  | 18.0<br>(13.2 to 22.9)                            | -0.2<br>(-3.8 to 3.0)                               |
| Edentulism and severe tooth loss              | 2,807.4<br>(2,463.8 to 3,151.6)                  | 189.1<br>(159.1 to 221.1)                                 | 78.0<br>(50.5 to 110.7)                 | 26.3<br>(21.9 to 31.0)                            | 0.2<br>(-3.3 to 3.7)                                |
| Other oral disorders                          | 723.9<br>(690.9 to 755.6)                        | --                                                        | 21.1<br>(13.1 to 31.5)                  | 12.8<br>(9.3 to 16.4)                             | -0.0<br>(-3.1 to 3.2)                               |
| <b>Injuries</b>                               | <b>11,913.8</b><br><b>(11,171.8 to 12,786.8)</b> | <b>4,088.7<sup>†</sup></b><br><b>(3,874.3 to 4,311.3)</b> | <b>366.0</b><br><b>(242.4 to 521.6)</b> | <b>20.8</b><br><b>(19.2 to 22.3)</b>              | <b>0.9</b><br><b>(-0.2 to 2.1)</b>                  |
| <b>Transport injuries</b>                     | <b>1,720.4</b><br><b>(1,579.4 to 1,866.0)</b>    | <b>374.1</b><br><b>(345.2 to 406.8)</b>                   | <b>74.2</b><br><b>(48.6 to 106.7)</b>   | <b>10.2</b><br><b>(8.4 to 12.0)</b>               | <b>-6.5</b><br><b>(-8.2 to -4.9)</b>                |
| Road injuries                                 | 1,256.0<br>(1,146.0 to 1,366.1)                  | 306.1<br>(278.1 to 337.8)                                 | 57.7<br>(38.1 to 83.2)                  | 8.2<br>(6.3 to 10.1)                              | -8.2<br>(-9.9 to -6.4)                              |
| Pedestrian road injuries                      | 220.6<br>(190.8 to 256.0)                        | 32.3<br>(27.0 to 39.1)                                    | 10.8<br>(7.0 to 15.6)                   | 11.5<br>(9.6 to 13.5)                             | -5.5<br>(-7.2 to -3.7)                              |
| Cyclist road injuries                         | 214.7<br>(174.0 to 258.5)                        | 60.3<br>(48.6 to 72.5)                                    | 8.6<br>(5.5 to 12.7)                    | 10.6<br>(8.6 to 12.7)                             | -5.3<br>(-7.2 to -3.3)                              |
| Motorcyclist road injuries                    | 194.4<br>(164.5 to 230.1)                        | 30.4<br>(24.6 to 37.7)                                    | 9.1<br>(5.9 to 13.2)                    | 15.7<br>(13.2 to 18.3)                            | -2.6<br>(-4.6 to -0.5)                              |
| Motor vehicle road injuries                   | 603.2<br>(510.6 to 694.9)                        | 177.4<br>(158.2 to 198.6)                                 | 28.4<br>(19.0 to 40.4)                  | 4.1<br>(2.2 to 6.0)                               | -11.6<br>(-13.4 to -9.8)                            |
| Other road injuries                           | 23.1<br>(19.9 to 27.0)                           | 5.7<br>(4.5 to 7.3)                                       | 0.8<br>(0.5 to 1.2)                     | 9.3<br>(7.0 to 11.7)                              | -7.3<br>(-9.2 to -5.3)                              |
| Other transport injuries                      | 464.4<br>(384.6 to 544.2)                        | 68.0<br>(60.1 to 76.2)                                    | 16.6<br>(10.6 to 24.0)                  | 17.9<br>(16.3 to 19.5)                            | -0.4<br>(-1.9 to 0.9)                               |
| <b>Unintentional injuries</b>                 | <b>9,458.4</b><br><b>(8,749.9 to 10,347.4)</b>   | <b>3,443.5</b><br><b>(3,224.9 to 3,670.8)</b>             | <b>265.6</b><br><b>(176.9 to 384.7)</b> | <b>24.5</b><br><b>(22.8 to 26.2)</b>              | <b>3.1</b><br><b>(2.0 to 4.4)</b>                   |
| Falls                                         | 4,122.7<br>(3,674.7 to 4,598.1)                  | 1,614.6<br>(1,440.6 to 1,794.8)                           | 152.6<br>(105.1 to 211.6)               | 27.4<br>(25.4 to 29.6)                            | 3.5<br>(2.1 to 5.1)                                 |
| Drowning                                      | 24.9<br>(21.6 to 28.3)                           | 2.4<br>(2.1 to 2.8)                                       | 1.2<br>(0.8 to 1.7)                     | 20.3<br>(14.7 to 26.7)                            | 4.6<br>(-1.0 to 10.7)                               |
| Fire, heat, and hot substances                | 1,063.5<br>(908.6 to 1,254.0)                    | 60.7<br>(50.5 to 70.3)                                    | 18.4<br>(10.2 to 30.8)                  | 19.8<br>(16.8 to 22.7)                            | 2.9<br>(0.4 to 5.6)                                 |
| Poisonings                                    | 36.1<br>(29.8 to 44.2)                           | 38.0<br>(31.0 to 45.3)                                    | 3.0<br>(1.9 to 4.4)                     | 18.6<br>(10.6 to 27.5)                            | 5.5<br>(-2.2 to 14.7)                               |
| Exposure to mechanical forces                 | 2,649.0<br>(2,198.8 to 3,370.5)                  | 632.6<br>(542.6 to 728.5)                                 | 47.4<br>(30.0 to 72.8)                  | 21.6<br>(20.1 to 23.3)                            | 4.0<br>(2.7 to 5.5)                                 |
| Unintentional firearm injuries                | 124.8<br>(100.7 to 160.8)                        | 11.4<br>(7.9 to 16.1)                                     | 1.9<br>(1.0 to 3.1)                     | 26.0<br>(23.7 to 28.8)                            | 8.2<br>(6.2 to 10.3)                                |
| Unintentional suffocation                     | 35.4<br>(27.3 to 44.1)                           | 6.2<br>(4.4 to 8.7)                                       | 0.8<br>(0.5 to 1.3)                     | 24.8<br>(22.7 to 27.2)                            | 5.7<br>(3.7 to 7.8)                                 |
| Other exposure to mechanical forces           | 2,488.8<br>(2,056.1 to 3,215.7)                  | 615.0<br>(527.9 to 705.6)                                 | 44.7<br>(28.4 to 68.4)                  | 21.4<br>(19.9 to 23.1)                            | 3.8<br>(2.5 to 5.3)                                 |

| Cause                                                                               | Prevalence in thousands (95% UI)              | Incidence in thousands (95% UI)          | YLDs in thousands (95% UI)           |                                                   |                                                     |
|-------------------------------------------------------------------------------------|-----------------------------------------------|------------------------------------------|--------------------------------------|---------------------------------------------------|-----------------------------------------------------|
|                                                                                     | 2016 counts                                   | 2016 counts                              | 2016 counts                          | Percentage change in counts between 2006 and 2016 | Percentage change in age-standardised rates between |
| Adverse effects of medical treatment                                                | 29.8<br>(23.7 to 36.8)                        | 390.2<br>(342.1 to 441.1)                | 4.0<br>(2.5 to 5.9)                  | 22.5<br>(16.3 to 29.4)                            | 1.5<br>(-2.2 to 6.2)                                |
| Animal contact                                                                      | 376.1<br>(323.4 to 443.7)                     | 194.9<br>(161.4 to 234.4)                | 7.5<br>(4.8 to 11.3)                 | 14.0<br>(10.3 to 18.0)                            | -1.1<br>(-4.7 to 3.0)                               |
| Venomous animal contact                                                             | 42.7<br>(35.6 to 52.4)                        | 48.5<br>(35.1 to 64.4)                   | 3.2<br>(2.0 to 4.8)                  | 11.8<br>(4.0 to 20.4)                             | -0.4<br>(-7.6 to 8.3)                               |
| Non-venomous animal contact                                                         | 333.4<br>(282.3 to 399.4)                     | 146.4<br>(119.5 to 176.7)                | 4.3<br>(2.4 to 7.0)                  | 15.8<br>(14.0 to 17.7)                            | -1.6<br>(-3.2 to -0.1)                              |
| Foreign body                                                                        | 273.0<br>(230.6 to 335.7)                     | 165.8<br>(144.5 to 194.7)                | 7.8<br>(4.9 to 11.7)                 | 18.9<br>(17.2 to 20.7)                            | 0.8<br>(-0.7 to 2.3)                                |
| Pulmonary aspiration and foreign body in airway                                     | 31.8<br>(25.8 to 38.3)                        | 35.3<br>(31.3 to 40.3)                   | 0.8<br>(0.5 to 1.3)                  | 22.2<br>(19.9 to 24.6)                            | 1.4<br>(-0.3 to 3.3)                                |
| Foreign body in eyes                                                                | 20.5<br>(13.8 to 28.1)                        | 80.4<br>(62.3 to 105.5)                  | 1.4<br>(0.9 to 2.2)                  | 16.5<br>(12.6 to 20.8)                            | 0.8<br>(-2.1 to 3.7)                                |
| Foreign body in other body part                                                     | 220.7<br>(180.4 to 284.2)                     | 50.1<br>(42.0 to 59.1)                   | 5.5<br>(3.4 to 8.4)                  | 19.0<br>(17.2 to 21.0)                            | 0.7<br>(-0.9 to 2.4)                                |
| Environmental heat and cold exposure                                                | 134.2<br>(119.8 to 152.2)                     | 29.2<br>(24.3 to 34.7)                   | 4.8<br>(3.1 to 7.0)                  | 22.5<br>(18.2 to 26.9)                            | 0.6<br>(-3.0 to 4.0)                                |
| Other unintentional injuries                                                        | 749.0<br>(632.6 to 891.1)                     | 315.0<br>(261.4 to 373.5)                | 19.0<br>(12.2 to 28.4)               | 22.5<br>(21.2 to 24.0)                            | 1.7<br>(0.6 to 2.9)                                 |
| <b>Self-harm and interpersonal violence</b>                                         | <b>1,202.3</b><br><b>(1,098.5 to 1,305.2)</b> | <b>265.8†</b><br><b>(238.0 to 292.9)</b> | <b>25.6</b><br><b>(16.9 to 36.6)</b> | <b>17.3</b><br><b>(14.6 to 19.7)</b>              | <b>2.2</b><br><b>(0.0 to 4.4)</b>                   |
| Self-harm                                                                           | 160.7<br>(133.1 to 188.3)                     | 112.1<br>(98.7 to 126.3)                 | 7.2<br>(4.7 to 10.3)                 | 12.8<br>(7.8 to 18.2)                             | -2.5<br>(-7.1 to 2.4)                               |
| Self-harm by firearm                                                                | 2.6<br>(2.1 to 3.3)                           | 0.2<br>(0.1 to 0.4)                      | < 0.05<br>(< 0.05 to 0.1)            | 10.7<br>(8.4 to 13.1)                             | -2.8<br>(-4.9 to -0.4)                              |
| Self-harm by other specified means                                                  | 158.1<br>(130.4 to 185.8)                     | 111.9<br>(98.4 to 125.9)                 | 7.2<br>(4.6 to 10.2)                 | 12.8<br>(7.8 to 18.3)                             | -2.5<br>(-7.1 to 2.4)                               |
| Interpersonal violence                                                              | 1,041.6<br>(948.1 to 1,139.9)                 | 153.7†<br>(130.3 to 178.1)               | 18.4<br>(12.2 to 26.5)               | 19.2<br>(16.7 to 21.5)                            | 4.1<br>(1.9 to 6.2)                                 |
| Assault by firearm                                                                  | 41.4<br>(33.1 to 52.0)                        | 5.3<br>(3.9 to 7.0)                      | 1.0<br>(0.6 to 1.5)                  | 37.2<br>(34.9 to 39.6)                            | 17.7<br>(15.6 to 19.9)                              |
| Assault by sharp object                                                             | 129.2<br>(105.2 to 157.4)                     | 32.9<br>(25.4 to 42.7)                   | 2.5<br>(1.5 to 3.9)                  | 23.9<br>(21.9 to 25.9)                            | 6.6<br>(4.7 to 8.4)                                 |
| Sexual violence                                                                     | 491.4<br>(426.0 to 562.9)                     | --                                       | 4.1<br>(2.7 to 5.9)                  | 3.1<br>(-1.4 to 7.7)                              | -2.7<br>(-7.4 to 2.1)                               |
| Assault by other means                                                              | 379.6<br>(311.7 to 463.6)                     | 115.5<br>(97.1 to 135.2)                 | 10.8<br>(7.0 to 16.0)                | 24.1<br>(22.1 to 26.2)                            | 6.4<br>(4.7 to 8.2)                                 |
| <b>Forces of nature, conflict and terrorism, and executions and police conflict</b> | <b>24.1</b><br><b>(14.7 to 35.7)</b>          | <b>5.3†</b><br><b>(2.1 to 9.2)</b>       | <b>0.6</b><br><b>(0.2 to 1.5)</b>    | <b>36.6</b><br><b>(24.9 to 43.0)</b>              | <b>18.1</b><br><b>(7.1 to 25.7)</b>                 |
| Exposure to forces of nature                                                        | 7.2<br>(2.5 to 13.3)                          | --                                       | 0.1<br>(< 0.05 to 0.4)               | -8.7<br>(-10.7 to -6.4)                           | -27.5<br>(-29.2 to -25.6)                           |
| Conflict and terrorism                                                              | 1.2<br>(0.3 to 2.4)                           | --                                       | < 0.05<br>(< 0.05 to 0.1)            | --                                                | --                                                  |
| Executions and police conflict                                                      | 15.7<br>(7.9 to 25.8)                         | 5.3<br>(2.1 to 9.2)                      | 0.4<br>(0.1 to 1.0)                  | 56.1<br>(34.3 to 66.0)                            | 36.9<br>(16.8 to 47.4)                              |
| <b>Impairments</b>                                                                  | --                                            | --                                       | --                                   | --                                                | --                                                  |
| Anaemia                                                                             | 2,837.1<br>(2,589.0 to 3,113.1)               | --                                       | 65.3<br>(44.8 to 92.4)               | 20.1<br>(10.9 to 30.4)                            | 4.5<br>(-3.6 to 14.0)                               |
| Developmental intellectual disability                                               | 563.1<br>(442.9 to 682.6)                     | --                                       | 70.8<br>(53.8 to 90.9)               | 49.5<br>(34.7 to 64.4)                            | 34.8<br>(21.5 to 48.5)                              |
| Epilepsy                                                                            | 144.1<br>(78.6 to 212.4)                      | --                                       | 41.7<br>(22.2 to 71.4)               | 39.3<br>(-34.5 to 219.7)                          | 26.0<br>(-40.5 to 184.5)                            |
| Guillain-Barre syndrome                                                             | 0.4<br>(0.3 to 0.5)                           | --                                       | 0.1<br>(0.1 to 0.2)                  | 32.0<br>(19.7 to 46.6)                            | 10.9<br>(1.7 to 21.4)                               |
| Hearing loss                                                                        | 7,438.7<br>(7,069.5 to 7,802.5)               | --                                       | 206.9<br>(144.2 to 288.7)            | 28.7<br>(24.0 to 33.9)                            | 2.4<br>(-1.1 to 6.5)                                |
| Heart failure                                                                       | 558.0<br>(487.6 to 632.3)                     | --                                       | 59.2<br>(45.7 to 74.4)               | 23.5<br>(14.4 to 32.1)                            | -5.0<br>(-11.9 to 1.4)                              |
| Infertility                                                                         | 199.9<br>(161.6 to 252.9)                     | --                                       | 1.6<br>(0.8 to 3.1)                  | 4.2<br>(-2.8 to 11.1)                             | 1.1<br>(-5.1 to 7.5)                                |
| Pelvic inflammatory disease                                                         | 4.1<br>(3.5 to 4.8)                           | --                                       | 0.6<br>(0.4 to 0.8)                  | 5.6<br>(-16.0 to 33.4)                            | -1.6<br>(-21.4 to 24.6)                             |
| Vision loss                                                                         | 2,337.2<br>(2,245.4 to 2,429.0)               | --                                       | 61.5<br>(43.5 to 87.6)               | 21.5<br>(17.4 to 26.1)                            | 2.7<br>(-1.0 to 6.7)                                |

We did not calculate incidence for the nine impairments, certain NTDs, and causes with only birth prevalence. Blank cells mean that no estimate is available.

† Incidence for aggregate causes represents the sum of the incidence of the causes below the aggregate.

‡ Incidence estimates for stroke represent first-ever stroke only.

^ Incidence of HIV/AIDS represents new infections of HIV only and does not include new infections of Tuberculosis in HIV positive cases.



SR Table 14: Prevalence, incidence, and YLDs for 2016, percentage change of YLD counts and percentage change of age-standardised YLD rates between 2006 and 2016 by cause and impairments, for all ages, Cape Verde.

| Cause                                                                                | Prevalence in thousands (95% UI) | Incidence in thousands (95% UI)         | YLDs in thousands (95% UI)    |                                                   |                                                     |
|--------------------------------------------------------------------------------------|----------------------------------|-----------------------------------------|-------------------------------|---------------------------------------------------|-----------------------------------------------------|
|                                                                                      | 2016 counts                      | 2016 counts                             | 2016 counts                   | Percentage change in counts between 2006 and 2016 | Percentage change in age-standardised rates between |
| <b>All causes</b>                                                                    | <b>526.1</b><br>(523.9 to 528.5) | <b>2,965.2†</b><br>(2,794.1 to 3,162.2) | <b>53.0</b><br>(39.4 to 69.1) | <b>12.7</b><br>(8.9 to 16.8)                      | <b>-2.9</b><br>(-5.6 to -0.0)                       |
| <b>Communicable, maternal, neonatal, and nutritional disorders</b>                   | <b>381.7</b><br>(371.6 to 392.4) | <b>1,678.5†</b><br>(1,531.8 to 1,832.1) | <b>10.0</b><br>(7.0 to 13.6)  | <b>-2.1</b><br>(-7.4 to 3.8)                      | <b>-11.1</b><br>(-15.6 to -6.2)                     |
| <b>HIV/AIDS and tuberculosis</b>                                                     | <b>178.3</b><br>(155.1 to 199.1) | <b>0.7†</b><br>(0.6 to 0.9)             | <b>0.5</b><br>(0.3 to 0.8)    | <b>12.7</b><br>(-7.6 to 40.8)                     | <b>-13.2</b><br>(-29.8 to 9.6)                      |
| Tuberculosis                                                                         | 160.4<br>(138.4 to 184.4)        | 0.4†<br>(0.3 to 0.4)                    | 0.1<br>(< 0.05 to 0.1)        | -12.4<br>(-26.3 to 3.6)                           | -27.7<br>(-36.9 to -17.1)                           |
| Drug-susceptible tuberculosis                                                        | 0.2<br>(0.2 to 0.3)              | 0.3<br>(0.3 to 0.4)                     | 0.1<br>(< 0.05 to 0.1)        | -12.2<br>(-26.1 to 4.4)                           | -27.5<br>(-37.0 to -17.0)                           |
| Multidrug-resistant tuberculosis without extensive drug resistance                   | < 0.05<br>(< 0.05 to < 0.05)     | < 0.05<br>(< 0.05 to < 0.05)            | < 0.05<br>(< 0.05 to < 0.05)  | -21.3<br>(-73.1 to 145.8)                         | -35.0<br>(-77.9 to 105.5)                           |
| Extensively drug-resistant tuberculosis                                              | < 0.05<br>(< 0.05 to < 0.05)     | < 0.05<br>(< 0.05 to < 0.05)            | < 0.05<br>(< 0.05 to < 0.05)  | 139.7<br>(-18.2 to 649.0)                         | 98.0<br>(-32.6 to 526.5)                            |
| Latent tuberculosis infection                                                        | 160.2<br>(138.2 to 184.1)        | --                                      | --                            | --                                                | --                                                  |
| HIV/AIDS                                                                             | 4.1<br>(3.1 to 5.5)              | 0.3^<br>(0.2 to 0.5)                    | 0.5<br>(0.2 to 0.7)           | 18.6<br>(-5.8 to 60.8)                            | -9.6<br>(-30.4 to 24.8)                             |
| Drug-susceptible HIV/AIDS - Tuberculosis                                             | < 0.05<br>(< 0.05 to < 0.05)     | < 0.05<br>(< 0.05 to 0.1)               | < 0.05<br>(< 0.05 to < 0.05)  | -23.2<br>(-36.4 to -5.3)                          | -38.5<br>(-49.4 to -23.2)                           |
| Multidrug-resistant HIV/AIDS - Tuberculosis without extensive drug resistance        | < 0.05<br>(< 0.05 to < 0.05)     | < 0.05<br>(< 0.05 to < 0.05)            | < 0.05<br>(< 0.05 to < 0.05)  | -33.0<br>(-77.2 to 107.3)                         | -46.4<br>(-81.8 to 66.0)                            |
| Extensively drug-resistant HIV/AIDS - Tuberculosis                                   | < 0.05<br>(< 0.05 to < 0.05)     | < 0.05<br>(< 0.05 to < 0.05)            | < 0.05<br>(< 0.05 to < 0.05)  | 104.2<br>(-30.7 to 531.4)                         | 63.5<br>(-44.5 to 405.7)                            |
| HIV/AIDS resulting in other diseases                                                 | 4.1<br>(3.1 to 5.5)              | 0.3<br>(0.2 to 0.5)                     | 0.4<br>(0.2 to 0.7)           | 20.1<br>(-5.5 to 65.3)                            | -8.7<br>(-30.2 to 27.9)                             |
| <b>Diarrhoea, lower respiratory infections, and other common infectious diseases</b> | <b>32.6</b><br>(31.1 to 34.4)    | <b>1,558.3†</b><br>(1,414.8 to 1,711.5) | <b>1.8</b><br>(1.2 to 2.4)    | <b>8.3</b><br>(4.7 to 12.3)                       | <b>-2.1</b><br>(-4.9 to 0.9)                        |
| Diarrhoeal diseases                                                                  | 5.9<br>(5.5 to 6.3)              | 399.3<br>(370.0 to 430.8)               | 0.7<br>(0.5 to 0.9)           | 18.2<br>(11.2 to 25.8)                            | 2.6<br>(-2.8 to 8.1)                                |
| Intestinal infectious diseases                                                       | < 0.05<br>(< 0.05 to 0.1)        | 0.8†<br>(0.5 to 1.1)                    | < 0.05<br>(< 0.05 to < 0.05)  | -19.5<br>(-33.9 to -1.1)                          | -21.0<br>(-33.4 to -6.4)                            |
| Typhoid fever                                                                        | < 0.05<br>(< 0.05 to 0.1)        | 0.6<br>(0.4 to 0.9)                     | < 0.05<br>(< 0.05 to < 0.05)  | -19.6<br>(-35.1 to 0.6)                           | -21.1<br>(-34.4 to -5.2)                            |
| Paratyphoid fever                                                                    | < 0.05<br>(< 0.05 to < 0.05)     | 0.2<br>(0.1 to 0.3)                     | < 0.05<br>(< 0.05 to < 0.05)  | -13.3<br>(-32.7 to 8.6)                           | -15.0<br>(-32.0 to 5.1)                             |
| Other intestinal infectious diseases                                                 | --                               | --                                      | < 0.05<br>(< 0.05 to < 0.05)  | -40.1<br>(-53.0 to -22.1)                         | -43.6<br>(-53.1 to -31.2)                           |
| Lower respiratory infections                                                         | 0.6<br>(0.6 to 0.7)              | 28.2<br>(26.0 to 30.6)                  | < 0.05<br>(< 0.05 to 0.1)     | 2.1<br>(-10.0 to 15.7)                            | -8.3<br>(-17.1 to 2.0)                              |
| Upper respiratory infections                                                         | 14.4<br>(12.5 to 16.3)           | 1,074.0<br>(933.8 to 1,228.2)           | 0.4<br>(0.2 to 0.6)           | 7.9<br>(0.9 to 14.9)                              | -0.8<br>(-6.1 to 4.8)                               |
| Otitis media                                                                         | 9.6<br>(8.6 to 10.7)             | 41.6<br>(32.6 to 52.7)                  | 0.3<br>(0.2 to 0.4)           | -6.5<br>(-13.3 to 1.2)                            | -9.0<br>(-15.1 to -2.1)                             |
| Meningitis                                                                           | 2.5<br>(2.2 to 2.9)              | 0.6<br>(0.5 to 0.7)                     | 0.2<br>(0.2 to 0.3)           | 11.1<br>(3.9 to 18.8)                             | -0.9<br>(-7.0 to 5.4)                               |
| Pneumococcal meningitis                                                              | 1.1<br>(0.9 to 1.4)              | 0.1<br>(0.1 to 0.2)                     | 0.1<br>(0.1 to 0.1)           | 11.6<br>(-2.5 to 26.9)                            | -1.5<br>(-12.1 to 10.1)                             |
| H influenzae type B meningitis                                                       | 0.3<br>(0.2 to 0.4)              | 0.1<br>(< 0.05 to 0.1)                  | < 0.05<br>(< 0.05 to 0.1)     | -7.2<br>(-17.7 to 3.3)                            | -15.7<br>(-24.8 to -7.1)                            |
| Meningococcal infection                                                              | 0.5<br>(0.4 to 0.7)              | 0.2<br>(0.1 to 0.2)                     | 0.1<br>(< 0.05 to 0.1)        | 12.4<br>(-4.2 to 32.2)                            | -0.1<br>(-13.5 to 16.1)                             |
| Other meningitis                                                                     | 0.6<br>(0.4 to 0.8)              | 0.2<br>(0.1 to 0.3)                     | < 0.05<br>(< 0.05 to 0.1)     | 28.0<br>(18.9 to 39.4)                            | 14.6<br>(7.2 to 23.6)                               |
| Encephalitis                                                                         | 1.2<br>(0.8 to 1.8)              | 0.6<br>(0.5 to 0.7)                     | 0.1<br>(0.1 to 0.2)           | 16.0<br>(2.0 to 31.1)                             | -2.5<br>(-13.2 to 9.0)                              |
| Diphtheria                                                                           | < 0.05<br>(< 0.05 to < 0.05)     | < 0.05<br>(< 0.05 to < 0.05)            | < 0.05<br>(< 0.05 to < 0.05)  | -58.1<br>(-80.7 to -14.4)                         | -59.3<br>(-79.2 to -26.0)                           |
| Whooping cough                                                                       | < 0.05<br>(< 0.05 to 0.1)        | 0.3<br>(0.2 to 0.4)                     | < 0.05<br>(< 0.05 to < 0.05)  | -73.4<br>(-82.6 to -62.6)                         | -74.4<br>(-83.2 to -64.2)                           |
| Tetanus                                                                              | < 0.05<br>(< 0.05 to < 0.05)     | < 0.05<br>(< 0.05 to < 0.05)            | < 0.05<br>(< 0.05 to < 0.05)  | 7.5<br>(2.3 to 11.6)                              | -3.0<br>(-7.8 to 0.8)                               |
| Measles                                                                              | < 0.05<br>(< 0.05 to < 0.05)     | 0.3<br>(0.1 to 0.8)                     | < 0.05<br>(< 0.05 to < 0.05)  | -94.4<br>(-96.6 to -91.4)                         | -94.6<br>(-96.7 to -91.7)                           |
| Varicella and herpes zoster                                                          | 0.5<br>(0.5 to 0.5)              | 12.7<br>(12.0 to 13.3)                  | < 0.05<br>(< 0.05 to < 0.05)  | 16.1<br>(-0.5 to 33.9)                            | 0.1<br>(-11.1 to 12.6)                              |
| <b>Neglected tropical diseases and malaria</b>                                       | <b>16.5</b><br>(14.6 to 19.1)    | <b>27.6†</b><br>(21.2 to 47.9)          | <b>0.7</b><br>(0.5 to 0.9)    | <b>2.0</b><br>(-18.6 to 26.1)                     | <b>-8.1</b><br>(-30.7 to 18.6)                      |
| Malaria                                                                              | 0.9<br>(0.8 to 1.0)              | < 0.05<br>(< 0.05 to < 0.05)            | 0.3<br>(0.2 to 0.3)           | 2.9<br>(-9.3 to 17.6)                             | -4.0<br>(-15.0 to 9.0)                              |
| Chagas disease                                                                       | --                               | --                                      | --                            | --                                                | --                                                  |
| Leishmaniasis                                                                        | --                               | --                                      | --                            | --                                                | --                                                  |
| Visceral leishmaniasis                                                               | --                               | --                                      | --                            | --                                                | --                                                  |
| Cutaneous and mucocutaneous leishmaniasis                                            | --                               | --                                      | --                            | --                                                | --                                                  |
| African trypanosomiasis                                                              | --                               | --                                      | --                            | --                                                | --                                                  |
| Schistosomiasis                                                                      | --                               | --                                      | --                            | --                                                | --                                                  |
| Cysticercosis                                                                        | 1.0<br>(0.3 to 1.6)              | --                                      | 0.1<br>(< 0.05 to 0.3)        | -0.6<br>(-73.4 to 212.6)                          | -21.9<br>(-78.0 to 130.6)                           |
| Cystic echinococcosis                                                                | 0.1<br>(< 0.05 to 0.2)           | < 0.05<br>(< 0.05 to 0.1)               | < 0.05<br>(< 0.05 to < 0.05)  | -33.0<br>(-92.4 to 513.1)                         | -44.3<br>(-94.0 to 377.1)                           |
| Lymphatic filariasis                                                                 | --                               | --                                      | --                            | --                                                | --                                                  |
| Onchocerciasis                                                                       | --                               | --                                      | --                            | --                                                | --                                                  |
| Trachoma                                                                             | --                               | --                                      | --                            | --                                                | --                                                  |
| Dengue                                                                               | 0.2<br>(0.1 to 0.3)              | 3.1<br>(1.6 to 5.4)                     | < 0.05<br>(< 0.05 to 0.1)     | 108.0<br>(49.2 to 451.7)                          | 92.4<br>(41.9 to 393.2)                             |
| Yellow fever                                                                         | --                               | --                                      | --                            | --                                                | --                                                  |
| Rabies                                                                               | < 0.05<br>(< 0.05 to < 0.05)     | < 0.05<br>(< 0.05 to < 0.05)            | < 0.05<br>(< 0.05 to < 0.05)  | -38.8<br>(-66.7 to 12.8)                          | -43.6<br>(-68.6 to -3.7)                            |
| Intestinal nematode infections                                                       | 7.5<br>(5.7 to 10.2)             | --                                      | < 0.05<br>(< 0.05 to < 0.05)  | -17.2<br>(-40.4 to 18.4)                          | -24.9<br>(-46.5 to 10.6)                            |
| Ascariasis                                                                           | 0.4<br>(0.2 to 0.7)              | --                                      | --                            | -100.0<br>(-100.0 to -100.0)                      | -100.0<br>(-100.0 to -100.0)                        |

| Cause                                                                   | Prevalence in thousands (95% UI)        | Incidence in thousands (95% UI)                | YLDs in thousands (95% UI)           |                                                   |                                                     |
|-------------------------------------------------------------------------|-----------------------------------------|------------------------------------------------|--------------------------------------|---------------------------------------------------|-----------------------------------------------------|
|                                                                         | 2016 counts                             | 2016 counts                                    | 2016 counts                          | Percentage change in counts between 2006 and 2016 | Percentage change in age-standardised rates between |
| Trichuriasis                                                            | 5.8<br>(4.0 to 8.4)                     | --                                             | < 0.05<br>(< 0.05 to < 0.05)         | -10.0<br>(-84.0 to 364.6)                         | -21.7<br>(-86.3 to 323.2)                           |
| Hookworm disease                                                        | 1.1<br>(0.8 to 1.5)                     | --                                             | < 0.05<br>(< 0.05 to < 0.05)         | -17.2<br>(-40.4 to 18.3)                          | -24.9<br>(-46.7 to 11.2)                            |
| Food-borne trematodiasis                                                | --                                      | --                                             | --                                   | --                                                | --                                                  |
| Leprosy                                                                 | < 0.05<br>(< 0.05 to < 0.05)            | < 0.05<br>(< 0.05 to < 0.05)                   | < 0.05<br>(< 0.05 to < 0.05)         | -15.4<br>(-36.5 to 26.9)                          | -29.9<br>(-47.0 to 5.8)                             |
| Ebola virus disease                                                     | --                                      | --                                             | --                                   | --                                                | --                                                  |
| Zika virus disease                                                      | 0.4<br>(0.3 to 0.8)                     | 24.4<br>(18.2 to 45.6)                         | < 0.05<br>(< 0.05 to < 0.05)         | --                                                | --                                                  |
| Guinea worm disease                                                     | --                                      | --                                             | --                                   | --                                                | --                                                  |
| Other neglected tropical diseases                                       | 7.3<br>(6.6 to 8.1)                     | --                                             | 0.2<br>(0.1 to 0.3)                  | -7.7<br>(-21.1 to 8.0)                            | -8.2<br>(-21.1 to 6.7)                              |
| <b>Maternal disorders</b>                                               | <b>1.3</b><br><b>(1.0 to 1.8)</b>       | <b>11.5†</b><br><b>(9.9 to 13.4)</b>           | <b>0.1</b><br><b>(0.1 to 0.1)</b>    | <b>-8.8</b><br><b>(-32.5 to 24.6)</b>             | <b>-27.4</b><br><b>(-45.9 to -1.2)</b>              |
| Maternal haemorrhage                                                    | 0.1<br>(0.1 to 0.2)                     | 1.1<br>(0.7 to 1.6)                            | < 0.05<br>(< 0.05 to < 0.05)         | -13.1<br>(-43.1 to 28.7)                          | -27.1<br>(-51.6 to 7.5)                             |
| Maternal sepsis and other pregnancy related infections                  | 0.2<br>(0.2 to 0.3)                     | 1.1<br>(0.8 to 1.4)                            | < 0.05<br>(< 0.05 to < 0.05)         | -2.3<br>(-47.8 to 88.2)                           | -16.5<br>(-53.5 to 55.8)                            |
| Maternal hypertensive disorders                                         | 0.9<br>(0.6 to 1.2)                     | 4.3<br>(3.6 to 4.8)                            | < 0.05<br>(< 0.05 to 0.1)            | 3.7<br>(-35.2 to 67.1)                            | -15.1<br>(-46.9 to 36.3)                            |
| Maternal obstructed labour and uterine rupture                          | < 0.05<br>(< 0.05 to 0.1)               | 0.6<br>(0.4 to 0.8)                            | < 0.05<br>(< 0.05 to < 0.05)         | -34.6<br>(-56.8 to -3.8)                          | -51.2<br>(-67.9 to -29.1)                           |
| Maternal abortion, miscarriage, and ectopic pregnancy                   | < 0.05<br>(< 0.05 to 0.1)               | 4.4<br>(3.1 to 6.3)                            | < 0.05<br>(< 0.05 to < 0.05)         | -7.1<br>(-55.9 to 79.2)                           | -25.1<br>(-63.7 to 46.0)                            |
| Other maternal disorders                                                | --                                      | --                                             | < 0.05<br>(< 0.05 to < 0.05)         | -13.6<br>(-35.9 to 18.2)                          | -30.5<br>(-48.2 to -5.5)                            |
| <b>Neonatal disorders</b>                                               | <b>7.2</b><br><b>(5.9 to 8.7)</b>       | --                                             | <b>1.4</b><br><b>(0.8 to 2.3)</b>    | <b>-1.9</b><br><b>(-17.0 to 15.5)</b>             | <b>-7.8</b><br><b>(-22.1 to 8.3)</b>                |
| Neonatal preterm birth complications                                    | 4.6<br>(3.6 to 6.0)                     | --                                             | 0.5<br>(0.3 to 0.7)                  | -22.6<br>(-39.8 to 5.1)                           | -27.7<br>(-43.3 to -3.1)                            |
| Neonatal encephalopathy due to birth asphyxia and trauma                | 1.9<br>(0.9 to 3.3)                     | --                                             | 0.3<br>(< 0.05 to 0.7)               | 26.0<br>(-11.6 to 104.2)                          | 18.6<br>(-17.2 to 91.7)                             |
| Neonatal sepsis and other neonatal infections                           | 1.4<br>(0.6 to 3.0)                     | --                                             | 0.6<br>(0.2 to 1.3)                  | 10.6<br>(-10.6 to 49.6)                           | 3.5<br>(-17.0 to 46.1)                              |
| Hemolytic disease and other neonatal jaundice                           | 0.1<br>(0.1 to 0.1)                     | --                                             | < 0.05<br>(< 0.05 to < 0.05)         | 4.5<br>(-4.5 to 14.6)                             | -4.1<br>(-12.0 to 4.7)                              |
| Other neonatal disorders                                                | --                                      | --                                             | 0.1<br>(< 0.05 to 0.1)               | -7.3<br>(-23.1 to 12.1)                           | -12.4<br>(-27.2 to 5.9)                             |
| <b>Nutritional deficiencies</b>                                         | <b>164.2</b><br><b>(154.6 to 172.4)</b> | <b>4.8†</b><br><b>(4.1 to 5.7)</b>             | <b>5.1</b><br><b>(3.4 to 7.3)</b>    | <b>-8.0</b><br><b>(-15.8 to -0.1)</b>             | <b>-15.1</b><br><b>(-21.2 to -8.9)</b>              |
| Protein-energy malnutrition                                             | 4.0<br>(3.1 to 5.3)                     | 2.6<br>(2.0 to 3.3)                            | 0.1<br>(0.1 to 0.2)                  | -21.7<br>(-43.4 to 12.4)                          | -26.0<br>(-46.5 to 6.0)                             |
| Iodine deficiency                                                       | 26.6<br>(23.4 to 29.9)                  | 0.7<br>(0.6 to 0.8)                            | 0.7<br>(0.5 to 1.0)                  | -11.9<br>(-17.6 to -5.6)                          | -24.1<br>(-28.9 to -18.9)                           |
| Vitamin A deficiency                                                    | 1.8<br>(1.3 to 2.3)                     | 1.5<br>(1.1 to 2.0)                            | < 0.05<br>(< 0.05 to < 0.05)         | 11.8<br>(-9.9 to 40.0)                            | 1.4<br>(-15.8 to 22.3)                              |
| Iron-deficiency anaemia                                                 | 144.4<br>(132.3 to 155.3)               | --                                             | 4.2<br>(2.8 to 6.2)                  | -6.8<br>(-16.4 to 3.2)                            | -12.9<br>(-20.6 to -5.0)                            |
| Other nutritional deficiencies                                          | --                                      | --                                             | < 0.05<br>(< 0.05 to < 0.05)         | -22.4<br>(-44.8 to 13.5)                          | -26.8<br>(-47.9 to 7.0)                             |
| <b>Other communicable, maternal, neonatal, and nutritional diseases</b> | <b>180.0</b><br><b>(169.0 to 192.3)</b> | <b>75.7</b><br><b>(65.3 to 88.6)</b>           | <b>0.5</b><br><b>(0.3 to 0.7)</b>    | <b>12.8</b><br><b>(5.4 to 20.5)</b>               | <b>-3.9</b><br><b>(-9.1 to 1.6)</b>                 |
| Sexually transmitted diseases excluding HIV                             | 118.0<br>(110.2 to 126.6)               | 65.8<br>(55.4 to 77.9)                         | 0.3<br>(0.2 to 0.4)                  | 26.6<br>(18.4 to 35.6)                            | -2.6<br>(-8.4 to 3.1)                               |
| Syphilis                                                                | 8.5<br>(6.8 to 10.8)                    | 5.8<br>(4.5 to 7.5)                            | < 0.05<br>(< 0.05 to < 0.05)         | 35.3<br>(18.7 to 56.5)                            | 4.9<br>(-9.1 to 21.7)                               |
| Chlamydial infection                                                    | 7.2<br>(4.9 to 10.1)                    | 5.9<br>(4.1 to 8.4)                            | 0.1<br>(< 0.05 to 0.1)               | 25.1<br>(8.8 to 45.2)                             | -4.5<br>(-16.3 to 9.0)                              |
| Gonococcal infection                                                    | 6.4<br>(4.2 to 9.1)                     | 20.8<br>(12.5 to 31.4)                         | 0.1<br>(< 0.05 to 0.1)               | 30.8<br>(12.2 to 50.4)                            | 1.4<br>(-11.2 to 13.7)                              |
| Trichomoniasis                                                          | 22.5<br>(18.3 to 27.0)                  | 20.4<br>(16.3 to 25.0)                         | < 0.05<br>(< 0.05 to 0.1)            | 25.0<br>(15.9 to 34.2)                            | -2.7<br>(-9.3 to 3.2)                               |
| Genital herpes                                                          | 84.1<br>(72.7 to 97.4)                  | 7.4<br>(6.3 to 8.9)                            | < 0.05<br>(< 0.05 to 0.1)            | 27.6<br>(14.5 to 40.0)                            | -0.6<br>(-8.5 to 7.8)                               |
| Other sexually transmitted diseases                                     | 5.4<br>(4.2 to 6.6)                     | 5.5<br>(4.5 to 6.6)                            | 0.1<br>(0.1 to 0.1)                  | 24.3<br>(12.0 to 37.7)                            | -5.6<br>(-15.0 to 3.8)                              |
| Hepatitis                                                               | 76.5<br>(63.1 to 92.3)                  | 9.9<br>(7.1 to 13.3)                           | < 0.05<br>(< 0.05 to < 0.05)         | -5.3<br>(-28.1 to 23.2)                           | -15.5<br>(-33.2 to 5.8)                             |
| Acute hepatitis A                                                       | 0.1<br>(< 0.05 to 0.3)                  | 1.6<br>(0.3 to 4.5)                            | < 0.05<br>(< 0.05 to < 0.05)         | -8.7<br>(-77.8 to 318.1)                          | -11.1<br>(-72.6 to 197.0)                           |
| Hepatitis B                                                             | 57.7<br>(45.0 to 73.2)                  | 6.8<br>(5.0 to 9.3)                            | < 0.05<br>(< 0.05 to < 0.05)         | -5.2<br>(-28.1 to 24.3)                           | -17.2<br>(-37.2 to 6.2)                             |
| Hepatitis C                                                             | 18.6<br>(16.4 to 21.0)                  | 1.0<br>(0.8 to 1.1)                            | < 0.05<br>(< 0.05 to < 0.05)         | 8.2<br>(-43.9 to 98.3)                            | -1.7<br>(-41.3 to 62.9)                             |
| Acute hepatitis E                                                       | < 0.05<br>(< 0.05 to < 0.05)            | 0.5<br>(0.4 to 0.6)                            | < 0.05<br>(< 0.05 to < 0.05)         | -11.9<br>(-36.8 to 21.8)                          | -14.0<br>(-33.1 to 9.2)                             |
| Other infectious diseases                                               | 5.5<br>(5.0 to 6.1)                     | < 0.05<br>(< 0.05 to < 0.05)                   | 0.2<br>(0.1 to 0.2)                  | -3.0<br>(-15.4 to 11.5)                           | -5.4<br>(-17.3 to 8.2)                              |
| <b>Non-communicable diseases</b>                                        | <b>485.7</b><br><b>(480.9 to 490.2)</b> | <b>1,246.4†</b><br><b>(1,150.1 to 1,346.3)</b> | <b>40.1</b><br><b>(29.6 to 52.2)</b> | <b>16.9</b><br><b>(12.0 to 22.2)</b>              | <b>-1.0</b><br><b>(-4.2 to 2.6)</b>                 |
| <b>Neoplasms</b>                                                        | <b>1.0</b><br><b>(1.0 to 1.1)</b>       | <b>0.5</b><br><b>(0.5 to 0.6)</b>              | <b>0.2</b><br><b>(0.1 to 0.2)</b>    | <b>22.7</b><br><b>(15.6 to 30.5)</b>              | <b>3.1</b><br><b>(-3.0 to 9.7)</b>                  |
| Lip and oral cavity cancer                                              | 0.1<br>(0.1 to 0.1)                     | < 0.05<br>(< 0.05 to < 0.05)                   | < 0.05<br>(< 0.05 to < 0.05)         | 29.8<br>(12.3 to 53.6)                            | -0.5<br>(-13.8 to 17.2)                             |
| Nasopharynx cancer                                                      | < 0.05<br>(< 0.05 to < 0.05)            | < 0.05<br>(< 0.05 to < 0.05)                   | < 0.05<br>(< 0.05 to < 0.05)         | 31.5<br>(6.9 to 62.8)                             | -1.4<br>(-17.4 to 19.5)                             |
| Other pharynx cancer                                                    | < 0.05<br>(< 0.05 to < 0.05)            | < 0.05<br>(< 0.05 to < 0.05)                   | < 0.05<br>(< 0.05 to < 0.05)         | 24.9<br>(6.1 to 45.2)                             | -7.1<br>(-21.1 to 8.6)                              |
| Oesophageal cancer                                                      | < 0.05<br>(< 0.05 to < 0.05)            | < 0.05<br>(< 0.05 to < 0.05)                   | < 0.05<br>(< 0.05 to < 0.05)         | 18.9<br>(-5.5 to 50.9)                            | 0.8<br>(-18.8 to 26.4)                              |
| Stomach cancer                                                          | 0.1<br>(0.1 to 0.1)                     | 0.1<br>(0.1 to 0.1)                            | < 0.05<br>(< 0.05 to < 0.05)         | 5.9<br>(-8.7 to 25.0)                             | -12.1<br>(-25.2 to 3.9)                             |
| Colon and rectum cancer                                                 | 0.1<br>(0.1 to 0.1)                     | < 0.05<br>(< 0.05 to < 0.05)                   | < 0.05<br>(< 0.05 to < 0.05)         | 37.9<br>(16.2 to 65.7)                            | 13.4<br>(-4.4 to 35.2)                              |
| Liver cancer                                                            | < 0.05<br>(< 0.05 to < 0.05)            | < 0.05<br>(< 0.05 to < 0.05)                   | < 0.05<br>(< 0.05 to < 0.05)         | 20.1<br>(4.9 to 36.5)                             | 0.2<br>(-11.6 to 14.2)                              |
| Liver cancer due to hepatitis B                                         | < 0.05<br>(< 0.05 to < 0.05)            | < 0.05<br>(< 0.05 to < 0.05)                   | < 0.05<br>(< 0.05 to < 0.05)         | 23.9<br>(8.0 to 42.3)                             | 2.2<br>(-10.4 to 17.2)                              |

| Cause                                              | Prevalence in thousands (95% UI)     | Incidence in thousands (95% UI)    | YLDs in thousands (95% UI)        |                                                   |                                                     |
|----------------------------------------------------|--------------------------------------|------------------------------------|-----------------------------------|---------------------------------------------------|-----------------------------------------------------|
|                                                    | 2016 counts                          | 2016 counts                        | 2016 counts                       | Percentage change in counts between 2006 and 2016 | Percentage change in age-standardised rates between |
| Liver cancer due to hepatitis C                    | < 0.05<br>(< 0.05 to < 0.05)         | < 0.05<br>(< 0.05 to < 0.05)       | < 0.05<br>(< 0.05 to < 0.05)      | 21.8<br>(2.6 to 46.4)                             | 3.4<br>(-11.2 to 20.6)                              |
| Liver cancer due to alcohol use                    | < 0.05<br>(< 0.05 to < 0.05)         | < 0.05<br>(< 0.05 to < 0.05)       | < 0.05<br>(< 0.05 to < 0.05)      | 3.5<br>(-11.9 to 21.3)                            | -9.4<br>(-21.9 to 4.7)                              |
| Liver cancer due to other causes                   | < 0.05<br>(< 0.05 to < 0.05)         | < 0.05<br>(< 0.05 to < 0.05)       | < 0.05<br>(< 0.05 to < 0.05)      | 25.4<br>(8.5 to 44.4)                             | 3.6<br>(-9.4 to 18.4)                               |
| Gallbladder and biliary tract cancer               | < 0.05<br>(< 0.05 to < 0.05)         | < 0.05<br>(< 0.05 to < 0.05)       | < 0.05<br>(< 0.05 to < 0.05)      | 8.9<br>(-4.2 to 23.8)                             | -7.0<br>(-19.7 to 6.8)                              |
| Pancreatic cancer                                  | < 0.05<br>(< 0.05 to < 0.05)         | < 0.05<br>(< 0.05 to < 0.05)       | < 0.05<br>(< 0.05 to < 0.05)      | 23.5<br>(2.8 to 49.7)                             | 7.1<br>(-10.1 to 28.2)                              |
| Larynx cancer                                      | < 0.05<br>(< 0.05 to < 0.05)         | < 0.05<br>(< 0.05 to < 0.05)       | < 0.05<br>(< 0.05 to < 0.05)      | 12.9<br>(-7.2 to 35.7)                            | -9.2<br>(-25.5 to 8.2)                              |
| Tracheal, bronchus, and lung cancer                | < 0.05<br>(< 0.05 to < 0.05)         | < 0.05<br>(< 0.05 to < 0.05)       | < 0.05<br>(< 0.05 to < 0.05)      | 12.7<br>(-7.4 to 36.1)                            | 2.3<br>(-15.6 to 24.7)                              |
| Malignant skin melanoma                            | < 0.05<br>(< 0.05 to < 0.05)         | < 0.05<br>(< 0.05 to < 0.05)       | < 0.05<br>(< 0.05 to < 0.05)      | 60.9<br>(35.7 to 91.1)                            | 27.0<br>(6.2 to 52.1)                               |
| Non-melanoma skin cancer                           | < 0.05<br>(< 0.05 to < 0.05)         | < 0.05<br>(< 0.05 to < 0.05)       | < 0.05<br>(< 0.05 to < 0.05)      | 22.2<br>(-19.6 to 71.6)                           | -1.4<br>(-35.6 to 40.7)                             |
| Non-melanoma skin cancer (squamous-cell carcinoma) | < 0.05<br>(< 0.05 to < 0.05)         | < 0.05<br>(< 0.05 to < 0.05)       | < 0.05<br>(< 0.05 to < 0.05)      | 21.0<br>(-23.2 to 76.0)                           | -1.9<br>(-37.3 to 43.9)                             |
| Non-melanoma skin cancer (basal-cell carcinoma)    | < 0.05<br>(< 0.05 to < 0.05)         | < 0.05<br>(< 0.05 to < 0.05)       | < 0.05<br>(< 0.05 to < 0.05)      | 35.0<br>(17.7 to 54.1)                            | 4.4<br>(-6.1 to 18.4)                               |
| Breast cancer                                      | 0.2<br>(0.1 to 0.2)                  | < 0.05<br>(< 0.05 to < 0.05)       | < 0.05<br>(< 0.05 to < 0.05)      | 45.6<br>(14.1 to 80.1)                            | 12.2<br>(-11.4 to 40.1)                             |
| Cervical cancer                                    | 0.2<br>(0.1 to 0.2)                  | < 0.05<br>(< 0.05 to 0.1)          | < 0.05<br>(< 0.05 to < 0.05)      | 19.6<br>(-6.5 to 52.8)                            | -10.7<br>(-30.6 to 14.8)                            |
| Uterine cancer                                     | < 0.05<br>(< 0.05 to < 0.05)         | < 0.05<br>(< 0.05 to < 0.05)       | < 0.05<br>(< 0.05 to < 0.05)      | 35.6<br>(9.0 to 71.5)                             | 14.7<br>(-7.3 to 42.4)                              |
| Ovarian cancer                                     | < 0.05<br>(< 0.05 to < 0.05)         | < 0.05<br>(< 0.05 to < 0.05)       | < 0.05<br>(< 0.05 to < 0.05)      | 44.3<br>(23.8 to 69.1)                            | 12.0<br>(-4.6 to 32.7)                              |
| Prostate cancer                                    | 0.2<br>(0.1 to 0.3)                  | 0.1<br>(< 0.05 to 0.1)             | < 0.05<br>(< 0.05 to < 0.05)      | 21.9<br>(2.4 to 48.8)                             | 11.0<br>(-6.3 to 32.6)                              |
| Testicular cancer                                  | < 0.05<br>(< 0.05 to < 0.05)         | < 0.05<br>(< 0.05 to < 0.05)       | < 0.05<br>(< 0.05 to < 0.05)      | 32.1<br>(7.8 to 64.9)                             | 8.1<br>(-12.4 to 34.6)                              |
| Kidney cancer                                      | 0.1<br>(0.1 to 0.1)                  | < 0.05<br>(< 0.05 to < 0.05)       | < 0.05<br>(< 0.05 to < 0.05)      | 48.0<br>(20.1 to 82.3)                            | 21.4<br>(0.1 to 50.0)                               |
| Bladder cancer                                     | < 0.05<br>(< 0.05 to 0.1)            | < 0.05<br>(< 0.05 to < 0.05)       | < 0.05<br>(< 0.05 to < 0.05)      | 31.2<br>(10.3 to 60.5)                            | 9.4<br>(-7.8 to 33.7)                               |
| Brain and nervous system cancer                    | < 0.05<br>(< 0.05 to < 0.05)         | < 0.05<br>(< 0.05 to < 0.05)       | < 0.05<br>(< 0.05 to < 0.05)      | 26.5<br>(8.2 to 59.5)                             | 8.4<br>(-8.3 to 36.6)                               |
| Thyroid cancer                                     | < 0.05<br>(< 0.05 to < 0.05)         | < 0.05<br>(< 0.05 to < 0.05)       | < 0.05<br>(< 0.05 to < 0.05)      | 59.4<br>(40.1 to 80.8)                            | 26.5<br>(11.7 to 41.4)                              |
| Mesothelioma                                       | < 0.05<br>(< 0.05 to < 0.05)         | < 0.05<br>(< 0.05 to < 0.05)       | < 0.05<br>(< 0.05 to < 0.05)      | 17.3<br>(1.1 to 34.7)                             | -6.7<br>(-19.6 to 7.6)                              |
| Hodgkin lymphoma                                   | < 0.05<br>(< 0.05 to < 0.05)         | < 0.05<br>(< 0.05 to < 0.05)       | < 0.05<br>(< 0.05 to < 0.05)      | -4.4<br>(-17.6 to 9.1)                            | -17.6<br>(-29.0 to -6.3)                            |
| Non-Hodgkin's lymphoma                             | < 0.05<br>(< 0.05 to < 0.05)         | < 0.05<br>(< 0.05 to < 0.05)       | < 0.05<br>(< 0.05 to < 0.05)      | 21.7<br>(7.4 to 37.6)                             | 6.4<br>(-6.5 to 21.4)                               |
| Multiple myeloma                                   | < 0.05<br>(< 0.05 to < 0.05)         | < 0.05<br>(< 0.05 to < 0.05)       | < 0.05<br>(< 0.05 to < 0.05)      | 28.5<br>(8.8 to 51.8)                             | 8.8<br>(-7.9 to 27.9)                               |
| Leukaemia                                          | 0.1<br>(< 0.05 to 0.1)               | < 0.05<br>(< 0.05 to < 0.05)       | < 0.05<br>(< 0.05 to < 0.05)      | 2.0<br>(-10.5 to 16.8)                            | -8.5<br>(-18.6 to 2.3)                              |
| Acute lymphoid leukaemia                           | < 0.05<br>(< 0.05 to < 0.05)         | < 0.05<br>(< 0.05 to < 0.05)       | < 0.05<br>(< 0.05 to < 0.05)      | -8.4<br>(-27.3 to 14.1)                           | -11.3<br>(-26.3 to 6.1)                             |
| Chronic lymphoid leukaemia                         | < 0.05<br>(< 0.05 to < 0.05)         | < 0.05<br>(< 0.05 to < 0.05)       | < 0.05<br>(< 0.05 to < 0.05)      | 3.7<br>(-14.5 to 25.5)                            | -2.8<br>(-20.7 to 17.8)                             |
| Acute myeloid leukaemia                            | < 0.05<br>(< 0.05 to < 0.05)         | < 0.05<br>(< 0.05 to < 0.05)       | < 0.05<br>(< 0.05 to < 0.05)      | 7.1<br>(-9.6 to 31.2)                             | 3.3<br>(-9.5 to 19.2)                               |
| Chronic myeloid leukaemia                          | < 0.05<br>(< 0.05 to < 0.05)         | < 0.05<br>(< 0.05 to < 0.05)       | < 0.05<br>(< 0.05 to < 0.05)      | 26.4<br>(0.2 to 57.5)                             | -11.6<br>(-27.9 to 7.1)                             |
| Other leukaemia                                    | < 0.05<br>(< 0.05 to < 0.05)         | < 0.05<br>(< 0.05 to < 0.05)       | < 0.05<br>(< 0.05 to < 0.05)      | -2.1<br>(-20.1 to 19.3)                           | -14.4<br>(-29.3 to 4.1)                             |
| Other neoplasms                                    | 0.1<br>(0.1 to 0.1)                  | < 0.05<br>(< 0.05 to < 0.05)       | < 0.05<br>(< 0.05 to < 0.05)      | 18.4<br>(0.5 to 37.4)                             | 3.2<br>(-11.3 to 21.7)                              |
| <b>Cardiovascular diseases</b>                     | <b>37.7</b><br><b>(35.6 to 39.9)</b> | <b>2.5†</b><br><b>(2.4 to 2.6)</b> | <b>2.2</b><br><b>(1.6 to 3.0)</b> | <b>18.4</b><br><b>(13.5 to 24.0)</b>              | <b>0.5</b><br><b>(-3.1 to 4.2)</b>                  |
| Rheumatic heart disease                            | 4.5<br>(4.0 to 5.0)                  | 0.1<br>(0.1 to 0.2)                | 0.2<br>(0.1 to 0.3)               | 25.7<br>(14.9 to 36.9)                            | 4.4<br>(-4.1 to 13.1)                               |
| Ischaemic heart disease                            | 7.9<br>(7.4 to 8.5)                  | 1.0<br>(0.9 to 1.0)                | 0.3<br>(0.2 to 0.5)               | 21.5<br>(14.6 to 28.6)                            | -0.2<br>(-5.0 to 4.9)                               |
| Cerebrovascular disease                            | 2.8<br>(2.6 to 2.9)                  | 0.4‡<br>(0.4 to 0.5)               | 0.4<br>(0.3 to 0.5)               | 20.7<br>(12.4 to 29.1)                            | 0.7<br>(-6.3 to 7.7)                                |
| Ischaemic stroke                                   | 2.3<br>(2.1 to 2.5)                  | 0.3‡<br>(0.2 to 0.3)               | 0.3<br>(0.2 to 0.4)               | 22.0<br>(11.9 to 32.3)                            | 1.7<br>(-6.7 to 10.1)                               |
| Hemorrhagic stroke                                 | 0.6<br>(0.5 to 0.7)                  | 0.1‡<br>(0.1 to 0.2)               | 0.1<br>(0.1 to 0.1)               | 15.7<br>(3.6 to 29.9)                             | -3.3<br>(-13.7 to 9.0)                              |
| Hypertensive heart disease                         | 0.7<br>(0.6 to 0.9)                  | --                                 | 0.1<br>(< 0.05 to 0.1)            | 11.0<br>(-2.2 to 26.9)                            | -6.0<br>(-15.0 to 4.3)                              |
| Cardiomyopathy and myocarditis                     | 0.4<br>(0.3 to 0.4)                  | 0.1†<br>(0.1 to 0.2)               | < 0.05<br>(< 0.05 to < 0.05)      | 24.3<br>(8.6 to 42.2)                             | -1.4<br>(-12.1 to 10.9)                             |
| Myocarditis                                        | 0.1<br>(0.1 to 0.1)                  | 0.1<br>(0.1 to 0.2)                | < 0.05<br>(< 0.05 to < 0.05)      | 19.6<br>(2.6 to 39.4)                             | 1.0<br>(-14.8 to 19.1)                              |
| Alcoholic cardiomyopathy                           | < 0.05<br>(< 0.05 to 0.1)            | --                                 | < 0.05<br>(< 0.05 to < 0.05)      | 37.8<br>(1.0 to 83.5)                             | 2.6<br>(-22.4 to 34.8)                              |
| Other cardiomyopathy                               | 0.3<br>(0.2 to 0.3)                  | --                                 | < 0.05<br>(< 0.05 to < 0.05)      | 24.0<br>(5.0 to 46.6)                             | -2.5<br>(-15.1 to 12.3)                             |
| Atrial fibrillation and flutter                    | 1.7<br>(1.5 to 1.9)                  | 0.1<br>(0.1 to 0.1)                | 0.1<br>(0.1 to 0.2)               | 17.9<br>(9.9 to 27.3)                             | 0.5<br>(-5.7 to 7.4)                                |
| Peripheral vascular disease                        | 6.2<br>(5.4 to 7.1)                  | 0.6<br>(0.5 to 0.7)                | < 0.05<br>(< 0.05 to 0.1)         | 5.8<br>(-5.1 to 19.5)                             | -4.9<br>(-11.7 to 2.5)                              |
| Endocarditis                                       | 0.1<br>(< 0.05 to 0.1)               | 0.1<br>(0.1 to 0.1)                | < 0.05<br>(< 0.05 to < 0.05)      | 25.1<br>(8.6 to 44.7)                             | -0.2<br>(-14.2 to 15.5)                             |
| Other cardiovascular and circulatory diseases      | 19.2<br>(16.0 to 22.9)               | --                                 | 1.0<br>(0.7 to 1.4)               | 15.8<br>(7.0 to 27.0)                             | 0.7<br>(-6.4 to 8.7)                                |
| <b>Chronic respiratory diseases</b>                | <b>29.7</b><br><b>(28.3 to 31.1)</b> | <b>6.0†</b><br><b>(5.5 to 6.4)</b> | <b>1.4</b><br><b>(1.1 to 1.8)</b> | <b>12.0</b><br><b>(7.1 to 17.4)</b>               | <b>1.2</b><br><b>(-3.2 to 5.5)</b>                  |
| Chronic obstructive pulmonary disease              | 7.0<br>(6.7 to 7.3)                  | 0.5<br>(0.5 to 0.5)                | 0.5<br>(0.4 to 0.5)               | 21.2<br>(12.5 to 30.2)                            | -1.5<br>(-8.2 to 5.6)                               |
| Pneumoconiosis                                     | < 0.05<br>(< 0.05 to < 0.05)         | < 0.05<br>(< 0.05 to < 0.05)       | < 0.05<br>(< 0.05 to < 0.05)      | 27.7<br>(20.6 to 34.7)                            | 0.2<br>(-4.9 to 5.4)                                |
| Silicosis                                          | < 0.05<br>(< 0.05 to < 0.05)         | < 0.05<br>(< 0.05 to < 0.05)       | < 0.05<br>(< 0.05 to < 0.05)      | 38.0<br>(27.1 to 51.3)                            | 0.3<br>(-6.7 to 8.0)                                |



| Cause                                                          | Prevalence in thousands (95% UI)  | Incidence in thousands (95% UI)   | YLDs in thousands (95% UI)        |                                                                     |                                                                      |
|----------------------------------------------------------------|-----------------------------------|-----------------------------------|-----------------------------------|---------------------------------------------------------------------|----------------------------------------------------------------------|
|                                                                | 2016 counts<br>(< 0.05 to < 0.05) | 2016 counts<br>(< 0.05 to < 0.05) | 2016 counts<br>(< 0.05 to < 0.05) | Percentage change in counts between 2006 and 2016<br>(16.5 to 35.2) | Percentage change in age-standardised rates between<br>(-5.9 to 6.4) |
| Asbestosis                                                     | < 0.05<br>(< 0.05 to < 0.05)      | < 0.05<br>(< 0.05 to < 0.05)      | < 0.05<br>(< 0.05 to < 0.05)      | 25.7<br>(16.5 to 35.2)                                              | -0.2<br>(-5.9 to 6.4)                                                |
| Coal workers pneumoconiosis                                    | --                                | --                                | --                                | --                                                                  | --                                                                   |
| Other pneumoconiosis                                           | < 0.05<br>(< 0.05 to < 0.05)      | < 0.05<br>(< 0.05 to < 0.05)      | < 0.05<br>(< 0.05 to < 0.05)      | 28.4<br>(16.0 to 40.4)                                              | 0.6<br>(-8.3 to 9.5)                                                 |
| Asthma                                                         | 22.9<br>(21.2 to 24.8)            | 5.5<br>(5.1 to 6.0)               | 0.9<br>(0.6 to 1.3)               | 6.9<br>(1.3 to 12.9)                                                | 2.5<br>(-2.0 to 7.3)                                                 |
| Interstitial lung disease and pulmonary sarcoidosis            | < 0.05<br>(< 0.05 to 0.1)         | < 0.05<br>(< 0.05 to < 0.05)      | < 0.05<br>(< 0.05 to < 0.05)      | 19.2<br>(14.5 to 23.9)                                              | -0.1<br>(-4.2 to 3.9)                                                |
| Other chronic respiratory diseases                             | --                                | --                                | < 0.05<br>(< 0.05 to < 0.05)      | 37.4<br>(7.9 to 72.5)                                               | 31.1<br>(7.7 to 57.3)                                                |
| <b>Cirrhosis and other chronic liver diseases</b>              | <b>1.6<br/>(1.6 to 1.7)</b>       | <b>0.1<br/>(0.1 to 0.1)</b>       | <b>0.1<br/>(0.1 to 0.2)</b>       | <b>18.8<br/>(7.4 to 31.6)</b>                                       | <b>4.1<br/>(-3.9 to 13.1)</b>                                        |
| Cirrhosis and other chronic liver diseases due to hepatitis B  | 0.6<br>(0.6 to 0.7)               | < 0.05<br>(< 0.05 to 0.1)         | < 0.05<br>(< 0.05 to 0.1)         | 32.9<br>(14.8 to 57.2)                                              | 5.2<br>(-6.4 to 20.3)                                                |
| Cirrhosis and other chronic liver diseases due to hepatitis C  | 0.2<br>(0.1 to 0.3)               | < 0.05<br>(< 0.05 to < 0.05)      | < 0.05<br>(< 0.05 to < 0.05)      | 39.4<br>(11.4 to 76.8)                                              | 9.4<br>(-10.1 to 35.1)                                               |
| Cirrhosis and other chronic liver diseases due to alcohol use  | 0.3<br>(0.3 to 0.4)               | < 0.05<br>(< 0.05 to < 0.05)      | < 0.05<br>(< 0.05 to < 0.05)      | 31.9<br>(9.3 to 58.9)                                               | 1.2<br>(-14.4 to 19.8)                                               |
| Cirrhosis and other chronic liver diseases due to other causes | 0.5<br>(0.4 to 0.5)               | < 0.05<br>(< 0.05 to < 0.05)      | 0.1<br>(< 0.05 to 0.1)            | 1.2<br>(-16.1 to 22.1)                                              | 2.7<br>(-14.5 to 22.2)                                               |
| <b>Digestive diseases</b>                                      | <b>8.0<br/>(7.5 to 8.5)</b>       | <b>9.3†<br/>(8.8 to 9.8)</b>      | <b>0.2<br/>(0.2 to 0.3)</b>       | <b>23.7<br/>(13.4 to 33.9)</b>                                      | <b>3.9<br/>(-3.0 to 10.9)</b>                                        |
| Peptic ulcer disease                                           | 1.5<br>(1.3 to 1.6)               | 0.7<br>(0.6 to 0.8)               | < 0.05<br>(< 0.05 to < 0.05)      | 36.8<br>(19.6 to 55.7)                                              | 8.7<br>(-2.6 to 21.4)                                                |
| Gastritis and duodenitis                                       | 3.1<br>(2.8 to 3.5)               | 3.0<br>(2.6 to 3.4)               | < 0.05<br>(< 0.05 to 0.1)         | 41.8<br>(24.5 to 62.8)                                              | 16.8<br>(3.7 to 30.9)                                                |
| Appendicitis                                                   | 0.1<br>(0.1 to 0.1)               | 2.4<br>(2.3 to 2.6)               | < 0.05<br>(< 0.05 to < 0.05)      | 10.6<br>(-18.9 to 50.0)                                             | 1.3<br>(-20.6 to 30.1)                                               |
| Paralytic ileus and intestinal obstruction                     | < 0.05<br>(< 0.05 to < 0.05)      | 0.2<br>(0.2 to 0.3)               | < 0.05<br>(< 0.05 to < 0.05)      | 23.6<br>(17.1 to 30.9)                                              | 5.9<br>(-0.6 to 13.0)                                                |
| Inguinal, femoral, and abdominal hernia                        | 3.1<br>(2.5 to 3.7)               | 1.2<br>(1.1 to 1.4)               | 0.1<br>(0.1 to 0.1)               | 11.6<br>(-4.4 to 27.8)                                              | -7.0<br>(-17.3 to 4.2)                                               |
| Inflammatory bowel disease                                     | 0.2<br>(0.1 to 0.2)               | 0.2<br>(0.2 to 0.2)               | < 0.05<br>(< 0.05 to < 0.05)      | 64.2<br>(34.1 to 96.5)                                              | 35.3<br>(11.1 to 62.4)                                               |
| Vascular intestinal disorders                                  | < 0.05<br>(< 0.05 to < 0.05)      | < 0.05<br>(< 0.05 to < 0.05)      | < 0.05<br>(< 0.05 to < 0.05)      | 16.5<br>(9.0 to 25.0)                                               | 2.6<br>(-1.7 to 7.3)                                                 |
| Gallbladder and biliary diseases                               | 0.3<br>(0.2 to 0.3)               | 1.4<br>(1.2 to 1.6)               | < 0.05<br>(< 0.05 to < 0.05)      | 29.5<br>(17.3 to 44.6)                                              | 2.2<br>(-8.0 to 13.9)                                                |
| Pancreatitis                                                   | < 0.05<br>(< 0.05 to < 0.05)      | 0.1<br>(0.1 to 0.1)               | < 0.05<br>(< 0.05 to < 0.05)      | 31.8<br>(25.8 to 38.1)                                              | 4.6<br>(0.4 to 8.6)                                                  |
| Other digestive diseases                                       | --                                | --                                | < 0.05<br>(< 0.05 to < 0.05)      | 22.4<br>(10.3 to 34.7)                                              | 6.8<br>(-1.0 to 14.4)                                                |
| <b>Neurological disorders</b>                                  | <b>181.8<br/>(173.8 to 190.9)</b> | <b>89.5<br/>(74.9 to 106.4)</b>   | <b>4.8<br/>(3.0 to 7.1)</b>       | <b>15.7<br/>(-17.2 to 60.6)</b>                                     | <b>-1.5<br/>(-27.1 to 31.8)</b>                                      |
| Alzheimer's disease and other dementias                        | 1.2<br>(1.0 to 1.4)               | 0.2<br>(0.2 to 0.2)               | 0.2<br>(0.1 to 0.2)               | 28.9<br>(18.8 to 40.1)                                              | -0.7<br>(-5.7 to 4.3)                                                |
| Parkinson's disease                                            | 0.1<br>(0.1 to 0.2)               | < 0.05<br>(< 0.05 to < 0.05)      | < 0.05<br>(< 0.05 to < 0.05)      | 28.5<br>(9.3 to 52.5)                                               | 8.7<br>(-6.2 to 25.3)                                                |
| Epilepsy                                                       | 3.4<br>(0.9 to 5.7)               | 0.4<br>(0.1 to 0.7)               | 1.1<br>(0.2 to 2.3)               | 2.9<br>(-77.7 to 374.9)                                             | -6.4<br>(-79.7 to 334.6)                                             |
| Multiple sclerosis                                             | < 0.05<br>(< 0.05 to < 0.05)      | < 0.05<br>(< 0.05 to < 0.05)      | < 0.05<br>(< 0.05 to < 0.05)      | 45.7<br>(40.4 to 50.7)                                              | 11.8<br>(7.9 to 15.6)                                                |
| Motor neuron disease                                           | < 0.05<br>(< 0.05 to < 0.05)      | < 0.05<br>(< 0.05 to < 0.05)      | < 0.05<br>(< 0.05 to < 0.05)      | 19.5<br>(14.1 to 25.2)                                              | 3.6<br>(0.5 to 7.3)                                                  |
| Migraine                                                       | 67.0<br>(62.9 to 71.2)            | 7.7<br>(7.2 to 8.2)               | 2.8<br>(1.8 to 4.0)               | 19.2<br>(13.8 to 24.2)                                              | -0.9<br>(-4.8 to 2.7)                                                |
| Tension-type headache                                          | 137.1<br>(121.5 to 154.9)         | 81.2<br>(66.5 to 98.2)            | 0.5<br>(0.3 to 0.7)               | 20.8<br>(14.0 to 28.5)                                              | -0.6<br>(-5.5 to 4.8)                                                |
| Other neurological disorders                                   | < 0.05<br>(< 0.05 to < 0.05)      | < 0.05<br>(< 0.05 to < 0.05)      | 0.2<br>(0.1 to 0.5)               | 20.4<br>(-71.6 to 422.2)                                            | 12.6<br>(-71.8 to 362.2)                                             |
| <b>Mental and substance use disorders</b>                      | <b>78.2<br/>(75.2 to 81.2)</b>    | <b>33.2†<br/>(30.7 to 36.1)</b>   | <b>10.8<br/>(7.9 to 14.1)</b>     | <b>18.4<br/>(15.2 to 21.9)</b>                                      | <b>-0.4<br/>(-2.8 to 2.0)</b>                                        |
| Schizophrenia                                                  | 1.0<br>(0.9 to 1.1)               | 0.1<br>(0.1 to 0.1)               | 0.7<br>(0.5 to 0.8)               | 36.3<br>(24.3 to 50.9)                                              | 1.5<br>(-6.6 to 11.3)                                                |
| Alcohol use disorders                                          | 6.5<br>(5.5 to 7.6)               | 3.5<br>(3.0 to 4.1)               | 0.7<br>(0.4 to 0.9)               | 30.6<br>(19.4 to 43.1)                                              | 1.9<br>(-5.8 to 10.0)                                                |
| Drug use disorders                                             | 4.0<br>(3.5 to 4.4)               | 0.5<br>(0.5 to 0.6)               | 1.3<br>(0.9 to 1.7)               | 33.5<br>(18.8 to 52.1)                                              | 1.7<br>(-8.8 to 13.8)                                                |
| Opioid use disorders                                           | 2.9<br>(2.4 to 3.4)               | 0.3<br>(0.2 to 0.3)               | 1.2<br>(0.8 to 1.6)               | 34.0<br>(18.2 to 54.0)                                              | 1.7<br>(-9.5 to 14.8)                                                |
| Cocaine use disorders                                          | 0.1<br>(0.1 to 0.1)               | < 0.05<br>(< 0.05 to < 0.05)      | < 0.05<br>(< 0.05 to < 0.05)      | 26.4<br>(16.4 to 37.3)                                              | 1.4<br>(-9.5 to 14.6)                                                |
| Amphetamine use disorders                                      | < 0.05<br>(< 0.05 to 0.1)         | < 0.05<br>(< 0.05 to < 0.05)      | < 0.05<br>(< 0.05 to < 0.05)      | 25.6<br>(12.9 to 39.6)                                              | 1.1<br>(-7.4 to 11.2)                                                |
| Cannabis use disorders                                         | 0.9<br>(0.7 to 1.0)               | 0.2<br>(0.1 to 0.2)               | < 0.05<br>(< 0.05 to < 0.05)      | 21.7<br>(-3.7 to 54.2)                                              | 0.4<br>(-18.3 to 23.6)                                               |
| Other drug use disorders                                       | 0.2<br>(0.2 to 0.2)               | < 0.05<br>(< 0.05 to < 0.05)      | < 0.05<br>(< 0.05 to < 0.05)      | 32.2<br>(12.6 to 53.7)                                              | 1.9<br>(-11.7 to 16.9)                                               |
| Depressive disorders                                           | 20.4<br>(19.1 to 21.9)            | 23.4<br>(21.0 to 26.2)            | 3.6<br>(2.5 to 4.9)               | 19.9<br>(14.2 to 25.6)                                              | -2.0<br>(-6.2 to 2.4)                                                |
| Major depressive disorder                                      | 14.5<br>(13.1 to 16.2)            | 22.3<br>(19.9 to 25.2)            | 3.0<br>(2.0 to 4.1)               | 18.8<br>(12.0 to 25.9)                                              | -2.4<br>(-7.4 to 2.9)                                                |
| Dysthymia                                                      | 6.4<br>(5.5 to 7.4)               | 1.1<br>(1.0 to 1.3)               | 0.6<br>(0.4 to 0.9)               | 25.3<br>(20.0 to 30.8)                                              | -0.0<br>(-3.3 to 3.3)                                                |
| Bipolar disorder                                               | 3.5<br>(3.0 to 4.1)               | 0.3<br>(0.3 to 0.4)               | 0.7<br>(0.4 to 1.1)               | 19.9<br>(12.2 to 29.3)                                              | 0.0<br>(-5.8 to 6.4)                                                 |
| Anxiety disorders                                              | 15.6<br>(14.0 to 17.1)            | 2.7<br>(2.5 to 3.0)               | 1.5<br>(1.1 to 2.1)               | 12.6<br>(4.6 to 21.3)                                               | 0.1<br>(-6.5 to 7.0)                                                 |
| Eating disorders                                               | 0.7<br>(0.6 to 0.8)               | 0.4<br>(0.3 to 0.6)               | 0.1<br>(0.1 to 0.2)               | 29.9<br>(12.1 to 50.4)                                              | 12.8<br>(-0.8 to 28.7)                                               |
| Anorexia nervosa                                               | 0.2<br>(0.1 to 0.2)               | 0.1<br>(< 0.05 to 0.1)            | < 0.05<br>(< 0.05 to 0.1)         | 17.3<br>(-9.9 to 54.2)                                              | 11.4<br>(-14.0 to 45.7)                                              |
| Bulimia nervosa                                                | 0.5<br>(0.4 to 0.7)               | 0.4<br>(0.2 to 0.5)               | 0.1<br>(0.1 to 0.2)               | 34.9<br>(13.3 to 59.4)                                              | 13.2<br>(-2.7 to 31.4)                                               |
| Autistic spectrum disorders                                    | 4.5<br>(4.1 to 5.1)               | < 0.05<br>(< 0.05 to 0.1)         | 0.7<br>(0.4 to 0.9)               | 9.6<br>(4.0 to 16.0)                                                | 0.9<br>(-3.7 to 6.1)                                                 |
| Autism                                                         | 1.3<br>(1.1 to 1.5)               | < 0.05<br>(< 0.05 to < 0.05)      | 0.3<br>(0.2 to 0.5)               | 9.5<br>(0.4 to 21.6)                                                | 0.7<br>(-6.9 to 10.2)                                                |
| Asperger syndrome and other autistic spectrum disorders        | 3.3<br>(2.7 to 3.9)               | < 0.05<br>(< 0.05 to 0.1)         | 0.3<br>(0.2 to 0.5)               | 9.8<br>(4.0 to 15.8)                                                | 1.1<br>(-3.7 to 6.1)                                                 |

| Cause                                                      | Prevalence in thousands (95% UI)  | Incidence in thousands (95% UI)        | YLDs in thousands (95% UI)   |                                                   |                                                     |
|------------------------------------------------------------|-----------------------------------|----------------------------------------|------------------------------|---------------------------------------------------|-----------------------------------------------------|
|                                                            | 2016 counts                       | 2016 counts                            | 2016 counts                  | Percentage change in counts between 2006 and 2016 | Percentage change in age-standardised rates between |
| Attention-deficit/hyperactivity disorder                   | 6.9<br>(6.2 to 7.7)               | 0.4<br>(0.3 to 0.4)                    | 0.1<br>(0.1 to 0.1)          | 1.7<br>(-5.7 to 9.4)                              | 0.5<br>(-6.3 to 7.4)                                |
| Conduct disorder                                           | 4.4<br>(3.6 to 5.2)               | 1.5<br>(1.2 to 1.8)                    | 0.5<br>(0.3 to 0.8)          | -15.9<br>(-21.1 to -10.0)                         | 0.1<br>(-6.2 to 6.9)                                |
| Idiopathic developmental intellectual disability           | 8.5<br>(4.8 to 12.2)              | --                                     | 0.3<br>(0.1 to 0.6)          | 0.4<br>(-7.1 to 7.1)                              | -8.5<br>(-15.3 to -2.6)                             |
| Other mental and substance use disorders                   | 9.1<br>(8.0 to 10.5)              | 0.4<br>(0.3 to 0.5)                    | 0.7<br>(0.5 to 1.0)          | 30.4<br>(22.5 to 37.9)                            | 0.6<br>(-5.0 to 5.7)                                |
| <b>Diabetes, urogenital, blood, and endocrine diseases</b> | <b>228.4<br/>(222.7 to 233.9)</b> | <b>62.2†<br/>(58.0 to 66.4)</b>        | <b>3.6<br/>(2.6 to 5.0)</b>  | <b>18.9<br/>(15.1 to 23.2)</b>                    | <b>-2.4<br/>(-5.3 to 0.8)</b>                       |
| Diabetes mellitus                                          | 15.3<br>(13.8 to 17.0)            | 1.0<br>(0.8 to 1.1)                    | 1.1<br>(0.7 to 1.5)          | 30.0<br>(22.4 to 38.0)                            | 3.4<br>(-2.4 to 9.5)                                |
| Acute glomerulonephritis                                   | < 0.05<br>(< 0.05 to < 0.05)      | 0.1<br>(0.1 to 0.1)                    | < 0.05<br>(< 0.05 to < 0.05) | 12.2<br>(6.3 to 18.0)                             | 0.4<br>(-3.2 to 4.5)                                |
| Chronic kidney disease                                     | 33.8<br>(30.7 to 37.3)            | 2.4<br>(2.1 to 2.7)                    | 0.9<br>(0.7 to 1.1)          | 22.0<br>(14.4 to 30.4)                            | -1.8<br>(-7.8 to 4.1)                               |
| Chronic kidney disease due to diabetes mellitus            | 11.5<br>(10.0 to 13.3)            | 0.8<br>(0.7 to 0.9)                    | 0.3<br>(0.2 to 0.4)          | 23.6<br>(12.5 to 36.2)                            | -1.5<br>(-8.8 to 6.7)                               |
| Chronic kidney disease due to hypertension                 | 7.0<br>(6.1 to 7.9)               | 0.6<br>(0.5 to 0.7)                    | 0.2<br>(0.1 to 0.2)          | 18.1<br>(4.9 to 33.8)                             | -3.2<br>(-13.7 to 8.8)                              |
| Chronic kidney disease due to glomerulonephritis           | 6.6<br>(5.7 to 7.5)               | 0.4<br>(0.3 to 0.5)                    | 0.2<br>(0.1 to 0.3)          | 23.0<br>(10.6 to 37.4)                            | -0.9<br>(-8.9 to 8.7)                               |
| Chronic kidney disease due to other causes                 | 8.6<br>(7.2 to 10.1)              | 0.7<br>(0.6 to 0.8)                    | 0.2<br>(0.2 to 0.3)          | 22.0<br>(9.5 to 36.1)                             | -1.7<br>(-9.4 to 7.6)                               |
| Urinary diseases and male infertility                      | 12.3<br>(10.7 to 14.3)            | 33.8†<br>(30.1 to 37.7)                | 0.2<br>(0.2 to 0.4)          | 23.8<br>(15.0 to 32.5)                            | -2.0<br>(-8.5 to 4.7)                               |
| Interstitial nephritis and urinary tract infections        | 0.6<br>(0.5 to 0.7)               | 29.9<br>(26.3 to 33.8)                 | < 0.05<br>(< 0.05 to < 0.05) | 16.1<br>(-1.5 to 35.3)                            | 1.3<br>(-11.4 to 15.7)                              |
| Urolithiasis                                               | 0.1<br>(0.1 to 0.1)               | 3.2<br>(2.8 to 3.7)                    | < 0.05<br>(< 0.05 to < 0.05) | 29.5<br>(21.4 to 38.6)                            | 1.9<br>(-5.0 to 9.0)                                |
| Benign prostatic hyperplasia                               | 5.5<br>(4.7 to 6.3)               | 0.7<br>(0.6 to 0.8)                    | 0.2<br>(0.1 to 0.3)          | 25.5<br>(14.6 to 37.9)                            | -2.0<br>(-9.3 to 6.2)                               |
| Male infertility                                           | 5.5<br>(4.3 to 7.2)               | --                                     | < 0.05<br>(< 0.05 to 0.1)    | 27.8<br>(18.7 to 37.3)                            | 0.8<br>(-6.1 to 7.5)                                |
| Other urinary diseases                                     | --                                | --                                     | < 0.05<br>(< 0.05 to < 0.05) | -0.7<br>(-12.2 to 11.2)                           | -15.9<br>(-23.4 to -7.7)                            |
| Gynecological diseases                                     | 66.5<br>(63.3 to 69.9)            | 24.6†<br>(22.7 to 26.5)                | 0.8<br>(0.6 to 1.2)          | 20.3<br>(15.3 to 25.8)                            | -9.2<br>(-12.6 to -5.7)                             |
| Uterine fibroids                                           | 5.0<br>(4.4 to 5.6)               | 0.6<br>(0.5 to 0.7)                    | 0.1<br>(0.1 to 0.2)          | 16.8<br>(5.9 to 28.8)                             | -15.3<br>(-23.4 to -6.7)                            |
| Polycystic ovarian syndrome                                | 0.6<br>(0.4 to 0.7)               | 1.3<br>(0.9 to 1.9)                    | < 0.05<br>(< 0.05 to < 0.05) | 22.4<br>(6.7 to 39.9)                             | -4.4<br>(-15.5 to 8.4)                              |
| Female infertility                                         | 0.7<br>(0.4 to 2.0)               | --                                     | < 0.05<br>(< 0.05 to < 0.05) | 35.2<br>(1.4 to 89.6)                             | 6.4<br>(-18.5 to 46.4)                              |
| Endometriosis                                              | 0.1<br>(0.1 to 0.1)               | 0.5<br>(0.4 to 0.6)                    | < 0.05<br>(< 0.05 to < 0.05) | 22.7<br>(-9.0 to 68.6)                            | -2.5<br>(-25.4 to 29.8)                             |
| Genital prolapse                                           | 29.3<br>(25.9 to 33.0)            | 2.3<br>(2.0 to 2.7)                    | 0.1<br>(< 0.05 to 0.2)       | 15.2<br>(7.4 to 22.9)                             | -12.4<br>(-18.7 to -6.4)                            |
| Premenstrual syndrome                                      | 30.1<br>(28.1 to 32.1)            | 11.0<br>(10.2 to 11.8)                 | 0.2<br>(0.1 to 0.4)          | 16.4<br>(6.9 to 26.9)                             | -7.4<br>(-14.4 to 0.1)                              |
| Other gynecological diseases                               | 10.1<br>(8.8 to 11.6)             | 8.9<br>(7.3 to 10.7)                   | 0.3<br>(0.2 to 0.5)          | 25.8<br>(16.8 to 34.7)                            | -6.8<br>(-12.3 to -1.3)                             |
| Hemoglobinopathies and hemolytic anaemias                  | 151.8<br>(145.8 to 157.6)         | --                                     | 0.4<br>(0.2 to 0.6)          | -3.4<br>(-13.5 to 7.6)                            | -8.0<br>(-15.8 to 0.9)                              |
| Thalassemias                                               | < 0.05<br>(< 0.05 to < 0.05)      | --                                     | < 0.05<br>(< 0.05 to < 0.05) | -0.2<br>(-27.6 to 31.8)                           | -2.0<br>(-27.5 to 29.0)                             |
| Thalassaemias trait                                        | 8.6<br>(3.6 to 16.9)              | --                                     | 0.1<br>(< 0.05 to 0.3)       | 6.1<br>(-8.9 to 22.3)                             | -2.3<br>(-15.3 to 10.9)                             |
| Sickle cell disorders                                      | 0.3<br>(0.1 to 0.8)               | --                                     | < 0.05<br>(< 0.05 to 0.1)    | 4.1<br>(-11.4 to 26.9)                            | 3.5<br>(-11.2 to 23.4)                              |
| Sickle cell trait                                          | 34.4<br>(30.2 to 39.5)            | --                                     | 0.1<br>(0.1 to 0.1)          | 2.6<br>(-10.4 to 17.6)                            | 0.2<br>(-11.0 to 13.1)                              |
| G6PD deficiency                                            | 28.1<br>(24.9 to 31.8)            | --                                     | < 0.05<br>(< 0.05 to < 0.05) | -8.8<br>(-22.7 to 6.6)                            | -14.8<br>(-25.5 to -3.0)                            |
| G6PD trait                                                 | 86.9<br>(85.7 to 88.3)            | --                                     | < 0.05<br>(< 0.05 to < 0.05) | 11.7<br>(-3.8 to 31.9)                            | 0.5<br>(-11.9 to 14.1)                              |
| Other hemoglobinopathies and hemolytic anaemias            | 6.3<br>(5.7 to 6.9)               | --                                     | 0.1<br>(0.1 to 0.2)          | -13.7<br>(-24.9 to -1.4)                          | -16.7<br>(-25.8 to -6.8)                            |
| Endocrine, metabolic, blood, and immune disorders          | 7.3<br>(6.8 to 7.8)               | 0.4<br>(0.4 to 0.5)                    | 0.2<br>(0.1 to 0.3)          | -1.6<br>(-10.8 to 9.1)                            | -7.5<br>(-14.5 to -0.2)                             |
| <b>Musculoskeletal disorders</b>                           | <b>63.8<br/>(60.5 to 67.3)</b>    | <b>29.7<br/>(26.9 to 32.8)</b>         | <b>7.0<br/>(5.0 to 9.2)</b>  | <b>25.9<br/>(21.8 to 30.4)</b>                    | <b>-0.0<br/>(-2.6 to 2.8)</b>                       |
| Rheumatoid arthritis                                       | 0.7<br>(0.6 to 0.8)               | < 0.05<br>(< 0.05 to < 0.05)           | 0.2<br>(0.1 to 0.2)          | 30.8<br>(17.4 to 46.1)                            | 3.8<br>(-5.8 to 14.7)                               |
| Osteoarthritis                                             | 12.6<br>(11.8 to 13.4)            | 0.7<br>(0.6 to 0.7)                    | 0.8<br>(0.5 to 1.0)          | 32.0<br>(26.7 to 37.4)                            | 4.5<br>(0.6 to 8.5)                                 |
| Low back and neck pain                                     | 43.9<br>(40.9 to 47.3)            | 19.5<br>(17.4 to 21.9)                 | 5.1<br>(3.6 to 6.7)          | 24.8<br>(19.6 to 30.0)                            | -1.1<br>(-4.2 to 2.0)                               |
| Low back pain                                              | 32.6<br>(28.7 to 37.1)            | 16.3<br>(14.2 to 18.7)                 | 3.7<br>(2.6 to 4.9)          | 22.8<br>(16.2 to 29.6)                            | -1.4<br>(-5.5 to 3.0)                               |
| Neck pain                                                  | 13.8<br>(12.0 to 16.0)            | 3.2<br>(2.8 to 3.8)                    | 1.4<br>(0.9 to 1.9)          | 30.4<br>(24.9 to 35.8)                            | -0.3<br>(-2.8 to 2.0)                               |
| Gout                                                       | 1.5<br>(1.3 to 1.7)               | 0.3<br>(0.3 to 0.3)                    | < 0.05<br>(< 0.05 to 0.1)    | 28.9<br>(11.8 to 49.1)                            | 1.0<br>(-11.3 to 16.5)                              |
| Other musculoskeletal disorders                            | 10.8<br>(8.7 to 13.3)             | 9.2<br>(7.3 to 11.3)                   | 0.9<br>(0.6 to 1.3)          | 26.8<br>(14.3 to 41.4)                            | 0.5<br>(-8.3 to 10.6)                               |
| <b>Other non-communicable diseases</b>                     | <b>375.6<br/>(364.6 to 385.0)</b> | <b>1,013.4†<br/>(919.5 to 1,113.0)</b> | <b>9.7<br/>(6.5 to 13.8)</b> | <b>9.6<br/>(7.6 to 11.3)</b>                      | <b>-2.4<br/>(-3.6 to -1.3)</b>                      |
| Congenital anomalies                                       | 4.2<br>(3.7 to 5.0)               | --                                     | 0.7<br>(0.5 to 0.9)          | 3.9<br>(-2.5 to 11.0)                             | -4.8<br>(-10.4 to 1.4)                              |
| Neural tube defects                                        | 0.8<br>(0.7 to 0.8)               | --                                     | 0.2<br>(0.2 to 0.3)          | 7.5<br>(-4.7 to 21.6)                             | -2.6<br>(-12.9 to 9.2)                              |
| Congenital heart anomalies                                 | 0.8<br>(0.7 to 0.9)               | --                                     | < 0.05<br>(< 0.05 to 0.1)    | 4.7<br>(-7.5 to 19.3)                             | 2.2<br>(-9.4 to 15.1)                               |
| Orofacial clefts                                           | 0.1<br>(0.1 to 0.1)               | --                                     | < 0.05<br>(< 0.05 to < 0.05) | -3.3<br>(-14.0 to 9.0)                            | -11.6<br>(-21.2 to -0.3)                            |
| Down's syndrome                                            | 0.1<br>(0.1 to 0.1)               | --                                     | < 0.05<br>(< 0.05 to < 0.05) | 8.0<br>(-0.0 to 16.0)                             | 0.9<br>(-6.7 to 8.2)                                |
| Turner syndrome                                            | 0.2<br>(0.1 to 0.2)               | --                                     | < 0.05<br>(< 0.05 to < 0.05) | -4.8<br>(-37.5 to 47.2)                           | -12.6<br>(-40.3 to 27.8)                            |
| Klinefelter syndrome                                       | 0.3<br>(0.2 to 0.3)               | --                                     | < 0.05<br>(< 0.05 to < 0.05) | 15.3<br>(-13.9 to 51.4)                           | 0.2<br>(-25.1 to 30.2)                              |

| Cause                                         | Prevalence in thousands (95% UI)     | Incidence in thousands (95% UI)       | YLDs in thousands (95% UI)        |                                                   |                                                     |
|-----------------------------------------------|--------------------------------------|---------------------------------------|-----------------------------------|---------------------------------------------------|-----------------------------------------------------|
|                                               | 2016 counts                          | 2016 counts                           | 2016 counts                       | Percentage change in counts between 2006 and 2016 | Percentage change in age-standardised rates between |
| Other chromosomal abnormalities               | 0.1<br>(0.1 to 0.1)                  | --                                    | < 0.05<br>(< 0.05 to < 0.05)      | -2.0<br>(-31.2 to 38.8)                           | -0.7<br>(-28.7 to 37.2)                             |
| Congenital musculoskeletal and limb anomalies | 0.5<br>(0.4 to 0.5)                  | --                                    | 0.1<br>(< 0.05 to 0.1)            | 8.9<br>(-4.1 to 24.2)                             | -1.0<br>(-11.9 to 10.8)                             |
| Urogenital congenital anomalies               | 0.3<br>(0.3 to 0.3)                  | --                                    | < 0.05<br>(< 0.05 to < 0.05)      | -2.2<br>(-9.0 to 6.0)                             | -1.3<br>(-7.9 to 6.6)                               |
| Digestive congenital anomalies                | 0.6<br>(0.5 to 0.6)                  | --                                    | < 0.05<br>(< 0.05 to < 0.05)      | 10.0<br>(-9.0 to 31.7)                            | 0.2<br>(-14.9 to 17.9)                              |
| Other congenital anomalies                    | 1.9<br>(1.2 to 3.0)                  | --                                    | 0.3<br>(0.2 to 0.4)               | 0.2<br>(-8.2 to 9.8)                              | -8.7<br>(-16.1 to -0.7)                             |
| Skin and subcutaneous diseases                | 187.4<br>(180.8 to 194.6)            | 449.1<br>(412.5 to 489.1)             | 4.3<br>(2.8 to 6.3)               | 5.7<br>(3.2 to 8.3)                               | 2.2<br>(0.4 to 4.3)                                 |
| Dermatitis                                    | 23.5<br>(20.0 to 27.4)               | 25.9<br>(22.5 to 30.2)                | 0.9<br>(0.5 to 1.5)               | 3.0<br>(-1.3 to 7.8)                              | 0.1<br>(-3.3 to 3.8)                                |
| Psoriasis                                     | 3.8<br>(3.6 to 4.1)                  | 0.5<br>(0.5 to 0.6)                   | 0.3<br>(0.2 to 0.5)               | 30.3<br>(18.9 to 43.8)                            | 11.3<br>(3.1 to 20.9)                               |
| Cellulitis                                    | 0.2<br>(0.2 to 0.2)                  | 3.5<br>(3.3 to 3.8)                   | < 0.05<br>(< 0.05 to < 0.05)      | 12.9<br>(-8.6 to 40.8)                            | 1.7<br>(-15.9 to 23.8)                              |
| Pyoderma                                      | 2.9<br>(2.7 to 3.0)                  | 56.9<br>(54.5 to 59.5)                | < 0.05<br>(< 0.05 to < 0.05)      | 7.2<br>(1.1 to 13.4)                              | 1.5<br>(-3.6 to 6.9)                                |
| Scabies                                       | 8.3<br>(6.7 to 10.6)                 | 25.7<br>(20.6 to 32.7)                | 0.2<br>(0.1 to 0.4)               | 0.8<br>(-5.6 to 8.1)                              | -5.1<br>(-9.8 to 0.2)                               |
| Fungal skin diseases                          | 76.9<br>(65.6 to 89.5)               | 230.0<br>(195.1 to 268.8)             | 0.4<br>(0.2 to 0.9)               | 7.5<br>(4.1 to 11.3)                              | 0.1<br>(-0.7 to 0.9)                                |
| Viral skin diseases                           | 14.8<br>(14.0 to 15.6)               | 21.0<br>(19.9 to 22.3)                | 0.5<br>(0.3 to 0.7)               | 3.1<br>(-0.8 to 7.1)                              | -0.2<br>(-3.4 to 3.2)                               |
| Acne vulgaris                                 | 51.9<br>(45.8 to 58.6)               | 35.2<br>(27.8 to 45.0)                | 1.3<br>(0.9 to 1.9)               | 0.9<br>(-4.3 to 6.5)                              | 4.5<br>(-0.2 to 9.5)                                |
| Alopecia areata                               | 1.0<br>(1.0 to 1.1)                  | 1.8<br>(1.7 to 1.9)                   | < 0.05<br>(< 0.05 to 0.1)         | 23.6<br>(10.5 to 38.7)                            | 0.4<br>(-10.0 to 11.3)                              |
| Pruritus                                      | 4.3<br>(3.8 to 4.8)                  | 3.4<br>(3.1 to 3.9)                   | < 0.05<br>(< 0.05 to 0.1)         | 18.0<br>(10.1 to 26.5)                            | 1.5<br>(-3.6 to 7.0)                                |
| Urticaria                                     | 5.0<br>(4.3 to 5.9)                  | 9.1<br>(7.8 to 10.5)                  | 0.3<br>(0.2 to 0.4)               | 6.8<br>(-0.6 to 14.7)                             | 0.0<br>(-6.0 to 6.0)                                |
| Decubitus ulcer                               | 0.1<br>(0.1 to 0.1)                  | 0.2<br>(0.2 to 0.3)                   | < 0.05<br>(< 0.05 to < 0.05)      | 25.8<br>(9.4 to 43.3)                             | 2.8<br>(-11.2 to 17.6)                              |
| Other skin and subcutaneous diseases          | 31.2<br>(30.3 to 32.1)               | 35.9<br>(34.8 to 37.0)                | 0.2<br>(0.1 to 0.3)               | 21.9<br>(18.4 to 25.4)                            | 4.7<br>(2.2 to 7.3)                                 |
| Sense organ diseases                          | 101.2<br>(98.0 to 104.5)             | 49.8†<br>(46.4 to 53.5)               | 3.6<br>(2.5 to 5.0)               | 11.3<br>(8.3 to 14.2)                             | -5.9<br>(-7.7 to -4.2)                              |
| Glaucoma                                      | 0.2<br>(0.1 to 0.2)                  | --                                    | < 0.05<br>(< 0.05 to < 0.05)      | 12.4<br>(-3.1 to 29.5)                            | 0.6<br>(-12.0 to 14.5)                              |
| Cataract                                      | 4.6<br>(4.1 to 5.2)                  | --                                    | 0.4<br>(0.3 to 0.6)               | 11.7<br>(5.2 to 18.3)                             | -5.0<br>(-9.3 to -0.7)                              |
| Macular degeneration                          | 0.1<br>(0.1 to 0.2)                  | --                                    | < 0.05<br>(< 0.05 to < 0.05)      | 15.0<br>(-1.3 to 33.2)                            | 2.8<br>(-10.2 to 18.1)                              |
| Refraction and accommodation disorders        | 41.1<br>(37.4 to 45.2)               | --                                    | 0.7<br>(0.4 to 1.1)               | 4.0<br>(-1.3 to 10.0)                             | -12.2<br>(-16.9 to -7.4)                            |
| Age-related and other hearing loss            | 68.3<br>(64.1 to 72.9)               | --                                    | 2.0<br>(1.4 to 2.8)               | 11.7<br>(6.3 to 16.5)                             | -5.7<br>(-8.7 to -3.3)                              |
| Other vision loss                             | 1.4<br>(1.3 to 1.6)                  | --                                    | 0.1<br>(0.1 to 0.2)               | 23.2<br>(11.9 to 34.4)                            | -1.1<br>(-8.7 to 6.5)                               |
| Other sense organ diseases                    | 11.8<br>(11.0 to 12.7)               | 49.8<br>(46.4 to 53.5)                | 0.4<br>(0.2 to 0.6)               | 20.7<br>(14.8 to 26.6)                            | 1.7<br>(-2.3 to 5.5)                                |
| Oral disorders                                | 242.3<br>(220.5 to 257.7)            | 514.5†<br>(426.2 to 609.9)            | 1.1<br>(0.6 to 1.9)               | 25.9<br>(22.5 to 29.5)                            | 0.1<br>(-2.1 to 2.4)                                |
| Caries of deciduous teeth                     | 45.0<br>(34.6 to 56.0)               | 145.7<br>(95.9 to 204.4)              | < 0.05<br>(< 0.05 to < 0.05)      | -3.6<br>(-14.8 to 8.3)                            | -1.4<br>(-12.9 to 11.1)                             |
| Caries of permanent teeth                     | 132.9<br>(113.4 to 153.4)            | 360.0<br>(292.1 to 436.3)             | 0.1<br>(< 0.05 to 0.1)            | 9.4<br>(2.2 to 17.2)                              | -4.1<br>(-8.7 to 0.9)                               |
| Periodontal disease                           | 70.5<br>(52.9 to 88.6)               | 8.2<br>(6.1 to 10.6)                  | 0.5<br>(0.2 to 1.0)               | 33.3<br>(27.1 to 39.8)                            | 0.5<br>(-3.2 to 4.9)                                |
| Edentulism and severe tooth loss              | 10.4<br>(8.8 to 12.2)                | 0.6<br>(0.5 to 0.7)                   | 0.3<br>(0.2 to 0.4)               | 28.5<br>(22.3 to 35.1)                            | 0.6<br>(-3.4 to 4.7)                                |
| Other oral disorders                          | 9.1<br>(8.6 to 9.5)                  | --                                    | 0.3<br>(0.2 to 0.4)               | 18.5<br>(13.8 to 23.2)                            | -0.1<br>(-3.3 to 3.2)                               |
| <b>Injuries</b>                               | <b>75.9</b><br><b>(71.3 to 81.0)</b> | <b>40.3†</b><br><b>(38.1 to 42.7)</b> | <b>2.8</b><br><b>(1.9 to 4.1)</b> | <b>14.7</b><br><b>(11.9 to 17.4)</b>              | <b>-4.7</b><br><b>(-6.8 to -2.6)</b>                |
| <b>Transport injuries</b>                     | <b>8.3</b><br><b>(7.7 to 8.8)</b>    | <b>3.4</b><br><b>(3.1 to 3.8)</b>     | <b>0.5</b><br><b>(0.3 to 0.6)</b> | <b>18.3</b><br><b>(15.5 to 21.2)</b>              | <b>-4.2</b><br><b>(-6.3 to -2.1)</b>                |
| Road injuries                                 | 6.5<br>(6.1 to 6.9)                  | 2.9<br>(2.6 to 3.3)                   | 0.4<br>(0.2 to 0.5)               | 19.9<br>(17.0 to 22.8)                            | -4.2<br>(-6.2 to -2.2)                              |
| Pedestrian road injuries                      | 1.7<br>(1.5 to 1.9)                  | 0.6<br>(0.5 to 0.7)                   | 0.1<br>(0.1 to 0.1)               | 10.1<br>(7.4 to 13.0)                             | -12.2<br>(-14.3 to -10.2)                           |
| Cyclist road injuries                         | 1.2<br>(1.0 to 1.4)                  | 0.6<br>(0.5 to 0.7)                   | 0.1<br>(< 0.05 to 0.1)            | 24.8<br>(21.5 to 27.9)                            | 0.8<br>(-1.3 to 3.0)                                |
| Motorcyclist road injuries                    | 1.1<br>(0.9 to 1.3)                  | 0.3<br>(0.3 to 0.4)                   | 0.1<br>(< 0.05 to 0.1)            | 18.4<br>(15.3 to 21.6)                            | -5.5<br>(-7.6 to -3.2)                              |
| Motor vehicle road injuries                   | 1.7<br>(1.5 to 1.9)                  | 0.9<br>(0.8 to 1.1)                   | 0.1<br>(0.1 to 0.1)               | 25.1<br>(22.2 to 28.1)                            | -0.5<br>(-2.5 to 1.7)                               |
| Other road injuries                           | 0.8<br>(0.7 to 0.9)                  | 0.5<br>(0.4 to 0.6)                   | < 0.05<br>(< 0.05 to 0.1)         | 26.8<br>(23.6 to 29.9)                            | 1.7<br>(-0.4 to 3.9)                                |
| Other transport injuries                      | 1.8<br>(1.5 to 2.1)                  | 0.5<br>(0.4 to 0.6)                   | 0.1<br>(0.1 to 0.1)               | 13.0<br>(9.0 to 16.8)                             | -4.1<br>(-7.0 to -1.2)                              |
| <b>Unintentional injuries</b>                 | <b>62.0</b><br><b>(57.4 to 67.0)</b> | <b>33.4</b><br><b>(31.3 to 35.8)</b>  | <b>2.1</b><br><b>(1.4 to 3.0)</b> | <b>14.8</b><br><b>(11.8 to 17.7)</b>              | <b>-3.9</b><br><b>(-6.2 to -1.7)</b>                |
| Falls                                         | 19.7<br>(16.9 to 22.6)               | 10.1<br>(8.6 to 12.0)                 | 0.8<br>(0.5 to 1.1)               | 23.7<br>(20.5 to 26.9)                            | 1.9<br>(-0.5 to 4.3)                                |
| Drowning                                      | 0.6<br>(0.5 to 0.7)                  | 0.1<br>(0.1 to 0.2)                   | < 0.05<br>(< 0.05 to < 0.05)      | 3.8<br>(-0.2 to 7.5)                              | -11.5<br>(-14.9 to -8.6)                            |
| Fire, heat, and hot substances                | 6.7<br>(5.6 to 8.2)                  | 1.0<br>(0.8 to 1.2)                   | 0.2<br>(0.1 to 0.3)               | 17.7<br>(10.7 to 23.5)                            | -1.7<br>(-6.6 to 2.5)                               |
| Poisonings                                    | 0.2<br>(0.2 to 0.3)                  | 0.3<br>(0.3 to 0.4)                   | < 0.05<br>(< 0.05 to < 0.05)      | 17.7<br>(8.0 to 27.5)                             | 3.1<br>(-4.1 to 10.2)                               |
| Exposure to mechanical forces                 | 12.1<br>(10.3 to 14.6)               | 5.6<br>(4.8 to 6.5)                   | 0.3<br>(0.2 to 0.4)               | 7.3<br>(4.1 to 10.5)                              | -10.4<br>(-12.9 to -8.0)                            |
| Unintentional firearm injuries                | 0.7<br>(0.6 to 0.8)                  | 0.2<br>(0.2 to 0.3)                   | < 0.05<br>(< 0.05 to < 0.05)      | 6.2<br>(3.1 to 9.6)                               | -13.7<br>(-16.0 to -11.3)                           |
| Unintentional suffocation                     | 1.0<br>(0.7 to 1.4)                  | 0.3<br>(0.2 to 0.4)                   | < 0.05<br>(< 0.05 to 0.1)         | 2.0<br>(-1.3 to 5.3)                              | -9.4<br>(-11.9 to -7.0)                             |
| Other exposure to mechanical forces           | 10.4<br>(8.7 to 12.8)                | 5.1<br>(4.4 to 5.9)                   | 0.2<br>(0.1 to 0.3)               | 8.2<br>(4.8 to 11.5)                              | -10.0<br>(-12.7 to -7.6)                            |



| Cause                                                                               | Prevalence in thousands (95% UI)        | Incidence in thousands (95% UI)                      | YLDs in thousands (95% UI)                          |                                                   |                                                     |
|-------------------------------------------------------------------------------------|-----------------------------------------|------------------------------------------------------|-----------------------------------------------------|---------------------------------------------------|-----------------------------------------------------|
|                                                                                     | 2016 counts                             | 2016 counts                                          | 2016 counts                                         | Percentage change in counts between 2006 and 2016 | Percentage change in age-standardised rates between |
| Adverse effects of medical treatment                                                | 0.2<br>(0.2 to 0.3)                     | 2.8<br>(2.4 to 3.2)                                  | < 0.05<br>(< 0.05 to < 0.05)                        | 13.5<br>(7.8 to 20.3)                             | -2.3<br>(-5.9 to 2.2)                               |
| Animal contact                                                                      | 3.0<br>(2.6 to 3.5)                     | 4.2<br>(3.5 to 4.9)                                  | 0.1<br>(0.1 to 0.1)                                 | 13.2<br>(6.8 to 19.2)                             | -3.5<br>(-8.0 to 0.8)                               |
| Venomous animal contact                                                             | 1.3<br>(1.1 to 1.6)                     | 1.9<br>(1.4 to 2.4)                                  | 0.1<br>(< 0.05 to 0.1)                              | 15.1<br>(6.8 to 23.4)                             | -0.5<br>(-6.8 to 5.5)                               |
| Non-venomous animal contact                                                         | 1.7<br>(1.4 to 2.0)                     | 2.3<br>(1.9 to 2.8)                                  | < 0.05<br>(< 0.05 to < 0.05)                        | 8.2<br>(3.2 to 12.2)                              | -10.1<br>(-13.8 to -6.9)                            |
| Foreign body                                                                        | 4.6<br>(3.8 to 5.4)                     | 3.1<br>(2.7 to 3.5)                                  | 0.2<br>(0.1 to 0.3)                                 | 11.4<br>(7.1 to 15.3)                             | -2.9<br>(-6.0 to -0.0)                              |
| Pulmonary aspiration and foreign body in airway                                     | 2.6<br>(2.0 to 3.5)                     | 1.2<br>(1.0 to 1.5)                                  | 0.1<br>(0.1 to 0.2)                                 | 10.3<br>(6.0 to 14.3)                             | -3.5<br>(-6.6 to -0.6)                              |
| Foreign body in eyes                                                                | 0.2<br>(0.1 to 0.3)                     | 1.1<br>(0.8 to 1.4)                                  | < 0.05<br>(< 0.05 to < 0.05)                        | 16.3<br>(10.7 to 22.9)                            | -0.1<br>(-2.8 to 2.7)                               |
| Foreign body in other body part                                                     | 1.7<br>(1.4 to 2.3)                     | 0.8<br>(0.7 to 1.0)                                  | 0.1<br>(< 0.05 to 0.1)                              | 12.9<br>(7.4 to 17.7)                             | -2.3<br>(-6.5 to 1.6)                               |
| Environmental heat and cold exposure                                                | 4.5<br>(3.9 to 5.2)                     | 1.5<br>(1.3 to 1.8)                                  | 0.2<br>(0.1 to 0.2)                                 | -0.2<br>(-3.1 to 2.8)                             | -17.4<br>(-19.8 to -15.1)                           |
| Other unintentional injuries                                                        | 10.6<br>(8.4 to 13.4)                   | 4.6<br>(3.9 to 5.5)                                  | 0.3<br>(0.2 to 0.4)                                 | 13.0<br>(10.4 to 15.8)                            | -4.9<br>(-6.9 to -2.7)                              |
| <b>Self-harm and interpersonal violence</b>                                         | <b>17.3</b><br><b>(15.5 to 19.1)</b>    | <b>3.4†</b><br><b>(2.9 to 3.9)</b>                   | <b>0.3</b><br><b>(0.2 to 0.5)</b>                   | <b>9.4</b><br><b>(6.1 to 12.3)</b>                | <b>-10.2</b><br><b>(-12.1 to -8.5)</b>              |
| Self-harm                                                                           | 0.8<br>(0.7 to 0.9)                     | 0.5<br>(0.4 to 0.6)                                  | < 0.05<br>(< 0.05 to 0.1)                           | 16.5<br>(12.6 to 20.7)                            | -8.2<br>(-11.4 to -5.2)                             |
| Self-harm by firearm                                                                | < 0.05<br>(< 0.05 to < 0.05)            | < 0.05<br>(< 0.05 to < 0.05)                         | < 0.05<br>(< 0.05 to < 0.05)                        | 1.8<br>(-2.1 to 5.6)                              | -19.2<br>(-21.9 to -16.6)                           |
| Self-harm by other specified means                                                  | 0.8<br>(0.6 to 0.9)                     | 0.5<br>(0.4 to 0.5)                                  | < 0.05<br>(< 0.05 to 0.1)                           | 17.2<br>(13.1 to 21.4)                            | -7.7<br>(-10.9 to -4.6)                             |
| Interpersonal violence                                                              | 16.5<br>(14.7 to 18.3)                  | 2.9‡<br>(2.5 to 3.4)                                 | 0.3<br>(0.2 to 0.4)                                 | 8.5<br>(5.2 to 11.5)                              | -10.6<br>(-12.5 to -8.9)                            |
| Assault by firearm                                                                  | 0.4<br>(0.3 to 0.5)                     | 0.2<br>(0.1 to 0.2)                                  | < 0.05<br>(< 0.05 to < 0.05)                        | 11.9<br>(7.7 to 16.1)                             | -13.0<br>(-15.6 to -10.4)                           |
| Assault by sharp object                                                             | 2.6<br>(2.1 to 3.1)                     | 1.5<br>(1.2 to 1.8)                                  | 0.1<br>(0.1 to 0.1)                                 | 9.3<br>(5.9 to 12.5)                              | -13.7<br>(-15.9 to -11.6)                           |
| Sexual violence                                                                     | 11.7<br>(10.1 to 13.6)                  | --                                                   | 0.1<br>(0.1 to 0.1)                                 | -0.6<br>(-6.1 to 4.8)                             | -13.3<br>(-17.0 to -9.7)                            |
| Assault by other means                                                              | 1.8<br>(1.5 to 2.1)                     | 1.3<br>(1.0 to 1.5)                                  | 0.1<br>(0.1 to 0.1)                                 | 21.1<br>(17.9 to 24.0)                            | -2.8<br>(-5.0 to -0.7)                              |
| <b>Forces of nature, conflict and terrorism, and executions and police conflict</b> | <b>0.1</b><br><b>(&lt; 0.05 to 0.1)</b> | <b>&lt; 0.05†</b><br><b>(&lt; 0.05 to &lt; 0.05)</b> | <b>&lt; 0.05</b><br><b>(&lt; 0.05 to &lt; 0.05)</b> | <b>-21.1</b><br><b>(-24.1 to -13.4)</b>           | <b>-31.4</b><br><b>(-34.0 to -24.9)</b>             |
| Exposure to forces of nature                                                        | < 0.05<br>(< 0.05 to 0.1)               | --                                                   | < 0.05<br>(< 0.05 to < 0.05)                        | -29.1<br>(-31.4 to -26.1)                         | -36.8<br>(-38.9 to -34.2)                           |
| Conflict and terrorism                                                              | --                                      | --                                                   | --                                                  | --                                                | --                                                  |
| Executions and police conflict                                                      | < 0.05<br>(< 0.05 to < 0.05)            | < 0.05<br>(< 0.05 to < 0.05)                         | < 0.05<br>(< 0.05 to < 0.05)                        | 21.7<br>(13.1 to 28.2)                            | 13.1<br>(7.1 to 17.9)                               |
| <b>Impairments</b>                                                                  | --                                      | --                                                   | --                                                  | --                                                | --                                                  |
| Anaemia                                                                             | 202.3<br>(186.9 to 218.0)               | --                                                   | 6.6<br>(4.4 to 9.3)                                 | -1.7<br>(-9.9 to 7.5)                             | -9.8<br>(-16.4 to -3.0)                             |
| Developmental intellectual disability                                               | 16.0<br>(12.2 to 19.9)                  | --                                                   | 1.9<br>(1.4 to 2.8)                                 | 5.8<br>(-1.1 to 14.4)                             | -3.1<br>(-9.0 to 4.5)                               |
| Epilepsy                                                                            | 6.8<br>(4.1 to 9.5)                     | --                                                   | 2.2<br>(1.2 to 3.6)                                 | 2.0<br>(-44.5 to 91.4)                            | -7.5<br>(-50.6 to 79.2)                             |
| Guillain-Barre syndrome                                                             | < 0.05<br>(< 0.05 to < 0.05)            | --                                                   | < 0.05<br>(< 0.05 to < 0.05)                        | 100.4<br>(66.3 to 183.2)                          | 74.6<br>(50.2 to 134.4)                             |
| Hearing loss                                                                        | 78.0<br>(73.8 to 82.5)                  | --                                                   | 2.5<br>(1.7 to 3.4)                                 | 7.7<br>(3.4 to 11.4)                              | -6.6<br>(-9.1 to -4.4)                              |
| Heart failure                                                                       | 2.4<br>(2.1 to 2.7)                     | --                                                   | 0.3<br>(0.2 to 0.3)                                 | 12.1<br>(2.9 to 23.4)                             | -5.2<br>(-12.1 to 2.5)                              |
| Infertility                                                                         | 14.7<br>(11.3 to 19.3)                  | --                                                   | 0.1<br>(< 0.05 to 0.2)                              | 25.0<br>(16.6 to 33.9)                            | -2.3<br>(-8.2 to 3.8)                               |
| Pelvic inflammatory disease                                                         | 0.6<br>(0.5 to 0.7)                     | --                                                   | 0.1<br>(< 0.05 to 0.1)                              | 20.2<br>(2.7 to 40.4)                             | -10.1<br>(-22.6 to 3.3)                             |
| Vision loss                                                                         | 49.8<br>(45.8 to 54.3)                  | --                                                   | 1.9<br>(1.3 to 2.7)                                 | 8.4<br>(1.8 to 15.8)                              | -6.2<br>(-10.5 to -0.5)                             |

We did not calculate incidence for the nine impairments, certain NTDs, and causes with only birth prevalence. Blank cells mean that no estimate is available.

† Incidence for aggregate causes represents the sum of the incidence of the causes below the aggregate.

‡ Incidence estimates for stroke represent first-ever stroke only.

^ Incidence of HIV/AIDS represents new infections of HIV only and does not include new infections of Tuberculosis in HIV positive cases.

SR Table 14: Prevalence, incidence, and YLDs for 2016, percentage change of YLD counts and percentage change of age-standardised YLD rates between 2006 and 2016 by cause and impairments, for all ages, Central African Republic.

| Cause                                                                                | Prevalence in thousands (95% UI)       | Incidence in thousands (95% UI)            | YLDs in thousands (95% UI)       |                                                   |                                                     |
|--------------------------------------------------------------------------------------|----------------------------------------|--------------------------------------------|----------------------------------|---------------------------------------------------|-----------------------------------------------------|
|                                                                                      | 2016 counts                            | 2016 counts                                | 2016 counts                      | Percentage change in counts between 2006 and 2016 | Percentage change in age-standardised rates between |
| <b>All causes</b>                                                                    | <b>4,985.8</b><br>(4,981.2 to 4,989.6) | <b>46,454.1†</b><br>(43,551.0 to 49,458.5) | <b>560.9</b><br>(416.5 to 732.0) | <b>17.8</b><br>(14.8 to 20.8)                     | <b>-4.7</b><br>(-7.1 to -2.3)                       |
| <b>Communicable, maternal, neonatal, and nutritional disorders</b>                   | <b>4,747.6</b><br>(4,723.6 to 4,771.8) | <b>32,884.0†</b><br>(29,960.8 to 35,473.7) | <b>178.8</b><br>(128.1 to 242.4) | <b>4.1</b><br>(-2.4 to 10.6)                      | <b>-17.0</b><br>(-23.4 to -10.8)                    |
| <b>HIV/AIDS and tuberculosis</b>                                                     | <b>1,213.1</b><br>(1,123.4 to 1,291.3) | <b>41.0†</b><br>(32.8 to 50.1)             | <b>22.4</b><br>(14.9 to 32.8)    | <b>-16.9</b><br>(-31.6 to 3.2)                    | <b>-35.4</b><br>(-47.3 to -18.6)                    |
| Tuberculosis                                                                         | 1,079.0<br>(972.9 to 1,190.4)          | 32.7†<br>(25.8 to 40.3)                    | 4.3<br>(2.7 to 6.2)              | 23.5<br>(12.0 to 37.4)                            | -2.8<br>(-10.6 to 6.5)                              |
| Drug-susceptible tuberculosis                                                        | 14.1<br>(11.0 to 17.7)                 | 32.5<br>(25.7 to 40.0)                     | 4.3<br>(2.7 to 6.1)              | 23.5<br>(11.8 to 37.5)                            | -2.7<br>(-10.5 to 6.8)                              |
| Multidrug-resistant tuberculosis without extensive drug resistance                   | 0.1<br>(< 0.05 to 0.1)                 | 0.2<br>(0.1 to 0.3)                        | < 0.05<br>(< 0.05 to < 0.05)     | 11.9<br>(-35.8 to 95.8)                           | -12.2<br>(-49.5 to 50.2)                            |
| Extensively drug-resistant tuberculosis                                              | < 0.05<br>(< 0.05 to < 0.05)           | < 0.05<br>(< 0.05 to < 0.05)               | < 0.05<br>(< 0.05 to < 0.05)     | 240.9<br>(95.8 to 496.5)                          | 167.7<br>(53.9 to 357.9)                            |
| Latent tuberculosis infection                                                        | 1,064.8<br>(959.4 to 1,176.3)          | --                                         | --                               | --                                                | --                                                  |
| HIV/AIDS                                                                             | 124.9<br>(112.3 to 145.3)              | 8.3^<br>(5.4 to 13.9)                      | 18.1<br>(11.8 to 27.3)           | -22.9<br>(-37.0 to -1.1)                          | -40.2<br>(-51.5 to -22.1)                           |
| Drug-susceptible HIV/AIDS - Tuberculosis                                             | 6.7<br>(4.3 to 9.6)                    | 15.4<br>(10.0 to 22.2)                     | 2.5<br>(1.4 to 4.0)              | -14.4<br>(-24.6 to -4.6)                          | -31.1<br>(-38.6 to -23.5)                           |
| Multidrug-resistant HIV/AIDS - Tuberculosis without extensive drug resistance        | < 0.05<br>(< 0.05 to 0.1)              | 0.1<br>(< 0.05 to 0.2)                     | < 0.05<br>(< 0.05 to < 0.05)     | -21.3<br>(-55.1 to 36.7)                          | -36.6<br>(-63.7 to 9.6)                             |
| Extensively drug-resistant HIV/AIDS - Tuberculosis                                   | < 0.05<br>(< 0.05 to < 0.05)           | < 0.05<br>(< 0.05 to < 0.05)               | < 0.05<br>(< 0.05 to < 0.05)     | 139.9<br>(36.8 to 315.8)                          | 93.2<br>(10.6 to 233.9)                             |
| HIV/AIDS resulting in other diseases                                                 | 118.1<br>(105.0 to 138.8)              | 8.3<br>(5.4 to 13.9)                       | 15.5<br>(10.0 to 24.4)           | -24.1<br>(-39.4 to 1.3)                           | -41.4<br>(-53.2 to -20.4)                           |
| <b>Diarrhoea, lower respiratory infections, and other common infectious diseases</b> | <b>496.7</b><br>(470.5 to 526.7)       | <b>25,996.6†</b><br>(23,518.7 to 28,512.1) | <b>27.4</b><br>(19.1 to 37.5)    | <b>24.3</b><br>(20.7 to 28.4)                     | <b>1.6</b><br>(-1.1 to 4.5)                         |
| Diarrhoeal diseases                                                                  | 108.7<br>(100.0 to 116.7)              | 7,225.1<br>(6,649.6 to 7,774.9)            | 12.2<br>(8.5 to 16.7)            | 24.6<br>(18.0 to 31.7)                            | 1.2<br>(-3.2 to 6.1)                                |
| Intestinal infectious diseases                                                       | 0.3<br>(0.2 to 0.4)                    | 5.6†<br>(4.4 to 7.3)                       | 0.1<br>(< 0.05 to 0.1)           | 14.8<br>(-3.9 to 38.8)                            | -5.2<br>(-18.4 to 11.3)                             |
| Typhoid fever                                                                        | 0.3<br>(0.2 to 0.4)                    | 5.0<br>(3.9 to 6.4)                        | < 0.05<br>(< 0.05 to 0.1)        | 15.0<br>(-4.8 to 40.7)                            | -5.0<br>(-18.8 to 12.3)                             |
| Paratyphoid fever                                                                    | < 0.05<br>(< 0.05 to < 0.05)           | 0.7<br>(0.5 to 0.9)                        | < 0.05<br>(< 0.05 to < 0.05)     | 23.5<br>(-1.2 to 54.9)                            | 1.8<br>(-16.5 to 23.6)                              |
| Other intestinal infectious diseases                                                 | --                                     | --                                         | < 0.05<br>(< 0.05 to < 0.05)     | -7.5<br>(-31.3 to 28.9)                           | -26.4<br>(-41.7 to -6.6)                            |
| Lower respiratory infections                                                         | 8.1<br>(7.4 to 8.9)                    | 342.7<br>(309.1 to 380.6)                  | 0.5<br>(0.3 to 0.7)              | 11.4<br>(-1.0 to 24.6)                            | -6.6<br>(-15.3 to 2.1)                              |
| Upper respiratory infections                                                         | 233.1<br>(201.8 to 263.0)              | 17,781.0<br>(15,267.0 to 20,228.8)         | 5.8<br>(3.4 to 9.1)              | 22.1<br>(16.0 to 28.5)                            | -0.2<br>(-4.8 to 4.8)                               |
| Otitis media                                                                         | 114.5<br>(102.0 to 128.2)              | 419.7<br>(327.0 to 534.5)                  | 4.0<br>(2.5 to 6.1)              | 26.6<br>(17.8 to 36.2)                            | 5.5<br>(-1.8 to 12.7)                               |
| Meningitis                                                                           | 46.4<br>(38.2 to 56.9)                 | 8.3<br>(7.3 to 9.8)                        | 3.3<br>(2.3 to 4.4)              | 25.7<br>(16.8 to 35.4)                            | 2.6<br>(-4.5 to 10.6)                               |
| Pneumococcal meningitis                                                              | 25.2<br>(20.0 to 31.6)                 | 3.1<br>(2.6 to 3.9)                        | 1.8<br>(1.3 to 2.5)              | 17.8<br>(6.0 to 31.7)                             | -4.2<br>(-13.3 to 6.1)                              |
| H influenzae type B meningitis                                                       | 8.2<br>(5.7 to 11.2)                   | 1.8<br>(1.3 to 2.4)                        | 0.6<br>(0.4 to 0.8)              | 12.6<br>(1.5 to 25.0)                             | -9.0<br>(-17.9 to 0.7)                              |
| Meningococcal infection                                                              | 2.3<br>(1.5 to 3.3)                    | 0.7<br>(0.5 to 0.9)                        | 0.2<br>(0.1 to 0.2)              | 34.4<br>(24.9 to 45.3)                            | 10.1<br>(1.5 to 19.6)                               |
| Other meningitis                                                                     | 10.7<br>(7.4 to 14.4)                  | 2.7<br>(2.3 to 3.3)                        | 0.7<br>(0.5 to 1.0)              | 68.8<br>(48.5 to 90.7)                            | 39.1<br>(22.8 to 56.0)                              |
| Encephalitis                                                                         | 12.5<br>(7.3 to 20.0)                  | 4.8<br>(4.1 to 5.5)                        | 1.1<br>(0.8 to 1.5)              | 32.2<br>(14.6 to 51.4)                            | 7.0<br>(-5.9 to 20.7)                               |
| Diphtheria                                                                           | < 0.05<br>(< 0.05 to < 0.05)           | < 0.05<br>(< 0.05 to < 0.05)               | < 0.05<br>(< 0.05 to < 0.05)     | 55.9<br>(-32.5 to 273.0)                          | 28.0<br>(-36.6 to 162.0)                            |
| Whooping cough                                                                       | 5.1<br>(3.9 to 6.5)                    | 37.1<br>(28.3 to 47.1)                     | 0.2<br>(0.1 to 0.4)              | 35.6<br>(18.4 to 52.0)                            | 9.7<br>(-4.4 to 23.4)                               |
| Tetanus                                                                              | 0.1<br>(0.1 to 0.1)                    | 0.6<br>(0.2 to 1.4)                        | < 0.05<br>(< 0.05 to < 0.05)     | 11.0<br>(-27.9 to 68.5)                           | -6.5<br>(-32.2 to 32.3)                             |
| Measles                                                                              | 1.0<br>(0.4 to 2.3)                    | 37.0<br>(13.1 to 83.2)                     | 0.1<br>(< 0.05 to 0.2)           | -23.4<br>(-47.2 to 11.8)                          | -37.5<br>(-56.9 to -8.8)                            |
| Varicella and herpes zoster                                                          | 4.7<br>(4.4 to 5.0)                    | 134.7<br>(127.7 to 142.0)                  | 0.1<br>(0.1 to 0.2)              | 23.3<br>(6.7 to 42.1)                             | 0.2<br>(-11.1 to 12.4)                              |
| <b>Neglected tropical diseases and malaria</b>                                       | <b>3,192.5</b><br>(3,082.8 to 3,300.0) | <b>1,762.4†</b><br>(946.0 to 2,492.3)      | <b>58.4</b><br>(38.5 to 84.4)    | <b>-11.8</b><br>(-22.0 to 0.8)                    | <b>-27.1</b><br>(-36.1 to -16.0)                    |
| Malaria                                                                              | 1,089.4<br>(897.2 to 1,291.3)          | 1,451.0<br>(628.7 to 2,163.6)              | 12.7<br>(9.2 to 17.7)            | -22.1<br>(-30.4 to -12.6)                         | -35.0<br>(-41.6 to -28.1)                           |
| Chagas disease                                                                       | --                                     | --                                         | --                               | --                                                | --                                                  |
| Leishmaniasis                                                                        | 0.9<br>(0.8 to 1.1)                    | < 0.05<br>(< 0.05 to 0.1)                  | < 0.05<br>(< 0.05 to 0.1)        | 5.9<br>(-16.0 to 42.3)                            | -12.3<br>(-28.2 to 15.0)                            |
| Visceral leishmaniasis                                                               | < 0.05<br>(< 0.05 to < 0.05)           | < 0.05<br>(< 0.05 to < 0.05)               | < 0.05<br>(< 0.05 to < 0.05)     | 27.9<br>(-39.2 to 174.8)                          | 3.3<br>(-54.3 to 144.8)                             |
| Cutaneous and mucocutaneous leishmaniasis                                            | 0.8<br>(0.6 to 1.1)                    | < 0.05<br>(< 0.05 to 0.1)                  | < 0.05<br>(< 0.05 to 0.1)        | 5.9<br>(-16.1 to 42.3)                            | -12.3<br>(-28.2 to 15.1)                            |
| African trypanosomiasis                                                              | 0.6<br>(0.3 to 1.1)                    | 0.3<br>(0.2 to 0.5)                        | 0.2<br>(0.1 to 0.3)              | -72.0<br>(-81.6 to -53.4)                         | -77.2<br>(-86.4 to -59.6)                           |
| Schistosomiasis                                                                      | 315.1<br>(273.9 to 364.7)              | 117.6<br>(104.3 to 133.1)                  | 2.3<br>(1.1 to 4.4)              | -16.6<br>(-22.4 to -10.2)                         | -33.8<br>(-38.1 to -29.2)                           |
| Cysticercosis                                                                        | 5.3<br>(4.2 to 6.5)                    | --                                         | 1.1<br>(0.7 to 1.6)              | 20.9<br>(0.6 to 42.0)                             | -5.1<br>(-20.2 to 8.8)                              |
| Cystic echinococcosis                                                                | 8.1<br>(2.3 to 25.3)                   | 1.7<br>(0.5 to 5.3)                        | 0.8<br>(0.2 to 2.3)              | -0.0<br>(-81.5 to 445.1)                          | -19.9<br>(-86.1 to 295.8)                           |
| Lymphatic filariasis                                                                 | 400.7<br>(332.2 to 492.7)              | 99.9<br>(80.0 to 124.7)                    | 10.4<br>(4.3 to 20.5)            | 19.6<br>(-4.4 to 28.1)                            | -4.4<br>(-23.4 to 2.1)                              |
| Onchocerciasis                                                                       | 294.9<br>(189.4 to 443.7)              | 64.4<br>(24.8 to 135.2)                    | 20.6<br>(8.8 to 37.4)            | -25.7<br>(-49.7 to 1.8)                           | -37.4<br>(-56.4 to -14.6)                           |
| Trachoma                                                                             | 1.8<br>(1.2 to 2.8)                    | --                                         | 0.1<br>(0.1 to 0.2)              | 18.3<br>(-15.3 to 62.3)                           | -4.4<br>(-37.6 to 39.5)                             |
| Dengue                                                                               | 1.6<br>(0.8 to 3.0)                    | 27.1<br>(13.7 to 46.7)                     | 0.3<br>(0.1 to 0.5)              | 162.9<br>(83.2 to 583.8)                          | 113.3<br>(52.9 to 434.8)                            |
| Yellow fever                                                                         | < 0.05<br>(< 0.05 to < 0.05)           | 0.3<br>(0.1 to 0.9)                        | < 0.05<br>(< 0.05 to < 0.05)     | -17.5<br>(-45.9 to 21.4)                          | -32.7<br>(-53.3 to -5.7)                            |
| Rabies                                                                               | < 0.05<br>(< 0.05 to < 0.05)           | < 0.05<br>(< 0.05 to < 0.05)               | < 0.05<br>(< 0.05 to < 0.05)     | 18.5<br>(-35.2 to 132.7)                          | -1.9<br>(-37.6 to 64.8)                             |
| Intestinal nematode infections                                                       | 2,138.3<br>(2,030.6 to 2,261.5)        | --                                         | 7.4<br>(4.4 to 11.5)             | 21.6<br>(10.3 to 33.5)                            | -0.9<br>(-10.8 to 10.1)                             |
| Ascariasis                                                                           | 592.9<br>(525.8 to 670.8)              | --                                         | 0.3<br>(0.2 to 0.6)              | 21.0<br>(1.1 to 45.2)                             | 0.4<br>(-18.8 to 24.9)                              |

| Cause                                                                   | Prevalence in thousands (95% UI)              | Incidence in thousands (95% UI)                   | YLDs in thousands (95% UI)              |                                                   |                                                     |
|-------------------------------------------------------------------------|-----------------------------------------------|---------------------------------------------------|-----------------------------------------|---------------------------------------------------|-----------------------------------------------------|
|                                                                         | 2016 counts                                   | 2016 counts                                       | 2016 counts                             | Percentage change in counts between 2006 and 2016 | Percentage change in age-standardised rates between |
| Trichuriasis                                                            | 425.9<br>(365.5 to 492.4)                     | --                                                | 0.1<br>( $< 0.05$ to 0.1)               | 20.4<br>(-9.1 to 63.8)                            | 0.0<br>(-27.6 to 41.2)                              |
| Hookworm disease                                                        | 1,544.0<br>(1,417.1 to 1,678.1)               | --                                                | 7.0<br>(4.2 to 10.9)                    | 21.7<br>(10.0 to 34.2)                            | -1.0<br>(-11.4 to 10.8)                             |
| Food-borne trematodiasis                                                | --                                            | --                                                | --                                      | --                                                | --                                                  |
| Leprosy                                                                 | 1.1<br>(1.0 to 1.2)                           | $< 0.05$<br>( $< 0.05$ to 0.1)                    | 0.1<br>( $< 0.05$ to 0.1)               | -15.6<br>(-27.3 to -2.4)                          | -28.7<br>(-37.1 to -19.6)                           |
| Ebola virus disease                                                     | --                                            | --                                                | --                                      | --                                                | --                                                  |
| Zika virus disease                                                      | --                                            | --                                                | --                                      | --                                                | --                                                  |
| Guinea worm disease                                                     | --                                            | --                                                | --                                      | --                                                | --                                                  |
| Other neglected tropical diseases                                       | 77.0<br>(72.7 to 81.7)                        | --                                                | 2.5<br>(1.6 to 3.7)                     | 18.3<br>(6.1 to 30.2)                             | -0.4<br>(-9.9 to 8.9)                               |
| <b>Maternal disorders</b>                                               | <b>17.3</b><br><b>(13.9 to 22.9)</b>          | <b>121.2†</b><br><b>(108.8 to 135.3)</b>          | <b>1.8</b><br><b>(1.2 to 2.5)</b>       | <b>26.1</b><br><b>(3.3 to 53.4)</b>               | <b>-3.9</b><br><b>(-20.2 to 16.5)</b>               |
| Maternal haemorrhage                                                    | 2.0<br>(1.5 to 2.6)                           | 13.2<br>(10.0 to 17.3)                            | 0.1<br>(0.1 to 0.1)                     | 21.6<br>(-10.7 to 69.9)                           | -6.5<br>(-31.6 to 31.0)                             |
| Maternal sepsis and other pregnancy related infections                  | 2.0<br>(1.6 to 2.5)                           | 9.8<br>(7.5 to 13.2)                              | $< 0.05$<br>( $< 0.05$ to 0.1)          | 20.2<br>(-40.1 to 142.4)                          | -7.5<br>(-52.0 to 78.5)                             |
| Maternal hypertensive disorders                                         | 10.9<br>(7.1 to 15.0)                         | 52.2<br>(45.6 to 57.6)                            | 0.5<br>(0.3 to 0.8)                     | 24.9<br>(-21.2 to 102.5)                          | -5.1<br>(-40.3 to 52.1)                             |
| Maternal obstructed labour and uterine rupture                          | 2.6<br>(2.2 to 3.2)                           | 6.1<br>(4.6 to 8.1)                               | 0.8<br>(0.5 to 1.2)                     | 30.0<br>(6.9 to 59.6)                             | -1.2<br>(-18.7 to 20.4)                             |
| Maternal abortion, miscarriage, and ectopic pregnancy                   | 0.3<br>(0.2 to 0.5)                           | 39.9<br>(31.2 to 50.9)                            | $< 0.05$<br>( $< 0.05$ to 0.1)          | 24.9<br>(-34.1 to 140.2)                          | -5.6<br>(-51.2 to 82.0)                             |
| Other maternal disorders                                                | --                                            | --                                                | 0.3<br>(0.2 to 0.4)                     | 19.9<br>(-1.9 to 45.9)                            | -8.3<br>(-24.0 to 10.8)                             |
| <b>Neonatal disorders</b>                                               | <b>74.7</b><br><b>(57.4 to 95.1)</b>          | --                                                | <b>6.3</b><br><b>(3.6 to 10.8)</b>      | <b>37.0</b><br><b>(9.1 to 72.9)</b>               | <b>12.9</b><br><b>(-11.8 to 43.4)</b>               |
| Neonatal preterm birth complications                                    | 52.9<br>(36.3 to 77.0)                        | --                                                | 2.0<br>(1.3 to 2.9)                     | 29.0<br>(-3.8 to 72.5)                            | 5.8<br>(-22.6 to 45.4)                              |
| Neonatal encephalopathy due to birth asphyxia and trauma                | 19.8<br>(10.4 to 33.8)                        | --                                                | 1.5<br>(0.3 to 4.4)                     | 40.4<br>(-16.8 to 109.3)                          | 16.6<br>(-35.1 to 78.2)                             |
| Neonatal sepsis and other neonatal infections                           | 4.5<br>(1.6 to 11.3)                          | --                                                | 1.6<br>(0.3 to 4.9)                     | 55.4<br>(-8.2 to 226.6)                           | 31.7<br>(-25.7 to 189.1)                            |
| Hemolytic disease and other neonatal jaundice                           | 1.5<br>(1.3 to 1.8)                           | --                                                | 0.5<br>(0.4 to 0.7)                     | 19.1<br>(4.1 to 35.3)                             | -1.2<br>(-12.5 to 11.2)                             |
| Other neonatal disorders                                                | --                                            | --                                                | 0.6<br>(0.4 to 1.0)                     | 31.0<br>(7.7 to 61.0)                             | 5.5<br>(-13.5 to 30.0)                              |
| <b>Nutritional deficiencies</b>                                         | <b>3,234.4</b><br><b>(3,134.1 to 3,324.5)</b> | <b>3,727.6†</b><br><b>(3,218.5 to 4,163.7)</b>    | <b>57.3</b><br><b>(38.8 to 80.8)</b>    | <b>23.3</b><br><b>(16.9 to 29.9)</b>              | <b>2.3</b><br><b>(-1.9 to 6.7)</b>                  |
| Protein-energy malnutrition                                             | 63.2<br>(53.8 to 72.8)                        | 50.5<br>(43.5 to 57.9)                            | 2.6<br>(1.6 to 4.0)                     | -5.7<br>(-28.8 to 22.6)                           | -23.9<br>(-42.8 to -0.4)                            |
| Iodine deficiency                                                       | 349.4<br>(308.4 to 391.4)                     | 11.7<br>(10.3 to 13.1)                            | 9.5<br>(6.5 to 13.4)                    | 37.7<br>(27.9 to 48.1)                            | 10.4<br>(3.0 to 18.2)                               |
| Vitamin A deficiency                                                    | 2,352.5<br>(2,171.2 to 2,539.6)               | 3,665.3<br>(3,153.0 to 4,102.9)                   | 0.5<br>(0.3 to 0.8)                     | 22.1<br>(1.4 to 47.6)                             | 2.5<br>(-14.4 to 22.9)                              |
| Iron-deficiency anaemia                                                 | 1,437.2<br>(1,378.8 to 1,498.2)               | --                                                | 44.6<br>(29.7 to 64.0)                  | 22.9<br>(15.2 to 30.9)                            | 1.8<br>(-3.5 to 7.1)                                |
| Other nutritional deficiencies                                          | --                                            | --                                                | 0.1<br>(0.1 to 0.1)                     | -6.7<br>(-30.3 to 22.9)                           | -24.5<br>(-43.7 to -0.0)                            |
| <b>Other communicable, maternal, neonatal, and nutritional diseases</b> | <b>2,039.3</b><br><b>(1,908.0 to 2,176.6)</b> | <b>1,235.1</b><br><b>(984.7 to 1,705.2)</b>       | <b>5.2</b><br><b>(3.3 to 7.8)</b>       | <b>27.8</b><br><b>(21.1 to 34.2)</b>              | <b>0.8</b><br><b>(-3.8 to 5.8)</b>                  |
| Sexually transmitted diseases excluding HIV                             | 1,362.4<br>(1,277.6 to 1,444.6)               | 708.0<br>(644.8 to 784.0)                         | 2.8<br>(1.7 to 4.4)                     | 31.4<br>(24.0 to 39.6)                            | 0.7<br>(-4.3 to 6.4)                                |
| Syphilis                                                                | 238.3<br>(200.5 to 281.4)                     | 170.0<br>(138.6 to 209.5)                         | 0.2<br>(0.1 to 0.3)                     | 30.2<br>(15.5 to 47.0)                            | 1.6<br>(-10.3 to 15.8)                              |
| Chlamydial infection                                                    | 58.7<br>(50.5 to 68.4)                        | 48.4<br>(41.0 to 57.3)                            | 0.5<br>(0.3 to 0.8)                     | 30.8<br>(16.3 to 48.2)                            | -0.3<br>(-10.3 to 12.3)                             |
| Gonococcal infection                                                    | 62.8<br>(52.5 to 76.4)                        | 194.5<br>(154.1 to 243.5)                         | 0.6<br>(0.3 to 0.9)                     | 31.9<br>(17.6 to 48.3)                            | 1.7<br>(-9.0 to 13.5)                               |
| Trichomoniasis                                                          | 127.7<br>(107.4 to 148.9)                     | 112.9<br>(94.9 to 133.1)                          | 0.1<br>(0.1 to 0.3)                     | 28.6<br>(20.0 to 38.5)                            | 0.1<br>(-6.1 to 6.8)                                |
| Genital herpes                                                          | 1,064.2<br>(930.7 to 1,230.8)                 | 121.0<br>(100.5 to 148.5)                         | 0.3<br>(0.1 to 0.6)                     | 29.5<br>(18.7 to 41.7)                            | 1.5<br>(-5.5 to 9.3)                                |
| Other sexually transmitted diseases                                     | 62.5<br>(57.1 to 67.6)                        | 61.1<br>(50.7 to 73.6)                            | 1.1<br>(0.7 to 1.6)                     | 32.4<br>(21.3 to 44.8)                            | 0.3<br>(-7.8 to 9.6)                                |
| Hepatitis                                                               | 864.7<br>(675.5 to 1,088.3)                   | 527.1<br>(295.0 to 996.1)                         | 0.5<br>(0.3 to 0.8)                     | 9.5<br>(-14.7 to 41.5)                            | -9.8<br>(-27.6 to 12.5)                             |
| Acute hepatitis A                                                       | 15.3<br>(1.0 to 50.1)                         | 198.6<br>(13.5 to 650.6)                          | 0.1<br>( $< 0.05$ to 0.1)               | 6.2<br>(-75.3 to 360.7)                           | -10.4<br>(-72.6 to 222.8)                           |
| Hepatitis B                                                             | 733.3<br>(549.8 to 961.0)                     | 292.8<br>(206.2 to 406.4)                         | 0.4<br>(0.2 to 0.6)                     | 10.4<br>(-11.6 to 39.6)                           | -9.7<br>(-28.6 to 12.8)                             |
| Hepatitis C                                                             | 114.3<br>(101.2 to 128.2)                     | 12.3<br>(11.2 to 13.4)                            | $< 0.05$<br>( $< 0.05$ to $< 0.05$ )    | 18.2<br>(-3.3 to 45.7)                            | -3.6<br>(-24.4 to 24.1)                             |
| Acute hepatitis E                                                       | 1.8<br>(1.5 to 2.2)                           | 23.4<br>(19.8 to 28.5)                            | $< 0.05$<br>( $< 0.05$ to 0.1)          | 4.5<br>(-22.1 to 39.1)                            | -11.6<br>(-31.0 to 13.4)                            |
| Other infectious diseases                                               | 58.2<br>(55.3 to 61.4)                        | $< 0.05$<br>( $< 0.05$ to $< 0.05$ )              | 1.9<br>(1.3 to 2.8)                     | 28.2<br>(16.0 to 40.4)                            | 5.6<br>(-3.1 to 14.4)                               |
| <b>Non-communicable diseases</b>                                        | <b>4,622.8</b><br><b>(4,595.8 to 4,649.8)</b> | <b>13,215.1†</b><br><b>(12,396.0 to 14,140.6)</b> | <b>354.9</b><br><b>(263.4 to 463.5)</b> | <b>24.8</b><br><b>(22.1 to 27.8)</b>              | <b>0.4</b><br><b>(-1.3 to 2.1)</b>                  |
| <b>Neoplasms</b>                                                        | <b>6.1</b><br><b>(5.0 to 7.1)</b>             | <b>4.2</b><br><b>(3.3 to 4.7)</b>                 | <b>1.3</b><br><b>(0.9 to 1.8)</b>       | <b>19.0</b><br><b>(11.5 to 28.1)</b>              | <b>-2.6</b><br><b>(-8.2 to 4.0)</b>                 |
| Lip and oral cavity cancer                                              | 0.3<br>(0.2 to 0.4)                           | 0.1<br>(0.1 to 0.1)                               | $< 0.05$<br>( $< 0.05$ to 0.1)          | 17.1<br>(3.6 to 34.5)                             | -4.2<br>(-15.9 to 10.5)                             |
| Nasopharynx cancer                                                      | 0.1<br>( $< 0.05$ to 0.1)                     | $< 0.05$<br>( $< 0.05$ to $< 0.05$ )              | $< 0.05$<br>( $< 0.05$ to $< 0.05$ )    | 16.7<br>(2.4 to 37.6)                             | -5.8<br>(-17.2 to 9.2)                              |
| Other pharynx cancer                                                    | $< 0.05$<br>( $< 0.05$ to 0.1)                | $< 0.05$<br>( $< 0.05$ to $< 0.05$ )              | $< 0.05$<br>( $< 0.05$ to $< 0.05$ )    | 14.4<br>(2.6 to 27.7)                             | -5.6<br>(-15.0 to 5.7)                              |
| Oesophageal cancer                                                      | 0.2<br>(0.1 to 0.2)                           | 0.2<br>(0.1 to 0.2)                               | $< 0.05$<br>( $< 0.05$ to 0.1)          | 13.4<br>(-9.3 to 43.5)                            | -5.8<br>(-24.4 to 19.5)                             |
| Stomach cancer                                                          | 0.4<br>(0.4 to 0.5)                           | 0.3<br>(0.3 to 0.3)                               | 0.1<br>(0.1 to 0.1)                     | 12.2<br>(-3.3 to 30.5)                            | -7.6<br>(-21.0 to 8.1)                              |
| Colon and rectum cancer                                                 | 0.6<br>(0.4 to 0.9)                           | 0.2<br>(0.2 to 0.3)                               | 0.1<br>(0.1 to 0.1)                     | 19.5<br>(1.4 to 47.3)                             | -1.7<br>(-17.2 to 20.3)                             |
| Liver cancer                                                            | 0.1<br>(0.1 to 0.1)                           | 0.2<br>(0.2 to 0.3)                               | 0.1<br>( $< 0.05$ to 0.1)               | 17.6<br>(2.8 to 34.3)                             | -3.2<br>(-15.2 to 10.2)                             |
| Liver cancer due to hepatitis B                                         | 0.1<br>(0.1 to 0.1)                           | 0.1<br>(0.1 to 0.1)                               | $< 0.05$<br>( $< 0.05$ to $< 0.05$ )    | 17.7<br>(2.3 to 33.6)                             | -4.0<br>(-16.9 to 8.8)                              |



| Cause                                              | Prevalence in thousands (95% UI)        | Incidence in thousands (95% UI)       | YLDs in thousands (95% UI)           |                                                   |                                                     |
|----------------------------------------------------|-----------------------------------------|---------------------------------------|--------------------------------------|---------------------------------------------------|-----------------------------------------------------|
|                                                    | 2016 counts                             | 2016 counts                           | 2016 counts                          | Percentage change in counts between 2006 and 2016 | Percentage change in age-standardised rates between |
| Liver cancer due to hepatitis C                    | 0.1<br>(0.1 to 0.1)                     | 0.1<br>(0.1 to 0.1)                   | < 0.05<br>(< 0.05 to < 0.05)         | 16.0<br>(0.8 to 34.5)                             | -3.9<br>(-16.3 to 10.9)                             |
| Liver cancer due to alcohol use                    | < 0.05<br>(< 0.05 to < 0.05)            | < 0.05<br>(< 0.05 to < 0.05)          | < 0.05<br>(< 0.05 to < 0.05)         | 24.8<br>(7.3 to 43.8)                             | 3.2<br>(-10.8 to 19.1)                              |
| Liver cancer due to other causes                   | < 0.05<br>(< 0.05 to 0.1)               | < 0.05<br>(< 0.05 to 0.1)             | < 0.05<br>(< 0.05 to < 0.05)         | 16.4<br>(1.5 to 33.7)                             | -4.5<br>(-16.6 to 9.4)                              |
| Gallbladder and biliary tract cancer               | < 0.05<br>(< 0.05 to < 0.05)            | < 0.05<br>(< 0.05 to 0.1)             | < 0.05<br>(< 0.05 to < 0.05)         | 15.3<br>(4.5 to 29.0)                             | -4.5<br>(-13.3 to 6.5)                              |
| Pancreatic cancer                                  | 0.1<br>(0.1 to 0.1)                     | 0.1<br>(0.1 to 0.1)                   | < 0.05<br>(< 0.05 to < 0.05)         | 19.9<br>(10.8 to 30.2)                            | -0.9<br>(-8.7 to 7.3)                               |
| Larynx cancer                                      | 0.1<br>(0.1 to 0.2)                     | 0.1<br>(< 0.05 to 0.1)                | < 0.05<br>(< 0.05 to < 0.05)         | 13.1<br>(-0.7 to 29.7)                            | -6.3<br>(-17.7 to 7.3)                              |
| Tracheal, bronchus, and lung cancer                | 0.3<br>(0.2 to 0.4)                     | 0.3<br>(0.2 to 0.4)                   | 0.1<br>(< 0.05 to 0.1)               | 19.8<br>(-3.5 to 50.9)                            | -0.8<br>(-20.2 to 24.5)                             |
| Malignant skin melanoma                            | 0.1<br>(< 0.05 to 0.1)                  | < 0.05<br>(< 0.05 to < 0.05)          | < 0.05<br>(< 0.05 to < 0.05)         | 20.7<br>(8.2 to 33.8)                             | -2.2<br>(-12.2 to 8.6)                              |
| Non-melanoma skin cancer                           | < 0.05<br>(< 0.05 to 0.1)               | 0.2<br>(0.2 to 0.4)                   | < 0.05<br>(< 0.05 to < 0.05)         | 31.2<br>(5.5 to 64.5)                             | 5.6<br>(-19.1 to 35.6)                              |
| Non-melanoma skin cancer (squamous-cell carcinoma) | < 0.05<br>(< 0.05 to < 0.05)            | < 0.05<br>(< 0.05 to 0.1)             | < 0.05<br>(< 0.05 to < 0.05)         | 32.3<br>(-0.5 to 73.1)                            | 6.3<br>(-22.8 to 44.7)                              |
| Non-melanoma skin cancer (basal-cell carcinoma)    | < 0.05<br>(< 0.05 to < 0.05)            | 0.2<br>(0.1 to 0.3)                   | < 0.05<br>(< 0.05 to < 0.05)         | 26.9<br>(15.9 to 38.4)                            | 2.8<br>(-5.5 to 12.3)                               |
| Breast cancer                                      | 1.5<br>(0.9 to 2.1)                     | 0.4<br>(0.2 to 0.6)                   | 0.2<br>(0.1 to 0.3)                  | 24.9<br>(1.9 to 56.1)                             | 1.5<br>(-16.0 to 25.3)                              |
| Cervical cancer                                    | 2.9<br>(1.4 to 3.9)                     | 0.8<br>(0.4 to 1.1)                   | 0.3<br>(0.1 to 0.4)                  | 16.3<br>(-7.1 to 46.4)                            | -8.0<br>(-24.9 to 15.4)                             |
| Uterine cancer                                     | 0.2<br>(0.2 to 0.3)                     | 0.1<br>(< 0.05 to 0.1)                | < 0.05<br>(< 0.05 to < 0.05)         | 18.2<br>(-4.6 to 46.0)                            | -1.9<br>(-20.5 to 21.2)                             |
| Ovarian cancer                                     | 0.2<br>(0.1 to 0.3)                     | 0.1<br>(0.1 to 0.1)                   | < 0.05<br>(< 0.05 to 0.1)            | 27.1<br>(-1.6 to 67.1)                            | 3.5<br>(-22.9 to 41.5)                              |
| Prostate cancer                                    | 0.6<br>(0.3 to 0.9)                     | 0.2<br>(0.1 to 0.3)                   | 0.1<br>(0.1 to 0.2)                  | 26.3<br>(4.1 to 55.8)                             | 4.3<br>(-12.2 to 25.2)                              |
| Testicular cancer                                  | 0.1<br>(< 0.05 to 0.1)                  | < 0.05<br>(< 0.05 to < 0.05)          | < 0.05<br>(< 0.05 to < 0.05)         | 23.0<br>(-0.3 to 51.0)                            | -4.4<br>(-20.6 to 15.2)                             |
| Kidney cancer                                      | 0.2<br>(0.1 to 0.3)                     | 0.1<br>(< 0.05 to 0.1)                | < 0.05<br>(< 0.05 to < 0.05)         | 20.9<br>(-8.3 to 55.3)                            | 2.2<br>(-14.9 to 21.4)                              |
| Bladder cancer                                     | 0.2<br>(0.2 to 0.3)                     | 0.1<br>(0.1 to 0.1)                   | < 0.05<br>(< 0.05 to < 0.05)         | 19.3<br>(4.4 to 37.9)                             | -1.4<br>(-14.5 to 14.2)                             |
| Brain and nervous system cancer                    | 0.2<br>(0.1 to 0.2)                     | 0.1<br>(0.1 to 0.1)                   | < 0.05<br>(< 0.05 to < 0.05)         | 22.7<br>(5.8 to 39.1)                             | 1.2<br>(-7.7 to 10.3)                               |
| Thyroid cancer                                     | 0.1<br>(0.1 to 0.1)                     | < 0.05<br>(< 0.05 to < 0.05)          | < 0.05<br>(< 0.05 to < 0.05)         | 14.3<br>(-3.3 to 37.6)                            | -6.3<br>(-20.9 to 12.9)                             |
| Mesothelioma                                       | < 0.05<br>(< 0.05 to < 0.05)            | < 0.05<br>(< 0.05 to < 0.05)          | < 0.05<br>(< 0.05 to < 0.05)         | 16.9<br>(6.1 to 29.6)                             | -4.0<br>(-13.3 to 6.8)                              |
| Hodgkin lymphoma                                   | 0.1<br>(0.1 to 0.1)                     | < 0.05<br>(< 0.05 to < 0.05)          | < 0.05<br>(< 0.05 to < 0.05)         | 16.7<br>(3.5 to 34.8)                             | -5.4<br>(-14.6 to 6.4)                              |
| Non-Hodgkin's lymphoma                             | 0.2<br>(0.2 to 0.3)                     | 0.1<br>(0.1 to 0.1)                   | < 0.05<br>(< 0.05 to < 0.05)         | 19.9<br>(7.2 to 35.1)                             | -1.4<br>(-11.0 to 9.7)                              |
| Multiple myeloma                                   | 0.1<br>(< 0.05 to 0.1)                  | < 0.05<br>(< 0.05 to < 0.05)          | < 0.05<br>(< 0.05 to < 0.05)         | 17.4<br>(6.1 to 29.0)                             | -2.9<br>(-12.3 to 6.5)                              |
| Leukaemia                                          | 0.5<br>(0.4 to 0.8)                     | 0.1<br>(0.1 to 0.2)                   | 0.1<br>(< 0.05 to 0.1)               | 13.6<br>(-1.9 to 34.9)                            | -4.4<br>(-14.1 to 8.7)                              |
| Acute lymphoid leukaemia                           | 0.1<br>(0.1 to 0.2)                     | < 0.05<br>(< 0.05 to 0.1)             | < 0.05<br>(< 0.05 to < 0.05)         | 11.7<br>(-12.8 to 51.4)                           | -5.1<br>(-22.1 to 18.6)                             |
| Chronic lymphoid leukaemia                         | < 0.05<br>(< 0.05 to < 0.05)            | < 0.05<br>(< 0.05 to < 0.05)          | < 0.05<br>(< 0.05 to < 0.05)         | 21.8<br>(6.6 to 40.6)                             | -0.0<br>(-12.7 to 14.4)                             |
| Acute myeloid leukaemia                            | 0.1<br>(< 0.05 to 0.1)                  | < 0.05<br>(< 0.05 to < 0.05)          | < 0.05<br>(< 0.05 to < 0.05)         | 20.0<br>(2.4 to 41.8)                             | -0.1<br>(-11.2 to 12.4)                             |
| Chronic myeloid leukaemia                          | < 0.05<br>(< 0.05 to 0.1)               | < 0.05<br>(< 0.05 to < 0.05)          | < 0.05<br>(< 0.05 to < 0.05)         | 18.1<br>(2.8 to 38.5)                             | -5.9<br>(-17.9 to 9.2)                              |
| Other leukaemia                                    | 0.3<br>(0.2 to 0.5)                     | 0.1<br>(< 0.05 to 0.1)                | < 0.05<br>(< 0.05 to 0.1)            | 10.9<br>(-9.9 to 43.7)                            | -5.7<br>(-19.2 to 14.2)                             |
| Other neoplasms                                    | 0.7<br>(0.5 to 1.1)                     | 0.2<br>(0.2 to 0.3)                   | 0.1<br>(< 0.05 to 0.1)               | 22.2<br>(3.4 to 41.9)                             | 0.4<br>(-12.3 to 15.0)                              |
| <b>Cardiovascular diseases</b>                     | <b>234.2</b><br><b>(221.3 to 245.9)</b> | <b>20.3†</b><br><b>(19.4 to 21.2)</b> | <b>13.0</b><br><b>(9.3 to 17.1)</b>  | <b>25.4</b><br><b>(20.4 to 30.4)</b>              | <b>0.6</b><br><b>(-2.8 to 4.0)</b>                  |
| Rheumatic heart disease                            | 77.9<br>(69.1 to 86.8)                  | 3.2<br>(2.8 to 3.6)                   | 3.7<br>(2.4 to 5.4)                  | 29.6<br>(18.1 to 39.7)                            | 3.1<br>(-5.8 to 10.9)                               |
| Ischaemic heart disease                            | 41.1<br>(38.9 to 43.3)                  | 6.8<br>(6.3 to 7.4)                   | 1.7<br>(1.2 to 2.4)                  | 22.2<br>(15.8 to 29.1)                            | -0.6<br>(-5.1 to 4.0)                               |
| Cerebrovascular disease                            | 17.6<br>(16.4 to 19.0)                  | 3.8‡<br>(3.5 to 4.1)                  | 2.5<br>(1.9 to 3.2)                  | 20.4<br>(11.3 to 30.5)                            | -1.3<br>(-8.8 to 7.3)                               |
| Ischaemic stroke                                   | 15.1<br>(13.6 to 16.7)                  | 2.4‡<br>(2.1 to 2.7)                  | 2.1<br>(1.5 to 2.6)                  | 23.6<br>(12.7 to 36.4)                            | 1.2<br>(-7.7 to 12.0)                               |
| Hemorrhagic stroke                                 | 3.4<br>(3.0 to 3.8)                     | 1.4‡<br>(1.2 to 1.5)                  | 0.5<br>(0.3 to 0.6)                  | 8.1<br>(-4.9 to 22.7)                             | -11.4<br>(-22.1 to 0.6)                             |
| Hypertensive heart disease                         | 3.5<br>(2.8 to 4.4)                     | --                                    | 0.3<br>(0.2 to 0.4)                  | 17.3<br>(4.7 to 31.6)                             | -4.2<br>(-13.6 to 6.1)                              |
| Cardiomyopathy and myocarditis                     | 2.7<br>(2.3 to 3.1)                     | 1.1†<br>(1.0 to 1.3)                  | 0.3<br>(0.2 to 0.4)                  | 23.8<br>(11.4 to 36.7)                            | 0.7<br>(-10.1 to 11.8)                              |
| Myocarditis                                        | 0.7<br>(0.6 to 0.8)                     | 1.1<br>(1.0 to 1.3)                   | < 0.05<br>(< 0.05 to 0.1)            | 23.4<br>(14.9 to 32.2)                            | 0.6<br>(-8.1 to 10.6)                               |
| Alcoholic cardiomyopathy                           | 0.4<br>(0.3 to 0.5)                     | --                                    | < 0.05<br>(< 0.05 to < 0.05)         | 24.0<br>(-7.4 to 63.5)                            | 1.9<br>(-23.1 to 34.9)                              |
| Other cardiomyopathy                               | 2.1<br>(1.8 to 2.6)                     | --                                    | 0.2<br>(0.1 to 0.3)                  | 23.8<br>(8.1 to 40.2)                             | 0.5<br>(-12.5 to 13.8)                              |
| Atrial fibrillation and flutter                    | 10.8<br>(9.3 to 12.4)                   | 1.0<br>(0.8 to 1.1)                   | 0.8<br>(0.6 to 1.2)                  | 22.9<br>(13.2 to 32.4)                            | 0.8<br>(-5.9 to 7.6)                                |
| Peripheral vascular disease                        | 36.2<br>(31.3 to 42.1)                  | 3.7<br>(3.2 to 4.3)                   | 0.2<br>(0.1 to 0.4)                  | 23.0<br>(14.3 to 32.3)                            | 2.1<br>(-4.5 to 9.1)                                |
| Endocarditis                                       | 0.2<br>(0.2 to 0.2)                     | 0.7<br>(0.6 to 0.8)                   | < 0.05<br>(< 0.05 to < 0.05)         | 25.1<br>(11.7 to 41.1)                            | -2.9<br>(-17.2 to 14.3)                             |
| Other cardiovascular and circulatory diseases      | 65.7<br>(53.1 to 81.1)                  | --                                    | 3.4<br>(2.2 to 4.9)                  | 28.3<br>(17.2 to 40.3)                            | 1.9<br>(-6.5 to 10.7)                               |
| <b>Chronic respiratory diseases</b>                | <b>384.8</b><br><b>(363.1 to 407.6)</b> | <b>75.9†</b><br><b>(69.9 to 82.7)</b> | <b>17.8</b><br><b>(12.9 to 23.9)</b> | <b>29.2</b><br><b>(23.7 to 34.7)</b>              | <b>5.0</b><br><b>(1.2 to 9.0)</b>                   |
| Chronic obstructive pulmonary disease              | 60.2<br>(57.5 to 62.8)                  | 4.7<br>(4.5 to 4.8)                   | 4.5<br>(3.9 to 5.0)                  | 20.5<br>(13.1 to 29.3)                            | -1.8<br>(-7.6 to 5.0)                               |
| Pneumoconiosis                                     | 0.1<br>(< 0.05 to 0.1)                  | < 0.05<br>(< 0.05 to < 0.05)          | < 0.05<br>(< 0.05 to < 0.05)         | 24.0<br>(16.9 to 30.2)                            | -0.3<br>(-6.3 to 5.1)                               |
| Silicosis                                          | < 0.05<br>(< 0.05 to < 0.05)            | < 0.05<br>(< 0.05 to < 0.05)          | < 0.05<br>(< 0.05 to < 0.05)         | 27.2<br>(17.6 to 38.6)                            | -1.0<br>(-7.2 to 6.5)                               |

| Cause                                                          | Prevalence in thousands (95% UI)        | Incidence in thousands (95% UI)    | YLDs in thousands (95% UI)        |                                                                             |                                                                             |
|----------------------------------------------------------------|-----------------------------------------|------------------------------------|-----------------------------------|-----------------------------------------------------------------------------|-----------------------------------------------------------------------------|
|                                                                | 2016 counts<br>(< 0.05 to < 0.05)       | 2016 counts<br>(< 0.05 to < 0.05)  | 2016 counts<br>(< 0.05 to < 0.05) | Percentage change in counts between 2006 and 2016<br>25.5<br>(16.9 to 34.1) | Percentage change in age-standardised rates between<br>0.7<br>(-5.0 to 6.6) |
| Asbestosis                                                     | < 0.05<br>(< 0.05 to < 0.05)            | < 0.05<br>(< 0.05 to < 0.05)       | < 0.05<br>(< 0.05 to < 0.05)      | 25.5<br>(16.9 to 34.1)                                                      | 0.7<br>(-5.0 to 6.6)                                                        |
| Coal workers pneumoconiosis                                    | --                                      | --                                 | --                                | --                                                                          | --                                                                          |
| Other pneumoconiosis                                           | < 0.05<br>(< 0.05 to < 0.05)            | < 0.05<br>(< 0.05 to < 0.05)       | < 0.05<br>(< 0.05 to < 0.05)      | 22.4<br>(10.5 to 33.4)                                                      | -1.0<br>(-10.7 to 8.2)                                                      |
| Asthma                                                         | 327.4<br>(302.1 to 357.0)               | 71.2<br>(65.1 to 77.9)             | 12.8<br>(8.3 to 18.4)             | 31.6<br>(24.8 to 39.0)                                                      | 9.3<br>(4.5 to 14.4)                                                        |
| Interstitial lung disease and pulmonary sarcoidosis            | 0.4<br>(0.3 to 0.4)                     | < 0.05<br>(< 0.05 to < 0.05)       | < 0.05<br>(< 0.05 to 0.1)         | 21.8<br>(17.8 to 26.0)                                                      | -2.1<br>(-7.0 to 3.6)                                                       |
| Other chronic respiratory diseases                             | --                                      | --                                 | 0.5<br>(0.4 to 0.6)               | 61.5<br>(28.1 to 107.5)                                                     | 33.1<br>(12.2 to 59.8)                                                      |
| <b>Cirrhosis and other chronic liver diseases</b>              | <b>8.4<br/>(7.9 to 8.8)</b>             | <b>1.3<br/>(1.2 to 1.3)</b>        | <b>0.8<br/>(0.6 to 1.2)</b>       | <b>22.4<br/>(9.8 to 38.1)</b>                                               | <b>0.1<br/>(-8.2 to 10.0)</b>                                               |
| Cirrhosis and other chronic liver diseases due to hepatitis B  | 2.2<br>(1.9 to 2.4)                     | 0.4<br>(0.3 to 0.4)                | 0.2<br>(0.1 to 0.2)               | 25.8<br>(3.8 to 51.2)                                                       | 0.7<br>(-14.9 to 18.2)                                                      |
| Cirrhosis and other chronic liver diseases due to hepatitis C  | 1.9<br>(1.8 to 2.2)                     | 0.3<br>(0.3 to 0.4)                | 0.2<br>(0.1 to 0.2)               | 22.7<br>(-1.5 to 51.6)                                                      | -1.3<br>(-17.9 to 17.9)                                                     |
| Cirrhosis and other chronic liver diseases due to alcohol use  | 1.3<br>(1.2 to 1.4)                     | 0.3<br>(0.2 to 0.3)                | 0.1<br>(0.1 to 0.1)               | 24.4<br>(2.5 to 51.4)                                                       | 0.1<br>(-16.8 to 20.3)                                                      |
| Cirrhosis and other chronic liver diseases due to other causes | 3.0<br>(2.7 to 3.2)                     | 0.3<br>(0.3 to 0.3)                | 0.4<br>(0.3 to 0.6)               | 20.3<br>(-0.5 to 48.5)                                                      | 0.7<br>(-15.2 to 19.9)                                                      |
| <b>Digestive diseases</b>                                      | <b>99.2<br/>(90.9 to 107.0)</b>         | <b>86.6†<br/>(82.6 to 91.1)</b>    | <b>3.2<br/>(2.3 to 4.4)</b>       | <b>29.0<br/>(20.5 to 37.7)</b>                                              | <b>4.8<br/>(-0.6 to 10.1)</b>                                               |
| Peptic ulcer disease                                           | 16.8<br>(15.6 to 18.2)                  | 8.3<br>(7.5 to 9.1)                | 0.3<br>(0.2 to 0.5)               | 26.6<br>(15.5 to 38.6)                                                      | 1.7<br>(-5.9 to 9.9)                                                        |
| Gastritis and duodenitis                                       | 22.4<br>(19.8 to 25.2)                  | 28.8<br>(25.9 to 32.4)             | 0.4<br>(0.2 to 0.5)               | 29.3<br>(16.4 to 42.0)                                                      | 5.8<br>(-2.4 to 14.3)                                                       |
| Appendicitis                                                   | 0.9<br>(0.8 to 0.9)                     | 23.1<br>(21.4 to 24.9)             | 0.3<br>(0.2 to 0.4)               | 21.4<br>(-11.0 to 65.5)                                                     | -1.7<br>(-22.1 to 25.7)                                                     |
| Paralytic ileus and intestinal obstruction                     | 0.1<br>(0.1 to 0.1)                     | 2.5<br>(2.3 to 2.8)                | < 0.05<br>(< 0.05 to < 0.05)      | 25.8<br>(16.7 to 35.9)                                                      | 1.6<br>(-11.5 to 15.9)                                                      |
| Inguinal, femoral, and abdominal hernia                        | 57.7<br>(48.7 to 68.3)                  | 6.2<br>(5.5 to 7.0)                | 1.9<br>(1.2 to 2.6)               | 30.4<br>(18.3 to 43.3)                                                      | 6.1<br>(-1.7 to 14.3)                                                       |
| Inflammatory bowel disease                                     | 0.2<br>(0.2 to 0.2)                     | 1.8<br>(1.7 to 1.9)                | < 0.05<br>(< 0.05 to < 0.05)      | 22.8<br>(20.0 to 25.5)                                                      | -2.9<br>(-5.0 to -0.8)                                                      |
| Vascular intestinal disorders                                  | < 0.05<br>(< 0.05 to < 0.05)            | 0.2<br>(0.2 to 0.2)                | < 0.05<br>(< 0.05 to < 0.05)      | 24.6<br>(18.6 to 30.1)                                                      | 1.0<br>(-3.0 to 4.8)                                                        |
| Gallbladder and biliary diseases                               | 3.2<br>(2.8 to 3.5)                     | 15.0<br>(13.1 to 17.1)             | 0.1<br>(0.1 to 0.1)               | 25.4<br>(7.0 to 46.3)                                                       | -0.5<br>(-18.0 to 19.5)                                                     |
| Pancreatitis                                                   | 0.1<br>(0.1 to 0.1)                     | 0.7<br>(0.7 to 0.8)                | < 0.05<br>(< 0.05 to < 0.05)      | 25.0<br>(20.6 to 29.4)                                                      | -0.6<br>(-3.9 to 2.8)                                                       |
| Other digestive diseases                                       | --                                      | --                                 | 0.3<br>(0.2 to 0.4)               | 31.9<br>(20.5 to 43.8)                                                      | 8.8<br>(2.6 to 14.8)                                                        |
| <b>Neurological disorders</b>                                  | <b>1,585.3<br/>(1,515.3 to 1,672.3)</b> | <b>789.5<br/>(669.8 to 927.7)</b>  | <b>32.1<br/>(21.7 to 45.2)</b>    | <b>26.8<br/>(1.4 to 60.1)</b>                                               | <b>0.7<br/>(-14.7 to 20.5)</b>                                              |
| Alzheimer's disease and other dementias                        | 12.8<br>(10.7 to 15.1)                  | 2.2<br>(1.8 to 2.7)                | 1.8<br>(1.2 to 2.4)               | 22.6<br>(16.7 to 28.9)                                                      | 0.2<br>(-4.3 to 4.7)                                                        |
| Parkinson's disease                                            | 0.7<br>(0.6 to 0.9)                     | 0.1<br>(0.1 to 0.1)                | 0.1<br>(0.1 to 0.1)               | 24.7<br>(6.4 to 45.8)                                                       | 3.0<br>(-11.2 to 19.0)                                                      |
| Epilepsy                                                       | 7.1<br>(1.0 to 18.5)                    | 1.0<br>(0.1 to 2.7)                | 3.1<br>(0.4 to 8.9)               | 23.7<br>(-83.6 to 930.3)                                                    | 0.8<br>(-86.5 to 741.7)                                                     |
| Multiple sclerosis                                             | 0.1<br>(0.1 to 0.2)                     | < 0.05<br>(< 0.05 to < 0.05)       | < 0.05<br>(< 0.05 to 0.1)         | 32.9<br>(28.4 to 37.6)                                                      | 4.2<br>(0.8 to 7.9)                                                         |
| Motor neuron disease                                           | < 0.05<br>(< 0.05 to 0.1)               | < 0.05<br>(< 0.05 to < 0.05)       | < 0.05<br>(< 0.05 to < 0.05)      | 24.0<br>(18.7 to 29.6)                                                      | 0.7<br>(-2.6 to 4.3)                                                        |
| Migraine                                                       | 543.7<br>(510.4 to 575.8)               | 67.8<br>(63.8 to 72.2)             | 22.6<br>(14.5 to 32.0)            | 26.9<br>(21.9 to 32.1)                                                      | 0.5<br>(-3.1 to 4.0)                                                        |
| Tension-type headache                                          | 1,229.4<br>(1,090.9 to 1,385.7)         | 718.3<br>(596.7 to 856.3)          | 3.8<br>(2.4 to 5.7)               | 26.8<br>(20.4 to 34.3)                                                      | 0.3<br>(-4.3 to 5.5)                                                        |
| Other neurological disorders                                   | < 0.05<br>(< 0.05 to < 0.05)            | < 0.05<br>(< 0.05 to < 0.05)       | 0.8<br>(0.2 to 2.1)               | 49.4<br>(-74.2 to 743.1)                                                    | 19.3<br>(-70.5 to 405.0)                                                    |
| <b>Mental and substance use disorders</b>                      | <b>759.7<br/>(720.5 to 797.6)</b>       | <b>321.3†<br/>(295.6 to 353.3)</b> | <b>92.4<br/>(66.7 to 120.3)</b>   | <b>25.1<br/>(22.4 to 28.0)</b>                                              | <b>-0.3<br/>(-2.4 to 1.9)</b>                                               |
| Schizophrenia                                                  | 6.3<br>(5.5 to 7.2)                     | 0.6<br>(0.5 to 0.7)                | 4.0<br>(2.9 to 5.0)               | 27.6<br>(15.3 to 41.1)                                                      | -1.0<br>(-9.8 to 8.7)                                                       |
| Alcohol use disorders                                          | 64.0<br>(54.3 to 74.4)                  | 34.8<br>(29.4 to 40.5)             | 6.3<br>(4.3 to 8.8)               | 28.5<br>(19.0 to 39.1)                                                      | -0.8<br>(-7.7 to 6.8)                                                       |
| Drug use disorders                                             | 21.5<br>(19.2 to 23.9)                  | 3.7<br>(3.2 to 4.2)                | 5.0<br>(3.4 to 6.7)               | 28.6<br>(14.9 to 44.4)                                                      | -0.9<br>(-10.3 to 9.7)                                                      |
| Opioid use disorders                                           | 10.5<br>(8.5 to 13.1)                   | 1.4<br>(1.2 to 1.7)                | 4.3<br>(2.8 to 5.9)               | 28.4<br>(13.1 to 46.3)                                                      | -1.4<br>(-12.1 to 10.9)                                                     |
| Cocaine use disorders                                          | 0.7<br>(0.5 to 0.8)                     | 0.1<br>(0.1 to 0.1)                | 0.1<br>(0.1 to 0.1)               | 30.8<br>(23.6 to 38.4)                                                      | 2.6<br>(-2.4 to 8.3)                                                        |
| Amphetamine use disorders                                      | 0.4<br>(0.2 to 0.5)                     | 0.1<br>(< 0.05 to 0.1)             | 0.1<br>(< 0.05 to 0.1)            | 31.2<br>(19.6 to 45.6)                                                      | 2.4<br>(-6.1 to 12.7)                                                       |
| Cannabis use disorders                                         | 9.4<br>(7.8 to 11.5)                    | 1.8<br>(1.5 to 2.3)                | 0.3<br>(0.2 to 0.4)               | 27.7<br>(3.8 to 58.2)                                                       | 0.2<br>(-17.2 to 21.2)                                                      |
| Other drug use disorders                                       | 1.4<br>(1.2 to 1.6)                     | 0.3<br>(0.3 to 0.4)                | 0.2<br>(0.2 to 0.3)               | 33.0<br>(11.0 to 56.5)                                                      | 3.4<br>(-12.5 to 20.9)                                                      |
| Depressive disorders                                           | 186.2<br>(172.5 to 202.3)               | 224.3<br>(198.7 to 257.4)          | 33.0<br>(22.5 to 45.1)            | 25.0<br>(19.6 to 31.0)                                                      | -0.8<br>(-5.1 to 3.3)                                                       |
| Major depressive disorder                                      | 138.3<br>(122.2 to 157.3)               | 215.1<br>(189.6 to 247.8)          | 28.1<br>(19.1 to 38.5)            | 24.7<br>(18.4 to 31.6)                                                      | -1.0<br>(-6.1 to 4.0)                                                       |
| Dysthymia                                                      | 51.8<br>(44.9 to 60.0)                  | 9.2<br>(8.1 to 10.7)               | 4.9<br>(3.3 to 7.2)               | 26.8<br>(21.8 to 31.9)                                                      | 0.3<br>(-2.8 to 3.6)                                                        |
| Bipolar disorder                                               | 26.3<br>(22.1 to 30.9)                  | 3.1<br>(2.6 to 3.7)                | 5.3<br>(3.3 to 7.9)               | 26.5<br>(17.2 to 35.7)                                                      | 0.3<br>(-5.8 to 6.4)                                                        |
| Anxiety disorders                                              | 148.8<br>(134.0 to 165.1)               | 26.7<br>(24.3 to 29.4)             | 14.3<br>(9.8 to 19.4)             | 24.2<br>(15.7 to 33.5)                                                      | 0.1<br>(-6.1 to 6.7)                                                        |
| Eating disorders                                               | 3.2<br>(2.5 to 3.8)                     | 2.8<br>(2.1 to 3.8)                | 0.7<br>(0.4 to 1.0)               | 21.8<br>(2.2 to 46.0)                                                       | -4.4<br>(-19.9 to 14.0)                                                     |
| Anorexia nervosa                                               | 0.9<br>(0.7 to 1.2)                     | 0.5<br>(0.3 to 0.6)                | 0.2<br>(0.1 to 0.3)               | 19.5<br>(-12.5 to 65.8)                                                     | -3.5<br>(-28.3 to 30.8)                                                     |
| Bulimia nervosa                                                | 2.2<br>(1.6 to 3.0)                     | 2.4<br>(1.6 to 3.4)                | 0.5<br>(0.3 to 0.7)               | 22.8<br>(-0.9 to 51.6)                                                      | -4.7<br>(-23.0 to 16.4)                                                     |
| Autistic spectrum disorders                                    | 41.4<br>(37.3 to 46.9)                  | 0.5<br>(0.3 to 0.7)                | 5.9<br>(4.0 to 8.3)               | 22.6<br>(15.7 to 29.4)                                                      | 0.5<br>(-4.6 to 5.6)                                                        |
| Autism                                                         | 11.4<br>(9.8 to 13.2)                   | 0.1<br>(< 0.05 to 0.1)             | 2.9<br>(1.9 to 4.2)               | 22.2<br>(10.8 to 34.9)                                                      | 0.5<br>(-8.2 to 10.0)                                                       |
| Asperger syndrome and other autistic spectrum disorders        | 30.1<br>(24.9 to 36.4)                  | 0.4<br>(0.3 to 0.6)                | 3.0<br>(2.0 to 4.4)               | 23.0<br>(16.2 to 29.3)                                                      | 0.5<br>(-4.4 to 5.3)                                                        |



| Cause                                                      | Prevalence in thousands (95% UI)              | Incidence in thousands (95% UI)                   | YLDs in thousands (95% UI)             |                                                   |                                                     |
|------------------------------------------------------------|-----------------------------------------------|---------------------------------------------------|----------------------------------------|---------------------------------------------------|-----------------------------------------------------|
|                                                            | 2016 counts                                   | 2016 counts                                       | 2016 counts                            | Percentage change in counts between 2006 and 2016 | Percentage change in age-standardised rates between |
| Attention-deficit/hyperactivity disorder                   | 65.2<br>(58.4 to 73.4)                        | 3.8<br>(3.3 to 4.5)                               | 0.8<br>(0.5 to 1.2)                    | 21.0<br>(12.1 to 30.3)                            | 0.1<br>(-6.7 to 7.3)                                |
| Conduct disorder                                           | 49.5<br>(40.7 to 58.6)                        | 17.4<br>(13.9 to 21.0)                            | 5.9<br>(3.6 to 9.1)                    | 17.4<br>(10.1 to 25.8)                            | 0.2<br>(-6.0 to 7.2)                                |
| Idiopathic developmental intellectual disability           | 147.4<br>(90.3 to 205.1)                      | --                                                | 6.0<br>(2.9 to 10.3)                   | 26.5<br>(18.8 to 34.3)                            | 3.1<br>(-3.0 to 9.3)                                |
| Other mental and substance use disorders                   | 72.4<br>(63.4 to 83.9)                        | 3.5<br>(3.1 to 4.1)                               | 5.3<br>(3.7 to 7.7)                    | 28.8<br>(22.0 to 35.9)                            | 0.4<br>(-4.2 to 5.1)                                |
| <b>Diabetes, urogenital, blood, and endocrine diseases</b> | <b>2,682.1</b><br><b>(2,634.4 to 2,730.8)</b> | <b>458.2†</b><br><b>(427.7 to 489.3)</b>          | <b>33.3</b><br><b>(23.6 to 45.1)</b>   | <b>26.0</b><br><b>(22.7 to 29.7)</b>              | <b>1.4</b><br><b>(-1.3 to 4.2)</b>                  |
| Diabetes mellitus                                          | 131.2<br>(118.0 to 145.5)                     | 8.7<br>(7.9 to 9.6)                               | 10.2<br>(7.0 to 14.2)                  | 25.4<br>(18.8 to 32.0)                            | 0.8<br>(-4.8 to 6.2)                                |
| Acute glomerulonephritis                                   | < 0.05<br>(< 0.05 to 0.1)                     | 0.6<br>(0.6 to 0.7)                               | < 0.05<br>(< 0.05 to < 0.05)           | 22.7<br>(18.0 to 28.6)                            | -0.1<br>(-3.6 to 4.0)                               |
| Chronic kidney disease                                     | 199.5<br>(178.9 to 220.6)                     | 15.0<br>(13.3 to 16.8)                            | 5.7<br>(4.2 to 7.3)                    | 33.0<br>(25.6 to 40.6)                            | 6.3<br>(1.3 to 11.6)                                |
| Chronic kidney disease due to diabetes mellitus            | 61.8<br>(51.8 to 72.7)                        | 4.4<br>(3.6 to 5.3)                               | 1.7<br>(1.2 to 2.3)                    | 34.2<br>(23.4 to 46.0)                            | 8.2<br>(0.9 to 16.4)                                |
| Chronic kidney disease due to hypertension                 | 42.8<br>(36.9 to 48.9)                        | 3.9<br>(3.2 to 4.5)                               | 1.0<br>(0.7 to 1.3)                    | 28.7<br>(17.2 to 43.5)                            | 4.5<br>(-4.5 to 15.8)                               |
| Chronic kidney disease due to glomerulonephritis           | 40.0<br>(34.6 to 45.4)                        | 2.4<br>(1.9 to 2.9)                               | 1.4<br>(1.0 to 1.9)                    | 34.6<br>(21.4 to 48.3)                            | 6.2<br>(-2.7 to 15.2)                               |
| Chronic kidney disease due to other causes                 | 54.9<br>(45.8 to 63.7)                        | 4.4<br>(3.6 to 5.1)                               | 1.6<br>(1.1 to 2.1)                    | 33.0<br>(21.6 to 46.2)                            | 5.6<br>(-2.1 to 14.1)                               |
| Urinary diseases and male infertility                      | 105.7<br>(92.5 to 119.2)                      | 226.6†<br>(202.6 to 253.0)                        | 2.1<br>(1.3 to 3.1)                    | 22.1<br>(15.4 to 30.6)                            | -0.2<br>(-5.5 to 6.7)                               |
| Interstitial nephritis and urinary tract infections        | 3.7<br>(3.3 to 4.2)                           | 195.1<br>(171.1 to 221.6)                         | 0.1<br>(0.1 to 0.2)                    | 26.4<br>(5.8 to 51.1)                             | 1.0<br>(-13.6 to 18.1)                              |
| Urolithiasis                                               | 1.0<br>(0.8 to 1.1)                           | 25.4<br>(22.4 to 29.0)                            | 0.1<br>(< 0.05 to 0.1)                 | 29.1<br>(19.8 to 38.2)                            | 2.2<br>(-5.9 to 11.0)                               |
| Benign prostatic hyperplasia                               | 47.5<br>(40.2 to 55.1)                        | 6.0<br>(5.1 to 7.1)                               | 1.5<br>(1.0 to 2.2)                    | 20.3<br>(12.2 to 30.8)                            | -0.2<br>(-6.2 to 7.9)                               |
| Male infertility                                           | 48.2<br>(38.0 to 60.8)                        | --                                                | 0.3<br>(0.1 to 0.6)                    | 35.5<br>(27.6 to 43.7)                            | 2.8<br>(-2.8 to 9.1)                                |
| Other urinary diseases                                     | --                                            | --                                                | 0.1<br>(< 0.05 to 0.1)                 | 4.7<br>(-7.2 to 18.1)                             | -15.5<br>(-23.2 to -7.1)                            |
| Gynecological diseases                                     | 594.4<br>(553.9 to 628.9)                     | 204.0†<br>(187.9 to 221.7)                        | 7.0<br>(4.7 to 10.1)                   | 26.7<br>(21.6 to 31.6)                            | -1.8<br>(-5.3 to 1.7)                               |
| Uterine fibroids                                           | 36.9<br>(32.5 to 41.5)                        | 4.6<br>(3.9 to 5.2)                               | 0.9<br>(0.6 to 1.4)                    | 26.7<br>(18.0 to 36.1)                            | -1.1<br>(-7.9 to 6.5)                               |
| Polycystic ovarian syndrome                                | 4.9<br>(3.7 to 6.4)                           | 7.2<br>(5.1 to 9.6)                               | < 0.05<br>(< 0.05 to 0.1)              | 32.9<br>(15.8 to 52.5)                            | -0.2<br>(-12.8 to 13.5)                             |
| Female infertility                                         | 49.5<br>(21.0 to 88.9)                        | --                                                | 0.3<br>(0.1 to 0.7)                    | 15.4<br>(-7.8 to 40.1)                            | -14.6<br>(-33.0 to 4.7)                             |
| Endometriosis                                              | 1.0<br>(0.9 to 1.2)                           | 4.1<br>(3.3 to 5.2)                               | 0.1<br>(0.1 to 0.1)                    | 29.0<br>(-5.5 to 79.0)                            | -0.4<br>(-24.9 to 32.3)                             |
| Genital prolapse                                           | 267.8<br>(237.3 to 300.8)                     | 22.8<br>(19.2 to 27.1)                            | 0.8<br>(0.4 to 1.5)                    | 19.5<br>(11.5 to 27.6)                            | -2.9<br>(-9.6 to 4.1)                               |
| Premenstrual syndrome                                      | 250.5<br>(226.2 to 273.2)                     | 94.7<br>(85.2 to 104.0)                           | 2.1<br>(1.3 to 3.1)                    | 23.9<br>(13.3 to 34.2)                            | -3.1<br>(-10.7 to 4.7)                              |
| Other gynecological diseases                               | 80.9<br>(70.0 to 93.0)                        | 70.7<br>(57.5 to 85.3)                            | 2.8<br>(1.8 to 4.0)                    | 32.5<br>(24.4 to 41.4)                            | 0.9<br>(-5.1 to 7.5)                                |
| Hemoglobinopathies and hemolytic anaemias                  | 2,189.3<br>(2,137.2 to 2,242.7)               | --                                                | 6.2<br>(4.2 to 9.0)                    | 23.0<br>(14.0 to 32.1)                            | 0.7<br>(-5.2 to 6.6)                                |
| Thalassemias                                               | < 0.05<br>(< 0.05 to < 0.05)                  | --                                                | < 0.05<br>(< 0.05 to < 0.05)           | 18.9<br>(-6.7 to 43.1)                            | -2.8<br>(-23.8 to 17.0)                             |
| Thalassaemias trait                                        | 23.8<br>(21.9 to 25.6)                        | --                                                | 0.4<br>(0.2 to 0.5)                    | 30.6<br>(15.3 to 47.4)                            | 6.8<br>(-3.8 to 19.3)                               |
| Sickle cell disorders                                      | 9.7<br>(8.5 to 11.1)                          | --                                                | 0.8<br>(0.5 to 1.1)                    | 20.7<br>(2.8 to 42.5)                             | 1.8<br>(-12.6 to 19.4)                              |
| Sickle cell trait                                          | 954.7<br>(897.4 to 1,013.7)                   | --                                                | 3.4<br>(2.2 to 4.9)                    | 21.9<br>(12.3 to 32.8)                            | 0.0<br>(-7.0 to 7.8)                                |
| G6PD deficiency                                            | 598.9<br>(558.8 to 645.8)                     | --                                                | < 0.05<br>(< 0.05 to 0.1)              | 18.7<br>(-10.0 to 56.1)                           | -1.2<br>(-19.5 to 20.6)                             |
| G6PD trait                                                 | 924.6<br>(908.9 to 941.0)                     | --                                                | < 0.05<br>(< 0.05 to < 0.05)           | 22.9<br>(9.8 to 38.8)                             | -0.2<br>(-9.2 to 9.8)                               |
| Other hemoglobinopathies and hemolytic anaemias            | 68.2<br>(65.6 to 70.7)                        | --                                                | 1.7<br>(1.2 to 2.5)                    | 24.8<br>(13.6 to 37.9)                            | 0.3<br>(-6.6 to 8.0)                                |
| Endocrine, metabolic, blood, and immune disorders          | 70.8<br>(68.1 to 73.7)                        | 3.3<br>(2.9 to 3.7)                               | 2.1<br>(1.4 to 3.0)                    | 22.3<br>(12.9 to 32.1)                            | 2.2<br>(-3.8 to 8.4)                                |
| <b>Musculoskeletal disorders</b>                           | <b>541.1</b><br><b>(509.0 to 570.5)</b>       | <b>266.4</b><br><b>(240.2 to 294.6)</b>           | <b>59.9</b><br><b>(43.1 to 78.4)</b>   | <b>24.3</b><br><b>(20.4 to 28.0)</b>              | <b>-0.9</b><br><b>(-3.5 to 1.8)</b>                 |
| Rheumatoid arthritis                                       | 7.3<br>(6.5 to 8.2)                           | 0.5<br>(0.4 to 0.5)                               | 1.7<br>(1.2 to 2.3)                    | 24.1<br>(11.8 to 37.0)                            | -1.0<br>(-9.1 to 7.7)                               |
| Osteoarthritis                                             | 84.4<br>(78.8 to 90.0)                        | 4.6<br>(4.3 to 5.0)                               | 5.1<br>(3.6 to 6.9)                    | 25.5<br>(20.7 to 30.7)                            | 2.3<br>(-1.3 to 6.2)                                |
| Low back and neck pain                                     | 388.1<br>(360.2 to 415.6)                     | 179.1<br>(159.1 to 201.6)                         | 44.3<br>(31.3 to 58.1)                 | 24.1<br>(19.6 to 28.7)                            | -1.1<br>(-4.2 to 2.2)                               |
| Low back pain                                              | 312.3<br>(275.1 to 355.7)                     | 155.1<br>(135.1 to 177.8)                         | 34.7<br>(24.7 to 45.9)                 | 23.4<br>(18.0 to 29.2)                            | -1.5<br>(-5.4 to 2.6)                               |
| Neck pain                                                  | 96.7<br>(83.7 to 111.8)                       | 24.0<br>(20.7 to 28.0)                            | 9.5<br>(6.5 to 13.5)                   | 26.4<br>(22.8 to 30.1)                            | 0.3<br>(-2.0 to 2.6)                                |
| Gout                                                       | 11.3<br>(10.0 to 12.7)                        | 2.3<br>(2.0 to 2.6)                               | 0.4<br>(0.2 to 0.5)                    | 25.0<br>(7.1 to 44.3)                             | 0.4<br>(-12.4 to 14.8)                              |
| Other musculoskeletal disorders                            | 99.2<br>(79.5 to 120.6)                       | 79.9<br>(62.5 to 99.6)                            | 8.5<br>(5.5 to 12.4)                   | 24.7<br>(12.5 to 36.7)                            | -2.3<br>(-11.2 to 6.4)                              |
| <b>Other non-communicable diseases</b>                     | <b>3,721.3</b><br><b>(3,644.0 to 3,792.0)</b> | <b>11,191.6†</b><br><b>(10,382.8 to 12,035.7)</b> | <b>101.0</b><br><b>(69.5 to 142.3)</b> | <b>23.0</b><br><b>(21.3 to 24.6)</b>              | <b>0.3</b><br><b>(-0.8 to 1.4)</b>                  |
| Congenital anomalies                                       | 78.4<br>(66.6 to 93.6)                        | --                                                | 12.1<br>(8.3 to 16.7)                  | 24.2<br>(16.4 to 32.7)                            | 1.2<br>(-5.1 to 8.2)                                |
| Neural tube defects                                        | 10.1<br>(8.8 to 11.3)                         | --                                                | 3.0<br>(2.1 to 4.0)                    | 23.4<br>(11.8 to 37.7)                            | 0.5<br>(-8.2 to 11.4)                               |
| Congenital heart anomalies                                 | 10.4<br>(8.5 to 12.5)                         | --                                                | 0.5<br>(0.2 to 0.9)                    | 28.1<br>(10.2 to 46.7)                            | 5.5<br>(-8.6 to 20.3)                               |
| Orofacial clefts                                           | 1.8<br>(1.6 to 2.0)                           | --                                                | < 0.05<br>(< 0.05 to 0.1)              | 22.7<br>(8.4 to 38.0)                             | 0.0<br>(-11.6 to 12.6)                              |
| Down's syndrome                                            | 0.9<br>(0.8 to 1.1)                           | --                                                | 0.1<br>(0.1 to 0.1)                    | 23.2<br>(14.9 to 32.5)                            | 0.5<br>(-6.4 to 7.9)                                |
| Turner syndrome                                            | 4.1<br>(3.4 to 4.8)                           | --                                                | 0.1<br>(< 0.05 to 0.1)                 | 23.3<br>(-7.7 to 65.0)                            | 1.0<br>(-24.2 to 33.4)                              |
| Klinefelter syndrome                                       | 3.3<br>(2.7 to 3.9)                           | --                                                | < 0.05<br>(< 0.05 to < 0.05)           | 24.1<br>(-3.3 to 61.0)                            | -0.5<br>(-22.5 to 28.8)                             |



| Cause                                         | Prevalence in thousands (95% UI)        | Incidence in thousands (95% UI)          | YLDs in thousands (95% UI)           |                                                   |                                                     |
|-----------------------------------------------|-----------------------------------------|------------------------------------------|--------------------------------------|---------------------------------------------------|-----------------------------------------------------|
|                                               | 2016 counts                             | 2016 counts                              | 2016 counts                          | Percentage change in counts between 2006 and 2016 | Percentage change in age-standardised rates between |
| Other chromosomal abnormalities               | 0.9<br>(0.8 to 1.1)                     | --                                       | 0.2<br>(0.1 to 0.2)                  | 22.4<br>(-8.6 to 68.6)                            | 0.2<br>(-25.3 to 35.6)                              |
| Congenital musculoskeletal and limb anomalies | 6.6<br>(5.8 to 7.5)                     | --                                       | 1.0<br>(0.6 to 1.4)                  | 27.5<br>(11.3 to 46.1)                            | 2.7<br>(-9.4 to 16.6)                               |
| Urogenital congenital anomalies               | 4.9<br>(4.3 to 5.5)                     | --                                       | 0.1<br>(0.1 to 0.2)                  | 20.1<br>(9.7 to 32.3)                             | -0.1<br>(-8.3 to 9.2)                               |
| Digestive congenital anomalies                | 4.0<br>(3.5 to 4.5)                     | --                                       | 0.2<br>(0.1 to 0.2)                  | 25.0<br>(2.5 to 50.9)                             | 1.8<br>(-14.3 to 21.5)                              |
| Other congenital anomalies                    | 41.8<br>(29.9 to 59.8)                  | --                                       | 7.0<br>(4.5 to 10.6)                 | 24.0<br>(13.5 to 36.4)                            | 1.1<br>(-7.3 to 11.3)                               |
| Skin and subcutaneous diseases                | 1,583.6<br>(1,535.3 to 1,645.8)         | 3,538.0<br>(3,340.4 to 3,769.7)          | 37.7<br>(24.8 to 54.8)               | 22.1<br>(19.7 to 24.9)                            | 0.7<br>(-1.2 to 2.7)                                |
| Dermatitis                                    | 265.7<br>(241.2 to 289.8)               | 230.5<br>(212.6 to 249.6)                | 10.6<br>(6.1 to 17.6)                | 20.1<br>(15.7 to 24.6)                            | 0.3<br>(-3.0 to 3.4)                                |
| Psoriasis                                     | 24.3<br>(23.2 to 25.5)                  | 3.9<br>(3.7 to 4.1)                      | 2.1<br>(1.5 to 2.8)                  | 26.9<br>(12.9 to 42.8)                            | 2.1<br>(-6.5 to 12.0)                               |
| Cellulitis                                    | 1.8<br>(1.7 to 2.0)                     | 31.7<br>(29.4 to 34.0)                   | 0.1<br>(0.1 to 0.1)                  | 23.9<br>(-0.3 to 53.7)                            | 1.2<br>(-17.2 to 22.8)                              |
| Pyoderma                                      | 27.9<br>(26.6 to 29.3)                  | 551.3<br>(526.8 to 577.0)                | 0.2<br>(0.1 to 0.3)                  | 21.9<br>(15.0 to 29.6)                            | 1.2<br>(-3.7 to 6.3)                                |
| Scabies                                       | 66.6<br>(57.4 to 77.6)                  | 204.5<br>(174.3 to 236.3)                | 1.7<br>(1.0 to 2.8)                  | 25.3<br>(19.5 to 32.0)                            | 2.9<br>(-1.3 to 7.6)                                |
| Fungal skin diseases                          | 629.4<br>(551.5 to 721.7)               | 1,660.0<br>(1,472.1 to 1,872.7)          | 3.6<br>(1.4 to 7.3)                  | 20.1<br>(18.5 to 21.8)                            | 0.2<br>(-0.7 to 1.1)                                |
| Viral skin diseases                           | 132.5<br>(124.2 to 140.7)               | 191.8<br>(179.3 to 204.5)                | 4.0<br>(2.6 to 6.0)                  | 20.7<br>(16.2 to 25.2)                            | 0.1<br>(-3.2 to 3.5)                                |
| Acne vulgaris                                 | 420.5<br>(369.1 to 478.6)               | 300.7<br>(242.2 to 383.3)                | 10.7<br>(7.1 to 15.5)                | 24.0<br>(17.7 to 31.2)                            | 1.6<br>(-3.4 to 7.0)                                |
| Alopecia areata                               | 8.2<br>(7.9 to 8.5)                     | 14.6<br>(14.0 to 15.2)                   | 0.3<br>(0.2 to 0.4)                  | 27.8<br>(13.3 to 44.1)                            | 0.5<br>(-9.8 to 11.8)                               |
| Pruritus                                      | 34.3<br>(30.1 to 38.7)                  | 28.2<br>(25.1 to 31.9)                   | 0.4<br>(0.2 to 0.7)                  | 22.6<br>(15.3 to 30.2)                            | -0.9<br>(-5.9 to 4.1)                               |
| Urticaria                                     | 48.4<br>(41.4 to 56.8)                  | 87.5<br>(74.4 to 102.2)                  | 2.9<br>(1.9 to 4.2)                  | 22.2<br>(14.7 to 30.1)                            | 0.3<br>(-5.1 to 6.3)                                |
| Decubitus ulcer                               | 0.5<br>(0.5 to 0.6)                     | 1.9<br>(1.7 to 2.1)                      | 0.1<br>(0.1 to 0.1)                  | 20.9<br>(7.6 to 37.2)                             | -1.2<br>(-14.7 to 15.1)                             |
| Other skin and subcutaneous diseases          | 205.3<br>(199.3 to 211.8)               | 231.5<br>(224.3 to 239.2)                | 1.1<br>(0.5 to 2.1)                  | 20.2<br>(16.4 to 23.9)                            | -2.5<br>(-5.0 to -0.0)                              |
| Sense organ diseases                          | 1,312.3<br>(1,283.4 to 1,340.4)         | 439.0†<br>(408.2 to 472.2)               | 42.3<br>(28.7 to 59.8)               | 22.8<br>(19.8 to 25.9)                            | -0.1<br>(-1.8 to 1.7)                               |
| Glaucoma                                      | 1.2<br>(1.0 to 1.5)                     | --                                       | 0.1<br>(0.1 to 0.1)                  | 26.8<br>(9.5 to 47.4)                             | 4.8<br>(-8.4 to 19.6)                               |
| Cataract                                      | 17.3<br>(14.5 to 20.4)                  | --                                       | 1.5<br>(1.0 to 2.1)                  | 31.8<br>(23.0 to 41.3)                            | 3.9<br>(-2.7 to 10.8)                               |
| Macular degeneration                          | 1.4<br>(1.1 to 1.8)                     | --                                       | 0.1<br>(0.1 to 0.1)                  | 24.2<br>(7.5 to 45.1)                             | 3.0<br>(-9.8 to 18.9)                               |
| Refraction and accommodation disorders        | 965.7<br>(929.5 to 1,001.6)             | --                                       | 11.8<br>(6.2 to 20.5)                | 22.0<br>(18.5 to 26.1)                            | -1.0<br>(-3.7 to 1.9)                               |
| Age-related and other hearing loss            | 605.1<br>(569.1 to 644.8)               | --                                       | 25.4<br>(17.6 to 35.0)               | 22.1<br>(17.2 to 26.7)                            | -0.4<br>(-2.9 to 2.0)                               |
| Other vision loss                             | 9.6<br>(8.2 to 11.1)                    | --                                       | 0.7<br>(0.4 to 0.9)                  | 39.3<br>(26.7 to 53.7)                            | 9.1<br>(0.4 to 18.9)                                |
| Other sense organ diseases                    | 93.5<br>(86.5 to 100.5)                 | 439.0<br>(408.2 to 472.2)                | 2.8<br>(1.8 to 4.3)                  | 24.2<br>(17.8 to 30.2)                            | 0.6<br>(-3.5 to 4.6)                                |
| Oral disorders                                | 2,589.6<br>(2,446.3 to 2,719.3)         | 7,214.6†<br>(6,427.1 to 8,035.6)         | 8.8<br>(5.3 to 13.5)                 | 25.6<br>(22.9 to 28.4)                            | 0.3<br>(-1.7 to 2.2)                                |
| Caries of deciduous teeth                     | 491.4<br>(389.2 to 607.2)               | 1,839.1<br>(1,279.8 to 2,499.9)          | 0.1<br>( $< 0.05$ to 0.2)            | 16.1<br>(5.0 to 28.0)                             | 0.2<br>(-10.0 to 10.6)                              |
| Caries of permanent teeth                     | 1,844.9<br>(1,692.5 to 1,987.6)         | 5,326.4<br>(4,810.8 to 5,833.6)          | 1.1<br>(0.5 to 2.0)                  | 28.7<br>(23.8 to 33.7)                            | 3.2<br>(-0.0 to 6.9)                                |
| Periodontal disease                           | 336.0<br>(271.5 to 410.3)               | 42.1<br>(33.3 to 52.9)                   | 2.2<br>(0.8 to 4.6)                  | 26.4<br>(21.2 to 31.3)                            | 0.6<br>(-3.2 to 4.2)                                |
| Edentulism and severe tooth loss              | 115.6<br>(99.8 to 132.2)                | 7.0<br>(6.0 to 8.1)                      | 3.2<br>(2.1 to 4.5)                  | 24.9<br>(19.5 to 30.6)                            | -0.5<br>(-4.3 to 3.2)                               |
| Other oral disorders                          | 77.8<br>(74.2 to 81.7)                  | --                                       | 2.3<br>(1.4 to 3.4)                  | 25.0<br>(20.3 to 30.0)                            | 0.2<br>(-2.8 to 3.6)                                |
| <b>Injuries</b>                               | <b>621.2</b><br><b>(578.8 to 671.2)</b> | <b>355.0†</b><br><b>(335.8 to 375.4)</b> | <b>27.3</b><br><b>(18.1 to 39.2)</b> | <b>37.2</b><br><b>(27.1 to 47.1)</b>              | <b>8.5</b><br><b>(2.1 to 15.1)</b>                  |
| <b>Transport injuries</b>                     | <b>64.9</b><br><b>(59.8 to 70.4)</b>    | <b>29.0</b><br><b>(25.4 to 32.9)</b>     | <b>4.1</b><br><b>(2.7 to 5.9)</b>    | <b>27.4</b><br><b>(21.9 to 34.0)</b>              | <b>1.4</b><br><b>(-2.1 to 5.5)</b>                  |
| Road injuries                                 | 45.9<br>(42.6 to 49.5)                  | 22.7<br>(19.4 to 26.6)                   | 2.8<br>(1.8 to 4.0)                  | 25.6<br>(20.4 to 31.8)                            | -0.4<br>(-3.6 to 3.7)                               |
| Pedestrian road injuries                      | 12.9<br>(11.2 to 14.9)                  | 4.9<br>(3.9 to 6.1)                      | 0.8<br>(0.5 to 1.2)                  | 25.1<br>(19.3 to 31.9)                            | -0.9<br>(-4.6 to 3.3)                               |
| Cyclist road injuries                         | 8.1<br>(6.7 to 9.5)                     | 4.7<br>(3.7 to 5.9)                      | 0.5<br>(0.3 to 0.7)                  | 27.2<br>(22.1 to 33.6)                            | 1.5<br>(-1.7 to 5.4)                                |
| Motorcyclist road injuries                    | 10.3<br>(8.7 to 12.7)                   | 3.7<br>(2.9 to 4.7)                      | 0.6<br>(0.4 to 0.9)                  | 24.9<br>(19.4 to 31.7)                            | -1.3<br>(-4.9 to 3.1)                               |
| Motor vehicle road injuries                   | 10.0<br>(8.5 to 11.4)                   | 6.3<br>(5.0 to 7.5)                      | 0.7<br>(0.4 to 0.9)                  | 26.8<br>(21.7 to 33.4)                            | 0.9<br>(-2.4 to 5.1)                                |
| Other road injuries                           | 4.6<br>(4.0 to 5.5)                     | 3.1<br>(2.4 to 4.0)                      | 0.3<br>(0.2 to 0.4)                  | 22.9<br>(18.3 to 28.2)                            | -2.4<br>(-5.2 to 0.9)                               |
| Other transport injuries                      | 19.1<br>(15.9 to 23.0)                  | 6.3<br>(5.3 to 7.6)                      | 1.3<br>(0.8 to 1.9)                  | 31.4<br>(24.5 to 39.3)                            | 5.8<br>(1.3 to 10.8)                                |
| <b>Unintentional injuries</b>                 | <b>475.2</b><br><b>(441.3 to 511.6)</b> | <b>310.1</b><br><b>(292.3 to 329.8)</b>  | <b>18.7</b><br><b>(12.7 to 26.1)</b> | <b>29.8</b><br><b>(23.9 to 35.8)</b>              | <b>4.0</b><br><b>(0.3 to 8.0)</b>                   |
| Falls                                         | 161.0<br>(140.6 to 181.7)               | 96.6<br>(84.3 to 112.5)                  | 7.4<br>(5.2 to 10.3)                 | 30.6<br>(23.8 to 37.6)                            | 4.2<br>(0.0 to 8.4)                                 |
| Drowning                                      | 2.1<br>(1.9 to 2.5)                     | 0.6<br>(0.5 to 0.7)                      | 0.1<br>(0.1 to 0.2)                  | 30.7<br>(21.9 to 39.8)                            | 5.0<br>(-0.5 to 10.7)                               |
| Fire, heat, and hot substances                | 55.4<br>(46.6 to 67.1)                  | 10.2<br>(8.5 to 12.1)                    | 1.7<br>(1.2 to 2.3)                  | 28.8<br>(19.3 to 40.3)                            | 3.3<br>(-3.2 to 11.1)                               |
| Poisonings                                    | 1.5<br>(1.2 to 1.8)                     | 2.6<br>(2.0 to 3.2)                      | 0.2<br>(0.1 to 0.2)                  | 27.3<br>(17.4 to 38.0)                            | 2.9<br>(-4.1 to 10.3)                               |
| Exposure to mechanical forces                 | 85.0<br>(72.6 to 102.8)                 | 44.1<br>(36.9 to 51.0)                   | 2.5<br>(1.6 to 3.6)                  | 30.1<br>(24.6 to 35.9)                            | 4.1<br>(0.6 to 7.9)                                 |
| Unintentional firearm injuries                | 2.7<br>(2.2 to 3.4)                     | 0.9<br>(0.7 to 1.3)                      | 0.1<br>(0.1 to 0.2)                  | 31.6<br>(25.9 to 38.6)                            | 4.6<br>(0.8 to 9.2)                                 |
| Unintentional suffocation                     | 7.0<br>(5.0 to 9.7)                     | 2.2<br>(1.5 to 3.2)                      | 0.2<br>(0.1 to 0.4)                  | 26.9<br>(18.4 to 36.9)                            | 2.9<br>(-2.8 to 9.6)                                |
| Other exposure to mechanical forces           | 75.3<br>(63.3 to 92.5)                  | 40.9<br>(34.2 to 47.3)                   | 2.1<br>(1.4 to 3.0)                  | 30.4<br>(25.2 to 36.1)                            | 4.2<br>(0.8 to 7.8)                                 |

| Cause                                                                               | Prevalence in thousands (95% UI)        | Incidence in thousands (95% UI)       | YLDs in thousands (95% UI)        |                                                   |                                                     |
|-------------------------------------------------------------------------------------|-----------------------------------------|---------------------------------------|-----------------------------------|---------------------------------------------------|-----------------------------------------------------|
|                                                                                     | 2016 counts                             | 2016 counts                           | 2016 counts                       | Percentage change in counts between 2006 and 2016 | Percentage change in age-standardised rates between |
| Adverse effects of medical treatment                                                | 2.0<br>(1.6 to 2.5)                     | 26.3<br>(22.5 to 30.5)                | 0.3<br>(0.2 to 0.4)               | 21.8<br>(15.4 to 29.0)                            | -1.7<br>(-5.4 to 2.4)                               |
| Animal contact                                                                      | 39.0<br>(34.4 to 45.5)                  | 61.1<br>(52.5 to 70.0)                | 1.4<br>(0.9 to 1.9)               | 32.3<br>(26.4 to 38.3)                            | 6.0<br>(2.0 to 9.8)                                 |
| Venomous animal contact                                                             | 13.0<br>(10.9 to 15.7)                  | 23.6<br>(18.8 to 29.2)                | 0.8<br>(0.6 to 1.2)               | 30.1<br>(21.6 to 39.1)                            | 4.1<br>(-1.4 to 10.2)                               |
| Non-venomous animal contact                                                         | 26.0<br>(21.9 to 31.4)                  | 37.5<br>(31.2 to 44.2)                | 0.6<br>(0.4 to 0.8)               | 35.8<br>(31.1 to 40.9)                            | 8.5<br>(5.4 to 11.9)                                |
| Foreign body                                                                        | 34.1<br>(27.2 to 41.6)                  | 26.0<br>(22.6 to 30.0)                | 1.7<br>(1.1 to 2.5)               | 29.4<br>(21.7 to 37.6)                            | 4.8<br>(-0.2 to 10.0)                               |
| Pulmonary aspiration and foreign body in airway                                     | 20.2<br>(14.6 to 28.2)                  | 10.4<br>(8.3 to 13.0)                 | 1.1<br>(0.7 to 1.7)               | 28.0<br>(19.7 to 36.3)                            | 3.8<br>(-1.5 to 9.2)                                |
| Foreign body in eyes                                                                | 1.6<br>(0.9 to 2.5)                     | 9.1<br>(6.8 to 12.2)                  | 0.1<br>(< 0.05 to 0.2)            | 26.4<br>(20.8 to 32.4)                            | 1.8<br>(-1.6 to 5.8)                                |
| Foreign body in other body part                                                     | 12.3<br>(9.7 to 16.0)                   | 6.5<br>(5.3 to 7.9)                   | 0.5<br>(0.3 to 0.7)               | 33.5<br>(24.5 to 42.6)                            | 7.6<br>(1.7 to 14.0)                                |
| Environmental heat and cold exposure                                                | 31.9<br>(26.9 to 37.5)                  | 12.0<br>(9.9 to 14.4)                 | 1.5<br>(1.0 to 2.1)               | 30.4<br>(23.7 to 38.1)                            | 4.6<br>(0.4 to 9.5)                                 |
| Other unintentional injuries                                                        | 63.1<br>(51.1 to 77.8)                  | 30.6<br>(26.2 to 36.0)                | 2.0<br>(1.3 to 2.8)               | 27.0<br>(21.6 to 32.8)                            | 1.9<br>(-1.5 to 5.7)                                |
| <b>Self-harm and interpersonal violence</b>                                         | <b>190.8</b><br><b>(168.2 to 216.9)</b> | <b>15.8†</b><br><b>(13.4 to 18.6)</b> | <b>2.6</b><br><b>(1.8 to 3.5)</b> | <b>25.8</b><br><b>(21.0 to 31.0)</b>              | <b>1.4</b><br><b>(-1.9 to 4.9)</b>                  |
| Self-harm                                                                           | 3.1<br>(2.7 to 3.5)                     | 2.0<br>(1.7 to 2.3)                   | 0.2<br>(0.1 to 0.3)               | 29.8<br>(25.1 to 35.5)                            | 3.4<br>(0.4 to 7.1)                                 |
| Self-harm by firearm                                                                | 0.5<br>(0.4 to 0.5)                     | 0.2<br>(0.1 to 0.3)                   | < 0.05<br>(< 0.05 to < 0.05)      | 34.0<br>(28.8 to 39.7)                            | 8.3<br>(4.5 to 12.5)                                |
| Self-harm by other specified means                                                  | 2.6<br>(2.2 to 3.0)                     | 1.7<br>(1.5 to 2.1)                   | 0.2<br>(0.1 to 0.2)               | 29.2<br>(24.2 to 35.1)                            | 2.7<br>(-0.4 to 6.6)                                |
| Interpersonal violence                                                              | 187.7<br>(165.1 to 213.4)               | 13.9†<br>(11.4 to 16.6)               | 2.4<br>(1.6 to 3.3)               | 25.5<br>(20.6 to 30.9)                            | 1.2<br>(-2.4 to 5.0)                                |
| Assault by firearm                                                                  | 0.7<br>(0.6 to 0.8)                     | 0.3<br>(0.2 to 0.4)                   | < 0.05<br>(< 0.05 to 0.1)         | 25.5<br>(19.6 to 31.9)                            | -1.2<br>(-5.1 to 3.2)                               |
| Assault by sharp object                                                             | 7.8<br>(6.4 to 9.5)                     | 4.4<br>(3.4 to 5.6)                   | 0.3<br>(0.2 to 0.4)               | 34.4<br>(28.1 to 42.2)                            | 6.3<br>(2.3 to 11.4)                                |
| Sexual violence                                                                     | 167.2<br>(144.9 to 192.0)               | --                                    | 1.5<br>(1.0 to 2.1)               | 19.8<br>(14.0 to 26.3)                            | -3.8<br>(-8.3 to 1.1)                               |
| Assault by other means                                                              | 12.0<br>(10.1 to 14.5)                  | 9.2<br>(7.4 to 11.0)                  | 0.6<br>(0.4 to 0.8)               | 38.5<br>(33.0 to 46.3)                            | 9.8<br>(6.2 to 15.0)                                |
| <b>Forces of nature, conflict and terrorism, and executions and police conflict</b> | <b>57.5</b><br><b>(33.8 to 91.6)</b>    | <b>0.1†</b><br><b>(0.1 to 0.2)</b>    | <b>2.0</b><br><b>(0.6 to 4.5)</b> | <b>669.6</b><br><b>(481.6 to 1,051.1)</b>         | <b>515.4</b><br><b>(381.1 to 800.5)</b>             |
| Exposure to forces of nature                                                        | --                                      | --                                    | --                                | --                                                | --                                                  |
| Conflict and terrorism                                                              | 57.2<br>(33.6 to 91.4)                  | --                                    | 1.9<br>(0.6 to 4.5)               | 688.0<br>(493.8 to 1,095.4)                       | 532.3<br>(393.5 to 836.6)                           |
| Executions and police conflict                                                      | 0.2<br>(0.1 to 0.4)                     | 0.1<br>(0.1 to 0.2)                   | < 0.05<br>(< 0.05 to < 0.05)      | 27.7<br>(16.2 to 42.0)                            | 8.9<br>(1.2 to 19.0)                                |
| <b>Impairments</b>                                                                  | --                                      | --                                    | --                                | --                                                | --                                                  |
| Anaemia                                                                             | 2,418.4<br>(2,313.8 to 2,524.8)         | --                                    | 92.1<br>(63.5 to 128.9)           | 3.2<br>(-6.0 to 11.8)                             | -17.3<br>(-26.7 to -8.9)                            |
| Developmental intellectual disability                                               | 230.9<br>(174.8 to 287.3)               | --                                    | 19.7<br>(14.2 to 26.6)            | 27.0<br>(20.7 to 35.6)                            | 3.5<br>(-1.3 to 10.1)                               |
| Epilepsy                                                                            | 26.6<br>(18.9 to 38.7)                  | --                                    | 10.0<br>(6.2 to 16.6)             | 26.9<br>(-28.1 to 128.3)                          | 2.8<br>(-43.1 to 88.4)                              |
| Guillain-Barre syndrome                                                             | < 0.05<br>(< 0.05 to < 0.05)            | --                                    | < 0.05<br>(< 0.05 to < 0.05)      | 22.1<br>(20.4 to 24.3)                            | 0.0<br>(-0.0 to 0.1)                                |
| Hearing loss                                                                        | 749.1<br>(714.2 to 788.0)               | --                                    | 35.4<br>(24.8 to 47.2)            | 22.7<br>(19.6 to 25.8)                            | -0.0<br>(-1.8 to 1.9)                               |
| Heart failure                                                                       | 14.3<br>(12.6 to 16.2)                  | --                                    | 1.6<br>(1.1 to 2.0)               | 18.8<br>(10.0 to 27.6)                            | -2.4<br>(-9.5 to 4.8)                               |
| Infertility                                                                         | 196.6<br>(155.1 to 249.0)               | --                                    | 1.1<br>(0.5 to 2.3)               | 28.4<br>(20.7 to 35.4)                            | -3.8<br>(-9.7 to 1.9)                               |
| Pelvic inflammatory disease                                                         | 6.0<br>(5.0 to 7.3)                     | --                                    | 0.8<br>(0.5 to 1.1)               | 32.4<br>(14.3 to 51.5)                            | 0.5<br>(-12.7 to 14.4)                              |
| Vision loss                                                                         | 1,062.6<br>(1,027.6 to 1,103.2)         | --                                    | 19.9<br>(13.0 to 29.9)            | 22.0<br>(17.9 to 29.9)                            | -1.3<br>(-3.8 to 2.3)                               |

We did not calculate incidence for the nine impairments, certain NTDs, and causes with only birth prevalence. Blank cells mean that no estimate is available.

† Incidence for aggregate causes represents the sum of the incidence of the causes below the aggregate.

‡ Incidence estimates for stroke represent first-ever stroke only.

^ Incidence of HIV/AIDS represents new infections of HIV only and does not include new infections of Tuberculosis in HIV positive cases.

SR Table 14: Prevalence, incidence, and YLDs for 2016, percentage change of YLD counts and percentage change of age-standardised YLD rates between 2006 and 2016 by cause and impairments, for all ages, Chad.

| Cause                                                                                | Prevalence in thousands (95% UI)          | Incidence in thousands (95% UI)               | YLDs in thousands (95% UI)             |                                                   |                                                     |
|--------------------------------------------------------------------------------------|-------------------------------------------|-----------------------------------------------|----------------------------------------|---------------------------------------------------|-----------------------------------------------------|
|                                                                                      | 2016 counts                               | 2016 counts                                   | 2016 counts                            | Percentage change in counts between 2006 and 2016 | Percentage change in age-standardised rates between |
| <b>All causes</b>                                                                    | <b>14,258.9</b><br>(14,231.9 to 14,285.4) | <b>110,840.8†</b><br>(104,904.5 to 117,270.0) | <b>1,402.9</b><br>(1,037.4 to 1,855.3) | <b>36.1</b><br>(31.8 to 40.4)                     | <b>-3.8</b><br>(-6.0 to -1.6)                       |
| <b>Communicable, maternal, neonatal, and nutritional disorders</b>                   | <b>13,379.9</b><br>(13,217.1 to 13,537.4) | <b>75,781.3†</b><br>(70,722.1 to 81,435.4)    | <b>453.0</b><br>(311.1 to 627.8)       | <b>29.0</b><br>(21.3 to 36.7)                     | <b>-12.0</b><br>(-17.4 to -7.3)                     |
| <b>HIV/AIDS and tuberculosis</b>                                                     | <b>3,777.5</b><br>(3,325.1 to 4,208.9)    | <b>31.7†</b><br>(25.1 to 39.7)                | <b>29.4</b><br>(18.4 to 44.2)          | <b>3.1</b><br>(-17.9 to 29.6)                     | <b>-29.5</b><br>(-44.9 to -9.7)                     |
| Tuberculosis                                                                         | 3,370.0<br>(2,899.7 to 3,919.7)           | 18.0†<br>(14.5 to 22.2)                       | 3.5<br>(2.2 to 5.0)                    | 13.5<br>(-1.9 to 32.0)                            | -21.4<br>(-29.7 to -12.1)                           |
| Drug-susceptible tuberculosis                                                        | 11.4<br>(9.0 to 14.3)                     | 17.7<br>(14.3 to 21.9)                        | 3.5<br>(2.2 to 4.9)                    | 13.8<br>(-2.4 to 32.7)                            | -21.2<br>(-29.8 to -11.7)                           |
| Multidrug-resistant tuberculosis without extensive drug resistance                   | 0.2<br>(0.1 to 0.5)                       | 0.3<br>(0.1 to 0.7)                           | 0.1<br>(< 0.05 to 0.1)                 | 0.6<br>(-66.2 to 207.2)                           | -30.4<br>(-77.0 to 113.6)                           |
| Extensively drug-resistant tuberculosis                                              | < 0.05<br>(< 0.05 to < 0.05)              | < 0.05<br>(< 0.05 to < 0.05)                  | < 0.05<br>(< 0.05 to < 0.05)           | 206.5<br>(3.1 to 833.7)                           | 111.4<br>(-30.2 to 544.9)                           |
| Latent tuberculosis infection                                                        | 3,358.5<br>(2,888.0 to 3,908.7)           | --                                            | --                                     | --                                                | --                                                  |
| HIV/AIDS                                                                             | 207.8<br>(158.8 to 265.1)                 | 13.7^<br>(8.5 to 20.0)                        | 25.8<br>(15.7 to 40.2)                 | 1.8<br>(-21.2 to 32.0)                            | -30.6<br>(-47.4 to -7.9)                            |
| Drug-susceptible HIV/AIDS - Tuberculosis                                             | 2.7<br>(1.6 to 4.1)                       | 4.2<br>(2.5 to 6.5)                           | 1.0<br>(0.5 to 1.8)                    | -15.9<br>(-29.8 to 1.6)                           | -37.5<br>(-47.7 to -24.9)                           |
| Multidrug-resistant HIV/AIDS - Tuberculosis without extensive drug resistance        | 0.1<br>(< 0.05 to 0.1)                    | 0.1<br>(< 0.05 to 0.2)                        | < 0.05<br>(< 0.05 to 0.1)              | -25.5<br>(-75.2 to 130.1)                         | -44.8<br>(-81.6 to 70.5)                            |
| Extensively drug-resistant HIV/AIDS - Tuberculosis                                   | < 0.05<br>(< 0.05 to < 0.05)              | < 0.05<br>(< 0.05 to < 0.05)                  | < 0.05<br>(< 0.05 to < 0.05)           | 127.0<br>(-24.4 to 601.0)                         | 68.1<br>(-43.9 to 419.3)                            |
| HIV/AIDS resulting in other diseases                                                 | 205.1<br>(155.9 to 262.5)                 | 13.7<br>(8.5 to 20.0)                         | 24.8<br>(15.0 to 39.1)                 | 2.8<br>(-21.4 to 35.0)                            | -30.2<br>(-47.9 to -6.0)                            |
| <b>Diarrhoea, lower respiratory infections, and other common infectious diseases</b> | <b>1,202.5</b><br>(1,150.5 to 1,259.1)    | <b>57,388.1†</b><br>(52,193.8 to 62,541.6)    | <b>71.9</b><br>(50.7 to 96.7)          | <b>35.9</b><br>(31.2 to 40.8)                     | <b>-4.1</b><br>(-6.7 to -1.5)                       |
| Diarrhoeal diseases                                                                  | 303.2<br>(278.6 to 327.5)                 | 20,134.1<br>(18,448.6 to 21,719.4)            | 34.2<br>(23.8 to 47.0)                 | 37.6<br>(28.5 to 46.3)                            | -3.8<br>(-8.2 to 0.5)                               |
| Intestinal infectious diseases                                                       | 2.2<br>(1.5 to 3.2)                       | 42.7†<br>(27.1 to 63.8)                       | 0.4<br>(0.2 to 0.6)                    | 9.6<br>(-16.5 to 42.5)                            | -23.6<br>(-37.7 to -6.8)                            |
| Typhoid fever                                                                        | 2.1<br>(1.3 to 3.2)                       | 32.5<br>(20.2 to 49.4)                        | 0.3<br>(0.2 to 0.5)                    | 9.4<br>(-18.4 to 46.7)                            | -23.7<br>(-38.8 to -5.0)                            |
| Paratyphoid fever                                                                    | 0.5<br>(0.2 to 0.8)                       | 10.2<br>(5.7 to 17.6)                         | < 0.05<br>(< 0.05 to 0.1)              | 19.0<br>(-9.4 to 55.4)                            | -17.5<br>(-33.9 to 2.0)                             |
| Other intestinal infectious diseases                                                 | --                                        | --                                            | < 0.05<br>(< 0.05 to < 0.05)           | -22.0<br>(-42.2 to 3.4)                           | -44.7<br>(-54.5 to -33.5)                           |
| Lower respiratory infections                                                         | 21.7<br>(19.7 to 24.0)                    | 926.3<br>(835.6 to 1,032.3)                   | 1.3<br>(0.9 to 1.9)                    | 28.9<br>(12.7 to 47.0)                            | -7.2<br>(-15.3 to 2.1)                              |
| Upper respiratory infections                                                         | 454.1<br>(392.6 to 517.0)                 | 34,144.9<br>(29,375.7 to 39,152.3)            | 11.3<br>(6.7 to 17.6)                  | 40.9<br>(32.6 to 49.4)                            | -0.7<br>(-5.9 to 4.5)                               |
| Otitis media                                                                         | 341.0<br>(303.9 to 380.4)                 | 1,423.7<br>(1,099.6 to 1,830.7)               | 11.3<br>(6.9 to 16.8)                  | 31.5<br>(22.3 to 41.2)                            | -8.1<br>(-14.0 to -2.2)                             |
| Meningitis                                                                           | 103.9<br>(85.7 to 123.7)                  | 33.7<br>(28.8 to 40.0)                        | 8.5<br>(6.0 to 11.2)                   | 39.7<br>(30.8 to 49.1)                            | -1.8<br>(-7.7 to 4.5)                               |
| Pneumococcal meningitis                                                              | 41.8<br>(31.9 to 54.0)                    | 7.6<br>(5.6 to 10.2)                          | 3.3<br>(2.2 to 4.4)                    | 45.3<br>(28.1 to 65.0)                            | 1.8<br>(-8.9 to 13.6)                               |
| H influenzae type B meningitis                                                       | 19.6<br>(12.3 to 29.9)                    | 7.3<br>(3.9 to 11.6)                          | 1.6<br>(1.1 to 2.2)                    | 17.3<br>(4.4 to 32.6)                             | -18.3<br>(-27.1 to -9.1)                            |
| Meningococcal infection                                                              | 33.1<br>(22.1 to 47.1)                    | 16.5<br>(12.1 to 21.6)                        | 2.5<br>(1.7 to 3.4)                    | 43.5<br>(30.9 to 57.0)                            | 1.0<br>(-7.6 to 10.2)                               |
| Other meningitis                                                                     | 9.5<br>(7.4 to 12.3)                      | 2.3<br>(1.6 to 3.4)                           | 1.1<br>(0.8 to 1.6)                    | 54.1<br>(38.8 to 70.7)                            | 7.5<br>(0.1 to 15.6)                                |
| Encephalitis                                                                         | 30.2<br>(19.6 to 45.1)                    | 15.8<br>(13.7 to 18.3)                        | 3.5<br>(2.4 to 4.5)                    | 41.9<br>(25.0 to 61.3)                            | 0.3<br>(-10.7 to 12.7)                              |
| Diphtheria                                                                           | < 0.05<br>(< 0.05 to < 0.05)              | 0.2<br>(0.1 to 0.3)                           | < 0.05<br>(< 0.05 to < 0.05)           | -55.9<br>(-84.3 to 33.2)                          | -69.3<br>(-87.0 to -20.5)                           |
| Whooping cough                                                                       | 20.1<br>(15.3 to 25.4)                    | 146.4<br>(111.5 to 185.3)                     | 1.0<br>(0.6 to 1.6)                    | 18.5<br>(6.0 to 32.5)                             | -18.9<br>(-27.9 to -9.2)                            |
| Tetanus                                                                              | 0.3<br>(0.3 to 0.5)                       | 1.7<br>(0.7 to 3.8)                           | < 0.05<br>(< 0.05 to < 0.05)           | -36.0<br>(-64.8 to 16.7)                          | -53.9<br>(-73.5 to -25.6)                           |
| Measles                                                                              | 2.4<br>(0.8 to 5.2)                       | 87.7<br>(30.5 to 191.5)                       | 0.2<br>(0.1 to 0.5)                    | -59.9<br>(-73.0 to -42.8)                         | -72.6<br>(-81.7 to -61.0)                           |
| Varicella and herpes zoster                                                          | 13.6<br>(12.7 to 14.6)                    | 431.1<br>(399.8 to 463.9)                     | 0.4<br>(0.2 to 0.6)                    | 39.8<br>(19.6 to 62.8)                            | -0.1<br>(-10.8 to 11.8)                             |
| <b>Neglected tropical diseases and malaria</b>                                       | <b>6,637.8</b><br>(6,208.3 to 7,097.7)    | <b>3,674.1†</b><br>(2,361.0 to 5,747.5)       | <b>100.4</b><br>(67.3 to 150.9)        | <b>21.7</b><br>(10.4 to 31.9)                     | <b>-14.7</b><br>(-23.4 to -7.0)                     |
| Malaria                                                                              | 868.7<br>(698.3 to 1,116.7)               | 1,998.5<br>(661.2 to 4,097.0)                 | 18.4<br>(13.7 to 24.6)                 | 19.3<br>(6.3 to 34.5)                             | -14.8<br>(-22.9 to -5.7)                            |
| Chagas disease                                                                       | --                                        | --                                            | --                                     | --                                                | --                                                  |
| Leishmaniasis                                                                        | 14.8<br>(8.5 to 25.8)                     | 0.5<br>(< 0.05 to 2.1)                        | 0.7<br>(0.3 to 1.5)                    | 10.9<br>(-14.9 to 77.5)                           | -17.6<br>(-32.8 to 27.8)                            |
| Visceral leishmaniasis                                                               | < 0.05<br>(< 0.05 to < 0.05)              | < 0.05<br>(< 0.05 to < 0.05)                  | < 0.05<br>(< 0.05 to < 0.05)           | -13.0<br>(-82.0 to 288.8)                         | -34.4<br>(-87.1 to 200.3)                           |
| Cutaneous and mucocutaneous leishmaniasis                                            | 11.3<br>(6.0 to 23.5)                     | 0.5<br>(< 0.05 to 2.1)                        | 0.7<br>(0.3 to 1.5)                    | 10.9<br>(-14.9 to 77.5)                           | -17.6<br>(-32.8 to 27.8)                            |
| African trypanosomiasis                                                              | 0.3<br>(0.1 to 0.5)                       | 0.1<br>(0.1 to 0.2)                           | 0.1<br>(< 0.05 to 0.1)                 | -67.4<br>(-78.8 to -49.3)                         | -77.2<br>(-86.9 to -55.9)                           |
| Schistosomiasis                                                                      | 3,619.6<br>(3,089.9 to 4,175.2)           | 1,536.2<br>(1,348.4 to 1,745.0)               | 27.7<br>(13.4 to 52.0)                 | 51.9<br>(44.2 to 60.4)                            | 4.6<br>(0.3 to 9.4)                                 |
| Cysticercosis                                                                        | 5.9<br>(4.7 to 7.1)                       | --                                            | 1.2<br>(0.7 to 1.8)                    | 43.6<br>(20.0 to 73.0)                            | 2.0<br>(-12.7 to 18.6)                              |
| Cystic echinococcosis                                                                | 7.6<br>(2.1 to 23.6)                      | 1.6<br>(0.4 to 4.9)                           | 0.7<br>(0.2 to 2.2)                    | -23.4<br>(-86.0 to 372.4)                         | -45.9<br>(-90.3 to 196.3)                           |
| Lymphatic filariasis                                                                 | 337.4<br>(233.0 to 478.6)                 | 48.5<br>(34.1 to 67.1)                        | 15.1<br>(5.4 to 32.2)                  | 42.2<br>(35.7 to 48.0)                            | 0.8<br>(-2.9 to 4.2)                                |
| Onchocerciasis                                                                       | 176.8<br>(99.3 to 266.9)                  | 25.4<br>(10.7 to 55.6)                        | 11.2<br>(4.8 to 21.2)                  | -36.1<br>(-58.8 to -7.5)                          | -48.5<br>(-64.9 to -26.6)                           |
| Trachoma                                                                             | 11.1<br>(7.2 to 15.8)                     | --                                            | 1.0<br>(0.6 to 1.6)                    | 11.7<br>(-10.9 to 39.5)                           | -16.2<br>(-35.6 to 9.7)                             |
| Dengue                                                                               | 3.6<br>(1.5 to 7.1)                       | 60.9<br>(27.0 to 113.7)                       | 0.6<br>(0.2 to 1.3)                    | 196.6<br>(98.3 to 607.0)                          | 105.3<br>(49.3 to 383.5)                            |
| Yellow fever                                                                         | 0.1<br>(< 0.05 to 0.1)                    | 1.9<br>(0.5 to 4.8)                           | < 0.05<br>(< 0.05 to < 0.05)           | -26.2<br>(-54.5 to 15.9)                          | -48.1<br>(-63.8 to -24.4)                           |
| Rabies                                                                               | < 0.05<br>(< 0.05 to < 0.05)              | 0.3<br>(0.1 to 0.7)                           | < 0.05<br>(< 0.05 to < 0.05)           | -12.6<br>(-51.1 to 64.3)                          | -39.7<br>(-58.6 to -3.3)                            |
| Intestinal nematode infections                                                       | 3,253.9<br>(2,673.5 to 3,911.5)           | --                                            | 11.7<br>(7.1 to 17.9)                  | 43.4<br>(25.7 to 63.4)                            | 0.0<br>(-12.5 to 14.1)                              |
| Ascariasis                                                                           | 223.8<br>(162.9 to 303.7)                 | --                                            | < 0.05<br>(< 0.05 to < 0.05)           | 41.5<br>(19.2 to 69.9)                            | 0.1<br>(-19.5 to 25.7)                              |



| Cause                                                                   | Prevalence in thousands (95% UI)                 | Incidence in thousands (95% UI)                   | YLDs in thousands (95% UI)                |                                                   |                                                     |
|-------------------------------------------------------------------------|--------------------------------------------------|---------------------------------------------------|-------------------------------------------|---------------------------------------------------|-----------------------------------------------------|
|                                                                         | 2016 counts                                      | 2016 counts                                       | 2016 counts                               | Percentage change in counts between 2006 and 2016 | Percentage change in age-standardised rates between |
| Trichuriasis                                                            | 215.9<br>(153.3 to 306.1)                        | --                                                | < 0.05<br>(< 0.05 to < 0.05)              | 39.0<br>(5.5 to 85.2)                             | -1.0<br>(-29.2 to 40.1)                             |
| Hookworm disease                                                        | 2,756.5<br>(2,172.3 to 3,417.8)                  | --                                                | 11.7<br>(7.1 to 17.9)                     | 43.4<br>(25.7 to 63.4)                            | 0.0<br>(-12.5 to 14.1)                              |
| Food-borne trematodiasis                                                | --                                               | --                                                | --                                        | --                                                | --                                                  |
| Leprosy                                                                 | 2.1<br>(1.9 to 2.2)                              | 0.2<br>(0.1 to 0.2)                               | 0.1<br>(0.1 to 0.2)                       | 10.4<br>(-7.1 to 31.3)                            | -16.8<br>(-27.5 to -4.0)                            |
| Ebola virus disease                                                     | --                                               | --                                                | --                                        | --                                                | --                                                  |
| Zika virus disease                                                      | --                                               | --                                                | --                                        | --                                                | --                                                  |
| Guinea worm disease                                                     | < 0.05<br>(< 0.05 to < 0.05)                     | < 0.05<br>(< 0.05 to < 0.05)                      | < 0.05<br>(< 0.05 to < 0.05)              | 5.7e+76<br>(3.1e+76 to 8.9e+76)                   | 5.3e+76<br>(2.9e+76 to 8.3e+76)                     |
| Other neglected tropical diseases                                       | 311.6<br>(285.9 to 337.6)                        | --                                                | 11.8<br>(7.5 to 17.4)                     | 36.6<br>(20.5 to 55.5)                            | -4.7<br>(-15.0 to 7.2)                              |
| <b>Maternal disorders</b>                                               | <b>48.1</b><br><b>(37.4 to 60.6)</b>             | <b>384.6†</b><br><b>(325.7 to 445.0)</b>          | <b>4.0</b><br><b>(2.6 to 5.7)</b>         | <b>21.1</b><br><b>(-3.4 to 54.4)</b>              | <b>-18.9</b><br><b>(-34.2 to 2.1)</b>               |
| Maternal haemorrhage                                                    | 5.6<br>(4.1 to 7.3)                              | 48.7<br>(31.1 to 73.5)                            | 0.3<br>(0.2 to 0.5)                       | 34.5<br>(-9.2 to 101.9)                           | -7.4<br>(-37.9 to 38.9)                             |
| Maternal sepsis and other pregnancy related infections                  | 6.9<br>(5.0 to 9.4)                              | 45.7<br>(33.8 to 63.4)                            | 0.2<br>(0.1 to 0.4)                       | 38.6<br>(-33.3 to 177.8)                          | -4.9<br>(-52.5 to 85.5)                             |
| Maternal hypertensive disorders                                         | 32.2<br>(19.7 to 46.4)                           | 141.8<br>(108.9 to 173.0)                         | 1.5<br>(0.8 to 2.6)                       | 41.0<br>(-12.2 to 131.2)                          | -4.3<br>(-40.4 to 57.2)                             |
| Maternal obstructed labour and uterine rupture                          | 3.8<br>(3.1 to 4.5)                              | 25.3<br>(16.9 to 36.0)                            | 1.2<br>(0.8 to 1.8)                       | 0.3<br>(-19.8 to 24.7)                            | -31.9<br>(-44.7 to -15.8)                           |
| Maternal abortion, miscarriage, and ectopic pregnancy                   | 1.0<br>(0.6 to 1.6)                              | 123.0<br>(90.0 to 171.2)                          | 0.1<br>(0.1 to 0.2)                       | 36.4<br>(-29.8 to 165.9)                          | -7.9<br>(-51.7 to 73.0)                             |
| Other maternal disorders                                                | --                                               | --                                                | 0.6<br>(0.4 to 0.9)                       | 15.4<br>(-8.0 to 47.5)                            | -22.6<br>(-37.4 to -2.3)                            |
| <b>Neonatal disorders</b>                                               | <b>197.2</b><br><b>(155.0 to 251.9)</b>          | --                                                | <b>16.9</b><br><b>(10.2 to 28.7)</b>      | <b>75.0</b><br><b>(33.3 to 129.2)</b>             | <b>23.6</b><br><b>(-8.1 to 64.3)</b>                |
| Neonatal preterm birth complications                                    | 124.6<br>(89.8 to 177.7)                         | --                                                | 5.6<br>(3.8 to 8.2)                       | 46.9<br>(11.4 to 92.7)                            | 3.7<br>(-23.1 to 39.4)                              |
| Neonatal encephalopathy due to birth asphyxia and trauma                | 75.1<br>(40.1 to 127.2)                          | --                                                | 4.5<br>(1.3 to 14.1)                      | 107.8<br>(-3.0 to 321.8)                          | 46.3<br>(-38.7 to 211.7)                            |
| Neonatal sepsis and other neonatal infections                           | 11.5<br>(4.6 to 24.3)                            | --                                                | 3.8<br>(0.9 to 10.0)                      | 118.3<br>(5.1 to 282.6)                           | 66.5<br>(-28.9 to 209.3)                            |
| Hemolytic disease and other neonatal jaundice                           | 3.2<br>(2.7 to 3.7)                              | --                                                | 1.1<br>(0.8 to 1.4)                       | 39.9<br>(22.6 to 59.0)                            | -0.7<br>(-11.0 to 10.5)                             |
| Other neonatal disorders                                                | --                                               | --                                                | 1.8<br>(1.1 to 2.9)                       | 64.7<br>(29.9 to 108.2)                           | 13.3<br>(-10.9 to 44.6)                             |
| <b>Nutritional deficiencies</b>                                         | <b>10,225.1</b><br><b>(9,818.6 to 10,703.8)</b>  | <b>11,527.4†</b><br><b>(10,027.6 to 12,591.6)</b> | <b>215.0</b><br><b>(141.7 to 307.7)</b>   | <b>31.4</b><br><b>(21.0 to 43.1)</b>              | <b>-9.8</b><br><b>(-15.7 to -3.9)</b>               |
| Protein-energy malnutrition                                             | 375.3<br>(321.5 to 432.7)                        | 294.2<br>(256.0 to 335.1)                         | 16.3<br>(10.0 to 24.6)                    | 28.3<br>(-3.4 to 65.2)                            | -13.0<br>(-34.9 to 13.2)                            |
| Iodine deficiency                                                       | 131.8<br>(115.7 to 149.9)                        | 5.8<br>(5.1 to 6.6)                               | 4.3<br>(2.9 to 6.0)                       | -27.6<br>(-36.4 to -16.8)                         | -48.5<br>(-54.0 to -42.2)                           |
| Vitamin A deficiency                                                    | 7,793.1<br>(7,056.0 to 8,558.6)                  | 11,227.4<br>(9,726.3 to 12,291.4)                 | 1.2<br>(0.7 to 2.1)                       | 35.0<br>(5.6 to 69.8)                             | -4.0<br>(-23.2 to 18.2)                             |
| Iron-deficiency anaemia                                                 | 5,311.9<br>(4,969.9 to 5,650.0)                  | --                                                | 192.6<br>(125.6 to 280.9)                 | 34.1<br>(22.9 to 47.4)                            | -7.4<br>(-14.0 to -0.9)                             |
| Other nutritional deficiencies                                          | --                                               | --                                                | 0.5<br>(0.3 to 0.8)                       | 26.5<br>(-6.1 to 65.9)                            | -14.0<br>(-36.6 to 13.6)                            |
| <b>Other communicable, maternal, neonatal, and nutritional diseases</b> | <b>4,867.8</b><br><b>(4,439.7 to 5,327.9)</b>    | <b>2,775.4</b><br><b>(2,175.8 to 3,661.3)</b>     | <b>15.7</b><br><b>(10.1 to 23.1)</b>      | <b>43.6</b><br><b>(33.6 to 55.0)</b>              | <b>-1.2</b><br><b>(-6.6 to 4.8)</b>                 |
| Sexually transmitted diseases excluding HIV                             | 2,325.3<br>(2,169.4 to 2,485.1)                  | 1,542.4<br>(1,306.3 to 1,840.2)                   | 6.0<br>(3.7 to 9.6)                       | 45.2<br>(35.5 to 55.7)                            | 0.1<br>(-6.1 to 6.6)                                |
| Syphilis                                                                | 273.4<br>(196.4 to 370.6)                        | 192.1<br>(132.6 to 267.9)                         | 0.3<br>(0.2 to 0.4)                       | 38.2<br>(23.8 to 55.6)                            | 0.3<br>(-11.8 to 15.1)                              |
| Chlamydial infection                                                    | 155.2<br>(108.0 to 212.8)                        | 136.3<br>(99.8 to 187.2)                          | 1.1<br>(0.7 to 1.9)                       | 46.6<br>(28.3 to 66.7)                            | -0.1<br>(-12.2 to 13.5)                             |
| Gonococcal infection                                                    | 139.4<br>(91.0 to 202.9)                         | 458.9<br>(265.4 to 721.9)                         | 1.2<br>(0.6 to 2.0)                       | 44.9<br>(27.6 to 65.6)                            | 0.5<br>(-11.2 to 13.8)                              |
| Trichomoniasis                                                          | 462.8<br>(380.2 to 556.5)                        | 431.2<br>(348.6 to 532.4)                         | 0.6<br>(0.2 to 1.3)                       | 43.8<br>(34.8 to 53.1)                            | -0.9<br>(-6.5 to 4.7)                               |
| Genital herpes                                                          | 1,554.1<br>(1,336.2 to 1,819.0)                  | 179.7<br>(150.8 to 216.5)                         | 0.4<br>(0.1 to 1.0)                       | 46.2<br>(33.1 to 63.5)                            | 2.5<br>(-5.3 to 12.6)                               |
| Other sexually transmitted diseases                                     | 125.2<br>(100.4 to 146.1)                        | 144.2<br>(120.0 to 175.9)                         | 2.3<br>(1.5 to 3.5)                       | 45.8<br>(30.5 to 61.4)                            | -0.4<br>(-10.4 to 10.1)                             |
| Hepatitis                                                               | 2,852.8<br>(2,229.2 to 3,586.4)                  | 1,233.0<br>(722.5 to 2,026.0)                     | 1.0<br>(0.6 to 1.6)                       | 15.4<br>(-10.8 to 50.0)                           | -16.9<br>(-33.1 to 1.5)                             |
| Acute hepatitis A                                                       | 32.3<br>(2.2 to 92.0)                            | 419.9<br>(28.7 to 1,196.0)                        | 0.1<br>(< 0.05 to 0.4)                    | 17.4<br>(-78.9 to 534.0)                          | -15.7<br>(-76.6 to 240.8)                           |
| Hepatitis B                                                             | 2,324.1<br>(1,715.2 to 3,072.2)                  | 683.7<br>(481.0 to 947.3)                         | 0.7<br>(0.4 to 1.2)                       | 13.5<br>(-9.1 to 41.1)                            | -17.7<br>(-34.0 to 0.6)                             |
| Hepatitis C                                                             | 489.9<br>(428.5 to 557.0)                        | 45.7<br>(40.8 to 51.1)                            | < 0.05<br>(< 0.05 to 0.1)                 | 37.2<br>(-2.9 to 95.3)                            | -6.3<br>(-24.3 to 16.1)                             |
| Acute hepatitis E                                                       | 6.4<br>(5.4 to 7.8)                              | 83.8<br>(69.5 to 101.4)                           | 0.1<br>(0.1 to 0.2)                       | 18.1<br>(-13.4 to 59.7)                           | -15.3<br>(-34.4 to 8.9)                             |
| Other infectious diseases                                               | 229.6<br>(212.0 to 246.6)                        | < 0.05<br>(< 0.05 to < 0.05)                      | 8.7<br>(5.6 to 12.8)                      | 46.8<br>(31.1 to 65.9)                            | 0.9<br>(-9.2 to 12.3)                               |
| <b>Non-communicable diseases</b>                                        | <b>12,669.2</b><br><b>(12,529.1 to 12,803.2)</b> | <b>33,934.5†</b><br><b>(30,827.3 to 37,019.8)</b> | <b>876.2</b><br><b>(645.6 to 1,131.1)</b> | <b>39.9</b><br><b>(34.2 to 45.8)</b>              | <b>-1.0</b><br><b>(-3.8 to 1.9)</b>                 |
| <b>Neoplasms</b>                                                        | <b>9.9</b><br><b>(8.8 to 10.8)</b>               | <b>6.5</b><br><b>(6.0 to 6.9)</b>                 | <b>2.0</b><br><b>(1.5 to 2.7)</b>         | <b>35.7</b><br><b>(22.2 to 44.2)</b>              | <b>1.4</b><br><b>(-6.7 to 7.2)</b>                  |
| Lip and oral cavity cancer                                              | 0.4<br>(0.3 to 0.4)                              | 0.1<br>(0.1 to 0.1)                               | < 0.05<br>(< 0.05 to 0.1)                 | 44.1<br>(25.8 to 63.5)                            | 6.7<br>(-6.9 to 21.0)                               |
| Nasopharynx cancer                                                      | 0.1<br>(0.1 to 0.1)                              | < 0.05<br>(< 0.05 to < 0.05)                      | < 0.05<br>(< 0.05 to < 0.05)              | 43.0<br>(20.8 to 68.9)                            | 0.3<br>(-14.3 to 16.7)                              |
| Other pharynx cancer                                                    | 0.1<br>(0.1 to 0.1)                              | < 0.05<br>(< 0.05 to < 0.05)                      | < 0.05<br>(< 0.05 to < 0.05)              | 36.3<br>(22.7 to 51.3)                            | 3.9<br>(-5.9 to 14.3)                               |
| Oesophageal cancer                                                      | 0.2<br>(0.2 to 0.2)                              | 0.2<br>(0.2 to 0.2)                               | < 0.05<br>(< 0.05 to 0.1)                 | 58.3<br>(39.8 to 81.1)                            | 20.2<br>(5.0 to 37.7)                               |
| Stomach cancer                                                          | 0.7<br>(0.6 to 0.8)                              | 0.5<br>(0.5 to 0.5)                               | 0.1<br>(0.1 to 0.2)                       | 27.9<br>(11.8 to 47.3)                            | -2.3<br>(-16.0 to 13.5)                             |
| Colon and rectum cancer                                                 | 0.6<br>(0.5 to 0.8)                              | 0.2<br>(0.2 to 0.3)                               | 0.1<br>(0.1 to 0.1)                       | 37.6<br>(21.7 to 56.3)                            | 3.8<br>(-8.7 to 19.6)                               |
| Liver cancer                                                            | 0.6<br>(0.5 to 0.6)                              | 0.9<br>(0.8 to 1.0)                               | 0.2<br>(0.1 to 0.3)                       | 26.7<br>(11.7 to 45.7)                            | -6.1<br>(-17.8 to 6.3)                              |
| Liver cancer due to hepatitis B                                         | 0.5<br>(0.5 to 0.6)                              | 0.5<br>(0.5 to 0.6)                               | 0.1<br>(0.1 to 0.2)                       | 27.3<br>(11.2 to 47.0)                            | -6.3<br>(-18.3 to 7.1)                              |

| Cause                                              | Prevalence in thousands (95% UI)        | Incidence in thousands (95% UI)          | YLDs in thousands (95% UI)           |                                                   |                                                     |
|----------------------------------------------------|-----------------------------------------|------------------------------------------|--------------------------------------|---------------------------------------------------|-----------------------------------------------------|
|                                                    | 2016 counts                             | 2016 counts                              | 2016 counts                          | Percentage change in counts between 2006 and 2016 | Percentage change in age-standardised rates between |
| Liver cancer due to hepatitis C                    | 0.1<br>( $< 0.05$ to 0.1)               | 0.1<br>( $< 0.05$ to 0.1)                | $< 0.05$<br>( $< 0.05$ to $< 0.05$ ) | 24.9<br>(8.7 to 44.4)                             | -4.6<br>(-17.2 to 9.9)                              |
| Liver cancer due to alcohol use                    | 0.1<br>(0.1 to 0.1)                     | 0.1<br>(0.1 to 0.1)                      | $< 0.05$<br>( $< 0.05$ to $< 0.05$ ) | 24.5<br>(7.7 to 43.5)                             | -6.1<br>(-18.3 to 7.2)                              |
| Liver cancer due to other causes                   | 0.2<br>(0.2 to 0.3)                     | 0.2<br>(0.2 to 0.3)                      | $< 0.05$<br>( $< 0.05$ to 0.1)       | 27.1<br>(10.8 to 47.8)                            | -6.4<br>(-17.8 to 7.1)                              |
| Gallbladder and biliary tract cancer               | 0.1<br>( $< 0.05$ to 0.1)               | 0.1<br>(0.1 to 0.1)                      | $< 0.05$<br>( $< 0.05$ to $< 0.05$ ) | 24.0<br>(12.1 to 35.8)                            | -6.6<br>(-14.9 to 1.9)                              |
| Pancreatic cancer                                  | 0.1<br>(0.1 to 0.1)                     | 0.2<br>(0.2 to 0.2)                      | $< 0.05$<br>( $< 0.05$ to 0.1)       | 44.1<br>(32.8 to 57.1)                            | 8.7<br>(0.1 to 19.0)                                |
| Larynx cancer                                      | 0.1<br>(0.1 to 0.1)                     | $< 0.05$<br>( $< 0.05$ to 0.1)           | $< 0.05$<br>( $< 0.05$ to $< 0.05$ ) | 34.2<br>(16.1 to 54.0)                            | 1.2<br>(-12.1 to 15.8)                              |
| Tracheal, bronchus, and lung cancer                | 0.4<br>(0.4 to 0.4)                     | 0.4<br>(0.3 to 0.4)                      | 0.1<br>(0.1 to 0.1)                  | 45.5<br>(18.9 to 78.4)                            | 10.8<br>(-10.0 to 36.9)                             |
| Malignant skin melanoma                            | 0.1<br>(0.1 to 0.1)                     | $< 0.05$<br>( $< 0.05$ to $< 0.05$ )     | $< 0.05$<br>( $< 0.05$ to $< 0.05$ ) | 32.0<br>(19.3 to 46.6)                            | -2.0<br>(-12.3 to 8.3)                              |
| Non-melanoma skin cancer                           | 0.1<br>( $< 0.05$ to 0.1)               | 0.3<br>(0.2 to 0.5)                      | $< 0.05$<br>( $< 0.05$ to $< 0.05$ ) | 31.6<br>(-25.8 to 80.0)                           | -5.1<br>(-50.5 to 37.4)                             |
| Non-melanoma skin cancer (squamous-cell carcinoma) | 0.1<br>( $< 0.05$ to 0.1)               | 0.1<br>( $< 0.05$ to 0.1)                | $< 0.05$<br>( $< 0.05$ to $< 0.05$ ) | 30.2<br>(-31.2 to 84.6)                           | -5.9<br>(-53.9 to 40.2)                             |
| Non-melanoma skin cancer (basal-cell carcinoma)    | $< 0.05$<br>( $< 0.05$ to 0.1)          | 0.2<br>(0.1 to 0.4)                      | $< 0.05$<br>( $< 0.05$ to $< 0.05$ ) | 41.8<br>(28.1 to 55.1)                            | 3.6<br>(-5.9 to 14.4)                               |
| Breast cancer                                      | 1.8<br>(1.4 to 2.3)                     | 0.4<br>(0.4 to 0.6)                      | 0.2<br>(0.1 to 0.3)                  | 39.6<br>(11.8 to 75.9)                            | 2.9<br>(-17.2 to 29.6)                              |
| Cervical cancer                                    | 3.7<br>(2.6 to 4.3)                     | 1.0<br>(0.7 to 1.2)                      | 0.4<br>(0.2 to 0.5)                  | 28.7<br>(-12.5 to 65.9)                           | -6.9<br>(-37.2 to 18.8)                             |
| Uterine cancer                                     | 0.3<br>(0.3 to 0.4)                     | 0.1<br>(0.1 to 0.1)                      | $< 0.05$<br>( $< 0.05$ to $< 0.05$ ) | 36.4<br>(9.8 to 67.8)                             | 3.5<br>(-16.7 to 26.5)                              |
| Ovarian cancer                                     | 0.3<br>(0.2 to 0.3)                     | 0.1<br>(0.1 to 0.1)                      | $< 0.05$<br>( $< 0.05$ to 0.1)       | 40.1<br>(22.1 to 61.4)                            | 2.7<br>(-10.5 to 18.8)                              |
| Prostate cancer                                    | 1.1<br>(0.7 to 1.4)                     | 0.4<br>(0.2 to 0.5)                      | 0.2<br>(0.1 to 0.2)                  | 48.5<br>(14.6 to 89.4)                            | 14.0<br>(-10.5 to 41.4)                             |
| Testicular cancer                                  | $< 0.05$<br>( $< 0.05$ to 0.1)          | $< 0.05$<br>( $< 0.05$ to $< 0.05$ )     | $< 0.05$<br>( $< 0.05$ to $< 0.05$ ) | 24.4<br>(1.2 to 53.5)                             | -11.0<br>(-27.1 to 9.9)                             |
| Kidney cancer                                      | 0.6<br>(0.5 to 0.8)                     | 0.1<br>(0.1 to 0.2)                      | 0.1<br>( $< 0.05$ to 0.1)            | 56.5<br>(18.2 to 103.0)                           | 13.6<br>(-1.4 to 31.4)                              |
| Bladder cancer                                     | 0.3<br>(0.3 to 0.4)                     | 0.1<br>(0.1 to 0.1)                      | $< 0.05$<br>( $< 0.05$ to 0.1)       | 29.7<br>(16.1 to 45.3)                            | -2.2<br>(-13.0 to 9.9)                              |
| Brain and nervous system cancer                    | 0.4<br>(0.3 to 0.5)                     | 0.2<br>(0.1 to 0.2)                      | 0.1<br>( $< 0.05$ to 0.1)            | 49.8<br>(37.8 to 68.7)                            | 7.3<br>(-1.2 to 19.5)                               |
| Thyroid cancer                                     | 0.1<br>(0.1 to 0.1)                     | $< 0.05$<br>( $< 0.05$ to $< 0.05$ )     | $< 0.05$<br>( $< 0.05$ to $< 0.05$ ) | 20.2<br>(6.3 to 35.8)                             | -11.4<br>(-20.8 to -1.5)                            |
| Mesothelioma                                       | $< 0.05$<br>( $< 0.05$ to $< 0.05$ )    | $< 0.05$<br>( $< 0.05$ to $< 0.05$ )     | $< 0.05$<br>( $< 0.05$ to $< 0.05$ ) | 17.2<br>(3.1 to 32.9)                             | -14.3<br>(-23.3 to -3.8)                            |
| Hodgkin lymphoma                                   | 0.1<br>(0.1 to 0.1)                     | $< 0.05$<br>( $< 0.05$ to $< 0.05$ )     | $< 0.05$<br>( $< 0.05$ to $< 0.05$ ) | 15.5<br>(0.7 to 32.8)                             | -14.1<br>(-21.1 to -3.7)                            |
| Non-Hodgkin's lymphoma                             | 0.7<br>(0.6 to 0.8)                     | 0.2<br>(0.2 to 0.3)                      | 0.1<br>(0.1 to 0.1)                  | 38.7<br>(21.9 to 56.2)                            | 0.4<br>(-9.4 to 10.7)                               |
| Multiple myeloma                                   | 0.1<br>(0.1 to 0.1)                     | $< 0.05$<br>( $< 0.05$ to 0.1)           | $< 0.05$<br>( $< 0.05$ to $< 0.05$ ) | 34.2<br>(19.9 to 47.9)                            | 0.1<br>(-10.9 to 10.3)                              |
| Leukaemia                                          | 0.9<br>(0.7 to 1.1)                     | 0.3<br>(0.2 to 0.3)                      | 0.1<br>(0.1 to 0.2)                  | 32.8<br>(16.9 to 50.4)                            | -3.9<br>(-16.4 to 6.3)                              |
| Acute lymphoid leukaemia                           | 0.2<br>(0.1 to 0.2)                     | 0.1<br>( $< 0.05$ to 0.1)                | $< 0.05$<br>( $< 0.05$ to $< 0.05$ ) | 31.3<br>(2.3 to 71.2)                             | -4.1<br>(-20.9 to 17.5)                             |
| Chronic lymphoid leukaemia                         | 0.1<br>(0.1 to 0.1)                     | $< 0.05$<br>( $< 0.05$ to $< 0.05$ )     | $< 0.05$<br>( $< 0.05$ to $< 0.05$ ) | 36.0<br>(9.3 to 66.9)                             | 0.6<br>(-18.9 to 23.2)                              |
| Acute myeloid leukaemia                            | 0.2<br>(0.2 to 0.3)                     | 0.1<br>(0.1 to 0.1)                      | $< 0.05$<br>( $< 0.05$ to $< 0.05$ ) | 47.0<br>(20.0 to 82.5)                            | 6.3<br>(-9.0 to 25.4)                               |
| Chronic myeloid leukaemia                          | 0.1<br>(0.1 to 0.1)                     | $< 0.05$<br>( $< 0.05$ to $< 0.05$ )     | $< 0.05$<br>( $< 0.05$ to $< 0.05$ ) | 31.8<br>(9.3 to 61.5)                             | -5.5<br>(-20.6 to 15.0)                             |
| Other leukaemia                                    | 0.4<br>(0.2 to 0.4)                     | 0.1<br>(0.1 to 0.1)                      | $< 0.05$<br>( $< 0.05$ to 0.1)       | 24.7<br>(4.2 to 46.3)                             | -9.1<br>(-24.0 to 5.4)                              |
| Other neoplasms                                    | 1.4<br>(1.2 to 1.7)                     | 0.4<br>(0.4 to 0.5)                      | 0.1<br>(0.1 to 0.2)                  | 34.3<br>(14.6 to 57.9)                            | -2.7<br>(-14.0 to 10.1)                             |
| <b>Cardiovascular diseases</b>                     | <b>585.8</b><br><b>(550.9 to 626.3)</b> | <b>43.1†</b><br><b>(41.4 to 45.0)</b>    | <b>33.5</b><br><b>(24.3 to 44.6)</b> | <b>39.6</b><br><b>(34.0 to 45.2)</b>              | <b>1.1</b><br><b>(-2.5 to 4.8)</b>                  |
| Rheumatic heart disease                            | 100.7<br>(89.2 to 112.5)                | 5.0<br>(4.4 to 5.5)                      | 4.9<br>(3.1 to 7.2)                  | 39.1<br>(26.7 to 52.8)                            | -2.3<br>(-10.4 to 6.0)                              |
| Ischaemic heart disease                            | 117.4<br>(110.9 to 123.9)               | 16.4<br>(15.4 to 17.6)                   | 5.1<br>(3.5 to 7.2)                  | 34.2<br>(26.5 to 42.3)                            | -0.9<br>(-5.6 to 4.0)                               |
| Cerebrovascular disease                            | 39.8<br>(37.1 to 42.4)                  | 7.0‡<br>(6.3 to 7.5)                     | 5.8<br>(4.2 to 7.3)                  | 37.0<br>(26.8 to 47.6)                            | 2.7<br>(-4.4 to 10.6)                               |
| Ischaemic stroke                                   | 33.8<br>(30.7 to 37.0)                  | 4.5‡<br>(3.9 to 5.0)                     | 4.6<br>(3.3 to 5.9)                  | 37.2<br>(25.2 to 50.3)                            | 2.9<br>(-5.7 to 12.3)                               |
| Hemorrhagic stroke                                 | 8.3<br>(7.5 to 9.3)                     | 2.5‡<br>(2.2 to 2.7)                     | 1.1<br>(0.8 to 1.4)                  | 36.3<br>(21.0 to 52.2)                            | 2.2<br>(-9.4 to 14.3)                               |
| Hypertensive heart disease                         | 9.0<br>(7.3 to 10.9)                    | --                                       | 0.7<br>(0.5 to 1.0)                  | 26.2<br>(12.5 to 41.4)                            | -6.3<br>(-15.2 to 3.3)                              |
| Cardiomyopathy and myocarditis                     | 5.0<br>(4.4 to 5.8)                     | 2.9†<br>(2.5 to 3.2)                     | 0.5<br>(0.3 to 0.7)                  | 36.5<br>(22.6 to 52.8)                            | -1.7<br>(-13.3 to 12.0)                             |
| Myocarditis                                        | 1.7<br>(1.4 to 1.9)                     | 2.9<br>(2.5 to 3.2)                      | 0.1<br>(0.1 to 0.2)                  | 41.0<br>(28.7 to 53.4)                            | -0.3<br>(-11.9 to 12.8)                             |
| Alcoholic cardiomyopathy                           | 0.7<br>(0.5 to 0.8)                     | --                                       | 0.1<br>( $< 0.05$ to 0.1)            | 33.1<br>(-2.3 to 76.4)                            | -1.4<br>(-26.4 to 28.7)                             |
| Other cardiomyopathy                               | 3.7<br>(3.0 to 4.6)                     | --                                       | 0.3<br>(0.2 to 0.5)                  | 35.6<br>(16.6 to 57.9)                            | -2.1<br>(-16.2 to 15.0)                             |
| Atrial fibrillation and flutter                    | 21.8<br>(19.1 to 25.1)                  | 1.9<br>(1.7 to 2.3)                      | 1.7<br>(1.1 to 2.4)                  | 33.2<br>(22.2 to 44.6)                            | 0.5<br>(-5.9 to 7.5)                                |
| Peripheral vascular disease                        | 78.7<br>(68.0 to 91.3)                  | 7.8<br>(6.7 to 9.1)                      | 0.4<br>(0.2 to 0.8)                  | 31.5<br>(20.9 to 42.1)                            | 0.1<br>(-8.0 to 7.3)                                |
| Endocarditis                                       | 0.8<br>(0.7 to 0.9)                     | 2.1<br>(1.9 to 2.4)                      | 0.1<br>( $< 0.05$ to 0.1)            | 41.7<br>(26.2 to 58.7)                            | 1.6<br>(-13.2 to 19.0)                              |
| Other cardiovascular and circulatory diseases      | 271.8<br>(224.5 to 328.1)               | --                                       | 14.3<br>(9.4 to 20.4)                | 45.0<br>(33.3 to 57.5)                            | 3.1<br>(-4.3 to 11.5)                               |
| <b>Chronic respiratory diseases</b>                | <b>781.2</b><br><b>(728.5 to 838.0)</b> | <b>164.8†</b><br><b>(149.7 to 182.2)</b> | <b>35.1</b><br><b>(25.5 to 47.1)</b> | <b>42.8</b><br><b>(35.9 to 49.6)</b>              | <b>2.2</b><br><b>(-2.1 to 6.5)</b>                  |
| Chronic obstructive pulmonary disease              | 123.7<br>(118.3 to 129.2)               | 8.9<br>(8.5 to 9.2)                      | 8.3<br>(7.1 to 9.3)                  | 38.6<br>(27.4 to 50.5)                            | 2.3<br>(-4.7 to 10.0)                               |
| Pneumoconiosis                                     | 0.1<br>(0.1 to 0.1)                     | $< 0.05$<br>( $< 0.05$ to $< 0.05$ )     | $< 0.05$<br>( $< 0.05$ to $< 0.05$ ) | 40.9<br>(32.0 to 49.8)                            | 3.0<br>(-3.1 to 9.5)                                |
| Silicosis                                          | $< 0.05$<br>( $< 0.05$ to $< 0.05$ )    | $< 0.05$<br>( $< 0.05$ to $< 0.05$ )     | $< 0.05$<br>( $< 0.05$ to $< 0.05$ ) | 42.7<br>(30.0 to 56.1)                            | 2.4<br>(-5.1 to 10.0)                               |



| Cause                                                          | Prevalence in thousands (95% UI)              | Incidence in thousands (95% UI)               | YLDs in thousands (95% UI)              |                                                   |                                                     |
|----------------------------------------------------------------|-----------------------------------------------|-----------------------------------------------|-----------------------------------------|---------------------------------------------------|-----------------------------------------------------|
|                                                                | 2016 counts                                   | 2016 counts                                   | 2016 counts                             | Percentage change in counts between 2006 and 2016 | Percentage change in age-standardised rates between |
| Asbestosis                                                     | < 0.05<br>(< 0.05 to 0.1)                     | < 0.05<br>(< 0.05 to < 0.05)                  | < 0.05<br>(< 0.05 to < 0.05)            | 40.3<br>(29.1 to 53.5)                            | 2.2<br>(-4.1 to 9.1)                                |
| Coal workers pneumoconiosis                                    | --                                            | --                                            | --                                      | --                                                | --                                                  |
| Other pneumoconiosis                                           | < 0.05<br>(< 0.05 to 0.1)                     | < 0.05<br>(< 0.05 to < 0.05)                  | < 0.05<br>(< 0.05 to < 0.05)            | 41.2<br>(27.5 to 55.6)                            | 4.0<br>(-7.8 to 14.9)                               |
| Asthma                                                         | 653.6<br>(587.9 to 729.6)                     | 155.8<br>(140.7 to 173.2)                     | 25.7<br>(16.8 to 37.2)                  | 42.6<br>(35.0 to 50.7)                            | 1.2<br>(-3.1 to 5.8)                                |
| Interstitial lung disease and pulmonary sarcoidosis            | 0.9<br>(0.8 to 1.0)                           | 0.1<br>(0.1 to 0.1)                           | 0.1<br>(0.1 to 0.1)                     | 39.8<br>(35.6 to 44.4)                            | -0.3<br>(-4.7 to 4.4)                               |
| Other chronic respiratory diseases                             | --                                            | --                                            | 1.1<br>(0.8 to 1.4)                     | 90.3<br>(38.9 to 150.1)                           | 34.6<br>(9.6 to 61.6)                               |
| <b>Cirrhosis and other chronic liver diseases</b>              | <b>29.3</b><br><b>(27.8 to 30.8)</b>          | <b>3.1</b><br><b>(2.9 to 3.2)</b>             | <b>3.0</b><br><b>(2.0 to 4.1)</b>       | <b>43.2</b><br><b>(27.2 to 61.2)</b>              | <b>1.9</b><br><b>(-6.0 to 10.5)</b>                 |
| Cirrhosis and other chronic liver diseases due to hepatitis B  | 9.7<br>(8.3 to 11.2)                          | 1.0<br>(0.9 to 1.2)                           | 0.8<br>(0.5 to 1.1)                     | 42.2<br>(19.2 to 69.4)                            | 1.8<br>(-10.7 to 15.9)                              |
| Cirrhosis and other chronic liver diseases due to hepatitis C  | 3.2<br>(2.2 to 4.7)                           | 0.4<br>(0.3 to 0.5)                           | 0.2<br>(0.1 to 0.4)                     | 33.2<br>(6.0 to 70.1)                             | -4.4<br>(-22.8 to 18.3)                             |
| Cirrhosis and other chronic liver diseases due to alcohol use  | 4.6<br>(4.0 to 5.3)                           | 0.6<br>(0.5 to 0.7)                           | 0.3<br>(0.2 to 0.5)                     | 47.1<br>(19.0 to 83.0)                            | 6.5<br>(-10.3 to 27.2)                              |
| Cirrhosis and other chronic liver diseases due to other causes | 11.7<br>(10.8 to 12.7)                        | 1.1<br>(1.0 to 1.2)                           | 1.6<br>(1.1 to 2.3)                     | 44.6<br>(19.9 to 76.8)                            | 2.2<br>(-13.4 to 21.0)                              |
| <b>Digestive diseases</b>                                      | <b>199.7</b><br><b>(180.6 to 221.1)</b>       | <b>188.5†</b><br><b>(179.6 to 198.5)</b>      | <b>6.5</b><br><b>(4.5 to 8.9)</b>       | <b>36.1</b><br><b>(24.1 to 48.2)</b>              | <b>-2.5</b><br><b>(-8.5 to 3.6)</b>                 |
| Peptic ulcer disease                                           | 32.2<br>(29.5 to 35.4)                        | 17.1<br>(15.2 to 19.2)                        | 0.7<br>(0.4 to 1.0)                     | 45.1<br>(28.0 to 65.3)                            | 3.4<br>(-6.7 to 14.1)                               |
| Gastritis and duodenitis                                       | 60.6<br>(52.7 to 69.0)                        | 59.0<br>(52.6 to 65.9)                        | 0.8<br>(0.6 to 1.3)                     | 47.8<br>(28.4 to 68.7)                            | 9.7<br>(-1.1 to 21.9)                               |
| Appendicitis                                                   | 1.9<br>(1.8 to 2.1)                           | 51.9<br>(47.7 to 56.2)                        | 0.6<br>(0.4 to 0.9)                     | 40.2<br>(0.2 to 94.9)                             | -1.3<br>(-22.4 to 24.0)                             |
| Paralytic ileus and intestinal obstruction                     | 0.2<br>(0.2 to 0.3)                           | 6.8<br>(6.0 to 7.6)                           | 0.1<br>(0.1 to 0.1)                     | 41.1<br>(36.2 to 46.4)                            | -0.3<br>(-7.0 to 6.9)                               |
| Inguinal, femoral, and abdominal hernia                        | 103.0<br>(82.2 to 128.1)                      | 19.2<br>(16.9 to 21.6)                        | 3.4<br>(2.3 to 4.9)                     | 30.0<br>(14.3 to 47.9)                            | -7.6<br>(-15.7 to 1.6)                              |
| Inflammatory bowel disease                                     | 0.5<br>(0.5 to 0.6)                           | 4.6<br>(4.4 to 4.8)                           | 0.1<br>(0.1 to 0.1)                     | 40.7<br>(37.2 to 44.1)                            | -1.2<br>(-3.6 to 1.3)                               |
| Vascular intestinal disorders                                  | 0.1<br>(0.1 to 0.1)                           | 0.4<br>(0.4 to 0.5)                           | < 0.05<br>(< 0.05 to < 0.05)            | 46.0<br>(37.9 to 54.9)                            | 4.5<br>(0.6 to 9.0)                                 |
| Gallbladder and biliary diseases                               | 6.0<br>(5.2 to 6.8)                           | 27.2<br>(23.3 to 31.4)                        | 0.1<br>(0.1 to 0.2)                     | 42.8<br>(29.3 to 57.0)                            | 2.5<br>(-8.5 to 14.7)                               |
| Pancreatitis                                                   | 0.2<br>(0.2 to 0.3)                           | 2.4<br>(2.1 to 2.6)                           | < 0.05<br>(< 0.05 to < 0.05)            | 46.0<br>(40.3 to 51.7)                            | 5.4<br>(1.3 to 9.5)                                 |
| Other digestive diseases                                       | --                                            | --                                            | 0.6<br>(0.4 to 0.9)                     | 40.1<br>(24.4 to 56.9)                            | 1.2<br>(-5.5 to 7.7)                                |
| <b>Neurological disorders</b>                                  | <b>4,344.1</b><br><b>(4,110.9 to 4,581.3)</b> | <b>2,272.9</b><br><b>(1,915.5 to 2,674.5)</b> | <b>97.1</b><br><b>(59.7 to 145.6)</b>   | <b>46.2</b><br><b>(3.1 to 107.3)</b>              | <b>1.8</b><br><b>(-23.0 to 33.2)</b>                |
| Alzheimer's disease and other dementias                        | 12.8<br>(10.8 to 15.1)                        | 2.2<br>(1.9 to 2.6)                           | 1.8<br>(1.2 to 2.4)                     | 28.5<br>(22.0 to 35.7)                            | -1.4<br>(-6.0 to 3.6)                               |
| Parkinson's disease                                            | 1.3<br>(1.0 to 1.6)                           | 0.2<br>(0.1 to 0.2)                           | 0.1<br>(0.1 to 0.2)                     | 39.4<br>(19.1 to 62.8)                            | 6.0<br>(-8.2 to 22.4)                               |
| Epilepsy                                                       | 45.0<br>(7.1 to 105.9)                        | 6.7<br>(1.0 to 16.0)                          | 18.4<br>(2.7 to 46.0)                   | 51.6<br>(-79.0 to 881.3)                          | 6.8<br>(-85.6 to 572.7)                             |
| Multiple sclerosis                                             | 0.5<br>(0.4 to 0.6)                           | < 0.05<br>(< 0.05 to < 0.05)                  | 0.1<br>(0.1 to 0.2)                     | 52.0<br>(47.1 to 57.6)                            | 8.0<br>(4.4 to 11.6)                                |
| Motor neuron disease                                           | 0.1<br>(0.1 to 0.2)                           | < 0.05<br>(< 0.05 to < 0.05)                  | < 0.05<br>(< 0.05 to < 0.05)            | 45.2<br>(38.9 to 51.4)                            | 3.8<br>(0.7 to 7.2)                                 |
| Migraine                                                       | 1,523.0<br>(1,428.1 to 1,617.5)               | 200.8<br>(188.1 to 215.1)                     | 62.3<br>(39.4 to 88.3)                  | 43.3<br>(36.3 to 50.6)                            | 0.3<br>(-3.5 to 4.0)                                |
| Tension-type headache                                          | 3,373.7<br>(2,993.4 to 3,801.6)               | 2,062.9<br>(1,706.3 to 2,467.5)               | 9.8<br>(6.0 to 14.9)                    | 43.5<br>(36.1 to 51.4)                            | 0.6<br>(-4.0 to 5.2)                                |
| Other neurological disorders                                   | < 0.05<br>(< 0.05 to 0.1)                     | 0.1<br>(< 0.05 to 0.1)                        | 4.5<br>(0.8 to 11.3)                    | 87.8<br>(-71.9 to 1,003.2)                        | 27.5<br>(-77.1 to 534.3)                            |
| <b>Mental and substance use disorders</b>                      | <b>1,898.6</b><br><b>(1,802.5 to 1,991.2)</b> | <b>729.3†</b><br><b>(670.9 to 795.5)</b>      | <b>227.0</b><br><b>(163.6 to 296.6)</b> | <b>41.6</b><br><b>(38.1 to 45.4)</b>              | <b>-1.1</b><br><b>(-3.5 to 1.5)</b>                 |
| Schizophrenia                                                  | 17.0<br>(14.7 to 19.5)                        | 1.6<br>(1.4 to 1.9)                           | 10.8<br>(7.9 to 13.8)                   | 45.3<br>(31.8 to 60.4)                            | 2.0<br>(-7.2 to 11.6)                               |
| Alcohol use disorders                                          | 129.2<br>(108.7 to 151.5)                     | 72.1<br>(60.0 to 84.7)                        | 12.9<br>(8.7 to 18.2)                   | 47.8<br>(36.2 to 60.3)                            | 2.2<br>(-5.5 to 9.8)                                |
| Drug use disorders                                             | 51.0<br>(45.6 to 57.0)                        | 9.1<br>(8.1 to 10.2)                          | 13.5<br>(9.2 to 18.4)                   | 56.0<br>(39.3 to 75.4)                            | 7.5<br>(-2.8 to 18.3)                               |
| Opioid use disorders                                           | 29.0<br>(23.9 to 35.6)                        | 3.9<br>(3.2 to 4.7)                           | 12.0<br>(8.0 to 16.6)                   | 57.2<br>(38.3 to 78.9)                            | 8.2<br>(-3.2 to 20.2)                               |
| Cocaine use disorders                                          | 1.6<br>(1.3 to 1.9)                           | 0.2<br>(0.2 to 0.3)                           | 0.2<br>(0.1 to 0.3)                     | 47.1<br>(38.3 to 55.1)                            | 2.9<br>(-2.5 to 8.2)                                |
| Amphetamine use disorders                                      | 0.8<br>(0.6 to 1.2)                           | 0.2<br>(0.1 to 0.2)                           | 0.1<br>(0.1 to 0.2)                     | 49.2<br>(33.1 to 64.6)                            | 2.5<br>(-8.1 to 12.3)                               |
| Cannabis use disorders                                         | 18.5<br>(15.4 to 22.4)                        | 4.0<br>(3.2 to 4.9)                           | 0.5<br>(0.3 to 0.8)                     | 45.8<br>(15.3 to 84.2)                            | -0.0<br>(-17.9 to 23.4)                             |
| Other drug use disorders                                       | 3.6<br>(3.1 to 4.1)                           | 0.8<br>(0.7 to 0.9)                           | 0.6<br>(0.4 to 0.9)                     | 47.9<br>(25.4 to 74.5)                            | 3.0<br>(-11.4 to 19.8)                              |
| Depressive disorders                                           | 407.1<br>(380.1 to 438.2)                     | 473.4<br>(419.7 to 536.3)                     | 71.0<br>(48.9 to 96.6)                  | 37.3<br>(30.4 to 45.7)                            | -3.8<br>(-8.8 to 1.5)                               |
| Major depressive disorder                                      | 289.2<br>(255.5 to 329.1)                     | 450.0<br>(396.4 to 513.4)                     | 59.0<br>(40.0 to 80.5)                  | 36.4<br>(27.9 to 46.2)                            | -4.6<br>(-10.4 to 1.6)                              |
| Dysthymia                                                      | 125.2<br>(107.9 to 145.2)                     | 23.4<br>(20.4 to 26.9)                        | 12.0<br>(8.1 to 17.5)                   | 42.1<br>(36.1 to 48.4)                            | 0.2<br>(-3.0 to 3.4)                                |
| Bipolar disorder                                               | 69.4<br>(58.6 to 82.2)                        | 8.4<br>(7.1 to 10.2)                          | 14.2<br>(8.7 to 21.0)                   | 44.0<br>(33.6 to 55.4)                            | 0.4<br>(-5.6 to 6.7)                                |
| Anxiety disorders                                              | 369.7<br>(332.4 to 410.8)                     | 72.0<br>(65.0 to 79.8)                        | 35.9<br>(24.5 to 49.8)                  | 42.5<br>(32.3 to 53.6)                            | 0.1<br>(-5.8 to 6.8)                                |
| Eating disorders                                               | 11.6<br>(9.2 to 14.2)                         | 9.6<br>(7.0 to 12.9)                          | 2.3<br>(1.5 to 3.5)                     | 62.2<br>(38.3 to 89.3)                            | 11.5<br>(-3.9 to 29.5)                              |
| Anorexia nervosa                                               | 3.3<br>(2.4 to 4.5)                           | 1.6<br>(1.1 to 2.1)                           | 0.7<br>(0.4 to 1.1)                     | 58.5<br>(15.8 to 115.9)                           | 9.5<br>(-18.8 to 47.7)                              |
| Bulimia nervosa                                                | 7.9<br>(5.8 to 10.7)                          | 8.0<br>(5.4 to 11.3)                          | 1.6<br>(1.0 to 2.5)                     | 63.8<br>(36.1 to 95.6)                            | 12.2<br>(-6.2 to 33.7)                              |
| Autistic spectrum disorders                                    | 120.3<br>(106.9 to 136.4)                     | 1.7<br>(1.2 to 2.4)                           | 16.9<br>(11.3 to 23.8)                  | 42.9<br>(35.3 to 50.5)                            | 0.4<br>(-4.4 to 5.3)                                |
| Autism                                                         | 31.7<br>(27.2 to 37.2)                        | 0.2<br>(0.1 to 0.4)                           | 8.1<br>(5.1 to 11.9)                    | 42.7<br>(29.4 to 57.3)                            | 0.3<br>(-8.6 to 9.1)                                |
| Asperger syndrome and other autistic spectrum disorders        | 87.9<br>(72.2 to 106.9)                       | 1.5<br>(1.0 to 2.1)                           | 8.8<br>(5.7 to 12.8)                    | 43.2<br>(35.5 to 51.1)                            | 0.5<br>(-4.4 to 4.9)                                |

| Cause                                                      | Prevalence in thousands (95% UI)               | Incidence in thousands (95% UI)                   | YLDs in thousands (95% UI)              |                                                   |                                                     |
|------------------------------------------------------------|------------------------------------------------|---------------------------------------------------|-----------------------------------------|---------------------------------------------------|-----------------------------------------------------|
|                                                            | 2016 counts                                    | 2016 counts                                       | 2016 counts                             | Percentage change in counts between 2006 and 2016 | Percentage change in age-standardised rates between |
| Attention-deficit/hyperactivity disorder                   | 201.3<br>(179.9 to 225.5)                      | 14.1<br>(12.3 to 16.4)                            | 2.4<br>(1.4 to 3.8)                     | 42.2<br>(32.1 to 53.2)                            | 0.3<br>(-6.3 to 7.2)                                |
| Conduct disorder                                           | 156.5<br>(128.1 to 186.9)                      | 57.4<br>(45.6 to 69.4)                            | 18.8<br>(11.6 to 29.1)                  | 41.7<br>(32.2 to 51.5)                            | 0.3<br>(-6.3 to 7.2)                                |
| Idiopathic developmental intellectual disability           | 351.4<br>(214.3 to 493.4)                      | --                                                | 15.2<br>(7.5 to 25.8)                   | 32.5<br>(24.2 to 42.1)                            | -7.5<br>(-13.1 to -1.4)                             |
| Other mental and substance use disorders                   | 174.4<br>(152.3 to 202.5)                      | 9.9<br>(8.6 to 11.5)                              | 13.0<br>(8.9 to 18.7)                   | 43.5<br>(36.0 to 51.8)                            | 0.5<br>(-4.1 to 5.2)                                |
| <b>Diabetes, urogenital, blood, and endocrine diseases</b> | <b>6,139.5</b><br><b>(5,941.7 to 6,331.3)</b>  | <b>1,415.5†</b><br><b>(1,315.9 to 1,518.4)</b>    | <b>79.8</b><br><b>(55.8 to 108.2)</b>   | <b>40.4</b><br><b>(34.8 to 46.0)</b>              | <b>0.8</b><br><b>(-2.1 to 3.8)</b>                  |
| Diabetes mellitus                                          | 232.9<br>(208.6 to 258.2)                      | 15.7<br>(14.2 to 17.4)                            | 16.0<br>(10.9 to 22.2)                  | 46.3<br>(38.4 to 54.6)                            | 6.7<br>(0.9 to 12.8)                                |
| Acute glomerulonephritis                                   | 0.1<br>(0.1 to 0.1)                            | 1.7<br>(1.4 to 2.0)                               | < 0.05<br>(< 0.05 to < 0.05)            | 41.6<br>(35.0 to 47.4)                            | 0.3<br>(-3.6 to 4.3)                                |
| Chronic kidney disease                                     | 581.4<br>(525.6 to 642.0)                      | 45.4<br>(40.3 to 50.6)                            | 16.1<br>(11.8 to 21.2)                  | 41.6<br>(32.4 to 51.8)                            | 2.4<br>(-3.3 to 9.3)                                |
| Chronic kidney disease due to diabetes mellitus            | 176.2<br>(148.8 to 206.1)                      | 12.5<br>(10.3 to 15.2)                            | 4.7<br>(3.3 to 6.3)                     | 42.2<br>(29.2 to 57.0)                            | 4.2<br>(-4.3 to 14.3)                               |
| Chronic kidney disease due to hypertension                 | 126.1<br>(108.3 to 143.4)                      | 12.3<br>(10.3 to 14.4)                            | 2.7<br>(1.8 to 3.6)                     | 35.0<br>(22.1 to 51.0)                            | 0.4<br>(-9.2 to 11.3)                               |
| Chronic kidney disease due to glomerulonephritis           | 118.0<br>(102.1 to 133.3)                      | 6.9<br>(5.6 to 8.4)                               | 4.2<br>(2.9 to 5.7)                     | 43.7<br>(29.3 to 59.0)                            | 1.7<br>(-6.5 to 10.6)                               |
| Chronic kidney disease due to other causes                 | 161.1<br>(135.2 to 189.0)                      | 13.7<br>(11.5 to 16.1)                            | 4.6<br>(3.2 to 6.2)                     | 43.1<br>(30.1 to 56.8)                            | 2.7<br>(-5.6 to 11.2)                               |
| Urinary diseases and male infertility                      | 253.8<br>(217.7 to 294.4)                      | 831.2†<br>(738.8 to 931.4)                        | 4.8<br>(3.0 to 7.0)                     | 36.5<br>(27.7 to 46.8)                            | 0.1<br>(-5.7 to 7.2)                                |
| Interstitial nephritis and urinary tract infections        | 14.5<br>(12.7 to 16.4)                         | 757.2<br>(664.5 to 853.2)                         | 0.5<br>(0.3 to 0.7)                     | 42.4<br>(22.6 to 65.3)                            | -0.5<br>(-12.7 to 13.3)                             |
| Urolithiasis                                               | 2.3<br>(2.0 to 2.7)                            | 61.4<br>(54.3 to 70.4)                            | 0.2<br>(0.1 to 0.2)                     | 43.5<br>(34.7 to 53.0)                            | 2.1<br>(-5.1 to 10.0)                               |
| Benign prostatic hyperplasia                               | 97.2<br>(82.1 to 113.1)                        | 12.6<br>(10.6 to 15.1)                            | 3.2<br>(2.0 to 4.6)                     | 31.2<br>(21.1 to 42.8)                            | -0.7<br>(-7.5 to 7.0)                               |
| Male infertility                                           | 124.1<br>(95.2 to 164.1)                       | --                                                | 0.7<br>(0.3 to 1.4)                     | 73.0<br>(39.5 to 116.1)                           | 18.0<br>(-7.4 to 51.9)                              |
| Other urinary diseases                                     | --                                             | --                                                | 0.2<br>(0.2 to 0.4)                     | 15.8<br>(3.3 to 29.6)                             | -16.7<br>(-23.7 to -8.7)                            |
| Gynecological diseases                                     | 1,373.6<br>(1,296.4 to 1,443.3)                | 512.8†<br>(472.1 to 554.5)                        | 16.8<br>(11.4 to 24.1)                  | 38.8<br>(32.1 to 45.7)                            | -3.8<br>(-7.7 to 0.4)                               |
| Uterine fibroids                                           | 84.4<br>(74.3 to 95.0)                         | 10.8<br>(9.3 to 12.3)                             | 2.2<br>(1.4 to 3.3)                     | 26.3<br>(15.2 to 37.6)                            | -11.1<br>(-19.2 to -3.2)                            |
| Polycystic ovarian syndrome                                | 11.6<br>(8.6 to 15.1)                          | 25.1<br>(18.1 to 33.4)                            | 0.1<br>(< 0.05 to 0.2)                  | 47.5<br>(29.4 to 69.3)                            | 0.0<br>(-11.5 to 14.0)                              |
| Female infertility                                         | 27.1<br>(8.6 to 75.8)                          | --                                                | 0.1<br>(< 0.05 to 0.5)                  | 124.2<br>(-25.1 to 537.4)                         | 46.2<br>(-55.1 to 337.8)                            |
| Endometriosis                                              | 2.6<br>(2.1 to 3.1)                            | 11.0<br>(8.8 to 13.7)                             | 0.2<br>(0.1 to 0.4)                     | 45.6<br>(5.2 to 103.1)                            | -0.3<br>(-24.1 to 32.6)                             |
| Genital prolapse                                           | 656.1<br>(582.1 to 734.5)                      | 64.3<br>(54.1 to 76.1)                            | 2.0<br>(1.0 to 3.7)                     | 31.5<br>(24.2 to 39.5)                            | -3.2<br>(-8.6 to 2.8)                               |
| Premenstrual syndrome                                      | 596.8<br>(541.4 to 647.8)                      | 231.9<br>(210.1 to 253.8)                         | 5.0<br>(3.0 to 7.6)                     | 44.7<br>(29.6 to 60.1)                            | -0.7<br>(-10.0 to 8.6)                              |
| Other gynecological diseases                               | 205.4<br>(179.4 to 235.0)                      | 169.8<br>(138.7 to 204.5)                         | 7.1<br>(4.8 to 10.1)                    | 40.0<br>(30.9 to 49.8)                            | -3.5<br>(-9.1 to 2.9)                               |
| Hemoglobinopathies and hemolytic anaemias                  | 4,696.0<br>(4,452.3 to 4,932.8)                | --                                                | 17.6<br>(11.7 to 25.7)                  | 40.0<br>(26.9 to 54.5)                            | -4.4<br>(-11.4 to 3.1)                              |
| Thalassemias                                               | 0.1<br>(0.1 to 0.1)                            | --                                                | < 0.05<br>(< 0.05 to < 0.05)            | 46.1<br>(23.1 to 71.3)                            | 0.5<br>(-15.4 to 17.7)                              |
| Thalassaemias trait                                        | 201.3<br>(181.8 to 221.7)                      | --                                                | 3.5<br>(2.3 to 5.1)                     | 42.0<br>(26.1 to 59.4)                            | -0.8<br>(-10.5 to 8.9)                              |
| Sickle cell disorders                                      | 7.6<br>(6.4 to 8.9)                            | --                                                | 0.6<br>(0.4 to 0.9)                     | 53.7<br>(30.6 to 83.3)                            | 10.4<br>(-5.3 to 29.4)                              |
| Sickle cell trait                                          | 1,449.9<br>(1,341.3 to 1,558.1)                | --                                                | 6.2<br>(4.0 to 9.1)                     | 46.5<br>(31.1 to 64.6)                            | 0.2<br>(-9.0 to 10.6)                               |
| G6PD deficiency                                            | 1,077.6<br>(907.8 to 1,255.4)                  | --                                                | 0.1<br>(0.1 to 0.2)                     | 50.0<br>(15.0 to 93.2)                            | -4.0<br>(-20.2 to 15.5)                             |
| G6PD trait                                                 | 2,276.4<br>(2,128.4 to 2,426.1)                | --                                                | < 0.05<br>(< 0.05 to < 0.05)            | 52.0<br>(28.6 to 80.4)                            | 6.5<br>(-6.2 to 20.5)                               |
| Other hemoglobinopathies and hemolytic anaemias            | 239.4<br>(222.6 to 258.6)                      | --                                                | 7.2<br>(4.7 to 10.4)                    | 32.9<br>(16.9 to 49.8)                            | -10.2<br>(-18.7 to -1.5)                            |
| Endocrine, metabolic, blood, and immune disorders          | 247.0<br>(231.7 to 261.9)                      | 8.7<br>(7.8 to 9.7)                               | 8.5<br>(5.6 to 12.3)                    | 34.3<br>(22.2 to 48.7)                            | -5.7<br>(-12.3 to 1.0)                              |
| <b>Musculoskeletal disorders</b>                           | <b>1,334.0</b><br><b>(1,255.5 to 1,410.5)</b>  | <b>651.9</b><br><b>(585.7 to 722.9)</b>           | <b>148.6</b><br><b>(105.6 to 196.2)</b> | <b>33.9</b><br><b>(26.5 to 41.2)</b>              | <b>-3.5</b><br><b>(-8.4 to 1.3)</b>                 |
| Rheumatoid arthritis                                       | 11.8<br>(10.3 to 13.4)                         | 0.8<br>(0.7 to 0.9)                               | 2.8<br>(1.8 to 3.8)                     | 45.7<br>(29.3 to 64.4)                            | 5.2<br>(-4.5 to 15.8)                               |
| Osteoarthritis                                             | 197.0<br>(184.2 to 210.8)                      | 11.4<br>(10.6 to 12.3)                            | 12.0<br>(8.5 to 16.4)                   | 42.1<br>(36.6 to 48.0)                            | 5.5<br>(1.6 to 9.5)                                 |
| Low back and neck pain                                     | 997.4<br>(922.6 to 1,073.1)                    | 451.5<br>(402.6 to 507.9)                         | 114.5<br>(80.1 to 151.0)                | 31.0<br>(21.5 to 39.9)                            | -5.7<br>(-12.0 to 0.3)                              |
| Low back pain                                              | 804.8<br>(709.7 to 921.8)                      | 391.4<br>(343.2 to 446.4)                         | 90.2<br>(63.0 to 119.9)                 | 28.9<br>(17.4 to 40.1)                            | -7.4<br>(-15.6 to 0.2)                              |
| Neck pain                                                  | 244.5<br>(212.1 to 280.3)                      | 60.2<br>(51.9 to 70.3)                            | 24.3<br>(16.4 to 34.3)                  | 39.4<br>(35.2 to 43.6)                            | 0.2<br>(-2.1 to 2.6)                                |
| Gout                                                       | 24.8<br>(21.9 to 28.1)                         | 5.2<br>(4.6 to 5.9)                               | 0.8<br>(0.5 to 1.1)                     | 37.7<br>(18.3 to 60.7)                            | 0.8<br>(-11.9 to 16.4)                              |
| Other musculoskeletal disorders                            | 214.9<br>(168.0 to 265.6)                      | 182.9<br>(142.5 to 227.8)                         | 18.5<br>(11.7 to 27.4)                  | 47.1<br>(33.2 to 62.2)                            | 2.1<br>(-6.4 to 11.7)                               |
| <b>Other non-communicable diseases</b>                     | <b>9,865.6</b><br><b>(9,561.3 to 10,148.6)</b> | <b>28,459.0†</b><br><b>(25,356.8 to 31,528.7)</b> | <b>243.7</b><br><b>(165.2 to 344.1)</b> | <b>39.4</b><br><b>(37.5 to 41.5)</b>              | <b>-1.5</b><br><b>(-2.6 to -0.3)</b>                |
| Congenital anomalies                                       | 165.4<br>(143.1 to 194.1)                      | --                                                | 24.3<br>(17.2 to 33.2)                  | 38.5<br>(30.3 to 48.8)                            | -2.9<br>(-8.3 to 3.7)                               |
| Neural tube defects                                        | 22.3<br>(19.9 to 25.0)                         | --                                                | 6.7<br>(4.6 to 9.2)                     | 40.9<br>(25.7 to 60.1)                            | -1.0<br>(-10.7 to 10.2)                             |
| Congenital heart anomalies                                 | 38.8<br>(32.1 to 46.7)                         | --                                                | 1.9<br>(1.0 to 3.2)                     | 39.1<br>(20.6 to 59.7)                            | -2.0<br>(-13.8 to 11.5)                             |
| Orofacial clefts                                           | 4.2<br>(3.6 to 4.7)                            | --                                                | 0.1<br>(0.1 to 0.1)                     | 41.6<br>(25.8 to 60.1)                            | -1.0<br>(-11.9 to 11.7)                             |
| Down's syndrome                                            | 2.4<br>(2.0 to 2.9)                            | --                                                | 0.2<br>(0.1 to 0.3)                     | 48.2<br>(38.1 to 59.5)                            | 3.4<br>(-3.7 to 10.9)                               |
| Turner syndrome                                            | 9.9<br>(8.4 to 11.6)                           | --                                                | 0.2<br>(0.1 to 0.3)                     | 36.1<br>(-2.3 to 94.5)                            | -4.4<br>(-28.8 to 32.3)                             |
| Klinefelter syndrome                                       | 8.7<br>(7.3 to 10.2)                           | --                                                | < 0.05<br>(< 0.05 to 0.1)               | 43.2<br>(10.1 to 85.8)                            | -0.9<br>(-23.6 to 28.2)                             |



| Cause                                         | Prevalence in thousands (95% UI)              | Incidence in thousands (95% UI)                           | YLDs in thousands (95% UI)            |                                                   |                                                     |
|-----------------------------------------------|-----------------------------------------------|-----------------------------------------------------------|---------------------------------------|---------------------------------------------------|-----------------------------------------------------|
|                                               | 2016 counts                                   | 2016 counts                                               | 2016 counts                           | Percentage change in counts between 2006 and 2016 | Percentage change in age-standardised rates between |
| Other chromosomal abnormalities               | 2.9<br>(2.5 to 3.5)                           | --                                                        | 0.6<br>(0.4 to 0.9)                   | 46.1<br>(2.7 to 107.6)                            | 0.7<br>(-28.5 to 41.2)                              |
| Congenital musculoskeletal and limb anomalies | 13.7<br>(11.9 to 15.6)                        | --                                                        | 2.0<br>(1.3 to 2.9)                   | 43.2<br>(23.5 to 65.7)                            | 1.2<br>(-9.9 to 14.2)                               |
| Urogenital congenital anomalies               | 11.6<br>(10.1 to 13.3)                        | --                                                        | 0.3<br>(0.1 to 0.4)                   | 40.6<br>(27.4 to 54.1)                            | -1.9<br>(-10.1 to 6.7)                              |
| Digestive congenital anomalies                | 14.2<br>(12.6 to 16.0)                        | --                                                        | 0.6<br>(0.4 to 0.9)                   | 47.7<br>(20.5 to 81.5)                            | 3.6<br>(-12.0 to 23.9)                              |
| Other congenital anomalies                    | 69.9<br>(46.0 to 103.9)                       | --                                                        | 11.7<br>(7.4 to 17.7)                 | 35.3<br>(24.9 to 48.4)                            | -5.3<br>(-12.2 to 3.2)                              |
| Skin and subcutaneous diseases                | 4,850.5<br>(4,675.7 to 5,089.7)               | 11,507.4<br>(10,506.3 to 12,624.0)                        | 113.5<br>(73.8 to 165.6)              | 45.1<br>(42.1 to 48.3)                            | 1.8<br>(0.0 to 3.7)                                 |
| Dermatitis                                    | 693.3<br>(571.4 to 833.6)                     | 595.5<br>(520.7 to 691.1)                                 | 27.8<br>(15.6 to 46.2)                | 42.4<br>(36.6 to 48.3)                            | 0.2<br>(-3.4 to 3.8)                                |
| Psoriasis                                     | 63.7<br>(59.9 to 67.9)                        | 10.4<br>(9.8 to 11.1)                                     | 5.6<br>(3.9 to 7.4)                   | 50.3<br>(32.2 to 70.9)                            | 6.1<br>(-3.8 to 17.0)                               |
| Cellulitis                                    | 5.0<br>(4.6 to 5.5)                           | 86.3<br>(79.2 to 93.6)                                    | 0.3<br>(0.2 to 0.4)                   | 43.9<br>(16.4 to 79.1)                            | 1.2<br>(-17.4 to 24.6)                              |
| Pyoderma                                      | 81.7<br>(77.3 to 85.8)                        | 1,597.3<br>(1,513.5 to 1,676.4)                           | 0.5<br>(0.2 to 1.0)                   | 44.4<br>(34.9 to 54.5)                            | 1.5<br>(-3.9 to 7.1)                                |
| Scabies                                       | 272.6<br>(215.6 to 350.2)                     | 847.0<br>(668.9 to 1,086.8)                               | 7.0<br>(3.8 to 11.6)                  | 39.6<br>(31.8 to 47.6)                            | -2.4<br>(-6.9 to 2.2)                               |
| Fungal skin diseases                          | 2,066.7<br>(1,717.8 to 2,446.3)               | 5,758.0<br>(4,843.8 to 6,822.6)                           | 11.7<br>(4.5 to 25.3)                 | 41.4<br>(39.7 to 43.2)                            | 0.2<br>(-0.7 to 1.0)                                |
| Viral skin diseases                           | 434.9<br>(411.3 to 460.1)                     | 596.9<br>(562.3 to 637.7)                                 | 13.3<br>(8.3 to 20.0)                 | 42.2<br>(37.0 to 48.0)                            | 0.2<br>(-3.0 to 3.6)                                |
| Acne vulgaris                                 | 1,289.6<br>(1,099.0 to 1,513.2)               | 948.5<br>(733.9 to 1,293.8)                               | 33.1<br>(21.8 to 47.7)                | 50.8<br>(43.1 to 58.7)                            | 4.6<br>(-0.2 to 9.9)                                |
| Alopecia areata                               | 22.3<br>(20.9 to 23.8)                        | 40.0<br>(37.4 to 42.6)                                    | 0.7<br>(0.5 to 1.1)                   | 44.1<br>(26.4 to 63.1)                            | 0.2<br>(-10.2 to 11.0)                              |
| Pruritus                                      | 96.1<br>(84.4 to 109.0)                       | 78.5<br>(69.7 to 89.0)                                    | 1.0<br>(0.5 to 1.9)                   | 43.8<br>(35.1 to 53.9)                            | 1.4<br>(-3.6 to 7.2)                                |
| Urticaria                                     | 151.7<br>(127.8 to 180.2)                     | 275.4<br>(231.0 to 324.8)                                 | 9.1<br>(5.8 to 13.4)                  | 43.7<br>(34.0 to 53.8)                            | 0.1<br>(-5.4 to 5.9)                                |
| Decubitus ulcer                               | 1.0<br>(0.9 to 1.1)                           | 3.5<br>(3.2 to 3.9)                                       | 0.2<br>(0.1 to 0.2)                   | 41.6<br>(32.5 to 51.8)                            | 5.2<br>(-6.5 to 18.9)                               |
| Other skin and subcutaneous diseases          | 595.0<br>(576.1 to 614.9)                     | 670.1<br>(647.2 to 692.7)                                 | 3.3<br>(1.6 to 6.0)                   | 47.4<br>(42.3 to 52.6)                            | 4.5<br>(1.9 to 7.0)                                 |
| Sense organ diseases                          | 2,401.6<br>(2,336.9 to 2,470.5)               | 1,273.2 <sup>†</sup><br>(1,180.6 to 1,376.7)              | 82.6<br>(57.2 to 115.7)               | 32.6<br>(29.0 to 36.4)                            | -3.3<br>(-5.4 to -1.5)                              |
| Glaucoma                                      | 2.9<br>(2.3 to 3.5)                           | --                                                        | 0.3<br>(0.2 to 0.5)                   | 36.1<br>(17.8 to 56.5)                            | 2.9<br>(-9.5 to 16.9)                               |
| Cataract                                      | 78.0<br>(67.0 to 89.4)                        | --                                                        | 7.0<br>(4.7 to 10.0)                  | 32.4<br>(22.9 to 41.2)                            | -1.8<br>(-8.6 to 4.7)                               |
| Macular degeneration                          | 3.4<br>(2.5 to 4.6)                           | --                                                        | 0.3<br>(0.2 to 0.4)                   | 36.1<br>(17.2 to 57.4)                            | 3.0<br>(-10.3 to 16.9)                              |
| Refraction and accommodation disorders        | 1,387.2<br>(1,332.8 to 1,443.3)               | --                                                        | 22.5<br>(13.6 to 36.4)                | 30.4<br>(25.8 to 35.6)                            | -6.8<br>(-9.4 to -3.6)                              |
| Age-related and other hearing loss            | 1,241.7<br>(1,157.2 to 1,335.3)               | --                                                        | 42.5<br>(29.5 to 59.2)                | 31.8<br>(25.7 to 37.5)                            | -3.6<br>(-6.2 to -1.1)                              |
| Other vision loss                             | 32.1<br>(27.9 to 37.1)                        | --                                                        | 3.1<br>(2.1 to 4.4)                   | 43.6<br>(30.1 to 58.3)                            | 3.8<br>(-4.4 to 12.6)                               |
| Other sense organ diseases                    | 229.6<br>(212.3 to 246.6)                     | 1,273.2<br>(1,180.6 to 1,376.7)                           | 6.9<br>(4.3 to 10.4)                  | 41.2<br>(33.6 to 49.1)                            | 1.2<br>(-2.5 to 5.3)                                |
| Oral disorders                                | 6,605.7<br>(6,034.2 to 7,110.3)               | 15,678.5 <sup>†</sup><br>(12,927.1 to 18,527.3)           | 23.3<br>(13.4 to 38.5)                | 39.1<br>(35.5 to 42.6)                            | -0.6<br>(-2.9 to 1.8)                               |
| Caries of deciduous teeth                     | 1,799.2<br>(1,393.5 to 2,267.2)               | 5,806.0<br>(3,881.0 to 8,119.2)                           | 0.4<br>(0.2 to 0.8)                   | 40.2<br>(24.5 to 56.9)                            | -1.1<br>(-12.0 to 10.9)                             |
| Caries of permanent teeth                     | 3,683.2<br>(3,125.6 to 4,257.4)               | 9,706.4<br>(7,799.7 to 11,770.3)                          | 2.2<br>(0.9 to 4.2)                   | 35.6<br>(27.9 to 43.4)                            | -4.6<br>(-9.0 to 0.2)                               |
| Periodontal disease                           | 1,228.1<br>(902.8 to 1,554.7)                 | 151.5<br>(111.1 to 195.1)                                 | 8.0<br>(3.0 to 17.4)                  | 40.8<br>(35.3 to 47.4)                            | 0.5<br>(-3.2 to 4.6)                                |
| Edentulism and severe tooth loss              | 240.2<br>(207.7 to 273.0)                     | 14.6<br>(12.6 to 16.7)                                    | 6.7<br>(4.4 to 9.4)                   | 35.8<br>(27.9 to 44.0)                            | -1.2<br>(-6.0 to 3.3)                               |
| Other oral disorders                          | 202.6<br>(192.7 to 213.8)                     | --                                                        | 5.9<br>(3.6 to 8.9)                   | 42.0<br>(36.2 to 47.8)                            | 0.1<br>(-3.1 to 3.4)                                |
| <b>Injuries</b>                               | <b>1,738.0</b><br><b>(1,608.8 to 1,883.0)</b> | <b>1,125.0<sup>†</sup></b><br><b>(1,059.8 to 1,193.1)</b> | <b>73.7</b><br><b>(48.9 to 105.8)</b> | <b>38.3</b><br><b>(33.7 to 42.7)</b>              | <b>-0.5</b><br><b>(-2.6 to 1.5)</b>                 |
| <b>Transport injuries</b>                     | <b>145.8</b><br><b>(134.9 to 156.7)</b>       | <b>76.3</b><br><b>(67.9 to 85.9)</b>                      | <b>9.1</b><br><b>(5.9 to 13.1)</b>    | <b>45.4</b><br><b>(41.2 to 49.6)</b>              | <b>4.3</b><br><b>(2.2 to 6.5)</b>                   |
| Road injuries                                 | 111.7<br>(104.7 to 119.1)                     | 63.0<br>(55.3 to 72.1)                                    | 6.9<br>(4.5 to 9.9)                   | 45.7<br>(41.8 to 49.9)                            | 4.7<br>(2.6 to 6.9)                                 |
| Pedestrian road injuries                      | 26.6<br>(23.4 to 30.3)                        | 11.0<br>(8.9 to 13.6)                                     | 1.7<br>(1.1 to 2.4)                   | 46.6<br>(42.3 to 50.9)                            | 5.7<br>(3.5 to 8.0)                                 |
| Cyclist road injuries                         | 20.1<br>(16.7 to 23.7)                        | 13.0<br>(10.0 to 16.5)                                    | 1.2<br>(0.8 to 1.7)                   | 52.1<br>(47.6 to 56.8)                            | 9.8<br>(7.5 to 12.3)                                |
| Motorcyclist road injuries                    | 18.6<br>(15.9 to 21.9)                        | 7.2<br>(5.8 to 8.8)                                       | 1.1<br>(0.7 to 1.6)                   | 37.9<br>(33.9 to 42.0)                            | -1.5<br>(-3.4 to 0.6)                               |
| Motor vehicle road injuries                   | 31.7<br>(27.6 to 35.8)                        | 21.2<br>(17.8 to 25.1)                                    | 2.1<br>(1.4 to 3.0)                   | 49.8<br>(45.4 to 54.4)                            | 8.1<br>(5.8 to 10.5)                                |
| Other road injuries                           | 14.7<br>(12.8 to 17.2)                        | 10.6<br>(8.3 to 13.6)                                     | 0.8<br>(0.5 to 1.2)                   | 36.7<br>(33.0 to 40.6)                            | -2.3<br>(-4.3 to -0.2)                              |
| Other transport injuries                      | 34.0<br>(28.0 to 42.0)                        | 13.3<br>(10.7 to 16.9)                                    | 2.3<br>(1.4 to 3.3)                   | 44.5<br>(38.9 to 50.4)                            | 2.7<br>(0.2 to 5.3)                                 |
| <b>Unintentional injuries</b>                 | <b>1,411.8</b><br><b>(1,298.9 to 1,530.6)</b> | <b>1,017.8</b><br><b>(953.0 to 1,085.9)</b>               | <b>54.9</b><br><b>(37.5 to 77.4)</b>  | <b>41.2</b><br><b>(37.4 to 44.8)</b>              | <b>0.4</b><br><b>(-1.5 to 2.1)</b>                  |
| Falls                                         | 455.4<br>(392.1 to 521.4)                     | 315.7<br>(272.9 to 370.0)                                 | 20.5<br>(14.2 to 28.4)                | 42.6<br>(38.4 to 46.4)                            | 1.6<br>(-0.5 to 3.4)                                |
| Drowning                                      | 4.9<br>(4.1 to 5.9)                           | 1.6<br>(1.4 to 1.9)                                       | 0.3<br>(0.2 to 0.5)                   | 37.3<br>(31.7 to 43.1)                            | -1.5<br>(-4.6 to 1.5)                               |
| Fire, heat, and hot substances                | 154.6<br>(128.3 to 191.0)                     | 34.2<br>(28.1 to 41.4)                                    | 4.9<br>(3.4 to 6.8)                   | 37.2<br>(29.6 to 46.0)                            | -3.0<br>(-7.1 to 1.6)                               |
| Poisonings                                    | 4.8<br>(3.7 to 5.8)                           | 9.7<br>(7.5 to 12.0)                                      | 0.5<br>(0.3 to 0.8)                   | 39.2<br>(27.4 to 51.6)                            | -2.2<br>(-8.7 to 4.7)                               |
| Exposure to mechanical forces                 | 255.9<br>(217.6 to 308.8)                     | 155.8<br>(130.6 to 180.8)                                 | 7.2<br>(4.7 to 10.7)                  | 46.4<br>(41.8 to 50.8)                            | 3.5<br>(1.1 to 5.8)                                 |
| Unintentional firearm injuries                | 13.8<br>(11.4 to 16.8)                        | 5.7<br>(4.2 to 7.5)                                       | 0.7<br>(0.4 to 1.0)                   | 48.4<br>(43.6 to 53.7)                            | 5.3<br>(2.8 to 8.1)                                 |
| Unintentional suffocation                     | 22.2<br>(15.7 to 30.2)                        | 8.4<br>(5.7 to 11.9)                                      | 0.8<br>(0.5 to 1.3)                   | 49.4<br>(43.1 to 55.5)                            | 5.0<br>(1.7 to 8.2)                                 |
| Other exposure to mechanical forces           | 219.9<br>(183.8 to 269.4)                     | 141.7<br>(119.4 to 164.1)                                 | 5.8<br>(3.8 to 8.4)                   | 45.8<br>(41.1 to 50.3)                            | 3.1<br>(0.7 to 5.4)                                 |

| Cause                                                                               | Prevalence in thousands (95% UI)        | Incidence in thousands (95% UI)       | YLDs in thousands (95% UI)         |                                                   |                                                     |
|-------------------------------------------------------------------------------------|-----------------------------------------|---------------------------------------|------------------------------------|---------------------------------------------------|-----------------------------------------------------|
|                                                                                     | 2016 counts                             | 2016 counts                           | 2016 counts                        | Percentage change in counts between 2006 and 2016 | Percentage change in age-standardised rates between |
| Adverse effects of medical treatment                                                | 6.8<br>(5.3 to 8.6)                     | 89.4<br>(76.5 to 104.4)               | 0.9<br>(0.6 to 1.4)                | 29.8<br>(22.0 to 38.6)                            | -11.3<br>(-14.6 to -8.0)                            |
| Animal contact                                                                      | 78.1<br>(68.4 to 91.8)                  | 140.5<br>(118.3 to 166.3)             | 3.0<br>(2.0 to 4.3)                | 36.6<br>(29.7 to 43.8)                            | -4.5<br>(-8.1 to -0.7)                              |
| Venomous animal contact                                                             | 32.5<br>(26.7 to 40.1)                  | 60.1<br>(47.7 to 75.2)                | 2.1<br>(1.4 to 3.1)                | 39.2<br>(29.6 to 49.5)                            | -2.5<br>(-7.6 to 3.1)                               |
| Non-venomous animal contact                                                         | 45.6<br>(38.0 to 56.4)                  | 80.3<br>(65.0 to 98.0)                | 0.9<br>(0.6 to 1.3)                | 30.8<br>(25.9 to 35.3)                            | -8.0<br>(-10.8 to -5.4)                             |
| Foreign body                                                                        | 114.8<br>(91.4 to 138.4)                | 96.4<br>(83.3 to 111.6)               | 5.5<br>(3.5 to 8.2)                | 42.0<br>(36.5 to 47.4)                            | -0.1<br>(-2.9 to 2.6)                               |
| Pulmonary aspiration and foreign body in airway                                     | 69.2<br>(49.7 to 95.0)                  | 42.8<br>(34.6 to 53.6)                | 3.7<br>(2.3 to 5.5)                | 47.0<br>(40.8 to 53.0)                            | 3.0<br>(0.1 to 5.8)                                 |
| Foreign body in eyes                                                                | 4.8<br>(2.4 to 7.6)                     | 27.7<br>(20.7 to 37.5)                | 0.3<br>(0.1 to 0.5)                | 46.9<br>(41.2 to 52.8)                            | 3.4<br>(0.6 to 6.7)                                 |
| Foreign body in other body part                                                     | 40.7<br>(31.5 to 53.0)                  | 25.8<br>(20.7 to 32.0)                | 1.5<br>(1.0 to 2.3)                | 30.8<br>(24.9 to 36.2)                            | -7.1<br>(-10.1 to -4.1)                             |
| Environmental heat and cold exposure                                                | 124.0<br>(103.8 to 147.8)               | 55.0<br>(45.8 to 66.1)                | 5.5<br>(3.6 to 8.0)                | 35.7<br>(31.5 to 39.8)                            | -3.4<br>(-5.5 to -1.4)                              |
| Other unintentional injuries                                                        | 212.6<br>(165.6 to 276.6)               | 119.6<br>(99.4 to 143.8)              | 6.4<br>(4.2 to 9.3)                | 43.3<br>(39.2 to 47.1)                            | 2.7<br>(0.7 to 4.5)                                 |
| <b>Self-harm and interpersonal violence</b>                                         | <b>433.5</b><br><b>(385.2 to 483.7)</b> | <b>30.6†</b><br><b>(25.8 to 35.9)</b> | <b>5.4</b><br><b>(3.7 to 7.4)</b>  | <b>36.6</b><br><b>(31.3 to 42.1)</b>              | <b>-2.6</b><br><b>(-5.8 to 0.7)</b>                 |
| Self-harm                                                                           | 5.5<br>(4.8 to 6.2)                     | 3.6<br>(3.0 to 4.2)                   | 0.3<br>(0.2 to 0.5)                | 51.9<br>(47.4 to 56.6)                            | 8.7<br>(6.3 to 11.1)                                |
| Self-harm by firearm                                                                | 0.4<br>(0.4 to 0.5)                     | 0.2<br>(0.1 to 0.3)                   | < 0.05<br>(< 0.05 to < 0.05)       | 33.0<br>(28.1 to 38.4)                            | -5.8<br>(-8.4 to -2.8)                              |
| Self-harm by other specified means                                                  | 5.1<br>(4.4 to 5.8)                     | 3.4<br>(2.8 to 4.0)                   | 0.3<br>(0.2 to 0.5)                | 53.2<br>(48.6 to 58.1)                            | 9.9<br>(7.4 to 12.3)                                |
| Interpersonal violence                                                              | 428.0<br>(379.6 to 478.1)               | 27.1†<br>(22.3 to 32.1)               | 5.0<br>(3.5 to 7.0)                | 35.7<br>(30.2 to 41.6)                            | -3.8<br>(-7.1 to -0.1)                              |
| Assault by firearm                                                                  | 1.9<br>(1.6 to 2.2)                     | 1.0<br>(0.7 to 1.3)                   | 0.1<br>(0.1 to 0.2)                | 41.1<br>(35.3 to 47.2)                            | -0.4<br>(-3.5 to 3.1)                               |
| Assault by sharp object                                                             | 14.4<br>(11.8 to 17.2)                  | 9.2<br>(7.0 to 12.1)                  | 0.5<br>(0.4 to 0.8)                | 47.1<br>(41.6 to 52.4)                            | 4.6<br>(1.5 to 7.7)                                 |
| Sexual violence                                                                     | 391.9<br>(343.6 to 442.2)               | --                                    | 3.5<br>(2.3 to 5.0)                | 31.4<br>(24.2 to 39.2)                            | -8.3<br>(-12.8 to -3.0)                             |
| Assault by other means                                                              | 19.8<br>(16.9 to 23.4)                  | 16.9<br>(13.5 to 20.6)                | 0.9<br>(0.6 to 1.3)                | 46.7<br>(42.1 to 51.1)                            | 3.9<br>(1.5 to 6.4)                                 |
| <b>Forces of nature, conflict and terrorism, and executions and police conflict</b> | <b>138.8</b><br><b>(72.9 to 238.4)</b>  | <b>0.2†</b><br><b>(0.1 to 0.4)</b>    | <b>4.3</b><br><b>(1.2 to 10.3)</b> | <b>1.9</b><br><b>(-6.0 to 8.1)</b>                | <b>-14.6</b><br><b>(-19.4 to -10.7)</b>             |
| Exposure to forces of nature                                                        | 0.7<br>(0.3 to 1.1)                     | --                                    | < 0.05<br>(< 0.05 to 0.1)          | -20.0<br>(-65.1 to 21.0)                          | -27.0<br>(-64.5 to 0.8)                             |
| Conflict and terrorism                                                              | 137.6<br>(71.9 to 236.7)                | --                                    | 4.2<br>(1.2 to 10.1)               | 1.9<br>(-5.7 to 8.0)                              | -14.5<br>(-19.4 to -10.7)                           |
| Executions and police conflict                                                      | 0.6<br>(0.3 to 1.2)                     | 0.2<br>(0.1 to 0.4)                   | < 0.05<br>(< 0.05 to 0.1)          | 36.8<br>(16.3 to 62.5)                            | 3.6<br>(-20.8 to 29.2)                              |
| <b>Impairments</b>                                                                  | --                                      | --                                    | --                                 | --                                                | --                                                  |
| Anaemia                                                                             | 7,738.3<br>(7,272.6 to 8,218.6)         | --                                    | 301.1<br>(201.7 to 430.3)          | 30.8<br>(20.2 to 41.8)                            | -10.0<br>(-17.1 to -3.7)                            |
| Developmental intellectual disability                                               | 566.0<br>(431.8 to 702.1)               | --                                    | 48.2<br>(34.8 to 65.0)             | 39.4<br>(31.5 to 49.9)                            | -2.6<br>(-7.6 to 4.2)                               |
| Epilepsy                                                                            | 86.4<br>(45.2 to 153.0)                 | --                                    | 33.8<br>(15.6 to 63.3)             | 57.4<br>(-34.4 to 257.2)                          | 9.7<br>(-56.7 to 164.1)                             |
| Guillain-Barre syndrome                                                             | 0.1<br>(0.1 to 0.1)                     | --                                    | < 0.05<br>(< 0.05 to < 0.05)       | 41.4<br>(40.4 to 42.6)                            | 0.0<br>(-0.0 to 0.1)                                |
| Hearing loss                                                                        | 1,594.7<br>(1,507.7 to 1,690.7)         | --                                    | 62.1<br>(43.5 to 84.6)             | 31.2<br>(26.9 to 35.4)                            | -4.5<br>(-6.6 to -2.4)                              |
| Heart failure                                                                       | 28.6<br>(25.5 to 32.1)                  | --                                    | 3.0<br>(2.2 to 4.0)                | 27.8<br>(18.5 to 37.6)                            | -4.1<br>(-11.6 to 3.2)                              |
| Infertility                                                                         | 349.0<br>(267.8 to 460.7)               | --                                    | 1.9<br>(0.8 to 4.1)                | 60.9<br>(30.1 to 100.8)                           | 8.6<br>(-13.7 to 40.1)                              |
| Pelvic inflammatory disease                                                         | 14.3<br>(11.9 to 17.2)                  | --                                    | 1.9<br>(1.2 to 2.6)                | 43.5<br>(26.1 to 63.1)                            | -1.6<br>(-12.8 to 11.2)                             |
| Vision loss                                                                         | 1,612.6<br>(1,553.1 to 1,674.7)         | --                                    | 45.3<br>(31.7 to 64.0)             | 33.7<br>(28.2 to 41.2)                            | -4.9<br>(-7.8 to -1.8)                              |

We did not calculate incidence for the nine impairments, certain NTDs, and causes with only birth prevalence. Blank cells mean that no estimate is available.

† Incidence for aggregate causes represents the sum of the incidence of the causes below the aggregate.

‡ Incidence estimates for stroke represent first-ever stroke only.

^ Incidence of HIV/AIDS represents new infections of HIV only and does not include new infections of Tuberculosis in HIV positive cases.

SR Table 14: Prevalence, incidence, and YLDs for 2016, percentage change of YLD counts and percentage change of age-standardised YLD rates between 2006 and 2016 by cause and impairments, for all ages, Chile.

| Cause                                                                                | Prevalence in thousands (95% UI)          | Incidence in thousands (95% UI)             | YLDs in thousands (95% UI)             |                                                   |                                                     |
|--------------------------------------------------------------------------------------|-------------------------------------------|---------------------------------------------|----------------------------------------|---------------------------------------------------|-----------------------------------------------------|
|                                                                                      | 2016 counts                               | 2016 counts                                 | 2016 counts                            | Percentage change in counts between 2006 and 2016 | Percentage change in age-standardised rates between |
| <b>All causes</b>                                                                    | <b>17,139.3</b><br>(17,058.7 to 17,209.0) | <b>98,524.1†</b><br>(92,765.2 to 104,959.2) | <b>2,093.1</b><br>(1,547.4 to 2,710.2) | <b>16.9</b><br>(14.5 to 19.2)                     | <b>-1.6</b><br>(-3.6 to 0.4)                        |
| <b>Communicable, maternal, neonatal, and nutritional disorders</b>                   | <b>8,930.0</b><br>(8,318.7 to 9,671.5)    | <b>52,043.8†</b><br>(46,638.0 to 58,012.8)  | <b>84.7</b><br>(60.1 to 117.3)         | <b>3.8</b><br>(-1.8 to 10.0)                      | <b>-5.3</b><br>(-10.3 to 0.3)                       |
| <b>HIV/AIDS and tuberculosis</b>                                                     | <b>1,703.7</b><br>(1,539.0 to 1,837.1)    | <b>3.2†</b><br>(2.5 to 4.1)                 | <b>3.1</b><br>(1.9 to 5.3)             | <b>11.5</b><br>(-9.5 to 36.7)                     | <b>-4.2</b><br>(-22.3 to 17.1)                      |
| Tuberculosis                                                                         | 1,566.4<br>(1,420.2 to 1,738.7)           | 2.1†<br>(1.8 to 2.6)                        | 0.5<br>(0.3 to 0.8)                    | 0.9<br>(-19.3 to 28.7)                            | -16.7<br>(-33.6 to 5.7)                             |
| Drug-susceptible tuberculosis                                                        | 1.6<br>(1.3 to 2.0)                       | 2.1<br>(1.8 to 2.5)                         | 0.5<br>(0.3 to 0.7)                    | 0.8<br>(-19.8 to 28.7)                            | -16.8<br>(-33.9 to 5.6)                             |
| Multidrug-resistant tuberculosis without extensive drug resistance                   | < 0.05<br>(< 0.05 to < 0.05)              | < 0.05<br>(< 0.05 to < 0.05)                | < 0.05<br>(< 0.05 to < 0.05)           | 3.5<br>(-68.2 to 273.0)                           | -15.2<br>(-73.8 to 207.9)                           |
| Extensively drug-resistant tuberculosis                                              | < 0.05<br>(< 0.05 to < 0.05)              | < 0.05<br>(< 0.05 to < 0.05)                | < 0.05<br>(< 0.05 to < 0.05)           | 122.5<br>(-31.6 to 701.7)                         | 82.3<br>(-43.7 to 563.0)                            |
| Latent tuberculosis infection                                                        | 1,564.8<br>(1,418.6 to 1,737.2)           | --                                          | --                                     | --                                                | --                                                  |
| HIV/AIDS                                                                             | 30.4<br>(19.6 to 46.4)                    | 1.0^<br>(0.6 to 1.8)                        | 2.6<br>(1.4 to 4.7)                    | 13.8<br>(-11.4 to 46.6)                           | -1.2<br>(-23.1 to 26.3)                             |
| Drug-susceptible HIV/AIDS - Tuberculosis                                             | 0.6<br>(0.4 to 0.9)                       | 0.8<br>(0.5 to 1.1)                         | 0.2<br>(0.1 to 0.4)                    | 1.1<br>(-24.6 to 40.0)                            | -12.4<br>(-35.0 to 22.2)                            |
| Multidrug-resistant HIV/AIDS - Tuberculosis without extensive drug resistance        | < 0.05<br>(< 0.05 to < 0.05)              | < 0.05<br>(< 0.05 to < 0.05)                | < 0.05<br>(< 0.05 to < 0.05)           | 3.5<br>(-68.1 to 268.7)                           | -10.4<br>(-72.4 to 219.3)                           |
| Extensively drug-resistant HIV/AIDS - Tuberculosis                                   | < 0.05<br>(< 0.05 to < 0.05)              | < 0.05<br>(< 0.05 to < 0.05)                | < 0.05<br>(< 0.05 to < 0.05)           | 122.6<br>(-31.3 to 692.6)                         | 92.6<br>(-40.5 to 586.4)                            |
| HIV/AIDS resulting in other diseases                                                 | 29.8<br>(19.0 to 45.8)                    | 1.0<br>(0.6 to 1.8)                         | 2.4<br>(1.2 to 4.5)                    | 15.3<br>(-12.7 to 52.1)                           | 0.1<br>(-24.4 to 31.1)                              |
| <b>Diarrhoea, lower respiratory infections, and other common infectious diseases</b> | <b>844.0</b><br>(785.6 to 903.1)          | <b>50,860.5†</b><br>(45,426.9 to 56,840.8)  | <b>28.4</b><br>(18.9 to 41.2)          | <b>8.2</b><br>(4.5 to 12.0)                       | <b>-0.2</b><br>(-3.7 to 3.3)                        |
| Diarrhoeal diseases                                                                  | 50.6<br>(46.9 to 54.6)                    | 3,323.7<br>(3,074.7 to 3,591.3)             | 5.8<br>(3.9 to 8.0)                    | 13.9<br>(4.6 to 23.7)                             | 7.2<br>(-1.7 to 16.2)                               |
| Intestinal infectious diseases                                                       | < 0.05<br>(< 0.05 to < 0.05)              | 0.4†<br>(0.3 to 0.5)                        | < 0.05<br>(< 0.05 to < 0.05)           | -6.7<br>(-20.4 to 7.6)                            | -19.2<br>(-30.8 to -7.0)                            |
| Typhoid fever                                                                        | < 0.05<br>(< 0.05 to < 0.05)              | 0.3<br>(0.3 to 0.4)                         | < 0.05<br>(< 0.05 to < 0.05)           | -5.7<br>(-20.2 to 9.1)                            | -18.0<br>(-30.2 to -5.2)                            |
| Paratyphoid fever                                                                    | < 0.05<br>(< 0.05 to < 0.05)              | < 0.05<br>(< 0.05 to 0.1)                   | < 0.05<br>(< 0.05 to < 0.05)           | 7.6<br>(-10.8 to 28.9)                            | -9.0<br>(-25.1 to 10.1)                             |
| Other intestinal infectious diseases                                                 | --                                        | --                                          | < 0.05<br>(< 0.05 to < 0.05)           | -38.3<br>(-54.4 to -15.7)                         | -46.6<br>(-62.5 to -25.5)                           |
| Lower respiratory infections                                                         | 10.9<br>(10.1 to 11.8)                    | 511.3<br>(473.8 to 552.5)                   | 0.7<br>(0.4 to 0.9)                    | 21.7<br>(8.2 to 37.4)                             | 0.4<br>(-10.9 to 13.4)                              |
| Upper respiratory infections                                                         | 609.4<br>(539.9 to 685.0)                 | 45,943.2<br>(40,541.3 to 51,940.9)          | 15.2<br>(9.0 to 23.4)                  | 8.4<br>(3.0 to 14.3)                              | -0.1<br>(-4.7 to 4.9)                               |
| Otitis media                                                                         | 160.7<br>(143.9 to 176.9)                 | 746.9<br>(612.9 to 914.6)                   | 4.7<br>(3.0 to 7.0)                    | -1.6<br>(-9.2 to 7.0)                             | -7.3<br>(-14.5 to 0.4)                              |
| Meningitis                                                                           | 3.1<br>(2.7 to 3.4)                       | 0.5<br>(0.4 to 0.6)                         | 0.5<br>(0.3 to 0.6)                    | 6.4<br>(2.7 to 10.2)                              | -5.4<br>(-8.6 to -2.0)                              |
| Pneumococcal meningitis                                                              | 1.1<br>(0.9 to 1.2)                       | < 0.05<br>(< 0.05 to < 0.05)                | 0.2<br>(0.1 to 0.3)                    | 1.6<br>(-4.3 to 7.3)                              | -9.6<br>(-14.6 to -4.5)                             |
| H influenzae type B meningitis                                                       | 0.2<br>(0.2 to 0.3)                       | < 0.05<br>(< 0.05 to < 0.05)                | < 0.05<br>(< 0.05 to 0.1)              | 6.4<br>(-0.5 to 12.6)                             | -5.6<br>(-12.0 to 0.0)                              |
| Meningococcal infection                                                              | 0.6<br>(0.5 to 0.8)                       | 0.2<br>(0.1 to 0.2)                         | 0.1<br>(0.1 to 0.1)                    | 0.4<br>(-7.0 to 11.7)                             | -11.6<br>(-18.4 to -2.6)                            |
| Other meningitis                                                                     | 1.1<br>(0.9 to 1.4)                       | 0.3<br>(0.2 to 0.3)                         | 0.2<br>(0.1 to 0.2)                    | 15.8<br>(10.2 to 21.1)                            | 3.5<br>(-1.3 to 8.2)                                |
| Encephalitis                                                                         | 5.6<br>(4.1 to 7.7)                       | 2.3<br>(2.1 to 2.5)                         | 0.8<br>(0.5 to 1.0)                    | 13.2<br>(9.5 to 16.9)                             | -1.6<br>(-4.8 to 1.5)                               |
| Diphtheria                                                                           | < 0.05<br>(< 0.05 to < 0.05)              | < 0.05<br>(< 0.05 to < 0.05)                | < 0.05<br>(< 0.05 to < 0.05)           | -19.6<br>(-55.3 to 41.6)                          | -28.5<br>(-59.2 to 24.9)                            |
| Whooping cough                                                                       | 2.4<br>(1.9 to 3.1)                       | 17.7<br>(13.8 to 22.5)                      | 0.1<br>(0.1 to 0.2)                    | -18.6<br>(-33.7 to -0.1)                          | -19.0<br>(-34.1 to -0.8)                            |
| Tetanus                                                                              | < 0.05<br>(< 0.05 to < 0.05)              | < 0.05<br>(< 0.05 to < 0.05)                | < 0.05<br>(< 0.05 to < 0.05)           | -26.5<br>(-44.1 to -5.0)                          | -40.6<br>(-54.6 to -23.5)                           |
| Measles                                                                              | < 0.05<br>(< 0.05 to < 0.05)              | < 0.05<br>(< 0.05 to < 0.05)                | < 0.05<br>(< 0.05 to < 0.05)           | --                                                | --                                                  |
| Varicella and herpes zoster                                                          | 18.0<br>(16.3 to 19.8)                    | 314.6<br>(304.2 to 325.7)                   | 0.8<br>(0.5 to 1.2)                    | 23.1<br>(8.4 to 40.5)                             | 0.8<br>(-11.2 to 14.3)                              |
| <b>Neglected tropical diseases and malaria</b>                                       | <b>4,616.3</b><br>(3,843.8 to 5,673.9)    | <b>0.3†</b><br>(0.1 to 1.2)                 | <b>6.9</b><br>(4.4 to 10.9)            | <b>3.2</b><br>(-23.2 to 42.8)                     | <b>-13.7</b><br>(-35.7 to 19.7)                     |
| Malaria                                                                              | --                                        | --                                          | --                                     | --                                                | --                                                  |
| Chagas disease                                                                       | 311.9<br>(266.3 to 362.0)                 | --                                          | 3.3<br>(2.2 to 4.6)                    | 6.0<br>(-1.7 to 14.6)                             | -17.4<br>(-23.2 to -11.1)                           |
| Leishmaniasis                                                                        | --                                        | --                                          | --                                     | --                                                | --                                                  |
| Visceral leishmaniasis                                                               | --                                        | --                                          | --                                     | --                                                | --                                                  |
| Cutaneous and mucocutaneous leishmaniasis                                            | --                                        | --                                          | --                                     | --                                                | --                                                  |
| African trypanosomiasis                                                              | --                                        | --                                          | --                                     | --                                                | --                                                  |
| Schistosomiasis                                                                      | --                                        | --                                          | --                                     | --                                                | --                                                  |
| Cysticercosis                                                                        | 2.7<br>(0.8 to 5.3)                       | --                                          | 0.4<br>(0.1 to 0.8)                    | -12.2<br>(-76.1 to 172.0)                         | -28.4<br>(-80.8 to 121.9)                           |
| Cystic echinococcosis                                                                | 1.6<br>(0.3 to 5.9)                       | 0.3<br>(0.1 to 1.2)                         | 0.1<br>(< 0.05 to 0.5)                 | -39.3<br>(-93.2 to 350.1)                         | -48.1<br>(-94.1 to 271.4)                           |
| Lymphatic filariasis                                                                 | --                                        | --                                          | --                                     | --                                                | --                                                  |
| Onchocerciasis                                                                       | --                                        | --                                          | --                                     | --                                                | --                                                  |
| Trachoma                                                                             | --                                        | --                                          | --                                     | --                                                | --                                                  |
| Dengue                                                                               | --                                        | --                                          | --                                     | --                                                | --                                                  |
| Yellow fever                                                                         | --                                        | --                                          | --                                     | --                                                | --                                                  |
| Rabies                                                                               | < 0.05<br>(< 0.05 to < 0.05)              | < 0.05<br>(< 0.05 to < 0.05)                | < 0.05<br>(< 0.05 to < 0.05)           | 6.0<br>(-21.5 to 44.7)                            | -10.8<br>(-34.9 to 22.9)                            |
| Intestinal nematode infections                                                       | 4,379.9<br>(3,604.7 to 5,441.1)           | --                                          | 2.5<br>(1.0 to 5.5)                    | 13.4<br>(-50.2 to 152.5)                          | 0.2<br>(-54.5 to 118.0)                             |
| Ascariasis                                                                           | 3,212.4<br>(2,475.1 to 4,201.2)           | --                                          | 2.4<br>(0.9 to 5.2)                    | 13.5<br>(-53.5 to 162.5)                          | 0.2<br>(-57.6 to 124.4)                             |



| Cause                                                                   | Prevalence in thousands (95% UI)                 | Incidence in thousands (95% UI)                   | YLDs in thousands (95% UI)                    |                                                                       |                                                                         |
|-------------------------------------------------------------------------|--------------------------------------------------|---------------------------------------------------|-----------------------------------------------|-----------------------------------------------------------------------|-------------------------------------------------------------------------|
|                                                                         | 2016 counts<br>(915.8 to 1,700.1)                | 2016 counts                                       | 2016 counts<br>(0.1 to 0.2)                   | Percentage change in counts between 2006 and 2016<br>(-61.5 to 232.3) | Percentage change in age-standardised rates between<br>(-65.1 to 183.5) |
| Trichuriasis                                                            | 1,251.1<br>(915.8 to 1,700.1)                    | --                                                | 0.1<br>(< 0.05 to 0.2)                        | 12.2<br>(-61.5 to 232.3)                                              | -0.9<br>(-65.1 to 183.5)                                                |
| Hookworm disease                                                        | 15.1<br>(10.6 to 20.4)                           | --                                                | 0.1<br>(< 0.05 to 0.1)                        | 14.4<br>(-27.8 to 76.5)                                               | -1.5<br>(-37.8 to 51.2)                                                 |
| Food-borne trematodiasis                                                | --                                               | --                                                | --                                            | --                                                                    | --                                                                      |
| Leprosy                                                                 | < 0.05<br>(< 0.05 to < 0.05)                     | --                                                | < 0.05<br>(< 0.05 to < 0.05)                  | -18.2<br>(-20.1 to -16.4)                                             | -37.6<br>(-39.7 to -35.8)                                               |
| Ebola virus disease                                                     | --                                               | --                                                | --                                            | --                                                                    | --                                                                      |
| Zika virus disease                                                      | --                                               | --                                                | --                                            | --                                                                    | --                                                                      |
| Guinea worm disease                                                     | --                                               | --                                                | --                                            | --                                                                    | --                                                                      |
| Other neglected tropical diseases                                       | 41.1<br>(35.7 to 47.5)                           | --                                                | 0.6<br>(0.3 to 0.9)                           | -17.6<br>(-32.4 to -1.1)                                              | -19.3<br>(-34.2 to -1.7)                                                |
| <b>Maternal disorders</b>                                               | <b>16.2</b><br><b>(12.9 to 20.0)</b>             | <b>329.4†</b><br><b>(306.7 to 350.6)</b>          | <b>1.1</b><br><b>(0.7 to 1.5)</b>             | <b>3.6</b><br><b>(-24.1 to 39.5)</b>                                  | <b>-3.6</b><br><b>(-29.4 to 29.7)</b>                                   |
| Maternal haemorrhage                                                    | 1.3<br>(1.1 to 1.5)                              | 12.2<br>(10.6 to 14.3)                            | 0.1<br>(< 0.05 to 0.1)                        | 12.1<br>(-23.5 to 61.8)                                               | 3.7<br>(-29.3 to 49.6)                                                  |
| Maternal sepsis and other pregnancy related infections                  | 5.9<br>(4.4 to 7.7)                              | 40.8<br>(37.6 to 44.5)                            | 0.2<br>(0.1 to 0.3)                           | 3.0<br>(-49.9 to 106.2)                                               | -3.8<br>(-53.4 to 93.8)                                                 |
| Maternal hypertensive disorders                                         | 7.7<br>(5.2 to 10.2)                             | 32.4<br>(29.9 to 34.9)                            | 0.4<br>(0.2 to 0.6)                           | 7.1<br>(-35.7 to 75.7)                                                | -0.6<br>(-40.6 to 62.8)                                                 |
| Maternal obstructed labour and uterine rupture                          | 0.3<br>(0.2 to 0.4)                              | 20.5<br>(18.7 to 21.8)                            | 0.1<br>(< 0.05 to 0.2)                        | 4.6<br>(-60.2 to 167.5)                                               | -3.4<br>(-62.7 to 153.2)                                                |
| Maternal abortion, miscarriage, and ectopic pregnancy                   | 1.8<br>(1.3 to 2.5)                              | 223.6<br>(200.9 to 243.9)                         | 0.2<br>(0.1 to 0.3)                           | -0.7<br>(-45.2 to 73.5)                                               | -7.3<br>(-49.0 to 61.4)                                                 |
| Other maternal disorders                                                | --                                               | --                                                | 0.2<br>(0.1 to 0.2)                           | -1.3<br>(-27.6 to 33.3)                                               | -8.1<br>(-32.3 to 24.1)                                                 |
| <b>Neonatal disorders</b>                                               | <b>122.2</b><br><b>(104.3 to 148.4)</b>          | --                                                | <b>20.3</b><br><b>(14.3 to 27.7)</b>          | <b>13.6</b><br><b>(-3.0 to 34.5)</b>                                  | <b>5.1</b><br><b>(-10.1 to 24.8)</b>                                    |
| Neonatal preterm birth complications                                    | 116.8<br>(95.5 to 147.6)                         | --                                                | 14.5<br>(9.9 to 20.5)                         | 18.0<br>(-4.9 to 45.7)                                                | 9.2<br>(-11.8 to 34.8)                                                  |
| Neonatal encephalopathy due to birth asphyxia and trauma                | 12.6<br>(6.9 to 20.2)                            | --                                                | 2.5<br>(0.9 to 4.7)                           | -5.7<br>(-33.7 to 27.6)                                               | -13.5<br>(-39.3 to 17.3)                                                |
| Neonatal sepsis and other neonatal infections                           | 6.0<br>(2.9 to 12.5)                             | --                                                | 2.5<br>(1.0 to 5.7)                           | 14.8<br>(-5.8 to 38.9)                                                | 6.2<br>(-13.2 to 28.9)                                                  |
| Hemolytic disease and other neonatal jaundice                           | 1.4<br>(1.2 to 1.7)                              | --                                                | 0.5<br>(0.4 to 0.6)                           | 7.9<br>(-0.9 to 17.8)                                                 | -1.3<br>(-9.4 to 7.7)                                                   |
| Other neonatal disorders                                                | --                                               | --                                                | 0.4<br>(0.3 to 0.6)                           | 5.1<br>(-17.3 to 34.8)                                                | 4.6<br>(-17.6 to 34.1)                                                  |
| <b>Nutritional deficiencies</b>                                         | <b>1,466.5</b><br><b>(1,369.7 to 1,551.7)</b>    | <b>97.6†</b><br><b>(76.6 to 123.8)</b>            | <b>21.5</b><br><b>(13.7 to 32.9)</b>          | <b>-9.6</b><br><b>(-17.7 to -0.8)</b>                                 | <b>-16.8</b><br><b>(-24.1 to -8.6)</b>                                  |
| Protein-energy malnutrition                                             | 10.3<br>(8.1 to 13.1)                            | 5.5<br>(4.3 to 7.1)                               | 0.4<br>(0.2 to 0.8)                           | -4.0<br>(-53.3 to 85.1)                                               | -4.4<br>(-53.5 to 84.0)                                                 |
| Iodine deficiency                                                       | 90.9<br>(79.4 to 103.4)                          | 1.7<br>(1.5 to 1.9)                               | 2.3<br>(1.6 to 3.3)                           | 9.4<br>(-4.6 to 25.2)                                                 | -5.8<br>(-18.1 to 8.1)                                                  |
| Vitamin A deficiency                                                    | 112.5<br>(87.2 to 140.7)                         | 90.4<br>(69.4 to 116.7)                           | --                                            | --                                                                    | --                                                                      |
| Iron-deficiency anaemia                                                 | 1,239.8<br>(1,141.3 to 1,352.9)                  | --                                                | 18.8<br>(11.9 to 29.3)                        | -11.6<br>(-20.3 to -2.3)                                              | -18.1<br>(-26.5 to -9.2)                                                |
| Other nutritional deficiencies                                          | --                                               | --                                                | < 0.05<br>(< 0.05 to < 0.05)                  | -4.2<br>(-53.7 to 89.7)                                               | -4.7<br>(-53.8 to 88.1)                                                 |
| <b>Other communicable, maternal, neonatal, and nutritional diseases</b> | <b>2,823.3</b><br><b>(2,609.8 to 3,069.5)</b>    | <b>752.8</b><br><b>(686.1 to 826.2)</b>           | <b>3.2</b><br><b>(1.9 to 5.5)</b>             | <b>6.3</b><br><b>(0.3 to 12.0)</b>                                    | <b>-5.4</b><br><b>(-10.7 to -0.2)</b>                                   |
| Sexually transmitted diseases excluding HIV                             | 2,480.6<br>(2,286.2 to 2,718.1)                  | 694.1<br>(627.9 to 765.7)                         | 2.3<br>(1.3 to 4.1)                           | 9.5<br>(2.3 to 15.8)                                                  | -4.3<br>(-10.6 to 1.0)                                                  |
| Syphilis                                                                | 49.1<br>(36.4 to 65.4)                           | 44.4<br>(32.0 to 61.7)                            | 0.2<br>(0.2 to 0.3)                           | 19.7<br>(7.3 to 34.7)                                                 | -8.1<br>(-17.6 to 3.7)                                                  |
| Chlamydial infection                                                    | 201.5<br>(154.1 to 256.0)                        | 159.5<br>(123.5 to 204.3)                         | 0.4<br>(0.2 to 0.7)                           | 1.6<br>(-11.6 to 17.6)                                                | -7.4<br>(-19.2 to 6.2)                                                  |
| Gonococcal infection                                                    | 13.7<br>(12.4 to 15.0)                           | 23.3<br>(19.8 to 27.2)                            | 0.2<br>(0.1 to 0.3)                           | 6.8<br>(-14.0 to 30.0)                                                | -1.7<br>(-20.2 to 19.4)                                                 |
| Trichomoniasis                                                          | 396.2<br>(343.3 to 454.0)                        | 333.6<br>(288.1 to 383.2)                         | 0.4<br>(0.2 to 0.9)                           | 12.6<br>(4.3 to 21.0)                                                 | -1.2<br>(-8.3 to 6.3)                                                   |
| Genital herpes                                                          | 1,917.1<br>(1,646.2 to 2,240.7)                  | 96.1<br>(82.4 to 113.8)                           | 0.5<br>(0.1 to 1.1)                           | 19.4<br>(10.3 to 28.3)                                                | -0.1<br>(-7.2 to 7.2)                                                   |
| Other sexually transmitted diseases                                     | 32.7<br>(28.9 to 36.7)                           | 37.2<br>(31.2 to 44.0)                            | 0.6<br>(0.4 to 0.9)                           | 3.1<br>(-11.4 to 18.6)                                                | -6.6<br>(-19.8 to 7.0)                                                  |
| Hepatitis                                                               | 390.8<br>(337.7 to 456.0)                        | 58.6<br>(45.1 to 71.5)                            | 0.1<br>(< 0.05 to 0.1)                        | 7.3<br>(-18.0 to 42.2)                                                | -5.2<br>(-28.2 to 26.6)                                                 |
| Acute hepatitis A                                                       | 2.5<br>(1.4 to 3.4)                              | 32.3<br>(18.9 to 44.5)                            | < 0.05<br>(< 0.05 to 0.1)                     | 4.1<br>(-33.1 to 71.3)                                                | -4.6<br>(-39.2 to 54.5)                                                 |
| Hepatitis B                                                             | 219.1<br>(171.7 to 281.6)                        | 20.5<br>(15.9 to 26.2)                            | < 0.05<br>(< 0.05 to < 0.05)                  | 12.6<br>(-4.1 to 30.9)                                                | -7.3<br>(-20.8 to 7.2)                                                  |
| Hepatitis C                                                             | 169.0<br>(151.5 to 188.0)                        | 2.8<br>(2.5 to 3.2)                               | < 0.05<br>(< 0.05 to < 0.05)                  | 9.6<br>(8.2 to 11.2)                                                  | 0.1<br>(-0.2 to 0.6)                                                    |
| Acute hepatitis E                                                       | 0.2<br>(0.2 to 0.3)                              | 3.1<br>(2.6 to 3.6)                               | < 0.05<br>(< 0.05 to < 0.05)                  | 10.6<br>(0.2 to 20.4)                                                 | -3.7<br>(-10.7 to 3.4)                                                  |
| Other infectious diseases                                               | 34.1<br>(30.4 to 38.7)                           | < 0.05<br>(< 0.05 to < 0.05)                      | 0.8<br>(0.5 to 1.3)                           | -1.8<br>(-13.4 to 10.1)                                               | -7.9<br>(-19.0 to 3.4)                                                  |
| <b>Non-communicable diseases</b>                                        | <b>16,486.8</b><br><b>(16,387.4 to 16,562.7)</b> | <b>44,981.7†</b><br><b>(42,958.6 to 47,224.2)</b> | <b>1,891.1</b><br><b>(1,393.0 to 2,444.2)</b> | <b>16.0</b><br><b>(13.5 to 18.5)</b>                                  | <b>-2.4</b><br><b>(-4.6 to -0.4)</b>                                    |
| <b>Neoplasms</b>                                                        | <b>124.6</b><br><b>(119.7 to 129.8)</b>          | <b>47.7</b><br><b>(46.2 to 49.1)</b>              | <b>15.1</b><br><b>(11.2 to 19.6)</b>          | <b>43.8</b><br><b>(37.8 to 49.9)</b>                                  | <b>6.1</b><br><b>(1.7 to 10.9)</b>                                      |
| Lip and oral cavity cancer                                              | 1.5<br>(1.4 to 1.6)                              | 0.4<br>(0.4 to 0.4)                               | 0.2<br>(0.1 to 0.2)                           | 44.2<br>(28.1 to 61.8)                                                | 4.8<br>(-7.0 to 17.5)                                                   |
| Nasopharynx cancer                                                      | 0.1<br>(0.1 to 0.1)                              | < 0.05<br>(< 0.05 to < 0.05)                      | < 0.05<br>(< 0.05 to < 0.05)                  | 23.7<br>(13.6 to 35.2)                                                | -1.4<br>(-9.4 to 7.7)                                                   |
| Other pharynx cancer                                                    | 0.4<br>(0.4 to 0.4)                              | 0.1<br>(0.1 to 0.1)                               | < 0.05<br>(< 0.05 to 0.1)                     | 46.9<br>(26.1 to 69.3)                                                | 6.7<br>(-8.7 to 23.5)                                                   |
| Oesophageal cancer                                                      | 0.8<br>(0.8 to 0.9)                              | 0.8<br>(0.8 to 0.9)                               | 0.2<br>(0.1 to 0.3)                           | 16.6<br>(-3.9 to 42.5)                                                | -18.4<br>(-33.3 to 0.5)                                                 |
| Stomach cancer                                                          | 6.6<br>(6.3 to 7.0)                              | 4.1<br>(3.9 to 4.4)                               | 1.0<br>(0.7 to 1.3)                           | 21.6<br>(4.5 to 40.6)                                                 | -13.2<br>(-25.7 to 0.7)                                                 |
| Colon and rectum cancer                                                 | 15.5<br>(14.4 to 16.7)                           | 4.4<br>(4.1 to 4.7)                               | 1.5<br>(1.1 to 2.0)                           | 61.9<br>(44.0 to 84.6)                                                | 15.8<br>(2.9 to 32.5)                                                   |
| Liver cancer                                                            | 0.5<br>(0.5 to 0.6)                              | 1.2<br>(1.1 to 1.3)                               | 0.2<br>(0.2 to 0.3)                           | 47.7<br>(34.5 to 63.0)                                                | 5.1<br>(-4.7 to 16.1)                                                   |
| Liver cancer due to hepatitis B                                         | 0.1<br>(0.1 to 0.2)                              | 0.1<br>(0.1 to 0.2)                               | < 0.05<br>(< 0.05 to < 0.05)                  | 36.2<br>(22.2 to 51.2)                                                | -0.6<br>(-10.9 to 10.6)                                                 |

| Cause                                              | Prevalence in thousands (95% UI)              | Incidence in thousands (95% UI)          | YLDs in thousands (95% UI)            |                                                   |                                                     |
|----------------------------------------------------|-----------------------------------------------|------------------------------------------|---------------------------------------|---------------------------------------------------|-----------------------------------------------------|
|                                                    | 2016 counts                                   | 2016 counts                              | 2016 counts                           | Percentage change in counts between 2006 and 2016 | Percentage change in age-standardised rates between |
| Liver cancer due to hepatitis C                    | 0.5<br>(0.4 to 0.5)                           | 0.6<br>(0.5 to 0.7)                      | 0.1<br>(0.1 to 0.2)                   | 45.7<br>(30.5 to 62.4)                            | 2.6<br>(-8.4 to 14.6)                               |
| Liver cancer due to alcohol use                    | 0.2<br>(0.2 to 0.3)                           | 0.3<br>(0.2 to 0.3)                      | 0.1<br>( $< 0.05$ to 0.1)             | 68.2<br>(49.2 to 89.9)                            | 20.3<br>(6.2 to 36.1)                               |
| Liver cancer due to other causes                   | 0.1<br>(0.1 to 0.2)                           | 0.2<br>(0.1 to 0.2)                      | $< 0.05$<br>( $< 0.05$ to $< 0.05$ )  | 37.1<br>(22.5 to 53.2)                            | -2.4<br>(-13.1 to 9.3)                              |
| Gallbladder and biliary tract cancer               | 1.9<br>(1.8 to 2.0)                           | 2.4<br>(2.3 to 2.6)                      | 0.5<br>(0.3 to 0.7)                   | 15.7<br>(-4.4 to 39.9)                            | -17.2<br>(-32.2 to 0.8)                             |
| Pancreatic cancer                                  | 1.0<br>(1.0 to 1.1)                           | 1.4<br>(1.3 to 1.5)                      | 0.3<br>(0.2 to 0.4)                   | 45.0<br>(26.4 to 65.5)                            | 3.2<br>(-10.2 to 18.2)                              |
| Larynx cancer                                      | 1.0<br>(1.0 to 1.1)                           | 0.3<br>(0.3 to 0.3)                      | 0.1<br>(0.1 to 0.2)                   | 40.5<br>(21.6 to 61.0)                            | 0.5<br>(-13.2 to 15.5)                              |
| Tracheal, bronchus, and lung cancer                | 3.9<br>(3.6 to 4.1)                           | 3.3<br>(3.1 to 3.5)                      | 0.8<br>(0.5 to 1.0)                   | 39.5<br>(15.8 to 67.3)                            | -0.7<br>(-17.9 to 19.1)                             |
| Malignant skin melanoma                            | 3.1<br>(2.6 to 3.7)                           | 0.7<br>(0.6 to 0.8)                      | 0.2<br>(0.1 to 0.3)                   | 64.1<br>(38.5 to 95.7)                            | 25.7<br>(6.3 to 49.1)                               |
| Non-melanoma skin cancer                           | 1.3<br>(1.0 to 1.6)                           | 2.8<br>(2.4 to 3.3)                      | 0.1<br>( $< 0.05$ to 0.1)             | 110.1<br>(63.1 to 159.2)                          | 46.0<br>(13.8 to 80.0)                              |
| Non-melanoma skin cancer (squamous-cell carcinoma) | 1.2<br>(0.8 to 1.6)                           | 1.2<br>(0.9 to 1.5)                      | 0.1<br>( $< 0.05$ to 0.1)             | 114.2<br>(64.6 to 164.9)                          | 48.4<br>(14.2 to 83.5)                              |
| Non-melanoma skin cancer (basal-cell carcinoma)    | 0.2<br>(0.2 to 0.4)                           | 1.6<br>(1.3 to 2.0)                      | $< 0.05$<br>( $< 0.05$ to $< 0.05$ )  | 50.1<br>(28.6 to 80.2)                            | 9.3<br>(-6.0 to 31.1)                               |
| Breast cancer                                      | 22.4<br>(20.9 to 24.2)                        | 4.6<br>(4.2 to 5.0)                      | 2.2<br>(1.5 to 2.9)                   | 40.1<br>(23.2 to 58.9)                            | 5.3<br>(-7.5 to 18.8)                               |
| Cervical cancer                                    | 7.5<br>(6.9 to 8.3)                           | 1.9<br>(1.8 to 2.1)                      | 0.7<br>(0.5 to 1.0)                   | 0.3<br>(-17.3 to 21.8)                            | -19.0<br>(-33.3 to -1.9)                            |
| Uterine cancer                                     | 5.0<br>(4.4 to 5.7)                           | 1.1<br>(0.9 to 1.2)                      | 0.4<br>(0.3 to 0.5)                   | 84.3<br>(45.4 to 127.4)                           | 33.6<br>(4.9 to 66.2)                               |
| Ovarian cancer                                     | 2.4<br>(2.0 to 2.7)                           | 0.8<br>(0.6 to 0.9)                      | 0.3<br>(0.2 to 0.5)                   | 22.9<br>(-10.4 to 67.9)                           | -5.3<br>(-31.4 to 28.5)                             |
| Prostate cancer                                    | 26.5<br>(19.5 to 30.4)                        | 6.7<br>(5.1 to 7.5)                      | 2.6<br>(1.7 to 3.4)                   | 67.4<br>(46.6 to 90.9)                            | 16.6<br>(1.7 to 33.5)                               |
| Testicular cancer                                  | 6.3<br>(5.3 to 7.5)                           | 1.2<br>(1.0 to 1.4)                      | 0.4<br>(0.3 to 0.6)                   | 55.7<br>(20.9 to 105.5)                           | 40.1<br>(8.7 to 85.7)                               |
| Kidney cancer                                      | 7.0<br>(6.5 to 7.5)                           | 1.9<br>(1.8 to 2.0)                      | 0.6<br>(0.5 to 0.8)                   | 44.5<br>(26.1 to 67.1)                            | 8.1<br>(-6.2 to 26.0)                               |
| Bladder cancer                                     | 5.3<br>(4.9 to 5.8)                           | 1.3<br>(1.2 to 1.4)                      | 0.5<br>(0.4 to 0.7)                   | 51.6<br>(32.9 to 73.0)                            | 7.7<br>(-6.0 to 23.6)                               |
| Brain and nervous system cancer                    | 1.2<br>(1.1 to 1.3)                           | 0.6<br>(0.5 to 0.6)                      | 0.2<br>(0.1 to 0.2)                   | 48.0<br>(28.7 to 64.1)                            | 18.5<br>(2.1 to 31.6)                               |
| Thyroid cancer                                     | 3.8<br>(3.5 to 4.2)                           | 0.7<br>(0.7 to 0.8)                      | 0.2<br>(0.2 to 0.3)                   | 69.0<br>(41.2 to 102.8)                           | 32.0<br>(10.2 to 57.6)                              |
| Mesothelioma                                       | 0.1<br>(0.1 to 0.1)                           | 0.1<br>(0.1 to 0.1)                      | $< 0.05$<br>( $< 0.05$ to $< 0.05$ )  | 30.2<br>(19.6 to 40.7)                            | -3.0<br>(-10.8 to 4.9)                              |
| Hodgkin lymphoma                                   | 0.7<br>(0.6 to 0.8)                           | 0.2<br>(0.1 to 0.2)                      | 0.1<br>( $< 0.05$ to 0.1)             | 53.6<br>(38.8 to 70.8)                            | 28.9<br>(15.7 to 43.6)                              |
| Non-Hodgkin's lymphoma                             | 4.2<br>(3.9 to 4.7)                           | 1.2<br>(1.2 to 1.4)                      | 0.4<br>(0.3 to 0.5)                   | 54.0<br>(37.3 to 75.2)                            | 16.3<br>(3.8 to 32.2)                               |
| Multiple myeloma                                   | 1.3<br>(0.9 to 1.5)                           | 0.6<br>(0.4 to 0.7)                      | 0.3<br>(0.2 to 0.4)                   | 56.6<br>(25.9 to 98.0)                            | 12.4<br>(-10.7 to 44.7)                             |
| Leukaemia                                          | 3.3<br>(3.1 to 3.6)                           | 1.0<br>(0.9 to 1.1)                      | 0.4<br>(0.3 to 0.6)                   | 33.1<br>(23.0 to 44.6)                            | 6.1<br>(-2.5 to 15.8)                               |
| Acute lymphoid leukaemia                           | 0.7<br>(0.6 to 0.9)                           | 0.2<br>(0.2 to 0.2)                      | 0.1<br>(0.1 to 0.1)                   | 36.4<br>(17.9 to 57.2)                            | 28.5<br>(8.6 to 51.6)                               |
| Chronic lymphoid leukaemia                         | 0.7<br>(0.6 to 0.9)                           | 0.2<br>(0.1 to 0.2)                      | 0.1<br>(0.1 to 0.1)                   | 36.9<br>(15.4 to 63.3)                            | -1.7<br>(-17.2 to 17.9)                             |
| Acute myeloid leukaemia                            | 0.4<br>(0.4 to 0.5)                           | 0.3<br>(0.2 to 0.3)                      | 0.1<br>(0.1 to 0.1)                   | 36.1<br>(24.8 to 48.7)                            | 10.5<br>(0.5 to 22.0)                               |
| Chronic myeloid leukaemia                          | 0.3<br>(0.3 to 0.3)                           | 0.1<br>(0.1 to 0.1)                      | $< 0.05$<br>( $< 0.05$ to $< 0.05$ )  | -0.9<br>(-12.2 to 9.8)                            | -24.2<br>(-32.8 to -16.1)                           |
| Other leukaemia                                    | 1.1<br>(1.0 to 1.2)                           | 0.2<br>(0.2 to 0.3)                      | 0.1<br>(0.1 to 0.2)                   | 39.3<br>(20.2 to 61.7)                            | 5.1<br>(-9.8 to 22.8)                               |
| Other neoplasms                                    | 6.1<br>(5.7 to 6.4)                           | 1.9<br>(1.8 to 2.0)                      | 0.6<br>(0.4 to 0.7)                   | 44.4<br>(30.1 to 61.1)                            | 11.1<br>(-0.1 to 24.1)                              |
| <b>Cardiovascular diseases</b>                     | <b>1,292.8</b><br><b>(1,244.5 to 1,342.8)</b> | <b>134.6†</b><br><b>(126.8 to 142.5)</b> | <b>81.9</b><br><b>(60.0 to 106.9)</b> | <b>34.6</b><br><b>(29.5 to 40.8)</b>              | <b>-2.5</b><br><b>(-6.2 to 1.9)</b>                 |
| Rheumatic heart disease                            | 2.1<br>(1.9 to 2.3)                           | 0.6<br>(0.5 to 0.6)                      | 0.2<br>(0.1 to 0.2)                   | 10.6<br>(-6.0 to 30.5)                            | -14.8<br>(-27.9 to 0.9)                             |
| Ischaemic heart disease                            | 378.7<br>(356.7 to 401.2)                     | 46.4<br>(42.1 to 51.4)                   | 14.7<br>(10.2 to 20.2)                | 33.6<br>(27.3 to 40.4)                            | -2.3<br>(-7.0 to 2.5)                               |
| Cerebrovascular disease                            | 202.4<br>(189.5 to 216.4)                     | 28.4‡<br>(26.1 to 30.9)                  | 32.7<br>(23.3 to 41.5)                | 37.4<br>(26.5 to 51.0)                            | -1.0<br>(-9.0 to 8.9)                               |
| Ischaemic stroke                                   | 166.6<br>(150.9 to 185.1)                     | 19.7‡<br>(17.5 to 22.1)                  | 26.0<br>(18.5 to 33.4)                | 37.0<br>(24.8 to 53.5)                            | -1.9<br>(-10.6 to 10.4)                             |
| Hemorrhagic stroke                                 | 44.4<br>(39.7 to 49.4)                        | 8.7‡<br>(7.8 to 9.7)                     | 6.7<br>(4.7 to 8.7)                   | 38.6<br>(22.2 to 56.1)                            | 2.5<br>(-9.3 to 15.6)                               |
| Hypertensive heart disease                         | 65.3<br>(54.3 to 77.8)                        | --                                       | 5.2<br>(3.6 to 7.3)                   | 32.6<br>(21.4 to 44.9)                            | -7.4<br>(-15.4 to 1.2)                              |
| Cardiomyopathy and myocarditis                     | 24.4<br>(21.5 to 27.9)                        | 4.2†<br>(3.6 to 4.8)                     | 2.0<br>(1.3 to 2.9)                   | 28.3<br>(14.3 to 44.2)                            | -1.8<br>(-12.3 to 10.3)                             |
| Myocarditis                                        | 2.1<br>(1.9 to 2.4)                           | 4.2<br>(3.6 to 4.8)                      | 0.1<br>(0.1 to 0.2)                   | 16.9<br>(8.0 to 29.1)                             | 0.7<br>(-6.8 to 11.0)                               |
| Alcoholic cardiomyopathy                           | 2.1<br>(1.6 to 2.6)                           | --                                       | 0.2<br>(0.1 to 0.3)                   | 33.5<br>(-1.6 to 77.3)                            | -1.0<br>(-26.7 to 30.5)                             |
| Other cardiomyopathy                               | 20.8<br>(17.2 to 24.7)                        | --                                       | 1.7<br>(1.1 to 2.4)                   | 28.9<br>(13.6 to 46.9)                            | -2.1<br>(-13.6 to 11.5)                             |
| Atrial fibrillation and flutter                    | 178.2<br>(155.2 to 205.9)                     | 14.7<br>(12.5 to 17.3)                   | 14.1<br>(9.4 to 19.9)                 | 38.9<br>(30.4 to 47.8)                            | -1.9<br>(-7.8 to 4.5)                               |
| Peripheral vascular disease                        | 437.9<br>(382.4 to 505.7)                     | 37.9<br>(32.6 to 44.1)                   | 1.7<br>(0.8 to 3.1)                   | 34.7<br>(25.9 to 44.7)                            | -6.8<br>(-12.9 to 0.2)                              |
| Endocarditis                                       | 1.6<br>(1.3 to 1.9)                           | 2.5<br>(2.2 to 2.7)                      | 0.1<br>(0.1 to 0.2)                   | 32.9<br>(14.1 to 56.2)                            | -4.5<br>(-18.7 to 12.9)                             |
| Other cardiovascular and circulatory diseases      | 216.0<br>(178.8 to 258.9)                     | --                                       | 11.3<br>(7.3 to 16.2)                 | 25.8<br>(15.7 to 36.9)                            | -4.8<br>(-12.0 to 3.7)                              |
| <b>Chronic respiratory diseases</b>                | <b>1,783.1</b><br><b>(1,702.3 to 1,870.4)</b> | <b>209.6†</b><br><b>(197.2 to 223.0)</b> | <b>61.5</b><br><b>(43.9 to 83.4)</b>  | <b>18.4</b><br><b>(12.8 to 24.2)</b>              | <b>4.5</b><br><b>(-0.7 to 9.8)</b>                  |
| Chronic obstructive pulmonary disease              | 524.4<br>(478.9 to 589.0)                     | 34.5<br>(31.7 to 38.4)                   | 9.1<br>(7.5 to 11.1)                  | 39.2<br>(18.3 to 63.4)                            | 2.9<br>(-12.3 to 20.4)                              |
| Pneumoconiosis                                     | 1.1<br>(1.0 to 1.2)                           | 0.2<br>(0.2 to 0.2)                      | 0.2<br>(0.1 to 0.2)                   | 16.2<br>(-6.5 to 41.0)                            | -17.7<br>(-34.0 to 0.4)                             |
| Silicosis                                          | 0.8<br>(0.7 to 1.0)                           | 0.2<br>(0.1 to 0.2)                      | 0.1<br>(0.1 to 0.2)                   | 20.7<br>(-9.2 to 57.4)                            | -14.6<br>(-36.0 to 11.6)                            |



| Cause                                                          | Prevalence in thousands (95% UI)        | Incidence in thousands (95% UI)          | YLDs in thousands (95% UI)        |                                                   |                                                     |
|----------------------------------------------------------------|-----------------------------------------|------------------------------------------|-----------------------------------|---------------------------------------------------|-----------------------------------------------------|
|                                                                | 2016 counts                             | 2016 counts                              | 2016 counts                       | Percentage change in counts between 2006 and 2016 | Percentage change in age-standardised rates between |
| Asbestosis                                                     | 0.1<br>(0.1 to 0.1)                     | < 0.05<br>(< 0.05 to < 0.05)             | < 0.05<br>(< 0.05 to < 0.05)      | 16.6<br>(7.1 to 26.9)                             | -14.9<br>(-21.9 to -6.8)                            |
| Coal workers pneumoconiosis                                    | --                                      | --                                       | --                                | --                                                | --                                                  |
| Other pneumoconiosis                                           | 0.1<br>(0.1 to 0.2)                     | < 0.05<br>(< 0.05 to < 0.05)             | < 0.05<br>(< 0.05 to < 0.05)      | -3.9<br>(-14.6 to 8.2)                            | -32.5<br>(-40.3 to -24.3)                           |
| Asthma                                                         | 1,288.8<br>(1,201.7 to 1,381.5)         | 172.9<br>(160.7 to 185.8)                | 50.5<br>(33.2 to 72.7)            | 14.5<br>(8.8 to 20.1)                             | 4.6<br>(-1.0 to 10.2)                               |
| Interstitial lung disease and pulmonary sarcoidosis            | 12.6<br>(11.4 to 13.8)                  | 2.0<br>(1.9 to 2.2)                      | 1.4<br>(0.9 to 1.9)               | 47.0<br>(29.7 to 65.9)                            | 6.7<br>(-5.9 to 20.5)                               |
| Other chronic respiratory diseases                             | --                                      | --                                       | 0.4<br>(0.3 to 0.5)               | 51.8<br>(33.9 to 71.8)                            | 38.3<br>(22.8 to 55.0)                              |
| <b>Cirrhosis and other chronic liver diseases</b>              | <b>223.6<br/>(212.9 to 234.9)</b>       | <b>5.8<br/>(5.5 to 6.0)</b>              | <b>4.2<br/>(2.8 to 5.8)</b>       | <b>34.0<br/>(21.4 to 47.5)</b>                    | <b>6.2<br/>(-3.4 to 16.7)</b>                       |
| Cirrhosis and other chronic liver diseases due to hepatitis B  | 36.4<br>(31.6 to 41.3)                  | 1.0<br>(0.9 to 1.1)                      | 0.7<br>(0.4 to 1.0)               | 35.6<br>(8.8 to 69.7)                             | 4.1<br>(-15.7 to 30.7)                              |
| Cirrhosis and other chronic liver diseases due to hepatitis C  | 72.3<br>(65.1 to 79.6)                  | 1.9<br>(1.7 to 2.0)                      | 1.3<br>(0.8 to 1.8)               | 34.8<br>(13.9 to 58.0)                            | 4.4<br>(-11.9 to 21.9)                              |
| Cirrhosis and other chronic liver diseases due to alcohol use  | 77.4<br>(70.2 to 85.4)                  | 2.0<br>(1.9 to 2.2)                      | 1.3<br>(0.9 to 1.9)               | 40.0<br>(19.8 to 64.1)                            | 6.4<br>(-8.6 to 24.2)                               |
| Cirrhosis and other chronic liver diseases due to other causes | 37.5<br>(33.4 to 42.3)                  | 0.9<br>(0.8 to 1.0)                      | 0.9<br>(0.6 to 1.3)               | 24.5<br>(0.6 to 51.9)                             | 9.7<br>(-11.2 to 34.1)                              |
| <b>Digestive diseases</b>                                      | <b>353.6<br/>(336.7 to 374.4)</b>       | <b>488.0†<br/>(452.5 to 524.2)</b>       | <b>12.8<br/>(9.1 to 17.4)</b>     | <b>14.7<br/>(6.4 to 23.5)</b>                     | <b>-9.5<br/>(-15.8 to -2.4)</b>                     |
| Peptic ulcer disease                                           | 139.3<br>(126.9 to 153.5)               | 12.2<br>(11.0 to 13.6)                   | 1.4<br>(0.9 to 2.2)               | 24.0<br>(9.9 to 40.6)                             | -2.1<br>(-13.4 to 9.9)                              |
| Gastritis and duodenitis                                       | 89.1<br>(79.8 to 98.9)                  | 71.9<br>(63.5 to 81.1)                   | 1.2<br>(0.8 to 1.9)               | 30.6<br>(15.8 to 47.8)                            | 2.8<br>(-8.4 to 16.0)                               |
| Appendicitis                                                   | 1.4<br>(1.3 to 1.5)                     | 37.3<br>(34.6 to 40.3)                   | 0.5<br>(0.3 to 0.6)               | 11.7<br>(-14.3 to 45.6)                           | 2.8<br>(-21.7 to 35.4)                              |
| Paralytic ileus and intestinal obstruction                     | 0.3<br>(0.3 to 0.3)                     | 8.1<br>(7.4 to 8.9)                      | 0.1<br>(0.1 to 0.1)               | 60.5<br>(46.1 to 76.0)                            | 21.2<br>(11.1 to 32.0)                              |
| Inguinal, femoral, and abdominal hernia                        | 93.4<br>(84.4 to 102.6)                 | 223.3<br>(194.4 to 252.9)                | 6.1<br>(4.1 to 8.5)               | 8.3<br>(-4.9 to 22.8)                             | -15.6<br>(-25.6 to -5.0)                            |
| Inflammatory bowel disease                                     | 9.9<br>(9.1 to 10.8)                    | 6.8<br>(6.5 to 7.0)                      | 1.4<br>(1.0 to 2.0)               | 14.2<br>(-3.8 to 33.2)                            | -6.5<br>(-20.9 to 8.6)                              |
| Vascular intestinal disorders                                  | 0.5<br>(0.5 to 0.6)                     | 2.2<br>(2.0 to 2.4)                      | 0.2<br>(0.1 to 0.2)               | 66.4<br>(32.1 to 108.3)                           | 21.4<br>(-4.8 to 54.0)                              |
| Gallbladder and biliary diseases                               | 29.9<br>(26.7 to 33.4)                  | 113.6<br>(98.8 to 131.0)                 | 0.7<br>(0.5 to 1.0)               | 11.4<br>(-9.9 to 36.6)                            | -12.6<br>(-28.6 to 6.8)                             |
| Pancreatitis                                                   | 1.4<br>(1.3 to 1.6)                     | 12.6<br>(11.4 to 14.0)                   | 0.2<br>(0.1 to 0.3)               | 42.8<br>(35.4 to 50.7)                            | 10.1<br>(4.6 to 16.3)                               |
| Other digestive diseases                                       | --                                      | --                                       | 1.0<br>(0.7 to 1.4)               | 17.6<br>(9.2 to 26.9)                             | -8.0<br>(-14.7 to -0.5)                             |
| <b>Neurological disorders</b>                                  | <b>6,794.9<br/>(6,523.6 to 7,087.1)</b> | <b>2,961.3<br/>(2,548.1 to 3,437.1)</b>  | <b>189.7<br/>(126.0 to 259.9)</b> | <b>15.9<br/>(-2.7 to 37.0)</b>                    | <b>0.4<br/>(-17.2 to 19.7)</b>                      |
| Alzheimer's disease and other dementias                        | 104.5<br>(87.2 to 124.7)                | 18.7<br>(15.5 to 22.7)                   | 15.8<br>(10.8 to 21.3)            | 47.4<br>(40.0 to 55.1)                            | -1.5<br>(-6.4 to 3.4)                               |
| Parkinson's disease                                            | 25.9<br>(20.2 to 32.3)                  | 3.1<br>(2.4 to 4.0)                      | 3.0<br>(1.9 to 4.3)               | 51.1<br>(37.9 to 65.6)                            | 5.4<br>(-4.2 to 15.9)                               |
| Epilepsy                                                       | 71.4<br>(16.3 to 124.9)                 | 7.7<br>(1.7 to 13.7)                     | 19.5<br>(3.8 to 42.8)             | 12.4<br>(-80.9 to 476.7)                          | 0.5<br>(-82.9 to 416.1)                             |
| Multiple sclerosis                                             | 9.4<br>(8.2 to 10.6)                    | 0.3<br>(0.2 to 0.3)                      | 2.5<br>(1.7 to 3.3)               | 32.6<br>(10.1 to 60.6)                            | 10.5<br>(-7.6 to 32.5)                              |
| Motor neuron disease                                           | 1.4<br>(1.2 to 1.6)                     | 0.2<br>(0.2 to 0.2)                      | 0.3<br>(0.2 to 0.4)               | 29.2<br>(24.3 to 34.0)                            | 6.9<br>(3.0 to 10.6)                                |
| Migraine                                                       | 3,026.3<br>(2,883.2 to 3,173.9)         | 284.6<br>(269.1 to 300.5)                | 126.4<br>(80.2 to 177.7)          | 12.3<br>(8.6 to 16.0)                             | -0.4<br>(-3.7 to 3.2)                               |
| Tension-type headache                                          | 4,807.7<br>(4,316.8 to 5,321.0)         | 2,646.7<br>(2,233.6 to 3,125.1)          | 17.8<br>(11.3 to 26.1)            | 14.7<br>(9.0 to 21.3)                             | 0.3<br>(-4.5 to 5.9)                                |
| Other neurological disorders                                   | 0.1<br>(0.1 to 0.1)                     | 0.2<br>(0.1 to 0.2)                      | 4.3<br>(1.5 to 8.6)               | 29.6<br>(-65.0 to 327.9)                          | 20.2<br>(-68.5 to 297.1)                            |
| <b>Mental and substance use disorders</b>                      | <b>3,356.1<br/>(3,250.9 to 3,474.6)</b> | <b>1,219.9†<br/>(1,139.5 to 1,315.7)</b> | <b>456.4<br/>(327.4 to 594.3)</b> | <b>11.2<br/>(8.5 to 14.0)</b>                     | <b>-1.4<br/>(-3.8 to 1.1)</b>                       |
| Schizophrenia                                                  | 39.0<br>(34.1 to 44.1)                  | 2.1<br>(1.9 to 2.4)                      | 24.9<br>(18.3 to 31.2)            | 18.3<br>(8.7 to 28.9)                             | 0.5<br>(-7.7 to 9.5)                                |
| Alcohol use disorders                                          | 422.0<br>(363.0 to 484.7)               | 177.9<br>(151.2 to 207.0)                | 42.4<br>(28.8 to 59.4)            | 5.0<br>(-5.7 to 16.8)                             | -6.6<br>(-16.0 to 3.8)                              |
| Drug use disorders                                             | 188.2<br>(175.5 to 203.3)               | 22.8<br>(20.4 to 25.2)                   | 35.1<br>(24.5 to 46.5)            | 16.1<br>(6.4 to 27.3)                             | 3.4<br>(-5.2 to 13.4)                               |
| Opioid use disorders                                           | 46.8<br>(38.1 to 57.6)                  | 5.4<br>(4.5 to 6.5)                      | 19.4<br>(13.1 to 26.9)            | 19.7<br>(7.8 to 33.9)                             | 4.4<br>(-6.3 to 16.4)                               |
| Cocaine use disorders                                          | 34.1<br>(29.6 to 39.2)                  | 2.1<br>(1.7 to 2.5)                      | 4.6<br>(2.9 to 6.9)               | 13.3<br>(-4.4 to 33.3)                            | 2.2<br>(-13.8 to 20.4)                              |
| Amphetamine use disorders                                      | 20.2<br>(13.7 to 27.9)                  | 1.8<br>(1.3 to 2.6)                      | 2.7<br>(1.5 to 4.3)               | 3.8<br>(-19.1 to 34.0)                            | -3.3<br>(-24.8 to 24.7)                             |
| Cannabis use disorders                                         | 80.0<br>(67.3 to 95.2)                  | 11.3<br>(9.3 to 13.7)                    | 2.3<br>(1.4 to 3.4)               | 21.8<br>(3.0 to 43.9)                             | 15.0<br>(-3.1 to 36.4)                              |
| Other drug use disorders                                       | 12.1<br>(10.6 to 13.5)                  | 2.1<br>(1.9 to 2.3)                      | 6.0<br>(3.9 to 8.7)               | 11.4<br>(-11.9 to 41.7)                           | 0.7<br>(-20.4 to 28.2)                              |
| Depressive disorders                                           | 764.6<br>(717.7 to 822.3)               | 797.0<br>(719.1 to 888.4)                | 129.4<br>(88.6 to 177.6)          | 10.4<br>(4.8 to 16.7)                             | -3.7<br>(-8.6 to 1.8)                               |
| Major depressive disorder                                      | 500.3<br>(454.8 to 555.5)               | 753.2<br>(676.0 to 845.3)                | 102.7<br>(70.0 to 141.2)          | 8.5<br>(2.0 to 16.1)                              | -4.6<br>(-10.5 to 2.3)                              |
| Dysthymia                                                      | 277.9<br>(241.3 to 319.1)               | 43.9<br>(38.4 to 50.5)                   | 26.7<br>(17.7 to 39.0)            | 18.3<br>(13.8 to 22.8)                            | -0.0<br>(-3.5 to 3.3)                               |
| Bipolar disorder                                               | 165.6<br>(143.8 to 191.3)               | 12.3<br>(10.7 to 14.2)                   | 33.7<br>(21.0 to 49.7)            | 14.4<br>(8.6 to 21.0)                             | -0.1<br>(-5.1 to 5.7)                               |
| Anxiety disorders                                              | 1,114.2<br>(1,013.2 to 1,219.2)         | 135.6<br>(125.6 to 146.8)                | 107.2<br>(74.9 to 146.4)          | 11.7<br>(4.7 to 18.9)                             | -0.8<br>(-6.9 to 5.3)                               |
| Eating disorders                                               | 43.0<br>(35.0 to 52.0)                  | 15.8<br>(11.8 to 20.6)                   | 8.8<br>(5.7 to 13.0)              | 18.3<br>(5.9 to 31.2)                             | 12.3<br>(0.3 to 24.8)                               |
| Anorexia nervosa                                               | 10.2<br>(7.5 to 13.8)                   | 2.8<br>(2.0 to 3.8)                      | 2.2<br>(1.3 to 3.4)               | 15.3<br>(-3.7 to 40.7)                            | 10.7<br>(-7.5 to 35.7)                              |
| Bulimia nervosa                                                | 31.6<br>(23.7 to 41.5)                  | 13.1<br>(9.3 to 17.9)                    | 6.6<br>(4.0 to 9.8)               | 19.3<br>(4.4 to 35.2)                             | 12.8<br>(-0.9 to 27.8)                              |
| Autistic spectrum disorders                                    | 150.5<br>(136.8 to 169.2)               | 0.7<br>(0.5 to 1.0)                      | 23.9<br>(16.3 to 33.9)            | 10.4<br>(5.0 to 16.0)                             | 0.5<br>(-4.4 to 5.4)                                |
| Autism                                                         | 58.1<br>(49.6 to 68.5)                  | 0.1<br>(< 0.05 to 0.2)                   | 14.7<br>(9.5 to 21.6)             | 10.8<br>(2.9 to 19.3)                             | 0.5<br>(-7.0 to 8.3)                                |
| Asperger syndrome and other autistic spectrum disorders        | 91.9<br>(76.8 to 110.7)                 | 0.6<br>(0.4 to 0.9)                      | 9.2<br>(6.0 to 13.2)              | 9.8<br>(4.0 to 15.8)                              | 0.5<br>(-4.7 to 5.7)                                |

| Cause                                                      | Prevalence in thousands (95% UI)                 | Incidence in thousands (95% UI)                              | YLDs in thousands (95% UI)              |                                                   |                                                     |
|------------------------------------------------------------|--------------------------------------------------|--------------------------------------------------------------|-----------------------------------------|---------------------------------------------------|-----------------------------------------------------|
|                                                            | 2016 counts                                      | 2016 counts                                                  | 2016 counts                             | Percentage change in counts between 2006 and 2016 | Percentage change in age-standardised rates between |
| Attention-deficit/hyperactivity disorder                   | 209.4<br>(191.9 to 230.1)                        | 9.0<br>(7.9 to 10.4)                                         | 2.5<br>(1.5 to 4.0)                     | 2.2<br>(-4.6 to 9.3)                              | 0.3<br>(-6.4 to 7.2)                                |
| Conduct disorder                                           | 107.6<br>(90.5 to 124.5)                         | 35.4<br>(28.7 to 42.2)                                       | 13.1<br>(8.1 to 19.8)                   | -6.0<br>(-11.8 to 0.1)                            | 0.3<br>(-6.0 to 6.9)                                |
| Idiopathic developmental intellectual disability           | 117.6<br>(57.7 to 180.1)                         | --                                                           | 5.8<br>(2.8 to 9.8)                     | 5.2<br>(-4.1 to 14.4)                             | -4.9<br>(-13.5 to 3.5)                              |
| Other mental and substance use disorders                   | 401.2<br>(348.9 to 463.6)                        | 11.3<br>(10.0 to 12.9)                                       | 29.8<br>(20.5 to 42.0)                  | 18.4<br>(13.5 to 24.2)                            | 0.3<br>(-3.8 to 5.2)                                |
| <b>Diabetes, urogenital, blood, and endocrine diseases</b> | <b>4,885.5</b><br><b>(4,792.8 to 4,997.7)</b>    | <b>1,871.7<sup>+</sup></b><br><b>(1,771.0 to 1,978.1)</b>    | <b>130.1</b><br><b>(93.8 to 172.8)</b>  | <b>32.6</b><br><b>(27.4 to 38.2)</b>              | <b>2.3</b><br><b>(-1.6 to 6.8)</b>                  |
| Diabetes mellitus                                          | 709.1<br>(640.5 to 794.4)                        | 40.2<br>(36.2 to 45.9)                                       | 54.8<br>(38.1 to 76.1)                  | 33.8<br>(22.3 to 46.0)                            | 0.6<br>(-8.2 to 9.8)                                |
| Acute glomerulonephritis                                   | 0.2<br>(0.2 to 0.2)                              | 2.7<br>(2.4 to 3.0)                                          | < 0.05<br>(< 0.05 to < 0.05)            | 9.2<br>(3.5 to 16.5)                              | -8.2<br>(-13.2 to -2.6)                             |
| Chronic kidney disease                                     | 737.2<br>(668.3 to 807.0)                        | 62.4<br>(55.3 to 70.4)                                       | 28.5<br>(21.5 to 35.6)                  | 44.8<br>(35.6 to 53.7)                            | 8.3<br>(1.4 to 14.8)                                |
| Chronic kidney disease due to diabetes mellitus            | 249.4<br>(207.0 to 293.2)                        | 22.2<br>(18.0 to 26.7)                                       | 10.0<br>(7.4 to 12.9)                   | 50.8<br>(36.4 to 66.5)                            | 12.3<br>(1.8 to 23.9)                               |
| Chronic kidney disease due to hypertension                 | 134.9<br>(114.2 to 155.8)                        | 7.7<br>(6.0 to 9.5)                                          | 5.2<br>(3.7 to 6.7)                     | 47.0<br>(31.6 to 66.0)                            | 3.4<br>(-7.4 to 16.5)                               |
| Chronic kidney disease due to glomerulonephritis           | 118.8<br>(100.9 to 136.7)                        | 12.7<br>(10.1 to 15.5)                                       | 4.1<br>(3.0 to 5.4)                     | 37.7<br>(21.5 to 55.1)                            | 8.4<br>(-3.6 to 22.0)                               |
| Chronic kidney disease due to other causes                 | 234.2<br>(192.8 to 278.6)                        | 19.8<br>(16.0 to 24.1)                                       | 9.2<br>(6.6 to 12.2)                    | 40.6<br>(27.8 to 54.1)                            | 7.0<br>(-2.1 to 17.0)                               |
| Urinary diseases and male infertility                      | 553.1<br>(509.7 to 591.1)                        | 1,140.8 <sup>+</sup><br>(1,044.0 to 1,238.4)                 | 17.6<br>(11.5 to 25.0)                  | 36.9<br>(29.3 to 45.0)                            | 0.8<br>(-4.7 to 6.8)                                |
| Interstitial nephritis and urinary tract infections        | 18.0<br>(16.1 to 19.8)                           | 941.5<br>(850.6 to 1,037.9)                                  | 0.6<br>(0.4 to 0.9)                     | 8.8<br>(-5.7 to 24.1)                             | -6.9<br>(-19.2 to 5.9)                              |
| Urolithiasis                                               | 5.3<br>(4.8 to 5.9)                              | 140.1<br>(127.0 to 154.4)                                    | 0.4<br>(0.3 to 0.6)                     | 29.9<br>(16.9 to 43.9)                            | 6.6<br>(-4.1 to 17.4)                               |
| Benign prostatic hyperplasia                               | 486.7<br>(441.5 to 533.5)                        | 59.1<br>(50.5 to 68.0)                                       | 16.1<br>(10.5 to 22.9)                  | 40.2<br>(31.6 to 49.3)                            | 1.5<br>(-4.7 to 8.0)                                |
| Male infertility                                           | 36.0<br>(28.0 to 46.3)                           | --                                                           | 0.2<br>(0.1 to 0.4)                     | 7.9<br>(-2.2 to 18.4)                             | 0.8<br>(-8.2 to 10.6)                               |
| Other urinary diseases                                     | --                                               | --                                                           | 0.4<br>(0.2 to 0.5)                     | -4.0<br>(-13.7 to 5.4)                            | -18.0<br>(-26.3 to -10.1)                           |
| Gynecological diseases                                     | 1,931.8<br>(1,850.0 to 2,022.4)                  | 572.3 <sup>+</sup><br>(535.9 to 614.1)                       | 18.8<br>(12.7 to 27.2)                  | 13.0<br>(7.1 to 19.2)                             | 0.1<br>(-5.1 to 6.0)                                |
| Uterine fibroids                                           | 179.7<br>(154.7 to 203.8)                        | 17.8<br>(15.1 to 20.5)                                       | 2.2<br>(1.2 to 3.9)                     | 10.8<br>(1.9 to 19.7)                             | -5.2<br>(-12.6 to 2.4)                              |
| Polycystic ovarian syndrome                                | 12.8<br>(10.0 to 16.0)                           | 10.9<br>(8.0 to 14.2)                                        | 0.1<br>(0.1 to 0.2)                     | 4.5<br>(-10.7 to 21.1)                            | -0.7<br>(-15.3 to 15.5)                             |
| Female infertility                                         | 30.0<br>(12.9 to 53.9)                           | --                                                           | 0.2<br>(< 0.05 to < 0.4)                | -10.4<br>(-26.2 to 8.1)                           | -16.4<br>(-31.3 to -1.2)                            |
| Endometriosis                                              | 6.7<br>(5.7 to 7.8)                              | 19.6<br>(15.8 to 24.1)                                       | 0.6<br>(0.4 to 0.9)                     | 10.5<br>(-16.3 to 41.8)                           | 1.5<br>(-23.3 to 31.0)                              |
| Genital prolapse                                           | 646.9<br>(580.0 to 724.6)                        | 33.0<br>(29.2 to 37.7)                                       | 2.0<br>(1.0 to 3.6)                     | 25.9<br>(14.8 to 38.0)                            | -5.7<br>(-14.3 to 3.2)                              |
| Premenstrual syndrome                                      | 1,080.6<br>(1,018.2 to 1,146.2)                  | 371.2<br>(346.2 to 397.5)                                    | 9.0<br>(5.6 to 13.8)                    | 6.2<br>(-1.7 to 14.2)                             | -2.9<br>(-10.3 to 4.5)                              |
| Other gynecological diseases                               | 144.0<br>(124.4 to 169.0)                        | 119.8<br>(98.8 to 147.7)                                     | 4.6<br>(3.0 to 6.7)                     | 26.2<br>(9.7 to 47.2)                             | 13.5<br>(-1.2 to 32.1)                              |
| Hemoglobinopathies and hemolytic anaemias                  | 1,653.5<br>(1,606.1 to 1,718.4)                  | --                                                           | 1.4<br>(0.9 to 2.2)                     | 8.6<br>(-3.4 to 22.8)                             | -6.4<br>(-17.1 to 5.3)                              |
| Thalassemias                                               | 0.2<br>(0.1 to 0.3)                              | --                                                           | < 0.05<br>(< 0.05 to < 0.05)            | 20.4<br>(-3.0 to 48.1)                            | 26.1<br>(0.9 to 55.5)                               |
| Thalassaemias trait                                        | 38.6<br>(33.2 to 43.5)                           | --                                                           | 0.4<br>(0.2 to 0.6)                     | 33.5<br>(7.4 to 69.0)                             | 13.9<br>(-8.5 to 44.1)                              |
| Sickle cell disorders                                      | 0.1<br>(0.1 to 0.1)                              | --                                                           | < 0.05<br>(< 0.05 to < 0.05)            | 21.3<br>(12.0 to 30.7)                            | 15.8<br>(6.6 to 24.8)                               |
| Sickle cell trait                                          | 190.1<br>(182.7 to 198.3)                        | --                                                           | 0.3<br>(0.2 to 0.5)                     | 13.6<br>(-7.9 to 37.5)                            | 0.4<br>(-18.8 to 22.0)                              |
| G6PD deficiency                                            | 186.4<br>(174.7 to 200.7)                        | --                                                           | < 0.05<br>(< 0.05 to < 0.05)            | 14.2<br>(-1.1 to 34.4)                            | 1.4<br>(-13.8 to 24.6)                              |
| G6PD trait                                                 | 1,218.4<br>(1,174.7 to 1,266.7)                  | --                                                           | < 0.05<br>(< 0.05 to < 0.05)            | 19.9<br>(8.1 to 33.8)                             | 5.7<br>(-5.2 to 18.6)                               |
| Other hemoglobinopathies and hemolytic anaemias            | 50.9<br>(46.6 to 55.6)                           | --                                                           | 0.7<br>(0.5 to 1.2)                     | -3.6<br>(-15.6 to 9.2)                            | -17.3<br>(-28.0 to -5.9)                            |
| Endocrine, metabolic, blood, and immune disorders          | 276.7<br>(257.1 to 297.4)                        | 53.4<br>(48.2 to 59.0)                                       | 9.0<br>(6.0 to 12.3)                    | 34.1<br>(25.8 to 42.7)                            | 5.0<br>(-1.6 to 11.1)                               |
| <b>Musculoskeletal disorders</b>                           | <b>4,812.0</b><br><b>(4,625.8 to 5,032.4)</b>    | <b>2,761.8</b><br><b>(2,511.7 to 3,050.3)</b>                | <b>543.8</b><br><b>(395.7 to 706.5)</b> | <b>12.3</b><br><b>(8.9 to 16.6)</b>               | <b>-7.3</b><br><b>(-10.1 to -4.0)</b>               |
| Rheumatoid arthritis                                       | 148.6<br>(133.2 to 166.2)                        | 7.7<br>(6.9 to 8.6)                                          | 34.9<br>(24.0 to 47.0)                  | 20.6<br>(12.3 to 29.3)                            | -7.0<br>(-13.5 to -0.2)                             |
| Osteoarthritis                                             | 1,083.4<br>(1,013.2 to 1,156.2)                  | 51.8<br>(48.1 to 55.9)                                       | 38.2<br>(25.1 to 54.8)                  | 33.8<br>(29.2 to 39.0)                            | -0.4<br>(-3.6 to 3.5)                               |
| Low back and neck pain                                     | 2,879.4<br>(2,719.2 to 3,079.3)                  | 1,260.5<br>(1,133.4 to 1,409.8)                              | 343.3<br>(245.2 to 451.2)               | 7.6<br>(2.9 to 12.8)                              | -10.3<br>(-14.1 to -6.2)                            |
| Low back pain                                              | 2,322.8<br>(2,119.4 to 2,567.1)                  | 1,103.5<br>(973.4 to 1,254.4)                                | 264.0<br>(187.7 to 351.6)               | 3.6<br>(-2.3 to 10.0)                             | -12.9<br>(-17.5 to -7.8)                            |
| Neck pain                                                  | 796.3<br>(689.6 to 921.8)                        | 157.0<br>(135.7 to 185.2)                                    | 79.4<br>(53.6 to 112.9)                 | 23.6<br>(20.3 to 27.0)                            | -0.0<br>(-2.0 to 2.2)                               |
| Gout                                                       | 147.2<br>(130.0 to 166.9)                        | 25.5<br>(22.2 to 29.2)                                       | 4.7<br>(3.1 to 6.5)                     | 30.4<br>(15.8 to 46.2)                            | 0.8<br>(-10.3 to 12.5)                              |
| Other musculoskeletal disorders                            | 1,427.1<br>(1,224.0 to 1,653.7)                  | 1,416.3<br>(1,208.8 to 1,675.8)                              | 122.8<br>(83.1 to 173.0)                | 18.0<br>(9.9 to 26.3)                             | -0.4<br>(-7.0 to 6.5)                               |
| <b>Other non-communicable diseases</b>                     | <b>13,792.6</b><br><b>(13,588.7 to 13,975.4)</b> | <b>35,281.3<sup>+</sup></b><br><b>(33,310.7 to 37,373.5)</b> | <b>395.6</b><br><b>(268.1 to 561.6)</b> | <b>17.7</b><br><b>(16.0 to 19.1)</b>              | <b>-0.8</b><br><b>(-2.0 to 0.2)</b>                 |
| Congenital anomalies                                       | 112.4<br>(102.3 to 125.0)                        | --                                                           | 16.2<br>(11.5 to 21.5)                  | 9.7<br>(3.8 to 16.5)                              | 0.3<br>(-5.1 to 6.5)                                |
| Neural tube defects                                        | 10.0<br>(9.0 to 11.1)                            | --                                                           | 3.0<br>(2.1 to 4.0)                     | 8.9<br>(-7.2 to 26.4)                             | -2.3<br>(-16.4 to 13.4)                             |
| Congenital heart anomalies                                 | 17.9<br>(15.8 to 20.4)                           | --                                                           | 0.9<br>(0.4 to 1.6)                     | 16.4<br>(1.0 to 32.1)                             | 7.8<br>(-6.4 to 23.1)                               |
| Orofacial clefts                                           | 9.5<br>(8.3 to 10.7)                             | --                                                           | 0.1<br>(0.1 to 0.1)                     | 11.2<br>(-2.3 to 25.5)                            | 0.3<br>(-11.8 to 13.1)                              |
| Down's syndrome                                            | 10.7<br>(9.2 to 12.3)                            | --                                                           | 1.0<br>(0.6 to 1.4)                     | 5.9<br>(-5.4 to 19.5)                             | 1.0<br>(-9.9 to 14.0)                               |
| Turner syndrome                                            | 3.1<br>(2.6 to 3.6)                              | --                                                           | 0.1<br>(< 0.05 to 0.1)                  | 14.8<br>(-12.8 to 49.1)                           | 7.4<br>(-21.4 to 42.5)                              |
| Klinefelter syndrome                                       | 4.1<br>(3.6 to 4.9)                              | --                                                           | < 0.05<br>(< 0.05 to < 0.05)            | 30.0<br>(-2.6 to 78.0)                            | 21.8<br>(-9.2 to 66.9)                              |



| Cause                                         | Prevalence in thousands (95% UI)              | Incidence in thousands (95% UI)                | YLDs in thousands (95% UI)             |                                                   |                                                     |
|-----------------------------------------------|-----------------------------------------------|------------------------------------------------|----------------------------------------|---------------------------------------------------|-----------------------------------------------------|
|                                               | 2016 counts                                   | 2016 counts                                    | 2016 counts                            | Percentage change in counts between 2006 and 2016 | Percentage change in age-standardised rates between |
| Other chromosomal abnormalities               | 10.9<br>(9.2 to 12.8)                         | --                                             | 1.2<br>(0.9 to 1.7)                    | 6.8<br>(-11.1 to 28.7)                            | 10.3<br>(-8.5 to 33.0)                              |
| Congenital musculoskeletal and limb anomalies | 27.7<br>(25.4 to 30.2)                        | --                                             | 4.0<br>(2.7 to 5.6)                    | 13.1<br>(2.1 to 25.7)                             | 1.0<br>(-8.9 to 12.4)                               |
| Urogenital congenital anomalies               | 14.3<br>(12.8 to 15.9)                        | --                                             | 0.3<br>(0.2 to 0.5)                    | 5.1<br>(-3.6 to 14.8)                             | 2.1<br>(-6.6 to 11.4)                               |
| Digestive congenital anomalies                | 17.5<br>(15.5 to 19.6)                        | --                                             | 0.8<br>(0.5 to 1.1)                    | 11.7<br>(-5.9 to 32.5)                            | 0.8<br>(-15.4 to 19.4)                              |
| Other congenital anomalies                    | 32.0<br>(20.1 to 49.8)                        | --                                             | 4.8<br>(3.1 to 7.3)                    | 7.6<br>(-3.4 to 21.1)                             | -3.3<br>(-13.1 to 8.5)                              |
| Skin and subcutaneous diseases                | 6,141.1<br>(6,023.3 to 6,268.5)               | 11,956.3<br>(11,321.9 to 12,682.1)             | 160.9<br>(108.1 to 230.5)              | 9.4<br>(7.2 to 11.5)                              | 1.6<br>(-0.3 to 3.5)                                |
| Dermatitis                                    | 1,126.5<br>(1,071.2 to 1,185.0)               | 1,301.8<br>(1,205.7 to 1,406.8)                | 41.9<br>(25.2 to 66.9)                 | 6.8<br>(2.9 to 11.0)                              | -0.6<br>(-4.5 to 3.4)                               |
| Psoriasis                                     | 235.0<br>(223.4 to 247.3)                     | 23.8<br>(22.6 to 25.0)                         | 20.4<br>(14.4 to 26.7)                 | 23.4<br>(15.4 to 32.1)                            | 6.0<br>(-0.8 to 13.3)                               |
| Cellulitis                                    | 8.6<br>(8.0 to 9.1)                           | 165.6<br>(155.6 to 175.7)                      | 0.5<br>(0.3 to 0.7)                    | 15.2<br>(-6.7 to 40.9)                            | -0.9<br>(-19.7 to 21.1)                             |
| Pyoderma                                      | 40.2<br>(38.9 to 41.6)                        | 910.1<br>(879.0 to 943.7)                      | 0.2<br>(0.1 to 0.5)                    | 20.7<br>(12.1 to 30.7)                            | 1.3<br>(-5.9 to 9.4)                                |
| Scabies                                       | 41.0<br>(36.0 to 46.7)                        | 123.2<br>(107.4 to 139.8)                      | 1.1<br>(0.6 to 1.7)                    | 6.9<br>(-1.3 to 15.5)                             | 0.3<br>(-7.4 to 8.2)                                |
| Fungal skin diseases                          | 1,170.6<br>(1,046.3 to 1,298.5)               | 4,455.1<br>(3,917.9 to 5,074.3)                | 6.5<br>(2.6 to 13.8)                   | 21.9<br>(19.5 to 24.4)                            | 0.0<br>(-1.2 to 1.3)                                |
| Viral skin diseases                           | 516.2<br>(495.3 to 539.2)                     | 690.7<br>(657.0 to 723.1)                      | 15.8<br>(9.8 to 23.5)                  | 4.7<br>(1.8 to 8.0)                               | -0.1<br>(-3.0 to 2.8)                               |
| Acne vulgaris                                 | 2,027.1<br>(1,864.6 to 2,170.9)               | 1,574.2<br>(1,273.9 to 1,931.7)                | 52.1<br>(34.9 to 75.4)                 | 3.3<br>(-0.6 to 7.4)                              | 2.3<br>(-1.4 to 6.1)                                |
| Alopecia areata                               | 61.4<br>(59.1 to 63.8)                        | 108.5<br>(104.3 to 112.7)                      | 2.0<br>(1.3 to 3.0)                    | 13.5<br>(4.3 to 22.7)                             | -0.0<br>(-8.1 to 8.0)                               |
| Pruritus                                      | 159.3<br>(140.1 to 180.2)                     | 126.3<br>(113.0 to 142.0)                      | 1.7<br>(0.8 to 3.1)                    | 19.0<br>(12.7 to 26.2)                            | 0.8<br>(-4.4 to 6.6)                                |
| Urticaria                                     | 136.5<br>(121.2 to 154.3)                     | 242.1<br>(214.1 to 274.7)                      | 8.2<br>(5.2 to 11.8)                   | 7.5<br>(1.9 to 14.0)                              | -0.1<br>(-5.5 to 5.7)                               |
| Decubitus ulcer                               | 5.7<br>(5.1 to 6.4)                           | 21.0<br>(18.6 to 23.6)                         | 0.9<br>(0.6 to 1.2)                    | 56.2<br>(37.4 to 77.0)                            | 10.5<br>(-2.7 to 25.7)                              |
| Other skin and subcutaneous diseases          | 1,789.3<br>(1,739.2 to 1,840.8)               | 2,213.9<br>(2,138.4 to 2,288.1)                | 9.8<br>(4.8 to 17.9)                   | 29.5<br>(26.7 to 32.3)                            | 5.4<br>(3.2 to 7.7)                                 |
| Sense organ diseases                          | 4,314.8<br>(4,216.4 to 4,410.7)               | 1,792.0†<br>(1,690.4 to 1,904.2)               | 151.2<br>(105.0 to 212.2)              | 25.5<br>(23.1 to 27.9)                            | -4.1<br>(-6.0 to -2.4)                              |
| Glaucoma                                      | 15.4<br>(12.8 to 17.9)                        | --                                             | 1.4<br>(0.9 to 1.9)                    | 40.6<br>(24.3 to 58.8)                            | -2.4<br>(-13.7 to 10.2)                             |
| Cataract                                      | 154.8<br>(132.8 to 178.6)                     | --                                             | 9.6<br>(6.8 to 13.0)                   | 33.1<br>(26.0 to 40.3)                            | -6.4<br>(-11.7 to -1.4)                             |
| Macular degeneration                          | 9.6<br>(7.9 to 11.5)                          | --                                             | 0.7<br>(0.5 to 1.0)                    | 45.1<br>(27.6 to 64.1)                            | -0.4<br>(-12.7 to 12.8)                             |
| Refraction and accommodation disorders        | 1,896.5<br>(1,817.3 to 1,977.8)               | --                                             | 32.6<br>(19.8 to 52.2)                 | 14.2<br>(10.4 to 18.2)                            | -5.2<br>(-8.0 to -2.1)                              |
| Age-related and other hearing loss            | 2,828.0<br>(2,673.8 to 2,982.3)               | --                                             | 81.9<br>(57.2 to 115.7)                | 28.5<br>(23.9 to 32.4)                            | -4.8<br>(-8.0 to -2.0)                              |
| Other vision loss                             | 86.3<br>(77.2 to 96.8)                        | --                                             | 6.3<br>(4.4 to 8.5)                    | 26.7<br>(17.8 to 36.4)                            | -2.0<br>(-8.8 to 5.3)                               |
| Other sense organ diseases                    | 598.2<br>(552.7 to 643.1)                     | 1,792.0<br>(1,690.4 to 1,904.2)                | 18.7<br>(11.7 to 28.3)                 | 28.7<br>(23.7 to 33.7)                            | 1.1<br>(-2.6 to 4.9)                                |
| Oral disorders                                | 10,003.9<br>(9,700.6 to 10,302.3)             | 21,533.0†<br>(19,789.6 to 23,477.5)            | 67.2<br>(39.5 to 107.6)                | 24.9<br>(22.3 to 27.8)                            | 0.0<br>(-1.6 to 1.8)                                |
| Caries of deciduous teeth                     | 736.2<br>(532.5 to 908.5)                     | 2,274.8<br>(1,339.2 to 3,442.4)                | 0.3<br>(0.1 to 0.6)                    | -5.8<br>(-15.8 to 6.0)                            | -1.8<br>(-12.0 to 10.2)                             |
| Caries of permanent teeth                     | 6,887.2<br>(6,511.4 to 7,291.2)               | 18,772.7<br>(17,358.9 to 20,192.0)             | 6.7<br>(3.0 to 12.9)                   | 8.9<br>(5.6 to 12.2)                              | -4.5<br>(-7.2 to -1.7)                              |
| Periodontal disease                           | 3,606.4<br>(3,159.3 to 4,079.6)               | 414.2<br>(353.2 to 473.1)                      | 23.7<br>(9.6 to 49.3)                  | 24.0<br>(20.1 to 28.6)                            | 1.3<br>(-1.6 to 4.8)                                |
| Edentulism and severe tooth loss              | 949.3<br>(826.4 to 1,065.2)                   | 71.4<br>(60.7 to 83.0)                         | 26.4<br>(17.2 to 37.5)                 | 35.7<br>(31.2 to 40.3)                            | 0.2<br>(-3.0 to 3.5)                                |
| Other oral disorders                          | 348.1<br>(332.6 to 364.8)                     | --                                             | 10.2<br>(6.3 to 15.4)                  | 15.1<br>(11.7 to 18.9)                            | -0.1<br>(-3.1 to 3.2)                               |
| <b>Injuries</b>                               | <b>3,965.1</b><br><b>(3,730.2 to 4,222.2)</b> | <b>1,498.6†</b><br><b>(1,424.9 to 1,572.9)</b> | <b>117.3</b><br><b>(77.9 to 169.4)</b> | <b>49.0</b><br><b>(46.0 to 51.7)</b>              | <b>20.4</b><br><b>(17.9 to 22.8)</b>                |
| <b>Transport injuries</b>                     | <b>387.3</b><br><b>(360.9 to 415.2)</b>       | <b>111.9</b><br><b>(102.5 to 122.0)</b>        | <b>17.4</b><br><b>(11.3 to 25.4)</b>   | <b>45.7</b><br><b>(42.1 to 49.5)</b>              | <b>17.3</b><br><b>(14.5 to 20.2)</b>                |
| Road injuries                                 | 321.2<br>(301.1 to 344.0)                     | 102.2<br>(93.1 to 112.5)                       | 15.1<br>(9.9 to 21.9)                  | 48.5<br>(44.7 to 52.3)                            | 18.6<br>(15.5 to 21.7)                              |
| Pedestrian road injuries                      | 85.8<br>(77.2 to 96.6)                        | 18.5<br>(16.0 to 21.7)                         | 4.4<br>(2.9 to 6.4)                    | 33.5<br>(30.0 to 36.9)                            | 4.9<br>(2.1 to 7.5)                                 |
| Cyclist road injuries                         | 61.9<br>(52.0 to 73.2)                        | 24.4<br>(20.4 to 29.1)                         | 2.6<br>(1.7 to 3.8)                    | 65.8<br>(61.4 to 70.2)                            | 34.9<br>(31.1 to 38.6)                              |
| Motorcyclist road injuries                    | 44.5<br>(38.0 to 53.1)                        | 8.6<br>(7.0 to 10.5)                           | 2.1<br>(1.4 to 3.1)                    | 59.4<br>(54.6 to 64.4)                            | 30.3<br>(26.4 to 34.1)                              |
| Motor vehicle road injuries                   | 99.4<br>(84.8 to 113.9)                       | 39.1<br>(34.2 to 44.2)                         | 4.8<br>(3.2 to 6.9)                    | 58.6<br>(54.4 to 62.9)                            | 26.6<br>(23.5 to 29.9)                              |
| Other road injuries                           | 29.5<br>(25.5 to 34.2)                        | 11.6<br>(9.7 to 13.5)                          | 1.2<br>(0.8 to 1.7)                    | 23.2<br>(19.8 to 26.6)                            | -1.8<br>(-4.7 to 0.9)                               |
| Other transport injuries                      | 66.2<br>(54.2 to 80.4)                        | 9.8<br>(8.3 to 11.6)                           | 2.3<br>(1.5 to 3.5)                    | 30.2<br>(26.6 to 33.9)                            | 9.9<br>(6.8 to 13.0)                                |
| <b>Unintentional injuries</b>                 | <b>3,316.8</b><br><b>(3,083.5 to 3,580.8)</b> | <b>1,290.3</b><br><b>(1,217.9 to 1,365.5)</b>  | <b>90.1</b><br><b>(60.0 to 130.1)</b>  | <b>52.2</b><br><b>(49.3 to 55.0)</b>              | <b>22.3</b><br><b>(19.8 to 24.7)</b>                |
| Falls                                         | 1,286.0<br>(1,149.1 to 1,427.5)               | 551.1<br>(502.0 to 603.3)                      | 47.1<br>(32.6 to 65.7)                 | 56.4<br>(52.9 to 59.9)                            | 21.8<br>(18.9 to 24.8)                              |
| Drowning                                      | 10.0<br>(8.8 to 11.2)                         | 1.3<br>(1.1 to 1.4)                            | 0.5<br>(0.3 to 0.7)                    | 23.3<br>(16.7 to 30.2)                            | 2.2<br>(-3.3 to 7.8)                                |
| Fire, heat, and hot substances                | 413.0<br>(348.9 to 482.9)                     | 28.9<br>(24.8 to 32.4)                         | 7.2<br>(4.1 to 11.9)                   | 41.4<br>(36.9 to 45.8)                            | 18.6<br>(14.9 to 22.1)                              |
| Poisonings                                    | 10.3<br>(8.5 to 12.6)                         | 12.3<br>(9.7 to 15.1)                          | 0.8<br>(0.5 to 1.3)                    | 57.5<br>(41.8 to 75.7)                            | 38.0<br>(24.3 to 53.8)                              |
| Exposure to mechanical forces                 | 903.6<br>(759.9 to 1,131.4)                   | 270.7<br>(234.4 to 308.2)                      | 16.4<br>(10.3 to 25.0)                 | 57.5<br>(54.0 to 60.5)                            | 28.8<br>(25.8 to 31.6)                              |
| Unintentional firearm injuries                | 56.1<br>(44.8 to 71.9)                        | 6.6<br>(4.6 to 9.3)                            | 0.9<br>(0.5 to 1.4)                    | 81.9<br>(77.6 to 85.9)                            | 50.3<br>(46.8 to 53.5)                              |
| Unintentional suffocation                     | 10.1<br>(7.5 to 13.1)                         | 1.4<br>(0.9 to 2.2)                            | 0.2<br>(0.1 to 0.4)                    | 33.1<br>(29.8 to 36.3)                            | 14.8<br>(11.6 to 17.8)                              |
| Other exposure to mechanical forces           | 837.4<br>(696.2 to 1,064.6)                   | 262.6<br>(228.2 to 299.2)                      | 15.3<br>(9.7 to 23.2)                  | 56.8<br>(53.3 to 59.8)                            | 28.0<br>(25.0 to 30.8)                              |



| Cause                                                                               | Prevalence in thousands (95% UI)        | Incidence in thousands (95% UI)        | YLDs in thousands (95% UI)         |                                                   |                                                     |
|-------------------------------------------------------------------------------------|-----------------------------------------|----------------------------------------|------------------------------------|---------------------------------------------------|-----------------------------------------------------|
|                                                                                     | 2016 counts                             | 2016 counts                            | 2016 counts                        | Percentage change in counts between 2006 and 2016 | Percentage change in age-standardised rates between |
| Adverse effects of medical treatment                                                | 9.2<br>(7.4 to 11.3)                    | 120.4<br>(106.0 to 136.1)              | 1.2<br>(0.8 to 1.8)                | 48.2<br>(42.0 to 55.2)                            | 22.0<br>(17.8 to 26.1)                              |
| Animal contact                                                                      | 95.7<br>(82.3 to 114.0)                 | 56.5<br>(46.5 to 68.5)                 | 2.1<br>(1.3 to 3.1)                | 35.0<br>(27.1 to 42.8)                            | 15.2<br>(8.3 to 22.0)                               |
| Venomous animal contact                                                             | 14.6<br>(12.0 to 17.6)                  | 15.8<br>(11.7 to 20.6)                 | 1.0<br>(0.7 to 1.6)                | 34.2<br>(19.6 to 50.9)                            | 18.4<br>(5.7 to 32.9)                               |
| Non-venomous animal contact                                                         | 81.1<br>(68.1 to 98.7)                  | 40.7<br>(33.2 to 49.4)                 | 1.1<br>(0.6 to 1.7)                | 35.9<br>(32.0 to 39.2)                            | 12.0<br>(8.8 to 14.6)                               |
| Foreign body                                                                        | 141.4<br>(117.1 to 170.4)               | 81.0<br>(72.1 to 92.3)                 | 3.8<br>(2.4 to 5.7)                | 42.4<br>(38.1 to 46.8)                            | 20.3<br>(16.6 to 23.7)                              |
| Pulmonary aspiration and foreign body in airway                                     | 32.4<br>(24.6 to 43.0)                  | 28.2<br>(24.4 to 32.9)                 | 0.8<br>(0.5 to 1.2)                | 28.7<br>(24.9 to 32.4)                            | 9.9<br>(6.5 to 13.1)                                |
| Foreign body in eyes                                                                | 6.9<br>(4.4 to 9.6)                     | 29.9<br>(23.1 to 39.8)                 | 0.5<br>(0.3 to 0.7)                | 26.2<br>(21.9 to 31.9)                            | 6.9<br>(3.5 to 10.6)                                |
| Foreign body in other body part                                                     | 102.1<br>(83.0 to 129.3)                | 22.8<br>(19.4 to 26.9)                 | 2.5<br>(1.6 to 3.8)                | 51.2<br>(46.2 to 56.1)                            | 27.2<br>(22.9 to 31.1)                              |
| Environmental heat and cold exposure                                                | 54.6<br>(46.4 to 67.4)                  | 10.5<br>(8.6 to 12.5)                  | 1.8<br>(1.1 to 2.7)                | 36.4<br>(30.7 to 42.2)                            | 13.0<br>(8.3 to 17.8)                               |
| Other unintentional injuries                                                        | 393.0<br>(320.7 to 478.0)               | 157.8<br>(132.7 to 184.9)              | 9.3<br>(5.9 to 14.0)               | 46.0<br>(42.6 to 49.2)                            | 21.6<br>(18.7 to 24.3)                              |
| <b>Self-harm and interpersonal violence</b>                                         | <b>498.4</b><br><b>(453.6 to 545.9)</b> | <b>95.7†</b><br><b>(85.5 to 107.1)</b> | <b>8.9</b><br><b>(6.0 to 12.6)</b> | <b>26.1</b><br><b>(21.7 to 29.9)</b>              | <b>7.9</b><br><b>(4.9 to 10.7)</b>                  |
| Self-harm                                                                           | 27.0<br>(22.7 to 31.6)                  | 21.9<br>(19.0 to 24.9)                 | 1.3<br>(0.8 to 1.9)                | 48.4<br>(38.0 to 60.5)                            | 24.2<br>(15.3 to 34.8)                              |
| Self-harm by firearm                                                                | 0.8<br>(0.6 to 1.0)                     | 0.1<br>(0.1 to 0.2)                    | < 0.05<br>(< 0.05 to < 0.05)       | 21.4<br>(17.8 to 24.6)                            | 2.6<br>(-0.5 to 5.5)                                |
| Self-harm by other specified means                                                  | 26.2<br>(21.9 to 30.8)                  | 21.8<br>(18.9 to 24.8)                 | 1.3<br>(0.8 to 1.9)                | 48.8<br>(38.2 to 61.0)                            | 24.5<br>(15.4 to 35.2)                              |
| Interpersonal violence                                                              | 471.4<br>(426.9 to 520.2)               | 73.7†<br>(64.2 to 85.4)                | 7.5<br>(5.1 to 10.8)               | 22.9<br>(18.5 to 26.9)                            | 5.6<br>(2.7 to 8.4)                                 |
| Assault by firearm                                                                  | 12.9<br>(10.4 to 15.7)                  | 2.4<br>(1.8 to 3.1)                    | 0.4<br>(0.2 to 0.6)                | 61.5<br>(56.1 to 66.1)                            | 34.7<br>(30.4 to 38.3)                              |
| Assault by sharp object                                                             | 80.4<br>(65.2 to 97.1)                  | 28.0<br>(22.5 to 34.9)                 | 1.7<br>(1.1 to 2.6)                | 26.8<br>(23.0 to 30.3)                            | 4.9<br>(1.8 to 7.5)                                 |
| Sexual violence                                                                     | 279.6<br>(242.2 to 322.6)               | --                                     | 2.4<br>(1.5 to 3.4)                | 0.8<br>(-3.4 to 5.4)                              | -5.4<br>(-9.2 to -1.0)                              |
| Assault by other means                                                              | 98.4<br>(81.6 to 120.3)                 | 43.4<br>(36.1 to 51.1)                 | 3.1<br>(2.0 to 4.6)                | 40.0<br>(36.2 to 43.5)                            | 14.6<br>(11.6 to 17.4)                              |
| <b>Forces of nature, conflict and terrorism, and executions and police conflict</b> | <b>42.2</b><br><b>(8.7 to 85.3)</b>     | <b>0.7†</b><br><b>(0.4 to 1.0)</b>     | <b>0.9</b><br><b>(0.1 to 2.7)</b>  | <b>59.6</b><br><b>(20.3 to 67.6)</b>              | <b>37.5</b><br><b>(3.7 to 44.8)</b>                 |
| Exposure to forces of nature                                                        | 39.3<br>(6.7 to 81.3)                   | --                                     | 0.8<br>(0.1 to 2.5)                | 64.2<br>(20.4 to 73.1)                            | 41.2<br>(3.3 to 49.2)                               |
| Conflict and terrorism                                                              | 0.8<br>(0.1 to 1.8)                     | --                                     | < 0.05<br>(< 0.05 to 0.1)          | -10.5<br>(-14.0 to -7.1)                          | -25.1<br>(-27.8 to -22.2)                           |
| Executions and police conflict                                                      | 2.1<br>(1.2 to 3.5)                     | 0.7<br>(0.4 to 1.0)                    | 0.1<br>(< 0.05 to 0.1)             | 32.0<br>(22.2 to 37.9)                            | 17.2<br>(10.6 to 21.8)                              |
| <b>Impairments</b>                                                                  | --                                      | --                                     | --                                 | --                                                | --                                                  |
| Anaemia                                                                             | 2,073.1<br>(1,923.0 to 2,228.5)         | --                                     | 44.4<br>(30.6 to 63.4)             | 6.4<br>(-1.5 to 15.2)                             | -9.6<br>(-16.1 to -2.4)                             |
| Developmental intellectual disability                                               | 253.6<br>(191.7 to 315.6)               | --                                     | 33.2<br>(24.6 to 42.9)             | 9.3<br>(4.5 to 14.8)                              | -0.1<br>(-4.6 to 4.7)                               |
| Epilepsy                                                                            | 100.1<br>(43.2 to 155.0)                | --                                     | 29.9<br>(13.3 to 52.8)             | 11.5<br>(-57.7 to 174.9)                          | 0.4<br>(-62.3 to 148.8)                             |
| Guillain-Barre syndrome                                                             | 0.2<br>(0.2 to 0.3)                     | --                                     | 0.1<br>(< 0.05 to 0.1)             | 30.9<br>(20.1 to 41.1)                            | 13.6<br>(4.7 to 21.8)                               |
| Hearing loss                                                                        | 2,981.0<br>(2,830.1 to 3,136.0)         | --                                     | 89.6<br>(62.8 to 125.8)            | 25.4<br>(21.4 to 29.0)                            | -5.2<br>(-8.1 to -2.6)                              |
| Heart failure                                                                       | 197.1<br>(172.6 to 224.6)               | --                                     | 19.9<br>(15.1 to 25.2)             | 37.7<br>(29.3 to 47.1)                            | -2.4<br>(-8.5 to 4.1)                               |
| Infertility                                                                         | 128.4<br>(98.9 to 163.4)                | --                                     | 0.8<br>(0.4 to 1.6)                | 3.0<br>(-3.3 to 9.4)                              | -3.6<br>(-9.2 to 2.1)                               |
| Pelvic inflammatory disease                                                         | 3.9<br>(3.3 to 4.6)                     | --                                     | 0.5<br>(0.3 to 0.8)                | 1.8<br>(-18.2 to 22.8)                            | -9.8<br>(-27.3 to 9.1)                              |
| Vision loss                                                                         | 2,198.4<br>(2,106.6 to 2,288.7)         | --                                     | 56.4<br>(38.9 to 81.5)             | 19.2<br>(16.0 to 22.7)                            | -4.2<br>(-6.6 to -1.5)                              |

We did not calculate incidence for the nine impairments, certain NTDs, and causes with only birth prevalence. Blank cells mean that no estimate is available.

† Incidence for aggregate causes represents the sum of the incidence of the causes below the aggregate.

‡ Incidence estimates for stroke represent first-ever stroke only.

^ Incidence of HIV/AIDS represents new infections of HIV only and does not include new infections of Tuberculosis in HIV positive cases.

SR Table 14: Prevalence, incidence, and YLDs for 2016, percentage change of YLD counts and percentage change of age-standardised YLD rates between 2006 and 2016 by cause and impairments, for all ages, China.

| Cause                                                                                | Prevalence in thousands (95% UI)                   | Incidence in thousands (95% UI)                     | YLDs in thousands (95% UI)                   |                                                   |                                                     |
|--------------------------------------------------------------------------------------|----------------------------------------------------|-----------------------------------------------------|----------------------------------------------|---------------------------------------------------|-----------------------------------------------------|
|                                                                                      | 2016 counts                                        | 2016 counts                                         | 2016 counts                                  | Percentage change in counts between 2006 and 2016 | Percentage change in age-standardised rates between |
| <b>All causes</b>                                                                    | <b>1,306,409.3</b><br>(1,304,955.9 to 1,308,023.5) | <b>6,720,705.6†</b><br>(6,364,590.3 to 7,112,157.0) | <b>139,444.3</b><br>(103,806.2 to 180,809.6) | <b>14.4</b><br>(13.6 to 15.2)                     | <b>-0.2</b><br>(-0.9 to 0.3)                        |
| <b>Communicable, maternal, neonatal, and nutritional disorders</b>                   | <b>880,790.4</b><br>(871,810.1 to 888,652.8)       | <b>3,405,723.7†</b><br>(3,069,051.9 to 3,767,653.3) | <b>9,222.0</b><br>(6,697.7 to 12,370.9)      | <b>0.3</b><br>(-2.6 to 3.9)                       | <b>-4.1</b><br>(-6.8 to -0.2)                       |
| <b>HIV/AIDS and tuberculosis</b>                                                     | <b>430,091.8</b><br>(408,013.9 to 441,182.4)       | <b>1,225.9†</b><br>(1,151.2 to 1,307.1)             | <b>814.9</b><br>(544.8 to 1,120.1)           | <b>17.4</b><br>(11.8 to 24.5)                     | <b>1.0</b><br>(-3.8 to 7.3)                         |
| Tuberculosis                                                                         | 414,405.1<br>(399,270.5 to 429,827.6)              | 1,181.0†<br>(1,113.5 to 1,251.2)                    | 706.3<br>(474.2 to 946.1)                    | 11.2<br>(7.9 to 14.6)                             | -4.4<br>(-7.4 to -1.5)                              |
| Drug-susceptible tuberculosis                                                        | 2,212.3<br>(2,079.7 to 2,373.6)                    | 1,127.4<br>(1,062.5 to 1,196.3)                     | 673.1<br>(452.4 to 902.0)                    | 12.0<br>(8.4 to 15.5)                             | -3.8<br>(-6.8 to -0.7)                              |
| Multidrug-resistant tuberculosis without extensive drug resistance                   | 96.7<br>(85.3 to 110.4)                            | 49.1<br>(43.1 to 56.7)                              | 30.3<br>(20.2 to 41.7)                       | -8.7<br>(-19.9 to 4.9)                            | -21.5<br>(-31.1 to -9.8)                            |
| Extensively drug-resistant tuberculosis                                              | 8.8<br>(7.8 to 10.1)                               | 4.5<br>(3.9 to 5.2)                                 | 2.9<br>(1.9 to 4.1)                          | 198.8<br>(164.3 to 239.1)                         | 154.7<br>(123.8 to 190.3)                           |
| Latent tuberculosis infection                                                        | 412,087.3<br>(396,964.9 to 427,572.7)              | --                                                  | --                                           | --                                                | --                                                  |
| HIV/AIDS                                                                             | 671.9<br>(304.4 to 1,366.2)                        | 44.9^<br>(15.1 to 85.8)                             | 108.6<br>(47.6 to 228.2)                     | 83.8<br>(41.8 to 125.5)                           | 66.7<br>(29.1 to 104.1)                             |
| Drug-susceptible HIV/AIDS - Tuberculosis                                             | 71.2<br>(43.5 to 113.9)                            | 41.4<br>(25.3 to 65.0)                              | 28.7<br>(15.7 to 48.9)                       | 49.1<br>(38.4 to 62.6)                            | 37.2<br>(27.4 to 49.2)                              |
| Multidrug-resistant HIV/AIDS - Tuberculosis without extensive drug resistance        | 3.8<br>(2.2 to 6.3)                                | 2.2<br>(1.3 to 3.6)                                 | 1.6<br>(0.8 to 2.8)                          | 20.9<br>(3.4 to 44.7)                             | 11.2<br>(-4.9 to 33.0)                              |
| Extensively drug-resistant HIV/AIDS - Tuberculosis                                   | 0.4<br>(0.2 to 0.6)                                | 0.2<br>(0.1 to 0.3)                                 | 0.1<br>(0.1 to 0.2)                          | 298.1<br>(240.4 to 376.1)                         | 265.9<br>(213.1 to 337.8)                           |
| HIV/AIDS resulting in other diseases                                                 | 596.5<br>(227.2 to 1,302.5)                        | 44.9<br>(15.1 to 85.8)                              | 78.2<br>(22.5 to 197.3)                      | 103.1<br>(37.5 to 171.3)                          | 83.1<br>(23.0 to 145.8)                             |
| <b>Diarrhoea, lower respiratory infections, and other common infectious diseases</b> | <b>61,470.3</b><br>(59,654.0 to 63,244.2)          | <b>3,287,894.1†</b><br>(2,948,816.0 to 3,645,702.5) | <b>2,483.6</b><br>(1,709.6 to 3,452.9)       | <b>-7.0</b><br>(-8.8 to -5.0)                     | <b>-9.7</b><br>(-11.3 to -8.1)                      |
| Diarrhoeal diseases                                                                  | 3,861.7<br>(3,597.8 to 4,139.2)                    | 260,399.1<br>(242,819.7 to 278,681.6)               | 435.5<br>(297.9 to 600.3)                    | -22.4<br>(-24.7 to -19.8)                         | -25.9<br>(-27.7 to -23.9)                           |
| Intestinal infectious diseases                                                       | 19.4<br>(17.6 to 21.2)                             | 411.3†<br>(400.4 to 424.6)                          | 3.3<br>(2.2 to 4.7)                          | -2.4<br>(-15.1 to 12.0)                           | 2.0<br>(-13.0 to 19.0)                              |
| Typhoid fever                                                                        | 19.3<br>(17.5 to 21.1)                             | 304.3<br>(293.5 to 315.5)                           | 3.0<br>(2.0 to 4.3)                          | -2.3<br>(-16.2 to 13.7)                           | 2.6<br>(-14.0 to 21.9)                              |
| Paratyphoid fever                                                                    | 4.7<br>(4.3 to 5.1)                                | 107.0<br>(101.6 to 113.3)                           | 0.3<br>(0.2 to 0.4)                          | 0.5<br>(-14.0 to 15.9)                            | 3.3<br>(-12.0 to 21.6)                              |
| Other intestinal infectious diseases                                                 | --                                                 | --                                                  | < 0.05<br>(< 0.05 to 0.1)                    | -25.8<br>(-37.6 to -11.3)                         | -30.3<br>(-43.6 to -12.8)                           |
| Lower respiratory infections                                                         | 991.7<br>(923.6 to 1,068.9)                        | 42,326.4<br>(39,027.7 to 46,039.9)                  | 59.8<br>(39.6 to 84.8)                       | 20.3<br>(15.9 to 25.0)                            | 10.2<br>(5.5 to 15.0)                               |
| Upper respiratory infections                                                         | 39,082.8<br>(34,725.5 to 43,720.0)                 | 2,928,434.3<br>(2,591,798.8 to 3,289,513.0)         | 975.0<br>(579.6 to 1,514.5)                  | -0.2<br>(-2.9 to 2.7)                             | -1.0<br>(-2.1 to 0.2)                               |
| Otitis media                                                                         | 13,018.9<br>(11,642.2 to 14,433.9)                 | 32,167.4<br>(26,821.6 to 38,570.6)                  | 381.6<br>(237.7 to 565.1)                    | -16.9<br>(-20.3 to -13.4)                         | -15.1<br>(-17.7 to -12.6)                           |
| Meningitis                                                                           | 510.2<br>(446.8 to 601.1)                          | 46.4<br>(37.1 to 55.4)                              | 84.6<br>(58.3 to 117.3)                      | -5.8<br>(-9.9 to 10.2)                            | -10.8<br>(-15.4 to 12.1)                            |
| Pneumococcal meningitis                                                              | 152.1<br>(133.2 to 174.3)                          | 3.8<br>(3.0 to 4.7)                                 | 26.7<br>(18.0 to 36.7)                       | 5.2<br>(1.0 to 9.5)                               | -1.9<br>(-5.7 to 1.3)                               |
| H influenzae type B meningitis                                                       | 58.8<br>(49.5 to 69.2)                             | 1.9<br>(1.4 to 2.6)                                 | 12.8<br>(8.4 to 17.8)                        | 10.3<br>(6.2 to 14.6)                             | 5.0<br>(1.0 to 8.6)                                 |
| Meningococcal infection                                                              | 47.8<br>(33.9 to 125.7)                            | 4.9<br>(3.7 to 6.4)                                 | 8.7<br>(4.8 to 22.4)                         | 16.8<br>(-4.3 to 217.0)                           | 15.8<br>(-11.4 to 291.4)                            |
| Other meningitis                                                                     | 251.5<br>(203.2 to 303.5)                          | 35.7<br>(28.6 to 42.8)                              | 36.3<br>(24.6 to 49.6)                       | -19.8<br>(-22.7 to -16.9)                         | -23.9<br>(-26.7 to -21.4)                           |
| Encephalitis                                                                         | 4,020.9<br>(2,678.0 to 5,872.0)                    | 1,215.5<br>(1,122.8 to 1,310.0)                     | 460.1<br>(326.5 to 597.0)                    | 0.4<br>(-3.6 to 4.1)                              | -4.0<br>(-7.6 to -0.5)                              |
| Diphtheria                                                                           | < 0.05<br>(< 0.05 to < 0.05)                       | 0.2<br>(0.2 to 0.3)                                 | < 0.05<br>(< 0.05 to < 0.05)                 | -29.8<br>(-38.4 to -19.9)                         | -35.4<br>(-43.2 to -25.9)                           |
| Whooping cough                                                                       | 7.5<br>(5.2 to 10.6)                               | 54.6<br>(37.8 to 77.2)                              | 0.4<br>(0.2 to 0.6)                          | -82.4<br>(-85.6 to -79.1)                         | -80.4<br>(-84.0 to -76.7)                           |
| Tetanus                                                                              | 6.1<br>(5.9 to 6.4)                                | 1.4<br>(0.9 to 2.0)                                 | 0.1<br>(0.1 to 0.2)                          | -11.3<br>(-19.8 to -5.2)                          | -17.1<br>(-25.5 to -10.8)                           |
| Measles                                                                              | 3.7<br>(1.2 to 8.7)                                | 133.5<br>(42.4 to 316.9)                            | 0.3<br>(0.1 to 0.8)                          | -65.8<br>(-75.9 to -52.4)                         | -62.3<br>(-73.4 to -47.4)                           |
| Varicella and herpes zoster                                                          | 1,754.1<br>(1,569.8 to 1,952.4)                    | 22,704.0<br>(21,350.0 to 24,070.0)                  | 82.9<br>(51.1 to 128.6)                      | 23.0<br>(15.2 to 32.1)                            | 3.5<br>(-2.1 to 10.5)                               |
| <b>Neglected tropical diseases and malaria</b>                                       | <b>282,105.8</b><br>(260,646.7 to 296,045.2)       | <b>5,590.0†</b><br>(4,544.6 to 6,969.8)             | <b>1,989.7</b><br>(1,107.8 to 3,353.3)       | <b>-3.1</b><br>(-8.4 to 1.2)                      | <b>-9.3</b><br>(-14.2 to -5.4)                      |
| Malaria                                                                              | 0.5<br>(0.2 to 0.9)                                | 0.1<br>(< 0.05 to 1.1)                              | 0.1<br>(0.1 to 0.3)                          | -50.4<br>(-68.0 to -32.4)                         | -51.9<br>(-69.3 to -33.9)                           |
| Chagas disease                                                                       | --                                                 | --                                                  | --                                           | --                                                | --                                                  |
| Leishmaniasis                                                                        | 0.2<br>(0.2 to 0.3)                                | 0.7<br>(0.6 to 0.8)                                 | < 0.05<br>(< 0.05 to < 0.05)                 | -26.2<br>(-34.7 to -16.0)                         | -41.2<br>(-48.9 to -31.0)                           |
| Visceral leishmaniasis                                                               | 0.2<br>(0.2 to 0.2)                                | 0.7<br>(0.6 to 0.7)                                 | < 0.05<br>(< 0.05 to < 0.05)                 | -30.7<br>(-36.5 to -24.8)                         | -45.3<br>(-50.5 to -39.1)                           |
| Cutaneous and mucocutaneous leishmaniasis                                            | 0.1<br>(< 0.05 to 0.2)                             | < 0.05<br>(< 0.05 to 0.1)                           | < 0.05<br>(< 0.05 to < 0.05)                 | -5.7<br>(-45.1 to 116.6)                          | -18.3<br>(-54.5 to 119.4)                           |
| African trypanosomiasis                                                              | --                                                 | --                                                  | --                                           | --                                                | --                                                  |
| Schistosomiasis                                                                      | 1,067.2<br>(685.0 to 1,555.1)                      | 312.9<br>(207.2 to 440.1)                           | 10.8<br>(5.8 to 19.4)                        | -75.5<br>(-82.8 to -61.5)                         | -78.5<br>(-84.8 to -66.2)                           |
| Cysticercosis                                                                        | 623.6<br>(526.3 to 735.5)                          | --                                                  | 93.0<br>(61.2 to 130.9)                      | -20.6<br>(-29.1 to -12.3)                         | -32.7<br>(-39.7 to -25.9)                           |
| Cystic echinococcosis                                                                | 24.2<br>(10.8 to 53.5)                             | 5.0<br>(2.4 to 11.5)                                | 2.3<br>(0.9 to 5.6)                          | -56.1<br>(-85.3 to 31.6)                          | -59.9<br>(-86.9 to 15.4)                            |
| Lymphatic filariasis                                                                 | --                                                 | --                                                  | --                                           | --                                                | --                                                  |
| Onchocerciasis                                                                       | --                                                 | --                                                  | --                                           | --                                                | --                                                  |
| Trachoma                                                                             | 320.3<br>(218.9 to 442.8)                          | --                                                  | 20.8<br>(13.8 to 29.3)                       | -1.4<br>(-12.8 to 10.8)                           | -29.6<br>(-38.7 to -20.0)                           |
| Dengue                                                                               | 155.0<br>(85.3 to 260.2)                           | 2,591.3<br>(1,600.9 to 3,902.5)                     | 25.4<br>(11.3 to 48.0)                       | 45.0<br>(15.0 to 204.5)                           | 43.3<br>(13.4 to 202.4)                             |
| Yellow fever                                                                         | --                                                 | --                                                  | --                                           | --                                                | --                                                  |
| Rabies                                                                               | < 0.05<br>(< 0.05 to < 0.05)                       | 1.0<br>(0.2 to 1.2)                                 | < 0.05<br>(< 0.05 to < 0.05)                 | -65.1<br>(-69.5 to -54.1)                         | -70.0<br>(-73.6 to -61.0)                           |
| Intestinal nematode infections                                                       | 231,639.3<br>(205,484.1 to 248,231.2)              | --                                                  | 253.2<br>(145.9 to 398.1)                    | -22.2<br>(-34.7 to -7.4)                          | -26.4<br>(-37.3 to -14.1)                           |
| Ascariasis                                                                           | 110,467.3<br>(73,772.2 to 159,923.9)               | --                                                  | 42.2<br>(18.8 to 82.0)                       | -61.2<br>(-78.3 to -35.0)                         | -65.0<br>(-79.0 to -42.8)                           |

| Cause                                                                   | Prevalence in thousands (95% UI)                    | Incidence in thousands (95% UI)                      | YLDs in thousands (95% UI)                   |                                                   |                                                     |
|-------------------------------------------------------------------------|-----------------------------------------------------|------------------------------------------------------|----------------------------------------------|---------------------------------------------------|-----------------------------------------------------|
|                                                                         | 2016 counts<br>(51,682.5 to 80,390.0)               | 2016 counts                                          | 2016 counts                                  | Percentage change in counts between 2006 and 2016 | Percentage change in age-standardised rates between |
| Trichuriasis                                                            | 64,685.8<br>(51,682.5 to 80,390.0)                  | --                                                   | 12.1<br>(5.3 to 25.0)                        | -6.2<br>(-52.0 to 85.9)                           | -12.3<br>(-52.3 to 61.4)                            |
| Hookworm disease                                                        | 62,017.3<br>(51,670.5 to 74,379.2)                  | --                                                   | 198.9<br>(118.0 to 316.8)                    | -2.4<br>(-18.9 to 15.7)                           | -6.0<br>(-20.8 to 10.3)                             |
| Food-borne trematodiasis                                                | 63,917.7<br>(60,975.6 to 67,347.5)                  | 2,678.6<br>(2,475.6 to 2,927.3)                      | 1,553.5<br>(755.2 to 2,920.3)                | 3.8<br>(-0.5 to 10.5)                             | -1.9<br>(-6.1 to 4.5)                               |
| Leprosy                                                                 | 19.6<br>(17.8 to 21.4)                              | 0.5<br>(0.5 to 0.5)                                  | 1.3<br>(0.9 to 1.9)                          | -10.8<br>(-12.8 to -8.9)                          | -30.0<br>(-32.1 to -28.0)                           |
| Ebola virus disease                                                     | --                                                  | --                                                   | --                                           | --                                                | --                                                  |
| Zika virus disease                                                      | --                                                  | --                                                   | --                                           | --                                                | --                                                  |
| Guinea worm disease                                                     | --                                                  | --                                                   | --                                           | --                                                | --                                                  |
| Other neglected tropical diseases                                       | 2,213.0<br>(2,097.8 to 2,339.5)                     | --                                                   | 29.2<br>(18.2 to 46.2)                       | 14.9<br>(7.7 to 23.4)                             | 22.0<br>(13.1 to 33.8)                              |
| <b>Maternal disorders</b>                                               | <b>467.5<br/>(434.3 to 499.1)</b>                   | <b>11,329.3†<br/>(10,351.7 to 12,546.1)</b>          | <b>36.4<br/>(23.7 to 52.3)</b>               | <b>-3.2<br/>(-23.4 to 20.5)</b>                   | <b>-8.3<br/>(-27.6 to 14.1)</b>                     |
| Maternal haemorrhage                                                    | 174.3<br>(150.4 to 201.0)                           | 1,189.1<br>(1,056.7 to 1,318.4)                      | 7.2<br>(4.8 to 10.3)                         | -12.4<br>(-35.1 to 19.0)                          | -17.9<br>(-39.0 to 11.6)                            |
| Maternal sepsis and other pregnancy related infections                  | 29.0<br>(19.8 to 40.8)                              | 247.7<br>(216.1 to 281.9)                            | 1.1<br>(0.5 to 1.9)                          | -19.8<br>(-61.3 to 72.6)                          | -24.5<br>(-64.0 to 62.1)                            |
| Maternal hypertensive disorders                                         | 235.9<br>(157.8 to 313.4)                           | 1,018.1<br>(983.2 to 1,049.6)                        | 11.4<br>(6.3 to 18.5)                        | 39.9<br>(-13.8 to 128.3)                          | 33.8<br>(-17.3 to 119.0)                            |
| Maternal obstructed labour and uterine rupture                          | 12.3<br>(7.6 to 17.9)                               | 890.7<br>(799.1 to 971.7)                            | 3.9<br>(2.1 to 6.6)                          | -2.9<br>(-51.0 to 90.9)                           | -10.0<br>(-54.5 to 75.8)                            |
| Maternal abortion, miscarriage, and ectopic pregnancy                   | 65.5<br>(44.0 to 90.7)                              | 7,983.8<br>(7,020.3 to 9,162.7)                      | 7.3<br>(4.1 to 11.6)                         | -26.0<br>(-55.4 to 22.6)                          | -29.0<br>(-57.5 to 18.6)                            |
| Other maternal disorders                                                | --                                                  | --                                                   | 5.6<br>(3.6 to 8.1)                          | -8.4<br>(-27.6 to 13.9)                           | -12.8<br>(-31.3 to 8.3)                             |
| <b>Neonatal disorders</b>                                               | <b>8,893.9<br/>(8,018.9 to 9,935.1)</b>             | --                                                   | <b>1,616.0<br/>(1,134.9 to 2,229.6)</b>      | <b>8.7<br/>(-6.0 to 26.3)</b>                     | <b>8.0<br/>(-6.9 to 25.6)</b>                       |
| Neonatal preterm birth complications                                    | 8,240.5<br>(6,899.1 to 9,727.1)                     | --                                                   | 1,150.3<br>(787.4 to 1,640.0)                | 5.0<br>(-14.6 to 29.3)                            | 4.5<br>(-15.0 to 28.9)                              |
| Neonatal encephalopathy due to birth asphyxia and trauma                | 923.4<br>(545.7 to 1,445.6)                         | --                                                   | 178.0<br>(66.4 to 350.4)                     | 24.1<br>(-2.1 to 123.1)                           | 22.5<br>(-2.7 to 115.2)                             |
| Neonatal sepsis and other neonatal infections                           | 426.9<br>(203.4 to 870.6)                           | --                                                   | 170.7<br>(73.4 to 382.3)                     | 22.7<br>(-2.9 to 62.9)                            | 20.4<br>(-5.0 to 57.8)                              |
| Hemolytic disease and other neonatal jaundice                           | 274.6<br>(249.2 to 301.1)                           | --                                                   | 94.0<br>(73.1 to 117.8)                      | 14.8<br>(8.9 to 20.3)                             | 14.1<br>(8.3 to 19.8)                               |
| Other neonatal disorders                                                | --                                                  | --                                                   | 22.9<br>(16.0 to 32.2)                       | -12.4<br>(-25.0 to 3.0)                           | -2.7<br>(-16.6 to 14.4)                             |
| <b>Nutritional deficiencies</b>                                         | <b>105,867.4<br/>(103,912.8 to 107,435.8)</b>       | <b>15,013.7†<br/>(12,208.6 to 18,202.5)</b>          | <b>1,702.1<br/>(1,135.3 to 2,486.9)</b>      | <b>4.2<br/>(0.8 to 7.9)</b>                       | <b>0.7<br/>(-2.7 to 4.1)</b>                        |
| Protein-energy malnutrition                                             | 1,693.4<br>(1,593.9 to 1,800.9)                     | 729.9<br>(687.9 to 775.7)                            | 49.9<br>(32.5 to 70.8)                       | -23.4<br>(-30.2 to -16.4)                         | -14.8<br>(-22.2 to -7.1)                            |
| Iodine deficiency                                                       | 17,655.7<br>(16,238.9 to 19,252.7)                  | 329.2<br>(305.2 to 355.8)                            | 451.9<br>(310.1 to 639.9)                    | 12.6<br>(10.1 to 15.3)                            | 2.9<br>(0.8 to 5.2)                                 |
| Vitamin A deficiency                                                    | 17,180.0<br>(13,858.0 to 21,118.7)                  | 13,954.6<br>(11,138.8 to 17,122.8)                   | 25.3<br>(15.8 to 37.3)                       | 12.0<br>(5.8 to 19.3)                             | 10.7<br>(5.4 to 17.2)                               |
| Iron-deficiency anaemia                                                 | 71,607.8<br>(68,485.2 to 75,136.2)                  | --                                                   | 1,173.3<br>(768.6 to 1,762.4)                | 2.8<br>(-2.1 to 7.8)                              | 1.3<br>(-3.3 to 6.0)                                |
| Other nutritional deficiencies                                          | --                                                  | --                                                   | 1.7<br>(1.1 to 2.4)                          | -23.2<br>(-30.3 to -15.7)                         | -14.9<br>(-22.6 to -6.6)                            |
| <b>Other communicable, maternal, neonatal, and nutritional diseases</b> | <b>385,252.5<br/>(374,338.0 to 394,649.9)</b>       | <b>84,670.7<br/>(77,581.7 to 92,433.3)</b>           | <b>560.3<br/>(356.6 to 869.3)</b>            | <b>-2.6<br/>(-5.1 to 0.1)</b>                     | <b>-6.2<br/>(-8.4 to -4.1)</b>                      |
| Sexually transmitted diseases excluding HIV                             | 213,750.0<br>(204,431.4 to 222,857.5)               | 71,168.1<br>(64,595.0 to 78,109.7)                   | 494.9<br>(311.2 to 768.5)                    | -1.2<br>(-4.2 to 1.9)                             | -5.3<br>(-7.7 to -3.1)                              |
| Syphilis                                                                | 994.2<br>(787.0 to 1,284.0)                         | 515.5<br>(359.6 to 729.0)                            | 34.9<br>(24.0 to 47.1)                       | 41.3<br>(31.2 to 52.6)                            | 7.1<br>(-0.9 to 15.8)                               |
| Chlamydial infection                                                    | 26,898.5<br>(21,541.0 to 33,174.6)                  | 20,676.3<br>(16,489.5 to 25,597.7)                   | 155.2<br>(87.5 to 250.8)                     | -2.3<br>(-6.1 to 1.6)                             | -4.1<br>(-7.2 to -1.2)                              |
| Gonococcal infection                                                    | 1,363.5<br>(1,222.7 to 1,466.3)                     | 2,159.8<br>(1,923.9 to 2,398.5)                      | 14.4<br>(9.3 to 21.5)                        | -11.4<br>(-16.2 to -6.2)                          | -10.9<br>(-15.6 to -5.9)                            |
| Trichomoniasis                                                          | 32,062.1<br>(27,775.1 to 36,618.1)                  | 26,803.0<br>(23,028.2 to 30,874.1)                   | 34.3<br>(13.3 to 72.6)                       | 7.9<br>(4.4 to 11.2)                              | 0.3<br>(-1.3 to 2.2)                                |
| Genital herpes                                                          | 155,074.1<br>(133,971.0 to 182,052.3)               | 7,392.8<br>(6,270.7 to 8,911.0)                      | 39.4<br>(12.4 to 89.5)                       | 13.0<br>(6.0 to 18.9)                             | -0.9<br>(-6.5 to 4.7)                               |
| Other sexually transmitted diseases                                     | 11,013.4<br>(9,319.9 to 12,176.3)                   | 13,620.6<br>(11,922.4 to 15,590.1)                   | 216.8<br>(142.3 to 318.5)                    | -7.6<br>(-11.4 to -3.9)                           | -8.9<br>(-12.4 to -5.9)                             |
| Hepatitis                                                               | 211,720.6<br>(179,775.6 to 240,981.3)               | 13,501.5<br>(10,918.3 to 15,967.3)                   | 14.7<br>(9.2 to 22.6)                        | -43.1<br>(-51.1 to -33.9)                         | -49.3<br>(-55.8 to -42.3)                           |
| Acute hepatitis A                                                       | 347.9<br>(180.8 to 444.5)                           | 4,522.0<br>(2,349.9 to 5,778.1)                      | 2.8<br>(1.8 to 4.3)                          | -49.2<br>(-59.3 to -35.1)                         | -52.0<br>(-61.6 to -39.7)                           |
| Hepatitis B                                                             | 166,042.0<br>(134,230.5 to 194,796.4)               | 8,025.1<br>(6,304.2 to 10,036.5)                     | 10.6<br>(6.3 to 17.1)                        | -42.2<br>(-52.9 to -29.9)                         | -51.6<br>(-59.5 to -42.2)                           |
| Hepatitis C                                                             | 45,307.7<br>(40,741.5 to 49,995.0)                  | 654.9<br>(581.5 to 738.8)                            | 0.6<br>(0.3 to 1.2)                          | 3.2<br>(-8.6 to 16.5)                             | 19.8<br>(4.6 to 37.0)                               |
| Acute hepatitis E                                                       | 23.0<br>(20.5 to 25.6)                              | 299.5<br>(265.9 to 333.1)                            | 0.6<br>(0.4 to 1.0)                          | -51.0<br>(-54.3 to -47.5)                         | -51.8<br>(-54.7 to -48.7)                           |
| Other infectious diseases                                               | 2,019.1<br>(1,921.4 to 2,122.1)                     | 1.1<br>(0.7 to 1.6)                                  | 50.7<br>(31.2 to 79.2)                       | 5.0<br>(1.2 to 9.2)                               | 8.6<br>(4.3 to 13.7)                                |
| <b>Non-communicable diseases</b>                                        | <b>1,223,597.0<br/>(1,221,420.5 to 1,226,128.0)</b> | <b>3,234,585.2†<br/>(3,102,569.0 to 3,375,720.1)</b> | <b>121,380.2<br/>(90,525.3 to 156,697.4)</b> | <b>14.7<br/>(13.8 to 15.5)</b>                    | <b>-0.7<br/>(-1.3 to -0.1)</b>                      |
| <b>Neoplasms</b>                                                        | <b>8,685.8<br/>(8,567.0 to 8,799.9)</b>             | <b>3,998.2<br/>(3,819.4 to 4,131.6)</b>              | <b>1,177.4<br/>(861.8 to 1,530.6)</b>        | <b>44.8<br/>(38.7 to 52.3)</b>                    | <b>10.8<br/>(6.0 to 16.7)</b>                       |
| Lip and oral cavity cancer                                              | 164.0<br>(156.7 to 169.8)                           | 44.8<br>(42.9 to 46.4)                               | 17.2<br>(12.5 to 22.8)                       | 61.7<br>(52.3 to 69.9)                            | 22.5<br>(15.7 to 28.6)                              |
| Nasopharynx cancer                                                      | 161.2<br>(147.1 to 175.4)                           | 45.3<br>(41.7 to 49.0)                               | 18.7<br>(13.1 to 25.1)                       | 0.5<br>(-10.5 to 11.8)                            | -15.8<br>(-24.7 to -6.8)                            |
| Other pharynx cancer                                                    | 27.8<br>(24.8 to 29.8)                              | 8.8<br>(7.8 to 9.3)                                  | 3.2<br>(2.3 to 4.3)                          | 79.0<br>(55.7 to 96.2)                            | 32.4<br>(15.3 to 44.9)                              |
| Oesophageal cancer                                                      | 278.8<br>(266.0 to 291.3)                           | 223.9<br>(216.3 to 231.1)                            | 55.1<br>(39.3 to 70.6)                       | 0.0<br>(-6.0 to 6.2)                              | -27.2<br>(-31.4 to -22.9)                           |
| Stomach cancer                                                          | 984.9<br>(936.1 to 1,038.4)                         | 510.4<br>(490.7 to 532.4)                            | 133.3<br>(96.6 to 171.8)                     | 24.7<br>(18.1 to 32.4)                            | -8.7<br>(-13.6 to -3.4)                             |
| Colon and rectum cancer                                                 | 1,469.9<br>(1,395.8 to 1,547.5)                     | 392.8<br>(373.0 to 412.4)                            | 138.6<br>(101.8 to 180.8)                    | 69.3<br>(57.4 to 83.2)                            | 25.0<br>(16.6 to 35.0)                              |
| Liver cancer                                                            | 665.8<br>(615.6 to 711.5)                           | 561.2<br>(532.2 to 592.6)                            | 127.9<br>(90.5 to 167.5)                     | 47.8<br>(37.8 to 61.5)                            | 11.8<br>(4.5 to 21.8)                               |
| Liver cancer due to hepatitis B                                         | 440.7<br>(382.6 to 495.3)                           | 300.6<br>(262.7 to 335.4)                            | 68.0<br>(47.2 to 90.6)                       | 43.7<br>(33.0 to 57.3)                            | 9.8<br>(1.5 to 19.9)                                |



| Cause                                              | Prevalence in thousands (95% UI)                 | Incidence in thousands (95% UI)                   | YLDs in thousands (95% UI)                     |                                                   |                                                     |
|----------------------------------------------------|--------------------------------------------------|---------------------------------------------------|------------------------------------------------|---------------------------------------------------|-----------------------------------------------------|
|                                                    | 2016 counts                                      | 2016 counts                                       | 2016 counts                                    | Percentage change in counts between 2006 and 2016 | Percentage change in age-standardised rates between |
| Liver cancer due to hepatitis C                    | 64.4<br>(55.6 to 74.3)                           | 45.1<br>(39.6 to 51.5)                            | 10.5<br>(7.3 to 14.3)                          | 51.7<br>(39.5 to 66.5)                            | 10.2<br>(1.9 to 21.1)                               |
| Liver cancer due to alcohol use                    | 84.5<br>(67.5 to 103.9)                          | 64.9<br>(52.0 to 78.8)                            | 14.8<br>(10.1 to 20.6)                         | 70.8<br>(44.6 to 117.0)                           | 23.1<br>(4.6 to 56.2)                               |
| Liver cancer due to other causes                   | 224.4<br>(194.7 to 260.5)                        | 150.7<br>(133.5 to 172.9)                         | 34.5<br>(24.4 to 46.2)                         | 46.5<br>(33.6 to 59.9)                            | 11.9<br>(2.1 to 22.1)                               |
| Gallbladder and biliary tract cancer               | 25.2<br>(20.4 to 28.0)                           | 28.6<br>(23.6 to 32.1)                            | 6.6<br>(4.3 to 8.9)                            | 29.7<br>(18.6 to 40.3)                            | -5.5<br>(-13.5 to 2.0)                              |
| Pancreatic cancer                                  | 57.2<br>(54.9 to 59.4)                           | 72.7<br>(70.2 to 74.9)                            | 15.3<br>(10.7 to 20.3)                         | 45.4<br>(38.9 to 51.2)                            | 6.0<br>(1.3 to 10.4)                                |
| Larynx cancer                                      | 113.4<br>(108.6 to 119.6)                        | 32.8<br>(31.4 to 34.4)                            | 13.4<br>(9.6 to 17.8)                          | 46.6<br>(39.3 to 57.1)                            | 6.7<br>(1.5 to 14.0)                                |
| Tracheal, bronchus, and lung cancer                | 1,005.5<br>(950.0 to 1,058.6)                    | 721.0<br>(688.7 to 749.8)                         | 171.8<br>(123.8 to 218.5)                      | 46.3<br>(38.0 to 54.3)                            | 7.8<br>(2.2 to 13.3)                                |
| Malignant skin melanoma                            | 55.3<br>(43.8 to 60.3)                           | 12.5<br>(10.0 to 13.6)                            | 4.2<br>(2.8 to 5.8)                            | 85.1<br>(52.8 to 101.0)                           | 48.2<br>(21.9 to 60.9)                              |
| Non-melanoma skin cancer                           | 39.2<br>(32.6 to 47.9)                           | 121.2<br>(98.0 to 147.9)                          | 1.9<br>(1.1 to 2.9)                            | 133.9<br>(95.0 to 158.6)                          | 69.6<br>(36.4 to 88.1)                              |
| Non-melanoma skin cancer (squamous-cell carcinoma) | 36.2<br>(28.8 to 46.2)                           | 37.0<br>(31.5 to 45.0)                            | 1.7<br>(1.0 to 2.7)                            | 139.0<br>(96.0 to 165.8)                          | 72.7<br>(36.4 to 92.5)                              |
| Non-melanoma skin cancer (basal-cell carcinoma)    | 12.1<br>(8.3 to 19.1)                            | 84.1<br>(62.0 to 107.8)                           | 0.1<br>(0.1 to 0.3)                            | 83.2<br>(74.9 to 91.7)                            | 36.3<br>(31.1 to 41.7)                              |
| Breast cancer                                      | 1,392.9<br>(1,121.4 to 1,590.3)                  | 285.6<br>(230.2 to 325.3)                         | 119.8<br>(82.4 to 165.5)                       | 50.0<br>(23.4 to 74.4)                            | 17.2<br>(-3.4 to 36.1)                              |
| Cervical cancer                                    | 352.2<br>(202.8 to 421.2)                        | 90.6<br>(53.0 to 107.1)                           | 33.7<br>(17.8 to 47.5)                         | 11.2<br>(-14.0 to 33.0)                           | -9.1<br>(-29.8 to 8.4)                              |
| Uterine cancer                                     | 330.1<br>(307.7 to 369.1)                        | 69.7<br>(65.2 to 77.8)                            | 25.7<br>(17.9 to 35.7)                         | 34.9<br>(22.8 to 56.0)                            | 3.8<br>(-5.2 to 19.5)                               |
| Ovarian cancer                                     | 94.8<br>(85.3 to 100.9)                          | 30.7<br>(27.9 to 32.6)                            | 14.9<br>(10.6 to 19.7)                         | 33.4<br>(18.9 to 42.6)                            | 4.4<br>(-6.6 to 11.7)                               |
| Prostate cancer                                    | 424.6<br>(334.5 to 539.4)                        | 106.5<br>(85.6 to 131.9)                          | 43.1<br>(29.1 to 58.5)                         | 74.8<br>(51.5 to 87.8)                            | 23.7<br>(7.9 to 32.4)                               |
| Testicular cancer                                  | 25.4<br>(23.4 to 27.5)                           | 5.1<br>(4.7 to 5.5)                               | 1.9<br>(1.3 to 2.5)                            | 75.6<br>(59.7 to 91.9)                            | 57.2<br>(43.3 to 72.1)                              |
| Kidney cancer                                      | 165.7<br>(150.7 to 174.5)                        | 44.2<br>(41.2 to 46.2)                            | 15.1<br>(10.9 to 20.2)                         | 46.5<br>(38.8 to 53.8)                            | 15.3<br>(9.2 to 21.2)                               |
| Bladder cancer                                     | 243.0<br>(227.5 to 254.4)                        | 60.9<br>(57.1 to 63.7)                            | 24.1<br>(17.4 to 32.1)                         | 48.8<br>(38.3 to 57.8)                            | 8.7<br>(1.1 to 15.2)                                |
| Brain and nervous system cancer                    | 263.2<br>(237.0 to 293.5)                        | 106.2<br>(97.0 to 119.9)                          | 34.6<br>(24.3 to 45.9)                         | 64.1<br>(53.3 to 78.6)                            | 42.0<br>(32.9 to 54.1)                              |
| Thyroid cancer                                     | 224.6<br>(204.8 to 249.6)                        | 43.0<br>(39.1 to 47.7)                            | 14.4<br>(9.9 to 20.2)                          | 101.8<br>(80.0 to 128.8)                          | 64.0<br>(46.6 to 85.5)                              |
| Mesothelioma                                       | 5.0<br>(4.4 to 5.4)                              | 3.4<br>(2.9 to 3.6)                               | 1.1<br>(0.8 to 1.5)                            | 50.6<br>(33.7 to 63.6)                            | 16.4<br>(4.7 to 26.0)                               |
| Hodgkin lymphoma                                   | 26.4<br>(20.4 to 32.4)                           | 7.0<br>(5.5 to 8.7)                               | 2.8<br>(1.9 to 3.9)                            | 27.7<br>(16.2 to 40.5)                            | 4.9<br>(-4.1 to 15.7)                               |
| Non-Hodgkin's lymphoma                             | 237.6<br>(199.0 to 252.0)                        | 68.5<br>(57.3 to 72.4)                            | 22.4<br>(15.4 to 30.4)                         | 107.1<br>(75.4 to 124.4)                          | 59.4<br>(36.1 to 72.4)                              |
| Multiple myeloma                                   | 44.5<br>(35.8 to 48.6)                           | 16.5<br>(14.1 to 18.6)                            | 9.2<br>(6.3 to 12.2)                           | 100.0<br>(79.6 to 114.9)                          | 48.6<br>(33.1 to 59.7)                              |
| Leukaemia                                          | 457.3<br>(360.7 to 508.9)                        | 112.9<br>(90.2 to 124.8)                          | 56.1<br>(37.6 to 76.6)                         | 33.7<br>(21.7 to 47.1)                            | 25.0<br>(10.3 to 40.2)                              |
| Acute lymphoid leukaemia                           | 73.0<br>(53.4 to 83.2)                           | 19.1<br>(14.2 to 21.6)                            | 9.0<br>(5.7 to 12.6)                           | 86.1<br>(29.2 to 112.9)                           | 99.7<br>(34.9 to 137.5)                             |
| Chronic lymphoid leukaemia                         | 73.4<br>(62.1 to 81.7)                           | 16.4<br>(13.9 to 18.2)                            | 9.3<br>(6.4 to 12.6)                           | 84.5<br>(58.7 to 102.8)                           | 48.1<br>(28.8 to 62.1)                              |
| Acute myeloid leukaemia                            | 24.4<br>(18.4 to 28.3)                           | 13.2<br>(10.5 to 14.7)                            | 3.9<br>(2.6 to 5.2)                            | 59.3<br>(37.7 to 79.6)                            | 52.3<br>(27.0 to 78.1)                              |
| Chronic myeloid leukaemia                          | 7.5<br>(6.3 to 8.9)                              | 2.6<br>(2.2 to 3.1)                               | 1.0<br>(0.7 to 1.3)                            | 12.4<br>(1.5 to 27.3)                             | -8.4<br>(-16.6 to 3.3)                              |
| Other leukaemia                                    | 278.9<br>(211.5 to 315.2)                        | 61.5<br>(46.9 to 69.3)                            | 33.0<br>(21.7 to 45.2)                         | 14.6<br>(2.9 to 28.2)                             | 6.5<br>(-6.3 to 21.4)                               |
| Other neoplasms                                    | 638.3<br>(554.0 to 673.5)                        | 171.7<br>(149.5 to 180.3)                         | 51.6<br>(36.3 to 69.2)                         | 102.8<br>(88.1 to 116.0)                          | 65.1<br>(52.6 to 76.3)                              |
| <b>Cardiovascular diseases</b>                     | <b>93,469.5</b><br><b>(91,781.6 to 95,072.2)</b> | <b>12,464.3†</b><br><b>(11,939.1 to 13,012.3)</b> | <b>9,250.5</b><br><b>(6,667.4 to 11,932.5)</b> | <b>49.5</b><br><b>(44.6 to 54.1)</b>              | <b>13.2</b><br><b>(9.7 to 16.4)</b>                 |
| Rheumatic heart disease                            | 1,854.9<br>(1,708.8 to 2,019.6)                  | 106.0<br>(100.9 to 111.8)                         | 106.5<br>(71.6 to 149.9)                       | -2.4<br>(-6.4 to 2.4)                             | -13.4<br>(-16.6 to -10.2)                           |
| Ischaemic heart disease                            | 22,904.0<br>(21,734.6 to 24,036.9)               | 3,095.7<br>(2,919.6 to 3,277.6)                   | 1,177.0<br>(813.1 to 1,607.5)                  | 45.2<br>(43.1 to 47.3)                            | 10.9<br>(9.6 to 12.1)                               |
| Cerebrovascular disease                            | 28,433.2<br>(27,457.2 to 29,357.5)               | 5,510.3‡<br>(5,123.3 to 5,891.1)                  | 5,937.8<br>(4,134.9 to 7,636.7)                | 55.7<br>(47.8 to 62.5)                            | 16.2<br>(10.5 to 21.1)                              |
| Ischaemic stroke                                   | 24,097.5<br>(21,465.5 to 26,881.0)               | 3,783.2‡<br>(3,416.3 to 4,147.5)                  | 4,830.9<br>(3,324.6 to 6,242.3)                | 61.6<br>(52.3 to 69.9)                            | 20.7<br>(13.7 to 26.8)                              |
| Hemorrhagic stroke                                 | 5,552.3<br>(5,008.2 to 6,191.4)                  | 1,727.1‡<br>(1,579.1 to 1,894.9)                  | 1,106.8<br>(785.4 to 1,419.5)                  | 34.3<br>(26.5 to 42.6)                            | -0.1<br>(-5.6 to 5.5)                               |
| Hypertensive heart disease                         | 4,768.9<br>(4,134.5 to 5,491.2)                  | --                                                | 389.0<br>(269.1 to 537.1)                      | 46.7<br>(42.8 to 50.6)                            | 9.1<br>(6.9 to 11.5)                                |
| Cardiomyopathy and myocarditis                     | 677.5<br>(639.1 to 720.9)                        | 729.1+<br>(662.5 to 808.3)                        | 72.2<br>(48.4 to 101.6)                        | 17.5<br>(13.2 to 22.0)                            | 6.2<br>(3.5 to 9.0)                                 |
| Myocarditis                                        | 536.1<br>(481.2 to 595.2)                        | 729.1<br>(662.5 to 808.3)                         | 40.3<br>(26.9 to 56.5)                         | 12.3<br>(7.5 to 17.6)                             | 4.9<br>(0.9 to 9.1)                                 |
| Alcoholic cardiomyopathy                           | 55.4<br>(46.0 to 66.6)                           | --                                                | 5.0<br>(3.2 to 7.2)                            | 26.0<br>(21.3 to 30.4)                            | 6.0<br>(3.7 to 8.2)                                 |
| Other cardiomyopathy                               | 310.4<br>(268.4 to 356.2)                        | --                                                | 26.9<br>(17.6 to 38.4)                         | 24.7<br>(19.6 to 30.5)                            | 8.2<br>(5.0 to 11.9)                                |
| Atrial fibrillation and flutter                    | 8,743.6<br>(7,641.8 to 10,051.8)                 | 735.7<br>(628.6 to 862.7)                         | 695.7<br>(462.5 to 978.8)                      | 53.6<br>(50.1 to 57.1)                            | 12.2<br>(10.3 to 14.2)                              |
| Peripheral vascular disease                        | 22,117.9<br>(19,187.5 to 25,701.8)               | 2,063.8<br>(1,779.3 to 2,404.9)                   | 96.5<br>(45.0 to 173.5)                        | 33.5<br>(30.7 to 36.3)                            | -6.1<br>(-7.8 to -4.3)                              |
| Endocarditis                                       | 38.9<br>(35.2 to 42.7)                           | 223.6<br>(200.1 to 248.5)                         | 2.9<br>(1.9 to 4.1)                            | 42.0<br>(38.5 to 45.5)                            | 9.8<br>(7.9 to 11.9)                                |
| Other cardiovascular and circulatory diseases      | 14,642.3<br>(12,631.3 to 17,021.7)               | --                                                | 773.0<br>(520.1 to 1,105.4)                    | 28.8<br>(23.9 to 33.4)                            | 7.1<br>(5.1 to 9.2)                                 |
| <b>Chronic respiratory diseases</b>                | <b>93,656.1</b><br><b>(91,808.9 to 94,977.9)</b> | <b>16,913.5†</b><br><b>(16,161.8 to 17,692.8)</b> | <b>4,734.9</b><br><b>(3,864.0 to 5,630.2)</b>  | <b>17.0</b><br><b>(12.4 to 22.0)</b>              | <b>-1.7</b><br><b>(-5.9 to 2.6)</b>                 |
| Chronic obstructive pulmonary disease              | 54,051.3<br>(51,673.8 to 56,336.2)               | 4,773.9<br>(4,549.0 to 5,000.3)                   | 2,772.4<br>(2,403.0 to 3,151.5)                | 18.6<br>(10.9 to 26.8)                            | -9.4<br>(-15.5 to -3.0)                             |
| Pneumoconiosis                                     | 685.6<br>(637.1 to 738.0)                        | 58.1<br>(54.4 to 62.2)                            | 98.4<br>(67.2 to 136.5)                        | 34.9<br>(30.2 to 39.9)                            | -3.1<br>(-6.6 to 0.4)                               |
| Silicosis                                          | 316.0<br>(285.1 to 349.2)                        | 30.5<br>(27.9 to 33.5)                            | 44.9<br>(30.3 to 62.2)                         | 33.1<br>(25.6 to 39.9)                            | -4.8<br>(-9.9 to 0.1)                               |

| Cause                                                          | Prevalence in thousands (95% UI)              | Incidence in thousands (95% UI)                        | YLDs in thousands (95% UI)                 |                                                   |                                                     |
|----------------------------------------------------------------|-----------------------------------------------|--------------------------------------------------------|--------------------------------------------|---------------------------------------------------|-----------------------------------------------------|
|                                                                | 2016 counts                                   | 2016 counts                                            | 2016 counts                                | Percentage change in counts between 2006 and 2016 | Percentage change in age-standardised rates between |
| Asbestosis                                                     | 29.1<br>(23.9 to 34.9)                        | 2.3<br>(1.9 to 2.7)                                    | 4.6<br>(2.9 to 6.5)                        | 35.1<br>(31.6 to 38.4)                            | -1.8<br>(-4.2 to 0.4)                               |
| Coal workers pneumoconiosis                                    | 230.8<br>(200.3 to 267.8)                     | 16.6<br>(14.3 to 19.1)                                 | 33.0<br>(22.2 to 47.1)                     | 36.1<br>(26.4 to 46.8)                            | -2.6<br>(-9.3 to 4.6)                               |
| Other pneumoconiosis                                           | 109.6<br>(92.4 to 127.8)                      | 8.8<br>(7.4 to 10.3)                                   | 15.9<br>(10.6 to 22.4)                     | 37.5<br>(27.3 to 48.8)                            | 0.3<br>(-6.7 to 8.5)                                |
| Asthma                                                         | 41,564.4<br>(39,184.7 to 44,200.3)            | 11,978.3<br>(11,250.9 to 12,714.4)                     | 1,632.2<br>(1,072.8 to 2,320.2)            | 11.9<br>(9.8 to 14.2)                             | 10.2<br>(8.4 to 12.0)                               |
| Interstitial lung disease and pulmonary sarcoidosis            | 1,261.9<br>(1,127.3 to 1,409.1)               | 103.2<br>(92.0 to 115.1)                               | 127.6<br>(85.7 to 183.5)                   | 35.1<br>(30.9 to 39.2)                            | 0.2<br>(-2.5 to 2.7)                                |
| Other chronic respiratory diseases                             | --                                            | --                                                     | 104.4<br>(89.8 to 117.6)                   | 26.8<br>(19.9 to 34.8)                            | 23.6<br>(16.8 to 31.4)                              |
| <b>Cirrhosis and other chronic liver diseases</b>              | <b>11,869.6<br/>(11,274.6 to 12,504.7)</b>    | <b>237.9<br/>(227.1 to 249.5)</b>                      | <b>271.2<br/>(188.5 to 374.6)</b>          | <b>19.6<br/>(16.0 to 22.9)</b>                    | <b>-2.6<br/>(-5.2 to -0.1)</b>                      |
| Cirrhosis and other chronic liver diseases due to hepatitis B  | 5,802.2<br>(5,400.0 to 6,207.8)               | 116.3<br>(109.1 to 124.3)                              | 125.3<br>(87.5 to 173.4)                   | 24.1<br>(19.8 to 29.4)                            | -2.8<br>(-6.0 to 1.0)                               |
| Cirrhosis and other chronic liver diseases due to hepatitis C  | 1,583.0<br>(1,425.5 to 1,746.3)               | 29.7<br>(26.8 to 32.7)                                 | 32.6<br>(22.2 to 46.0)                     | 30.2<br>(21.4 to 38.8)                            | 1.8<br>(-4.4 to 7.9)                                |
| Cirrhosis and other chronic liver diseases due to alcohol use  | 1,788.4<br>(1,630.4 to 1,955.8)               | 35.8<br>(32.8 to 39.1)                                 | 38.6<br>(26.5 to 53.8)                     | 26.8<br>(19.7 to 34.6)                            | -2.0<br>(-7.2 to 3.7)                               |
| Cirrhosis and other chronic liver diseases due to other causes | 2,696.0<br>(2,367.1 to 3,061.9)               | 56.1<br>(49.6 to 63.7)                                 | 74.7<br>(49.8 to 103.3)                    | 6.2<br>(1.0 to 11.5)                              | -4.1<br>(-8.2 to 0.2)                               |
| <b>Digestive diseases</b>                                      | <b>94,144.7<br/>(92,105.7 to 96,181.9)</b>    | <b>59,649.0<sup>†</sup><br/>(56,077.5 to 63,515.6)</b> | <b>2,399.1<br/>(1,674.6 to 3,300.7)</b>    | <b>40.6<br/>(35.7 to 45.6)</b>                    | <b>14.5<br/>(11.2 to 17.8)</b>                      |
| Peptic ulcer disease                                           | 27,466.9<br>(25,522.2 to 29,566.8)            | 2,288.4<br>(2,047.6 to 2,550.8)                        | 545.5<br>(346.4 to 811.0)                  | 42.3<br>(33.9 to 51.4)                            | 15.5<br>(9.6 to 21.7)                               |
| Gastritis and duodenitis                                       | 58,330.8<br>(52,837.2 to 64,113.8)            | 28,192.8<br>(25,336.7 to 31,250.4)                     | 817.8<br>(537.3 to 1,192.0)                | 41.0<br>(33.8 to 49.0)                            | 13.5<br>(8.2 to 18.8)                               |
| Appendicitis                                                   | 88.0<br>(82.2 to 93.7)                        | 2,309.9<br>(2,158.0 to 2,460.8)                        | 28.1<br>(18.9 to 38.7)                     | 6.5<br>(0.5 to 12.8)                              | 5.5<br>(-0.2 to 11.5)                               |
| Paralytic ileus and intestinal obstruction                     | 33.9<br>(30.7 to 37.1)                        | 904.4<br>(821.0 to 990.7)                              | 10.8<br>(7.2 to 14.8)                      | 34.2<br>(28.2 to 40.1)                            | 10.5<br>(7.0 to 14.4)                               |
| Inguinal, femoral, and abdominal hernia                        | 5,768.6<br>(5,296.5 to 6,224.1)               | 6,591.2<br>(5,727.7 to 7,433.9)                        | 389.7<br>(260.5 to 547.4)                  | 28.0<br>(22.1 to 34.2)                            | 9.7<br>(5.1 to 15.2)                                |
| Inflammatory bowel disease                                     | 2,313.1<br>(2,107.8 to 2,553.9)               | 772.5<br>(715.6 to 829.9)                              | 329.2<br>(224.0 to 454.3)                  | 55.1<br>(48.4 to 62.1)                            | 22.7<br>(18.0 to 27.6)                              |
| Vascular intestinal disorders                                  | 8.8<br>(7.6 to 10.4)                          | 67.7<br>(59.0 to 77.8)                                 | 2.9<br>(1.9 to 4.1)                        | 26.1<br>(20.1 to 31.9)                            | 7.5<br>(5.3 to 9.8)                                 |
| Gallbladder and biliary diseases                               | 6,531.9<br>(5,858.8 to 7,254.3)               | 16,953.9<br>(15,232.4 to 18,979.4)                     | 64.4<br>(44.0 to 90.5)                     | 38.6<br>(30.7 to 47.5)                            | 11.4<br>(5.9 to 17.1)                               |
| Pancreatitis                                                   | 176.0<br>(158.7 to 194.2)                     | 1,568.1<br>(1,418.9 to 1,731.4)                        | 22.2<br>(15.0 to 31.4)                     | 35.0<br>(27.3 to 43.9)                            | 12.3<br>(6.6 to 18.6)                               |
| Other digestive diseases                                       | --                                            | --                                                     | 188.7<br>(132.1 to 258.6)                  | 48.2<br>(43.3 to 53.1)                            | 19.6<br>(16.1 to 23.0)                              |
| <b>Neurological disorders</b>                                  | <b>370,381.2<br/>(361,073.6 to 380,500.7)</b> | <b>147,305.3<br/>(127,396.5 to 169,562.8)</b>          | <b>9,924.9<br/>(6,836.8 to 13,277.6)</b>   | <b>8.8<br/>(5.0 to 12.9)</b>                      | <b>-1.5<br/>(-5.3 to 2.2)</b>                       |
| Alzheimer's disease and other dementias                        | 10,427.5<br>(8,917.5 to 12,196.3)             | 1,770.2<br>(1,501.7 to 2,089.1)                        | 1,512.5<br>(1,049.3 to 2,023.2)            | 49.0<br>(46.8 to 51.3)                            | 3.2<br>(2.1 to 4.4)                                 |
| Parkinson's disease                                            | 1,407.7<br>(1,126.6 to 1,738.8)               | 155.9<br>(123.5 to 193.4)                              | 167.8<br>(107.5 to 233.0)                  | 41.6<br>(36.7 to 46.2)                            | 1.2<br>(-1.7 to 4.0)                                |
| Epilepsy                                                       | 3,261.1<br>(2,614.0 to 3,892.7)               | 295.2<br>(238.2 to 352.8)                              | 1,001.6<br>(650.7 to 1,412.2)              | -13.7<br>(-34.5 to 11.1)                          | -15.4<br>(-35.5 to 9.1)                             |
| Multiple sclerosis                                             | 103.2<br>(91.2 to 115.7)                      | 5.2<br>(4.6 to 5.8)                                    | 29.5<br>(20.0 to 39.5)                     | 51.6<br>(49.1 to 54.3)                            | 32.0<br>(30.5 to 33.5)                              |
| Motor neuron disease                                           | 54.4<br>(46.8 to 63.7)                        | 10.2<br>(8.7 to 12.0)                                  | 11.6<br>(7.9 to 15.6)                      | 22.0<br>(17.1 to 26.6)                            | 10.2<br>(8.2 to 12.2)                               |
| Migraine                                                       | 132,930.7<br>(127,445.9 to 138,273.9)         | 14,452.6<br>(13,843.8 to 15,050.3)                     | 5,938.3<br>(3,853.6 to 8,301.7)            | 5.8<br>(4.7 to 7.0)                               | -0.4<br>(-1.2 to 0.5)                               |
| Tension-type headache                                          | 260,794.5<br>(231,640.9 to 293,801.0)         | 130,610.1<br>(110,742.4 to 152,750.9)                  | 1,022.7<br>(650.0 to 1,503.4)              | 7.0<br>(4.5 to 9.4)                               | -0.3<br>(-1.6 to 1.1)                               |
| Other neurological disorders                                   | 3.0<br>(1.9 to 4.2)                           | 5.9<br>(3.8 to 8.1)                                    | 241.0<br>(163.8 to 328.5)                  | 6.2<br>(-14.7 to 30.3)                            | 5.2<br>(-15.9 to 29.3)                              |
| <b>Mental and substance use disorders</b>                      | <b>204,881.1<br/>(201,652.4 to 208,314.4)</b> | <b>69,692.6<sup>†</sup><br/>(65,060.2 to 74,658.3)</b> | <b>28,205.3<br/>(20,797.5 to 36,198.4)</b> | <b>6.5<br/>(5.4 to 7.8)</b>                       | <b>-2.4<br/>(-3.2 to -1.5)</b>                      |
| Schizophrenia                                                  | 7,004.6<br>(6,228.3 to 7,822.7)               | 322.7<br>(282.7 to 366.4)                              | 4,561.3<br>(3,339.0 to 5,665.3)            | 11.2<br>(9.2 to 13.5)                             | 0.4<br>(-1.1 to 2.0)                                |
| Alcohol use disorders                                          | 16,561.1<br>(14,832.2 to 18,469.9)            | 8,122.4<br>(7,089.6 to 9,144.0)                        | 1,666.7<br>(1,145.2 to 2,289.0)            | 4.1<br>(1.4 to 7.0)                               | -5.2<br>(-7.6 to -2.7)                              |
| Drug use disorders                                             | 11,747.9<br>(11,365.9 to 12,177.8)            | 1,444.5<br>(1,313.2 to 1,583.6)                        | 2,472.0<br>(1,789.0 to 3,188.7)            | 4.3<br>(1.0 to 7.6)                               | -2.8<br>(-5.6 to 0.1)                               |
| Opioid use disorders                                           | 4,508.2<br>(4,008.5 to 5,126.1)               | 488.2<br>(433.0 to 556.6)                              | 1,877.3<br>(1,313.9 to 2,439.0)            | 5.2<br>(1.4 to 9.5)                               | -5.2<br>(-8.6 to -1.6)                              |
| Cocaine use disorders                                          | 405.0<br>(352.5 to 467.7)                     | 36.2<br>(31.0 to 42.3)                                 | 56.6<br>(34.2 to 81.5)                     | 9.0<br>(1.8 to 16.9)                              | 1.2<br>(-4.6 to 7.7)                                |
| Amphetamine use disorders                                      | 1,153.3<br>(791.9 to 1,597.9)                 | 100.4<br>(73.2 to 132.4)                               | 154.6<br>(86.3 to 248.8)                   | 2.3<br>(-4.0 to 9.1)                              | 10.1<br>(3.5 to 16.7)                               |
| Cannabis use disorders                                         | 5,127.7<br>(4,314.0 to 6,100.5)               | 663.4<br>(556.5 to 790.6)                              | 151.1<br>(93.1 to 222.0)                   | -7.2<br>(-12.0 to -2.5)                           | 0.6<br>(-2.3 to 3.4)                                |
| Other drug use disorders                                       | 871.1<br>(781.0 to 966.9)                     | 156.3<br>(141.1 to 172.5)                              | 232.4<br>(155.5 to 332.2)                  | 5.3<br>(0.5 to 10.2)                              | 4.2<br>(-0.7 to 9.5)                                |
| Depressive disorders                                           | 55,648.3<br>(54,038.5 to 57,042.2)            | 48,616.1<br>(44,299.4 to 53,216.3)                     | 8,627.8<br>(5,989.7 to 11,756.1)           | 9.3<br>(6.7 to 12.1)                              | -6.5<br>(-8.0 to -4.8)                              |
| Major depressive disorder                                      | 29,264.0<br>(26,726.9 to 32,195.2)            | 44,594.3<br>(40,456.0 to 49,404.4)                     | 5,967.6<br>(4,091.3 to 8,089.2)            | 5.0<br>(2.4 to 7.8)                               | -9.1<br>(-10.7 to -7.5)                             |
| Dysthymia                                                      | 27,694.8<br>(24,069.9 to 31,897.1)            | 4,021.7<br>(3,504.9 to 4,656.3)                        | 2,660.2<br>(1,789.2 to 3,834.0)            | 20.1<br>(14.0 to 27.5)                            | 0.3<br>(-4.3 to 5.4)                                |
| Bipolar disorder                                               | 4,642.9<br>(4,084.4 to 5,271.2)               | 380.8<br>(334.6 to 432.0)                              | 951.3<br>(598.4 to 1,396.9)                | 9.3<br>(6.3 to 12.4)                              | 0.0<br>(-1.9 to 1.9)                                |
| Anxiety disorders                                              | 44,196.3<br>(41,481.8 to 47,220.4)            | 7,053.0<br>(6,596.1 to 7,545.2)                        | 4,275.0<br>(2,993.8 to 5,790.8)            | 6.2<br>(2.6 to 10.3)                              | 0.0<br>(-3.2 to 3.5)                                |
| Eating disorders                                               | 1,400.7<br>(1,270.3 to 1,568.8)               | 822.0<br>(623.9 to 1,070.2)                            | 291.5<br>(188.5 to 422.0)                  | 13.7<br>(8.3 to 19.4)                             | 26.2<br>(22.2 to 30.7)                              |
| Anorexia nervosa                                               | 376.9<br>(276.2 to 516.4)                     | 149.2<br>(111.3 to 197.0)                              | 81.3<br>(48.0 to 124.5)                    | 5.3<br>(-1.7 to 12.3)                             | 21.6<br>(14.6 to 29.1)                              |
| Bulimia nervosa                                                | 986.8<br>(758.6 to 1,296.0)                   | 672.8<br>(480.8 to 917.6)                              | 210.2<br>(127.3 to 314.9)                  | 17.3<br>(10.1 to 24.3)                            | 28.3<br>(23.7 to 34.2)                              |
| Autistic spectrum disorders                                    | 10,999.8<br>(10,514.4 to 11,423.3)            | 50.6<br>(33.9 to 71.3)                                 | 1,586.4<br>(1,069.7 to 2,232.1)            | 2.6<br>(1.4 to 3.8)                               | 0.9<br>(-0.2 to 2.0)                                |
| Autism                                                         | 3,121.3<br>(2,686.0 to 3,625.0)               | 4.5<br>(2.3 to 7.7)                                    | 797.2<br>(514.0 to 1,163.2)                | 3.6<br>(1.6 to 5.5)                               | 1.5<br>(-0.5 to 3.3)                                |
| Asperger syndrome and other autistic spectrum disorders        | 7,864.4<br>(6,583.5 to 9,425.2)               | 46.1<br>(29.8 to 66.0)                                 | 789.2<br>(510.0 to 1,161.5)                | 1.7<br>(0.5 to 2.9)                               | 0.4<br>(-0.7 to 1.4)                                |



| Cause                                                      | Prevalence in thousands (95% UI)              | Incidence in thousands (95% UI)                      | YLDs in thousands (95% UI)                 |                                                   |                                                     |
|------------------------------------------------------------|-----------------------------------------------|------------------------------------------------------|--------------------------------------------|---------------------------------------------------|-----------------------------------------------------|
|                                                            | 2016 counts                                   | 2016 counts                                          | 2016 counts                                | Percentage change in counts between 2006 and 2016 | Percentage change in age-standardised rates between |
| Attention-deficit/hyperactivity disorder                   | 15,628.0<br>(14,397.6 to 16,957.5)            | 510.4<br>(456.0 to 571.7)                            | 189.1<br>(113.6 to 296.5)                  | -7.9<br>(-9.6 to -6.2)                            | 0.8<br>(-0.7 to 2.4)                                |
| Conduct disorder                                           | 4,779.3<br>(3,976.0 to 5,603.9)               | 1,622.7<br>(1,263.2 to 1,967.6)                      | 585.9<br>(354.6 to 899.1)                  | -26.7<br>(-28.8 to -24.6)                         | 0.8<br>(-1.1 to 2.8)                                |
| Idiopathic developmental intellectual disability           | 19,058.8<br>(11,772.0 to 26,172.2)            | --                                                   | 798.6<br>(403.4 to 1,348.7)                | -7.5<br>(-11.6 to -4.7)                           | -7.0<br>(-11.0 to -4.3)                             |
| Other mental and substance use disorders                   | 29,362.0<br>(25,556.3 to 33,978.4)            | 747.5<br>(659.9 to 846.9)                            | 2,199.7<br>(1,488.0 to 3,155.1)            | 12.6<br>(11.3 to 14.1)                            | 0.1<br>(-0.9 to 1.2)                                |
| <b>Diabetes, urogenital, blood, and endocrine diseases</b> | <b>502,529.5<br/>(499,895.2 to 505,692.6)</b> | <b>157,316.4†<br/>(148,668.7 to 165,269.8)</b>       | <b>12,733.0<br/>(9,039.2 to 17,525.3)</b>  | <b>14.0<br/>(11.9 to 16.3)</b>                    | <b>-3.0<br/>(-4.8 to -1.1)</b>                      |
| Diabetes mellitus                                          | 89,783.1<br>(81,973.0 to 97,771.6)            | 3,978.0<br>(3,614.7 to 4,403.1)                      | 5,540.1<br>(3,694.2 to 7,888.2)            | 12.1<br>(7.9 to 16.3)                             | -9.5<br>(-13.1 to -6.2)                             |
| Acute glomerulonephritis                                   | 35.1<br>(31.0 to 40.0)                        | 512.6<br>(449.0 to 586.8)                            | 1.8<br>(1.1 to 2.6)                        | -11.3<br>(-15.2 to -7.1)                          | -21.8<br>(-24.6 to -18.9)                           |
| Chronic kidney disease                                     | 32,664.0<br>(29,598.0 to 35,836.3)            | 2,319.5<br>(2,042.6 to 2,591.7)                      | 1,400.8<br>(1,051.5 to 1,777.5)            | 40.9<br>(36.7 to 45.3)                            | 9.2<br>(6.5 to 12.0)                                |
| Chronic kidney disease due to diabetes mellitus            | 16,908.5<br>(14,820.5 to 19,196.6)            | 1,209.6<br>(1,033.3 to 1,398.9)                      | 716.8<br>(533.6 to 914.4)                  | 41.1<br>(35.0 to 47.4)                            | 9.4<br>(5.2 to 13.8)                                |
| Chronic kidney disease due to hypertension                 | 7,134.0<br>(6,168.7 to 8,148.3)               | 168.6<br>(137.0 to 205.2)                            | 423.6<br>(305.2 to 549.5)                  | 48.3<br>(40.4 to 57.1)                            | 8.8<br>(3.5 to 14.7)                                |
| Chronic kidney disease due to glomerulonephritis           | 5,725.7<br>(4,938.7 to 6,583.1)               | 729.5<br>(596.5 to 864.3)                            | 117.9<br>(83.0 to 160.8)                   | 25.8<br>(18.8 to 33.3)                            | 9.2<br>(5.2 to 13.2)                                |
| Chronic kidney disease due to other causes                 | 2,895.8<br>(2,366.7 to 3,534.6)               | 211.9<br>(171.7 to 259.7)                            | 142.6<br>(99.9 to 191.7)                   | 33.4<br>(25.9 to 41.7)                            | 9.2<br>(5.4 to 13.7)                                |
| Urinary diseases and male infertility                      | 32,715.2<br>(30,262.5 to 35,291.4)            | 64,338.9†<br>(59,035.5 to 70,194.7)                  | 924.0<br>(607.8 to 1,312.3)                | 31.5<br>(28.9 to 34.0)                            | -1.7<br>(-3.0 to -0.4)                              |
| Interstitial nephritis and urinary tract infections        | 789.4<br>(694.8 to 893.4)                     | 41,197.7<br>(36,265.3 to 46,668.7)                   | 26.2<br>(16.1 to 40.0)                     | 8.8<br>(3.5 to 14.5)                              | -0.3<br>(-4.0 to 3.8)                               |
| Urolithiasis                                               | 741.1<br>(668.5 to 818.9)                     | 19,713.5<br>(17,806.2 to 21,796.2)                   | 53.8<br>(36.7 to 73.7)                     | 25.4<br>(18.9 to 31.3)                            | 2.7<br>(-1.6 to 7.5)                                |
| Benign prostatic hyperplasia                               | 23,731.3<br>(20,960.1 to 26,749.7)            | 3,427.7<br>(2,932.0 to 4,005.4)                      | 781.8<br>(510.0 to 1,131.2)                | 36.9<br>(34.7 to 39.2)                            | -1.5<br>(-2.9 to -0.1)                              |
| Male infertility                                           | 6,319.8<br>(4,720.6 to 8,304.6)               | --                                                   | 34.8<br>(13.2 to 73.1)                     | -5.9<br>(-11.1 to -0.6)                           | -1.6<br>(-5.2 to 2.6)                               |
| Other urinary diseases                                     | --                                            | --                                                   | 27.4<br>(18.7 to 37.5)                     | -1.8<br>(-5.7 to 2.1)                             | -15.7<br>(-18.3 to -12.8)                           |
| Gynecological diseases                                     | 166,255.8<br>(163,768.8 to 168,661.6)         | 82,325.3†<br>(76,239.2 to 88,388.9)                  | 2,697.7<br>(1,854.6 to 3,817.4)            | 5.7<br>(2.6 to 10.0)                              | 0.7<br>(-2.0 to 4.9)                                |
| Uterine fibroids                                           | 27,169.3<br>(24,386.4 to 30,081.9)            | 2,598.1<br>(2,280.3 to 2,981.8)                      | 260.2<br>(138.5 to 466.8)                  | 14.6<br>(11.5 to 17.0)                            | -0.9<br>(-2.8 to 0.8)                               |
| Polycystic ovarian syndrome                                | 1,942.4<br>(1,548.3 to 2,372.5)               | 703.2<br>(506.1 to 923.4)                            | 16.6<br>(7.6 to 30.4)                      | -3.9<br>(-6.7 to -0.7)                            | 3.1<br>(0.4 to 6.3)                                 |
| Female infertility                                         | 8,593.5<br>(3,630.0 to 16,062.6)              | --                                                   | 45.8<br>(13.0 to 116.5)                    | 8.9<br>(-8.5 to 37.3)                             | 13.4<br>(-2.1 to 37.5)                              |
| Endometriosis                                              | 1,656.4<br>(1,461.5 to 1,862.3)               | 3,727.0<br>(3,072.5 to 4,588.6)                      | 154.3<br>(103.3 to 215.2)                  | 5.3<br>(1.1 to 9.6)                               | 0.1<br>(-3.2 to 3.9)                                |
| Genital prolapse                                           | 18,958.8<br>(16,621.3 to 21,436.8)            | 1,067.6<br>(925.1 to 1,215.9)                        | 59.4<br>(28.5 to 107.5)                    | 15.7<br>(11.8 to 19.6)                            | -12.2<br>(-15.3 to -9.3)                            |
| Premenstrual syndrome                                      | 96,920.4<br>(93,114.9 to 100,908.5)           | 33,175.6<br>(31,628.4 to 34,783.6)                   | 815.0<br>(503.7 to 1,247.6)                | -0.9<br>(-2.7 to 1.0)                             | -2.5<br>(-4.1 to -0.9)                              |
| Other gynecological diseases                               | 37,560.0<br>(32,925.1 to 41,889.3)            | 41,053.9<br>(35,106.0 to 46,714.5)                   | 1,346.3<br>(884.1 to 1,921.9)              | 8.0<br>(2.4 to 17.3)                              | 3.4<br>(-1.9 to 12.5)                               |
| Hemoglobinopathies and hemolytic anaemias                  | 259,378.3<br>(258,063.8 to 260,924.2)         | --                                                   | 1,524.9<br>(1,001.2 to 2,292.0)            | 3.0<br>(-2.5 to 8.0)                              | 1.2<br>(-4.3 to 7.5)                                |
| Thalassemias                                               | 124.5<br>(122.4 to 126.6)                     | --                                                   | 7.7<br>(5.0 to 11.4)                       | -9.4<br>(-15.9 to -1.8)                           | -0.5<br>(-8.2 to 8.5)                               |
| Thalassaemia trait                                         | 118,403.5<br>(115,733.9 to 121,117.2)         | --                                                   | 1,451.2<br>(954.8 to 2,181.3)              | 2.5<br>(-3.0 to 7.6)                              | 1.1<br>(-4.6 to 7.5)                                |
| Sickle cell disorders                                      | 0.1<br>(0.1 to 0.1)                           | --                                                   | < 0.05<br>(< 0.05 to < 0.05)               | -1.9<br>(-8.6 to 2.7)                             | 3.7<br>(-2.8 to 9.0)                                |
| Sickle cell trait                                          | 2,829.1<br>(2,633.3 to 3,044.8)               | --                                                   | 8.3<br>(5.2 to 12.9)                       | 5.4<br>(-3.1 to 14.5)                             | 3.0<br>(-6.9 to 13.8)                               |
| G6PD deficiency                                            | 38,323.7<br>(37,180.1 to 39,591.2)            | --                                                   | 2.0<br>(1.4 to 3.0)                        | 9.2<br>(2.5 to 16.8)                              | 4.4<br>(-4.7 to 14.4)                               |
| G6PD trait                                                 | 116,959.1<br>(115,356.3 to 118,864.3)         | --                                                   | 0.1<br>(0.1 to 0.1)                        | 1.7<br>(-3.1 to 6.8)                              | 0.9<br>(-4.3 to 7.0)                                |
| Other hemoglobinopathies and hemolytic anaemias            | 3,959.4<br>(3,795.1 to 4,139.8)               | --                                                   | 55.6<br>(35.8 to 84.3)                     | 18.4<br>(11.7 to 25.4)                            | 6.5<br>(0.7 to 12.4)                                |
| Endocrine, metabolic, blood, and immune disorders          | 19,553.9<br>(17,749.1 to 21,516.2)            | 3,842.0<br>(3,415.0 to 4,312.2)                      | 643.8<br>(429.9 to 892.3)                  | 29.9<br>(26.4 to 33.7)                            | 3.7<br>(1.4 to 6.0)                                 |
| <b>Musculoskeletal disorders</b>                           | <b>249,808.4<br/>(244,838.4 to 255,259.3)</b> | <b>107,982.9<br/>(97,774.6 to 119,958.2)</b>         | <b>26,500.0<br/>(19,041.8 to 34,762.6)</b> | <b>16.5<br/>(14.1 to 18.9)</b>                    | <b>-2.8<br/>(-4.2 to -1.4)</b>                      |
| Rheumatoid arthritis                                       | 3,838.9<br>(3,443.0 to 4,309.9)               | 212.2<br>(189.5 to 237.4)                            | 910.4<br>(618.6 to 1,206.7)                | 39.7<br>(35.5 to 44.4)                            | 12.8<br>(9.9 to 15.8)                               |
| Osteoarthritis                                             | 69,463.1<br>(65,022.0 to 74,048.2)            | 3,354.8<br>(3,097.2 to 3,623.5)                      | 4,323.6<br>(3,046.2 to 5,890.4)            | 32.6<br>(31.2 to 33.9)                            | 0.6<br>(-0.2 to 1.5)                                |
| Low back and neck pain                                     | 143,766.1<br>(138,052.5 to 148,472.4)         | 49,623.5<br>(44,588.8 to 55,133.5)                   | 16,243.5<br>(11,431.5 to 21,619.8)         | 15.4<br>(12.2 to 18.6)                            | -2.6<br>(-4.6 to -0.5)                              |
| Low back pain                                              | 67,287.8<br>(58,938.5 to 76,801.9)            | 31,527.8<br>(27,364.9 to 36,560.0)                   | 7,692.7<br>(5,424.8 to 10,210.3)           | 12.2<br>(9.2 to 15.2)                             | -4.1<br>(-5.3 to -2.9)                              |
| Neck pain                                                  | 84,922.9<br>(72,645.0 to 98,640.6)            | 18,095.6<br>(15,568.3 to 21,328.7)                   | 8,550.8<br>(5,762.3 to 12,040.3)           | 18.3<br>(13.2 to 24.2)                            | -1.1<br>(-5.0 to 3.0)                               |
| Gout                                                       | 7,836.5<br>(6,947.8 to 8,894.9)               | 1,555.7<br>(1,350.9 to 1,770.4)                      | 250.3<br>(171.9 to 344.5)                  | 25.1<br>(20.6 to 29.5)                            | -3.4<br>(-6.4 to -0.4)                              |
| Other musculoskeletal disorders                            | 55,167.5<br>(45,798.1 to 65,520.0)            | 53,236.7<br>(44,095.5 to 64,041.8)                   | 4,772.2<br>(3,197.5 to 6,850.3)            | 4.7<br>(-0.6 to 9.5)                              | -8.7<br>(-11.9 to -5.9)                             |
| <b>Other non-communicable diseases</b>                     | <b>953,636.5<br/>(949,022.1 to 959,206.9)</b> | <b>2,659,025.1†<br/>(2,529,018.3 to 2,797,886.1)</b> | <b>26,184.0<br/>(17,723.4 to 37,538.9)</b> | <b>12.1<br/>(10.8 to 13.3)</b>                    | <b>-1.0<br/>(-1.8 to -0.4)</b>                      |
| Congenital anomalies                                       | 13,954.9<br>(13,053.3 to 14,845.5)            | --                                                   | 1,352.2<br>(974.2 to 1,806.8)              | 0.6<br>(-2.7 to 3.6)                              | -2.3<br>(-5.4 to 0.6)                               |
| Neural tube defects                                        | 465.8<br>(439.9 to 495.7)                     | --                                                   | 140.2<br>(98.1 to 187.0)                   | -1.5<br>(-6.1 to 3.4)                             | -5.2<br>(-9.8 to -0.6)                              |
| Congenital heart anomalies                                 | 3,300.0<br>(2,968.4 to 3,657.8)               | --                                                   | 160.1<br>(69.1 to 274.8)                   | 0.1<br>(-4.0 to 4.1)                              | -1.1<br>(-5.0 to 2.6)                               |
| Orofacial clefts                                           | 828.1<br>(745.5 to 908.0)                     | --                                                   | 8.9<br>(5.7 to 12.9)                       | -7.6<br>(-12.4 to -2.5)                           | -11.2<br>(-15.6 to -6.2)                            |
| Down's syndrome                                            | 153.1<br>(131.0 to 179.2)                     | --                                                   | 14.7<br>(9.8 to 20.7)                      | 14.8<br>(8.1 to 23.2)                             | 14.9<br>(8.5 to 22.9)                               |
| Turner syndrome                                            | 306.2<br>(277.4 to 338.2)                     | --                                                   | 5.6<br>(2.8 to 9.1)                        | 1.4<br>(-6.7 to 10.3)                             | 4.8<br>(-3.3 to 13.8)                               |
| Klinefelter syndrome                                       | 200.3<br>(174.0 to 231.5)                     | --                                                   | 1.3<br>(0.7 to 2.6)                        | -7.5<br>(-13.6 to -1.0)                           | -6.2<br>(-12.3 to 0.2)                              |

| Cause                                         | Prevalence in thousands (95% UI)                    | Incidence in thousands (95% UI)                   | YLDs in thousands (95% UI)                     |                                                   |                                                     |
|-----------------------------------------------|-----------------------------------------------------|---------------------------------------------------|------------------------------------------------|---------------------------------------------------|-----------------------------------------------------|
|                                               | 2016 counts                                         | 2016 counts                                       | 2016 counts                                    | Percentage change in counts between 2006 and 2016 | Percentage change in age-standardised rates between |
| Other chromosomal abnormalities               | 216.2<br>(193.2 to 243.2)                           | --                                                | 23.1<br>(16.1 to 31.0)                         | -14.4<br>(-18.3 to -10.5)                         | 3.3<br>(-1.6 to 8.1)                                |
| Congenital musculoskeletal and limb anomalies | 1,411.7<br>(1,294.1 to 1,539.8)                     | --                                                | 193.1<br>(131.5 to 264.8)                      | 7.6<br>(1.9 to 12.7)                              | 2.2<br>(-3.0 to 6.8)                                |
| Urogenital congenital anomalies               | 1,208.1<br>(1,101.6 to 1,319.1)                     | --                                                | 30.3<br>(17.8 to 48.0)                         | -13.8<br>(-17.6 to -10.0)                         | -5.8<br>(-9.1 to -2.0)                              |
| Digestive congenital anomalies                | 3,196.6<br>(2,878.3 to 3,560.7)                     | --                                                | 142.3<br>(92.8 to 205.5)                       | 5.0<br>(0.6 to 9.3)                               | 1.2<br>(-2.9 to 5.5)                                |
| Other congenital anomalies                    | 5,924.6<br>(3,954.8 to 8,507.5)                     | --                                                | 632.6<br>(424.5 to 915.8)                      | -0.5<br>(-6.7 to 5.2)                             | -4.3<br>(-10.2 to 1.0)                              |
| Skin and subcutaneous diseases                | 391,702.5<br>(387,859.5 to 395,331.9)               | 915,697.7<br>(871,216.2 to 966,590.2)             | 8,814.2<br>(5,904.5 to 12,972.3)               | -1.9<br>(-3.3 to -0.6)                            | 1.2<br>(0.6 to 1.8)                                 |
| Dermatitis                                    | 41,123.5<br>(39,111.2 to 43,430.6)                  | 84,544.8<br>(78,344.1 to 91,107.3)                | 1,373.9<br>(836.9 to 2,160.1)                  | 3.3<br>(1.3 to 5.3)                               | 0.3<br>(-1.6 to 2.2)                                |
| Psoriasis                                     | 10,721.1<br>(10,321.8 to 11,148.6)                  | 1,419.2<br>(1,367.6 to 1,469.5)                   | 937.9<br>(670.6 to 1,228.7)                    | 20.3<br>(17.8 to 22.6)                            | 9.6<br>(7.6 to 11.5)                                |
| Cellulitis                                    | 221.6<br>(206.9 to 237.5)                           | 3,673.6<br>(3,453.2 to 3,898.6)                   | 13.1<br>(8.3 to 18.8)                          | 1.2<br>(-1.6 to 4.0)                              | -2.9<br>(-4.6 to -1.1)                              |
| Pyoderma                                      | 3,051.8<br>(2,967.8 to 3,147.9)                     | 81,207.3<br>(78,473.0 to 84,002.9)                | 16.9<br>(6.8 to 35.1)                          | 25.4<br>(23.3 to 27.6)                            | 1.9<br>(0.4 to 3.5)                                 |
| Scabies                                       | 39,559.4<br>(34,952.4 to 45,136.0)                  | 122,678.9<br>(106,780.1 to 139,892.1)             | 1,021.6<br>(572.5 to 1,607.5)                  | -8.4<br>(-11.1 to -5.3)                           | -8.1<br>(-8.9 to -7.4)                              |
| Fungal skin diseases                          | 101,203.5<br>(91,034.8 to 112,492.5)                | 357,876.5<br>(316,638.4 to 402,159.5)             | 567.5<br>(224.7 to 1,197.7)                    | 11.3<br>(8.8 to 13.8)                             | 0.0<br>(-0.3 to 0.2)                                |
| Viral skin diseases                           | 30,648.8<br>(29,627.8 to 31,622.7)                  | 46,409.8<br>(44,700.0 to 48,073.7)                | 941.2<br>(579.1 to 1,394.2)                    | -2.6<br>(-3.9 to -1.5)                            | -0.2<br>(-0.9 to 0.6)                               |
| Acne vulgaris                                 | 93,267.1<br>(86,299.9 to 100,325.1)                 | 58,622.1<br>(51,263.7 to 68,203.3)                | 2,417.5<br>(1,623.8 to 3,494.7)                | -16.8<br>(-18.7 to -14.7)                         | 2.7<br>(1.5 to 4.0)                                 |
| Alopecia areata                               | 2,823.8<br>(2,721.0 to 2,929.0)                     | 4,966.2<br>(4,786.5 to 5,158.7)                   | 93.0<br>(58.6 to 139.8)                        | 5.2<br>(2.6 to 7.7)                               | 0.0<br>(-2.2 to 2.3)                                |
| Pruritus                                      | 14,206.8<br>(12,460.5 to 16,155.1)                  | 11,155.7<br>(9,913.0 to 12,735.3)                 | 151.5<br>(69.8 to 282.5)                       | 15.4<br>(11.9 to 19.1)                            | 2.6<br>(1.5 to 3.8)                                 |
| Urticaria                                     | 10,858.7<br>(9,587.9 to 12,295.5)                   | 19,152.3<br>(16,925.0 to 21,721.0)                | 654.4<br>(420.4 to 931.8)                      | 0.1<br>(-2.6 to 2.9)                              | -0.1<br>(-1.2 to 1.1)                               |
| Decubitus ulcer                               | 281.3<br>(252.3 to 311.5)                           | 1,038.4<br>(924.9 to 1,165.4)                     | 45.0<br>(31.4 to 60.7)                         | 40.4<br>(34.6 to 47.0)                            | 7.3<br>(3.1 to 12.0)                                |
| Other skin and subcutaneous diseases          | 105,551.7<br>(102,622.0 to 108,446.8)               | 122,952.8<br>(119,229.0 to 126,993.0)             | 580.8<br>(281.5 to 1,061.0)                    | 29.6<br>(28.5 to 30.8)                            | 10.7<br>(10.1 to 11.3)                              |
| Sense organ diseases                          | 393,064.1<br>(388,827.9 to 397,441.9)               | 133,282.1†<br>(125,997.2 to 141,435.0)            | 13,127.5<br>(8,993.0 to 18,501.0)              | 23.3<br>(21.4 to 25.0)                            | -2.8<br>(-4.2 to -1.6)                              |
| Glaucoma                                      | 1,066.8<br>(890.8 to 1,264.1)                       | --                                                | 101.5<br>(67.4 to 142.4)                       | 38.6<br>(33.8 to 43.6)                            | -2.5<br>(-5.7 to 0.6)                               |
| Cataract                                      | 14,352.0<br>(12,406.9 to 16,393.3)                  | --                                                | 845.3<br>(599.5 to 1,150.4)                    | 29.9<br>(25.5 to 35.4)                            | -5.7<br>(-8.8 to -2.2)                              |
| Macular degeneration                          | 2,365.5<br>(1,954.3 to 2,858.9)                     | --                                                | 124.2<br>(84.0 to 169.6)                       | 42.9<br>(35.5 to 50.8)                            | 0.3<br>(-4.4 to 5.5)                                |
| Refraction and accommodation disorders        | 166,894.8<br>(160,473.4 to 173,348.0)               | --                                                | 2,791.8<br>(1,730.4 to 4,416.8)                | 19.4<br>(17.4 to 21.1)                            | -3.5<br>(-4.8 to -2.4)                              |
| Age-related and other hearing loss            | 298,782.8<br>(283,528.1 to 314,300.2)               | --                                                | 7,230.5<br>(4,864.0 to 10,354.7)               | 23.2<br>(20.2 to 25.8)                            | -3.0<br>(-4.8 to -1.4)                              |
| Other vision loss                             | 8,086.5<br>(6,959.9 to 9,322.5)                     | --                                                | 581.8<br>(403.0 to 786.3)                      | 25.2<br>(21.4 to 29.1)                            | -3.7<br>(-6.6 to -1.1)                              |
| Other sense organ diseases                    | 45,968.3<br>(42,635.6 to 49,132.1)                  | 133,282.1<br>(125,997.2 to 141,435.0)             | 1,452.4<br>(911.4 to 2,193.8)                  | 24.5<br>(23.2 to 25.8)                            | 1.2<br>(0.4 to 2.0)                                 |
| Oral disorders                                | 586,757.7<br>(570,381.8 to 597,702.0)               | 1,610,045.3†<br>(1,490,261.6 to 1,730,467.3)      | 2,890.1<br>(1,756.3 to 4,540.2)                | 21.6<br>(19.7 to 23.9)                            | 0.1<br>(-0.4 to 0.7)                                |
| Caries of deciduous teeth                     | 64,992.2<br>(54,325.9 to 75,473.4)                  | 227,594.6<br>(163,259.3 to 306,593.9)             | 15.3<br>(6.8 to 30.5)                          | 2.3<br>(-1.3 to 6.3)                              | 3.7<br>(0.4 to 7.6)                                 |
| Caries of permanent teeth                     | 412,724.9<br>(390,194.8 to 435,379.5)               | 1,366,372.2<br>(1,269,761.3 to 1,469,426.6)       | 243.3<br>(108.0 to 468.8)                      | 0.8<br>(-1.0 to 2.7)                              | -3.3<br>(-4.3 to -2.3)                              |
| Periodontal disease                           | 106,263.4<br>(86,267.4 to 127,270.5)                | 12,664.9<br>(9,828.2 to 15,848.1)                 | 694.8<br>(271.0 to 1,453.3)                    | 26.3<br>(23.0 to 29.5)                            | -1.1<br>(-2.0 to -0.3)                              |
| Edentulism and severe tooth loss              | 40,440.5<br>(34,954.9 to 46,091.0)                  | 3,413.6<br>(2,890.1 to 3,966.8)                   | 1,125.5<br>(728.4 to 1,601.6)                  | 37.0<br>(35.1 to 39.0)                            | 1.8<br>(1.0 to 2.6)                                 |
| Other oral disorders                          | 27,582.5<br>(26,332.4 to 28,799.9)                  | --                                                | 811.2<br>(499.5 to 1,224.5)                    | 8.4<br>(7.1 to 9.8)                               | -0.1<br>(-0.8 to 0.6)                               |
| <b>Injuries</b>                               | <b>243,587.4</b><br><b>(232,524.5 to 255,860.2)</b> | <b>80,396.7†</b><br><b>(77,108.8 to 83,502.0)</b> | <b>8,842.0</b><br><b>(5,894.3 to 12,637.4)</b> | <b>30.1</b><br><b>(27.4 to 32.6)</b>              | <b>11.9</b><br><b>(10.0 to 13.6)</b>                |
| <b>Transport injuries</b>                     | <b>60,807.7</b><br><b>(57,018.2 to 65,060.3)</b>    | <b>16,771.0</b><br><b>(15,260.5 to 18,433.8)</b>  | <b>2,972.2</b><br><b>(1,973.0 to 4,259.2)</b>  | <b>42.7</b><br><b>(40.0 to 45.2)</b>              | <b>20.4</b><br><b>(18.4 to 22.2)</b>                |
| Road injuries                                 | 48,494.1<br>(45,369.5 to 51,849.0)                  | 14,750.4<br>(13,234.3 to 16,458.1)                | 2,407.7<br>(1,598.5 to 3,451.3)                | 54.4<br>(52.0 to 56.6)                            | 28.8<br>(27.1 to 30.3)                              |
| Pedestrian road injuries                      | 13,471.4<br>(11,893.1 to 15,250.9)                  | 3,318.5<br>(2,800.4 to 3,880.2)                   | 668.1<br>(449.3 to 944.2)                      | 61.2<br>(58.5 to 63.9)                            | 32.7<br>(30.7 to 34.5)                              |
| Cyclist road injuries                         | 10,637.1<br>(9,027.6 to 12,339.2)                   | 3,927.1<br>(3,258.2 to 4,679.9)                   | 512.1<br>(339.1 to 738.6)                      | 52.4<br>(50.2 to 54.5)                            | 26.0<br>(24.4 to 27.5)                              |
| Motorcyclist road injuries                    | 11,787.4<br>(10,173.8 to 14,210.3)                  | 2,585.8<br>(2,146.6 to 3,057.4)                   | 565.7<br>(379.3 to 816.0)                      | 37.9<br>(35.6 to 40.1)                            | 16.4<br>(14.8 to 17.8)                              |
| Motor vehicle road injuries                   | 8,050.8<br>(6,787.7 to 9,245.6)                     | 3,121.3<br>(2,601.3 to 3,673.1)                   | 449.5<br>(300.1 to 637.1)                      | 61.5<br>(59.0 to 64.0)                            | 35.4<br>(33.5 to 37.0)                              |
| Other road injuries                           | 4,547.4<br>(3,898.5 to 5,393.6)                     | 1,797.7<br>(1,420.9 to 2,264.4)                   | 212.3<br>(138.7 to 313.2)                      | 76.0<br>(72.9 to 78.9)                            | 49.6<br>(47.5 to 51.4)                              |
| Other transport injuries                      | 12,313.5<br>(10,353.7 to 14,520.5)                  | 2,020.6<br>(1,753.0 to 2,335.4)                   | 564.5<br>(375.6 to 807.3)                      | 7.8<br>(4.7 to 10.8)                              | -4.1<br>(-6.7 to -1.9)                              |
| <b>Unintentional injuries</b>                 | <b>164,253.1</b><br><b>(153,998.5 to 174,695.0)</b> | <b>57,758.3</b><br><b>(55,017.6 to 60,614.5)</b>  | <b>5,060.4</b><br><b>(3,404.2 to 7,308.1)</b>  | <b>30.1</b><br><b>(27.3 to 32.8)</b>              | <b>12.2</b><br><b>(10.2 to 14.1)</b>                |
| Falls                                         | 56,207.8<br>(50,120.0 to 62,495.3)                  | 20,482.3<br>(18,794.0 to 22,367.9)                | 2,136.1<br>(1,469.2 to 2,993.1)                | 54.4<br>(51.8 to 56.8)                            | 30.4<br>(28.4 to 32.2)                              |
| Drowning                                      | 1,353.5<br>(1,188.8 to 1,542.3)                     | 183.1<br>(166.1 to 201.3)                         | 59.3<br>(38.8 to 85.9)                         | -1.6<br>(-5.1 to 1.9)                             | -14.0<br>(-16.9 to -11.3)                           |
| Fire, heat, and hot substances                | 14,556.1<br>(12,491.9 to 17,394.3)                  | 1,237.6<br>(1,055.6 to 1,403.9)                   | 339.1<br>(215.2 to 522.7)                      | 29.2<br>(24.3 to 33.1)                            | 15.8<br>(12.2 to 18.7)                              |
| Poisonings                                    | 537.6<br>(466.3 to 607.3)                           | 783.5<br>(666.1 to 916.8)                         | 36.5<br>(23.4 to 53.1)                         | 40.3<br>(36.9 to 43.8)                            | 27.2<br>(24.4 to 30.3)                              |
| Exposure to mechanical forces                 | 38,072.7<br>(33,193.0 to 44,765.8)                  | 12,379.5<br>(11,069.3 to 13,708.7)                | 851.1<br>(552.4 to 1,242.2)                    | 38.6<br>(34.9 to 42.0)                            | 17.8<br>(15.2 to 20.1)                              |
| Unintentional firearm injuries                | 1,221.8<br>(1,022.3 to 1,467.8)                     | 229.1<br>(180.1 to 285.9)                         | 44.5<br>(28.8 to 65.2)                         | 17.7<br>(14.6 to 20.5)                            | 2.7<br>(0.3 to 4.7)                                 |
| Unintentional suffocation                     | 3,266.6<br>(2,487.8 to 4,312.7)                     | 452.9<br>(361.6 to 561.9)                         | 85.5<br>(52.6 to 130.3)                        | -4.9<br>(-7.4 to -2.1)                            | -12.9<br>(-14.6 to -11.2)                           |
| Other exposure to mechanical forces           | 33,584.3<br>(28,718.7 to 40,428.4)                  | 11,697.5<br>(10,396.4 to 12,984.6)                | 721.1<br>(472.6 to 1,050.2)                    | 48.2<br>(44.7 to 51.2)                            | 24.9<br>(22.4 to 27.0)                              |



| Cause                                                                               | Prevalence in thousands (95% UI)                 | Incidence in thousands (95% UI)                | YLDs in thousands (95% UI)              |                                                   |                                                     |
|-------------------------------------------------------------------------------------|--------------------------------------------------|------------------------------------------------|-----------------------------------------|---------------------------------------------------|-----------------------------------------------------|
|                                                                                     | 2016 counts                                      | 2016 counts                                    | 2016 counts                             | Percentage change in counts between 2006 and 2016 | Percentage change in age-standardised rates between |
| Adverse effects of medical treatment                                                | 497.8<br>(403.0 to 599.8)                        | 6,515.4<br>(6,073.7 to 7,027.6)                | 66.3<br>(42.1 to 98.8)                  | 5.7<br>(4.0 to 7.5)                               | -0.0<br>(-1.8 to 1.7)                               |
| Animal contact                                                                      | 3,310.8<br>(2,848.7 to 4,052.7)                  | 3,076.0<br>(2,807.1 to 3,446.2)                | 82.0<br>(53.1 to 118.4)                 | 5.5<br>(3.1 to 7.8)                               | -4.2<br>(-6.0 to -2.4)                              |
| Venomous animal contact                                                             | 803.8<br>(673.3 to 940.3)                        | 993.9<br>(798.5 to 1,211.0)                    | 46.1<br>(30.0 to 66.3)                  | 11.4<br>(8.0 to 14.9)                             | 3.8<br>(0.8 to 6.9)                                 |
| Non-venomous animal contact                                                         | 2,506.9<br>(2,088.9 to 3,230.7)                  | 2,082.1<br>(1,824.6 to 2,365.8)                | 35.9<br>(22.7 to 56.2)                  | -1.3<br>(-5.2 to 1.9)                             | -13.1<br>(-16.0 to -10.7)                           |
| Foreign body                                                                        | 7,415.3<br>(6,150.5 to 8,650.4)                  | 3,046.8<br>(2,721.9 to 3,481.6)                | 247.8<br>(155.8 to 368.4)               | 4.2<br>(0.8 to 7.7)                               | -6.8<br>(-9.5 to -4.2)                              |
| Pulmonary aspiration and foreign body in airway                                     | 4,961.6<br>(3,894.2 to 6,268.2)                  | 1,186.0<br>(1,032.2 to 1,404.9)                | 179.6<br>(113.0 to 268.8)               | 5.8<br>(2.4 to 9.3)                               | -4.6<br>(-7.3 to -2.0)                              |
| Foreign body in eyes                                                                | 257.1<br>(158.1 to 367.8)                        | 1,215.5<br>(969.0 to 1,545.6)                  | 14.5<br>(7.8 to 23.6)                   | 41.2<br>(35.6 to 48.3)                            | 22.4<br>(18.6 to 26.6)                              |
| Foreign body in other body part                                                     | 2,196.5<br>(1,797.5 to 2,705.3)                  | 645.3<br>(556.6 to 754.6)                      | 53.7<br>(33.7 to 80.3)                  | -6.9<br>(-11.2 to -3.0)                           | -18.3<br>(-21.7 to -15.3)                           |
| Environmental heat and cold exposure                                                | 18,209.8<br>(15,324.3 to 21,724.4)               | 3,438.4<br>(2,863.3 to 4,074.8)                | 587.6<br>(386.2 to 854.9)               | 14.0<br>(10.8 to 17.1)                            | 1.1<br>(-1.6 to 3.6)                                |
| Other unintentional injuries                                                        | 24,091.7<br>(19,676.1 to 29,089.0)               | 6,615.8<br>(5,535.5 to 7,862.0)                | 654.8<br>(424.2 to 968.7)               | 0.8<br>(-1.0 to 2.4)                              | -12.2<br>(-13.9 to -10.7)                           |
| <b>Self-harm and interpersonal violence</b>                                         | <b>40,347.6</b><br><b>(36,635.1 to 44,455.4)</b> | <b>5,593.6†</b><br><b>(4,996.4 to 6,238.7)</b> | <b>693.6</b><br><b>(478.0 to 973.8)</b> | <b>-1.5</b><br><b>(-3.5 to 0.5)</b>               | <b>-11.0</b><br><b>(-12.0 to -10.1)</b>             |
| Self-harm                                                                           | 1,340.7<br>(1,165.3 to 1,525.7)                  | 589.2<br>(515.4 to 672.8)                      | 55.2<br>(35.3 to 81.1)                  | -3.3<br>(-6.0 to -0.5)                            | -19.2<br>(-21.3 to -17.4)                           |
| Self-harm by firearm                                                                | 38.9<br>(32.2 to 47.0)                           | 5.2<br>(2.9 to 8.5)                            | 1.1<br>(0.7 to 1.7)                     | 21.6<br>(16.9 to 25.8)                            | 10.8<br>(7.2 to 14.3)                               |
| Self-harm by other specified means                                                  | 1,301.8<br>(1,125.5 to 1,488.0)                  | 584.0<br>(510.4 to 666.6)                      | 54.0<br>(34.6 to 79.3)                  | -3.7<br>(-6.5 to -0.9)                            | -19.7<br>(-21.7 to -17.9)                           |
| Interpersonal violence                                                              | 39,006.9<br>(35,369.1 to 43,152.6)               | 5,004.4†<br>(4,415.1 to 5,645.1)               | 638.4<br>(441.3 to 898.0)               | -1.4<br>(-3.4 to 0.7)                             | -10.2<br>(-11.1 to -9.3)                            |
| Assault by firearm                                                                  | 238.6<br>(209.8 to 275.8)                        | 56.7<br>(43.0 to 73.2)                         | 9.7<br>(6.3 to 14.3)                    | 18.7<br>(16.2 to 21.3)                            | 2.3<br>(0.6 to 3.8)                                 |
| Assault by sharp object                                                             | 2,791.8<br>(2,284.3 to 3,326.6)                  | 840.0<br>(675.9 to 1,034.0)                    | 72.6<br>(47.0 to 105.7)                 | -6.7<br>(-9.5 to -3.7)                            | -18.0<br>(-19.9 to -16.1)                           |
| Sexual violence                                                                     | 26,971.2<br>(23,476.2 to 30,647.4)               | --                                             | 219.9<br>(147.7 to 316.4)               | -11.2<br>(-14.0 to -8.3)                          | -9.5<br>(-10.3 to -8.8)                             |
| Assault by other means                                                              | 9,005.3<br>(7,592.3 to 10,737.9)                 | 4,107.7<br>(3,593.4 to 4,649.7)                | 336.2<br>(224.1 to 487.3)               | 7.2<br>(5.3 to 9.0)                               | -9.1<br>(-10.4 to -8.0)                             |
| <b>Forces of nature, conflict and terrorism, and executions and police conflict</b> | <b>5,150.3</b><br><b>(1,482.7 to 7,821.0)</b>    | <b>273.8†</b><br><b>(177.0 to 348.0)</b>       | <b>115.9</b><br><b>(20.3 to 307.8)</b>  | <b>-4.8</b><br><b>(-13.3 to -0.4)</b>             | <b>-16.7</b><br><b>(-23.2 to -13.0)</b>             |
| Exposure to forces of nature                                                        | 609.2<br>(101.0 to 1,270.8)                      | 42.2<br>(6.6 to 84.1)                          | 19.6<br>(3.0 to 54.7)                   | 143.8<br>(76.3 to 159.7)                          | 128.7<br>(65.5 to 144.1)                            |
| Conflict and terrorism                                                              | 94.4<br>(39.8 to 170.7)                          | --                                             | 2.3<br>(0.4 to 7.3)                     | -0.1<br>(-7.2 to 3.5)                             | -11.5<br>(-18.4 to -8.3)                            |
| Executions and police conflict                                                      | 4,446.7<br>(1,034.3 to 7,015.6)                  | 231.6<br>(136.8 to 294.0)                      | 94.0<br>(16.9 to 246.3)                 | -15.6<br>(-21.3 to -11.1)                         | -28.1<br>(-32.1 to -24.4)                           |
| <b>Impairments</b>                                                                  | --                                               | --                                             | --                                      | --                                                | --                                                  |
| Anaemia                                                                             | 233,946.2<br>(223,301.0 to 245,049.8)            | --                                             | 5,393.1<br>(3,611.7 to 7,696.1)         | 17.3<br>(12.4 to 22.7)                            | 6.0<br>(1.6 to 10.2)                                |
| Developmental intellectual disability                                               | 30,642.0<br>(23,486.4 to 37,625.9)               | --                                             | 2,858.4<br>(2,068.7 to 3,689.3)         | -0.1<br>(-2.6 to 3.7)                             | -0.9<br>(-3.4 to 2.5)                               |
| Epilepsy                                                                            | 6,442.5<br>(5,594.2 to 7,332.9)                  | --                                             | 2,018.3<br>(1,531.6 to 2,607.1)         | -6.6<br>(-19.9 to 7.9)                            | -8.2<br>(-21.4 to 6.4)                              |
| Guillain-Barre syndrome                                                             | 7.9<br>(6.0 to 10.2)                             | --                                             | 2.3<br>(1.4 to 3.5)                     | 10.8<br>(5.0 to 16.5)                             | 0.1<br>(-0.0 to 0.1)                                |
| Hearing loss                                                                        | 315,996.4<br>(300,606.3 to 331,025.0)            | --                                             | 8,118.5<br>(5,548.2 to 11,495.2)        | 18.5<br>(15.8 to 21.1)                            | -4.0<br>(-5.6 to -2.6)                              |
| Heart failure                                                                       | 12,995.0<br>(11,494.2 to 14,653.0)               | --                                             | 1,890.4<br>(1,412.5 to 2,351.4)         | 37.4<br>(33.6 to 40.9)                            | 1.2<br>(-1.9 to 3.9)                                |
| Infertility                                                                         | 29,216.7<br>(21,801.5 to 38,874.6)               | --                                             | 168.5<br>(69.9 to 346.6)                | -4.5<br>(-9.7 to 1.1)                             | -0.2<br>(-4.2 to 4.3)                               |
| Pelvic inflammatory disease                                                         | 1,135.4<br>(989.3 to 1,297.5)                    | --                                             | 148.2<br>(100.9 to 204.1)               | -7.1<br>(-12.4 to -1.7)                           | -12.2<br>(-16.9 to -7.7)                            |
| Vision loss                                                                         | 196,623.4<br>(189,422.0 to 204,016.1)            | --                                             | 4,972.4<br>(3,441.1 to 7,149.6)         | 21.9<br>(19.8 to 23.8)                            | -2.7<br>(-4.3 to -1.2)                              |

We did not calculate incidence for the nine impairments, certain NTDs, and causes with only birth prevalence. Blank cells mean that no estimate is available.

† Incidence for aggregate causes represents the sum of the incidence of the causes below the aggregate.

‡ Incidence estimates for stroke represent first-ever stroke only.

^ Incidence of HIV/AIDS represents new infections of HIV only and does not include new infections of Tuberculosis in HIV positive cases.

SR Table 14: Prevalence, incidence, and YLDs for 2016, percentage change of YLD counts and percentage change of age-standardised YLD rates between 2006 and 2016 by cause and impairments, for all ages, Colombia.

| Cause                                                                                | Prevalence in thousands (95% UI)          | Incidence in thousands (95% UI)               | YLDs in thousands (95% UI)             |                                                   |                                                     |
|--------------------------------------------------------------------------------------|-------------------------------------------|-----------------------------------------------|----------------------------------------|---------------------------------------------------|-----------------------------------------------------|
|                                                                                      | 2016 counts                               | 2016 counts                                   | 2016 counts                            | Percentage change in counts between 2006 and 2016 | Percentage change in age-standardised rates between |
| <b>All causes</b>                                                                    | <b>46,957.5</b><br>(46,808.2 to 47,088.4) | <b>285,520.4†</b><br>(267,672.8 to 306,188.7) | <b>4,497.0</b><br>(3,317.8 to 5,872.5) | <b>17.8</b><br>(14.1 to 21.1)                     | <b>-1.8</b><br>(-4.5 to 0.9)                        |
| <b>Communicable, maternal, neonatal, and nutritional disorders</b>                   | <b>36,115.2</b><br>(35,187.8 to 37,051.5) | <b>188,024.0†</b><br>(170,892.0 to 208,330.4) | <b>329.4</b><br>(231.5 to 454.6)       | <b>0.7</b><br>(-5.0 to 7.0)                       | <b>-5.9</b><br>(-11.3 to -0.1)                      |
| <b>HIV/AIDS and tuberculosis</b>                                                     | <b>11,989.4</b><br>(10,660.2 to 13,038.0) | <b>15.1†</b><br>(12.5 to 18.2)                | <b>7.7</b><br>(4.5 to 13.4)            | <b>12.1</b><br>(-14.0 to 47.6)                    | <b>-6.1</b><br>(-28.1 to 24.2)                      |
| Tuberculosis                                                                         | 11,052.7<br>(9,862.5 to 12,276.6)         | 9.6†<br>(8.1 to 11.2)                         | 1.3<br>(0.8 to 1.8)                    | -2.5<br>(-17.5 to 15.1)                           | -20.4<br>(-33.3 to -4.8)                            |
| Drug-susceptible tuberculosis                                                        | 4.0<br>(3.4 to 4.6)                       | 9.4<br>(7.9 to 10.9)                          | 1.2<br>(0.8 to 1.8)                    | -2.1<br>(-18.0 to 16.7)                           | -20.1<br>(-33.3 to -4.0)                            |
| Multidrug-resistant tuberculosis without extensive drug resistance                   | 0.1<br>(< 0.05 to 0.2)                    | 0.2<br>(0.1 to 0.4)                           | < 0.05<br>(< 0.05 to 0.1)              | -17.2<br>(-55.0 to 45.9)                          | -32.9<br>(-63.7 to 18.2)                            |
| Extensively drug-resistant tuberculosis                                              | < 0.05<br>(< 0.05 to < 0.05)              | < 0.05<br>(< 0.05 to < 0.05)                  | < 0.05<br>(< 0.05 to < 0.05)           | 120.6<br>(19.7 to 288.6)                          | 78.6<br>(-3.3 to 214.8)                             |
| Latent tuberculosis infection                                                        | 11,048.6<br>(9,857.8 to 12,272.6)         | --                                            | --                                     | --                                                | --                                                  |
| HIV/AIDS                                                                             | 71.4<br>(50.8 to 102.0)                   | 5.4 <sup>A</sup><br>(3.6 to 8.2)              | 6.4<br>(3.5 to 11.9)                   | 15.5<br>(-15.9 to 66.5)                           | -2.2<br>(-29.3 to 42.0)                             |
| Drug-susceptible HIV/AIDS - Tuberculosis                                             | 0.5<br>(0.3 to 0.7)                       | 1.1<br>(0.7 to 1.7)                           | 0.2<br>(0.1 to 0.3)                    | -12.7<br>(-18.4 to -6.6)                          | -24.4<br>(-29.4 to -19.2)                           |
| Multidrug-resistant HIV/AIDS - Tuberculosis without extensive drug resistance        | < 0.05<br>(< 0.05 to < 0.05)              | < 0.05<br>(< 0.05 to 0.1)                     | < 0.05<br>(< 0.05 to < 0.05)           | -26.0<br>(-60.2 to 30.6)                          | -36.0<br>(-65.6 to 12.8)                            |
| Extensively drug-resistant HIV/AIDS - Tuberculosis                                   | < 0.05<br>(< 0.05 to < 0.05)              | < 0.05<br>(< 0.05 to < 0.05)                  | < 0.05<br>(< 0.05 to < 0.05)           | 97.0<br>(6.0 to 247.5)                            | 70.3<br>(-8.3 to 200.4)                             |
| HIV/AIDS resulting in other diseases                                                 | 70.9<br>(50.3 to 101.5)                   | 5.4<br>(3.6 to 8.2)                           | 6.2<br>(3.3 to 11.7)                   | 16.7<br>(-16.1 to 73.1)                           | -1.2<br>(-29.4 to 47.7)                             |
| <b>Diarrhoea, lower respiratory infections, and other common infectious diseases</b> | <b>2,970.5</b><br>(2,792.2 to 3,162.6)    | <b>180,063.6†</b><br>(162,821.1 to 200,312.1) | <b>125.1</b><br>(84.6 to 175.2)        | <b>2.0</b><br>(-1.8 to 6.3)                       | <b>-4.2</b><br>(-7.8 to -0.1)                       |
| Diarrhoeal diseases                                                                  | 432.9<br>(404.0 to 464.0)                 | 29,199.1<br>(27,234.1 to 31,336.9)            | 49.1<br>(34.3 to 68.0)                 | 6.5<br>(0.0 to 13.7)                              | 0.2<br>(-5.7 to 7.3)                                |
| Intestinal infectious diseases                                                       | 0.1<br>(0.1 to 0.1)                       | 1.0†<br>(0.8 to 1.3)                          | < 0.05<br>(< 0.05 to < 0.05)           | -4.8<br>(-18.3 to 9.7)                            | -22.1<br>(-32.4 to -10.7)                           |
| Typhoid fever                                                                        | 0.1<br>(0.1 to 0.1)                       | 1.0<br>(0.8 to 1.3)                           | < 0.05<br>(< 0.05 to < 0.05)           | -0.4<br>(-14.4 to 14.2)                           | -19.7<br>(-30.5 to -8.1)                            |
| Paratyphoid fever                                                                    | < 0.05<br>(< 0.05 to < 0.05)              | < 0.05<br>(< 0.05 to < 0.05)                  | < 0.05<br>(< 0.05 to < 0.05)           | -24.4<br>(-39.4 to -5.8)                          | -34.4<br>(-47.4 to -18.9)                           |
| Other intestinal infectious diseases                                                 | --                                        | --                                            | < 0.05<br>(< 0.05 to < 0.05)           | -55.2<br>(-68.9 to -35.3)                         | -52.1<br>(-66.2 to -32.2)                           |
| Lower respiratory infections                                                         | 25.6<br>(23.4 to 27.9)                    | 1,165.4<br>(1,064.1 to 1,275.2)               | 1.6<br>(1.0 to 2.2)                    | 6.9<br>(-9.0 to 25.9)                             | -2.0<br>(-15.0 to 14.0)                             |
| Upper respiratory infections                                                         | 1,925.7<br>(1,707.5 to 2,185.3)           | 146,187.2<br>(128,839.6 to 166,970.3)         | 48.2<br>(28.2 to 75.2)                 | -0.7<br>(-7.3 to 7.5)                             | -7.0<br>(-13.2 to -0.1)                             |
| Otitis media                                                                         | 615.3<br>(551.6 to 677.9)                 | 2,608.7<br>(2,128.1 to 3,218.0)               | 17.5<br>(11.0 to 26.6)                 | -4.9<br>(-11.6 to 2.2)                            | -7.3<br>(-13.3 to -0.6)                             |
| Meningitis                                                                           | 30.9<br>(27.0 to 34.8)                    | 5.8<br>(5.1 to 6.6)                           | 3.7<br>(2.6 to 5.0)                    | 5.5<br>(2.0 to 8.9)                               | -7.4<br>(-10.6 to -4.4)                             |
| Pneumococcal meningitis                                                              | 13.6<br>(11.9 to 15.5)                    | 0.9<br>(0.8 to 1.1)                           | 1.8<br>(1.2 to 2.4)                    | -0.7<br>(-6.9 to 4.9)                             | -13.4<br>(-18.9 to -8.2)                            |
| H influenzae type B meningitis                                                       | 3.0<br>(2.6 to 3.6)                       | 0.4<br>(0.3 to 0.5)                           | 0.5<br>(0.3 to 0.7)                    | 4.6<br>(-0.4 to 10.2)                             | -5.7<br>(-10.1 to -0.8)                             |
| Meningococcal infection                                                              | 2.0<br>(1.6 to 2.5)                       | 0.6<br>(0.5 to 0.7)                           | 0.3<br>(0.2 to 0.4)                    | 9.6<br>(4.9 to 14.6)                              | -4.7<br>(-8.7 to -0.5)                              |
| Other meningitis                                                                     | 12.2<br>(9.6 to 14.9)                     | 3.9<br>(3.4 to 4.4)                           | 1.2<br>(0.8 to 1.6)                    | 16.0<br>(10.9 to 21.3)                            | 1.7<br>(-2.7 to 5.9)                                |
| Encephalitis                                                                         | 25.9<br>(18.5 to 36.5)                    | 11.2<br>(9.9 to 12.6)                         | 3.1<br>(2.2 to 4.2)                    | 12.1<br>(2.7 to 22.9)                             | -2.7<br>(-10.6 to 5.9)                              |
| Diphtheria                                                                           | < 0.05<br>(< 0.05 to < 0.05)              | < 0.05<br>(< 0.05 to < 0.05)                  | < 0.05<br>(< 0.05 to < 0.05)           | -46.4<br>(-70.3 to -4.2)                          | -48.4<br>(-71.2 to -9.4)                            |
| Whooping cough                                                                       | 3.1<br>(2.4 to 4.0)                       | 22.6<br>(17.3 to 29.2)                        | 0.2<br>(0.1 to 0.3)                    | -62.4<br>(-72.4 to -50.4)                         | -56.9<br>(-68.2 to -43.1)                           |
| Tetanus                                                                              | < 0.05<br>(< 0.05 to 0.1)                 | < 0.05<br>(< 0.05 to < 0.05)                  | < 0.05<br>(< 0.05 to < 0.05)           | -20.7<br>(-34.4 to -8.1)                          | -30.6<br>(-43.1 to -19.2)                           |
| Measles                                                                              | < 0.05<br>(0.0 to < 0.05)                 | < 0.05<br>(0.0 to < 0.05)                     | < 0.05<br>(0.0 to < 0.05)              | --                                                | --                                                  |
| Varicella and herpes zoster                                                          | 44.0<br>(40.3 to 48.0)                    | 862.6<br>(830.6 to 896.1)                     | 1.8<br>(1.1 to 2.7)                    | 23.2<br>(8.2 to 40.5)                             | 0.2<br>(-11.0 to 11.8)                              |
| <b>Neglected tropical diseases and malaria</b>                                       | <b>23,008.8</b><br>(21,129.0 to 24,986.3) | <b>2,229.3†</b><br>(1,296.6 to 4,168.1)       | <b>63.0</b><br>(39.7 to 96.9)          | <b>17.0</b><br>(-6.8 to 46.7)                     | <b>5.5</b><br>(-15.6 to 32.3)                       |
| Malaria                                                                              | 4.6<br>(2.7 to 8.1)                       | 46.3<br>(37.3 to 64.3)                        | 0.1<br>(0.1 to 0.2)                    | -55.7<br>(-67.5 to -32.9)                         | -57.1<br>(-69.1 to -32.3)                           |
| Chagas disease                                                                       | 110.9<br>(86.8 to 141.5)                  | 3.7<br>(2.9 to 4.5)                           | 1.1<br>(0.7 to 1.6)                    | 25.8<br>(5.9 to 51.2)                             | -5.5<br>(-19.8 to 13.2)                             |
| Leishmaniasis                                                                        | 19.2<br>(3.2 to 49.6)                     | 25.7<br>(0.7 to 92.2)                         | 0.8<br>(< 0.05 to 3.0)                 | -56.4<br>(-98.7 to 75.5)                          | -62.4<br>(-98.9 to 52.9)                            |
| Visceral leishmaniasis                                                               | < 0.05<br>(< 0.05 to < 0.05)              | < 0.05<br>(< 0.05 to < 0.05)                  | < 0.05<br>(< 0.05 to < 0.05)           | -73.0<br>(-78.7 to -66.3)                         | -79.8<br>(-84.8 to -73.3)                           |
| Cutaneous and mucocutaneous leishmaniasis                                            | 12.8<br>(0.4 to 46.1)                     | 25.7<br>(0.7 to 92.2)                         | 0.8<br>(< 0.05 to 3.0)                 | -56.4<br>(-98.7 to 75.6)                          | -62.3<br>(-98.9 to 53.0)                            |
| African trypanosomiasis                                                              | --                                        | --                                            | --                                     | --                                                | --                                                  |
| Schistosomiasis                                                                      | --                                        | --                                            | --                                     | --                                                | --                                                  |
| Cysticercosis                                                                        | 44.8<br>(28.2 to 62.3)                    | --                                            | 6.0<br>(2.7 to 10.7)                   | 15.8<br>(-29.5 to 73.9)                           | -6.1<br>(-42.6 to 40.0)                             |
| Cystic echinococcosis                                                                | --                                        | --                                            | --                                     | --                                                | --                                                  |
| Lymphatic filariasis                                                                 | --                                        | --                                            | --                                     | --                                                | --                                                  |
| Onchocerciasis                                                                       | --                                        | --                                            | --                                     | --                                                | --                                                  |
| Trachoma                                                                             | --                                        | --                                            | --                                     | --                                                | --                                                  |
| Dengue                                                                               | 38.8<br>(23.2 to 61.2)                    | 648.3<br>(448.1 to 892.2)                     | 6.4<br>(3.0 to 11.3)                   | 134.6<br>(76.9 to 454.2)                          | 113.6<br>(62.3 to 402.8)                            |
| Yellow fever                                                                         | < 0.05<br>(< 0.05 to < 0.05)              | 0.1<br>(< 0.05 to 0.2)                        | < 0.05<br>(< 0.05 to < 0.05)           | -65.7<br>(-73.2 to -55.4)                         | -68.5<br>(-75.2 to -59.6)                           |
| Rabies                                                                               | < 0.05<br>(< 0.05 to < 0.05)              | < 0.05<br>(< 0.05 to < 0.05)                  | < 0.05<br>(< 0.05 to < 0.05)           | -24.0<br>(-47.1 to 4.7)                           | -35.0<br>(-52.6 to -11.3)                           |
| Intestinal nematode infections                                                       | 22,812.5<br>(20,929.0 to 24,808.3)        | --                                            | 45.4<br>(25.5 to 76.3)                 | 15.0<br>(-14.8 to 55.1)                           | 4.8<br>(-22.2 to 41.2)                              |
| Ascariasis                                                                           | 12,727.7<br>(10,599.3 to 15,201.7)        | --                                            | 15.1<br>(7.4 to 29.5)                  | 9.0<br>(-37.4 to 81.4)                            | 1.0<br>(-42.4 to 67.1)                              |

| Cause                                                                   | Prevalence in thousands (95% UI)           | Incidence in thousands (95% UI)              | YLDs in thousands (95% UI)              |                                                   |                                                     |
|-------------------------------------------------------------------------|--------------------------------------------|----------------------------------------------|-----------------------------------------|---------------------------------------------------|-----------------------------------------------------|
|                                                                         | 2016 counts<br>(7,801.3 to 11,324.5)       | 2016 counts                                  | 2016 counts                             | Percentage change in counts between 2006 and 2016 | Percentage change in age-standardised rates between |
| Trichuriasis                                                            | 9,394.6<br>(7,801.3 to 11,324.5)           | --                                           | 5.4<br>(2.4 to 10.1)                    | 8.5<br>(-38.3 to 100.1)                           | -0.2<br>(-43.1 to 82.5)                             |
| Hookworm disease                                                        | 5,877.3<br>(5,000.3 to 6,975.6)            | --                                           | 25.0<br>(14.0 to 42.3)                  | 20.6<br>(-18.9 to 82.9)                           | 8.5<br>(-27.8 to 65.7)                              |
| Food-borne trematodiasis                                                | --                                         | --                                           | --                                      | --                                                | --                                                  |
| Leprosy                                                                 | 1.7<br>(1.4 to 1.9)                        | 0.1<br>(0.1 to 0.1)                          | 0.1<br>(0.1 to 0.1)                     | 2.3<br>(-19.2 to 30.0)                            | -23.7<br>(-40.8 to -1.0)                            |
| Ebola virus disease                                                     | --                                         | --                                           | --                                      | --                                                | --                                                  |
| Zika virus disease                                                      | 25.0<br>(10.5 to 55.7)                     | 1,505.1<br>(629.0 to 3,356.1)                | 0.5<br>(0.2 to 1.2)                     | --                                                | --                                                  |
| Guinea worm disease                                                     | --                                         | --                                           | --                                      | --                                                | --                                                  |
| Other neglected tropical diseases                                       | 135.5<br>(115.0 to 160.1)                  | --                                           | 2.6<br>(1.5 to 4.2)                     | -22.1<br>(-37.9 to -2.1)                          | -15.7<br>(-32.7 to 6.2)                             |
| <b>Maternal disorders</b>                                               | <b>63.3<br/>(51.4 to 78.7)</b>             | <b>1,379.1†<br/>(1,202.5 to 1,511.2)</b>     | <b>4.0<br/>(2.5 to 6.0)</b>             | <b>-3.3<br/>(-29.3 to 33.9)</b>                   | <b>-9.3<br/>(-33.6 to 26.1)</b>                     |
| Maternal haemorrhage                                                    | 10.9<br>(7.9 to 14.9)                      | 38.8<br>(28.3 to 51.3)                       | 0.3<br>(0.2 to 0.5)                     | -4.1<br>(-34.0 to 39.9)                           | -10.5<br>(-37.9 to 30.3)                            |
| Maternal sepsis and other pregnancy related infections                  | 14.2<br>(10.8 to 18.8)                     | 85.2<br>(62.1 to 116.5)                      | 0.4<br>(0.2 to 0.7)                     | -17.4<br>(-60.8 to 69.7)                          | -22.2<br>(-63.0 to 58.5)                            |
| Maternal hypertensive disorders                                         | 32.7<br>(20.8 to 45.0)                     | 184.2<br>(158.0 to 208.6)                    | 1.7<br>(0.9 to 2.6)                     | -5.7<br>(-41.1 to 52.2)                           | -11.5<br>(-44.9 to 43.1)                            |
| Maternal obstructed labour and uterine rupture                          | 0.4<br>(0.2 to 0.6)                        | 26.1<br>(18.7 to 35.5)                       | 0.1<br>(0.1 to 0.2)                     | -18.9<br>(-56.5 to 52.5)                          | -23.7<br>(-58.8 to 43.1)                            |
| Maternal abortion, miscarriage, and ectopic pregnancy                   | 8.6<br>(5.7 to 11.9)                       | 1,044.7<br>(865.8 to 1,170.4)                | 1.0<br>(0.5 to 1.5)                     | 17.1<br>(-37.7 to 119.1)                          | 9.5<br>(-41.9 to 106.5)                             |
| Other maternal disorders                                                | --                                         | --                                           | 0.6<br>(0.4 to 0.9)                     | -8.4<br>(-33.1 to 26.7)                           | -13.7<br>(-37.2 to 19.9)                            |
| <b>Neonatal disorders</b>                                               | <b>322.8<br/>(276.1 to 375.6)</b>          | <b>--</b>                                    | <b>58.9<br/>(40.6 to 82.0)</b>          | <b>9.4<br/>(-5.0 to 30.0)</b>                     | <b>2.7<br/>(-10.8 to 21.9)</b>                      |
| Neonatal preterm birth complications                                    | 271.4<br>(214.9 to 340.2)                  | --                                           | 29.6<br>(20.3 to 41.8)                  | 4.6<br>(-15.2 to 27.9)                            | -2.4<br>(-20.6 to 19.6)                             |
| Neonatal encephalopathy due to birth asphyxia and trauma                | 67.1<br>(30.6 to 106.9)                    | --                                           | 10.8<br>(2.4 to 21.4)                   | 32.6<br>(-12.2 to 389.4)                          | 23.4<br>(-18.0 to 353.5)                            |
| Neonatal sepsis and other neonatal infections                           | 26.2<br>(11.4 to 56.1)                     | --                                           | 11.2<br>(3.9 to 26.8)                   | 10.5<br>(-11.3 to 69.3)                           | 4.2<br>(-16.4 to 61.3)                              |
| Hemolytic disease and other neonatal jaundice                           | 20.5<br>(17.9 to 23.4)                     | --                                           | 5.8<br>(4.2 to 7.6)                     | 4.8<br>(-10.8 to 23.0)                            | -3.4<br>(-17.4 to 13.5)                             |
| Other neonatal disorders                                                | --                                         | --                                           | 1.5<br>(1.0 to 2.1)                     | -13.6<br>(-30.6 to 8.2)                           | -1.4<br>(-20.7 to 23.5)                             |
| <b>Nutritional deficiencies</b>                                         | <b>3,980.3<br/>(3,713.9 to 4,242.5)</b>    | <b>1,005.8†<br/>(800.0 to 1,239.4)</b>       | <b>56.2<br/>(36.1 to 84.6)</b>          | <b>-21.4<br/>(-29.5 to -13.3)</b>                 | <b>-23.1<br/>(-31.3 to -14.9)</b>                   |
| Protein-energy malnutrition                                             | 44.4<br>(33.4 to 58.2)                     | 21.8<br>(16.3 to 29.1)                       | 1.2<br>(0.7 to 2.0)                     | -32.0<br>(-55.8 to 3.7)                           | -21.8<br>(-48.8 to 18.0)                            |
| Iodine deficiency                                                       | 631.6<br>(554.9 to 719.6)                  | 12.7<br>(11.2 to 14.3)                       | 16.2<br>(10.9 to 22.9)                  | 11.0<br>(0.7 to 21.2)                             | -4.2<br>(-12.8 to 4.3)                              |
| Vitamin A deficiency                                                    | 1,123.7<br>(923.2 to 1,364.3)              | 971.3<br>(767.6 to 1,205.5)                  | 1.4<br>(0.9 to 2.2)                     | 6.8<br>(-11.1 to 27.6)                            | 1.8<br>(-15.1 to 21.7)                              |
| Iron-deficiency anaemia                                                 | 2,291.6<br>(2,043.1 to 2,590.8)            | --                                           | 37.3<br>(22.6 to 59.6)                  | -30.6<br>(-40.5 to -20.1)                         | -29.2<br>(-39.7 to -18.1)                           |
| Other nutritional deficiencies                                          | --                                         | --                                           | < 0.05<br>(< 0.05 to 0.1)               | -32.5<br>(-57.6 to 5.2)                           | -22.8<br>(-51.4 to 20.1)                            |
| <b>Other communicable, maternal, neonatal, and nutritional diseases</b> | <b>13,013.6<br/>(12,214.6 to 13,898.0)</b> | <b>3,331.2<br/>(3,037.2 to 3,668.3)</b>      | <b>13.3<br/>(7.7 to 22.4)</b>           | <b>6.9<br/>(-0.3 to 14.0)</b>                     | <b>-3.8<br/>(-9.7 to 2.4)</b>                       |
| Sexually transmitted diseases excluding HIV                             | 10,310.9<br>(9,512.5 to 11,208.0)          | 3,090.5<br>(2,791.7 to 3,403.4)              | 10.1<br>(5.6 to 17.9)                   | 14.4<br>(6.4 to 23.0)                             | -0.7<br>(-7.5 to 6.2)                               |
| Syphilis                                                                | 278.4<br>(227.3 to 339.1)                  | 204.9<br>(162.3 to 254.9)                    | 0.8<br>(0.6 to 1.2)                     | 32.6<br>(14.2 to 51.4)                            | -0.6<br>(-12.9 to 13.3)                             |
| Chlamydial infection                                                    | 632.8<br>(478.6 to 809.3)                  | 486.7<br>(370.2 to 625.1)                    | 2.1<br>(1.2 to 3.7)                     | 8.7<br>(-9.0 to 31.1)                             | -0.7<br>(-16.9 to 19.7)                             |
| Gonococcal infection                                                    | 114.0<br>(89.8 to 143.3)                   | 402.0<br>(307.9 to 515.3)                    | 1.1<br>(0.6 to 1.8)                     | 9.4<br>(-14.8 to 38.8)                            | -1.1<br>(-23.4 to 24.9)                             |
| Trichomoniasis                                                          | 1,635.5<br>(1,409.5 to 1,878.8)            | 1,422.0<br>(1,206.9 to 1,649.7)              | 2.1<br>(0.8 to 4.5)                     | 14.8<br>(7.9 to 22.9)                             | 0.1<br>(-5.8 to 7.0)                                |
| Genital herpes                                                          | 8,401.1<br>(7,305.6 to 9,693.1)            | 530.4<br>(452.7 to 630.1)                    | 2.2<br>(0.7 to 4.9)                     | 21.2<br>(9.4 to 31.9)                             | -0.1<br>(-8.5 to 8.4)                               |
| Other sexually transmitted diseases                                     | 54.2<br>(49.6 to 59.8)                     | 44.5<br>(38.0 to 52.6)                       | 1.8<br>(1.1 to 2.9)                     | 9.1<br>(-4.0 to 24.6)                             | -2.1<br>(-14.0 to 11.1)                             |
| Hepatitis                                                               | 3,594.6<br>(3,178.1 to 4,074.8)            | 240.7<br>(174.3 to 323.8)                    | 0.2<br>(0.1 to 0.3)                     | -37.0<br>(-54.1 to -9.5)                          | -40.9<br>(-56.5 to -18.4)                           |
| Acute hepatitis A                                                       | 5.9<br>(1.4 to 11.6)                       | 76.1<br>(18.6 to 151.2)                      | 0.1<br>(< 0.05 to 0.1)                  | -40.4<br>(-79.1 to 76.0)                          | -41.5<br>(-80.0 to 63.6)                            |
| Hepatitis B                                                             | 2,092.2<br>(1,724.0 to 2,552.9)            | 125.0<br>(93.0 to 161.7)                     | 0.1<br>(0.1 to 0.2)                     | -39.1<br>(-48.0 to -29.1)                         | -46.5<br>(-53.3 to -38.9)                           |
| Hepatitis C                                                             | 1,495.9<br>(1,333.0 to 1,667.7)            | 32.1<br>(27.8 to 37.0)                       | < 0.05<br>(< 0.05 to 0.1)               | -18.9<br>(-64.4 to 83.4)                          | -11.2<br>(-61.6 to 95.8)                            |
| Acute hepatitis E                                                       | 0.6<br>(0.5 to 0.7)                        | 7.5<br>(6.6 to 8.6)                          | < 0.05<br>(< 0.05 to < 0.05)            | -33.0<br>(-39.7 to -25.6)                         | -39.5<br>(-44.1 to -34.2)                           |
| Other infectious diseases                                               | 105.4<br>(91.5 to 122.3)                   | 0.1<br>(< 0.05 to 0.1)                       | 3.0<br>(1.9 to 4.8)                     | -8.8<br>(-21.3 to 5.7)                            | -8.4<br>(-21.2 to 6.7)                              |
| <b>Non-communicable diseases</b>                                        | <b>43,499.7<br/>(43,249.6 to 43,747.4)</b> | <b>94,755.7†<br/>(89,982.5 to 100,417.3)</b> | <b>3,922.9<br/>(2,892.0 to 5,116.1)</b> | <b>19.2<br/>(14.9 to 23.1)</b>                    | <b>-1.4<br/>(-4.7 to 1.6)</b>                       |
| <b>Neoplasms</b>                                                        | <b>196.1<br/>(183.5 to 209.7)</b>          | <b>85.1<br/>(78.7 to 92.9)</b>               | <b>24.2<br/>(17.7 to 31.2)</b>          | <b>45.2<br/>(37.9 to 53.6)</b>                    | <b>2.7<br/>(-2.8 to 8.8)</b>                        |
| Lip and oral cavity cancer                                              | 3.7<br>(3.5 to 4.0)                        | 1.0<br>(1.0 to 1.1)                          | 0.4<br>(0.3 to 0.5)                     | 36.6<br>(21.7 to 53.4)                            | -5.1<br>(-15.9 to 7.1)                              |
| Nasopharynx cancer                                                      | 0.6<br>(0.5 to 0.6)                        | 0.2<br>(0.2 to 0.2)                          | 0.1<br>(0.1 to 0.1)                     | 15.7<br>(3.6 to 30.5)                             | -13.7<br>(-23.2 to -2.5)                            |
| Other pharynx cancer                                                    | 0.6<br>(0.5 to 0.6)                        | 0.2<br>(0.2 to 0.2)                          | 0.1<br>(0.1 to 0.1)                     | 45.3<br>(33.0 to 58.4)                            | -2.2<br>(-10.4 to 6.7)                              |
| Oesophageal cancer                                                      | 0.8<br>(0.7 to 0.9)                        | 0.8<br>(0.8 to 0.9)                          | 0.2<br>(0.1 to 0.3)                     | 21.4<br>(1.6 to 43.7)                             | -18.2<br>(-32.8 to -1.5)                            |
| Stomach cancer                                                          | 11.8<br>(11.1 to 12.5)                     | 6.7<br>(6.4 to 7.1)                          | 1.7<br>(1.2 to 2.2)                     | 29.8<br>(12.9 to 48.8)                            | -11.2<br>(-23.6 to 2.3)                             |
| Colon and rectum cancer                                                 | 26.4<br>(24.2 to 29.5)                     | 7.4<br>(6.8 to 8.2)                          | 2.5<br>(1.8 to 3.4)                     | 65.6<br>(43.2 to 91.3)                            | 13.7<br>(-2.2 to 31.7)                              |
| Liver cancer                                                            | 0.7<br>(0.6 to 0.8)                        | 2.2<br>(2.0 to 2.4)                          | 0.5<br>(0.3 to 0.6)                     | 38.5<br>(26.1 to 52.7)                            | -5.3<br>(-14.0 to 4.6)                              |
| Liver cancer due to hepatitis B                                         | 0.4<br>(0.3 to 0.6)                        | 0.5<br>(0.4 to 0.7)                          | 0.1<br>(0.1 to 0.2)                     | 41.8<br>(26.3 to 59.0)                            | -0.2<br>(-11.3 to 11.2)                             |



| Cause                                              | Prevalence in thousands (95% UI)              | Incidence in thousands (95% UI)          | YLDs in thousands (95% UI)              |                                                   |                                                     |
|----------------------------------------------------|-----------------------------------------------|------------------------------------------|-----------------------------------------|---------------------------------------------------|-----------------------------------------------------|
|                                                    | 2016 counts                                   | 2016 counts                              | 2016 counts                             | Percentage change in counts between 2006 and 2016 | Percentage change in age-standardised rates between |
| Liver cancer due to hepatitis C                    | 0.5<br>(0.4 to 0.6)                           | 0.6<br>(0.5 to 0.8)                      | 0.1<br>(0.1 to 0.2)                     | 47.3<br>(31.5 to 66.0)                            | -0.2<br>(-11.2 to 12.9)                             |
| Liver cancer due to alcohol use                    | 0.5<br>(0.4 to 0.6)                           | 0.6<br>(0.5 to 0.7)                      | 0.1<br>(0.1 to 0.2)                     | 24.6<br>(7.3 to 42.3)                             | -17.2<br>(-28.9 to -5.2)                            |
| Liver cancer due to other causes                   | 0.3<br>(0.3 to 0.4)                           | 0.4<br>(0.4 to 0.5)                      | 0.1<br>(0.1 to 0.1)                     | 43.9<br>(28.1 to 60.9)                            | 1.2<br>(-10.3 to 13.2)                              |
| Gallbladder and biliary tract cancer               | 0.8<br>(0.7 to 0.9)                           | 1.1<br>(1.0 to 1.2)                      | 0.2<br>(0.2 to 0.3)                     | 25.8<br>(11.2 to 39.9)                            | -14.9<br>(-25.7 to -4.0)                            |
| Pancreatic cancer                                  | 1.3<br>(1.2 to 1.4)                           | 1.8<br>(1.7 to 1.9)                      | 0.4<br>(0.3 to 0.5)                     | 47.8<br>(34.0 to 61.2)                            | -0.0<br>(-9.9 to 10.1)                              |
| Larynx cancer                                      | 2.3<br>(2.1 to 2.5)                           | 0.7<br>(0.7 to 0.8)                      | 0.3<br>(0.2 to 0.4)                     | 25.3<br>(9.5 to 44.1)                             | -15.5<br>(-27.1 to -1.8)                            |
| Tracheal, bronchus, and lung cancer                | 5.2<br>(4.8 to 5.8)                           | 4.7<br>(4.4 to 5.2)                      | 1.1<br>(0.8 to 1.4)                     | 21.1<br>(0.7 to 46.0)                             | -18.0<br>(-32.1 to -1.0)                            |
| Malignant skin melanoma                            | 3.4<br>(2.7 to 5.1)                           | 0.8<br>(0.6 to 1.2)                      | 0.3<br>(0.2 to 0.4)                     | 79.8<br>(49.3 to 111.3)                           | 30.4<br>(7.2 to 54.2)                               |
| Non-melanoma skin cancer                           | 6.1<br>(3.5 to 10.6)                          | 14.2<br>(8.5 to 21.5)                    | 0.2<br>(0.1 to 0.5)                     | -33.7<br>(-59.1 to 25.9)                          | -57.1<br>(-73.7 to -16.2)                           |
| Non-melanoma skin cancer (squamous-cell carcinoma) | 4.5<br>(2.4 to 9.8)                           | 4.3<br>(2.3 to 9.1)                      | 0.2<br>(0.1 to 0.5)                     | -36.1<br>(-61.6 to 24.9)                          | -58.6<br>(-75.5 to -17.6)                           |
| Non-melanoma skin cancer (basal-cell carcinoma)    | 1.4<br>(0.8 to 2.6)                           | 9.9<br>(5.4 to 15.9)                     | < 0.05<br>(< 0.05 to < 0.05)            | 42.4<br>(8.5 to 83.2)                             | -0.5<br>(-26.1 to 31.5)                             |
| Breast cancer                                      | 40.4<br>(34.5 to 46.9)                        | 8.6<br>(7.3 to 9.9)                      | 3.4<br>(2.4 to 4.6)                     | 50.9<br>(20.6 to 87.5)                            | 8.2<br>(-12.1 to 32.1)                              |
| Cervical cancer                                    | 15.5<br>(13.7 to 17.7)                        | 4.1<br>(3.7 to 4.6)                      | 1.5<br>(1.1 to 2.0)                     | 0.8<br>(-17.1 to 22.5)                            | -23.9<br>(-37.2 to -8.4)                            |
| Uterine cancer                                     | 8.0<br>(7.0 to 9.2)                           | 1.7<br>(1.5 to 2.0)                      | 0.6<br>(0.4 to 0.9)                     | 83.7<br>(51.0 to 121.8)                           | 24.3<br>(3.1 to 49.8)                               |
| Ovarian cancer                                     | 5.5<br>(4.4 to 6.7)                           | 1.8<br>(1.4 to 2.2)                      | 0.8<br>(0.5 to 1.2)                     | 48.1<br>(5.7 to 100.2)                            | 9.3<br>(-22.7 to 47.6)                              |
| Prostate cancer                                    | 42.0<br>(36.0 to 48.7)                        | 9.7<br>(8.4 to 11.2)                     | 3.9<br>(2.8 to 5.2)                     | 69.8<br>(45.0 to 102.1)                           | 11.4<br>(-4.6 to 31.7)                              |
| Testicular cancer                                  | 1.9<br>(1.6 to 2.4)                           | 0.4<br>(0.3 to 0.5)                      | 0.1<br>(0.1 to 0.2)                     | 59.8<br>(9.1 to 121.5)                            | 37.0<br>(-4.0 to 85.9)                              |
| Kidney cancer                                      | 5.8<br>(5.2 to 6.3)                           | 1.5<br>(1.4 to 1.7)                      | 0.5<br>(0.4 to 0.7)                     | 46.7<br>(28.2 to 67.7)                            | 10.5<br>(-3.4 to 25.9)                              |
| Bladder cancer                                     | 4.5<br>(4.2 to 4.9)                           | 1.2<br>(1.1 to 1.3)                      | 0.5<br>(0.3 to 0.6)                     | 48.6<br>(31.6 to 66.4)                            | 0.6<br>(-11.4 to 13.9)                              |
| Brain and nervous system cancer                    | 3.1<br>(2.4 to 3.5)                           | 1.4<br>(1.1 to 1.6)                      | 0.5<br>(0.3 to 0.6)                     | 18.5<br>(-1.2 to 40.6)                            | -6.8<br>(-22.2 to 11.2)                             |
| Thyroid cancer                                     | 5.3<br>(4.8 to 6.1)                           | 1.0<br>(0.9 to 1.2)                      | 0.4<br>(0.2 to 0.5)                     | 77.8<br>(43.4 to 125.5)                           | 24.5<br>(2.7 to 52.8)                               |
| Mesothelioma                                       | 0.2<br>(0.2 to 0.2)                           | 0.1<br>(0.1 to 0.1)                      | < 0.05<br>(< 0.05 to 0.1)               | 38.1<br>(21.5 to 50.8)                            | -2.1<br>(-14.0 to 6.7)                              |
| Hodgkin lymphoma                                   | 0.8<br>(0.8 to 0.9)                           | 0.3<br>(0.2 to 0.3)                      | 0.1<br>(0.1 to 0.1)                     | 11.7<br>(3.0 to 22.4)                             | -13.7<br>(-20.2 to -5.5)                            |
| Non-Hodgkin's lymphoma                             | 5.1<br>(4.6 to 6.0)                           | 1.7<br>(1.6 to 2.0)                      | 0.6<br>(0.4 to 0.7)                     | 41.5<br>(28.3 to 56.1)                            | 5.0<br>(-5.0 to 16.4)                               |
| Multiple myeloma                                   | 1.3<br>(1.1 to 1.8)                           | 0.7<br>(0.6 to 1.0)                      | 0.3<br>(0.2 to 0.5)                     | 60.3<br>(40.0 to 81.4)                            | 9.1<br>(-6.6 to 26.6)                               |
| Leukaemia                                          | 9.0<br>(8.3 to 9.9)                           | 2.6<br>(2.4 to 2.8)                      | 1.2<br>(0.8 to 1.6)                     | 13.6<br>(3.4 to 26.8)                             | -6.6<br>(-14.9 to 4.2)                              |
| Acute lymphoid leukaemia                           | 3.1<br>(2.7 to 3.5)                           | 0.8<br>(0.8 to 0.9)                      | 0.4<br>(0.3 to 0.5)                     | 9.0<br>(-6.8 to 26.1)                             | -1.1<br>(-14.8 to 14.3)                             |
| Chronic lymphoid leukaemia                         | 2.0<br>(1.7 to 2.4)                           | 0.5<br>(0.4 to 0.5)                      | 0.2<br>(0.2 to 0.3)                     | 39.0<br>(15.0 to 64.7)                            | -2.5<br>(-20.1 to 17.1)                             |
| Acute myeloid leukaemia                            | 0.9<br>(0.7 to 1.0)                           | 0.5<br>(0.5 to 0.6)                      | 0.2<br>(0.1 to 0.2)                     | 19.3<br>(6.5 to 32.9)                             | 2.3<br>(-8.3 to 13.7)                               |
| Chronic myeloid leukaemia                          | 0.7<br>(0.6 to 0.8)                           | 0.2<br>(0.2 to 0.3)                      | 0.1<br>(0.1 to 0.1)                     | 5.5<br>(-5.6 to 17.4)                             | -21.0<br>(-29.3 to -12.0)                           |
| Other leukaemia                                    | 2.3<br>(2.0 to 2.6)                           | 0.5<br>(0.4 to 0.6)                      | 0.3<br>(0.2 to 0.4)                     | 2.4<br>(-10.2 to 19.8)                            | -15.6<br>(-26.6 to -0.6)                            |
| Other neoplasms                                    | 23.4<br>(19.1 to 27.8)                        | 6.3<br>(5.3 to 7.4)                      | 1.9<br>(1.3 to 2.6)                     | 125.7<br>(89.8 to 168.7)                          | 71.7<br>(44.7 to 104.8)                             |
| <b>Cardiovascular diseases</b>                     | <b>2,358.7</b><br><b>(2,243.5 to 2,467.0)</b> | <b>226.0†</b><br><b>(214.7 to 239.8)</b> | <b>132.8</b><br><b>(94.7 to 176.6)</b>  | <b>37.8</b><br><b>(32.9 to 42.8)</b>              | <b>-2.3</b><br><b>(-5.6 to 1.3)</b>                 |
| Rheumatic heart disease                            | 2.4<br>(2.1 to 2.8)                           | 0.6<br>(0.5 to 0.6)                      | 0.2<br>(0.1 to 0.3)                     | 28.0<br>(18.2 to 38.1)                            | -4.2<br>(-11.5 to 3.3)                              |
| Ischaemic heart disease                            | 657.3<br>(619.5 to 696.0)                     | 74.2<br>(69.8 to 78.5)                   | 38.0<br>(26.0 to 52.3)                  | 41.1<br>(34.4 to 48.4)                            | -0.1<br>(-4.3 to 4.4)                               |
| Cerebrovascular disease                            | 280.4<br>(259.4 to 302.4)                     | 42.3‡<br>(38.5 to 46.2)                  | 28.1<br>(20.3 to 36.1)                  | 32.9<br>(21.6 to 44.4)                            | -8.0<br>(-16.3 to -0.1)                             |
| Ischaemic stroke                                   | 225.6<br>(199.5 to 253.2)                     | 28.0‡<br>(24.7 to 31.8)                  | 21.5<br>(15.4 to 27.9)                  | 34.4<br>(19.6 to 48.5)                            | -8.1<br>(-18.3 to 1.6)                              |
| Hemorrhagic stroke                                 | 69.2<br>(62.8 to 76.2)                        | 14.2‡<br>(12.8 to 15.7)                  | 6.6<br>(4.8 to 8.5)                     | 28.4<br>(14.0 to 43.9)                            | -7.5<br>(-17.6 to 3.3)                              |
| Hypertensive heart disease                         | 113.3<br>(97.3 to 132.9)                      | --                                       | 9.2<br>(6.3 to 12.7)                    | 47.0<br>(32.6 to 62.7)                            | 0.4<br>(-9.1 to 10.3)                               |
| Cardiomyopathy and myocarditis                     | 22.3<br>(19.7 to 25.0)                        | 11.2†<br>(9.9 to 12.8)                   | 2.3<br>(1.6 to 3.3)                     | 23.3<br>(8.8 to 40.7)                             | 0.2<br>(-10.6 to 13.8)                              |
| Myocarditis                                        | 7.6<br>(6.7 to 8.6)                           | 11.2<br>(9.9 to 12.8)                    | 0.6<br>(0.4 to 0.8)                     | 12.6<br>(4.2 to 21.8)                             | -0.2<br>(-7.8 to 8.1)                               |
| Alcoholic cardiomyopathy                           | 1.0<br>(0.8 to 1.2)                           | --                                       | 0.1<br>(0.1 to 0.1)                     | 36.8<br>(26.5 to 48.2)                            | 0.5<br>(-6.4 to 8.1)                                |
| Other cardiomyopathy                               | 19.3<br>(16.6 to 22.5)                        | --                                       | 1.6<br>(1.1 to 2.4)                     | 26.9<br>(7.4 to 52.4)                             | 0.3<br>(-13.6 to 19.0)                              |
| Atrial fibrillation and flutter                    | 285.7<br>(249.4 to 327.4)                     | 23.6<br>(20.2 to 27.6)                   | 22.8<br>(15.2 to 31.8)                  | 46.2<br>(36.3 to 55.9)                            | -0.4<br>(-6.6 to 5.5)                               |
| Peripheral vascular disease                        | 713.2<br>(616.1 to 828.9)                     | 69.1<br>(59.5 to 81.1)                   | 3.1<br>(1.4 to 5.7)                     | 43.6<br>(31.6 to 56.9)                            | -6.5<br>(-14.0 to 1.8)                              |
| Endocarditis                                       | 2.3<br>(2.0 to 2.6)                           | 5.0<br>(4.5 to 5.5)                      | 0.2<br>(0.1 to 0.3)                     | 29.1<br>(20.3 to 38.4)                            | -0.7<br>(-8.0 to 7.4)                               |
| Other cardiovascular and circulatory diseases      | 548.4<br>(466.2 to 644.1)                     | --                                       | 28.9<br>(19.4 to 41.4)                  | 30.7<br>(19.8 to 41.5)                            | -0.8<br>(-8.8 to 7.1)                               |
| <b>Chronic respiratory diseases</b>                | <b>4,751.1</b><br><b>(4,538.4 to 4,972.4)</b> | <b>760.8†</b><br><b>(712.3 to 813.3)</b> | <b>165.8</b><br><b>(121.2 to 223.6)</b> | <b>10.3</b><br><b>(4.3 to 16.7)</b>               | <b>-2.2</b><br><b>(-7.5 to 3.2)</b>                 |
| Chronic obstructive pulmonary disease              | 1,698.1<br>(1,583.0 to 1,854.9)               | 128.7<br>(119.5 to 140.6)                | 35.8<br>(29.3 to 44.3)                  | 31.7<br>(15.4 to 49.8)                            | -4.5<br>(-16.5 to 9.2)                              |
| Pneumoconiosis                                     | 7.0<br>(6.4 to 7.6)                           | 0.6<br>(0.5 to 0.6)                      | 1.0<br>(0.7 to 1.5)                     | 47.0<br>(27.2 to 70.6)                            | 2.6<br>(-12.2 to 21.5)                              |
| Silicosis                                          | 1.5<br>(1.3 to 1.7)                           | 0.1<br>(0.1 to 0.2)                      | 0.2<br>(0.1 to 0.3)                     | 48.1<br>(16.3 to 88.0)                            | 3.2<br>(-22.6 to 36.6)                              |

| Cause                                                          | Prevalence in thousands (95% UI)           | Incidence in thousands (95% UI)          | YLDs in thousands (95% UI)          |                                                   |                                                     |
|----------------------------------------------------------------|--------------------------------------------|------------------------------------------|-------------------------------------|---------------------------------------------------|-----------------------------------------------------|
|                                                                | 2016 counts                                | 2016 counts                              | 2016 counts                         | Percentage change in counts between 2006 and 2016 | Percentage change in age-standardised rates between |
| Asbestosis                                                     | 1.4<br>(1.2 to 1.6)                        | 0.1<br>(0.1 to 0.1)                      | 0.2<br>(0.1 to 0.3)                 | 36.6<br>(20.3 to 55.4)                            | 0.2<br>(-15.2 to 19.0)                              |
| Coal workers pneumoconiosis                                    | 0.8<br>(0.6 to 0.9)                        | 0.1<br>( $< 0.05$ to 0.1)                | 0.1<br>(0.1 to 0.2)                 | 43.8<br>(33.8 to 53.5)                            | 1.0<br>(-5.8 to 8.3)                                |
| Other pneumoconiosis                                           | 3.4<br>(2.9 to 4.0)                        | 0.3<br>(0.2 to 0.3)                      | 0.5<br>(0.3 to 0.7)                 | 52.3<br>(15.2 to 101.8)                           | 3.8<br>(-21.9 to 40.4)                              |
| Asthma                                                         | 3,142.7<br>(2,899.0 to 3,404.3)            | 629.6<br>(582.3 to 681.8)                | 124.4<br>(81.4 to 180.6)            | 4.5<br>(-1.9 to 11.0)                             | -2.2<br>(-8.4 to 3.7)                               |
| Interstitial lung disease and pulmonary sarcoidosis            | 18.1<br>(16.6 to 19.8)                     | 2.0<br>(1.8 to 2.1)                      | 1.9<br>(1.3 to 2.8)                 | 39.1<br>(29.1 to 50.7)                            | 5.6<br>(-3.3 to 16.0)                               |
| Other chronic respiratory diseases                             | --                                         | --                                       | 2.6<br>(2.0 to 3.2)                 | 38.7<br>(7.1 to 78.2)                             | 31.9<br>(3.0 to 67.5)                               |
| <b>Cirrhosis and other chronic liver diseases</b>              | <b>336.4<br/>(318.0 to 356.2)</b>          | <b>8.7<br/>(8.4 to 9.1)</b>              | <b>8.2<br/>(5.6 to 11.3)</b>        | <b>35.8<br/>(21.6 to 50.6)</b>                    | <b>6.6<br/>(-3.2 to 16.3)</b>                       |
| Cirrhosis and other chronic liver diseases due to hepatitis B  | 15.0<br>(13.3 to 16.9)                     | 0.4<br>(0.4 to 0.5)                      | 0.3<br>(0.2 to 0.5)                 | 47.6<br>(21.3 to 77.5)                            | 8.4<br>(-14.5 to 35.4)                              |
| Cirrhosis and other chronic liver diseases due to hepatitis C  | 123.5<br>(113.8 to 133.4)                  | 3.2<br>(3.0 to 3.4)                      | 2.6<br>(1.7 to 3.6)                 | 41.9<br>(19.8 to 68.1)                            | 4.5<br>(-10.2 to 20.9)                              |
| Cirrhosis and other chronic liver diseases due to alcohol use  | 124.1<br>(114.6 to 134.7)                  | 3.2<br>(3.0 to 3.4)                      | 2.6<br>(1.8 to 3.6)                 | 54.6<br>(32.4 to 80.5)                            | 10.3<br>(-4.2 to 26.5)                              |
| Cirrhosis and other chronic liver diseases due to other causes | 73.8<br>(67.3 to 80.4)                     | 1.9<br>(1.8 to 2.0)                      | 2.7<br>(1.8 to 3.8)                 | 16.1<br>(-4.8 to 43.0)                            | 4.9<br>(-12.4 to 25.5)                              |
| <b>Digestive diseases</b>                                      | <b>1,567.2<br/>(1,435.1 to 1,742.2)</b>    | <b>1,123.6†<br/>(1,039.9 to 1,217.5)</b> | <b>64.0<br/>(44.5 to 86.3)</b>      | <b>27.8<br/>(17.5 to 39.2)</b>                    | <b>2.6<br/>(-5.1 to 11.0)</b>                       |
| Peptic ulcer disease                                           | 813.6<br>(729.1 to 923.1)                  | 28.3<br>(25.4 to 31.9)                   | 17.7<br>(11.1 to 27.6)              | 29.5<br>(10.6 to 50.4)                            | 3.8<br>(-10.7 to 20.1)                              |
| Gastritis and duodenitis                                       | 367.3<br>(314.9 to 437.4)                  | 110.0<br>(97.8 to 125.2)                 | 11.1<br>(7.1 to 16.9)               | 40.9<br>(20.5 to 63.5)                            | 12.5<br>(-3.1 to 30.1)                              |
| Appendicitis                                                   | 3.9<br>(3.6 to 4.3)                        | 103.3<br>(95.0 to 112.2)                 | 1.2<br>(0.8 to 1.8)                 | 8.0<br>(-25.0 to 50.5)                            | 0.2<br>(-28.9 to 37.3)                              |
| Paralytic ileus and intestinal obstruction                     | 0.5<br>(0.5 to 0.6)                        | 14.7<br>(13.2 to 16.5)                   | 0.2<br>(0.1 to 0.2)                 | 25.7<br>(20.4 to 31.6)                            | 4.9<br>(1.0 to 8.8)                                 |
| Inguinal, femoral, and abdominal hernia                        | 357.4<br>(322.2 to 393.2)                  | 297.7<br>(257.7 to 343.1)                | 23.8<br>(15.9 to 33.5)              | 17.9<br>(7.4 to 29.2)                             | -5.0<br>(-12.6 to 3.4)                              |
| Inflammatory bowel disease                                     | 14.4<br>(13.5 to 15.5)                     | 12.3<br>(11.9 to 12.8)                   | 2.1<br>(1.4 to 2.9)                 | 67.7<br>(40.2 to 99.5)                            | 26.3<br>(5.7 to 49.9)                               |
| Vascular intestinal disorders                                  | 0.6<br>(0.5 to 0.7)                        | 3.1<br>(2.8 to 3.4)                      | 0.2<br>(0.1 to 0.2)                 | 37.0<br>(24.7 to 49.0)                            | 9.0<br>(-2.9 to 21.3)                               |
| Gallbladder and biliary diseases                               | 59.7<br>(54.3 to 65.4)                     | 530.7<br>(461.9 to 615.0)                | 2.5<br>(1.7 to 3.5)                 | 43.1<br>(18.0 to 73.0)                            | 11.2<br>(-7.7 to 32.1)                              |
| Pancreatitis                                                   | 2.6<br>(2.4 to 2.9)                        | 23.5<br>(21.1 to 26.3)                   | 0.3<br>(0.2 to 0.5)                 | 36.4<br>(31.2 to 42.1)                            | 8.3<br>(4.6 to 12.2)                                |
| Other digestive diseases                                       | --                                         | --                                       | 4.9<br>(3.4 to 6.6)                 | 31.9<br>(22.1 to 43.7)                            | 6.9<br>(-0.7 to 15.2)                               |
| <b>Neurological disorders</b>                                  | <b>18,586.2<br/>(17,852.8 to 19,521.0)</b> | <b>8,457.6<br/>(7,281.8 to 9,664.6)</b>  | <b>528.7<br/>(347.1 to 744.9)</b>   | <b>17.1<br/>(-7.4 to 47.4)</b>                    | <b>-0.1<br/>(-20.7 to 25.4)</b>                     |
| Alzheimer's disease and other dementias                        | 248.6<br>(210.9 to 295.5)                  | 43.6<br>(36.5 to 52.2)                   | 36.5<br>(25.4 to 48.9)              | 47.6<br>(41.5 to 54.5)                            | -1.6<br>(-5.4 to 2.8)                               |
| Parkinson's disease                                            | 25.9<br>(20.5 to 32.1)                     | 3.0<br>(2.4 to 3.8)                      | 3.1<br>(2.0 to 4.4)                 | 58.5<br>(38.6 to 80.3)                            | 6.5<br>(-6.1 to 20.7)                               |
| Epilepsy                                                       | 259.7<br>(59.3 to 473.5)                   | 25.6<br>(5.9 to 46.8)                    | 71.5<br>(12.2 to 160.8)             | 7.9<br>(-84.5 to 434.8)                           | -2.1<br>(-85.8 to 388.7)                            |
| Multiple sclerosis                                             | 2.7<br>(2.3 to 3.1)                        | 0.1<br>(0.1 to 0.1)                      | 0.8<br>(0.5 to 1.0)                 | 37.5<br>(32.6 to 42.8)                            | 10.9<br>(7.1 to 15.0)                               |
| Motor neuron disease                                           | 1.4<br>(1.2 to 1.6)                        | 0.2<br>(0.2 to 0.2)                      | 0.3<br>(0.2 to 0.4)                 | 24.5<br>(19.3 to 30.1)                            | 5.0<br>(1.4 to 8.8)                                 |
| Migraine                                                       | 7,037.5<br>(6,687.9 to 7,402.8)            | 762.3<br>(720.9 to 806.4)                | 336.9<br>(217.5 to 466.1)           | 15.9<br>(12.0 to 19.9)                            | -0.1<br>(-3.3 to 3.1)                               |
| Tension-type headache                                          | 13,988.6<br>(12,563.2 to 15,554.2)         | 7,622.5<br>(6,436.7 to 8,845.0)          | 64.4<br>(41.3 to 95.4)              | 17.0<br>(11.3 to 23.2)                            | -0.6<br>(-5.0 to 4.3)                               |
| Other neurological disorders                                   | 0.2<br>(0.1 to 0.3)                        | 0.4<br>(0.2 to 0.5)                      | 15.3<br>(3.7 to 33.6)               | 25.5<br>(-74.2 to 425.0)                          | 17.2<br>(-74.9 to 355.4)                            |
| <b>Mental and substance use disorders</b>                      | <b>6,095.2<br/>(5,919.7 to 6,286.9)</b>    | <b>2,212.2†<br/>(2,074.6 to 2,354.7)</b> | <b>844.5<br/>(610.8 to 1,096.3)</b> | <b>10.2<br/>(7.1 to 13.1)</b>                     | <b>-3.6<br/>(-6.1 to -1.1)</b>                      |
| Schizophrenia                                                  | 104.5<br>(91.7 to 118.7)                   | 6.7<br>(5.9 to 7.7)                      | 68.1<br>(49.1 to 85.8)              | 23.2<br>(12.6 to 35.5)                            | 1.6<br>(-6.7 to 11.1)                               |
| Alcohol use disorders                                          | 874.3<br>(783.5 to 968.3)                  | 462.3<br>(408.4 to 518.1)                | 88.8<br>(61.1 to 120.5)             | 21.4<br>(11.2 to 33.0)                            | 7.3<br>(-1.2 to 16.8)                               |
| Drug use disorders                                             | 317.4<br>(285.3 to 357.0)                  | 38.5<br>(34.8 to 43.2)                   | 81.6<br>(57.4 to 111.5)             | 9.9<br>(-1.2 to 21.7)                             | -1.6<br>(-11.0 to 8.5)                              |
| Opioid use disorders                                           | 112.4<br>(90.4 to 138.7)                   | 14.2<br>(11.8 to 17.0)                   | 47.3<br>(31.9 to 66.5)              | 19.8<br>(7.0 to 35.3)                             | 3.8<br>(-6.9 to 15.9)                               |
| Cocaine use disorders                                          | 35.3<br>(30.5 to 40.7)                     | 2.3<br>(1.9 to 2.7)                      | 4.9<br>(3.0 to 7.3)                 | 14.0<br>(-10.1 to 46.9)                           | 0.5<br>(-20.5 to 29.0)                              |
| Amphetamine use disorders                                      | 102.1<br>(70.9 to 143.0)                   | 8.3<br>(5.8 to 11.8)                     | 13.6<br>(7.5 to 22.3)               | -7.9<br>(-25.8 to 12.6)                           | -12.3<br>(-29.5 to 6.9)                             |
| Cannabis use disorders                                         | 56.4<br>(49.2 to 65.7)                     | 9.7<br>(8.4 to 11.1)                     | 1.7<br>(1.0 to 2.5)                 | 7.0<br>(-14.9 to 34.1)                            | -1.2<br>(-20.4 to 22.4)                             |
| Other drug use disorders                                       | 20.7<br>(18.2 to 23.4)                     | 3.9<br>(3.5 to 4.5)                      | 14.2<br>(8.4 to 22.3)               | -0.2<br>(-22.8 to 29.6)                           | -7.8<br>(-28.3 to 19.8)                             |
| Depressive disorders                                           | 1,124.9<br>(1,055.8 to 1,203.6)            | 1,257.7<br>(1,135.8 to 1,390.8)          | 194.4<br>(132.2 to 264.9)           | 6.4<br>(-0.6 to 13.4)                             | -10.7<br>(-16.1 to -5.2)                            |
| Major depressive disorder                                      | 767.2<br>(693.7 to 854.6)                  | 1,185.5<br>(1,066.4 to 1,315.5)          | 158.4<br>(107.8 to 218.0)           | 4.2<br>(-3.9 to 12.3)                             | -12.0<br>(-18.1 to -5.7)                            |
| Dysthymia                                                      | 371.6<br>(325.2 to 421.6)                  | 72.2<br>(63.2 to 82.3)                   | 36.0<br>(24.0 to 52.6)              | 16.7<br>(8.0 to 26.3)                             | -4.5<br>(-11.0 to 3.2)                              |
| Bipolar disorder                                               | 375.9<br>(331.4 to 425.1)                  | 30.5<br>(26.9 to 35.1)                   | 77.9<br>(48.0 to 115.1)             | 14.0<br>(7.1 to 20.9)                             | 0.1<br>(-5.7 to 6.0)                                |
| Anxiety disorders                                              | 1,248.2<br>(1,142.9 to 1,359.4)            | 214.5<br>(198.0 to 232.6)                | 121.8<br>(84.4 to 166.2)            | 1.4<br>(-7.0 to 10.3)                             | -10.8<br>(-18.0 to -3.4)                            |
| Eating disorders                                               | 96.6<br>(77.7 to 120.2)                    | 40.2<br>(30.2 to 53.6)                   | 19.6<br>(12.2 to 29.8)              | 20.4<br>(6.7 to 36.2)                             | 13.2<br>(0.9 to 27.6)                               |
| Anorexia nervosa                                               | 16.6<br>(12.2 to 22.6)                     | 6.5<br>(4.7 to 8.6)                      | 3.6<br>(2.1 to 5.7)                 | 14.8<br>(-9.6 to 46.2)                            | 12.0<br>(-11.8 to 42.8)                             |
| Bulimia nervosa                                                | 75.2<br>(56.4 to 101.0)                    | 33.7<br>(24.1 to 47.0)                   | 16.0<br>(9.7 to 24.9)               | 21.7<br>(6.9 to 39.8)                             | 13.5<br>(-0.6 to 30.4)                              |
| Autistic spectrum disorders                                    | 419.8<br>(373.2 to 467.1)                  | 2.5<br>(1.7 to 3.5)                      | 62.4<br>(42.1 to 88.0)              | 9.2<br>(3.7 to 14.8)                              | 0.2<br>(-4.7 to 5.2)                                |
| Autism                                                         | 129.1<br>(111.0 to 151.5)                  | 0.3<br>(0.1 to 0.5)                      | 33.1<br>(21.3 to 48.9)              | 9.7<br>(1.0 to 19.2)                              | 0.2<br>(-7.6 to 8.8)                                |
| Asperger syndrome and other autistic spectrum disorders        | 290.9<br>(242.3 to 351.6)                  | 2.2<br>(1.4 to 3.2)                      | 29.3<br>(19.0 to 43.2)              | 8.8<br>(3.4 to 14.2)                              | 0.3<br>(-4.6 to 5.2)                                |



| Cause                                                      | Prevalence in thousands (95% UI)                 | Incidence in thousands (95% UI)                   | YLDs in thousands (95% UI)                  |                                                   |                                                     |
|------------------------------------------------------------|--------------------------------------------------|---------------------------------------------------|---------------------------------------------|---------------------------------------------------|-----------------------------------------------------|
|                                                            | 2016 counts                                      | 2016 counts                                       | 2016 counts                                 | Percentage change in counts between 2006 and 2016 | Percentage change in age-standardised rates between |
| Attention-deficit/hyperactivity disorder                   | 388.5<br>(349.1 to 437.7)                        | 15.8<br>(13.9 to 18.2)                            | 4.7<br>(2.8 to 7.6)                         | 3.2<br>(-5.1 to 11.7)                             | 0.3<br>(-7.5 to 8.4)                                |
| Conduct disorder                                           | 341.2<br>(283.3 to 400.2)                        | 112.6<br>(89.4 to 134.6)                          | 41.6<br>(25.8 to 63.4)                      | -4.5<br>(-10.6 to 2.1)                            | -0.0<br>(-6.3 to 6.9)                               |
| Idiopathic developmental intellectual disability           | 314.4<br>(157.9 to 472.4)                        | --                                                | 13.0<br>(5.5 to 23.1)                       | 3.0<br>(-5.2 to 11.3)                             | -6.7<br>(-14.4 to 0.8)                              |
| Other mental and substance use disorders                   | 940.8<br>(829.4 to 1,085.0)                      | 30.9<br>(27.6 to 35.1)                            | 70.8<br>(48.8 to 102.2)                     | 20.9<br>(14.6 to 27.1)                            | 0.2<br>(-4.5 to 5.0)                                |
| <b>Diabetes, urogenital, blood, and endocrine diseases</b> | <b>17,755.2</b><br><b>(17,446.8 to 18,041.6)</b> | <b>3,950.1†</b><br><b>(3,728.9 to 4,176.6)</b>    | <b>330.6</b><br><b>(235.5 to 448.4)</b>     | <b>39.1</b><br><b>(33.3 to 46.0)</b>              | <b>5.9</b><br><b>(1.6 to 10.9)</b>                  |
| Diabetes mellitus                                          | 1,992.0<br>(1,806.9 to 2,206.1)                  | 108.7<br>(98.1 to 121.4)                          | 178.6<br>(124.1 to 249.7)                   | 49.0<br>(38.7 to 61.7)                            | 10.2<br>(2.6 to 19.2)                               |
| Acute glomerulonephritis                                   | 0.6<br>(0.6 to 0.7)                              | 9.7<br>(8.4 to 11.1)                              | < 0.05<br>(< 0.05 to < 0.05)                | 22.0<br>(16.3 to 27.1)                            | 0.2<br>(-3.5 to 4.2)                                |
| Chronic kidney disease                                     | 2,156.7<br>(1,940.1 to 2,372.7)                  | 192.2<br>(166.7 to 217.8)                         | 58.1<br>(43.9 to 73.4)                      | 43.9<br>(33.6 to 54.5)                            | 3.0<br>(-4.0 to 10.8)                               |
| Chronic kidney disease due to diabetes mellitus            | 747.7<br>(617.9 to 892.4)                        | 70.8<br>(56.5 to 87.2)                            | 18.8<br>(13.5 to 24.7)                      | 48.9<br>(34.6 to 65.1)                            | 3.3<br>(-6.3 to 13.7)                               |
| Chronic kidney disease due to hypertension                 | 453.7<br>(384.9 to 528.4)                        | 53.5<br>(43.0 to 64.9)                            | 8.0<br>(5.6 to 10.7)                        | 50.5<br>(32.4 to 70.4)                            | 1.2<br>(-10.9 to 14.9)                              |
| Chronic kidney disease due to glomerulonephritis           | 483.9<br>(412.7 to 549.9)                        | 26.3<br>(20.5 to 33.1)                            | 18.2<br>(13.2 to 24.1)                      | 37.4<br>(24.3 to 51.4)                            | 3.4<br>(-6.3 to 13.2)                               |
| Chronic kidney disease due to other causes                 | 471.4<br>(386.6 to 566.6)                        | 41.6<br>(33.3 to 51.6)                            | 13.1<br>(9.3 to 17.3)                       | 42.6<br>(29.3 to 58.4)                            | 3.5<br>(-6.2 to 13.9)                               |
| Urinary diseases and male infertility                      | 712.1<br>(639.0 to 790.1)                        | 1,896.6†<br>(1,716.3 to 2,100.6)                  | 20.5<br>(13.4 to 29.5)                      | 42.8<br>(34.0 to 51.8)                            | -0.5<br>(-6.1 to 5.5)                               |
| Interstitial nephritis and urinary tract infections        | 32.0<br>(28.6 to 35.8)                           | 1,680.1<br>(1,497.2 to 1,883.3)                   | 1.1<br>(0.6 to 1.6)                         | 16.2<br>(-2.1 to 38.7)                            | 0.1<br>(-15.0 to 17.8)                              |
| Urolithiasis                                               | 5.4<br>(4.8 to 6.2)                              | 142.9<br>(126.2 to 162.5)                         | 0.4<br>(0.3 to 0.6)                         | 26.6<br>(21.4 to 32.2)                            | 1.5<br>(-2.1 to 5.3)                                |
| Benign prostatic hyperplasia                               | 545.6<br>(462.7 to 640.0)                        | 73.5<br>(60.7 to 88.1)                            | 18.0<br>(11.6 to 26.0)                      | 47.4<br>(37.5 to 57.8)                            | -0.6<br>(-7.0 to 6.0)                               |
| Male infertility                                           | 98.6<br>(76.0 to 130.8)                          | --                                                | 0.6<br>(0.2 to 1.2)                         | 38.5<br>(5.8 to 82.3)                             | 26.8<br>(-3.0 to 66.0)                              |
| Other urinary diseases                                     | --                                               | --                                                | 0.5<br>(0.3 to 0.8)                         | -3.0<br>(-14.7 to 11.8)                           | -16.4<br>(-26.1 to -5.2)                            |
| Gynecological diseases                                     | 5,271.0<br>(5,021.1 to 5,500.0)                  | 1,673.9†<br>(1,579.6 to 1,766.2)                  | 48.4<br>(32.0 to 72.1)                      | 13.6<br>(7.8 to 19.4)                             | -2.6<br>(-7.5 to 2.2)                               |
| Uterine fibroids                                           | 421.5<br>(366.1 to 481.6)                        | 45.4<br>(39.0 to 52.6)                            | 3.6<br>(1.8 to 6.7)                         | 8.8<br>(-2.0 to 17.6)                             | -11.5<br>(-19.7 to -5.0)                            |
| Polycystic ovarian syndrome                                | 6.2<br>(4.4 to 8.1)                              | 33.2<br>(23.9 to 44.3)                            | 0.1<br>(< 0.05 to 0.1)                      | 6.5<br>(-22.9 to 48.8)                            | -1.9<br>(-28.5 to 37.4)                             |
| Female infertility                                         | 220.7<br>(150.8 to 315.5)                        | --                                                | 1.2<br>(0.5 to 2.7)                         | 58.5<br>(14.0 to 118.8)                           | 44.8<br>(4.9 to 101.3)                              |
| Endometriosis                                              | 2.2<br>(1.8 to 2.7)                              | 10.4<br>(8.6 to 12.6)                             | 0.2<br>(0.1 to 0.3)                         | 11.5<br>(-12.5 to 40.4)                           | -0.4<br>(-22.3 to 26.1)                             |
| Genital prolapse                                           | 1,396.7<br>(1,192.1 to 1,628.2)                  | 86.3<br>(72.2 to 102.4)                           | 4.4<br>(2.1 to 7.9)                         | 14.2<br>(3.8 to 26.8)                             | -19.4<br>(-26.6 to -10.4)                           |
| Premenstrual syndrome                                      | 3,370.6<br>(3,196.3 to 3,559.4)                  | 1,196.0<br>(1,119.3 to 1,272.8)                   | 28.4<br>(17.8 to 43.6)                      | 12.4<br>(4.2 to 21.3)                             | 1.0<br>(-6.4 to 8.7)                                |
| Other gynecological diseases                               | 296.9<br>(250.7 to 349.3)                        | 302.6<br>(252.0 to 360.7)                         | 10.5<br>(6.9 to 15.1)                       | 14.5<br>(2.0 to 28.6)                             | -2.5<br>(-12.9 to 9.6)                              |
| Hemoglobinopathies and hemolytic anaemias                  | 11,142.6<br>(10,825.6 to 11,448.1)               | --                                                | 13.4<br>(8.6 to 20.4)                       | 19.6<br>(6.3 to 33.8)                             | 10.0<br>(-1.7 to 22.2)                              |
| Thalassemias                                               | 0.3<br>(0.2 to 0.3)                              | --                                                | < 0.05<br>(< 0.05 to < 0.05)                | 17.2<br>(-11.4 to 45.5)                           | 32.2<br>(-0.8 to 64.3)                              |
| Thalassaemias trait                                        | 107.2<br>(98.4 to 117.0)                         | --                                                | 1.5<br>(0.9 to 2.3)                         | 30.7<br>(10.1 to 55.4)                            | 16.7<br>(-1.4 to 37.7)                              |
| Sickle cell disorders                                      | 6.0<br>(5.1 to 6.8)                              | --                                                | 0.6<br>(0.4 to 0.9)                         | 13.7<br>(-5.4 to 36.8)                            | 10.8<br>(-7.9 to 34.0)                              |
| Sickle cell trait                                          | 2,238.9<br>(2,093.2 to 2,369.9)                  | --                                                | 9.3<br>(5.9 to 14.6)                        | 29.8<br>(13.5 to 48.9)                            | 21.1<br>(5.8 to 38.5)                               |
| G6PD deficiency                                            | 2,286.0<br>(2,123.3 to 2,475.9)                  | --                                                | 0.1<br>(< 0.05 to 0.1)                      | 6.2<br>(-20.7 to 41.3)                            | 1.7<br>(-22.0 to 31.2)                              |
| G6PD trait                                                 | 7,096.4<br>(6,869.5 to 7,338.4)                  | --                                                | < 0.05<br>(< 0.05 to < 0.05)                | 40.5<br>(19.9 to 64.3)                            | 26.2<br>(7.8 to 46.5)                               |
| Other hemoglobinopathies and hemolytic anaemias            | 133.9<br>(119.6 to 149.4)                        | --                                                | 1.9<br>(1.2 to 3.0)                         | -16.7<br>(-28.1 to -1.8)                          | -23.9<br>(-34.1 to -11.1)                           |
| Endocrine, metabolic, blood, and immune disorders          | 372.7<br>(341.2 to 405.6)                        | 69.1<br>(61.5 to 77.7)                            | 11.5<br>(7.6 to 15.9)                       | 26.4<br>(15.8 to 37.5)                            | 0.1<br>(-7.0 to 7.6)                                |
| <b>Musculoskeletal disorders</b>                           | <b>7,419.8</b><br><b>(7,082.6 to 7,752.8)</b>    | <b>3,617.9</b><br><b>(3,294.6 to 4,003.5)</b>     | <b>804.3</b><br><b>(580.3 to 1,060.6)</b>   | <b>22.4</b><br><b>(17.2 to 27.1)</b>              | <b>-2.6</b><br><b>(-6.1 to 0.5)</b>                 |
| Rheumatoid arthritis                                       | 104.3<br>(93.1 to 117.0)                         | 6.2<br>(5.5 to 6.9)                               | 24.9<br>(17.1 to 33.6)                      | 35.8<br>(23.8 to 49.1)                            | 3.5<br>(-4.9 to 12.5)                               |
| Osteoarthritis                                             | 1,594.9<br>(1,493.7 to 1,700.4)                  | 83.6<br>(77.4 to 89.8)                            | 99.2<br>(69.5 to 134.7)                     | 43.8<br>(38.3 to 49.4)                            | 1.3<br>(-2.4 to 5.0)                                |
| Low back and neck pain                                     | 4,261.0<br>(3,950.2 to 4,597.2)                  | 1,664.3<br>(1,496.4 to 1,850.2)                   | 490.8<br>(348.2 to 649.0)                   | 17.9<br>(10.7 to 24.2)                            | -4.7<br>(-9.5 to -0.4)                              |
| Low back pain                                              | 2,742.8<br>(2,419.2 to 3,133.9)                  | 1,271.0<br>(1,113.7 to 1,448.1)                   | 314.1<br>(219.4 to 417.7)                   | 12.7<br>(2.5 to 22.0)                             | -7.2<br>(-14.6 to -0.9)                             |
| Neck pain                                                  | 1,753.5<br>(1,499.9 to 2,031.7)                  | 393.3<br>(340.1 to 463.9)                         | 176.8<br>(119.3 to 251.7)                   | 28.4<br>(24.3 to 32.4)                            | 0.0<br>(-2.1 to 2.1)                                |
| Gout                                                       | 110.5<br>(97.2 to 124.5)                         | 22.3<br>(19.3 to 25.2)                            | 3.6<br>(2.4 to 5.0)                         | 33.4<br>(12.5 to 58.1)                            | 0.5<br>(-13.9 to 17.6)                              |
| Other musculoskeletal disorders                            | 2,135.5<br>(1,840.4 to 2,452.0)                  | 1,841.6<br>(1,544.2 to 2,169.3)                   | 185.7<br>(126.7 to 262.4)                   | 23.0<br>(13.5 to 32.6)                            | 0.2<br>(-6.4 to 7.6)                                |
| <b>Other non-communicable diseases</b>                     | <b>34,126.2</b><br><b>(33,505.7 to 34,733.8)</b> | <b>74,313.6†</b><br><b>(69,688.2 to 79,625.6)</b> | <b>1,019.7</b><br><b>(699.3 to 1,449.4)</b> | <b>18.9</b><br><b>(17.2 to 20.5)</b>              | <b>-1.9</b><br><b>(-2.9 to -0.8)</b>                |
| Congenital anomalies                                       | 408.3<br>(349.6 to 478.6)                        | --                                                | 47.1<br>(32.8 to 63.9)                      | 3.0<br>(-3.3 to 8.9)                              | -4.4<br>(-10.2 to 1.2)                              |
| Neural tube defects                                        | 19.0<br>(16.8 to 21.5)                           | --                                                | 5.7<br>(4.0 to 7.7)                         | 9.0<br>(-5.6 to 26.0)                             | -1.6<br>(-14.8 to 13.0)                             |
| Congenital heart anomalies                                 | 45.9<br>(39.9 to 52.8)                           | --                                                | 2.3<br>(1.0 to 3.9)                         | 7.3<br>(-5.9 to 23.1)                             | 3.1<br>(-9.4 to 18.2)                               |
| Orofacial clefts                                           | 40.2<br>(35.3 to 45.4)                           | --                                                | 0.5<br>(0.3 to 0.7)                         | -4.3<br>(-15.1 to 7.9)                            | -12.8<br>(-22.7 to -1.7)                            |
| Down's syndrome                                            | 40.1<br>(34.5 to 46.9)                           | --                                                | 3.7<br>(2.5 to 5.2)                         | 4.2<br>(-8.1 to 17.0)                             | -3.6<br>(-15.0 to 7.9)                              |
| Turner syndrome                                            | 12.3<br>(10.4 to 14.4)                           | --                                                | 0.2<br>(0.1 to 0.4)                         | 2.9<br>(-32.0 to 53.3)                            | -2.6<br>(-34.6 to 43.6)                             |
| Klinefelter syndrome                                       | 20.1<br>(16.9 to 23.7)                           | --                                                | 0.1<br>(0.1 to 0.2)                         | 6.1<br>(-18.6 to 38.6)                            | 1.4<br>(-21.8 to 31.9)                              |

| Cause                                         | Prevalence in thousands (95% UI)              | Incidence in thousands (95% UI)                | YLDs in thousands (95% UI)              |                                                   |                                                     |
|-----------------------------------------------|-----------------------------------------------|------------------------------------------------|-----------------------------------------|---------------------------------------------------|-----------------------------------------------------|
|                                               | 2016 counts                                   | 2016 counts                                    | 2016 counts                             | Percentage change in counts between 2006 and 2016 | Percentage change in age-standardised rates between |
| Other chromosomal abnormalities               | 34.1<br>(28.6 to 40.7)                        | --                                             | 3.9<br>(2.7 to 5.5)                     | -13.3<br>(-27.4 to 1.5)                           | -5.9<br>(-21.2 to 11.1)                             |
| Congenital musculoskeletal and limb anomalies | 50.9<br>(46.0 to 55.8)                        | --                                             | 7.0<br>(4.7 to 9.8)                     | 13.7<br>(2.3 to 25.6)                             | 1.6<br>(-8.2 to 12.0)                               |
| Urogenital congenital anomalies               | 43.9<br>(38.6 to 49.5)                        | --                                             | 1.4<br>(0.8 to 2.1)                     | -3.0<br>(-13.5 to 9.2)                            | 0.4<br>(-10.8 to 13.7)                              |
| Digestive congenital anomalies                | 43.7<br>(38.7 to 48.8)                        | --                                             | 1.9<br>(1.2 to 2.8)                     | 7.6<br>(-10.8 to 27.7)                            | -2.0<br>(-18.6 to 16.4)                             |
| Other congenital anomalies                    | 176.2<br>(113.2 to 261.3)                     | --                                             | 20.4<br>(12.6 to 31.9)                  | 1.3<br>(-10.4 to 12.6)                            | -8.0<br>(-18.4 to 2.3)                              |
| Skin and subcutaneous diseases                | 13,952.3<br>(13,619.4 to 14,297.5)            | 28,347.9<br>(27,071.7 to 29,749.6)             | 355.4<br>(239.0 to 511.7)               | 8.5<br>(6.1 to 11.1)                              | 1.6<br>(-0.4 to 3.8)                                |
| Dermatitis                                    | 2,129.8<br>(2,000.4 to 2,271.6)               | 2,561.8<br>(2,368.8 to 2,759.8)                | 82.3<br>(48.6 to 133.1)                 | 6.1<br>(1.1 to 12.6)                              | 0.9<br>(-3.5 to 6.8)                                |
| Psoriasis                                     | 421.8<br>(401.9 to 442.7)                     | 58.7<br>(56.0 to 61.5)                         | 37.0<br>(26.4 to 48.8)                  | 26.5<br>(15.8 to 37.6)                            | 7.5<br>(-1.0 to 16.6)                               |
| Cellulitis                                    | 16.6<br>(15.3 to 17.9)                        | 283.3<br>(265.1 to 302.7)                      | 1.0<br>(0.6 to 1.4)                     | 11.9<br>(-10.6 to 41.4)                           | 1.4<br>(-18.4 to 25.9)                              |
| Pyoderma                                      | 113.3<br>(109.6 to 117.0)                     | 2,521.4<br>(2,432.5 to 2,613.6)                | 0.6<br>(0.2 to 1.3)                     | 25.4<br>(16.8 to 34.7)                            | 0.8<br>(-5.5 to 7.4)                                |
| Scabies                                       | 624.0<br>(547.3 to 720.1)                     | 1,906.9<br>(1,656.6 to 2,199.7)                | 16.2<br>(9.0 to 25.9)                   | 1.1<br>(-3.4 to 6.0)                              | -3.6<br>(-7.5 to 0.5)                               |
| Fungal skin diseases                          | 3,031.8<br>(2,741.8 to 3,341.7)               | 10,936.2<br>(9,804.8 to 12,133.4)              | 17.1<br>(6.8 to 35.2)                   | 15.3<br>(12.5 to 18.1)                            | 0.1<br>(-1.2 to 1.3)                                |
| Viral skin diseases                           | 1,319.8<br>(1,258.1 to 1,383.5)               | 1,986.9<br>(1,893.9 to 2,085.9)                | 40.6<br>(25.3 to 59.5)                  | 6.4<br>(3.0 to 9.9)                               | -0.0<br>(-3.1 to 3.1)                               |
| Acne vulgaris                                 | 4,078.6<br>(3,679.9 to 4,506.9)               | 2,719.3<br>(2,267.4 to 3,306.9)                | 105.6<br>(71.0 to 154.3)                | 3.1<br>(-1.4 to 7.6)                              | 2.0<br>(-2.4 to 6.4)                                |
| Alopecia areata                               | 87.1<br>(83.7 to 90.7)                        | 154.0<br>(147.9 to 160.4)                      | 2.9<br>(1.8 to 4.4)                     | 13.9<br>(1.5 to 27.5)                             | -0.1<br>(-10.4 to 11.7)                             |
| Pruritus                                      | 432.2<br>(379.3 to 486.9)                     | 342.7<br>(305.5 to 388.9)                      | 4.6<br>(2.1 to 8.5)                     | 20.0<br>(13.5 to 26.9)                            | 1.3<br>(-3.7 to 6.4)                                |
| Urticaria                                     | 420.7<br>(369.9 to 482.6)                     | 745.7<br>(656.2 to 853.6)                      | 25.5<br>(16.2 to 36.5)                  | 4.0<br>(-1.9 to 9.9)                              | 0.1<br>(-5.1 to 5.3)                                |
| Decubitus ulcer                               | 17.9<br>(16.2 to 19.8)                        | 65.5<br>(58.9 to 72.5)                         | 2.9<br>(2.0 to 3.9)                     | 32.9<br>(18.6 to 48.6)                            | -0.2<br>(-11.6 to 12.3)                             |
| Other skin and subcutaneous diseases          | 3,481.9<br>(3,378.9 to 3,584.9)               | 4,065.6<br>(3,927.3 to 4,199.3)                | 19.2<br>(9.3 to 35.3)                   | 28.8<br>(25.5 to 32.0)                            | 4.2<br>(1.8 to 6.7)                                 |
| Sense organ diseases                          | 12,647.2<br>(12,392.2 to 12,921.0)            | 4,567.4†<br>(4,284.6 to 4,875.6)               | 458.7<br>(318.0 to 646.2)               | 26.2<br>(23.9 to 28.8)                            | -4.5<br>(-5.9 to -2.8)                              |
| Glaucoma                                      | 43.1<br>(35.6 to 50.9)                        | --                                             | 4.7<br>(3.1 to 6.6)                     | 53.4<br>(36.6 to 71.5)                            | -0.1<br>(-10.7 to 11.1)                             |
| Cataract                                      | 624.0<br>(552.1 to 701.3)                     | --                                             | 52.0<br>(37.0 to 71.5)                  | 38.6<br>(32.3 to 45.1)                            | -5.3<br>(-9.1 to -0.9)                              |
| Macular degeneration                          | 21.7<br>(16.9 to 27.6)                        | --                                             | 1.7<br>(1.1 to 2.4)                     | 56.5<br>(35.5 to 82.1)                            | 2.4<br>(-10.8 to 18.5)                              |
| Refraction and accommodation disorders        | 6,813.5<br>(6,536.4 to 7,109.8)               | --                                             | 117.0<br>(70.2 to 187.9)                | 12.5<br>(9.1 to 16.2)                             | -8.8<br>(-11.3 to -5.9)                             |
| Age-related and other hearing loss            | 7,866.9<br>(7,438.3 to 8,342.2)               | --                                             | 222.9<br>(154.1 to 314.8)               | 29.9<br>(25.4 to 34.0)                            | -3.5<br>(-5.8 to -1.4)                              |
| Other vision loss                             | 197.2<br>(175.4 to 221.7)                     | --                                             | 18.1<br>(12.3 to 24.6)                  | 31.8<br>(21.8 to 43.2)                            | 0.2<br>(-6.9 to 8.1)                                |
| Other sense organ diseases                    | 1,348.8<br>(1,244.8 to 1,457.6)               | 4,567.4<br>(4,284.6 to 4,875.6)                | 42.4<br>(26.6 to 63.6)                  | 30.8<br>(25.7 to 36.6)                            | 1.0<br>(-2.5 to 4.8)                                |
| Oral disorders                                | 22,866.4<br>(21,817.9 to 23,855.5)            | 41,398.3†<br>(37,007.4 to 46,360.4)            | 158.5<br>(96.0 to 248.8)                | 31.1<br>(28.0 to 34.7)                            | 0.3<br>(-1.5 to 2.1)                                |
| Caries of deciduous teeth                     | 2,508.5<br>(1,945.5 to 3,072.2)               | 9,742.5<br>(6,342.0 to 13,598.1)               | 1.0<br>(0.4 to 1.9)                     | -9.6<br>(-18.4 to 0.1)                            | -1.9<br>(-11.1 to 8.2)                              |
| Caries of permanent teeth                     | 14,457.8<br>(13,324.7 to 15,701.1)            | 30,689.1<br>(27,927.4 to 33,860.2)             | 14.2<br>(6.2 to 27.5)                   | 11.0<br>(6.6 to 15.4)                             | -1.4<br>(-5.1 to 2.3)                               |
| Periodontal disease                           | 6,077.9<br>(5,074.9 to 7,159.6)               | 731.1<br>(586.9 to 891.8)                      | 40.1<br>(15.7 to 83.4)                  | 29.6<br>(24.8 to 35.0)                            | 0.9<br>(-2.2 to 4.3)                                |
| Edentulism and severe tooth loss              | 2,735.8<br>(2,379.0 to 3,073.6)               | 235.7<br>(198.8 to 276.4)                      | 76.5<br>(49.8 to 108.4)                 | 43.6<br>(38.9 to 48.7)                            | 0.3<br>(-2.9 to 3.5)                                |
| Other oral disorders                          | 901.6<br>(863.0 to 941.5)                     | --                                             | 26.6<br>(16.4 to 40.1)                  | 16.7<br>(12.8 to 21.0)                            | 0.0<br>(-3.1 to 3.3)                                |
| <b>Injuries</b>                               | <b>6,384.7</b><br><b>(5,993.4 to 6,906.9)</b> | <b>2,740.8†</b><br><b>(2,573.1 to 2,918.6)</b> | <b>244.6</b><br><b>(162.7 to 350.2)</b> | <b>22.2</b><br><b>(18.9 to 25.1)</b>              | <b>-1.3</b><br><b>(-3.7 to 0.7)</b>                 |
| <b>Transport injuries</b>                     | <b>940.6</b><br><b>(877.2 to 1,006.3)</b>     | <b>338.4</b><br><b>(304.0 to 374.6)</b>        | <b>48.9</b><br><b>(32.3 to 70.3)</b>    | <b>31.3</b><br><b>(28.1 to 34.6)</b>              | <b>3.9</b><br><b>(1.6 to 6.1)</b>                   |
| Road injuries                                 | 911.9<br>(851.5 to 977.7)                     | 331.8<br>(297.6 to 368.2)                      | 47.5<br>(31.4 to 68.2)                  | 31.9<br>(28.6 to 35.2)                            | 4.3<br>(2.1 to 6.5)                                 |
| Pedestrian road injuries                      | 163.9<br>(143.2 to 186.6)                     | 44.7<br>(38.0 to 52.8)                         | 8.5<br>(5.6 to 12.2)                    | 18.2<br>(15.1 to 21.2)                            | -7.8<br>(-10.1 to -5.8)                             |
| Cyclist road injuries                         | 167.9<br>(139.2 to 197.3)                     | 65.9<br>(54.0 to 79.1)                         | 8.3<br>(5.4 to 12.0)                    | 28.4<br>(24.8 to 31.8)                            | 4.5<br>(2.1 to 6.8)                                 |
| Motorcyclist road injuries                    | 191.1<br>(164.5 to 230.7)                     | 46.5<br>(38.7 to 55.6)                         | 9.5<br>(6.2 to 13.8)                    | 36.4<br>(32.6 to 39.9)                            | 8.9<br>(6.3 to 11.4)                                |
| Motor vehicle road injuries                   | 261.0<br>(225.3 to 296.5)                     | 112.6<br>(97.1 to 129.1)                       | 15.0<br>(10.1 to 21.3)                  | 35.3<br>(31.9 to 38.6)                            | 6.2<br>(4.0 to 8.5)                                 |
| Other road injuries                           | 127.9<br>(110.9 to 147.6)                     | 62.1<br>(50.3 to 75.3)                         | 6.3<br>(4.1 to 9.1)                     | 44.0<br>(40.1 to 47.8)                            | 13.0<br>(10.4 to 15.6)                              |
| Other transport injuries                      | 28.7<br>(24.5 to 33.5)                        | 6.5<br>(5.6 to 7.7)                            | 1.4<br>(0.9 to 2.0)                     | 14.8<br>(10.8 to 18.4)                            | -8.2<br>(-11.2 to -5.5)                             |
| <b>Unintentional injuries</b>                 | <b>4,493.1</b><br><b>(4,091.2 to 5,003.4)</b> | <b>2,027.6</b><br><b>(1,879.7 to 2,188.7)</b>  | <b>154.8</b><br><b>(103.9 to 216.7)</b> | <b>25.6</b><br><b>(22.1 to 28.5)</b>              | <b>1.1</b><br><b>(-1.6 to 3.3)</b>                  |
| Falls                                         | 2,342.7<br>(2,035.2 to 2,698.7)               | 1,067.7<br>(940.3 to 1,214.7)                  | 94.3<br>(65.9 to 130.1)                 | 29.9<br>(26.3 to 32.9)                            | 1.9<br>(-0.9 to 4.1)                                |
| Drowning                                      | 18.2<br>(15.9 to 20.7)                        | 3.9<br>(3.5 to 4.3)                            | 0.9<br>(0.6 to 1.3)                     | 9.3<br>(5.0 to 13.3)                              | -12.5<br>(-15.9 to -9.4)                            |
| Fire, heat, and hot substances                | 399.8<br>(321.3 to 523.1)                     | 44.4<br>(34.3 to 55.1)                         | 10.2<br>(6.6 to 15.0)                   | 17.3<br>(10.6 to 23.4)                            | 0.9<br>(-4.3 to 5.5)                                |
| Poisonings                                    | 13.6<br>(11.2 to 16.2)                        | 17.9<br>(14.2 to 21.9)                         | 1.2<br>(0.8 to 1.9)                     | 31.9<br>(21.4 to 43.8)                            | 14.9<br>(6.2 to 24.6)                               |
| Exposure to mechanical forces                 | 907.4<br>(775.9 to 1,099.0)                   | 328.5<br>(278.1 to 380.1)                      | 20.7<br>(13.3 to 30.3)                  | 31.2<br>(27.0 to 35.1)                            | 7.3<br>(3.9 to 9.9)                                 |
| Unintentional firearm injuries                | 49.4<br>(40.6 to 59.9)                        | 12.3<br>(8.9 to 16.1)                          | 2.0<br>(1.3 to 2.9)                     | 35.6<br>(30.9 to 39.7)                            | 9.0<br>(5.8 to 11.9)                                |
| Unintentional suffocation                     | 26.8<br>(19.3 to 35.7)                        | 4.2<br>(2.8 to 6.1)                            | 0.8<br>(0.5 to 1.4)                     | 17.3<br>(13.5 to 20.7)                            | 4.1<br>(1.0 to 7.1)                                 |
| Other exposure to mechanical forces           | 831.1<br>(699.1 to 1,022.7)                   | 312.0<br>(264.0 to 361.6)                      | 17.9<br>(11.5 to 26.0)                  | 31.5<br>(27.0 to 35.3)                            | 7.2<br>(3.7 to 9.9)                                 |

| Cause                                                                               | Prevalence in thousands (95% UI)              | Incidence in thousands (95% UI)          | YLDs in thousands (95% UI)           |                                                   |                                                     |
|-------------------------------------------------------------------------------------|-----------------------------------------------|------------------------------------------|--------------------------------------|---------------------------------------------------|-----------------------------------------------------|
|                                                                                     | 2016 counts                                   | 2016 counts                              | 2016 counts                          | Percentage change in counts between 2006 and 2016 | Percentage change in age-standardised rates between |
| Adverse effects of medical treatment                                                | 5.2<br>(4.1 to 6.4)                           | 67.8<br>(60.1 to 77.1)                   | 0.7<br>(0.4 to 1.0)                  | 17.5<br>(11.1 to 24.2)                            | -0.5<br>(-5.3 to 5.2)                               |
| Animal contact                                                                      | 162.9<br>(142.7 to 192.8)                     | 183.7<br>(152.8 to 220.5)                | 5.6<br>(3.7 to 8.0)                  | 9.5<br>(2.9 to 16.6)                              | -6.5<br>(-12.0 to -1.0)                             |
| Venomous animal contact                                                             | 82.7<br>(68.4 to 100.9)                       | 86.9<br>(68.2 to 109.8)                  | 4.4<br>(2.9 to 6.3)                  | 11.6<br>(3.3 to 20.9)                             | -3.2<br>(-10.1 to 4.4)                              |
| Non-venomous animal contact                                                         | 80.2<br>(68.0 to 98.8)                        | 96.9<br>(77.6 to 119.3)                  | 1.2<br>(0.8 to 1.9)                  | 2.4<br>(-2.2 to 6.4)                              | -16.7<br>(-20.3 to -13.5)                           |
| Foreign body                                                                        | 240.1<br>(195.8 to 284.9)                     | 185.0<br>(158.3 to 218.3)                | 9.4<br>(5.9 to 14.1)                 | 9.4<br>(5.1 to 13.3)                              | -6.5<br>(-9.8 to -3.6)                              |
| Pulmonary aspiration and foreign body in airway                                     | 176.3<br>(136.6 to 221.7)                     | 57.0<br>(50.4 to 65.3)                   | 7.0<br>(4.4 to 10.5)                 | 4.9<br>(0.6 to 8.8)                               | -9.3<br>(-12.6 to -6.3)                             |
| Foreign body in eyes                                                                | 22.3<br>(13.2 to 32.3)                        | 111.6<br>(86.9 to 143.6)                 | 1.3<br>(0.7 to 2.1)                  | 33.2<br>(27.4 to 39.7)                            | 6.9<br>(4.0 to 9.8)                                 |
| Foreign body in other body part                                                     | 41.5<br>(34.1 to 53.5)                        | 16.4<br>(13.7 to 19.8)                   | 1.1<br>(0.7 to 1.7)                  | 17.4<br>(11.7 to 22.3)                            | -2.0<br>(-6.2 to 1.7)                               |
| Environmental heat and cold exposure                                                | 73.8<br>(63.1 to 89.1)                        | 19.7<br>(16.0 to 23.6)                   | 2.6<br>(1.7 to 3.9)                  | 24.5<br>(20.8 to 27.9)                            | 1.7<br>(-1.2 to 4.4)                                |
| Other unintentional injuries                                                        | 329.4<br>(269.6 to 402.3)                     | 108.9<br>(91.3 to 127.5)                 | 9.1<br>(5.8 to 13.5)                 | 13.6<br>(11.2 to 15.7)                            | -6.1<br>(-8.0 to -4.3)                              |
| <b>Self-harm and interpersonal violence</b>                                         | <b>1,611.0</b><br><b>(1,467.8 to 1,752.7)</b> | <b>370.6†</b><br><b>(316.7 to 434.9)</b> | <b>35.3</b><br><b>(23.9 to 50.1)</b> | <b>5.1</b><br><b>(2.2 to 7.8)</b>                 | <b>-13.4</b><br><b>(-15.5 to -11.4)</b>             |
| Self-harm                                                                           | 29.9<br>(26.1 to 33.8)                        | 13.2<br>(11.6 to 14.8)                   | 1.4<br>(0.9 to 2.0)                  | 14.0<br>(9.2 to 18.6)                             | -9.1<br>(-12.6 to -5.8)                             |
| Self-harm by firearm                                                                | 3.2<br>(2.7 to 3.7)                           | 0.9<br>(0.6 to 1.3)                      | 0.1<br>(0.1 to 0.2)                  | -14.9<br>(-18.2 to -12.0)                         | -32.1<br>(-34.5 to -30.0)                           |
| Self-harm by other specified means                                                  | 26.7<br>(22.8 to 30.6)                        | 12.2<br>(10.8 to 13.8)                   | 1.2<br>(0.8 to 1.8)                  | 17.5<br>(12.2 to 22.5)                            | -6.3<br>(-10.1 to -2.7)                             |
| Interpersonal violence                                                              | 1,581.2<br>(1,438.0 to 1,722.0)               | 357.5†<br>(304.3 to 421.8)               | 33.9<br>(23.1 to 47.9)               | 4.8<br>(1.9 to 7.5)                               | -13.5<br>(-15.6 to -11.5)                           |
| Assault by firearm                                                                  | 102.2<br>(83.6 to 123.4)                      | 34.2<br>(26.6 to 43.3)                   | 4.8<br>(3.1 to 7.1)                  | -6.0<br>(-9.1 to -3.1)                            | -25.0<br>(-27.3 to -23.0)                           |
| Assault by sharp object                                                             | 354.5<br>(293.3 to 422.0)                     | 165.1<br>(134.1 to 197.8)                | 10.8<br>(7.0 to 15.6)                | 7.6<br>(4.0 to 10.9)                              | -13.6<br>(-16.1 to -11.3)                           |
| Sexual violence                                                                     | 863.7<br>(752.4 to 983.4)                     | --                                       | 7.3<br>(4.9 to 10.5)                 | -3.2<br>(-9.3 to 2.6)                             | -11.5<br>(-16.9 to -6.5)                            |
| Assault by other means                                                              | 260.8<br>(220.7 to 315.4)                     | 158.2<br>(131.8 to 189.1)                | 11.0<br>(7.3 to 16.0)                | 13.8<br>(10.8 to 16.6)                            | -8.8<br>(-11.0 to -6.9)                             |
| <b>Forces of nature, conflict and terrorism, and executions and police conflict</b> | <b>203.7</b><br><b>(130.4 to 297.2)</b>       | <b>4.2†</b><br><b>(0.4 to 6.6)</b>       | <b>5.7</b><br><b>(1.6 to 14.4)</b>   | <b>-8.6</b><br><b>(-13.1 to -5.0)</b>             | <b>-21.9</b><br><b>(-25.4 to -18.9)</b>             |
| Exposure to forces of nature                                                        | 103.6<br>(50.9 to 168.1)                      | --                                       | 3.1<br>(1.0 to 7.4)                  | -15.3<br>(-19.6 to -11.7)                         | -28.5<br>(-31.8 to -25.6)                           |
| Conflict and terrorism                                                              | 92.5<br>(57.7 to 137.8)                       | --                                       | 2.4<br>(0.6 to 6.5)                  | -2.9<br>(-7.7 to 1.0)                             | -15.3<br>(-19.0 to -11.8)                           |
| Executions and police conflict                                                      | 7.6<br>(1.5 to 12.4)                          | 4.2<br>(0.4 to 6.6)                      | 0.2<br>(0.1 to 0.5)                  | 101.1<br>(7.9 to 167.5)                           | 83.2<br>(0.4 to 140.3)                              |
| <b>Impairments</b>                                                                  | --                                            | --                                       | --                                   | --                                                | --                                                  |
| Anaemia                                                                             | 6,114.8<br>(5,598.3 to 6,688.7)               | --                                       | 141.8<br>(94.6 to 207.5)             | 3.1<br>(-6.0 to 12.8)                             | -9.3<br>(-16.9 to -1.3)                             |
| Developmental intellectual disability                                               | 670.2<br>(514.8 to 824.6)                     | --                                       | 79.6<br>(57.5 to 107.3)              | 6.4<br>(1.2 to 11.8)                              | -1.9<br>(-6.8 to 3.3)                               |
| Epilepsy                                                                            | 371.2<br>(174.6 to 590.1)                     | --                                       | 102.7<br>(43.7 to 196.6)             | 8.5<br>(-62.2 to 187.1)                           | -1.9<br>(-66.0 to 159.3)                            |
| Guillain-Barre syndrome                                                             | 0.7<br>(0.5 to 1.0)                           | --                                       | 0.2<br>(0.1 to 0.3)                  | 56.9<br>(30.1 to 109.9)                           | 34.2<br>(14.2 to 76.0)                              |
| Hearing loss                                                                        | 8,520.0<br>(8,107.1 to 8,987.4)               | --                                       | 256.2<br>(179.2 to 360.3)            | 24.4<br>(20.6 to 27.6)                            | -4.3<br>(-6.4 to -2.4)                              |
| Heart failure                                                                       | 297.2<br>(260.4 to 339.6)                     | --                                       | 34.4<br>(25.0 to 44.3)               | 43.7<br>(33.8 to 55.1)                            | -1.4<br>(-8.3 to 7.0)                               |
| Infertility                                                                         | 429.0<br>(336.4 to 564.1)                     | --                                       | 2.6<br>(1.1 to 5.2)                  | 35.1<br>(10.3 to 68.8)                            | 23.5<br>(1.1 to 54.6)                               |
| Pelvic inflammatory disease                                                         | 4.5<br>(3.8 to 5.2)                           | --                                       | 0.6<br>(0.4 to 0.9)                  | 7.7<br>(-15.5 to 38.6)                            | -7.8<br>(-27.5 to 18.3)                             |
| Vision loss                                                                         | 7,841.3<br>(7,518.3 to 8,176.7)               | --                                       | 215.4<br>(150.5 to 307.7)            | 20.3<br>(17.1 to 24.4)                            | -5.9<br>(-8.0 to -3.2)                              |

We did not calculate incidence for the nine impairments, certain NTDs, and causes with only birth prevalence. Blank cells mean that no estimate is available.

† Incidence for aggregate causes represents the sum of the incidence of the causes below the aggregate.

‡ Incidence estimates for stroke represent first-ever stroke only.

^ Incidence of HIV/AIDS represents new infections of HIV only and does not include new infections of Tuberculosis in HIV positive cases.



SR Table 14: Prevalence, incidence, and YLDs for 2016, percentage change of YLD counts and percentage change of age-standardised YLD rates between 2006 and 2016 by cause and impairments, for all ages, Comoros.

| Cause                                                                                | Prevalence in thousands (95% UI) | Incidence in thousands (95% UI)         | YLDs in thousands (95% UI)    |                                                   |                                                     |
|--------------------------------------------------------------------------------------|----------------------------------|-----------------------------------------|-------------------------------|---------------------------------------------------|-----------------------------------------------------|
|                                                                                      | 2016 counts                      | 2016 counts                             | 2016 counts                   | Percentage change in counts between 2006 and 2016 | Percentage change in age-standardised rates between |
| <b>All causes</b>                                                                    | <b>766.7</b><br>(764.5 to 768.8) | <b>5,611.1†</b><br>(5,294.4 to 5,965.6) | <b>70.3</b><br>(52.0 to 93.0) | <b>25.0</b><br>(20.6 to 29.2)                     | <b>-2.4</b><br>(-5.0 to -0.1)                       |
| <b>Communicable, maternal, neonatal, and nutritional disorders</b>                   | <b>685.4</b><br>(667.7 to 702.5) | <b>3,459.7†</b><br>(3,189.9 to 3,764.8) | <b>15.0</b><br>(10.6 to 20.4) | <b>10.2</b><br>(2.9 to 18.5)                      | <b>-10.8</b><br>(-15.5 to -5.2)                     |
| <b>HIV/AIDS and tuberculosis</b>                                                     | <b>177.3</b><br>(153.3 to 196.2) | <b>1.6†</b><br>(1.3 to 2.0)             | <b>0.4</b><br>(0.2 to 0.6)    | <b>28.7</b><br>(7.1 to 56.7)                      | <b>-2.1</b><br>(-17.8 to 16.3)                      |
| Tuberculosis                                                                         | 161.8<br>(142.4 to 187.3)        | 1.5†<br>(1.2 to 1.8)                    | 0.3<br>(0.2 to 0.5)           | 22.9<br>(8.3 to 38.4)                             | -5.6<br>(-15.2 to 4.0)                              |
| Drug-susceptible tuberculosis                                                        | 1.0<br>(0.8 to 1.3)              | 1.5<br>(1.2 to 1.8)                     | 0.3<br>(0.2 to 0.5)           | 22.7<br>(7.8 to 38.5)                             | -5.8<br>(-15.7 to 3.9)                              |
| Multidrug-resistant tuberculosis without extensive drug resistance                   | < 0.05<br>(< 0.05 to 0.1)        | < 0.05<br>(< 0.05 to 0.1)               | < 0.05<br>(< 0.05 to < 0.05)  | 34.7<br>(-57.3 to 297.5)                          | 3.1<br>(-66.9 to 207.3)                             |
| Extensively drug-resistant tuberculosis                                              | < 0.05<br>(< 0.05 to < 0.05)     | < 0.05<br>(< 0.05 to < 0.05)            | < 0.05<br>(< 0.05 to < 0.05)  | 310.6<br>(30.3 to 1,107.9)                        | 214.2<br>(-0.6 to 832.8)                            |
| Latent tuberculosis infection                                                        | 160.8<br>(141.3 to 186.3)        | --                                      | --                            | --                                                | --                                                  |
| HIV/AIDS                                                                             | 0.4<br>(0.1 to 1.5)              | 0.1 <sup>a</sup><br>(< 0.05 to 0.4)     | 0.1<br>(< 0.05 to 0.2)        | 69.2<br>(-20.6 to 281.1)                          | 23.4<br>(-43.6 to 189.6)                            |
| Drug-susceptible HIV/AIDS - Tuberculosis                                             | < 0.05<br>(< 0.05 to < 0.05)     | < 0.05<br>(< 0.05 to 0.1)               | < 0.05<br>(< 0.05 to < 0.05)  | 40.0<br>(14.7 to 75.8)                            | 4.0<br>(-12.4 to 26.9)                              |
| Multidrug-resistant HIV/AIDS - Tuberculosis without extensive drug resistance        | < 0.05<br>(< 0.05 to < 0.05)     | < 0.05<br>(< 0.05 to < 0.05)            | < 0.05<br>(< 0.05 to < 0.05)  | 53.3<br>(-51.4 to 362.2)                          | 14.1<br>(-63.9 to 244.1)                            |
| Extensively drug-resistant HIV/AIDS - Tuberculosis                                   | < 0.05<br>(< 0.05 to < 0.05)     | < 0.05<br>(< 0.05 to < 0.05)            | < 0.05<br>(< 0.05 to < 0.05)  | 367.1<br>(47.8 to 1,310.1)                        | 247.6<br>(9.9 to 950.0)                             |
| HIV/AIDS resulting in other diseases                                                 | 0.4<br>(< 0.05 to 1.5)           | 0.1<br>(< 0.05 to 0.4)                  | 0.1<br>(< 0.05 to 0.2)        | 76.6<br>(-39.0 to 437.3)                          | 28.0<br>(-56.7 to 315.1)                            |
| <b>Diarrhoea, lower respiratory infections, and other common infectious diseases</b> | <b>60.1</b><br>(57.6 to 63.3)    | <b>3,057.6†</b><br>(2,795.3 to 3,334.9) | <b>3.5</b><br>(2.5 to 4.8)    | <b>20.9</b><br>(17.3 to 24.7)                     | <b>-0.9</b><br>(-3.5 to 2.1)                        |
| Diarrhoeal diseases                                                                  | 14.0<br>(13.1 to 14.9)           | 938.3<br>(874.5 to 1,001.4)             | 1.6<br>(1.1 to 2.2)           | 18.6<br>(13.2 to 25.1)                            | -1.5<br>(-5.7 to 3.2)                               |
| Intestinal infectious diseases                                                       | < 0.05<br>(< 0.05 to 0.1)        | 0.7†<br>(0.5 to 0.9)                    | < 0.05<br>(< 0.05 to < 0.05)  | 18.6<br>(-4.6 to 47.5)                            | -2.8<br>(-18.1 to 17.7)                             |
| Typhoid fever                                                                        | < 0.05<br>(< 0.05 to 0.1)        | 0.6<br>(0.4 to 0.8)                     | < 0.05<br>(< 0.05 to < 0.05)  | 20.2<br>(-3.9 to 50.2)                            | -2.0<br>(-18.0 to 19.2)                             |
| Paratyphoid fever                                                                    | < 0.05<br>(< 0.05 to < 0.05)     | 0.1<br>(< 0.05 to 0.1)                  | < 0.05<br>(< 0.05 to < 0.05)  | 32.2<br>(-2.4 to 79.9)                            | 7.7<br>(-17.0 to 41.6)                              |
| Other intestinal infectious diseases                                                 | --                               | --                                      | < 0.05<br>(< 0.05 to < 0.05)  | -42.5<br>(-59.3 to -17.8)                         | -41.2<br>(-55.5 to -21.6)                           |
| Lower respiratory infections                                                         | 1.2<br>(1.1 to 1.3)              | 49.9<br>(45.4 to 55.1)                  | 0.1<br>(< 0.05 to 0.1)        | 7.5<br>(-4.4 to 21.2)                             | -10.0<br>(-17.7 to -1.2)                            |
| Upper respiratory infections                                                         | 26.3<br>(23.2 to 29.9)           | 1,982.7<br>(1,733.2 to 2,261.4)         | 0.7<br>(0.4 to 1.0)           | 20.2<br>(14.4 to 27.3)                            | -1.9<br>(-6.1 to 3.1)                               |
| Otitis media                                                                         | 14.4<br>(12.8 to 16.0)           | 59.8<br>(47.3 to 75.8)                  | 0.5<br>(0.3 to 0.7)           | 21.0<br>(12.2 to 30.8)                            | 1.1<br>(-5.6 to 8.6)                                |
| Meningitis                                                                           | 4.8<br>(4.1 to 5.6)              | 0.8<br>(0.7 to 0.9)                     | 0.5<br>(0.3 to 0.6)           | 29.7<br>(20.7 to 39.8)                            | 2.9<br>(-3.2 to 10.2)                               |
| Pneumococcal meningitis                                                              | 2.3<br>(1.9 to 2.9)              | 0.2<br>(0.2 to 0.3)                     | 0.2<br>(0.1 to 0.3)           | 37.5<br>(21.2 to 56.8)                            | 8.5<br>(-3.1 to 20.9)                               |
| H influenzae type B meningitis                                                       | 0.8<br>(0.6 to 1.1)              | 0.1<br>(0.1 to 0.2)                     | 0.1<br>(0.1 to 0.1)           | 14.7<br>(-1.7 to 33.3)                            | -9.1<br>(-20.6 to 4.1)                              |
| Meningococcal infection                                                              | 0.3<br>(0.2 to 0.5)              | 0.1<br>(0.1 to 0.1)                     | < 0.05<br>(< 0.05 to < 0.05)  | 34.9<br>(27.8 to 44.2)                            | 7.6<br>(1.8 to 15.6)                                |
| Other meningitis                                                                     | 1.3<br>(1.0 to 1.8)              | 0.3<br>(0.2 to 0.4)                     | 0.1<br>(0.1 to 0.2)           | 29.4<br>(14.1 to 47.1)                            | 2.7<br>(-8.7 to 15.0)                               |
| Encephalitis                                                                         | 2.3<br>(1.5 to 3.4)              | 0.8<br>(0.7 to 1.0)                     | 0.2<br>(0.2 to 0.3)           | 31.9<br>(17.7 to 48.3)                            | 1.8<br>(-8.1 to 13.3)                               |
| Diphtheria                                                                           | < 0.05<br>(< 0.05 to < 0.05)     | < 0.05<br>(< 0.05 to < 0.05)            | < 0.05<br>(< 0.05 to < 0.05)  | -33.2<br>(-68.7 to 38.7)                          | -37.9<br>(-68.4 to 17.1)                            |
| Whooping cough                                                                       | 0.4<br>(0.3 to 0.5)              | 2.9<br>(2.2 to 3.6)                     | < 0.05<br>(< 0.05 to < 0.05)  | -5.6<br>(-19.6 to 9.6)                            | -7.6<br>(-20.9 to 7.3)                              |
| Tetanus                                                                              | < 0.05<br>(< 0.05 to < 0.05)     | < 0.05<br>(< 0.05 to < 0.05)            | < 0.05<br>(< 0.05 to < 0.05)  | -14.7<br>(-40.8 to 11.5)                          | -29.4<br>(-45.2 to -12.0)                           |
| Measles                                                                              | 0.1<br>(< 0.05 to 0.2)           | 3.2<br>(1.1 to 7.0)                     | < 0.05<br>(< 0.05 to < 0.05)  | -34.7<br>(-57.7 to -1.8)                          | -37.8<br>(-59.9 to -5.7)                            |
| Varicella and herpes zoster                                                          | 0.7<br>(0.6 to 0.7)              | 18.6<br>(17.7 to 19.5)                  | < 0.05<br>(< 0.05 to < 0.05)  | 29.0<br>(11.1 to 49.8)                            | -0.1<br>(-11.7 to 11.8)                             |
| <b>Neglected tropical diseases and malaria</b>                                       | <b>461.4</b><br>(415.7 to 515.9) | <b>23.6†</b><br>(20.3 to 27.4)          | <b>2.9</b><br>(1.9 to 4.3)    | <b>12.1</b><br>(0.4 to 25.8)                      | <b>-11.5</b><br>(-21.8 to 0.3)                      |
| Malaria                                                                              | 1.4<br>(1.3 to 1.6)              | 2.6<br>(1.5 to 3.6)                     | 0.2<br>(0.2 to 0.3)           | -20.4<br>(-36.7 to -1.0)                          | -35.3<br>(-47.6 to -21.1)                           |
| Chagas disease                                                                       | --                               | --                                      | --                            | --                                                | --                                                  |
| Leishmaniasis                                                                        | --                               | --                                      | --                            | --                                                | --                                                  |
| Visceral leishmaniasis                                                               | --                               | --                                      | --                            | --                                                | --                                                  |
| Cutaneous and mucocutaneous leishmaniasis                                            | --                               | --                                      | --                            | --                                                | --                                                  |
| African trypanosomiasis                                                              | --                               | --                                      | --                            | --                                                | --                                                  |
| Schistosomiasis                                                                      | --                               | --                                      | --                            | --                                                | --                                                  |
| Cysticercosis                                                                        | < 0.05<br>(< 0.05 to < 0.05)     | --                                      | < 0.05<br>(< 0.05 to < 0.05)  | 5.1<br>(-36.7 to 51.7)                            | -21.7<br>(-52.2 to 12.6)                            |
| Cystic echinococcosis                                                                | --                               | --                                      | --                            | --                                                | --                                                  |
| Lymphatic filariasis                                                                 | 24.2<br>(19.0 to 30.1)           | 13.8<br>(12.2 to 15.3)                  | 1.1<br>(0.5 to 2.0)           | 7.8<br>(-9.3 to 16.9)                             | -18.6<br>(-31.8 to -12.2)                           |
| Onchocerciasis                                                                       | --                               | --                                      | --                            | --                                                | --                                                  |
| Trachoma                                                                             | --                               | --                                      | --                            | --                                                | --                                                  |
| Dengue                                                                               | 0.4<br>(0.2 to 0.7)              | 7.2<br>(4.5 to 10.6)                    | 0.1<br>(< 0.05 to 0.1)        | 173.9<br>(88.8 to 531.7)                          | 119.5<br>(58.7 to 391.7)                            |
| Yellow fever                                                                         | --                               | --                                      | --                            | --                                                | --                                                  |
| Rabies                                                                               | < 0.05<br>(< 0.05 to < 0.05)     | < 0.05<br>(< 0.05 to < 0.05)            | < 0.05<br>(< 0.05 to < 0.05)  | -6.4<br>(-56.0 to 82.4)                           | -22.7<br>(-58.6 to 37.6)                            |
| Intestinal nematode infections                                                       | 447.7<br>(399.8 to 503.8)        | --                                      | 1.2<br>(0.7 to 2.0)           | 26.1<br>(1.5 to 59.6)                             | 2.5<br>(-20.8 to 34.6)                              |
| Ascariasis                                                                           | 172.2<br>(132.2 to 222.3)        | --                                      | 0.1<br>(0.1 to 0.2)           | 23.4<br>(-19.3 to 86.8)                           | 0.1<br>(-39.3 to 65.0)                              |

| Cause                                                                   | Prevalence in thousands (95% UI)  | Incidence in thousands (95% UI)          | YLDs in thousands (95% UI)     |                                                   |                                                     |
|-------------------------------------------------------------------------|-----------------------------------|------------------------------------------|--------------------------------|---------------------------------------------------|-----------------------------------------------------|
|                                                                         | 2016 counts                       | 2016 counts                              | 2016 counts                    | Percentage change in counts between 2006 and 2016 | Percentage change in age-standardised rates between |
| Trichuriasis                                                            | 260.4<br>(203.2 to 334.4)         | --                                       | 0.4<br>(0.2 to 0.7)            | 24.1<br>(-21.3 to 98.2)                           | -0.4<br>(-43.3 to 72.2)                             |
| Hookworm disease                                                        | 156.5<br>(121.0 to 200.7)         | --                                       | 0.7<br>(0.4 to 1.1)            | 27.7<br>(-6.4 to 75.4)                            | 4.5<br>(-26.3 to 51.6)                              |
| Food-borne trematodiasis                                                | --                                | --                                       | --                             | --                                                | --                                                  |
| Leprosy                                                                 | 0.2<br>(0.1 to 0.2)               | 0.1<br>(0.1 to 0.1)                      | < 0.05<br>(< 0.05 to < 0.05)   | 62.5<br>(25.8 to 113.3)                           | 16.5<br>(-6.4 to 48.9)                              |
| Ebola virus disease                                                     | --                                | --                                       | --                             | --                                                | --                                                  |
| Zika virus disease                                                      | --                                | --                                       | --                             | --                                                | --                                                  |
| Guinea worm disease                                                     | --                                | --                                       | --                             | --                                                | --                                                  |
| Other neglected tropical diseases                                       | 8.0<br>(6.7 to 9.3)               | --                                       | 0.2<br>(0.1 to 0.4)            | -0.5<br>(-21.1 to 26.5)                           | -11.7<br>(-28.7 to 10.5)                            |
| <b>Maternal disorders</b>                                               | <b>2.9<br/>(2.4 to 3.5)</b>       | <b>13.3†<br/>(12.0 to 14.6)</b>          | <b>0.6<br/>(0.4 to 0.8)</b>    | <b>-13.0<br/>(-24.3 to 0.1)</b>                   | <b>-35.0<br/>(-43.2 to -25.6)</b>                   |
| Maternal haemorrhage                                                    | 0.2<br>(0.1 to 0.2)               | 1.6<br>(1.1 to 2.4)                      | < 0.05<br>(< 0.05 to < 0.05)   | 0.5<br>(-33.4 to 49.4)                            | -23.6<br>(-49.5 to 13.1)                            |
| Maternal sepsis and other pregnancy related infections                  | 0.3<br>(0.3 to 0.4)               | 0.9<br>(0.7 to 1.2)                      | < 0.05<br>(< 0.05 to < 0.05)   | 2.6<br>(-45.1 to 86.1)                            | -20.8<br>(-56.1 to 37.3)                            |
| Maternal hypertensive disorders                                         | 1.2<br>(0.8 to 1.6)               | 5.3<br>(4.5 to 5.9)                      | 0.1<br>(< 0.05 to 0.1)         | 7.8<br>(-34.9 to 80.4)                            | -18.5<br>(-50.8 to 35.0)                            |
| Maternal obstructed labour and uterine rupture                          | 1.3<br>(1.1 to 1.5)               | 1.5<br>(1.1 to 2.0)                      | 0.4<br>(0.3 to 0.6)            | -14.8<br>(-27.1 to -1.4)                          | -36.3<br>(-44.9 to -26.6)                           |
| Maternal abortion, miscarriage, and ectopic pregnancy                   | < 0.05<br>(< 0.05 to < 0.05)      | 4.0<br>(3.3 to 4.8)                      | < 0.05<br>(< 0.05 to < 0.05)   | 3.7<br>(-43.6 to 96.6)                            | -22.2<br>(-57.5 to 47.0)                            |
| Other maternal disorders                                                | --                                | --                                       | 0.1<br>(0.1 to 0.1)            | -17.1<br>(-27.8 to -4.7)                          | -37.9<br>(-45.7 to -28.9)                           |
| <b>Neonatal disorders</b>                                               | <b>9.3<br/>(7.3 to 11.9)</b>      | --                                       | <b>1.6<br/>(0.8 to 2.9)</b>    | <b>17.1<br/>(-8.8 to 47.2)</b>                    | <b>-1.8<br/>(-24.2 to 23.3)</b>                     |
| Neonatal preterm birth complications                                    | 6.4<br>(4.8 to 8.8)               | --                                       | 0.6<br>(0.4 to 0.9)            | 1.7<br>(-20.8 to 29.7)                            | -15.8<br>(-34.0 to 6.7)                             |
| Neonatal encephalopathy due to birth asphyxia and trauma                | 2.3<br>(1.1 to 4.1)               | --                                       | 0.2<br>(< 0.05 to 0.6)         | 32.4<br>(-45.5 to 174.4)                          | 10.0<br>(-54.9 to 138.1)                            |
| Neonatal sepsis and other neonatal infections                           | 1.6<br>(0.4 to 4.1)               | --                                       | 0.6<br>(0.1 to 1.8)            | 34.4<br>(-17.4 to 186.7)                          | 11.6<br>(-32.1 to 168.9)                            |
| Hemolytic disease and other neonatal jaundice                           | 0.2<br>(0.2 to 0.2)               | --                                       | 0.1<br>(< 0.05 to 0.1)         | 25.7<br>(10.5 to 41.4)                            | 1.9<br>(-9.3 to 13.4)                               |
| Other neonatal disorders                                                | --                                | --                                       | 0.1<br>(0.1 to 0.2)            | -0.2<br>(-19.5 to 23.2)                           | -1.6<br>(-21.0 to 21.5)                             |
| <b>Nutritional deficiencies</b>                                         | <b>288.7<br/>(249.6 to 331.6)</b> | <b>186.6†<br/>(105.8 to 282.3)</b>       | <b>5.2<br/>(3.4 to 7.5)</b>    | <b>0.9<br/>(-13.2 to 17.2)</b>                    | <b>-17.6<br/>(-27.0 to -5.7)</b>                    |
| Protein-energy malnutrition                                             | 9.2<br>(6.8 to 12.1)              | 6.5<br>(4.9 to 8.5)                      | 0.4<br>(0.2 to 0.6)            | -23.1<br>(-43.3 to 6.6)                           | -24.5<br>(-44.3 to 5.1)                             |
| Iodine deficiency                                                       | 13.0<br>(11.5 to 14.7)            | 0.5<br>(0.4 to 0.5)                      | 0.4<br>(0.2 to 0.5)            | 13.2<br>(2.4 to 25.5)                             | -12.6<br>(-19.9 to -4.5)                            |
| Vitamin A deficiency                                                    | 166.6<br>(107.3 to 231.4)         | 179.6<br>(98.3 to 275.7)                 | < 0.05<br>(< 0.05 to 0.1)      | 12.1<br>(-10.7 to 38.8)                           | -7.8<br>(-25.6 to 12.3)                             |
| Iron-deficiency anaemia                                                 | 145.9<br>(125.4 to 164.6)         | --                                       | 4.3<br>(2.7 to 6.4)            | 2.8<br>(-13.6 to 21.7)                            | -17.6<br>(-28.8 to -3.8)                            |
| Other nutritional deficiencies                                          | --                                | --                                       | < 0.05<br>(< 0.05 to < 0.05)   | -24.0<br>(-44.8 to 7.5)                           | -25.7<br>(-46.1 to 5.0)                             |
| <b>Other communicable, maternal, neonatal, and nutritional diseases</b> | <b>262.5<br/>(246.8 to 276.8)</b> | <b>177.0<br/>(143.6 to 221.4)</b>        | <b>0.9<br/>(0.5 to 1.4)</b>    | <b>27.1<br/>(18.4 to 37.2)</b>                    | <b>-1.0<br/>(-6.6 to 5.5)</b>                       |
| Sexually transmitted diseases excluding HIV                             | 216.9<br>(201.6 to 230.8)         | 148.8<br>(115.9 to 191.9)                | 0.6<br>(0.4 to 1.1)            | 35.3<br>(26.8 to 45.3)                            | 0.8<br>(-5.4 to 7.8)                                |
| Syphilis                                                                | 20.2<br>(16.4 to 25.1)            | 14.2<br>(11.1 to 17.8)                   | < 0.05<br>(< 0.05 to < 0.05)   | 34.7<br>(15.4 to 59.2)                            | -0.7<br>(-14.6 to 17.0)                             |
| Chlamydial infection                                                    | 12.4<br>(9.8 to 15.7)             | 9.9<br>(7.8 to 12.8)                     | 0.1<br>(< 0.05 to 0.1)         | 34.6<br>(19.7 to 52.4)                            | 0.3<br>(-10.6 to 13.2)                              |
| Gonococcal infection                                                    | 18.8<br>(10.3 to 30.4)            | 64.0<br>(33.1 to 106.5)                  | 0.2<br>(0.1 to 0.5)            | 36.3<br>(20.9 to 54.8)                            | 1.7<br>(-10.1 to 14.8)                              |
| Trichomoniasis                                                          | 37.2<br>(30.2 to 44.9)            | 35.1<br>(27.9 to 43.6)                   | 0.1<br>(< 0.05 to 0.1)         | 31.1<br>(22.8 to 40.4)                            | -0.3<br>(-5.9 to 6.0)                               |
| Genital herpes                                                          | 164.3<br>(140.1 to 192.9)         | 17.2<br>(14.2 to 21.1)                   | < 0.05<br>(< 0.05 to 0.1)      | 33.5<br>(22.0 to 44.8)                            | -0.1<br>(-6.6 to 7.0)                               |
| Other sexually transmitted diseases                                     | 8.6<br>(7.9 to 9.3)               | 8.4<br>(7.0 to 10.2)                     | 0.2<br>(0.1 to 0.3)            | 36.1<br>(25.4 to 48.0)                            | 0.8<br>(-7.1 to 9.3)                                |
| Hepatitis                                                               | 62.0<br>(51.1 to 74.8)            | 28.2<br>(19.4 to 41.8)                   | < 0.05<br>(< 0.05 to 0.1)      | -0.8<br>(-24.5 to 30.1)                           | -16.1<br>(-32.4 to 4.0)                             |
| Acute hepatitis A                                                       | 0.5<br>(0.1 to 1.5)               | 7.0<br>(1.2 to 19.0)                     | < 0.05<br>(< 0.05 to < 0.05)   | -4.6<br>(-74.6 to 315.7)                          | -16.7<br>(-69.7 to 166.6)                           |
| Hepatitis B                                                             | 49.7<br>(39.3 to 62.2)            | 18.9<br>(13.9 to 25.8)                   | < 0.05<br>(< 0.05 to < 0.05)   | 0.2<br>(-22.1 to 28.5)                            | -16.3<br>(-32.4 to 4.4)                             |
| Hepatitis C                                                             | 11.7<br>(10.3 to 13.1)            | 0.9<br>(0.8 to 1.0)                      | < 0.05<br>(< 0.05 to < 0.05)   | 10.1<br>(-5.4 to 28.7)                            | -5.0<br>(-13.0 to 3.8)                              |
| Acute hepatitis E                                                       | 0.1<br>(0.1 to 0.1)               | 1.4<br>(1.1 to 1.9)                      | < 0.05<br>(< 0.05 to < 0.05)   | -5.1<br>(-31.8 to 31.5)                           | -16.1<br>(-35.2 to 6.1)                             |
| Other infectious diseases                                               | 6.0<br>(5.0 to 6.9)               | < 0.05<br>(< 0.05 to < 0.05)             | 0.2<br>(0.1 to 0.3)            | 10.8<br>(-8.3 to 35.2)                            | -4.3<br>(-19.3 to 14.9)                             |
| <b>Non-communicable diseases</b>                                        | <b>696.2<br/>(689.1 to 703.3)</b> | <b>2,095.1†<br/>(1,916.6 to 2,268.3)</b> | <b>51.2<br/>(37.9 to 67.2)</b> | <b>29.9<br/>(24.8 to 35.3)</b>                    | <b>-0.3<br/>(-3.1 to 2.6)</b>                       |
| <b>Neoplasms</b>                                                        | <b>1.2<br/>(1.0 to 1.3)</b>       | <b>0.5<br/>(0.4 to 0.6)</b>              | <b>0.2<br/>(0.1 to 0.2)</b>    | <b>39.8<br/>(30.7 to 49.5)</b>                    | <b>4.2<br/>(-2.1 to 11.0)</b>                       |
| Lip and oral cavity cancer                                              | < 0.05<br>(< 0.05 to < 0.05)      | < 0.05<br>(< 0.05 to < 0.05)             | < 0.05<br>(< 0.05 to < 0.05)   | 44.0<br>(25.4 to 64.7)                            | 4.5<br>(-9.2 to 20.2)                               |
| Nasopharynx cancer                                                      | < 0.05<br>(< 0.05 to < 0.05)      | < 0.05<br>(< 0.05 to < 0.05)             | < 0.05<br>(< 0.05 to < 0.05)   | 32.0<br>(12.3 to 57.8)                            | -4.5<br>(-18.5 to 13.3)                             |
| Other pharynx cancer                                                    | < 0.05<br>(< 0.05 to < 0.05)      | < 0.05<br>(< 0.05 to < 0.05)             | < 0.05<br>(< 0.05 to < 0.05)   | 34.4<br>(19.8 to 50.1)                            | -2.6<br>(-13.1 to 8.6)                              |
| Oesophageal cancer                                                      | < 0.05<br>(< 0.05 to < 0.05)      | < 0.05<br>(< 0.05 to < 0.05)             | < 0.05<br>(< 0.05 to < 0.05)   | 28.4<br>(4.7 to 55.6)                             | -5.6<br>(-23.6 to 15.5)                             |
| Stomach cancer                                                          | < 0.05<br>(< 0.05 to < 0.05)      | < 0.05<br>(< 0.05 to < 0.05)             | < 0.05<br>(< 0.05 to < 0.05)   | 20.3<br>(6.0 to 36.1)                             | -11.2<br>(-23.0 to 2.8)                             |
| Colon and rectum cancer                                                 | 0.1<br>(0.1 to 0.1)               | < 0.05<br>(< 0.05 to < 0.05)             | < 0.05<br>(< 0.05 to < 0.05)   | 47.5<br>(24.8 to 71.8)                            | 8.4<br>(-8.9 to 28.8)                               |
| Liver cancer                                                            | < 0.05<br>(< 0.05 to < 0.05)      | < 0.05<br>(< 0.05 to < 0.05)             | < 0.05<br>(< 0.05 to < 0.05)   | 38.1<br>(21.5 to 56.8)                            | 1.3<br>(-10.4 to 14.7)                              |
| Liver cancer due to hepatitis B                                         | < 0.05<br>(< 0.05 to < 0.05)      | < 0.05<br>(< 0.05 to < 0.05)             | < 0.05<br>(< 0.05 to < 0.05)   | 38.5<br>(21.0 to 58.0)                            | 0.8<br>(-10.9 to 14.4)                              |

| Cause                                              | Prevalence in thousands (95% UI)     | Incidence in thousands (95% UI)       | YLDs in thousands (95% UI)        |                                                   |                                                     |
|----------------------------------------------------|--------------------------------------|---------------------------------------|-----------------------------------|---------------------------------------------------|-----------------------------------------------------|
|                                                    | 2016 counts                          | 2016 counts                           | 2016 counts                       | Percentage change in counts between 2006 and 2016 | Percentage change in age-standardised rates between |
| Liver cancer due to hepatitis C                    | < 0.05<br>(< 0.05 to < 0.05)         | < 0.05<br>(< 0.05 to < 0.05)          | < 0.05<br>(< 0.05 to < 0.05)      | 38.1<br>(20.8 to 59.6)                            | 1.3<br>(-10.7 to 16.3)                              |
| Liver cancer due to alcohol use                    | < 0.05<br>(< 0.05 to < 0.05)         | < 0.05<br>(< 0.05 to < 0.05)          | < 0.05<br>(< 0.05 to < 0.05)      | 43.9<br>(25.5 to 66.5)                            | 5.8<br>(-8.0 to 21.6)                               |
| Liver cancer due to other causes                   | < 0.05<br>(< 0.05 to < 0.05)         | < 0.05<br>(< 0.05 to < 0.05)          | < 0.05<br>(< 0.05 to < 0.05)      | 35.7<br>(18.3 to 53.5)                            | 0.4<br>(-11.6 to 13.1)                              |
| Gallbladder and biliary tract cancer               | < 0.05<br>(< 0.05 to < 0.05)         | < 0.05<br>(< 0.05 to < 0.05)          | < 0.05<br>(< 0.05 to < 0.05)      | 26.7<br>(15.9 to 39.1)                            | -7.4<br>(-14.7 to 0.9)                              |
| Pancreatic cancer                                  | < 0.05<br>(< 0.05 to < 0.05)         | < 0.05<br>(< 0.05 to < 0.05)          | < 0.05<br>(< 0.05 to < 0.05)      | 42.6<br>(30.4 to 55.9)                            | 4.6<br>(-4.5 to 15.3)                               |
| Larynx cancer                                      | < 0.05<br>(< 0.05 to < 0.05)         | < 0.05<br>(< 0.05 to < 0.05)          | < 0.05<br>(< 0.05 to < 0.05)      | 38.6<br>(20.2 to 59.6)                            | 0.2<br>(-12.0 to 14.9)                              |
| Tracheal, bronchus, and lung cancer                | < 0.05<br>(< 0.05 to < 0.05)         | < 0.05<br>(< 0.05 to < 0.05)          | < 0.05<br>(< 0.05 to < 0.05)      | 40.8<br>(18.8 to 65.1)                            | 4.6<br>(-13.5 to 25.4)                              |
| Malignant skin melanoma                            | < 0.05<br>(< 0.05 to < 0.05)         | < 0.05<br>(< 0.05 to < 0.05)          | < 0.05<br>(< 0.05 to < 0.05)      | 48.5<br>(22.6 to 78.4)                            | 7.9<br>(-10.7 to 29.2)                              |
| Non-melanoma skin cancer                           | < 0.05<br>(< 0.05 to < 0.05)         | < 0.05<br>(< 0.05 to < 0.05)          | < 0.05<br>(< 0.05 to < 0.05)      | 39.5<br>(10.4 to 72.8)                            | -0.1<br>(-24.0 to 26.5)                             |
| Non-melanoma skin cancer (squamous-cell carcinoma) | < 0.05<br>(< 0.05 to < 0.05)         | < 0.05<br>(< 0.05 to < 0.05)          | < 0.05<br>(< 0.05 to < 0.05)      | 38.4<br>(3.4 to 78.4)                             | -1.0<br>(-27.8 to 29.7)                             |
| Non-melanoma skin cancer (basal-cell carcinoma)    | < 0.05<br>(< 0.05 to < 0.05)         | < 0.05<br>(< 0.05 to < 0.05)          | < 0.05<br>(< 0.05 to < 0.05)      | 44.4<br>(28.9 to 62.9)                            | 5.8<br>(-3.1 to 18.8)                               |
| Breast cancer                                      | 0.2<br>(0.1 to 0.3)                  | < 0.05<br>(< 0.05 to 0.1)             | < 0.05<br>(< 0.05 to < 0.05)      | 56.0<br>(19.3 to 104.2)                           | 12.7<br>(-13.3 to 43.5)                             |
| Cervical cancer                                    | 0.3<br>(0.2 to 0.5)                  | 0.1<br>(0.1 to 0.1)                   | < 0.05<br>(< 0.05 to 0.1)         | 28.2<br>(-1.2 to 61.7)                            | -7.1<br>(-26.3 to 14.1)                             |
| Uterine cancer                                     | < 0.05<br>(< 0.05 to < 0.05)         | < 0.05<br>(< 0.05 to < 0.05)          | < 0.05<br>(< 0.05 to < 0.05)      | 56.7<br>(15.9 to 106.3)                           | 11.7<br>(-16.5 to 44.0)                             |
| Ovarian cancer                                     | 0.1<br>(< 0.05 to 0.1)               | < 0.05<br>(< 0.05 to < 0.05)          | < 0.05<br>(< 0.05 to < 0.05)      | 49.7<br>(15.5 to 94.4)                            | 7.3<br>(-18.3 to 44.0)                              |
| Prostate cancer                                    | 0.2<br>(0.1 to 0.2)                  | 0.1<br>(< 0.05 to 0.1)                | < 0.05<br>(< 0.05 to < 0.05)      | 56.4<br>(23.3 to 91.2)                            | 15.7<br>(-7.7 to 38.7)                              |
| Testicular cancer                                  | < 0.05<br>(< 0.05 to < 0.05)         | < 0.05<br>(< 0.05 to < 0.05)          | < 0.05<br>(< 0.05 to < 0.05)      | 39.3<br>(13.3 to 73.5)                            | 1.5<br>(-17.4 to 26.7)                              |
| Kidney cancer                                      | < 0.05<br>(< 0.05 to < 0.05)         | < 0.05<br>(< 0.05 to < 0.05)          | < 0.05<br>(< 0.05 to < 0.05)      | 41.1<br>(5.6 to 89.1)                             | 15.1<br>(-4.4 to 36.8)                              |
| Bladder cancer                                     | < 0.05<br>(< 0.05 to < 0.05)         | < 0.05<br>(< 0.05 to < 0.05)          | < 0.05<br>(< 0.05 to < 0.05)      | 46.1<br>(29.8 to 64.6)                            | 6.4<br>(-6.1 to 20.2)                               |
| Brain and nervous system cancer                    | < 0.05<br>(< 0.05 to < 0.05)         | < 0.05<br>(< 0.05 to < 0.05)          | < 0.05<br>(< 0.05 to < 0.05)      | 40.3<br>(23.8 to 65.6)                            | 8.9<br>(-5.7 to 31.5)                               |
| Thyroid cancer                                     | < 0.05<br>(< 0.05 to < 0.05)         | < 0.05<br>(< 0.05 to < 0.05)          | < 0.05<br>(< 0.05 to < 0.05)      | 56.1<br>(24.0 to 94.0)                            | 9.0<br>(-10.5 to 33.5)                              |
| Mesothelioma                                       | < 0.05<br>(< 0.05 to < 0.05)         | < 0.05<br>(< 0.05 to < 0.05)          | < 0.05<br>(< 0.05 to < 0.05)      | 34.9<br>(19.4 to 54.3)                            | -0.6<br>(-12.1 to 14.3)                             |
| Hodgkin lymphoma                                   | < 0.05<br>(< 0.05 to < 0.05)         | < 0.05<br>(< 0.05 to < 0.05)          | < 0.05<br>(< 0.05 to < 0.05)      | 18.9<br>(4.5 to 36.9)                             | -7.5<br>(-15.8 to 2.8)                              |
| Non-Hodgkin's lymphoma                             | 0.1<br>(0.1 to 0.1)                  | < 0.05<br>(< 0.05 to < 0.05)          | < 0.05<br>(< 0.05 to < 0.05)      | 29.9<br>(10.0 to 51.6)                            | 2.2<br>(-9.7 to 15.2)                               |
| Multiple myeloma                                   | < 0.05<br>(< 0.05 to < 0.05)         | < 0.05<br>(< 0.05 to < 0.05)          | < 0.05<br>(< 0.05 to < 0.05)      | 48.4<br>(32.8 to 70.9)                            | 7.9<br>(-3.6 to 24.5)                               |
| Leukaemia                                          | < 0.05<br>(< 0.05 to < 0.05)         | < 0.05<br>(< 0.05 to < 0.05)          | < 0.05<br>(< 0.05 to < 0.05)      | 24.4<br>(11.7 to 35.6)                            | -2.5<br>(-10.7 to 5.7)                              |
| Acute lymphoid leukaemia                           | < 0.05<br>(< 0.05 to < 0.05)         | < 0.05<br>(< 0.05 to < 0.05)          | < 0.05<br>(< 0.05 to < 0.05)      | 21.0<br>(3.5 to 39.7)                             | -2.2<br>(-13.5 to 10.3)                             |
| Chronic lymphoid leukaemia                         | < 0.05<br>(< 0.05 to < 0.05)         | < 0.05<br>(< 0.05 to < 0.05)          | < 0.05<br>(< 0.05 to < 0.05)      | 36.6<br>(16.0 to 59.6)                            | 3.7<br>(-12.2 to 23.4)                              |
| Acute myeloid leukaemia                            | < 0.05<br>(< 0.05 to < 0.05)         | < 0.05<br>(< 0.05 to < 0.05)          | < 0.05<br>(< 0.05 to < 0.05)      | 33.9<br>(15.5 to 51.7)                            | 6.3<br>(-6.6 to 20.2)                               |
| Chronic myeloid leukaemia                          | < 0.05<br>(< 0.05 to < 0.05)         | < 0.05<br>(< 0.05 to < 0.05)          | < 0.05<br>(< 0.05 to < 0.05)      | 28.6<br>(7.3 to 52.4)                             | -5.0<br>(-19.3 to 11.7)                             |
| Other leukaemia                                    | < 0.05<br>(< 0.05 to < 0.05)         | < 0.05<br>(< 0.05 to < 0.05)          | < 0.05<br>(< 0.05 to < 0.05)      | 17.6<br>(1.8 to 34.8)                             | -7.9<br>(-19.4 to 5.1)                              |
| Other neoplasms                                    | 0.1<br>(0.1 to 0.2)                  | < 0.05<br>(< 0.05 to 0.1)             | < 0.05<br>(< 0.05 to < 0.05)      | 31.1<br>(13.1 to 53.6)                            | -1.5<br>(-13.8 to 14.6)                             |
| <b>Cardiovascular diseases</b>                     | <b>36.9</b><br><b>(34.1 to 39.8)</b> | <b>2.8†</b><br><b>(2.6 to 2.9)</b>    | <b>2.0</b><br><b>(1.4 to 2.8)</b> | <b>36.5</b><br><b>(30.3 to 42.8)</b>              | <b>1.6</b><br><b>(-2.6 to 5.5)</b>                  |
| Rheumatic heart disease                            | 9.9<br>(8.8 to 11.0)                 | 0.4<br>(0.4 to 0.4)                   | 0.5<br>(0.3 to 0.7)               | 52.7<br>(40.3 to 66.8)                            | 15.5<br>(6.3 to 25.8)                               |
| Ischaemic heart disease                            | 8.0<br>(7.5 to 8.4)                  | 1.0<br>(1.0 to 1.1)                   | 0.4<br>(0.2 to 0.5)               | 34.3<br>(27.2 to 41.8)                            | -1.3<br>(-5.7 to 3.1)                               |
| Cerebrovascular disease                            | 2.1<br>(2.0 to 2.3)                  | 0.4‡<br>(0.4 to 0.4)                  | 0.3<br>(0.2 to 0.4)               | 32.3<br>(21.5 to 43.5)                            | -3.5<br>(-10.9 to 4.1)                              |
| Ischaemic stroke                                   | 1.9<br>(1.7 to 2.1)                  | 0.3‡<br>(0.2 to 0.3)                  | 0.3<br>(0.2 to 0.3)               | 34.4<br>(22.4 to 48.2)                            | -2.7<br>(-11.1 to 6.4)                              |
| Hemorrhagic stroke                                 | 0.4<br>(0.3 to 0.4)                  | 0.1‡<br>(0.1 to 0.1)                  | 0.1<br>(< 0.05 to 0.1)            | 22.5<br>(5.8 to 40.1)                             | -7.4<br>(-20.1 to 6.4)                              |
| Hypertensive heart disease                         | 0.6<br>(0.5 to 0.7)                  | --                                    | < 0.05<br>(< 0.05 to 0.1)         | 33.4<br>(18.2 to 50.1)                            | -1.6<br>(-10.8 to 8.7)                              |
| Cardiomyopathy and myocarditis                     | 0.4<br>(0.4 to 0.5)                  | 0.2‡<br>(0.2 to 0.2)                  | < 0.05<br>(< 0.05 to 0.1)         | 37.1<br>(20.9 to 55.5)                            | 2.2<br>(-10.2 to 16.5)                              |
| Myocarditis                                        | 0.1<br>(0.1 to 0.1)                  | 0.2<br>(0.2 to 0.2)                   | < 0.05<br>(< 0.05 to < 0.05)      | 32.3<br>(24.3 to 40.9)                            | 1.7<br>(-6.5 to 10.6)                               |
| Alcoholic cardiomyopathy                           | < 0.05<br>(< 0.05 to 0.1)            | --                                    | < 0.05<br>(< 0.05 to < 0.05)      | 43.2<br>(10.6 to 86.5)                            | 2.8<br>(-20.7 to 34.4)                              |
| Other cardiomyopathy                               | 0.4<br>(0.3 to 0.5)                  | --                                    | < 0.05<br>(< 0.05 to < 0.05)      | 37.7<br>(17.1 to 61.2)                            | 2.3<br>(-12.4 to 18.7)                              |
| Atrial fibrillation and flutter                    | 1.4<br>(1.2 to 1.6)                  | 0.1<br>(0.1 to 0.1)                   | 0.1<br>(0.1 to 0.1)               | 34.9<br>(24.0 to 48.3)                            | 0.5<br>(-6.0 to 8.1)                                |
| Peripheral vascular disease                        | 5.5<br>(4.7 to 6.4)                  | 0.6<br>(0.5 to 0.6)                   | < 0.05<br>(< 0.05 to < 0.05)      | 30.6<br>(19.6 to 41.6)                            | -2.2<br>(-9.8 to 5.2)                               |
| Endocarditis                                       | < 0.05<br>(< 0.05 to < 0.05)         | 0.1<br>(0.1 to 0.1)                   | < 0.05<br>(< 0.05 to < 0.05)      | 29.9<br>(18.3 to 42.5)                            | 0.9<br>(-12.6 to 13.7)                              |
| Other cardiovascular and circulatory diseases      | 11.9<br>(8.2 to 16.2)                | --                                    | 0.6<br>(0.4 to 1.0)               | 30.2<br>(17.1 to 44.5)                            | 2.3<br>(-7.6 to 12.9)                               |
| <b>Chronic respiratory diseases</b>                | <b>62.2</b><br><b>(58.5 to 66.1)</b> | <b>11.5†</b><br><b>(10.6 to 12.5)</b> | <b>2.8</b><br><b>(2.0 to 3.8)</b> | <b>33.1</b><br><b>(26.5 to 39.9)</b>              | <b>4.1</b><br><b>(-0.1 to 8.6)</b>                  |
| Chronic obstructive pulmonary disease              | 6.9<br>(6.6 to 7.2)                  | 0.5<br>(0.5 to 0.5)                   | 0.5<br>(0.5 to 0.6)               | 34.0<br>(24.4 to 44.9)                            | -1.6<br>(-7.7 to 5.2)                               |
| Pneumoconiosis                                     | < 0.05<br>(< 0.05 to < 0.05)         | < 0.05<br>(< 0.05 to < 0.05)          | < 0.05<br>(< 0.05 to < 0.05)      | 38.4<br>(29.9 to 46.3)                            | 0.6<br>(-5.4 to 6.8)                                |
| Silicosis                                          | < 0.05<br>(< 0.05 to < 0.05)         | < 0.05<br>(< 0.05 to < 0.05)          | < 0.05<br>(< 0.05 to < 0.05)      | 37.5<br>(26.1 to 50.2)                            | -0.4<br>(-7.3 to 6.8)                               |



| Cause                                                          | Prevalence in thousands (95% UI)  | Incidence in thousands (95% UI)   | YLDs in thousands (95% UI)        |                                                                     |                                                                      |
|----------------------------------------------------------------|-----------------------------------|-----------------------------------|-----------------------------------|---------------------------------------------------------------------|----------------------------------------------------------------------|
|                                                                | 2016 counts<br>(< 0.05 to < 0.05) | 2016 counts<br>(< 0.05 to < 0.05) | 2016 counts<br>(< 0.05 to < 0.05) | Percentage change in counts between 2006 and 2016<br>(27.2 to 48.0) | Percentage change in age-standardised rates between<br>(-5.1 to 6.5) |
| Asbestosis                                                     | < 0.05<br>(< 0.05 to < 0.05)      | < 0.05<br>(< 0.05 to < 0.05)      | < 0.05<br>(< 0.05 to < 0.05)      | 37.5<br>(27.2 to 48.0)                                              | 0.7<br>(-5.1 to 6.5)                                                 |
| Coal workers pneumoconiosis                                    | --                                | --                                | --                                | --                                                                  | --                                                                   |
| Other pneumoconiosis                                           | < 0.05<br>(< 0.05 to < 0.05)      | < 0.05<br>(< 0.05 to < 0.05)      | < 0.05<br>(< 0.05 to < 0.05)      | 39.1<br>(27.2 to 52.8)                                              | 0.5<br>(-9.1 to 11.3)                                                |
| Asthma                                                         | 55.4<br>(50.5 to 60.6)            | 11.0<br>(10.1 to 12.0)            | 2.2<br>(1.4 to 3.2)               | 32.0<br>(24.6 to 40.1)                                              | 6.6<br>(1.2 to 12.5)                                                 |
| Interstitial lung disease and pulmonary sarcoidosis            | 0.1<br>(0.1 to 0.1)               | < 0.05<br>(< 0.05 to < 0.05)      | < 0.05<br>(< 0.05 to < 0.05)      | 31.1<br>(27.0 to 35.5)                                              | -1.7<br>(-6.5 to 3.1)                                                |
| Other chronic respiratory diseases                             | --                                | --                                | 0.1<br>(0.1 to 0.1)               | 70.1<br>(31.2 to 123.0)                                             | 34.4<br>(10.9 to 64.5)                                               |
| <b>Cirrhosis and other chronic liver diseases</b>              | <b>1.8<br/>(1.7 to 1.9)</b>       | <b>0.1<br/>(0.1 to 0.1)</b>       | <b>0.1<br/>(0.1 to 0.2)</b>       | <b>31.7<br/>(18.0 to 46.9)</b>                                      | <b>3.0<br/>(-4.8 to 11.9)</b>                                        |
| Cirrhosis and other chronic liver diseases due to hepatitis B  | 0.5<br>(0.4 to 0.6)               | < 0.05<br>(< 0.05 to 0.1)         | < 0.05<br>(< 0.05 to < 0.05)      | 40.0<br>(17.6 to 66.4)                                              | 3.5<br>(-10.6 to 20.0)                                               |
| Cirrhosis and other chronic liver diseases due to hepatitis C  | 0.4<br>(0.2 to 0.5)               | < 0.05<br>(< 0.05 to < 0.05)      | < 0.05<br>(< 0.05 to < 0.05)      | 39.4<br>(13.6 to 72.2)                                              | 2.8<br>(-13.1 to 23.6)                                               |
| Cirrhosis and other chronic liver diseases due to alcohol use  | 0.3<br>(0.3 to 0.4)               | < 0.05<br>(< 0.05 to < 0.05)      | < 0.05<br>(< 0.05 to < 0.05)      | 42.1<br>(17.2 to 72.0)                                              | 3.7<br>(-12.1 to 21.8)                                               |
| Cirrhosis and other chronic liver diseases due to other causes | 0.6<br>(0.6 to 0.7)               | < 0.05<br>(< 0.05 to < 0.05)      | 0.1<br>(< 0.05 to 0.1)            | 23.3<br>(0.5 to 48.4)                                               | 2.2<br>(-14.2 to 20.7)                                               |
| <b>Digestive diseases</b>                                      | <b>12.2<br/>(11.3 to 13.2)</b>    | <b>11.4†<br/>(10.9 to 12.0)</b>   | <b>0.4<br/>(0.3 to 0.6)</b>       | <b>42.3<br/>(29.7 to 56.0)</b>                                      | <b>11.7<br/>(3.9 to 19.7)</b>                                        |
| Peptic ulcer disease                                           | 1.8<br>(1.6 to 2.0)               | 0.8<br>(0.7 to 0.9)               | < 0.05<br>(< 0.05 to 0.1)         | 78.5<br>(48.2 to 114.3)                                             | 30.1<br>(13.4 to 50.1)                                               |
| Gastritis and duodenitis                                       | 4.7<br>(4.1 to 5.3)               | 3.7<br>(3.3 to 4.2)               | 0.1<br>(< 0.05 to 0.1)            | 80.1<br>(51.2 to 116.6)                                             | 39.2<br>(20.0 to 61.4)                                               |
| Appendicitis                                                   | 0.1<br>(0.1 to 0.1)               | 2.9<br>(2.7 to 3.2)               | < 0.05<br>(< 0.05 to < 0.05)      | 22.6<br>(-12.2 to 75.8)                                             | -2.9<br>(-25.2 to 28.2)                                              |
| Paralytic ileus and intestinal obstruction                     | < 0.05<br>(< 0.05 to < 0.05)      | 0.6<br>(0.5 to 0.6)               | < 0.05<br>(< 0.05 to < 0.05)      | 25.9<br>(18.2 to 33.1)                                              | -2.3<br>(-13.6 to 8.8)                                               |
| Inguinal, femoral, and abdominal hernia                        | 5.4<br>(4.6 to 6.4)               | 1.0<br>(0.9 to 1.1)               | 0.2<br>(0.1 to 0.3)               | 31.6<br>(16.2 to 48.6)                                              | 2.4<br>(-7.0 to 13.3)                                                |
| Inflammatory bowel disease                                     | 0.1<br>(< 0.05 to 0.1)            | 0.3<br>(0.3 to 0.3)               | < 0.05<br>(< 0.05 to < 0.05)      | 25.0<br>(21.1 to 29.3)                                              | -6.6<br>(-9.7 to -3.4)                                               |
| Vascular intestinal disorders                                  | < 0.05<br>(< 0.05 to < 0.05)      | < 0.05<br>(< 0.05 to < 0.05)      | < 0.05<br>(< 0.05 to < 0.05)      | 22.6<br>(16.4 to 28.8)                                              | -4.4<br>(-8.2 to -0.4)                                               |
| Gallbladder and biliary diseases                               | 0.4<br>(0.4 to 0.5)               | 2.0<br>(1.7 to 2.3)               | < 0.05<br>(< 0.05 to < 0.05)      | 33.1<br>(14.2 to 54.0)                                              | -2.3<br>(-17.7 to 16.5)                                              |
| Pancreatitis                                                   | < 0.05<br>(< 0.05 to < 0.05)      | 0.1<br>(0.1 to 0.1)               | < 0.05<br>(< 0.05 to < 0.05)      | 32.6<br>(28.0 to 38.5)                                              | -0.8<br>(-3.9 to 2.7)                                                |
| Other digestive diseases                                       | --                                | --                                | < 0.05<br>(< 0.05 to < 0.05)      | 41.1<br>(26.9 to 57.6)                                              | 15.1<br>(7.1 to 23.7)                                                |
| <b>Neurological disorders</b>                                  | <b>225.6<br/>(214.7 to 237.8)</b> | <b>104.4<br/>(89.2 to 121.1)</b>  | <b>5.7<br/>(3.6 to 8.4)</b>       | <b>30.5<br/>(-7.9 to 85.6)</b>                                      | <b>0.4<br/>(-24.4 to 34.1)</b>                                       |
| Alzheimer's disease and other dementias                        | 1.0<br>(0.8 to 1.2)               | 0.2<br>(0.1 to 0.2)               | 0.1<br>(0.1 to 0.2)               | 29.3<br>(22.5 to 36.9)                                              | -1.1<br>(-5.7 to 3.8)                                                |
| Parkinson's disease                                            | 0.1<br>(0.1 to 0.1)               | < 0.05<br>(< 0.05 to < 0.05)      | < 0.05<br>(< 0.05 to < 0.05)      | 44.6<br>(23.1 to 69.2)                                              | 9.0<br>(-4.9 to 25.0)                                                |
| Epilepsy                                                       | 3.5<br>(1.0 to 5.9)               | 0.5<br>(0.1 to 0.8)               | 1.3<br>(0.4 to 2.6)               | 24.6<br>(-68.9 to 487.6)                                            | -0.8<br>(-75.5 to 369.3)                                             |
| Multiple sclerosis                                             | < 0.05<br>(< 0.05 to < 0.05)      | < 0.05<br>(< 0.05 to < 0.05)      | < 0.05<br>(< 0.05 to < 0.05)      | 49.8<br>(44.4 to 54.0)                                              | 10.1<br>(6.7 to 13.1)                                                |
| Motor neuron disease                                           | < 0.05<br>(< 0.05 to < 0.05)      | < 0.05<br>(< 0.05 to < 0.05)      | < 0.05<br>(< 0.05 to < 0.05)      | 30.4<br>(25.5 to 37.1)                                              | 1.4<br>(-1.6 to 5.1)                                                 |
| Migraine                                                       | 77.6<br>(72.7 to 82.5)            | 10.0<br>(9.3 to 10.6)             | 3.4<br>(2.1 to 4.8)               | 31.2<br>(25.7 to 37.1)                                              | 0.0<br>(-3.7 to 3.8)                                                 |
| Tension-type headache                                          | 168.8<br>(148.6 to 190.8)         | 93.8<br>(78.7 to 110.7)           | 0.6<br>(0.4 to 0.8)               | 30.5<br>(23.5 to 38.8)                                              | -0.9<br>(-5.8 to 4.7)                                                |
| Other neurological disorders                                   | < 0.05<br>(< 0.05 to < 0.05)      | < 0.05<br>(< 0.05 to < 0.05)      | 0.3<br>(0.1 to 0.6)               | 51.1<br>(-59.9 to 568.6)                                            | 20.7<br>(-64.8 to 390.4)                                             |
| <b>Mental and substance use disorders</b>                      | <b>112.8<br/>(107.0 to 117.8)</b> | <b>38.5†<br/>(35.6 to 41.8)</b>   | <b>13.2<br/>(9.6 to 17.4)</b>     | <b>30.3<br/>(27.3 to 33.3)</b>                                      | <b>0.3<br/>(-1.7 to 2.4)</b>                                         |
| Schizophrenia                                                  | 1.2<br>(1.0 to 1.3)               | 0.1<br>(0.1 to 0.1)               | 0.8<br>(0.5 to 0.9)               | 36.3<br>(23.1 to 50.5)                                              | -0.2<br>(-8.9 to 9.6)                                                |
| Alcohol use disorders                                          | 10.3<br>(8.6 to 12.1)             | 5.5<br>(4.6 to 6.4)               | 1.0<br>(0.7 to 1.5)               | 35.1<br>(24.3 to 46.9)                                              | 2.0<br>(-5.4 to 10.1)                                                |
| Drug use disorders                                             | 3.5<br>(3.1 to 4.0)               | 0.6<br>(0.5 to 0.7)               | 0.7<br>(0.5 to 1.0)               | 38.0<br>(24.8 to 53.5)                                              | 3.2<br>(-5.8 to 13.6)                                                |
| Opioid use disorders                                           | 1.5<br>(1.2 to 1.9)               | 0.2<br>(0.2 to 0.2)               | 0.6<br>(0.4 to 0.9)               | 39.1<br>(23.2 to 57.2)                                              | 3.5<br>(-6.9 to 15.8)                                                |
| Cocaine use disorders                                          | 0.1<br>(0.1 to 0.1)               | < 0.05<br>(< 0.05 to < 0.05)      | < 0.05<br>(< 0.05 to < 0.05)      | 34.5<br>(27.0 to 42.7)                                              | 2.6<br>(-2.4 to 8.1)                                                 |
| Amphetamine use disorders                                      | 0.1<br>(< 0.05 to 0.1)            | < 0.05<br>(< 0.05 to < 0.05)      | < 0.05<br>(< 0.05 to < 0.05)      | 31.5<br>(19.6 to 44.6)                                              | 2.4<br>(-6.7 to 11.9)                                                |
| Cannabis use disorders                                         | 1.8<br>(1.4 to 2.2)               | 0.3<br>(0.3 to 0.4)               | 0.1<br>(< 0.05 to 0.1)            | 28.8<br>(5.1 to 57.4)                                               | 0.7<br>(-16.9 to 20.4)                                               |
| Other drug use disorders                                       | 0.2<br>(0.2 to 0.3)               | < 0.05<br>(< 0.05 to 0.1)         | < 0.05<br>(< 0.05 to 0.1)         | 36.2<br>(14.9 to 60.1)                                              | 2.3<br>(-12.2 to 18.9)                                               |
| Depressive disorders                                           | 21.7<br>(20.4 to 23.3)            | 23.1<br>(20.5 to 26.0)            | 3.6<br>(2.5 to 5.0)               | 31.8<br>(25.8 to 38.5)                                              | -0.0<br>(-3.8 to 4.4)                                                |
| Major depressive disorder                                      | 13.8<br>(12.2 to 15.6)            | 21.6<br>(19.1 to 24.6)            | 2.8<br>(1.9 to 3.9)               | 31.2<br>(23.7 to 39.6)                                              | -0.0<br>(-5.0 to 5.6)                                                |
| Dysthymia                                                      | 8.2<br>(7.1 to 9.5)               | 1.5<br>(1.3 to 1.7)               | 0.8<br>(0.5 to 1.2)               | 33.9<br>(28.6 to 39.0)                                              | 0.1<br>(-3.0 to 3.4)                                                 |
| Bipolar disorder                                               | 4.4<br>(3.8 to 5.3)               | 0.5<br>(0.4 to 0.6)               | 0.9<br>(0.6 to 1.4)               | 30.6<br>(21.9 to 41.5)                                              | 0.2<br>(-5.6 to 6.8)                                                 |
| Anxiety disorders                                              | 24.1<br>(21.5 to 27.2)            | 4.2<br>(3.8 to 4.8)               | 2.4<br>(1.6 to 3.2)               | 29.4<br>(20.2 to 39.0)                                              | 0.2<br>(-6.2 to 6.7)                                                 |
| Eating disorders                                               | 0.6<br>(0.5 to 0.8)               | 0.5<br>(0.4 to 0.7)               | 0.1<br>(0.1 to 0.2)               | 26.6<br>(7.9 to 49.6)                                               | -1.1<br>(-15.7 to 16.6)                                              |
| Anorexia nervosa                                               | 0.2<br>(0.1 to 0.2)               | 0.1<br>(0.1 to 0.1)               | < 0.05<br>(< 0.05 to 0.1)         | 22.7<br>(-8.9 to 66.9)                                              | -1.5<br>(-26.9 to 33.6)                                              |
| Bulimia nervosa                                                | 0.4<br>(0.3 to 0.6)               | 0.4<br>(0.3 to 0.6)               | 0.1<br>(0.1 to 0.1)               | 28.2<br>(6.5 to 56.2)                                               | -0.9<br>(-17.7 to 18.3)                                              |
| Autistic spectrum disorders                                    | 6.6<br>(6.0 to 7.4)               | 0.1<br>(< 0.05 to 0.1)            | 1.0<br>(0.6 to 1.3)               | 24.9<br>(18.2 to 31.8)                                              | 0.3<br>(-4.4 to 5.4)                                                 |
| Autism                                                         | 1.8<br>(1.6 to 2.1)               | < 0.05<br>(< 0.05 to < 0.05)      | 0.5<br>(0.3 to 0.7)               | 25.0<br>(12.6 to 37.3)                                              | 0.3<br>(-8.4 to 9.3)                                                 |
| Asperger syndrome and other autistic spectrum disorders        | 4.8<br>(4.0 to 5.8)               | 0.1<br>(< 0.05 to 0.1)            | 0.5<br>(0.3 to 0.7)               | 24.7<br>(18.0 to 32.6)                                              | 0.2<br>(-4.5 to 5.3)                                                 |

| Cause                                                      | Prevalence in thousands (95% UI)        | Incidence in thousands (95% UI)                | YLDs in thousands (95% UI)          |                                                   |                                                     |
|------------------------------------------------------------|-----------------------------------------|------------------------------------------------|-------------------------------------|---------------------------------------------------|-----------------------------------------------------|
|                                                            | 2016 counts                             | 2016 counts                                    | 2016 counts                         | Percentage change in counts between 2006 and 2016 | Percentage change in age-standardised rates between |
| Attention-deficit/hyperactivity disorder                   | 10.6<br>(9.5 to 11.9)                   | 0.6<br>(0.5 to 0.7)                            | 0.1<br>(0.1 to 0.2)                 | 24.6<br>(16.1 to 34.5)                            | 0.1<br>(-6.1 to 7.3)                                |
| Conduct disorder                                           | 7.8<br>(6.4 to 9.2)                     | 2.8<br>(2.2 to 3.4)                            | 1.0<br>(0.6 to 1.5)                 | 20.4<br>(12.9 to 28.7)                            | 0.1<br>(-6.1 to 6.9)                                |
| Idiopathic developmental intellectual disability           | 20.0<br>(12.3 to 27.8)                  | --                                             | 0.8<br>(0.4 to 1.4)                 | 24.1<br>(15.5 to 33.0)                            | -1.4<br>(-7.7 to 5.4)                               |
| Other mental and substance use disorders                   | 11.6<br>(10.1 to 13.4)                  | 0.6<br>(0.5 to 0.6)                            | 0.9<br>(0.6 to 1.3)                 | 35.1<br>(27.5 to 43.4)                            | 0.3<br>(-4.1 to 5.5)                                |
| <b>Diabetes, urogenital, blood, and endocrine diseases</b> | <b>290.1</b><br><b>(281.9 to 299.5)</b> | <b>75.2†</b><br><b>(70.4 to 80.1)</b>          | <b>4.2</b><br><b>(3.0 to 5.7)</b>   | <b>35.2</b><br><b>(29.8 to 40.9)</b>              | <b>2.0</b><br><b>(-1.5 to 5.8)</b>                  |
| Diabetes mellitus                                          | 15.5<br>(13.9 to 17.3)                  | 1.1<br>(1.0 to 1.2)                            | 1.5<br>(1.0 to 2.0)                 | 39.6<br>(32.1 to 47.8)                            | 1.7<br>(-3.8 to 7.7)                                |
| Acute glomerulonephritis                                   | < 0.05<br>(< 0.05 to < 0.05)            | 0.1<br>(0.1 to 0.1)                            | < 0.05<br>(< 0.05 to < 0.05)        | 27.1<br>(22.8 to 32.2)                            | -0.1<br>(-3.2 to 3.3)                               |
| Chronic kidney disease                                     | 27.8<br>(25.2 to 30.9)                  | 2.1<br>(1.9 to 2.4)                            | 0.9<br>(0.6 to 1.1)                 | 55.4<br>(42.4 to 69.6)                            | 13.6<br>(4.9 to 24.0)                               |
| Chronic kidney disease due to diabetes mellitus            | 8.6<br>(7.2 to 10.1)                    | 0.6<br>(0.5 to 0.8)                            | 0.2<br>(0.2 to 0.3)                 | 58.6<br>(41.2 to 78.1)                            | 13.7<br>(3.5 to 26.4)                               |
| Chronic kidney disease due to hypertension                 | 5.6<br>(4.8 to 6.5)                     | 0.6<br>(0.5 to 0.7)                            | 0.1<br>(0.1 to 0.2)                 | 56.3<br>(38.5 to 76.0)                            | 11.1<br>(-0.9 to 24.4)                              |
| Chronic kidney disease due to glomerulonephritis           | 5.9<br>(5.0 to 6.9)                     | 0.3<br>(0.3 to 0.4)                            | 0.2<br>(0.2 to 0.3)                 | 54.5<br>(38.1 to 73.3)                            | 16.5<br>(5.2 to 29.2)                               |
| Chronic kidney disease due to other causes                 | 7.8<br>(6.5 to 9.1)                     | 0.6<br>(0.5 to 0.7)                            | 0.2<br>(0.2 to 0.3)                 | 52.7<br>(37.2 to 70.7)                            | 13.0<br>(2.8 to 24.6)                               |
| Urinary diseases and male infertility                      | 13.6<br>(12.2 to 15.0)                  | 38.9†<br>(35.0 to 43.3)                        | 0.3<br>(0.2 to 0.5)                 | 35.9<br>(26.3 to 46.7)                            | -0.8<br>(-7.5 to 6.8)                               |
| Interstitial nephritis and urinary tract infections        | 0.7<br>(0.6 to 0.7)                     | 33.8<br>(29.9 to 38.2)                         | < 0.05<br>(< 0.05 to < 0.05)        | 28.4<br>(10.0 to 52.0)                            | 1.6<br>(-11.8 to 17.1)                              |
| Urolithiasis                                               | 0.2<br>(0.1 to 0.2)                     | 4.2<br>(3.7 to 4.8)                            | < 0.05<br>(< 0.05 to < 0.05)        | 35.8<br>(24.5 to 47.8)                            | 1.2<br>(-8.4 to 11.2)                               |
| Benign prostatic hyperplasia                               | 7.1<br>(6.0 to 8.3)                     | 0.9<br>(0.8 to 1.1)                            | 0.2<br>(0.1 to 0.3)                 | 39.0<br>(26.9 to 53.1)                            | -0.5<br>(-8.2 to 8.1)                               |
| Male infertility                                           | 5.2<br>(4.2 to 6.3)                     | --                                             | < 0.05<br>(< 0.05 to 0.1)           | 33.7<br>(12.2 to 59.8)                            | -0.4<br>(-16.4 to 18.7)                             |
| Other urinary diseases                                     | --                                      | --                                             | < 0.05<br>(< 0.05 to < 0.05)        | 7.6<br>(-4.0 to 21.8)                             | -15.6<br>(-23.2 to -6.7)                            |
| Gynecological diseases                                     | 85.4<br>(81.4 to 89.5)                  | 32.3†<br>(30.1 to 34.6)                        | 1.0<br>(0.7 to 1.4)                 | 30.2<br>(24.1 to 37.3)                            | -4.4<br>(-8.4 to 0.1)                               |
| Uterine fibroids                                           | 6.0<br>(5.3 to 6.8)                     | 0.8<br>(0.7 to 0.9)                            | 0.1<br>(0.1 to 0.2)                 | 21.8<br>(5.8 to 39.0)                             | -14.3<br>(-25.9 to -2.4)                            |
| Polycystic ovarian syndrome                                | 0.8<br>(0.6 to 1.0)                     | 1.9<br>(1.4 to 2.6)                            | < 0.05<br>(< 0.05 to < 0.05)        | 34.8<br>(18.1 to 54.5)                            | -0.0<br>(-11.8 to 14.4)                             |
| Female infertility                                         | 3.4<br>(2.1 to 4.9)                     | --                                             | < 0.05<br>(< 0.05 to < 0.05)        | 15.2<br>(-28.8 to 106.0)                          | -14.5<br>(-52.0 to 61.0)                            |
| Endometriosis                                              | 0.2<br>(0.1 to 0.2)                     | 0.6<br>(0.5 to 0.8)                            | < 0.05<br>(< 0.05 to < 0.05)        | 29.6<br>(-5.7 to 77.7)                            | -0.8<br>(-26.4 to 31.8)                             |
| Genital prolapse                                           | 32.7<br>(28.6 to 36.8)                  | 2.9<br>(2.5 to 3.5)                            | 0.1<br>(0.1 to 0.2)                 | 18.6<br>(10.7 to 26.4)                            | -14.2<br>(-19.9 to -8.3)                            |
| Premenstrual syndrome                                      | 44.3<br>(41.1 to 47.5)                  | 16.9<br>(15.5 to 18.2)                         | 0.4<br>(0.2 to 0.6)                 | 31.4<br>(20.4 to 43.9)                            | 0.4<br>(-7.2 to 8.9)                                |
| Other gynecological diseases                               | 10.4<br>(8.9 to 11.9)                   | 9.2<br>(7.5 to 11.0)                           | 0.4<br>(0.2 to 0.5)                 | 36.4<br>(24.8 to 48.8)                            | 0.9<br>(-6.9 to 9.3)                                |
| Hemoglobinopathies and hemolytic anaemias                  | 200.1<br>(190.8 to 210.9)               | --                                             | 0.3<br>(0.2 to 0.5)                 | 11.8<br>(-6.7 to 34.6)                            | -7.9<br>(-20.8 to 7.5)                              |
| Thalassemias                                               | < 0.05<br>(< 0.05 to < 0.05)            | --                                             | < 0.05<br>(< 0.05 to < 0.05)        | 6.4<br>(-18.5 to 35.6)                            | 0.2<br>(-22.4 to 27.9)                              |
| Thalassaemias trait                                        | 3.5<br>(1.2 to 6.7)                     | --                                             | 0.1<br>(< 0.05 to 0.1)              | 34.4<br>(1.4 to 73.5)                             | 14.3<br>(-13.8 to 44.6)                             |
| Sickle cell disorders                                      | < 0.05<br>(< 0.05 to 0.1)               | --                                             | < 0.05<br>(< 0.05 to < 0.05)        | 35.2<br>(7.9 to 72.2)                             | 15.7<br>(-5.6 to 45.7)                              |
| Sickle cell trait                                          | 28.1<br>(24.8 to 31.6)                  | --                                             | 0.1<br>(0.1 to 0.2)                 | 18.5<br>(-2.7 to 46.7)                            | 5.2<br>(-10.8 to 25.6)                              |
| G6PD deficiency                                            | 52.6<br>(44.8 to 60.7)                  | --                                             | < 0.05<br>(< 0.05 to < 0.05)        | 3.2<br>(-24.5 to 46.4)                            | -8.7<br>(-29.2 to 19.1)                             |
| G6PD trait                                                 | 122.7<br>(116.6 to 129.0)               | --                                             | < 0.05<br>(< 0.05 to < 0.05)        | 28.9<br>(2.2 to 64.7)                             | 12.7<br>(-8.9 to 42.1)                              |
| Other hemoglobinopathies and hemolytic anaemias            | 6.3<br>(5.4 to 7.2)                     | --                                             | 0.2<br>(0.1 to 0.2)                 | 1.0<br>(-18.3 to 26.3)                            | -22.1<br>(-33.8 to -6.7)                            |
| Endocrine, metabolic, blood, and immune disorders          | 8.0<br>(7.2 to 8.8)                     | 0.6<br>(0.5 to 0.7)                            | 0.2<br>(0.2 to 0.4)                 | 11.8<br>(-2.5 to 30.0)                            | -8.0<br>(-16.4 to 1.5)                              |
| <b>Musculoskeletal disorders</b>                           | <b>74.3</b><br><b>(70.0 to 78.4)</b>    | <b>35.4</b><br><b>(31.8 to 39.4)</b>           | <b>8.2</b><br><b>(5.9 to 10.7)</b>  | <b>31.7</b><br><b>(26.0 to 37.0)</b>              | <b>-1.9</b><br><b>(-5.5 to 1.6)</b>                 |
| Rheumatoid arthritis                                       | 1.0<br>(0.9 to 1.2)                     | 0.1<br>(0.1 to 0.1)                            | 0.2<br>(0.2 to 0.3)                 | 34.2<br>(21.4 to 49.0)                            | -1.8<br>(-9.5 to 7.6)                               |
| Osteoarthritis                                             | 12.9<br>(12.1 to 13.8)                  | 0.8<br>(0.7 to 0.8)                            | 0.8<br>(0.6 to 1.1)                 | 44.1<br>(38.3 to 50.1)                            | 3.9<br>(-0.1 to 7.8)                                |
| Low back and neck pain                                     | 50.6<br>(47.3 to 54.3)                  | 23.2<br>(20.7 to 26.0)                         | 5.9<br>(4.1 to 7.7)                 | 29.1<br>(21.5 to 36.1)                            | -3.6<br>(-8.5 to 1.2)                               |
| Low back pain                                              | 39.1<br>(34.8 to 44.7)                  | 19.6<br>(17.1 to 22.4)                         | 4.5<br>(3.1 to 5.9)                 | 26.7<br>(17.0 to 35.7)                            | -4.7<br>(-11.1 to 1.3)                              |
| Neck pain                                                  | 14.0<br>(12.1 to 16.3)                  | 3.6<br>(3.1 to 4.2)                            | 1.4<br>(1.0 to 2.0)                 | 37.2<br>(32.7 to 41.7)                            | 0.3<br>(-2.2 to 2.8)                                |
| Gout                                                       | 1.7<br>(1.5 to 2.0)                     | 0.4<br>(0.3 to 0.4)                            | 0.1<br>(< 0.05 to 0.1)              | 39.3<br>(19.4 to 62.0)                            | 1.1<br>(-11.9 to 15.2)                              |
| Other musculoskeletal disorders                            | 14.0<br>(11.0 to 17.1)                  | 11.0<br>(8.4 to 14.0)                          | 1.2<br>(0.8 to 1.8)                 | 36.3<br>(23.4 to 49.5)                            | 2.0<br>(-6.8 to 11.4)                               |
| <b>Other non-communicable diseases</b>                     | <b>561.9</b><br><b>(545.9 to 577.8)</b> | <b>1,815.1†</b><br><b>(1,637.1 to 1,988.3)</b> | <b>14.3</b><br><b>(9.6 to 20.6)</b> | <b>25.0</b><br><b>(23.1 to 26.8)</b>              | <b>-2.3</b><br><b>(-3.4 to -1.2)</b>                |
| Congenital anomalies                                       | 7.1<br>(5.6 to 9.1)                     | --                                             | 1.0<br>(0.7 to 1.5)                 | 20.2<br>(11.2 to 30.5)                            | -2.7<br>(-9.3 to 5.1)                               |
| Neural tube defects                                        | 0.9<br>(0.8 to 1.0)                     | --                                             | 0.3<br>(0.2 to 0.4)                 | 24.2<br>(9.5 to 41.4)                             | -0.1<br>(-11.2 to 11.8)                             |
| Congenital heart anomalies                                 | 0.7<br>(0.6 to 0.8)                     | --                                             | < 0.05<br>(< 0.05 to 0.1)           | 19.2<br>(1.7 to 40.4)                             | 3.8<br>(-10.4 to 20.8)                              |
| Orofacial clefts                                           | 0.2<br>(0.2 to 0.2)                     | --                                             | < 0.05<br>(< 0.05 to < 0.05)        | 15.1<br>(2.2 to 28.5)                             | -6.2<br>(-16.6 to 4.7)                              |
| Down's syndrome                                            | 0.1<br>(0.1 to 0.2)                     | --                                             | < 0.05<br>(< 0.05 to < 0.05)        | 23.4<br>(13.2 to 32.0)                            | 1.4<br>(-6.8 to 8.4)                                |
| Turner syndrome                                            | 0.4<br>(0.3 to 0.5)                     | --                                             | < 0.05<br>(< 0.05 to < 0.05)        | 19.3<br>(-17.7 to 71.9)                           | -2.0<br>(-30.8 to 38.2)                             |
| Klinefelter syndrome                                       | 0.4<br>(0.4 to 0.5)                     | --                                             | < 0.05<br>(< 0.05 to < 0.05)        | 25.4<br>(-4.0 to 67.5)                            | 0.2<br>(-23.5 to 31.9)                              |



| Cause                                         | Prevalence in thousands (95% UI)      | Incidence in thousands (95% UI)       | YLDs in thousands (95% UI)        |                                                   |                                                     |
|-----------------------------------------------|---------------------------------------|---------------------------------------|-----------------------------------|---------------------------------------------------|-----------------------------------------------------|
|                                               | 2016 counts                           | 2016 counts                           | 2016 counts                       | Percentage change in counts between 2006 and 2016 | Percentage change in age-standardised rates between |
| Other chromosomal abnormalities               | 0.1<br>(0.1 to 0.1)                   | --                                    | < 0.05<br>(< 0.05 to < 0.05)      | 7.7<br>(-25.4 to 50.3)                            | -0.0<br>(-30.8 to 39.6)                             |
| Congenital musculoskeletal and limb anomalies | 0.9<br>(0.8 to 1.0)                   | --                                    | 0.1<br>(0.1 to 0.2)               | 26.0<br>(10.4 to 43.5)                            | -0.0<br>(-11.1 to 12.4)                             |
| Urogenital congenital anomalies               | 0.7<br>(0.6 to 0.8)                   | --                                    | < 0.05<br>(< 0.05 to < 0.05)      | 16.8<br>(8.8 to 26.2)                             | -0.3<br>(-6.8 to 7.1)                               |
| Digestive congenital anomalies                | 0.4<br>(0.4 to 0.5)                   | --                                    | < 0.05<br>(< 0.05 to < 0.05)      | 24.0<br>(-4.7 to 60.3)                            | 0.2<br>(-21.2 to 24.4)                              |
| Other congenital anomalies                    | 3.8<br>(2.1 to 6.5)                   | --                                    | 0.5<br>(0.3 to 0.9)               | 17.3<br>(5.3 to 31.2)                             | -5.2<br>(-14.7 to 5.8)                              |
| Skin and subcutaneous diseases                | 270.6<br>(258.7 to 284.8)             | 643.3<br>(590.5 to 707.4)             | 6.7<br>(4.3 to 9.8)               | 24.5<br>(21.9 to 27.1)                            | 1.4<br>(-0.3 to 3.1)                                |
| Dermatitis                                    | 42.8<br>(33.5 to 52.4)                | 34.9<br>(30.5 to 40.4)                | 1.7<br>(1.0 to 3.0)               | 21.1<br>(16.2 to 26.1)                            | 0.1<br>(-3.2 to 3.3)                                |
| Psoriasis                                     | 4.5<br>(4.3 to 4.7)                   | 0.7<br>(0.6 to 0.7)                   | 0.4<br>(0.3 to 0.5)               | 40.3<br>(25.6 to 56.4)                            | 8.1<br>(-1.5 to 18.0)                               |
| Cellulitis                                    | 0.3<br>(0.3 to 0.3)                   | 5.0<br>(4.6 to 5.4)                   | < 0.05<br>(< 0.05 to < 0.05)      | 25.0<br>(-0.8 to 58.9)                            | 0.4<br>(-17.6 to 24.0)                              |
| Pyoderma                                      | 4.9<br>(4.7 to 5.2)                   | 94.5<br>(90.0 to 99.1)                | < 0.05<br>(< 0.05 to 0.1)         | 21.0<br>(14.4 to 28.0)                            | 0.5<br>(-4.2 to 5.4)                                |
| Scabies                                       | 16.8<br>(14.5 to 19.7)                | 51.7<br>(43.9 to 60.6)                | 0.4<br>(0.2 to 0.7)               | 17.1<br>(12.0 to 22.7)                            | -3.9<br>(-7.6 to 0.3)                               |
| Fungal skin diseases                          | 106.6<br>(87.7 to 129.1)              | 307.1<br>(256.6 to 367.6)             | 0.6<br>(0.2 to 1.3)               | 23.8<br>(21.9 to 26.0)                            | 0.2<br>(-0.6 to 1.0)                                |
| Viral skin diseases                           | 26.0<br>(22.6 to 30.1)                | 34.6<br>(29.6 to 39.8)                | 0.8<br>(0.5 to 1.2)               | 23.6<br>(19.3 to 27.9)                            | 0.1<br>(-2.9 to 3.2)                                |
| Acne vulgaris                                 | 76.0<br>(65.8 to 87.1)                | 57.1<br>(43.9 to 78.0)                | 2.0<br>(1.3 to 2.8)               | 28.1<br>(21.5 to 34.9)                            | 4.5<br>(-0.6 to 9.7)                                |
| Alopecia areata                               | 1.3<br>(1.2 to 1.4)                   | 2.4<br>(2.2 to 2.5)                   | < 0.05<br>(< 0.05 to 0.1)         | 31.1<br>(15.3 to 48.6)                            | 0.1<br>(-10.2 to 10.8)                              |
| Pruritus                                      | 5.5<br>(4.8 to 6.2)                   | 4.4<br>(3.9 to 5.0)                   | 0.1<br>(< 0.05 to 0.1)            | 28.0<br>(20.3 to 35.8)                            | -0.0<br>(-5.1 to 5.2)                               |
| Urticaria                                     | 7.1<br>(6.1 to 8.3)                   | 12.7<br>(10.9 to 14.9)                | 0.4<br>(0.3 to 0.6)               | 18.7<br>(10.9 to 27.5)                            | 0.1<br>(-5.6 to 6.5)                                |
| Decubitus ulcer                               | 0.1<br>(0.1 to 0.1)                   | 0.3<br>(0.2 to 0.3)                   | < 0.05<br>(< 0.05 to < 0.05)      | 29.3<br>(17.0 to 43.5)                            | -1.4<br>(-15.3 to 15.1)                             |
| Other skin and subcutaneous diseases          | 33.9<br>(32.8 to 35.0)                | 38.1<br>(36.8 to 39.3)                | 0.2<br>(0.1 to 0.3)               | 27.2<br>(23.4 to 31.2)                            | -1.0<br>(-3.4 to 1.3)                               |
| Sense organ diseases                          | 158.7<br>(154.6 to 162.8)             | 68.3†<br>(63.6 to 73.5)               | 5.4<br>(3.8 to 7.7)               | 24.8<br>(21.5 to 28.3)                            | -4.8<br>(-6.6 to -3.1)                              |
| Glaucoma                                      | 0.3<br>(0.2 to 0.4)                   | --                                    | < 0.05<br>(< 0.05 to 0.1)         | 32.1<br>(15.9 to 51.1)                            | -2.6<br>(-13.9 to 10.7)                             |
| Cataract                                      | 4.4<br>(3.5 to 5.3)                   | --                                    | 0.4<br>(0.2 to 0.5)               | 24.8<br>(17.2 to 32.8)                            | -7.0<br>(-12.8 to -1.7)                             |
| Macular degeneration                          | 0.6<br>(0.5 to 0.9)                   | --                                    | < 0.05<br>(< 0.05 to 0.1)         | 35.5<br>(21.6 to 52.2)                            | 0.5<br>(-9.1 to 12.2)                               |
| Refraction and accommodation disorders        | 95.9<br>(92.1 to 100.1)               | --                                    | 1.5<br>(0.8 to 2.4)               | 16.3<br>(12.5 to 20.3)                            | -11.1<br>(-13.6 to -8.6)                            |
| Age-related and other hearing loss            | 82.7<br>(76.7 to 89.4)                | --                                    | 2.9<br>(1.9 to 4.1)               | 27.6<br>(22.0 to 33.3)                            | -2.7<br>(-5.3 to -0.1)                              |
| Other vision loss                             | 2.4<br>(2.0 to 2.9)                   | --                                    | 0.2<br>(0.1 to 0.3)               | 31.9<br>(21.3 to 43.1)                            | -2.5<br>(-9.4 to 5.2)                               |
| Other sense organ diseases                    | 14.4<br>(13.3 to 15.5)                | 68.3<br>(63.6 to 73.5)                | 0.4<br>(0.3 to 0.7)               | 33.4<br>(25.9 to 40.7)                            | 1.3<br>(-2.9 to 5.4)                                |
| Oral disorders                                | 385.4<br>(351.5 to 414.3)             | 1,103.5†<br>(926.2 to 1,270.3)        | 1.2<br>(0.7 to 2.0)               | 33.9<br>(30.3 to 37.6)                            | -0.1<br>(-2.4 to 2.4)                               |
| Caries of deciduous teeth                     | 81.3<br>(64.8 to 100.3)               | 322.0<br>(232.2 to 436.5)             | < 0.05<br>(< 0.05 to < 0.05)      | 12.5<br>(-0.6 to 27.4)                            | -1.2<br>(-12.1 to 11.6)                             |
| Caries of permanent teeth                     | 254.2<br>(217.8 to 292.6)             | 773.6<br>(641.1 to 901.9)             | 0.1<br>(0.1 to 0.3)               | 30.1<br>(22.3 to 38.1)                            | 0.5<br>(-4.5 to 6.0)                                |
| Periodontal disease                           | 59.7<br>(35.0 to 86.8)                | 7.3<br>(4.5 to 10.8)                  | 0.4<br>(0.1 to 0.9)               | 36.9<br>(27.9 to 45.5)                            | -0.8<br>(-6.7 to 4.7)                               |
| Edentulism and severe tooth loss              | 10.3<br>(9.1 to 11.7)                 | 0.7<br>(0.6 to 0.8)                   | 0.3<br>(0.2 to 0.4)               | 37.4<br>(30.7 to 43.9)                            | 0.7<br>(-3.3 to 4.7)                                |
| Other oral disorders                          | 12.4<br>(11.8 to 13.0)                | --                                    | 0.4<br>(0.2 to 0.6)               | 31.0<br>(26.6 to 36.4)                            | 0.1<br>(-2.8 to 3.3)                                |
| <b>Injuries</b>                               | <b>98.2</b><br><b>(91.8 to 105.7)</b> | <b>56.4†</b><br><b>(53.0 to 60.0)</b> | <b>4.1</b><br><b>(2.8 to 5.8)</b> | <b>27.5</b><br><b>(25.0 to 29.9)</b>              | <b>-3.9</b><br><b>(-5.6 to -2.4)</b>                |
| <b>Transport injuries</b>                     | <b>12.4</b><br><b>(11.6 to 13.4)</b>  | <b>5.8</b><br><b>(5.1 to 6.6)</b>     | <b>0.7</b><br><b>(0.5 to 1.1)</b> | <b>28.5</b><br><b>(25.6 to 31.1)</b>              | <b>-4.4</b><br><b>(-6.1 to -2.8)</b>                |
| Road injuries                                 | 10.5<br>(9.8 to 11.3)                 | 5.2<br>(4.6 to 6.0)                   | 0.6<br>(0.4 to 0.9)               | 27.5<br>(24.7 to 30.1)                            | -5.5<br>(-7.2 to -3.9)                              |
| Pedestrian road injuries                      | 2.5<br>(2.2 to 2.9)                   | 0.9<br>(0.7 to 1.1)                   | 0.1<br>(0.1 to 0.2)               | 28.4<br>(25.3 to 31.1)                            | -5.3<br>(-7.2 to -3.5)                              |
| Cyclist road injuries                         | 2.1<br>(1.7 to 2.4)                   | 1.1<br>(0.9 to 1.4)                   | 0.1<br>(0.1 to 0.2)               | 35.5<br>(32.2 to 38.5)                            | 1.4<br>(-0.6 to 3.2)                                |
| Motorcyclist road injuries                    | 1.1<br>(0.9 to 1.3)                   | 0.4<br>(0.3 to 0.5)                   | 0.1<br>(< 0.05 to 0.1)            | 14.7<br>(12.1 to 17.0)                            | -15.7<br>(-17.3 to -14.2)                           |
| Motor vehicle road injuries                   | 4.0<br>(3.4 to 4.5)                   | 2.3<br>(1.9 to 2.7)                   | 0.2<br>(0.2 to 0.4)               | 24.9<br>(22.0 to 27.7)                            | -7.2<br>(-8.9 to -5.5)                              |
| Other road injuries                           | 0.8<br>(0.7 to 1.0)                   | 0.5<br>(0.4 to 0.7)                   | < 0.05<br>(< 0.05 to 0.1)         | 41.1<br>(37.7 to 44.5)                            | 5.8<br>(3.7 to 7.7)                                 |
| Other transport injuries                      | 1.9<br>(1.6 to 2.3)                   | 0.6<br>(0.5 to 0.7)                   | 0.1<br>(0.1 to 0.2)               | 33.7<br>(29.2 to 38.0)                            | 2.7<br>(0.1 to 5.2)                                 |
| <b>Unintentional injuries</b>                 | <b>79.2</b><br><b>(72.9 to 86.7)</b>  | <b>46.9</b><br><b>(43.8 to 50.2)</b>  | <b>2.9</b><br><b>(2.0 to 4.2)</b> | <b>28.8</b><br><b>(25.9 to 31.4)</b>              | <b>-3.2</b><br><b>(-5.1 to -1.6)</b>                |
| Falls                                         | 29.1<br>(25.0 to 33.3)                | 17.3<br>(14.9 to 20.2)                | 1.2<br>(0.9 to 1.7)               | 26.7<br>(23.7 to 29.3)                            | -6.1<br>(-8.2 to -4.1)                              |
| Drowning                                      | 0.4<br>(0.4 to 0.5)                   | 0.1<br>(0.1 to 0.1)                   | < 0.05<br>(< 0.05 to < 0.05)      | 28.4<br>(24.2 to 32.3)                            | -3.2<br>(-5.7 to -0.8)                              |
| Fire, heat, and hot substances                | 11.1<br>(9.2 to 13.7)                 | 1.9<br>(1.6 to 2.4)                   | 0.3<br>(0.2 to 0.5)               | 29.3<br>(23.0 to 35.2)                            | -2.2<br>(-6.2 to 1.6)                               |
| Poisonings                                    | 0.3<br>(0.2 to 0.3)                   | 0.4<br>(0.3 to 0.5)                   | < 0.05<br>(< 0.05 to < 0.05)      | 32.6<br>(21.0 to 44.8)                            | 3.3<br>(-4.1 to 11.1)                               |
| Exposure to mechanical forces                 | 12.0<br>(10.2 to 14.7)                | 6.1<br>(5.1 to 7.2)                   | 0.3<br>(0.2 to 0.5)               | 29.4<br>(26.3 to 32.3)                            | -3.5<br>(-5.5 to -1.8)                              |
| Unintentional firearm injuries                | 0.6<br>(0.5 to 0.7)                   | 0.2<br>(0.1 to 0.3)                   | < 0.05<br>(< 0.05 to < 0.05)      | 29.4<br>(26.0 to 32.9)                            | -4.2<br>(-6.2 to -2.0)                              |
| Unintentional suffocation                     | 1.0<br>(0.7 to 1.4)                   | 0.3<br>(0.2 to 0.4)                   | < 0.05<br>(< 0.05 to 0.1)         | 33.1<br>(29.0 to 37.6)                            | 4.0<br>(1.5 to 6.5)                                 |
| Other exposure to mechanical forces           | 10.5<br>(8.8 to 13.0)                 | 5.6<br>(4.7 to 6.6)                   | 0.3<br>(0.2 to 0.4)               | 28.9<br>(25.8 to 31.9)                            | -4.2<br>(-6.1 to -2.4)                              |

| Cause                                                                               | Prevalence in thousands (95% UI) | Incidence in thousands (95% UI)                | YLDs in thousands (95% UI)              |                                                   |                                                     |
|-------------------------------------------------------------------------------------|----------------------------------|------------------------------------------------|-----------------------------------------|---------------------------------------------------|-----------------------------------------------------|
|                                                                                     | 2016 counts                      | 2016 counts                                    | 2016 counts                             | Percentage change in counts between 2006 and 2016 | Percentage change in age-standardised rates between |
| Adverse effects of medical treatment                                                | 0.2<br>(0.2 to 0.3)              | 3.3<br>(2.8 to 3.8)                            | < 0.05<br>(< 0.05 to 0.1)               | 14.6<br>(8.5 to 21.8)                             | -3.1<br>(-7.7 to 1.8)                               |
| Animal contact                                                                      | 4.9<br>(4.3 to 5.7)              | 7.6<br>(6.3 to 8.9)                            | 0.2<br>(0.1 to 0.2)                     | 37.0<br>(30.0 to 44.6)                            | 3.8<br>(-0.3 to 8.3)                                |
| Venomous animal contact                                                             | 1.8<br>(1.5 to 2.1)              | 3.0<br>(2.4 to 3.8)                            | 0.1<br>(0.1 to 0.2)                     | 36.3<br>(26.1 to 47.8)                            | 3.6<br>(-2.4 to 10.3)                               |
| Non-venomous animal contact                                                         | 3.1<br>(2.6 to 3.8)              | 4.5<br>(3.7 to 5.4)                            | 0.1<br>(< 0.05 to 0.1)                  | 38.3<br>(33.6 to 42.6)                            | 4.1<br>(1.2 to 6.8)                                 |
| Foreign body                                                                        | 5.7<br>(4.6 to 6.9)              | 3.9<br>(3.4 to 4.5)                            | 0.2<br>(0.2 to 0.4)                     | 30.3<br>(25.8 to 34.6)                            | 2.2<br>(-0.3 to 4.5)                                |
| Pulmonary aspiration and foreign body in airway                                     | 3.1<br>(2.2 to 4.2)              | 1.3<br>(1.1 to 1.6)                            | 0.1<br>(0.1 to 0.2)                     | 28.1<br>(23.2 to 32.9)                            | 0.9<br>(-1.9 to 3.4)                                |
| Foreign body in eyes                                                                | 0.2<br>(0.1 to 0.4)              | 1.4<br>(1.1 to 1.9)                            | < 0.05<br>(< 0.05 to < 0.05)            | 31.2<br>(26.6 to 35.8)                            | 2.5<br>(-0.2 to 5.0)                                |
| Foreign body in other body part                                                     | 2.4<br>(1.9 to 3.1)              | 1.2<br>(0.9 to 1.4)                            | 0.1<br>(0.1 to 0.1)                     | 34.5<br>(29.4 to 39.3)                            | 4.5<br>(1.6 to 7.4)                                 |
| Environmental heat and cold exposure                                                | 4.5<br>(3.7 to 5.4)              | 1.5<br>(1.2 to 1.9)                            | 0.2<br>(0.1 to 0.3)                     | 32.1<br>(28.9 to 35.3)                            | 1.7<br>(-0.3 to 3.6)                                |
| Other unintentional injuries                                                        | 11.0<br>(8.4 to 14.3)            | 4.7<br>(3.8 to 5.8)                            | 0.3<br>(0.2 to 0.5)                     | 30.6<br>(27.5 to 33.8)                            | -0.3<br>(-2.2 to 1.6)                               |
| <b>Self-harm and interpersonal violence</b>                                         | <b>26.9<br/>(24.0 to 30.0)</b>   | <b>3.7†<br/>(3.1 to 4.3)</b>                   | <b>0.4<br/>(0.3 to 0.6)</b>             | <b>21.4<br/>(17.4 to 25.1)</b>                    | <b>-5.9<br/>(-8.3 to -3.8)</b>                      |
| Self-harm                                                                           | 0.4<br>(0.4 to 0.5)              | 0.3<br>(0.2 to 0.3)                            | < 0.05<br>(< 0.05 to < 0.05)            | 29.7<br>(26.1 to 33.2)                            | -3.0<br>(-5.2 to -0.9)                              |
| Self-harm by firearm                                                                | < 0.05<br>(< 0.05 to < 0.05)     | < 0.05<br>(< 0.05 to < 0.05)                   | < 0.05<br>(< 0.05 to < 0.05)            | 32.0<br>(27.7 to 36.6)                            | -1.3<br>(-4.0 to 1.7)                               |
| Self-harm by other specified means                                                  | 0.4<br>(0.3 to 0.5)              | 0.2<br>(0.2 to 0.3)                            | < 0.05<br>(< 0.05 to < 0.05)            | 29.5<br>(25.8 to 33.2)                            | -3.2<br>(-5.5 to -0.9)                              |
| Interpersonal violence                                                              | 26.4<br>(23.6 to 29.6)           | 3.4†<br>(2.9 to 4.0)                           | 0.4<br>(0.3 to 0.6)                     | 20.9<br>(16.9 to 24.7)                            | -6.2<br>(-8.6 to -3.9)                              |
| Assault by firearm                                                                  | 0.2<br>(0.1 to 0.2)              | 0.1<br>(< 0.05 to 0.1)                         | < 0.05<br>(< 0.05 to < 0.05)            | 33.5<br>(29.0 to 37.9)                            | -0.3<br>(-2.9 to 2.4)                               |
| Assault by sharp object                                                             | 1.4<br>(1.1 to 1.6)              | 0.7<br>(0.5 to 0.9)                            | < 0.05<br>(< 0.05 to 0.1)               | 35.9<br>(32.0 to 39.5)                            | 2.0<br>(-0.4 to 4.2)                                |
| Sexual violence                                                                     | 21.3<br>(18.5 to 24.5)           | --                                             | 0.2<br>(0.1 to 0.3)                     | 7.8<br>(2.3 to 13.0)                              | -15.9<br>(-19.5 to -12.3)                           |
| Assault by other means                                                              | 3.6<br>(3.1 to 4.4)              | 2.7<br>(2.2 to 3.1)                            | 0.2<br>(0.1 to 0.2)                     | 35.1<br>(32.2 to 38.3)                            | 0.5<br>(-1.2 to 2.6)                                |
| <b>Forces of nature, conflict and terrorism, and executions and police conflict</b> | <b>0.9<br/>(0.5 to 1.5)</b>      | <b>&lt; 0.05†<br/>(&lt; 0.05 to &lt; 0.05)</b> | <b>&lt; 0.05<br/>(&lt; 0.05 to 0.1)</b> | <b>-15.4<br/>(-18.6 to -12.5)</b>                 | <b>-23.2<br/>(-25.7 to -20.9)</b>                   |
| Exposure to forces of nature                                                        | 0.1<br>(< 0.05 to 0.1)           | --                                             | < 0.05<br>(< 0.05 to < 0.05)            | -24.2<br>(-26.3 to -21.8)                         | -32.6<br>(-34.3 to -30.6)                           |
| Conflict and terrorism                                                              | 0.8<br>(0.4 to 1.2)              | --                                             | < 0.05<br>(< 0.05 to 0.1)               | -16.3<br>(-19.6 to -13.0)                         | -22.6<br>(-25.1 to -19.9)                           |
| Executions and police conflict                                                      | 0.1<br>(< 0.05 to 0.2)           | < 0.05<br>(< 0.05 to < 0.05)                   | < 0.05<br>(< 0.05 to < 0.05)            | 9.4<br>(-2.3 to 29.8)                             | -9.6<br>(-19.5 to 4.2)                              |
| <b>Impairments</b>                                                                  | --                               | --                                             | --                                      | --                                                | --                                                  |
| Anaemia                                                                             | 215.7<br>(188.6 to 241.3)        | --                                             | 6.6<br>(4.3 to 9.7)                     | 8.5<br>(-7.3 to 27.7)                             | -9.5<br>(-19.5 to 2.4)                              |
| Developmental intellectual disability                                               | 30.7<br>(23.1 to 38.4)           | --                                             | 3.0<br>(2.1 to 4.2)                     | 24.5<br>(12.6 to 36.0)                            | -0.0<br>(-9.0 to 9.0)                               |
| Epilepsy                                                                            | 6.3<br>(3.3 to 9.5)              | --                                             | 2.5<br>(1.2 to 4.0)                     | 23.9<br>(-39.2 to 158.6)                          | -0.2<br>(-52.7 to 120.0)                            |
| Guillain-Barre syndrome                                                             | < 0.05<br>(< 0.05 to < 0.05)     | --                                             | < 0.05<br>(< 0.05 to < 0.05)            | 25.6<br>(23.1 to 28.4)                            | -0.0<br>(-0.1 to 0.0)                               |
| Hearing loss                                                                        | 98.5<br>(92.8 to 104.8)          | --                                             | 3.8<br>(2.6 to 5.2)                     | 25.3<br>(21.2 to 29.7)                            | -2.8<br>(-5.0 to -0.6)                              |
| Heart failure                                                                       | 2.1<br>(1.8 to 2.4)              | --                                             | 0.2<br>(0.2 to 0.3)                     | 32.1<br>(22.4 to 42.2)                            | 0.2<br>(-7.5 to 8.4)                                |
| Infertility                                                                         | 22.3<br>(20.3 to 24.7)           | --                                             | 0.1<br>(0.1 to 0.3)                     | 31.1<br>(12.8 to 53.1)                            | -3.0<br>(-17.1 to 13.7)                             |
| Pelvic inflammatory disease                                                         | 0.8<br>(0.7 to 1.0)              | --                                             | 0.1<br>(0.1 to 0.2)                     | 36.1<br>(16.5 to 56.2)                            | 1.3<br>(-12.3 to 15.4)                              |
| Vision loss                                                                         | 107.7<br>(103.1 to 112.9)        | --                                             | 2.8<br>(1.9 to 4.2)                     | 21.4<br>(11.6 to 31.7)                            | -7.0<br>(-11.1 to -1.3)                             |

We did not calculate incidence for the nine impairments, certain NTDs, and causes with only birth prevalence. Blank cells mean that no estimate is available.

† Incidence for aggregate causes represents the sum of the incidence of the causes below the aggregate.

‡ Incidence estimates for stroke represent first-ever stroke only.

^ Incidence of HIV/AIDS represents new infections of HIV only and does not include new infections of Tuberculosis in HIV positive cases.

SR Table 14: Prevalence, incidence, and YLDs for 2016, percentage change of YLD counts and percentage change of age-standardised YLD rates between 2006 and 2016 by cause and impairments, for all ages, Congo (Brazzaville).

| Cause                                                                                | Prevalence in thousands (95% UI)       | Incidence in thousands (95% UI)            | YLDs in thousands (95% UI)       |                                                   |                                                     |
|--------------------------------------------------------------------------------------|----------------------------------------|--------------------------------------------|----------------------------------|---------------------------------------------------|-----------------------------------------------------|
|                                                                                      | 2016 counts                            | 2016 counts                                | 2016 counts                      | Percentage change in counts between 2006 and 2016 | Percentage change in age-standardised rates between |
| <b>All causes</b>                                                                    | <b>4,661.4</b><br>(4,654.2 to 4,669.3) | <b>34,414.5†</b><br>(32,467.1 to 36,597.0) | <b>474.2</b><br>(351.2 to 619.4) | <b>24.3</b><br>(21.3 to 27.1)                     | <b>-5.1</b><br>(-7.1 to -3.4)                       |
| <b>Communicable, maternal, neonatal, and nutritional disorders</b>                   | <b>4,340.6</b><br>(4,290.6 to 4,392.4) | <b>22,740.2†</b><br>(20,822.9 to 24,776.6) | <b>129.8</b><br>(91.5 to 180.8)  | <b>10.1</b><br>(5.0 to 15.2)                      | <b>-18.2</b><br>(-22.5 to -14.3)                    |
| <b>HIV/AIDS and tuberculosis</b>                                                     | <b>1,102.4</b><br>(1,010.0 to 1,181.3) | <b>21.3†</b><br>(18.1 to 24.5)             | <b>13.5</b><br>(9.0 to 19.2)     | <b>-4.6</b><br>(-15.2 to 7.6)                     | <b>-28.3</b><br>(-37.6 to -17.3)                    |
| Tuberculosis                                                                         | 993.1<br>(899.9 to 1,096.9)            | 15.8†<br>(13.0 to 18.9)                    | 2.1<br>(1.4 to 3.0)              | 2.8<br>(-8.4 to 16.7)                             | -20.5<br>(-27.8 to -11.7)                           |
| Drug-susceptible tuberculosis                                                        | 7.0<br>(5.7 to 8.2)                    | 15.7<br>(12.9 to 18.7)                     | 2.1<br>(1.4 to 3.0)              | 2.9<br>(-8.3 to 17.0)                             | -20.5<br>(-27.8 to -11.4)                           |
| Multidrug-resistant tuberculosis without extensive drug resistance                   | 0.1<br>(< 0.05 to 0.1)                 | 0.1<br>(0.1 to 0.2)                        | < 0.05<br>(< 0.05 to < 0.05)     | -1.2<br>(-43.2 to 79.9)                           | -24.0<br>(-57.1 to 37.6)                            |
| Extensively drug-resistant tuberculosis                                              | < 0.05<br>(< 0.05 to < 0.05)           | < 0.05<br>(< 0.05 to < 0.05)               | < 0.05<br>(< 0.05 to < 0.05)     | 201.0<br>(72.9 to 448.0)                          | 131.6<br>(30.7 to 319.5)                            |
| Latent tuberculosis infection                                                        | 986.1<br>(893.0 to 1,089.9)            | --                                         | --                               | --                                                | --                                                  |
| HIV/AIDS                                                                             | 81.9<br>(76.8 to 88.4)                 | 5.4 <sup>A</sup><br>(4.6 to 6.7)           | 11.3<br>(7.5 to 16.7)            | -5.8<br>(-17.2 to 8.0)                            | -29.7<br>(-39.5 to -17.1)                           |
| Drug-susceptible HIV/AIDS - Tuberculosis                                             | 1.9<br>(1.2 to 2.9)                    | 4.4<br>(2.7 to 6.6)                        | 0.7<br>(0.4 to 1.2)              | -23.5<br>(-35.6 to -11.4)                         | -40.2<br>(-48.9 to -31.3)                           |
| Multidrug-resistant HIV/AIDS - Tuberculosis without extensive drug resistance        | < 0.05<br>(< 0.05 to < 0.05)           | < 0.05<br>(< 0.05 to 0.1)                  | < 0.05<br>(< 0.05 to < 0.05)     | -26.5<br>(-58.2 to 32.0)                          | -42.5<br>(-67.3 to 3.3)                             |
| Extensively drug-resistant HIV/AIDS - Tuberculosis                                   | < 0.05<br>(< 0.05 to < 0.05)           | < 0.05<br>(< 0.05 to < 0.05)               | < 0.05<br>(< 0.05 to < 0.05)     | 124.0<br>(27.2 to 302.3)                          | 75.2<br>(-0.5 to 214.7)                             |
| HIV/AIDS resulting in other diseases                                                 | 79.9<br>(74.8 to 86.6)                 | 5.4<br>(4.6 to 6.7)                        | 10.6<br>(7.1 to 15.8)            | -4.3<br>(-16.9 to 11.3)                           | -28.8<br>(-39.4 to -14.1)                           |
| <b>Diarrhoea, lower respiratory infections, and other common infectious diseases</b> | <b>365.2</b><br>(347.0 to 386.7)       | <b>20,003.8†</b><br>(18,180.6 to 21,841.5) | <b>19.9</b><br>(14.1 to 27.1)    | <b>23.8</b><br>(19.9 to 27.8)                     | <b>-5.2</b><br>(-7.9 to -2.5)                       |
| Diarrhoeal diseases                                                                  | 79.7<br>(73.5 to 86.1)                 | 5,331.4<br>(4,930.6 to 5,764.0)            | 9.0<br>(6.2 to 12.3)             | 21.0<br>(14.3 to 27.4)                            | -7.7<br>(-11.8 to -3.5)                             |
| Intestinal infectious diseases                                                       | 0.2<br>(0.1 to 0.2)                    | 3.1†<br>(2.4 to 4.0)                       | < 0.05<br>(< 0.05 to < 0.05)     | 17.3<br>(-2.3 to 42.2)                            | -12.0<br>(-24.3 to 3.2)                             |
| Typhoid fever                                                                        | 0.2<br>(0.1 to 0.2)                    | 2.7<br>(2.1 to 3.5)                        | < 0.05<br>(< 0.05 to < 0.05)     | 17.7<br>(-2.7 to 44.3)                            | -11.8<br>(-24.6 to 4.7)                             |
| Paratyphoid fever                                                                    | < 0.05<br>(< 0.05 to < 0.05)           | 0.4<br>(0.3 to 0.5)                        | < 0.05<br>(< 0.05 to < 0.05)     | 26.7<br>(2.3 to 59.6)                             | -5.5<br>(-21.5 to 15.2)                             |
| Other intestinal infectious diseases                                                 | --                                     | --                                         | < 0.05<br>(< 0.05 to < 0.05)     | -14.2<br>(-37.5 to 17.6)                          | -31.5<br>(-45.8 to -13.7)                           |
| Lower respiratory infections                                                         | 5.5<br>(5.0 to 6.0)                    | 243.1<br>(219.1 to 268.4)                  | 0.3<br>(0.2 to 0.5)              | 15.7<br>(1.0 to 30.8)                             | -9.1<br>(-18.5 to 0.4)                              |
| Upper respiratory infections                                                         | 183.1<br>(160.0 to 206.6)              | 13,837.3<br>(12,001.6 to 15,735.8)         | 4.6<br>(2.7 to 7.2)              | 30.2<br>(23.2 to 37.0)                            | 0.1<br>(-4.8 to 5.4)                                |
| Otitis media                                                                         | 81.0<br>(71.7 to 90.2)                 | 418.6<br>(324.9 to 536.4)                  | 2.5<br>(1.6 to 3.8)              | 23.1<br>(13.4 to 33.2)                            | -5.9<br>(-12.6 to 1.0)                              |
| Meningitis                                                                           | 25.5<br>(21.5 to 29.9)                 | 6.4<br>(5.5 to 7.6)                        | 2.4<br>(1.7 to 3.2)              | 25.4<br>(16.2 to 36.0)                            | -4.5<br>(-11.0 to 2.6)                              |
| Pneumococcal meningitis                                                              | 13.1<br>(11.0 to 15.8)                 | 1.7<br>(1.4 to 2.2)                        | 1.3<br>(0.9 to 1.8)              | 13.7<br>(-0.1 to 30.3)                            | -14.2<br>(-23.8 to -3.5)                            |
| H influenzae type B meningitis                                                       | 3.1<br>(2.5 to 4.0)                    | 0.8<br>(0.6 to 1.2)                        | 0.4<br>(0.2 to 0.5)              | 7.9<br>(-5.8 to 23.2)                             | -18.5<br>(-28.4 to -7.7)                            |
| Meningococcal infection                                                              | 1.1<br>(0.8 to 1.4)                    | 0.4<br>(0.3 to 0.6)                        | 0.1<br>(0.1 to 0.2)              | 29.0<br>(22.7 to 35.4)                            | -1.6<br>(-6.4 to 3.3)                               |
| Other meningitis                                                                     | 8.2<br>(5.9 to 10.7)                   | 3.4<br>(2.9 to 4.1)                        | 0.6<br>(0.4 to 0.8)              | 83.0<br>(63.3 to 103.9)                           | 42.1<br>(27.0 to 58.0)                              |
| Encephalitis                                                                         | 7.7<br>(5.0 to 11.4)                   | 4.5<br>(3.9 to 5.2)                        | 0.8<br>(0.6 to 1.1)              | 31.6<br>(17.0 to 47.9)                            | 0.7<br>(-9.1 to 12.0)                               |
| Diphtheria                                                                           | < 0.05<br>(< 0.05 to < 0.05)           | < 0.05<br>(< 0.05 to < 0.05)               | < 0.05<br>(< 0.05 to < 0.05)     | -60.7<br>(-82.6 to -8.7)                          | -67.0<br>(-82.8 to -34.4)                           |
| Whooping cough                                                                       | 2.6<br>(2.1 to 3.3)                    | 19.3<br>(15.0 to 24.2)                     | 0.1<br>(0.1 to 0.2)              | -14.0<br>(-27.2 to 0.2)                           | -30.7<br>(-41.4 to -19.2)                           |
| Tetanus                                                                              | < 0.05<br>(< 0.05 to < 0.05)           | < 0.05<br>(< 0.05 to 0.1)                  | < 0.05<br>(< 0.05 to < 0.05)     | -0.3<br>(-23.0 to 21.2)                           | -29.4<br>(-48.9 to -9.8)                            |
| Measles                                                                              | 0.4<br>(0.1 to 0.8)                    | 13.7<br>(4.8 to 30.4)                      | < 0.05<br>(< 0.05 to 0.1)        | 10.5<br>(-44.1 to 114.5)                          | -12.2<br>(-55.1 to 70.4)                            |
| Varicella and herpes zoster                                                          | 4.4<br>(4.1 to 4.7)                    | 126.2<br>(118.0 to 134.9)                  | 0.1<br>(0.1 to 0.2)              | 32.3<br>(14.8 to 52.2)                            | 0.3<br>(-10.8 to 12.0)                              |
| <b>Neglected tropical diseases and malaria</b>                                       | <b>3,458.3</b><br>(3,296.7 to 3,622.4) | <b>1,473.7†</b><br>(1,060.3 to 1,990.9)    | <b>30.9</b><br>(20.8 to 47.4)    | <b>-13.3</b><br>(-20.7 to -5.9)                   | <b>-36.1</b><br>(-42.1 to -30.0)                    |
| Malaria                                                                              | 579.6<br>(476.6 to 698.1)              | 1,037.9<br>(623.4 to 1,553.7)              | 7.9<br>(5.7 to 10.9)             | -17.3<br>(-27.5 to -5.8)                          | -38.2<br>(-45.1 to -30.7)                           |
| Chagas disease                                                                       | --                                     | --                                         | --                               | --                                                | --                                                  |
| Leishmaniasis                                                                        | --                                     | --                                         | --                               | --                                                | --                                                  |
| Visceral leishmaniasis                                                               | --                                     | --                                         | --                               | --                                                | --                                                  |
| Cutaneous and mucocutaneous leishmaniasis                                            | --                                     | --                                         | --                               | --                                                | --                                                  |
| African trypanosomiasis                                                              | 0.1<br>(< 0.05 to 0.2)                 | 0.1<br>(< 0.05 to 0.1)                     | < 0.05<br>(< 0.05 to < 0.05)     | -79.6<br>(-85.9 to -70.4)                         | -84.3<br>(-90.4 to -74.5)                           |
| Schistosomiasis                                                                      | 1,001.0<br>(887.4 to 1,108.2)          | 392.9<br>(361.0 to 428.0)                  | 7.4<br>(3.6 to 14.1)             | -3.7<br>(-7.2 to 0.2)                             | -26.8<br>(-29.5 to -24.1)                           |
| Cysticercosis                                                                        | 5.5<br>(4.3 to 6.7)                    | --                                         | 1.0<br>(0.6 to 1.6)              | 24.9<br>(2.8 to 47.2)                             | -5.0<br>(-20.0 to 10.3)                             |
| Cystic echinococcosis                                                                | 0.8<br>(0.2 to 2.9)                    | 0.2<br>(< 0.05 to 0.6)                     | 0.1<br>(< 0.05 to 0.3)           | -36.0<br>(-90.6 to 342.9)                         | -51.6<br>(-92.3 to 192.8)                           |
| Lymphatic filariasis                                                                 | 85.2<br>(70.0 to 103.7)                | 13.4<br>(11.1 to 16.3)                     | 3.2<br>(1.5 to 5.7)              | -53.1<br>(-63.4 to -49.0)                         | -64.7<br>(-72.6 to -61.9)                           |
| Onchocerciasis                                                                       | 20.1<br>(10.6 to 32.6)                 | 4.6<br>(1.9 to 9.9)                        | 1.4<br>(0.5 to 2.8)              | -53.0<br>(-72.5 to -30.4)                         | -61.4<br>(-77.4 to -41.6)                           |
| Trachoma                                                                             | --                                     | --                                         | --                               | --                                                | --                                                  |
| Dengue                                                                               | 1.4<br>(0.6 to 2.6)                    | 23.7<br>(11.6 to 41.8)                     | 0.2<br>(0.1 to 0.5)              | 178.0<br>(86.1 to 585.8)                          | 110.4<br>(48.7 to 399.2)                            |
| Yellow fever                                                                         | < 0.05<br>(< 0.05 to 0.1)              | 0.9<br>(0.3 to 2.4)                        | < 0.05<br>(< 0.05 to < 0.05)     | -28.9<br>(-50.0 to 4.0)                           | -45.8<br>(-59.9 to -24.6)                           |
| Rabies                                                                               | < 0.05<br>(< 0.05 to < 0.05)           | < 0.05<br>(< 0.05 to < 0.05)               | < 0.05<br>(< 0.05 to < 0.05)     | -23.6<br>(-57.0 to 39.4)                          | -38.7<br>(-59.7 to -7.6)                            |
| Intestinal nematode infections                                                       | 2,865.3<br>(2,612.9 to 3,126.3)        | --                                         | 7.5<br>(4.4 to 12.3)             | 29.7<br>(12.5 to 48.5)                            | -1.1<br>(-16.4 to 16.3)                             |
| Ascariasis                                                                           | 1,545.5<br>(1,286.2 to 1,848.5)        | --                                         | 2.3<br>(1.3 to 4.0)              | 30.6<br>(-1.1 to 67.0)                            | -0.9<br>(-28.3 to 35.3)                             |



| Cause                                                                   | Prevalence in thousands (95% UI)              | Incidence in thousands (95% UI)                   | YLDs in thousands (95% UI)              |                                                   |                                                     |
|-------------------------------------------------------------------------|-----------------------------------------------|---------------------------------------------------|-----------------------------------------|---------------------------------------------------|-----------------------------------------------------|
|                                                                         | 2016 counts                                   | 2016 counts                                       | 2016 counts                             | Percentage change in counts between 2006 and 2016 | Percentage change in age-standardised rates between |
| Trichuriasis                                                            | 1,340.0<br>(1,092.4 to 1,671.4)               | --                                                | 1.5<br>(0.8 to 2.5)                     | 32.2<br>(2.2 to 71.9)                             | 0.4<br>(-26.9 to 38.5)                              |
| Hookworm disease                                                        | 986.4<br>(803.3 to 1,220.4)                   | --                                                | 3.7<br>(2.2 to 5.9)                     | 28.2<br>(4.1 to 56.3)                             | -1.8<br>(-23.2 to 24.4)                             |
| Food-borne trematodiasis                                                | --                                            | --                                                | --                                      | --                                                | --                                                  |
| Leprosy                                                                 | 0.7<br>(0.6 to 0.8)                           | < 0.05<br>(< 0.05 to < 0.05)                      | < 0.05<br>(< 0.05 to 0.1)               | -9.5<br>(-23.9 to 9.1)                            | -29.4<br>(-39.0 to -17.3)                           |
| Ebola virus disease                                                     | --                                            | --                                                | --                                      | --                                                | --                                                  |
| Zika virus disease                                                      | --                                            | --                                                | --                                      | --                                                | --                                                  |
| Guinea worm disease                                                     | --                                            | --                                                | --                                      | --                                                | --                                                  |
| Other neglected tropical diseases                                       | 74.4<br>(69.4 to 79.4)                        | --                                                | 2.2<br>(1.4 to 3.3)                     | 28.7<br>(16.4 to 41.8)                            | -0.7<br>(-9.8 to 8.8)                               |
| <b>Maternal disorders</b>                                               | <b>13.8</b><br><b>(10.6 to 17.9)</b>          | <b>102.5†</b><br><b>(91.8 to 114.9)</b>           | <b>1.0</b><br><b>(0.7 to 1.4)</b>       | <b>11.3</b><br><b>(-14.5 to 46.7)</b>             | <b>-13.3</b><br><b>(-32.7 to 13.3)</b>              |
| Maternal haemorrhage                                                    | 1.6<br>(1.2 to 2.1)                           | 11.1<br>(8.2 to 14.7)                             | 0.1<br>(< 0.05 to 0.1)                  | 18.6<br>(-14.8 to 64.3)                           | -6.2<br>(-32.4 to 28.8)                             |
| Maternal sepsis and other pregnancy related infections                  | 1.8<br>(1.4 to 2.3)                           | 8.8<br>(6.7 to 11.9)                              | < 0.05<br>(< 0.05 to 0.1)               | 21.1<br>(-39.2 to 140.9)                          | -5.5<br>(-50.7 to 81.9)                             |
| Maternal hypertensive disorders                                         | 9.7<br>(6.3 to 13.3)                          | 43.3<br>(37.3 to 48.6)                            | 0.5<br>(0.2 to 0.8)                     | 20.2<br>(-26.2 to 97.7)                           | -5.2<br>(-42.0 to 55.5)                             |
| Maternal obstructed labour and uterine rupture                          | 0.8<br>(0.6 to 0.9)                           | 5.2<br>(3.8 to 7.0)                               | 0.2<br>(0.1 to 0.4)                     | -3.0<br>(-24.0 to 24.0)                           | -25.0<br>(-40.7 to -5.0)                            |
| Maternal abortion, miscarriage, and ectopic pregnancy                   | 0.3<br>(0.2 to 0.4)                           | 34.1<br>(26.5 to 44.1)                            | < 0.05<br>(< 0.05 to 0.1)               | 17.8<br>(-41.1 to 144.4)                          | -8.0<br>(-54.6 to 83.7)                             |
| Other maternal disorders                                                | --                                            | --                                                | 0.2<br>(0.1 to 0.2)                     | 6.2<br>(-18.6 to 39.7)                            | -17.2<br>(-35.8 to 8.0)                             |
| <b>Neonatal disorders</b>                                               | <b>62.3</b><br><b>(51.0 to 77.0)</b>          | --                                                | <b>9.1</b><br><b>(5.0 to 16.3)</b>      | <b>35.2</b><br><b>(4.2 to 62.6)</b>               | <b>7.3</b><br><b>(-16.9 to 28.9)</b>                |
| Neonatal preterm birth complications                                    | 45.6<br>(33.9 to 61.1)                        | --                                                | 3.1<br>(2.0 to 4.8)                     | 22.0<br>(-4.5 to 55.7)                            | -4.5<br>(-24.5 to 21.9)                             |
| Neonatal encephalopathy due to birth asphyxia and trauma                | 12.1<br>(6.1 to 20.9)                         | --                                                | 1.2<br>(0.2 to 3.3)                     | 43.9<br>(-11.2 to 151.1)                          | 14.1<br>(-31.4 to 98.7)                             |
| Neonatal sepsis and other neonatal infections                           | 9.3<br>(2.1 to 22.6)                          | --                                                | 3.6<br>(0.4 to 9.8)                     | 51.3<br>(-43.6 to 121.8)                          | 21.8<br>(-58.6 to 84.5)                             |
| Hemolytic disease and other neonatal jaundice                           | 1.3<br>(1.1 to 1.5)                           | --                                                | 0.4<br>(0.3 to 0.5)                     | 25.6<br>(4.8 to 48.2)                             | -2.5<br>(-16.1 to 11.3)                             |
| Other neonatal disorders                                                | --                                            | --                                                | 0.8<br>(0.5 to 1.3)                     | 20.9<br>(-4.5 to 43.4)                            | -2.4<br>(-23.0 to 15.8)                             |
| <b>Nutritional deficiencies</b>                                         | <b>1,813.5</b><br><b>(1,761.0 to 1,874.2)</b> | <b>405.2†</b><br><b>(349.5 to 482.5)</b>          | <b>51.3</b><br><b>(34.4 to 73.1)</b>    | <b>24.3</b><br><b>(18.4 to 30.5)</b>              | <b>-4.9</b><br><b>(-8.7 to -1.3)</b>                |
| Protein-energy malnutrition                                             | 57.1<br>(50.1 to 64.5)                        | 44.8<br>(40.0 to 49.7)                            | 2.1<br>(1.3 to 3.1)                     | 3.6<br>(-20.7 to 37.2)                            | -16.7<br>(-36.3 to 10.7)                            |
| Iodine deficiency                                                       | 404.1<br>(358.5 to 457.1)                     | 15.1<br>(13.4 to 17.0)                            | 10.2<br>(6.9 to 14.4)                   | 12.9<br>(7.2 to 19.2)                             | -13.7<br>(-17.8 to -9.3)                            |
| Vitamin A deficiency                                                    | 383.3<br>(328.2 to 466.4)                     | 345.3<br>(291.5 to 422.2)                         | 0.6<br>(0.3 to 0.8)                     | 19.2<br>(-2.6 to 43.3)                            | -9.5<br>(-25.6 to 7.6)                              |
| Iron-deficiency anaemia                                                 | 1,325.7<br>(1,267.2 to 1,388.1)               | --                                                | 38.4<br>(25.4 to 56.6)                  | 29.2<br>(21.6 to 37.3)                            | -0.7<br>(-6.1 to 4.3)                               |
| Other nutritional deficiencies                                          | --                                            | --                                                | 0.1<br>(< 0.05 to 0.1)                  | 1.8<br>(-23.9 to 37.9)                            | -18.2<br>(-38.9 to 10.9)                            |
| <b>Other communicable, maternal, neonatal, and nutritional diseases</b> | <b>1,637.7</b><br><b>(1,528.0 to 1,746.2)</b> | <b>733.8</b><br><b>(622.7 to 900.8)</b>           | <b>4.0</b><br><b>(2.6 to 6.0)</b>       | <b>30.5</b><br><b>(23.6 to 37.8)</b>              | <b>-0.8</b><br><b>(-5.4 to 3.8)</b>                 |
| Sexually transmitted diseases excluding HIV                             | 1,099.8<br>(1,022.5 to 1,177.0)               | 525.8<br>(471.5 to 591.2)                         | 2.1<br>(1.3 to 3.2)                     | 28.4<br>(20.5 to 37.1)                            | -1.5<br>(-6.9 to 4.3)                               |
| Syphilis                                                                | 131.6<br>(106.4 to 161.2)                     | 93.6<br>(72.4 to 118.9)                           | 0.1<br>(0.1 to 0.2)                     | 37.6<br>(23.3 to 55.6)                            | 2.7<br>(-9.2 to 17.6)                               |
| Chlamydial infection                                                    | 42.0<br>(34.8 to 49.9)                        | 39.0<br>(32.9 to 45.8)                            | 0.4<br>(0.2 to 0.6)                     | 24.7<br>(8.8 to 42.4)                             | -3.4<br>(-15.2 to 9.3)                              |
| Gonococcal infection                                                    | 45.7<br>(35.8 to 58.4)                        | 155.2<br>(116.1 to 204.7)                         | 0.5<br>(0.3 to 0.7)                     | 29.7<br>(14.5 to 45.4)                            | -0.2<br>(-11.4 to 11.1)                             |
| Trichomoniasis                                                          | 111.5<br>(94.9 to 129.1)                      | 98.5<br>(83.3 to 115.2)                           | 0.1<br>(< 0.05 to 0.2)                  | 29.3<br>(20.8 to 38.6)                            | 0.2<br>(-5.6 to 6.4)                                |
| Genital herpes                                                          | 883.2<br>(764.3 to 1,030.3)                   | 93.5<br>(77.5 to 115.1)                           | 0.2<br>(0.1 to 0.5)                     | 33.5<br>(21.6 to 45.2)                            | 1.8<br>(-5.9 to 9.8)                                |
| Other sexually transmitted diseases                                     | 33.5<br>(30.4 to 37.2)                        | 45.8<br>(38.1 to 54.6)                            | 0.8<br>(0.5 to 1.1)                     | 26.5<br>(14.6 to 39.0)                            | -3.8<br>(-12.3 to 5.2)                              |
| Hepatitis                                                               | 669.4<br>(541.7 to 830.9)                     | 208.0<br>(123.8 to 369.8)                         | 0.2<br>(0.1 to 0.3)                     | 0.0<br>(-23.2 to 28.5)                            | -17.8<br>(-33.3 to 1.8)                             |
| Acute hepatitis A                                                       | 5.8<br>(0.4 to 18.2)                          | 75.2<br>(5.6 to 236.0)                            | < 0.05<br>(< 0.05 to 0.1)               | -3.6<br>(-75.6 to 333.3)                          | -18.7<br>(-73.2 to 174.9)                           |
| Hepatitis B                                                             | 511.6<br>(382.6 to 671.4)                     | 112.2<br>(82.3 to 153.8)                          | 0.1<br>(0.1 to 0.2)                     | -1.0<br>(-21.8 to 26.0)                           | -18.6<br>(-34.0 to 0.5)                             |
| Hepatitis C                                                             | 151.3<br>(133.2 to 171.8)                     | 11.2<br>(10.0 to 12.5)                            | < 0.05<br>(< 0.05 to < 0.05)            | 23.0<br>(-25.1 to 103.2)                          | -4.8<br>(-30.4 to 30.1)                             |
| Acute hepatitis E                                                       | 0.7<br>(0.6 to 0.9)                           | 9.4<br>(8.0 to 11.4)                              | < 0.05<br>(< 0.05 to < 0.05)            | 3.9<br>(-25.0 to 43.4)                            | -14.4<br>(-33.8 to 9.8)                             |
| Other infectious diseases                                               | 54.5<br>(51.1 to 57.9)                        | < 0.05<br>(< 0.05 to < 0.05)                      | 1.7<br>(1.1 to 2.6)                     | 38.0<br>(24.8 to 52.6)                            | 4.9<br>(-4.0 to 15.0)                               |
| <b>Non-communicable diseases</b>                                        | <b>4,243.1</b><br><b>(4,215.7 to 4,272.9)</b> | <b>11,310.2†</b><br><b>(10,538.5 to 12,167.8)</b> | <b>315.8</b><br><b>(232.8 to 411.4)</b> | <b>31.0</b><br><b>(27.2 to 35.0)</b>              | <b>-0.7</b><br><b>(-2.8 to 1.4)</b>                 |
| <b>Neoplasms</b>                                                        | <b>6.0</b><br><b>(5.4 to 6.6)</b>             | <b>3.6</b><br><b>(3.1 to 4.0)</b>                 | <b>1.2</b><br><b>(0.8 to 1.5)</b>       | <b>28.1</b><br><b>(18.7 to 42.1)</b>              | <b>-3.4</b><br><b>(-10.2 to 5.5)</b>                |
| Lip and oral cavity cancer                                              | 0.2<br>(0.2 to 0.3)                           | 0.1<br>(0.1 to 0.1)                               | < 0.05<br>(< 0.05 to < 0.05)            | 33.5<br>(17.5 to 53.1)                            | -0.2<br>(-12.0 to 14.2)                             |
| Nasopharynx cancer                                                      | < 0.05<br>(< 0.05 to 0.1)                     | < 0.05<br>(< 0.05 to < 0.05)                      | < 0.05<br>(< 0.05 to < 0.05)            | 21.1<br>(3.6 to 49.0)                             | -10.1<br>(-21.6 to 8.2)                             |
| Other pharynx cancer                                                    | < 0.05<br>(< 0.05 to < 0.05)                  | < 0.05<br>(< 0.05 to < 0.05)                      | < 0.05<br>(< 0.05 to < 0.05)            | 31.2<br>(14.9 to 52.2)                            | -1.9<br>(-14.1 to 13.5)                             |
| Oesophageal cancer                                                      | 0.1<br>(0.1 to 0.2)                           | 0.1<br>(0.1 to 0.2)                               | < 0.05<br>(< 0.05 to < 0.05)            | 19.5<br>(-2.8 to 47.0)                            | -10.0<br>(-27.8 to 10.9)                            |
| Stomach cancer                                                          | 0.2<br>(0.2 to 0.2)                           | 0.1<br>(0.1 to 0.1)                               | < 0.05<br>(< 0.05 to < 0.05)            | 8.6<br>(-5.0 to 24.9)                             | -18.0<br>(-29.4 to -4.5)                            |
| Colon and rectum cancer                                                 | 0.6<br>(0.5 to 0.7)                           | 0.2<br>(0.2 to 0.2)                               | 0.1<br>(< 0.05 to 0.1)                  | 36.9<br>(14.3 to 67.7)                            | 2.8<br>(-14.1 to 24.8)                              |
| Liver cancer                                                            | 0.1<br>(0.1 to 0.1)                           | 0.3<br>(0.2 to 0.3)                               | 0.1<br>(< 0.05 to 0.1)                  | 29.8<br>(13.9 to 48.1)                            | -2.9<br>(-14.7 to 10.8)                             |
| Liver cancer due to hepatitis B                                         | 0.1<br>(0.1 to 0.1)                           | 0.1<br>(0.1 to 0.1)                               | < 0.05<br>(< 0.05 to < 0.05)            | 28.9<br>(12.4 to 48.5)                            | -3.7<br>(-15.9 to 10.6)                             |

| Cause                                              | Prevalence in thousands (95% UI)        | Incidence in thousands (95% UI)       | YLDs in thousands (95% UI)           |                                                   |                                                     |
|----------------------------------------------------|-----------------------------------------|---------------------------------------|--------------------------------------|---------------------------------------------------|-----------------------------------------------------|
|                                                    | 2016 counts                             | 2016 counts                           | 2016 counts                          | Percentage change in counts between 2006 and 2016 | Percentage change in age-standardised rates between |
| Liver cancer due to hepatitis C                    | 0.1<br>(0.1 to 0.1)                     | 0.1<br>(0.1 to 0.1)                   | < 0.05<br>(< 0.05 to < 0.05)         | 28.2<br>(9.7 to 48.3)                             | -4.0<br>(-17.9 to 11.5)                             |
| Liver cancer due to alcohol use                    | < 0.05<br>(< 0.05 to < 0.05)            | < 0.05<br>(< 0.05 to < 0.05)          | < 0.05<br>(< 0.05 to < 0.05)         | 43.7<br>(23.9 to 67.8)                            | 6.9<br>(-7.1 to 24.4)                               |
| Liver cancer due to other causes                   | < 0.05<br>(< 0.05 to 0.1)               | 0.1<br>(< 0.05 to 0.1)                | < 0.05<br>(< 0.05 to < 0.05)         | 26.7<br>(9.4 to 44.5)                             | -5.1<br>(-18.0 to 8.3)                              |
| Gallbladder and biliary tract cancer               | < 0.05<br>(< 0.05 to < 0.05)            | < 0.05<br>(< 0.05 to < 0.05)          | < 0.05<br>(< 0.05 to < 0.05)         | 18.5<br>(5.5 to 37.3)                             | -11.0<br>(-20.3 to 2.0)                             |
| Pancreatic cancer                                  | 0.1<br>(0.1 to 0.1)                     | 0.1<br>(0.1 to 0.1)                   | < 0.05<br>(< 0.05 to < 0.05)         | 37.7<br>(26.3 to 51.0)                            | 2.7<br>(-5.6 to 12.5)                               |
| Larynx cancer                                      | 0.1<br>(0.1 to 0.1)                     | < 0.05<br>(< 0.05 to < 0.05)          | < 0.05<br>(< 0.05 to < 0.05)         | 23.1<br>(8.7 to 41.8)                             | -7.5<br>(-18.4 to 6.1)                              |
| Tracheal, bronchus, and lung cancer                | 0.2<br>(0.2 to 0.3)                     | 0.2<br>(0.2 to 0.2)                   | < 0.05<br>(< 0.05 to 0.1)            | 28.5<br>(4.7 to 58.4)                             | -3.6<br>(-21.8 to 19.4)                             |
| Malignant skin melanoma                            | 0.1<br>(0.1 to 0.1)                     | < 0.05<br>(< 0.05 to < 0.05)          | < 0.05<br>(< 0.05 to < 0.05)         | 48.5<br>(26.9 to 67.1)                            | 9.7<br>(-5.5 to 23.7)                               |
| Non-melanoma skin cancer                           | < 0.05<br>(< 0.05 to 0.1)               | 0.2<br>(0.1 to 0.3)                   | < 0.05<br>(< 0.05 to < 0.05)         | 47.1<br>(14.3 to 93.7)                            | 8.9<br>(-18.1 to 47.0)                              |
| Non-melanoma skin cancer (squamous-cell carcinoma) | < 0.05<br>(< 0.05 to < 0.05)            | < 0.05<br>(< 0.05 to 0.1)             | < 0.05<br>(< 0.05 to < 0.05)         | 48.9<br>(9.7 to 108.3)                            | 9.8<br>(-21.9 to 55.3)                              |
| Non-melanoma skin cancer (basal-cell carcinoma)    | < 0.05<br>(< 0.05 to < 0.05)            | 0.2<br>(0.1 to 0.3)                   | < 0.05<br>(< 0.05 to < 0.05)         | 38.9<br>(25.8 to 52.0)                            | 3.7<br>(-5.5 to 12.8)                               |
| Breast cancer                                      | 1.9<br>(1.3 to 2.6)                     | 0.4<br>(0.3 to 0.6)                   | 0.2<br>(0.1 to 0.3)                  | 36.3<br>(9.2 to 76.8)                             | 0.4<br>(-19.0 to 27.8)                              |
| Cervical cancer                                    | 2.2<br>(1.2 to 2.9)                     | 0.6<br>(0.3 to 0.8)                   | 0.2<br>(0.1 to 0.3)                  | 13.2<br>(-7.3 to 47.4)                            | -16.7<br>(-31.7 to 6.7)                             |
| Uterine cancer                                     | 0.3<br>(0.2 to 0.3)                     | 0.1<br>(< 0.05 to 0.1)                | < 0.05<br>(< 0.05 to < 0.05)         | 33.0<br>(6.9 to 69.2)                             | -1.0<br>(-20.3 to 25.2)                             |
| Ovarian cancer                                     | 0.2<br>(0.2 to 0.4)                     | 0.1<br>(0.1 to 0.1)                   | < 0.05<br>(< 0.05 to 0.1)            | 38.6<br>(3.7 to 96.5)                             | 3.1<br>(-25.2 to 50.6)                              |
| Prostate cancer                                    | 0.8<br>(0.4 to 1.0)                     | 0.2<br>(0.1 to 0.3)                   | 0.1<br>(0.1 to 0.2)                  | 48.7<br>(18.6 to 79.4)                            | 8.8<br>(-10.1 to 28.2)                              |
| Testicular cancer                                  | < 0.05<br>(< 0.05 to < 0.05)            | < 0.05<br>(< 0.05 to < 0.05)          | < 0.05<br>(< 0.05 to < 0.05)         | 26.4<br>(-0.3 to 61.0)                            | -3.5<br>(-21.1 to 19.0)                             |
| Kidney cancer                                      | 0.3<br>(0.2 to 0.4)                     | 0.1<br>(0.1 to 0.1)                   | < 0.05<br>(< 0.05 to < 0.05)         | 37.2<br>(4.1 to 78.7)                             | 8.0<br>(-8.6 to 28.1)                               |
| Bladder cancer                                     | 0.3<br>(0.2 to 0.3)                     | 0.1<br>(0.1 to 0.1)                   | < 0.05<br>(< 0.05 to < 0.05)         | 36.9<br>(16.6 to 61.4)                            | 1.7<br>(-12.9 to 19.3)                              |
| Brain and nervous system cancer                    | 0.2<br>(0.1 to 0.3)                     | 0.1<br>(0.1 to 0.1)                   | < 0.05<br>(< 0.05 to < 0.05)         | 28.2<br>(8.9 to 50.7)                             | 0.5<br>(-8.3 to 9.3)                                |
| Thyroid cancer                                     | 0.1<br>(0.1 to 0.1)                     | < 0.05<br>(< 0.05 to < 0.05)          | < 0.05<br>(< 0.05 to < 0.05)         | 40.9<br>(16.9 to 75.5)                            | 0.3<br>(-16.5 to 25.3)                              |
| Mesothelioma                                       | < 0.05<br>(< 0.05 to < 0.05)            | < 0.05<br>(< 0.05 to < 0.05)          | < 0.05<br>(< 0.05 to < 0.05)         | 17.9<br>(3.0 to 36.4)                             | -11.3<br>(-22.7 to 2.6)                             |
| Hodgkin lymphoma                                   | < 0.05<br>(< 0.05 to < 0.05)            | < 0.05<br>(< 0.05 to < 0.05)          | < 0.05<br>(< 0.05 to < 0.05)         | 3.5<br>(-7.4 to 17.1)                             | -20.3<br>(-26.9 to -12.2)                           |
| Non-Hodgkin's lymphoma                             | 0.2<br>(0.2 to 0.3)                     | 0.1<br>(0.1 to 0.1)                   | < 0.05<br>(< 0.05 to < 0.05)         | 31.1<br>(17.2 to 45.8)                            | 0.2<br>(-10.0 to 10.7)                              |
| Multiple myeloma                                   | < 0.05<br>(< 0.05 to 0.1)               | < 0.05<br>(< 0.05 to < 0.05)          | < 0.05<br>(< 0.05 to < 0.05)         | 35.4<br>(22.4 to 48.9)                            | 1.7<br>(-7.9 to 11.2)                               |
| Leukaemia                                          | 0.3<br>(0.3 to 0.4)                     | 0.1<br>(0.1 to 0.1)                   | < 0.05<br>(< 0.05 to 0.1)            | 12.3<br>(-5.5 to 38.1)                            | -11.5<br>(-20.9 to 1.1)                             |
| Acute lymphoid leukaemia                           | 0.1<br>(0.1 to 0.1)                     | < 0.05<br>(< 0.05 to < 0.05)          | < 0.05<br>(< 0.05 to < 0.05)         | 14.2<br>(-14.1 to 53.1)                           | -9.3<br>(-27.8 to 11.9)                             |
| Chronic lymphoid leukaemia                         | < 0.05<br>(< 0.05 to < 0.05)            | < 0.05<br>(< 0.05 to < 0.05)          | < 0.05<br>(< 0.05 to < 0.05)         | 26.8<br>(9.2 to 49.1)                             | -4.7<br>(-17.1 to 11.1)                             |
| Acute myeloid leukaemia                            | 0.1<br>(< 0.05 to 0.1)                  | < 0.05<br>(< 0.05 to < 0.05)          | < 0.05<br>(< 0.05 to < 0.05)         | 26.8<br>(2.5 to 51.1)                             | 0.6<br>(-11.9 to 13.0)                              |
| Chronic myeloid leukaemia                          | < 0.05<br>(< 0.05 to < 0.05)            | < 0.05<br>(< 0.05 to < 0.05)          | < 0.05<br>(< 0.05 to < 0.05)         | 14.6<br>(-2.8 to 38.3)                            | -13.4<br>(-24.9 to 2.6)                             |
| Other leukaemia                                    | 0.1<br>(0.1 to 0.2)                     | < 0.05<br>(< 0.05 to < 0.05)          | < 0.05<br>(< 0.05 to < 0.05)         | 1.7<br>(-18.7 to 33.7)                            | -18.2<br>(-31.0 to -0.6)                            |
| Other neoplasms                                    | 0.6<br>(0.5 to 0.8)                     | 0.2<br>(0.2 to 0.2)                   | 0.1<br>(< 0.05 to 0.1)               | 27.5<br>(4.8 to 50.5)                             | -2.0<br>(-13.7 to 12.3)                             |
| <b>Cardiovascular diseases</b>                     | <b>219.6</b><br><b>(208.8 to 229.8)</b> | <b>18.4†</b><br><b>(17.6 to 19.3)</b> | <b>12.0</b><br><b>(8.8 to 15.9)</b>  | <b>36.6</b><br><b>(31.3 to 41.9)</b>              | <b>1.5</b><br><b>(-2.3 to 5.3)</b>                  |
| Rheumatic heart disease                            | 63.9<br>(56.5 to 71.6)                  | 2.7<br>(2.4 to 3.0)                   | 3.1<br>(1.9 to 4.5)                  | 42.9<br>(31.0 to 54.3)                            | 9.0<br>(0.4 to 17.6)                                |
| Ischaemic heart disease                            | 41.4<br>(39.1 to 43.7)                  | 5.9<br>(5.5 to 6.4)                   | 1.7<br>(1.2 to 2.4)                  | 34.5<br>(27.0 to 42.3)                            | 0.1<br>(-4.5 to 4.9)                                |
| Cerebrovascular disease                            | 17.2<br>(16.1 to 18.5)                  | 3.0‡<br>(2.7 to 3.2)                  | 2.5<br>(1.8 to 3.2)                  | 30.7<br>(21.7 to 41.4)                            | -2.2<br>(-9.2 to 6.2)                               |
| Ischaemic stroke                                   | 14.9<br>(13.5 to 16.5)                  | 2.0‡<br>(1.7 to 2.2)                  | 2.1<br>(1.5 to 2.6)                  | 33.0<br>(22.0 to 45.6)                            | -0.8<br>(-8.9 to 8.9)                               |
| Hemorrhagic stroke                                 | 3.1<br>(2.8 to 3.6)                     | 1.0‡<br>(0.9 to 1.1)                  | 0.4<br>(0.3 to 0.6)                  | 21.2<br>(6.6 to 36.8)                             | -8.9<br>(-20.2 to 3.6)                              |
| Hypertensive heart disease                         | 3.4<br>(2.7 to 4.2)                     | --                                    | 0.3<br>(0.2 to 0.4)                  | 31.9<br>(17.8 to 48.5)                            | -3.3<br>(-13.0 to 7.5)                              |
| Cardiomyopathy and myocarditis                     | 2.7<br>(2.3 to 3.0)                     | 1.1†<br>(0.9 to 1.2)                  | 0.2<br>(0.2 to 0.4)                  | 35.8<br>(21.6 to 51.7)                            | 2.0<br>(-9.5 to 15.2)                               |
| Myocarditis                                        | 0.6<br>(0.6 to 0.7)                     | 1.1<br>(0.9 to 1.2)                   | < 0.05<br>(< 0.05 to 0.1)            | 34.3<br>(26.8 to 42.3)                            | 2.0<br>(-5.8 to 10.3)                               |
| Alcoholic cardiomyopathy                           | 0.4<br>(0.3 to 0.4)                     | --                                    | < 0.05<br>(< 0.05 to < 0.05)         | 38.9<br>(5.9 to 81.8)                             | 2.1<br>(-22.6 to 33.8)                              |
| Other cardiomyopathy                               | 2.1<br>(1.8 to 2.6)                     | --                                    | 0.2<br>(0.1 to 0.3)                  | 35.7<br>(18.8 to 55.9)                            | 1.9<br>(-11.5 to 17.7)                              |
| Atrial fibrillation and flutter                    | 9.9<br>(8.7 to 11.5)                    | 0.9<br>(0.7 to 1.0)                   | 0.8<br>(0.5 to 1.1)                  | 36.8<br>(25.8 to 48.2)                            | 1.4<br>(-5.7 to 9.1)                                |
| Peripheral vascular disease                        | 43.4<br>(37.7 to 49.9)                  | 4.2<br>(3.6 to 4.9)                   | 0.2<br>(0.1 to 0.4)                  | 30.2<br>(19.6 to 41.1)                            | -2.6<br>(-10.3 to 5.1)                              |
| Endocarditis                                       | 0.2<br>(0.2 to 0.3)                     | 0.7<br>(0.6 to 0.8)                   | < 0.05<br>(< 0.05 to < 0.05)         | 35.0<br>(20.5 to 51.8)                            | 0.0<br>(-14.8 to 17.5)                              |
| Other cardiovascular and circulatory diseases      | 60.6<br>(48.8 to 74.6)                  | --                                    | 3.2<br>(2.1 to 4.5)                  | 37.9<br>(25.6 to 51.6)                            | 3.0<br>(-6.4 to 12.7)                               |
| <b>Chronic respiratory diseases</b>                | <b>310.2</b><br><b>(291.4 to 328.1)</b> | <b>63.7†</b><br><b>(58.6 to 69.4)</b> | <b>14.9</b><br><b>(11.1 to 19.6)</b> | <b>36.0</b><br><b>(30.3 to 42.0)</b>              | <b>1.6</b><br><b>(-2.2 to 5.8)</b>                  |
| Chronic obstructive pulmonary disease              | 59.1<br>(56.6 to 61.7)                  | 4.2<br>(4.1 to 4.4)                   | 4.5<br>(3.9 to 5.0)                  | 32.4<br>(23.6 to 42.6)                            | -0.8<br>(-7.1 to 6.1)                               |
| Pneumoconiosis                                     | 0.1<br>(< 0.05 to 0.1)                  | < 0.05<br>(< 0.05 to < 0.05)          | < 0.05<br>(< 0.05 to < 0.05)         | 34.7<br>(27.4 to 43.1)                            | 0.4<br>(-5.0 to 6.9)                                |
| Silicosis                                          | < 0.05<br>(< 0.05 to < 0.05)            | < 0.05<br>(< 0.05 to < 0.05)          | < 0.05<br>(< 0.05 to < 0.05)         | 37.5<br>(27.0 to 48.3)                            | 1.8<br>(-4.7 to 8.4)                                |



| Cause                                                          | Prevalence in thousands (95% UI)              | Incidence in thousands (95% UI)          | YLDs in thousands (95% UI)            |                                                   |                                                     |
|----------------------------------------------------------------|-----------------------------------------------|------------------------------------------|---------------------------------------|---------------------------------------------------|-----------------------------------------------------|
|                                                                | 2016 counts                                   | 2016 counts                              | 2016 counts                           | Percentage change in counts between 2006 and 2016 | Percentage change in age-standardised rates between |
| Asbestosis                                                     | < 0.05<br>(< 0.05 to < 0.05)                  | < 0.05<br>(< 0.05 to < 0.05)             | < 0.05<br>(< 0.05 to < 0.05)          | 34.9<br>(25.9 to 44.6)                            | 1.0<br>(-4.2 to 6.7)                                |
| Coal workers pneumoconiosis                                    | --                                            | --                                       | --                                    | --                                                | --                                                  |
| Other pneumoconiosis                                           | < 0.05<br>(< 0.05 to < 0.05)                  | < 0.05<br>(< 0.05 to < 0.05)             | < 0.05<br>(< 0.05 to < 0.05)          | 34.3<br>(22.1 to 49.4)                            | -0.2<br>(-9.7 to 12.0)                              |
| Asthma                                                         | 253.9<br>(233.7 to 278.1)                     | 59.4<br>(54.4 to 65.1)                   | 10.0<br>(6.5 to 14.4)                 | 36.2<br>(29.6 to 43.3)                            | 2.8<br>(-1.4 to 7.4)                                |
| Interstitial lung disease and pulmonary sarcoidosis            | 0.4<br>(0.4 to 0.4)                           | < 0.05<br>(< 0.05 to < 0.05)             | < 0.05<br>(< 0.05 to 0.1)             | 32.5<br>(26.6 to 38.6)                            | -1.1<br>(-7.5 to 6.0)                               |
| Other chronic respiratory diseases                             | --                                            | --                                       | 0.5<br>(0.4 to 0.6)                   | 78.8<br>(39.0 to 126.8)                           | 32.4<br>(11.4 to 57.2)                              |
| <b>Cirrhosis and other chronic liver diseases</b>              | <b>9.3</b><br><b>(8.9 to 9.8)</b>             | <b>1.1</b><br><b>(1.1 to 1.2)</b>        | <b>0.9</b><br><b>(0.6 to 1.2)</b>     | <b>29.9</b><br><b>(16.1 to 45.0)</b>              | <b>-1.8</b><br><b>(-9.9 to 6.7)</b>                 |
| Cirrhosis and other chronic liver diseases due to hepatitis B  | 2.7<br>(2.4 to 2.9)                           | 0.4<br>(0.3 to 0.4)                      | 0.2<br>(0.1 to 0.3)                   | 30.4<br>(9.2 to 55.9)                             | -1.8<br>(-15.1 to 13.6)                             |
| Cirrhosis and other chronic liver diseases due to hepatitis C  | 2.2<br>(1.9 to 2.4)                           | 0.3<br>(0.3 to 0.3)                      | 0.2<br>(0.1 to 0.2)                   | 27.4<br>(3.8 to 53.8)                             | -4.1<br>(-19.8 to 13.0)                             |
| Cirrhosis and other chronic liver diseases due to alcohol use  | 1.5<br>(1.4 to 1.7)                           | 0.2<br>(0.2 to 0.2)                      | 0.1<br>(0.1 to 0.1)                   | 34.8<br>(10.5 to 63.3)                            | 0.4<br>(-15.7 to 18.1)                              |
| Cirrhosis and other chronic liver diseases due to other causes | 3.0<br>(2.8 to 3.2)                           | 0.3<br>(0.2 to 0.3)                      | 0.4<br>(0.3 to 0.6)                   | 29.4<br>(3.9 to 60.8)                             | -1.1<br>(-18.6 to 17.7)                             |
| <b>Digestive diseases</b>                                      | <b>72.7</b><br><b>(67.9 to 78.3)</b>          | <b>86.5†</b><br><b>(82.8 to 90.9)</b>    | <b>2.2</b><br><b>(1.6 to 3.0)</b>     | <b>28.1</b><br><b>(18.2 to 39.5)</b>              | <b>-2.9</b><br><b>(-8.7 to 3.4)</b>                 |
| Peptic ulcer disease                                           | 15.0<br>(13.8 to 16.4)                        | 6.3<br>(5.7 to 6.9)                      | 0.3<br>(0.2 to 0.4)                   | 32.1<br>(20.1 to 45.3)                            | -1.6<br>(-9.1 to 6.5)                               |
| Gastritis and duodenitis                                       | 24.0<br>(21.1 to 27.0)                        | 26.2<br>(23.6 to 29.2)                   | 0.3<br>(0.2 to 0.5)                   | 38.2<br>(24.6 to 53.0)                            | 4.2<br>(-4.0 to 12.7)                               |
| Appendicitis                                                   | 0.9<br>(0.8 to 1.0)                           | 24.0<br>(22.3 to 26.0)                   | 0.3<br>(0.2 to 0.4)                   | 29.1<br>(-4.4 to 72.9)                            | -1.6<br>(-23.0 to 25.5)                             |
| Paralytic ileus and intestinal obstruction                     | 0.1<br>(0.1 to 0.1)                           | 2.6<br>(2.4 to 2.9)                      | < 0.05<br>(< 0.05 to < 0.05)          | 34.4<br>(24.5 to 44.5)                            | 1.8<br>(-10.8 to 17.0)                              |
| Inguinal, femoral, and abdominal hernia                        | 31.2<br>(26.1 to 37.5)                        | 9.9<br>(8.8 to 11.2)                     | 1.0<br>(0.6 to 1.3)                   | 21.9<br>(7.4 to 39.5)                             | -7.8<br>(-16.4 to 2.0)                              |
| Inflammatory bowel disease                                     | 0.2<br>(0.2 to 0.3)                           | 1.6<br>(1.5 to 1.7)                      | < 0.05<br>(< 0.05 to 0.1)             | 38.7<br>(34.8 to 42.8)                            | 6.3<br>(3.4 to 9.3)                                 |
| Vascular intestinal disorders                                  | < 0.05<br>(< 0.05 to < 0.05)                  | 0.2<br>(0.2 to 0.2)                      | < 0.05<br>(< 0.05 to < 0.05)          | 35.3<br>(28.7 to 42.2)                            | 3.4<br>(-0.6 to 7.7)                                |
| Gallbladder and biliary diseases                               | 3.3<br>(2.9 to 3.7)                           | 14.9<br>(12.9 to 17.1)                   | 0.1<br>(0.1 to 0.1)                   | 31.5<br>(11.3 to 56.3)                            | -1.4<br>(-17.9 to 17.8)                             |
| Pancreatitis                                                   | 0.1<br>(0.1 to 0.1)                           | 0.8<br>(0.7 to 0.8)                      | < 0.05<br>(< 0.05 to < 0.05)          | 31.2<br>(26.5 to 35.7)                            | -0.9<br>(-4.3 to 2.7)                               |
| Other digestive diseases                                       | --                                            | --                                       | 0.2<br>(0.1 to 0.3)                   | 30.9<br>(17.7 to 46.4)                            | 0.8<br>(-5.2 to 8.1)                                |
| <b>Neurological disorders</b>                                  | <b>1,352.8</b><br><b>(1,289.9 to 1,432.7)</b> | <b>659.0</b><br><b>(559.0 to 773.5)</b>  | <b>32.2</b><br><b>(20.9 to 46.2)</b>  | <b>31.9</b><br><b>(0.3 to 74.6)</b>               | <b>0.2</b><br><b>(-19.1 to 24.4)</b>                |
| Alzheimer's disease and other dementias                        | 11.2<br>(9.7 to 12.9)                         | 2.0<br>(1.7 to 2.3)                      | 1.6<br>(1.1 to 2.1)                   | 37.3<br>(31.1 to 43.7)                            | 0.7<br>(-3.6 to 4.9)                                |
| Parkinson's disease                                            | 0.8<br>(0.6 to 1.0)                           | 0.1<br>(0.1 to 0.1)                      | 0.1<br>(0.1 to 0.1)                   | 44.0<br>(23.5 to 68.1)                            | 6.7<br>(-7.4 to 22.7)                               |
| Epilepsy                                                       | 14.5<br>(3.5 to 26.7)                         | 2.0<br>(0.5 to 3.6)                      | 5.6<br>(1.2 to 11.5)                  | 26.2<br>(-74.9 to 544.3)                          | -3.6<br>(-80.8 to 395.7)                            |
| Multiple sclerosis                                             | 0.1<br>(0.1 to 0.2)                           | < 0.05<br>(< 0.05 to < 0.05)             | < 0.05<br>(< 0.05 to 0.1)             | 45.2<br>(39.6 to 50.6)                            | 9.1<br>(5.2 to 13.0)                                |
| Motor neuron disease                                           | < 0.05<br>(< 0.05 to 0.1)                     | < 0.05<br>(< 0.05 to < 0.05)             | < 0.05<br>(< 0.05 to < 0.05)          | 35.0<br>(29.5 to 41.2)                            | 3.3<br>(0.1 to 7.1)                                 |
| Migraine                                                       | 478.9<br>(451.0 to 507.6)                     | 61.5<br>(58.0 to 65.4)                   | 20.2<br>(13.0 to 28.4)                | 31.8<br>(26.4 to 37.1)                            | 0.4<br>(-3.3 to 3.9)                                |
| Tension-type headache                                          | 1,018.9<br>(900.6 to 1,153.5)                 | 593.4<br>(494.9 to 707.1)                | 3.3<br>(2.1 to 4.9)                   | 31.4<br>(24.4 to 39.0)                            | 0.1<br>(-4.5 to 5.2)                                |
| Other neurological disorders                                   | < 0.05<br>(< 0.05 to < 0.05)                  | < 0.05<br>(< 0.05 to < 0.05)             | 1.3<br>(0.3 to 2.7)                   | 55.9<br>(-64.2 to 602.8)                          | 15.7<br>(-68.6 to 354.6)                            |
| <b>Mental and substance use disorders</b>                      | <b>645.4</b><br><b>(616.6 to 670.7)</b>       | <b>280.0†</b><br><b>(258.3 to 305.0)</b> | <b>81.6</b><br><b>(59.3 to 105.9)</b> | <b>28.1</b><br><b>(24.8 to 31.3)</b>              | <b>-2.1</b><br><b>(-4.5 to 0.3)</b>                 |
| Schizophrenia                                                  | 6.5<br>(5.7 to 7.4)                           | 0.6<br>(0.5 to 0.6)                      | 4.2<br>(3.0 to 5.3)                   | 35.1<br>(22.5 to 48.5)                            | 2.1<br>(-6.7 to 11.3)                               |
| Alcohol use disorders                                          | 57.2<br>(48.9 to 66.6)                        | 31.1<br>(26.4 to 36.2)                   | 5.7<br>(3.9 to 7.9)                   | 27.9<br>(17.1 to 38.5)                            | -1.7<br>(-9.3 to 5.9)                               |
| Drug use disorders                                             | 19.6<br>(17.6 to 21.6)                        | 3.3<br>(2.9 to 3.7)                      | 4.8<br>(3.2 to 6.5)                   | 25.4<br>(12.7 to 39.2)                            | -1.7<br>(-10.8 to 8.1)                              |
| Opioid use disorders                                           | 10.1<br>(8.3 to 12.4)                         | 1.3<br>(1.1 to 1.6)                      | 4.2<br>(2.7 to 5.8)                   | 24.7<br>(10.2 to 40.2)                            | -2.2<br>(-12.3 to 8.9)                              |
| Cocaine use disorders                                          | 0.6<br>(0.5 to 0.7)                           | 0.1<br>(0.1 to 0.1)                      | 0.1<br>(0.1 to 0.1)                   | 31.7<br>(24.3 to 39.3)                            | 2.8<br>(-2.6 to 8.5)                                |
| Amphetamine use disorders                                      | 0.3<br>(0.2 to 0.4)                           | 0.1<br>(< 0.05 to 0.1)                   | < 0.05<br>(< 0.05 to 0.1)             | 27.3<br>(16.2 to 39.8)                            | 2.5<br>(-5.9 to 12.3)                               |
| Cannabis use disorders                                         | 8.2<br>(6.8 to 9.9)                           | 1.6<br>(1.3 to 2.0)                      | 0.2<br>(0.1 to 0.4)                   | 26.5<br>(2.8 to 54.6)                             | 0.4<br>(-17.2 to 20.3)                              |
| Other drug use disorders                                       | 1.3<br>(1.1 to 1.4)                           | 0.3<br>(0.2 to 0.3)                      | 0.2<br>(0.1 to 0.3)                   | 34.1<br>(13.0 to 58.9)                            | 3.9<br>(-11.9 to 21.4)                              |
| Depressive disorders                                           | 159.2<br>(148.4 to 172.5)                     | 188.9<br>(167.8 to 212.8)                | 28.1<br>(19.3 to 38.2)                | 23.9<br>(17.4 to 30.5)                            | -4.9<br>(-9.7 to -0.2)                              |
| Major depressive disorder                                      | 115.7<br>(102.7 to 130.4)                     | 180.6<br>(159.0 to 204.4)                | 23.6<br>(16.3 to 32.3)                | 22.4<br>(15.0 to 30.3)                            | -6.0<br>(-11.3 to -0.2)                             |
| Dysthymia                                                      | 46.6<br>(40.5 to 54.0)                        | 8.3<br>(7.3 to 9.6)                      | 4.5<br>(3.0 to 6.5)                   | 32.2<br>(26.9 to 37.8)                            | 0.3<br>(-3.0 to 3.7)                                |
| Bipolar disorder                                               | 24.1<br>(20.4 to 28.3)                        | 2.8<br>(2.3 to 3.3)                      | 4.9<br>(3.0 to 7.2)                   | 30.8<br>(21.6 to 41.0)                            | 0.5<br>(-5.5 to 7.3)                                |
| Anxiety disorders                                              | 135.6<br>(122.2 to 150.3)                     | 25.0<br>(22.8 to 27.5)                   | 13.1<br>(9.0 to 18.0)                 | 31.3<br>(22.2 to 41.1)                            | 0.1<br>(-6.0 to 6.7)                                |
| Eating disorders                                               | 5.1<br>(4.2 to 6.1)                           | 3.5<br>(2.5 to 4.6)                      | 1.0<br>(0.7 to 1.5)                   | 40.6<br>(22.5 to 59.6)                            | 9.8<br>(-3.7 to 24.9)                               |
| Anorexia nervosa                                               | 1.3<br>(1.0 to 1.8)                           | 0.6<br>(0.4 to 0.8)                      | 0.3<br>(0.2 to 0.5)                   | 38.4<br>(5.2 to 80.1)                             | 8.2<br>(-16.6 to 39.5)                              |
| Bulimia nervosa                                                | 3.6<br>(2.7 to 4.7)                           | 2.9<br>(2.0 to 4.1)                      | 0.7<br>(0.5 to 1.1)                   | 41.4<br>(21.6 to 67.2)                            | 10.3<br>(-4.6 to 29.6)                              |
| Autistic spectrum disorders                                    | 39.6<br>(35.5 to 45.1)                        | 0.5<br>(0.3 to 0.7)                      | 5.6<br>(3.8 to 7.9)                   | 31.3<br>(24.0 to 38.6)                            | 0.6<br>(-4.4 to 5.5)                                |
| Autism                                                         | 10.9<br>(9.5 to 12.8)                         | 0.1<br>(< 0.05 to 0.1)                   | 2.8<br>(1.8 to 4.1)                   | 31.4<br>(19.6 to 44.7)                            | 0.7<br>(-7.5 to 9.6)                                |
| Asperger syndrome and other autistic spectrum disorders        | 28.5<br>(23.5 to 34.5)                        | 0.4<br>(0.3 to 0.6)                      | 2.9<br>(1.9 to 4.2)                   | 31.3<br>(23.5 to 39.0)                            | 0.5<br>(-4.8 to 5.9)                                |

| Cause                                                      | Prevalence in thousands (95% UI)              | Incidence in thousands (95% UI)                 | YLDs in thousands (95% UI)            |                                                   |                                                     |
|------------------------------------------------------------|-----------------------------------------------|-------------------------------------------------|---------------------------------------|---------------------------------------------------|-----------------------------------------------------|
|                                                            | 2016 counts                                   | 2016 counts                                     | 2016 counts                           | Percentage change in counts between 2006 and 2016 | Percentage change in age-standardised rates between |
| Attention-deficit/hyperactivity disorder                   | 61.5<br>(55.0 to 69.1)                        | 4.0<br>(3.5 to 4.7)                             | 0.7<br>(0.4 to 1.2)                   | 31.6<br>(22.6 to 42.3)                            | 0.2<br>(-6.4 to 7.7)                                |
| Conduct disorder                                           | 47.4<br>(38.8 to 56.2)                        | 17.4<br>(13.9 to 21.0)                          | 5.7<br>(3.5 to 8.7)                   | 33.3<br>(24.7 to 42.6)                            | 0.2<br>(-6.5 to 6.9)                                |
| Idiopathic developmental intellectual disability           | 81.0<br>(46.6 to 116.8)                       | --                                              | 3.0<br>(1.3 to 5.4)                   | 21.2<br>(12.5 to 29.3)                            | -7.5<br>(-13.6 to -1.3)                             |
| Other mental and substance use disorders                   | 65.1<br>(57.0 to 75.5)                        | 3.1<br>(2.7 to 3.6)                             | 4.8<br>(3.3 to 6.9)                   | 31.8<br>(24.6 to 39.5)                            | 0.5<br>(-4.0 to 5.3)                                |
| <b>Diabetes, urogenital, blood, and endocrine diseases</b> | <b>2,391.1</b><br><b>(2,349.9 to 2,433.7)</b> | <b>427.9†</b><br><b>(401.8 to 456.2)</b>        | <b>29.2</b><br><b>(20.6 to 40.0)</b>  | <b>32.7</b><br><b>(28.8 to 36.7)</b>              | <b>-0.1</b><br><b>(-3.2 to 2.9)</b>                 |
| Diabetes mellitus                                          | 134.7<br>(119.9 to 149.9)                     | 8.9<br>(8.0 to 9.9)                             | 10.6<br>(7.3 to 14.9)                 | 34.9<br>(26.3 to 43.0)                            | 0.4<br>(-6.0 to 6.5)                                |
| Acute glomerulonephritis                                   | < 0.05<br>(< 0.05 to < 0.05)                  | 0.6<br>(0.5 to 0.7)                             | < 0.05<br>(< 0.05 to < 0.05)          | 31.6<br>(26.2 to 37.4)                            | 0.0<br>(-3.5 to 4.2)                                |
| Chronic kidney disease                                     | 184.0<br>(165.5 to 203.3)                     | 13.9<br>(12.3 to 15.5)                          | 4.8<br>(3.6 to 6.3)                   | 34.6<br>(27.2 to 42.8)                            | 0.5<br>(-4.5 to 6.0)                                |
| Chronic kidney disease due to diabetes mellitus            | 57.8<br>(48.6 to 67.6)                        | 4.1<br>(3.4 to 5.0)                             | 1.4<br>(1.0 to 1.9)                   | 38.5<br>(26.4 to 50.9)                            | 2.0<br>(-5.5 to 10.2)                               |
| Chronic kidney disease due to hypertension                 | 39.5<br>(33.9 to 45.1)                        | 3.5<br>(3.0 to 4.2)                             | 0.8<br>(0.6 to 1.1)                   | 33.5<br>(20.4 to 49.5)                            | -1.1<br>(-9.9 to 10.4)                              |
| Chronic kidney disease due to glomerulonephritis           | 36.5<br>(31.7 to 41.6)                        | 2.2<br>(1.8 to 2.7)                             | 1.2<br>(0.9 to 1.7)                   | 32.3<br>(19.4 to 46.6)                            | 0.2<br>(-8.1 to 9.3)                                |
| Chronic kidney disease due to other causes                 | 50.1<br>(42.3 to 58.4)                        | 4.0<br>(3.4 to 4.7)                             | 1.4<br>(1.0 to 1.8)                   | 33.3<br>(20.2 to 47.6)                            | 0.1<br>(-7.5 to 8.8)                                |
| Urinary diseases and male infertility                      | 64.9<br>(58.5 to 71.2)                        | 216.7†<br>(194.6 to 240.4)                      | 1.7<br>(1.1 to 2.6)                   | 32.3<br>(23.2 to 41.7)                            | -0.1<br>(-6.9 to 6.5)                               |
| Interstitial nephritis and urinary tract infections        | 3.6<br>(3.2 to 4.1)                           | 187.5<br>(165.5 to 211.3)                       | 0.1<br>(0.1 to 0.2)                   | 30.2<br>(9.3 to 57.0)                             | 0.6<br>(-14.1 to 17.7)                              |
| Urolithiasis                                               | 0.9<br>(0.8 to 1.0)                           | 23.7<br>(20.9 to 27.2)                          | 0.1<br>(< 0.05 to 0.1)                | 35.0<br>(26.6 to 44.7)                            | 1.8<br>(-5.7 to 10.0)                               |
| Benign prostatic hyperplasia                               | 43.0<br>(36.4 to 49.7)                        | 5.6<br>(4.6 to 6.5)                             | 1.4<br>(0.9 to 2.1)                   | 34.7<br>(23.4 to 46.8)                            | 0.6<br>(-6.9 to 8.5)                                |
| Male infertility                                           | 15.8<br>(13.9 to 17.7)                        | --                                              | 0.1<br>(< 0.05 to 0.2)                | 21.2<br>(9.8 to 34.1)                             | -9.4<br>(-17.5 to -0.4)                             |
| Other urinary diseases                                     | --                                            | --                                              | 0.1<br>(< 0.05 to 0.1)                | 7.4<br>(-5.2 to 22.7)                             | -15.9<br>(-23.7 to -6.8)                            |
| Gynecological diseases                                     | 505.1<br>(481.6 to 530.3)                     | 184.6†<br>(171.0 to 198.7)                      | 6.0<br>(4.0 to 8.5)                   | 30.3<br>(25.0 to 35.6)                            | -1.6<br>(-4.9 to 2.0)                               |
| Uterine fibroids                                           | 34.2<br>(30.1 to 38.6)                        | 4.2<br>(3.6 to 4.9)                             | 0.8<br>(0.5 to 1.3)                   | 36.0<br>(26.7 to 45.3)                            | -1.1<br>(-8.0 to 5.9)                               |
| Polycystic ovarian syndrome                                | 4.0<br>(3.0 to 5.2)                           | 7.6<br>(5.2 to 10.1)                            | < 0.05<br>(< 0.05 to 0.1)             | 31.6<br>(14.9 to 50.2)                            | -0.8<br>(-12.1 to 11.7)                             |
| Female infertility                                         | 2.7<br>(2.4 to 3.7)                           | --                                              | < 0.05<br>(< 0.05 to < 0.05)          | 32.7<br>(10.0 to 81.9)                            | -4.0<br>(-18.9 to 26.0)                             |
| Endometriosis                                              | 0.9<br>(0.7 to 1.1)                           | 3.6<br>(2.9 to 4.5)                             | 0.1<br>(0.1 to 0.1)                   | 29.5<br>(-4.0 to 75.7)                            | 0.3<br>(-23.1 to 33.5)                              |
| Genital prolapse                                           | 241.9<br>(214.0 to 272.2)                     | 21.5<br>(18.0 to 25.8)                          | 0.8<br>(0.4 to 1.4)                   | 29.5<br>(22.0 to 37.4)                            | -3.3<br>(-9.0 to 3.0)                               |
| Premenstrual syndrome                                      | 224.1<br>(207.6 to 241.2)                     | 84.9<br>(78.0 to 92.1)                          | 1.9<br>(1.2 to 2.8)                   | 28.4<br>(17.6 to 41.0)                            | -2.0<br>(-9.9 to 6.9)                               |
| Other gynecological diseases                               | 72.5<br>(62.8 to 83.2)                        | 62.7<br>(51.3 to 75.7)                          | 2.4<br>(1.6 to 3.5)                   | 30.3<br>(22.0 to 39.0)                            | -0.7<br>(-6.4 to 5.3)                               |
| Hemoglobinopathies and hemolytic anaemias                  | 1,954.6<br>(1,913.2 to 1,997.6)               | --                                              | 4.1<br>(2.7 to 5.9)                   | 29.9<br>(20.2 to 39.6)                            | -1.4<br>(-7.6 to 4.5)                               |
| Thalassemias                                               | < 0.05<br>(< 0.05 to < 0.05)                  | --                                              | < 0.05<br>(< 0.05 to < 0.05)          | 27.2<br>(12.1 to 42.4)                            | 0.9<br>(-10.9 to 12.7)                              |
| Thalassaemias trait                                        | 20.7<br>(19.3 to 22.2)                        | --                                              | 0.3<br>(0.2 to 0.4)                   | 33.4<br>(17.9 to 51.9)                            | 2.8<br>(-7.8 to 15.4)                               |
| Sickle cell disorders                                      | 5.0<br>(4.3 to 5.6)                           | --                                              | 0.4<br>(0.3 to 0.6)                   | 32.1<br>(11.0 to 57.9)                            | 3.5<br>(-12.2 to 22.7)                              |
| Sickle cell trait                                          | 628.6<br>(589.0 to 660.2)                     | --                                              | 2.0<br>(1.3 to 2.9)                   | 28.9<br>(17.8 to 39.6)                            | -1.4<br>(-8.8 to 5.6)                               |
| G6PD deficiency                                            | 663.5<br>(621.3 to 716.3)                     | --                                              | < 0.05<br>(< 0.05 to < 0.05)          | 8.7<br>(-13.6 to 40.6)                            | -12.2<br>(-25.9 to 6.1)                             |
| G6PD trait                                                 | 874.9<br>(863.8 to 887.2)                     | --                                              | < 0.05<br>(< 0.05 to < 0.05)          | 28.1<br>(16.0 to 41.2)                            | -1.9<br>(-9.5 to 6.7)                               |
| Other hemoglobinopathies and hemolytic anaemias            | 57.0<br>(54.2 to 59.7)                        | --                                              | 1.4<br>(0.9 to 2.0)                   | 30.5<br>(17.9 to 43.9)                            | -3.0<br>(-10.2 to 4.3)                              |
| Endocrine, metabolic, blood, and immune disorders          | 65.2<br>(62.2 to 68.2)                        | 3.2<br>(2.8 to 3.6)                             | 1.9<br>(1.2 to 2.7)                   | 30.7<br>(20.9 to 41.5)                            | 0.1<br>(-5.7 to 5.9)                                |
| <b>Musculoskeletal disorders</b>                           | <b>476.2</b><br><b>(449.9 to 501.4)</b>       | <b>231.9</b><br><b>(209.0 to 255.7)</b>         | <b>52.4</b><br><b>(37.4 to 68.8)</b>  | <b>33.7</b><br><b>(29.2 to 38.4)</b>              | <b>0.3</b><br><b>(-2.6 to 3.5)</b>                  |
| Rheumatoid arthritis                                       | 7.5<br>(6.7 to 8.5)                           | 0.5<br>(0.4 to 0.6)                             | 1.8<br>(1.2 to 2.4)                   | 32.4<br>(20.8 to 45.7)                            | -1.1<br>(-9.2 to 6.9)                               |
| Osteoarthritis                                             | 85.9<br>(80.4 to 91.7)                        | 4.8<br>(4.5 to 5.2)                             | 5.2<br>(3.7 to 7.2)                   | 39.4<br>(34.3 to 45.0)                            | 2.9<br>(-0.8 to 6.8)                                |
| Low back and neck pain                                     | 331.0<br>(307.4 to 355.1)                     | 152.9<br>(135.7 to 171.2)                       | 37.9<br>(26.7 to 49.9)                | 33.5<br>(28.0 to 39.6)                            | 0.4<br>(-3.6 to 4.6)                                |
| Low back pain                                              | 259.7<br>(230.0 to 295.2)                     | 130.8<br>(113.9 to 149.6)                       | 29.1<br>(20.4 to 38.4)                | 33.0<br>(25.8 to 41.0)                            | 0.4<br>(-4.8 to 6.0)                                |
| Neck pain                                                  | 88.9<br>(76.6 to 102.8)                       | 22.1<br>(19.0 to 25.8)                          | 8.8<br>(5.9 to 12.5)                  | 35.2<br>(31.4 to 39.4)                            | 0.4<br>(-2.0 to 2.8)                                |
| Gout                                                       | 10.5<br>(9.2 to 11.9)                         | 2.1<br>(1.9 to 2.4)                             | 0.3<br>(0.2 to 0.5)                   | 35.5<br>(18.4 to 56.4)                            | 0.6<br>(-10.8 to 13.5)                              |
| Other musculoskeletal disorders                            | 83.8<br>(63.1 to 104.4)                       | 71.6<br>(55.9 to 88.0)                          | 7.2<br>(4.4 to 10.7)                  | 31.4<br>(18.3 to 46.0)                            | -2.2<br>(-11.5 to 8.8)                              |
| <b>Other non-communicable diseases</b>                     | <b>3,272.4</b><br><b>(3,207.5 to 3,340.2)</b> | <b>9,538.1†</b><br><b>(8,786.5 to 10,377.0)</b> | <b>89.2</b><br><b>(61.1 to 125.8)</b> | <b>29.9</b><br><b>(28.2 to 31.6)</b>              | <b>-1.6</b><br><b>(-2.7 to -0.6)</b>                |
| Congenital anomalies                                       | 56.0<br>(48.2 to 66.4)                        | --                                              | 8.9<br>(6.3 to 12.2)                  | 25.5<br>(17.8 to 34.3)                            | -3.7<br>(-9.4 to 2.9)                               |
| Neural tube defects                                        | 8.5<br>(7.5 to 9.6)                           | --                                              | 2.5<br>(1.8 to 3.4)                   | 29.0<br>(15.5 to 44.1)                            | -1.2<br>(-10.6 to 9.4)                              |
| Congenital heart anomalies                                 | 6.6<br>(5.5 to 8.0)                           | --                                              | 0.3<br>(0.1 to 0.6)                   | 27.7<br>(9.4 to 49.1)                             | 0.2<br>(-13.1 to 15.1)                              |
| Orofacial clefts                                           | 1.5<br>(1.3 to 1.7)                           | --                                              | < 0.05<br>(< 0.05 to < 0.05)          | 20.5<br>(6.3 to 35.6)                             | -7.5<br>(-18.3 to 4.4)                              |
| Down's syndrome                                            | 0.8<br>(0.7 to 1.0)                           | --                                              | 0.1<br>(< 0.05 to 0.1)                | 32.0<br>(22.5 to 43.9)                            | 2.0<br>(-5.3 to 11.1)                               |
| Turner syndrome                                            | 2.8<br>(2.4 to 3.3)                           | --                                              | < 0.05<br>(< 0.05 to 0.1)             | 21.4<br>(-14.5 to 71.3)                           | -4.7<br>(-31.1 to 31.0)                             |
| Klinefelter syndrome                                       | 2.8<br>(2.3 to 3.3)                           | --                                              | < 0.05<br>(< 0.05 to < 0.05)          | 25.8<br>(-4.0 to 66.9)                            | -1.1<br>(-23.6 to 30.6)                             |



| Cause                                         | Prevalence in thousands (95% UI)        | Incidence in thousands (95% UI)          | YLDs in thousands (95% UI)           |                                                   |                                                     |
|-----------------------------------------------|-----------------------------------------|------------------------------------------|--------------------------------------|---------------------------------------------------|-----------------------------------------------------|
|                                               | 2016 counts                             | 2016 counts                              | 2016 counts                          | Percentage change in counts between 2006 and 2016 | Percentage change in age-standardised rates between |
| Other chromosomal abnormalities               | 1.0<br>(0.8 to 1.2)                     | --                                       | 0.2<br>(0.1 to 0.3)                  | 26.9<br>(-7.6 to 76.3)                            | 0.2<br>(-25.9 to 36.6)                              |
| Congenital musculoskeletal and limb anomalies | 5.5<br>(4.8 to 6.2)                     | --                                       | 0.8<br>(0.5 to 1.1)                  | 29.8<br>(12.7 to 47.8)                            | -0.5<br>(-12.6 to 12.1)                             |
| Urogenital congenital anomalies               | 3.9<br>(3.5 to 4.5)                     | --                                       | 0.1<br>(0.1 to 0.2)                  | 29.4<br>(18.1 to 41.1)                            | -0.2<br>(-8.0 to 7.8)                               |
| Digestive congenital anomalies                | 3.8<br>(3.4 to 4.3)                     | --                                       | 0.2<br>(0.1 to 0.2)                  | 31.9<br>(8.5 to 62.0)                             | 1.2<br>(-13.8 to 21.2)                              |
| Other congenital anomalies                    | 28.7<br>(20.6 to 40.9)                  | --                                       | 4.7<br>(3.0 to 7.1)                  | 22.6<br>(11.5 to 34.8)                            | -6.1<br>(-14.5 to 2.6)                              |
| Skin and subcutaneous diseases                | 1,574.4<br>(1,523.0 to 1,636.9)         | 3,465.5<br>(3,270.8 to 3,706.1)          | 37.8<br>(24.9 to 55.3)               | 32.9<br>(30.2 to 35.6)                            | 1.9<br>(0.1 to 3.8)                                 |
| Dermatitis                                    | 257.7<br>(233.7 to 281.3)               | 212.5<br>(196.0 to 229.9)                | 10.4<br>(6.0 to 17.2)                | 31.5<br>(26.4 to 36.3)                            | 0.4<br>(-2.9 to 3.6)                                |
| Psoriasis                                     | 28.8<br>(27.4 to 30.3)                  | 4.3<br>(4.1 to 4.5)                      | 2.5<br>(1.7 to 3.3)                  | 41.3<br>(28.6 to 56.0)                            | 7.3<br>(-0.6 to 15.9)                               |
| Cellulitis                                    | 1.8<br>(1.7 to 1.9)                     | 30.5<br>(28.1 to 32.8)                   | 0.1<br>(0.1 to 0.1)                  | 32.1<br>(4.9 to 68.1)                             | 2.3<br>(-17.3 to 27.7)                              |
| Pyoderma                                      | 28.2<br>(27.0 to 29.4)                  | 549.1<br>(525.8 to 572.6)                | 0.2<br>(0.1 to 0.3)                  | 32.9<br>(24.7 to 41.0)                            | 1.4<br>(-3.6 to 6.5)                                |
| Scabies                                       | 58.7<br>(50.4 to 68.7)                  | 181.1<br>(155.4 to 211.3)                | 1.5<br>(0.8 to 2.4)                  | 30.8<br>(24.0 to 38.1)                            | 0.8<br>(-4.0 to 5.4)                                |
| Fungal skin diseases                          | 609.9<br>(532.6 to 704.0)               | 1,589.2<br>(1,405.3 to 1,804.0)          | 3.5<br>(1.4 to 7.1)                  | 32.1<br>(30.6 to 33.8)                            | 0.3<br>(-0.7 to 1.2)                                |
| Viral skin diseases                           | 126.1<br>(118.2 to 134.1)               | 180.7<br>(168.8 to 192.2)                | 3.9<br>(2.4 to 5.8)                  | 31.4<br>(26.7 to 36.7)                            | 0.2<br>(-3.0 to 3.6)                                |
| Acne vulgaris                                 | 425.7<br>(378.6 to 480.1)               | 307.2<br>(249.3 to 390.0)                | 10.9<br>(7.3 to 15.9)                | 34.0<br>(28.1 to 40.7)                            | 3.1<br>(-1.2 to 8.1)                                |
| Alopecia areata                               | 7.4<br>(7.1 to 7.7)                     | 13.2<br>(12.7 to 13.7)                   | 0.2<br>(0.1 to 0.4)                  | 30.9<br>(15.8 to 49.3)                            | 0.4<br>(-10.0 to 12.3)                              |
| Pruritus                                      | 34.4<br>(30.0 to 38.9)                  | 27.7<br>(24.7 to 31.2)                   | 0.4<br>(0.2 to 0.7)                  | 33.2<br>(25.1 to 41.0)                            | 1.2<br>(-4.0 to 6.2)                                |
| Urticaria                                     | 46.9<br>(39.9 to 55.2)                  | 84.4<br>(71.4 to 99.0)                   | 2.8<br>(1.8 to 4.1)                  | 30.0<br>(21.6 to 39.0)                            | 0.4<br>(-5.2 to 6.7)                                |
| Decubitus ulcer                               | 0.5<br>(0.5 to 0.6)                     | 1.9<br>(1.8 to 2.2)                      | 0.1<br>(0.1 to 0.1)                  | 32.6<br>(17.3 to 49.9)                            | -0.5<br>(-14.1 to 15.5)                             |
| Other skin and subcutaneous diseases          | 246.9<br>(239.8 to 254.0)               | 283.7<br>(275.0 to 292.4)                | 1.4<br>(0.7 to 2.5)                  | 36.4<br>(32.5 to 40.0)                            | 3.6<br>(1.1 to 5.8)                                 |
| Sense organ diseases                          | 1,022.1<br>(996.1 to 1,046.2)           | 432.8†<br>(402.3 to 466.7)               | 34.6<br>(23.6 to 48.4)               | 27.3<br>(24.4 to 30.3)                            | -3.5<br>(-5.0 to -2.0)                              |
| Glaucoma                                      | 1.7<br>(1.4 to 2.1)                     | --                                       | 0.1<br>(0.1 to 0.2)                  | 34.6<br>(18.8 to 52.6)                            | 1.2<br>(-9.4 to 13.4)                               |
| Cataract                                      | 21.8<br>(18.9 to 25.0)                  | --                                       | 1.9<br>(1.4 to 2.6)                  | 29.7<br>(23.3 to 36.5)                            | -3.9<br>(-8.0 to 0.8)                               |
| Macular degeneration                          | 2.1<br>(1.7 to 2.6)                     | --                                       | 0.1<br>(0.1 to 0.2)                  | 37.0<br>(20.8 to 56.6)                            | 2.9<br>(-8.3 to 16.4)                               |
| Refraction and accommodation disorders        | 634.0<br>(610.4 to 657.7)               | --                                       | 8.7<br>(4.9 to 14.5)                 | 21.9<br>(18.5 to 25.7)                            | -7.5<br>(-10.0 to -4.9)                             |
| Age-related and other hearing loss            | 547.2<br>(515.8 to 581.6)               | --                                       | 20.0<br>(13.8 to 27.6)               | 28.3<br>(23.5 to 33.0)                            | -2.7<br>(-5.1 to -0.5)                              |
| Other vision loss                             | 13.2<br>(11.7 to 14.9)                  | --                                       | 1.0<br>(0.7 to 1.4)                  | 34.6<br>(24.4 to 45.0)                            | 0.6<br>(-6.5 to 7.2)                                |
| Other sense organ diseases                    | 89.1<br>(82.5 to 95.6)                  | 432.8<br>(402.3 to 466.7)                | 2.7<br>(1.7 to 4.0)                  | 34.2<br>(27.8 to 41.2)                            | 1.4<br>(-2.5 to 5.5)                                |
| Oral disorders                                | 2,057.8<br>(1,924.4 to 2,168.1)         | 5,639.8†<br>(4,929.0 to 6,461.2)         | 7.9<br>(4.8 to 12.2)                 | 32.5<br>(29.4 to 35.4)                            | -0.0<br>(-1.9 to 2.1)                               |
| Caries of deciduous teeth                     | 485.0<br>(381.6 to 587.3)               | 1,893.4<br>(1,290.8 to 2,580.3)          | 0.1<br>( $< 0.05$ to 0.2)            | 29.1<br>(15.7 to 44.6)                            | -1.6<br>(-11.8 to 10.1)                             |
| Caries of permanent teeth                     | 1,270.8<br>(1,152.9 to 1,390.9)         | 3,701.5<br>(3,301.8 to 4,179.3)          | 0.8<br>(0.3 to 1.4)                  | 28.3<br>(23.1 to 33.6)                            | -2.1<br>(-5.6 to 1.6)                               |
| Periodontal disease                           | 309.9<br>(251.0 to 380.5)               | 38.6<br>(30.4 to 48.2)                   | 2.0<br>(0.8 to 4.3)                  | 35.8<br>(30.3 to 41.5)                            | 0.7<br>(-2.9 to 4.7)                                |
| Edentulism and severe tooth loss              | 107.2<br>(93.4 to 121.3)                | 6.4<br>(5.6 to 7.2)                      | 3.0<br>(1.9 to 4.2)                  | 31.8<br>(25.7 to 38.0)                            | -0.2<br>(-3.9 to 3.5)                               |
| Other oral disorders                          | 71.0<br>(67.9 to 74.6)                  | --                                       | 2.1<br>(1.3 to 3.1)                  | 32.0<br>(26.8 to 37.0)                            | 0.3<br>(-2.9 to 3.4)                                |
| <b>Injuries</b>                               | <b>691.8</b><br><b>(620.3 to 779.4)</b> | <b>364.0†</b><br><b>(344.3 to 386.1)</b> | <b>28.6</b><br><b>(18.1 to 42.0)</b> | <b>26.7</b><br><b>(19.7 to 33.7)</b>              | <b>-1.4</b><br><b>(-4.5 to 1.4)</b>                 |
| <b>Transport injuries</b>                     | <b>85.8</b><br><b>(79.8 to 92.1)</b>    | <b>38.7</b><br><b>(34.3 to 43.6)</b>     | <b>5.1</b><br><b>(3.3 to 7.4)</b>    | <b>34.9</b><br><b>(29.9 to 39.4)</b>              | <b>1.9</b><br><b>(-0.4 to 3.9)</b>                  |
| Road injuries                                 | 65.1<br>(60.9 to 70.1)                  | 31.7<br>(27.6 to 36.6)                   | 3.8<br>(2.5 to 5.5)                  | 36.4<br>(32.0 to 40.2)                            | 2.9<br>(0.7 to 4.7)                                 |
| Pedestrian road injuries                      | 19.2<br>(16.9 to 21.9)                  | 7.2<br>(5.9 to 8.8)                      | 1.2<br>(0.7 to 1.7)                  | 34.0<br>(29.7 to 37.7)                            | 0.9<br>(-1.3 to 2.7)                                |
| Cyclist road injuries                         | 11.8<br>(9.9 to 13.9)                   | 6.9<br>(5.5 to 8.6)                      | 0.6<br>(0.4 to 0.9)                  | 39.5<br>(34.3 to 44.0)                            | 5.7<br>(3.4 to 7.9)                                 |
| Motorcyclist road injuries                    | 13.2<br>(11.3 to 16.3)                  | 4.6<br>(3.7 to 5.8)                      | 0.8<br>(0.5 to 1.1)                  | 32.2<br>(27.4 to 36.5)                            | -0.4<br>(-2.8 to 1.7)                               |
| Motor vehicle road injuries                   | 16.5<br>(14.1 to 18.9)                  | 10.2<br>(8.4 to 12.1)                    | 1.1<br>(0.7 to 1.5)                  | 38.7<br>(34.4 to 42.4)                            | 4.4<br>(2.2 to 6.3)                                 |
| Other road injuries                           | 4.4<br>(3.7 to 5.1)                     | 2.9<br>(2.1 to 3.9)                      | 0.2<br>(0.1 to 0.3)                  | 44.7<br>(40.0 to 49.1)                            | 10.1<br>(7.8 to 12.2)                               |
| Other transport injuries                      | 20.7<br>(17.4 to 24.8)                  | 7.0<br>(5.9 to 8.4)                      | 1.3<br>(0.8 to 1.9)                  | 30.5<br>(23.5 to 37.6)                            | -1.1<br>(-4.2 to 1.9)                               |
| <b>Unintentional injuries</b>                 | <b>484.6</b><br><b>(447.7 to 524.0)</b> | <b>307.4</b><br><b>(288.1 to 329.0)</b>  | <b>18.3</b><br><b>(12.0 to 25.8)</b> | <b>34.3</b><br><b>(28.5 to 40.0)</b>              | <b>1.6</b><br><b>(-1.0 to 3.8)</b>                  |
| Falls                                         | 175.6<br>(153.4 to 198.1)               | 107.9<br>(93.5 to 126.2)                 | 7.9<br>(5.3 to 10.9)                 | 35.6<br>(30.0 to 41.1)                            | 2.1<br>(-0.2 to 4.3)                                |
| Drowning                                      | 2.1<br>(1.8 to 2.4)                     | 0.6<br>(0.5 to 0.7)                      | 0.1<br>(0.1 to 0.2)                  | 23.5<br>(15.7 to 31.1)                            | -6.3<br>(-10.1 to -2.9)                             |
| Fire, heat, and hot substances                | 54.7<br>(45.6 to 67.4)                  | 10.4<br>(8.4 to 12.7)                    | 1.7<br>(1.1 to 2.3)                  | 34.2<br>(24.1 to 44.9)                            | 2.2<br>(-3.1 to 7.5)                                |
| Poisonings                                    | 1.7<br>(1.4 to 2.1)                     | 3.1<br>(2.4 to 3.9)                      | 0.2<br>(0.1 to 0.3)                  | 41.4<br>(29.6 to 55.5)                            | 7.7<br>(0.5 to 15.6)                                |
| Exposure to mechanical forces                 | 90.1<br>(76.8 to 108.9)                 | 47.4<br>(39.7 to 56.2)                   | 2.5<br>(1.5 to 3.6)                  | 36.2<br>(29.9 to 41.9)                            | 3.5<br>(0.5 to 6.2)                                 |
| Unintentional firearm injuries                | 3.0<br>(2.5 to 3.7)                     | 1.1<br>(0.7 to 1.5)                      | 0.1<br>(0.1 to 0.2)                  | 40.1<br>(34.2 to 46.0)                            | 6.6<br>(3.5 to 9.5)                                 |
| Unintentional suffocation                     | 7.5<br>(5.3 to 10.2)                    | 2.5<br>(1.6 to 3.5)                      | 0.3<br>(0.1 to 0.4)                  | 29.4<br>(18.4 to 41.5)                            | -0.6<br>(-6.6 to 5.5)                               |
| Other exposure to mechanical forces           | 79.6<br>(66.9 to 97.7)                  | 43.9<br>(36.8 to 51.6)                   | 2.0<br>(1.3 to 3.0)                  | 36.8<br>(31.2 to 42.0)                            | 3.7<br>(0.9 to 6.2)                                 |

| Cause                                                                               | Prevalence in thousands (95% UI)        | Incidence in thousands (95% UI)                       | YLDs in thousands (95% UI)           |                                                   |                                                     |
|-------------------------------------------------------------------------------------|-----------------------------------------|-------------------------------------------------------|--------------------------------------|---------------------------------------------------|-----------------------------------------------------|
|                                                                                     | 2016 counts                             | 2016 counts                                           | 2016 counts                          | Percentage change in counts between 2006 and 2016 | Percentage change in age-standardised rates between |
| Adverse effects of medical treatment                                                | 1.8<br>(1.4 to 2.3)                     | 23.4<br>(19.9 to 27.4)                                | 0.2<br>(0.1 to 0.4)                  | 26.2<br>(19.1 to 33.9)                            | -2.5<br>(-6.8 to 1.4)                               |
| Animal contact                                                                      | 27.1<br>(24.0 to 31.5)                  | 43.7<br>(36.6 to 50.8)                                | 1.0<br>(0.6 to 1.4)                  | 29.2<br>(22.9 to 36.0)                            | -2.9<br>(-6.5 to 0.9)                               |
| Venomous animal contact                                                             | 10.9<br>(9.1 to 13.1)                   | 18.5<br>(14.4 to 23.0)                                | 0.7<br>(0.4 to 0.9)                  | 30.8<br>(22.0 to 40.6)                            | -1.2<br>(-6.4 to 4.2)                               |
| Non-venomous animal contact                                                         | 16.2<br>(13.6 to 19.7)                  | 25.1<br>(20.4 to 30.1)                                | 0.3<br>(0.2 to 0.5)                  | 25.9<br>(21.6 to 30.3)                            | -5.6<br>(-8.4 to -2.9)                              |
| Foreign body                                                                        | 32.8<br>(26.4 to 39.5)                  | 25.4<br>(22.1 to 29.3)                                | 1.4<br>(0.9 to 2.2)                  | 23.8<br>(15.8 to 31.7)                            | -5.2<br>(-9.2 to -1.3)                              |
| Pulmonary aspiration and foreign body in airway                                     | 19.2<br>(14.0 to 26.4)                  | 10.4<br>(8.3 to 13.0)                                 | 0.9<br>(0.6 to 1.4)                  | 18.3<br>(10.4 to 26.5)                            | -9.4<br>(-13.3 to -5.5)                             |
| Foreign body in eyes                                                                | 1.5<br>(0.8 to 2.3)                     | 8.3<br>(6.4 to 11.2)                                  | 0.1<br>( $< 0.05$ to 0.1)            | 33.9<br>(29.1 to 38.4)                            | 2.0<br>(-0.7 to 4.8)                                |
| Foreign body in other body part                                                     | 12.1<br>(9.6 to 15.7)                   | 6.7<br>(5.4 to 8.1)                                   | 0.4<br>(0.3 to 0.6)                  | 35.2<br>(25.8 to 44.9)                            | 3.1<br>(-1.6 to 7.8)                                |
| Environmental heat and cold exposure                                                | 29.9<br>(24.9 to 36.0)                  | 11.5<br>(9.3 to 14.0)                                 | 1.3<br>(0.8 to 1.9)                  | 34.3<br>(27.2 to 40.8)                            | 0.9<br>(-2.2 to 3.6)                                |
| Other unintentional injuries                                                        | 68.7<br>(54.2 to 86.9)                  | 34.1<br>(27.9 to 41.8)                                | 2.1<br>(1.3 to 3.0)                  | 38.9<br>(32.0 to 45.1)                            | 4.2<br>(1.3 to 6.6)                                 |
| <b>Self-harm and interpersonal violence</b>                                         | <b>164.8</b><br><b>(146.0 to 184.6)</b> | <b>17.8†</b><br><b>(15.2 to 20.8)</b>                 | <b>2.4</b><br><b>(1.7 to 3.3)</b>    | <b>25.0</b><br><b>(21.8 to 28.3)</b>              | <b>-3.5</b><br><b>(-5.4 to -1.5)</b>                |
| Self-harm                                                                           | 4.0<br>(3.5 to 4.6)                     | 2.5<br>(2.1 to 2.9)                                   | 0.2<br>(0.1 to 0.3)                  | 31.3<br>(26.2 to 36.1)                            | -2.1<br>(-5.0 to 0.6)                               |
| Self-harm by firearm                                                                | 0.3<br>(0.2 to 0.3)                     | 0.1<br>(0.1 to 0.2)                                   | $< 0.05$<br>( $< 0.05$ to $< 0.05$ ) | 24.8<br>(19.8 to 29.4)                            | -7.0<br>(-9.8 to -4.2)                              |
| Self-harm by other specified means                                                  | 3.8<br>(3.2 to 4.3)                     | 2.4<br>(2.0 to 2.8)                                   | 0.2<br>(0.1 to 0.3)                  | 31.7<br>(26.5 to 36.6)                            | -1.9<br>(-4.8 to 1.0)                               |
| Interpersonal violence                                                              | 160.8<br>(142.1 to 180.2)               | 15.3†                                                 | 2.2<br>(1.5 to 3.0)                  | 24.4<br>(20.9 to 27.9)                            | -3.6<br>(-5.8 to -1.5)                              |
| Assault by firearm                                                                  | 0.8<br>(0.7 to 1.0)                     | 0.4<br>(0.2 to 0.5)                                   | $< 0.05$<br>( $< 0.05$ to 0.1)       | 32.8<br>(26.5 to 39.2)                            | 0.4<br>(-3.1 to 4.0)                                |
| Assault by sharp object                                                             | 8.8<br>(7.1 to 10.5)                    | 4.8<br>(3.7 to 6.2)                                   | 0.3<br>(0.2 to 0.5)                  | 35.7<br>(30.1 to 41.1)                            | 3.0<br>(0.1 to 5.8)                                 |
| Sexual violence                                                                     | 137.6<br>(118.4 to 157.9)               | --                                                    | 1.2<br>(0.8 to 1.8)                  | 16.1<br>(11.4 to 20.8)                            | -10.5<br>(-13.8 to -7.4)                            |
| Assault by other means                                                              | 13.6<br>(11.5 to 16.4)                  | 10.2<br>(8.3 to 12.2)                                 | 0.6<br>(0.4 to 0.9)                  | 37.6<br>(32.6 to 42.4)                            | 4.1<br>(1.5 to 6.8)                                 |
| <b>Forces of nature, conflict and terrorism, and executions and police conflict</b> | <b>94.2</b><br><b>(36.1 to 174.6)</b>   | <b>0.1†</b><br><b>(<math>&lt; 0.05</math> to 0.1)</b> | <b>2.8</b><br><b>(0.7 to 6.3)</b>    | <b>-14.0</b><br><b>(-26.0 to -4.5)</b>            | <b>-21.0</b><br><b>(-30.1 to -14.7)</b>             |
| Exposure to forces of nature                                                        | $< 0.05$<br>( $< 0.05$ to 0.1)          | --                                                    | $< 0.05$<br>( $< 0.05$ to $< 0.05$ ) | --                                                | --                                                  |
| Conflict and terrorism                                                              | 94.0<br>(35.9 to 174.4)                 | --                                                    | 2.8<br>(0.7 to 6.3)                  | -14.1<br>(-26.1 to -4.7)                          | -21.1<br>(-30.2 to -14.7)                           |
| Executions and police conflict                                                      | 0.2<br>(0.1 to 0.3)                     | 0.1<br>( $< 0.05$ to 0.1)                             | $< 0.05$<br>( $< 0.05$ to $< 0.05$ ) | 23.6<br>(12.7 to 40.0)                            | -1.3<br>(-7.8 to 10.3)                              |
| <b>Impairments</b>                                                                  | --                                      | --                                                    | --                                   | --                                                | --                                                  |
| Anaemia                                                                             | 2,090.1<br>(2,000.7 to 2,185.6)         | --                                                    | 71.6<br>(48.6 to 102.3)              | 15.2<br>(7.4 to 22.6)                             | -13.3<br>(-20.2 to -7.3)                            |
| Developmental intellectual disability                                               | 145.5<br>(110.5 to 181.3)               | --                                                    | 16.0<br>(11.2 to 23.2)               | 29.9<br>(17.5 to 43.2)                            | -0.2<br>(-8.7 to 9.9)                               |
| Epilepsy                                                                            | 37.0<br>(22.6 to 54.4)                  | --                                                    | 13.6<br>(7.4 to 23.1)                | 30.9<br>(-25.3 to 135.7)                          | 0.3<br>(-44.8 to 85.7)                              |
| Guillain-Barre syndrome                                                             | $< 0.05$<br>( $< 0.05$ to $< 0.05$ )    | --                                                    | $< 0.05$<br>( $< 0.05$ to $< 0.05$ ) | 31.8<br>(30.4 to 33.2)                            | 0.0<br>(-0.0 to 0.1)                                |
| Hearing loss                                                                        | 638.5<br>(606.6 to 671.6)               | --                                                    | 26.0<br>(18.4 to 35.1)               | 26.0<br>(22.6 to 29.6)                            | -3.7<br>(-5.8 to -1.7)                              |
| Heart failure                                                                       | 13.8<br>(12.2 to 15.7)                  | --                                                    | 1.5<br>(1.1 to 2.0)                  | 33.1<br>(23.6 to 43.3)                            | -1.0<br>(-8.2 to 6.5)                               |
| Infertility                                                                         | 71.3<br>(65.1 to 78.4)                  | --                                                    | 0.4<br>(0.2 to 0.8)                  | 25.4<br>(16.7 to 35.0)                            | -7.3<br>(-13.4 to -0.6)                             |
| Pelvic inflammatory disease                                                         | 4.6<br>(3.9 to 5.5)                     | --                                                    | 0.6<br>(0.4 to 0.8)                  | 24.8<br>(7.5 to 43.8)                             | -4.3<br>(-16.6 to 9.2)                              |
| Vision loss                                                                         | 704.5<br>(678.6 to 731.2)               | --                                                    | 16.8<br>(10.9 to 25.2)               | 28.4<br>(18.3 to 40.3)                            | -3.7<br>(-7.8 to 1.9)                               |

We did not calculate incidence for the nine impairments, certain NTDs, and causes with only birth prevalence. Blank cells mean that no estimate is available.

† Incidence for aggregate causes represents the sum of the incidence of the causes below the aggregate.

‡ Incidence estimates for stroke represent first-ever stroke only.

^ Incidence of HIV/AIDS represents new infections of HIV only and does not include new infections of Tuberculosis in HIV positive cases.

SR Table 14: Prevalence, incidence, and YLDs for 2016, percentage change of YLD counts and percentage change of age-standardised YLD rates between 2006 and 2016 by cause and impairments, for all ages, Costa Rica.

| Cause                                                                                | Prevalence in thousands (95% UI)       | Incidence in thousands (95% UI)            | YLDs in thousands (95% UI)           |                                                   |                                                     |
|--------------------------------------------------------------------------------------|----------------------------------------|--------------------------------------------|--------------------------------------|---------------------------------------------------|-----------------------------------------------------|
|                                                                                      | 2016 counts                            | 2016 counts                                | 2016 counts                          | Percentage change in counts between 2006 and 2016 | Percentage change in age-standardised rates between |
| <b>All causes</b>                                                                    | <b>4,627.3</b><br>(4,608.4 to 4,645.3) | <b>26,889.4†</b><br>(25,364.0 to 28,566.1) | <b>467.0</b><br>(346.5 to 608.8)     | <b>21.8</b><br>(18.6 to 25.0)                     | <b>-0.2</b><br>(-2.7 to 2.3)                        |
| <b>Communicable, maternal, neonatal, and nutritional disorders</b>                   | <b>3,339.0</b><br>(3,204.4 to 3,487.9) | <b>16,428.8†</b><br>(15,087.3 to 17,946.1) | <b>31.3</b><br>(21.9 to 43.1)        | <b>7.5</b><br>(2.3 to 13.1)                       | <b>0.2</b><br>(-4.8 to 5.3)                         |
| <b>HIV/AIDS and tuberculosis</b>                                                     | <b>1,246.9</b><br>(1,114.1 to 1,353.9) | <b>0.9†</b><br>(0.7 to 1.1)                | <b>0.6</b><br>(0.4 to 1.0)           | <b>45.3</b><br>(9.1 to 88.1)                      | <b>20.3</b><br>(-8.8 to 54.4)                       |
| Tuberculosis                                                                         | 1,148.0<br>(1,029.9 to 1,280.9)        | 0.5†<br>(0.4 to 0.5)                       | 0.1<br>( $< 0.05$ to 0.1)            | -4.4<br>(-17.1 to 9.9)                            | -23.1<br>(-33.8 to -10.4)                           |
| Drug-susceptible tuberculosis                                                        | 0.2<br>(0.2 to 0.3)                    | 0.5<br>(0.4 to 0.5)                        | 0.1<br>( $< 0.05$ to 0.1)            | -4.3<br>(-16.9 to 10.7)                           | -23.1<br>(-33.9 to -9.4)                            |
| Multidrug-resistant tuberculosis without extensive drug resistance                   | $< 0.05$<br>( $< 0.05$ to $< 0.05$ )   | $< 0.05$<br>( $< 0.05$ to $< 0.05$ )       | $< 0.05$<br>( $< 0.05$ to $< 0.05$ ) | -11.0<br>(-51.8 to 64.9)                          | -29.0<br>(-61.8 to 32.1)                            |
| Extensively drug-resistant tuberculosis                                              | $< 0.05$<br>( $< 0.05$ to $< 0.05$ )   | $< 0.05$<br>( $< 0.05$ to $< 0.05$ )       | $< 0.05$<br>( $< 0.05$ to $< 0.05$ ) | 137.0<br>(28.2 to 339.0)                          | 89.0<br>(1.8 to 252.1)                              |
| Latent tuberculosis infection                                                        | 1,147.8<br>(1,029.7 to 1,280.7)        | --                                         | --                                   | --                                                | --                                                  |
| HIV/AIDS                                                                             | 6.6<br>(4.8 to 9.1)                    | 0.4 <sup>A</sup><br>(0.3 to 0.6)           | 0.6<br>(0.3 to 1.0)                  | 56.4<br>(11.1 to 118.6)                           | 30.9<br>(-8.1 to 82.9)                              |
| Drug-susceptible HIV/AIDS - Tuberculosis                                             | $< 0.05$<br>( $< 0.05$ to $< 0.05$ )   | $< 0.05$<br>( $< 0.05$ to 0.1)             | $< 0.05$<br>( $< 0.05$ to $< 0.05$ ) | -8.9<br>(-14.9 to -1.7)                           | -23.2<br>(-28.2 to -17.4)                           |
| Multidrug-resistant HIV/AIDS - Tuberculosis without extensive drug resistance        | $< 0.05$<br>( $< 0.05$ to $< 0.05$ )   | $< 0.05$<br>( $< 0.05$ to $< 0.05$ )       | $< 0.05$<br>( $< 0.05$ to $< 0.05$ ) | -15.2<br>(-53.4 to 60.0)                          | -28.6<br>(-60.7 to 34.5)                            |
| Extensively drug-resistant HIV/AIDS - Tuberculosis                                   | $< 0.05$<br>( $< 0.05$ to $< 0.05$ )   | $< 0.05$<br>( $< 0.05$ to $< 0.05$ )       | $< 0.05$<br>( $< 0.05$ to $< 0.05$ ) | 125.8<br>(24.2 to 326.2)                          | 90.1<br>(4.6 to 258.3)                              |
| HIV/AIDS resulting in other diseases                                                 | 6.6<br>(4.8 to 9.1)                    | 0.4<br>(0.3 to 0.6)                        | 0.6<br>(0.3 to 0.9)                  | 58.3<br>(11.4 to 123.8)                           | 32.5<br>(-8.0 to 86.6)                              |
| <b>Diarrhoea, lower respiratory infections, and other common infectious diseases</b> | <b>269.1</b><br>(252.4 to 286.4)       | <b>15,798.8†</b><br>(14,462.5 to 17,315.8) | <b>13.1</b><br>(8.9 to 18.3)         | <b>19.6</b><br>(14.8 to 24.7)                     | <b>12.0</b><br>(7.9 to 16.7)                        |
| Diarrhoeal diseases                                                                  | 58.4<br>(54.5 to 62.6)                 | 3,923.9<br>(3,658.3 to 4,210.1)            | 6.6<br>(4.5 to 9.1)                  | 36.9<br>(29.2 to 45.6)                            | 27.9<br>(20.9 to 35.6)                              |
| Intestinal infectious diseases                                                       | $< 0.05$<br>( $< 0.05$ to $< 0.05$ )   | $< 0.05†$<br>( $< 0.05$ to $< 0.05$ )      | $< 0.05$<br>( $< 0.05$ to $< 0.05$ ) | -12.1<br>(-29.1 to 7.9)                           | -28.6<br>(-41.9 to -13.6)                           |
| Typhoid fever                                                                        | $< 0.05$<br>( $< 0.05$ to $< 0.05$ )   | $< 0.05$<br>( $< 0.05$ to $< 0.05$ )       | $< 0.05$<br>( $< 0.05$ to $< 0.05$ ) | -4.3<br>(-22.7 to 17.2)                           | -23.0<br>(-38.2 to -7.1)                            |
| Paratyphoid fever                                                                    | $< 0.05$<br>( $< 0.05$ to $< 0.05$ )   | $< 0.05$<br>( $< 0.05$ to $< 0.05$ )       | $< 0.05$<br>( $< 0.05$ to $< 0.05$ ) | 42.7<br>(13.2 to 82.1)                            | 25.1<br>(-0.4 to 58.8)                              |
| Other intestinal infectious diseases                                                 | --                                     | --                                         | $< 0.05$<br>( $< 0.05$ to $< 0.05$ ) | -73.2<br>(-84.0 to -56.3)                         | -72.0<br>(-83.4 to -54.7)                           |
| Lower respiratory infections                                                         | 4.2<br>(3.8 to 4.7)                    | 180.6<br>(163.1 to 201.5)                  | 0.2<br>(0.2 to 0.4)                  | 56.3<br>(38.9 to 79.2)                            | 37.4<br>(22.4 to 57.9)                              |
| Upper respiratory infections                                                         | 151.2<br>(134.0 to 169.9)              | 11,373.0<br>(10,051.8 to 12,853.7)         | 3.8<br>(2.2 to 5.9)                  | 7.3<br>(1.2 to 13.4)                              | -0.0<br>(-5.3 to 5.2)                               |
| Otitis media                                                                         | 57.6<br>(51.7 to 63.5)                 | 238.5<br>(194.5 to 293.7)                  | 1.6<br>(1.0 to 2.4)                  | -4.1<br>(-10.2 to 3.2)                            | -6.0<br>(-12.1 to 0.5)                              |
| Meningitis                                                                           | 3.2<br>(2.8 to 3.6)                    | 0.6<br>(0.5 to 0.7)                        | 0.4<br>(0.3 to 0.5)                  | 8.4<br>(4.9 to 11.9)                              | -5.9<br>(-8.9 to -2.9)                              |
| Pneumococcal meningitis                                                              | 1.4<br>(1.2 to 1.6)                    | 0.1<br>(0.1 to 0.1)                        | 0.2<br>(0.1 to 0.2)                  | 1.5<br>(-4.8 to 6.9)                              | -12.2<br>(-17.7 to -7.3)                            |
| H influenzae type B meningitis                                                       | 0.3<br>(0.2 to 0.4)                    | $< 0.05$<br>( $< 0.05$ to $< 0.05$ )       | $< 0.05$<br>( $< 0.05$ to 0.1)       | 9.8<br>(4.5 to 14.7)                              | -2.2<br>(-7.0 to 1.9)                               |
| Meningococcal infection                                                              | 0.2<br>(0.2 to 0.3)                    | 0.1<br>( $< 0.05$ to 0.1)                  | $< 0.05$<br>( $< 0.05$ to $< 0.05$ ) | 13.2<br>(8.3 to 18.3)                             | -2.9<br>(-6.9 to 1.2)                               |
| Other meningitis                                                                     | 1.3<br>(1.0 to 1.6)                    | 0.4<br>(0.3 to 0.5)                        | 0.1<br>(0.1 to 0.2)                  | 18.5<br>(13.6 to 23.8)                            | 2.8<br>(-1.2 to 7.2)                                |
| Encephalitis                                                                         | 2.6<br>(1.9 to 3.7)                    | 1.1<br>(1.0 to 1.3)                        | 0.3<br>(0.2 to 0.4)                  | 13.0<br>(1.7 to 25.1)                             | -3.1<br>(-12.0 to 6.7)                              |
| Diphtheria                                                                           | $< 0.05$<br>( $< 0.05$ to $< 0.05$ )   | $< 0.05$<br>( $< 0.05$ to $< 0.05$ )       | $< 0.05$<br>( $< 0.05$ to $< 0.05$ ) | -19.0<br>(-52.9 to 39.4)                          | -25.5<br>(-56.9 to 30.9)                            |
| Whooping cough                                                                       | 0.3<br>(0.2 to 0.3)                    | 1.9<br>(1.5 to 2.5)                        | $< 0.05$<br>( $< 0.05$ to $< 0.05$ ) | -46.6<br>(-59.9 to -28.4)                         | -38.0<br>(-53.6 to -16.5)                           |
| Tetanus                                                                              | $< 0.05$<br>( $< 0.05$ to $< 0.05$ )   | $< 0.05$<br>( $< 0.05$ to $< 0.05$ )       | $< 0.05$<br>( $< 0.05$ to $< 0.05$ ) | 7.8<br>(-14.5 to 32.5)                            | 1.2<br>(-14.7 to 20.7)                              |
| Measles                                                                              | $< 0.05$<br>(0.0 to $< 0.05$ )         | $< 0.05$<br>(0.0 to $< 0.05$ )             | $< 0.05$<br>(0.0 to $< 0.05$ )       | --                                                | --                                                  |
| Varicella and herpes zoster                                                          | 4.4<br>(4.0 to 4.8)                    | 79.2<br>(75.6 to 83.0)                     | 0.2<br>(0.1 to 0.3)                  | 24.4<br>(8.8 to 42.0)                             | 0.1<br>(-11.6 to 12.7)                              |
| <b>Neglected tropical diseases and malaria</b>                                       | <b>1,775.4</b><br>(1,499.0 to 2,117.7) | <b>96.3†</b><br>(69.7 to 146.7)            | <b>4.3</b><br>(2.7 to 6.5)           | <b>33.1</b><br>(5.6 to 68.2)                      | <b>17.8</b><br>(-5.3 to 47.3)                       |
| Malaria                                                                              | --                                     | --                                         | --                                   | --                                                | --                                                  |
| Chagas disease                                                                       | 26.6<br>(20.6 to 33.9)                 | 0.8<br>(0.6 to 1.0)                        | 0.3<br>(0.2 to 0.4)                  | 32.3<br>(14.0 to 54.4)                            | -1.4<br>(-14.3 to 13.3)                             |
| Leishmaniasis                                                                        | 3.8<br>(1.8 to 6.5)                    | 6.2<br>(2.1 to 12.6)                       | 0.2<br>(0.1 to 0.4)                  | 16.4<br>(-63.6 to 169.7)                          | -0.6<br>(-68.6 to 126.7)                            |
| Visceral leishmaniasis                                                               | $< 0.05$<br>( $< 0.05$ to $< 0.05$ )   | $< 0.05$<br>( $< 0.05$ to $< 0.05$ )       | $< 0.05$<br>( $< 0.05$ to $< 0.05$ ) | -59.5<br>(-95.6 to 75.4)                          | -69.3<br>(-96.6 to 29.9)                            |
| Cutaneous and mucocutaneous leishmaniasis                                            | 3.1<br>(1.1 to 6.3)                    | 6.2<br>(2.1 to 12.6)                       | 0.2<br>(0.1 to 0.4)                  | 16.4<br>(-63.6 to 169.8)                          | -0.5<br>(-68.6 to 126.8)                            |
| African trypanosomiasis                                                              | --                                     | --                                         | --                                   | --                                                | --                                                  |
| Schistosomiasis                                                                      | --                                     | --                                         | --                                   | --                                                | --                                                  |
| Cysticercosis                                                                        | 2.1<br>(1.0 to 3.8)                    | --                                         | 0.3<br>(0.1 to 0.6)                  | 295.4<br>(93.3 to 661.0)                          | 207.0<br>(49.6 to 490.6)                            |
| Cystic echinococcosis                                                                | --                                     | --                                         | --                                   | --                                                | --                                                  |
| Lymphatic filariasis                                                                 | --                                     | --                                         | --                                   | --                                                | --                                                  |
| Onchocerciasis                                                                       | --                                     | --                                         | --                                   | --                                                | --                                                  |
| Trachoma                                                                             | --                                     | --                                         | --                                   | --                                                | --                                                  |
| Dengue                                                                               | 3.3<br>(2.0 to 5.2)                    | 55.5<br>(38.2 to 76.9)                     | 0.5<br>(0.3 to 1.0)                  | 49.0<br>(11.2 to 282.7)                           | 34.5<br>(0.7 to 242.5)                              |
| Yellow fever                                                                         | --                                     | --                                         | --                                   | --                                                | --                                                  |
| Rabies                                                                               | $< 0.05$<br>( $< 0.05$ to $< 0.05$ )   | $< 0.05$<br>( $< 0.05$ to $< 0.05$ )       | $< 0.05$<br>( $< 0.05$ to $< 0.05$ ) | -50.7<br>(-64.8 to -28.6)                         | -57.1<br>(-69.0 to -37.1)                           |
| Intestinal nematode infections                                                       | 1,745.4<br>(1,468.0 to 2,089.0)        | --                                         | 2.7<br>(1.5 to 4.6)                  | 31.0<br>(-4.4 to 87.9)                            | 16.5<br>(-14.5 to 66.0)                             |
| Ascariasis                                                                           | 956.2<br>(664.2 to 1,327.5)            | --                                         | 0.6<br>(0.3 to 1.2)                  | 11.1<br>(-36.4 to 103.1)                          | 0.4<br>(-41.7 to 80.3)                              |



| Cause                                                                   | Prevalence in thousands (95% UI)              | Incidence in thousands (95% UI)                  | YLDs in thousands (95% UI)              |                                                   |                                                     |
|-------------------------------------------------------------------------|-----------------------------------------------|--------------------------------------------------|-----------------------------------------|---------------------------------------------------|-----------------------------------------------------|
|                                                                         | 2016 counts                                   | 2016 counts                                      | 2016 counts                             | Percentage change in counts between 2006 and 2016 | Percentage change in age-standardised rates between |
| Trichuriasis                                                            | 635.6<br>(422.8 to 929.7)                     | --                                               | 0.2<br>(0.1 to 0.4)                     | 12.1<br>(-53.8 to 178.0)                          | -2.5<br>(-59.0 to 139.6)                            |
| Hookworm disease                                                        | 438.0<br>(309.2 to 609.5)                     | --                                               | 1.9<br>(1.1 to 3.3)                     | 41.3<br>(-5.7 to 116.3)                           | 25.4<br>(-15.4 to 91.8)                             |
| Food-borne trematodiasis                                                | --                                            | --                                               | --                                      | --                                                | --                                                  |
| Leprosy                                                                 | 0.1<br>( $< 0.05$ to 0.1)                     | $< 0.05$<br>( $< 0.05$ to $< 0.05$ )             | $< 0.05$<br>( $< 0.05$ to $< 0.05$ )    | -2.9<br>(-19.9 to 43.7)                           | -28.7<br>(-42.7 to 9.4)                             |
| Ebola virus disease                                                     | --                                            | --                                               | --                                      | --                                                | --                                                  |
| Zika virus disease                                                      | 0.6<br>(0.3 to 1.3)                           | 33.8<br>(18.8 to 79.8)                           | $< 0.05$<br>( $< 0.05$ to $< 0.05$ )    | --                                                | --                                                  |
| Guinea worm disease                                                     | --                                            | --                                               | --                                      | --                                                | --                                                  |
| Other neglected tropical diseases                                       | 13.9<br>(11.7 to 16.3)                        | --                                               | 0.3<br>(0.1 to 0.4)                     | -19.0<br>(-34.5 to -2.6)                          | -12.2<br>(-29.7 to 5.9)                             |
| <b>Maternal disorders</b>                                               | <b>5.4</b><br><b>(4.2 to 6.7)</b>             | <b>99.2†</b><br><b>(82.2 to 118.2)</b>           | <b>0.3</b><br><b>(0.2 to 0.5)</b>       | <b>-12.1</b><br><b>(-33.2 to 17.4)</b>            | <b>-20.5</b><br><b>(-39.5 to 6.3)</b>               |
| Maternal haemorrhage                                                    | 0.9<br>(0.7 to 1.3)                           | 3.3<br>(2.4 to 4.3)                              | $< 0.05$<br>( $< 0.05$ to $< 0.05$ )    | 2.9<br>(-27.6 to 47.0)                            | -6.7<br>(-34.3 to 33.5)                             |
| Maternal sepsis and other pregnancy related infections                  | 1.3<br>(1.0 to 1.7)                           | 7.3<br>(5.5 to 9.9)                              | $< 0.05$<br>( $< 0.05$ to 0.1)          | -15.4<br>(-59.4 to 78.3)                          | -22.9<br>(-63.1 to 61.3)                            |
| Maternal hypertensive disorders                                         | 2.9<br>(1.9 to 3.9)                           | 16.9<br>(14.9 to 18.6)                           | 0.1<br>(0.1 to 0.2)                     | -7.9<br>(-42.0 to 47.3)                           | -16.8<br>(-47.5 to 33.3)                            |
| Maternal obstructed labour and uterine rupture                          | $< 0.05$<br>( $< 0.05$ to $< 0.05$ )          | 2.2<br>(1.6 to 3.0)                              | $< 0.05$<br>( $< 0.05$ to $< 0.05$ )    | -17.4<br>(-55.6 to 50.7)                          | -25.2<br>(-59.3 to 35.2)                            |
| Maternal abortion, miscarriage, and ectopic pregnancy                   | 0.6<br>(0.4 to 0.8)                           | 69.4<br>(53.1 to 88.1)                           | 0.1<br>( $< 0.05$ to 0.1)               | -19.6<br>(-56.0 to 49.6)                          | -27.8<br>(-60.6 to 33.0)                            |
| Other maternal disorders                                                | --                                            | --                                               | 0.1<br>( $< 0.05$ to 0.1)               | -16.7<br>(-36.7 to 11.3)                          | -24.3<br>(-42.4 to 1.1)                             |
| <b>Neonatal disorders</b>                                               | <b>28.8</b><br><b>(24.7 to 34.3)</b>          | --                                               | <b>4.9</b><br><b>(3.3 to 6.9)</b>       | <b>10.0</b><br><b>(-7.3 to 30.0)</b>              | <b>1.9</b><br><b>(-14.3 to 20.5)</b>                |
| Neonatal preterm birth complications                                    | 26.0<br>(20.5 to 32.9)                        | --                                               | 3.1<br>(2.0 to 4.6)                     | 12.1<br>(-11.8 to 40.3)                           | 3.3<br>(-19.1 to 29.9)                              |
| Neonatal encephalopathy due to birth asphyxia and trauma                | 5.0<br>(2.6 to 8.4)                           | --                                               | 0.8<br>(0.2 to 1.7)                     | 31.0<br>(-14.6 to 143.8)                          | 20.2<br>(-20.4 to 122.5)                            |
| Neonatal sepsis and other neonatal infections                           | 1.2<br>(0.5 to 2.8)                           | --                                               | 0.6<br>(0.2 to 1.3)                     | -13.9<br>(-30.8 to 22.5)                          | -19.8<br>(-35.7 to 15.5)                            |
| Hemolytic disease and other neonatal jaundice                           | 1.2<br>(1.0 to 1.4)                           | --                                               | 0.3<br>(0.2 to 0.4)                     | 9.7<br>(-7.8 to 28.3)                             | -0.4<br>(-16.1 to 17.5)                             |
| Other neonatal disorders                                                | --                                            | --                                               | 0.1<br>(0.1 to 0.1)                     | -14.1<br>(-32.6 to 9.7)                           | 0.0<br>(-21.4 to 27.6)                              |
| <b>Nutritional deficiencies</b>                                         | <b>423.9</b><br><b>(395.7 to 450.2)</b>       | <b>76.6†</b><br><b>(65.5 to 92.8)</b>            | <b>6.6</b><br><b>(4.2 to 9.8)</b>       | <b>-20.6</b><br><b>(-28.6 to -12.6)</b>           | <b>-22.7</b><br><b>(-31.0 to -14.6)</b>             |
| Protein-energy malnutrition                                             | 10.3<br>(7.6 to 13.9)                         | 6.3<br>(4.6 to 8.5)                              | 0.2<br>(0.1 to 0.3)                     | -25.0<br>(-54.9 to 23.0)                          | -12.3<br>(-47.1 to 43.2)                            |
| Iodine deficiency                                                       | 63.1<br>(55.7 to 71.8)                        | 1.2<br>(1.0 to 1.3)                              | 1.6<br>(1.1 to 2.3)                     | 18.8<br>(8.3 to 29.9)                             | 1.4<br>(-7.5 to 10.6)                               |
| Vitamin A deficiency                                                    | 80.9<br>(67.7 to 98.2)                        | 69.2<br>(58.4 to 86.0)                           | 0.1<br>(0.1 to 0.2)                     | 7.8<br>(-7.3 to 25.9)                             | 2.4<br>(-12.5 to 20.1)                              |
| Iron-deficiency anaemia                                                 | 283.4<br>(253.6 to 317.9)                     | --                                               | 4.7<br>(2.8 to 7.2)                     | -29.3<br>(-38.7 to -20.4)                         | -28.7<br>(-39.1 to -18.7)                           |
| Other nutritional deficiencies                                          | --                                            | --                                               | $< 0.05$<br>( $< 0.05$ to $< 0.05$ )    | -25.7<br>(-56.2 to 25.4)                          | -13.5<br>(-48.6 to 45.9)                            |
| <b>Other communicable, maternal, neonatal, and nutritional diseases</b> | <b>1,286.0</b><br><b>(1,190.8 to 1,378.4)</b> | <b>357.0</b><br><b>(324.0 to 395.9)</b>          | <b>1.4</b><br><b>(0.8 to 2.4)</b>       | <b>10.3</b><br><b>(3.6 to 16.6)</b>               | <b>-3.0</b><br><b>(-9.0 to 2.6)</b>                 |
| Sexually transmitted diseases excluding HIV                             | 1,125.7<br>(1,039.7 to 1,217.2)               | 317.4<br>(284.6 to 356.5)                        | 1.1<br>(0.6 to 1.9)                     | 18.1<br>(10.4 to 26.7)                            | -0.2<br>(-6.4 to 6.5)                               |
| Syphilis                                                                | 16.7<br>(9.4 to 28.2)                         | 13.2<br>(6.8 to 22.3)                            | 0.1<br>(0.1 to 0.1)                     | 40.0<br>(25.5 to 58.1)                            | 1.8<br>(-9.2 to 15.5)                               |
| Chlamydial infection                                                    | 67.1<br>(44.6 to 94.7)                        | 51.0<br>(33.3 to 75.9)                           | 0.2<br>(0.1 to 0.4)                     | 13.7<br>(-2.9 to 33.2)                            | -0.4<br>(-15.2 to 16.9)                             |
| Gonococcal infection                                                    | 14.6<br>(11.1 to 19.0)                        | 50.1<br>(36.4 to 66.6)                           | 0.1<br>(0.1 to 0.2)                     | 13.7<br>(-11.7 to 45.7)                           | 0.1<br>(-22.3 to 28.0)                              |
| Trichomoniasis                                                          | 163.1<br>(141.0 to 186.8)                     | 141.4<br>(120.5 to 164.3)                        | 0.2<br>(0.1 to 0.5)                     | 16.7<br>(9.2 to 24.6)                             | -0.1<br>(-6.0 to 6.3)                               |
| Genital herpes                                                          | 940.1<br>(807.8 to 1,096.8)                   | 57.4<br>(47.9 to 69.3)                           | 0.2<br>(0.1 to 0.6)                     | 22.8<br>(14.9 to 30.5)                            | -0.1<br>(-5.7 to 6.0)                               |
| Other sexually transmitted diseases                                     | 5.6<br>(5.0 to 6.3)                           | 4.3<br>(3.6 to 5.0)                              | 0.2<br>(0.1 to 0.3)                     | 12.8<br>(-0.6 to 28.3)                            | -1.3<br>(-13.0 to 12.0)                             |
| Hepatitis                                                               | 219.8<br>(195.3 to 247.6)                     | 39.7<br>(31.8 to 47.0)                           | 0.1<br>( $< 0.05$ to 0.1)               | -17.3<br>(-36.6 to 5.1)                           | -26.9<br>(-43.3 to -8.3)                            |
| Acute hepatitis A                                                       | 1.6<br>(1.1 to 2.1)                           | 20.7<br>(13.6 to 26.8)                           | $< 0.05$<br>( $< 0.05$ to 0.1)          | -22.5<br>(-52.3 to 19.9)                          | -28.2<br>(-54.9 to 9.7)                             |
| Hepatitis B                                                             | 83.9<br>(65.9 to 108.0)                       | 14.1<br>(10.7 to 18.4)                           | $< 0.05$<br>( $< 0.05$ to $< 0.05$ )    | -10.8<br>(-25.7 to 5.7)                           | -28.0<br>(-39.5 to -15.0)                           |
| Hepatitis C                                                             | 134.2<br>(119.5 to 149.4)                     | 3.5<br>(3.1 to 3.9)                              | $< 0.05$<br>( $< 0.05$ to $< 0.05$ )    | -10.6<br>(-23.8 to 3.2)                           | -9.5<br>(-25.6 to 7.0)                              |
| Acute hepatitis E                                                       | 0.1<br>(0.1 to 0.1)                           | 1.4<br>(1.1 to 1.6)                              | $< 0.05$<br>( $< 0.05$ to $< 0.05$ )    | -7.7<br>(-15.9 to 0.1)                            | -22.6<br>(-28.7 to -17.0)                           |
| Other infectious diseases                                               | 11.0<br>(9.5 to 12.8)                         | $< 0.05$<br>( $< 0.05$ to $< 0.05$ )             | 0.3<br>(0.2 to 0.5)                     | -6.3<br>(-18.9 to 6.3)                            | -5.3<br>(-19.2 to 8.6)                              |
| <b>Non-communicable diseases</b>                                        | <b>4,320.0</b><br><b>(4,290.7 to 4,346.2)</b> | <b>10,163.4†</b><br><b>(9,602.6 to 10,814.0)</b> | <b>409.5</b><br><b>(300.5 to 532.9)</b> | <b>22.4</b><br><b>(19.0 to 25.9)</b>              | <b>-0.5</b><br><b>(-3.3 to 2.3)</b>                 |
| <b>Neoplasms</b>                                                        | <b>25.3</b><br><b>(24.1 to 26.8)</b>          | <b>10.1</b><br><b>(9.7 to 10.5)</b>              | <b>3.0</b><br><b>(2.2 to 3.9)</b>       | <b>62.5</b><br><b>(54.5 to 70.7)</b>              | <b>13.5</b><br><b>(8.0 to 19.2)</b>                 |
| Lip and oral cavity cancer                                              | 0.4<br>(0.3 to 0.4)                           | 0.1<br>(0.1 to 0.1)                              | $< 0.05$<br>( $< 0.05$ to $< 0.05$ )    | 46.3<br>(31.3 to 62.6)                            | 1.7<br>(-9.2 to 13.4)                               |
| Nasopharynx cancer                                                      | 0.1<br>(0.1 to 0.2)                           | $< 0.05$<br>( $< 0.05$ to $< 0.05$ )             | $< 0.05$<br>( $< 0.05$ to $< 0.05$ )    | 25.5<br>(11.5 to 41.9)                            | 0.5<br>(-10.4 to 13.0)                              |
| Other pharynx cancer                                                    | 0.1<br>(0.1 to 0.1)                           | $< 0.05$<br>( $< 0.05$ to $< 0.05$ )             | $< 0.05$<br>( $< 0.05$ to $< 0.05$ )    | 57.8<br>(43.6 to 74.5)                            | 8.1<br>(-1.9 to 19.9)                               |
| Oesophageal cancer                                                      | 0.1<br>(0.1 to 0.1)                           | 0.1<br>(0.1 to 0.1)                              | $< 0.05$<br>( $< 0.05$ to $< 0.05$ )    | 32.4<br>(19.8 to 46.8)                            | -11.9<br>(-20.7 to -2.1)                            |
| Stomach cancer                                                          | 1.8<br>(1.7 to 1.9)                           | 1.0<br>(0.9 to 1.0)                              | 0.2<br>(0.2 to 0.3)                     | 50.0<br>(31.7 to 71.0)                            | 1.3<br>(-11.4 to 15.4)                              |
| Colon and rectum cancer                                                 | 4.0<br>(3.7 to 4.4)                           | 1.1<br>(1.0 to 1.2)                              | 0.4<br>(0.3 to 0.5)                     | 78.5<br>(56.2 to 104.3)                           | 21.4<br>(6.8 to 38.9)                               |
| Liver cancer                                                            | 0.1<br>(0.1 to 0.1)                           | 0.3<br>(0.2 to 0.3)                              | 0.1<br>( $< 0.05$ to 0.1)               | 56.2<br>(42.4 to 71.8)                            | 5.2<br>(-4.3 to 15.8)                               |
| Liver cancer due to hepatitis B                                         | $< 0.05$<br>( $< 0.05$ to 0.1)                | 0.1<br>( $< 0.05$ to 0.1)                        | $< 0.05$<br>( $< 0.05$ to $< 0.05$ )    | 57.9<br>(40.3 to 78.0)                            | 10.5<br>(-1.5 to 24.4)                              |

| Cause                                              | Prevalence in thousands (95% UI)        | Incidence in thousands (95% UI)       | YLDs in thousands (95% UI)           |                                                   |                                                     |
|----------------------------------------------------|-----------------------------------------|---------------------------------------|--------------------------------------|---------------------------------------------------|-----------------------------------------------------|
|                                                    | 2016 counts                             | 2016 counts                           | 2016 counts                          | Percentage change in counts between 2006 and 2016 | Percentage change in age-standardised rates between |
| Liver cancer due to hepatitis C                    | 0.1<br>(0.1 to 0.1)                     | 0.1<br>(0.1 to 0.1)                   | < 0.05<br>(< 0.05 to < 0.05)         | 66.1<br>(48.6 to 86.3)                            | 9.7<br>(-1.5 to 23.2)                               |
| Liver cancer due to alcohol use                    | 0.1<br>(< 0.05 to 0.1)                  | 0.1<br>(0.1 to 0.1)                   | < 0.05<br>(< 0.05 to < 0.05)         | 40.7<br>(24.6 to 58.3)                            | -7.3<br>(-18.1 to 4.5)                              |
| Liver cancer due to other causes                   | < 0.05<br>(< 0.05 to 0.1)               | 0.1<br>(< 0.05 to 0.1)                | < 0.05<br>(< 0.05 to < 0.05)         | 60.1<br>(43.0 to 80.0)                            | 10.5<br>(-1.5 to 24.8)                              |
| Gallbladder and biliary tract cancer               | 0.1<br>(0.1 to 0.1)                     | 0.1<br>(0.1 to 0.1)                   | < 0.05<br>(< 0.05 to < 0.05)         | 19.3<br>(9.8 to 29.7)                             | -20.4<br>(-27.2 to -13.1)                           |
| Pancreatic cancer                                  | 0.2<br>(0.2 to 0.2)                     | 0.2<br>(0.2 to 0.3)                   | 0.1<br>(< 0.05 to 0.1)               | 52.2<br>(34.8 to 70.2)                            | 1.6<br>(-10.7 to 14.4)                              |
| Larynx cancer                                      | 0.2<br>(0.2 to 0.2)                     | 0.1<br>(0.1 to 0.1)                   | < 0.05<br>(< 0.05 to < 0.05)         | 40.8<br>(21.8 to 62.3)                            | -5.2<br>(-18.2 to 10.3)                             |
| Tracheal, bronchus, and lung cancer                | 0.4<br>(0.4 to 0.4)                     | 0.4<br>(0.3 to 0.4)                   | 0.1<br>(0.1 to 0.1)                  | 40.4<br>(17.1 to 69.9)                            | -5.9<br>(-21.7 to 15.1)                             |
| Malignant skin melanoma                            | 0.5<br>(0.4 to 0.6)                     | 0.1<br>(0.1 to 0.1)                   | < 0.05<br>(< 0.05 to < 0.05)         | 84.6<br>(56.2 to 119.4)                           | 31.8<br>(10.7 to 56.2)                              |
| Non-melanoma skin cancer                           | 0.6<br>(0.4 to 0.9)                     | 1.4<br>(1.2 to 1.6)                   | < 0.05<br>(< 0.05 to < 0.05)         | 86.4<br>(36.2 to 214.3)                           | 26.8<br>(-8.3 to 117.7)                             |
| Non-melanoma skin cancer (squamous-cell carcinoma) | 0.4<br>(0.3 to 0.8)                     | 0.4<br>(0.3 to 0.6)                   | < 0.05<br>(< 0.05 to < 0.05)         | 89.0<br>(34.5 to 230.5)                           | 28.4<br>(-10.2 to 127.2)                            |
| Non-melanoma skin cancer (basal-cell carcinoma)    | 0.1<br>(0.1 to 0.2)                     | 1.0<br>(0.8 to 1.1)                   | < 0.05<br>(< 0.05 to < 0.05)         | 56.1<br>(18.5 to 106.5)                           | 7.3<br>(-19.7 to 44.7)                              |
| Breast cancer                                      | 5.1<br>(4.5 to 5.8)                     | 1.1<br>(1.0 to 1.2)                   | 0.4<br>(0.3 to 0.6)                  | 60.8<br>(33.3 to 93.8)                            | 15.7<br>(-4.0 to 38.1)                              |
| Cervical cancer                                    | 1.3<br>(1.1 to 1.4)                     | 0.3<br>(0.3 to 0.4)                   | 0.1<br>(0.1 to 0.2)                  | 19.3<br>(2.2 to 37.4)                             | -9.1<br>(-22.1 to 5.2)                              |
| Uterine cancer                                     | 1.3<br>(1.2 to 1.4)                     | 0.3<br>(0.2 to 0.3)                   | 0.1<br>(0.1 to 0.1)                  | 92.3<br>(53.9 to 134.7)                           | 32.5<br>(6.4 to 60.6)                               |
| Ovarian cancer                                     | 0.5<br>(0.4 to 0.5)                     | 0.1<br>(0.1 to 0.2)                   | 0.1<br>(< 0.05 to 0.1)               | 43.6<br>(11.8 to 83.2)                            | 6.4<br>(-19.7 to 38.0)                              |
| Prostate cancer                                    | 6.1<br>(4.7 to 6.7)                     | 1.4<br>(1.1 to 1.5)                   | 0.6<br>(0.4 to 0.7)                  | 83.1<br>(62.0 to 108.1)                           | 17.2<br>(3.4 to 33.2)                               |
| Testicular cancer                                  | 0.4<br>(0.3 to 0.5)                     | 0.1<br>(0.1 to 0.1)                   | < 0.05<br>(< 0.05 to < 0.05)         | 74.6<br>(21.3 to 151.5)                           | 49.1<br>(4.7 to 114.0)                              |
| Kidney cancer                                      | 0.8<br>(0.7 to 0.8)                     | 0.2<br>(0.2 to 0.2)                   | 0.1<br>(0.1 to 0.1)                  | 59.5<br>(42.4 to 81.2)                            | 17.2<br>(5.5 to 32.5)                               |
| Bladder cancer                                     | 0.7<br>(0.6 to 0.7)                     | 0.2<br>(0.2 to 0.2)                   | 0.1<br>(< 0.05 to 0.1)               | 64.0<br>(44.6 to 86.9)                            | 8.8<br>(-4.7 to 24.8)                               |
| Brain and nervous system cancer                    | 0.3<br>(0.3 to 0.4)                     | 0.1<br>(0.1 to 0.2)                   | < 0.05<br>(< 0.05 to 0.1)            | 32.4<br>(19.1 to 47.5)                            | 3.6<br>(-7.3 to 15.3)                               |
| Thyroid cancer                                     | 0.5<br>(0.4 to 0.5)                     | 0.1<br>(0.1 to 0.1)                   | < 0.05<br>(< 0.05 to < 0.05)         | 75.9<br>(42.2 to 115.9)                           | 28.4<br>(4.2 to 56.1)                               |
| Mesothelioma                                       | < 0.05<br>(< 0.05 to < 0.05)            | < 0.05<br>(< 0.05 to < 0.05)          | < 0.05<br>(< 0.05 to < 0.05)         | 42.7<br>(31.3 to 54.5)                            | 1.1<br>(-7.2 to 9.5)                                |
| Hodgkin lymphoma                                   | 0.2<br>(0.1 to 0.2)                     | 0.1<br>(< 0.05 to 0.1)                | < 0.05<br>(< 0.05 to < 0.05)         | 35.8<br>(23.4 to 48.9)                            | 6.0<br>(-3.6 to 15.8)                               |
| Non-Hodgkin's lymphoma                             | 0.7<br>(0.6 to 0.8)                     | 0.2<br>(0.2 to 0.2)                   | 0.1<br>(0.1 to 0.1)                  | 50.9<br>(34.6 to 68.7)                            | 9.6<br>(-2.1 to 22.6)                               |
| Multiple myeloma                                   | 0.2<br>(0.2 to 0.3)                     | 0.1<br>(0.1 to 0.1)                   | < 0.05<br>(< 0.05 to 0.1)            | 69.3<br>(45.4 to 98.7)                            | 15.3<br>(-2.2 to 37.9)                              |
| Leukaemia                                          | 1.0<br>(0.9 to 1.0)                     | 0.3<br>(0.3 to 0.3)                   | 0.1<br>(0.1 to 0.2)                  | 28.2<br>(19.4 to 37.3)                            | -1.2<br>(-8.1 to 6.2)                               |
| Acute lymphoid leukaemia                           | 0.3<br>(0.3 to 0.3)                     | 0.1<br>(0.1 to 0.1)                   | < 0.05<br>(< 0.05 to 0.1)            | 20.2<br>(8.6 to 32.1)                             | 3.2<br>(-6.0 to 13.1)                               |
| Chronic lymphoid leukaemia                         | 0.3<br>(0.2 to 0.3)                     | 0.1<br>(0.1 to 0.1)                   | < 0.05<br>(< 0.05 to < 0.05)         | 61.4<br>(33.9 to 94.2)                            | 9.8<br>(-10.1 to 33.4)                              |
| Acute myeloid leukaemia                            | 0.1<br>(0.1 to 0.1)                     | 0.1<br>(0.1 to 0.1)                   | < 0.05<br>(< 0.05 to < 0.05)         | 30.4<br>(19.0 to 42.8)                            | 5.3<br>(-3.5 to 14.8)                               |
| Chronic myeloid leukaemia                          | 0.1<br>(0.1 to 0.1)                     | < 0.05<br>(< 0.05 to < 0.05)          | < 0.05<br>(< 0.05 to < 0.05)         | 9.3<br>(-3.2 to 23.2)                             | -21.6<br>(-31.0 to -11.2)                           |
| Other leukaemia                                    | 0.2<br>(0.1 to 0.2)                     | < 0.05<br>(< 0.05 to < 0.05)          | < 0.05<br>(< 0.05 to < 0.05)         | 15.0<br>(1.1 to 29.1)                             | -12.6<br>(-24.0 to -1.1)                            |
| Other neoplasms                                    | 2.7<br>(2.2 to 3.1)                     | 0.7<br>(0.6 to 0.8)                   | 0.2<br>(0.1 to 0.3)                  | 117.5<br>(83.2 to 160.8)                          | 64.3<br>(37.7 to 97.6)                              |
| <b>Cardiovascular diseases</b>                     | <b>265.4</b><br><b>(253.6 to 277.1)</b> | <b>25.1†</b><br><b>(23.8 to 26.5)</b> | <b>15.3</b><br><b>(10.9 to 20.2)</b> | <b>40.1</b><br><b>(35.6 to 45.1)</b>              | <b>-1.6</b><br><b>(-4.6 to 1.6)</b>                 |
| Rheumatic heart disease                            | 0.3<br>(0.3 to 0.4)                     | 0.1<br>(0.1 to 0.1)                   | < 0.05<br>(< 0.05 to < 0.05)         | 18.0<br>(7.5 to 29.3)                             | -10.5<br>(-18.6 to -2.0)                            |
| Ischaemic heart disease                            | 85.3<br>(80.3 to 90.0)                  | 8.2<br>(7.6 to 8.7)                   | 5.0<br>(3.4 to 6.8)                  | 41.6<br>(35.9 to 47.6)                            | -0.0<br>(-3.9 to 4.0)                               |
| Cerebrovascular disease                            | 31.9<br>(29.3 to 34.5)                  | 4.7‡<br>(4.3 to 5.2)                  | 3.2<br>(2.3 to 4.1)                  | 39.6<br>(26.8 to 51.9)                            | -3.6<br>(-12.8 to 5.1)                              |
| Ischaemic stroke                                   | 26.2<br>(23.0 to 29.3)                  | 3.3‡<br>(2.9 to 3.7)                  | 2.5<br>(1.8 to 3.3)                  | 40.0<br>(25.3 to 54.2)                            | -4.3<br>(-14.7 to 6.0)                              |
| Hemorrhagic stroke                                 | 7.1<br>(6.4 to 7.9)                     | 1.4‡<br>(1.3 to 1.6)                  | 0.7<br>(0.5 to 0.9)                  | 38.3<br>(22.7 to 55.6)                            | -0.9<br>(-12.0 to 10.7)                             |
| Hypertensive heart disease                         | 12.1<br>(10.3 to 14.2)                  | --                                    | 1.0<br>(0.7 to 1.4)                  | 48.8<br>(33.8 to 63.0)                            | -0.6<br>(-10.3 to 9.0)                              |
| Cardiomyopathy and myocarditis                     | 4.5<br>(4.0 to 5.0)                     | 1.3†<br>(1.1 to 1.4)                  | 0.4<br>(0.3 to 0.6)                  | 30.5<br>(16.3 to 46.6)                            | 1.3<br>(-9.2 to 13.1)                               |
| Myocarditis                                        | 0.9<br>(0.8 to 1.0)                     | 1.3<br>(1.1 to 1.4)                   | 0.1<br>(< 0.05 to 0.1)               | 14.9<br>(1.0 to 31.8)                             | 0.9<br>(-10.7 to 14.2)                              |
| Alcoholic cardiomyopathy                           | 0.5<br>(0.4 to 0.6)                     | --                                    | < 0.05<br>(< 0.05 to 0.1)            | 37.1<br>(8.9 to 75.0)                             | 1.0<br>(-19.9 to 30.7)                              |
| Other cardiomyopathy                               | 3.7<br>(3.2 to 4.3)                     | --                                    | 0.3<br>(0.2 to 0.5)                  | 33.7<br>(15.5 to 53.2)                            | 1.4<br>(-11.9 to 15.4)                              |
| Atrial fibrillation and flutter                    | 34.1<br>(29.6 to 39.3)                  | 2.7<br>(2.3 to 3.2)                   | 2.7<br>(1.8 to 3.8)                  | 47.2<br>(38.6 to 57.1)                            | -0.9<br>(-6.5 to 5.5)                               |
| Peripheral vascular disease                        | 80.6<br>(69.6 to 93.4)                  | 7.6<br>(6.5 to 8.8)                   | 0.4<br>(0.2 to 0.7)                  | 44.4<br>(34.3 to 55.9)                            | -6.2<br>(-12.3 to 0.9)                              |
| Endocarditis                                       | 0.3<br>(0.2 to 0.3)                     | 0.6<br>(0.5 to 0.6)                   | < 0.05<br>(< 0.05 to < 0.05)         | 33.4<br>(21.7 to 46.9)                            | -1.8<br>(-11.3 to 8.8)                              |
| Other cardiovascular and circulatory diseases      | 48.9<br>(41.8 to 57.5)                  | --                                    | 2.6<br>(1.7 to 3.6)                  | 29.9<br>(19.5 to 42.8)                            | -2.5<br>(-10.2 to 6.1)                              |
| <b>Chronic respiratory diseases</b>                | <b>494.8</b><br><b>(474.3 to 519.1)</b> | <b>76.7†</b><br><b>(72.0 to 82.2)</b> | <b>17.5</b><br><b>(12.7 to 23.4)</b> | <b>9.5</b><br><b>(3.9 to 15.4)</b>                | <b>-2.3</b><br><b>(-7.0 to 2.5)</b>                 |
| Chronic obstructive pulmonary disease              | 169.3<br>(157.6 to 185.1)               | 11.6<br>(10.8 to 12.8)                | 3.5<br>(2.9 to 4.3)                  | 33.1<br>(17.2 to 53.7)                            | -3.7<br>(-15.1 to 11.5)                             |
| Pneumoconiosis                                     | 0.8<br>(0.7 to 0.8)                     | 0.1<br>(0.1 to 0.1)                   | 0.1<br>(0.1 to 0.1)                  | 49.6<br>(27.3 to 76.0)                            | 4.0<br>(-12.3 to 23.2)                              |
| Silicosis                                          | 0.2<br>(0.1 to 0.2)                     | < 0.05<br>(< 0.05 to < 0.05)          | < 0.05<br>(< 0.05 to < 0.05)         | 47.7<br>(10.9 to 97.9)                            | 3.6<br>(-24.5 to 43.6)                              |



| Cause                                                          | Prevalence in thousands (95% UI)              | Incidence in thousands (95% UI)          | YLDs in thousands (95% UI)            |                                                   |                                                     |
|----------------------------------------------------------------|-----------------------------------------------|------------------------------------------|---------------------------------------|---------------------------------------------------|-----------------------------------------------------|
|                                                                | 2016 counts                                   | 2016 counts                              | 2016 counts                           | Percentage change in counts between 2006 and 2016 | Percentage change in age-standardised rates between |
| Asbestosis                                                     | 0.2<br>(0.1 to 0.2)                           | < 0.05<br>(< 0.05 to < 0.05)             | < 0.05<br>(< 0.05 to < 0.05)          | 40.8<br>(22.1 to 63.8)                            | 1.4<br>(-14.0 to 20.4)                              |
| Coal workers pneumoconiosis                                    | --                                            | --                                       | --                                    | --                                                | --                                                  |
| Other pneumoconiosis                                           | 0.4<br>(0.4 to 0.5)                           | < 0.05<br>(< 0.05 to < 0.05)             | 0.1<br>(< 0.05 to 0.1)                | 54.5<br>(16.8 to 106.6)                           | 5.3<br>(-21.0 to 42.8)                              |
| Asthma                                                         | 336.2<br>(311.8 to 363.0)                     | 64.6<br>(60.1 to 70.0)                   | 13.3<br>(8.7 to 19.2)                 | 3.4<br>(-2.3 to 9.2)                              | -2.6<br>(-7.7 to 2.7)                               |
| Interstitial lung disease and pulmonary sarcoidosis            | 2.9<br>(2.6 to 3.1)                           | 0.4<br>(0.3 to 0.4)                      | 0.3<br>(0.2 to 0.4)                   | 43.4<br>(31.4 to 56.9)                            | 2.0<br>(-6.8 to 12.7)                               |
| Other chronic respiratory diseases                             | --                                            | --                                       | 0.2<br>(0.2 to 0.3)                   | 37.3<br>(10.7 to 69.6)                            | 33.5<br>(7.3 to 64.4)                               |
| <b>Cirrhosis and other chronic liver diseases</b>              | <b>48.1</b><br><b>(45.7 to 50.6)</b>          | <b>1.3</b><br><b>(1.2 to 1.3)</b>        | <b>1.2</b><br><b>(0.8 to 1.6)</b>     | <b>36.4</b><br><b>(25.5 to 48.2)</b>              | <b>3.8</b><br><b>(-4.1 to 12.1)</b>                 |
| Cirrhosis and other chronic liver diseases due to hepatitis B  | 1.7<br>(1.6 to 1.9)                           | < 0.05<br>(< 0.05 to 0.1)                | < 0.05<br>(< 0.05 to 0.1)             | 43.7<br>(11.2 to 84.1)                            | 5.0<br>(-19.2 to 35.2)                              |
| Cirrhosis and other chronic liver diseases due to hepatitis C  | 19.2<br>(17.9 to 20.6)                        | 0.5<br>(0.5 to 0.6)                      | 0.4<br>(0.3 to 0.6)                   | 39.4<br>(22.5 to 59.2)                            | 2.2<br>(-9.3 to 15.9)                               |
| Cirrhosis and other chronic liver diseases due to alcohol use  | 17.7<br>(16.4 to 19.2)                        | 0.5<br>(0.5 to 0.5)                      | 0.4<br>(0.3 to 0.6)                   | 48.5<br>(28.4 to 71.6)                            | 5.9<br>(-7.1 to 20.7)                               |
| Cirrhosis and other chronic liver diseases due to other causes | 9.5<br>(8.7 to 10.3)                          | 0.2<br>(0.2 to 0.3)                      | 0.3<br>(0.2 to 0.5)                   | 19.7<br>(0.6 to 42.5)                             | 3.3<br>(-12.3 to 21.1)                              |
| <b>Digestive diseases</b>                                      | <b>99.3</b><br><b>(93.0 to 107.6)</b>         | <b>115.6†</b><br><b>(107.2 to 124.8)</b> | <b>5.3</b><br><b>(3.7 to 7.1)</b>     | <b>50.8</b><br><b>(39.1 to 63.3)</b>              | <b>19.5</b><br><b>(10.7 to 28.9)</b>                |
| Peptic ulcer disease                                           | 38.6<br>(34.5 to 43.7)                        | 3.0<br>(2.7 to 3.3)                      | 1.0<br>(0.6 to 1.5)                   | 139.0<br>(103.0 to 177.5)                         | 82.6<br>(55.3 to 110.7)                             |
| Gastritis and duodenitis                                       | 19.5<br>(16.8 to 22.9)                        | 11.5<br>(10.0 to 13.3)                   | 0.7<br>(0.4 to 1.0)                   | 157.8<br>(123.2 to 201.2)                         | 96.3<br>(70.5 to 126.3)                             |
| Appendicitis                                                   | 0.4<br>(0.4 to 0.4)                           | 10.7<br>(9.8 to 11.6)                    | 0.1<br>(0.1 to 0.2)                   | 6.5<br>(-22.1 to 51.8)                            | 0.5<br>(-26.6 to 40.7)                              |
| Paralytic ileus and intestinal obstruction                     | < 0.05<br>(< 0.05 to 0.1)                     | 1.3<br>(1.2 to 1.5)                      | < 0.05<br>(< 0.05 to < 0.05)          | 24.4<br>(19.3 to 29.3)                            | 4.1<br>(0.8 to 7.1)                                 |
| Inguinal, femoral, and abdominal hernia                        | 35.4<br>(31.9 to 39.1)                        | 32.5<br>(28.0 to 37.1)                   | 2.3<br>(1.6 to 3.3)                   | 21.6<br>(10.8 to 34.1)                            | -1.3<br>(-9.5 to 7.3)                               |
| Inflammatory bowel disease                                     | 2.7<br>(2.5 to 2.9)                           | 1.3<br>(1.2 to 1.3)                      | 0.4<br>(0.3 to 0.5)                   | 42.0<br>(22.4 to 65.7)                            | 7.2<br>(-7.7 to 23.8)                               |
| Vascular intestinal disorders                                  | 0.1<br>(0.1 to 0.1)                           | 0.4<br>(0.4 to 0.5)                      | < 0.05<br>(< 0.05 to < 0.05)          | 45.3<br>(23.6 to 69.0)                            | 8.0<br>(-9.2 to 28.6)                               |
| Gallbladder and biliary diseases                               | 5.8<br>(5.3 to 6.4)                           | 52.1<br>(45.1 to 59.8)                   | 0.2<br>(0.2 to 0.4)                   | 42.0<br>(16.4 to 74.6)                            | 11.3<br>(-8.1 to 35.3)                              |
| Pancreatitis                                                   | 0.3<br>(0.3 to 0.4)                           | 2.9<br>(2.6 to 3.2)                      | < 0.05<br>(< 0.05 to 0.1)             | 35.7<br>(30.6 to 40.7)                            | 5.2<br>(1.5 to 8.9)                                 |
| Other digestive diseases                                       | --                                            | --                                       | 0.4<br>(0.3 to 0.6)                   | 52.2<br>(39.7 to 65.5)                            | 21.8<br>(12.6 to 31.0)                              |
| <b>Neurological disorders</b>                                  | <b>1,845.5</b><br><b>(1,767.6 to 1,933.2)</b> | <b>832.4</b><br><b>(715.9 to 954.3)</b>  | <b>52.7</b><br><b>(35.4 to 73.4)</b>  | <b>19.2</b><br><b>(-3.6 to 46.4)</b>              | <b>-0.1</b><br><b>(-18.9 to 23.4)</b>               |
| Alzheimer's disease and other dementias                        | 31.9<br>(26.8 to 38.0)                        | 5.6<br>(4.6 to 6.7)                      | 4.7<br>(3.3 to 6.3)                   | 57.2<br>(50.9 to 64.1)                            | -0.7<br>(-4.6 to 3.4)                               |
| Parkinson's disease                                            | 3.2<br>(2.5 to 4.0)                           | 0.4<br>(0.3 to 0.5)                      | 0.4<br>(0.2 to 0.5)                   | 59.2<br>(39.7 to 81.9)                            | 5.7<br>(-6.9 to 20.0)                               |
| Epilepsy                                                       | 24.9<br>(7.0 to 42.2)                         | 2.5<br>(0.7 to 4.2)                      | 6.3<br>(1.5 to 14.4)                  | 8.8<br>(-80.3 to 520.2)                           | -2.4<br>(-82.4 to 453.3)                            |
| Multiple sclerosis                                             | 0.4<br>(0.3 to 0.4)                           | < 0.05<br>(< 0.05 to < 0.05)             | 0.1<br>(0.1 to 0.1)                   | 35.5<br>(30.2 to 40.6)                            | 7.9<br>(3.6 to 12.0)                                |
| Motor neuron disease                                           | 0.2<br>(0.2 to 0.2)                           | < 0.05<br>(< 0.05 to < 0.05)             | < 0.05<br>(< 0.05 to 0.1)             | 28.7<br>(22.6 to 34.4)                            | 4.7<br>(0.6 to 8.8)                                 |
| Migraine                                                       | 690.6<br>(650.2 to 731.9)                     | 74.4<br>(70.0 to 79.0)                   | 33.3<br>(21.7 to 46.3)                | 17.0<br>(12.9 to 21.2)                            | -0.1<br>(-3.5 to 3.3)                               |
| Tension-type headache                                          | 1,386.2<br>(1,245.8 to 1,541.8)               | 749.5<br>(636.5 to 872.2)                | 6.5<br>(4.1 to 9.5)                   | 17.8<br>(12.1 to 24.6)                            | -0.6<br>(-5.0 to 4.6)                               |
| Other neurological disorders                                   | < 0.05<br>(< 0.05 to < 0.05)                  | < 0.05<br>(< 0.05 to 0.1)                | 1.3<br>(0.4 to 2.9)                   | 24.9<br>(-68.8 to 431.0)                          | 17.1<br>(-70.8 to 376.9)                            |
| <b>Mental and substance use disorders</b>                      | <b>640.1</b><br><b>(619.6 to 661.2)</b>       | <b>259.0†</b><br><b>(240.3 to 280.2)</b> | <b>91.5</b><br><b>(65.4 to 118.7)</b> | <b>17.6</b><br><b>(15.0 to 20.3)</b>              | <b>0.8</b><br><b>(-1.2 to 2.8)</b>                  |
| Schizophrenia                                                  | 11.0<br>(9.6 to 12.6)                         | 0.7<br>(0.6 to 0.8)                      | 7.1<br>(5.2 to 9.0)                   | 23.9<br>(13.9 to 35.7)                            | 1.1<br>(-7.0 to 10.3)                               |
| Alcohol use disorders                                          | 68.4<br>(58.8 to 78.8)                        | 37.1<br>(31.5 to 42.4)                   | 6.9<br>(4.7 to 9.7)                   | 22.1<br>(12.5 to 32.9)                            | 4.9<br>(-3.0 to 13.5)                               |
| Drug use disorders                                             | 26.9<br>(24.4 to 29.6)                        | 3.5<br>(3.2 to 3.9)                      | 7.4<br>(5.1 to 10.0)                  | 21.8<br>(10.5 to 34.5)                            | 3.1<br>(-6.1 to 13.4)                               |
| Opioid use disorders                                           | 12.6<br>(10.4 to 15.3)                        | 1.5<br>(1.3 to 1.8)                      | 5.3<br>(3.5 to 7.3)                   | 27.1<br>(14.4 to 41.9)                            | 5.2<br>(-4.9 to 16.6)                               |
| Cocaine use disorders                                          | 3.2<br>(2.7 to 3.8)                           | 0.2<br>(0.2 to 0.2)                      | 0.4<br>(0.2 to 0.7)                   | 5.6<br>(-19.7 to 35.2)                            | -8.7<br>(-29.9 to 15.5)                             |
| Amphetamine use disorders                                      | 4.5<br>(3.1 to 6.3)                           | 0.4<br>(0.3 to 0.6)                      | 0.6<br>(0.3 to 1.0)                   | 11.7<br>(-13.6 to 44.7)                           | 2.9<br>(-20.3 to 31.7)                              |
| Cannabis use disorders                                         | 5.2<br>(4.4 to 6.1)                           | 0.9<br>(0.8 to 1.1)                      | 0.2<br>(0.1 to 0.2)                   | 6.4<br>(-15.6 to 34.9)                            | -3.5<br>(-23.5 to 21.6)                             |
| Other drug use disorders                                       | 2.1<br>(1.9 to 2.4)                           | 0.4<br>(0.4 to 0.5)                      | 0.9<br>(0.6 to 1.3)                   | 12.4<br>(-12.3 to 42.1)                           | -1.1<br>(-22.8 to 24.6)                             |
| Depressive disorders                                           | 151.9<br>(143.0 to 163.3)                     | 172.9<br>(155.8 to 192.8)                | 26.7<br>(18.4 to 36.2)                | 21.7<br>(16.4 to 27.4)                            | 0.0<br>(-4.1 to 4.3)                                |
| Major depressive disorder                                      | 108.0<br>(97.4 to 119.9)                      | 164.5<br>(147.5 to 184.0)                | 22.3<br>(15.2 to 30.2)                | 21.3<br>(14.9 to 27.9)                            | 0.0<br>(-4.7 to 5.3)                                |
| Dysthymia                                                      | 46.1<br>(40.4 to 52.6)                        | 8.4<br>(7.4 to 9.6)                      | 4.5<br>(3.0 to 6.5)                   | 23.7<br>(17.7 to 29.4)                            | 0.0<br>(-4.1 to 4.3)                                |
| Bipolar disorder                                               | 41.0<br>(35.3 to 47.8)                        | 3.0<br>(2.6 to 3.5)                      | 8.5<br>(5.2 to 12.7)                  | 15.3<br>(8.7 to 22.4)                             | -0.0<br>(-5.5 to 5.9)                               |
| Anxiety disorders                                              | 142.7<br>(129.9 to 156.4)                     | 23.0<br>(21.2 to 25.0)                   | 13.9<br>(9.7 to 18.9)                 | 15.3<br>(8.5 to 22.1)                             | 0.1<br>(-5.5 to 5.8)                                |
| Eating disorders                                               | 8.4<br>(6.8 to 10.2)                          | 3.7<br>(2.8 to 4.9)                      | 1.7<br>(1.1 to 2.5)                   | 19.1<br>(5.1 to 34.9)                             | 9.4<br>(-3.2 to 23.7)                               |
| Anorexia nervosa                                               | 1.7<br>(1.2 to 2.3)                           | 0.6<br>(0.5 to 0.8)                      | 0.4<br>(0.2 to 0.6)                   | 14.1<br>(-10.6 to 47.5)                           | 10.0<br>(-13.7 to 42.4)                             |
| Bulimia nervosa                                                | 6.4<br>(4.7 to 8.5)                           | 3.1<br>(2.2 to 4.3)                      | 1.4<br>(0.8 to 2.1)                   | 20.5<br>(4.3 to 39.0)                             | 9.2<br>(-5.4 to 25.7)                               |
| Autistic spectrum disorders                                    | 42.7<br>(38.2 to 47.6)                        | 0.2<br>(0.1 to 0.3)                      | 6.4<br>(4.3 to 9.0)                   | 10.2<br>(4.9 to 15.8)                             | 0.0<br>(-4.8 to 4.8)                                |
| Autism                                                         | 13.6<br>(11.6 to 16.0)                        | < 0.05<br>(< 0.05 to < 0.05)             | 3.5<br>(2.2 to 5.0)                   | 10.6<br>(1.6 to 20.1)                             | -0.2<br>(-8.3 to 8.2)                               |
| Asperger syndrome and other autistic spectrum disorders        | 28.9<br>(24.1 to 35.0)                        | 0.2<br>(0.1 to 0.3)                      | 2.9<br>(1.9 to 4.2)                   | 9.7<br>(4.3 to 15.0)                              | 0.3<br>(-4.4 to 4.8)                                |

| Cause                                                      | Prevalence in thousands (95% UI)        | Incidence in thousands (95% UI)          | YLDs in thousands (95% UI)       |                                                   |                                                     |
|------------------------------------------------------------|-----------------------------------------|------------------------------------------|----------------------------------|---------------------------------------------------|-----------------------------------------------------|
|                                                            | 2016 counts                             | 2016 counts                              | 2016 counts                      | Percentage change in counts between 2006 and 2016 | Percentage change in age-standardised rates between |
| Attention-deficit/hyperactivity disorder                   | 36.9<br>(29.1 to 46.2)                  | 1.4<br>(1.0 to 1.9)                      | 0.5<br>(0.2 to 0.7)              | 2.5<br>(-5.8 to 11.5)                             | 0.1<br>(-7.7 to 8.6)                                |
| Conduct disorder                                           | 32.1<br>(25.9 to 38.5)                  | 10.5<br>(8.2 to 12.8)                    | 3.9<br>(2.4 to 6.0)              | -7.7<br>(-13.6 to -1.2)                           | 0.2<br>(-6.2 to 7.1)                                |
| Idiopathic developmental intellectual disability           | 28.0<br>(13.6 to 42.2)                  | --                                       | 1.2<br>(0.5 to 2.1)              | 6.9<br>(-0.9 to 16.1)                             | -4.6<br>(-11.6 to 3.2)                              |
| Other mental and substance use disorders                   | 97.1<br>(85.7 to 112.0)                 | 3.1<br>(2.7 to 3.5)                      | 7.3<br>(5.1 to 10.6)             | 22.9<br>(17.1 to 29.5)                            | 0.2<br>(-4.5 to 5.2)                                |
| <b>Diabetes, urogenital, blood, and endocrine diseases</b> | <b>1,511.4<br/>(1,474.1 to 1,544.7)</b> | <b>388.4†<br/>(367.4 to 411.0)</b>       | <b>36.3<br/>(25.7 to 49.2)</b>   | <b>25.8<br/>(20.3 to 32.0)</b>                    | <b>-5.1<br/>(-9.4 to -0.5)</b>                      |
| Diabetes mellitus                                          | 226.5<br>(200.5 to 252.1)               | 11.2<br>(10.0 to 12.5)                   | 20.3<br>(13.9 to 28.5)           | 24.1<br>(15.5 to 34.6)                            | -7.5<br>(-14.0 to -0.0)                             |
| Acute glomerulonephritis                                   | 0.1<br>(0.1 to 0.1)                     | 1.0<br>(0.9 to 1.2)                      | < 0.05<br>(< 0.05 to < 0.05)     | 24.1<br>(18.4 to 29.9)                            | 0.5<br>(-3.3 to 4.2)                                |
| Chronic kidney disease                                     | 276.5<br>(249.9 to 305.1)               | 23.7<br>(20.7 to 26.8)                   | 6.6<br>(4.8 to 8.5)              | 38.4<br>(26.5 to 50.5)                            | -2.8<br>(-11.5 to 5.8)                              |
| Chronic kidney disease due to diabetes mellitus            | 105.3<br>(88.7 to 123.9)                | 9.5<br>(7.7 to 11.6)                     | 2.3<br>(1.6 to 3.0)              | 37.6<br>(18.6 to 57.0)                            | -4.5<br>(-17.7 to 9.4)                              |
| Chronic kidney disease due to hypertension                 | 53.7<br>(45.5 to 62.8)                  | 6.2<br>(4.9 to 7.6)                      | 0.9<br>(0.6 to 1.3)              | 43.4<br>(21.3 to 68.8)                            | -6.8<br>(-21.4 to 9.5)                              |
| Chronic kidney disease due to glomerulonephritis           | 60.8<br>(51.9 to 69.8)                  | 3.2<br>(2.5 to 4.0)                      | 2.0<br>(1.4 to 2.6)              | 36.3<br>(17.0 to 57.2)                            | 0.4<br>(-13.6 to 15.9)                              |
| Chronic kidney disease due to other causes                 | 56.7<br>(45.9 to 67.7)                  | 4.8<br>(3.8 to 5.9)                      | 1.4<br>(1.0 to 1.9)              | 39.6<br>(19.8 to 61.5)                            | -1.1<br>(-15.7 to 15.2)                             |
| Urinary diseases and male infertility                      | 88.3<br>(79.7 to 98.1)                  | 186.6†<br>(168.1 to 206.2)               | 2.4<br>(1.6 to 3.5)              | 40.5<br>(32.2 to 49.0)                            | -1.1<br>(-6.8 to 4.5)                               |
| Interstitial nephritis and urinary tract infections        | 3.1<br>(2.8 to 3.5)                     | 163.0<br>(144.6 to 183.1)                | 0.1<br>(0.1 to 0.2)              | 18.5<br>(-0.5 to 41.2)                            | 2.2<br>(-13.6 to 20.9)                              |
| Urolithiasis                                               | 0.6<br>(0.5 to 0.6)                     | 15.0<br>(13.2 to 17.0)                   | < 0.05<br>(< 0.05 to 0.1)        | 27.7<br>(22.4 to 32.9)                            | 1.5<br>(-2.1 to 5.2)                                |
| Benign prostatic hyperplasia                               | 64.7<br>(54.7 to 75.5)                  | 8.6<br>(7.1 to 10.3)                     | 2.1<br>(1.4 to 3.1)              | 45.5<br>(36.2 to 55.5)                            | -0.8<br>(-7.3 to 5.7)                               |
| Male infertility                                           | 16.0<br>(12.3 to 20.7)                  | --                                       | 0.1<br>(< 0.05 to 0.2)           | 8.1<br>(-0.3 to 17.9)                             | -3.7<br>(-10.9 to 4.5)                              |
| Other urinary diseases                                     | --                                      | --                                       | 0.1<br>(< 0.05 to 0.1)           | -1.4<br>(-13.4 to 12.3)                           | -15.4<br>(-25.3 to -4.4)                            |
| Gynecological diseases                                     | 517.9<br>(493.1 to 540.6)               | 158.4†<br>(149.4 to 167.9)               | 4.8<br>(3.2 to 7.1)              | 10.1<br>(4.7 to 15.8)                             | -5.9<br>(-10.5 to -1.0)                             |
| Uterine fibroids                                           | 41.5<br>(36.1 to 47.5)                  | 4.4<br>(3.7 to 5.0)                      | 0.4<br>(0.2 to 0.7)              | -2.1<br>(-13.9 to 8.3)                            | -18.9<br>(-28.4 to -10.5)                           |
| Polycystic ovarian syndrome                                | 0.6<br>(0.4 to 0.8)                     | 3.4<br>(2.5 to 4.5)                      | < 0.05<br>(< 0.05 to < 0.05)     | 10.8<br>(-21.5 to 53.7)                           | 0.2<br>(-29.1 to 38.7)                              |
| Female infertility                                         | 38.1<br>(26.8 to 53.1)                  | --                                       | 0.2<br>(0.1 to 0.5)              | 14.3<br>(6.0 to 25.1)                             | 1.9<br>(-5.5 to 10.5)                               |
| Endometriosis                                              | 0.2<br>(0.2 to 0.2)                     | 1.0<br>(0.8 to 1.2)                      | < 0.05<br>(< 0.05 to < 0.05)     | 11.0<br>(-10.7 to 41.0)                           | -1.3<br>(-20.6 to 24.7)                             |
| Genital prolapse                                           | 134.8<br>(114.7 to 156.8)               | 7.7<br>(6.5 to 9.1)                      | 0.4<br>(0.2 to 0.8)              | 10.9<br>(-0.2 to 22.3)                            | -20.9<br>(-28.9 to -12.8)                           |
| Premenstrual syndrome                                      | 318.6<br>(300.7 to 335.4)               | 112.6<br>(105.8 to 119.9)                | 2.7<br>(1.7 to 4.2)              | 10.2<br>(1.7 to 18.2)                             | -2.1<br>(-9.4 to 5.0)                               |
| Other gynecological diseases                               | 31.4<br>(26.7 to 36.5)                  | 29.4<br>(24.5 to 35.1)                   | 1.1<br>(0.7 to 1.5)              | 13.9<br>(1.5 to 26.4)                             | -3.3<br>(-13.6 to 7.2)                              |
| Hemoglobinopathies and hemolytic anaemias                  | 695.9<br>(665.4 to 729.4)               | --                                       | 0.9<br>(0.5 to 1.4)              | 39.6<br>(20.5 to 65.8)                            | 23.7<br>(7.0 to 46.6)                               |
| Thalassemias                                               | < 0.05<br>(< 0.05 to < 0.05)            | --                                       | < 0.05<br>(< 0.05 to < 0.05)     | -6.7<br>(-23.4 to 11.1)                           | 5.0<br>(-14.8 to 25.8)                              |
| Thalassaemias trait                                        | 19.6<br>(7.0 to 34.5)                   | --                                       | 0.3<br>(0.1 to 0.7)              | 55.7<br>(13.5 to 138.6)                           | 36.9<br>(1.1 to 111.7)                              |
| Sickle cell disorders                                      | 0.1<br>(< 0.05 to 0.1)                  | --                                       | < 0.05<br>(< 0.05 to < 0.05)     | 22.8<br>(11.6 to 33.6)                            | 18.0<br>(6.7 to 28.4)                               |
| Sickle cell trait                                          | 65.7<br>(61.8 to 70.0)                  | --                                       | 0.3<br>(0.2 to 0.5)              | 83.4<br>(55.5 to 116.0)                           | 66.6<br>(42.3 to 95.1)                              |
| G6PD deficiency                                            | 136.4<br>(125.3 to 150.5)               | --                                       | < 0.05<br>(< 0.05 to < 0.05)     | 55.6<br>(19.7 to 94.9)                            | 29.9<br>(0.8 to 63.9)                               |
| G6PD trait                                                 | 479.1<br>(454.3 to 504.9)               | --                                       | < 0.05<br>(< 0.05 to < 0.05)     | 100.4<br>(72.4 to 132.2)                          | 74.9<br>(51.5 to 101.5)                             |
| Other hemoglobinopathies and hemolytic anaemias            | 15.0<br>(13.2 to 16.9)                  | --                                       | 0.2<br>(0.1 to 0.4)              | -4.8<br>(-18.0 to 10.0)                           | -14.3<br>(-25.8 to -1.3)                            |
| Endocrine, metabolic, blood, and immune disorders          | 41.3<br>(38.0 to 44.8)                  | 7.5<br>(6.7 to 8.3)                      | 1.2<br>(0.8 to 1.7)              | 29.2<br>(19.6 to 39.0)                            | 1.5<br>(-5.2 to 8.5)                                |
| <b>Musculoskeletal disorders</b>                           | <b>752.7<br/>(720.1 to 789.3)</b>       | <b>359.1<br/>(326.8 to 395.6)</b>        | <b>80.4<br/>(58.1 to 105.5)</b>  | <b>27.8<br/>(24.2 to 31.4)</b>                    | <b>-0.1<br/>(-2.7 to 2.4)</b>                       |
| Rheumatoid arthritis                                       | 11.8<br>(10.6 to 13.2)                  | 0.7<br>(0.6 to 0.8)                      | 2.8<br>(1.9 to 3.7)              | 38.0<br>(27.2 to 50.6)                            | 4.6<br>(-3.0 to 13.4)                               |
| Osteoarthritis                                             | 184.9<br>(173.3 to 197.5)               | 9.2<br>(8.5 to 9.9)                      | 11.5<br>(8.0 to 15.5)            | 43.1<br>(38.0 to 49.1)                            | 1.5<br>(-2.0 to 5.6)                                |
| Low back and neck pain                                     | 407.7<br>(381.2 to 439.7)               | 156.8<br>(141.2 to 173.8)                | 46.5<br>(32.7 to 61.8)           | 26.2<br>(22.1 to 30.1)                            | -0.2<br>(-3.2 to 2.6)                               |
| Low back pain                                              | 245.7<br>(216.2 to 278.8)               | 116.2<br>(101.4 to 132.3)                | 28.1<br>(19.7 to 37.2)           | 24.8<br>(18.7 to 31.0)                            | -0.4<br>(-4.9 to 4.0)                               |
| Neck pain                                                  | 183.2<br>(157.2 to 212.5)               | 40.6<br>(35.2 to 48.0)                   | 18.4<br>(12.4 to 26.3)           | 28.5<br>(24.5 to 32.7)                            | 0.1<br>(-2.2 to 2.2)                                |
| Gout                                                       | 12.2<br>(10.8 to 13.8)                  | 2.4<br>(2.1 to 2.8)                      | 0.4<br>(0.3 to 0.6)              | 33.7<br>(12.7 to 58.7)                            | 0.7<br>(-14.7 to 17.9)                              |
| Other musculoskeletal disorders                            | 221.3<br>(189.5 to 255.0)               | 189.9<br>(158.9 to 224.5)                | 19.2<br>(13.1 to 27.3)           | 22.3<br>(12.9 to 32.3)                            | -1.7<br>(-9.2 to 5.9)                               |
| <b>Other non-communicable diseases</b>                     | <b>3,488.7<br/>(3,423.7 to 3,551.5)</b> | <b>8,095.7†<br/>(7,546.2 to 8,716.8)</b> | <b>106.5<br/>(73.6 to 151.4)</b> | <b>21.5<br/>(20.0 to 23.1)</b>                    | <b>-1.2<br/>(-2.2 to -0.2)</b>                      |
| Congenital anomalies                                       | 40.8<br>(35.0 to 47.4)                  | --                                       | 4.7<br>(3.3 to 6.4)              | 4.5<br>(-1.6 to 10.8)                             | -3.7<br>(-9.3 to 2.2)                               |
| Neural tube defects                                        | 2.0<br>(1.8 to 2.2)                     | --                                       | 0.6<br>(0.4 to 0.8)              | 6.0<br>(-9.0 to 24.2)                             | -4.9<br>(-17.8 to 10.6)                             |
| Congenital heart anomalies                                 | 3.3<br>(2.9 to 3.8)                     | --                                       | 0.2<br>(0.1 to 0.3)              | 15.2<br>(0.1 to 31.4)                             | 7.2<br>(-6.5 to 21.8)                               |
| Orofacial clefts                                           | 4.7<br>(4.1 to 5.3)                     | --                                       | < 0.05<br>(< 0.05 to 0.1)        | -3.9<br>(-17.5 to 9.1)                            | -13.2<br>(-25.2 to -1.2)                            |
| Down's syndrome                                            | 4.5<br>(3.9 to 5.2)                     | --                                       | 0.4<br>(0.3 to 0.6)              | 3.2<br>(-11.8 to 18.0)                            | -5.1<br>(-19.2 to 8.3)                              |
| Turner syndrome                                            | 1.0<br>(0.9 to 1.2)                     | --                                       | < 0.05<br>(< 0.05 to < 0.05)     | 8.2<br>(-29.4 to 64.8)                            | 0.7<br>(-33.3 to 52.0)                              |
| Klinefelter syndrome                                       | 1.8<br>(1.5 to 2.1)                     | --                                       | < 0.05<br>(< 0.05 to < 0.05)     | 8.8<br>(-16.9 to 41.0)                            | 0.8<br>(-22.8 to 30.4)                              |



| Cause                                         | Prevalence in thousands (95% UI)        | Incidence in thousands (95% UI)                     | YLDs in thousands (95% UI)           |                                                   |                                                     |
|-----------------------------------------------|-----------------------------------------|-----------------------------------------------------|--------------------------------------|---------------------------------------------------|-----------------------------------------------------|
|                                               | 2016 counts                             | 2016 counts                                         | 2016 counts                          | Percentage change in counts between 2006 and 2016 | Percentage change in age-standardised rates between |
| Other chromosomal abnormalities               | 3.7<br>(3.1 to 4.4)                     | --                                                  | 0.4<br>(0.3 to 0.6)                  | -8.3<br>(-21.6 to 7.1)                            | 1.3<br>(-13.5 to 18.8)                              |
| Congenital musculoskeletal and limb anomalies | 5.3<br>(4.8 to 5.8)                     | --                                                  | 0.7<br>(0.5 to 1.0)                  | 16.9<br>(4.1 to 31.9)                             | 2.7<br>(-8.3 to 15.0)                               |
| Urogenital congenital anomalies               | 3.9<br>(3.4 to 4.4)                     | --                                                  | 0.1<br>(0.1 to 0.2)                  | -5.2<br>(-19.5 to 11.2)                           | -0.5<br>(-15.8 to 17.0)                             |
| Digestive congenital anomalies                | 5.1<br>(4.5 to 5.7)                     | --                                                  | 0.2<br>(0.1 to 0.3)                  | 9.5<br>(-7.0 to 29.5)                             | -1.2<br>(-15.8 to 16.2)                             |
| Other congenital anomalies                    | 17.2<br>(10.9 to 25.8)                  | --                                                  | 1.9<br>(1.2 to 3.1)                  | 2.7<br>(-8.6 to 15.2)                             | -7.5<br>(-17.9 to 3.9)                              |
| Skin and subcutaneous diseases                | 1,403.6<br>(1,371.5 to 1,440.2)         | 2,933.8<br>(2,800.8 to 3,084.8)                     | 34.9<br>(23.5 to 50.0)               | 9.4<br>(7.0 to 11.7)                              | 1.9<br>(-0.1 to 4.0)                                |
| Dermatitis                                    | 203.7<br>(192.9 to 215.3)               | 257.1<br>(237.8 to 276.9)                           | 7.8<br>(4.6 to 12.7)                 | 8.2<br>(2.8 to 13.8)                              | 2.7<br>(-2.2 to 8.2)                                |
| Psoriasis                                     | 43.9<br>(41.9 to 46.1)                  | 6.0<br>(5.7 to 6.3)                                 | 3.9<br>(2.8 to 5.1)                  | 26.0<br>(17.0 to 35.5)                            | 6.2<br>(-0.9 to 13.8)                               |
| Cellulitis                                    | 1.7<br>(1.5 to 1.8)                     | 28.4<br>(26.6 to 30.4)                              | 0.1<br>(0.1 to 0.1)                  | 13.3<br>(-8.1 to 39.8)                            | 1.5<br>(-18.6 to 24.7)                              |
| Pyoderma                                      | 11.8<br>(11.5 to 12.2)                  | 267.4<br>(257.9 to 277.1)                           | 0.1<br>(< 0.05 to 0.1)               | 26.6<br>(17.9 to 35.8)                            | 1.4<br>(-5.1 to 8.0)                                |
| Scabies                                       | 67.0<br>(58.8 to 77.1)                  | 203.5<br>(177.1 to 233.8)                           | 1.7<br>(1.0 to 2.8)                  | 3.4<br>(-1.1 to 8.4)                              | -1.9<br>(-5.8 to 2.0)                               |
| Fungal skin diseases                          | 314.0<br>(284.1 to 346.0)               | 1,151.4<br>(1,031.1 to 1,280.2)                     | 1.8<br>(0.7 to 3.6)                  | 17.3<br>(14.7 to 20.2)                            | 0.0<br>(-1.2 to 1.3)                                |
| Viral skin diseases                           | 128.0<br>(122.0 to 134.2)               | 193.3<br>(184.2 to 202.8)                           | 3.9<br>(2.5 to 5.8)                  | 6.4<br>(3.1 to 9.8)                               | -0.1<br>(-3.2 to 2.9)                               |
| Acne vulgaris                                 | 390.3<br>(350.0 to 431.5)               | 256.2<br>(211.8 to 311.8)                           | 10.1<br>(6.8 to 14.6)                | 2.6<br>(-2.8 to 7.6)                              | 1.9<br>(-3.1 to 6.7)                                |
| Alopecia areata                               | 8.7<br>(8.4 to 9.1)                     | 15.4<br>(14.8 to 16.1)                              | 0.3<br>(0.2 to 0.4)                  | 16.3<br>(4.1 to 30.1)                             | 0.2<br>(-9.8 to 12.0)                               |
| Pruritus                                      | 44.5<br>(39.0 to 50.0)                  | 35.2<br>(31.3 to 39.9)                              | 0.5<br>(0.2 to 0.9)                  | 21.1<br>(13.9 to 27.7)                            | 1.1<br>(-4.1 to 6.2)                                |
| Urticaria                                     | 40.3<br>(35.6 to 46.0)                  | 71.3<br>(63.0 to 81.5)                              | 2.4<br>(1.6 to 3.5)                  | 4.1<br>(-1.9 to 10.7)                             | -0.0<br>(-5.6 to 5.9)                               |
| Decubitus ulcer                               | 2.0<br>(1.8 to 2.2)                     | 7.2<br>(6.4 to 8.1)                                 | 0.3<br>(0.2 to 0.4)                  | 41.2<br>(26.9 to 57.1)                            | 2.2<br>(-8.7 to 13.6)                               |
| Other skin and subcutaneous diseases          | 373.6<br>(363.2 to 384.0)               | 441.4<br>(427.7 to 455.5)                           | 2.1<br>(1.0 to 3.8)                  | 28.8<br>(25.8 to 32.1)                            | 3.1<br>(1.0 to 5.7)                                 |
| Sense organ diseases                          | 1,278.9<br>(1,252.4 to 1,310.1)         | 463.2 <sup>†</sup><br>(436.6 to 494.2)              | 49.6<br>(34.5 to 69.0)               | 30.2<br>(28.1 to 32.6)                            | -3.5<br>(-4.9 to -2.0)                              |
| Glaucoma                                      | 5.4<br>(4.5 to 6.4)                     | --                                                  | 0.6<br>(0.4 to 0.8)                  | 49.7<br>(35.0 to 66.6)                            | -1.6<br>(-11.1 to 9.0)                              |
| Cataract                                      | 74.7<br>(66.1 to 84.2)                  | --                                                  | 6.2<br>(4.4 to 8.4)                  | 42.8<br>(36.9 to 48.6)                            | -5.1<br>(-8.8 to -1.4)                              |
| Macular degeneration                          | 2.7<br>(2.1 to 3.5)                     | --                                                  | 0.2<br>(0.1 to 0.3)                  | 55.5<br>(36.1 to 76.3)                            | 1.5<br>(-10.8 to 14.4)                              |
| Refraction and accommodation disorders        | 610.5<br>(578.5 to 640.1)               | --                                                  | 11.2<br>(6.9 to 17.5)                | 16.3<br>(12.6 to 20.2)                            | -6.3<br>(-9.1 to -3.3)                              |
| Age-related and other hearing loss            | 866.5<br>(821.2 to 914.8)               | --                                                  | 24.8<br>(17.2 to 34.8)               | 33.4<br>(29.5 to 37.1)                            | -2.9<br>(-5.2 to -0.8)                              |
| Other vision loss                             | 22.3<br>(20.0 to 24.8)                  | --                                                  | 2.1<br>(1.4 to 2.8)                  | 32.6<br>(23.5 to 42.3)                            | -0.1<br>(-6.6 to 6.6)                               |
| Other sense organ diseases                    | 145.0<br>(132.7 to 156.5)               | 463.2<br>(436.6 to 494.2)                           | 4.6<br>(2.8 to 6.9)                  | 31.7<br>(26.4 to 37.6)                            | 0.8<br>(-3.2 to 4.8)                                |
| Oral disorders                                | 2,460.1<br>(2,350.1 to 2,566.8)         | 4,698.8 <sup>†</sup><br>(4,156.2 to 5,290.6)        | 17.3<br>(10.5 to 27.1)               | 31.6<br>(28.4 to 35.5)                            | 0.1<br>(-1.6 to 1.9)                                |
| Caries of deciduous teeth                     | 224.2<br>(168.1 to 277.1)               | 878.0<br>(574.0 to 1,221.2)                         | 0.1<br>(< 0.05 to 0.2)               | -10.8<br>(-19.4 to -1.8)                          | -1.1<br>(-10.2 to 9.1)                              |
| Caries of permanent teeth                     | 1,659.8<br>(1,515.5 to 1,820.9)         | 3,717.8<br>(3,261.4 to 4,209.0)                     | 1.6<br>(0.7 to 3.1)                  | 10.1<br>(6.1 to 14.4)                             | -3.1<br>(-6.2 to 0.1)                               |
| Periodontal disease                           | 642.0<br>(540.3 to 755.1)               | 77.2<br>(62.8 to 94.2)                              | 4.2<br>(1.7 to 8.8)                  | 29.6<br>(25.1 to 34.3)                            | 0.9<br>(-2.1 to 3.9)                                |
| Edentulism and severe tooth loss              | 310.4<br>(270.8 to 348.7)               | 25.7<br>(21.7 to 30.2)                              | 8.7<br>(5.6 to 12.2)                 | 43.7<br>(39.0 to 48.8)                            | 0.4<br>(-2.8 to 3.6)                                |
| Other oral disorders                          | 91.2<br>(87.3 to 95.2)                  | --                                                  | 2.7<br>(1.7 to 4.0)                  | 18.0<br>(14.3 to 22.1)                            | 0.1<br>(-2.8 to 3.4)                                |
| <b>Injuries</b>                               | <b>694.1</b><br><b>(648.9 to 755.6)</b> | <b>297.2<sup>†</sup></b><br><b>(278.3 to 316.0)</b> | <b>26.2</b><br><b>(17.6 to 36.9)</b> | <b>32.0</b><br><b>(28.9 to 34.8)</b>              | <b>4.0</b><br><b>(1.9 to 6.2)</b>                   |
| <b>Transport injuries</b>                     | <b>121.3</b><br><b>(113.5 to 129.6)</b> | <b>40.9</b><br><b>(37.0 to 45.2)</b>                | <b>6.1</b><br><b>(4.0 to 8.8)</b>    | <b>31.1</b><br><b>(27.7 to 34.5)</b>              | <b>2.8</b><br><b>(0.5 to 5.2)</b>                   |
| Road injuries                                 | 116.6<br>(108.9 to 124.7)               | 39.8<br>(36.0 to 44.2)                              | 5.9<br>(3.9 to 8.5)                  | 31.3<br>(27.9 to 34.7)                            | 3.0<br>(0.7 to 5.3)                                 |
| Pedestrian road injuries                      | 27.7<br>(24.8 to 31.2)                  | 7.0<br>(6.1 to 8.1)                                 | 1.4<br>(0.9 to 2.0)                  | 29.9<br>(26.3 to 33.4)                            | 0.3<br>(-2.1 to 2.6)                                |
| Cyclist road injuries                         | 18.1<br>(15.0 to 21.3)                  | 6.5<br>(5.2 to 7.9)                                 | 0.8<br>(0.6 to 1.2)                  | 19.0<br>(15.7 to 22.3)                            | -4.6<br>(-6.9 to -2.4)                              |
| Motorcyclist road injuries                    | 15.8<br>(13.5 to 19.0)                  | 3.5<br>(2.9 to 4.3)                                 | 0.8<br>(0.5 to 1.1)                  | 30.2<br>(26.6 to 33.6)                            | 3.1<br>(0.5 to 5.8)                                 |
| Motor vehicle road injuries                   | 39.2<br>(33.7 to 44.6)                  | 15.7<br>(13.6 to 17.9)                              | 2.2<br>(1.5 to 3.1)                  | 36.7<br>(33.0 to 40.1)                            | 7.2<br>(4.6 to 9.5)                                 |
| Other road injuries                           | 15.8<br>(13.7 to 18.3)                  | 7.1<br>(5.8 to 8.6)                                 | 0.7<br>(0.5 to 1.1)                  | 36.1<br>(32.5 to 39.6)                            | 5.7<br>(3.1 to 8.1)                                 |
| Other transport injuries                      | 4.7<br>(4.0 to 5.4)                     | 1.0<br>(0.9 to 1.2)                                 | 0.2<br>(0.1 to 0.3)                  | 25.6<br>(21.2 to 29.7)                            | -0.6<br>(-3.6 to 2.4)                               |
| <b>Unintentional injuries</b>                 | <b>522.3</b><br><b>(478.1 to 580.8)</b> | <b>233.5</b><br><b>(215.6 to 252.4)</b>             | <b>17.6</b><br><b>(12.1 to 24.5)</b> | <b>32.7</b><br><b>(29.4 to 35.7)</b>              | <b>4.0</b><br><b>(1.6 to 6.4)</b>                   |
| Falls                                         | 280.2<br>(245.0 to 321.6)               | 128.2<br>(113.0 to 144.5)                           | 11.2<br>(7.8 to 15.4)                | 36.0<br>(33.0 to 39.1)                            | 3.8<br>(1.4 to 6.1)                                 |
| Drowning                                      | 2.9<br>(2.6 to 3.2)                     | 0.7<br>(0.6 to 0.8)                                 | 0.1<br>(0.1 to 0.2)                  | 16.6<br>(12.5 to 20.5)                            | -12.1<br>(-15.2 to -9.2)                            |
| Fire, heat, and hot substances                | 44.2<br>(35.7 to 56.4)                  | 4.7<br>(3.7 to 5.7)                                 | 1.1<br>(0.7 to 1.6)                  | 21.6<br>(14.8 to 27.6)                            | 2.6<br>(-2.7 to 7.2)                                |
| Poisonings                                    | 1.6<br>(1.3 to 1.9)                     | 2.0<br>(1.6 to 2.4)                                 | 0.1<br>(0.1 to 0.2)                  | 21.4<br>(11.2 to 33.1)                            | 5.0<br>(-3.5 to 14.6)                               |
| Exposure to mechanical forces                 | 107.3<br>(91.2 to 129.8)                | 36.1<br>(30.3 to 42.0)                              | 2.3<br>(1.5 to 3.4)                  | 43.3<br>(38.9 to 47.3)                            | 15.8<br>(12.7 to 18.6)                              |
| Unintentional firearm injuries                | 6.5<br>(5.3 to 7.9)                     | 1.5<br>(1.1 to 2.1)                                 | 0.2<br>(0.1 to 0.4)                  | 50.6<br>(46.0 to 55.1)                            | 19.1<br>(16.0 to 22.3)                              |
| Unintentional suffocation                     | 2.5<br>(1.9 to 3.3)                     | 0.4<br>(0.2 to 0.5)                                 | 0.1<br>(< 0.05 to 0.1)               | 19.5<br>(15.5 to 23.7)                            | 4.8<br>(1.5 to 7.9)                                 |
| Other exposure to mechanical forces           | 98.3<br>(82.5 to 121.0)                 | 34.3<br>(28.8 to 40.0)                              | 2.0<br>(1.3 to 3.0)                  | 43.6<br>(39.2 to 47.6)                            | 15.8<br>(12.7 to 18.8)                              |



| Cause                                                                               | Prevalence in thousands (95% UI)        | Incidence in thousands (95% UI)       | YLDs in thousands (95% UI)                    |                                                   |                                                     |
|-------------------------------------------------------------------------------------|-----------------------------------------|---------------------------------------|-----------------------------------------------|---------------------------------------------------|-----------------------------------------------------|
|                                                                                     | 2016 counts                             | 2016 counts                           | 2016 counts                                   | Percentage change in counts between 2006 and 2016 | Percentage change in age-standardised rates between |
| Adverse effects of medical treatment                                                | 0.9<br>(0.7 to 1.1)                     | 11.6<br>(10.6 to 12.7)                | 0.1<br>(0.1 to 0.2)                           | 23.2<br>(17.7 to 29.5)                            | -9.2<br>(-13.2 to -5.0)                             |
| Animal contact                                                                      | 17.1<br>(15.0 to 20.1)                  | 18.2<br>(15.0 to 21.8)                | 0.6<br>(0.4 to 0.8)                           | 12.1<br>(5.1 to 20.4)                             | -4.7<br>(-10.5 to 1.9)                              |
| Venomous animal contact                                                             | 8.6<br>(7.1 to 10.5)                    | 8.5<br>(6.7 to 10.8)                  | 0.4<br>(0.3 to 0.6)                           | 13.2<br>(4.0 to 23.8)                             | -2.2<br>(-9.9 to 6.3)                               |
| Non-venomous animal contact                                                         | 8.5<br>(7.3 to 10.4)                    | 9.7<br>(7.7 to 11.8)                  | 0.1<br>(0.1 to 0.2)                           | 8.2<br>(3.8 to 11.9)                              | -12.6<br>(-16.0 to -10.0)                           |
| Foreign body                                                                        | 23.3<br>(19.3 to 27.5)                  | 18.8<br>(16.2 to 22.1)                | 0.9<br>(0.5 to 1.3)                           | 23.5<br>(19.7 to 27.0)                            | 1.3<br>(-1.7 to 3.9)                                |
| Pulmonary aspiration and foreign body in airway                                     | 16.3<br>(12.8 to 20.6)                  | 5.2<br>(4.6 to 6.1)                   | 0.6<br>(0.4 to 0.9)                           | 23.4<br>(18.9 to 27.7)                            | 2.9<br>(-0.5 to 6.1)                                |
| Foreign body in eyes                                                                | 2.3<br>(1.4 to 3.4)                     | 11.4<br>(8.9 to 14.5)                 | 0.1<br>(0.1 to 0.2)                           | 27.8<br>(22.6 to 33.6)                            | 1.3<br>(-1.4 to 4.2)                                |
| Foreign body in other body part                                                     | 4.7<br>(3.9 to 5.9)                     | 2.2<br>(1.9 to 2.6)                   | 0.1<br>(0.1 to 0.2)                           | 19.5<br>(14.8 to 23.7)                            | -5.7<br>(-9.3 to -2.5)                              |
| Environmental heat and cold exposure                                                | 7.4<br>(6.4 to 8.9)                     | 1.9<br>(1.6 to 2.3)                   | 0.2<br>(0.2 to 0.4)                           | 25.0<br>(21.3 to 28.4)                            | 0.1<br>(-2.8 to 2.6)                                |
| Other unintentional injuries                                                        | 37.4<br>(30.8 to 45.6)                  | 11.3<br>(9.5 to 13.4)                 | 1.0<br>(0.7 to 1.5)                           | 18.9<br>(16.3 to 21.3)                            | -2.2<br>(-4.1 to -0.5)                              |
| <b>Self-harm and interpersonal violence</b>                                         | <b>125.4</b><br><b>(114.0 to 137.5)</b> | <b>22.5†</b><br><b>(19.4 to 26.2)</b> | <b>2.4</b><br><b>(1.6 to 3.4)</b>             | <b>28.5</b><br><b>(24.0 to 32.9)</b>              | <b>6.6</b><br><b>(3.8 to 9.3)</b>                   |
| Self-harm                                                                           | 4.3<br>(3.7 to 4.9)                     | 1.8<br>(1.6 to 2.1)                   | 0.2<br>(0.1 to 0.3)                           | 23.8<br>(19.3 to 28.5)                            | -3.1<br>(-6.4 to 0.1)                               |
| Self-harm by firearm                                                                | 0.5<br>(0.4 to 0.5)                     | 0.1<br>(0.1 to 0.2)                   | < 0.05<br>(< 0.05 to < 0.05)                  | -1.6<br>(-4.9 to 1.4)                             | -23.6<br>(-25.9 to -21.4)                           |
| Self-harm by other specified means                                                  | 3.8<br>(3.3 to 4.4)                     | 1.7<br>(1.5 to 2.0)                   | 0.2<br>(0.1 to 0.2)                           | 26.8<br>(22.0 to 32.0)                            | -0.6<br>(-4.2 to 3.0)                               |
| Interpersonal violence                                                              | 121.1<br>(109.7 to 133.2)               | 20.7†<br>(17.6 to 24.3)               | 2.2<br>(1.5 to 3.1)                           | 28.9<br>(24.1 to 33.4)                            | 7.4<br>(4.5 to 10.4)                                |
| Assault by firearm                                                                  | 5.1<br>(4.2 to 6.0)                     | 1.5<br>(1.1 to 2.0)                   | 0.2<br>(0.1 to 0.3)                           | 62.4<br>(56.5 to 67.7)                            | 30.3<br>(26.3 to 33.9)                              |
| Assault by sharp object                                                             | 20.4<br>(16.8 to 24.2)                  | 8.5<br>(6.8 to 10.4)                  | 0.6<br>(0.4 to 0.8)                           | 33.6<br>(29.4 to 37.6)                            | 7.1<br>(4.0 to 10.0)                                |
| Sexual violence                                                                     | 76.2<br>(66.2 to 86.9)                  | --                                    | 0.6<br>(0.4 to 0.9)                           | 0.6<br>(-3.7 to 5.0)                              | -9.1<br>(-12.6 to -5.4)                             |
| Assault by other means                                                              | 19.5<br>(16.5 to 23.4)                  | 10.7<br>(8.7 to 12.7)                 | 0.8<br>(0.5 to 1.2)                           | 49.7<br>(45.8 to 53.7)                            | 19.1<br>(16.3 to 21.9)                              |
| <b>Forces of nature, conflict and terrorism, and executions and police conflict</b> | <b>1.2</b><br><b>(0.7 to 2.0)</b>       | <b>0.4†</b><br><b>(0.2 to 0.5)</b>    | <b>&lt; 0.05</b><br><b>(&lt; 0.05 to 0.1)</b> | <b>34.7</b><br><b>(24.9 to 65.0)</b>              | <b>15.5</b><br><b>(6.3 to 44.5)</b>                 |
| Exposure to forces of nature                                                        | 1.2<br>(0.6 to 1.9)                     | 0.3<br>(0.2 to 0.5)                   | < 0.05<br>(< 0.05 to 0.1)                     | 34.9<br>(24.6 to 67.8)                            | 15.5<br>(5.9 to 46.7)                               |
| Conflict and terrorism                                                              | --                                      | --                                    | --                                            | --                                                | --                                                  |
| Executions and police conflict                                                      | 0.1<br>(< 0.05 to 0.1)                  | < 0.05<br>(< 0.05 to < 0.05)          | < 0.05<br>(< 0.05 to < 0.05)                  | 29.2<br>(19.3 to 35.6)                            | 16.0<br>(8.8 to 21.0)                               |
| <b>Impairments</b>                                                                  | --                                      | --                                    | --                                            | --                                                | --                                                  |
| Anaemia                                                                             | 632.3<br>(575.1 to 690.6)               | --                                    | 15.1<br>(10.4 to 21.4)                        | 10.1<br>(0.4 to 20.4)                             | -5.9<br>(-13.9 to 2.4)                              |
| Developmental intellectual disability                                               | 61.5<br>(47.0 to 75.6)                  | --                                    | 7.1<br>(5.1 to 9.6)                           | 6.4<br>(1.0 to 11.8)                              | -3.3<br>(-8.1 to 1.5)                               |
| Epilepsy                                                                            | 32.1<br>(14.0 to 49.8)                  | --                                    | 8.4<br>(3.3 to 16.4)                          | 10.2<br>(-62.2 to 242.3)                          | -1.3<br>(-66.0 to 208.0)                            |
| Guillain-Barre syndrome                                                             | 0.1<br>(< 0.05 to 0.1)                  | --                                    | < 0.05<br>(< 0.05 to < 0.05)                  | 24.9<br>(16.8 to 40.0)                            | 7.7<br>(4.1 to 17.9)                                |
| Hearing loss                                                                        | 928.6<br>(885.5 to 976.4)               | --                                    | 27.9<br>(19.5 to 39.1)                        | 28.2<br>(25.1 to 31.3)                            | -3.5<br>(-5.5 to -1.7)                              |
| Heart failure                                                                       | 37.7<br>(33.3 to 43.1)                  | --                                    | 4.2<br>(3.1 to 5.3)                           | 47.2<br>(36.5 to 57.8)                            | -0.8<br>(-7.9 to 6.3)                               |
| Infertility                                                                         | 65.1<br>(50.2 to 84.8)                  | --                                    | 0.4<br>(0.1 to 0.8)                           | 12.1<br>(5.7 to 19.3)                             | 0.0<br>(-5.5 to 6.5)                                |
| Pelvic inflammatory disease                                                         | 0.4<br>(0.4 to 0.5)                     | --                                    | 0.1<br>(< 0.05 to 0.1)                        | 10.4<br>(-13.2 to 43.5)                           | -5.9<br>(-26.7 to 21.2)                             |
| Vision loss                                                                         | 727.0<br>(690.2 to 761.2)               | --                                    | 21.8<br>(15.3 to 31.0)                        | 24.3<br>(20.8 to 28.1)                            | -5.2<br>(-7.4 to -3.0)                              |

We did not calculate incidence for the nine impairments, certain NTDs, and causes with only birth prevalence. Blank cells mean that no estimate is available.

† Incidence for aggregate causes represents the sum of the incidence of the causes below the aggregate.

‡ Incidence estimates for stroke represent first-ever stroke only.

^ Incidence of HIV/AIDS represents new infections of HIV only and does not include new infections of Tuberculosis in HIV positive cases.

SR Table 14: Prevalence, incidence, and YLDs for 2016, percentage change of YLD counts and percentage change of age-standardised YLD rates between 2006 and 2016 by cause and impairments, for all ages, Cote d'Ivoire.

| Cause                                                                                | Prevalence in thousands (95% UI)          | Incidence in thousands (95% UI)               | YLDs in thousands (95% UI)             |                                                   |                                                     |
|--------------------------------------------------------------------------------------|-------------------------------------------|-----------------------------------------------|----------------------------------------|---------------------------------------------------|-----------------------------------------------------|
|                                                                                      | 2016 counts                               | 2016 counts                                   | 2016 counts                            | Percentage change in counts between 2006 and 2016 | Percentage change in age-standardised rates between |
| <b>All causes</b>                                                                    | <b>22,712.9</b><br>(22,677.2 to 22,751.8) | <b>150,983.9†</b><br>(142,695.6 to 160,647.8) | <b>2,264.6</b><br>(1,665.4 to 2,988.7) | <b>22.2</b><br>(18.8 to 25.8)                     | <b>-3.6</b><br>(-5.8 to -1.3)                       |
| <b>Communicable, maternal, neonatal, and nutritional disorders</b>                   | <b>20,425.8</b><br>(20,183.5 to 20,619.2) | <b>95,359.5†</b><br>(88,080.2 to 103,216.3)   | <b>646.0</b><br>(449.0 to 903.3)       | <b>9.7</b><br>(4.7 to 14.1)                       | <b>-14.6</b><br>(-19.4 to -11.0)                    |
| <b>HIV/AIDS and tuberculosis</b>                                                     | <b>6,438.1</b><br>(5,689.7 to 7,109.6)    | <b>62.6†</b><br>(53.3 to 73.8)                | <b>63.8</b><br>(43.5 to 90.3)          | <b>-15.8</b><br>(-28.5 to 0.0)                    | <b>-34.6</b><br>(-45.3 to -20.2)                    |
| Tuberculosis                                                                         | 5,666.8<br>(4,897.8 to 6,543.2)           | 32.5†<br>(25.8 to 41.3)                       | 5.6<br>(3.5 to 8.0)                    | 11.6<br>(-4.6 to 29.4)                            | -15.1<br>(-24.9 to -4.4)                            |
| Drug-susceptible tuberculosis                                                        | 17.9<br>(14.0 to 22.8)                    | 31.7<br>(25.3 to 40.1)                        | 5.5<br>(3.5 to 7.9)                    | 11.7<br>(-4.5 to 29.8)                            | -15.0<br>(-25.0 to -3.9)                            |
| Multidrug-resistant tuberculosis without extensive drug resistance                   | 0.5<br>(0.1 to 1.0)                       | 0.8<br>(0.3 to 1.8)                           | 0.1<br>(< 0.05 to 0.4)                 | 7.3<br>(-63.5 to 171.2)                           | -17.9<br>(-72.1 to 108.2)                           |
| Extensively drug-resistant tuberculosis                                              | < 0.05<br>(< 0.05 to < 0.05)              | < 0.05<br>(< 0.05 to < 0.05)                  | < 0.05<br>(< 0.05 to < 0.05)           | 224.1<br>(11.3 to 710.1)                          | 144.7<br>(-15.9 to 505.5)                           |
| Latent tuberculosis infection                                                        | 5,648.4<br>(4,881.3 to 6,523.8)           | --                                            | --                                     | --                                                | --                                                  |
| HIV/AIDS                                                                             | 522.5<br>(466.7 to 580.1)                 | 30.0^<br>(24.2 to 37.7)                       | 58.1<br>(38.9 to 84.3)                 | -17.8<br>(-30.9 to -1.1)                          | -36.1<br>(-47.0 to -20.8)                           |
| Drug-susceptible HIV/AIDS - Tuberculosis                                             | 5.7<br>(3.5 to 8.3)                       | 10.1<br>(6.3 to 15.3)                         | 2.2<br>(1.1 to 3.7)                    | -30.2<br>(-42.9 to -16.2)                         | -42.2<br>(-52.1 to -30.3)                           |
| Multidrug-resistant HIV/AIDS - Tuberculosis without extensive drug resistance        | 0.2<br>(0.1 to 0.4)                       | 0.3<br>(0.1 to 0.7)                           | 0.1<br>(< 0.05 to 0.2)                 | -33.4<br>(-77.7 to 62.7)                          | -45.0<br>(-81.5 to 34.4)                            |
| Extensively drug-resistant HIV/AIDS - Tuberculosis                                   | < 0.05<br>(< 0.05 to < 0.05)              | < 0.05<br>(< 0.05 to < 0.05)                  | < 0.05<br>(< 0.05 to < 0.05)           | 102.9<br>(-31.9 to 396.0)                         | 67.6<br>(-43.7 to 309.7)                            |
| HIV/AIDS resulting in other diseases                                                 | 516.6<br>(459.9 to 575.7)                 | 30.0<br>(24.2 to 37.7)                        | 55.9<br>(37.2 to 80.7)                 | -17.2<br>(-30.8 to 0.4)                           | -35.8<br>(-47.2 to -19.7)                           |
| <b>Diarrhoea, lower respiratory infections, and other common infectious diseases</b> | <b>1,621.0</b><br>(1,550.3 to 1,705.9)    | <b>79,805.5†</b><br>(72,650.3 to 87,149.2)    | <b>90.2</b><br>(63.0 to 122.8)         | <b>21.1</b><br>(17.1 to 25.2)                     | <b>-4.0</b><br>(-6.7 to -1.3)                       |
| Diarrhoeal diseases                                                                  | 340.7<br>(314.0 to 368.1)                 | 22,792.4<br>(20,929.4 to 24,753.2)            | 38.4<br>(26.7 to 53.1)                 | 19.0<br>(11.9 to 26.4)                            | -6.0<br>(-10.7 to -1.6)                             |
| Intestinal infectious diseases                                                       | 2.0<br>(1.3 to 3.0)                       | 40.4†<br>(26.1 to 59.7)                       | 0.3<br>(0.2 to 0.6)                    | 3.1<br>(-18.5 to 30.2)                            | -18.5<br>(-32.1 to -2.1)                            |
| Typhoid fever                                                                        | 2.0<br>(1.2 to 3.0)                       | 30.8<br>(19.7 to 46.2)                        | 0.3<br>(0.2 to 0.5)                    | 3.1<br>(-20.4 to 32.8)                            | -18.5<br>(-33.1 to -0.3)                            |
| Paratyphoid fever                                                                    | 0.4<br>(0.2 to 0.7)                       | 9.6<br>(5.5 to 15.9)                          | < 0.05<br>(< 0.05 to < 0.05)           | 11.4<br>(-15.3 to 43.4)                           | -12.2<br>(-29.9 to 9.0)                             |
| Other intestinal infectious diseases                                                 | --                                        | --                                            | < 0.05<br>(< 0.05 to < 0.05)           | -28.0<br>(-46.3 to -3.5)                          | -41.8<br>(-52.3 to -29.0)                           |
| Lower respiratory infections                                                         | 28.7<br>(26.4 to 31.2)                    | 1,253.5<br>(1,145.3 to 1,368.5)               | 1.7<br>(1.1 to 2.5)                    | 16.5<br>(2.9 to 30.8)                             | -7.9<br>(-16.3 to 1.8)                              |
| Upper respiratory infections                                                         | 704.5<br>(620.9 to 799.0)                 | 52,941.9<br>(46,308.9 to 60,377.1)            | 17.5<br>(10.3 to 27.5)                 | 26.2<br>(19.4 to 33.9)                            | -0.2<br>(-5.5 to 5.0)                               |
| Otitis media                                                                         | 494.1<br>(440.8 to 549.6)                 | 2,019.1<br>(1,568.7 to 2,582.0)               | 15.7<br>(9.8 to 23.6)                  | 21.0<br>(12.9 to 30.2)                            | -3.6<br>(-9.6 to 2.5)                               |
| Meningitis                                                                           | 90.5<br>(77.1 to 105.0)                   | 24.9<br>(21.5 to 30.1)                        | 9.9<br>(7.0 to 13.1)                   | 26.9<br>(18.7 to 35.2)                            | -0.9<br>(-6.8 to 5.1)                               |
| Pneumococcal meningitis                                                              | 27.1<br>(23.1 to 32.2)                    | 2.8<br>(2.0 to 3.8)                           | 3.5<br>(2.4 to 4.7)                    | 16.9<br>(-0.3 to 35.8)                            | -9.7<br>(-21.8 to 3.4)                              |
| H influenzae type B meningitis                                                       | 12.2<br>(9.2 to 16.7)                     | 2.7<br>(1.4 to 4.6)                           | 1.7<br>(1.2 to 2.3)                    | 8.6<br>(-5.1 to 22.6)                             | -15.5<br>(-25.8 to -5.2)                            |
| Meningococcal infection                                                              | 20.5<br>(14.7 to 27.8)                    | 7.4<br>(5.1 to 10.3)                          | 2.4<br>(1.7 to 3.3)                    | 25.4<br>(16.1 to 35.6)                            | -2.6<br>(-9.8 to 5.2)                               |
| Other meningitis                                                                     | 30.8<br>(21.5 to 41.2)                    | 12.1<br>(9.4 to 15.4)                         | 2.3<br>(1.6 to 3.2)                    | 72.0<br>(54.4 to 93.5)                            | 36.7<br>(23.8 to 53.4)                              |
| Encephalitis                                                                         | 47.3<br>(31.3 to 69.4)                    | 24.4<br>(21.3 to 28.1)                        | 5.4<br>(3.8 to 7.2)                    | 29.8<br>(15.2 to 47.2)                            | 2.0<br>(-9.1 to 14.8)                               |
| Diphtheria                                                                           | < 0.05<br>(< 0.05 to < 0.05)              | < 0.05<br>(< 0.05 to < 0.05)                  | < 0.05<br>(< 0.05 to < 0.05)           | -43.7<br>(-75.0 to 24.2)                          | -56.6<br>(-76.6 to -15.0)                           |
| Whooping cough                                                                       | 10.1<br>(7.9 to 12.7)                     | 73.7<br>(57.5 to 92.7)                        | 0.5<br>(0.3 to 0.8)                    | -23.7<br>(-36.2 to -9.2)                          | -39.6<br>(-49.6 to -27.9)                           |
| Tetanus                                                                              | 0.4<br>(0.4 to 0.4)                       | 0.5<br>(0.2 to 1.0)                           | < 0.05<br>(< 0.05 to < 0.05)           | -16.4<br>(-43.7 to 14.6)                          | -33.8<br>(-50.4 to -15.8)                           |
| Measles                                                                              | 0.6<br>(0.2 to 1.5)                       | 21.7<br>(7.2 to 53.7)                         | 0.1<br>(< 0.05 to 0.1)                 | -86.2<br>(-91.7 to -78.7)                         | -89.1<br>(-93.3 to -83.1)                           |
| Varicella and herpes zoster                                                          | 21.0<br>(19.6 to 22.6)                    | 612.9<br>(574.9 to 653.1)                     | 0.6<br>(0.4 to 1.0)                    | 26.9<br>(8.9 to 48.0)                             | 0.2<br>(-11.1 to 13.2)                              |
| <b>Neglected tropical diseases and malaria</b>                                       | <b>14,203.0</b><br>(13,754.7 to 14,662.4) | <b>8,560.3†</b><br>(7,086.5 to 10,733.9)      | <b>179.1</b><br>(118.0 to 283.2)       | <b>-17.5</b><br>(-23.4 to -10.5)                  | <b>-32.3</b><br>(-37.3 to -26.0)                    |
| Malaria                                                                              | 3,558.0<br>(3,139.1 to 3,983.5)           | 5,185.9<br>(3,734.8 to 7,389.6)               | 45.8<br>(33.4 to 61.1)                 | -50.6<br>(-56.0 to -44.5)                         | -59.9<br>(-64.2 to -55.0)                           |
| Chagas disease                                                                       | --                                        | --                                            | --                                     | --                                                | --                                                  |
| Leishmaniasis                                                                        | < 0.05<br>(< 0.05 to < 0.05)              | < 0.05<br>(< 0.05 to < 0.05)                  | < 0.05<br>(< 0.05 to < 0.05)           | -5.4<br>(-49.1 to 208.5)                          | -20.4<br>(-55.9 to 136.2)                           |
| Visceral leishmaniasis                                                               | < 0.05<br>(< 0.05 to < 0.05)              | < 0.05<br>(< 0.05 to < 0.05)                  | < 0.05<br>(< 0.05 to < 0.05)           | -21.1<br>(-99.8 to 11,069.7)                      | -40.0<br>(-99.8 to 8,544.6)                         |
| Cutaneous and mucocutaneous leishmaniasis                                            | < 0.05<br>(< 0.05 to < 0.05)              | < 0.05<br>(0.0 to < 0.05)                     | < 0.05<br>(< 0.05 to < 0.05)           | -5.0<br>(-48.8 to 217.8)                          | -19.7<br>(-54.9 to 154.9)                           |
| African trypanosomiasis                                                              | < 0.05<br>(< 0.05 to 0.1)                 | < 0.05<br>(< 0.05 to < 0.05)                  | < 0.05<br>(< 0.05 to < 0.05)           | -82.0<br>(-89.9 to -70.8)                         | -85.9<br>(-92.5 to -75.6)                           |
| Schistosomiasis                                                                      | 7,087.8<br>(6,423.5 to 7,713.1)           | 2,846.6<br>(2,599.2 to 3,100.0)               | 55.7<br>(26.9 to 104.9)                | -10.6<br>(-13.7 to -7.2)                          | -30.9<br>(-33.2 to -28.3)                           |
| Cysticercosis                                                                        | 31.9<br>(23.1 to 40.9)                    | --                                            | 6.0<br>(3.4 to 9.4)                    | 26.0<br>(-3.5 to 56.1)                            | -1.6<br>(-24.0 to 20.1)                             |
| Cystic echinococcosis                                                                | 8.2<br>(2.2 to 27.3)                      | 1.7<br>(0.5 to 5.7)                           | 0.8<br>(0.2 to 2.5)                    | -24.2<br>(-88.0 to 346.0)                         | -40.4<br>(-89.1 to 199.0)                           |
| Lymphatic filariasis                                                                 | 668.5<br>(481.1 to 971.8)                 | 163.8<br>(136.1 to 195.6)                     | 33.4<br>(12.0 to 74.6)                 | 16.1<br>(-17.6 to 37.0)                           | -8.8<br>(-35.7 to 7.6)                              |
| Onchocerciasis                                                                       | --                                        | --                                            | --                                     | --                                                | --                                                  |
| Trachoma                                                                             | 8.9<br>(5.7 to 13.1)                      | --                                            | 0.8<br>(0.5 to 1.3)                    | -25.9<br>(-41.8 to -6.6)                          | -42.3<br>(-58.0 to -20.9)                           |
| Dengue                                                                               | 21.6<br>(12.9 to 34.1)                    | 361.0<br>(249.3 to 497.2)                     | 3.5<br>(1.7 to 6.2)                    | 180.6<br>(109.7 to 536.7)                         | 121.8<br>(69.1 to 401.6)                            |
| Yellow fever                                                                         | < 0.05<br>(< 0.05 to 0.1)                 | 0.9<br>(0.3 to 2.3)                           | < 0.05<br>(< 0.05 to < 0.05)           | -31.5<br>(-47.9 to -11.9)                         | -45.8<br>(-57.5 to -32.6)                           |
| Rabies                                                                               | < 0.05<br>(< 0.05 to < 0.05)              | 0.2<br>(< 0.05 to 0.4)                        | < 0.05<br>(< 0.05 to < 0.05)           | 19.7<br>(-29.0 to 103.5)                          | -9.0<br>(-39.4 to 37.1)                             |
| Intestinal nematode infections                                                       | 7,997.9<br>(7,328.1 to 8,714.2)           | --                                            | 19.3<br>(11.6 to 30.5)                 | 25.3<br>(12.1 to 41.4)                            | -1.0<br>(-12.9 to 13.5)                             |
| Ascariasis                                                                           | 2,245.1<br>(1,845.0 to 2,764.5)           | --                                            | 0.7<br>(0.4 to 1.2)                    | 24.4<br>(-5.3 to 63.0)                            | -0.5<br>(-27.1 to 36.0)                             |

| Cause                                                                   | Prevalence in thousands (95% UI)                 | Incidence in thousands (95% UI)                   | YLDs in thousands (95% UI)                    |                                                   |                                                     |
|-------------------------------------------------------------------------|--------------------------------------------------|---------------------------------------------------|-----------------------------------------------|---------------------------------------------------|-----------------------------------------------------|
|                                                                         | 2016 counts                                      | 2016 counts                                       | 2016 counts                                   | Percentage change in counts between 2006 and 2016 | Percentage change in age-standardised rates between |
| Trichuriasis                                                            | 2,430.7<br>(1,974.0 to 2,951.5)                  | --                                                | 0.6<br>(0.3 to 1.1)                           | 23.7<br>(-18.9 to 83.7)                           | -1.6<br>(-40.2 to 60.4)                             |
| Hookworm disease                                                        | 4,574.3<br>(3,912.6 to 5,289.2)                  | --                                                | 18.0<br>(10.8 to 28.2)                        | 25.4<br>(11.2 to 42.5)                            | -1.0<br>(-13.7 to 14.5)                             |
| Food-borne trematodiasis                                                | --                                               | --                                                | --                                            | --                                                | --                                                  |
| Leprosy                                                                 | 4.5<br>(4.2 to 4.8)                              | 0.3<br>(0.3 to 0.4)                               | 0.3<br>(0.2 to 0.4)                           | 1.3<br>(-13.2 to 19.9)                            | -19.4<br>(-29.1 to -7.4)                            |
| Ebola virus disease                                                     | --                                               | --                                                | --                                            | --                                                | --                                                  |
| Zika virus disease                                                      | --                                               | --                                                | --                                            | --                                                | --                                                  |
| Guinea worm disease                                                     | --                                               | --                                                | --                                            | --                                                | --                                                  |
| Other neglected tropical diseases                                       | 387.2<br>(368.2 to 407.3)                        | --                                                | 13.5<br>(9.0 to 19.6)                         | 42.2<br>(30.6 to 55.0)                            | 16.8<br>(7.9 to 26.6)                               |
| <b>Maternal disorders</b>                                               | <b>82.3</b><br><b>(65.0 to 101.6)</b>            | <b>513.5†</b><br><b>(466.9 to 564.8)</b>          | <b>7.5</b><br><b>(4.9 to 10.7)</b>            | <b>5.9</b><br><b>(-13.8 to 34.3)</b>              | <b>-19.9</b><br><b>(-34.6 to 0.5)</b>               |
| Maternal haemorrhage                                                    | 6.5<br>(5.1 to 8.4)                              | 62.0<br>(40.6 to 90.7)                            | 0.3<br>(0.2 to 0.5)                           | 24.2<br>(-16.7 to 86.0)                           | -5.5<br>(-35.7 to 40.3)                             |
| Maternal sepsis and other pregnancy related infections                  | 10.8<br>(8.3 to 14.2)                            | 62.4<br>(47.3 to 81.9)                            | 0.3<br>(0.1 to 0.5)                           | 32.4<br>(-31.3 to 159.7)                          | 0.6<br>(-47.6 to 95.6)                              |
| Maternal hypertensive disorders                                         | 56.2<br>(38.0 to 75.9)                           | 247.1<br>(226.8 to 261.1)                         | 2.7<br>(1.5 to 4.4)                           | 20.6<br>(-26.1 to 99.4)                           | -8.5<br>(-44.0 to 50.0)                             |
| Maternal obstructed labour and uterine rupture                          | 9.2<br>(6.6 to 12.6)                             | 34.0<br>(23.9 to 47.4)                            | 3.0<br>(1.7 to 4.5)                           | -6.4<br>(-25.1 to 16.0)                           | -28.0<br>(-42.2 to -11.2)                           |
| Maternal abortion, miscarriage, and ectopic pregnancy                   | 0.9<br>(0.6 to 1.3)                              | 108.0<br>(79.6 to 144.8)                          | 0.1<br>(< 0.05 to 0.2)                        | 22.4<br>(-38.7 to 145.5)                          | -6.5<br>(-51.6 to 79.3)                             |
| Other maternal disorders                                                | --                                               | --                                                | 1.2<br>(0.8 to 1.7)                           | 1.5<br>(-17.6 to 28.6)                            | -23.4<br>(-37.2 to -4.0)                            |
| <b>Neonatal disorders</b>                                               | <b>298.3</b><br><b>(237.0 to 369.4)</b>          | --                                                | <b>33.2</b><br><b>(19.3 to 56.6)</b>          | <b>45.5</b><br><b>(13.6 to 85.6)</b>              | <b>17.7</b><br><b>(-8.8 to 51.2)</b>                |
| Neonatal preterm birth complications                                    | 208.8<br>(151.7 to 310.1)                        | --                                                | 11.9<br>(7.7 to 17.7)                         | 29.5<br>(1.5 to 64.2)                             | 3.6<br>(-20.2 to 32.6)                              |
| Neonatal encephalopathy due to birth asphyxia and trauma                | 85.6<br>(43.6 to 149.9)                          | --                                                | 6.4<br>(1.4 to 19.5)                          | 56.5<br>(-16.4 to 192.9)                          | 27.4<br>(-35.7 to 144.4)                            |
| Neonatal sepsis and other neonatal infections                           | 28.3<br>(9.1 to 69.5)                            | --                                                | 10.4<br>(2.0 to 29.9)                         | 72.5<br>(-17.1 to 184.9)                          | 43.6<br>(-37.4 to 146.6)                            |
| Hemolytic disease and other neonatal jaundice                           | 4.8<br>(4.1 to 5.5)                              | --                                                | 1.6<br>(1.2 to 2.1)                           | 20.1<br>(4.9 to 37.4)                             | -3.6<br>(-14.2 to 8.4)                              |
| Other neonatal disorders                                                | --                                               | --                                                | 2.9<br>(1.8 to 4.9)                           | 33.8<br>(8.1 to 65.0)                             | 5.7<br>(-14.9 to 31.0)                              |
| <b>Nutritional deficiencies</b>                                         | <b>8,273.8</b><br><b>(7,999.7 to 8,566.1)</b>    | <b>2,380.1†</b><br><b>(1,909.0 to 2,955.9)</b>    | <b>250.8</b><br><b>(167.5 to 357.4)</b>       | <b>42.9</b><br><b>(35.6 to 49.9)</b>              | <b>16.7</b><br><b>(12.0 to 21.4)</b>                |
| Protein-energy malnutrition                                             | 324.4<br>(259.1 to 405.8)                        | 229.6<br>(186.7 to 281.2)                         | 10.8<br>(6.6 to 16.5)                         | 3.8<br>(-23.9 to 41.8)                            | -18.2<br>(-40.4 to 12.2)                            |
| Iodine deficiency                                                       | 335.3<br>(273.9 to 407.4)                        | 12.8<br>(10.5 to 15.5)                            | 9.8<br>(6.4 to 14.1)                          | 5.0<br>(-8.0 to 17.8)                             | -17.8<br>(-27.5 to -8.7)                            |
| Vitamin A deficiency                                                    | 2,293.6<br>(1,858.9 to 2,802.1)                  | 2,137.7<br>(1,660.7 to 2,711.8)                   | 1.9<br>(1.1 to 3.1)                           | 17.2<br>(-10.8 to 57.1)                           | -6.5<br>(-27.4 to 20.7)                             |
| Iron-deficiency anaemia                                                 | 6,817.2<br>(6,587.3 to 7,062.9)                  | --                                                | 227.8<br>(151.8 to 329.5)                     | 48.2<br>(40.4 to 55.8)                            | 21.7<br>(16.7 to 26.8)                              |
| Other nutritional deficiencies                                          | --                                               | --                                                | 0.4<br>(0.2 to 0.6)                           | 1.9<br>(-26.7 to 41.1)                            | -19.5<br>(-42.6 to 11.6)                            |
| <b>Other communicable, maternal, neonatal, and nutritional diseases</b> | <b>7,561.1</b><br><b>(6,981.8 to 8,162.5)</b>    | <b>4,037.6</b><br><b>(3,431.2 to 4,918.8)</b>     | <b>21.5</b><br><b>(13.9 to 31.7)</b>          | <b>34.8</b><br><b>(27.2 to 42.1)</b>              | <b>3.7</b><br><b>(-1.5 to 8.9)</b>                  |
| Sexually transmitted diseases excluding HIV                             | 4,029.6<br>(3,769.9 to 4,325.0)                  | 2,396.7<br>(2,173.0 to 2,647.9)                   | 9.8<br>(6.2 to 15.5)                          | 28.6<br>(20.0 to 38.0)                            | -0.6<br>(-6.5 to 6.2)                               |
| Syphilis                                                                | 270.0<br>(196.4 to 363.0)                        | 186.2<br>(128.4 to 258.6)                         | 0.5<br>(0.4 to 0.7)                           | 30.1<br>(15.6 to 50.1)                            | 2.3<br>(-10.2 to 17.6)                              |
| Chlamydial infection                                                    | 325.2<br>(260.7 to 398.2)                        | 276.2<br>(225.8 to 333.6)                         | 2.0<br>(1.2 to 3.1)                           | 27.7<br>(12.2 to 46.4)                            | -1.9<br>(-13.3 to 11.9)                             |
| Gonococcal infection                                                    | 223.2<br>(181.6 to 274.6)                        | 728.7<br>(571.9 to 918.4)                         | 1.8<br>(1.1 to 2.9)                           | 28.1<br>(12.3 to 47.4)                            | -1.3<br>(-12.5 to 12.6)                             |
| Trichomoniasis                                                          | 739.4<br>(625.0 to 859.2)                        | 676.1<br>(567.7 to 795.2)                         | 1.0<br>(0.4 to 2.0)                           | 34.3<br>(25.7 to 44.0)                            | 3.8<br>(-2.1 to 10.3)                               |
| Genital herpes                                                          | 2,851.8<br>(2,473.1 to 3,328.5)                  | 296.9<br>(250.2 to 358.6)                         | 0.8<br>(0.2 to 1.7)                           | 29.6<br>(17.9 to 42.4)                            | 0.8<br>(-7.1 to 9.2)                                |
| Other sexually transmitted diseases                                     | 190.3<br>(174.4 to 207.3)                        | 232.7<br>(194.6 to 282.4)                         | 3.8<br>(2.5 to 5.6)                           | 27.7<br>(14.8 to 41.6)                            | -1.5<br>(-11.2 to 9.4)                              |
| Hepatitis                                                               | 4,122.6<br>(3,351.5 to 5,050.4)                  | 1,640.9<br>(1,101.2 to 2,440.4)                   | 1.8<br>(1.1 to 2.9)                           | 9.6<br>(-12.9 to 38.9)                            | -14.6<br>(-30.2 to 6.1)                             |
| Acute hepatitis A                                                       | 29.2<br>(3.2 to 84.5)                            | 379.2<br>(41.9 to 1,097.9)                        | 0.2<br>(0.1 to 0.5)                           | 16.1<br>(-75.8 to 490.3)                          | -10.2<br>(-74.4 to 275.9)                           |
| Hepatitis B                                                             | 3,134.7<br>(2,374.3 to 4,061.2)                  | 1,079.6<br>(753.4 to 1,524.5)                     | 1.3<br>(0.7 to 2.2)                           | 7.7<br>(-14.9 to 34.9)                            | -15.6<br>(-31.9 to 3.7)                             |
| Hepatitis C                                                             | 950.9<br>(837.6 to 1,085.7)                      | 81.0<br>(73.3 to 89.5)                            | 0.1<br>(< 0.05 to 0.1)                        | 22.1<br>(-19.9 to 80.7)                           | -5.3<br>(-28.9 to 22.6)                             |
| Acute hepatitis E                                                       | 7.8<br>(6.0 to 10.3)                             | 101.1<br>(77.4 to 133.5)                          | 0.2<br>(0.1 to 0.3)                           | 11.6<br>(-18.4 to 50.9)                           | -13.3<br>(-34.1 to 13.3)                            |
| Other infectious diseases                                               | 285.4<br>(272.6 to 298.7)                        | < 0.05<br>(< 0.05 to < 0.05)                      | 9.9<br>(6.5 to 14.5)                          | 48.0<br>(35.5 to 60.7)                            | 19.8<br>(10.6 to 28.9)                              |
| <b>Non-communicable diseases</b>                                        | <b>20,785.2</b><br><b>(20,611.4 to 20,960.8)</b> | <b>53,875.9†</b><br><b>(49,087.9 to 58,743.0)</b> | <b>1,499.8</b><br><b>(1,096.9 to 1,935.5)</b> | <b>28.1</b><br><b>(23.3 to 33.4)</b>              | <b>0.2</b><br><b>(-2.6 to 3.1)</b>                  |
| <b>Neoplasms</b>                                                        | <b>21.1</b><br><b>(19.4 to 23.0)</b>             | <b>11.1</b><br><b>(9.8 to 11.8)</b>               | <b>3.8</b><br><b>(2.8 to 5.1)</b>             | <b>26.6</b><br><b>(18.1 to 36.1)</b>              | <b>0.0</b><br><b>(-6.0 to 7.0)</b>                  |
| Lip and oral cavity cancer                                              | 0.8<br>(0.7 to 0.9)                              | 0.3<br>(0.2 to 0.3)                               | 0.1<br>(0.1 to 0.1)                           | 30.7<br>(13.1 to 51.4)                            | 2.0<br>(-13.1 to 21.1)                              |
| Nasopharynx cancer                                                      | 0.1<br>(0.1 to 0.1)                              | < 0.05<br>(< 0.05 to < 0.05)                      | < 0.05<br>(< 0.05 to < 0.05)                  | 16.9<br>(-1.2 to 39.4)                            | -7.8<br>(-21.9 to 9.4)                              |
| Other pharynx cancer                                                    | 0.2<br>(0.2 to 0.2)                              | 0.1<br>(0.1 to 0.1)                               | < 0.05<br>(< 0.05 to < 0.05)                  | 20.7<br>(7.2 to 35.7)                             | -5.0<br>(-15.5 to 7.1)                              |
| Oesophageal cancer                                                      | 0.1<br>(0.1 to 0.1)                              | 0.1<br>(0.1 to 0.1)                               | < 0.05<br>(< 0.05 to < 0.05)                  | 20.4<br>(6.0 to 37.1)                             | -3.6<br>(-14.1 to 8.3)                              |
| Stomach cancer                                                          | 0.6<br>(0.6 to 0.7)                              | 0.5<br>(0.4 to 0.5)                               | 0.1<br>(0.1 to 0.2)                           | 15.4<br>(2.3 to 30.6)                             | -7.7<br>(-20.1 to 6.9)                              |
| Colon and rectum cancer                                                 | 1.1<br>(1.0 to 1.2)                              | 0.4<br>(0.4 to 0.4)                               | 0.1<br>(0.1 to 0.2)                           | 27.4<br>(11.2 to 44.9)                            | 0.2<br>(-14.0 to 16.4)                              |
| Liver cancer                                                            | 0.5<br>(0.4 to 0.6)                              | 1.0<br>(0.9 to 1.2)                               | 0.2<br>(0.1 to 0.3)                           | 24.0<br>(8.2 to 40.0)                             | -2.2<br>(-14.5 to 10.2)                             |
| Liver cancer due to hepatitis B                                         | 0.5<br>(0.4 to 0.6)                              | 0.6<br>(0.5 to 0.7)                               | 0.1<br>(0.1 to 0.2)                           | 24.3<br>(8.9 to 41.3)                             | -1.8<br>(-14.9 to 11.6)                             |



| Cause                                              | Prevalence in thousands (95% UI)              | Incidence in thousands (95% UI)          | YLDs in thousands (95% UI)           |                                                   |                                                     |
|----------------------------------------------------|-----------------------------------------------|------------------------------------------|--------------------------------------|---------------------------------------------------|-----------------------------------------------------|
|                                                    | 2016 counts                                   | 2016 counts                              | 2016 counts                          | Percentage change in counts between 2006 and 2016 | Percentage change in age-standardised rates between |
| Liver cancer due to hepatitis C                    | 0.1<br>(0.1 to 0.1)                           | 0.1<br>(0.1 to 0.1)                      | < 0.05<br>(< 0.05 to < 0.05)         | 26.6<br>(8.3 to 45.1)                             | -0.7<br>(-14.1 to 13.6)                             |
| Liver cancer due to alcohol use                    | 0.1<br>(0.1 to 0.1)                           | 0.1<br>(0.1 to 0.2)                      | < 0.05<br>(< 0.05 to < 0.05)         | 17.7<br>(1.4 to 34.9)                             | -7.2<br>(-19.4 to 6.0)                              |
| Liver cancer due to other causes                   | 0.2<br>(0.2 to 0.2)                           | 0.2<br>(0.2 to 0.3)                      | 0.1<br>(< 0.05 to 0.1)               | 26.1<br>(9.2 to 43.4)                             | -0.6<br>(-13.2 to 12.7)                             |
| Gallbladder and biliary tract cancer               | 0.1<br>(0.1 to 0.1)                           | 0.1<br>(0.1 to 0.2)                      | < 0.05<br>(< 0.05 to 0.1)            | 15.4<br>(4.8 to 28.3)                             | -8.7<br>(-16.9 to 0.1)                              |
| Pancreatic cancer                                  | 0.2<br>(0.2 to 0.2)                           | 0.3<br>(0.3 to 0.3)                      | 0.1<br>(< 0.05 to 0.1)               | 31.7<br>(20.9 to 43.6)                            | 3.5<br>(-4.5 to 12.1)                               |
| Larynx cancer                                      | 0.4<br>(0.4 to 0.5)                           | 0.1<br>(0.1 to 0.2)                      | 0.1<br>(< 0.05 to 0.1)               | 16.5<br>(-1.8 to 38.5)                            | -6.2<br>(-20.3 to 10.5)                             |
| Tracheal, bronchus, and lung cancer                | 0.5<br>(0.4 to 0.6)                           | 0.5<br>(0.4 to 0.5)                      | 0.1<br>(0.1 to 0.2)                  | 20.9<br>(-5.0 to 51.8)                            | -4.5<br>(-25.5 to 20.7)                             |
| Malignant skin melanoma                            | 0.3<br>(0.2 to 0.4)                           | 0.1<br>(0.1 to 0.1)                      | < 0.05<br>(< 0.05 to < 0.05)         | 34.4<br>(12.1 to 58.3)                            | 3.6<br>(-13.0 to 21.9)                              |
| Non-melanoma skin cancer                           | 0.1<br>(0.1 to 0.2)                           | 0.5<br>(0.3 to 0.7)                      | < 0.05<br>(< 0.05 to < 0.05)         | 26.4<br>(-22.3 to 78.0)                           | -7.6<br>(-49.4 to 37.4)                             |
| Non-melanoma skin cancer (squamous-cell carcinoma) | 0.1<br>(0.1 to 0.1)                           | 0.1<br>(0.1 to 0.2)                      | < 0.05<br>(< 0.05 to < 0.05)         | 21.1<br>(-27.7 to 76.2)                           | -9.9<br>(-51.7 to 37.7)                             |
| Non-melanoma skin cancer (basal-cell carcinoma)    | < 0.05<br>(< 0.05 to 0.1)                     | 0.3<br>(0.2 to 0.6)                      | < 0.05<br>(< 0.05 to < 0.05)         | 102.4<br>(46.3 to 155.6)                          | 42.4<br>(8.2 to 78.5)                               |
| Breast cancer                                      | 6.2<br>(4.6 to 7.1)                           | 1.5<br>(1.2 to 1.7)                      | 0.7<br>(0.5 to 0.9)                  | 30.0<br>(3.9 to 62.0)                             | 2.5<br>(-16.9 to 26.9)                              |
| Cervical cancer                                    | 4.3<br>(3.4 to 5.2)                           | 1.3<br>(1.0 to 1.5)                      | 0.5<br>(0.3 to 0.6)                  | 16.0<br>(-7.5 to 43.4)                            | -8.1<br>(-27.0 to 13.2)                             |
| Uterine cancer                                     | 0.6<br>(0.5 to 0.7)                           | 0.1<br>(0.1 to 0.2)                      | 0.1<br>(< 0.05 to 0.1)               | 24.6<br>(-1.8 to 59.5)                            | -2.9<br>(-21.2 to 20.9)                             |
| Ovarian cancer                                     | 0.7<br>(0.6 to 0.8)                           | 0.3<br>(0.2 to 0.3)                      | 0.1<br>(0.1 to 0.2)                  | 30.8<br>(-4.2 to 75.0)                            | 2.6<br>(-26.5 to 42.0)                              |
| Prostate cancer                                    | 4.8<br>(2.3 to 6.4)                           | 1.6<br>(0.8 to 2.0)                      | 0.7<br>(0.3 to 1.1)                  | 38.0<br>(12.9 to 66.2)                            | 5.2<br>(-10.5 to 23.1)                              |
| Testicular cancer                                  | 0.1<br>(0.1 to 0.1)                           | < 0.05<br>(< 0.05 to < 0.05)             | < 0.05<br>(< 0.05 to < 0.05)         | 15.3<br>(-9.5 to 44.8)                            | -10.6<br>(-31.8 to 15.8)                            |
| Kidney cancer                                      | 0.7<br>(0.6 to 0.8)                           | 0.2<br>(0.2 to 0.2)                      | 0.1<br>(< 0.05 to 0.1)               | 34.5<br>(17.0 to 54.5)                            | 7.7<br>(-5.4 to 23.0)                               |
| Bladder cancer                                     | 0.7<br>(0.6 to 0.8)                           | 0.2<br>(0.2 to 0.2)                      | 0.1<br>(0.1 to 0.1)                  | 29.1<br>(13.0 to 47.4)                            | 1.0<br>(-11.8 to 15.0)                              |
| Brain and nervous system cancer                    | 0.5<br>(0.4 to 0.6)                           | 0.2<br>(0.2 to 0.2)                      | 0.1<br>(< 0.05 to 0.1)               | 27.6<br>(17.2 to 39.1)                            | 2.6<br>(-5.9 to 11.9)                               |
| Thyroid cancer                                     | 0.4<br>(0.4 to 0.5)                           | 0.1<br>(0.1 to 0.1)                      | < 0.05<br>(< 0.05 to < 0.05)         | 25.1<br>(-0.1 to 60.1)                            | -3.3<br>(-21.5 to 22.1)                             |
| Mesothelioma                                       | < 0.05<br>(< 0.05 to < 0.05)                  | < 0.05<br>(< 0.05 to < 0.05)             | < 0.05<br>(< 0.05 to < 0.05)         | 9.8<br>(-3.4 to 25.4)                             | -13.6<br>(-22.7 to -2.7)                            |
| Hodgkin lymphoma                                   | 0.2<br>(0.1 to 0.2)                           | 0.1<br>(< 0.05 to 0.1)                   | < 0.05<br>(< 0.05 to < 0.05)         | 3.3<br>(-6.2 to 14.2)                             | -17.9<br>(-25.6 to -9.7)                            |
| Non-Hodgkin's lymphoma                             | 1.6<br>(1.3 to 1.8)                           | 0.5<br>(0.5 to 0.6)                      | 0.2<br>(0.1 to 0.2)                  | 24.5<br>(10.8 to 41.0)                            | -0.6<br>(-10.0 to 10.7)                             |
| Multiple myeloma                                   | 0.2<br>(0.2 to 0.2)                           | 0.1<br>(0.1 to 0.2)                      | 0.1<br>(< 0.05 to 0.1)               | 31.2<br>(13.5 to 52.1)                            | 3.5<br>(-15.7 to 26.5)                              |
| Leukaemia                                          | 1.2<br>(1.1 to 1.4)                           | 0.4<br>(0.4 to 0.5)                      | 0.2<br>(0.1 to 0.2)                  | 18.2<br>(6.3 to 31.5)                             | -6.6<br>(-17.2 to 4.2)                              |
| Acute lymphoid leukaemia                           | 0.2<br>(0.2 to 0.3)                           | 0.1<br>(< 0.05 to 0.1)                   | < 0.05<br>(< 0.05 to < 0.05)         | 13.1<br>(-7.3 to 37.3)                            | -7.2<br>(-19.0 to 6.6)                              |
| Chronic lymphoid leukaemia                         | 0.2<br>(0.2 to 0.3)                           | 0.1<br>(< 0.05 to 0.1)                   | < 0.05<br>(< 0.05 to < 0.05)         | 25.4<br>(-0.2 to 54.7)                            | -1.9<br>(-25.5 to 27.3)                             |
| Acute myeloid leukaemia                            | 0.2<br>(0.2 to 0.3)                           | 0.1<br>(0.1 to 0.2)                      | < 0.05<br>(< 0.05 to 0.1)            | 24.4<br>(7.0 to 46.2)                             | 0.0<br>(-10.2 to 11.9)                              |
| Chronic myeloid leukaemia                          | 0.2<br>(0.1 to 0.2)                           | 0.1<br>(0.1 to 0.1)                      | < 0.05<br>(< 0.05 to < 0.05)         | 15.9<br>(0.4 to 35.8)                             | -8.3<br>(-19.9 to 6.6)                              |
| Other leukaemia                                    | 0.4<br>(0.3 to 0.4)                           | 0.1<br>(0.1 to 0.1)                      | 0.1<br>(< 0.05 to 0.1)               | 13.4<br>(-1.4 to 30.3)                            | -11.1<br>(-24.6 to 4.4)                             |
| Other neoplasms                                    | 1.4<br>(1.3 to 1.6)                           | 0.5<br>(0.5 to 0.5)                      | 0.1<br>(0.1 to 0.2)                  | 25.2<br>(10.2 to 41.1)                            | -1.2<br>(-11.1 to 10.1)                             |
| <b>Cardiovascular diseases</b>                     | <b>1,062.1</b><br><b>(1,007.1 to 1,125.5)</b> | <b>82.4†</b><br><b>(78.7 to 86.4)</b>    | <b>61.2</b><br><b>(44.4 to 80.7)</b> | <b>28.9</b><br><b>(23.4 to 34.1)</b>              | <b>-0.1</b><br><b>(-3.9 to 3.7)</b>                 |
| Rheumatic heart disease                            | 180.8<br>(161.4 to 204.0)                     | 7.9<br>(7.0 to 8.9)                      | 8.8<br>(5.6 to 12.8)                 | 26.7<br>(15.8 to 38.9)                            | -1.4<br>(-9.2 to 8.0)                               |
| Ischaemic heart disease                            | 220.9<br>(208.3 to 234.3)                     | 31.1<br>(29.0 to 33.5)                   | 9.0<br>(6.0 to 12.5)                 | 23.0<br>(15.8 to 30.8)                            | -3.4<br>(-7.9 to 1.6)                               |
| Cerebrovascular disease                            | 87.0<br>(81.4 to 93.2)                        | 14.5‡<br>(13.3 to 15.7)                  | 12.4<br>(9.0 to 15.7)                | 25.6<br>(16.2 to 35.1)                            | -1.5<br>(-8.3 to 5.5)                               |
| Ischaemic stroke                                   | 73.2<br>(66.1 to 80.8)                        | 9.1‡<br>(8.1 to 10.3)                    | 9.9<br>(7.2 to 12.5)                 | 26.8<br>(15.6 to 38.3)                            | -1.2<br>(-9.4 to 7.3)                               |
| Hemorrhagic stroke                                 | 18.6<br>(16.6 to 20.7)                        | 5.4‡<br>(4.9 to 5.9)                     | 2.5<br>(1.8 to 3.2)                  | 21.4<br>(7.9 to 37.6)                             | -3.2<br>(-13.9 to 9.1)                              |
| Hypertensive heart disease                         | 17.8<br>(14.4 to 21.6)                        | --                                       | 1.4<br>(1.0 to 2.0)                  | 22.9<br>(9.9 to 36.8)                             | -6.2<br>(-14.7 to 3.9)                              |
| Cardiomyopathy and myocarditis                     | 10.7<br>(9.3 to 12.2)                         | 5.2†<br>(4.5 to 5.9)                     | 1.0<br>(0.7 to 1.4)                  | 25.0<br>(10.7 to 39.8)                            | -2.8<br>(-14.0 to 9.5)                              |
| Myocarditis                                        | 3.0<br>(2.6 to 3.4)                           | 5.2<br>(4.5 to 5.9)                      | 0.2<br>(0.1 to 0.3)                  | 26.1<br>(14.3 to 39.8)                            | -1.5<br>(-13.1 to 11.5)                             |
| Alcoholic cardiomyopathy                           | 1.6<br>(1.2 to 2.0)                           | --                                       | 0.1<br>(0.1 to 0.2)                  | 23.6<br>(-9.1 to 65.1)                            | -2.7<br>(-27.4 to 28.3)                             |
| Other cardiomyopathy                               | 8.0<br>(6.4 to 9.8)                           | --                                       | 0.7<br>(0.4 to 1.0)                  | 24.9<br>(8.0 to 43.9)                             | -3.1<br>(-15.7 to 11.7)                             |
| Atrial fibrillation and flutter                    | 44.3<br>(38.7 to 50.8)                        | 4.0<br>(3.4 to 4.8)                      | 3.5<br>(2.3 to 4.8)                  | 30.5<br>(20.6 to 41.9)                            | 1.0<br>(-5.2 to 7.9)                                |
| Peripheral vascular disease                        | 163.6<br>(141.3 to 190.6)                     | 16.1<br>(13.8 to 18.8)                   | 0.8<br>(0.4 to 1.6)                  | 25.7<br>(15.6 to 37.1)                            | -2.4<br>(-9.4 to 5.2)                               |
| Endocarditis                                       | 1.5<br>(1.2 to 1.8)                           | 3.6<br>(3.2 to 4.0)                      | 0.1<br>(0.1 to 0.2)                  | 36.1<br>(18.5 to 55.8)                            | 2.3<br>(-12.8 to 21.1)                              |
| Other cardiovascular and circulatory diseases      | 460.9<br>(381.0 to 550.2)                     | --                                       | 24.2<br>(16.1 to 34.4)               | 34.4<br>(22.7 to 46.7)                            | 3.6<br>(-4.8 to 13.2)                               |
| <b>Chronic respiratory diseases</b>                | <b>1,469.8</b><br><b>(1,381.4 to 1,556.1)</b> | <b>285.8†</b><br><b>(261.7 to 311.1)</b> | <b>67.5</b><br><b>(49.5 to 89.4)</b> | <b>24.9</b><br><b>(19.5 to 30.7)</b>              | <b>-1.1</b><br><b>(-4.9 to 3.1)</b>                 |
| Chronic obstructive pulmonary disease              | 265.2<br>(253.9 to 277.3)                     | 18.6<br>(17.8 to 19.3)                   | 17.9<br>(15.4 to 19.9)               | 23.1<br>(14.2 to 33.2)                            | -2.6<br>(-9.1 to 4.7)                               |
| Pneumoconiosis                                     | 0.2<br>(0.2 to 0.2)                           | < 0.05<br>(< 0.05 to < 0.05)             | < 0.05<br>(< 0.05 to < 0.05)         | 27.1<br>(18.6 to 35.3)                            | 0.4<br>(-6.5 to 7.3)                                |
| Silicosis                                          | < 0.05<br>(< 0.05 to < 0.05)                  | < 0.05<br>(< 0.05 to < 0.05)             | < 0.05<br>(< 0.05 to < 0.05)         | 26.2<br>(16.0 to 37.4)                            | -0.8<br>(-7.5 to 6.4)                               |

| Cause                                                          | Prevalence in thousands (95% UI)        | Incidence in thousands (95% UI)                     | YLDs in thousands (95% UI)        |                                                   |                                                     |
|----------------------------------------------------------------|-----------------------------------------|-----------------------------------------------------|-----------------------------------|---------------------------------------------------|-----------------------------------------------------|
|                                                                | 2016 counts                             | 2016 counts                                         | 2016 counts                       | Percentage change in counts between 2006 and 2016 | Percentage change in age-standardised rates between |
| Asbestosis                                                     | 0.1<br>(0.1 to 0.1)                     | < 0.05<br>(< 0.05 to < 0.05)                        | < 0.05<br>(< 0.05 to < 0.05)      | 27.8<br>(18.2 to 37.4)                            | 0.8<br>(-5.0 to 6.7)                                |
| Coal workers pneumoconiosis                                    | --                                      | --                                                  | --                                | --                                                | --                                                  |
| Other pneumoconiosis                                           | 0.1<br>(0.1 to 0.1)                     | < 0.05<br>(< 0.05 to < 0.05)                        | < 0.05<br>(< 0.05 to < 0.05)      | 26.5<br>(13.7 to 40.6)                            | 0.1<br>(-11.1 to 13.3)                              |
| Asthma                                                         | 1,211.5<br>(1,109.4 to 1,321.3)         | 267.1<br>(243.0 to 292.6)                           | 47.5<br>(31.2 to 68.3)            | 24.3<br>(17.6 to 31.5)                            | -0.8<br>(-5.2 to 3.7)                               |
| Interstitial lung disease and pulmonary sarcoidosis            | 1.6<br>(1.4 to 1.8)                     | 0.1<br>(0.1 to 0.2)                                 | 0.2<br>(0.1 to 0.3)               | 26.3<br>(22.0 to 30.4)                            | -2.6<br>(-8.1 to 2.6)                               |
| Other chronic respiratory diseases                             | --                                      | --                                                  | 1.8<br>(1.4 to 2.3)               | 65.9<br>(30.4 to 115.3)                           | 30.3<br>(9.8 to 56.2)                               |
| <b>Cirrhosis and other chronic liver diseases</b>              | <b>57.6<br/>(54.6 to 60.5)</b>          | <b>6.4<br/>(6.1 to 6.8)</b>                         | <b>5.3<br/>(3.6 to 7.4)</b>       | <b>23.4<br/>(11.3 to 37.9)</b>                    | <b>-3.0<br/>(-10.2 to 5.3)</b>                      |
| Cirrhosis and other chronic liver diseases due to hepatitis B  | 20.6<br>(17.7 to 23.6)                  | 2.4<br>(2.1 to 2.7)                                 | 1.5<br>(1.0 to 2.2)               | 23.2<br>(4.7 to 42.4)                             | -3.6<br>(-15.0 to 9.1)                              |
| Cirrhosis and other chronic liver diseases due to hepatitis C  | 8.4<br>(6.1 to 11.7)                    | 1.1<br>(0.8 to 1.5)                                 | 0.6<br>(0.4 to 1.0)               | 23.5<br>(1.2 to 50.4)                             | -3.0<br>(-18.8 to 15.2)                             |
| Cirrhosis and other chronic liver diseases due to alcohol use  | 9.0<br>(7.7 to 10.3)                    | 1.3<br>(1.1 to 1.4)                                 | 0.6<br>(0.4 to 0.9)               | 21.7<br>(-0.5 to 48.2)                            | -4.4<br>(-19.4 to 11.9)                             |
| Cirrhosis and other chronic liver diseases due to other causes | 19.5<br>(17.8 to 21.2)                  | 1.7<br>(1.6 to 1.8)                                 | 2.5<br>(1.7 to 3.6)               | 23.9<br>(2.3 to 50.6)                             | -1.3<br>(-16.7 to 17.0)                             |
| <b>Digestive diseases</b>                                      | <b>332.9<br/>(306.4 to 360.8)</b>       | <b>328.0<sup>†</sup><br/>(312.3 to 345.2)</b>       | <b>10.5<br/>(7.3 to 14.1)</b>     | <b>21.3<br/>(11.5 to 31.3)</b>                    | <b>-4.4<br/>(-10.0 to 1.6)</b>                      |
| Peptic ulcer disease                                           | 59.3<br>(53.9 to 65.0)                  | 27.1<br>(24.4 to 30.2)                              | 1.1<br>(0.7 to 1.6)               | 17.0<br>(4.6 to 29.8)                             | -7.0<br>(-15.1 to 1.4)                              |
| Gastritis and duodenitis                                       | 104.8<br>(92.2 to 118.2)                | 110.4<br>(98.7 to 123.1)                            | 1.4<br>(0.9 to 2.1)               | 24.4<br>(11.1 to 38.4)                            | 0.2<br>(-8.3 to 9.1)                                |
| Appendicitis                                                   | 2.8<br>(2.6 to 3.1)                     | 75.0<br>(69.3 to 81.5)                              | 0.9<br>(0.5 to 1.3)               | 19.4<br>(-14.6 to 68.4)                           | -6.8<br>(-26.5 to 18.3)                             |
| Paralytic ileus and intestinal obstruction                     | 0.4<br>(0.4 to 0.5)                     | 11.5<br>(10.4 to 12.8)                              | 0.1<br>(0.1 to 0.2)               | 26.5<br>(21.4 to 31.5)                            | -1.4<br>(-8.6 to 6.9)                               |
| Inguinal, femoral, and abdominal hernia                        | 162.5<br>(133.4 to 196.5)               | 39.0<br>(34.3 to 44.3)                              | 5.4<br>(3.6 to 7.6)               | 20.1<br>(5.1 to 36.1)                             | -5.9<br>(-14.8 to 3.6)                              |
| Inflammatory bowel disease                                     | 1.0<br>(1.0 to 1.1)                     | 7.8<br>(7.5 to 8.2)                                 | 0.2<br>(0.1 to 0.2)               | 28.9<br>(25.8 to 32.5)                            | 1.2<br>(-1.2 to 4.0)                                |
| Vascular intestinal disorders                                  | 0.1<br>(0.1 to 0.1)                     | 0.8<br>(0.7 to 0.9)                                 | < 0.05<br>(< 0.05 to 0.1)         | 28.6<br>(21.5 to 35.9)                            | 1.2<br>(-3.0 to 5.8)                                |
| Gallbladder and biliary diseases                               | 11.4<br>(10.1 to 12.9)                  | 51.6<br>(44.6 to 59.0)                              | 0.3<br>(0.2 to 0.4)               | 27.2<br>(15.1 to 40.1)                            | 0.0<br>(-11.0 to 12.4)                              |
| Pancreatitis                                                   | 0.5<br>(0.5 to 0.6)                     | 4.9<br>(4.5 to 5.5)                                 | 0.1<br>(< 0.05 to 0.1)            | 27.2<br>(21.6 to 33.2)                            | -0.1<br>(-4.5 to 4.3)                               |
| Other digestive diseases                                       | --                                      | --                                                  | 0.9<br>(0.6 to 1.3)               | 26.5<br>(13.5 to 40.6)                            | 0.3<br>(-6.2 to 7.2)                                |
| <b>Neurological disorders</b>                                  | <b>7,151.9<br/>(6,820.5 to 7,558.1)</b> | <b>3,650.8<br/>(3,081.3 to 4,302.0)</b>             | <b>166.0<br/>(104.3 to 243.5)</b> | <b>30.9<br/>(-5.2 to 85.3)</b>                    | <b>1.7<br/>(-21.9 to 35.8)</b>                      |
| Alzheimer's disease and other dementias                        | 22.9<br>(19.1 to 27.2)                  | 3.9<br>(3.3 to 4.7)                                 | 3.1<br>(2.2 to 4.2)               | 33.4<br>(25.1 to 42.4)                            | -0.4<br>(-5.2 to 4.8)                               |
| Parkinson's disease                                            | 2.8<br>(2.1 to 3.5)                     | 0.4<br>(0.3 to 0.5)                                 | 0.3<br>(0.2 to 0.5)               | 36.8<br>(15.8 to 62.9)                            | 5.0<br>(-9.3 to 21.0)                               |
| Epilepsy                                                       | 81.4<br>(18.2 to 168.1)                 | 11.2<br>(2.5 to 23.0)                               | 31.9<br>(6.6 to 74.3)             | 29.9<br>(-75.5 to 775.2)                          | 2.1<br>(-80.8 to 593.1)                             |
| Multiple sclerosis                                             | 0.8<br>(0.7 to 0.9)                     | < 0.05<br>(< 0.05 to < 0.05)                        | 0.2<br>(0.1 to 0.3)               | 37.8<br>(33.4 to 43.2)                            | 8.3<br>(4.8 to 12.3)                                |
| Motor neuron disease                                           | 0.2<br>(0.2 to 0.3)                     | 0.1<br>(< 0.05 to 0.1)                              | < 0.05<br>(< 0.05 to 0.1)         | 28.7<br>(22.6 to 34.5)                            | 2.0<br>(-1.5 to 5.5)                                |
| Migraine                                                       | 2,571.8<br>(2,418.9 to 2,736.1)         | 324.3<br>(303.5 to 346.8)                           | 106.3<br>(67.5 to 150.4)          | 29.6<br>(24.1 to 34.9)                            | 1.0<br>(-2.6 to 4.5)                                |
| Tension-type headache                                          | 5,497.2<br>(4,897.3 to 6,207.6)         | 3,310.8<br>(2,746.0 to 3,953.6)                     | 16.7<br>(10.4 to 25.1)            | 29.9<br>(23.1 to 37.3)                            | 1.2<br>(-3.8 to 6.4)                                |
| Other neurological disorders                                   | 0.1<br>(< 0.05 to 0.1)                  | 0.1<br>(0.1 to 0.2)                                 | 7.5<br>(1.7 to 17.3)              | 59.6<br>(-67.3 to 861.6)                          | 22.3<br>(-72.1 to 550.5)                            |
| <b>Mental and substance use disorders</b>                      | <b>3,050.7<br/>(2,902.0 to 3,192.9)</b> | <b>1,088.7<sup>†</sup><br/>(1,010.1 to 1,178.5)</b> | <b>365.9<br/>(265.8 to 477.0)</b> | <b>29.8<br/>(26.8 to 33.1)</b>                    | <b>1.5<br/>(-0.7 to 4.0)</b>                        |
| Schizophrenia                                                  | 31.5<br>(27.4 to 35.9)                  | 2.8<br>(2.5 to 3.2)                                 | 20.1<br>(14.4 to 25.5)            | 29.0<br>(16.3 to 42.5)                            | 0.8<br>(-8.0 to 10.1)                               |
| Alcohol use disorders                                          | 235.9<br>(200.5 to 274.8)               | 129.8<br>(110.9 to 150.5)                           | 23.5<br>(16.0 to 33.0)            | 29.7<br>(19.8 to 41.1)                            | 0.0<br>(-7.1 to 8.1)                                |
| Drug use disorders                                             | 95.5<br>(85.5 to 106.3)                 | 15.9<br>(14.1 to 17.8)                              | 26.6<br>(18.3 to 36.1)            | 39.4<br>(24.2 to 55.7)                            | 7.5<br>(-2.7 to 19.0)                               |
| Opioid use disorders                                           | 57.6<br>(48.0 to 69.5)                  | 7.3<br>(6.1 to 8.7)                                 | 24.0<br>(16.2 to 32.8)            | 40.2<br>(23.2 to 58.8)                            | 8.2<br>(-3.1 to 20.5)                               |
| Cocaine use disorders                                          | 2.8<br>(2.3 to 3.4)                     | 0.4<br>(0.3 to 0.5)                                 | 0.4<br>(0.2 to 0.6)               | 31.8<br>(24.9 to 39.4)                            | 2.1<br>(-2.5 to 7.5)                                |
| Amphetamine use disorders                                      | 1.4<br>(1.0 to 2.0)                     | 0.3<br>(0.2 to 0.4)                                 | 0.2<br>(0.1 to 0.3)               | 33.1<br>(20.2 to 46.7)                            | 2.1<br>(-7.6 to 12.0)                               |
| Cannabis use disorders                                         | 31.4<br>(26.1 to 37.7)                  | 6.6<br>(5.4 to 8.0)                                 | 0.9<br>(0.6 to 1.4)               | 30.6<br>(4.7 to 65.3)                             | -0.2<br>(-17.5 to 21.7)                             |
| Other drug use disorders                                       | 6.4<br>(5.6 to 7.4)                     | 1.4<br>(1.2 to 1.6)                                 | 1.1<br>(0.7 to 1.5)               | 32.3<br>(13.2 to 56.2)                            | 2.5<br>(-11.9 to 19.0)                              |
| Depressive disorders                                           | 617.0<br>(575.1 to 665.0)               | 670.7<br>(597.3 to 753.6)                           | 103.7<br>(71.6 to 142.3)          | 31.7<br>(25.5 to 38.5)                            | 3.0<br>(-1.8 to 8.4)                                |
| Major depressive disorder                                      | 403.3<br>(356.7 to 454.6)               | 630.0<br>(553.8 to 712.8)                           | 82.1<br>(56.1 to 112.5)           | 32.5<br>(24.8 to 41.0)                            | 3.8<br>(-2.2 to 10.1)                               |
| Dysthymia                                                      | 224.7<br>(193.9 to 260.8)               | 40.7<br>(35.5 to 47.0)                              | 21.6<br>(14.4 to 31.3)            | 28.9<br>(23.8 to 34.6)                            | 0.4<br>(-2.9 to 3.8)                                |
| Bipolar disorder                                               | 119.8<br>(101.6 to 141.9)               | 13.9<br>(11.8 to 16.6)                              | 24.5<br>(14.9 to 36.4)            | 30.0<br>(21.0 to 39.8)                            | 0.5<br>(-5.5 to 6.8)                                |
| Anxiety disorders                                              | 617.8<br>(556.5 to 685.6)               | 116.9<br>(106.0 to 129.5)                           | 59.9<br>(41.0 to 81.5)            | 28.5<br>(19.5 to 38.4)                            | 0.5<br>(-5.9 to 7.2)                                |
| Eating disorders                                               | 21.2<br>(17.2 to 25.8)                  | 16.1<br>(11.7 to 21.9)                              | 4.3<br>(2.7 to 6.2)               | 36.3<br>(17.2 to 59.1)                            | 5.2<br>(-9.1 to 22.9)                               |
| Anorexia nervosa                                               | 5.8<br>(4.1 to 7.9)                     | 2.6<br>(1.9 to 3.5)                                 | 1.2<br>(0.7 to 1.9)               | 34.5<br>(-0.1 to 79.2)                            | 3.7<br>(-21.5 to 37.0)                              |
| Bulimia nervosa                                                | 14.7<br>(10.9 to 19.8)                  | 13.5<br>(9.1 to 19.2)                               | 3.1<br>(1.8 to 4.6)               | 37.0<br>(14.8 to 64.0)                            | 5.7<br>(-11.4 to 25.9)                              |
| Autistic spectrum disorders                                    | 192.3<br>(171.9 to 219.7)               | 2.4<br>(1.6 to 3.3)                                 | 27.3<br>(18.3 to 38.1)            | 26.4<br>(20.1 to 33.3)                            | -0.4<br>(-5.1 to 4.3)                               |
| Autism                                                         | 51.8<br>(44.6 to 60.6)                  | 0.3<br>(0.2 to 0.5)                                 | 13.2<br>(8.5 to 19.2)             | 26.6<br>(15.5 to 38.5)                            | -0.1<br>(-8.5 to 8.3)                               |
| Asperger syndrome and other autistic spectrum disorders        | 140.9<br>(116.6 to 170.8)               | 2.0<br>(1.3 to 2.9)                                 | 14.1<br>(9.1 to 20.7)             | 26.2<br>(19.7 to 33.2)                            | -0.7<br>(-5.0 to 4.0)                               |



| Cause                                                      | Prevalence in thousands (95% UI)                 | Incidence in thousands (95% UI)                   | YLDs in thousands (95% UI)              |                                                   |                                                     |
|------------------------------------------------------------|--------------------------------------------------|---------------------------------------------------|-----------------------------------------|---------------------------------------------------|-----------------------------------------------------|
|                                                            | 2016 counts                                      | 2016 counts                                       | 2016 counts                             | Percentage change in counts between 2006 and 2016 | Percentage change in age-standardised rates between |
| Attention-deficit/hyperactivity disorder                   | 316.2<br>(283.1 to 353.5)                        | 19.8<br>(17.2 to 23.0)                            | 3.8<br>(2.3 to 6.0)                     | 26.3<br>(17.4 to 36.2)                            | -0.2<br>(-6.9 to 7.1)                               |
| Conduct disorder                                           | 236.5<br>(194.0 to 281.8)                        | 84.6<br>(67.3 to 101.8)                           | 28.5<br>(17.5 to 43.3)                  | 26.7<br>(18.9 to 35.0)                            | 0.4<br>(-5.8 to 6.6)                                |
| Idiopathic developmental intellectual disability           | 497.2<br>(301.5 to 698.0)                        | --                                                | 20.3<br>(9.6 to 35.0)                   | 22.8<br>(14.3 to 31.3)                            | -3.6<br>(-10.2 to 2.6)                              |
| Other mental and substance use disorders                   | 316.5<br>(276.5 to 366.9)                        | 16.0<br>(14.0 to 18.5)                            | 23.5<br>(16.0 to 33.6)                  | 28.3<br>(21.1 to 35.5)                            | -0.2<br>(-5.0 to 4.5)                               |
| <b>Diabetes, urogenital, blood, and endocrine diseases</b> | <b>11,629.4</b><br><b>(11,376.0 to 11,906.6)</b> | <b>2,540.1†</b><br><b>(2,379.1 to 2,734.4)</b>    | <b>154.3</b><br><b>(109.5 to 210.2)</b> | <b>28.5</b><br><b>(25.3 to 32.0)</b>              | <b>0.5</b><br><b>(-1.9 to 3.2)</b>                  |
| Diabetes mellitus                                          | 531.8<br>(477.5 to 588.6)                        | 36.0<br>(32.7 to 39.7)                            | 37.0<br>(25.1 to 51.1)                  | 28.3<br>(21.0 to 36.2)                            | 0.8<br>(-4.6 to 6.6)                                |
| Acute glomerulonephritis                                   | 0.2<br>(0.2 to 0.2)                              | 2.8<br>(2.4 to 3.3)                               | < 0.05<br>(< 0.05 to < 0.05)            | 27.3<br>(22.5 to 32.2)                            | 0.4<br>(-3.1 to 3.8)                                |
| Chronic kidney disease                                     | 1,214.5<br>(1,090.0 to 1,337.8)                  | 93.6<br>(82.8 to 105.2)                           | 31.9<br>(23.0 to 41.8)                  | 25.4<br>(18.6 to 33.7)                            | -2.1<br>(-6.9 to 3.1)                               |
| Chronic kidney disease due to diabetes mellitus            | 385.3<br>(326.8 to 451.5)                        | 27.5<br>(22.7 to 33.4)                            | 9.7<br>(7.0 to 12.9)                    | 26.9<br>(17.0 to 38.4)                            | -0.8<br>(-7.6 to 6.9)                               |
| Chronic kidney disease due to hypertension                 | 258.9<br>(221.4 to 294.4)                        | 24.1<br>(20.1 to 28.5)                            | 5.4<br>(3.7 to 7.3)                     | 26.3<br>(12.0 to 39.3)                            | -1.9<br>(-12.0 to 7.5)                              |
| Chronic kidney disease due to glomerulonephritis           | 241.8<br>(207.6 to 275.6)                        | 14.8<br>(11.6 to 18.3)                            | 8.0<br>(5.7 to 11.1)                    | 24.8<br>(13.4 to 37.8)                            | -2.9<br>(-9.7 to 5.0)                               |
| Chronic kidney disease due to other causes                 | 328.5<br>(273.7 to 385.7)                        | 27.2<br>(22.7 to 32.1)                            | 8.8<br>(6.1 to 12.1)                    | 23.7<br>(12.8 to 35.8)                            | -3.4<br>(-10.8 to 4.3)                              |
| Urinary diseases and male infertility                      | 446.2<br>(406.3 to 480.0)                        | 1,499.2†<br>(1,353.4 to 1,680.5)                  | 10.0<br>(6.5 to 14.5)                   | 20.8<br>(12.7 to 29.0)                            | -2.8<br>(-8.9 to 3.4)                               |
| Interstitial nephritis and urinary tract infections        | 26.0<br>(23.2 to 29.4)                           | 1,357.3<br>(1,211.9 to 1,533.0)                   | 0.9<br>(0.5 to 1.3)                     | 23.8<br>(7.7 to 42.7)                             | -3.4<br>(-14.5 to 10.0)                             |
| Urolithiasis                                               | 4.3<br>(3.8 to 4.9)                              | 113.2<br>(100.1 to 129.4)                         | 0.3<br>(0.2 to 0.5)                     | 28.2<br>(18.9 to 37.7)                            | 0.7<br>(-7.5 to 9.2)                                |
| Benign prostatic hyperplasia                               | 224.9<br>(187.3 to 261.6)                        | 28.7<br>(23.8 to 34.2)                            | 7.3<br>(4.6 to 10.7)                    | 23.5<br>(12.3 to 34.4)                            | -1.1<br>(-8.4 to 6.2)                               |
| Male infertility                                           | 182.5<br>(164.3 to 201.8)                        | --                                                | 1.0<br>(0.4 to 2.1)                     | 8.6<br>(-10.6 to 32.0)                            | -17.8<br>(-32.8 to 0.5)                             |
| Other urinary diseases                                     | --                                               | --                                                | 0.5<br>(0.3 to 0.7)                     | 1.8<br>(-8.9 to 13.2)                             | -18.6<br>(-25.9 to -11.0)                           |
| Gynecological diseases                                     | 2,299.8<br>(2,182.3 to 2,423.6)                  | 891.9†<br>(826.3 to 969.1)                        | 28.0<br>(18.9 to 39.9)                  | 34.2<br>(28.7 to 40.2)                            | 4.2<br>(0.3 to 8.3)                                 |
| Uterine fibroids                                           | 156.8<br>(138.1 to 176.8)                        | 19.8<br>(17.1 to 22.7)                            | 3.5<br>(2.1 to 5.4)                     | 40.0<br>(30.0 to 49.8)                            | 10.9<br>(3.2 to 18.3)                               |
| Polycystic ovarian syndrome                                | 20.0<br>(15.0 to 25.9)                           | 48.2<br>(35.1 to 64.1)                            | 0.2<br>(0.1 to 0.3)                     | 30.9<br>(15.0 to 49.1)                            | 1.0<br>(-10.8 to 15.0)                              |
| Female infertility                                         | 19.3<br>(14.3 to 28.6)                           | --                                                | 0.1<br>(< 0.05 to 0.2)                  | -24.3<br>(-69.0 to 73.5)                          | -43.9<br>(-77.8 to 22.7)                            |
| Endometriosis                                              | 4.4<br>(3.6 to 5.3)                              | 18.2<br>(14.6 to 22.9)                            | 0.4<br>(0.2 to 0.6)                     | 32.0<br>(-4.3 to 77.7)                            | 1.9<br>(-23.9 to 33.5)                              |
| Genital prolapse                                           | 1,044.5<br>(921.7 to 1,172.1)                    | 102.0<br>(85.7 to 120.8)                          | 3.2<br>(1.6 to 5.9)                     | 25.9<br>(17.9 to 34.6)                            | -1.1<br>(-7.5 to 6.0)                               |
| Premenstrual syndrome                                      | 1,052.7<br>(969.1 to 1,132.9)                    | 403.4<br>(369.1 to 437.3)                         | 8.7<br>(5.5 to 13.5)                    | 31.0<br>(18.6 to 43.5)                            | 1.3<br>(-7.8 to 10.8)                               |
| Other gynecological diseases                               | 346.9<br>(301.0 to 398.7)                        | 300.4<br>(245.6 to 361.9)                         | 11.8<br>(7.8 to 16.9)                   | 38.7<br>(29.9 to 48.1)                            | 7.4<br>(1.0 to 14.3)                                |
| Hemoglobinopathies and hemolytic anaemias                  | 9,263.9<br>(8,961.7 to 9,583.1)                  | --                                                | 36.8<br>(24.8 to 53.0)                  | 26.5<br>(19.8 to 33.7)                            | 0.4<br>(-4.2 to 5.2)                                |
| Thalassemias                                               | 1.2<br>(1.0 to 1.3)                              | --                                                | 0.1<br>(0.1 to 0.2)                     | 28.7<br>(-30.4 to 140.2)                          | 2.9<br>(-44.5 to 92.9)                              |
| Thalassaemias trait                                        | 1,076.0<br>(1,004.0 to 1,140.6)                  | --                                                | 16.6<br>(11.2 to 23.7)                  | 21.5<br>(13.5 to 31.2)                            | -1.7<br>(-7.4 to 5.5)                               |
| Sickle cell disorders                                      | 19.9<br>(18.2 to 21.7)                           | --                                                | 1.6<br>(1.1 to 2.2)                     | 32.1<br>(16.8 to 50.1)                            | 6.7<br>(-5.2 to 20.0)                               |
| Sickle cell trait                                          | 2,934.9<br>(2,823.2 to 3,048.0)                  | --                                                | 10.5<br>(7.0 to 15.3)                   | 28.1<br>(19.3 to 38.1)                            | 1.8<br>(-4.4 to 8.6)                                |
| G6PD deficiency                                            | 3,050.2<br>(2,778.2 to 3,398.1)                  | --                                                | 0.1<br>(0.1 to 0.2)                     | 13.5<br>(-27.4 to 78.5)                           | -9.3<br>(-34.1 to 25.1)                             |
| G6PD trait                                                 | 3,345.8<br>(3,119.7 to 3,557.8)                  | --                                                | < 0.05<br>(< 0.05 to < 0.05)            | 37.6<br>(24.8 to 51.9)                            | 10.2<br>(1.7 to 19.6)                               |
| Other hemoglobinopathies and hemolytic anaemias            | 302.4<br>(291.6 to 313.1)                        | --                                                | 7.9<br>(5.2 to 11.6)                    | 34.9<br>(24.6 to 46.6)                            | 2.5<br>(-4.1 to 9.7)                                |
| Endocrine, metabolic, blood, and immune disorders          | 336.8<br>(324.7 to 348.3)                        | 16.5<br>(14.8 to 18.4)                            | 10.7<br>(7.2 to 15.3)                   | 40.4<br>(30.7 to 50.4)                            | 10.4<br>(4.2 to 16.2)                               |
| <b>Musculoskeletal disorders</b>                           | <b>2,330.9</b><br><b>(2,190.6 to 2,457.8)</b>    | <b>1,118.9</b><br><b>(1,011.2 to 1,237.6)</b>     | <b>256.6</b><br><b>(183.4 to 337.8)</b> | <b>28.7</b><br><b>(22.9 to 35.2)</b>              | <b>0.6</b><br><b>(-3.5 to 4.9)</b>                  |
| Rheumatoid arthritis                                       | 21.9<br>(19.2 to 24.9)                           | 1.5<br>(1.3 to 1.7)                               | 5.2<br>(3.5 to 6.9)                     | 31.6<br>(18.5 to 46.2)                            | 3.2<br>(-5.8 to 13.3)                               |
| Osteoarthritis                                             | 365.3<br>(341.8 to 389.4)                        | 21.2<br>(19.7 to 22.9)                            | 22.4<br>(15.7 to 30.2)                  | 28.6<br>(23.6 to 33.5)                            | 1.3<br>(-2.4 to 4.9)                                |
| Low back and neck pain                                     | 1,672.2<br>(1,543.5 to 1,805.2)                  | 753.4<br>(670.9 to 845.6)                         | 191.5<br>(134.5 to 251.2)               | 29.2<br>(22.0 to 37.2)                            | 0.9<br>(-4.2 to 6.4)                                |
| Low back pain                                              | 1,297.8<br>(1,143.2 to 1,481.5)                  | 641.8<br>(561.1 to 733.4)                         | 145.8<br>(102.3 to 195.0)               | 29.4<br>(20.0 to 39.5)                            | 0.9<br>(-5.8 to 8.2)                                |
| Neck pain                                                  | 460.0<br>(397.3 to 529.7)                        | 111.6<br>(95.8 to 130.4)                          | 45.7<br>(30.7 to 64.8)                  | 28.6<br>(25.4 to 32.0)                            | 0.8<br>(-1.4 to 3.0)                                |
| Gout                                                       | 50.9<br>(44.7 to 57.5)                           | 10.5<br>(9.1 to 12.0)                             | 1.6<br>(1.1 to 2.2)                     | 25.7<br>(7.7 to 45.2)                             | -0.9<br>(-13.7 to 13.6)                             |
| Other musculoskeletal disorders                            | 418.2<br>(338.1 to 505.5)                        | 332.3<br>(261.6 to 411.7)                         | 35.9<br>(23.8 to 51.3)                  | 25.6<br>(14.3 to 38.3)                            | -2.3<br>(-10.6 to 7.4)                              |
| <b>Other non-communicable diseases</b>                     | <b>16,035.6</b><br><b>(15,589.8 to 16,467.4)</b> | <b>44,763.6†</b><br><b>(40,153.7 to 49,373.6)</b> | <b>408.8</b><br><b>(276.3 to 581.2)</b> | <b>25.8</b><br><b>(24.0 to 27.6)</b>              | <b>-1.4</b><br><b>(-2.5 to -0.2)</b>                |
| Congenital anomalies                                       | 238.4<br>(206.3 to 274.8)                        | --                                                | 35.3<br>(25.2 to 47.7)                  | 23.6<br>(16.0 to 31.2)                            | -2.5<br>(-8.2 to 3.5)                               |
| Neural tube defects                                        | 34.6<br>(30.6 to 38.9)                           | --                                                | 10.3<br>(7.1 to 14.0)                   | 23.3<br>(9.3 to 38.0)                             | -2.5<br>(-12.5 to 8.3)                              |
| Congenital heart anomalies                                 | 52.9<br>(43.5 to 62.9)                           | --                                                | 2.7<br>(1.3 to 4.5)                     | 29.7<br>(13.5 to 47.2)                            | 3.6<br>(-8.1 to 17.3)                               |
| Orofacial clefts                                           | 6.5<br>(5.7 to 7.4)                              | --                                                | 0.1<br>(0.1 to 0.2)                     | 19.8<br>(6.0 to 35.9)                             | -5.3<br>(-16.2 to 7.4)                              |
| Down's syndrome                                            | 4.0<br>(3.4 to 4.8)                              | --                                                | 0.4<br>(0.2 to 0.5)                     | 29.3<br>(20.1 to 39.2)                            | 2.1<br>(-5.0 to 9.8)                                |
| Turner syndrome                                            | 13.9<br>(11.8 to 16.3)                           | --                                                | 0.2<br>(0.1 to 0.4)                     | 21.0<br>(-14.2 to 69.9)                           | -3.7<br>(-30.7 to 31.4)                             |
| Klinefelter syndrome                                       | 14.1<br>(11.7 to 16.5)                           | --                                                | 0.1<br>(< 0.05 to 0.1)                  | 27.8<br>(-4.1 to 68.8)                            | -0.5<br>(-25.3 to 29.4)                             |

| Cause                                         | Prevalence in thousands (95% UI)              | Incidence in thousands (95% UI)                | YLDs in thousands (95% UI)             |                                                   |                                                     |
|-----------------------------------------------|-----------------------------------------------|------------------------------------------------|----------------------------------------|---------------------------------------------------|-----------------------------------------------------|
|                                               | 2016 counts                                   | 2016 counts                                    | 2016 counts                            | Percentage change in counts between 2006 and 2016 | Percentage change in age-standardised rates between |
| Other chromosomal abnormalities               | 4.7<br>(4.0 to 5.7)                           | --                                             | 0.9<br>(0.6 to 1.2)                    | 26.0<br>(-9.3 to 76.7)                            | 0.1<br>(-27.6 to 38.6)                              |
| Congenital musculoskeletal and limb anomalies | 22.9<br>(20.0 to 26.2)                        | --                                             | 3.4<br>(2.2 to 4.7)                    | 25.6<br>(10.4 to 44.5)                            | -0.6<br>(-11.3 to 12.8)                             |
| Urogenital congenital anomalies               | 16.8<br>(14.7 to 19.1)                        | --                                             | 0.4<br>(0.2 to 0.6)                    | 24.3<br>(13.2 to 36.2)                            | -1.2<br>(-9.1 to 7.3)                               |
| Digestive congenital anomalies                | 23.5<br>(21.0 to 26.3)                        | --                                             | 1.0<br>(0.7 to 1.5)                    | 28.4<br>(7.2 to 56.4)                             | 1.4<br>(-13.0 to 21.1)                              |
| Other congenital anomalies                    | 97.6<br>(64.1 to 148.3)                       | --                                             | 15.9<br>(10.1 to 23.6)                 | 21.8<br>(11.5 to 34.1)                            | -4.0<br>(-11.8 to 5.5)                              |
| Skin and subcutaneous diseases                | 7,937.9<br>(7,640.1 to 8,234.3)               | 18,418.2<br>(16,989.4 to 20,095.1)             | 182.3<br>(120.5 to 270.0)              | 28.9<br>(26.5 to 31.8)                            | 1.6<br>(-0.1 to 3.6)                                |
| Dermatitis                                    | 1,065.8<br>(886.5 to 1,270.5)                 | 999.0<br>(874.8 to 1,157.5)                    | 42.3<br>(24.0 to 70.8)                 | 25.4<br>(20.2 to 31.2)                            | 0.2<br>(-3.3 to 3.8)                                |
| Psoriasis                                     | 123.2<br>(115.9 to 131.1)                     | 19.0<br>(17.9 to 20.2)                         | 10.8<br>(7.6 to 14.4)                  | 34.5<br>(20.5 to 50.6)                            | 5.7<br>(-3.0 to 16.0)                               |
| Cellulitis                                    | 8.2<br>(7.5 to 8.9)                           | 141.2<br>(130.7 to 152.6)                      | 0.5<br>(0.3 to 0.7)                    | 27.5<br>(3.1 to 58.4)                             | 0.8<br>(-17.9 to 23.1)                              |
| Pyoderma                                      | 126.9<br>(120.3 to 133.2)                     | 2,491.0<br>(2,365.7 to 2,607.6)                | 0.7<br>(0.3 to 1.5)                    | 26.4<br>(18.8 to 34.8)                            | 0.9<br>(-4.0 to 6.1)                                |
| Scabies                                       | 396.6<br>(318.3 to 510.6)                     | 1,228.1<br>(983.4 to 1,584.7)                  | 10.2<br>(5.6 to 17.2)                  | 23.5<br>(16.8 to 30.6)                            | -2.5<br>(-7.0 to 2.4)                               |
| Fungal skin diseases                          | 3,459.4<br>(2,964.4 to 4,000.0)               | 9,244.6<br>(7,857.2 to 10,857.8)               | 19.6<br>(7.8 to 41.9)                  | 25.8<br>(24.3 to 27.3)                            | 0.2<br>(-0.5 to 1.0)                                |
| Viral skin diseases                           | 671.2<br>(635.5 to 709.5)                     | 930.6<br>(878.2 to 993.1)                      | 20.6<br>(12.8 to 30.6)                 | 26.0<br>(21.4 to 30.7)                            | 0.4<br>(-2.8 to 3.9)                                |
| Acne vulgaris                                 | 2,139.5<br>(1,849.6 to 2,488.1)               | 1,549.3<br>(1,200.9 to 2,062.7)                | 54.9<br>(35.9 to 79.2)                 | 35.0<br>(27.7 to 42.5)                            | 3.9<br>(-1.2 to 9.4)                                |
| Alopecia areata                               | 38.0<br>(35.6 to 40.4)                        | 67.9<br>(63.6 to 72.2)                         | 1.2<br>(0.8 to 1.9)                    | 28.5<br>(14.1 to 45.2)                            | 0.2<br>(-9.5 to 11.1)                               |
| Pruritus                                      | 161.9<br>(141.9 to 183.8)                     | 131.0<br>(116.1 to 147.8)                      | 1.7<br>(0.8 to 3.1)                    | 27.7<br>(20.2 to 35.1)                            | 0.7<br>(-4.7 to 5.8)                                |
| Urticaria                                     | 227.3<br>(194.1 to 267.7)                     | 410.0<br>(347.3 to 481.1)                      | 13.7<br>(8.7 to 19.7)                  | 26.3<br>(18.5 to 34.9)                            | 0.4<br>(-5.1 to 6.5)                                |
| Decubitus ulcer                               | 1.8<br>(1.6 to 2.0)                           | 6.5<br>(5.8 to 7.2)                            | 0.3<br>(0.2 to 0.4)                    | 30.9<br>(20.4 to 42.4)                            | 3.5<br>(-9.6 to 18.9)                               |
| Other skin and subcutaneous diseases          | 1,061.9<br>(1,027.9 to 1,095.2)               | 1,200.1<br>(1,160.7 to 1,238.3)                | 5.8<br>(2.8 to 10.7)                   | 29.4<br>(25.8 to 33.6)                            | 1.7<br>(-0.7 to 4.2)                                |
| Sense organ diseases                          | 4,229.5<br>(4,126.0 to 4,346.9)               | 2,044.1†<br>(1,892.6 to 2,204.0)               | 147.5<br>(102.7 to 207.2)              | 22.6<br>(19.5 to 25.6)                            | -3.1<br>(-4.8 to -1.2)                              |
| Glaucoma                                      | 7.0<br>(5.6 to 8.6)                           | --                                             | 0.8<br>(0.5 to 1.1)                    | 30.2<br>(14.6 to 48.1)                            | 2.5<br>(-8.8 to 15.2)                               |
| Cataract                                      | 166.8<br>(142.3 to 192.1)                     | --                                             | 15.2<br>(10.3 to 21.7)                 | 26.0<br>(19.4 to 33.1)                            | -2.0<br>(-7.4 to 3.3)                               |
| Macular degeneration                          | 8.2<br>(6.0 to 11.1)                          | --                                             | 0.7<br>(0.4 to 1.1)                    | 32.4<br>(14.4 to 53.3)                            | 3.9<br>(-8.4 to 18.1)                               |
| Refraction and accommodation disorders        | 2,356.0<br>(2,261.3 to 2,457.3)               | --                                             | 39.4<br>(23.8 to 63.1)                 | 18.3<br>(14.1 to 22.6)                            | -6.4<br>(-8.9 to -3.5)                              |
| Age-related and other hearing loss            | 2,325.6<br>(2,176.5 to 2,494.2)               | --                                             | 72.3<br>(49.8 to 102.0)                | 22.8<br>(17.6 to 27.9)                            | -2.9<br>(-5.3 to -0.5)                              |
| Other vision loss                             | 67.7<br>(58.9 to 77.5)                        | --                                             | 6.7<br>(4.5 to 9.5)                    | 26.6<br>(15.5 to 38.2)                            | 0.2<br>(-6.7 to 7.7)                                |
| Other sense organ diseases                    | 410.2<br>(379.7 to 440.5)                     | 2,044.1<br>(1,892.6 to 2,204.0)                | 12.4<br>(7.9 to 18.8)                  | 28.6<br>(22.1 to 35.4)                            | 1.1<br>(-2.7 to 5.2)                                |
| Oral disorders                                | 10,567.7<br>(9,666.8 to 11,279.5)             | 24,301.3†<br>(20,151.3 to 28,757.6)            | 43.6<br>(25.4 to 71.0)                 | 26.0<br>(22.5 to 29.2)                            | -0.7<br>(-3.2 to 1.5)                               |
| Caries of deciduous teeth                     | 2,472.4<br>(1,892.0 to 3,098.8)               | 8,063.4<br>(5,422.6 to 11,360.7)               | 0.6<br>(0.2 to 1.2)                    | 21.1<br>(6.9 to 37.8)                             | -0.5<br>(-12.0 to 13.6)                             |
| Caries of permanent teeth                     | 5,950.1<br>(5,042.9 to 6,853.4)               | 15,929.7<br>(12,892.3 to 19,226.0)             | 3.5<br>(1.5 to 6.9)                    | 26.4<br>(20.0 to 33.5)                            | -1.4<br>(-5.9 to 3.3)                               |
| Periodontal disease                           | 2,312.2<br>(1,692.0 to 2,932.0)               | 278.3<br>(205.0 to 360.1)                      | 15.1<br>(5.7 to 32.9)                  | 28.3<br>(22.5 to 33.9)                            | 0.4<br>(-3.7 to 4.2)                                |
| Edentulism and severe tooth loss              | 509.3<br>(443.8 to 578.0)                     | 29.9<br>(25.7 to 34.0)                         | 14.2<br>(9.3 to 20.3)                  | 22.3<br>(14.2 to 29.6)                            | -2.2<br>(-7.4 to 2.2)                               |
| Other oral disorders                          | 346.4<br>(330.6 to 364.2)                     | --                                             | 10.2<br>(6.2 to 15.3)                  | 28.1<br>(23.4 to 33.3)                            | 0.5<br>(-2.5 to 3.8)                                |
| <b>Injuries</b>                               | <b>2,826.4</b><br><b>(2,642.8 to 3,025.5)</b> | <b>1,748.5†</b><br><b>(1,648.6 to 1,848.9)</b> | <b>118.8</b><br><b>(80.8 to 167.9)</b> | <b>27.7</b><br><b>(25.2 to 30.1)</b>              | <b>-0.9</b><br><b>(-2.5 to 0.6)</b>                 |
| <b>Transport injuries</b>                     | <b>316.7</b><br><b>(294.1 to 339.4)</b>       | <b>151.0</b><br><b>(133.4 to 169.8)</b>        | <b>19.0</b><br><b>(12.6 to 27.3)</b>   | <b>24.7</b><br><b>(22.1 to 27.3)</b>              | <b>-2.5</b><br><b>(-4.1 to -0.9)</b>                |
| Road injuries                                 | 255.4<br>(239.3 to 273.2)                     | 130.1<br>(113.7 to 148.5)                      | 15.1<br>(10.0 to 21.7)                 | 23.5<br>(21.0 to 26.0)                            | -3.3<br>(-5.0 to -1.7)                              |
| Pedestrian road injuries                      | 60.6<br>(53.6 to 69.0)                        | 22.6<br>(18.3 to 27.6)                         | 3.6<br>(2.4 to 5.2)                    | 19.7<br>(17.2 to 22.2)                            | -6.4<br>(-8.1 to -4.7)                              |
| Cyclist road injuries                         | 43.4<br>(36.5 to 51.2)                        | 25.2<br>(19.6 to 31.5)                         | 2.4<br>(1.6 to 3.5)                    | 30.2<br>(27.6 to 33.1)                            | 1.9<br>(0.2 to 3.8)                                 |
| Motorcyclist road injuries                    | 43.1<br>(37.0 to 51.4)                        | 15.0<br>(12.0 to 18.5)                         | 2.5<br>(1.6 to 3.5)                    | 18.3<br>(15.7 to 20.9)                            | -7.5<br>(-9.1 to -5.8)                              |
| Motor vehicle road injuries                   | 80.4<br>(69.4 to 91.1)                        | 49.1<br>(41.1 to 57.7)                         | 5.1<br>(3.4 to 7.3)                    | 22.4<br>(19.8 to 25.0)                            | -4.0<br>(-5.8 to -2.3)                              |
| Other road injuries                           | 27.8<br>(24.0 to 32.7)                        | 18.3<br>(14.0 to 23.3)                         | 1.5<br>(1.0 to 2.2)                    | 36.5<br>(33.7 to 39.4)                            | 7.8<br>(5.9 to 10.0)                                |
| Other transport injuries                      | 61.3<br>(50.6 to 75.3)                        | 21.0<br>(17.1 to 26.3)                         | 3.9<br>(2.6 to 5.7)                    | 29.6<br>(25.4 to 33.7)                            | 1.4<br>(-1.1 to 3.8)                                |
| <b>Unintentional injuries</b>                 | <b>2,411.1</b><br><b>(2,229.6 to 2,606.5)</b> | <b>1,550.0</b><br><b>(1,454.7 to 1,648.1)</b>  | <b>91.4</b><br><b>(62.2 to 128.1)</b>  | <b>28.2</b><br><b>(25.8 to 30.5)</b>              | <b>-0.7</b><br><b>(-2.3 to 0.7)</b>                 |
| Falls                                         | 888.6<br>(772.1 to 1,012.6)                   | 557.0<br>(485.4 to 642.4)                      | 39.2<br>(27.7 to 53.8)                 | 26.9<br>(24.5 to 29.3)                            | -1.9<br>(-3.5 to -0.5)                              |
| Drowning                                      | 9.1<br>(7.7 to 10.7)                          | 2.6<br>(2.2 to 3.1)                            | 0.6<br>(0.4 to 0.8)                    | 20.7<br>(17.0 to 23.9)                            | -6.5<br>(-8.8 to -4.4)                              |
| Fire, heat, and hot substances                | 253.8<br>(212.5 to 310.1)                     | 48.6<br>(39.8 to 58.6)                         | 7.7<br>(5.2 to 10.8)                   | 30.5<br>(24.1 to 37.4)                            | 1.4<br>(-2.7 to 6.0)                                |
| Poisonings                                    | 8.1<br>(6.2 to 10.0)                          | 14.1<br>(11.1 to 17.8)                         | 0.9<br>(0.5 to 1.3)                    | 37.0<br>(26.7 to 47.9)                            | 7.1<br>(0.2 to 13.7)                                |
| Exposure to mechanical forces                 | 413.0<br>(352.0 to 497.4)                     | 219.3<br>(184.8 to 254.2)                      | 11.2<br>(7.4 to 16.4)                  | 29.8<br>(26.5 to 32.7)                            | 0.5<br>(-1.5 to 2.4)                                |
| Unintentional firearm injuries                | 22.1<br>(18.3 to 27.1)                        | 8.0<br>(5.9 to 10.4)                           | 1.0<br>(0.7 to 1.5)                    | 30.1<br>(26.7 to 33.4)                            | 1.1<br>(-1.2 to 3.2)                                |
| Unintentional suffocation                     | 37.1<br>(26.2 to 50.2)                        | 11.9<br>(8.1 to 17.0)                          | 1.3<br>(0.8 to 2.0)                    | 36.8<br>(32.6 to 41.2)                            | 7.1<br>(4.6 to 9.7)                                 |
| Other exposure to mechanical forces           | 353.8<br>(296.2 to 435.0)                     | 199.5<br>(169.2 to 231.1)                      | 8.9<br>(5.9 to 12.8)                   | 28.8<br>(25.3 to 31.9)                            | -0.3<br>(-2.4 to 1.7)                               |

| Cause                                                                               | Prevalence in thousands (95% UI)        | Incidence in thousands (95% UI)       | YLDs in thousands (95% UI)         |                                                   |                                                     |
|-------------------------------------------------------------------------------------|-----------------------------------------|---------------------------------------|------------------------------------|---------------------------------------------------|-----------------------------------------------------|
|                                                                                     | 2016 counts                             | 2016 counts                           | 2016 counts                        | Percentage change in counts between 2006 and 2016 | Percentage change in age-standardised rates between |
| Adverse effects of medical treatment                                                | 9.1<br>(7.2 to 11.3)                    | 118.7<br>(102.4 to 136.3)             | 1.2<br>(0.8 to 1.8)                | 22.9<br>(16.7 to 30.1)                            | -4.9<br>(-9.1 to -0.5)                              |
| Animal contact                                                                      | 132.4<br>(117.3 to 154.0)               | 217.7<br>(185.4 to 250.1)             | 4.8<br>(3.2 to 6.8)                | 23.8<br>(18.5 to 29.5)                            | -4.7<br>(-8.1 to -1.5)                              |
| Venomous animal contact                                                             | 57.1<br>(48.1 to 68.9)                  | 96.8<br>(78.1 to 118.0)               | 3.4<br>(2.2 to 4.7)                | 24.2<br>(16.8 to 31.7)                            | -4.7<br>(-9.0 to -0.4)                              |
| Non-venomous animal contact                                                         | 75.4<br>(63.3 to 92.4)                  | 120.8<br>(98.9 to 145.3)              | 1.4<br>(0.9 to 2.1)                | 22.8<br>(18.8 to 26.8)                            | -4.8<br>(-7.6 to -2.0)                              |
| Foreign body                                                                        | 178.0<br>(142.6 to 214.2)               | 134.4<br>(116.9 to 154.2)             | 8.1<br>(5.3 to 11.9)               | 28.8<br>(24.8 to 32.6)                            | 0.8<br>(-1.5 to 3.0)                                |
| Pulmonary aspiration and foreign body in airway                                     | 108.9<br>(80.3 to 147.4)                | 57.7<br>(46.9 to 71.7)                | 5.5<br>(3.5 to 8.2)                | 28.1<br>(23.8 to 32.4)                            | -0.1<br>(-2.5 to 2.4)                               |
| Foreign body in eyes                                                                | 7.7<br>(4.1 to 11.9)                    | 43.3<br>(32.8 to 57.5)                | 0.4<br>(0.2 to 0.8)                | 31.9<br>(27.0 to 37.1)                            | 4.0<br>(1.3 to 6.9)                                 |
| Foreign body in other body part                                                     | 61.3<br>(48.1 to 79.8)                  | 33.4<br>(26.8 to 40.9)                | 2.2<br>(1.4 to 3.2)                | 29.7<br>(25.1 to 34.6)                            | 2.4<br>(-0.5 to 5.2)                                |
| Environmental heat and cold exposure                                                | 180.8<br>(152.0 to 213.9)               | 70.5<br>(57.9 to 86.6)                | 7.7<br>(5.2 to 11.1)               | 30.7<br>(28.0 to 33.5)                            | 2.3<br>(0.5 to 4.0)                                 |
| Other unintentional injuries                                                        | 338.4<br>(269.4 to 431.5)               | 167.2<br>(140.4 to 201.7)             | 10.1<br>(6.6 to 14.7)              | 30.1<br>(27.3 to 32.9)                            | 0.9<br>(-0.7 to 2.5)                                |
| <b>Self-harm and interpersonal violence</b>                                         | <b>580.6</b><br><b>(519.2 to 649.8)</b> | <b>47.0†</b><br><b>(39.3 to 55.9)</b> | <b>7.6</b><br><b>(5.3 to 10.5)</b> | <b>21.7</b><br><b>(17.0 to 25.8)</b>              | <b>-4.1</b><br><b>(-7.3 to -1.4)</b>                |
| Self-harm                                                                           | 14.3<br>(12.4 to 16.3)                  | 9.1<br>(7.8 to 10.6)                  | 0.8<br>(0.5 to 1.2)                | 23.7<br>(20.8 to 26.8)                            | -4.2<br>(-6.2 to -2.1)                              |
| Self-harm by firearm                                                                | 0.8<br>(0.7 to 0.9)                     | 0.4<br>(0.2 to 0.6)                   | < 0.05<br>(< 0.05 to 0.1)          | 17.7<br>(13.6 to 21.8)                            | -9.6<br>(-12.8 to -6.4)                             |
| Self-harm by other specified means                                                  | 13.5<br>(11.6 to 15.5)                  | 8.7<br>(7.4 to 10.1)                  | 0.8<br>(0.5 to 1.1)                | 24.0<br>(20.9 to 27.1)                            | -3.9<br>(-6.0 to -1.8)                              |
| Interpersonal violence                                                              | 566.2<br>(504.2 to 635.1)               | 37.9†<br>(30.2 to 46.6)               | 6.8<br>(4.7 to 9.3)                | 21.4<br>(16.4 to 26.0)                            | -4.1<br>(-7.8 to -1.1)                              |
| Assault by firearm                                                                  | 2.6<br>(2.2 to 3.0)                     | 1.1<br>(0.8 to 1.6)                   | 0.1<br>(0.1 to 0.2)                | 28.6<br>(24.4 to 32.8)                            | 1.0<br>(-1.7 to 3.8)                                |
| Assault by sharp object                                                             | 21.9<br>(17.8 to 26.3)                  | 12.0<br>(8.7 to 16.0)                 | 0.8<br>(0.5 to 1.1)                | 30.7<br>(27.5 to 33.9)                            | 2.7<br>(0.4 to 4.9)                                 |
| Sexual violence                                                                     | 508.5<br>(447.8 to 578.0)               | --                                    | 4.4<br>(3.0 to 6.2)                | 15.3<br>(8.7 to 21.2)                             | -10.4<br>(-15.2 to -6.1)                            |
| Assault by other means                                                              | 33.4<br>(28.5 to 39.6)                  | 24.9<br>(19.4 to 31.2)                | 1.5<br>(1.0 to 2.1)                | 37.3<br>(34.3 to 40.3)                            | 8.0<br>(5.9 to 10.1)                                |
| <b>Forces of nature, conflict and terrorism, and executions and police conflict</b> | <b>26.4</b><br><b>(12.6 to 45.4)</b>    | <b>0.4†</b><br><b>(0.2 to 0.6)</b>    | <b>0.8</b><br><b>(0.2 to 2.6)</b>  | <b>161.5</b><br><b>(137.8 to 173.9)</b>           | <b>120.1</b><br><b>(103.1 to 129.2)</b>             |
| Exposure to forces of nature                                                        | 0.3<br>(0.1 to 0.5)                     | --                                    | < 0.05<br>(< 0.05 to < 0.05)       | 326.1<br>(294.1 to 487.3)                         | 223.4<br>(196.6 to 365.7)                           |
| Conflict and terrorism                                                              | 25.3<br>(11.8 to 44.2)                  | --                                    | 0.8<br>(0.2 to 2.5)                | 169.6<br>(146.4 to 182.1)                         | 130.0<br>(114.5 to 139.1)                           |
| Executions and police conflict                                                      | 0.8<br>(0.4 to 1.8)                     | 0.4<br>(0.2 to 0.6)                   | < 0.05<br>(< 0.05 to 0.1)          | 28.7<br>(13.4 to 47.0)                            | 3.7<br>(-13.4 to 23.4)                              |
| <b>Impairments</b>                                                                  | --                                      | --                                    | --                                 | --                                                | --                                                  |
| Anaemia                                                                             | 11,570.0<br>(11,195.2 to 11,952.3)      | --                                    | 433.1<br>(293.0 to 608.0)          | 9.8<br>(2.2 to 16.0)                              | -13.5<br>(-21.0 to -7.5)                            |
| Developmental intellectual disability                                               | 812.9<br>(621.7 to 1,006.7)             | --                                    | 77.0<br>(55.2 to 105.8)            | 28.0<br>(19.4 to 39.5)                            | 0.7<br>(-5.5 to 9.2)                                |
| Epilepsy                                                                            | 181.7<br>(112.3 to 277.8)               | --                                    | 65.7<br>(35.8 to 111.0)            | 31.4<br>(-34.3 to 175.7)                          | 3.3<br>(-49.0 to 119.4)                             |
| Guillain-Barre syndrome                                                             | 0.1<br>(0.1 to 0.2)                     | --                                    | < 0.05<br>(< 0.05 to 0.1)          | 26.2<br>(25.1 to 27.4)                            | -0.1<br>(-0.2 to -0.0)                              |
| Hearing loss                                                                        | 2,820.6<br>(2,668.4 to 2,990.8)         | --                                    | 98.2<br>(68.4 to 135.5)            | 21.5<br>(17.8 to 25.3)                            | -3.5<br>(-5.6 to -1.5)                              |
| Heart failure                                                                       | 58.0<br>(51.3 to 65.4)                  | --                                    | 6.1<br>(4.4 to 8.0)                | 23.1<br>(13.9 to 32.6)                            | -5.4<br>(-12.4 to 2.4)                              |
| Infertility                                                                         | 502.8<br>(467.5 to 541.7)               | --                                    | 2.9<br>(1.2 to 5.8)                | 13.1<br>(-5.5 to 35.3)                            | -14.1<br>(-28.9 to 4.6)                             |
| Pelvic inflammatory disease                                                         | 23.2<br>(19.4 to 27.6)                  | --                                    | 3.0<br>(2.0 to 4.2)                | 32.4<br>(15.2 to 53.8)                            | 3.0<br>(-9.9 to 18.1)                               |
| Vision loss                                                                         | 2,717.7<br>(2,607.7 to 2,832.7)         | --                                    | 80.9<br>(56.8 to 114.1)            | 24.2<br>(18.0 to 33.9)                            | -3.5<br>(-6.7 to 0.9)                               |

We did not calculate incidence for the nine impairments, certain NTDs, and causes with only birth prevalence. Blank cells mean that no estimate is available.

† Incidence for aggregate causes represents the sum of the incidence of the causes below the aggregate.

‡ Incidence estimates for stroke represent first-ever stroke only.

^ Incidence of HIV/AIDS represents new infections of HIV only and does not include new infections of Tuberculosis in HIV positive cases.



SR Table 14: Prevalence, incidence, and YLDs for 2016, percentage change of YLD counts and percentage change of age-standardised YLD rates between 2006 and 2016 by cause and impairments, for all ages, Croatia.

| Cause                                                                                | Prevalence in thousands (95% UI)       | Incidence in thousands (95% UI)            | YLDs in thousands (95% UI)       |                                                   |                                                     |
|--------------------------------------------------------------------------------------|----------------------------------------|--------------------------------------------|----------------------------------|---------------------------------------------------|-----------------------------------------------------|
|                                                                                      | 2016 counts                            | 2016 counts                                | 2016 counts                      | Percentage change in counts between 2006 and 2016 | Percentage change in age-standardised rates between |
| <b>All causes</b>                                                                    | <b>4,046.4</b><br>(4,034.9 to 4,057.4) | <b>20,564.1†</b><br>(19,789.9 to 21,398.8) | <b>573.4</b><br>(430.1 to 740.5) | <b>1.6</b><br>(0.1 to 3.2)                        | <b>-0.5</b><br>(-2.2 to 1.1)                        |
| <b>Communicable, maternal, neonatal, and nutritional disorders</b>                   | <b>1,803.9</b><br>(1,746.8 to 1,866.8) | <b>8,100.3†</b><br>(7,455.2 to 8,788.0)    | <b>17.9</b><br>(13.0 to 23.9)    | <b>-13.5</b><br>(-17.4 to -9.2)                   | <b>-9.6</b><br>(-14.1 to -4.7)                      |
| <b>HIV/AIDS and tuberculosis</b>                                                     | <b>967.2</b><br>(889.8 to 1,026.5)     | <b>0.6†</b><br>(0.5 to 0.6)                | <b>0.2</b><br>(0.1 to 0.2)       | <b>-26.9</b><br>(-40.9 to -9.8)                   | <b>-26.0</b><br>(-39.6 to -10.8)                    |
| Tuberculosis                                                                         | 910.7<br>(846.1 to 980.0)              | 0.5†<br>(0.5 to 0.6)                       | 0.1<br>(0.1 to 0.2)              | -34.2<br>(-48.2 to -17.2)                         | -33.9<br>(-46.7 to -18.9)                           |
| Drug-susceptible tuberculosis                                                        | 0.4<br>(0.4 to 0.5)                    | 0.5<br>(0.5 to 0.6)                        | 0.1<br>(0.1 to 0.2)              | -34.1<br>(-47.9 to -17.1)                         | -33.8<br>(-46.6 to -18.6)                           |
| Multidrug-resistant tuberculosis without extensive drug resistance                   | < 0.05<br>(< 0.05 to < 0.05)           | < 0.05<br>(< 0.05 to < 0.05)               | < 0.05<br>(< 0.05 to < 0.05)     | -62.5<br>(-93.5 to 38.4)                          | -62.8<br>(-93.5 to 39.1)                            |
| Extensively drug-resistant tuberculosis                                              | < 0.05<br>(< 0.05 to < 0.05)           | < 0.05<br>(< 0.05 to < 0.05)               | < 0.05<br>(< 0.05 to < 0.05)     | 15.8<br>(-79.8 to 326.5)                          | 14.8<br>(-79.9 to 328.4)                            |
| Latent tuberculosis infection                                                        | 910.3<br>(845.7 to 979.5)              | --                                         | --                               | --                                                | --                                                  |
| HIV/AIDS                                                                             | 0.3<br>(0.2 to 0.6)                    | < 0.05^<br>(< 0.05 to < 0.05)              | < 0.05<br>(< 0.05 to 0.1)        | 17.0<br>(-9.6 to 55.3)                            | 19.3<br>(-9.7 to 56.9)                              |
| Drug-susceptible HIV/AIDS - Tuberculosis                                             | < 0.05<br>(< 0.05 to < 0.05)           | < 0.05<br>(< 0.05 to < 0.05)               | < 0.05<br>(< 0.05 to < 0.05)     | -36.9<br>(-40.6 to -32.5)                         | -36.2<br>(-40.0 to -31.6)                           |
| Multidrug-resistant HIV/AIDS - Tuberculosis without extensive drug resistance        | < 0.05<br>(< 0.05 to < 0.05)           | < 0.05<br>(< 0.05 to < 0.05)               | < 0.05<br>(< 0.05 to < 0.05)     | -64.0<br>(-93.8 to 39.7)                          | -63.6<br>(-93.7 to 41.5)                            |
| Extensively drug-resistant HIV/AIDS - Tuberculosis                                   | < 0.05<br>(< 0.05 to < 0.05)           | < 0.05<br>(< 0.05 to < 0.05)               | < 0.05<br>(< 0.05 to < 0.05)     | 10.9<br>(-80.8 to 330.3)                          | 12.1<br>(-80.6 to 335.6)                            |
| HIV/AIDS resulting in other diseases                                                 | 0.3<br>(0.1 to 0.6)                    | < 0.05<br>(< 0.05 to < 0.05)               | < 0.05<br>(< 0.05 to 0.1)        | 21.5<br>(-8.1 to 64.7)                            | 24.0<br>(-7.4 to 66.4)                              |
| <b>Diarrhoea, lower respiratory infections, and other common infectious diseases</b> | <b>146.7</b><br>(139.6 to 155.2)       | <b>7,763.7†</b><br>(7,115.2 to 8,452.1)    | <b>7.1</b><br>(4.9 to 9.8)       | <b>-7.0</b><br>(-10.3 to -3.5)                    | <b>-4.4</b><br>(-8.3 to -0.2)                       |
| Diarrhoeal diseases                                                                  | 27.1<br>(25.7 to 28.4)                 | 1,773.3<br>(1,683.1 to 1,868.6)            | 3.0<br>(2.1 to 4.1)              | -8.8<br>(-14.8 to -2.4)                           | -7.6<br>(-14.5 to -0.1)                             |
| Intestinal infectious diseases                                                       | < 0.05<br>(< 0.05 to < 0.05)           | < 0.05†<br>(< 0.05 to < 0.05)              | < 0.05<br>(< 0.05 to < 0.05)     | 2.2<br>(-11.9 to 17.2)                            | -1.1<br>(-13.9 to 14.1)                             |
| Typhoid fever                                                                        | < 0.05<br>(< 0.05 to < 0.05)           | < 0.05<br>(< 0.05 to < 0.05)               | < 0.05<br>(< 0.05 to < 0.05)     | 8.2<br>(-9.9 to 29.1)                             | 9.6<br>(-7.7 to 30.8)                               |
| Paratyphoid fever                                                                    | < 0.05<br>(< 0.05 to < 0.05)           | < 0.05<br>(< 0.05 to < 0.05)               | < 0.05<br>(< 0.05 to < 0.05)     | 0.9<br>(-15.7 to 21.1)                            | -2.3<br>(-17.6 to 15.7)                             |
| Other intestinal infectious diseases                                                 | --                                     | --                                         | < 0.05<br>(< 0.05 to < 0.05)     | -34.2<br>(-52.5 to -12.3)                         | -47.4<br>(-65.9 to -23.2)                           |
| Lower respiratory infections                                                         | 3.2<br>(3.1 to 3.4)                    | 147.4<br>(138.2 to 157.9)                  | 0.2<br>(0.1 to 0.3)              | 9.6<br>(-2.3 to 24.7)                             | 4.1<br>(-8.2 to 18.9)                               |
| Upper respiratory infections                                                         | 75.8<br>(67.6 to 84.8)                 | 5,619.9<br>(4,997.1 to 6,306.5)            | 1.9<br>(1.1 to 2.9)              | -5.6<br>(-10.6 to -0.7)                           | -0.1<br>(-5.3 to 5.4)                               |
| Otitis media                                                                         | 38.6<br>(34.8 to 42.7)                 | 164.1<br>(135.5 to 198.6)                  | 1.1<br>(0.7 to 1.6)              | -9.6<br>(-16.0 to -2.4)                           | -3.7<br>(-10.4 to 3.9)                              |
| Meningitis                                                                           | 3.6<br>(3.2 to 4.1)                    | 0.4<br>(0.4 to 0.4)                        | 0.4<br>(0.3 to 0.5)              | -6.5<br>(-8.5 to -4.3)                            | -2.2<br>(-4.4 to 0.1)                               |
| Pneumococcal meningitis                                                              | 2.1<br>(1.8 to 2.6)                    | 0.2<br>(0.1 to 0.2)                        | 0.2<br>(0.1 to 0.2)              | -7.6<br>(-10.8 to -4.2)                           | -4.1<br>(-7.5 to -0.6)                              |
| H influenzae type B meningitis                                                       | 0.3<br>(0.2 to 0.3)                    | < 0.05<br>(< 0.05 to < 0.05)               | 0.1<br>(< 0.05 to 0.1)           | -6.6<br>(-9.7 to -3.0)                            | -0.9<br>(-4.4 to 2.7)                               |
| Meningococcal infection                                                              | 0.4<br>(0.4 to 0.5)                    | 0.1<br>(0.1 to 0.1)                        | 0.1<br>(< 0.05 to 0.1)           | -5.7<br>(-9.0 to -1.9)                            | -1.0<br>(-4.8 to 2.9)                               |
| Other meningitis                                                                     | 0.8<br>(0.6 to 0.9)                    | 0.1<br>(0.1 to 0.2)                        | 0.1<br>(0.1 to 0.1)              | -4.7<br>(-7.4 to -1.6)                            | 0.1<br>(-2.9 to 3.5)                                |
| Encephalitis                                                                         | 3.0<br>(2.1 to 4.2)                    | 1.3<br>(1.3 to 1.3)                        | 0.3<br>(0.2 to 0.5)              | -2.2<br>(-14.3 to 11.0)                           | 1.5<br>(-11.0 to 14.3)                              |
| Diphtheria                                                                           | < 0.05<br>(< 0.05 to < 0.05)           | < 0.05<br>(< 0.05 to < 0.05)               | < 0.05<br>(< 0.05 to < 0.05)     | -28.6<br>(-63.5 to 40.4)                          | -24.8<br>(-57.8 to 33.5)                            |
| Whooping cough                                                                       | 0.2<br>(0.1 to 0.2)                    | 1.2<br>(1.0 to 1.6)                        | < 0.05<br>(< 0.05 to < 0.05)     | -17.8<br>(-39.4 to 10.7)                          | -14.6<br>(-37.2 to 15.5)                            |
| Tetanus                                                                              | < 0.05<br>(< 0.05 to < 0.05)           | < 0.05<br>(< 0.05 to < 0.05)               | < 0.05<br>(< 0.05 to < 0.05)     | -73.0<br>(-81.1 to -55.6)                         | -67.8<br>(-78.0 to -49.2)                           |
| Measles                                                                              | < 0.05<br>(< 0.05 to < 0.05)           | 0.2<br>(0.2 to 0.2)                        | < 0.05<br>(< 0.05 to < 0.05)     | 7,854.8<br>(3,446.6 to 5.6e+77)                   | 8,112.8<br>(3,561.7 to 8.7e+77)                     |
| Varicella and herpes zoster                                                          | 3.5<br>(3.1 to 3.8)                    | 55.7<br>(53.3 to 58.1)                     | 0.1<br>(0.1 to 0.2)              | 2.8<br>(-9.5 to 16.4)                             | -0.1<br>(-13.2 to 14.8)                             |
| <b>Neglected tropical diseases and malaria</b>                                       | <b>0.5</b><br>(0.2 to 1.1)             | <b>&lt; 0.05†</b><br>(< 0.05 to 0.2)       | <b>0.1</b><br>(< 0.05 to 0.1)    | <b>-15.2</b><br>(-86.6 to 218.8)                  | <b>-18.0</b><br>(-86.8 to 226.6)                    |
| Malaria                                                                              | --                                     | --                                         | --                               | --                                                | --                                                  |
| Chagas disease                                                                       | --                                     | --                                         | --                               | --                                                | --                                                  |
| Leishmaniasis                                                                        | < 0.05<br>(< 0.05 to < 0.05)           | < 0.05<br>(< 0.05 to < 0.05)               | < 0.05<br>(< 0.05 to < 0.05)     | 30.1<br>(-89.5 to 848.0)                          | 44.9<br>(-89.2 to 1,155.8)                          |
| Visceral leishmaniasis                                                               | < 0.05<br>(< 0.05 to < 0.05)           | < 0.05<br>(< 0.05 to < 0.05)               | < 0.05<br>(< 0.05 to < 0.05)     | -72.2<br>(-98.2 to 38.1)                          | -73.5<br>(-97.7 to 33.0)                            |
| Cutaneous and mucocutaneous leishmaniasis                                            | < 0.05<br>(< 0.05 to < 0.05)           | < 0.05<br>(< 0.05 to < 0.05)               | < 0.05<br>(< 0.05 to < 0.05)     | 73.4<br>(-91.3 to 9,212.5)                        | 79.2<br>(-91.1 to 9,515.8)                          |
| African trypanosomiasis                                                              | --                                     | --                                         | --                               | --                                                | --                                                  |
| Schistosomiasis                                                                      | --                                     | --                                         | --                               | --                                                | --                                                  |
| Cysticercosis                                                                        | 0.3<br>(< 0.05 to 0.7)                 | --                                         | < 0.05<br>(< 0.05 to 0.1)        | 18.4<br>(-100.0 to 596.1)                         | 15.6<br>(-100.0 to 570.4)                           |
| Cystic echinococcosis                                                                | 0.2<br>(< 0.05 to 0.8)                 | < 0.05<br>(< 0.05 to 0.2)                  | < 0.05<br>(< 0.05 to 0.1)        | -46.3<br>(-94.0 to 327.3)                         | -45.7<br>(-94.2 to 348.3)                           |
| Lymphatic filariasis                                                                 | --                                     | --                                         | --                               | --                                                | --                                                  |
| Onchocerciasis                                                                       | --                                     | --                                         | --                               | --                                                | --                                                  |
| Trachoma                                                                             | --                                     | --                                         | --                               | --                                                | --                                                  |
| Dengue                                                                               | --                                     | --                                         | --                               | --                                                | --                                                  |
| Yellow fever                                                                         | --                                     | --                                         | --                               | --                                                | --                                                  |
| Rabies                                                                               | < 0.05<br>(< 0.05 to < 0.05)           | < 0.05<br>(< 0.05 to < 0.05)               | < 0.05<br>(< 0.05 to < 0.05)     | -5.2<br>(-27.4 to 24.3)                           | -11.6<br>(-32.0 to 13.5)                            |
| Intestinal nematode infections                                                       | --                                     | --                                         | --                               | --                                                | --                                                  |
| Ascariasis                                                                           | --                                     | --                                         | --                               | --                                                | --                                                  |

| Cause                                                                   | Prevalence in thousands (95% UI)              | Incidence in thousands (95% UI)                   | YLDs in thousands (95% UI)              |                                                   |                                                     |
|-------------------------------------------------------------------------|-----------------------------------------------|---------------------------------------------------|-----------------------------------------|---------------------------------------------------|-----------------------------------------------------|
|                                                                         | 2016 counts                                   | 2016 counts                                       | 2016 counts                             | Percentage change in counts between 2006 and 2016 | Percentage change in age-standardised rates between |
| Trichuriasis                                                            | --                                            | --                                                | --                                      | --                                                | --                                                  |
| Hookworm disease                                                        | --                                            | --                                                | --                                      | --                                                | --                                                  |
| Food-borne trematodiasis                                                | --                                            | --                                                | --                                      | --                                                | --                                                  |
| Leprosy                                                                 | --                                            | --                                                | --                                      | --                                                | --                                                  |
| Ebola virus disease                                                     | --                                            | --                                                | --                                      | --                                                | --                                                  |
| Zika virus disease                                                      | --                                            | --                                                | --                                      | --                                                | --                                                  |
| Guinea worm disease                                                     | --                                            | --                                                | --                                      | --                                                | --                                                  |
| Other neglected tropical diseases                                       | --                                            | --                                                | < 0.05<br>(< 0.05 to < 0.05)            | --                                                | --                                                  |
| <b>Maternal disorders</b>                                               | <b>2.3</b><br><b>(1.8 to 2.7)</b>             | <b>21.6†</b><br><b>(19.9 to 23.5)</b>             | <b>0.1</b><br><b>(0.1 to 0.1)</b>       | <b>2.0</b><br><b>(-22.7 to 34.3)</b>              | <b>10.3</b><br><b>(-15.8 to 45.8)</b>               |
| Maternal haemorrhage                                                    | 1.1<br>(0.8 to 1.4)                           | 3.1<br>(2.8 to 3.4)                               | < 0.05<br>(< 0.05 to < 0.05)            | 11.2<br>(-25.7 to 67.1)                           | 20.4<br>(-19.1 to 80.9)                             |
| Maternal sepsis and other pregnancy related infections                  | 0.6<br>(0.4 to 0.8)                           | 3.9<br>(3.6 to 4.2)                               | < 0.05<br>(< 0.05 to < 0.05)            | -12.0<br>(-59.3 to 86.8)                          | -2.8<br>(-56.2 to 108.8)                            |
| Maternal hypertensive disorders                                         | 0.6<br>(0.4 to 0.8)                           | 2.4<br>(2.1 to 2.7)                               | < 0.05<br>(< 0.05 to < 0.05)            | 9.5<br>(-38.8 to 93.4)                            | 17.6<br>(-34.0 to 109.3)                            |
| Maternal obstructed labour and uterine rupture                          | < 0.05<br>(< 0.05 to < 0.05)                  | 0.8<br>(0.7 to 0.9)                               | < 0.05<br>(< 0.05 to < 0.05)            | 3.0<br>(-43.2 to 85.6)                            | 9.9<br>(-39.3 to 98.5)                              |
| Maternal abortion, miscarriage, and ectopic pregnancy                   | 0.1<br>(0.1 to 0.1)                           | 11.4<br>(9.7 to 13.3)                             | < 0.05<br>(< 0.05 to < 0.05)            | -4.1<br>(-57.6 to 123.6)                          | 2.0<br>(-54.6 to 135.7)                             |
| Other maternal disorders                                                | --                                            | --                                                | < 0.05<br>(< 0.05 to < 0.05)            | -4.3<br>(-27.1 to 26.2)                           | 3.8<br>(-20.8 to 37.1)                              |
| <b>Neonatal disorders</b>                                               | <b>29.8</b><br><b>(25.1 to 35.0)</b>          | <b>5.4</b><br><b>--</b>                           | <b>5.4</b><br><b>(3.8 to 7.5)</b>       | <b>-15.4</b><br><b>(-24.7 to -3.3)</b>            | <b>-9.8</b><br><b>(-19.8 to 3.4)</b>                |
| Neonatal preterm birth complications                                    | 23.0<br>(17.6 to 30.1)                        | --                                                | 2.5<br>(1.6 to 3.6)                     | -12.7<br>(-31.2 to 13.1)                          | -6.0<br>(-26.9 to 22.3)                             |
| Neonatal encephalopathy due to birth asphyxia and trauma                | 7.7<br>(5.5 to 10.5)                          | --                                                | 1.4<br>(0.9 to 2.2)                     | -10.2<br>(-22.9 to 11.2)                          | -4.9<br>(-18.4 to 17.7)                             |
| Neonatal sepsis and other neonatal infections                           | 3.3<br>(1.6 to 6.9)                           | --                                                | 1.3<br>(0.6 to 3.0)                     | -24.9<br>(-34.4 to -11.2)                         | -20.2<br>(-30.4 to -5.4)                            |
| Hemolytic disease and other neonatal jaundice                           | 0.4<br>(0.3 to 0.5)                           | --                                                | 0.1<br>(0.1 to 0.1)                     | -7.1<br>(-13.6 to 0.0)                            | -0.9<br>(-8.1 to 6.9)                               |
| Other neonatal disorders                                                | --                                            | --                                                | 0.1<br>(0.1 to 0.1)                     | -13.8<br>(-28.6 to 6.0)                           | -13.0<br>(-27.8 to 7.0)                             |
| <b>Nutritional deficiencies</b>                                         | <b>345.8</b><br><b>(318.6 to 369.8)</b>       | <b>21.5†</b><br><b>(17.0 to 27.1)</b>             | <b>3.9</b><br><b>(2.5 to 6.0)</b>       | <b>-21.5</b><br><b>(-29.0 to -13.6)</b>           | <b>-18.2</b><br><b>(-27.3 to -7.7)</b>              |
| Protein-energy malnutrition                                             | 7.3<br>(4.4 to 12.2)                          | 3.2<br>(1.9 to 5.2)                               | 0.3<br>(0.2 to 0.5)                     | -18.2<br>(-51.9 to 36.0)                          | -16.7<br>(-50.8 to 37.9)                            |
| Iodine deficiency                                                       | 43.3<br>(31.8 to 58.8)                        | 0.6<br>(0.4 to 0.8)                               | 1.1<br>(0.7 to 1.7)                     | -2.5<br>(-11.4 to 7.5)                            | 0.2<br>(-9.5 to 11.5)                               |
| Vitamin A deficiency                                                    | 21.3<br>(16.4 to 26.9)                        | 17.7<br>(13.3 to 23.0)                            | --                                      | --                                                | --                                                  |
| Iron-deficiency anaemia                                                 | 270.6<br>(243.6 to 298.7)                     | --                                                | 2.5<br>(1.5 to 4.2)                     | -28.0<br>(-36.9 to -17.8)                         | -22.9<br>(-33.1 to -10.3)                           |
| Other nutritional deficiencies                                          | --                                            | --                                                | < 0.05<br>(< 0.05 to < 0.05)            | -19.0<br>(-54.2 to 38.1)                          | -18.0<br>(-53.4 to 39.4)                            |
| <b>Other communicable, maternal, neonatal, and nutritional diseases</b> | <b>736.0</b><br><b>(686.9 to 792.1)</b>       | <b>292.9</b><br><b>(253.4 to 341.6)</b>           | <b>1.1</b><br><b>(0.7 to 1.9)</b>       | <b>-9.0</b><br><b>(-13.9 to -3.9)</b>             | <b>-3.2</b><br><b>(-9.0 to 2.7)</b>                 |
| Sexually transmitted diseases excluding HIV                             | 579.8<br>(535.9 to 633.3)                     | 285.5<br>(246.0 to 333.9)                         | 1.0<br>(0.6 to 1.6)                     | -9.1<br>(-14.5 to -3.4)                           | -3.0<br>(-9.4 to 3.5)                               |
| Syphilis                                                                | 3.2<br>(2.0 to 5.1)                           | 2.3<br>(1.2 to 3.8)                               | 0.1<br>(0.1 to 0.1)                     | 8.4<br>(-3.6 to 21.5)                             | 2.5<br>(-8.4 to 14.8)                               |
| Chlamydial infection                                                    | 55.4<br>(42.1 to 71.8)                        | 40.2<br>(30.6 to 51.9)                            | 0.2<br>(0.1 to 0.4)                     | -14.2<br>(-25.8 to -2.5)                          | -5.9<br>(-18.9 to 7.2)                              |
| Gonococcal infection                                                    | 40.6<br>(30.8 to 53.6)                        | 139.6<br>(101.2 to 187.9)                         | 0.2<br>(0.1 to 0.3)                     | -11.2<br>(-23.1 to 1.0)                           | -0.1<br>(-14.4 to 13.8)                             |
| Trichomoniasis                                                          | 91.4<br>(80.1 to 104.9)                       | 76.0<br>(66.4 to 87.8)                            | 0.1<br>(< 0.05 to 0.2)                  | -7.0<br>(-13.3 to -0.1)                           | -1.0<br>(-7.8 to 6.5)                               |
| Genital herpes                                                          | 405.7<br>(349.8 to 480.0)                     | 14.9<br>(12.6 to 18.0)                            | 0.1<br>(< 0.05 to 0.2)                  | -1.7<br>(-10.3 to 7.4)                            | -1.1<br>(-9.5 to 8.1)                               |
| Other sexually transmitted diseases                                     | 15.0<br>(11.8 to 18.9)                        | 12.4<br>(10.8 to 14.5)                            | 0.3<br>(0.2 to 0.5)                     | -12.0<br>(-21.7 to -1.8)                          | -4.5<br>(-15.5 to 7.2)                              |
| Hepatitis                                                               | 178.9<br>(154.1 to 209.0)                     | 7.4<br>(6.4 to 8.8)                               | < 0.05<br>(< 0.05 to < 0.05)            | -39.0<br>(-45.7 to -31.1)                         | -36.4<br>(-44.6 to -27.3)                           |
| Acute hepatitis A                                                       | 0.1<br>(0.1 to 0.1)                           | 1.7<br>(1.4 to 1.9)                               | < 0.05<br>(< 0.05 to < 0.05)            | -41.7<br>(-52.3 to -27.3)                         | -38.6<br>(-51.8 to -21.5)                           |
| Hepatitis B                                                             | 118.2<br>(95.5 to 146.1)                      | 5.1<br>(4.0 to 6.5)                               | < 0.05<br>(< 0.05 to < 0.05)            | -39.4<br>(-49.1 to -28.0)                         | -39.7<br>(-49.4 to -28.5)                           |
| Hepatitis C                                                             | 60.5<br>(54.2 to 67.1)                        | 0.5<br>(0.4 to 0.6)                               | < 0.05<br>(< 0.05 to < 0.05)            | -11.0<br>(-12.8 to -9.3)                          | -4.7<br>(-5.7 to -3.5)                              |
| Acute hepatitis E                                                       | < 0.05<br>(< 0.05 to < 0.05)                  | 0.2<br>(0.1 to 0.2)                               | < 0.05<br>(< 0.05 to < 0.05)            | -34.1<br>(-40.5 to -27.3)                         | -35.3<br>(-40.2 to -30.4)                           |
| Other infectious diseases                                               | 10.2<br>(9.1 to 11.4)                         | < 0.05<br>(< 0.05 to < 0.05)                      | 0.2<br>(0.1 to 0.3)                     | -6.9<br>(-18.4 to 4.7)                            | -2.3<br>(-17.0 to 13.4)                             |
| <b>Non-communicable diseases</b>                                        | <b>3,943.4</b><br><b>(3,928.6 to 3,959.2)</b> | <b>11,717.9†</b><br><b>(11,279.4 to 12,194.8)</b> | <b>481.2</b><br><b>(360.1 to 619.2)</b> | <b>0.6</b><br><b>(-1.2 to 2.4)</b>                | <b>-1.1</b><br><b>(-3.0 to 0.8)</b>                 |
| <b>Neoplasms</b>                                                        | <b>81.8</b><br><b>(78.3 to 85.5)</b>          | <b>27.1</b><br><b>(25.7 to 28.4)</b>              | <b>8.5</b><br><b>(6.3 to 11.0)</b>      | <b>14.5</b><br><b>(9.0 to 20.3)</b>               | <b>6.3</b><br><b>(1.3 to 11.8)</b>                  |
| Lip and oral cavity cancer                                              | 1.3<br>(1.2 to 1.5)                           | 0.4<br>(0.3 to 0.4)                               | 0.1<br>(0.1 to 0.2)                     | -3.8<br>(-24.2 to 20.2)                           | -10.3<br>(-29.5 to 12.1)                            |
| Nasopharynx cancer                                                      | 0.1<br>(0.1 to 0.1)                           | < 0.05<br>(< 0.05 to < 0.05)                      | < 0.05<br>(< 0.05 to < 0.05)            | -23.4<br>(-34.3 to -10.2)                         | -23.5<br>(-34.8 to -8.8)                            |
| Other pharynx cancer                                                    | 0.9<br>(0.8 to 1.1)                           | 0.3<br>(0.3 to 0.3)                               | 0.1<br>(0.1 to 0.1)                     | 3.9<br>(-20.8 to 34.9)                            | -0.8<br>(-24.2 to 28.2)                             |
| Oesophageal cancer                                                      | 0.3<br>(0.2 to 0.3)                           | 0.2<br>(0.2 to 0.3)                               | 0.1<br>(< 0.05 to 0.1)                  | -1.2<br>(-25.4 to 32.3)                           | -8.8<br>(-30.9 to 20.6)                             |
| Stomach cancer                                                          | 2.4<br>(2.0 to 3.0)                           | 1.2<br>(1.1 to 1.4)                               | 0.3<br>(0.2 to 0.4)                     | 4.6<br>(-16.0 to 30.1)                            | -5.7<br>(-23.8 to 17.1)                             |
| Colon and rectum cancer                                                 | 14.3<br>(13.2 to 15.7)                        | 3.9<br>(3.6 to 4.3)                               | 1.3<br>(1.0 to 1.7)                     | 16.9<br>(3.8 to 32.1)                             | 6.1<br>(-5.5 to 19.4)                               |
| Liver cancer                                                            | 0.4<br>(0.3 to 0.6)                           | 0.6<br>(0.5 to 0.7)                               | 0.1<br>(0.1 to 0.2)                     | 22.1<br>(-0.1 to 49.7)                            | 10.3<br>(-8.9 to 35.0)                              |
| Liver cancer due to hepatitis B                                         | 0.2<br>(0.2 to 0.4)                           | 0.2<br>(0.1 to 0.2)                               | < 0.05<br>(< 0.05 to 0.1)               | 21.1<br>(-1.7 to 52.6)                            | 10.1<br>(-9.4 to 37.8)                              |



| Cause                                              | Prevalence in thousands (95% UI)        | Incidence in thousands (95% UI)       | YLDs in thousands (95% UI)           |                                                   |                                                     |
|----------------------------------------------------|-----------------------------------------|---------------------------------------|--------------------------------------|---------------------------------------------------|-----------------------------------------------------|
|                                                    | 2016 counts                             | 2016 counts                           | 2016 counts                          | Percentage change in counts between 2006 and 2016 | Percentage change in age-standardised rates between |
| Liver cancer due to hepatitis C                    | 0.1<br>(0.1 to 0.2)                     | 0.1<br>(0.1 to 0.1)                   | < 0.05<br>(< 0.05 to < 0.05)         | 26.3<br>(1.0 to 58.1)                             | 10.1<br>(-11.7 to 37.2)                             |
| Liver cancer due to alcohol use                    | 0.3<br>(0.2 to 0.4)                     | 0.2<br>(0.1 to 0.2)                   | < 0.05<br>(< 0.05 to 0.1)            | 17.1<br>(-6.6 to 47.0)                            | 6.7<br>(-14.2 to 33.7)                              |
| Liver cancer due to other causes                   | 0.1<br>(0.1 to 0.2)                     | 0.1<br>(0.1 to 0.1)                   | < 0.05<br>(< 0.05 to < 0.05)         | 29.1<br>(3.0 to 62.7)                             | 17.4<br>(-5.5 to 47.9)                              |
| Gallbladder and biliary tract cancer               | 0.4<br>(0.3 to 0.6)                     | 0.4<br>(0.3 to 0.5)                   | 0.1<br>(0.1 to 0.1)                  | 8.4<br>(-15.8 to 46.3)                            | -4.7<br>(-24.9 to 24.4)                             |
| Pancreatic cancer                                  | 0.8<br>(0.7 to 1.0)                     | 0.8<br>(0.8 to 0.9)                   | 0.2<br>(0.1 to 0.2)                  | 17.7<br>(-3.8 to 43.4)                            | 4.6<br>(-13.1 to 25.6)                              |
| Larynx cancer                                      | 1.1<br>(1.0 to 1.3)                     | 0.3<br>(0.3 to 0.4)                   | 0.1<br>(0.1 to 0.2)                  | -16.3<br>(-34.8 to 7.7)                           | -21.7<br>(-38.1 to 0.7)                             |
| Tracheal, bronchus, and lung cancer                | 4.9<br>(4.4 to 5.6)                     | 3.3<br>(3.0 to 3.6)                   | 0.8<br>(0.6 to 1.0)                  | 2.4<br>(-13.4 to 20.0)                            | -5.6<br>(-20.7 to 10.8)                             |
| Malignant skin melanoma                            | 3.2<br>(2.5 to 3.6)                     | 0.7<br>(0.5 to 0.8)                   | 0.2<br>(0.1 to 0.3)                  | 24.8<br>(7.2 to 44.5)                             | 18.9<br>(2.6 to 37.1)                               |
| Non-melanoma skin cancer                           | 0.5<br>(0.4 to 0.7)                     | 1.3<br>(0.8 to 1.9)                   | < 0.05<br>(< 0.05 to < 0.05)         | -19.7<br>(-61.0 to 49.5)                          | -28.9<br>(-64.6 to 28.2)                            |
| Non-melanoma skin cancer (squamous-cell carcinoma) | 0.4<br>(0.2 to 0.6)                     | 0.4<br>(0.3 to 0.6)                   | < 0.05<br>(< 0.05 to < 0.05)         | -21.6<br>(-62.4 to 51.8)                          | -30.8<br>(-66.1 to 30.5)                            |
| Non-melanoma skin cancer (basal-cell carcinoma)    | 0.1<br>(0.1 to 0.3)                     | 0.9<br>(0.4 to 1.5)                   | < 0.05<br>(< 0.05 to < 0.05)         | 18.1<br>(-6.8 to 52.4)                            | 7.6<br>(-10.8 to 34.5)                              |
| Breast cancer                                      | 13.3<br>(12.1 to 14.7)                  | 2.8<br>(2.5 to 3.1)                   | 1.2<br>(0.8 to 1.5)                  | 8.3<br>(-4.4 to 24.1)                             | 1.3<br>(-10.7 to 16.2)                              |
| Cervical cancer                                    | 2.0<br>(1.8 to 2.3)                     | 0.5<br>(0.4 to 0.6)                   | 0.2<br>(0.1 to 0.2)                  | 0.1<br>(-18.2 to 22.2)                            | -2.5<br>(-20.4 to 19.7)                             |
| Uterine cancer                                     | 5.7<br>(5.0 to 6.6)                     | 1.2<br>(1.1 to 1.4)                   | 0.4<br>(0.3 to 0.6)                  | 39.4<br>(15.6 to 68.8)                            | 30.0<br>(7.2 to 56.6)                               |
| Ovarian cancer                                     | 1.8<br>(1.6 to 2.2)                     | 0.6<br>(0.5 to 0.7)                   | 0.2<br>(0.2 to 0.4)                  | 4.9<br>(-22.0 to 37.7)                            | 0.9<br>(-24.7 to 32.5)                              |
| Prostate cancer                                    | 9.8<br>(7.2 to 12.6)                    | 2.4<br>(1.8 to 2.9)                   | 0.9<br>(0.6 to 1.3)                  | 26.8<br>(1.5 to 58.0)                             | 14.6<br>(-8.7 to 42.2)                              |
| Testicular cancer                                  | 0.8<br>(0.6 to 1.0)                     | 0.1<br>(0.1 to 0.2)                   | 0.1<br>(< 0.05 to 0.1)               | -7.0<br>(-29.7 to 23.1)                           | 0.1<br>(-26.3 to 34.3)                              |
| Kidney cancer                                      | 3.9<br>(3.5 to 4.3)                     | 1.0<br>(0.9 to 1.1)                   | 0.3<br>(0.2 to 0.4)                  | 16.6<br>(-0.6 to 35.9)                            | 10.7<br>(-5.8 to 29.1)                              |
| Bladder cancer                                     | 4.8<br>(4.4 to 5.2)                     | 1.1<br>(1.1 to 1.2)                   | 0.4<br>(0.3 to 0.6)                  | 16.7<br>(1.4 to 33.4)                             | 5.7<br>(-8.2 to 19.8)                               |
| Brain and nervous system cancer                    | 1.9<br>(1.3 to 2.4)                     | 0.8<br>(0.5 to 0.9)                   | 0.2<br>(0.1 to 0.3)                  | 19.1<br>(-4.9 to 47.9)                            | 15.1<br>(-7.2 to 40.0)                              |
| Thyroid cancer                                     | 1.9<br>(1.7 to 2.2)                     | 0.4<br>(0.3 to 0.4)                   | 0.1<br>(0.1 to 0.2)                  | 15.6<br>(-3.1 to 37.1)                            | 12.0<br>(-6.5 to 32.8)                              |
| Mesothelioma                                       | 0.1<br>(0.1 to 0.1)                     | 0.1<br>(< 0.05 to 0.1)                | < 0.05<br>(< 0.05 to < 0.05)         | 16.9<br>(1.5 to 30.1)                             | 9.0<br>(-5.3 to 21.3)                               |
| Hodgkin lymphoma                                   | 0.7<br>(0.6 to 0.8)                     | 0.1<br>(0.1 to 0.2)                   | 0.1<br>(< 0.05 to 0.1)               | 4.8<br>(-15.7 to 32.1)                            | 8.2<br>(-15.5 to 38.7)                              |
| Non-Hodgkin's lymphoma                             | 2.7<br>(2.2 to 3.1)                     | 0.7<br>(0.6 to 0.8)                   | 0.2<br>(0.1 to 0.3)                  | 30.6<br>(10.8 to 51.7)                            | 22.6<br>(5.5 to 40.5)                               |
| Multiple myeloma                                   | 0.6<br>(0.4 to 0.8)                     | 0.2<br>(0.2 to 0.3)                   | 0.1<br>(0.1 to 0.2)                  | 18.1<br>(-10.9 to 55.3)                           | 10.1<br>(-16.8 to 41.2)                             |
| Leukaemia                                          | 2.7<br>(2.4 to 3.0)                     | 0.8<br>(0.7 to 0.8)                   | 0.3<br>(0.2 to 0.5)                  | 35.7<br>(14.7 to 58.5)                            | 26.8<br>(8.6 to 48.0)                               |
| Acute lymphoid leukaemia                           | 0.3<br>(0.3 to 0.4)                     | 0.1<br>(0.1 to 0.1)                   | < 0.05<br>(< 0.05 to 0.1)            | 35.8<br>(3.6 to 81.8)                             | 40.9<br>(-2.5 to 112.9)                             |
| Chronic lymphoid leukaemia                         | 1.6<br>(1.4 to 1.9)                     | 0.4<br>(0.3 to 0.4)                   | 0.2<br>(0.1 to 0.3)                  | 45.9<br>(13.3 to 89.5)                            | 34.4<br>(5.4 to 71.8)                               |
| Acute myeloid leukaemia                            | 0.2<br>(0.2 to 0.3)                     | 0.1<br>(0.1 to 0.2)                   | < 0.05<br>(< 0.05 to 0.1)            | 38.8<br>(17.2 to 62.5)                            | 26.9<br>(1.9 to 57.7)                               |
| Chronic myeloid leukaemia                          | 0.2<br>(0.1 to 0.2)                     | 0.1<br>(< 0.05 to 0.1)                | < 0.05<br>(< 0.05 to < 0.05)         | 6.2<br>(-10.5 to 26.7)                            | -1.3<br>(-15.2 to 16.7)                             |
| Other leukaemia                                    | 0.4<br>(0.3 to 0.4)                     | 0.1<br>(0.1 to 0.1)                   | < 0.05<br>(< 0.05 to 0.1)            | 13.5<br>(-10.5 to 43.4)                           | 0.1<br>(-18.5 to 23.1)                              |
| Other neoplasms                                    | 2.9<br>(2.6 to 3.2)                     | 0.8<br>(0.7 to 0.9)                   | 0.2<br>(0.2 to 0.3)                  | 31.3<br>(10.8 to 54.4)                            | 24.9<br>(5.5 to 45.6)                               |
| <b>Cardiovascular diseases</b>                     | <b>563.0</b><br><b>(544.3 to 579.7)</b> | <b>65.6†</b><br><b>(62.8 to 68.5)</b> | <b>47.3</b><br><b>(34.6 to 60.9)</b> | <b>4.9</b><br><b>(-0.5 to 11.0)</b>               | <b>-4.7</b><br><b>(-9.3 to 0.5)</b>                 |
| Rheumatic heart disease                            | 0.4<br>(0.3 to 0.4)                     | 0.1<br>(0.1 to 0.1)                   | < 0.05<br>(< 0.05 to < 0.05)         | -1.8<br>(-18.6 to 16.5)                           | -8.0<br>(-21.7 to 7.1)                              |
| Ischaemic heart disease                            | 221.6<br>(208.6 to 234.2)               | 26.2<br>(24.6 to 27.9)                | 12.3<br>(8.6 to 16.5)                | 8.4<br>(3.9 to 13.0)                              | -0.5<br>(-4.7 to 3.5)                               |
| Cerebrovascular disease                            | 97.3<br>(90.2 to 104.7)                 | 20.5‡<br>(19.2 to 21.5)               | 19.6<br>(13.7 to 25.0)               | -0.3<br>(-10.1 to 12.6)                           | -10.9<br>(-19.2 to 0.4)                             |
| Ischaemic stroke                                   | 84.7<br>(74.8 to 96.5)                  | 16.6‡<br>(15.4 to 17.7)               | 16.4<br>(11.5 to 21.2)               | -0.8<br>(-12.5 to 15.6)                           | -11.9<br>(-21.7 to 2.1)                             |
| Hemorrhagic stroke                                 | 16.6<br>(14.7 to 18.6)                  | 3.8‡<br>(3.6 to 4.1)                  | 3.2<br>(2.3 to 4.1)                  | 2.1<br>(-8.7 to 13.6)                             | -5.8<br>(-14.7 to 4.7)                              |
| Hypertensive heart disease                         | 25.0<br>(21.1 to 29.6)                  | --                                    | 1.9<br>(1.3 to 2.7)                  | 13.9<br>(2.4 to 26.1)                             | -0.3<br>(-9.8 to 10.3)                              |
| Cardiomyopathy and myocarditis                     | 16.2<br>(14.1 to 18.3)                  | 1.6†<br>(1.4 to 1.8)                  | 1.3<br>(0.9 to 1.8)                  | 13.9<br>(3.0 to 25.8)                             | 0.7<br>(-8.0 to 10.6)                               |
| Myocarditis                                        | 3.8<br>(3.3 to 4.5)                     | 1.6<br>(1.4 to 1.8)                   | 0.3<br>(0.2 to 0.4)                  | 5.4<br>(-9.2 to 21.6)                             | 1.5<br>(-12.0 to 17.7)                              |
| Alcoholic cardiomyopathy                           | 6.4<br>(5.4 to 7.6)                     | --                                    | 0.5<br>(0.4 to 0.7)                  | 5.7<br>(-7.8 to 20.3)                             | 0.1<br>(-12.8 to 14.7)                              |
| Other cardiomyopathy                               | 6.3<br>(5.2 to 7.5)                     | --                                    | 0.5<br>(0.3 to 0.7)                  | 31.1<br>(15.5 to 48.8)                            | 0.9<br>(-10.1 to 13.9)                              |
| Atrial fibrillation and flutter                    | 57.4<br>(49.6 to 66.3)                  | 4.5<br>(3.8 to 5.2)                   | 4.4<br>(3.0 to 6.1)                  | 14.0<br>(6.9 to 22.1)                             | 0.4<br>(-5.8 to 7.2)                                |
| Peripheral vascular disease                        | 135.4<br>(118.1 to 156.2)               | 12.0<br>(10.3 to 14.2)                | 0.6<br>(0.3 to 1.1)                  | 9.0<br>(-0.1 to 18.1)                             | -5.6<br>(-12.3 to 1.1)                              |
| Endocarditis                                       | 0.2<br>(0.2 to 0.3)                     | 0.7<br>(0.6 to 0.8)                   | < 0.05<br>(< 0.05 to < 0.05)         | 8.3<br>(-2.4 to 19.6)                             | 2.2<br>(-6.4 to 11.1)                               |
| Other cardiovascular and circulatory diseases      | 139.1<br>(119.4 to 162.4)               | --                                    | 7.1<br>(4.8 to 9.9)                  | 5.2<br>(-3.2 to 14.5)                             | 1.0<br>(-7.0 to 9.3)                                |
| <b>Chronic respiratory diseases</b>                | <b>364.9</b><br><b>(351.9 to 375.7)</b> | <b>46.3†</b><br><b>(44.1 to 48.8)</b> | <b>13.6</b><br><b>(10.4 to 17.1)</b> | <b>2.1</b><br><b>(-3.5 to 7.9)</b>                | <b>1.3</b><br><b>(-3.6 to 6.1)</b>                  |
| Chronic obstructive pulmonary disease              | 191.6<br>(181.9 to 201.3)               | 11.2<br>(10.7 to 11.9)                | 5.8<br>(4.7 to 6.8)                  | 4.3<br>(-7.4 to 16.5)                             | -1.9<br>(-12.3 to 9.2)                              |
| Pneumoconiosis                                     | 0.8<br>(0.8 to 0.9)                     | < 0.05<br>(< 0.05 to 0.1)             | 0.1<br>(0.1 to 0.2)                  | 5.8<br>(-13.3 to 25.5)                            | -1.4<br>(-18.2 to 15.8)                             |
| Silicosis                                          | 0.1<br>(0.1 to 0.1)                     | < 0.05<br>(< 0.05 to < 0.05)          | < 0.05<br>(< 0.05 to < 0.05)         | 2.4<br>(-3.1 to 8.6)                              | -2.8<br>(-7.8 to 2.7)                               |

| Cause                                                          | Prevalence in thousands (95% UI)        | Incidence in thousands (95% UI)               | YLDs in thousands (95% UI)      |                                                   |                                                     |
|----------------------------------------------------------------|-----------------------------------------|-----------------------------------------------|---------------------------------|---------------------------------------------------|-----------------------------------------------------|
|                                                                | 2016 counts                             | 2016 counts                                   | 2016 counts                     | Percentage change in counts between 2006 and 2016 | Percentage change in age-standardised rates between |
| Asbestosis                                                     | 0.3<br>(0.2 to 0.3)                     | < 0.05<br>(< 0.05 to < 0.05)                  | < 0.05<br>(< 0.05 to 0.1)       | 6.5<br>(-22.0 to 42.5)                            | -0.3<br>(-25.0 to 30.3)                             |
| Coal workers pneumoconiosis                                    | --                                      | --                                            | --                              | --                                                | --                                                  |
| Other pneumoconiosis                                           | 0.4<br>(0.4 to 0.5)                     | < 0.05<br>(< 0.05 to < 0.05)                  | 0.1<br>(< 0.05 to 0.1)          | 6.5<br>(-22.2 to 41.4)                            | -1.6<br>(-27.7 to 29.9)                             |
| Asthma                                                         | 184.7<br>(173.5 to 197.5)               | 34.9<br>(32.6 to 37.2)                        | 7.1<br>(4.7 to 10.0)            | -0.3<br>(-4.6 to 4.5)                             | 2.3<br>(-2.3 to 7.5)                                |
| Interstitial lung disease and pulmonary sarcoidosis            | 4.1<br>(3.8 to 4.4)                     | 0.2<br>(0.2 to 0.2)                           | 0.4<br>(0.3 to 0.6)             | 5.3<br>(-9.5 to 21.5)                             | 1.6<br>(-11.3 to 16.1)                              |
| Other chronic respiratory diseases                             | --                                      | --                                            | 0.2<br>(0.2 to 0.2)             | 24.5<br>(13.2 to 37.2)                            | 32.6<br>(20.0 to 45.9)                              |
| <b>Cirrhosis and other chronic liver diseases</b>              | <b>53.6<br/>(51.0 to 56.2)</b>          | <b>1.6<br/>(1.5 to 1.6)</b>                   | <b>1.2<br/>(0.8 to 1.6)</b>     | <b>1.3<br/>(-7.4 to 10.3)</b>                     | <b>0.4<br/>(-8.6 to 9.9)</b>                        |
| Cirrhosis and other chronic liver diseases due to hepatitis B  | 9.3<br>(7.8 to 11.0)                    | 0.3<br>(0.2 to 0.3)                           | 0.2<br>(0.1 to 0.3)             | 4.6<br>(-14.6 to 26.5)                            | 2.7<br>(-15.5 to 25.7)                              |
| Cirrhosis and other chronic liver diseases due to hepatitis C  | 11.5<br>(8.4 to 15.4)                   | 0.3<br>(0.2 to 0.5)                           | 0.2<br>(0.1 to 0.4)             | 6.2<br>(-13.2 to 30.3)                            | 4.0<br>(-14.8 to 26.7)                              |
| Cirrhosis and other chronic liver diseases due to alcohol use  | 19.5<br>(16.0 to 23.2)                  | 0.6<br>(0.5 to 0.7)                           | 0.4<br>(0.3 to 0.6)             | 0.3<br>(-13.4 to 15.4)                            | -2.5<br>(-16.6 to 13.4)                             |
| Cirrhosis and other chronic liver diseases due to other causes | 13.3<br>(11.7 to 15.0)                  | 0.3<br>(0.3 to 0.4)                           | 0.3<br>(0.2 to 0.5)             | -2.6<br>(-18.1 to 13.4)                           | 0.1<br>(-16.6 to 17.6)                              |
| <b>Digestive diseases</b>                                      | <b>198.2<br/>(187.2 to 211.2)</b>       | <b>249.1<sup>†</sup><br/>(237.6 to 260.4)</b> | <b>9.0<br/>(6.4 to 12.0)</b>    | <b>5.3<br/>(-0.8 to 11.6)</b>                     | <b>6.0<br/>(-0.4 to 12.7)</b>                       |
| Peptic ulcer disease                                           | 78.8<br>(71.8 to 87.2)                  | 6.5<br>(5.9 to 7.0)                           | 1.5<br>(1.0 to 2.3)             | 11.3<br>(-6.3 to 32.7)                            | 18.7<br>(-1.2 to 42.6)                              |
| Gastritis and duodenitis                                       | 54.6<br>(48.3 to 61.6)                  | 35.3<br>(31.8 to 39.0)                        | 1.2<br>(0.8 to 1.8)             | 13.8<br>(-3.2 to 33.4)                            | 22.6<br>(4.4 to 43.2)                               |
| Appendicitis                                                   | 0.2<br>(0.2 to 0.2)                     | 4.6<br>(4.3 to 5.0)                           | 0.1<br>(< 0.05 to 0.1)          | -5.7<br>(-28.5 to 24.7)                           | 1.7<br>(-28.5 to 45.2)                              |
| Paralytic ileus and intestinal obstruction                     | 0.1<br>(0.1 to 0.1)                     | 2.0<br>(1.9 to 2.2)                           | < 0.05<br>(< 0.05 to < 0.05)    | 16.3<br>(10.2 to 23.0)                            | 7.5<br>(3.0 to 12.2)                                |
| Inguinal, femoral, and abdominal hernia                        | 43.5<br>(41.6 to 45.7)                  | 119.3<br>(108.6 to 129.4)                     | 3.2<br>(2.2 to 4.3)             | 1.4<br>(-5.2 to 8.3)                              | -0.8<br>(-7.9 to 6.7)                               |
| Inflammatory bowel disease                                     | 12.8<br>(12.0 to 13.7)                  | 2.9<br>(2.8 to 2.9)                           | 1.8<br>(1.2 to 2.5)             | 0.0<br>(-8.0 to 9.1)                              | -0.1<br>(-8.5 to 8.8)                               |
| Vascular intestinal disorders                                  | 0.1<br>(0.1 to 0.1)                     | 0.7<br>(0.6 to 0.8)                           | < 0.05<br>(< 0.05 to < 0.05)    | 5.5<br>(-16.7 to 35.3)                            | -1.2<br>(-17.0 to 18.3)                             |
| Gallbladder and biliary diseases                               | 15.1<br>(13.9 to 16.5)                  | 71.0<br>(67.4 to 74.6)                        | 0.3<br>(0.2 to 0.5)             | 8.2<br>(-8.9 to 31.5)                             | 5.0<br>(-11.9 to 27.7)                              |
| Pancreatitis                                                   | 0.8<br>(0.7 to 0.8)                     | 6.9<br>(6.3 to 7.5)                           | 0.1<br>(0.1 to 0.1)             | 5.4<br>(-12.8 to 26.6)                            | 2.1<br>(-11.8 to 18.0)                              |
| Other digestive diseases                                       | --                                      | --                                            | 0.7<br>(0.5 to 1.0)             | 11.4<br>(5.2 to 17.9)                             | 8.7<br>(2.2 to 15.8)                                |
| <b>Neurological disorders</b>                                  | <b>1,529.1<br/>(1,468.3 to 1,600.7)</b> | <b>619.9<br/>(542.5 to 709.4)</b>             | <b>49.9<br/>(33.8 to 67.8)</b>  | <b>-0.9<br/>(-11.0 to 11.5)</b>                   | <b>-0.5<br/>(-12.1 to 13.8)</b>                     |
| Alzheimer's disease and other dementias                        | 45.1<br>(37.8 to 53.8)                  | 7.7<br>(6.3 to 9.3)                           | 6.6<br>(4.5 to 8.9)             | 27.5<br>(20.1 to 36.2)                            | -0.6<br>(-5.2 to 4.5)                               |
| Parkinson's disease                                            | 9.7<br>(7.5 to 12.2)                    | 1.1<br>(0.8 to 1.4)                           | 1.1<br>(0.7 to 1.5)             | 16.4<br>(5.5 to 29.1)                             | 2.8<br>(-6.6 to 13.6)                               |
| Epilepsy                                                       | 12.5<br>(2.5 to 24.6)                   | 1.3<br>(0.3 to 2.5)                           | 3.0<br>(0.6 to 7.8)             | -1.4<br>(-83.5 to 561.6)                          | -1.1<br>(-83.6 to 572.2)                            |
| Multiple sclerosis                                             | 2.0<br>(1.8 to 2.3)                     | 0.1<br>(0.1 to 0.1)                           | 0.5<br>(0.4 to 0.7)             | 8.6<br>(-8.5 to 29.2)                             | 9.4<br>(-7.7 to 30.8)                               |
| Motor neuron disease                                           | 0.2<br>(0.2 to 0.2)                     | < 0.05<br>(< 0.05 to < 0.05)                  | < 0.05<br>(< 0.05 to 0.1)       | 1.6<br>(-2.1 to 5.7)                              | 0.4<br>(-3.5 to 4.7)                                |
| Migraine                                                       | 679.8<br>(651.5 to 708.1)               | 67.1<br>(62.6 to 71.7)                        | 32.2<br>(21.0 to 44.6)          | -5.3<br>(-8.3 to -1.9)                            | -0.8<br>(-3.9 to 2.5)                               |
| Tension-type headache                                          | 1,033.9<br>(929.5 to 1,144.5)           | 542.6<br>(465.2 to 632.7)                     | 5.8<br>(3.7 to 8.5)             | -4.5<br>(-9.2 to 0.9)                             | -1.4<br>(-6.3 to 3.7)                               |
| Other neurological disorders                                   | < 0.05<br>(< 0.05 to < 0.05)            | < 0.05<br>(< 0.05 to 0.1)                     | 0.7<br>(0.3 to 1.4)             | 8.4<br>(-61.2 to 224.4)                           | 16.0<br>(-65.3 to 327.3)                            |
| <b>Mental and substance use disorders</b>                      | <b>626.9<br/>(605.9 to 647.5)</b>       | <b>252.0<sup>†</sup><br/>(234.6 to 271.2)</b> | <b>84.4<br/>(61.4 to 109.2)</b> | <b>-4.9<br/>(-7.1 to -2.4)</b>                    | <b>-1.4<br/>(-3.7 to 1.1)</b>                       |
| Schizophrenia                                                  | 10.9<br>(9.2 to 12.8)                   | 0.5<br>(0.4 to 0.6)                           | 6.9<br>(5.0 to 8.7)             | -2.6<br>(-11.4 to 6.5)                            | 0.8<br>(-8.9 to 10.8)                               |
| Alcohol use disorders                                          | 82.8<br>(74.3 to 91.5)                  | 42.2<br>(37.5 to 47.3)                        | 8.2<br>(5.7 to 11.1)            | -2.2<br>(-10.4 to 5.8)                            | 3.0<br>(-5.1 to 11.1)                               |
| Drug use disorders                                             | 30.1<br>(28.0 to 32.5)                  | 3.9<br>(3.5 to 4.2)                           | 5.8<br>(4.1 to 7.5)             | -16.6<br>(-25.7 to -5.9)                          | -9.8<br>(-20.5 to 2.1)                              |
| Opioid use disorders                                           | 9.9<br>(8.6 to 11.5)                    | 1.2<br>(1.1 to 1.4)                           | 4.1<br>(2.8 to 5.4)             | -20.2<br>(-32.3 to -6.2)                          | -14.5<br>(-29.0 to 1.9)                             |
| Cocaine use disorders                                          | 2.4<br>(2.2 to 2.8)                     | 0.2<br>(0.1 to 0.2)                           | 0.3<br>(0.2 to 0.5)             | -4.3<br>(-23.4 to 21.5)                           | 2.3<br>(-19.2 to 31.8)                              |
| Amphetamine use disorders                                      | 1.9<br>(1.4 to 2.5)                     | 0.2<br>(0.1 to 0.2)                           | 0.2<br>(0.1 to 0.4)             | -16.0<br>(-36.3 to 10.9)                          | -4.3<br>(-28.4 to 28.0)                             |
| Cannabis use disorders                                         | 13.8<br>(12.0 to 15.9)                  | 1.8<br>(1.5 to 2.1)                           | 0.4<br>(0.2 to 0.6)             | -3.7<br>(-17.5 to 12.3)                           | 9.4<br>(-7.4 to 29.6)                               |
| Other drug use disorders                                       | 3.0<br>(2.7 to 3.2)                     | 0.5<br>(0.5 to 0.6)                           | 0.7<br>(0.5 to 1.0)             | -5.2<br>(-21.6 to 15.1)                           | 1.7<br>(-17.0 to 25.4)                              |
| Depressive disorders                                           | 155.8<br>(145.9 to 166.1)               | 170.1<br>(153.5 to 187.1)                     | 26.0<br>(18.0 to 35.3)          | -3.2<br>(-8.2 to 2.7)                             | -3.4<br>(-8.0 to 1.8)                               |
| Major depressive disorder                                      | 107.1<br>(97.2 to 117.5)                | 161.4<br>(144.7 to 178.5)                     | 21.2<br>(14.6 to 28.9)          | -3.8<br>(-9.6 to 2.9)                             | -4.1<br>(-9.8 to 2.2)                               |
| Dysthymia                                                      | 51.0<br>(44.8 to 58.2)                  | 8.7<br>(7.6 to 9.9)                           | 4.8<br>(3.3 to 6.9)             | -0.7<br>(-4.5 to 3.3)                             | -0.2<br>(-4.0 to 4.0)                               |
| Bipolar disorder                                               | 28.8<br>(24.9 to 33.1)                  | 2.0<br>(1.7 to 2.3)                           | 5.8<br>(3.7 to 8.6)             | -5.0<br>(-10.3 to 0.8)                            | 0.1<br>(-5.8 to 6.7)                                |
| Anxiety disorders                                              | 154.7<br>(141.6 to 169.5)               | 21.8<br>(20.2 to 23.6)                        | 14.6<br>(10.2 to 19.8)          | -3.9<br>(-9.4 to 2.1)                             | -0.2<br>(-6.0 to 6.0)                               |
| Eating disorders                                               | 4.5<br>(3.7 to 5.5)                     | 2.0<br>(1.5 to 2.6)                           | 0.9<br>(0.6 to 1.3)             | -5.1<br>(-17.0 to 7.9)                            | 6.1<br>(-6.9 to 20.2)                               |
| Anorexia nervosa                                               | 0.9<br>(0.7 to 1.2)                     | 0.4<br>(0.3 to 0.5)                           | 0.2<br>(0.1 to 0.3)             | -8.5<br>(-30.2 to 18.0)                           | 4.8<br>(-20.6 to 35.7)                              |
| Bulimia nervosa                                                | 3.4<br>(2.6 to 4.5)                     | 1.7<br>(1.2 to 2.3)                           | 0.7<br>(0.4 to 1.1)             | -4.1<br>(-18.7 to 11.8)                           | 6.5<br>(-9.7 to 24.0)                               |
| Autistic spectrum disorders                                    | 34.3<br>(30.9 to 38.1)                  | 0.1<br>(0.1 to 0.2)                           | 5.1<br>(3.4 to 7.2)             | -4.9<br>(-9.2 to -0.4)                            | 0.2<br>(-4.3 to 5.1)                                |
| Autism                                                         | 11.3<br>(9.7 to 13.2)                   | < 0.05<br>(< 0.05 to < 0.05)                  | 2.8<br>(1.8 to 4.1)             | -4.8<br>(-11.7 to 2.9)                            | 0.1<br>(-7.5 to 8.4)                                |
| Asperger syndrome and other autistic spectrum disorders        | 23.1<br>(19.2 to 27.7)                  | 0.1<br>(0.1 to 0.2)                           | 2.3<br>(1.5 to 3.3)             | -5.0<br>(-9.9 to -0.6)                            | 0.3<br>(-4.9 to 5.0)                                |



| Cause                                                      | Prevalence in thousands (95% UI)              | Incidence in thousands (95% UI)                | YLDs in thousands (95% UI)             |                                                   |                                                     |
|------------------------------------------------------------|-----------------------------------------------|------------------------------------------------|----------------------------------------|---------------------------------------------------|-----------------------------------------------------|
|                                                            | 2016 counts                                   | 2016 counts                                    | 2016 counts                            | Percentage change in counts between 2006 and 2016 | Percentage change in age-standardised rates between |
| Attention-deficit/hyperactivity disorder                   | 24.9<br>(22.6 to 27.8)                        | 0.9<br>(0.8 to 1.0)                            | 0.3<br>(0.2 to 0.5)                    | -10.6<br>(-17.2 to -2.8)                          | 0.2<br>(-7.6 to 9.1)                                |
| Conduct disorder                                           | 19.8<br>(16.4 to 23.4)                        | 6.5<br>(5.2 to 7.8)                            | 2.4<br>(1.5 to 3.7)                    | -13.3<br>(-18.8 to -7.7)                          | 0.2<br>(-6.2 to 6.8)                                |
| Idiopathic developmental intellectual disability           | 33.6<br>(17.2 to 49.5)                        | --                                             | 1.4<br>(0.6 to 2.4)                    | -10.6<br>(-17.0 to -4.0)                          | -5.5<br>(-12.6 to 1.2)                              |
| Other mental and substance use disorders                   | 95.4<br>(84.9 to 109.1)                       | 2.1<br>(1.8 to 2.3)                            | 7.0<br>(4.8 to 10.0)                   | -1.9<br>(-6.2 to 2.6)                             | 0.2<br>(-4.5 to 5.0)                                |
| <b>Diabetes, urogenital, blood, and endocrine diseases</b> | <b>1,267.0</b><br><b>(1,241.7 to 1,293.9)</b> | <b>541.0†</b><br><b>(515.5 to 566.1)</b>       | <b>38.5</b><br><b>(27.1 to 51.7)</b>   | <b>3.7</b><br><b>(-1.0 to 8.7)</b>                | <b>1.2</b><br><b>(-3.0 to 5.9)</b>                  |
| Diabetes mellitus                                          | 223.3<br>(199.3 to 251.8)                     | 10.7<br>(9.6 to 12.1)                          | 19.3<br>(13.3 to 26.4)                 | 5.5<br>(-3.5 to 15.0)                             | -0.1<br>(-8.5 to 8.6)                               |
| Acute glomerulonephritis                                   | 0.1<br>(0.1 to 0.1)                           | 1.1<br>(1.0 to 1.3)                            | < 0.05<br>(< 0.05 to < 0.05)           | -2.9<br>(-6.8 to 1.3)                             | 0.3<br>(-3.6 to 4.3)                                |
| Chronic kidney disease                                     | 185.4<br>(165.7 to 205.6)                     | 13.0<br>(11.3 to 14.8)                         | 5.3<br>(3.9 to 6.7)                    | 6.4<br>(-1.8 to 14.7)                             | -2.0<br>(-8.8 to 5.7)                               |
| Chronic kidney disease due to diabetes mellitus            | 67.5<br>(59.2 to 77.0)                        | 5.0<br>(4.2 to 5.8)                            | 1.9<br>(1.4 to 2.4)                    | 16.0<br>(3.4 to 29.0)                             | 9.6<br>(-1.5 to 21.5)                               |
| Chronic kidney disease due to hypertension                 | 32.8<br>(28.5 to 37.5)                        | 2.7<br>(2.3 to 3.1)                            | 0.8<br>(0.6 to 1.0)                    | 34.4<br>(15.9 to 56.1)                            | 9.4<br>(-4.0 to 25.0)                               |
| Chronic kidney disease due to glomerulonephritis           | 33.1<br>(29.1 to 37.4)                        | 1.8<br>(1.4 to 2.2)                            | 1.1<br>(0.8 to 1.5)                    | -5.7<br>(-17.6 to 7.8)                            | -9.0<br>(-19.7 to 2.7)                              |
| Chronic kidney disease due to other causes                 | 51.9<br>(45.4 to 58.8)                        | 3.6<br>(3.1 to 4.2)                            | 1.5<br>(1.1 to 1.9)                    | -4.7<br>(-14.6 to 7.5)                            | -12.1<br>(-20.9 to -1.9)                            |
| Urinary diseases and male infertility                      | 119.0<br>(109.6 to 129.2)                     | 337.6†<br>(313.8 to 362.5)                     | 3.6<br>(2.4 to 5.2)                    | 1.4<br>(-4.2 to 7.2)                              | -3.2<br>(-8.3 to 2.1)                               |
| Interstitial nephritis and urinary tract infections        | 5.0<br>(4.6 to 5.4)                           | 259.2<br>(237.4 to 281.9)                      | 0.2<br>(0.1 to 0.2)                    | -1.6<br>(-12.7 to 11.1)                           | 0.8<br>(-12.2 to 14.1)                              |
| Urolithiasis                                               | 2.5<br>(2.2 to 2.8)                           | 66.3<br>(59.3 to 74.1)                         | 0.2<br>(0.1 to 0.2)                    | 6.2<br>(-12.3 to 28.5)                            | 4.7<br>(-11.4 to 23.4)                              |
| Benign prostatic hyperplasia                               | 97.5<br>(88.0 to 108.8)                       | 12.0<br>(10.5 to 14.0)                         | 3.1<br>(2.1 to 4.4)                    | 2.6<br>(-4.0 to 9.2)                              | -2.8<br>(-8.7 to 3.1)                               |
| Male infertility                                           | 11.5<br>(8.6 to 15.3)                         | --                                             | 0.1<br>(< 0.05 to 0.1)                 | -20.0<br>(-26.6 to -13.1)                         | -12.8<br>(-20.4 to -5.0)                            |
| Other urinary diseases                                     | --                                            | --                                             | 0.1<br>(0.1 to 0.2)                    | -16.7<br>(-25.6 to -6.4)                          | -16.5<br>(-25.5 to -7.3)                            |
| Gynecological diseases                                     | 430.3<br>(412.3 to 449.5)                     | 158.4†<br>(150.7 to 166.1)                     | 4.9<br>(3.4 to 7.0)                    | -11.8<br>(-16.4 to -6.7)                          | -3.1<br>(-8.1 to 2.6)                               |
| Uterine fibroids                                           | 44.1<br>(41.6 to 47.1)                        | 4.0<br>(3.6 to 4.4)                            | 0.4<br>(0.2 to 0.7)                    | -10.2<br>(-16.6 to -4.4)                          | -6.6<br>(-13.8 to -0.0)                             |
| Polycystic ovarian syndrome                                | 3.9<br>(2.9 to 5.0)                           | 1.9<br>(1.4 to 2.6)                            | < 0.05<br>(< 0.05 to 0.1)              | -7.5<br>(-18.7 to 5.1)                            | -0.3<br>(-12.2 to 12.6)                             |
| Female infertility                                         | 3.9<br>(1.4 to 8.9)                           | --                                             | < 0.05<br>(< 0.05 to 0.1)              | -7.5<br>(-49.5 to 67.7)                           | 4.0<br>(-45.3 to 84.9)                              |
| Endometriosis                                              | 1.6<br>(1.4 to 1.9)                           | 6.7<br>(5.4 to 8.0)                            | 0.1<br>(0.1 to 0.2)                    | -6.5<br>(-26.6 to 20.5)                           | 7.2<br>(-16.6 to 39.2)                              |
| Genital prolapse                                           | 117.3<br>(102.8 to 131.9)                     | 4.2<br>(3.7 to 4.8)                            | 0.4<br>(0.2 to 0.7)                    | 5.0<br>(-4.9 to 16.4)                             | -1.2<br>(-10.1 to 9.1)                              |
| Premenstrual syndrome                                      | 243.3<br>(230.3 to 256.3)                     | 83.2<br>(77.5 to 88.6)                         | 2.0<br>(1.3 to 3.1)                    | -11.0<br>(-17.4 to -4.1)                          | -0.6<br>(-7.8 to 7.3)                               |
| Other gynecological diseases                               | 54.8<br>(50.9 to 59.7)                        | 58.4<br>(53.9 to 64.1)                         | 1.9<br>(1.3 to 2.7)                    | -16.0<br>(-23.3 to -6.5)                          | -6.3<br>(-14.3 to 3.7)                              |
| Hemoglobinopathies and hemolytic anaemias                  | 425.7<br>(409.9 to 443.9)                     | --                                             | 1.4<br>(0.9 to 2.2)                    | 22.8<br>(6.6 to 41.6)                             | 35.1<br>(16.2 to 57.0)                              |
| Thalassemias                                               | < 0.05<br>(< 0.05 to < 0.05)                  | --                                             | < 0.05<br>(< 0.05 to < 0.05)           | 62.0<br>(27.5 to 95.6)                            | 80.4<br>(40.5 to 119.2)                             |
| Thalassaemias trait                                        | 50.0<br>(34.5 to 67.2)                        | --                                             | 0.9<br>(0.5 to 1.5)                    | 23.6<br>(3.3 to 48.9)                             | 39.2<br>(15.6 to 69.6)                              |
| Sickle cell disorders                                      | < 0.05<br>(< 0.05 to < 0.05)                  | --                                             | < 0.05<br>(< 0.05 to < 0.05)           | 4.7<br>(-1.3 to 11.4)                             | 19.3<br>(12.2 to 27.4)                              |
| Sickle cell trait                                          | 56.6<br>(55.0 to 58.3)                        | --                                             | 0.2<br>(0.1 to 0.4)                    | 31.2<br>(11.1 to 55.7)                            | 49.0<br>(25.6 to 79.1)                              |
| G6PD deficiency                                            | 88.7<br>(81.4 to 96.6)                        | --                                             | < 0.05<br>(< 0.05 to < 0.05)           | 12.2<br>(-5.7 to 33.3)                            | 22.0<br>(1.6 to 47.2)                               |
| G6PD trait                                                 | 220.9<br>(213.2 to 229.5)                     | --                                             | < 0.05<br>(< 0.05 to < 0.05)           | 38.0<br>(11.3 to 69.5)                            | 63.6<br>(29.8 to 104.4)                             |
| Other hemoglobinopathies and hemolytic anaemias            | 21.1<br>(19.0 to 23.5)                        | --                                             | 0.2<br>(0.1 to 0.4)                    | 12.7<br>(-1.9 to 32.6)                            | 8.5<br>(-7.2 to 28.1)                               |
| Endocrine, metabolic, blood, and immune disorders          | 118.8<br>(111.6 to 125.8)                     | 20.2<br>(18.3 to 22.2)                         | 3.9<br>(2.7 to 5.3)                    | 11.6<br>(6.2 to 17.1)                             | 8.5<br>(3.0 to 14.0)                                |
| <b>Musculoskeletal disorders</b>                           | <b>1,018.0</b><br><b>(973.2 to 1,065.8)</b>   | <b>434.6</b><br><b>(386.0 to 489.6)</b>        | <b>119.3</b><br><b>(86.1 to 155.1)</b> | <b>-0.7</b><br><b>(-4.9 to 3.4)</b>               | <b>-3.0</b><br><b>(-7.0 to 0.8)</b>                 |
| Rheumatoid arthritis                                       | 22.0<br>(19.5 to 24.8)                        | 1.0<br>(0.9 to 1.2)                            | 5.0<br>(3.4 to 6.7)                    | 8.9<br>(0.5 to 17.9)                              | 3.6<br>(-4.4 to 11.8)                               |
| Osteoarthritis                                             | 285.1<br>(266.4 to 303.5)                     | 11.6<br>(10.7 to 12.4)                         | 17.2<br>(12.2 to 23.2)                 | 6.8<br>(2.9 to 10.7)                              | -0.4<br>(-4.2 to 3.2)                               |
| Low back and neck pain                                     | 770.0<br>(720.3 to 824.1)                     | 374.6<br>(326.5 to 427.6)                      | 91.8<br>(64.8 to 120.6)                | -2.2<br>(-7.4 to 2.8)                             | -3.7<br>(-8.7 to 1.2)                               |
| Low back pain                                              | 639.9<br>(568.7 to 720.1)                     | 331.3<br>(283.7 to 383.8)                      | 71.3<br>(50.8 to 93.4)                 | -3.0<br>(-9.8 to 3.6)                             | -4.6<br>(-11.2 to 1.6)                              |
| Neck pain                                                  | 208.3<br>(179.7 to 241.6)                     | 43.3<br>(37.7 to 50.7)                         | 20.4<br>(14.0 to 28.7)                 | 0.3<br>(-2.2 to 3.0)                              | -0.1<br>(-2.2 to 2.0)                               |
| Gout                                                       | 23.6<br>(20.8 to 26.8)                        | 4.6<br>(4.0 to 5.2)                            | 0.7<br>(0.5 to 1.0)                    | 6.5<br>(-7.1 to 23.3)                             | 1.2<br>(-11.6 to 17.6)                              |
| Other musculoskeletal disorders                            | 53.7<br>(42.2 to 68.4)                        | 42.8<br>(33.8 to 55.5)                         | 4.5<br>(2.9 to 6.7)                    | -6.5<br>(-18.0 to 5.9)                            | -4.5<br>(-17.1 to 8.1)                              |
| <b>Other non-communicable diseases</b>                     | <b>3,402.6</b><br><b>(3,364.9 to 3,438.2)</b> | <b>9,480.8†</b><br><b>(9,034.1 to 9,950.0)</b> | <b>109.6</b><br><b>(75.7 to 154.1)</b> | <b>2.8</b><br><b>(1.7 to 4.0)</b>                 | <b>0.0</b><br><b>(-1.1 to 1.1)</b>                  |
| Congenital anomalies                                       | 53.3<br>(49.4 to 57.6)                        | --                                             | 6.6<br>(4.8 to 8.6)                    | -3.1<br>(-7.7 to 1.5)                             | 1.9<br>(-3.0 to 7.0)                                |
| Neural tube defects                                        | 5.1<br>(4.6 to 5.7)                           | --                                             | 1.5<br>(1.1 to 2.0)                    | -10.0<br>(-19.7 to 0.5)                           | -6.5<br>(-16.5 to 5.5)                              |
| Congenital heart anomalies                                 | 9.8<br>(8.7 to 11.1)                          | --                                             | 0.5<br>(0.2 to 0.9)                    | 4.3<br>(-7.4 to 17.4)                             | 9.8<br>(-3.6 to 24.8)                               |
| Orofacial clefts                                           | 1.9<br>(1.7 to 2.1)                           | --                                             | < 0.05<br>(< 0.05 to < 0.05)           | -8.8<br>(-19.4 to 2.6)                            | -5.2<br>(-16.2 to 6.5)                              |
| Down's syndrome                                            | 2.2<br>(1.9 to 2.5)                           | --                                             | 0.2<br>(0.1 to 0.3)                    | 0.2<br>(-9.4 to 10.5)                             | 5.8<br>(-4.8 to 17.0)                               |
| Turner syndrome                                            | 3.0<br>(2.6 to 3.4)                           | --                                             | 0.1<br>(< 0.05 to 0.1)                 | -31.4<br>(-45.2 to -13.2)                         | -26.1<br>(-41.8 to -5.6)                            |
| Klinefelter syndrome                                       | 2.8<br>(2.4 to 3.2)                           | --                                             | < 0.05<br>(< 0.05 to < 0.05)           | -21.9<br>(-35.9 to -4.3)                          | -13.1<br>(-29.1 to 6.6)                             |

| Cause                                         | Prevalence in thousands (95% UI)              | Incidence in thousands (95% UI)          | YLDs in thousands (95% UI)            |                                                   |                                                     |
|-----------------------------------------------|-----------------------------------------------|------------------------------------------|---------------------------------------|---------------------------------------------------|-----------------------------------------------------|
|                                               | 2016 counts                                   | 2016 counts                              | 2016 counts                           | Percentage change in counts between 2006 and 2016 | Percentage change in age-standardised rates between |
| Other chromosomal abnormalities               | 6.0<br>(5.2 to 6.7)                           | --                                       | 0.7<br>(0.5 to 0.9)                   | 4.3<br>(-8.7 to 19.3)                             | 13.7<br>(-0.7 to 30.1)                              |
| Congenital musculoskeletal and limb anomalies | 11.0<br>(10.0 to 12.0)                        | --                                       | 1.5<br>(1.0 to 2.1)                   | 1.0<br>(-8.5 to 11.2)                             | 4.9<br>(-5.4 to 15.9)                               |
| Urogenital congenital anomalies               | 5.7<br>(5.1 to 6.3)                           | --                                       | 0.1<br>(0.1 to 0.2)                   | -5.9<br>(-14.9 to 4.3)                            | 0.8<br>(-10.4 to 14.4)                              |
| Digestive congenital anomalies                | 5.2<br>(4.6 to 5.8)                           | --                                       | 0.2<br>(0.1 to 0.3)                   | -6.3<br>(-18.9 to 8.7)                            | -2.7<br>(-16.1 to 13.8)                             |
| Other congenital anomalies                    | 11.2<br>(7.0 to 17.1)                         | --                                       | 1.7<br>(1.1 to 2.4)                   | -3.2<br>(-11.1 to 6.0)                            | 0.1<br>(-7.9 to 9.4)                                |
| Skin and subcutaneous diseases                | 1,303.8<br>(1,268.8 to 1,338.5)               | 3,486.1<br>(3,255.3 to 3,722.8)          | 27.2<br>(18.4 to 39.9)                | -4.0<br>(-6.0 to -2.1)                            | 0.9<br>(-1.1 to 3.0)                                |
| Dermatitis                                    | 132.1<br>(124.2 to 141.0)                     | 199.4<br>(182.6 to 218.6)                | 4.7<br>(2.8 to 7.4)                   | -2.5<br>(-6.5 to 2.1)                             | 2.1<br>(-3.2 to 7.8)                                |
| Psoriasis                                     | 51.1<br>(48.6 to 53.8)                        | 6.4<br>(6.0 to 6.7)                      | 4.4<br>(3.1 to 5.7)                   | 0.8<br>(-5.6 to 8.3)                              | 2.8<br>(-4.7 to 10.4)                               |
| Cellulitis                                    | 1.3<br>(1.2 to 1.4)                           | 21.7<br>(20.5 to 23.0)                   | 0.1<br>(< 0.05 to 0.1)                | 1.8<br>(-10.9 to 16.6)                            | 3.1<br>(-6.2 to 13.5)                               |
| Pyoderma                                      | 21.7<br>(20.9 to 22.4)                        | 564.9<br>(543.5 to 585.9)                | 0.1<br>(< 0.05 to 0.2)                | 4.9<br>(-0.2 to 10.3)                             | 1.1<br>(-3.9 to 6.4)                                |
| Scabies                                       | 27.1<br>(24.2 to 30.5)                        | 82.3<br>(73.1 to 92.5)                   | 0.7<br>(0.4 to 1.1)                   | -6.8<br>(-11.3 to -2.3)                           | -0.7<br>(-5.6 to 4.4)                               |
| Fungal skin diseases                          | 440.9<br>(392.7 to 491.2)                     | 1,693.8<br>(1,469.3 to 1,935.5)          | 2.4<br>(1.0 to 5.1)                   | 3.8<br>(2.1 to 5.6)                               | 0.0<br>(-1.0 to 1.2)                                |
| Viral skin diseases                           | 93.0<br>(89.4 to 96.8)                        | 140.5<br>(134.8 to 146.5)                | 2.8<br>(1.8 to 4.2)                   | -6.3<br>(-9.0 to -3.3)                            | -0.2<br>(-3.2 to 3.1)                               |
| Acne vulgaris                                 | 256.6<br>(232.3 to 283.7)                     | 162.4<br>(135.9 to 196.4)                | 6.6<br>(4.5 to 9.5)                   | -12.0<br>(-15.8 to -7.9)                          | 0.3<br>(-4.1 to 4.8)                                |
| Alopecia areata                               | 8.0<br>(7.7 to 8.3)                           | 14.0<br>(13.5 to 14.6)                   | 0.3<br>(0.2 to 0.4)                   | -5.2<br>(-14.0 to 4.7)                            | -0.0<br>(-10.2 to 10.4)                             |
| Pruritus                                      | 47.0<br>(41.5 to 53.1)                        | 36.8<br>(32.5 to 42.1)                   | 0.5<br>(0.2 to 0.9)                   | 0.6<br>(-5.2 to 6.1)                              | 0.4<br>(-4.8 to 6.0)                                |
| Urticaria                                     | 36.1<br>(32.1 to 40.6)                        | 63.9<br>(56.4 to 72.5)                   | 2.1<br>(1.4 to 3.1)                   | -4.9<br>(-9.7 to 0.2)                             | -0.1<br>(-4.9 to 5.1)                               |
| Decubitus ulcer                               | 1.9<br>(1.7 to 2.2)                           | 7.0<br>(6.2 to 8.0)                      | 0.3<br>(0.2 to 0.4)                   | 13.1<br>(-6.3 to 35.1)                            | 3.0<br>(-12.3 to 19.1)                              |
| Other skin and subcutaneous diseases          | 411.7<br>(399.5 to 423.7)                     | 493.0<br>(475.3 to 510.7)                | 2.2<br>(1.1 to 4.0)                   | 3.9<br>(1.6 to 6.3)                               | 2.0<br>(-0.3 to 4.4)                                |
| Sense organ diseases                          | 1,432.1<br>(1,405.6 to 1,460.5)               | 477.4†<br>(451.3 to 505.2)               | 54.5<br>(38.2 to 75.9)                | 6.4<br>(4.8 to 8.6)                               | -1.6<br>(-3.2 to 0.0)                               |
| Glaucoma                                      | 5.1<br>(4.2 to 6.1)                           | --                                       | 0.4<br>(0.2 to 0.5)                   | 11.8<br>(-2.6 to 27.0)                            | -1.0<br>(-13.7 to 12.3)                             |
| Cataract                                      | 91.2<br>(76.7 to 106.3)                       | --                                       | 4.2<br>(2.9 to 6.0)                   | 12.2<br>(6.4 to 19.8)                             | -3.5<br>(-8.4 to 2.0)                               |
| Macular degeneration                          | 3.2<br>(2.5 to 4.0)                           | --                                       | 0.2<br>(0.1 to 0.2)                   | 15.4<br>(-1.0 to 35.8)                            | 0.9<br>(-13.4 to 17.9)                              |
| Refraction and accommodation disorders        | 497.3<br>(471.6 to 524.2)                     | --                                       | 9.6<br>(6.0 to 14.9)                  | 1.1<br>(-2.6 to 4.5)                              | -2.6<br>(-5.8 to 0.6)                               |
| Age-related and other hearing loss            | 1,182.2<br>(1,134.5 to 1,230.8)               | --                                       | 32.7<br>(22.9 to 45.6)                | 7.5<br>(5.0 to 10.5)                              | -1.5<br>(-3.8 to 0.8)                               |
| Other vision loss                             | 31.4<br>(27.1 to 36.2)                        | --                                       | 1.7<br>(1.2 to 2.4)                   | 8.5<br>(1.1 to 16.5)                              | -0.4<br>(-7.2 to 6.5)                               |
| Other sense organ diseases                    | 186.2<br>(171.7 to 202.2)                     | 477.4<br>(451.3 to 505.2)                | 5.7<br>(3.6 to 8.7)                   | 4.8<br>(1.0 to 9.0)                               | 0.1<br>(-3.6 to 3.9)                                |
| Oral disorders                                | 2,637.4<br>(2,571.3 to 2,704.0)               | 5,517.3†<br>(5,150.0 to 5,894.4)         | 21.4<br>(13.3 to 32.7)                | 5.1<br>(2.8 to 8.1)                               | 1.2<br>(-0.8 to 3.2)                                |
| Caries of deciduous teeth                     | 226.5<br>(192.9 to 258.3)                     | 893.2<br>(707.8 to 1,117.9)              | 0.1<br>(< 0.05 to 0.2)                | -16.1<br>(-24.7 to -6.8)                          | -10.6<br>(-19.4 to -1.0)                            |
| Caries of permanent teeth                     | 1,899.8<br>(1,811.2 to 1,987.8)               | 4,500.9<br>(4,189.5 to 4,836.6)          | 1.8<br>(0.8 to 3.4)                   | -1.0<br>(-3.6 to 1.9)                             | 3.3<br>(0.3 to 6.5)                                 |
| Periodontal disease                           | 710.0<br>(610.6 to 818.1)                     | 89.4<br>(74.8 to 104.5)                  | 4.6<br>(1.8 to 9.6)                   | 1.3<br>(-1.9 to 4.6)                              | 0.2<br>(-2.7 to 3.5)                                |
| Edentulism and severe tooth loss              | 455.5<br>(398.3 to 517.1)                     | 33.8<br>(28.4 to 39.9)                   | 12.4<br>(8.1 to 17.5)                 | 9.8<br>(5.8 to 14.3)                              | 1.9<br>(-1.7 to 5.7)                                |
| Other oral disorders                          | 85.4<br>(81.9 to 89.0)                        | --                                       | 2.5<br>(1.5 to 3.7)                   | -3.3<br>(-6.1 to -0.6)                            | -0.1<br>(-3.1 to 3.0)                               |
| <b>Injuries</b>                               | <b>1,990.1</b><br><b>(1,861.0 to 2,134.6)</b> | <b>745.8†</b><br><b>(721.6 to 777.1)</b> | <b>74.3</b><br><b>(51.4 to 103.3)</b> | <b>14.1</b><br><b>(11.9 to 16.6)</b>              | <b>8.1</b><br><b>(6.1 to 10.1)</b>                  |
| <b>Transport injuries</b>                     | <b>301.6</b><br><b>(277.5 to 325.9)</b>       | <b>73.0</b><br><b>(66.9 to 80.1)</b>     | <b>14.2</b><br><b>(9.5 to 20.4)</b>   | <b>-3.9</b><br><b>(-5.4 to -2.4)</b>              | <b>-4.7</b><br><b>(-6.4 to -3.0)</b>                |
| Road injuries                                 | 292.5<br>(268.9 to 316.1)                     | 71.4<br>(65.3 to 78.4)                   | 13.8<br>(9.3 to 19.8)                 | -3.8<br>(-5.4 to -2.4)                            | -4.7<br>(-6.4 to -3.0)                              |
| Pedestrian road injuries                      | 69.1<br>(59.9 to 80.0)                        | 12.6<br>(10.9 to 14.7)                   | 3.2<br>(2.1 to 4.5)                   | 1.4<br>(-0.1 to 2.9)                              | 0.1<br>(-1.7 to 2.0)                                |
| Cyclist road injuries                         | 63.6<br>(53.4 to 75.2)                        | 17.6<br>(15.1 to 20.2)                   | 2.8<br>(1.9 to 4.1)                   | 2.9<br>(1.4 to 4.4)                               | 2.3<br>(0.5 to 4.2)                                 |
| Motorcyclist road injuries                    | 38.0<br>(32.2 to 46.4)                        | 6.1<br>(5.1 to 7.2)                      | 1.7<br>(1.1 to 2.4)                   | 5.6<br>(3.9 to 7.4)                               | 4.0<br>(2.1 to 6.2)                                 |
| Motor vehicle road injuries                   | 115.4<br>(96.7 to 133.6)                      | 33.2<br>(29.6 to 37.2)                   | 5.9<br>(4.0 to 8.4)                   | -11.9<br>(-13.6 to -10.4)                         | -12.7<br>(-14.5 to -10.9)                           |
| Other road injuries                           | 6.4<br>(5.6 to 7.5)                           | 2.0<br>(1.6 to 2.5)                      | 0.3<br>(0.2 to 0.4)                   | 17.1<br>(15.3 to 19.0)                            | 15.4<br>(13.4 to 17.6)                              |
| Other transport injuries                      | 9.1<br>(7.8 to 10.3)                          | 1.6<br>(1.4 to 1.7)                      | 0.4<br>(0.3 to 0.6)                   | -5.5<br>(-7.2 to -3.8)                            | -4.7<br>(-6.6 to -2.7)                              |
| <b>Unintentional injuries</b>                 | <b>1,550.6</b><br><b>(1,447.9 to 1,675.3)</b> | <b>657.7</b><br><b>(633.8 to 688.5)</b>  | <b>56.0</b><br><b>(39.3 to 76.2)</b>  | <b>22.0</b><br><b>(20.2 to 24.2)</b>              | <b>14.7</b><br><b>(13.2 to 16.3)</b>                |
| Falls                                         | 1,059.6<br>(965.7 to 1,154.6)                 | 504.1<br>(482.0 to 532.9)                | 44.0<br>(31.5 to 59.2)                | 25.5<br>(23.6 to 27.7)                            | 16.0<br>(14.5 to 17.7)                              |
| Drowning                                      | 2.0<br>(1.8 to 2.3)                           | 0.2<br>(0.2 to 0.3)                      | 0.1<br>(0.1 to 0.1)                   | 13.4<br>(10.0 to 16.7)                            | 12.5<br>(8.6 to 15.9)                               |
| Fire, heat, and hot substances                | 52.3<br>(45.8 to 59.6)                        | 5.1<br>(4.5 to 5.7)                      | 1.2<br>(0.7 to 1.8)                   | 4.3<br>(1.4 to 7.2)                               | 4.5<br>(1.0 to 7.9)                                 |
| Poisonings                                    | 3.2<br>(2.7 to 3.8)                           | 2.9<br>(2.3 to 3.6)                      | 0.2<br>(0.2 to 0.4)                   | 60.0<br>(48.2 to 72.1)                            | 64.0<br>(50.4 to 78.1)                              |
| Exposure to mechanical forces                 | 272.4<br>(235.2 to 325.7)                     | 77.3<br>(70.0 to 84.9)                   | 5.8<br>(3.8 to 8.5)                   | 2.7<br>(1.5 to 4.0)                               | 2.0<br>(0.5 to 3.4)                                 |
| Unintentional firearm injuries                | 3.0<br>(2.6 to 3.6)                           | 0.5<br>(0.4 to 0.7)                      | 0.1<br>(0.1 to 0.2)                   | -9.3<br>(-11.1 to -7.6)                           | -9.8<br>(-11.6 to -7.8)                             |
| Unintentional suffocation                     | 3.0<br>(2.4 to 3.7)                           | 0.4<br>(0.3 to 0.5)                      | 0.1<br>(0.1 to 0.1)                   | 3.1<br>(0.7 to 5.6)                               | 4.1<br>(1.0 to 7.0)                                 |
| Other exposure to mechanical forces           | 266.4<br>(229.5 to 319.4)                     | 76.4<br>(69.1 to 84.0)                   | 5.6<br>(3.7 to 8.2)                   | 3.0<br>(1.7 to 4.2)                               | 2.2<br>(0.7 to 3.6)                                 |

| Cause                                                                               | Prevalence in thousands (95% UI)      | Incidence in thousands (95% UI)          | YLDs in thousands (95% UI)        |                                                   |                                                     |
|-------------------------------------------------------------------------------------|---------------------------------------|------------------------------------------|-----------------------------------|---------------------------------------------------|-----------------------------------------------------|
|                                                                                     | 2016 counts                           | 2016 counts                              | 2016 counts                       | Percentage change in counts between 2006 and 2016 | Percentage change in age-standardised rates between |
| Adverse effects of medical treatment                                                | 1.0<br>(0.8 to 1.2)                   | 12.7<br>(11.4 to 14.2)                   | 0.1<br>(0.1 to 0.2)               | 13.9<br>(8.5 to 19.9)                             | 7.5<br>(2.9 to 12.2)                                |
| Animal contact                                                                      | 11.5<br>(10.1 to 13.5)                | 9.6<br>(8.1 to 11.8)                     | 0.3<br>(0.2 to 0.5)               | 10.5<br>(4.4 to 16.6)                             | 14.0<br>(6.5 to 21.6)                               |
| Venomous animal contact                                                             | 4.2<br>(3.6 to 5.2)                   | 3.7<br>(2.8 to 4.6)                      | 0.2<br>(0.1 to 0.3)               | 11.0<br>(2.2 to 19.7)                             | 15.5<br>(5.7 to 25.6)                               |
| Non-venomous animal contact                                                         | 7.3<br>(6.1 to 9.1)                   | 5.9<br>(4.9 to 7.3)                      | 0.1<br>(0.1 to 0.2)               | 9.6<br>(6.6 to 12.8)                              | 10.2<br>(6.6 to 14.0)                               |
| Foreign body                                                                        | 28.1<br>(23.9 to 32.1)                | 19.7<br>(16.8 to 23.7)                   | 0.9<br>(0.6 to 1.4)               | 7.7<br>(5.9 to 9.7)                               | 7.9<br>(5.5 to 10.3)                                |
| Pulmonary aspiration and foreign body in airway                                     | 15.6<br>(12.5 to 19.2)                | 4.2<br>(3.6 to 4.8)                      | 0.5<br>(0.3 to 0.8)               | 8.3<br>(6.0 to 10.5)                              | 8.2<br>(5.4 to 11.1)                                |
| Foreign body in eyes                                                                | 3.0<br>(1.9 to 4.1)                   | 12.8<br>(10.0 to 16.5)                   | 0.2<br>(0.1 to 0.3)               | -1.7<br>(-4.8 to 1.4)                             | -1.5<br>(-4.4 to 1.4)                               |
| Foreign body in other body part                                                     | 9.5<br>(8.0 to 11.6)                  | 2.7<br>(2.3 to 3.2)                      | 0.2<br>(0.1 to 0.3)               | 14.6<br>(12.7 to 16.5)                            | 15.4<br>(12.9 to 17.9)                              |
| Environmental heat and cold exposure                                                | 29.5<br>(25.3 to 35.2)                | 5.3<br>(4.5 to 6.3)                      | 0.9<br>(0.6 to 1.4)               | 12.3<br>(10.2 to 14.3)                            | 11.0<br>(8.7 to 13.2)                               |
| Other unintentional injuries                                                        | 91.1<br>(73.2 to 110.9)               | 20.6<br>(17.0 to 24.5)                   | 2.4<br>(1.5 to 3.5)               | 38.3<br>(36.0 to 40.8)                            | 38.1<br>(35.0 to 41.1)                              |
| <b>Self-harm and interpersonal violence</b>                                         | <b>99.2</b><br><b>(91.3 to 107.6)</b> | <b>15.1†</b><br><b>(13.5 to 16.8)</b>    | <b>2.0</b><br><b>(1.3 to 2.8)</b> | <b>-5.0</b><br><b>(-6.5 to -3.6)</b>              | <b>-3.0</b><br><b>(-4.5 to -1.6)</b>                |
| Self-harm                                                                           | 11.5<br>(9.8 to 13.2)                 | 4.1<br>(3.6 to 4.6)                      | 0.4<br>(0.3 to 0.6)               | 0.1<br>(-2.1 to 2.3)                              | -1.9<br>(-4.2 to 0.7)                               |
| Self-harm by firearm                                                                | 0.4<br>(0.3 to 0.4)                   | 0.1<br>(0.1 to 0.1)                      | < 0.05<br>(< 0.05 to < 0.05)      | -19.2<br>(-21.9 to -16.6)                         | -18.7<br>(-21.2 to -16.1)                           |
| Self-harm by other specified means                                                  | 11.1<br>(9.4 to 12.8)                 | 4.0<br>(3.5 to 4.5)                      | 0.4<br>(0.3 to 0.6)               | 0.7<br>(-1.5 to 3.0)                              | -1.3<br>(-3.7 to 1.3)                               |
| Interpersonal violence                                                              | 87.7<br>(80.2 to 96.0)                | 11.0†<br>(9.5 to 12.8)                   | 1.6<br>(1.1 to 2.2)               | -6.3<br>(-7.9 to -4.9)                            | -3.3<br>(-5.0 to -1.8)                              |
| Assault by firearm                                                                  | 0.8<br>(0.7 to 0.9)                   | 0.2<br>(0.1 to 0.2)                      | < 0.05<br>(< 0.05 to < 0.05)      | -9.2<br>(-11.1 to -7.2)                           | -7.8<br>(-10.2 to -5.4)                             |
| Assault by sharp object                                                             | 6.0<br>(5.0 to 7.2)                   | 1.4<br>(1.0 to 1.8)                      | 0.1<br>(0.1 to 0.2)               | 4.4<br>(2.3 to 6.3)                               | 6.8<br>(4.1 to 9.3)                                 |
| Sexual violence                                                                     | 53.0<br>(47.0 to 59.9)                | --                                       | 0.4<br>(0.3 to 0.6)               | -10.7<br>(-13.9 to -7.8)                          | -3.6<br>(-7.3 to -0.2)                              |
| Assault by other means                                                              | 27.9<br>(23.4 to 33.6)                | 9.5<br>(8.2 to 11.0)                     | 1.0<br>(0.6 to 1.4)               | -5.6<br>(-7.2 to -4.1)                            | -4.4<br>(-6.2 to -2.6)                              |
| <b>Forces of nature, conflict and terrorism, and executions and police conflict</b> | <b>91.6</b><br><b>(40.6 to 161.9)</b> | <b>0.1†</b><br><b>(&lt; 0.05 to 0.1)</b> | <b>2.1</b><br><b>(0.5 to 5.4)</b> | <b>-11.9</b><br><b>(-17.6 to -7.5)</b>            | <b>-19.6</b><br><b>(-25.5 to -15.0)</b>             |
| Exposure to forces of nature                                                        | 0.3<br>(0.1 to 0.4)                   | --                                       | < 0.05<br>(< 0.05 to < 0.05)      | -19.7<br>(-21.3 to -17.9)                         | -26.4<br>(-28.1 to -24.6)                           |
| Conflict and terrorism                                                              | 91.1<br>(40.2 to 161.3)               | --                                       | 2.0<br>(0.5 to 5.3)               | -11.9<br>(-17.7 to -7.6)                          | -19.6<br>(-25.6 to -15.0)                           |
| Executions and police conflict                                                      | 0.2<br>(0.1 to 0.4)                   | 0.1<br>(< 0.05 to 0.1)                   | < 0.05<br>(< 0.05 to < 0.05)      | 23.6<br>(15.1 to 28.2)                            | 24.8<br>(16.8 to 29.7)                              |
| <b>Impairments</b>                                                                  | --                                    | --                                       | --                                | --                                                | --                                                  |
| Anaemia                                                                             | 580.7<br>(527.5 to 637.0)             | --                                       | 10.7<br>(7.1 to 15.4)             | -1.8<br>(-11.5 to 8.7)                            | -2.7<br>(-12.2 to 8.3)                              |
| Developmental intellectual disability                                               | 75.9<br>(59.8 to 92.2)                | --                                       | 8.6<br>(6.3 to 11.3)              | -9.8<br>(-14.3 to -5.4)                           | -4.2<br>(-9.2 to 1.0)                               |
| Epilepsy                                                                            | 20.1<br>(10.1 to 32.4)                | --                                       | 5.8<br>(3.0 to 10.7)              | -10.5<br>(-58.4 to 96.2)                          | -8.4<br>(-56.1 to 95.2)                             |
| Guillain-Barre syndrome                                                             | < 0.05<br>(< 0.05 to 0.1)             | --                                       | < 0.05<br>(< 0.05 to < 0.05)      | 0.5<br>(-2.3 to 3.8)                              | 0.1<br>(0.0 to 0.2)                                 |
| Hearing loss                                                                        | 1,223.6<br>(1,177.2 to 1,270.5)       | --                                       | 34.6<br>(24.4 to 48.3)            | 6.4<br>(4.1 to 9.1)                               | -1.8<br>(-3.9 to 0.2)                               |
| Heart failure                                                                       | 99.3<br>(87.6 to 112.1)               | --                                       | 9.4<br>(7.0 to 12.0)              | 13.3<br>(5.6 to 22.0)                             | 0.1<br>(-6.4 to 7.4)                                |
| Infertility                                                                         | 42.5<br>(33.1 to 55.5)                | --                                       | 0.3<br>(0.1 to 0.5)               | -13.5<br>(-21.6 to -6.5)                          | -6.0<br>(-14.8 to 1.9)                              |
| Pelvic inflammatory disease                                                         | 1.3<br>(1.1 to 1.5)                   | --                                       | 0.2<br>(0.1 to 0.2)               | -18.0<br>(-32.0 to -0.8)                          | -12.1<br>(-28.0 to 6.6)                             |
| Vision loss                                                                         | 636.3<br>(602.0 to 671.5)             | --                                       | 17.8<br>(12.4 to 25.7)            | 2.0<br>(-2.0 to 5.1)                              | -4.7<br>(-8.3 to -1.8)                              |

We did not calculate incidence for the nine impairments, certain NTDs, and causes with only birth prevalence. Blank cells mean that no estimate is available.

† Incidence for aggregate causes represents the sum of the incidence of the causes below the aggregate.

‡ Incidence estimates for stroke represent first-ever stroke only.

^ Incidence of HIV/AIDS represents new infections of HIV only and does not include new infections of Tuberculosis in HIV positive cases.



SR Table 14: Prevalence, incidence, and YLDs for 2016, percentage change of YLD counts and percentage change of age-standardised YLD rates between 2006 and 2016 by cause and impairments, for all ages, Cuba.

| Cause                                                                                | Prevalence in thousands (95% UI)          | Incidence in thousands (95% UI)            | YLDs in thousands (95% UI)             |                                                   |                                                     |
|--------------------------------------------------------------------------------------|-------------------------------------------|--------------------------------------------|----------------------------------------|---------------------------------------------------|-----------------------------------------------------|
|                                                                                      | 2016 counts                               | 2016 counts                                | 2016 counts                            | Percentage change in counts between 2006 and 2016 | Percentage change in age-standardised rates between |
| <b>All causes</b>                                                                    | <b>11,121.4</b><br>(11,100.0 to 11,144.3) | <b>67,471.0†</b><br>(64,194.7 to 71,069.8) | <b>1,345.2</b><br>(1,003.9 to 1,749.9) | <b>9.4</b><br>(7.7 to 11.1)                       | <b>0.1</b><br>(-1.6 to 1.7)                         |
| <b>Communicable, maternal, neonatal, and nutritional disorders</b>                   | <b>7,987.9</b><br>(7,811.2 to 8,154.3)    | <b>35,015.1†</b><br>(32,094.9 to 38,086.7) | <b>109.7</b><br>(77.1 to 149.9)        | <b>-4.3</b><br>(-11.1 to 3.8)                     | <b>-3.9</b><br>(-11.4 to 4.3)                       |
| <b>HIV/AIDS and tuberculosis</b>                                                     | <b>2,894.8</b><br>(2,583.1 to 3,138.8)    | <b>5.0†</b><br>(3.3 to 6.7)                | <b>2.8</b><br>(1.3 to 5.2)             | <b>231.8</b><br>(153.7 to 329.3)                  | <b>220.7</b><br>(152.8 to 302.2)                    |
| Tuberculosis                                                                         | 2,673.7<br>(2,386.5 to 2,984.1)           | 0.7†<br>(0.6 to 0.8)                       | 0.1<br>(0.1 to 0.2)                    | -12.9<br>(-19.9 to -5.9)                          | -16.1<br>(-21.3 to -10.9)                           |
| Drug-susceptible tuberculosis                                                        | 0.4<br>(0.3 to 0.5)                       | 0.7<br>(0.6 to 0.8)                        | 0.1<br>(0.1 to 0.2)                    | -13.1<br>(-19.9 to -5.9)                          | -16.3<br>(-21.6 to -11.0)                           |
| Multidrug-resistant tuberculosis without extensive drug resistance                   | < 0.05<br>(< 0.05 to < 0.05)              | < 0.05<br>(< 0.05 to < 0.05)               | < 0.05<br>(< 0.05 to < 0.05)           | 2.6<br>(-73.9 to 259.5)                           | -1.3<br>(-75.3 to 252.7)                            |
| Extensively drug-resistant tuberculosis                                              | < 0.05<br>(< 0.05 to < 0.05)              | < 0.05<br>(< 0.05 to < 0.05)               | < 0.05<br>(< 0.05 to < 0.05)           | 173.1<br>(-30.4 to 857.4)                         | 162.8<br>(-34.2 to 839.2)                           |
| Latent tuberculosis infection                                                        | 2,673.3<br>(2,386.1 to 2,983.7)           | --                                         | --                                     | --                                                | --                                                  |
| HIV/AIDS                                                                             | 28.6<br>(18.1 to 40.7)                    | 4.3 <sup>^</sup><br>(2.6 to 6.0)           | 2.7<br>(1.2 to 5.0)                    | 284.4<br>(181.6 to 447.5)                         | 274.8<br>(183.5 to 413.6)                           |
| Drug-susceptible HIV/AIDS - Tuberculosis                                             | < 0.05<br>(< 0.05 to < 0.05)              | < 0.05<br>(< 0.05 to 0.1)                  | < 0.05<br>(< 0.05 to < 0.05)           | 51.7<br>(32.1 to 80.2)                            | 47.2<br>(28.3 to 74.1)                              |
| Multidrug-resistant HIV/AIDS - Tuberculosis without extensive drug resistance        | < 0.05<br>(< 0.05 to < 0.05)              | < 0.05<br>(< 0.05 to < 0.05)               | < 0.05<br>(< 0.05 to < 0.05)           | 79.0<br>(-53.9 to 561.0)                          | 73.6<br>(-55.3 to 539.9)                            |
| Extensively drug-resistant HIV/AIDS - Tuberculosis                                   | < 0.05<br>(< 0.05 to < 0.05)              | < 0.05<br>(< 0.05 to < 0.05)               | < 0.05<br>(< 0.05 to < 0.05)           | 376.6<br>(22.7 to 1,660.5)                        | 362.1<br>(19.0 to 1,604.2)                          |
| HIV/AIDS resulting in other diseases                                                 | 28.6<br>(18.0 to 40.7)                    | 4.3<br>(2.6 to 6.0)                        | 2.7<br>(1.2 to 5.0)                    | 286.9<br>(183.2 to 454.5)                         | 277.2<br>(184.5 to 419.9)                           |
| <b>Diarrhoea, lower respiratory infections, and other common infectious diseases</b> | <b>578.5</b><br>(548.1 to 610.5)          | <b>33,525.8†</b><br>(30,643.4 to 36,572.6) | <b>25.6</b><br>(17.6 to 35.9)          | <b>5.0</b><br>(1.2 to 8.8)                        | <b>2.9</b><br>(-0.3 to 6.2)                         |
| Diarrhoeal diseases                                                                  | 95.5<br>(90.1 to 101.1)                   | 6,524.2<br>(6,160.7 to 6,908.1)            | 10.6<br>(7.4 to 14.4)                  | 17.8<br>(10.6 to 25.0)                            | 11.0<br>(4.7 to 17.8)                               |
| Intestinal infectious diseases                                                       | < 0.05<br>(< 0.05 to < 0.05)              | 0.2†<br>(0.1 to 0.2)                       | < 0.05<br>(< 0.05 to < 0.05)           | -9.6<br>(-21.9 to 3.3)                            | -21.1<br>(-31.1 to -10.0)                           |
| Typhoid fever                                                                        | < 0.05<br>(< 0.05 to < 0.05)              | < 0.05<br>(< 0.05 to < 0.05)               | < 0.05<br>(< 0.05 to < 0.05)           | -18.8<br>(-32.8 to -2.7)                          | -25.2<br>(-37.9 to -10.6)                           |
| Paratyphoid fever                                                                    | < 0.05<br>(< 0.05 to < 0.05)              | 0.1<br>(0.1 to 0.2)                        | < 0.05<br>(< 0.05 to < 0.05)           | 6.2<br>(-11.7 to 26.3)                            | -8.1<br>(-22.0 to 7.7)                              |
| Other intestinal infectious diseases                                                 | --                                        | --                                         | < 0.05<br>(< 0.05 to < 0.05)           | -51.6<br>(-64.5 to -34.1)                         | -64.2<br>(-76.0 to -46.0)                           |
| Lower respiratory infections                                                         | 15.4<br>(14.3 to 16.5)                    | 708.1<br>(645.6 to 770.0)                  | 0.9<br>(0.6 to 1.3)                    | 27.4<br>(14.8 to 41.3)                            | 7.8<br>(-3.1 to 19.1)                               |
| Upper respiratory infections                                                         | 341.4<br>(304.1 to 381.2)                 | 25,630.8<br>(22,691.9 to 28,714.7)         | 8.5<br>(5.1 to 13.1)                   | -2.6<br>(-8.0 to 3.0)                             | -0.1<br>(-5.4 to 4.8)                               |
| Otitis media                                                                         | 122.4<br>(109.9 to 135.2)                 | 475.0<br>(391.6 to 580.8)                  | 3.4<br>(2.1 to 5.2)                    | -10.7<br>(-17.4 to -3.6)                          | -8.4<br>(-15.4 to -1.8)                             |
| Meningitis                                                                           | 7.1<br>(6.3 to 8.1)                       | 0.8<br>(0.7 to 0.9)                        | 0.9<br>(0.6 to 1.2)                    | 4.6<br>(0.3 to 15.9)                              | 5.1<br>(1.3 to 12.6)                                |
| Pneumococcal meningitis                                                              | 3.4<br>(3.0 to 4.0)                       | 0.2<br>(0.1 to 0.2)                        | 0.4<br>(0.3 to 0.6)                    | 3.2<br>(-1.2 to 7.5)                              | 3.8<br>(-0.0 to 8.1)                                |
| H influenzae type B meningitis                                                       | 0.9<br>(0.8 to 1.1)                       | 0.1<br>(< 0.05 to 0.1)                     | 0.1<br>(0.1 to 0.2)                    | -0.5<br>(-4.8 to 3.6)                             | 1.7<br>(-2.7 to 5.9)                                |
| Meningococcal infection                                                              | 0.5<br>(0.3 to 1.0)                       | 0.1<br>(< 0.05 to 0.1)                     | 0.1<br>(< 0.05 to 0.1)                 | 17.4<br>(-1.1 to 171.9)                           | 11.5<br>(-2.2 to 110.5)                             |
| Other meningitis                                                                     | 2.3<br>(1.8 to 2.9)                       | 0.5<br>(0.4 to 0.5)                        | 0.2<br>(0.2 to 0.3)                    | 7.0<br>(1.9 to 13.5)                              | 7.9<br>(2.9 to 14.0)                                |
| Encephalitis                                                                         | 7.7<br>(5.2 to 11.1)                      | 3.0<br>(2.6 to 3.3)                        | 0.8<br>(0.5 to 1.1)                    | -0.5<br>(-16.4 to 19.3)                           | -2.5<br>(-17.9 to 15.9)                             |
| Diphtheria                                                                           | < 0.05<br>(< 0.05 to < 0.05)              | < 0.05<br>(< 0.05 to < 0.05)               | < 0.05<br>(< 0.05 to < 0.05)           | -22.0<br>(-55.3 to 36.4)                          | -28.5<br>(-57.1 to 20.2)                            |
| Whooping cough                                                                       | 0.4<br>(0.3 to 0.5)                       | 2.8<br>(2.1 to 3.6)                        | < 0.05<br>(< 0.05 to < 0.05)           | -52.7<br>(-66.3 to -35.1)                         | -50.1<br>(-64.5 to -31.7)                           |
| Tetanus                                                                              | < 0.05<br>(< 0.05 to < 0.05)              | < 0.05<br>(< 0.05 to < 0.05)               | < 0.05<br>(< 0.05 to < 0.05)           | 1.2<br>(-14.0 to 17.4)                            | 0.1<br>(-13.2 to 15.1)                              |
| Measles                                                                              | < 0.05<br>(0.0 to < 0.05)                 | < 0.05<br>(0.0 to < 0.05)                  | < 0.05<br>(0.0 to < 0.05)              | --                                                | --                                                  |
| Varicella and herpes zoster                                                          | 11.8<br>(10.6 to 13.1)                    | 181.0<br>(173.5 to 189.3)                  | 0.5<br>(0.3 to 0.8)                    | 13.2<br>(-0.2 to 27.7)                            | -0.1<br>(-11.7 to 12.3)                             |
| <b>Neglected tropical diseases and malaria</b>                                       | <b>3,305.0</b><br>(3,106.7 to 3,496.8)    | <b>267.7†</b><br>(183.7 to 371.2)          | <b>13.6</b><br>(8.3 to 20.8)           | <b>14.0</b><br>(-8.3 to 43.6)                     | <b>13.7</b><br>(-6.8 to 41.3)                       |
| Malaria                                                                              | --                                        | --                                         | --                                     | --                                                | --                                                  |
| Chagas disease                                                                       | --                                        | --                                         | --                                     | --                                                | --                                                  |
| Leishmaniasis                                                                        | --                                        | --                                         | --                                     | --                                                | --                                                  |
| Visceral leishmaniasis                                                               | --                                        | --                                         | --                                     | --                                                | --                                                  |
| Cutaneous and mucocutaneous leishmaniasis                                            | --                                        | --                                         | --                                     | --                                                | --                                                  |
| African trypanosomiasis                                                              | --                                        | --                                         | --                                     | --                                                | --                                                  |
| Schistosomiasis                                                                      | --                                        | --                                         | --                                     | --                                                | --                                                  |
| Cysticercosis                                                                        | --                                        | --                                         | --                                     | --                                                | --                                                  |
| Cystic echinococcosis                                                                | --                                        | --                                         | --                                     | --                                                | --                                                  |
| Lymphatic filariasis                                                                 | --                                        | --                                         | --                                     | --                                                | --                                                  |
| Onchocerciasis                                                                       | --                                        | --                                         | --                                     | --                                                | --                                                  |
| Trachoma                                                                             | --                                        | --                                         | --                                     | --                                                | --                                                  |
| Dengue                                                                               | 16.0<br>(9.5 to 25.3)                     | 267.3<br>(183.3 to 370.9)                  | 2.6<br>(1.2 to 4.6)                    | 218.5<br>(149.9 to 577.6)                         | 217.1<br>(150.9 to 574.9)                           |
| Yellow fever                                                                         | --                                        | --                                         | --                                     | --                                                | --                                                  |
| Rabies                                                                               | < 0.05<br>(< 0.05 to < 0.05)              | < 0.05<br>(< 0.05 to < 0.05)               | < 0.05<br>(< 0.05 to < 0.05)           | -28.1<br>(-50.2 to 8.4)                           | -34.2<br>(-56.4 to 3.5)                             |
| Intestinal nematode infections                                                       | 3,243.9<br>(3,045.9 to 3,438.9)           | --                                         | 9.7<br>(5.5 to 16.0)                   | 0.8<br>(-21.8 to 32.8)                            | -0.1<br>(-20.9 to 29.1)                             |
| Ascariasis                                                                           | 1,498.4<br>(1,298.8 to 1,721.0)           | --                                         | 2.2<br>(1.1 to 4.3)                    | -0.4<br>(-36.7 to 66.0)                           | 0.2<br>(-33.1 to 57.9)                              |

| Cause                                                                   | Prevalence in thousands (95% UI)                 | Incidence in thousands (95% UI)                   | YLDs in thousands (95% UI)                  |                                                   |                                                     |
|-------------------------------------------------------------------------|--------------------------------------------------|---------------------------------------------------|---------------------------------------------|---------------------------------------------------|-----------------------------------------------------|
|                                                                         | 2016 counts                                      | 2016 counts                                       | 2016 counts                                 | Percentage change in counts between 2006 and 2016 | Percentage change in age-standardised rates between |
| Trichuriasis                                                            | 653.3<br>(582.5 to 741.1)                        | --                                                | 0.1<br>( $< 0.05$ to 0.2)                   | 0.5<br>(-49.7 to 105.9)                           | 1.2<br>(-45.5 to 91.6)                              |
| Hookworm disease                                                        | 1,512.4<br>(1,379.1 to 1,664.8)                  | --                                                | 7.3<br>(4.2 to 12.2)                        | 1.2<br>(-25.3 to 39.7)                            | -0.2<br>(-24.4 to 34.8)                             |
| Food-borne trematodiasis                                                | --                                               | --                                                | --                                          | --                                                | --                                                  |
| Leprosy                                                                 | 0.5<br>(0.4 to 0.6)                              | 0.1<br>(0.1 to 0.1)                               | $< 0.05$<br>( $< 0.05$ to $< 0.05$ )        | 8.1<br>(-15.5 to 38.9)                            | -10.7<br>(-30.3 to 15.8)                            |
| Ebola virus disease                                                     | --                                               | --                                                | --                                          | --                                                | --                                                  |
| Zika virus disease                                                      | $< 0.05$<br>( $< 0.05$ to $< 0.05$ )             | 0.3<br>(0.1 to 0.7)                               | $< 0.05$<br>( $< 0.05$ to $< 0.05$ )        | --                                                | --                                                  |
| Guinea worm disease                                                     | --                                               | --                                                | --                                          | --                                                | --                                                  |
| Other neglected tropical diseases                                       | 68.0<br>(57.8 to 80.5)                           | --                                                | 1.3<br>(0.8 to 2.1)                         | -11.9<br>(-31.8 to 12.2)                          | -4.7<br>(-28.4 to 24.1)                             |
| <b>Maternal disorders</b>                                               | <b>11.0</b><br><b>(8.8 to 13.8)</b>              | <b>231.3†</b><br><b>(207.1 to 249.5)</b>          | <b>0.7</b><br><b>(0.4 to 1.0)</b>           | <b>-10.4</b><br><b>(-35.0 to 20.9)</b>            | <b>-1.6</b><br><b>(-28.2 to 33.8)</b>               |
| Maternal haemorrhage                                                    | 0.8<br>(0.5 to 1.0)                              | 6.5<br>(4.7 to 8.7)                               | $< 0.05$<br>( $< 0.05$ to 0.1)              | -1.1<br>(-31.6 to 37.8)                           | 9.2<br>(-25.4 to 52.8)                              |
| Maternal sepsis and other pregnancy related infections                  | 3.1<br>(2.5 to 4.0)                              | 15.2<br>(11.2 to 20.9)                            | 0.1<br>( $< 0.05$ to 0.1)                   | -6.2<br>(-52.8 to 87.8)                           | 1.9<br>(-50.1 to 108.0)                             |
| Maternal hypertensive disorders                                         | 6.0<br>(3.9 to 8.2)                              | 27.6<br>(23.4 to 31.3)                            | 0.3<br>(0.1 to 0.5)                         | -12.1<br>(-47.1 to 46.3)                          | -3.1<br>(-41.5 to 61.2)                             |
| Maternal obstructed labour and uterine rupture                          | 0.1<br>( $< 0.05$ to 0.1)                        | 5.5<br>(3.9 to 7.4)                               | $< 0.05$<br>( $< 0.05$ to $< 0.05$ )        | -7.3<br>(-48.7 to 67.1)                           | 1.9<br>(-43.9 to 86.4)                              |
| Maternal abortion, miscarriage, and ectopic pregnancy                   | 1.4<br>(1.0 to 2.0)                              | 176.6<br>(154.0 to 192.5)                         | 0.2<br>(0.1 to 0.2)                         | -8.5<br>(-48.3 to 63.4)                           | 0.6<br>(-43.1 to 76.3)                              |
| Other maternal disorders                                                | --                                               | --                                                | 0.1<br>(0.1 to 0.2)                         | -14.5<br>(-37.9 to 15.5)                          | -6.2<br>(-31.7 to 27.5)                             |
| <b>Neonatal disorders</b>                                               | <b>148.6</b><br><b>(124.2 to 175.3)</b>          | --                                                | <b>22.7</b><br><b>(15.6 to 33.5)</b>        | <b>-11.3</b><br><b>(-25.8 to 11.7)</b>            | <b>-7.5</b><br><b>(-23.0 to 16.5)</b>               |
| Neonatal preterm birth complications                                    | 132.6<br>(102.6 to 171.0)                        | --                                                | 14.3<br>(9.1 to 21.9)                       | -3.5<br>(-25.5 to 32.0)                           | 1.4<br>(-22.1 to 39.3)                              |
| Neonatal encephalopathy due to birth asphyxia and trauma                | 9.5<br>(6.0 to 13.8)                             | --                                                | 1.6<br>(0.8 to 2.6)                         | 1.9<br>(-19.1 to 39.1)                            | 4.6<br>(-16.6 to 43.0)                              |
| Neonatal sepsis and other neonatal infections                           | 14.8<br>(7.2 to 30.8)                            | --                                                | 6.2<br>(2.7 to 14.0)                        | -27.2<br>(-36.8 to -17.8)                         | -25.0<br>(-34.7 to -15.6)                           |
| Hemolytic disease and other neonatal jaundice                           | 0.8<br>(0.6 to 0.9)                              | --                                                | 0.2<br>(0.1 to 0.3)                         | -2.7<br>(-10.4 to 5.8)                            | 0.1<br>(-7.5 to 8.7)                                |
| Other neonatal disorders                                                | --                                               | --                                                | 0.5<br>(0.3 to 0.7)                         | -13.6<br>(-31.0 to 11.9)                          | -8.1<br>(-26.5 to 18.6)                             |
| <b>Nutritional deficiencies</b>                                         | <b>2,068.9</b><br><b>(1,802.8 to 2,281.1)</b>    | <b>122.5†</b><br><b>(102.6 to 151.7)</b>          | <b>39.3</b><br><b>(24.6 to 58.9)</b>        | <b>-14.2</b><br><b>(-25.9 to -0.8)</b>            | <b>-13.9</b><br><b>(-26.1 to 0.6)</b>               |
| Protein-energy malnutrition                                             | 12.5<br>(9.9 to 16.0)                            | 6.1<br>(4.8 to 7.7)                               | 0.4<br>(0.3 to 0.7)                         | -31.4<br>(-53.9 to 1.1)                           | -26.9<br>(-50.6 to 6.6)                             |
| Iodine deficiency                                                       | 46.9<br>(41.3 to 53.6)                           | 0.8<br>(0.7 to 0.9)                               | 1.1<br>(0.7 to 1.7)                         | 6.2<br>(-8.8 to 23.9)                             | -0.2<br>(-14.6 to 15.8)                             |
| Vitamin A deficiency                                                    | 132.7<br>(110.4 to 162.3)                        | 115.7<br>(95.7 to 144.9)                          | --                                          | --                                                | --                                                  |
| Iron-deficiency anaemia                                                 | 1,790.5<br>(1,568.5 to 2,037.1)                  | --                                                | 37.7<br>(23.4 to 56.7)                      | -14.5<br>(-26.4 to -0.3)                          | -13.9<br>(-26.7 to 1.3)                             |
| Other nutritional deficiencies                                          | --                                               | --                                                | $< 0.05$<br>( $< 0.05$ to $< 0.05$ )        | -31.7<br>(-54.6 to 1.6)                           | -27.3<br>(-51.6 to 7.5)                             |
| <b>Other communicable, maternal, neonatal, and nutritional diseases</b> | <b>3,402.9</b><br><b>(3,167.4 to 3,650.2)</b>    | <b>862.8</b><br><b>(673.6 to 1,123.8)</b>         | <b>4.9</b><br><b>(2.9 to 8.1)</b>           | <b>-5.0</b><br><b>(-14.1 to 3.9)</b>              | <b>0.5</b><br><b>(-8.1 to 9.5)</b>                  |
| Sexually transmitted diseases excluding HIV                             | 3,068.1<br>(2,821.0 to 3,322.1)                  | 836.7<br>(647.6 to 1,100.0)                       | 3.7<br>(2.0 to 6.3)                         | -3.8<br>(-13.6 to 7.7)                            | 1.7<br>(-6.0 to 11.0)                               |
| Syphilis                                                                | 42.9<br>(35.8 to 52.2)                           | 30.3<br>(24.3 to 37.8)                            | 0.4<br>(0.3 to 0.5)                         | 25.9<br>(10.5 to 44.2)                            | 4.0<br>(-7.7 to 19.2)                               |
| Chlamydial infection                                                    | 89.3<br>(70.6 to 111.3)                          | 66.4<br>(51.9 to 83.8)                            | 0.5<br>(0.3 to 0.8)                         | -7.1<br>(-22.4 to 11.8)                           | 1.5<br>(-14.4 to 21.2)                              |
| Gonococcal infection                                                    | 79.1<br>(31.6 to 154.2)                          | 270.8<br>(93.0 to 527.6)                          | 1.0<br>(0.3 to 2.1)                         | -10.9<br>(-30.1 to 15.8)                          | 3.7<br>(-13.9 to 23.6)                              |
| Trichomoniasis                                                          | 400.2<br>(348.6 to 459.8)                        | 339.6<br>(293.7 to 393.3)                         | 0.4<br>(0.1 to 0.8)                         | -0.6<br>(-7.8 to 6.8)                             | -0.7<br>(-6.8 to 5.7)                               |
| Genital herpes                                                          | 2,626.5<br>(2,279.6 to 3,029.1)                  | 110.1<br>(92.3 to 131.2)                          | 0.7<br>(0.2 to 1.5)                         | 6.5<br>(0.0 to 12.2)                              | 0.1<br>(-6.0 to 6.2)                                |
| Other sexually transmitted diseases                                     | 23.5<br>(21.2 to 26.1)                           | 19.5<br>(16.7 to 22.9)                            | 0.8<br>(0.4 to 1.4)                         | -11.7<br>(-23.6 to 1.8)                           | 1.0<br>(-9.5 to 12.8)                               |
| Hepatitis                                                               | 453.9<br>(404.2 to 505.5)                        | 26.1<br>(19.7 to 33.4)                            | $< 0.05$<br>( $< 0.05$ to $< 0.05$ )        | -34.9<br>(-49.9 to -14.3)                         | -35.1<br>(-51.5 to -13.1)                           |
| Acute hepatitis A                                                       | 0.6<br>(0.2 to 1.1)                              | 7.8<br>(2.6 to 14.4)                              | $< 0.05$<br>( $< 0.05$ to $< 0.05$ )        | -38.2<br>(-73.6 to 51.6)                          | -36.9<br>(-74.9 to 64.5)                            |
| Hepatitis B                                                             | 183.2<br>(144.0 to 228.2)                        | 13.2<br>(10.3 to 16.9)                            | $< 0.05$<br>( $< 0.05$ to $< 0.05$ )        | -35.7<br>(-46.0 to -24.3)                         | -39.8<br>(-48.6 to -29.2)                           |
| Hepatitis C                                                             | 270.0<br>(241.7 to 299.0)                        | 3.3<br>(2.9 to 3.8)                               | $< 0.05$<br>( $< 0.05$ to $< 0.05$ )        | -13.7<br>(-32.8 to 9.3)                           | -8.4<br>(-33.8 to 24.0)                             |
| Acute hepatitis E                                                       | 0.1<br>(0.1 to 0.2)                              | 1.8<br>(1.5 to 2.1)                               | $< 0.05$<br>( $< 0.05$ to $< 0.05$ )        | -36.7<br>(-42.4 to -30.2)                         | -36.5<br>(-41.4 to -31.1)                           |
| Other infectious diseases                                               | 58.0<br>(49.4 to 68.4)                           | $< 0.05$<br>( $< 0.05$ to $< 0.05$ )              | 1.2<br>(0.7 to 1.9)                         | -7.3<br>(-22.8 to 10.7)                           | -0.9<br>(-19.9 to 22.5)                             |
| <b>Non-communicable diseases</b>                                        | <b>10,619.6</b><br><b>(10,577.3 to 10,666.1)</b> | <b>31,501.9†</b><br><b>(30,001.4 to 33,139.5)</b> | <b>1,147.9</b><br><b>(852.5 to 1,483.4)</b> | <b>10.2</b><br><b>(8.3 to 12.0)</b>               | <b>0.2</b><br><b>(-1.5 to 2.0)</b>                  |
| <b>Neoplasms</b>                                                        | <b>134.2</b><br><b>(128.8 to 139.6)</b>          | <b>46.3</b><br><b>(44.7 to 47.6)</b>              | <b>14.8</b><br><b>(11.0 to 19.1)</b>        | <b>42.5</b><br><b>(36.4 to 48.9)</b>              | <b>13.4</b><br><b>(8.6 to 18.4)</b>                 |
| Lip and oral cavity cancer                                              | 3.6<br>(3.3 to 3.8)                              | 1.0<br>(0.9 to 1.1)                               | 0.4<br>(0.3 to 0.5)                         | 35.7<br>(17.7 to 56.9)                            | 6.1<br>(-8.0 to 23.0)                               |
| Nasopharynx cancer                                                      | 0.3<br>(0.3 to 0.4)                              | 0.1<br>(0.1 to 0.1)                               | $< 0.05$<br>( $< 0.05$ to 0.1)              | 23.3<br>(12.9 to 34.4)                            | 2.6<br>(-6.0 to 11.5)                               |
| Other pharynx cancer                                                    | 0.8<br>(0.8 to 0.9)                              | 0.3<br>(0.3 to 0.3)                               | 0.1<br>(0.1 to 0.1)                         | 58.6<br>(38.2 to 83.9)                            | 23.0<br>(7.2 to 42.5)                               |
| Oesophageal cancer                                                      | 0.8<br>(0.8 to 0.9)                              | 0.8<br>(0.7 to 0.8)                               | 0.2<br>(0.1 to 0.2)                         | 41.3<br>(14.5 to 75.9)                            | 8.7<br>(-12.8 to 36.4)                              |
| Stomach cancer                                                          | 2.6<br>(2.4 to 2.9)                              | 1.4<br>(1.2 to 1.4)                               | 0.4<br>(0.3 to 0.5)                         | 45.2<br>(25.1 to 69.2)                            | 12.9<br>(-3.0 to 32.5)                              |
| Colon and rectum cancer                                                 | 20.4<br>(19.0 to 21.7)                           | 5.5<br>(5.1 to 5.8)                               | 1.9<br>(1.3 to 2.4)                         | 49.5<br>(33.8 to 66.5)                            | 16.1<br>(3.4 to 29.8)                               |
| Liver cancer                                                            | 0.3<br>(0.2 to 0.3)                              | 0.8<br>(0.8 to 0.9)                               | 0.2<br>(0.1 to 0.2)                         | 30.0<br>(19.4 to 41.9)                            | 0.7<br>(-7.7 to 9.5)                                |
| Liver cancer due to hepatitis B                                         | 0.2<br>(0.2 to 0.3)                              | 0.3<br>(0.2 to 0.3)                               | 0.1<br>( $< 0.05$ to 0.1)                   | 29.3<br>(17.4 to 42.4)                            | 1.3<br>(-8.1 to 11.5)                               |

| Cause                                              | Prevalence in thousands (95% UI)              | Incidence in thousands (95% UI)          | YLDs in thousands (95% UI)           |                                                   |                                                     |
|----------------------------------------------------|-----------------------------------------------|------------------------------------------|--------------------------------------|---------------------------------------------------|-----------------------------------------------------|
|                                                    | 2016 counts                                   | 2016 counts                              | 2016 counts                          | Percentage change in counts between 2006 and 2016 | Percentage change in age-standardised rates between |
| Liver cancer due to hepatitis C                    | 0.2<br>(0.2 to 0.2)                           | 0.2<br>(0.2 to 0.3)                      | 0.1<br>( $< 0.05$ to 0.1)            | 29.0<br>(16.8 to 42.4)                            | -1.5<br>(-10.6 to 9.1)                              |
| Liver cancer due to alcohol use                    | 0.1<br>(0.1 to 0.1)                           | 0.1<br>(0.1 to 0.2)                      | $< 0.05$<br>( $< 0.05$ to $< 0.05$ ) | 34.1<br>(21.1 to 50.1)                            | 3.5<br>(-6.8 to 16.2)                               |
| Liver cancer due to other causes                   | 0.1<br>(0.1 to 0.2)                           | 0.2<br>(0.1 to 0.2)                      | $< 0.05$<br>( $< 0.05$ to $< 0.05$ ) | 29.4<br>(16.8 to 43.2)                            | 0.4<br>(-9.4 to 11.4)                               |
| Gallbladder and biliary tract cancer               | 0.1<br>(0.1 to 0.2)                           | 0.2<br>(0.2 to 0.2)                      | $< 0.05$<br>( $< 0.05$ to 0.1)       | 13.2<br>(5.5 to 21.2)                             | -12.7<br>(-18.7 to -6.3)                            |
| Pancreatic cancer                                  | 0.7<br>(0.6 to 0.7)                           | 0.9<br>(0.8 to 1.0)                      | 0.2<br>(0.1 to 0.2)                  | 28.6<br>(18.6 to 39.5)                            | -0.6<br>(-8.1 to 7.6)                               |
| Larynx cancer                                      | 5.0<br>(4.6 to 5.4)                           | 1.4<br>(1.3 to 1.6)                      | 0.5<br>(0.4 to 0.7)                  | 45.4<br>(20.3 to 74.1)                            | 12.1<br>(-7.9 to 35.6)                              |
| Tracheal, bronchus, and lung cancer                | 6.7<br>(6.3 to 7.0)                           | 5.7<br>(5.4 to 6.0)                      | 1.3<br>(0.9 to 1.7)                  | 28.5<br>(10.1 to 49.7)                            | -0.8<br>(-15.3 to 16.3)                             |
| Malignant skin melanoma                            | 1.2<br>(1.0 to 1.5)                           | 0.3<br>(0.2 to 0.3)                      | 0.1<br>(0.1 to 0.1)                  | 55.3<br>(30.7 to 83.4)                            | 30.3<br>(9.8 to 54.2)                               |
| Non-melanoma skin cancer                           | 1.0<br>(0.8 to 1.2)                           | 2.7<br>(2.2 to 3.1)                      | $< 0.05$<br>( $< 0.05$ to 0.1)       | 9.6<br>(-10.9 to 34.2)                            | -15.3<br>(-31.1 to 4.1)                             |
| Non-melanoma skin cancer (squamous-cell carcinoma) | 0.9<br>(0.7 to 1.2)                           | 1.1<br>(0.9 to 1.3)                      | $< 0.05$<br>( $< 0.05$ to 0.1)       | 11.1<br>(-11.0 to 38.2)                           | -14.3<br>(-31.5 to 6.9)                             |
| Non-melanoma skin cancer (basal-cell carcinoma)    | 0.2<br>(0.2 to 0.4)                           | 1.6<br>(1.2 to 2.0)                      | $< 0.05$<br>( $< 0.05$ to $< 0.05$ ) | -11.0<br>(-27.1 to 9.0)                           | -28.9<br>(-41.5 to -13.9)                           |
| Breast cancer                                      | 20.0<br>(18.3 to 21.8)                        | 4.3<br>(3.9 to 4.6)                      | 1.7<br>(1.2 to 2.2)                  | 33.7<br>(16.3 to 55.4)                            | 7.3<br>(-6.6 to 24.4)                               |
| Cervical cancer                                    | 5.1<br>(4.6 to 5.6)                           | 1.3<br>(1.2 to 1.4)                      | 0.5<br>(0.3 to 0.6)                  | -9.1<br>(-26.3 to 12.5)                           | -17.9<br>(-33.1 to 0.4)                             |
| Uterine cancer                                     | 14.0<br>(12.5 to 15.7)                        | 3.0<br>(2.6 to 3.3)                      | 1.1<br>(0.7 to 1.4)                  | 51.7<br>(25.3 to 83.9)                            | 21.5<br>(0.9 to 47.2)                               |
| Ovarian cancer                                     | 1.6<br>(1.4 to 1.8)                           | 0.5<br>(0.4 to 0.6)                      | 0.2<br>(0.2 to 0.3)                  | 21.8<br>(-7.8 to 62.7)                            | 1.7<br>(-23.7 to 36.1)                              |
| Prostate cancer                                    | 33.3<br>(26.0 to 37.1)                        | 7.8<br>(6.2 to 8.6)                      | 3.1<br>(2.2 to 4.1)                  | 60.0<br>(42.4 to 81.4)                            | 23.3<br>(9.1 to 40.1)                               |
| Testicular cancer                                  | 0.5<br>(0.4 to 0.6)                           | 0.1<br>(0.1 to 0.1)                      | $< 0.05$<br>( $< 0.05$ to 0.1)       | 44.8<br>(4.5 to 96.5)                             | 43.8<br>(-0.5 to 106.1)                             |
| Kidney cancer                                      | 2.6<br>(2.4 to 2.8)                           | 0.7<br>(0.7 to 0.8)                      | 0.2<br>(0.2 to 0.3)                  | 31.4<br>(15.8 to 50.1)                            | 7.4<br>(-5.0 to 22.0)                               |
| Bladder cancer                                     | 5.5<br>(5.1 to 5.9)                           | 1.4<br>(1.3 to 1.5)                      | 0.5<br>(0.4 to 0.7)                  | 46.6<br>(27.5 to 68.8)                            | 13.6<br>(-1.5 to 31.3)                              |
| Brain and nervous system cancer                    | 1.5<br>(1.1 to 1.7)                           | 0.7<br>(0.5 to 0.8)                      | 0.2<br>(0.1 to 0.3)                  | 31.4<br>(17.5 to 45.7)                            | 12.0<br>(0.0 to 23.9)                               |
| Thyroid cancer                                     | 2.2<br>(2.0 to 2.4)                           | 0.4<br>(0.4 to 0.5)                      | 0.1<br>(0.1 to 0.2)                  | 58.7<br>(29.6 to 95.9)                            | 36.6<br>(12.1 to 67.1)                              |
| Mesothelioma                                       | $< 0.05$<br>( $< 0.05$ to $< 0.05$ )          | $< 0.05$<br>( $< 0.05$ to $< 0.05$ )     | $< 0.05$<br>( $< 0.05$ to $< 0.05$ ) | 2.0<br>(-6.2 to 16.9)                             | -17.0<br>(-23.4 to -6.5)                            |
| Hodgkin lymphoma                                   | 0.9<br>(0.2 to 1.0)                           | 0.2<br>(0.1 to 0.2)                      | 0.1<br>( $< 0.05$ to 0.1)            | 20.3<br>(9.9 to 34.1)                             | 12.2<br>(1.7 to 25.8)                               |
| Non-Hodgkin's lymphoma                             | 2.8<br>(2.6 to 3.1)                           | 0.8<br>(0.8 to 1.0)                      | 0.3<br>(0.2 to 0.4)                  | 46.7<br>(31.6 to 64.6)                            | 21.5<br>(9.5 to 35.8)                               |
| Multiple myeloma                                   | 0.9<br>(0.7 to 1.0)                           | 0.4<br>(0.4 to 0.5)                      | 0.2<br>(0.1 to 0.3)                  | 45.4<br>(18.5 to 78.5)                            | 13.4<br>(-8.2 to 39.6)                              |
| Leukaemia                                          | 2.4<br>(2.2 to 2.5)                           | 0.7<br>(0.7 to 0.8)                      | 0.3<br>(0.2 to 0.4)                  | 16.9<br>(8.8 to 25.8)                             | -1.5<br>(-8.6 to 5.8)                               |
| Acute lymphoid leukaemia                           | 0.3<br>(0.3 to 0.4)                           | 0.1<br>(0.1 to 0.1)                      | $< 0.05$<br>( $< 0.05$ to 0.1)       | 7.3<br>(-6.9 to 22.9)                             | 8.3<br>(-9.5 to 28.5)                               |
| Chronic lymphoid leukaemia                         | 0.9<br>(0.8 to 1.1)                           | 0.2<br>(0.2 to 0.2)                      | 0.1<br>(0.1 to 0.2)                  | 30.0<br>(12.2 to 51.6)                            | 2.2<br>(-11.9 to 18.7)                              |
| Acute myeloid leukaemia                            | 0.2<br>(0.2 to 0.3)                           | 0.2<br>(0.1 to 0.2)                      | $< 0.05$<br>( $< 0.05$ to 0.1)       | 12.8<br>(3.1 to 22.8)                             | -0.1<br>(-8.7 to 8.5)                               |
| Chronic myeloid leukaemia                          | 0.4<br>(0.3 to 0.4)                           | 0.1<br>(0.1 to 0.1)                      | $< 0.05$<br>( $< 0.05$ to 0.1)       | 3.1<br>(-8.5 to 15.3)                             | -15.3<br>(-24.7 to -5.7)                            |
| Other leukaemia                                    | 0.6<br>(0.5 to 0.6)                           | 0.1<br>(0.1 to 0.1)                      | 0.1<br>( $< 0.05$ to 0.1)            | 16.7<br>(1.5 to 32.9)                             | -5.7<br>(-17.3 to 6.5)                              |
| Other neoplasms                                    | 11.9<br>(10.3 to 13.6)                        | 3.1<br>(2.7 to 3.5)                      | 0.9<br>(0.6 to 1.2)                  | 84.6<br>(54.7 to 116.2)                           | 54.8<br>(30.2 to 81.3)                              |
| <b>Cardiovascular diseases</b>                     | <b>973.2</b><br><b>(940.8 to 1,003.9)</b>     | <b>112.7†</b><br><b>(107.2 to 118.5)</b> | <b>56.6</b><br><b>(41.2 to 74.0)</b> | <b>24.4</b><br><b>(20.3 to 28.5)</b>              | <b>-1.6</b><br><b>(-4.9 to 1.6)</b>                 |
| Rheumatic heart disease                            | 1.0<br>(0.9 to 1.1)                           | 0.4<br>(0.3 to 0.4)                      | 0.1<br>(0.1 to 0.1)                  | -2.1<br>(-15.3 to 13.3)                           | -18.2<br>(-28.9 to -5.6)                            |
| Ischaemic heart disease                            | 392.9<br>(371.6 to 413.7)                     | 50.5<br>(46.9 to 54.4)                   | 19.1<br>(13.3 to 25.9)               | 26.1<br>(21.1 to 31.3)                            | 0.3<br>(-3.7 to 4.4)                                |
| Cerebrovascular disease                            | 151.0<br>(141.6 to 160.7)                     | 21.4‡<br>(19.7 to 23.2)                  | 15.8<br>(11.5 to 19.9)               | 24.0<br>(15.4 to 33.8)                            | -3.2<br>(-9.7 to 4.3)                               |
| Ischaemic stroke                                   | 128.3<br>(115.9 to 140.7)                     | 15.1‡<br>(13.5 to 16.8)                  | 13.0<br>(9.4 to 16.4)                | 25.5<br>(15.2 to 37.8)                            | -2.7<br>(-10.8 to 6.6)                              |
| Hemorrhagic stroke                                 | 28.9<br>(26.0 to 32.1)                        | 6.3‡<br>(5.7 to 6.9)                     | 2.9<br>(2.1 to 3.7)                  | 17.6<br>(4.9 to 32.0)                             | -5.4<br>(-15.3 to 5.7)                              |
| Hypertensive heart disease                         | 32.5<br>(27.3 to 38.6)                        | --                                       | 2.6<br>(1.8 to 3.6)                  | 26.6<br>(13.8 to 40.9)                            | -1.4<br>(-11.5 to 9.8)                              |
| Cardiomyopathy and myocarditis                     | 13.4<br>(11.9 to 15.0)                        | 3.6†<br>(3.1 to 4.1)                     | 1.2<br>(0.8 to 1.7)                  | 16.8<br>(4.0 to 31.6)                             | -0.3<br>(-10.0 to 11.4)                             |
| Myocarditis                                        | 2.8<br>(2.5 to 3.1)                           | 3.6<br>(3.1 to 4.1)                      | 0.2<br>(0.1 to 0.3)                  | 9.8<br>(-4.7 to 27.3)                             | -0.0<br>(-13.1 to 14.3)                             |
| Alcoholic cardiomyopathy                           | 4.6<br>(3.8 to 5.5)                           | --                                       | 0.4<br>(0.2 to 0.6)                  | 21.2<br>(-3.6 to 50.1)                            | -0.4<br>(-20.1 to 23.3)                             |
| Other cardiomyopathy                               | 7.4<br>(6.4 to 8.6)                           | --                                       | 0.6<br>(0.4 to 0.9)                  | 16.7<br>(1.5 to 34.5)                             | -0.3<br>(-14.0 to 15.9)                             |
| Atrial fibrillation and flutter                    | 119.8<br>(104.4 to 138.8)                     | 9.2<br>(7.8 to 10.6)                     | 9.4<br>(6.3 to 13.1)                 | 28.6<br>(20.9 to 36.8)                            | -0.2<br>(-6.1 to 6.4)                               |
| Peripheral vascular disease                        | 276.8<br>(240.8 to 319.7)                     | 26.0<br>(22.4 to 30.2)                   | 1.2<br>(0.6 to 2.3)                  | 26.2<br>(18.0 to 35.7)                            | -3.5<br>(-9.9 to 3.7)                               |
| Endocarditis                                       | 0.7<br>(0.6 to 0.9)                           | 1.7<br>(1.5 to 1.9)                      | 0.1<br>( $< 0.05$ to 0.1)            | 21.2<br>(2.8 to 42.6)                             | -3.1<br>(-16.8 to 12.2)                             |
| Other cardiovascular and circulatory diseases      | 136.8<br>(115.8 to 162.0)                     | --                                       | 7.1<br>(4.8 to 10.1)                 | 16.5<br>(6.9 to 27.1)                             | -4.3<br>(-12.1 to 3.8)                              |
| <b>Chronic respiratory diseases</b>                | <b>1,392.0</b><br><b>(1,332.1 to 1,455.0)</b> | <b>202.0†</b><br><b>(189.7 to 215.1)</b> | <b>45.3</b><br><b>(32.9 to 60.7)</b> | <b>3.8</b><br><b>(-1.7 to 10.1)</b>               | <b>2.5</b><br><b>(-2.6 to 8.4)</b>                  |
| Chronic obstructive pulmonary disease              | 555.0<br>(518.3 to 605.3)                     | 34.2<br>(31.8 to 37.1)                   | 9.8<br>(7.7 to 12.9)                 | 20.2<br>(1.7 to 39.5)                             | -2.1<br>(-16.5 to 14.0)                             |
| Pneumoconiosis                                     | 0.8<br>(0.7 to 0.8)                           | 0.1<br>(0.1 to 0.1)                      | 0.1<br>(0.1 to 0.2)                  | 31.9<br>(18.2 to 47.8)                            | 3.6<br>(-6.2 to 14.8)                               |
| Silicosis                                          | 0.2<br>(0.1 to 0.2)                           | $< 0.05$<br>( $< 0.05$ to $< 0.05$ )     | $< 0.05$<br>( $< 0.05$ to $< 0.05$ ) | 29.3<br>(23.6 to 35.5)                            | 4.4<br>(-0.1 to 9.2)                                |



| Cause                                                          | Prevalence in thousands (95% UI)        | Incidence in thousands (95% UI)         | YLDs in thousands (95% UI)        |                                                   |                                                     |
|----------------------------------------------------------------|-----------------------------------------|-----------------------------------------|-----------------------------------|---------------------------------------------------|-----------------------------------------------------|
|                                                                | 2016 counts                             | 2016 counts                             | 2016 counts                       | Percentage change in counts between 2006 and 2016 | Percentage change in age-standardised rates between |
| Asbestosis                                                     | 0.3<br>(0.2 to 0.3)                     | < 0.05<br>(< 0.05 to < 0.05)            | < 0.05<br>(< 0.05 to 0.1)         | 28.2<br>(-0.1 to 66.5)                            | 0.3<br>(-19.5 to 26.8)                              |
| Coal workers pneumoconiosis                                    | --                                      | --                                      | --                                | --                                                | --                                                  |
| Other pneumoconiosis                                           | 0.3<br>(0.3 to 0.4)                     | < 0.05<br>(< 0.05 to < 0.05)            | < 0.05<br>(< 0.05 to 0.1)         | 36.6<br>(21.6 to 55.9)                            | 6.2<br>(-5.5 to 20.9)                               |
| Asthma                                                         | 877.6<br>(813.6 to 944.5)               | 167.2<br>(155.2 to 180.1)               | 34.4<br>(22.5 to 49.4)            | -0.7<br>(-5.5 to 5.0)                             | 3.1<br>(-2.3 to 10.1)                               |
| Interstitial lung disease and pulmonary sarcoidosis            | 5.5<br>(4.9 to 6.0)                     | 0.5<br>(0.5 to 0.6)                     | 0.6<br>(0.4 to 0.8)               | 27.5<br>(14.9 to 40.8)                            | 4.2<br>(-5.5 to 14.3)                               |
| Other chronic respiratory diseases                             | --                                      | --                                      | 0.5<br>(0.3 to 0.6)               | 24.8<br>(1.4 to 51.2)                             | 31.0<br>(3.0 to 64.8)                               |
| <b>Cirrhosis and other chronic liver diseases</b>              | <b>110.9<br/>(104.9 to 116.9)</b>       | <b>2.5<br/>(2.4 to 2.6)</b>             | <b>2.3<br/>(1.6 to 3.1)</b>       | <b>25.9<br/>(13.7 to 37.9)</b>                    | <b>8.1<br/>(-2.2 to 19.0)</b>                       |
| Cirrhosis and other chronic liver diseases due to hepatitis B  | 12.9<br>(10.7 to 15.3)                  | 0.3<br>(0.2 to 0.4)                     | 0.2<br>(0.2 to 0.4)               | 31.1<br>(-0.9 to 67.5)                            | 8.1<br>(-16.5 to 37.2)                              |
| Cirrhosis and other chronic liver diseases due to hepatitis C  | 37.1<br>(33.3 to 40.9)                  | 0.8<br>(0.8 to 0.9)                     | 0.7<br>(0.5 to 1.0)               | 29.6<br>(7.8 to 55.2)                             | 7.7<br>(-9.6 to 29.1)                               |
| Cirrhosis and other chronic liver diseases due to alcohol use  | 40.3<br>(36.7 to 44.0)                  | 0.9<br>(0.9 to 1.0)                     | 0.8<br>(0.5 to 1.1)               | 34.1<br>(13.8 to 59.7)                            | 9.8<br>(-6.8 to 29.8)                               |
| Cirrhosis and other chronic liver diseases due to other causes | 20.6<br>(18.7 to 22.6)                  | 0.4<br>(0.4 to 0.5)                     | 0.6<br>(0.4 to 0.8)               | 10.7<br>(-8.5 to 33.1)                            | 7.0<br>(-13.4 to 30.6)                              |
| <b>Digestive diseases</b>                                      | <b>479.9<br/>(448.9 to 513.6)</b>       | <b>373.9†<br/>(347.9 to 404.1)</b>      | <b>16.6<br/>(11.6 to 22.5)</b>    | <b>21.2<br/>(10.3 to 33.8)</b>                    | <b>7.5<br/>(-1.7 to 18.2)</b>                       |
| Peptic ulcer disease                                           | 170.4<br>(152.5 to 192.0)               | 13.4<br>(12.0 to 15.0)                  | 3.4<br>(2.2 to 5.1)               | 41.6<br>(16.4 to 71.7)                            | 26.3<br>(5.0 to 52.1)                               |
| Gastritis and duodenitis                                       | 195.3<br>(171.8 to 221.6)               | 88.8<br>(78.9 to 99.7)                  | 3.5<br>(2.3 to 5.2)               | 50.0<br>(26.5 to 79.1)                            | 30.8<br>(10.5 to 56.1)                              |
| Appendicitis                                                   | 0.7<br>(0.6 to 0.7)                     | 17.6<br>(16.4 to 18.9)                  | 0.2<br>(0.1 to 0.3)               | 3.3<br>(-23.6 to 37.8)                            | 4.4<br>(-28.6 to 49.0)                              |
| Paralytic ileus and intestinal obstruction                     | 0.2<br>(0.2 to 0.2)                     | 5.4<br>(4.9 to 6.0)                     | 0.1<br>(< 0.05 to 0.1)            | 20.4<br>(15.2 to 25.9)                            | 6.6<br>(3.2 to 10.2)                                |
| Inguinal, femoral, and abdominal hernia                        | 102.0<br>(91.2 to 112.4)                | 96.4<br>(82.9 to 110.9)                 | 6.9<br>(4.7 to 9.7)               | 3.8<br>(-5.7 to 13.8)                             | -5.5<br>(-13.8 to 3.4)                              |
| Inflammatory bowel disease                                     | 2.6<br>(2.4 to 2.9)                     | 2.1<br>(2.0 to 2.2)                     | 0.4<br>(0.2 to 0.5)               | 9.1<br>(-10.7 to 31.8)                            | -4.5<br>(-19.8 to 13.1)                             |
| Vascular intestinal disorders                                  | 0.2<br>(0.1 to 0.2)                     | 0.9<br>(0.8 to 1.0)                     | 0.1<br>(< 0.05 to 0.1)            | 30.0<br>(21.8 to 39.5)                            | 8.7<br>(3.3 to 15.1)                                |
| Gallbladder and biliary diseases                               | 22.0<br>(19.5 to 24.7)                  | 143.3<br>(124.5 to 167.0)               | 0.6<br>(0.4 to 0.9)               | 24.1<br>(-0.9 to 54.8)                            | 8.5<br>(-11.3 to 32.1)                              |
| Pancreatitis                                                   | 0.7<br>(0.6 to 0.8)                     | 6.1<br>(5.5 to 6.8)                     | 0.1<br>(0.1 to 0.1)               | 35.6<br>(30.3 to 41.6)                            | 17.4<br>(14.1 to 21.2)                              |
| Other digestive diseases                                       | --                                      | --                                      | 1.3<br>(1.0 to 1.8)               | 24.9<br>(14.0 to 36.6)                            | 10.2<br>(1.0 to 20.4)                               |
| <b>Neurological disorders</b>                                  | <b>4,568.4<br/>(4,369.3 to 4,794.4)</b> | <b>2,044.2<br/>(1,764.9 to 2,337.6)</b> | <b>125.6<br/>(85.8 to 169.4)</b>  | <b>4.4<br/>(-6.6 to 16.7)</b>                     | <b>-0.4<br/>(-12.5 to 13.2)</b>                     |
| Alzheimer's disease and other dementias                        | 103.2<br>(86.5 to 122.3)                | 17.8<br>(14.8 to 21.4)                  | 15.4<br>(10.6 to 20.5)            | 29.0<br>(20.5 to 38.3)                            | -3.6<br>(-10.0 to 3.3)                              |
| Parkinson's disease                                            | 12.7<br>(10.0 to 15.9)                  | 1.4<br>(1.1 to 1.9)                     | 1.5<br>(0.9 to 2.1)               | 34.9<br>(19.2 to 52.9)                            | 3.2<br>(-9.1 to 17.5)                               |
| Epilepsy                                                       | 33.2<br>(8.4 to 58.0)                   | 3.6<br>(0.9 to 6.2)                     | 8.4<br>(1.8 to 18.6)              | 2.1<br>(-80.4 to 415.5)                           | 0.5<br>(-80.7 to 413.8)                             |
| Multiple sclerosis                                             | 2.0<br>(1.8 to 2.2)                     | 0.1<br>(0.1 to 0.1)                     | 0.6<br>(0.4 to 0.8)               | 15.0<br>(-1.1 to 32.4)                            | 6.1<br>(-7.6 to 20.2)                               |
| Motor neuron disease                                           | 0.5<br>(0.5 to 0.6)                     | 0.1<br>(0.1 to 0.1)                     | 0.1<br>(0.1 to 0.1)               | 11.6<br>(7.2 to 16.2)                             | 1.8<br>(-1.7 to 5.4)                                |
| Migraine                                                       | 1,708.8<br>(1,601.8 to 1,816.7)         | 175.3<br>(163.4 to 188.6)               | 81.7<br>(53.1 to 114.2)           | 0.7<br>(-2.8 to 4.6)                              | -0.4<br>(-3.6 to 3.2)                               |
| Tension-type headache                                          | 3,454.8<br>(3,110.0 to 3,848.0)         | 1,845.9<br>(1,568.8 to 2,135.5)         | 16.0<br>(10.1 to 23.7)            | 1.9<br>(-3.2 to 8.0)                              | -1.0<br>(-5.5 to 4.2)                               |
| Other neurological disorders                                   | < 0.05<br>(< 0.05 to 0.1)               | 0.1<br>(0.1 to 0.1)                     | 1.9<br>(0.7 to 3.7)               | 18.8<br>(-61.2 to 269.1)                          | 18.6<br>(-65.2 to 291.4)                            |
| <b>Mental and substance use disorders</b>                      | <b>1,929.5<br/>(1,869.5 to 1,989.8)</b> | <b>834.8†<br/>(771.1 to 904.0)</b>      | <b>265.7<br/>(190.8 to 346.2)</b> | <b>2.1<br/>(-0.4 to 4.7)</b>                      | <b>-1.2<br/>(-3.3 to 1.0)</b>                       |
| Schizophrenia                                                  | 27.3<br>(24.1 to 30.9)                  | 1.4<br>(1.2 to 1.6)                     | 17.5<br>(13.0 to 22.1)            | 5.2<br>(-3.8 to 15.9)                             | 1.4<br>(-7.2 to 11.2)                               |
| Alcohol use disorders                                          | 209.8<br>(188.0 to 235.4)               | 102.5<br>(90.1 to 116.7)                | 21.0<br>(14.3 to 28.9)            | 4.9<br>(-4.5 to 15.8)                             | 3.5<br>(-5.2 to 13.8)                               |
| Drug use disorders                                             | 80.0<br>(74.0 to 86.7)                  | 9.5<br>(8.5 to 10.6)                    | 17.3<br>(12.2 to 23.0)            | 5.5<br>(-3.4 to 15.3)                             | 5.7<br>(-3.8 to 15.1)                               |
| Opioid use disorders                                           | 30.8<br>(26.0 to 36.8)                  | 3.5<br>(2.9 to 4.1)                     | 12.7<br>(8.7 to 17.4)             | 8.0<br>(-3.4 to 21.0)                             | 7.2<br>(-3.8 to 19.5)                               |
| Cocaine use disorders                                          | 12.8<br>(11.2 to 14.7)                  | 0.6<br>(0.6 to 0.8)                     | 1.7<br>(1.1 to 2.6)               | 1.0<br>(-17.5 to 24.7)                            | 2.4<br>(-17.1 to 26.3)                              |
| Amphetamine use disorders                                      | 1.0<br>(0.7 to 1.3)                     | 0.2<br>(0.1 to 0.2)                     | 0.1<br>(0.1 to 0.2)               | -2.7<br>(-17.2 to 19.7)                           | 1.3<br>(-15.6 to 28.5)                              |
| Cannabis use disorders                                         | 31.8<br>(26.7 to 37.8)                  | 4.3<br>(3.6 to 5.1)                     | 0.9<br>(0.6 to 1.4)               | -6.5<br>(-19.5 to 9.3)                            | 0.3<br>(-14.2 to 16.9)                              |
| Other drug use disorders                                       | 5.1<br>(4.5 to 5.7)                     | 0.9<br>(0.8 to 1.0)                     | 1.8<br>(1.1 to 2.6)               | 1.2<br>(-20.2 to 26.4)                            | 2.4<br>(-19.8 to 27.9)                              |
| Depressive disorders                                           | 522.0<br>(486.2 to 557.1)               | 609.8<br>(550.3 to 678.3)               | 92.1<br>(62.8 to 123.6)           | 3.3<br>(-2.4 to 9.5)                              | -5.9<br>(-10.5 to -0.9)                             |
| Major depressive disorder                                      | 386.4<br>(348.8 to 425.9)               | 585.3<br>(525.7 to 653.9)               | 78.2<br>(53.0 to 105.8)           | 2.4<br>(-4.4 to 9.8)                              | -6.9<br>(-12.0 to -0.8)                             |
| Dysthymia                                                      | 145.1<br>(127.2 to 166.0)               | 24.5<br>(21.4 to 28.4)                  | 13.9<br>(9.4 to 20.2)             | 8.5<br>(3.8 to 13.5)                              | -0.1<br>(-3.8 to 3.8)                               |
| Bipolar disorder                                               | 108.0<br>(93.8 to 123.6)                | 7.3<br>(6.4 to 8.4)                     | 22.1<br>(13.6 to 32.6)            | -0.0<br>(-5.0 to 6.0)                             | -0.2<br>(-5.1 to 5.0)                               |
| Anxiety disorders                                              | 502.4<br>(456.5 to 552.8)               | 68.4<br>(63.3 to 74.0)                  | 48.3<br>(33.8 to 65.0)            | 1.3<br>(-2.3 to 5.2)                              | -0.2<br>(-3.6 to 3.5)                               |
| Eating disorders                                               | 16.5<br>(13.4 to 20.0)                  | 6.9<br>(5.2 to 9.1)                     | 3.3<br>(2.1 to 4.8)               | -1.5<br>(-12.7 to 11.8)                           | 14.5<br>(1.3 to 29.3)                               |
| Anorexia nervosa                                               | 2.7<br>(2.0 to 3.7)                     | 1.1<br>(0.8 to 1.4)                     | 0.6<br>(0.3 to 0.9)               | -0.8<br>(-22.0 to 27.3)                           | 12.5<br>(-12.4 to 45.1)                             |
| Bulimia nervosa                                                | 12.9<br>(9.7 to 16.9)                   | 5.9<br>(4.2 to 8.0)                     | 2.7<br>(1.6 to 4.1)               | -1.6<br>(-14.9 to 13.8)                           | 15.0<br>(-0.7 to 32.1)                              |
| Autistic spectrum disorders                                    | 95.4<br>(86.1 to 106.8)                 | 0.4<br>(0.3 to 0.6)                     | 14.4<br>(9.8 to 20.2)             | -0.9<br>(-6.1 to 4.3)                             | 0.2<br>(-5.1 to 5.5)                                |
| Autism                                                         | 32.0<br>(27.4 to 37.2)                  | < 0.05<br>(< 0.05 to 0.1)               | 8.1<br>(5.2 to 11.8)              | -0.6<br>(-8.7 to 8.2)                             | 0.1<br>(-8.0 to 9.3)                                |
| Asperger syndrome and other autistic spectrum disorders        | 63.9<br>(53.3 to 76.3)                  | 0.4<br>(0.2 to 0.5)                     | 6.4<br>(4.1 to 9.3)               | -1.2<br>(-5.8 to 3.5)                             | 0.3<br>(-4.6 to 5.0)                                |

| Cause                                                      | Prevalence in thousands (95% UI)              | Incidence in thousands (95% UI)                              | YLDs in thousands (95% UI)              |                                                   |                                                     |
|------------------------------------------------------------|-----------------------------------------------|--------------------------------------------------------------|-----------------------------------------|---------------------------------------------------|-----------------------------------------------------|
|                                                            | 2016 counts                                   | 2016 counts                                                  | 2016 counts                             | Percentage change in counts between 2006 and 2016 | Percentage change in age-standardised rates between |
| Attention-deficit/hyperactivity disorder                   | 177.1<br>(160.2 to 196.3)                     | 5.7<br>(5.0 to 6.6)                                          | 2.1<br>(1.3 to 3.4)                     | -8.6<br>(-13.5 to -3.5)                           | 0.3<br>(-4.6 to 5.7)                                |
| Conduct disorder                                           | 51.4<br>(41.7 to 61.9)                        | 17.0<br>(13.1 to 20.7)                                       | 6.2<br>(3.8 to 9.5)                     | -16.0<br>(-21.6 to -9.9)                          | 0.1<br>(-6.6 to 7.3)                                |
| Idiopathic developmental intellectual disability           | 58.8<br>(24.6 to 93.0)                        | --                                                           | 2.6<br>(1.0 to 4.7)                     | -9.2<br>(-16.3 to -2.3)                           | -7.4<br>(-14.7 to -0.8)                             |
| Other mental and substance use disorders                   | 253.8<br>(225.2 to 291.4)                     | 5.9<br>(5.3 to 6.6)                                          | 18.8<br>(13.0 to 26.9)                  | 5.5<br>(1.0 to 10.6)                              | 0.1<br>(-4.2 to 5.2)                                |
| <b>Diabetes, urogenital, blood, and endocrine diseases</b> | <b>4,074.6</b><br><b>(3,980.1 to 4,178.4)</b> | <b>1,233.7<sup>+</sup></b><br><b>(1,155.2 to 1,316.1)</b>    | <b>104.4</b><br><b>(73.8 to 141.2)</b>  | <b>18.9</b><br><b>(12.7 to 25.6)</b>              | <b>2.6</b><br><b>(-2.3 to 7.8)</b>                  |
| Diabetes mellitus                                          | 673.7<br>(606.4 to 747.8)                     | 30.1<br>(27.0 to 33.8)                                       | 60.3<br>(41.5 to 83.1)                  | 25.0<br>(15.6 to 36.2)                            | 5.2<br>(-2.6 to 14.5)                               |
| Acute glomerulonephritis                                   | 0.1<br>(0.1 to 0.2)                           | 2.3<br>(2.0 to 2.6)                                          | < 0.05<br>(< 0.05 to < 0.05)            | 7.4<br>(2.1 to 12.8)                              | 0.2<br>(-3.0 to 3.6)                                |
| Chronic kidney disease                                     | 513.6<br>(461.8 to 565.4)                     | 36.1<br>(31.8 to 40.3)                                       | 13.5<br>(9.9 to 17.6)                   | 30.1<br>(18.2 to 44.1)                            | 7.9<br>(-2.0 to 19.2)                               |
| Chronic kidney disease due to diabetes mellitus            | 194.9<br>(164.6 to 227.8)                     | 14.0<br>(11.6 to 16.5)                                       | 4.8<br>(3.5 to 6.4)                     | 38.7<br>(21.9 to 60.1)                            | 12.6<br>(-0.8 to 29.2)                              |
| Chronic kidney disease due to hypertension                 | 110.1<br>(93.9 to 126.4)                      | 9.4<br>(7.7 to 11.2)                                         | 2.1<br>(1.5 to 2.8)                     | 30.4<br>(13.5 to 50.1)                            | 1.0<br>(-12.5 to 16.8)                              |
| Chronic kidney disease due to glomerulonephritis           | 104.0<br>(88.5 to 120.4)                      | 5.3<br>(4.2 to 6.5)                                          | 3.7<br>(2.6 to 5.0)                     | 23.7<br>(9.6 to 39.4)                             | 7.6<br>(-4.3 to 20.4)                               |
| Chronic kidney disease due to other causes                 | 104.6<br>(84.7 to 126.5)                      | 7.4<br>(5.9 to 9.0)                                          | 2.9<br>(2.0 to 3.9)                     | 25.3<br>(11.8 to 40.5)                            | 6.0<br>(-4.9 to 17.8)                               |
| Urinary diseases and male infertility                      | 279.2<br>(247.3 to 311.3)                     | 741.6 <sup>+</sup><br>(669.1 to 826.5)                       | 7.6<br>(4.8 to 11.0)                    | 22.8<br>(14.6 to 31.4)                            | -1.8<br>(-7.9 to 4.7)                               |
| Interstitial nephritis and urinary tract infections        | 12.6<br>(11.2 to 14.2)                        | 658.2<br>(586.0 to 740.4)                                    | 0.4<br>(0.2 to 0.6)                     | 2.0<br>(-9.8 to 17.6)                             | 1.2<br>(-10.6 to 15.0)                              |
| Urolithiasis                                               | 2.2<br>(1.9 to 2.5)                           | 57.8<br>(50.6 to 65.6)                                       | 0.2<br>(0.1 to 0.2)                     | 13.8<br>(7.6 to 20.0)                             | 2.3<br>(-1.7 to 6.5)                                |
| Benign prostatic hyperplasia                               | 197.6<br>(167.5 to 230.4)                     | 25.7<br>(21.6 to 30.6)                                       | 6.5<br>(4.0 to 9.5)                     | 30.4<br>(20.7 to 40.7)                            | -1.0<br>(-8.4 to 6.7)                               |
| Male infertility                                           | 53.7<br>(42.1 to 69.3)                        | --                                                           | 0.3<br>(0.1 to 0.6)                     | -23.4<br>(-30.6 to -15.7)                         | -7.1<br>(-13.9 to 0.4)                              |
| Other urinary diseases                                     | --                                            | --                                                           | 0.2<br>(0.1 to 0.3)                     | -14.9<br>(-22.8 to -5.2)                          | -16.3<br>(-24.5 to -7.2)                            |
| Gynecological diseases                                     | 1,387.2<br>(1,322.5 to 1,446.2)               | 397.1 <sup>+</sup><br>(372.5 to 421.6)                       | 14.6<br>(9.8 to 21.1)                   | -2.7<br>(-8.0 to 2.6)                             | -3.0<br>(-7.6 to 1.7)                               |
| Uterine fibroids                                           | 133.8<br>(116.7 to 153.3)                     | 11.6<br>(9.9 to 13.7)                                        | 2.3<br>(1.4 to 3.7)                     | 1.5<br>(-12.9 to 19.4)                            | -5.9<br>(-18.8 to 9.8)                              |
| Polycystic ovarian syndrome                                | 1.2<br>(0.8 to 1.5)                           | 11.2<br>(7.8 to 15.6)                                        | < 0.05<br>(< 0.05 to < 0.05)            | -23.4<br>(-47.1 to 10.1)                          | -2.5<br>(-32.4 to 39.4)                             |
| Female infertility                                         | 111.3<br>(77.5 to 156.6)                      | --                                                           | 0.6<br>(0.2 to 1.3)                     | -15.2<br>(-23.1 to -5.9)                          | 4.5<br>(-3.1 to 13.3)                               |
| Endometriosis                                              | 1.1<br>(0.9 to 1.3)                           | 4.4<br>(3.6 to 5.4)                                          | 0.1<br>(0.1 to 0.2)                     | 4.9<br>(-23.7 to 42.5)                            | -0.8<br>(-25.3 to 30.3)                             |
| Genital prolapse                                           | 458.0<br>(392.0 to 525.6)                     | 22.4<br>(19.0 to 26.4)                                       | 1.4<br>(0.7 to 2.6)                     | 19.2<br>(8.7 to 29.8)                             | -2.9<br>(-11.2 to 5.2)                              |
| Premenstrual syndrome                                      | 733.1<br>(695.4 to 771.2)                     | 246.7<br>(230.7 to 261.7)                                    | 6.1<br>(3.8 to 9.3)                     | -5.9<br>(-12.6 to 1.2)                            | -1.0<br>(-7.6 to 6.0)                               |
| Other gynecological diseases                               | 120.2<br>(103.1 to 139.0)                     | 100.8<br>(83.2 to 120.6)                                     | 4.0<br>(2.6 to 5.7)                     | -4.2<br>(-13.8 to 6.5)                            | -6.0<br>(-14.9 to 3.0)                              |
| Hemoglobinopathies and hemolytic anaemias                  | 1,939.7<br>(1,840.1 to 2,052.1)               | --                                                           | 3.0<br>(1.9 to 4.6)                     | -6.3<br>(-17.8 to 7.2)                            | -9.1<br>(-21.5 to 5.6)                              |
| Thalassemias                                               | < 0.05<br>(< 0.05 to 0.1)                     | --                                                           | < 0.05<br>(< 0.05 to < 0.05)            | -14.9<br>(-34.7 to 7.9)                           | -6.2<br>(-28.4 to 18.8)                             |
| Thalassaemias trait                                        | 12.1<br>(10.2 to 13.8)                        | --                                                           | 0.1<br>(0.1 to 0.2)                     | 7.3<br>(-8.9 to 28.3)                             | 5.7<br>(-11.5 to 27.9)                              |
| Sickle cell disorders                                      | 0.6<br>(0.6 to 0.7)                           | --                                                           | 0.1<br>(0.1 to 0.1)                     | 4.5<br>(-7.5 to 19.2)                             | 16.5<br>(0.2 to 36.5)                               |
| Sickle cell trait                                          | 373.2<br>(357.0 to 393.1)                     | --                                                           | 1.1<br>(0.7 to 1.7)                     | 0.2<br>(-16.0 to 19.8)                            | 0.8<br>(-15.8 to 20.6)                              |
| G6PD deficiency                                            | 359.0<br>(325.9 to 400.2)                     | --                                                           | < 0.05<br>(< 0.05 to 0.1)               | 18.9<br>(-5.7 to 46.7)                            | 14.8<br>(-9.1 to 44.8)                              |
| G6PD trait                                                 | 1,170.9<br>(1,082.3 to 1,261.3)               | --                                                           | < 0.05<br>(< 0.05 to < 0.05)            | 23.9<br>(1.8 to 52.5)                             | 22.1<br>(0.7 to 49.7)                               |
| Other hemoglobinopathies and hemolytic anaemias            | 108.4<br>(93.6 to 125.2)                      | --                                                           | 1.7<br>(1.1 to 2.6)                     | -11.5<br>(-22.9 to 1.9)                           | -16.7<br>(-29.2 to -1.7)                            |
| Endocrine, metabolic, blood, and immune disorders          | 185.9<br>(170.8 to 201.2)                     | 26.5<br>(23.8 to 29.5)                                       | 5.3<br>(3.6 to 7.3)                     | 12.3<br>(4.8 to 20.5)                             | -2.0<br>(-9.4 to 6.2)                               |
| <b>Musculoskeletal disorders</b>                           | <b>2,195.7</b><br><b>(2,091.7 to 2,298.7)</b> | <b>1,011.2</b><br><b>(908.5 to 1,136.6)</b>                  | <b>234.6</b><br><b>(170.1 to 306.2)</b> | <b>15.9</b><br><b>(11.7 to 20.2)</b>              | <b>1.9</b><br><b>(-1.6 to 5.6)</b>                  |
| Rheumatoid arthritis                                       | 65.5<br>(58.6 to 73.3)                        | 3.3<br>(2.9 to 3.7)                                          | 15.4<br>(10.5 to 20.5)                  | 21.0<br>(12.2 to 31.0)                            | 1.7<br>(-5.2 to 9.5)                                |
| Osteoarthritis                                             | 606.2<br>(565.1 to 647.0)                     | 27.9<br>(25.7 to 30.1)                                       | 37.3<br>(26.5 to 50.4)                  | 29.2<br>(24.6 to 34.1)                            | 3.5<br>(-0.1 to 7.3)                                |
| Low back and neck pain                                     | 1,101.1<br>(1,027.0 to 1,180.0)               | 412.2<br>(368.9 to 458.6)                                    | 124.2<br>(87.0 to 164.8)                | 21.6<br>(15.6 to 28.2)                            | 8.3<br>(3.3 to 14.0)                                |
| Low back pain                                              | 622.4<br>(544.8 to 704.6)                     | 297.6<br>(258.0 to 342.3)                                    | 70.5<br>(49.4 to 93.1)                  | 27.8<br>(17.3 to 39.0)                            | 15.1<br>(6.4 to 24.7)                               |
| Neck pain                                                  | 539.4<br>(460.7 to 627.6)                     | 114.7<br>(98.6 to 135.0)                                     | 53.7<br>(36.6 to 76.9)                  | 14.2<br>(9.8 to 19.4)                             | 0.0<br>(-2.1 to 2.1)                                |
| Gout                                                       | 48.2<br>(42.7 to 54.7)                        | 9.4<br>(8.2 to 10.7)                                         | 1.5<br>(1.0 to 2.1)                     | 18.1<br>(2.4 to 38.2)                             | 0.2<br>(-13.2 to 16.7)                              |
| Other musculoskeletal disorders                            | 654.4<br>(557.8 to 758.9)                     | 558.5<br>(461.9 to 680.7)                                    | 56.2<br>(38.2 to 80.1)                  | -2.1<br>(-11.7 to 8.0)                            | -10.1<br>(-17.9 to -1.7)                            |
| <b>Other non-communicable diseases</b>                     | <b>8,820.1</b><br><b>(8,705.7 to 8,943.1)</b> | <b>25,640.6<sup>+</sup></b><br><b>(24,131.3 to 27,261.7)</b> | <b>282.0</b><br><b>(192.6 to 401.7)</b> | <b>10.1</b><br><b>(8.8 to 11.4)</b>               | <b>-1.3</b><br><b>(-2.3 to -0.3)</b>                |
| Congenital anomalies                                       | 78.0<br>(65.8 to 91.0)                        | --                                                           | 8.4<br>(5.9 to 11.5)                    | -2.7<br>(-8.9 to 3.8)                             | -2.3<br>(-8.4 to 4.1)                               |
| Neural tube defects                                        | 2.0<br>(1.8 to 2.2)                           | --                                                           | 0.6<br>(0.4 to 0.8)                     | 6.8<br>(-1.9 to 15.1)                             | 5.2<br>(-3.2 to 13.5)                               |
| Congenital heart anomalies                                 | 19.2<br>(16.9 to 21.7)                        | --                                                           | 0.9<br>(0.4 to 1.6)                     | 2.4<br>(-9.3 to 14.4)                             | 2.4<br>(-9.0 to 14.4)                               |
| Orofacial clefts                                           | 5.2<br>(4.5 to 6.0)                           | --                                                           | 0.1<br>(< 0.05 to 0.1)                  | -2.9<br>(-17.2 to 13.9)                           | -4.0<br>(-18.2 to 12.5)                             |
| Down's syndrome                                            | 5.6<br>(4.8 to 6.5)                           | --                                                           | 0.5<br>(0.4 to 0.8)                     | -9.1<br>(-19.4 to 3.4)                            | -6.3<br>(-16.8 to 6.7)                              |
| Turner syndrome                                            | 1.5<br>(1.3 to 1.8)                           | --                                                           | < 0.05<br>(< 0.05 to < 0.05)            | -3.5<br>(-17.7 to 11.5)                           | 2.8<br>(-10.7 to 18.4)                              |
| Klinefelter syndrome                                       | 2.1<br>(1.8 to 2.5)                           | --                                                           | < 0.05<br>(< 0.05 to < 0.05)            | -9.9<br>(-31.3 to 20.0)                           | -0.1<br>(-25.1 to 35.3)                             |



| Cause                                         | Prevalence in thousands (95% UI)              | Incidence in thousands (95% UI)            | YLDs in thousands (95% UI)            |                                                   |                                                     |
|-----------------------------------------------|-----------------------------------------------|--------------------------------------------|---------------------------------------|---------------------------------------------------|-----------------------------------------------------|
|                                               | 2016 counts                                   | 2016 counts                                | 2016 counts                           | Percentage change in counts between 2006 and 2016 | Percentage change in age-standardised rates between |
| Other chromosomal abnormalities               | 4.5<br>(3.8 to 5.4)                           | --                                         | 0.5<br>(0.3 to 0.6)                   | -11.9<br>(-25.0 to 2.9)                           | 1.1<br>(-13.9 to 18.5)                              |
| Congenital musculoskeletal and limb anomalies | 8.1<br>(7.3 to 9.0)                           | --                                         | 1.2<br>(0.8 to 1.6)                   | 6.4<br>(-3.2 to 17.1)                             | 3.0<br>(-6.1 to 12.8)                               |
| Urogenital congenital anomalies               | 6.5<br>(5.6 to 7.5)                           | --                                         | 0.2<br>(0.1 to 0.4)                   | -11.8<br>(-27.8 to 7.6)                           | -1.4<br>(-20.2 to 21.4)                             |
| Digestive congenital anomalies                | 10.2<br>(9.1 to 11.6)                         | --                                         | 0.4<br>(0.3 to 0.6)                   | -6.6<br>(-22.1 to 13.2)                           | -7.1<br>(-22.1 to 13.0)                             |
| Other congenital anomalies                    | 36.0<br>(22.1 to 54.5)                        | --                                         | 3.9<br>(2.4 to 6.0)                   | -4.4<br>(-16.2 to 8.2)                            | -5.5<br>(-17.3 to 6.3)                              |
| Skin and subcutaneous diseases                | 3,855.6<br>(3,742.5 to 3,964.2)               | 10,069.7<br>(9,389.5 to 10,848.3)          | 85.5<br>(57.5 to 125.5)               | -0.8<br>(-2.8 to 1.0)                             | 1.0<br>(-0.8 to 2.9)                                |
| Dermatitis                                    | 503.3<br>(473.4 to 536.1)                     | 637.4<br>(591.3 to 688.1)                  | 19.0<br>(11.2 to 31.0)                | -3.0<br>(-6.4 to 0.4)                             | -0.1<br>(-3.4 to 3.4)                               |
| Psoriasis                                     | 128.6<br>(122.4 to 135.2)                     | 16.4<br>(15.6 to 17.2)                     | 11.1<br>(7.9 to 14.7)                 | 10.7<br>(2.9 to 18.2)                             | 5.0<br>(-2.4 to 12.2)                               |
| Cellulitis                                    | 4.4<br>(4.1 to 4.7)                           | 84.0<br>(78.6 to 89.5)                     | 0.2<br>(0.2 to 0.4)                   | 4.8<br>(-14.4 to 27.5)                            | 1.5<br>(-18.7 to 26.8)                              |
| Pyoderma                                      | 41.1<br>(39.5 to 42.7)                        | 1,038.3<br>(995.4 to 1,084.4)              | 0.2<br>(0.1 to 0.5)                   | 18.9<br>(11.7 to 26.8)                            | 1.2<br>(-4.8 to 7.5)                                |
| Scabies                                       | 194.4<br>(172.2 to 220.9)                     | 595.7<br>(523.0 to 675.8)                  | 5.0<br>(2.8 to 7.8)                   | -9.0<br>(-12.8 to -4.7)                           | -6.3<br>(-10.0 to -2.6)                             |
| Fungal skin diseases                          | 1,405.8<br>(1,256.7 to 1,567.5)               | 5,226.1<br>(4,555.9 to 5,996.3)            | 7.8<br>(3.1 to 16.4)                  | 9.3<br>(6.8 to 11.7)                              | -0.0<br>(-1.0 to 0.9)                               |
| Viral skin diseases                           | 285.1<br>(271.3 to 299.1)                     | 431.2<br>(408.0 to 454.0)                  | 8.7<br>(5.4 to 12.8)                  | -3.4<br>(-6.5 to -0.0)                            | -0.1<br>(-3.2 to 3.1)                               |
| Acne vulgaris                                 | 763.5<br>(693.3 to 839.6)                     | 495.2<br>(416.0 to 603.6)                  | 19.7<br>(13.1 to 28.4)                | -9.9<br>(-14.2 to -5.6)                           | 2.2<br>(-2.7 to 7.2)                                |
| Alopecia areata                               | 20.3<br>(19.5 to 21.1)                        | 35.7<br>(34.3 to 37.1)                     | 0.7<br>(0.4 to 1.0)                   | -1.6<br>(-12.5 to 10.3)                           | 0.1<br>(-11.0 to 12.3)                              |
| Pruritus                                      | 117.7<br>(104.0 to 134.0)                     | 92.8<br>(82.7 to 105.8)                    | 1.2<br>(0.6 to 2.3)                   | 9.7<br>(3.5 to 16.3)                              | 1.6<br>(-3.4 to 7.0)                                |
| Urticaria                                     | 89.2<br>(78.9 to 100.2)                       | 157.7<br>(139.6 to 178.5)                  | 5.3<br>(3.5 to 7.6)                   | -2.4<br>(-8.1 to 4.1)                             | -0.0<br>(-5.8 to 5.9)                               |
| Decubitus ulcer                               | 5.6<br>(5.0 to 6.2)                           | 20.6<br>(18.2 to 23.2)                     | 0.9<br>(0.6 to 1.2)                   | 32.5<br>(16.2 to 49.9)                            | 6.9<br>(-5.9 to 21.3)                               |
| Other skin and subcutaneous diseases          | 1,035.2<br>(1,004.4 to 1,065.5)               | 1,238.8<br>(1,194.9 to 1,281.1)            | 5.7<br>(2.7 to 10.3)                  | 18.8<br>(16.0 to 21.5)                            | 5.0<br>(2.6 to 7.2)                                 |
| Sense organ diseases                          | 3,644.7<br>(3,562.4 to 3,731.6)               | 1,195.5†<br>(1,130.2 to 1,267.5)           | 136.2<br>(95.2 to 190.1)              | 16.9<br>(15.1 to 18.8)                            | -3.4<br>(-5.0 to -2.0)                              |
| Glaucoma                                      | 20.9<br>(17.4 to 24.5)                        | --                                         | 2.2<br>(1.5 to 3.1)                   | 27.4<br>(15.3 to 41.0)                            | -2.3<br>(-11.2 to 8.3)                              |
| Cataract                                      | 220.4<br>(193.3 to 249.2)                     | --                                         | 16.0<br>(11.6 to 21.6)                | 22.7<br>(17.4 to 28.3)                            | -5.6<br>(-9.8 to -1.3)                              |
| Macular degeneration                          | 6.1<br>(4.9 to 7.5)                           | --                                         | 0.4<br>(0.3 to 0.6)                   | 31.9<br>(13.1 to 52.0)                            | 0.7<br>(-14.3 to 16.5)                              |
| Refraction and accommodation disorders        | 1,524.1<br>(1,461.0 to 1,588.4)               | --                                         | 23.4<br>(13.8 to 37.9)                | 5.2<br>(1.7 to 8.8)                               | -6.5<br>(-9.4 to -3.4)                              |
| Age-related and other hearing loss            | 2,742.5<br>(2,610.8 to 2,889.8)               | --                                         | 76.5<br>(53.8 to 107.2)               | 19.1<br>(16.0 to 21.8)                            | -2.9<br>(-5.2 to -0.8)                              |
| Other vision loss                             | 43.3<br>(38.7 to 48.5)                        | --                                         | 3.9<br>(2.7 to 5.4)                   | 18.4<br>(9.1 to 29.1)                             | -0.2<br>(-7.6 to 8.5)                               |
| Other sense organ diseases                    | 436.4<br>(400.8 to 472.1)                     | 1,195.5<br>(1,130.2 to 1,267.5)            | 13.7<br>(8.6 to 20.6)                 | 17.9<br>(13.3 to 22.4)                            | 0.5<br>(-3.1 to 4.2)                                |
| Oral disorders                                | 6,242.6<br>(6,034.4 to 6,472.2)               | 14,375.5†<br>(13,099.9 to 15,791.5)        | 51.9<br>(31.5 to 81.5)                | 15.7<br>(12.4 to 19.5)                            | -0.5<br>(-2.2 to 1.3)                               |
| Caries of deciduous teeth                     | 537.2<br>(438.4 to 634.7)                     | 1,878.1<br>(1,360.9 to 2,520.9)            | 0.2<br>(0.1 to 0.4)                   | -13.7<br>(-21.9 to -4.6)                          | -1.4<br>(-10.2 to 8.8)                              |
| Caries of permanent teeth                     | 3,783.5<br>(3,520.4 to 4,059.7)               | 12,158.1<br>(10,968.2 to 13,409.8)         | 3.7<br>(1.6 to 7.1)                   | -2.5<br>(-6.4 to 1.4)                             | -4.9<br>(-8.1 to -1.6)                              |
| Periodontal disease                           | 2,329.9<br>(1,994.9 to 2,678.2)               | 261.6<br>(219.1 to 307.6)                  | 15.3<br>(6.1 to 31.2)                 | 9.4<br>(5.3 to 13.6)                              | -1.1<br>(-3.8 to 1.6)                               |
| Edentulism and severe tooth loss              | 944.7<br>(824.1 to 1,068.3)                   | 77.7<br>(65.2 to 90.9)                     | 26.1<br>(16.9 to 36.8)                | 27.5<br>(23.8 to 31.5)                            | 0.6<br>(-2.4 to 3.7)                                |
| Other oral disorders                          | 227.5<br>(217.8 to 236.9)                     | --                                         | 6.6<br>(4.1 to 10.0)                  | 3.7<br>(0.3 to 7.1)                               | 0.0<br>(-3.0 to 3.2)                                |
| <b>Injuries</b>                               | <b>2,403.2</b><br><b>(2,255.2 to 2,600.9)</b> | <b>954.1†</b><br><b>(897.8 to 1,015.5)</b> | <b>87.7</b><br><b>(60.1 to 123.0)</b> | <b>20.5</b><br><b>(18.2 to 22.7)</b>              | <b>5.9</b><br><b>(3.8 to 7.9)</b>                   |
| <b>Transport injuries</b>                     | <b>211.8</b><br><b>(198.6 to 227.1)</b>       | <b>56.6</b><br><b>(50.9 to 62.7)</b>       | <b>10.3</b><br><b>(6.9 to 15.0)</b>   | <b>9.5</b><br><b>(7.0 to 11.9)</b>                | <b>-2.6</b><br><b>(-4.8 to -0.5)</b>                |
| Road injuries                                 | 197.2<br>(184.9 to 211.9)                     | 54.0<br>(48.3 to 60.0)                     | 9.7<br>(6.4 to 14.0)                  | 9.5<br>(7.0 to 11.9)                              | -2.7<br>(-4.8 to -0.6)                              |
| Pedestrian road injuries                      | 28.6<br>(25.2 to 32.6)                        | 6.2<br>(5.2 to 7.4)                        | 1.4<br>(0.9 to 2.0)                   | 15.8<br>(13.2 to 18.4)                            | 1.2<br>(-1.1 to 3.3)                                |
| Cyclist road injuries                         | 58.8<br>(50.1 to 68.8)                        | 17.2<br>(14.5 to 20.1)                     | 2.8<br>(1.8 to 4.0)                   | -8.2<br>(-10.4 to -6.0)                           | -17.7<br>(-19.7 to -15.6)                           |
| Motorcyclist road injuries                    | 38.7<br>(33.3 to 45.8)                        | 6.8<br>(5.5 to 8.1)                        | 1.8<br>(1.2 to 2.6)                   | 15.4<br>(12.8 to 18.1)                            | 3.4<br>(1.0 to 5.7)                                 |
| Motor vehicle road injuries                   | 44.9<br>(39.2 to 50.7)                        | 14.2<br>(12.1 to 16.5)                     | 2.5<br>(1.6 to 3.5)                   | 20.1<br>(17.1 to 22.8)                            | 7.1<br>(4.7 to 9.4)                                 |
| Other road injuries                           | 26.1<br>(22.8 to 30.1)                        | 9.8<br>(8.1 to 11.8)                       | 1.2<br>(0.8 to 1.8)                   | 24.8<br>(21.9 to 27.6)                            | 8.5<br>(6.0 to 10.9)                                |
| Other transport injuries                      | 14.6<br>(12.5 to 17.1)                        | 2.5<br>(2.2 to 2.9)                        | 0.7<br>(0.4 to 1.0)                   | 8.7<br>(5.3 to 11.8)                              | -1.8<br>(-4.8 to 0.8)                               |
| <b>Unintentional injuries</b>                 | <b>2,095.3</b><br><b>(1,947.0 to 2,287.2)</b> | <b>863.7</b><br><b>(807.8 to 926.2)</b>    | <b>72.2</b><br><b>(49.7 to 101.0)</b> | <b>23.8</b><br><b>(21.4 to 26.0)</b>              | <b>7.9</b><br><b>(5.7 to 9.8)</b>                   |
| Falls                                         | 1,075.6<br>(959.5 to 1,209.3)                 | 498.6<br>(447.3 to 553.7)                  | 44.7<br>(31.5 to 61.4)                | 28.8<br>(26.3 to 31.4)                            | 8.8<br>(6.5 to 10.9)                                |
| Drowning                                      | 6.7<br>(6.0 to 7.5)                           | 1.1<br>(1.0 to 1.3)                        | 0.3<br>(0.2 to 0.4)                   | 6.9<br>(3.7 to 9.9)                               | -5.9<br>(-8.7 to -3.5)                              |
| Fire, heat, and hot substances                | 205.6<br>(168.0 to 256.9)                     | 16.9<br>(13.8 to 20.3)                     | 4.8<br>(3.0 to 7.4)                   | 16.0<br>(10.6 to 20.6)                            | 10.1<br>(5.2 to 14.3)                               |
| Poisonings                                    | 5.5<br>(4.6 to 6.5)                           | 5.8<br>(4.6 to 7.0)                        | 0.5<br>(0.3 to 0.7)                   | 24.7<br>(15.0 to 35.7)                            | 20.4<br>(11.3 to 31.1)                              |
| Exposure to mechanical forces                 | 303.5<br>(258.4 to 367.9)                     | 84.7<br>(73.3 to 96.9)                     | 6.5<br>(4.2 to 9.6)                   | 29.7<br>(26.6 to 32.7)                            | 18.3<br>(15.5 to 20.8)                              |
| Unintentional firearm injuries                | 21.2<br>(17.4 to 26.0)                        | 3.9<br>(2.9 to 5.2)                        | 0.8<br>(0.5 to 1.2)                   | 31.9<br>(28.6 to 35.4)                            | 19.7<br>(16.6 to 22.6)                              |
| Unintentional suffocation                     | 9.3<br>(6.8 to 12.2)                          | 1.1<br>(0.7 to 1.5)                        | 0.3<br>(0.2 to 0.4)                   | 7.1<br>(4.4 to 9.8)                               | 3.5<br>(0.4 to 6.4)                                 |
| Other exposure to mechanical forces           | 273.0<br>(229.9 to 337.4)                     | 79.7<br>(69.2 to 91.2)                     | 5.5<br>(3.6 to 8.1)                   | 30.7<br>(27.6 to 33.8)                            | 19.1<br>(16.3 to 21.6)                              |

| Cause                                                                               | Prevalence in thousands (95% UI)        | Incidence in thousands (95% UI)                | YLDs in thousands (95% UI)              |                                                   |                                                     |
|-------------------------------------------------------------------------------------|-----------------------------------------|------------------------------------------------|-----------------------------------------|---------------------------------------------------|-----------------------------------------------------|
|                                                                                     | 2016 counts                             | 2016 counts                                    | 2016 counts                             | Percentage change in counts between 2006 and 2016 | Percentage change in age-standardised rates between |
| Adverse effects of medical treatment                                                | 3.7<br>(2.9 to 4.5)                     | 48.0<br>(42.6 to 54.5)                         | 0.5<br>(0.3 to 0.7)                     | 13.2<br>(6.6 to 19.9)                             | 1.5<br>(-3.9 to 7.4)                                |
| Animal contact                                                                      | 42.4<br>(37.7 to 48.5)                  | 42.9<br>(36.9 to 49.9)                         | 1.3<br>(0.8 to 1.8)                     | -0.1<br>(-5.8 to 5.7)                             | -5.8<br>(-11.1 to -0.0)                             |
| Venomous animal contact                                                             | 21.7<br>(18.3 to 25.4)                  | 20.7<br>(16.6 to 25.4)                         | 1.0<br>(0.6 to 1.4)                     | 1.3<br>(-5.9 to 9.5)                              | -3.1<br>(-10.2 to 5.0)                              |
| Non-venomous animal contact                                                         | 20.7<br>(17.6 to 25.6)                  | 22.2<br>(18.3 to 26.7)                         | 0.3<br>(0.2 to 0.5)                     | -4.5<br>(-7.7 to -1.8)                            | -14.3<br>(-17.2 to -11.8)                           |
| Foreign body                                                                        | 83.6<br>(71.0 to 96.2)                  | 72.8<br>(62.3 to 86.5)                         | 3.0<br>(1.9 to 4.5)                     | 6.1<br>(3.4 to 8.7)                               | -3.7<br>(-6.2 to -1.3)                              |
| Pulmonary aspiration and foreign body in airway                                     | 48.6<br>(38.3 to 61.5)                  | 16.1<br>(14.3 to 18.2)                         | 1.8<br>(1.1 to 2.7)                     | 4.7<br>(1.4 to 7.7)                               | -3.6<br>(-6.7 to -0.6)                              |
| Foreign body in eyes                                                                | 10.2<br>(6.4 to 14.4)                   | 46.8<br>(36.9 to 60.2)                         | 0.6<br>(0.3 to 1.0)                     | 6.0<br>(2.0 to 10.1)                              | -7.7<br>(-10.0 to -5.4)                             |
| Foreign body in other body part                                                     | 24.8<br>(20.4 to 30.6)                  | 9.9<br>(8.6 to 11.4)                           | 0.6<br>(0.4 to 0.9)                     | 10.3<br>(7.0 to 13.5)                             | -0.3<br>(-3.5 to 2.6)                               |
| Environmental heat and cold exposure                                                | 121.8<br>(105.8 to 139.9)               | 28.2<br>(24.2 to 32.7)                         | 4.1<br>(2.7 to 5.9)                     | 14.8<br>(12.2 to 17.3)                            | 3.0<br>(0.7 to 5.2)                                 |
| Other unintentional injuries                                                        | 247.0<br>(199.6 to 302.2)               | 64.7<br>(56.0 to 75.1)                         | 6.7<br>(4.3 to 9.8)                     | 14.5<br>(12.5 to 16.5)                            | 4.8<br>(2.7 to 6.8)                                 |
| <b>Self-harm and interpersonal violence</b>                                         | <b>319.0</b><br><b>(289.4 to 350.6)</b> | <b>33.7†</b><br><b>(30.0 to 37.5)</b>          | <b>5.0</b><br><b>(3.4 to 7.0)</b>       | <b>3.0</b><br><b>(-0.1 to 6.2)</b>                | <b>-1.5</b><br><b>(-3.7 to 0.8)</b>                 |
| Self-harm                                                                           | 17.6<br>(15.2 to 20.1)                  | 8.4<br>(7.4 to 9.5)                            | 0.7<br>(0.4 to 1.0)                     | 7.4<br>(4.2 to 10.6)                              | -8.5<br>(-11.2 to -6.0)                             |
| Self-harm by firearm                                                                | 1.0<br>(0.8 to 1.1)                     | 0.2<br>(0.1 to 0.4)                            | < 0.05<br>(< 0.05 to < 0.05)            | -11.6<br>(-14.6 to -8.6)                          | -19.8<br>(-22.4 to -17.4)                           |
| Self-harm by other specified means                                                  | 16.6<br>(14.2 to 19.1)                  | 8.2<br>(7.1 to 9.2)                            | 0.6<br>(0.4 to 0.9)                     | 8.6<br>(5.2 to 11.8)                              | -7.8<br>(-10.6 to -5.3)                             |
| Interpersonal violence                                                              | 301.4<br>(272.2 to 332.4)               | 25.3†<br>(21.7 to 29.2)                        | 4.3<br>(3.0 to 6.0)                     | 2.4<br>(-1.0 to 5.9)                              | -0.5<br>(-3.0 to 2.2)                               |
| Assault by firearm                                                                  | 3.7<br>(3.3 to 4.3)                     | 0.8<br>(0.6 to 1.1)                            | 0.2<br>(0.1 to 0.2)                     | 34.5<br>(30.8 to 38.4)                            | 22.6<br>(19.2 to 26.1)                              |
| Assault by sharp object                                                             | 38.2<br>(31.4 to 45.1)                  | 11.5<br>(9.4 to 13.7)                          | 1.1<br>(0.7 to 1.6)                     | 14.0<br>(11.2 to 16.6)                            | 4.8<br>(2.2 to 7.1)                                 |
| Sexual violence                                                                     | 228.5<br>(201.2 to 258.7)               | --                                             | 1.8<br>(1.2 to 2.6)                     | -12.3<br>(-16.0 to -8.5)                          | -7.5<br>(-10.6 to -3.9)                             |
| Assault by other means                                                              | 31.0<br>(26.8 to 36.4)                  | 13.0<br>(10.8 to 15.2)                         | 1.2<br>(0.8 to 1.8)                     | 17.5<br>(15.0 to 19.9)                            | 7.2<br>(4.9 to 9.5)                                 |
| <b>Forces of nature, conflict and terrorism, and executions and police conflict</b> | <b>5.6</b><br><b>(1.7 to 10.5)</b>      | <b>&lt; 0.05†</b><br><b>(&lt; 0.05 to 0.1)</b> | <b>0.2</b><br><b>(&lt; 0.05 to 0.5)</b> | <b>10.3</b><br><b>(-51.2 to 30.1)</b>             | <b>1.3</b><br><b>(-57.2 to 21.0)</b>                |
| Exposure to forces of nature                                                        | 4.5<br>(0.7 to 9.2)                     | --                                             | 0.1<br>(< 0.05 to 0.4)                  | 15.5<br>(-55.4 to 42.2)                           | 6.0<br>(-60.4 to 31.6)                              |
| Conflict and terrorism                                                              | 0.1<br>(< 0.05 to 0.3)                  | --                                             | < 0.05<br>(< 0.05 to < 0.05)            | -16.6<br>(-19.6 to -13.3)                         | -25.4<br>(-28.4 to -22.4)                           |
| Executions and police conflict                                                      | 1.0<br>(0.2 to 1.6)                     | < 0.05<br>(< 0.05 to 0.1)                      | < 0.05<br>(< 0.05 to 0.1)               | -11.2<br>(-14.9 to 3.7)                           | -21.7<br>(-24.8 to -3.0)                            |
| <b>Impairments</b>                                                                  | --                                      | --                                             | --                                      | --                                                | --                                                  |
| Anaemia                                                                             | 2,867.8<br>(2,527.5 to 3,233.3)         | --                                             | 68.8<br>(44.6 to 100.5)                 | -1.3<br>(-13.4 to 12.9)                           | -5.8<br>(-17.7 to 8.7)                              |
| Developmental intellectual disability                                               | 160.5<br>(125.2 to 196.6)               | --                                             | 21.9<br>(15.7 to 31.0)                  | -11.8<br>(-18.3 to -6.2)                          | -10.4<br>(-17.4 to -4.6)                            |
| Epilepsy                                                                            | 60.4<br>(32.2 to 88.9)                  | --                                             | 18.8<br>(10.0 to 31.6)                  | -11.0<br>(-52.0 to 69.0)                          | -10.2<br>(-50.4 to 68.2)                            |
| Guillain-Barre syndrome                                                             | 0.1<br>(0.1 to 0.1)                     | --                                             | < 0.05<br>(< 0.05 to 0.1)               | 9.2<br>(4.1 to 14.3)                              | 0.1<br>(0.1 to 0.2)                                 |
| Hearing loss                                                                        | 2,875.8<br>(2,742.6 to 3,019.2)         | --                                             | 83.0<br>(58.4 to 116.4)                 | 16.3<br>(13.5 to 18.8)                            | -3.5<br>(-5.7 to -1.7)                              |
| Heart failure                                                                       | 132.2<br>(115.0 to 151.5)               | --                                             | 14.0<br>(10.4 to 18.0)                  | 27.8<br>(19.2 to 37.0)                            | -0.7<br>(-7.4 to 6.2)                               |
| Infertility                                                                         | 204.6<br>(159.7 to 263.7)               | --                                             | 1.2<br>(0.5 to 2.4)                     | -17.4<br>(-23.1 to -11.0)                         | 0.1<br>(-5.0 to 5.6)                                |
| Pelvic inflammatory disease                                                         | 2.0<br>(1.7 to 2.3)                     | --                                             | 0.3<br>(0.2 to 0.4)                     | -7.5<br>(-25.9 to 16.0)                           | -4.5<br>(-21.9 to 16.6)                             |
| Vision loss                                                                         | 1,849.6<br>(1,773.0 to 1,931.4)         | --                                             | 53.8<br>(38.2 to 75.5)                  | 6.8<br>(0.5 to 11.5)                              | -8.3<br>(-12.5 to -5.2)                             |

We did not calculate incidence for the nine impairments, certain NTDs, and causes with only birth prevalence. Blank cells mean that no estimate is available.

† Incidence for aggregate causes represents the sum of the incidence of the causes below the aggregate.

‡ Incidence estimates for stroke represent first-ever stroke only.

^ Incidence of HIV/AIDS represents new infections of HIV only and does not include new infections of Tuberculosis in HIV positive cases.

SR Table 14: Prevalence, incidence, and YLDs for 2016, percentage change of YLD counts and percentage change of age-standardised YLD rates between 2006 and 2016 by cause and impairments, for all ages, Cyprus.

| Cause                                                                                | Prevalence in thousands (95% UI)    | Incidence in thousands (95% UI)         | YLDs in thousands (95% UI)             |                                                   |                                                     |
|--------------------------------------------------------------------------------------|-------------------------------------|-----------------------------------------|----------------------------------------|---------------------------------------------------|-----------------------------------------------------|
|                                                                                      | 2016 counts                         | 2016 counts                             | 2016 counts                            | Percentage change in counts between 2006 and 2016 | Percentage change in age-standardised rates between |
| <b>All causes</b>                                                                    | <b>862.1</b><br>(858.1 to 865.8)    | <b>6,156.4†</b><br>(5,766.1 to 6,602.4) | <b>108.6</b><br>(80.7 to 140.3)        | <b>22.4</b><br>(20.8 to 24.0)                     | <b>-1.0</b><br>(-2.4 to 0.5)                        |
| <b>Communicable, maternal, neonatal, and nutritional disorders</b>                   | <b>290.9</b><br>(275.8 to 307.5)    | <b>3,526.4†</b><br>(3,145.0 to 3,921.6) | <b>4.2</b><br>(3.0 to 5.6)             | <b>11.8</b><br>(5.9 to 17.6)                      | <b>-6.6</b><br>(-11.5 to -1.7)                      |
| <b>HIV/AIDS and tuberculosis</b>                                                     | <b>104.8</b><br>(86.6 to 121.2)     | <b>0.2†</b><br>(0.1 to 0.2)             | <b>0.1</b><br>(0.1 to 0.2)             | <b>75.9</b><br>(49.5 to 100.0)                    | <b>38.3</b><br>(17.8 to 56.9)                       |
| Tuberculosis                                                                         | 92.5<br>(74.1 to 111.5)             | 0.1†<br>(0.1 to 0.1)                    | < 0.05<br>(< 0.05 to < 0.05)           | 0.4<br>(-20.4 to 28.0)                            | -19.0<br>(-35.9 to 3.7)                             |
| Drug-susceptible tuberculosis                                                        | 0.1<br>(< 0.05 to 0.1)              | 0.1<br>(0.1 to 0.1)                     | < 0.05<br>(< 0.05 to < 0.05)           | 0.7<br>(-20.2 to 28.4)                            | -18.8<br>(-35.8 to 4.0)                             |
| Multidrug-resistant tuberculosis without extensive drug resistance                   | < 0.05<br>(< 0.05 to < 0.05)        | < 0.05<br>(< 0.05 to < 0.05)            | < 0.05<br>(< 0.05 to < 0.05)           | -49.0<br>(-67.8 to -19.6)                         | -58.9<br>(-73.9 to -35.0)                           |
| Extensively drug-resistant tuberculosis                                              | < 0.05<br>(< 0.05 to < 0.05)        | < 0.05<br>(< 0.05 to < 0.05)            | < 0.05<br>(< 0.05 to < 0.05)           | 9.7<br>(-30.7 to 72.9)                            | -11.6<br>(-43.8 to 39.9)                            |
| Latent tuberculosis infection                                                        | 92.4<br>(74.1 to 111.5)             | --                                      | --                                     | --                                                | --                                                  |
| HIV/AIDS                                                                             | 1.4<br>(0.6 to 2.2)                 | 0.1^<br>(0.1 to 0.1)                    | 0.1<br>(0.1 to 0.2)                    | 100.4<br>(75.9 to 128.5)                          | 56.6<br>(37.6 to 79.2)                              |
| Drug-susceptible HIV/AIDS - Tuberculosis                                             | < 0.05<br>(< 0.05 to < 0.05)        | < 0.05<br>(< 0.05 to < 0.05)            | < 0.05<br>(< 0.05 to < 0.05)           | 5.3<br>(-3.4 to 15.2)                             | -18.2<br>(-25.0 to -10.5)                           |
| Multidrug-resistant HIV/AIDS - Tuberculosis without extensive drug resistance        | < 0.05<br>(< 0.05 to < 0.05)        | < 0.05<br>(< 0.05 to < 0.05)            | < 0.05<br>(< 0.05 to < 0.05)           | -46.0<br>(-65.9 to -14.7)                         | -58.1<br>(-73.5 to -33.7)                           |
| Extensively drug-resistant HIV/AIDS - Tuberculosis                                   | < 0.05<br>(< 0.05 to < 0.05)        | < 0.05<br>(< 0.05 to < 0.05)            | < 0.05<br>(< 0.05 to < 0.05)           | 16.1<br>(-26.6 to 83.5)                           | -9.8<br>(-42.9 to 42.6)                             |
| HIV/AIDS resulting in other diseases                                                 | 1.4<br>(0.6 to 2.2)                 | 0.1<br>(0.1 to 0.1)                     | 0.1<br>(0.1 to 0.2)                    | 102.4<br>(77.5 to 131.4)                          | 58.1<br>(39.1 to 81.6)                              |
| <b>Diarrhoea, lower respiratory infections, and other common infectious diseases</b> | <b>55.2</b><br>(51.3 to 59.3)       | <b>3,486.2†</b><br>(3,105.2 to 3,882.9) | <b>1.7</b><br>(1.1 to 2.5)             | <b>17.2</b><br>(13.5 to 22.4)                     | <b>-0.9</b><br>(-3.9 to 2.7)                        |
| Diarrhoeal diseases                                                                  | 2.7<br>(2.5 to 2.9)                 | 178.2<br>(164.8 to 192.2)               | 0.3<br>(0.2 to 0.4)                    | 13.8<br>(6.0 to 22.4)                             | -4.5<br>(-11.2 to 2.7)                              |
| Intestinal infectious diseases                                                       | < 0.05<br>(< 0.05 to < 0.05)        | < 0.05†<br>(< 0.05 to < 0.05)           | < 0.05<br>(< 0.05 to < 0.05)           | 24.9<br>(5.0 to 47.5)                             | 2.0<br>(-14.4 to 20.6)                              |
| Typhoid fever                                                                        | < 0.05<br>(< 0.05 to < 0.05)        | < 0.05<br>(< 0.05 to < 0.05)            | < 0.05<br>(< 0.05 to < 0.05)           | 36.8<br>(9.7 to 68.0)                             | 12.5<br>(-9.6 to 39.2)                              |
| Paratyphoid fever                                                                    | < 0.05<br>(< 0.05 to < 0.05)        | < 0.05<br>(< 0.05 to < 0.05)            | < 0.05<br>(< 0.05 to < 0.05)           | 10.7<br>(-9.1 to 36.0)                            | -8.7<br>(-25.2 to 11.4)                             |
| Other intestinal infectious diseases                                                 | --                                  | --                                      | < 0.05<br>(< 0.05 to < 0.05)           | -2.9<br>(-25.6 to 27.1)                           | -26.1<br>(-46.4 to 0.6)                             |
| Lower respiratory infections                                                         | 0.3<br>(0.3 to 0.3)                 | 14.4<br>(13.2 to 15.6)                  | < 0.05<br>(< 0.05 to < 0.05)           | 26.0<br>(9.8 to 44.2)                             | -1.0<br>(-14.3 to 14.3)                             |
| Upper respiratory infections                                                         | 42.1<br>(37.3 to 47.0)              | 3,222.6<br>(2,838.1 to 3,620.7)         | 1.0<br>(0.6 to 1.6)                    | 18.0<br>(12.7 to 23.4)                            | 0.1<br>(-4.3 to 4.5)                                |
| Otitis media                                                                         | 10.0<br>(8.6 to 11.7)               | 57.1<br>(39.7 to 90.7)                  | 0.3<br>(0.2 to 0.4)                    | 14.3<br>(6.5 to 23.3)                             | -0.7<br>(-7.2 to 6.4)                               |
| Meningitis                                                                           | 0.1<br>(0.1 to 0.4)                 | < 0.05<br>(< 0.05 to < 0.05)            | < 0.05<br>(< 0.05 to 0.1)              | 44.3<br>(13.6 to 394.3)                           | 10.7<br>(-6.2 to 187.8)                             |
| Pneumococcal meningitis                                                              | < 0.05<br>(< 0.05 to < 0.05)        | < 0.05<br>(< 0.05 to < 0.05)            | < 0.05<br>(< 0.05 to < 0.05)           | 11.2<br>(3.7 to 17.8)                             | -8.4<br>(-14.4 to -2.8)                             |
| H influenzae type B meningitis                                                       | < 0.05<br>(< 0.05 to < 0.05)        | < 0.05<br>(< 0.05 to < 0.05)            | < 0.05<br>(< 0.05 to < 0.05)           | 10.0<br>(0.5 to 19.0)                             | -9.8<br>(-17.9 to -2.1)                             |
| Meningococcal infection                                                              | < 0.05<br>(< 0.05 to 0.3)           | < 0.05<br>(< 0.05 to < 0.05)            | < 0.05<br>(< 0.05 to < 0.05)           | 188.3<br>(10.3 to 2,210.4)                        | 85.9<br>(-9.6 to 1,116.7)                           |
| Other meningitis                                                                     | 0.1<br>(< 0.05 to 0.1)              | < 0.05<br>(< 0.05 to < 0.05)            | < 0.05<br>(< 0.05 to < 0.05)           | 22.6<br>(18.2 to 27.4)                            | 1.7<br>(-2.0 to 5.9)                                |
| Encephalitis                                                                         | 0.3<br>(0.2 to 0.4)                 | 0.1<br>(0.1 to 0.1)                     | < 0.05<br>(< 0.05 to 0.1)              | 23.0<br>(19.1 to 27.2)                            | 0.7<br>(-2.5 to 4.1)                                |
| Diphtheria                                                                           | < 0.05<br>(< 0.05 to < 0.05)        | < 0.05<br>(< 0.05 to < 0.05)            | < 0.05<br>(< 0.05 to < 0.05)           | -12.8<br>(-51.9 to 55.0)                          | -28.8<br>(-59.1 to 23.9)                            |
| Whooping cough                                                                       | < 0.05<br>(< 0.05 to < 0.05)        | < 0.05<br>(< 0.05 to < 0.05)            | < 0.05<br>(< 0.05 to < 0.05)           | -28.9<br>(-59.6 to 15.1)                          | -40.3<br>(-66.1 to -3.2)                            |
| Tetanus                                                                              | < 0.05<br>(< 0.05 to < 0.05)        | < 0.05<br>(< 0.05 to < 0.05)            | < 0.05<br>(< 0.05 to < 0.05)           | 3.6<br>(-19.1 to 16.3)                            | -12.3<br>(-28.6 to -2.6)                            |
| Measles                                                                              | < 0.05<br>(0.0 to < 0.05)           | < 0.05<br>(0.0 to < 0.05)               | < 0.05<br>(0.0 to < 0.05)              | -77.5<br>(-100.0 to 6.4e+75)                      | -80.9<br>(-100.0 to 7.6e+75)                        |
| Varicella and herpes zoster                                                          | 0.9<br>(0.8 to 1.0)                 | 13.8<br>(13.3 to 14.3)                  | < 0.05<br>(< 0.05 to 0.1)              | 22.6<br>(8.3 to 38.2)                             | -0.2<br>(-12.1 to 13.0)                             |
| <b>Neglected tropical diseases and malaria</b>                                       | <b>&lt; 0.05</b><br>(< 0.05 to 0.1) | <b>&lt; 0.05†</b><br>(< 0.05 to < 0.05) | <b>&lt; 0.05</b><br>(< 0.05 to < 0.05) | <b>-26.7</b><br>(-92.9 to 807.3)                  | <b>-40.1</b><br>(-94.0 to 609.3)                    |
| Malaria                                                                              | --                                  | --                                      | --                                     | --                                                | --                                                  |
| Chagas disease                                                                       | --                                  | --                                      | --                                     | --                                                | --                                                  |
| Leishmaniasis                                                                        | < 0.05<br>(0.0 to < 0.05)           | < 0.05<br>(0.0 to < 0.05)               | < 0.05<br>(0.0 to < 0.05)              | 15.4<br>(-100.0 to 9.9e+17)                       | 1.1<br>(-100.0 to 7.0e+17)                          |
| Visceral leishmaniasis                                                               | < 0.05<br>(0.0 to < 0.05)           | < 0.05<br>(0.0 to < 0.05)               | < 0.05<br>(0.0 to < 0.05)              | -5.5<br>(-100.0 to 2.9e+21)                       | -24.7<br>(-100.0 to 1.8e+21)                        |
| Cutaneous and mucocutaneous leishmaniasis                                            | < 0.05<br>(0.0 to < 0.05)           | < 0.05<br>(0.0 to < 0.05)               | < 0.05<br>(0.0 to < 0.05)              | --                                                | --                                                  |
| African trypanosomiasis                                                              | --                                  | --                                      | --                                     | --                                                | --                                                  |
| Schistosomiasis                                                                      | --                                  | --                                      | --                                     | --                                                | --                                                  |
| Cysticercosis                                                                        | --                                  | --                                      | --                                     | --                                                | --                                                  |
| Cystic echinococcosis                                                                | < 0.05<br>(< 0.05 to 0.1)           | < 0.05<br>(< 0.05 to < 0.05)            | < 0.05<br>(< 0.05 to < 0.05)           | -26.8<br>(-92.9 to 807.5)                         | -40.2<br>(-94.0 to 609.4)                           |
| Lymphatic filariasis                                                                 | --                                  | --                                      | --                                     | --                                                | --                                                  |
| Onchocerciasis                                                                       | --                                  | --                                      | --                                     | --                                                | --                                                  |
| Trachoma                                                                             | --                                  | --                                      | --                                     | --                                                | --                                                  |
| Dengue                                                                               | --                                  | --                                      | --                                     | --                                                | --                                                  |
| Yellow fever                                                                         | --                                  | --                                      | --                                     | --                                                | --                                                  |
| Rabies                                                                               | < 0.05<br>(< 0.05 to < 0.05)        | < 0.05<br>(< 0.05 to < 0.05)            | < 0.05<br>(< 0.05 to < 0.05)           | -2.3<br>(-32.0 to 54.4)                           | -30.3<br>(-51.7 to 4.5)                             |
| Intestinal nematode infections                                                       | --                                  | --                                      | --                                     | --                                                | --                                                  |
| Ascariasis                                                                           | --                                  | --                                      | --                                     | --                                                | --                                                  |



| Cause                                                                   | Prevalence in thousands (95% UI)        | Incidence in thousands (95% UI)                | YLDs in thousands (95% UI)                         |                                                   |                                                     |
|-------------------------------------------------------------------------|-----------------------------------------|------------------------------------------------|----------------------------------------------------|---------------------------------------------------|-----------------------------------------------------|
|                                                                         | 2016 counts                             | 2016 counts                                    | 2016 counts                                        | Percentage change in counts between 2006 and 2016 | Percentage change in age-standardised rates between |
| Trichuriasis                                                            | --                                      | --                                             | --                                                 | --                                                | --                                                  |
| Hookworm disease                                                        | --                                      | --                                             | --                                                 | --                                                | --                                                  |
| Food-borne trematodiasis                                                | --                                      | --                                             | --                                                 | --                                                | --                                                  |
| Leprosy                                                                 | --                                      | --                                             | --                                                 | --                                                | --                                                  |
| Ebola virus disease                                                     | --                                      | --                                             | --                                                 | --                                                | --                                                  |
| Zika virus disease                                                      | --                                      | --                                             | --                                                 | --                                                | --                                                  |
| Guinea worm disease                                                     | --                                      | --                                             | --                                                 | --                                                | --                                                  |
| Other neglected tropical diseases                                       | --                                      | --                                             | < 0.05<br>(< 0.05 to < 0.05)                       | --                                                | --                                                  |
| <b>Maternal disorders</b>                                               | <b>0.7</b><br><b>(0.5 to 0.8)</b>       | <b>7.4†</b><br><b>(6.5 to 8.3)</b>             | <b>&lt; 0.05</b><br><b>(&lt; 0.05 to &lt; 0.1)</b> | <b>48.9</b><br><b>(10.4 to 102.5)</b>             | <b>11.0</b><br><b>(-17.5 to 50.8)</b>               |
| Maternal haemorrhage                                                    | 0.2<br>(0.1 to 0.3)                     | 1.6<br>(1.3 to 2.0)                            | < 0.05<br>(< 0.05 to < 0.05)                       | 18.1<br>(-26.6 to 88.6)                           | -12.4<br>(-45.1 to 39.7)                            |
| Maternal sepsis and other pregnancy related infections                  | 0.1<br>(0.1 to 0.2)                     | 0.8<br>(0.6 to 1.0)                            | < 0.05<br>(< 0.05 to < 0.05)                       | 32.6<br>(-37.3 to 182.5)                          | 0.5<br>(-52.4 to 115.6)                             |
| Maternal hypertensive disorders                                         | 0.3<br>(0.2 to 0.5)                     | 1.4<br>(1.1 to 1.7)                            | < 0.05<br>(< 0.05 to < 0.05)                       | 86.7<br>(11.1 to 234.6)                           | 38.6<br>(-17.0 to 148.0)                            |
| Maternal obstructed labour and uterine rupture                          | < 0.05<br>(< 0.05 to < 0.05)            | 0.2<br>(0.1 to 0.2)                            | < 0.05<br>(< 0.05 to < 0.05)                       | 55.7<br>(-17.2 to 197.1)                          | 15.4<br>(-38.8 to 120.8)                            |
| Maternal abortion, miscarriage, and ectopic pregnancy                   | < 0.05<br>(< 0.05 to < 0.05)            | 3.5<br>(2.8 to 4.3)                            | < 0.05<br>(< 0.05 to < 0.05)                       | 27.1<br>(-44.6 to 190.3)                          | -4.9<br>(-58.0 to 114.5)                            |
| Other maternal disorders                                                | --                                      | --                                             | < 0.05<br>(< 0.05 to < 0.05)                       | 41.7<br>(5.0 to 92.5)                             | 5.8<br>(-21.4 to 44.0)                              |
| <b>Neonatal disorders</b>                                               | <b>10.2</b><br><b>(8.8 to 11.9)</b>     | --                                             | <b>1.6</b><br><b>(1.1 to 2.2)</b>                  | <b>5.9</b><br><b>(-6.2 to 18.0)</b>               | <b>-11.2</b><br><b>(-21.3 to -1.0)</b>              |
| Neonatal preterm birth complications                                    | 7.6<br>(6.1 to 9.9)                     | --                                             | 0.8<br>(0.5 to 1.2)                                | 4.5<br>(-14.8 to 23.7)                            | -12.2<br>(-28.5 to 4.2)                             |
| Neonatal encephalopathy due to birth asphyxia and trauma                | 3.2<br>(2.2 to 4.5)                     | --                                             | 0.6<br>(0.3 to 1.0)                                | 6.7<br>(-15.8 to 25.7)                            | -10.8<br>(-29.6 to 5.0)                             |
| Neonatal sepsis and other neonatal infections                           | 0.5<br>(0.2 to 1.1)                     | --                                             | 0.2<br>(0.1 to 0.5)                                | 8.6<br>(-8.1 to 28.7)                             | -8.2<br>(-21.7 to 9.3)                              |
| Hemolytic disease and other neonatal jaundice                           | 0.1<br>(0.1 to 0.1)                     | --                                             | < 0.05<br>(< 0.05 to < 0.05)                       | 20.1<br>(12.2 to 28.9)                            | 0.6<br>(-6.1 to 7.9)                                |
| Other neonatal disorders                                                | --                                      | --                                             | < 0.05<br>(< 0.05 to < 0.05)                       | 2.7<br>(-13.5 to 20.9)                            | -15.2<br>(-28.6 to -0.1)                            |
| <b>Nutritional deficiencies</b>                                         | <b>36.7</b><br><b>(32.2 to 42.8)</b>    | <b>5.5†</b><br><b>(4.3 to 6.8)</b>             | <b>0.6</b><br><b>(0.4 to 0.9)</b>                  | <b>3.8</b><br><b>(-9.6 to 19.3)</b>               | <b>-14.7</b><br><b>(-26.9 to -2.1)</b>              |
| Protein-energy malnutrition                                             | 0.5<br>(0.5 to 0.5)                     | 0.3<br>(0.3 to 0.3)                            | 0.1<br>(< 0.05 to 0.1)                             | 19.3<br>(9.2 to 31.3)                             | -1.4<br>(-9.8 to 8.5)                               |
| Iodine deficiency                                                       | 13.4<br>(10.1 to 17.4)                  | 0.2<br>(0.1 to 0.2)                            | 0.3<br>(0.2 to 0.5)                                | 18.8<br>(7.0 to 31.4)                             | -2.5<br>(-12.5 to 8.3)                              |
| Vitamin A deficiency                                                    | 6.0<br>(4.7 to 7.7)                     | 5.0<br>(3.8 to 6.4)                            | --                                                 | --                                                | --                                                  |
| Iron-deficiency anaemia                                                 | 16.4<br>(12.5 to 22.0)                  | --                                             | 0.2<br>(0.1 to 0.3)                                | -18.5<br>(-42.5 to 14.7)                          | -31.6<br>(-52.5 to -3.7)                            |
| Other nutritional deficiencies                                          | --                                      | --                                             | < 0.05<br>(< 0.05 to < 0.05)                       | 19.0<br>(8.4 to 31.3)                             | -1.7<br>(-10.5 to 8.4)                              |
| <b>Other communicable, maternal, neonatal, and nutritional diseases</b> | <b>137.9</b><br><b>(128.3 to 148.6)</b> | <b>27.1</b><br><b>(23.0 to 34.0)</b>           | <b>0.1</b><br><b>(0.1 to 0.2)</b>                  | <b>13.1</b><br><b>(4.5 to 20.6)</b>               | <b>-8.6</b><br><b>(-15.7 to -2.2)</b>               |
| Sexually transmitted diseases excluding HIV                             | 116.2<br>(107.1 to 127.4)               | 25.1<br>(20.9 to 31.9)                         | 0.1<br>(0.1 to 0.2)                                | 14.4<br>(2.9 to 23.7)                             | -8.8<br>(-18.2 to -1.5)                             |
| Syphilis                                                                | 0.3<br>(0.2 to 0.3)                     | 0.2<br>(0.1 to 0.3)                            | < 0.05<br>(< 0.05 to < 0.05)                       | 15.4<br>(-0.6 to 32.0)                            | -8.9<br>(-21.4 to 4.7)                              |
| Chlamydial infection                                                    | 4.3<br>(2.1 to 8.4)                     | 3.2<br>(1.5 to 6.3)                            | < 0.05<br>(< 0.05 to < 0.05)                       | 12.9<br>(-10.8 to 41.0)                           | -9.5<br>(-28.2 to 11.9)                             |
| Gonococcal infection                                                    | 1.0<br>(0.5 to 2.8)                     | 2.7<br>(0.7 to 9.2)                            | < 0.05<br>(< 0.05 to < 0.05)                       | 0.3<br>(-20.2 to 18.8)                            | -20.0<br>(-36.5 to -4.1)                            |
| Trichomoniasis                                                          | 16.3<br>(13.7 to 19.2)                  | 13.6<br>(11.3 to 16.2)                         | < 0.05<br>(< 0.05 to < 0.05)                       | 26.3<br>(15.9 to 38.0)                            | 1.1<br>(-6.9 to 10.2)                               |
| Genital herpes                                                          | 96.4<br>(82.4 to 113.0)                 | 4.6<br>(3.9 to 5.5)                            | < 0.05<br>(< 0.05 to 0.1)                          | 25.4<br>(18.0 to 33.0)                            | 0.2<br>(-5.8 to 6.6)                                |
| Other sexually transmitted diseases                                     | 1.0<br>(0.9 to 1.1)                     | 0.7<br>(0.5 to 0.9)                            | < 0.05<br>(< 0.05 to < 0.05)                       | 1.5<br>(-17.3 to 20.2)                            | -19.0<br>(-34.3 to -4.2)                            |
| Hepatitis                                                               | 26.3<br>(23.0 to 29.9)                  | 2.0<br>(1.7 to 2.4)                            | < 0.05<br>(< 0.05 to < 0.05)                       | -24.6<br>(-37.7 to -8.2)                          | -40.2<br>(-50.7 to -27.7)                           |
| Acute hepatitis A                                                       | < 0.05<br>(< 0.05 to 0.1)               | 0.6<br>(0.5 to 0.8)                            | < 0.05<br>(< 0.05 to < 0.05)                       | -29.4<br>(-51.3 to 5.3)                           | -44.1<br>(-61.6 to -16.4)                           |
| Hepatitis B                                                             | 13.2<br>(10.3 to 16.6)                  | 1.1<br>(0.9 to 1.5)                            | < 0.05<br>(< 0.05 to < 0.05)                       | -22.9<br>(-34.8 to -8.7)                          | -39.8<br>(-49.0 to -28.9)                           |
| Hepatitis C                                                             | 13.1<br>(11.7 to 14.5)                  | 0.2<br>(0.2 to 0.2)                            | < 0.05<br>(< 0.05 to < 0.05)                       | -0.0<br>(-2.4 to 2.4)                             | -12.9<br>(-14.9 to -11.1)                           |
| Acute hepatitis E                                                       | < 0.05<br>(< 0.05 to < 0.05)            | 0.1<br>(0.1 to 0.1)                            | < 0.05<br>(< 0.05 to < 0.05)                       | -19.5<br>(-26.1 to -12.6)                         | -39.1<br>(-43.3 to -35.0)                           |
| Other infectious diseases                                               | 0.5<br>(0.4 to 0.6)                     | < 0.05<br>(< 0.05 to < 0.05)                   | < 0.05<br>(< 0.05 to < 0.05)                       | 15.4<br>(4.5 to 26.8)                             | -3.2<br>(-15.4 to 10.4)                             |
| <b>Non-communicable diseases</b>                                        | <b>845.3</b><br><b>(840.2 to 850.4)</b> | <b>2,536.6†</b><br><b>(2,373.1 to 2,683.3)</b> | <b>95.6</b><br><b>(70.8 to 123.5)</b>              | <b>23.3</b><br><b>(21.5 to 25.1)</b>              | <b>-0.3</b><br><b>(-1.8 to 1.3)</b>                 |
| <b>Neoplasms</b>                                                        | <b>13.0</b><br><b>(12.5 to 13.5)</b>    | <b>4.1</b><br><b>(3.8 to 4.4)</b>              | <b>1.3</b><br><b>(1.0 to 1.7)</b>                  | <b>41.1</b><br><b>(31.4 to 49.8)</b>              | <b>9.5</b><br><b>(1.8 to 16.3)</b>                  |
| Lip and oral cavity cancer                                              | 0.1<br>(0.1 to 0.2)                     | < 0.05<br>(< 0.05 to < 0.05)                   | < 0.05<br>(< 0.05 to < 0.05)                       | 31.1<br>(12.5 to 53.3)                            | 1.8<br>(-13.0 to 19.2)                              |
| Nasopharynx cancer                                                      | < 0.05<br>(< 0.05 to < 0.05)            | < 0.05<br>(< 0.05 to < 0.05)                   | < 0.05<br>(< 0.05 to < 0.05)                       | 39.2<br>(19.3 to 64.5)                            | 10.9<br>(-5.3 to 31.6)                              |
| Other pharynx cancer                                                    | < 0.05<br>(< 0.05 to < 0.05)            | < 0.05<br>(< 0.05 to < 0.05)                   | < 0.05<br>(< 0.05 to < 0.05)                       | 26.0<br>(11.3 to 44.0)                            | -0.1<br>(-11.7 to 14.1)                             |
| Oesophageal cancer                                                      | < 0.05<br>(< 0.05 to < 0.05)            | < 0.05<br>(< 0.05 to < 0.05)                   | < 0.05<br>(< 0.05 to < 0.05)                       | 38.7<br>(24.1 to 56.1)                            | 7.1<br>(-4.2 to 20.6)                               |
| Stomach cancer                                                          | 0.2<br>(0.2 to 0.2)                     | 0.1<br>(0.1 to 0.1)                            | < 0.05<br>(< 0.05 to < 0.05)                       | 38.7<br>(15.9 to 63.9)                            | 6.2<br>(-11.1 to 25.9)                              |
| Colon and rectum cancer                                                 | 1.8<br>(1.7 to 2.0)                     | 0.5<br>(0.4 to 0.5)                            | 0.2<br>(0.1 to 0.2)                                | 34.7<br>(18.2 to 53.8)                            | 2.9<br>(-10.0 to 17.5)                              |
| Liver cancer                                                            | < 0.05<br>(< 0.05 to < 0.05)            | 0.1<br>(< 0.05 to 0.1)                         | < 0.05<br>(< 0.05 to < 0.05)                       | 60.7<br>(32.6 to 94.2)                            | 24.2<br>(2.7 to 49.1)                               |
| Liver cancer due to hepatitis B                                         | < 0.05<br>(< 0.05 to < 0.05)            | < 0.05<br>(< 0.05 to < 0.05)                   | < 0.05<br>(< 0.05 to < 0.05)                       | 62.8<br>(33.1 to 95.9)                            | 27.2<br>(3.2 to 54.2)                               |

| Cause                                              | Prevalence in thousands (95% UI)      | Incidence in thousands (95% UI)    | YLDs in thousands (95% UI)        |                                                   |                                                     |
|----------------------------------------------------|---------------------------------------|------------------------------------|-----------------------------------|---------------------------------------------------|-----------------------------------------------------|
|                                                    | 2016 counts                           | 2016 counts                        | 2016 counts                       | Percentage change in counts between 2006 and 2016 | Percentage change in age-standardised rates between |
| Liver cancer due to hepatitis C                    | < 0.05<br>(< 0.05 to < 0.05)          | < 0.05<br>(< 0.05 to < 0.05)       | < 0.05<br>(< 0.05 to < 0.05)      | 65.0<br>(34.8 to 102.9)                           | 26.0<br>(2.4 to 52.9)                               |
| Liver cancer due to alcohol use                    | < 0.05<br>(< 0.05 to < 0.05)          | < 0.05<br>(< 0.05 to < 0.05)       | < 0.05<br>(< 0.05 to < 0.05)      | 52.7<br>(25.4 to 87.2)                            | 18.7<br>(-2.6 to 45.8)                              |
| Liver cancer due to other causes                   | < 0.05<br>(< 0.05 to < 0.05)          | < 0.05<br>(< 0.05 to < 0.05)       | < 0.05<br>(< 0.05 to < 0.05)      | 66.2<br>(33.3 to 106.1)                           | 28.5<br>(3.1 to 58.6)                               |
| Gallbladder and biliary tract cancer               | < 0.05<br>(< 0.05 to 0.1)             | < 0.05<br>(< 0.05 to < 0.05)       | < 0.05<br>(< 0.05 to < 0.05)      | 20.2<br>(-7.4 to 52.0)                            | -8.8<br>(-29.6 to 13.8)                             |
| Pancreatic cancer                                  | 0.1<br>(0.1 to 0.1)                   | 0.1<br>(0.1 to 0.1)                | < 0.05<br>(< 0.05 to < 0.05)      | 41.3<br>(20.2 to 64.0)                            | 8.2<br>(-7.5 to 24.5)                               |
| Larynx cancer                                      | 0.1<br>(0.1 to 0.1)                   | < 0.05<br>(< 0.05 to < 0.05)       | < 0.05<br>(< 0.05 to < 0.05)      | 22.2<br>(1.8 to 46.6)                             | -4.3<br>(-20.4 to 15.5)                             |
| Tracheal, bronchus, and lung cancer                | 0.5<br>(0.4 to 0.6)                   | 0.4<br>(0.3 to 0.4)                | 0.1<br>(0.1 to 0.1)               | 45.0<br>(19.4 to 76.9)                            | 12.7<br>(-6.9 to 38.1)                              |
| Malignant skin melanoma                            | 0.6<br>(0.4 to 0.6)                   | 0.1<br>(0.1 to 0.1)                | < 0.05<br>(< 0.05 to 0.1)         | 67.1<br>(33.9 to 99.1)                            | 30.9<br>(4.5 to 56.9)                               |
| Non-melanoma skin cancer                           | 0.2<br>(0.1 to 0.2)                   | 0.4<br>(0.2 to 0.5)                | < 0.05<br>(< 0.05 to < 0.05)      | 160.8<br>(75.2 to 291.1)                          | 97.2<br>(32.6 to 196.2)                             |
| Non-melanoma skin cancer (squamous-cell carcinoma) | 0.1<br>(0.1 to 0.2)                   | 0.1<br>(0.1 to 0.2)                | < 0.05<br>(< 0.05 to < 0.05)      | 163.4<br>(73.2 to 302.3)                          | 98.8<br>(30.8 to 204.1)                             |
| Non-melanoma skin cancer (basal-cell carcinoma)    | < 0.05<br>(< 0.05 to 0.1)             | 0.2<br>(0.1 to 0.4)                | < 0.05<br>(< 0.05 to < 0.05)      | 120.0<br>(25.5 to 245.5)                          | 72.2<br>(-1.3 to 164.4)                             |
| Breast cancer                                      | 3.0<br>(2.4 to 3.4)                   | 0.6<br>(0.5 to 0.7)                | 0.3<br>(0.2 to 0.4)               | 31.7<br>(15.9 to 50.5)                            | 3.6<br>(-9.2 to 18.7)                               |
| Cervical cancer                                    | 0.1<br>(0.1 to 0.2)                   | < 0.05<br>(< 0.05 to < 0.05)       | < 0.05<br>(< 0.05 to < 0.05)      | 9.4<br>(-12.0 to 37.6)                            | -13.0<br>(-31.2 to 10.7)                            |
| Uterine cancer                                     | 0.6<br>(0.5 to 0.7)                   | 0.1<br>(0.1 to 0.1)                | < 0.05<br>(< 0.05 to 0.1)         | 49.7<br>(14.6 to 91.9)                            | 16.9<br>(-11.2 to 50.0)                             |
| Ovarian cancer                                     | 0.2<br>(0.2 to 0.2)                   | 0.1<br>(0.1 to 0.1)                | < 0.05<br>(< 0.05 to < 0.05)      | 37.2<br>(-0.3 to 87.1)                            | 7.6<br>(-22.4 to 46.5)                              |
| Prostate cancer                                    | 2.6<br>(2.0 to 3.4)                   | 0.6<br>(0.5 to 0.8)                | 0.2<br>(0.1 to 0.3)               | 44.0<br>(21.2 to 65.3)                            | 9.2<br>(-8.6 to 26.6)                               |
| Testicular cancer                                  | 0.2<br>(0.1 to 0.2)                   | < 0.05<br>(< 0.05 to < 0.05)       | < 0.05<br>(< 0.05 to < 0.05)      | 36.3<br>(-2.5 to 95.5)                            | 5.3<br>(-24.8 to 50.0)                              |
| Kidney cancer                                      | 0.2<br>(0.2 to 0.2)                   | 0.1<br>(0.1 to 0.1)                | < 0.05<br>(< 0.05 to < 0.05)      | 34.4<br>(16.9 to 56.3)                            | 5.6<br>(-8.0 to 22.5)                               |
| Bladder cancer                                     | 0.7<br>(0.6 to 0.8)                   | 0.2<br>(0.1 to 0.2)                | 0.1<br>(< 0.05 to 0.1)            | 32.8<br>(13.5 to 54.4)                            | 1.5<br>(-13.0 to 18.1)                              |
| Brain and nervous system cancer                    | 0.2<br>(0.2 to 0.3)                   | 0.1<br>(0.1 to 0.1)                | < 0.05<br>(< 0.05 to < 0.05)      | 42.9<br>(16.5 to 76.4)                            | 14.2<br>(-6.4 to 40.6)                              |
| Thyroid cancer                                     | 0.3<br>(0.3 to 0.3)                   | 0.1<br>(< 0.05 to 0.1)             | < 0.05<br>(< 0.05 to < 0.05)      | 36.7<br>(14.6 to 63.1)                            | 8.5<br>(-9.5 to 30.1)                               |
| Mesothelioma                                       | < 0.05<br>(< 0.05 to < 0.05)          | < 0.05<br>(< 0.05 to < 0.05)       | < 0.05<br>(< 0.05 to < 0.05)      | 23.1<br>(7.9 to 40.9)                             | -4.7<br>(-16.5 to 9.3)                              |
| Hodgkin lymphoma                                   | 0.1<br>(0.1 to 0.2)                   | < 0.05<br>(< 0.05 to < 0.05)       | < 0.05<br>(< 0.05 to < 0.05)      | 28.7<br>(0.9 to 63.1)                             | 2.3<br>(-20.1 to 30.7)                              |
| Non-Hodgkin's lymphoma                             | 0.6<br>(0.5 to 0.7)                   | 0.1<br>(0.1 to 0.2)                | < 0.05<br>(< 0.05 to 0.1)         | 53.3<br>(31.9 to 76.8)                            | 20.2<br>(3.9 to 37.3)                               |
| Multiple myeloma                                   | 0.1<br>(0.1 to 0.1)                   | < 0.05<br>(< 0.05 to 0.1)          | < 0.05<br>(< 0.05 to < 0.05)      | 45.6<br>(14.1 to 82.6)                            | 12.6<br>(-12.3 to 42.1)                             |
| Leukaemia                                          | 0.5<br>(0.4 to 0.6)                   | 0.1<br>(0.1 to 0.2)                | 0.1<br>(< 0.05 to 0.1)            | 61.8<br>(32.4 to 90.6)                            | 25.4<br>(0.7 to 49.6)                               |
| Acute lymphoid leukaemia                           | 0.1<br>(0.1 to 0.1)                   | < 0.05<br>(< 0.05 to < 0.05)       | < 0.05<br>(< 0.05 to < 0.05)      | 58.6<br>(13.7 to 112.6)                           | 39.7<br>(-7.1 to 101.2)                             |
| Chronic lymphoid leukaemia                         | 0.2<br>(0.2 to 0.3)                   | 0.1<br>(< 0.05 to 0.1)             | < 0.05<br>(< 0.05 to < 0.05)      | 69.4<br>(29.0 to 112.8)                           | 27.8<br>(-3.3 to 60.1)                              |
| Acute myeloid leukaemia                            | < 0.05<br>(< 0.05 to 0.1)             | < 0.05<br>(< 0.05 to < 0.05)       | < 0.05<br>(< 0.05 to < 0.05)      | 67.7<br>(32.1 to 103.0)                           | 28.0<br>(-0.5 to 54.3)                              |
| Chronic myeloid leukaemia                          | < 0.05<br>(< 0.05 to < 0.05)          | < 0.05<br>(< 0.05 to < 0.05)       | < 0.05<br>(< 0.05 to < 0.05)      | 32.7<br>(9.0 to 62.2)                             | 1.0<br>(-16.8 to 24.1)                              |
| Other leukaemia                                    | 0.1<br>(0.1 to 0.2)                   | < 0.05<br>(< 0.05 to < 0.05)       | < 0.05<br>(< 0.05 to < 0.05)      | 54.4<br>(23.6 to 95.8)                            | 14.3<br>(-8.4 to 43.7)                              |
| Other neoplasms                                    | 0.7<br>(0.5 to 0.8)                   | 0.2<br>(0.1 to 0.2)                | 0.1<br>(< 0.05 to 0.1)            | 77.4<br>(44.4 to 114.0)                           | 39.6<br>(13.7 to 69.7)                              |
| <b>Cardiovascular diseases</b>                     | <b>96.8</b><br><b>(92.7 to 101.0)</b> | <b>8.7†</b><br><b>(8.2 to 9.2)</b> | <b>6.0</b><br><b>(4.3 to 7.9)</b> | <b>21.1</b><br><b>(16.8 to 25.4)</b>              | <b>-5.9</b><br><b>(-9.2 to -2.6)</b>                |
| Rheumatic heart disease                            | 0.1<br>(0.1 to 0.1)                   | < 0.05<br>(< 0.05 to < 0.05)       | < 0.05<br>(< 0.05 to < 0.05)      | 15.2<br>(-4.0 to 39.0)                            | -9.8<br>(-24.2 to 7.8)                              |
| Ischaemic heart disease                            | 24.4<br>(22.4 to 26.5)                | 2.6<br>(2.4 to 2.8)                | 1.3<br>(0.9 to 1.8)               | 19.4<br>(13.9 to 25.3)                            | -7.4<br>(-11.5 to -3.0)                             |
| Cerebrovascular disease                            | 11.0<br>(10.3 to 11.8)                | 1.6†<br>(1.5 to 1.7)               | 1.7<br>(1.2 to 2.2)               | 27.9<br>(20.2 to 36.6)                            | -0.8<br>(-6.8 to 5.6)                               |
| Ischaemic stroke                                   | 8.5<br>(7.7 to 9.4)                   | 0.9†<br>(0.8 to 1.1)               | 1.3<br>(0.9 to 1.7)               | 27.4<br>(17.6 to 37.7)                            | -1.5<br>(-8.9 to 6.7)                               |
| Hemorrhagic stroke                                 | 3.0<br>(2.7 to 3.4)                   | 0.6†<br>(0.6 to 0.7)               | 0.4<br>(0.3 to 0.6)               | 29.4<br>(16.1 to 44.0)                            | 0.9<br>(-8.9 to 12.1)                               |
| Hypertensive heart disease                         | 2.9<br>(2.5 to 3.4)                   | --                                 | 0.2<br>(0.2 to 0.3)               | 15.9<br>(5.0 to 27.7)                             | -12.2<br>(-20.7 to -2.9)                            |
| Cardiomyopathy and myocarditis                     | 1.2<br>(1.0 to 1.3)                   | 0.5†<br>(0.5 to 0.6)               | 0.1<br>(0.1 to 0.1)               | 14.2<br>(2.1 to 26.4)                             | -11.1<br>(-20.2 to -1.7)                            |
| Myocarditis                                        | 0.5<br>(0.4 to 0.5)                   | 0.5<br>(0.5 to 0.6)                | < 0.05<br>(< 0.05 to 0.1)         | 11.7<br>(-4.4 to 31.0)                            | -9.2<br>(-22.1 to 6.1)                              |
| Alcoholic cardiomyopathy                           | 0.1<br>(0.1 to 0.2)                   | --                                 | < 0.05<br>(< 0.05 to < 0.05)      | 8.6<br>(-16.4 to 39.5)                            | -14.3<br>(-33.9 to 10.6)                            |
| Other cardiomyopathy                               | 0.7<br>(0.6 to 0.8)                   | --                                 | 0.1<br>(< 0.05 to 0.1)            | 17.4<br>(3.1 to 34.2)                             | -11.8<br>(-22.6 to 0.6)                             |
| Atrial fibrillation and flutter                    | 10.0<br>(9.0 to 11.1)                 | 0.8<br>(0.7 to 0.9)                | 0.8<br>(0.5 to 1.1)               | 30.9<br>(23.4 to 38.4)                            | 0.2<br>(-5.6 to 6.1)                                |
| Peripheral vascular disease                        | 35.7<br>(31.4 to 40.7)                | 2.9<br>(2.5 to 3.5)                | 0.1<br>(0.1 to 0.2)               | 20.4<br>(12.1 to 29.4)                            | -8.5<br>(-14.5 to -2.0)                             |
| Endocarditis                                       | 0.2<br>(0.1 to 0.2)                   | 0.2<br>(0.2 to 0.2)                | < 0.05<br>(< 0.05 to < 0.05)      | 16.1<br>(-2.0 to 37.4)                            | -11.0<br>(-24.1 to 4.6)                             |
| Other cardiovascular and circulatory diseases      | 32.0<br>(28.2 to 36.3)                | --                                 | 1.7<br>(1.1 to 2.3)               | 13.4<br>(5.6 to 21.3)                             | -10.3<br>(-16.2 to -4.1)                            |
| <b>Chronic respiratory diseases</b>                | <b>89.7</b><br><b>(86.6 to 92.7)</b>  | <b>7.4†</b><br><b>(7.0 to 7.7)</b> | <b>3.3</b><br><b>(2.4 to 4.4)</b> | <b>18.6</b><br><b>(12.8 to 24.6)</b>              | <b>-1.1</b><br><b>(-5.6 to 3.4)</b>                 |
| Chronic obstructive pulmonary disease              | 33.4<br>(31.6 to 35.1)                | 2.1<br>(2.0 to 2.2)                | 0.9<br>(0.7 to 1.1)               | 17.8<br>(1.4 to 35.0)                             | -7.5<br>(-20.3 to 5.7)                              |
| Pneumoconiosis                                     | < 0.05<br>(< 0.05 to < 0.05)          | < 0.05<br>(< 0.05 to < 0.05)       | < 0.05<br>(< 0.05 to < 0.05)      | 28.2<br>(21.1 to 36.4)                            | -0.5<br>(-6.1 to 6.0)                               |
| Silicosis                                          | < 0.05<br>(< 0.05 to < 0.05)          | < 0.05<br>(< 0.05 to < 0.05)       | < 0.05<br>(< 0.05 to < 0.05)      | 36.4<br>(27.2 to 46.2)                            | 5.7<br>(-1.5 to 13.3)                               |



| Cause                                                          | Prevalence in thousands (95% UI)        | Incidence in thousands (95% UI)         | YLDs in thousands (95% UI)           |                                                   |                                                     |
|----------------------------------------------------------------|-----------------------------------------|-----------------------------------------|--------------------------------------|---------------------------------------------------|-----------------------------------------------------|
|                                                                | 2016 counts                             | 2016 counts                             | 2016 counts                          | Percentage change in counts between 2006 and 2016 | Percentage change in age-standardised rates between |
| Asbestosis                                                     | < 0.05<br>(< 0.05 to < 0.05)            | < 0.05<br>(< 0.05 to < 0.05)            | < 0.05<br>(< 0.05 to < 0.05)         | 11.0<br>(-2.2 to 26.7)                            | -13.4<br>(-24.4 to -0.6)                            |
| Coal workers pneumoconiosis                                    | --                                      | --                                      | --                                   | --                                                | --                                                  |
| Other pneumoconiosis                                           | < 0.05<br>(< 0.05 to < 0.05)            | < 0.05<br>(< 0.05 to < 0.05)            | < 0.05<br>(< 0.05 to < 0.05)         | -14.5<br>(-25.4 to -4.2)                          | -34.6<br>(-43.1 to -26.6)                           |
| Asthma                                                         | 59.2<br>(55.6 to 63.2)                  | 5.2<br>(4.9 to 5.5)                     | 2.3<br>(1.5 to 3.3)                  | 18.4<br>(13.8 to 23.3)                            | 0.8<br>(-3.3 to 5.1)                                |
| Interstitial lung disease and pulmonary sarcoidosis            | 0.6<br>(0.5 to 0.7)                     | 0.1<br>(0.1 to 0.1)                     | 0.1<br>(< 0.05 to 0.1)               | 25.4<br>(11.1 to 41.4)                            | -2.5<br>(-13.9 to 9.9)                              |
| Other chronic respiratory diseases                             | --                                      | --                                      | < 0.05<br>(< 0.05 to < 0.05)         | 45.6<br>(23.8 to 70.2)                            | 26.0<br>(6.1 to 49.8)                               |
| <b>Cirrhosis and other chronic liver diseases</b>              | <b>7.5</b><br><b>(7.0 to 7.8)</b>       | <b>0.1</b><br><b>(0.1 to 0.1)</b>       | <b>0.2</b><br><b>(0.1 to 0.2)</b>    | <b>28.6</b><br><b>(14.2 to 43.1)</b>              | <b>5.2</b><br><b>(-6.5 to 17.6)</b>                 |
| Cirrhosis and other chronic liver diseases due to hepatitis B  | 1.0<br>(0.8 to 1.3)                     | < 0.05<br>(< 0.05 to < 0.05)            | < 0.05<br>(< 0.05 to < 0.05)         | 32.1<br>(4.0 to 70.4)                             | 5.6<br>(-17.3 to 36.2)                              |
| Cirrhosis and other chronic liver diseases due to hepatitis C  | 2.3<br>(1.8 to 2.9)                     | < 0.05<br>(< 0.05 to 0.1)               | 0.1<br>(< 0.05 to 0.1)               | 32.4<br>(8.4 to 62.6)                             | 6.2<br>(-13.2 to 30.6)                              |
| Cirrhosis and other chronic liver diseases due to alcohol use  | 3.4<br>(2.9 to 3.9)                     | 0.1<br>(0.1 to 0.1)                     | 0.1<br>(< 0.05 to 0.1)               | 30.0<br>(11.4 to 52.9)                            | 3.9<br>(-11.5 to 23.1)                              |
| Cirrhosis and other chronic liver diseases due to other causes | 0.7<br>(0.6 to 0.9)                     | < 0.05<br>(< 0.05 to < 0.05)            | < 0.05<br>(< 0.05 to < 0.05)         | 17.6<br>(-6.4 to 48.0)                            | 5.8<br>(-16.3 to 32.7)                              |
| <b>Digestive diseases</b>                                      | <b>17.1</b><br><b>(16.1 to 18.1)</b>    | <b>22.4†</b><br><b>(20.8 to 24.0)</b>   | <b>0.7</b><br><b>(0.5 to 1.0)</b>    | <b>14.4</b><br><b>(6.9 to 22.2)</b>               | <b>-7.8</b><br><b>(-13.9 to -1.2)</b>               |
| Peptic ulcer disease                                           | 3.8<br>(3.4 to 4.4)                     | 1.0<br>(0.9 to 1.1)                     | < 0.05<br>(< 0.05 to 0.1)            | 11.2<br>(-16.8 to 49.9)                           | -9.1<br>(-32.9 to 23.7)                             |
| Gastritis and duodenitis                                       | 4.7<br>(4.1 to 5.4)                     | 3.5<br>(3.1 to 3.9)                     | < 0.05<br>(< 0.05 to 0.1)            | 20.0<br>(-6.8 to 54.1)                            | -3.0<br>(-24.6 to 26.5)                             |
| Appendicitis                                                   | < 0.05<br>(< 0.05 to < 0.05)            | 0.9<br>(0.8 to 1.0)                     | < 0.05<br>(< 0.05 to < 0.05)         | 15.8<br>(11.8 to 19.5)                            | 0.4<br>(-2.8 to 3.5)                                |
| Paralytic ileus and intestinal obstruction                     | < 0.05<br>(< 0.05 to < 0.05)            | 0.5<br>(0.4 to 0.5)                     | < 0.05<br>(< 0.05 to < 0.05)         | 22.9<br>(14.8 to 31.4)                            | -2.6<br>(-8.1 to 2.6)                               |
| Inguinal, femoral, and abdominal hernia                        | 7.1<br>(6.5 to 7.7)                     | 10.5<br>(9.2 to 11.9)                   | 0.5<br>(0.3 to 0.6)                  | 11.6<br>(2.0 to 21.3)                             | -10.1<br>(-18.1 to -2.2)                            |
| Inflammatory bowel disease                                     | 0.5<br>(0.5 to 0.6)                     | 0.3<br>(0.3 to 0.3)                     | 0.1<br>(0.1 to 0.1)                  | 24.1<br>(4.8 to 48.4)                             | 0.5<br>(-15.4 to 20.5)                              |
| Vascular intestinal disorders                                  | < 0.05<br>(< 0.05 to < 0.05)            | 0.1<br>(0.1 to 0.1)                     | < 0.05<br>(< 0.05 to < 0.05)         | 35.6<br>(13.3 to 61.5)                            | 6.6<br>(-8.7 to 23.9)                               |
| Gallbladder and biliary diseases                               | 1.4<br>(1.3 to 1.6)                     | 5.3<br>(4.7 to 5.9)                     | < 0.05<br>(< 0.05 to < 0.05)         | 16.0<br>(-3.9 to 41.3)                            | -8.3<br>(-23.7 to 11.0)                             |
| Pancreatitis                                                   | 0.1<br>(< 0.05 to 0.1)                  | 0.5<br>(0.4 to 0.5)                     | < 0.05<br>(< 0.05 to < 0.05)         | 15.4<br>(11.1 to 19.9)                            | -8.2<br>(-11.4 to -4.8)                             |
| Other digestive diseases                                       | --                                      | --                                      | 0.1<br>(< 0.05 to 0.1)               | 19.3<br>(11.5 to 27.7)                            | -4.8<br>(-11.8 to 3.0)                              |
| <b>Neurological disorders</b>                                  | <b>367.4</b><br><b>(355.1 to 381.9)</b> | <b>146.6</b><br><b>(126.2 to 170.0)</b> | <b>11.5</b><br><b>(7.8 to 15.7)</b>  | <b>24.1</b><br><b>(13.6 to 36.3)</b>              | <b>0.2</b><br><b>(-9.1 to 11.0)</b>                 |
| Alzheimer's disease and other dementias                        | 9.6<br>(8.2 to 11.5)                    | 1.9<br>(1.6 to 2.3)                     | 1.5<br>(1.0 to 2.0)                  | 36.9<br>(31.0 to 44.0)                            | -0.8<br>(-4.9 to 4.0)                               |
| Parkinson's disease                                            | 1.2<br>(1.0 to 1.6)                     | 0.1<br>(0.1 to 0.2)                     | 0.1<br>(0.1 to 0.2)                  | 36.1<br>(23.1 to 51.3)                            | 4.1<br>(-6.1 to 16.1)                               |
| Epilepsy                                                       | 2.3<br>(0.5 to 4.1)                     | 0.2<br>(0.1 to 0.4)                     | 0.6<br>(0.1 to 1.3)                  | 13.0<br>(-77.7 to 531.4)                          | -5.5<br>(-81.4 to 429.8)                            |
| Multiple sclerosis                                             | 0.7<br>(0.6 to 0.7)                     | < 0.05<br>(< 0.05 to < 0.05)            | 0.2<br>(0.1 to 0.2)                  | 32.1<br>(10.4 to 56.1)                            | 5.8<br>(-11.8 to 25.3)                              |
| Motor neuron disease                                           | 0.1<br>(0.1 to 0.1)                     | < 0.05<br>(< 0.05 to < 0.05)            | < 0.05<br>(< 0.05 to < 0.05)         | 24.9<br>(19.7 to 29.7)                            | 1.3<br>(-3.0 to 5.4)                                |
| Migraine                                                       | 183.9<br>(173.8 to 194.2)               | 16.3<br>(15.1 to 17.5)                  | 7.9<br>(5.1 to 11.1)                 | 22.4<br>(18.5 to 26.7)                            | 0.3<br>(-3.1 to 3.7)                                |
| Tension-type headache                                          | 243.2<br>(217.6 to 270.2)               | 128.1<br>(107.4 to 151.5)               | 1.1<br>(0.7 to 1.7)                  | 23.2<br>(16.8 to 30.3)                            | 0.6<br>(-4.6 to 6.3)                                |
| Other neurological disorders                                   | < 0.05<br>(< 0.05 to < 0.05)            | < 0.05<br>(< 0.05 to < 0.05)            | 0.1<br>(0.1 to 0.3)                  | 31.2<br>(-45.1 to 246.0)                          | 13.7<br>(-56.1 to 227.7)                            |
| <b>Mental and substance use disorders</b>                      | <b>147.4</b><br><b>(141.6 to 153.7)</b> | <b>46.1†</b><br><b>(42.7 to 49.8)</b>   | <b>20.4</b><br><b>(14.7 to 26.4)</b> | <b>22.5</b><br><b>(20.2 to 25.1)</b>              | <b>0.8</b><br><b>(-1.0 to 2.7)</b>                  |
| Schizophrenia                                                  | 2.6<br>(2.1 to 3.1)                     | 0.1<br>(0.1 to 0.2)                     | 1.6<br>(1.2 to 2.1)                  | 24.6<br>(14.6 to 35.6)                            | -0.1<br>(-8.2 to 8.6)                               |
| Alcohol use disorders                                          | 10.0<br>(8.5 to 11.6)                   | 4.6<br>(3.9 to 5.3)                     | 1.0<br>(0.7 to 1.4)                  | 28.4<br>(18.4 to 39.6)                            | 2.4<br>(-5.8 to 11.3)                               |
| Drug use disorders                                             | 6.3<br>(5.9 to 6.8)                     | 0.9<br>(0.8 to 1.0)                     | 1.2<br>(0.9 to 1.6)                  | 36.0<br>(22.8 to 51.7)                            | 8.0<br>(-2.4 to 20.1)                               |
| Opioid use disorders                                           | 1.7<br>(1.4 to 1.9)                     | 0.2<br>(0.2 to 0.3)                     | 0.7<br>(0.5 to 0.9)                  | 49.3<br>(29.2 to 71.5)                            | 16.5<br>(1.1 to 34.4)                               |
| Cocaine use disorders                                          | 1.1<br>(1.0 to 1.2)                     | 0.1<br>(0.1 to 0.1)                     | 0.1<br>(0.1 to 0.2)                  | 16.6<br>(-4.4 to 40.8)                            | -5.2<br>(-22.6 to 14.7)                             |
| Amphetamine use disorders                                      | 0.6<br>(0.4 to 0.8)                     | 0.1<br>(< 0.05 to 0.1)                  | 0.1<br>(< 0.05 to 0.1)               | 24.8<br>(-8.1 to 66.4)                            | 2.1<br>(-26.2 to 36.3)                              |
| Cannabis use disorders                                         | 2.3<br>(2.0 to 2.7)                     | 0.4<br>(0.3 to 0.4)                     | 0.1<br>(< 0.05 to 0.1)               | 26.6<br>(6.8 to 52.5)                             | 5.1<br>(-11.6 to 27.8)                              |
| Other drug use disorders                                       | 0.8<br>(0.7 to 0.9)                     | 0.1<br>(0.1 to 0.1)                     | 0.2<br>(0.1 to 0.3)                  | 22.9<br>(-3.0 to 53.9)                            | -1.1<br>(-22.2 to 24.6)                             |
| Depressive disorders                                           | 34.1<br>(32.0 to 36.8)                  | 30.6<br>(27.6 to 34.1)                  | 5.3<br>(3.7 to 7.3)                  | 23.3<br>(18.0 to 28.4)                            | 0.3<br>(-3.8 to 4.4)                                |
| Major depressive disorder                                      | 18.5<br>(16.6 to 20.8)                  | 28.4<br>(25.4 to 31.9)                  | 3.8<br>(2.6 to 5.2)                  | 22.7<br>(15.5 to 29.9)                            | 0.3<br>(-5.5 to 6.0)                                |
| Dysthymia                                                      | 16.1<br>(14.1 to 18.6)                  | 2.2<br>(1.9 to 2.5)                     | 1.5<br>(1.0 to 2.2)                  | 24.7<br>(20.9 to 28.9)                            | 0.3<br>(-2.9 to 3.6)                                |
| Bipolar disorder                                               | 10.7<br>(7.1 to 15.3)                   | 0.7<br>(0.5 to 1.0)                     | 2.2<br>(1.2 to 3.6)                  | 24.0<br>(18.2 to 29.9)                            | 0.5<br>(-4.1 to 5.5)                                |
| Anxiety disorders                                              | 48.6<br>(42.8 to 55.2)                  | 6.1<br>(5.3 to 7.0)                     | 4.7<br>(3.2 to 6.3)                  | 20.3<br>(15.2 to 25.2)                            | 0.4<br>(-3.6 to 4.5)                                |
| Eating disorders                                               | 3.5<br>(2.9 to 4.3)                     | 0.9<br>(0.7 to 1.2)                     | 0.7<br>(0.5 to 1.1)                  | 25.1<br>(13.5 to 37.9)                            | 1.9<br>(-6.9 to 12.1)                               |
| Anorexia nervosa                                               | 1.1<br>(0.8 to 1.4)                     | 0.2<br>(0.1 to 0.2)                     | 0.2<br>(0.1 to 0.3)                  | 22.9<br>(3.9 to 45.2)                             | 1.2<br>(-14.2 to 19.6)                              |
| Bulimia nervosa                                                | 2.4<br>(1.8 to 3.2)                     | 0.7<br>(0.5 to 1.0)                     | 0.5<br>(0.3 to 0.8)                  | 26.1<br>(12.2 to 41.7)                            | 2.2<br>(-8.8 to 14.8)                               |
| Autistic spectrum disorders                                    | 6.8<br>(6.0 to 7.6)                     | < 0.05<br>(< 0.05 to < 0.05)            | 1.1<br>(0.7 to 1.6)                  | 18.0<br>(12.2 to 24.1)                            | -0.5<br>(-5.5 to 5.0)                               |
| Autism                                                         | 2.7<br>(2.3 to 3.1)                     | < 0.05<br>(< 0.05 to < 0.05)            | 0.7<br>(0.4 to 1.0)                  | 18.3<br>(10.3 to 27.0)                            | -0.5<br>(-7.5 to 6.9)                               |
| Asperger syndrome and other autistic spectrum disorders        | 4.1<br>(3.4 to 5.0)                     | < 0.05<br>(< 0.05 to < 0.05)            | 0.4<br>(0.3 to 0.6)                  | 17.6<br>(11.4 to 23.7)                            | -0.6<br>(-5.6 to 5.0)                               |

| Cause                                                      | Prevalence in thousands (95% UI)        | Incidence in thousands (95% UI)                | YLDs in thousands (95% UI)           |                                                   |                                                     |
|------------------------------------------------------------|-----------------------------------------|------------------------------------------------|--------------------------------------|---------------------------------------------------|-----------------------------------------------------|
|                                                            | 2016 counts                             | 2016 counts                                    | 2016 counts                          | Percentage change in counts between 2006 and 2016 | Percentage change in age-standardised rates between |
| Attention-deficit/hyperactivity disorder                   | 6.3<br>(4.6 to 8.5)                     | 0.2<br>(0.2 to 0.3)                            | 0.1<br>( $< 0.05$ to 0.1)            | 9.9<br>(1.0 to 19.5)                              | -0.2<br>(-8.2 to 8.5)                               |
| Conduct disorder                                           | 4.8<br>(3.7 to 6.0)                     | 1.4<br>(1.0 to 1.8)                            | 0.6<br>(0.4 to 0.9)                  | -4.1<br>(-10.4 to 2.1)                            | -0.1<br>(-6.3 to 6.0)                               |
| Idiopathic developmental intellectual disability           | 5.5<br>(2.1 to 9.3)                     | --                                             | 0.3<br>(0.1 to 0.5)                  | 20.4<br>(10.1 to 32.6)                            | 0.1<br>(-8.7 to 10.0)                               |
| Other mental and substance use disorders                   | 21.2<br>(18.4 to 24.5)                  | 0.6<br>(0.5 to 0.7)                            | 1.6<br>(1.1 to 2.2)                  | 25.4<br>(19.8 to 31.3)                            | -0.1<br>(-4.7 to 4.5)                               |
| <b>Diabetes, urogenital, blood, and endocrine diseases</b> | <b>368.9</b><br><b>(361.9 to 376.4)</b> | <b>88.6†</b><br><b>(83.5 to 94.2)</b>          | <b>7.6</b><br><b>(5.5 to 10.3)</b>   | <b>17.8</b><br><b>(12.6 to 23.9)</b>              | <b>-6.4</b><br><b>(-10.7 to -1.4)</b>               |
| Diabetes mellitus                                          | 51.1<br>(46.4 to 56.0)                  | 3.2<br>(2.9 to 3.5)                            | 4.0<br>(2.7 to 5.4)                  | 14.0<br>(5.7 to 25.0)                             | -10.2<br>(-17.1 to -1.4)                            |
| Acute glomerulonephritis                                   | $< 0.05$<br>( $< 0.05$ to $< 0.05$ )    | 0.2<br>(0.1 to 0.2)                            | $< 0.05$<br>( $< 0.05$ to $< 0.05$ ) | 21.9<br>(16.7 to 27.2)                            | -0.2<br>(-4.1 to 3.8)                               |
| Chronic kidney disease                                     | 33.0<br>(29.1 to 37.0)                  | 2.9<br>(2.5 to 3.3)                            | 0.8<br>(0.6 to 1.1)                  | 20.9<br>(11.8 to 31.2)                            | -6.1<br>(-13.1 to 2.1)                              |
| Chronic kidney disease due to diabetes mellitus            | 11.4<br>(9.4 to 13.7)                   | 1.1<br>(0.9 to 1.3)                            | 0.3<br>(0.2 to 0.4)                  | 22.5<br>(9.6 to 37.3)                             | -4.1<br>(-14.2 to 7.7)                              |
| Chronic kidney disease due to hypertension                 | 6.3<br>(5.2 to 7.5)                     | 0.6<br>(0.5 to 0.7)                            | 0.1<br>(0.1 to 0.1)                  | 25.5<br>(8.9 to 43.8)                             | -7.2<br>(-19.3 to 6.1)                              |
| Chronic kidney disease due to glomerulonephritis           | 5.3<br>(4.4 to 6.2)                     | 0.4<br>(0.3 to 0.5)                            | 0.2<br>(0.1 to 0.3)                  | 18.7<br>(6.3 to 34.7)                             | -6.5<br>(-16.4 to 6.4)                              |
| Chronic kidney disease due to other causes                 | 10.0<br>(8.1 to 12.2)                   | 0.9<br>(0.7 to 1.1)                            | 0.2<br>(0.2 to 0.3)                  | 18.9<br>(6.7 to 33.3)                             | -7.5<br>(-17.0 to 3.8)                              |
| Urinary diseases and male infertility                      | 18.4<br>(16.6 to 20.5)                  | 46.1†<br>(41.4 to 51.5)                        | 0.6<br>(0.4 to 0.8)                  | 26.5<br>(18.8 to 34.6)                            | 0.2<br>(-5.8 to 6.7)                                |
| Interstitial nephritis and urinary tract infections        | 0.7<br>(0.6 to 0.8)                     | 34.7<br>(30.1 to 39.9)                         | $< 0.05$<br>( $< 0.05$ to $< 0.05$ ) | 28.9<br>(8.6 to 55.1)                             | 3.5<br>(-13.0 to 24.3)                              |
| Urolithiasis                                               | 0.4<br>(0.3 to 0.4)                     | 9.7<br>(8.6 to 11.0)                           | $< 0.05$<br>( $< 0.05$ to $< 0.05$ ) | 24.8<br>(7.4 to 46.8)                             | -0.5<br>(-13.8 to 16.3)                             |
| Benign prostatic hyperplasia                               | 14.5<br>(12.4 to 17.0)                  | 1.7<br>(1.4 to 2.0)                            | 0.5<br>(0.3 to 0.7)                  | 27.6<br>(18.5 to 36.7)                            | 1.0<br>(-6.2 to 8.4)                                |
| Male infertility                                           | 2.2<br>(1.6 to 3.0)                     | --                                             | $< 0.05$<br>( $< 0.05$ to $< 0.05$ ) | 17.1<br>(5.4 to 29.5)                             | -6.2<br>(-14.7 to 3.1)                              |
| Other urinary diseases                                     | --                                      | --                                             | $< 0.05$<br>( $< 0.05$ to $< 0.05$ ) | 7.4<br>(-4.4 to 20.3)                             | -14.6<br>(-23.8 to -4.4)                            |
| Gynecological diseases                                     | 98.0<br>(93.0 to 103.9)                 | 31.3†<br>(29.3 to 33.3)                        | 1.0<br>(0.7 to 1.4)                  | 20.7<br>(13.7 to 27.8)                            | -2.1<br>(-7.6 to 3.7)                               |
| Uterine fibroids                                           | 6.2<br>(5.5 to 7.0)                     | 0.7<br>(0.6 to 0.7)                            | 0.1<br>( $< 0.05$ to 0.1)            | 16.2<br>(2.7 to 31.1)                             | -3.9<br>(-15.4 to 9.1)                              |
| Polycystic ovarian syndrome                                | 0.3<br>(0.2 to 0.4)                     | 1.0<br>(0.7 to 1.4)                            | $< 0.05$<br>( $< 0.05$ to $< 0.05$ ) | 27.3<br>(1.1 to 57.1)                             | 0.8<br>(-19.8 to 24.3)                              |
| Female infertility                                         | 4.3<br>(2.8 to 6.5)                     | --                                             | $< 0.05$<br>( $< 0.05$ to 0.1)       | 34.7<br>(22.4 to 49.3)                            | 8.5<br>(-1.0 to 21.0)                               |
| Endometriosis                                              | 0.4<br>(0.3 to 0.5)                     | 1.1<br>(0.8 to 1.3)                            | $< 0.05$<br>( $< 0.05$ to 0.1)       | 25.8<br>(-3.1 to 65.5)                            | 1.9<br>(-21.2 to 35.5)                              |
| Genital prolapse                                           | 32.8<br>(28.6 to 37.2)                  | 1.6<br>(1.4 to 1.9)                            | 0.1<br>( $< 0.05$ to 0.2)            | 16.2<br>(6.1 to 27.4)                             | -7.8<br>(-15.6 to 1.0)                              |
| Premenstrual syndrome                                      | 53.4<br>(49.7 to 57.3)                  | 18.3<br>(16.8 to 19.8)                         | 0.5<br>(0.3 to 0.7)                  | 23.5<br>(13.9 to 34.4)                            | 1.0<br>(-6.9 to 9.9)                                |
| Other gynecological diseases                               | 8.5<br>(7.4 to 9.8)                     | 8.7<br>(7.4 to 10.0)                           | 0.3<br>(0.2 to 0.4)                  | 17.4<br>(3.4 to 33.7)                             | -5.7<br>(-16.3 to 7.2)                              |
| Hemoglobinopathies and hemolytic anaemias                  | 232.0<br>(224.4 to 240.2)               | --                                             | 0.5<br>(0.2 to 0.8)                  | 23.9<br>(-8.2 to 67.8)                            | 4.2<br>(-23.8 to 40.8)                              |
| Thalassemias                                               | 0.3<br>(0.3 to 0.4)                     | --                                             | $< 0.05$<br>( $< 0.05$ to $< 0.05$ ) | 21.3<br>(-3.5 to 56.5)                            | 5.2<br>(-17.6 to 36.8)                              |
| Thalassaemias trait                                        | 90.5<br>(84.1 to 97.5)                  | --                                             | 0.4<br>(0.2 to 0.7)                  | 26.1<br>(-8.4 to 74.0)                            | 6.1<br>(-23.9 to 45.5)                              |
| Sickle cell disorders                                      | $< 0.05$<br>( $< 0.05$ to $< 0.05$ )    | --                                             | $< 0.05$<br>( $< 0.05$ to $< 0.05$ ) | 10.7<br>(-8.7 to 43.1)                            | -5.7<br>(-22.1 to 20.0)                             |
| Sickle cell trait                                          | 12.9<br>(7.5 to 20.3)                   | --                                             | $< 0.05$<br>( $< 0.05$ to $< 0.05$ ) | 24.8<br>(-16.7 to 78.3)                           | 4.8<br>(-30.3 to 49.5)                              |
| G6PD deficiency                                            | 35.0<br>(32.2 to 38.3)                  | --                                             | $< 0.05$<br>( $< 0.05$ to $< 0.05$ ) | 19.4<br>(-9.8 to 56.9)                            | -1.4<br>(-26.9 to 32.7)                             |
| G6PD trait                                                 | 115.5<br>(110.9 to 120.7)               | --                                             | $< 0.05$<br>( $< 0.05$ to $< 0.05$ ) | 28.5<br>(-16.6 to 92.6)                           | 8.1<br>(-29.7 to 62.7)                              |
| Other hemoglobinopathies and hemolytic anaemias            | 0.8<br>(0.7 to 0.9)                     | --                                             | $< 0.05$<br>( $< 0.05$ to $< 0.05$ ) | -9.3<br>(-21.2 to 4.6)                            | -30.1<br>(-41.0 to -16.5)                           |
| Endocrine, metabolic, blood, and immune disorders          | 25.4<br>(23.1 to 27.7)                  | 4.9<br>(4.5 to 5.4)                            | 0.9<br>(0.6 to 1.2)                  | 21.4<br>(15.4 to 27.3)                            | -4.6<br>(-9.3 to 0.2)                               |
| <b>Musculoskeletal disorders</b>                           | <b>225.2</b><br><b>(215.2 to 236.0)</b> | <b>112.4</b><br><b>(102.0 to 123.8)</b>        | <b>24.6</b><br><b>(17.7 to 32.0)</b> | <b>26.4</b><br><b>(23.1 to 30.0)</b>              | <b>1.1</b><br><b>(-1.5 to 3.9)</b>                  |
| Rheumatoid arthritis                                       | 4.4<br>(3.9 to 4.8)                     | 0.2<br>(0.2 to 0.2)                            | 1.0<br>(0.7 to 1.4)                  | 21.1<br>(12.3 to 29.9)                            | -3.4<br>(-10.5 to 3.6)                              |
| Osteoarthritis                                             | 57.8<br>(52.5 to 63.7)                  | 2.7<br>(2.4 to 3.0)                            | 2.0<br>(1.3 to 2.9)                  | 27.2<br>(23.2 to 31.5)                            | -0.1<br>(-3.3 to 3.3)                               |
| Low back and neck pain                                     | 153.7<br>(144.5 to 164.6)               | 65.6<br>(58.2 to 73.4)                         | 18.4<br>(13.0 to 24.3)               | 26.3<br>(22.5 to 30.7)                            | 1.2<br>(-1.7 to 4.7)                                |
| Low back pain                                              | 113.4<br>(101.1 to 127.9)               | 55.6<br>(48.2 to 63.4)                         | 12.8<br>(9.0 to 17.1)                | 26.9<br>(21.5 to 33.1)                            | 1.5<br>(-2.7 to 6.3)                                |
| Neck pain                                                  | 56.1<br>(48.8 to 64.3)                  | 10.0<br>(8.7 to 11.8)                          | 5.6<br>(3.8 to 7.8)                  | 25.1<br>(22.8 to 27.5)                            | 0.4<br>(-1.4 to 2.2)                                |
| Gout                                                       | 8.8<br>(7.7 to 9.9)                     | 1.4<br>(1.2 to 1.6)                            | 0.3<br>(0.2 to 0.4)                  | 25.3<br>(12.8 to 39.9)                            | -0.7<br>(-10.8 to 11.1)                             |
| Other musculoskeletal disorders                            | 32.9<br>(25.8 to 41.1)                  | 42.4<br>(35.1 to 50.8)                         | 2.8<br>(1.8 to 4.1)                  | 28.5<br>(15.1 to 42.3)                            | 3.2<br>(-7.2 to 14.1)                               |
| <b>Other non-communicable diseases</b>                     | <b>692.8</b><br><b>(676.7 to 709.2)</b> | <b>2,100.2†</b><br><b>(1,941.2 to 2,241.6)</b> | <b>20.0</b><br><b>(13.9 to 28.4)</b> | <b>22.9</b><br><b>(21.4 to 24.5)</b>              | <b>0.5</b><br><b>(-0.6 to 1.8)</b>                  |
| Congenital anomalies                                       | 10.8<br>(10.2 to 11.4)                  | --                                             | 1.2<br>(0.9 to 1.6)                  | 18.3<br>(13.0 to 23.9)                            | 0.7<br>(-4.1 to 5.5)                                |
| Neural tube defects                                        | 0.7<br>(0.6 to 0.8)                     | --                                             | 0.2<br>(0.1 to 0.3)                  | 19.0<br>(5.7 to 33.4)                             | -0.5<br>(-11.5 to 11.7)                             |
| Congenital heart anomalies                                 | 2.8<br>(2.4 to 3.1)                     | --                                             | 0.1<br>(0.1 to 0.3)                  | 23.6<br>(11.9 to 36.6)                            | 5.6<br>(-4.2 to 16.5)                               |
| Orofacial clefts                                           | 0.3<br>(0.3 to 0.4)                     | --                                             | $< 0.05$<br>( $< 0.05$ to $< 0.05$ ) | 14.6<br>(0.0 to 29.1)                             | -4.3<br>(-16.3 to 7.9)                              |
| Down's syndrome                                            | 0.5<br>(0.4 to 0.6)                     | --                                             | $< 0.05$<br>( $< 0.05$ to 0.1)       | 17.1<br>(6.0 to 28.7)                             | -0.3<br>(-10.2 to 9.5)                              |
| Turner syndrome                                            | 0.4<br>(0.3 to 0.5)                     | --                                             | $< 0.05$<br>( $< 0.05$ to $< 0.05$ ) | 16.7<br>(-14.0 to 55.3)                           | -2.2<br>(-28.6 to 30.1)                             |
| Klinefelter syndrome                                       | 0.8<br>(0.6 to 0.9)                     | --                                             | $< 0.05$<br>( $< 0.05$ to $< 0.05$ ) | 21.1<br>(-0.9 to 45.9)                            | -1.1<br>(-18.5 to 19.6)                             |

| Cause                                         | Prevalence in thousands (95% UI)        | Incidence in thousands (95% UI)       | YLDs in thousands (95% UI)         |                                                   |                                                     |
|-----------------------------------------------|-----------------------------------------|---------------------------------------|------------------------------------|---------------------------------------------------|-----------------------------------------------------|
|                                               | 2016 counts                             | 2016 counts                           | 2016 counts                        | Percentage change in counts between 2006 and 2016 | Percentage change in age-standardised rates between |
| Other chromosomal abnormalities               | 0.9<br>(0.8 to 1.1)                     | --                                    | 0.1<br>(0.1 to 0.1)                | -0.4<br>(-12.9 to 12.4)                           | -4.7<br>(-16.9 to 7.5)                              |
| Congenital musculoskeletal and limb anomalies | 2.3<br>(2.1 to 2.5)                     | --                                    | 0.3<br>(0.2 to 0.5)                | 20.1<br>(9.6 to 31.5)                             | 0.6<br>(-8.4 to 10.2)                               |
| Urogenital congenital anomalies               | 1.3<br>(1.2 to 1.5)                     | --                                    | < 0.05<br>(< 0.05 to < 0.05)       | 14.2<br>(5.7 to 23.5)                             | 0.4<br>(-7.2 to 8.7)                                |
| Digestive congenital anomalies                | 1.9<br>(1.7 to 2.2)                     | --                                    | 0.1<br>(0.1 to 0.1)                | 14.1<br>(1.8 to 29.4)                             | -4.3<br>(-15.0 to 8.4)                              |
| Other congenital anomalies                    | 1.3<br>(0.5 to 2.3)                     | --                                    | 0.3<br>(0.1 to 0.4)                | 23.0<br>(12.5 to 35.1)                            | 4.0<br>(-4.8 to 14.7)                               |
| Skin and subcutaneous diseases                | 307.4<br>(299.8 to 314.1)               | 673.1<br>(637.5 to 714.8)             | 7.8<br>(5.3 to 11.1)               | 18.2<br>(16.0 to 20.6)                            | 1.1<br>(-0.8 to 3.1)                                |
| Dermatitis                                    | 40.4<br>(37.6 to 43.5)                  | 64.6<br>(55.1 to 76.0)                | 1.4<br>(0.8 to 2.2)                | 17.3<br>(12.6 to 21.8)                            | 0.6<br>(-3.6 to 4.6)                                |
| Psoriasis                                     | 17.8<br>(16.7 to 19.0)                  | 1.6<br>(1.5 to 1.7)                   | 1.5<br>(1.1 to 2.0)                | 26.4<br>(20.0 to 33.0)                            | 3.1<br>(-2.3 to 8.7)                                |
| Cellulitis                                    | 0.3<br>(0.3 to 0.3)                     | 4.9<br>(4.6 to 5.2)                   | < 0.05<br>(< 0.05 to < 0.05)       | 22.4<br>(2.5 to 44.8)                             | 0.7<br>(-15.6 to 18.1)                              |
| Pyoderma                                      | 3.6<br>(3.5 to 3.7)                     | 96.2<br>(93.2 to 99.2)                | < 0.05<br>(< 0.05 to < 0.05)       | 24.9<br>(18.3 to 31.7)                            | 0.2<br>(-5.3 to 5.8)                                |
| Scabies                                       | 0.9<br>(0.6 to 1.2)                     | 2.6<br>(1.8 to 3.6)                   | < 0.05<br>(< 0.05 to < 0.05)       | 16.8<br>(3.4 to 31.9)                             | 0.2<br>(-11.0 to 13.1)                              |
| Fungal skin diseases                          | 63.7<br>(56.8 to 70.7)                  | 246.9<br>(215.6 to 281.2)             | 0.4<br>(0.1 to 0.7)                | 25.0<br>(23.2 to 26.8)                            | 0.1<br>(-1.1 to 1.3)                                |
| Viral skin diseases                           | 26.3<br>(22.6 to 30.6)                  | 35.1<br>(29.9 to 40.9)                | 0.8<br>(0.5 to 1.2)                | 15.5<br>(11.0 to 19.8)                            | 0.3<br>(-2.7 to 3.1)                                |
| Acne vulgaris                                 | 95.0<br>(86.8 to 103.5)                 | 68.7<br>(56.2 to 85.7)                | 2.4<br>(1.6 to 3.6)                | 11.6<br>(7.1 to 16.5)                             | 0.9<br>(-2.9 to 5.0)                                |
| Alopecia areata                               | 2.9<br>(2.8 to 3.0)                     | 5.2<br>(5.0 to 5.4)                   | 0.1<br>(0.1 to 0.1)                | 24.5<br>(14.6 to 35.2)                            | 0.1<br>(-7.9 to 9.0)                                |
| Pruritus                                      | 8.3<br>(7.3 to 9.4)                     | 6.5<br>(5.8 to 7.4)                   | 0.1<br>(< 0.05 to 0.2)             | 23.4<br>(17.1 to 30.4)                            | -0.0<br>(-5.0 to 5.2)                               |
| Urticaria                                     | 5.8<br>(5.1 to 6.6)                     | 10.3<br>(9.2 to 11.7)                 | 0.4<br>(0.2 to 0.5)                | 20.8<br>(13.2 to 28.1)                            | 0.3<br>(-5.4 to 6.6)                                |
| Decubitus ulcer                               | 0.6<br>(0.5 to 0.7)                     | 2.2<br>(1.9 to 2.5)                   | 0.1<br>(0.1 to 0.1)                | 27.0<br>(13.8 to 42.8)                            | -3.9<br>(-13.5 to 7.7)                              |
| Other skin and subcutaneous diseases          | 101.0<br>(98.1 to 103.8)                | 128.2<br>(123.7 to 132.7)             | 0.6<br>(0.3 to 1.0)                | 26.4<br>(23.8 to 28.8)                            | 1.7<br>(-0.4 to 3.6)                                |
| Sense organ diseases                          | 231.1<br>(217.0 to 244.1)               | 92.8+<br>(87.6 to 98.7)               | 7.3<br>(5.1 to 10.5)               | 27.3<br>(24.3 to 30.7)                            | -0.1<br>(-2.5 to 2.4)                               |
| Glaucoma                                      | 0.5<br>(0.3 to 0.6)                     | --                                    | < 0.05<br>(< 0.05 to 0.1)          | 29.9<br>(10.5 to 51.7)                            | -0.8<br>(-15.7 to 16.2)                             |
| Cataract                                      | 3.7<br>(2.6 to 5.0)                     | --                                    | 0.3<br>(0.2 to 0.4)                | 30.5<br>(20.9 to 42.1)                            | -2.4<br>(-10.3 to 6.1)                              |
| Macular degeneration                          | 0.9<br>(0.6 to 1.2)                     | --                                    | 0.1<br>(< 0.05 to 0.1)             | 33.7<br>(18.4 to 51.6)                            | 0.1<br>(-11.1 to 13.5)                              |
| Refraction and accommodation disorders        | 64.2<br>(57.8 to 71.2)                  | --                                    | 1.2<br>(0.7 to 1.9)                | 19.3<br>(14.0 to 25.1)                            | -3.1<br>(-7.2 to 1.6)                               |
| Age-related and other hearing loss            | 183.4<br>(160.9 to 207.0)               | --                                    | 4.5<br>(3.1 to 6.6)                | 29.3<br>(24.8 to 34.2)                            | 0.8<br>(-2.8 to 4.5)                                |
| Other vision loss                             | 2.3<br>(1.8 to 2.9)                     | --                                    | 0.2<br>(0.1 to 0.2)                | 27.0<br>(16.1 to 39.2)                            | 0.3<br>(-8.4 to 10.1)                               |
| Other sense organ diseases                    | 33.1<br>(30.5 to 35.8)                  | 92.8<br>(87.6 to 98.7)                | 1.0<br>(0.7 to 1.6)                | 27.2<br>(22.7 to 31.8)                            | 1.1<br>(-2.4 to 5.0)                                |
| Oral disorders                                | 515.3<br>(487.3 to 541.6)               | 1,334.2+<br>(1,187.7 to 1,464.2)      | 3.7<br>(2.3 to 5.7)                | 26.1<br>(23.4 to 28.8)                            | 0.1<br>(-2.0 to 2.2)                                |
| Caries of deciduous teeth                     | 32.0<br>(22.0 to 43.1)                  | 124.4<br>(74.0 to 178.7)              | < 0.05<br>(< 0.05 to < 0.05)       | 7.5<br>(-6.5 to 22.6)                             | -0.4<br>(-12.6 to 14.0)                             |
| Caries of permanent teeth                     | 370.2<br>(336.7 to 407.4)               | 1,188.0<br>(1,040.5 to 1,313.2)       | 0.2<br>(0.1 to 0.4)                | 22.0<br>(17.0 to 27.1)                            | 0.3<br>(-3.6 to 4.4)                                |
| Periodontal disease                           | 136.8<br>(97.8 to 178.3)                | 16.1<br>(11.9 to 21.0)                | 0.9<br>(0.3 to 2.0)                | 24.2<br>(17.8 to 30.2)                            | -0.1<br>(-5.4 to 4.7)                               |
| Edentulism and severe tooth loss              | 75.3<br>(64.7 to 86.3)                  | 5.8<br>(4.7 to 7.0)                   | 2.1<br>(1.3 to 2.9)                | 28.5<br>(24.7 to 32.4)                            | 0.1<br>(-2.9 to 3.1)                                |
| Other oral disorders                          | 18.1<br>(17.3 to 18.9)                  | --                                    | 0.5<br>(0.3 to 0.8)                | 22.5<br>(18.6 to 26.3)                            | 0.3<br>(-3.1 to 3.5)                                |
| <b>Injuries</b>                               | <b>281.8</b><br><b>(262.3 to 304.2)</b> | <b>93.4+</b><br><b>(88.0 to 99.7)</b> | <b>8.8</b><br><b>(5.9 to 12.6)</b> | <b>18.1</b><br><b>(16.7 to 19.5)</b>              | <b>-5.1</b><br><b>(-6.2 to -4.0)</b>                |
| <b>Transport injuries</b>                     | <b>48.6</b><br><b>(44.9 to 52.2)</b>    | <b>12.4</b><br><b>(11.2 to 13.6)</b>  | <b>2.2</b><br><b>(1.4 to 3.1)</b>  | <b>3.5</b><br><b>(1.7 to 5.0)</b>                 | <b>-16.9</b><br><b>(-18.3 to -15.5)</b>             |
| Road injuries                                 | 42.2<br>(39.0 to 45.6)                  | 11.4<br>(10.2 to 12.7)                | 1.9<br>(1.3 to 2.8)                | 3.6<br>(1.8 to 5.2)                               | -16.9<br>(-18.3 to -15.4)                           |
| Pedestrian road injuries                      | 6.1<br>(5.3 to 7.1)                     | 1.1<br>(0.9 to 1.2)                   | 0.3<br>(0.2 to 0.5)                | 1.8<br>(-0.1 to 3.7)                              | -18.1<br>(-19.7 to -16.4)                           |
| Cyclist road injuries                         | 11.0<br>(9.1 to 13.1)                   | 3.6<br>(3.0 to 4.2)                   | 0.5<br>(0.3 to 0.7)                | 20.1<br>(18.3 to 21.9)                            | -3.5<br>(-5.0 to -2.0)                              |
| Motorcyclist road injuries                    | 9.9<br>(8.4 to 12.0)                    | 1.8<br>(1.5 to 2.1)                   | 0.5<br>(0.3 to 0.7)                | -2.1<br>(-4.1 to -0.2)                            | -21.5<br>(-23.1 to -19.9)                           |
| Motor vehicle road injuries                   | 12.5<br>(10.4 to 14.5)                  | 4.3<br>(3.7 to 4.9)                   | 0.6<br>(0.4 to 0.9)                | -3.2<br>(-5.0 to -1.5)                            | -22.4<br>(-23.9 to -21.0)                           |
| Other road injuries                           | 2.7<br>(2.2 to 3.2)                     | 0.7<br>(0.6 to 0.9)                   | 0.1<br>(0.1 to 0.1)                | 17.0<br>(14.5 to 19.5)                            | -5.7<br>(-7.9 to -3.6)                              |
| Other transport injuries                      | 6.4<br>(5.3 to 7.5)                     | 1.0<br>(0.9 to 1.1)                   | 0.2<br>(0.1 to 0.3)                | 2.6<br>(1.2 to 3.9)                               | -17.5<br>(-18.7 to -16.3)                           |
| <b>Unintentional injuries</b>                 | <b>222.7</b><br><b>(204.9 to 243.1)</b> | <b>76.8</b><br><b>(71.5 to 82.9)</b>  | <b>6.2</b><br><b>(4.1 to 9.0)</b>  | <b>24.3</b><br><b>(22.8 to 25.8)</b>              | <b>-0.3</b><br><b>(-1.5 to 1.0)</b>                 |
| Falls                                         | 110.4<br>(95.5 to 126.2)                | 37.7<br>(33.2 to 42.7)                | 3.8<br>(2.6 to 5.3)                | 26.2<br>(24.3 to 28.1)                            | 0.9<br>(-0.5 to 2.5)                                |
| Drowning                                      | 0.5<br>(0.4 to 0.5)                     | 0.1<br>(0.1 to 0.1)                   | < 0.05<br>(< 0.05 to < 0.05)       | 13.7<br>(8.2 to 19.5)                             | -7.8<br>(-12.5 to -2.7)                             |
| Fire, heat, and hot substances                | 21.0<br>(17.9 to 24.8)                  | 1.2<br>(1.0 to 1.4)                   | 0.4<br>(0.2 to 0.6)                | 23.0<br>(20.1 to 26.3)                            | -0.2<br>(-2.6 to 2.6)                               |
| Poisonings                                    | 0.8<br>(0.7 to 1.0)                     | 0.8<br>(0.6 to 0.9)                   | 0.1<br>(< 0.05 to 0.1)             | 22.2<br>(11.1 to 33.5)                            | 1.5<br>(-8.3 to 11.6)                               |
| Exposure to mechanical forces                 | 49.9<br>(41.7 to 63.8)                  | 13.8<br>(11.8 to 15.9)                | 0.9<br>(0.6 to 1.4)                | 16.1<br>(14.5 to 17.8)                            | -6.5<br>(-7.9 to -5.0)                              |
| Unintentional firearm injuries                | 1.6<br>(1.3 to 2.0)                     | 0.2<br>(0.1 to 0.2)                   | < 0.05<br>(< 0.05 to < 0.05)       | 18.1<br>(15.9 to 20.5)                            | -5.2<br>(-6.9 to -3.4)                              |
| Unintentional suffocation                     | 0.6<br>(0.5 to 0.7)                     | 0.1<br>(0.1 to 0.2)                   | < 0.05<br>(< 0.05 to < 0.05)       | 30.4<br>(28.4 to 32.3)                            | 4.2<br>(2.4 to 6.0)                                 |
| Other exposure to mechanical forces           | 47.7<br>(39.7 to 61.5)                  | 13.5<br>(11.5 to 15.6)                | 0.9<br>(0.6 to 1.3)                | 15.9<br>(14.2 to 17.6)                            | -6.7<br>(-8.1 to -5.1)                              |



| Cause                                                                               | Prevalence in thousands (95% UI)     | Incidence in thousands (95% UI)    | YLDs in thousands (95% UI)                          |                                                   |                                                     |
|-------------------------------------------------------------------------------------|--------------------------------------|------------------------------------|-----------------------------------------------------|---------------------------------------------------|-----------------------------------------------------|
|                                                                                     | 2016 counts                          | 2016 counts                        | 2016 counts                                         | Percentage change in counts between 2006 and 2016 | Percentage change in age-standardised rates between |
| Adverse effects of medical treatment                                                | 0.4<br>(0.3 to 0.4)                  | 4.5<br>(4.1 to 5.0)                | < 0.05<br>(< 0.05 to 0.1)                           | 19.6<br>(15.1 to 24.8)                            | -4.9<br>(-8.2 to -0.9)                              |
| Animal contact                                                                      | 3.6<br>(3.2 to 4.2)                  | 2.1<br>(1.8 to 2.6)                | 0.1<br>(< 0.05 to 0.1)                              | 18.1<br>(13.4 to 22.6)                            | -4.3<br>(-8.4 to -0.4)                              |
| Venomous animal contact                                                             | 0.5<br>(0.5 to 0.6)                  | 0.6<br>(0.5 to 0.8)                | < 0.05<br>(< 0.05 to < 0.05)                        | 16.2<br>(6.2 to 25.7)                             | -4.5<br>(-12.9 to 3.7)                              |
| Non-venomous animal contact                                                         | 3.1<br>(2.6 to 3.7)                  | 1.5<br>(1.2 to 1.8)                | < 0.05<br>(< 0.05 to 0.1)                           | 19.5<br>(17.6 to 21.6)                            | -4.2<br>(-5.8 to -2.5)                              |
| Foreign body                                                                        | 5.6<br>(4.8 to 6.7)                  | 4.1<br>(3.6 to 4.9)                | 0.2<br>(0.1 to 0.2)                                 | 26.7<br>(24.7 to 28.8)                            | 2.2<br>(0.5 to 4.0)                                 |
| Pulmonary aspiration and foreign body in airway                                     | 0.9<br>(0.7 to 1.1)                  | 0.9<br>(0.8 to 1.1)                | < 0.05<br>(< 0.05 to < 0.05)                        | 22.7<br>(20.6 to 25.0)                            | -2.7<br>(-4.5 to -1.0)                              |
| Foreign body in eyes                                                                | 0.5<br>(0.4 to 0.8)                  | 2.3<br>(1.7 to 3.0)                | < 0.05<br>(< 0.05 to 0.1)                           | 37.8<br>(33.2 to 42.3)                            | 12.3<br>(8.9 to 15.6)                               |
| Foreign body in other body part                                                     | 4.2<br>(3.5 to 5.2)                  | 0.9<br>(0.8 to 1.1)                | 0.1<br>(0.1 to 0.2)                                 | 24.0<br>(22.1 to 26.0)                            | -0.2<br>(-1.7 to 1.5)                               |
| Environmental heat and cold exposure                                                | 2.8<br>(2.5 to 3.1)                  | 0.7<br>(0.6 to 0.8)                | 0.1<br>(0.1 to 0.1)                                 | 18.9<br>(15.0 to 23.0)                            | -6.4<br>(-9.6 to -3.1)                              |
| Other unintentional injuries                                                        | 27.8<br>(23.3 to 32.8)               | 11.7<br>(9.9 to 13.7)              | 0.7<br>(0.4 to 1.0)                                 | 28.2<br>(26.8 to 29.7)                            | 2.6<br>(1.4 to 4.0)                                 |
| <b>Self-harm and interpersonal violence</b>                                         | <b>22.5</b><br><b>(20.3 to 24.8)</b> | <b>4.1†</b><br><b>(3.6 to 4.6)</b> | <b>0.4</b><br><b>(0.3 to 0.6)</b>                   | <b>17.1</b><br><b>(15.0 to 19.1)</b>              | <b>-4.1</b><br><b>(-5.9 to -2.4)</b>                |
| Self-harm                                                                           | 1.4<br>(1.2 to 1.7)                  | 1.2<br>(1.0 to 1.4)                | 0.1<br>(< 0.05 to 0.1)                              | 26.6<br>(18.9 to 35.3)                            | 1.7<br>(-4.8 to 9.0)                                |
| Self-harm by firearm                                                                | < 0.05<br>(< 0.05 to < 0.05)         | < 0.05<br>(< 0.05 to < 0.05)       | < 0.05<br>(< 0.05 to < 0.05)                        | 23.3<br>(20.7 to 25.6)                            | 1.0<br>(-1.2 to 3.0)                                |
| Self-harm by other specified means                                                  | 1.4<br>(1.2 to 1.7)                  | 1.2<br>(1.0 to 1.4)                | 0.1<br>(< 0.05 to 0.1)                              | 26.7<br>(18.9 to 35.4)                            | 1.7<br>(-4.9 to 9.1)                                |
| Interpersonal violence                                                              | 21.0<br>(19.0 to 23.3)               | 2.9†<br>(2.4 to 3.3)               | 0.3<br>(0.2 to 0.5)                                 | 15.4<br>(13.3 to 17.4)                            | -5.1<br>(-6.9 to -3.3)                              |
| Assault by firearm                                                                  | 0.6<br>(0.5 to 0.7)                  | 0.1<br>(0.1 to 0.1)                | < 0.05<br>(< 0.05 to < 0.05)                        | 19.6<br>(17.7 to 21.6)                            | -3.5<br>(-5.1 to -1.8)                              |
| Assault by sharp object                                                             | 1.6<br>(1.3 to 1.9)                  | 0.5<br>(0.3 to 0.6)                | < 0.05<br>(< 0.05 to < 0.05)                        | 22.7<br>(20.6 to 24.8)                            | -1.4<br>(-3.1 to 0.5)                               |
| Sexual violence                                                                     | 12.4<br>(10.8 to 14.3)               | --                                 | 0.1<br>(0.1 to 0.1)                                 | 13.0<br>(8.2 to 17.7)                             | -3.1<br>(-7.2 to 1.3)                               |
| Assault by other means                                                              | 6.5<br>(5.3 to 8.0)                  | 2.3<br>(1.9 to 2.7)                | 0.2<br>(0.1 to 0.3)                                 | 15.4<br>(13.6 to 17.1)                            | -7.1<br>(-8.6 to -5.7)                              |
| <b>Forces of nature, conflict and terrorism, and executions and police conflict</b> | <b>0.5</b><br><b>(0.3 to 0.7)</b>    | <b>0.2†</b><br><b>(0.1 to 0.3)</b> | <b>&lt; 0.05</b><br><b>(&lt; 0.05 to &lt; 0.05)</b> | <b>34.1</b><br><b>(-19.3 to 64.8)</b>             | <b>3.7</b><br><b>(-38.7 to 28.7)</b>                |
| Exposure to forces of nature                                                        | 0.1<br>(< 0.05 to 0.1)               | --                                 | < 0.05<br>(< 0.05 to < 0.05)                        | -43.8<br>(-84.7 to 33.0)                          | -58.4<br>(-88.7 to -2.7)                            |
| Conflict and terrorism                                                              | --                                   | --                                 | --                                                  | --                                                | --                                                  |
| Executions and police conflict                                                      | 0.4<br>(0.2 to 0.7)                  | 0.2<br>(0.1 to 0.3)                | < 0.05<br>(< 0.05 to < 0.05)                        | 71.9<br>(51.6 to 103.3)                           | 36.7<br>(20.4 to 63.7)                              |
| <b>Impairments</b>                                                                  | --                                   | --                                 | --                                                  | --                                                | --                                                  |
| Anaemia                                                                             | 68.8<br>(55.1 to 85.8)               | --                                 | 1.3<br>(0.8 to 1.9)                                 | 15.5<br>(-6.2 to 43.1)                            | -6.8<br>(-25.3 to 16.4)                             |
| Developmental intellectual disability                                               | 15.0<br>(11.3 to 19.2)               | --                                 | 1.9<br>(1.4 to 2.5)                                 | 16.8<br>(11.5 to 22.6)                            | -1.9<br>(-6.2 to 3.0)                               |
| Epilepsy                                                                            | 4.3<br>(2.3 to 6.2)                  | --                                 | 1.3<br>(0.7 to 2.1)                                 | 11.8<br>(-40.5 to 113.9)                          | -7.2<br>(-50.3 to 77.8)                             |
| Guillain-Barre syndrome                                                             | < 0.05<br>(< 0.05 to < 0.05)         | --                                 | < 0.05<br>(< 0.05 to < 0.05)                        | 22.1<br>(19.2 to 24.7)                            | -0.1<br>(-0.2 to 0.0)                               |
| Hearing loss                                                                        | 191.4<br>(168.7 to 214.8)            | --                                 | 4.8<br>(3.3 to 7.2)                                 | 28.1<br>(24.0 to 32.7)                            | 0.5<br>(-2.7 to 3.9)                                |
| Heart failure                                                                       | 14.2<br>(12.7 to 16.0)               | --                                 | 1.5<br>(1.1 to 1.9)                                 | 17.4<br>(9.9 to 25.7)                             | -10.4<br>(-16.2 to -4.1)                            |
| Infertility                                                                         | 9.2<br>(7.1 to 12.2)                 | --                                 | 0.1<br>(< 0.05 to 0.1)                              | 25.8<br>(17.1 to 34.3)                            | 1.5<br>(-4.9 to 8.1)                                |
| Pelvic inflammatory disease                                                         | 0.1<br>(0.1 to 0.1)                  | --                                 | < 0.05<br>(< 0.05 to < 0.05)                        | -23.4<br>(-41.0 to -0.2)                          | -40.0<br>(-53.7 to -21.7)                           |
| Vision loss                                                                         | 73.4<br>(65.8 to 81.8)               | --                                 | 2.2<br>(1.5 to 3.0)                                 | 20.7<br>(16.0 to 25.3)                            | -3.4<br>(-7.0 to 0.3)                               |

We did not calculate incidence for the nine impairments, certain NTDs, and causes with only birth prevalence. Blank cells mean that no estimate is available.

† Incidence for aggregate causes represents the sum of the incidence of the causes below the aggregate.

‡ Incidence estimates for stroke represent first-ever stroke only.

^ Incidence of HIV/AIDS represents new infections of HIV only and does not include new infections of Tuberculosis in HIV positive cases.

SR Table 14: Prevalence, incidence, and YLDs for 2016, percentage change of YLD counts and percentage change of age-standardised YLD rates between 2006 and 2016 by cause and impairments, for all ages, Czech Republic.

| Cause                                                                                | Prevalence in thousands (95% UI)          | Incidence in thousands (95% UI)            | YLDs in thousands (95% UI)             |                                                   |                                                     |
|--------------------------------------------------------------------------------------|-------------------------------------------|--------------------------------------------|----------------------------------------|---------------------------------------------------|-----------------------------------------------------|
|                                                                                      | 2016 counts                               | 2016 counts                                | 2016 counts                            | Percentage change in counts between 2006 and 2016 | Percentage change in age-standardised rates between |
| <b>All causes</b>                                                                    | <b>10,130.4</b><br>(10,091.1 to 10,174.0) | <b>55,390.7†</b><br>(52,815.6 to 57,858.3) | <b>1,484.4</b><br>(1,104.3 to 1,922.3) | <b>8.1</b><br>(6.5 to 9.7)                        | <b>-0.4</b><br>(-2.0 to 1.2)                        |
| <b>Communicable, maternal, neonatal, and nutritional disorders</b>                   | <b>4,712.4</b><br>(4,578.8 to 4,863.2)    | <b>21,402.9†</b><br>(19,763.9 to 23,211.4) | <b>53.9</b><br>(39.0 to 73.2)          | <b>-1.9</b><br>(-7.0 to 4.3)                      | <b>-4.5</b><br>(-10.0 to 1.7)                       |
| <b>HIV/AIDS and tuberculosis</b>                                                     | <b>2,459.0</b><br>(2,258.1 to 2,608.5)    | <b>0.7†</b><br>(0.6 to 0.8)                | <b>0.3</b><br>(0.2 to 0.5)             | <b>5.4</b><br>(-9.7 to 23.2)                      | <b>1.4</b><br>(-12.7 to 18.0)                       |
| Tuberculosis                                                                         | 2,313.6<br>(2,135.1 to 2,502.5)           | 0.6†<br>(0.5 to 0.7)                       | 0.2<br>(0.1 to 0.3)                    | -17.9<br>(-28.3 to -5.4)                          | -22.6<br>(-31.2 to -13.2)                           |
| Drug-susceptible tuberculosis                                                        | 0.6<br>(0.5 to 0.7)                       | 0.6<br>(0.5 to 0.7)                        | 0.2<br>(0.1 to 0.2)                    | -17.9<br>(-29.0 to -5.0)                          | -22.6<br>(-31.5 to -12.8)                           |
| Multidrug-resistant tuberculosis without extensive drug resistance                   | < 0.05<br>(< 0.05 to < 0.05)              | < 0.05<br>(< 0.05 to < 0.05)               | < 0.05<br>(< 0.05 to < 0.05)           | -26.7<br>(-68.5 to 60.6)                          | -30.7<br>(-70.1 to 52.8)                            |
| Extensively drug-resistant tuberculosis                                              | < 0.05<br>(< 0.05 to < 0.05)              | < 0.05<br>(< 0.05 to < 0.05)               | < 0.05<br>(< 0.05 to < 0.05)           | 126.0<br>(-2.8 to 395.1)                          | 113.5<br>(-7.8 to 371.1)                            |
| Latent tuberculosis infection                                                        | 2,313.0<br>(2,134.6 to 2,501.9)           | --                                         | --                                     | --                                                | --                                                  |
| HIV/AIDS                                                                             | 1.2<br>(0.6 to 1.9)                       | 0.1 <sup>a</sup><br>(< 0.05 to 0.1)        | 0.1<br>(0.1 to 0.2)                    | 73.2<br>(31.8 to 121.5)                           | 69.6<br>(27.2 to 116.8)                             |
| Drug-susceptible HIV/AIDS - Tuberculosis                                             | < 0.05<br>(< 0.05 to < 0.05)              | < 0.05<br>(< 0.05 to < 0.05)               | < 0.05<br>(< 0.05 to < 0.05)           | 16.1<br>(5.0 to 35.0)                             | 15.3<br>(4.2 to 33.9)                               |
| Multidrug-resistant HIV/AIDS - Tuberculosis without extensive drug resistance        | < 0.05<br>(< 0.05 to < 0.05)              | < 0.05<br>(< 0.05 to < 0.05)               | < 0.05<br>(< 0.05 to < 0.05)           | 7.3<br>(-54.0 to 146.4)                           | 6.6<br>(-54.3 to 144.7)                             |
| Extensively drug-resistant HIV/AIDS - Tuberculosis                                   | < 0.05<br>(< 0.05 to < 0.05)              | < 0.05<br>(< 0.05 to < 0.05)               | < 0.05<br>(< 0.05 to < 0.05)           | 230.8<br>(41.9 to 659.3)                          | 228.6<br>(41.0 to 654.2)                            |
| HIV/AIDS resulting in other diseases                                                 | 1.2<br>(0.6 to 1.9)                       | 0.1<br>(< 0.05 to 0.1)                     | 0.1<br>(0.1 to 0.2)                    | 78.5<br>(33.4 to 132.3)                           | 74.8<br>(29.0 to 128.8)                             |
| <b>Diarrhoea, lower respiratory infections, and other common infectious diseases</b> | <b>379.6</b><br>(360.6 to 400.8)          | <b>20,447.3†</b><br>(18,761.4 to 22,188.8) | <b>18.9</b><br>(13.0 to 25.9)          | <b>7.5</b><br>(4.1 to 11.5)                       | <b>1.0</b><br>(-2.2 to 4.8)                         |
| Diarrhoeal diseases                                                                  | 78.7<br>(74.1 to 84.2)                    | 5,175.9<br>(4,862.1 to 5,527.3)            | 8.7<br>(6.0 to 12.0)                   | 15.8<br>(9.5 to 22.8)                             | 4.0<br>(-2.1 to 10.6)                               |
| Intestinal infectious diseases                                                       | < 0.05<br>(< 0.05 to < 0.05)              | 0.1†<br>(0.1 to 0.1)                       | < 0.05<br>(< 0.05 to < 0.05)           | 13.0<br>(-2.7 to 30.9)                            | 3.2<br>(-11.5 to 19.5)                              |
| Typhoid fever                                                                        | < 0.05<br>(< 0.05 to < 0.05)              | < 0.05<br>(< 0.05 to < 0.05)               | < 0.05<br>(< 0.05 to < 0.05)           | 8.0<br>(-12.8 to 33.1)                            | -0.1<br>(-18.4 to 23.4)                             |
| Paratyphoid fever                                                                    | < 0.05<br>(< 0.05 to < 0.05)              | 0.1<br>(0.1 to 0.1)                        | < 0.05<br>(< 0.05 to < 0.05)           | 20.4<br>(-1.0 to 47.2)                            | 11.2<br>(-8.1 to 35.7)                              |
| Other intestinal infectious diseases                                                 | --                                        | --                                         | < 0.05<br>(< 0.05 to < 0.05)           | -21.2<br>(-41.9 to 3.0)                           | -32.5<br>(-53.8 to -3.4)                            |
| Lower respiratory infections                                                         | 9.7<br>(8.9 to 10.6)                      | 440.2<br>(400.4 to 482.3)                  | 0.6<br>(0.4 to 0.8)                    | 22.5<br>(8.9 to 38.8)                             | 3.7<br>(-8.7 to 18.2)                               |
| Upper respiratory infections                                                         | 192.0<br>(170.8 to 215.4)                 | 14,241.5<br>(12,636.8 to 16,018.0)         | 4.7<br>(2.8 to 7.5)                    | 1.2<br>(-4.7 to 6.8)                              | -0.1<br>(-5.4 to 5.1)                               |
| Otitis media                                                                         | 91.8<br>(82.6 to 101.0)                   | 434.2<br>(357.6 to 526.1)                  | 2.5<br>(1.6 to 3.8)                    | -2.3<br>(-9.6 to 6.0)                             | -4.6<br>(-11.6 to 2.9)                              |
| Meningitis                                                                           | 7.6<br>(6.7 to 8.5)                       | 1.0<br>(0.8 to 1.1)                        | 1.0<br>(0.7 to 1.3)                    | -1.2<br>(-3.8 to 1.0)                             | -2.4<br>(-4.9 to -0.1)                              |
| Pneumococcal meningitis                                                              | 3.8<br>(3.2 to 4.6)                       | 0.3<br>(0.2 to 0.3)                        | 0.4<br>(0.3 to 0.6)                    | -0.8<br>(-4.3 to 2.9)                             | -2.2<br>(-5.8 to 1.6)                               |
| H influenzae type B meningitis                                                       | 0.7<br>(0.6 to 0.8)                       | < 0.05<br>(< 0.05 to < 0.05)               | 0.1<br>(0.1 to 0.2)                    | -2.8<br>(-6.9 to 1.5)                             | -2.9<br>(-7.1 to 1.8)                               |
| Meningococcal infection                                                              | 1.2<br>(1.0 to 1.5)                       | 0.2<br>(0.2 to 0.3)                        | 0.2<br>(0.1 to 0.2)                    | -2.1<br>(-5.9 to 1.8)                             | -3.4<br>(-7.0 to 0.5)                               |
| Other meningitis                                                                     | 1.9<br>(1.5 to 2.3)                       | 0.4<br>(0.3 to 0.5)                        | 0.2<br>(0.2 to 0.3)                    | -0.6<br>(-4.3 to 3.0)                             | -1.9<br>(-5.4 to 1.6)                               |
| Encephalitis                                                                         | 10.2<br>(6.7 to 15.0)                     | 6.3<br>(6.1 to 6.5)                        | 1.0<br>(0.7 to 1.3)                    | 1.0<br>(-11.4 to 15.4)                            | -2.6<br>(-13.7 to 9.7)                              |
| Diphtheria                                                                           | < 0.05<br>(< 0.05 to < 0.05)              | < 0.05<br>(< 0.05 to < 0.05)               | < 0.05<br>(< 0.05 to < 0.05)           | -31.3<br>(-66.0 to 41.3)                          | -30.7<br>(-62.2 to 28.7)                            |
| Whooping cough                                                                       | 0.2<br>(0.1 to 0.2)                       | 1.3<br>(1.0 to 1.8)                        | < 0.05<br>(< 0.05 to < 0.05)           | -30.4<br>(-58.4 to 7.2)                           | -36.2<br>(-62.2 to -0.7)                            |
| Tetanus                                                                              | < 0.05<br>(< 0.05 to < 0.05)              | < 0.05<br>(< 0.05 to < 0.05)               | < 0.05<br>(< 0.05 to < 0.05)           | -29.6<br>(-46.5 to -13.6)                         | -29.7<br>(-46.2 to -14.5)                           |
| Measles                                                                              | < 0.05<br>(< 0.05 to < 0.05)              | < 0.05<br>(< 0.05 to < 0.05)               | < 0.05<br>(< 0.05 to < 0.05)           | --                                                | --                                                  |
| Varicella and herpes zoster                                                          | 8.7<br>(7.7 to 9.6)                       | 146.8<br>(141.2 to 152.6)                  | 0.4<br>(0.2 to 0.6)                    | 9.9<br>(-3.5 to 26.0)                             | 0.1<br>(-12.6 to 15.1)                              |
| <b>Neglected tropical diseases and malaria</b>                                       | <b>0.3</b><br>(0.1 to 1.2)                | <b>0.1†</b><br>(< 0.05 to 0.2)             | <b>&lt; 0.05</b><br>(< 0.05 to 0.1)    | <b>-41.8</b><br>(-91.2 to 347.3)                  | <b>-45.2</b><br>(-91.5 to 305.2)                    |
| Malaria                                                                              | --                                        | --                                         | --                                     | --                                                | --                                                  |
| Chagas disease                                                                       | --                                        | --                                         | --                                     | --                                                | --                                                  |
| Leishmaniasis                                                                        | --                                        | --                                         | --                                     | --                                                | --                                                  |
| Visceral leishmaniasis                                                               | --                                        | --                                         | --                                     | --                                                | --                                                  |
| Cutaneous and mucocutaneous leishmaniasis                                            | --                                        | --                                         | --                                     | --                                                | --                                                  |
| African trypanosomiasis                                                              | --                                        | --                                         | --                                     | --                                                | --                                                  |
| Schistosomiasis                                                                      | --                                        | --                                         | --                                     | --                                                | --                                                  |
| Cysticercosis                                                                        | < 0.05<br>(< 0.05 to 0.1)                 | --                                         | < 0.05<br>(0.0 to < 0.05)              | --                                                | --                                                  |
| Cystic echinococcosis                                                                | 0.3<br>(0.1 to 1.2)                       | 0.1<br>(< 0.05 to 0.2)                     | < 0.05<br>(< 0.05 to 0.1)              | -46.3<br>(-93.6 to 397.7)                         | -48.8<br>(-93.4 to 316.2)                           |
| Lymphatic filariasis                                                                 | --                                        | --                                         | --                                     | --                                                | --                                                  |
| Onchocerciasis                                                                       | --                                        | --                                         | --                                     | --                                                | --                                                  |
| Trachoma                                                                             | --                                        | --                                         | --                                     | --                                                | --                                                  |
| Dengue                                                                               | --                                        | --                                         | --                                     | --                                                | --                                                  |
| Yellow fever                                                                         | --                                        | --                                         | --                                     | --                                                | --                                                  |
| Rabies                                                                               | < 0.05<br>(< 0.05 to < 0.05)              | < 0.05<br>(< 0.05 to < 0.05)               | < 0.05<br>(< 0.05 to < 0.05)           | -0.3<br>(-25.9 to 14.4)                           | -16.4<br>(-36.3 to -1.0)                            |
| Intestinal nematode infections                                                       | --                                        | --                                         | --                                     | --                                                | --                                                  |
| Ascariasis                                                                           | --                                        | --                                         | --                                     | --                                                | --                                                  |



| Cause                                                                   | Prevalence in thousands (95% UI)              | Incidence in thousands (95% UI)                   | YLDs in thousands (95% UI)                  |                                                   |                                                     |
|-------------------------------------------------------------------------|-----------------------------------------------|---------------------------------------------------|---------------------------------------------|---------------------------------------------------|-----------------------------------------------------|
|                                                                         | 2016 counts                                   | 2016 counts                                       | 2016 counts                                 | Percentage change in counts between 2006 and 2016 | Percentage change in age-standardised rates between |
| Trichuriasis                                                            | --                                            | --                                                | --                                          | --                                                | --                                                  |
| Hookworm disease                                                        | --                                            | --                                                | --                                          | --                                                | --                                                  |
| Food-borne trematodiasis                                                | --                                            | --                                                | --                                          | --                                                | --                                                  |
| Leprosy                                                                 | --                                            | --                                                | --                                          | --                                                | --                                                  |
| Ebola virus disease                                                     | --                                            | --                                                | --                                          | --                                                | --                                                  |
| Zika virus disease                                                      | --                                            | --                                                | --                                          | --                                                | --                                                  |
| Guinea worm disease                                                     | --                                            | --                                                | --                                          | --                                                | --                                                  |
| Other neglected tropical diseases                                       | --                                            | --                                                | < 0.05<br>(< 0.05 to < 0.05)                | --                                                | --                                                  |
| <b>Maternal disorders</b>                                               | <b>7.0</b><br><b>(5.1 to 8.7)</b>             | <b>124.1†</b><br><b>(110.0 to 143.4)</b>          | <b>0.4</b><br><b>(0.3 to 0.6)</b>           | <b>-14.3</b><br><b>(-36.6 to 16.1)</b>            | <b>-9.3</b><br><b>(-32.5 to 23.1)</b>               |
| Maternal haemorrhage                                                    | 2.0<br>(1.4 to 2.8)                           | 12.0<br>(10.5 to 14.0)                            | 0.1<br>(< 0.05 to 0.1)                      | 13.5<br>(-24.3 to 75.5)                           | 26.4<br>(-15.3 to 95.0)                             |
| Maternal sepsis and other pregnancy related infections                  | 1.2<br>(1.0 to 1.5)                           | 6.6<br>(5.9 to 7.3)                               | < 0.05<br>(< 0.05 to 0.1)                   | -14.3<br>(-61.1 to 85.0)                          | -5.2<br>(-58.8 to 106.4)                            |
| Maternal hypertensive disorders                                         | 3.2<br>(2.2 to 4.4)                           | 13.0<br>(11.9 to 14.2)                            | 0.1<br>(0.1 to 0.3)                         | -29.2<br>(-58.5 to 21.8)                          | -26.6<br>(-57.5 to 27.7)                            |
| Maternal obstructed labour and uterine rupture                          | < 0.05<br>(< 0.05 to < 0.05)                  | 1.2<br>(1.0 to 1.7)                               | < 0.05<br>(< 0.05 to < 0.05)                | 7.1<br>(-42.2 to 93.5)                            | 15.3<br>(-37.2 to 105.2)                            |
| Maternal abortion, miscarriage, and ectopic pregnancy                   | 0.8<br>(0.5 to 1.0)                           | 91.3<br>(77.2 to 111.1)                           | 0.1<br>(< 0.05 to 0.1)                      | 7.7<br>(-45.8 to 114.0)                           | 11.2<br>(-43.0 to 117.8)                            |
| Other maternal disorders                                                | --                                            | --                                                | 0.1<br>(< 0.05 to 0.1)                      | -19.3<br>(-40.4 to 8.9)                           | -14.6<br>(-36.2 to 15.6)                            |
| <b>Neonatal disorders</b>                                               | <b>75.5</b><br><b>(65.6 to 85.8)</b>          | --                                                | <b>13.8</b><br><b>(10.0 to 18.9)</b>        | <b>2.7</b><br><b>(-8.6 to 19.0)</b>               | <b>2.6</b><br><b>(-9.0 to 18.9)</b>                 |
| Neonatal preterm birth complications                                    | 59.3<br>(47.0 to 75.5)                        | --                                                | 6.4<br>(4.2 to 9.3)                         | 0.8<br>(-20.2 to 33.3)                            | 2.0<br>(-19.1 to 35.1)                              |
| Neonatal encephalopathy due to birth asphyxia and trauma                | 20.8<br>(15.4 to 28.3)                        | --                                                | 4.0<br>(2.6 to 6.0)                         | 4.9<br>(-9.1 to 29.9)                             | 4.6<br>(-9.6 to 28.8)                               |
| Neonatal sepsis and other neonatal infections                           | 7.2<br>(3.5 to 14.9)                          | --                                                | 2.9<br>(1.2 to 6.5)                         | 3.3<br>(-11.4 to 22.8)                            | 1.9<br>(-13.4 to 21.1)                              |
| Hemolytic disease and other neonatal jaundice                           | 0.6<br>(0.5 to 0.8)                           | --                                                | 0.2<br>(0.1 to 0.2)                         | -2.6<br>(-10.0 to 4.4)                            | -2.3<br>(-10.0 to 4.8)                              |
| Other neonatal disorders                                                | --                                            | --                                                | 0.2<br>(0.2 to 0.4)                         | 13.1<br>(-8.4 to 39.7)                            | 0.8<br>(-18.4 to 24.5)                              |
| <b>Nutritional deficiencies</b>                                         | <b>1,222.0</b><br><b>(1,091.6 to 1,332.8)</b> | <b>61.6†</b><br><b>(49.0 to 75.3)</b>             | <b>16.8</b><br><b>(10.5 to 25.4)</b>        | <b>-13.2</b><br><b>(-24.0 to -1.2)</b>            | <b>-14.8</b><br><b>(-26.3 to -2.8)</b>              |
| Protein-energy malnutrition                                             | 17.5<br>(10.3 to 28.3)                        | 6.8<br>(4.0 to 10.9)                              | 0.4<br>(0.2 to 0.7)                         | 6.5<br>(-40.5 to 84.4)                            | -4.7<br>(-46.8 to 66.8)                             |
| Iodine deficiency                                                       | 83.4<br>(73.1 to 96.1)                        | 1.1<br>(1.0 to 1.2)                               | 2.1<br>(1.4 to 3.0)                         | 3.2<br>(-7.2 to 15.7)                             | 0.4<br>(-10.6 to 13.1)                              |
| Vitamin A deficiency                                                    | 64.7<br>(51.4 to 79.0)                        | 53.8<br>(41.5 to 67.0)                            | --                                          | --                                                | --                                                  |
| Iron-deficiency anaemia                                                 | 1,014.3<br>(891.6 to 1,134.7)                 | --                                                | 14.3<br>(8.6 to 22.3)                       | -15.6<br>(-27.6 to -2.5)                          | -16.6<br>(-29.0 to -3.4)                            |
| Other nutritional deficiencies                                          | --                                            | --                                                | < 0.05<br>(< 0.05 to < 0.05)                | 6.5<br>(-41.6 to 87.9)                            | -5.1<br>(-48.4 to 68.4)                             |
| <b>Other communicable, maternal, neonatal, and nutritional diseases</b> | <b>1,783.1</b><br><b>(1,663.7 to 1,905.2)</b> | <b>769.1</b><br><b>(665.0 to 894.6)</b>           | <b>3.7</b><br><b>(2.4 to 5.8)</b>           | <b>-1.2</b><br><b>(-7.3 to 4.9)</b>               | <b>-2.0</b><br><b>(-8.4 to 3.8)</b>                 |
| Sexually transmitted diseases excluding HIV                             | 1,377.2<br>(1,274.7 to 1,493.6)               | 747.9<br>(644.4 to 875.1)                         | 3.0<br>(1.9 to 4.9)                         | -1.1<br>(-7.7 to 5.6)                             | -1.2<br>(-7.7 to 4.9)                               |
| Syphilis                                                                | 12.1<br>(10.0 to 14.7)                        | 6.9<br>(4.7 to 9.4)                               | 0.6<br>(0.4 to 0.9)                         | 14.8<br>(-5.2 to 36.3)                            | 2.2<br>(-14.1 to 19.7)                              |
| Chlamydial infection                                                    | 143.8<br>(110.0 to 188.4)                     | 104.0<br>(80.9 to 135.4)                          | 0.6<br>(0.3 to 1.0)                         | -8.1<br>(-19.4 to 4.9)                            | -2.8<br>(-14.3 to 10.2)                             |
| Gonococcal infection                                                    | 108.4<br>(82.2 to 141.9)                      | 362.0<br>(265.4 to 483.3)                         | 0.4<br>(0.2 to 0.8)                         | -7.8<br>(-20.2 to 5.6)                            | -0.5<br>(-13.5 to 13.2)                             |
| Trichomoniasis                                                          | 238.2<br>(206.7 to 274.2)                     | 197.9<br>(170.9 to 229.7)                         | 0.3<br>(0.1 to 0.6)                         | -1.2<br>(-8.1 to 6.6)                             | -0.5<br>(-7.5 to 7.1)                               |
| Genital herpes                                                          | 901.7<br>(769.1 to 1,065.5)                   | 34.0<br>(28.4 to 41.3)                            | 0.2<br>(0.1 to 0.5)                         | 6.5<br>(-1.8 to 15.1)                             | 0.1<br>(-7.5 to 8.1)                                |
| Other sexually transmitted diseases                                     | 53.5<br>(42.7 to 63.0)                        | 43.1<br>(36.7 to 50.2)                            | 0.9<br>(0.6 to 1.5)                         | -4.4<br>(-15.7 to 6.0)                            | -2.7<br>(-13.3 to 7.4)                              |
| Hepatitis                                                               | 448.3<br>(389.2 to 516.9)                     | 21.2<br>(17.9 to 25.3)                            | < 0.05<br>(< 0.05 to < 0.05)                | 15.7<br>(-1.1 to 35.0)                            | 4.3<br>(-10.2 to 19.7)                              |
| Acute hepatitis A                                                       | 0.3<br>(0.2 to 0.4)                           | 4.2<br>(3.0 to 5.2)                               | < 0.05<br>(< 0.05 to < 0.05)                | 10.9<br>(-23.6 to 62.4)                           | 3.2<br>(-29.9 to 48.1)                              |
| Hepatitis B                                                             | 259.0<br>(209.4 to 325.5)                     | 14.1<br>(10.9 to 17.9)                            | < 0.05<br>(< 0.05 to < 0.05)                | 17.9<br>(-3.1 to 43.7)                            | 5.3<br>(-12.2 to 26.0)                              |
| Hepatitis C                                                             | 188.9<br>(169.6 to 208.9)                     | 2.1<br>(1.9 to 2.4)                               | < 0.05<br>(< 0.05 to < 0.05)                | 14.1<br>(12.9 to 15.3)                            | 1.4<br>(0.8 to 2.0)                                 |
| Acute hepatitis E                                                       | 0.1<br>(< 0.05 to 0.1)                        | 0.8<br>(0.5 to 1.1)                               | < 0.05<br>(< 0.05 to < 0.05)                | 24.7<br>(13.1 to 36.1)                            | 9.0<br>(1.9 to 16.2)                                |
| Other infectious diseases                                               | 35.5<br>(30.9 to 40.5)                        | < 0.05<br>(< 0.05 to < 0.05)                      | 0.6<br>(0.4 to 1.0)                         | -2.1<br>(-17.0 to 13.9)                           | -4.7<br>(-20.1 to 12.1)                             |
| <b>Non-communicable diseases</b>                                        | <b>9,812.2</b><br><b>(9,759.4 to 9,871.3)</b> | <b>31,693.9†</b><br><b>(29,854.2 to 33,417.5)</b> | <b>1,197.5</b><br><b>(891.4 to 1,539.9)</b> | <b>8.3</b><br><b>(6.5 to 10.3)</b>                | <b>-0.2</b><br><b>(-2.2 to 1.8)</b>                 |
| <b>Neoplasms</b>                                                        | <b>194.7</b><br><b>(185.6 to 204.5)</b>       | <b>69.0</b><br><b>(64.5 to 73.0)</b>              | <b>19.1</b><br><b>(14.2 to 24.9)</b>        | <b>11.1</b><br><b>(4.5 to 18.7)</b>               | <b>-6.1</b><br><b>(-11.7 to 0.2)</b>                |
| Lip and oral cavity cancer                                              | 3.0<br>(2.6 to 3.4)                           | 0.8<br>(0.7 to 0.9)                               | 0.3<br>(0.2 to 0.4)                         | 10.1<br>(-6.9 to 28.7)                            | -4.1<br>(-18.7 to 12.6)                             |
| Nasopharynx cancer                                                      | 0.1<br>(0.1 to 0.2)                           | < 0.05<br>(< 0.05 to 0.1)                         | < 0.05<br>(< 0.05 to < 0.05)                | -13.5<br>(-24.3 to 0.7)                           | -21.7<br>(-32.3 to -7.6)                            |
| Other pharynx cancer                                                    | 1.7<br>(1.5 to 2.0)                           | 0.5<br>(0.5 to 0.6)                               | 0.2<br>(0.1 to 0.3)                         | 15.1<br>(-2.3 to 34.3)                            | 3.8<br>(-12.0 to 21.1)                              |
| Oesophageal cancer                                                      | 0.7<br>(0.6 to 0.9)                           | 0.6<br>(0.5 to 0.7)                               | 0.1<br>(0.1 to 0.2)                         | 7.1<br>(-22.3 to 42.0)                            | -6.9<br>(-31.0 to 21.3)                             |
| Stomach cancer                                                          | 3.6<br>(2.9 to 4.5)                           | 1.8<br>(1.5 to 2.1)                               | 0.5<br>(0.3 to 0.6)                         | 4.8<br>(-16.6 to 29.8)                            | -13.1<br>(-30.3 to 6.4)                             |
| Colon and rectum cancer                                                 | 30.3<br>(27.8 to 34.5)                        | 8.3<br>(7.7 to 9.5)                               | 2.8<br>(2.0 to 3.6)                         | 2.6<br>(-9.4 to 18.4)                             | -15.4<br>(-25.2 to -1.7)                            |
| Liver cancer                                                            | 0.4<br>(0.3 to 0.6)                           | 1.0<br>(0.8 to 1.1)                               | 0.2<br>(0.1 to 0.3)                         | 10.1<br>(-8.8 to 33.1)                            | -9.5<br>(-24.8 to 8.2)                              |
| Liver cancer due to hepatitis B                                         | 0.3<br>(0.2 to 0.5)                           | 0.3<br>(0.2 to 0.4)                               | 0.1<br>(< 0.05 to 0.1)                      | 9.7<br>(-10.2 to 33.9)                            | -8.8<br>(-24.7 to 11.2)                             |

| Cause                                              | Prevalence in thousands (95% UI)              | Incidence in thousands (95% UI)          | YLDs in thousands (95% UI)             |                                                   |                                                     |
|----------------------------------------------------|-----------------------------------------------|------------------------------------------|----------------------------------------|---------------------------------------------------|-----------------------------------------------------|
|                                                    | 2016 counts                                   | 2016 counts                              | 2016 counts                            | Percentage change in counts between 2006 and 2016 | Percentage change in age-standardised rates between |
| Liver cancer due to hepatitis C                    | 0.3<br>(0.2 to 0.4)                           | 0.2<br>(0.2 to 0.3)                      | 0.1<br>( $< 0.05$ to 0.1)              | 13.4<br>(-6.9 to 39.8)                            | -7.6<br>(-23.4 to 12.8)                             |
| Liver cancer due to alcohol use                    | 0.3<br>(0.2 to 0.4)                           | 0.2<br>(0.2 to 0.3)                      | 0.1<br>( $< 0.05$ to 0.1)              | 3.1<br>(-15.8 to 27.2)                            | -15.8<br>(-30.8 to 2.8)                             |
| Liver cancer due to other causes                   | 0.2<br>(0.1 to 0.3)                           | 0.2<br>(0.1 to 0.2)                      | $< 0.05$<br>( $< 0.05$ to 0.1)         | 16.6<br>(-6.0 to 45.6)                            | -3.6<br>(-21.2 to 20.1)                             |
| Gallbladder and biliary tract cancer               | 1.1<br>(0.8 to 1.4)                           | 1.0<br>(0.9 to 1.2)                      | 0.2<br>(0.1 to 0.3)                    | -3.6<br>(-23.2 to 22.5)                           | -21.7<br>(-36.9 to -2.3)                            |
| Pancreatic cancer                                  | 2.0<br>(1.6 to 2.4)                           | 2.2<br>(2.0 to 2.5)                      | 0.4<br>(0.3 to 0.6)                    | 15.5<br>(-7.0 to 42.1)                            | -4.2<br>(-22.5 to 16.8)                             |
| Larynx cancer                                      | 1.7<br>(1.6 to 1.9)                           | 0.5<br>(0.4 to 0.5)                      | 0.2<br>(0.1 to 0.3)                    | -5.2<br>(-19.5 to 13.0)                           | -16.9<br>(-29.6 to -1.3)                            |
| Tracheal, bronchus, and lung cancer                | 9.6<br>(8.4 to 11.0)                          | 6.5<br>(5.9 to 7.2)                      | 1.5<br>(1.1 to 1.9)                    | 2.7<br>(-12.6 to 22.6)                            | -14.8<br>(-27.7 to 1.1)                             |
| Malignant skin melanoma                            | 10.9<br>(8.4 to 12.8)                         | 2.2<br>(1.8 to 2.6)                      | 0.7<br>(0.5 to 1.0)                    | 23.9<br>(4.5 to 46.2)                             | 8.6<br>(-7.9 to 25.4)                               |
| Non-melanoma skin cancer                           | 3.9<br>(3.4 to 4.5)                           | 11.6<br>(10.5 to 12.7)                   | 0.1<br>(0.1 to 0.2)                    | 55.3<br>(33.5 to 80.8)                            | 25.4<br>(7.8 to 45.5)                               |
| Non-melanoma skin cancer (squamous-cell carcinoma) | 3.0<br>(2.7 to 3.3)                           | 2.8<br>(2.7 to 3.0)                      | 0.1<br>(0.1 to 0.2)                    | 55.1<br>(31.7 to 82.6)                            | 24.9<br>(6.4 to 45.8)                               |
| Non-melanoma skin cancer (basal-cell carcinoma)    | 1.2<br>(0.9 to 1.7)                           | 8.7<br>(7.7 to 9.8)                      | $< 0.05$<br>( $< 0.05$ to $< 0.05$ )   | 57.9<br>(18.0 to 108.6)                           | 31.1<br>(-1.0 to 70.8)                              |
| Breast cancer                                      | 27.2<br>(24.4 to 31.1)                        | 5.7<br>(5.1 to 6.5)                      | 2.3<br>(1.7 to 3.1)                    | -2.4<br>(-14.6 to 13.4)                           | -16.1<br>(-26.9 to -2.8)                            |
| Cervical cancer                                    | 3.6<br>(3.2 to 4.2)                           | 0.9<br>(0.8 to 1.1)                      | 0.3<br>(0.2 to 0.5)                    | -14.2<br>(-27.9 to 2.1)                           | -23.3<br>(-35.3 to -8.4)                            |
| Uterine cancer                                     | 10.1<br>(8.7 to 11.9)                         | 2.1<br>(1.8 to 2.5)                      | 0.7<br>(0.5 to 1.0)                    | 10.2<br>(-11.9 to 38.4)                           | -4.9<br>(-22.8 to 18.9)                             |
| Ovarian cancer                                     | 3.8<br>(3.1 to 4.5)                           | 1.2<br>(1.0 to 1.4)                      | 0.5<br>(0.4 to 0.7)                    | 1.6<br>(-23.7 to 36.0)                            | -11.8<br>(-33.2 to 17.8)                            |
| Prostate cancer                                    | 30.2<br>(20.3 to 39.1)                        | 6.9<br>(4.9 to 8.6)                      | 2.6<br>(1.6 to 3.6)                    | 32.9<br>(5.6 to 68.3)                             | 6.0<br>(-15.5 to 34.4)                              |
| Testicular cancer                                  | 2.5<br>(2.1 to 3.2)                           | 0.5<br>(0.4 to 0.6)                      | 0.2<br>(0.1 to 0.2)                    | -1.0<br>(-23.4 to 31.9)                           | 0.7<br>(-23.2 to 36.6)                              |
| Kidney cancer                                      | 10.7<br>(9.1 to 11.9)                         | 3.0<br>(2.6 to 3.2)                      | 0.9<br>(0.6 to 1.2)                    | 4.4<br>(-11.6 to 21.4)                            | -11.6<br>(-24.2 to 2.1)                             |
| Bladder cancer                                     | 11.8<br>(10.7 to 13.0)                        | 2.8<br>(2.5 to 3.0)                      | 1.0<br>(0.7 to 1.3)                    | 16.4<br>(0.7 to 34.0)                             | -4.1<br>(-16.5 to 10.2)                             |
| Brain and nervous system cancer                    | 1.6<br>(1.2 to 1.8)                           | 0.8<br>(0.6 to 0.9)                      | 0.2<br>(0.1 to 0.3)                    | 0.1<br>(-15.5 to 15.5)                            | -11.8<br>(-25.4 to 3.5)                             |
| Thyroid cancer                                     | 3.9<br>(3.5 to 4.6)                           | 0.8<br>(0.7 to 0.9)                      | 0.2<br>(0.2 to 0.4)                    | 8.5<br>(-9.8 to 32.2)                             | -2.6<br>(-19.6 to 18.4)                             |
| Mesothelioma                                       | 0.1<br>(0.1 to 0.1)                           | 0.1<br>(0.1 to 0.1)                      | $< 0.05$<br>( $< 0.05$ to $< 0.05$ )   | 13.2<br>(0.3 to 23.9)                             | -2.6<br>(-13.6 to 6.3)                              |
| Hodgkin lymphoma                                   | 1.5<br>(1.2 to 1.9)                           | 0.3<br>(0.3 to 0.4)                      | 0.1<br>(0.1 to 0.2)                    | 0.0<br>(-20.5 to 23.6)                            | 1.4<br>(-21.8 to 28.5)                              |
| Non-Hodgkin's lymphoma                             | 6.5<br>(5.4 to 7.4)                           | 1.7<br>(1.4 to 1.9)                      | 0.5<br>(0.4 to 0.7)                    | 33.8<br>(10.4 to 54.5)                            | 14.2<br>(-5.0 to 30.9)                              |
| Multiple myeloma                                   | 1.4<br>(1.1 to 1.8)                           | 0.5<br>(0.4 to 0.7)                      | 0.3<br>(0.2 to 0.4)                    | 22.0<br>(-10.5 to 62.7)                           | 3.5<br>(-22.9 to 37.4)                              |
| Leukaemia                                          | 8.8<br>(7.7 to 10.0)                          | 2.4<br>(2.1 to 2.7)                      | 1.1<br>(0.8 to 1.5)                    | 39.4<br>(16.5 to 63.0)                            | 16.4<br>(-2.8 to 35.9)                              |
| Acute lymphoid leukaemia                           | 0.8<br>(0.7 to 1.0)                           | 0.2<br>(0.2 to 0.2)                      | 0.1<br>(0.1 to 0.1)                    | 40.4<br>(8.2 to 81.1)                             | 30.1<br>(-9.7 to 87.9)                              |
| Chronic lymphoid leukaemia                         | 5.3<br>(4.2 to 6.1)                           | 1.2<br>(1.0 to 1.4)                      | 0.6<br>(0.4 to 0.9)                    | 52.0<br>(20.0 to 89.8)                            | 24.8<br>(-1.7 to 56.0)                              |
| Acute myeloid leukaemia                            | 0.7<br>(0.6 to 0.8)                           | 0.5<br>(0.4 to 0.6)                      | 0.1<br>(0.1 to 0.2)                    | 45.3<br>(22.6 to 71.4)                            | 20.8<br>(2.2 to 42.3)                               |
| Chronic myeloid leukaemia                          | 0.4<br>(0.3 to 0.5)                           | 0.1<br>(0.1 to 0.1)                      | $< 0.05$<br>( $< 0.05$ to 0.1)         | -1.0<br>(-16.9 to 17.2)                           | -11.8<br>(-25.9 to 4.0)                             |
| Other leukaemia                                    | 1.7<br>(1.4 to 2.0)                           | 0.4<br>(0.3 to 0.5)                      | 0.2<br>(0.1 to 0.3)                    | 17.8<br>(-6.4 to 45.4)                            | -4.8<br>(-23.3 to 16.2)                             |
| Other neoplasms                                    | 8.5<br>(7.1 to 9.9)                           | 2.3<br>(1.9 to 2.6)                      | 0.7<br>(0.4 to 0.9)                    | 41.3<br>(16.0 to 66.2)                            | 23.3<br>(1.6 to 44.0)                               |
| <b>Cardiovascular diseases</b>                     | <b>1,526.7</b><br><b>(1,458.2 to 1,591.1)</b> | <b>151.7†</b><br><b>(144.5 to 159.3)</b> | <b>123.2</b><br><b>(89.2 to 158.6)</b> | <b>10.6</b><br><b>(5.5 to 16.1)</b>               | <b>-6.4</b><br><b>(-10.7 to -1.9)</b>               |
| Rheumatic heart disease                            | 1.2<br>(1.1 to 1.3)                           | 0.3<br>(0.3 to 0.4)                      | 0.1<br>(0.1 to 0.1)                    | 8.8<br>(-13.2 to 38.3)                            | -7.0<br>(-24.6 to 15.4)                             |
| Ischaemic heart disease                            | 541.1<br>(507.1 to 573.1)                     | 66.4<br>(62.1 to 70.8)                   | 32.2<br>(22.7 to 43.0)                 | 19.4<br>(14.2 to 24.7)                            | 0.6<br>(-3.7 to 5.0)                                |
| Cerebrovascular disease                            | 215.2<br>(195.1 to 239.3)                     | 39.0‡<br>(35.3 to 42.8)                  | 42.1<br>(29.2 to 54.1)                 | -0.3<br>(-10.4 to 12.8)                           | -16.4<br>(-24.4 to -5.7)                            |
| Ischaemic stroke                                   | 191.0<br>(167.2 to 224.5)                     | 31.1‡<br>(27.6 to 34.9)                  | 36.4<br>(25.2 to 47.2)                 | -1.6<br>(-13.0 to 13.7)                           | -18.0<br>(-26.8 to -5.9)                            |
| Hemorrhagic stroke                                 | 30.1<br>(26.7 to 33.7)                        | 7.9‡<br>(7.0 to 8.8)                     | 5.7<br>(4.1 to 7.2)                    | 9.4<br>(-2.7 to 22.1)                             | -5.6<br>(-15.5 to 4.9)                              |
| Hypertensive heart disease                         | 46.8<br>(39.2 to 55.9)                        | --                                       | 3.6<br>(2.5 to 5.0)                    | 13.7<br>(1.4 to 27.1)                             | -6.0<br>(-15.6 to 4.7)                              |
| Cardiomyopathy and myocarditis                     | 31.6<br>(28.1 to 35.2)                        | 5.1†<br>(4.5 to 5.8)                     | 2.6<br>(1.7 to 3.6)                    | 9.3<br>(-1.3 to 21.8)                             | -3.1<br>(-12.2 to 7.0)                              |
| Myocarditis                                        | 6.2<br>(5.5 to 7.0)                           | 5.1<br>(4.5 to 5.8)                      | 0.5<br>(0.3 to 0.7)                    | 2.9<br>(-12.2 to 20.5)                            | -2.3<br>(-16.5 to 13.3)                             |
| Alcoholic cardiomyopathy                           | 4.1<br>(3.3 to 4.9)                           | --                                       | 0.3<br>(0.2 to 0.5)                    | 10.7<br>(-11.2 to 38.7)                           | 4.2<br>(-16.3 to 32.0)                              |
| Other cardiomyopathy                               | 22.4<br>(18.9 to 26.4)                        | --                                       | 1.8<br>(1.2 to 2.5)                    | 10.9<br>(-0.9 to 23.9)                            | -4.6<br>(-14.9 to 6.6)                              |
| Atrial fibrillation and flutter                    | 127.9<br>(110.3 to 148.7)                     | 10.4<br>(8.8 to 12.3)                    | 9.7<br>(6.7 to 13.5)                   | 23.3<br>(15.8 to 31.1)                            | 0.8<br>(-5.5 to 7.2)                                |
| Peripheral vascular disease                        | 321.2<br>(276.0 to 372.9)                     | 28.2<br>(24.3 to 33.2)                   | 1.3<br>(0.6 to 2.4)                    | 18.6<br>(8.5 to 29.2)                             | -5.5<br>(-12.1 to 1.8)                              |
| Endocarditis                                       | 1.2<br>(1.1 to 1.4)                           | 2.3<br>(2.1 to 2.5)                      | 0.1<br>(0.1 to 0.1)                    | 10.8<br>(-10.0 to 34.1)                           | -2.0<br>(-17.8 to 15.5)                             |
| Other cardiovascular and circulatory diseases      | 618.9<br>(538.4 to 709.0)                     | --                                       | 31.4<br>(21.4 to 43.6)                 | 14.4<br>(5.9 to 23.1)                             | -0.8<br>(-8.0 to 6.0)                               |
| <b>Chronic respiratory diseases</b>                | <b>804.2</b><br><b>(778.8 to 830.1)</b>       | <b>103.8†</b><br><b>(98.7 to 109.3)</b>  | <b>30.1</b><br><b>(23.3 to 37.6)</b>   | <b>12.2</b><br><b>(6.1 to 19.0)</b>               | <b>2.1</b><br><b>(-2.7 to 7.3)</b>                  |
| Chronic obstructive pulmonary disease              | 444.2<br>(422.8 to 466.2)                     | 25.3<br>(24.0 to 26.6)                   | 13.4<br>(11.0 to 16.0)                 | 14.6<br>(1.5 to 27.1)                             | -0.3<br>(-11.1 to 10.9)                             |
| Pneumoconiosis                                     | 3.3<br>(3.0 to 3.6)                           | 0.2<br>(0.2 to 0.2)                      | 0.5<br>(0.3 to 0.7)                    | 10.8<br>(-8.8 to 35.5)                            | -5.5<br>(-21.8 to 14.3)                             |
| Silicosis                                          | 0.6<br>(0.6 to 0.7)                           | $< 0.05$<br>( $< 0.05$ to $< 0.05$ )     | 0.1<br>(0.1 to 0.1)                    | 13.0<br>(-20.9 to 61.9)                           | -5.3<br>(-32.7 to 34.2)                             |

| Cause                                                          | Prevalence in thousands (95% UI)              | Incidence in thousands (95% UI)               | YLDs in thousands (95% UI)              |                                                   |                                                     |
|----------------------------------------------------------------|-----------------------------------------------|-----------------------------------------------|-----------------------------------------|---------------------------------------------------|-----------------------------------------------------|
|                                                                | 2016 counts                                   | 2016 counts                                   | 2016 counts                             | Percentage change in counts between 2006 and 2016 | Percentage change in age-standardised rates between |
| Asbestosis                                                     | 0.4<br>(0.3 to 0.4)                           | < 0.05<br>(< 0.05 to < 0.05)                  | 0.1<br>(< 0.05 to 0.1)                  | 16.3<br>(8.7 to 25.0)                             | 0.7<br>(-6.2 to 8.0)                                |
| Coal workers pneumoconiosis                                    | 2.0<br>(1.7 to 2.3)                           | 0.1<br>(0.1 to 0.1)                           | 0.3<br>(0.2 to 0.4)                     | 8.0<br>(-19.2 to 47.0)                            | -7.4<br>(-30.6 to 23.1)                             |
| Other pneumoconiosis                                           | 0.2<br>(0.2 to 0.3)                           | < 0.05<br>(< 0.05 to < 0.05)                  | < 0.05<br>(< 0.05 to 0.1)               | 20.4<br>(8.6 to 33.8)                             | -0.2<br>(-9.7 to 10.7)                              |
| Asthma                                                         | 376.7<br>(351.6 to 405.9)                     | 77.7<br>(72.9 to 83.0)                        | 14.4<br>(9.5 to 20.4)                   | 9.2<br>(3.9 to 15.0)                              | 3.0<br>(-1.9 to 8.3)                                |
| Interstitial lung disease and pulmonary sarcoidosis            | 12.8<br>(11.7 to 13.9)                        | 0.7<br>(0.6 to 0.7)                           | 1.3<br>(0.9 to 1.9)                     | 16.2<br>(1.7 to 33.0)                             | 2.7<br>(-9.1 to 15.8)                               |
| Other chronic respiratory diseases                             | --                                            | --                                            | 0.5<br>(0.4 to 0.6)                     | 35.9<br>(23.7 to 49.3)                            | 31.5<br>(19.7 to 44.9)                              |
| <b>Cirrhosis and other chronic liver diseases</b>              | <b>123.3</b><br><b>(117.6 to 129.0)</b>       | <b>2.9</b><br><b>(2.8 to 3.0)</b>             | <b>2.6</b><br><b>(1.8 to 3.6)</b>       | <b>13.1</b><br><b>(3.0 to 24.6)</b>               | <b>5.7</b><br><b>(-4.4 to 16.8)</b>                 |
| Cirrhosis and other chronic liver diseases due to hepatitis B  | 27.1<br>(23.8 to 31.0)                        | 0.7<br>(0.6 to 0.8)                           | 0.6<br>(0.4 to 0.8)                     | 16.7<br>(-4.4 to 45.0)                            | 7.2<br>(-12.9 to 34.0)                              |
| Cirrhosis and other chronic liver diseases due to hepatitis C  | 22.2<br>(17.8 to 27.6)                        | 0.6<br>(0.4 to 0.7)                           | 0.5<br>(0.3 to 0.7)                     | 17.5<br>(-8.2 to 48.8)                            | 8.2<br>(-15.1 to 35.5)                              |
| Cirrhosis and other chronic liver diseases due to alcohol use  | 33.9<br>(29.2 to 39.0)                        | 0.8<br>(0.7 to 1.0)                           | 0.7<br>(0.4 to 1.0)                     | 14.1<br>(-5.5 to 36.9)                            | 3.7<br>(-14.5 to 24.9)                              |
| Cirrhosis and other chronic liver diseases due to other causes | 40.1<br>(36.6 to 44.1)                        | 0.8<br>(0.8 to 0.9)                           | 0.9<br>(0.6 to 1.3)                     | 8.5<br>(-7.5 to 27.4)                             | 5.3<br>(-10.9 to 23.5)                              |
| <b>Digestive diseases</b>                                      | <b>560.1</b><br><b>(522.6 to 610.3)</b>       | <b>704.5†</b><br><b>(663.2 to 746.1)</b>      | <b>24.3</b><br><b>(17.6 to 33.0)</b>    | <b>25.4</b><br><b>(15.2 to 36.3)</b>              | <b>12.4</b><br><b>(3.6 to 21.4)</b>                 |
| Peptic ulcer disease                                           | 226.7<br>(200.0 to 257.2)                     | 15.3<br>(13.9 to 16.8)                        | 5.1<br>(3.1 to 7.7)                     | 36.7<br>(11.1 to 66.4)                            | 22.9<br>(-0.7 to 50.5)                              |
| Gastritis and duodenitis                                       | 179.3<br>(155.2 to 205.4)                     | 122.1<br>(110.1 to 135.2)                     | 4.3<br>(2.7 to 6.4)                     | 34.0<br>(12.6 to 59.6)                            | 16.3<br>(-2.4 to 38.8)                              |
| Appendicitis                                                   | 0.7<br>(0.6 to 0.7)                           | 17.0<br>(15.8 to 18.2)                        | 0.2<br>(0.1 to 0.3)                     | -3.8<br>(-23.7 to 24.2)                           | 0.4<br>(-26.9 to 42.2)                              |
| Paralytic ileus and intestinal obstruction                     | 0.2<br>(0.2 to 0.2)                           | 6.2<br>(5.9 to 6.6)                           | 0.1<br>(< 0.05 to 0.1)                  | 17.2<br>(6.2 to 29.1)                             | 2.0<br>(-5.3 to 10.3)                               |
| Inguinal, femoral, and abdominal hernia                        | 105.6<br>(94.9 to 116.2)                      | 300.4<br>(261.8 to 339.0)                     | 7.5<br>(5.1 to 10.3)                    | 25.5<br>(15.1 to 37.4)                            | 11.9<br>(2.6 to 22.5)                               |
| Inflammatory bowel disease                                     | 28.1<br>(26.4 to 29.9)                        | 7.5<br>(7.2 to 7.7)                           | 4.0<br>(2.7 to 5.4)                     | 7.5<br>(-2.2 to 17.9)                             | 1.2<br>(-8.2 to 11.1)                               |
| Vascular intestinal disorders                                  | 0.2<br>(0.2 to 0.2)                           | 1.3<br>(1.1 to 1.4)                           | 0.1<br>(< 0.05 to 0.1)                  | 17.2<br>(2.6 to 32.9)                             | 2.9<br>(-7.2 to 12.7)                               |
| Gallbladder and biliary diseases                               | 36.0<br>(32.4 to 40.0)                        | 215.9<br>(205.1 to 228.4)                     | 0.9<br>(0.6 to 1.3)                     | 17.6<br>(-2.1 to 41.1)                            | 5.5<br>(-11.3 to 26.3)                              |
| Pancreatitis                                                   | 2.1<br>(1.9 to 2.3)                           | 18.9<br>(17.1 to 20.8)                        | 0.3<br>(0.2 to 0.4)                     | 21.0<br>(1.9 to 43.3)                             | 8.6<br>(-5.8 to 25.0)                               |
| Other digestive diseases                                       | --                                            | --                                            | 2.0<br>(1.4 to 2.7)                     | 32.8<br>(22.6 to 43.9)                            | 16.3<br>(7.9 to 26.4)                               |
| <b>Neurological disorders</b>                                  | <b>3,851.0</b><br><b>(3,698.2 to 4,021.5)</b> | <b>1,574.7</b><br><b>(1,362.4 to 1,811.9)</b> | <b>124.7</b><br><b>(84.7 to 170.6)</b>  | <b>3.5</b><br><b>(-9.7 to 17.7)</b>               | <b>-0.7</b><br><b>(-15.3 to 15.0)</b>               |
| Alzheimer's disease and other dementias                        | 96.2<br>(80.2 to 115.1)                       | 16.6<br>(13.7 to 19.9)                        | 13.8<br>(9.6 to 18.4)                   | 27.7<br>(20.7 to 35.2)                            | -0.1<br>(-4.8 to 4.9)                               |
| Parkinson's disease                                            | 22.7<br>(17.4 to 28.7)                        | 2.6<br>(2.0 to 3.4)                           | 2.6<br>(1.6 to 3.6)                     | 26.6<br>(12.9 to 42.1)                            | 3.5<br>(-7.2 to 15.7)                               |
| Epilepsy                                                       | 35.2<br>(7.2 to 68.0)                         | 3.5<br>(0.7 to 6.9)                           | 8.3<br>(1.3 to 20.3)                    | -0.5<br>(-84.9 to 514.0)                          | -4.0<br>(-85.5 to 504.2)                            |
| Multiple sclerosis                                             | 7.4<br>(6.6 to 8.2)                           | 0.2<br>(0.2 to 0.2)                           | 1.9<br>(1.3 to 2.5)                     | 16.2<br>(-1.6 to 36.0)                            | 8.9<br>(-7.0 to 27.5)                               |
| Motor neuron disease                                           | 0.4<br>(0.4 to 0.5)                           | 0.1<br>(0.1 to 0.1)                           | 0.1<br>(0.1 to 0.1)                     | 11.8<br>(7.4 to 16.6)                             | 3.0<br>(-1.0 to 6.9)                                |
| Migraine                                                       | 1,722.6<br>(1,621.7 to 1,823.6)               | 172.2<br>(159.3 to 186.2)                     | 81.4<br>(53.0 to 114.7)                 | -0.0<br>(-3.5 to 3.5)                             | -0.9<br>(-4.4 to 2.4)                               |
| Tension-type headache                                          | 2,614.5<br>(2,338.9 to 2,906.6)               | 1,379.4<br>(1,168.1 to 1,620.2)               | 14.7<br>(9.3 to 21.8)                   | 1.2<br>(-4.0 to 6.7)                              | -1.5<br>(-6.5 to 3.6)                               |
| Other neurological disorders                                   | < 0.05<br>(< 0.05 to 0.1)                     | 0.1<br>(0.1 to 0.1)                           | 1.9<br>(0.8 to 3.8)                     | 14.1<br>(-60.8 to 247.1)                          | 15.5<br>(-67.3 to 312.5)                            |
| <b>Mental and substance use disorders</b>                      | <b>1,529.2</b><br><b>(1,480.0 to 1,581.2)</b> | <b>579.1†</b><br><b>(540.0 to 623.0)</b>      | <b>203.3</b><br><b>(148.0 to 262.2)</b> | <b>1.4</b><br><b>(-1.0 to 3.9)</b>                | <b>0.9</b><br><b>(-1.5 to 3.3)</b>                  |
| Schizophrenia                                                  | 28.4<br>(24.8 to 32.5)                        | 1.3<br>(1.1 to 1.5)                           | 17.9<br>(13.3 to 22.4)                  | 4.4<br>(-3.6 to 14.0)                             | 0.5<br>(-7.5 to 9.8)                                |
| Alcohol use disorders                                          | 173.2<br>(154.9 to 192.8)                     | 94.7<br>(84.0 to 106.2)                       | 17.1<br>(11.8 to 23.3)                  | 3.4<br>(-4.8 to 12.0)                             | 4.0<br>(-4.2 to 12.4)                               |
| Drug use disorders                                             | 95.4<br>(90.2 to 100.9)                       | 9.6<br>(8.8 to 10.4)                          | 15.0<br>(10.6 to 19.9)                  | 9.2<br>(-0.8 to 21.0)                             | 21.8<br>(9.4 to 35.9)                               |
| Opioid use disorders                                           | 12.6<br>(12.3 to 13.4)                        | 1.8<br>(1.8 to 1.9)                           | 5.1<br>(3.6 to 6.6)                     | -4.0<br>(-16.8 to 11.0)                           | -2.3<br>(-15.3 to 13.3)                             |
| Cocaine use disorders                                          | 4.4<br>(3.9 to 5.1)                           | 0.3<br>(0.3 to 0.4)                           | 0.6<br>(0.4 to 0.9)                     | -2.5<br>(-25.0 to 26.8)                           | 1.1<br>(-24.9 to 34.6)                              |
| Amphetamine use disorders                                      | 31.3<br>(30.2 to 32.6)                        | 1.7<br>(1.6 to 1.9)                           | 4.1<br>(2.6 to 6.1)                     | 33.8<br>(18.8 to 51.8)                            | 57.6<br>(39.4 to 78.6)                              |
| Cannabis use disorders                                         | 42.5<br>(36.7 to 49.0)                        | 4.5<br>(3.8 to 5.2)                           | 1.2<br>(0.8 to 1.8)                     | -19.0<br>(-30.9 to -5.9)                          | -7.9<br>(-21.8 to 8.5)                              |
| Other drug use disorders                                       | 7.2<br>(6.4 to 8.0)                           | 1.2<br>(1.1 to 1.4)                           | 3.9<br>(2.5 to 5.7)                     | 23.9<br>(-1.6 to 58.1)                            | 41.1<br>(10.9 to 82.6)                              |
| Depressive disorders                                           | 361.4<br>(338.2 to 387.1)                     | 385.1<br>(348.9 to 425.1)                     | 59.6<br>(41.1 to 81.0)                  | 0.8<br>(-4.9 to 5.9)                              | -3.9<br>(-8.7 to 0.7)                               |
| Major depressive disorder                                      | 240.9<br>(218.9 to 264.2)                     | 363.5<br>(327.3 to 402.6)                     | 47.7<br>(32.9 to 64.6)                  | -0.3<br>(-7.3 to 6.1)                             | -4.7<br>(-10.3 to 0.9)                              |
| Dysthymia                                                      | 126.8<br>(111.5 to 145.0)                     | 21.6<br>(18.9 to 24.6)                        | 11.9<br>(8.1 to 17.0)                   | 5.4<br>(1.2 to 9.6)                               | -0.3<br>(-4.3 to 3.6)                               |
| Bipolar disorder                                               | 73.2<br>(63.8 to 83.6)                        | 4.8<br>(4.2 to 5.4)                           | 14.7<br>(9.2 to 21.6)                   | -1.0<br>(-6.5 to 5.2)                             | -0.1<br>(-5.9 to 6.6)                               |
| Anxiety disorders                                              | 384.6<br>(349.7 to 419.8)                     | 55.3<br>(51.1 to 60.0)                        | 36.2<br>(25.3 to 48.9)                  | 1.3<br>(-5.3 to 8.2)                              | -0.2<br>(-6.4 to 6.4)                               |
| Eating disorders                                               | 13.0<br>(10.7 to 15.8)                        | 5.0<br>(3.8 to 6.5)                           | 2.6<br>(1.6 to 3.9)                     | -1.9<br>(-14.4 to 12.4)                           | 8.3<br>(-4.3 to 23.0)                               |
| Anorexia nervosa                                               | 2.6<br>(1.9 to 3.5)                           | 0.9<br>(0.7 to 1.2)                           | 0.6<br>(0.3 to 0.8)                     | -8.4<br>(-27.7 to 18.4)                           | 6.5<br>(-15.6 to 36.6)                              |
| Bulimia nervosa                                                | 10.0<br>(7.5 to 13.2)                         | 4.1<br>(2.9 to 5.6)                           | 2.1<br>(1.3 to 3.2)                     | -0.1<br>(-15.0 to 17.3)                           | 8.8<br>(-5.9 to 26.1)                               |
| Autistic spectrum disorders                                    | 87.7<br>(78.8 to 98.2)                        | 0.4<br>(0.2 to 0.5)                           | 13.0<br>(8.7 to 18.4)                   | 1.5<br>(-3.3 to 6.4)                              | 0.4<br>(-4.3 to 4.9)                                |
| Autism                                                         | 28.8<br>(24.5 to 33.8)                        | < 0.05<br>(< 0.05 to 0.1)                     | 7.2<br>(4.6 to 10.4)                    | 1.6<br>(-6.1 to 10.0)                             | 0.4<br>(-7.5 to 8.6)                                |
| Asperger syndrome and other autistic spectrum disorders        | 58.9<br>(49.0 to 70.5)                        | 0.3<br>(0.2 to 0.5)                           | 5.8<br>(3.8 to 8.6)                     | 1.4<br>(-2.9 to 6.3)                              | 0.4<br>(-4.0 to 5.4)                                |



| Cause                                                      | Prevalence in thousands (95% UI)              | Incidence in thousands (95% UI)                   | YLDs in thousands (95% UI)              |                                                   |                                                     |
|------------------------------------------------------------|-----------------------------------------------|---------------------------------------------------|-----------------------------------------|---------------------------------------------------|-----------------------------------------------------|
|                                                            | 2016 counts                                   | 2016 counts                                       | 2016 counts                             | Percentage change in counts between 2006 and 2016 | Percentage change in age-standardised rates between |
| Attention-deficit/hyperactivity disorder                   | 62.6<br>(56.7 to 69.4)                        | 2.4<br>(2.1 to 2.8)                               | 0.8<br>(0.5 to 1.2)                     | -6.5<br>(-13.6 to 2.2)                            | 0.1<br>(-7.4 to 9.0)                                |
| Conduct disorder                                           | 44.1<br>(36.5 to 52.3)                        | 15.7<br>(12.5 to 18.8)                            | 5.4<br>(3.3 to 8.3)                     | -15.9<br>(-21.9 to -9.8)                          | 0.2<br>(-6.2 to 7.2)                                |
| Idiopathic developmental intellectual disability           | 80.4<br>(41.0 to 118.1)                       | --                                                | 3.3<br>(1.5 to 5.7)                     | -6.9<br>(-14.0 to -0.3)                           | -5.4<br>(-13.0 to 1.1)                              |
| Other mental and substance use disorders                   | 242.6<br>(215.6 to 278.1)                     | 4.9<br>(4.4 to 5.5)                               | 17.7<br>(12.3 to 25.2)                  | 4.2<br>(-0.8 to 9.3)                              | 0.1<br>(-4.9 to 5.1)                                |
| <b>Diabetes, urogenital, blood, and endocrine diseases</b> | <b>3,674.4</b><br><b>(3,577.2 to 3,763.4)</b> | <b>1,596.4†</b><br><b>(1,512.9 to 1,695.3)</b>    | <b>123.9</b><br><b>(87.6 to 164.5)</b>  | <b>15.4</b><br><b>(9.9 to 20.8)</b>               | <b>2.5</b><br><b>(-2.0 to 7.0)</b>                  |
| Diabetes mellitus                                          | 697.9<br>(619.7 to 786.1)                     | 35.5<br>(31.5 to 40.1)                            | 64.2<br>(44.1 to 88.0)                  | 19.4<br>(8.5 to 29.8)                             | 3.5<br>(-6.1 to 13.1)                               |
| Acute glomerulonephritis                                   | 0.2<br>(0.2 to 0.2)                           | 2.9<br>(2.6 to 3.3)                               | < 0.05<br>(< 0.05 to < 0.05)            | 3.0<br>(-1.9 to 8.1)                              | 0.2<br>(-4.5 to 5.0)                                |
| Chronic kidney disease                                     | 411.2<br>(370.2 to 457.3)                     | 29.2<br>(25.2 to 32.9)                            | 13.7<br>(10.2 to 17.4)                  | 24.7<br>(14.7 to 35.6)                            | 6.4<br>(-1.7 to 14.5)                               |
| Chronic kidney disease due to diabetes mellitus            | 138.3<br>(113.7 to 164.6)                     | 10.2<br>(8.1 to 12.4)                             | 4.5<br>(3.2 to 6.0)                     | 24.0<br>(10.8 to 38.6)                            | 6.3<br>(-5.4 to 18.3)                               |
| Chronic kidney disease due to hypertension                 | 67.6<br>(56.1 to 80.0)                        | 6.5<br>(5.2 to 8.1)                               | 1.8<br>(1.2 to 2.4)                     | 31.9<br>(11.7 to 53.8)                            | 4.3<br>(-10.5 to 19.7)                              |
| Chronic kidney disease due to glomerulonephritis           | 77.7<br>(64.1 to 92.9)                        | 3.5<br>(2.7 to 4.5)                               | 3.2<br>(2.2 to 4.3)                     | 23.5<br>(10.3 to 38.2)                            | 9.2<br>(-1.7 to 21.5)                               |
| Chronic kidney disease due to other causes                 | 127.6<br>(102.7 to 154.5)                     | 9.0<br>(7.2 to 11.1)                              | 4.2<br>(3.0 to 5.6)                     | 23.4<br>(10.0 to 38.1)                            | 5.3<br>(-5.4 to 16.3)                               |
| Urinary diseases and male infertility                      | 422.6<br>(376.9 to 470.2)                     | 944.0†<br>(876.9 to 1,017.9)                      | 12.6<br>(8.4 to 18.1)                   | 15.0<br>(8.6 to 21.7)                             | 0.9<br>(-4.1 to 6.4)                                |
| Interstitial nephritis and urinary tract infections        | 12.8<br>(11.6 to 14.0)                        | 662.1<br>(597.0 to 727.1)                         | 0.4<br>(0.3 to 0.6)                     | -1.9<br>(-12.4 to 11.1)                           | -0.7<br>(-12.1 to 12.8)                             |
| Urolithiasis                                               | 9.1<br>(8.2 to 10.1)                          | 239.7<br>(217.8 to 265.4)                         | 0.6<br>(0.4 to 0.9)                     | 7.5<br>(-11.5 to 27.9)                            | -1.4<br>(-17.3 to 15.7)                             |
| Benign prostatic hyperplasia                               | 341.3<br>(288.1 to 397.2)                     | 42.1<br>(34.3 to 50.3)                            | 10.9<br>(7.2 to 16.0)                   | 18.5<br>(11.2 to 26.4)                            | 2.9<br>(-3.1 to 9.9)                                |
| Male infertility                                           | 46.7<br>(35.5 to 60.5)                        | --                                                | 0.3<br>(0.1 to 0.5)                     | -13.5<br>(-22.1 to -4.5)                          | -12.8<br>(-20.4 to -4.9)                            |
| Other urinary diseases                                     | --                                            | --                                                | 0.4<br>(0.2 to 0.5)                     | -14.7<br>(-24.9 to -3.6)                          | -18.2<br>(-26.9 to -9.0)                            |
| Gynecological diseases                                     | 1,359.7<br>(1,296.2 to 1,420.3)               | 524.4†<br>(470.2 to 581.4)                        | 17.2<br>(11.9 to 24.6)                  | -2.4<br>(-6.4 to 1.8)                             | -0.7<br>(-4.7 to 3.4)                               |
| Uterine fibroids                                           | 159.8<br>(143.0 to 176.4)                     | 15.7<br>(13.5 to 17.9)                            | 1.6<br>(0.9 to 2.8)                     | -2.4<br>(-12.0 to 5.8)                            | -7.0<br>(-16.5 to 1.3)                              |
| Polycystic ovarian syndrome                                | 11.2<br>(8.4 to 14.6)                         | 5.5<br>(3.7 to 7.5)                               | 0.1<br>(< 0.05 to 0.2)                  | 4.0<br>(-8.6 to 18.4)                             | 0.4<br>(-11.5 to 13.6)                              |
| Female infertility                                         | 23.7<br>(9.3 to 48.1)                         | --                                                | 0.1<br>(< 0.05 to 0.3)                  | 9.5<br>(-16.9 to 62.2)                            | 23.6<br>(-2.9 to 71.3)                              |
| Endometriosis                                              | 5.2<br>(4.4 to 6.2)                           | 18.1<br>(13.9 to 23.6)                            | 0.5<br>(0.3 to 0.8)                     | -10.1<br>(-29.4 to 13.0)                          | 0.7<br>(-21.1 to 26.8)                              |
| Genital prolapse                                           | 460.8<br>(398.4 to 525.5)                     | 17.7<br>(15.2 to 20.5)                            | 1.4<br>(0.7 to 2.6)                     | 19.9<br>(8.9 to 34.6)                             | 7.3<br>(-2.5 to 19.9)                               |
| Premenstrual syndrome                                      | 632.6<br>(596.9 to 667.1)                     | 215.3<br>(200.6 to 230.4)                         | 5.3<br>(3.3 to 8.2)                     | -3.4<br>(-10.2 to 4.1)                            | -0.4<br>(-7.3 to 7.4)                               |
| Other gynecological diseases                               | 234.9<br>(192.7 to 278.4)                     | 252.1<br>(199.5 to 304.1)                         | 8.2<br>(5.2 to 11.8)                    | -4.5<br>(-10.0 to 1.6)                            | -1.1<br>(-6.6 to 4.9)                               |
| Hemoglobinopathies and hemolytic anaemias                  | 1,271.0<br>(1,176.8 to 1,371.1)               | --                                                | 4.0<br>(2.4 to 6.2)                     | 12.7<br>(-3.4 to 32.7)                            | 0.6<br>(-15.2 to 20.4)                              |
| Thalassemias                                               | < 0.05<br>(< 0.05 to < 0.05)                  | --                                                | < 0.05<br>(< 0.05 to < 0.05)            | 27.9<br>(-1.6 to 57.1)                            | 18.4<br>(-8.5 to 45.9)                              |
| Thalassaemias trait                                        | 120.6<br>(82.2 to 166.3)                      | --                                                | 2.4<br>(1.3 to 3.9)                     | 18.4<br>(-2.7 to 44.0)                            | 4.4<br>(-14.9 to 28.7)                              |
| Sickle cell disorders                                      | 0.1<br>(0.1 to 0.1)                           | --                                                | < 0.05<br>(< 0.05 to < 0.05)            | 3.4<br>(-3.7 to 11.5)                             | 8.3<br>(0.4 to 16.8)                                |
| Sickle cell trait                                          | 128.3<br>(124.4 to 132.5)                     | --                                                | 0.6<br>(0.3 to 0.9)                     | 17.5<br>(-6.2 to 48.5)                            | 0.1<br>(-23.2 to 34.9)                              |
| G6PD deficiency                                            | 186.0<br>(160.9 to 214.7)                     | --                                                | < 0.05<br>(< 0.05 to < 0.05)            | -0.1<br>(-23.3 to 28.4)                           | -18.7<br>(-43.8 to 14.2)                            |
| G6PD trait                                                 | 794.5<br>(721.0 to 873.9)                     | --                                                | < 0.05<br>(< 0.05 to < 0.05)            | 41.7<br>(8.7 to 85.5)                             | 34.9<br>(-0.1 to 87.8)                              |
| Other hemoglobinopathies and hemolytic anaemias            | 71.1<br>(62.4 to 79.3)                        | --                                                | 1.0<br>(0.6 to 1.5)                     | -0.5<br>(-16.4 to 18.9)                           | -6.8<br>(-21.8 to 11.2)                             |
| Endocrine, metabolic, blood, and immune disorders          | 380.4<br>(347.0 to 414.8)                     | 60.3<br>(53.6 to 68.2)                            | 12.3<br>(8.3 to 17.0)                   | 17.0<br>(11.4 to 23.1)                            | 2.9<br>(-1.7 to 7.7)                                |
| <b>Musculoskeletal disorders</b>                           | <b>2,522.5</b><br><b>(2,414.4 to 2,638.7)</b> | <b>1,076.8</b><br><b>(952.8 to 1,207.8)</b>       | <b>294.0</b><br><b>(211.6 to 382.6)</b> | <b>9.9</b><br><b>(5.8 to 13.9)</b>                | <b>0.1</b><br><b>(-3.2 to 3.7)</b>                  |
| Rheumatoid arthritis                                       | 47.9<br>(42.7 to 54.1)                        | 2.2<br>(1.9 to 2.5)                               | 10.9<br>(7.5 to 14.5)                   | 8.7<br>(0.2 to 18.1)                              | -2.5<br>(-10.2 to 5.9)                              |
| Osteoarthritis                                             | 685.6<br>(641.1 to 728.6)                     | 29.0<br>(26.8 to 31.2)                            | 41.2<br>(29.0 to 56.0)                  | 15.0<br>(10.9 to 19.1)                            | -0.4<br>(-3.8 to 3.1)                               |
| Low back and neck pain                                     | 1,958.6<br>(1,835.5 to 2,096.2)               | 951.2<br>(830.4 to 1,078.3)                       | 232.2<br>(164.4 to 305.7)               | 9.1<br>(3.9 to 14.1)                              | 0.3<br>(-3.9 to 4.6)                                |
| Low back pain                                              | 1,636.1<br>(1,453.4 to 1,828.8)               | 841.6<br>(717.8 to 971.1)                         | 181.6<br>(127.5 to 240.5)               | 9.2<br>(2.9 to 15.7)                              | 0.4<br>(-5.2 to 5.8)                                |
| Neck pain                                                  | 517.8<br>(446.6 to 601.1)                     | 109.6<br>(95.1 to 128.6)                          | 50.6<br>(34.6 to 71.3)                  | 8.7<br>(5.3 to 12.4)                              | -0.1<br>(-2.2 to 2.2)                               |
| Gout                                                       | 57.7<br>(50.6 to 66.0)                        | 11.2<br>(9.7 to 12.8)                             | 1.8<br>(1.2 to 2.4)                     | 17.4<br>(1.2 to 34.6)                             | 3.4<br>(-11.2 to 19.2)                              |
| Other musculoskeletal disorders                            | 94.7<br>(78.7 to 119.1)                       | 83.2<br>(68.5 to 105.5)                           | 7.9<br>(5.3 to 11.7)                    | 8.0<br>(-4.4 to 20.8)                             | 1.6<br>(-9.8 to 13.7)                               |
| <b>Other non-communicable diseases</b>                     | <b>8,150.5</b><br><b>(8,016.6 to 8,296.4)</b> | <b>25,835.0†</b><br><b>(24,029.2 to 27,586.2)</b> | <b>252.2</b><br><b>(174.6 to 353.8)</b> | <b>8.4</b><br><b>(7.2 to 9.8)</b>                 | <b>-1.0</b><br><b>(-2.2 to 0.1)</b>                 |
| Congenital anomalies                                       | 127.4<br>(116.8 to 137.4)                     | --                                                | 12.7<br>(9.2 to 16.8)                   | -5.1<br>(-10.9 to 1.2)                            | -8.8<br>(-14.8 to -2.4)                             |
| Neural tube defects                                        | 4.5<br>(4.0 to 5.0)                           | --                                                | 1.3<br>(0.9 to 1.8)                     | 22.6<br>(2.9 to 44.8)                             | 19.7<br>(0.3 to 42.4)                               |
| Congenital heart anomalies                                 | 42.1<br>(37.2 to 47.3)                        | --                                                | 2.2<br>(0.9 to 3.7)                     | -19.0<br>(-28.7 to -8.0)                          | -25.2<br>(-34.0 to -15.4)                           |
| Orofacial clefts                                           | 6.2<br>(5.4 to 7.0)                           | --                                                | 0.1<br>(< 0.05 to 0.1)                  | -1.1<br>(-13.2 to 11.9)                           | -4.6<br>(-16.5 to 8.1)                              |
| Down's syndrome                                            | 5.6<br>(5.0 to 6.2)                           | --                                                | 0.6<br>(0.4 to 0.8)                     | 10.8<br>(0.8 to 21.2)                             | 12.0<br>(2.0 to 22.9)                               |
| Turner syndrome                                            | 2.6<br>(2.2 to 2.9)                           | --                                                | < 0.05<br>(< 0.05 to 0.1)               | 7.1<br>(-23.7 to 52.6)                            | 8.6<br>(-24.6 to 54.7)                              |
| Klinefelter syndrome                                       | 4.3<br>(3.7 to 5.0)                           | --                                                | < 0.05<br>(< 0.05 to 0.1)               | -2.5<br>(-22.8 to 25.0)                           | 1.9<br>(-20.3 to 29.8)                              |

| Cause                                         | Prevalence in thousands (95% UI)              | Incidence in thousands (95% UI)                           | YLDs in thousands (95% UI)              |                                                   |                                                     |
|-----------------------------------------------|-----------------------------------------------|-----------------------------------------------------------|-----------------------------------------|---------------------------------------------------|-----------------------------------------------------|
|                                               | 2016 counts                                   | 2016 counts                                               | 2016 counts                             | Percentage change in counts between 2006 and 2016 | Percentage change in age-standardised rates between |
| Other chromosomal abnormalities               | 5.6<br>(4.9 to 6.3)                           | --                                                        | 0.7<br>(0.5 to 0.9)                     | 12.6<br>(-5.8 to 34.1)                            | 12.2<br>(-6.0 to 33.7)                              |
| Congenital musculoskeletal and limb anomalies | 26.8<br>(24.1 to 29.8)                        | --                                                        | 3.5<br>(2.3 to 4.7)                     | -9.5<br>(-19.1 to 0.0)                            | -12.4<br>(-21.7 to -2.6)                            |
| Urogenital congenital anomalies               | 16.8<br>(15.1 to 18.7)                        | --                                                        | 0.4<br>(0.2 to 0.7)                     | -10.6<br>(-21.6 to 2.0)                           | -16.1<br>(-27.6 to -2.8)                            |
| Digestive congenital anomalies                | 10.8<br>(9.5 to 12.3)                         | --                                                        | 0.5<br>(0.3 to 0.7)                     | -11.3<br>(-25.7 to 3.5)                           | -13.6<br>(-27.9 to 1.3)                             |
| Other congenital anomalies                    | 27.4<br>(17.0 to 41.3)                        | --                                                        | 3.5<br>(2.2 to 5.0)                     | -1.7<br>(-10.8 to 8.2)                            | -6.7<br>(-15.6 to 2.8)                              |
| Skin and subcutaneous diseases                | 3,255.3<br>(3,166.9 to 3,340.4)               | 8,802.8<br>(8,263.5 to 9,355.8)                           | 69.1<br>(46.6 to 100.0)                 | 0.4<br>(-1.9 to 2.6)                              | 0.7<br>(-1.3 to 2.7)                                |
| Dermatitis                                    | 368.9<br>(332.4 to 410.7)                     | 506.0<br>(461.6 to 552.9)                                 | 13.4<br>(7.9 to 21.4)                   | 4.2<br>(0.2 to 8.3)                               | -0.1<br>(-3.6 to 3.4)                               |
| Psoriasis                                     | 132.9<br>(126.6 to 140.2)                     | 16.4<br>(15.6 to 17.2)                                    | 11.3<br>(8.2 to 14.8)                   | 7.3<br>(0.5 to 14.3)                              | 2.4<br>(-4.5 to 9.4)                                |
| Cellulitis                                    | 5.3<br>(5.0 to 5.7)                           | 118.0<br>(111.2 to 124.6)                                 | 0.3<br>(0.2 to 0.4)                     | 5.9<br>(-12.7 to 30.4)                            | 1.5<br>(-17.1 to 26.1)                              |
| Pyoderma                                      | 58.8<br>(56.8 to 61.0)                        | 1,621.7<br>(1,559.9 to 1,685.2)                           | 0.3<br>(0.1 to 0.7)                     | 13.5<br>(7.9 to 19.3)                             | 0.9<br>(-4.4 to 6.5)                                |
| Scabies                                       | 64.8<br>(57.7 to 73.1)                        | 197.1<br>(174.7 to 222.3)                                 | 1.7<br>(0.9 to 2.6)                     | -0.8<br>(-5.9 to 5.1)                             | 0.5<br>(-4.6 to 6.0)                                |
| Fungal skin diseases                          | 1,064.1<br>(948.6 to 1,178.6)                 | 4,040.6<br>(3,533.9 to 4,598.0)                           | 5.8<br>(2.3 to 12.1)                    | 10.7<br>(8.8 to 12.6)                             | 0.1<br>(-1.0 to 1.2)                                |
| Viral skin diseases                           | 232.6<br>(223.7 to 241.9)                     | 350.0<br>(335.3 to 364.7)                                 | 7.0<br>(4.3 to 10.4)                    | 0.5<br>(-2.7 to 4.0)                              | -0.1<br>(-3.3 to 3.2)                               |
| Acne vulgaris                                 | 591.9<br>(540.3 to 648.2)                     | 366.3<br>(312.9 to 438.1)                                 | 15.2<br>(10.2 to 21.9)                  | -15.7<br>(-19.7 to -11.2)                         | 0.6<br>(-4.2 to 5.9)                                |
| Alopecia areata                               | 20.7<br>(19.9 to 21.5)                        | 36.1<br>(34.8 to 37.6)                                    | 0.7<br>(0.4 to 1.0)                     | 0.1<br>(-9.8 to 11.1)                             | 0.2<br>(-9.9 to 10.8)                               |
| Pruritus                                      | 117.9<br>(104.4 to 133.8)                     | 92.2<br>(81.8 to 104.8)                                   | 1.2<br>(0.6 to 2.2)                     | 8.0<br>(2.1 to 14.3)                              | 0.6<br>(-4.7 to 5.8)                                |
| Urticaria                                     | 92.6<br>(82.1 to 104.2)                       | 164.2<br>(145.3 to 186.3)                                 | 5.5<br>(3.6 to 7.9)                     | 4.1<br>(-1.6 to 10.4)                             | -0.0<br>(-4.9 to 5.5)                               |
| Decubitus ulcer                               | 7.1<br>(6.3 to 8.1)                           | 26.1<br>(23.0 to 29.6)                                    | 1.1<br>(0.8 to 1.4)                     | 26.8<br>(9.7 to 48.0)                             | 7.3<br>(-5.2 to 22.5)                               |
| Other skin and subcutaneous diseases          | 1,054.9<br>(1,023.8 to 1,087.3)               | 1,268.2<br>(1,223.9 to 1,318.0)                           | 5.7<br>(2.7 to 10.2)                    | 12.3<br>(9.7 to 15.0)                             | 2.8<br>(0.5 to 5.1)                                 |
| Sense organ diseases                          | 3,381.0<br>(3,314.9 to 3,454.8)               | 1,182.2 <sup>†</sup><br>(1,116.9 to 1,253.4)              | 123.2<br>(85.9 to 171.3)                | 13.4<br>(11.3 to 15.4)                            | -1.7<br>(-3.4 to -0.2)                              |
| Glaucoma                                      | 12.0<br>(9.7 to 14.4)                         | --                                                        | 0.8<br>(0.6 to 1.1)                     | 22.9<br>(8.4 to 41.4)                             | -0.4<br>(-12.0 to 14.0)                             |
| Cataract                                      | 203.5<br>(170.2 to 237.5)                     | --                                                        | 9.3<br>(6.4 to 13.2)                    | 19.5<br>(12.4 to 26.6)                            | -3.1<br>(-8.5 to 2.3)                               |
| Macular degeneration                          | 7.4<br>(5.8 to 9.4)                           | --                                                        | 0.4<br>(0.2 to 0.5)                     | 24.6<br>(5.8 to 44.5)                             | 0.4<br>(-14.5 to 15.7)                              |
| Refraction and accommodation disorders        | 991.5<br>(940.7 to 1,044.5)                   | --                                                        | 20.8<br>(13.3 to 32.0)                  | 6.5<br>(3.1 to 10.9)                              | -3.7<br>(-6.5 to -0.6)                              |
| Age-related and other hearing loss            | 2,836.2<br>(2,720.5 to 2,957.3)               | --                                                        | 73.9<br>(51.6 to 103.2)                 | 14.5<br>(11.7 to 17.2)                            | -1.4<br>(-3.9 to 0.9)                               |
| Other vision loss                             | 74.3<br>(63.8 to 86.6)                        | --                                                        | 4.0<br>(2.8 to 5.5)                     | 15.3<br>(7.2 to 24.2)                             | -1.2<br>(-7.8 to 5.7)                               |
| Other sense organ diseases                    | 453.0<br>(416.1 to 491.5)                     | 1,182.2<br>(1,116.9 to 1,253.4)                           | 13.9<br>(8.8 to 20.9)                   | 13.2<br>(9.1 to 17.5)                             | 0.4<br>(-3.1 to 4.4)                                |
| Oral disorders                                | 5,995.3<br>(5,739.9 to 6,237.4)               | 15,850.0 <sup>†</sup><br>(14,140.0 to 17,461.2)           | 47.3<br>(29.9 to 70.5)                  | 13.2<br>(10.6 to 16.2)                            | 0.6<br>(-1.4 to 2.6)                                |
| Caries of deciduous teeth                     | 548.6<br>(460.0 to 654.8)                     | 2,278.2<br>(1,794.2 to 2,892.2)                           | 0.2<br>(0.1 to 0.4)                     | 23.4<br>(12.2 to 34.4)                            | -0.8<br>(-9.5 to 7.6)                               |
| Caries of permanent teeth                     | 4,251.0<br>(3,883.7 to 4,647.5)               | 13,330.3<br>(11,731.5 to 14,794.7)                        | 4.1<br>(1.8 to 8.0)                     | 1.0<br>(-3.3 to 5.8)                              | -1.3<br>(-5.1 to 2.4)                               |
| Periodontal disease                           | 1,274.9<br>(1,045.2 to 1,516.0)               | 160.9<br>(123.2 to 198.5)                                 | 8.2<br>(3.2 to 17.2)                    | 10.1<br>(5.5 to 14.6)                             | 0.4<br>(-3.5 to 3.8)                                |
| Edentulism and severe tooth loss              | 1,057.7<br>(922.8 to 1,195.9)                 | 80.6<br>(67.7 to 95.3)                                    | 28.6<br>(18.6 to 40.3)                  | 18.8<br>(14.8 to 22.8)                            | 1.2<br>(-2.3 to 4.5)                                |
| Other oral disorders                          | 215.0<br>(205.7 to 224.4)                     | --                                                        | 6.2<br>(3.9 to 9.3)                     | 2.9<br>(-0.3 to 6.2)                              | -0.1<br>(-3.2 to 3.1)                               |
| <b>Injuries</b>                               | <b>6,587.7</b><br><b>(6,138.4 to 7,224.1)</b> | <b>2,293.9<sup>†</sup></b><br><b>(2,128.1 to 2,469.8)</b> | <b>233.1</b><br><b>(160.8 to 321.6)</b> | <b>9.2</b><br><b>(7.9 to 10.6)</b>                | <b>0.1</b><br><b>(-1.4 to 1.4)</b>                  |
| <b>Transport injuries</b>                     | <b>767.1</b><br><b>(707.2 to 830.1)</b>       | <b>184.0</b><br><b>(167.0 to 201.0)</b>                   | <b>36.3</b><br><b>(24.1 to 52.0)</b>    | <b>4.3</b><br><b>(2.9 to 5.7)</b>                 | <b>-3.1</b><br><b>(-4.6 to -1.8)</b>                |
| Road injuries                                 | 739.5<br>(680.3 to 801.2)                     | 179.4<br>(162.6 to 196.6)                                 | 35.1<br>(23.3 to 50.3)                  | 3.9<br>(2.5 to 5.3)                               | -3.6<br>(-5.0 to -2.2)                              |
| Pedestrian road injuries                      | 131.8<br>(113.7 to 152.1)                     | 23.5<br>(20.1 to 27.7)                                    | 6.0<br>(4.0 to 8.8)                     | 2.1<br>(0.8 to 3.4)                               | -5.2<br>(-6.7 to -3.7)                              |
| Cyclist road injuries                         | 204.1<br>(171.6 to 240.5)                     | 54.1<br>(46.0 to 63.1)                                    | 9.1<br>(6.0 to 13.1)                    | 1.7<br>(0.4 to 3.1)                               | -5.4<br>(-6.9 to -3.9)                              |
| Motorcyclist road injuries                    | 87.9<br>(74.6 to 108.2)                       | 13.2<br>(10.8 to 16.2)                                    | 3.9<br>(2.5 to 5.7)                     | -0.7<br>(-2.1 to 0.7)                             | -7.8<br>(-9.4 to -6.4)                              |
| Motor vehicle road injuries                   | 288.2<br>(240.7 to 335.7)                     | 80.8<br>(70.6 to 91.0)                                    | 14.9<br>(10.0 to 21.0)                  | 6.9<br>(5.4 to 8.5)                               | -0.8<br>(-2.4 to 0.7)                               |
| Other road injuries                           | 27.5<br>(23.5 to 32.4)                        | 7.8<br>(6.1 to 9.8)                                       | 1.2<br>(0.8 to 1.7)                     | 8.9<br>(7.2 to 10.7)                              | 1.1<br>(-0.4 to 2.9)                                |
| Other transport injuries                      | 27.6<br>(23.7 to 31.7)                        | 4.5<br>(4.0 to 5.1)                                       | 1.2<br>(0.8 to 1.7)                     | 19.3<br>(17.7 to 21.0)                            | 10.4<br>(8.8 to 12.1)                               |
| <b>Unintentional injuries</b>                 | <b>5,635.8</b><br><b>(5,186.0 to 6,237.1)</b> | <b>2,053.3</b><br><b>(1,888.0 to 2,230.7)</b>             | <b>189.6</b><br><b>(130.9 to 262.0)</b> | <b>10.3</b><br><b>(8.8 to 11.7)</b>               | <b>0.7</b><br><b>(-1.0 to 2.1)</b>                  |
| Falls                                         | 3,584.4<br>(3,197.2 to 4,066.2)               | 1,458.9<br>(1,310.0 to 1,629.0)                           | 140.2<br>(98.6 to 192.6)                | 6.4<br>(4.9 to 8.0)                               | -4.0<br>(-5.5 to -2.5)                              |
| Drowning                                      | 5.6<br>(4.9 to 6.3)                           | 0.7<br>(0.6 to 0.8)                                       | 0.2<br>(0.1 to 0.3)                     | 14.0<br>(11.3 to 16.9)                            | 5.8<br>(3.4 to 8.3)                                 |
| Fire, heat, and hot substances                | 268.0<br>(232.8 to 311.4)                     | 23.5<br>(19.8 to 26.6)                                    | 6.1<br>(3.8 to 9.3)                     | 19.6<br>(16.9 to 22.5)                            | 12.9<br>(10.3 to 15.9)                              |
| Poisonings                                    | 10.1<br>(8.6 to 11.8)                         | 9.2<br>(7.5 to 11.2)                                      | 0.8<br>(0.5 to 1.2)                     | 30.4<br>(22.2 to 39.3)                            | 26.3<br>(17.7 to 35.2)                              |
| Exposure to mechanical forces                 | 1,195.4<br>(1,018.9 to 1,479.9)               | 326.4<br>(277.9 to 370.4)                                 | 25.4<br>(16.7 to 37.3)                  | 26.1<br>(24.3 to 28.0)                            | 17.6<br>(16.1 to 19.2)                              |
| Unintentional firearm injuries                | 8.2<br>(6.9 to 9.7)                           | 1.5<br>(1.1 to 2.0)                                       | 0.3<br>(0.2 to 0.5)                     | 17.1<br>(15.3 to 19.1)                            | 7.9<br>(6.2 to 9.6)                                 |
| Unintentional suffocation                     | 8.8<br>(7.1 to 10.8)                          | 1.1<br>(0.8 to 1.6)                                       | 0.3<br>(0.2 to 0.4)                     | 9.2<br>(7.4 to 11.2)                              | 3.3<br>(1.5 to 5.1)                                 |
| Other exposure to mechanical forces           | 1,178.4<br>(1,002.9 to 1,461.2)               | 323.7<br>(275.7 to 367.4)                                 | 24.9<br>(16.3 to 36.5)                  | 26.5<br>(24.6 to 28.4)                            | 17.9<br>(16.4 to 19.5)                              |



| Cause                                                                               | Prevalence in thousands (95% UI)  | Incidence in thousands (95% UI) | YLDs in thousands (95% UI)              |                                                   |                                                     |
|-------------------------------------------------------------------------------------|-----------------------------------|---------------------------------|-----------------------------------------|---------------------------------------------------|-----------------------------------------------------|
|                                                                                     | 2016 counts                       | 2016 counts                     | 2016 counts                             | Percentage change in counts between 2006 and 2016 | Percentage change in age-standardised rates between |
| Adverse effects of medical treatment                                                | 2.8<br>(2.2 to 3.5)               | 36.6<br>(32.5 to 41.2)          | 0.4<br>(0.2 to 0.6)                     | 30.4<br>(24.2 to 36.5)                            | 13.1<br>(8.8 to 17.0)                               |
| Animal contact                                                                      | 58.4<br>(51.2 to 68.5)            | 46.7<br>(38.9 to 53.8)          | 1.7<br>(1.1 to 2.5)                     | -3.4<br>(-8.1 to 1.5)                             | -7.1<br>(-12.1 to -2.3)                             |
| Venomous animal contact                                                             | 23.8<br>(19.8 to 28.8)            | 19.2<br>(15.0 to 23.6)          | 1.2<br>(0.8 to 1.8)                     | -3.1<br>(-9.4 to 3.7)                             | -5.8<br>(-12.3 to 0.8)                              |
| Non-venomous animal contact                                                         | 34.6<br>(29.0 to 42.9)            | 27.5<br>(22.2 to 32.6)          | 0.5<br>(0.3 to 0.8)                     | -4.0<br>(-6.0 to -2.1)                            | -10.8<br>(-12.5 to -9.2)                            |
| Foreign body                                                                        | 110.3<br>(94.1 to 126.7)          | 58.9<br>(52.1 to 67.5)          | 3.6<br>(2.3 to 5.3)                     | 8.2<br>(6.6 to 9.8)                               | 0.3<br>(-1.2 to 1.9)                                |
| Pulmonary aspiration and foreign body in airway                                     | 65.9<br>(53.2 to 81.1)            | 19.2<br>(17.3 to 21.7)          | 2.3<br>(1.4 to 3.4)                     | 4.8<br>(3.1 to 6.6)                               | -3.0<br>(-4.9 to -1.2)                              |
| Foreign body in eyes                                                                | 6.5<br>(4.2 to 9.1)               | 28.4<br>(22.0 to 36.6)          | 0.4<br>(0.2 to 0.6)                     | 13.4<br>(9.2 to 17.8)                             | 6.5<br>(3.8 to 9.3)                                 |
| Foreign body in other body part                                                     | 37.9<br>(31.8 to 46.7)            | 11.3<br>(9.8 to 13.1)           | 0.9<br>(0.6 to 1.3)                     | 15.8<br>(14.0 to 17.6)                            | 7.5<br>(5.8 to 9.1)                                 |
| Environmental heat and cold exposure                                                | 110.9<br>(96.1 to 128.8)          | 21.4<br>(18.2 to 24.7)          | 3.5<br>(2.3 to 5.2)                     | 16.8<br>(15.4 to 18.3)                            | 8.5<br>(7.2 to 9.8)                                 |
| Other unintentional injuries                                                        | 289.9<br>(236.6 to 347.7)         | 71.0<br>(60.2 to 82.2)          | 7.7<br>(5.0 to 11.4)                    | 34.5<br>(32.9 to 36.0)                            | 25.7<br>(24.0 to 27.3)                              |
| <b>Self-harm and interpersonal violence</b>                                         | <b>320.7<br/>(294.0 to 349.2)</b> | <b>56.5†<br/>(49.6 to 64.0)</b> | <b>7.2<br/>(4.8 to 10.3)</b>            | <b>7.6<br/>(5.9 to 9.1)</b>                       | <b>2.8<br/>(1.3 to 4.2)</b>                         |
| Self-harm                                                                           | 37.1<br>(31.2 to 43.0)            | 11.7<br>(10.2 to 13.2)          | 1.4<br>(0.9 to 2.0)                     | 7.2<br>(4.9 to 9.6)                               | 0.3<br>(-2.0 to 2.8)                                |
| Self-harm by firearm                                                                | 0.8<br>(0.7 to 0.9)               | 0.2<br>(0.1 to 0.3)             | < 0.05<br>(< 0.05 to < 0.05)            | -2.2<br>(-4.5 to 0.3)                             | -7.5<br>(-9.9 to -5.4)                              |
| Self-harm by other specified means                                                  | 36.3<br>(30.3 to 42.1)            | 11.5<br>(10.0 to 13.1)          | 1.4<br>(0.9 to 2.0)                     | 7.3<br>(5.0 to 9.8)                               | 0.5<br>(-1.9 to 3.0)                                |
| Interpersonal violence                                                              | 283.7<br>(257.7 to 312.0)         | 44.9†<br>(38.1 to 52.4)         | 5.9<br>(3.9 to 8.4)                     | 7.7<br>(5.8 to 9.4)                               | 3.3<br>(1.7 to 4.9)                                 |
| Assault by firearm                                                                  | 2.3<br>(2.0 to 2.7)               | 0.4<br>(0.3 to 0.6)             | 0.1<br>(0.1 to 0.1)                     | 10.8<br>(8.7 to 12.9)                             | 5.0<br>(2.7 to 7.3)                                 |
| Assault by sharp object                                                             | 21.5<br>(17.6 to 25.6)            | 4.8<br>(3.6 to 6.3)             | 0.5<br>(0.3 to 0.7)                     | 14.5<br>(12.3 to 16.5)                            | 8.7<br>(6.6 to 10.6)                                |
| Sexual violence                                                                     | 136.9<br>(121.3 to 156.1)         | --                              | 1.1<br>(0.7 to 1.5)                     | -6.0<br>(-10.1 to -1.6)                           | -3.9<br>(-7.5 to -0.1)                              |
| Assault by other means                                                              | 123.0<br>(101.7 to 148.9)         | 39.6<br>(33.6 to 46.4)          | 4.2<br>(2.8 to 6.1)                     | 11.1<br>(9.5 to 12.6)                             | 5.3<br>(3.8 to 6.8)                                 |
| <b>Forces of nature, conflict and terrorism, and executions and police conflict</b> | <b>0.9<br/>(0.6 to 1.3)</b>       | <b>0.2†<br/>(0.1 to 0.2)</b>    | <b>&lt; 0.05<br/>(&lt; 0.05 to 0.1)</b> | <b>29.4<br/>(26.6 to 33.6)</b>                    | <b>22.4<br/>(19.9 to 25.9)</b>                      |
| Exposure to forces of nature                                                        | 0.2<br>(0.1 to 0.5)               | --                              | < 0.05<br>(< 0.05 to < 0.05)            | 28.9<br>(22.4 to 78.2)                            | 18.5<br>(12.6 to 61.3)                              |
| Conflict and terrorism                                                              | --                                | --                              | --                                      | --                                                | --                                                  |
| Executions and police conflict                                                      | 0.6<br>(0.4 to 1.0)               | 0.2<br>(0.1 to 0.2)             | < 0.05<br>(< 0.05 to < 0.05)            | 29.6<br>(21.6 to 33.3)                            | 24.1<br>(16.7 to 27.6)                              |
| <b>Impairments</b>                                                                  | --                                | --                              | --                                      | --                                                | --                                                  |
| Anaemia                                                                             | 1,917.2<br>(1,677.7 to 2,136.1)   | --                              | 39.2<br>(25.5 to 56.1)                  | 5.0<br>(-7.9 to 19.8)                             | -5.7<br>(-16.8 to 7.4)                              |
| Developmental intellectual disability                                               | 191.4<br>(153.6 to 229.1)         | --                              | 20.4<br>(15.1 to 26.6)                  | -3.1<br>(-7.3 to 1.6)                             | -4.1<br>(-8.5 to 0.8)                               |
| Epilepsy                                                                            | 53.7<br>(24.3 to 87.7)            | --                              | 15.1<br>(7.3 to 27.3)                   | -1.0<br>(-59.2 to 137.1)                          | -2.9<br>(-59.4 to 129.8)                            |
| Guillain-Barre syndrome                                                             | 0.1<br>(0.1 to 0.1)               | --                              | < 0.05<br>(< 0.05 to 0.1)               | 7.8<br>(3.6 to 12.1)                              | 0.1<br>(0.0 to 0.2)                                 |
| Hearing loss                                                                        | 2,932.6<br>(2,819.0 to 3,049.0)   | --                              | 78.4<br>(55.0 to 109.8)                 | 13.3<br>(10.6 to 15.8)                            | -1.8<br>(-3.9 to 0.3)                               |
| Heart failure                                                                       | 290.5<br>(251.7 to 331.2)         | --                              | 27.2<br>(20.2 to 35.1)                  | 24.0<br>(15.6 to 32.5)                            | 1.4<br>(-5.3 to 8.2)                                |
| Infertility                                                                         | 158.7<br>(120.8 to 207.9)         | --                              | 0.9<br>(0.4 to 1.9)                     | 0.9<br>(-7.5 to 9.4)                              | 0.5<br>(-5.9 to 7.3)                                |
| Pelvic inflammatory disease                                                         | 4.4<br>(3.7 to 5.1)               | --                              | 0.6<br>(0.4 to 0.8)                     | -9.4<br>(-24.8 to 8.2)                            | -7.6<br>(-22.8 to 10.7)                             |
| Vision loss                                                                         | 1,311.0<br>(1,234.3 to 1,391.9)   | --                              | 39.6<br>(27.7 to 56.3)                  | 10.3<br>(7.1 to 13.7)                             | -2.5<br>(-5.1 to 0.3)                               |

We did not calculate incidence for the nine impairments, certain NTDs, and causes with only birth prevalence. Blank cells mean that no estimate is available.

† Incidence for aggregate causes represents the sum of the incidence of the causes below the aggregate.

‡ Incidence estimates for stroke represent first-ever stroke only.

^ Incidence of HIV/AIDS represents new infections of HIV only and does not include new infections of Tuberculosis in HIV positive cases.

SR Table 14: Prevalence, incidence, and YLDs for 2016, percentage change of YLD counts and percentage change of age-standardised YLD rates between 2006 and 2016 by cause and impairments, for all ages, Denmark.

| Cause                                                                                | Prevalence in thousands (95% UI)       | Incidence in thousands (95% UI)            | YLDs in thousands (95% UI)             |                                                   |                                                     |
|--------------------------------------------------------------------------------------|----------------------------------------|--------------------------------------------|----------------------------------------|---------------------------------------------------|-----------------------------------------------------|
|                                                                                      | 2016 counts                            | 2016 counts                                | 2016 counts                            | Percentage change in counts between 2006 and 2016 | Percentage change in age-standardised rates between |
| <b>All causes</b>                                                                    | <b>5,425.8</b><br>(5,393.3 to 5,455.5) | <b>38,531.2†</b><br>(36,168.9 to 41,070.0) | <b>762.6</b><br>(568.7 to 976.7)       | <b>9.1</b><br>(7.6 to 10.7)                       | <b>0.3</b><br>(-1.1 to 1.8)                         |
| <b>Communicable, maternal, neonatal, and nutritional disorders</b>                   | <b>1,861.9</b><br>(1,763.4 to 1,961.8) | <b>21,699.1†</b><br>(19,538.9 to 24,010.2) | <b>23.3</b><br>(16.6 to 31.4)          | <b>4.0</b><br>(-0.7 to 9.4)                       | <b>0.8</b><br>(-4.1 to 6.0)                         |
| <b>HIV/AIDS and tuberculosis</b>                                                     | <b>726.9</b><br>(598.3 to 834.6)       | <b>0.7†</b><br>(0.4 to 1.0)                | <b>1.1</b><br>(0.5 to 2.0)             | <b>23.4</b><br>(5.3 to 41.4)                      | <b>13.8</b><br>(-3.1 to 30.3)                       |
| Tuberculosis                                                                         | 642.8<br>(514.1 to 776.4)              | 0.3†<br>(0.3 to 0.4)                       | 0.1<br>(0.1 to 0.1)                    | -15.2<br>(-26.8 to -1.4)                          | -18.1<br>(-30.6 to -1.8)                            |
| Drug-susceptible tuberculosis                                                        | 0.3<br>(0.2 to 0.4)                    | 0.3<br>(0.3 to 0.4)                        | 0.1<br>(0.1 to 0.1)                    | -15.5<br>(-27.2 to -1.7)                          | -18.3<br>(-30.8 to -2.1)                            |
| Multidrug-resistant tuberculosis without extensive drug resistance                   | < 0.05<br>(< 0.05 to < 0.05)           | < 0.05<br>(< 0.05 to < 0.05)               | < 0.05<br>(< 0.05 to < 0.05)           | 47.2<br>(-6.5 to 127.1)                           | 42.4<br>(-9.7 to 119.5)                             |
| Extensively drug-resistant tuberculosis                                              | < 0.05<br>(< 0.05 to < 0.05)           | < 0.05<br>(< 0.05 to < 0.05)               | < 0.05<br>(< 0.05 to < 0.05)           | 216.7<br>(101.1 to 387.9)                         | 206.2<br>(94.2 to 371.9)                            |
| Latent tuberculosis infection                                                        | 642.5<br>(513.8 to 776.1)              | --                                         | --                                     | --                                                | --                                                  |
| HIV/AIDS                                                                             | 11.9<br>(5.8 to 20.0)                  | 0.3^<br>(0.1 to 0.6)                       | 1.0<br>(0.5 to 1.9)                    | 28.8<br>(9.1 to 49.1)                             | 18.6<br>(0.0 to 37.7)                               |
| Drug-susceptible HIV/AIDS - Tuberculosis                                             | < 0.05<br>(< 0.05 to < 0.05)           | < 0.05<br>(< 0.05 to < 0.05)               | < 0.05<br>(< 0.05 to < 0.05)           | -38.3<br>(-44.6 to -31.3)                         | -43.1<br>(-49.0 to -36.7)                           |
| Multidrug-resistant HIV/AIDS - Tuberculosis without extensive drug resistance        | < 0.05<br>(< 0.05 to < 0.05)           | < 0.05<br>(< 0.05 to < 0.05)               | < 0.05<br>(< 0.05 to < 0.05)           | 7.8<br>(-32.0 to 66.5)                            | -0.6<br>(-37.4 to 53.5)                             |
| Extensively drug-resistant HIV/AIDS - Tuberculosis                                   | < 0.05<br>(< 0.05 to < 0.05)           | < 0.05<br>(< 0.05 to < 0.05)               | < 0.05<br>(< 0.05 to < 0.05)           | 131.9<br>(46.2 to 258.4)                          | 113.8<br>(34.7 to 230.3)                            |
| HIV/AIDS resulting in other diseases                                                 | 11.9<br>(5.8 to 20.0)                  | 0.3<br>(0.1 to 0.6)                        | 1.0<br>(0.5 to 1.9)                    | 29.4<br>(9.8 to 49.9)                             | 19.2<br>(0.5 to 38.3)                               |
| <b>Diarrhoea, lower respiratory infections, and other common infectious diseases</b> | <b>335.3</b><br>(311.2 to 360.3)       | <b>21,496.5†</b><br>(19,333.8 to 23,778.4) | <b>10.5</b><br>(6.9 to 15.3)           | <b>3.0</b><br>(-0.4 to 6.3)                       | <b>-0.5</b><br>(-3.7 to 2.7)                        |
| Diarrhoeal diseases                                                                  | 16.6<br>(15.6 to 17.8)                 | 1,102.2<br>(1,031.4 to 1,181.0)            | 1.9<br>(1.3 to 2.5)                    | 2.3<br>(-5.1 to 10.4)                             | -1.2<br>(-9.1 to 6.9)                               |
| Intestinal infectious diseases                                                       | < 0.05<br>(< 0.05 to < 0.05)           | 0.1†<br>(0.1 to 0.1)                       | < 0.05<br>(< 0.05 to < 0.05)           | 15.4<br>(-3.9 to 35.6)                            | 7.9<br>(-9.5 to 26.7)                               |
| Typhoid fever                                                                        | < 0.05<br>(< 0.05 to < 0.05)           | 0.1<br>(< 0.05 to 0.1)                     | < 0.05<br>(< 0.05 to < 0.05)           | 19.6<br>(-1.9 to 44.3)                            | 12.4<br>(-8.1 to 35.3)                              |
| Paratyphoid fever                                                                    | < 0.05<br>(< 0.05 to < 0.05)           | < 0.05<br>(< 0.05 to < 0.05)               | < 0.05<br>(< 0.05 to < 0.05)           | -0.5<br>(-18.4 to 21.7)                           | -7.2<br>(-23.8 to 12.5)                             |
| Other intestinal infectious diseases                                                 | --                                     | --                                         | < 0.05<br>(< 0.05 to < 0.05)           | -17.1<br>(-35.0 to 4.9)                           | -21.1<br>(-41.4 to 9.2)                             |
| Lower respiratory infections                                                         | 4.1<br>(3.8 to 4.4)                    | 177.2<br>(163.9 to 192.3)                  | 0.2<br>(0.2 to 0.3)                    | 12.9<br>(1.0 to 26.8)                             | 1.2<br>(-10.4 to 14.3)                              |
| Upper respiratory infections                                                         | 258.7<br>(232.2 to 287.7)              | 19,778.3<br>(17,620.4 to 22,085.2)         | 6.4<br>(3.8 to 9.8)                    | 3.1<br>(-1.5 to 7.7)                              | 0.1<br>(-4.0 to 4.1)                                |
| Otitis media                                                                         | 54.0<br>(46.4 to 63.6)                 | 348.2<br>(241.0 to 533.3)                  | 1.4<br>(0.9 to 2.1)                    | 1.1<br>(-6.2 to 8.6)                              | -1.3<br>(-8.7 to 5.9)                               |
| Meningitis                                                                           | 1.3<br>(1.1 to 1.6)                    | 0.4<br>(0.3 to 0.4)                        | 0.1<br>(0.1 to 0.2)                    | -4.1<br>(-7.7 to -0.9)                            | -8.6<br>(-12.1 to -5.5)                             |
| Pneumococcal meningitis                                                              | 0.3<br>(0.2 to 0.3)                    | < 0.05<br>(< 0.05 to < 0.05)               | < 0.05<br>(< 0.05 to < 0.05)           | -15.6<br>(-23.5 to -8.8)                          | -19.9<br>(-27.6 to -13.3)                           |
| H influenzae type B meningitis                                                       | 0.1<br>(0.1 to 0.1)                    | < 0.05<br>(< 0.05 to < 0.05)               | < 0.05<br>(< 0.05 to < 0.05)           | -0.8<br>(-6.8 to 4.8)                             | -5.8<br>(-12.3 to 0.1)                              |
| Meningococcal infection                                                              | 0.2<br>(0.2 to 0.3)                    | 0.1<br>(0.1 to 0.1)                        | < 0.05<br>(< 0.05 to < 0.05)           | -3.8<br>(-9.3 to 2.0)                             | -9.6<br>(-15.1 to -4.3)                             |
| Other meningitis                                                                     | 0.7<br>(0.5 to 0.9)                    | 0.2<br>(0.2 to 0.3)                        | 0.1<br>(< 0.05 to 0.1)                 | 1.3<br>(-3.3 to 6.2)                              | -3.0<br>(-7.7 to 1.6)                               |
| Encephalitis                                                                         | 2.2<br>(1.5 to 3.2)                    | 1.4<br>(1.3 to 1.6)                        | 0.3<br>(0.2 to 0.4)                    | 6.9<br>(3.4 to 10.7)                              | 0.8<br>(-2.5 to 4.3)                                |
| Diphtheria                                                                           | < 0.05<br>(< 0.05 to < 0.05)           | < 0.05<br>(< 0.05 to < 0.05)               | < 0.05<br>(< 0.05 to < 0.05)           | -34.6<br>(-67.0 to 25.6)                          | -35.6<br>(-64.7 to 15.0)                            |
| Whooping cough                                                                       | 0.3<br>(0.2 to 0.4)                    | 2.4<br>(1.8 to 3.0)                        | < 0.05<br>(< 0.05 to < 0.05)           | -31.4<br>(-49.7 to -4.0)                          | -24.4<br>(-44.9 to 6.4)                             |
| Tetanus                                                                              | < 0.05<br>(< 0.05 to < 0.05)           | < 0.05<br>(< 0.05 to < 0.05)               | < 0.05<br>(< 0.05 to < 0.05)           | -37.8<br>(-51.7 to -20.6)                         | -39.6<br>(-52.9 to -24.7)                           |
| Measles                                                                              | < 0.05<br>(< 0.05 to < 0.05)           | < 0.05<br>(< 0.05 to < 0.05)               | < 0.05<br>(< 0.05 to < 0.05)           | 272.4<br>(-9.2 to 3.0e+76)                        | 308.6<br>(-0.4 to 4.1e+76)                          |
| Varicella and herpes zoster                                                          | 5.9<br>(5.3 to 6.5)                    | 86.5<br>(82.8 to 90.6)                     | 0.3<br>(0.2 to 0.4)                    | 10.1<br>(-1.2 to 23.8)                            | -0.1<br>(-10.8 to 13.6)                             |
| <b>Neglected tropical diseases and malaria</b>                                       | <b>0.3</b><br>(0.3 to 0.4)             | <b>&lt; 0.05†</b><br>(< 0.05 to < 0.05)    | <b>&lt; 0.05</b><br>(< 0.05 to < 0.05) | <b>-8.1</b><br>(-71.7 to 157.8)                   | <b>-15.7</b><br>(-76.2 to 163.5)                    |
| Malaria                                                                              | --                                     | --                                         | --                                     | --                                                | --                                                  |
| Chagas disease                                                                       | 0.3<br>(0.3 to 0.4)                    | --                                         | < 0.05<br>(< 0.05 to < 0.05)           | 15.3<br>(-3.7 to 40.2)                            | 8.0<br>(-8.5 to 28.4)                               |
| Leishmaniasis                                                                        | --                                     | --                                         | --                                     | --                                                | --                                                  |
| Visceral leishmaniasis                                                               | --                                     | --                                         | --                                     | --                                                | --                                                  |
| Cutaneous and mucocutaneous leishmaniasis                                            | --                                     | --                                         | --                                     | --                                                | --                                                  |
| African trypanosomiasis                                                              | --                                     | --                                         | --                                     | --                                                | --                                                  |
| Schistosomiasis                                                                      | --                                     | --                                         | --                                     | --                                                | --                                                  |
| Cysticercosis                                                                        | --                                     | --                                         | --                                     | --                                                | --                                                  |
| Cystic echinococcosis                                                                | < 0.05<br>(< 0.05 to 0.1)              | < 0.05<br>(< 0.05 to < 0.05)               | < 0.05<br>(< 0.05 to < 0.05)           | -37.8<br>(-96.1 to 705.8)                         | -41.8<br>(-96.1 to 645.4)                           |
| Lymphatic filariasis                                                                 | --                                     | --                                         | --                                     | --                                                | --                                                  |
| Onchocerciasis                                                                       | --                                     | --                                         | --                                     | --                                                | --                                                  |
| Trachoma                                                                             | --                                     | --                                         | --                                     | --                                                | --                                                  |
| Dengue                                                                               | --                                     | --                                         | --                                     | --                                                | --                                                  |
| Yellow fever                                                                         | --                                     | --                                         | --                                     | --                                                | --                                                  |
| Rabies                                                                               | < 0.05<br>(< 0.05 to < 0.05)           | < 0.05<br>(< 0.05 to < 0.05)               | < 0.05<br>(< 0.05 to < 0.05)           | 1.8<br>(-18.9 to 34.5)                            | -6.7<br>(-25.4 to 25.3)                             |
| Intestinal nematode infections                                                       | --                                     | --                                         | --                                     | --                                                | --                                                  |
| Ascariasis                                                                           | --                                     | --                                         | --                                     | --                                                | --                                                  |

| Cause                                                                   | Prevalence in thousands (95% UI)              | Incidence in thousands (95% UI)                   | YLDs in thousands (95% UI)              |                                                   |                                                     |
|-------------------------------------------------------------------------|-----------------------------------------------|---------------------------------------------------|-----------------------------------------|---------------------------------------------------|-----------------------------------------------------|
|                                                                         | 2016 counts                                   | 2016 counts                                       | 2016 counts                             | Percentage change in counts between 2006 and 2016 | Percentage change in age-standardised rates between |
| Trichuriasis                                                            | --                                            | --                                                | --                                      | --                                                | --                                                  |
| Hookworm disease                                                        | --                                            | --                                                | --                                      | --                                                | --                                                  |
| Food-borne trematodiasis                                                | --                                            | --                                                | --                                      | --                                                | --                                                  |
| Leprosy                                                                 | --                                            | --                                                | --                                      | --                                                | --                                                  |
| Ebola virus disease                                                     | --                                            | --                                                | --                                      | --                                                | --                                                  |
| Zika virus disease                                                      | --                                            | --                                                | --                                      | --                                                | --                                                  |
| Guinea worm disease                                                     | --                                            | --                                                | --                                      | --                                                | --                                                  |
| Other neglected tropical diseases                                       | --                                            | --                                                | < 0.05<br>(< 0.05 to < 0.05)            | --                                                | --                                                  |
| <b>Maternal disorders</b>                                               | <b>3.4</b><br><b>(2.7 to 4.4)</b>             | <b>37.7†</b><br><b>(34.5 to 41.6)</b>             | <b>0.2</b><br><b>(0.1 to 0.3)</b>       | <b>30.4</b><br><b>(-9.8 to 85.3)</b>              | <b>32.7</b><br><b>(-8.2 to 89.5)</b>                |
| Maternal haemorrhage                                                    | 0.4<br>(0.2 to 0.8)                           | 2.6<br>(1.8 to 3.5)                               | < 0.05<br>(< 0.05 to < 0.05)            | 11.9<br>(-31.1 to 79.6)                           | 15.0<br>(-29.5 to 83.7)                             |
| Maternal sepsis and other pregnancy related infections                  | 1.0<br>(0.8 to 1.3)                           | 5.0<br>(3.7 to 6.7)                               | < 0.05<br>(< 0.05 to < 0.05)            | 0.5<br>(-50.9 to 110.2)                           | -0.1<br>(-52.8 to 113.4)                            |
| Maternal hypertensive disorders                                         | 1.9<br>(1.2 to 2.7)                           | 7.7<br>(6.5 to 9.1)                               | 0.1<br>(< 0.05 to 0.1)                  | 68.5<br>(-3.0 to 196.0)                           | 73.8<br>(-0.6 to 202.6)                             |
| Maternal obstructed labour and uterine rupture                          | < 0.05<br>(< 0.05 to 0.1)                     | 3.4<br>(2.4 to 4.6)                               | < 0.05<br>(< 0.05 to < 0.05)            | -8.4<br>(-64.0 to 152.7)                          | -5.1<br>(-64.2 to 152.4)                            |
| Maternal abortion, miscarriage, and ectopic pregnancy                   | 0.2<br>(0.1 to 0.2)                           | 19.1<br>(16.8 to 21.6)                            | < 0.05<br>(< 0.05 to < 0.05)            | 8.7<br>(-51.0 to 125.4)                           | 5.9<br>(-52.6 to 121.5)                             |
| Other maternal disorders                                                | --                                            | --                                                | < 0.05<br>(< 0.05 to < 0.05)            | 24.7<br>(-13.3 to 77.2)                           | 26.1<br>(-12.4 to 80.3)                             |
| <b>Neonatal disorders</b>                                               | <b>42.4</b><br><b>(36.2 to 50.4)</b>          | --                                                | <b>6.8</b><br><b>(4.8 to 9.5)</b>       | <b>5.4</b><br><b>(-7.8 to 21.0)</b>               | <b>2.4</b><br><b>(-10.9 to 17.4)</b>                |
| Neonatal preterm birth complications                                    | 35.5<br>(28.4 to 45.5)                        | --                                                | 3.6<br>(2.4 to 5.3)                     | 6.0<br>(-16.2 to 30.8)                            | 3.1<br>(-18.9 to 28.1)                              |
| Neonatal encephalopathy due to birth asphyxia and trauma                | 10.0<br>(7.0 to 14.0)                         | --                                                | 1.8<br>(1.1 to 2.8)                     | 7.9<br>(-11.0 to 27.9)                            | 4.5<br>(-13.9 to 25.2)                              |
| Neonatal sepsis and other neonatal infections                           | 2.7<br>(1.3 to 5.7)                           | --                                                | 1.1<br>(0.5 to 2.5)                     | 1.9<br>(-18.5 to 24.4)                            | -1.9<br>(-22.2 to 19.4)                             |
| Hemolytic disease and other neonatal jaundice                           | 0.4<br>(0.3 to 0.5)                           | --                                                | 0.1<br>(0.1 to 0.1)                     | 1.8<br>(-6.7 to 9.8)                              | -1.8<br>(-9.8 to 5.9)                               |
| Other neonatal disorders                                                | --                                            | --                                                | 0.1<br>(0.1 to 0.2)                     | -10.9<br>(-28.1 to 9.5)                           | -0.4<br>(-19.6 to 22.4)                             |
| <b>Nutritional deficiencies</b>                                         | <b>252.0</b><br><b>(220.1 to 287.6)</b>       | <b>22.9†</b><br><b>(18.0 to 29.1)</b>             | <b>4.1</b><br><b>(2.7 to 6.0)</b>       | <b>1.7</b><br><b>(-9.8 to 14.4)</b>               | <b>0.6</b><br><b>(-11.6 to 14.9)</b>                |
| Protein-energy malnutrition                                             | 2.6<br>(2.6 to 2.7)                           | 1.6<br>(1.6 to 1.7)                               | 0.3<br>(0.2 to 0.4)                     | -11.3<br>(-22.5 to 0.4)                           | -0.9<br>(-13.4 to 12.3)                             |
| Iodine deficiency                                                       | 97.0<br>(81.3 to 114.2)                       | 1.3<br>(1.1 to 1.6)                               | 2.4<br>(1.6 to 3.5)                     | 5.0<br>(-4.5 to 17.0)                             | -1.8<br>(-11.0 to 9.8)                              |
| Vitamin A deficiency                                                    | 24.6<br>(18.8 to 32.7)                        | 20.0<br>(15.1 to 26.2)                            | --                                      | --                                                | --                                                  |
| Iron-deficiency anaemia                                                 | 123.5<br>(94.0 to 159.2)                      | --                                                | 1.3<br>(0.7 to 2.4)                     | -0.9<br>(-27.7 to 34.5)                           | 4.5<br>(-24.3 to 41.7)                              |
| Other nutritional deficiencies                                          | --                                            | --                                                | < 0.05<br>(< 0.05 to < 0.05)            | -11.7<br>(-23.2 to 0.5)                           | -1.2<br>(-14.1 to 12.5)                             |
| <b>Other communicable, maternal, neonatal, and nutritional diseases</b> | <b>869.8</b><br><b>(800.8 to 952.1)</b>       | <b>141.2</b><br><b>(126.0 to 160.6)</b>           | <b>0.6</b><br><b>(0.4 to 1.1)</b>       | <b>-11.2</b><br><b>(-19.5 to -4.0)</b>            | <b>-15.6</b><br><b>(-24.3 to -7.6)</b>              |
| Sexually transmitted diseases excluding HIV                             | 766.0<br>(700.6 to 848.9)                     | 131.9<br>(117.4 to 151.3)                         | 0.4<br>(0.2 to 0.8)                     | -18.2<br>(-30.8 to -8.2)                          | -25.0<br>(-36.9 to -14.7)                           |
| Syphilis                                                                | 6.2<br>(4.9 to 8.0)                           | 6.0<br>(4.4 to 8.0)                               | < 0.05<br>(< 0.05 to 0.1)               | -3.0<br>(-16.2 to 10.1)                           | -13.7<br>(-25.9 to -1.5)                            |
| Chlamydial infection                                                    | 18.8<br>(14.2 to 24.6)                        | 13.7<br>(10.0 to 18.2)                            | 0.1<br>(< 0.05 to 0.1)                  | -21.2<br>(-41.5 to -1.1)                          | -25.8<br>(-44.9 to -7.2)                            |
| Gonococcal infection                                                    | 3.3<br>(1.8 to 7.3)                           | 7.8<br>(2.1 to 24.2)                              | < 0.05<br>(< 0.05 to < 0.05)            | -68.9<br>(-80.6 to -47.4)                         | -71.0<br>(-82.2 to -48.3)                           |
| Trichomoniasis                                                          | 93.4<br>(81.8 to 106.4)                       | 77.5<br>(67.6 to 88.8)                            | 0.1<br>(< 0.05 to 0.2)                  | 6.6<br>(-2.4 to 16.3)                             | 1.5<br>(-7.3 to 11.1)                               |
| Genital herpes                                                          | 655.9<br>(560.9 to 761.1)                     | 25.3<br>(21.5 to 29.7)                            | 0.2<br>(0.1 to 0.4)                     | 5.2<br>(-4.6 to 15.1)                             | -1.8<br>(-11.1 to 7.7)                              |
| Other sexually transmitted diseases                                     | 4.1<br>(3.7 to 4.6)                           | 1.7<br>(1.1 to 2.3)                               | 0.1<br>(< 0.05 to 0.1)                  | -46.4<br>(-60.7 to -32.6)                         | -46.5<br>(-60.5 to -32.7)                           |
| Hepatitis                                                               | 127.3<br>(112.5 to 145.7)                     | 9.3<br>(7.5 to 11.9)                              | < 0.05<br>(< 0.05 to < 0.05)            | -7.9<br>(-29.2 to 16.6)                           | -19.0<br>(-41.7 to 8.3)                             |
| Acute hepatitis A                                                       | 0.2<br>(0.1 to 0.4)                           | 3.1<br>(1.9 to 5.4)                               | < 0.05<br>(< 0.05 to < 0.05)            | -15.4<br>(-52.6 to 45.2)                          | -25.8<br>(-61.6 to 39.6)                            |
| Hepatitis B                                                             | 67.9<br>(54.0 to 84.9)                        | 5.2<br>(4.0 to 6.6)                               | < 0.05<br>(< 0.05 to < 0.05)            | -1.4<br>(-16.4 to 15.1)                           | -12.9<br>(-26.5 to 1.9)                             |
| Hepatitis C                                                             | 59.2<br>(53.2 to 65.6)                        | 0.7<br>(0.6 to 0.7)                               | < 0.05<br>(< 0.05 to < 0.05)            | -7.3<br>(-8.0 to -6.5)                            | -3.7<br>(-4.6 to -2.7)                              |
| Acute hepatitis E                                                       | < 0.05<br>(< 0.05 to < 0.05)                  | 0.4<br>(0.3 to 0.5)                               | < 0.05<br>(< 0.05 to < 0.05)            | -5.8<br>(-13.4 to 1.4)                            | -20.2<br>(-27.6 to -13.2)                           |
| Other infectious diseases                                               | 3.9<br>(2.9 to 5.2)                           | < 0.05<br>(< 0.05 to < 0.05)                      | 0.2<br>(0.1 to 0.3)                     | 10.1<br>(0.7 to 20.6)                             | 11.2<br>(-1.1 to 25.5)                              |
| <b>Non-communicable diseases</b>                                        | <b>5,327.5</b><br><b>(5,287.3 to 5,362.6)</b> | <b>16,221.0†</b><br><b>(15,179.2 to 17,184.1)</b> | <b>680.7</b><br><b>(507.4 to 874.4)</b> | <b>9.2</b><br><b>(7.5 to 11.1)</b>                | <b>0.2</b><br><b>(-1.2 to 2.0)</b>                  |
| <b>Neoplasms</b>                                                        | <b>127.7</b><br><b>(122.4 to 132.8)</b>       | <b>38.9</b><br><b>(36.2 to 41.1)</b>              | <b>12.8</b><br><b>(9.5 to 16.7)</b>     | <b>15.4</b><br><b>(9.0 to 22.3)</b>               | <b>-2.0</b><br><b>(-7.4 to 4.0)</b>                 |
| Lip and oral cavity cancer                                              | 1.8<br>(1.6 to 2.1)                           | 0.5<br>(0.4 to 0.5)                               | 0.2<br>(0.1 to 0.2)                     | 2.6<br>(-11.8 to 19.8)                            | -12.1<br>(-24.6 to 2.9)                             |
| Nasopharynx cancer                                                      | 0.2<br>(0.1 to 0.2)                           | < 0.05<br>(< 0.05 to 0.1)                         | < 0.05<br>(< 0.05 to < 0.05)            | -3.1<br>(-15.6 to 13.7)                           | -15.5<br>(-26.9 to -0.7)                            |
| Other pharynx cancer                                                    | 1.6<br>(1.5 to 1.8)                           | 0.4<br>(0.4 to 0.5)                               | 0.2<br>(0.1 to 0.2)                     | 27.0<br>(8.3 to 49.1)                             | 11.5<br>(-4.7 to 30.5)                              |
| Oesophageal cancer                                                      | 0.7<br>(0.6 to 0.8)                           | 0.5<br>(0.4 to 0.6)                               | 0.1<br>(0.1 to 0.2)                     | 10.7<br>(-13.7 to 41.8)                           | -6.8<br>(-27.6 to 18.8)                             |
| Stomach cancer                                                          | 1.3<br>(1.2 to 1.4)                           | 0.7<br>(0.6 to 0.7)                               | 0.2<br>(0.1 to 0.2)                     | -0.0<br>(-14.2 to 17.0)                           | -15.9<br>(-27.7 to -2.4)                            |
| Colon and rectum cancer                                                 | 18.7<br>(17.2 to 20.9)                        | 4.9<br>(4.5 to 5.5)                               | 1.7<br>(1.2 to 2.3)                     | 15.7<br>(3.8 to 32.4)                             | -3.6<br>(-14.0 to 10.7)                             |
| Liver cancer                                                            | 0.3<br>(0.3 to 0.4)                           | 0.5<br>(0.4 to 0.5)                               | 0.1<br>(0.1 to 0.1)                     | 27.7<br>(7.2 to 53.2)                             | 7.3<br>(-10.4 to 28.0)                              |
| Liver cancer due to hepatitis B                                         | 0.1<br>(0.1 to 0.1)                           | 0.1<br>(< 0.05 to 0.1)                            | < 0.05<br>(< 0.05 to < 0.05)            | 26.3<br>(4.3 to 53.0)                             | 9.0<br>(-9.9 to 30.9)                               |



| Cause                                              | Prevalence in thousands (95% UI)        | Incidence in thousands (95% UI)       | YLDs in thousands (95% UI)           |                                                   |                                                     |
|----------------------------------------------------|-----------------------------------------|---------------------------------------|--------------------------------------|---------------------------------------------------|-----------------------------------------------------|
|                                                    | 2016 counts                             | 2016 counts                           | 2016 counts                          | Percentage change in counts between 2006 and 2016 | Percentage change in age-standardised rates between |
| Liver cancer due to hepatitis C                    | 0.2<br>(0.1 to 0.2)                     | 0.1<br>(0.1 to 0.2)                   | < 0.05<br>(< 0.05 to < 0.05)         | 30.9<br>(8.3 to 61.2)                             | 10.0<br>(-8.6 to 34.2)                              |
| Liver cancer due to alcohol use                    | 0.3<br>(0.2 to 0.4)                     | 0.2<br>(0.1 to 0.2)                   | < 0.05<br>(< 0.05 to 0.1)            | 22.9<br>(0.5 to 49.1)                             | 2.5<br>(-16.0 to 23.1)                              |
| Liver cancer due to other causes                   | 0.1<br>(0.1 to 0.1)                     | 0.1<br>(< 0.05 to 0.1)                | < 0.05<br>(< 0.05 to < 0.05)         | 38.1<br>(11.3 to 71.1)                            | 16.3<br>(-5.8 to 45.6)                              |
| Gallbladder and biliary tract cancer               | 0.3<br>(0.2 to 0.4)                     | 0.3<br>(0.2 to 0.3)                   | 0.1<br>(< 0.05 to 0.1)               | 0.8<br>(-22.2 to 27.6)                            | -16.1<br>(-35.4 to 6.6)                             |
| Pancreatic cancer                                  | 0.9<br>(0.8 to 1.0)                     | 1.1<br>(1.0 to 1.1)                   | 0.2<br>(0.1 to 0.3)                  | 10.9<br>(-8.1 to 30.9)                            | -7.4<br>(-22.6 to 9.0)                              |
| Larynx cancer                                      | 1.0<br>(0.9 to 1.1)                     | 0.3<br>(0.2 to 0.3)                   | 0.1<br>(0.1 to 0.1)                  | 1.1<br>(-16.2 to 20.3)                            | -14.5<br>(-28.4 to 2.0)                             |
| Tracheal, bronchus, and lung cancer                | 7.5<br>(6.7 to 8.3)                     | 4.7<br>(4.4 to 5.1)                   | 1.1<br>(0.8 to 1.4)                  | 9.7<br>(-6.0 to 26.8)                             | -9.7<br>(-23.1 to 4.1)                              |
| Malignant skin melanoma                            | 9.8<br>(7.8 to 11.2)                    | 2.0<br>(1.6 to 2.3)                   | 0.6<br>(0.4 to 0.9)                  | 34.6<br>(12.0 to 54.5)                            | 19.9<br>(0.2 to 37.9)                               |
| Non-melanoma skin cancer                           | 0.8<br>(0.6 to 1.0)                     | 1.7<br>(1.2 to 2.4)                   | < 0.05<br>(< 0.05 to 0.1)            | 17.2<br>(-8.6 to 48.1)                            | -3.2<br>(-23.7 to 21.7)                             |
| Non-melanoma skin cancer (squamous-cell carcinoma) | 0.7<br>(0.5 to 0.9)                     | 0.7<br>(0.6 to 0.9)                   | < 0.05<br>(< 0.05 to 0.1)            | 18.7<br>(-8.2 to 51.5)                            | -2.0<br>(-23.4 to 23.1)                             |
| Non-melanoma skin cancer (basal-cell carcinoma)    | 0.1<br>(0.1 to 0.3)                     | 1.0<br>(0.5 to 1.7)                   | < 0.05<br>(< 0.05 to < 0.05)         | -8.6<br>(-44.7 to 53.4)                           | -22.0<br>(-51.9 to 29.2)                            |
| Breast cancer                                      | 21.7<br>(19.9 to 24.5)                  | 4.5<br>(4.2 to 5.1)                   | 2.0<br>(1.4 to 2.6)                  | 3.3<br>(-6.6 to 15.7)                             | -9.4<br>(-18.4 to 1.4)                              |
| Cervical cancer                                    | 1.4<br>(1.2 to 1.7)                     | 0.4<br>(0.3 to 0.4)                   | 0.1<br>(0.1 to 0.2)                  | -13.8<br>(-27.1 to 3.8)                           | -19.0<br>(-32.4 to -0.7)                            |
| Uterine cancer                                     | 4.3<br>(3.7 to 5.0)                     | 0.9<br>(0.8 to 1.1)                   | 0.3<br>(0.2 to 0.5)                  | 13.8<br>(-8.9 to 43.0)                            | -2.9<br>(-22.7 to 22.0)                             |
| Ovarian cancer                                     | 2.1<br>(1.7 to 2.4)                     | 0.7<br>(0.6 to 0.8)                   | 0.3<br>(0.2 to 0.4)                  | 1.9<br>(-23.2 to 32.1)                            | -12.4<br>(-34.6 to 14.5)                            |
| Prostate cancer                                    | 21.4<br>(13.2 to 25.0)                  | 5.3<br>(3.5 to 6.0)                   | 1.9<br>(1.2 to 2.6)                  | 36.0<br>(16.4 to 59.2)                            | 10.2<br>(-5.7 to 29.3)                              |
| Testicular cancer                                  | 1.3<br>(1.1 to 1.6)                     | 0.2<br>(0.2 to 0.3)                   | 0.1<br>(0.1 to 0.1)                  | -13.0<br>(-34.4 to 15.0)                          | -15.3<br>(-36.6 to 12.6)                            |
| Kidney cancer                                      | 2.8<br>(2.5 to 3.1)                     | 0.8<br>(0.7 to 0.9)                   | 0.3<br>(0.2 to 0.4)                  | 20.0<br>(1.0 to 39.3)                             | 2.5<br>(-12.8 to 18.5)                              |
| Bladder cancer                                     | 8.7<br>(7.8 to 9.6)                     | 2.0<br>(1.8 to 2.2)                   | 0.7<br>(0.5 to 1.0)                  | 8.6<br>(-5.2 to 23.2)                             | -10.1<br>(-21.8 to 1.9)                             |
| Brain and nervous system cancer                    | 4.0<br>(3.1 to 4.7)                     | 1.5<br>(1.2 to 1.7)                   | 0.5<br>(0.3 to 0.7)                  | 23.7<br>(-3.9 to 50.1)                            | 10.2<br>(-13.0 to 32.2)                             |
| Thyroid cancer                                     | 1.9<br>(1.7 to 2.2)                     | 0.4<br>(0.3 to 0.4)                   | 0.1<br>(0.1 to 0.2)                  | 12.0<br>(-6.9 to 34.2)                            | 2.0<br>(-15.4 to 22.3)                              |
| Mesothelioma                                       | 0.2<br>(0.2 to 0.2)                     | 0.1<br>(0.1 to 0.2)                   | < 0.05<br>(< 0.05 to 0.1)            | 31.1<br>(10.2 to 47.2)                            | 8.9<br>(-8.3 to 22.2)                               |
| Hodgkin lymphoma                                   | 0.7<br>(0.6 to 0.9)                     | 0.2<br>(0.1 to 0.2)                   | 0.1<br>(< 0.05 to 0.1)               | 10.1<br>(-10.9 to 34.9)                           | 2.1<br>(-19.9 to 29.4)                              |
| Non-Hodgkin's lymphoma                             | 5.4<br>(4.6 to 6.1)                     | 1.3<br>(1.2 to 1.5)                   | 0.4<br>(0.3 to 0.6)                  | 36.7<br>(14.5 to 59.7)                            | 16.9<br>(-1.4 to 35.2)                              |
| Multiple myeloma                                   | 1.3<br>(1.0 to 1.6)                     | 0.4<br>(0.4 to 0.5)                   | 0.2<br>(0.1 to 0.3)                  | 26.1<br>(-3.6 to 62.5)                            | 5.6<br>(-19.1 to 35.9)                              |
| Leukaemia                                          | 5.5<br>(4.9 to 6.1)                     | 1.6<br>(1.4 to 1.7)                   | 0.7<br>(0.5 to 0.9)                  | 13.0<br>(-1.9 to 29.5)                            | -5.1<br>(-17.7 to 9.0)                              |
| Acute lymphoid leukaemia                           | 0.5<br>(0.4 to 0.6)                     | 0.1<br>(0.1 to 0.1)                   | 0.1<br>(< 0.05 to 0.1)               | -1.6<br>(-26.4 to 31.8)                           | -4.0<br>(-33.1 to 38.2)                             |
| Chronic lymphoid leukaemia                         | 2.8<br>(2.4 to 3.3)                     | 0.7<br>(0.6 to 0.8)                   | 0.3<br>(0.2 to 0.5)                  | 11.6<br>(-11.0 to 38.5)                           | -8.0<br>(-26.8 to 15.3)                             |
| Acute myeloid leukaemia                            | 0.5<br>(0.4 to 0.6)                     | 0.4<br>(0.3 to 0.4)                   | 0.1<br>(0.1 to 0.1)                  | 15.5<br>(-4.1 to 43.1)                            | -5.0<br>(-20.7 to 15.8)                             |
| Chronic myeloid leukaemia                          | 0.4<br>(0.4 to 0.5)                     | 0.1<br>(0.1 to 0.2)                   | 0.1<br>(< 0.05 to 0.1)               | -3.5<br>(-20.3 to 16.5)                           | -17.9<br>(-32.0 to -0.7)                            |
| Other leukaemia                                    | 1.3<br>(1.1 to 1.5)                     | 0.3<br>(0.2 to 0.3)                   | 0.2<br>(0.1 to 0.2)                  | 29.3<br>(1.3 to 65.7)                             | 6.2<br>(-16.1 to 35.1)                              |
| Other neoplasms                                    | 4.5<br>(3.8 to 5.2)                     | 1.2<br>(1.0 to 1.4)                   | 0.4<br>(0.2 to 0.5)                  | 22.9<br>(1.7 to 45.9)                             | 7.9<br>(-10.7 to 27.6)                              |
| <b>Cardiovascular diseases</b>                     | <b>747.2</b><br><b>(716.3 to 777.2)</b> | <b>72.7†</b><br><b>(68.0 to 77.9)</b> | <b>44.3</b><br><b>(32.3 to 57.9)</b> | <b>3.6</b><br><b>(-0.7 to 8.2)</b>                | <b>-11.9</b><br><b>(-15.4 to -8.2)</b>              |
| Rheumatic heart disease                            | 0.3<br>(0.3 to 0.4)                     | 0.1<br>(0.1 to 0.2)                   | < 0.05<br>(< 0.05 to < 0.05)         | 24.5<br>(13.8 to 35.5)                            | 6.6<br>(-1.6 to 14.5)                               |
| Ischaemic heart disease                            | 197.0<br>(182.3 to 213.8)               | 23.3<br>(21.0 to 26.1)                | 9.8<br>(6.9 to 13.2)                 | 7.7<br>(1.6 to 13.9)                              | -9.1<br>(-14.1 to -4.0)                             |
| Cerebrovascular disease                            | 92.3<br>(86.4 to 98.1)                  | 12.5‡<br>(11.5 to 13.6)               | 14.4<br>(10.2 to 18.3)               | 2.2<br>(-4.6 to 10.4)                             | -11.6<br>(-17.0 to -4.9)                            |
| Ischaemic stroke                                   | 74.5<br>(66.9 to 82.9)                  | 8.4‡<br>(7.5 to 9.4)                  | 11.2<br>(8.0 to 14.5)                | 1.2<br>(-6.6 to 11.6)                             | -12.7<br>(-19.2 to -3.9)                            |
| Hemorrhagic stroke                                 | 21.5<br>(19.1 to 24.0)                  | 4.2‡<br>(3.8 to 4.6)                  | 3.2<br>(2.2 to 4.1)                  | 5.9<br>(-5.0 to 18.4)                             | -7.8<br>(-17.2 to 2.5)                              |
| Hypertensive heart disease                         | 10.2<br>(8.5 to 12.3)                   | --                                    | 0.8<br>(0.5 to 1.1)                  | 3.6<br>(-9.4 to 17.9)                             | -13.0<br>(-24.1 to -1.0)                            |
| Cardiomyopathy and myocarditis                     | 8.9<br>(7.7 to 9.9)                     | 2.3†<br>(2.0 to 2.6)                  | 0.8<br>(0.5 to 1.1)                  | -2.8<br>(-13.8 to 7.9)                            | -13.4<br>(-23.1 to -3.8)                            |
| Myocarditis                                        | 2.0<br>(1.8 to 2.2)                     | 2.3<br>(2.0 to 2.6)                   | 0.1<br>(0.1 to 0.2)                  | -1.6<br>(-16.1 to 15.1)                           | -10.1<br>(-23.5 to 6.0)                             |
| Alcoholic cardiomyopathy                           | 2.6<br>(2.1 to 3.1)                     | --                                    | 0.2<br>(0.1 to 0.3)                  | -6.9<br>(-27.1 to 14.8)                           | -17.0<br>(-34.1 to 2.5)                             |
| Other cardiomyopathy                               | 5.2<br>(4.5 to 6.1)                     | --                                    | 0.4<br>(0.3 to 0.6)                  | -1.1<br>(-14.3 to 14.1)                           | -13.0<br>(-24.8 to 0.7)                             |
| Atrial fibrillation and flutter                    | 79.8<br>(69.3 to 92.2)                  | 6.6<br>(5.6 to 7.7)                   | 6.2<br>(4.2 to 8.7)                  | 12.5<br>(5.7 to 19.4)                             | -5.6<br>(-11.6 to 0.4)                              |
| Peripheral vascular disease                        | 322.9<br>(283.1 to 366.2)               | 26.4<br>(22.5 to 31.2)                | 1.2<br>(0.6 to 2.4)                  | 7.8<br>(0.3 to 15.5)                              | -11.3<br>(-17.4 to -5.0)                            |
| Endocarditis                                       | 0.7<br>(0.6 to 0.9)                     | 1.4<br>(1.2 to 1.5)                   | 0.1<br>(< 0.05 to 0.1)               | -1.3<br>(-20.1 to 20.9)                           | -16.0<br>(-31.0 to 0.6)                             |
| Other cardiovascular and circulatory diseases      | 213.1<br>(180.6 to 247.1)               | --                                    | 11.0<br>(7.5 to 15.4)                | -2.4<br>(-11.4 to 7.6)                            | -17.1<br>(-24.2 to -9.3)                            |
| <b>Chronic respiratory diseases</b>                | <b>640.2</b><br><b>(619.7 to 660.6)</b> | <b>56.1†</b><br><b>(53.3 to 59.2)</b> | <b>23.3</b><br><b>(17.8 to 29.7)</b> | <b>1.2</b><br><b>(-5.7 to 8.9)</b>                | <b>-7.9</b><br><b>(-13.5 to -2.2)</b>               |
| Chronic obstructive pulmonary disease              | 343.4<br>(327.4 to 360.6)               | 20.9<br>(19.8 to 22.1)                | 10.0<br>(7.8 to 12.2)                | 7.4<br>(-9.5 to 26.7)                             | -7.9<br>(-22.0 to 7.9)                              |
| Pneumoconiosis                                     | < 0.05<br>(< 0.05 to < 0.05)            | < 0.05<br>(< 0.05 to < 0.05)          | < 0.05<br>(< 0.05 to < 0.05)         | 13.9<br>(6.9 to 21.8)                             | -8.7<br>(-14.3 to -2.7)                             |
| Silicosis                                          | < 0.05<br>(< 0.05 to < 0.05)            | < 0.05<br>(< 0.05 to < 0.05)          | < 0.05<br>(< 0.05 to < 0.05)         | 29.3<br>(19.4 to 39.0)                            | -0.0<br>(-7.2 to 7.2)                               |

| Cause                                                          | Prevalence in thousands (95% UI)              | Incidence in thousands (95% UI)          | YLDs in thousands (95% UI)             |                                                   |                                                     |
|----------------------------------------------------------------|-----------------------------------------------|------------------------------------------|----------------------------------------|---------------------------------------------------|-----------------------------------------------------|
|                                                                | 2016 counts                                   | 2016 counts                              | 2016 counts                            | Percentage change in counts between 2006 and 2016 | Percentage change in age-standardised rates between |
| Asbestosis                                                     | < 0.05<br>(< 0.05 to < 0.05)                  | < 0.05<br>(< 0.05 to < 0.05)             | < 0.05<br>(< 0.05 to < 0.05)           | -2.9<br>(-13.8 to 9.0)                            | -18.8<br>(-28.2 to -8.8)                            |
| Coal workers pneumoconiosis                                    | --                                            | --                                       | --                                     | --                                                | --                                                  |
| Other pneumoconiosis                                           | < 0.05<br>(< 0.05 to < 0.05)                  | < 0.05<br>(< 0.05 to < 0.05)             | < 0.05<br>(< 0.05 to < 0.05)           | 5.6<br>(-2.4 to 12.5)                             | -9.2<br>(-15.7 to -3.6)                             |
| Asthma                                                         | 323.2<br>(300.7 to 349.7)                     | 34.7<br>(32.0 to 37.7)                   | 12.5<br>(8.2 to 17.9)                  | -4.1<br>(-8.1 to 0.5)                             | -8.6<br>(-13.0 to -4.0)                             |
| Interstitial lung disease and pulmonary sarcoidosis            | 5.5<br>(5.0 to 6.2)                           | 0.5<br>(0.5 to 0.6)                      | 0.6<br>(0.4 to 0.8)                    | 12.2<br>(-0.4 to 26.4)                            | -2.6<br>(-12.4 to 8.8)                              |
| Other chronic respiratory diseases                             | --                                            | --                                       | 0.3<br>(0.2 to 0.4)                    | 21.8<br>(4.5 to 40.1)                             | 17.7<br>(-0.2 to 36.6)                              |
| <b>Cirrhosis and other chronic liver diseases</b>              | <b>56.3</b><br><b>(53.5 to 58.9)</b>          | <b>1.3</b><br><b>(1.2 to 1.4)</b>        | <b>1.4</b><br><b>(1.0 to 1.9)</b>      | <b>10.7</b><br><b>(1.2 to 21.6)</b>               | <b>2.6</b><br><b>(-6.8 to 13.5)</b>                 |
| Cirrhosis and other chronic liver diseases due to hepatitis B  | 7.7<br>(6.1 to 9.5)                           | 0.2<br>(0.1 to 0.2)                      | 0.2<br>(0.1 to 0.3)                    | 13.8<br>(-10.5 to 45.8)                           | 4.3<br>(-19.2 to 33.7)                              |
| Cirrhosis and other chronic liver diseases due to hepatitis C  | 16.2<br>(12.5 to 20.9)                        | 0.4<br>(0.3 to 0.5)                      | 0.4<br>(0.2 to 0.6)                    | 13.7<br>(-4.8 to 37.6)                            | 4.8<br>(-12.5 to 25.6)                              |
| Cirrhosis and other chronic liver diseases due to alcohol use  | 27.4<br>(23.6 to 31.4)                        | 0.7<br>(0.6 to 0.7)                      | 0.6<br>(0.4 to 0.9)                    | 8.4<br>(-5.7 to 24.6)                             | -1.0<br>(-13.5 to 14.2)                             |
| Cirrhosis and other chronic liver diseases due to other causes | 5.0<br>(3.9 to 6.3)                           | 0.1<br>(0.1 to 0.1)                      | 0.2<br>(0.1 to 0.3)                    | 9.6<br>(-12.6 to 40.9)                            | 6.3<br>(-15.4 to 37.0)                              |
| <b>Digestive diseases</b>                                      | <b>121.2</b><br><b>(113.4 to 131.3)</b>       | <b>161.2†</b><br><b>(149.8 to 173.6)</b> | <b>4.0</b><br><b>(2.8 to 5.3)</b>      | <b>6.1</b><br><b>(-1.8 to 14.3)</b>               | <b>-3.0</b><br><b>(-10.6 to 4.5)</b>                |
| Peptic ulcer disease                                           | 31.3<br>(27.7 to 35.9)                        | 7.9<br>(7.2 to 8.7)                      | 0.3<br>(0.2 to 0.5)                    | -1.7<br>(-24.5 to 29.1)                           | -10.7<br>(-32.8 to 20.1)                            |
| Gastritis and duodenitis                                       | 46.5<br>(40.2 to 53.9)                        | 34.9<br>(30.5 to 40.0)                   | 0.3<br>(0.2 to 0.5)                    | 13.8<br>(-9.6 to 45.7)                            | 1.5<br>(-19.0 to 31.9)                              |
| Appendicitis                                                   | 0.3<br>(0.2 to 0.3)                           | 7.2<br>(6.6 to 7.8)                      | 0.1<br>(0.1 to 0.1)                    | 4.5<br>(-15.2 to 30.3)                            | -0.1<br>(-22.8 to 30.8)                             |
| Paralytic ileus and intestinal obstruction                     | 0.1<br>(0.1 to 0.1)                           | 3.4<br>(3.1 to 3.8)                      | < 0.05<br>(< 0.05 to 0.1)              | 10.8<br>(1.0 to 22.3)                             | 0.1<br>(-7.1 to 8.2)                                |
| Inguinal, femoral, and abdominal hernia                        | 28.1<br>(25.0 to 31.4)                        | 64.8<br>(55.6 to 73.5)                   | 2.0<br>(1.4 to 2.7)                    | 10.9<br>(-0.5 to 22.6)                            | 2.1<br>(-8.7 to 13.2)                               |
| Inflammatory bowel disease                                     | 3.9<br>(3.6 to 4.1)                           | 1.6<br>(1.5 to 1.6)                      | 0.6<br>(0.4 to 0.8)                    | -7.4<br>(-20.3 to 9.0)                            | -13.9<br>(-26.1 to 1.8)                             |
| Vascular intestinal disorders                                  | 0.3<br>(0.2 to 0.3)                           | 1.2<br>(1.0 to 1.3)                      | 0.1<br>(0.1 to 0.1)                    | 13.8<br>(-13.8 to 54.7)                           | -1.8<br>(-22.2 to 29.9)                             |
| Gallbladder and biliary diseases                               | 14.2<br>(12.6 to 16.0)                        | 36.7<br>(32.3 to 41.8)                   | 0.2<br>(0.1 to 0.3)                    | 0.0<br>(-17.7 to 20.7)                            | -10.9<br>(-24.9 to 6.9)                             |
| Pancreatitis                                                   | 0.4<br>(0.4 to 0.4)                           | 3.6<br>(3.2 to 4.0)                      | 0.1<br>(< 0.05 to 0.1)                 | -6.7<br>(-11.6 to -2.0)                           | -18.1<br>(-21.5 to -14.3)                           |
| Other digestive diseases                                       | --                                            | --                                       | 0.3<br>(0.2 to 0.4)                    | 10.2<br>(1.9 to 18.8)                             | 0.5<br>(-8.2 to 8.8)                                |
| <b>Neurological disorders</b>                                  | <b>2,140.4</b><br><b>(2,064.7 to 2,235.1)</b> | <b>823.9</b><br><b>(712.4 to 941.9)</b>  | <b>68.3</b><br><b>(47.3 to 92.8)</b>   | <b>5.1</b><br><b>(-4.6 to 15.4)</b>               | <b>-0.8</b><br><b>(-10.4 to 9.9)</b>                |
| Alzheimer's disease and other dementias                        | 55.3<br>(47.1 to 64.5)                        | 10.8<br>(8.9 to 12.8)                    | 8.3<br>(5.7 to 11.1)                   | 9.4<br>(2.1 to 15.4)                              | -6.8<br>(-12.9 to -1.5)                             |
| Parkinson's disease                                            | 9.1<br>(7.1 to 11.2)                          | 1.1<br>(0.9 to 1.4)                      | 1.1<br>(0.7 to 1.5)                    | 54.6<br>(30.8 to 84.0)                            | 28.6<br>(8.7 to 52.7)                               |
| Epilepsy                                                       | 14.9<br>(4.0 to 26.1)                         | 1.3<br>(0.4 to 2.3)                      | 3.5<br>(0.8 to 8.1)                    | -0.6<br>(-81.9 to 474.6)                          | -7.2<br>(-83.4 to 440.1)                            |
| Multiple sclerosis                                             | 11.7<br>(10.6 to 12.8)                        | 0.3<br>(0.2 to 0.3)                      | 3.0<br>(2.1 to 3.9)                    | 11.7<br>(-0.6 to 25.6)                            | 5.6<br>(-6.1 to 19.1)                               |
| Motor neuron disease                                           | 1.0<br>(0.9 to 1.1)                           | 0.2<br>(0.2 to 0.2)                      | 0.2<br>(0.1 to 0.3)                    | 14.4<br>(9.4 to 19.7)                             | 2.0<br>(-2.4 to 6.4)                                |
| Migraine                                                       | 1,026.8<br>(974.7 to 1,074.1)                 | 89.5<br>(84.8 to 94.2)                   | 44.5<br>(28.8 to 62.2)                 | 3.2<br>(0.2 to 6.2)                               | -0.8<br>(-4.0 to 2.3)                               |
| Tension-type headache                                          | 1,409.7<br>(1,266.7 to 1,575.5)               | 720.7<br>(609.8 to 836.6)                | 6.6<br>(4.3 to 9.6)                    | 5.6<br>(1.0 to 10.5)                              | 0.4<br>(-3.9 to 4.9)                                |
| Other neurological disorders                                   | < 0.05<br>(< 0.05 to < 0.05)                  | < 0.05<br>(< 0.05 to 0.1)                | 1.1<br>(0.6 to 1.9)                    | 16.5<br>(-41.9 to 141.6)                          | 13.7<br>(-49.1 to 165.5)                            |
| <b>Mental and substance use disorders</b>                      | <b>918.5</b><br><b>(885.0 to 949.5)</b>       | <b>284.1†</b><br><b>(267.1 to 302.2)</b> | <b>126.7</b><br><b>(91.9 to 163.6)</b> | <b>5.7</b><br><b>(3.6 to 7.8)</b>                 | <b>0.1</b><br><b>(-1.8 to 2.1)</b>                  |
| Schizophrenia                                                  | 16.2<br>(14.3 to 18.3)                        | 0.8<br>(0.7 to 0.9)                      | 10.2<br>(7.5 to 12.6)                  | 10.1<br>(0.4 to 20.5)                             | 5.9<br>(-3.9 to 16.1)                               |
| Alcohol use disorders                                          | 100.0<br>(89.5 to 111.5)                      | 33.8<br>(29.5 to 39.0)                   | 9.8<br>(6.9 to 13.7)                   | 3.1<br>(-5.7 to 13.0)                             | -2.3<br>(-10.7 to 7.0)                              |
| Drug use disorders                                             | 53.0<br>(49.8 to 56.3)                        | 6.7<br>(6.2 to 7.3)                      | 10.0<br>(7.3 to 13.1)                  | 10.5<br>(1.2 to 20.2)                             | 6.2<br>(-3.1 to 15.9)                               |
| Opioid use disorders                                           | 14.6<br>(12.7 to 16.6)                        | 1.8<br>(1.5 to 2.1)                      | 6.0<br>(4.2 to 7.9)                    | 3.3<br>(-7.5 to 14.6)                             | 0.1<br>(-10.9 to 11.6)                              |
| Cocaine use disorders                                          | 6.1<br>(5.4 to 7.0)                           | 0.4<br>(0.3 to 0.5)                      | 0.8<br>(0.5 to 1.2)                    | 20.4<br>(-1.7 to 49.0)                            | 11.8<br>(-9.7 to 39.4)                              |
| Amphetamine use disorders                                      | 6.1<br>(4.9 to 7.7)                           | 0.6<br>(0.4 to 0.7)                      | 0.8<br>(0.5 to 1.2)                    | 40.6<br>(8.0 to 80.5)                             | 27.7<br>(-3.4 to 66.7)                              |
| Cannabis use disorders                                         | 20.6<br>(17.8 to 23.3)                        | 3.0<br>(2.6 to 3.6)                      | 0.6<br>(0.4 to 0.9)                    | 37.2<br>(16.1 to 60.6)                            | 27.8<br>(7.4 to 50.9)                               |
| Other drug use disorders                                       | 6.9<br>(6.4 to 7.5)                           | 0.9<br>(0.8 to 1.0)                      | 1.8<br>(1.2 to 2.6)                    | 14.2<br>(-4.2 to 36.6)                            | 9.2<br>(-9.8 to 32.0)                               |
| Depressive disorders                                           | 209.4<br>(196.8 to 225.5)                     | 183.4<br>(167.8 to 199.8)                | 31.9<br>(22.2 to 42.8)                 | 3.8<br>(-0.8 to 8.7)                              | -2.9<br>(-7.0 to 1.4)                               |
| Major depressive disorder                                      | 110.6<br>(100.6 to 121.0)                     | 169.8<br>(154.1 to 186.0)                | 22.2<br>(15.4 to 30.2)                 | 2.3<br>(-3.7 to 9.3)                              | -4.0<br>(-10.0 to 2.1)                              |
| Dysthymia                                                      | 101.4<br>(89.0 to 116.9)                      | 13.7<br>(12.0 to 15.7)                   | 9.6<br>(6.4 to 14.1)                   | 7.3<br>(3.9 to 10.7)                              | -0.1<br>(-3.4 to 3.1)                               |
| Bipolar disorder                                               | 54.9<br>(48.0 to 63.2)                        | 3.4<br>(3.0 to 4.0)                      | 11.1<br>(7.0 to 16.2)                  | 6.5<br>(1.1 to 12.1)                              | 0.1<br>(-5.3 to 5.2)                                |
| Anxiety disorders                                              | 299.0<br>(263.4 to 336.8)                     | 37.7<br>(33.0 to 42.7)                   | 28.4<br>(19.7 to 38.7)                 | 5.7<br>(1.6 to 9.9)                               | -0.1<br>(-4.0 to 3.9)                               |
| Eating disorders                                               | 18.5<br>(15.3 to 22.6)                        | 5.7<br>(4.3 to 7.3)                      | 3.8<br>(2.5 to 5.4)                    | 6.7<br>(-2.7 to 17.2)                             | 3.5<br>(-5.6 to 13.4)                               |
| Anorexia nervosa                                               | 5.2<br>(3.9 to 6.8)                           | 1.1<br>(0.8 to 1.4)                      | 1.1<br>(0.7 to 1.6)                    | 9.4<br>(-6.1 to 29.6)                             | 3.0<br>(-11.9 to 21.3)                              |
| Bulimia nervosa                                                | 12.9<br>(9.8 to 17.1)                         | 4.7<br>(3.3 to 6.2)                      | 2.7<br>(1.7 to 4.0)                    | 5.6<br>(-5.3 to 19.3)                             | 3.7<br>(-7.0 to 15.8)                               |
| Autistic spectrum disorders                                    | 42.6<br>(39.2 to 46.4)                        | 0.2<br>(0.1 to 0.2)                      | 7.0<br>(4.8 to 9.9)                    | 4.8<br>(-0.3 to 10.1)                             | -0.0<br>(-4.9 to 5.2)                               |
| Autism                                                         | 18.2<br>(15.8 to 21.0)                        | < 0.05<br>(< 0.05 to < 0.05)             | 4.6<br>(2.9 to 6.6)                    | 4.8<br>(-2.0 to 12.5)                             | -0.1<br>(-6.8 to 7.5)                               |
| Asperger syndrome and other autistic spectrum disorders        | 24.4<br>(20.6 to 29.1)                        | 0.1<br>(0.1 to 0.2)                      | 2.4<br>(1.6 to 3.5)                    | 4.6<br>(-0.7 to 10.1)                             | 0.1<br>(-5.0 to 5.6)                                |



| Cause                                                      | Prevalence in thousands (95% UI)              | Incidence in thousands (95% UI)                   | YLDs in thousands (95% UI)              |                                                   |                                                     |
|------------------------------------------------------------|-----------------------------------------------|---------------------------------------------------|-----------------------------------------|---------------------------------------------------|-----------------------------------------------------|
|                                                            | 2016 counts                                   | 2016 counts                                       | 2016 counts                             | Percentage change in counts between 2006 and 2016 | Percentage change in age-standardised rates between |
| Attention-deficit/hyperactivity disorder                   | 18.7<br>(16.1 to 21.7)                        | 1.0<br>(0.8 to 1.2)                               | 0.2<br>(0.1 to 0.4)                     | 1.9<br>(-9.3 to 14.5)                             | 0.1<br>(-11.3 to 12.8)                              |
| Conduct disorder                                           | 26.1<br>(21.5 to 30.8)                        | 8.2<br>(6.5 to 10.0)                              | 3.2<br>(1.9 to 4.8)                     | 3.1<br>(-3.9 to 10.8)                             | -0.0<br>(-7.1 to 7.4)                               |
| Idiopathic developmental intellectual disability           | 27.2<br>(11.1 to 44.6)                        | --                                                | 1.3<br>(0.6 to 2.4)                     | 4.7<br>(-4.3 to 15.3)                             | -0.2<br>(-8.7 to 10.6)                              |
| Other mental and substance use disorders                   | 133.2<br>(116.1 to 154.0)                     | 3.2<br>(2.8 to 3.6)                               | 9.8<br>(6.7 to 13.7)                    | 6.5<br>(2.1 to 11.4)                              | 0.2<br>(-4.2 to 4.9)                                |
| <b>Diabetes, urogenital, blood, and endocrine diseases</b> | <b>2,161.7</b><br><b>(1,971.2 to 2,395.9)</b> | <b>539.6†</b><br><b>(508.8 to 575.6)</b>          | <b>45.7</b><br><b>(32.3 to 61.4)</b>    | <b>11.7</b><br><b>(6.7 to 17.2)</b>               | <b>-1.2</b><br><b>(-5.4 to 3.5)</b>                 |
| Diabetes mellitus                                          | 300.8<br>(269.9 to 335.4)                     | 16.1<br>(14.1 to 18.2)                            | 20.2<br>(13.7 to 28.2)                  | 15.9<br>(5.8 to 27.7)                             | 1.0<br>(-7.5 to 11.2)                               |
| Acute glomerulonephritis                                   | 0.1<br>(0.1 to 0.1)                           | 1.0<br>(0.8 to 1.1)                               | < 0.05<br>(< 0.05 to < 0.05)            | 8.5<br>(3.1 to 13.9)                              | -0.6<br>(-4.9 to 4.0)                               |
| Chronic kidney disease                                     | 232.0<br>(207.2 to 256.0)                     | 19.7<br>(16.9 to 22.4)                            | 5.9<br>(4.4 to 7.4)                     | 15.1<br>(6.3 to 24.6)                             | 0.6<br>(-6.2 to 8.4)                                |
| Chronic kidney disease due to diabetes mellitus            | 82.1<br>(73.0 to 91.7)                        | 7.4<br>(6.2 to 8.4)                               | 2.1<br>(1.6 to 2.7)                     | 16.9<br>(4.3 to 31.3)                             | 0.4<br>(-10.6 to 11.9)                              |
| Chronic kidney disease due to hypertension                 | 40.9<br>(36.2 to 45.2)                        | 3.7<br>(3.2 to 4.2)                               | 0.7<br>(0.5 to 0.9)                     | 18.0<br>(1.6 to 36.5)                             | 0.6<br>(-13.0 to 16.1)                              |
| Chronic kidney disease due to glomerulonephritis           | 35.5<br>(31.2 to 39.7)                        | 2.4<br>(2.0 to 2.9)                               | 1.2<br>(0.9 to 1.6)                     | 11.4<br>(-1.2 to 24.8)                            | 0.3<br>(-10.0 to 11.8)                              |
| Chronic kidney disease due to other causes                 | 73.5<br>(65.2 to 81.4)                        | 6.2<br>(5.3 to 7.0)                               | 1.8<br>(1.4 to 2.3)                     | 14.6<br>(2.3 to 29.2)                             | 1.0<br>(-9.0 to 12.5)                               |
| Urinary diseases and male infertility                      | 175.1<br>(159.6 to 190.0)                     | 298.7†<br>(269.7 to 332.0)                        | 5.7<br>(3.8 to 8.1)                     | 17.3<br>(10.3 to 24.3)                            | 1.2<br>(-4.9 to 7.6)                                |
| Interstitial nephritis and urinary tract infections        | 4.1<br>(3.6 to 4.7)                           | 216.4<br>(189.3 to 246.8)                         | 0.1<br>(0.1 to 0.2)                     | 3.6<br>(-10.7 to 21.9)                            | -1.0<br>(-15.2 to 16.9)                             |
| Urolithiasis                                               | 2.4<br>(2.1 to 2.8)                           | 64.0<br>(56.8 to 72.7)                            | 0.2<br>(0.1 to 0.3)                     | 15.7<br>(-3.7 to 37.8)                            | 4.8<br>(-10.9 to 22.6)                              |
| Benign prostatic hyperplasia                               | 160.7<br>(141.8 to 178.8)                     | 18.2<br>(15.4 to 21.3)                            | 5.2<br>(3.4 to 7.5)                     | 18.8<br>(10.9 to 26.7)                            | 1.9<br>(-5.2 to 9.2)                                |
| Male infertility                                           | 4.6<br>(3.1 to 6.4)                           | --                                                | < 0.05<br>(< 0.05 to 0.1)               | -18.0<br>(-30.9 to -4.8)                          | -14.1<br>(-27.7 to -0.8)                            |
| Other urinary diseases                                     | --                                            | --                                                | 0.1<br>(0.1 to 0.1)                     | -9.3<br>(-19.8 to 1.8)                            | -14.6<br>(-23.6 to -4.9)                            |
| Gynecological diseases                                     | 790.6<br>(746.6 to 843.9)                     | 169.7†<br>(158.9 to 180.9)                        | 5.7<br>(3.9 to 8.5)                     | 1.9<br>(-3.5 to 7.2)                              | -3.5<br>(-8.7 to 1.8)                               |
| Uterine fibroids                                           | 35.7<br>(31.5 to 40.6)                        | 3.3<br>(2.9 to 3.8)                               | 0.3<br>(0.1 to 0.6)                     | -1.1<br>(-11.8 to 9.3)                            | -4.5<br>(-15.5 to 6.2)                              |
| Polycystic ovarian syndrome                                | 1.5<br>(1.1 to 2.0)                           | 5.0<br>(3.5 to 6.9)                               | < 0.05<br>(< 0.05 to < 0.05)            | -1.8<br>(-22.2 to 24.7)                           | 0.3<br>(-21.2 to 27.1)                              |
| Female infertility                                         | 4.8<br>(2.1 to 8.6)                           | --                                                | < 0.05<br>(< 0.05 to 0.1)               | 14.0<br>(-10.7 to 60.4)                           | 16.1<br>(-8.0 to 61.4)                              |
| Endometriosis                                              | 3.3<br>(2.6 to 3.9)                           | 9.1<br>(7.0 to 12.0)                              | 0.3<br>(0.2 to 0.4)                     | 7.0<br>(-13.6 to 32.4)                            | -1.8<br>(-21.4 to 21.9)                             |
| Genital prolapse                                           | 486.7<br>(426.4 to 551.7)                     | 22.1<br>(18.7 to 26.1)                            | 1.5<br>(0.7 to 2.7)                     | 8.0<br>(-0.4 to 18.7)                             | -3.9<br>(-11.1 to 4.8)                              |
| Premenstrual syndrome                                      | 278.9<br>(260.2 to 299.4)                     | 94.2<br>(86.5 to 102.6)                           | 2.3<br>(1.4 to 3.5)                     | 3.1<br>(-4.7 to 12.1)                             | -0.1<br>(-7.9 to 8.2)                               |
| Other gynecological diseases                               | 36.8<br>(31.4 to 43.1)                        | 36.0<br>(30.2 to 42.6)                            | 1.3<br>(0.8 to 1.8)                     | -6.9<br>(-18.9 to 6.5)                            | -9.6<br>(-21.5 to 3.3)                              |
| Hemoglobinopathies and hemolytic anaemias                  | 1,071.9<br>(813.1 to 1,384.1)                 | --                                                | 2.0<br>(0.6 to 4.7)                     | -2.4<br>(-27.2 to 33.6)                           | -6.4<br>(-31.5 to 30.0)                             |
| Thalassemias                                               | 0.5<br>(0.1 to 2.0)                           | --                                                | < 0.05<br>(< 0.05 to 0.1)               | 0.9<br>(-33.2 to 62.4)                            | 7.0<br>(-31.1 to 74.5)                              |
| Thalassaemias trait                                        | 427.8<br>(129.8 to 942.6)                     | --                                                | 1.8<br>(0.4 to 4.4)                     | -2.4<br>(-28.6 to 37.0)                           | -6.6<br>(-32.8 to 33.6)                             |
| Sickle cell disorders                                      | < 0.05<br>(< 0.05 to 0.1)                     | --                                                | < 0.05<br>(< 0.05 to < 0.05)            | 4.5<br>(-14.6 to 28.5)                            | 1.7<br>(-15.2 to 24.2)                              |
| Sickle cell trait                                          | 78.9<br>(46.9 to 122.2)                       | --                                                | 0.1<br>(< 0.05 to 0.2)                  | -4.8<br>(-35.4 to 34.8)                           | -9.8<br>(-39.7 to 28.9)                             |
| G6PD deficiency                                            | 93.1<br>(78.1 to 110.1)                       | --                                                | < 0.05<br>(< 0.05 to < 0.05)            | 38.9<br>(-2.7 to 101.0)                           | 35.1<br>(-6.3 to 96.2)                              |
| G6PD trait                                                 | 504.2<br>(464.1 to 546.4)                     | --                                                | < 0.05<br>(< 0.05 to < 0.05)            | 91.3<br>(14.3 to 222.2)                           | 73.9<br>(4.8 to 199.3)                              |
| Other hemoglobinopathies and hemolytic anaemias            | 5.8<br>(4.8 to 6.8)                           | --                                                | 0.1<br>(0.1 to 0.2)                     | -3.2<br>(-17.8 to 14.0)                           | -5.3<br>(-22.8 to 16.4)                             |
| Endocrine, metabolic, blood, and immune disorders          | 176.2<br>(158.8 to 195.9)                     | 34.5<br>(30.6 to 39.0)                            | 6.1<br>(4.1 to 8.4)                     | 5.8<br>(-0.1 to 12.1)                             | -5.4<br>(-10.5 to 0.1)                              |
| <b>Musculoskeletal disorders</b>                           | <b>1,865.5</b><br><b>(1,787.6 to 1,955.6)</b> | <b>1,063.9</b><br><b>(939.2 to 1,203.0)</b>       | <b>223.8</b><br><b>(160.4 to 290.9)</b> | <b>14.0</b><br><b>(10.2 to 18.2)</b>              | <b>4.7</b><br><b>(1.3 to 8.3)</b>                   |
| Rheumatoid arthritis                                       | 31.8<br>(28.5 to 35.4)                        | 1.6<br>(1.4 to 1.8)                               | 7.3<br>(5.0 to 9.7)                     | 12.8<br>(5.0 to 22.0)                             | 0.3<br>(-7.1 to 8.6)                                |
| Osteoarthritis                                             | 461.2<br>(434.7 to 488.9)                     | 20.1<br>(18.7 to 21.6)                            | 16.1<br>(10.7 to 23.0)                  | 15.6<br>(11.9 to 19.5)                            | 0.6<br>(-2.6 to 4.0)                                |
| Low back and neck pain                                     | 1,424.6<br>(1,326.3 to 1,530.2)               | 720.7<br>(605.8 to 847.1)                         | 177.0<br>(124.4 to 232.7)               | 14.9<br>(10.2 to 20.2)                            | 6.2<br>(1.9 to 10.8)                                |
| Low back pain                                              | 1,229.2<br>(1,089.5 to 1,398.6)               | 654.1<br>(539.0 to 783.6)                         | 138.3<br>(97.3 to 183.7)                | 17.5<br>(11.7 to 24.2)                            | 8.5<br>(3.3 to 14.5)                                |
| Neck pain                                                  | 393.3<br>(341.1 to 449.6)                     | 66.6<br>(58.0 to 77.8)                            | 38.8<br>(26.4 to 54.6)                  | 6.6<br>(0.7 to 11.4)                              | -1.8<br>(-7.1 to 2.8)                               |
| Gout                                                       | 64.8<br>(56.6 to 74.2)                        | 10.3<br>(8.8 to 11.9)                             | 2.0<br>(1.4 to 2.8)                     | 12.5<br>(0.6 to 26.5)                             | 0.2<br>(-10.8 to 13.5)                              |
| Other musculoskeletal disorders                            | 253.2<br>(205.3 to 309.3)                     | 311.2<br>(261.9 to 368.6)                         | 21.3<br>(14.3 to 30.5)                  | 6.2<br>(-4.4 to 18.0)                             | -2.8<br>(-11.0 to 6.9)                              |
| <b>Other non-communicable diseases</b>                     | <b>4,525.9</b><br><b>(4,455.2 to 4,594.0)</b> | <b>13,179.3†</b><br><b>(12,172.0 to 14,121.2)</b> | <b>130.4</b><br><b>(88.8 to 185.2)</b>  | <b>9.3</b><br><b>(7.9 to 10.6)</b>                | <b>-0.2</b><br><b>(-1.4 to 0.9)</b>                 |
| Congenital anomalies                                       | 72.9<br>(69.9 to 76.3)                        | --                                                | 7.9<br>(5.8 to 10.2)                    | -6.5<br>(-11.6 to -0.8)                           | -9.9<br>(-14.9 to -4.3)                             |
| Neural tube defects                                        | 4.4<br>(3.9 to 4.9)                           | --                                                | 1.3<br>(0.9 to 1.8)                     | -21.8<br>(-31.3 to -11.3)                         | -25.6<br>(-34.9 to -15.2)                           |
| Congenital heart anomalies                                 | 19.1<br>(17.0 to 21.6)                        | --                                                | 1.0<br>(0.4 to 1.8)                     | 13.0<br>(1.5 to 25.9)                             | 9.0<br>(-2.9 to 21.6)                               |
| Orofacial clefts                                           | 5.2<br>(4.5 to 5.9)                           | --                                                | < 0.05<br>(< 0.05 to 0.1)               | -3.7<br>(-16.5 to 11.2)                           | -7.8<br>(-20.3 to 6.4)                              |
| Down's syndrome                                            | 3.6<br>(3.1 to 4.1)                           | --                                                | 0.3<br>(0.2 to 0.5)                     | -9.4<br>(-19.4 to 0.9)                            | -9.8<br>(-20.1 to 0.8)                              |
| Turner syndrome                                            | 1.8<br>(1.6 to 2.1)                           | --                                                | < 0.05<br>(< 0.05 to 0.1)               | 15.7<br>(-19.7 to 61.5)                           | 13.4<br>(-22.4 to 61.5)                             |
| Klinefelter syndrome                                       | 6.3<br>(5.4 to 7.4)                           | --                                                | < 0.05<br>(< 0.05 to 0.1)               | 27.8<br>(5.7 to 55.4)                             | 25.4<br>(4.2 to 53.6)                               |

| Cause                                         | Prevalence in thousands (95% UI)              | Incidence in thousands (95% UI)          | YLDs in thousands (95% UI)           |                                                   |                                                     |
|-----------------------------------------------|-----------------------------------------------|------------------------------------------|--------------------------------------|---------------------------------------------------|-----------------------------------------------------|
|                                               | 2016 counts                                   | 2016 counts                              | 2016 counts                          | Percentage change in counts between 2006 and 2016 | Percentage change in age-standardised rates between |
| Other chromosomal abnormalities               | 7.4<br>(6.2 to 8.7)                           | --                                       | 0.7<br>(0.5 to 1.0)                  | -8.8<br>(-21.6 to 5.5)                            | -8.0<br>(-20.8 to 6.0)                              |
| Congenital musculoskeletal and limb anomalies | 19.5<br>(17.8 to 21.2)                        | --                                       | 2.6<br>(1.8 to 3.6)                  | -5.9<br>(-14.0 to 3.2)                            | -11.3<br>(-19.4 to -3.1)                            |
| Urogenital congenital anomalies               | 6.8<br>(6.1 to 7.6)                           | --                                       | 0.2<br>(0.1 to 0.2)                  | -5.0<br>(-14.0 to 4.4)                            | -6.0<br>(-15.9 to 3.8)                              |
| Digestive congenital anomalies                | 10.9<br>(9.7 to 12.3)                         | --                                       | 0.5<br>(0.3 to 0.7)                  | -6.4<br>(-18.5 to 6.5)                            | -10.8<br>(-22.6 to 1.4)                             |
| Other congenital anomalies                    | 2.9<br>(1.6 to 4.8)                           | --                                       | 1.1<br>(0.8 to 1.5)                  | -0.1<br>(-9.5 to 9.5)                             | -3.7<br>(-13.2 to 6.1)                              |
| Skin and subcutaneous diseases                | 2,098.0<br>(2,052.9 to 2,142.4)               | 4,715.5<br>(4,456.6 to 5,002.3)          | 55.1<br>(37.4 to 78.4)               | 6.6<br>(4.8 to 8.3)                               | 0.7<br>(-0.8 to 2.3)                                |
| Dermatitis                                    | 390.1<br>(366.0 to 415.8)                     | 409.7<br>(361.8 to 467.3)                | 14.6<br>(8.7 to 23.5)                | 3.5<br>(0.8 to 6.2)                               | -0.0<br>(-2.6 to 2.6)                               |
| Psoriasis                                     | 124.0<br>(116.7 to 131.7)                     | 10.7<br>(10.1 to 11.5)                   | 10.6<br>(7.6 to 14.0)                | 9.7<br>(4.5 to 15.3)                              | 2.1<br>(-3.2 to 7.7)                                |
| Cellulitis                                    | 2.0<br>(1.9 to 2.1)                           | 31.3<br>(29.4 to 33.4)                   | 0.1<br>(0.1 to 0.2)                  | 7.9<br>(-7.0 to 25.7)                             | -0.2<br>(-13.4 to 15.1)                             |
| Pyoderma                                      | 27.8<br>(27.0 to 28.7)                        | 780.6<br>(755.3 to 806.9)                | 0.1<br>(0.1 to 0.3)                  | 9.2<br>(3.8 to 14.6)                              | -0.1<br>(-5.4 to 5.4)                               |
| Scabies                                       | 5.1<br>(3.7 to 7.0)                           | 15.3<br>(11.3 to 21.1)                   | 0.1<br>(0.1 to 0.2)                  | 4.2<br>(-7.2 to 15.9)                             | 0.3<br>(-10.4 to 11.6)                              |
| Fungal skin diseases                          | 441.4<br>(390.8 to 493.4)                     | 1,731.0<br>(1,499.4 to 1,988.3)          | 2.4<br>(1.0 to 5.1)                  | 11.1<br>(9.2 to 12.8)                             | 0.0<br>(-1.2 to 1.3)                                |
| Viral skin diseases                           | 162.4<br>(139.7 to 188.4)                     | 215.4<br>(185.4 to 250.5)                | 4.9<br>(3.1 to 7.4)                  | 3.8<br>(0.6 to 7.3)                               | -0.1<br>(-2.7 to 2.7)                               |
| Acne vulgaris                                 | 559.2<br>(512.9 to 605.5)                     | 428.6<br>(348.6 to 535.1)                | 14.4<br>(9.6 to 20.8)                | 6.6<br>(2.8 to 10.3)                              | 1.0<br>(-2.4 to 4.5)                                |
| Alopecia areata                               | 17.1<br>(16.5 to 17.7)                        | 30.1<br>(29.1 to 31.1)                   | 0.6<br>(0.4 to 0.8)                  | 3.7<br>(-4.4 to 13.1)                             | -0.2<br>(-8.3 to 8.7)                               |
| Pruritus                                      | 54.9<br>(48.5 to 62.6)                        | 43.2<br>(38.2 to 49.2)                   | 0.6<br>(0.3 to 1.1)                  | 7.9<br>(2.6 to 13.8)                              | -0.2<br>(-5.2 to 4.8)                               |
| Urticaria                                     | 36.9<br>(32.6 to 41.6)                        | 65.1<br>(57.7 to 73.6)                   | 2.2<br>(1.4 to 3.1)                  | 3.4<br>(-2.6 to 9.7)                              | 0.1<br>(-5.7 to 6.5)                                |
| Decubitus ulcer                               | 3.4<br>(3.0 to 3.9)                           | 12.7<br>(11.2 to 14.3)                   | 0.5<br>(0.4 to 0.7)                  | 9.0<br>(-4.0 to 24.2)                             | -2.5<br>(-12.4 to 8.9)                              |
| Other skin and subcutaneous diseases          | 726.8<br>(707.0 to 746.4)                     | 941.8<br>(907.8 to 973.4)                | 3.9<br>(1.9 to 7.2)                  | 13.4<br>(11.1 to 15.8)                            | 2.1<br>(-0.1 to 4.2)                                |
| Sense organ diseases                          | 1,296.6<br>(1,260.5 to 1,335.0)               | 626.6†<br>(592.1 to 662.7)               | 38.4<br>(26.2 to 53.9)               | 14.8<br>(11.8 to 17.8)                            | -0.1<br>(-2.5 to 2.1)                               |
| Glaucoma                                      | 3.1<br>(2.6 to 3.6)                           | --                                       | 0.3<br>(0.2 to 0.4)                  | 20.1<br>(2.7 to 41.1)                             | 0.2<br>(-14.5 to 18.2)                              |
| Cataract                                      | 19.7<br>(16.6 to 23.5)                        | --                                       | 1.6<br>(1.1 to 2.2)                  | 12.0<br>(3.7 to 20.6)                             | -3.9<br>(-11.1 to 3.9)                              |
| Macular degeneration                          | 4.5<br>(3.8 to 5.5)                           | --                                       | 0.4<br>(0.3 to 0.6)                  | 19.3<br>(6.1 to 34.8)                             | 0.4<br>(-11.0 to 13.5)                              |
| Refraction and accommodation disorders        | 244.9<br>(232.0 to 256.6)                     | --                                       | 5.4<br>(3.5 to 8.2)                  | 7.5<br>(3.6 to 12.0)                              | -2.5<br>(-6.1 to 1.7)                               |
| Age-related and other hearing loss            | 1,060.1<br>(1,004.0 to 1,116.4)               | --                                       | 22.2<br>(14.6 to 33.0)               | 17.2<br>(12.4 to 22.0)                            | 0.6<br>(-3.4 to 4.4)                                |
| Other vision loss                             | 14.0<br>(12.3 to 15.9)                        | --                                       | 1.1<br>(0.7 to 1.4)                  | 13.2<br>(3.0 to 24.0)                             | -0.2<br>(-9.8 to 10.1)                              |
| Other sense organ diseases                    | 238.8<br>(220.0 to 259.0)                     | 626.6<br>(592.1 to 662.7)                | 7.4<br>(4.7 to 11.2)                 | 13.7<br>(9.7 to 18.2)                             | 0.6<br>(-3.2 to 4.5)                                |
| Oral disorders                                | 3,479.7<br>(3,356.4 to 3,587.2)               | 7,837.2†<br>(6,820.1 to 8,761.9)         | 29.1<br>(17.3 to 46.5)               | 13.0<br>(10.0 to 16.6)                            | 1.5<br>(-0.3 to 3.5)                                |
| Caries of deciduous teeth                     | 217.9<br>(150.9 to 288.1)                     | 866.1<br>(525.7 to 1,244.4)              | 0.1<br>( $< 0.05$ to 0.2)            | -5.6<br>(-15.2 to 6.0)                            | -0.2<br>(-10.2 to 11.7)                             |
| Caries of permanent teeth                     | 2,139.5<br>(1,935.1 to 2,360.8)               | 6,756.4<br>(5,790.8 to 7,578.9)          | 2.1<br>(0.9 to 4.1)                  | 5.5<br>(1.3 to 9.8)                               | -0.4<br>(-4.2 to 3.6)                               |
| Periodontal disease                           | 1,640.0<br>(1,501.8 to 1,781.0)               | 179.2<br>(160.3 to 194.6)                | 10.7<br>(4.4 to 22.3)                | 4.9<br>(2.6 to 7.3)                               | -0.7<br>(-2.9 to 1.6)                               |
| Edentulism and severe tooth loss              | 471.0<br>(410.7 to 533.6)                     | 35.4<br>(29.4 to 42.1)                   | 12.9<br>(8.4 to 18.5)                | 24.5<br>(19.7 to 29.8)                            | 5.3<br>(1.6 to 9.1)                                 |
| Other oral disorders                          | 113.2<br>(108.3 to 118.3)                     | --                                       | 3.3<br>(2.0 to 4.9)                  | 6.3<br>(3.1 to 9.6)                               | -0.0<br>(-3.1 to 3.2)                               |
| <b>Injuries</b>                               | <b>1,875.0</b><br><b>(1,749.1 to 2,026.2)</b> | <b>611.0†</b><br><b>(570.8 to 653.9)</b> | <b>58.6</b><br><b>(39.2 to 83.1)</b> | <b>9.7</b><br><b>(8.4 to 11.0)</b>                | <b>0.6</b><br><b>(-0.7 to 1.8)</b>                  |
| <b>Transport injuries</b>                     | <b>255.7</b><br><b>(236.2 to 275.8)</b>       | <b>58.7</b><br><b>(52.9 to 65.1)</b>     | <b>11.4</b><br><b>(7.5 to 16.5)</b>  | <b>-0.2</b><br><b>(-1.8 to 1.3)</b>               | <b>-8.7</b><br><b>(-10.3 to -7.0)</b>               |
| Road injuries                                 | 230.9<br>(212.6 to 249.8)                     | 55.4<br>(49.7 to 61.8)                   | 10.5<br>(6.9 to 15.2)                | -1.3<br>(-2.9 to 0.2)                             | -9.6<br>(-11.3 to -8.0)                             |
| Pedestrian road injuries                      | 34.7<br>(29.9 to 40.4)                        | 5.2<br>(4.2 to 6.4)                      | 1.7<br>(1.1 to 2.5)                  | 12.7<br>(10.9 to 14.6)                            | 3.3<br>(1.4 to 5.1)                                 |
| Cyclist road injuries                         | 68.7<br>(56.9 to 81.9)                        | 20.6<br>(17.4 to 24.0)                   | 2.9<br>(1.9 to 4.2)                  | -3.2<br>(-4.6 to -1.7)                            | -11.9<br>(-13.5 to -10.4)                           |
| Motorcyclist road injuries                    | 45.4<br>(38.3 to 54.0)                        | 6.7<br>(5.5 to 8.2)                      | 2.1<br>(1.4 to 3.1)                  | -2.5<br>(-4.3 to -0.4)                            | -10.5<br>(-12.5 to -8.6)                            |
| Motor vehicle road injuries                   | 66.5<br>(55.8 to 77.2)                        | 19.2<br>(16.5 to 22.2)                   | 3.2<br>(2.1 to 4.6)                  | -7.4<br>(-9.0 to -5.9)                            | -15.1<br>(-16.7 to -13.4)                           |
| Other road injuries                           | 15.5<br>(13.0 to 18.4)                        | 3.6<br>(2.8 to 4.6)                      | 0.6<br>(0.4 to 0.8)                  | 14.0<br>(11.8 to 16.4)                            | 5.0<br>(2.8 to 7.5)                                 |
| Other transport injuries                      | 24.9<br>(20.4 to 29.5)                        | 3.3<br>(2.8 to 3.8)                      | 0.9<br>(0.6 to 1.3)                  | 14.7<br>(13.2 to 16.1)                            | 5.1<br>(3.6 to 6.5)                                 |
| <b>Unintentional injuries</b>                 | <b>1,548.2</b><br><b>(1,427.9 to 1,689.0)</b> | <b>524.9</b><br><b>(485.1 to 566.7)</b>  | <b>44.7</b><br><b>(29.9 to 64.1)</b> | <b>12.8</b><br><b>(11.4 to 14.3)</b>              | <b>3.6</b><br><b>(2.1 to 4.9)</b>                   |
| Falls                                         | 815.4<br>(711.3 to 923.6)                     | 296.4<br>(261.0 to 334.4)                | 29.0<br>(20.0 to 40.2)               | 12.3<br>(10.5 to 14.1)                            | 3.0<br>(1.3 to 4.6)                                 |
| Drowning                                      | 3.0<br>(2.6 to 3.4)                           | 0.3<br>(0.3 to 0.4)                      | 0.1<br>(0.1 to 0.2)                  | 17.9<br>(12.6 to 23.5)                            | 9.0<br>(3.6 to 14.6)                                |
| Fire, heat, and hot substances                | 146.5<br>(125.6 to 171.2)                     | 7.9<br>(6.6 to 9.2)                      | 2.5<br>(1.4 to 4.2)                  | 6.6<br>(3.9 to 9.3)                               | -0.5<br>(-3.2 to 2.3)                               |
| Poisonings                                    | 5.6<br>(4.6 to 7.0)                           | 4.8<br>(4.0 to 5.9)                      | 0.5<br>(0.3 to 0.7)                  | 10.5<br>(1.6 to 19.6)                             | 4.5<br>(-4.6 to 14.2)                               |
| Exposure to mechanical forces                 | 314.4<br>(263.3 to 400.9)                     | 73.9<br>(62.6 to 85.7)                   | 5.6<br>(3.5 to 8.7)                  | 15.0<br>(13.5 to 16.4)                            | 5.8<br>(4.3 to 7.1)                                 |
| Unintentional firearm injuries                | 10.0<br>(8.1 to 12.4)                         | 0.9<br>(0.6 to 1.3)                      | 0.1<br>(0.1 to 0.2)                  | 8.7<br>(6.9 to 10.7)                              | -0.3<br>(-2.0 to 1.5)                               |
| Unintentional suffocation                     | 4.1<br>(3.4 to 5.0)                           | 0.7<br>(0.5 to 1.0)                      | 0.1<br>(0.1 to 0.2)                  | 12.6<br>(11.0 to 14.4)                            | 3.5<br>(1.7 to 5.2)                                 |
| Other exposure to mechanical forces           | 300.4<br>(249.5 to 386.1)                     | 72.3<br>(61.3 to 83.7)                   | 5.4<br>(3.4 to 8.3)                  | 15.2<br>(13.7 to 16.6)                            | 6.0<br>(4.5 to 7.3)                                 |

| Cause                                                                               | Prevalence in thousands (95% UI)        | Incidence in thousands (95% UI)       | YLDs in thousands (95% UI)                    |                                                   |                                                     |
|-------------------------------------------------------------------------------------|-----------------------------------------|---------------------------------------|-----------------------------------------------|---------------------------------------------------|-----------------------------------------------------|
|                                                                                     | 2016 counts                             | 2016 counts                           | 2016 counts                                   | Percentage change in counts between 2006 and 2016 | Percentage change in age-standardised rates between |
| Adverse effects of medical treatment                                                | 2.1<br>(1.7 to 2.6)                     | 27.7<br>(24.5 to 31.3)                | 0.3<br>(0.2 to 0.4)                           | 12.9<br>(8.2 to 18.0)                             | 3.9<br>(0.2 to 7.5)                                 |
| Animal contact                                                                      | 21.9<br>(19.4 to 25.5)                  | 11.9<br>(9.7 to 14.5)                 | 0.4<br>(0.2 to 0.6)                           | 6.4<br>(3.0 to 9.7)                               | -2.0<br>(-5.6 to 1.6)                               |
| Venomous animal contact                                                             | 3.3<br>(2.8 to 3.8)                     | 3.7<br>(2.7 to 4.9)                   | 0.2<br>(0.1 to 0.2)                           | 5.8<br>(-1.9 to 13.7)                             | -1.1<br>(-8.8 to 6.8)                               |
| Non-venomous animal contact                                                         | 18.7<br>(16.1 to 22.0)                  | 8.2<br>(6.6 to 10.1)                  | 0.2<br>(0.1 to 0.4)                           | 6.8<br>(5.1 to 8.4)                               | -2.7<br>(-4.3 to -1.1)                              |
| Foreign body                                                                        | 33.7<br>(29.1 to 39.9)                  | 23.2<br>(20.1 to 27.4)                | 1.0<br>(0.6 to 1.5)                           | 13.0<br>(11.4 to 14.5)                            | 4.4<br>(2.9 to 6.0)                                 |
| Pulmonary aspiration and foreign body in airway                                     | 5.5<br>(4.4 to 6.8)                     | 5.7<br>(5.0 to 6.5)                   | 0.1<br>(0.1 to 0.2)                           | 11.9<br>(9.7 to 14.0)                             | 3.7<br>(1.4 to 5.8)                                 |
| Foreign body in eyes                                                                | 3.2<br>(2.2 to 4.4)                     | 12.6<br>(9.7 to 16.5)                 | 0.2<br>(0.1 to 0.3)                           | 13.4<br>(10.2 to 17.4)                            | 6.3<br>(3.6 to 9.4)                                 |
| Foreign body in other body part                                                     | 24.9<br>(20.9 to 30.9)                  | 5.0<br>(4.1 to 5.9)                   | 0.6<br>(0.4 to 0.9)                           | 13.1<br>(11.4 to 14.8)                            | 3.8<br>(2.1 to 5.5)                                 |
| Environmental heat and cold exposure                                                | 16.4<br>(14.7 to 18.4)                  | 3.8<br>(3.2 to 4.4)                   | 0.6<br>(0.4 to 0.8)                           | 12.9<br>(9.2 to 16.8)                             | 1.4<br>(-2.1 to 5.1)                                |
| Other unintentional injuries                                                        | 189.1<br>(158.9 to 224.1)               | 74.9<br>(63.3 to 87.6)                | 4.7<br>(3.0 to 7.0)                           | 18.0<br>(16.7 to 19.3)                            | 7.0<br>(5.7 to 8.2)                                 |
| <b>Self-harm and interpersonal violence</b>                                         | <b>134.3</b><br><b>(122.7 to 145.8)</b> | <b>27.3†</b><br><b>(24.2 to 30.7)</b> | <b>2.5</b><br><b>(1.7 to 3.6)</b>             | <b>4.6</b><br><b>(2.7 to 6.6)</b>                 | <b>-3.0</b><br><b>(-4.9 to -1.2)</b>                |
| Self-harm                                                                           | 17.0<br>(13.9 to 20.4)                  | 13.0<br>(11.3 to 15.0)                | 0.7<br>(0.4 to 1.0)                           | 0.0<br>(-4.4 to 4.3)                              | -7.8<br>(-12.5 to -3.3)                             |
| Self-harm by firearm                                                                | 0.2<br>(0.1 to 0.2)                     | < 0.05<br>(< 0.05 to < 0.05)          | < 0.05<br>(< 0.05 to < 0.05)                  | 5.1<br>(3.1 to 7.1)                               | -2.6<br>(-4.8 to -0.3)                              |
| Self-harm by other specified means                                                  | 16.9<br>(13.8 to 20.2)                  | 13.0<br>(11.3 to 15.0)                | 0.7<br>(0.4 to 1.0)                           | 0.0<br>(-4.4 to 4.3)                              | -7.8<br>(-12.5 to -3.3)                             |
| Interpersonal violence                                                              | 117.2<br>(106.5 to 129.1)               | 14.3†<br>(11.9 to 17.1)               | 1.9<br>(1.3 to 2.7)                           | 6.4<br>(4.6 to 8.3)                               | -1.4<br>(-3.2 to 0.4)                               |
| Assault by firearm                                                                  | 3.5<br>(2.9 to 4.3)                     | 0.4<br>(0.3 to 0.6)                   | 0.1<br>(< 0.05 to 0.1)                        | 15.6<br>(13.8 to 17.5)                            | 6.7<br>(4.8 to 8.7)                                 |
| Assault by sharp object                                                             | 10.1<br>(8.1 to 12.2)                   | 2.4<br>(1.8 to 3.3)                   | 0.2<br>(0.1 to 0.3)                           | 9.7<br>(8.0 to 11.4)                              | 1.6<br>(-0.2 to 3.4)                                |
| Sexual violence                                                                     | 64.3<br>(56.7 to 73.3)                  | --                                    | 0.5<br>(0.4 to 0.8)                           | 3.4<br>(-0.8 to 8.2)                              | -3.8<br>(-8.0 to 0.6)                               |
| Assault by other means                                                              | 39.4<br>(32.1 to 48.7)                  | 11.5<br>(9.5 to 13.7)                 | 1.1<br>(0.7 to 1.7)                           | 6.7<br>(5.0 to 8.4)                               | -0.8<br>(-2.5 to 0.8)                               |
| <b>Forces of nature, conflict and terrorism, and executions and police conflict</b> | <b>1.1</b><br><b>(0.6 to 1.6)</b>       | <b>0.2†</b><br><b>(0.1 to 0.3)</b>    | <b>&lt; 0.05</b><br><b>(&lt; 0.05 to 0.1)</b> | <b>108.0</b><br><b>(62.9 to 128.2)</b>            | <b>91.9</b><br><b>(50.3 to 111.9)</b>               |
| Exposure to forces of nature                                                        | --                                      | --                                    | --                                            | --                                                | --                                                  |
| Conflict and terrorism                                                              | 0.4<br>(0.2 to 0.8)                     | --                                    | < 0.05<br>(< 0.05 to < 0.05)                  | --                                                | --                                                  |
| Executions and police conflict                                                      | 0.7<br>(0.4 to 1.1)                     | 0.2<br>(0.1 to 0.3)                   | < 0.05<br>(< 0.05 to < 0.05)                  | 36.8<br>(26.6 to 41.1)                            | 24.5<br>(16.4 to 28.5)                              |
| <b>Impairments</b>                                                                  | --                                      | --                                    | --                                            | --                                                | --                                                  |
| Anaemia                                                                             | 425.6<br>(302.7 to 631.5)               | --                                    | 8.2<br>(5.3 to 12.6)                          | 8.8<br>(-10.0 to 30.1)                            | 1.4<br>(-17.7 to 23.6)                              |
| Developmental intellectual disability                                               | 87.0<br>(70.1 to 105.0)                 | --                                    | 10.8<br>(8.0 to 13.9)                         | 2.6<br>(-1.6 to 7.3)                              | -1.5<br>(-5.8 to 3.2)                               |
| Epilepsy                                                                            | 23.2<br>(12.2 to 34.3)                  | --                                    | 6.5<br>(3.5 to 11.5)                          | 1.8<br>(-53.8 to 129.7)                           | -3.4<br>(-55.1 to 112.5)                            |
| Guillain-Barre syndrome                                                             | 0.1<br>(< 0.05 to 0.1)                  | --                                    | < 0.05<br>(< 0.05 to < 0.05)                  | 9.4<br>(5.9 to 13.5)                              | 0.1<br>(-0.0 to 0.1)                                |
| Hearing loss                                                                        | 1,097.3<br>(1,041.0 to 1,154.0)         | --                                    | 23.6<br>(15.6 to 34.9)                        | 16.1<br>(11.6 to 20.7)                            | 0.3<br>(-3.5 to 3.7)                                |
| Heart failure                                                                       | 103.6<br>(90.1 to 119.1)                | --                                    | 12.5<br>(10.0 to 15.1)                        | 10.5<br>(1.2 to 20.8)                             | -9.0<br>(-16.6 to -0.6)                             |
| Infertility                                                                         | 22.5<br>(18.3 to 28.6)                  | --                                    | 0.2<br>(0.1 to 0.3)                           | 1.4<br>(-6.9 to 11.3)                             | 2.6<br>(-6.1 to 12.2)                               |
| Pelvic inflammatory disease                                                         | 0.2<br>(0.1 to 0.3)                     | --                                    | < 0.05<br>(< 0.05 to < 0.05)                  | -72.6<br>(-79.6 to -63.4)                         | -72.0<br>(-79.5 to -62.1)                           |
| Vision loss                                                                         | 296.5<br>(281.7 to 311.4)               | --                                    | 10.6<br>(7.7 to 14.5)                         | 8.8<br>(5.1 to 12.8)                              | -1.8<br>(-5.5 to 2.4)                               |

We did not calculate incidence for the nine impairments, certain NTDs, and causes with only birth prevalence. Blank cells mean that no estimate is available.

† Incidence for aggregate causes represents the sum of the incidence of the causes below the aggregate.

‡ Incidence estimates for stroke represent first-ever stroke only.

^ Incidence of HIV/AIDS represents new infections of HIV only and does not include new infections of Tuberculosis in HIV positive cases.



SR Table 14: Prevalence, incidence, and YLDs for 2016, percentage change of YLD counts and percentage change of age-standardised YLD rates between 2006 and 2016 by cause and impairments, for all ages, Djibouti.

| Cause                                                                                | Prevalence in thousands (95% UI) | Incidence in thousands (95% UI)         | YLDs in thousands (95% UI)     |                                                   |                                                     |
|--------------------------------------------------------------------------------------|----------------------------------|-----------------------------------------|--------------------------------|---------------------------------------------------|-----------------------------------------------------|
|                                                                                      | 2016 counts                      | 2016 counts                             | 2016 counts                    | Percentage change in counts between 2006 and 2016 | Percentage change in age-standardised rates between |
| <b>All causes</b>                                                                    | <b>941.6</b><br>(937.9 to 945.1) | <b>6,232.6†</b><br>(5,873.1 to 6,621.4) | <b>90.1</b><br>(67.0 to 118.5) | <b>16.8</b><br>(13.2 to 20.9)                     | <b>-1.7</b><br>(-4.1 to 1.0)                        |
| <b>Communicable, maternal, neonatal, and nutritional disorders</b>                   | <b>756.1</b><br>(738.4 to 773.3) | <b>3,633.8†</b><br>(3,318.2 to 3,965.8) | <b>19.7</b><br>(13.9 to 26.7)  | <b>1.6</b><br>(-5.7 to 10.3)                      | <b>-11.6</b><br>(-17.6 to -4.8)                     |
| <b>HIV/AIDS and tuberculosis</b>                                                     | <b>294.1</b><br>(268.6 to 312.8) | <b>4.1†</b><br>(3.3 to 5.2)             | <b>2.4</b><br>(1.2 to 4.2)     | <b>0.8</b><br>(-19.0 to 25.3)                     | <b>-19.5</b><br>(-35.5 to -0.1)                     |
| Tuberculosis                                                                         | 270.9<br>(246.8 to 295.0)        | 3.4†<br>(2.8 to 4.0)                    | 0.6<br>(0.4 to 0.8)            | 11.2<br>(0.3 to 23.2)                             | -9.9<br>(-17.3 to -2.2)                             |
| Drug-susceptible tuberculosis                                                        | 1.9<br>(1.6 to 2.2)              | 3.2<br>(2.7 to 3.8)                     | 0.6<br>(0.4 to 0.8)            | 11.0<br>(-0.7 to 24.7)                            | -10.1<br>(-18.0 to -0.8)                            |
| Multidrug-resistant tuberculosis without extensive drug resistance                   | 0.1<br>(< 0.05 to 0.1)           | 0.1<br>(0.1 to 0.2)                     | < 0.05<br>(< 0.05 to < 0.05)   | 15.2<br>(-57.0 to 272.5)                          | -6.3<br>(-64.9 to 210.3)                            |
| Extensively drug-resistant tuberculosis                                              | < 0.05<br>(< 0.05 to < 0.05)     | < 0.05<br>(< 0.05 to < 0.05)            | < 0.05<br>(< 0.05 to < 0.05)   | 247.8<br>(37.9 to 926.7)                          | 180.6<br>(10.9 to 731.2)                            |
| Latent tuberculosis infection                                                        | 268.9<br>(245.0 to 293.1)        | --                                      | --                             | --                                                | --                                                  |
| HIV/AIDS                                                                             | 11.9<br>(6.1 to 21.1)            | 0.7^<br>(0.2 to 1.5)                    | 1.8<br>(0.8 to 3.5)            | -2.4<br>(-28.7 to 30.3)                           | -22.6<br>(-43.3 to 3.6)                             |
| Drug-susceptible HIV/AIDS - Tuberculosis                                             | 0.4<br>(0.2 to 0.6)              | 0.6<br>(0.4 to 1.0)                     | 0.1<br>(0.1 to 0.2)            | -5.7<br>(-19.8 to 12.8)                           | -22.0<br>(-33.5 to -5.5)                            |
| Multidrug-resistant HIV/AIDS - Tuberculosis without extensive drug resistance        | < 0.05<br>(< 0.05 to < 0.05)     | < 0.05<br>(< 0.05 to 0.1)               | < 0.05<br>(< 0.05 to < 0.05)   | -2.8<br>(-61.7 to 200.5)                          | -19.6<br>(-68.3 to 147.5)                           |
| Extensively drug-resistant HIV/AIDS - Tuberculosis                                   | < 0.05<br>(< 0.05 to < 0.05)     | < 0.05<br>(< 0.05 to < 0.05)            | < 0.05<br>(< 0.05 to < 0.05)   | 196.2<br>(16.8 to 816.2)                          | 144.9<br>(-3.4 to 654.6)                            |
| HIV/AIDS resulting in other diseases                                                 | 11.5<br>(5.6 to 20.6)            | 0.7<br>(0.2 to 1.5)                     | 1.6<br>(0.6 to 3.3)            | -2.0<br>(-31.2 to 36.1)                           | -22.6<br>(-45.4 to 7.2)                             |
| <b>Diarrhoea, lower respiratory infections, and other common infectious diseases</b> | <b>64.7</b><br>(61.6 to 68.3)    | <b>3,278.7†</b><br>(2,982.8 to 3,590.9) | <b>3.6</b><br>(2.5 to 4.8)     | <b>9.2</b><br>(5.8 to 12.7)                       | <b>-4.0</b><br>(-6.5 to -1.3)                       |
| Diarrhoeal diseases                                                                  | 12.0<br>(11.1 to 13.1)           | 809.6<br>(747.4 to 879.0)               | 1.4<br>(0.9 to 1.9)            | 10.1<br>(3.9 to 17.3)                             | -5.2<br>(-9.8 to -0.0)                              |
| Intestinal infectious diseases                                                       | < 0.05<br>(< 0.05 to 0.1)        | 0.8†<br>(0.6 to 1.0)                    | < 0.05<br>(< 0.05 to < 0.05)   | -0.5<br>(-18.7 to 20.4)                           | -7.4<br>(-23.2 to 10.3)                             |
| Typhoid fever                                                                        | < 0.05<br>(< 0.05 to 0.1)        | 0.7<br>(0.5 to 0.9)                     | < 0.05<br>(< 0.05 to < 0.05)   | 1.0<br>(-18.0 to 23.4)                            | -6.6<br>(-22.5 to 12.4)                             |
| Paratyphoid fever                                                                    | < 0.05<br>(< 0.05 to < 0.05)     | 0.1<br>(< 0.05 to 0.1)                  | < 0.05<br>(< 0.05 to < 0.05)   | 11.5<br>(-16.7 to 50.2)                           | 2.5<br>(-21.7 to 34.1)                              |
| Other intestinal infectious diseases                                                 | --                               | --                                      | < 0.05<br>(< 0.05 to < 0.05)   | -44.0<br>(-60.4 to -20.0)                         | -44.1<br>(-56.8 to -26.5)                           |
| Lower respiratory infections                                                         | 1.5<br>(1.4 to 1.7)              | 66.4<br>(59.0 to 74.1)                  | 0.1<br>(0.1 to 0.1)            | 0.2<br>(-11.7 to 13.5)                            | -9.8<br>(-18.3 to -0.1)                             |
| Upper respiratory infections                                                         | 30.4<br>(26.6 to 34.3)           | 2,280.5<br>(1,980.2 to 2,590.5)         | 0.8<br>(0.4 to 1.2)            | 12.0<br>(6.0 to 18.3)                             | -0.1<br>(-5.1 to 5.3)                               |
| Otitis media                                                                         | 16.4<br>(14.5 to 18.3)           | 86.0<br>(66.6 to 112.1)                 | 0.5<br>(0.3 to 0.8)            | 4.4<br>(-3.2 to 13.0)                             | -4.7<br>(-10.8 to 2.6)                              |
| Meningitis                                                                           | 4.8<br>(4.1 to 5.6)              | 1.2<br>(1.0 to 1.4)                     | 0.5<br>(0.4 to 0.7)            | 10.4<br>(1.9 to 19.3)                             | -3.4<br>(-9.8 to 3.9)                               |
| Pneumococcal meningitis                                                              | 1.8<br>(1.5 to 2.1)              | 0.2<br>(0.1 to 0.3)                     | 0.2<br>(0.1 to 0.3)            | 4.2<br>(-9.8 to 20.3)                             | -10.2<br>(-21.1 to 2.6)                             |
| H influenzae type B meningitis                                                       | 0.9<br>(0.7 to 1.1)              | 0.2<br>(0.1 to 0.3)                     | 0.1<br>(0.1 to 0.1)            | -1.3<br>(-16.9 to 15.6)                           | -12.6<br>(-25.1 to 0.5)                             |
| Meningococcal infection                                                              | 0.3<br>(0.2 to 0.4)              | 0.1<br>(0.1 to 0.2)                     | < 0.05<br>(< 0.05 to < 0.05)   | 14.3<br>(8.3 to 20.7)                             | 0.4<br>(-4.8 to 6.1)                                |
| Other meningitis                                                                     | 1.9<br>(1.4 to 2.4)              | 0.7<br>(0.5 to 0.8)                     | 0.2<br>(0.1 to 0.2)            | 28.8<br>(11.9 to 46.0)                            | 13.5<br>(0.8 to 26.4)                               |
| Encephalitis                                                                         | 2.4<br>(1.6 to 3.5)              | 1.1<br>(1.0 to 1.2)                     | 0.3<br>(0.2 to 0.4)            | 15.5<br>(2.9 to 30.4)                             | -2.1<br>(-12.3 to 9.0)                              |
| Diphtheria                                                                           | < 0.05<br>(< 0.05 to < 0.05)     | < 0.05<br>(< 0.05 to < 0.05)            | < 0.05<br>(< 0.05 to < 0.05)   | -66.3<br>(-87.1 to -9.7)                          | -66.9<br>(-84.6 to -28.2)                           |
| Whooping cough                                                                       | 0.7<br>(0.6 to 0.9)              | 5.3<br>(4.1 to 6.7)                     | < 0.05<br>(< 0.05 to 0.1)      | -19.3<br>(-30.1 to -7.5)                          | -24.2<br>(-34.4 to -13.1)                           |
| Tetanus                                                                              | < 0.05<br>(< 0.05 to < 0.05)     | < 0.05<br>(< 0.05 to 0.1)               | < 0.05<br>(< 0.05 to < 0.05)   | -35.3<br>(-55.9 to -12.0)                         | -41.9<br>(-58.6 to -25.5)                           |
| Measles                                                                              | < 0.05<br>(< 0.05 to < 0.05)     | 0.6<br>(0.2 to 1.5)                     | < 0.05<br>(< 0.05 to < 0.05)   | -81.1<br>(-88.5 to -68.9)                         | -82.4<br>(-89.1 to -71.6)                           |
| Varicella and herpes zoster                                                          | 0.9<br>(0.9 to 1.0)              | 27.2<br>(25.3 to 29.3)                  | < 0.05<br>(< 0.05 to < 0.05)   | 20.4<br>(4.7 to 39.1)                             | -0.3<br>(-11.5 to 12.4)                             |
| <b>Neglected tropical diseases and malaria</b>                                       | <b>284.2</b><br>(251.1 to 326.4) | <b>22.2†</b><br>(9.2 to 48.3)           | <b>1.2</b><br>(0.8 to 1.8)     | <b>5.7</b><br>(-9.3 to 22.3)                      | <b>-13.6</b><br>(-26.9 to 1.0)                      |
| Malaria                                                                              | 3.8<br>(2.8 to 5.6)              | 15.3<br>(5.0 to 35.5)                   | 0.3<br>(0.2 to 0.4)            | 20.9<br>(2.2 to 42.5)                             | 8.4<br>(-7.0 to 27.9)                               |
| Chagas disease                                                                       | --                               | --                                      | --                             | --                                                | --                                                  |
| Leishmaniasis                                                                        | < 0.05<br>(< 0.05 to < 0.05)     | < 0.05<br>(< 0.05 to < 0.05)            | < 0.05<br>(< 0.05 to < 0.05)   | 280.8<br>(73.0 to 1,109.2)                        | 180.4<br>(3.6 to 904.6)                             |
| Visceral leishmaniasis                                                               | < 0.05<br>(< 0.05 to < 0.05)     | < 0.05<br>(< 0.05 to < 0.05)            | < 0.05<br>(< 0.05 to < 0.05)   | 308.9<br>(79.6 to 1,034.1)                        | 195.9<br>(8.0 to 874.6)                             |
| Cutaneous and mucocutaneous leishmaniasis                                            | < 0.05<br>(0.0 to < 0.05)        | < 0.05<br>(0.0 to < 0.05)               | < 0.05<br>(0.0 to < 0.05)      | --                                                | --                                                  |
| African trypanosomiasis                                                              | --                               | --                                      | --                             | --                                                | --                                                  |
| Schistosomiasis                                                                      | 7.1<br>(< 0.05 to 72.1)          | 2.5<br>(0.5 to 21.6)                    | < 0.05<br>(< 0.05 to 0.5)      | 19.2<br>(-20.0 to 94.3)                           | -5.6<br>(-34.9 to 39.0)                             |
| Cysticercosis                                                                        | --                               | --                                      | --                             | --                                                | --                                                  |
| Cystic echinococcosis                                                                | 0.3<br>(0.1 to 1.1)              | 0.1<br>(< 0.05 to 0.2)                  | < 0.05<br>(< 0.05 to 0.1)      | -22.5<br>(-88.3 to 339.1)                         | -35.6<br>(-89.9 to 269.7)                           |
| Lymphatic filariasis                                                                 | --                               | --                                      | --                             | --                                                | --                                                  |
| Onchocerciasis                                                                       | --                               | --                                      | --                             | --                                                | --                                                  |
| Trachoma                                                                             | 0.7<br>(0.5 to 1.1)              | --                                      | 0.1<br>(< 0.05 to 0.1)         | -40.3<br>(-51.1 to -27.3)                         | -56.4<br>(-65.8 to -44.9)                           |
| Dengue                                                                               | 0.3<br>(0.1 to 0.5)              | 4.3<br>(1.9 to 8.0)                     | < 0.05<br>(< 0.05 to 0.1)      | 148.0<br>(76.1 to 489.1)                          | 117.5<br>(57.8 to 410.5)                            |
| Yellow fever                                                                         | --                               | --                                      | --                             | --                                                | --                                                  |
| Rabies                                                                               | < 0.05<br>(< 0.05 to < 0.05)     | < 0.05<br>(< 0.05 to < 0.05)            | < 0.05<br>(< 0.05 to < 0.05)   | -27.6<br>(-67.8 to 36.3)                          | -33.3<br>(-67.9 to 22.3)                            |
| Intestinal nematode infections                                                       | 268.1<br>(237.5 to 305.7)        | --                                      | 0.3<br>(0.1 to 0.5)            | 14.6<br>(-21.6 to 68.0)                           | 2.3<br>(-34.4 to 55.4)                              |
| Ascariasis                                                                           | 42.1<br>(33.7 to 51.7)           | --                                      | < 0.05<br>(< 0.05 to < 0.05)   | 9.5<br>(-48.3 to 138.1)                           | -0.8<br>(-57.1 to 133.8)                            |

| Cause                                                                   | Prevalence in thousands (95% UI)        | Incidence in thousands (95% UI)                | YLDs in thousands (95% UI)           |                                                   |                                                     |
|-------------------------------------------------------------------------|-----------------------------------------|------------------------------------------------|--------------------------------------|---------------------------------------------------|-----------------------------------------------------|
|                                                                         | 2016 counts                             | 2016 counts                                    | 2016 counts                          | Percentage change in counts between 2006 and 2016 | Percentage change in age-standardised rates between |
| Trichuriasis                                                            | 199.7<br>(165.4 to 241.5)               | --                                             | 0.1<br>(0.1 to 0.3)                  | 10.5<br>(-40.9 to 104.1)                          | -1.3<br>(-51.6 to 95.7)                             |
| Hookworm disease                                                        | 43.4<br>(34.9 to 53.3)                  | --                                             | 0.1<br>(0.1 to 0.2)                  | 19.6<br>(-18.3 to 72.5)                           | 6.5<br>(-31.8 to 62.0)                              |
| Food-borne trematodiasis                                                | --                                      | --                                             | --                                   | --                                                | --                                                  |
| Leprosy                                                                 | < 0.05<br>(< 0.05 to < 0.05)            | < 0.05<br>(< 0.05 to < 0.05)                   | < 0.05<br>(< 0.05 to < 0.05)         | 72.7<br>(13.9 to 295.9)                           | 18.7<br>(-17.9 to 158.4)                            |
| Ebola virus disease                                                     | --                                      | --                                             | --                                   | --                                                | --                                                  |
| Zika virus disease                                                      | --                                      | --                                             | --                                   | --                                                | --                                                  |
| Guinea worm disease                                                     | --                                      | --                                             | --                                   | --                                                | --                                                  |
| Other neglected tropical diseases                                       | 12.9<br>(11.0 to 15.0)                  | --                                             | 0.4<br>(0.2 to 0.6)                  | -1.0<br>(-19.0 to 18.4)                           | -8.1<br>(-24.4 to 9.1)                              |
| <b>Maternal disorders</b>                                               | <b>3.1</b><br><b>(2.4 to 3.9)</b>       | <b>37.1†</b><br><b>(26.6 to 51.8)</b>          | <b>0.3</b><br><b>(0.2 to 0.5)</b>    | <b>-16.4</b><br><b>(-30.1 to 0.1)</b>             | <b>-33.4</b><br><b>(-44.4 to -20.2)</b>             |
| Maternal haemorrhage                                                    | 0.4<br>(0.3 to 0.5)                     | 2.9<br>(1.9 to 4.2)                            | < 0.05<br>(< 0.05 to < 0.05)         | 6.0<br>(-34.4 to 62.0)                            | -13.6<br>(-46.0 to 32.3)                            |
| Maternal sepsis and other pregnancy related infections                  | 0.4<br>(0.4 to 0.5)                     | 1.5<br>(1.2 to 2.0)                            | < 0.05<br>(< 0.05 to < 0.05)         | 7.9<br>(-43.0 to 118.0)                           | -12.1<br>(-51.8 to 66.3)                            |
| Maternal hypertensive disorders                                         | 1.6<br>(1.0 to 2.3)                     | 7.0<br>(5.5 to 8.6)                            | 0.1<br>(< 0.05 to 0.1)               | 15.3<br>(-30.4 to 90.9)                           | -6.0<br>(-42.8 to 53.6)                             |
| Maternal obstructed labour and uterine rupture                          | 0.5<br>(0.4 to 0.7)                     | 2.5<br>(1.8 to 3.6)                            | 0.2<br>(0.1 to 0.3)                  | -28.1<br>(-40.6 to -12.9)                         | -42.9<br>(-52.7 to -31.6)                           |
| Maternal abortion, miscarriage, and ectopic pregnancy                   | 0.2<br>(0.1 to 0.3)                     | 23.1<br>(12.8 to 38.0)                         | < 0.05<br>(< 0.05 to < 0.05)         | 5.4<br>(-36.5 to 83.7)                            | -14.8<br>(-48.7 to 46.1)                            |
| Other maternal disorders                                                | --                                      | --                                             | 0.1<br>(< 0.05 to 0.1)               | -20.5<br>(-33.6 to -4.8)                          | -36.7<br>(-47.1 to -24.4)                           |
| <b>Neonatal disorders</b>                                               | <b>12.6</b><br><b>(9.9 to 16.1)</b>     | <b>2.1</b><br><b>--</b>                        | <b>1.1</b><br><b>(1.1 to 3.7)</b>    | <b>31.6</b><br><b>(4.3 to 61.3)</b>               | <b>23.0</b><br><b>(-3.6 to 52.6)</b>                |
| Neonatal preterm birth complications                                    | 8.4<br>(6.5 to 11.1)                    | --                                             | 0.7<br>(0.4 to 1.1)                  | 8.6<br>(-14.8 to 36.5)                            | -0.6<br>(-21.3 to 25.2)                             |
| Neonatal encephalopathy due to birth asphyxia and trauma                | 3.2<br>(1.6 to 5.6)                     | --                                             | 0.4<br>(0.1 to 1.0)                  | 78.1<br>(-15.3 to 230.5)                          | 66.8<br>(-26.2 to 217.1)                            |
| Neonatal sepsis and other neonatal infections                           | 2.1<br>(0.5 to 5.0)                     | --                                             | 0.8<br>(0.1 to 2.3)                  | 47.6<br>(-6.2 to 128.9)                           | 40.6<br>(-12.5 to 134.3)                            |
| Hemolytic disease and other neonatal jaundice                           | 0.2<br>(0.2 to 0.3)                     | --                                             | 0.1<br>(0.1 to 0.1)                  | 9.3<br>(-4.7 to 26.7)                             | -1.2<br>(-10.8 to 10.9)                             |
| Other neonatal disorders                                                | --                                      | --                                             | 0.2<br>(0.1 to 0.3)                  | 17.3<br>(-4.2 to 42.1)                            | 9.6<br>(-10.6 to 32.9)                              |
| <b>Nutritional deficiencies</b>                                         | <b>297.1</b><br><b>(273.6 to 322.9)</b> | <b>83.7†</b><br><b>(61.2 to 120.9)</b>         | <b>9.1</b><br><b>(5.8 to 12.9)</b>   | <b>-6.9</b><br><b>(-17.7 to 5.3)</b>              | <b>-16.7</b><br><b>(-25.5 to -7.0)</b>              |
| Protein-energy malnutrition                                             | 34.7<br>(27.3 to 43.2)                  | 26.7<br>(21.1 to 32.7)                         | 1.5<br>(0.9 to 2.4)                  | -23.5<br>(-42.5 to 2.2)                           | -28.9<br>(-46.7 to -4.9)                            |
| Iodine deficiency                                                       | 23.2<br>(18.4 to 28.9)                  | 0.7<br>(0.6 to 0.9)                            | 0.7<br>(0.4 to 1.0)                  | 1.0<br>(-7.9 to 11.8)                             | -14.1<br>(-21.1 to -5.1)                            |
| Vitamin A deficiency                                                    | 63.8<br>(39.0 to 101.8)                 | 56.4<br>(33.7 to 93.9)                         | < 0.05<br>(< 0.05 to 0.1)            | 2.0<br>(-19.5 to 29.3)                            | -8.6<br>(-27.7 to 13.4)                             |
| Iron-deficiency anaemia                                                 | 223.8<br>(195.8 to 251.2)               | --                                             | 6.8<br>(4.2 to 10.0)                 | -2.8<br>(-16.4 to 11.3)                           | -15.0<br>(-25.9 to -3.0)                            |
| Other nutritional deficiencies                                          | --                                      | --                                             | 0.1<br>(< 0.05 to 0.1)               | -24.0<br>(-43.5 to 2.9)                           | -29.4<br>(-47.6 to -4.5)                            |
| <b>Other communicable, maternal, neonatal, and nutritional diseases</b> | <b>300.5</b><br><b>(283.8 to 318.4)</b> | <b>207.9</b><br><b>(164.6 to 264.0)</b>        | <b>1.1</b><br><b>(0.7 to 1.8)</b>    | <b>17.3</b><br><b>(9.2 to 25.3)</b>               | <b>-1.7</b><br><b>(-7.1 to 4.0)</b>                 |
| Sexually transmitted diseases excluding HIV                             | 238.8<br>(221.8 to 257.4)               | 166.8<br>(127.4 to 220.2)                      | 0.8<br>(0.5 to 1.3)                  | 24.7<br>(16.3 to 33.3)                            | 0.1<br>(-6.1 to 6.5)                                |
| Syphilis                                                                | 8.4<br>(6.3 to 10.7)                    | 5.7<br>(4.1 to 7.7)                            | < 0.05<br>(< 0.05 to 0.1)            | 34.7<br>(14.5 to 59.1)                            | 1.6<br>(-14.5 to 20.7)                              |
| Chlamydial infection                                                    | 15.7<br>(12.2 to 20.1)                  | 12.4<br>(9.7 to 16.1)                          | 0.1<br>(0.1 to 0.2)                  | 23.5<br>(9.0 to 38.7)                             | -0.1<br>(-11.1 to 11.9)                             |
| Gonococcal infection                                                    | 23.3<br>(13.2 to 37.6)                  | 78.5<br>(40.2 to 131.0)                        | 0.3<br>(0.1 to 0.5)                  | 24.8<br>(10.7 to 41.4)                            | 0.1<br>(-11.2 to 12.0)                              |
| Trichomoniasis                                                          | 47.0<br>(38.5 to 56.6)                  | 43.9<br>(35.0 to 55.0)                         | 0.1<br>(< 0.05 to 0.1)               | 22.4<br>(14.2 to 32.0)                            | -0.1<br>(-6.0 to 6.8)                               |
| Genital herpes                                                          | 174.3<br>(150.7 to 204.7)               | 15.4<br>(13.0 to 18.7)                         | < 0.05<br>(< 0.05 to 0.1)            | 25.8<br>(14.2 to 37.7)                            | 0.1<br>(-7.2 to 8.8)                                |
| Other sexually transmitted diseases                                     | 11.7<br>(10.4 to 12.7)                  | 10.9<br>(9.0 to 13.3)                          | 0.3<br>(0.2 to 0.4)                  | 24.0<br>(14.8 to 34.5)                            | -0.1<br>(-7.4 to 7.6)                               |
| Hepatitis                                                               | 77.2<br>(64.5 to 91.9)                  | 41.1<br>(24.8 to 65.2)                         | < 0.05<br>(< 0.05 to 0.1)            | -11.2<br>(-33.7 to 17.5)                          | -19.0<br>(-35.0 to -0.4)                            |
| Acute hepatitis A                                                       | 1.2<br>(0.1 to 3.0)                     | 15.6<br>(1.9 to 38.7)                          | < 0.05<br>(< 0.05 to < 0.05)         | -19.7<br>(-77.8 to 247.7)                         | -20.8<br>(-70.4 to 142.2)                           |
| Hepatitis B                                                             | 58.8<br>(46.5 to 73.1)                  | 22.4<br>(16.9 to 29.3)                         | < 0.05<br>(< 0.05 to < 0.05)         | -9.5<br>(-28.2 to 13.7)                           | -19.4<br>(-35.0 to -1.2)                            |
| Hepatitis C                                                             | 17.1<br>(15.2 to 19.1)                  | 1.5<br>(1.4 to 1.7)                            | < 0.05<br>(< 0.05 to < 0.05)         | 10.3<br>(-9.4 to 34.5)                            | -4.7<br>(-13.7 to 5.6)                              |
| Acute hepatitis E                                                       | 0.1<br>(0.1 to 0.2)                     | 1.7<br>(1.3 to 2.1)                            | < 0.05<br>(< 0.05 to < 0.05)         | -11.0<br>(-32.7 to 17.6)                          | -15.2<br>(-32.6 to 4.9)                             |
| Other infectious diseases                                               | 9.6<br>(8.2 to 11.0)                    | < 0.05<br>(< 0.05 to < 0.05)                   | 0.3<br>(0.2 to 0.5)                  | 6.2<br>(-11.3 to 26.0)                            | -3.6<br>(-18.8 to 13.0)                             |
| <b>Non-communicable diseases</b>                                        | <b>859.9</b><br><b>(848.8 to 869.5)</b> | <b>2,522.0†</b><br><b>(2,306.9 to 2,729.2)</b> | <b>64.5</b><br><b>(47.7 to 84.0)</b> | <b>22.0</b><br><b>(17.2 to 27.2)</b>              | <b>0.8</b><br><b>(-2.1 to 4.0)</b>                  |
| <b>Neoplasms</b>                                                        | <b>1.8</b><br><b>(1.6 to 1.9)</b>       | <b>0.7</b><br><b>(0.6 to 0.9)</b>              | <b>0.2</b><br><b>(0.1 to 0.4)</b>    | <b>36.2</b><br><b>(27.5 to 45.3)</b>              | <b>3.0</b><br><b>(-3.3 to 9.2)</b>                  |
| Lip and oral cavity cancer                                              | 0.1<br>(< 0.05 to 0.1)                  | < 0.05<br>(< 0.05 to < 0.05)                   | < 0.05<br>(< 0.05 to < 0.05)         | 39.1<br>(22.0 to 61.2)                            | 3.5<br>(-10.1 to 21.3)                              |
| Nasopharynx cancer                                                      | < 0.05<br>(< 0.05 to < 0.05)            | < 0.05<br>(< 0.05 to < 0.05)                   | < 0.05<br>(< 0.05 to < 0.05)         | 24.4<br>(6.4 to 47.0)                             | -5.3<br>(-18.4 to 11.7)                             |
| Other pharynx cancer                                                    | < 0.05<br>(< 0.05 to < 0.05)            | < 0.05<br>(< 0.05 to < 0.05)                   | < 0.05<br>(< 0.05 to < 0.05)         | 33.1<br>(14.0 to 50.6)                            | -1.2<br>(-14.7 to 11.7)                             |
| Oesophageal cancer                                                      | < 0.05<br>(< 0.05 to < 0.05)            | < 0.05<br>(< 0.05 to < 0.05)                   | < 0.05<br>(< 0.05 to < 0.05)         | 29.4<br>(0.1 to 63.9)                             | -4.9<br>(-25.6 to 19.3)                             |
| Stomach cancer                                                          | < 0.05<br>(< 0.05 to < 0.05)            | < 0.05<br>(< 0.05 to < 0.05)                   | < 0.05<br>(< 0.05 to < 0.05)         | 13.1<br>(-1.2 to 30.1)                            | -16.6<br>(-29.0 to -2.7)                            |
| Colon and rectum cancer                                                 | 0.1<br>(0.1 to 0.1)                     | < 0.05<br>(< 0.05 to 0.1)                      | < 0.05<br>(< 0.05 to < 0.05)         | 49.5<br>(26.1 to 79.3)                            | 9.6<br>(-8.0 to 33.1)                               |
| Liver cancer                                                            | < 0.05<br>(< 0.05 to < 0.05)            | < 0.05<br>(< 0.05 to < 0.05)                   | < 0.05<br>(< 0.05 to < 0.05)         | 38.5<br>(21.9 to 56.5)                            | 2.8<br>(-9.1 to 16.8)                               |
| Liver cancer due to hepatitis B                                         | < 0.05<br>(< 0.05 to < 0.05)            | < 0.05<br>(< 0.05 to < 0.05)                   | < 0.05<br>(< 0.05 to < 0.05)         | 37.0<br>(19.1 to 55.7)                            | 2.5<br>(-10.5 to 17.1)                              |



| Cause                                              | Prevalence in thousands (95% UI)     | Incidence in thousands (95% UI)       | YLDs in thousands (95% UI)        |                                                   |                                                     |
|----------------------------------------------------|--------------------------------------|---------------------------------------|-----------------------------------|---------------------------------------------------|-----------------------------------------------------|
|                                                    | 2016 counts                          | 2016 counts                           | 2016 counts                       | Percentage change in counts between 2006 and 2016 | Percentage change in age-standardised rates between |
| Liver cancer due to hepatitis C                    | < 0.05<br>(< 0.05 to < 0.05)         | < 0.05<br>(< 0.05 to < 0.05)          | < 0.05<br>(< 0.05 to < 0.05)      | 41.3<br>(22.7 to 64.0)                            | 2.8<br>(-10.1 to 19.1)                              |
| Liver cancer due to alcohol use                    | < 0.05<br>(< 0.05 to < 0.05)         | < 0.05<br>(< 0.05 to < 0.05)          | < 0.05<br>(< 0.05 to < 0.05)      | 44.8<br>(25.7 to 66.2)                            | 6.0<br>(-7.8 to 21.9)                               |
| Liver cancer due to other causes                   | < 0.05<br>(< 0.05 to < 0.05)         | < 0.05<br>(< 0.05 to < 0.05)          | < 0.05<br>(< 0.05 to < 0.05)      | 34.9<br>(18.5 to 52.5)                            | 1.9<br>(-10.6 to 15.7)                              |
| Gallbladder and biliary tract cancer               | < 0.05<br>(< 0.05 to < 0.05)         | < 0.05<br>(< 0.05 to < 0.05)          | < 0.05<br>(< 0.05 to < 0.05)      | 27.2<br>(15.9 to 39.2)                            | -7.4<br>(-15.6 to 0.7)                              |
| Pancreatic cancer                                  | < 0.05<br>(< 0.05 to < 0.05)         | < 0.05<br>(< 0.05 to < 0.05)          | < 0.05<br>(< 0.05 to < 0.05)      | 46.5<br>(34.4 to 62.6)                            | 6.7<br>(-2.3 to 18.3)                               |
| Larynx cancer                                      | < 0.05<br>(< 0.05 to < 0.05)         | < 0.05<br>(< 0.05 to < 0.05)          | < 0.05<br>(< 0.05 to < 0.05)      | 31.7<br>(11.5 to 53.2)                            | -3.9<br>(-17.5 to 11.1)                             |
| Tracheal, bronchus, and lung cancer                | < 0.05<br>(< 0.05 to < 0.05)         | < 0.05<br>(< 0.05 to < 0.05)          | < 0.05<br>(< 0.05 to < 0.05)      | 46.7<br>(20.1 to 78.8)                            | 7.6<br>(-13.6 to 34.2)                              |
| Malignant skin melanoma                            | < 0.05<br>(< 0.05 to < 0.05)         | < 0.05<br>(< 0.05 to < 0.05)          | < 0.05<br>(< 0.05 to < 0.05)      | 50.4<br>(27.8 to 80.9)                            | 9.3<br>(-7.3 to 31.8)                               |
| Non-melanoma skin cancer                           | < 0.05<br>(< 0.05 to < 0.05)         | < 0.05<br>(< 0.05 to < 0.05)          | < 0.05<br>(< 0.05 to < 0.05)      | 48.9<br>(23.7 to 84.9)                            | 6.6<br>(-13.0 to 38.3)                              |
| Non-melanoma skin cancer (squamous-cell carcinoma) | < 0.05<br>(< 0.05 to < 0.05)         | < 0.05<br>(< 0.05 to < 0.05)          | < 0.05<br>(< 0.05 to < 0.05)      | 50.6<br>(20.9 to 94.0)                            | 7.0<br>(-14.8 to 42.3)                              |
| Non-melanoma skin cancer (basal-cell carcinoma)    | < 0.05<br>(< 0.05 to < 0.05)         | < 0.05<br>(< 0.05 to < 0.05)          | < 0.05<br>(< 0.05 to < 0.05)      | 40.4<br>(25.9 to 57.8)                            | 3.9<br>(-6.9 to 17.4)                               |
| Breast cancer                                      | 0.2<br>(0.1 to 0.3)                  | 0.1<br>(< 0.05 to 0.1)                | < 0.05<br>(< 0.05 to < 0.05)      | 52.7<br>(18.4 to 92.2)                            | 12.1<br>(-11.7 to 40.1)                             |
| Cervical cancer                                    | 0.4<br>(0.2 to 0.7)                  | 0.1<br>(0.1 to 0.2)                   | < 0.05<br>(< 0.05 to 0.1)         | 24.2<br>(-3.4 to 55.2)                            | -7.0<br>(-26.6 to 14.6)                             |
| Uterine cancer                                     | < 0.05<br>(< 0.05 to 0.1)            | < 0.05<br>(< 0.05 to < 0.05)          | < 0.05<br>(< 0.05 to < 0.05)      | 48.1<br>(14.5 to 89.7)                            | 6.9<br>(-16.9 to 35.9)                              |
| Ovarian cancer                                     | 0.1<br>(< 0.05 to 0.1)               | < 0.05<br>(< 0.05 to < 0.05)          | < 0.05<br>(< 0.05 to < 0.05)      | 47.5<br>(12.5 to 92.3)                            | 8.9<br>(-18.2 to 44.9)                              |
| Prostate cancer                                    | 0.2<br>(0.1 to 0.3)                  | 0.1<br>(< 0.05 to 0.1)                | < 0.05<br>(< 0.05 to 0.1)         | 57.0<br>(19.6 to 91.8)                            | 11.2<br>(-13.2 to 33.1)                             |
| Testicular cancer                                  | < 0.05<br>(< 0.05 to < 0.05)         | < 0.05<br>(< 0.05 to < 0.05)          | < 0.05<br>(< 0.05 to < 0.05)      | 7.5<br>(-19.8 to 42.1)                            | -17.7<br>(-39.8 to 10.7)                            |
| Kidney cancer                                      | 0.1<br>(< 0.05 to 0.1)               | < 0.05<br>(< 0.05 to < 0.05)          | < 0.05<br>(< 0.05 to < 0.05)      | 38.7<br>(-3.0 to 100.6)                           | 19.2<br>(-0.8 to 41.5)                              |
| Bladder cancer                                     | < 0.05<br>(< 0.05 to < 0.05)         | < 0.05<br>(< 0.05 to < 0.05)          | < 0.05<br>(< 0.05 to < 0.05)      | 47.1<br>(27.4 to 67.0)                            | 5.4<br>(-9.1 to 20.6)                               |
| Brain and nervous system cancer                    | < 0.05<br>(< 0.05 to < 0.05)         | < 0.05<br>(< 0.05 to < 0.05)          | < 0.05<br>(< 0.05 to < 0.05)      | 34.4<br>(17.0 to 66.3)                            | 9.8<br>(-5.0 to 41.8)                               |
| Thyroid cancer                                     | < 0.05<br>(< 0.05 to 0.1)            | < 0.05<br>(< 0.05 to < 0.05)          | < 0.05<br>(< 0.05 to < 0.05)      | 44.5<br>(14.5 to 79.3)                            | 3.6<br>(-16.4 to 26.8)                              |
| Mesothelioma                                       | < 0.05<br>(< 0.05 to < 0.05)         | < 0.05<br>(< 0.05 to < 0.05)          | < 0.05<br>(< 0.05 to < 0.05)      | 34.9<br>(17.1 to 55.5)                            | 0.8<br>(-12.1 to 16.7)                              |
| Hodgkin lymphoma                                   | < 0.05<br>(< 0.05 to < 0.05)         | < 0.05<br>(< 0.05 to < 0.05)          | < 0.05<br>(< 0.05 to < 0.05)      | 4.4<br>(-8.5 to 19.9)                             | -13.4<br>(-21.9 to -3.6)                            |
| Non-Hodgkin's lymphoma                             | 0.1<br>(0.1 to 0.2)                  | < 0.05<br>(< 0.05 to 0.1)             | < 0.05<br>(< 0.05 to < 0.05)      | 23.2<br>(2.7 to 45.1)                             | 3.4<br>(-8.6 to 16.4)                               |
| Multiple myeloma                                   | < 0.05<br>(< 0.05 to < 0.05)         | < 0.05<br>(< 0.05 to < 0.05)          | < 0.05<br>(< 0.05 to < 0.05)      | 45.7<br>(29.1 to 71.2)                            | 7.9<br>(-4.6 to 27.3)                               |
| Leukaemia                                          | < 0.05<br>(< 0.05 to 0.1)            | < 0.05<br>(< 0.05 to < 0.05)          | < 0.05<br>(< 0.05 to < 0.05)      | 18.0<br>(6.3 to 29.2)                             | -3.7<br>(-12.5 to 5.3)                              |
| Acute lymphoid leukaemia                           | < 0.05<br>(< 0.05 to < 0.05)         | < 0.05<br>(< 0.05 to < 0.05)          | < 0.05<br>(< 0.05 to < 0.05)      | 12.6<br>(-5.3 to 33.0)                            | -1.4<br>(-13.5 to 11.1)                             |
| Chronic lymphoid leukaemia                         | < 0.05<br>(< 0.05 to < 0.05)         | < 0.05<br>(< 0.05 to < 0.05)          | < 0.05<br>(< 0.05 to < 0.05)      | 45.8<br>(20.2 to 74.7)                            | 5.4<br>(-13.4 to 26.4)                              |
| Acute myeloid leukaemia                            | < 0.05<br>(< 0.05 to < 0.05)         | < 0.05<br>(< 0.05 to < 0.05)          | < 0.05<br>(< 0.05 to < 0.05)      | 29.3<br>(11.9 to 47.9)                            | 8.3<br>(-6.1 to 21.7)                               |
| Chronic myeloid leukaemia                          | < 0.05<br>(< 0.05 to < 0.05)         | < 0.05<br>(< 0.05 to < 0.05)          | < 0.05<br>(< 0.05 to < 0.05)      | 16.7<br>(-4.1 to 38.2)                            | -9.1<br>(-24.5 to 6.1)                              |
| Other leukaemia                                    | < 0.05<br>(< 0.05 to < 0.05)         | < 0.05<br>(< 0.05 to < 0.05)          | < 0.05<br>(< 0.05 to < 0.05)      | 8.9<br>(-7.5 to 24.5)                             | -10.8<br>(-22.8 to 2.0)                             |
| Other neoplasms                                    | 0.2<br>(0.1 to 0.2)                  | 0.1<br>(0.1 to 0.1)                   | < 0.05<br>(< 0.05 to < 0.05)      | 23.2<br>(7.1 to 42.2)                             | -2.6<br>(-14.4 to 12.5)                             |
| <b>Cardiovascular diseases</b>                     | <b>49.6</b><br><b>(46.2 to 53.1)</b> | <b>3.8†</b><br><b>(3.6 to 4.0)</b>    | <b>2.7</b><br><b>(1.9 to 3.7)</b> | <b>33.6</b><br><b>(27.3 to 40.1)</b>              | <b>3.9</b><br><b>(-0.2 to 8.3)</b>                  |
| Rheumatic heart disease                            | 11.6<br>(10.1 to 13.2)               | 0.4<br>(0.4 to 0.5)                   | 0.6<br>(0.4 to 0.8)               | 37.1<br>(26.4 to 58.2)                            | 13.5<br>(4.9 to 29.0)                               |
| Ischaemic heart disease                            | 11.3<br>(10.6 to 12.2)               | 1.4<br>(1.3 to 1.5)                   | 0.5<br>(0.4 to 0.7)               | 38.4<br>(31.0 to 45.6)                            | 2.5<br>(-2.1 to 7.2)                                |
| Cerebrovascular disease                            | 3.2<br>(3.0 to 3.5)                  | 0.6†<br>(0.5 to 0.6)                  | 0.5<br>(0.3 to 0.6)               | 38.1<br>(27.1 to 50.2)                            | 1.2<br>(-6.7 to 9.9)                                |
| Ischaemic stroke                                   | 2.8<br>(2.6 to 3.1)                  | 0.4†<br>(0.4 to 0.5)                  | 0.4<br>(0.3 to 0.5)               | 40.0<br>(27.1 to 54.3)                            | 2.0<br>(-7.0 to 12.0)                               |
| Hemorrhagic stroke                                 | 0.5<br>(0.5 to 0.6)                  | 0.2†<br>(0.2 to 0.2)                  | 0.1<br>(0.1 to 0.1)               | 28.8<br>(11.7 to 46.7)                            | -2.8<br>(-16.0 to 11.2)                             |
| Hypertensive heart disease                         | 0.9<br>(0.7 to 1.1)                  | --                                    | 0.1<br>(< 0.05 to 0.1)            | 38.1<br>(23.3 to 55.4)                            | -0.8<br>(-10.3 to 10.1)                             |
| Cardiomyopathy and myocarditis                     | 0.6<br>(0.5 to 0.8)                  | 0.2†<br>(0.2 to 0.3)                  | 0.1<br>(< 0.05 to 0.1)            | 33.9<br>(18.6 to 51.0)                            | 2.3<br>(-10.9 to 18.3)                              |
| Myocarditis                                        | 0.1<br>(0.1 to 0.2)                  | 0.2<br>(0.2 to 0.3)                   | < 0.05<br>(< 0.05 to < 0.05)      | 24.9<br>(16.7 to 34.7)                            | 1.8<br>(-6.7 to 10.3)                               |
| Alcoholic cardiomyopathy                           | 0.1<br>(< 0.05 to 0.1)               | --                                    | < 0.05<br>(< 0.05 to < 0.05)      | 42.0<br>(8.4 to 86.3)                             | 2.9<br>(-22.0 to 36.3)                              |
| Other cardiomyopathy                               | 0.5<br>(0.4 to 0.7)                  | --                                    | < 0.05<br>(< 0.05 to 0.1)         | 35.5<br>(17.0 to 58.1)                            | 2.3<br>(-13.2 to 21.5)                              |
| Atrial fibrillation and flutter                    | 2.1<br>(1.8 to 2.4)                  | 0.2<br>(0.2 to 0.2)                   | 0.2<br>(0.1 to 0.2)               | 40.5<br>(29.7 to 52.5)                            | 1.1<br>(-5.0 to 7.9)                                |
| Peripheral vascular disease                        | 8.6<br>(7.4 to 10.0)                 | 0.8<br>(0.7 to 1.0)                   | < 0.05<br>(< 0.05 to 0.1)         | 38.7<br>(29.4 to 50.0)                            | -0.7<br>(-7.0 to 6.6)                               |
| Endocarditis                                       | < 0.05<br>(< 0.05 to 0.1)            | 0.1<br>(0.1 to 0.2)                   | < 0.05<br>(< 0.05 to < 0.05)      | 28.4<br>(16.2 to 42.8)                            | 3.8<br>(-10.6 to 19.8)                              |
| Other cardiovascular and circulatory diseases      | 15.8<br>(11.0 to 21.6)               | --                                    | 0.8<br>(0.5 to 1.3)               | 24.8<br>(10.7 to 43.1)                            | 4.9<br>(-6.9 to 19.5)                               |
| <b>Chronic respiratory diseases</b>                | <b>61.2</b><br><b>(57.9 to 64.6)</b> | <b>13.1†</b><br><b>(12.0 to 14.2)</b> | <b>2.9</b><br><b>(2.2 to 3.8)</b> | <b>20.2</b><br><b>(14.8 to 25.8)</b>              | <b>3.4</b><br><b>(-0.5 to 7.6)</b>                  |
| Chronic obstructive pulmonary disease              | 10.4<br>(9.9 to 10.9)                | 0.7<br>(0.7 to 0.8)                   | 0.8<br>(0.7 to 0.9)               | 35.5<br>(25.5 to 46.3)                            | 2.5<br>(-4.3 to 9.6)                                |
| Pneumoconiosis                                     | < 0.05<br>(< 0.05 to < 0.05)         | < 0.05<br>(< 0.05 to < 0.05)          | < 0.05<br>(< 0.05 to < 0.05)      | 35.8<br>(28.3 to 43.8)                            | 1.4<br>(-4.0 to 7.3)                                |
| Silicosis                                          | < 0.05<br>(< 0.05 to < 0.05)         | < 0.05<br>(< 0.05 to < 0.05)          | < 0.05<br>(< 0.05 to < 0.05)      | 32.1<br>(21.1 to 43.5)                            | 0.5<br>(-5.9 to 7.2)                                |

| Cause                                                          | Prevalence in thousands (95% UI)        | Incidence in thousands (95% UI)         | YLDs in thousands (95% UI)           |                                                                     |                                                                      |
|----------------------------------------------------------------|-----------------------------------------|-----------------------------------------|--------------------------------------|---------------------------------------------------------------------|----------------------------------------------------------------------|
|                                                                | 2016 counts<br>(< 0.05 to < 0.05)       | 2016 counts<br>(< 0.05 to < 0.05)       | 2016 counts<br>(< 0.05 to < 0.05)    | Percentage change in counts between 2006 and 2016<br>(23.9 to 44.6) | Percentage change in age-standardised rates between<br>(-4.9 to 7.4) |
| Asbestosis                                                     | < 0.05<br>(< 0.05 to < 0.05)            | < 0.05<br>(< 0.05 to < 0.05)            | < 0.05<br>(< 0.05 to < 0.05)         | 34.0<br>(23.9 to 44.6)                                              | 1.0<br>(-4.9 to 7.4)                                                 |
| Coal workers pneumoconiosis                                    | --                                      | --                                      | --                                   | --                                                                  | --                                                                   |
| Other pneumoconiosis                                           | < 0.05<br>(< 0.05 to < 0.05)            | < 0.05<br>(< 0.05 to < 0.05)            | < 0.05<br>(< 0.05 to < 0.05)         | 37.5<br>(26.1 to 51.2)                                              | 1.7<br>(-7.1 to 12.4)                                                |
| Asthma                                                         | 51.0<br>(47.1 to 55.3)                  | 12.3<br>(11.3 to 13.4)                  | 2.0<br>(1.3 to 2.9)                  | 14.0<br>(8.1 to 19.7)                                               | 3.1<br>(-1.7 to 7.3)                                                 |
| Interstitial lung disease and pulmonary sarcoidosis            | 0.1<br>(0.1 to 0.1)                     | < 0.05<br>(< 0.05 to < 0.05)            | < 0.05<br>(< 0.05 to < 0.05)         | 27.0<br>(22.4 to 31.9)                                              | -0.8<br>(-6.1 to 4.8)                                                |
| Other chronic respiratory diseases                             | --                                      | --                                      | 0.1<br>(0.1 to 0.1)                  | 48.6<br>(15.5 to 91.6)                                              | 35.0<br>(9.8 to 67.3)                                                |
| <b>Cirrhosis and other chronic liver diseases</b>              | <b>2.2</b><br><b>(2.1 to 2.4)</b>       | <b>0.2</b><br><b>(0.2 to 0.2)</b>       | <b>0.2</b><br><b>(0.1 to 0.2)</b>    | <b>24.0</b><br><b>(10.1 to 38.5)</b>                                | <b>4.0</b><br><b>(-4.9 to 13.7)</b>                                  |
| Cirrhosis and other chronic liver diseases due to hepatitis B  | 0.6<br>(0.5 to 0.8)                     | 0.1<br>(< 0.05 to 0.1)                  | < 0.05<br>(< 0.05 to 0.1)            | 34.9<br>(12.2 to 61.5)                                              | 4.1<br>(-10.8 to 21.8)                                               |
| Cirrhosis and other chronic liver diseases due to hepatitis C  | 0.5<br>(0.3 to 0.6)                     | < 0.05<br>(< 0.05 to 0.1)               | < 0.05<br>(< 0.05 to < 0.05)         | 36.3<br>(10.7 to 70.5)                                              | 4.3<br>(-13.4 to 25.2)                                               |
| Cirrhosis and other chronic liver diseases due to alcohol use  | 0.4<br>(0.4 to 0.5)                     | < 0.05<br>(< 0.05 to 0.1)               | < 0.05<br>(< 0.05 to < 0.05)         | 38.8<br>(9.9 to 69.3)                                               | 4.1<br>(-14.9 to 23.8)                                               |
| Cirrhosis and other chronic liver diseases due to other causes | 0.7<br>(0.7 to 0.8)                     | 0.1<br>(0.1 to 0.1)                     | 0.1<br>(0.1 to 0.1)                  | 11.3<br>(-10.3 to 35.6)                                             | 3.8<br>(-13.6 to 23.8)                                               |
| <b>Digestive diseases</b>                                      | <b>14.8</b><br><b>(13.7 to 15.9)</b>    | <b>15.6†</b><br><b>(14.8 to 16.4)</b>   | <b>0.5</b><br><b>(0.4 to 0.7)</b>    | <b>25.4</b><br><b>(13.2 to 37.6)</b>                                | <b>4.2</b><br><b>(-3.3 to 12.7)</b>                                  |
| Peptic ulcer disease                                           | 2.4<br>(2.1 to 2.7)                     | 1.1<br>(1.0 to 1.2)                     | 0.1<br>(< 0.05 to 0.1)               | 63.1<br>(39.7 to 94.1)                                              | 22.0<br>(7.4 to 40.8)                                                |
| Gastritis and duodenitis                                       | 5.9<br>(5.1 to 6.7)                     | 4.9<br>(4.4 to 5.5)                     | 0.1<br>(0.1 to 0.1)                  | 59.0<br>(33.6 to 89.0)                                              | 25.3<br>(7.3 to 45.3)                                                |
| Appendicitis                                                   | 0.1<br>(0.1 to 0.1)                     | 3.8<br>(3.6 to 4.1)                     | < 0.05<br>(< 0.05 to 0.1)            | 0.2<br>(-26.6 to 33.1)                                              | -10.7<br>(-30.9 to 14.2)                                             |
| Paralytic ileus and intestinal obstruction                     | < 0.05<br>(< 0.05 to < 0.05)            | 0.8<br>(0.7 to 0.8)                     | < 0.05<br>(< 0.05 to < 0.05)         | 19.7<br>(10.6 to 29.0)                                              | -2.8<br>(-15.9 to 11.1)                                              |
| Inguinal, femoral, and abdominal hernia                        | 6.1<br>(5.1 to 7.2)                     | 1.7<br>(1.5 to 1.9)                     | 0.2<br>(0.2 to 0.3)                  | 14.9<br>(-0.1 to 30.8)                                              | -5.0<br>(-14.8 to 5.5)                                               |
| Inflammatory bowel disease                                     | 0.1<br>(0.1 to 0.1)                     | 0.3<br>(0.3 to 0.4)                     | < 0.05<br>(< 0.05 to < 0.05)         | 23.1<br>(19.3 to 26.9)                                              | -1.2<br>(-4.3 to 1.8)                                                |
| Vascular intestinal disorders                                  | < 0.05<br>(< 0.05 to < 0.05)            | < 0.05<br>(< 0.05 to < 0.05)            | < 0.05<br>(< 0.05 to < 0.05)         | 22.0<br>(15.5 to 29.1)                                              | 1.5<br>(-2.3 to 5.8)                                                 |
| Gallbladder and biliary diseases                               | 0.6<br>(0.5 to 0.7)                     | 2.7<br>(2.4 to 3.1)                     | < 0.05<br>(< 0.05 to < 0.05)         | 32.1<br>(14.2 to 52.8)                                              | 2.1<br>(-14.4 to 21.4)                                               |
| Pancreatitis                                                   | < 0.05<br>(< 0.05 to < 0.05)            | 0.1<br>(0.1 to 0.2)                     | < 0.05<br>(< 0.05 to < 0.05)         | 29.5<br>(24.8 to 34.2)                                              | 2.6<br>(-0.7 to 5.6)                                                 |
| Other digestive diseases                                       | --                                      | --                                      | < 0.05<br>(< 0.05 to 0.1)            | 23.6<br>(8.9 to 39.1)                                               | 7.4<br>(-0.8 to 16.3)                                                |
| <b>Neurological disorders</b>                                  | <b>276.2</b><br><b>(263.3 to 290.8)</b> | <b>126.4</b><br><b>(107.0 to 147.9)</b> | <b>7.2</b><br><b>(4.3 to 10.6)</b>   | <b>20.3</b><br><b>(-15.8 to 75.8)</b>                               | <b>0.9</b><br><b>(-24.9 to 38.5)</b>                                 |
| Alzheimer's disease and other dementias                        | 1.6<br>(1.4 to 1.9)                     | 0.3<br>(0.2 to 0.3)                     | 0.2<br>(0.2 to 0.3)                  | 42.5<br>(35.0 to 50.1)                                              | -1.1<br>(-5.4 to 3.6)                                                |
| Parkinson's disease                                            | 0.1<br>(0.1 to 0.2)                     | < 0.05<br>(< 0.05 to < 0.05)            | < 0.05<br>(< 0.05 to < 0.05)         | 54.5<br>(30.9 to 82.3)                                              | 9.9<br>(-5.0 to 26.9)                                                |
| Epilepsy                                                       | 4.4<br>(1.1 to 7.6)                     | 0.6<br>(0.1 to 1.1)                     | 1.7<br>(0.4 to 3.4)                  | 15.6<br>(-77.0 to 491.5)                                            | 1.8<br>(-79.7 to 422.7)                                              |
| Multiple sclerosis                                             | < 0.05<br>(< 0.05 to 0.1)               | < 0.05<br>(< 0.05 to < 0.05)            | < 0.05<br>(< 0.05 to < 0.05)         | 45.5<br>(40.1 to 51.1)                                              | 13.1<br>(9.3 to 17.2)                                                |
| Motor neuron disease                                           | < 0.05<br>(< 0.05 to < 0.05)            | < 0.05<br>(< 0.05 to < 0.05)            | < 0.05<br>(< 0.05 to < 0.05)         | 22.4<br>(16.6 to 28.0)                                              | 2.4<br>(-1.1 to 5.7)                                                 |
| Migraine                                                       | 94.8<br>(88.9 to 100.5)                 | 11.5<br>(10.8 to 12.2)                  | 4.1<br>(2.6 to 5.8)                  | 19.8<br>(14.6 to 25.3)                                              | -0.2<br>(-3.8 to 3.7)                                                |
| Tension-type headache                                          | 207.4<br>(183.1 to 234.8)               | 113.9<br>(94.5 to 135.1)                | 0.7<br>(0.5 to 1.1)                  | 19.7<br>(13.0 to 27.1)                                              | -1.2<br>(-6.1 to 4.0)                                                |
| Other neurological disorders                                   | < 0.05<br>(< 0.05 to < 0.05)            | < 0.05<br>(< 0.05 to < 0.05)            | 0.4<br>(0.1 to 0.8)                  | 37.6<br>(-70.8 to 552.3)                                            | 22.8<br>(-70.8 to 428.1)                                             |
| <b>Mental and substance use disorders</b>                      | <b>135.4</b><br><b>(128.9 to 141.1)</b> | <b>51.3†</b><br><b>(47.5 to 55.6)</b>   | <b>16.7</b><br><b>(12.1 to 21.8)</b> | <b>18.8</b><br><b>(16.1 to 21.9)</b>                                | <b>-0.2</b><br><b>(-2.3 to 2.1)</b>                                  |
| Schizophrenia                                                  | 1.5<br>(1.3 to 1.8)                     | 0.1<br>(0.1 to 0.1)                     | 1.0<br>(0.7 to 1.3)                  | 29.9<br>(17.4 to 43.6)                                              | 1.0<br>(-7.5 to 10.5)                                                |
| Alcohol use disorders                                          | 12.9<br>(11.0 to 15.0)                  | 6.8<br>(5.8 to 7.9)                     | 1.3<br>(0.9 to 1.8)                  | 26.6<br>(16.7 to 37.9)                                              | 2.5<br>(-4.9 to 10.9)                                                |
| Drug use disorders                                             | 4.4<br>(3.9 to 4.9)                     | 0.7<br>(0.6 to 0.8)                     | 0.9<br>(0.6 to 1.3)                  | 29.5<br>(17.1 to 44.5)                                              | 3.6<br>(-6.0 to 14.6)                                                |
| Opioid use disorders                                           | 1.9<br>(1.5 to 2.4)                     | 0.2<br>(0.2 to 0.3)                     | 0.8<br>(0.5 to 1.1)                  | 30.9<br>(16.3 to 48.5)                                              | 3.9<br>(-6.6 to 16.5)                                                |
| Cocaine use disorders                                          | 0.1<br>(0.1 to 0.1)                     | < 0.05<br>(< 0.05 to < 0.05)            | < 0.05<br>(< 0.05 to < 0.05)         | 25.0<br>(17.6 to 32.1)                                              | 2.5<br>(-3.2 to 8.2)                                                 |
| Amphetamine use disorders                                      | 0.1<br>(< 0.05 to 0.1)                  | < 0.05<br>(< 0.05 to < 0.05)            | < 0.05<br>(< 0.05 to < 0.05)         | 23.4<br>(13.4 to 34.0)                                              | 2.9<br>(-5.2 to 11.9)                                                |
| Cannabis use disorders                                         | 2.1<br>(1.7 to 2.7)                     | 0.4<br>(0.3 to 0.5)                     | 0.1<br>(< 0.05 to 0.1)               | 17.9<br>(-1.8 to 45.3)                                              | -0.1<br>(-15.7 to 20.3)                                              |
| Other drug use disorders                                       | 0.3<br>(0.3 to 0.3)                     | 0.1<br>(0.1 to 0.1)                     | 0.1<br>(< 0.05 to 0.1)               | 27.9<br>(8.3 to 49.9)                                               | 2.6<br>(-11.7 to 19.4)                                               |
| Depressive disorders                                           | 30.4<br>(28.5 to 32.8)                  | 33.4<br>(29.7 to 37.5)                  | 5.2<br>(3.6 to 7.1)                  | 22.0<br>(16.1 to 27.8)                                              | -0.7<br>(-5.0 to 3.8)                                                |
| Major depressive disorder                                      | 20.3<br>(18.0 to 22.9)                  | 31.6<br>(28.0 to 35.7)                  | 4.2<br>(2.9 to 5.8)                  | 21.2<br>(14.3 to 28.2)                                              | -0.8<br>(-6.2 to 4.7)                                                |
| Dysthymia                                                      | 10.5<br>(9.1 to 12.1)                   | 1.8<br>(1.6 to 2.1)                     | 1.0<br>(0.7 to 1.5)                  | 25.4<br>(20.2 to 30.8)                                              | 0.0<br>(-3.5 to 3.5)                                                 |
| Bipolar disorder                                               | 5.5<br>(4.7 to 6.4)                     | 0.5<br>(0.5 to 0.6)                     | 1.1<br>(0.7 to 1.7)                  | 19.8<br>(11.9 to 29.6)                                              | 0.1<br>(-5.8 to 7.0)                                                 |
| Anxiety disorders                                              | 28.9<br>(25.8 to 32.5)                  | 4.9<br>(4.4 to 5.5)                     | 2.8<br>(1.9 to 3.9)                  | 17.0<br>(8.8 to 26.5)                                               | 0.1<br>(-6.5 to 7.0)                                                 |
| Eating disorders                                               | 0.9<br>(0.7 to 1.1)                     | 0.6<br>(0.5 to 0.8)                     | 0.2<br>(0.1 to 0.3)                  | 22.1<br>(5.4 to 41.8)                                               | 7.3<br>(-7.3 to 24.3)                                                |
| Anorexia nervosa                                               | 0.2<br>(0.2 to 0.3)                     | 0.1<br>(0.1 to 0.1)                     | < 0.05<br>(< 0.05 to 0.1)            | 14.6<br>(-15.1 to 53.1)                                             | 5.4<br>(-20.8 to 40.0)                                               |
| Bulimia nervosa                                                | 0.6<br>(0.5 to 0.8)                     | 0.5<br>(0.4 to 0.7)                     | 0.1<br>(0.1 to 0.2)                  | 25.0<br>(4.0 to 49.1)                                               | 8.0<br>(-9.5 to 28.1)                                                |
| Autistic spectrum disorders                                    | 8.0<br>(7.1 to 9.2)                     | 0.1<br>(0.1 to 0.1)                     | 1.1<br>(0.8 to 1.6)                  | 12.6<br>(6.5 to 18.7)                                               | 0.0<br>(-5.0 to 4.8)                                                 |
| Autism                                                         | 2.2<br>(1.9 to 2.5)                     | < 0.05<br>(< 0.05 to < 0.05)            | 0.6<br>(0.4 to 0.8)                  | 12.2<br>(2.0 to 23.8)                                               | -0.1<br>(-8.6 to 9.5)                                                |
| Asperger syndrome and other autistic spectrum disorders        | 5.8<br>(4.8 to 7.0)                     | 0.1<br>(0.1 to 0.1)                     | 0.6<br>(0.4 to 0.8)                  | 13.1<br>(7.4 to 19.3)                                               | 0.1<br>(-4.5 to 4.9)                                                 |

| Cause                                                      | Prevalence in thousands (95% UI)        | Incidence in thousands (95% UI)                | YLDs in thousands (95% UI)           |                                                   |                                                     |
|------------------------------------------------------------|-----------------------------------------|------------------------------------------------|--------------------------------------|---------------------------------------------------|-----------------------------------------------------|
|                                                            | 2016 counts                             | 2016 counts                                    | 2016 counts                          | Percentage change in counts between 2006 and 2016 | Percentage change in age-standardised rates between |
| Attention-deficit/hyperactivity disorder                   | 11.6<br>(10.4 to 13.0)                  | 0.7<br>(0.6 to 0.8)                            | 0.1<br>(0.1 to 0.2)                  | 8.2<br>(0.6 to 15.9)                              | 0.1<br>(-6.7 to 6.9)                                |
| Conduct disorder                                           | 7.8<br>(6.3 to 9.2)                     | 2.7<br>(2.1 to 3.3)                            | 0.9<br>(0.6 to 1.4)                  | -3.0<br>(-9.1 to 3.5)                             | 0.1<br>(-6.2 to 7.0)                                |
| Idiopathic developmental intellectual disability           | 20.6<br>(12.8 to 28.8)                  | --                                             | 0.8<br>(0.4 to 1.4)                  | 2.1<br>(-5.4 to 8.7)                              | -9.8<br>(-16.1 to -4.2)                             |
| Other mental and substance use disorders                   | 14.9<br>(13.0 to 17.2)                  | 0.6<br>(0.6 to 0.7)                            | 1.1<br>(0.8 to 1.6)                  | 26.8<br>(20.1 to 34.5)                            | 0.1<br>(-4.5 to 5.4)                                |
| <b>Diabetes, urogenital, blood, and endocrine diseases</b> | <b>400.6</b><br><b>(381.4 to 427.1)</b> | <b>96.7†</b><br><b>(91.1 to 103.0)</b>         | <b>6.2</b><br><b>(4.4 to 8.5)</b>    | <b>33.1</b><br><b>(27.4 to 38.6)</b>              | <b>4.9</b><br><b>(1.2 to 8.8)</b>                   |
| Diabetes mellitus                                          | 23.8<br>(21.4 to 26.4)                  | 1.6<br>(1.4 to 1.8)                            | 2.3<br>(1.5 to 3.1)                  | 47.9<br>(39.5 to 56.8)                            | 10.2<br>(4.0 to 16.4)                               |
| Acute glomerulonephritis                                   | < 0.05<br>(< 0.05 to < 0.05)            | 0.1<br>(0.1 to 0.1)                            | < 0.05<br>(< 0.05 to < 0.05)         | 17.1<br>(11.8 to 23.1)                            | 0.1<br>(-3.4 to 4.0)                                |
| Chronic kidney disease                                     | 40.1<br>(35.9 to 44.4)                  | 3.0<br>(2.6 to 3.4)                            | 1.2<br>(0.8 to 1.6)                  | 47.6<br>(35.8 to 60.5)                            | 9.8<br>(1.7 to 19.4)                                |
| Chronic kidney disease due to diabetes mellitus            | 13.1<br>(11.1 to 15.4)                  | 0.9<br>(0.8 to 1.1)                            | 0.4<br>(0.3 to 0.5)                  | 49.9<br>(33.0 to 67.3)                            | 9.3<br>(-1.4 to 21.4)                               |
| Chronic kidney disease due to hypertension                 | 8.1<br>(6.9 to 9.3)                     | 0.7<br>(0.6 to 0.9)                            | 0.2<br>(0.1 to 0.3)                  | 53.0<br>(37.1 to 73.5)                            | 8.2<br>(-2.5 to 21.1)                               |
| Chronic kidney disease due to glomerulonephritis           | 8.1<br>(6.9 to 9.4)                     | 0.5<br>(0.4 to 0.6)                            | 0.3<br>(0.2 to 0.4)                  | 43.6<br>(28.0 to 60.5)                            | 11.3<br>(0.8 to 22.7)                               |
| Chronic kidney disease due to other causes                 | 10.7<br>(8.9 to 12.6)                   | 0.8<br>(0.7 to 1.0)                            | 0.3<br>(0.2 to 0.4)                  | 45.6<br>(31.2 to 62.5)                            | 10.8<br>(1.1 to 22.6)                               |
| Urinary diseases and male infertility                      | 19.4<br>(16.8 to 22.2)                  | 49.5†<br>(44.7 to 55.2)                        | 0.4<br>(0.3 to 0.6)                  | 35.4<br>(26.4 to 47.8)                            | -0.1<br>(-6.4 to 8.7)                               |
| Interstitial nephritis and urinary tract infections        | 0.8<br>(0.7 to 0.9)                     | 42.6<br>(37.8 to 48.1)                         | < 0.05<br>(< 0.05 to < 0.05)         | 18.6<br>(0.6 to 42.5)                             | 2.4<br>(-12.5 to 19.1)                              |
| Urolithiasis                                               | 0.2<br>(0.2 to 0.2)                     | 5.5<br>(4.8 to 6.3)                            | < 0.05<br>(< 0.05 to < 0.05)         | 28.4<br>(17.7 to 40.8)                            | 1.1<br>(-8.6 to 12.0)                               |
| Benign prostatic hyperplasia                               | 10.4<br>(8.7 to 12.2)                   | 1.3<br>(1.1 to 1.6)                            | 0.3<br>(0.2 to 0.5)                  | 39.6<br>(27.6 to 55.3)                            | -0.3<br>(-7.8 to 9.6)                               |
| Male infertility                                           | 6.9<br>(5.1 to 9.5)                     | --                                             | < 0.05<br>(< 0.05 to 0.1)            | 36.0<br>(12.5 to 64.4)                            | 9.6<br>(-10.0 to 34.5)                              |
| Other urinary diseases                                     | --                                      | --                                             | < 0.05<br>(< 0.05 to < 0.05)         | -0.3<br>(-11.4 to 13.1)                           | -15.2<br>(-23.3 to -6.2)                            |
| Gynecological diseases                                     | 123.9<br>(116.7 to 130.2)               | 41.7†<br>(38.9 to 44.8)                        | 1.3<br>(0.9 to 1.9)                  | 22.4<br>(16.0 to 29.0)                            | -3.0<br>(-7.4 to 1.8)                               |
| Uterine fibroids                                           | 8.0<br>(7.1 to 9.1)                     | 1.0<br>(0.8 to 1.1)                            | 0.2<br>(0.1 to 0.3)                  | 19.3<br>(3.0 to 34.9)                             | -9.2<br>(-21.0 to 2.8)                              |
| Polycystic ovarian syndrome                                | 1.0<br>(0.8 to 1.3)                     | 2.4<br>(1.7 to 3.4)                            | < 0.05<br>(< 0.05 to < 0.05)         | 24.7<br>(9.1 to 42.6)                             | 1.0<br>(-11.0 to 15.3)                              |
| Female infertility                                         | 8.0<br>(3.0 to 15.8)                    | --                                             | < 0.05<br>(< 0.05 to 0.1)            | 89.7<br>(-4.8 to 252.9)                           | 54.1<br>(-28.8 to 200.2)                            |
| Endometriosis                                              | 0.2<br>(0.2 to 0.2)                     | 0.7<br>(0.6 to 0.9)                            | < 0.05<br>(< 0.05 to < 0.05)         | 21.2<br>(-9.8 to 64.3)                            | 0.1<br>(-23.5 to 33.3)                              |
| Genital prolapse                                           | 58.6<br>(51.9 to 65.7)                  | 5.3<br>(4.5 to 6.4)                            | 0.2<br>(0.1 to 0.3)                  | 26.0<br>(18.3 to 33.9)                            | -6.8<br>(-12.5 to -0.8)                             |
| Premenstrual syndrome                                      | 55.2<br>(51.3 to 59.0)                  | 20.6<br>(19.0 to 22.1)                         | 0.5<br>(0.3 to 0.7)                  | 18.6<br>(8.9 to 28.8)                             | -1.1<br>(-8.8 to 7.2)                               |
| Other gynecological diseases                               | 13.3<br>(11.6 to 15.3)                  | 11.7<br>(9.6 to 14.0)                          | 0.5<br>(0.3 to 0.7)                  | 22.1<br>(12.1 to 32.3)                            | -2.8<br>(-10.2 to 4.9)                              |
| Hemoglobinopathies and hemolytic anaemias                  | 276.4<br>(253.1 to 306.1)               | --                                             | 0.6<br>(0.4 to 1.0)                  | 8.4<br>(-8.7 to 27.2)                             | -4.8<br>(-19.9 to 10.4)                             |
| Thalassemias                                               | < 0.05<br>(< 0.05 to < 0.05)            | --                                             | < 0.05<br>(< 0.05 to < 0.05)         | 1.7<br>(-55.5 to 46.6)                            | -5.1<br>(-58.7 to 36.2)                             |
| Thalassaemias trait                                        | 4.3<br>(1.5 to 7.7)                     | --                                             | 0.1<br>(< 0.05 to 0.1)               | 14.7<br>(-52.8 to 57.6)                           | 1.3<br>(-57.5 to 39.7)                              |
| Sickle cell disorders                                      | 0.2<br>(< 0.05 to 0.4)                  | --                                             | < 0.05<br>(< 0.05 to < 0.05)         | 6.9<br>(-23.2 to 56.3)                            | 3.5<br>(-25.2 to 46.4)                              |
| Sickle cell trait                                          | 70.0<br>(38.4 to 114.1)                 | --                                             | 0.3<br>(0.1 to 0.5)                  | 14.2<br>(-6.4 to 40.0)                            | 4.9<br>(-12.8 to 28.0)                              |
| G6PD deficiency                                            | 65.5<br>(55.8 to 75.3)                  | --                                             | < 0.05<br>(< 0.05 to < 0.05)         | 10.8<br>(-11.6 to 38.9)                           | -2.5<br>(-19.8 to 18.2)                             |
| G6PD trait                                                 | 153.5<br>(145.8 to 160.9)               | --                                             | < 0.05<br>(< 0.05 to < 0.05)         | 25.7<br>(0.4 to 59.0)                             | 12.1<br>(-8.4 to 38.0)                              |
| Other hemoglobinopathies and hemolytic anaemias            | 10.2<br>(8.8 to 11.7)                   | --                                             | 0.3<br>(0.2 to 0.4)                  | 1.5<br>(-16.1 to 21.7)                            | -14.9<br>(-27.5 to -0.4)                            |
| Endocrine, metabolic, blood, and immune disorders          | 12.2<br>(11.1 to 13.5)                  | 0.8<br>(0.7 to 0.9)                            | 0.4<br>(0.2 to 0.6)                  | 7.4<br>(-5.2 to 20.4)                             | -6.6<br>(-15.1 to 1.6)                              |
| <b>Musculoskeletal disorders</b>                           | <b>94.8</b><br><b>(89.8 to 99.8)</b>    | <b>43.6</b><br><b>(39.1 to 48.8)</b>           | <b>10.3</b><br><b>(7.4 to 13.5)</b>  | <b>31.6</b><br><b>(27.6 to 35.6)</b>              | <b>1.4</b><br><b>(-1.3 to 4.0)</b>                  |
| Rheumatoid arthritis                                       | 1.4<br>(1.2 to 1.6)                     | 0.1<br>(0.1 to 0.1)                            | 0.3<br>(0.2 to 0.5)                  | 33.2<br>(20.5 to 46.6)                            | 2.2<br>(-6.7 to 10.8)                               |
| Osteoarthritis                                             | 20.4<br>(19.1 to 21.7)                  | 1.2<br>(1.1 to 1.2)                            | 1.3<br>(0.9 to 1.7)                  | 44.1<br>(38.7 to 49.9)                            | 5.3<br>(1.7 to 9.4)                                 |
| Low back and neck pain                                     | 61.2<br>(56.7 to 66.1)                  | 27.9<br>(24.8 to 31.3)                         | 7.1<br>(5.0 to 9.3)                  | 30.1<br>(25.6 to 34.9)                            | 0.4<br>(-2.8 to 3.6)                                |
| Low back pain                                              | 45.8<br>(40.4 to 52.0)                  | 23.2<br>(20.1 to 26.5)                         | 5.2<br>(3.6 to 6.9)                  | 29.7<br>(23.8 to 36.5)                            | 0.6<br>(-3.6 to 5.0)                                |
| Neck pain                                                  | 18.8<br>(16.1 to 21.9)                  | 4.7<br>(4.0 to 5.5)                            | 1.9<br>(1.3 to 2.7)                  | 31.2<br>(27.5 to 35.1)                            | 0.1<br>(-2.4 to 2.4)                                |
| Gout                                                       | 2.5<br>(2.1 to 2.8)                     | 0.5<br>(0.4 to 0.6)                            | 0.1<br>(0.1 to 0.1)                  | 34.9<br>(15.2 to 57.8)                            | 0.3<br>(-12.7 to 15.2)                              |
| Other musculoskeletal disorders                            | 17.4<br>(13.8 to 21.4)                  | 14.0<br>(10.6 to 17.8)                         | 1.5<br>(1.0 to 2.2)                  | 28.6<br>(17.1 to 43.5)                            | 1.9<br>(-6.9 to 12.4)                               |
| <b>Other non-communicable diseases</b>                     | <b>680.2</b><br><b>(658.8 to 700.4)</b> | <b>2,170.6†</b><br><b>(1,957.1 to 2,375.2)</b> | <b>17.6</b><br><b>(11.9 to 25.0)</b> | <b>15.9</b><br><b>(14.0 to 17.7)</b>              | <b>-1.6</b><br><b>(-2.9 to -0.4)</b>                |
| Congenital anomalies                                       | 9.0<br>(7.1 to 12.1)                    | --                                             | 1.3<br>(0.9 to 1.9)                  | 7.2<br>(-0.9 to 15.8)                             | -5.4<br>(-12.2 to 1.7)                              |
| Neural tube defects                                        | 1.1<br>(0.9 to 1.2)                     | --                                             | 0.3<br>(0.2 to 0.4)                  | 11.9<br>(-2.2 to 27.5)                            | -1.7<br>(-13.7 to 10.9)                             |
| Congenital heart anomalies                                 | 0.8<br>(0.7 to 1.0)                     | --                                             | < 0.05<br>(< 0.05 to 0.1)            | 8.0<br>(-7.4 to 27.2)                             | 1.1<br>(-12.5 to 17.4)                              |
| Orofacial clefts                                           | 0.2<br>(0.2 to 0.3)                     | --                                             | < 0.05<br>(< 0.05 to < 0.05)         | 5.4<br>(-6.5 to 19.2)                             | -6.6<br>(-17.1 to 5.3)                              |
| Down's syndrome                                            | 0.2<br>(0.1 to 0.2)                     | --                                             | < 0.05<br>(< 0.05 to < 0.05)         | 10.5<br>(1.6 to 19.1)                             | 0.5<br>(-7.3 to 8.6)                                |
| Turner syndrome                                            | 0.5<br>(0.4 to 0.6)                     | --                                             | < 0.05<br>(< 0.05 to < 0.05)         | 6.3<br>(-25.7 to 50.9)                            | -2.9<br>(-31.1 to 33.5)                             |
| Klinefelter syndrome                                       | 0.5<br>(0.4 to 0.6)                     | --                                             | < 0.05<br>(< 0.05 to < 0.05)         | 15.0<br>(-12.7 to 48.7)                           | -0.2<br>(-23.3 to 27.1)                             |



| Cause                                         | Prevalence in thousands (95% UI)        | Incidence in thousands (95% UI)       | YLDs in thousands (95% UI)        |                                                   |                                                     |
|-----------------------------------------------|-----------------------------------------|---------------------------------------|-----------------------------------|---------------------------------------------------|-----------------------------------------------------|
|                                               | 2016 counts                             | 2016 counts                           | 2016 counts                       | Percentage change in counts between 2006 and 2016 | Percentage change in age-standardised rates between |
| Other chromosomal abnormalities               | 0.2<br>(0.1 to 0.2)                     | --                                    | < 0.05<br>(< 0.05 to 0.1)         | 6.0<br>(-29.6 to 54.3)                            | 0.5<br>(-29.4 to 39.4)                              |
| Congenital musculoskeletal and limb anomalies | 1.1<br>(0.9 to 1.2)                     | --                                    | 0.1<br>(0.1 to 0.2)               | 11.3<br>(-2.3 to 27.7)                            | -2.1<br>(-13.1 to 10.8)                             |
| Urogenital congenital anomalies               | 0.9<br>(0.8 to 1.0)                     | --                                    | < 0.05<br>(< 0.05 to < 0.05)      | 5.4<br>(-2.6 to 14.0)                             | -0.3<br>(-7.5 to 7.0)                               |
| Digestive congenital anomalies                | 0.5<br>(0.5 to 0.6)                     | --                                    | < 0.05<br>(< 0.05 to < 0.05)      | 12.3<br>(-12.1 to 42.8)                           | -0.9<br>(-20.3 to 21.9)                             |
| Other congenital anomalies                    | 4.9<br>(2.8 to 8.4)                     | --                                    | 0.7<br>(0.4 to 1.2)               | 4.0<br>(-8.2 to 16.0)                             | -8.6<br>(-19.2 to 1.4)                              |
| Skin and subcutaneous diseases                | 332.5<br>(317.7 to 348.8)               | 815.6<br>(751.1 to 897.7)             | 8.0<br>(5.2 to 11.8)              | 11.1<br>(8.8 to 13.4)                             | 1.8<br>(0.2 to 3.7)                                 |
| Dermatitis                                    | 51.7<br>(40.8 to 63.0)                  | 44.0<br>(38.5 to 50.6)                | 2.1<br>(1.2 to 3.6)               | 9.0<br>(4.7 to 13.7)                              | 0.1<br>(-3.3 to 3.6)                                |
| Psoriasis                                     | 5.4<br>(5.1 to 5.6)                     | 0.8<br>(0.8 to 0.9)                   | 0.5<br>(0.3 to 0.6)               | 32.1<br>(18.9 to 46.1)                            | 10.5<br>(1.3 to 20.3)                               |
| Cellulitis                                    | 0.4<br>(0.3 to 0.4)                     | 6.3<br>(5.9 to 6.8)                   | < 0.05<br>(< 0.05 to < 0.05)      | 16.5<br>(-8.8 to 49.0)                            | 1.6<br>(-17.1 to 25.2)                              |
| Pyoderma                                      | 6.4<br>(6.1 to 6.7)                     | 123.8<br>(118.3 to 129.3)             | < 0.05<br>(< 0.05 to 0.1)         | 12.4<br>(6.4 to 19.0)                             | 1.2<br>(-3.7 to 6.3)                                |
| Scabies                                       | 20.2<br>(17.4 to 23.4)                  | 62.3<br>(53.4 to 72.7)                | 0.5<br>(0.3 to 0.8)               | 5.7<br>(0.8 to 10.7)                              | -4.5<br>(-8.1 to -0.6)                              |
| Fungal skin diseases                          | 131.4<br>(109.7 to 156.3)               | 392.3<br>(329.2 to 465.9)             | 0.7<br>(0.3 to 1.6)               | 13.2<br>(10.8 to 15.9)                            | 0.2<br>(-0.7 to 1.0)                                |
| Viral skin diseases                           | 30.4<br>(26.8 to 35.0)                  | 40.8<br>(35.4 to 46.4)                | 0.9<br>(0.6 to 1.4)               | 10.4<br>(6.5 to 14.5)                             | 0.2<br>(-2.7 to 3.1)                                |
| Acne vulgaris                                 | 85.7<br>(74.8 to 97.9)                  | 62.1<br>(48.4 to 84.5)                | 2.2<br>(1.5 to 3.2)               | 8.2<br>(3.1 to 13.9)                              | 4.8<br>(0.1 to 10.1)                                |
| Alopecia areata                               | 1.7<br>(1.6 to 1.8)                     | 3.0<br>(2.8 to 3.1)                   | 0.1<br>(< 0.05 to 0.1)            | 21.1<br>(7.5 to 36.5)                             | 0.3<br>(-9.5 to 11.9)                               |
| Pruritus                                      | 7.2<br>(6.3 to 8.1)                     | 5.9<br>(5.2 to 6.6)                   | 0.1<br>(< 0.05 to 0.1)            | 20.3<br>(13.0 to 27.8)                            | 0.8<br>(-4.6 to 6.2)                                |
| Urticaria                                     | 9.6<br>(8.2 to 11.2)                    | 17.4<br>(14.8 to 20.2)                | 0.6<br>(0.4 to 0.8)               | 11.0<br>(3.9 to 18.5)                             | 0.2<br>(-5.4 to 6.5)                                |
| Decubitus ulcer                               | 0.1<br>(0.1 to 0.1)                     | 0.4<br>(0.4 to 0.4)                   | < 0.05<br>(< 0.05 to < 0.05)      | 30.4<br>(16.9 to 45.0)                            | 0.8<br>(-13.1 to 16.1)                              |
| Other skin and subcutaneous diseases          | 49.4<br>(48.0 to 50.9)                  | 56.5<br>(54.8 to 58.2)                | 0.3<br>(0.1 to 0.5)               | 24.6<br>(20.8 to 28.3)                            | 2.3<br>(-0.1 to 4.7)                                |
| Sense organ diseases                          | 176.5<br>(169.9 to 183.2)               | 87.3†<br>(81.0 to 94.0)               | 6.8<br>(4.7 to 9.5)               | 21.5<br>(17.5 to 25.7)                            | -3.8<br>(-5.9 to -1.6)                              |
| Glaucoma                                      | 0.5<br>(0.4 to 0.6)                     | --                                    | 0.1<br>(< 0.05 to 0.1)            | 44.7<br>(26.3 to 66.1)                            | 4.1<br>(-9.0 to 18.9)                               |
| Cataract                                      | 6.5<br>(5.2 to 8.0)                     | --                                    | 0.5<br>(0.4 to 0.8)               | 38.2<br>(30.2 to 47.3)                            | -0.4<br>(-6.2 to 6.6)                               |
| Macular degeneration                          | 0.9<br>(0.6 to 1.2)                     | --                                    | 0.1<br>(< 0.05 to 0.1)            | 48.0<br>(31.5 to 65.2)                            | 6.9<br>(-4.9 to 18.6)                               |
| Refraction and accommodation disorders        | 76.0<br>(68.3 to 84.4)                  | --                                    | 1.4<br>(0.8 to 2.2)               | 10.0<br>(3.8 to 16.8)                             | -10.7<br>(-15.6 to -5.4)                            |
| Age-related and other hearing loss            | 115.4<br>(107.6 to 123.7)               | --                                    | 3.9<br>(2.7 to 5.6)               | 21.8<br>(15.6 to 27.8)                            | -3.7<br>(-6.4 to -1.0)                              |
| Other vision loss                             | 3.2<br>(2.7 to 3.8)                     | --                                    | 0.3<br>(0.2 to 0.4)               | 33.2<br>(23.1 to 45.1)                            | 2.2<br>(-5.2 to 10.2)                               |
| Other sense organ diseases                    | 19.1<br>(17.7 to 20.6)                  | 87.3<br>(81.0 to 94.0)                | 0.6<br>(0.4 to 0.9)               | 27.8<br>(21.6 to 34.2)                            | 1.5<br>(-2.5 to 5.5)                                |
| Oral disorders                                | 464.2<br>(426.7 to 498.2)               | 1,267.8†<br>(1,066.3 to 1,464.1)      | 1.5<br>(0.8 to 2.6)               | 26.9<br>(23.3 to 30.7)                            | 0.1<br>(-2.5 to 2.8)                                |
| Caries of deciduous teeth                     | 108.5<br>(85.7 to 131.3)                | 394.2<br>(282.5 to 515.7)             | < 0.05<br>(< 0.05 to 0.1)         | 5.0<br>(-6.2 to 16.7)                             | -1.1<br>(-11.5 to 10.3)                             |
| Caries of permanent teeth                     | 283.1<br>(244.3 to 325.7)               | 863.1<br>(709.9 to 1,018.9)           | 0.2<br>(0.1 to 0.3)               | 16.1<br>(8.7 to 23.5)                             | -1.5<br>(-6.6 to 3.6)                               |
| Periodontal disease                           | 82.1<br>(50.7 to 115.7)                 | 9.7<br>(6.2 to 14.1)                  | 0.5<br>(0.2 to 1.2)               | 33.2<br>(25.0 to 42.6)                            | 0.1<br>(-5.5 to 6.3)                                |
| Edentulism and severe tooth loss              | 11.8<br>(10.0 to 13.6)                  | 0.8<br>(0.7 to 0.9)                   | 0.3<br>(0.2 to 0.5)               | 35.2<br>(28.6 to 42.2)                            | 0.5<br>(-3.4 to 4.9)                                |
| Other oral disorders                          | 15.1<br>(14.3 to 15.8)                  | --                                    | 0.4<br>(0.3 to 0.7)               | 20.2<br>(15.6 to 24.7)                            | 0.1<br>(-3.2 to 3.3)                                |
| <b>Injuries</b>                               | <b>136.6</b><br><b>(128.4 to 146.3)</b> | <b>76.9†</b><br><b>(72.4 to 81.3)</b> | <b>5.9</b><br><b>(4.0 to 8.3)</b> | <b>20.3</b><br><b>(17.9 to 22.6)</b>              | <b>-1.9</b><br><b>(-3.6 to -0.4)</b>                |
| <b>Transport injuries</b>                     | <b>17.0</b><br><b>(15.8 to 18.3)</b>    | <b>7.5</b><br><b>(6.6 to 8.6)</b>     | <b>1.0</b><br><b>(0.7 to 1.5)</b> | <b>29.0</b><br><b>(26.4 to 31.5)</b>              | <b>1.7</b><br><b>(-0.1 to 3.4)</b>                  |
| Road injuries                                 | 14.8<br>(13.7 to 15.9)                  | 6.8<br>(5.9 to 7.9)                   | 0.9<br>(0.6 to 1.2)               | 29.9<br>(27.3 to 32.4)                            | 1.7<br>(-0.1 to 3.4)                                |
| Pedestrian road injuries                      | 5.0<br>(4.4 to 5.6)                     | 1.7<br>(1.4 to 2.1)                   | 0.3<br>(0.2 to 0.4)               | 24.6<br>(22.0 to 27.1)                            | -2.4<br>(-4.2 to -0.7)                              |
| Cyclist road injuries                         | 2.9<br>(2.5 to 3.5)                     | 1.5<br>(1.2 to 1.9)                   | 0.2<br>(0.1 to 0.2)               | 34.0<br>(31.1 to 36.9)                            | 6.1<br>(4.3 to 8.0)                                 |
| Motorcyclist road injuries                    | 1.6<br>(1.4 to 1.9)                     | 0.5<br>(0.4 to 0.7)                   | 0.1<br>(0.1 to 0.1)               | 30.3<br>(27.6 to 33.0)                            | 1.2<br>(-0.6 to 3.0)                                |
| Motor vehicle road injuries                   | 4.2<br>(3.6 to 4.7)                     | 2.4<br>(2.0 to 2.8)                   | 0.3<br>(0.2 to 0.4)               | 32.1<br>(29.4 to 34.8)                            | 2.8<br>(1.1 to 4.7)                                 |
| Other road injuries                           | 1.1<br>(0.9 to 1.3)                     | 0.7<br>(0.5 to 0.8)                   | 0.1<br>(< 0.05 to 0.1)            | 36.6<br>(33.2 to 39.7)                            | 8.4<br>(6.4 to 10.5)                                |
| Other transport injuries                      | 2.3<br>(1.9 to 2.7)                     | 0.7<br>(0.6 to 0.9)                   | 0.1<br>(0.1 to 0.2)               | 23.5<br>(19.7 to 27.7)                            | 1.6<br>(-1.0 to 4.2)                                |
| <b>Unintentional injuries</b>                 | <b>109.1</b><br><b>(101.2 to 118.8)</b> | <b>64.5</b><br><b>(60.4 to 68.8)</b>  | <b>4.1</b><br><b>(2.8 to 5.8)</b> | <b>20.0</b><br><b>(17.5 to 22.4)</b>              | <b>-2.3</b><br><b>(-4.1 to -0.6)</b>                |
| Falls                                         | 40.8<br>(35.4 to 46.4)                  | 23.5<br>(20.7 to 27.1)                | 1.8<br>(1.2 to 2.5)               | 21.5<br>(18.8 to 24.2)                            | -3.7<br>(-5.7 to -1.7)                              |
| Drowning                                      | 0.5<br>(0.5 to 0.6)                     | 0.1<br>(0.1 to 0.2)                   | < 0.05<br>(< 0.05 to < 0.05)      | 17.2<br>(13.5 to 21.2)                            | -3.9<br>(-6.5 to -1.1)                              |
| Fire, heat, and hot substances                | 15.8<br>(13.1 to 19.4)                  | 2.7<br>(2.2 to 3.3)                   | 0.5<br>(0.3 to 0.7)               | 13.8<br>(8.0 to 18.9)                             | -4.4<br>(-8.2 to -0.8)                              |
| Poisonings                                    | 0.4<br>(0.3 to 0.4)                     | 0.6<br>(0.5 to 0.8)                   | < 0.05<br>(< 0.05 to 0.1)         | 17.9<br>(8.7 to 28.1)                             | 1.1<br>(-5.5 to 8.7)                                |
| Exposure to mechanical forces                 | 16.1<br>(13.7 to 19.7)                  | 8.2<br>(6.9 to 9.5)                   | 0.5<br>(0.3 to 0.7)               | 21.7<br>(18.9 to 24.4)                            | -1.9<br>(-3.8 to -0.0)                              |
| Unintentional firearm injuries                | 0.8<br>(0.6 to 1.0)                     | 0.2<br>(0.2 to 0.3)                   | < 0.05<br>(< 0.05 to 0.1)         | 25.8<br>(22.6 to 28.8)                            | -0.7<br>(-2.9 to 1.2)                               |
| Unintentional suffocation                     | 1.2<br>(0.9 to 1.6)                     | 0.4<br>(0.3 to 0.6)                   | < 0.05<br>(< 0.05 to 0.1)         | 14.1<br>(10.5 to 17.9)                            | -2.9<br>(-5.3 to -0.4)                              |
| Other exposure to mechanical forces           | 14.1<br>(11.8 to 17.7)                  | 7.5<br>(6.4 to 8.8)                   | 0.4<br>(0.2 to 0.5)               | 22.2<br>(19.3 to 25.0)                            | -1.9<br>(-3.8 to 0.0)                               |

| Cause                                                                               | Prevalence in thousands (95% UI)     | Incidence in thousands (95% UI)                                          | YLDs in thousands (95% UI)                           |                                                   |                                                     |
|-------------------------------------------------------------------------------------|--------------------------------------|--------------------------------------------------------------------------|------------------------------------------------------|---------------------------------------------------|-----------------------------------------------------|
|                                                                                     | 2016 counts                          | 2016 counts                                                              | 2016 counts                                          | Percentage change in counts between 2006 and 2016 | Percentage change in age-standardised rates between |
| Adverse effects of medical treatment                                                | 0.4<br>(0.3 to 0.5)                  | 5.2<br>(4.5 to 6.2)                                                      | 0.1<br>( $< 0.05$ to 0.1)                            | 5.1<br>(-0.8 to 12.1)                             | -5.4<br>(-9.1 to -1.4)                              |
| Animal contact                                                                      | 5.6<br>(5.0 to 6.5)                  | 8.7<br>(7.3 to 10.1)                                                     | 0.2<br>(0.1 to 0.3)                                  | 16.9<br>(11.2 to 23.1)                            | -3.1<br>(-6.8 to 0.7)                               |
| Venomous animal contact                                                             | 2.2<br>(1.8 to 2.6)                  | 3.6<br>(2.9 to 4.5)                                                      | 0.1<br>(0.1 to 0.2)                                  | 15.7<br>(8.2 to 24.4)                             | -3.0<br>(-8.3 to 2.9)                               |
| Non-venomous animal contact                                                         | 3.4<br>(2.9 to 4.1)                  | 5.1<br>(4.1 to 6.0)                                                      | 0.1<br>( $< 0.05$ to 0.1)                            | 19.6<br>(15.1 to 23.7)                            | -3.4<br>(-6.3 to -0.7)                              |
| Foreign body                                                                        | 7.4<br>(6.0 to 8.9)                  | 5.7<br>(4.9 to 6.5)                                                      | 0.3<br>(0.2 to 0.5)                                  | 9.6<br>(5.8 to 13.5)                              | -5.8<br>(-8.6 to -3.2)                              |
| Pulmonary aspiration and foreign body in airway                                     | 4.1<br>(3.0 to 5.6)                  | 2.3<br>(1.8 to 2.9)                                                      | 0.2<br>(0.1 to 0.3)                                  | 5.4<br>(1.5 to 9.6)                               | -8.8<br>(-11.6 to -6.3)                             |
| Foreign body in eyes                                                                | 0.3<br>(0.2 to 0.5)                  | 1.8<br>(1.4 to 2.4)                                                      | $< 0.05$<br>( $< 0.05$ to $< 0.05$ )                 | 19.2<br>(13.5 to 25.2)                            | -0.2<br>(-3.1 to 2.6)                               |
| Foreign body in other body part                                                     | 3.0<br>(2.4 to 3.9)                  | 1.6<br>(1.3 to 1.9)                                                      | 0.1<br>(0.1 to 0.1)                                  | 17.0<br>(12.4 to 21.4)                            | -0.9<br>(-4.1 to 2.0)                               |
| Environmental heat and cold exposure                                                | 8.6<br>(7.2 to 10.3)                 | 3.1<br>(2.5 to 3.9)                                                      | 0.4<br>(0.2 to 0.5)                                  | 31.1<br>(27.7 to 34.5)                            | 8.1<br>(5.9 to 10.2)                                |
| Other unintentional injuries                                                        | 13.6<br>(10.7 to 17.3)               | 6.7<br>(5.5 to 8.2)                                                      | 0.4<br>(0.3 to 0.6)                                  | 23.2<br>(20.6 to 25.9)                            | 2.0<br>(0.4 to 3.9)                                 |
| <b>Self-harm and interpersonal violence</b>                                         | <b>40.1</b><br><b>(35.6 to 45.0)</b> | <b>4.8†</b><br><b>(4.0 to 5.5)</b>                                       | <b>0.6</b><br><b>(0.4 to 0.9)</b>                    | <b>15.4</b><br><b>(11.6 to 19.2)</b>              | <b>-3.0</b><br><b>(-5.3 to -0.8)</b>                |
| Self-harm                                                                           | 0.7<br>(0.6 to 0.8)                  | 0.4<br>(0.3 to 0.5)                                                      | $< 0.05$<br>( $< 0.05$ to 0.1)                       | 36.2<br>(32.3 to 40.1)                            | 5.6<br>(2.9 to 8.0)                                 |
| Self-harm by firearm                                                                | 0.1<br>( $< 0.05$ to 0.1)            | $< 0.05$<br>( $< 0.05$ to $< 0.05$ )                                     | $< 0.05$<br>( $< 0.05$ to $< 0.05$ )                 | 29.6<br>(25.6 to 34.1)                            | -0.9<br>(-3.8 to 2.2)                               |
| Self-harm by other specified means                                                  | 0.6<br>(0.5 to 0.7)                  | 0.4<br>(0.3 to 0.4)                                                      | $< 0.05$<br>( $< 0.05$ to 0.1)                       | 36.7<br>(32.6 to 40.6)                            | 6.1<br>(3.4 to 8.5)                                 |
| Interpersonal violence                                                              | 39.4<br>(34.9 to 44.3)               | 4.4†<br>(3.7 to 5.2)                                                     | 0.6<br>(0.4 to 0.8)                                  | 14.2<br>(10.5 to 18.1)                            | -3.7<br>(-6.0 to -1.3)                              |
| Assault by firearm                                                                  | 0.2<br>(0.2 to 0.3)                  | 0.1<br>(0.1 to 0.1)                                                      | $< 0.05$<br>( $< 0.05$ to $< 0.05$ )                 | 34.3<br>(30.0 to 38.6)                            | 6.6<br>(3.8 to 9.4)                                 |
| Assault by sharp object                                                             | 1.8<br>(1.4 to 2.1)                  | 0.9<br>(0.7 to 1.1)                                                      | 0.1<br>( $< 0.05$ to 0.1)                            | 29.9<br>(26.3 to 33.5)                            | 4.2<br>(1.8 to 6.4)                                 |
| Sexual violence                                                                     | 32.5<br>(28.3 to 37.1)               | --                                                                       | 0.3<br>(0.2 to 0.4)                                  | 0.8<br>(-3.6 to 5.1)                              | -12.9<br>(-16.0 to -9.8)                            |
| Assault by other means                                                              | 4.9<br>(4.1 to 5.9)                  | 3.4<br>(2.9 to 4.0)                                                      | 0.2<br>(0.1 to 0.3)                                  | 32.4<br>(29.6 to 35.0)                            | 4.9<br>(3.0 to 6.7)                                 |
| <b>Forces of nature, conflict and terrorism, and executions and police conflict</b> | <b>2.9</b><br><b>(1.4 to 5.0)</b>    | <b><math>&lt; 0.05†</math></b><br><b>(<math>&lt; 0.05</math> to 0.1)</b> | <b>0.1</b><br><b>(<math>&lt; 0.05</math> to 0.3)</b> | <b>-9.2</b><br><b>(-12.4 to -5.4)</b>             | <b>-17.7</b><br><b>(-20.3 to -14.6)</b>             |
| Exposure to forces of nature                                                        | 0.4<br>(0.2 to 0.7)                  | --                                                                       | $< 0.05$<br>( $< 0.05$ to $< 0.05$ )                 | -22.0<br>(-24.5 to -19.4)                         | -29.4<br>(-31.4 to -27.0)                           |
| Conflict and terrorism                                                              | 2.3<br>(0.9 to 4.5)                  | --                                                                       | 0.1<br>( $< 0.05$ to 0.2)                            | -6.3<br>(-9.7 to -0.6)                            | -14.7<br>(-17.5 to -9.6)                            |
| Executions and police conflict                                                      | 0.1<br>( $< 0.05$ to 0.2)            | $< 0.05$<br>( $< 0.05$ to 0.1)                                           | $< 0.05$<br>( $< 0.05$ to $< 0.05$ )                 | 13.6<br>(-8.1 to 40.8)                            | -1.7<br>(-17.4 to 16.0)                             |
| <b>Impairments</b>                                                                  | --                                   | --                                                                       | --                                                   | --                                                | --                                                  |
| Anaemia                                                                             | 326.9<br>(286.8 to 364.4)            | --                                                                       | 11.6<br>(7.6 to 16.6)                                | 2.6<br>(-9.5 to 15.5)                             | -11.2<br>(-20.7 to -1.2)                            |
| Developmental intellectual disability                                               | 33.1<br>(25.1 to 41.5)               | --                                                                       | 3.4<br>(2.3 to 4.9)                                  | 14.9<br>(6.0 to 31.6)                             | 2.1<br>(-5.7 to 16.7)                               |
| Epilepsy                                                                            | 7.8<br>(3.8 to 12.3)                 | --                                                                       | 3.1<br>(1.4 to 5.3)                                  | 22.4<br>(-44.9 to 154.8)                          | 9.2<br>(-53.9 to 153.5)                             |
| Guillain-Barre syndrome                                                             | $< 0.05$<br>( $< 0.05$ to $< 0.05$ ) | --                                                                       | $< 0.05$<br>( $< 0.05$ to $< 0.05$ )                 | 15.3<br>(11.4 to 19.4)                            | 0.0<br>(-0.1 to 0.1)                                |
| Hearing loss                                                                        | 132.8<br>(125.4 to 140.8)            | --                                                                       | 4.9<br>(3.4 to 6.8)                                  | 17.0<br>(12.5 to 21.1)                            | -4.5<br>(-6.9 to -2.4)                              |
| Heart failure                                                                       | 3.2<br>(2.8 to 3.6)                  | --                                                                       | 0.4<br>(0.2 to 0.5)                                  | 40.2<br>(29.6 to 51.1)                            | 2.1<br>(-6.2 to 10.4)                               |
| Infertility                                                                         | 33.5<br>(25.9 to 44.3)               | --                                                                       | 0.2<br>(0.1 to 0.4)                                  | 37.8<br>(14.9 to 68.0)                            | 10.7<br>(-8.5 to 36.2)                              |
| Pelvic inflammatory disease                                                         | 1.1<br>(0.9 to 1.3)                  | --                                                                       | 0.1<br>(0.1 to 0.2)                                  | 22.8<br>(6.6 to 40.5)                             | -1.0<br>(-13.4 to 12.5)                             |
| Vision loss                                                                         | 92.7<br>(84.3 to 102.0)              | --                                                                       | 3.3<br>(2.2 to 4.8)                                  | 21.2<br>(12.5 to 35.4)                            | -4.6<br>(-9.8 to 3.5)                               |

We did not calculate incidence for the nine impairments, certain NTDs, and causes with only birth prevalence. Blank cells mean that no estimate is available.

† Incidence for aggregate causes represents the sum of the incidence of the causes below the aggregate.

‡ Incidence estimates for stroke represent first-ever stroke only.

^ Incidence of HIV/AIDS represents new infections of HIV only and does not include new infections of Tuberculosis in HIV positive cases.



SR Table 14: Prevalence, incidence, and YLDs for 2016, percentage change of YLD counts and percentage change of age-standardised YLD rates between 2006 and 2016 by cause and impairments, for all ages, Dominica.

| Cause                                                                                | Prevalence in thousands (95% UI) | Incidence in thousands (95% UI)         | YLDs in thousands (95% UI)             |                                                   |                                                     |
|--------------------------------------------------------------------------------------|----------------------------------|-----------------------------------------|----------------------------------------|---------------------------------------------------|-----------------------------------------------------|
|                                                                                      | 2016 counts                      | 2016 counts                             | 2016 counts                            | Percentage change in counts between 2006 and 2016 | Percentage change in age-standardised rates between |
| <b>All causes</b>                                                                    | <b>71.4</b><br>(71.1 to 71.6)    | <b>476.5†</b><br>(452.9 to 503.7)       | <b>7.9</b><br>(5.9 to 10.3)            | <b>14.5</b><br>(11.9 to 17.2)                     | <b>1.0</b><br>(-1.2 to 3.2)                         |
| <b>Communicable, maternal, neonatal, and nutritional disorders</b>                   | <b>41.0</b><br>(39.7 to 42.3)    | <b>267.0†</b><br>(245.3 to 291.8)       | <b>0.7</b><br>(0.5 to 1.0)             | <b>8.6</b><br>(-0.1 to 18.0)                      | <b>4.2</b><br>(-4.1 to 13.2)                        |
| <b>HIV/AIDS and tuberculosis</b>                                                     | <b>18.5</b><br>(16.6 to 20.1)    | <b>&lt; 0.05†</b><br>(< 0.05 to < 0.05) | <b>&lt; 0.05</b><br>(< 0.05 to < 0.05) | <b>-10.9</b><br>(-23.1 to 2.6)                    | <b>-20.8</b><br>(-31.2 to -8.2)                     |
| Tuberculosis                                                                         | 17.1<br>(15.4 to 18.9)           | < 0.05†<br>(< 0.05 to < 0.05)           | < 0.05<br>(< 0.05 to < 0.05)           | 4.3<br>(-21.2 to 37.5)                            | -6.7<br>(-28.4 to 21.5)                             |
| Drug-susceptible tuberculosis                                                        | < 0.05<br>(< 0.05 to < 0.05)     | < 0.05<br>(< 0.05 to < 0.05)            | < 0.05<br>(< 0.05 to < 0.05)           | 4.5<br>(-21.0 to 38.6)                            | -6.5<br>(-28.6 to 21.8)                             |
| Multidrug-resistant tuberculosis without extensive drug resistance                   | < 0.05<br>(< 0.05 to < 0.05)     | < 0.05<br>(< 0.05 to < 0.05)            | < 0.05<br>(< 0.05 to < 0.05)           | -25.2<br>(-88.4 to 358.6)                         | -33.5<br>(-89.6 to 306.2)                           |
| Extensively drug-resistant tuberculosis                                              | < 0.05<br>(< 0.05 to < 0.05)     | < 0.05<br>(< 0.05 to < 0.05)            | < 0.05<br>(< 0.05 to < 0.05)           | 99.1<br>(-69.2 to 1,122.4)                        | 77.2<br>(-72.2 to 981.4)                            |
| Latent tuberculosis infection                                                        | 17.1<br>(15.4 to 18.9)           | --                                      | --                                     | --                                                | --                                                  |
| HIV/AIDS                                                                             | 0.1<br>(< 0.05 to 0.1)           | < 0.05^<br>(< 0.05 to < 0.05)           | < 0.05<br>(< 0.05 to < 0.05)           | -14.3<br>(-28.5 to -1.7)                          | -24.0<br>(-36.3 to -12.5)                           |
| Drug-susceptible HIV/AIDS - Tuberculosis                                             | < 0.05<br>(< 0.05 to < 0.05)     | < 0.05<br>(< 0.05 to < 0.05)            | < 0.05<br>(< 0.05 to < 0.05)           | -5.9<br>(-12.2 to 1.2)                            | -15.1<br>(-20.8 to -8.6)                            |
| Multidrug-resistant HIV/AIDS - Tuberculosis without extensive drug resistance        | < 0.05<br>(< 0.05 to < 0.05)     | < 0.05<br>(< 0.05 to < 0.05)            | < 0.05<br>(< 0.05 to < 0.05)           | -32.2<br>(-89.5 to 310.8)                         | -38.9<br>(-90.6 to 270.4)                           |
| Extensively drug-resistant HIV/AIDS - Tuberculosis                                   | < 0.05<br>(< 0.05 to < 0.05)     | < 0.05<br>(< 0.05 to < 0.05)            | < 0.05<br>(< 0.05 to < 0.05)           | 80.4<br>(-72.2 to 993.6)                          | 62.6<br>(-74.9 to 886.1)                            |
| HIV/AIDS resulting in other diseases                                                 | 0.1<br>(< 0.05 to 0.1)           | < 0.05<br>(< 0.05 to < 0.05)            | < 0.05<br>(< 0.05 to < 0.05)           | -14.7<br>(-29.6 to -1.7)                          | -24.4<br>(-37.5 to -12.5)                           |
| <b>Diarrhoea, lower respiratory infections, and other common infectious diseases</b> | <b>4.2</b><br>(4.0 to 4.5)       | <b>243.4†</b><br>(222.8 to 264.8)       | <b>0.2</b><br>(0.1 to 0.3)             | <b>11.9</b><br>(8.2 to 15.5)                      | <b>6.5</b><br>(3.0 to 10.0)                         |
| Diarrhoeal diseases                                                                  | 0.8<br>(0.8 to 0.9)              | 54.3<br>(50.9 to 58.0)                  | 0.1<br>(0.1 to 0.1)                    | 22.1<br>(15.3 to 29.2)                            | 15.9<br>(9.6 to 22.5)                               |
| Intestinal infectious diseases                                                       | < 0.05<br>(< 0.05 to < 0.05)     | < 0.05†<br>(< 0.05 to < 0.05)           | < 0.05<br>(< 0.05 to < 0.05)           | 9.5<br>(-4.0 to 24.5)                             | -4.9<br>(-16.3 to 7.6)                              |
| Typhoid fever                                                                        | < 0.05<br>(< 0.05 to < 0.05)     | < 0.05<br>(< 0.05 to < 0.05)            | < 0.05<br>(< 0.05 to < 0.05)           | 11.5<br>(-3.2 to 28.9)                            | -3.4<br>(-15.5 to 11.3)                             |
| Paratyphoid fever                                                                    | < 0.05<br>(< 0.05 to < 0.05)     | < 0.05<br>(< 0.05 to < 0.05)            | < 0.05<br>(< 0.05 to < 0.05)           | 11.2<br>(-7.7 to 36.5)                            | -3.6<br>(-19.7 to 17.0)                             |
| Other intestinal infectious diseases                                                 | --                               | --                                      | < 0.05<br>(< 0.05 to < 0.05)           | -28.1<br>(-46.1 to -1.7)                          | -30.9<br>(-48.1 to -6.1)                            |
| Lower respiratory infections                                                         | 0.1<br>(0.1 to 0.1)              | 4.3<br>(3.9 to 4.7)                     | < 0.05<br>(< 0.05 to < 0.05)           | 23.8<br>(11.9 to 37.2)                            | 11.8<br>(1.1 to 23.4)                               |
| Upper respiratory infections                                                         | 2.4<br>(2.1 to 2.7)              | 179.4<br>(158.6 to 202.0)               | 0.1<br>(< 0.05 to 0.1)                 | 4.8<br>(-0.6 to 10.4)                             | -0.1<br>(-5.1 to 5.2)                               |
| Otitis media                                                                         | 0.9<br>(0.8 to 1.0)              | 4.0<br>(3.2 to 4.9)                     | < 0.05<br>(< 0.05 to < 0.05)           | -1.8<br>(-8.6 to 5.5)                             | -4.0<br>(-10.3 to 3.0)                              |
| Meningitis                                                                           | 0.1<br>(0.1 to 0.1)              | < 0.05<br>(< 0.05 to < 0.05)            | < 0.05<br>(< 0.05 to < 0.05)           | 7.0<br>(4.0 to 10.2)                              | -0.7<br>(-3.5 to 2.2)                               |
| Pneumococcal meningitis                                                              | < 0.05<br>(< 0.05 to < 0.05)     | < 0.05<br>(< 0.05 to < 0.05)            | < 0.05<br>(< 0.05 to < 0.05)           | 7.7<br>(3.5 to 12.1)                              | -0.5<br>(-4.4 to 3.5)                               |
| H influenzae type B meningitis                                                       | < 0.05<br>(< 0.05 to < 0.05)     | < 0.05<br>(< 0.05 to < 0.05)            | < 0.05<br>(< 0.05 to < 0.05)           | -11.3<br>(-18.3 to -4.5)                          | -17.1<br>(-23.7 to -10.8)                           |
| Meningococcal infection                                                              | < 0.05<br>(< 0.05 to < 0.05)     | < 0.05<br>(< 0.05 to < 0.05)            | < 0.05<br>(< 0.05 to < 0.05)           | 7.9<br>(3.2 to 13.1)                              | -1.1<br>(-5.6 to 3.6)                               |
| Other meningitis                                                                     | < 0.05<br>(< 0.05 to < 0.05)     | < 0.05<br>(< 0.05 to < 0.05)            | < 0.05<br>(< 0.05 to < 0.05)           | 19.6<br>(13.1 to 28.1)                            | 11.5<br>(5.6 to 19.1)                               |
| Encephalitis                                                                         | 0.1<br>(< 0.05 to 0.1)           | < 0.05<br>(< 0.05 to < 0.05)            | < 0.05<br>(< 0.05 to < 0.05)           | 6.8<br>(-9.6 to 25.2)                             | -2.1<br>(-17.0 to 14.3)                             |
| Diphtheria                                                                           | < 0.05<br>(< 0.05 to < 0.05)     | < 0.05<br>(< 0.05 to < 0.05)            | < 0.05<br>(< 0.05 to < 0.05)           | 18.8<br>(-31.2 to 107.6)                          | 10.8<br>(-35.5 to 92.8)                             |
| Whooping cough                                                                       | < 0.05<br>(< 0.05 to < 0.05)     | < 0.05<br>(< 0.05 to < 0.05)            | < 0.05<br>(< 0.05 to < 0.05)           | -10.4<br>(-44.3 to 43.0)                          | -3.1<br>(-39.8 to 54.7)                             |
| Tetanus                                                                              | < 0.05<br>(< 0.05 to < 0.05)     | < 0.05<br>(< 0.05 to < 0.05)            | < 0.05<br>(< 0.05 to < 0.05)           | -47.8<br>(-60.8 to -25.6)                         | -55.9<br>(-66.9 to -37.7)                           |
| Measles                                                                              | < 0.05<br>(0.0 to < 0.05)        | < 0.05<br>(0.0 to < 0.05)               | < 0.05<br>(0.0 to < 0.05)              | --                                                | --                                                  |
| Varicella and herpes zoster                                                          | 0.1<br>(0.1 to 0.1)              | 1.4<br>(1.3 to 1.4)                     | < 0.05<br>(< 0.05 to < 0.05)           | 15.9<br>(1.0 to 31.5)                             | 0.5<br>(-11.6 to 12.9)                              |
| <b>Neglected tropical diseases and malaria</b>                                       | <b>0.8</b><br>(0.7 to 1.0)       | <b>14.5†</b><br>(8.3 to 27.7)           | <b>&lt; 0.05</b><br>(< 0.05 to 0.1)    | <b>171.0</b><br>(98.8 to 278.8)                   | <b>159.0</b><br>(92.7 to 258.7)                     |
| Malaria                                                                              | --                               | --                                      | --                                     | --                                                | --                                                  |
| Chagas disease                                                                       | < 0.05<br>(< 0.05 to < 0.05)     | --                                      | < 0.05<br>(< 0.05 to < 0.05)           | 53.2<br>(-62.6 to 575.5)                          | 35.7<br>(-64.3 to 444.2)                            |
| Leishmaniasis                                                                        | --                               | --                                      | --                                     | --                                                | --                                                  |
| Visceral leishmaniasis                                                               | --                               | --                                      | --                                     | --                                                | --                                                  |
| Cutaneous and mucocutaneous leishmaniasis                                            | --                               | --                                      | --                                     | --                                                | --                                                  |
| African trypanosomiasis                                                              | --                               | --                                      | --                                     | --                                                | --                                                  |
| Schistosomiasis                                                                      | --                               | --                                      | --                                     | --                                                | --                                                  |
| Cysticercosis                                                                        | --                               | --                                      | --                                     | --                                                | --                                                  |
| Cystic echinococcosis                                                                | --                               | --                                      | --                                     | --                                                | --                                                  |
| Lymphatic filariasis                                                                 | --                               | --                                      | --                                     | --                                                | --                                                  |
| Onchocerciasis                                                                       | --                               | --                                      | --                                     | --                                                | --                                                  |
| Trachoma                                                                             | --                               | --                                      | --                                     | --                                                | --                                                  |
| Dengue                                                                               | 0.2<br>(0.1 to 0.3)              | 3.1<br>(2.0 to 4.4)                     | < 0.05<br>(< 0.05 to 0.1)              | 372.5<br>(274.1 to 906.1)                         | 341.9<br>(251.4 to 837.5)                           |
| Yellow fever                                                                         | --                               | --                                      | --                                     | --                                                | --                                                  |
| Rabies                                                                               | < 0.05<br>(< 0.05 to < 0.05)     | < 0.05<br>(< 0.05 to < 0.05)            | < 0.05<br>(< 0.05 to < 0.05)           | 61.0<br>(6.9 to 149.1)                            | 40.2<br>(-6.4 to 109.9)                             |
| Intestinal nematode infections                                                       | < 0.05<br>(< 0.05 to < 0.05)     | --                                      | < 0.05<br>(< 0.05 to < 0.05)           | -22.6<br>(-53.7 to 31.0)                          | -26.8<br>(-56.2 to 23.4)                            |
| Ascariasis                                                                           | < 0.05<br>(< 0.05 to < 0.05)     | --                                      | --                                     | --                                                | --                                                  |

| Cause                                                                   | Prevalence in thousands (95% UI)  | Incidence in thousands (95% UI)    | YLDs in thousands (95% UI)                    |                                                   |                                                     |
|-------------------------------------------------------------------------|-----------------------------------|------------------------------------|-----------------------------------------------|---------------------------------------------------|-----------------------------------------------------|
|                                                                         | 2016 counts<br>(< 0.05 to < 0.05) | 2016 counts                        | 2016 counts                                   | Percentage change in counts between 2006 and 2016 | Percentage change in age-standardised rates between |
| Trichuriasis                                                            | < 0.05<br>(< 0.05 to < 0.05)      | --                                 | --                                            | --                                                | --                                                  |
| Hookworm disease                                                        | < 0.05<br>(< 0.05 to < 0.05)      | --                                 | < 0.05<br>(< 0.05 to < 0.05)                  | -22.6<br>(-53.7 to 31.0)                          | -26.8<br>(-56.2 to 23.4)                            |
| Food-borne trematodiasis                                                | --                                | --                                 | --                                            | --                                                | --                                                  |
| Leprosy                                                                 | < 0.05<br>(< 0.05 to < 0.05)      | --                                 | < 0.05<br>(< 0.05 to < 0.05)                  | -5.3<br>(-36.7 to 165.8)                          | -22.9<br>(-48.3 to 118.6)                           |
| Ebola virus disease                                                     | --                                | --                                 | --                                            | --                                                | --                                                  |
| Zika virus disease                                                      | 0.2<br>(0.1 to 0.4)               | 11.4<br>(5.6 to 24.7)              | < 0.05<br>(< 0.05 to < 0.05)                  | --                                                | --                                                  |
| Guinea worm disease                                                     | --                                | --                                 | --                                            | --                                                | --                                                  |
| Other neglected tropical diseases                                       | 0.4<br>(0.4 to 0.5)               | --                                 | < 0.05<br>(< 0.05 to < 0.05)                  | -3.3<br>(-26.4 to 28.0)                           | -0.0<br>(-24.1 to 33.1)                             |
| <b>Maternal disorders</b>                                               | <b>0.1<br/>(0.1 to 0.1)</b>       | <b>1.6†<br/>(1.3 to 1.9)</b>       | <b>&lt; 0.05<br/>(&lt; 0.05 to &lt; 0.05)</b> | <b>-5.1<br/>(-29.6 to 31.2)</b>                   | <b>-11.3<br/>(-34.3 to 22.8)</b>                    |
| Maternal haemorrhage                                                    | < 0.05<br>(< 0.05 to < 0.05)      | 0.1<br>(< 0.05 to 0.1)             | < 0.05<br>(< 0.05 to < 0.05)                  | 11.2<br>(-26.4 to 70.8)                           | 4.6<br>(-30.6 to 62.1)                              |
| Maternal sepsis and other pregnancy related infections                  | < 0.05<br>(< 0.05 to < 0.05)      | 0.1<br>(0.1 to 0.2)                | < 0.05<br>(< 0.05 to < 0.05)                  | -0.7<br>(-53.7 to 108.9)                          | -7.3<br>(-56.6 to 96.2)                             |
| Maternal hypertensive disorders                                         | 0.1<br>(< 0.05 to 0.1)            | 0.2<br>(0.2 to 0.3)                | < 0.05<br>(< 0.05 to < 0.05)                  | -7.0<br>(-42.0 to 54.2)                           | -13.0<br>(-45.8 to 44.5)                            |
| Maternal obstructed labour and uterine rupture                          | < 0.05<br>(< 0.05 to < 0.05)      | 0.1<br>(< 0.05 to 0.1)             | < 0.05<br>(< 0.05 to < 0.05)                  | -4.5<br>(-49.3 to 74.8)                           | -10.9<br>(-52.9 to 62.6)                            |
| Maternal abortion, miscarriage, and ectopic pregnancy                   | < 0.05<br>(< 0.05 to < 0.05)      | 1.1<br>(0.8 to 1.4)                | < 0.05<br>(< 0.05 to < 0.05)                  | -5.2<br>(-46.6 to 64.3)                           | -11.4<br>(-50.3 to 53.2)                            |
| Other maternal disorders                                                | --                                | --                                 | < 0.05<br>(< 0.05 to < 0.05)                  | -9.5<br>(-32.8 to 25.0)                           | -15.3<br>(-37.3 to 17.1)                            |
| <b>Neonatal disorders</b>                                               | <b>1.3<br/>(1.1 to 1.7)</b>       | <b>0.2</b>                         | <b>0.2<br/>(0.1 to 0.4)</b>                   | <b>16.5<br/>(-1.3 to 38.1)</b>                    | <b>12.3<br/>(-4.8 to 32.8)</b>                      |
| Neonatal preterm birth complications                                    | 1.1<br>(0.8 to 1.4)               | --                                 | 0.1<br>(0.1 to 0.2)                           | 16.6<br>(-9.4 to 48.4)                            | 11.9<br>(-13.1 to 42.6)                             |
| Neonatal encephalopathy due to birth asphyxia and trauma                | < 0.05<br>(< 0.05 to 0.1)         | --                                 | < 0.05<br>(< 0.05 to < 0.05)                  | 21.4<br>(-24.6 to 140.5)                          | 15.9<br>(-27.2 to 127.1)                            |
| Neonatal sepsis and other neonatal infections                           | 0.3<br>(0.1 to 0.6)               | --                                 | 0.1<br>(< 0.05 to 0.3)                        | 18.2<br>(-8.3 to 64.1)                            | 13.7<br>(-10.8 to 58.0)                             |
| Hemolytic disease and other neonatal jaundice                           | < 0.05<br>(< 0.05 to < 0.05)      | --                                 | < 0.05<br>(< 0.05 to < 0.05)                  | 5.8<br>(-12.4 to 29.1)                            | 0.2<br>(-17.0 to 21.7)                              |
| Other neonatal disorders                                                | --                                | --                                 | < 0.05<br>(< 0.05 to < 0.05)                  | 1.8<br>(-15.6 to 21.7)                            | 11.4<br>(-7.7 to 33.1)                              |
| <b>Nutritional deficiencies</b>                                         | <b>10.7<br/>(9.6 to 11.7)</b>     | <b>1.2†<br/>(0.8 to 1.9)</b>       | <b>0.2<br/>(0.1 to 0.3)</b>                   | <b>-13.8<br/>(-26.3 to 0.9)</b>                   | <b>-15.7<br/>(-27.5 to -1.3)</b>                    |
| Protein-energy malnutrition                                             | 0.1<br>(0.1 to 0.2)               | 0.1<br>(0.1 to 0.1)                | < 0.05<br>(< 0.05 to < 0.05)                  | -14.9<br>(-40.0 to 19.3)                          | -7.0<br>(-34.2 to 30.1)                             |
| Iodine deficiency                                                       | 0.2<br>(0.2 to 0.3)               | < 0.05<br>(< 0.05 to < 0.05)       | < 0.05<br>(< 0.05 to < 0.05)                  | 15.3<br>(0.2 to 34.2)                             | 2.0<br>(-11.5 to 18.3)                              |
| Vitamin A deficiency                                                    | 1.4<br>(0.9 to 2.3)               | 1.2<br>(0.7 to 1.9)                | < 0.05<br>(< 0.05 to < 0.05)                  | 2.3<br>(-12.9 to 22.5)                            | -0.9<br>(-15.6 to 17.8)                             |
| Iron-deficiency anaemia                                                 | 8.7<br>(7.5 to 10.0)              | --                                 | 0.2<br>(0.1 to 0.2)                           | -14.8<br>(-28.2 to 0.9)                           | -16.8<br>(-29.5 to -1.4)                            |
| Other nutritional deficiencies                                          | --                                | --                                 | < 0.05<br>(< 0.05 to < 0.05)                  | -16.4<br>(-42.1 to 19.1)                          | -8.6<br>(-36.6 to 30.1)                             |
| <b>Other communicable, maternal, neonatal, and nutritional diseases</b> | <b>19.8<br/>(18.5 to 21.2)</b>    | <b>6.3<br/>(5.0 to 8.2)</b>        | <b>&lt; 0.05<br/>(&lt; 0.05 to 0.1)</b>       | <b>8.8<br/>(-0.0 to 18.2)</b>                     | <b>2.0<br/>(-5.9 to 11.1)</b>                       |
| Sexually transmitted diseases excluding HIV                             | 17.7<br>(16.3 to 19.1)            | 6.1<br>(4.8 to 7.9)                | < 0.05<br>(< 0.05 to < 0.05)                  | 10.6<br>(1.5 to 20.4)                             | 1.1<br>(-6.9 to 10.1)                               |
| Syphilis                                                                | 0.7<br>(0.5 to 0.9)               | 0.5<br>(0.3 to 0.7)                | < 0.05<br>(< 0.05 to < 0.05)                  | 14.8<br>(1.1 to 31.1)                             | -6.5<br>(-18.5 to 7.2)                              |
| Chlamydial infection                                                    | 0.7<br>(0.5 to 0.8)               | 0.5<br>(0.4 to 0.7)                | < 0.05<br>(< 0.05 to < 0.05)                  | 9.1<br>(-9.7 to 30.3)                             | 1.1<br>(-16.0 to 20.2)                              |
| Gonococcal infection                                                    | 0.5<br>(0.2 to 1.0)               | 1.9<br>(0.7 to 3.6)                | < 0.05<br>(< 0.05 to < 0.05)                  | 10.3<br>(-8.8 to 33.2)                            | 4.9<br>(-13.5 to 26.2)                              |
| Trichomoniasis                                                          | 2.5<br>(2.2 to 2.9)               | 2.2<br>(1.9 to 2.5)                | < 0.05<br>(< 0.05 to < 0.05)                  | 10.9<br>(3.9 to 18.8)                             | 0.1<br>(-5.8 to 7.0)                                |
| Genital herpes                                                          | 14.5<br>(12.6 to 16.7)            | 0.9<br>(0.8 to 1.1)                | < 0.05<br>(< 0.05 to < 0.05)                  | 14.3<br>(6.9 to 20.9)                             | 0.1<br>(-5.8 to 5.8)                                |
| Other sexually transmitted diseases                                     | 0.1<br>(0.1 to 0.2)               | 0.1<br>(0.1 to 0.1)                | < 0.05<br>(< 0.05 to < 0.05)                  | 7.7<br>(-4.1 to 21.6)                             | 1.5<br>(-9.2 to 14.2)                               |
| Hepatitis                                                               | 2.7<br>(2.4 to 3.1)               | 0.2<br>(0.2 to 0.3)                | < 0.05<br>(< 0.05 to < 0.05)                  | -5.9<br>(-26.2 to 20.7)                           | -15.0<br>(-32.6 to 7.5)                             |
| Acute hepatitis A                                                       | < 0.05<br>(< 0.05 to < 0.05)      | 0.1<br>(< 0.05 to 0.1)             | < 0.05<br>(< 0.05 to < 0.05)                  | -3.4<br>(-61.6 to 148.7)                          | -11.0<br>(-63.3 to 127.8)                           |
| Hepatitis B                                                             | 1.2<br>(0.9 to 1.5)               | 0.1<br>(0.1 to 0.2)                | < 0.05<br>(< 0.05 to < 0.05)                  | -7.0<br>(-21.7 to 8.4)                            | -19.2<br>(-31.8 to -6.1)                            |
| Hepatitis C                                                             | 1.6<br>(1.4 to 1.8)               | < 0.05<br>(< 0.05 to < 0.05)       | < 0.05<br>(< 0.05 to < 0.05)                  | -6.0<br>(-22.5 to 12.8)                           | -3.6<br>(-21.2 to 16.8)                             |
| Acute hepatitis E                                                       | < 0.05<br>(< 0.05 to < 0.05)      | < 0.05<br>(< 0.05 to < 0.05)       | < 0.05<br>(< 0.05 to < 0.05)                  | -6.2<br>(-12.8 to 0.8)                            | -15.3<br>(-20.8 to -9.1)                            |
| Other infectious diseases                                               | 0.4<br>(0.3 to 0.4)               | < 0.05<br>(< 0.05 to < 0.05)       | < 0.05<br>(< 0.05 to < 0.05)                  | 4.5<br>(-14.2 to 28.2)                            | 5.5<br>(-13.2 to 29.8)                              |
| <b>Non-communicable diseases</b>                                        | <b>68.6<br/>(68.2 to 69.0)</b>    | <b>204.7†<br/>(194.2 to 215.8)</b> | <b>6.7<br/>(4.9 to 8.8)</b>                   | <b>14.3<br/>(11.5 to 17.1)</b>                    | <b>-0.1<br/>(-2.5 to 2.3)</b>                       |
| <b>Neoplasms</b>                                                        | <b>0.7<br/>(0.7 to 0.7)</b>       | <b>0.2<br/>(0.2 to 0.2)</b>        | <b>0.1<br/>(0.1 to 0.1)</b>                   | <b>43.6<br/>(34.8 to 52.9)</b>                    | <b>14.5<br/>(7.2 to 22.1)</b>                       |
| Lip and oral cavity cancer                                              | < 0.05<br>(< 0.05 to < 0.05)      | < 0.05<br>(< 0.05 to < 0.05)       | < 0.05<br>(< 0.05 to < 0.05)                  | 31.5<br>(15.0 to 50.1)                            | 4.5<br>(-8.9 to 19.5)                               |
| Nasopharynx cancer                                                      | < 0.05<br>(< 0.05 to < 0.05)      | < 0.05<br>(< 0.05 to < 0.05)       | < 0.05<br>(< 0.05 to < 0.05)                  | 43.2<br>(26.6 to 60.5)                            | 22.0<br>(8.5 to 36.1)                               |
| Other pharynx cancer                                                    | < 0.05<br>(< 0.05 to < 0.05)      | < 0.05<br>(< 0.05 to < 0.05)       | < 0.05<br>(< 0.05 to < 0.05)                  | 36.9<br>(19.4 to 57.3)                            | 7.3<br>(-6.1 to 23.2)                               |
| Oesophageal cancer                                                      | < 0.05<br>(< 0.05 to < 0.05)      | < 0.05<br>(< 0.05 to < 0.05)       | < 0.05<br>(< 0.05 to < 0.05)                  | 16.6<br>(-1.1 to 37.8)                            | -8.6<br>(-22.8 to 8.8)                              |
| Stomach cancer                                                          | < 0.05<br>(< 0.05 to < 0.05)      | < 0.05<br>(< 0.05 to < 0.05)       | < 0.05<br>(< 0.05 to < 0.05)                  | 33.2<br>(14.9 to 52.4)                            | 5.0<br>(-9.8 to 20.6)                               |
| Colon and rectum cancer                                                 | 0.1<br>(0.1 to 0.1)               | < 0.05<br>(< 0.05 to < 0.05)       | < 0.05<br>(< 0.05 to < 0.05)                  | 62.9<br>(43.9 to 83.6)                            | 28.6<br>(13.7 to 45.2)                              |
| Liver cancer                                                            | < 0.05<br>(< 0.05 to < 0.05)      | < 0.05<br>(< 0.05 to < 0.05)       | < 0.05<br>(< 0.05 to < 0.05)                  | 31.6<br>(22.6 to 41.8)                            | 4.5<br>(-2.8 to 12.6)                               |
| Liver cancer due to hepatitis B                                         | < 0.05<br>(< 0.05 to < 0.05)      | < 0.05<br>(< 0.05 to < 0.05)       | < 0.05<br>(< 0.05 to < 0.05)                  | 31.8<br>(21.4 to 42.9)                            | 5.7<br>(-2.5 to 14.6)                               |

| Cause                                              | Prevalence in thousands (95% UI)  | Incidence in thousands (95% UI)    | YLDs in thousands (95% UI)        |                                                   |                                                     |
|----------------------------------------------------|-----------------------------------|------------------------------------|-----------------------------------|---------------------------------------------------|-----------------------------------------------------|
|                                                    | 2016 counts                       | 2016 counts                        | 2016 counts                       | Percentage change in counts between 2006 and 2016 | Percentage change in age-standardised rates between |
| Liver cancer due to hepatitis C                    | < 0.05<br>(< 0.05 to < 0.05)      | < 0.05<br>(< 0.05 to < 0.05)       | < 0.05<br>(< 0.05 to < 0.05)      | 32.2<br>(21.5 to 44.7)                            | 4.1<br>(-4.4 to 14.0)                               |
| Liver cancer due to alcohol use                    | < 0.05<br>(< 0.05 to < 0.05)      | < 0.05<br>(< 0.05 to < 0.05)       | < 0.05<br>(< 0.05 to < 0.05)      | 32.5<br>(22.3 to 45.0)                            | 3.9<br>(-4.2 to 14.2)                               |
| Liver cancer due to other causes                   | < 0.05<br>(< 0.05 to < 0.05)      | < 0.05<br>(< 0.05 to < 0.05)       | < 0.05<br>(< 0.05 to < 0.05)      | 29.4<br>(18.7 to 42.1)                            | 3.9<br>(-4.9 to 14.0)                               |
| Gallbladder and biliary tract cancer               | < 0.05<br>(< 0.05 to < 0.05)      | < 0.05<br>(< 0.05 to < 0.05)       | < 0.05<br>(< 0.05 to < 0.05)      | 26.6<br>(18.2 to 35.2)                            | -0.3<br>(-7.1 to 6.5)                               |
| Pancreatic cancer                                  | < 0.05<br>(< 0.05 to < 0.05)      | < 0.05<br>(< 0.05 to < 0.05)       | < 0.05<br>(< 0.05 to < 0.05)      | 33.1<br>(14.8 to 55.7)                            | 4.8<br>(-10.3 to 23.3)                              |
| Larynx cancer                                      | < 0.05<br>(< 0.05 to < 0.05)      | < 0.05<br>(< 0.05 to < 0.05)       | < 0.05<br>(< 0.05 to < 0.05)      | 41.0<br>(17.2 to 67.5)                            | 10.4<br>(-9.2 to 31.4)                              |
| Tracheal, bronchus, and lung cancer                | < 0.05<br>(< 0.05 to < 0.05)      | < 0.05<br>(< 0.05 to < 0.05)       | < 0.05<br>(< 0.05 to < 0.05)      | 39.6<br>(17.3 to 68.1)                            | 9.7<br>(-7.9 to 32.2)                               |
| Malignant skin melanoma                            | < 0.05<br>(< 0.05 to < 0.05)      | < 0.05<br>(< 0.05 to < 0.05)       | < 0.05<br>(< 0.05 to < 0.05)      | 52.9<br>(30.4 to 77.0)                            | 24.4<br>(5.4 to 44.9)                               |
| Non-melanoma skin cancer                           | < 0.05<br>(< 0.05 to < 0.05)      | < 0.05<br>(< 0.05 to < 0.05)       | < 0.05<br>(< 0.05 to < 0.05)      | -35.6<br>(-72.7 to 40.9)                          | -49.8<br>(-79.0 to 11.4)                            |
| Non-melanoma skin cancer (squamous-cell carcinoma) | < 0.05<br>(< 0.05 to < 0.05)      | < 0.05<br>(< 0.05 to < 0.05)       | < 0.05<br>(< 0.05 to < 0.05)      | -37.5<br>(-73.7 to 41.5)                          | -51.2<br>(-79.7 to 11.9)                            |
| Non-melanoma skin cancer (basal-cell carcinoma)    | < 0.05<br>(< 0.05 to < 0.05)      | < 0.05<br>(< 0.05 to < 0.05)       | < 0.05<br>(< 0.05 to < 0.05)      | 26.0<br>(13.4 to 41.3)                            | 0.8<br>(-8.9 to 13.7)                               |
| Breast cancer                                      | 0.1<br>(0.1 to 0.1)               | < 0.05<br>(< 0.05 to < 0.05)       | < 0.05<br>(< 0.05 to < 0.05)      | 47.1<br>(28.2 to 68.5)                            | 19.0<br>(4.1 to 35.9)                               |
| Cervical cancer                                    | < 0.05<br>(< 0.05 to < 0.05)      | < 0.05<br>(< 0.05 to < 0.05)       | < 0.05<br>(< 0.05 to < 0.05)      | -0.2<br>(-19.7 to 21.7)                           | -16.8<br>(-32.9 to 0.6)                             |
| Uterine cancer                                     | < 0.05<br>(< 0.05 to < 0.05)      | < 0.05<br>(< 0.05 to < 0.05)       | < 0.05<br>(< 0.05 to < 0.05)      | 94.4<br>(62.0 to 135.8)                           | 53.3<br>(27.7 to 85.7)                              |
| Ovarian cancer                                     | < 0.05<br>(< 0.05 to < 0.05)      | < 0.05<br>(< 0.05 to < 0.05)       | < 0.05<br>(< 0.05 to < 0.05)      | 97.2<br>(41.9 to 163.5)                           | 57.9<br>(15.1 to 110.8)                             |
| Prostate cancer                                    | 0.3<br>(0.2 to 0.4)               | 0.1<br>(0.1 to 0.1)                | < 0.05<br>(< 0.05 to < 0.05)      | 43.1<br>(26.2 to 61.7)                            | 12.1<br>(-1.3 to 26.7)                              |
| Testicular cancer                                  | < 0.05<br>(< 0.05 to < 0.05)      | < 0.05<br>(< 0.05 to < 0.05)       | < 0.05<br>(< 0.05 to < 0.05)      | 39.6<br>(14.8 to 67.6)                            | 25.4<br>(3.3 to 50.0)                               |
| Kidney cancer                                      | < 0.05<br>(< 0.05 to < 0.05)      | < 0.05<br>(< 0.05 to < 0.05)       | < 0.05<br>(< 0.05 to < 0.05)      | 47.2<br>(29.5 to 68.6)                            | 21.7<br>(7.2 to 38.8)                               |
| Bladder cancer                                     | < 0.05<br>(< 0.05 to < 0.05)      | < 0.05<br>(< 0.05 to < 0.05)       | < 0.05<br>(< 0.05 to < 0.05)      | 39.8<br>(24.9 to 57.6)                            | 10.3<br>(-1.7 to 24.2)                              |
| Brain and nervous system cancer                    | < 0.05<br>(< 0.05 to < 0.05)      | < 0.05<br>(< 0.05 to < 0.05)       | < 0.05<br>(< 0.05 to < 0.05)      | 24.3<br>(14.1 to 42.5)                            | 5.5<br>(-2.9 to 20.9)                               |
| Thyroid cancer                                     | < 0.05<br>(< 0.05 to < 0.05)      | < 0.05<br>(< 0.05 to < 0.05)       | < 0.05<br>(< 0.05 to < 0.05)      | 83.2<br>(52.1 to 117.7)                           | 51.8<br>(25.5 to 80.6)                              |
| Mesothelioma                                       | < 0.05<br>(< 0.05 to < 0.05)      | < 0.05<br>(< 0.05 to < 0.05)       | < 0.05<br>(< 0.05 to < 0.05)      | 37.7<br>(26.1 to 50.8)                            | 9.6<br>(0.6 to 20.4)                                |
| Hodgkin lymphoma                                   | < 0.05<br>(< 0.05 to < 0.05)      | < 0.05<br>(< 0.05 to < 0.05)       | < 0.05<br>(< 0.05 to < 0.05)      | 50.8<br>(35.5 to 65.8)                            | 29.6<br>(16.8 to 42.1)                              |
| Non-Hodgkin's lymphoma                             | < 0.05<br>(< 0.05 to < 0.05)      | < 0.05<br>(< 0.05 to < 0.05)       | < 0.05<br>(< 0.05 to < 0.05)      | 37.5<br>(21.2 to 59.9)                            | 13.8<br>(0.5 to 31.7)                               |
| Multiple myeloma                                   | < 0.05<br>(< 0.05 to < 0.05)      | < 0.05<br>(< 0.05 to < 0.05)       | < 0.05<br>(< 0.05 to < 0.05)      | 66.1<br>(26.0 to 110.2)                           | 30.6<br>(-1.6 to 65.8)                              |
| Leukaemia                                          | < 0.05<br>(< 0.05 to < 0.05)      | < 0.05<br>(< 0.05 to < 0.05)       | < 0.05<br>(< 0.05 to < 0.05)      | 26.1<br>(13.5 to 40.4)                            | 6.5<br>(-4.7 to 18.8)                               |
| Acute lymphoid leukaemia                           | < 0.05<br>(< 0.05 to < 0.05)      | < 0.05<br>(< 0.05 to < 0.05)       | < 0.05<br>(< 0.05 to < 0.05)      | 40.6<br>(17.4 to 63.9)                            | 35.0<br>(12.5 to 57.8)                              |
| Chronic lymphoid leukaemia                         | < 0.05<br>(< 0.05 to < 0.05)      | < 0.05<br>(< 0.05 to < 0.05)       | < 0.05<br>(< 0.05 to < 0.05)      | 32.2<br>(7.5 to 60.7)                             | 5.2<br>(-14.7 to 27.8)                              |
| Acute myeloid leukaemia                            | < 0.05<br>(< 0.05 to < 0.05)      | < 0.05<br>(< 0.05 to < 0.05)       | < 0.05<br>(< 0.05 to < 0.05)      | 73.5<br>(53.5 to 93.2)                            | 50.8<br>(33.9 to 67.6)                              |
| Chronic myeloid leukaemia                          | < 0.05<br>(< 0.05 to < 0.05)      | < 0.05<br>(< 0.05 to < 0.05)       | < 0.05<br>(< 0.05 to < 0.05)      | 139.6<br>(99.2 to 188.5)                          | 97.0<br>(65.0 to 137.1)                             |
| Other leukaemia                                    | < 0.05<br>(< 0.05 to < 0.05)      | < 0.05<br>(< 0.05 to < 0.05)       | < 0.05<br>(< 0.05 to < 0.05)      | 11.3<br>(-4.3 to 29.2)                            | -7.5<br>(-20.7 to 7.8)                              |
| Other neoplasms                                    | 0.1<br>(< 0.05 to 0.1)            | < 0.05<br>(< 0.05 to < 0.05)       | < 0.05<br>(< 0.05 to < 0.05)      | 80.5<br>(51.8 to 117.6)                           | 50.3<br>(26.9 to 80.9)                              |
| <b>Cardiovascular diseases</b>                     | <b>5.1</b><br><b>(5.0 to 5.3)</b> | <b>0.5†</b><br><b>(0.5 to 0.6)</b> | <b>0.3</b><br><b>(0.2 to 0.4)</b> | <b>22.4</b><br><b>(18.7 to 26.2)</b>              | <b>-0.0</b><br><b>(-2.8 to 3.1)</b>                 |
| Rheumatic heart disease                            | 0.7<br>(0.6 to 0.8)               | < 0.05<br>(< 0.05 to < 0.05)       | < 0.05<br>(< 0.05 to < 0.05)      | 12.8<br>(2.3 to 22.7)                             | 1.5<br>(-7.9 to 10.2)                               |
| Ischaemic heart disease                            | 1.6<br>(1.5 to 1.7)               | 0.2<br>(0.2 to 0.2)                | 0.1<br>(< 0.05 to 0.1)            | 23.1<br>(17.2 to 28.9)                            | -0.9<br>(-5.5 to 3.4)                               |
| Cerebrovascular disease                            | 0.7<br>(0.6 to 0.7)               | 0.1‡<br>(0.1 to 0.1)               | 0.1<br>(< 0.05 to 0.1)            | 28.4<br>(20.2 to 37.6)                            | 2.8<br>(-4.0 to 10.5)                               |
| Ischaemic stroke                                   | 0.5<br>(0.5 to 0.6)               | 0.1‡<br>(0.1 to 0.1)               | 0.1<br>(< 0.05 to 0.1)            | 28.6<br>(18.3 to 40.2)                            | 2.4<br>(-5.6 to 11.8)                               |
| Hemorrhagic stroke                                 | 0.2<br>(0.1 to 0.2)               | < 0.05‡<br>(< 0.05 to < 0.05)      | < 0.05<br>(< 0.05 to < 0.05)      | 27.8<br>(14.4 to 41.2)                            | 4.2<br>(-6.6 to 15.5)                               |
| Hypertensive heart disease                         | 0.2<br>(0.2 to 0.3)               | --                                 | < 0.05<br>(< 0.05 to < 0.05)      | 22.5<br>(11.6 to 34.4)                            | -2.9<br>(-11.3 to 6.5)                              |
| Cardiomyopathy and myocarditis                     | 0.1<br>(0.1 to 0.1)               | < 0.05†<br>(< 0.05 to < 0.05)      | < 0.05<br>(< 0.05 to < 0.05)      | 16.6<br>(3.7 to 31.0)                             | -2.6<br>(-13.0 to 9.6)                              |
| Myocarditis                                        | < 0.05<br>(< 0.05 to < 0.05)      | < 0.05<br>(< 0.05 to < 0.05)       | < 0.05<br>(< 0.05 to < 0.05)      | 11.7<br>(1.6 to 24.0)                             | -2.2<br>(-11.8 to 9.3)                              |
| Alcoholic cardiomyopathy                           | < 0.05<br>(< 0.05 to < 0.05)      | --                                 | < 0.05<br>(< 0.05 to < 0.05)      | 22.4<br>(1.4 to 47.2)                             | -3.0<br>(-19.9 to 18.1)                             |
| Other cardiomyopathy                               | 0.1<br>(0.1 to 0.1)               | --                                 | < 0.05<br>(< 0.05 to < 0.05)      | 16.9<br>(2.2 to 33.5)                             | -2.6<br>(-14.4 to 11.0)                             |
| Atrial fibrillation and flutter                    | 0.5<br>(0.4 to 0.6)               | < 0.05<br>(< 0.05 to < 0.05)       | < 0.05<br>(< 0.05 to 0.1)         | 26.2<br>(18.2 to 34.7)                            | 0.1<br>(-6.1 to 6.8)                                |
| Peripheral vascular disease                        | 1.3<br>(1.1 to 1.5)               | 0.1<br>(0.1 to 0.1)                | < 0.05<br>(< 0.05 to < 0.05)      | 30.2<br>(21.1 to 40.4)                            | 2.0<br>(-5.0 to 10.0)                               |
| Endocarditis                                       | < 0.05<br>(< 0.05 to < 0.05)      | < 0.05<br>(< 0.05 to < 0.05)       | < 0.05<br>(< 0.05 to < 0.05)      | 18.8<br>(1.2 to 38.9)                             | -2.3<br>(-17.6 to 14.9)                             |
| Other cardiovascular and circulatory diseases      | 0.7<br>(0.6 to 0.9)               | --                                 | < 0.05<br>(< 0.05 to 0.1)         | 16.0<br>(6.4 to 25.9)                             | -3.2<br>(-10.8 to 4.9)                              |
| <b>Chronic respiratory diseases</b>                | <b>8.1</b><br><b>(7.7 to 8.5)</b> | <b>1.3†</b><br><b>(1.2 to 1.4)</b> | <b>0.3</b><br><b>(0.2 to 0.4)</b> | <b>10.0</b><br><b>(5.3 to 15.5)</b>               | <b>3.9</b><br><b>(-0.5 to 8.8)</b>                  |
| Chronic obstructive pulmonary disease              | 2.0<br>(1.9 to 2.2)               | 0.1<br>(0.1 to 0.1)                | < 0.05<br>(< 0.05 to < 0.05)      | 22.4<br>(4.6 to 42.3)                             | -0.1<br>(-14.6 to 16.7)                             |
| Pneumoconiosis                                     | < 0.05<br>(< 0.05 to < 0.05)      | < 0.05<br>(< 0.05 to < 0.05)       | < 0.05<br>(< 0.05 to < 0.05)      | 28.5<br>(16.9 to 40.6)                            | 2.4<br>(-7.0 to 12.3)                               |
| Silicosis                                          | < 0.05<br>(< 0.05 to < 0.05)      | < 0.05<br>(< 0.05 to < 0.05)       | < 0.05<br>(< 0.05 to < 0.05)      | 31.3<br>(25.1 to 37.4)                            | 5.2<br>(0.3 to 10.3)                                |



| Cause                                                          | Prevalence in thousands (95% UI)  | Incidence in thousands (95% UI)               | YLDs in thousands (95% UI)                    |                                                                             |                                                                               |
|----------------------------------------------------------------|-----------------------------------|-----------------------------------------------|-----------------------------------------------|-----------------------------------------------------------------------------|-------------------------------------------------------------------------------|
|                                                                | 2016 counts<br>(< 0.05 to < 0.05) | 2016 counts<br>(< 0.05 to < 0.05)             | 2016 counts<br>(< 0.05 to < 0.05)             | Percentage change in counts between 2006 and 2016<br>24.6<br>(-1.0 to 56.9) | Percentage change in age-standardised rates between<br>0.0<br>(-21.2 to 26.5) |
| Asbestosis                                                     | < 0.05<br>(< 0.05 to < 0.05)      | < 0.05<br>(< 0.05 to < 0.05)                  | < 0.05<br>(< 0.05 to < 0.05)                  | 24.6<br>(-1.0 to 56.9)                                                      | 0.0<br>(-21.2 to 26.5)                                                        |
| Coal workers pneumoconiosis                                    | --                                | --                                            | --                                            | --                                                                          | --                                                                            |
| Other pneumoconiosis                                           | < 0.05<br>(< 0.05 to < 0.05)      | < 0.05<br>(< 0.05 to < 0.05)                  | < 0.05<br>(< 0.05 to < 0.05)                  | 30.4<br>(13.8 to 47.0)                                                      | 3.1<br>(-9.9 to 16.7)                                                         |
| Asthma                                                         | 6.2<br>(5.7 to 6.7)               | 1.2<br>(1.1 to 1.3)                           | 0.2<br>(0.2 to 0.4)                           | 7.9<br>(2.9 to 13.4)                                                        | 4.2<br>(-0.4 to 9.4)                                                          |
| Interstitial lung disease and pulmonary sarcoidosis            | < 0.05<br>(< 0.05 to < 0.05)      | < 0.05<br>(< 0.05 to < 0.05)                  | < 0.05<br>(< 0.05 to < 0.05)                  | 26.8<br>(14.9 to 40.1)                                                      | 5.3<br>(-5.1 to 17.3)                                                         |
| Other chronic respiratory diseases                             | --                                | --                                            | < 0.05<br>(< 0.05 to < 0.05)                  | 41.8<br>(11.3 to 78.9)                                                      | 37.7<br>(9.2 to 72.9)                                                         |
| <b>Cirrhosis and other chronic liver diseases</b>              | <b>0.5<br/>(0.5 to 0.6)</b>       | <b>&lt; 0.05<br/>(&lt; 0.05 to &lt; 0.05)</b> | <b>&lt; 0.05<br/>(&lt; 0.05 to &lt; 0.05)</b> | <b>24.5<br/>(12.2 to 38.6)</b>                                              | <b>6.6<br/>(-3.5 to 18.1)</b>                                                 |
| Cirrhosis and other chronic liver diseases due to hepatitis B  | 0.1<br>(< 0.05 to 0.1)            | < 0.05<br>(< 0.05 to < 0.05)                  | < 0.05<br>(< 0.05 to < 0.05)                  | 30.2<br>(2.1 to 64.9)                                                       | 6.0<br>(-16.1 to 34.0)                                                        |
| Cirrhosis and other chronic liver diseases due to hepatitis C  | 0.1<br>(0.1 to 0.2)               | < 0.05<br>(< 0.05 to < 0.05)                  | < 0.05<br>(< 0.05 to < 0.05)                  | 31.4<br>(8.6 to 59.2)                                                       | 7.5<br>(-10.4 to 29.0)                                                        |
| Cirrhosis and other chronic liver diseases due to alcohol use  | 0.2<br>(0.2 to 0.2)               | < 0.05<br>(< 0.05 to < 0.05)                  | < 0.05<br>(< 0.05 to < 0.05)                  | 31.6<br>(12.5 to 54.5)                                                      | 6.7<br>(-7.9 to 24.0)                                                         |
| Cirrhosis and other chronic liver diseases due to other causes | 0.1<br>(0.1 to 0.1)               | < 0.05<br>(< 0.05 to < 0.05)                  | < 0.05<br>(< 0.05 to < 0.05)                  | 12.3<br>(-8.1 to 37.1)                                                      | 5.9<br>(-13.1 to 28.5)                                                        |
| <b>Digestive diseases</b>                                      | <b>2.6<br/>(2.4 to 2.8)</b>       | <b>1.9†<br/>(1.8 to 2.0)</b>                  | <b>0.1<br/>(0.1 to 0.1)</b>                   | <b>30.2<br/>(17.5 to 45.4)</b>                                              | <b>14.8<br/>(4.2 to 27.5)</b>                                                 |
| Peptic ulcer disease                                           | 1.0<br>(0.8 to 1.1)               | 0.1<br>(0.1 to 0.1)                           | < 0.05<br>(< 0.05 to < 0.05)                  | 51.3<br>(21.1 to 87.8)                                                      | 30.2<br>(5.0 to 63.0)                                                         |
| Gastritis and duodenitis                                       | 1.0<br>(0.8 to 1.1)               | 0.5<br>(0.4 to 0.5)                           | < 0.05<br>(< 0.05 to < 0.05)                  | 58.6<br>(30.2 to 92.5)                                                      | 36.5<br>(13.0 to 64.3)                                                        |
| Appendicitis                                                   | < 0.05<br>(< 0.05 to < 0.05)      | 0.1<br>(0.1 to 0.1)                           | < 0.05<br>(< 0.05 to < 0.05)                  | 2.9<br>(-28.3 to 47.7)                                                      | -1.3<br>(-30.6 to 38.2)                                                       |
| Paralytic ileus and intestinal obstruction                     | < 0.05<br>(< 0.05 to < 0.05)      | < 0.05<br>(< 0.05 to < 0.05)                  | < 0.05<br>(< 0.05 to < 0.05)                  | 15.3<br>(10.4 to 20.8)                                                      | 3.1<br>(-1.6 to 7.4)                                                          |
| Inguinal, femoral, and abdominal hernia                        | 0.6<br>(0.6 to 0.7)               | 0.5<br>(0.4 to 0.5)                           | < 0.05<br>(< 0.05 to 0.1)                     | 11.9<br>(1.8 to 22.2)                                                       | 0.7<br>(-7.9 to 9.9)                                                          |
| Inflammatory bowel disease                                     | < 0.05<br>(< 0.05 to < 0.05)      | < 0.05<br>(< 0.05 to < 0.05)                  | < 0.05<br>(< 0.05 to < 0.05)                  | -10.8<br>(-14.0 to -7.5)                                                    | -24.2<br>(-26.9 to -21.3)                                                     |
| Vascular intestinal disorders                                  | < 0.05<br>(< 0.05 to < 0.05)      | < 0.05<br>(< 0.05 to < 0.05)                  | < 0.05<br>(< 0.05 to < 0.05)                  | 21.8<br>(15.2 to 28.3)                                                      | 8.4<br>(3.6 to 13.3)                                                          |
| Gallbladder and biliary diseases                               | 0.1<br>(0.1 to 0.1)               | 0.7<br>(0.6 to 0.8)                           | < 0.05<br>(< 0.05 to < 0.05)                  | 31.6<br>(5.7 to 65.3)                                                       | 11.8<br>(-10.0 to 38.9)                                                       |
| Pancreatitis                                                   | < 0.05<br>(< 0.05 to < 0.05)      | < 0.05<br>(< 0.05 to < 0.05)                  | < 0.05<br>(< 0.05 to < 0.05)                  | 32.4<br>(27.9 to 37.3)                                                      | 13.2<br>(9.8 to 16.9)                                                         |
| Other digestive diseases                                       | --                                | --                                            | < 0.05<br>(< 0.05 to < 0.05)                  | 31.0<br>(19.5 to 45.3)                                                      | 17.4<br>(7.5 to 29.9)                                                         |
| <b>Neurological disorders</b>                                  | <b>29.0<br/>(27.8 to 30.3)</b>    | <b>13.6<br/>(11.7 to 15.5)</b>                | <b>0.8<br/>(0.5 to 1.1)</b>                   | <b>12.5<br/>(-7.8 to 37.3)</b>                                              | <b>0.8<br/>(-17.1 to 22.8)</b>                                                |
| Alzheimer's disease and other dementias                        | 0.4<br>(0.3 to 0.4)               | 0.1<br>(0.1 to 0.1)                           | 0.1<br>(< 0.05 to 0.1)                        | 25.2<br>(19.7 to 31.3)                                                      | -1.2<br>(-5.5 to 3.5)                                                         |
| Parkinson's disease                                            | 0.1<br>(< 0.05 to 0.1)            | < 0.05<br>(< 0.05 to < 0.05)                  | < 0.05<br>(< 0.05 to < 0.05)                  | 32.7<br>(17.5 to 50.2)                                                      | 4.7<br>(-7.2 to 18.2)                                                         |
| Epilepsy                                                       | 0.3<br>(0.1 to 0.6)               | < 0.05<br>(< 0.05 to 0.1)                     | 0.1<br>(< 0.05 to 0.2)                        | 15.4<br>(-77.3 to 602.0)                                                    | 6.3<br>(-79.0 to 540.8)                                                       |
| Multiple sclerosis                                             | < 0.05<br>(< 0.05 to < 0.05)      | < 0.05<br>(< 0.05 to < 0.05)                  | < 0.05<br>(< 0.05 to < 0.05)                  | 25.8<br>(18.5 to 34.7)                                                      | 8.7<br>(2.7 to 15.9)                                                          |
| Motor neuron disease                                           | < 0.05<br>(< 0.05 to < 0.05)      | < 0.05<br>(< 0.05 to < 0.05)                  | < 0.05<br>(< 0.05 to < 0.05)                  | 17.0<br>(12.7 to 21.8)                                                      | 3.5<br>(-0.2 to 7.1)                                                          |
| Migraine                                                       | 10.7<br>(10.1 to 11.4)            | 1.2<br>(1.1 to 1.3)                           | 0.5<br>(0.3 to 0.7)                           | 10.3<br>(6.6 to 14.5)                                                       | -0.5<br>(-3.9 to 3.2)                                                         |
| Tension-type headache                                          | 22.2<br>(19.9 to 24.6)            | 12.3<br>(10.4 to 14.2)                        | 0.1<br>(0.1 to 0.1)                           | 10.4<br>(5.2 to 16.4)                                                       | -1.1<br>(-5.7 to 3.9)                                                         |
| Other neurological disorders                                   | < 0.05<br>(< 0.05 to < 0.05)      | < 0.05<br>(< 0.05 to < 0.05)                  | < 0.05<br>(< 0.05 to < 0.05)                  | 33.7<br>(-65.2 to 510.6)                                                    | 25.8<br>(-66.8 to 453.4)                                                      |
| <b>Mental and substance use disorders</b>                      | <b>11.7<br/>(11.3 to 12.0)</b>    | <b>4.2†<br/>(3.9 to 4.5)</b>                  | <b>1.5<br/>(1.1 to 1.9)</b>                   | <b>11.0<br/>(8.8 to 13.1)</b>                                               | <b>0.4<br/>(-1.6 to 2.3)</b>                                                  |
| Schizophrenia                                                  | 0.1<br>(0.1 to 0.2)               | < 0.05<br>(< 0.05 to < 0.05)                  | 0.1<br>(0.1 to 0.1)                           | 14.5<br>(4.0 to 26.3)                                                       | 0.4<br>(-8.6 to 10.9)                                                         |
| Alcohol use disorders                                          | 1.3<br>(1.2 to 1.5)               | 0.7<br>(0.6 to 0.8)                           | 0.1<br>(0.1 to 0.2)                           | 11.2<br>(1.8 to 21.4)                                                       | -0.1<br>(-8.4 to 8.7)                                                         |
| Drug use disorders                                             | 0.6<br>(0.6 to 0.7)               | 0.1<br>(0.1 to 0.1)                           | 0.1<br>(0.1 to 0.1)                           | 12.3<br>(3.5 to 22.2)                                                       | 1.5<br>(-6.5 to 10.3)                                                         |
| Opioid use disorders                                           | 0.2<br>(0.1 to 0.2)               | < 0.05<br>(< 0.05 to < 0.05)                  | 0.1<br>(< 0.05 to 0.1)                        | 15.7<br>(3.6 to 28.5)                                                       | 3.6<br>(-7.0 to 14.6)                                                         |
| Cocaine use disorders                                          | 0.1<br>(0.1 to 0.1)               | < 0.05<br>(< 0.05 to < 0.05)                  | < 0.05<br>(< 0.05 to < 0.05)                  | 4.9<br>(-12.8 to 27.5)                                                      | -4.4<br>(-20.4 to 16.0)                                                       |
| Amphetamine use disorders                                      | < 0.05<br>(< 0.05 to < 0.05)      | < 0.05<br>(< 0.05 to < 0.05)                  | < 0.05<br>(< 0.05 to < 0.05)                  | 8.1<br>(-23.6 to 47.7)                                                      | -0.1<br>(-28.4 to 35.7)                                                       |
| Cannabis use disorders                                         | 0.3<br>(0.2 to 0.4)               | < 0.05<br>(< 0.05 to 0.1)                     | < 0.05<br>(< 0.05 to < 0.05)                  | 4.6<br>(-10.6 to 24.6)                                                      | -0.6<br>(-14.9 to 18.0)                                                       |
| Other drug use disorders                                       | < 0.05<br>(< 0.05 to < 0.05)      | < 0.05<br>(< 0.05 to < 0.05)                  | < 0.05<br>(< 0.05 to < 0.05)                  | 7.8<br>(-15.5 to 37.7)                                                      | -2.2<br>(-23.2 to 24.9)                                                       |
| Depressive disorders                                           | 2.3<br>(2.2 to 2.5)               | 2.6<br>(2.3 to 2.8)                           | 0.4<br>(0.3 to 0.5)                           | 14.9<br>(9.7 to 20.5)                                                       | 1.0<br>(-3.6 to 5.6)                                                          |
| Major depressive disorder                                      | 1.6<br>(1.4 to 1.7)               | 2.4<br>(2.1 to 2.7)                           | 0.3<br>(0.2 to 0.4)                           | 14.8<br>(8.4 to 21.9)                                                       | 1.3<br>(-4.3 to 7.2)                                                          |
| Dysthymia                                                      | 0.8<br>(0.7 to 0.9)               | 0.1<br>(0.1 to 0.2)                           | 0.1<br>(0.1 to 0.1)                           | 15.0<br>(10.5 to 20.2)                                                      | -0.1<br>(-3.7 to 4.1)                                                         |
| Bipolar disorder                                               | 0.7<br>(0.6 to 0.8)               | 0.1<br>(< 0.05 to 0.1)                        | 0.1<br>(0.1 to 0.2)                           | 9.6<br>(4.2 to 15.7)                                                        | -0.3<br>(-5.1 to 5.1)                                                         |
| Anxiety disorders                                              | 3.1<br>(2.8 to 3.4)               | 0.5<br>(0.4 to 0.5)                           | 0.3<br>(0.2 to 0.4)                           | 9.8<br>(6.0 to 14.0)                                                        | -0.2<br>(-3.5 to 3.4)                                                         |
| Eating disorders                                               | 0.1<br>(0.1 to 0.1)               | 0.1<br>(< 0.05 to 0.1)                        | < 0.05<br>(< 0.05 to < 0.05)                  | 10.1<br>(-1.6 to 23.6)                                                      | 5.7<br>(-5.4 to 18.5)                                                         |
| Anorexia nervosa                                               | < 0.05<br>(< 0.05 to < 0.05)      | < 0.05<br>(< 0.05 to < 0.05)                  | < 0.05<br>(< 0.05 to < 0.05)                  | 7.7<br>(-16.6 to 41.0)                                                      | 4.9<br>(-18.0 to 36.8)                                                        |
| Bulimia nervosa                                                | 0.1<br>(0.1 to 0.1)               | < 0.05<br>(< 0.05 to 0.1)                     | < 0.05<br>(< 0.05 to < 0.05)                  | 10.6<br>(-3.1 to 26.5)                                                      | 5.9<br>(-7.1 to 20.6)                                                         |
| Autistic spectrum disorders                                    | 0.6<br>(0.6 to 0.7)               | < 0.05<br>(< 0.05 to < 0.05)                  | 0.1<br>(0.1 to 0.1)                           | 6.5<br>(1.3 to 11.4)                                                        | 0.0<br>(-4.8 to 4.7)                                                          |
| Autism                                                         | 0.2<br>(0.2 to 0.2)               | < 0.05<br>(< 0.05 to < 0.05)                  | 0.1<br>(< 0.05 to 0.1)                        | 6.5<br>(-2.0 to 15.4)                                                       | -0.1<br>(-8.0 to 8.2)                                                         |
| Asperger syndrome and other autistic spectrum disorders        | 0.4<br>(0.4 to 0.5)               | < 0.05<br>(< 0.05 to < 0.05)                  | < 0.05<br>(< 0.05 to 0.1)                     | 6.3<br>(1.2 to 11.9)                                                        | 0.2<br>(-4.6 to 5.4)                                                          |

| Cause                                                      | Prevalence in thousands (95% UI)     | Incidence in thousands (95% UI)                     | YLDs in thousands (95% UI)           |                                                   |                                                     |
|------------------------------------------------------------|--------------------------------------|-----------------------------------------------------|--------------------------------------|---------------------------------------------------|-----------------------------------------------------|
|                                                            | 2016 counts                          | 2016 counts                                         | 2016 counts                          | Percentage change in counts between 2006 and 2016 | Percentage change in age-standardised rates between |
| Attention-deficit/hyperactivity disorder                   | 1.4<br>(1.2 to 1.5)                  | 0.1<br>( $< 0.05$ to 0.1)                           | $< 0.05$<br>( $< 0.05$ to $< 0.05$ ) | 2.6<br>(-3.1 to 8.8)                              | 0.1<br>(-5.5 to 5.9)                                |
| Conduct disorder                                           | 0.5<br>(0.4 to 0.6)                  | 0.2<br>(0.1 to 0.2)                                 | 0.1<br>( $< 0.05$ to 0.1)            | -3.0<br>(-9.5 to 3.8)                             | 0.0<br>(-6.7 to 6.8)                                |
| Idiopathic developmental intellectual disability           | 0.4<br>(0.2 to 0.6)                  | --                                                  | $< 0.05$<br>( $< 0.05$ to $< 0.05$ ) | 4.2<br>(-4.0 to 12.6)                             | -2.6<br>(-10.2 to 4.8)                              |
| Other mental and substance use disorders                   | 1.4<br>(1.3 to 1.7)                  | $< 0.05$<br>( $< 0.05$ to 0.1)                      | 0.1<br>(0.1 to 0.1)                  | 13.9<br>(8.3 to 19.6)                             | -0.1<br>(-4.9 to 4.7)                               |
| <b>Diabetes, urogenital, blood, and endocrine diseases</b> | <b>30.4</b><br><b>(29.6 to 31.2)</b> | <b>8.2<sup>†</sup></b><br><b>(7.7 to 8.8)</b>       | <b>0.8</b><br><b>(0.6 to 1.1)</b>    | <b>18.3</b><br><b>(12.6 to 24.7)</b>              | <b>-1.9</b><br><b>(-6.7 to 3.2)</b>                 |
| Diabetes mellitus                                          | 6.0<br>(5.5 to 6.7)                  | 0.4<br>(0.3 to 0.4)                                 | 0.5<br>(0.4 to 0.7)                  | 19.9<br>(11.3 to 29.1)                            | -3.3<br>(-10.3 to 4.0)                              |
| Acute glomerulonephritis                                   | $< 0.05$<br>( $< 0.05$ to $< 0.05$ ) | $< 0.05$<br>( $< 0.05$ to $< 0.05$ )                | $< 0.05$<br>( $< 0.05$ to $< 0.05$ ) | 11.4<br>(7.4 to 16.3)                             | 0.4<br>(-3.1 to 4.4)                                |
| Chronic kidney disease                                     | 3.5<br>(3.1 to 3.8)                  | 0.3<br>(0.2 to 0.3)                                 | 0.1<br>(0.1 to 0.1)                  | 31.7<br>(21.3 to 42.4)                            | 8.6<br>(0.2 to 17.7)                                |
| Chronic kidney disease due to diabetes mellitus            | 1.4<br>(1.2 to 1.6)                  | 0.1<br>(0.1 to 0.1)                                 | $< 0.05$<br>( $< 0.05$ to 0.1)       | 37.4<br>(24.1 to 51.6)                            | 11.1<br>(0.2 to 22.9)                               |
| Chronic kidney disease due to hypertension                 | 0.7<br>(0.6 to 0.8)                  | 0.1<br>(0.1 to 0.1)                                 | $< 0.05$<br>( $< 0.05$ to $< 0.05$ ) | 34.3<br>(19.6 to 50.2)                            | 6.9<br>(-5.0 to 20.2)                               |
| Chronic kidney disease due to glomerulonephritis           | 0.7<br>(0.6 to 0.8)                  | $< 0.05$<br>( $< 0.05$ to $< 0.05$ )                | $< 0.05$<br>( $< 0.05$ to $< 0.05$ ) | 26.4<br>(13.8 to 39.3)                            | 7.2<br>(-3.0 to 18.2)                               |
| Chronic kidney disease due to other causes                 | 0.7<br>(0.6 to 0.8)                  | 0.1<br>( $< 0.05$ to 0.1)                           | $< 0.05$<br>( $< 0.05$ to $< 0.05$ ) | 28.0<br>(15.4 to 42.3)                            | 7.2<br>(-3.3 to 19.4)                               |
| Urinary diseases and male infertility                      | 1.4<br>(1.2 to 1.5)                  | 4.8 <sup>†</sup><br>(4.4 to 5.4)                    | $< 0.05$<br>( $< 0.05$ to $< 0.05$ ) | 22.3<br>(15.5 to 30.0)                            | -1.4<br>(-6.9 to 4.8)                               |
| Interstitial nephritis and urinary tract infections        | 0.1<br>(0.1 to 0.1)                  | 4.4<br>(3.9 to 5.0)                                 | $< 0.05$<br>( $< 0.05$ to $< 0.05$ ) | 10.9<br>(-2.5 to 26.5)                            | 2.4<br>(-9.8 to 16.1)                               |
| Urolithiasis                                               | $< 0.05$<br>( $< 0.05$ to $< 0.05$ ) | 0.3<br>(0.3 to 0.3)                                 | $< 0.05$<br>( $< 0.05$ to $< 0.05$ ) | 17.9<br>(13.3 to 22.6)                            | 1.9<br>(-1.9 to 5.6)                                |
| Benign prostatic hyperplasia                               | 0.8<br>(0.7 to 1.0)                  | 0.1<br>(0.1 to 0.1)                                 | $< 0.05$<br>( $< 0.05$ to $< 0.05$ ) | 28.3<br>(19.6 to 38.7)                            | -0.7<br>(-7.2 to 7.3)                               |
| Male infertility                                           | 0.4<br>(0.3 to 0.5)                  | --                                                  | $< 0.05$<br>( $< 0.05$ to $< 0.05$ ) | -1.5<br>(-8.2 to 5.9)                             | -5.8<br>(-12.1 to 1.1)                              |
| Other urinary diseases                                     | --                                   | --                                                  | $< 0.05$<br>( $< 0.05$ to $< 0.05$ ) | -8.5<br>(-17.5 to 2.1)                            | -15.7<br>(-23.9 to -6.5)                            |
| Gynecological diseases                                     | 8.4<br>(7.9 to 8.8)                  | 2.6 <sup>†</sup><br>(2.4 to 2.7)                    | 0.1<br>(0.1 to 0.1)                  | 6.7<br>(1.9 to 11.5)                              | -3.8<br>(-8.0 to 0.6)                               |
| Uterine fibroids                                           | 0.7<br>(0.6 to 0.8)                  | 0.1<br>(0.1 to 0.1)                                 | $< 0.05$<br>( $< 0.05$ to $< 0.05$ ) | -1.2<br>(-14.7 to 11.1)                           | -13.5<br>(-24.4 to -3.1)                            |
| Polycystic ovarian syndrome                                | $< 0.05$<br>( $< 0.05$ to $< 0.05$ ) | 0.1<br>( $< 0.05$ to 0.1)                           | $< 0.05$<br>( $< 0.05$ to $< 0.05$ ) | 1.1<br>(-28.6 to 42.0)                            | -0.9<br>(-29.9 to 39.4)                             |
| Female infertility                                         | 0.8<br>(0.6 to 1.1)                  | --                                                  | $< 0.05$<br>( $< 0.05$ to $< 0.05$ ) | 7.7<br>(-1.4 to 16.8)                             | 3.6<br>(-4.6 to 12.3)                               |
| Endometriosis                                              | $< 0.05$<br>( $< 0.05$ to $< 0.05$ ) | $< 0.05$<br>( $< 0.05$ to $< 0.05$ )                | $< 0.05$<br>( $< 0.05$ to $< 0.05$ ) | 11.5<br>(-17.6 to 47.8)                           | -0.0<br>(-26.2 to 31.9)                             |
| Genital prolapse                                           | 2.6<br>(2.2 to 2.9)                  | 0.1<br>(0.1 to 0.2)                                 | $< 0.05$<br>( $< 0.05$ to $< 0.05$ ) | 11.0<br>(2.8 to 20.2)                             | -10.1<br>(-16.7 to -2.7)                            |
| Premenstrual syndrome                                      | 4.7<br>(4.4 to 5.0)                  | 1.7<br>(1.6 to 1.8)                                 | $< 0.05$<br>( $< 0.05$ to 0.1)       | 7.0<br>(-1.0 to 14.7)                             | -1.0<br>(-8.5 to 6.1)                               |
| Other gynecological diseases                               | 0.6<br>(0.5 to 0.7)                  | 0.6<br>(0.5 to 0.7)                                 | $< 0.05$<br>( $< 0.05$ to $< 0.05$ ) | 7.2<br>(-2.8 to 17.9)                             | -4.0<br>(-12.7 to 5.4)                              |
| Hemoglobinopathies and hemolytic anaemias                  | 17.8<br>(16.9 to 18.7)               | --                                                  | $< 0.05$<br>( $< 0.05$ to 0.1)       | -5.0<br>(-19.1 to 12.4)                           | -8.3<br>(-21.4 to 7.6)                              |
| Thalassemias                                               | $< 0.05$<br>( $< 0.05$ to $< 0.05$ ) | --                                                  | $< 0.05$<br>( $< 0.05$ to $< 0.05$ ) | -18.5<br>(-33.7 to 2.9)                           | -11.6<br>(-28.8 to 12.1)                            |
| Thalassaemias trait                                        | 0.1<br>(0.1 to 0.2)                  | --                                                  | $< 0.05$<br>( $< 0.05$ to $< 0.05$ ) | 0.2<br>(-44.2 to 29.3)                            | -4.9<br>(-47.6 to 21.3)                             |
| Sickle cell disorders                                      | $< 0.05$<br>( $< 0.05$ to $< 0.05$ ) | --                                                  | $< 0.05$<br>( $< 0.05$ to $< 0.05$ ) | 4.2<br>(-8.6 to 18.6)                             | 3.3<br>(-9.4 to 17.7)                               |
| Sickle cell trait                                          | 6.8<br>(6.0 to 7.6)                  | --                                                  | $< 0.05$<br>( $< 0.05$ to $< 0.05$ ) | -7.4<br>(-24.9 to 14.4)                           | -9.6<br>(-25.9 to 11.0)                             |
| G6PD deficiency                                            | 3.6<br>(3.1 to 4.0)                  | --                                                  | $< 0.05$<br>( $< 0.05$ to $< 0.05$ ) | 29.2<br>(-2.4 to 66.9)                            | 24.7<br>(-5.3 to 59.7)                              |
| G6PD trait                                                 | 8.2<br>(7.7 to 8.8)                  | --                                                  | $< 0.05$<br>( $< 0.05$ to $< 0.05$ ) | 16.1<br>(-8.4 to 47.9)                            | 10.8<br>(-12.9 to 41.0)                             |
| Other hemoglobinopathies and hemolytic anaemias            | 0.5<br>(0.5 to 0.6)                  | --                                                  | $< 0.05$<br>( $< 0.05$ to $< 0.05$ ) | -2.4<br>(-17.7 to 14.4)                           | -10.0<br>(-23.5 to 4.5)                             |
| Endocrine, metabolic, blood, and immune disorders          | 1.1<br>(1.0 to 1.2)                  | 0.2<br>(0.1 to 0.2)                                 | $< 0.05$<br>( $< 0.05$ to $< 0.05$ ) | 14.2<br>(6.1 to 23.2)                             | -1.0<br>(-7.7 to 6.2)                               |
| <b>Musculoskeletal disorders</b>                           | <b>12.1</b><br><b>(11.7 to 12.7)</b> | <b>6.1</b><br><b>(5.5 to 6.8)</b>                   | <b>1.3</b><br><b>(0.9 to 1.7)</b>    | <b>15.7</b><br><b>(12.4 to 18.9)</b>              | <b>-1.7</b><br><b>(-4.4 to 0.8)</b>                 |
| Rheumatoid arthritis                                       | 0.3<br>(0.2 to 0.3)                  | $< 0.05$<br>( $< 0.05$ to $< 0.05$ )                | 0.1<br>( $< 0.05$ to 0.1)            | 23.5<br>(14.3 to 33.8)                            | 2.5<br>(-5.0 to 10.6)                               |
| Osteoarthritis                                             | 2.8<br>(2.6 to 3.0)                  | 0.1<br>(0.1 to 0.1)                                 | 0.2<br>(0.1 to 0.2)                  | 27.4<br>(22.8 to 32.4)                            | 1.8<br>(-1.8 to 5.7)                                |
| Low back and neck pain                                     | 6.2<br>(5.8 to 6.7)                  | 2.4<br>(2.2 to 2.7)                                 | 0.7<br>(0.5 to 0.9)                  | 16.1<br>(12.2 to 19.9)                            | -0.9<br>(-4.1 to 2.2)                               |
| Low back pain                                              | 3.8<br>(3.4 to 4.4)                  | 1.8<br>(1.6 to 2.1)                                 | 0.4<br>(0.3 to 0.6)                  | 14.6<br>(8.9 to 20.5)                             | -1.4<br>(-5.9 to 3.3)                               |
| Neck pain                                                  | 2.7<br>(2.3 to 3.1)                  | 0.6<br>(0.5 to 0.7)                                 | 0.3<br>(0.2 to 0.4)                  | 18.6<br>(15.3 to 22.0)                            | -0.0<br>(-2.1 to 2.1)                               |
| Gout                                                       | 0.2<br>(0.2 to 0.3)                  | $< 0.05$<br>( $< 0.05$ to 0.1)                      | $< 0.05$<br>( $< 0.05$ to $< 0.05$ ) | 21.7<br>(3.9 to 42.5)                             | 0.3<br>(-13.2 to 17.1)                              |
| Other musculoskeletal disorders                            | 4.1<br>(3.5 to 4.7)                  | 3.5<br>(2.9 to 4.2)                                 | 0.4<br>(0.2 to 0.5)                  | 8.8<br>(1.3 to 16.5)                              | -5.6<br>(-11.9 to 0.9)                              |
| <b>Other non-communicable diseases</b>                     | <b>55.5</b><br><b>(54.5 to 56.5)</b> | <b>168.7<sup>†</sup></b><br><b>(158.1 to 179.7)</b> | <b>1.6</b><br><b>(1.1 to 2.2)</b>    | <b>12.3</b><br><b>(11.0 to 13.6)</b>              | <b>-0.9</b><br><b>(-1.9 to 0.1)</b>                 |
| Congenital anomalies                                       | 0.6<br>(0.5 to 0.7)                  | --                                                  | 0.1<br>( $< 0.05$ to 0.1)            | 5.3<br>(-1.1 to 11.8)                             | 0.0<br>(-6.3 to 6.0)                                |
| Neural tube defects                                        | $< 0.05$<br>( $< 0.05$ to $< 0.05$ ) | --                                                  | $< 0.05$<br>( $< 0.05$ to $< 0.05$ ) | 12.9<br>(-2.6 to 31.1)                            | 5.1<br>(-9.1 to 21.6)                               |
| Congenital heart anomalies                                 | 0.1<br>(0.1 to 0.2)                  | --                                                  | $< 0.05$<br>( $< 0.05$ to $< 0.05$ ) | 5.9<br>(-5.7 to 18.9)                             | 2.3<br>(-8.7 to 14.5)                               |
| Orofacial clefts                                           | $< 0.05$<br>( $< 0.05$ to 0.1)       | --                                                  | $< 0.05$<br>( $< 0.05$ to $< 0.05$ ) | 7.0<br>(-5.6 to 20.3)                             | 0.3<br>(-11.6 to 12.8)                              |
| Down's syndrome                                            | $< 0.05$<br>( $< 0.05$ to $< 0.05$ ) | --                                                  | $< 0.05$<br>( $< 0.05$ to $< 0.05$ ) | 11.2<br>(2.4 to 21.2)                             | 6.0<br>(-2.2 to 15.7)                               |
| Turner syndrome                                            | $< 0.05$<br>( $< 0.05$ to $< 0.05$ ) | --                                                  | $< 0.05$<br>( $< 0.05$ to $< 0.05$ ) | 13.6<br>(-26.2 to 69.7)                           | 9.5<br>(-28.6 to 63.2)                              |
| Klinefelter syndrome                                       | $< 0.05$<br>( $< 0.05$ to $< 0.05$ ) | --                                                  | $< 0.05$<br>( $< 0.05$ to $< 0.05$ ) | 5.0<br>(-24.4 to 44.2)                            | 0.8<br>(-27.3 to 38.2)                              |



| Cause                                         | Prevalence in thousands (95% UI)     | Incidence in thousands (95% UI)      | YLDs in thousands (95% UI)           |                                                   |                                                     |
|-----------------------------------------------|--------------------------------------|--------------------------------------|--------------------------------------|---------------------------------------------------|-----------------------------------------------------|
|                                               | 2016 counts                          | 2016 counts                          | 2016 counts                          | Percentage change in counts between 2006 and 2016 | Percentage change in age-standardised rates between |
| Other chromosomal abnormalities               | 0.1<br>( $< 0.05$ to 0.1)            | --                                   | $< 0.05$<br>( $< 0.05$ to $< 0.05$ ) | -5.0<br>(-19.4 to 12.1)                           | 0.0<br>(-15.7 to 18.0)                              |
| Congenital musculoskeletal and limb anomalies | 0.1<br>(0.1 to 0.1)                  | --                                   | $< 0.05$<br>( $< 0.05$ to $< 0.05$ ) | 7.5<br>(-3.1 to 19.2)                             | -0.9<br>(-10.4 to 9.6)                              |
| Urogenital congenital anomalies               | 0.1<br>(0.1 to 0.1)                  | --                                   | $< 0.05$<br>( $< 0.05$ to $< 0.05$ ) | -2.0<br>(-15.2 to 12.5)                           | 0.9<br>(-12.4 to 16.1)                              |
| Digestive congenital anomalies                | 0.1<br>(0.1 to 0.1)                  | --                                   | $< 0.05$<br>( $< 0.05$ to $< 0.05$ ) | 14.6<br>(-3.6 to 37.1)                            | 7.2<br>(-9.9 to 27.6)                               |
| Other congenital anomalies                    | 0.2<br>(0.1 to 0.4)                  | --                                   | $< 0.05$<br>( $< 0.05$ to $< 0.05$ ) | 3.8<br>(-8.1 to 16.4)                             | -3.0<br>(-14.0 to 8.6)                              |
| Skin and subcutaneous diseases                | 24.6<br>(24.0 to 25.3)               | 58.7<br>(55.2 to 62.4)               | 0.6<br>(0.4 to 0.9)                  | 5.7<br>(3.8 to 7.8)                               | 0.6<br>(-1.1 to 2.6)                                |
| Dermatitis                                    | 3.6<br>(3.4 to 3.9)                  | 3.9<br>(3.6 to 4.2)                  | 0.1<br>(0.1 to 0.2)                  | 2.5<br>(-1.1 to 6.0)                              | 0.0<br>(-3.2 to 3.4)                                |
| Psoriasis                                     | 0.7<br>(0.7 to 0.8)                  | 0.1<br>(0.1 to 0.1)                  | 0.1<br>( $< 0.05$ to 0.1)            | 16.5<br>(8.4 to 25.4)                             | 4.2<br>(-2.9 to 11.9)                               |
| Cellulitis                                    | $< 0.05$<br>( $< 0.05$ to $< 0.05$ ) | 0.5<br>(0.5 to 0.6)                  | $< 0.05$<br>( $< 0.05$ to $< 0.05$ ) | 8.7<br>(-13.2 to 36.0)                            | 1.2<br>(-18.9 to 26.1)                              |
| Pyoderma                                      | 0.2<br>(0.2 to 0.2)                  | 5.2<br>(5.0 to 5.5)                  | $< 0.05$<br>( $< 0.05$ to $< 0.05$ ) | 17.3<br>(10.2 to 24.8)                            | 0.5<br>(-5.5 to 6.6)                                |
| Scabies                                       | 1.4<br>(1.2 to 1.6)                  | 4.3<br>(3.8 to 5.0)                  | $< 0.05$<br>( $< 0.05$ to 0.1)       | -1.2<br>(-5.2 to 2.7)                             | -4.9<br>(-8.5 to -1.4)                              |
| Fungal skin diseases                          | 8.1<br>(7.2 to 8.8)                  | 28.6<br>(25.3 to 32.3)               | $< 0.05$<br>( $< 0.05$ to 0.1)       | 11.2<br>(9.4 to 13.0)                             | -0.0<br>(-1.0 to 0.9)                               |
| Viral skin diseases                           | 2.1<br>(2.0 to 2.2)                  | 3.1<br>(2.9 to 3.2)                  | 0.1<br>( $< 0.05$ to 0.1)            | 4.3<br>(1.3 to 7.5)                               | -0.1<br>(-3.0 to 2.9)                               |
| Acne vulgaris                                 | 6.2<br>(5.5 to 6.9)                  | 4.2<br>(3.5 to 5.2)                  | 0.2<br>(0.1 to 0.2)                  | 3.5<br>(-0.8 to 8.3)                              | 2.2<br>(-2.2 to 6.9)                                |
| Alopecia areata                               | 0.1<br>(0.1 to 0.1)                  | 0.2<br>(0.2 to 0.2)                  | $< 0.05$<br>( $< 0.05$ to $< 0.05$ ) | 9.4<br>(-2.5 to 23.6)                             | -0.1<br>(-10.9 to 12.2)                             |
| Pruritus                                      | 0.7<br>(0.6 to 0.8)                  | 0.5<br>(0.5 to 0.6)                  | $< 0.05$<br>( $< 0.05$ to $< 0.05$ ) | 13.3<br>(7.1 to 19.3)                             | 0.9<br>(-4.4 to 5.8)                                |
| Urticaria                                     | 0.6<br>(0.6 to 0.7)                  | 1.1<br>(1.0 to 1.3)                  | $< 0.05$<br>( $< 0.05$ to 0.1)       | 2.7<br>(-2.9 to 8.6)                              | -0.0<br>(-5.5 to 5.5)                               |
| Decubitus ulcer                               | $< 0.05$<br>( $< 0.05$ to 0.1)       | 0.2<br>(0.2 to 0.2)                  | $< 0.05$<br>( $< 0.05$ to $< 0.05$ ) | 15.6<br>(2.6 to 30.0)                             | -6.0<br>(-16.8 to 5.8)                              |
| Other skin and subcutaneous diseases          | 5.6<br>(5.4 to 5.7)                  | 6.6<br>(6.4 to 6.8)                  | $< 0.05$<br>( $< 0.05$ to 0.1)       | 17.4<br>(14.7 to 20.2)                            | 1.4<br>(-0.7 to 3.9)                                |
| Sense organ diseases                          | 18.4<br>(18.0 to 18.8)               | 7.2†<br>(6.8 to 7.7)                 | 0.6<br>(0.4 to 0.9)                  | 17.2<br>(15.4 to 19.1)                            | -2.8<br>(-4.2 to -1.3)                              |
| Glaucoma                                      | 0.1<br>(0.1 to 0.1)                  | --                                   | $< 0.05$<br>( $< 0.05$ to $< 0.05$ ) | 25.9<br>(14.2 to 39.9)                            | -1.6<br>(-10.6 to 8.9)                              |
| Cataract                                      | 0.7<br>(0.7 to 0.8)                  | --                                   | 0.1<br>( $< 0.05$ to 0.1)            | 20.2<br>(15.2 to 25.4)                            | -4.5<br>(-8.6 to -0.4)                              |
| Macular degeneration                          | $< 0.05$<br>( $< 0.05$ to $< 0.05$ ) | --                                   | $< 0.05$<br>( $< 0.05$ to $< 0.05$ ) | 28.9<br>(8.8 to 51.5)                             | 0.8<br>(-15.1 to 18.3)                              |
| Refraction and accommodation disorders        | 8.1<br>(7.7 to 8.4)                  | --                                   | 0.1<br>(0.1 to 0.2)                  | 8.8<br>(5.6 to 12.0)                              | -6.2<br>(-8.8 to -3.3)                              |
| Age-related and other hearing loss            | 13.0<br>(12.3 to 13.7)               | --                                   | 0.4<br>(0.3 to 0.5)                  | 19.1<br>(16.1 to 22.0)                            | -2.0<br>(-4.2 to 0.2)                               |
| Other vision loss                             | 0.2<br>(0.2 to 0.2)                  | --                                   | $< 0.05$<br>( $< 0.05$ to $< 0.05$ ) | 17.5<br>(7.6 to 27.8)                             | -2.4<br>(-10.3 to 5.7)                              |
| Other sense organ diseases                    | 2.2<br>(2.0 to 2.4)                  | 7.2<br>(6.8 to 7.7)                  | 0.1<br>( $< 0.05$ to 0.1)            | 19.2<br>(14.4 to 23.7)                            | 0.4<br>(-3.3 to 4.0)                                |
| Oral disorders                                | 39.8<br>(38.2 to 41.3)               | 102.7†<br>(93.5 to 113.1)            | 0.2<br>(0.1 to 0.4)                  | 19.3<br>(16.9 to 22.1)                            | -0.1<br>(-1.9 to 1.7)                               |
| Caries of deciduous teeth                     | 5.2<br>(4.2 to 6.2)                  | 17.9<br>(13.0 to 24.3)               | $< 0.05$<br>( $< 0.05$ to $< 0.05$ ) | -6.8<br>(-16.1 to 4.6)                            | -0.3<br>(-10.2 to 11.7)                             |
| Caries of permanent teeth                     | 25.3<br>(23.5 to 27.2)               | 83.0<br>(74.8 to 91.2)               | $< 0.05$<br>( $< 0.05$ to $< 0.05$ ) | 8.4<br>(4.4 to 12.6)                              | -1.2<br>(-4.8 to 2.3)                               |
| Periodontal disease                           | 11.9<br>(10.1 to 13.9)               | 1.4<br>(1.2 to 1.7)                  | 0.1<br>( $< 0.05$ to 0.2)            | 16.5<br>(13.0 to 20.4)                            | -0.7<br>(-3.5 to 2.4)                               |
| Edentulism and severe tooth loss              | 4.2<br>(3.6 to 4.7)                  | 0.4<br>(0.3 to 0.4)                  | 0.1<br>(0.1 to 0.2)                  | 26.5<br>(22.9 to 30.8)                            | 0.4<br>(-2.5 to 3.8)                                |
| Other oral disorders                          | 1.4<br>(1.3 to 1.4)                  | --                                   | $< 0.05$<br>( $< 0.05$ to 0.1)       | 11.3<br>(7.8 to 15.3)                             | -0.1<br>(-3.2 to 3.4)                               |
| <b>Injuries</b>                               | <b>11.6</b><br><b>(10.8 to 12.6)</b> | <b>4.8†</b><br><b>(4.5 to 5.1)</b>   | <b>0.5</b><br><b>(0.3 to 0.6)</b>    | <b>30.5</b><br><b>(28.0 to 33.3)</b>              | <b>13.7</b><br><b>(11.5 to 16.1)</b>                |
| <b>Transport injuries</b>                     | <b>1.4</b><br><b>(1.3 to 1.5)</b>    | <b>0.5</b><br><b>(0.4 to 0.5)</b>    | <b>0.1</b><br><b>(0.1 to 0.1)</b>    | <b>36.8</b><br><b>(34.1 to 40.1)</b>              | <b>17.9</b><br><b>(15.6 to 20.6)</b>                |
| Road injuries                                 | 1.4<br>(1.3 to 1.4)                  | 0.5<br>(0.4 to 0.5)                  | 0.1<br>( $< 0.05$ to 0.1)            | 38.0<br>(35.1 to 41.2)                            | 18.8<br>(16.5 to 21.5)                              |
| Pedestrian road injuries                      | 0.2<br>(0.2 to 0.2)                  | $< 0.05$<br>( $< 0.05$ to 0.1)       | $< 0.05$<br>( $< 0.05$ to $< 0.05$ ) | 42.0<br>(39.0 to 45.4)                            | 22.0<br>(19.6 to 24.8)                              |
| Cyclist road injuries                         | 0.3<br>(0.2 to 0.4)                  | 0.1<br>(0.1 to 0.1)                  | $< 0.05$<br>( $< 0.05$ to $< 0.05$ ) | 42.9<br>(39.6 to 46.4)                            | 24.3<br>(21.7 to 27.2)                              |
| Motorcyclist road injuries                    | 0.3<br>(0.3 to 0.4)                  | 0.1<br>(0.1 to 0.1)                  | $< 0.05$<br>( $< 0.05$ to $< 0.05$ ) | 35.8<br>(32.7 to 39.3)                            | 16.8<br>(14.2 to 19.6)                              |
| Motor vehicle road injuries                   | 0.4<br>(0.3 to 0.5)                  | 0.2<br>(0.1 to 0.2)                  | $< 0.05$<br>( $< 0.05$ to $< 0.05$ ) | 36.5<br>(33.4 to 39.9)                            | 17.2<br>(14.7 to 19.9)                              |
| Other road injuries                           | 0.1<br>(0.1 to 0.2)                  | 0.1<br>( $< 0.05$ to 0.1)            | $< 0.05$<br>( $< 0.05$ to $< 0.05$ ) | 32.2<br>(29.4 to 35.1)                            | 13.4<br>(11.1 to 15.8)                              |
| Other transport injuries                      | 0.1<br>(0.1 to 0.1)                  | $< 0.05$<br>( $< 0.05$ to $< 0.05$ ) | $< 0.05$<br>( $< 0.05$ to $< 0.05$ ) | 19.3<br>(16.3 to 22.7)                            | 4.0<br>(1.5 to 6.9)                                 |
| <b>Unintentional injuries</b>                 | <b>9.5</b><br><b>(8.7 to 10.4)</b>   | <b>4.1</b><br><b>(3.8 to 4.4)</b>    | <b>0.3</b><br><b>(0.2 to 0.5)</b>    | <b>28.8</b><br><b>(26.5 to 31.4)</b>              | <b>12.0</b><br><b>(10.2 to 14.0)</b>                |
| Falls                                         | 4.0<br>(3.5 to 4.6)                  | 1.7<br>(1.5 to 2.0)                  | 0.2<br>(0.1 to 0.2)                  | 34.7<br>(32.4 to 37.4)                            | 14.8<br>(12.9 to 16.9)                              |
| Drowning                                      | 0.1<br>( $< 0.05$ to 0.1)            | $< 0.05$<br>( $< 0.05$ to $< 0.05$ ) | $< 0.05$<br>( $< 0.05$ to $< 0.05$ ) | 26.0<br>(22.7 to 29.6)                            | 7.9<br>(4.9 to 10.9)                                |
| Fire, heat, and hot substances                | 1.2<br>(1.0 to 1.5)                  | 0.1<br>(0.1 to 0.2)                  | $< 0.05$<br>( $< 0.05$ to $< 0.05$ ) | 23.2<br>(18.0 to 29.4)                            | 10.3<br>(5.8 to 15.7)                               |
| Poisonings                                    | $< 0.05$<br>( $< 0.05$ to $< 0.05$ ) | $< 0.05$<br>( $< 0.05$ to 0.1)       | $< 0.05$<br>( $< 0.05$ to $< 0.05$ ) | 26.2<br>(16.3 to 36.1)                            | 13.8<br>(5.2 to 22.4)                               |
| Exposure to mechanical forces                 | 1.6<br>(1.4 to 1.9)                  | 0.6<br>(0.5 to 0.6)                  | $< 0.05$<br>( $< 0.05$ to 0.1)       | 32.4<br>(29.6 to 35.5)                            | 15.6<br>(13.2 to 18.1)                              |
| Unintentional firearm injuries                | 0.1<br>(0.1 to 0.1)                  | $< 0.05$<br>( $< 0.05$ to $< 0.05$ ) | $< 0.05$<br>( $< 0.05$ to $< 0.05$ ) | 25.9<br>(22.9 to 29.2)                            | 8.9<br>(6.5 to 11.7)                                |
| Unintentional suffocation                     | 0.1<br>( $< 0.05$ to 0.1)            | $< 0.05$<br>( $< 0.05$ to $< 0.05$ ) | $< 0.05$<br>( $< 0.05$ to $< 0.05$ ) | 25.4<br>(21.6 to 29.2)                            | 14.4<br>(10.8 to 18.0)                              |
| Other exposure to mechanical forces           | 1.5<br>(1.2 to 1.8)                  | 0.5<br>(0.5 to 0.6)                  | $< 0.05$<br>( $< 0.05$ to $< 0.05$ ) | 33.9<br>(31.0 to 37.0)                            | 16.7<br>(14.2 to 19.2)                              |

| Cause                                                                               | Prevalence in thousands (95% UI)        | Incidence in thousands (95% UI)                      | YLDs in thousands (95% UI)                          |                                                   |                                                     |
|-------------------------------------------------------------------------------------|-----------------------------------------|------------------------------------------------------|-----------------------------------------------------|---------------------------------------------------|-----------------------------------------------------|
|                                                                                     | 2016 counts                             | 2016 counts                                          | 2016 counts                                         | Percentage change in counts between 2006 and 2016 | Percentage change in age-standardised rates between |
| Adverse effects of medical treatment                                                | < 0.05<br>(< 0.05 to < 0.05)            | 0.4<br>(0.4 to 0.5)                                  | < 0.05<br>(< 0.05 to < 0.05)                        | 19.9<br>(14.4 to 25.5)                            | 9.7<br>(4.3 to 15.1)                                |
| Animal contact                                                                      | 0.2<br>(0.2 to 0.3)                     | 0.2<br>(0.2 to 0.3)                                  | < 0.05<br>(< 0.05 to < 0.05)                        | 10.8<br>(4.2 to 17.7)                             | -0.3<br>(-6.0 to 5.5)                               |
| Venomous animal contact                                                             | 0.1<br>(0.1 to 0.1)                     | 0.1<br>(0.1 to 0.1)                                  | < 0.05<br>(< 0.05 to < 0.05)                        | 11.5<br>(3.1 to 20.4)                             | 1.0<br>(-6.5 to 8.9)                                |
| Non-venomous animal contact                                                         | 0.1<br>(0.1 to 0.1)                     | 0.1<br>(0.1 to 0.2)                                  | < 0.05<br>(< 0.05 to < 0.05)                        | 8.6<br>(5.0 to 12.3)                              | -4.6<br>(-7.6 to -1.3)                              |
| Foreign body                                                                        | 0.5<br>(0.4 to 0.6)                     | 0.4<br>(0.3 to 0.4)                                  | < 0.05<br>(< 0.05 to < 0.05)                        | 18.5<br>(15.2 to 22.0)                            | 6.3<br>(3.4 to 9.4)                                 |
| Pulmonary aspiration and foreign body in airway                                     | 0.3<br>(0.2 to 0.4)                     | 0.1<br>(0.1 to 0.1)                                  | < 0.05<br>(< 0.05 to < 0.05)                        | 19.2<br>(15.4 to 23.2)                            | 8.0<br>(4.6 to 11.4)                                |
| Foreign body in eyes                                                                | < 0.05<br>(< 0.05 to 0.1)               | 0.2<br>(0.2 to 0.3)                                  | < 0.05<br>(< 0.05 to < 0.05)                        | 13.8<br>(10.3 to 18.1)                            | -1.3<br>(-3.7 to 1.3)                               |
| Foreign body in other body part                                                     | 0.1<br>(0.1 to 0.2)                     | < 0.05<br>(< 0.05 to 0.1)                            | < 0.05<br>(< 0.05 to < 0.05)                        | 19.4<br>(15.7 to 23.7)                            | 6.4<br>(3.1 to 10.1)                                |
| Environmental heat and cold exposure                                                | 0.7<br>(0.6 to 0.8)                     | 0.2<br>(0.1 to 0.2)                                  | < 0.05<br>(< 0.05 to < 0.05)                        | 17.6<br>(15.2 to 20.4)                            | 3.2<br>(1.2 to 5.5)                                 |
| Other unintentional injuries                                                        | 1.2<br>(1.0 to 1.5)                     | 0.4<br>(0.3 to 0.4)                                  | < 0.05<br>(< 0.05 to 0.1)                           | 24.3<br>(21.8 to 27.4)                            | 10.5<br>(8.5 to 12.9)                               |
| <b>Self-harm and interpersonal violence</b>                                         | <b>2.2</b><br><b>(1.9 to 2.4)</b>       | <b>0.2†</b><br><b>(0.2 to 0.3)</b>                   | <b>&lt; 0.05</b><br><b>(&lt; 0.05 to &lt; 0.05)</b> | <b>21.3</b><br><b>(16.9 to 25.9)</b>              | <b>9.6</b><br><b>(6.1 to 13.0)</b>                  |
| Self-harm                                                                           | < 0.05<br>(< 0.05 to 0.1)               | < 0.05<br>(< 0.05 to < 0.05)                         | < 0.05<br>(< 0.05 to < 0.05)                        | 31.5<br>(27.5 to 35.6)                            | 12.3<br>(9.2 to 15.6)                               |
| Self-harm by firearm                                                                | < 0.05<br>(< 0.05 to < 0.05)            | < 0.05<br>(< 0.05 to < 0.05)                         | < 0.05<br>(< 0.05 to < 0.05)                        | 10.6<br>(7.4 to 14.5)                             | -4.1<br>(-6.7 to -1.0)                              |
| Self-harm by other specified means                                                  | < 0.05<br>(< 0.05 to 0.1)               | < 0.05<br>(< 0.05 to < 0.05)                         | < 0.05<br>(< 0.05 to < 0.05)                        | 33.2<br>(29.1 to 37.4)                            | 13.7<br>(10.5 to 17.2)                              |
| Interpersonal violence                                                              | 2.1<br>(1.9 to 2.4)                     | 0.2†<br>(0.2 to 0.3)                                 | < 0.05<br>(< 0.05 to < 0.05)                        | 20.6<br>(16.1 to 25.4)                            | 9.4<br>(5.8 to 13.0)                                |
| Assault by firearm                                                                  | < 0.05<br>(< 0.05 to < 0.05)            | < 0.05<br>(< 0.05 to < 0.05)                         | < 0.05<br>(< 0.05 to < 0.05)                        | 55.2<br>(50.6 to 59.7)                            | 35.5<br>(31.5 to 39.3)                              |
| Assault by sharp object                                                             | 0.2<br>(0.2 to 0.3)                     | 0.1<br>(0.1 to 0.1)                                  | < 0.05<br>(< 0.05 to < 0.05)                        | 44.8<br>(41.2 to 48.1)                            | 26.5<br>(23.5 to 29.3)                              |
| Sexual violence                                                                     | 1.6<br>(1.4 to 1.9)                     | --                                                   | < 0.05<br>(< 0.05 to < 0.05)                        | -1.3<br>(-5.2 to 2.7)                             | -7.0<br>(-10.7 to -3.2)                             |
| Assault by other means                                                              | 0.2<br>(0.2 to 0.3)                     | 0.1<br>(0.1 to 0.1)                                  | < 0.05<br>(< 0.05 to < 0.05)                        | 41.2<br>(38.2 to 44.6)                            | 22.9<br>(20.2 to 25.6)                              |
| <b>Forces of nature, conflict and terrorism, and executions and police conflict</b> | <b>0.1</b><br><b>(&lt; 0.05 to 0.2)</b> | <b>&lt; 0.05†</b><br><b>(&lt; 0.05 to &lt; 0.05)</b> | <b>&lt; 0.05</b><br><b>(&lt; 0.05 to &lt; 0.05)</b> | <b>889.5</b><br><b>(613.6 to 945.6)</b>           | <b>801.2</b><br><b>(560.5 to 851.4)</b>             |
| Exposure to forces of nature                                                        | 0.1<br>(< 0.05 to 0.2)                  | --                                                   | < 0.05<br>(< 0.05 to < 0.05)                        | 1,152.6<br>(1,099.7 to 1,236.8)                   | 1,035.3<br>(981.8 to 1,112.5)                       |
| Conflict and terrorism                                                              | --                                      | --                                                   | --                                                  | --                                                | --                                                  |
| Executions and police conflict                                                      | < 0.05<br>(< 0.05 to < 0.05)            | < 0.05<br>(< 0.05 to < 0.05)                         | < 0.05<br>(< 0.05 to < 0.05)                        | 39.9<br>(22.9 to 50.0)                            | 26.2<br>(11.8 to 34.9)                              |
| <b>Impairments</b>                                                                  | --                                      | --                                                   | --                                                  | --                                                | --                                                  |
| Anaemia                                                                             | 15.7<br>(13.8 to 17.6)                  | --                                                   | 0.4<br>(0.3 to 0.6)                                 | 1.9<br>(-9.8 to 15.6)                             | -5.4<br>(-15.6 to 6.7)                              |
| Developmental intellectual disability                                               | 1.3<br>(1.0 to 1.7)                     | --                                                   | 0.2<br>(0.1 to 0.4)                                 | 13.3<br>(-0.2 to 31.0)                            | 8.0<br>(-5.1 to 24.7)                               |
| Epilepsy                                                                            | 0.6<br>(0.3 to 1.0)                     | --                                                   | 0.2<br>(0.1 to 0.5)                                 | 16.8<br>(-39.6 to 130.0)                          | 10.2<br>(-43.3 to 116.4)                            |
| Guillain-Barre syndrome                                                             | < 0.05<br>(< 0.05 to < 0.05)            | --                                                   | < 0.05<br>(< 0.05 to < 0.05)                        | 229.3<br>(110.8 to 495.3)                         | 192.4<br>(88.7 to 427.6)                            |
| Hearing loss                                                                        | 13.9<br>(13.3 to 14.6)                  | --                                                   | 0.4<br>(0.3 to 0.6)                                 | 16.4<br>(13.7 to 18.9)                            | -2.4<br>(-4.3 to -0.4)                              |
| Heart failure                                                                       | 0.5<br>(0.4 to 0.5)                     | --                                                   | < 0.05<br>(< 0.05 to 0.1)                           | 22.9<br>(13.1 to 34.1)                            | -1.6<br>(-9.7 to 8.2)                               |
| Infertility                                                                         | 1.4<br>(1.1 to 1.8)                     | --                                                   | < 0.05<br>(< 0.05 to < 0.05)                        | 4.7<br>(-1.1 to 11.2)                             | 0.4<br>(-5.0 to 6.4)                                |
| Pelvic inflammatory disease                                                         | < 0.05<br>(< 0.05 to < 0.05)            | --                                                   | < 0.05<br>(< 0.05 to < 0.05)                        | 5.2<br>(-13.3 to 29.4)                            | -4.3<br>(-20.7 to 16.0)                             |
| Vision loss                                                                         | 9.5<br>(9.1 to 10.0)                    | --                                                   | 0.3<br>(0.2 to 0.5)                                 | 15.0<br>(7.0 to 26.2)                             | 0.6<br>(-6.0 to 11.3)                               |

We did not calculate incidence for the nine impairments, certain NTDs, and causes with only birth prevalence. Blank cells mean that no estimate is available.

† Incidence for aggregate causes represents the sum of the incidence of the causes below the aggregate.

‡ Incidence estimates for stroke represent first-ever stroke only.

^ Incidence of HIV/AIDS represents new infections of HIV only and does not include new infections of Tuberculosis in HIV positive cases.

SR Table 14: Prevalence, incidence, and YLDs for 2016, percentage change of YLD counts and percentage change of age-standardised YLD rates between 2006 and 2016 by cause and impairments, for all ages, Dominican Republic.

| Cause                                                                                | Prevalence in thousands (95% UI)        | Incidence in thousands (95% UI)            | YLDs in thousands (95% UI)           |                                                   |                                                     |
|--------------------------------------------------------------------------------------|-----------------------------------------|--------------------------------------------|--------------------------------------|---------------------------------------------------|-----------------------------------------------------|
|                                                                                      | 2016 counts                             | 2016 counts                                | 2016 counts                          | Percentage change in counts between 2006 and 2016 | Percentage change in age-standardised rates between |
| <b>All causes</b>                                                                    | <b>9,991.1</b><br>(9,945.4 to 10,037.1) | <b>63,948.6†</b><br>(60,820.3 to 67,453.1) | <b>1,010.5</b><br>(754.0 to 1,310.6) | <b>17.9</b><br>(15.7 to 20.2)                     | <b>-1.1</b><br>(-2.8 to 0.6)                        |
| <b>Communicable, maternal, neonatal, and nutritional disorders</b>                   | <b>5,342.1</b><br>(5,176.6 to 5,500.0)  | <b>34,343.2†</b><br>(31,495.9 to 37,420.2) | <b>120.9</b><br>(86.8 to 165.6)      | <b>0.7</b><br>(-5.4 to 6.8)                       | <b>-9.1</b><br>(-14.9 to -3.5)                      |
| <b>HIV/AIDS and tuberculosis</b>                                                     | <b>2,241.6</b><br>(2,034.1 to 2,416.4)  | <b>10.4†</b><br>(8.5 to 12.6)              | <b>12.3</b><br>(7.8 to 19.1)         | <b>-10.7</b><br>(-25.6 to 8.2)                    | <b>-25.3</b><br>(-38.3 to -8.9)                     |
| Tuberculosis                                                                         | 2,037.0<br>(1,836.5 to 2,257.2)         | 4.7†<br>(3.9 to 5.6)                       | 0.6<br>(0.4 to 0.8)                  | -4.8<br>(-25.1 to 20.6)                           | -17.9<br>(-35.1 to 2.3)                             |
| Drug-susceptible tuberculosis                                                        | 1.9<br>(1.6 to 2.2)                     | 4.7<br>(3.9 to 5.5)                        | 0.6<br>(0.4 to 0.8)                  | -4.6<br>(-25.2 to 21.7)                           | -17.7<br>(-35.0 to 3.0)                             |
| Multidrug-resistant tuberculosis without extensive drug resistance                   | < 0.05<br>(< 0.05 to < 0.05)            | < 0.05<br>(< 0.05 to 0.1)                  | < 0.05<br>(< 0.05 to < 0.05)         | -31.1<br>(-87.6 to 337.8)                         | -40.7<br>(-89.4 to 267.1)                           |
| Extensively drug-resistant tuberculosis                                              | < 0.05<br>(< 0.05 to < 0.05)            | < 0.05<br>(< 0.05 to < 0.05)               | < 0.05<br>(< 0.05 to < 0.05)         | 83.4<br>(-67.0 to 1,065.8)                        | 57.8<br>(-71.7 to 877.5)                            |
| Latent tuberculosis infection                                                        | 2,035.1<br>(1,834.6 to 2,255.2)         | --                                         | --                                   | --                                                | --                                                  |
| HIV/AIDS                                                                             | 92.4<br>(82.0 to 104.9)                 | 5.7^<br>(4.0 to 7.8)                       | 11.8<br>(7.5 to 18.3)                | -10.9<br>(-26.4 to 8.7)                           | -25.6<br>(-39.0 to -8.4)                            |
| Drug-susceptible HIV/AIDS - Tuberculosis                                             | 0.4<br>(0.2 to 0.6)                     | 1.0<br>(0.6 to 1.5)                        | 0.2<br>(0.1 to 0.3)                  | -27.7<br>(-40.6 to -14.0)                         | -38.2<br>(-49.1 to -26.9)                           |
| Multidrug-resistant HIV/AIDS - Tuberculosis without extensive drug resistance        | < 0.05<br>(< 0.05 to < 0.05)            | < 0.05<br>(< 0.05 to < 0.05)               | < 0.05<br>(< 0.05 to < 0.05)         | -48.6<br>(-90.7 to 232.2)                         | -56.1<br>(-92.0 to 183.3)                           |
| Extensively drug-resistant HIV/AIDS - Tuberculosis                                   | < 0.05<br>(< 0.05 to < 0.05)            | < 0.05<br>(< 0.05 to < 0.05)               | < 0.05<br>(< 0.05 to < 0.05)         | 36.9<br>(-75.1 to 784.1)                          | 16.9<br>(-78.8 to 654.0)                            |
| HIV/AIDS resulting in other diseases                                                 | 92.0<br>(81.7 to 104.6)                 | 5.7<br>(4.0 to 7.8)                        | 11.6<br>(7.4 to 18.1)                | -10.6<br>(-26.4 to 9.5)                           | -25.4<br>(-39.0 to -7.9)                            |
| <b>Diarrhoea, lower respiratory infections, and other common infectious diseases</b> | <b>585.6</b><br>(553.6 to 619.8)        | <b>32,817.0†</b><br>(29,915.9 to 35,819.7) | <b>29.0</b><br>(19.9 to 40.5)        | <b>6.8</b><br>(3.1 to 10.4)                       | <b>-1.8</b><br>(-5.2 to 1.5)                        |
| Diarrhoeal diseases                                                                  | 125.9<br>(117.0 to 135.0)               | 8,294.8<br>(7,727.3 to 8,892.6)            | 14.2<br>(9.9 to 19.6)                | 7.4<br>(0.8 to 14.0)                              | -0.6<br>(-6.3 to 5.2)                               |
| Intestinal infectious diseases                                                       | < 0.05<br>(< 0.05 to 0.1)               | 1.0†<br>(0.8 to 1.3)                       | < 0.05<br>(< 0.05 to < 0.05)         | 88.6<br>(65.7 to 115.4)                           | 54.6<br>(36.2 to 75.3)                              |
| Typhoid fever                                                                        | < 0.05<br>(< 0.05 to 0.1)               | 0.7<br>(0.6 to 1.0)                        | < 0.05<br>(< 0.05 to < 0.05)         | 92.1<br>(66.5 to 122.8)                           | 56.6<br>(35.8 to 80.7)                              |
| Paratyphoid fever                                                                    | < 0.05<br>(< 0.05 to < 0.05)            | 0.3<br>(0.2 to 0.4)                        | < 0.05<br>(< 0.05 to < 0.05)         | 89.8<br>(55.6 to 130.8)                           | 56.5<br>(30.5 to 90.5)                              |
| Other intestinal infectious diseases                                                 | --                                      | --                                         | < 0.05<br>(< 0.05 to < 0.05)         | 9.2<br>(-18.1 to 44.5)                            | 4.2<br>(-16.8 to 30.1)                              |
| Lower respiratory infections                                                         | 12.4<br>(11.3 to 13.5)                  | 547.6<br>(497.9 to 600.3)                  | 0.8<br>(0.5 to 1.1)                  | 14.8<br>(1.9 to 29.6)                             | 6.0<br>(-4.8 to 17.3)                               |
| Upper respiratory infections                                                         | 307.6<br>(271.4 to 348.4)               | 23,078.3<br>(20,239.3 to 26,317.4)         | 7.7<br>(4.6 to 12.1)                 | 10.0<br>(4.1 to 16.4)                             | -0.3<br>(-5.5 to 5.5)                               |
| Otitis media                                                                         | 138.6<br>(123.8 to 152.4)               | 651.1<br>(524.4 to 811.3)                  | 4.0<br>(2.5 to 6.0)                  | -1.3<br>(-8.3 to 6.3)                             | -7.7<br>(-14.3 to -0.9)                             |
| Meningitis                                                                           | 13.1<br>(11.2 to 15.1)                  | 2.9<br>(2.5 to 3.3)                        | 1.1<br>(0.8 to 1.5)                  | 3.0<br>(-1.4 to 7.1)                              | -9.3<br>(-13.1 to -5.8)                             |
| Pneumococcal meningitis                                                              | 6.5<br>(5.2 to 7.8)                     | 0.8<br>(0.6 to 0.9)                        | 0.5<br>(0.4 to 0.7)                  | -5.5<br>(-11.6 to 0.2)                            | -17.3<br>(-22.4 to -12.2)                           |
| H influenzae type B meningitis                                                       | 2.0<br>(1.5 to 2.5)                     | 0.5<br>(0.4 to 0.6)                        | 0.2<br>(0.1 to 0.3)                  | -3.0<br>(-11.3 to 4.4)                            | -13.1<br>(-20.0 to -6.6)                            |
| Meningococcal infection                                                              | 0.8<br>(0.6 to 1.0)                     | 0.3<br>(0.2 to 0.4)                        | 0.1<br>(< 0.05 to 0.1)               | 7.7<br>(1.4 to 14.5)                              | -5.9<br>(-11.6 to -0.1)                             |
| Other meningitis                                                                     | 3.9<br>(2.9 to 5.0)                     | 1.3<br>(1.1 to 1.6)                        | 0.3<br>(0.2 to 0.4)                  | 24.8<br>(17.5 to 32.7)                            | 10.1<br>(4.0 to 16.9)                               |
| Encephalitis                                                                         | 6.2<br>(4.3 to 8.8)                     | 2.8<br>(2.4 to 3.2)                        | 0.7<br>(0.5 to 0.9)                  | 12.1<br>(-5.7 to 33.1)                            | -3.0<br>(-17.6 to 14.1)                             |
| Diphtheria                                                                           | < 0.05<br>(< 0.05 to < 0.05)            | < 0.05<br>(< 0.05 to < 0.05)               | < 0.05<br>(< 0.05 to < 0.05)         | -38.2<br>(-68.3 to 19.5)                          | -40.2<br>(-69.0 to 13.1)                            |
| Whooping cough                                                                       | 3.5<br>(2.7 to 4.4)                     | 25.5<br>(19.8 to 32.0)                     | 0.2<br>(0.1 to 0.3)                  | -21.2<br>(-32.5 to -7.7)                          | -14.8<br>(-27.0 to -0.1)                            |
| Tetanus                                                                              | < 0.05<br>(< 0.05 to < 0.05)            | < 0.05<br>(< 0.05 to 0.1)                  | < 0.05<br>(< 0.05 to < 0.05)         | -27.2<br>(-45.0 to -5.6)                          | -40.9<br>(-56.5 to -23.9)                           |
| Measles                                                                              | < 0.05<br>(0.0 to < 0.05)               | < 0.05<br>(0.0 to < 0.05)                  | < 0.05<br>(0.0 to < 0.05)            | --                                                | --                                                  |
| Varicella and herpes zoster                                                          | 9.7<br>(8.9 to 10.4)                    | 213.0<br>(206.4 to 220.1)                  | 0.4<br>(0.2 to 0.6)                  | 21.6<br>(6.7 to 38.2)                             | 0.2<br>(-11.1 to 12.1)                              |
| <b>Neglected tropical diseases and malaria</b>                                       | <b>186.7</b><br>(170.6 to 204.9)        | <b>310.1†</b><br>(211.9 to 433.1)          | <b>4.9</b><br>(3.0 to 7.6)           | <b>-24.0</b><br>(-38.4 to 4.2)                    | <b>-33.6</b><br>(-47.1 to -9.1)                     |
| Malaria                                                                              | < 0.05<br>(< 0.05 to 0.1)               | 0.6<br>(0.6 to 0.6)                        | < 0.05<br>(< 0.05 to < 0.05)         | -64.4<br>(-75.4 to -43.1)                         | -68.6<br>(-78.1 to -50.5)                           |
| Chagas disease                                                                       | 1.2<br>(1.0 to 1.5)                     | --                                         | < 0.05<br>(< 0.05 to < 0.05)         | -34.7<br>(-43.2 to -25.4)                         | -51.8<br>(-58.4 to -44.4)                           |
| Leishmaniasis                                                                        | < 0.05<br>(< 0.05 to < 0.05)            | < 0.05<br>(< 0.05 to 0.1)                  | < 0.05<br>(< 0.05 to < 0.05)         | 34.4<br>(-100.0 to 12,799,572.7)                  | 19.0<br>(-100.0 to 10,801,257.4)                    |
| Visceral leishmaniasis                                                               | --                                      | --                                         | --                                   | --                                                | --                                                  |
| Cutaneous and mucocutaneous leishmaniasis                                            | < 0.05<br>(< 0.05 to < 0.05)            | < 0.05<br>(< 0.05 to 0.1)                  | < 0.05<br>(< 0.05 to < 0.05)         | 34.4<br>(-100.0 to 12,799,572.7)                  | 19.0<br>(-100.0 to 10,801,257.4)                    |
| African trypanosomiasis                                                              | --                                      | --                                         | --                                   | --                                                | --                                                  |
| Schistosomiasis                                                                      | 95.9<br>(77.9 to 117.9)                 | 24.4<br>(21.0 to 28.4)                     | 0.8<br>(0.4 to 1.5)                  | 25.1<br>(14.5 to 36.9)                            | -0.2<br>(-8.7 to 8.8)                               |
| Cysticercosis                                                                        | 3.9<br>(2.0 to 6.0)                     | --                                         | 0.6<br>(0.2 to 1.0)                  | 8.5<br>(-46.3 to 88.9)                            | -13.0<br>(-56.6 to 52.2)                            |
| Cystic echinococcosis                                                                | --                                      | --                                         | --                                   | --                                                | --                                                  |
| Lymphatic filariasis                                                                 | 1.6<br>(1.1 to 2.4)                     | 0.7<br>(0.7 to 0.8)                        | 0.1<br>(< 0.05 to 0.2)               | -91.6<br>(-95.1 to -88.3)                         | -93.0<br>(-96.0 to -90.4)                           |
| Onchocerciasis                                                                       | --                                      | --                                         | --                                   | --                                                | --                                                  |
| Trachoma                                                                             | --                                      | --                                         | --                                   | --                                                | --                                                  |
| Dengue                                                                               | 14.1<br>(7.9 to 23.3)                   | 235.3<br>(149.9 to 344.2)                  | 2.3<br>(1.0 to 4.2)                  | -18.2<br>(-35.0 to 80.6)                          | -27.2<br>(-42.1 to 57.7)                            |
| Yellow fever                                                                         | --                                      | --                                         | --                                   | --                                                | --                                                  |
| Rabies                                                                               | < 0.05<br>(< 0.05 to < 0.05)            | < 0.05<br>(< 0.05 to < 0.05)               | < 0.05<br>(< 0.05 to < 0.05)         | 180.7<br>(-16.6 to 693.5)                         | 129.8<br>(-24.7 to 495.4)                           |
| Intestinal nematode infections                                                       | 24.2<br>(18.0 to 31.4)                  | --                                         | < 0.05<br>(< 0.05 to 0.1)            | 21.1<br>(-19.2 to 86.1)                           | 1.9<br>(-31.5 to 56.7)                              |
| Ascariasis                                                                           | 8.2<br>(5.1 to 12.3)                    | --                                         | --                                   | --                                                | --                                                  |



| Cause                                                                   | Prevalence in thousands (95% UI)              | Incidence in thousands (95% UI)                   | YLDs in thousands (95% UI)                |                                                   |                                                     |
|-------------------------------------------------------------------------|-----------------------------------------------|---------------------------------------------------|-------------------------------------------|---------------------------------------------------|-----------------------------------------------------|
|                                                                         | 2016 counts                                   | 2016 counts                                       | 2016 counts                               | Percentage change in counts between 2006 and 2016 | Percentage change in age-standardised rates between |
| Trichuriasis                                                            | 8.3<br>(5.1 to 13.4)                          | --                                                | --                                        | --                                                | --                                                  |
| Hookworm disease                                                        | 8.1<br>(5.2 to 11.6)                          | --                                                | < 0.05<br>(< 0.05 to 0.1)                 | 21.1<br>(-19.2 to 86.1)                           | 1.9<br>(-31.5 to 56.7)                              |
| Food-borne trematodiasis                                                | --                                            | --                                                | --                                        | --                                                | --                                                  |
| Leprosy                                                                 | 0.5<br>(0.4 to 0.6)                           | < 0.05<br>(< 0.05 to < 0.05)                      | < 0.05<br>(< 0.05 to < 0.05)              | -1.5<br>(-22.1 to 30.1)                           | -24.0<br>(-40.7 to 2.3)                             |
| Ebola virus disease                                                     | --                                            | --                                                | --                                        | --                                                | --                                                  |
| Zika virus disease                                                      | 0.8<br>(0.4 to 1.9)                           | 48.9<br>(23.0 to 107.4)                           | < 0.05<br>(< 0.05 to 0.1)                 | --                                                | --                                                  |
| Guinea worm disease                                                     | --                                            | --                                                | --                                        | --                                                | --                                                  |
| Other neglected tropical diseases                                       | 46.6<br>(40.7 to 52.9)                        | --                                                | 1.1<br>(0.6 to 1.7)                       | -15.6<br>(-28.9 to 0.9)                           | -16.4<br>(-29.0 to -0.9)                            |
| <b>Maternal disorders</b>                                               | <b>13.6</b><br><b>(10.2 to 17.6)</b>          | <b>167.9†</b><br><b>(148.3 to 189.1)</b>          | <b>0.8</b><br><b>(0.5 to 1.3)</b>         | <b>-15.5</b><br><b>(-38.2 to 15.0)</b>            | <b>-23.4</b><br><b>(-43.9 to 4.3)</b>               |
| Maternal haemorrhage                                                    | 1.1<br>(0.8 to 1.5)                           | 11.2<br>(8.0 to 15.1)                             | 0.1<br>(< 0.05 to 0.1)                    | -12.7<br>(-43.4 to 34.7)                          | -20.4<br>(-48.3 to 21.2)                            |
| Maternal sepsis and other pregnancy related infections                  | 3.9<br>(2.8 to 5.4)                           | 26.9<br>(19.9 to 36.7)                            | 0.1<br>(0.1 to 0.2)                       | -9.3<br>(-55.7 to 94.5)                           | -17.5<br>(-59.2 to 72.9)                            |
| Maternal hypertensive disorders                                         | 8.4<br>(5.4 to 12.1)                          | 37.6<br>(29.7 to 45.0)                            | 0.4<br>(0.2 to 0.7)                       | -5.2<br>(-41.4 to 60.9)                           | -14.2<br>(-47.0 to 46.2)                            |
| Maternal obstructed labour and uterine rupture                          | 0.1<br>(0.1 to 0.2)                           | 9.3<br>(6.6 to 12.4)                              | < 0.05<br>(< 0.05 to 0.1)                 | -10.9<br>(-56.2 to 96.2)                          | -19.2<br>(-59.8 to 75.5)                            |
| Maternal abortion, miscarriage, and ectopic pregnancy                   | 0.7<br>(0.5 to 1.0)                           | 83.0<br>(67.3 to 100.8)                           | 0.1<br>(< 0.05 to 0.1)                    | -49.7<br>(-72.7 to 0.1)                           | -54.5<br>(-75.5 to -10.2)                           |
| Other maternal disorders                                                | --                                            | --                                                | 0.1<br>(0.1 to 0.2)                       | -19.8<br>(-41.4 to 9.5)                           | -27.1<br>(-46.5 to -0.8)                            |
| <b>Neonatal disorders</b>                                               | <b>203.0</b><br><b>(158.9 to 274.2)</b>       | --                                                | <b>40.4</b><br><b>(22.9 to 73.2)</b>      | <b>12.8</b><br><b>(-3.5 to 31.1)</b>              | <b>4.5</b><br><b>(-10.5 to 21.8)</b>                |
| Neonatal preterm birth complications                                    | 146.6<br>(113.5 to 203.0)                     | --                                                | 13.7<br>(8.9 to 20.0)                     | 4.3<br>(-17.0 to 26.5)                            | -4.6<br>(-24.0 to 15.5)                             |
| Neonatal encephalopathy due to birth asphyxia and trauma                | 6.9<br>(3.5 to 12.3)                          | --                                                | 0.7<br>(0.1 to 2.0)                       | 19.4<br>(-36.1 to 132.4)                          | 9.6<br>(-41.6 to 113.6)                             |
| Neonatal sepsis and other neonatal infections                           | 53.6<br>(19.0 to 115.3)                       | --                                                | 23.5<br>(6.9 to 55.4)                     | 20.2<br>(-6.7 to 63.9)                            | 11.1<br>(-12.5 to 55.3)                             |
| Hemolytic disease and other neonatal jaundice                           | 4.0<br>(3.5 to 4.6)                           | --                                                | 1.0<br>(0.7 to 1.4)                       | 8.9<br>(-11.3 to 33.6)                            | -1.6<br>(-18.7 to 19.2)                             |
| Other neonatal disorders                                                | --                                            | --                                                | 1.4<br>(0.8 to 2.6)                       | -8.7<br>(-21.3 to 6.7)                            | -0.8<br>(-14.4 to 15.9)                             |
| <b>Nutritional deficiencies</b>                                         | <b>1,240.7</b><br><b>(1,151.0 to 1,313.0)</b> | <b>58.3†</b><br><b>(47.7 to 72.3)</b>             | <b>28.3</b><br><b>(18.4 to 42.0)</b>      | <b>-9.0</b><br><b>(-16.2 to -0.5)</b>             | <b>-16.8</b><br><b>(-23.0 to -9.9)</b>              |
| Protein-energy malnutrition                                             | 22.5<br>(17.9 to 28.5)                        | 11.1<br>(8.9 to 13.8)                             | 0.9<br>(0.5 to 1.4)                       | -18.5<br>(-40.9 to 14.3)                          | -11.4<br>(-35.6 to 24.0)                            |
| Iodine deficiency                                                       | 20.7<br>(17.9 to 23.8)                        | 0.6<br>(0.5 to 0.7)                               | 0.5<br>(0.3 to 0.7)                       | 16.0<br>(5.6 to 27.5)                             | -3.2<br>(-12.6 to 7.2)                              |
| Vitamin A deficiency                                                    | 56.1<br>(44.4 to 71.7)                        | 46.6<br>(36.3 to 60.5)                            | 0.7<br>(0.4 to 1.0)                       | 5.7<br>(-11.8 to 27.6)                            | -2.9<br>(-18.4 to 15.5)                             |
| Iron-deficiency anaemia                                                 | 1,130.7<br>(1,038.6 to 1,225.3)               | --                                                | 26.2<br>(16.9 to 39.2)                    | -9.3<br>(-16.9 to -0.4)                           | -17.5<br>(-24.1 to -10.2)                           |
| Other nutritional deficiencies                                          | --                                            | --                                                | < 0.05<br>(< 0.05 to < 0.05)              | -19.7<br>(-42.6 to 15.1)                          | -13.0<br>(-37.8 to 24.5)                            |
| <b>Other communicable, maternal, neonatal, and nutritional diseases</b> | <b>2,614.9</b><br><b>(2,440.6 to 2,808.6)</b> | <b>979.5</b><br><b>(786.7 to 1,232.9)</b>         | <b>4.3</b><br><b>(2.5 to 7.1)</b>         | <b>11.3</b><br><b>(3.5 to 19.5)</b>               | <b>-2.3</b><br><b>(-8.9 to 4.3)</b>                 |
| Sexually transmitted diseases excluding HIV                             | 2,320.7<br>(2,143.4 to 2,507.0)               | 864.2<br>(688.7 to 1,111.3)                       | 3.2<br>(1.7 to 5.7)                       | 19.2<br>(10.1 to 30.0)                            | 1.8<br>(-6.0 to 10.1)                               |
| Syphilis                                                                | 95.5<br>(79.7 to 110.3)                       | 69.7<br>(54.8 to 85.8)                            | 0.2<br>(0.2 to 0.3)                       | 30.2<br>(14.3 to 47.6)                            | -0.8<br>(-12.7 to 13.3)                             |
| Chlamydial infection                                                    | 98.4<br>(78.0 to 123.4)                       | 74.9<br>(58.9 to 95.2)                            | 0.5<br>(0.3 to 0.8)                       | 14.6<br>(-3.5 to 35.7)                            | 0.5<br>(-15.0 to 18.7)                              |
| Gonococcal infection                                                    | 75.8<br>(32.0 to 139.6)                       | 264.1<br>(100.8 to 500.2)                         | 0.9<br>(0.3 to 2.1)                       | 20.4<br>(0.9 to 45.8)                             | 4.6<br>(-12.2 to 26.2)                              |
| Trichomoniasis                                                          | 342.2<br>(295.1 to 392.3)                     | 298.9<br>(253.4 to 348.5)                         | 0.3<br>(0.1 to 0.7)                       | 18.1<br>(10.3 to 26.6)                            | 1.0<br>(-5.3 to 7.7)                                |
| Genital herpes                                                          | 1,876.2<br>(1,621.2 to 2,167.0)               | 139.5<br>(117.1 to 166.3)                         | 0.5<br>(0.2 to 1.1)                       | 21.8<br>(12.8 to 32.2)                            | 0.4<br>(-6.2 to 8.6)                                |
| Other sexually transmitted diseases                                     | 20.6<br>(19.1 to 22.2)                        | 17.1<br>(14.7 to 20.1)                            | 0.8<br>(0.4 to 1.3)                       | 16.9<br>(4.6 to 30.8)                             | 1.4<br>(-9.1 to 12.8)                               |
| Hepatitis                                                               | 378.8<br>(334.8 to 431.5)                     | 115.3<br>(73.5 to 177.8)                          | 0.1<br>(0.1 to 0.2)                       | -23.6<br>(-42.1 to 1.4)                           | -34.4<br>(-48.2 to -16.8)                           |
| Acute hepatitis A                                                       | 4.0<br>(1.0 to 8.8)                           | 52.7<br>(13.1 to 114.8)                           | < 0.05<br>(< 0.05 to 0.1)                 | -24.2<br>(-69.1 to 84.3)                          | -32.2<br>(-69.9 to 56.1)                            |
| Hepatitis B                                                             | 168.7<br>(134.4 to 215.0)                     | 44.1<br>(34.7 to 55.6)                            | 0.1<br>(< 0.05 to 0.1)                    | -25.0<br>(-38.1 to -8.9)                          | -37.3<br>(-48.6 to -23.7)                           |
| Hepatitis C                                                             | 205.3<br>(183.0 to 230.8)                     | 8.2<br>(7.4 to 9.0)                               | < 0.05<br>(< 0.05 to < 0.05)              | -11.9<br>(-26.0 to 5.8)                           | -19.6<br>(-30.9 to -5.2)                            |
| Acute hepatitis E                                                       | 0.8<br>(0.7 to 1.0)                           | 10.3<br>(8.6 to 12.4)                             | < 0.05<br>(< 0.05 to < 0.05)              | -21.4<br>(-30.0 to -12.0)                         | -32.5<br>(-40.1 to -24.2)                           |
| Other infectious diseases                                               | 36.1<br>(32.0 to 40.4)                        | < 0.05<br>(< 0.05 to < 0.05)                      | 0.9<br>(0.6 to 1.5)                       | -3.9<br>(-17.6 to 10.7)                           | -7.9<br>(-20.5 to 5.0)                              |
| <b>Non-communicable diseases</b>                                        | <b>9,588.6</b><br><b>(9,526.3 to 9,648.4)</b> | <b>28,884.0†</b><br><b>(27,354.3 to 30,602.1)</b> | <b>829.9</b><br><b>(610.6 to 1,081.6)</b> | <b>20.1</b><br><b>(17.4 to 22.7)</b>              | <b>-0.5</b><br><b>(-2.4 to 1.4)</b>                 |
| <b>Neoplasms</b>                                                        | <b>31.7</b><br><b>(30.2 to 33.3)</b>          | <b>12.9</b><br><b>(12.2 to 13.6)</b>              | <b>4.2</b><br><b>(3.1 to 5.5)</b>         | <b>48.1</b><br><b>(39.7 to 56.5)</b>              | <b>9.6</b><br><b>(2.7 to 16.8)</b>                  |
| Lip and oral cavity cancer                                              | 1.2<br>(1.1 to 1.3)                           | 0.3<br>(0.3 to 0.4)                               | 0.1<br>(0.1 to 0.2)                       | 48.7<br>(29.1 to 71.0)                            | 8.7<br>(-6.3 to 26.1)                               |
| Nasopharynx cancer                                                      | 0.2<br>(0.2 to 0.3)                           | 0.1<br>(0.1 to 0.1)                               | < 0.05<br>(< 0.05 to < 0.05)              | 38.3<br>(23.4 to 56.1)                            | 5.3<br>(-6.8 to 19.1)                               |
| Other pharynx cancer                                                    | 0.3<br>(0.3 to 0.3)                           | 0.1<br>(0.1 to 0.1)                               | < 0.05<br>(< 0.05 to 0.1)                 | 60.6<br>(39.6 to 84.7)                            | 16.3<br>(0.7 to 34.4)                               |
| Oesophageal cancer                                                      | 0.1<br>(0.1 to 0.1)                           | 0.1<br>(0.1 to 0.1)                               | < 0.05<br>(< 0.05 to < 0.05)              | 46.3<br>(33.7 to 60.8)                            | 6.5<br>(-3.1 to 17.4)                               |
| Stomach cancer                                                          | 0.8<br>(0.8 to 0.9)                           | 0.5<br>(0.5 to 0.6)                               | 0.1<br>(0.1 to 0.2)                       | 30.4<br>(14.3 to 49.1)                            | -4.5<br>(-17.2 to 10.8)                             |
| Colon and rectum cancer                                                 | 3.8<br>(3.5 to 4.1)                           | 1.1<br>(1.0 to 1.2)                               | 0.4<br>(0.3 to 0.5)                       | 72.9<br>(51.6 to 99.3)                            | 25.3<br>(8.7 to 46.0)                               |
| Liver cancer                                                            | 0.2<br>(0.2 to 0.2)                           | 0.6<br>(0.5 to 0.6)                               | 0.1<br>(0.1 to 0.2)                       | 26.0<br>(12.7 to 42.8)                            | -7.5<br>(-17.6 to 5.4)                              |
| Liver cancer due to hepatitis B                                         | 0.2<br>(0.1 to 0.2)                           | 0.2<br>(0.2 to 0.2)                               | < 0.05<br>(< 0.05 to 0.1)                 | 23.2<br>(9.3 to 39.0)                             | -7.8<br>(-17.9 to 3.6)                              |

| Cause                                              | Prevalence in thousands (95% UI)          | Incidence in thousands (95% UI)          | YLDs in thousands (95% UI)           |                                                   |                                                     |
|----------------------------------------------------|-------------------------------------------|------------------------------------------|--------------------------------------|---------------------------------------------------|-----------------------------------------------------|
|                                                    | 2016 counts                               | 2016 counts                              | 2016 counts                          | Percentage change in counts between 2006 and 2016 | Percentage change in age-standardised rates between |
| Liver cancer due to hepatitis C                    | 0.1<br>(0.1 to 0.2)                       | 0.2<br>(0.1 to 0.2)                      | < 0.05<br>(< 0.05 to < 0.05)         | 30.1<br>(13.7 to 51.0)                            | -6.7<br>(-18.8 to 8.7)                              |
| Liver cancer due to alcohol use                    | 0.1<br>(0.1 to 0.1)                       | 0.1<br>(0.1 to 0.1)                      | < 0.05<br>(< 0.05 to < 0.05)         | 28.2<br>(12.9 to 48.3)                            | -7.2<br>(-18.5 to 7.5)                              |
| Liver cancer due to other causes                   | 0.1<br>(0.1 to 0.1)                       | 0.1<br>(0.1 to 0.1)                      | < 0.05<br>(< 0.05 to < 0.05)         | 23.0<br>(9.5 to 39.0)                             | -8.4<br>(-18.8 to 3.6)                              |
| Gallbladder and biliary tract cancer               | 0.1<br>(< 0.05 to 0.1)                    | 0.1<br>(0.1 to 0.1)                      | < 0.05<br>(< 0.05 to < 0.05)         | 29.6<br>(18.4 to 39.2)                            | -6.2<br>(-14.3 to 0.9)                              |
| Pancreatic cancer                                  | 0.2<br>(0.2 to 0.2)                       | 0.3<br>(0.3 to 0.3)                      | 0.1<br>(< 0.05 to 0.1)               | 53.2<br>(40.4 to 66.6)                            | 10.8<br>(1.3 to 21.1)                               |
| Larynx cancer                                      | 0.5<br>(0.4 to 0.5)                       | 0.1<br>(0.1 to 0.1)                      | 0.1<br>(< 0.05 to 0.1)               | 39.1<br>(22.1 to 57.9)                            | 0.8<br>(-11.5 to 14.8)                              |
| Tracheal, bronchus, and lung cancer                | 1.0<br>(0.9 to 1.1)                       | 0.9<br>(0.8 to 1.0)                      | 0.2<br>(0.1 to 0.3)                  | 37.3<br>(14.3 to 66.0)                            | 0.0<br>(-17.9 to 21.8)                              |
| Malignant skin melanoma                            | 0.2<br>(0.2 to 0.3)                       | < 0.05<br>(< 0.05 to 0.1)                | < 0.05<br>(< 0.05 to < 0.05)         | 56.8<br>(37.1 to 82.8)                            | 17.2<br>(2.0 to 37.5)                               |
| Non-melanoma skin cancer                           | 0.4<br>(0.3 to 0.5)                       | 0.9<br>(0.7 to 1.3)                      | < 0.05<br>(< 0.05 to < 0.05)         | -18.0<br>(-67.8 to 83.6)                          | -42.6<br>(-77.9 to 31.8)                            |
| Non-melanoma skin cancer (squamous-cell carcinoma) | 0.3<br>(0.2 to 0.5)                       | 0.4<br>(0.3 to 0.5)                      | < 0.05<br>(< 0.05 to < 0.05)         | -19.8<br>(-69.3 to 86.5)                          | -43.8<br>(-78.7 to 33.3)                            |
| Non-melanoma skin cancer (basal-cell carcinoma)    | 0.1<br>(< 0.05 to 0.1)                    | 0.6<br>(0.3 to 0.9)                      | < 0.05<br>(< 0.05 to < 0.05)         | 38.6<br>(20.5 to 58.9)                            | 3.0<br>(-10.7 to 18.5)                              |
| Breast cancer                                      | 6.0<br>(4.9 to 6.9)                       | 1.3<br>(1.1 to 1.5)                      | 0.5<br>(0.4 to 0.7)                  | 61.7<br>(31.5 to 92.1)                            | 23.1<br>(0.1 to 45.3)                               |
| Cervical cancer                                    | 2.7<br>(2.2 to 3.2)                       | 0.7<br>(0.6 to 0.9)                      | 0.3<br>(0.2 to 0.4)                  | 17.4<br>(-1.4 to 40.6)                            | -8.2<br>(-24.1 to 10.0)                             |
| Uterine cancer                                     | 1.5<br>(1.3 to 1.7)                       | 0.3<br>(0.3 to 0.4)                      | 0.1<br>(0.1 to 0.2)                  | 51.5<br>(24.9 to 85.6)                            | 12.7<br>(-6.7 to 37.1)                              |
| Ovarian cancer                                     | 0.4<br>(0.4 to 0.5)                       | 0.1<br>(0.1 to 0.2)                      | 0.1<br>(< 0.05 to 0.1)               | 43.9<br>(19.2 to 72.3)                            | 9.6<br>(-8.9 to 31.2)                               |
| Prostate cancer                                    | 11.9<br>(8.6 to 14.1)                     | 3.0<br>(2.2 to 3.5)                      | 1.3<br>(0.8 to 1.7)                  | 55.9<br>(33.6 to 79.6)                            | 9.8<br>(-6.2 to 27.3)                               |
| Testicular cancer                                  | 0.1<br>(< 0.05 to 0.1)                    | < 0.05<br>(< 0.05 to < 0.05)             | < 0.05<br>(< 0.05 to < 0.05)         | 35.1<br>(8.0 to 66.3)                             | 7.8<br>(-12.5 to 31.6)                              |
| Kidney cancer                                      | 0.6<br>(0.5 to 0.8)                       | 0.2<br>(0.1 to 0.2)                      | 0.1<br>(< 0.05 to 0.1)               | 40.9<br>(24.3 to 59.2)                            | 12.6<br>(-1.3 to 28.8)                              |
| Bladder cancer                                     | 0.6<br>(0.5 to 0.6)                       | 0.1<br>(0.1 to 0.2)                      | 0.1<br>(< 0.05 to 0.1)               | 58.9<br>(39.9 to 82.7)                            | 14.0<br>(-0.3 to 32.3)                              |
| Brain and nervous system cancer                    | 0.5<br>(0.4 to 0.6)                       | 0.2<br>(0.2 to 0.3)                      | 0.1<br>(< 0.05 to 0.1)               | 28.9<br>(15.8 to 43.7)                            | 5.3<br>(-6.1 to 21.8)                               |
| Thyroid cancer                                     | 0.5<br>(0.4 to 0.5)                       | 0.1<br>(0.1 to 0.1)                      | < 0.05<br>(< 0.05 to < 0.05)         | 110.0<br>(73.7 to 153.1)                          | 57.6<br>(31.3 to 90.9)                              |
| Mesothelioma                                       | < 0.05<br>(< 0.05 to < 0.05)              | < 0.05<br>(< 0.05 to < 0.05)             | < 0.05<br>(< 0.05 to < 0.05)         | 31.1<br>(18.3 to 45.2)                            | -0.8<br>(-10.6 to 10.6)                             |
| Hodgkin lymphoma                                   | 0.1<br>(< 0.05 to 0.1)                    | < 0.05<br>(< 0.05 to < 0.05)             | < 0.05<br>(< 0.05 to < 0.05)         | 34.5<br>(21.7 to 51.5)                            | 6.7<br>(-3.0 to 17.9)                               |
| Non-Hodgkin's lymphoma                             | 0.5<br>(0.5 to 0.6)                       | 0.2<br>(0.1 to 0.2)                      | 0.1<br>(< 0.05 to 0.1)               | 47.9<br>(34.6 to 64.4)                            | 15.1<br>(3.5 to 28.4)                               |
| Multiple myeloma                                   | 0.2<br>(0.2 to 0.2)                       | 0.1<br>(0.1 to 0.1)                      | < 0.05<br>(< 0.05 to 0.1)            | 56.0<br>(39.4 to 75.4)                            | 14.2<br>(1.6 to 28.5)                               |
| Leukaemia                                          | 1.4<br>(1.3 to 1.7)                       | 0.4<br>(0.3 to 0.5)                      | 0.2<br>(0.1 to 0.2)                  | 15.2<br>(4.5 to 27.0)                             | -6.0<br>(-15.7 to 4.9)                              |
| Acute lymphoid leukaemia                           | 0.2<br>(0.2 to 0.3)                       | 0.1<br>(0.1 to 0.1)                      | < 0.05<br>(< 0.05 to < 0.05)         | 7.7<br>(-9.6 to 30.3)                             | 0.7<br>(-14.4 to 19.2)                              |
| Chronic lymphoid leukaemia                         | 0.2<br>(0.1 to 0.2)                       | < 0.05<br>(< 0.05 to < 0.05)             | < 0.05<br>(< 0.05 to < 0.05)         | 60.4<br>(39.5 to 83.4)                            | 19.4<br>(2.2 to 37.5)                               |
| Acute myeloid leukaemia                            | 0.1<br>(0.1 to 0.1)                       | 0.1<br>(0.1 to 0.1)                      | < 0.05<br>(< 0.05 to < 0.05)         | 36.9<br>(20.4 to 56.6)                            | 17.9<br>(4.8 to 34.4)                               |
| Chronic myeloid leukaemia                          | 0.1<br>(< 0.05 to 0.1)                    | < 0.05<br>(< 0.05 to < 0.05)             | < 0.05<br>(< 0.05 to < 0.05)         | 48.4<br>(24.3 to 75.3)                            | 13.1<br>(-3.4 to 33.4)                              |
| Other leukaemia                                    | 0.8<br>(0.8 to 1.0)                       | 0.2<br>(0.2 to 0.2)                      | 0.1<br>(0.1 to 0.1)                  | 6.2<br>(-7.8 to 22.8)                             | -15.4<br>(-28.0 to 1.2)                             |
| Other neoplasms                                    | 2.6<br>(2.3 to 3.1)                       | 0.8<br>(0.7 to 0.9)                      | 0.2<br>(0.2 to 0.3)                  | 65.9<br>(42.7 to 92.2)                            | 30.2<br>(11.3 to 51.4)                              |
| <b>Cardiovascular diseases</b>                     | <b>615.6</b><br><b>(594.4 to 636.1)</b>   | <b>60.8†</b><br><b>(58.0 to 63.6)</b>    | <b>35.5</b><br><b>(25.7 to 46.5)</b> | <b>31.5</b><br><b>(27.6 to 35.7)</b>              | <b>0.3</b><br><b>(-2.5 to 3.4)</b>                  |
| Rheumatic heart disease                            | 89.4<br>(79.8 to 101.0)                   | 2.7<br>(2.4 to 3.0)                      | 4.3<br>(2.6 to 6.3)                  | 23.0<br>(13.8 to 34.5)                            | 4.2<br>(-3.5 to 13.3)                               |
| Ischaemic heart disease                            | 192.5<br>(182.7 to 202.6)                 | 26.2<br>(24.4 to 28.1)                   | 9.2<br>(6.4 to 12.5)                 | 35.9<br>(30.1 to 42.1)                            | 1.5<br>(-2.5 to 5.9)                                |
| Cerebrovascular disease                            | 79.5<br>(74.7 to 84.8)                    | 11.4‡<br>(10.4 to 12.3)                  | 8.2<br>(5.9 to 10.3)                 | 33.9<br>(25.0 to 43.4)                            | -1.6<br>(-8.5 to 5.5)                               |
| Ischaemic stroke                                   | 65.1<br>(59.1 to 71.9)                    | 7.5‡<br>(6.7 to 8.5)                     | 6.4<br>(4.7 to 8.2)                  | 35.3<br>(24.1 to 47.3)                            | -1.3<br>(-9.5 to 7.6)                               |
| Hemorrhagic stroke                                 | 18.7<br>(16.9 to 20.7)                    | 3.8‡<br>(3.5 to 4.2)                     | 1.8<br>(1.3 to 2.3)                  | 29.2<br>(16.2 to 43.4)                            | -2.5<br>(-12.6 to 8.3)                              |
| Hypertensive heart disease                         | 25.4<br>(21.9 to 29.7)                    | --                                       | 2.0<br>(1.4 to 2.9)                  | 40.8<br>(28.7 to 54.7)                            | 2.1<br>(-6.4 to 12.4)                               |
| Cardiomyopathy and myocarditis                     | 4.4<br>(3.8 to 5.0)                       | 2.3†<br>(2.0 to 2.6)                     | 0.5<br>(0.3 to 0.7)                  | 27.8<br>(11.6 to 45.9)                            | 4.2<br>(-8.8 to 18.6)                               |
| Myocarditis                                        | 2.3<br>(2.0 to 2.5)                       | 2.3<br>(2.0 to 2.6)                      | 0.2<br>(0.1 to 0.2)                  | 25.1<br>(6.8 to 47.0)                             | 4.1<br>(-12.0 to 23.2)                              |
| Alcoholic cardiomyopathy                           | 0.3<br>(0.3 to 0.4)                       | --                                       | < 0.05<br>(< 0.05 to < 0.05)         | 37.6<br>(26.6 to 50.0)                            | 3.8<br>(-5.3 to 13.1)                               |
| Other cardiomyopathy                               | 3.2<br>(2.8 to 3.7)                       | --                                       | 0.3<br>(0.2 to 0.4)                  | 28.6<br>(5.8 to 55.0)                             | 4.3<br>(-12.4 to 23.0)                              |
| Atrial fibrillation and flutter                    | 56.7<br>(49.5 to 64.8)                    | 4.5<br>(3.8 to 5.2)                      | 4.5<br>(3.0 to 6.2)                  | 36.0<br>(28.0 to 44.7)                            | -1.2<br>(-6.6 to 4.8)                               |
| Peripheral vascular disease                        | 129.9<br>(112.6 to 150.4)                 | 12.5<br>(10.7 to 14.6)                   | 0.6<br>(0.3 to 1.2)                  | 33.4<br>(23.4 to 44.2)                            | -4.9<br>(-11.8 to 2.5)                              |
| Endocarditis                                       | 0.5<br>(0.5 to 0.6)                       | 1.3<br>(1.2 to 1.4)                      | < 0.05<br>(< 0.05 to 0.1)            | 26.4<br>(13.9 to 41.7)                            | 0.7<br>(-11.8 to 15.4)                              |
| Other cardiovascular and circulatory diseases      | 117.2<br>(101.1 to 136.0)                 | --                                       | 6.2<br>(4.2 to 8.9)                  | 23.2<br>(13.6 to 33.7)                            | -0.2<br>(-7.2 to 8.0)                               |
| <b>Chronic respiratory diseases</b>                | <b>996.5</b><br><b>(940.4 to 1,059.9)</b> | <b>170.1†</b><br><b>(157.2 to 184.9)</b> | <b>35.5</b><br><b>(24.8 to 49.8)</b> | <b>15.0</b><br><b>(9.1 to 21.0)</b>               | <b>2.6</b><br><b>(-2.1 to 7.4)</b>                  |
| Chronic obstructive pulmonary disease              | 236.2<br>(219.5 to 258.3)                 | 15.2<br>(14.2 to 16.5)                   | 4.3<br>(3.4 to 5.4)                  | 33.0<br>(14.8 to 53.2)                            | 1.8<br>(-12.3 to 17.6)                              |
| Pneumoconiosis                                     | 0.4<br>(0.3 to 0.4)                       | < 0.05<br>(< 0.05 to < 0.05)             | 0.1<br>(< 0.05 to 0.1)               | 36.4<br>(23.6 to 50.6)                            | -0.5<br>(-10.3 to 10.1)                             |
| Silicosis                                          | 0.1<br>(0.1 to 0.1)                       | < 0.05<br>(< 0.05 to < 0.05)             | < 0.05<br>(< 0.05 to < 0.05)         | 37.9<br>(32.2 to 44.2)                            | 3.5<br>(-1.3 to 8.4)                                |



| Cause                                                          | Prevalence in thousands (95% UI)        | Incidence in thousands (95% UI)         | YLDs in thousands (95% UI)        |                                                   |                                                     |
|----------------------------------------------------------------|-----------------------------------------|-----------------------------------------|-----------------------------------|---------------------------------------------------|-----------------------------------------------------|
|                                                                | 2016 counts                             | 2016 counts                             | 2016 counts                       | Percentage change in counts between 2006 and 2016 | Percentage change in age-standardised rates between |
| Asbestosis                                                     | 0.1<br>(0.1 to 0.1)                     | < 0.05<br>(< 0.05 to < 0.05)            | < 0.05<br>(< 0.05 to < 0.05)      | 35.7<br>(7.9 to 72.3)                             | -1.9<br>(-23.5 to 25.7)                             |
| Coal workers pneumoconiosis                                    | --                                      | --                                      | --                                | --                                                | --                                                  |
| Other pneumoconiosis                                           | 0.1<br>(0.1 to 0.2)                     | < 0.05<br>(< 0.05 to < 0.05)            | < 0.05<br>(< 0.05 to < 0.05)      | 36.2<br>(19.6 to 55.9)                            | -1.2<br>(-13.2 to 12.6)                             |
| Asthma                                                         | 769.1<br>(698.3 to 847.5)               | 154.5<br>(141.5 to 169.1)               | 30.5<br>(19.7 to 44.8)            | 12.2<br>(6.4 to 18.6)                             | 2.3<br>(-2.7 to 7.6)                                |
| Interstitial lung disease and pulmonary sarcoidosis            | 3.0<br>(2.7 to 3.3)                     | 0.3<br>(0.2 to 0.3)                     | 0.3<br>(0.2 to 0.5)               | 37.6<br>(27.0 to 50.6)                            | 6.6<br>(-3.0 to 18.3)                               |
| Other chronic respiratory diseases                             | --                                      | --                                      | 0.4<br>(0.3 to 0.5)               | 51.2<br>(15.6 to 97.4)                            | 38.0<br>(8.4 to 75.6)                               |
| <b>Cirrhosis and other chronic liver diseases</b>              | <b>69.4<br/>(65.5 to 73.4)</b>          | <b>2.0<br/>(1.9 to 2.1)</b>             | <b>1.7<br/>(1.2 to 2.4)</b>       | <b>24.5<br/>(12.8 to 38.8)</b>                    | <b>-1.9<br/>(-9.8 to 7.2)</b>                       |
| Cirrhosis and other chronic liver diseases due to hepatitis B  | 7.4<br>(6.2 to 8.8)                     | 0.2<br>(0.2 to 0.3)                     | 0.2<br>(0.1 to 0.2)               | 29.5<br>(4.4 to 60.7)                             | -3.5<br>(-22.1 to 18.9)                             |
| Cirrhosis and other chronic liver diseases due to hepatitis C  | 21.6<br>(19.4 to 23.9)                  | 0.6<br>(0.6 to 0.7)                     | 0.5<br>(0.3 to 0.6)               | 29.3<br>(10.6 to 54.7)                            | -2.9<br>(-16.0 to 14.5)                             |
| Cirrhosis and other chronic liver diseases due to alcohol use  | 23.9<br>(21.9 to 26.2)                  | 0.7<br>(0.7 to 0.8)                     | 0.5<br>(0.3 to 0.7)               | 30.8<br>(13.4 to 51.8)                            | -3.4<br>(-15.1 to 10.2)                             |
| Cirrhosis and other chronic liver diseases due to other causes | 16.5<br>(15.2 to 18.0)                  | 0.4<br>(0.4 to 0.4)                     | 0.6<br>(0.4 to 0.8)               | 15.2<br>(-6.4 to 43.4)                            | 1.4<br>(-15.6 to 23.4)                              |
| <b>Digestive diseases</b>                                      | <b>298.6<br/>(281.4 to 315.2)</b>       | <b>240.4†<br/>(224.5 to 257.4)</b>      | <b>11.0<br/>(7.6 to 14.8)</b>     | <b>25.3<br/>(15.8 to 35.3)</b>                    | <b>5.6<br/>(-1.4 to 13.0)</b>                       |
| Peptic ulcer disease                                           | 106.3<br>(96.8 to 117.3)                | 9.4<br>(8.4 to 10.4)                    | 1.9<br>(1.2 to 2.9)               | 54.9<br>(36.5 to 74.3)                            | 20.9<br>(7.6 to 36.1)                               |
| Gastritis and duodenitis                                       | 106.7<br>(95.0 to 119.7)                | 51.1<br>(45.5 to 57.4)                  | 1.8<br>(1.2 to 2.7)               | 54.4<br>(39.0 to 71.5)                            | 21.0<br>(9.1 to 34.4)                               |
| Appendicitis                                                   | 0.8<br>(0.8 to 0.9)                     | 21.7<br>(19.8 to 23.7)                  | 0.3<br>(0.2 to 0.4)               | 6.6<br>(-24.9 to 54.8)                            | -3.1<br>(-28.8 to 33.4)                             |
| Paralytic ileus and intestinal obstruction                     | 0.1<br>(0.1 to 0.2)                     | 3.7<br>(3.3 to 4.3)                     | < 0.05<br>(< 0.05 to 0.1)         | 21.2<br>(16.8 to 25.9)                            | 6.7<br>(3.7 to 10.2)                                |
| Inguinal, femoral, and abdominal hernia                        | 79.0<br>(69.7 to 88.4)                  | 61.4<br>(53.6 to 70.1)                  | 5.4<br>(3.6 to 7.6)               | 10.6<br>(-1.0 to 22.6)                            | -4.3<br>(-13.0 to 5.2)                              |
| Inflammatory bowel disease                                     | 0.6<br>(0.6 to 0.7)                     | 1.8<br>(1.7 to 1.9)                     | 0.1<br>(0.1 to 0.1)               | 27.9<br>(20.5 to 35.5)                            | 1.1<br>(-6.3 to 8.5)                                |
| Vascular intestinal disorders                                  | 0.1<br>(0.1 to 0.1)                     | 0.4<br>(0.4 to 0.4)                     | < 0.05<br>(< 0.05 to < 0.05)      | 27.8<br>(20.4 to 35.6)                            | 11.3<br>(5.9 to 16.3)                               |
| Gallbladder and biliary diseases                               | 14.1<br>(12.5 to 15.9)                  | 87.4<br>(75.7 to 99.9)                  | 0.4<br>(0.2 to 0.6)               | 40.8<br>(17.2 to 72.2)                            | 13.1<br>(-6.2 to 37.6)                              |
| Pancreatitis                                                   | 0.4<br>(0.4 to 0.5)                     | 3.6<br>(3.2 to 4.0)                     | 0.1<br>(< 0.05 to 0.1)            | 42.2<br>(37.6 to 47.3)                            | 16.4<br>(13.2 to 19.9)                              |
| Other digestive diseases                                       | --                                      | --                                      | 1.0<br>(0.7 to 1.3)               | 25.0<br>(14.0 to 36.4)                            | 8.7<br>(0.7 to 16.5)                                |
| <b>Neurological disorders</b>                                  | <b>4,007.3<br/>(3,833.2 to 4,182.9)</b> | <b>1,933.1<br/>(1,651.1 to 2,232.6)</b> | <b>99.2<br/>(66.0 to 136.8)</b>   | <b>19.1<br/>(0.1 to 40.3)</b>                     | <b>0.3<br/>(-14.8 to 17.0)</b>                      |
| Alzheimer's disease and other dementias                        | 39.8<br>(33.6 to 47.3)                  | 6.9<br>(5.7 to 8.3)                     | 5.9<br>(4.1 to 7.9)               | 43.1<br>(35.4 to 51.2)                            | -1.2<br>(-6.4 to 4.2)                               |
| Parkinson's disease                                            | 5.5<br>(4.3 to 6.7)                     | 0.6<br>(0.5 to 0.8)                     | 0.6<br>(0.4 to 0.9)               | 47.0<br>(28.5 to 67.3)                            | 5.8<br>(-7.3 to 20.1)                               |
| Epilepsy                                                       | 31.1<br>(7.5 to 58.2)                   | 3.9<br>(1.0 to 7.2)                     | 9.3<br>(1.9 to 20.8)              | 15.0<br>(-78.7 to 537.7)                          | 1.5<br>(-81.0 to 466.7)                             |
| Multiple sclerosis                                             | 1.0<br>(0.9 to 1.2)                     | < 0.05<br>(< 0.05 to 0.1)               | 0.3<br>(0.2 to 0.4)               | 38.6<br>(30.2 to 47.2)                            | 12.2<br>(5.6 to 19.0)                               |
| Motor neuron disease                                           | 0.3<br>(0.3 to 0.3)                     | < 0.05<br>(< 0.05 to 0.1)               | 0.1<br>(< 0.05 to 0.1)            | 23.0<br>(17.9 to 28.5)                            | 4.3<br>(0.6 to 7.9)                                 |
| Migraine                                                       | 1,469.7<br>(1,382.4 to 1,552.2)         | 171.7<br>(160.7 to 183.9)               | 68.2<br>(43.8 to 94.8)            | 17.5<br>(13.6 to 22.2)                            | -0.1<br>(-3.2 to 3.6)                               |
| Tension-type headache                                          | 3,092.0<br>(2,786.6 to 3,444.3)         | 1,749.9<br>(1,467.0 to 2,053.8)         | 12.8<br>(8.1 to 19.1)             | 18.0<br>(12.3 to 24.4)                            | -0.6<br>(-5.0 to 4.4)                               |
| Other neurological disorders                                   | < 0.05<br>(< 0.05 to 0.1)               | 0.1<br>(< 0.05 to 0.1)                  | 2.1<br>(0.6 to 4.5)               | 35.6<br>(-67.6 to 477.6)                          | 20.7<br>(-68.7 to 363.4)                            |
| <b>Mental and substance use disorders</b>                      | <b>1,579.4<br/>(1,528.4 to 1,631.2)</b> | <b>579.7†<br/>(542.4 to 622.8)</b>      | <b>204.6<br/>(146.1 to 266.4)</b> | <b>16.5<br/>(14.2 to 18.9)</b>                    | <b>-0.8<br/>(-2.8 to 1.2)</b>                       |
| Schizophrenia                                                  | 19.5<br>(17.1 to 22.1)                  | 1.3<br>(1.2 to 1.5)                     | 12.6<br>(9.1 to 15.9)             | 23.5<br>(11.6 to 35.9)                            | 1.3<br>(-7.6 to 11.2)                               |
| Alcohol use disorders                                          | 154.5<br>(131.7 to 177.1)               | 81.8<br>(69.7 to 93.9)                  | 15.6<br>(10.6 to 21.9)            | 19.0<br>(9.5 to 30.1)                             | 1.3<br>(-6.4 to 10.2)                               |
| Drug use disorders                                             | 64.8<br>(59.4 to 70.7)                  | 9.1<br>(8.1 to 10.3)                    | 14.3<br>(9.8 to 19.2)             | 20.2<br>(8.8 to 31.3)                             | 1.7<br>(-7.0 to 10.7)                               |
| Opioid use disorders                                           | 24.7<br>(20.0 to 30.4)                  | 3.1<br>(2.6 to 3.7)                     | 10.3<br>(6.9 to 14.3)             | 20.8<br>(8.4 to 34.7)                             | 1.2<br>(-8.7 to 11.8)                               |
| Cocaine use disorders                                          | 11.3<br>(9.7 to 13.0)                   | 0.8<br>(0.6 to 0.9)                     | 1.6<br>(1.0 to 2.3)               | 17.7<br>(-4.8 to 43.9)                            | 2.0<br>(-16.8 to 23.1)                              |
| Amphetamine use disorders                                      | 1.0<br>(0.7 to 1.4)                     | 0.2<br>(0.1 to 0.2)                     | 0.1<br>(0.1 to 0.2)               | 15.4<br>(-5.4 to 47.2)                            | 1.8<br>(-15.2 to 28.2)                              |
| Cannabis use disorders                                         | 25.0<br>(20.7 to 30.5)                  | 4.3<br>(3.5 to 5.2)                     | 0.7<br>(0.5 to 1.1)               | 22.2<br>(-2.1 to 47.7)                            | 9.0<br>(-12.1 to 29.8)                              |
| Other drug use disorders                                       | 4.1<br>(3.6 to 4.6)                     | 0.8<br>(0.7 to 0.9)                     | 1.6<br>(1.0 to 2.2)               | 18.3<br>(-7.1 to 49.8)                            | 1.8<br>(-19.2 to 27.7)                              |
| Depressive disorders                                           | 320.4<br>(299.1 to 344.4)               | 360.6<br>(324.4 to 400.0)               | 55.7<br>(38.5 to 75.9)            | 16.4<br>(10.6 to 22.4)                            | -4.1<br>(-8.9 to 1.0)                               |
| Major depressive disorder                                      | 222.3<br>(200.6 to 247.0)               | 341.9<br>(305.3 to 380.5)               | 45.7<br>(31.5 to 63.2)            | 15.2<br>(8.4 to 22.4)                             | -5.0<br>(-10.7 to 1.0)                              |
| Dysthymia                                                      | 103.2<br>(90.2 to 117.4)                | 18.7<br>(16.5 to 21.5)                  | 10.0<br>(6.7 to 14.8)             | 22.1<br>(16.8 to 27.7)                            | 0.1<br>(-3.7 to 4.1)                                |
| Bipolar disorder                                               | 91.2<br>(77.8 to 106.8)                 | 7.8<br>(6.8 to 9.2)                     | 18.8<br>(11.8 to 27.8)            | 16.1<br>(10.0 to 23.0)                            | 0.1<br>(-5.0 to 5.5)                                |
| Anxiety disorders                                              | 428.1<br>(388.4 to 470.7)               | 65.1<br>(60.0 to 71.0)                  | 41.6<br>(28.7 to 56.4)            | 16.5<br>(12.5 to 20.9)                            | 0.1<br>(-3.2 to 3.5)                                |
| Eating disorders                                               | 19.0<br>(15.4 to 23.3)                  | 9.3<br>(6.9 to 12.4)                    | 3.8<br>(2.4 to 5.7)               | 25.2<br>(11.7 to 41.2)                            | 12.8<br>(0.7 to 26.7)                               |
| Anorexia nervosa                                               | 3.5<br>(2.6 to 4.8)                     | 1.4<br>(1.1 to 1.9)                     | 0.8<br>(0.4 to 1.2)               | 21.1<br>(-5.5 to 52.8)                            | 11.6<br>(-13.3 to 41.0)                             |
| Bulimia nervosa                                                | 14.6<br>(10.8 to 19.5)                  | 7.9<br>(5.5 to 11.0)                    | 3.1<br>(1.9 to 4.7)               | 26.3<br>(10.9 to 44.5)                            | 13.1<br>(-0.7 to 29.4)                              |
| Autistic spectrum disorders                                    | 90.0<br>(80.8 to 100.4)                 | 0.7<br>(0.4 to 0.9)                     | 13.6<br>(9.2 to 19.1)             | 12.0<br>(6.6 to 18.1)                             | -0.1<br>(-4.6 to 5.0)                               |
| Autism                                                         | 28.9<br>(24.8 to 33.8)                  | 0.1<br>(< 0.05 to 0.1)                  | 7.4<br>(4.8 to 10.9)              | 12.2<br>(2.9 to 21.9)                             | -0.1<br>(-7.8 to 8.1)                               |
| Asperger syndrome and other autistic spectrum disorders        | 61.6<br>(51.1 to 74.1)                  | 0.6<br>(0.4 to 0.8)                     | 6.2<br>(4.1 to 9.1)               | 11.7<br>(6.3 to 17.2)                             | -0.1<br>(-4.5 to 4.7)                               |

| Cause                                                      | Prevalence in thousands (95% UI)              | Incidence in thousands (95% UI)                   | YLDs in thousands (95% UI)              |                                                   |                                                     |
|------------------------------------------------------------|-----------------------------------------------|---------------------------------------------------|-----------------------------------------|---------------------------------------------------|-----------------------------------------------------|
|                                                            | 2016 counts                                   | 2016 counts                                       | 2016 counts                             | Percentage change in counts between 2006 and 2016 | Percentage change in age-standardised rates between |
| Attention-deficit/hyperactivity disorder                   | 208.1<br>(188.3 to 231.8)                     | 9.5<br>(8.3 to 11.0)                              | 2.5<br>(1.5 to 4.0)                     | 9.0<br>(3.1 to 15.2)                              | -0.0<br>(-5.2 to 5.4)                               |
| Conduct disorder                                           | 78.8<br>(63.8 to 94.9)                        | 27.5<br>(21.0 to 33.6)                            | 9.6<br>(5.8 to 14.6)                    | 3.6<br>(-3.0 to 11.5)                             | -0.1<br>(-6.5 to 7.3)                               |
| Idiopathic developmental intellectual disability           | 55.3<br>(22.6 to 88.0)                        | --                                                | 2.5<br>(0.9 to 4.5)                     | 4.5<br>(-5.0 to 13.4)                             | -7.4<br>(-15.7 to 0.2)                              |
| Other mental and substance use disorders                   | 186.7<br>(164.2 to 215.5)                     | 7.0<br>(6.2 to 8.0)                               | 14.0<br>(9.7 to 20.1)                   | 21.2<br>(14.8 to 27.9)                            | -0.0<br>(-4.9 to 4.9)                               |
| <b>Diabetes, urogenital, blood, and endocrine diseases</b> | <b>3,790.6</b><br><b>(3,683.7 to 3,896.4)</b> | <b>1,041.5†</b><br><b>(967.8 to 1,121.0)</b>      | <b>66.3</b><br><b>(47.0 to 90.7)</b>    | <b>25.9</b><br><b>(21.2 to 31.0)</b>              | <b>-0.0</b><br><b>(-3.9 to 4.3)</b>                 |
| Diabetes mellitus                                          | 402.5<br>(362.4 to 443.8)                     | 22.3<br>(20.2 to 24.7)                            | 35.3<br>(24.4 to 49.3)                  | 31.7<br>(23.6 to 40.9)                            | 1.0<br>(-5.4 to 8.2)                                |
| Acute glomerulonephritis                                   | 0.1<br>(0.1 to 0.1)                           | 1.8<br>(1.6 to 2.1)                               | < 0.05<br>(< 0.05 to < 0.05)            | 17.2<br>(12.8 to 22.0)                            | 0.2<br>(-3.4 to 4.1)                                |
| Chronic kidney disease                                     | 306.3<br>(277.4 to 337.0)                     | 23.4<br>(20.7 to 26.0)                            | 8.1<br>(6.0 to 10.4)                    | 41.1<br>(32.2 to 51.5)                            | 7.3<br>(0.5 to 15.4)                                |
| Chronic kidney disease due to diabetes mellitus            | 105.8<br>(89.3 to 123.7)                      | 8.2<br>(6.7 to 9.7)                               | 2.5<br>(1.8 to 3.3)                     | 48.1<br>(33.5 to 65.5)                            | 10.7<br>(-0.3 to 22.9)                              |
| Chronic kidney disease due to hypertension                 | 68.4<br>(59.0 to 78.1)                        | 6.8<br>(5.7 to 8.0)                               | 1.2<br>(0.8 to 1.5)                     | 49.8<br>(33.7 to 69.3)                            | 6.3<br>(-5.6 to 21.2)                               |
| Chronic kidney disease due to glomerulonephritis           | 65.0<br>(56.2 to 73.8)                        | 3.2<br>(2.5 to 3.9)                               | 2.6<br>(1.8 to 3.4)                     | 34.6<br>(21.3 to 49.4)                            | 5.9<br>(-4.1 to 16.7)                               |
| Chronic kidney disease due to other causes                 | 67.1<br>(55.6 to 79.5)                        | 5.2<br>(4.3 to 6.2)                               | 1.9<br>(1.3 to 2.6)                     | 36.6<br>(23.6 to 51.7)                            | 5.2<br>(-4.9 to 16.1)                               |
| Urinary diseases and male infertility                      | 145.8<br>(130.3 to 159.0)                     | 651.1†<br>(578.3 to 728.9)                        | 4.0<br>(2.6 to 5.8)                     | 28.5<br>(21.0 to 36.6)                            | -3.5<br>(-9.0 to 2.6)                               |
| Interstitial nephritis and urinary tract infections        | 11.5<br>(10.1 to 13.0)                        | 600.0<br>(528.3 to 676.5)                         | 0.4<br>(0.2 to 0.6)                     | 15.1<br>(0.1 to 32.9)                             | 1.3<br>(-11.4 to 16.6)                              |
| Urolithiasis                                               | 1.5<br>(1.3 to 1.7)                           | 38.6<br>(34.1 to 43.6)                            | 0.1<br>(0.1 to 0.2)                     | 24.8<br>(19.1 to 30.1)                            | 1.5<br>(-2.6 to 5.5)                                |
| Benign prostatic hyperplasia                               | 95.4<br>(80.5 to 111.0)                       | 12.6<br>(10.5 to 15.0)                            | 3.1<br>(2.0 to 4.5)                     | 33.2<br>(23.9 to 43.4)                            | -4.0<br>(-10.4 to 2.7)                              |
| Male infertility                                           | 32.5<br>(28.6 to 37.1)                        | --                                                | 0.2<br>(0.1 to 0.4)                     | 30.0<br>(14.1 to 48.8)                            | 14.2<br>(0.5 to 30.7)                               |
| Other urinary diseases                                     | --                                            | --                                                | 0.2<br>(0.1 to 0.3)                     | -5.1<br>(-15.6 to 6.6)                            | -16.4<br>(-25.3 to -6.4)                            |
| Gynecological diseases                                     | 1,017.3<br>(949.7 to 1,073.3)                 | 326.7†<br>(302.3 to 350.8)                        | 10.7<br>(7.2 to 15.8)                   | 10.3<br>(5.1 to 15.8)                             | -7.0<br>(-11.0 to -2.5)                             |
| Uterine fibroids                                           | 84.1<br>(73.2 to 96.1)                        | 9.2<br>(7.9 to 10.8)                              | 1.4<br>(0.8 to 2.3)                     | 11.0<br>(-0.8 to 21.1)                            | -10.5<br>(-19.7 to -2.4)                            |
| Polycystic ovarian syndrome                                | 1.1<br>(0.8 to 1.5)                           | 7.7<br>(5.5 to 10.6)                              | < 0.05<br>(< 0.05 to < 0.05)            | 15.2<br>(-16.3 to 57.5)                           | 0.5<br>(-27.0 to 37.8)                              |
| Female infertility                                         | 59.6<br>(49.1 to 72.0)                        | --                                                | 0.3<br>(0.1 to 0.7)                     | 46.6<br>(25.0 to 72.7)                            | 29.6<br>(9.9 to 52.8)                               |
| Endometriosis                                              | 0.8<br>(0.7 to 1.0)                           | 4.0<br>(3.3 to 4.8)                               | 0.1<br>(< 0.05 to 0.1)                  | 17.9<br>(-10.6 to 60.4)                           | 0.7<br>(-24.1 to 38.5)                              |
| Genital prolapse                                           | 316.8<br>(274.9 to 363.3)                     | 20.6<br>(17.6 to 23.9)                            | 1.0<br>(0.5 to 1.8)                     | 11.1<br>(3.2 to 20.0)                             | -15.3<br>(-21.2 to -8.7)                            |
| Premenstrual syndrome                                      | 574.6<br>(519.8 to 626.3)                     | 208.3<br>(187.1 to 227.9)                         | 4.8<br>(3.0 to 7.4)                     | 6.1<br>(-3.1 to 15.5)                             | -7.4<br>(-15.0 to 0.3)                              |
| Other gynecological diseases                               | 92.9<br>(80.8 to 105.5)                       | 76.8<br>(64.0 to 90.8)                            | 3.1<br>(2.0 to 4.4)                     | 13.4<br>(3.6 to 23.7)                             | -3.9<br>(-12.1 to 4.7)                              |
| Hemoglobinopathies and hemolytic anaemias                  | 2,502.2<br>(2,376.4 to 2,610.5)               | --                                                | 4.9<br>(3.2 to 7.2)                     | 8.1<br>(-2.4 to 20.4)                             | -2.6<br>(-11.2 to 7.0)                              |
| Thalassemias                                               | 0.1<br>(0.1 to 0.1)                           | --                                                | < 0.05<br>(< 0.05 to < 0.05)            | -4.2<br>(-23.7 to 17.8)                           | 1.5<br>(-19.4 to 24.9)                              |
| Thalassaemias trait                                        | 30.4<br>(27.0 to 34.1)                        | --                                                | 0.4<br>(0.2 to 0.6)                     | 20.5<br>(0.4 to 43.5)                             | 5.8<br>(-10.5 to 25.5)                              |
| Sickle cell disorders                                      | 6.5<br>(5.7 to 7.5)                           | --                                                | 0.6<br>(0.4 to 0.8)                     | 12.9<br>(-2.5 to 31.9)                            | 6.6<br>(-7.6 to 23.4)                               |
| Sickle cell trait                                          | 1,001.1<br>(943.2 to 1,064.0)                 | --                                                | 3.0<br>(1.9 to 4.5)                     | 11.1<br>(-1.3 to 25.7)                            | 1.0<br>(-9.7 to 13.1)                               |
| G6PD deficiency                                            | 478.9<br>(415.9 to 544.2)                     | --                                                | < 0.05<br>(< 0.05 to < 0.05)            | 9.8<br>(-17.8 to 47.3)                            | -1.4<br>(-23.1 to 25.9)                             |
| G6PD trait                                                 | 1,139.5<br>(1,056.0 to 1,217.9)               | --                                                | < 0.05<br>(< 0.05 to < 0.05)            | 31.7<br>(16.4 to 49.3)                            | 16.0<br>(2.6 to 30.3)                               |
| Other hemoglobinopathies and hemolytic anaemias            | 47.0<br>(42.9 to 51.1)                        | --                                                | 0.9<br>(0.6 to 1.3)                     | -7.2<br>(-18.3 to 4.4)                            | -18.4<br>(-27.1 to -9.3)                            |
| Endocrine, metabolic, blood, and immune disorders          | 107.1<br>(99.0 to 115.4)                      | 16.2<br>(14.7 to 17.9)                            | 3.2<br>(2.2 to 4.4)                     | 19.2<br>(11.1 to 28.4)                            | 0.5<br>(-5.5 to 7.1)                                |
| <b>Musculoskeletal disorders</b>                           | <b>1,496.2</b><br><b>(1,422.1 to 1,570.3)</b> | <b>752.9</b><br><b>(682.6 to 837.1)</b>           | <b>162.3</b><br><b>(117.5 to 213.2)</b> | <b>25.3</b><br><b>(21.3 to 29.5)</b>              | <b>0.2</b><br><b>(-2.7 to 3.4)</b>                  |
| Rheumatoid arthritis                                       | 31.7<br>(28.2 to 35.9)                        | 1.8<br>(1.6 to 2.0)                               | 7.5<br>(5.0 to 10.1)                    | 35.9<br>(25.9 to 46.5)                            | 6.6<br>(-0.7 to 14.5)                               |
| Osteoarthritis                                             | 312.1<br>(291.7 to 333.0)                     | 15.9<br>(14.8 to 17.2)                            | 19.3<br>(13.7 to 26.1)                  | 44.6<br>(39.5 to 49.5)                            | 7.3<br>(3.7 to 10.9)                                |
| Low back and neck pain                                     | 831.9<br>(777.0 to 892.2)                     | 328.9<br>(296.5 to 363.6)                         | 95.1<br>(67.1 to 126.4)                 | 23.4<br>(17.8 to 29.2)                            | -0.7<br>(-5.0 to 3.5)                               |
| Low back pain                                              | 540.1<br>(475.6 to 609.7)                     | 252.4<br>(221.1 to 287.0)                         | 61.4<br>(43.1 to 81.2)                  | 21.7<br>(13.0 to 30.4)                            | -1.2<br>(-7.8 to 5.4)                               |
| Neck pain                                                  | 334.8<br>(287.7 to 387.5)                     | 76.5<br>(66.3 to 90.0)                            | 33.6<br>(22.7 to 48.2)                  | 26.7<br>(23.6 to 29.8)                            | 0.2<br>(-1.9 to 2.1)                                |
| Gout                                                       | 27.5<br>(24.5 to 30.8)                        | 5.5<br>(4.8 to 6.2)                               | 0.9<br>(0.6 to 1.2)                     | 29.6<br>(11.2 to 50.8)                            | -0.5<br>(-13.6 to 15.2)                             |
| Other musculoskeletal disorders                            | 456.1<br>(388.4 to 533.0)                     | 400.7<br>(334.8 to 474.9)                         | 39.5<br>(26.5 to 55.9)                  | 20.0<br>(11.6 to 29.2)                            | -2.4<br>(-8.6 to 4.7)                               |
| <b>Other non-communicable diseases</b>                     | <b>7,742.7</b><br><b>(7,603.6 to 7,878.7)</b> | <b>24,090.6†</b><br><b>(22,653.4 to 25,781.8)</b> | <b>209.7</b><br><b>(142.2 to 298.7)</b> | <b>17.0</b><br><b>(15.6 to 18.3)</b>              | <b>-2.3</b><br><b>(-3.3 to -1.4)</b>                |
| Congenital anomalies                                       | 90.9<br>(79.1 to 104.4)                       | --                                                | 10.1<br>(7.1 to 13.6)                   | 9.7<br>(2.9 to 17.0)                              | -0.4<br>(-6.6 to 6.2)                               |
| Neural tube defects                                        | 3.8<br>(3.3 to 4.2)                           | --                                                | 1.1<br>(0.8 to 1.6)                     | 14.6<br>(-1.5 to 32.5)                            | 1.8<br>(-12.8 to 17.0)                              |
| Congenital heart anomalies                                 | 20.6<br>(17.9 to 23.6)                        | --                                                | 1.0<br>(0.4 to 1.7)                     | 9.4<br>(-4.6 to 23.9)                             | 3.0<br>(-9.4 to 15.7)                               |
| Orofacial clefts                                           | 6.1<br>(5.4 to 6.9)                           | --                                                | 0.1<br>(0.1 to 0.1)                     | 5.2<br>(-6.4 to 17.6)                             | -5.8<br>(-16.1 to 5.5)                              |
| Down's syndrome                                            | 6.2<br>(5.4 to 7.2)                           | --                                                | 0.6<br>(0.4 to 0.8)                     | 20.5<br>(10.2 to 32.2)                            | 9.6<br>(0.4 to 19.8)                                |
| Turner syndrome                                            | 2.1<br>(1.8 to 2.5)                           | --                                                | < 0.05<br>(< 0.05 to 0.1)               | 9.9<br>(-31.0 to 71.8)                            | 0.8<br>(-33.9 to 53.1)                              |
| Klinefelter syndrome                                       | 2.7<br>(2.3 to 3.3)                           | --                                                | < 0.05<br>(< 0.05 to < 0.05)            | 11.6<br>(-17.5 to 53.3)                           | 1.6<br>(-24.6 to 38.0)                              |



| Cause                                         | Prevalence in thousands (95% UI)              | Incidence in thousands (95% UI)          | YLDs in thousands (95% UI)           |                                                   |                                                     |
|-----------------------------------------------|-----------------------------------------------|------------------------------------------|--------------------------------------|---------------------------------------------------|-----------------------------------------------------|
|                                               | 2016 counts                                   | 2016 counts                              | 2016 counts                          | Percentage change in counts between 2006 and 2016 | Percentage change in age-standardised rates between |
| Other chromosomal abnormalities               | 8.1<br>(6.8 to 9.9)                           | --                                       | 0.8<br>(0.6 to 1.2)                  | 13.5<br>(-4.0 to 34.6)                            | 13.9<br>(-3.8 to 35.0)                              |
| Congenital musculoskeletal and limb anomalies | 8.0<br>(7.3 to 8.8)                           | --                                       | 1.2<br>(0.8 to 1.6)                  | 24.1<br>(11.0 to 37.5)                            | 9.1<br>(-1.7 to 20.2)                               |
| Urogenital congenital anomalies               | 10.9<br>(9.2 to 13.0)                         | --                                       | 0.5<br>(0.3 to 0.7)                  | 3.8<br>(-10.3 to 20.1)                            | 1.7<br>(-11.7 to 17.4)                              |
| Digestive congenital anomalies                | 10.8<br>(9.5 to 12.1)                         | --                                       | 0.5<br>(0.3 to 0.7)                  | 16.5<br>(-2.2 to 38.1)                            | 3.9<br>(-12.1 to 21.7)                              |
| Other congenital anomalies                    | 36.5<br>(23.2 to 54.4)                        | --                                       | 4.4<br>(2.7 to 6.7)                  | 3.6<br>(-8.1 to 15.8)                             | -7.4<br>(-17.4 to 3.2)                              |
| Skin and subcutaneous diseases                | 3,455.3<br>(3,364.1 to 3,553.7)               | 7,928.6<br>(7,474.7 to 8,394.0)          | 86.2<br>(57.6 to 124.9)              | 10.8<br>(8.7 to 13.1)                             | 0.8<br>(-0.9 to 2.6)                                |
| Dermatitis                                    | 536.1<br>(497.4 to 576.8)                     | 540.4<br>(500.5 to 580.9)                | 21.3<br>(12.4 to 35.3)               | 7.5<br>(3.8 to 11.2)                              | 0.1<br>(-3.1 to 3.3)                                |
| Psoriasis                                     | 91.8<br>(87.6 to 96.3)                        | 12.8<br>(12.2 to 13.4)                   | 8.1<br>(5.7 to 10.6)                 | 26.8<br>(17.3 to 38.2)                            | 7.4<br>(0.1 to 16.2)                                |
| Cellulitis                                    | 4.0<br>(3.7 to 4.3)                           | 73.9<br>(68.7 to 79.5)                   | 0.2<br>(0.1 to 0.3)                  | 12.6<br>(-12.8 to 45.0)                           | 0.8<br>(-20.2 to 26.1)                              |
| Pyoderma                                      | 26.6<br>(25.7 to 27.6)                        | 644.6<br>(620.8 to 667.7)                | 0.1<br>(0.1 to 0.3)                  | 23.4<br>(15.6 to 32.1)                            | 1.2<br>(-4.5 to 7.6)                                |
| Scabies                                       | 227.6<br>(199.1 to 263.0)                     | 698.3<br>(604.4 to 808.6)                | 5.9<br>(3.3 to 9.4)                  | -1.0<br>(-5.4 to 3.7)                             | -9.1<br>(-12.7 to -5.3)                             |
| Fungal skin diseases                          | 1,081.6<br>(974.6 to 1,189.9)                 | 3,767.8<br>(3,345.7 to 4,219.6)          | 6.1<br>(2.4 to 13.0)                 | 17.0<br>(15.1 to 19.0)                            | 0.1<br>(-0.8 to 1.0)                                |
| Viral skin diseases                           | 303.2<br>(288.4 to 318.9)                     | 447.7<br>(423.0 to 473.0)                | 9.3<br>(5.8 to 13.7)                 | 10.1<br>(6.5 to 13.5)                             | 0.1<br>(-3.0 to 3.1)                                |
| Acne vulgaris                                 | 908.3<br>(812.2 to 1,015.9)                   | 636.3<br>(518.4 to 793.6)                | 23.5<br>(15.8 to 34.0)               | 9.0<br>(4.0 to 14.1)                              | 1.7<br>(-2.9 to 6.6)                                |
| Alopecia areata                               | 17.9<br>(17.2 to 18.7)                        | 31.8<br>(30.6 to 33.1)                   | 0.6<br>(0.4 to 0.9)                  | 15.9<br>(2.6 to 30.2)                             | -0.2<br>(-11.4 to 11.5)                             |
| Pruritus                                      | 89.7<br>(79.5 to 100.9)                       | 71.2<br>(63.7 to 80.0)                   | 1.0<br>(0.4 to 1.8)                  | 19.9<br>(13.3 to 26.5)                            | 1.6<br>(-3.6 to 6.8)                                |
| Urticaria                                     | 96.6<br>(84.3 to 111.4)                       | 171.6<br>(150.8 to 198.4)                | 5.9<br>(3.7 to 8.4)                  | 6.8<br>(1.1 to 13.4)                              | 0.0<br>(-5.1 to 5.5)                                |
| Decubitus ulcer                               | 3.0<br>(2.7 to 3.4)                           | 11.0<br>(9.7 to 12.4)                    | 0.5<br>(0.3 to 0.7)                  | 37.0<br>(23.2 to 53.7)                            | 7.9<br>(-5.0 to 23.4)                               |
| Other skin and subcutaneous diseases          | 706.2<br>(684.6 to 726.9)                     | 821.0<br>(793.9 to 848.5)                | 3.9<br>(1.9 to 7.1)                  | 27.1<br>(23.7 to 30.0)                            | 4.7<br>(2.2 to 7.0)                                 |
| Sense organ diseases                          | 2,354.6<br>(2,307.1 to 2,408.7)               | 994.6†<br>(930.5 to 1,061.1)             | 82.6<br>(56.8 to 114.7)              | 21.4<br>(19.4 to 23.7)                            | -5.7<br>(-7.2 to -4.2)                              |
| Glaucoma                                      | 10.6<br>(8.8 to 12.4)                         | --                                       | 1.1<br>(0.8 to 1.5)                  | 32.1<br>(20.3 to 44.8)                            | -5.2<br>(-13.4 to 3.8)                              |
| Cataract                                      | 104.7<br>(92.9 to 117.1)                      | --                                       | 7.9<br>(5.7 to 10.9)                 | 24.2<br>(18.1 to 30.7)                            | -10.9<br>(-15.2 to -6.4)                            |
| Macular degeneration                          | 2.9<br>(2.4 to 3.6)                           | --                                       | 0.2<br>(0.1 to 0.3)                  | 32.6<br>(14.6 to 55.6)                            | -5.3<br>(-18.0 to 10.4)                             |
| Refraction and accommodation disorders        | 1,124.8<br>(1,080.9 to 1,170.3)               | --                                       | 17.8<br>(10.5 to 29.0)               | 9.8<br>(6.1 to 13.4)                              | -10.8<br>(-13.6 to -7.8)                            |
| Age-related and other hearing loss            | 1,538.1<br>(1,457.2 to 1,628.1)               | --                                       | 44.5<br>(31.1 to 62.3)               | 24.7<br>(21.2 to 28.1)                            | -3.9<br>(-6.2 to -1.8)                              |
| Other vision loss                             | 27.9<br>(25.0 to 31.0)                        | --                                       | 2.6<br>(1.8 to 3.5)                  | 25.4<br>(15.2 to 36.0)                            | -3.4<br>(-10.5 to 4.0)                              |
| Other sense organ diseases                    | 270.4<br>(248.5 to 290.4)                     | 994.6<br>(930.5 to 1,061.1)              | 8.4<br>(5.3 to 12.8)                 | 26.9<br>(21.8 to 32.3)                            | 1.0<br>(-2.6 to 4.8)                                |
| Oral disorders                                | 5,534.4<br>(5,296.1 to 5,757.0)               | 15,167.4†<br>(13,844.6 to 16,666.6)      | 30.8<br>(18.3 to 48.8)               | 26.8<br>(23.9 to 30.2)                            | -0.3<br>(-2.5 to 1.9)                               |
| Caries of deciduous teeth                     | 880.4<br>(713.6 to 1,057.8)                   | 2,980.3<br>(2,127.1 to 4,064.3)          | 0.2<br>(0.1 to 0.4)                  | -1.6<br>(-11.6 to 10.4)                           | -0.8<br>(-11.6 to 10.9)                             |
| Caries of permanent teeth                     | 3,521.1<br>(3,255.3 to 3,793.9)               | 11,966.0<br>(10,780.5 to 13,138.0)       | 2.1<br>(0.9 to 4.0)                  | 12.2<br>(7.9 to 16.5)                             | -3.2<br>(-6.6 to 0.2)                               |
| Periodontal disease                           | 1,504.0<br>(1,280.2 to 1,756.1)               | 180.0<br>(149.8 to 213.3)                | 9.9<br>(4.0 to 20.4)                 | 24.9<br>(21.0 to 29.3)                            | -0.5<br>(-3.6 to 2.6)                               |
| Edentulism and severe tooth loss              | 473.0<br>(413.7 to 533.0)                     | 41.2<br>(34.8 to 48.2)                   | 13.2<br>(8.5 to 18.7)                | 35.8<br>(30.0 to 41.4)                            | 0.1<br>(-4.5 to 4.1)                                |
| Other oral disorders                          | 185.0<br>(176.8 to 193.4)                     | --                                       | 5.5<br>(3.4 to 8.2)                  | 18.1<br>(14.0 to 22.3)                            | 0.1<br>(-3.0 to 3.4)                                |
| <b>Injuries</b>                               | <b>1,546.9</b><br><b>(1,453.6 to 1,677.2)</b> | <b>721.4†</b><br><b>(679.9 to 768.4)</b> | <b>59.7</b><br><b>(40.0 to 84.4)</b> | <b>31.2</b><br><b>(28.7 to 33.6)</b>              | <b>7.6</b><br><b>(5.8 to 9.3)</b>                   |
| <b>Transport injuries</b>                     | <b>230.1</b><br><b>(212.2 to 248.4)</b>       | <b>88.7</b><br><b>(79.6 to 100.1)</b>    | <b>12.3</b><br><b>(8.2 to 17.7)</b>  | <b>39.4</b><br><b>(36.1 to 42.6)</b>              | <b>12.7</b><br><b>(10.3 to 14.9)</b>                |
| Road injuries                                 | 222.0<br>(204.5 to 240.0)                     | 86.8<br>(77.7 to 98.2)                   | 11.9<br>(7.9 to 17.1)                | 40.4<br>(37.1 to 43.7)                            | 13.3<br>(11.0 to 15.6)                              |
| Pedestrian road injuries                      | 21.1<br>(18.1 to 24.4)                        | 5.7<br>(4.5 to 7.1)                      | 1.1<br>(0.7 to 1.6)                  | 53.9<br>(50.3 to 57.8)                            | 23.9<br>(21.5 to 26.4)                              |
| Cyclist road injuries                         | 51.4<br>(42.6 to 61.2)                        | 20.9<br>(16.6 to 25.6)                   | 2.6<br>(1.7 to 3.7)                  | 42.8<br>(39.0 to 46.7)                            | 17.3<br>(14.6 to 19.9)                              |
| Motorcyclist road injuries                    | 37.7<br>(31.9 to 44.9)                        | 9.3<br>(7.5 to 11.3)                     | 1.9<br>(1.2 to 2.8)                  | 42.9<br>(39.5 to 46.4)                            | 15.2<br>(12.8 to 17.6)                              |
| Motor vehicle road injuries                   | 92.3<br>(80.3 to 104.5)                       | 41.5<br>(36.0 to 47.8)                   | 5.4<br>(3.6 to 7.6)                  | 36.9<br>(33.7 to 40.2)                            | 9.8<br>(7.3 to 12.0)                                |
| Other road injuries                           | 19.5<br>(16.8 to 22.9)                        | 9.4<br>(7.2 to 12.0)                     | 1.0<br>(0.6 to 1.4)                  | 35.8<br>(32.6 to 38.9)                            | 9.5<br>(7.3 to 11.6)                                |
| Other transport injuries                      | 8.1<br>(6.8 to 9.9)                           | 1.8<br>(1.5 to 2.3)                      | 0.4<br>(0.3 to 0.6)                  | 15.2<br>(11.7 to 18.9)                            | -3.6<br>(-6.2 to -1.0)                              |
| <b>Unintentional injuries</b>                 | <b>1,230.6</b><br><b>(1,137.2 to 1,356.5)</b> | <b>591.4</b><br><b>(550.9 to 636.3)</b>  | <b>42.1</b><br><b>(28.2 to 59.4)</b> | <b>30.7</b><br><b>(28.1 to 33.1)</b>              | <b>7.0</b><br><b>(5.1 to 8.7)</b>                   |
| Falls                                         | 475.0<br>(408.2 to 550.0)                     | 219.6<br>(186.3 to 259.8)                | 19.2<br>(13.4 to 26.6)               | 39.6<br>(36.8 to 42.2)                            | 12.2<br>(10.1 to 14.2)                              |
| Drowning                                      | 3.3<br>(2.9 to 3.8)                           | 0.7<br>(0.6 to 0.8)                      | 0.2<br>(0.1 to 0.2)                  | 16.5<br>(13.4 to 19.5)                            | -6.8<br>(-9.2 to -4.6)                              |
| Fire, heat, and hot substances                | 126.1<br>(102.7 to 158.4)                     | 16.4<br>(13.1 to 20.2)                   | 3.4<br>(2.3 to 5.0)                  | 29.5<br>(23.3 to 35.5)                            | 9.5<br>(4.8 to 14.1)                                |
| Poisonings                                    | 3.5<br>(2.9 to 4.2)                           | 5.1<br>(4.0 to 6.3)                      | 0.3<br>(0.2 to 0.5)                  | 45.1<br>(32.8 to 58.9)                            | 24.4<br>(15.1 to 34.8)                              |
| Exposure to mechanical forces                 | 242.0<br>(207.7 to 290.1)                     | 97.0<br>(83.5 to 110.8)                  | 5.8<br>(3.8 to 8.4)                  | 31.8<br>(28.8 to 34.8)                            | 7.5<br>(5.2 to 9.7)                                 |
| Unintentional firearm injuries                | 24.8<br>(19.9 to 31.3)                        | 6.9<br>(5.2 to 9.0)                      | 1.0<br>(0.6 to 1.5)                  | 21.8<br>(18.7 to 24.6)                            | -2.2<br>(-4.5 to -0.2)                              |
| Unintentional suffocation                     | 7.8<br>(5.7 to 10.2)                          | 1.5<br>(1.1 to 2.1)                      | 0.2<br>(0.1 to 0.4)                  | 19.3<br>(15.8 to 22.6)                            | 2.9<br>(0.1 to 5.7)                                 |
| Other exposure to mechanical forces           | 209.4<br>(175.9 to 257.9)                     | 88.6<br>(76.6 to 101.9)                  | 4.6<br>(3.0 to 6.6)                  | 35.0<br>(32.0 to 38.1)                            | 10.2<br>(7.8 to 12.5)                               |

| Cause                                                                               | Prevalence in thousands (95% UI)        | Incidence in thousands (95% UI)          | YLDs in thousands (95% UI)              |                                                   |                                                     |
|-------------------------------------------------------------------------------------|-----------------------------------------|------------------------------------------|-----------------------------------------|---------------------------------------------------|-----------------------------------------------------|
|                                                                                     | 2016 counts                             | 2016 counts                              | 2016 counts                             | Percentage change in counts between 2006 and 2016 | Percentage change in age-standardised rates between |
| Adverse effects of medical treatment                                                | 4.5<br>(3.6 to 5.5)                     | 59.0<br>(53.0 to 65.3)                   | 0.6<br>(0.4 to 0.9)                     | 26.7<br>(20.4 to 33.0)                            | 11.8<br>(6.7 to 16.4)                               |
| Animal contact                                                                      | 29.8<br>(26.1 to 34.6)                  | 35.7<br>(29.2 to 42.9)                   | 1.1<br>(0.7 to 1.5)                     | 9.9<br>(2.7 to 17.7)                              | -6.6<br>(-12.1 to -0.9)                             |
| Venomous animal contact                                                             | 15.6<br>(12.8 to 18.7)                  | 17.5<br>(13.6 to 22.1)                   | 0.8<br>(0.5 to 1.2)                     | 11.9<br>(2.9 to 21.8)                             | -4.0<br>(-11.2 to 3.4)                              |
| Non-venomous animal contact                                                         | 14.2<br>(11.8 to 18.1)                  | 18.2<br>(14.5 to 22.5)                   | 0.2<br>(0.1 to 0.4)                     | 3.1<br>(-0.8 to 6.3)                              | -14.5<br>(-17.4 to -12.0)                           |
| Foreign body                                                                        | 69.8<br>(57.0 to 81.7)                  | 61.8<br>(52.9 to 73.0)                   | 2.8<br>(1.8 to 4.2)                     | 21.2<br>(17.6 to 24.7)                            | 2.8<br>(0.3 to 5.2)                                 |
| Pulmonary aspiration and foreign body in airway                                     | 41.6<br>(31.5 to 54.3)                  | 14.6<br>(12.7 to 17.1)                   | 1.8<br>(1.1 to 2.6)                     | 19.8<br>(15.6 to 23.9)                            | 2.9<br>(-0.4 to 5.8)                                |
| Foreign body in eyes                                                                | 7.6<br>(4.5 to 11.1)                    | 38.7<br>(30.4 to 49.6)                   | 0.4<br>(0.2 to 0.7)                     | 33.0<br>(28.9 to 38.2)                            | 9.2<br>(6.4 to 12.2)                                |
| Foreign body in other body part                                                     | 20.6<br>(16.4 to 25.8)                  | 8.5<br>(7.2 to 10.0)                     | 0.6<br>(0.4 to 0.9)                     | 17.7<br>(13.7 to 21.4)                            | -1.6<br>(-4.5 to 1.4)                               |
| Environmental heat and cold exposure                                                | 94.9<br>(80.5 to 111.4)                 | 27.2<br>(22.5 to 32.3)                   | 3.5<br>(2.3 to 5.1)                     | 20.4<br>(17.7 to 23.1)                            | -1.0<br>(-3.2 to 1.0)                               |
| Other unintentional injuries                                                        | 181.8<br>(148.2 to 219.8)               | 68.9<br>(60.7 to 79.1)                   | 5.3<br>(3.4 to 7.7)                     | 19.0<br>(16.8 to 21.2)                            | -2.5<br>(-4.4 to -0.8)                              |
| <b>Self-harm and interpersonal violence</b>                                         | <b>310.9</b><br><b>(283.8 to 341.1)</b> | <b>41.3†</b><br><b>(36.0 to 46.8)</b>    | <b>5.0</b><br><b>(3.5 to 7.0)</b>       | <b>19.6</b><br><b>(16.2 to 22.9)</b>              | <b>1.7</b><br><b>(-0.6 to 4.1)</b>                  |
| Self-harm                                                                           | 6.7<br>(5.9 to 7.6)                     | 3.4<br>(3.0 to 4.0)                      | 0.3<br>(0.2 to 0.5)                     | 26.0<br>(22.6 to 29.6)                            | -0.9<br>(-3.4 to 1.5)                               |
| Self-harm by firearm                                                                | 0.5<br>(0.5 to 0.6)                     | 0.2<br>(0.1 to 0.2)                      | < 0.05<br>(< 0.05 to < 0.05)            | 0.6<br>(-2.5 to 3.6)                              | -20.0<br>(-22.2 to -17.8)                           |
| Self-harm by other specified means                                                  | 6.2<br>(5.4 to 7.1)                     | 3.3<br>(2.8 to 3.8)                      | 0.3<br>(0.2 to 0.4)                     | 28.2<br>(24.5 to 31.9)                            | 0.6<br>(-2.0 to 3.1)                                |
| Interpersonal violence                                                              | 304.2<br>(277.0 to 334.3)               | 37.9†<br>(32.6 to 43.3)                  | 4.7<br>(3.2 to 6.6)                     | 19.1<br>(15.6 to 22.7)                            | 1.9<br>(-0.6 to 4.4)                                |
| Assault by firearm                                                                  | 7.3<br>(6.1 to 8.8)                     | 2.6<br>(2.0 to 3.5)                      | 0.4<br>(0.2 to 0.5)                     | 38.4<br>(34.1 to 42.5)                            | 11.6<br>(8.8 to 14.6)                               |
| Assault by sharp object                                                             | 34.0<br>(28.2 to 40.6)                  | 15.8<br>(12.9 to 19.0)                   | 1.1<br>(0.7 to 1.5)                     | 33.4<br>(29.9 to 37.0)                            | 9.3<br>(6.8 to 11.8)                                |
| Sexual violence                                                                     | 230.2<br>(205.2 to 259.3)               | --                                       | 1.9<br>(1.3 to 2.8)                     | 4.0<br>(-1.5 to 9.3)                              | -7.3<br>(-12.0 to -2.8)                             |
| Assault by other means                                                              | 32.7<br>(28.1 to 38.6)                  | 19.4<br>(16.3 to 22.7)                   | 1.4<br>(0.9 to 2.0)                     | 30.4<br>(27.6 to 33.4)                            | 7.2<br>(5.1 to 9.3)                                 |
| <b>Forces of nature, conflict and terrorism, and executions and police conflict</b> | <b>5.4</b><br><b>(1.0 to 10.9)</b>      | <b>0.1†</b><br><b>(&lt; 0.05 to 0.1)</b> | <b>0.2</b><br><b>(&lt; 0.05 to 0.5)</b> | <b>0.3</b><br><b>(-3.6 to 4.5)</b>                | <b>-12.8</b><br><b>(-15.6 to -9.4)</b>              |
| Exposure to forces of nature                                                        | 4.4<br>(0.7 to 9.2)                     | --                                       | 0.1<br>(< 0.05 to 0.4)                  | -4.6<br>(-8.0 to -0.5)                            | -17.3<br>(-20.0 to -13.8)                           |
| Conflict and terrorism                                                              | 0.8<br>(0.1 to 1.9)                     | --                                       | < 0.05<br>(< 0.05 to 0.1)               | 40.9<br>(34.8 to 47.9)                            | 26.0<br>(21.2 to 32.2)                              |
| Executions and police conflict                                                      | 0.2<br>(0.1 to 0.3)                     | 0.1<br>(< 0.05 to 0.1)                   | < 0.05<br>(< 0.05 to < 0.05)            | 18.5<br>(13.3 to 24.5)                            | 8.4<br>(3.9 to 13.4)                                |
| <b>Impairments</b>                                                                  | --                                      | --                                       | --                                      | --                                                | --                                                  |
| Anaemia                                                                             | 1,940.0<br>(1,793.6 to 2,077.6)         | --                                       | 57.3<br>(38.9 to 80.5)                  | -1.8<br>(-9.2 to 6.1)                             | -13.9<br>(-20.4 to -7.3)                            |
| Developmental intellectual disability                                               | 195.1<br>(146.7 to 260.0)               | --                                       | 38.1<br>(20.8 to 70.0)                  | 15.5<br>(1.6 to 33.4)                             | 5.2<br>(-7.3 to 21.6)                               |
| Epilepsy                                                                            | 94.5<br>(50.4 to 158.4)                 | --                                       | 36.4<br>(16.9 to 69.8)                  | 16.2<br>(-28.5 to 79.9)                           | 5.5<br>(-36.1 to 65.3)                              |
| Guillain-Barre syndrome                                                             | 0.1<br>(0.1 to 0.1)                     | --                                       | < 0.05<br>(< 0.05 to < 0.05)            | 23.2<br>(17.2 to 32.6)                            | 5.7<br>(2.5 to 13.0)                                |
| Hearing loss                                                                        | 1,679.9<br>(1,599.5 to 1,767.3)         | --                                       | 51.7<br>(36.1 to 71.9)                  | 20.4<br>(17.2 to 23.3)                            | -4.6<br>(-6.7 to -2.7)                              |
| Heart failure                                                                       | 65.1<br>(56.7 to 73.9)                  | --                                       | 6.3<br>(4.5 to 8.4)                     | 41.1<br>(31.3 to 51.7)                            | 3.1<br>(-4.3 to 10.7)                               |
| Infertility                                                                         | 127.9<br>(113.5 to 144.4)               | --                                       | 0.8<br>(0.3 to 1.5)                     | 31.4<br>(19.0 to 46.0)                            | 15.2<br>(4.4 to 28.0)                               |
| Pelvic inflammatory disease                                                         | 1.7<br>(1.5 to 2.0)                     | --                                       | 0.2<br>(0.1 to 0.3)                     | 12.8<br>(-7.7 to 40.6)                            | -4.4<br>(-21.7 to 18.8)                             |
| Vision loss                                                                         | 1,348.8<br>(1,287.5 to 1,422.5)         | --                                       | 53.0<br>(34.1 to 84.8)                  | 17.0<br>(8.7 to 28.9)                             | -3.4<br>(-10.2 to 5.1)                              |

We did not calculate incidence for the nine impairments, certain NTDs, and causes with only birth prevalence. Blank cells mean that no estimate is available.

† Incidence for aggregate causes represents the sum of the incidence of the causes below the aggregate.

‡ Incidence estimates for stroke represent first-ever stroke only.

^ Incidence of HIV/AIDS represents new infections of HIV only and does not include new infections of Tuberculosis in HIV positive cases.

SR Table 14: Prevalence, incidence, and YLDs for 2016, percentage change of YLD counts and percentage change of age-standardised YLD rates between 2006 and 2016 by cause and impairments, for all ages, DR Congo.

| Cause                                                                                | Prevalence in thousands (95% UI)          | Incidence in thousands (95% UI)               | YLDs in thousands (95% UI)              |                                                   |                                                     |
|--------------------------------------------------------------------------------------|-------------------------------------------|-----------------------------------------------|-----------------------------------------|---------------------------------------------------|-----------------------------------------------------|
|                                                                                      | 2016 counts                               | 2016 counts                                   | 2016 counts                             | Percentage change in counts between 2006 and 2016 | Percentage change in age-standardised rates between |
| <b>All causes</b>                                                                    | <b>78,876.4</b><br>(78,773.3 to 78,960.5) | <b>627,077.9†</b><br>(595,962.4 to 661,312.6) | <b>8,044.0</b><br>(5,907.3 to 10,486.3) | <b>28.6</b><br>(25.9 to 31.5)                     | <b>-6.8</b><br>(-8.4 to -5.0)                       |
| <b>Communicable, maternal, neonatal, and nutritional disorders</b>                   | <b>74,373.1</b><br>(73,730.9 to 74,887.4) | <b>416,752.4†</b><br>(388,712.1 to 445,378.6) | <b>2,477.7</b><br>(1,709.1 to 3,419.1)  | <b>8.3</b><br>(3.2 to 13.4)                       | <b>-24.2</b><br>(-28.4 to -19.9)                    |
| <b>HIV/AIDS and tuberculosis</b>                                                     | <b>16,666.4</b><br>(15,182.1 to 17,892.0) | <b>296.9†</b><br>(254.8 to 343.3)             | <b>106.7</b><br>(70.7 to 148.7)         | <b>-12.9</b><br>(-28.8 to 6.8)                    | <b>-39.2</b><br>(-50.9 to -24.2)                    |
| Tuberculosis                                                                         | 15,359.8<br>(13,889.5 to 16,854.5)        | 267.6†<br>(227.0 to 310.6)                    | 48.0<br>(31.2 to 67.3)                  | 21.2<br>(10.2 to 34.0)                            | -14.1<br>(-20.5 to -6.8)                            |
| Drug-susceptible tuberculosis                                                        | 156.5<br>(132.8 to 182.0)                 | 265.6<br>(224.7 to 308.4)                     | 47.6<br>(30.9 to 66.9)                  | 21.3<br>(10.3 to 34.2)                            | -14.0<br>(-20.5 to -6.7)                            |
| Multidrug-resistant tuberculosis without extensive drug resistance                   | 1.2<br>(0.6 to 2.0)                       | 2.0<br>(1.0 to 3.4)                           | 0.4<br>(0.2 to 0.7)                     | 15.4<br>(-34.7 to 107.8)                          | -18.6<br>(-54.4 to 47.1)                            |
| Extensively drug-resistant tuberculosis                                              | < 0.05<br>(< 0.05 to < 0.05)              | < 0.05<br>(< 0.05 to < 0.05)                  | < 0.05<br>(< 0.05 to < 0.05)            | 251.6<br>(98.9 to 533.1)                          | 148.0<br>(39.1 to 347.9)                            |
| Latent tuberculosis infection                                                        | 15,202.1<br>(13,731.6 to 16,679.0)        | --                                            | --                                      | --                                                | --                                                  |
| HIV/AIDS                                                                             | 426.2<br>(350.2 to 528.4)                 | 29.3^<br>(14.2 to 49.0)                       | 58.7<br>(37.9 to 89.9)                  | -29.1<br>(-44.5 to -6.3)                          | -51.6<br>(-62.7 to -33.5)                           |
| Drug-susceptible HIV/AIDS - Tuberculosis                                             | 19.9<br>(11.9 to 31.5)                    | 33.8<br>(20.1 to 53.6)                        | 7.7<br>(4.0 to 13.0)                    | -28.0<br>(-39.9 to -15.3)                         | -46.4<br>(-55.1 to -36.9)                           |
| Multidrug-resistant HIV/AIDS - Tuberculosis without extensive drug resistance        | 0.2<br>(0.1 to 0.4)                       | 0.3<br>(0.1 to 0.6)                           | 0.1<br>(< 0.05 to 0.1)                  | -32.1<br>(-61.8 to 21.8)                          | -49.3<br>(-71.4 to -9.0)                            |
| Extensively drug-resistant HIV/AIDS - Tuberculosis                                   | < 0.05<br>(< 0.05 to < 0.05)              | < 0.05<br>(< 0.05 to < 0.05)                  | < 0.05<br>(< 0.05 to < 0.05)            | 106.8<br>(16.3 to 271.2)                          | 54.6<br>(-13.0 to 177.4)                            |
| HIV/AIDS resulting in other diseases                                                 | 406.2<br>(330.9 to 509.8)                 | 29.3<br>(14.2 to 49.0)                        | 51.0<br>(31.9 to 80.4)                  | -29.3<br>(-46.1 to -0.5)                          | -52.3<br>(-63.8 to -29.5)                           |
| <b>Diarrhoea, lower respiratory infections, and other common infectious diseases</b> | <b>6,742.5</b><br>(6,470.0 to 7,053.4)    | <b>333,193.9†</b><br>(307,344.5 to 361,767.1) | <b>375.0</b><br>(262.9 to 509.5)        | <b>31.3</b><br>(27.1 to 35.5)                     | <b>-5.7</b><br>(-8.2 to -3.2)                       |
| Diarrhoeal diseases                                                                  | 1,404.8<br>(1,297.1 to 1,512.2)           | 93,484.6<br>(86,150.9 to 101,082.6)           | 158.2<br>(109.2 to 217.4)               | 35.3<br>(27.4 to 43.4)                            | -3.1<br>(-7.6 to 1.2)                               |
| Intestinal infectious diseases                                                       | 5.3<br>(3.9 to 6.9)                       | 94.0†<br>(72.1 to 122.0)                      | 0.9<br>(0.5 to 1.3)                     | 18.4<br>(-1.3 to 43.3)                            | -16.6<br>(-27.8 to -2.5)                            |
| Typhoid fever                                                                        | 5.3<br>(3.9 to 6.9)                       | 82.8<br>(63.7 to 108.0)                       | 0.8<br>(0.5 to 1.2)                     | 18.7<br>(-2.4 to 45.3)                            | -16.5<br>(-28.2 to -1.6)                            |
| Paratyphoid fever                                                                    | 0.5<br>(0.3 to 0.7)                       | 11.3<br>(7.9 to 15.4)                         | < 0.05<br>(< 0.05 to 0.1)               | 27.7<br>(2.3 to 62.8)                             | -10.5<br>(-25.8 to 9.2)                             |
| Other intestinal infectious diseases                                                 | --                                        | --                                            | < 0.05<br>(< 0.05 to < 0.05)            | -6.7<br>(-32.7 to 32.5)                           | -34.9<br>(-48.0 to -16.9)                           |
| Lower respiratory infections                                                         | 114.6<br>(104.7 to 125.7)                 | 4,893.3<br>(4,448.6 to 5,427.8)               | 6.9<br>(4.5 to 10.0)                    | 15.6<br>(1.6 to 30.3)                             | -11.4<br>(-19.9 to -2.3)                            |
| Upper respiratory infections                                                         | 2,971.0<br>(2,639.7 to 3,326.4)           | 224,133.1<br>(198,037.4 to 252,892.9)         | 73.9<br>(44.1 to 116.6)                 | 36.8<br>(27.7 to 46.5)                            | -1.4<br>(-6.8 to 4.5)                               |
| Otitis media                                                                         | 1,866.8<br>(1,667.3 to 2,083.9)           | 7,622.9<br>(5,894.4 to 9,795.5)               | 66.4<br>(42.4 to 98.5)                  | 28.1<br>(18.9 to 37.9)                            | -9.1<br>(-15.0 to -3.0)                             |
| Meningitis                                                                           | 553.4<br>(452.9 to 662.4)                 | 122.8<br>(105.9 to 147.5)                     | 46.6<br>(33.0 to 62.2)                  | 24.1<br>(14.0 to 33.9)                            | -11.4<br>(-18.0 to -4.8)                            |
| Pneumococcal meningitis                                                              | 263.4<br>(215.5 to 320.9)                 | 34.1<br>(27.5 to 42.7)                        | 24.2<br>(16.9 to 32.3)                  | 10.2<br>(-2.8 to 25.3)                            | -22.0<br>(-30.7 to -12.3)                           |
| H influenzae type B meningitis                                                       | 74.1<br>(54.7 to 98.8)                    | 17.9<br>(12.9 to 24.6)                        | 7.4<br>(5.2 to 9.9)                     | 1.3<br>(-11.8 to 16.2)                            | -29.2<br>(-38.0 to -18.6)                           |
| Meningococcal infection                                                              | 25.1<br>(17.4 to 35.1)                    | 8.3<br>(6.0 to 11.4)                          | 2.4<br>(1.6 to 3.2)                     | 31.8<br>(23.4 to 40.5)                            | -5.9<br>(-12.3 to 0.9)                              |
| Other meningitis                                                                     | 190.9<br>(129.5 to 252.5)                 | 62.5<br>(51.9 to 76.3)                        | 12.6<br>(8.4 to 17.9)                   | 95.4<br>(71.3 to 124.7)                           | 42.8<br>(25.4 to 63.2)                              |
| Encephalitis                                                                         | 174.9<br>(107.7 to 268.0)                 | 77.7<br>(66.8 to 90.1)                        | 17.2<br>(12.0 to 22.6)                  | 28.6<br>(13.5 to 47.2)                            | -7.5<br>(-17.2 to 4.7)                              |
| Diphtheria                                                                           | < 0.05<br>(< 0.05 to < 0.05)              | 0.1<br>(< 0.05 to 0.1)                        | < 0.05<br>(< 0.05 to < 0.05)            | -63.6<br>(-86.0 to -1.7)                          | -73.4<br>(-87.5 to -41.8)                           |
| Whooping cough                                                                       | 54.2<br>(42.1 to 68.1)                    | 395.9<br>(307.5 to 496.8)                     | 2.7<br>(1.5 to 4.3)                     | -10.8<br>(-22.9 to 2.9)                           | -36.9<br>(-45.5 to -27.0)                           |
| Tetanus                                                                              | 0.8<br>(0.8 to 0.9)                       | 1.2<br>(0.5 to 2.5)                           | < 0.05<br>(< 0.05 to < 0.05)            | -10.2<br>(-38.0 to 24.6)                          | -39.6<br>(-61.0 to -15.2)                           |
| Measles                                                                              | 1.7<br>(0.6 to 3.9)                       | 62.4<br>(21.6 to 143.2)                       | 0.2<br>(< 0.05 to 0.4)                  | -75.5<br>(-83.9 to -62.0)                         | -82.7<br>(-88.7 to -73.4)                           |
| Varicella and herpes zoster                                                          | 74.9<br>(69.8 to 80.7)                    | 2,305.8<br>(2,138.1 to 2,478.8)               | 2.1<br>(1.2 to 3.2)                     | 38.9<br>(17.7 to 62.6)                            | 0.1<br>(-11.6 to 12.8)                              |
| <b>Neglected tropical diseases and malaria</b>                                       | <b>57,488.0</b><br>(55,544.3 to 59,427.7) | <b>33,845.4†</b><br>(28,407.5 to 40,945.5)    | <b>1,006.0</b><br>(646.5 to 1,494.5)    | <b>-9.4</b><br>(-18.1 to -0.1)                    | <b>-33.8</b><br>(-40.6 to -26.8)                    |
| Malaria                                                                              | 15,994.4<br>(13,590.5 to 18,382.0)        | 22,750.6<br>(17,381.4 to 30,099.5)            | 193.3<br>(141.1 to 263.2)               | -28.5<br>(-35.7 to -20.2)                         | -49.6<br>(-54.4 to -43.8)                           |
| Chagas disease                                                                       | --                                        | --                                            | --                                      | --                                                | --                                                  |
| Leishmaniasis                                                                        | 14.0<br>(9.7 to 21.8)                     | 0.7<br>(0.1 to 2.1)                           | 0.7<br>(0.4 to 1.4)                     | 12.7<br>(-14.9 to 62.1)                           | -14.0<br>(-32.0 to 20.0)                            |
| Visceral leishmaniasis                                                               | < 0.05<br>(< 0.05 to < 0.05)              | 0.1<br>(0.1 to 0.1)                           | < 0.05<br>(< 0.05 to < 0.05)            | -4.5<br>(-13.1 to 5.6)                            | -32.3<br>(-49.6 to -8.1)                            |
| Cutaneous and mucocutaneous leishmaniasis                                            | 11.4<br>(7.1 to 19.1)                     | 0.6<br>(< 0.05 to 2.0)                        | 0.7<br>(0.4 to 1.3)                     | 12.7<br>(-14.9 to 62.3)                           | -13.9<br>(-32.0 to 20.4)                            |
| African trypanosomiasis                                                              | 5.3<br>(3.0 to 9.4)                       | 3.8<br>(3.1 to 4.9)                           | 1.4<br>(0.7 to 2.8)                     | -66.5<br>(-77.5 to -50.6)                         | -75.2<br>(-85.8 to -57.3)                           |
| Schistosomiasis                                                                      | 22,147.8<br>(19,941.0 to 24,676.7)        | 8,484.1<br>(7,752.3 to 9,357.4)               | 167.5<br>(82.7 to 315.8)                | 26.5<br>(19.5 to 33.2)                            | -8.5<br>(-13.1 to -4.3)                             |
| Cysticercosis                                                                        | 64.5<br>(52.1 to 77.3)                    | --                                            | 12.3<br>(7.2 to 18.3)                   | 37.7<br>(14.8 to 60.8)                            | -0.8<br>(-15.9 to 14.1)                             |
| Cystic echinococcosis                                                                | 40.2<br>(9.8 to 134.7)                    | 8.4<br>(2.1 to 27.9)                          | 3.7<br>(0.8 to 12.2)                    | -37.5<br>(-90.0 to 266.5)                         | -55.0<br>(-92.6 to 154.1)                           |
| Lymphatic filariasis                                                                 | 430.6<br>(271.0 to 735.3)                 | 85.5<br>(69.2 to 103.9)                       | 25.4<br>(6.6 to 64.3)                   | 24.6<br>(-9.2 to 46.1)                            | -10.0<br>(-33.7 to 3.9)                             |
| Onchocerciasis                                                                       | 7,498.4<br>(4,701.5 to 13,642.8)          | 2,099.0<br>(940.8 to 4,070.0)                 | 465.1<br>(223.8 to 830.0)               | -18.2<br>(-35.4 to -3.3)                          | -39.8<br>(-51.8 to -28.6)                           |
| Trachoma                                                                             | --                                        | --                                            | --                                      | --                                                | --                                                  |
| Dengue                                                                               | 24.3<br>(11.0 to 44.6)                    | 406.2<br>(200.5 to 710.8)                     | 4.0<br>(1.5 to 8.1)                     | 195.7<br>(100.4 to 615.0)                         | 109.3<br>(50.6 to 384.2)                            |
| Yellow fever                                                                         | 0.1<br>(< 0.05 to 0.4)                    | 5.7<br>(1.6 to 15.0)                          | < 0.05<br>(< 0.05 to < 0.05)            | -30.9<br>(-51.1 to -3.8)                          | -50.4<br>(-62.5 to -34.3)                           |
| Rabies                                                                               | < 0.05<br>(< 0.05 to < 0.05)              | 0.1<br>(< 0.05 to 0.2)                        | < 0.05<br>(< 0.05 to < 0.05)            | -8.5<br>(-53.4 to 87.1)                           | -33.2<br>(-59.4 to 10.5)                            |
| Intestinal nematode infections                                                       | 39,195.0<br>(35,636.0 to 42,951.5)        | --                                            | 94.5<br>(56.3 to 146.9)                 | 38.4<br>(25.6 to 53.1)                            | -0.8<br>(-11.2 to 11.6)                             |
| Ascariasis                                                                           | 18,688.0<br>(15,071.2 to 22,732.2)        | --                                            | 21.3<br>(12.2 to 35.5)                  | 38.5<br>(18.1 to 62.9)                            | -0.8<br>(-18.1 to 20.4)                             |



| Cause                                                                   | Prevalence in thousands (95% UI)                 | Incidence in thousands (95% UI)                      | YLDs in thousands (95% UI)                    |                                                   |                                                     |
|-------------------------------------------------------------------------|--------------------------------------------------|------------------------------------------------------|-----------------------------------------------|---------------------------------------------------|-----------------------------------------------------|
|                                                                         | 2016 counts                                      | 2016 counts                                          | 2016 counts                                   | Percentage change in counts between 2006 and 2016 | Percentage change in age-standardised rates between |
| Trichuriasis                                                            | 14,191.6<br>(11,166.2 to 17,901.7)               | --                                                   | 8.6<br>(4.5 to 14.9)                          | 39.3<br>(9.2 to 75.6)                             | 0.2<br>(-24.9 to 31.6)                              |
| Hookworm disease                                                        | 16,319.7<br>(13,213.6 to 19,849.9)               | --                                                   | 64.6<br>(39.4 to 98.5)                        | 38.2<br>(22.4 to 57.1)                            | -0.9<br>(-14.1 to 14.5)                             |
| Food-borne trematodiasis                                                | --                                               | --                                                   | --                                            | --                                                | --                                                  |
| Leprosy                                                                 | 13.1<br>(12.4 to 13.8)                           | 1.3<br>(1.2 to 1.4)                                  | 0.8<br>(0.5 to 1.1)                           | 30.7<br>(9.1 to 54.6)                             | -2.6<br>(-15.7 to 11.6)                             |
| Ebola virus disease                                                     | --                                               | --                                                   | --                                            | --                                                | --                                                  |
| Zika virus disease                                                      | --                                               | --                                                   | --                                            | --                                                | --                                                  |
| Guinea worm disease                                                     | --                                               | --                                                   | --                                            | --                                                | --                                                  |
| Other neglected tropical diseases                                       | 1,107.7<br>(1,058.0 to 1,159.7)                  | --                                                   | 37.3<br>(24.4 to 54.2)                        | 31.2<br>(20.7 to 41.7)                            | -6.9<br>(-14.1 to 0.1)                              |
| <b>Maternal disorders</b>                                               | <b>263.9</b><br><b>(201.4 to 342.0)</b>          | <b>2,032.1†</b><br><b>(1,795.3 to 2,297.7)</b>       | <b>19.9</b><br><b>(13.1 to 28.9)</b>          | <b>6.5</b><br><b>(-19.2 to 41.7)</b>              | <b>-25.3</b><br><b>(-42.7 to -1.8)</b>              |
| Maternal haemorrhage                                                    | 39.3<br>(29.8 to 50.9)                           | 240.4<br>(180.4 to 316.2)                            | 1.6<br>(1.0 to 2.5)                           | 42.8<br>(-0.7 to 106.9)                           | 1.5<br>(-29.2 to 45.6)                              |
| Maternal sepsis and other pregnancy related infections                  | 33.0<br>(25.7 to 42.2)                           | 179.6<br>(137.6 to 236.8)                            | 0.8<br>(0.4 to 1.5)                           | 40.5<br>(-28.3 to 179.0)                          | -2.0<br>(-48.9 to 90.6)                             |
| Maternal hypertensive disorders                                         | 171.1<br>(109.9 to 239.8)                        | 759.2<br>(627.8 to 892.3)                            | 8.2<br>(4.2 to 13.4)                          | -1.0<br>(-40.6 to 70.6)                           | -31.0<br>(-57.8 to 17.5)                            |
| Maternal obstructed labour and uterine rupture                          | 17.2<br>(14.0 to 21.1)                           | 107.3<br>(79.2 to 141.8)                             | 5.6<br>(3.4 to 8.2)                           | 6.3<br>(-17.2 to 35.9)                            | -24.8<br>(-40.6 to -5.1)                            |
| Maternal abortion, miscarriage, and ectopic pregnancy                   | 6.1<br>(4.0 to 8.9)                              | 745.5<br>(582.9 to 970.8)                            | 0.7<br>(0.3 to 1.1)                           | 37.8<br>(-26.5 to 156.4)                          | -4.0<br>(-48.1 to 74.6)                             |
| Other maternal disorders                                                | --                                               | --                                                   | 3.1<br>(2.0 to 4.5)                           | 1.7<br>(-22.9 to 35.6)                            | -28.6<br>(-45.2 to -6.0)                            |
| <b>Neonatal disorders</b>                                               | <b>1,110.3</b><br><b>(924.2 to 1,352.0)</b>      | --                                                   | <b>119.4</b><br><b>(67.9 to 208.3)</b>        | <b>66.7</b><br><b>(24.3 to 116.6)</b>             | <b>21.3</b><br><b>(-12.0 to 57.6)</b>               |
| Neonatal preterm birth complications                                    | 807.2<br>(587.3 to 1,139.6)                      | --                                                   | 37.9<br>(25.4 to 55.6)                        | 40.5<br>(8.7 to 78.3)                             | 1.3<br>(-23.9 to 29.7)                              |
| Neonatal encephalopathy due to birth asphyxia and trauma                | 239.6<br>(128.1 to 423.1)                        | --                                                   | 20.4<br>(4.4 to 63.8)                         | 97.0<br>(-5.0 to 239.6)                           | 44.7<br>(-35.0 to 160.7)                            |
| Neonatal sepsis and other neonatal infections                           | 113.6<br>(33.7 to 265.5)                         | --                                                   | 41.3<br>(7.0 to 115.6)                        | 98.4<br>(-24.0 to 222.0)                          | 49.3<br>(-52.5 to 153.5)                            |
| Hemolytic disease and other neonatal jaundice                           | 23.9<br>(20.3 to 27.7)                           | --                                                   | 8.0<br>(6.0 to 10.4)                          | 40.0<br>(21.3 to 59.5)                            | 0.5<br>(-10.8 to 12.4)                              |
| Other neonatal disorders                                                | --                                               | --                                                   | 11.8<br>(7.0 to 19.6)                         | 51.9<br>(20.4 to 86.2)                            | 7.7<br>(-14.8 to 33.5)                              |
| <b>Nutritional deficiencies</b>                                         | <b>39,434.1</b><br><b>(37,241.2 to 42,232.6)</b> | <b>32,541.6†</b><br><b>(25,989.9 to 40,774.3)</b>    | <b>783.4</b><br><b>(529.3 to 1,107.8)</b>     | <b>24.3</b><br><b>(18.2 to 30.1)</b>              | <b>-11.8</b><br><b>(-15.5 to -8.2)</b>              |
| Protein-energy malnutrition                                             | 1,220.2<br>(1,054.5 to 1,407.1)                  | 1,023.3<br>(892.2 to 1,161.4)                        | 56.7<br>(34.4 to 84.7)                        | 4.5<br>(-20.4 to 35.4)                            | -26.1<br>(-44.3 to -3.4)                            |
| Iodine deficiency                                                       | 4,000.3<br>(3,541.0 to 4,511.2)                  | 164.8<br>(146.0 to 185.9)                            | 110.6<br>(74.9 to 155.9)                      | 8.6<br>(1.0 to 17.4)                              | -22.2<br>(-27.3 to -16.1)                           |
| Vitamin A deficiency                                                    | 24,660.6<br>(21,302.6 to 28,678.9)               | 31,353.5<br>(24,855.7 to 39,531.3)                   | 8.7<br>(5.3 to 13.5)                          | 27.7<br>(5.3 to 58.5)                             | -8.8<br>(-25.0 to 11.0)                             |
| Iron-deficiency anaemia                                                 | 18,528.0<br>(17,859.7 to 19,189.1)               | --                                                   | 605.5<br>(399.8 to 876.8)                     | 30.1<br>(23.0 to 36.8)                            | -7.5<br>(-12.1 to -3.2)                             |
| Other nutritional deficiencies                                          | --                                               | --                                                   | 1.9<br>(1.1 to 2.9)                           | 3.7<br>(-22.3 to 36.2)                            | -26.6<br>(-45.1 to -2.8)                            |
| <b>Other communicable, maternal, neonatal, and nutritional diseases</b> | <b>29,609.6</b><br><b>(27,254.1 to 32,130.9)</b> | <b>14,842.6</b><br><b>(11,866.4 to 20,063.4)</b>     | <b>67.4</b><br><b>(43.9 to 98.7)</b>          | <b>39.8</b><br><b>(32.1 to 47.1)</b>              | <b>-0.8</b><br><b>(-5.5 to 4.2)</b>                 |
| Sexually transmitted diseases excluding HIV                             | 17,717.1<br>(16,444.0 to 18,940.9)               | 9,020.9<br>(8,181.2 to 9,952.2)                      | 34.7<br>(21.6 to 52.5)                        | 41.6<br>(32.5 to 51.4)                            | 0.9<br>(-5.4 to 7.6)                                |
| Syphilis                                                                | 2,918.2<br>(2,358.6 to 3,550.1)                  | 2,134.3<br>(1,645.9 to 2,729.8)                      | 2.2<br>(1.5 to 3.4)                           | 37.3<br>(19.6 to 57.4)                            | 0.5<br>(-13.2 to 16.3)                              |
| Chlamydial infection                                                    | 697.4<br>(564.2 to 845.9)                        | 681.7<br>(575.1 to 800.5)                            | 6.5<br>(4.1 to 9.6)                           | 42.1<br>(23.5 to 62.2)                            | 0.7<br>(-12.2 to 15.1)                              |
| Gonococcal infection                                                    | 629.8<br>(521.9 to 765.0)                        | 2,174.8<br>(1,755.2 to 2,661.8)                      | 7.4<br>(4.2 to 11.2)                          | 42.1<br>(26.0 to 61.9)                            | 1.1<br>(-9.9 to 14.3)                               |
| Trichomoniasis                                                          | 1,795.4<br>(1,523.3 to 2,090.2)                  | 1,599.2<br>(1,344.5 to 1,871.1)                      | 2.0<br>(0.8 to 4.1)                           | 41.2<br>(31.8 to 52.4)                            | 0.4<br>(-5.5 to 7.5)                                |
| Genital herpes                                                          | 13,659.1<br>(11,734.6 to 15,968.3)               | 1,609.3<br>(1,323.7 to 1,997.8)                      | 3.7<br>(1.2 to 8.2)                           | 42.0<br>(29.4 to 55.9)                            | 1.5<br>(-6.3 to 9.4)                                |
| Other sexually transmitted diseases                                     | 545.2<br>(423.1 to 697.6)                        | 821.6<br>(679.8 to 1,000.6)                          | 12.9<br>(8.7 to 18.5)                         | 41.9<br>(26.9 to 57.8)                            | 0.8<br>(-9.4 to 12.0)                               |
| Hepatitis                                                               | 14,490.5<br>(11,227.3 to 18,670.0)               | 5,821.6<br>(3,080.2 to 11,011.2)                     | 4.5<br>(2.6 to 7.1)                           | 17.6<br>(-12.1 to 53.9)                           | -11.6<br>(-29.7 to 10.0)                            |
| Acute hepatitis A                                                       | 191.1<br>(11.4 to 579.9)                         | 2,484.3<br>(148.5 to 7,538.0)                        | 0.7<br>(0.2 to 1.7)                           | 19.2<br>(-77.0 to 419.1)                          | -10.2<br>(-74.7 to 204.4)                           |
| Hepatitis B                                                             | 11,978.0<br>(8,707.1 to 16,106.6)                | 2,927.0<br>(2,050.0 to 3,981.4)                      | 3.3<br>(1.8 to 5.4)                           | 16.2<br>(-6.8 to 46.7)                            | -12.4<br>(-30.5 to 8.2)                             |
| Hepatitis C                                                             | 2,305.0<br>(2,021.1 to 2,591.7)                  | 197.6<br>(177.9 to 219.6)                            | 0.2<br>(0.1 to 0.4)                           | 37.2<br>(-19.6 to 130.7)                          | -1.7<br>(-28.9 to 36.8)                             |
| Acute hepatitis E                                                       | 16.4<br>(14.0 to 19.6)                           | 212.6<br>(181.6 to 254.5)                            | 0.3<br>(0.2 to 0.5)                           | 18.8<br>(-18.5 to 71.2)                           | -8.9<br>(-31.8 to 21.0)                             |
| Other infectious diseases                                               | 810.6<br>(776.8 to 846.6)                        | 0.1<br>(0.1 to 0.1)                                  | 28.2<br>(18.6 to 40.6)                        | 41.8<br>(30.7 to 52.1)                            | -1.2<br>(-8.1 to 5.4)                               |
| <b>Non-communicable diseases</b>                                        | <b>72,625.2</b><br><b>(72,169.6 to 73,092.1)</b> | <b>204,535.9†</b><br><b>(189,871.5 to 220,273.1)</b> | <b>5,168.0</b><br><b>(3,826.6 to 6,761.4)</b> | <b>40.1</b><br><b>(36.7 to 44.0)</b>              | <b>0.5</b><br><b>(-1.3 to 2.3)</b>                  |
| <b>Neoplasms</b>                                                        | <b>66.5</b><br><b>(59.8 to 72.8)</b>             | <b>40.4</b><br><b>(35.5 to 43.7)</b>                 | <b>12.7</b><br><b>(9.1 to 16.8)</b>           | <b>33.3</b><br><b>(23.3 to 46.0)</b>              | <b>-1.9</b><br><b>(-8.3 to 5.6)</b>                 |
| Lip and oral cavity cancer                                              | 2.6<br>(2.4 to 3.1)                              | 0.8<br>(0.7 to 0.9)                                  | 0.3<br>(0.2 to 0.4)                           | 42.3<br>(25.3 to 61.0)                            | 3.3<br>(-9.0 to 16.6)                               |
| Nasopharynx cancer                                                      | 0.6<br>(0.4 to 0.8)                              | 0.2<br>(0.1 to 0.2)                                  | 0.1<br>(< 0.05 to 0.1)                        | 32.5<br>(15.4 to 57.6)                            | -4.1<br>(-15.3 to 9.6)                              |
| Other pharynx cancer                                                    | 0.4<br>(0.3 to 0.5)                              | 0.2<br>(0.1 to 0.2)                                  | 0.1<br>(< 0.05 to 0.1)                        | 35.7<br>(17.8 to 53.6)                            | -0.5<br>(-13.3 to 11.3)                             |
| Oesophageal cancer                                                      | 1.6<br>(1.4 to 1.9)                              | 1.5<br>(1.3 to 1.9)                                  | 0.4<br>(0.2 to 0.5)                           | 26.6<br>(3.1 to 55.5)                             | -7.0<br>(-24.6 to 14.7)                             |
| Stomach cancer                                                          | 3.4<br>(3.0 to 3.7)                              | 2.3<br>(2.1 to 2.6)                                  | 0.6<br>(0.4 to 0.8)                           | 17.7<br>(3.1 to 34.4)                             | -13.3<br>(-24.8 to 0.5)                             |
| Colon and rectum cancer                                                 | 5.2<br>(4.6 to 5.9)                              | 2.0<br>(1.8 to 2.2)                                  | 0.7<br>(0.5 to 0.9)                           | 39.0<br>(16.6 to 65.1)                            | 1.4<br>(-15.6 to 22.1)                              |
| Liver cancer                                                            | 1.2<br>(0.9 to 1.4)                              | 3.0<br>(2.2 to 3.6)                                  | 0.6<br>(0.4 to 0.9)                           | 33.7<br>(17.6 to 52.8)                            | -2.8<br>(-14.5 to 10.4)                             |
| Liver cancer due to hepatitis B                                         | 1.0<br>(0.7 to 1.2)                              | 1.1<br>(0.8 to 1.4)                                  | 0.2<br>(0.1 to 0.3)                           | 32.3<br>(15.8 to 50.6)                            | -3.7<br>(-15.8 to 9.9)                              |

| Cause                                              | Prevalence in thousands (95% UI)              | Incidence in thousands (95% UI)                | YLDs in thousands (95% UI)              |                                                   |                                                     |
|----------------------------------------------------|-----------------------------------------------|------------------------------------------------|-----------------------------------------|---------------------------------------------------|-----------------------------------------------------|
|                                                    | 2016 counts                                   | 2016 counts                                    | 2016 counts                             | Percentage change in counts between 2006 and 2016 | Percentage change in age-standardised rates between |
| Liver cancer due to hepatitis C                    | 0.9<br>(0.6 to 1.1)                           | 1.0<br>(0.7 to 1.3)                            | 0.2<br>(0.1 to 0.3)                     | 32.2<br>(14.3 to 52.6)                            | -4.0<br>(-16.7 to 10.0)                             |
| Liver cancer due to alcohol use                    | 0.3<br>(0.2 to 0.4)                           | 0.3<br>(0.2 to 0.4)                            | 0.1<br>( $< 0.05$ to 0.1)               | 49.9<br>(29.1 to 74.9)                            | 9.0<br>(-5.8 to 26.1)                               |
| Liver cancer due to other causes                   | 0.5<br>(0.4 to 0.7)                           | 0.6<br>(0.4 to 0.7)                            | 0.1<br>(0.1 to 0.2)                     | 31.0<br>(14.0 to 50.0)                            | -4.8<br>(-17.3 to 9.6)                              |
| Gallbladder and biliary tract cancer               | 0.2<br>(0.2 to 0.3)                           | 0.4<br>(0.3 to 0.4)                            | 0.1<br>(0.1 to 0.1)                     | 27.6<br>(13.1 to 43.8)                            | -7.1<br>(-16.8 to 3.9)                              |
| Pancreatic cancer                                  | 0.7<br>(0.7 to 0.8)                           | 1.0<br>(0.9 to 1.1)                            | 0.2<br>(0.1 to 0.3)                     | 45.3<br>(33.9 to 56.9)                            | 5.4<br>(-2.6 to 14.0)                               |
| Larynx cancer                                      | 0.9<br>(0.8 to 1.1)                           | 0.3<br>(0.3 to 0.4)                            | 0.1<br>(0.1 to 0.2)                     | 35.6<br>(19.6 to 53.2)                            | -0.6<br>(-12.1 to 12.2)                             |
| Tracheal, bronchus, and lung cancer                | 2.4<br>(2.0 to 2.8)                           | 2.1<br>(1.8 to 2.5)                            | 0.5<br>(0.4 to 0.7)                     | 57.4<br>(32.3 to 90.6)                            | 14.3<br>(-5.7 to 39.0)                              |
| Malignant skin melanoma                            | 0.6<br>(0.5 to 0.8)                           | 0.2<br>(0.1 to 0.2)                            | 0.1<br>( $< 0.05$ to 0.1)               | 44.2<br>(26.0 to 63.2)                            | 3.9<br>(-7.8 to 16.9)                               |
| Non-melanoma skin cancer                           | 0.5<br>(0.3 to 0.8)                           | 3.2<br>(2.1 to 4.9)                            | $< 0.05$<br>( $< 0.05$ to $< 0.05$ )    | 63.0<br>(29.1 to 109.8)                           | 15.8<br>(-12.1 to 55.4)                             |
| Non-melanoma skin cancer (squamous-cell carcinoma) | 0.3<br>(0.2 to 0.5)                           | 0.6<br>(0.4 to 0.7)                            | $< 0.05$<br>( $< 0.05$ to $< 0.05$ )    | 67.2<br>(22.0 to 126.9)                           | 17.8<br>(-17.1 to 67.6)                             |
| Non-melanoma skin cancer (basal-cell carcinoma)    | 0.4<br>(0.2 to 0.7)                           | 2.6<br>(1.5 to 4.4)                            | $< 0.05$<br>( $< 0.05$ to $< 0.05$ )    | 48.9<br>(36.1 to 61.3)                            | 7.3<br>(-1.8 to 16.2)                               |
| Breast cancer                                      | 13.2<br>(10.4 to 18.0)                        | 3.3<br>(2.6 to 4.5)                            | 1.6<br>(1.1 to 2.3)                     | 35.0<br>(6.4 to 72.4)                             | -1.9<br>(-21.5 to 24.0)                             |
| Cervical cancer                                    | 25.6<br>(16.1 to 32.2)                        | 7.3<br>(4.7 to 9.2)                            | 2.6<br>(1.5 to 3.7)                     | 23.4<br>(-2.0 to 61.1)                            | -11.0<br>(-28.4 to 13.2)                            |
| Uterine cancer                                     | 2.2<br>(1.9 to 2.8)                           | 0.6<br>(0.5 to 0.7)                            | 0.2<br>(0.1 to 0.3)                     | 26.5<br>(1.3 to 57.7)                             | -7.8<br>(-25.2 to 13.2)                             |
| Ovarian cancer                                     | 2.1<br>(1.7 to 2.4)                           | 0.8<br>(0.6 to 0.9)                            | 0.4<br>(0.2 to 0.5)                     | 45.6<br>(18.2 to 81.3)                            | 5.1<br>(-19.9 to 38.6)                              |
| Prostate cancer                                    | 7.2<br>(4.0 to 9.2)                           | 2.5<br>(1.4 to 3.1)                            | 1.2<br>(0.6 to 1.7)                     | 52.0<br>(23.0 to 87.2)                            | 8.2<br>(-9.7 to 30.0)                               |
| Testicular cancer                                  | 0.4<br>(0.2 to 0.5)                           | 0.1<br>(0.1 to 0.1)                            | $< 0.05$<br>( $< 0.05$ to $< 0.05$ )    | 25.7<br>(0.1 to 56.7)                             | -10.0<br>(-25.2 to 9.9)                             |
| Kidney cancer                                      | 2.3<br>(2.0 to 2.8)                           | 0.6<br>(0.5 to 0.8)                            | 0.2<br>(0.1 to 0.3)                     | 41.9<br>(12.1 to 68.7)                            | 6.8<br>(-7.0 to 21.5)                               |
| Bladder cancer                                     | 2.2<br>(1.9 to 2.4)                           | 0.7<br>(0.6 to 0.8)                            | 0.3<br>(0.2 to 0.4)                     | 43.6<br>(23.2 to 67.3)                            | 3.5<br>(-11.3 to 21.8)                              |
| Brain and nervous system cancer                    | 2.3<br>(1.9 to 2.8)                           | 0.9<br>(0.7 to 1.0)                            | 0.3<br>(0.2 to 0.4)                     | 38.6<br>(22.4 to 55.0)                            | 2.3<br>(-5.6 to 12.1)                               |
| Thyroid cancer                                     | 1.0<br>(0.8 to 1.1)                           | 0.2<br>(0.2 to 0.3)                            | 0.1<br>(0.1 to 0.1)                     | 26.3<br>(5.6 to 51.8)                             | -9.8<br>(-24.8 to 9.7)                              |
| Mesothelioma                                       | 0.1<br>(0.1 to 0.1)                           | 0.1<br>(0.1 to 0.1)                            | $< 0.05$<br>( $< 0.05$ to $< 0.05$ )    | 32.1<br>(17.5 to 47.7)                            | -2.7<br>(-14.1 to 9.2)                              |
| Hodgkin lymphoma                                   | 0.7<br>(0.5 to 0.9)                           | 0.2<br>(0.2 to 0.3)                            | 0.1<br>(0.1 to 0.1)                     | 14.7<br>(-0.9 to 36.7)                            | -15.0<br>(-23.5 to -4.0)                            |
| Non-Hodgkin's lymphoma                             | 3.2<br>(2.7 to 3.7)                           | 1.2<br>(1.0 to 1.3)                            | 0.4<br>(0.2 to 0.5)                     | 39.4<br>(23.8 to 56.2)                            | 2.1<br>(-7.5 to 13.5)                               |
| Multiple myeloma                                   | 0.5<br>(0.3 to 0.6)                           | 0.3<br>(0.2 to 0.4)                            | 0.1<br>(0.1 to 0.2)                     | 40.9<br>(26.7 to 58.8)                            | 2.8<br>(-7.4 to 15.9)                               |
| Leukaemia                                          | 6.1<br>(4.9 to 7.7)                           | 1.6<br>(1.3 to 1.9)                            | 0.7<br>(0.5 to 1.0)                     | 19.9<br>(-2.6 to 48.2)                            | -9.8<br>(-20.7 to 1.8)                              |
| Acute lymphoid leukaemia                           | 1.7<br>(1.2 to 2.6)                           | 0.4<br>(0.3 to 0.6)                            | 0.2<br>(0.1 to 0.3)                     | 24.8<br>(-10.7 to 69.3)                           | -7.1<br>(-29.0 to 15.8)                             |
| Chronic lymphoid leukaemia                         | 0.3<br>(0.2 to 0.4)                           | 0.1<br>(0.1 to 0.1)                            | $< 0.05$<br>( $< 0.05$ to 0.1)          | 35.5<br>(18.1 to 59.1)                            | -2.5<br>(-14.4 to 13.6)                             |
| Acute myeloid leukaemia                            | 0.8<br>(0.5 to 1.2)                           | 0.4<br>(0.3 to 0.5)                            | 0.1<br>(0.1 to 0.2)                     | 38.6<br>(9.6 to 70.8)                             | 2.7<br>(-10.9 to 16.4)                              |
| Chronic myeloid leukaemia                          | 0.4<br>(0.3 to 0.5)                           | 0.1<br>(0.1 to 0.2)                            | $< 0.05$<br>( $< 0.05$ to 0.1)          | 24.7<br>(5.1 to 51.3)                             | -9.4<br>(-22.5 to 7.6)                              |
| Other leukaemia                                    | 3.0<br>(2.0 to 4.3)                           | 0.6<br>(0.4 to 0.9)                            | 0.3<br>(0.2 to 0.5)                     | 10.2<br>(-15.6 to 44.4)                           | -15.0<br>(-28.6 to -0.1)                            |
| Other neoplasms                                    | 8.7<br>(7.6 to 10.2)                          | 2.8<br>(2.5 to 3.1)                            | 0.8<br>(0.6 to 1.1)                     | 35.1<br>(5.5 to 60.0)                             | -0.8<br>(-12.7 to 11.4)                             |
| <b>Cardiovascular diseases</b>                     | <b>3,136.0</b><br><b>(2,968.1 to 3,294.2)</b> | <b>265.0†</b><br><b>(253.7 to 277.4)</b>       | <b>169.5</b><br><b>(121.7 to 224.4)</b> | <b>48.0</b><br><b>(42.3 to 54.3)</b>              | <b>5.0</b><br><b>(1.3 to 9.2)</b>                   |
| Rheumatic heart disease                            | 1,066.3<br>(942.4 to 1,192.6)                 | 49.9<br>(44.0 to 55.9)                         | 50.8<br>(31.8 to 75.3)                  | 51.9<br>(39.3 to 66.2)                            | 9.3<br>(0.8 to 18.8)                                |
| Ischaemic heart disease                            | 496.9<br>(470.6 to 524.4)                     | 82.8<br>(77.1 to 89.0)                         | 20.6<br>(14.0 to 28.2)                  | 45.9<br>(37.5 to 55.6)                            | 5.4<br>(0.5 to 10.8)                                |
| Cerebrovascular disease                            | 205.4<br>(192.4 to 220.3)                     | 41.8‡<br>(38.4 to 45.4)                        | 29.9<br>(21.8 to 37.9)                  | 46.4<br>(35.4 to 58.6)                            | 6.1<br>(-1.7 to 15.2)                               |
| Ischaemic stroke                                   | 175.3<br>(157.9 to 193.2)                     | 26.4‡<br>(23.2 to 29.8)                        | 24.0<br>(17.5 to 30.6)                  | 49.0<br>(35.3 to 63.2)                            | 7.9<br>(-1.7 to 18.3)                               |
| Hemorrhagic stroke                                 | 41.9<br>(37.3 to 46.8)                        | 15.4‡<br>(13.9 to 17.0)                        | 5.8<br>(4.2 to 7.4)                     | 36.7<br>(19.7 to 56.3)                            | -1.0<br>(-13.1 to 13.3)                             |
| Hypertensive heart disease                         | 47.3<br>(37.9 to 58.5)                        | --                                             | 3.8<br>(2.5 to 5.4)                     | 36.8<br>(21.5 to 53.0)                            | -3.1<br>(-12.4 to 7.2)                              |
| Cardiomyopathy and myocarditis                     | 38.4<br>(33.2 to 44.3)                        | 16.5†<br>(14.4 to 18.8)                        | 3.7<br>(2.4 to 5.2)                     | 42.6<br>(29.1 to 57.8)                            | 2.4<br>(-8.0 to 13.8)                               |
| Myocarditis                                        | 10.1<br>(8.9 to 11.3)                         | 16.5<br>(14.4 to 18.8)                         | 0.7<br>(0.5 to 1.0)                     | 42.3<br>(33.2 to 51.9)                            | 2.1<br>(-6.9 to 12.0)                               |
| Alcoholic cardiomyopathy                           | 3.8<br>(3.0 to 4.8)                           | --                                             | 0.3<br>(0.2 to 0.5)                     | 41.4<br>(13.4 to 76.8)                            | 2.6<br>(-18.3 to 29.9)                              |
| Other cardiomyopathy                               | 31.4<br>(25.8 to 37.8)                        | --                                             | 2.6<br>(1.7 to 3.7)                     | 42.8<br>(25.4 to 62.3)                            | 2.4<br>(-9.5 to 16.2)                               |
| Atrial fibrillation and flutter                    | 132.1<br>(115.0 to 151.6)                     | 11.8<br>(10.1 to 13.8)                         | 10.2<br>(6.8 to 14.3)                   | 41.3<br>(29.7 to 54.1)                            | 1.4<br>(-5.7 to 8.3)                                |
| Peripheral vascular disease                        | 502.8<br>(432.2 to 582.9)                     | 51.6<br>(44.3 to 60.4)                         | 2.7<br>(1.2 to 4.9)                     | 43.1<br>(32.0 to 54.0)                            | 2.9<br>(-4.4 to 10.1)                               |
| Endocarditis                                       | 3.0<br>(2.6 to 3.6)                           | 10.5<br>(9.2 to 11.9)                          | 0.2<br>(0.2 to 0.3)                     | 49.0<br>(34.0 to 67.5)                            | 1.8<br>(-13.2 to 19.7)                              |
| Other cardiovascular and circulatory diseases      | 911.4<br>(731.5 to 1,120.8)                   | --                                             | 47.6<br>(30.8 to 68.4)                  | 49.0<br>(35.9 to 63.1)                            | 3.9<br>(-4.2 to 13.4)                               |
| <b>Chronic respiratory diseases</b>                | <b>6,362.4</b><br><b>(5,917.2 to 6,806.5)</b> | <b>1,293.0†</b><br><b>(1,169.8 to 1,423.0)</b> | <b>284.6</b><br><b>(202.5 to 390.7)</b> | <b>57.1</b><br><b>(49.7 to 65.0)</b>              | <b>11.8</b><br><b>(7.6 to 16.1)</b>                 |
| Chronic obstructive pulmonary disease              | 730.4<br>(698.0 to 762.8)                     | 56.2<br>(53.8 to 58.6)                         | 55.7<br>(47.7 to 62.4)                  | 49.2<br>(38.3 to 61.4)                            | 8.8<br>(1.8 to 16.3)                                |
| Pneumoconiosis                                     | 0.7<br>(0.6 to 0.8)                           | 0.1<br>(0.1 to 0.1)                            | 0.1<br>(0.1 to 0.2)                     | 43.5<br>(36.3 to 51.6)                            | 5.1<br>(-0.1 to 11.1)                               |
| Silicosis                                          | $< 0.05$<br>( $< 0.05$ to 0.1)                | $< 0.05$<br>( $< 0.05$ to $< 0.05$ )           | $< 0.05$<br>( $< 0.05$ to $< 0.05$ )    | 41.3<br>(30.2 to 53.5)                            | 2.5<br>(-4.0 to 9.4)                                |



| Cause                                                          | Prevalence in thousands (95% UI)           | Incidence in thousands (95% UI)                     | YLDs in thousands (95% UI)            |                                                   |                                                     |
|----------------------------------------------------------------|--------------------------------------------|-----------------------------------------------------|---------------------------------------|---------------------------------------------------|-----------------------------------------------------|
|                                                                | 2016 counts                                | 2016 counts                                         | 2016 counts                           | Percentage change in counts between 2006 and 2016 | Percentage change in age-standardised rates between |
| Asbestosis                                                     | 0.3<br>(0.2 to 0.4)                        | < 0.05<br>(< 0.05 to < 0.05)                        | < 0.05<br>(< 0.05 to 0.1)             | 40.5<br>(29.6 to 50.4)                            | 2.2<br>(-3.6 to 8.2)                                |
| Coal workers pneumoconiosis                                    | --                                         | --                                                  | --                                    | --                                                | --                                                  |
| Other pneumoconiosis                                           | 0.4<br>(0.3 to 0.4)                        | 0.1<br>(< 0.05 to 0.1)                              | 0.1<br>(< 0.05 to 0.1)                | 46.3<br>(34.9 to 61.3)                            | 7.8<br>(-1.4 to 18.7)                               |
| Asthma                                                         | 5,639.7<br>(5,133.6 to 6,216.2)            | 1,236.1<br>(1,112.6 to 1,367.0)                     | 221.0<br>(143.6 to 322.9)             | 58.2<br>(49.8 to 67.6)                            | 12.9<br>(8.0 to 18.0)                               |
| Interstitial lung disease and pulmonary sarcoidosis            | 5.4<br>(4.7 to 6.1)                        | 0.5<br>(0.5 to 0.6)                                 | 0.6<br>(0.4 to 0.9)                   | 41.3<br>(37.0 to 45.8)                            | 1.2<br>(-3.7 to 6.5)                                |
| Other chronic respiratory diseases                             | --                                         | --                                                  | 7.2<br>(5.5 to 9.0)                   | 97.2<br>(47.8 to 159.5)                           | 41.5<br>(16.0 to 71.2)                              |
| <b>Cirrhosis and other chronic liver diseases</b>              | <b>134.7<br/>(128.1 to 141.6)</b>          | <b>14.9<br/>(14.3 to 15.6)</b>                      | <b>13.1<br/>(9.1 to 18.5)</b>         | <b>41.5<br/>(25.6 to 60.5)</b>                    | <b>1.7<br/>(-7.0 to 10.7)</b>                       |
| Cirrhosis and other chronic liver diseases due to hepatitis B  | 34.8<br>(31.5 to 38.1)                     | 4.1<br>(3.8 to 4.5)                                 | 2.7<br>(1.8 to 3.8)                   | 40.9<br>(16.3 to 69.8)                            | 2.0<br>(-13.3 to 19.2)                              |
| Cirrhosis and other chronic liver diseases due to hepatitis C  | 32.1<br>(29.0 to 35.3)                     | 3.8<br>(3.5 to 4.2)                                 | 2.5<br>(1.7 to 3.6)                   | 37.4<br>(11.6 to 67.3)                            | -0.6<br>(-16.8 to 16.5)                             |
| Cirrhosis and other chronic liver diseases due to alcohol use  | 19.6<br>(17.8 to 21.6)                     | 2.7<br>(2.5 to 2.9)                                 | 1.5<br>(1.0 to 2.1)                   | 42.9<br>(14.5 to 76.5)                            | 4.0<br>(-14.1 to 24.9)                              |
| Cirrhosis and other chronic liver diseases due to other causes | 48.2<br>(45.0 to 51.8)                     | 4.3<br>(4.0 to 4.6)                                 | 6.5<br>(4.3 to 9.4)                   | 43.0<br>(16.4 to 77.5)                            | 2.1<br>(-14.7 to 23.5)                              |
| <b>Digestive diseases</b>                                      | <b>1,409.6<br/>(1,291.8 to 1,557.6)</b>    | <b>1,259.3<sup>†</sup><br/>(1,199.4 to 1,324.8)</b> | <b>45.2<br/>(31.5 to 61.1)</b>        | <b>39.1<br/>(28.0 to 50.9)</b>                    | <b>1.2<br/>(-4.7 to 6.7)</b>                        |
| Peptic ulcer disease                                           | 203.2<br>(187.5 to 221.9)                  | 100.1<br>(90.0 to 111.2)                            | 4.4<br>(2.9 to 6.3)                   | 57.4<br>(41.9 to 72.8)                            | 12.0<br>(3.4 to 21.1)                               |
| Gastritis and duodenitis                                       | 363.8<br>(319.2 to 409.5)                  | 418.7<br>(378.1 to 466.0)                           | 5.3<br>(3.5 to 7.8)                   | 56.7<br>(40.3 to 74.4)                            | 14.4<br>(5.1 to 24.2)                               |
| Appendicitis                                                   | 13.9<br>(12.8 to 15.1)                     | 369.4<br>(339.4 to 401.1)                           | 4.2<br>(2.7 to 6.2)                   | 39.6<br>(3.6 to 93.0)                             | -0.3<br>(-21.7 to 28.7)                             |
| Paralytic ileus and intestinal obstruction                     | 1.4<br>(1.3 to 1.6)                        | 40.3<br>(36.3 to 44.7)                              | 0.5<br>(0.3 to 0.6)                   | 44.5<br>(36.2 to 53.1)                            | 3.5<br>(-8.6 to 17.2)                               |
| Inguinal, femoral, and abdominal hernia                        | 806.5<br>(658.5 to 980.9)                  | 88.5<br>(77.9 to 100.7)                             | 24.7<br>(16.6 to 34.9)                | 32.4<br>(18.1 to 47.7)                            | -4.6<br>(-13.0 to 3.3)                              |
| Inflammatory bowel disease                                     | 3.1<br>(2.9 to 3.3)                        | 26.1<br>(25.0 to 27.3)                              | 0.5<br>(0.3 to 0.7)                   | 34.2<br>(30.1 to 38.3)                            | -4.8<br>(-7.7 to -2.0)                              |
| Vascular intestinal disorders                                  | 0.5<br>(0.4 to 0.5)                        | 2.7<br>(2.4 to 3.1)                                 | 0.1<br>(0.1 to 0.2)                   | 45.9<br>(38.8 to 53.5)                            | 6.2<br>(2.3 to 10.6)                                |
| Gallbladder and biliary diseases                               | 43.1<br>(38.1 to 48.2)                     | 203.6<br>(178.2 to 231.3)                           | 1.2<br>(0.8 to 1.7)                   | 43.6<br>(23.5 to 67.1)                            | 4.3<br>(-12.5 to 25.2)                              |
| Pancreatitis                                                   | 1.1<br>(0.9 to 1.2)                        | 9.9<br>(8.7 to 11.3)                                | 0.1<br>(0.1 to 0.2)                   | 47.9<br>(43.1 to 53.3)                            | 7.5<br>(4.0 to 11.2)                                |
| Other digestive diseases                                       | --                                         | --                                                  | 4.2<br>(2.9 to 5.7)                   | 42.7<br>(27.9 to 58.2)                            | 4.9<br>(-1.4 to 11.4)                               |
| <b>Neurological disorders</b>                                  | <b>23,139.7<br/>(22,025.6 to 24,394.3)</b> | <b>11,676.6<br/>(9,889.6 to 13,712.1)</b>           | <b>489.2<br/>(316.9 to 719.1)</b>     | <b>43.4<br/>(11.6 to 84.3)</b>                    | <b>1.7<br/>(-15.0 to 21.6)</b>                      |
| Alzheimer's disease and other dementias                        | 141.6<br>(118.7 to 169.0)                  | 24.8<br>(20.5 to 30.7)                              | 19.6<br>(13.6 to 26.2)                | 43.4<br>(36.5 to 51.0)                            | -0.5<br>(-4.9 to 4.2)                               |
| Parkinson's disease                                            | 8.8<br>(6.9 to 11.3)                       | 1.2<br>(0.9 to 1.5)                                 | 1.0<br>(0.6 to 1.5)                   | 52.1<br>(28.0 to 81.2)                            | 8.3<br>(-7.4 to 25.9)                               |
| Epilepsy                                                       | 170.3<br>(31.6 to 351.4)                   | 26.7<br>(4.8 to 56.5)                               | 67.9<br>(12.1 to 165.5)               | 52.5<br>(-74.4 to 949.2)                          | 8.4<br>(-81.8 to 636.7)                             |
| Multiple sclerosis                                             | 1.9<br>(1.7 to 2.2)                        | 0.1<br>(0.1 to 0.1)                                 | 0.6<br>(0.4 to 0.7)                   | 51.2<br>(45.4 to 56.0)                            | 8.9<br>(4.8 to 12.4)                                |
| Motor neuron disease                                           | 0.7<br>(0.6 to 0.8)                        | 0.2<br>(0.2 to 0.2)                                 | 0.1<br>(0.1 to 0.2)                   | 43.6<br>(37.3 to 50.4)                            | 4.0<br>(0.8 to 7.5)                                 |
| Migraine                                                       | 7,907.4<br>(7,433.8 to 8,374.2)            | 1,041.2<br>(979.0 to 1,106.6)                       | 328.6<br>(208.9 to 463.5)             | 40.5<br>(34.2 to 46.9)                            | 0.6<br>(-3.3 to 4.1)                                |
| Tension-type headache                                          | 17,930.6<br>(15,956.3 to 20,188.8)         | 10,581.9<br>(8,810.2 to 12,625.2)                   | 54.2<br>(34.0 to 81.5)                | 39.4<br>(32.1 to 46.7)                            | 0.1<br>(-4.7 to 5.2)                                |
| Other neurological disorders                                   | 0.2<br>(0.1 to 0.3)                        | 0.4<br>(0.2 to 0.6)                                 | 17.2<br>(3.7 to 41.2)                 | 87.9<br>(-62.3 to 944.3)                          | 28.2<br>(-67.1 to 434.6)                            |
| <b>Mental and substance use disorders</b>                      | <b>11,274.6<br/>(10,710.0 to 11,838.8)</b> | <b>4,504.5<sup>†</sup><br/>(4,140.8 to 4,942.2)</b> | <b>1,335.6<br/>(970.0 to 1,740.5)</b> | <b>39.4<br/>(36.2 to 42.8)</b>                    | <b>-0.1<br/>(-2.2 to 2.3)</b>                       |
| Schizophrenia                                                  | 92.5<br>(80.4 to 105.0)                    | 8.7<br>(7.6 to 9.9)                                 | 58.6<br>(42.7 to 74.4)                | 43.2<br>(30.1 to 58.2)                            | 2.7<br>(-5.9 to 12.6)                               |
| Alcohol use disorders                                          | 878.6<br>(744.4 to 1,025.7)                | 481.6<br>(405.0 to 561.5)                           | 87.0<br>(59.8 to 123.0)               | 45.2<br>(32.8 to 57.9)                            | 3.5<br>(-4.5 to 12.0)                               |
| Drug use disorders                                             | 303.4<br>(270.4 to 336.7)                  | 54.3<br>(47.5 to 61.2)                              | 70.2<br>(48.3 to 95.5)                | 42.5<br>(27.1 to 59.7)                            | 1.5<br>(-7.4 to 12.3)                               |
| Opioid use disorders                                           | 147.4<br>(120.4 to 181.7)                  | 20.2<br>(16.7 to 24.4)                              | 60.8<br>(40.9 to 84.0)                | 42.2<br>(24.9 to 61.5)                            | 1.3<br>(-9.4 to 13.5)                               |
| Cocaine use disorders                                          | 9.1<br>(7.6 to 11.1)                       | 1.3<br>(1.1 to 1.6)                                 | 1.3<br>(0.8 to 2.0)                   | 44.5<br>(36.7 to 53.0)                            | 3.5<br>(-1.9 to 9.0)                                |
| Amphetamine use disorders                                      | 5.1<br>(3.5 to 7.1)                        | 0.9<br>(0.6 to 1.3)                                 | 0.7<br>(0.4 to 1.2)                   | 46.8<br>(34.3 to 61.0)                            | 4.1<br>(-4.3 to 13.6)                               |
| Cannabis use disorders                                         | 135.6<br>(112.3 to 164.7)                  | 27.6<br>(22.3 to 34.3)                              | 3.9<br>(2.4 to 6.0)                   | 41.8<br>(16.3 to 72.7)                            | 0.6<br>(-16.2 to 20.9)                              |
| Other drug use disorders                                       | 19.3<br>(16.8 to 21.9)                     | 4.2<br>(3.7 to 4.9)                                 | 3.4<br>(2.3 to 4.8)                   | 46.6<br>(24.5 to 71.7)                            | 4.8<br>(-10.0 to 22.0)                              |
| Depressive disorders                                           | 2,519.5<br>(2,341.3 to 2,717.2)            | 3,005.8<br>(2,658.9 to 3,411.3)                     | 443.9<br>(304.8 to 612.0)             | 38.9<br>(32.7 to 45.3)                            | -0.3<br>(-4.5 to 3.9)                               |
| Major depressive disorder                                      | 1,838.0<br>(1,635.9 to 2,076.3)            | 2,872.8<br>(2,529.8 to 3,284.7)                     | 374.5<br>(254.5 to 518.8)             | 38.7<br>(31.7 to 46.4)                            | -0.5<br>(-5.4 to 4.7)                               |
| Dysthymia                                                      | 725.9<br>(627.7 to 841.9)                  | 133.0<br>(116.2 to 153.4)                           | 69.4<br>(46.4 to 99.6)                | 40.0<br>(34.0 to 46.0)                            | 0.5<br>(-2.9 to 3.9)                                |
| Bipolar disorder                                               | 390.7<br>(330.5 to 464.6)                  | 46.3<br>(38.8 to 55.5)                              | 79.6<br>(49.0 to 118.3)               | 41.2<br>(30.9 to 51.3)                            | 0.9<br>(-5.0 to 6.8)                                |
| Anxiety disorders                                              | 2,220.3<br>(1,996.2 to 2,454.3)            | 417.1<br>(377.5 to 459.6)                           | 214.2<br>(149.1 to 290.3)             | 40.2<br>(30.0 to 49.6)                            | 0.4<br>(-5.8 to 6.7)                                |
| Eating disorders                                               | 48.2<br>(38.6 to 60.2)                     | 44.6<br>(32.0 to 60.7)                              | 9.9<br>(6.3 to 14.2)                  | 60.2<br>(33.5 to 90.5)                            | 14.1<br>(-4.3 to 34.9)                              |
| Anorexia nervosa                                               | 14.2<br>(10.2 to 18.9)                     | 7.3<br>(5.3 to 9.7)                                 | 3.0<br>(1.7 to 4.7)                   | 57.5<br>(11.9 to 121.3)                           | 12.0<br>(-18.8 to 55.2)                             |
| Bulimia nervosa                                                | 32.9<br>(24.3 to 45.2)                     | 37.4<br>(24.7 to 53.2)                              | 6.9<br>(4.0 to 10.5)                  | 61.5<br>(30.5 to 98.5)                            | 14.9<br>(-6.7 to 41.1)                              |
| Autistic spectrum disorders                                    | 663.2<br>(593.6 to 750.7)                  | 9.1<br>(6.4 to 12.7)                                | 93.6<br>(63.7 to 130.4)               | 41.2<br>(33.7 to 49.6)                            | 0.9<br>(-3.7 to 6.0)                                |
| Autism                                                         | 178.6<br>(153.1 to 206.5)                  | 1.3<br>(0.7 to 2.1)                                 | 45.5<br>(29.6 to 67.0)                | 41.5<br>(27.8 to 56.9)                            | 1.0<br>(-7.2 to 10.8)                               |
| Asperger syndrome and other autistic spectrum disorders        | 481.4<br>(395.9 to 584.8)                  | 7.8<br>(5.1 to 11.4)                                | 48.1<br>(31.2 to 70.7)                | 40.9<br>(32.9 to 49.2)                            | 0.8<br>(-4.0 to 5.9)                                |

| Cause                                                      | Prevalence in thousands (95% UI)                 | Incidence in thousands (95% UI)                      | YLDs in thousands (95% UI)                    |                                                   |                                                     |
|------------------------------------------------------------|--------------------------------------------------|------------------------------------------------------|-----------------------------------------------|---------------------------------------------------|-----------------------------------------------------|
|                                                            | 2016 counts                                      | 2016 counts                                          | 2016 counts                                   | Percentage change in counts between 2006 and 2016 | Percentage change in age-standardised rates between |
| Attention-deficit/hyperactivity disorder                   | 1,057.3<br>(943.5 to 1,191.6)                    | 72.7<br>(62.8 to 85.0)                               | 12.7<br>(7.4 to 20.3)                         | 40.3<br>(30.2 to 51.0)                            | 0.4<br>(-6.0 to 7.0)                                |
| Conduct disorder                                           | 845.5<br>(692.9 to 1,003.6)                      | 311.2<br>(248.1 to 375.5)                            | 101.5<br>(62.6 to 156.9)                      | 40.2<br>(30.7 to 51.2)                            | 0.5<br>(-6.2 to 8.2)                                |
| Idiopathic developmental intellectual disability           | 2,285.0<br>(1,439.0 to 3,167.4)                  | --                                                   | 90.0<br>(43.5 to 154.2)                       | 23.7<br>(16.1 to 30.9)                            | -11.4<br>(-16.5 to -6.4)                            |
| Other mental and substance use disorders                   | 1,006.8<br>(879.7 to 1,166.7)                    | 53.1<br>(46.4 to 61.5)                               | 74.5<br>(51.3 to 106.7)                       | 40.7<br>(32.7 to 48.6)                            | 0.7<br>(-4.2 to 5.4)                                |
| <b>Diabetes, urogenital, blood, and endocrine diseases</b> | <b>41,904.3</b><br><b>(41,316.5 to 42,441.7)</b> | <b>6,722.0†</b><br><b>(6,273.2 to 7,185.9)</b>       | <b>474.8</b><br><b>(337.1 to 643.0)</b>       | <b>41.0</b><br><b>(37.1 to 44.9)</b>              | <b>2.0</b><br><b>(-0.9 to 4.9)</b>                  |
| Diabetes mellitus                                          | 1,820.8<br>(1,632.0 to 2,022.5)                  | 122.3<br>(110.1 to 135.3)                            | 142.2<br>(98.0 to 197.3)                      | 40.1<br>(32.5 to 49.2)                            | 1.9<br>(-3.6 to 8.8)                                |
| Acute glomerulonephritis                                   | 0.7<br>(0.5 to 0.8)                              | 9.8<br>(8.3 to 11.5)                                 | < 0.05<br>(< 0.05 to < 0.05)                  | 39.6<br>(33.4 to 46.2)                            | 0.1<br>(-3.6 to 3.8)                                |
| Chronic kidney disease                                     | 2,422.0<br>(2,169.4 to 2,687.0)                  | 187.1<br>(165.9 to 209.0)                            | 71.4<br>(52.5 to 92.4)                        | 49.6<br>(41.2 to 59.0)                            | 6.1<br>(0.7 to 11.8)                                |
| Chronic kidney disease due to diabetes mellitus            | 737.6<br>(616.2 to 865.6)                        | 53.2<br>(44.0 to 64.7)                               | 20.9<br>(14.9 to 27.9)                        | 48.8<br>(36.2 to 62.0)                            | 6.3<br>(-1.6 to 14.8)                               |
| Chronic kidney disease due to hypertension                 | 518.6<br>(446.4 to 594.5)                        | 48.9<br>(41.1 to 57.7)                               | 11.7<br>(8.1 to 15.5)                         | 46.4<br>(31.7 to 62.5)                            | 2.9<br>(-6.8 to 13.2)                               |
| Chronic kidney disease due to glomerulonephritis           | 488.8<br>(419.2 to 556.1)                        | 29.3<br>(23.5 to 35.6)                               | 18.4<br>(12.9 to 24.9)                        | 51.4<br>(37.9 to 67.6)                            | 7.9<br>(-0.6 to 17.2)                               |
| Chronic kidney disease due to other causes                 | 677.0<br>(567.2 to 791.7)                        | 55.7<br>(46.6 to 65.0)                               | 20.3<br>(14.3 to 27.5)                        | 50.9<br>(37.3 to 66.4)                            | 7.2<br>(-0.8 to 15.9)                               |
| Urinary diseases and male infertility                      | 1,027.1<br>(901.7 to 1,152.7)                    | 3,408.2†<br>(3,038.3 to 3,829.2)                     | 26.6<br>(16.9 to 38.4)                        | 40.9<br>(30.5 to 51.3)                            | 3.2<br>(-3.8 to 10.4)                               |
| Interstitial nephritis and urinary tract infections        | 56.7<br>(49.7 to 64.3)                           | 2,964.5<br>(2,597.8 to 3,364.5)                      | 1.9<br>(1.1 to 2.9)                           | 42.5<br>(19.3 to 69.8)                            | 1.8<br>(-12.9 to 19.3)                              |
| Urolithiasis                                               | 13.5<br>(11.9 to 15.6)                           | 359.6<br>(317.5 to 411.3)                            | 1.0<br>(0.7 to 1.5)                           | 41.8<br>(32.9 to 51.3)                            | 2.6<br>(-4.8 to 10.5)                               |
| Benign prostatic hyperplasia                               | 651.0<br>(544.7 to 760.3)                        | 84.1<br>(70.7 to 98.8)                               | 21.1<br>(13.1 to 30.6)                        | 40.8<br>(28.1 to 53.8)                            | 3.3<br>(-4.4 to 11.4)                               |
| Male infertility                                           | 264.4<br>(201.8 to 345.3)                        | --                                                   | 1.5<br>(0.6 to 3.1)                           | 67.6<br>(32.9 to 115.3)                           | 18.1<br>(-7.4 to 56.2)                              |
| Other urinary diseases                                     | --                                               | --                                                   | 1.1<br>(0.7 to 1.6)                           | 16.0<br>(2.2 to 31.7)                             | -15.1<br>(-22.7 to -6.9)                            |
| Gynecological diseases                                     | 8,071.9<br>(7,687.1 to 8,535.2)                  | 2,949.2†<br>(2,726.7 to 3,191.3)                     | 92.3<br>(62.6 to 133.0)                       | 38.8<br>(33.0 to 45.2)                            | -0.9<br>(-4.5 to 3.1)                               |
| Uterine fibroids                                           | 516.4<br>(454.6 to 581.5)                        | 64.0<br>(55.3 to 73.7)                               | 11.6<br>(7.4 to 17.8)                         | 37.7<br>(27.5 to 48.7)                            | -0.2<br>(-7.5 to 7.3)                               |
| Polycystic ovarian syndrome                                | 62.9<br>(46.7 to 81.6)                           | 109.2<br>(76.3 to 147.2)                             | 0.5<br>(0.2 to 1.0)                           | 42.5<br>(23.3 to 63.3)                            | 1.4<br>(-11.7 to 15.5)                              |
| Female infertility                                         | 48.5<br>(32.1 to 109.2)                          | --                                                   | 0.3<br>(0.1 to 0.7)                           | 71.5<br>(13.5 to 270.4)                           | 18.6<br>(-21.3 to 135.4)                            |
| Endometriosis                                              | 14.3<br>(11.9 to 17.1)                           | 60.1<br>(48.5 to 75.7)                               | 1.3<br>(0.8 to 2.1)                           | 42.4<br>(5.2 to 93.5)                             | 0.8<br>(-23.7 to 34.3)                              |
| Genital prolapse                                           | 4,094.4<br>(3,636.2 to 4,543.2)                  | 395.6<br>(329.6 to 474.4)                            | 12.7<br>(6.1 to 22.7)                         | 35.2<br>(26.6 to 43.5)                            | -2.2<br>(-8.4 to 4.3)                               |
| Premenstrual syndrome                                      | 3,508.2<br>(3,156.4 to 3,819.0)                  | 1,338.7<br>(1,200.5 to 1,469.9)                      | 29.1<br>(18.2 to 44.6)                        | 39.4<br>(26.1 to 53.9)                            | -1.0<br>(-9.3 to 8.8)                               |
| Other gynecological diseases                               | 1,061.3<br>(912.5 to 1,223.2)                    | 981.6<br>(803.2 to 1,181.8)                          | 36.8<br>(24.4 to 52.2)                        | 39.7<br>(30.4 to 49.1)                            | -0.5<br>(-6.6 to 6.0)                               |
| Hemoglobinopathies and hemolytic anaemias                  | 35,665.6<br>(35,062.0 to 36,230.5)               | --                                                   | 113.1<br>(75.9 to 160.9)                      | 40.1<br>(32.0 to 48.6)                            | -0.1<br>(-5.3 to 5.2)                               |
| Thalassemias                                               | < 0.05<br>(< 0.05 to 0.1)                        | --                                                   | < 0.05<br>(< 0.05 to < 0.05)                  | 42.9<br>(27.5 to 55.9)                            | 1.1<br>(-9.7 to 10.3)                               |
| Thalassaemias trait                                        | 376.1<br>(347.6 to 404.6)                        | --                                                   | 5.5<br>(3.6 to 8.0)                           | 46.2<br>(29.3 to 64.8)                            | 6.4<br>(-4.3 to 17.8)                               |
| Sickle cell disorders                                      | 239.5<br>(222.3 to 257.9)                        | --                                                   | 18.9<br>(13.2 to 26.3)                        | 43.3<br>(27.1 to 62.7)                            | 4.3<br>(-7.8 to 18.4)                               |
| Sickle cell trait                                          | 17,193.0<br>(16,611.4 to 17,733.5)               | --                                                   | 64.2<br>(42.6 to 93.0)                        | 41.3<br>(31.2 to 50.7)                            | 1.0<br>(-5.5 to 7.1)                                |
| G6PD deficiency                                            | 9,080.0<br>(8,669.9 to 9,580.8)                  | --                                                   | 0.5<br>(0.3 to 0.8)                           | 10.1<br>(-14.3 to 41.1)                           | -16.8<br>(-30.0 to -1.4)                            |
| G6PD trait                                                 | 14,651.7<br>(14,479.9 to 14,861.2)               | --                                                   | < 0.05<br>(< 0.05 to < 0.05)                  | 41.0<br>(28.1 to 55.1)                            | 0.9<br>(-7.6 to 9.0)                                |
| Other hemoglobinopathies and hemolytic anaemias            | 837.1<br>(807.0 to 870.6)                        | --                                                   | 23.9<br>(16.0 to 34.5)                        | 34.3<br>(21.7 to 47.7)                            | -6.1<br>(-12.6 to 0.7)                              |
| Endocrine, metabolic, blood, and immune disorders          | 931.6<br>(897.9 to 966.3)                        | 45.4<br>(40.1 to 51.0)                               | 29.2<br>(19.5 to 41.4)                        | 35.8<br>(26.2 to 45.2)                            | -0.8<br>(-6.2 to 4.6)                               |
| <b>Musculoskeletal disorders</b>                           | <b>7,200.5</b><br><b>(6,781.0 to 7,582.5)</b>    | <b>3,535.9</b><br><b>(3,165.5 to 3,926.0)</b>        | <b>793.0</b><br><b>(566.8 to 1,040.4)</b>     | <b>37.2</b><br><b>(33.0 to 41.8)</b>              | <b>-1.1</b><br><b>(-3.7 to 1.7)</b>                 |
| Rheumatoid arthritis                                       | 97.5<br>(86.6 to 110.2)                          | 6.6<br>(5.9 to 7.4)                                  | 22.9<br>(15.4 to 30.9)                        | 41.9<br>(28.2 to 56.0)                            | 3.0<br>(-5.6 to 11.4)                               |
| Osteoarthritis                                             | 1,047.0<br>(983.6 to 1,122.0)                    | 59.5<br>(55.4 to 64.2)                               | 63.7<br>(45.4 to 86.1)                        | 36.3<br>(31.0 to 41.9)                            | -0.9<br>(-4.5 to 3.0)                               |
| Low back and neck pain                                     | 5,193.6<br>(4,840.1 to 5,562.2)                  | 2,397.1<br>(2,134.9 to 2,686.6)                      | 590.7<br>(414.3 to 772.5)                     | 36.4<br>(31.6 to 41.6)                            | -1.6<br>(-4.7 to 1.7)                               |
| Low back pain                                              | 4,111.7<br>(3,645.4 to 4,684.6)                  | 2,063.2<br>(1,803.5 to 2,349.0)                      | 458.7<br>(321.9 to 604.9)                     | 35.6<br>(29.7 to 42.2)                            | -2.2<br>(-6.1 to 2.1)                               |
| Neck pain                                                  | 1,333.8<br>(1,151.9 to 1,540.4)                  | 333.9<br>(288.5 to 390.2)                            | 132.1<br>(89.2 to 185.9)                      | 39.4<br>(35.4 to 43.5)                            | 0.6<br>(-1.9 to 3.1)                                |
| Gout                                                       | 150.2<br>(133.3 to 169.6)                        | 31.3<br>(27.4 to 35.3)                               | 4.7<br>(3.2 to 6.4)                           | 39.9<br>(21.1 to 62.5)                            | 1.7<br>(-11.2 to 16.3)                              |
| Other musculoskeletal disorders                            | 1,297.1<br>(1,020.6 to 1,597.4)                  | 1,041.4<br>(808.9 to 1,314.1)                        | 111.0<br>(71.9 to 161.9)                      | 41.0<br>(27.4 to 55.3)                            | 0.5<br>(-9.1 to 10.0)                               |
| <b>Other non-communicable diseases</b>                     | <b>57,907.1</b><br><b>(56,696.7 to 58,985.1)</b> | <b>175,224.4†</b><br><b>(160,651.5 to 190,759.6)</b> | <b>1,550.2</b><br><b>(1,065.0 to 2,181.9)</b> | <b>37.6</b><br><b>(35.6 to 39.5)</b>              | <b>-1.4</b><br><b>(-2.4 to -0.4)</b>                |
| Congenital anomalies                                       | 1,211.7<br>(1,072.8 to 1,397.4)                  | --                                                   | 190.2<br>(132.5 to 257.3)                     | 33.8<br>(25.3 to 43.1)                            | -4.5<br>(-10.7 to 1.9)                              |
| Neural tube defects                                        | 146.4<br>(129.7 to 164.2)                        | --                                                   | 43.5<br>(30.3 to 58.6)                        | 40.3<br>(24.9 to 56.7)                            | 0.3<br>(-9.8 to 11.1)                               |
| Congenital heart anomalies                                 | 175.4<br>(143.5 to 210.4)                        | --                                                   | 8.6<br>(4.1 to 14.3)                          | 32.1<br>(13.0 to 51.1)                            | -4.8<br>(-17.2 to 8.6)                              |
| Orofacial clefts                                           | 25.2<br>(21.8 to 28.6)                           | --                                                   | 0.5<br>(0.3 to 0.7)                           | 36.8<br>(21.8 to 54.0)                            | -2.5<br>(-13.2 to 9.8)                              |
| Down's syndrome                                            | 14.0<br>(11.8 to 16.8)                           | --                                                   | 1.2<br>(0.8 to 1.7)                           | 42.5<br>(32.9 to 54.2)                            | 1.7<br>(-5.1 to 10.0)                               |
| Turner syndrome                                            | 52.2<br>(43.8 to 61.5)                           | --                                                   | 0.8<br>(0.4 to 1.4)                           | 38.7<br>(-3.7 to 92.9)                            | -0.5<br>(-28.7 to 35.7)                             |
| Klinefelter syndrome                                       | 49.6<br>(41.6 to 59.1)                           | --                                                   | 0.2<br>(0.1 to 0.4)                           | 39.2<br>(7.7 to 79.7)                             | -1.2<br>(-22.7 to 26.9)                             |



| Cause                                         | Prevalence in thousands (95% UI)              | Incidence in thousands (95% UI)                           | YLDs in thousands (95% UI)              |                                                   |                                                     |
|-----------------------------------------------|-----------------------------------------------|-----------------------------------------------------------|-----------------------------------------|---------------------------------------------------|-----------------------------------------------------|
|                                               | 2016 counts                                   | 2016 counts                                               | 2016 counts                             | Percentage change in counts between 2006 and 2016 | Percentage change in age-standardised rates between |
| Other chromosomal abnormalities               | 17.1<br>(14.6 to 20.2)                        | --                                                        | 3.3<br>(2.1 to 4.9)                     | 43.8<br>(2.9 to 100.9)                            | 1.8<br>(-26.3 to 39.8)                              |
| Congenital musculoskeletal and limb anomalies | 120.7<br>(106.5 to 135.9)                     | --                                                        | 17.9<br>(11.9 to 25.1)                  | 40.4<br>(22.7 to 59.3)                            | 0.1<br>(-10.4 to 12.1)                              |
| Urogenital congenital anomalies               | 77.9<br>(67.8 to 89.8)                        | --                                                        | 1.8<br>(1.0 to 2.9)                     | 39.3<br>(26.2 to 54.2)                            | -1.0<br>(-9.5 to 8.4)                               |
| Digestive congenital anomalies                | 62.8<br>(55.2 to 69.9)                        | --                                                        | 2.8<br>(1.8 to 4.0)                     | 42.3<br>(14.4 to 76.4)                            | 1.8<br>(-15.7 to 21.8)                              |
| Other congenital anomalies                    | 653.4<br>(498.5 to 874.1)                     | --                                                        | 109.7<br>(72.2 to 159.2)                | 29.9<br>(17.8 to 42.3)                            | -7.4<br>(-15.8 to 1.7)                              |
| Skin and subcutaneous diseases                | 25,536.5<br>(24,660.3 to 26,666.1)            | 56,744.3<br>(53,350.9 to 60,924.0)                        | 616.9<br>(401.9 to 901.7)               | 42.7<br>(39.9 to 45.8)                            | 2.1<br>(0.3 to 4.0)                                 |
| Dermatitis                                    | 4,470.7<br>(4,045.5 to 4,895.2)               | 3,467.9<br>(3,199.5 to 3,755.7)                           | 181.1<br>(103.5 to 299.9)               | 40.7<br>(35.2 to 46.2)                            | 0.4<br>(-2.9 to 3.7)                                |
| Psoriasis                                     | 360.4<br>(343.9 to 378.5)                     | 58.9<br>(56.1 to 61.9)                                    | 31.4<br>(21.7 to 41.6)                  | 51.0<br>(33.4 to 69.7)                            | 8.0<br>(-1.6 to 18.3)                               |
| Cellulitis                                    | 28.9<br>(26.5 to 31.5)                        | 494.0<br>(456.3 to 533.0)                                 | 1.6<br>(1.0 to 2.4)                     | 41.2<br>(12.3 to 76.5)                            | 2.4<br>(-16.5 to 23.5)                              |
| Pyoderma                                      | 467.2<br>(443.9 to 491.6)                     | 9,134.4<br>(8,702.9 to 9,579.0)                           | 2.6<br>(1.1 to 5.5)                     | 42.8<br>(33.8 to 52.6)                            | 2.3<br>(-3.0 to 7.6)                                |
| Scabies                                       | 1,067.1<br>(914.6 to 1,239.8)                 | 3,294.1<br>(2,800.5 to 3,855.6)                           | 27.5<br>(15.2 to 44.3)                  | 40.5<br>(33.3 to 47.2)                            | 0.2<br>(-3.9 to 4.4)                                |
| Fungal skin diseases                          | 10,417.0<br>(9,051.5 to 12,118.1)             | 26,660.0<br>(23,429.2 to 30,509.9)                        | 59.0<br>(23.4 to 122.5)                 | 40.2<br>(38.6 to 41.9)                            | 0.3<br>(-0.6 to 1.2)                                |
| Viral skin diseases                           | 2,177.1<br>(2,037.6 to 2,316.4)               | 3,101.3<br>(2,886.3 to 3,303.7)                           | 66.6<br>(41.4 to 99.3)                  | 40.4<br>(34.7 to 46.2)                            | 0.3<br>(-3.0 to 4.0)                                |
| Acne vulgaris                                 | 6,640.3<br>(5,830.6 to 7,588.3)               | 4,898.1<br>(3,913.2 to 6,266.0)                           | 169.9<br>(113.4 to 245.2)               | 45.8<br>(39.0 to 54.5)                            | 3.9<br>(-0.7 to 9.6)                                |
| Alopecia areata                               | 119.3<br>(114.5 to 123.9)                     | 213.2<br>(204.7 to 221.5)                                 | 3.9<br>(2.5 to 6.0)                     | 40.5<br>(23.3 to 58.5)                            | 0.2<br>(-10.0 to 10.8)                              |
| Pruritus                                      | 523.2<br>(458.9 to 594.9)                     | 431.7<br>(383.0 to 488.2)                                 | 5.6<br>(2.6 to 10.1)                    | 42.4<br>(33.7 to 51.3)                            | 1.7<br>(-3.1 to 6.6)                                |
| Urticaria                                     | 823.1<br>(695.3 to 974.7)                     | 1,492.1<br>(1,254.4 to 1,756.5)                           | 49.6<br>(31.4 to 71.7)                  | 41.1<br>(32.1 to 50.9)                            | 0.4<br>(-5.2 to 6.5)                                |
| Decubitus ulcer                               | 7.0<br>(6.3 to 7.8)                           | 25.6<br>(22.9 to 28.4)                                    | 1.2<br>(0.8 to 1.6)                     | 43.5<br>(29.4 to 59.4)                            | 4.6<br>(-10.2 to 21.7)                              |
| Other skin and subcutaneous diseases          | 3,085.8<br>(2,993.1 to 3,180.5)               | 3,472.8<br>(3,363.8 to 3,581.8)                           | 16.9<br>(8.2 to 30.7)                   | 47.5<br>(43.0 to 52.0)                            | 5.6<br>(3.1 to 8.3)                                 |
| Sense organ diseases                          | 19,181.1<br>(18,783.8 to 19,552.8)            | 7,059.1 <sup>†</sup><br>(6,535.4 to 7,610.9)              | 618.7<br>(421.9 to 867.4)               | 33.6<br>(30.6 to 37.0)                            | -2.9<br>(-4.4 to -1.3)                              |
| Glaucoma                                      | 18.8<br>(15.1 to 22.7)                        | --                                                        | 1.6<br>(1.0 to 2.2)                     | 47.6<br>(27.3 to 68.7)                            | 6.5<br>(-6.7 to 19.7)                               |
| Cataract                                      | 263.0<br>(226.3 to 303.5)                     | --                                                        | 22.9<br>(15.9 to 31.0)                  | 46.2<br>(37.3 to 55.2)                            | 2.8<br>(-2.5 to 8.1)                                |
| Macular degeneration                          | 21.2<br>(16.9 to 26.8)                        | --                                                        | 1.4<br>(0.9 to 2.1)                     | 49.8<br>(30.1 to 73.0)                            | 7.8<br>(-4.8 to 22.2)                               |
| Refraction and accommodation disorders        | 14,108.6<br>(13,595.9 to 14,636.1)            | --                                                        | 177.6<br>(95.0 to 312.0)                | 26.9<br>(23.4 to 30.6)                            | -7.7<br>(-10.0 to -5.2)                             |
| Age-related and other hearing loss            | 8,422.8<br>(7,951.5 to 8,920.5)               | --                                                        | 363.3<br>(253.8 to 498.0)               | 35.1<br>(30.3 to 40.1)                            | -2.2<br>(-4.2 to -0.0)                              |
| Other vision loss                             | 163.7<br>(144.0 to 186.3)                     | --                                                        | 11.6<br>(8.0 to 16.1)                   | 47.7<br>(35.2 to 61.2)                            | 6.4<br>(-1.1 to 15.0)                               |
| Other sense organ diseases                    | 1,340.7<br>(1,240.3 to 1,441.3)               | 7,059.1<br>(6,535.4 to 7,610.9)                           | 40.4<br>(25.4 to 61.4)                  | 41.2<br>(33.8 to 48.2)                            | 1.6<br>(-2.5 to 5.5)                                |
| Oral disorders                                | 39,716.2<br>(37,349.8 to 41,841.0)            | 111,421.0 <sup>†</sup><br>(97,606.3 to 126,232.5)         | 124.5<br>(75.0 to 192.7)                | 39.0<br>(35.8 to 42.1)                            | 0.3<br>(-1.8 to 2.3)                                |
| Caries of deciduous teeth                     | 9,378.4<br>(7,513.8 to 11,538.0)              | 35,290.6<br>(24,284.6 to 47,726.4)                        | 2.2<br>(1.0 to 4.4)                     | 38.8<br>(23.2 to 55.9)                            | -0.9<br>(-11.9 to 11.3)                             |
| Caries of permanent teeth                     | 26,742.5<br>(24,270.2 to 29,132.9)            | 75,453.8<br>(67,002.2 to 83,600.8)                        | 15.7<br>(6.8 to 29.6)                   | 35.1<br>(29.9 to 40.5)                            | -3.0<br>(-6.1 to 0.2)                               |
| Periodontal disease                           | 4,612.3<br>(3,691.7 to 5,663.9)               | 580.5<br>(458.9 to 729.3)                                 | 29.9<br>(11.9 to 63.6)                  | 39.0<br>(33.8 to 44.2)                            | 0.7<br>(-2.9 to 4.2)                                |
| Edentulism and severe tooth loss              | 1,555.0<br>(1,344.4 to 1,783.4)               | 96.1<br>(82.7 to 109.7)                                   | 43.2<br>(28.1 to 62.0)                  | 39.7<br>(32.7 to 45.7)                            | 0.8<br>(-3.3 to 4.4)                                |
| Other oral disorders                          | 1,144.3<br>(1,090.4 to 1,203.4)               | --                                                        | 33.4<br>(20.6 to 50.5)                  | 39.9<br>(34.6 to 46.0)                            | 0.3<br>(-2.8 to 3.5)                                |
| <b>Injuries</b>                               | <b>9,059.4</b><br><b>(8,456.6 to 9,734.3)</b> | <b>5,789.6<sup>†</sup></b><br><b>(5,451.2 to 6,153.7)</b> | <b>398.2</b><br><b>(267.4 to 570.5)</b> | <b>42.7</b><br><b>(39.2 to 46.5)</b>              | <b>4.4</b><br><b>(2.7 to 6.0)</b>                   |
| <b>Transport injuries</b>                     | <b>1,059.2</b><br><b>(979.8 to 1,147.0)</b>   | <b>507.3</b><br><b>(447.4 to 570.7)</b>                   | <b>65.0</b><br><b>(43.1 to 92.5)</b>    | <b>48.4</b><br><b>(44.9 to 52.1)</b>              | <b>7.9</b><br><b>(6.0 to 9.8)</b>                   |
| Road injuries                                 | 750.2<br>(700.9 to 806.9)                     | 393.4<br>(339.1 to 455.9)                                 | 44.9<br>(29.8 to 64.2)                  | 51.6<br>(48.4 to 55.2)                            | 10.2<br>(8.3 to 12.2)                               |
| Pedestrian road injuries                      | 213.8<br>(188.1 to 243.9)                     | 86.7<br>(69.6 to 107.1)                                   | 13.1<br>(8.7 to 18.6)                   | 50.0<br>(46.7 to 53.6)                            | 9.3<br>(7.5 to 11.4)                                |
| Cyclist road injuries                         | 139.3<br>(116.5 to 165.1)                     | 88.4<br>(68.7 to 111.2)                                   | 7.8<br>(5.1 to 11.3)                    | 57.3<br>(53.5 to 61.3)                            | 14.3<br>(12.3 to 16.6)                              |
| Motorcyclist road injuries                    | 166.2<br>(141.7 to 204.2)                     | 62.8<br>(49.7 to 78.9)                                    | 9.6<br>(6.3 to 13.9)                    | 45.4<br>(42.0 to 49.1)                            | 5.5<br>(3.5 to 7.6)                                 |
| Motor vehicle road injuries                   | 171.6<br>(147.2 to 196.3)                     | 113.2<br>(91.9 to 136.4)                                  | 11.2<br>(7.5 to 15.9)                   | 53.9<br>(50.5 to 57.5)                            | 11.6<br>(9.7 to 13.8)                               |
| Other road injuries                           | 59.3<br>(50.9 to 70.0)                        | 42.3<br>(31.4 to 55.6)                                    | 3.3<br>(2.1 to 4.8)                     | 56.0<br>(52.4 to 59.8)                            | 13.7<br>(11.6 to 15.8)                              |
| Other transport injuries                      | 308.9<br>(258.4 to 370.3)                     | 113.9<br>(95.5 to 139.2)                                  | 20.1<br>(13.2 to 28.4)                  | 41.8<br>(36.7 to 47.4)                            | 2.1<br>(-0.2 to 4.6)                                |
| <b>Unintentional injuries</b>                 | <b>6,993.5</b><br><b>(6,492.7 to 7,528.5)</b> | <b>5,027.0</b><br><b>(4,686.1 to 5,374.7)</b>             | <b>267.8</b><br><b>(182.2 to 373.4)</b> | <b>46.4</b><br><b>(42.9 to 49.5)</b>              | <b>5.3</b><br><b>(3.7 to 6.9)</b>                   |
| Falls                                         | 2,445.7<br>(2,130.1 to 2,759.9)               | 1,607.0<br>(1,386.2 to 1,895.7)                           | 109.5<br>(76.4 to 150.9)                | 48.0<br>(44.6 to 51.3)                            | 6.6<br>(4.9 to 8.3)                                 |
| Drowning                                      | 29.8<br>(25.7 to 34.3)                        | 9.1<br>(7.7 to 10.7)                                      | 1.9<br>(1.2 to 2.8)                     | 36.1<br>(31.0 to 41.3)                            | -1.4<br>(-4.3 to 1.4)                               |
| Fire, heat, and hot substances                | 783.3<br>(651.8 to 950.8)                     | 162.5<br>(129.8 to 196.9)                                 | 24.4<br>(16.8 to 33.6)                  | 44.5<br>(36.8 to 52.7)                            | 4.0<br>(-0.1 to 8.6)                                |
| Poisonings                                    | 22.6<br>(18.0 to 27.4)                        | 45.3<br>(34.7 to 57.7)                                    | 2.4<br>(1.5 to 3.6)                     | 53.1<br>(39.6 to 68.0)                            | 9.5<br>(2.3 to 17.5)                                |
| Exposure to mechanical forces                 | 1,272.9<br>(1,086.7 to 1,538.5)               | 731.6<br>(609.8 to 857.0)                                 | 35.4<br>(23.2 to 51.1)                  | 48.9<br>(45.0 to 52.5)                            | 7.7<br>(5.6 to 9.7)                                 |
| Unintentional firearm injuries                | 44.3<br>(36.4 to 54.7)                        | 16.8<br>(11.7 to 23.4)                                    | 2.2<br>(1.4 to 3.2)                     | 49.3<br>(45.2 to 53.8)                            | 8.0<br>(5.6 to 10.5)                                |
| Unintentional suffocation                     | 105.8<br>(75.2 to 143.2)                      | 39.2<br>(26.4 to 55.7)                                    | 3.7<br>(2.2 to 5.9)                     | 45.7<br>(38.5 to 52.9)                            | 4.6<br>(1.4 to 7.9)                                 |
| Other exposure to mechanical forces           | 1,122.8<br>(942.5 to 1,376.3)                 | 675.6<br>(560.4 to 784.1)                                 | 29.5<br>(19.7 to 42.2)                  | 49.2<br>(45.3 to 53.2)                            | 8.0<br>(5.8 to 9.9)                                 |



| Cause                                                                               | Prevalence in thousands (95% UI)              | Incidence in thousands (95% UI)          | YLDs in thousands (95% UI)           |                                                   |                                                     |
|-------------------------------------------------------------------------------------|-----------------------------------------------|------------------------------------------|--------------------------------------|---------------------------------------------------|-----------------------------------------------------|
|                                                                                     | 2016 counts                                   | 2016 counts                              | 2016 counts                          | Percentage change in counts between 2006 and 2016 | Percentage change in age-standardised rates between |
| Adverse effects of medical treatment                                                | 28.8<br>(22.4 to 36.1)                        | 376.9<br>(315.5 to 445.8)                | 3.8<br>(2.3 to 5.8)                  | 35.8<br>(28.2 to 45.2)                            | -3.3<br>(-6.8 to 0.7)                               |
| Animal contact                                                                      | 568.1<br>(499.4 to 659.3)                     | 986.3<br>(834.6 to 1,157.2)              | 19.7<br>(13.2 to 27.9)               | 37.9<br>(31.6 to 44.8)                            | -1.6<br>(-4.9 to 1.8)                               |
| Venomous animal contact                                                             | 190.8<br>(158.7 to 229.5)                     | 382.0<br>(297.9 to 476.7)                | 12.2<br>(8.1 to 17.5)                | 40.9<br>(31.0 to 51.5)                            | 0.7<br>(-4.8 to 6.4)                                |
| Non-venomous animal contact                                                         | 377.2<br>(316.9 to 454.4)                     | 604.4<br>(495.5 to 723.6)                | 7.5<br>(4.9 to 10.9)                 | 33.3<br>(29.1 to 37.5)                            | -4.6<br>(-7.1 to -2.2)                              |
| Foreign body                                                                        | 491.7<br>(393.3 to 594.7)                     | 428.9<br>(369.8 to 497.5)                | 23.0<br>(14.8 to 34.2)               | 45.0<br>(39.3 to 50.9)                            | 4.0<br>(1.4 to 6.7)                                 |
| Pulmonary aspiration and foreign body in airway                                     | 287.5<br>(209.2 to 394.8)                     | 170.4<br>(135.9 to 214.0)                | 14.9<br>(9.4 to 22.5)                | 43.5<br>(37.6 to 50.0)                            | 2.8<br>(-0.0 to 5.8)                                |
| Foreign body in eyes                                                                | 26.4<br>(13.6 to 41.1)                        | 150.4<br>(114.0 to 202.5)                | 1.5<br>(0.7 to 2.6)                  | 44.2<br>(38.9 to 50.0)                            | 3.5<br>(0.6 to 6.4)                                 |
| Foreign body in other body part                                                     | 177.8<br>(141.7 to 232.7)                     | 108.1<br>(86.6 to 130.9)                 | 6.6<br>(4.3 to 9.6)                  | 48.6<br>(42.1 to 55.3)                            | 6.8<br>(3.6 to 10.0)                                |
| Environmental heat and cold exposure                                                | 459.1<br>(385.1 to 539.2)                     | 193.4<br>(157.2 to 238.8)                | 20.2<br>(13.3 to 29.2)               | 41.9<br>(38.1 to 45.4)                            | 0.9<br>(-0.9 to 2.7)                                |
| Other unintentional injuries                                                        | 891.5<br>(711.4 to 1,112.2)                   | 485.9<br>(396.7 to 592.4)                | 27.5<br>(18.0 to 39.4)               | 51.8<br>(48.0 to 55.4)                            | 8.1<br>(6.4 to 9.7)                                 |
| <b>Self-harm and interpersonal violence</b>                                         | <b>3,547.3</b><br><b>(3,122.4 to 4,012.8)</b> | <b>254.1†</b><br><b>(214.4 to 297.6)</b> | <b>45.6</b><br><b>(31.6 to 62.7)</b> | <b>37.0</b><br><b>(31.2 to 44.6)</b>              | <b>-0.4</b><br><b>(-3.9 to 4.5)</b>                 |
| Self-harm                                                                           | 49.7<br>(43.4 to 56.1)                        | 31.6<br>(26.7 to 37.2)                   | 2.8<br>(1.8 to 4.1)                  | 48.3<br>(44.7 to 51.8)                            | 7.1<br>(4.9 to 9.3)                                 |
| Self-harm by firearm                                                                | 6.2<br>(5.4 to 7.2)                           | 3.0<br>(1.9 to 4.3)                      | 0.3<br>(0.2 to 0.4)                  | 25.2<br>(21.8 to 29.3)                            | -9.7<br>(-12.2 to -7.2)                             |
| Self-harm by other specified means                                                  | 43.5<br>(37.2 to 49.9)                        | 28.7<br>(23.9 to 34.1)                   | 2.5<br>(1.6 to 3.7)                  | 51.4<br>(47.4 to 55.4)                            | 9.6<br>(7.2 to 12.0)                                |
| Interpersonal violence                                                              | 3,497.6<br>(3,077.4 to 3,965.5)               | 222.4†<br>(183.4 to 264.1)               | 42.8<br>(29.5 to 58.6)               | 36.4<br>(30.2 to 44.3)                            | -1.2<br>(-4.9 to 4.2)                               |
| Assault by firearm                                                                  | 10.4<br>(8.8 to 12.3)                         | 4.8<br>(3.4 to 6.6)                      | 0.6<br>(0.4 to 0.8)                  | 36.1<br>(31.4 to 40.9)                            | -2.0<br>(-4.7 to 0.9)                               |
| Assault by sharp object                                                             | 120.3<br>(97.7 to 145.2)                      | 72.0<br>(55.4 to 92.7)                   | 4.4<br>(2.9 to 6.4)                  | 46.9<br>(42.7 to 51.1)                            | 6.4<br>(4.1 to 8.9)                                 |
| Sexual violence                                                                     | 3,186.5<br>(2,757.4 to 3,654.4)               | --                                       | 29.5<br>(19.5 to 42.0)               | 32.1<br>(23.7 to 43.4)                            | -5.6<br>(-11.1 to 2.5)                              |
| Assault by other means                                                              | 180.4<br>(151.6 to 217.9)                     | 145.7<br>(118.3 to 175.3)                | 8.3<br>(5.6 to 12.0)                 | 47.6<br>(44.1 to 51.5)                            | 6.8<br>(4.7 to 9.2)                                 |
| <b>Forces of nature, conflict and terrorism, and executions and police conflict</b> | <b>646.0</b><br><b>(357.9 to 1,062.3)</b>     | <b>1.3†</b><br><b>(0.8 to 2.0)</b>       | <b>19.8</b><br><b>(5.4 to 49.2)</b>  | <b>4.1</b><br><b>(-5.0 to 11.6)</b>               | <b>-8.8</b><br><b>(-14.8 to -4.3)</b>               |
| Exposure to forces of nature                                                        | 1.1<br>(0.2 to 2.3)                           | --                                       | < 0.05<br>(< 0.05 to 0.1)            | 36.6<br>(31.4 to 43.0)                            | 11.1<br>(7.6 to 15.8)                               |
| Conflict and terrorism                                                              | 642.1<br>(354.9 to 1,057.4)                   | --                                       | 19.7<br>(5.4 to 48.8)                | 3.9<br>(-5.3 to 11.4)                             | -8.9<br>(-14.9 to -4.4)                             |
| Executions and police conflict                                                      | 2.8<br>(1.5 to 5.4)                           | 1.3<br>(0.8 to 2.0)                      | 0.1<br>(< 0.05 to 0.3)               | 43.8<br>(27.2 to 58.2)                            | 10.5<br>(1.4 to 18.5)                               |
| <b>Impairments</b>                                                                  | --                                            | --                                       | --                                   | --                                                | --                                                  |
| Anaemia                                                                             | 32,323.5<br>(31,032.3 to 33,553.2)            | --                                       | 1,132.5<br>(754.3 to 1,611.9)        | 11.9<br>(5.2 to 18.2)                             | -20.2<br>(-25.8 to -15.1)                           |
| Developmental intellectual disability                                               | 3,520.4<br>(2,689.3 to 4,388.8)               | --                                       | 314.2<br>(226.0 to 426.4)            | 35.9<br>(25.8 to 52.0)                            | -3.5<br>(-9.9 to 6.4)                               |
| Epilepsy                                                                            | 493.2<br>(311.3 to 731.5)                     | --                                       | 184.7<br>(101.7 to 300.9)            | 51.9<br>(-17.5 to 173.7)                          | 7.9<br>(-41.9 to 95.4)                              |
| Guillain-Barre syndrome                                                             | 0.5<br>(0.4 to 0.7)                           | --                                       | 0.2<br>(0.1 to 0.2)                  | 39.7<br>(39.2 to 40.1)                            | 0.0<br>(-0.0 to 0.1)                                |
| Hearing loss                                                                        | 10,639.6<br>(10,202.9 to 11,095.4)            | --                                       | 520.2<br>(368.2 to 696.8)            | 32.0<br>(28.7 to 35.1)                            | -3.8<br>(-5.4 to -2.3)                              |
| Heart failure                                                                       | 182.6<br>(162.0 to 206.9)                     | --                                       | 19.8<br>(14.1 to 25.7)               | 41.9<br>(31.7 to 52.1)                            | 1.5<br>(-5.8 to 8.8)                                |
| Infertility                                                                         | 1,167.6<br>(896.2 to 1,520.0)                 | --                                       | 6.8<br>(2.9 to 13.7)                 | 53.3<br>(24.9 to 93.3)                            | 8.0<br>(-14.1 to 39.2)                              |
| Pelvic inflammatory disease                                                         | 81.4<br>(68.2 to 97.9)                        | --                                       | 10.5<br>(6.9 to 15.1)                | 39.4<br>(20.7 to 59.8)                            | -0.9<br>(-13.6 to 12.7)                             |
| Vision loss                                                                         | 15,316.0<br>(14,782.9 to 15,865.4)            | --                                       | 296.7<br>(194.3 to 452.4)            | 33.9<br>(26.1 to 48.3)                            | -4.6<br>(-7.7 to 0.2)                               |

We did not calculate incidence for the nine impairments, certain NTDs, and causes with only birth prevalence. Blank cells mean that no estimate is available.

† Incidence for aggregate causes represents the sum of the incidence of the causes below the aggregate.

‡ Incidence estimates for stroke represent first-ever stroke only.

^ Incidence of HIV/AIDS represents new infections of HIV only and does not include new infections of Tuberculosis in HIV positive cases.

SR Table 14: Prevalence, incidence, and YLDs for 2016, percentage change of YLD counts and percentage change of age-standardised YLD rates between 2006 and 2016 by cause and impairments, for all ages, Ecuador.

| Cause                                                                                | Prevalence in thousands (95% UI)          | Incidence in thousands (95% UI)               | YLDs in thousands (95% UI)             |                                                   |                                                     |
|--------------------------------------------------------------------------------------|-------------------------------------------|-----------------------------------------------|----------------------------------------|---------------------------------------------------|-----------------------------------------------------|
|                                                                                      | 2016 counts                               | 2016 counts                                   | 2016 counts                            | Percentage change in counts between 2006 and 2016 | Percentage change in age-standardised rates between |
| <b>All causes</b>                                                                    | <b>16,021.6</b><br>(15,959.6 to 16,073.8) | <b>111,949.4†</b><br>(106,012.9 to 118,295.9) | <b>1,526.4</b><br>(1,125.2 to 1,998.8) | <b>22.8</b><br>(18.8 to 26.7)                     | <b>-1.1</b><br>(-4.0 to 1.8)                        |
| <b>Communicable, maternal, neonatal, and nutritional disorders</b>                   | <b>11,866.8</b><br>(11,324.3 to 12,422.6) | <b>61,230.2†</b><br>(56,028.0 to 66,847.8)    | <b>119.6</b><br>(86.6 to 163.2)        | <b>0.3</b><br>(-5.9 to 7.2)                       | <b>-13.0</b><br>(-18.6 to -6.9)                     |
| <b>HIV/AIDS and tuberculosis</b>                                                     | <b>2,968.3</b><br>(2,725.9 to 3,165.6)    | <b>6.6†</b><br>(5.7 to 7.6)                   | <b>3.2</b><br>(1.9 to 5.3)             | <b>44.6</b><br>(14.3 to 79.5)                     | <b>18.0</b><br>(-7.9 to 47.5)                       |
| Tuberculosis                                                                         | 2,771.6<br>(2,541.6 to 3,030.9)           | 4.6†<br>(3.9 to 5.4)                          | 0.7<br>(0.4 to 1.0)                    | -11.3<br>(-32.3 to 16.8)                          | -26.4<br>(-43.0 to -5.7)                            |
| Drug-susceptible tuberculosis                                                        | 2.0<br>(1.7 to 2.4)                       | 4.4<br>(3.6 to 5.1)                           | 0.6<br>(0.4 to 1.0)                    | -11.3<br>(-34.0 to 18.6)                          | -26.4<br>(-45.1 to -4.1)                            |
| Multidrug-resistant tuberculosis without extensive drug resistance                   | 0.1<br>(< 0.05 to 0.3)                    | 0.2<br>(0.1 to 0.6)                           | < 0.05<br>(< 0.05 to 0.1)              | -14.9<br>(-72.4 to 102.5)                         | -29.7<br>(-77.4 to 65.5)                            |
| Extensively drug-resistant tuberculosis                                              | < 0.05<br>(< 0.05 to < 0.05)              | < 0.05<br>(< 0.05 to < 0.05)                  | < 0.05<br>(< 0.05 to < 0.05)           | 126.6<br>(-26.5 to 438.8)                         | 87.1<br>(-39.7 to 340.2)                            |
| Latent tuberculosis infection                                                        | 2,769.4<br>(2,539.4 to 3,028.8)           | --                                            | --                                     | --                                                | --                                                  |
| HIV/AIDS                                                                             | 25.7<br>(18.6 to 35.5)                    | 2.0^<br>(1.4 to 2.8)                          | 2.6<br>(1.4 to 4.6)                    | 73.2<br>(25.7 to 148.1)                           | 41.1<br>(1.2 to 105.8)                              |
| Drug-susceptible HIV/AIDS - Tuberculosis                                             | 0.4<br>(0.3 to 0.7)                       | 0.9<br>(0.6 to 1.4)                           | 0.2<br>(0.1 to 0.3)                    | 6.8<br>(-4.9 to 17.2)                             | -10.3<br>(-20.1 to -1.6)                            |
| Multidrug-resistant HIV/AIDS - Tuberculosis without extensive drug resistance        | < 0.05<br>(< 0.05 to 0.1)                 | 0.1<br>(< 0.05 to 0.2)                        | < 0.05<br>(< 0.05 to < 0.05)           | 2.3<br>(-66.8 to 142.6)                           | -14.1<br>(-72.1 to 103.8)                           |
| Extensively drug-resistant HIV/AIDS - Tuberculosis                                   | < 0.05<br>(< 0.05 to < 0.05)              | < 0.05<br>(< 0.05 to < 0.05)                  | < 0.05<br>(< 0.05 to < 0.05)           | 172.4<br>(-11.6 to 546.0)                         | 128.7<br>(-25.8 to 442.6)                           |
| HIV/AIDS resulting in other diseases                                                 | 25.2<br>(18.1 to 35.0)                    | 2.0<br>(1.4 to 2.8)                           | 2.4<br>(1.2 to 4.3)                    | 82.4<br>(28.2 to 185.7)                           | 48.1<br>(2.2 to 137.8)                              |
| <b>Diarrhoea, lower respiratory infections, and other common infectious diseases</b> | <b>1,012.2</b><br>(954.1 to 1,074.5)      | <b>59,141.3†</b><br>(53,936.3 to 64,704.9)    | <b>48.1</b><br>(32.9 to 67.2)          | <b>-1.6</b><br>(-5.7 to 2.4)                      | <b>-13.6</b><br>(-17.0 to -10.3)                    |
| Diarrhoeal diseases                                                                  | 209.9<br>(196.9 to 223.7)                 | 13,978.9<br>(13,124.6 to 14,919.9)            | 23.8<br>(16.4 to 33.0)                 | -12.4<br>(-17.3 to -7.1)                          | -22.4<br>(-26.5 to -18.0)                           |
| Intestinal infectious diseases                                                       | < 0.05<br>(< 0.05 to < 0.05)              | 0.4†<br>(0.3 to 0.6)                          | < 0.05<br>(< 0.05 to < 0.05)           | 32.9<br>(16.2 to 51.3)                            | 6.4<br>(-6.4 to 20.2)                               |
| Typhoid fever                                                                        | < 0.05<br>(< 0.05 to < 0.05)              | 0.4<br>(0.3 to 0.6)                           | < 0.05<br>(< 0.05 to < 0.05)           | 34.5<br>(17.9 to 53.2)                            | 7.4<br>(-5.5 to 21.8)                               |
| Paratyphoid fever                                                                    | < 0.05<br>(< 0.05 to < 0.05)              | < 0.05<br>(< 0.05 to < 0.05)                  | < 0.05<br>(< 0.05 to < 0.05)           | 42.6<br>(13.7 to 74.9)                            | 15.8<br>(-6.3 to 40.5)                              |
| Other intestinal infectious diseases                                                 | --                                        | --                                            | < 0.05<br>(< 0.05 to < 0.05)           | -9.0<br>(-33.4 to 22.3)                           | -21.8<br>(-38.1 to -2.2)                            |
| Lower respiratory infections                                                         | 13.5<br>(12.6 to 14.5)                    | 626.1<br>(580.6 to 674.5)                     | 0.8<br>(0.5 to 1.2)                    | 20.2<br>(6.2 to 35.6)                             | 1.8<br>(-7.9 to 12.5)                               |
| Upper respiratory infections                                                         | 570.3<br>(505.1 to 643.0)                 | 43,036.7<br>(37,882.8 to 48,697.9)            | 14.3<br>(8.4 to 22.3)                  | 14.1<br>(8.3 to 20.1)                             | -0.6<br>(-5.6 to 4.5)                               |
| Otitis media                                                                         | 232.0<br>(208.8 to 255.9)                 | 1,102.5<br>(877.6 to 1,377.0)                 | 6.4<br>(4.0 to 9.7)                    | 4.6<br>(-2.8 to 12.0)                             | -7.0<br>(-13.3 to -0.8)                             |
| Meningitis                                                                           | 7.5<br>(6.8 to 8.3)                       | 1.2<br>(1.0 to 1.4)                           | 1.1<br>(0.8 to 1.5)                    | 15.3<br>(11.9 to 18.5)                            | -2.9<br>(-5.8 to -0.3)                              |
| Pneumococcal meningitis                                                              | 2.7<br>(2.4 to 3.1)                       | 0.1<br>(0.1 to 0.1)                           | 0.4<br>(0.3 to 0.6)                    | 12.3<br>(6.4 to 18.0)                             | -6.0<br>(-10.9 to -1.5)                             |
| H influenzae type B meningitis                                                       | 1.0<br>(0.8 to 1.2)                       | 0.1<br>(0.1 to 0.1)                           | 0.2<br>(0.1 to 0.2)                    | 8.9<br>(2.4 to 15.1)                              | -6.4<br>(-11.7 to -1.5)                             |
| Meningococcal infection                                                              | 0.9<br>(0.7 to 1.1)                       | 0.2<br>(0.2 to 0.3)                           | 0.1<br>(0.1 to 0.2)                    | 13.6<br>(8.3 to 18.9)                             | -4.2<br>(-8.8 to 0.6)                               |
| Other meningitis                                                                     | 3.0<br>(2.4 to 3.6)                       | 0.8<br>(0.7 to 0.9)                           | 0.4<br>(0.2 to 0.5)                    | 23.8<br>(19.4 to 28.7)                            | 4.0<br>(0.5 to 7.8)                                 |
| Encephalitis                                                                         | 6.6<br>(5.2 to 8.4)                       | 2.1<br>(2.0 to 2.1)                           | 1.0<br>(0.7 to 1.4)                    | 14.2<br>(5.9 to 23.6)                             | -4.9<br>(-12.4 to 3.5)                              |
| Diphtheria                                                                           | < 0.05<br>(< 0.05 to < 0.05)              | < 0.05<br>(< 0.05 to < 0.05)                  | < 0.05<br>(< 0.05 to < 0.05)           | -17.2<br>(-53.8 to 46.0)                          | -26.3<br>(-57.6 to 25.5)                            |
| Whooping cough                                                                       | 1.9<br>(1.5 to 2.5)                       | 14.0<br>(10.8 to 18.0)                        | 0.1<br>(0.1 to 0.1)                    | -7.2<br>(-28.4 to 22.5)                           | -14.6<br>(-34.0 to 12.6)                            |
| Tetanus                                                                              | < 0.05<br>(< 0.05 to < 0.05)              | < 0.05<br>(< 0.05 to < 0.05)                  | < 0.05<br>(< 0.05 to < 0.05)           | -19.9<br>(-35.4 to -3.5)                          | -34.9<br>(-47.8 to -20.6)                           |
| Measles                                                                              | < 0.05<br>(0.0 to < 0.05)                 | < 0.05<br>(0.0 to < 0.05)                     | < 0.05<br>(0.0 to < 0.05)              | --                                                | --                                                  |
| Varicella and herpes zoster                                                          | 15.9<br>(14.8 to 17.2)                    | 379.4<br>(367.4 to 393.2)                     | 0.6<br>(0.3 to 0.9)                    | 25.9<br>(10.7 to 44.1)                            | 0.1<br>(-10.8 to 12.4)                              |
| <b>Neglected tropical diseases and malaria</b>                                       | <b>8,540.7</b><br>(7,489.6 to 9,653.7)    | <b>313.5†</b><br>(217.1 to 481.6)             | <b>23.9</b><br>(14.0 to 38.2)          | <b>-10.0</b><br>(-28.3 to 12.9)                   | <b>-23.6</b><br>(-39.9 to -3.6)                     |
| Malaria                                                                              | 0.1<br>(< 0.05 to 0.1)                    | 0.7<br>(0.5 to 0.9)                           | < 0.05<br>(< 0.05 to < 0.05)           | -81.1<br>(-88.5 to -65.8)                         | -83.4<br>(-90.1 to -70.4)                           |
| Chagas disease                                                                       | 127.9<br>(100.5 to 159.1)                 | 3.6<br>(2.9 to 4.5)                           | 1.0<br>(0.7 to 1.6)                    | 22.0<br>(4.0 to 41.2)                             | -7.0<br>(-20.1 to 6.9)                              |
| Leishmaniasis                                                                        | 2.8<br>(1.4 to 4.8)                       | 4.4<br>(1.5 to 8.9)                           | 0.1<br>(< 0.05 to 0.3)                 | -29.3<br>(-80.4 to 64.9)                          | -42.1<br>(-83.5 to 32.3)                            |
| Visceral leishmaniasis                                                               | --                                        | --                                            | --                                     | --                                                | --                                                  |
| Cutaneous and mucocutaneous leishmaniasis                                            | 2.2<br>(0.7 to 4.5)                       | 4.4<br>(1.5 to 8.9)                           | 0.1<br>(< 0.05 to 0.3)                 | -29.3<br>(-80.4 to 64.9)                          | -42.1<br>(-83.5 to 32.3)                            |
| African trypanosomiasis                                                              | --                                        | --                                            | --                                     | --                                                | --                                                  |
| Schistosomiasis                                                                      | --                                        | --                                            | --                                     | --                                                | --                                                  |
| Cysticercosis                                                                        | 4.5<br>(1.6 to 7.8)                       | --                                            | 0.7<br>(0.2 to 1.3)                    | -1.1<br>(-66.5 to 116.7)                          | -22.9<br>(-73.6 to 68.2)                            |
| Cystic echinococcosis                                                                | 0.1<br>(< 0.05 to 0.5)                    | < 0.05<br>(< 0.05 to 0.1)                     | < 0.05<br>(< 0.05 to < 0.05)           | -38.7<br>(-95.8 to 745.9)                         | -50.1<br>(-96.4 to 549.7)                           |
| Lymphatic filariasis                                                                 | --                                        | --                                            | --                                     | --                                                | --                                                  |
| Onchocerciasis                                                                       | --                                        | --                                            | --                                     | --                                                | --                                                  |
| Trachoma                                                                             | --                                        | --                                            | --                                     | --                                                | --                                                  |
| Dengue                                                                               | 11.1<br>(6.5 to 17.6)                     | 184.6<br>(125.4 to 258.0)                     | 1.8<br>(0.8 to 3.2)                    | 58.9<br>(20.6 to 261.6)                           | 36.4<br>(3.8 to 212.3)                              |
| Yellow fever                                                                         | < 0.05<br>(< 0.05 to < 0.05)              | 0.1<br>(< 0.05 to 0.3)                        | < 0.05<br>(< 0.05 to < 0.05)           | -32.2<br>(-49.7 to -7.3)                          | -41.6<br>(-56.0 to -21.3)                           |
| Rabies                                                                               | < 0.05<br>(< 0.05 to < 0.05)              | < 0.05<br>(< 0.05 to < 0.05)                  | < 0.05<br>(< 0.05 to < 0.05)           | -50.8<br>(-70.9 to -24.9)                         | -56.9<br>(-73.8 to -39.1)                           |
| Intestinal nematode infections                                                       | 8,445.7<br>(7,383.3 to 9,574.1)           | --                                            | 18.4<br>(9.6 to 31.8)                  | -16.1<br>(-37.0 to 10.7)                          | -28.3<br>(-46.6 to -4.1)                            |
| Ascariasis                                                                           | 5,191.1<br>(4,030.3 to 6,637.7)           | --                                            | 9.4<br>(4.7 to 16.4)                   | -18.2<br>(-43.7 to 16.2)                          | -30.0<br>(-52.9 to 1.8)                             |

| Cause                                                                   | Prevalence in thousands (95% UI)                 | Incidence in thousands (95% UI)                   | YLDs in thousands (95% UI)                  |                                                   |                                                     |
|-------------------------------------------------------------------------|--------------------------------------------------|---------------------------------------------------|---------------------------------------------|---------------------------------------------------|-----------------------------------------------------|
|                                                                         | 2016 counts                                      | 2016 counts                                       | 2016 counts                                 | Percentage change in counts between 2006 and 2016 | Percentage change in age-standardised rates between |
| Trichuriasis                                                            | 4,667.4<br>(3,696.8 to 5,801.0)                  | --                                                | 7.7<br>(3.7 to 14.3)                        | -11.9<br>(-48.0 to 43.7)                          | -24.8<br>(-56.7 to 25.0)                            |
| Hookworm disease                                                        | 423.8<br>(310.9 to 579.8)                        | --                                                | 1.4<br>(0.8 to 2.2)                         | -23.8<br>(-47.2 to 11.0)                          | -33.8<br>(-54.5 to -1.5)                            |
| Food-borne trematodiasis                                                | 38.4<br>(30.5 to 48.0)                           | 3.4<br>(2.8 to 4.2)                               | 1.1<br>(0.4 to 2.3)                         | 8.1<br>(-11.8 to 35.9)                            | -14.9<br>(-29.1 to 3.7)                             |
| Leprosy                                                                 | 0.2<br>(0.1 to 0.2)                              | < 0.05<br>(< 0.05 to < 0.05)                      | < 0.05<br>(< 0.05 to < 0.05)                | 17.4<br>(0.7 to 41.4)                             | -13.2<br>(-26.2 to 5.8)                             |
| Ebola virus disease                                                     | --                                               | --                                                | --                                          | --                                                | --                                                  |
| Zika virus disease                                                      | 1.9<br>(0.8 to 4.5)                              | 116.6<br>(50.0 to 271.2)                          | < 0.05<br>(< 0.05 to 0.1)                   | --                                                | --                                                  |
| Guinea worm disease                                                     | --                                               | --                                                | --                                          | --                                                | --                                                  |
| Other neglected tropical diseases                                       | 29.0<br>(23.4 to 37.0)                           | --                                                | 0.6<br>(0.4 to 1.0)                         | 1.2<br>(-21.9 to 43.6)                            | -7.0<br>(-27.5 to 30.4)                             |
| <b>Maternal disorders</b>                                               | <b>36.5</b><br><b>(30.4 to 43.1)</b>             | <b>658.1†</b><br><b>(622.5 to 691.5)</b>          | <b>2.2</b><br><b>(1.4 to 3.1)</b>           | <b>18.3</b><br><b>(-10.0 to 56.2)</b>             | <b>2.2</b><br><b>(-22.3 to 34.6)</b>                |
| Maternal haemorrhage                                                    | 9.0<br>(7.9 to 10.3)                             | 32.5<br>(30.0 to 34.9)                            | 0.3<br>(0.2 to 0.4)                         | 36.1<br>(-0.7 to 89.8)                            | 18.4<br>(-13.4 to 63.8)                             |
| Maternal sepsis and other pregnancy related infections                  | 13.1<br>(9.0 to 18.2)                            | 114.4<br>(102.6 to 122.7)                         | 0.5<br>(0.2 to 0.9)                         | 25.3<br>(-39.5 to 164.0)                          | 8.5<br>(-47.3 to 127.8)                             |
| Maternal hypertensive disorders                                         | 11.8<br>(8.0 to 15.8)                            | 68.8<br>(66.2 to 71.3)                            | 0.6<br>(0.4 to 1.0)                         | 23.3<br>(-22.5 to 99.8)                           | 6.1<br>(-33.0 to 71.4)                              |
| Maternal obstructed labour and uterine rupture                          | 0.3<br>(0.2 to 0.4)                              | 22.1<br>(20.2 to 23.9)                            | 0.1<br>(< 0.05 to 0.2)                      | 14.1<br>(-55.6 to 173.8)                          | -0.9<br>(-61.0 to 132.3)                            |
| Maternal abortion, miscarriage, and ectopic pregnancy                   | 3.5<br>(2.3 to 4.7)                              | 420.4<br>(386.0 to 452.1)                         | 0.4<br>(0.2 to 0.6)                         | 1.2<br>(-41.7 to 77.9)                            | -12.9<br>(-49.7 to 53.4)                            |
| Other maternal disorders                                                | --                                               | --                                                | 0.3<br>(0.2 to 0.5)                         | 12.7<br>(-14.5 to 49.2)                           | -2.4<br>(-25.6 to 28.9)                             |
| <b>Neonatal disorders</b>                                               | <b>179.7</b><br><b>(153.1 to 212.1)</b>          | --                                                | <b>26.1</b><br><b>(17.9 to 36.9)</b>        | <b>11.1</b><br><b>(-4.7 to 31.8)</b>              | <b>-2.9</b><br><b>(-16.6 to 15.0)</b>               |
| Neonatal preterm birth complications                                    | 150.2<br>(118.0 to 192.2)                        | --                                                | 14.2<br>(9.4 to 21.0)                       | 11.2<br>(-12.9 to 40.9)                           | -3.1<br>(-23.7 to 23.2)                             |
| Neonatal encephalopathy due to birth asphyxia and trauma                | 26.9<br>(14.5 to 43.8)                           | --                                                | 3.7<br>(0.9 to 8.2)                         | 8.8<br>(-22.4 to 148.2)                           | -5.2<br>(-32.5 to 117.3)                            |
| Neonatal sepsis and other neonatal infections                           | 11.3<br>(4.2 to 24.2)                            | --                                                | 4.9<br>(1.6 to 11.4)                        | 13.3<br>(-9.2 to 62.6)                            | -0.5<br>(-20.2 to 44.2)                             |
| Hemolytic disease and other neonatal jaundice                           | 7.9<br>(6.9 to 9.1)                              | --                                                | 2.2<br>(1.6 to 2.9)                         | 13.7<br>(-4.2 to 34.1)                            | -1.9<br>(-16.7 to 14.9)                             |
| Other neonatal disorders                                                | --                                               | --                                                | 1.0<br>(0.7 to 1.4)                         | 2.2<br>(-16.9 to 27.0)                            | -6.2<br>(-23.8 to 16.6)                             |
| <b>Nutritional deficiencies</b>                                         | <b>774.8</b><br><b>(712.6 to 856.0)</b>          | <b>228.3†</b><br><b>(184.8 to 278.6)</b>          | <b>11.8</b><br><b>(7.6 to 17.4)</b>         | <b>-3.4</b><br><b>(-16.3 to 16.8)</b>             | <b>-14.5</b><br><b>(-24.9 to 2.2)</b>               |
| Protein-energy malnutrition                                             | 31.7<br>(17.8 to 52.3)                           | 17.1<br>(9.4 to 28.9)                             | 1.1<br>(0.6 to 1.9)                         | 9.1<br>(-37.4 to 94.5)                            | 0.1<br>(-42.6 to 78.5)                              |
| Iodine deficiency                                                       | 15.9<br>(13.5 to 18.3)                           | 0.5<br>(0.4 to 0.5)                               | 0.4<br>(0.3 to 0.6)                         | 24.8<br>(4.6 to 49.9)                             | 0.4<br>(-16.1 to 20.9)                              |
| Vitamin A deficiency                                                    | 247.6<br>(202.8 to 303.9)                        | 210.8<br>(169.4 to 261.7)                         | 1.2<br>(0.8 to 1.8)                         | 12.3<br>(-7.4 to 34.3)                            | -0.5<br>(-17.1 to 17.9)                             |
| Iron-deficiency anaemia                                                 | 494.4<br>(434.4 to 575.4)                        | --                                                | 9.1<br>(5.6 to 14.1)                        | -7.4<br>(-21.1 to 18.7)                           | -18.1<br>(-29.3 to 3.1)                             |
| Other nutritional deficiencies                                          | --                                               | --                                                | < 0.05<br>(< 0.05 to 0.1)                   | 9.1<br>(-39.3 to 103.2)                           | 0.1<br>(-44.3 to 86.7)                              |
| <b>Other communicable, maternal, neonatal, and nutritional diseases</b> | <b>3,817.9</b><br><b>(3,525.4 to 4,091.8)</b>    | <b>882.4</b><br><b>(799.6 to 971.6)</b>           | <b>4.1</b><br><b>(2.4 to 6.7)</b>           | <b>15.3</b><br><b>(7.3 to 23.2)</b>               | <b>-4.2</b><br><b>(-10.6 to 2.0)</b>                |
| Sexually transmitted diseases excluding HIV                             | 3,251.9<br>(2,960.3 to 3,522.6)                  | 786.0<br>(714.4 to 863.0)                         | 3.1<br>(1.8 to 5.3)                         | 18.3<br>(9.0 to 27.0)                             | -3.2<br>(-10.3 to 3.1)                              |
| Syphilis                                                                | 184.7<br>(138.2 to 243.8)                        | 130.7<br>(91.3 to 178.0)                          | 0.3<br>(0.2 to 0.4)                         | 36.7<br>(22.2 to 53.2)                            | 2.1<br>(-9.7 to 14.3)                               |
| Chlamydial infection                                                    | 100.8<br>(80.7 to 125.0)                         | 77.8<br>(62.2 to 97.8)                            | 0.7<br>(0.4 to 1.1)                         | 14.6<br>(-4.4 to 37.2)                            | -3.3<br>(-19.0 to 15.3)                             |
| Gonococcal infection                                                    | 27.7<br>(23.3 to 33.2)                           | 83.8<br>(65.2 to 105.8)                           | 0.3<br>(0.1 to 0.4)                         | 11.9<br>(-11.5 to 38.4)                           | -6.8<br>(-25.9 to 15.2)                             |
| Trichomoniasis                                                          | 306.5<br>(263.6 to 352.3)                        | 262.2<br>(222.8 to 304.9)                         | 0.4<br>(0.1 to 0.8)                         | 20.9<br>(12.5 to 30.3)                            | -0.4<br>(-7.1 to 6.6)                               |
| Genital herpes                                                          | 2,787.0<br>(2,393.4 to 3,262.3)                  | 200.9<br>(169.2 to 239.8)                         | 0.7<br>(0.2 to 1.6)                         | 25.8<br>(15.7 to 36.3)                            | 0.0<br>(-6.9 to 8.0)                                |
| Other sexually transmitted diseases                                     | 38.9<br>(34.9 to 42.5)                           | 30.7<br>(26.6 to 35.2)                            | 0.7<br>(0.5 to 1.1)                         | 10.0<br>(-3.9 to 23.9)                            | -8.9<br>(-20.1 to 2.3)                              |
| Hepatitis                                                               | 762.2<br>(668.6 to 875.3)                        | 96.4<br>(65.5 to 143.5)                           | 0.1<br>(0.1 to 0.1)                         | -10.4<br>(-29.6 to 16.6)                          | -23.6<br>(-37.9 to -3.4)                            |
| Acute hepatitis A                                                       | 2.6<br>(0.5 to 6.2)                              | 33.5<br>(6.6 to 80.0)                             | < 0.05<br>(< 0.05 to < 0.05)                | -16.0<br>(-70.1 to 151.5)                         | -25.6<br>(-71.1 to 101.6)                           |
| Hepatitis B                                                             | 398.6<br>(315.0 to 503.0)                        | 45.3<br>(35.3 to 57.7)                            | < 0.05<br>(< 0.05 to 0.1)                   | -9.6<br>(-23.7 to 7.0)                            | -25.0<br>(-36.6 to -12.3)                           |
| Hepatitis C                                                             | 360.6<br>(321.0 to 402.4)                        | 10.9<br>(9.4 to 12.6)                             | < 0.05<br>(< 0.05 to < 0.05)                | 6.7<br>(-18.5 to 38.4)                            | -5.5<br>(-26.3 to 20.7)                             |
| Acute hepatitis E                                                       | 0.5<br>(0.4 to 0.7)                              | 6.7<br>(5.5 to 8.4)                               | < 0.05<br>(< 0.05 to < 0.05)                | -14.7<br>(-22.9 to -6.0)                          | -24.7<br>(-30.9 to -17.9)                           |
| Other infectious diseases                                               | 20.6<br>(16.9 to 25.8)                           | < 0.05<br>(< 0.05 to < 0.05)                      | 0.9<br>(0.5 to 1.3)                         | 8.9<br>(-8.5 to 31.6)                             | -5.4<br>(-20.2 to 14.2)                             |
| <b>Non-communicable diseases</b>                                        | <b>15,100.3</b><br><b>(15,006.2 to 15,172.8)</b> | <b>49,539.2†</b><br><b>(47,249.7 to 51,966.9)</b> | <b>1,310.9</b><br><b>(959.9 to 1,718.6)</b> | <b>24.6</b><br><b>(19.9 to 29.2)</b>              | <b>-0.3</b><br><b>(-3.7 to 3.0)</b>                 |
| <b>Neoplasms</b>                                                        | <b>45.7</b><br><b>(43.6 to 48.1)</b>             | <b>21.9</b><br><b>(21.2 to 22.9)</b>              | <b>6.4</b><br><b>(4.6 to 8.3)</b>           | <b>40.1</b><br><b>(33.9 to 46.6)</b>              | <b>2.0</b><br><b>(-2.7 to 7.0)</b>                  |
| Lip and oral cavity cancer                                              | 1.0<br>(0.9 to 1.0)                              | 0.3<br>(0.2 to 0.3)                               | 0.1<br>(0.1 to 0.1)                         | 34.9<br>(21.1 to 50.2)                            | -2.5<br>(-13.2 to 9.2)                              |
| Nasopharynx cancer                                                      | 0.1<br>(0.1 to 0.1)                              | < 0.05<br>(< 0.05 to < 0.05)                      | < 0.05<br>(< 0.05 to < 0.05)                | 17.7<br>(5.3 to 32.5)                             | -8.1<br>(-16.2 to 1.3)                              |
| Other pharynx cancer                                                    | 0.3<br>(0.2 to 0.3)                              | 0.1<br>(0.1 to 0.1)                               | < 0.05<br>(< 0.05 to < 0.05)                | 44.1<br>(32.5 to 57.8)                            | 2.9<br>(-5.9 to 12.6)                               |
| Oesophageal cancer                                                      | 0.2<br>(0.1 to 0.2)                              | 0.2<br>(0.1 to 0.2)                               | < 0.05<br>(< 0.05 to 0.1)                   | 27.1<br>(13.9 to 40.3)                            | -10.5<br>(-20.4 to -0.8)                            |
| Stomach cancer                                                          | 3.6<br>(3.4 to 3.8)                              | 2.3<br>(2.2 to 2.4)                               | 0.6<br>(0.4 to 0.7)                         | 18.8<br>(4.2 to 34.5)                             | -15.8<br>(-26.4 to -3.8)                            |
| Colon and rectum cancer                                                 | 6.7<br>(6.2 to 7.2)                              | 1.8<br>(1.7 to 2.0)                               | 0.6<br>(0.5 to 0.8)                         | 63.9<br>(43.5 to 86.2)                            | 16.6<br>(1.1 to 33.2)                               |
| Liver cancer                                                            | 0.4<br>(0.4 to 0.5)                              | 0.9<br>(0.9 to 1.0)                               | 0.2<br>(0.1 to 0.3)                         | 36.6<br>(24.9 to 49.8)                            | -3.5<br>(-12.1 to 5.9)                              |
| Liver cancer due to hepatitis B                                         | 0.4<br>(0.4 to 0.5)                              | 0.5<br>(0.4 to 0.6)                               | 0.1<br>(0.1 to 0.1)                         | 35.2<br>(22.9 to 49.1)                            | -3.9<br>(-13.0 to 6.3)                              |



| Cause                                              | Prevalence in thousands (95% UI)              | Incidence in thousands (95% UI)          | YLDs in thousands (95% UI)           |                                                   |                                                     |
|----------------------------------------------------|-----------------------------------------------|------------------------------------------|--------------------------------------|---------------------------------------------------|-----------------------------------------------------|
|                                                    | 2016 counts                                   | 2016 counts                              | 2016 counts                          | Percentage change in counts between 2006 and 2016 | Percentage change in age-standardised rates between |
| Liver cancer due to hepatitis C                    | 0.1<br>(0.1 to 0.1)                           | 0.1<br>(0.1 to 0.2)                      | < 0.05<br>(< 0.05 to < 0.05)         | 42.3<br>(27.7 to 60.2)                            | -0.8<br>(-11.3 to 11.9)                             |
| Liver cancer due to alcohol use                    | 0.1<br>(0.1 to 0.1)                           | 0.1<br>(0.1 to 0.2)                      | < 0.05<br>(< 0.05 to < 0.05)         | 31.5<br>(18.2 to 46.5)                            | -8.7<br>(-18.1 to 1.9)                              |
| Liver cancer due to other causes                   | 0.1<br>(0.1 to 0.2)                           | 0.2<br>(0.1 to 0.2)                      | < 0.05<br>(< 0.05 to < 0.05)         | 41.0<br>(28.4 to 56.0)                            | 0.5<br>(-8.5 to 11.2)                               |
| Gallbladder and biliary tract cancer               | 0.2<br>(0.2 to 0.3)                           | 0.3<br>(0.3 to 0.4)                      | 0.1<br>(0.1 to 0.1)                  | 24.0<br>(15.5 to 34.5)                            | -12.7<br>(-19.1 to -4.9)                            |
| Pancreatic cancer                                  | 0.4<br>(0.3 to 0.4)                           | 0.5<br>(0.5 to 0.5)                      | 0.1<br>(0.1 to 0.1)                  | 38.5<br>(27.4 to 49.4)                            | -2.8<br>(-11.0 to 5.3)                              |
| Larynx cancer                                      | 0.4<br>(0.4 to 0.4)                           | 0.1<br>(0.1 to 0.1)                      | < 0.05<br>(< 0.05 to 0.1)            | 37.8<br>(25.3 to 51.7)                            | -2.4<br>(-11.8 to 8.1)                              |
| Tracheal, bronchus, and lung cancer                | 1.1<br>(1.0 to 1.2)                           | 1.0<br>(0.9 to 1.1)                      | 0.2<br>(0.2 to 0.3)                  | 30.1<br>(11.2 to 53.4)                            | -8.2<br>(-22.7 to 9.6)                              |
| Malignant skin melanoma                            | 0.8<br>(0.6 to 1.4)                           | 0.2<br>(0.1 to 0.3)                      | 0.1<br>(< 0.05 to 0.1)               | 63.6<br>(39.3 to 86.2)                            | 18.8<br>(0.3 to 36.6)                               |
| Non-melanoma skin cancer                           | 0.9<br>(0.7 to 1.1)                           | 2.9<br>(2.4 to 3.5)                      | < 0.05<br>(< 0.05 to 0.1)            | 54.2<br>(22.7 to 102.5)                           | 9.8<br>(-13.3 to 45.2)                              |
| Non-melanoma skin cancer (squamous-cell carcinoma) | 0.7<br>(0.5 to 1.0)                           | 0.7<br>(0.6 to 1.0)                      | < 0.05<br>(< 0.05 to 0.1)            | 53.2<br>(19.7 to 107.6)                           | 9.2<br>(-15.1 to 48.5)                              |
| Non-melanoma skin cancer (basal-cell carcinoma)    | 0.3<br>(0.2 to 0.5)                           | 2.2<br>(1.7 to 2.7)                      | < 0.05<br>(< 0.05 to < 0.05)         | 65.2<br>(25.6 to 112.7)                           | 17.3<br>(-14.0 to 55.4)                             |
| Breast cancer                                      | 7.2<br>(6.5 to 7.8)                           | 1.6<br>(1.4 to 1.7)                      | 0.6<br>(0.5 to 0.8)                  | 44.8<br>(20.2 to 74.9)                            | 5.8<br>(-11.6 to 28.1)                              |
| Cervical cancer                                    | 5.3<br>(4.8 to 5.9)                           | 1.4<br>(1.3 to 1.6)                      | 0.5<br>(0.4 to 0.7)                  | 13.8<br>(-7.7 to 40.6)                            | -15.1<br>(-31.1 to 4.8)                             |
| Uterine cancer                                     | 3.7<br>(3.3 to 4.1)                           | 0.8<br>(0.7 to 0.9)                      | 0.3<br>(0.2 to 0.4)                  | 51.6<br>(24.7 to 82.7)                            | 8.0<br>(-11.4 to 30.8)                              |
| Ovarian cancer                                     | 1.2<br>(1.0 to 1.4)                           | 0.4<br>(0.3 to 0.5)                      | 0.2<br>(0.1 to 0.2)                  | 40.3<br>(14.6 to 71.4)                            | 4.9<br>(-16.4 to 32.5)                              |
| Prostate cancer                                    | 10.1<br>(8.9 to 13.2)                         | 2.5<br>(2.2 to 3.2)                      | 1.0<br>(0.7 to 1.4)                  | 57.4<br>(35.2 to 83.6)                            | 8.5<br>(-7.0 to 26.2)                               |
| Testicular cancer                                  | 0.5<br>(0.4 to 0.6)                           | 0.1<br>(0.1 to 0.1)                      | < 0.05<br>(< 0.05 to 0.1)            | 39.0<br>(-0.1 to 85.3)                            | 11.9<br>(-16.8 to 45.0)                             |
| Kidney cancer                                      | 1.9<br>(1.8 to 2.1)                           | 0.5<br>(0.5 to 0.6)                      | 0.2<br>(0.1 to 0.2)                  | 51.8<br>(34.9 to 71.6)                            | 14.1<br>(1.2 to 29.0)                               |
| Bladder cancer                                     | 0.9<br>(0.8 to 1.0)                           | 0.2<br>(0.2 to 0.3)                      | 0.1<br>(0.1 to 0.1)                  | 52.2<br>(35.5 to 71.4)                            | 7.2<br>(-5.3 to 21.5)                               |
| Brain and nervous system cancer                    | 1.1<br>(0.8 to 1.2)                           | 0.5<br>(0.4 to 0.5)                      | 0.1<br>(0.1 to 0.2)                  | 28.2<br>(10.6 to 42.1)                            | 0.9<br>(-12.8 to 11.3)                              |
| Thyroid cancer                                     | 2.0<br>(1.8 to 2.2)                           | 0.4<br>(0.4 to 0.5)                      | 0.1<br>(0.1 to 0.2)                  | 61.3<br>(34.4 to 92.9)                            | 17.6<br>(-1.6 to 39.5)                              |
| Mesothelioma                                       | < 0.05<br>(< 0.05 to < 0.05)                  | < 0.05<br>(< 0.05 to < 0.05)             | < 0.05<br>(< 0.05 to < 0.05)         | 31.0<br>(21.8 to 40.6)                            | -4.4<br>(-11.1 to 2.6)                              |
| Hodgkin lymphoma                                   | 0.3<br>(0.2 to 0.3)                           | 0.1<br>(0.1 to 0.1)                      | < 0.05<br>(< 0.05 to < 0.05)         | 24.3<br>(10.5 to 37.6)                            | -3.7<br>(-13.9 to 5.8)                              |
| Non-Hodgkin's lymphoma                             | 1.7<br>(1.6 to 1.9)                           | 0.6<br>(0.5 to 0.7)                      | 0.2<br>(0.1 to 0.2)                  | 35.8<br>(23.4 to 48.4)                            | 1.6<br>(-8.4 to 11.9)                               |
| Multiple myeloma                                   | 0.3<br>(0.3 to 0.4)                           | 0.2<br>(0.2 to 0.3)                      | 0.1<br>(0.1 to 0.1)                  | 62.3<br>(46.2 to 80.4)                            | 14.8<br>(2.6 to 28.5)                               |
| Leukaemia                                          | 2.9<br>(2.7 to 3.2)                           | 0.8<br>(0.8 to 0.9)                      | 0.4<br>(0.3 to 0.5)                  | 14.9<br>(5.0 to 26.4)                             | -5.9<br>(-13.3 to 2.6)                              |
| Acute lymphoid leukaemia                           | 1.1<br>(0.9 to 1.2)                           | 0.3<br>(0.2 to 0.3)                      | 0.1<br>(0.1 to 0.2)                  | 33.1<br>(9.5 to 55.9)                             | 16.6<br>(-3.5 to 34.3)                              |
| Chronic lymphoid leukaemia                         | 0.2<br>(0.2 to 0.3)                           | 0.1<br>(< 0.05 to 0.1)                   | < 0.05<br>(< 0.05 to < 0.05)         | 46.4<br>(23.9 to 72.1)                            | 6.0<br>(-10.4 to 25.0)                              |
| Acute myeloid leukaemia                            | 0.3<br>(0.3 to 0.4)                           | 0.2<br>(0.2 to 0.2)                      | 0.1<br>(< 0.05 to 0.1)               | 37.4<br>(19.9 to 53.1)                            | 12.6<br>(-1.1 to 24.5)                              |
| Chronic myeloid leukaemia                          | 0.2<br>(0.1 to 0.2)                           | 0.1<br>(0.1 to 0.1)                      | < 0.05<br>(< 0.05 to < 0.05)         | 54.1<br>(37.7 to 73.1)                            | 18.3<br>(6.5 to 32.1)                               |
| Other leukaemia                                    | 1.2<br>(1.1 to 1.3)                           | 0.3<br>(0.2 to 0.3)                      | 0.1<br>(0.1 to 0.2)                  | -10.3<br>(-20.5 to 2.9)                           | -26.4<br>(-35.3 to -16.0)                           |
| Other neoplasms                                    | 3.4<br>(3.0 to 3.8)                           | 1.1<br>(1.0 to 1.2)                      | 0.3<br>(0.2 to 0.4)                  | 74.2<br>(51.8 to 98.3)                            | 31.7<br>(15.3 to 50.0)                              |
| <b>Cardiovascular diseases</b>                     | <b>849.6</b><br><b>(821.5 to 880.6)</b>       | <b>76.7†</b><br><b>(73.1 to 80.5)</b>    | <b>46.4</b><br><b>(33.4 to 61.6)</b> | <b>34.6</b><br><b>(30.3 to 39.4)</b>              | <b>-0.7</b><br><b>(-3.7 to 2.8)</b>                 |
| Rheumatic heart disease                            | 137.2<br>(122.6 to 154.2)                     | 4.1<br>(3.7 to 4.6)                      | 6.5<br>(4.2 to 9.7)                  | 27.2<br>(16.5 to 38.1)                            | 4.0<br>(-4.3 to 12.7)                               |
| Ischaemic heart disease                            | 227.2<br>(214.9 to 239.8)                     | 27.2<br>(25.4 to 29.2)                   | 11.8<br>(8.0 to 16.1)                | 38.9<br>(32.5 to 45.4)                            | 0.0<br>(-4.0 to 4.4)                                |
| Cerebrovascular disease                            | 85.7<br>(80.0 to 91.9)                        | 13.3‡<br>(12.2 to 14.4)                  | 8.7<br>(6.3 to 11.0)                 | 26.9<br>(16.6 to 38.3)                            | -9.2<br>(-16.8 to -0.6)                             |
| Ischaemic stroke                                   | 71.8<br>(63.9 to 80.0)                        | 9.1‡<br>(8.1 to 10.2)                    | 6.9<br>(5.0 to 9.0)                  | 26.2<br>(13.6 to 40.1)                            | -10.5<br>(-19.7 to -0.3)                            |
| Hemorrhagic stroke                                 | 18.2<br>(16.4 to 20.0)                        | 4.2‡<br>(3.8 to 4.6)                     | 1.7<br>(1.2 to 2.2)                  | 30.0<br>(14.7 to 46.4)                            | -3.4<br>(-15.8 to 9.6)                              |
| Hypertensive heart disease                         | 39.5<br>(33.9 to 46.3)                        | --                                       | 3.2<br>(2.2 to 4.4)                  | 46.6<br>(34.1 to 60.9)                            | 3.1<br>(-5.6 to 12.7)                               |
| Cardiomyopathy and myocarditis                     | 4.6<br>(4.0 to 5.2)                           | 3.3†<br>(2.9 to 3.7)                     | 0.5<br>(0.3 to 0.8)                  | 33.4<br>(19.9 to 49.8)                            | 6.5<br>(-4.3 to 19.6)                               |
| Myocarditis                                        | 2.2<br>(1.9 to 2.5)                           | 3.3<br>(2.9 to 3.7)                      | 0.2<br>(0.1 to 0.2)                  | 27.6<br>(18.1 to 40.0)                            | 5.5<br>(-3.0 to 16.0)                               |
| Alcoholic cardiomyopathy                           | 0.2<br>(0.2 to 0.3)                           | --                                       | < 0.05<br>(< 0.05 to < 0.05)         | 51.8<br>(38.2 to 66.5)                            | 7.6<br>(-2.3 to 18.4)                               |
| Other cardiomyopathy                               | 4.0<br>(3.4 to 4.7)                           | --                                       | 0.3<br>(0.2 to 0.5)                  | 35.2<br>(16.9 to 59.0)                            | 6.8<br>(-8.1 to 26.3)                               |
| Atrial fibrillation and flutter                    | 83.9<br>(73.3 to 96.0)                        | 6.7<br>(5.7 to 7.8)                      | 6.6<br>(4.4 to 9.3)                  | 42.9<br>(33.7 to 52.3)                            | 0.3<br>(-5.9 to 6.7)                                |
| Peripheral vascular disease                        | 213.0<br>(185.5 to 245.8)                     | 20.5<br>(17.7 to 23.7)                   | 1.0<br>(0.5 to 1.9)                  | 40.8<br>(30.9 to 51.9)                            | -3.3<br>(-10.1 to 4.1)                              |
| Endocarditis                                       | 0.7<br>(0.6 to 0.8)                           | 1.5<br>(1.4 to 1.7)                      | 0.1<br>(< 0.05 to 0.1)               | 35.7<br>(17.6 to 56.1)                            | 3.5<br>(-13.2 to 23.1)                              |
| Other cardiovascular and circulatory diseases      | 151.4<br>(127.9 to 179.0)                     | --                                       | 8.0<br>(5.3 to 11.4)                 | 32.4<br>(20.6 to 44.6)                            | 3.9<br>(-4.5 to 12.7)                               |
| <b>Chronic respiratory diseases</b>                | <b>1,071.9</b><br><b>(1,015.8 to 1,130.2)</b> | <b>200.6†</b><br><b>(184.5 to 217.4)</b> | <b>36.5</b><br><b>(26.1 to 49.4)</b> | <b>18.5</b><br><b>(12.5 to 25.1)</b>              | <b>2.5</b><br><b>(-2.8 to 8.0)</b>                  |
| Chronic obstructive pulmonary disease              | 357.6<br>(333.8 to 388.8)                     | 23.6<br>(22.0 to 25.5)                   | 6.5<br>(5.1 to 8.2)                  | 34.8<br>(14.2 to 56.8)                            | -0.2<br>(-15.2 to 16.8)                             |
| Pneumoconiosis                                     | 0.3<br>(0.3 to 0.4)                           | < 0.05<br>(< 0.05 to < 0.05)             | 0.1<br>(< 0.05 to 0.1)               | 40.0<br>(33.2 to 46.7)                            | -1.6<br>(-6.3 to 3.2)                               |
| Silicosis                                          | 0.1<br>(0.1 to 0.1)                           | < 0.05<br>(< 0.05 to < 0.05)             | < 0.05<br>(< 0.05 to < 0.05)         | 39.1<br>(32.5 to 46.4)                            | -1.8<br>(-6.8 to 3.4)                               |

| Cause                                                          | Prevalence in thousands (95% UI)        | Incidence in thousands (95% UI)         | YLDs in thousands (95% UI)        |                                                   |                                                     |
|----------------------------------------------------------------|-----------------------------------------|-----------------------------------------|-----------------------------------|---------------------------------------------------|-----------------------------------------------------|
|                                                                | 2016 counts                             | 2016 counts                             | 2016 counts                       | Percentage change in counts between 2006 and 2016 | Percentage change in age-standardised rates between |
| Asbestosis                                                     | 0.1<br>(0.1 to 0.1)                     | < 0.05<br>(< 0.05 to < 0.05)            | < 0.05<br>(< 0.05 to < 0.05)      | 40.1<br>(30.5 to 50.9)                            | 0.6<br>(-5.6 to 7.3)                                |
| Coal workers pneumoconiosis                                    | --                                      | --                                      | --                                | --                                                | --                                                  |
| Other pneumoconiosis                                           | 0.1<br>(0.1 to 0.2)                     | < 0.05<br>(< 0.05 to < 0.05)            | < 0.05<br>(< 0.05 to < 0.05)      | 40.6<br>(27.5 to 54.1)                            | -2.6<br>(-11.7 to 6.6)                              |
| Asthma                                                         | 712.9<br>(649.3 to 783.7)               | 175.7<br>(159.2 to 192.4)               | 28.3<br>(18.2 to 41.6)            | 13.9<br>(7.9 to 20.6)                             | 2.5<br>(-2.7 to 8.0)                                |
| Interstitial lung disease and pulmonary sarcoidosis            | 9.4<br>(8.7 to 10.2)                    | 1.3<br>(1.2 to 1.4)                     | 1.0<br>(0.7 to 1.4)               | 49.8<br>(36.8 to 64.3)                            | 8.1<br>(-1.9 to 19.6)                               |
| Other chronic respiratory diseases                             | --                                      | --                                      | 0.7<br>(0.5 to 0.9)               | 55.0<br>(15.2 to 106.7)                           | 38.3<br>(4.9 to 79.9)                               |
| <b>Cirrhosis and other chronic liver diseases</b>              | <b>127.6<br/>(121.6 to 134.1)</b>       | <b>3.7<br/>(3.6 to 3.8)</b>             | <b>2.5<br/>(1.7 to 3.5)</b>       | <b>38.8<br/>(24.9 to 54.3)</b>                    | <b>9.0<br/>(-0.8 to 19.7)</b>                       |
| Cirrhosis and other chronic liver diseases due to hepatitis B  | 23.2<br>(20.4 to 26.3)                  | 0.7<br>(0.6 to 0.8)                     | 0.4<br>(0.3 to 0.6)               | 53.6<br>(27.0 to 84.3)                            | 12.8<br>(-6.7 to 35.9)                              |
| Cirrhosis and other chronic liver diseases due to hepatitis C  | 17.0<br>(15.0 to 19.0)                  | 0.5<br>(0.5 to 0.6)                     | 0.3<br>(0.2 to 0.4)               | 61.1<br>(29.2 to 100.0)                           | 18.6<br>(-5.8 to 46.7)                              |
| Cirrhosis and other chronic liver diseases due to alcohol use  | 52.1<br>(48.1 to 56.2)                  | 1.6<br>(1.5 to 1.7)                     | 0.9<br>(0.6 to 1.2)               | 49.4<br>(30.4 to 70.5)                            | 8.1<br>(-5.2 to 22.3)                               |
| Cirrhosis and other chronic liver diseases due to other causes | 35.3<br>(32.6 to 38.4)                  | 0.9<br>(0.8 to 0.9)                     | 1.0<br>(0.7 to 1.4)               | 21.7<br>(-1.0 to 47.9)                            | 5.5<br>(-12.1 to 25.2)                              |
| <b>Digestive diseases</b>                                      | <b>609.4<br/>(570.9 to 647.3)</b>       | <b>490.5†<br/>(462.9 to 519.0)</b>      | <b>23.9<br/>(16.8 to 32.5)</b>    | <b>24.6<br/>(16.8 to 32.8)</b>                    | <b>-2.7<br/>(-8.5 to 3.2)</b>                       |
| Peptic ulcer disease                                           | 293.7<br>(266.4 to 327.0)               | 12.0<br>(10.8 to 13.2)                  | 6.3<br>(4.0 to 9.4)               | 38.9<br>(22.9 to 57.8)                            | 5.1<br>(-6.8 to 18.8)                               |
| Gastritis and duodenitis                                       | 179.6<br>(161.2 to 200.0)               | 93.0<br>(86.2 to 101.6)                 | 4.3<br>(2.8 to 6.5)               | 29.2<br>(15.3 to 45.4)                            | -1.5<br>(-11.7 to 10.9)                             |
| Appendicitis                                                   | 2.1<br>(1.9 to 2.2)                     | 55.3<br>(51.2 to 59.4)                  | 0.7<br>(0.4 to 0.9)               | 16.8<br>(-13.8 to 61.7)                           | 2.0<br>(-22.9 to 35.1)                              |
| Paralytic ileus and intestinal obstruction                     | 0.2<br>(0.2 to 0.3)                     | 6.6<br>(5.9 to 7.3)                     | 0.1<br>(< 0.05 to 0.1)            | 35.8<br>(26.3 to 46.0)                            | 10.0<br>(1.9 to 18.6)                               |
| Inguinal, femoral, and abdominal hernia                        | 129.6<br>(123.1 to 137.0)               | 99.5<br>(88.7 to 111.5)                 | 9.4<br>(6.4 to 12.9)              | 13.6<br>(5.2 to 22.4)                             | -9.6<br>(-15.4 to -3.4)                             |
| Inflammatory bowel disease                                     | 1.4<br>(1.3 to 1.5)                     | 3.2<br>(3.1 to 3.3)                     | 0.2<br>(0.1 to 0.3)               | 39.1<br>(19.7 to 64.4)                            | 4.7<br>(-12.5 to 27.5)                              |
| Vascular intestinal disorders                                  | 0.1<br>(0.1 to 0.1)                     | 0.6<br>(0.5 to 0.6)                     | < 0.05<br>(< 0.05 to 0.1)         | 47.2<br>(39.1 to 55.3)                            | 19.3<br>(13.3 to 25.5)                              |
| Gallbladder and biliary diseases                               | 22.5<br>(20.2 to 24.9)                  | 209.4<br>(186.2 to 233.8)               | 0.9<br>(0.6 to 1.3)               | 45.7<br>(21.8 to 74.6)                            | 11.8<br>(-6.3 to 33.4)                              |
| Pancreatitis                                                   | 1.2<br>(1.1 to 1.3)                     | 11.0<br>(10.2 to 11.8)                  | 0.1<br>(0.1 to 0.2)               | 29.1<br>(17.8 to 40.3)                            | -1.7<br>(-12.6 to 9.1)                              |
| Other digestive diseases                                       | --                                      | --                                      | 1.9<br>(1.3 to 2.6)               | 23.2<br>(15.0 to 31.2)                            | -1.6<br>(-7.4 to 4.3)                               |
| <b>Neurological disorders</b>                                  | <b>5,582.3<br/>(5,340.4 to 5,856.5)</b> | <b>2,586.2<br/>(2,223.9 to 2,978.4)</b> | <b>158.2<br/>(102.2 to 226.7)</b> | <b>20.5<br/>(-9.4 to 61.6)</b>                    | <b>-1.3<br/>(-24.6 to 30.1)</b>                     |
| Alzheimer's disease and other dementias                        | 55.9<br>(47.2 to 65.9)                  | 9.6<br>(8.1 to 11.5)                    | 8.2<br>(5.7 to 11.1)              | 42.7<br>(35.2 to 50.1)                            | -1.1<br>(-6.2 to 3.9)                               |
| Parkinson's disease                                            | 8.7<br>(6.9 to 10.7)                    | 1.0<br>(0.8 to 1.3)                     | 1.0<br>(0.6 to 1.4)               | 51.0<br>(32.9 to 72.4)                            | 5.2<br>(-7.0 to 19.9)                               |
| Epilepsy                                                       | 88.5<br>(20.0 to 156.6)                 | 13.3<br>(3.1 to 23.6)                   | 26.7<br>(5.7 to 58.8)             | 9.7<br>(-79.2 to 562.1)                           | -7.2<br>(-82.4 to 458.9)                            |
| Multiple sclerosis                                             | 0.8<br>(0.7 to 0.9)                     | < 0.05<br>(< 0.05 to < 0.05)            | 0.2<br>(0.2 to 0.3)               | 40.6<br>(34.8 to 45.6)                            | 10.0<br>(5.5 to 13.8)                               |
| Motor neuron disease                                           | 0.4<br>(0.3 to 0.4)                     | 0.1<br>(0.1 to 0.1)                     | 0.1<br>(0.1 to 0.1)               | 29.0<br>(24.1 to 33.6)                            | 4.7<br>(1.4 to 7.9)                                 |
| Migraine                                                       | 2,045.9<br>(1,943.4 to 2,147.7)         | 243.4<br>(229.1 to 258.1)               | 97.5<br>(62.8 to 137.3)           | 21.1<br>(17.0 to 25.5)                            | -0.4<br>(-3.5 to 2.9)                               |
| Tension-type headache                                          | 4,184.5<br>(3,746.6 to 4,690.6)         | 2,318.6<br>(1,957.9 to 2,707.6)         | 18.8<br>(11.9 to 27.9)            | 22.0<br>(15.7 to 29.1)                            | -0.8<br>(-5.3 to 4.5)                               |
| Other neurological disorders                                   | < 0.05<br>(< 0.05 to 0.1)               | 0.1<br>(0.1 to 0.1)                     | 5.6<br>(1.4 to 12.2)              | 30.1<br>(-69.4 to 572.4)                          | 11.9<br>(-72.7 to 437.6)                            |
| <b>Mental and substance use disorders</b>                      | <b>2,370.1<br/>(2,291.5 to 2,450.3)</b> | <b>878.4†<br/>(820.1 to 941.3)</b>      | <b>323.9<br/>(233.3 to 419.5)</b> | <b>20.9<br/>(18.3 to 23.4)</b>                    | <b>-0.0<br/>(-2.0 to 2.0)</b>                       |
| Schizophrenia                                                  | 31.5<br>(27.6 to 35.9)                  | 2.2<br>(1.9 to 2.4)                     | 20.4<br>(15.0 to 25.8)            | 27.3<br>(15.7 to 40.3)                            | 0.9<br>(-8.1 to 10.6)                               |
| Alcohol use disorders                                          | 252.6<br>(220.9 to 287.1)               | 133.1<br>(115.0 to 151.7)               | 25.5<br>(17.4 to 35.0)            | 13.6<br>(3.4 to 25.1)                             | -7.0<br>(-15.0 to 2.3)                              |
| Drug use disorders                                             | 116.6<br>(107.3 to 126.8)               | 14.8<br>(13.5 to 16.4)                  | 28.0<br>(19.6 to 37.3)            | 25.8<br>(14.5 to 37.6)                            | 4.7<br>(-4.2 to 13.7)                               |
| Opioid use disorders                                           | 43.1<br>(36.1 to 52.2)                  | 5.2<br>(4.4 to 6.2)                     | 17.9<br>(12.1 to 24.0)            | 32.9<br>(20.9 to 47.7)                            | 8.1<br>(-1.3 to 19.5)                               |
| Cocaine use disorders                                          | 22.6<br>(19.5 to 26.1)                  | 1.5<br>(1.3 to 1.8)                     | 3.1<br>(1.9 to 4.7)               | 20.8<br>(-1.8 to 44.8)                            | 1.8<br>(-16.0 to 21.5)                              |
| Amphetamine use disorders                                      | 15.1<br>(10.1 to 21.5)                  | 1.6<br>(1.1 to 2.3)                     | 2.0<br>(1.1 to 3.4)               | 5.0<br>(-19.6 to 37.0)                            | -7.4<br>(-28.8 to 19.8)                             |
| Cannabis use disorders                                         | 31.4<br>(25.9 to 37.4)                  | 5.2<br>(4.3 to 6.2)                     | 0.9<br>(0.6 to 1.4)               | 12.8<br>(-10.6 to 42.1)                           | -2.5<br>(-22.5 to 21.7)                             |
| Other drug use disorders                                       | 6.5<br>(5.8 to 7.4)                     | 1.3<br>(1.1 to 1.4)                     | 4.0<br>(2.6 to 5.9)               | 16.8<br>(-10.6 to 52.6)                           | -0.3<br>(-23.1 to 29.6)                             |
| Depressive disorders                                           | 490.1<br>(458.5 to 527.1)               | 536.8<br>(482.9 to 595.2)               | 84.7<br>(58.2 to 115.2)           | 24.7<br>(18.6 to 30.9)                            | -0.2<br>(-4.8 to 4.5)                               |
| Major depressive disorder                                      | 335.7<br>(302.4 to 372.5)               | 507.6<br>(454.1 to 566.2)               | 69.1<br>(46.7 to 94.5)            | 24.2<br>(17.0 to 31.8)                            | -0.3<br>(-6.0 to 5.5)                               |
| Dysthymia                                                      | 160.9<br>(140.5 to 183.1)               | 29.1<br>(25.7 to 33.4)                  | 15.6<br>(10.5 to 23.1)            | 26.5<br>(20.8 to 32.2)                            | 0.1<br>(-3.6 to 4.0)                                |
| Bipolar disorder                                               | 139.6<br>(119.5 to 162.8)               | 12.0<br>(10.3 to 14.2)                  | 28.9<br>(17.8 to 42.6)            | 20.3<br>(14.0 to 27.8)                            | 0.1<br>(-5.0 to 5.7)                                |
| Anxiety disorders                                              | 662.5<br>(601.0 to 728.8)               | 100.5<br>(92.7 to 109.7)                | 64.5<br>(44.7 to 87.3)            | 20.1<br>(15.9 to 24.6)                            | 0.0<br>(-3.2 to 3.5)                                |
| Eating disorders                                               | 33.6<br>(27.3 to 42.1)                  | 14.8<br>(10.9 to 19.8)                  | 6.7<br>(4.2 to 10.1)              | 29.4<br>(16.1 to 46.1)                            | 12.7<br>(0.8 to 27.4)                               |
| Anorexia nervosa                                               | 5.1<br>(3.8 to 7.0)                     | 2.1<br>(1.6 to 2.8)                     | 1.1<br>(0.6 to 1.7)               | 20.8<br>(-5.2 to 56.1)                            | 8.2<br>(-14.7 to 39.6)                              |
| Bulimia nervosa                                                | 26.5<br>(19.8 to 35.3)                  | 12.7<br>(8.8 to 17.6)                   | 5.6<br>(3.4 to 8.4)               | 31.3<br>(15.1 to 50.4)                            | 13.6<br>(-0.2 to 30.3)                              |
| Autistic spectrum disorders                                    | 140.6<br>(124.4 to 157.7)               | 1.1<br>(0.8 to 1.6)                     | 21.1<br>(14.2 to 29.6)            | 16.3<br>(10.7 to 22.7)                            | 0.1<br>(-4.6 to 5.0)                                |
| Autism                                                         | 44.3<br>(37.8 to 51.7)                  | 0.1<br>(0.1 to 0.2)                     | 11.3<br>(7.3 to 16.6)             | 16.4<br>(6.5 to 26.9)                             | -0.1<br>(-8.2 to 8.4)                               |
| Asperger syndrome and other autistic spectrum disorders        | 96.8<br>(80.2 to 116.8)                 | 1.0<br>(0.6 to 1.4)                     | 9.7<br>(6.3 to 14.3)              | 16.3<br>(10.7 to 22.0)                            | 0.3<br>(-4.2 to 4.8)                                |



| Cause                                                      | Prevalence in thousands (95% UI)                 | Incidence in thousands (95% UI)                   | YLDs in thousands (95% UI)              |                                                   |                                                     |
|------------------------------------------------------------|--------------------------------------------------|---------------------------------------------------|-----------------------------------------|---------------------------------------------------|-----------------------------------------------------|
|                                                            | 2016 counts                                      | 2016 counts                                       | 2016 counts                             | Percentage change in counts between 2006 and 2016 | Percentage change in age-standardised rates between |
| Attention-deficit/hyperactivity disorder                   | 179.2<br>(160.2 to 200.9)                        | 8.6<br>(7.5 to 10.1)                              | 2.2<br>(1.3 to 3.5)                     | 11.5<br>(3.3 to 19.9)                             | 0.1<br>(-7.0 to 7.7)                                |
| Conduct disorder                                           | 128.7<br>(105.4 to 151.7)                        | 43.8<br>(34.4 to 52.8)                            | 15.7<br>(9.5 to 24.3)                   | 5.1<br>(-1.6 to 12.1)                             | 0.1<br>(-6.2 to 6.9)                                |
| Idiopathic developmental intellectual disability           | 103.3<br>(47.8 to 157.3)                         | --                                                | 4.5<br>(1.9 to 8.0)                     | 11.5<br>(3.3 to 21.8)                             | -4.7<br>(-11.4 to 3.9)                              |
| Other mental and substance use disorders                   | 291.8<br>(256.8 to 336.8)                        | 10.8<br>(9.5 to 12.3)                             | 21.9<br>(15.0 to 31.4)                  | 25.7<br>(19.5 to 32.4)                            | 0.2<br>(-4.6 to 5.2)                                |
| <b>Diabetes, urogenital, blood, and endocrine diseases</b> | <b>5,310.8</b><br><b>(5,231.9 to 5,394.3)</b>    | <b>2,188.5†</b><br><b>(2,009.5 to 2,367.4)</b>    | <b>103.0</b><br><b>(73.1 to 139.3)</b>  | <b>30.9</b><br><b>(24.8 to 36.9)</b>              | <b>-0.5</b><br><b>(-5.1 to 4.0)</b>                 |
| Diabetes mellitus                                          | 588.3<br>(538.9 to 643.8)                        | 35.9<br>(32.7 to 39.4)                            | 56.5<br>(39.3 to 77.9)                  | 35.7<br>(25.0 to 46.8)                            | 0.6<br>(-7.3 to 8.7)                                |
| Acute glomerulonephritis                                   | 0.1<br>(0.1 to 0.2)                              | 2.1<br>(1.9 to 2.4)                               | < 0.05<br>(< 0.05 to < 0.05)            | 24.1<br>(17.1 to 30.9)                            | 3.7<br>(-1.5 to 8.8)                                |
| Chronic kidney disease                                     | 500.3<br>(453.7 to 550.4)                        | 41.8<br>(37.1 to 46.6)                            | 13.2<br>(9.9 to 17.0)                   | 36.2<br>(27.6 to 45.8)                            | -0.1<br>(-6.3 to 6.7)                               |
| Chronic kidney disease due to diabetes mellitus            | 179.2<br>(151.2 to 209.1)                        | 15.3<br>(12.6 to 18.2)                            | 4.3<br>(3.1 to 5.7)                     | 42.7<br>(27.6 to 58.8)                            | 1.7<br>(-8.4 to 13.0)                               |
| Chronic kidney disease due to hypertension                 | 96.5<br>(81.9 to 112.8)                          | 11.8<br>(9.7 to 14.0)                             | 1.7<br>(1.2 to 2.3)                     | 39.6<br>(24.8 to 58.3)                            | -2.5<br>(-13.1 to 11.0)                             |
| Chronic kidney disease due to glomerulonephritis           | 116.9<br>(100.6 to 131.8)                        | 5.7<br>(4.5 to 7.0)                               | 4.2<br>(3.0 to 5.5)                     | 32.1<br>(18.0 to 47.7)                            | -0.1<br>(-9.4 to 11.1)                              |
| Chronic kidney disease due to other causes                 | 107.6<br>(88.8 to 127.6)                         | 9.1<br>(7.4 to 11.0)                              | 3.0<br>(2.2 to 4.1)                     | 31.6<br>(17.0 to 47.5)                            | -1.4<br>(-11.6 to 9.9)                              |
| Urinary diseases and male infertility                      | 229.1<br>(207.2 to 251.4)                        | 1,477.4†<br>(1,297.9 to 1,653.4)                  | 6.9<br>(4.5 to 9.9)                     | 35.2<br>(27.5 to 43.6)                            | -1.8<br>(-7.4 to 4.0)                               |
| Interstitial nephritis and urinary tract infections        | 26.6<br>(23.3 to 30.1)                           | 1,395.9<br>(1,217.5 to 1,568.5)                   | 0.9<br>(0.5 to 1.4)                     | 20.9<br>(5.6 to 38.2)                             | 0.2<br>(-12.5 to 13.7)                              |
| Urolithiasis                                               | 2.3<br>(2.0 to 2.6)                              | 60.3<br>(53.4 to 68.5)                            | 0.2<br>(0.1 to 0.2)                     | 29.3<br>(24.7 to 34.1)                            | 1.6<br>(-1.9 to 5.2)                                |
| Benign prostatic hyperplasia                               | 160.4<br>(136.6 to 186.1)                        | 21.2<br>(17.8 to 25.2)                            | 5.2<br>(3.3 to 7.6)                     | 41.5<br>(32.1 to 51.9)                            | -1.7<br>(-7.8 to 5.3)                               |
| Male infertility                                           | 30.7<br>(23.9 to 40.0)                           | --                                                | 0.2<br>(0.1 to 0.4)                     | 47.6<br>(19.3 to 80.7)                            | 22.8<br>(-0.9 to 49.9)                              |
| Other urinary diseases                                     | --                                               | --                                                | 0.4<br>(0.2 to 0.6)                     | 0.3<br>(-11.0 to 12.8)                            | -16.2<br>(-25.1 to -6.6)                            |
| Gynecological diseases                                     | 1,833.6<br>(1,767.6 to 1,905.8)                  | 602.0†<br>(571.4 to 632.1)                        | 17.4<br>(11.8 to 25.6)                  | 20.2<br>(14.0 to 26.9)                            | -2.4<br>(-7.3 to 2.9)                               |
| Uterine fibroids                                           | 193.6<br>(178.0 to 212.3)                        | 20.8<br>(18.3 to 23.5)                            | 1.7<br>(0.8 to 3.1)                     | 22.4<br>(14.8 to 28.7)                            | -3.9<br>(-9.1 to 0.4)                               |
| Polycystic ovarian syndrome                                | 5.6<br>(4.4 to 7.0)                              | 17.8<br>(12.2 to 24.2)                            | < 0.05<br>(< 0.05 to 0.1)               | 17.9<br>(-5.8 to 45.1)                            | -0.4<br>(-20.3 to 23.6)                             |
| Female infertility                                         | 30.9<br>(12.1 to 60.8)                           | --                                                | 0.2<br>(< 0.05 to 0.4)                  | 105.8<br>(5.6 to 254.4)                           | 69.9<br>(-13.8 to 191.2)                            |
| Endometriosis                                              | 2.0<br>(1.6 to 2.3)                              | 7.9<br>(6.6 to 9.6)                               | 0.2<br>(0.1 to 0.3)                     | 19.4<br>(-11.9 to 60.5)                           | 1.2<br>(-24.3 to 34.9)                              |
| Genital prolapse                                           | 648.7<br>(604.1 to 701.9)                        | 44.2<br>(40.3 to 48.5)                            | 2.0<br>(1.0 to 3.7)                     | 26.9<br>(18.3 to 37.0)                            | -6.9<br>(-13.6 to 0.7)                              |
| Premenstrual syndrome                                      | 1,034.3<br>(973.8 to 1,092.7)                    | 378.3<br>(351.6 to 403.5)                         | 8.7<br>(5.4 to 13.4)                    | 18.0<br>(9.2 to 27.6)                             | -1.0<br>(-8.2 to 7.0)                               |
| Other gynecological diseases                               | 131.5<br>(116.5 to 144.2)                        | 133.1<br>(117.2 to 147.8)                         | 4.6<br>(3.0 to 6.6)                     | 19.2<br>(5.7 to 34.3)                             | -3.3<br>(-14.3 to 9.2)                              |
| Hemoglobinopathies and hemolytic anaemias                  | 3,116.2<br>(3,051.0 to 3,183.0)                  | --                                                | 4.2<br>(2.7 to 6.5)                     | -2.7<br>(-14.3 to 11.5)                           | -14.1<br>(-23.4 to -2.6)                            |
| Thalassemias                                               | 0.1<br>(0.1 to 0.2)                              | --                                                | < 0.05<br>(< 0.05 to < 0.05)            | 22.0<br>(3.0 to 44.8)                             | 13.1<br>(-4.4 to 33.7)                              |
| Thalassaemias trait                                        | 22.3<br>(19.2 to 25.2)                           | --                                                | 0.2<br>(0.1 to 0.3)                     | 14.4<br>(-9.3 to 46.4)                            | -0.2<br>(-19.9 to 25.9)                             |
| Sickle cell disorders                                      | 2.2<br>(1.8 to 2.6)                              | --                                                | 0.2<br>(0.1 to 0.3)                     | 22.7<br>(-2.5 to 52.1)                            | 11.5<br>(-10.5 to 36.8)                             |
| Sickle cell trait                                          | 807.7<br>(736.1 to 880.7)                        | --                                                | 3.4<br>(2.2 to 5.3)                     | -5.4<br>(-17.7 to 9.9)                            | -15.7<br>(-26.1 to -3.0)                            |
| G6PD deficiency                                            | 424.2<br>(405.2 to 446.4)                        | --                                                | < 0.05<br>(< 0.05 to < 0.05)            | 42.6<br>(18.3 to 73.6)                            | 17.1<br>(0.3 to 35.7)                               |
| G6PD trait                                                 | 2,018.2<br>(1,972.6 to 2,070.5)                  | --                                                | < 0.05<br>(< 0.05 to < 0.05)            | 10.7<br>(-1.7 to 26.1)                            | -4.8<br>(-14.7 to 7.4)                              |
| Other hemoglobinopathies and hemolytic anaemias            | 18.6<br>(16.4 to 21.5)                           | --                                                | 0.4<br>(0.2 to 0.6)                     | 0.8<br>(-15.7 to 24.7)                            | -18.1<br>(-28.9 to -3.1)                            |
| Endocrine, metabolic, blood, and immune disorders          | 140.6<br>(129.4 to 152.3)                        | 29.2<br>(26.6 to 32.0)                            | 4.7<br>(3.1 to 6.6)                     | 37.9<br>(28.1 to 48.1)                            | 5.6<br>(-1.0 to 12.6)                               |
| <b>Musculoskeletal disorders</b>                           | <b>2,371.4</b><br><b>(2,261.2 to 2,487.0)</b>    | <b>1,095.0</b><br><b>(991.9 to 1,207.8)</b>       | <b>263.0</b><br><b>(189.8 to 346.7)</b> | <b>32.8</b><br><b>(28.2 to 37.7)</b>              | <b>2.2</b><br><b>(-1.0 to 5.7)</b>                  |
| Rheumatoid arthritis                                       | 46.4<br>(41.6 to 52.2)                           | 2.8<br>(2.5 to 3.1)                               | 11.0<br>(7.5 to 14.7)                   | 38.7<br>(28.0 to 50.9)                            | 4.3<br>(-3.2 to 13.2)                               |
| Osteoarthritis                                             | 529.5<br>(493.9 to 564.5)                        | 27.2<br>(25.2 to 29.3)                            | 32.7<br>(23.3 to 44.5)                  | 45.7<br>(40.6 to 51.1)                            | 4.3<br>(0.6 to 7.8)                                 |
| Low back and neck pain                                     | 1,500.3<br>(1,392.8 to 1,619.2)                  | 628.1<br>(563.4 to 700.6)                         | 174.0<br>(121.8 to 230.1)               | 31.7<br>(25.8 to 38.6)                            | 2.0<br>(-2.3 to 7.0)                                |
| Low back pain                                              | 1,065.9<br>(944.4 to 1,212.2)                    | 508.6<br>(443.9 to 581.5)                         | 121.5<br>(84.8 to 161.8)                | 32.0<br>(23.3 to 41.4)                            | 3.0<br>(-3.5 to 10.0)                               |
| Neck pain                                                  | 522.9<br>(448.9 to 605.1)                        | 119.6<br>(103.4 to 140.8)                         | 52.5<br>(35.5 to 75.1)                  | 31.0<br>(27.7 to 34.5)                            | 0.0<br>(-2.1 to 2.1)                                |
| Gout                                                       | 40.8<br>(36.4 to 45.9)                           | 8.2<br>(7.2 to 9.3)                               | 1.3<br>(0.9 to 1.8)                     | 35.7<br>(15.8 to 60.1)                            | 0.5<br>(-13.6 to 18.5)                              |
| Other musculoskeletal disorders                            | 507.6<br>(422.9 to 603.3)                        | 428.7<br>(347.7 to 521.0)                         | 44.0<br>(29.4 to 62.8)                  | 27.1<br>(16.3 to 37.8)                            | 0.7<br>(-7.3 to 9.1)                                |
| <b>Other non-communicable diseases</b>                     | <b>13,268.7</b><br><b>(13,079.1 to 13,421.5)</b> | <b>41,997.7†</b><br><b>(39,717.8 to 44,393.6)</b> | <b>347.0</b><br><b>(236.4 to 498.2)</b> | <b>21.8</b><br><b>(20.1 to 23.3)</b>              | <b>-2.0</b><br><b>(-3.2 to -0.9)</b>                |
| Congenital anomalies                                       | 145.8<br>(127.8 to 168.3)                        | --                                                | 17.0<br>(12.2 to 22.6)                  | 9.1<br>(3.2 to 15.5)                              | -5.5<br>(-10.6 to -0.2)                             |
| Neural tube defects                                        | 6.5<br>(5.9 to 7.3)                              | --                                                | 1.9<br>(1.3 to 2.6)                     | 3.8<br>(-11.9 to 22.3)                            | -11.7<br>(-24.8 to 3.4)                             |
| Congenital heart anomalies                                 | 17.0<br>(15.0 to 19.4)                           | --                                                | 0.8<br>(0.4 to 1.4)                     | 17.0<br>(1.3 to 34.5)                             | 4.1<br>(-9.4 to 18.9)                               |
| Orofacial clefts                                           | 16.3<br>(14.3 to 18.4)                           | --                                                | 0.2<br>(0.1 to 0.3)                     | 2.1<br>(-9.2 to 16.4)                             | -12.5<br>(-22.2 to -0.5)                            |
| Down's syndrome                                            | 14.0<br>(12.6 to 15.7)                           | --                                                | 1.3<br>(0.9 to 1.8)                     | 8.2<br>(-3.7 to 21.5)                             | -6.4<br>(-15.9 to 4.9)                              |
| Turner syndrome                                            | 2.4<br>(2.1 to 2.7)                              | --                                                | < 0.05<br>(< 0.05 to 0.1)               | 4.9<br>(-8.4 to 21.2)                             | -7.5<br>(-19.3 to 6.4)                              |
| Klinefelter syndrome                                       | 3.0<br>(2.6 to 3.4)                              | --                                                | < 0.05<br>(< 0.05 to < 0.05)            | 13.2<br>(-14.4 to 49.4)                           | -1.0<br>(-24.9 to 30.0)                             |

| Cause                                         | Prevalence in thousands (95% UI)              | Incidence in thousands (95% UI)                | YLDs in thousands (95% UI)            |                                                   |                                                     |
|-----------------------------------------------|-----------------------------------------------|------------------------------------------------|---------------------------------------|---------------------------------------------------|-----------------------------------------------------|
|                                               | 2016 counts                                   | 2016 counts                                    | 2016 counts                           | Percentage change in counts between 2006 and 2016 | Percentage change in age-standardised rates between |
| Other chromosomal abnormalities               | 10.6<br>(9.1 to 12.4)                         | --                                             | 1.3<br>(0.9 to 1.8)                   | -4.7<br>(-21.7 to 15.0)                           | -11.2<br>(-26.9 to 7.1)                             |
| Congenital musculoskeletal and limb anomalies | 28.8<br>(26.4 to 31.5)                        | --                                             | 4.3<br>(2.9 to 6.0)                   | 20.2<br>(7.9 to 32.8)                             | 2.8<br>(-7.4 to 13.6)                               |
| Urogenital congenital anomalies               | 18.8<br>(16.9 to 20.9)                        | --                                             | 0.5<br>(0.3 to 0.8)                   | 2.1<br>(-5.7 to 10.5)                             | -6.1<br>(-13.3 to 1.3)                              |
| Digestive congenital anomalies                | 14.3<br>(12.8 to 16.1)                        | --                                             | 0.7<br>(0.4 to 0.9)                   | 15.8<br>(-4.6 to 40.0)                            | -1.0<br>(-17.4 to 17.7)                             |
| Other congenital anomalies                    | 57.0<br>(36.8 to 85.7)                        | --                                             | 6.0<br>(4.0 to 8.9)                   | 6.7<br>(-3.8 to 17.8)                             | -8.8<br>(-17.8 to 0.7)                              |
| Skin and subcutaneous diseases                | 5,829.5<br>(5,649.3 to 6,030.6)               | 13,664.6<br>(12,794.2 to 14,582.2)             | 138.5<br>(91.4 to 203.3)              | 15.5<br>(13.0 to 17.9)                            | 0.9<br>(-1.0 to 2.8)                                |
| Dermatitis                                    | 954.2<br>(896.6 to 1,011.8)                   | 862.2<br>(800.1 to 925.9)                      | 38.5<br>(22.4 to 63.9)                | 10.8<br>(5.8 to 16.2)                             | -1.4<br>(-5.7 to 3.1)                               |
| Psoriasis                                     | 139.8<br>(133.1 to 146.6)                     | 19.6<br>(18.7 to 20.5)                         | 12.3<br>(8.8 to 16.1)                 | 28.4<br>(18.4 to 39.3)                            | 5.1<br>(-2.5 to 13.0)                               |
| Cellulitis                                    | 7.5<br>(6.9 to 8.1)                           | 151.9<br>(141.2 to 163.4)                      | 0.4<br>(0.3 to 0.6)                   | 17.3<br>(-8.9 to 48.8)                            | 1.3<br>(-19.4 to 26.1)                              |
| Pyoderma                                      | 43.2<br>(41.9 to 44.5)                        | 1,039.7<br>(1,005.1 to 1,073.6)                | 0.2<br>(0.1 to 0.5)                   | 26.6<br>(18.4 to 35.0)                            | -0.3<br>(-6.3 to 5.6)                               |
| Scabies                                       | 291.2<br>(254.8 to 334.3)                     | 897.2<br>(777.1 to 1,028.6)                    | 7.5<br>(4.2 to 12.1)                  | 7.9<br>(3.7 to 12.6)                              | -5.1<br>(-8.4 to -1.4)                              |
| Fungal skin diseases                          | 2,384.9<br>(2,127.2 to 2,652.0)               | 7,448.6<br>(6,607.8 to 8,322.0)                | 13.4<br>(5.2 to 27.7)                 | 21.7<br>(19.7 to 23.6)                            | 0.1<br>(-0.7 to 0.8)                                |
| Viral skin diseases                           | 474.2<br>(452.0 to 496.7)                     | 699.1<br>(666.6 to 734.4)                      | 14.6<br>(9.0 to 21.5)                 | 14.0<br>(10.5 to 17.8)                            | 0.1<br>(-3.0 to 3.2)                                |
| Acne vulgaris                                 | 1,280.2<br>(1,145.5 to 1,428.1)               | 850.2<br>(708.7 to 1,024.1)                    | 33.1<br>(22.2 to 48.1)                | 14.0<br>(8.3 to 19.8)                             | 3.6<br>(-1.8 to 8.8)                                |
| Alopecia areata                               | 28.1<br>(27.0 to 29.2)                        | 49.8<br>(47.8 to 51.8)                         | 0.9<br>(0.6 to 1.4)                   | 20.5<br>(6.6 to 35.8)                             | 0.1<br>(-10.5 to 12.3)                              |
| Pruritus                                      | 140.0<br>(123.8 to 157.9)                     | 111.8<br>(100.6 to 125.6)                      | 1.5<br>(0.7 to 2.7)                   | 24.9<br>(18.2 to 31.8)                            | 1.6<br>(-3.6 to 6.4)                                |
| Urticaria                                     | 156.9<br>(136.7 to 181.0)                     | 280.9<br>(246.0 to 323.9)                      | 9.5<br>(6.1 to 13.8)                  | 13.7<br>(7.6 to 20.4)                             | 0.1<br>(-5.0 to 5.5)                                |
| Decubitus ulcer                               | 3.1<br>(2.9 to 3.4)                           | 11.4<br>(10.3 to 12.6)                         | 0.5<br>(0.4 to 0.7)                   | 51.8<br>(33.0 to 72.2)                            | 15.5<br>(-0.9 to 34.1)                              |
| Other skin and subcutaneous diseases          | 1,072.2<br>(1,041.4 to 1,103.5)               | 1,242.1<br>(1,202.2 to 1,283.2)                | 5.9<br>(2.8 to 10.9)                  | 31.4<br>(27.9 to 34.7)                            | 4.0<br>(1.6 to 6.4)                                 |
| Sense organ diseases                          | 4,099.4<br>(4,014.0 to 4,191.0)               | 1,567.4†<br>(1,467.8 to 1,675.8)               | 142.4<br>(98.6 to 198.8)              | 26.8<br>(24.6 to 29.2)                            | -4.5<br>(-6.3 to -2.8)                              |
| Glaucoma                                      | 13.3<br>(11.2 to 15.7)                        | --                                             | 1.4<br>(0.9 to 1.9)                   | 42.8<br>(29.0 to 59.6)                            | -2.1<br>(-11.4 to 9.0)                              |
| Cataract                                      | 232.9<br>(206.2 to 261.5)                     | --                                             | 17.7<br>(12.5 to 24.1)                | 32.1<br>(24.0 to 40.4)                            | -7.7<br>(-13.4 to -1.9)                             |
| Macular degeneration                          | 17.4<br>(14.1 to 21.4)                        | --                                             | 1.2<br>(0.8 to 1.7)                   | 41.0<br>(25.0 to 58.2)                            | -3.6<br>(-14.8 to 8.0)                              |
| Refraction and accommodation disorders        | 2,242.0<br>(2,150.5 to 2,336.7)               | --                                             | 36.3<br>(21.7 to 58.7)                | 17.6<br>(13.8 to 21.7)                            | -7.0<br>(-10.0 to -3.6)                             |
| Age-related and other hearing loss            | 2,525.1<br>(2,391.5 to 2,671.5)               | --                                             | 68.0<br>(47.4 to 94.8)                | 29.2<br>(25.5 to 32.7)                            | -3.6<br>(-5.8 to -1.4)                              |
| Other vision loss                             | 52.7<br>(47.1 to 58.8)                        | --                                             | 4.7<br>(3.2 to 6.4)                   | 31.5<br>(21.5 to 42.2)                            | -1.0<br>(-8.4 to 6.3)                               |
| Other sense organ diseases                    | 422.1<br>(388.7 to 455.3)                     | 1,567.4<br>(1,467.8 to 1,675.8)                | 13.1<br>(8.2 to 19.8)                 | 31.5<br>(25.7 to 37.2)                            | 0.8<br>(-3.4 to 4.7)                                |
| Oral disorders                                | 10,553.5<br>(10,222.4 to 10,851.4)            | 26,765.7†<br>(24,625.7 to 28,831.6)            | 49.1<br>(29.8 to 76.2)                | 31.9<br>(29.2 to 34.9)                            | 0.2<br>(-1.6 to 2.1)                                |
| Caries of deciduous teeth                     | 1,257.2<br>(1,030.4 to 1,449.9)               | 4,218.9<br>(2,858.5 to 5,712.5)                | 0.3<br>(0.1 to 0.6)                   | 5.2<br>(-5.8 to 18.0)                             | -1.2<br>(-11.4 to 10.9)                             |
| Caries of permanent teeth                     | 8,365.2<br>(7,957.0 to 8,741.0)               | 22,236.2<br>(20,638.5 to 23,760.8)             | 4.9<br>(2.2 to 9.5)                   | 15.7<br>(12.4 to 19.0)                            | -2.4<br>(-5.1 to 0.2)                               |
| Periodontal disease                           | 1,953.8<br>(1,647.1 to 2,317.0)               | 240.0<br>(197.1 to 291.4)                      | 12.9<br>(5.0 to 26.7)                 | 31.9<br>(27.3 to 36.9)                            | 0.6<br>(-2.5 to 4.2)                                |
| Edentulism and severe tooth loss              | 813.3<br>(714.6 to 918.9)                     | 70.6<br>(59.7 to 82.6)                         | 22.6<br>(14.8 to 31.7)                | 41.0<br>(36.5 to 46.0)                            | 0.6<br>(-2.6 to 4.0)                                |
| Other oral disorders                          | 286.8<br>(274.1 to 299.8)                     | --                                             | 8.4<br>(5.2 to 12.6)                  | 21.8<br>(17.4 to 25.9)                            | 0.0<br>(-3.2 to 3.2)                                |
| <b>Injuries</b>                               | <b>2,368.3</b><br><b>(2,216.3 to 2,552.3)</b> | <b>1,180.0†</b><br><b>(1,103.9 to 1,256.7)</b> | <b>95.9</b><br><b>(64.9 to 136.2)</b> | <b>32.4</b><br><b>(29.7 to 34.8)</b>              | <b>3.8</b><br><b>(1.9 to 5.6)</b>                   |
| <b>Transport injuries</b>                     | <b>306.3</b><br><b>(287.1 to 326.6)</b>       | <b>119.8</b><br><b>(106.7 to 132.1)</b>        | <b>16.7</b><br><b>(11.1 to 23.9)</b>  | <b>48.8</b><br><b>(45.5 to 52.2)</b>              | <b>14.8</b><br><b>(12.5 to 17.1)</b>                |
| Road injuries                                 | 294.7<br>(276.2 to 314.9)                     | 116.9<br>(103.5 to 129.1)                      | 16.0<br>(10.7 to 23.0)                | 49.5<br>(46.2 to 52.9)                            | 15.3<br>(13.0 to 17.5)                              |
| Pedestrian road injuries                      | 86.0<br>(76.6 to 97.0)                        | 26.6<br>(22.8 to 30.6)                         | 4.7<br>(3.1 to 6.7)                   | 31.9<br>(28.9 to 34.8)                            | 1.7<br>(-0.3 to 3.8)                                |
| Cyclist road injuries                         | 45.6<br>(38.4 to 53.4)                        | 20.6<br>(16.5 to 24.9)                         | 2.3<br>(1.5 to 3.4)                   | 54.0<br>(50.3 to 57.8)                            | 20.8<br>(18.1 to 23.4)                              |
| Motorcyclist road injuries                    | 51.6<br>(44.2 to 62.2)                        | 14.1<br>(11.6 to 17.0)                         | 2.7<br>(1.8 to 3.9)                   | 62.3<br>(58.4 to 66.4)                            | 25.8<br>(23.1 to 28.5)                              |
| Motor vehicle road injuries                   | 83.4<br>(72.3 to 93.6)                        | 40.8<br>(34.8 to 46.7)                         | 4.9<br>(3.4 to 7.1)                   | 60.3<br>(56.4 to 64.3)                            | 22.5<br>(19.9 to 25.1)                              |
| Other road injuries                           | 28.1<br>(24.6 to 32.7)                        | 14.8<br>(11.7 to 18.5)                         | 1.4<br>(0.9 to 2.1)                   | 50.9<br>(46.9 to 54.6)                            | 17.0<br>(14.3 to 19.5)                              |
| Other transport injuries                      | 11.6<br>(10.0 to 13.5)                        | 3.0<br>(2.5 to 3.5)                            | 0.6<br>(0.4 to 0.9)                   | 32.5<br>(28.9 to 36.1)                            | 4.1<br>(1.4 to 6.5)                                 |
| <b>Unintentional injuries</b>                 | <b>1,924.3</b><br><b>(1,772.3 to 2,094.3)</b> | <b>950.5</b><br><b>(892.7 to 1,018.3)</b>      | <b>70.5</b><br><b>(48.2 to 99.4)</b>  | <b>30.1</b><br><b>(27.3 to 32.5)</b>              | <b>1.9</b><br><b>(-0.2 to 3.8)</b>                  |
| Falls                                         | 853.9<br>(751.8 to 969.1)                     | 434.5<br>(386.3 to 487.6)                      | 36.8<br>(26.1 to 50.2)                | 31.7<br>(29.0 to 34.1)                            | 0.7<br>(-1.4 to 2.7)                                |
| Drowning                                      | 7.0<br>(6.2 to 8.0)                           | 1.5<br>(1.3 to 1.7)                            | 0.4<br>(0.2 to 0.5)                   | 12.1<br>(8.7 to 15.5)                             | -13.4<br>(-15.9 to -10.9)                           |
| Fire, heat, and hot substances                | 178.4<br>(145.5 to 219.9)                     | 24.3<br>(19.6 to 29.3)                         | 4.9<br>(3.2 to 7.1)                   | 23.4<br>(17.0 to 29.2)                            | 0.7<br>(-4.0 to 4.9)                                |
| Poisonings                                    | 5.1<br>(4.3 to 6.0)                           | 8.0<br>(6.5 to 9.7)                            | 0.5<br>(0.3 to 0.7)                   | 46.4<br>(33.0 to 59.0)                            | 20.6<br>(10.7 to 30.4)                              |
| Exposure to mechanical forces                 | 289.1<br>(246.4 to 349.5)                     | 118.3<br>(100.9 to 136.8)                      | 7.1<br>(4.6 to 10.4)                  | 37.0<br>(33.0 to 40.2)                            | 8.1<br>(5.4 to 10.4)                                |
| Unintentional firearm injuries                | 16.3<br>(13.4 to 19.7)                        | 4.3<br>(3.1 to 5.8)                            | 0.7<br>(0.4 to 1.0)                   | 36.7<br>(32.9 to 40.5)                            | 7.8<br>(5.2 to 10.3)                                |
| Unintentional suffocation                     | 15.3<br>(10.9 to 20.4)                        | 3.4<br>(2.3 to 4.9)                            | 0.5<br>(0.3 to 0.8)                   | 24.9<br>(21.0 to 28.7)                            | 4.5<br>(1.5 to 7.5)                                 |
| Other exposure to mechanical forces           | 257.5<br>(217.2 to 317.0)                     | 110.5<br>(94.6 to 127.9)                       | 5.9<br>(3.9 to 8.6)                   | 38.1<br>(34.1 to 41.5)                            | 8.4<br>(5.7 to 10.8)                                |

| Cause                                                                               | Prevalence in thousands (95% UI)        | Incidence in thousands (95% UI)       | YLDs in thousands (95% UI)        |                                                   |                                                     |
|-------------------------------------------------------------------------------------|-----------------------------------------|---------------------------------------|-----------------------------------|---------------------------------------------------|-----------------------------------------------------|
|                                                                                     | 2016 counts                             | 2016 counts                           | 2016 counts                       | Percentage change in counts between 2006 and 2016 | Percentage change in age-standardised rates between |
| Adverse effects of medical treatment                                                | 5.0<br>(3.9 to 6.3)                     | 65.8<br>(56.2 to 77.0)                | 0.7<br>(0.4 to 1.0)               | 20.8<br>(13.5 to 29.5)                            | 1.5<br>(-4.1 to 8.1)                                |
| Animal contact                                                                      | 42.2<br>(37.2 to 48.4)                  | 53.4<br>(43.8 to 63.8)                | 1.4<br>(0.9 to 2.0)               | 15.1<br>(7.8 to 21.8)                             | -6.8<br>(-12.1 to -1.7)                             |
| Venomous animal contact                                                             | 20.9<br>(17.6 to 24.6)                  | 25.7<br>(20.2 to 32.5)                | 1.1<br>(0.7 to 1.5)               | 16.7<br>(7.6 to 25.8)                             | -4.6<br>(-11.4 to 2.4)                              |
| Non-venomous animal contact                                                         | 21.4<br>(17.8 to 27.3)                  | 27.7<br>(21.9 to 34.4)                | 0.3<br>(0.2 to 0.5)               | 10.2<br>(5.7 to 14.1)                             | -12.6<br>(-16.0 to -9.8)                            |
| Foreign body                                                                        | 175.6<br>(141.8 to 208.5)               | 113.5<br>(100.3 to 128.7)             | 7.1<br>(4.5 to 10.4)              | 22.9<br>(18.7 to 27.0)                            | 1.0<br>(-1.9 to 4.0)                                |
| Pulmonary aspiration and foreign body in airway                                     | 121.4<br>(92.9 to 155.7)                | 47.0<br>(40.6 to 54.6)                | 5.2<br>(3.3 to 7.7)               | 22.0<br>(17.4 to 26.4)                            | 1.0<br>(-2.3 to 4.3)                                |
| Foreign body in eyes                                                                | 9.2<br>(5.3 to 13.4)                    | 46.8<br>(36.7 to 60.3)                | 0.5<br>(0.3 to 0.9)               | 26.2<br>(21.5 to 31.2)                            | 0.1<br>(-2.4 to 2.9)                                |
| Foreign body in other body part                                                     | 45.0<br>(35.3 to 57.8)                  | 19.8<br>(16.4 to 23.7)                | 1.3<br>(0.8 to 2.0)               | 25.3<br>(20.3 to 29.9)                            | 1.7<br>(-1.8 to 5.0)                                |
| Environmental heat and cold exposure                                                | 124.4<br>(107.1 to 143.2)               | 37.3<br>(31.1 to 44.4)                | 4.7<br>(3.1 to 6.9)               | 26.9<br>(23.8 to 30.0)                            | 0.1<br>(-2.2 to 2.3)                                |
| Other unintentional injuries                                                        | 243.6<br>(195.2 to 300.0)               | 93.8<br>(78.5 to 111.3)               | 7.0<br>(4.6 to 10.3)              | 34.1<br>(31.3 to 36.7)                            | 7.4<br>(5.4 to 9.2)                                 |
| <b>Self-harm and interpersonal violence</b>                                         | <b>454.5</b><br><b>(408.3 to 505.9)</b> | <b>54.5†</b><br><b>(47.9 to 61.6)</b> | <b>7.1</b><br><b>(4.9 to 9.9)</b> | <b>18.1</b><br><b>(14.5 to 21.9)</b>              | <b>-4.4</b><br><b>(-7.0 to -1.5)</b>                |
| Self-harm                                                                           | 11.1<br>(9.6 to 12.7)                   | 5.2<br>(4.5 to 6.0)                   | 0.5<br>(0.3 to 0.8)               | 24.9<br>(20.1 to 29.2)                            | -3.0<br>(-6.3 to -0.0)                              |
| Self-harm by firearm                                                                | 0.6<br>(0.5 to 0.7)                     | 0.2<br>(0.1 to 0.3)                   | < 0.05<br>(< 0.05 to < 0.05)      | -10.2<br>(-13.5 to -7.4)                          | -29.8<br>(-32.2 to -27.8)                           |
| Self-harm by other specified means                                                  | 10.5<br>(9.0 to 12.1)                   | 5.1<br>(4.4 to 5.8)                   | 0.5<br>(0.3 to 0.7)               | 27.0<br>(22.0 to 31.6)                            | -1.4<br>(-4.8 to 1.7)                               |
| Interpersonal violence                                                              | 443.4<br>(396.7 to 494.8)               | 49.2†<br>(42.9 to 56.4)               | 6.6<br>(4.5 to 9.1)               | 17.6<br>(13.7 to 21.6)                            | -4.5<br>(-7.3 to -1.4)                              |
| Assault by firearm                                                                  | 9.1<br>(7.8 to 10.7)                    | 3.3<br>(2.6 to 4.3)                   | 0.5<br>(0.3 to 0.7)               | 13.6<br>(10.2 to 17.0)                            | -12.8<br>(-15.1 to -10.5)                           |
| Assault by sharp object                                                             | 42.1<br>(35.0 to 50.0)                  | 20.3<br>(16.6 to 24.5)                | 1.4<br>(0.9 to 2.0)               | 17.1<br>(13.7 to 20.3)                            | -8.5<br>(-10.8 to -6.3)                             |
| Sexual violence                                                                     | 352.3<br>(306.6 to 401.7)               | --                                    | 3.0<br>(2.0 to 4.3)               | 12.7<br>(5.9 to 20.9)                             | -4.0<br>(-9.5 to 2.8)                               |
| Assault by other means                                                              | 39.9<br>(34.5 to 47.1)                  | 25.6<br>(21.6 to 29.8)                | 1.8<br>(1.2 to 2.5)               | 28.4<br>(25.7 to 31.3)                            | 0.2<br>(-1.8 to 2.1)                                |
| <b>Forces of nature, conflict and terrorism, and executions and police conflict</b> | <b>35.5</b><br><b>(6.1 to 72.3)</b>     | <b>55.2†</b><br><b>(8.5 to 106.8)</b> | <b>1.7</b><br><b>(0.6 to 3.6)</b> | <b>60.2</b><br><b>(8.0 to 431.7)</b>              | <b>29.5</b><br><b>(-10.5 to 320.7)</b>              |
| Exposure to forces of nature                                                        | 34.5<br>(5.6 to 70.5)                   | 55.1<br>(8.4 to 106.7)                | 1.6<br>(0.6 to 3.5)               | 61.9<br>(8.3 to 442.6)                            | 30.6<br>(-10.4 to 328.5)                            |
| Conflict and terrorism                                                              | 0.8<br>(0.2 to 1.7)                     | --                                    | < 0.05<br>(< 0.05 to 0.1)         | -4.7<br>(-9.2 to -0.4)                            | -17.1<br>(-20.6 to -13.5)                           |
| Executions and police conflict                                                      | 0.2<br>(0.1 to 0.4)                     | 0.1<br>(0.1 to 0.1)                   | < 0.05<br>(< 0.05 to < 0.05)      | 32.7<br>(24.1 to 39.5)                            | 16.6<br>(9.9 to 21.8)                               |
| <b>Impairments</b>                                                                  | --                                      | --                                    | --                                | --                                                | --                                                  |
| Anaemia                                                                             | 1,586.7<br>(1,453.1 to 1,738.4)         | --                                    | 39.4<br>(26.4 to 55.8)            | 16.7<br>(6.5 to 28.6)                             | -4.2<br>(-11.0 to 4.1)                              |
| Developmental intellectual disability                                               | 235.0<br>(182.4 to 290.2)               | --                                    | 29.0<br>(20.9 to 39.2)            | 12.6<br>(6.5 to 19.6)                             | -2.9<br>(-8.0 to 2.9)                               |
| Epilepsy                                                                            | 121.5<br>(50.9 to 192.9)                | --                                    | 38.3<br>(15.6 to 71.5)            | 10.2<br>(-57.9 to 202.5)                          | -6.5<br>(-64.6 to 161.2)                            |
| Guillain-Barre syndrome                                                             | 0.1<br>(0.1 to 0.2)                     | --                                    | < 0.05<br>(< 0.05 to 0.1)         | 14.5<br>(-0.3 to 35.9)                            | -3.5<br>(-15.0 to 12.5)                             |
| Hearing loss                                                                        | 2,754.8<br>(2,620.6 to 2,894.1)         | --                                    | 78.7<br>(55.2 to 109.0)           | 25.1<br>(21.7 to 28.3)                            | -4.2<br>(-6.3 to -2.3)                              |
| Heart failure                                                                       | 93.9<br>(82.8 to 106.9)                 | --                                    | 9.6<br>(7.1 to 12.4)              | 45.4<br>(36.5 to 55.4)                            | 2.7<br>(-3.8 to 10.0)                               |
| Infertility                                                                         | 130.0<br>(102.1 to 170.8)               | --                                    | 0.8<br>(0.3 to 1.6)               | 35.6<br>(15.2 to 61.2)                            | 12.7<br>(-4.3 to 34.1)                              |
| Pelvic inflammatory disease                                                         | 3.1<br>(2.7 to 3.6)                     | --                                    | 0.4<br>(0.3 to 0.6)               | 0.5<br>(-18.4 to 22.9)                            | -17.7<br>(-32.7 to 0.9)                             |
| Vision loss                                                                         | 2,625.9<br>(2,521.0 to 2,735.0)         | --                                    | 70.7<br>(49.4 to 101.8)           | 22.5<br>(18.6 to 26.8)                            | -5.9<br>(-8.9 to -2.6)                              |

We did not calculate incidence for the nine impairments, certain NTDs, and causes with only birth prevalence. Blank cells mean that no estimate is available.

† Incidence for aggregate causes represents the sum of the incidence of the causes below the aggregate.

‡ Incidence estimates for stroke represent first-ever stroke only.

^ Incidence of HIV/AIDS represents new infections of HIV only and does not include new infections of Tuberculosis in HIV positive cases.



SR Table 14: Prevalence, incidence, and YLDs for 2016, percentage change of YLD counts and percentage change of age-standardised YLD rates between 2006 and 2016 by cause and impairments, for all ages, Egypt.

| Cause                                                                                | Prevalence in thousands (95% UI)          | Incidence in thousands (95% UI)               | YLDs in thousands (95% UI)              |                                                   |                                                     |
|--------------------------------------------------------------------------------------|-------------------------------------------|-----------------------------------------------|-----------------------------------------|---------------------------------------------------|-----------------------------------------------------|
|                                                                                      | 2016 counts                               | 2016 counts                                   | 2016 counts                             | Percentage change in counts between 2006 and 2016 | Percentage change in age-standardised rates between |
| <b>All causes</b>                                                                    | <b>87,522.1</b><br>(87,158.9 to 87,944.1) | <b>505,883.2†</b><br>(480,994.5 to 534,786.5) | <b>9,833.8</b><br>(7,213.8 to 12,746.1) | <b>20.5</b><br>(17.3 to 23.5)                     | <b>-2.1</b><br>(-4.4 to -0.1)                       |
| <b>Communicable, maternal, neonatal, and nutritional disorders</b>                   | <b>57,135.1</b><br>(55,416.5 to 58,861.9) | <b>287,773.1†</b><br>(264,727.6 to 312,728.2) | <b>1,011.5</b><br>(712.7 to 1,415.3)    | <b>-9.4</b><br>(-19.1 to -0.2)                    | <b>-27.0</b><br>(-35.4 to -18.7)                    |
| <b>HIV/AIDS and tuberculosis</b>                                                     | <b>26,308.5</b><br>(22,234.7 to 29,940.5) | <b>14.2†</b><br>(11.5 to 17.5)                | <b>3.0</b><br>(1.8 to 4.5)              | <b>10.9</b><br>(-15.1 to 46.4)                    | <b>-9.5</b><br>(-29.4 to 17.5)                      |
| Tuberculosis                                                                         | 23,479.7<br>(19,572.2 to 27,845.7)        | 13.6†<br>(10.9 to 16.8)                       | 2.4<br>(1.4 to 3.7)                     | -0.4<br>(-27.0 to 36.7)                           | -17.8<br>(-37.8 to 9.6)                             |
| Drug-susceptible tuberculosis                                                        | 7.2<br>(5.6 to 9.2)                       | 13.0<br>(10.2 to 16.1)                        | 2.3<br>(1.3 to 3.5)                     | -2.1<br>(-30.2 to 35.7)                           | -19.2<br>(-41.3 to 10.4)                            |
| Multidrug-resistant tuberculosis without extensive drug resistance                   | 0.4<br>(0.1 to 0.9)                       | 0.6<br>(0.1 to 1.6)                           | 0.1<br>(< 0.05 to 0.3)                  | 47.9<br>(-71.7 to 470.8)                          | 21.7<br>(-76.7 to 371.1)                            |
| Extensively drug-resistant tuberculosis                                              | < 0.05<br>(< 0.05 to < 0.05)              | < 0.05<br>(< 0.05 to 0.1)                     | < 0.05<br>(< 0.05 to < 0.05)            | 236.0<br>(-35.9 to 1,195.7)                       | 176.4<br>(-47.2 to 969.3)                           |
| Latent tuberculosis infection                                                        | 23,472.1<br>(19,563.7 to 27,838.5)        | --                                            | --                                      | --                                                | --                                                  |
| HIV/AIDS                                                                             | 4.8<br>(2.9 to 7.8)                       | 0.6 <sup>^</sup><br>(0.3 to 1.1)              | 0.6<br>(0.2 to 1.2)                     | 114.9<br>(67.9 to 184.6)                          | 62.5<br>(24.9 to 121.5)                             |
| Drug-susceptible HIV/AIDS - Tuberculosis                                             | 0.1<br>(< 0.05 to 0.1)                    | 0.1<br>(0.1 to 0.2)                           | < 0.05<br>(< 0.05 to < 0.05)            | -10.2<br>(-22.6 to 0.4)                           | -28.9<br>(-38.6 to -20.5)                           |
| Multidrug-resistant HIV/AIDS - Tuberculosis without extensive drug resistance        | < 0.05<br>(< 0.05 to < 0.05)              | < 0.05<br>(< 0.05 to < 0.05)                  | < 0.05<br>(< 0.05 to < 0.05)            | 37.9<br>(-73.6 to 432.3)                          | 9.3<br>(-79.1 to 321.8)                             |
| Extensively drug-resistant HIV/AIDS - Tuberculosis                                   | < 0.05<br>(< 0.05 to < 0.05)              | < 0.05<br>(< 0.05 to < 0.05)                  | < 0.05<br>(< 0.05 to < 0.05)            | 213.1<br>(-40.0 to 1,108.9)                       | 148.1<br>(-52.5 to 857.8)                           |
| HIV/AIDS resulting in other diseases                                                 | 4.7<br>(2.9 to 7.8)                       | 0.6<br>(0.3 to 1.1)                           | 0.5<br>(0.2 to 1.1)                     | 129.5<br>(73.1 to 233.6)                          | 72.5<br>(27.9 to 163.5)                             |
| <b>Diarrhoea, lower respiratory infections, and other common infectious diseases</b> | <b>5,195.2</b><br>(4,986.9 to 5,448.0)    | <b>270,474.4†</b><br>(247,684.2 to 295,270.2) | <b>277.8</b><br>(193.8 to 380.3)        | <b>20.9</b><br>(17.4 to 24.9)                     | <b>1.3</b><br>(-1.6 to 4.3)                         |
| Diarrhoeal diseases                                                                  | 1,059.0<br>(988.0 to 1,128.8)             | 67,917.6<br>(63,556.2 to 72,663.8)            | 120.7<br>(83.5 to 165.4)                | 26.8<br>(20.3 to 33.9)                            | 7.0<br>(2.0 to 12.8)                                |
| Intestinal infectious diseases                                                       | 1.9<br>(1.6 to 2.3)                       | 37.1†<br>(32.3 to 43.0)                       | 0.3<br>(0.2 to 0.5)                     | -0.5<br>(-15.4 to 16.6)                           | -14.2<br>(-26.1 to -1.4)                            |
| Typhoid fever                                                                        | 1.9<br>(1.6 to 2.3)                       | 30.4<br>(26.3 to 35.4)                        | 0.3<br>(0.2 to 0.4)                     | -0.6<br>(-16.4 to 17.9)                           | -14.1<br>(-26.4 to -0.3)                            |
| Paratyphoid fever                                                                    | 0.3<br>(0.2 to 0.4)                       | 6.7<br>(5.7 to 7.9)                           | < 0.05<br>(< 0.05 to < 0.05)            | 6.3<br>(-11.4 to 27.0)                            | -9.4<br>(-22.9 to 6.8)                              |
| Other intestinal infectious diseases                                                 | --                                        | --                                            | < 0.05<br>(< 0.05 to < 0.05)            | -22.6<br>(-38.6 to -3.9)                          | -33.7<br>(-44.1 to -21.5)                           |
| Lower respiratory infections                                                         | 146.6<br>(132.2 to 162.2)                 | 6,206.4<br>(5,570.6 to 6,926.6)               | 8.9<br>(5.8 to 12.8)                    | 20.3<br>(6.8 to 35.4)                             | 0.1<br>(-9.9 to 11.6)                               |
| Upper respiratory infections                                                         | 2,483.6<br>(2,195.9 to 2,789.8)           | 186,118.9<br>(163,486.3 to 210,187.3)         | 61.9<br>(36.6 to 96.8)                  | 20.1<br>(12.9 to 27.6)                            | 0.7<br>(-4.9 to 6.3)                                |
| Otitis media                                                                         | 1,363.1<br>(1,217.5 to 1,518.5)           | 7,707.4<br>(6,088.1 to 9,675.3)               | 39.5<br>(24.6 to 59.0)                  | 10.2<br>(2.0 to 18.8)                             | -6.9<br>(-13.6 to -0.1)                             |
| Meningitis                                                                           | 159.8<br>(137.0 to 186.9)                 | 28.0<br>(22.2 to 35.0)                        | 18.6<br>(12.9 to 24.5)                  | 19.7<br>(15.4 to 24.6)                            | -0.4<br>(-4.2 to 3.7)                               |
| Pneumococcal meningitis                                                              | 69.1<br>(56.3 to 84.6)                    | 6.4<br>(4.6 to 8.7)                           | 7.5<br>(5.2 to 10.5)                    | 21.6<br>(12.7 to 31.6)                            | 1.1<br>(-6.9 to 10.0)                               |
| H influenzae type B meningitis                                                       | 43.0<br>(32.9 to 56.2)                    | 10.7<br>(7.5 to 14.4)                         | 4.9<br>(3.4 to 6.6)                     | 15.6<br>(11.1 to 20.0)                            | -3.1<br>(-6.8 to 0.6)                               |
| Meningococcal infection                                                              | 25.8<br>(19.5 to 34.9)                    | 7.1<br>(5.0 to 9.7)                           | 3.0<br>(2.0 to 4.0)                     | 17.0<br>(12.0 to 21.8)                            | -2.9<br>(-7.1 to 1.2)                               |
| Other meningitis                                                                     | 22.0<br>(17.7 to 27.7)                    | 3.8<br>(2.4 to 5.7)                           | 3.2<br>(2.2 to 4.5)                     | 24.3<br>(16.9 to 32.3)                            | 2.8<br>(-2.4 to 8.6)                                |
| Encephalitis                                                                         | 227.9<br>(159.9 to 321.3)                 | 123.6<br>(110.5 to 138.1)                     | 24.5<br>(17.5 to 32.2)                  | 16.1<br>(2.7 to 30.6)                             | -5.1<br>(-15.4 to 5.8)                              |
| Diphtheria                                                                           | < 0.05<br>(< 0.05 to < 0.05)              | < 0.05<br>(< 0.05 to < 0.05)                  | < 0.05<br>(< 0.05 to < 0.05)            | -18.7<br>(-56.6 to 53.4)                          | -29.1<br>(-60.1 to 31.2)                            |
| Whooping cough                                                                       | 9.7<br>(7.5 to 12.6)                      | 71.0<br>(54.5 to 91.9)                        | 0.5<br>(0.3 to 0.8)                     | 2.3<br>(-28.6 to 52.8)                            | -13.6<br>(-39.4 to 29.1)                            |
| Tetanus                                                                              | 0.2<br>(0.2 to 0.2)                       | 0.4<br>(0.1 to 1.0)                           | < 0.05<br>(< 0.05 to < 0.05)            | -2.1<br>(-32.0 to 40.8)                           | -17.2<br>(-41.3 to 16.8)                            |
| Measles                                                                              | 0.3<br>(0.1 to 0.6)                       | 9.8<br>(3.1 to 23.2)                          | < 0.05<br>(< 0.05 to 0.1)               | -23.5<br>(-47.8 to 10.5)                          | -36.5<br>(-56.6 to -8.2)                            |
| Varicella and herpes zoster                                                          | 87.6<br>(81.6 to 93.9)                    | 2,254.0<br>(2,164.1 to 2,359.7)               | 2.9<br>(1.8 to 4.5)                     | 24.1<br>(8.3 to 42.1)                             | 0.1<br>(-11.2 to 12.6)                              |
| <b>Neglected tropical diseases and malaria</b>                                       | <b>12,531.7</b><br>(11,309.5 to 13,764.1) | <b>1,737.1†</b><br>(1,438.9 to 2,136.7)       | <b>91.8</b><br>(58.5 to 144.5)          | <b>-67.5</b><br>(-74.2 to -56.4)                  | <b>-73.8</b><br>(-79.5 to -64.5)                    |
| Malaria                                                                              | < 0.05<br>(< 0.05 to < 0.05)              | < 0.05<br>(< 0.05 to < 0.05)                  | < 0.05<br>(< 0.05 to < 0.05)            | 131.6<br>(-66.8 to 1,184.6)                       | 96.0<br>(-71.4 to 980.5)                            |
| Chagas disease                                                                       | --                                        | --                                            | --                                      | --                                                | --                                                  |
| Leishmaniasis                                                                        | 15.7<br>(9.8 to 24.1)                     | 3.4<br>(1.1 to 7.3)                           | 0.8<br>(0.4 to 1.6)                     | 3.0<br>(-20.2 to 46.6)                            | -17.1<br>(-33.9 to 14.0)                            |
| Visceral leishmaniasis                                                               | < 0.05<br>(< 0.05 to < 0.05)              | < 0.05<br>(< 0.05 to < 0.05)                  | < 0.05<br>(< 0.05 to < 0.05)            | 3.4<br>(-84.5 to 797.1)                           | -20.3<br>(-88.7 to 615.2)                           |
| Cutaneous and mucocutaneous leishmaniasis                                            | 13.1<br>(6.8 to 22.9)                     | 3.4<br>(1.1 to 7.3)                           | 0.8<br>(0.4 to 1.6)                     | 3.0<br>(-20.2 to 46.6)                            | -17.1<br>(-33.9 to 14.0)                            |
| African trypanosomiasis                                                              | --                                        | --                                            | --                                      | --                                                | --                                                  |
| Schistosomiasis                                                                      | 2,960.3<br>(2,799.9 to 3,126.6)           | 1,020.2<br>(963.0 to 1,083.4)                 | 34.2<br>(18.7 to 59.4)                  | -85.0<br>(-86.9 to -81.8)                         | -88.2<br>(-89.7 to -85.7)                           |
| Cysticercosis                                                                        | --                                        | --                                            | --                                      | --                                                | --                                                  |
| Cystic echinococcosis                                                                | 14.8<br>(3.1 to 58.4)                     | 3.1<br>(0.7 to 12.0)                          | 1.4<br>(0.2 to 5.4)                     | -32.6<br>(-91.9 to 428.4)                         | -45.4<br>(-92.8 to 328.3)                           |
| Lymphatic filariasis                                                                 | 5.9<br>(3.6 to 10.2)                      | 1.4<br>(1.3 to 1.5)                           | 0.5<br>(0.2 to 1.1)                     | -36.6<br>(-54.4 to -16.8)                         | -48.2<br>(-62.6 to -31.6)                           |
| Onchocerciasis                                                                       | --                                        | --                                            | --                                      | --                                                | --                                                  |
| Trachoma                                                                             | 175.8<br>(126.9 to 231.6)                 | --                                            | 10.7<br>(7.0 to 15.6)                   | -28.7<br>(-45.5 to -6.3)                          | -43.8<br>(-59.1 to -22.3)                           |
| Dengue                                                                               | 40.5<br>(21.1 to 69.8)                    | 677.8<br>(396.4 to 1,055.3)                   | 6.6<br>(2.7 to 13.0)                    | 169.8<br>(97.5 to 563.5)                          | 127.1<br>(67.5 to 442.1)                            |
| Yellow fever                                                                         | --                                        | --                                            | --                                      | --                                                | --                                                  |
| Rabies                                                                               | < 0.05<br>(< 0.05 to < 0.05)              | < 0.05<br>(< 0.05 to < 0.05)                  | < 0.05<br>(< 0.05 to < 0.05)            | -51.1<br>(-74.4 to -11.3)                         | -56.8<br>(-76.0 to -26.0)                           |
| Intestinal nematode infections                                                       | 8,875.5<br>(7,597.7 to 10,204.1)          | --                                            | 17.7<br>(9.6 to 29.6)                   | 22.1<br>(-10.1 to 64.9)                           | 1.8<br>(-25.8 to 38.8)                              |
| Ascariasis                                                                           | 4,501.8<br>(3,477.9 to 5,748.2)           | --                                            | 1.4<br>(0.7 to 2.6)                     | 20.3<br>(-32.5 to 117.1)                          | -0.1<br>(-45.8 to 84.5)                             |

| Cause                                                                   | Prevalence in thousands (95% UI)                 | Incidence in thousands (95% UI)                      | YLDs in thousands (95% UI)                     |                                                   |                                                     |
|-------------------------------------------------------------------------|--------------------------------------------------|------------------------------------------------------|------------------------------------------------|---------------------------------------------------|-----------------------------------------------------|
|                                                                         | 2016 counts                                      | 2016 counts                                          | 2016 counts                                    | Percentage change in counts between 2006 and 2016 | Percentage change in age-standardised rates between |
| Trichuriasis                                                            | 579.1<br>(431.3 to 765.9)                        | --                                                   | < 0.05<br>(< 0.05 to 0.1)                      | 24.4<br>(-75.8 to 483.0)                          | 3.2<br>(-80.5 to 407.6)                             |
| Hookworm disease                                                        | 4,237.5<br>(3,414.9 to 5,210.5)                  | --                                                   | 16.3<br>(8.8 to 27.3)                          | 22.2<br>(-12.0 to 68.3)                           | 1.9<br>(-27.2 to 41.4)                              |
| Food-borne trematodiasis                                                | 350.3<br>(268.3 to 436.0)                        | 30.9<br>(24.1 to 37.4)                               | 6.8<br>(2.0 to 14.6)                           | 21.5<br>(-3.2 to 45.7)                            | -5.7<br>(-26.3 to 12.6)                             |
| Leprosy                                                                 | 1.8<br>(1.6 to 1.9)                              | 0.2<br>(0.2 to 0.2)                                  | 0.1<br>(0.1 to 0.2)                            | 6.4<br>(-12.9 to 31.5)                            | -16.0<br>(-34.4 to 8.7)                             |
| Ebola virus disease                                                     | --                                               | --                                                   | --                                             | --                                                | --                                                  |
| Zika virus disease                                                      | --                                               | --                                                   | --                                             | --                                                | --                                                  |
| Guinea worm disease                                                     | --                                               | --                                                   | --                                             | --                                                | --                                                  |
| Other neglected tropical diseases                                       | 666.2<br>(623.5 to 713.5)                        | --                                                   | 13.1<br>(8.1 to 19.8)                          | -7.0<br>(-20.5 to 7.5)                            | -21.6<br>(-32.7 to -9.9)                            |
| <b>Maternal disorders</b>                                               | <b>147.2</b><br><b>(108.5 to 194.5)</b>          | <b>1,389.0†</b><br><b>(1,243.1 to 1,550.7)</b>       | <b>9.0</b><br><b>(5.4 to 13.9)</b>             | <b>-17.8</b><br><b>(-43.3 to 21.7)</b>            | <b>-29.4</b><br><b>(-51.2 to 4.7)</b>               |
| Maternal haemorrhage                                                    | 18.9<br>(14.1 to 25.3)                           | 104.7<br>(76.1 to 140.3)                             | 0.7<br>(0.4 to 1.0)                            | -1.4<br>(-35.2 to 50.6)                           | -17.1<br>(-45.0 to 24.5)                            |
| Maternal sepsis and other pregnancy related infections                  | 26.2<br>(14.9 to 42.0)                           | 274.3<br>(197.3 to 378.4)                            | 1.1<br>(0.5 to 2.2)                            | 7.7<br>(-50.8 to 138.9)                           | -7.6<br>(-56.8 to 103.4)                            |
| Maternal hypertensive disorders                                         | 100.9<br>(64.3 to 141.8)                         | 444.8<br>(356.9 to 534.2)                            | 4.8<br>(2.5 to 8.2)                            | -25.1<br>(-56.2 to 28.3)                          | -35.4<br>(-62.0 to 10.9)                            |
| Maternal obstructed labour and uterine rupture                          | 2.2<br>(1.2 to 3.5)                              | 158.1<br>(114.7 to 215.8)                            | 0.7<br>(0.2 to 1.3)                            | -6.6<br>(-66.9 to 136.9)                          | -20.4<br>(-71.4 to 106.2)                           |
| Maternal abortion, miscarriage, and ectopic pregnancy                   | 3.3<br>(2.2 to 4.7)                              | 407.1<br>(335.8 to 499.8)                            | 0.4<br>(0.2 to 0.7)                            | 7.0<br>(-49.8 to 127.3)                           | -12.0<br>(-58.6 to 88.2)                            |
| Other maternal disorders                                                | --                                               | --                                                   | 1.4<br>(0.8 to 2.1)                            | -21.9<br>(-46.1 to 15.2)                          | -32.3<br>(-53.1 to -0.0)                            |
| <b>Neonatal disorders</b>                                               | <b>890.6</b><br><b>(692.8 to 1,373.8)</b>        | --                                                   | <b>200.0</b><br><b>(116.5 to 417.8)</b>        | <b>15.8</b><br><b>(-0.1 to 34.3)</b>              | <b>-2.2</b><br><b>(-15.8 to 13.7)</b>               |
| Neonatal preterm birth complications                                    | 634.2<br>(498.7 to 829.1)                        | --                                                   | 76.0<br>(47.3 to 118.6)                        | 10.2<br>(-14.4 to 41.4)                           | -6.9<br>(-27.7 to 19.2)                             |
| Neonatal encephalopathy due to birth asphyxia and trauma                | 121.9<br>(58.7 to 217.5)                         | --                                                   | 18.3<br>(3.6 to 46.5)                          | 26.6<br>(-25.6 to 188.2)                          | 6.5<br>(-37.5 to 145.7)                             |
| Neonatal sepsis and other neonatal infections                           | 202.3<br>(68.5 to 645.1)                         | --                                                   | 87.1<br>(24.9 to 294.8)                        | 19.6<br>(-2.8 to 61.0)                            | 1.4<br>(-17.9 to 38.2)                              |
| Hemolytic disease and other neonatal jaundice                           | 31.9<br>(27.8 to 36.6)                           | --                                                   | 10.1<br>(7.3 to 13.2)                          | 14.5<br>(-3.6 to 33.9)                            | -3.9<br>(-17.4 to 10.5)                             |
| Other neonatal disorders                                                | --                                               | --                                                   | 8.5<br>(4.7 to 18.2)                           | 10.5<br>(-6.7 to 30.2)                            | -8.7<br>(-23.0 to 7.7)                              |
| <b>Nutritional deficiencies</b>                                         | <b>16,252.0</b><br><b>(15,487.1 to 16,903.3)</b> | <b>732.2†</b><br><b>(632.1 to 842.1)</b>             | <b>355.1</b><br><b>(238.2 to 516.9)</b>        | <b>0.2</b><br><b>(-7.7 to 8.1)</b>                | <b>-14.8</b><br><b>(-21.2 to -8.6)</b>              |
| Protein-energy malnutrition                                             | 732.6<br>(634.1 to 833.1)                        | 365.0<br>(319.0 to 412.4)                            | 36.6<br>(22.8 to 54.3)                         | 20.2<br>(-7.2 to 54.8)                            | 0.4<br>(-22.4 to 29.3)                              |
| Iodine deficiency                                                       | 1,042.1<br>(913.9 to 1,184.9)                    | 28.8<br>(25.4 to 32.6)                               | 28.2<br>(17.7 to 40.9)                         | -6.0<br>(-15.0 to 5.1)                            | -22.4<br>(-29.5 to -14.4)                           |
| Vitamin A deficiency                                                    | 426.9<br>(334.9 to 532.0)                        | 338.4<br>(254.6 to 431.7)                            | 11.0<br>(6.2 to 18.1)                          | 14.1<br>(-3.4 to 34.6)                            | -5.5<br>(-19.9 to 10.6)                             |
| Iron-deficiency anaemia                                                 | 14,484.3<br>(13,755.4 to 15,340.4)               | --                                                   | 278.1<br>(179.4 to 424.2)                      | -1.8<br>(-11.5 to 7.1)                            | -15.6<br>(-23.2 to -8.4)                            |
| Other nutritional deficiencies                                          | --                                               | --                                                   | 1.2<br>(0.8 to 1.8)                            | 19.9<br>(-8.7 to 56.5)                            | -0.4<br>(-24.0 to 29.8)                             |
| <b>Other communicable, maternal, neonatal, and nutritional diseases</b> | <b>23,709.0</b><br><b>(22,484.8 to 24,863.3)</b> | <b>13,426.2</b><br><b>(11,471.1 to 15,466.9)</b>     | <b>71.8</b><br><b>(44.7 to 113.4)</b>          | <b>21.8</b><br><b>(13.5 to 30.3)</b>              | <b>-2.0</b><br><b>(-8.2 to 4.3)</b>                 |
| Sexually transmitted diseases excluding HIV                             | 13,636.0<br>(12,625.7 to 14,687.0)               | 12,031.5<br>(10,186.4 to 14,066.3)                   | 59.0<br>(35.6 to 94.5)                         | 27.3<br>(17.6 to 37.2)                            | 0.8<br>(-6.5 to 8.4)                                |
| Syphilis                                                                | 139.1<br>(103.2 to 184.0)                        | 97.5<br>(69.5 to 131.9)                              | 0.8<br>(0.6 to 1.2)                            | 32.1<br>(18.7 to 47.6)                            | 2.8<br>(-7.8 to 15.1)                               |
| Chlamydial infection                                                    | 1,101.4<br>(845.4 to 1,417.8)                    | 841.6<br>(665.5 to 1,054.1)                          | 5.6<br>(3.3 to 9.2)                            | 19.7<br>(3.8 to 39.2)                             | -2.6<br>(-15.0 to 11.8)                             |
| Gonococcal infection                                                    | 2,427.9<br>(1,980.3 to 3,017.1)                  | 8,577.7<br>(6,713.8 to 10,540.8)                     | 29.7<br>(17.4 to 48.6)                         | 29.0<br>(15.0 to 42.5)                            | 1.8<br>(-8.6 to 12.0)                               |
| Trichomoniasis                                                          | 1,702.7<br>(1,457.5 to 1,958.5)                  | 1,443.6<br>(1,236.2 to 1,670.5)                      | 2.2<br>(0.8 to 4.6)                            | 25.7<br>(16.6 to 35.7)                            | 2.3<br>(-4.9 to 9.8)                                |
| Genital herpes                                                          | 8,969.0<br>(7,590.4 to 10,525.2)                 | 645.8<br>(545.1 to 773.2)                            | 2.3<br>(0.8 to 5.4)                            | 26.3<br>(16.7 to 35.3)                            | 0.2<br>(-5.9 to 6.5)                                |
| Other sexually transmitted diseases                                     | 378.8<br>(350.4 to 407.9)                        | 425.2<br>(332.3 to 538.4)                            | 18.4<br>(11.6 to 28.9)                         | 27.1<br>(16.4 to 37.8)                            | -0.1<br>(-8.4 to 8.4)                               |
| Hepatitis                                                               | 11,850.1<br>(10,701.1 to 13,133.7)               | 1,394.7<br>(1,087.8 to 1,801.3)                      | 1.5<br>(0.9 to 2.4)                            | 2.0<br>(-19.1 to 27.4)                            | -15.7<br>(-32.7 to 3.5)                             |
| Acute hepatitis A                                                       | 26.0<br>(6.4 to 54.0)                            | 338.1<br>(83.1 to 702.2)                             | 0.3<br>(0.1 to 0.5)                            | -13.8<br>(-64.8 to 148.4)                         | -22.8<br>(-66.3 to 86.6)                            |
| Hepatitis B                                                             | 4,033.7<br>(3,228.2 to 5,040.4)                  | 599.5<br>(474.6 to 755.2)                            | 0.8<br>(0.5 to 1.3)                            | -5.1<br>(-25.1 to 18.3)                           | -20.4<br>(-38.8 to 1.7)                             |
| Hepatitis C                                                             | 7,787.6<br>(6,991.5 to 8,584.9)                  | 419.8<br>(379.3 to 462.0)                            | 0.4<br>(0.2 to 0.8)                            | 44.4<br>(5.0 to 106.7)                            | 16.8<br>(-14.1 to 62.8)                             |
| Acute hepatitis E                                                       | 2.9<br>(2.2 to 3.8)                              | 37.3<br>(29.1 to 48.9)                               | 0.1<br>(< 0.05 to 0.1)                         | -2.3<br>(-13.6 to 9.3)                            | -13.7<br>(-24.0 to -4.3)                            |
| Other infectious diseases                                               | 532.4<br>(498.7 to 570.2)                        | 0.1<br>(0.1 to 0.2)                                  | 11.2<br>(7.0 to 17.2)                          | 1.7<br>(-11.0 to 15.7)                            | -13.8<br>(-24.1 to -2.6)                            |
| <b>Non-communicable diseases</b>                                        | <b>82,682.1</b><br><b>(82,067.8 to 83,318.6)</b> | <b>211,694.0†</b><br><b>(198,957.6 to 226,374.8)</b> | <b>8,339.6</b><br><b>(6,089.6 to 10,823.0)</b> | <b>24.9</b><br><b>(22.3 to 27.4)</b>              | <b>0.8</b><br><b>(-1.0 to 2.5)</b>                  |
| <b>Neoplasms</b>                                                        | <b>128.1</b><br><b>(118.6 to 141.5)</b>          | <b>73.8</b><br><b>(68.3 to 89.8)</b>                 | <b>23.9</b><br><b>(17.0 to 31.9)</b>           | <b>37.9</b><br><b>(29.7 to 46.6)</b>              | <b>6.9</b><br><b>(0.8 to 13.1)</b>                  |
| Lip and oral cavity cancer                                              | 2.9<br>(2.5 to 3.4)                              | 0.8<br>(0.7 to 1.0)                                  | 0.3<br>(0.2 to 0.4)                            | 31.2<br>(15.5 to 46.9)                            | 1.3<br>(-11.5 to 14.2)                              |
| Nasopharynx cancer                                                      | 0.6<br>(0.5 to 0.8)                              | 0.2<br>(0.1 to 0.2)                                  | 0.1<br>(< 0.05 to 0.1)                         | 17.9<br>(-1.1 to 41.2)                            | -6.2<br>(-19.8 to 10.2)                             |
| Other pharynx cancer                                                    | 0.6<br>(0.5 to 0.7)                              | 0.2<br>(0.2 to 0.3)                                  | 0.1<br>(0.1 to 0.1)                            | 34.0<br>(16.2 to 51.0)                            | 2.8<br>(-10.5 to 16.0)                              |
| Oesophageal cancer                                                      | 1.3<br>(1.2 to 1.4)                              | 1.1<br>(1.0 to 1.2)                                  | 0.3<br>(0.2 to 0.4)                            | 32.1<br>(20.6 to 44.5)                            | 1.3<br>(-7.4 to 10.8)                               |
| Stomach cancer                                                          | 3.8<br>(3.6 to 4.1)                              | 2.6<br>(2.4 to 2.7)                                  | 0.7<br>(0.5 to 0.9)                            | 17.9<br>(7.4 to 29.4)                             | -8.5<br>(-17.2 to 1.2)                              |
| Colon and rectum cancer                                                 | 14.0<br>(11.8 to 16.7)                           | 4.4<br>(3.7 to 5.3)                                  | 1.6<br>(1.1 to 2.1)                            | 45.7<br>(25.2 to 68.1)                            | 12.3<br>(-3.4 to 30.4)                              |
| Liver cancer                                                            | 7.8<br>(6.6 to 9.2)                              | 12.0<br>(10.4 to 13.7)                               | 2.5<br>(1.7 to 3.5)                            | 41.9<br>(16.8 to 69.6)                            | 8.6<br>(-9.9 to 28.9)                               |
| Liver cancer due to hepatitis B                                         | 1.4<br>(1.1 to 1.9)                              | 1.5<br>(1.1 to 2.0)                                  | 0.3<br>(0.2 to 0.5)                            | 46.8<br>(24.2 to 70.7)                            | 12.0<br>(-4.6 to 30.3)                              |



| Cause                                              | Prevalence in thousands (95% UI)              | Incidence in thousands (95% UI)                | YLDs in thousands (95% UI)              |                                                   |                                                     |
|----------------------------------------------------|-----------------------------------------------|------------------------------------------------|-----------------------------------------|---------------------------------------------------|-----------------------------------------------------|
|                                                    | 2016 counts                                   | 2016 counts                                    | 2016 counts                             | Percentage change in counts between 2006 and 2016 | Percentage change in age-standardised rates between |
| Liver cancer due to hepatitis C                    | 7.4<br>(6.1 to 8.7)                           | 7.8<br>(6.6 to 9.0)                            | 1.6<br>(1.1 to 2.2)                     | 39.4<br>(10.7 to 76.7)                            | 6.8<br>(-14.7 to 33.2)                              |
| Liver cancer due to alcohol use                    | 0.8<br>(0.6 to 1.3)                           | 0.9<br>(0.6 to 1.4)                            | 0.2<br>(0.1 to 0.3)                     | 47.4<br>(20.7 to 78.7)                            | 12.1<br>(-7.4 to 34.8)                              |
| Liver cancer due to other causes                   | 1.8<br>(1.4 to 2.2)                           | 1.8<br>(1.4 to 2.3)                            | 0.4<br>(0.3 to 0.6)                     | 45.5<br>(22.2 to 75.3)                            | 11.8<br>(-5.3 to 33.7)                              |
| Gallbladder and biliary tract cancer               | 0.5<br>(0.4 to 0.8)                           | 0.7<br>(0.6 to 1.1)                            | 0.2<br>(0.1 to 0.3)                     | 20.4<br>(9.9 to 30.0)                             | -6.6<br>(-15.0 to 0.7)                              |
| Pancreatic cancer                                  | 1.9<br>(1.7 to 2.1)                           | 2.5<br>(2.2 to 2.8)                            | 0.5<br>(0.4 to 0.7)                     | 38.1<br>(26.6 to 49.7)                            | 6.7<br>(-2.6 to 15.5)                               |
| Larynx cancer                                      | 2.6<br>(2.1 to 2.9)                           | 0.8<br>(0.6 to 0.9)                            | 0.3<br>(0.2 to 0.4)                     | 34.0<br>(16.9 to 53.6)                            | 2.7<br>(-10.4 to 18.0)                              |
| Tracheal, bronchus, and lung cancer                | 5.4<br>(4.7 to 6.1)                           | 4.6<br>(4.1 to 5.3)                            | 1.1<br>(0.8 to 1.5)                     | 39.8<br>(16.0 to 69.6)                            | 7.9<br>(-11.3 to 31.1)                              |
| Malignant skin melanoma                            | 1.1<br>(0.8 to 1.3)                           | 0.3<br>(0.2 to 0.3)                            | 0.1<br>(0.1 to 0.1)                     | 62.5<br>(44.4 to 80.0)                            | 24.5<br>(11.4 to 37.3)                              |
| Non-melanoma skin cancer                           | 0.4<br>(0.3 to 0.5)                           | 1.5<br>(1.2 to 1.8)                            | < 0.05<br>( $< 0.05$ to $< 0.05$ )      | 21.6<br>(-1.1 to 43.9)                            | -7.3<br>(-27.2 to 12.6)                             |
| Non-melanoma skin cancer (squamous-cell carcinoma) | 0.4<br>(0.2 to 0.5)                           | 0.5<br>(0.4 to 0.6)                            | < 0.05<br>( $< 0.05$ to $< 0.05$ )      | 21.4<br>(-2.7 to 45.0)                            | -7.5<br>(-29.0 to 13.5)                             |
| Non-melanoma skin cancer (basal-cell carcinoma)    | 0.1<br>(0.1 to 0.2)                           | 1.0<br>(0.8 to 1.3)                            | < 0.05<br>( $< 0.05$ to $< 0.05$ )      | 23.5<br>(6.7 to 37.3)                             | -5.4<br>(-18.4 to 6.3)                              |
| Breast cancer                                      | 39.2<br>(27.9 to 72.7)                        | 8.5<br>(6.0 to 16.1)                           | 3.6<br>(2.1 to 6.6)                     | 36.0<br>(3.3 to 67.9)                             | 3.9<br>(-20.4 to 27.1)                              |
| Cervical cancer                                    | 4.0<br>(2.9 to 5.7)                           | 1.1<br>(0.8 to 1.5)                            | 0.4<br>(0.2 to 0.6)                     | 18.5<br>(-6.6 to 46.6)                            | -9.4<br>(-28.1 to 10.9)                             |
| Uterine cancer                                     | 5.4<br>(4.3 to 6.7)                           | 1.2<br>(1.0 to 1.5)                            | 0.4<br>(0.3 to 0.6)                     | 54.9<br>(21.9 to 94.8)                            | 17.0<br>(-6.9 to 45.7)                              |
| Ovarian cancer                                     | 8.4<br>(6.8 to 9.4)                           | 2.8<br>(2.3 to 3.1)                            | 1.3<br>(0.8 to 1.8)                     | 43.0<br>(4.2 to 93.4)                             | 10.7<br>(-20.7 to 50.8)                             |
| Prostate cancer                                    | 10.3<br>(8.3 to 15.5)                         | 2.9<br>(2.3 to 4.2)                            | 1.2<br>(0.8 to 2.0)                     | 53.3<br>(19.3 to 93.4)                            | 17.0<br>(-8.6 to 45.9)                              |
| Testicular cancer                                  | 0.5<br>(0.4 to 0.6)                           | 0.1<br>(0.1 to 0.1)                            | < 0.05<br>( $< 0.05$ to 0.1)            | 50.5<br>(21.4 to 90.9)                            | 16.6<br>(-4.7 to 44.6)                              |
| Kidney cancer                                      | 6.7<br>(5.8 to 7.7)                           | 1.8<br>(1.5 to 2.1)                            | 0.6<br>(0.4 to 0.8)                     | 49.2<br>(28.3 to 73.8)                            | 16.3<br>(-1.3 to 35.3)                              |
| Bladder cancer                                     | 42.1<br>(36.4 to 49.1)                        | 10.4<br>(9.0 to 12.1)                          | 3.7<br>(2.6 to 4.9)                     | 54.9<br>(29.7 to 81.6)                            | 16.7<br>(-1.6 to 36.1)                              |
| Brain and nervous system cancer                    | 5.2<br>(4.2 to 7.3)                           | 2.4<br>(1.8 to 3.6)                            | 0.8<br>(0.5 to 1.1)                     | 29.5<br>(11.9 to 48.1)                            | 3.2<br>(-11.1 to 19.2)                              |
| Thyroid cancer                                     | 3.3<br>(2.7 to 6.6)                           | 0.7<br>(0.5 to 1.3)                            | 0.2<br>(0.1 to 0.4)                     | 65.5<br>(35.7 to 100.3)                           | 22.6<br>(0.5 to 49.3)                               |
| Mesothelioma                                       | 0.2<br>(0.1 to 0.3)                           | 0.2<br>(0.1 to 0.2)                            | 0.1<br>( $< 0.05$ to 0.1)               | 34.2<br>(19.3 to 53.6)                            | 3.2<br>(-8.3 to 17.5)                               |
| Hodgkin lymphoma                                   | 3.4<br>(1.7 to 4.5)                           | 1.1<br>(0.6 to 1.3)                            | 0.4<br>(0.2 to 0.6)                     | 13.5<br>(-2.0 to 29.2)                            | -7.5<br>(-18.7 to 4.1)                              |
| Non-Hodgkin's lymphoma                             | 5.2<br>(4.1 to 9.6)                           | 1.8<br>(1.4 to 3.6)                            | 0.6<br>(0.3 to 1.1)                     | 25.0<br>(6.8 to 46.2)                             | -0.8<br>(-15.9 to 15.0)                             |
| Multiple myeloma                                   | 1.1<br>(0.8 to 1.9)                           | 0.7<br>(0.5 to 1.3)                            | 0.3<br>(0.2 to 0.6)                     | 44.0<br>(26.1 to 59.9)                            | 10.7<br>(-3.3 to 22.7)                              |
| Leukaemia                                          | 10.7<br>(9.0 to 14.9)                         | 3.2<br>(2.8 to 4.4)                            | 1.4<br>(0.9 to 2.1)                     | 16.3<br>(4.4 to 25.9)                             | -6.0<br>(-15.1 to 1.2)                              |
| Acute lymphoid leukaemia                           | 2.4<br>(1.7 to 3.0)                           | 0.6<br>(0.5 to 0.8)                            | 0.3<br>(0.2 to 0.4)                     | 13.0<br>(-5.4 to 35.2)                            | -4.2<br>(-17.9 to 11.9)                             |
| Chronic lymphoid leukaemia                         | 1.8<br>(1.3 to 3.0)                           | 0.4<br>(0.3 to 0.7)                            | 0.2<br>(0.1 to 0.4)                     | 29.5<br>(10.3 to 49.9)                            | 0.1<br>(-14.6 to 15.4)                              |
| Acute myeloid leukaemia                            | 1.5<br>(1.2 to 2.0)                           | 0.9<br>(0.8 to 1.2)                            | 0.3<br>(0.2 to 0.4)                     | 24.8<br>(8.6 to 39.9)                             | 1.9<br>(-10.0 to 13.4)                              |
| Chronic myeloid leukaemia                          | 1.4<br>(0.9 to 1.9)                           | 0.5<br>(0.3 to 0.7)                            | 0.2<br>(0.1 to 0.3)                     | 17.2<br>(1.3 to 35.3)                             | -8.8<br>(-20.4 to 4.0)                              |
| Other leukaemia                                    | 3.5<br>(2.5 to 7.4)                           | 0.8<br>(0.6 to 1.7)                            | 0.4<br>(0.3 to 1.0)                     | 7.9<br>(-9.1 to 26.3)                             | -12.7<br>(-26.7 to 0.8)                             |
| Other neoplasms                                    | 10.7<br>(9.4 to 12.9)                         | 3.6<br>(3.1 to 4.8)                            | 1.1<br>(0.7 to 1.5)                     | 23.1<br>(8.4 to 39.4)                             | -1.2<br>(-12.8 to 11.8)                             |
| <b>Cardiovascular diseases</b>                     | <b>5,642.0</b><br><b>(5,466.0 to 5,843.9)</b> | <b>673.4†</b><br><b>(643.8 to 707.1)</b>       | <b>322.9</b><br><b>(234.9 to 420.4)</b> | <b>31.1</b><br><b>(26.6 to 35.6)</b>              | <b>2.8</b><br><b>(-0.5 to 6.4)</b>                  |
| Rheumatic heart disease                            | 632.7<br>(561.5 to 710.9)                     | 20.7<br>(18.4 to 23.4)                         | 29.9<br>(18.7 to 44.0)                  | 33.5<br>(22.3 to 46.4)                            | 8.5<br>(-0.4 to 18.6)                               |
| Ischaemic heart disease                            | 2,567.3<br>(2,419.7 to 2,707.1)               | 365.2<br>(340.6 to 390.6)                      | 88.5<br>(61.5 to 121.3)                 | 37.9<br>(32.0 to 44.2)                            | 7.1<br>(2.8 to 11.5)                                |
| Cerebrovascular disease                            | 691.6<br>(651.4 to 732.4)                     | 107.9‡<br>(98.4 to 117.5)                      | 106.0<br>(76.0 to 133.6)                | 26.5<br>(17.3 to 35.8)                            | -1.6<br>(-8.3 to 5.5)                               |
| Ischaemic stroke                                   | 613.3<br>(553.9 to 675.8)                     | 80.6‡<br>(71.4 to 90.1)                        | 90.4<br>(64.2 to 114.7)                 | 25.7<br>(15.5 to 36.3)                            | -2.2<br>(-10.3 to 5.7)                              |
| Hemorrhagic stroke                                 | 106.5<br>(95.4 to 118.2)                      | 27.3‡<br>(24.5 to 30.3)                        | 15.6<br>(11.1 to 20.0)                  | 31.0<br>(15.7 to 46.5)                            | 2.6<br>(-9.7 to 14.8)                               |
| Hypertensive heart disease                         | 102.2<br>(86.9 to 119.5)                      | --                                             | 8.1<br>(5.6 to 11.4)                    | 30.7<br>(16.4 to 46.9)                            | 1.0<br>(-9.3 to 12.8)                               |
| Cardiomyopathy and myocarditis                     | 39.9<br>(35.5 to 44.6)                        | 32.8†<br>(28.5 to 37.8)                        | 4.3<br>(2.9 to 6.2)                     | 29.3<br>(14.2 to 47.2)                            | 5.3<br>(-5.5 to 17.6)                               |
| Myocarditis                                        | 17.4<br>(15.5 to 19.5)                        | 32.8<br>(28.5 to 37.8)                         | 1.2<br>(0.8 to 1.8)                     | 25.7<br>(17.5 to 34.7)                            | 4.4<br>(-3.0 to 12.5)                               |
| Alcoholic cardiomyopathy                           | 4.3<br>(3.6 to 5.1)                           | --                                             | 0.4<br>(0.2 to 0.5)                     | 38.3<br>(17.0 to 61.0)                            | 6.2<br>(-11.6 to 27.0)                              |
| Other cardiomyopathy                               | 32.2<br>(27.9 to 37.1)                        | --                                             | 2.7<br>(1.8 to 3.9)                     | 29.9<br>(7.2 to 57.9)                             | 5.5<br>(-10.2 to 25.0)                              |
| Atrial fibrillation and flutter                    | 294.2<br>(258.4 to 338.3)                     | 25.8<br>(22.2 to 30.4)                         | 22.7<br>(15.3 to 31.7)                  | 30.7<br>(21.1 to 40.3)                            | 2.0<br>(-4.7 to 8.8)                                |
| Peripheral vascular disease                        | 1,077.1<br>(927.5 to 1,255.3)                 | 106.6<br>(91.5 to 125.0)                       | 4.9<br>(2.3 to 9.1)                     | 29.5<br>(19.5 to 39.4)                            | 0.4<br>(-7.0 to 7.3)                                |
| Endocarditis                                       | 4.9<br>(4.3 to 5.6)                           | 14.5<br>(13.1 to 16.2)                         | 0.4<br>(0.3 to 0.6)                     | 30.3<br>(14.5 to 48.7)                            | 4.3<br>(-12.2 to 24.7)                              |
| Other cardiovascular and circulatory diseases      | 1,115.7<br>(960.5 to 1,302.7)                 | --                                             | 58.1<br>(39.1 to 82.5)                  | 29.3<br>(19.6 to 39.3)                            | 4.5<br>(-3.2 to 11.9)                               |
| <b>Chronic respiratory diseases</b>                | <b>8,473.6</b><br><b>(8,087.1 to 8,853.8)</b> | <b>1,487.9†</b><br><b>(1,380.1 to 1,597.8)</b> | <b>353.7</b><br><b>(256.7 to 475.9)</b> | <b>31.4</b><br><b>(25.8 to 36.7)</b>              | <b>6.9</b><br><b>(2.8 to 10.8)</b>                  |
| Chronic obstructive pulmonary disease              | 2,287.6<br>(2,187.2 to 2,390.6)               | 145.8<br>(139.0 to 152.3)                      | 90.9<br>(76.1 to 104.7)                 | 33.9<br>(23.6 to 45.2)                            | 4.5<br>(-3.5 to 13.2)                               |
| Pneumoconiosis                                     | 4.4<br>(4.0 to 4.8)                           | 0.3<br>(0.3 to 0.3)                            | 0.7<br>(0.5 to 1.0)                     | 34.4<br>(28.2 to 40.6)                            | 3.3<br>(-1.6 to 8.3)                                |
| Silicosis                                          | 0.9<br>(0.8 to 1.1)                           | 0.1<br>(0.1 to 0.1)                            | 0.1<br>(0.1 to 0.2)                     | 34.5<br>(27.7 to 42.2)                            | 2.9<br>(-2.0 to 8.3)                                |

| Cause                                                          | Prevalence in thousands (95% UI)           | Incidence in thousands (95% UI)                     | YLDs in thousands (95% UI)              |                                                   |                                                     |
|----------------------------------------------------------------|--------------------------------------------|-----------------------------------------------------|-----------------------------------------|---------------------------------------------------|-----------------------------------------------------|
|                                                                | 2016 counts                                | 2016 counts                                         | 2016 counts                             | Percentage change in counts between 2006 and 2016 | Percentage change in age-standardised rates between |
| Asbestosis                                                     | 1.2<br>(1.0 to 1.3)                        | 0.1<br>(0.1 to 0.1)                                 | 0.2<br>(0.1 to 0.3)                     | 31.7<br>(25.0 to 38.6)                            | 1.7<br>(-3.0 to 6.7)                                |
| Coal workers pneumoconiosis                                    | --                                         | --                                                  | --                                      | --                                                | --                                                  |
| Other pneumoconiosis                                           | 2.3<br>(1.9 to 2.6)                        | 0.2<br>(0.1 to 0.2)                                 | 0.4<br>(0.2 to 0.5)                     | 35.9<br>(24.8 to 48.0)                            | 4.2<br>(-4.5 to 13.5)                               |
| Asthma                                                         | 6,465.8<br>(5,963.2 to 7,030.2)            | 1,338.7<br>(1,230.0 to 1,448.6)                     | 252.1<br>(165.8 to 368.6)               | 29.8<br>(23.7 to 36.1)                            | 7.6<br>(2.7 to 12.6)                                |
| Interstitial lung disease and pulmonary sarcoidosis            | 28.0<br>(25.2 to 30.9)                     | 3.1<br>(2.8 to 3.4)                                 | 3.0<br>(2.0 to 4.3)                     | 29.5<br>(16.6 to 43.4)                            | 1.3<br>(-9.5 to 13.0)                               |
| Other chronic respiratory diseases                             | --                                         | --                                                  | 7.0<br>(5.6 to 8.5)                     | 64.7<br>(34.7 to 100.6)                           | 36.7<br>(15.3 to 61.8)                              |
| <b>Cirrhosis and other chronic liver diseases</b>              | <b>562.8<br/>(532.8 to 596.4)</b>          | <b>43.8<br/>(41.6 to 46.1)</b>                      | <b>26.3<br/>(18.2 to 36.3)</b>          | <b>15.9<br/>(6.5 to 26.5)</b>                     | <b>-6.9<br/>(-12.9 to -0.3)</b>                     |
| Cirrhosis and other chronic liver diseases due to hepatitis B  | 86.6<br>(68.2 to 107.0)                    | 7.2<br>(5.4 to 9.0)                                 | 3.4<br>(2.2 to 5.1)                     | 21.3<br>(1.8 to 46.1)                             | -5.9<br>(-19.6 to 10.6)                             |
| Cirrhosis and other chronic liver diseases due to hepatitis C  | 288.2<br>(257.2 to 319.7)                  | 23.4<br>(20.7 to 26.3)                              | 11.5<br>(7.9 to 15.9)                   | 18.2<br>(6.1 to 31.4)                             | -8.3<br>(-15.8 to 0.5)                              |
| Cirrhosis and other chronic liver diseases due to alcohol use  | 35.1<br>(30.7 to 40.3)                     | 3.1<br>(2.6 to 3.6)                                 | 1.4<br>(0.9 to 2.0)                     | 21.9<br>(-2.3 to 49.9)                            | -6.1<br>(-23.7 to 13.6)                             |
| Cirrhosis and other chronic liver diseases due to other causes | 152.8<br>(138.1 to 169.1)                  | 10.1<br>(9.1 to 11.3)                               | 10.0<br>(6.8 to 14.1)                   | 11.0<br>(-4.9 to 30.8)                            | -5.3<br>(-17.3 to 9.1)                              |
| <b>Digestive diseases</b>                                      | <b>2,955.1<br/>(2,804.8 to 3,127.4)</b>    | <b>2,181.9<sup>†</sup><br/>(2,050.3 to 2,330.7)</b> | <b>91.5<br/>(64.2 to 124.2)</b>         | <b>28.5<br/>(19.9 to 37.0)</b>                    | <b>1.4<br/>(-4.7 to 7.4)</b>                        |
| Peptic ulcer disease                                           | 858.7<br>(777.4 to 952.9)                  | 81.2<br>(72.5 to 91.3)                              | 17.6<br>(11.2 to 26.3)                  | 42.6<br>(28.5 to 56.6)                            | 9.3<br>(-0.8 to 19.9)                               |
| Gastritis and duodenitis                                       | 948.7<br>(835.9 to 1,065.7)                | 857.9<br>(757.6 to 973.9)                           | 15.8<br>(10.2 to 23.3)                  | 44.1<br>(30.7 to 58.3)                            | 12.5<br>(3.1 to 22.7)                               |
| Appendicitis                                                   | 10.6<br>(9.8 to 11.6)                      | 278.6<br>(256.0 to 305.4)                           | 3.3<br>(2.1 to 4.9)                     | 16.5<br>(-16.4 to 63.7)                           | 1.1<br>(-25.1 to 37.9)                              |
| Paralytic ileus and intestinal obstruction                     | 1.3<br>(1.2 to 1.5)                        | 35.6<br>(31.9 to 40.0)                              | 0.4<br>(0.3 to 0.6)                     | 21.6<br>(17.9 to 25.8)                            | -1.6<br>(-4.8 to 1.8)                               |
| Inguinal, femoral, and abdominal hernia                        | 1,021.7<br>(905.1 to 1,150.3)              | 335.7<br>(290.9 to 381.4)                           | 41.6<br>(28.0 to 58.5)                  | 18.9<br>(7.4 to 31.7)                             | -6.2<br>(-14.7 to 2.4)                              |
| Inflammatory bowel disease                                     | 13.4<br>(10.2 to 17.2)                     | 62.3<br>(45.6 to 81.2)                              | 2.1<br>(1.3 to 3.2)                     | 35.2<br>(16.2 to 55.1)                            | 7.3<br>(-7.4 to 22.8)                               |
| Vascular intestinal disorders                                  | 0.7<br>(0.6 to 0.8)                        | 3.7<br>(3.4 to 4.2)                                 | 0.2<br>(0.1 to 0.3)                     | 33.0<br>(27.3 to 39.1)                            | 6.1<br>(1.9 to 10.1)                                |
| Gallbladder and biliary diseases                               | 202.6<br>(179.4 to 228.7)                  | 504.4<br>(439.3 to 582.8)                           | 3.1<br>(2.0 to 4.4)                     | 25.5<br>(-0.8 to 54.3)                            | -3.0<br>(-23.0 to 18.7)                             |
| Pancreatitis                                                   | 2.5<br>(2.2 to 2.8)                        | 22.6<br>(20.0 to 25.4)                              | 0.3<br>(0.2 to 0.5)                     | 33.1<br>(28.2 to 38.2)                            | 4.6<br>(0.6 to 8.6)                                 |
| Other digestive diseases                                       | --                                         | --                                                  | 7.1<br>(5.0 to 9.6)                     | 32.5<br>(22.8 to 41.8)                            | 5.3<br>(-1.3 to 11.7)                               |
| <b>Neurological disorders</b>                                  | <b>35,527.7<br/>(34,008.8 to 37,125.2)</b> | <b>17,555.6<br/>(14,873.6 to 20,581.4)</b>          | <b>1,017.4<br/>(682.9 to 1,385.7)</b>   | <b>22.8<br/>(5.3 to 43.9)</b>                     | <b>0.7<br/>(-11.9 to 15.8)</b>                      |
| Alzheimer's disease and other dementias                        | 355.4<br>(306.3 to 409.9)                  | 59.4<br>(50.9 to 69.4)                              | 49.3<br>(34.9 to 65.5)                  | 25.3<br>(20.2 to 30.6)                            | -0.1<br>(-4.1 to 3.8)                               |
| Parkinson's disease                                            | 48.7<br>(39.5 to 59.9)                     | 5.9<br>(4.8 to 7.3)                                 | 5.6<br>(3.6 to 7.7)                     | 40.7<br>(25.6 to 57.5)                            | 10.6<br>(0.0 to 23.4)                               |
| Epilepsy                                                       | 347.3<br>(119.9 to 516.2)                  | 46.8<br>(15.8 to 70.3)                              | 126.0<br>(38.5 to 237.7)                | 16.5<br>(-60.7 to 303.6)                          | -1.7<br>(-66.9 to 243.6)                            |
| Multiple sclerosis                                             | 29.6<br>(26.1 to 33.4)                     | 1.3<br>(1.1 to 1.4)                                 | 7.8<br>(5.3 to 10.6)                    | 35.7<br>(13.2 to 64.0)                            | 5.2<br>(-11.8 to 26.1)                              |
| Motor neuron disease                                           | 1.9<br>(1.7 to 2.2)                        | 0.3<br>(0.3 to 0.4)                                 | 0.4<br>(0.3 to 0.6)                     | 26.1<br>(19.9 to 32.0)                            | 3.2<br>(-0.9 to 7.4)                                |
| Migraine                                                       | 14,623.1<br>(13,720.8 to 15,493.2)         | 1,659.3<br>(1,538.9 to 1,784.9)                     | 674.2<br>(433.5 to 936.6)               | 22.4<br>(18.0 to 26.8)                            | 0.3<br>(-3.0 to 3.7)                                |
| Tension-type headache                                          | 26,934.8<br>(24,165.7 to 30,075.3)         | 15,781.9<br>(13,078.0 to 18,806.7)                  | 121.9<br>(77.1 to 181.8)                | 24.5<br>(17.8 to 31.8)                            | 1.2<br>(-3.7 to 6.4)                                |
| Other neurological disorders                                   | 0.3<br>(0.2 to 0.4)                        | 0.7<br>(0.4 to 0.9)                                 | 32.1<br>(11.8 to 58.7)                  | 42.4<br>(-44.8 to 317.3)                          | 19.3<br>(-50.5 to 219.8)                            |
| <b>Mental and substance use disorders</b>                      | <b>14,296.6<br/>(13,546.8 to 14,910.6)</b> | <b>4,873.4<sup>†</sup><br/>(4,486.7 to 5,289.9)</b> | <b>1,870.5<br/>(1,353.4 to 2,435.4)</b> | <b>24.6<br/>(20.7 to 28.6)</b>                    | <b>2.7<br/>(-0.3 to 5.8)</b>                        |
| Schizophrenia                                                  | 155.5<br>(135.2 to 177.6)                  | 11.0<br>(9.6 to 12.5)                               | 98.8<br>(73.0 to 123.7)                 | 31.2<br>(19.1 to 44.0)                            | 1.4<br>(-7.4 to 10.3)                               |
| Alcohol use disorders                                          | 521.8<br>(436.2 to 617.5)                  | 289.9<br>(241.8 to 343.3)                           | 52.2<br>(34.9 to 73.0)                  | 28.2<br>(15.4 to 42.2)                            | 4.6<br>(-4.8 to 14.9)                               |
| Drug use disorders                                             | 758.9<br>(661.7 to 864.5)                  | 92.4<br>(81.0 to 106.0)                             | 243.8<br>(162.5 to 340.4)               | 32.0<br>(20.5 to 44.6)                            | 5.1<br>(-3.1 to 14.2)                               |
| Opioid use disorders                                           | 545.2<br>(421.8 to 692.7)                  | 55.2<br>(45.2 to 68.0)                              | 226.1<br>(149.5 to 320.6)               | 32.9<br>(20.4 to 45.6)                            | 5.3<br>(-3.6 to 14.5)                               |
| Cocaine use disorders                                          | 35.7<br>(30.4 to 42.3)                     | 3.6<br>(3.0 to 4.4)                                 | 4.9<br>(2.9 to 7.7)                     | 21.2<br>(-13.4 to 67.9)                           | 4.4<br>(-23.4 to 39.2)                              |
| Amphetamine use disorders                                      | 6.7<br>(4.6 to 9.2)                        | 1.1<br>(0.8 to 1.6)                                 | 0.9<br>(0.5 to 1.5)                     | 22.7<br>(12.7 to 34.1)                            | 3.4<br>(-4.0 to 13.0)                               |
| Cannabis use disorders                                         | 144.2<br>(117.2 to 177.4)                  | 25.5<br>(20.9 to 31.1)                              | 4.2<br>(2.5 to 6.4)                     | 13.6<br>(-9.1 to 41.0)                            | 0.4<br>(-18.5 to 21.8)                              |
| Other drug use disorders                                       | 35.2<br>(30.8 to 40.0)                     | 6.9<br>(6.0 to 7.8)                                 | 7.7<br>(4.9 to 10.7)                    | 26.6<br>(2.2 to 55.9)                             | 4.2<br>(-14.4 to 26.2)                              |
| Depressive disorders                                           | 2,782.1<br>(2,584.1 to 3,000.1)            | 3,313.1<br>(2,940.8 to 3,697.5)                     | 488.4<br>(335.8 to 661.7)               | 26.0<br>(17.1 to 35.6)                            | 2.3<br>(-4.7 to 9.3)                                |
| Major depressive disorder                                      | 2,025.0<br>(1,801.4 to 2,272.2)            | 3,164.1<br>(2,796.9 to 3,552.2)                     | 412.1<br>(282.5 to 560.5)               | 25.4<br>(15.0 to 36.2)                            | 2.1<br>(-6.0 to 10.3)                               |
| Dysthymia                                                      | 800.0<br>(696.7 to 919.2)                  | 149.0<br>(130.0 to 170.5)                           | 76.3<br>(50.9 to 109.2)                 | 29.1<br>(18.4 to 41.1)                            | 3.0<br>(-4.8 to 12.2)                               |
| Bipolar disorder                                               | 719.9<br>(616.9 to 846.8)                  | 62.9<br>(53.8 to 73.8)                              | 146.8<br>(92.0 to 216.9)                | 19.0<br>(11.9 to 26.4)                            | 0.3<br>(-5.1 to 5.8)                                |
| Anxiety disorders                                              | 4,100.1<br>(3,712.3 to 4,502.8)            | 622.2<br>(567.5 to 683.9)                           | 394.8<br>(273.3 to 540.3)               | 28.7<br>(18.3 to 40.4)                            | 7.0<br>(-1.3 to 16.2)                               |
| Eating disorders                                               | 157.9<br>(127.0 to 193.8)                  | 80.4<br>(59.6 to 106.4)                             | 31.3<br>(19.8 to 45.8)                  | 29.5<br>(15.0 to 46.5)                            | 11.3<br>(-0.8 to 26.2)                              |
| Anorexia nervosa                                               | 24.2<br>(17.6 to 32.8)                     | 10.7<br>(7.9 to 14.2)                               | 5.2<br>(3.1 to 8.1)                     | 20.3<br>(-8.3 to 58.0)                            | 9.5<br>(-15.9 to 42.6)                              |
| Bulimia nervosa                                                | 124.7<br>(91.7 to 166.2)                   | 69.7<br>(49.0 to 95.3)                              | 26.1<br>(15.9 to 39.1)                  | 31.4<br>(14.6 to 50.6)                            | 11.7<br>(-2.3 to 27.5)                              |
| Autistic spectrum disorders                                    | 826.1<br>(745.4 to 927.5)                  | 7.0<br>(4.7 to 10.0)                                | 117.5<br>(79.3 to 166.0)                | 19.8<br>(14.3 to 26.0)                            | 0.7<br>(-4.0 to 5.7)                                |
| Autism                                                         | 225.3<br>(190.7 to 264.0)                  | 0.8<br>(0.4 to 1.3)                                 | 57.3<br>(37.1 to 83.7)                  | 20.0<br>(9.8 to 30.7)                             | 0.8<br>(-7.6 to 9.5)                                |
| Asperger syndrome and other autistic spectrum disorders        | 601.5<br>(503.2 to 720.6)                  | 6.2<br>(4.0 to 9.3)                                 | 60.2<br>(39.4 to 88.0)                  | 19.6<br>(13.8 to 25.7)                            | 0.6<br>(-3.9 to 5.4)                                |



| Cause                                                      | Prevalence in thousands (95% UI)                 | Incidence in thousands (95% UI)                      | YLDs in thousands (95% UI)                    |                                                   |                                                     |
|------------------------------------------------------------|--------------------------------------------------|------------------------------------------------------|-----------------------------------------------|---------------------------------------------------|-----------------------------------------------------|
|                                                            | 2016 counts                                      | 2016 counts                                          | 2016 counts                                   | Percentage change in counts between 2006 and 2016 | Percentage change in age-standardised rates between |
| Attention-deficit/hyperactivity disorder                   | 1,422.2<br>(1,261.9 to 1,594.0)                  | 65.9<br>(57.2 to 75.0)                               | 17.1<br>(10.3 to 27.2)                        | 15.8<br>(8.5 to 23.1)                             | 0.3<br>(-5.8 to 6.6)                                |
| Conduct disorder                                           | 773.3<br>(624.9 to 916.5)                        | 269.6<br>(214.1 to 327.1)                            | 93.9<br>(56.8 to 142.0)                       | 5.6<br>(-1.4 to 12.9)                             | 0.1<br>(-6.3 to 6.7)                                |
| Idiopathic developmental intellectual disability           | 1,921.9<br>(1,181.3 to 2,665.7)                  | --                                                   | 70.5<br>(31.7 to 124.2)                       | 7.4<br>(0.5 to 13.5)                              | -9.9<br>(-15.5 to -4.8)                             |
| Other mental and substance use disorders                   | 1,555.4<br>(1,366.2 to 1,798.0)                  | 59.1<br>(52.5 to 67.4)                               | 115.2<br>(79.2 to 165.5)                      | 26.8<br>(19.9 to 34.0)                            | 0.4<br>(-4.5 to 5.4)                                |
| <b>Diabetes, urogenital, blood, and endocrine diseases</b> | <b>39,844.3</b><br><b>(39,101.8 to 40,657.3)</b> | <b>10,326.2†</b><br><b>(9,716.0 to 10,973.7)</b>     | <b>1,016.6</b><br><b>(725.5 to 1,380.0)</b>   | <b>33.4</b><br><b>(27.7 to 38.8)</b>              | <b>4.4</b><br><b>(-0.1 to 8.8)</b>                  |
| Diabetes mellitus                                          | 5,727.5<br>(5,120.5 to 6,355.5)                  | 337.6<br>(299.6 to 378.8)                            | 562.1<br>(388.9 to 800.2)                     | 46.6<br>(36.5 to 56.4)                            | 12.8<br>(5.2 to 20.7)                               |
| Acute glomerulonephritis                                   | 0.8<br>(0.7 to 1.0)                              | 12.5<br>(10.7 to 14.3)                               | < 0.05<br>(< 0.05 to 0.1)                     | 21.4<br>(16.3 to 27.6)                            | 0.4<br>(-3.0 to 4.6)                                |
| Chronic kidney disease                                     | 4,836.0<br>(4,381.4 to 5,316.9)                  | 355.0<br>(313.9 to 396.8)                            | 161.4<br>(120.1 to 206.7)                     | 19.5<br>(12.3 to 27.2)                            | -7.8<br>(-13.0 to -2.4)                             |
| Chronic kidney disease due to diabetes mellitus            | 1,929.4<br>(1,639.8 to 2,255.0)                  | 140.9<br>(116.6 to 170.5)                            | 59.5<br>(42.8 to 78.1)                        | 14.2<br>(4.4 to 24.3)                             | -13.0<br>(-19.8 to -5.9)                            |
| Chronic kidney disease due to hypertension                 | 751.9<br>(634.5 to 862.6)                        | 56.0<br>(45.4 to 68.0)                               | 24.3<br>(17.4 to 32.1)                        | 21.9<br>(7.5 to 36.6)                             | -5.8<br>(-15.5 to 4.6)                              |
| Chronic kidney disease due to glomerulonephritis           | 740.0<br>(624.1 to 859.3)                        | 49.9<br>(39.8 to 61.1)                               | 28.1<br>(19.3 to 38.3)                        | 23.5<br>(8.4 to 39.4)                             | -2.1<br>(-12.8 to 8.9)                              |
| Chronic kidney disease due to other causes                 | 1,414.8<br>(1,187.1 to 1,651.7)                  | 108.2<br>(90.0 to 129.1)                             | 49.5<br>(35.4 to 66.1)                        | 23.0<br>(11.5 to 35.6)                            | -4.8<br>(-12.4 to 4.0)                              |
| Urinary diseases and male infertility                      | 1,698.3<br>(1,485.9 to 1,926.7)                  | 5,153.5†<br>(4,627.5 to 5,696.9)                     | 51.1<br>(33.4 to 75.5)                        | 20.3<br>(6.6 to 35.7)                             | -7.2<br>(-17.5 to 4.2)                              |
| Interstitial nephritis and urinary tract infections        | 77.5<br>(67.7 to 87.6)                           | 4,038.1<br>(3,522.5 to 4,561.7)                      | 2.6<br>(1.6 to 4.0)                           | 22.0<br>(2.4 to 44.4)                             | 1.2<br>(-13.8 to 17.8)                              |
| Urolithiasis                                               | 36.5<br>(32.0 to 42.0)                           | 964.8<br>(846.3 to 1,111.4)                          | 2.7<br>(1.8 to 3.8)                           | 30.3<br>(8.8 to 52.9)                             | 1.9<br>(-15.1 to 20.6)                              |
| Benign prostatic hyperplasia                               | 1,299.0<br>(1,082.9 to 1,578.5)                  | 150.7<br>(124.9 to 182.5)                            | 42.4<br>(26.7 to 63.0)                        | 20.4<br>(3.7 to 38.6)                             | -7.8<br>(-19.7 to 4.8)                              |
| Male infertility                                           | 236.8<br>(210.5 to 267.9)                        | --                                                   | 1.5<br>(0.6 to 3.0)                           | 17.9<br>(2.2 to 34.8)                             | -2.2<br>(-14.6 to 11.4)                             |
| Other urinary diseases                                     | --                                               | --                                                   | 2.0<br>(1.3 to 2.8)                           | 5.6<br>(-6.4 to 19.0)                             | -15.2<br>(-24.7 to -4.1)                            |
| Gynecological diseases                                     | 10,832.0<br>(10,300.6 to 11,309.5)               | 4,260.0†<br>(3,927.5 to 4,626.4)                     | 131.2<br>(88.5 to 188.7)                      | 22.8<br>(17.7 to 28.3)                            | -2.2<br>(-6.0 to 1.8)                               |
| Uterine fibroids                                           | 861.6<br>(757.5 to 971.0)                        | 99.5<br>(85.7 to 114.8)                              | 12.7<br>(7.4 to 21.0)                         | 25.7<br>(15.0 to 36.5)                            | -3.9<br>(-11.7 to 3.9)                              |
| Polycystic ovarian syndrome                                | 74.2<br>(55.4 to 96.4)                           | 104.6<br>(73.9 to 137.4)                             | 0.7<br>(0.3 to 1.3)                           | 25.3<br>(7.4 to 46.3)                             | -1.2<br>(-15.0 to 14.6)                             |
| Female infertility                                         | 238.5<br>(175.7 to 310.7)                        | --                                                   | 1.5<br>(0.6 to 3.2)                           | 37.8<br>(4.0 to 73.7)                             | 25.9<br>(-3.7 to 57.5)                              |
| Endometriosis                                              | 19.8<br>(16.1 to 23.7)                           | 57.4<br>(46.9 to 71.0)                               | 1.9<br>(1.1 to 2.8)                           | 19.1<br>(-13.6 to 61.0)                           | 0.5<br>(-25.6 to 33.1)                              |
| Genital prolapse                                           | 3,800.1<br>(3,315.3 to 4,296.5)                  | 266.4<br>(228.6 to 309.2)                            | 11.8<br>(5.7 to 21.5)                         | 13.9<br>(5.7 to 21.9)                             | -12.0<br>(-18.7 to -5.6)                            |
| Premenstrual syndrome                                      | 5,805.0<br>(5,407.0 to 6,217.5)                  | 2,152.2<br>(1,974.3 to 2,349.5)                      | 48.2<br>(29.9 to 73.6)                        | 18.7<br>(9.7 to 28.2)                             | -1.0<br>(-8.2 to 6.7)                               |
| Other gynecological diseases                               | 1,628.3<br>(1,396.4 to 1,899.5)                  | 1,579.9<br>(1,294.5 to 1,908.6)                      | 54.6<br>(35.9 to 79.8)                        | 28.0<br>(19.8 to 36.9)                            | -0.3<br>(-6.7 to 6.2)                               |
| Hemoglobinopathies and hemolytic anaemias                  | 26,217.4<br>(25,498.5 to 27,033.7)               | --                                                   | 68.3<br>(44.2 to 102.3)                       | 14.3<br>(4.6 to 24.0)                             | -3.4<br>(-10.5 to 4.1)                              |
| Thalassemias                                               | 3.2<br>(2.9 to 3.5)                              | --                                                   | 0.2<br>(0.1 to 0.3)                           | 27.8<br>(1.6 to 61.2)                             | 7.5<br>(-14.0 to 34.8)                              |
| Thalassaemias trait                                        | 3,699.6<br>(3,497.9 to 3,912.3)                  | --                                                   | 38.2<br>(24.6 to 56.6)                        | 15.2<br>(4.9 to 26.2)                             | -3.6<br>(-11.4 to 4.6)                              |
| Sickle cell disorders                                      | 38.5<br>(31.4 to 50.6)                           | --                                                   | 3.5<br>(2.2 to 5.2)                           | 22.6<br>(5.7 to 42.2)                             | 4.8<br>(-9.4 to 21.4)                               |
| Sickle cell trait                                          | 7,267.8<br>(6,666.6 to 8,207.7)                  | --                                                   | 14.6<br>(9.0 to 22.7)                         | 14.4<br>(1.3 to 27.6)                             | -3.4<br>(-13.2 to 6.9)                              |
| G6PD deficiency                                            | 4,507.7<br>(4,098.4 to 4,980.9)                  | --                                                   | 0.4<br>(0.3 to 0.6)                           | 18.1<br>(4.1 to 33.5)                             | 2.2<br>(-8.8 to 14.1)                               |
| G6PD trait                                                 | 12,825.7<br>(12,650.8 to 13,017.5)               | --                                                   | < 0.05<br>(< 0.05 to < 0.05)                  | 23.5<br>(11.8 to 36.2)                            | 2.8<br>(-6.1 to 12.7)                               |
| Other hemoglobinopathies and hemolytic anaemias            | 733.6<br>(677.9 to 793.6)                        | --                                                   | 11.4<br>(7.3 to 17.6)                         | 8.6<br>(-4.0 to 21.9)                             | -5.1<br>(-14.3 to 4.9)                              |
| Endocrine, metabolic, blood, and immune disorders          | 1,488.8<br>(1,391.0 to 1,586.9)                  | 207.7<br>(186.0 to 231.7)                            | 42.5<br>(28.9 to 58.9)                        | 22.4<br>(14.7 to 30.4)                            | 0.1<br>(-5.4 to 5.9)                                |
| <b>Musculoskeletal disorders</b>                           | <b>15,717.0</b><br><b>(14,962.4 to 16,452.9)</b> | <b>8,510.5</b><br><b>(7,667.9 to 9,400.0)</b>        | <b>1,790.6</b><br><b>(1,310.0 to 2,327.8)</b> | <b>27.8</b><br><b>(24.5 to 31.2)</b>              | <b>0.3</b><br><b>(-2.0 to 2.7)</b>                  |
| Rheumatoid arthritis                                       | 278.3<br>(247.4 to 313.9)                        | 16.7<br>(14.9 to 18.7)                               | 64.7<br>(44.0 to 85.7)                        | 34.1<br>(23.9 to 44.6)                            | 5.2<br>(-2.3 to 12.3)                               |
| Osteoarthritis                                             | 3,234.9<br>(3,017.6 to 3,458.1)                  | 174.8<br>(162.0 to 188.9)                            | 197.3<br>(141.4 to 267.5)                     | 34.1<br>(28.9 to 39.3)                            | 2.5<br>(-1.3 to 6.2)                                |
| Low back and neck pain                                     | 9,547.0<br>(8,873.6 to 10,243.3)                 | 4,063.8<br>(3,628.5 to 4,503.7)                      | 1,117.7<br>(796.8 to 1,467.2)                 | 27.0<br>(22.5 to 31.2)                            | -0.3<br>(-3.2 to 2.7)                               |
| Low back pain                                              | 6,634.5<br>(5,827.7 to 7,527.0)                  | 3,269.3<br>(2,838.6 to 3,718.2)                      | 743.9<br>(530.1 to 978.4)                     | 26.1<br>(19.9 to 31.9)                            | -0.5<br>(-4.8 to 3.8)                               |
| Neck pain                                                  | 3,783.5<br>(3,279.0 to 4,347.6)                  | 794.5<br>(689.2 to 943.2)                            | 373.8<br>(251.6 to 521.5)                     | 28.8<br>(25.6 to 31.9)                            | 0.1<br>(-1.8 to 1.9)                                |
| Gout                                                       | 253.9<br>(225.2 to 287.3)                        | 52.5<br>(45.7 to 59.6)                               | 8.0<br>(5.4 to 11.0)                          | 31.3<br>(12.9 to 55.4)                            | 0.7<br>(-12.0 to 17.3)                              |
| Other musculoskeletal disorders                            | 4,738.0<br>(4,023.8 to 5,542.9)                  | 4,202.8<br>(3,530.1 to 5,002.8)                      | 402.9<br>(273.9 to 575.7)                     | 26.1<br>(18.1 to 34.7)                            | 0.1<br>(-6.0 to 6.7)                                |
| <b>Other non-communicable diseases</b>                     | <b>62,460.3</b><br><b>(61,217.5 to 63,744.5)</b> | <b>165,967.6†</b><br><b>(153,804.2 to 180,135.5)</b> | <b>1,826.2</b><br><b>(1,262.2 to 2,542.5)</b> | <b>17.4</b><br><b>(15.7 to 19.1)</b>              | <b>-3.8</b><br><b>(-5.0 to -2.4)</b>                |
| Congenital anomalies                                       | 1,321.9<br>(1,199.0 to 1,481.0)                  | --                                                   | 180.3<br>(127.9 to 240.5)                     | 17.8<br>(11.8 to 24.3)                            | -0.7<br>(-5.8 to 4.7)                               |
| Neural tube defects                                        | 153.6<br>(135.1 to 173.0)                        | --                                                   | 45.8<br>(32.0 to 61.4)                        | 18.8<br>(7.2 to 33.5)                             | -1.0<br>(-10.9 to 10.7)                             |
| Congenital heart anomalies                                 | 242.6<br>(209.7 to 280.0)                        | --                                                   | 11.1<br>(4.8 to 19.1)                         | 20.4<br>(7.0 to 34.1)                             | 2.2<br>(-8.6 to 13.2)                               |
| Orofacial clefts                                           | 39.5<br>(34.5 to 45.0)                           | --                                                   | 0.5<br>(0.3 to 0.8)                           | 5.4<br>(-6.5 to 18.3)                             | -12.1<br>(-22.1 to -1.4)                            |
| Down's syndrome                                            | 39.4<br>(33.6 to 46.3)                           | --                                                   | 3.5<br>(2.4 to 5.0)                           | 21.8<br>(13.8 to 30.9)                            | 2.9<br>(-4.1 to 10.4)                               |
| Turner syndrome                                            | 35.8<br>(30.6 to 41.9)                           | --                                                   | 0.6<br>(0.3 to 1.1)                           | 9.8<br>(-23.9 to 59.8)                            | -6.4<br>(-33.9 to 32.4)                             |
| Klinefelter syndrome                                       | 43.0<br>(36.1 to 50.7)                           | --                                                   | 0.2<br>(0.1 to 0.5)                           | 20.1<br>(-9.3 to 61.0)                            | 0.8<br>(-22.5 to 32.2)                              |

| Cause                                         | Prevalence in thousands (95% UI)                 | Incidence in thousands (95% UI)                | YLDs in thousands (95% UI)              |                                                   |                                                     |
|-----------------------------------------------|--------------------------------------------------|------------------------------------------------|-----------------------------------------|---------------------------------------------------|-----------------------------------------------------|
|                                               | 2016 counts                                      | 2016 counts                                    | 2016 counts                             | Percentage change in counts between 2006 and 2016 | Percentage change in age-standardised rates between |
| Other chromosomal abnormalities               | 276.7<br>(228.4 to 330.0)                        | --                                             | 26.6<br>(17.6 to 36.7)                  | 14.3<br>(2.3 to 28.7)                             | 1.8<br>(-9.1 to 14.4)                               |
| Congenital musculoskeletal and limb anomalies | 175.5<br>(158.7 to 193.2)                        | --                                             | 26.2<br>(17.8 to 36.5)                  | 19.4<br>(8.3 to 32.4)                             | -0.2<br>(-9.2 to 10.3)                              |
| Urogenital congenital anomalies               | 90.4<br>(79.4 to 102.7)                          | --                                             | 2.8<br>(1.7 to 4.4)                     | 13.3<br>(4.5 to 22.8)                             | -0.6<br>(-7.9 to 7.7)                               |
| Digestive congenital anomalies                | 101.6<br>(89.3 to 114.2)                         | --                                             | 4.3<br>(2.7 to 6.2)                     | 26.4<br>(7.1 to 50.9)                             | 5.6<br>(-10.1 to 24.9)                              |
| Other congenital anomalies                    | 348.1<br>(209.7 to 548.2)                        | --                                             | 58.6<br>(36.4 to 90.1)                  | 17.1<br>(7.0 to 28.7)                             | -2.5<br>(-10.9 to 6.8)                              |
| Skin and subcutaneous diseases                | 25,640.6<br>(25,033.2 to 26,412.8)               | 53,274.8<br>(51,004.6 to 55,794.0)             | 651.1<br>(436.5 to 942.7)               | 16.6<br>(14.0 to 19.2)                            | 1.8<br>(-0.2 to 3.8)                                |
| Dermatitis                                    | 3,452.5<br>(3,212.2 to 3,720.9)                  | 5,596.9<br>(5,125.8 to 6,093.2)                | 126.2<br>(75.1 to 206.2)                | 19.4<br>(13.2 to 25.6)                            | 0.1<br>(-4.5 to 5.1)                                |
| Psoriasis                                     | 583.9<br>(557.7 to 613.1)                        | 88.0<br>(84.0 to 91.9)                         | 50.5<br>(35.7 to 66.4)                  | 32.0<br>(20.2 to 44.5)                            | 7.3<br>(-1.2 to 16.9)                               |
| Cellulitis                                    | 43.6<br>(40.6 to 47.2)                           | 913.2<br>(852.6 to 974.6)                      | 2.5<br>(1.6 to 3.6)                     | 20.7<br>(-3.6 to 51.9)                            | 0.8<br>(-17.9 to 24.1)                              |
| Pyoderma                                      | 210.0<br>(202.2 to 218.2)                        | 4,677.8<br>(4,515.2 to 4,859.0)                | 1.2<br>(0.5 to 2.5)                     | 23.3<br>(13.9 to 32.8)                            | 0.8<br>(-5.9 to 7.9)                                |
| Scabies                                       | 1,268.8<br>(1,102.3 to 1,455.3)                  | 3,826.9<br>(3,309.4 to 4,389.9)                | 32.8<br>(18.4 to 52.4)                  | 13.6<br>(8.2 to 19.5)                             | -2.2<br>(-6.8 to 2.2)                               |
| Fungal skin diseases                          | 5,668.3<br>(5,117.0 to 6,313.3)                  | 19,555.3<br>(17,606.3 to 21,640.3)             | 31.8<br>(12.8 to 65.2)                  | 22.2<br>(19.8 to 24.4)                            | 0.3<br>(-0.9 to 1.6)                                |
| Viral skin diseases                           | 2,543.2<br>(2,414.1 to 2,683.5)                  | 3,637.7<br>(3,441.8 to 3,845.1)                | 78.0<br>(48.5 to 115.7)                 | 17.4<br>(13.3 to 21.4)                            | 0.1<br>(-2.9 to 3.1)                                |
| Acne vulgaris                                 | 8,521.6<br>(7,708.6 to 9,356.1)                  | 6,090.8<br>(5,028.0 to 7,343.8)                | 219.1<br>(147.0 to 315.5)               | 8.5<br>(3.4 to 14.0)                              | 2.8<br>(-1.7 to 7.5)                                |
| Alopecia areata                               | 176.0<br>(167.8 to 183.9)                        | 311.9<br>(297.7 to 325.9)                      | 5.8<br>(3.7 to 8.8)                     | 23.9<br>(10.8 to 39.1)                            | 0.2<br>(-9.9 to 11.4)                               |
| Pruritus                                      | 742.7<br>(649.5 to 842.6)                        | 597.0<br>(536.0 to 668.3)                      | 7.9<br>(3.6 to 14.4)                    | 25.4<br>(17.8 to 32.9)                            | 1.5<br>(-4.2 to 7.2)                                |
| Urticaria                                     | 1,045.8<br>(903.8 to 1,204.5)                    | 1,866.4<br>(1,614.0 to 2,154.8)                | 63.1<br>(39.8 to 91.1)                  | 20.5<br>(14.2 to 26.9)                            | 0.2<br>(-4.9 to 5.3)                                |
| Decubitus ulcer                               | 20.4<br>(18.1 to 22.6)                           | 74.1<br>(65.8 to 83.2)                         | 3.3<br>(2.2 to 4.5)                     | 31.4<br>(17.4 to 46.0)                            | 6.2<br>(-6.5 to 21.0)                               |
| Other skin and subcutaneous diseases          | 5,299.5<br>(5,143.6 to 5,455.2)                  | 6,038.8<br>(5,851.0 to 6,231.6)                | 29.0<br>(14.0 to 53.6)                  | 29.6<br>(26.3 to 33.0)                            | 4.5<br>(2.1 to 6.9)                                 |
| Sense organ diseases                          | 19,189.9<br>(18,721.2 to 19,698.5)               | 8,505.1†<br>(7,940.1 to 9,130.9)               | 786.5<br>(548.3 to 1,086.2)             | 15.3<br>(12.5 to 18.1)                            | -8.1<br>(-10.2 to -6.0)                             |
| Glaucoma                                      | 116.3<br>(95.7 to 139.7)                         | --                                             | 9.7<br>(6.6 to 13.4)                    | 24.8<br>(13.1 to 37.9)                            | -3.9<br>(-12.6 to 6.0)                              |
| Cataract                                      | 1,445.6<br>(1,260.6 to 1,637.1)                  | --                                             | 91.7<br>(65.2 to 125.1)                 | 12.2<br>(5.2 to 19.2)                             | -11.9<br>(-17.4 to -6.4)                            |
| Macular degeneration                          | 133.7<br>(104.6 to 170.8)                        | --                                             | 8.3<br>(5.4 to 11.6)                    | 20.0<br>(8.7 to 33.0)                             | -6.9<br>(-15.3 to 2.5)                              |
| Refraction and accommodation disorders        | 10,748.0<br>(10,219.1 to 11,299.0)               | --                                             | 228.9<br>(143.9 to 349.9)               | 6.8<br>(2.4 to 10.7)                              | -14.6<br>(-18.4 to -11.2)                           |
| Age-related and other hearing loss            | 10,280.5<br>(9,652.9 to 10,996.6)                | --                                             | 344.6<br>(237.3 to 480.2)               | 19.6<br>(14.8 to 24.2)                            | -4.6<br>(-7.6 to -1.8)                              |
| Other vision loss                             | 595.4<br>(527.4 to 676.7)                        | --                                             | 38.3<br>(26.6 to 52.2)                  | 19.1<br>(10.7 to 28.1)                            | -6.6<br>(-12.6 to -0.0)                             |
| Other sense organ diseases                    | 2,121.3<br>(1,956.0 to 2,283.2)                  | 8,505.1<br>(7,940.1 to 9,130.9)                | 65.0<br>(40.9 to 97.5)                  | 27.7<br>(21.9 to 33.4)                            | 1.2<br>(-2.7 to 5.0)                                |
| Oral disorders                                | 42,181.2<br>(40,071.0 to 44,172.0)               | 104,187.6†<br>(92,359.3 to 118,072.1)          | 208.4<br>(126.7 to 321.3)               | 28.4<br>(25.9 to 30.9)                            | 0.8<br>(-1.1 to 2.5)                                |
| Caries of deciduous teeth                     | 8,644.4<br>(6,580.1 to 11,006.9)                 | 34,601.4<br>(23,998.8 to 46,227.5)             | 2.0<br>(0.9 to 4.0)                     | 21.8<br>(8.2 to 34.9)                             | -1.6<br>(-12.8 to 9.0)                              |
| Caries of permanent teeth                     | 25,531.8<br>(23,336.2 to 27,749.8)               | 68,289.9<br>(61,997.1 to 75,616.3)             | 15.0<br>(6.6 to 29.2)                   | 21.8<br>(16.1 to 27.8)                            | 2.2<br>(-2.1 to 6.5)                                |
| Periodontal disease                           | 8,405.2<br>(6,958.1 to 10,045.0)                 | 1,030.7<br>(829.1 to 1,250.5)                  | 54.6<br>(21.6 to 112.2)                 | 30.6<br>(26.0 to 35.1)                            | 0.5<br>(-2.9 to 3.7)                                |
| Edentulism and severe tooth loss              | 3,325.7<br>(2,859.4 to 3,790.5)                  | 265.6<br>(221.3 to 311.3)                      | 91.5<br>(59.7 to 129.2)                 | 31.4<br>(26.8 to 35.5)                            | 1.0<br>(-2.2 to 4.1)                                |
| Other oral disorders                          | 1,547.2<br>(1,475.1 to 1,619.2)                  | --                                             | 45.2<br>(28.0 to 68.2)                  | 22.8<br>(18.6 to 27.5)                            | 0.3<br>(-3.1 to 3.6)                                |
| <b>Injuries</b>                               | <b>13,437.5</b><br><b>(12,516.4 to 14,334.8)</b> | <b>6,416.1†</b><br><b>(6,052.3 to 6,804.0)</b> | <b>482.6</b><br><b>(321.9 to 688.5)</b> | <b>31.4</b><br><b>(28.3 to 34.2)</b>              | <b>6.7</b><br><b>(4.6 to 8.8)</b>                   |
| <b>Transport injuries</b>                     | <b>1,610.7</b><br><b>(1,484.5 to 1,745.7)</b>    | <b>587.3</b><br><b>(525.3 to 653.8)</b>        | <b>85.8</b><br><b>(57.4 to 122.7)</b>   | <b>34.2</b><br><b>(30.9 to 37.5)</b>              | <b>7.6</b><br><b>(5.3 to 10.0)</b>                  |
| Road injuries                                 | 1,089.2<br>(1,017.7 to 1,168.1)                  | 451.9<br>(395.5 to 515.7)                      | 58.1<br>(39.1 to 82.9)                  | 40.6<br>(37.3 to 43.8)                            | 11.7<br>(9.3 to 13.8)                               |
| Pedestrian road injuries                      | 224.1<br>(198.9 to 254.1)                        | 67.3<br>(55.8 to 80.9)                         | 11.8<br>(7.9 to 16.8)                   | 39.1<br>(35.7 to 42.5)                            | 10.7<br>(8.4 to 13.0)                               |
| Cyclist road injuries                         | 198.3<br>(165.1 to 235.2)                        | 89.4<br>(69.7 to 110.1)                        | 9.9<br>(6.6 to 14.3)                    | 37.2<br>(33.8 to 40.4)                            | 9.7<br>(7.3 to 12.0)                                |
| Motorcyclist road injuries                    | 188.0<br>(159.3 to 224.3)                        | 51.3<br>(40.5 to 64.8)                         | 9.6<br>(6.3 to 13.8)                    | 43.1<br>(39.6 to 46.6)                            | 13.2<br>(10.6 to 15.6)                              |
| Motor vehicle road injuries                   | 361.6<br>(311.1 to 410.3)                        | 181.8<br>(155.5 to 212.1)                      | 21.1<br>(14.3 to 29.8)                  | 43.0<br>(39.7 to 46.2)                            | 13.2<br>(10.9 to 15.5)                              |
| Other road injuries                           | 117.2<br>(100.5 to 137.5)                        | 62.1<br>(47.9 to 78.9)                         | 5.8<br>(3.8 to 8.4)                     | 37.5<br>(34.3 to 40.7)                            | 8.8<br>(6.5 to 10.9)                                |
| Other transport injuries                      | 521.4<br>(429.8 to 628.5)                        | 135.3<br>(112.7 to 165.8)                      | 27.7<br>(18.6 to 39.7)                  | 22.4<br>(18.8 to 26.4)                            | -0.6<br>(-3.2 to 2.1)                               |
| <b>Unintentional injuries</b>                 | <b>11,194.1</b><br><b>(10,329.4 to 12,040.2)</b> | <b>5,665.5</b><br><b>(5,299.7 to 6,057.8)</b>  | <b>364.8</b><br><b>(245.5 to 515.0)</b> | <b>32.7</b><br><b>(29.7 to 35.4)</b>              | <b>7.6</b><br><b>(5.5 to 9.6)</b>                   |
| Falls                                         | 3,698.4<br>(3,145.8 to 4,203.8)                  | 1,778.9<br>(1,546.9 to 2,088.1)                | 143.1<br>(99.5 to 199.2)                | 31.9<br>(28.9 to 34.6)                            | 7.1<br>(4.9 to 9.0)                                 |
| Drowning                                      | 23.9<br>(20.6 to 27.8)                           | 5.1<br>(4.3 to 6.0)                            | 1.2<br>(0.8 to 1.8)                     | 19.1<br>(15.1 to 23.1)                            | -3.1<br>(-6.0 to -0.3)                              |
| Fire, heat, and hot substances                | 1,042.2<br>(874.7 to 1,261.8)                    | 142.2<br>(112.9 to 171.1)                      | 27.6<br>(18.3 to 40.5)                  | 36.5<br>(29.6 to 43.0)                            | 9.6<br>(4.4 to 14.1)                                |
| Poisonings                                    | 53.1<br>(44.4 to 63.2)                           | 85.3<br>(66.7 to 106.2)                        | 4.8<br>(3.1 to 7.1)                     | 44.1<br>(32.5 to 57.0)                            | 18.7<br>(10.0 to 28.2)                              |
| Exposure to mechanical forces                 | 2,118.3<br>(1,813.4 to 2,569.7)                  | 960.1<br>(815.8 to 1,107.7)                    | 51.8<br>(34.1 to 75.1)                  | 47.3<br>(43.3 to 51.1)                            | 17.5<br>(14.6 to 20.1)                              |
| Unintentional firearm injuries                | 139.8<br>(112.1 to 178.0)                        | 41.1<br>(30.3 to 54.9)                         | 5.7<br>(3.7 to 8.4)                     | 62.5<br>(57.8 to 67.0)                            | 28.3<br>(24.9 to 31.4)                              |
| Unintentional suffocation                     | 68.1<br>(53.7 to 86.1)                           | 16.6<br>(11.7 to 23.3)                         | 2.4<br>(1.5 to 3.6)                     | 28.4<br>(24.3 to 32.0)                            | 4.9<br>(2.2 to 7.3)                                 |
| Other exposure to mechanical forces           | 1,910.4<br>(1,612.9 to 2,364.4)                  | 902.4<br>(769.7 to 1,040.6)                    | 43.8<br>(28.8 to 63.1)                  | 46.7<br>(42.5 to 50.6)                            | 16.9<br>(14.0 to 19.6)                              |

| Cause                                                                               | Prevalence in thousands (95% UI)              | Incidence in thousands (95% UI)          | YLDs in thousands (95% UI)           |                                                   |                                                     |
|-------------------------------------------------------------------------------------|-----------------------------------------------|------------------------------------------|--------------------------------------|---------------------------------------------------|-----------------------------------------------------|
|                                                                                     | 2016 counts                                   | 2016 counts                              | 2016 counts                          | Percentage change in counts between 2006 and 2016 | Percentage change in age-standardised rates between |
| Adverse effects of medical treatment                                                | 30.4<br>(24.0 to 38.0)                        | 397.8<br>(343.5 to 453.5)                | 4.1<br>(2.5 to 6.1)                  | 38.5<br>(32.7 to 45.6)                            | 16.8<br>(12.3 to 21.6)                              |
| Animal contact                                                                      | 488.0<br>(427.9 to 566.6)                     | 640.6<br>(520.6 to 771.4)                | 15.7<br>(10.3 to 22.2)               | 21.6<br>(15.3 to 28.9)                            | -0.8<br>(-5.7 to 4.5)                               |
| Venomous animal contact                                                             | 197.9<br>(163.1 to 236.5)                     | 270.3<br>(204.6 to 351.6)                | 11.0<br>(7.3 to 15.6)                | 24.1<br>(14.7 to 34.2)                            | 2.2<br>(-4.9 to 9.9)                                |
| Non-venomous animal contact                                                         | 290.1<br>(239.3 to 358.9)                     | 370.2<br>(290.5 to 457.9)                | 4.7<br>(3.0 to 7.1)                  | 16.2<br>(11.8 to 20.2)                            | -6.7<br>(-9.7 to -3.8)                              |
| Foreign body                                                                        | 686.2<br>(574.8 to 825.8)                     | 489.5<br>(417.4 to 573.5)                | 23.5<br>(15.2 to 34.6)               | 25.4<br>(21.2 to 29.2)                            | 2.3<br>(-0.8 to 5.0)                                |
| Pulmonary aspiration and foreign body in airway                                     | 187.9<br>(139.9 to 251.6)                     | 76.6<br>(61.6 to 97.6)                   | 7.9<br>(5.0 to 11.9)                 | 21.8<br>(17.7 to 25.9)                            | 0.0<br>(-2.9 to 3.0)                                |
| Foreign body in eyes                                                                | 39.8<br>(21.9 to 59.9)                        | 209.3<br>(160.4 to 278.6)                | 2.2<br>(1.1 to 3.8)                  | 26.0<br>(21.3 to 30.8)                            | 2.0<br>(-1.1 to 4.8)                                |
| Foreign body in other body part                                                     | 458.6<br>(373.6 to 589.4)                     | 203.6<br>(167.9 to 246.5)                | 13.3<br>(8.6 to 19.5)                | 27.6<br>(22.7 to 32.0)                            | 3.7<br>(-0.0 to 6.9)                                |
| Environmental heat and cold exposure                                                | 739.6<br>(618.8 to 874.6)                     | 221.5<br>(178.0 to 271.9)                | 27.1<br>(17.8 to 39.1)               | 22.8<br>(19.6 to 25.9)                            | -0.3<br>(-2.7 to 1.9)                               |
| Other unintentional injuries                                                        | 2,314.0<br>(1,834.9 to 2,872.8)               | 944.4<br>(788.6 to 1,125.9)              | 66.0<br>(43.3 to 95.9)               | 31.7<br>(28.9 to 34.3)                            | 7.2<br>(5.2 to 9.1)                                 |
| <b>Self-harm and interpersonal violence</b>                                         | <b>1,757.5</b><br><b>(1,577.8 to 1,960.7)</b> | <b>161.0†</b><br><b>(136.7 to 187.5)</b> | <b>24.2</b><br><b>(16.8 to 33.4)</b> | <b>17.2</b><br><b>(12.5 to 21.4)</b>              | <b>-1.7</b><br><b>(-4.9 to 1.2)</b>                 |
| Self-harm                                                                           | 55.2<br>(47.2 to 63.8)                        | 23.0<br>(19.2 to 27.6)                   | 2.7<br>(1.7 to 3.9)                  | 32.5<br>(27.5 to 37.5)                            | 7.2<br>(3.6 to 10.8)                                |
| Self-harm by firearm                                                                | 3.4<br>(2.8 to 4.1)                           | 0.7<br>(0.4 to 1.2)                      | 0.1<br>(0.1 to 0.2)                  | 20.1<br>(15.5 to 25.0)                            | -0.5<br>(-3.8 to 2.9)                               |
| Self-harm by other specified means                                                  | 51.8<br>(43.9 to 60.5)                        | 22.3<br>(18.6 to 26.7)                   | 2.6<br>(1.7 to 3.7)                  | 33.1<br>(28.0 to 38.3)                            | 7.6<br>(3.9 to 11.3)                                |
| Interpersonal violence                                                              | 1,702.2<br>(1,521.5 to 1,907.2)               | 138.0†<br>(114.2 to 164.1)               | 21.5<br>(14.9 to 29.8)               | 15.5<br>(10.7 to 19.9)                            | -2.8<br>(-6.2 to 0.3)                               |
| Assault by firearm                                                                  | 9.0<br>(7.8 to 10.4)                          | 3.1<br>(2.2 to 4.3)                      | 0.4<br>(0.3 to 0.6)                  | 43.0<br>(38.4 to 47.7)                            | 15.2<br>(12.1 to 18.4)                              |
| Assault by sharp object                                                             | 80.0<br>(64.9 to 95.8)                        | 34.3<br>(25.3 to 45.3)                   | 2.4<br>(1.6 to 3.4)                  | 36.3<br>(32.5 to 40.1)                            | 10.5<br>(7.6 to 13.1)                               |
| Sexual violence                                                                     | 1,448.0<br>(1,266.0 to 1,645.5)               | --                                       | 12.0<br>(8.1 to 17.1)                | 1.8<br>(-4.2 to 7.1)                              | -13.5<br>(-17.8 to -9.4)                            |
| Assault by other means                                                              | 165.3<br>(141.0 to 196.3)                     | 100.5<br>(82.8 to 120.4)                 | 6.7<br>(4.5 to 9.7)                  | 40.0<br>(36.6 to 43.4)                            | 12.4<br>(10.1 to 14.7)                              |
| <b>Forces of nature, conflict and terrorism, and executions and police conflict</b> | <b>323.2</b><br><b>(153.8 to 580.5)</b>       | <b>2.3†</b><br><b>(1.7 to 3.3)</b>       | <b>7.9</b><br><b>(1.7 to 23.1)</b>   | <b>0.1</b><br><b>(-4.5 to 3.9)</b>                | <b>-13.7</b><br><b>(-17.4 to -10.8)</b>             |
| Exposure to forces of nature                                                        | 6.0<br>(3.0 to 10.4)                          | --                                       | 0.2<br>(0.1 to 0.5)                  | -11.9<br>(-15.2 to -7.1)                          | -24.0<br>(-26.9 to -20.0)                           |
| Conflict and terrorism                                                              | 311.3<br>(145.2 to 568.8)                     | --                                       | 7.5<br>(1.6 to 22.1)                 | -0.1<br>(-4.8 to 3.7)                             | -13.8<br>(-17.6 to -10.9)                           |
| Executions and police conflict                                                      | 5.9<br>(3.6 to 9.5)                           | 2.3<br>(1.7 to 3.3)                      | 0.2<br>(0.1 to 0.4)                  | 33.3<br>(25.8 to 39.7)                            | 15.8<br>(9.5 to 20.9)                               |
| <b>Impairments</b>                                                                  | --                                            | --                                       | --                                   | --                                                | --                                                  |
| Anaemia                                                                             | 23,498.1<br>(22,340.5 to 24,751.4)            | --                                       | 551.6<br>(375.7 to 791.9)            | 3.9<br>(-3.9 to 12.1)                             | -12.8<br>(-18.5 to -6.8)                            |
| Developmental intellectual disability                                               | 3,278.3<br>(2,510.0 to 4,089.1)               | --                                       | 333.6<br>(228.9 to 551.0)            | 13.6<br>(7.3 to 22.0)                             | -4.3<br>(-9.6 to 2.7)                               |
| Epilepsy                                                                            | 653.0<br>(365.5 to 1,108.2)                   | --                                       | 255.0<br>(131.4 to 465.1)            | 16.1<br>(-31.6 to 109.0)                          | -2.0<br>(-42.6 to 77.7)                             |
| Guillain-Barre syndrome                                                             | 0.8<br>(0.7 to 1.1)                           | --                                       | 0.2<br>(0.1 to 0.4)                  | 22.8<br>(19.3 to 26.3)                            | 0.1<br>(0.0 to 0.1)                                 |
| Hearing loss                                                                        | 11,591.1<br>(10,958.7 to 12,275.5)            | --                                       | 417.8<br>(293.6 to 566.1)            | 17.7<br>(13.8 to 21.7)                            | -5.0<br>(-7.6 to -2.5)                              |
| Heart failure                                                                       | 502.5<br>(438.1 to 575.9)                     | --                                       | 51.5<br>(37.1 to 67.6)               | 33.7<br>(24.7 to 43.6)                            | 5.0<br>(-2.3 to 12.7)                               |
| Infertility                                                                         | 1,093.2<br>(1,005.8 to 1,196.0)               | --                                       | 7.1<br>(3.1 to 13.9)                 | 27.6<br>(16.8 to 38.4)                            | 3.9<br>(-4.5 to 12.2)                               |
| Pelvic inflammatory disease                                                         | 42.4<br>(33.0 to 53.2)                        | --                                       | 5.5<br>(3.5 to 8.3)                  | 19.7<br>(-2.7 to 42.6)                            | -6.6<br>(-23.3 to 12.1)                             |
| Vision loss                                                                         | 13,979.1<br>(13,295.8 to 14,696.4)            | --                                       | 501.0<br>(344.3 to 739.5)            | 11.0<br>(6.4 to 17.0)                             | -11.8<br>(-15.3 to -7.4)                            |

We did not calculate incidence for the nine impairments, certain NTDs, and causes with only birth prevalence. Blank cells mean that no estimate is available.

† Incidence for aggregate causes represents the sum of the incidence of the causes below the aggregate.

‡ Incidence estimates for stroke represent first-ever stroke only.

^ Incidence of HIV/AIDS represents new infections of HIV only and does not include new infections of Tuberculosis in HIV positive cases.



SR Table 14: Prevalence, incidence, and YLDs for 2016, percentage change of YLD counts and percentage change of age-standardised YLD rates between 2006 and 2016 by cause and impairments, for all ages, El Salvador.

| Cause                                                                                | Prevalence in thousands (95% UI)       | Incidence in thousands (95% UI)            | YLDs in thousands (95% UI)       |                                                   |                                                     |
|--------------------------------------------------------------------------------------|----------------------------------------|--------------------------------------------|----------------------------------|---------------------------------------------------|-----------------------------------------------------|
|                                                                                      | 2016 counts                            | 2016 counts                                | 2016 counts                      | Percentage change in counts between 2006 and 2016 | Percentage change in age-standardised rates between |
| <b>All causes</b>                                                                    | <b>5,833.8</b><br>(5,806.2 to 5,858.2) | <b>36,871.7†</b><br>(34,705.8 to 39,124.6) | <b>579.3</b><br>(429.3 to 755.5) | <b>9.8</b><br>(7.3 to 12.7)                       | <b>-1.2</b><br>(-3.2 to 1.2)                        |
| <b>Communicable, maternal, neonatal, and nutritional disorders</b>                   | <b>3,556.8</b><br>(3,440.3 to 3,676.9) | <b>22,571.5†</b><br>(20,668.7 to 24,755.0) | <b>40.1</b><br>(28.6 to 54.2)    | <b>-10.9</b><br>(-16.2 to -5.4)                   | <b>-9.5</b><br>(-15.3 to -3.7)                      |
| <b>HIV/AIDS and tuberculosis</b>                                                     | <b>1,507.5</b><br>(1,351.9 to 1,634.6) | <b>1.7†</b><br>(1.5 to 2.0)                | <b>1.3</b><br>(0.8 to 2.1)       | <b>3.4</b><br>(-25.2 to 41.8)                     | <b>-5.2</b><br>(-32.8 to 31.6)                      |
| Tuberculosis                                                                         | 1,388.1<br>(1,245.8 to 1,549.5)        | 1.3†<br>(1.1 to 1.5)                       | 0.2<br>(0.1 to 0.2)              | -3.8<br>(-20.1 to 17.1)                           | -13.2<br>(-28.9 to 6.4)                             |
| Drug-susceptible tuberculosis                                                        | 0.5<br>(0.4 to 0.6)                    | 1.3<br>(1.1 to 1.5)                        | 0.2<br>(0.1 to 0.2)              | -3.6<br>(-20.0 to 17.2)                           | -13.1<br>(-28.9 to 6.4)                             |
| Multidrug-resistant tuberculosis without extensive drug resistance                   | < 0.05<br>(< 0.05 to < 0.05)           | < 0.05<br>(< 0.05 to < 0.05)               | < 0.05<br>(< 0.05 to < 0.05)     | -17.2<br>(-58.9 to 72.8)                          | -26.1<br>(-63.4 to 54.9)                            |
| Extensively drug-resistant tuberculosis                                              | < 0.05<br>(< 0.05 to < 0.05)           | < 0.05<br>(< 0.05 to < 0.05)               | < 0.05<br>(< 0.05 to < 0.05)     | 120.3<br>(9.4 to 360.7)                           | 96.8<br>(-2.7 to 312.4)                             |
| Latent tuberculosis infection                                                        | 1,387.6<br>(1,245.3 to 1,549.0)        | --                                         | --                               | --                                                | --                                                  |
| HIV/AIDS                                                                             | 13.1<br>(9.6 to 18.0)                  | 0.4 <sup>a</sup><br>(0.3 to 0.6)           | 1.1<br>(0.6 to 1.9)              | 4.5<br>(-27.1 to 52.9)                            | -3.9<br>(-34.7 to 44.0)                             |
| Drug-susceptible HIV/AIDS - Tuberculosis                                             | < 0.05<br>(< 0.05 to 0.1)              | 0.1<br>(0.1 to 0.2)                        | < 0.05<br>(< 0.05 to < 0.05)     | -45.6<br>(-51.1 to -39.9)                         | -49.3<br>(-54.4 to -44.0)                           |
| Multidrug-resistant HIV/AIDS - Tuberculosis without extensive drug resistance        | < 0.05<br>(< 0.05 to < 0.05)           | < 0.05<br>(< 0.05 to < 0.05)               | < 0.05<br>(< 0.05 to < 0.05)     | -53.0<br>(-77.2 to -1.3)                          | -56.2<br>(-78.7 to -8.0)                            |
| Extensively drug-resistant HIV/AIDS - Tuberculosis                                   | < 0.05<br>(< 0.05 to < 0.05)           | < 0.05<br>(< 0.05 to < 0.05)               | < 0.05<br>(< 0.05 to < 0.05)     | 25.2<br>(-39.1 to 162.9)                          | 16.6<br>(-43.3 to 144.9)                            |
| HIV/AIDS resulting in other diseases                                                 | 13.0<br>(9.5 to 17.9)                  | 0.4<br>(0.3 to 0.6)                        | 1.1<br>(0.6 to 1.9)              | 6.2<br>(-26.8 to 58.4)                            | -2.4<br>(-34.5 to 48.4)                             |
| <b>Diarrhoea, lower respiratory infections, and other common infectious diseases</b> | <b>372.2</b><br>(350.4 to 394.7)       | <b>21,233.6†</b><br>(19,335.0 to 23,328.0) | <b>18.4</b><br>(12.6 to 25.6)    | <b>-5.0</b><br>(-8.1 to -1.6)                     | <b>-1.5</b><br>(-4.7 to 1.8)                        |
| Diarrhoeal diseases                                                                  | 82.4<br>(76.7 to 88.5)                 | 5,503.2<br>(5,115.2 to 5,926.0)            | 9.3<br>(6.4 to 12.8)             | -5.1<br>(-10.2 to 0.5)                            | -0.3<br>(-5.4 to 5.2)                               |
| Intestinal infectious diseases                                                       | < 0.05<br>(< 0.05 to < 0.05)           | 0.2†<br>(0.1 to 0.4)                       | < 0.05<br>(< 0.05 to < 0.05)     | -2.4<br>(-22.3 to 22.5)                           | -11.8<br>(-26.4 to 6.5)                             |
| Typhoid fever                                                                        | < 0.05<br>(< 0.05 to < 0.05)           | 0.2<br>(0.1 to 0.4)                        | < 0.05<br>(< 0.05 to < 0.05)     | -1.8<br>(-22.1 to 23.1)                           | -11.3<br>(-26.1 to 7.7)                             |
| Paratyphoid fever                                                                    | < 0.05<br>(< 0.05 to < 0.05)           | < 0.05<br>(< 0.05 to < 0.05)               | < 0.05<br>(< 0.05 to < 0.05)     | 6.4<br>(-32.6 to 66.2)                            | -2.3<br>(-37.4 to 45.9)                             |
| Other intestinal infectious diseases                                                 | --                                     | --                                         | < 0.05<br>(< 0.05 to < 0.05)     | -25.4<br>(-48.4 to 6.2)                           | -31.6<br>(-47.2 to -12.7)                           |
| Lower respiratory infections                                                         | 5.7<br>(5.3 to 6.2)                    | 241.4<br>(221.7 to 264.4)                  | 0.3<br>(0.2 to 0.5)              | 9.8<br>(-3.5 to 24.1)                             | 5.5<br>(-6.2 to 17.8)                               |
| Upper respiratory infections                                                         | 199.1<br>(175.6 to 224.5)              | 14,993.1<br>(13,157.6 to 17,026.6)         | 5.0<br>(3.0 to 7.7)              | -2.2<br>(-7.9 to 4.1)                             | -0.5<br>(-5.8 to 4.9)                               |
| Otitis media                                                                         | 88.4<br>(78.5 to 97.8)                 | 365.5<br>(294.9 to 452.9)                  | 2.6<br>(1.6 to 3.9)              | -13.4<br>(-19.8 to -6.5)                          | -7.2<br>(-13.9 to -0.4)                             |
| Meningitis                                                                           | 4.0<br>(3.5 to 4.5)                    | 0.8<br>(0.7 to 0.9)                        | 0.5<br>(0.3 to 0.6)              | -0.7<br>(-3.4 to 2.3)                             | -5.9<br>(-8.7 to -3.2)                              |
| Pneumococcal meningitis                                                              | 1.7<br>(1.5 to 1.9)                    | 0.1<br>(0.1 to 0.1)                        | 0.2<br>(0.1 to 0.3)              | -5.7<br>(-10.9 to -0.9)                           | -11.2<br>(-16.2 to -6.5)                            |
| H influenzae type B meningitis                                                       | 0.4<br>(0.3 to 0.5)                    | 0.1<br>(< 0.05 to 0.1)                     | 0.1<br>(< 0.05 to 0.1)           | -5.8<br>(-11.2 to -0.2)                           | -7.9<br>(-12.9 to -2.8)                             |
| Meningococcal infection                                                              | 0.3<br>(0.2 to 0.3)                    | 0.1<br>(0.1 to 0.1)                        | < 0.05<br>(< 0.05 to < 0.05)     | 3.6<br>(-0.9 to 7.7)                              | -2.9<br>(-7.0 to 1.1)                               |
| Other meningitis                                                                     | 1.6<br>(1.2 to 1.9)                    | 0.5<br>(0.4 to 0.6)                        | 0.1<br>(0.1 to 0.2)              | 9.4<br>(5.3 to 13.7)                              | 3.5<br>(0.0 to 7.4)                                 |
| Encephalitis                                                                         | 3.4<br>(2.4 to 4.8)                    | 1.4<br>(1.3 to 1.6)                        | 0.4<br>(0.3 to 0.6)              | 5.2<br>(1.3 to 9.4)                               | -1.7<br>(-5.3 to 2.0)                               |
| Diphtheria                                                                           | < 0.05<br>(< 0.05 to < 0.05)           | < 0.05<br>(< 0.05 to < 0.05)               | < 0.05<br>(< 0.05 to < 0.05)     | -32.8<br>(-61.8 to 20.5)                          | -30.4<br>(-60.5 to 22.7)                            |
| Whooping cough                                                                       | 1.0<br>(0.8 to 1.2)                    | 7.0<br>(5.5 to 8.9)                        | < 0.05<br>(< 0.05 to 0.1)        | -36.9<br>(-47.3 to -24.9)                         | -21.7<br>(-34.4 to -7.1)                            |
| Tetanus                                                                              | < 0.05<br>(< 0.05 to < 0.05)           | < 0.05<br>(< 0.05 to < 0.05)               | < 0.05<br>(< 0.05 to < 0.05)     | -17.1<br>(-31.9 to -4.5)                          | -23.4<br>(-36.9 to -10.4)                           |
| Measles                                                                              | < 0.05<br>(0.0 to < 0.05)              | < 0.05<br>(0.0 to < 0.05)                  | < 0.05<br>(0.0 to < 0.05)        | --                                                | --                                                  |
| Varicella and herpes zoster                                                          | 5.7<br>(5.3 to 6.2)                    | 121.0<br>(117.6 to 125.0)                  | 0.2<br>(0.1 to 0.3)              | 11.1<br>(-1.9 to 26.3)                            | 0.2<br>(-10.5 to 12.8)                              |
| <b>Neglected tropical diseases and malaria</b>                                       | <b>1,020.0</b><br>(850.6 to 1,203.9)   | <b>569.3†</b><br>(344.7 to 1,077.0)        | <b>5.1</b><br>(3.1 to 7.8)       | <b>-33.6</b><br>(-52.4 to -9.2)                   | <b>-36.6</b><br>(-55.1 to -12.6)                    |
| Malaria                                                                              | --                                     | --                                         | --                               | --                                                | --                                                  |
| Chagas disease                                                                       | 31.0<br>(24.0 to 38.6)                 | 1.0<br>(0.8 to 1.2)                        | 0.3<br>(0.2 to 0.4)              | 18.6<br>(2.2 to 36.5)                             | -1.9<br>(-14.9 to 11.4)                             |
| Leishmaniasis                                                                        | < 0.05<br>(< 0.05 to 0.1)              | 0.1<br>(< 0.05 to 0.1)                     | < 0.05<br>(< 0.05 to < 0.05)     | -43.2<br>(-83.9 to 41.9)                          | -43.1<br>(-83.8 to 41.3)                            |
| Visceral leishmaniasis                                                               | < 0.05<br>(< 0.05 to < 0.05)           | < 0.05<br>(< 0.05 to < 0.05)               | < 0.05<br>(< 0.05 to < 0.05)     | -58.7<br>(-100.0 to 35,435.8)                     | -64.8<br>(-100.0 to 36,054.9)                       |
| Cutaneous and mucocutaneous leishmaniasis                                            | < 0.05<br>(< 0.05 to 0.1)              | 0.1<br>(< 0.05 to 0.1)                     | < 0.05<br>(< 0.05 to < 0.05)     | -43.1<br>(-83.8 to 41.9)                          | -43.1<br>(-83.8 to 41.6)                            |
| African trypanosomiasis                                                              | --                                     | --                                         | --                               | --                                                | --                                                  |
| Schistosomiasis                                                                      | --                                     | --                                         | --                               | --                                                | --                                                  |
| Cysticercosis                                                                        | 1.5<br>(0.6 to 3.0)                    | --                                         | 0.2<br>(0.1 to 0.5)              | -20.9<br>(-69.3 to 47.6)                          | -32.1<br>(-73.6 to 27.4)                            |
| Cystic echinococcosis                                                                | --                                     | --                                         | --                               | --                                                | --                                                  |
| Lymphatic filariasis                                                                 | --                                     | --                                         | --                               | --                                                | --                                                  |
| Onchocerciasis                                                                       | --                                     | --                                         | --                               | --                                                | --                                                  |
| Trachoma                                                                             | --                                     | --                                         | --                               | --                                                | --                                                  |
| Dengue                                                                               | 13.7<br>(8.0 to 22.3)                  | 229.5<br>(151.8 to 326.4)                  | 2.2<br>(1.0 to 4.0)              | 55.8<br>(24.4 to 236.3)                           | 53.4<br>(22.9 to 230.6)                             |
| Yellow fever                                                                         | --                                     | --                                         | --                               | --                                                | --                                                  |
| Rabies                                                                               | < 0.05<br>(< 0.05 to < 0.05)           | < 0.05<br>(< 0.05 to < 0.05)               | < 0.05<br>(< 0.05 to < 0.05)     | -56.7<br>(-84.2 to -17.4)                         | -57.7<br>(-83.1 to -18.6)                           |
| Intestinal nematode infections                                                       | 963.7<br>(793.8 to 1,148.5)            | --                                         | 1.9<br>(1.0 to 3.5)              | -64.0<br>(-77.7 to -39.1)                         | -66.0<br>(-79.3 to -41.9)                           |
| Ascariasis                                                                           | 172.1<br>(116.0 to 243.8)              | --                                         | < 0.05<br>(< 0.05 to 0.1)        | -55.3<br>(-87.6 to 46.5)                          | -58.4<br>(-88.7 to 41.8)                            |

| Cause                                                                   | Prevalence in thousands (95% UI)              | Incidence in thousands (95% UI)                   | YLDs in thousands (95% UI)              |                                                   |                                                     |
|-------------------------------------------------------------------------|-----------------------------------------------|---------------------------------------------------|-----------------------------------------|---------------------------------------------------|-----------------------------------------------------|
|                                                                         | 2016 counts                                   | 2016 counts                                       | 2016 counts                             | Percentage change in counts between 2006 and 2016 | Percentage change in age-standardised rates between |
| Trichuriasis                                                            | 452.9<br>(300.0 to 642.8)                     | --                                                | 0.2<br>(0.1 to 0.5)                     | -57.6<br>(-89.6 to 50.0)                          | -61.4<br>(-90.6 to 39.5)                            |
| Hookworm disease                                                        | 403.8<br>(299.8 to 537.0)                     | --                                                | 1.7<br>(0.8 to 3.2)                     | -64.7<br>(-78.6 to -37.8)                         | -66.6<br>(-80.1 to -40.2)                           |
| Food-borne trematodiasis                                                | --                                            | --                                                | --                                      | --                                                | --                                                  |
| Leprosy                                                                 | < 0.05<br>(< 0.05 to < 0.05)                  | < 0.05<br>(< 0.05 to < 0.05)                      | < 0.05<br>(< 0.05 to < 0.05)            | 28.8<br>(-7.2 to 107.4)                           | 6.5<br>(-23.9 to 75.4)                              |
| Ebola virus disease                                                     | --                                            | --                                                | --                                      | --                                                | --                                                  |
| Zika virus disease                                                      | 5.6<br>(2.4 to 14.2)                          | 338.8<br>(142.0 to 857.9)                         | 0.1<br>(< 0.05 to 0.3)                  | --                                                | --                                                  |
| Guinea worm disease                                                     | --                                            | --                                                | --                                      | --                                                | --                                                  |
| Other neglected tropical diseases                                       | 17.4<br>(15.4 to 19.3)                        | --                                                | 0.3<br>(0.2 to 0.5)                     | -20.2<br>(-33.5 to -5.0)                          | -4.2<br>(-19.3 to 13.2)                             |
| <b>Maternal disorders</b>                                               | <b>8.1</b><br><b>(6.3 to 10.5)</b>            | <b>98.8†</b><br><b>(86.0 to 115.1)</b>            | <b>0.5</b><br><b>(0.3 to 0.7)</b>       | <b>-9.1</b><br><b>(-34.3 to 25.6)</b>             | <b>-17.2</b><br><b>(-40.3 to 14.4)</b>              |
| Maternal haemorrhage                                                    | 1.3<br>(1.0 to 1.8)                           | 5.9<br>(4.3 to 8.1)                               | < 0.05<br>(< 0.05 to 0.1)               | -28.0<br>(-49.1 to 1.2)                           | -33.9<br>(-53.3 to -7.6)                            |
| Maternal sepsis and other pregnancy related infections                  | 2.0<br>(1.5 to 2.8)                           | 13.4<br>(10.0 to 18.2)                            | 0.1<br>(< 0.05 to 0.1)                  | -18.0<br>(-61.4 to 68.0)                          | -25.0<br>(-64.2 to 51.6)                            |
| Maternal hypertensive disorders                                         | 4.8<br>(3.1 to 6.7)                           | 26.6<br>(22.5 to 30.4)                            | 0.2<br>(0.1 to 0.4)                     | 4.0<br>(-36.4 to 72.0)                            | -5.6<br>(-42.4 to 57.7)                             |
| Maternal obstructed labour and uterine rupture                          | 0.1<br>(< 0.05 to 0.1)                        | 4.1<br>(2.9 to 5.6)                               | < 0.05<br>(< 0.05 to < 0.05)            | -20.0<br>(-56.1 to 42.1)                          | -27.1<br>(-60.0 to 28.6)                            |
| Maternal abortion, miscarriage, and ectopic pregnancy                   | 0.4<br>(0.3 to 0.6)                           | 48.8<br>(37.7 to 64.4)                            | < 0.05<br>(< 0.05 to 0.1)               | -23.3<br>(-59.5 to 47.7)                          | -30.2<br>(-63.3 to 36.1)                            |
| Other maternal disorders                                                | --                                            | --                                                | 0.1<br>(< 0.05 to 0.1)                  | -13.3<br>(-37.1 to 19.7)                          | -21.1<br>(-42.9 to 9.0)                             |
| <b>Neonatal disorders</b>                                               | <b>38.8</b><br><b>(33.4 to 46.4)</b>          | --                                                | <b>6.6</b><br><b>(4.5 to 9.4)</b>       | <b>-1.7</b><br><b>(-14.8 to 13.9)</b>             | <b>0.4</b><br><b>(-13.3 to 15.9)</b>                |
| Neonatal preterm birth complications                                    | 32.8<br>(26.4 to 42.5)                        | --                                                | 3.3<br>(2.2 to 4.7)                     | -4.8<br>(-23.3 to 16.7)                           | -3.7<br>(-21.8 to 17.6)                             |
| Neonatal encephalopathy due to birth asphyxia and trauma                | 8.8<br>(4.6 to 14.5)                          | --                                                | 1.3<br>(0.4 to 2.9)                     | 31.1<br>(-4.3 to 164.2)                           | 32.6<br>(-2.8 to 165.7)                             |
| Neonatal sepsis and other neonatal infections                           | 2.1<br>(0.8 to 4.8)                           | --                                                | 0.9<br>(0.3 to 2.2)                     | -16.8<br>(-38.3 to 8.7)                           | -13.8<br>(-35.6 to 14.7)                            |
| Hemolytic disease and other neonatal jaundice                           | 2.9<br>(2.6 to 3.4)                           | --                                                | 0.8<br>(0.6 to 1.1)                     | -2.4<br>(-16.2 to 14.7)                           | -2.8<br>(-15.6 to 12.7)                             |
| Other neonatal disorders                                                | --                                            | --                                                | 0.2<br>(0.1 to 0.3)                     | -23.4<br>(-38.1 to -5.2)                          | -4.7<br>(-22.8 to 17.8)                             |
| <b>Nutritional deficiencies</b>                                         | <b>579.3</b><br><b>(538.4 to 628.3)</b>       | <b>214.3†</b><br><b>(177.8 to 265.6)</b>          | <b>6.6</b><br><b>(4.3 to 9.9)</b>       | <b>-16.1</b><br><b>(-23.4 to -7.9)</b>            | <b>-10.1</b><br><b>(-17.5 to -2.4)</b>              |
| Protein-energy malnutrition                                             | 10.0<br>(7.8 to 12.9)                         | 4.7<br>(3.6 to 6.1)                               | 0.3<br>(0.2 to 0.5)                     | -37.1<br>(-61.7 to 2.6)                           | -21.6<br>(-51.9 to 27.7)                            |
| Iodine deficiency                                                       | 68.4<br>(60.0 to 78.3)                        | 1.6<br>(1.4 to 1.8)                               | 1.8<br>(1.2 to 2.5)                     | 13.4<br>(0.8 to 25.9)                             | 4.0<br>(-7.1 to 14.6)                               |
| Vitamin A deficiency                                                    | 237.8<br>(200.1 to 296.1)                     | 208.1<br>(171.6 to 259.6)                         | 0.2<br>(0.1 to 0.3)                     | -5.8<br>(-21.4 to 11.7)                           | -0.5<br>(-16.2 to 16.6)                             |
| Iron-deficiency anaemia                                                 | 285.3<br>(259.2 to 311.9)                     | --                                                | 4.3<br>(2.7 to 6.7)                     | -22.6<br>(-31.8 to -12.9)                         | -14.2<br>(-23.9 to -4.5)                            |
| Other nutritional deficiencies                                          | --                                            | --                                                | < 0.05<br>(< 0.05 to < 0.05)            | -38.0<br>(-63.3 to 3.4)                           | -22.8<br>(-54.1 to 29.0)                            |
| <b>Other communicable, maternal, neonatal, and nutritional diseases</b> | <b>1,482.9</b><br><b>(1,379.9 to 1,611.5)</b> | <b>453.7</b><br><b>(406.6 to 503.1)</b>           | <b>1.7</b><br><b>(0.9 to 2.9)</b>       | <b>7.0</b><br><b>(0.5 to 12.9)</b>                | <b>0.1</b><br><b>(-5.4 to 5.4)</b>                  |
| Sexually transmitted diseases excluding HIV                             | 1,277.6<br>(1,185.0 to 1,401.7)               | 432.6<br>(385.0 to 480.6)                         | 1.3<br>(0.7 to 2.4)                     | 12.6<br>(5.3 to 20.1)                             | 0.4<br>(-5.8 to 6.4)                                |
| Syphilis                                                                | 9.8<br>(7.8 to 12.3)                          | 7.0<br>(5.4 to 9.0)                               | 0.1<br>(0.1 to 0.1)                     | 26.9<br>(10.3 to 44.0)                            | 2.8<br>(-10.3 to 16.2)                              |
| Chlamydial infection                                                    | 141.5<br>(107.5 to 180.3)                     | 105.9<br>(79.1 to 138.7)                          | 0.3<br>(0.2 to 0.6)                     | 10.5<br>(-4.1 to 27.5)                            | -0.1<br>(-13.1 to 14.6)                             |
| Gonococcal infection                                                    | 18.1<br>(13.5 to 23.4)                        | 62.7<br>(45.3 to 83.2)                            | 0.1<br>(0.1 to 0.2)                     | 9.0<br>(-15.7 to 39.6)                            | -1.0<br>(-22.9 to 25.1)                             |
| Trichomoniasis                                                          | 200.9<br>(173.1 to 230.1)                     | 176.9<br>(150.6 to 207.0)                         | 0.3<br>(0.1 to 0.6)                     | 13.1<br>(6.1 to 20.0)                             | 1.1<br>(-4.7 to 7.2)                                |
| Genital herpes                                                          | 1,015.8<br>(876.4 to 1,181.0)                 | 74.2<br>(62.7 to 88.5)                            | 0.3<br>(0.1 to 0.6)                     | 14.7<br>(7.6 to 21.4)                             | 0.5<br>(-4.9 to 6.0)                                |
| Other sexually transmitted diseases                                     | 6.8<br>(6.2 to 7.4)                           | 5.9<br>(5.0 to 7.0)                               | 0.2<br>(0.1 to 0.4)                     | 9.8<br>(-2.3 to 22.3)                             | -0.4<br>(-11.6 to 11.5)                             |
| Hepatitis                                                               | 271.0<br>(239.7 to 308.6)                     | 21.0<br>(15.1 to 29.1)                            | < 0.05<br>(< 0.05 to < 0.05)            | 27.6<br>(-2.1 to 68.1)                            | 28.6<br>(3.0 to 62.2)                               |
| Acute hepatitis A                                                       | 0.5<br>(0.1 to 1.1)                           | 7.0<br>(1.7 to 14.8)                              | < 0.05<br>(< 0.05 to < 0.05)            | 37.9<br>(-46.8 to 247.8)                          | 40.0<br>(-40.0 to 229.8)                            |
| Hepatitis B                                                             | 111.2<br>(86.9 to 144.5)                      | 9.5<br>(7.4 to 12.3)                              | < 0.05<br>(< 0.05 to < 0.05)            | 43.6<br>(23.2 to 66.7)                            | 32.1<br>(13.9 to 51.6)                              |
| Hepatitis C                                                             | 159.2<br>(141.3 to 177.6)                     | 3.9<br>(3.3 to 4.5)                               | < 0.05<br>(< 0.05 to < 0.05)            | -13.1<br>(-31.8 to 10.3)                          | 5.3<br>(-18.0 to 34.6)                              |
| Acute hepatitis E                                                       | < 0.05<br>(< 0.05 to 0.1)                     | 0.6<br>(0.5 to 0.8)                               | < 0.05<br>(< 0.05 to < 0.05)            | 57.5<br>(41.2 to 74.3)                            | 43.7<br>(32.7 to 55.2)                              |
| Other infectious diseases                                               | 13.2<br>(11.8 to 14.5)                        | < 0.05<br>(< 0.05 to < 0.05)                      | 0.3<br>(0.2 to 0.5)                     | -12.2<br>(-22.9 to -0.8)                          | -2.5<br>(-13.5 to 9.3)                              |
| <b>Non-communicable diseases</b>                                        | <b>5,516.2</b><br><b>(5,474.5 to 5,552.8)</b> | <b>13,931.7†</b><br><b>(13,055.9 to 14,882.6)</b> | <b>505.0</b><br><b>(373.8 to 661.6)</b> | <b>11.7</b><br><b>(8.8 to 15.2)</b>               | <b>-0.4</b><br><b>(-2.8 to 2.4)</b>                 |
| <b>Neoplasms</b>                                                        | <b>17.5</b><br><b>(16.6 to 18.5)</b>          | <b>8.8</b><br><b>(8.1 to 9.6)</b>                 | <b>2.5</b><br><b>(1.8 to 3.2)</b>       | <b>31.6</b><br><b>(24.8 to 39.1)</b>              | <b>6.6</b><br><b>(1.1 to 13.0)</b>                  |
| Lip and oral cavity cancer                                              | 0.5<br>(0.5 to 0.5)                           | 0.1<br>(0.1 to 0.1)                               | 0.1<br>(< 0.05 to 0.1)                  | 31.5<br>(16.2 to 48.1)                            | 5.1<br>(-7.4 to 18.1)                               |
| Nasopharynx cancer                                                      | 0.1<br>(0.1 to 0.1)                           | < 0.05<br>(< 0.05 to < 0.05)                      | < 0.05<br>(< 0.05 to < 0.05)            | 2.7<br>(-8.2 to 15.7)                             | -12.4<br>(-21.4 to -2.6)                            |
| Other pharynx cancer                                                    | 0.1<br>(0.1 to 0.1)                           | < 0.05<br>(< 0.05 to < 0.05)                      | < 0.05<br>(< 0.05 to < 0.05)            | 20.5<br>(6.4 to 35.8)                             | -1.0<br>(-12.9 to 11.6)                             |
| Oesophageal cancer                                                      | 0.1<br>(0.1 to 0.1)                           | 0.1<br>(0.1 to 0.1)                               | < 0.05<br>(< 0.05 to < 0.05)            | 11.2<br>(-1.2 to 23.3)                            | -14.8<br>(-24.5 to -5.4)                            |
| Stomach cancer                                                          | 1.1<br>(1.1 to 1.2)                           | 0.7<br>(0.7 to 0.8)                               | 0.2<br>(0.1 to 0.2)                     | 14.7<br>(-0.5 to 32.5)                            | -11.5<br>(-23.6 to 2.4)                             |
| Colon and rectum cancer                                                 | 2.2<br>(2.0 to 2.4)                           | 0.7<br>(0.6 to 0.7)                               | 0.2<br>(0.2 to 0.3)                     | 54.9<br>(34.1 to 78.9)                            | 20.1<br>(4.0 to 38.9)                               |
| Liver cancer                                                            | 0.1<br>(0.1 to 0.1)                           | 0.3<br>(0.3 to 0.4)                               | 0.1<br>(< 0.05 to 0.1)                  | 30.4<br>(20.2 to 42.0)                            | 1.2<br>(-6.8 to 10.0)                               |
| Liver cancer due to hepatitis B                                         | 0.1<br>(< 0.05 to 0.1)                        | 0.1<br>(0.1 to 0.1)                               | < 0.05<br>(< 0.05 to < 0.05)            | 31.9<br>(19.6 to 45.8)                            | 6.5<br>(-3.0 to 17.0)                               |

| Cause                                              | Prevalence in thousands (95% UI)        | Incidence in thousands (95% UI)        | YLDs in thousands (95% UI)           |                                                   |                                                     |
|----------------------------------------------------|-----------------------------------------|----------------------------------------|--------------------------------------|---------------------------------------------------|-----------------------------------------------------|
|                                                    | 2016 counts                             | 2016 counts                            | 2016 counts                          | Percentage change in counts between 2006 and 2016 | Percentage change in age-standardised rates between |
| Liver cancer due to hepatitis C                    | 0.1<br>(0.1 to 0.1)                     | 0.1<br>(0.1 to 0.1)                    | < 0.05<br>(< 0.05 to < 0.05)         | 40.9<br>(27.0 to 56.9)                            | 6.3<br>(-4.4 to 18.5)                               |
| Liver cancer due to alcohol use                    | 0.1<br>(0.1 to 0.1)                     | 0.1<br>(0.1 to 0.1)                    | < 0.05<br>(< 0.05 to < 0.05)         | 15.3<br>(2.4 to 31.3)                             | -11.0<br>(-21.4 to 0.8)                             |
| Liver cancer due to other causes                   | 0.1<br>(< 0.05 to 0.1)                  | 0.1<br>(0.1 to 0.1)                    | < 0.05<br>(< 0.05 to < 0.05)         | 32.8<br>(19.4 to 46.0)                            | 5.0<br>(-5.1 to 15.6)                               |
| Gallbladder and biliary tract cancer               | 0.1<br>(0.1 to 0.1)                     | 0.1<br>(0.1 to 0.2)                    | < 0.05<br>(< 0.05 to < 0.05)         | 17.2<br>(5.6 to 30.5)                             | -10.0<br>(-19.4 to 1.1)                             |
| Pancreatic cancer                                  | 0.2<br>(0.1 to 0.2)                     | 0.2<br>(0.2 to 0.2)                    | < 0.05<br>(< 0.05 to 0.1)            | 35.8<br>(24.4 to 48.1)                            | 4.5<br>(-4.5 to 14.3)                               |
| Larynx cancer                                      | 0.2<br>(0.2 to 0.2)                     | 0.1<br>(0.1 to 0.1)                    | < 0.05<br>(< 0.05 to < 0.05)         | 27.5<br>(12.0 to 45.6)                            | -0.3<br>(-12.3 to 14.6)                             |
| Tracheal, bronchus, and lung cancer                | 0.5<br>(0.4 to 0.5)                     | 0.4<br>(0.4 to 0.4)                    | 0.1<br>(0.1 to 0.1)                  | 27.4<br>(6.3 to 53.4)                             | -0.4<br>(-16.7 to 20.5)                             |
| Malignant skin melanoma                            | 0.1<br>(0.1 to 0.1)                     | < 0.05<br>(< 0.05 to < 0.05)           | < 0.05<br>(< 0.05 to < 0.05)         | 59.7<br>(42.8 to 77.8)                            | 31.5<br>(18.1 to 46.5)                              |
| Non-melanoma skin cancer                           | 0.5<br>(0.3 to 0.8)                     | 1.6<br>(1.0 to 2.3)                    | < 0.05<br>(< 0.05 to < 0.05)         | 15.7<br>(-28.5 to 117.6)                          | -13.1<br>(-47.9 to 68.7)                            |
| Non-melanoma skin cancer (squamous-cell carcinoma) | 0.3<br>(0.2 to 0.7)                     | 0.3<br>(0.2 to 0.6)                    | < 0.05<br>(< 0.05 to < 0.05)         | 14.6<br>(-30.2 to 134.8)                          | -14.4<br>(-48.8 to 80.2)                            |
| Non-melanoma skin cancer (basal-cell carcinoma)    | 0.2<br>(0.1 to 0.3)                     | 1.2<br>(0.7 to 1.9)                    | < 0.05<br>(< 0.05 to < 0.05)         | 27.5<br>(-1.9 to 69.2)                            | 1.1<br>(-23.4 to 32.8)                              |
| Breast cancer                                      | 3.6<br>(3.0 to 4.1)                     | 0.8<br>(0.7 to 0.9)                    | 0.3<br>(0.2 to 0.4)                  | 50.4<br>(20.9 to 83.3)                            | 23.5<br>(-0.7 to 50.2)                              |
| Cervical cancer                                    | 3.2<br>(2.3 to 3.8)                     | 0.9<br>(0.6 to 1.0)                    | 0.3<br>(0.2 to 0.4)                  | 3.7<br>(-18.2 to 30.5)                            | -12.2<br>(-30.6 to 9.6)                             |
| Uterine cancer                                     | 1.3<br>(1.2 to 1.5)                     | 0.3<br>(0.3 to 0.4)                    | 0.1<br>(0.1 to 0.1)                  | 55.0<br>(30.6 to 84.1)                            | 24.7<br>(5.3 to 47.8)                               |
| Ovarian cancer                                     | 0.5<br>(0.4 to 0.6)                     | 0.2<br>(0.1 to 0.2)                    | 0.1<br>(0.1 to 0.1)                  | 37.6<br>(12.0 to 65.8)                            | 16.1<br>(-6.4 to 40.7)                              |
| Prostate cancer                                    | 3.3<br>(2.7 to 4.8)                     | 0.8<br>(0.7 to 1.2)                    | 0.3<br>(0.2 to 0.5)                  | 64.3<br>(40.7 to 92.9)                            | 20.9<br>(3.8 to 40.5)                               |
| Testicular cancer                                  | 0.1<br>(0.1 to 0.1)                     | < 0.05<br>(< 0.05 to < 0.05)           | < 0.05<br>(< 0.05 to < 0.05)         | 70.4<br>(36.6 to 111.2)                           | 45.7<br>(18.8 to 77.8)                              |
| Kidney cancer                                      | 0.6<br>(0.5 to 0.7)                     | 0.2<br>(0.1 to 0.2)                    | 0.1<br>(< 0.05 to 0.1)               | 33.6<br>(15.4 to 56.1)                            | 14.8<br>(-0.7 to 34.4)                              |
| Bladder cancer                                     | 0.4<br>(0.4 to 0.4)                     | 0.1<br>(0.1 to 0.1)                    | < 0.05<br>(< 0.05 to 0.1)            | 50.3<br>(33.9 to 69.2)                            | 13.3<br>(0.6 to 28.4)                               |
| Brain and nervous system cancer                    | 0.4<br>(0.3 to 0.5)                     | 0.2<br>(0.1 to 0.2)                    | 0.1<br>(< 0.05 to 0.1)               | 21.4<br>(8.2 to 39.2)                             | 8.4<br>(-3.1 to 26.8)                               |
| Thyroid cancer                                     | 0.3<br>(0.2 to 0.3)                     | 0.1<br>(< 0.05 to 0.1)                 | < 0.05<br>(< 0.05 to < 0.05)         | 76.5<br>(46.1 to 116.0)                           | 40.3<br>(15.5 to 73.6)                              |
| Mesothelioma                                       | < 0.05<br>(< 0.05 to < 0.05)            | < 0.05<br>(< 0.05 to < 0.05)           | < 0.05<br>(< 0.05 to < 0.05)         | 25.7<br>(10.7 to 42.2)                            | 5.1<br>(-7.7 to 19.8)                               |
| Hodgkin lymphoma                                   | 0.1<br>(0.1 to 0.1)                     | < 0.05<br>(< 0.05 to 0.1)              | < 0.05<br>(< 0.05 to < 0.05)         | -1.7<br>(-12.3 to 6.6)                            | -17.1<br>(-27.2 to -7.0)                            |
| Non-Hodgkin's lymphoma                             | 0.4<br>(0.4 to 0.4)                     | 0.1<br>(0.1 to 0.2)                    | < 0.05<br>(< 0.05 to 0.1)            | 30.4<br>(18.0 to 43.4)                            | 8.4<br>(-2.6 to 20.0)                               |
| Multiple myeloma                                   | 0.1<br>(0.1 to 0.1)                     | 0.1<br>(0.1 to 0.1)                    | < 0.05<br>(< 0.05 to < 0.05)         | 47.3<br>(30.4 to 67.2)                            | 17.4<br>(3.9 to 33.5)                               |
| Leukaemia                                          | 1.6<br>(1.4 to 1.8)                     | 0.4<br>(0.4 to 0.5)                    | 0.2<br>(0.1 to 0.3)                  | 2.9<br>(-5.3 to 13.4)                             | -8.4<br>(-15.9 to -0.2)                             |
| Acute lymphoid leukaemia                           | 0.3<br>(0.3 to 0.4)                     | 0.1<br>(0.1 to 0.1)                    | < 0.05<br>(< 0.05 to 0.1)            | 17.9<br>(-10.1 to 36.3)                           | 5.8<br>(-8.9 to 20.0)                               |
| Chronic lymphoid leukaemia                         | 0.4<br>(0.3 to 0.4)                     | 0.1<br>(0.1 to 0.1)                    | < 0.05<br>(< 0.05 to 0.1)            | 28.5<br>(12.6 to 47.7)                            | 5.0<br>(-8.8 to 21.0)                               |
| Acute myeloid leukaemia                            | 0.1<br>(< 0.05 to 0.1)                  | < 0.05<br>(< 0.05 to < 0.05)           | < 0.05<br>(< 0.05 to < 0.05)         | 47.6<br>(8.4 to 84.2)                             | 37.3<br>(3.9 to 67.6)                               |
| Chronic myeloid leukaemia                          | 0.1<br>(0.1 to 0.1)                     | < 0.05<br>(< 0.05 to < 0.05)           | < 0.05<br>(< 0.05 to < 0.05)         | 21.4<br>(4.0 to 41.5)                             | 0.4<br>(-14.3 to 16.7)                              |
| Other leukaemia                                    | 0.7<br>(0.6 to 0.8)                     | 0.2<br>(0.1 to 0.2)                    | 0.1<br>(0.1 to 0.1)                  | -16.4<br>(-26.7 to -3.7)                          | -23.5<br>(-33.1 to -11.0)                           |
| Other neoplasms                                    | 0.9<br>(0.8 to 1.0)                     | 0.3<br>(0.2 to 0.3)                    | 0.1<br>(0.1 to 0.1)                  | 64.2<br>(41.6 to 89.8)                            | 36.0<br>(17.6 to 58.3)                              |
| <b>Cardiovascular diseases</b>                     | <b>304.4</b><br><b>(290.5 to 318.5)</b> | <b>27.9†</b><br><b>(26.4 to 29.6)</b>  | <b>17.1</b><br><b>(12.3 to 22.5)</b> | <b>25.6</b><br><b>(21.2 to 30.3)</b>              | <b>0.8</b><br><b>(-2.7 to 4.3)</b>                  |
| Rheumatic heart disease                            | 0.3<br>(0.2 to 0.3)                     | 0.1<br>(0.1 to 0.1)                    | < 0.05<br>(< 0.05 to < 0.05)         | 18.7<br>(11.9 to 25.7)                            | 2.7<br>(-3.1 to 8.6)                                |
| Ischaemic heart disease                            | 81.7<br>(76.6 to 86.9)                  | 8.7<br>(8.1 to 9.2)                    | 5.0<br>(3.4 to 6.7)                  | 28.8<br>(22.6 to 34.7)                            | 2.1<br>(-2.4 to 6.5)                                |
| Cerebrovascular disease                            | 34.0<br>(31.6 to 36.6)                  | 5.1‡<br>(4.6 to 5.6)                   | 3.5<br>(2.5 to 4.4)                  | 29.1<br>(18.7 to 38.7)                            | 0.8<br>(-7.4 to 8.6)                                |
| Ischaemic stroke                                   | 28.3<br>(25.1 to 31.7)                  | 3.5‡<br>(3.1 to 4.0)                   | 2.8<br>(2.0 to 3.6)                  | 29.5<br>(17.4 to 41.5)                            | 0.3<br>(-9.3 to 9.8)                                |
| Hemorrhagic stroke                                 | 7.3<br>(6.6 to 8.1)                     | 1.6‡<br>(1.4 to 1.8)                   | 0.7<br>(0.5 to 0.9)                  | 27.2<br>(12.0 to 43.7)                            | 2.6<br>(-10.0 to 16.2)                              |
| Hypertensive heart disease                         | 12.5<br>(10.7 to 14.8)                  | --                                     | 1.0<br>(0.7 to 1.4)                  | 32.4<br>(18.8 to 47.2)                            | 1.1<br>(-8.9 to 11.6)                               |
| Cardiomyopathy and myocarditis                     | 1.4<br>(1.3 to 1.6)                     | 1.4†<br>(1.3 to 1.6)                   | 0.2<br>(0.1 to 0.2)                  | 13.5<br>(1.7 to 26.5)                             | 1.5<br>(-8.3 to 13.5)                               |
| Myocarditis                                        | 1.1<br>(1.0 to 1.3)                     | 1.4<br>(1.3 to 1.6)                    | 0.1<br>(0.1 to 0.1)                  | 10.7<br>(-5.0 to 27.8)                            | 1.5<br>(-11.9 to 17.4)                              |
| Alcoholic cardiomyopathy                           | 0.1<br>(0.1 to 0.1)                     | --                                     | < 0.05<br>(< 0.05 to < 0.05)         | 22.6<br>(13.1 to 33.4)                            | 0.8<br>(-6.8 to 9.8)                                |
| Other cardiomyopathy                               | 0.9<br>(0.8 to 1.1)                     | --                                     | 0.1<br>(0.1 to 0.1)                  | 16.1<br>(2.4 to 32.3)                             | 1.6<br>(-10.8 to 17.0)                              |
| Atrial fibrillation and flutter                    | 37.1<br>(32.2 to 42.4)                  | 2.9<br>(2.4 to 3.3)                    | 2.9<br>(2.0 to 4.1)                  | 30.6<br>(22.5 to 39.5)                            | -0.5<br>(-6.6 to 5.9)                               |
| Peripheral vascular disease                        | 95.5<br>(83.0 to 110.2)                 | 9.1<br>(7.9 to 10.7)                   | 0.5<br>(0.2 to 0.9)                  | 28.4<br>(16.8 to 39.4)                            | -3.3<br>(-11.2 to 4.2)                              |
| Endocarditis                                       | 0.4<br>(0.3 to 0.4)                     | 0.6<br>(0.6 to 0.7)                    | < 0.05<br>(< 0.05 to < 0.05)         | 20.4<br>(4.9 to 39.2)                             | 0.1<br>(-14.1 to 16.6)                              |
| Other cardiovascular and circulatory diseases      | 76.8<br>(65.4 to 90.5)                  | --                                     | 4.1<br>(2.7 to 5.8)                  | 15.2<br>(6.9 to 24.7)                             | 0.4<br>(-6.8 to 8.4)                                |
| <b>Chronic respiratory diseases</b>                | <b>579.7</b><br><b>(552.2 to 608.9)</b> | <b>95.3†</b><br><b>(89.2 to 101.8)</b> | <b>20.9</b><br><b>(14.9 to 28.5)</b> | <b>1.8</b><br><b>(-3.2 to 7.1)</b>                | <b>1.6</b><br><b>(-3.1 to 6.5)</b>                  |
| Chronic obstructive pulmonary disease              | 167.2<br>(155.2 to 182.0)               | 10.8<br>(10.0 to 11.8)                 | 3.6<br>(2.9 to 4.3)                  | 22.9<br>(7.4 to 42.2)                             | 1.3<br>(-11.2 to 17.4)                              |
| Pneumoconiosis                                     | 0.8<br>(0.7 to 0.8)                     | 0.1<br>(0.1 to 0.1)                    | 0.1<br>(0.1 to 0.1)                  | 27.2<br>(7.9 to 49.9)                             | 1.6<br>(-14.7 to 20.6)                              |
| Silicosis                                          | 0.2<br>(0.1 to 0.2)                     | < 0.05<br>(< 0.05 to < 0.05)           | < 0.05<br>(< 0.05 to < 0.05)         | 23.5<br>(-7.7 to 63.9)                            | 1.0<br>(-25.4 to 34.8)                              |



| Cause                                                          | Prevalence in thousands (95% UI)        | Incidence in thousands (95% UI)               | YLDs in thousands (95% UI)       |                                                   |                                                     |
|----------------------------------------------------------------|-----------------------------------------|-----------------------------------------------|----------------------------------|---------------------------------------------------|-----------------------------------------------------|
|                                                                | 2016 counts                             | 2016 counts                                   | 2016 counts                      | Percentage change in counts between 2006 and 2016 | Percentage change in age-standardised rates between |
| Asbestosis                                                     | 0.2<br>(0.1 to 0.2)                     | < 0.05<br>(< 0.05 to < 0.05)                  | < 0.05<br>(< 0.05 to < 0.05)     | 23.0<br>(3.8 to 45.3)                             | -1.8<br>(-18.2 to 17.5)                             |
| Coal workers pneumoconiosis                                    | --                                      | --                                            | --                               | --                                                | --                                                  |
| Other pneumoconiosis                                           | 0.4<br>(0.4 to 0.5)                     | < 0.05<br>(< 0.05 to < 0.05)                  | 0.1<br>(< 0.05 to 0.1)           | 30.9<br>(-0.4 to 72.4)                            | 3.4<br>(-21.5 to 36.5)                              |
| Asthma                                                         | 421.0<br>(388.0 to 456.3)               | 84.1<br>(77.9 to 90.5)                        | 16.7<br>(10.8 to 24.1)           | -2.7<br>(-7.6 to 2.3)                             | 1.0<br>(-3.7 to 5.9)                                |
| Interstitial lung disease and pulmonary sarcoidosis            | 2.6<br>(2.4 to 2.8)                     | 0.3<br>(0.3 to 0.3)                           | 0.3<br>(0.2 to 0.4)              | 34.2<br>(22.8 to 46.8)                            | 7.7<br>(-2.4 to 18.3)                               |
| Other chronic respiratory diseases                             | --                                      | --                                            | 0.3<br>(0.2 to 0.4)              | 26.4<br>(-3.8 to 66.2)                            | 36.7<br>(6.9 to 76.1)                               |
| <b>Cirrhosis and other chronic liver diseases</b>              | <b>54.9<br/>(52.1 to 57.7)</b>          | <b>1.9<br/>(1.8 to 2.0)</b>                   | <b>1.4<br/>(1.0 to 2.0)</b>      | <b>21.2<br/>(11.5 to 32.5)</b>                    | <b>4.7<br/>(-3.2 to 13.5)</b>                       |
| Cirrhosis and other chronic liver diseases due to hepatitis B  | 1.9<br>(1.7 to 2.2)                     | 0.1<br>(0.1 to 0.1)                           | < 0.05<br>(< 0.05 to 0.1)        | 28.4<br>(-1.1 to 64.4)                            | 5.1<br>(-19.7 to 36.6)                              |
| Cirrhosis and other chronic liver diseases due to hepatitis C  | 20.7<br>(19.2 to 22.3)                  | 0.7<br>(0.7 to 0.8)                           | 0.5<br>(0.3 to 0.7)              | 22.1<br>(6.7 to 39.2)                             | 0.8<br>(-11.3 to 14.5)                              |
| Cirrhosis and other chronic liver diseases due to alcohol use  | 20.5<br>(18.9 to 22.1)                  | 0.7<br>(0.7 to 0.8)                           | 0.5<br>(0.3 to 0.7)              | 35.7<br>(18.7 to 53.2)                            | 8.8<br>(-4.7 to 22.1)                               |
| Cirrhosis and other chronic liver diseases due to other causes | 11.8<br>(10.8 to 12.8)                  | 0.4<br>(0.4 to 0.4)                           | 0.4<br>(0.3 to 0.6)              | 7.0<br>(-10.0 to 26.9)                            | 4.5<br>(-10.6 to 22.0)                              |
| <b>Digestive diseases</b>                                      | <b>151.9<br/>(139.8 to 165.3)</b>       | <b>122.2<sup>†</sup><br/>(113.4 to 131.6)</b> | <b>6.3<br/>(4.5 to 8.6)</b>      | <b>12.4<br/>(4.8 to 20.9)</b>                     | <b>1.4<br/>(-5.1 to 8.5)</b>                        |
| Peptic ulcer disease                                           | 69.7<br>(62.8 to 77.4)                  | 3.8<br>(3.5 to 4.2)                           | 1.2<br>(0.8 to 1.9)              | 26.8<br>(11.2 to 44.6)                            | 8.3<br>(-5.4 to 24.3)                               |
| Gastritis and duodenitis                                       | 31.3<br>(27.2 to 35.9)                  | 12.4<br>(10.9 to 14.0)                        | 0.8<br>(0.5 to 1.1)              | 29.9<br>(13.1 to 49.4)                            | 11.1<br>(-3.3 to 28.0)                              |
| Appendicitis                                                   | 0.4<br>(0.4 to 0.5)                     | 11.5<br>(10.6 to 12.5)                        | 0.1<br>(0.1 to 0.2)              | -3.8<br>(-34.0 to 42.3)                           | -2.5<br>(-29.9 to 35.9)                             |
| Paralytic ileus and intestinal obstruction                     | 0.1<br>(< 0.05 to 0.1)                  | 1.5<br>(1.3 to 1.7)                           | < 0.05<br>(< 0.05 to < 0.05)     | 8.2<br>(3.2 to 13.5)                              | 4.4<br>(1.1 to 7.9)                                 |
| Inguinal, femoral, and abdominal hernia                        | 47.9<br>(43.1 to 52.6)                  | 30.8<br>(26.9 to 34.9)                        | 3.2<br>(2.2 to 4.5)              | 3.0<br>(-6.1 to 12.7)                             | -4.8<br>(-12.9 to 3.7)                              |
| Inflammatory bowel disease                                     | 1.2<br>(1.1 to 1.3)                     | 1.5<br>(1.5 to 1.6)                           | 0.2<br>(0.1 to 0.2)              | 30.1<br>(7.1 to 55.8)                             | 9.8<br>(-10.6 to 33.0)                              |
| Vascular intestinal disorders                                  | 0.1<br>(< 0.05 to 0.1)                  | 0.3<br>(0.3 to 0.3)                           | < 0.05<br>(< 0.05 to < 0.05)     | 20.7<br>(12.7 to 30.6)                            | 12.6<br>(5.8 to 19.7)                               |
| Gallbladder and biliary diseases                               | 6.2<br>(5.7 to 6.8)                     | 57.7<br>(49.8 to 66.0)                        | 0.3<br>(0.2 to 0.4)              | 31.0<br>(7.5 to 60.5)                             | 13.7<br>(-6.6 to 39.5)                              |
| Pancreatitis                                                   | 0.3<br>(0.3 to 0.3)                     | 2.8<br>(2.5 to 3.0)                           | < 0.05<br>(< 0.05 to 0.1)        | 22.7<br>(18.8 to 27.1)                            | 7.8<br>(4.3 to 11.5)                                |
| Other digestive diseases                                       | --                                      | --                                            | 0.5<br>(0.4 to 0.7)              | 13.4<br>(5.3 to 22.0)                             | 5.0<br>(-1.8 to 11.9)                               |
| <b>Neurological disorders</b>                                  | <b>2,350.4<br/>(2,250.3 to 2,462.7)</b> | <b>1,086.4<br/>(931.6 to 1,253.1)</b>         | <b>65.5<br/>(43.4 to 89.3)</b>   | <b>11.6<br/>(-8.2 to 38.9)</b>                    | <b>0.6<br/>(-15.7 to 23.6)</b>                      |
| Alzheimer's disease and other dementias                        | 37.4<br>(31.3 to 44.7)                  | 6.5<br>(5.4 to 7.9)                           | 5.5<br>(3.8 to 7.4)              | 46.1<br>(39.1 to 53.6)                            | -0.7<br>(-4.9 to 3.9)                               |
| Parkinson's disease                                            | 3.4<br>(2.7 to 4.3)                     | 0.4<br>(0.3 to 0.5)                           | 0.4<br>(0.3 to 0.6)              | 41.8<br>(26.1 to 61.2)                            | 6.4<br>(-5.1 to 20.6)                               |
| Epilepsy                                                       | 30.5<br>(7.5 to 51.5)                   | 3.4<br>(0.8 to 5.9)                           | 8.8<br>(1.8 to 19.5)             | 2.1<br>(-77.8 to 374.5)                           | 0.1<br>(-78.0 to 367.8)                             |
| Multiple sclerosis                                             | 0.4<br>(0.4 to 0.5)                     | < 0.05<br>(< 0.05 to < 0.05)                  | 0.1<br>(0.1 to 0.1)              | 30.2<br>(24.7 to 36.6)                            | 13.8<br>(9.0 to 19.2)                               |
| Motor neuron disease                                           | 0.2<br>(0.1 to 0.2)                     | < 0.05<br>(< 0.05 to < 0.05)                  | < 0.05<br>(< 0.05 to < 0.05)     | 11.7<br>(6.9 to 17.2)                             | 3.9<br>(0.5 to 8.0)                                 |
| Migraine                                                       | 861.9<br>(810.5 to 915.2)               | 96.3<br>(90.4 to 102.5)                       | 40.8<br>(26.6 to 57.4)           | 10.0<br>(5.9 to 14.0)                             | 0.3<br>(-3.2 to 3.7)                                |
| Tension-type headache                                          | 1,782.9<br>(1,604.5 to 1,991.1)         | 979.7<br>(824.1 to 1,146.8)                   | 7.8<br>(5.0 to 11.4)             | 9.9<br>(4.9 to 15.8)                              | -0.3<br>(-4.7 to 4.3)                               |
| Other neurological disorders                                   | < 0.05<br>(< 0.05 to < 0.05)            | < 0.05<br>(< 0.05 to 0.1)                     | 1.9<br>(0.5 to 4.2)              | 18.8<br>(-68.6 to 368.2)                          | 20.0<br>(-66.7 to 342.3)                            |
| <b>Mental and substance use disorders</b>                      | <b>850.9<br/>(823.3 to 877.4)</b>       | <b>358.3<sup>†</sup><br/>(332.7 to 385.8)</b> | <b>117.5<br/>(85.5 to 153.5)</b> | <b>7.7<br/>(5.0 to 10.2)</b>                      | <b>-1.3<br/>(-3.6 to 1.0)</b>                       |
| Schizophrenia                                                  | 11.4<br>(10.0 to 12.8)                  | 0.8<br>(0.7 to 0.9)                           | 7.4<br>(5.3 to 9.3)              | 15.1<br>(4.3 to 26.5)                             | 1.4<br>(-7.9 to 11.3)                               |
| Alcohol use disorders                                          | 153.9<br>(136.0 to 174.6)               | 72.2<br>(61.9 to 84.4)                        | 15.6<br>(10.7 to 21.4)           | 3.9<br>(-5.9 to 14.6)                             | -7.6<br>(-16.2 to 1.9)                              |
| Drug use disorders                                             | 27.1<br>(24.3 to 30.4)                  | 4.0<br>(3.6 to 4.5)                           | 7.5<br>(5.2 to 10.4)             | 15.9<br>(5.2 to 27.7)                             | 3.7<br>(-5.1 to 13.8)                               |
| Opioid use disorders                                           | 12.9<br>(10.2 to 16.3)                  | 1.7<br>(1.4 to 2.1)                           | 5.4<br>(3.6 to 7.7)              | 16.6<br>(4.5 to 30.1)                             | 4.0<br>(-6.8 to 15.8)                               |
| Cocaine use disorders                                          | 1.7<br>(1.4 to 2.1)                     | 0.2<br>(0.1 to 0.2)                           | 0.2<br>(0.1 to 0.4)              | 14.2<br>(-12.2 to 49.6)                           | 1.4<br>(-19.8 to 28.9)                              |
| Amphetamine use disorders                                      | 5.9<br>(4.0 to 8.4)                     | 0.6<br>(0.4 to 0.9)                           | 0.8<br>(0.4 to 1.3)              | 14.1<br>(-11.5 to 48.2)                           | 3.8<br>(-18.9 to 35.0)                              |
| Cannabis use disorders                                         | 5.3<br>(4.4 to 6.3)                     | 1.0<br>(0.9 to 1.2)                           | 0.2<br>(0.1 to 0.2)              | 13.5<br>(-10.4 to 46.5)                           | 3.8<br>(-15.6 to 29.2)                              |
| Other drug use disorders                                       | 2.4<br>(2.1 to 2.7)                     | 0.5<br>(0.4 to 0.6)                           | 0.9<br>(0.6 to 1.4)              | 14.5<br>(-10.1 to 42.9)                           | 2.9<br>(-18.4 to 27.3)                              |
| Depressive disorders                                           | 188.1<br>(176.5 to 201.1)               | 219.8<br>(197.1 to 244.2)                     | 33.5<br>(23.0 to 45.7)           | 9.9<br>(4.5 to 15.9)                              | -2.2<br>(-6.7 to 2.8)                               |
| Major depressive disorder                                      | 137.5<br>(123.6 to 152.7)               | 209.8<br>(186.8 to 234.4)                     | 28.4<br>(19.2 to 38.7)           | 9.2<br>(2.8 to 16.1)                              | -2.6<br>(-8.2 to 3.2)                               |
| Dysthymia                                                      | 53.2<br>(46.8 to 60.8)                  | 10.0<br>(8.8 to 11.4)                         | 5.2<br>(3.4 to 7.5)              | 14.1<br>(8.8 to 19.4)                             | 0.2<br>(-4.0 to 4.4)                                |
| Bipolar disorder                                               | 46.9<br>(40.0 to 54.8)                  | 4.2<br>(3.6 to 5.0)                           | 9.7<br>(6.0 to 14.5)             | 10.2<br>(4.0 to 17.3)                             | 0.1<br>(-5.2 to 6.0)                                |
| Anxiety disorders                                              | 177.8<br>(162.2 to 194.3)               | 29.1<br>(26.9 to 31.6)                        | 17.3<br>(12.2 to 23.7)           | 8.0<br>(1.6 to 15.0)                              | 0.3<br>(-5.6 to 6.5)                                |
| Eating disorders                                               | 9.7<br>(7.7 to 11.7)                    | 5.0<br>(3.7 to 6.6)                           | 2.0<br>(1.2 to 2.9)              | 17.2<br>(2.7 to 32.3)                             | 10.1<br>(-3.4 to 24.4)                              |
| Anorexia nervosa                                               | 2.2<br>(1.6 to 2.9)                     | 0.9<br>(0.7 to 1.2)                           | 0.5<br>(0.3 to 0.7)              | 12.2<br>(-15.3 to 46.6)                           | 9.0<br>(-17.3 to 40.7)                              |
| Bulimia nervosa                                                | 7.1<br>(5.3 to 9.5)                     | 4.1<br>(2.8 to 5.7)                           | 1.5<br>(0.9 to 2.3)              | 18.8<br>(2.1 to 37.4)                             | 10.4<br>(-5.3 to 27.2)                              |
| Autistic spectrum disorders                                    | 51.9<br>(46.5 to 58.4)                  | 0.4<br>(0.2 to 0.5)                           | 7.7<br>(5.2 to 10.8)             | 0.7<br>(-4.2 to 5.8)                              | -0.1<br>(-4.6 to 4.7)                               |
| Autism                                                         | 15.8<br>(13.6 to 18.5)                  | < 0.05<br>(< 0.05 to 0.1)                     | 4.0<br>(2.6 to 6.0)              | 1.3<br>(-7.0 to 10.2)                             | 0.2<br>(-7.7 to 8.2)                                |
| Asperger syndrome and other autistic spectrum disorders        | 36.2<br>(30.1 to 43.7)                  | 0.3<br>(0.2 to 0.5)                           | 3.6<br>(2.4 to 5.4)              | 0.1<br>(-4.2 to 5.2)                              | -0.4<br>(-4.4 to 4.3)                               |

| Cause                                                      | Prevalence in thousands (95% UI)              | Incidence in thousands (95% UI)                   | YLDs in thousands (95% UI)             |                                                   |                                                     |
|------------------------------------------------------------|-----------------------------------------------|---------------------------------------------------|----------------------------------------|---------------------------------------------------|-----------------------------------------------------|
|                                                            | 2016 counts                                   | 2016 counts                                       | 2016 counts                            | Percentage change in counts between 2006 and 2016 | Percentage change in age-standardised rates between |
| Attention-deficit/hyperactivity disorder                   | 50.4<br>(39.6 to 63.2)                        | 2.2<br>(1.6 to 2.9)                               | 0.6<br>(0.4 to 1.0)                    | -3.4<br>(-12.0 to 4.7)                            | 0.0<br>(-8.3 to 8.1)                                |
| Conduct disorder                                           | 50.3<br>(40.7 to 60.3)                        | 16.3<br>(12.7 to 20.0)                            | 6.2<br>(3.8 to 9.4)                    | -9.6<br>(-15.1 to -3.6)                           | 0.4<br>(-5.8 to 7.1)                                |
| Idiopathic developmental intellectual disability           | 45.8<br>(23.8 to 67.0)                        | --                                                | 1.8<br>(0.8 to 3.2)                    | -4.2<br>(-11.6 to 3.6)                            | -8.1<br>(-16.0 to -0.8)                             |
| Other mental and substance use disorders                   | 109.8<br>(96.6 to 126.6)                      | 4.3<br>(3.8 to 4.9)                               | 8.2<br>(5.7 to 11.8)                   | 14.1<br>(8.7 to 20.1)                             | -0.1<br>(-4.6 to 5.0)                               |
| <b>Diabetes, urogenital, blood, and endocrine diseases</b> | <b>2,106.1</b><br><b>(2,031.5 to 2,182.7)</b> | <b>536.6†</b><br><b>(508.1 to 566.1)</b>          | <b>52.4</b><br><b>(37.5 to 70.8)</b>   | <b>19.3</b><br><b>(14.0 to 24.4)</b>              | <b>0.6</b><br><b>(-3.9 to 5.1)</b>                  |
| Diabetes mellitus                                          | 347.4<br>(313.1 to 386.4)                     | 18.9<br>(17.0 to 21.1)                            | 31.0<br>(21.4 to 42.9)                 | 22.1<br>(13.5 to 30.7)                            | 2.4<br>(-5.1 to 9.7)                                |
| Acute glomerulonephritis                                   | 0.1<br>(0.1 to 0.1)                           | 1.2<br>(1.1 to 1.4)                               | < 0.05<br>(< 0.05 to < 0.05)           | 11.3<br>(5.9 to 16.1)                             | 0.1<br>(-3.9 to 4.0)                                |
| Chronic kidney disease                                     | 422.2<br>(398.4 to 446.2)                     | 39.0<br>(35.9 to 42.3)                            | 10.1<br>(7.6 to 12.8)                  | 22.2<br>(15.3 to 28.4)                            | -0.8<br>(-6.0 to 4.4)                               |
| Chronic kidney disease due to diabetes mellitus            | 164.1<br>(142.0 to 186.9)                     | 16.1<br>(13.7 to 18.7)                            | 3.6<br>(2.6 to 4.7)                    | 23.7<br>(13.9 to 33.5)                            | 0.1<br>(-7.7 to 7.8)                                |
| Chronic kidney disease due to hypertension                 | 86.9<br>(75.1 to 98.9)                        | 10.1<br>(8.3 to 12.1)                             | 1.3<br>(0.9 to 1.7)                    | 30.9<br>(17.6 to 45.8)                            | -3.1<br>(-12.9 to 7.4)                              |
| Chronic kidney disease due to glomerulonephritis           | 85.2<br>(75.5 to 95.1)                        | 4.9<br>(3.8 to 6.1)                               | 3.0<br>(2.2 to 4.0)                    | 18.2<br>(7.6 to 29.3)                             | -0.7<br>(-9.0 to 8.1)                               |
| Chronic kidney disease due to other causes                 | 86.1<br>(71.1 to 101.2)                       | 7.9<br>(6.3 to 9.5)                               | 2.1<br>(1.6 to 2.9)                    | 20.7<br>(9.4 to 32.1)                             | -1.2<br>(-9.8 to 7.5)                               |
| Urinary diseases and male infertility                      | 80.7<br>(72.7 to 90.1)                        | 254.5†<br>(232.0 to 279.5)                        | 2.4<br>(1.6 to 3.5)                    | 20.5<br>(13.4 to 27.9)                            | -3.2<br>(-8.8 to 2.4)                               |
| Interstitial nephritis and urinary tract infections        | 4.4<br>(3.9 to 4.9)                           | 229.4<br>(206.6 to 254.8)                         | 0.1<br>(0.1 to 0.2)                    | 7.6<br>(-8.3 to 27.6)                             | 0.7<br>(-13.4 to 18.3)                              |
| Urolithiasis                                               | 0.6<br>(0.6 to 0.7)                           | 16.7<br>(14.9 to 18.8)                            | < 0.05<br>(< 0.05 to 0.1)              | 15.5<br>(11.0 to 20.2)                            | 1.4<br>(-2.3 to 5.3)                                |
| Benign prostatic hyperplasia                               | 64.1<br>(54.5 to 74.7)                        | 8.4<br>(7.0 to 10.1)                              | 2.1<br>(1.3 to 3.1)                    | 22.8<br>(15.1 to 31.1)                            | -3.6<br>(-9.6 to 2.8)                               |
| Male infertility                                           | 8.4<br>(6.4 to 11.4)                          | --                                                | < 0.05<br>(< 0.05 to 0.1)              | 39.4<br>(8.3 to 80.9)                             | 27.6<br>(-0.9 to 65.8)                              |
| Other urinary diseases                                     | --                                            | --                                                | 0.1<br>(< 0.05 to 0.1)                 | -11.3<br>(-22.1 to 1.7)                           | -16.0<br>(-25.4 to -5.0)                            |
| Gynecological diseases                                     | 717.9<br>(683.8 to 754.6)                     | 215.0†<br>(202.2 to 227.7)                        | 6.1<br>(4.1 to 9.0)                    | 8.7<br>(3.4 to 14.6)                              | -3.8<br>(-8.5 to 1.4)                               |
| Uterine fibroids                                           | 49.4<br>(43.0 to 56.4)                        | 5.5<br>(4.7 to 6.4)                               | 0.4<br>(0.2 to 0.8)                    | 12.6<br>(4.7 to 19.6)                             | -2.0<br>(-8.5 to 3.9)                               |
| Polycystic ovarian syndrome                                | 0.8<br>(0.6 to 1.0)                           | 4.4<br>(3.1 to 5.8)                               | < 0.05<br>(< 0.05 to < 0.05)           | 9.8<br>(-22.1 to 55.7)                            | 0.2<br>(-29.2 to 43.4)                              |
| Female infertility                                         | 22.5<br>(14.6 to 33.6)                        | --                                                | 0.1<br>(< 0.05 to 0.3)                 | 61.5<br>(14.8 to 119.7)                           | 49.7<br>(6.2 to 106.8)                              |
| Endometriosis                                              | 0.3<br>(0.2 to 0.3)                           | 1.4<br>(1.1 to 1.7)                               | < 0.05<br>(< 0.05 to < 0.05)           | 11.2<br>(-10.2 to 38.7)                           | 0.1<br>(-21.5 to 27.9)                              |
| Genital prolapse                                           | 249.2<br>(214.2 to 289.0)                     | 15.1<br>(12.7 to 17.9)                            | 0.8<br>(0.4 to 1.4)                    | -1.0<br>(-9.2 to 8.5)                             | -18.8<br>(-25.6 to -11.0)                           |
| Premenstrual syndrome                                      | 417.7<br>(392.5 to 442.9)                     | 152.3<br>(141.6 to 162.5)                         | 3.5<br>(2.2 to 5.4)                    | 7.3<br>(-0.1 to 15.8)                             | -2.6<br>(-9.2 to 5.1)                               |
| Other gynecological diseases                               | 35.9<br>(30.4 to 41.8)                        | 36.4<br>(30.4 to 43.2)                            | 1.3<br>(0.8 to 1.8)                    | 14.7<br>(1.4 to 28.7)                             | 1.7<br>(-9.4 to 14.0)                               |
| Hemoglobinopathies and hemolytic anaemias                  | 1,037.7<br>(951.4 to 1,126.3)                 | --                                                | 1.4<br>(0.8 to 2.2)                    | -3.3<br>(-14.8 to 10.1)                           | -2.9<br>(-14.4 to 10.1)                             |
| Thalassemias                                               | < 0.05<br>(< 0.05 to 0.1)                     | --                                                | < 0.05<br>(< 0.05 to < 0.05)           | -23.5<br>(-33.8 to -12.6)                         | -5.6<br>(-18.3 to 8.3)                              |
| Thalassaemias trait                                        | 28.6<br>(9.7 to 50.7)                         | --                                                | 0.4<br>(0.1 to 0.8)                    | 5.7<br>(-11.8 to 37.3)                            | 3.5<br>(-12.7 to 37.6)                              |
| Sickle cell disorders                                      | 0.5<br>(0.2 to 0.8)                           | --                                                | < 0.05<br>(< 0.05 to 0.1)              | 2.5<br>(-20.5 to 32.3)                            | 7.7<br>(-14.6 to 36.9)                              |
| Sickle cell trait                                          | 240.8<br>(164.0 to 337.6)                     | --                                                | 0.8<br>(0.4 to 1.3)                    | -4.2<br>(-17.9 to 12.0)                           | -2.6<br>(-16.5 to 13.2)                             |
| G6PD deficiency                                            | 133.7<br>(115.5 to 154.3)                     | --                                                | < 0.05<br>(< 0.05 to < 0.05)           | -8.1<br>(-20.4 to 5.0)                            | -9.3<br>(-20.6 to 2.1)                              |
| G6PD trait                                                 | 666.3<br>(613.3 to 723.7)                     | --                                                | < 0.05<br>(< 0.05 to < 0.05)           | 0.4<br>(-10.0 to 11.1)                            | -2.5<br>(-12.4 to 8.0)                              |
| Other hemoglobinopathies and hemolytic anaemias            | 15.4<br>(13.8 to 17.1)                        | --                                                | 0.2<br>(0.1 to 0.3)                    | -13.4<br>(-26.2 to 0.9)                           | -13.7<br>(-25.6 to -1.5)                            |
| Endocrine, metabolic, blood, and immune disorders          | 43.9<br>(40.6 to 47.8)                        | 8.0<br>(7.2 to 8.9)                               | 1.3<br>(0.9 to 1.8)                    | 15.5<br>(6.5 to 24.7)                             | 3.1<br>(-4.1 to 10.5)                               |
| <b>Musculoskeletal disorders</b>                           | <b>843.0</b><br><b>(804.4 to 883.9)</b>       | <b>398.5</b><br><b>(361.3 to 439.9)</b>           | <b>89.3</b><br><b>(64.5 to 118.0)</b>  | <b>16.1</b><br><b>(13.2 to 19.1)</b>              | <b>-0.3</b><br><b>(-2.5 to 2.2)</b>                 |
| Rheumatoid arthritis                                       | 12.2<br>(10.8 to 13.7)                        | 0.7<br>(0.6 to 0.8)                               | 2.9<br>(2.0 to 3.9)                    | 21.6<br>(11.4 to 33.3)                            | 3.3<br>(-4.9 to 13.5)                               |
| Osteoarthritis                                             | 205.7<br>(192.7 to 219.4)                     | 10.0<br>(9.3 to 10.7)                             | 12.7<br>(9.0 to 17.2)                  | 21.8<br>(17.2 to 26.8)                            | -1.2<br>(-4.8 to 2.7)                               |
| Low back and neck pain                                     | 472.5<br>(437.8 to 509.5)                     | 184.8<br>(166.8 to 204.9)                         | 53.7<br>(38.2 to 71.7)                 | 15.6<br>(12.0 to 19.3)                            | 0.0<br>(-2.8 to 3.1)                                |
| Low back pain                                              | 293.7<br>(259.4 to 332.2)                     | 139.2<br>(122.2 to 158.2)                         | 33.4<br>(23.4 to 44.8)                 | 14.6<br>(9.6 to 20.4)                             | -0.1<br>(-4.3 to 4.7)                               |
| Neck pain                                                  | 202.7<br>(174.3 to 233.3)                     | 45.7<br>(39.6 to 53.3)                            | 20.3<br>(13.8 to 29.1)                 | 17.1<br>(14.2 to 20.0)                            | 0.3<br>(-1.8 to 2.4)                                |
| Gout                                                       | 12.8<br>(11.4 to 14.4)                        | 2.6<br>(2.3 to 2.9)                               | 0.4<br>(0.3 to 0.6)                    | 19.2<br>(0.9 to 40.5)                             | -0.4<br>(-15.7 to 17.1)                             |
| Other musculoskeletal disorders                            | 226.3<br>(190.4 to 266.8)                     | 200.5<br>(167.6 to 238.2)                         | 19.7<br>(12.8 to 28.0)                 | 13.3<br>(4.4 to 22.4)                             | -0.9<br>(-8.3 to 6.8)                               |
| <b>Other non-communicable diseases</b>                     | <b>4,501.7</b><br><b>(4,398.9 to 4,588.9)</b> | <b>11,295.8†</b><br><b>(10,435.0 to 12,192.7)</b> | <b>132.1</b><br><b>(91.2 to 184.5)</b> | <b>9.6</b><br><b>(8.2 to 11.1)</b>                | <b>-1.5</b><br><b>(-2.6 to -0.3)</b>                |
| Congenital anomalies                                       | 62.7<br>(54.7 to 72.5)                        | --                                                | 7.7<br>(5.5 to 10.4)                   | -6.8<br>(-12.1 to -1.3)                           | -5.9<br>(-11.2 to -0.2)                             |
| Neural tube defects                                        | 4.8<br>(4.2 to 5.4)                           | --                                                | 1.4<br>(1.0 to 1.9)                    | -10.9<br>(-22.6 to 2.3)                           | -12.7<br>(-23.8 to -0.0)                            |
| Congenital heart anomalies                                 | 6.6<br>(5.7 to 7.6)                           | --                                                | 0.3<br>(0.1 to 0.5)                    | -5.0<br>(-17.0 to 10.2)                           | 2.4<br>(-10.0 to 17.4)                              |
| Orofacial clefts                                           | 5.0<br>(4.4 to 5.6)                           | --                                                | 0.1<br>(< 0.05 to 0.1)                 | -18.6<br>(-27.5 to -8.7)                          | -19.4<br>(-28.2 to -9.8)                            |
| Down's syndrome                                            | 5.3<br>(4.6 to 6.2)                           | --                                                | 0.5<br>(0.3 to 0.7)                    | 4.0<br>(-6.6 to 16.3)                             | 4.6<br>(-5.5 to 16.4)                               |
| Turner syndrome                                            | 1.9<br>(1.6 to 2.2)                           | --                                                | < 0.05<br>(< 0.05 to 0.1)              | -0.0<br>(-31.6 to 43.1)                           | -0.3<br>(-31.4 to 41.2)                             |
| Klinefelter syndrome                                       | 2.9<br>(2.4 to 3.4)                           | --                                                | < 0.05<br>(< 0.05 to < 0.05)           | 1.2<br>(-21.7 to 30.6)                            | -0.7<br>(-23.0 to 27.5)                             |



| Cause                                         | Prevalence in thousands (95% UI)        | Incidence in thousands (95% UI)          | YLDs in thousands (95% UI)           |                                                   |                                                     |
|-----------------------------------------------|-----------------------------------------|------------------------------------------|--------------------------------------|---------------------------------------------------|-----------------------------------------------------|
|                                               | 2016 counts                             | 2016 counts                              | 2016 counts                          | Percentage change in counts between 2006 and 2016 | Percentage change in age-standardised rates between |
| Other chromosomal abnormalities               | 6.6<br>(5.5 to 7.9)                     | --                                       | 0.7<br>(0.5 to 1.0)                  | -13.2<br>(-24.6 to -0.4)                          | 2.2<br>(-11.2 to 17.0)                              |
| Congenital musculoskeletal and limb anomalies | 7.9<br>(7.2 to 8.7)                     | --                                       | 1.1<br>(0.7 to 1.5)                  | 6.3<br>(-3.3 to 17.8)                             | 3.4<br>(-5.7 to 14.2)                               |
| Urogenital congenital anomalies               | 7.3<br>(6.5 to 8.2)                     | --                                       | 0.2<br>(0.1 to 0.3)                  | -10.8<br>(-19.6 to -0.8)                          | -0.7<br>(-10.4 to 9.7)                              |
| Digestive congenital anomalies                | 6.1<br>(5.3 to 6.9)                     | --                                       | 0.3<br>(0.2 to 0.4)                  | 8.8<br>(-10.3 to 31.8)                            | 7.3<br>(-10.5 to 28.8)                              |
| Other congenital anomalies                    | 23.7<br>(15.4 to 34.9)                  | --                                       | 3.1<br>(1.9 to 4.7)                  | -9.6<br>(-18.6 to 0.7)                            | -10.3<br>(-19.0 to -0.7)                            |
| Skin and subcutaneous diseases                | 1,759.9<br>(1,717.1 to 1,810.5)         | 3,626.2<br>(3,450.9 to 3,818.7)          | 44.6<br>(30.2 to 63.9)               | 2.5<br>(0.1 to 5.1)                               | 2.5<br>(0.5 to 4.7)                                 |
| Dermatitis                                    | 250.8<br>(236.9 to 266.1)               | 311.8<br>(288.1 to 335.9)                | 9.6<br>(5.7 to 15.5)                 | -2.7<br>(-7.3 to 3.0)                             | 1.4<br>(-3.0 to 6.8)                                |
| Psoriasis                                     | 48.0<br>(45.9 to 50.2)                  | 6.9<br>(6.6 to 7.2)                      | 4.2<br>(3.0 to 5.6)                  | 17.7<br>(8.8 to 27.4)                             | 8.9<br>(0.9 to 17.4)                                |
| Cellulitis                                    | 2.1<br>(1.9 to 2.2)                     | 35.6<br>(33.2 to 38.3)                   | 0.1<br>(0.1 to 0.2)                  | 2.8<br>(-17.5 to 28.7)                            | 1.8<br>(-16.9 to 24.5)                              |
| Pyoderma                                      | 13.8<br>(13.4 to 14.3)                  | 306.2<br>(295.6 to 317.3)                | 0.1<br>(< 0.05 to 0.2)               | 10.2<br>(2.9 to 18.7)                             | 0.5<br>(-5.7 to 7.6)                                |
| Scabies                                       | 86.9<br>(76.0 to 100.1)                 | 265.5<br>(229.1 to 306.8)                | 2.2<br>(1.3 to 3.6)                  | -5.0<br>(-9.4 to -0.3)                            | -3.1<br>(-6.9 to 1.0)                               |
| Fungal skin diseases                          | 396.3<br>(360.2 to 438.2)               | 1,435.3<br>(1,284.4 to 1,596.1)          | 2.2<br>(0.9 to 4.6)                  | 5.3<br>(2.9 to 7.7)                               | 0.1<br>(-1.2 to 1.3)                                |
| Viral skin diseases                           | 176.1<br>(167.8 to 184.6)               | 264.4<br>(251.9 to 277.7)                | 5.4<br>(3.4 to 8.0)                  | -1.7<br>(-4.9 to 1.4)                             | 0.3<br>(-2.9 to 3.3)                                |
| Acne vulgaris                                 | 532.8<br>(470.0 to 599.1)               | 360.8<br>(294.4 to 449.8)                | 13.8<br>(8.9 to 19.9)                | 4.2<br>(-1.3 to 9.7)                              | 4.1<br>(-1.0 to 9.2)                                |
| Alopecia areata                               | 10.5<br>(10.1 to 11.0)                  | 18.7<br>(18.0 to 19.5)                   | 0.4<br>(0.2 to 0.5)                  | 8.3<br>(-3.3 to 22.4)                             | 0.1<br>(-10.3 to 12.5)                              |
| Pruritus                                      | 52.9<br>(47.0 to 59.4)                  | 42.1<br>(37.7 to 47.3)                   | 0.6<br>(0.3 to 1.0)                  | 9.5<br>(3.2 to 15.6)                              | 1.4<br>(-3.9 to 6.6)                                |
| Urticaria                                     | 55.7<br>(48.9 to 64.2)                  | 99.0<br>(87.0 to 114.0)                  | 3.4<br>(2.1 to 4.9)                  | -5.5<br>(-11.2 to 0.7)                            | 0.2<br>(-5.3 to 6.0)                                |
| Decubitus ulcer                               | 2.0<br>(1.8 to 2.2)                     | 7.3<br>(6.5 to 8.2)                      | 0.3<br>(0.2 to 0.4)                  | 27.9<br>(12.9 to 42.7)                            | 7.4<br>(-6.1 to 21.1)                               |
| Other skin and subcutaneous diseases          | 406.6<br>(395.6 to 418.1)               | 472.5<br>(458.2 to 487.4)                | 2.2<br>(1.1 to 4.1)                  | 16.1<br>(13.5 to 19.1)                            | 4.0<br>(1.8 to 6.6)                                 |
| Sense organ diseases                          | 1,526.2<br>(1,495.5 to 1,559.8)         | 585.5†<br>(549.9 to 624.7)               | 61.1<br>(42.1 to 85.0)               | 15.3<br>(13.1 to 17.7)                            | -3.9<br>(-5.5 to -2.3)                              |
| Glaucoma                                      | 6.1<br>(5.2 to 7.1)                     | --                                       | 0.6<br>(0.4 to 0.9)                  | 30.6<br>(17.6 to 44.8)                            | 0.7<br>(-8.8 to 11.1)                               |
| Cataract                                      | 89.1<br>(80.2 to 97.9)                  | --                                       | 7.2<br>(5.1 to 9.8)                  | 31.3<br>(24.6 to 38.7)                            | -3.5<br>(-8.2 to 1.5)                               |
| Macular degeneration                          | 4.1<br>(3.4 to 5.0)                     | --                                       | 0.3<br>(0.2 to 0.4)                  | 40.5<br>(23.6 to 59.7)                            | 6.3<br>(-6.4 to 21.4)                               |
| Refraction and accommodation disorders        | 838.6<br>(799.9 to 876.8)               | --                                       | 16.0<br>(10.0 to 24.7)               | 5.0<br>(1.4 to 9.0)                               | -6.1<br>(-9.4 to -2.4)                              |
| Age-related and other hearing loss            | 962.7<br>(916.1 to 1,013.8)             | --                                       | 29.6<br>(20.9 to 41.1)               | 16.8<br>(13.3 to 20.0)                            | -4.2<br>(-6.5 to -2.1)                              |
| Other vision loss                             | 24.0<br>(21.9 to 26.3)                  | --                                       | 2.2<br>(1.5 to 3.0)                  | 21.2<br>(12.1 to 30.5)                            | 1.5<br>(-5.9 to 8.6)                                |
| Other sense organ diseases                    | 166.5<br>(153.3 to 179.1)               | 585.5<br>(549.9 to 624.7)                | 5.2<br>(3.2 to 7.9)                  | 17.6<br>(12.7 to 22.7)                            | 1.3<br>(-2.6 to 5.5)                                |
| Oral disorders                                | 3,323.1<br>(3,151.7 to 3,461.4)         | 7,084.2†<br>(6,260.7 to 7,936.2)         | 18.8<br>(11.4 to 28.8)               | 18.6<br>(16.3 to 21.5)                            | 0.7<br>(-1.0 to 2.5)                                |
| Caries of deciduous teeth                     | 357.7<br>(276.9 to 435.8)               | 1,341.9<br>(855.9 to 1,859.9)            | 0.1<br>(< 0.05 to 0.2)               | -21.5<br>(-31.0 to -11.1)                         | -1.1<br>(-12.9 to 12.1)                             |
| Caries of permanent teeth                     | 2,384.0<br>(2,175.4 to 2,589.7)         | 5,630.2<br>(4,931.8 to 6,349.1)          | 1.4<br>(0.6 to 2.7)                  | 2.1<br>(-2.0 to 6.2)                              | -3.6<br>(-7.2 to -0.2)                              |
| Periodontal disease                           | 680.9<br>(570.6 to 806.4)               | 84.1<br>(68.7 to 101.6)                  | 4.5<br>(1.8 to 9.2)                  | 18.4<br>(15.1 to 22.1)                            | 1.4<br>(-1.6 to 4.4)                                |
| Edentulism and severe tooth loss              | 343.3<br>(300.3 to 385.9)               | 28.0<br>(23.7 to 32.6)                   | 9.5<br>(6.2 to 13.5)                 | 26.0<br>(22.5 to 30.0)                            | 1.1<br>(-1.7 to 4.4)                                |
| Other oral disorders                          | 110.3<br>(105.5 to 115.3)               | --                                       | 3.2<br>(2.0 to 4.9)                  | 9.0<br>(5.6 to 12.7)                              | 0.3<br>(-2.7 to 3.5)                                |
| <b>Injuries</b>                               | <b>893.5</b><br><b>(811.4 to 999.8)</b> | <b>368.6†</b><br><b>(344.9 to 393.3)</b> | <b>34.2</b><br><b>(22.4 to 49.6)</b> | <b>12.5</b><br><b>(6.9 to 18.9)</b>               | <b>-1.4</b><br><b>(-5.3 to 3.1)</b>                 |
| <b>Transport injuries</b>                     | <b>123.0</b><br><b>(114.6 to 131.7)</b> | <b>47.2</b><br><b>(41.8 to 52.7)</b>     | <b>6.5</b><br><b>(4.3 to 9.4)</b>    | <b>13.6</b><br><b>(9.5 to 17.6)</b>               | <b>-1.8</b><br><b>(-4.7 to 0.9)</b>                 |
| Road injuries                                 | 116.2<br>(107.8 to 124.8)               | 45.4<br>(40.1 to 50.8)                   | 6.2<br>(4.0 to 8.9)                  | 15.0<br>(10.8 to 19.0)                            | -0.6<br>(-3.5 to 2.2)                               |
| Pedestrian road injuries                      | 28.4<br>(24.9 to 32.2)                  | 7.8<br>(6.5 to 9.2)                      | 1.5<br>(1.0 to 2.2)                  | 7.7<br>(3.8 to 11.7)                              | -7.3<br>(-9.9 to -4.7)                              |
| Cyclist road injuries                         | 17.2<br>(14.0 to 20.6)                  | 7.2<br>(5.6 to 8.9)                      | 0.8<br>(0.5 to 1.2)                  | 15.4<br>(10.4 to 20.5)                            | 2.7<br>(-1.0 to 6.4)                                |
| Motorcyclist road injuries                    | 10.3<br>(8.7 to 12.1)                   | 2.6<br>(2.1 to 3.2)                      | 0.5<br>(0.3 to 0.8)                  | 16.3<br>(11.5 to 21.0)                            | 1.3<br>(-2.2 to 4.4)                                |
| Motor vehicle road injuries                   | 44.1<br>(37.7 to 50.2)                  | 19.8<br>(16.8 to 22.9)                   | 2.5<br>(1.7 to 3.6)                  | 19.9<br>(15.7 to 24.0)                            | 3.4<br>(0.5 to 6.2)                                 |
| Other road injuries                           | 16.2<br>(14.0 to 18.7)                  | 8.1<br>(6.5 to 9.8)                      | 0.8<br>(0.5 to 1.2)                  | 13.2<br>(9.8 to 16.8)                             | -3.6<br>(-6.0 to -1.2)                              |
| Other transport injuries                      | 6.8<br>(5.9 to 7.8)                     | 1.8<br>(1.6 to 2.0)                      | 0.4<br>(0.2 to 0.5)                  | -5.7<br>(-9.3 to -2.1)                            | -19.2<br>(-21.9 to -16.6)                           |
| <b>Unintentional injuries</b>                 | <b>544.3</b><br><b>(496.3 to 604.4)</b> | <b>272.0</b><br><b>(252.2 to 294.0)</b>  | <b>20.0</b><br><b>(13.6 to 28.3)</b> | <b>22.9</b><br><b>(17.9 to 28.2)</b>              | <b>6.0</b><br><b>(2.8 to 9.4)</b>                   |
| Falls                                         | 301.4<br>(263.2 to 343.2)               | 155.0<br>(138.3 to 174.4)                | 13.0<br>(9.0 to 17.7)                | 25.8<br>(20.7 to 31.1)                            | 5.5<br>(1.9 to 8.9)                                 |
| Drowning                                      | 2.6<br>(2.3 to 2.9)                     | 0.6<br>(0.6 to 0.7)                      | 0.1<br>(0.1 to 0.2)                  | 4.0<br>(-1.6 to 9.7)                              | -13.2<br>(-17.2 to -9.3)                            |
| Fire, heat, and hot substances                | 46.1<br>(36.9 to 60.9)                  | 5.7<br>(4.4 to 7.1)                      | 1.2<br>(0.8 to 1.8)                  | 15.4<br>(6.1 to 25.8)                             | 7.2<br>(-0.5 to 16.2)                               |
| Poisonings                                    | 1.5<br>(1.2 to 1.9)                     | 2.1<br>(1.7 to 2.6)                      | 0.1<br>(0.1 to 0.2)                  | 30.7<br>(19.8 to 43.0)                            | 22.3<br>(13.0 to 33.4)                              |
| Exposure to mechanical forces                 | 101.0<br>(85.3 to 124.5)                | 39.1<br>(31.9 to 46.8)                   | 2.4<br>(1.5 to 3.5)                  | 43.4<br>(37.2 to 49.3)                            | 28.8<br>(24.1 to 33.4)                              |
| Unintentional firearm injuries                | 6.0<br>(4.9 to 7.3)                     | 1.6<br>(1.1 to 2.2)                      | 0.2<br>(0.1 to 0.4)                  | 50.0<br>(44.1 to 55.8)                            | 31.3<br>(26.9 to 35.4)                              |
| Unintentional suffocation                     | 2.8<br>(2.0 to 3.7)                     | 0.5<br>(0.3 to 0.8)                      | 0.1<br>(0.1 to 0.1)                  | 13.5<br>(6.9 to 20.7)                             | 8.8<br>(3.1 to 14.9)                                |
| Other exposure to mechanical forces           | 92.2<br>(77.0 to 115.4)                 | 37.0<br>(30.3 to 44.0)                   | 2.0<br>(1.3 to 3.0)                  | 44.4<br>(38.2 to 50.2)                            | 29.6<br>(24.8 to 34.1)                              |

| Cause                                                                               | Prevalence in thousands (95% UI)        | Incidence in thousands (95% UI)                      | YLDs in thousands (95% UI)        |                                                   |                                                     |
|-------------------------------------------------------------------------------------|-----------------------------------------|------------------------------------------------------|-----------------------------------|---------------------------------------------------|-----------------------------------------------------|
|                                                                                     | 2016 counts                             | 2016 counts                                          | 2016 counts                       | Percentage change in counts between 2006 and 2016 | Percentage change in age-standardised rates between |
| Adverse effects of medical treatment                                                | 0.7<br>(0.5 to 0.8)                     | 8.8<br>(7.8 to 9.9)                                  | 0.1<br>(0.1 to 0.1)               | 5.0<br>(-0.4 to 10.3)                             | -4.4<br>(-9.2 to 0.2)                               |
| Animal contact                                                                      | 20.9<br>(18.3 to 24.6)                  | 24.8<br>(20.2 to 30.2)                               | 0.7<br>(0.5 to 1.1)               | 3.8<br>(-3.0 to 11.5)                             | -3.9<br>(-9.6 to 2.2)                               |
| Venomous animal contact                                                             | 10.1<br>(8.3 to 12.5)                   | 11.3<br>(8.8 to 14.5)                                | 0.6<br>(0.4 to 0.8)               | 5.8<br>(-3.0 to 15.2)                             | -0.8<br>(-8.2 to 7.4)                               |
| Non-venomous animal contact                                                         | 10.8<br>(9.1 to 13.3)                   | 13.4<br>(10.6 to 16.7)                               | 0.2<br>(0.1 to 0.3)               | -2.1<br>(-6.5 to 1.7)                             | -12.3<br>(-15.8 to -9.3)                            |
| Foreign body                                                                        | 23.8<br>(19.5 to 28.2)                  | 20.1<br>(17.3 to 23.8)                               | 1.0<br>(0.6 to 1.5)               | 10.1<br>(5.2 to 15.0)                             | 1.0<br>(-3.0 to 4.7)                                |
| Pulmonary aspiration and foreign body in airway                                     | 16.5<br>(12.9 to 21.1)                  | 5.7<br>(4.9 to 6.8)                                  | 0.7<br>(0.4 to 1.1)               | 9.7<br>(4.4 to 15.3)                              | 1.6<br>(-2.8 to 5.7)                                |
| Foreign body in eyes                                                                | 2.5<br>(1.5 to 3.6)                     | 12.2<br>(9.6 to 15.7)                                | 0.1<br>(0.1 to 0.2)               | 13.2<br>(8.0 to 18.8)                             | 1.3<br>(-1.6 to 4.5)                                |
| Foreign body in other body part                                                     | 4.8<br>(4.0 to 6.3)                     | 2.1<br>(1.8 to 2.6)                                  | 0.1<br>(0.1 to 0.2)               | 9.2<br>(3.1 to 15.4)                              | -2.0<br>(-6.7 to 2.4)                               |
| Environmental heat and cold exposure                                                | 8.3<br>(7.1 to 10.1)                    | 2.4<br>(1.9 to 2.8)                                  | 0.3<br>(0.2 to 0.5)               | 9.5<br>(5.0 to 14.0)                              | -2.4<br>(-5.7 to 0.7)                               |
| Other unintentional injuries                                                        | 38.0<br>(31.1 to 46.5)                  | 13.5<br>(11.4 to 16.0)                               | 1.1<br>(0.7 to 1.6)               | 0.6<br>(-2.8 to 4.0)                              | -9.3<br>(-11.9 to -6.9)                             |
| <b>Self-harm and interpersonal violence</b>                                         | <b>190.5</b><br><b>(174.8 to 207.9)</b> | <b>49.3†</b><br><b>(42.6 to 57.0)</b>                | <b>4.3</b><br><b>(2.9 to 6.2)</b> | <b>7.2</b><br><b>(4.4 to 9.8)</b>                 | <b>-5.0</b><br><b>(-7.2 to -2.8)</b>                |
| Self-harm                                                                           | 4.4<br>(3.8 to 5.0)                     | 2.1<br>(1.9 to 2.3)                                  | 0.2<br>(0.1 to 0.3)               | 6.1<br>(0.5 to 11.7)                              | -8.4<br>(-12.4 to -4.5)                             |
| Self-harm by firearm                                                                | 0.3<br>(0.3 to 0.4)                     | 0.1<br>(0.1 to 0.1)                                  | < 0.05<br>(< 0.05 to < 0.05)      | -26.7<br>(-30.1 to -22.4)                         | -36.3<br>(-38.8 to -33.3)                           |
| Self-harm by other specified means                                                  | 4.1<br>(3.5 to 4.7)                     | 2.0<br>(1.8 to 2.2)                                  | 0.2<br>(0.1 to 0.3)               | 9.0<br>(2.9 to 14.9)                              | -6.0<br>(-10.2 to -1.9)                             |
| Interpersonal violence                                                              | 186.1<br>(170.1 to 203.6)               | 47.2†<br>(40.7 to 54.8)                              | 4.1<br>(2.8 to 5.9)               | 7.2<br>(4.5 to 9.9)                               | -4.8<br>(-7.1 to -2.6)                              |
| Assault by firearm                                                                  | 12.1<br>(10.0 to 14.4)                  | 4.4<br>(3.5 to 5.5)                                  | 0.6<br>(0.4 to 0.8)               | 5.3<br>(1.1 to 9.1)                               | -9.0<br>(-12.1 to -6.1)                             |
| Assault by sharp object                                                             | 35.0<br>(29.0 to 41.7)                  | 17.1<br>(13.6 to 21.2)                               | 1.1<br>(0.7 to 1.5)               | 11.2<br>(6.8 to 15.6)                             | -3.1<br>(-6.4 to 0.1)                               |
| Sexual violence                                                                     | 99.4<br>(86.3 to 114.7)                 | --                                                   | 0.8<br>(0.6 to 1.2)               | -5.9<br>(-10.7 to -1.5)                           | -10.5<br>(-14.6 to -6.7)                            |
| Assault by other means                                                              | 39.6<br>(33.5 to 47.6)                  | 25.7<br>(21.7 to 30.5)                               | 1.7<br>(1.1 to 2.4)               | 13.4<br>(9.7 to 17.1)                             | -1.5<br>(-4.2 to 1.3)                               |
| <b>Forces of nature, conflict and terrorism, and executions and police conflict</b> | <b>135.1</b><br><b>(75.4 to 217.8)</b>  | <b>&lt; 0.05†</b><br><b>(&lt; 0.05 to &lt; 0.05)</b> | <b>3.4</b><br><b>(1.1 to 7.1)</b> | <b>-22.7</b><br><b>(-29.5 to -17.6)</b>           | <b>-27.0</b><br><b>(-32.5 to -23.3)</b>             |
| Exposure to forces of nature                                                        | 12.4<br>(6.0 to 20.2)                   | --                                                   | 0.4<br>(0.1 to 1.0)               | -13.6<br>(-18.1 to -9.8)                          | -18.1<br>(-21.9 to -14.9)                           |
| Conflict and terrorism                                                              | 122.6<br>(68.1 to 200.7)                | --                                                   | 3.0<br>(0.9 to 6.2)               | -23.8<br>(-30.7 to -18.5)                         | -28.0<br>(-33.6 to -24.0)                           |
| Executions and police conflict                                                      | 0.1<br>(0.1 to 0.2)                     | < 0.05<br>(< 0.05 to < 0.05)                         | < 0.05<br>(< 0.05 to < 0.05)      | 6.7<br>(0.6 to 13.4)                              | 4.2<br>(-1.9 to 11.7)                               |
| <b>Impairments</b>                                                                  | --                                      | --                                                   | --                                | --                                                | --                                                  |
| Anaemia                                                                             | 697.6<br>(642.9 to 754.5)               | --                                                   | 16.9<br>(11.7 to 23.2)            | -4.9<br>(-12.2 to 3.4)                            | -9.5<br>(-15.9 to -2.5)                             |
| Developmental intellectual disability                                               | 92.8<br>(71.5 to 114.2)                 | --                                                   | 10.2<br>(7.4 to 13.6)             | -3.7<br>(-8.0 to 1.0)                             | -4.0<br>(-8.0 to 0.6)                               |
| Epilepsy                                                                            | 39.3<br>(15.7 to 60.3)                  | --                                                   | 11.8<br>(4.7 to 22.0)             | -0.2<br>(-62.4 to 188.2)                          | -2.3<br>(-63.1 to 182.8)                            |
| Guillain-Barre syndrome                                                             | 0.1<br>(0.1 to 0.2)                     | --                                                   | < 0.05<br>(< 0.05 to 0.1)         | 74.4<br>(30.9 to 187.6)                           | 67.3<br>(26.9 to 168.8)                             |
| Hearing loss                                                                        | 1,055.3<br>(1,009.6 to 1,104.9)         | --                                                   | 34.4<br>(24.2 to 47.5)            | 11.7<br>(8.9 to 14.3)                             | -5.1<br>(-7.2 to -3.2)                              |
| Heart failure                                                                       | 40.9<br>(35.6 to 47.0)                  | --                                                   | 4.4<br>(3.2 to 5.6)               | 34.5<br>(24.5 to 44.2)                            | 2.2<br>(-5.3 to 9.2)                                |
| Infertility                                                                         | 45.0<br>(35.0 to 58.6)                  | --                                                   | 0.3<br>(0.1 to 0.6)               | 34.2<br>(11.7 to 62.8)                            | 24.0<br>(2.6 to 51.6)                               |
| Pelvic inflammatory disease                                                         | 0.6<br>(0.5 to 0.7)                     | --                                                   | 0.1<br>(0.1 to 0.1)               | 8.8<br>(-12.6 to 34.3)                            | -2.3<br>(-22.0 to 22.5)                             |
| Vision loss                                                                         | 981.5<br>(942.7 to 1,020.1)             | --                                                   | 28.9<br>(20.0 to 40.5)            | 12.1<br>(8.4 to 16.0)                             | -4.2<br>(-6.9 to -1.2)                              |

We did not calculate incidence for the nine impairments, certain NTDs, and causes with only birth prevalence. Blank cells mean that no estimate is available.

† Incidence for aggregate causes represents the sum of the incidence of the causes below the aggregate.

‡ Incidence estimates for stroke represent first-ever stroke only.

^ Incidence of HIV/AIDS represents new infections of HIV only and does not include new infections of Tuberculosis in HIV positive cases.

SR Table 14: Prevalence, incidence, and YLDs for 2016, percentage change of YLD counts and percentage change of age-standardised YLD rates between 2006 and 2016 by cause and impairments, for all ages, Equatorial Guinea.

| Cause                                                                                | Prevalence in thousands (95% UI) | Incidence in thousands (95% UI)         | YLDs in thousands (95% UI)     |                                                   |                                                     |
|--------------------------------------------------------------------------------------|----------------------------------|-----------------------------------------|--------------------------------|---------------------------------------------------|-----------------------------------------------------|
|                                                                                      | 2016 counts                      | 2016 counts                             | 2016 counts                    | Percentage change in counts between 2006 and 2016 | Percentage change in age-standardised rates between |
| <b>All causes</b>                                                                    | <b>829.4</b><br>(828.3 to 830.5) | <b>6,025.1†</b><br>(5,651.7 to 6,428.8) | <b>86.4</b><br>(63.8 to 111.8) | <b>32.1</b><br>(28.5 to 35.9)                     | <b>-3.2</b><br>(-5.4 to -0.9)                       |
| <b>Communicable, maternal, neonatal, and nutritional disorders</b>                   | <b>773.5</b><br>(765.0 to 782.1) | <b>4,108.4†</b><br>(3,758.5 to 4,469.3) | <b>21.8</b><br>(15.4 to 29.6)  | <b>20.3</b><br>(12.3 to 29.2)                     | <b>-10.7</b><br>(-16.4 to -4.0)                     |
| <b>HIV/AIDS and tuberculosis</b>                                                     | <b>250.8</b><br>(231.6 to 268.6) | <b>4.8†</b><br>(3.5 to 6.2)             | <b>4.6</b><br>(3.0 to 6.9)     | <b>31.8</b><br>(4.6 to 68.9)                      | <b>0.1</b><br>(-19.9 to 27.8)                       |
| Tuberculosis                                                                         | 220.8<br>(199.2 to 244.0)        | 2.6†<br>(2.1 to 3.2)                    | 0.4<br>(0.2 to 0.5)            | 8.8<br>(-2.5 to 22.5)                             | -22.2<br>(-29.2 to -14.1)                           |
| Drug-susceptible tuberculosis                                                        | 1.1<br>(0.9 to 1.4)              | 2.6<br>(2.1 to 3.1)                     | 0.3<br>(0.2 to 0.5)            | 8.9<br>(-2.5 to 22.9)                             | -22.2<br>(-29.1 to -14.1)                           |
| Multidrug-resistant tuberculosis without extensive drug resistance                   | < 0.05<br>(< 0.05 to < 0.05)     | < 0.05<br>(< 0.05 to < 0.05)            | < 0.05<br>(< 0.05 to < 0.05)   | 5.0<br>(-39.8 to 83.8)                            | -25.2<br>(-56.9 to 30.1)                            |
| Extensively drug-resistant tuberculosis                                              | < 0.05<br>(< 0.05 to < 0.05)     | < 0.05<br>(< 0.05 to < 0.05)            | < 0.05<br>(< 0.05 to < 0.05)   | 220.0<br>(83.6 to 460.1)                          | 128.0<br>(31.3 to 296.3)                            |
| Latent tuberculosis infection                                                        | 219.7<br>(198.1 to 242.8)        | --                                      | --                             | --                                                | --                                                  |
| HIV/AIDS                                                                             | 31.1<br>(25.1 to 38.1)           | 2.2^<br>(1.0 to 3.5)                    | 4.2<br>(2.7 to 6.5)            | 34.1<br>(4.8 to 76.5)                             | 2.6<br>(-19.9 to 35.4)                              |
| Drug-susceptible HIV/AIDS - Tuberculosis                                             | 0.4<br>(0.2 to 0.6)              | 0.9<br>(0.6 to 1.3)                     | 0.1<br>(0.1 to 0.2)            | -8.0<br>(-21.9 to 7.7)                            | -29.8<br>(-40.1 to -18.9)                           |
| Multidrug-resistant HIV/AIDS - Tuberculosis without extensive drug resistance        | < 0.05<br>(< 0.05 to < 0.05)     | < 0.05<br>(< 0.05 to < 0.05)            | < 0.05<br>(< 0.05 to < 0.05)   | -11.7<br>(-48.4 to 54.6)                          | -32.8<br>(-60.6 to 17.9)                            |
| Extensively drug-resistant HIV/AIDS - Tuberculosis                                   | < 0.05<br>(< 0.05 to < 0.05)     | < 0.05<br>(< 0.05 to < 0.05)            | < 0.05<br>(< 0.05 to < 0.05)   | 169.1<br>(57.4 to 370.9)                          | 104.8<br>(20.1 to 259.1)                            |
| HIV/AIDS resulting in other diseases                                                 | 30.7<br>(24.8 to 37.7)           | 2.2<br>(1.0 to 3.5)                     | 4.1<br>(2.6 to 6.2)            | 36.4<br>(5.4 to 82.5)                             | 4.3<br>(-19.4 to 41.0)                              |
| <b>Diarrhoea, lower respiratory infections, and other common infectious diseases</b> | <b>62.7</b><br>(59.4 to 66.6)    | <b>3,649.6†</b><br>(3,315.0 to 4,009.8) | <b>3.4</b><br>(2.4 to 4.6)     | <b>35.2</b><br>(31.0 to 39.9)                     | <b>1.1</b><br>(-1.7 to 4.2)                         |
| Diarrhoeal diseases                                                                  | 14.3<br>(13.2 to 15.3)           | 961.8<br>(889.1 to 1,034.8)             | 1.6<br>(1.1 to 2.2)            | 39.1<br>(31.2 to 47.2)                            | 3.5<br>(-1.7 to 8.8)                                |
| Intestinal infectious diseases                                                       | < 0.05<br>(< 0.05 to < 0.05)     | 0.5†<br>(0.4 to 0.7)                    | < 0.05<br>(< 0.05 to < 0.05)   | 2.1<br>(-15.8 to 23.8)                            | -23.8<br>(-34.9 to -10.9)                           |
| Typhoid fever                                                                        | < 0.05<br>(< 0.05 to < 0.05)     | 0.5<br>(0.4 to 0.6)                     | < 0.05<br>(< 0.05 to < 0.05)   | 2.4<br>(-16.2 to 25.0)                            | -23.6<br>(-35.2 to -9.9)                            |
| Paratyphoid fever                                                                    | < 0.05<br>(< 0.05 to < 0.05)     | 0.1<br>(< 0.05 to 0.1)                  | < 0.05<br>(< 0.05 to < 0.05)   | 9.6<br>(-12.2 to 37.1)                            | -18.2<br>(-32.6 to -0.2)                            |
| Other intestinal infectious diseases                                                 | --                               | --                                      | < 0.05<br>(< 0.05 to < 0.05)   | -21.8<br>(-41.7 to 5.6)                           | -40.5<br>(-52.5 to -24.6)                           |
| Lower respiratory infections                                                         | 1.0<br>(0.9 to 1.1)              | 45.1<br>(40.4 to 50.1)                  | 0.1<br>(< 0.05 to 0.1)         | 22.6<br>(8.3 to 39.1)                             | -7.0<br>(-16.3 to 2.4)                              |
| Upper respiratory infections                                                         | 33.5<br>(29.4 to 38.1)           | 2,541.3<br>(2,214.1 to 2,902.1)         | 0.8<br>(0.5 to 1.3)            | 32.5<br>(25.6 to 39.8)                            | -0.8<br>(-5.4 to 3.9)                               |
| Otitis media                                                                         | 10.5<br>(9.3 to 11.8)            | 63.3<br>(50.1 to 80.0)                  | 0.3<br>(0.2 to 0.4)            | 20.7<br>(11.2 to 32.0)                            | -9.6<br>(-16.3 to -1.7)                             |
| Meningitis                                                                           | 4.4<br>(3.7 to 5.1)              | 1.0<br>(0.9 to 1.2)                     | 0.4<br>(0.3 to 0.5)            | 38.0<br>(28.6 to 47.5)                            | 2.7<br>(-3.5 to 9.0)                                |
| Pneumococcal meningitis                                                              | 3.1<br>(2.5 to 3.8)              | 0.5<br>(0.4 to 0.6)                     | 0.2<br>(0.2 to 0.3)            | 42.6<br>(27.5 to 58.6)                            | 6.1<br>(-3.7 to 16.4)                               |
| H influenzae type B meningitis                                                       | 0.6<br>(0.5 to 0.8)              | 0.2<br>(0.2 to 0.3)                     | 0.1<br>(< 0.05 to 0.1)         | 24.2<br>(11.5 to 38.4)                            | -7.5<br>(-16.1 to 2.0)                              |
| Meningococcal infection                                                              | 0.1<br>(0.1 to 0.2)              | 0.1<br>(0.1 to 0.1)                     | < 0.05<br>(< 0.05 to < 0.05)   | 35.6<br>(29.7 to 41.8)                            | 1.1<br>(-3.1 to 5.6)                                |
| Other meningitis                                                                     | 0.5<br>(0.4 to 0.7)              | 0.2<br>(0.2 to 0.2)                     | 0.1<br>(< 0.05 to 0.1)         | 37.2<br>(28.8 to 46.5)                            | 1.4<br>(-3.6 to 6.7)                                |
| Encephalitis                                                                         | 1.1<br>(0.8 to 1.6)              | 0.8<br>(0.7 to 0.9)                     | 0.1<br>(0.1 to 0.2)            | 45.6<br>(26.6 to 67.8)                            | 6.7<br>(-5.8 to 20.7)                               |
| Diphtheria                                                                           | < 0.05<br>(< 0.05 to < 0.05)     | < 0.05<br>(< 0.05 to < 0.05)            | < 0.05<br>(< 0.05 to < 0.05)   | -24.7<br>(-62.8 to 66.3)                          | -39.3<br>(-68.8 to 25.2)                            |
| Whooping cough                                                                       | 0.8<br>(0.6 to 1.0)              | 6.0<br>(4.5 to 7.6)                     | < 0.05<br>(< 0.05 to 0.1)      | 27.2<br>(13.9 to 40.8)                            | -1.8<br>(-12.0 to 8.8)                              |
| Tetanus                                                                              | < 0.05<br>(< 0.05 to < 0.05)     | < 0.05<br>(< 0.05 to 0.1)               | < 0.05<br>(< 0.05 to < 0.05)   | 4.1<br>(-28.4 to 40.5)                            | -23.9<br>(-49.4 to 4.7)                             |
| Measles                                                                              | 0.3<br>(0.1 to 0.6)              | 10.3<br>(3.7 to 22.7)                   | < 0.05<br>(< 0.05 to 0.1)      | 32.4<br>(1.7 to 77.3)                             | 2.3<br>(-21.6 to 37.3)                              |
| Varicella and herpes zoster                                                          | 0.8<br>(0.7 to 0.8)              | 19.5<br>(18.6 to 20.6)                  | < 0.05<br>(< 0.05 to < 0.05)   | 39.6<br>(19.1 to 60.8)                            | 0.3<br>(-10.6 to 12.4)                              |
| <b>Neglected tropical diseases and malaria</b>                                       | <b>654.6</b><br>(632.7 to 678.1) | <b>308.6†</b><br>(241.9 to 375.7)       | <b>7.2</b><br>(4.8 to 10.7)    | <b>0.1</b><br>(-8.5 to 9.7)                       | <b>-25.8</b><br>(-32.1 to -18.8)                    |
| Malaria                                                                              | 263.2<br>(225.5 to 300.3)        | 259.9<br>(193.5 to 330.6)               | 2.4<br>(1.6 to 3.3)            | 4.1<br>(-8.9 to 19.2)                             | -19.3<br>(-28.5 to -8.8)                            |
| Chagas disease                                                                       | --                               | --                                      | --                             | --                                                | --                                                  |
| Leishmaniasis                                                                        | --                               | --                                      | --                             | --                                                | --                                                  |
| Visceral leishmaniasis                                                               | --                               | --                                      | --                             | --                                                | --                                                  |
| Cutaneous and mucocutaneous leishmaniasis                                            | --                               | --                                      | --                             | --                                                | --                                                  |
| African trypanosomiasis                                                              | --                               | --                                      | --                             | --                                                | --                                                  |
| Schistosomiasis                                                                      | 83.1<br>(53.8 to 122.3)          | 29.8<br>(21.2 to 41.2)                  | 0.6<br>(0.2 to 1.2)            | 29.7<br>(23.7 to 35.6)                            | -4.8<br>(-8.8 to -0.8)                              |
| Cysticercosis                                                                        | 0.3<br>(< 0.05 to 0.6)           | --                                      | < 0.05<br>(< 0.05 to 0.1)      | 13.4<br>(-100.0 to 1,385.2)                       | -17.9<br>(-100.0 to 805.2)                          |
| Cystic echinococcosis                                                                | < 0.05<br>(< 0.05 to 0.1)        | < 0.05<br>(< 0.05 to < 0.05)            | < 0.05<br>(< 0.05 to < 0.05)   | -50.8<br>(-95.3 to 319.9)                         | -63.6<br>(-95.8 to 185.0)                           |
| Lymphatic filariasis                                                                 | 27.0<br>(20.3 to 36.5)           | 3.7<br>(2.8 to 4.7)                     | 1.2<br>(0.5 to 2.5)            | 21.7<br>(17.6 to 26.3)                            | -9.9<br>(-12.4 to -6.9)                             |
| Onchocerciasis                                                                       | 24.0<br>(13.6 to 47.9)           | 6.7<br>(2.5 to 14.6)                    | 1.2<br>(0.6 to 2.2)            | -42.0<br>(-54.5 to -29.9)                         | -56.2<br>(-64.8 to -47.6)                           |
| Trachoma                                                                             | --                               | --                                      | --                             | --                                                | --                                                  |
| Dengue                                                                               | 0.5<br>(0.3 to 0.8)              | 8.3<br>(5.4 to 12.1)                    | 0.1<br>(< 0.05 to 0.1)         | 194.4<br>(113.6 to 600.4)                         | 118.5<br>(63.4 to 404.7)                            |
| Yellow fever                                                                         | < 0.05<br>(< 0.05 to < 0.05)     | 0.1<br>(< 0.05 to 0.2)                  | < 0.05<br>(< 0.05 to < 0.05)   | -36.6<br>(-62.4 to 4.5)                           | -52.6<br>(-70.6 to -26.2)                           |
| Rabies                                                                               | < 0.05<br>(< 0.05 to < 0.05)     | < 0.05<br>(< 0.05 to < 0.05)            | < 0.05<br>(< 0.05 to < 0.05)   | -37.5<br>(-70.1 to 24.1)                          | -50.1<br>(-72.9 to -15.0)                           |
| Intestinal nematode infections                                                       | 530.0<br>(495.9 to 565.4)        | --                                      | 1.5<br>(0.8 to 2.5)            | 32.1<br>(13.9 to 52.3)                            | -1.1<br>(-16.3 to 16.4)                             |
| Ascariasis                                                                           | 330.2<br>(285.1 to 378.3)        | --                                      | 0.7<br>(0.4 to 1.1)            | 34.0<br>(5.4 to 72.0)                             | 0.2<br>(-24.5 to 33.6)                              |



| Cause                                                                   | Prevalence in thousands (95% UI)        | Incidence in thousands (95% UI)                | YLDs in thousands (95% UI)           |                                                   |                                                     |
|-------------------------------------------------------------------------|-----------------------------------------|------------------------------------------------|--------------------------------------|---------------------------------------------------|-----------------------------------------------------|
|                                                                         | 2016 counts                             | 2016 counts                                    | 2016 counts                          | Percentage change in counts between 2006 and 2016 | Percentage change in age-standardised rates between |
| Trichuriasis                                                            | 242.9<br>(204.5 to 288.9)               | --                                             | 0.3<br>(0.1 to 0.5)                  | 32.6<br>(-5.3 to 82.3)                            | -0.9<br>(-31.3 to 42.3)                             |
| Hookworm disease                                                        | 155.4<br>(128.8 to 186.0)               | --                                             | 0.6<br>(0.3 to 0.9)                  | 29.7<br>(4.9 to 61.4)                             | -2.5<br>(-23.3 to 24.8)                             |
| Food-borne trematodiasis                                                | --                                      | --                                             | --                                   | --                                                | --                                                  |
| Leprosy                                                                 | 0.1<br>( $< 0.05$ to 0.1)               | $< 0.05$<br>( $< 0.05$ to $< 0.05$ )           | $< 0.05$<br>( $< 0.05$ to $< 0.05$ ) | 9.5<br>(-17.9 to 49.0)                            | -19.8<br>(-37.5 to 6.1)                             |
| Ebola virus disease                                                     | --                                      | --                                             | --                                   | --                                                | --                                                  |
| Zika virus disease                                                      | --                                      | --                                             | --                                   | --                                                | --                                                  |
| Guinea worm disease                                                     | --                                      | --                                             | --                                   | --                                                | --                                                  |
| Other neglected tropical diseases                                       | 6.9<br>(6.0 to 7.9)                     | --                                             | 0.2<br>(0.1 to 0.3)                  | 35.8<br>(8.6 to 64.0)                             | 2.0<br>(-17.6 to 21.5)                              |
| <b>Maternal disorders</b>                                               | <b>2.2</b><br><b>(1.7 to 2.7)</b>       | <b>16.3†</b><br><b>(14.7 to 18.3)</b>          | <b>0.2</b><br><b>(0.1 to 0.2)</b>    | <b>8.6</b><br><b>(-14.1 to 38.8)</b>              | <b>-22.7</b><br><b>(-38.5 to -1.5)</b>              |
| Maternal haemorrhage                                                    | 0.2<br>(0.2 to 0.3)                     | 1.5<br>(1.1 to 2.0)                            | $< 0.05$<br>( $< 0.05$ to $< 0.05$ ) | 13.3<br>(-21.3 to 69.3)                           | -21.4<br>(-44.9 to 16.0)                            |
| Maternal sepsis and other pregnancy related infections                  | 0.3<br>(0.2 to 0.4)                     | 1.2<br>(0.9 to 1.7)                            | $< 0.05$<br>( $< 0.05$ to $< 0.05$ ) | 23.5<br>(-39.2 to 138.4)                          | -10.6<br>(-55.3 to 72.5)                            |
| Maternal hypertensive disorders                                         | 1.5<br>(1.0 to 2.0)                     | 7.0<br>(6.2 to 7.5)                            | 0.1<br>( $< 0.05$ to 0.1)            | 30.4<br>(-17.7 to 112.7)                          | -9.3<br>(-42.4 to 48.2)                             |
| Maternal obstructed labour and uterine rupture                          | 0.2<br>(0.1 to 0.2)                     | 0.7<br>(0.6 to 1.0)                            | 0.1<br>( $< 0.05$ to 0.1)            | -10.6<br>(-30.2 to 12.6)                          | -33.8<br>(-48.3 to -17.1)                           |
| Maternal abortion, miscarriage, and ectopic pregnancy                   | $< 0.05$<br>( $< 0.05$ to 0.1)          | 5.9<br>(4.4 to 7.6)                            | $< 0.05$<br>( $< 0.05$ to $< 0.05$ ) | 22.4<br>(-41.1 to 134.7)                          | -13.1<br>(-57.7 to 67.2)                            |
| Other maternal disorders                                                | --                                      | --                                             | $< 0.05$<br>( $< 0.05$ to $< 0.05$ ) | 4.0<br>(-17.6 to 33.1)                            | -26.1<br>(-41.1 to -6.2)                            |
| <b>Neonatal disorders</b>                                               | <b>7.9</b><br><b>(6.3 to 9.8)</b>       | --                                             | <b>0.9</b><br><b>(0.5 to 1.7)</b>    | <b>67.1</b><br><b>(26.5 to 119.2)</b>             | <b>26.1</b><br><b>(-4.1 to 66.4)</b>                |
| Neonatal preterm birth complications                                    | 5.5<br>(4.0 to 7.8)                     | --                                             | 0.3<br>(0.2 to 0.4)                  | 25.4<br>(-0.5 to 56.1)                            | -5.0<br>(-25.0 to 18.6)                             |
| Neonatal encephalopathy due to birth asphyxia and trauma                | 1.7<br>(1.0 to 3.0)                     | --                                             | 0.1<br>( $< 0.05$ to 0.3)            | 49.1<br>(-32.3 to 225.0)                          | 12.8<br>(-48.4 to 145.8)                            |
| Neonatal sepsis and other neonatal infections                           | 1.1<br>(0.3 to 2.5)                     | --                                             | 0.4<br>(0.1 to 1.1)                  | 142.6<br>(57.6 to 845.4)                          | 88.5<br>(22.7 to 694.0)                             |
| Hemolytic disease and other neonatal jaundice                           | 0.2<br>(0.2 to 0.2)                     | --                                             | 0.1<br>( $< 0.05$ to 0.1)            | 30.9<br>(8.8 to 55.3)                             | -1.2<br>(-16.0 to 14.9)                             |
| Other neonatal disorders                                                | --                                      | --                                             | 0.1<br>( $< 0.05$ to 0.1)            | 45.6<br>(16.1 to 87.4)                            | 13.3<br>(-9.9 to 46.6)                              |
| <b>Nutritional deficiencies</b>                                         | <b>162.8</b><br><b>(149.5 to 174.7)</b> | <b>11.5†</b><br><b>(10.0 to 13.2)</b>          | <b>4.8</b><br><b>(3.1 to 6.9)</b>    | <b>30.4</b><br><b>(16.9 to 44.4)</b>              | <b>-5.4</b><br><b>(-13.9 to 3.1)</b>                |
| Protein-energy malnutrition                                             | 4.9<br>(4.1 to 5.8)                     | 3.5<br>(3.0 to 4.1)                            | 0.4<br>(0.2 to 0.5)                  | 37.3<br>(4.8 to 79.3)                             | 6.4<br>(-19.1 to 39.7)                              |
| Iodine deficiency                                                       | 43.0<br>(32.7 to 54.8)                  | 1.4<br>(1.1 to 1.8)                            | 1.1<br>(0.6 to 1.6)                  | 33.7<br>(21.5 to 47.0)                            | -2.1<br>(-10.7 to 6.9)                              |
| Vitamin A deficiency                                                    | 7.9<br>(6.3 to 9.9)                     | 6.6<br>(5.1 to 8.2)                            | 0.1<br>(0.1 to 0.2)                  | 24.1<br>(2.1 to 45.9)                             | -7.4<br>(-23.4 to 7.7)                              |
| Iron-deficiency anaemia                                                 | 118.0<br>(104.8 to 133.1)               | --                                             | 3.3<br>(2.0 to 4.9)                  | 28.9<br>(9.8 to 48.6)                             | -7.7<br>(-19.4 to 4.3)                              |
| Other nutritional deficiencies                                          | --                                      | --                                             | $< 0.05$<br>( $< 0.05$ to $< 0.05$ ) | 36.6<br>(2.9 to 81.6)                             | 6.0<br>(-20.5 to 40.6)                              |
| <b>Other communicable, maternal, neonatal, and nutritional diseases</b> | <b>286.0</b><br><b>(270.2 to 302.2)</b> | <b>117.6</b><br><b>(104.2 to 135.5)</b>        | <b>0.6</b><br><b>(0.4 to 0.9)</b>    | <b>35.1</b><br><b>(26.3 to 43.9)</b>              | <b>0.1</b><br><b>(-5.5 to 5.8)</b>                  |
| Sexually transmitted diseases excluding HIV                             | 211.3<br>(197.9 to 224.5)               | 99.1<br>(89.7 to 110.6)                        | 0.4<br>(0.3 to 0.6)                  | 33.0<br>(24.6 to 42.2)                            | -0.3<br>(-6.1 to 5.3)                               |
| Syphilis                                                                | 25.7<br>(21.5 to 30.0)                  | 17.8<br>(14.6 to 21.8)                         | $< 0.05$<br>( $< 0.05$ to $< 0.05$ ) | 41.9<br>(24.0 to 63.7)                            | 2.8<br>(-10.6 to 19.5)                              |
| Chlamydial infection                                                    | 8.6<br>(7.1 to 10.3)                    | 7.2<br>(6.0 to 8.4)                            | 0.1<br>( $< 0.05$ to 0.1)            | 33.7<br>(16.1 to 53.4)                            | -0.8<br>(-13.5 to 12.2)                             |
| Gonococcal infection                                                    | 9.2<br>(7.2 to 11.5)                    | 30.0<br>(22.6 to 39.1)                         | 0.1<br>(0.1 to 0.1)                  | 33.4<br>(17.7 to 51.7)                            | -1.0<br>(-11.5 to 11.0)                             |
| Trichomoniasis                                                          | 21.5<br>(18.4 to 24.8)                  | 18.9<br>(16.1 to 22.0)                         | $< 0.05$<br>( $< 0.05$ to $< 0.05$ ) | 40.8<br>(30.3 to 52.0)                            | 1.1<br>(-5.6 to 8.1)                                |
| Genital herpes                                                          | 170.5<br>(148.1 to 196.1)               | 17.2<br>(14.2 to 20.8)                         | $< 0.05$<br>( $< 0.05$ to 0.1)       | 40.9<br>(28.8 to 54.0)                            | 1.4<br>(-6.5 to 9.3)                                |
| Other sexually transmitted diseases                                     | 8.0<br>(6.4 to 9.2)                     | 8.1<br>(6.8 to 9.6)                            | 0.1<br>(0.1 to 0.2)                  | 27.8<br>(16.9 to 41.0)                            | -1.3<br>(-9.8 to 7.0)                               |
| Hepatitis                                                               | 99.2<br>(82.8 to 117.9)                 | 18.4<br>(10.9 to 32.8)                         | $< 0.05$<br>( $< 0.05$ to $< 0.05$ ) | -13.5<br>(-33.6 to 11.4)                          | -31.0<br>(-45.3 to -14.5)                           |
| Acute hepatitis A                                                       | 0.5<br>(0.1 to 1.6)                     | 7.0<br>(0.7 to 21.2)                           | $< 0.05$<br>( $< 0.05$ to $< 0.05$ ) | -17.6<br>(-75.1 to 214.4)                         | -33.2<br>(-75.7 to 114.6)                           |
| Hepatitis B                                                             | 70.2<br>(54.1 to 88.2)                  | 9.3<br>(7.1 to 12.2)                           | $< 0.05$<br>( $< 0.05$ to $< 0.05$ ) | -15.8<br>(-36.0 to 9.1)                           | -32.5<br>(-47.7 to -15.0)                           |
| Hepatitis C                                                             | 28.4<br>(25.0 to 32.0)                  | 1.5<br>(1.3 to 1.6)                            | $< 0.05$<br>( $< 0.05$ to $< 0.05$ ) | 18.4<br>(-29.3 to 101.2)                          | -12.2<br>(-41.8 to 32.2)                            |
| Acute hepatitis E                                                       | $< 0.05$<br>( $< 0.05$ to 0.1)          | 0.7<br>(0.5 to 0.8)                            | $< 0.05$<br>( $< 0.05$ to $< 0.05$ ) | -7.1<br>(-18.6 to 5.0)                            | -23.7<br>(-35.5 to -11.1)                           |
| Other infectious diseases                                               | 5.0<br>(4.4 to 5.8)                     | $< 0.05$<br>( $< 0.05$ to $< 0.05$ )           | 0.2<br>(0.1 to 0.3)                  | 49.4<br>(26.7 to 75.2)                            | 9.8<br>(-5.1 to 26.7)                               |
| <b>Non-communicable diseases</b>                                        | <b>759.6</b><br><b>(755.2 to 763.7)</b> | <b>1,846.6†</b><br><b>(1,724.8 to 1,983.7)</b> | <b>59.3</b><br><b>(43.8 to 77.3)</b> | <b>36.8</b><br><b>(33.1 to 40.9)</b>              | <b>-0.7</b><br><b>(-2.8 to 1.6)</b>                 |
| <b>Neoplasms</b>                                                        | <b>1.6</b><br><b>(1.4 to 1.7)</b>       | <b>0.7</b><br><b>(0.7 to 0.8)</b>              | <b>0.2</b><br><b>(0.2 to 0.3)</b>    | <b>47.7</b><br><b>(31.9 to 68.5)</b>              | <b>5.5</b><br><b>(-4.1 to 16.3)</b>                 |
| Lip and oral cavity cancer                                              | 0.1<br>( $< 0.05$ to 0.1)               | $< 0.05$<br>( $< 0.05$ to $< 0.05$ )           | $< 0.05$<br>( $< 0.05$ to $< 0.05$ ) | 51.9<br>(28.8 to 76.9)                            | 3.4<br>(-10.8 to 19.2)                              |
| Nasopharynx cancer                                                      | $< 0.05$<br>( $< 0.05$ to $< 0.05$ )    | $< 0.05$<br>( $< 0.05$ to $< 0.05$ )           | $< 0.05$<br>( $< 0.05$ to $< 0.05$ ) | 30.1<br>(2.7 to 60.6)                             | -8.0<br>(-25.0 to 11.5)                             |
| Other pharynx cancer                                                    | $< 0.05$<br>( $< 0.05$ to $< 0.05$ )    | $< 0.05$<br>( $< 0.05$ to $< 0.05$ )           | $< 0.05$<br>( $< 0.05$ to $< 0.05$ ) | 70.6<br>(34.2 to 104.6)                           | 9.9<br>(-12.8 to 31.0)                              |
| Oesophageal cancer                                                      | $< 0.05$<br>( $< 0.05$ to $< 0.05$ )    | $< 0.05$<br>( $< 0.05$ to $< 0.05$ )           | $< 0.05$<br>( $< 0.05$ to $< 0.05$ ) | 34.8<br>(5.4 to 67.0)                             | -9.7<br>(-30.3 to 14.4)                             |
| Stomach cancer                                                          | $< 0.05$<br>( $< 0.05$ to $< 0.05$ )    | $< 0.05$<br>( $< 0.05$ to $< 0.05$ )           | $< 0.05$<br>( $< 0.05$ to $< 0.05$ ) | 10.3<br>(-2.0 to 23.1)                            | -21.7<br>(-31.8 to -10.3)                           |
| Colon and rectum cancer                                                 | 0.1<br>(0.1 to 0.2)                     | $< 0.05$<br>( $< 0.05$ to 0.1)                 | $< 0.05$<br>( $< 0.05$ to $< 0.05$ ) | 66.0<br>(36.0 to 100.7)                           | 13.7<br>(-7.1 to 35.4)                              |
| Liver cancer                                                            | $< 0.05$<br>( $< 0.05$ to $< 0.05$ )    | 0.1<br>( $< 0.05$ to 0.1)                      | $< 0.05$<br>( $< 0.05$ to $< 0.05$ ) | 51.1<br>(28.1 to 74.9)                            | 2.0<br>(-11.9 to 17.2)                              |
| Liver cancer due to hepatitis B                                         | $< 0.05$<br>( $< 0.05$ to $< 0.05$ )    | $< 0.05$<br>( $< 0.05$ to $< 0.05$ )           | $< 0.05$<br>( $< 0.05$ to $< 0.05$ ) | 47.4<br>(23.7 to 72.0)                            | 0.0<br>(-14.8 to 16.6)                              |

| Cause                                              | Prevalence in thousands (95% UI)     | Incidence in thousands (95% UI)       | YLDs in thousands (95% UI)        |                                                   |                                                     |
|----------------------------------------------------|--------------------------------------|---------------------------------------|-----------------------------------|---------------------------------------------------|-----------------------------------------------------|
|                                                    | 2016 counts                          | 2016 counts                           | 2016 counts                       | Percentage change in counts between 2006 and 2016 | Percentage change in age-standardised rates between |
| Liver cancer due to hepatitis C                    | < 0.05<br>(< 0.05 to < 0.05)         | < 0.05<br>(< 0.05 to < 0.05)          | < 0.05<br>(< 0.05 to < 0.05)      | 49.4<br>(28.3 to 74.0)                            | -0.7<br>(-15.2 to 16.6)                             |
| Liver cancer due to alcohol use                    | < 0.05<br>(< 0.05 to < 0.05)         | < 0.05<br>(< 0.05 to < 0.05)          | < 0.05<br>(< 0.05 to < 0.05)      | 72.3<br>(43.4 to 104.2)                           | 16.4<br>(-2.5 to 36.8)                              |
| Liver cancer due to other causes                   | < 0.05<br>(< 0.05 to < 0.05)         | < 0.05<br>(< 0.05 to < 0.05)          | < 0.05<br>(< 0.05 to < 0.05)      | 40.9<br>(16.6 to 64.5)                            | -3.8<br>(-18.5 to 12.1)                             |
| Gallbladder and biliary tract cancer               | < 0.05<br>(< 0.05 to < 0.05)         | < 0.05<br>(< 0.05 to < 0.05)          | < 0.05<br>(< 0.05 to < 0.05)      | 32.0<br>(8.8 to 59.0)                             | -9.6<br>(-24.6 to 7.0)                              |
| Pancreatic cancer                                  | < 0.05<br>(< 0.05 to < 0.05)         | < 0.05<br>(< 0.05 to < 0.05)          | < 0.05<br>(< 0.05 to < 0.05)      | 55.5<br>(41.9 to 69.6)                            | 4.8<br>(-4.9 to 14.7)                               |
| Larynx cancer                                      | < 0.05<br>(< 0.05 to < 0.05)         | < 0.05<br>(< 0.05 to < 0.05)          | < 0.05<br>(< 0.05 to < 0.05)      | 56.3<br>(32.2 to 88.0)                            | 2.0<br>(-13.8 to 21.4)                              |
| Tracheal, bronchus, and lung cancer                | 0.1<br>(< 0.05 to 0.1)               | < 0.05<br>(< 0.05 to 0.1)             | < 0.05<br>(< 0.05 to < 0.05)      | 54.5<br>(25.1 to 91.0)                            | 5.0<br>(-16.5 to 33.0)                              |
| Malignant skin melanoma                            | < 0.05<br>(< 0.05 to < 0.05)         | < 0.05<br>(< 0.05 to < 0.05)          | < 0.05<br>(< 0.05 to < 0.05)      | 97.8<br>(62.1 to 137.1)                           | 35.0<br>(11.7 to 61.6)                              |
| Non-melanoma skin cancer                           | < 0.05<br>(< 0.05 to < 0.05)         | < 0.05<br>(< 0.05 to 0.1)             | < 0.05<br>(< 0.05 to < 0.05)      | 54.3<br>(25.1 to 101.0)                           | 4.0<br>(-18.6 to 38.1)                              |
| Non-melanoma skin cancer (squamous-cell carcinoma) | < 0.05<br>(< 0.05 to < 0.05)         | < 0.05<br>(< 0.05 to < 0.05)          | < 0.05<br>(< 0.05 to < 0.05)      | 54.8<br>(20.7 to 109.5)                           | 4.2<br>(-21.5 to 43.4)                              |
| Non-melanoma skin cancer (basal-cell carcinoma)    | < 0.05<br>(< 0.05 to < 0.05)         | < 0.05<br>(< 0.05 to 0.1)             | < 0.05<br>(< 0.05 to < 0.05)      | 51.8<br>(33.0 to 78.8)                            | 2.3<br>(-6.9 to 13.2)                               |
| Breast cancer                                      | 0.4<br>(0.3 to 0.6)                  | 0.1<br>(0.1 to 0.1)                   | < 0.05<br>(< 0.05 to 0.1)         | 57.8<br>(14.6 to 112.4)                           | 11.0<br>(-17.1 to 41.1)                             |
| Cervical cancer                                    | 0.3<br>(0.2 to 0.4)                  | 0.1<br>(0.1 to 0.1)                   | < 0.05<br>(< 0.05 to < 0.05)      | 7.0<br>(-19.7 to 53.1)                            | -20.0<br>(-38.3 to 9.6)                             |
| Uterine cancer                                     | 0.1<br>(< 0.05 to 0.1)               | < 0.05<br>(< 0.05 to < 0.05)          | < 0.05<br>(< 0.05 to < 0.05)      | 82.2<br>(38.5 to 136.5)                           | 14.1<br>(-10.7 to 44.1)                             |
| Ovarian cancer                                     | 0.1<br>(< 0.05 to 0.1)               | < 0.05<br>(< 0.05 to < 0.05)          | < 0.05<br>(< 0.05 to < 0.05)      | 57.0<br>(21.1 to 103.4)                           | 6.9<br>(-16.2 to 37.8)                              |
| Prostate cancer                                    | 0.3<br>(0.1 to 0.4)                  | 0.1<br>(< 0.05 to 0.1)                | < 0.05<br>(< 0.05 to < 0.05)      | 93.7<br>(46.1 to 136.3)                           | 29.3<br>(0.2 to 57.2)                               |
| Testicular cancer                                  | < 0.05<br>(< 0.05 to < 0.05)         | < 0.05<br>(< 0.05 to < 0.05)          | < 0.05<br>(< 0.05 to < 0.05)      | 84.0<br>(45.7 to 132.8)                           | 28.3<br>(5.9 to 57.7)                               |
| Kidney cancer                                      | 0.1<br>(0.1 to 0.1)                  | < 0.05<br>(< 0.05 to < 0.05)          | < 0.05<br>(< 0.05 to < 0.05)      | 50.5<br>(7.5 to 101.7)                            | 11.8<br>(-11.2 to 35.9)                             |
| Bladder cancer                                     | 0.1<br>(< 0.05 to 0.1)               | < 0.05<br>(< 0.05 to < 0.05)          | < 0.05<br>(< 0.05 to < 0.05)      | 69.3<br>(39.6 to 102.0)                           | 14.9<br>(-5.2 to 37.5)                              |
| Brain and nervous system cancer                    | < 0.05<br>(< 0.05 to 0.1)            | < 0.05<br>(< 0.05 to < 0.05)          | < 0.05<br>(< 0.05 to < 0.05)      | 34.5<br>(10.2 to 61.7)                            | 0.2<br>(-11.7 to 11.8)                              |
| Thyroid cancer                                     | < 0.05<br>(< 0.05 to < 0.05)         | < 0.05<br>(< 0.05 to < 0.05)          | < 0.05<br>(< 0.05 to < 0.05)      | 95.6<br>(50.9 to 156.7)                           | 29.2<br>(3.0 to 62.4)                               |
| Mesothelioma                                       | < 0.05<br>(< 0.05 to < 0.05)         | < 0.05<br>(< 0.05 to < 0.05)          | < 0.05<br>(< 0.05 to < 0.05)      | 36.9<br>(13.3 to 57.9)                            | -5.7<br>(-21.4 to 7.5)                              |
| Hodgkin lymphoma                                   | < 0.05<br>(< 0.05 to < 0.05)         | < 0.05<br>(< 0.05 to < 0.05)          | < 0.05<br>(< 0.05 to < 0.05)      | 23.7<br>(8.2 to 45.6)                             | -14.6<br>(-22.5 to -4.1)                            |
| Non-Hodgkin's lymphoma                             | 0.1<br>(0.1 to 0.1)                  | < 0.05<br>(< 0.05 to < 0.05)          | < 0.05<br>(< 0.05 to < 0.05)      | 53.9<br>(27.2 to 79.1)                            | 9.3<br>(-3.3 to 23.3)                               |
| Multiple myeloma                                   | < 0.05<br>(< 0.05 to < 0.05)         | < 0.05<br>(< 0.05 to < 0.05)          | < 0.05<br>(< 0.05 to < 0.05)      | 64.7<br>(47.6 to 83.2)                            | 8.3<br>(-2.6 to 20.8)                               |
| Leukaemia                                          | 0.1<br>(< 0.05 to 0.1)               | < 0.05<br>(< 0.05 to < 0.05)          | < 0.05<br>(< 0.05 to < 0.05)      | 15.5<br>(-10.3 to 48.1)                           | -12.2<br>(-26.8 to 4.3)                             |
| Acute lymphoid leukaemia                           | < 0.05<br>(< 0.05 to < 0.05)         | < 0.05<br>(< 0.05 to < 0.05)          | < 0.05<br>(< 0.05 to < 0.05)      | 11.4<br>(-22.3 to 57.3)                           | -14.4<br>(-37.9 to 12.2)                            |
| Chronic lymphoid leukaemia                         | < 0.05<br>(< 0.05 to < 0.05)         | < 0.05<br>(< 0.05 to < 0.05)          | < 0.05<br>(< 0.05 to < 0.05)      | 45.8<br>(20.5 to 76.0)                            | -3.1<br>(-18.7 to 14.9)                             |
| Acute myeloid leukaemia                            | < 0.05<br>(< 0.05 to < 0.05)         | < 0.05<br>(< 0.05 to < 0.05)          | < 0.05<br>(< 0.05 to < 0.05)      | 33.1<br>(0.5 to 64.1)                             | 1.1<br>(-16.5 to 16.2)                              |
| Chronic myeloid leukaemia                          | < 0.05<br>(< 0.05 to < 0.05)         | < 0.05<br>(< 0.05 to < 0.05)          | < 0.05<br>(< 0.05 to < 0.05)      | 21.6<br>(-4.8 to 59.7)                            | -14.1<br>(-30.5 to 8.4)                             |
| Other leukaemia                                    | < 0.05<br>(< 0.05 to < 0.05)         | < 0.05<br>(< 0.05 to < 0.05)          | < 0.05<br>(< 0.05 to < 0.05)      | 1.2<br>(-30.6 to 44.1)                            | -20.3<br>(-40.9 to 2.8)                             |
| Other neoplasms                                    | 0.1<br>(0.1 to 0.1)                  | < 0.05<br>(< 0.05 to < 0.05)          | < 0.05<br>(< 0.05 to < 0.05)      | 37.3<br>(3.9 to 62.8)                             | -0.6<br>(-15.0 to 13.7)                             |
| <b>Cardiovascular diseases</b>                     | <b>31.9</b><br><b>(30.2 to 33.7)</b> | <b>2.9†</b><br><b>(2.7 to 3.0)</b>    | <b>1.8</b><br><b>(1.3 to 2.4)</b> | <b>44.8</b><br><b>(38.3 to 51.5)</b>              | <b>2.3</b><br><b>(-1.3 to 6.0)</b>                  |
| Rheumatic heart disease                            | < 0.05<br>(< 0.05 to 0.1)            | < 0.05<br>(< 0.05 to < 0.05)          | < 0.05<br>(< 0.05 to < 0.05)      | 23.9<br>(10.3 to 40.0)                            | -13.3<br>(-27.6 to 3.2)                             |
| Ischaemic heart disease                            | 8.7<br>(8.2 to 9.2)                  | 1.1<br>(1.0 to 1.2)                   | 0.4<br>(0.2 to 0.5)               | 47.7<br>(38.9 to 56.5)                            | 4.0<br>(-0.9 to 8.8)                                |
| Cerebrovascular disease                            | 3.5<br>(3.3 to 3.8)                  | 0.5†<br>(0.5 to 0.6)                  | 0.5<br>(0.4 to 0.6)               | 43.9<br>(33.1 to 54.9)                            | 0.1<br>(-7.0 to 7.6)                                |
| Ischaemic stroke                                   | 3.1<br>(2.8 to 3.4)                  | 0.4†<br>(0.3 to 0.4)                  | 0.4<br>(0.3 to 0.5)               | 44.9<br>(32.1 to 58.7)                            | 0.8<br>(-7.3 to 9.6)                                |
| Hemorrhagic stroke                                 | 0.6<br>(0.6 to 0.7)                  | 0.2†<br>(0.1 to 0.2)                  | 0.1<br>(0.1 to 0.1)               | 39.4<br>(21.5 to 59.6)                            | -3.4<br>(-14.7 to 9.1)                              |
| Hypertensive heart disease                         | 0.7<br>(0.5 to 0.8)                  | --                                    | 0.1<br>(< 0.05 to 0.1)            | 35.8<br>(18.9 to 56.1)                            | -2.2<br>(-11.9 to 8.6)                              |
| Cardiomyopathy and myocarditis                     | 0.6<br>(0.5 to 0.7)                  | 0.2†<br>(0.2 to 0.2)                  | 0.1<br>(< 0.05 to 0.1)            | 55.3<br>(34.4 to 77.7)                            | 3.1<br>(-9.1 to 16.1)                               |
| Myocarditis                                        | 0.1<br>(0.1 to 0.1)                  | 0.2<br>(0.2 to 0.2)                   | < 0.05<br>(< 0.05 to < 0.05)      | 45.1<br>(36.6 to 54.8)                            | 3.0<br>(-4.3 to 10.6)                               |
| Alcoholic cardiomyopathy                           | 0.1<br>(0.1 to 0.1)                  | --                                    | < 0.05<br>(< 0.05 to < 0.05)      | 61.5<br>(16.5 to 121.9)                           | 3.9<br>(-21.8 to 38.0)                              |
| Other cardiomyopathy                               | 0.4<br>(0.4 to 0.5)                  | --                                    | < 0.05<br>(< 0.05 to 0.1)         | 56.4<br>(31.9 to 83.4)                            | 2.9<br>(-11.3 to 18.2)                              |
| Atrial fibrillation and flutter                    | 1.8<br>(1.6 to 2.1)                  | 0.2<br>(0.1 to 0.2)                   | 0.1<br>(0.1 to 0.2)               | 41.5<br>(30.4 to 53.5)                            | 1.4<br>(-4.5 to 8.1)                                |
| Peripheral vascular disease                        | 8.2<br>(7.0 to 9.6)                  | 0.7<br>(0.6 to 0.9)                   | < 0.05<br>(< 0.05 to 0.1)         | 42.6<br>(29.8 to 58.7)                            | -2.3<br>(-9.3 to 5.7)                               |
| Endocarditis                                       | < 0.05<br>(< 0.05 to < 0.05)         | 0.1<br>(0.1 to 0.1)                   | < 0.05<br>(< 0.05 to < 0.05)      | 48.3<br>(30.9 to 67.6)                            | 2.2<br>(-13.0 to 20.3)                              |
| Other cardiovascular and circulatory diseases      | 11.7<br>(9.5 to 14.4)                | --                                    | 0.6<br>(0.4 to 0.9)               | 44.9<br>(31.5 to 59.7)                            | 5.0<br>(-3.4 to 15.0)                               |
| <b>Chronic respiratory diseases</b>                | <b>66.6</b><br><b>(63.0 to 70.2)</b> | <b>12.2†</b><br><b>(11.3 to 13.2)</b> | <b>3.2</b><br><b>(2.4 to 4.2)</b> | <b>41.1</b><br><b>(35.6 to 46.9)</b>              | <b>1.3</b><br><b>(-2.2 to 5.0)</b>                  |
| Chronic obstructive pulmonary disease              | 12.9<br>(12.3 to 13.5)               | 0.9<br>(0.9 to 1.0)                   | 1.0<br>(0.8 to 1.1)               | 46.1<br>(36.5 to 56.8)                            | -1.0<br>(-6.6 to 5.6)                               |
| Pneumoconiosis                                     | < 0.05<br>(< 0.05 to < 0.05)         | < 0.05<br>(< 0.05 to < 0.05)          | < 0.05<br>(< 0.05 to < 0.05)      | 43.7<br>(34.4 to 53.2)                            | -2.0<br>(-8.5 to 5.4)                               |
| Silicosis                                          | < 0.05<br>(< 0.05 to < 0.05)         | < 0.05<br>(< 0.05 to < 0.05)          | < 0.05<br>(< 0.05 to < 0.05)      | 34.8<br>(23.9 to 46.8)                            | -0.1<br>(-6.9 to 6.7)                               |



| Cause                                                          | Prevalence in thousands (95% UI)  | Incidence in thousands (95% UI)   | YLDs in thousands (95% UI)        |                                                                     |                                                                      |
|----------------------------------------------------------------|-----------------------------------|-----------------------------------|-----------------------------------|---------------------------------------------------------------------|----------------------------------------------------------------------|
|                                                                | 2016 counts<br>(< 0.05 to < 0.05) | 2016 counts<br>(< 0.05 to < 0.05) | 2016 counts<br>(< 0.05 to < 0.05) | Percentage change in counts between 2006 and 2016<br>(33.7 to 55.6) | Percentage change in age-standardised rates between<br>(-4.2 to 8.1) |
| Asbestosis                                                     | < 0.05<br>(< 0.05 to < 0.05)      | < 0.05<br>(< 0.05 to < 0.05)      | < 0.05<br>(< 0.05 to < 0.05)      | 44.9<br>(33.7 to 55.6)                                              | 1.6<br>(-4.2 to 8.1)                                                 |
| Coal workers pneumoconiosis                                    | --                                | --                                | --                                | --                                                                  | --                                                                   |
| Other pneumoconiosis                                           | < 0.05<br>(< 0.05 to < 0.05)      | < 0.05<br>(< 0.05 to < 0.05)      | < 0.05<br>(< 0.05 to < 0.05)      | 44.0<br>(28.1 to 59.8)                                              | -4.4<br>(-14.1 to 8.3)                                               |
| Asthma                                                         | 54.5<br>(50.2 to 59.2)            | 11.3<br>(10.4 to 12.3)            | 2.1<br>(1.4 to 3.1)               | 38.0<br>(31.7 to 44.6)                                              | 2.4<br>(-1.8 to 6.7)                                                 |
| Interstitial lung disease and pulmonary sarcoidosis            | 0.1<br>(0.1 to 0.1)               | < 0.05<br>(< 0.05 to < 0.05)      | < 0.05<br>(< 0.05 to < 0.05)      | 42.1<br>(34.9 to 49.2)                                              | 1.5<br>(-5.9 to 9.5)                                                 |
| Other chronic respiratory diseases                             | --                                | --                                | 0.1<br>(0.1 to 0.1)               | 73.8<br>(37.9 to 117.5)                                             | 30.3<br>(9.6 to 54.0)                                                |
| <b>Cirrhosis and other chronic liver diseases</b>              | <b>1.8<br/>(1.7 to 1.9)</b>       | <b>0.2<br/>(0.2 to 0.2)</b>       | <b>0.2<br/>(0.1 to 0.2)</b>       | <b>41.7<br/>(27.7 to 57.9)</b>                                      | <b>1.3<br/>(-6.5 to 10.1)</b>                                        |
| Cirrhosis and other chronic liver diseases due to hepatitis B  | 0.5<br>(0.5 to 0.6)               | 0.1<br>(0.1 to 0.1)               | < 0.05<br>(< 0.05 to 0.1)         | 45.5<br>(21.0 to 74.1)                                              | 1.4<br>(-12.9 to 18.1)                                               |
| Cirrhosis and other chronic liver diseases due to hepatitis C  | 0.4<br>(0.4 to 0.4)               | < 0.05<br>(< 0.05 to 0.1)         | < 0.05<br>(< 0.05 to < 0.05)      | 39.7<br>(14.5 to 70.7)                                              | -3.9<br>(-19.0 to 14.2)                                              |
| Cirrhosis and other chronic liver diseases due to alcohol use  | 0.4<br>(0.3 to 0.4)               | 0.1<br>(< 0.05 to 0.1)            | < 0.05<br>(< 0.05 to < 0.05)      | 53.3<br>(25.1 to 88.3)                                              | 6.8<br>(-8.6 to 25.1)                                                |
| Cirrhosis and other chronic liver diseases due to other causes | 0.5<br>(0.5 to 0.6)               | < 0.05<br>(< 0.05 to < 0.05)      | 0.1<br>(< 0.05 to 0.1)            | 36.4<br>(10.8 to 67.0)                                              | 1.6<br>(-15.3 to 21.5)                                               |
| <b>Digestive diseases</b>                                      | <b>12.1<br/>(11.4 to 12.8)</b>    | <b>16.4†<br/>(15.6 to 17.4)</b>   | <b>0.4<br/>(0.3 to 0.5)</b>       | <b>34.8<br/>(22.8 to 47.8)</b>                                      | <b>-0.1<br/>(-7.4 to 7.8)</b>                                        |
| Peptic ulcer disease                                           | 3.2<br>(2.8 to 3.5)               | 1.0<br>(0.9 to 1.1)               | 0.1<br>(< 0.05 to 0.1)            | 42.6<br>(22.6 to 66.4)                                              | 6.7<br>(-5.4 to 20.3)                                                |
| Gastritis and duodenitis                                       | 4.6<br>(4.0 to 5.2)               | 4.8<br>(4.3 to 5.4)               | 0.1<br>(< 0.05 to 0.1)            | 44.4<br>(25.5 to 66.6)                                              | 9.9<br>(-2.4 to 23.4)                                                |
| Appendicitis                                                   | 0.1<br>(0.1 to 0.1)               | 3.7<br>(3.4 to 4.0)               | < 0.05<br>(< 0.05 to 0.1)         | 34.2<br>(-3.0 to 86.1)                                              | -1.1<br>(-23.9 to 29.6)                                              |
| Paralytic ileus and intestinal obstruction                     | < 0.05<br>(< 0.05 to < 0.05)      | 0.5<br>(0.4 to 0.5)               | < 0.05<br>(< 0.05 to < 0.05)      | 39.5<br>(30.4 to 48.9)                                              | 0.2<br>(-10.9 to 12.4)                                               |
| Inguinal, femoral, and abdominal hernia                        | 3.9<br>(3.3 to 4.5)               | 3.2<br>(2.8 to 3.6)               | 0.1<br>(0.1 to 0.1)               | 21.4<br>(4.4 to 43.4)                                               | -12.5<br>(-22.7 to 0.6)                                              |
| Inflammatory bowel disease                                     | 0.1<br>(0.1 to 0.1)               | 0.3<br>(0.3 to 0.3)               | < 0.05<br>(< 0.05 to < 0.05)      | 63.6<br>(57.6 to 69.7)                                              | 16.7<br>(13.0 to 20.6)                                               |
| Vascular intestinal disorders                                  | < 0.05<br>(< 0.05 to < 0.05)      | < 0.05<br>(< 0.05 to < 0.05)      | < 0.05<br>(< 0.05 to < 0.05)      | 40.5<br>(32.6 to 48.7)                                              | 2.5<br>(-1.8 to 7.0)                                                 |
| Gallbladder and biliary diseases                               | 0.6<br>(0.6 to 0.7)               | 2.8<br>(2.4 to 3.2)               | < 0.05<br>(< 0.05 to < 0.05)      | 34.9<br>(9.8 to 64.8)                                               | -2.7<br>(-20.2 to 19.1)                                              |
| Pancreatitis                                                   | < 0.05<br>(< 0.05 to < 0.05)      | 0.2<br>(0.1 to 0.2)               | < 0.05<br>(< 0.05 to < 0.05)      | 38.0<br>(31.3 to 44.2)                                              | -0.4<br>(-4.1 to 3.0)                                                |
| Other digestive diseases                                       | --                                | --                                | < 0.05<br>(< 0.05 to < 0.05)      | 38.2<br>(24.6 to 53.8)                                              | 3.6<br>(-4.4 to 12.0)                                                |
| <b>Neurological disorders</b>                                  | <b>244.3<br/>(233.0 to 258.0)</b> | <b>115.9<br/>(99.1 to 135.1)</b>  | <b>5.8<br/>(3.8 to 8.3)</b>       | <b>34.0<br/>(2.8 to 77.5)</b>                                       | <b>-0.8<br/>(-20.3 to 25.3)</b>                                      |
| Alzheimer's disease and other dementias                        | 1.7<br>(1.4 to 2.0)               | 0.3<br>(0.2 to 0.4)               | 0.2<br>(0.2 to 0.3)               | 27.6<br>(20.6 to 35.2)                                              | -1.4<br>(-5.9 to 2.9)                                                |
| Parkinson's disease                                            | 0.2<br>(0.1 to 0.2)               | < 0.05<br>(< 0.05 to < 0.05)      | < 0.05<br>(< 0.05 to < 0.05)      | 52.2<br>(28.7 to 79.4)                                              | 10.4<br>(-3.1 to 25.3)                                               |
| Epilepsy                                                       | 2.6<br>(0.5 to 5.1)               | 0.3<br>(0.1 to 0.6)               | 0.9<br>(0.2 to 2.0)               | 25.0<br>(-77.1 to 675.1)                                            | -7.7<br>(-82.8 to 461.9)                                             |
| Multiple sclerosis                                             | < 0.05<br>(< 0.05 to < 0.05)      | < 0.05<br>(< 0.05 to < 0.05)      | < 0.05<br>(< 0.05 to < 0.05)      | 53.6<br>(47.9 to 59.0)                                              | 13.6<br>(9.5 to 17.2)                                                |
| Motor neuron disease                                           | < 0.05<br>(< 0.05 to < 0.05)      | < 0.05<br>(< 0.05 to < 0.05)      | < 0.05<br>(< 0.05 to < 0.05)      | 42.0<br>(35.2 to 49.1)                                              | 4.1<br>(0.5 to 7.6)                                                  |
| Migraine                                                       | 89.1<br>(84.2 to 94.2)            | 11.2<br>(10.6 to 11.9)            | 3.8<br>(2.4 to 5.3)               | 35.6<br>(30.2 to 41.6)                                              | 0.2<br>(-3.4 to 4.1)                                                 |
| Tension-type headache                                          | 181.0<br>(160.8 to 205.6)         | 104.1<br>(87.2 to 123.0)          | 0.6<br>(0.4 to 0.9)               | 34.8<br>(27.8 to 43.2)                                              | -0.1<br>(-5.0 to 5.4)                                                |
| Other neurological disorders                                   | < 0.05<br>(< 0.05 to < 0.05)      | < 0.05<br>(< 0.05 to < 0.05)      | 0.2<br>(< 0.05 to 0.5)            | 51.7<br>(-67.3 to 683.0)                                            | 11.3<br>(-72.3 to 380.1)                                             |
| <b>Mental and substance use disorders</b>                      | <b>118.5<br/>(114.1 to 122.3)</b> | <b>54.8†<br/>(50.5 to 59.9)</b>   | <b>15.8<br/>(11.4 to 20.6)</b>    | <b>36.7<br/>(33.1 to 40.1)</b>                                      | <b>0.0<br/>(-2.3 to 2.4)</b>                                         |
| Schizophrenia                                                  | 1.4<br>(1.2 to 1.6)               | 0.1<br>(0.1 to 0.1)               | 0.9<br>(0.7 to 1.2)               | 40.3<br>(27.2 to 54.4)                                              | 3.0<br>(-5.6 to 12.8)                                                |
| Alcohol use disorders                                          | 11.5<br>(9.8 to 13.2)             | 6.1<br>(5.3 to 7.0)               | 1.2<br>(0.8 to 1.6)               | 38.1<br>(26.1 to 50.7)                                              | -1.2<br>(-8.7 to 6.8)                                                |
| Drug use disorders                                             | 3.8<br>(3.4 to 4.3)               | 0.6<br>(0.6 to 0.7)               | 0.9<br>(0.7 to 1.2)               | 39.4<br>(24.9 to 55.3)                                              | -2.0<br>(-11.2 to 8.4)                                               |
| Opioid use disorders                                           | 2.0<br>(1.6 to 2.4)               | 0.3<br>(0.2 to 0.3)               | 0.8<br>(0.6 to 1.1)               | 38.8<br>(22.3 to 57.5)                                              | -2.5<br>(-13.0 to 9.2)                                               |
| Cocaine use disorders                                          | 0.1<br>(0.1 to 0.1)               | < 0.05<br>(< 0.05 to < 0.05)      | < 0.05<br>(< 0.05 to < 0.05)      | 43.3<br>(34.9 to 52.7)                                              | 2.4<br>(-2.9 to 8.1)                                                 |
| Amphetamine use disorders                                      | 0.1<br>(< 0.05 to 0.1)            | < 0.05<br>(< 0.05 to < 0.05)      | < 0.05<br>(< 0.05 to < 0.05)      | 53.0<br>(41.1 to 68.8)                                              | 2.1<br>(-5.9 to 10.9)                                                |
| Cannabis use disorders                                         | 1.6<br>(1.3 to 1.9)               | 0.3<br>(0.2 to 0.4)               | < 0.05<br>(< 0.05 to 0.1)         | 42.8<br>(15.7 to 75.7)                                              | -0.4<br>(-18.5 to 20.5)                                              |
| Other drug use disorders                                       | 0.2<br>(0.2 to 0.3)               | 0.1<br>(< 0.05 to 0.1)            | < 0.05<br>(< 0.05 to 0.1)         | 43.0<br>(19.0 to 68.2)                                              | 3.0<br>(-13.1 to 19.3)                                               |
| Depressive disorders                                           | 31.9<br>(29.6 to 34.4)            | 37.8<br>(33.4 to 42.7)            | 5.7<br>(3.9 to 7.7)               | 38.0<br>(30.8 to 45.0)                                              | 0.2<br>(-4.4 to 4.5)                                                 |
| Major depressive disorder                                      | 23.3<br>(20.6 to 26.2)            | 36.2<br>(31.7 to 41.0)            | 4.8<br>(3.3 to 6.6)               | 37.7<br>(29.2 to 45.8)                                              | 0.2<br>(-5.2 to 5.2)                                                 |
| Dysthymia                                                      | 9.2<br>(7.9 to 10.6)              | 1.6<br>(1.4 to 1.9)               | 0.9<br>(0.6 to 1.3)               | 40.0<br>(33.8 to 46.3)                                              | 0.3<br>(-3.2 to 3.6)                                                 |
| Bipolar disorder                                               | 4.6<br>(3.9 to 5.4)               | 0.5<br>(0.4 to 0.6)               | 1.0<br>(0.6 to 1.4)               | 38.2<br>(29.1 to 48.6)                                              | 0.5<br>(-5.7 to 6.6)                                                 |
| Anxiety disorders                                              | 25.3<br>(22.8 to 27.8)            | 4.5<br>(4.2 to 5.0)               | 2.5<br>(1.7 to 3.3)               | 35.0<br>(25.1 to 44.9)                                              | -0.1<br>(-6.7 to 6.6)                                                |
| Eating disorders                                               | 1.6<br>(1.3 to 2.0)               | 0.9<br>(0.6 to 1.1)               | 0.3<br>(0.2 to 0.5)               | 61.0<br>(42.1 to 82.2)                                              | 18.2<br>(5.2 to 33.4)                                                |
| Anorexia nervosa                                               | 0.4<br>(0.3 to 0.6)               | 0.1<br>(0.1 to 0.2)               | 0.1<br>(< 0.05 to 0.1)            | 60.4<br>(28.1 to 99.2)                                              | 16.2<br>(-5.4 to 43.9)                                               |
| Bulimia nervosa                                                | 1.2<br>(0.8 to 1.6)               | 0.7<br>(0.5 to 1.0)               | 0.2<br>(0.1 to 0.4)               | 61.1<br>(40.3 to 84.4)                                              | 18.8<br>(4.2 to 35.1)                                                |
| Autistic spectrum disorders                                    | 7.0<br>(6.3 to 7.9)               | 0.1<br>(0.1 to 0.1)               | 1.0<br>(0.7 to 1.4)               | 34.6<br>(27.4 to 42.6)                                              | 0.2<br>(-4.6 to 5.7)                                                 |
| Autism                                                         | 1.9<br>(1.6 to 2.2)               | < 0.05<br>(< 0.05 to < 0.05)      | 0.5<br>(0.3 to 0.7)               | 34.6<br>(21.9 to 48.5)                                              | 0.2<br>(-8.3 to 9.6)                                                 |
| Asperger syndrome and other autistic spectrum disorders        | 5.1<br>(4.3 to 6.2)               | 0.1<br>(< 0.05 to 0.1)            | 0.5<br>(0.3 to 0.8)               | 34.6<br>(27.4 to 42.4)                                              | 0.1<br>(-4.8 to 5.1)                                                 |

| Cause                                                      | Prevalence in thousands (95% UI)  | Incidence in thousands (95% UI)          | YLDs in thousands (95% UI)     |                                                   |                                                     |
|------------------------------------------------------------|-----------------------------------|------------------------------------------|--------------------------------|---------------------------------------------------|-----------------------------------------------------|
|                                                            | 2016 counts                       | 2016 counts                              | 2016 counts                    | Percentage change in counts between 2006 and 2016 | Percentage change in age-standardised rates between |
| Attention-deficit/hyperactivity disorder                   | 11.0<br>(9.9 to 12.4)             | 0.6<br>(0.5 to 0.7)                      | 0.1<br>(0.1 to 0.2)            | 33.3<br>(23.4 to 43.1)                            | 0.1<br>(-6.7 to 7.1)                                |
| Conduct disorder                                           | 8.2<br>(6.7 to 9.7)               | 3.0<br>(2.4 to 3.6)                      | 1.0<br>(0.6 to 1.5)            | 28.5<br>(20.0 to 38.0)                            | 0.3<br>(-6.4 to 7.7)                                |
| Idiopathic developmental intellectual disability           | 9.3<br>(5.0 to 13.8)              | --                                       | 0.4<br>(0.1 to 0.6)            | 13.7<br>(1.7 to 22.4)                             | -16.1<br>(-25.1 to -9.9)                            |
| Other mental and substance use disorders                   | 12.9<br>(11.3 to 14.9)            | 0.6<br>(0.5 to 0.7)                      | 1.0<br>(0.7 to 1.4)            | 38.4<br>(31.4 to 46.0)                            | 0.0<br>(-4.6 to 5.0)                                |
| <b>Diabetes, urogenital, blood, and endocrine diseases</b> | <b>456.4<br/>(449.4 to 463.4)</b> | <b>77.9†<br/>(73.1 to 83.2)</b>          | <b>6.0<br/>(4.3 to 8.2)</b>    | <b>41.0<br/>(35.6 to 46.7)</b>                    | <b>1.4<br/>(-2.0 to 5.0)</b>                        |
| Diabetes mellitus                                          | 33.1<br>(29.6 to 37.3)            | 2.2<br>(1.9 to 2.5)                      | 2.6<br>(1.8 to 3.7)            | 50.9<br>(42.4 to 60.9)                            | 4.0<br>(-1.5 to 10.1)                               |
| Acute glomerulonephritis                                   | < 0.05<br>(< 0.05 to < 0.05)      | 0.1<br>(0.1 to 0.1)                      | < 0.05<br>(< 0.05 to < 0.05)   | 35.6<br>(29.6 to 42.2)                            | -0.1<br>(-3.4 to 3.6)                               |
| Chronic kidney disease                                     | 34.8<br>(30.9 to 38.8)            | 2.7<br>(2.3 to 3.1)                      | 0.9<br>(0.7 to 1.2)            | 41.2<br>(30.6 to 52.9)                            | 2.2<br>(-4.4 to 9.2)                                |
| Chronic kidney disease due to diabetes mellitus            | 11.5<br>(9.6 to 13.6)             | 0.8<br>(0.7 to 1.0)                      | 0.3<br>(0.2 to 0.4)            | 45.9<br>(30.5 to 63.3)                            | 4.0<br>(-4.6 to 13.2)                               |
| Chronic kidney disease due to hypertension                 | 7.1<br>(6.1 to 8.2)               | 0.7<br>(0.5 to 0.8)                      | 0.1<br>(0.1 to 0.2)            | 46.1<br>(28.4 to 66.1)                            | 2.9<br>(-6.8 to 14.3)                               |
| Chronic kidney disease due to glomerulonephritis           | 6.8<br>(5.8 to 7.9)               | 0.4<br>(0.3 to 0.5)                      | 0.2<br>(0.2 to 0.3)            | 38.0<br>(22.4 to 56.7)                            | 1.7<br>(-8.0 to 12.2)                               |
| Chronic kidney disease due to other causes                 | 9.3<br>(7.6 to 11.2)              | 0.8<br>(0.6 to 0.9)                      | 0.2<br>(0.2 to 0.3)            | 36.5<br>(21.4 to 53.6)                            | 0.0<br>(-8.3 to 9.2)                                |
| Urinary diseases and male infertility                      | 16.9<br>(14.8 to 18.9)            | 40.0†<br>(36.0 to 44.6)                  | 0.4<br>(0.3 to 0.6)            | 56.9<br>(45.8 to 69.2)                            | -0.0<br>(-6.3 to 6.8)                               |
| Interstitial nephritis and urinary tract infections        | 0.7<br>(0.6 to 0.7)               | 33.8<br>(29.9 to 38.3)                   | < 0.05<br>(< 0.05 to < 0.05)   | 36.1<br>(13.8 to 60.5)                            | -1.2<br>(-15.4 to 15.0)                             |
| Urolithiasis                                               | 0.2<br>(0.2 to 0.2)               | 4.8<br>(4.2 to 5.5)                      | < 0.05<br>(< 0.05 to < 0.05)   | 38.1<br>(25.2 to 53.1)                            | 0.6<br>(-9.0 to 11.6)                               |
| Benign prostatic hyperplasia                               | 10.6<br>(8.9 to 12.5)             | 1.4<br>(1.1 to 1.6)                      | 0.4<br>(0.2 to 0.5)            | 66.3<br>(51.9 to 83.3)                            | 0.7<br>(-6.4 to 9.0)                                |
| Male infertility                                           | 4.8<br>(3.7 to 6.2)               | --                                       | < 0.05<br>(< 0.05 to 0.1)      | 17.5<br>(6.8 to 29.7)                             | -3.5<br>(-10.6 to 4.2)                              |
| Other urinary diseases                                     | --                                | --                                       | < 0.05<br>(< 0.05 to < 0.05)   | 12.3<br>(-0.8 to 26.6)                            | -17.2<br>(-25.4 to -8.3)                            |
| Gynecological diseases                                     | 88.6<br>(83.6 to 94.2)            | 32.3†<br>(29.7 to 35.0)                  | 1.0<br>(0.7 to 1.4)            | 29.9<br>(23.3 to 36.5)                            | -2.7<br>(-6.7 to 1.7)                               |
| Uterine fibroids                                           | 6.8<br>(6.0 to 7.7)               | 0.8<br>(0.7 to 0.9)                      | 0.1<br>(< 0.05 to 0.1)         | 12.9<br>(-2.3 to 27.8)                            | -11.6<br>(-22.6 to -0.1)                            |
| Polycystic ovarian syndrome                                | 0.7<br>(0.5 to 0.9)               | 1.2<br>(0.9 to 1.7)                      | < 0.05<br>(< 0.05 to < 0.05)   | 20.8<br>(4.7 to 39.8)                             | 0.3<br>(-11.7 to 14.7)                              |
| Female infertility                                         | 1.7<br>(0.6 to 4.3)               | --                                       | < 0.05<br>(< 0.05 to < 0.05)   | 35.5<br>(-6.5 to 96.0)                            | 9.8<br>(-21.6 to 52.5)                              |
| Endometriosis                                              | 0.2<br>(0.1 to 0.2)               | 0.6<br>(0.5 to 0.8)                      | < 0.05<br>(< 0.05 to < 0.05)   | 36.5<br>(-2.0 to 83.3)                            | 1.2<br>(-25.3 to 35.1)                              |
| Genital prolapse                                           | 42.0<br>(36.9 to 47.4)            | 3.7<br>(3.1 to 4.5)                      | 0.1<br>(0.1 to 0.2)            | 42.0<br>(32.5 to 52.8)                            | -6.9<br>(-13.0 to -0.5)                             |
| Premenstrual syndrome                                      | 38.8<br>(35.3 to 42.3)            | 14.3<br>(12.9 to 15.7)                   | 0.3<br>(0.2 to 0.5)            | 25.5<br>(12.9 to 38.1)                            | -2.8<br>(-11.8 to 6.8)                              |
| Other gynecological diseases                               | 11.7<br>(10.0 to 13.6)            | 11.7<br>(9.7 to 14.0)                    | 0.4<br>(0.3 to 0.6)            | 33.9<br>(23.6 to 45.4)                            | 1.4<br>(-5.2 to 9.0)                                |
| Hemoglobinopathies and hemolytic anaemias                  | 378.2<br>(370.6 to 385.5)         | --                                       | 0.9<br>(0.6 to 1.3)            | 22.9<br>(8.0 to 39.9)                             | -5.2<br>(-15.4 to 5.6)                              |
| Thalassemias                                               | < 0.05<br>(< 0.05 to < 0.05)      | --                                       | < 0.05<br>(< 0.05 to < 0.05)   | 25.4<br>(4.1 to 50.5)                             | -3.1<br>(-19.6 to 16.8)                             |
| Thalassaemias trait                                        | 3.6<br>(3.4 to 3.9)               | --                                       | < 0.05<br>(< 0.05 to 0.1)      | 24.3<br>(3.5 to 46.7)                             | -2.8<br>(-17.0 to 13.4)                             |
| Sickle cell disorders                                      | 2.1<br>(1.8 to 2.3)               | --                                       | 0.2<br>(0.1 to 0.2)            | 31.8<br>(12.5 to 52.5)                            | 0.5<br>(-13.2 to 15.5)                              |
| Sickle cell trait                                          | 177.3<br>(169.2 to 186.4)         | --                                       | 0.5<br>(0.3 to 0.8)            | 19.8<br>(3.0 to 40.4)                             | -5.4<br>(-17.4 to 8.2)                              |
| G6PD deficiency                                            | 109.1<br>(102.1 to 117.5)         | --                                       | < 0.05<br>(< 0.05 to < 0.05)   | 26.9<br>(-8.4 to 75.5)                            | 3.8<br>(-19.1 to 32.0)                              |
| G6PD trait                                                 | 152.0<br>(149.4 to 154.7)         | --                                       | < 0.05<br>(< 0.05 to < 0.05)   | 26.4<br>(2.2 to 59.2)                             | -1.5<br>(-18.6 to 20.4)                             |
| Other hemoglobinopathies and hemolytic anaemias            | 5.2<br>(4.7 to 5.9)               | --                                       | 0.1<br>(0.1 to 0.2)            | 24.5<br>(4.8 to 48.0)                             | -11.1<br>(-23.0 to 1.5)                             |
| Endocrine, metabolic, blood, and immune disorders          | 7.3<br>(6.7 to 8.0)               | 0.6<br>(0.6 to 0.7)                      | 0.2<br>(0.1 to 0.3)            | 37.0<br>(21.2 to 54.2)                            | -0.6<br>(-8.9 to 8.3)                               |
| <b>Musculoskeletal disorders</b>                           | <b>96.2<br/>(90.4 to 101.4)</b>   | <b>45.3<br/>(40.4 to 50.5)</b>           | <b>10.7<br/>(7.7 to 13.9)</b>  | <b>38.2<br/>(33.0 to 43.5)</b>                    | <b>-1.0<br/>(-3.4 to 1.5)</b>                       |
| Rheumatoid arthritis                                       | 1.5<br>(1.4 to 1.7)               | 0.1<br>(0.1 to 0.1)                      | 0.4<br>(0.2 to 0.5)            | 38.5<br>(25.6 to 53.0)                            | -3.6<br>(-11.3 to 4.5)                              |
| Osteoarthritis                                             | 18.0<br>(16.7 to 19.2)            | 1.1<br>(1.0 to 1.1)                      | 1.1<br>(0.8 to 1.5)            | 54.3<br>(48.0 to 60.5)                            | 4.6<br>(1.1 to 8.1)                                 |
| Low back and neck pain                                     | 66.8<br>(61.7 to 71.9)            | 30.8<br>(27.0 to 34.9)                   | 7.7<br>(5.5 to 10.2)           | 36.7<br>(30.6 to 43.2)                            | -1.9<br>(-4.9 to 1.2)                               |
| Low back pain                                              | 52.5<br>(46.2 to 59.9)            | 26.4<br>(22.8 to 30.5)                   | 5.9<br>(4.1 to 7.8)            | 36.5<br>(28.6 to 44.8)                            | -2.5<br>(-6.5 to 1.5)                               |
| Neck pain                                                  | 18.1<br>(15.5 to 21.2)            | 4.4<br>(3.8 to 5.1)                      | 1.8<br>(1.2 to 2.5)            | 37.0<br>(30.2 to 45.0)                            | 0.2<br>(-2.4 to 2.7)                                |
| Gout                                                       | 2.2<br>(2.0 to 2.6)               | 0.5<br>(0.4 to 0.5)                      | 0.1<br>(< 0.05 to 0.1)         | 44.7<br>(22.5 to 71.7)                            | 1.1<br>(-12.4 to 16.1)                              |
| Other musculoskeletal disorders                            | 16.6<br>(13.4 to 20.4)            | 13.0<br>(9.9 to 16.5)                    | 1.4<br>(0.9 to 2.1)            | 35.4<br>(20.1 to 52.0)                            | -1.0<br>(-10.7 to 9.9)                              |
| <b>Other non-communicable diseases</b>                     | <b>562.0<br/>(551.6 to 572.6)</b> | <b>1,520.2†<br/>(1,404.2 to 1,656.4)</b> | <b>15.2<br/>(10.3 to 21.7)</b> | <b>33.5<br/>(31.5 to 35.5)</b>                    | <b>-3.0<br/>(-4.4 to -1.8)</b>                      |
| Congenital anomalies                                       | 8.4<br>(7.1 to 9.8)               | --                                       | 1.4<br>(1.0 to 1.9)            | 25.9<br>(17.2 to 35.4)                            | -6.6<br>(-12.8 to -0.0)                             |
| Neural tube defects                                        | 1.5<br>(1.3 to 1.7)               | --                                       | 0.4<br>(0.3 to 0.6)            | 30.2<br>(16.3 to 46.9)                            | -3.2<br>(-13.7 to 8.0)                              |
| Congenital heart anomalies                                 | 0.8<br>(0.7 to 0.9)               | --                                       | < 0.05<br>(< 0.05 to 0.1)      | 30.4<br>(11.0 to 53.1)                            | 0.5<br>(-13.8 to 17.2)                              |
| Orofacial clefts                                           | 0.3<br>(0.2 to 0.3)               | --                                       | < 0.05<br>(< 0.05 to < 0.05)   | 26.7<br>(11.5 to 42.7)                            | -5.5<br>(-16.8 to 6.4)                              |
| Down's syndrome                                            | 0.1<br>(0.1 to 0.2)               | --                                       | < 0.05<br>(< 0.05 to < 0.05)   | 28.7<br>(17.6 to 40.1)                            | -2.7<br>(-11.3 to 6.0)                              |
| Turner syndrome                                            | 0.4<br>(0.3 to 0.5)               | --                                       | < 0.05<br>(< 0.05 to < 0.05)   | 25.3<br>(-12.7 to 84.5)                           | -5.7<br>(-33.5 to 36.4)                             |
| Klinefelter syndrome                                       | 0.4<br>(0.4 to 0.5)               | --                                       | < 0.05<br>(< 0.05 to < 0.05)   | 33.3<br>(0.7 to 74.6)                             | -4.0<br>(-27.6 to 25.1)                             |



| Cause                                         | Prevalence in thousands (95% UI)        | Incidence in thousands (95% UI)       | YLDs in thousands (95% UI)        |                                                   |                                                     |
|-----------------------------------------------|-----------------------------------------|---------------------------------------|-----------------------------------|---------------------------------------------------|-----------------------------------------------------|
|                                               | 2016 counts                             | 2016 counts                           | 2016 counts                       | Percentage change in counts between 2006 and 2016 | Percentage change in age-standardised rates between |
| Other chromosomal abnormalities               | 0.1<br>(0.1 to 0.2)                     | --                                    | < 0.05<br>(< 0.05 to < 0.05)      | 28.6<br>(-6.6 to 73.7)                            | -0.7<br>(-29.1 to 35.8)                             |
| Congenital musculoskeletal and limb anomalies | 1.0<br>(0.9 to 1.1)                     | --                                    | 0.1<br>(0.1 to 0.2)               | 33.0<br>(15.8 to 51.4)                            | -1.1<br>(-12.0 to 11.7)                             |
| Urogenital congenital anomalies               | 0.6<br>(0.5 to 0.7)                     | --                                    | < 0.05<br>(< 0.05 to < 0.05)      | 30.2<br>(20.6 to 40.3)                            | -1.1<br>(-8.0 to 6.4)                               |
| Digestive congenital anomalies                | 0.7<br>(0.6 to 0.8)                     | --                                    | < 0.05<br>(< 0.05 to < 0.05)      | 34.4<br>(9.4 to 65.0)                             | -0.1<br>(-17.4 to 19.6)                             |
| Other congenital anomalies                    | 4.3<br>(3.0 to 6.0)                     | --                                    | 0.6<br>(0.4 to 1.0)               | 20.8<br>(9.0 to 32.8)                             | -10.9<br>(-19.2 to -2.0)                            |
| Skin and subcutaneous diseases                | 289.1<br>(281.4 to 299.7)               | 624.4<br>(592.0 to 664.1)             | 6.9<br>(4.5 to 10.0)              | 36.9<br>(34.0 to 39.7)                            | 2.6<br>(0.8 to 4.7)                                 |
| Dermatitis                                    | 43.5<br>(39.4 to 47.3)                  | 39.1<br>(36.0 to 42.3)                | 1.7<br>(1.0 to 2.9)               | 32.8<br>(27.9 to 37.7)                            | 0.2<br>(-3.0 to 3.7)                                |
| Psoriasis                                     | 6.4<br>(6.1 to 6.7)                     | 0.9<br>(0.8 to 0.9)                   | 0.6<br>(0.4 to 0.7)               | 51.8<br>(38.6 to 65.8)                            | 10.7<br>(2.4 to 19.2)                               |
| Cellulitis                                    | 0.3<br>(0.3 to 0.4)                     | 5.7<br>(5.3 to 6.1)                   | < 0.05<br>(< 0.05 to < 0.05)      | 39.9<br>(12.1 to 73.0)                            | 2.1<br>(-15.6 to 24.6)                              |
| Pyoderma                                      | 4.9<br>(4.7 to 5.2)                     | 95.6<br>(91.1 to 100.3)               | < 0.05<br>(< 0.05 to 0.1)         | 35.6<br>(27.4 to 43.4)                            | 1.1<br>(-4.0 to 6.0)                                |
| Scabies                                       | 10.1<br>(8.7 to 11.7)                   | 30.9<br>(26.5 to 35.9)                | 0.3<br>(0.1 to 0.4)               | 33.2<br>(26.4 to 40.1)                            | -1.2<br>(-5.3 to 3.2)                               |
| Fungal skin diseases                          | 104.3<br>(91.0 to 119.5)                | 274.0<br>(244.1 to 308.9)             | 0.6<br>(0.2 to 1.2)               | 33.2<br>(31.4 to 35.2)                            | 0.1<br>(-0.9 to 1.1)                                |
| Viral skin diseases                           | 21.8<br>(20.4 to 23.2)                  | 31.5<br>(29.5 to 33.5)                | 0.7<br>(0.4 to 1.0)               | 33.9<br>(29.0 to 39.1)                            | 0.1<br>(-3.2 to 3.5)                                |
| Acne vulgaris                                 | 81.3<br>(72.5 to 91.2)                  | 57.4<br>(46.9 to 72.9)                | 2.1<br>(1.4 to 3.1)               | 38.5<br>(31.6 to 45.7)                            | 4.4<br>(-0.4 to 9.6)                                |
| Alopecia areata                               | 1.4<br>(1.3 to 1.4)                     | 2.5<br>(2.4 to 2.6)                   | < 0.05<br>(< 0.05 to 0.1)         | 37.6<br>(22.6 to 54.7)                            | 0.3<br>(-10.0 to 11.5)                              |
| Pruritus                                      | 6.7<br>(5.9 to 7.6)                     | 5.3<br>(4.7 to 6.0)                   | 0.1<br>(< 0.05 to 0.1)            | 39.6<br>(31.0 to 49.0)                            | 2.1<br>(-3.1 to 7.6)                                |
| Urticaria                                     | 7.7<br>(6.6 to 9.0)                     | 13.7<br>(11.8 to 16.0)                | 0.5<br>(0.3 to 0.7)               | 32.9<br>(24.3 to 41.8)                            | 0.1<br>(-5.9 to 5.9)                                |
| Decubitus ulcer                               | 0.1<br>(0.1 to 0.1)                     | 0.4<br>(0.4 to 0.4)                   | < 0.05<br>(< 0.05 to < 0.05)      | 39.3<br>(24.0 to 56.7)                            | -0.7<br>(-14.4 to 14.5)                             |
| Other skin and subcutaneous diseases          | 57.6<br>(55.8 to 59.4)                  | 67.5<br>(65.2 to 69.7)                | 0.3<br>(0.1 to 0.6)               | 47.9<br>(44.2 to 51.9)                            | 5.9<br>(3.5 to 8.3)                                 |
| Sense organ diseases                          | 179.3<br>(175.1 to 183.7)               | 76.5†<br>(71.1 to 82.2)               | 5.5<br>(3.7 to 7.7)               | 30.0<br>(26.3 to 33.8)                            | -7.0<br>(-9.0 to -5.0)                              |
| Glaucoma                                      | 0.3<br>(0.2 to 0.4)                     | --                                    | < 0.05<br>(< 0.05 to < 0.05)      | 64.0<br>(42.4 to 89.6)                            | 4.5<br>(-7.2 to 17.8)                               |
| Cataract                                      | 3.5<br>(3.0 to 4.0)                     | --                                    | 0.3<br>(0.2 to 0.4)               | 36.7<br>(28.0 to 46.6)                            | -2.4<br>(-7.1 to 2.8)                               |
| Macular degeneration                          | 0.4<br>(0.3 to 0.4)                     | --                                    | < 0.05<br>(< 0.05 to < 0.05)      | 61.5<br>(38.9 to 85.5)                            | 5.9<br>(-6.1 to 19.9)                               |
| Refraction and accommodation disorders        | 95.8<br>(92.0 to 99.6)                  | --                                    | 1.4<br>(0.8 to 2.2)               | 24.9<br>(20.7 to 29.1)                            | -10.5<br>(-13.0 to -7.6)                            |
| Age-related and other hearing loss            | 106.2<br>(100.0 to 112.8)               | --                                    | 3.0<br>(2.0 to 4.3)               | 28.1<br>(21.7 to 34.2)                            | -8.5<br>(-12.2 to -5.0)                             |
| Other vision loss                             | 2.4<br>(2.1 to 2.7)                     | --                                    | 0.2<br>(0.1 to 0.3)               | 52.9<br>(40.3 to 67.1)                            | 4.1<br>(-3.0 to 11.5)                               |
| Other sense organ diseases                    | 17.2<br>(15.9 to 18.6)                  | 76.5<br>(71.1 to 82.2)                | 0.5<br>(0.3 to 0.8)               | 43.3<br>(36.9 to 50.2)                            | 1.5<br>(-2.0 to 5.1)                                |
| Oral disorders                                | 315.8<br>(297.3 to 333.1)               | 819.4†<br>(709.1 to 948.3)            | 1.6<br>(1.0 to 2.4)               | 39.1<br>(35.3 to 43.0)                            | -0.0<br>(-2.1 to 2.0)                               |
| Caries of deciduous teeth                     | 70.0<br>(54.7 to 85.1)                  | 293.1<br>(196.2 to 403.8)             | < 0.05<br>(< 0.05 to < 0.05)      | 27.3<br>(12.9 to 44.7)                            | -2.1<br>(-13.1 to 10.8)                             |
| Caries of permanent teeth                     | 172.8<br>(156.7 to 190.2)               | 517.0<br>(460.7 to 584.0)             | 0.1<br>(< 0.05 to 0.2)            | 25.4<br>(19.4 to 32.2)                            | -6.8<br>(-10.5 to -2.6)                             |
| Periodontal disease                           | 64.6<br>(51.5 to 79.9)                  | 7.9<br>(6.2 to 9.9)                   | 0.4<br>(0.2 to 0.9)               | 39.9<br>(31.8 to 49.2)                            | 0.2<br>(-3.3 to 3.7)                                |
| Edentulism and severe tooth loss              | 22.5<br>(19.4 to 25.8)                  | 1.4<br>(1.2 to 1.6)                   | 0.6<br>(0.4 to 0.9)               | 42.6<br>(36.0 to 49.5)                            | 0.5<br>(-3.0 to 4.2)                                |
| Other oral disorders                          | 13.5<br>(12.9 to 14.2)                  | --                                    | 0.4<br>(0.2 to 0.6)               | 37.4<br>(32.4 to 42.5)                            | 0.3<br>(-2.5 to 3.2)                                |
| <b>Injuries</b>                               | <b>130.3</b><br><b>(122.2 to 138.5)</b> | <b>70.2†</b><br><b>(66.2 to 74.3)</b> | <b>5.3</b><br><b>(3.6 to 7.6)</b> | <b>35.2</b><br><b>(32.4 to 37.7)</b>              | <b>-2.9</b><br><b>(-4.8 to -1.4)</b>                |
| <b>Transport injuries</b>                     | <b>18.9</b><br><b>(17.6 to 20.4)</b>    | <b>8.0</b><br><b>(7.0 to 9.1)</b>     | <b>1.1</b><br><b>(0.7 to 1.6)</b> | <b>34.5</b><br><b>(31.7 to 37.3)</b>              | <b>-3.4</b><br><b>(-5.2 to -1.8)</b>                |
| Road injuries                                 | 15.0<br>(14.0 to 16.1)                  | 6.8<br>(5.9 to 7.9)                   | 0.9<br>(0.6 to 1.2)               | 35.1<br>(32.4 to 37.7)                            | -3.2<br>(-5.0 to -1.7)                              |
| Pedestrian road injuries                      | 4.3<br>(3.8 to 4.9)                     | 1.5<br>(1.2 to 1.9)                   | 0.2<br>(0.2 to 0.4)               | 33.9<br>(30.8 to 36.6)                            | -4.6<br>(-6.4 to -3.0)                              |
| Cyclist road injuries                         | 2.8<br>(2.4 to 3.3)                     | 1.5<br>(1.2 to 1.9)                   | 0.1<br>(0.1 to 0.2)               | 35.6<br>(32.8 to 38.3)                            | -3.0<br>(-4.7 to -1.4)                              |
| Motorcyclist road injuries                    | 3.0<br>(2.6 to 3.7)                     | 1.0<br>(0.8 to 1.2)                   | 0.2<br>(0.1 to 0.2)               | 30.1<br>(27.1 to 32.8)                            | -6.1<br>(-8.0 to -4.5)                              |
| Motor vehicle road injuries                   | 3.9<br>(3.4 to 4.5)                     | 2.3<br>(1.8 to 2.7)                   | 0.2<br>(0.2 to 0.4)               | 37.6<br>(34.6 to 40.4)                            | -1.6<br>(-3.3 to 0.0)                               |
| Other road injuries                           | 0.9<br>(0.8 to 1.0)                     | 0.6<br>(0.4 to 0.7)                   | < 0.05<br>(< 0.05 to 0.1)         | 47.5<br>(44.1 to 50.5)                            | 5.7<br>(3.6 to 7.5)                                 |
| Other transport injuries                      | 3.9<br>(3.3 to 4.7)                     | 1.2<br>(1.0 to 1.4)                   | 0.2<br>(0.2 to 0.3)               | 32.4<br>(28.8 to 36.2)                            | -4.2<br>(-6.3 to -2.1)                              |
| <b>Unintentional injuries</b>                 | <b>104.8</b><br><b>(96.9 to 113.0)</b>  | <b>58.3</b><br><b>(54.7 to 62.2)</b>  | <b>3.8</b><br><b>(2.6 to 5.3)</b> | <b>36.0</b><br><b>(33.0 to 38.8)</b>              | <b>-2.6</b><br><b>(-4.6 to -0.9)</b>                |
| Falls                                         | 39.1<br>(34.1 to 43.9)                  | 22.2<br>(19.5 to 25.5)                | 1.7<br>(1.2 to 2.3)               | 36.9<br>(33.7 to 39.8)                            | -3.7<br>(-6.0 to -1.7)                              |
| Drowning                                      | 0.5<br>(0.4 to 0.6)                     | 0.1<br>(0.1 to 0.1)                   | < 0.05<br>(< 0.05 to < 0.05)      | 32.4<br>(28.5 to 36.3)                            | -3.6<br>(-6.2 to -1.0)                              |
| Fire, heat, and hot substances                | 11.9<br>(10.2 to 14.4)                  | 2.0<br>(1.7 to 2.4)                   | 0.4<br>(0.2 to 0.5)               | 34.4<br>(28.2 to 40.5)                            | -1.9<br>(-5.7 to 1.7)                               |
| Poisonings                                    | 0.4<br>(0.3 to 0.5)                     | 0.6<br>(0.5 to 0.7)                   | < 0.05<br>(< 0.05 to 0.1)         | 38.4<br>(27.9 to 50.6)                            | 1.8<br>(-4.5 to 9.1)                                |
| Exposure to mechanical forces                 | 21.9<br>(18.7 to 26.4)                  | 10.1<br>(8.6 to 11.7)                 | 0.6<br>(0.4 to 0.8)               | 35.8<br>(32.3 to 38.9)                            | -1.3<br>(-3.5 to 0.5)                               |
| Unintentional firearm injuries                | 0.7<br>(0.6 to 0.8)                     | 0.2<br>(0.1 to 0.3)                   | < 0.05<br>(< 0.05 to < 0.05)      | 40.1<br>(36.5 to 43.5)                            | 1.6<br>(-0.7 to 3.6)                                |
| Unintentional suffocation                     | 1.5<br>(1.1 to 2.1)                     | 0.4<br>(0.3 to 0.6)                   | 0.1<br>(< 0.05 to 0.1)            | 35.8<br>(31.5 to 39.7)                            | 0.6<br>(-1.9 to 2.9)                                |
| Other exposure to mechanical forces           | 19.7<br>(16.6 to 24.2)                  | 9.5<br>(8.1 to 11.0)                  | 0.5<br>(0.3 to 0.7)               | 35.6<br>(31.8 to 38.8)                            | -1.7<br>(-4.0 to 0.3)                               |

| Cause                                                                               | Prevalence in thousands (95% UI)        | Incidence in thousands (95% UI)                      | YLDs in thousands (95% UI)                          |                                                   |                                                     |
|-------------------------------------------------------------------------------------|-----------------------------------------|------------------------------------------------------|-----------------------------------------------------|---------------------------------------------------|-----------------------------------------------------|
|                                                                                     | 2016 counts                             | 2016 counts                                          | 2016 counts                                         | Percentage change in counts between 2006 and 2016 | Percentage change in age-standardised rates between |
| Adverse effects of medical treatment                                                | 0.4<br>(0.3 to 0.5)                     | 4.7<br>(4.1 to 5.5)                                  | < 0.05<br>(< 0.05 to 0.1)                           | 30.5<br>(22.0 to 38.5)                            | -2.8<br>(-7.4 to 1.8)                               |
| Animal contact                                                                      | 4.1<br>(3.6 to 4.7)                     | 6.1<br>(5.2 to 7.1)                                  | 0.1<br>(0.1 to 0.2)                                 | 20.5<br>(14.9 to 26.3)                            | -13.3<br>(-16.5 to -10.0)                           |
| Venomous animal contact                                                             | 2.0<br>(1.7 to 2.3)                     | 2.9<br>(2.3 to 3.6)                                  | 0.1<br>(0.1 to 0.1)                                 | 23.2<br>(15.7 to 30.7)                            | -10.8<br>(-15.1 to -6.2)                            |
| Non-venomous animal contact                                                         | 2.1<br>(1.8 to 2.6)                     | 3.2<br>(2.6 to 3.9)                                  | < 0.05<br>(< 0.05 to 0.1)                           | 13.6<br>(9.2 to 17.5)                             | -18.8<br>(-21.5 to -16.5)                           |
| Foreign body                                                                        | 7.3<br>(5.9 to 8.8)                     | 4.6<br>(4.0 to 5.3)                                  | 0.3<br>(0.2 to 0.5)                                 | 34.1<br>(29.9 to 38.4)                            | -1.1<br>(-3.6 to 1.3)                               |
| Pulmonary aspiration and foreign body in airway                                     | 4.4<br>(3.2 to 6.1)                     | 1.9<br>(1.6 to 2.3)                                  | 0.2<br>(0.1 to 0.3)                                 | 33.3<br>(28.8 to 37.8)                            | -1.6<br>(-4.2 to 0.9)                               |
| Foreign body in eyes                                                                | 0.3<br>(0.1 to 0.4)                     | 1.5<br>(1.2 to 2.0)                                  | < 0.05<br>(< 0.05 to < 0.05)                        | 39.2<br>(33.5 to 45.6)                            | 2.8<br>(0.3 to 5.8)                                 |
| Foreign body in other body part                                                     | 2.6<br>(2.1 to 3.4)                     | 1.2<br>(1.0 to 1.5)                                  | 0.1<br>(0.1 to 0.1)                                 | 35.2<br>(30.0 to 40.0)                            | -0.5<br>(-3.5 to 2.2)                               |
| Environmental heat and cold exposure                                                | 5.6<br>(4.7 to 6.6)                     | 1.9<br>(1.5 to 2.3)                                  | 0.2<br>(0.1 to 0.3)                                 | 40.5<br>(37.0 to 43.8)                            | 1.2<br>(-1.0 to 3.1)                                |
| Other unintentional injuries                                                        | 13.6<br>(10.9 to 17.0)                  | 5.9<br>(4.9 to 7.1)                                  | 0.4<br>(0.3 to 0.6)                                 | 40.3<br>(37.4 to 43.2)                            | 0.9<br>(-0.9 to 2.5)                                |
| <b>Self-harm and interpersonal violence</b>                                         | <b>28.4</b><br><b>(25.2 to 31.8)</b>    | <b>3.9†</b><br><b>(3.3 to 4.5)</b>                   | <b>0.5</b><br><b>(0.3 to 0.7)</b>                   | <b>30.4</b><br><b>(26.9 to 33.9)</b>              | <b>-3.8</b><br><b>(-5.8 to -1.8)</b>                |
| Self-harm                                                                           | 1.1<br>(0.9 to 1.3)                     | 0.7<br>(0.6 to 0.8)                                  | 0.1<br>(< 0.05 to 0.1)                              | 41.7<br>(37.8 to 45.5)                            | 0.7<br>(-1.8 to 3.0)                                |
| Self-harm by firearm                                                                | < 0.05<br>(< 0.05 to 0.1)               | < 0.05<br>(< 0.05 to < 0.05)                         | < 0.05<br>(< 0.05 to < 0.05)                        | 22.8<br>(17.6 to 27.9)                            | -14.1<br>(-16.9 to -11.1)                           |
| Self-harm by other specified means                                                  | 1.0<br>(0.9 to 1.2)                     | 0.6<br>(0.5 to 0.7)                                  | 0.1<br>(< 0.05 to 0.1)                              | 42.5<br>(38.7 to 46.4)                            | 1.4<br>(-1.2 to 3.7)                                |
| Interpersonal violence                                                              | 27.3<br>(24.1 to 30.7)                  | 3.2‡<br>(2.7 to 3.8)                                 | 0.4<br>(0.3 to 0.6)                                 | 29.0<br>(25.2 to 32.6)                            | -4.6<br>(-6.8 to -2.4)                              |
| Assault by firearm                                                                  | 0.2<br>(0.2 to 0.3)                     | 0.1<br>(0.1 to 0.1)                                  | < 0.05<br>(< 0.05 to < 0.05)                        | 35.9<br>(31.4 to 40.4)                            | -1.0<br>(-3.9 to 1.8)                               |
| Assault by sharp object                                                             | 1.9<br>(1.6 to 2.3)                     | 1.0<br>(0.7 to 1.2)                                  | 0.1<br>(< 0.05 to 0.1)                              | 38.0<br>(34.1 to 41.7)                            | 0.4<br>(-2.0 to 2.6)                                |
| Sexual violence                                                                     | 21.9<br>(18.9 to 25.3)                  | --                                                   | 0.2<br>(0.1 to 0.3)                                 | 18.0<br>(12.6 to 24.2)                            | -12.9<br>(-15.9 to -9.5)                            |
| Assault by other means                                                              | 3.2<br>(2.7 to 3.9)                     | 2.2<br>(1.8 to 2.6)                                  | 0.1<br>(0.1 to 0.2)                                 | 42.2<br>(38.8 to 45.5)                            | 3.1<br>(1.0 to 5.1)                                 |
| <b>Forces of nature, conflict and terrorism, and executions and police conflict</b> | <b>0.1</b><br><b>(&lt; 0.05 to 0.2)</b> | <b>&lt; 0.05†</b><br><b>(&lt; 0.05 to &lt; 0.05)</b> | <b>&lt; 0.05</b><br><b>(&lt; 0.05 to &lt; 0.05)</b> | <b>-0.7</b><br><b>(-5.3 to 12.3)</b>              | <b>-18.4</b><br><b>(-21.9 to -9.4)</b>              |
| Exposure to forces of nature                                                        | --                                      | --                                                   | --                                                  | --                                                | --                                                  |
| Conflict and terrorism                                                              | 0.1<br>(< 0.05 to 0.2)                  | --                                                   | < 0.05<br>(< 0.05 to < 0.05)                        | -8.0<br>(-12.2 to -3.2)                           | -22.8<br>(-25.9 to -18.9)                           |
| Executions and police conflict                                                      | < 0.05<br>(< 0.05 to 0.1)               | < 0.05<br>(< 0.05 to < 0.05)                         | < 0.05<br>(< 0.05 to < 0.05)                        | 21.6<br>(13.4 to 37.0)                            | -6.6<br>(-11.7 to 3.5)                              |
| <b>Impairments</b>                                                                  | --                                      | --                                                   | --                                                  | --                                                | --                                                  |
| Anaemia                                                                             | 287.1<br>(259.6 to 319.5)               | --                                                   | 11.8<br>(7.9 to 16.3)                               | 25.0<br>(10.9 to 42.1)                            | -4.7<br>(-15.0 to 7.6)                              |
| Developmental intellectual disability                                               | 18.6<br>(14.2 to 23.0)                  | --                                                   | 2.1<br>(1.5 to 3.0)                                 | 37.4<br>(26.1 to 56.6)                            | 1.5<br>(-6.4 to 14.6)                               |
| Epilepsy                                                                            | 5.0<br>(2.7 to 7.8)                     | --                                                   | 1.8<br>(0.9 to 3.1)                                 | 39.3<br>(-36.1 to 213.7)                          | 1.9<br>(-55.0 to 137.0)                             |
| Guillain-Barre syndrome                                                             | < 0.05<br>(< 0.05 to < 0.05)            | --                                                   | < 0.05<br>(< 0.05 to < 0.05)                        | 35.6<br>(30.1 to 41.2)                            | -0.1<br>(-0.2 to 0.0)                               |
| Hearing loss                                                                        | 118.2<br>(111.9 to 124.9)               | --                                                   | 3.8<br>(2.6 to 5.3)                                 | 25.5<br>(20.1 to 30.4)                            | -9.2<br>(-12.5 to -6.2)                             |
| Heart failure                                                                       | 2.4<br>(2.1 to 2.7)                     | --                                                   | 0.2<br>(0.2 to 0.3)                                 | 34.9<br>(24.0 to 46.8)                            | -0.5<br>(-8.1 to 8.2)                               |
| Infertility                                                                         | 19.1<br>(14.8 to 24.4)                  | --                                                   | 0.1<br>(< 0.05 to 0.2)                              | 19.7<br>(10.3 to 31.0)                            | 0.4<br>(-5.4 to 6.7)                                |
| Pelvic inflammatory disease                                                         | 0.8<br>(0.7 to 1.0)                     | --                                                   | 0.1<br>(0.1 to 0.1)                                 | 30.3<br>(12.6 to 51.6)                            | -2.9<br>(-15.1 to 11.6)                             |
| Vision loss                                                                         | 108.6<br>(104.3 to 112.9)               | --                                                   | 2.6<br>(1.8 to 3.8)                                 | 36.7<br>(28.3 to 51.8)                            | -4.1<br>(-8.1 to 2.9)                               |

We did not calculate incidence for the nine impairments, certain NTDs, and causes with only birth prevalence. Blank cells mean that no estimate is available.

† Incidence for aggregate causes represents the sum of the incidence of the causes below the aggregate.

‡ Incidence estimates for stroke represent first-ever stroke only.

^ Incidence of HIV/AIDS represents new infections of HIV only and does not include new infections of Tuberculosis in HIV positive cases.

SR Table 14: Prevalence, incidence, and YLDs for 2016, percentage change of YLD counts and percentage change of age-standardised YLD rates between 2006 and 2016 by cause and impairments, for all ages, Eritrea.

| Cause                                                                                | Prevalence in thousands (95% UI)       | Incidence in thousands (95% UI)            | YLDs in thousands (95% UI)       |                                                   |                                                     |
|--------------------------------------------------------------------------------------|----------------------------------------|--------------------------------------------|----------------------------------|---------------------------------------------------|-----------------------------------------------------|
|                                                                                      | 2016 counts                            | 2016 counts                                | 2016 counts                      | Percentage change in counts between 2006 and 2016 | Percentage change in age-standardised rates between |
| <b>All causes</b>                                                                    | <b>5,195.4</b><br>(5,170.2 to 5,219.8) | <b>37,634.9†</b><br>(35,456.4 to 40,146.1) | <b>469.1</b><br>(345.1 to 619.5) | <b>24.0</b><br>(19.6 to 28.6)                     | <b>-1.8</b><br>(-4.3 to 0.7)                        |
| <b>Communicable, maternal, neonatal, and nutritional disorders</b>                   | <b>4,230.1</b><br>(4,076.7 to 4,368.6) | <b>22,918.3†</b><br>(21,066.5 to 24,987.9) | <b>108.9</b><br>(76.0 to 149.4)  | <b>16.0</b><br>(6.0 to 25.9)                      | <b>-8.9</b><br>(-15.4 to -2.1)                      |
| <b>HIV/AIDS and tuberculosis</b>                                                     | <b>1,195.9</b><br>(1,044.5 to 1,334.1) | <b>16.2†</b><br>(13.0 to 19.6)             | <b>5.8</b><br>(3.6 to 8.4)       | <b>1.8</b><br>(-21.0 to 24.1)                     | <b>-24.6</b><br>(-42.5 to -5.7)                     |
| Tuberculosis                                                                         | 1,084.6<br>(952.0 to 1,238.9)          | 14.2†<br>(11.4 to 17.3)                    | 2.7<br>(1.7 to 3.9)              | 35.5<br>(19.9 to 53.4)                            | 4.1<br>(-4.9 to 14.8)                               |
| Drug-susceptible tuberculosis                                                        | 8.5<br>(6.9 to 10.5)                   | 13.8<br>(11.2 to 17.0)                     | 2.6<br>(1.7 to 3.8)              | 35.2<br>(18.3 to 53.6)                            | 3.9<br>(-5.9 to 15.0)                               |
| Multidrug-resistant tuberculosis without extensive drug resistance                   | 0.2<br>(< 0.05 to 0.5)                 | 0.3<br>(0.1 to 0.7)                        | 0.1<br>(< 0.05 to 0.1)           | 49.0<br>(-50.4 to 332.1)                          | 13.4<br>(-62.1 to 233.8)                            |
| Extensively drug-resistant tuberculosis                                              | < 0.05<br>(< 0.05 to < 0.05)           | < 0.05<br>(< 0.05 to < 0.05)               | < 0.05<br>(< 0.05 to < 0.05)     | 355.9<br>(50.5 to 1,221.7)                        | 249.1<br>(15.8 to 921.9)                            |
| Latent tuberculosis infection                                                        | 1,075.8<br>(944.8 to 1,230.7)          | --                                         | --                               | --                                                | --                                                  |
| HIV/AIDS                                                                             | 26.4<br>(17.4 to 36.9)                 | 2.0^<br>(0.8 to 3.5)                       | 3.1<br>(1.6 to 5.3)              | -16.0<br>(-41.5 to 14.1)                          | -40.2<br>(-60.2 to -14.3)                           |
| Drug-susceptible HIV/AIDS - Tuberculosis                                             | 0.7<br>(0.4 to 1.1)                    | 1.1<br>(0.6 to 1.7)                        | 0.2<br>(0.1 to 0.5)              | -12.2<br>(-30.0 to 11.7)                          | -29.7<br>(-43.3 to -11.3)                           |
| Multidrug-resistant HIV/AIDS - Tuberculosis without extensive drug resistance        | < 0.05<br>(< 0.05 to < 0.05)           | < 0.05<br>(< 0.05 to 0.1)                  | < 0.05<br>(< 0.05 to < 0.05)     | -3.2<br>(-67.9 to 186.4)                          | -22.5<br>(-74.3 to 129.3)                           |
| Extensively drug-resistant HIV/AIDS - Tuberculosis                                   | < 0.05<br>(< 0.05 to < 0.05)           | < 0.05<br>(< 0.05 to < 0.05)               | < 0.05<br>(< 0.05 to < 0.05)     | 194.8<br>(-2.2 to 773.5)                          | 136.3<br>(-21.7 to 599.0)                           |
| HIV/AIDS resulting in other diseases                                                 | 25.8<br>(17.0 to 36.3)                 | 2.0<br>(0.8 to 3.5)                        | 2.9<br>(1.4 to 5.0)              | -16.3<br>(-43.9 to 19.1)                          | -41.1<br>(-62.1 to -12.7)                           |
| <b>Diarrhoea, lower respiratory infections, and other common infectious diseases</b> | <b>395.4</b><br>(377.7 to 416.9)       | <b>19,451.5†</b><br>(17,654.2 to 21,246.8) | <b>23.1</b><br>(16.4 to 31.2)    | <b>16.3</b><br>(12.8 to 20.3)                     | <b>-4.8</b><br>(-7.3 to -2.2)                       |
| Diarrhoeal diseases                                                                  | 88.7<br>(82.1 to 95.9)                 | 5,929.0<br>(5,482.3 to 6,414.1)            | 10.0<br>(6.9 to 14.0)            | 9.3<br>(3.8 to 15.8)                              | -8.7<br>(-12.5 to -4.6)                             |
| Intestinal infectious diseases                                                       | 0.4<br>(0.3 to 0.6)                    | 7.2†<br>(5.1 to 10.1)                      | 0.1<br>(< 0.05 to 0.1)           | 5.0<br>(-18.1 to 35.4)                            | -15.5<br>(-30.9 to 4.7)                             |
| Typhoid fever                                                                        | 0.4<br>(0.3 to 0.6)                    | 6.7<br>(4.8 to 9.2)                        | 0.1<br>(< 0.05 to 0.1)           | 6.4<br>(-17.7 to 38.1)                            | -14.8<br>(-30.9 to 5.8)                             |
| Paratyphoid fever                                                                    | < 0.05<br>(< 0.05 to < 0.05)           | 0.6<br>(0.4 to 0.9)                        | < 0.05<br>(< 0.05 to < 0.05)     | 17.3<br>(-14.5 to 61.4)                           | -6.4<br>(-28.0 to 23.2)                             |
| Other intestinal infectious diseases                                                 | --                                     | --                                         | < 0.05<br>(< 0.05 to < 0.05)     | -48.4<br>(-64.2 to -25.7)                         | -49.1<br>(-61.6 to -33.5)                           |
| Lower respiratory infections                                                         | 7.7<br>(6.9 to 8.4)                    | 332.4<br>(299.7 to 368.6)                  | 0.5<br>(0.3 to 0.7)              | 4.2<br>(-8.7 to 18.3)                             | -12.6<br>(-20.9 to -3.3)                            |
| Upper respiratory infections                                                         | 167.2<br>(145.0 to 191.1)              | 12,553.1<br>(10,832.7 to 14,420.6)         | 4.2<br>(2.5 to 6.6)              | 23.1<br>(16.2 to 30.9)                            | -0.1<br>(-5.2 to 5.2)                               |
| Otitis media                                                                         | 106.9<br>(94.9 to 119.1)               | 464.2<br>(362.0 to 590.3)                  | 3.5<br>(2.2 to 5.3)              | 24.7<br>(15.2 to 34.9)                            | 2.5<br>(-4.6 to 9.5)                                |
| Meningitis                                                                           | 31.4<br>(26.4 to 37.1)                 | 6.4<br>(5.5 to 7.5)                        | 3.1<br>(2.2 to 4.1)              | 21.6<br>(11.7 to 32.4)                            | -3.0<br>(-10.0 to 3.8)                              |
| Pneumococcal meningitis                                                              | 10.1<br>(8.4 to 12.1)                  | 1.0<br>(0.8 to 1.3)                        | 1.1<br>(0.8 to 1.6)              | 7.0<br>(-8.3 to 24.6)                             | -16.9<br>(-27.1 to -5.8)                            |
| H influenzae type B meningitis                                                       | 5.0<br>(3.9 to 6.4)                    | 0.8<br>(0.6 to 1.2)                        | 0.6<br>(0.4 to 0.9)              | 4.6<br>(-12.2 to 25.0)                            | -17.2<br>(-28.8 to -4.3)                            |
| Meningococcal infection                                                              | 2.4<br>(1.7 to 3.3)                    | 0.7<br>(0.5 to 1.0)                        | 0.2<br>(0.2 to 0.3)              | 28.9<br>(20.6 to 38.7)                            | 4.0<br>(-3.2 to 12.6)                               |
| Other meningitis                                                                     | 13.9<br>(10.1 to 18.3)                 | 3.8<br>(3.2 to 4.6)                        | 1.1<br>(0.7 to 1.5)              | 56.7<br>(34.0 to 82.1)                            | 28.1<br>(11.7 to 45.9)                              |
| Encephalitis                                                                         | 15.0<br>(9.6 to 22.5)                  | 5.9<br>(5.1 to 6.7)                        | 1.6<br>(1.2 to 2.1)              | 26.6<br>(11.8 to 43.4)                            | 0.7<br>(-9.3 to 11.1)                               |
| Diphtheria                                                                           | < 0.05<br>(< 0.05 to < 0.05)           | < 0.05<br>(< 0.05 to < 0.05)               | < 0.05<br>(< 0.05 to < 0.05)     | -45.7<br>(-77.0 to 32.3)                          | -49.8<br>(-74.8 to 2.9)                             |
| Whooping cough                                                                       | 0.5<br>(0.4 to 0.6)                    | 3.5<br>(2.6 to 4.5)                        | < 0.05<br>(< 0.05 to < 0.05)     | -56.4<br>(-69.5 to -39.0)                         | -60.7<br>(-72.6 to -44.5)                           |
| Tetanus                                                                              | 0.1<br>(0.1 to 0.1)                    | 0.3<br>(0.1 to 0.5)                        | < 0.05<br>(< 0.05 to < 0.05)     | -9.2<br>(-38.4 to 25.4)                           | -21.8<br>(-40.0 to 0.7)                             |
| Measles                                                                              | 0.1<br>(< 0.05 to 0.3)                 | 4.2<br>(1.5 to 9.6)                        | < 0.05<br>(< 0.05 to < 0.05)     | -12.0<br>(-42.1 to 42.6)                          | -23.5<br>(-49.5 to 22.8)                            |
| Varicella and herpes zoster                                                          | 4.9<br>(4.6 to 5.2)                    | 145.3<br>(136.8 to 154.0)                  | 0.1<br>(0.1 to 0.2)              | 27.0<br>(8.4 to 48.1)                             | 0.0<br>(-10.6 to 12.8)                              |
| <b>Neglected tropical diseases and malaria</b>                                       | <b>1,173.5</b><br>(971.9 to 1,452.8)   | <b>143.8†</b><br>(93.7 to 200.0)           | <b>7.2</b><br>(4.7 to 10.8)      | <b>9.9</b><br>(-6.4 to 26.3)                      | <b>-23.6</b><br>(-35.2 to -10.0)                    |
| Malaria                                                                              | 11.3<br>(9.2 to 14.7)                  | 41.3<br>(29.0 to 54.0)                     | 1.7<br>(1.3 to 2.2)              | 23.7<br>(5.3 to 45.0)                             | 0.3<br>(-13.4 to 15.7)                              |
| Chagas disease                                                                       | --                                     | --                                         | --                               | --                                                | --                                                  |
| Leishmaniasis                                                                        | 1.2<br>(0.9 to 1.6)                    | 0.3<br>(0.3 to 0.3)                        | 0.1<br>(< 0.05 to 0.1)           | -10.2<br>(-25.7 to 12.1)                          | -27.7<br>(-38.2 to -15.1)                           |
| Visceral leishmaniasis                                                               | 0.1<br>(0.1 to 0.1)                    | 0.3<br>(0.3 to 0.3)                        | < 0.05<br>(< 0.05 to < 0.05)     | -26.5<br>(-33.7 to -18.2)                         | -51.7<br>(-64.6 to -34.0)                           |
| Cutaneous and mucocutaneous leishmaniasis                                            | 1.0<br>(0.6 to 1.6)                    | < 0.05<br>(< 0.05 to < 0.05)               | 0.1<br>(< 0.05 to 0.1)           | -8.7<br>(-25.8 to 19.2)                           | -23.4<br>(-34.6 to -5.9)                            |
| African trypanosomiasis                                                              | --                                     | --                                         | --                               | --                                                | --                                                  |
| Schistosomiasis                                                                      | 211.2<br>(60.3 to 383.5)               | 79.7<br>(34.5 to 131.1)                    | 1.6<br>(0.3 to 4.0)              | 12.5<br>(4.8 to 22.2)                             | -13.8<br>(-19.0 to -7.7)                            |
| Cysticercosis                                                                        | --                                     | --                                         | --                               | --                                                | --                                                  |
| Cystic echinococcosis                                                                | 3.8<br>(0.9 to 12.8)                   | 0.8<br>(0.2 to 2.7)                        | 0.4<br>(0.1 to 1.2)              | 1.1<br>(-83.9 to 609.9)                           | -20.3<br>(-86.5 to 386.6)                           |
| Lymphatic filariasis                                                                 | 4.7<br>(3.6 to 6.2)                    | 0.7<br>(0.5 to 0.9)                        | 0.2<br>(0.1 to 0.4)              | 30.5<br>(5.9 to 58.8)                             | 1.1<br>(-14.9 to 20.1)                              |
| Onchocerciasis                                                                       | --                                     | --                                         | --                               | --                                                | --                                                  |
| Trachoma                                                                             | 3.5<br>(2.6 to 4.6)                    | --                                         | 0.4<br>(0.2 to 0.5)              | -47.4<br>(-56.5 to -36.5)                         | -61.9<br>(-69.9 to -51.2)                           |
| Dengue                                                                               | 1.2<br>(0.5 to 2.5)                    | 20.8<br>(8.7 to 40.2)                      | 0.2<br>(0.1 to 0.5)              | 163.6<br>(88.4 to 529.4)                          | 109.6<br>(54.0 to 385.2)                            |
| Yellow fever                                                                         | < 0.05<br>(< 0.05 to < 0.05)           | 0.1<br>(< 0.05 to 0.3)                     | < 0.05<br>(< 0.05 to < 0.05)     | -31.5<br>(-49.0 to -6.4)                          | -44.8<br>(-56.8 to -27.9)                           |
| Rabies                                                                               | < 0.05<br>(< 0.05 to < 0.05)           | < 0.05<br>(< 0.05 to 0.1)                  | < 0.05<br>(< 0.05 to < 0.05)     | -7.3<br>(-50.1 to 67.2)                           | -21.6<br>(-53.6 to 22.5)                            |
| Intestinal nematode infections                                                       | 937.5<br>(757.6 to 1,214.2)            | --                                         | 0.4<br>(0.2 to 0.6)              | 25.8<br>(2.3 to 56.1)                             | 3.1<br>(-15.2 to 28.0)                              |
| Ascariasis                                                                           | 244.8<br>(172.1 to 339.6)              | --                                         | < 0.05<br>(< 0.05 to < 0.05)     | 24.4<br>(-9.1 to 68.8)                            | -1.0<br>(-27.1 to 34.0)                             |



| Cause                                                                   | Prevalence in thousands (95% UI)              | Incidence in thousands (95% UI)                   | YLDs in thousands (95% UI)              |                                                   |                                                     |
|-------------------------------------------------------------------------|-----------------------------------------------|---------------------------------------------------|-----------------------------------------|---------------------------------------------------|-----------------------------------------------------|
|                                                                         | 2016 counts                                   | 2016 counts                                       | 2016 counts                             | Percentage change in counts between 2006 and 2016 | Percentage change in age-standardised rates between |
| Trichuriasis                                                            | 575.9<br>(410.6 to 827.5)                     | --                                                | 0.1<br>( $< 0.05$ to 0.1)               | 25.8<br>(-4.0 to 59.3)                            | -0.5<br>(-24.8 to 27.9)                             |
| Hookworm disease                                                        | 125.4<br>(92.5 to 168.9)                      | --                                                | 0.3<br>(0.2 to 0.5)                     | 25.9<br>(-3.1 to 62.8)                            | 4.3<br>(-19.2 to 35.8)                              |
| Food-borne trematodiasis                                                | --                                            | --                                                | --                                      | --                                                | --                                                  |
| Leprosy                                                                 | $< 0.05$<br>( $< 0.05$ to $< 0.05$ )          | $< 0.05$<br>( $< 0.05$ to $< 0.05$ )              | $< 0.05$<br>( $< 0.05$ to $< 0.05$ )    | 85.8<br>(37.9 to 178.0)                           | 34.3<br>(-0.3 to 97.8)                              |
| Ebola virus disease                                                     | --                                            | --                                                | --                                      | --                                                | --                                                  |
| Zika virus disease                                                      | --                                            | --                                                | --                                      | --                                                | --                                                  |
| Guinea worm disease                                                     | --                                            | --                                                | --                                      | --                                                | --                                                  |
| Other neglected tropical diseases                                       | 72.5<br>(60.2 to 86.0)                        | --                                                | 2.4<br>(1.4 to 3.8)                     | 10.8<br>(-13.9 to 37.1)                           | -10.3<br>(-28.8 to 9.4)                             |
| <b>Maternal disorders</b>                                               | <b>16.2</b><br><b>(13.1 to 20.0)</b>          | <b>249.5†</b><br><b>(177.2 to 327.7)</b>          | <b>1.7</b><br><b>(1.1 to 2.4)</b>       | <b>-6.9</b><br><b>(-24.1 to 14.6)</b>             | <b>-29.8</b><br><b>(-41.9 to -14.6)</b>             |
| Maternal haemorrhage                                                    | 1.6<br>(1.2 to 2.2)                           | 14.0<br>(9.1 to 20.9)                             | 0.1<br>( $< 0.05$ to 0.1)               | 2.2<br>(-34.0 to 65.6)                            | -17.3<br>(-45.9 to 30.5)                            |
| Maternal sepsis and other pregnancy related infections                  | 2.2<br>(1.8 to 2.7)                           | 7.1<br>(5.2 to 9.7)                               | $< 0.05$<br>( $< 0.05$ to 0.1)          | 0.6<br>(-48.9 to 90.1)                            | -18.2<br>(-55.2 to 44.8)                            |
| Maternal hypertensive disorders                                         | 9.1<br>(5.8 to 12.6)                          | 40.3<br>(33.8 to 46.5)                            | 0.4<br>(0.2 to 0.7)                     | 10.9<br>(-32.3 to 83.4)                           | -12.6<br>(-46.5 to 46.1)                            |
| Maternal obstructed labour and uterine rupture                          | 2.3<br>(1.7 to 3.1)                           | 11.9<br>(8.1 to 16.4)                             | 0.7<br>(0.4 to 1.1)                     | -18.4<br>(-36.2 to 2.1)                           | -39.4<br>(-51.1 to -24.7)                           |
| Maternal abortion, miscarriage, and ectopic pregnancy                   | 1.4<br>(0.8 to 2.3)                           | 176.3<br>(106.0 to 253.6)                         | 0.2<br>(0.1 to 0.3)                     | 24.9<br>(-29.0 to 123.3)                          | -3.0<br>(-45.7 to 73.8)                             |
| Other maternal disorders                                                | --                                            | --                                                | 0.3<br>(0.2 to 0.4)                     | -12.0<br>(-28.5 to 8.5)                           | -33.1<br>(-44.7 to -18.4)                           |
| <b>Neonatal disorders</b>                                               | <b>92.7</b><br><b>(70.9 to 116.7)</b>         | --                                                | <b>16.1</b><br><b>(7.7 to 27.8)</b>     | <b>64.1</b><br><b>(23.2 to 105.1)</b>             | <b>38.7</b><br><b>(2.4 to 74.8)</b>                 |
| Neonatal preterm birth complications                                    | 49.3<br>(38.0 to 65.5)                        | --                                                | 3.9<br>(2.5 to 6.1)                     | 20.2<br>(-6.5 to 53.6)                            | -0.1<br>(-21.9 to 27.0)                             |
| Neonatal encephalopathy due to birth asphyxia and trauma                | 39.8<br>(16.8 to 66.7)                        | --                                                | 6.0<br>(0.6 to 13.9)                    | 121.0<br>(-0.9 to 341.4)                          | 85.5<br>(-17.5 to 278.4)                            |
| Neonatal sepsis and other neonatal infections                           | 11.3<br>(3.5 to 26.8)                         | --                                                | 4.7<br>(1.1 to 12.0)                    | 76.9<br>(25.1 to 221.5)                           | 50.0<br>(6.1 to 216.6)                              |
| Hemolytic disease and other neonatal jaundice                           | 1.4<br>(1.2 to 1.6)                           | --                                                | 0.5<br>(0.3 to 0.6)                     | 18.0<br>(3.8 to 33.9)                             | -2.3<br>(-12.0 to 8.9)                              |
| Other neonatal disorders                                                | --                                            | --                                                | 1.1<br>(0.6 to 1.7)                     | 33.1<br>(4.4 to 64.1)                             | 19.4<br>(-6.3 to 47.9)                              |
| <b>Nutritional deficiencies</b>                                         | <b>2,509.5</b><br><b>(2,227.1 to 2,808.9)</b> | <b>1,882.0†</b><br><b>(1,146.3 to 2,910.6)</b>    | <b>48.8</b><br><b>(30.7 to 72.5)</b>    | <b>7.9</b><br><b>(-7.5 to 23.7)</b>               | <b>-13.7</b><br><b>(-23.1 to -3.8)</b>              |
| Protein-energy malnutrition                                             | 88.6<br>(60.6 to 124.8)                       | 63.0<br>(44.1 to 88.1)                            | 3.5<br>(2.0 to 5.5)                     | -6.5<br>(-31.4 to 26.6)                           | -16.7<br>(-39.1 to 12.8)                            |
| Iodine deficiency                                                       | 227.7<br>(195.9 to 263.4)                     | 8.6<br>(7.4 to 9.9)                               | 6.3<br>(4.2 to 9.0)                     | 16.4<br>(7.4 to 27.3)                             | -6.2<br>(-13.1 to 2.6)                              |
| Vitamin A deficiency                                                    | 1,512.4<br>(1,045.9 to 2,035.9)               | 1,810.4<br>(1,074.1 to 2,834.3)                   | 0.3<br>(0.2 to 0.5)                     | 11.0<br>(-14.3 to 45.7)                           | -8.8<br>(-28.9 to 16.2)                             |
| Iron-deficiency anaemia                                                 | 1,233.0<br>(1,053.3 to 1,414.1)               | --                                                | 38.6<br>(23.7 to 58.8)                  | 8.2<br>(-10.3 to 28.8)                            | -15.0<br>(-27.1 to -2.6)                            |
| Other nutritional deficiencies                                          | --                                            | --                                                | 0.1<br>(0.1 to 0.2)                     | -6.2<br>(-32.3 to 29.2)                           | -16.9<br>(-39.8 to 14.8)                            |
| <b>Other communicable, maternal, neonatal, and nutritional diseases</b> | <b>1,561.9</b><br><b>(1,474.4 to 1,657.5)</b> | <b>1,175.4</b><br><b>(950.3 to 1,463.7)</b>       | <b>6.1</b><br><b>(3.8 to 9.7)</b>       | <b>26.7</b><br><b>(15.6 to 37.8)</b>              | <b>-0.8</b><br><b>(-7.7 to 5.4)</b>                 |
| Sexually transmitted diseases excluding HIV                             | 1,197.4<br>(1,107.6 to 1,294.3)               | 897.1<br>(688.7 to 1,174.4)                       | 4.0<br>(2.3 to 6.8)                     | 34.4<br>(22.6 to 47.4)                            | 1.9<br>(-5.1 to 9.3)                                |
| Syphilis                                                                | 67.5<br>(54.0 to 82.8)                        | 47.7<br>(36.8 to 59.9)                            | 0.2<br>(0.1 to 0.2)                     | 36.0<br>(18.0 to 59.4)                            | 1.0<br>(-13.4 to 19.0)                              |
| Chlamydial infection                                                    | 83.7<br>(64.2 to 108.0)                       | 66.5<br>(52.0 to 85.8)                            | 0.5<br>(0.3 to 0.9)                     | 35.9<br>(18.0 to 55.7)                            | 3.1<br>(-9.9 to 16.8)                               |
| Gonococcal infection                                                    | 119.9<br>(66.2 to 194.2)                      | 408.6<br>(214.1 to 689.3)                         | 1.4<br>(0.6 to 2.9)                     | 34.0<br>(13.9 to 57.7)                            | 1.7<br>(-10.9 to 16.0)                              |
| Trichomoniasis                                                          | 243.7<br>(197.6 to 295.7)                     | 230.5<br>(181.5 to 289.9)                         | 0.3<br>(0.1 to 0.7)                     | 22.7<br>(13.7 to 32.4)                            | -0.8<br>(-6.8 to 4.7)                               |
| Genital herpes                                                          | 840.6<br>(716.6 to 982.0)                     | 88.3<br>(73.3 to 106.7)                           | 0.2<br>(0.1 to 0.5)                     | 28.5<br>(15.2 to 40.9)                            | 0.0<br>(-6.8 to 8.1)                                |
| Other sexually transmitted diseases                                     | 57.7<br>(48.8 to 64.2)                        | 55.4<br>(45.8 to 67.7)                            | 1.4<br>(0.8 to 2.2)                     | 38.2<br>(24.5 to 54.0)                            | 3.1<br>(-5.4 to 12.6)                               |
| Hepatitis                                                               | 445.1<br>(365.1 to 537.0)                     | 278.3<br>(186.3 to 398.9)                         | 0.3<br>(0.2 to 0.5)                     | 0.7<br>(-24.5 to 35.0)                            | -12.0<br>(-27.8 to 7.5)                             |
| Acute hepatitis A                                                       | 6.3<br>(1.1 to 14.5)                          | 82.4<br>(14.0 to 188.0)                           | 0.1<br>( $< 0.05$ to 0.1)               | -3.9<br>(-74.5 to 300.4)                          | -11.9<br>(-67.8 to 143.8)                           |
| Hepatitis B                                                             | 357.8<br>(278.5 to 447.8)                     | 174.1<br>(127.8 to 237.8)                         | 0.2<br>(0.1 to 0.4)                     | 1.9<br>(-20.1 to 26.9)                            | -12.4<br>(-28.9 to 6.0)                             |
| Hepatitis C                                                             | 80.0<br>(70.5 to 90.3)                        | 8.3<br>(7.6 to 9.1)                               | $< 0.05$<br>( $< 0.05$ to $< 0.05$ )    | 15.1<br>(0.9 to 32.7)                             | -2.3<br>(-14.9 to 13.6)                             |
| Acute hepatitis E                                                       | 1.0<br>(0.8 to 1.4)                           | 13.6<br>(10.7 to 18.4)                            | $< 0.05$<br>( $< 0.05$ to $< 0.05$ )    | -0.9<br>(-31.9 to 42.9)                           | -10.2<br>(-30.1 to 14.9)                            |
| Other infectious diseases                                               | 53.7<br>(44.8 to 62.8)                        | $< 0.05$<br>( $< 0.05$ to $< 0.05$ )              | 1.8<br>(1.1 to 2.8)                     | 17.4<br>(-6.4 to 43.3)                            | -6.1<br>(-22.7 to 12.6)                             |
| <b>Non-communicable diseases</b>                                        | <b>4,740.5</b><br><b>(4,679.1 to 4,804.8)</b> | <b>14,307.4†</b><br><b>(13,046.6 to 15,540.1)</b> | <b>328.0</b><br><b>(242.5 to 431.9)</b> | <b>27.2</b><br><b>(22.0 to 32.7)</b>              | <b>-0.0</b><br><b>(-3.0 to 2.9)</b>                 |
| <b>Neoplasms</b>                                                        | <b>7.2</b><br><b>(6.2 to 8.1)</b>             | <b>3.4</b><br><b>(2.8 to 3.7)</b>                 | <b>1.1</b><br><b>(0.8 to 1.5)</b>       | <b>36.7</b><br><b>(27.7 to 47.2)</b>              | <b>3.0</b><br><b>(-3.3 to 9.7)</b>                  |
| Lip and oral cavity cancer                                              | 0.2<br>(0.2 to 0.3)                           | 0.1<br>(0.1 to 0.1)                               | $< 0.05$<br>( $< 0.05$ to $< 0.05$ )    | 38.8<br>(21.0 to 61.3)                            | 4.1<br>(-9.2 to 20.0)                               |
| Nasopharynx cancer                                                      | 0.1<br>(0.1 to 0.1)                           | $< 0.05$<br>( $< 0.05$ to $< 0.05$ )              | $< 0.05$<br>( $< 0.05$ to $< 0.05$ )    | 25.4<br>(7.9 to 47.8)                             | -3.8<br>(-17.0 to 11.5)                             |
| Other pharynx cancer                                                    | $< 0.05$<br>( $< 0.05$ to 0.1)                | $< 0.05$<br>( $< 0.05$ to $< 0.05$ )              | $< 0.05$<br>( $< 0.05$ to $< 0.05$ )    | 25.4<br>(12.7 to 39.4)                            | -4.2<br>(-14.1 to 6.1)                              |
| Oesophageal cancer                                                      | 0.1<br>(0.1 to 0.1)                           | 0.1<br>(0.1 to 0.1)                               | $< 0.05$<br>( $< 0.05$ to $< 0.05$ )    | 18.4<br>(-1.8 to 42.3)                            | -10.0<br>(-25.1 to 8.1)                             |
| Stomach cancer                                                          | 0.2<br>(0.2 to 0.2)                           | 0.1<br>(0.1 to 0.1)                               | $< 0.05$<br>( $< 0.05$ to $< 0.05$ )    | 21.3<br>(8.8 to 35.8)                             | -8.6<br>(-19.2 to 3.8)                              |
| Colon and rectum cancer                                                 | 0.5<br>(0.4 to 0.5)                           | 0.2<br>(0.1 to 0.2)                               | 0.1<br>( $< 0.05$ to 0.1)               | 40.5<br>(18.8 to 64.6)                            | 5.6<br>(-12.0 to 25.9)                              |
| Liver cancer                                                            | 0.1<br>( $< 0.05$ to 0.1)                     | 0.1<br>(0.1 to 0.2)                               | $< 0.05$<br>( $< 0.05$ to $< 0.05$ )    | 30.8<br>(16.2 to 48.0)                            | -2.3<br>(-13.2 to 9.9)                              |
| Liver cancer due to hepatitis B                                         | $< 0.05$<br>( $< 0.05$ to 0.1)                | $< 0.05$<br>( $< 0.05$ to 0.1)                    | $< 0.05$<br>( $< 0.05$ to $< 0.05$ )    | 30.4<br>(13.1 to 49.4)                            | -2.6<br>(-14.8 to 10.5)                             |

| Cause                                              | Prevalence in thousands (95% UI)        | Incidence in thousands (95% UI)       | YLDs in thousands (95% UI)           |                                                   |                                                     |
|----------------------------------------------------|-----------------------------------------|---------------------------------------|--------------------------------------|---------------------------------------------------|-----------------------------------------------------|
|                                                    | 2016 counts                             | 2016 counts                           | 2016 counts                          | Percentage change in counts between 2006 and 2016 | Percentage change in age-standardised rates between |
| Liver cancer due to hepatitis C                    | < 0.05<br>(< 0.05 to < 0.05)            | < 0.05<br>(< 0.05 to 0.1)             | < 0.05<br>(< 0.05 to < 0.05)         | 31.3<br>(13.6 to 50.5)                            | -2.5<br>(-14.4 to 12.6)                             |
| Liver cancer due to alcohol use                    | < 0.05<br>(< 0.05 to < 0.05)            | < 0.05<br>(< 0.05 to < 0.05)          | < 0.05<br>(< 0.05 to < 0.05)         | 34.7<br>(17.9 to 54.5)                            | -0.3<br>(-13.1 to 14.3)                             |
| Liver cancer due to other causes                   | < 0.05<br>(< 0.05 to < 0.05)            | < 0.05<br>(< 0.05 to < 0.05)          | < 0.05<br>(< 0.05 to < 0.05)         | 29.1<br>(13.0 to 46.3)                            | -2.4<br>(-14.2 to 10.0)                             |
| Gallbladder and biliary tract cancer               | < 0.05<br>(< 0.05 to < 0.05)            | < 0.05<br>(< 0.05 to < 0.05)          | < 0.05<br>(< 0.05 to < 0.05)         | 26.6<br>(14.9 to 39.6)                            | -6.1<br>(-14.0 to 2.9)                              |
| Pancreatic cancer                                  | < 0.05<br>(< 0.05 to 0.1)               | 0.1<br>(0.1 to 0.1)                   | < 0.05<br>(< 0.05 to < 0.05)         | 40.3<br>(25.7 to 56.1)                            | 2.5<br>(-8.0 to 13.8)                               |
| Larynx cancer                                      | 0.1<br>(0.1 to 0.1)                     | < 0.05<br>(< 0.05 to < 0.05)          | < 0.05<br>(< 0.05 to < 0.05)         | 30.6<br>(12.5 to 50.3)                            | -0.3<br>(-12.9 to 14.2)                             |
| Tracheal, bronchus, and lung cancer                | 0.1<br>(0.1 to 0.1)                     | 0.1<br>(0.1 to 0.1)                   | < 0.05<br>(< 0.05 to < 0.05)         | 41.0<br>(19.8 to 66.2)                            | 3.4<br>(-14.0 to 24.0)                              |
| Malignant skin melanoma                            | 0.1<br>(0.1 to 0.1)                     | < 0.05<br>(< 0.05 to < 0.05)          | < 0.05<br>(< 0.05 to < 0.05)         | 39.4<br>(15.7 to 67.8)                            | 4.4<br>(-12.1 to 24.7)                              |
| Non-melanoma skin cancer                           | < 0.05<br>(< 0.05 to < 0.05)            | 0.1<br>(0.1 to 0.2)                   | < 0.05<br>(< 0.05 to < 0.05)         | 40.6<br>(15.0 to 73.1)                            | 0.9<br>(-22.9 to 26.1)                              |
| Non-melanoma skin cancer (squamous-cell carcinoma) | < 0.05<br>(< 0.05 to < 0.05)            | < 0.05<br>(< 0.05 to < 0.05)          | < 0.05<br>(< 0.05 to < 0.05)         | 39.9<br>(7.9 to 80.0)                             | -0.3<br>(-27.6 to 29.2)                             |
| Non-melanoma skin cancer (basal-cell carcinoma)    | < 0.05<br>(< 0.05 to < 0.05)            | 0.1<br>(0.1 to 0.2)                   | < 0.05<br>(< 0.05 to < 0.05)         | 43.4<br>(29.6 to 61.7)                            | 8.3<br>(-1.8 to 23.0)                               |
| Breast cancer                                      | 1.2<br>(0.9 to 1.6)                     | 0.3<br>(0.2 to 0.4)                   | 0.1<br>(0.1 to 0.2)                  | 47.8<br>(13.4 to 91.4)                            | 8.7<br>(-15.7 to 39.0)                              |
| Cervical cancer                                    | 2.5<br>(1.5 to 3.3)                     | 0.7<br>(0.4 to 0.9)                   | 0.2<br>(0.1 to 0.4)                  | 31.2<br>(5.2 to 64.4)                             | -2.8<br>(-21.9 to 19.2)                             |
| Uterine cancer                                     | 0.2<br>(0.1 to 0.2)                     | 0.1<br>(< 0.05 to 0.1)                | < 0.05<br>(< 0.05 to < 0.05)         | 43.1<br>(6.0 to 89.8)                             | 7.7<br>(-19.6 to 39.6)                              |
| Ovarian cancer                                     | 0.3<br>(0.2 to 0.4)                     | 0.1<br>(0.1 to 0.1)                   | < 0.05<br>(< 0.05 to 0.1)            | 41.4<br>(8.3 to 86.1)                             | 5.9<br>(-21.1 to 43.2)                              |
| Prostate cancer                                    | 0.8<br>(0.3 to 1.2)                     | 0.3<br>(0.1 to 0.4)                   | 0.1<br>(< 0.05 to 0.2)               | 62.5<br>(28.4 to 102.2)                           | 15.7<br>(-5.8 to 38.9)                              |
| Testicular cancer                                  | < 0.05<br>(< 0.05 to < 0.05)            | < 0.05<br>(< 0.05 to < 0.05)          | < 0.05<br>(< 0.05 to < 0.05)         | 28.1<br>(2.4 to 61.5)                             | 0.3<br>(-19.8 to 27.2)                              |
| Kidney cancer                                      | 0.2<br>(0.1 to 0.3)                     | < 0.05<br>(< 0.05 to 0.1)             | < 0.05<br>(< 0.05 to < 0.05)         | 28.9<br>(-11.4 to 79.6)                           | 5.3<br>(-13.6 to 25.9)                              |
| Bladder cancer                                     | 0.1<br>(0.1 to 0.2)                     | < 0.05<br>(< 0.05 to 0.1)             | < 0.05<br>(< 0.05 to < 0.05)         | 43.7<br>(26.4 to 62.5)                            | 5.3<br>(-7.0 to 19.7)                               |
| Brain and nervous system cancer                    | 0.1<br>(0.1 to 0.2)                     | 0.1<br>(0.1 to 0.1)                   | < 0.05<br>(< 0.05 to < 0.05)         | 37.4<br>(21.4 to 56.3)                            | 8.7<br>(-5.9 to 27.3)                               |
| Thyroid cancer                                     | 0.2<br>(0.1 to 0.2)                     | < 0.05<br>(< 0.05 to 0.1)             | < 0.05<br>(< 0.05 to < 0.05)         | 39.1<br>(14.1 to 73.0)                            | 2.2<br>(-15.3 to 25.4)                              |
| Mesothelioma                                       | < 0.05<br>(< 0.05 to < 0.05)            | < 0.05<br>(< 0.05 to < 0.05)          | < 0.05<br>(< 0.05 to < 0.05)         | 34.4<br>(20.5 to 51.0)                            | 3.3<br>(-7.8 to 16.0)                               |
| Hodgkin lymphoma                                   | 0.1<br>(< 0.05 to 0.2)                  | < 0.05<br>(< 0.05 to 0.1)             | < 0.05<br>(< 0.05 to < 0.05)         | 28.3<br>(12.2 to 52.1)                            | 0.0<br>(-10.0 to 13.8)                              |
| Non-Hodgkin's lymphoma                             | 0.7<br>(0.4 to 0.8)                     | 0.2<br>(0.1 to 0.3)                   | 0.1<br>(< 0.05 to 0.1)               | 32.3<br>(11.1 to 58.5)                            | 2.3<br>(-9.0 to 15.7)                               |
| Multiple myeloma                                   | 0.1<br>(< 0.05 to 0.1)                  | < 0.05<br>(< 0.05 to < 0.05)          | < 0.05<br>(< 0.05 to < 0.05)         | 40.0<br>(23.9 to 61.9)                            | 5.0<br>(-6.5 to 21.1)                               |
| Leukaemia                                          | 0.3<br>(0.2 to 0.3)                     | 0.1<br>(0.1 to 0.1)                   | < 0.05<br>(< 0.05 to < 0.05)         | 23.9<br>(12.3 to 35.2)                            | -2.6<br>(-10.6 to 6.0)                              |
| Acute lymphoid leukaemia                           | 0.1<br>(0.1 to 0.1)                     | < 0.05<br>(< 0.05 to < 0.05)          | < 0.05<br>(< 0.05 to < 0.05)         | 20.8<br>(3.6 to 43.4)                             | -2.0<br>(-12.8 to 10.1)                             |
| Chronic lymphoid leukaemia                         | < 0.05<br>(< 0.05 to < 0.05)            | < 0.05<br>(< 0.05 to < 0.05)          | < 0.05<br>(< 0.05 to < 0.05)         | 39.5<br>(19.2 to 63.1)                            | 0.2<br>(-15.1 to 17.4)                              |
| Acute myeloid leukaemia                            | < 0.05<br>(< 0.05 to < 0.05)            | < 0.05<br>(< 0.05 to < 0.05)          | < 0.05<br>(< 0.05 to < 0.05)         | 28.9<br>(11.1 to 47.5)                            | 3.1<br>(-9.4 to 15.9)                               |
| Chronic myeloid leukaemia                          | < 0.05<br>(< 0.05 to < 0.05)            | < 0.05<br>(< 0.05 to < 0.05)          | < 0.05<br>(< 0.05 to < 0.05)         | 27.1<br>(7.4 to 50.2)                             | -3.3<br>(-17.0 to 12.6)                             |
| Other leukaemia                                    | 0.1<br>(0.1 to 0.1)                     | < 0.05<br>(< 0.05 to < 0.05)          | < 0.05<br>(< 0.05 to < 0.05)         | 18.8<br>(4.4 to 36.2)                             | -5.3<br>(-16.6 to 7.1)                              |
| Other neoplasms                                    | 1.0<br>(0.8 to 1.1)                     | 0.3<br>(0.3 to 0.4)                   | 0.1<br>(0.1 to 0.1)                  | 29.8<br>(14.3 to 50.0)                            | -0.8<br>(-12.8 to 14.6)                             |
| <b>Cardiovascular diseases</b>                     | <b>255.1</b><br><b>(235.7 to 274.1)</b> | <b>17.8†</b><br><b>(17.0 to 18.7)</b> | <b>13.7</b><br><b>(9.6 to 18.9)</b>  | <b>37.6</b><br><b>(30.3 to 48.1)</b>              | <b>3.5</b><br><b>(-0.9 to 8.5)</b>                  |
| Rheumatic heart disease                            | 111.3<br>(98.6 to 125.2)                | 4.8<br>(4.2 to 5.4)                   | 5.3<br>(3.3 to 7.8)                  | 47.8<br>(34.6 to 80.2)                            | 15.1<br>(4.8 to 37.4)                               |
| Ischaemic heart disease                            | 37.6<br>(35.0 to 40.3)                  | 5.4<br>(5.0 to 5.8)                   | 1.8<br>(1.2 to 2.5)                  | 34.2<br>(26.5 to 42.8)                            | -0.6<br>(-5.2 to 4.2)                               |
| Cerebrovascular disease                            | 11.8<br>(10.9 to 12.6)                  | 2.4†<br>(2.1 to 2.6)                  | 1.7<br>(1.2 to 2.2)                  | 33.0<br>(22.1 to 44.1)                            | -2.9<br>(-10.8 to 5.6)                              |
| Ischaemic stroke                                   | 10.4<br>(9.3 to 11.5)                   | 1.5†<br>(1.3 to 1.7)                  | 1.4<br>(1.0 to 1.8)                  | 35.7<br>(22.8 to 49.6)                            | -1.5<br>(-10.9 to 8.6)                              |
| Hemorrhagic stroke                                 | 2.1<br>(1.9 to 2.3)                     | 0.8†<br>(0.8 to 0.9)                  | 0.3<br>(0.2 to 0.4)                  | 21.3<br>(5.5 to 39.2)                             | -9.6<br>(-21.1 to 3.7)                              |
| Hypertensive heart disease                         | 3.1<br>(2.4 to 3.8)                     | --                                    | 0.2<br>(0.2 to 0.4)                  | 38.0<br>(23.0 to 56.5)                            | -1.6<br>(-10.9 to 8.9)                              |
| Cardiomyopathy and myocarditis                     | 2.2<br>(1.7 to 2.6)                     | 1.1†<br>(0.9 to 1.2)                  | 0.2<br>(0.1 to 0.3)                  | 30.1<br>(16.1 to 45.8)                            | 0.4<br>(-12.5 to 15.6)                              |
| Myocarditis                                        | 0.6<br>(0.5 to 0.7)                     | 1.1<br>(0.9 to 1.2)                   | < 0.05<br>(< 0.05 to 0.1)            | 27.4<br>(19.6 to 36.0)                            | 0.4<br>(-7.1 to 9.1)                                |
| Alcoholic cardiomyopathy                           | 0.2<br>(0.1 to 0.3)                     | --                                    | < 0.05<br>(< 0.05 to < 0.05)         | 33.3<br>(1.6 to 72.3)                             | 1.5<br>(-22.9 to 31.3)                              |
| Other cardiomyopathy                               | 1.8<br>(1.3 to 2.3)                     | --                                    | 0.1<br>(0.1 to 0.2)                  | 30.6<br>(12.1 to 51.2)                            | 0.3<br>(-14.3 to 18.5)                              |
| Atrial fibrillation and flutter                    | 7.3<br>(6.4 to 8.4)                     | 0.7<br>(0.6 to 0.8)                   | 0.6<br>(0.4 to 0.8)                  | 42.8<br>(29.9 to 56.3)                            | 0.6<br>(-5.8 to 7.6)                                |
| Peripheral vascular disease                        | 28.1<br>(24.1 to 32.8)                  | 2.9<br>(2.5 to 3.3)                   | 0.1<br>(0.1 to 0.3)                  | 44.4<br>(31.9 to 58.2)                            | 1.6<br>(-6.1 to 9.6)                                |
| Endocarditis                                       | 0.2<br>(0.1 to 0.3)                     | 0.7<br>(0.6 to 0.8)                   | < 0.05<br>(< 0.05 to < 0.05)         | 28.7<br>(16.6 to 42.0)                            | 1.7<br>(-12.6 to 17.8)                              |
| Other cardiovascular and circulatory diseases      | 69.8<br>(47.9 to 95.4)                  | --                                    | 3.8<br>(2.2 to 5.8)                  | 28.1<br>(12.4 to 47.3)                            | 3.4<br>(-8.8 to 17.4)                               |
| <b>Chronic respiratory diseases</b>                | <b>337.1</b><br><b>(315.7 to 360.2)</b> | <b>69.4†</b><br><b>(63.4 to 75.8)</b> | <b>15.5</b><br><b>(11.2 to 21.0)</b> | <b>28.4</b><br><b>(22.1 to 35.2)</b>              | <b>0.4</b><br><b>(-3.4 to 4.7)</b>                  |
| Chronic obstructive pulmonary disease              | 43.7<br>(41.8 to 45.8)                  | 3.2<br>(3.1 to 3.4)                   | 3.4<br>(2.9 to 3.8)                  | 29.3<br>(19.7 to 40.0)                            | -1.3<br>(-7.6 to 5.7)                               |
| Pneumoconiosis                                     | 0.1<br>(< 0.05 to 0.1)                  | < 0.05<br>(< 0.05 to < 0.05)          | < 0.05<br>(< 0.05 to < 0.05)         | 32.5<br>(24.4 to 40.7)                            | 0.6<br>(-5.4 to 6.3)                                |
| Silicosis                                          | < 0.05<br>(< 0.05 to < 0.05)            | < 0.05<br>(< 0.05 to < 0.05)          | < 0.05<br>(< 0.05 to < 0.05)         | 34.8<br>(21.4 to 47.5)                            | -0.5<br>(-7.4 to 6.7)                               |



| Cause                                                          | Prevalence in thousands (95% UI)        | Incidence in thousands (95% UI)    | YLDs in thousands (95% UI)        |                                                                     |                                                                      |
|----------------------------------------------------------------|-----------------------------------------|------------------------------------|-----------------------------------|---------------------------------------------------------------------|----------------------------------------------------------------------|
|                                                                | 2016 counts<br>(< 0.05 to < 0.05)       | 2016 counts<br>(< 0.05 to < 0.05)  | 2016 counts<br>(< 0.05 to < 0.05) | Percentage change in counts between 2006 and 2016<br>(23.4 to 47.4) | Percentage change in age-standardised rates between<br>(-4.6 to 7.9) |
| Asbestosis                                                     | < 0.05<br>(< 0.05 to < 0.05)            | < 0.05<br>(< 0.05 to < 0.05)       | < 0.05<br>(< 0.05 to < 0.05)      | 34.6<br>(23.4 to 47.4)                                              | 1.1<br>(-4.6 to 7.9)                                                 |
| Coal workers pneumoconiosis                                    | --                                      | --                                 | --                                | --                                                                  | --                                                                   |
| Other pneumoconiosis                                           | < 0.05<br>(< 0.05 to < 0.05)            | < 0.05<br>(< 0.05 to < 0.05)       | < 0.05<br>(< 0.05 to < 0.05)      | 30.6<br>(19.9 to 42.4)                                              | 0.2<br>(-8.6 to 9.8)                                                 |
| Asthma                                                         | 292.9<br>(266.1 to 322.5)               | 66.1<br>(60.2 to 72.5)             | 11.6<br>(7.7 to 16.8)             | 26.9<br>(19.1 to 34.7)                                              | 0.7<br>(-4.3 to 6.0)                                                 |
| Interstitial lung disease and pulmonary sarcoidosis            | 0.4<br>(0.3 to 0.4)                     | < 0.05<br>(< 0.05 to < 0.05)       | < 0.05<br>(< 0.05 to 0.1)         | 29.9<br>(26.1 to 33.7)                                              | -1.9<br>(-6.6 to 3.0)                                                |
| Other chronic respiratory diseases                             | --                                      | --                                 | 0.5<br>(0.4 to 0.6)               | 71.3<br>(31.3 to 120.1)                                             | 32.0<br>(8.9 to 59.6)                                                |
| <b>Cirrhosis and other chronic liver diseases</b>              | <b>10.6<br/>(10.1 to 11.1)</b>          | <b>1.0<br/>(1.0 to 1.1)</b>        | <b>0.9<br/>(0.6 to 1.2)</b>       | <b>26.0<br/>(11.2 to 43.7)</b>                                      | <b>-0.5<br/>(-8.4 to 9.0)</b>                                        |
| Cirrhosis and other chronic liver diseases due to hepatitis B  | 2.7<br>(2.2 to 3.3)                     | 0.3<br>(0.2 to 0.3)                | 0.2<br>(0.1 to 0.3)               | 31.6<br>(10.2 to 58.5)                                              | -0.1<br>(-14.0 to 15.9)                                              |
| Cirrhosis and other chronic liver diseases due to hepatitis C  | 1.9<br>(1.2 to 2.7)                     | 0.2<br>(0.1 to 0.3)                | 0.1<br>(0.1 to 0.2)               | 29.5<br>(2.1 to 64.2)                                               | -1.3<br>(-18.2 to 19.3)                                              |
| Cirrhosis and other chronic liver diseases due to alcohol use  | 1.9<br>(1.6 to 2.2)                     | 0.2<br>(0.2 to 0.3)                | 0.1<br>(0.1 to 0.2)               | 32.4<br>(7.8 to 60.2)                                               | -0.6<br>(-16.1 to 17.4)                                              |
| Cirrhosis and other chronic liver diseases due to other causes | 4.0<br>(3.7 to 4.4)                     | 0.3<br>(0.3 to 0.3)                | 0.5<br>(0.3 to 0.7)               | 21.7<br>(-1.2 to 51.0)                                              | -0.1<br>(-16.4 to 18.9)                                              |
| <b>Digestive diseases</b>                                      | <b>82.8<br/>(76.3 to 89.9)</b>          | <b>72.8†<br/>(69.3 to 76.6)</b>    | <b>2.8<br/>(2.0 to 3.9)</b>       | <b>37.0<br/>(25.8 to 50.3)</b>                                      | <b>7.6<br/>(0.2 to 14.7)</b>                                         |
| Peptic ulcer disease                                           | 11.6<br>(10.4 to 12.9)                  | 6.2<br>(5.5 to 6.9)                | 0.3<br>(0.2 to 0.4)               | 55.7<br>(32.5 to 83.4)                                              | 16.6<br>(1.9 to 33.0)                                                |
| Gastritis and duodenitis                                       | 28.1<br>(24.4 to 31.9)                  | 23.4<br>(21.0 to 26.1)             | 0.4<br>(0.2 to 0.6)               | 50.6<br>(25.6 to 78.3)                                              | 15.8<br>(-0.1 to 31.7)                                               |
| Appendicitis                                                   | 0.7<br>(0.6 to 0.8)                     | 18.4<br>(16.8 to 20.0)             | 0.2<br>(0.1 to 0.3)               | 20.2<br>(-12.7 to 71.4)                                             | -2.6<br>(-23.3 to 26.4)                                              |
| Paralytic ileus and intestinal obstruction                     | 0.1<br>(0.1 to 0.1)                     | 3.4<br>(3.1 to 3.8)                | < 0.05<br>(< 0.05 to 0.1)         | 26.4<br>(19.1 to 33.6)                                              | -1.4<br>(-13.5 to 12.2)                                              |
| Inguinal, femoral, and abdominal hernia                        | 41.5<br>(34.6 to 49.5)                  | 6.1<br>(5.4 to 7.0)                | 1.6<br>(1.0 to 2.2)               | 34.6<br>(20.4 to 51.7)                                              | 5.2<br>(-4.1 to 14.6)                                                |
| Inflammatory bowel disease                                     | 0.2<br>(0.2 to 0.2)                     | 1.8<br>(1.8 to 1.9)                | < 0.05<br>(< 0.05 to < 0.05)      | 13.6<br>(9.4 to 17.7)                                               | -13.7<br>(-16.8 to -10.6)                                            |
| Vascular intestinal disorders                                  | < 0.05<br>(< 0.05 to < 0.05)            | 0.2<br>(0.1 to 0.2)                | < 0.05<br>(< 0.05 to < 0.05)      | 29.5<br>(23.0 to 37.0)                                              | 1.5<br>(-2.3 to 5.4)                                                 |
| Gallbladder and biliary diseases                               | 2.9<br>(2.5 to 3.2)                     | 12.7<br>(11.0 to 14.5)             | 0.1<br>(< 0.05 to 0.1)            | 32.8<br>(13.0 to 56.7)                                              | -0.6<br>(-17.9 to 23.4)                                              |
| Pancreatitis                                                   | 0.1<br>(0.1 to 0.1)                     | 0.6<br>(0.5 to 0.7)                | < 0.05<br>(< 0.05 to < 0.05)      | 29.5<br>(24.3 to 35.2)                                              | -0.5<br>(-3.8 to 3.1)                                                |
| Other digestive diseases                                       | --                                      | --                                 | 0.2<br>(0.2 to 0.3)               | 39.3<br>(24.8 to 56.5)                                              | 11.7<br>(4.4 to 19.8)                                                |
| <b>Neurological disorders</b>                                  | <b>1,495.9<br/>(1,415.8 to 1,573.2)</b> | <b>707.2<br/>(602.6 to 823.4)</b>  | <b>37.1<br/>(22.9 to 54.4)</b>    | <b>28.8<br/>(-9.4 to 81.5)</b>                                      | <b>1.2<br/>(-23.3 to 32.1)</b>                                       |
| Alzheimer's disease and other dementias                        | 5.5<br>(4.6 to 6.5)                     | 1.0<br>(0.8 to 1.2)                | 0.8<br>(0.5 to 1.0)               | 51.8<br>(42.7 to 61.9)                                              | -1.5<br>(-6.3 to 3.6)                                                |
| Parkinson's disease                                            | 0.5<br>(0.4 to 0.7)                     | 0.1<br>(0.1 to 0.1)                | 0.1<br>(< 0.05 to 0.1)            | 56.0<br>(31.7 to 87.0)                                              | 7.9<br>(-6.4 to 24.3)                                                |
| Epilepsy                                                       | 20.9<br>(4.8 to 38.0)                   | 3.0<br>(0.7 to 5.4)                | 8.6<br>(2.0 to 18.2)              | 29.2<br>(-74.0 to 535.7)                                            | 3.1<br>(-79.1 to 402.3)                                              |
| Multiple sclerosis                                             | 0.2<br>(0.2 to 0.3)                     | < 0.05<br>(< 0.05 to < 0.05)       | 0.1<br>(< 0.05 to 0.1)            | 44.6<br>(39.3 to 49.6)                                              | 8.6<br>(4.9 to 12.3)                                                 |
| Motor neuron disease                                           | 0.1<br>(< 0.05 to 0.1)                  | < 0.05<br>(< 0.05 to < 0.05)       | < 0.05<br>(< 0.05 to < 0.05)      | 27.7<br>(21.5 to 34.0)                                              | 0.8<br>(-2.6 to 4.0)                                                 |
| Migraine                                                       | 508.6<br>(474.9 to 541.5)               | 66.8<br>(62.5 to 71.5)             | 21.9<br>(14.1 to 30.9)            | 26.1<br>(20.5 to 32.7)                                              | -0.1<br>(-3.7 to 4.0)                                                |
| Tension-type headache                                          | 1,130.8<br>(1,000.2 to 1,285.3)         | 636.4<br>(531.2 to 753.2)          | 3.7<br>(2.3 to 5.5)               | 26.1<br>(19.1 to 34.0)                                              | -0.7<br>(-5.2 to 4.8)                                                |
| Other neurological disorders                                   | < 0.05<br>(< 0.05 to < 0.05)            | < 0.05<br>(< 0.05 to < 0.05)       | 2.0<br>(0.5 to 4.3)               | 57.5<br>(-66.4 to 632.1)                                            | 25.1<br>(-70.2 to 407.2)                                             |
| <b>Mental and substance use disorders</b>                      | <b>772.0<br/>(729.3 to 813.8)</b>       | <b>284.9†<br/>(262.8 to 309.9)</b> | <b>91.1<br/>(65.9 to 119.2)</b>   | <b>24.9<br/>(21.9 to 27.9)</b>                                      | <b>-0.2<br/>(-2.5 to 2.1)</b>                                        |
| Schizophrenia                                                  | 7.0<br>(6.0 to 7.9)                     | 0.7<br>(0.6 to 0.7)                | 4.5<br>(3.2 to 5.8)               | 32.7<br>(19.0 to 47.7)                                              | -0.6<br>(-9.1 to 9.2)                                                |
| Alcohol use disorders                                          | 69.3<br>(58.4 to 80.5)                  | 36.8<br>(30.8 to 42.8)             | 7.0<br>(4.8 to 9.9)               | 28.1<br>(17.5 to 41.1)                                              | 1.4<br>(-6.1 to 10.3)                                                |
| Drug use disorders                                             | 22.9<br>(20.1 to 25.9)                  | 4.0<br>(3.4 to 4.5)                | 4.8<br>(3.2 to 6.7)               | 33.2<br>(18.6 to 48.2)                                              | 3.4<br>(-6.7 to 14.1)                                                |
| Opioid use disorders                                           | 9.7<br>(7.6 to 12.5)                    | 1.3<br>(1.1 to 1.6)                | 4.1<br>(2.6 to 5.8)               | 35.4<br>(17.8 to 53.9)                                              | 3.8<br>(-7.9 to 16.1)                                                |
| Cocaine use disorders                                          | 0.6<br>(0.5 to 0.8)                     | 0.1<br>(0.1 to 0.1)                | 0.1<br>(0.1 to 0.1)               | 26.4<br>(18.5 to 35.0)                                              | 2.8<br>(-2.5 to 8.7)                                                 |
| Amphetamine use disorders                                      | 0.4<br>(0.2 to 0.5)                     | 0.1<br>(< 0.05 to 0.1)             | < 0.05<br>(< 0.05 to 0.1)         | 20.7<br>(9.7 to 34.0)                                               | 2.8<br>(-5.6 to 12.5)                                                |
| Cannabis use disorders                                         | 11.7<br>(9.3 to 14.6)                   | 2.2<br>(1.7 to 2.7)                | 0.3<br>(0.2 to 0.5)               | 16.8<br>(-5.0 to 44.5)                                              | 0.5<br>(-16.1 to 21.9)                                               |
| Other drug use disorders                                       | 1.5<br>(1.3 to 1.7)                     | 0.3<br>(0.3 to 0.4)                | 0.2<br>(0.2 to 0.4)               | 29.6<br>(9.5 to 52.7)                                               | 1.5<br>(-13.2 to 18.2)                                               |
| Depressive disorders                                           | 158.8<br>(147.4 to 170.4)               | 180.0<br>(159.1 to 202.2)          | 27.6<br>(18.9 to 37.7)            | 24.5<br>(18.3 to 30.8)                                              | -0.9<br>(-5.1 to 3.8)                                                |
| Major depressive disorder                                      | 109.3<br>(95.9 to 123.5)                | 170.6<br>(150.3 to 193.0)          | 22.6<br>(15.3 to 31.0)            | 23.8<br>(16.5 to 31.6)                                              | -1.1<br>(-6.2 to 4.5)                                                |
| Dysthymia                                                      | 51.7<br>(44.5 to 60.0)                  | 9.4<br>(8.2 to 10.9)               | 5.0<br>(3.3 to 7.3)               | 27.9<br>(22.2 to 33.4)                                              | -0.0<br>(-3.5 to 3.3)                                                |
| Bipolar disorder                                               | 27.9<br>(23.6 to 33.1)                  | 3.1<br>(2.6 to 3.8)                | 5.8<br>(3.5 to 8.6)               | 22.3<br>(13.5 to 32.1)                                              | 0.0<br>(-6.0 to 6.3)                                                 |
| Anxiety disorders                                              | 158.1<br>(139.8 to 178.4)               | 28.4<br>(25.4 to 31.9)             | 15.4<br>(10.6 to 21.2)            | 24.5<br>(16.2 to 34.0)                                              | -0.0<br>(-6.0 to 7.3)                                                |
| Eating disorders                                               | 3.8<br>(3.1 to 4.6)                     | 3.2<br>(2.3 to 4.3)                | 0.8<br>(0.5 to 1.1)               | 17.7<br>(-0.6 to 38.8)                                              | -3.4<br>(-17.6 to 12.1)                                              |
| Anorexia nervosa                                               | 1.0<br>(0.8 to 1.4)                     | 0.5<br>(0.4 to 0.7)                | 0.2<br>(0.1 to 0.4)               | 11.9<br>(-17.9 to 54.8)                                             | -3.3<br>(-28.2 to 30.5)                                              |
| Bulimia nervosa                                                | 2.6<br>(1.9 to 3.6)                     | 2.7<br>(1.8 to 3.8)                | 0.6<br>(0.3 to 0.9)               | 20.2<br>(-2.0 to 46.6)                                              | -3.4<br>(-20.0 to 16.4)                                              |
| Autistic spectrum disorders                                    | 45.0<br>(40.0 to 51.0)                  | 0.5<br>(0.4 to 0.8)                | 6.5<br>(4.3 to 9.2)               | 24.1<br>(17.5 to 31.6)                                              | 0.5<br>(-4.4 to 5.8)                                                 |
| Autism                                                         | 12.4<br>(10.7 to 14.5)                  | 0.1<br>(< 0.05 to 0.1)             | 3.2<br>(2.0 to 4.6)               | 23.8<br>(11.9 to 37.2)                                              | 0.3<br>(-8.3 to 9.3)                                                 |
| Asperger syndrome and other autistic spectrum disorders        | 32.5<br>(26.9 to 39.5)                  | 0.5<br>(0.3 to 0.7)                | 3.3<br>(2.1 to 4.8)               | 24.4<br>(17.6 to 31.9)                                              | 0.6<br>(-3.9 to 5.8)                                                 |

| Cause                                                      | Prevalence in thousands (95% UI)              | Incidence in thousands (95% UI)                   | YLDs in thousands (95% UI)            |                                                   |                                                     |
|------------------------------------------------------------|-----------------------------------------------|---------------------------------------------------|---------------------------------------|---------------------------------------------------|-----------------------------------------------------|
|                                                            | 2016 counts                                   | 2016 counts                                       | 2016 counts                           | Percentage change in counts between 2006 and 2016 | Percentage change in age-standardised rates between |
| Attention-deficit/hyperactivity disorder                   | 72.4<br>(64.8 to 81.5)                        | 4.6<br>(4.0 to 5.4)                               | 0.9<br>(0.5 to 1.4)                   | 23.6<br>(14.8 to 32.5)                            | 0.4<br>(-6.1 to 7.2)                                |
| Conduct disorder                                           | 54.2<br>(44.0 to 64.3)                        | 20.0<br>(15.6 to 24.5)                            | 6.6<br>(4.0 to 10.0)                  | 18.7<br>(11.3 to 27.3)                            | 0.2<br>(-6.0 to 7.4)                                |
| Idiopathic developmental intellectual disability           | 149.6<br>(93.5 to 208.7)                      | --                                                | 5.9<br>(2.7 to 10.3)                  | 20.2<br>(10.9 to 28.6)                            | -2.5<br>(-9.7 to 4.1)                               |
| Other mental and substance use disorders                   | 73.2<br>(64.0 to 85.0)                        | 3.7<br>(3.2 to 4.2)                               | 5.5<br>(3.8 to 7.9)                   | 30.2<br>(22.4 to 38.4)                            | 0.3<br>(-4.5 to 5.2)                                |
| <b>Diabetes, urogenital, blood, and endocrine diseases</b> | <b>2,123.7</b><br><b>(1,997.3 to 2,326.0)</b> | <b>485.5†</b><br><b>(453.4 to 519.3)</b>          | <b>27.8</b><br><b>(19.3 to 38.3)</b>  | <b>29.9</b><br><b>(23.8 to 36.5)</b>              | <b>1.1</b><br><b>(-2.6 to 5.1)</b>                  |
| Diabetes mellitus                                          | 92.5<br>(83.0 to 102.8)                       | 6.8<br>(6.1 to 7.5)                               | 8.6<br>(5.9 to 12.0)                  | 35.3<br>(27.3 to 44.9)                            | 1.7<br>(-4.3 to 8.6)                                |
| Acute glomerulonephritis                                   | < 0.05<br>(< 0.05 to 0.1)                     | 0.7<br>(0.6 to 0.8)                               | < 0.05<br>(< 0.05 to < 0.05)          | 25.8<br>(18.8 to 32.0)                            | -0.2<br>(-4.1 to 3.8)                               |
| Chronic kidney disease                                     | 176.4<br>(158.2 to 196.6)                     | 13.8<br>(12.2 to 15.5)                            | 4.9<br>(3.5 to 6.5)                   | 47.7<br>(35.8 to 60.3)                            | 8.7<br>(0.3 to 17.2)                                |
| Chronic kidney disease due to diabetes mellitus            | 52.5<br>(44.1 to 61.9)                        | 3.8<br>(3.1 to 4.6)                               | 1.4<br>(1.0 to 1.9)                   | 49.5<br>(33.8 to 67.0)                            | 8.4<br>(-1.3 to 18.4)                               |
| Chronic kidney disease due to hypertension                 | 36.6<br>(31.0 to 42.1)                        | 3.8<br>(3.1 to 4.4)                               | 0.8<br>(0.5 to 1.0)                   | 50.6<br>(32.7 to 70.3)                            | 7.4<br>(-4.5 to 21.1)                               |
| Chronic kidney disease due to glomerulonephritis           | 36.9<br>(31.7 to 42.6)                        | 2.0<br>(1.6 to 2.5)                               | 1.4<br>(1.0 to 1.9)                   | 46.8<br>(30.4 to 65.8)                            | 9.9<br>(-1.2 to 21.0)                               |
| Chronic kidney disease due to other causes                 | 50.4<br>(42.0 to 58.9)                        | 4.2<br>(3.5 to 4.9)                               | 1.4<br>(1.0 to 2.0)                   | 45.4<br>(29.2 to 63.6)                            | 9.2<br>(-1.4 to 19.5)                               |
| Urinary diseases and male infertility                      | 81.2<br>(70.0 to 93.9)                        | 250.1†<br>(223.3 to 281.2)                        | 1.8<br>(1.2 to 2.6)                   | 27.3<br>(18.1 to 38.2)                            | 2.1<br>(-5.1 to 10.9)                               |
| Interstitial nephritis and urinary tract infections        | 4.2<br>(3.6 to 4.8)                           | 218.8<br>(191.1 to 249.9)                         | 0.1<br>(0.1 to 0.2)                   | 24.2<br>(2.9 to 49.3)                             | 0.9<br>(-13.9 to 18.7)                              |
| Urolithiasis                                               | 1.0<br>(0.9 to 1.1)                           | 26.2<br>(23.1 to 30.2)                            | 0.1<br>(< 0.05 to 0.1)                | 31.7<br>(21.5 to 43.5)                            | 0.7<br>(-9.0 to 10.3)                               |
| Benign prostatic hyperplasia                               | 40.0<br>(33.4 to 47.0)                        | 5.2<br>(4.3 to 6.0)                               | 1.3<br>(0.8 to 1.9)                   | 29.3<br>(17.1 to 43.5)                            | 2.6<br>(-5.3 to 12.4)                               |
| Male infertility                                           | 31.5<br>(23.4 to 43.3)                        | --                                                | 0.2<br>(0.1 to 0.4)                   | 26.3<br>(0.1 to 57.2)                             | 5.0<br>(-16.6 to 31.2)                              |
| Other urinary diseases                                     | --                                            | --                                                | 0.1<br>(0.1 to 0.1)                   | 5.2<br>(-7.8 to 20.9)                             | -16.0<br>(-24.3 to -6.5)                            |
| Gynecological diseases                                     | 558.5<br>(524.7 to 593.6)                     | 210.7†<br>(196.6 to 226.2)                        | 6.5<br>(4.3 to 9.3)                   | 23.1<br>(16.5 to 30.2)                            | -5.6<br>(-9.8 to -1.0)                              |
| Uterine fibroids                                           | 36.5<br>(32.1 to 41.1)                        | 4.8<br>(4.2 to 5.6)                               | 0.8<br>(0.5 to 1.2)                   | 23.6<br>(8.8 to 39.7)                             | -13.4<br>(-24.2 to -2.1)                            |
| Polycystic ovarian syndrome                                | 5.2<br>(3.9 to 6.8)                           | 12.6<br>(9.2 to 17.1)                             | < 0.05<br>(< 0.05 to 0.1)             | 38.3<br>(20.8 to 59.6)                            | 1.0<br>(-11.1 to 15.0)                              |
| Female infertility                                         | 25.6<br>(9.5 to 57.5)                         | --                                                | 0.1<br>(< 0.05 to 0.4)                | 0.9<br>(-58.5 to 112.2)                           | -2.5<br>(-60.2 to 115.5)                            |
| Endometriosis                                              | 1.1<br>(0.9 to 1.3)                           | 4.2<br>(3.4 to 5.2)                               | 0.1<br>(0.1 to 0.1)                   | 22.9<br>(-11.8 to 76.7)                           | -0.6<br>(-25.3 to 32.8)                             |
| Genital prolapse                                           | 220.5<br>(194.2 to 247.8)                     | 20.1<br>(17.0 to 23.6)                            | 0.7<br>(0.3 to 1.3)                   | 17.9<br>(10.2 to 25.5)                            | -9.3<br>(-16.1 to -2.9)                             |
| Premenstrual syndrome                                      | 282.5<br>(259.9 to 304.1)                     | 108.4<br>(99.5 to 118.0)                          | 2.4<br>(1.5 to 3.6)                   | 20.9<br>(10.2 to 32.0)                            | -2.1<br>(-9.8 to 6.2)                               |
| Other gynecological diseases                               | 68.3<br>(58.6 to 78.9)                        | 60.6<br>(49.5 to 72.9)                            | 2.4<br>(1.5 to 3.3)                   | 28.4<br>(17.7 to 39.9)                            | -3.4<br>(-10.2 to 3.6)                              |
| Hemoglobinopathies and hemolytic anaemias                  | 1,570.9<br>(1,425.0 to 1,794.4)               | --                                                | 4.0<br>(2.3 to 6.8)                   | 22.0<br>(-0.2 to 47.5)                            | -1.5<br>(-15.7 to 14.2)                             |
| Thalassemias                                               | < 0.05<br>(< 0.05 to < 0.05)                  | --                                                | < 0.05<br>(< 0.05 to < 0.05)          | 14.3<br>(-13.8 to 60.7)                           | -1.3<br>(-25.7 to 38.4)                             |
| Thalassaemias trait                                        | 25.6<br>(8.6 to 47.6)                         | --                                                | 0.4<br>(0.1 to 0.9)                   | 36.4<br>(-1.6 to 90.3)                            | 10.9<br>(-14.9 to 54.4)                             |
| Sickle cell disorders                                      | 1.3<br>(0.4 to 3.5)                           | --                                                | 0.1<br>(< 0.05 to 0.3)                | 21.0<br>(-11.9 to 67.5)                           | 2.6<br>(-24.5 to 39.0)                              |
| Sickle cell trait                                          | 476.2<br>(255.5 to 802.1)                     | --                                                | 1.9<br>(0.9 to 3.9)                   | 27.0<br>(1.8 to 58.4)                             | 5.6<br>(-12.3 to 27.9)                              |
| G6PD deficiency                                            | 342.3<br>(292.5 to 395.9)                     | --                                                | < 0.05<br>(< 0.05 to < 0.05)          | 3.9<br>(-22.1 to 39.6)                            | -10.3<br>(-27.4 to 11.7)                            |
| G6PD trait                                                 | 830.7<br>(788.8 to 873.8)                     | --                                                | < 0.05<br>(< 0.05 to < 0.05)          | 42.5<br>(11.4 to 83.2)                            | 16.4<br>(-5.6 to 43.3)                              |
| Other hemoglobinopathies and hemolytic anaemias            | 57.0<br>(48.2 to 66.2)                        | --                                                | 1.5<br>(0.9 to 2.3)                   | 13.6<br>(-10.0 to 42.6)                           | -12.0<br>(-25.7 to 4.0)                             |
| Endocrine, metabolic, blood, and immune disorders          | 63.7<br>(56.8 to 71.6)                        | 3.5<br>(3.1 to 3.9)                               | 2.0<br>(1.3 to 2.9)                   | 14.0<br>(-2.5 to 33.2)                            | -8.8<br>(-17.2 to 0.5)                              |
| <b>Musculoskeletal disorders</b>                           | <b>404.9</b><br><b>(380.5 to 427.2)</b>       | <b>197.0</b><br><b>(176.5 to 219.6)</b>           | <b>43.8</b><br><b>(31.2 to 58.0)</b>  | <b>31.9</b><br><b>(27.4 to 36.6)</b>              | <b>-0.4</b><br><b>(-3.1 to 2.4)</b>                 |
| Rheumatoid arthritis                                       | 5.8<br>(5.1 to 6.6)                           | 0.4<br>(0.4 to 0.5)                               | 1.4<br>(0.9 to 1.9)                   | 28.1<br>(14.8 to 43.0)                            | -2.5<br>(-11.1 to 6.8)                              |
| Osteoarthritis                                             | 65.2<br>(60.9 to 69.5)                        | 3.9<br>(3.6 to 4.2)                               | 4.0<br>(2.8 to 5.5)                   | 30.2<br>(25.0 to 36.0)                            | -3.7<br>(-7.1 to 0.2)                               |
| Low back and neck pain                                     | 272.3<br>(253.2 to 293.7)                     | 124.2<br>(111.3 to 138.3)                         | 31.2<br>(21.9 to 41.2)                | 31.0<br>(26.1 to 36.5)                            | -0.2<br>(-3.4 to 3.0)                               |
| Low back pain                                              | 200.0<br>(176.2 to 227.6)                     | 102.2<br>(89.3 to 116.5)                          | 22.7<br>(15.8 to 30.2)                | 30.2<br>(23.6 to 37.1)                            | -0.3<br>(-4.6 to 3.8)                               |
| Neck pain                                                  | 84.8<br>(73.0 to 98.4)                        | 22.0<br>(18.9 to 25.9)                            | 8.5<br>(5.7 to 12.3)                  | 33.5<br>(28.3 to 38.4)                            | 0.2<br>(-2.3 to 2.6)                                |
| Gout                                                       | 10.0<br>(8.8 to 11.3)                         | 2.1<br>(1.8 to 2.4)                               | 0.3<br>(0.2 to 0.4)                   | 35.9<br>(15.8 to 58.2)                            | 1.0<br>(-11.8 to 15.3)                              |
| Other musculoskeletal disorders                            | 78.2<br>(58.1 to 101.6)                       | 66.4<br>(50.1 to 85.2)                            | 6.8<br>(4.0 to 10.5)                  | 37.9<br>(23.1 to 57.0)                            | 3.0<br>(-7.4 to 15.2)                               |
| <b>Other non-communicable diseases</b>                     | <b>3,764.9</b><br><b>(3,641.8 to 3,888.3)</b> | <b>12,468.4†</b><br><b>(11,233.9 to 13,728.7)</b> | <b>94.1</b><br><b>(63.8 to 133.7)</b> | <b>24.1</b><br><b>(22.1 to 26.2)</b>              | <b>-1.5</b><br><b>(-2.8 to -0.2)</b>                |
| Congenital anomalies                                       | 53.6<br>(43.1 to 69.1)                        | --                                                | 7.4<br>(4.9 to 10.9)                  | 22.0<br>(13.3 to 31.2)                            | -1.1<br>(-8.1 to 6.0)                               |
| Neural tube defects                                        | 6.0<br>(5.3 to 6.8)                           | --                                                | 1.8<br>(1.2 to 2.4)                   | 25.4<br>(10.8 to 41.8)                            | 1.2<br>(-9.4 to 12.1)                               |
| Congenital heart anomalies                                 | 5.8<br>(4.8 to 6.9)                           | --                                                | 0.3<br>(0.1 to 0.5)                   | 24.5<br>(5.5 to 47.1)                             | 3.8<br>(-10.3 to 21.0)                              |
| Orofacial clefts                                           | 1.3<br>(1.1 to 1.5)                           | --                                                | < 0.05<br>(< 0.05 to < 0.05)          | 17.2<br>(4.8 to 32.3)                             | -4.9<br>(-15.0 to 7.4)                              |
| Down's syndrome                                            | 0.9<br>(0.8 to 1.1)                           | --                                                | 0.1<br>(0.1 to 0.1)                   | 23.8<br>(14.8 to 33.8)                            | 1.1<br>(-6.2 to 9.4)                                |
| Turner syndrome                                            | 3.5<br>(3.0 to 4.2)                           | --                                                | 0.1<br>(< 0.05 to 0.1)                | 20.6<br>(-13.2 to 70.7)                           | 0.1<br>(-27.1 to 36.9)                              |
| Klinefelter syndrome                                       | 3.2<br>(2.7 to 3.8)                           | --                                                | < 0.05<br>(< 0.05 to < 0.05)          | 22.9<br>(-6.8 to 65.5)                            | 1.1<br>(-23.1 to 33.8)                              |



| Cause                                         | Prevalence in thousands (95% UI)        | Incidence in thousands (95% UI)          | YLDs in thousands (95% UI)           |                                                   |                                                     |
|-----------------------------------------------|-----------------------------------------|------------------------------------------|--------------------------------------|---------------------------------------------------|-----------------------------------------------------|
|                                               | 2016 counts                             | 2016 counts                              | 2016 counts                          | Percentage change in counts between 2006 and 2016 | Percentage change in age-standardised rates between |
| Other chromosomal abnormalities               | 0.8<br>(0.7 to 1.0)                     | --                                       | 0.2<br>(0.1 to 0.2)                  | 10.6<br>(-25.3 to 61.3)                           | -3.4<br>(-33.9 to 38.6)                             |
| Congenital musculoskeletal and limb anomalies | 5.9<br>(5.1 to 6.7)                     | --                                       | 0.9<br>(0.6 to 1.2)                  | 23.2<br>(7.9 to 40.6)                             | -1.4<br>(-11.5 to 10.4)                             |
| Urogenital congenital anomalies               | 5.7<br>(5.0 to 6.4)                     | --                                       | 0.1<br>(0.1 to 0.2)                  | 18.6<br>(9.6 to 29.9)                             | -0.5<br>(-7.7 to 8.2)                               |
| Digestive congenital anomalies                | 2.7<br>(2.3 to 3.0)                     | --                                       | 0.1<br>(0.1 to 0.2)                  | 24.6<br>(-5.9 to 66.1)                            | 0.9<br>(-19.2 to 26.7)                              |
| Other congenital anomalies                    | 28.0<br>(16.0 to 48.3)                  | --                                       | 3.9<br>(2.1 to 6.7)                  | 20.6<br>(8.1 to 34.7)                             | -2.4<br>(-12.4 to 8.0)                              |
| Skin and subcutaneous diseases                | 1,839.5<br>(1,755.5 to 1,941.0)         | 4,404.4<br>(4,045.1 to 4,875.2)          | 45.8<br>(29.6 to 67.1)               | 22.5<br>(20.1 to 25.1)                            | 1.0<br>(-0.6 to 2.8)                                |
| Dermatitis                                    | 302.1<br>(234.8 to 374.9)               | 232.7<br>(203.0 to 270.1)                | 12.3<br>(6.8 to 21.5)                | 24.4<br>(19.8 to 29.4)                            | 0.1<br>(-3.2 to 3.4)                                |
| Psoriasis                                     | 27.4<br>(26.0 to 28.8)                  | 4.3<br>(4.1 to 4.5)                      | 2.4<br>(1.7 to 3.2)                  | 34.8<br>(20.4 to 51.6)                            | 5.9<br>(-2.7 to 15.7)                               |
| Cellulitis                                    | 1.9<br>(1.8 to 2.1)                     | 33.2<br>(30.8 to 36.0)                   | 0.1<br>(0.1 to 0.2)                  | 23.5<br>(-3.6 to 59.6)                            | 0.8<br>(-18.6 to 25.7)                              |
| Pyoderma                                      | 34.7<br>(32.9 to 36.5)                  | 665.2<br>(632.6 to 698.4)                | 0.2<br>(0.1 to 0.4)                  | 24.9<br>(17.6 to 33.0)                            | 0.6<br>(-4.0 to 5.6)                                |
| Scabies                                       | 121.8<br>(104.3 to 142.4)               | 374.5<br>(319.3 to 438.6)                | 3.1<br>(1.8 to 5.1)                  | 17.0<br>(11.1 to 22.6)                            | -3.3<br>(-6.9 to 0.2)                               |
| Fungal skin diseases                          | 735.1<br>(599.6 to 896.8)               | 2,098.7<br>(1,746.9 to 2,531.7)          | 4.2<br>(1.6 to 8.8)                  | 26.7<br>(24.1 to 29.1)                            | 0.3<br>(-0.6 to 1.2)                                |
| Viral skin diseases                           | 180.3<br>(156.9 to 208.1)               | 238.8<br>(204.3 to 274.9)                | 5.5<br>(3.5 to 8.3)                  | 23.8<br>(18.7 to 28.9)                            | -0.0<br>(-3.1 to 3.1)                               |
| Acne vulgaris                                 | 496.6<br>(431.8 to 566.4)               | 379.6<br>(292.5 to 505.1)                | 12.8<br>(8.4 to 18.6)                | 18.0<br>(12.2 to 24.2)                            | 3.5<br>(-0.9 to 8.5)                                |
| Alopecia areata                               | 8.8<br>(8.2 to 9.4)                     | 15.8<br>(14.6 to 16.8)                   | 0.3<br>(0.2 to 0.4)                  | 28.0<br>(13.2 to 45.1)                            | 0.2<br>(-9.2 to 11.0)                               |
| Pruritus                                      | 35.9<br>(31.4 to 40.6)                  | 29.2<br>(25.8 to 32.9)                   | 0.4<br>(0.2 to 0.7)                  | 26.6<br>(18.7 to 35.2)                            | -0.5<br>(-5.6 to 4.8)                               |
| Urticaria                                     | 52.1<br>(44.4 to 61.5)                  | 93.3<br>(79.3 to 109.7)                  | 3.1<br>(2.0 to 4.6)                  | 22.5<br>(13.8 to 30.3)                            | -0.0<br>(-6.2 to 5.7)                               |
| Decubitus ulcer                               | 0.4<br>(0.4 to 0.5)                     | 1.6<br>(1.4 to 1.8)                      | 0.1<br>(0.1 to 0.1)                  | 29.7<br>(17.4 to 42.5)                            | -1.5<br>(-15.7 to 13.8)                             |
| Other skin and subcutaneous diseases          | 212.7<br>(206.0 to 219.1)               | 237.6<br>(229.9 to 244.9)                | 1.2<br>(0.6 to 2.1)                  | 24.1<br>(19.9 to 28.2)                            | -1.9<br>(-4.3 to 0.5)                               |
| Sense organ diseases                          | 866.8<br>(829.7 to 903.1)               | 469.4†<br>(436.0 to 506.6)               | 33.6<br>(23.3 to 47.1)               | 25.4<br>(21.2 to 29.9)                            | -3.4<br>(-5.4 to -1.2)                              |
| Glaucoma                                      | 2.3<br>(1.9 to 2.7)                     | --                                       | 0.3<br>(0.2 to 0.4)                  | 40.8<br>(25.5 to 59.2)                            | 2.1<br>(-8.4 to 13.8)                               |
| Cataract                                      | 23.7<br>(20.9 to 26.5)                  | --                                       | 2.3<br>(1.6 to 3.1)                  | 34.3<br>(26.3 to 43.5)                            | -5.7<br>(-11.6 to 0.7)                              |
| Macular degeneration                          | 4.7<br>(3.8 to 5.7)                     | --                                       | 0.4<br>(0.2 to 0.5)                  | 35.4<br>(21.6 to 50.8)                            | -0.9<br>(-10.3 to 9.5)                              |
| Refraction and accommodation disorders        | 425.0<br>(381.7 to 475.0)               | --                                       | 8.3<br>(5.2 to 12.6)                 | 18.0<br>(11.5 to 25.1)                            | -8.1<br>(-13.1 to -2.9)                             |
| Age-related and other hearing loss            | 503.3<br>(462.8 to 545.2)               | --                                       | 18.3<br>(12.2 to 26.1)               | 26.4<br>(19.8 to 33.5)                            | -2.2<br>(-5.1 to 0.6)                               |
| Other vision loss                             | 15.7<br>(14.1 to 17.5)                  | --                                       | 1.4<br>(0.9 to 1.9)                  | 28.4<br>(17.4 to 40.0)                            | -0.6<br>(-7.2 to 6.6)                               |
| Other sense organ diseases                    | 91.2<br>(84.4 to 98.1)                  | 469.4<br>(436.0 to 506.6)                | 2.8<br>(1.7 to 4.2)                  | 31.1<br>(23.9 to 38.6)                            | 0.9<br>(-3.0 to 4.8)                                |
| Oral disorders                                | 2,631.9<br>(2,401.6 to 2,846.2)         | 7,594.6†<br>(6,407.5 to 8,777.0)         | 7.3<br>(4.1 to 12.4)                 | 31.1<br>(27.1 to 35.6)                            | 0.2<br>(-2.8 to 3.3)                                |
| Caries of deciduous teeth                     | 639.6<br>(501.9 to 811.5)               | 2,460.8<br>(1,741.7 to 3,325.8)          | 0.1<br>(0.1 to 0.3)                  | 25.9<br>(11.9 to 41.7)                            | -0.8<br>(-11.7 to 11.0)                             |
| Caries of permanent teeth                     | 1,690.7<br>(1,429.8 to 1,978.5)         | 5,085.9<br>(4,186.5 to 5,960.0)          | 1.0<br>(0.4 to 1.9)                  | 27.0<br>(20.1 to 35.7)                            | 1.4<br>(-2.9 to 6.7)                                |
| Periodontal disease                           | 359.4<br>(211.5 to 528.2)               | 44.5<br>(27.2 to 67.6)                   | 2.4<br>(0.8 to 5.3)                  | 35.3<br>(25.1 to 48.0)                            | 0.4<br>(-7.1 to 8.2)                                |
| Edentulism and severe tooth loss              | 49.6<br>(42.3 to 57.6)                  | 3.4<br>(2.8 to 3.9)                      | 1.4<br>(0.9 to 2.0)                  | 34.8<br>(27.3 to 42.4)                            | -0.1<br>(-4.4 to 4.2)                               |
| Other oral disorders                          | 80.6<br>(76.8 to 84.8)                  | --                                       | 2.4<br>(1.5 to 3.6)                  | 27.2<br>(22.0 to 32.5)                            | -0.0<br>(-3.1 to 3.1)                               |
| <b>Injuries</b>                               | <b>747.2</b><br><b>(689.5 to 821.4)</b> | <b>409.3†</b><br><b>(385.6 to 433.9)</b> | <b>32.2</b><br><b>(20.7 to 47.5)</b> | <b>20.5</b><br><b>(15.9 to 25.2)</b>              | <b>-2.4</b><br><b>(-4.1 to -0.8)</b>                |
| <b>Transport injuries</b>                     | <b>68.2</b><br><b>(63.5 to 73.2)</b>    | <b>34.5</b><br><b>(30.2 to 39.1)</b>     | <b>4.3</b><br><b>(2.8 to 6.3)</b>    | <b>23.7</b><br><b>(20.6 to 26.5)</b>              | <b>-4.2</b><br><b>(-5.8 to -2.7)</b>                |
| Road injuries                                 | 57.0<br>(53.1 to 61.2)                  | 30.7<br>(26.6 to 35.5)                   | 3.5<br>(2.3 to 5.2)                  | 22.0<br>(19.2 to 24.5)                            | -5.4<br>(-7.0 to -3.9)                              |
| Pedestrian road injuries                      | 19.5<br>(17.2 to 22.2)                  | 7.9<br>(6.4 to 9.6)                      | 1.2<br>(0.8 to 1.8)                  | 17.9<br>(15.1 to 20.6)                            | -7.9<br>(-9.5 to -6.3)                              |
| Cyclist road injuries                         | 11.3<br>(9.5 to 13.4)                   | 7.0<br>(5.5 to 8.6)                      | 0.7<br>(0.4 to 1.0)                  | 26.4<br>(23.0 to 29.6)                            | -1.5<br>(-3.2 to 0.2)                               |
| Motorcyclist road injuries                    | 6.2<br>(5.3 to 7.4)                     | 2.3<br>(1.9 to 3.0)                      | 0.4<br>(0.2 to 0.6)                  | 22.7<br>(19.6 to 25.5)                            | -6.4<br>(-7.9 to -4.8)                              |
| Motor vehicle road injuries                   | 15.6<br>(13.3 to 17.7)                  | 10.3<br>(8.6 to 12.4)                    | 1.0<br>(0.7 to 1.5)                  | 22.0<br>(19.2 to 24.5)                            | -5.8<br>(-7.5 to -4.2)                              |
| Other road injuries                           | 4.4<br>(3.8 to 5.2)                     | 3.1<br>(2.3 to 4.1)                      | 0.2<br>(0.2 to 0.4)                  | 31.5<br>(27.8 to 35.0)                            | 3.0<br>(1.3 to 4.7)                                 |
| Other transport injuries                      | 11.2<br>(9.4 to 13.6)                   | 3.8<br>(3.1 to 4.7)                      | 0.8<br>(0.5 to 1.1)                  | 32.2<br>(25.8 to 38.6)                            | 3.5<br>(1.1 to 6.1)                                 |
| <b>Unintentional injuries</b>                 | <b>531.1</b><br><b>(492.0 to 580.5)</b> | <b>349.5</b><br><b>(327.0 to 373.1)</b>  | <b>21.0</b><br><b>(14.1 to 29.6)</b> | <b>28.9</b><br><b>(24.5 to 33.2)</b>              | <b>0.7</b><br><b>(-1.0 to 2.2)</b>                  |
| Falls                                         | 193.0<br>(166.7 to 220.1)               | 124.7<br>(107.1 to 145.2)                | 9.0<br>(6.2 to 12.4)                 | 28.9<br>(24.3 to 33.4)                            | 0.7<br>(-1.1 to 2.3)                                |
| Drowning                                      | 1.9<br>(1.7 to 2.2)                     | 0.6<br>(0.5 to 0.7)                      | 0.1<br>(0.1 to 0.2)                  | 22.6<br>(16.0 to 28.8)                            | -3.4<br>(-6.2 to -0.7)                              |
| Fire, heat, and hot substances                | 73.1<br>(60.4 to 90.0)                  | 14.3<br>(11.7 to 17.4)                   | 2.4<br>(1.6 to 3.3)                  | 22.7<br>(15.0 to 30.6)                            | -2.9<br>(-6.6 to 1.1)                               |
| Poisonings                                    | 1.7<br>(1.3 to 2.0)                     | 3.0<br>(2.4 to 3.9)                      | 0.2<br>(0.1 to 0.3)                  | 25.3<br>(15.6 to 36.0)                            | -0.1<br>(-5.9 to 6.2)                               |
| Exposure to mechanical forces                 | 79.8<br>(68.4 to 97.2)                  | 45.6<br>(38.2 to 53.5)                   | 2.3<br>(1.5 to 3.5)                  | 24.9<br>(21.5 to 28.2)                            | -3.6<br>(-5.3 to -2.0)                              |
| Unintentional firearm injuries                | 3.9<br>(3.1 to 4.8)                     | 1.5<br>(1.1 to 2.0)                      | 0.2<br>(0.1 to 0.3)                  | 26.4<br>(22.6 to 30.3)                            | -3.9<br>(-5.9 to -1.9)                              |
| Unintentional suffocation                     | 6.2<br>(4.5 to 8.4)                     | 2.1<br>(1.4 to 3.0)                      | 0.2<br>(0.1 to 0.4)                  | 30.8<br>(22.2 to 40.2)                            | 4.0<br>(0.3 to 7.8)                                 |
| Other exposure to mechanical forces           | 69.7<br>(58.6 to 87.0)                  | 42.0<br>(35.2 to 49.4)                   | 1.9<br>(1.2 to 2.9)                  | 24.1<br>(20.7 to 27.2)                            | -4.2<br>(-5.9 to -2.6)                              |



| Cause                                                                               | Prevalence in thousands (95% UI)        | Incidence in thousands (95% UI)       | YLDs in thousands (95% UI)           |                                                   |                                                     |
|-------------------------------------------------------------------------------------|-----------------------------------------|---------------------------------------|--------------------------------------|---------------------------------------------------|-----------------------------------------------------|
|                                                                                     | 2016 counts                             | 2016 counts                           | 2016 counts                          | Percentage change in counts between 2006 and 2016 | Percentage change in age-standardised rates between |
| Adverse effects of medical treatment                                                | 1.8<br>(1.4 to 2.2)                     | 23.4<br>(20.0 to 27.1)                | 0.2<br>(0.1 to 0.4)                  | 17.5<br>(10.3 to 25.0)                            | -2.3<br>(-6.5 to 1.8)                               |
| Animal contact                                                                      | 35.1<br>(30.9 to 40.6)                  | 60.0<br>(51.2 to 69.8)                | 1.2<br>(0.8 to 1.8)                  | 27.8<br>(22.5 to 33.2)                            | 0.5<br>(-2.5 to 3.7)                                |
| Venomous animal contact                                                             | 12.1<br>(10.1 to 14.7)                  | 23.6<br>(18.9 to 29.1)                | 0.8<br>(0.5 to 1.1)                  | 25.2<br>(17.5 to 33.7)                            | -1.1<br>(-5.5 to 3.7)                               |
| Non-venomous animal contact                                                         | 23.0<br>(19.3 to 27.7)                  | 36.4<br>(30.0 to 43.0)                | 0.5<br>(0.3 to 0.7)                  | 32.4<br>(28.2 to 36.6)                            | 2.9<br>(0.4 to 5.6)                                 |
| Foreign body                                                                        | 34.8<br>(28.1 to 41.5)                  | 27.8<br>(24.0 to 32.3)                | 1.7<br>(1.0 to 2.5)                  | 26.0<br>(18.9 to 33.7)                            | 0.9<br>(-2.4 to 4.3)                                |
| Pulmonary aspiration and foreign body in airway                                     | 18.2<br>(13.3 to 24.8)                  | 9.4<br>(7.6 to 11.7)                  | 1.0<br>(0.6 to 1.5)                  | 20.8<br>(13.8 to 28.9)                            | -2.6<br>(-5.8 to 1.1)                               |
| Foreign body in eyes                                                                | 1.8<br>(0.9 to 2.8)                     | 10.2<br>(7.6 to 13.7)                 | 0.1<br>( $< 0.05$ to 0.2)            | 29.8<br>(24.2 to 35.6)                            | 1.8<br>(-1.1 to 4.8)                                |
| Foreign body in other body part                                                     | 14.8<br>(11.8 to 19.6)                  | 8.3<br>(6.7 to 10.1)                  | 0.6<br>(0.4 to 0.9)                  | 35.4<br>(27.4 to 44.3)                            | 7.2<br>(3.3 to 10.9)                                |
| Environmental heat and cold exposure                                                | 35.2<br>(28.9 to 43.4)                  | 13.6<br>(10.9 to 17.0)                | 1.6<br>(1.0 to 2.4)                  | 38.4<br>(32.3 to 44.7)                            | 7.5<br>(5.1 to 9.8)                                 |
| Other unintentional injuries                                                        | 74.7<br>(57.7 to 98.1)                  | 36.6<br>(30.0 to 44.9)                | 2.3<br>(1.5 to 3.4)                  | 39.2<br>(33.6 to 44.4)                            | 5.7<br>(3.7 to 7.5)                                 |
| <b>Self-harm and interpersonal violence</b>                                         | <b>220.7</b><br><b>(194.7 to 247.6)</b> | <b>25.0†</b><br><b>(21.2 to 29.3)</b> | <b>3.3</b><br><b>(2.3 to 4.5)</b>    | <b>22.1</b><br><b>(17.5 to 26.0)</b>              | <b>-1.9</b><br><b>(-4.1 to 0.1)</b>                 |
| Self-harm                                                                           | 3.2<br>(2.7 to 3.6)                     | 2.1<br>(1.8 to 2.4)                   | 0.2<br>(0.1 to 0.3)                  | 30.1<br>(26.9 to 33.2)                            | 0.6<br>(-1.4 to 2.6)                                |
| Self-harm by firearm                                                                | 0.3<br>(0.3 to 0.3)                     | 0.1<br>(0.1 to 0.2)                   | $< 0.05$<br>( $< 0.05$ to $< 0.05$ ) | 27.8<br>(24.0 to 32.2)                            | -1.0<br>(-3.8 to 1.8)                               |
| Self-harm by other specified means                                                  | 2.9<br>(2.4 to 3.3)                     | 1.9<br>(1.6 to 2.3)                   | 0.2<br>(0.1 to 0.3)                  | 30.3<br>(27.0 to 33.6)                            | 0.8<br>(-1.3 to 2.8)                                |
| Interpersonal violence                                                              | 217.6<br>(191.4 to 244.4)               | 22.9†<br>(19.2 to 27.2)               | 3.1<br>(2.2 to 4.3)                  | 21.6<br>(16.9 to 25.7)                            | -2.1<br>(-4.4 to -0.1)                              |
| Assault by firearm                                                                  | 1.0<br>(0.8 to 1.1)                     | 0.4<br>(0.3 to 0.6)                   | 0.1<br>( $< 0.05$ to 0.1)            | 34.0<br>(29.4 to 39.0)                            | 2.8<br>(0.2 to 5.5)                                 |
| Assault by sharp object                                                             | 8.4<br>(6.8 to 10.1)                    | 4.7<br>(3.5 to 6.1)                   | 0.3<br>(0.2 to 0.5)                  | 36.9<br>(32.6 to 41.2)                            | 6.7<br>(4.6 to 9.0)                                 |
| Sexual violence                                                                     | 185.9<br>(161.3 to 211.7)               | --                                    | 1.7<br>(1.1 to 2.4)                  | 11.9<br>(6.2 to 17.5)                             | -9.8<br>(-13.0 to -6.5)                             |
| Assault by other means                                                              | 22.4<br>(18.9 to 27.0)                  | 17.8<br>(14.6 to 21.3)                | 1.0<br>(0.7 to 1.5)                  | 35.7<br>(32.2 to 39.1)                            | 4.7<br>(2.8 to 6.6)                                 |
| <b>Forces of nature, conflict and terrorism, and executions and police conflict</b> | <b>113.1</b><br><b>(71.0 to 174.9)</b>  | <b>0.3†</b><br><b>(0.1 to 0.6)</b>    | <b>3.6</b><br><b>(1.2 to 7.6)</b>    | <b>-15.1</b><br><b>(-25.0 to -7.0)</b>            | <b>-16.9</b><br><b>(-24.1 to -11.9)</b>             |
| Exposure to forces of nature                                                        | --                                      | --                                    | --                                   | --                                                | --                                                  |
| Conflict and terrorism                                                              | 112.3<br>(70.3 to 174.2)                | --                                    | 3.6<br>(1.2 to 7.5)                  | -15.2<br>(-25.2 to -7.2)                          | -17.1<br>(-24.2 to -12.1)                           |
| Executions and police conflict                                                      | 0.8<br>(0.4 to 1.6)                     | 0.3<br>(0.1 to 0.6)                   | $< 0.05$<br>( $< 0.05$ to 0.1)       | 17.8<br>(-0.4 to 41.6)                            | 2.5<br>(-13.4 to 18.5)                              |
| <b>Impairments</b>                                                                  | --                                      | --                                    | --                                   | --                                                | --                                                  |
| Anaemia                                                                             | 1,733.2<br>(1,500.6 to 1,975.9)         | --                                    | 57.8<br>(36.5 to 86.6)               | 10.6<br>(-6.2 to 28.8)                            | -12.5<br>(-22.9 to -1.6)                            |
| Developmental intellectual disability                                               | 233.5<br>(175.9 to 290.9)               | --                                    | 23.2<br>(16.3 to 32.7)               | 34.1<br>(24.0 to 48.2)                            | 8.4<br>(1.0 to 19.7)                                |
| Epilepsy                                                                            | 45.5<br>(24.4 to 68.5)                  | --                                    | 18.8<br>(9.4 to 30.5)                | 45.9<br>(-28.0 to 176.0)                          | 17.2<br>(-46.8 to 138.5)                            |
| Guillain-Barre syndrome                                                             | $< 0.05$<br>( $< 0.05$ to $< 0.05$ )    | --                                    | $< 0.05$<br>( $< 0.05$ to $< 0.05$ ) | 25.9<br>(22.2 to 29.6)                            | -0.0<br>(-0.1 to 0.0)                               |
| Hearing loss                                                                        | 618.2<br>(581.0 to 659.1)               | --                                    | 24.8<br>(17.1 to 34.6)               | 24.8<br>(20.1 to 29.5)                            | -2.2<br>(-4.5 to 0.2)                               |
| Heart failure                                                                       | 10.4<br>(9.2 to 11.8)                   | --                                    | 1.2<br>(0.8 to 1.5)                  | 42.2<br>(32.4 to 53.9)                            | 0.5<br>(-7.0 to 8.4)                                |
| Infertility                                                                         | 149.5<br>(116.2 to 196.3)               | --                                    | 0.9<br>(0.4 to 1.8)                  | 34.4<br>(8.8 to 66.5)                             | 7.7<br>(-12.9 to 36.4)                              |
| Pelvic inflammatory disease                                                         | 5.5<br>(4.5 to 6.6)                     | --                                    | 0.7<br>(0.5 to 1.0)                  | 32.9<br>(16.1 to 53.6)                            | -0.1<br>(-11.6 to 14.0)                             |
| Vision loss                                                                         | 504.0<br>(458.6 to 554.8)               | --                                    | 18.9<br>(13.2 to 26.8)               | 28.1<br>(19.5 to 42.8)                            | -6.7<br>(-11.2 to 0.0)                              |

We did not calculate incidence for the nine impairments, certain NTDs, and causes with only birth prevalence. Blank cells mean that no estimate is available.

† Incidence for aggregate causes represents the sum of the incidence of the causes below the aggregate.

‡ Incidence estimates for stroke represent first-ever stroke only.

^ Incidence of HIV/AIDS represents new infections of HIV only and does not include new infections of Tuberculosis in HIV positive cases.

SR Table 14: Prevalence, incidence, and YLDs for 2016, percentage change of YLD counts and percentage change of age-standardised YLD rates between 2006 and 2016 by cause and impairments, for all ages, Estonia.

| Cause                                                                                | Prevalence in thousands (95% UI)       | Incidence in thousands (95% UI)         | YLDs in thousands (95% UI)             |                                                   |                                                     |
|--------------------------------------------------------------------------------------|----------------------------------------|-----------------------------------------|----------------------------------------|---------------------------------------------------|-----------------------------------------------------|
|                                                                                      | 2016 counts                            | 2016 counts                             | 2016 counts                            | Percentage change in counts between 2006 and 2016 | Percentage change in age-standardised rates between |
| <b>All causes</b>                                                                    | <b>1,251.9</b><br>(1,246.8 to 1,256.8) | <b>8,655.3†</b><br>(8,063.9 to 9,386.7) | <b>182.8</b><br>(136.3 to 236.3)       | <b>1.1</b><br>(-0.3 to 2.5)                       | <b>-1.4</b><br>(-2.9 to 0.0)                        |
| <b>Communicable, maternal, neonatal, and nutritional disorders</b>                   | <b>681.7</b><br>(660.4 to 706.8)       | <b>4,997.9†</b><br>(4,422.9 to 5,696.4) | <b>8.0</b><br>(5.8 to 10.6)            | <b>-6.0</b><br>(-10.0 to -1.3)                    | <b>-2.9</b><br>(-7.2 to 1.9)                        |
| <b>HIV/AIDS and tuberculosis</b>                                                     | <b>351.9</b><br>(322.3 to 373.1)       | <b>0.3†</b><br>(0.3 to 0.4)             | <b>0.2</b><br>(0.1 to 0.2)             | <b>21.3</b><br>(0.1 to 46.8)                      | <b>26.8</b><br>(4.1 to 54.2)                        |
| Tuberculosis                                                                         | 330.7<br>(306.8 to 358.2)              | 0.2†<br>(0.2 to 0.3)                    | < 0.05<br>(< 0.05 to 0.1)              | -35.9<br>(-48.6 to -19.7)                         | -37.0<br>(-49.4 to -21.2)                           |
| Drug-susceptible tuberculosis                                                        | 0.1<br>(0.1 to 0.1)                    | 0.2<br>(0.2 to 0.2)                     | < 0.05<br>(< 0.05 to 0.1)              | -37.5<br>(-52.7 to -16.6)                         | -38.4<br>(-53.0 to -17.9)                           |
| Multidrug-resistant tuberculosis without extensive drug resistance                   | < 0.05<br>(< 0.05 to < 0.05)           | < 0.05<br>(< 0.05 to 0.1)               | < 0.05<br>(< 0.05 to < 0.05)           | -37.2<br>(-53.6 to -18.4)                         | -38.8<br>(-54.3 to -20.6)                           |
| Extensively drug-resistant tuberculosis                                              | < 0.05<br>(< 0.05 to < 0.05)           | < 0.05<br>(< 0.05 to < 0.05)            | < 0.05<br>(< 0.05 to < 0.05)           | 93.7<br>(43.2 to 151.8)                           | 88.7<br>(40.9 to 145.0)                             |
| Latent tuberculosis infection                                                        | 330.6<br>(306.7 to 358.0)              | --                                      | --                                     | --                                                | --                                                  |
| HIV/AIDS                                                                             | 1.3<br>(0.9 to 1.9)                    | 0.1 <sup>a</sup><br>(0.1 to 0.1)        | 0.1<br>(0.1 to 0.2)                    | 94.7<br>(56.0 to 140.9)                           | 98.3<br>(58.4 to 145.7)                             |
| Drug-susceptible HIV/AIDS - Tuberculosis                                             | < 0.05<br>(< 0.05 to < 0.05)           | < 0.05<br>(< 0.05 to < 0.05)            | < 0.05<br>(< 0.05 to < 0.05)           | -34.0<br>(-40.8 to -24.8)                         | -33.0<br>(-39.9 to -23.5)                           |
| Multidrug-resistant HIV/AIDS - Tuberculosis without extensive drug resistance        | < 0.05<br>(< 0.05 to < 0.05)           | < 0.05<br>(< 0.05 to < 0.05)            | < 0.05<br>(< 0.05 to < 0.05)           | -32.4<br>(-49.6 to -9.5)                          | -31.3<br>(-48.9 to -7.9)                            |
| Extensively drug-resistant HIV/AIDS - Tuberculosis                                   | < 0.05<br>(< 0.05 to < 0.05)           | < 0.05<br>(< 0.05 to < 0.05)            | < 0.05<br>(< 0.05 to < 0.05)           | 108.5<br>(55.5 to 178.9)                          | 111.7<br>(57.9 to 183.7)                            |
| HIV/AIDS resulting in other diseases                                                 | 1.3<br>(0.9 to 1.9)                    | 0.1<br>(0.1 to 0.1)                     | 0.1<br>(0.1 to 0.2)                    | 121.2<br>(69.5 to 185.2)                          | 125.5<br>(73.4 to 190.1)                            |
| <b>Diarrhoea, lower respiratory infections, and other common infectious diseases</b> | <b>80.1</b><br>(74.2 to 86.3)          | <b>4,900.5†</b><br>(4,327.5 to 5,601.8) | <b>3.8</b><br>(2.6 to 5.2)             | <b>-1.5</b><br>(-4.6 to 1.8)                      | <b>0.1</b><br>(-3.1 to 3.4)                         |
| Diarrhoeal diseases                                                                  | 15.2<br>(14.3 to 16.2)                 | 989.4<br>(930.0 to 1,054.2)             | 1.7<br>(1.2 to 2.3)                    | 2.3<br>(-2.8 to 7.6)                              | 1.7<br>(-3.8 to 7.5)                                |
| Intestinal infectious diseases                                                       | < 0.05<br>(< 0.05 to < 0.05)           | < 0.05†<br>(< 0.05 to < 0.05)           | < 0.05<br>(< 0.05 to < 0.05)           | 9.8<br>(-4.9 to 25.9)                             | 6.5<br>(-7.6 to 22.2)                               |
| Typhoid fever                                                                        | < 0.05<br>(< 0.05 to < 0.05)           | < 0.05<br>(< 0.05 to < 0.05)            | < 0.05<br>(< 0.05 to < 0.05)           | 21.5<br>(0.7 to 45.6)                             | 21.4<br>(-0.2 to 47.0)                              |
| Paratyphoid fever                                                                    | < 0.05<br>(< 0.05 to < 0.05)           | < 0.05<br>(< 0.05 to < 0.05)            | < 0.05<br>(< 0.05 to < 0.05)           | 3.3<br>(-13.2 to 22.7)                            | -0.6<br>(-16.0 to 17.3)                             |
| Other intestinal infectious diseases                                                 | --                                     | --                                      | < 0.05<br>(< 0.05 to < 0.05)           | -29.4<br>(-47.0 to -7.2)                          | -40.1<br>(-58.7 to -14.7)                           |
| Lower respiratory infections                                                         | 2.2<br>(2.0 to 2.4)                    | 102.1<br>(93.8 to 112.4)                | 0.1<br>(0.1 to 0.2)                    | 14.1<br>(3.4 to 26.3)                             | 8.9<br>(-1.7 to 21.4)                               |
| Upper respiratory infections                                                         | 49.2<br>(42.1 to 57.7)                 | 3,733.4<br>(3,166.1 to 4,420.8)         | 1.2<br>(0.7 to 1.9)                    | -3.8<br>(-9.5 to 2.0)                             | 0.2<br>(-5.4 to 5.6)                                |
| Otitis media                                                                         | 12.4<br>(11.2 to 13.7)                 | 54.4<br>(45.3 to 66.3)                  | 0.3<br>(0.2 to 0.5)                    | -11.0<br>(-17.3 to -3.5)                          | -7.5<br>(-14.0 to -0.8)                             |
| Meningitis                                                                           | 1.4<br>(1.2 to 1.6)                    | 0.2<br>(0.2 to 0.2)                     | 0.1<br>(0.1 to 0.2)                    | -7.9<br>(-9.9 to -6.0)                            | -3.7<br>(-5.8 to -1.6)                              |
| Pneumococcal meningitis                                                              | 0.7<br>(0.6 to 0.8)                    | 0.1<br>(< 0.05 to 0.1)                  | 0.1<br>(< 0.05 to 0.1)                 | -6.4<br>(-9.4 to -3.3)                            | -2.4<br>(-5.7 to 0.9)                               |
| H influenzae type B meningitis                                                       | 0.2<br>(0.1 to 0.2)                    | < 0.05<br>(< 0.05 to < 0.05)            | < 0.05<br>(< 0.05 to < 0.05)           | -11.9<br>(-16.3 to -8.1)                          | -7.3<br>(-12.3 to -2.9)                             |
| Meningococcal infection                                                              | 0.2<br>(0.2 to 0.3)                    | 0.1<br>(< 0.05 to 0.1)                  | < 0.05<br>(< 0.05 to < 0.05)           | -8.0<br>(-11.5 to -4.2)                           | -4.0<br>(-7.7 to 0.2)                               |
| Other meningitis                                                                     | 0.3<br>(0.3 to 0.4)                    | 0.1<br>(0.1 to 0.1)                     | < 0.05<br>(< 0.05 to < 0.05)           | -7.6<br>(-10.4 to -4.9)                           | -3.3<br>(-6.4 to -0.1)                              |
| Encephalitis                                                                         | 2.1<br>(1.4 to 3.0)                    | 1.3<br>(1.2 to 1.4)                     | 0.2<br>(0.1 to 0.3)                    | -4.2<br>(-16.1 to 8.9)                            | -2.5<br>(-14.7 to 12.3)                             |
| Diphtheria                                                                           | < 0.05<br>(< 0.05 to < 0.05)           | < 0.05<br>(< 0.05 to < 0.05)            | < 0.05<br>(< 0.05 to < 0.05)           | -42.4<br>(-71.3 to 11.8)                          | -41.1<br>(-68.2 to 8.1)                             |
| Whooping cough                                                                       | 0.1<br>(0.1 to 0.1)                    | 0.5<br>(0.4 to 0.6)                     | < 0.05<br>(< 0.05 to < 0.05)           | -21.2<br>(-37.8 to -0.4)                          | -19.5<br>(-36.9 to 2.7)                             |
| Tetanus                                                                              | < 0.05<br>(< 0.05 to < 0.05)           | < 0.05<br>(< 0.05 to < 0.05)            | < 0.05<br>(< 0.05 to < 0.05)           | -20.7<br>(-34.8 to -8.6)                          | -16.9<br>(-30.4 to -5.0)                            |
| Measles                                                                              | < 0.05<br>(< 0.05 to < 0.05)           | < 0.05<br>(< 0.05 to < 0.05)            | < 0.05<br>(< 0.05 to < 0.05)           | --                                                | --                                                  |
| Varicella and herpes zoster                                                          | 1.2<br>(1.1 to 1.3)                    | 19.2<br>(18.5 to 19.9)                  | < 0.05<br>(< 0.05 to 0.1)              | 4.2<br>(-7.6 to 17.2)                             | 0.0<br>(-12.0 to 12.6)                              |
| <b>Neglected tropical diseases and malaria</b>                                       | <b>0.1</b><br>(< 0.05 to 0.2)          | <b>&lt; 0.05†</b><br>(< 0.05 to < 0.05) | <b>&lt; 0.05</b><br>(< 0.05 to < 0.05) | <b>-24.9</b><br>(-95.8 to 286.4)                  | <b>-27.7</b><br>(-95.3 to 261.7)                    |
| Malaria                                                                              | --                                     | --                                      | --                                     | --                                                | --                                                  |
| Chagas disease                                                                       | --                                     | --                                      | --                                     | --                                                | --                                                  |
| Leishmaniasis                                                                        | --                                     | --                                      | --                                     | --                                                | --                                                  |
| Visceral leishmaniasis                                                               | --                                     | --                                      | --                                     | --                                                | --                                                  |
| Cutaneous and mucocutaneous leishmaniasis                                            | --                                     | --                                      | --                                     | --                                                | --                                                  |
| African trypanosomiasis                                                              | --                                     | --                                      | --                                     | --                                                | --                                                  |
| Schistosomiasis                                                                      | --                                     | --                                      | --                                     | --                                                | --                                                  |
| Cysticercosis                                                                        | 0.1<br>(< 0.05 to 0.2)                 | --                                      | < 0.05<br>(0.0 to < 0.05)              | -10.3<br>(-100.0 to 1,224.1)                      | -13.0<br>(-100.0 to 1,170.4)                        |
| Cystic echinococcosis                                                                | < 0.05<br>(< 0.05 to 0.1)              | < 0.05<br>(< 0.05 to < 0.05)            | < 0.05<br>(< 0.05 to < 0.05)           | -57.8<br>(-96.7 to 343.4)                         | -57.6<br>(-96.0 to 329.4)                           |
| Lymphatic filariasis                                                                 | --                                     | --                                      | --                                     | --                                                | --                                                  |
| Onchocerciasis                                                                       | --                                     | --                                      | --                                     | --                                                | --                                                  |
| Trachoma                                                                             | --                                     | --                                      | --                                     | --                                                | --                                                  |
| Dengue                                                                               | --                                     | --                                      | --                                     | --                                                | --                                                  |
| Yellow fever                                                                         | --                                     | --                                      | --                                     | --                                                | --                                                  |
| Rabies                                                                               | < 0.05<br>(< 0.05 to < 0.05)           | < 0.05<br>(< 0.05 to < 0.05)            | < 0.05<br>(< 0.05 to < 0.05)           | 9.5<br>(-18.2 to 49.3)                            | -13.9<br>(-33.8 to 11.5)                            |
| Intestinal nematode infections                                                       | --                                     | --                                      | --                                     | --                                                | --                                                  |
| Ascariasis                                                                           | --                                     | --                                      | --                                     | --                                                | --                                                  |

| Cause                                                                   | Prevalence in thousands (95% UI)              | Incidence in thousands (95% UI)                | YLDs in thousands (95% UI)              |                                                   |                                                     |
|-------------------------------------------------------------------------|-----------------------------------------------|------------------------------------------------|-----------------------------------------|---------------------------------------------------|-----------------------------------------------------|
|                                                                         | 2016 counts                                   | 2016 counts                                    | 2016 counts                             | Percentage change in counts between 2006 and 2016 | Percentage change in age-standardised rates between |
| Trichuriasis                                                            | --                                            | --                                             | --                                      | --                                                | --                                                  |
| Hookworm disease                                                        | --                                            | --                                             | --                                      | --                                                | --                                                  |
| Food-borne trematodiasis                                                | --                                            | --                                             | --                                      | --                                                | --                                                  |
| Leprosy                                                                 | --                                            | --                                             | --                                      | --                                                | --                                                  |
| Ebola virus disease                                                     | --                                            | --                                             | --                                      | --                                                | --                                                  |
| Zika virus disease                                                      | --                                            | --                                             | --                                      | --                                                | --                                                  |
| Guinea worm disease                                                     | --                                            | --                                             | --                                      | --                                                | --                                                  |
| Other neglected tropical diseases                                       | --                                            | --                                             | < 0.05<br>(< 0.05 to < 0.05)            | --                                                | --                                                  |
| <b>Maternal disorders</b>                                               | <b>1.9</b><br><b>(1.5 to 2.5)</b>             | <b>15.3†</b><br><b>(13.1 to 17.8)</b>          | <b>0.1</b><br><b>(0.1 to 0.1)</b>       | <b>-3.7</b><br><b>(-27.3 to 25.0)</b>             | <b>-0.5</b><br><b>(-25.0 to 29.9)</b>               |
| Maternal haemorrhage                                                    | 1.0<br>(0.6 to 1.6)                           | 2.8<br>(2.1 to 3.6)                            | < 0.05<br>(< 0.05 to < 0.05)            | 18.8<br>(-25.6 to 84.6)                           | 20.8<br>(-23.0 to 87.1)                             |
| Maternal sepsis and other pregnancy related infections                  | 0.5<br>(0.4 to 0.6)                           | 2.1<br>(1.6 to 2.8)                            | < 0.05<br>(< 0.05 to < 0.05)            | -18.8<br>(-57.9 to 63.5)                          | -13.6<br>(-55.9 to 74.0)                            |
| Maternal hypertensive disorders                                         | 0.5<br>(0.3 to 0.7)                           | 1.9<br>(1.4 to 2.4)                            | < 0.05<br>(< 0.05 to < 0.05)            | -7.2<br>(-44.5 to 58.3)                           | -4.0<br>(-42.3 to 63.3)                             |
| Maternal obstructed labour and uterine rupture                          | < 0.05<br>(< 0.05 to < 0.05)                  | 0.9<br>(0.6 to 1.2)                            | < 0.05<br>(< 0.05 to < 0.05)            | -9.6<br>(-51.4 to 63.2)                           | -6.0<br>(-48.7 to 69.5)                             |
| Maternal abortion, miscarriage, and ectopic pregnancy                   | 0.1<br>(< 0.05 to 0.1)                        | 7.7<br>(5.8 to 10.1)                           | < 0.05<br>(< 0.05 to < 0.05)            | -14.7<br>(-57.8 to 62.7)                          | -12.0<br>(-56.1 to 68.6)                            |
| Other maternal disorders                                                | --                                            | --                                             | < 0.05<br>(< 0.05 to < 0.05)            | -10.2<br>(-32.2 to 16.8)                          | -6.9<br>(-29.9 to 21.4)                             |
| <b>Neonatal disorders</b>                                               | <b>12.1</b><br><b>(10.4 to 14.2)</b>          | <b>2.2</b><br><b>--</b>                        | <b>2.2</b><br><b>(1.5 to 3.0)</b>       | <b>-9.2</b><br><b>(-20.0 to 5.0)</b>              | <b>-4.9</b><br><b>(-16.6 to 9.6)</b>                |
| Neonatal preterm birth complications                                    | 6.4<br>(5.0 to 8.4)                           | --                                             | 0.6<br>(0.4 to 0.9)                     | -20.5<br>(-38.2 to 2.2)                           | -14.7<br>(-33.6 to 10.3)                            |
| Neonatal encephalopathy due to birth asphyxia and trauma                | 6.4<br>(4.5 to 8.9)                           | --                                             | 1.2<br>(0.7 to 1.8)                     | 5.9<br>(-11.3 to 36.7)                            | 10.2<br>(-7.2 to 40.1)                              |
| Neonatal sepsis and other neonatal infections                           | 0.8<br>(0.4 to 1.7)                           | --                                             | 0.3<br>(0.1 to 0.8)                     | -26.2<br>(-37.6 to -3.6)                          | -23.5<br>(-35.1 to -1.3)                            |
| Hemolytic disease and other neonatal jaundice                           | 0.1<br>(0.1 to 0.1)                           | --                                             | < 0.05<br>(< 0.05 to < 0.05)            | -8.2<br>(-14.6 to -0.3)                           | -2.0<br>(-9.1 to 6.4)                               |
| Other neonatal disorders                                                | --                                            | --                                             | < 0.05<br>(< 0.05 to 0.1)               | -11.9<br>(-24.7 to 3.6)                           | -11.4<br>(-24.2 to 4.1)                             |
| <b>Nutritional deficiencies</b>                                         | <b>99.3</b><br><b>(86.2 to 110.9)</b>         | <b>2.4†</b><br><b>(1.9 to 3.1)</b>             | <b>1.3</b><br><b>(0.8 to 2.1)</b>       | <b>-14.7</b><br><b>(-24.8 to -2.9)</b>            | <b>-9.6</b><br><b>(-21.5 to 5.0)</b>                |
| Protein-energy malnutrition                                             | 1.6<br>(1.2 to 2.0)                           | 0.7<br>(0.6 to 0.9)                            | 0.1<br>(< 0.05 to 0.1)                  | -16.4<br>(-43.7 to 24.9)                          | -15.7<br>(-43.4 to 25.8)                            |
| Iodine deficiency                                                       | 17.6<br>(15.3 to 20.6)                        | 0.2<br>(0.2 to 0.3)                            | 0.4<br>(0.2 to 0.6)                     | 1.9<br>(-8.7 to 14.1)                             | 2.0<br>(-8.6 to 14.0)                               |
| Vitamin A deficiency                                                    | 1.7<br>(1.2 to 2.5)                           | 1.5<br>(1.0 to 2.1)                            | --                                      | --                                                | --                                                  |
| Iron-deficiency anaemia                                                 | 72.9<br>(60.4 to 86.0)                        | --                                             | 0.8<br>(0.5 to 1.4)                     | -20.5<br>(-33.6 to -5.0)                          | -11.9<br>(-27.7 to 8.1)                             |
| Other nutritional deficiencies                                          | --                                            | --                                             | < 0.05<br>(< 0.05 to < 0.05)            | -16.5<br>(-44.5 to 27.3)                          | -16.1<br>(-44.1 to 27.3)                            |
| <b>Other communicable, maternal, neonatal, and nutritional diseases</b> | <b>338.7</b><br><b>(312.3 to 367.5)</b>       | <b>79.3</b><br><b>(66.4 to 96.0)</b>           | <b>0.5</b><br><b>(0.3 to 0.7)</b>       | <b>-4.7</b><br><b>(-10.2 to 2.0)</b>              | <b>-1.4</b><br><b>(-7.3 to 5.1)</b>                 |
| Sexually transmitted diseases excluding HIV                             | 273.2<br>(250.7 to 300.6)                     | 76.2<br>(63.4 to 93.1)                         | 0.4<br>(0.2 to 0.6)                     | -5.6<br>(-11.3 to 1.2)                            | -3.0<br>(-9.2 to 3.5)                               |
| Syphilis                                                                | 2.3<br>(1.8 to 2.8)                           | 1.4<br>(1.0 to 1.9)                            | 0.1<br>(0.1 to 0.1)                     | 13.3<br>(-4.9 to 35.5)                            | 5.0<br>(-10.8 to 24.1)                              |
| Chlamydial infection                                                    | 17.5<br>(14.0 to 22.0)                        | 13.4<br>(10.5 to 16.8)                         | 0.1<br>(< 0.05 to 0.1)                  | -8.1<br>(-19.4 to 3.0)                            | -3.3<br>(-15.1 to 8.6)                              |
| Gonococcal infection                                                    | 8.5<br>(5.4 to 12.4)                          | 27.9<br>(15.9 to 43.7)                         | < 0.05<br>(< 0.05 to 0.1)               | -13.8<br>(-27.0 to 3.4)                           | -2.4<br>(-16.5 to 14.7)                             |
| Trichomoniasis                                                          | 23.1<br>(20.1 to 26.5)                        | 19.1<br>(16.5 to 22.0)                         | < 0.05<br>(< 0.05 to < 0.05)            | -6.7<br>(-13.6 to 0.6)                            | -2.3<br>(-9.6 to 5.5)                               |
| Genital herpes                                                          | 227.7<br>(197.0 to 266.0)                     | 8.5<br>(7.2 to 10.4)                           | 0.1<br>(< 0.05 to 0.1)                  | -5.8<br>(-16.0 to 5.8)                            | -6.6<br>(-17.0 to 5.6)                              |
| Other sexually transmitted diseases                                     | 5.9<br>(4.8 to 7.1)                           | 5.9<br>(5.0 to 7.0)                            | 0.1<br>(0.1 to 0.2)                     | -10.9<br>(-22.1 to 0.4)                           | -5.2<br>(-17.1 to 6.0)                              |
| Hepatitis                                                               | 87.2<br>(75.8 to 100.7)                       | 3.1<br>(2.6 to 3.7)                            | < 0.05<br>(< 0.05 to < 0.05)            | -26.8<br>(-38.7 to -13.1)                         | -22.7<br>(-35.9 to -7.4)                            |
| Acute hepatitis A                                                       | 0.1<br>(< 0.05 to 0.1)                        | 0.7<br>(0.4 to 0.9)                            | < 0.05<br>(< 0.05 to < 0.05)            | -33.6<br>(-57.4 to 8.8)                           | -27.5<br>(-55.2 to 20.4)                            |
| Hepatitis B                                                             | 52.4<br>(42.3 to 65.1)                        | 2.1<br>(1.6 to 2.6)                            | < 0.05<br>(< 0.05 to < 0.05)            | -27.4<br>(-39.7 to -12.5)                         | -27.6<br>(-40.1 to -12.8)                           |
| Hepatitis C                                                             | 34.8<br>(31.2 to 38.4)                        | 0.4<br>(0.3 to 0.4)                            | < 0.05<br>(< 0.05 to < 0.05)            | -3.5<br>(-30.5 to 31.9)                           | -1.1<br>(-29.8 to 37.3)                             |
| Acute hepatitis E                                                       | < 0.05<br>(< 0.05 to < 0.05)                  | 0.1<br>(< 0.05 to 0.1)                         | < 0.05<br>(< 0.05 to < 0.05)            | -27.1<br>(-38.8 to -15.0)                         | -25.3<br>(-33.6 to -17.2)                           |
| Other infectious diseases                                               | 2.5<br>(2.0 to 3.1)                           | < 0.05<br>(< 0.05 to < 0.05)                   | 0.1<br>(< 0.05 to 0.1)                  | 2.7<br>(-10.4 to 19.1)                            | 8.3<br>(-7.4 to 29.4)                               |
| <b>Non-communicable diseases</b>                                        | <b>1,202.8</b><br><b>(1,196.8 to 1,208.7)</b> | <b>3,451.8†</b><br><b>(3,324.8 to 3,599.0)</b> | <b>152.8</b><br><b>(113.7 to 196.5)</b> | <b>1.7</b><br><b>(0.0 to 3.4)</b>                 | <b>-1.1</b><br><b>(-2.9 to 0.6)</b>                 |
| <b>Neoplasms</b>                                                        | <b>23.8</b><br><b>(22.7 to 25.1)</b>          | <b>7.6</b><br><b>(6.7 to 8.4)</b>              | <b>2.3</b><br><b>(1.7 to 3.1)</b>       | <b>12.9</b><br><b>(4.0 to 22.1)</b>               | <b>2.9</b><br><b>(-5.4 to 11.4)</b>                 |
| Lip and oral cavity cancer                                              | 0.4<br>(0.3 to 0.5)                           | 0.1<br>(0.1 to 0.1)                            | < 0.05<br>(< 0.05 to 0.1)               | 4.2<br>(-16.2 to 29.2)                            | -5.5<br>(-24.3 to 17.2)                             |
| Nasopharynx cancer                                                      | < 0.05<br>(< 0.05 to < 0.05)                  | < 0.05<br>(< 0.05 to < 0.05)                   | < 0.05<br>(< 0.05 to < 0.05)            | -17.8<br>(-29.2 to 0.1)                           | -19.4<br>(-30.8 to -1.3)                            |
| Other pharynx cancer                                                    | 0.2<br>(0.2 to 0.3)                           | 0.1<br>(0.1 to 0.1)                            | < 0.05<br>(< 0.05 to < 0.05)            | 34.4<br>(3.6 to 71.5)                             | 27.0<br>(-1.9 to 64.0)                              |
| Oesophageal cancer                                                      | 0.1<br>(0.1 to 0.1)                           | 0.1<br>(0.1 to 0.1)                            | < 0.05<br>(< 0.05 to < 0.05)            | 9.1<br>(-17.9 to 45.0)                            | -0.8<br>(-25.8 to 32.6)                             |
| Stomach cancer                                                          | 0.8<br>(0.7 to 0.9)                           | 0.4<br>(0.4 to 0.5)                            | 0.1<br>(0.1 to 0.1)                     | -4.2<br>(-19.9 to 13.9)                           | -14.2<br>(-28.0 to 1.8)                             |
| Colon and rectum cancer                                                 | 3.2<br>(2.9 to 3.7)                           | 0.9<br>(0.8 to 1.0)                            | 0.3<br>(0.2 to 0.4)                     | 12.5<br>(-1.3 to 30.2)                            | -1.1<br>(-13.2 to 15.0)                             |
| Liver cancer                                                            | 0.1<br>(0.1 to 0.1)                           | 0.1<br>(0.1 to 0.1)                            | < 0.05<br>(< 0.05 to < 0.05)            | 47.6<br>(22.7 to 77.0)                            | 30.4<br>(9.0 to 55.5)                               |
| Liver cancer due to hepatitis B                                         | 0.1<br>(< 0.05 to 0.1)                        | < 0.05<br>(< 0.05 to 0.1)                      | < 0.05<br>(< 0.05 to < 0.05)            | 44.5<br>(20.1 to 73.8)                            | 28.8<br>(7.5 to 53.8)                               |



| Cause                                              | Prevalence in thousands (95% UI)        | Incidence in thousands (95% UI)       | YLDs in thousands (95% UI)          |                                                   |                                                     |
|----------------------------------------------------|-----------------------------------------|---------------------------------------|-------------------------------------|---------------------------------------------------|-----------------------------------------------------|
|                                                    | 2016 counts                             | 2016 counts                           | 2016 counts                         | Percentage change in counts between 2006 and 2016 | Percentage change in age-standardised rates between |
| Liver cancer due to hepatitis C                    | < 0.05<br>(< 0.05 to < 0.05)            | < 0.05<br>(< 0.05 to < 0.05)          | < 0.05<br>(< 0.05 to < 0.05)        | 50.9<br>(22.2 to 85.2)                            | 27.7<br>(4.3 to 55.6)                               |
| Liver cancer due to alcohol use                    | 0.1<br>(0.1 to 0.1)                     | 0.1<br>(< 0.05 to 0.1)                | < 0.05<br>(< 0.05 to < 0.05)        | 52.4<br>(24.4 to 87.6)                            | 35.2<br>(12.0 to 65.4)                              |
| Liver cancer due to other causes                   | < 0.05<br>(< 0.05 to < 0.05)            | < 0.05<br>(< 0.05 to < 0.05)          | < 0.05<br>(< 0.05 to < 0.05)        | 38.5<br>(13.9 to 67.7)                            | 22.6<br>(1.0 to 47.4)                               |
| Gallbladder and biliary tract cancer               | < 0.05<br>(< 0.05 to < 0.05)            | < 0.05<br>(< 0.05 to 0.1)             | < 0.05<br>(< 0.05 to < 0.05)        | 1.4<br>(-7.7 to 13.4)                             | -13.3<br>(-21.1 to -2.6)                            |
| Pancreatic cancer                                  | 0.2<br>(0.2 to 0.2)                     | 0.2<br>(0.2 to 0.3)                   | < 0.05<br>(< 0.05 to 0.1)           | 15.1<br>(-5.7 to 40.4)                            | 0.2<br>(-17.5 to 20.2)                              |
| Larynx cancer                                      | 0.3<br>(0.2 to 0.3)                     | 0.1<br>(0.1 to 0.1)                   | < 0.05<br>(< 0.05 to < 0.05)        | -5.0<br>(-25.8 to 19.7)                           | -11.0<br>(-29.8 to 11.7)                            |
| Tracheal, bronchus, and lung cancer                | 0.9<br>(0.8 to 1.0)                     | 0.7<br>(0.6 to 0.7)                   | 0.1<br>(0.1 to 0.2)                 | -9.1<br>(-23.0 to 6.5)                            | -18.0<br>(-30.6 to -3.0)                            |
| Malignant skin melanoma                            | 1.0<br>(0.7 to 1.2)                     | 0.2<br>(0.1 to 0.3)                   | 0.1<br>(< 0.05 to 0.1)              | 28.1<br>(4.7 to 51.2)                             | 17.9<br>(-3.1 to 39.6)                              |
| Non-melanoma skin cancer                           | 0.3<br>(0.1 to 0.7)                     | 0.7<br>(0.4 to 1.2)                   | < 0.05<br>(< 0.05 to < 0.05)        | 121.1<br>(2.2 to 468.3)                           | 82.8<br>(-15.3 to 367.6)                            |
| Non-melanoma skin cancer (squamous-cell carcinoma) | 0.2<br>(0.1 to 0.6)                     | 0.2<br>(0.1 to 0.6)                   | < 0.05<br>(< 0.05 to < 0.05)        | 128.9<br>(-2.5 to 517.3)                          | 87.6<br>(-19.5 to 404.2)                            |
| Non-melanoma skin cancer (basal-cell carcinoma)    | 0.1<br>(< 0.05 to 0.1)                  | 0.5<br>(0.3 to 0.9)                   | < 0.05<br>(< 0.05 to < 0.05)        | 52.7<br>(-31.9 to 196.3)                          | 40.5<br>(-34.7 to 153.8)                            |
| Breast cancer                                      | 3.1<br>(2.8 to 3.6)                     | 0.6<br>(0.6 to 0.8)                   | 0.3<br>(0.2 to 0.4)                 | -0.7<br>(-13.6 to 15.2)                           | -8.1<br>(-20.1 to 6.5)                              |
| Cervical cancer                                    | 0.6<br>(0.5 to 0.7)                     | 0.1<br>(0.1 to 0.2)                   | 0.1<br>(< 0.05 to 0.1)              | -19.9<br>(-35.2 to 2.6)                           | -23.2<br>(-38.7 to -0.2)                            |
| Uterine cancer                                     | 1.7<br>(1.4 to 2.1)                     | 0.4<br>(0.3 to 0.5)                   | 0.1<br>(0.1 to 0.2)                 | 17.1<br>(-7.8 to 50.1)                            | 7.5<br>(-16.0 to 40.0)                              |
| Ovarian cancer                                     | 0.6<br>(0.5 to 0.8)                     | 0.2<br>(0.1 to 0.2)                   | 0.1<br>(0.1 to 0.1)                 | -0.8<br>(-26.1 to 33.1)                           | -7.9<br>(-32.0 to 24.7)                             |
| Prostate cancer                                    | 4.3<br>(1.9 to 5.4)                     | 1.0<br>(0.5 to 1.2)                   | 0.4<br>(0.2 to 0.5)                 | 29.7<br>(2.6 to 58.0)                             | 16.6<br>(-7.2 to 42.1)                              |
| Testicular cancer                                  | 0.1<br>(0.1 to 0.1)                     | < 0.05<br>(< 0.05 to < 0.05)          | < 0.05<br>(< 0.05 to < 0.05)        | -17.7<br>(-41.2 to 16.2)                          | -14.9<br>(-40.6 to 21.7)                            |
| Kidney cancer                                      | 1.4<br>(1.1 to 1.6)                     | 0.4<br>(0.3 to 0.4)                   | 0.1<br>(0.1 to 0.2)                 | 7.6<br>(-11.5 to 29.2)                            | -0.6<br>(-18.3 to 19.3)                             |
| Bladder cancer                                     | 1.0<br>(0.9 to 1.1)                     | 0.2<br>(0.2 to 0.3)                   | 0.1<br>(0.1 to 0.1)                 | 13.3<br>(-2.9 to 29.9)                            | -1.0<br>(-15.2 to 13.1)                             |
| Brain and nervous system cancer                    | 0.4<br>(0.2 to 0.5)                     | 0.1<br>(0.1 to 0.2)                   | < 0.05<br>(< 0.05 to 0.1)           | 25.2<br>(-2.2 to 48.4)                            | 18.8<br>(-7.4 to 41.5)                              |
| Thyroid cancer                                     | 0.6<br>(0.5 to 0.7)                     | 0.1<br>(0.1 to 0.1)                   | < 0.05<br>(< 0.05 to 0.1)           | 18.8<br>(-2.5 to 46.0)                            | 14.2<br>(-7.3 to 41.7)                              |
| Mesothelioma                                       | < 0.05<br>(< 0.05 to < 0.05)            | < 0.05<br>(< 0.05 to < 0.05)          | < 0.05<br>(< 0.05 to < 0.05)        | 23.8<br>(9.4 to 35.0)                             | 10.0<br>(-3.2 to 20.1)                              |
| Hodgkin lymphoma                                   | 0.2<br>(0.1 to 0.2)                     | < 0.05<br>(< 0.05 to < 0.05)          | < 0.05<br>(< 0.05 to < 0.05)        | 13.0<br>(-15.6 to 36.8)                           | 20.8<br>(-10.2 to 48.9)                             |
| Non-Hodgkin's lymphoma                             | 1.0<br>(0.7 to 1.2)                     | 0.2<br>(0.2 to 0.3)                   | 0.1<br>(0.1 to 0.1)                 | 56.8<br>(27.2 to 86.1)                            | 44.5<br>(17.2 to 71.5)                              |
| Multiple myeloma                                   | 0.2<br>(0.1 to 0.3)                     | 0.1<br>(< 0.05 to 0.1)                | < 0.05<br>(< 0.05 to 0.1)           | 35.9<br>(-6.9 to 82.2)                            | 24.6<br>(-13.9 to 66.8)                             |
| Leukaemia                                          | 0.9<br>(0.8 to 1.1)                     | 0.3<br>(0.2 to 0.3)                   | 0.1<br>(0.1 to 0.2)                 | 48.4<br>(23.3 to 77.4)                            | 40.2<br>(15.1 to 68.3)                              |
| Acute lymphoid leukaemia                           | 0.1<br>(0.1 to 0.2)                     | < 0.05<br>(< 0.05 to < 0.05)          | < 0.05<br>(< 0.05 to < 0.05)        | 86.4<br>(38.3 to 146.9)                           | 93.8<br>(32.6 to 170.2)                             |
| Chronic lymphoid leukaemia                         | 0.6<br>(0.4 to 0.7)                     | 0.1<br>(0.1 to 0.1)                   | 0.1<br>(< 0.05 to 0.1)              | 52.0<br>(16.2 to 94.6)                            | 36.3<br>(3.8 to 74.9)                               |
| Acute myeloid leukaemia                            | 0.1<br>(0.1 to 0.1)                     | 0.1<br>(0.1 to 0.1)                   | < 0.05<br>(< 0.05 to < 0.05)        | 39.5<br>(18.1 to 64.3)                            | 26.1<br>(5.1 to 49.6)                               |
| Chronic myeloid leukaemia                          | < 0.05<br>(< 0.05 to 0.1)               | < 0.05<br>(< 0.05 to < 0.05)          | < 0.05<br>(< 0.05 to < 0.05)        | -10.5<br>(-26.1 to 9.9)                           | -16.5<br>(-31.2 to 0.6)                             |
| Other leukaemia                                    | 0.1<br>(0.1 to 0.1)                     | < 0.05<br>(< 0.05 to < 0.05)          | < 0.05<br>(< 0.05 to < 0.05)        | 49.9<br>(15.7 to 93.9)                            | 31.2<br>(1.9 to 70.1)                               |
| Other neoplasms                                    | 0.4<br>(0.3 to 0.5)                     | 0.1<br>(0.1 to 0.2)                   | < 0.05<br>(< 0.05 to 0.1)           | 21.6<br>(-3.4 to 47.3)                            | 12.0<br>(-11.2 to 33.9)                             |
| <b>Cardiovascular diseases</b>                     | <b>160.3</b><br><b>(154.4 to 165.6)</b> | <b>21.8†</b><br><b>(20.5 to 23.1)</b> | <b>13.4</b><br><b>(9.9 to 17.1)</b> | <b>8.2</b><br><b>(3.2 to 12.9)</b>                | <b>-5.0</b><br><b>(-9.1 to -1.0)</b>                |
| Rheumatic heart disease                            | 0.3<br>(0.3 to 0.3)                     | 0.1<br>(< 0.05 to 0.1)                | < 0.05<br>(< 0.05 to < 0.05)        | -4.0<br>(-24.5 to 21.1)                           | -7.6<br>(-26.1 to 14.1)                             |
| Ischaemic heart disease                            | 72.8<br>(68.8 to 77.4)                  | 10.9<br>(10.0 to 12.0)                | 3.4<br>(2.4 to 4.5)                 | 12.0<br>(7.7 to 17.4)                             | -1.6<br>(-5.5 to 2.7)                               |
| Cerebrovascular disease                            | 32.3<br>(30.2 to 34.6)                  | 4.6‡<br>(4.2 to 5.1)                  | 6.6<br>(4.7 to 8.3)                 | 3.5<br>(-4.8 to 12.1)                             | -9.3<br>(-16.2 to -2.0)                             |
| Ischaemic stroke                                   | 29.7<br>(26.5 to 33.1)                  | 3.8‡<br>(3.3 to 4.2)                  | 5.8<br>(4.1 to 7.5)                 | 2.7<br>(-6.4 to 12.5)                             | -10.4<br>(-18.1 to -2.3)                            |
| Hemorrhagic stroke                                 | 3.7<br>(3.2 to 4.2)                     | 0.9‡<br>(0.8 to 1.0)                  | 0.7<br>(0.5 to 0.9)                 | 11.1<br>(-1.8 to 25.7)                            | 0.0<br>(-11.2 to 12.8)                              |
| Hypertensive heart disease                         | 9.7<br>(8.0 to 11.6)                    | --                                    | 0.8<br>(0.5 to 1.1)                 | 21.5<br>(10.5 to 34.3)                            | 2.6<br>(-5.9 to 12.5)                               |
| Cardiomyopathy and myocarditis                     | 3.3<br>(2.9 to 3.7)                     | 0.7+<br>(0.6 to 0.8)                  | 0.3<br>(0.2 to 0.4)                 | 5.4<br>(-4.7 to 16.8)                             | 3.7<br>(-6.2 to 14.8)                               |
| Myocarditis                                        | 0.2<br>(0.2 to 0.3)                     | 0.7<br>(0.6 to 0.8)                   | < 0.05<br>(< 0.05 to < 0.05)        | -0.6<br>(-12.5 to 13.9)                           | 2.0<br>(-7.4 to 12.7)                               |
| Alcoholic cardiomyopathy                           | 0.7<br>(0.6 to 0.9)                     | --                                    | 0.1<br>(< 0.05 to 0.1)              | 7.1<br>(-11.4 to 29.5)                            | 4.6<br>(-13.4 to 26.4)                              |
| Other cardiomyopathy                               | 2.4<br>(2.1 to 2.8)                     | --                                    | 0.2<br>(0.1 to 0.3)                 | 5.4<br>(-6.1 to 17.5)                             | 3.6<br>(-8.5 to 15.7)                               |
| Atrial fibrillation and flutter                    | 18.2<br>(15.7 to 21.2)                  | 1.4<br>(1.2 to 1.6)                   | 1.4<br>(1.0 to 1.9)                 | 17.6<br>(10.6 to 25.2)                            | 0.1<br>(-5.9 to 6.5)                                |
| Peripheral vascular disease                        | 44.2<br>(38.4 to 51.0)                  | 3.9<br>(3.3 to 4.5)                   | 0.2<br>(0.1 to 0.4)                 | 5.5<br>(-4.1 to 15.4)                             | -10.8<br>(-17.5 to -3.6)                            |
| Endocarditis                                       | 0.1<br>(0.1 to 0.1)                     | 0.3<br>(0.2 to 0.3)                   | < 0.05<br>(< 0.05 to < 0.05)        | 8.8<br>(0.9 to 18.1)                              | 1.2<br>(-5.0 to 8.2)                                |
| Other cardiovascular and circulatory diseases      | 15.8<br>(13.1 to 19.0)                  | --                                    | 0.8<br>(0.5 to 1.2)                 | 8.5<br>(-1.1 to 18.9)                             | 1.3<br>(-6.8 to 10.5)                               |
| <b>Chronic respiratory diseases</b>                | <b>120.0</b><br><b>(115.4 to 125.3)</b> | <b>15.1†</b><br><b>(14.3 to 16.0)</b> | <b>3.9</b><br><b>(2.9 to 5.1)</b>   | <b>2.6</b><br><b>(-2.5 to 7.8)</b>                | <b>2.2</b><br><b>(-2.6 to 7.0)</b>                  |
| Chronic obstructive pulmonary disease              | 51.9<br>(48.3 to 56.8)                  | 2.8<br>(2.6 to 3.0)                   | 0.9<br>(0.8 to 1.2)                 | 5.3<br>(-11.2 to 23.0)                            | -1.2<br>(-15.8 to 15.7)                             |
| Pneumoconiosis                                     | 0.2<br>(0.1 to 0.2)                     | < 0.05<br>(< 0.05 to < 0.05)          | < 0.05<br>(< 0.05 to < 0.05)        | 13.2<br>(-5.6 to 35.1)                            | 4.1<br>(-11.5 to 22.2)                              |
| Silicosis                                          | < 0.05<br>(< 0.05 to < 0.05)            | < 0.05<br>(< 0.05 to < 0.05)          | < 0.05<br>(< 0.05 to < 0.05)        | 11.6<br>(6.6 to 16.9)                             | 4.3<br>(-0.3 to 9.1)                                |

| Cause                                                          | Prevalence in thousands (95% UI)  | Incidence in thousands (95% UI)    | YLDs in thousands (95% UI)     |                                                   |                                                     |
|----------------------------------------------------------------|-----------------------------------|------------------------------------|--------------------------------|---------------------------------------------------|-----------------------------------------------------|
|                                                                | 2016 counts                       | 2016 counts                        | 2016 counts                    | Percentage change in counts between 2006 and 2016 | Percentage change in age-standardised rates between |
| Asbestosis                                                     | < 0.05<br>(< 0.05 to < 0.05)      | < 0.05<br>(< 0.05 to < 0.05)       | < 0.05<br>(< 0.05 to < 0.05)   | 6.0<br>(-0.4 to 12.6)                             | 0.6<br>(-5.6 to 7.1)                                |
| Coal workers pneumoconiosis                                    | --                                | --                                 | --                             | --                                                | --                                                  |
| Other pneumoconiosis                                           | 0.1<br>(0.1 to 0.1)               | < 0.05<br>(< 0.05 to < 0.05)       | < 0.05<br>(< 0.05 to < 0.05)   | 17.4<br>(-15.2 to 60.1)                           | 6.0<br>(-21.6 to 41.8)                              |
| Asthma                                                         | 71.1<br>(66.9 to 75.8)            | 12.3<br>(11.5 to 13.1)             | 2.7<br>(1.8 to 3.9)            | 1.1<br>(-3.2 to 6.0)                              | 2.6<br>(-1.7 to 7.8)                                |
| Interstitial lung disease and pulmonary sarcoidosis            | 1.6<br>(1.4 to 1.7)               | 0.1<br>(0.1 to 0.1)                | 0.2<br>(0.1 to 0.2)            | 4.3<br>(-9.5 to 20.4)                             | -0.6<br>(-13.6 to 13.7)                             |
| Other chronic respiratory diseases                             | --                                | --                                 | < 0.05<br>(< 0.05 to 0.1)      | 30.4<br>(18.2 to 43.5)                            | 34.9<br>(22.6 to 48.0)                              |
| <b>Cirrhosis and other chronic liver diseases</b>              | <b>13.9<br/>(13.2 to 14.7)</b>    | <b>0.3<br/>(0.3 to 0.4)</b>        | <b>0.4<br/>(0.2 to 0.5)</b>    | <b>4.0<br/>(-5.8 to 14.3)</b>                     | <b>3.8<br/>(-6.5 to 14.4)</b>                       |
| Cirrhosis and other chronic liver diseases due to hepatitis B  | 2.5<br>(2.2 to 2.8)               | 0.1<br>(0.1 to 0.1)                | 0.1<br>(< 0.05 to 0.1)         | 5.3<br>(-15.4 to 29.8)                            | 3.4<br>(-17.8 to 28.8)                              |
| Cirrhosis and other chronic liver diseases due to hepatitis C  | 2.9<br>(2.6 to 3.2)               | 0.1<br>(0.1 to 0.1)                | 0.1<br>(< 0.05 to 0.1)         | 2.5<br>(-16.2 to 25.9)                            | 1.0<br>(-17.5 to 23.8)                              |
| Cirrhosis and other chronic liver diseases due to alcohol use  | 5.0<br>(4.6 to 5.5)               | 0.1<br>(0.1 to 0.1)                | 0.1<br>(0.1 to 0.2)            | 9.5<br>(-6.1 to 30.6)                             | 6.4<br>(-10.0 to 27.9)                              |
| Cirrhosis and other chronic liver diseases due to other causes | 3.5<br>(3.2 to 3.8)               | 0.1<br>(0.1 to 0.1)                | 0.1<br>(0.1 to 0.2)            | -1.1<br>(-16.2 to 15.2)                           | 3.5<br>(-11.5 to 21.4)                              |
| <b>Digestive diseases</b>                                      | <b>72.0<br/>(67.2 to 76.9)</b>    | <b>80.8†<br/>(75.5 to 86.5)</b>    | <b>2.1<br/>(1.5 to 2.8)</b>    | <b>14.0<br/>(6.0 to 22.8)</b>                     | <b>11.3<br/>(3.1 to 20.2)</b>                       |
| Peptic ulcer disease                                           | 25.9<br>(23.2 to 29.4)            | 2.0<br>(1.8 to 2.2)                | 0.3<br>(0.2 to 0.5)            | 16.7<br>(-2.6 to 41.3)                            | 15.9<br>(-4.7 to 41.9)                              |
| Gastritis and duodenitis                                       | 29.0<br>(25.2 to 33.0)            | 22.0<br>(19.8 to 24.5)             | 0.4<br>(0.2 to 0.6)            | 24.3<br>(5.8 to 47.6)                             | 24.9<br>(3.5 to 50.3)                               |
| Appendicitis                                                   | 0.1<br>(0.1 to 0.1)               | 2.5<br>(2.3 to 2.7)                | < 0.05<br>(< 0.05 to < 0.05)   | -12.1<br>(-32.3 to 15.8)                          | -2.2<br>(-27.4 to 35.2)                             |
| Paralytic ileus and intestinal obstruction                     | < 0.05<br>(< 0.05 to < 0.05)      | 0.6<br>(0.6 to 0.7)                | < 0.05<br>(< 0.05 to < 0.05)   | 10.6<br>(6.7 to 14.7)                             | 3.8<br>(1.1 to 6.8)                                 |
| Inguinal, femoral, and abdominal hernia                        | 10.0<br>(9.0 to 11.2)             | 24.2<br>(20.8 to 27.6)             | 0.7<br>(0.5 to 1.0)            | 14.5<br>(4.4 to 26.0)                             | 8.6<br>(-1.0 to 19.2)                               |
| Inflammatory bowel disease                                     | 2.4<br>(2.3 to 2.6)               | 1.1<br>(1.0 to 1.1)                | 0.3<br>(0.2 to 0.5)            | 2.8<br>(-7.2 to 13.5)                             | 0.9<br>(-9.7 to 12.0)                               |
| Vascular intestinal disorders                                  | < 0.05<br>(< 0.05 to 0.1)         | 0.3<br>(0.3 to 0.3)                | < 0.05<br>(< 0.05 to < 0.05)   | 7.7<br>(-21.2 to 47.1)                            | -3.3<br>(-24.1 to 21.7)                             |
| Gallbladder and biliary diseases                               | 5.9<br>(5.2 to 6.6)               | 25.7<br>(22.4 to 29.3)             | 0.1<br>(0.1 to 0.1)            | 7.7<br>(-10.1 to 29.1)                            | 3.5<br>(-13.5 to 23.5)                              |
| Pancreatitis                                                   | 0.3<br>(0.2 to 0.3)               | 2.4<br>(2.1 to 2.6)                | < 0.05<br>(< 0.05 to < 0.05)   | 11.5<br>(-10.3 to 36.3)                           | 7.0<br>(-10.1 to 24.9)                              |
| Other digestive diseases                                       | --                                | --                                 | 0.2<br>(0.1 to 0.2)            | 22.9<br>(14.5 to 32.5)                            | 17.3<br>(8.3 to 27.9)                               |
| <b>Neurological disorders</b>                                  | <b>532.4<br/>(512.8 to 554.5)</b> | <b>229.2<br/>(197.4 to 265.6)</b>  | <b>16.3<br/>(10.9 to 22.2)</b> | <b>-1.4<br/>(-12.3 to 10.3)</b>                   | <b>-1.7<br/>(-13.7 to 11.0)</b>                     |
| Alzheimer's disease and other dementias                        | 13.5<br>(11.2 to 16.3)            | 2.3<br>(1.9 to 2.9)                | 2.0<br>(1.4 to 2.7)            | 32.4<br>(23.9 to 41.4)                            | -0.9<br>(-6.0 to 4.3)                               |
| Parkinson's disease                                            | 3.1<br>(2.4 to 3.9)               | 0.3<br>(0.2 to 0.4)                | 0.4<br>(0.2 to 0.5)            | 13.3<br>(-3.6 to 31.8)                            | -2.8<br>(-16.7 to 12.9)                             |
| Epilepsy                                                       | 3.8<br>(0.8 to 7.2)               | 0.3<br>(0.1 to 0.6)                | 0.9<br>(0.1 to 2.2)            | -18.7<br>(-85.9 to 293.6)                         | -17.9<br>(-86.5 to 292.9)                           |
| Multiple sclerosis                                             | 0.9<br>(0.8 to 1.0)               | < 0.05<br>(< 0.05 to < 0.05)       | 0.2<br>(0.2 to 0.3)            | 17.1<br>(-0.2 to 39.0)                            | 14.6<br>(-2.5 to 35.9)                              |
| Motor neuron disease                                           | < 0.05<br>(< 0.05 to 0.1)         | < 0.05<br>(< 0.05 to < 0.05)       | < 0.05<br>(< 0.05 to < 0.05)   | 4.0<br>(0.3 to 7.5)                               | 2.5<br>(-1.5 to 6.3)                                |
| Migraine                                                       | 225.2<br>(211.3 to 239.5)         | 21.8<br>(19.5 to 24.4)             | 10.6<br>(6.8 to 14.8)          | -4.7<br>(-8.4 to -0.8)                            | -0.6<br>(-4.4 to 3.2)                               |
| Tension-type headache                                          | 382.2<br>(341.2 to 422.7)         | 204.4<br>(173.3 to 240.8)          | 1.9<br>(1.2 to 3.0)            | -2.9<br>(-8.8 to 3.3)                             | -0.3<br>(-5.9 to 5.8)                               |
| Other neurological disorders                                   | < 0.05<br>(< 0.05 to < 0.05)      | < 0.05<br>(< 0.05 to < 0.05)       | 0.2<br>(0.1 to 0.4)            | -3.7<br>(-66.1 to 158.7)                          | 1.6<br>(-68.6 to 206.8)                             |
| <b>Mental and substance use disorders</b>                      | <b>229.9<br/>(223.4 to 237.0)</b> | <b>107.7†<br/>(100.4 to 116.0)</b> | <b>32.5<br/>(23.7 to 42.1)</b> | <b>-6.3<br/>(-8.9 to -3.6)</b>                    | <b>-3.0<br/>(-5.5 to -0.2)</b>                      |
| Schizophrenia                                                  | 3.1<br>(2.8 to 3.6)               | 0.2<br>(0.1 to 0.2)                | 2.0<br>(1.5 to 2.5)            | 0.3<br>(-8.6 to 9.6)                              | 1.8<br>(-7.4 to 11.7)                               |
| Alcohol use disorders                                          | 55.7<br>(50.3 to 61.4)            | 26.9<br>(23.4 to 30.5)             | 5.5<br>(3.8 to 7.6)            | -11.4<br>(-19.0 to -3.9)                          | -8.3<br>(-15.9 to -0.3)                             |
| Drug use disorders                                             | 15.1<br>(14.1 to 16.1)            | 1.5<br>(1.4 to 1.7)                | 3.7<br>(2.6 to 4.8)            | 7.8<br>(-1.5 to 17.6)                             | 15.6<br>(5.0 to 26.5)                               |
| Opioid use disorders                                           | 6.0<br>(5.2 to 7.0)               | 0.7<br>(0.6 to 0.8)                | 2.5<br>(1.8 to 3.3)            | 11.5<br>(-0.1 to 23.5)                            | 16.4<br>(3.5 to 30.1)                               |
| Cocaine use disorders                                          | 2.8<br>(2.3 to 3.2)               | 0.1<br>(0.1 to 0.1)                | 0.4<br>(0.2 to 0.6)            | 9.8<br>(-6.6 to 28.9)                             | 22.7<br>(3.0 to 45.5)                               |
| Amphetamine use disorders                                      | 1.7<br>(1.3 to 2.2)               | 0.1<br>(0.1 to 0.1)                | 0.2<br>(0.1 to 0.4)            | -6.2<br>(-26.9 to 16.8)                           | 9.8<br>(-15.0 to 38.2)                              |
| Cannabis use disorders                                         | 3.7<br>(3.1 to 4.4)               | 0.5<br>(0.4 to 0.5)                | 0.1<br>(0.1 to 0.2)            | -18.0<br>(-30.7 to -3.9)                          | -2.3<br>(-19.6 to 14.9)                             |
| Other drug use disorders                                       | 1.3<br>(1.2 to 1.4)               | 0.2<br>(0.2 to 0.2)                | 0.5<br>(0.3 to 0.8)            | 3.6<br>(-17.7 to 30.6)                            | 14.9<br>(-10.4 to 45.7)                             |
| Depressive disorders                                           | 66.0<br>(61.7 to 70.5)            | 68.8<br>(62.5 to 76.0)             | 10.8<br>(7.5 to 14.6)          | -9.6<br>(-14.8 to -4.5)                           | -10.6<br>(-15.4 to -5.3)                            |
| Major depressive disorder                                      | 42.5<br>(38.6 to 46.9)            | 65.3<br>(58.9 to 72.3)             | 8.4<br>(5.8 to 11.3)           | -12.1<br>(-18.3 to -5.7)                          | -13.1<br>(-18.9 to -6.7)                            |
| Dysthymia                                                      | 25.2<br>(22.1 to 28.9)            | 3.6<br>(3.2 to 4.1)                | 2.4<br>(1.6 to 3.4)            | 0.0<br>(-3.1 to 3.1)                              | -0.6<br>(-3.8 to 2.5)                               |
| Bipolar disorder                                               | 8.7<br>(7.6 to 9.9)               | 0.6<br>(0.5 to 0.7)                | 1.8<br>(1.1 to 2.6)            | -6.2<br>(-11.4 to -0.2)                           | -0.1<br>(-6.0 to 6.4)                               |
| Anxiety disorders                                              | 39.4<br>(35.9 to 43.0)            | 6.1<br>(5.6 to 6.6)                | 3.7<br>(2.6 to 5.0)            | -4.0<br>(-8.4 to 0.6)                             | -0.1<br>(-4.6 to 5.0)                               |
| Eating disorders                                               | 1.5<br>(1.2 to 1.8)               | 0.6<br>(0.5 to 0.8)                | 0.3<br>(0.2 to 0.4)            | -2.1<br>(-13.8 to 12.1)                           | 12.4<br>(-0.7 to 27.9)                              |
| Anorexia nervosa                                               | 0.3<br>(0.2 to 0.4)               | 0.1<br>(0.1 to 0.1)                | 0.1<br>(< 0.05 to 0.1)         | -9.3<br>(-28.4 to 18.4)                           | 10.2<br>(-13.3 to 41.8)                             |
| Bulimia nervosa                                                | 1.1<br>(0.8 to 1.5)               | 0.5<br>(0.4 to 0.7)                | 0.2<br>(0.1 to 0.4)            | -0.0<br>(-14.8 to 17.3)                           | 13.0<br>(-2.4 to 30.6)                              |
| Autistic spectrum disorders                                    | 10.3<br>(9.3 to 11.5)             | < 0.05<br>(< 0.05 to 0.1)          | 1.5<br>(1.0 to 2.1)            | -3.8<br>(-8.3 to 0.9)                             | 0.8<br>(-4.1 to 5.6)                                |
| Autism                                                         | 3.2<br>(2.8 to 3.8)               | < 0.05<br>(< 0.05 to < 0.05)       | 0.8<br>(0.5 to 1.2)            | -4.1<br>(-11.5 to 3.8)                            | 0.6<br>(-7.5 to 8.9)                                |
| Asperger syndrome and other autistic spectrum disorders        | 7.1<br>(5.9 to 8.5)               | < 0.05<br>(< 0.05 to 0.1)          | 0.7<br>(0.5 to 1.0)            | -3.5<br>(-7.8 to 1.0)                             | 1.0<br>(-3.6 to 5.8)                                |



| Cause                                                      | Prevalence in thousands (95% UI)        | Incidence in thousands (95% UI)                | YLDs in thousands (95% UI)           |                                                   |                                                     |
|------------------------------------------------------------|-----------------------------------------|------------------------------------------------|--------------------------------------|---------------------------------------------------|-----------------------------------------------------|
|                                                            | 2016 counts                             | 2016 counts                                    | 2016 counts                          | Percentage change in counts between 2006 and 2016 | Percentage change in age-standardised rates between |
| Attention-deficit/hyperactivity disorder                   | 7.8<br>(7.0 to 8.6)                     | 0.3<br>(0.3 to 0.4)                            | 0.1<br>(0.1 to 0.1)                  | -10.9<br>(-17.8 to -3.3)                          | -0.0<br>(-7.4 to 8.5)                               |
| Conduct disorder                                           | 5.6<br>(4.7 to 6.7)                     | 2.0<br>(1.6 to 2.4)                            | 0.7<br>(0.4 to 1.1)                  | -23.4<br>(-28.5 to -17.8)                         | -0.0<br>(-5.3 to 6.2)                               |
| Idiopathic developmental intellectual disability           | 8.9<br>(4.2 to 13.7)                    | --                                             | 0.3<br>(0.1 to 0.6)                  | -14.0<br>(-20.9 to -8.1)                          | -8.4<br>(-15.6 to -2.5)                             |
| Other mental and substance use disorders                   | 29.5<br>(26.3 to 33.8)                  | 0.6<br>(0.6 to 0.7)                            | 2.2<br>(1.5 to 3.1)                  | -0.0<br>(-4.4 to 4.5)                             | 0.5<br>(-4.1 to 5.3)                                |
| <b>Diabetes, urogenital, blood, and endocrine diseases</b> | <b>475.0</b><br><b>(466.4 to 484.4)</b> | <b>251.5†</b><br><b>(236.9 to 267.4)</b>       | <b>14.3</b><br><b>(10.2 to 19.2)</b> | <b>5.4</b><br><b>(0.2 to 10.7)</b>                | <b>0.4</b><br><b>(-4.4 to 5.4)</b>                  |
| Diabetes mellitus                                          | 75.5<br>(67.1 to 85.1)                  | 3.4<br>(3.0 to 3.8)                            | 6.6<br>(4.6 to 9.0)                  | 7.4<br>(-3.1 to 18.4)                             | -0.1<br>(-10.1 to 10.8)                             |
| Acute glomerulonephritis                                   | < 0.05<br>(< 0.05 to < 0.05)            | 0.4<br>(0.4 to 0.5)                            | < 0.05<br>(< 0.05 to < 0.05)         | 0.8<br>(-4.0 to 6.0)                              | 1.1<br>(-3.3 to 5.9)                                |
| Chronic kidney disease                                     | 127.0<br>(113.6 to 140.5)               | 9.5<br>(8.1 to 11.0)                           | 2.3<br>(1.7 to 3.0)                  | 16.9<br>(6.4 to 28.9)                             | 3.7<br>(-5.1 to 13.4)                               |
| Chronic kidney disease due to diabetes mellitus            | 44.7<br>(38.8 to 51.5)                  | 3.6<br>(2.9 to 4.3)                            | 0.8<br>(0.6 to 1.0)                  | 16.7<br>(2.6 to 33.2)                             | 7.1<br>(-5.7 to 22.1)                               |
| Chronic kidney disease due to hypertension                 | 27.4<br>(23.6 to 31.6)                  | 2.7<br>(2.2 to 3.2)                            | 0.3<br>(0.2 to 0.5)                  | 33.0<br>(9.2 to 60.0)                             | 4.1<br>(-12.9 to 24.6)                              |
| Chronic kidney disease due to glomerulonephritis           | 25.7<br>(22.2 to 29.6)                  | 1.1<br>(0.8 to 1.4)                            | 0.7<br>(0.5 to 0.9)                  | 15.8<br>(1.0 to 31.8)                             | 6.3<br>(-5.7 to 19.3)                               |
| Chronic kidney disease due to other causes                 | 29.2<br>(23.9 to 34.8)                  | 2.1<br>(1.7 to 2.6)                            | 0.5<br>(0.4 to 0.7)                  | 10.3<br>(-5.9 to 30.0)                            | -4.0<br>(-17.2 to 11.6)                             |
| Urinary diseases and male infertility                      | 51.0<br>(45.9 to 56.1)                  | 165.5†<br>(152.2 to 179.6)                     | 1.6<br>(1.0 to 2.3)                  | 7.6<br>(1.9 to 13.1)                              | 0.5<br>(-4.4 to 5.6)                                |
| Interstitial nephritis and urinary tract infections        | 2.3<br>(2.1 to 2.6)                     | 120.5<br>(108.3 to 133.4)                      | 0.1<br>(< 0.05 to 0.1)               | -10.1<br>(-19.6 to 0.5)                           | -3.9<br>(-13.7 to 7.6)                              |
| Urolithiasis                                               | 1.5<br>(1.3 to 1.7)                     | 39.9<br>(35.2 to 45.1)                         | 0.1<br>(0.1 to 0.1)                  | 3.4<br>(-12.0 to 23.7)                            | -0.4<br>(-15.0 to 18.3)                             |
| Benign prostatic hyperplasia                               | 40.6<br>(34.7 to 46.8)                  | 5.2<br>(4.2 to 6.1)                            | 1.3<br>(0.8 to 1.9)                  | 11.6<br>(4.8 to 17.7)                             | 3.1<br>(-3.0 to 9.3)                                |
| Male infertility                                           | 5.2<br>(4.1 to 6.7)                     | --                                             | < 0.05<br>(< 0.05 to 0.1)            | -13.7<br>(-20.6 to -6.5)                          | -8.9<br>(-16.1 to -1.4)                             |
| Other urinary diseases                                     | --                                      | --                                             | 0.1<br>(< 0.05 to 0.1)               | -19.4<br>(-27.2 to -9.8)                          | -18.5<br>(-26.1 to -9.9)                            |
| Gynecological diseases                                     | 171.3<br>(163.3 to 182.5)               | 66.8†<br>(61.0 to 73.6)                        | 2.2<br>(1.5 to 3.2)                  | -9.1<br>(-12.9 to -5.7)                           | -2.9<br>(-6.8 to 0.9)                               |
| Uterine fibroids                                           | 23.5<br>(20.5 to 27.0)                  | 2.0<br>(1.7 to 2.4)                            | 0.2<br>(0.1 to 0.4)                  | -10.9<br>(-17.9 to -5.4)                          | -9.6<br>(-17.4 to -3.3)                             |
| Polycystic ovarian syndrome                                | 1.2<br>(0.9 to 1.6)                     | 0.5<br>(0.4 to 0.7)                            | < 0.05<br>(< 0.05 to < 0.05)         | -6.4<br>(-17.6 to 7.6)                            | -1.2<br>(-13.1 to 13.8)                             |
| Female infertility                                         | 2.4<br>(1.0 to 4.6)                     | --                                             | < 0.05<br>(< 0.05 to < 0.05)         | 12.6<br>(-13.6 to 52.9)                           | 19.5<br>(-5.0 to 61.3)                              |
| Endometriosis                                              | 0.9<br>(0.8 to 1.1)                     | 2.4<br>(1.8 to 3.0)                            | 0.1<br>(0.1 to 0.1)                  | -10.6<br>(-28.6 to 11.5)                          | -1.6<br>(-21.0 to 22.7)                             |
| Genital prolapse                                           | 59.4<br>(50.6 to 68.8)                  | 2.1<br>(1.8 to 2.5)                            | 0.2<br>(0.1 to 0.3)                  | 7.9<br>(-2.5 to 19.3)                             | 0.5<br>(-8.5 to 10.7)                               |
| Premenstrual syndrome                                      | 74.6<br>(70.6 to 78.8)                  | 25.1<br>(23.4 to 26.8)                         | 0.6<br>(0.4 to 1.0)                  | -12.7<br>(-19.4 to -5.9)                          | -2.7<br>(-10.2 to 5.0)                              |
| Other gynecological diseases                               | 31.4<br>(27.0 to 36.5)                  | 34.8<br>(29.1 to 41.2)                         | 1.1<br>(0.7 to 1.6)                  | -9.2<br>(-14.1 to -3.9)                           | -2.6<br>(-7.9 to 2.8)                               |
| Hemoglobinopathies and hemolytic anaemias                  | 150.6<br>(147.0 to 153.9)               | --                                             | 0.4<br>(0.3 to 0.6)                  | 22.6<br>(3.4 to 46.1)                             | 25.7<br>(3.7 to 53.1)                               |
| Thalassemias                                               | < 0.05<br>(< 0.05 to < 0.05)            | --                                             | < 0.05<br>(< 0.05 to < 0.05)         | 15.9<br>(-8.9 to 41.7)                            | 14.7<br>(-10.4 to 41.7)                             |
| Thalassaemia trait                                         | 21.9<br>(19.9 to 24.1)                  | --                                             | 0.3<br>(0.2 to 0.5)                  | 21.8<br>(1.5 to 46.6)                             | 24.9<br>(2.4 to 53.1)                               |
| Sickle cell disorders                                      | < 0.05<br>(< 0.05 to < 0.05)            | --                                             | < 0.05<br>(< 0.05 to < 0.05)         | 5.2<br>(-3.1 to 15.1)                             | 18.4<br>(8.7 to 30.9)                               |
| Sickle cell trait                                          | 18.1<br>(17.4 to 19.0)                  | --                                             | 0.1<br>(< 0.05 to 0.1)               | 33.6<br>(6.9 to 67.8)                             | 38.0<br>(6.2 to 78.2)                               |
| G6PD deficiency                                            | 14.0<br>(13.2 to 14.9)                  | --                                             | < 0.05<br>(< 0.05 to < 0.05)         | 18.9<br>(-5.0 to 53.2)                            | 33.9<br>(1.9 to 85.0)                               |
| G6PD trait                                                 | 96.7<br>(94.3 to 99.4)                  | --                                             | < 0.05<br>(< 0.05 to < 0.05)         | 38.3<br>(12.5 to 74.2)                            | 51.1<br>(17.4 to 103.2)                             |
| Other hemoglobinopathies and hemolytic anaemias            | 4.6<br>(3.8 to 5.7)                     | --                                             | 0.1<br>(< 0.05 to 0.1)               | 17.8<br>(-2.8 to 48.4)                            | 18.5<br>(-3.7 to 52.5)                              |
| Endocrine, metabolic, blood, and immune disorders          | 37.9<br>(34.2 to 42.3)                  | 5.9<br>(5.1 to 6.6)                            | 1.3<br>(0.8 to 1.8)                  | -1.1<br>(-7.0 to 5.3)                             | -3.2<br>(-8.8 to 3.4)                               |
| <b>Musculoskeletal disorders</b>                           | <b>307.0</b><br><b>(293.7 to 321.6)</b> | <b>130.0</b><br><b>(116.0 to 146.1)</b>        | <b>35.6</b><br><b>(25.7 to 46.5)</b> | <b>4.6</b><br><b>(0.9 to 8.5)</b>                 | <b>-0.2</b><br><b>(-3.6 to 3.5)</b>                 |
| Rheumatoid arthritis                                       | 6.7<br>(6.0 to 7.5)                     | 0.3<br>(0.3 to 0.3)                            | 1.5<br>(1.1 to 2.0)                  | -1.4<br>(-9.9 to 8.5)                             | -6.8<br>(-15.0 to 2.0)                              |
| Osteoarthritis                                             | 92.3<br>(86.9 to 98.3)                  | 3.7<br>(3.4 to 4.0)                            | 5.6<br>(3.9 to 7.5)                  | 12.1<br>(8.4 to 16.1)                             | 2.9<br>(-0.7 to 6.8)                                |
| Low back and neck pain                                     | 227.1<br>(213.1 to 242.6)               | 110.7<br>(97.0 to 125.4)                       | 26.9<br>(19.1 to 35.3)               | 4.1<br>(-0.5 to 9.0)                              | 0.0<br>(-4.5 to 4.8)                                |
| Low back pain                                              | 185.7<br>(165.8 to 209.4)               | 97.3<br>(84.0 to 112.2)                        | 20.6<br>(14.8 to 27.0)               | 4.7<br>(-1.5 to 11.3)                             | 0.1<br>(-5.7 to 6.0)                                |
| Neck pain                                                  | 64.2<br>(55.4 to 74.3)                  | 13.3<br>(11.6 to 15.7)                         | 6.3<br>(4.3 to 8.8)                  | 2.2<br>(-0.1 to 4.7)                              | -0.1<br>(-2.2 to 2.1)                               |
| Gout                                                       | 7.4<br>(6.5 to 8.4)                     | 1.4<br>(1.2 to 1.6)                            | 0.2<br>(0.1 to 0.3)                  | 8.6<br>(-5.6 to 24.7)                             | 1.9<br>(-11.7 to 17.4)                              |
| Other musculoskeletal disorders                            | 15.6<br>(12.2 to 20.2)                  | 14.0<br>(10.2 to 18.7)                         | 1.3<br>(0.8 to 2.0)                  | -6.9<br>(-18.4 to 5.9)                            | -7.8<br>(-20.3 to 5.2)                              |
| <b>Other non-communicable diseases</b>                     | <b>929.8</b><br><b>(918.3 to 941.9)</b> | <b>2,607.7†</b><br><b>(2,482.7 to 2,745.4)</b> | <b>32.0</b><br><b>(22.2 to 44.4)</b> | <b>3.4</b><br><b>(2.2 to 4.7)</b>                 | <b>-0.4</b><br><b>(-1.4 to 0.7)</b>                 |
| Congenital anomalies                                       | 17.6<br>(16.1 to 19.2)                  | --                                             | 2.0<br>(1.5 to 2.7)                  | -0.8<br>(-5.5 to 3.7)                             | 2.4<br>(-2.2 to 7.0)                                |
| Neural tube defects                                        | 1.3<br>(1.1 to 1.4)                     | --                                             | 0.4<br>(0.3 to 0.5)                  | 5.0<br>(-6.7 to 18.4)                             | 7.9<br>(-4.2 to 21.6)                               |
| Congenital heart anomalies                                 | 3.0<br>(2.6 to 3.4)                     | --                                             | 0.1<br>(0.1 to 0.3)                  | 8.2<br>(-3.0 to 19.7)                             | 10.8<br>(-0.4 to 22.9)                              |
| Orofacial clefts                                           | 0.7<br>(0.6 to 0.8)                     | --                                             | < 0.05<br>(< 0.05 to < 0.05)         | -8.2<br>(-18.4 to 3.0)                            | -5.9<br>(-16.3 to 5.6)                              |
| Down's syndrome                                            | 0.8<br>(0.7 to 0.9)                     | --                                             | 0.1<br>(0.1 to 0.1)                  | -3.6<br>(-12.6 to 4.6)                            | 2.4<br>(-7.2 to 11.5)                               |
| Turner syndrome                                            | 0.7<br>(0.6 to 0.8)                     | --                                             | < 0.05<br>(< 0.05 to < 0.05)         | -11.3<br>(-32.7 to 18.0)                          | -4.9<br>(-27.5 to 25.9)                             |
| Klinefelter syndrome                                       | 0.8<br>(0.7 to 0.9)                     | --                                             | < 0.05<br>(< 0.05 to < 0.05)         | -3.1<br>(-22.6 to 18.4)                           | 4.4<br>(-16.4 to 27.2)                              |

| Cause                                         | Prevalence in thousands (95% UI)        | Incidence in thousands (95% UI)          | YLDs in thousands (95% UI)           |                                                   |                                                     |
|-----------------------------------------------|-----------------------------------------|------------------------------------------|--------------------------------------|---------------------------------------------------|-----------------------------------------------------|
|                                               | 2016 counts                             | 2016 counts                              | 2016 counts                          | Percentage change in counts between 2006 and 2016 | Percentage change in age-standardised rates between |
| Other chromosomal abnormalities               | 1.2<br>(1.1 to 1.4)                     | --                                       | 0.2<br>(0.1 to 0.2)                  | -5.2<br>(-15.9 to 7.3)                            | 1.6<br>(-9.6 to 15.0)                               |
| Congenital musculoskeletal and limb anomalies | 4.0<br>(3.7 to 4.4)                     | --                                       | 0.6<br>(0.4 to 0.8)                  | -3.8<br>(-12.0 to 5.2)                            | -1.5<br>(-10.0 to 8.1)                              |
| Urogenital congenital anomalies               | 2.2<br>(2.0 to 2.5)                     | --                                       | < 0.05<br>(< 0.05 to 0.1)            | -3.0<br>(-12.6 to 7.0)                            | 0.4<br>(-10.4 to 12.3)                              |
| Digestive congenital anomalies                | 2.2<br>(1.9 to 2.5)                     | --                                       | 0.1<br>(0.1 to 0.1)                  | -0.2<br>(-12.8 to 13.1)                           | 2.4<br>(-10.5 to 16.6)                              |
| Other congenital anomalies                    | 4.1<br>(2.5 to 6.2)                     | --                                       | 0.5<br>(0.4 to 0.8)                  | -1.6<br>(-10.4 to 7.7)                            | 1.5<br>(-7.6 to 11.1)                               |
| Skin and subcutaneous diseases                | 420.0<br>(410.0 to 430.4)               | 1,116.1<br>(1,045.4 to 1,192.9)          | 9.3<br>(6.3 to 13.5)                 | -5.6<br>(-7.7 to -3.7)                            | 0.5<br>(-1.4 to 2.4)                                |
| Dermatitis                                    | 60.1<br>(57.3 to 63.2)                  | 63.8<br>(58.4 to 69.6)                   | 2.3<br>(1.4 to 3.7)                  | -2.6<br>(-6.1 to 1.0)                             | -1.1<br>(-4.9 to 2.9)                               |
| Psoriasis                                     | 16.5<br>(15.8 to 17.3)                  | 2.0<br>(1.9 to 2.1)                      | 1.4<br>(1.0 to 1.8)                  | 2.9<br>(-4.0 to 9.7)                              | 4.0<br>(-2.8 to 11.3)                               |
| Cellulitis                                    | 0.8<br>(0.8 to 0.9)                     | 18.7<br>(17.5 to 19.9)                   | < 0.05<br>(< 0.05 to 0.1)            | 0.6<br>(-15.8 to 21.2)                            | 1.2<br>(-16.3 to 24.2)                              |
| Pyoderma                                      | 7.0<br>(6.8 to 7.3)                     | 187.3<br>(179.8 to 194.6)                | < 0.05<br>(< 0.05 to 0.1)            | 5.7<br>(0.5 to 11.5)                              | 0.2<br>(-4.9 to 5.6)                                |
| Scabies                                       | 7.9<br>(7.0 to 8.8)                     | 24.2<br>(21.4 to 27.2)                   | 0.2<br>(0.1 to 0.3)                  | -10.1<br>(-15.3 to -5.2)                          | -4.4<br>(-9.4 to 0.8)                               |
| Fungal skin diseases                          | 138.4<br>(123.4 to 153.8)               | 532.8<br>(463.0 to 608.0)                | 0.8<br>(0.3 to 1.6)                  | 6.4<br>(4.4 to 8.4)                               | 0.1<br>(-1.0 to 1.2)                                |
| Viral skin diseases                           | 29.3<br>(28.2 to 30.5)                  | 44.2<br>(42.4 to 46.2)                   | 0.9<br>(0.6 to 1.3)                  | -5.2<br>(-8.2 to -2.1)                            | -0.3<br>(-3.2 to 2.8)                               |
| Acne vulgaris                                 | 76.3<br>(69.9 to 83.2)                  | 48.1<br>(40.7 to 58.0)                   | 2.0<br>(1.3 to 2.9)                  | -22.1<br>(-25.9 to -18.4)                         | 0.6<br>(-3.7 to 5.3)                                |
| Alopecia areata                               | 2.5<br>(2.4 to 2.6)                     | 4.4<br>(4.2 to 4.6)                      | 0.1<br>(0.1 to 0.1)                  | -3.5<br>(-13.3 to 7.7)                            | 0.2<br>(-10.1 to 12.3)                              |
| Pruritus                                      | 14.8<br>(13.1 to 16.7)                  | 11.5<br>(10.2 to 13.1)                   | 0.1<br>(0.1 to 0.3)                  | 3.3<br>(-2.0 to 8.8)                              | 1.3<br>(-3.5 to 6.7)                                |
| Urticaria                                     | 11.4<br>(10.1 to 12.9)                  | 20.2<br>(17.8 to 22.8)                   | 0.7<br>(0.4 to 1.0)                  | -2.1<br>(-6.9 to 3.2)                             | -0.0<br>(-4.9 to 5.1)                               |
| Decubitus ulcer                               | 0.7<br>(0.6 to 0.8)                     | 2.4<br>(2.1 to 2.7)                      | 0.1<br>(0.1 to 0.1)                  | 13.9<br>(-5.5 to 37.3)                            | 2.0<br>(-12.8 to 18.7)                              |
| Other skin and subcutaneous diseases          | 130.2<br>(126.6 to 134.0)               | 156.4<br>(151.1 to 162.0)                | 0.7<br>(0.3 to 1.3)                  | 8.0<br>(5.4 to 10.7)                              | 4.8<br>(2.5 to 7.3)                                 |
| Sense organ diseases                          | 409.2<br>(400.6 to 418.6)               | 150.6†<br>(142.0 to 159.6)               | 15.0<br>(10.6 to 20.8)               | 8.9<br>(7.0 to 11.1)                              | -2.4<br>(-4.0 to -0.7)                              |
| Glaucoma                                      | 1.2<br>(1.0 to 1.4)                     | --                                       | 0.1<br>(0.1 to 0.2)                  | 18.1<br>(3.3 to 38.1)                             | 1.1<br>(-12.1 to 18.4)                              |
| Cataract                                      | 15.5<br>(13.1 to 18.2)                  | --                                       | 0.8<br>(0.5 to 1.1)                  | 16.1<br>(8.9 to 23.6)                             | -4.3<br>(-9.9 to 1.1)                               |
| Macular degeneration                          | 0.6<br>(0.5 to 0.7)                     | --                                       | < 0.05<br>(< 0.05 to < 0.05)         | 21.6<br>(0.4 to 47.6)                             | 1.6<br>(-15.0 to 21.4)                              |
| Refraction and accommodation disorders        | 95.9<br>(91.7 to 100.5)                 | --                                       | 1.7<br>(1.1 to 2.7)                  | 0.4<br>(-2.8 to 4.2)                              | -5.2<br>(-8.2 to -1.7)                              |
| Age-related and other hearing loss            | 361.3<br>(347.3 to 376.0)               | --                                       | 10.2<br>(7.2 to 14.0)                | 10.0<br>(7.7 to 13.1)                             | -2.3<br>(-4.5 to 0.0)                               |
| Other vision loss                             | 5.9<br>(5.1 to 6.8)                     | --                                       | 0.4<br>(0.3 to 0.5)                  | 12.7<br>(3.7 to 21.8)                             | -0.1<br>(-7.8 to 8.0)                               |
| Other sense organ diseases                    | 58.1<br>(53.4 to 63.1)                  | 150.6<br>(142.0 to 159.6)                | 1.8<br>(1.1 to 2.7)                  | 6.8<br>(2.8 to 11.0)                              | 0.3<br>(-3.5 to 4.1)                                |
| Oral disorders                                | 574.9<br>(554.4 to 595.3)               | 1,341.0†<br>(1,242.1 to 1,447.0)         | 5.7<br>(3.6 to 8.4)                  | 7.4<br>(4.6 to 10.7)                              | 0.9<br>(-1.5 to 3.2)                                |
| Caries of deciduous teeth                     | 62.7<br>(51.1 to 75.0)                  | 258.1<br>(196.2 to 336.4)                | < 0.05<br>(< 0.05 to < 0.05)         | 13.2<br>(2.6 to 24.8)                             | -1.8<br>(-10.6 to 7.8)                              |
| Caries of permanent teeth                     | 313.4<br>(294.4 to 332.6)               | 1,054.2<br>(974.7 to 1,136.1)            | 0.3<br>(0.1 to 0.6)                  | -6.3<br>(-9.8 to -2.6)                            | -2.8<br>(-6.5 to 0.7)                               |
| Periodontal disease                           | 150.3<br>(124.1 to 178.6)               | 19.0<br>(15.0 to 23.1)                   | 1.0<br>(0.4 to 2.0)                  | 3.2<br>(-0.7 to 7.1)                              | -0.2<br>(-3.7 to 3.9)                               |
| Edentulism and severe tooth loss              | 134.5<br>(117.3 to 152.6)               | 9.8<br>(8.3 to 11.5)                     | 3.7<br>(2.4 to 5.2)                  | 12.3<br>(8.0 to 16.5)                             | 2.1<br>(-1.6 to 6.0)                                |
| Other oral disorders                          | 26.5<br>(25.4 to 27.7)                  | --                                       | 0.8<br>(0.5 to 1.1)                  | -2.4<br>(-5.4 to 0.6)                             | -0.2<br>(-3.3 to 3.0)                               |
| <b>Injuries</b>                               | <b>643.8</b><br><b>(601.5 to 698.2)</b> | <b>205.6†</b><br><b>(193.1 to 218.3)</b> | <b>22.0</b><br><b>(15.1 to 31.0)</b> | <b>0.1</b><br><b>(-1.3 to 1.5)</b>                | <b>-2.6</b><br><b>(-4.1 to -1.1)</b>                |
| <b>Transport injuries</b>                     | <b>57.6</b><br><b>(53.6 to 62.0)</b>    | <b>13.9</b><br><b>(12.7 to 15.2)</b>     | <b>2.7</b><br><b>(1.8 to 3.9)</b>    | <b>-9.3</b><br><b>(-10.7 to -8.0)</b>             | <b>-11.4</b><br><b>(-13.0 to -9.9)</b>              |
| Road injuries                                 | 52.8<br>(49.0 to 56.9)                  | 13.2<br>(12.0 to 14.4)                   | 2.5<br>(1.7 to 3.6)                  | -10.0<br>(-11.4 to -8.7)                          | -12.3<br>(-13.8 to -10.8)                           |
| Pedestrian road injuries                      | 11.9<br>(10.4 to 13.6)                  | 2.1<br>(1.8 to 2.5)                      | 0.5<br>(0.4 to 0.8)                  | -8.6<br>(-10.0 to -7.3)                           | -10.7<br>(-12.4 to -9.1)                            |
| Cyclist road injuries                         | 12.1<br>(10.2 to 14.2)                  | 3.4<br>(2.8 to 4.0)                      | 0.5<br>(0.4 to 0.8)                  | -2.2<br>(-3.7 to -0.7)                            | -4.7<br>(-6.3 to -3.2)                              |
| Motorcyclist road injuries                    | 5.7<br>(4.8 to 6.8)                     | 0.9<br>(0.7 to 1.1)                      | 0.2<br>(0.2 to 0.4)                  | 10.5<br>(8.8 to 12.3)                             | 7.7<br>(6.0 to 9.5)                                 |
| Motor vehicle road injuries                   | 19.8<br>(16.6 to 22.6)                  | 5.7<br>(5.0 to 6.4)                      | 1.0<br>(0.7 to 1.4)                  | -20.5<br>(-21.8 to -19.2)                         | -22.5<br>(-23.9 to -21.1)                           |
| Other road injuries                           | 3.3<br>(2.8 to 3.9)                     | 1.1<br>(0.8 to 1.4)                      | 0.1<br>(0.1 to 0.2)                  | 18.3<br>(16.4 to 20.1)                            | 14.6<br>(12.7 to 16.4)                              |
| Other transport injuries                      | 4.8<br>(4.1 to 5.6)                     | 0.7<br>(0.6 to 0.8)                      | 0.2<br>(0.1 to 0.3)                  | 0.0<br>(-1.9 to 1.8)                              | -0.3<br>(-2.4 to 1.8)                               |
| <b>Unintentional injuries</b>                 | <b>560.7</b><br><b>(519.8 to 612.8)</b> | <b>182.9</b><br><b>(170.6 to 195.8)</b>  | <b>18.3</b><br><b>(12.4 to 25.8)</b> | <b>2.5</b><br><b>(1.0 to 3.9)</b>                 | <b>-0.5</b><br><b>(-2.1 to 1.1)</b>                 |
| Falls                                         | 304.2<br>(270.1 to 348.4)               | 111.0<br>(99.8 to 122.3)                 | 11.7<br>(8.1 to 16.1)                | 3.3<br>(1.9 to 4.9)                               | -0.8<br>(-2.4 to 0.8)                               |
| Drowning                                      | 1.5<br>(1.3 to 1.7)                     | 0.2<br>(0.2 to 0.2)                      | 0.1<br>(< 0.05 to 0.1)               | -11.8<br>(-14.2 to -9.8)                          | -13.6<br>(-16.0 to -11.6)                           |
| Fire, heat, and hot substances                | 50.0<br>(43.4 to 58.9)                  | 4.8<br>(4.2 to 5.3)                      | 1.1<br>(0.7 to 1.7)                  | -12.0<br>(-14.7 to -9.6)                          | -12.8<br>(-15.7 to -10.1)                           |
| Poisonings                                    | 1.6<br>(1.3 to 1.9)                     | 1.3<br>(1.0 to 1.6)                      | 0.1<br>(0.1 to 0.2)                  | 31.1<br>(23.7 to 39.0)                            | 34.8<br>(26.7 to 43.4)                              |
| Exposure to mechanical forces                 | 92.2<br>(78.8 to 114.2)                 | 25.1<br>(21.8 to 28.5)                   | 2.0<br>(1.3 to 2.9)                  | 12.6<br>(10.8 to 14.3)                            | 10.9<br>(8.9 to 12.8)                               |
| Unintentional firearm injuries                | 1.3<br>(1.1 to 1.6)                     | 0.2<br>(0.1 to 0.3)                      | < 0.05<br>(< 0.05 to 0.1)            | 14.7<br>(12.4 to 16.9)                            | 13.4<br>(11.1 to 15.6)                              |
| Unintentional suffocation                     | 3.0<br>(2.5 to 3.8)                     | 0.4<br>(0.3 to 0.5)                      | 0.1<br>(0.1 to 0.1)                  | -1.0<br>(-2.8 to 0.9)                             | -3.4<br>(-5.1 to -1.7)                              |
| Other exposure to mechanical forces           | 87.9<br>(74.6 to 109.7)                 | 24.5<br>(21.2 to 27.9)                   | 1.8<br>(1.2 to 2.7)                  | 13.3<br>(11.5 to 15.1)                            | 11.8<br>(9.7 to 13.6)                               |

| Cause                                                                               | Prevalence in thousands (95% UI)     | Incidence in thousands (95% UI)                      | YLDs in thousands (95% UI)                          |                                                   |                                                     |
|-------------------------------------------------------------------------------------|--------------------------------------|------------------------------------------------------|-----------------------------------------------------|---------------------------------------------------|-----------------------------------------------------|
|                                                                                     | 2016 counts                          | 2016 counts                                          | 2016 counts                                         | Percentage change in counts between 2006 and 2016 | Percentage change in age-standardised rates between |
| Adverse effects of medical treatment                                                | 0.4<br>(0.3 to 0.5)                  | 4.8<br>(4.3 to 5.4)                                  | < 0.05<br>(< 0.05 to 0.1)                           | 9.1<br>(4.1 to 14.0)                              | 3.2<br>(-1.9 to 8.1)                                |
| Animal contact                                                                      | 8.5<br>(7.5 to 9.7)                  | 6.9<br>(5.7 to 8.3)                                  | 0.2<br>(0.2 to 0.3)                                 | -4.5<br>(-8.2 to -0.7)                            | -3.3<br>(-7.4 to 1.1)                               |
| Venomous animal contact                                                             | 3.6<br>(3.0 to 4.3)                  | 2.9<br>(2.2 to 3.7)                                  | 0.2<br>(0.1 to 0.2)                                 | -2.3<br>(-7.5 to 3.2)                             | -0.2<br>(-5.8 to 6.0)                               |
| Non-venomous animal contact                                                         | 4.9<br>(4.2 to 6.0)                  | 4.0<br>(3.2 to 4.9)                                  | 0.1<br>(< 0.05 to 0.1)                              | -9.5<br>(-11.9 to -7.5)                           | -11.3<br>(-13.8 to -9.3)                            |
| Foreign body                                                                        | 22.4<br>(19.2 to 25.5)               | 9.4<br>(8.5 to 10.6)                                 | 0.7<br>(0.5 to 1.0)                                 | -13.2<br>(-15.0 to -11.3)                         | -13.8<br>(-15.9 to -11.7)                           |
| Pulmonary aspiration and foreign body in airway                                     | 14.1<br>(11.6 to 17.1)               | 4.1<br>(3.7 to 4.6)                                  | 0.5<br>(0.3 to 0.7)                                 | -21.9<br>(-23.4 to -20.5)                         | -22.8<br>(-24.5 to -21.1)                           |
| Foreign body in eyes                                                                | 0.8<br>(0.5 to 1.1)                  | 3.3<br>(2.6 to 4.3)                                  | < 0.05<br>(< 0.05 to 0.1)                           | 10.7<br>(7.0 to 14.4)                             | 9.0<br>(5.8 to 12.0)                                |
| Foreign body in other body part                                                     | 7.5<br>(6.2 to 9.3)                  | 2.0<br>(1.7 to 2.3)                                  | 0.2<br>(0.1 to 0.3)                                 | 17.4<br>(14.6 to 20.1)                            | 16.5<br>(13.4 to 19.4)                              |
| Environmental heat and cold exposure                                                | 33.4<br>(29.7 to 38.0)               | 7.9<br>(6.9 to 8.9)                                  | 1.1<br>(0.7 to 1.6)                                 | -13.3<br>(-14.8 to -11.8)                         | -15.4<br>(-17.0 to -13.8)                           |
| Other unintentional injuries                                                        | 46.6<br>(37.8 to 56.5)               | 11.5<br>(9.7 to 13.3)                                | 1.3<br>(0.8 to 1.9)                                 | 25.6<br>(24.0 to 27.4)                            | 23.9<br>(22.0 to 25.9)                              |
| <b>Self-harm and interpersonal violence</b>                                         | <b>43.0</b><br><b>(39.6 to 46.5)</b> | <b>8.8†</b><br><b>(7.8 to 10.0)</b>                  | <b>1.0</b><br><b>(0.7 to 1.4)</b>                   | <b>-12.9</b><br><b>(-14.3 to -11.6)</b>           | <b>-12.2</b><br><b>(-13.6 to -10.9)</b>             |
| Self-harm                                                                           | 4.5<br>(3.8 to 5.2)                  | 1.7<br>(1.4 to 1.9)                                  | 0.2<br>(0.1 to 0.2)                                 | -15.2<br>(-17.1 to -13.4)                         | -17.3<br>(-19.0 to -15.6)                           |
| Self-harm by firearm                                                                | 0.1<br>(0.1 to 0.1)                  | < 0.05<br>(< 0.05 to < 0.05)                         | < 0.05<br>(< 0.05 to < 0.05)                        | -42.5<br>(-44.7 to -40.5)                         | -41.2<br>(-43.6 to -39.2)                           |
| Self-harm by other specified means                                                  | 4.4<br>(3.7 to 5.2)                  | 1.6<br>(1.4 to 1.9)                                  | 0.2<br>(0.1 to 0.2)                                 | -14.4<br>(-16.3 to -12.6)                         | -16.6<br>(-18.4 to -14.9)                           |
| Interpersonal violence                                                              | 38.5<br>(35.3 to 42.1)               | 7.2‡<br>(6.2 to 8.3)                                 | 0.8<br>(0.6 to 1.2)                                 | -12.4<br>(-13.8 to -11.1)                         | -11.2<br>(-12.7 to -9.9)                            |
| Assault by firearm                                                                  | 0.3<br>(0.2 to 0.3)                  | 0.1<br>(< 0.05 to 0.1)                               | < 0.05<br>(< 0.05 to < 0.05)                        | -16.6<br>(-18.6 to -14.8)                         | -16.1<br>(-18.2 to -14.0)                           |
| Assault by sharp object                                                             | 4.7<br>(3.9 to 5.6)                  | 1.2<br>(1.0 to 1.5)                                  | 0.1<br>(0.1 to 0.2)                                 | -19.2<br>(-21.2 to -17.5)                         | -19.3<br>(-21.4 to -17.3)                           |
| Sexual violence                                                                     | 17.7<br>(15.7 to 19.9)               | --                                                   | 0.1<br>(0.1 to 0.2)                                 | -13.6<br>(-17.7 to -10.0)                         | -6.7<br>(-11.1 to -3.0)                             |
| Assault by other means                                                              | 15.8<br>(13.3 to 19.0)               | 5.9<br>(5.0 to 6.8)                                  | 0.6<br>(0.4 to 0.8)                                 | -10.5<br>(-11.9 to -9.0)                          | -10.7<br>(-12.3 to -9.2)                            |
| <b>Forces of nature, conflict and terrorism, and executions and police conflict</b> | <b>0.2</b><br><b>(0.1 to 0.2)</b>    | <b>&lt; 0.05†</b><br><b>(&lt; 0.05 to &lt; 0.05)</b> | <b>&lt; 0.05</b><br><b>(&lt; 0.05 to &lt; 0.05)</b> | <b>117.6</b><br><b>(75.3 to 140.4)</b>            | <b>121.6</b><br><b>(74.0 to 148.0)</b>              |
| Exposure to forces of nature                                                        | < 0.05<br>(< 0.05 to < 0.05)         | --                                                   | < 0.05<br>(< 0.05 to < 0.05)                        | -20.4<br>(-22.2 to -18.1)                         | -25.8<br>(-27.6 to -23.4)                           |
| Conflict and terrorism                                                              | 0.1<br>(< 0.05 to 0.1)               | --                                                   | < 0.05<br>(< 0.05 to < 0.05)                        | --                                                | --                                                  |
| Executions and police conflict                                                      | 0.1<br>(< 0.05 to 0.1)               | < 0.05<br>(< 0.05 to < 0.05)                         | < 0.05<br>(< 0.05 to < 0.05)                        | 18.8<br>(11.6 to 22.9)                            | 20.3<br>(13.5 to 24.4)                              |
| <b>Impairments</b>                                                                  | --                                   | --                                                   | --                                                  | --                                                | --                                                  |
| Anaemia                                                                             | 194.8<br>(166.9 to 224.1)            | --                                                   | 4.1<br>(2.8 to 5.9)                                 | 7.0<br>(-5.3 to 22.2)                             | 3.5<br>(-9.7 to 19.4)                               |
| Developmental intellectual disability                                               | 22.3<br>(17.6 to 27.1)               | --                                                   | 2.5<br>(1.9 to 3.4)                                 | -10.4<br>(-15.1 to -5.3)                          | -6.2<br>(-11.2 to -0.8)                             |
| Epilepsy                                                                            | 6.5<br>(3.2 to 9.9)                  | --                                                   | 1.8<br>(0.9 to 3.2)                                 | -18.1<br>(-63.4 to 69.8)                          | -16.2<br>(-60.1 to 68.0)                            |
| Guillain-Barre syndrome                                                             | < 0.05<br>(< 0.05 to < 0.05)         | --                                                   | < 0.05<br>(< 0.05 to < 0.05)                        | 2.1<br>(-1.1 to 5.4)                              | 0.2<br>(0.1 to 0.3)                                 |
| Hearing loss                                                                        | 375.1<br>(360.8 to 389.2)            | --                                                   | 10.8<br>(7.7 to 15.0)                               | 8.5<br>(6.4 to 11.1)                              | -2.8<br>(-5.0 to -0.9)                              |
| Heart failure                                                                       | 30.2<br>(25.9 to 34.9)               | --                                                   | 2.6<br>(1.8 to 3.6)                                 | 19.9<br>(12.0 to 29.4)                            | 1.5<br>(-5.0 to 9.0)                                |
| Infertility                                                                         | 17.9<br>(14.3 to 22.6)               | --                                                   | 0.1<br>(0.1 to 0.2)                                 | -5.3<br>(-10.9 to 0.3)                            | -0.2<br>(-5.9 to 5.9)                               |
| Pelvic inflammatory disease                                                         | 0.6<br>(0.5 to 0.7)                  | --                                                   | 0.1<br>(0.1 to 0.1)                                 | -15.0<br>(-28.8 to 1.4)                           | -10.9<br>(-25.0 to 6.0)                             |
| Vision loss                                                                         | 121.5<br>(115.4 to 127.9)            | --                                                   | 3.5<br>(2.5 to 4.9)                                 | 2.2<br>(-3.0 to 6.2)                              | -6.9<br>(-11.8 to -3.1)                             |

We did not calculate incidence for the nine impairments, certain NTDs, and causes with only birth prevalence. Blank cells mean that no estimate is available.

† Incidence for aggregate causes represents the sum of the incidence of the causes below the aggregate.

‡ Incidence estimates for stroke represent first-ever stroke only.

^ Incidence of HIV/AIDS represents new infections of HIV only and does not include new infections of Tuberculosis in HIV positive cases.



SR Table 14: Prevalence, incidence, and YLDs for 2016, percentage change of YLD counts and percentage change of age-standardised YLD rates between 2006 and 2016 by cause and impairments, for all ages, Ethiopia.

| Cause                                                                                | Prevalence in thousands (95% UI)          | Incidence in thousands (95% UI)               | YLDs in thousands (95% UI)              |                                                   |                                                     |
|--------------------------------------------------------------------------------------|-------------------------------------------|-----------------------------------------------|-----------------------------------------|---------------------------------------------------|-----------------------------------------------------|
|                                                                                      | 2016 counts                               | 2016 counts                                   | 2016 counts                             | Percentage change in counts between 2006 and 2016 | Percentage change in age-standardised rates between |
| <b>All causes</b>                                                                    | <b>99,175.5</b><br>(98,813.0 to 99,533.2) | <b>631,073.2†</b><br>(598,757.9 to 667,877.2) | <b>8,872.4</b><br>(6,548.1 to 11,636.3) | <b>28.4</b><br>(25.2 to 32.1)                     | <b>-4.6</b><br>(-6.8 to -2.4)                       |
| <b>Communicable, maternal, neonatal, and nutritional disorders</b>                   | <b>79,965.4</b><br>(78,480.7 to 81,554.1) | <b>345,749.0†</b><br>(321,166.5 to 372,182.3) | <b>1,859.7</b><br>(1,319.7 to 2,566.1)  | <b>5.0</b><br>(-2.3 to 12.1)                      | <b>-24.4</b><br>(-30.7 to -18.7)                    |
| <b>HIV/AIDS and tuberculosis</b>                                                     | <b>17,061.8</b><br>(15,493.7 to 18,516.5) | <b>256.2†</b><br>(205.4 to 316.1)             | <b>114.9</b><br>(80.3 to 155.1)         | <b>-33.1</b><br>(-52.0 to -11.3)                  | <b>-51.6</b><br>(-67.5 to -32.4)                    |
| Tuberculosis                                                                         | 15,504.0<br>(13,915.8 to 17,316.8)        | 219.2†<br>(183.0 to 265.3)                    | 46.8<br>(30.2 to 65.7)                  | 1.8<br>(-12.1 to 19.1)                            | -27.6<br>(-35.6 to -17.8)                           |
| Drug-susceptible tuberculosis                                                        | 148.5<br>(123.2 to 178.6)                 | 214.6<br>(177.8 to 259.9)                     | 45.8<br>(29.6 to 63.3)                  | 1.6<br>(-12.6 to 18.4)                            | -27.8<br>(-35.8 to -17.9)                           |
| Multidrug-resistant tuberculosis without extensive drug resistance                   | 3.1<br>(0.9 to 7.5)                       | 4.5<br>(1.3 to 11.1)                          | 1.0<br>(0.3 to 2.6)                     | 16.1<br>(-60.9 to 199.7)                          | -17.9<br>(-72.8 to 113.4)                           |
| Extensively drug-resistant tuberculosis                                              | < 0.05<br>(< 0.05 to < 0.05)              | < 0.05<br>(< 0.05 to 0.1)                     | < 0.05<br>(< 0.05 to < 0.05)            | 253.3<br>(18.3 to 781.5)                          | 149.4<br>(-16.0 to 530.8)                           |
| Latent tuberculosis infection                                                        | 15,352.4<br>(13,735.4 to 17,150.8)        | --                                            | --                                      | --                                                | --                                                  |
| HIV/AIDS                                                                             | 670.9<br>(568.3 to 799.0)                 | 37.0^<br>(8.8 to 80.3)                        | 68.0<br>(46.3 to 93.9)                  | -45.9<br>(-64.1 to -20.0)                         | -60.7<br>(-76.2 to -37.1)                           |
| Drug-susceptible HIV/AIDS - Tuberculosis                                             | 19.0<br>(11.2 to 30.1)                    | 27.4<br>(16.6 to 44.0)                        | 7.4<br>(3.7 to 12.7)                    | -59.6<br>(-67.7 to -50.6)                         | -67.3<br>(-73.8 to -60.3)                           |
| Multidrug-resistant HIV/AIDS - Tuberculosis without extensive drug resistance        | 0.5<br>(0.1 to 1.3)                       | 0.7<br>(0.2 to 1.8)                           | 0.2<br>(0.1 to 0.5)                     | -53.8<br>(-84.9 to 15.7)                          | -62.7<br>(-87.8 to -6.7)                            |
| Extensively drug-resistant HIV/AIDS - Tuberculosis                                   | < 0.05<br>(< 0.05 to < 0.05)              | < 0.05<br>(< 0.05 to < 0.05)                  | < 0.05<br>(< 0.05 to < 0.05)            | 40.8<br>(-54.0 to 252.8)                          | 13.7<br>(-62.8 to 184.6)                            |
| HIV/AIDS resulting in other diseases                                                 | 651.5<br>(549.1 to 781.0)                 | 37.0<br>(8.8 to 80.3)                         | 60.5<br>(40.8 to 84.6)                  | -43.5<br>(-64.7 to -8.2)                          | -59.6<br>(-77.0 to -28.1)                           |
| <b>Diarrhoea, lower respiratory infections, and other common infectious diseases</b> | <b>6,903.9</b><br>(6,629.4 to 7,219.5)    | <b>308,648.2†</b><br>(284,288.9 to 334,559.9) | <b>425.8</b><br>(299.6 to 573.6)        | <b>18.0</b><br>(13.9 to 22.2)                     | <b>-9.9</b><br>(-12.7 to -7.1)                      |
| Diarrhoeal diseases                                                                  | 1,671.4<br>(1,566.5 to 1,772.3)           | 111,979.1<br>(105,260.3 to 119,055.1)         | 189.2<br>(131.2 to 260.3)               | 16.0<br>(10.0 to 22.1)                            | -10.8<br>(-14.8 to -6.6)                            |
| Intestinal infectious diseases                                                       | 7.6<br>(5.3 to 10.6)                      | 130.1†<br>(93.7 to 180.7)                     | 1.2<br>(0.7 to 1.9)                     | -4.5<br>(-27.3 to 22.0)                           | -25.6<br>(-39.5 to -9.0)                            |
| Typhoid fever                                                                        | 7.6<br>(5.3 to 10.6)                      | 119.5<br>(86.4 to 166.9)                      | 1.2<br>(0.7 to 1.9)                     | -3.5<br>(-27.0 to 24.6)                           | -25.0<br>(-39.4 to -7.2)                            |
| Paratyphoid fever                                                                    | 0.5<br>(0.3 to 0.7)                       | 10.6<br>(6.6 to 16.1)                         | < 0.05<br>(< 0.05 to 0.1)               | 5.9<br>(-22.5 to 46.4)                            | -17.8<br>(-37.5 to 7.8)                             |
| Other intestinal infectious diseases                                                 | --                                        | --                                            | < 0.05<br>(< 0.05 to < 0.05)            | -45.6<br>(-61.8 to -23.4)                         | -54.6<br>(-65.0 to -40.9)                           |
| Lower respiratory infections                                                         | 144.3<br>(132.8 to 156.0)                 | 6,326.4<br>(5,777.9 to 6,903.3)               | 8.8<br>(5.7 to 12.4)                    | 11.6<br>(-2.5 to 27.4)                            | -11.8<br>(-20.6 to -2.6)                            |
| Upper respiratory infections                                                         | 2,379.1<br>(2,073.0 to 2,706.9)           | 177,096.1<br>(153,501.2 to 202,536.7)         | 59.6<br>(35.0 to 93.0)                  | 38.7<br>(29.0 to 48.8)                            | 3.3<br>(-3.0 to 10.1)                               |
| Otitis media                                                                         | 1,977.3<br>(1,753.4 to 2,205.9)           | 8,768.1<br>(6,825.5 to 11,197.5)              | 64.1<br>(39.5 to 95.9)                  | 10.5<br>(1.6 to 19.7)                             | -14.6<br>(-20.3 to -8.5)                            |
| Meningitis                                                                           | 768.8<br>(644.6 to 902.9)                 | 192.6<br>(169.9 to 221.1)                     | 65.2<br>(45.7 to 86.1)                  | 17.3<br>(8.6 to 28.2)                             | -12.0<br>(-18.1 to -4.8)                            |
| Pneumococcal meningitis                                                              | 228.1<br>(187.2 to 279.6)                 | 27.4<br>(21.6 to 34.2)                        | 22.6<br>(15.6 to 30.3)                  | 9.7<br>(-4.6 to 27.2)                             | -18.9<br>(-27.7 to -7.9)                            |
| H influenzae type B meningitis                                                       | 166.7<br>(121.1 to 223.3)                 | 42.1<br>(31.4 to 55.0)                        | 14.7<br>(10.2 to 19.5)                  | -3.6<br>(-18.4 to 15.2)                           | -28.2<br>(-38.0 to -16.1)                           |
| Meningococcal infection                                                              | 108.9<br>(72.1 to 153.0)                  | 42.4<br>(32.7 to 54.0)                        | 7.4<br>(4.9 to 10.1)                    | 17.4<br>(6.8 to 28.8)                             | -11.1<br>(-19.4 to -2.1)                            |
| Other meningitis                                                                     | 265.0<br>(191.0 to 349.9)                 | 80.6<br>(64.2 to 100.0)                       | 20.5<br>(14.0 to 28.4)                  | 52.7<br>(33.1 to 72.3)                            | 15.3<br>(1.7 to 28.0)                               |
| Encephalitis                                                                         | 265.6<br>(171.8 to 397.0)                 | 114.4<br>(99.0 to 131.5)                      | 28.7<br>(20.2 to 38.1)                  | 22.3<br>(7.2 to 39.8)                             | -9.3<br>(-19.2 to 2.1)                              |
| Diphtheria                                                                           | < 0.05<br>(< 0.05 to < 0.05)              | 0.2<br>(0.1 to 0.2)                           | < 0.05<br>(< 0.05 to < 0.05)            | -83.0<br>(-92.4 to -59.9)                         | -84.7<br>(-92.3 to -69.4)                           |
| Whooping cough                                                                       | 91.4<br>(69.9 to 115.7)                   | 666.9<br>(510.2 to 844.3)                     | 4.5<br>(2.7 to 7.2)                     | -10.2<br>(-20.5 to 1.6)                           | -29.0<br>(-37.1 to -19.5)                           |
| Tetanus                                                                              | 1.6<br>(1.5 to 1.8)                       | 5.3<br>(2.9 to 7.6)                           | 0.1<br>(< 0.05 to 0.1)                  | -41.4<br>(-61.2 to -14.4)                         | -56.4<br>(-73.6 to -37.3)                           |
| Measles                                                                              | 17.3<br>(6.2 to 38.0)                     | 632.7<br>(226.2 to 1,385.4)                   | 1.6<br>(0.5 to 3.8)                     | 14.5<br>(-22.9 to 69.8)                           | -9.1<br>(-38.7 to 35.4)                             |
| Varicella and herpes zoster                                                          | 94.0<br>(88.2 to 100.8)                   | 2,736.4<br>(2,577.6 to 2,902.4)               | 2.8<br>(1.7 to 4.4)                     | 34.2<br>(15.2 to 55.8)                            | 0.0<br>(-10.9 to 12.8)                              |
| <b>Neglected tropical diseases and malaria</b>                                       | <b>51,812.3</b><br>(48,736.7 to 55,269.1) | <b>9,499.9†</b><br>(8,483.5 to 10,538.3)      | <b>353.1</b><br>(223.2 to 559.0)        | <b>-0.4</b><br>(-12.6 to 9.3)                     | <b>-28.3</b><br>(-37.9 to -21.5)                    |
| Malaria                                                                              | 271.2<br>(228.6 to 338.5)                 | 987.2<br>(682.1 to 1,388.7)                   | 33.8<br>(25.5 to 43.6)                  | -9.4<br>(-25.3 to 9.5)                            | -31.2<br>(-42.4 to -17.8)                           |
| Chagas disease                                                                       | --                                        | --                                            | --                                      | --                                                | --                                                  |
| Leishmaniasis                                                                        | 39.7<br>(31.3 to 49.9)                    | 6.0<br>(5.3 to 6.8)                           | 2.2<br>(1.3 to 3.7)                     | 7.9<br>(-9.5 to 33.5)                             | -17.9<br>(-28.5 to -2.4)                            |
| Visceral leishmaniasis                                                               | 1.2<br>(1.2 to 1.3)                       | 4.9<br>(4.7 to 5.0)                           | 0.1<br>(0.1 to 0.1)                     | -11.0<br>(-19.0 to -2.8)                          | -37.3<br>(-45.8 to -28.4)                           |
| Cutaneous and mucocutaneous leishmaniasis                                            | 33.6<br>(23.1 to 47.5)                    | 1.1<br>(0.5 to 1.9)                           | 2.1<br>(1.2 to 3.6)                     | 8.8<br>(-9.4 to 37.1)                             | -16.7<br>(-27.9 to 1.4)                             |
| African trypanosomiasis                                                              | --                                        | --                                            | --                                      | --                                                | --                                                  |
| Schistosomiasis                                                                      | 21,988.9<br>(19,204.2 to 24,599.8)        | 7,925.1<br>(7,036.4 to 8,819.3)               | 168.8<br>(82.7 to 320.7)                | 12.5<br>(9.1 to 15.5)                             | -19.1<br>(-21.2 to -17.0)                           |
| Cysticercosis                                                                        | 34.5<br>(29.0 to 41.1)                    | --                                            | 6.4<br>(3.7 to 9.7)                     | 28.4<br>(2.8 to 57.2)                             | -7.7<br>(-22.8 to 9.5)                              |
| Cystic echinococcosis                                                                | 110.2<br>(31.0 to 361.8)                  | 23.4<br>(6.4 to 74.2)                         | 10.2<br>(2.6 to 34.2)                   | -51.4<br>(-90.3 to 166.9)                         | -64.2<br>(-92.7 to 72.3)                            |
| Lymphatic filariasis                                                                 | 23.5<br>(17.0 to 34.0)                    | 2.8<br>(2.3 to 3.4)                           | 1.2<br>(0.4 to 2.6)                     | 23.3<br>(-17.7 to 71.8)                           | -9.9<br>(-38.2 to 20.5)                             |
| Onchocerciasis                                                                       | 334.6<br>(204.2 to 498.0)                 | 98.8<br>(45.5 to 205.6)                       | 23.7<br>(9.8 to 44.8)                   | -45.8<br>(-65.5 to -22.5)                         | -58.1<br>(-73.7 to -39.2)                           |
| Trachoma                                                                             | 90.2<br>(69.0 to 116.0)                   | --                                            | 8.8<br>(5.8 to 12.5)                    | -39.3<br>(-49.2 to -28.8)                         | -55.9<br>(-64.0 to -47.1)                           |
| Dengue                                                                               | 26.4<br>(11.3 to 51.1)                    | 442.4<br>(197.9 to 820.5)                     | 4.4<br>(1.5 to 9.6)                     | 182.8<br>(101.1 to 547.1)                         | 110.8<br>(56.0 to 377.8)                            |
| Yellow fever                                                                         | 0.3<br>(0.1 to 1.0)                       | 12.6<br>(3.0 to 35.9)                         | < 0.05<br>(< 0.05 to < 0.05)            | -40.9<br>(-70.5 to 21.3)                          | -55.1<br>(-76.0 to -16.3)                           |
| Rabies                                                                               | < 0.05<br>(< 0.05 to < 0.05)              | 0.6<br>(0.2 to 1.0)                           | < 0.05<br>(< 0.05 to < 0.05)            | -42.2<br>(-66.3 to -0.1)                          | -52.3<br>(-68.9 to -24.7)                           |
| Intestinal nematode infections                                                       | 37,976.5<br>(33,972.4 to 42,496.2)        | --                                            | 61.5<br>(35.8 to 98.7)                  | 31.0<br>(16.4 to 46.2)                            | 0.6<br>(-11.5 to 14.3)                              |
| Ascariasis                                                                           | 15,930.0<br>(12,552.5 to 19,790.0)        | --                                            | 10.3<br>(5.5 to 17.0)                   | 27.5<br>(10.2 to 46.9)                            | -0.9<br>(-16.6 to 17.0)                             |

| Cause                                                                   | Prevalence in thousands (95% UI)                 | Incidence in thousands (95% UI)                      | YLDs in thousands (95% UI)                    |                                                   |                                                     |
|-------------------------------------------------------------------------|--------------------------------------------------|------------------------------------------------------|-----------------------------------------------|---------------------------------------------------|-----------------------------------------------------|
|                                                                         | 2016 counts                                      | 2016 counts                                          | 2016 counts                                   | Percentage change in counts between 2006 and 2016 | Percentage change in age-standardised rates between |
| Trichuriasis                                                            | 17,243.4<br>(13,844.5 to 21,218.8)               | --                                                   | 9.6<br>(5.3 to 15.9)                          | 28.8<br>(10.3 to 50.4)                            | -0.1<br>(-15.7 to 20.1)                             |
| Hookworm disease                                                        | 11,756.7<br>(9,246.9 to 15,062.7)                | --                                                   | 41.6<br>(25.0 to 65.2)                        | 32.4<br>(12.9 to 54.4)                            | 1.1<br>(-14.9 to 19.7)                              |
| Food-borne trematodiasis                                                | --                                               | --                                                   | --                                            | --                                                | --                                                  |
| Leprosy                                                                 | 12.0<br>(11.3 to 12.7)                           | 1.0<br>(1.0 to 1.1)                                  | 0.7<br>(0.5 to 1.1)                           | 3.6<br>(-15.2 to 23.9)                            | -22.7<br>(-34.8 to -10.1)                           |
| Ebola virus disease                                                     | --                                               | --                                                   | --                                            | --                                                | --                                                  |
| Zika virus disease                                                      | --                                               | --                                                   | --                                            | --                                                | --                                                  |
| Guinea worm disease                                                     | < 0.05<br>(< 0.05 to < 0.05)                     | < 0.05<br>(< 0.05 to < 0.05)                         | < 0.05<br>(< 0.05 to < 0.05)                  | -91.3<br>(-98.3 to -76.1)                         | -93.8<br>(-98.8 to -83.0)                           |
| Other neglected tropical diseases                                       | 1,027.3<br>(945.0 to 1,107.5)                    | --                                                   | 31.4<br>(19.9 to 46.9)                        | 2.0<br>(-9.4 to 13.4)                             | -17.9<br>(-26.7 to -9.0)                            |
| <b>Maternal disorders</b>                                               | <b>366.6</b><br><b>(296.3 to 468.0)</b>          | <b>5,140.8†</b><br><b>(3,717.2 to 6,735.4)</b>       | <b>39.2</b><br><b>(26.4 to 54.4)</b>          | <b>-22.1</b><br><b>(-35.7 to -6.2)</b>            | <b>-46.8</b><br><b>(-55.5 to -36.5)</b>             |
| Maternal haemorrhage                                                    | 34.3<br>(26.2 to 44.8)                           | 304.0<br>(206.6 to 450.5)                            | 1.6<br>(0.9 to 2.6)                           | 16.9<br>(-26.0 to 83.9)                           | -17.9<br>(-46.8 to 28.5)                            |
| Maternal sepsis and other pregnancy related infections                  | 43.4<br>(35.6 to 52.8)                           | 156.7<br>(119.4 to 211.2)                            | 0.8<br>(0.4 to 1.4)                           | 27.9<br>(-35.7 to 154.6)                          | -9.3<br>(-50.9 to 69.0)                             |
| Maternal hypertensive disorders                                         | 214.6<br>(139.7 to 293.0)                        | 932.5<br>(821.5 to 1,030.6)                          | 10.3<br>(5.8 to 16.5)                         | 25.6<br>(-21.7 to 104.7)                          | -11.0<br>(-44.4 to 45.1)                            |
| Maternal obstructed labour and uterine rupture                          | 52.7<br>(43.1 to 64.1)                           | 212.0<br>(158.8 to 281.5)                            | 17.3<br>(11.0 to 25.1)                        | -41.2<br>(-51.6 to -30.0)                         | -59.4<br>(-66.2 to -51.5)                           |
| Maternal abortion, miscarriage, and ectopic pregnancy                   | 29.0<br>(15.5 to 47.5)                           | 3,535.6<br>(2,128.7 to 5,093.1)                      | 3.2<br>(1.4 to 5.7)                           | 23.1<br>(-29.4 to 102.1)                          | -14.1<br>(-50.0 to 39.1)                            |
| Other maternal disorders                                                | --                                               | --                                                   | 6.0<br>(4.1 to 8.4)                           | -25.7<br>(-38.6 to -10.6)                         | -49.4<br>(-57.6 to -39.5)                           |
| <b>Neonatal disorders</b>                                               | <b>1,604.8</b><br><b>(1,230.8 to 2,070.9)</b>    | --                                                   | <b>247.5</b><br><b>(116.5 to 436.9)</b>       | <b>65.0</b><br><b>(17.0 to 118.4)</b>             | <b>31.9</b><br><b>(-7.0 to 75.5)</b>                |
| Neonatal preterm birth complications                                    | 825.5<br>(610.2 to 1,129.6)                      | --                                                   | 51.8<br>(33.3 to 78.3)                        | 10.3<br>(-14.5 to 43.5)                           | -12.0<br>(-32.0 to 14.6)                            |
| Neonatal encephalopathy due to birth asphyxia and trauma                | 710.4<br>(338.2 to 1,222.3)                      | --                                                   | 93.8<br>(12.8 to 233.7)                       | 120.0<br>(9.7 to 493.6)                           | 74.6<br>(-16.3 to 365.9)                            |
| Neonatal sepsis and other neonatal infections                           | 193.6<br>(51.3 to 457.7)                         | --                                                   | 76.5<br>(14.3 to 206.1)                       | 87.9<br>(9.0 to 185.7)                            | 50.9<br>(-16.5 to 135.9)                            |
| Hemolytic disease and other neonatal jaundice                           | 24.7<br>(21.2 to 28.6)                           | --                                                   | 8.3<br>(6.2 to 10.8)                          | 25.0<br>(8.1 to 42.1)                             | -3.2<br>(-14.2 to 8.2)                              |
| Other neonatal disorders                                                | --                                               | --                                                   | 17.1<br>(9.5 to 29.6)                         | 30.9<br>(0.7 to 63.0)                             | 3.2<br>(-20.9 to 28.9)                              |
| <b>Nutritional deficiencies</b>                                         | <b>19,122.5</b><br><b>(18,409.7 to 19,733.0)</b> | <b>2,848.4†</b><br><b>(2,519.6 to 3,212.0)</b>       | <b>581.6</b><br><b>(386.1 to 844.7)</b>       | <b>-4.2</b><br><b>(-11.0 to 1.8)</b>              | <b>-31.2</b><br><b>(-35.5 to -27.7)</b>             |
| Protein-energy malnutrition                                             | 1,661.7<br>(1,425.4 to 1,919.8)                  | 1,243.9<br>(1,069.3 to 1,434.0)                      | 62.6<br>(38.3 to 92.9)                        | 3.5<br>(-20.8 to 34.4)                            | -18.8<br>(-38.1 to 6.0)                             |
| Iodine deficiency                                                       | 1,144.1<br>(970.0 to 1,343.9)                    | 42.8<br>(36.2 to 50.1)                               | 35.2<br>(23.2 to 50.0)                        | -40.6<br>(-48.7 to -32.1)                         | -56.0<br>(-61.3 to -50.3)                           |
| Vitamin A deficiency                                                    | 1,822.4<br>(1,484.2 to 2,192.8)                  | 1,561.7<br>(1,274.1 to 1,873.8)                      | 2.5<br>(1.5 to 4.0)                           | 8.4<br>(-16.3 to 36.1)                            | -17.5<br>(-35.9 to 1.5)                             |
| Iron-deficiency anaemia                                                 | 16,454.8<br>(15,493.3 to 17,444.4)               | --                                                   | 479.2<br>(311.2 to 712.1)                     | -0.8<br>(-8.6 to 6.6)                             | -28.0<br>(-33.2 to -23.6)                           |
| Other nutritional deficiencies                                          | --                                               | --                                                   | 2.1<br>(1.3 to 3.1)                           | 1.8<br>(-22.8 to 33.9)                            | -20.1<br>(-39.6 to 5.5)                             |
| <b>Other communicable, maternal, neonatal, and nutritional diseases</b> | <b>31,575.0</b><br><b>(29,823.7 to 33,530.7)</b> | <b>19,355.7</b><br><b>(16,817.2 to 22,344.6)</b>     | <b>97.7</b><br><b>(61.7 to 150.1)</b>         | <b>28.2</b><br><b>(19.1 to 37.1)</b>              | <b>-4.5</b><br><b>(-11.0 to 2.0)</b>                |
| Sexually transmitted diseases excluding HIV                             | 24,045.7<br>(22,501.5 to 25,647.5)               | 14,216.5<br>(12,743.8 to 15,855.4)                   | 68.1<br>(42.1 to 107.9)                       | 42.7<br>(30.8 to 54.3)                            | 0.7<br>(-7.2 to 8.6)                                |
| Syphilis                                                                | 1,368.5<br>(992.3 to 1,848.9)                    | 981.4<br>(690.8 to 1,398.8)                          | 3.4<br>(2.4 to 4.7)                           | 36.6<br>(16.7 to 60.9)                            | -1.5<br>(-16.6 to 17.4)                             |
| Chlamydial infection                                                    | 2,602.2<br>(2,021.5 to 3,221.1)                  | 2,039.0<br>(1,606.1 to 2,510.3)                      | 21.2<br>(12.0 to 35.0)                        | 40.8<br>(26.8 to 56.1)                            | -0.8<br>(-10.7 to 9.5)                              |
| Gonococcal infection                                                    | 1,089.3<br>(857.2 to 1,377.5)                    | 3,798.7<br>(2,928.5 to 4,891.7)                      | 10.2<br>(5.9 to 16.2)                         | 43.4<br>(5.9 to 93.0)                             | 0.8<br>(-25.2 to 32.7)                              |
| Trichomoniasis                                                          | 4,614.1<br>(3,760.8 to 5,553.1)                  | 4,402.7<br>(3,503.8 to 5,505.6)                      | 6.5<br>(2.5 to 13.7)                          | 40.6<br>(32.7 to 50.1)                            | -0.8<br>(-6.0 to 5.2)                               |
| Genital herpes                                                          | 17,598.8<br>(15,197.6 to 20,750.6)               | 1,960.4<br>(1,632.5 to 2,410.4)                      | 4.8<br>(1.6 to 10.9)                          | 49.2<br>(36.4 to 65.1)                            | 5.6<br>(-2.3 to 14.9)                               |
| Other sexually transmitted diseases                                     | 744.9<br>(592.2 to 942.2)                        | 1,034.2<br>(859.3 to 1,245.0)                        | 22.2<br>(14.4 to 33.2)                        | 44.6<br>(29.3 to 60.6)                            | 1.9<br>(-9.6 to 12.5)                               |
| Hepatitis                                                               | 9,719.5<br>(7,887.0 to 11,831.7)                 | 5,139.1<br>(3,434.3 to 7,621.3)                      | 6.0<br>(3.6 to 9.5)                           | -8.6<br>(-31.4 to 21.2)                           | -24.2<br>(-38.0 to -7.5)                            |
| Acute hepatitis A                                                       | 103.4<br>(14.9 to 288.8)                         | 1,344.5<br>(193.9 to 3,754.1)                        | 1.0<br>(0.3 to 2.1)                           | -15.1<br>(-78.0 to 251.4)                         | -26.7<br>(-73.0 to 118.7)                           |
| Hepatitis B                                                             | 8,000.9<br>(6,165.1 to 10,103.9)                 | 3,389.8<br>(2,481.6 to 4,632.7)                      | 4.4<br>(2.6 to 7.3)                           | -8.6<br>(-28.0 to 15.8)                           | -24.9<br>(-39.2 to -8.1)                            |
| Hepatitis C                                                             | 1,596.0<br>(1,404.0 to 1,800.3)                  | 155.5<br>(141.9 to 169.8)                            | 0.1<br>(0.1 to 0.3)                           | 19.2<br>(-0.1 to 41.1)                            | -6.6<br>(-21.2 to 10.1)                             |
| Acute hepatitis E                                                       | 19.2<br>(15.1 to 26.2)                           | 249.2<br>(196.5 to 340.2)                            | 0.5<br>(0.3 to 0.8)                           | 0.2<br>(-28.4 to 42.5)                            | -16.1<br>(-34.7 to 5.3)                             |
| Other infectious diseases                                               | 742.3<br>(688.5 to 794.6)                        | 0.1<br>(0.1 to 0.1)                                  | 23.6<br>(15.0 to 35.3)                        | 7.6<br>(-3.0 to 18.7)                             | -15.0<br>(-22.5 to -6.9)                            |
| <b>Non-communicable diseases</b>                                        | <b>90,213.5</b><br><b>(89,291.7 to 91,170.1)</b> | <b>277,701.0†</b><br><b>(253,105.5 to 300,052.7)</b> | <b>6,440.1</b><br><b>(4,761.0 to 8,411.1)</b> | <b>36.9</b><br><b>(32.7 to 41.6)</b>              | <b>0.3</b><br><b>(-2.0 to 2.8)</b>                  |
| <b>Neoplasms</b>                                                        | <b>146.9</b><br><b>(127.5 to 194.8)</b>          | <b>65.6</b><br><b>(54.0 to 79.1)</b>                 | <b>22.1</b><br><b>(14.5 to 30.7)</b>          | <b>28.5</b><br><b>(17.3 to 41.9)</b>              | <b>-5.7</b><br><b>(-13.5 to 3.0)</b>                |
| Lip and oral cavity cancer                                              | 5.9<br>(5.4 to 6.5)                              | 1.8<br>(1.6 to 1.9)                                  | 0.7<br>(0.5 to 0.9)                           | 73.4<br>(51.0 to 100.1)                           | 24.3<br>(7.5 to 43.3)                               |
| Nasopharynx cancer                                                      | 2.6<br>(1.8 to 4.0)                              | 0.8<br>(0.6 to 1.2)                                  | 0.3<br>(0.2 to 0.6)                           | 25.0<br>(5.2 to 50.3)                             | -9.8<br>(-23.8 to 8.0)                              |
| Other pharynx cancer                                                    | 1.1<br>(0.9 to 1.3)                              | 0.5<br>(0.4 to 0.6)                                  | 0.2<br>(0.1 to 0.2)                           | 28.1<br>(1.9 to 53.1)                             | -5.4<br>(-24.1 to 11.9)                             |
| Oesophageal cancer                                                      | 1.9<br>(1.8 to 2.1)                              | 1.9<br>(1.8 to 2.1)                                  | 0.5<br>(0.3 to 0.7)                           | 22.3<br>(6.4 to 40.9)                             | -11.1<br>(-24.8 to 4.2)                             |
| Stomach cancer                                                          | 3.6<br>(3.2 to 4.1)                              | 2.5<br>(2.2 to 2.8)                                  | 0.7<br>(0.5 to 0.9)                           | 3.3<br>(-9.7 to 19.6)                             | -23.7<br>(-34.0 to -10.2)                           |
| Colon and rectum cancer                                                 | 9.0<br>(8.2 to 9.8)                              | 3.6<br>(3.3 to 3.9)                                  | 1.2<br>(0.9 to 1.6)                           | 32.2<br>(10.5 to 57.1)                            | -3.1<br>(-19.1 to 14.0)                             |
| Liver cancer                                                            | 1.5<br>(1.1 to 1.8)                              | 3.8<br>(2.9 to 4.5)                                  | 0.8<br>(0.5 to 1.2)                           | 35.6<br>(16.7 to 54.3)                            | -2.0<br>(-15.2 to 11.1)                             |
| Liver cancer due to hepatitis B                                         | 1.1<br>(0.8 to 1.4)                              | 1.1<br>(0.8 to 1.4)                                  | 0.2<br>(0.1 to 0.4)                           | 34.7<br>(14.5 to 54.6)                            | -2.7<br>(-17.0 to 11.3)                             |



| Cause                                              | Prevalence in thousands (95% UI)              | Incidence in thousands (95% UI)                | YLDs in thousands (95% UI)              |                                                   |                                                     |
|----------------------------------------------------|-----------------------------------------------|------------------------------------------------|-----------------------------------------|---------------------------------------------------|-----------------------------------------------------|
|                                                    | 2016 counts                                   | 2016 counts                                    | 2016 counts                             | Percentage change in counts between 2006 and 2016 | Percentage change in age-standardised rates between |
| Liver cancer due to hepatitis C                    | 1.1<br>(0.8 to 1.4)                           | 1.1<br>(0.8 to 1.4)                            | 0.2<br>(0.1 to 0.4)                     | 36.4<br>(15.3 to 57.2)                            | -1.3<br>(-15.5 to 13.4)                             |
| Liver cancer due to alcohol use                    | 0.5<br>(0.4 to 0.7)                           | 0.6<br>(0.4 to 0.7)                            | 0.1<br>(0.1 to 0.2)                     | 33.5<br>(13.7 to 55.9)                            | -3.2<br>(-16.9 to 12.4)                             |
| Liver cancer due to other causes                   | 1.0<br>(0.7 to 1.3)                           | 1.0<br>(0.8 to 1.3)                            | 0.2<br>(0.1 to 0.3)                     | 36.8<br>(18.4 to 56.3)                            | -1.4<br>(-14.2 to 11.7)                             |
| Gallbladder and biliary tract cancer               | 0.3<br>(0.2 to 0.3)                           | 0.4<br>(0.4 to 0.5)                            | 0.1<br>(0.1 to 0.1)                     | 22.7<br>(2.8 to 45.2)                             | -10.8<br>(-24.0 to 4.2)                             |
| Pancreatic cancer                                  | 1.0<br>(0.9 to 1.1)                           | 1.4<br>(1.3 to 1.4)                            | 0.3<br>(0.2 to 0.4)                     | 47.1<br>(34.9 to 60.1)                            | 5.9<br>(-2.5 to 15.0)                               |
| Larynx cancer                                      | 1.5<br>(1.2 to 1.9)                           | 0.5<br>(0.4 to 0.7)                            | 0.2<br>(0.1 to 0.3)                     | 23.8<br>(8.1 to 44.4)                             | -9.1<br>(-20.9 to 5.7)                              |
| Tracheal, bronchus, and lung cancer                | 2.3<br>(2.1 to 2.5)                           | 2.1<br>(2.0 to 2.3)                            | 0.5<br>(0.4 to 0.7)                     | 48.8<br>(22.4 to 78.7)                            | 7.6<br>(-11.9 to 30.4)                              |
| Malignant skin melanoma                            | 1.8<br>(1.4 to 2.0)                           | 0.5<br>(0.4 to 0.6)                            | 0.2<br>(0.1 to 0.2)                     | 48.2<br>(19.4 to 81.6)                            | 7.9<br>(-11.9 to 31.9)                              |
| Non-melanoma skin cancer                           | 0.4<br>(0.2 to 0.6)                           | 2.7<br>(1.8 to 4.0)                            | < 0.05<br>(< 0.05 to < 0.05)            | 50.7<br>(23.0 to 85.0)                            | 6.1<br>(-15.3 to 31.8)                              |
| Non-melanoma skin cancer (squamous-cell carcinoma) | 0.3<br>(0.1 to 0.4)                           | 0.7<br>(0.6 to 0.8)                            | < 0.05<br>(< 0.05 to < 0.05)            | 51.1<br>(17.4 to 92.0)                            | 6.0<br>(-18.1 to 36.8)                              |
| Non-melanoma skin cancer (basal-cell carcinoma)    | 0.3<br>(0.2 to 0.5)                           | 2.0<br>(1.2 to 3.3)                            | < 0.05<br>(< 0.05 to < 0.05)            | 49.0<br>(34.7 to 67.1)                            | 6.7<br>(-3.2 to 19.1)                               |
| Breast cancer                                      | 16.9<br>(14.2 to 21.7)                        | 4.2<br>(3.5 to 5.5)                            | 2.0<br>(1.3 to 2.8)                     | 31.0<br>(-5.9 to 90.6)                            | -4.1<br>(-29.7 to 38.1)                             |
| Cervical cancer                                    | 45.4<br>(26.6 to 82.2)                        | 13.1<br>(7.9 to 23.5)                          | 4.7<br>(2.5 to 8.3)                     | 11.1<br>(-13.8 to 51.5)                           | -19.1<br>(-37.3 to 9.5)                             |
| Uterine cancer                                     | 4.1<br>(3.0 to 4.9)                           | 1.0<br>(0.7 to 1.2)                            | 0.4<br>(0.2 to 0.5)                     | 19.6<br>(-5.4 to 53.0)                            | -11.7<br>(-29.8 to 12.2)                            |
| Ovarian cancer                                     | 5.9<br>(4.0 to 6.9)                           | 2.1<br>(1.5 to 2.5)                            | 1.0<br>(0.6 to 1.4)                     | 69.9<br>(23.7 to 129.4)                           | 22.9<br>(-11.8 to 67.6)                             |
| Prostate cancer                                    | 19.4<br>(6.9 to 26.7)                         | 6.2<br>(2.5 to 8.3)                            | 2.9<br>(1.0 to 4.6)                     | 44.2<br>(15.0 to 76.0)                            | 1.4<br>(-17.6 to 21.4)                              |
| Testicular cancer                                  | 0.3<br>(0.2 to 0.4)                           | 0.1<br>(0.1 to 0.1)                            | < 0.05<br>(< 0.05 to < 0.05)            | -2.7<br>(-20.9 to 19.8)                           | -31.1<br>(-43.9 to -15.5)                           |
| Kidney cancer                                      | 3.6<br>(2.2 to 5.2)                           | 0.9<br>(0.6 to 1.2)                            | 0.3<br>(0.2 to 0.5)                     | 44.8<br>(0.4 to 103.2)                            | 14.5<br>(-4.1 to 35.8)                              |
| Bladder cancer                                     | 3.0<br>(2.6 to 3.5)                           | 1.0<br>(0.8 to 1.1)                            | 0.4<br>(0.2 to 0.5)                     | 38.6<br>(14.4 to 62.0)                            | -0.3<br>(-16.8 to 15.8)                             |
| Brain and nervous system cancer                    | 2.6<br>(2.3 to 3.0)                           | 1.2<br>(1.0 to 1.4)                            | 0.4<br>(0.2 to 0.5)                     | 38.4<br>(22.8 to 57.4)                            | 7.4<br>(-5.4 to 28.1)                               |
| Thyroid cancer                                     | 3.5<br>(1.7 to 4.3)                           | 0.8<br>(0.4 to 0.9)                            | 0.3<br>(0.1 to 0.4)                     | 21.4<br>(-4.7 to 58.7)                            | -12.9<br>(-30.9 to 12.4)                            |
| Mesothelioma                                       | 0.2<br>(0.1 to 0.2)                           | 0.1<br>(0.1 to 0.2)                            | < 0.05<br>(< 0.05 to 0.1)               | 18.7<br>(-0.5 to 40.0)                            | -13.1<br>(-26.6 to 2.1)                             |
| Hodgkin lymphoma                                   | 1.6<br>(0.7 to 2.4)                           | 0.6<br>(0.3 to 0.8)                            | 0.2<br>(0.1 to 0.4)                     | -7.0<br>(-17.3 to 6.2)                            | -29.0<br>(-35.9 to -20.9)                           |
| Non-Hodgkin's lymphoma                             | 11.9<br>(6.6 to 15.8)                         | 3.9<br>(2.3 to 5.0)                            | 1.2<br>(0.6 to 1.9)                     | 33.9<br>(6.8 to 64.2)                             | 3.5<br>(-10.8 to 18.1)                              |
| Multiple myeloma                                   | 1.1<br>(0.6 to 1.4)                           | 0.7<br>(0.4 to 0.8)                            | 0.3<br>(0.2 to 0.5)                     | 43.8<br>(26.7 to 61.7)                            | 5.3<br>(-7.0 to 19.0)                               |
| Leukaemia                                          | 4.2<br>(3.6 to 4.9)                           | 1.3<br>(1.1 to 1.4)                            | 0.6<br>(0.4 to 0.8)                     | 16.6<br>(2.6 to 35.8)                             | -11.2<br>(-20.6 to 0.7)                             |
| Acute lymphoid leukaemia                           | 1.2<br>(0.9 to 1.5)                           | 0.3<br>(0.2 to 0.4)                            | 0.1<br>(0.1 to 0.2)                     | 17.5<br>(-11.4 to 46.6)                           | -6.2<br>(-24.2 to 13.0)                             |
| Chronic lymphoid leukaemia                         | 0.6<br>(0.5 to 0.8)                           | 0.1<br>(0.1 to 0.2)                            | 0.1<br>(0.1 to 0.1)                     | 30.6<br>(6.9 to 62.5)                             | -6.9<br>(-24.1 to 15.0)                             |
| Acute myeloid leukaemia                            | 0.4<br>(0.3 to 0.5)                           | 0.3<br>(0.2 to 0.3)                            | 0.1<br>(< 0.05 to 0.1)                  | 34.8<br>(14.0 to 63.1)                            | 4.8<br>(-10.1 to 21.4)                              |
| Chronic myeloid leukaemia                          | 0.5<br>(0.4 to 0.7)                           | 0.2<br>(0.1 to 0.2)                            | 0.1<br>(< 0.05 to 0.1)                  | 10.9<br>(-8.4 to 37.9)                            | -20.0<br>(-34.1 to -2.0)                            |
| Other leukaemia                                    | 1.5<br>(1.3 to 1.8)                           | 0.3<br>(0.3 to 0.4)                            | 0.2<br>(0.1 to 0.3)                     | 6.8<br>(-10.7 to 27.3)                            | -17.2<br>(-29.5 to -2.6)                            |
| Other neoplasms                                    | 17.7<br>(14.0 to 20.9)                        | 6.1<br>(4.9 to 7.2)                            | 1.8<br>(1.2 to 2.5)                     | 27.7<br>(11.1 to 45.8)                            | -7.5<br>(-19.3 to 5.8)                              |
| <b>Cardiovascular diseases</b>                     | <b>3,826.5</b><br><b>(3,627.9 to 4,050.7)</b> | <b>348.8†</b><br><b>(334.4 to 365.2)</b>       | <b>218.5</b><br><b>(158.4 to 292.9)</b> | <b>48.4</b><br><b>(42.3 to 55.1)</b>              | <b>6.4</b><br><b>(2.2 to 10.8)</b>                  |
| Rheumatic heart disease                            | 892.8<br>(787.3 to 1,002.1)                   | 39.0<br>(34.4 to 43.6)                         | 42.5<br>(26.4 to 63.2)                  | 43.1<br>(30.0 to 56.6)                            | 3.7<br>(-5.6 to 12.7)                               |
| Ischaemic heart disease                            | 922.5<br>(862.8 to 989.4)                     | 138.5<br>(129.3 to 148.3)                      | 41.4<br>(28.0 to 57.1)                  | 42.9<br>(35.0 to 51.7)                            | 2.9<br>(-2.0 to 8.0)                                |
| Cerebrovascular disease                            | 350.3<br>(323.8 to 380.3)                     | 52.6‡<br>(48.0 to 57.2)                        | 50.2<br>(36.1 to 64.2)                  | 63.6<br>(50.2 to 78.5)                            | 17.3<br>(7.9 to 27.4)                               |
| Ischaemic stroke                                   | 310.8<br>(277.9 to 348.4)                     | 33.0‡<br>(29.0 to 37.2)                        | 42.9<br>(30.6 to 55.5)                  | 70.6<br>(54.4 to 88.2)                            | 22.1<br>(10.8 to 34.1)                              |
| Hemorrhagic stroke                                 | 51.8<br>(46.0 to 58.0)                        | 19.6‡<br>(17.6 to 21.6)                        | 7.3<br>(5.2 to 9.4)                     | 31.6<br>(14.8 to 50.1)                            | -5.5<br>(-18.0 to 8.6)                              |
| Hypertensive heart disease                         | 62.3<br>(48.8 to 76.9)                        | --                                             | 5.0<br>(3.3 to 7.3)                     | 41.6<br>(26.6 to 58.6)                            | 0.2<br>(-9.1 to 10.7)                               |
| Cardiomyopathy and myocarditis                     | 80.3<br>(71.0 to 90.1)                        | 21.7†<br>(19.0 to 24.7)                        | 7.3<br>(4.9 to 10.2)                    | 38.0<br>(25.5 to 52.0)                            | 0.7<br>(-9.1 to 11.5)                               |
| Myocarditis                                        | 17.0<br>(15.2 to 19.1)                        | 21.7<br>(19.0 to 24.7)                         | 1.3<br>(0.9 to 1.8)                     | 36.7<br>(24.3 to 51.1)                            | 1.2<br>(-12.1 to 17.4)                              |
| Alcoholic cardiomyopathy                           | 8.6<br>(7.1 to 10.3)                          | --                                             | 0.7<br>(0.5 to 1.0)                     | 37.4<br>(7.1 to 75.9)                             | 0.6<br>(-22.0 to 29.5)                              |
| Other cardiomyopathy                               | 64.3<br>(54.0 to 76.6)                        | --                                             | 5.3<br>(3.6 to 7.5)                     | 38.4<br>(22.8 to 54.9)                            | 0.7<br>(-11.0 to 12.9)                              |
| Atrial fibrillation and flutter                    | 182.8<br>(158.9 to 209.8)                     | 15.8<br>(13.6 to 18.5)                         | 14.4<br>(9.7 to 20.5)                   | 42.1<br>(30.9 to 54.7)                            | 0.6<br>(-6.0 to 7.8)                                |
| Peripheral vascular disease                        | 676.5<br>(587.4 to 781.9)                     | 67.9<br>(58.5 to 79.4)                         | 3.6<br>(1.7 to 6.8)                     | 33.4<br>(21.7 to 47.6)                            | -5.0<br>(-12.9 to 4.2)                              |
| Endocarditis                                       | 2.9<br>(2.4 to 3.7)                           | 13.4<br>(11.8 to 15.1)                         | 0.2<br>(0.1 to 0.3)                     | 47.9<br>(34.0 to 62.6)                            | 2.9<br>(-10.8 to 19.7)                              |
| Other cardiovascular and circulatory diseases      | 1,015.5<br>(736.6 to 1,350.2)                 | --                                             | 53.9<br>(31.7 to 83.9)                  | 49.3<br>(32.0 to 70.2)                            | 5.2<br>(-7.1 to 19.5)                               |
| <b>Chronic respiratory diseases</b>                | <b>5,760.9</b><br><b>(5,429.5 to 6,119.3)</b> | <b>1,197.2†</b><br><b>(1,104.7 to 1,297.0)</b> | <b>272.5</b><br><b>(200.2 to 363.6)</b> | <b>40.2</b><br><b>(33.9 to 47.2)</b>              | <b>6.6</b><br><b>(2.8 to 10.9)</b>                  |
| Chronic obstructive pulmonary disease              | 925.1<br>(884.6 to 966.1)                     | 66.6<br>(63.9 to 69.3)                         | 71.7<br>(61.8 to 79.9)                  | 45.8<br>(35.1 to 57.0)                            | 6.8<br>(0.1 to 14.1)                                |
| Pneumoconiosis                                     | 1.0<br>(0.9 to 1.2)                           | 0.1<br>(0.1 to 0.2)                            | 0.2<br>(0.1 to 0.2)                     | 40.9<br>(33.4 to 48.8)                            | 2.2<br>(-3.4 to 8.2)                                |
| Silicosis                                          | 0.1<br>(< 0.05 to 0.1)                        | < 0.05<br>(< 0.05 to < 0.05)                   | < 0.05<br>(< 0.05 to < 0.05)            | 41.8<br>(30.9 to 53.6)                            | 1.3<br>(-5.2 to 8.0)                                |

| Cause                                                          | Prevalence in thousands (95% UI)           | Incidence in thousands (95% UI)                     | YLDs in thousands (95% UI)              |                                                   |                                                     |
|----------------------------------------------------------------|--------------------------------------------|-----------------------------------------------------|-----------------------------------------|---------------------------------------------------|-----------------------------------------------------|
|                                                                | 2016 counts                                | 2016 counts                                         | 2016 counts                             | Percentage change in counts between 2006 and 2016 | Percentage change in age-standardised rates between |
| Asbestosis                                                     | 0.4<br>(0.4 to 0.5)                        | < 0.05<br>(< 0.05 to < 0.05)                        | 0.1<br>(< 0.05 to 0.1)                  | 39.3<br>(28.6 to 51.0)                            | 0.1<br>(-6.0 to 6.5)                                |
| Coal workers pneumoconiosis                                    | --                                         | --                                                  | --                                      | --                                                | --                                                  |
| Other pneumoconiosis                                           | 0.6<br>(0.5 to 0.7)                        | 0.1<br>(0.1 to 0.1)                                 | 0.1<br>(0.1 to 0.1)                     | 42.0<br>(31.2 to 55.4)                            | 3.8<br>(-5.0 to 14.9)                               |
| Asthma                                                         | 4,836.6<br>(4,424.2 to 5,276.3)            | 1,129.8<br>(1,036.9 to 1,229.2)                     | 191.2<br>(124.8 to 277.2)               | 37.0<br>(29.6 to 44.8)                            | 5.6<br>(1.1 to 10.3)                                |
| Interstitial lung disease and pulmonary sarcoidosis            | 7.1<br>(6.2 to 8.1)                        | 0.7<br>(0.6 to 0.7)                                 | 0.8<br>(0.5 to 1.2)                     | 39.7<br>(35.6 to 44.1)                            | 1.7<br>(-2.4 to 6.2)                                |
| Other chronic respiratory diseases                             | --                                         | --                                                  | 8.6<br>(6.6 to 10.8)                    | 77.3<br>(34.4 to 136.9)                           | 39.1<br>(14.3 to 70.6)                              |
| <b>Cirrhosis and other chronic liver diseases</b>              | <b>217.9<br/>(206.9 to 228.6)</b>          | <b>22.5<br/>(21.6 to 23.6)</b>                      | <b>17.7<br/>(12.0 to 24.8)</b>          | <b>31.7<br/>(16.9 to 50.0)</b>                    | <b>-1.0<br/>(-9.5 to 8.3)</b>                       |
| Cirrhosis and other chronic liver diseases due to hepatitis B  | 60.8<br>(52.0 to 69.6)                     | 6.9<br>(6.0 to 8.0)                                 | 3.9<br>(2.5 to 5.6)                     | 36.8<br>(12.9 to 65.6)                            | -1.4<br>(-15.4 to 15.4)                             |
| Cirrhosis and other chronic liver diseases due to hepatitis C  | 42.1<br>(33.7 to 52.7)                     | 4.7<br>(3.8 to 5.8)                                 | 2.7<br>(1.7 to 3.9)                     | 40.6<br>(13.5 to 74.7)                            | 1.4<br>(-16.6 to 21.5)                              |
| Cirrhosis and other chronic liver diseases due to alcohol use  | 37.6<br>(32.8 to 42.5)                     | 4.9<br>(4.3 to 5.5)                                 | 2.3<br>(1.6 to 3.3)                     | 37.3<br>(12.6 to 67.4)                            | -1.3<br>(-16.9 to 17.3)                             |
| Cirrhosis and other chronic liver diseases due to other causes | 77.4<br>(71.4 to 83.9)                     | 6.0<br>(5.6 to 6.5)                                 | 8.8<br>(5.7 to 12.6)                    | 25.9<br>(2.5 to 57.3)                             | -1.8<br>(-17.4 to 18.2)                             |
| <b>Digestive diseases</b>                                      | <b>1,578.8<br/>(1,474.1 to 1,698.5)</b>    | <b>1,362.4<sup>†</sup><br/>(1,296.0 to 1,435.6)</b> | <b>52.3<br/>(36.3 to 70.6)</b>          | <b>27.8<br/>(17.0 to 38.9)</b>                    | <b>-1.9<br/>(-7.8 to 4.8)</b>                       |
| Peptic ulcer disease                                           | 237.6<br>(219.3 to 257.7)                  | 117.9<br>(106.1 to 130.8)                           | 5.4<br>(3.6 to 7.9)                     | 65.4<br>(49.0 to 83.6)                            | 19.5<br>(9.7 to 30.2)                               |
| Gastritis and duodenitis                                       | 574.2<br>(502.5 to 645.6)                  | 473.9<br>(427.7 to 529.2)                           | 8.2<br>(5.3 to 11.9)                    | 70.2<br>(52.2 to 91.2)                            | 30.2<br>(18.8 to 42.7)                              |
| Appendicitis                                                   | 10.6<br>(9.8 to 11.5)                      | 280.0<br>(256.9 to 305.7)                           | 3.3<br>(2.0 to 4.8)                     | 29.9<br>(-7.0 to 80.3)                            | -4.6<br>(-26.2 to 21.0)                             |
| Paralytic ileus and intestinal obstruction                     | 2.2<br>(2.0 to 2.4)                        | 63.9<br>(58.2 to 70.0)                              | 0.7<br>(0.5 to 1.0)                     | 36.4<br>(28.7 to 44.7)                            | 0.6<br>(-9.7 to 12.2)                               |
| Inguinal, femoral, and abdominal hernia                        | 732.6<br>(613.0 to 868.9)                  | 130.2<br>(115.5 to 146.7)                           | 27.7<br>(18.3 to 38.8)                  | 12.8<br>(0.2 to 25.9)                             | -15.5<br>(-22.7 to -7.4)                            |
| Inflammatory bowel disease                                     | 4.5<br>(4.3 to 4.8)                        | 34.9<br>(33.5 to 36.6)                              | 0.7<br>(0.5 to 1.0)                     | 58.0<br>(52.7 to 64.1)                            | 21.6<br>(16.8 to 26.4)                              |
| Vascular intestinal disorders                                  | 0.5<br>(0.4 to 0.6)                        | 3.3<br>(2.9 to 3.8)                                 | 0.2<br>(0.1 to 0.2)                     | 43.4<br>(35.9 to 51.0)                            | 12.7<br>(8.5 to 17.1)                               |
| Gallbladder and biliary diseases                               | 55.2<br>(48.6 to 61.6)                     | 246.2<br>(212.8 to 279.9)                           | 1.4<br>(0.9 to 2.0)                     | 42.1<br>(23.5 to 64.5)                            | 3.0<br>(-12.6 to 22.5)                              |
| Pancreatitis                                                   | 1.3<br>(1.1 to 1.5)                        | 12.1<br>(10.5 to 13.8)                              | 0.2<br>(0.1 to 0.2)                     | 47.5<br>(42.3 to 53.2)                            | 8.2<br>(4.6 to 11.8)                                |
| Other digestive diseases                                       | --                                         | --                                                  | 4.7<br>(3.2 to 6.3)                     | 28.3<br>(14.6 to 42.5)                            | 1.6<br>(-5.0 to 8.5)                                |
| <b>Neurological disorders</b>                                  | <b>24,966.9<br/>(23,672.0 to 26,343.5)</b> | <b>11,124.2<br/>(9,493.8 to 12,955.1)</b>           | <b>668.2<br/>(431.5 to 959.6)</b>       | <b>36.6<br/>(2.2 to 84.9)</b>                     | <b>-0.7<br/>(-21.0 to 26.3)</b>                     |
| Alzheimer's disease and other dementias                        | 145.1<br>(121.5 to 172.7)                  | 25.2<br>(21.0 to 30.6)                              | 20.7<br>(14.3 to 27.8)                  | 46.0<br>(37.7 to 54.4)                            | -0.1<br>(-5.1 to 4.9)                               |
| Parkinson's disease                                            | 12.4<br>(9.7 to 15.7)                      | 1.7<br>(1.3 to 2.1)                                 | 1.5<br>(0.9 to 2.1)                     | 56.9<br>(34.7 to 83.3)                            | 9.6<br>(-4.6 to 26.0)                               |
| Epilepsy                                                       | 371.8<br>(106.6 to 596.9)                  | 50.8<br>(14.5 to 83.1)                              | 144.8<br>(39.2 to 287.3)                | 26.1<br>(-66.7 to 366.7)                          | -5.6<br>(-74.8 to 247.5)                            |
| Multiple sclerosis                                             | 3.3<br>(2.9 to 3.8)                        | 0.2<br>(0.2 to 0.2)                                 | 0.9<br>(0.6 to 1.3)                     | 58.6<br>(53.3 to 64.9)                            | 14.6<br>(10.9 to 18.9)                              |
| Motor neuron disease                                           | 1.0<br>(0.9 to 1.2)                        | 0.3<br>(0.2 to 0.3)                                 | 0.2<br>(0.1 to 0.3)                     | 41.0<br>(34.8 to 47.7)                            | 5.6<br>(2.4 to 9.2)                                 |
| Migraine                                                       | 9,229.2<br>(8,780.8 to 9,658.4)            | 1,219.9<br>(1,157.5 to 1,286.7)                     | 401.1<br>(254.8 to 560.7)               | 38.7<br>(33.1 to 45.0)                            | -0.1<br>(-3.5 to 3.7)                               |
| Tension-type headache                                          | 17,741.4<br>(15,603.3 to 20,337.5)         | 9,825.6<br>(8,220.4 to 11,642.1)                    | 64.6<br>(41.4 to 97.3)                  | 37.7<br>(29.6 to 47.2)                            | -0.8<br>(-6.2 to 5.0)                               |
| Other neurological disorders                                   | 0.2<br>(0.1 to 0.4)                        | 0.5<br>(0.3 to 0.7)                                 | 34.3<br>(9.8 to 67.8)                   | 54.4<br>(-56.5 to 445.5)                          | 14.1<br>(-65.1 to 273.5)                            |
| <b>Mental and substance use disorders</b>                      | <b>15,287.9<br/>(14,440.9 to 16,069.5)</b> | <b>5,779.1<sup>†</sup><br/>(5,346.6 to 6,253.7)</b> | <b>1,832.5<br/>(1,325.7 to 2,394.2)</b> | <b>37.4<br/>(33.6 to 41.2)</b>                    | <b>-1.2<br/>(-3.6 to 1.5)</b>                       |
| Schizophrenia                                                  | 130.9<br>(113.6 to 149.6)                  | 12.3<br>(10.8 to 14.1)                              | 84.8<br>(61.9 to 107.2)                 | 46.2<br>(31.3 to 61.8)                            | 4.0<br>(-5.2 to 14.2)                               |
| Alcohol use disorders                                          | 1,856.6<br>(1,543.3 to 2,114.5)            | 872.5<br>(727.1 to 1,026.1)                         | 187.3<br>(126.2 to 263.4)               | 61.0<br>(41.2 to 84.8)                            | 12.1<br>(-0.4 to 27.2)                              |
| Drug use disorders                                             | 442.3<br>(394.7 to 497.2)                  | 79.7<br>(68.1 to 92.6)                              | 92.2<br>(62.6 to 127.2)                 | 46.9<br>(32.7 to 63.2)                            | 2.9<br>(-6.1 to 12.7)                               |
| Opioid use disorders                                           | 187.3<br>(151.2 to 236.5)                  | 26.1<br>(21.2 to 32.1)                              | 78.2<br>(51.2 to 110.4)                 | 47.3<br>(31.3 to 67.5)                            | 3.0<br>(-7.2 to 14.7)                               |
| Cocaine use disorders                                          | 12.3<br>(10.2 to 14.9)                     | 1.8<br>(1.4 to 2.2)                                 | 1.8<br>(1.1 to 2.6)                     | 45.5<br>(38.5 to 53.9)                            | 3.0<br>(-1.8 to 8.2)                                |
| Amphetamine use disorders                                      | 6.8<br>(4.5 to 9.4)                        | 1.2<br>(0.8 to 1.8)                                 | 1.0<br>(0.5 to 1.6)                     | 46.3<br>(32.7 to 61.8)                            | 3.3<br>(-6.1 to 13.5)                               |
| Cannabis use disorders                                         | 225.0<br>(177.9 to 282.5)                  | 44.6<br>(34.7 to 56.8)                              | 6.6<br>(3.9 to 10.2)                    | 43.3<br>(17.3 to 73.6)                            | 0.6<br>(-16.8 to 20.0)                              |
| Other drug use disorders                                       | 27.2<br>(23.8 to 30.9)                     | 6.0<br>(5.2 to 6.9)                                 | 4.8<br>(3.1 to 6.7)                     | 47.0<br>(24.2 to 73.8)                            | 4.2<br>(-11.1 to 21.5)                              |
| Depressive disorders                                           | 3,157.3<br>(2,945.2 to 3,401.0)            | 3,591.5<br>(3,197.8 to 4,026.7)                     | 548.2<br>(373.2 to 754.4)               | 35.8<br>(28.9 to 43.6)                            | -4.9<br>(-9.4 to 0.1)                               |
| Major depressive disorder                                      | 2,186.5<br>(1,931.1 to 2,453.3)            | 3,408.0<br>(3,001.3 to 3,841.9)                     | 450.5<br>(304.6 to 618.1)               | 34.9<br>(26.4 to 44.0)                            | -6.0<br>(-11.4 to -0.0)                             |
| Dysthymia                                                      | 1,008.1<br>(871.7 to 1,160.9)              | 183.4<br>(160.3 to 212.6)                           | 97.7<br>(65.5 to 142.4)                 | 40.2<br>(34.7 to 46.1)                            | 0.4<br>(-2.9 to 3.6)                                |
| Bipolar disorder                                               | 535.8<br>(453.0 to 641.2)                  | 63.5<br>(53.6 to 76.8)                              | 110.8<br>(67.4 to 166.0)                | 40.8<br>(31.3 to 51.4)                            | 0.3<br>(-5.6 to 6.6)                                |
| Anxiety disorders                                              | 3,146.1<br>(2,835.7 to 3,474.0)            | 554.0<br>(506.2 to 606.3)                           | 307.6<br>(214.2 to 423.1)               | 37.1<br>(27.5 to 47.4)                            | 0.2<br>(-6.3 to 7.2)                                |
| Eating disorders                                               | 77.2<br>(63.0 to 94.7)                     | 65.8<br>(47.2 to 89.0)                              | 15.8<br>(9.8 to 23.5)                   | 72.1<br>(44.5 to 104.1)                           | 23.1<br>(4.5 to 46.1)                               |
| Anorexia nervosa                                               | 21.7<br>(15.6 to 29.3)                     | 10.5<br>(7.7 to 14.2)                               | 4.7<br>(2.6 to 7.4)                     | 63.2<br>(17.8 to 126.8)                           | 18.2<br>(-13.7 to 62.5)                             |
| Bulimia nervosa                                                | 52.8<br>(38.7 to 72.5)                     | 55.3<br>(37.5 to 78.2)                              | 11.1<br>(6.6 to 17.3)                   | 76.2<br>(43.6 to 119.7)                           | 25.1<br>(2.2 to 54.2)                               |
| Autistic spectrum disorders                                    | 861.7<br>(763.2 to 979.7)                  | 10.2<br>(7.0 to 14.1)                               | 123.3<br>(83.6 to 174.3)                | 32.8<br>(25.6 to 41.0)                            | 0.5<br>(-4.4 to 6.0)                                |
| Autism                                                         | 236.1<br>(204.3 to 273.9)                  | 1.4<br>(0.7 to 2.4)                                 | 60.8<br>(39.1 to 88.7)                  | 32.7<br>(20.7 to 46.8)                            | 0.5<br>(-7.8 to 10.5)                               |
| Asperger syndrome and other autistic spectrum disorders        | 621.0<br>(513.9 to 752.5)                  | 8.7<br>(5.7 to 12.7)                                | 62.5<br>(40.7 to 91.9)                  | 33.0<br>(25.5 to 40.6)                            | 0.4<br>(-4.5 to 5.2)                                |



| Cause                                                      | Prevalence in thousands (95% UI)                 | Incidence in thousands (95% UI)                      | YLDs in thousands (95% UI)                    |                                                   |                                                     |
|------------------------------------------------------------|--------------------------------------------------|------------------------------------------------------|-----------------------------------------------|---------------------------------------------------|-----------------------------------------------------|
|                                                            | 2016 counts                                      | 2016 counts                                          | 2016 counts                                   | Percentage change in counts between 2006 and 2016 | Percentage change in age-standardised rates between |
| Attention-deficit/hyperactivity disorder                   | 1,380.5<br>(1,234.1 to 1,553.2)                  | 82.2<br>(71.1 to 96.2)                               | 16.7<br>(9.8 to 26.4)                         | 31.6<br>(21.5 to 41.9)                            | 0.4<br>(-6.7 to 7.6)                                |
| Conduct disorder                                           | 1,056.5<br>(882.6 to 1,223.4)                    | 373.4<br>(299.4 to 445.1)                            | 128.2<br>(78.9 to 197.7)                      | 31.2<br>(20.8 to 41.9)                            | 1.5<br>(-6.7 to 9.8)                                |
| Idiopathic developmental intellectual disability           | 2,706.7<br>(1,641.3 to 3,785.9)                  | --                                                   | 113.0<br>(53.1 to 192.5)                      | 8.8<br>(-0.3 to 18.0)                             | -18.8<br>(-26.0 to -12.4)                           |
| Other mental and substance use disorders                   | 1,396.8<br>(1,220.4 to 1,618.5)                  | 74.0<br>(64.7 to 85.7)                               | 104.7<br>(71.7 to 149.9)                      | 41.5<br>(33.5 to 50.6)                            | 0.3<br>(-4.3 to 5.2)                                |
| <b>Diabetes, urogenital, blood, and endocrine diseases</b> | <b>35,536.5</b><br><b>(34,969.0 to 36,107.3)</b> | <b>9,443.9†</b><br><b>(8,834.0 to 10,058.7)</b>      | <b>527.0</b><br><b>(371.6 to 721.3)</b>       | <b>38.9</b><br><b>(34.7 to 43.4)</b>              | <b>2.4</b><br><b>(-0.7 to 5.9)</b>                  |
| Diabetes mellitus                                          | 1,908.7<br>(1,721.8 to 2,114.4)                  | 133.8<br>(121.3 to 147.4)                            | 174.8<br>(120.3 to 241.7)                     | 45.3<br>(36.7 to 54.5)                            | 5.0<br>(-1.4 to 11.8)                               |
| Acute glomerulonephritis                                   | 0.9<br>(0.7 to 1.0)                              | 13.0<br>(11.1 to 15.2)                               | < 0.05<br>(< 0.05 to 0.1)                     | 33.4<br>(27.7 to 40.2)                            | -0.5<br>(-4.2 to 3.8)                               |
| Chronic kidney disease                                     | 3,782.9<br>(3,386.5 to 4,196.8)                  | 287.8<br>(255.6 to 323.6)                            | 105.1<br>(75.5 to 138.2)                      | 57.6<br>(47.7 to 68.4)                            | 10.7<br>(4.5 to 17.4)                               |
| Chronic kidney disease due to diabetes mellitus            | 1,148.4<br>(961.7 to 1,355.6)                    | 81.6<br>(67.3 to 98.6)                               | 29.9<br>(21.1 to 40.2)                        | 56.5<br>(42.7 to 71.5)                            | 9.6<br>(1.5 to 18.7)                                |
| Chronic kidney disease due to hypertension                 | 799.8<br>(689.8 to 908.9)                        | 75.0<br>(62.4 to 88.2)                               | 17.9<br>(12.1 to 24.4)                        | 60.9<br>(44.6 to 78.5)                            | 11.8<br>(1.4 to 22.7)                               |
| Chronic kidney disease due to glomerulonephritis           | 785.9<br>(675.3 to 891.7)                        | 46.1<br>(36.8 to 57.2)                               | 27.6<br>(19.4 to 37.5)                        | 59.3<br>(44.0 to 77.0)                            | 13.5<br>(4.2 to 23.7)                               |
| Chronic kidney disease due to other causes                 | 1,048.8<br>(882.3 to 1,218.9)                    | 85.0<br>(70.8 to 99.3)                               | 29.7<br>(20.5 to 39.5)                        | 55.3<br>(41.4 to 70.5)                            | 9.0<br>(0.7 to 17.8)                                |
| Urinary diseases and male infertility                      | 1,409.8<br>(1,248.4 to 1,588.8)                  | 4,826.3†<br>(4,320.8 to 5,406.6)                     | 37.9<br>(24.6 to 54.9)                        | 33.4<br>(24.1 to 43.1)                            | -2.8<br>(-9.3 to 4.0)                               |
| Interstitial nephritis and urinary tract infections        | 80.0<br>(69.7 to 90.9)                           | 4,195.2<br>(3,678.7 to 4,769.6)                      | 2.7<br>(1.6 to 4.2)                           | 38.7<br>(14.6 to 66.4)                            | 2.4<br>(-13.2 to 20.1)                              |
| Urolithiasis                                               | 19.4<br>(17.1 to 22.0)                           | 514.2<br>(455.5 to 585.6)                            | 1.5<br>(1.0 to 2.1)                           | 42.0<br>(31.0 to 53.6)                            | 2.7<br>(-6.5 to 12.2)                               |
| Benign prostatic hyperplasia                               | 922.1<br>(786.4 to 1,073.1)                      | 116.9<br>(98.2 to 136.7)                             | 30.2<br>(18.9 to 44.2)                        | 31.9<br>(21.4 to 43.5)                            | -3.3<br>(-10.3 to 4.2)                              |
| Male infertility                                           | 331.5<br>(245.8 to 455.8)                        | --                                                   | 1.9<br>(0.7 to 4.1)                           | 69.2<br>(35.5 to 115.6)                           | 20.1<br>(-4.7 to 55.2)                              |
| Other urinary diseases                                     | --                                               | --                                                   | 1.6<br>(1.0 to 2.2)                           | 14.0<br>(0.1 to 29.5)                             | -14.7<br>(-23.1 to -5.9)                            |
| Gynecological diseases                                     | 11,054.0<br>(10,539.9 to 11,554.4)               | 4,109.4†<br>(3,833.6 to 4,407.2)                     | 115.6<br>(76.8 to 167.0)                      | 35.9<br>(29.7 to 42.7)                            | -4.6<br>(-8.7 to -0.6)                              |
| Uterine fibroids                                           | 706.8<br>(622.0 to 795.4)                        | 87.9<br>(75.9 to 101.0)                              | 10.1<br>(5.8 to 16.6)                         | 13.9<br>(2.6 to 24.1)                             | -20.6<br>(-28.4 to -13.9)                           |
| Polycystic ovarian syndrome                                | 88.8<br>(65.5 to 115.4)                          | 233.1<br>(164.2 to 318.4)                            | 0.8<br>(0.3 to 1.5)                           | 46.1<br>(26.7 to 68.5)                            | 1.7<br>(-11.7 to 16.8)                              |
| Female infertility                                         | 98.8<br>(48.7 to 221.1)                          | --                                                   | 0.6<br>(0.1 to 1.6)                           | 96.0<br>(-3.9 to 344.1)                           | 34.0<br>(-25.0 to 197.3)                            |
| Endometriosis                                              | 20.1<br>(16.9 to 24.2)                           | 84.4<br>(68.4 to 107.7)                              | 1.9<br>(1.2 to 2.9)                           | 42.6<br>(6.0 to 98.7)                             | -0.4<br>(-24.2 to 35.5)                             |
| Genital prolapse                                           | 4,922.5<br>(4,356.8 to 5,507.2)                  | 441.3<br>(371.6 to 520.1)                            | 15.5<br>(7.6 to 28.2)                         | 33.0<br>(25.2 to 42.6)                            | -2.8<br>(-8.7 to 4.4)                               |
| Premenstrual syndrome                                      | 5,549.2<br>(5,138.8 to 5,921.9)                  | 2,161.5<br>(1,980.7 to 2,328.8)                      | 46.6<br>(29.0 to 72.4)                        | 40.0<br>(28.0 to 53.0)                            | -2.0<br>(-9.8 to 6.3)                               |
| Other gynecological diseases                               | 1,159.4<br>(991.1 to 1,341.9)                    | 1,101.3<br>(906.4 to 1,315.8)                        | 40.2<br>(26.3 to 58.0)                        | 37.8<br>(27.5 to 48.5)                            | -3.2<br>(-9.9 to 3.7)                               |
| Hemoglobinopathies and hemolytic anaemias                  | 24,237.3<br>(23,762.4 to 24,704.9)               | --                                                   | 64.4<br>(42.5 to 94.7)                        | 21.6<br>(12.4 to 32.0)                            | -4.0<br>(-9.7 to 2.5)                               |
| Thalassemias                                               | 1.2<br>(1.1 to 1.4)                              | --                                                   | 0.1<br>(0.1 to 0.2)                           | 23.1<br>(11.1 to 35.1)                            | -1.9<br>(-11.5 to 7.8)                              |
| Thalassaemias trait                                        | 2,261.9<br>(2,156.6 to 2,379.7)                  | --                                                   | 37.1<br>(24.5 to 54.2)                        | 29.7<br>(18.9 to 41.4)                            | 4.9<br>(-2.7 to 13.0)                               |
| Sickle cell disorders                                      | 1.9<br>(1.2 to 2.8)                              | --                                                   | 0.3<br>(0.1 to 0.4)                           | 22.4<br>(10.5 to 35.0)                            | -2.6<br>(-12.1 to 7.2)                              |
| Sickle cell trait                                          | 2,313.6<br>(1,927.6 to 2,789.8)                  | --                                                   | 7.4<br>(4.5 to 11.4)                          | 34.9<br>(18.9 to 54.9)                            | 11.2<br>(-0.9 to 25.1)                              |
| G6PD deficiency                                            | 4,233.7<br>(3,981.5 to 4,511.0)                  | --                                                   | 0.5<br>(0.3 to 0.7)                           | 2.2<br>(-7.5 to 12.8)                             | -14.3<br>(-21.1 to -6.8)                            |
| G6PD trait                                                 | 16,515.3<br>(16,289.9 to 16,807.9)               | --                                                   | < 0.05<br>(< 0.05 to < 0.05)                  | 34.6<br>(21.7 to 47.7)                            | 5.5<br>(-3.0 to 14.8)                               |
| Other hemoglobinopathies and hemolytic anaemias            | 724.9<br>(682.8 to 767.7)                        | --                                                   | 19.0<br>(12.4 to 28.2)                        | 5.1<br>(-6.3 to 20.4)                             | -25.1<br>(-31.7 to -17.1)                           |
| Endocrine, metabolic, blood, and immune disorders          | 965.3<br>(912.9 to 1,018.0)                      | 73.5<br>(65.6 to 82.3)                               | 29.1<br>(19.6 to 41.3)                        | 12.1<br>(3.2 to 22.4)                             | -10.6<br>(-16.3 to -4.2)                            |
| <b>Musculoskeletal disorders</b>                           | <b>8,819.9</b><br><b>(8,345.6 to 9,279.8)</b>    | <b>4,237.0</b><br><b>(3,795.8 to 4,715.4)</b>        | <b>969.0</b><br><b>(689.1 to 1,272.5)</b>     | <b>44.0</b><br><b>(38.1 to 50.5)</b>              | <b>2.5</b><br><b>(-1.4 to 6.9)</b>                  |
| Rheumatoid arthritis                                       | 122.4<br>(108.9 to 138.9)                        | 8.2<br>(7.3 to 9.3)                                  | 29.3<br>(19.9 to 39.6)                        | 44.2<br>(29.4 to 58.7)                            | 4.5<br>(-4.4 to 13.5)                               |
| Osteoarthritis                                             | 1,506.9<br>(1,407.2 to 1,605.4)                  | 83.7<br>(77.5 to 90.1)                               | 93.0<br>(64.9 to 126.8)                       | 43.8<br>(37.9 to 49.5)                            | 4.1<br>(0.2 to 8.0)                                 |
| Low back and neck pain                                     | 6,087.1<br>(5,676.1 to 6,520.3)                  | 2,801.1<br>(2,488.6 to 3,146.0)                      | 702.3<br>(492.6 to 926.6)                     | 43.6<br>(35.7 to 51.8)                            | 2.3<br>(-3.0 to 7.7)                                |
| Low back pain                                              | 4,708.7<br>(4,179.8 to 5,337.9)                  | 2,372.4<br>(2,066.1 to 2,717.7)                      | 533.6<br>(376.5 to 709.1)                     | 44.3<br>(33.8 to 55.2)                            | 2.6<br>(-4.3 to 9.7)                                |
| Neck pain                                                  | 1,679.6<br>(1,453.5 to 1,943.0)                  | 428.6<br>(370.2 to 497.2)                            | 168.7<br>(113.7 to 238.1)                     | 41.7<br>(34.7 to 49.2)                            | 1.5<br>(-3.1 to 6.5)                                |
| Gout                                                       | 211.7<br>(187.6 to 238.6)                        | 43.9<br>(38.4 to 49.4)                               | 6.7<br>(4.5 to 9.3)                           | 38.4<br>(18.3 to 58.4)                            | -0.8<br>(-13.6 to 12.5)                             |
| Other musculoskeletal disorders                            | 1,578.0<br>(1,214.1 to 1,963.2)                  | 1,300.2<br>(989.9 to 1,640.2)                        | 137.7<br>(83.3 to 205.3)                      | 46.6<br>(31.9 to 64.4)                            | 2.1<br>(-7.9 to 13.8)                               |
| <b>Other non-communicable diseases</b>                     | <b>73,735.2</b><br><b>(71,684.7 to 75,842.4)</b> | <b>244,120.3†</b><br><b>(219,102.0 to 266,982.2)</b> | <b>1,860.4</b><br><b>(1,253.6 to 2,643.8)</b> | <b>31.3</b><br><b>(29.0 to 33.6)</b>              | <b>-1.9</b><br><b>(-3.1 to -0.6)</b>                |
| Congenital anomalies                                       | 1,107.6<br>(878.2 to 1,450.4)                    | --                                                   | 155.9<br>(104.1 to 232.8)                     | 23.4<br>(14.0 to 33.7)                            | -6.2<br>(-13.4 to 1.3)                              |
| Neural tube defects                                        | 129.7<br>(115.5 to 145.1)                        | --                                                   | 38.9<br>(27.3 to 52.8)                        | 33.3<br>(17.9 to 50.8)                            | 0.8<br>(-9.2 to 12.5)                               |
| Congenital heart anomalies                                 | 114.3<br>(93.7 to 137.2)                         | --                                                   | 5.5<br>(2.6 to 9.5)                           | 16.2<br>(-2.6 to 37.5)                            | -5.6<br>(-20.0 to 10.7)                             |
| Orofacial clefts                                           | 39.7<br>(34.5 to 45.3)                           | --                                                   | 0.7<br>(0.5 to 1.1)                           | 21.6<br>(8.5 to 37.4)                             | -7.6<br>(-17.7 to 4.4)                              |
| Down's syndrome                                            | 17.6<br>(14.7 to 21.0)                           | --                                                   | 1.5<br>(1.0 to 2.1)                           | 33.8<br>(23.3 to 45.1)                            | 2.6<br>(-5.2 to 11.3)                               |
| Turner syndrome                                            | 63.5<br>(53.5 to 75.6)                           | --                                                   | 1.1<br>(0.5 to 1.9)                           | 16.9<br>(-16.9 to 61.6)                           | -9.7<br>(-34.5 to 23.7)                             |
| Klinefelter syndrome                                       | 62.9<br>(52.9 to 74.3)                           | --                                                   | 0.3<br>(0.1 to 0.5)                           | 32.8<br>(1.4 to 75.6)                             | -1.2<br>(-23.7 to 28.5)                             |

| Cause                                         | Prevalence in thousands (95% UI)                 | Incidence in thousands (95% UI)                | YLDs in thousands (95% UI)              |                                                   |                                                     |
|-----------------------------------------------|--------------------------------------------------|------------------------------------------------|-----------------------------------------|---------------------------------------------------|-----------------------------------------------------|
|                                               | 2016 counts                                      | 2016 counts                                    | 2016 counts                             | Percentage change in counts between 2006 and 2016 | Percentage change in age-standardised rates between |
| Other chromosomal abnormalities               | 15.0<br>(12.6 to 17.8)                           | --                                             | 3.0<br>(1.8 to 4.6)                     | 28.3<br>(-12.7 to 86.5)                           | 1.7<br>(-30.7 to 47.3)                              |
| Congenital musculoskeletal and limb anomalies | 111.9<br>(98.5 to 126.0)                         | --                                             | 16.3<br>(10.5 to 22.7)                  | 28.5<br>(11.8 to 46.9)                            | -2.1<br>(-13.0 to 10.1)                             |
| Urogenital congenital anomalies               | 110.2<br>(96.3 to 126.2)                         | --                                             | 2.9<br>(1.7 to 4.6)                     | 27.5<br>(17.2 to 39.4)                            | -0.5<br>(-8.2 to 8.2)                               |
| Digestive congenital anomalies                | 50.6<br>(44.4 to 57.5)                           | --                                             | 2.2<br>(1.4 to 3.3)                     | 35.3<br>(2.9 to 75.8)                             | 2.0<br>(-18.3 to 26.0)                              |
| Other congenital anomalies                    | 587.4<br>(329.5 to 1,012.6)                      | --                                             | 83.4<br>(46.2 to 144.7)                 | 18.3<br>(5.6 to 31.6)                             | -10.4<br>(-20.0 to -0.7)                            |
| Skin and subcutaneous diseases                | 39,428.8<br>(38,189.9 to 40,917.5)               | 90,796.4<br>(85,220.5 to 97,067.6)             | 907.4<br>(587.0 to 1,334.9)             | 32.4<br>(29.1 to 35.8)                            | 1.0<br>(-1.1 to 2.9)                                |
| Dermatitis                                    | 5,215.0<br>(4,790.3 to 5,682.9)                  | 4,328.4<br>(3,801.2 to 5,002.6)                | 211.1<br>(121.1 to 344.6)               | 25.6<br>(19.0 to 32.7)                            | -1.7<br>(-6.0 to 2.8)                               |
| Psoriasis                                     | 491.7<br>(467.9 to 516.5)                        | 78.5<br>(74.8 to 82.3)                         | 43.3<br>(30.3 to 57.8)                  | 51.7<br>(35.1 to 70.8)                            | 12.0<br>(2.1 to 23.3)                               |
| Cellulitis                                    | 37.2<br>(34.1 to 40.5)                           | 647.0<br>(597.9 to 697.1)                      | 2.1<br>(1.3 to 3.2)                     | 33.9<br>(6.1 to 68.4)                             | 1.4<br>(-16.9 to 24.7)                              |
| Pyoderma                                      | 667.2<br>(634.3 to 702.1)                        | 12,829.3<br>(12,209.1 to 13,458.2)             | 3.8<br>(1.5 to 8.0)                     | 30.3<br>(22.7 to 38.7)                            | 2.2<br>(-2.6 to 7.6)                                |
| Scabies                                       | 2,545.6<br>(2,184.1 to 2,946.4)                  | 7,807.2<br>(6,692.1 to 9,113.3)                | 66.0<br>(36.9 to 106.0)                 | 21.6<br>(16.1 to 27.2)                            | -8.0<br>(-11.3 to -4.4)                             |
| Fungal skin diseases                          | 19,453.7<br>(17,385.8 to 21,693.8)               | 45,162.5<br>(40,330.2 to 51,312.7)             | 110.6<br>(43.9 to 228.4)                | 28.3<br>(26.5 to 30.2)                            | 0.1<br>(-0.6 to 0.9)                                |
| Viral skin diseases                           | 3,861.4<br>(3,635.7 to 4,085.9)                  | 4,869.4<br>(4,611.4 to 5,125.9)                | 119.0<br>(73.2 to 177.1)                | 29.0<br>(23.3 to 35.5)                            | -0.3<br>(-4.1 to 4.0)                               |
| Acne vulgaris                                 | 9,786.6<br>(8,488.3 to 11,038.6)                 | 7,448.9<br>(5,750.3 to 9,631.0)                | 252.7<br>(167.2 to 364.8)               | 41.9<br>(34.1 to 50.6)                            | 3.6<br>(-1.8 to 9.2)                                |
| Alopecia areata                               | 165.6<br>(154.3 to 176.3)                        | 296.1<br>(275.6 to 315.1)                      | 5.5<br>(3.4 to 8.2)                     | 38.7<br>(22.1 to 57.5)                            | 0.2<br>(-10.0 to 11.6)                              |
| Pruritus                                      | 701.6<br>(615.5 to 790.6)                        | 570.7<br>(508.2 to 641.3)                      | 7.5<br>(3.5 to 13.7)                    | 37.8<br>(29.4 to 46.8)                            | 2.8<br>(-2.4 to 8.1)                                |
| Urticaria                                     | 990.3<br>(845.9 to 1,165.7)                      | 1,783.0<br>(1,519.3 to 2,089.8)                | 60.0<br>(37.6 to 87.5)                  | 29.3<br>(21.0 to 38.1)                            | 0.2<br>(-5.4 to 6.1)                                |
| Decubitus ulcer                               | 9.6<br>(8.6 to 10.6)                             | 35.0<br>(31.3 to 39.2)                         | 1.6<br>(1.1 to 2.2)                     | 39.9<br>(27.3 to 54.0)                            | 3.3<br>(-9.1 to 17.9)                               |
| Other skin and subcutaneous diseases          | 4,379.0<br>(4,243.1 to 4,526.9)                  | 4,940.4<br>(4,783.5 to 5,106.9)                | 24.2<br>(11.6 to 43.9)                  | 48.3<br>(44.0 to 52.8)                            | 9.3<br>(6.6 to 11.9)                                |
| Sense organ diseases                          | 16,277.9<br>(15,784.1 to 16,889.4)               | 8,966.8†<br>(8,344.8 to 9,637.0)               | 660.3<br>(461.4 to 926.6)               | 30.5<br>(26.0 to 35.5)                            | -3.5<br>(-5.6 to -1.3)                              |
| Glaucoma                                      | 40.8<br>(34.1 to 48.2)                           | --                                             | 5.1<br>(3.3 to 7.2)                     | 60.7<br>(40.6 to 82.8)                            | 15.4<br>(2.1 to 29.6)                               |
| Cataract                                      | 714.1<br>(635.8 to 798.7)                        | --                                             | 54.7<br>(38.6 to 74.7)                  | 42.5<br>(35.2 to 50.3)                            | 1.1<br>(-3.9 to 6.6)                                |
| Macular degeneration                          | 100.6<br>(83.3 to 120.2)                         | --                                             | 7.2<br>(4.9 to 9.9)                     | 58.8<br>(43.2 to 76.5)                            | 14.7<br>(4.3 to 26.0)                               |
| Refraction and accommodation disorders        | 6,637.5<br>(6,351.7 to 6,942.6)                  | --                                             | 129.0<br>(82.2 to 198.7)                | 17.3<br>(11.8 to 23.3)                            | -12.1<br>(-15.1 to -8.5)                            |
| Age-related and other hearing loss            | 10,646.5<br>(9,874.9 to 11,440.8)                | --                                             | 392.5<br>(266.6 to 553.9)               | 31.3<br>(24.2 to 38.9)                            | -3.9<br>(-6.9 to -0.8)                              |
| Other vision loss                             | 206.8<br>(184.8 to 230.8)                        | --                                             | 16.0<br>(11.2 to 21.9)                  | 47.2<br>(33.7 to 62.0)                            | 10.0<br>(1.6 to 18.7)                               |
| Other sense organ diseases                    | 1,822.0<br>(1,683.2 to 1,957.7)                  | 8,966.8<br>(8,344.8 to 9,637.0)                | 55.8<br>(35.3 to 83.3)                  | 39.4<br>(32.6 to 46.2)                            | 2.0<br>(-2.1 to 5.8)                                |
| Oral disorders                                | 50,105.2<br>(45,991.6 to 54,060.1)               | 144,357.1†<br>(120,487.9 to 166,738.0)         | 136.8<br>(74.8 to 233.3)                | 37.5<br>(34.2 to 41.1)                            | 0.4<br>(-1.8 to 3.0)                                |
| Caries of deciduous teeth                     | 11,498.9<br>(9,161.4 to 14,237.9)                | 44,227.8<br>(31,836.0 to 59,067.3)             | 2.7<br>(1.1 to 5.2)                     | 17.1<br>(5.4 to 31.8)                             | -1.9<br>(-11.5 to 10.4)                             |
| Caries of permanent teeth                     | 32,548.8<br>(27,829.5 to 37,706.3)               | 99,208.4<br>(81,607.8 to 116,022.0)            | 19.2<br>(8.2 to 37.4)                   | 31.2<br>(24.0 to 38.4)                            | -3.9<br>(-8.3 to 0.6)                               |
| Periodontal disease                           | 7,247.3<br>(4,449.3 to 10,384.4)                 | 867.4<br>(556.1 to 1,269.4)                    | 47.6<br>(17.1 to 109.4)                 | 40.0<br>(34.0 to 47.1)                            | 0.3<br>(-3.8 to 5.8)                                |
| Edentulism and severe tooth loss              | 774.3<br>(672.6 to 874.6)                        | 53.5<br>(46.6 to 60.6)                         | 21.7<br>(14.1 to 30.6)                  | 43.8<br>(35.4 to 52.4)                            | 3.1<br>(-1.8 to 8.1)                                |
| Other oral disorders                          | 1,546.9<br>(1,475.9 to 1,627.9)                  | --                                             | 45.6<br>(27.9 to 68.4)                  | 36.4<br>(31.0 to 42.1)                            | 0.1<br>(-3.1 to 3.5)                                |
| <b>Injuries</b>                               | <b>13,490.2</b><br><b>(12,472.8 to 14,763.4)</b> | <b>7,623.1†</b><br><b>(7,214.8 to 8,056.0)</b> | <b>572.6</b><br><b>(378.9 to 832.6)</b> | <b>31.9</b><br><b>(24.8 to 39.9)</b>              | <b>-0.5</b><br><b>(-4.4 to 3.4)</b>                 |
| <b>Transport injuries</b>                     | <b>1,276.0</b><br><b>(1,186.5 to 1,371.7)</b>    | <b>632.8</b><br><b>(561.7 to 710.6)</b>        | <b>77.6</b><br><b>(50.9 to 112.0)</b>   | <b>50.9</b><br><b>(44.5 to 57.1)</b>              | <b>10.5</b><br><b>(7.3 to 13.6)</b>                 |
| Road injuries                                 | 1,058.4<br>(986.2 to 1,139.3)                    | 559.7<br>(491.4 to 635.2)                      | 63.6<br>(41.7 to 91.7)                  | 53.6<br>(47.6 to 59.4)                            | 12.1<br>(8.9 to 15.1)                               |
| Pedestrian road injuries                      | 365.2<br>(324.4 to 413.8)                        | 151.9<br>(126.0 to 180.6)                      | 22.3<br>(14.8 to 32.2)                  | 40.4<br>(34.7 to 46.1)                            | 2.5<br>(-0.3 to 5.3)                                |
| Cyclist road injuries                         | 214.6<br>(180.4 to 254.4)                        | 126.6<br>(99.2 to 158.2)                       | 11.9<br>(7.7 to 17.4)                   | 61.5<br>(53.8 to 68.6)                            | 18.7<br>(14.6 to 22.6)                              |
| Motorcyclist road injuries                    | 84.2<br>(71.5 to 100.2)                          | 30.0<br>(23.3 to 38.4)                         | 4.9<br>(3.1 to 7.2)                     | 61.8<br>(53.8 to 69.2)                            | 17.8<br>(13.6 to 21.7)                              |
| Motor vehicle road injuries                   | 307.9<br>(264.2 to 349.9)                        | 192.6<br>(159.1 to 225.7)                      | 19.8<br>(13.1 to 28.2)                  | 64.1<br>(57.9 to 70.0)                            | 19.2<br>(16.0 to 22.2)                              |
| Other road injuries                           | 86.5<br>(73.7 to 102.1)                          | 58.6<br>(44.4 to 77.3)                         | 4.7<br>(3.0 to 6.9)                     | 54.4<br>(47.9 to 60.1)                            | 12.5<br>(9.0 to 15.6)                               |
| Other transport injuries                      | 217.6<br>(181.4 to 262.2)                        | 73.1<br>(60.1 to 90.5)                         | 13.9<br>(8.9 to 20.3)                   | 39.7<br>(31.3 to 48.3)                            | 2.7<br>(-1.6 to 7.0)                                |
| <b>Unintentional injuries</b>                 | <b>9,847.5</b><br><b>(9,121.4 to 10,760.1)</b>   | <b>6,488.6</b><br><b>(6,073.0 to 6,911.2)</b>  | <b>380.9</b><br><b>(259.1 to 535.8)</b> | <b>40.0</b><br><b>(33.7 to 46.4)</b>              | <b>3.5</b><br><b>(0.1 to 6.5)</b>                   |
| Falls                                         | 3,787.8<br>(3,291.0 to 4,330.3)                  | 2,397.9<br>(2,083.2 to 2,769.5)                | 171.9<br>(119.1 to 238.0)               | 43.0<br>(36.1 to 50.1)                            | 5.2<br>(1.7 to 8.5)                                 |
| Drowning                                      | 34.7<br>(30.1 to 39.8)                           | 9.8<br>(8.5 to 11.2)                           | 2.2<br>(1.4 to 3.2)                     | 25.6<br>(17.8 to 33.7)                            | -5.6<br>(-9.9 to -1.5)                              |
| Fire, heat, and hot substances                | 1,287.2<br>(1,065.5 to 1,606.5)                  | 244.8<br>(197.7 to 296.9)                      | 40.1<br>(27.4 to 55.8)                  | 34.2<br>(24.6 to 44.5)                            | 0.9<br>(-4.9 to 6.8)                                |
| Poisonings                                    | 28.7<br>(22.9 to 34.6)                           | 53.8<br>(42.1 to 68.0)                         | 3.0<br>(1.9 to 4.5)                     | 40.7<br>(29.3 to 54.9)                            | 4.4<br>(-1.9 to 12.1)                               |
| Exposure to mechanical forces                 | 1,401.4<br>(1,199.9 to 1,710.9)                  | 774.9<br>(655.6 to 911.3)                      | 39.5<br>(25.7 to 58.7)                  | 46.1<br>(39.7 to 52.2)                            | 7.2<br>(3.6 to 10.5)                                |
| Unintentional firearm injuries                | 62.8<br>(51.7 to 76.5)                           | 22.9<br>(16.3 to 31.9)                         | 3.0<br>(1.9 to 4.5)                     | 45.6<br>(38.5 to 52.9)                            | 5.9<br>(2.0 to 9.9)                                 |
| Unintentional suffocation                     | 110.3<br>(80.2 to 146.0)                         | 36.3<br>(25.3 to 51.7)                         | 3.9<br>(2.3 to 6.1)                     | 39.9<br>(30.7 to 49.8)                            | 4.3<br>(-0.9 to 9.6)                                |
| Other exposure to mechanical forces           | 1,228.4<br>(1,028.1 to 1,526.5)                  | 715.7<br>(607.1 to 841.3)                      | 32.6<br>(21.4 to 48.0)                  | 46.9<br>(40.8 to 52.7)                            | 7.7<br>(4.2 to 10.7)                                |

| Cause                                                                               | Prevalence in thousands (95% UI)              | Incidence in thousands (95% UI)          | YLDs in thousands (95% UI)            |                                                   |                                                     |
|-------------------------------------------------------------------------------------|-----------------------------------------------|------------------------------------------|---------------------------------------|---------------------------------------------------|-----------------------------------------------------|
|                                                                                     | 2016 counts                                   | 2016 counts                              | 2016 counts                           | Percentage change in counts between 2006 and 2016 | Percentage change in age-standardised rates between |
| Adverse effects of medical treatment                                                | 40.2<br>(31.8 to 49.5)                        | 526.4<br>(459.2 to 595.2)                | 5.4<br>(3.3 to 8.1)                   | 14.7<br>(8.6 to 20.8)                             | -14.2<br>(-17.3 to -10.9)                           |
| Animal contact                                                                      | 636.6<br>(561.2 to 738.0)                     | 1,051.0<br>(890.0 to 1,225.5)            | 22.3<br>(14.9 to 31.6)                | 32.1<br>(25.5 to 39.5)                            | -3.8<br>(-7.2 to -0.1)                              |
| Venomous animal contact                                                             | 227.8<br>(190.8 to 274.4)                     | 419.5<br>(330.8 to 524.6)                | 14.4<br>(9.4 to 20.7)                 | 40.0<br>(30.2 to 51.9)                            | 3.1<br>(-1.9 to 9.3)                                |
| Non-venomous animal contact                                                         | 408.8<br>(344.6 to 499.2)                     | 631.5<br>(520.3 to 751.3)                | 7.9<br>(5.2 to 11.6)                  | 19.8<br>(14.2 to 25.2)                            | -12.7<br>(-16.4 to -9.5)                            |
| Foreign body                                                                        | 705.6<br>(570.6 to 840.4)                     | 549.1<br>(480.0 to 636.8)                | 31.6<br>(20.3 to 47.2)                | 25.9<br>(18.5 to 34.3)                            | -5.6<br>(-9.8 to -1.5)                              |
| Pulmonary aspiration and foreign body in airway                                     | 365.7<br>(269.2 to 496.2)                     | 188.0<br>(152.9 to 233.7)                | 18.7<br>(11.7 to 28.4)                | 31.0<br>(22.8 to 39.9)                            | -0.7<br>(-5.3 to 4.4)                               |
| Foreign body in eyes                                                                | 34.5<br>(18.0 to 53.8)                        | 193.6<br>(146.5 to 258.9)                | 1.9<br>(0.9 to 3.4)                   | 40.2<br>(34.5 to 45.7)                            | 3.8<br>(0.8 to 7.1)                                 |
| Foreign body in other body part                                                     | 305.4<br>(243.2 to 399.1)                     | 167.4<br>(136.5 to 202.6)                | 11.0<br>(7.1 to 16.3)                 | 16.2<br>(8.3 to 24.4)                             | -13.9<br>(-18.2 to -9.6)                            |
| Environmental heat and cold exposure                                                | 556.1<br>(458.2 to 680.1)                     | 214.2<br>(173.4 to 266.4)                | 24.1<br>(15.6 to 35.6)                | 38.2<br>(30.9 to 46.1)                            | -0.1<br>(-3.9 to 3.6)                               |
| Other unintentional injuries                                                        | 1,369.2<br>(1,068.2 to 1,780.0)               | 666.8<br>(547.3 to 814.8)                | 40.9<br>(26.5 to 60.0)                | 50.9<br>(44.0 to 57.2)                            | 10.5<br>(7.2 to 13.5)                               |
| <b>Self-harm and interpersonal violence</b>                                         | <b>4,498.5</b><br><b>(3,976.1 to 5,086.6)</b> | <b>497.3†</b><br><b>(422.2 to 573.5)</b> | <b>66.2</b><br><b>(46.5 to 91.2)</b>  | <b>28.0</b><br><b>(24.3 to 31.5)</b>              | <b>-5.5</b><br><b>(-7.5 to -3.3)</b>                |
| Self-harm                                                                           | 67.3<br>(59.0 to 76.1)                        | 42.7<br>(36.6 to 49.8)                   | 3.8<br>(2.4 to 5.7)                   | 50.5<br>(43.8 to 57.0)                            | 6.9<br>(3.6 to 10.3)                                |
| Self-harm by firearm                                                                | 6.2<br>(5.4 to 7.1)                           | 3.0<br>(1.9 to 4.3)                      | 0.3<br>(0.2 to 0.4)                   | 20.4<br>(15.6 to 26.2)                            | -16.4<br>(-19.1 to -13.2)                           |
| Self-harm by other specified means                                                  | 61.2<br>(52.6 to 70.2)                        | 39.7<br>(33.7 to 46.6)                   | 3.6<br>(2.2 to 5.3)                   | 53.5<br>(46.4 to 60.4)                            | 9.7<br>(6.3 to 13.3)                                |
| Interpersonal violence                                                              | 4,431.1<br>(3,904.7 to 5,024.9)               | 454.6†<br>(381.6 to 532.5)               | 62.4<br>(43.7 to 85.7)                | 26.8<br>(23.0 to 30.4)                            | -6.5<br>(-8.6 to -4.3)                              |
| Assault by firearm                                                                  | 18.5<br>(16.0 to 21.8)                        | 8.0<br>(5.8 to 10.6)                     | 1.0<br>(0.6 to 1.4)                   | 42.5<br>(35.7 to 50.0)                            | 2.3<br>(-1.5 to 6.2)                                |
| Assault by sharp object                                                             | 167.3<br>(136.2 to 198.8)                     | 90.3<br>(69.5 to 117.0)                  | 5.8<br>(3.8 to 8.6)                   | 39.3<br>(31.8 to 46.6)                            | 1.5<br>(-2.8 to 5.3)                                |
| Sexual violence                                                                     | 3,775.7<br>(3,276.7 to 4,357.4)               | --                                       | 34.7<br>(23.0 to 49.3)                | 18.4<br>(12.6 to 23.7)                            | -14.2<br>(-17.6 to -10.7)                           |
| Assault by other means                                                              | 469.5<br>(399.4 to 564.3)                     | 356.4<br>(296.6 to 419.9)                | 20.9<br>(13.9 to 30.5)                | 38.8<br>(32.9 to 44.7)                            | 1.0<br>(-2.4 to 4.3)                                |
| <b>Forces of nature, conflict and terrorism, and executions and police conflict</b> | <b>1,644.0</b><br><b>(997.7 to 2,634.6)</b>   | <b>4.4†</b><br><b>(2.3 to 7.9)</b>       | <b>48.0</b><br><b>(14.9 to 106.8)</b> | <b>-18.5</b><br><b>(-28.5 to -9.6)</b>            | <b>-27.7</b><br><b>(-35.6 to -21.5)</b>             |
| Exposure to forces of nature                                                        | 3.6<br>(1.9 to 5.9)                           | --                                       | 0.1<br>(< 0.05 to 0.4)                | -55.7<br>(-84.6 to -6.0)                          | -57.3<br>(-84.8 to -13.8)                           |
| Conflict and terrorism                                                              | 1,625.7<br>(982.2 to 2,603.3)                 | --                                       | 47.4<br>(14.8 to 105.0)               | -18.5<br>(-28.2 to -9.8)                          | -27.7<br>(-35.4 to -21.6)                           |
| Executions and police conflict                                                      | 14.6<br>(7.1 to 25.8)                         | 4.4<br>(2.3 to 7.9)                      | 0.5<br>(0.1 to 1.4)                   | 9.1<br>(-2.2 to 28.7)                             | -12.2<br>(-19.1 to -1.6)                            |
| <b>Impairments</b>                                                                  | --                                            | --                                       | --                                    | --                                                | --                                                  |
| Anaemia                                                                             | 27,069.2<br>(25,632.8 to 28,524.1)            | --                                       | 855.1<br>(573.9 to 1,234.8)           | -1.3<br>(-11.5 to 6.7)                            | -25.8<br>(-36.2 to -18.5)                           |
| Developmental intellectual disability                                               | 4,253.4<br>(3,216.9 to 5,286.6)               | --                                       | 407.7<br>(287.0 to 567.5)             | 26.5<br>(15.0 to 42.5)                            | -4.8<br>(-12.9 to 7.0)                              |
| Epilepsy                                                                            | 818.6<br>(492.8 to 1,186.0)                   | --                                       | 318.8<br>(173.5 to 514.0)             | 42.7<br>(-16.0 to 156.6)                          | 7.4<br>(-39.2 to 102.3)                             |
| Guillain-Barre syndrome                                                             | 0.6<br>(0.5 to 0.9)                           | --                                       | 0.2<br>(0.1 to 0.3)                   | 31.8<br>(28.8 to 35.2)                            | 0.1<br>(0.0 to 0.1)                                 |
| Hearing loss                                                                        | 12,884.3<br>(12,141.3 to 13,653.5)            | --                                       | 525.1<br>(362.7 to 722.6)             | 25.4<br>(20.5 to 29.9)                            | -5.9<br>(-8.3 to -3.5)                              |
| Heart failure                                                                       | 262.1<br>(230.5 to 298.2)                     | --                                       | 28.9<br>(20.4 to 38.3)                | 44.7<br>(34.6 to 54.6)                            | 2.8<br>(-4.5 to 10.2)                               |
| Infertility                                                                         | 1,623.4<br>(1,286.1 to 2,107.0)               | --                                       | 9.8<br>(4.2 to 19.1)                  | 60.3<br>(30.8 to 97.1)                            | 12.7<br>(-9.1 to 41.8)                              |
| Pelvic inflammatory disease                                                         | 102.7<br>(86.6 to 123.0)                      | --                                       | 13.5<br>(9.0 to 19.5)                 | 43.8<br>(24.9 to 65.8)                            | 1.2<br>(-11.3 to 15.6)                              |
| Vision loss                                                                         | 8,288.0<br>(7,934.8 to 8,671.0)               | --                                       | 316.0<br>(219.4 to 443.6)             | 32.6<br>(22.5 to 48.6)                            | -5.0<br>(-9.5 to 2.1)                               |

We did not calculate incidence for the nine impairments, certain NTDs, and causes with only birth prevalence. Blank cells mean that no estimate is available.

† Incidence for aggregate causes represents the sum of the incidence of the causes below the aggregate.

‡ Incidence estimates for stroke represent first-ever stroke only.

^ Incidence of HIV/AIDS represents new infections of HIV only and does not include new infections of Tuberculosis in HIV positive cases.



SR Table 14: Prevalence, incidence, and YLDs for 2016, percentage change of YLD counts and percentage change of age-standardised YLD rates between 2006 and 2016 by cause and impairments, for all ages, Federated States of Micronesia.

| Cause                                                                                | Prevalence in thousands (95% UI) | Incidence in thousands (95% UI)   | YLDs in thousands (95% UI)    |                                                   |                                                     |
|--------------------------------------------------------------------------------------|----------------------------------|-----------------------------------|-------------------------------|---------------------------------------------------|-----------------------------------------------------|
|                                                                                      | 2016 counts                      | 2016 counts                       | 2016 counts                   | Percentage change in counts between 2006 and 2016 | Percentage change in age-standardised rates between |
| <b>All causes</b>                                                                    | <b>99.9</b><br>(99.4 to 100.3)   | <b>635.0†</b><br>(600.0 to 673.2) | <b>10.0</b><br>(7.4 to 13.0)  | <b>4.1</b><br>(1.7 to 6.8)                        | <b>0.7</b><br>(-1.3 to 3.4)                         |
| <b>Communicable, maternal, neonatal, and nutritional disorders</b>                   | <b>81.8</b><br>(79.5 to 84.7)    | <b>361.8†</b><br>(329.7 to 395.3) | <b>1.6</b><br>(1.1 to 2.2)    | <b>-3.4</b><br>(-12.2 to 8.9)                     | <b>-0.3</b><br>(-9.7 to 18.4)                       |
| <b>HIV/AIDS and tuberculosis</b>                                                     | <b>26.8</b><br>(24.9 to 28.4)    | <b>0.2†</b><br>(0.1 to 0.4)       | <b>0.1</b><br>(< 0.05 to 0.3) | <b>103.4</b><br>(1.5 to 359.0)                    | <b>116.3</b><br>(-2.8 to 397.9)                     |
| Tuberculosis                                                                         | 25.2<br>(23.5 to 27.2)           | 0.1†<br>(0.1 to 0.1)              | < 0.05<br>(< 0.05 to < 0.05)  | -6.9<br>(-19.0 to 5.8)                            | -13.5<br>(-23.2 to -4.0)                            |
| Drug-susceptible tuberculosis                                                        | 0.1<br>(0.1 to 0.1)              | 0.1<br>(0.1 to 0.1)               | < 0.05<br>(< 0.05 to < 0.05)  | -6.5<br>(-19.7 to 9.9)                            | -13.2<br>(-24.6 to -0.3)                            |
| Multidrug-resistant tuberculosis without extensive drug resistance                   | < 0.05<br>(< 0.05 to < 0.05)     | < 0.05<br>(< 0.05 to < 0.05)      | < 0.05<br>(< 0.05 to < 0.05)  | -35.3<br>(-98.4 to 2,036.3)                       | -40.4<br>(-98.5 to 1,824.2)                         |
| Extensively drug-resistant tuberculosis                                              | < 0.05<br>(< 0.05 to < 0.05)     | < 0.05<br>(< 0.05 to < 0.05)      | < 0.05<br>(< 0.05 to < 0.05)  | 112.9<br>(-94.7 to 6,928.2)                       | 96.1<br>(-95.1 to 6,228.3)                          |
| Latent tuberculosis infection                                                        | 25.2<br>(23.4 to 27.1)           | --                                | --                            | --                                                | --                                                  |
| HIV/AIDS                                                                             | 0.4<br>(< 0.05 to 2.0)           | < 0.05^<br>(< 0.05 to 0.3)        | 0.1<br>(< 0.05 to 0.3)        | 523.3<br>(163.7 to 1,385.7)                       | 613.7<br>(205.4 to 1,661.9)                         |
| Drug-susceptible HIV/AIDS - Tuberculosis                                             | < 0.05<br>(< 0.05 to < 0.05)     | < 0.05<br>(< 0.05 to < 0.05)      | < 0.05<br>(< 0.05 to < 0.05)  | 215.5<br>(127.3 to 353.8)                         | 266.1<br>(164.5 to 416.2)                           |
| Multidrug-resistant HIV/AIDS - Tuberculosis without extensive drug resistance        | < 0.05<br>(< 0.05 to < 0.05)     | < 0.05<br>(< 0.05 to < 0.05)      | < 0.05<br>(< 0.05 to < 0.05)  | 123.3<br>(-94.6 to 7,444.8)                       | 158.0<br>(-93.7 to 8,658.8)                         |
| Extensively drug-resistant HIV/AIDS - Tuberculosis                                   | < 0.05<br>(< 0.05 to < 0.05)     | < 0.05<br>(< 0.05 to < 0.05)      | < 0.05<br>(< 0.05 to < 0.05)  | 635.0<br>(-82.1 to 24,721.9)                      | 749.3<br>(-79.4 to 28,714.5)                        |
| HIV/AIDS resulting in other diseases                                                 | 0.4<br>(< 0.05 to 2.0)           | < 0.05<br>(< 0.05 to 0.3)         | < 0.05<br>(< 0.05 to 0.3)     | 574.2<br>(153.6 to 2,266.4)                       | 667.5<br>(174.1 to 2,889.4)                         |
| <b>Diarrhoea, lower respiratory infections, and other common infectious diseases</b> | <b>6.6</b><br>(6.3 to 7.0)       | <b>343.9†</b><br>(311.6 to 377.4) | <b>0.4</b><br>(0.3 to 0.5)    | <b>-0.8</b><br>(-4.1 to 2.9)                      | <b>1.0</b><br>(-2.0 to 4.0)                         |
| Diarrhoeal diseases                                                                  | 1.4<br>(1.3 to 1.5)              | 94.8<br>(87.9 to 102.9)           | 0.2<br>(0.1 to 0.2)           | 3.1<br>(-2.8 to 9.4)                              | 3.2<br>(-2.0 to 8.7)                                |
| Intestinal infectious diseases                                                       | < 0.05<br>(< 0.05 to < 0.05)     | 0.1†<br>(0.1 to 0.2)              | < 0.05<br>(< 0.05 to < 0.05)  | -27.1<br>(-40.8 to -8.4)                          | -22.6<br>(-34.6 to -6.9)                            |
| Typhoid fever                                                                        | < 0.05<br>(< 0.05 to < 0.05)     | 0.1<br>(0.1 to 0.1)               | < 0.05<br>(< 0.05 to < 0.05)  | -27.0<br>(-41.7 to -6.8)                          | -22.4<br>(-35.4 to -5.5)                            |
| Paratyphoid fever                                                                    | < 0.05<br>(< 0.05 to < 0.05)     | < 0.05<br>(< 0.05 to < 0.05)      | < 0.05<br>(< 0.05 to < 0.05)  | -24.0<br>(-36.9 to -7.5)                          | -20.2<br>(-31.7 to -6.5)                            |
| Other intestinal infectious diseases                                                 | --                               | --                                | < 0.05<br>(< 0.05 to < 0.05)  | -48.6<br>(-59.0 to -34.8)                         | -42.8<br>(-52.6 to -30.9)                           |
| Lower respiratory infections                                                         | 0.2<br>(0.2 to 0.2)              | 7.5<br>(6.8 to 8.3)               | < 0.05<br>(< 0.05 to < 0.05)  | 13.9<br>(2.4 to 26.2)                             | 15.3<br>(5.3 to 26.0)                               |
| Upper respiratory infections                                                         | 3.1<br>(2.7 to 3.6)              | 234.5<br>(204.5 to 268.5)         | 0.1<br>(< 0.05 to 0.1)        | -3.1<br>(-8.7 to 2.8)                             | -0.1<br>(-4.8 to 5.2)                               |
| Otitis media                                                                         | 1.5<br>(1.3 to 1.7)              | 4.2<br>(3.3 to 5.3)               | < 0.05<br>(< 0.05 to 0.1)     | -7.9<br>(-14.7 to -0.2)                           | -1.4<br>(-8.0 to 5.8)                               |
| Meningitis                                                                           | 0.3<br>(0.3 to 0.4)              | < 0.05<br>(< 0.05 to 0.1)         | < 0.05<br>(< 0.05 to < 0.05)  | -5.7<br>(-13.6 to 2.3)                            | -5.2<br>(-12.0 to 2.0)                              |
| Pneumococcal meningitis                                                              | 0.2<br>(0.1 to 0.2)              | < 0.05<br>(< 0.05 to < 0.05)      | < 0.05<br>(< 0.05 to < 0.05)  | -13.4<br>(-25.2 to -0.4)                          | -13.4<br>(-23.6 to -1.9)                            |
| H influenzae type B meningitis                                                       | < 0.05<br>(< 0.05 to 0.1)        | < 0.05<br>(< 0.05 to < 0.05)      | < 0.05<br>(< 0.05 to < 0.05)  | -0.8<br>(-5.0 to 3.5)                             | 0.2<br>(-3.9 to 4.3)                                |
| Meningococcal infection                                                              | < 0.05<br>(< 0.05 to < 0.05)     | < 0.05<br>(< 0.05 to < 0.05)      | < 0.05<br>(< 0.05 to < 0.05)  | -2.2<br>(-6.8 to 2.3)                             | -1.7<br>(-6.1 to 2.6)                               |
| Other meningitis                                                                     | 0.1<br>(0.1 to 0.1)              | < 0.05<br>(< 0.05 to < 0.05)      | < 0.05<br>(< 0.05 to < 0.05)  | 18.7<br>(7.2 to 30.4)                             | 20.4<br>(9.5 to 31.2)                               |
| Encephalitis                                                                         | 0.4<br>(0.2 to 0.5)              | 0.1<br>(0.1 to 0.2)               | < 0.05<br>(< 0.05 to < 0.05)  | 1.7<br>(-10.8 to 15.4)                            | 0.3<br>(-10.7 to 11.0)                              |
| Diphtheria                                                                           | < 0.05<br>(< 0.05 to < 0.05)     | < 0.05<br>(< 0.05 to < 0.05)      | < 0.05<br>(< 0.05 to < 0.05)  | -10.6<br>(-51.8 to 57.1)                          | -3.6<br>(-51.2 to 71.9)                             |
| Whooping cough                                                                       | < 0.05<br>(< 0.05 to < 0.05)     | 0.2<br>(0.2 to 0.2)               | < 0.05<br>(< 0.05 to < 0.05)  | -20.9<br>(-34.4 to -3.8)                          | -7.8<br>(-23.3 to 11.2)                             |
| Tetanus                                                                              | < 0.05<br>(< 0.05 to < 0.05)     | < 0.05<br>(< 0.05 to < 0.05)      | < 0.05<br>(< 0.05 to < 0.05)  | -3.4<br>(-14.9 to 7.3)                            | -4.4<br>(-16.9 to 7.4)                              |
| Measles                                                                              | < 0.05<br>(< 0.05 to < 0.05)     | < 0.05<br>(< 0.05 to 0.1)         | < 0.05<br>(< 0.05 to < 0.05)  | -84.0<br>(-90.7 to -71.4)                         | -81.0<br>(-88.9 to -65.8)                           |
| Varicella and herpes zoster                                                          | 0.1<br>(0.1 to 0.1)              | 2.4<br>(2.3 to 2.4)               | < 0.05<br>(< 0.05 to < 0.05)  | 4.8<br>(-9.3 to 20.3)                             | -0.0<br>(-10.9 to 11.0)                             |
| <b>Neglected tropical diseases and malaria</b>                                       | <b>49.6</b><br>(43.3 to 57.8)    | <b>2.6†</b><br>(1.8 to 3.6)       | <b>0.3</b><br>(0.1 to 0.5)    | <b>2.3</b><br>(-18.0 to 27.1)                     | <b>2.7</b><br>(-17.9 to 28.7)                       |
| Malaria                                                                              | --                               | --                                | --                            | --                                                | --                                                  |
| Chagas disease                                                                       | --                               | --                                | --                            | --                                                | --                                                  |
| Leishmaniasis                                                                        | --                               | --                                | --                            | --                                                | --                                                  |
| Visceral leishmaniasis                                                               | --                               | --                                | --                            | --                                                | --                                                  |
| Cutaneous and mucocutaneous leishmaniasis                                            | --                               | --                                | --                            | --                                                | --                                                  |
| African trypanosomiasis                                                              | --                               | --                                | --                            | --                                                | --                                                  |
| Schistosomiasis                                                                      | --                               | --                                | --                            | --                                                | --                                                  |
| Cysticercosis                                                                        | < 0.05<br>(< 0.05 to < 0.05)     | --                                | < 0.05<br>(< 0.05 to < 0.05)  | -26.7<br>(-71.1 to 62.7)                          | -32.9<br>(-72.5 to 49.5)                            |
| Cystic echinococcosis                                                                | --                               | --                                | --                            | --                                                | --                                                  |
| Lymphatic filariasis                                                                 | 2.0<br>(1.3 to 3.1)              | 0.4<br>(0.3 to 0.4)               | 0.1<br>(< 0.05 to 0.3)        | 5.8<br>(-15.2 to 16.3)                            | 2.8<br>(-17.5 to 12.7)                              |
| Onchocerciasis                                                                       | --                               | --                                | --                            | --                                                | --                                                  |
| Trachoma                                                                             | --                               | --                                | --                            | --                                                | --                                                  |
| Dengue                                                                               | 0.1<br>(0.1 to 0.2)              | 2.0<br>(1.3 to 2.9)               | < 0.05<br>(< 0.05 to < 0.05)  | 10.2<br>(-16.3 to 196.8)                          | 11.9<br>(-14.1 to 205.0)                            |
| Yellow fever                                                                         | --                               | --                                | --                            | --                                                | --                                                  |
| Rabies                                                                               | < 0.05<br>(< 0.05 to < 0.05)     | < 0.05<br>(< 0.05 to < 0.05)      | < 0.05<br>(< 0.05 to < 0.05)  | -25.5<br>(-52.3 to 21.9)                          | -22.0<br>(-51.3 to 27.4)                            |
| Intestinal nematode infections                                                       | 48.3<br>(41.6 to 56.6)           | --                                | 0.1<br>(< 0.05 to 0.2)        | 1.3<br>(-36.8 to 63.1)                            | 2.4<br>(-38.7 to 71.8)                              |
| Ascariasis                                                                           | 36.3<br>(27.5 to 47.6)           | --                                | 0.1<br>(< 0.05 to 0.1)        | 0.5<br>(-47.2 to 97.3)                            | 0.9<br>(-51.1 to 109.6)                             |

| Cause                                                                   | Prevalence in thousands (95% UI) | Incidence in thousands (95% UI)    | YLDs in thousands (95% UI)                    |                                                   |                                                     |
|-------------------------------------------------------------------------|----------------------------------|------------------------------------|-----------------------------------------------|---------------------------------------------------|-----------------------------------------------------|
|                                                                         | 2016 counts                      | 2016 counts                        | 2016 counts                                   | Percentage change in counts between 2006 and 2016 | Percentage change in age-standardised rates between |
| Trichuriasis                                                            | 9.4<br>(6.5 to 13.1)             | --                                 | < 0.05<br>(< 0.05 to < 0.05)                  | 0.9<br>(-72.1 to 255.3)                           | 1.5<br>(-76.2 to 296.9)                             |
| Hookworm disease                                                        | 9.6<br>(7.4 to 12.4)             | --                                 | < 0.05<br>(< 0.05 to 0.1)                     | 2.8<br>(-35.6 to 65.4)                            | 5.3<br>(-36.5 to 75.0)                              |
| Food-borne trematodiasis                                                | --                               | --                                 | --                                            | --                                                | --                                                  |
| Leprosy                                                                 | 0.1<br>(< 0.05 to 0.1)           | < 0.05<br>(< 0.05 to < 0.05)       | < 0.05<br>(< 0.05 to < 0.05)                  | 61.6<br>(6.2 to 176.9)                            | 42.4<br>(-4.0 to 143.8)                             |
| Ebola virus disease                                                     | --                               | --                                 | --                                            | --                                                | --                                                  |
| Zika virus disease                                                      | < 0.05<br>(< 0.05 to < 0.05)     | 0.2<br>(0.1 to 0.5)                | < 0.05<br>(< 0.05 to < 0.05)                  | --                                                | --                                                  |
| Guinea worm disease                                                     | --                               | --                                 | --                                            | --                                                | --                                                  |
| Other neglected tropical diseases                                       | 1.0<br>(0.8 to 1.1)              | --                                 | < 0.05<br>(< 0.05 to < 0.05)                  | -13.6<br>(-32.6 to 10.0)                          | -2.3<br>(-21.6 to 22.0)                             |
| <b>Maternal disorders</b>                                               | <b>0.1<br/>(0.1 to 0.1)</b>      | <b>1.2†<br/>(1.1 to 1.5)</b>       | <b>&lt; 0.05<br/>(&lt; 0.05 to &lt; 0.05)</b> | <b>-0.5<br/>(-26.1 to 33.9)</b>                   | <b>-13.2<br/>(-36.1 to 17.1)</b>                    |
| Maternal haemorrhage                                                    | < 0.05<br>(< 0.05 to < 0.05)     | 0.2<br>(0.1 to 0.3)                | < 0.05<br>(< 0.05 to < 0.05)                  | -6.1<br>(-37.4 to 41.9)                           | -18.8<br>(-44.6 to 21.7)                            |
| Maternal sepsis and other pregnancy related infections                  | < 0.05<br>(< 0.05 to < 0.05)     | 0.1<br>(0.1 to 0.1)                | < 0.05<br>(< 0.05 to < 0.05)                  | -12.1<br>(-63.1 to 122.5)                         | -21.1<br>(-65.8 to 83.8)                            |
| Maternal hypertensive disorders                                         | < 0.05<br>(< 0.05 to 0.1)        | 0.2<br>(0.1 to 0.2)                | < 0.05<br>(< 0.05 to < 0.05)                  | 16.4<br>(-31.8 to 96.4)                           | 1.0<br>(-40.2 to 70.2)                              |
| Maternal obstructed labour and uterine rupture                          | < 0.05<br>(< 0.05 to < 0.05)     | 0.1<br>(0.1 to 0.2)                | < 0.05<br>(< 0.05 to < 0.05)                  | -5.3<br>(-65.4 to 162.5)                          | -18.5<br>(-69.4 to 121.3)                           |
| Maternal abortion, miscarriage, and ectopic pregnancy                   | < 0.05<br>(< 0.05 to < 0.05)     | 0.6<br>(0.5 to 0.8)                | < 0.05<br>(< 0.05 to < 0.05)                  | -16.1<br>(-56.7 to 71.6)                          | -25.8<br>(-62.0 to 44.0)                            |
| Other maternal disorders                                                | --                               | --                                 | < 0.05<br>(< 0.05 to < 0.05)                  | -6.3<br>(-30.4 to 25.9)                           | -17.6<br>(-39.1 to 11.1)                            |
| <b>Neonatal disorders</b>                                               | <b>1.5<br/>(1.2 to 1.9)</b>      | <b>--</b>                          | <b>0.2<br/>(0.1 to 0.3)</b>                   | <b>-9.0<br/>(-24.0 to 7.5)</b>                    | <b>-4.9<br/>(-20.5 to 11.8)</b>                     |
| Neonatal preterm birth complications                                    | 1.4<br>(1.1 to 1.9)              | --                                 | 0.1<br>(0.1 to 0.2)                           | -8.0<br>(-27.1 to 13.7)                           | -4.6<br>(-24.1 to 17.7)                             |
| Neonatal encephalopathy due to birth asphyxia and trauma                | 0.1<br>(< 0.05 to 0.1)           | --                                 | < 0.05<br>(< 0.05 to < 0.05)                  | -15.0<br>(-51.1 to 20.3)                          | -11.8<br>(-48.6 to 23.1)                            |
| Neonatal sepsis and other neonatal infections                           | < 0.05<br>(< 0.05 to 0.1)        | --                                 | < 0.05<br>(< 0.05 to < 0.05)                  | -8.9<br>(-31.6 to 15.4)                           | -2.3<br>(-25.0 to 21.9)                             |
| Hemolytic disease and other neonatal jaundice                           | < 0.05<br>(< 0.05 to < 0.05)     | --                                 | < 0.05<br>(< 0.05 to < 0.05)                  | -3.0<br>(-13.3 to 7.8)                            | -0.4<br>(-10.8 to 10.6)                             |
| Other neonatal disorders                                                | --                               | --                                 | < 0.05<br>(< 0.05 to < 0.05)                  | -22.3<br>(-37.1 to -5.7)                          | -7.0<br>(-24.6 to 13.0)                             |
| <b>Nutritional deficiencies</b>                                         | <b>25.7<br/>(23.3 to 27.8)</b>   | <b>3.5†<br/>(2.8 to 4.2)</b>       | <b>0.6<br/>(0.4 to 0.9)</b>                   | <b>-11.5<br/>(-24.2 to 2.2)</b>                   | <b>-10.0<br/>(-21.2 to 0.9)</b>                     |
| Protein-energy malnutrition                                             | 0.7<br>(0.5 to 0.9)              | 0.3<br>(0.2 to 0.4)                | < 0.05<br>(< 0.05 to < 0.05)                  | -0.8<br>(-40.2 to 69.5)                           | 17.9<br>(-28.9 to 101.6)                            |
| Iodine deficiency                                                       | < 0.05<br>(< 0.05 to 0.1)        | < 0.05<br>(< 0.05 to < 0.05)       | < 0.05<br>(< 0.05 to < 0.05)                  | 9.2<br>(-1.5 to 20.5)                             | 1.2<br>(-8.4 to 11.1)                               |
| Vitamin A deficiency                                                    | 3.7<br>(3.0 to 4.6)              | 3.2<br>(2.6 to 4.0)                | < 0.05<br>(< 0.05 to < 0.05)                  | -11.4<br>(-26.2 to 7.3)                           | -4.6<br>(-19.2 to 12.7)                             |
| Iron-deficiency anaemia                                                 | 21.9<br>(19.5 to 24.8)           | --                                 | 0.6<br>(0.4 to 0.8)                           | -12.1<br>(-24.8 to 2.3)                           | -11.2<br>(-22.7 to -0.1)                            |
| Other nutritional deficiencies                                          | --                               | --                                 | < 0.05<br>(< 0.05 to < 0.05)                  | -1.4<br>(-41.9 to 71.4)                           | 17.7<br>(-30.5 to 105.4)                            |
| <b>Other communicable, maternal, neonatal, and nutritional diseases</b> | <b>29.0<br/>(27.2 to 30.6)</b>   | <b>10.4<br/>(9.3 to 11.6)</b>      | <b>0.1<br/>(&lt; 0.05 to 0.1)</b>             | <b>-1.6<br/>(-10.0 to 8.1)</b>                    | <b>-2.1<br/>(-8.7 to 5.4)</b>                       |
| Sexually transmitted diseases excluding HIV                             | 20.0<br>(18.5 to 21.4)           | 9.0<br>(8.0 to 10.2)               | < 0.05<br>(< 0.05 to 0.1)                     | 1.7<br>(-4.6 to 8.7)                              | -4.5<br>(-10.1 to 1.6)                              |
| Syphilis                                                                | 3.2<br>(2.7 to 4.0)              | 2.0<br>(1.7 to 2.5)                | < 0.05<br>(< 0.05 to < 0.05)                  | 6.6<br>(-4.6 to 19.3)                             | -2.9<br>(-13.5 to 10.3)                             |
| Chlamydial infection                                                    | 1.8<br>(1.2 to 2.6)              | 1.5<br>(1.0 to 2.3)                | < 0.05<br>(< 0.05 to < 0.05)                  | 4.5<br>(-8.8 to 19.9)                             | -3.6<br>(-14.5 to 9.3)                              |
| Gonococcal infection                                                    | 0.3<br>(0.2 to 0.4)              | 0.8<br>(0.4 to 1.3)                | < 0.05<br>(< 0.05 to < 0.05)                  | 3.1<br>(-15.6 to 27.0)                            | -4.4<br>(-20.5 to 14.7)                             |
| Trichomoniasis                                                          | 2.7<br>(2.2 to 3.3)              | 2.4<br>(2.0 to 3.0)                | < 0.05<br>(< 0.05 to < 0.05)                  | 5.7<br>(-2.6 to 15.2)                             | -2.2<br>(-8.5 to 4.9)                               |
| Genital herpes                                                          | 13.7<br>(11.8 to 16.0)           | 1.4<br>(1.2 to 1.6)                | < 0.05<br>(< 0.05 to < 0.05)                  | 7.8<br>(-2.2 to 19.5)                             | -0.1<br>(-7.5 to 8.4)                               |
| Other sexually transmitted diseases                                     | 0.7<br>(0.6 to 0.8)              | 0.9<br>(0.8 to 1.0)                | < 0.05<br>(< 0.05 to < 0.05)                  | -3.1<br>(-13.1 to 8.4)                            | -6.8<br>(-16.0 to 3.8)                              |
| Hepatitis                                                               | 10.9<br>(9.0 to 13.1)            | 1.4<br>(1.2 to 1.7)                | < 0.05<br>(< 0.05 to < 0.05)                  | -0.2<br>(-19.9 to 24.9)                           | -2.1<br>(-20.8 to 22.0)                             |
| Acute hepatitis A                                                       | < 0.05<br>(< 0.05 to < 0.05)     | 0.4<br>(0.2 to 0.5)                | < 0.05<br>(< 0.05 to < 0.05)                  | 0.9<br>(-41.8 to 70.5)                            | 1.1<br>(-35.2 to 58.0)                              |
| Hepatitis B                                                             | 8.6<br>(6.8 to 10.9)             | 0.9<br>(0.7 to 1.2)                | < 0.05<br>(< 0.05 to < 0.05)                  | -0.1<br>(-24.2 to 31.5)                           | -3.6<br>(-27.2 to 27.2)                             |
| Hepatitis C                                                             | 2.2<br>(1.9 to 2.5)              | 0.1<br>(0.1 to 0.1)                | < 0.05<br>(< 0.05 to < 0.05)                  | -9.8<br>(-26.4 to 12.0)                           | 1.1<br>(-15.9 to 23.0)                              |
| Acute hepatitis E                                                       | < 0.05<br>(< 0.05 to < 0.05)     | < 0.05<br>(< 0.05 to 0.1)          | < 0.05<br>(< 0.05 to < 0.05)                  | 1.4<br>(-9.7 to 13.3)                             | 0.9<br>(-10.3 to 12.1)                              |
| Other infectious diseases                                               | 0.8<br>(0.7 to 0.9)              | < 0.05<br>(< 0.05 to < 0.05)       | < 0.05<br>(< 0.05 to < 0.05)                  | -6.1<br>(-23.3 to 16.9)                           | 2.4<br>(-15.3 to 24.1)                              |
| <b>Non-communicable diseases</b>                                        | <b>91.3<br/>(90.5 to 92.0)</b>   | <b>267.3†<br/>(251.8 to 284.3)</b> | <b>8.0<br/>(5.9 to 10.3)</b>                  | <b>5.3<br/>(3.3 to 7.4)</b>                       | <b>0.6<br/>(-1.1 to 2.1)</b>                        |
| <b>Neoplasms</b>                                                        | <b>0.2<br/>(0.1 to 0.2)</b>      | <b>0.1<br/>(0.1 to 0.1)</b>        | <b>&lt; 0.05<br/>(&lt; 0.05 to &lt; 0.05)</b> | <b>13.8<br/>(6.6 to 21.0)</b>                     | <b>5.0<br/>(-1.4 to 11.3)</b>                       |
| Lip and oral cavity cancer                                              | < 0.05<br>(< 0.05 to < 0.05)     | < 0.05<br>(< 0.05 to < 0.05)       | < 0.05<br>(< 0.05 to < 0.05)                  | 15.8<br>(1.6 to 34.2)                             | 5.9<br>(-8.0 to 22.9)                               |
| Nasopharynx cancer                                                      | < 0.05<br>(< 0.05 to < 0.05)     | < 0.05<br>(< 0.05 to < 0.05)       | < 0.05<br>(< 0.05 to < 0.05)                  | 10.2<br>(-9.7 to 32.3)                            | 4.2<br>(-15.5 to 25.7)                              |
| Other pharynx cancer                                                    | < 0.05<br>(< 0.05 to < 0.05)     | < 0.05<br>(< 0.05 to < 0.05)       | < 0.05<br>(< 0.05 to < 0.05)                  | 16.1<br>(0.7 to 31.6)                             | 6.0<br>(-8.4 to 19.9)                               |
| Oesophageal cancer                                                      | < 0.05<br>(< 0.05 to < 0.05)     | < 0.05<br>(< 0.05 to < 0.05)       | < 0.05<br>(< 0.05 to < 0.05)                  | 11.9<br>(-0.2 to 24.9)                            | -1.7<br>(-12.2 to 10.0)                             |
| Stomach cancer                                                          | < 0.05<br>(< 0.05 to < 0.05)     | < 0.05<br>(< 0.05 to < 0.05)       | < 0.05<br>(< 0.05 to < 0.05)                  | 10.0<br>(-3.1 to 24.9)                            | -0.7<br>(-14.5 to 14.9)                             |
| Colon and rectum cancer                                                 | < 0.05<br>(< 0.05 to < 0.05)     | < 0.05<br>(< 0.05 to < 0.05)       | < 0.05<br>(< 0.05 to < 0.05)                  | 24.7<br>(4.1 to 45.5)                             | 10.5<br>(-7.7 to 28.8)                              |
| Liver cancer                                                            | < 0.05<br>(< 0.05 to < 0.05)     | < 0.05<br>(< 0.05 to < 0.05)       | < 0.05<br>(< 0.05 to < 0.05)                  | 8.8<br>(-4.7 to 23.8)                             | -2.8<br>(-14.7 to 10.0)                             |
| Liver cancer due to hepatitis B                                         | < 0.05<br>(< 0.05 to < 0.05)     | < 0.05<br>(< 0.05 to < 0.05)       | < 0.05<br>(< 0.05 to < 0.05)                  | 8.3<br>(-6.1 to 24.6)                             | -2.9<br>(-15.1 to 11.2)                             |

| Cause                                              | Prevalence in thousands (95% UI)     | Incidence in thousands (95% UI)    | YLDs in thousands (95% UI)        |                                                   |                                                     |
|----------------------------------------------------|--------------------------------------|------------------------------------|-----------------------------------|---------------------------------------------------|-----------------------------------------------------|
|                                                    | 2016 counts                          | 2016 counts                        | 2016 counts                       | Percentage change in counts between 2006 and 2016 | Percentage change in age-standardised rates between |
| Liver cancer due to hepatitis C                    | < 0.05<br>(< 0.05 to < 0.05)         | < 0.05<br>(< 0.05 to < 0.05)       | < 0.05<br>(< 0.05 to < 0.05)      | 10.4<br>(-4.4 to 27.0)                            | -2.1<br>(-15.3 to 12.7)                             |
| Liver cancer due to alcohol use                    | < 0.05<br>(< 0.05 to < 0.05)         | < 0.05<br>(< 0.05 to < 0.05)       | < 0.05<br>(< 0.05 to < 0.05)      | 3.7<br>(-11.1 to 20.6)                            | -8.9<br>(-20.5 to 4.7)                              |
| Liver cancer due to other causes                   | < 0.05<br>(< 0.05 to < 0.05)         | < 0.05<br>(< 0.05 to < 0.05)       | < 0.05<br>(< 0.05 to < 0.05)      | 10.5<br>(-5.0 to 28.0)                            | -1.2<br>(-14.9 to 13.9)                             |
| Gallbladder and biliary tract cancer               | < 0.05<br>(< 0.05 to < 0.05)         | < 0.05<br>(< 0.05 to < 0.05)       | < 0.05<br>(< 0.05 to < 0.05)      | 11.5<br>(0.8 to 21.2)                             | -0.1<br>(-9.5 to 8.8)                               |
| Pancreatic cancer                                  | < 0.05<br>(< 0.05 to < 0.05)         | < 0.05<br>(< 0.05 to < 0.05)       | < 0.05<br>(< 0.05 to < 0.05)      | 17.9<br>(6.9 to 29.0)                             | 3.4<br>(-5.9 to 13.6)                               |
| Larynx cancer                                      | < 0.05<br>(< 0.05 to < 0.05)         | < 0.05<br>(< 0.05 to < 0.05)       | < 0.05<br>(< 0.05 to < 0.05)      | 24.4<br>(7.0 to 40.2)                             | 9.0<br>(-6.5 to 23.8)                               |
| Tracheal, bronchus, and lung cancer                | < 0.05<br>(< 0.05 to < 0.05)         | < 0.05<br>(< 0.05 to < 0.05)       | < 0.05<br>(< 0.05 to < 0.05)      | 14.6<br>(-7.5 to 39.4)                            | 1.1<br>(-16.8 to 22.5)                              |
| Malignant skin melanoma                            | < 0.05<br>(< 0.05 to < 0.05)         | < 0.05<br>(< 0.05 to < 0.05)       | < 0.05<br>(< 0.05 to < 0.05)      | 21.3<br>(1.8 to 44.7)                             | 7.2<br>(-9.2 to 26.7)                               |
| Non-melanoma skin cancer                           | < 0.05<br>(< 0.05 to < 0.05)         | < 0.05<br>(< 0.05 to < 0.05)       | < 0.05<br>(< 0.05 to < 0.05)      | -23.4<br>(-65.0 to 48.6)                          | -32.0<br>(-70.4 to 37.5)                            |
| Non-melanoma skin cancer (squamous-cell carcinoma) | < 0.05<br>(< 0.05 to < 0.05)         | < 0.05<br>(< 0.05 to < 0.05)       | < 0.05<br>(< 0.05 to < 0.05)      | -23.6<br>(-65.3 to 49.0)                          | -32.1<br>(-70.5 to 37.8)                            |
| Non-melanoma skin cancer (basal-cell carcinoma)    | < 0.05<br>(< 0.05 to < 0.05)         | < 0.05<br>(< 0.05 to < 0.05)       | < 0.05<br>(< 0.05 to < 0.05)      | 10.0<br>(-7.5 to 26.9)                            | 0.8<br>(-7.3 to 11.8)                               |
| Breast cancer                                      | 0.1<br>(< 0.05 to 0.1)               | < 0.05<br>(< 0.05 to < 0.05)       | < 0.05<br>(< 0.05 to < 0.05)      | 15.2<br>(-5.6 to 41.9)                            | 10.6<br>(-8.4 to 35.2)                              |
| Cervical cancer                                    | < 0.05<br>(< 0.05 to < 0.05)         | < 0.05<br>(< 0.05 to < 0.05)       | < 0.05<br>(< 0.05 to < 0.05)      | -5.0<br>(-26.4 to 22.3)                           | -8.5<br>(-29.4 to 17.7)                             |
| Uterine cancer                                     | < 0.05<br>(< 0.05 to < 0.05)         | < 0.05<br>(< 0.05 to < 0.05)       | < 0.05<br>(< 0.05 to < 0.05)      | 22.4<br>(-3.1 to 55.7)                            | 10.4<br>(-12.2 to 39.0)                             |
| Ovarian cancer                                     | < 0.05<br>(< 0.05 to < 0.05)         | < 0.05<br>(< 0.05 to < 0.05)       | < 0.05<br>(< 0.05 to < 0.05)      | 18.7<br>(-9.7 to 55.0)                            | 6.3<br>(-21.8 to 44.1)                              |
| Prostate cancer                                    | < 0.05<br>(< 0.05 to < 0.05)         | < 0.05<br>(< 0.05 to < 0.05)       | < 0.05<br>(< 0.05 to < 0.05)      | 28.0<br>(5.8 to 55.9)                             | 11.9<br>(-6.1 to 33.4)                              |
| Testicular cancer                                  | < 0.05<br>(< 0.05 to < 0.05)         | < 0.05<br>(< 0.05 to < 0.05)       | < 0.05<br>(< 0.05 to < 0.05)      | 39.9<br>(6.0 to 78.0)                             | 23.3<br>(-3.9 to 51.7)                              |
| Kidney cancer                                      | < 0.05<br>(< 0.05 to < 0.05)         | < 0.05<br>(< 0.05 to < 0.05)       | < 0.05<br>(< 0.05 to < 0.05)      | 7.3<br>(-9.2 to 26.9)                             | 4.4<br>(-11.9 to 24.3)                              |
| Bladder cancer                                     | < 0.05<br>(< 0.05 to < 0.05)         | < 0.05<br>(< 0.05 to < 0.05)       | < 0.05<br>(< 0.05 to < 0.05)      | 30.4<br>(12.4 to 49.5)                            | 13.6<br>(-1.3 to 29.8)                              |
| Brain and nervous system cancer                    | < 0.05<br>(< 0.05 to < 0.05)         | < 0.05<br>(< 0.05 to < 0.05)       | < 0.05<br>(< 0.05 to < 0.05)      | 10.0<br>(-3.3 to 26.1)                            | 6.1<br>(-6.3 to 21.8)                               |
| Thyroid cancer                                     | < 0.05<br>(< 0.05 to < 0.05)         | < 0.05<br>(< 0.05 to < 0.05)       | < 0.05<br>(< 0.05 to < 0.05)      | 33.5<br>(7.2 to 66.4)                             | 20.4<br>(-2.0 to 49.9)                              |
| Mesothelioma                                       | < 0.05<br>(< 0.05 to < 0.05)         | < 0.05<br>(< 0.05 to < 0.05)       | < 0.05<br>(< 0.05 to < 0.05)      | 28.9<br>(12.8 to 48.4)                            | 8.3<br>(-5.4 to 25.8)                               |
| Hodgkin lymphoma                                   | < 0.05<br>(< 0.05 to < 0.05)         | < 0.05<br>(< 0.05 to < 0.05)       | < 0.05<br>(< 0.05 to < 0.05)      | 8.7<br>(-9.0 to 25.5)                             | -1.5<br>(-16.4 to 12.0)                             |
| Non-Hodgkin's lymphoma                             | < 0.05<br>(< 0.05 to < 0.05)         | < 0.05<br>(< 0.05 to < 0.05)       | < 0.05<br>(< 0.05 to < 0.05)      | 13.7<br>(2.7 to 26.5)                             | 6.1<br>(-4.9 to 18.4)                               |
| Multiple myeloma                                   | < 0.05<br>(< 0.05 to < 0.05)         | < 0.05<br>(< 0.05 to < 0.05)       | < 0.05<br>(< 0.05 to < 0.05)      | 27.5<br>(12.1 to 45.8)                            | 10.6<br>(-3.2 to 26.8)                              |
| Leukaemia                                          | < 0.05<br>(< 0.05 to < 0.05)         | < 0.05<br>(< 0.05 to < 0.05)       | < 0.05<br>(< 0.05 to < 0.05)      | 2.5<br>(-8.0 to 13.9)                             | -1.1<br>(-10.7 to 8.8)                              |
| Acute lymphoid leukaemia                           | < 0.05<br>(< 0.05 to < 0.05)         | < 0.05<br>(< 0.05 to < 0.05)       | < 0.05<br>(< 0.05 to < 0.05)      | -4.7<br>(-21.6 to 15.7)                           | -1.4<br>(-15.6 to 15.8)                             |
| Chronic lymphoid leukaemia                         | < 0.05<br>(< 0.05 to < 0.05)         | < 0.05<br>(< 0.05 to < 0.05)       | < 0.05<br>(< 0.05 to < 0.05)      | 19.1<br>(-4.6 to 47.5)                            | -0.5<br>(-21.1 to 25.4)                             |
| Acute myeloid leukaemia                            | < 0.05<br>(< 0.05 to < 0.05)         | < 0.05<br>(< 0.05 to < 0.05)       | < 0.05<br>(< 0.05 to < 0.05)      | 2.2<br>(-10.0 to 14.8)                            | 1.8<br>(-9.8 to 14.1)                               |
| Chronic myeloid leukaemia                          | < 0.05<br>(< 0.05 to < 0.05)         | < 0.05<br>(< 0.05 to < 0.05)       | < 0.05<br>(< 0.05 to < 0.05)      | 11.1<br>(-6.8 to 33.0)                            | -2.7<br>(-18.0 to 14.4)                             |
| Other leukaemia                                    | < 0.05<br>(< 0.05 to < 0.05)         | < 0.05<br>(< 0.05 to < 0.05)       | < 0.05<br>(< 0.05 to < 0.05)      | -0.1<br>(-13.2 to 15.9)                           | -1.9<br>(-15.2 to 12.3)                             |
| Other neoplasms                                    | < 0.05<br>(< 0.05 to < 0.05)         | < 0.05<br>(< 0.05 to < 0.05)       | < 0.05<br>(< 0.05 to < 0.05)      | 11.1<br>(-3.2 to 27.7)                            | 3.7<br>(-9.2 to 18.9)                               |
| <b>Cardiovascular diseases</b>                     | <b>5.4</b><br><b>(5.1 to 5.6)</b>    | <b>0.5†</b><br><b>(0.5 to 0.5)</b> | <b>0.4</b><br><b>(0.3 to 0.5)</b> | <b>7.0</b><br><b>(2.9 to 11.3)</b>                | <b>-2.0</b><br><b>(-5.5 to 1.9)</b>                 |
| Rheumatic heart disease                            | 1.9<br>(1.7 to 2.1)                  | 0.1<br>(0.1 to 0.1)                | 0.1<br>(0.1 to 0.1)               | -1.4<br>(-9.0 to 7.1)                             | -5.3<br>(-12.3 to 2.8)                              |
| Ischaemic heart disease                            | 1.1<br>(1.0 to 1.2)                  | 0.1<br>(0.1 to 0.2)                | 0.1<br>(< 0.05 to 0.1)            | 11.8<br>(6.1 to 17.7)                             | 0.8<br>(-3.6 to 5.4)                                |
| Cerebrovascular disease                            | 0.7<br>(0.7 to 0.8)                  | 0.1‡<br>(0.1 to 0.1)               | 0.1<br>(0.1 to 0.2)               | 9.7<br>(1.7 to 18.2)                              | -3.4<br>(-10.0 to 3.6)                              |
| Ischaemic stroke                                   | 0.6<br>(0.5 to 0.7)                  | 0.1‡<br>(0.1 to 0.1)               | 0.1<br>(0.1 to 0.1)               | 11.4<br>(2.0 to 21.5)                             | -2.7<br>(-10.6 to 5.6)                              |
| Hemorrhagic stroke                                 | 0.2<br>(0.1 to 0.2)                  | < 0.05‡<br>(< 0.05 to 0.1)         | < 0.05<br>(< 0.05 to < 0.05)      | 4.1<br>(-6.2 to 15.7)                             | -5.7<br>(-14.5 to 4.5)                              |
| Hypertensive heart disease                         | 0.1<br>(0.1 to 0.1)                  | --                                 | < 0.05<br>(< 0.05 to < 0.05)      | 10.5<br>(-0.6 to 23.9)                            | 1.2<br>(-7.8 to 11.8)                               |
| Cardiomyopathy and myocarditis                     | < 0.05<br>(< 0.05 to < 0.05)         | < 0.05†<br>(< 0.05 to < 0.05)      | < 0.05<br>(< 0.05 to < 0.05)      | 9.6<br>(-1.8 to 22.9)                             | 3.8<br>(-7.0 to 15.9)                               |
| Myocarditis                                        | < 0.05<br>(< 0.05 to < 0.05)         | < 0.05<br>(< 0.05 to < 0.05)       | < 0.05<br>(< 0.05 to < 0.05)      | 6.8<br>(-3.2 to 17.5)                             | 3.0<br>(-8.7 to 15.8)                               |
| Alcoholic cardiomyopathy                           | < 0.05<br>(< 0.05 to < 0.05)         | --                                 | < 0.05<br>(< 0.05 to < 0.05)      | 19.5<br>(6.1 to 34.8)                             | 5.1<br>(-8.0 to 19.6)                               |
| Other cardiomyopathy                               | < 0.05<br>(< 0.05 to < 0.05)         | --                                 | < 0.05<br>(< 0.05 to < 0.05)      | 10.6<br>(-7.1 to 30.6)                            | 4.0<br>(-11.5 to 21.3)                              |
| Atrial fibrillation and flutter                    | 0.3<br>(0.3 to 0.3)                  | < 0.05<br>(< 0.05 to < 0.05)       | < 0.05<br>(< 0.05 to < 0.05)      | 11.7<br>(3.7 to 20.1)                             | 0.7<br>(-5.9 to 7.4)                                |
| Peripheral vascular disease                        | 0.9<br>(0.8 to 1.0)                  | 0.1<br>(0.1 to 0.1)                | < 0.05<br>(< 0.05 to < 0.05)      | 16.3<br>(6.2 to 27.2)                             | -2.0<br>(-8.9 to 5.2)                               |
| Endocarditis                                       | < 0.05<br>(< 0.05 to < 0.05)         | < 0.05<br>(< 0.05 to < 0.05)       | < 0.05<br>(< 0.05 to < 0.05)      | 7.5<br>(-2.4 to 17.8)                             | 2.5<br>(-10.1 to 17.1)                              |
| Other cardiovascular and circulatory diseases      | 0.8<br>(0.7 to 0.9)                  | --                                 | < 0.05<br>(< 0.05 to 0.1)         | 7.6<br>(-2.4 to 18.2)                             | 2.6<br>(-5.0 to 10.3)                               |
| <b>Chronic respiratory diseases</b>                | <b>10.9</b><br><b>(10.5 to 11.5)</b> | <b>2.4†</b><br><b>(2.2 to 2.5)</b> | <b>0.6</b><br><b>(0.4 to 0.7)</b> | <b>21.4</b><br><b>(17.1 to 26.2)</b>              | <b>17.3</b><br><b>(12.7 to 22.3)</b>                |
| Chronic obstructive pulmonary disease              | 2.8<br>(2.6 to 2.9)                  | 0.2<br>(0.2 to 0.2)                | 0.2<br>(0.2 to 0.2)               | 11.0<br>(4.8 to 18.3)                             | 1.5<br>(-4.4 to 7.8)                                |
| Pneumoconiosis                                     | < 0.05<br>(< 0.05 to < 0.05)         | < 0.05<br>(< 0.05 to < 0.05)       | < 0.05<br>(< 0.05 to < 0.05)      | 17.6<br>(-2.1 to 44.9)                            | -2.1<br>(-18.3 to 18.6)                             |
| Silicosis                                          | < 0.05<br>(< 0.05 to < 0.05)         | < 0.05<br>(< 0.05 to < 0.05)       | < 0.05<br>(< 0.05 to < 0.05)      | 17.3<br>(-15.5 to 63.3)                           | -1.6<br>(-28.4 to 33.7)                             |



| Cause                                                          | Prevalence in thousands (95% UI) | Incidence in thousands (95% UI)               | YLDs in thousands (95% UI)                    |                                                   |                                                     |
|----------------------------------------------------------------|----------------------------------|-----------------------------------------------|-----------------------------------------------|---------------------------------------------------|-----------------------------------------------------|
|                                                                | 2016 counts                      | 2016 counts                                   | 2016 counts                                   | Percentage change in counts between 2006 and 2016 | Percentage change in age-standardised rates between |
| Asbestosis                                                     | < 0.05<br>(< 0.05 to < 0.05)     | < 0.05<br>(< 0.05 to < 0.05)                  | < 0.05<br>(< 0.05 to < 0.05)                  | 19.0<br>(11.2 to 28.1)                            | -1.8<br>(-8.0 to 6.2)                               |
| Coal workers pneumoconiosis                                    | --                               | --                                            | --                                            | --                                                | --                                                  |
| Other pneumoconiosis                                           | < 0.05<br>(< 0.05 to < 0.05)     | < 0.05<br>(< 0.05 to < 0.05)                  | < 0.05<br>(< 0.05 to < 0.05)                  | 16.8<br>(-1.4 to 36.7)                            | -3.5<br>(-18.7 to 14.4)                             |
| Asthma                                                         | 8.6<br>(8.0 to 9.2)              | 2.2<br>(2.0 to 2.3)                           | 0.3<br>(0.2 to 0.5)                           | 28.8<br>(22.7 to 35.6)                            | 35.5<br>(29.6 to 41.9)                              |
| Interstitial lung disease and pulmonary sarcoidosis            | 0.1<br>(0.1 to 0.1)              | < 0.05<br>(< 0.05 to < 0.05)                  | < 0.05<br>(< 0.05 to < 0.05)                  | 8.5<br>(-3.9 to 21.5)                             | -1.0<br>(-11.4 to 10.3)                             |
| Other chronic respiratory diseases                             | --                               | --                                            | < 0.05<br>(< 0.05 to < 0.05)                  | 27.8<br>(8.3 to 50.7)                             | 33.9<br>(17.9 to 53.1)                              |
| <b>Cirrhosis and other chronic liver diseases</b>              | <b>0.5<br/>(0.4 to 0.5)</b>      | <b>&lt; 0.05<br/>(&lt; 0.05 to &lt; 0.05)</b> | <b>&lt; 0.05<br/>(&lt; 0.05 to &lt; 0.05)</b> | <b>2.0<br/>(-9.4 to 14.8)</b>                     | <b>2.1<br/>(-6.9 to 12.4)</b>                       |
| Cirrhosis and other chronic liver diseases due to hepatitis B  | 0.2<br>(0.1 to 0.2)              | < 0.05<br>(< 0.05 to < 0.05)                  | < 0.05<br>(< 0.05 to < 0.05)                  | 11.4<br>(-7.0 to 33.3)                            | 2.6<br>(-12.1 to 19.8)                              |
| Cirrhosis and other chronic liver diseases due to hepatitis C  | 0.1<br>(0.1 to 0.1)              | < 0.05<br>(< 0.05 to < 0.05)                  | < 0.05<br>(< 0.05 to < 0.05)                  | 13.0<br>(-9.0 to 41.9)                            | 5.3<br>(-15.5 to 33.2)                              |
| Cirrhosis and other chronic liver diseases due to alcohol use  | 0.1<br>(< 0.05 to 0.1)           | < 0.05<br>(< 0.05 to < 0.05)                  | < 0.05<br>(< 0.05 to < 0.05)                  | 9.0<br>(-14.6 to 38.4)                            | 1.5<br>(-20.6 to 27.4)                              |
| Cirrhosis and other chronic liver diseases due to other causes | 0.2<br>(0.2 to 0.2)              | < 0.05<br>(< 0.05 to < 0.05)                  | < 0.05<br>(< 0.05 to < 0.05)                  | -3.8<br>(-20.1 to 14.0)                           | 1.2<br>(-13.7 to 17.0)                              |
| <b>Digestive diseases</b>                                      | <b>1.5<br/>(1.4 to 1.6)</b>      | <b>1.8†<br/>(1.7 to 1.9)</b>                  | <b>&lt; 0.05<br/>(&lt; 0.05 to 0.1)</b>       | <b>13.2<br/>(3.1 to 24.4)</b>                     | <b>10.6<br/>(1.6 to 20.9)</b>                       |
| Peptic ulcer disease                                           | 0.5<br>(0.4 to 0.5)              | 0.2<br>(0.2 to 0.2)                           | < 0.05<br>(< 0.05 to < 0.05)                  | 22.4<br>(4.1 to 42.6)                             | 16.4<br>(-0.2 to 35.7)                              |
| Gastritis and duodenitis                                       | 0.7<br>(0.6 to 0.8)              | 0.6<br>(0.5 to 0.7)                           | < 0.05<br>(< 0.05 to < 0.05)                  | 21.3<br>(4.1 to 39.8)                             | 19.2<br>(2.7 to 37.7)                               |
| Appendicitis                                                   | < 0.05<br>(< 0.05 to < 0.05)     | 0.4<br>(0.4 to 0.4)                           | < 0.05<br>(< 0.05 to < 0.05)                  | -0.9<br>(-27.2 to 35.1)                           | -0.6<br>(-22.8 to 27.8)                             |
| Paralytic ileus and intestinal obstruction                     | < 0.05<br>(< 0.05 to < 0.05)     | < 0.05<br>(< 0.05 to < 0.05)                  | < 0.05<br>(< 0.05 to < 0.05)                  | 0.9<br>(-3.1 to 5.5)                              | -1.6<br>(-5.4 to 2.3)                               |
| Inguinal, femoral, and abdominal hernia                        | 0.2<br>(0.2 to 0.3)              | 0.1<br>(0.1 to 0.2)                           | < 0.05<br>(< 0.05 to < 0.05)                  | 9.1<br>(-6.2 to 26.2)                             | 6.2<br>(-4.9 to 19.4)                               |
| Inflammatory bowel disease                                     | < 0.05<br>(< 0.05 to < 0.05)     | 0.1<br>(0.1 to 0.1)                           | < 0.05<br>(< 0.05 to < 0.05)                  | -0.6<br>(-14.6 to 15.0)                           | -7.2<br>(-22.2 to 9.1)                              |
| Vascular intestinal disorders                                  | < 0.05<br>(< 0.05 to < 0.05)     | < 0.05<br>(< 0.05 to < 0.05)                  | < 0.05<br>(< 0.05 to < 0.05)                  | 1.9<br>(-3.4 to 7.9)                              | 1.4<br>(-2.6 to 5.7)                                |
| Gallbladder and biliary diseases                               | 0.1<br>(0.1 to 0.1)              | 0.4<br>(0.3 to 0.4)                           | < 0.05<br>(< 0.05 to < 0.05)                  | 3.2<br>(-17.3 to 26.2)                            | -1.9<br>(-21.9 to 21.9)                             |
| Pancreatitis                                                   | < 0.05<br>(< 0.05 to < 0.05)     | < 0.05<br>(< 0.05 to < 0.05)                  | < 0.05<br>(< 0.05 to < 0.05)                  | 4.7<br>(0.1 to 9.5)                               | -1.1<br>(-4.5 to 2.5)                               |
| Other digestive diseases                                       | --                               | --                                            | < 0.05<br>(< 0.05 to < 0.05)                  | 15.6<br>(4.9 to 27.8)                             | 14.5<br>(5.3 to 24.4)                               |
| <b>Neurological disorders</b>                                  | <b>30.0<br/>(28.7 to 31.7)</b>   | <b>13.9<br/>(11.8 to 16.3)</b>                | <b>0.7<br/>(0.5 to 1.0)</b>                   | <b>3.5<br/>(-14.9 to 26.4)</b>                    | <b>-0.2<br/>(-14.8 to 17.1)</b>                     |
| Alzheimer's disease and other dementias                        | 0.3<br>(0.3 to 0.4)              | 0.1<br>(< 0.05 to 0.1)                        | < 0.05<br>(< 0.05 to 0.1)                     | 2.1<br>(-3.1 to 7.7)                              | -0.3<br>(-4.5 to 4.2)                               |
| Parkinson's disease                                            | < 0.05<br>(< 0.05 to < 0.05)     | < 0.05<br>(< 0.05 to < 0.05)                  | < 0.05<br>(< 0.05 to < 0.05)                  | 17.0<br>(1.7 to 35.1)                             | 5.3<br>(-7.2 to 18.6)                               |
| Epilepsy                                                       | 0.3<br>(0.1 to 0.5)              | < 0.05<br>(< 0.05 to 0.1)                     | 0.1<br>(< 0.05 to 0.2)                        | -0.6<br>(-71.0 to 219.1)                          | -0.7<br>(-71.0 to 216.4)                            |
| Multiple sclerosis                                             | < 0.05<br>(< 0.05 to < 0.05)     | < 0.05<br>(< 0.05 to < 0.05)                  | < 0.05<br>(< 0.05 to < 0.05)                  | 15.6<br>(10.8 to 20.4)                            | 10.3<br>(6.1 to 14.5)                               |
| Motor neuron disease                                           | < 0.05<br>(< 0.05 to < 0.05)     | < 0.05<br>(< 0.05 to < 0.05)                  | < 0.05<br>(< 0.05 to < 0.05)                  | 5.4<br>(0.9 to 9.7)                               | 2.6<br>(-0.5 to 5.9)                                |
| Migraine                                                       | 10.7<br>(10.0 to 11.3)           | 1.3<br>(1.2 to 1.4)                           | 0.4<br>(0.3 to 0.6)                           | 3.8<br>(-0.5 to 8.7)                              | -1.0<br>(-4.5 to 2.8)                               |
| Tension-type headache                                          | 22.2<br>(19.6 to 25.3)           | 12.5<br>(10.4 to 15.0)                        | 0.1<br>(< 0.05 to 0.1)                        | 4.1<br>(-1.7 to 10.4)                             | -0.7<br>(-5.5 to 5.0)                               |
| Other neurological disorders                                   | < 0.05<br>(< 0.05 to < 0.05)     | < 0.05<br>(< 0.05 to < 0.05)                  | < 0.05<br>(< 0.05 to < 0.05)                  | 16.8<br>(-60.9 to 235.2)                          | 19.0<br>(-55.9 to 206.4)                            |
| <b>Mental and substance use disorders</b>                      | <b>13.2<br/>(12.7 to 13.8)</b>   | <b>4.5†<br/>(4.1 to 4.8)</b>                  | <b>1.7<br/>(1.2 to 2.2)</b>                   | <b>4.0<br/>(1.3 to 6.5)</b>                       | <b>-0.2<br/>(-2.3 to 1.9)</b>                       |
| Schizophrenia                                                  | 0.2<br>(0.2 to 0.3)              | < 0.05<br>(< 0.05 to < 0.05)                  | 0.2<br>(0.1 to 0.2)                           | 8.0<br>(-1.2 to 18.1)                             | -1.0<br>(-8.2 to 7.1)                               |
| Alcohol use disorders                                          | 0.8<br>(0.7 to 1.0)              | 0.5<br>(0.4 to 0.6)                           | 0.1<br>(0.1 to 0.1)                           | 8.9<br>(-1.4 to 20.4)                             | 0.8<br>(-8.0 to 9.7)                                |
| Drug use disorders                                             | 0.8<br>(0.7 to 0.9)              | 0.1<br>(0.1 to 0.1)                           | 0.1<br>(0.1 to 0.2)                           | 15.0<br>(3.6 to 26.8)                             | 3.1<br>(-5.5 to 12.3)                               |
| Opioid use disorders                                           | 0.2<br>(0.1 to 0.2)              | < 0.05<br>(< 0.05 to < 0.05)                  | 0.1<br>(0.1 to 0.1)                           | 17.7<br>(2.9 to 33.8)                             | 3.0<br>(-8.0 to 14.9)                               |
| Cocaine use disorders                                          | < 0.05<br>(< 0.05 to < 0.05)     | < 0.05<br>(< 0.05 to < 0.05)                  | < 0.05<br>(< 0.05 to < 0.05)                  | 13.3<br>(5.8 to 21.9)                             | 3.3<br>(-2.1 to 9.8)                                |
| Amphetamine use disorders                                      | 0.1<br>(0.1 to 0.1)              | < 0.05<br>(< 0.05 to < 0.05)                  | < 0.05<br>(< 0.05 to < 0.05)                  | 14.3<br>(-15.3 to 57.5)                           | 6.5<br>(-18.8 to 41.7)                              |
| Cannabis use disorders                                         | 0.5<br>(0.4 to 0.7)              | 0.1<br>(0.1 to 0.1)                           | < 0.05<br>(< 0.05 to < 0.05)                  | 5.2<br>(-9.2 to 22.0)                             | 0.1<br>(-12.7 to 14.3)                              |
| Other drug use disorders                                       | < 0.05<br>(< 0.05 to < 0.05)     | < 0.05<br>(< 0.05 to < 0.05)                  | < 0.05<br>(< 0.05 to < 0.05)                  | 13.6<br>(-11.4 to 45.5)                           | 4.7<br>(-15.0 to 29.8)                              |
| Depressive disorders                                           | 2.9<br>(2.7 to 3.1)              | 2.7<br>(2.4 to 3.0)                           | 0.5<br>(0.3 to 0.6)                           | 5.2<br>(-0.3 to 10.6)                             | -1.0<br>(-4.9 to 3.0)                               |
| Major depressive disorder                                      | 1.6<br>(1.4 to 1.8)              | 2.5<br>(2.2 to 2.8)                           | 0.3<br>(0.2 to 0.5)                           | 4.2<br>(-2.8 to 11.2)                             | -1.4<br>(-6.7 to 4.5)                               |
| Dysthymia                                                      | 1.3<br>(1.2 to 1.5)              | 0.2<br>(0.2 to 0.2)                           | 0.1<br>(0.1 to 0.2)                           | 7.9<br>(3.5 to 12.6)                              | -0.2<br>(-3.1 to 2.7)                               |
| Bipolar disorder                                               | 0.4<br>(0.4 to 0.5)              | < 0.05<br>(< 0.05 to 0.1)                     | 0.1<br>(0.1 to 0.1)                           | 5.8<br>(-2.9 to 16.1)                             | 0.0<br>(-7.1 to 7.9)                                |
| Anxiety disorders                                              | 3.3<br>(3.0 to 3.7)              | 0.6<br>(0.5 to 0.6)                           | 0.3<br>(0.2 to 0.4)                           | 1.8<br>(-5.0 to 9.1)                              | -0.2<br>(-6.0 to 6.0)                               |
| Eating disorders                                               | 0.1<br>(0.1 to 0.1)              | 0.1<br>(0.1 to 0.1)                           | < 0.05<br>(< 0.05 to < 0.05)                  | 7.2<br>(-9.7 to 26.2)                             | 0.1<br>(-15.1 to 17.1)                              |
| Anorexia nervosa                                               | < 0.05<br>(< 0.05 to < 0.05)     | < 0.05<br>(< 0.05 to < 0.05)                  | < 0.05<br>(< 0.05 to < 0.05)                  | 4.3<br>(-22.6 to 40.5)                            | 1.4<br>(-23.8 to 34.1)                              |
| Bulimia nervosa                                                | 0.1<br>(< 0.05 to 0.1)           | 0.1<br>(< 0.05 to 0.1)                        | < 0.05<br>(< 0.05 to < 0.05)                  | 8.8<br>(-11.0 to 32.1)                            | -0.5<br>(-18.0 to 20.6)                             |
| Autistic spectrum disorders                                    | 0.9<br>(0.8 to 1.0)              | < 0.05<br>(< 0.05 to < 0.05)                  | 0.1<br>(0.1 to 0.2)                           | -1.3<br>(-6.7 to 4.5)                             | 0.4<br>(-4.7 to 5.7)                                |
| Autism                                                         | 0.2<br>(0.2 to 0.3)              | < 0.05<br>(< 0.05 to < 0.05)                  | 0.1<br>(< 0.05 to 0.1)                        | -1.2<br>(-10.6 to 8.2)                            | 0.4<br>(-8.4 to 9.5)                                |
| Asperger syndrome and other autistic spectrum disorders        | 0.6<br>(0.5 to 0.8)              | < 0.05<br>(< 0.05 to < 0.05)                  | 0.1<br>(< 0.05 to 0.1)                        | -1.4<br>(-6.5 to 4.1)                             | 0.4<br>(-4.3 to 5.1)                                |

| Cause                                                      | Prevalence in thousands (95% UI)     | Incidence in thousands (95% UI)          | YLDs in thousands (95% UI)        |                                                   |                                                     |
|------------------------------------------------------------|--------------------------------------|------------------------------------------|-----------------------------------|---------------------------------------------------|-----------------------------------------------------|
|                                                            | 2016 counts                          | 2016 counts                              | 2016 counts                       | Percentage change in counts between 2006 and 2016 | Percentage change in age-standardised rates between |
| Attention-deficit/hyperactivity disorder                   | 1.0<br>(0.8 to 1.1)                  | < 0.05<br>(< 0.05 to 0.1)                | < 0.05<br>(< 0.05 to < 0.05)      | -3.5<br>(-11.6 to 5.5)                            | 0.2<br>(-7.6 to 8.6)                                |
| Conduct disorder                                           | 1.0<br>(0.8 to 1.2)                  | 0.3<br>(0.3 to 0.4)                      | 0.1<br>(0.1 to 0.2)               | -9.0<br>(-15.0 to -2.8)                           | -0.2<br>(-6.8 to 6.6)                               |
| Idiopathic developmental intellectual disability           | 1.1<br>(0.6 to 1.6)                  | --                                       | < 0.05<br>(< 0.05 to 0.1)         | -1.2<br>(-8.8 to 7.5)                             | -1.6<br>(-9.0 to 6.4)                               |
| Other mental and substance use disorders                   | 1.6<br>(1.4 to 1.9)                  | 0.1<br>(0.1 to 0.1)                      | 0.1<br>(0.1 to 0.2)               | 9.1<br>(2.7 to 15.0)                              | 0.3<br>(-4.5 to 5.1)                                |
| <b>Diabetes, urogenital, blood, and endocrine diseases</b> | <b>38.7</b><br><b>(37.9 to 39.6)</b> | <b>10.4†</b><br><b>(9.6 to 11.5)</b>     | <b>1.2</b><br><b>(0.9 to 1.7)</b> | <b>9.3</b><br><b>(5.5 to 13.2)</b>                | <b>1.8</b><br><b>(-1.6 to 5.2)</b>                  |
| Diabetes mellitus                                          | 12.8<br>(11.8 to 14.0)               | 0.9<br>(0.9 to 1.1)                      | 0.9<br>(0.6 to 1.2)               | 12.8<br>(7.5 to 18.4)                             | 3.2<br>(-1.5 to 7.9)                                |
| Acute glomerulonephritis                                   | < 0.05<br>(< 0.05 to < 0.05)         | < 0.05<br>(< 0.05 to < 0.05)             | < 0.05<br>(< 0.05 to < 0.05)      | 0.4<br>(-4.4 to 6.4)                              | -0.5<br>(-4.1 to 3.2)                               |
| Chronic kidney disease                                     | 3.0<br>(2.7 to 3.3)                  | 0.2<br>(0.2 to 0.3)                      | 0.1<br>(0.1 to 0.2)               | 10.1<br>(2.5 to 18.6)                             | 2.8<br>(-3.8 to 9.8)                                |
| Chronic kidney disease due to diabetes mellitus            | 1.7<br>(1.4 to 1.9)                  | 0.1<br>(0.1 to 0.2)                      | 0.1<br>(0.1 to 0.1)               | 11.9<br>(1.8 to 22.7)                             | 3.6<br>(-4.6 to 12.4)                               |
| Chronic kidney disease due to hypertension                 | 0.5<br>(0.4 to 0.6)                  | < 0.05<br>(< 0.05 to < 0.05)             | < 0.05<br>(< 0.05 to < 0.05)      | 9.7<br>(-2.6 to 24.1)                             | 1.9<br>(-8.7 to 13.7)                               |
| Chronic kidney disease due to glomerulonephritis           | 0.5<br>(0.5 to 0.6)                  | 0.1<br>(< 0.05 to 0.1)                   | < 0.05<br>(< 0.05 to < 0.05)      | 5.9<br>(-7.7 to 22.2)                             | 1.0<br>(-9.5 to 13.4)                               |
| Chronic kidney disease due to other causes                 | 0.3<br>(0.2 to 0.4)                  | < 0.05<br>(< 0.05 to < 0.05)             | < 0.05<br>(< 0.05 to < 0.05)      | 6.4<br>(-3.4 to 17.5)                             | 2.7<br>(-7.2 to 12.4)                               |
| Urinary diseases and male infertility                      | 1.3<br>(1.2 to 1.5)                  | 5.3†<br>(4.6 to 6.4)                     | < 0.05<br>(< 0.05 to < 0.05)      | 11.8<br>(5.0 to 19.0)                             | -1.2<br>(-6.8 to 4.7)                               |
| Interstitial nephritis and urinary tract infections        | 0.1<br>(0.1 to 0.1)                  | 4.7<br>(4.1 to 5.9)                      | < 0.05<br>(< 0.05 to < 0.05)      | 1.2<br>(-16.2 to 24.7)                            | -2.1<br>(-17.7 to 20.5)                             |
| Urolithiasis                                               | < 0.05<br>(< 0.05 to < 0.05)         | 0.4<br>(0.4 to 0.5)                      | < 0.05<br>(< 0.05 to < 0.05)      | 6.1<br>(-4.5 to 18.3)                             | -0.9<br>(-11.3 to 11.0)                             |
| Benign prostatic hyperplasia                               | 0.6<br>(0.5 to 0.7)                  | 0.1<br>(0.1 to 0.1)                      | < 0.05<br>(< 0.05 to < 0.05)      | 17.2<br>(8.0 to 27.3)                             | -0.6<br>(-7.0 to 6.7)                               |
| Male infertility                                           | 0.5<br>(0.4 to 0.7)                  | --                                       | < 0.05<br>(< 0.05 to < 0.05)      | 12.0<br>(3.0 to 22.0)                             | 4.7<br>(-1.8 to 11.5)                               |
| Other urinary diseases                                     | --                                   | --                                       | < 0.05<br>(< 0.05 to < 0.05)      | -15.9<br>(-27.7 to -1.3)                          | -18.3<br>(-27.7 to -5.3)                            |
| Gynecological diseases                                     | 9.5<br>(9.0 to 9.9)                  | 3.6†<br>(3.4 to 3.9)                     | 0.1<br>(0.1 to 0.2)               | -3.7<br>(-8.4 to 1.4)                             | -5.4<br>(-9.9 to -0.7)                              |
| Uterine fibroids                                           | 1.0<br>(0.9 to 1.1)                  | 0.1<br>(0.1 to 0.1)                      | < 0.05<br>(< 0.05 to < 0.05)      | -19.6<br>(-30.0 to -8.6)                          | -14.2<br>(-25.2 to -2.9)                            |
| Polycystic ovarian syndrome                                | 0.1<br>(0.1 to 0.1)                  | < 0.05<br>(< 0.05 to 0.1)                | < 0.05<br>(< 0.05 to < 0.05)      | 1.1<br>(-13.8 to 18.9)                            | -4.6<br>(-17.3 to 9.7)                              |
| Female infertility                                         | 0.5<br>(0.2 to 0.9)                  | --                                       | < 0.05<br>(< 0.05 to < 0.05)      | -0.2<br>(-20.7 to 23.1)                           | -12.4<br>(-29.9 to 8.8)                             |
| Endometriosis                                              | < 0.05<br>(< 0.05 to < 0.05)         | 0.1<br>(0.1 to 0.2)                      | < 0.05<br>(< 0.05 to < 0.05)      | -2.0<br>(-27.2 to 31.1)                           | -2.1<br>(-25.6 to 27.2)                             |
| Genital prolapse                                           | 1.9<br>(1.6 to 2.1)                  | 0.1<br>(0.1 to 0.1)                      | < 0.05<br>(< 0.05 to < 0.05)      | -4.7<br>(-13.4 to 5.3)                            | -14.8<br>(-22.7 to -5.8)                            |
| Premenstrual syndrome                                      | 5.8<br>(5.4 to 6.3)                  | 2.2<br>(2.0 to 2.4)                      | < 0.05<br>(< 0.05 to 0.1)         | 1.3<br>(-6.8 to 10.6)                             | -0.1<br>(-7.8 to 8.2)                               |
| Other gynecological diseases                               | 1.2<br>(1.1 to 1.4)                  | 1.0<br>(0.8 to 1.2)                      | < 0.05<br>(< 0.05 to 0.1)         | -1.7<br>(-9.7 to 7.0)                             | -3.4<br>(-10.4 to 4.5)                              |
| Hemoglobinopathies and hemolytic anaemias                  | 21.0<br>(20.2 to 21.9)               | --                                       | < 0.05<br>(< 0.05 to 0.1)         | -7.7<br>(-22.8 to 8.4)                            | -5.4<br>(-18.4 to 7.1)                              |
| Thalassemias                                               | < 0.05<br>(< 0.05 to < 0.05)         | --                                       | < 0.05<br>(< 0.05 to < 0.05)      | 6.1<br>(-12.9 to 33.5)                            | 26.1<br>(2.8 to 60.7)                               |
| Thalassaemias trait                                        | 1.6<br>(0.7 to 3.2)                  | --                                       | < 0.05<br>(< 0.05 to < 0.05)      | -5.3<br>(-22.3 to 14.1)                           | 1.4<br>(-15.0 to 19.7)                              |
| Sickle cell disorders                                      | < 0.05<br>(< 0.05 to < 0.05)         | --                                       | < 0.05<br>(< 0.05 to < 0.05)      | -10.5<br>(-22.4 to -1.3)                          | -2.1<br>(-14.7 to 7.8)                              |
| Sickle cell trait                                          | 0.1<br>(0.1 to 0.1)                  | --                                       | < 0.05<br>(< 0.05 to < 0.05)      | 0.5<br>(-17.3 to 22.1)                            | 1.4<br>(-13.6 to 19.4)                              |
| G6PD deficiency                                            | 4.8<br>(4.7 to 5.0)                  | --                                       | < 0.05<br>(< 0.05 to < 0.05)      | 36.4<br>(9.8 to 70.4)                             | 46.3<br>(22.3 to 75.5)                              |
| G6PD trait                                                 | 14.1<br>(13.9 to 14.4)               | --                                       | < 0.05<br>(< 0.05 to < 0.05)      | 16.3<br>(-4.5 to 45.2)                            | 27.7<br>(4.3 to 57.7)                               |
| Other hemoglobinopathies and hemolytic anaemias            | 1.1<br>(1.0 to 1.3)                  | --                                       | < 0.05<br>(< 0.05 to < 0.05)      | -10.5<br>(-26.5 to 8.1)                           | -11.2<br>(-23.2 to 2.2)                             |
| Endocrine, metabolic, blood, and immune disorders          | 2.1<br>(2.0 to 2.3)                  | 0.3<br>(0.2 to 0.3)                      | 0.1<br>(< 0.05 to 0.1)            | 0.9<br>(-6.6 to 8.4)                              | -3.1<br>(-8.6 to 2.5)                               |
| <b>Musculoskeletal disorders</b>                           | <b>13.7</b><br><b>(13.0 to 14.2)</b> | <b>6.9</b><br><b>(6.2 to 7.5)</b>        | <b>1.5</b><br><b>(1.1 to 1.9)</b> | <b>3.8</b><br><b>(0.5 to 7.5)</b>                 | <b>-2.8</b><br><b>(-5.2 to -0.3)</b>                |
| Rheumatoid arthritis                                       | 0.1<br>(0.1 to 0.1)                  | < 0.05<br>(< 0.05 to < 0.05)             | < 0.05<br>(< 0.05 to < 0.05)      | 9.2<br>(-2.5 to 22.5)                             | 1.3<br>(-8.6 to 11.5)                               |
| Osteoarthritis                                             | 3.0<br>(2.8 to 3.2)                  | 0.1<br>(0.1 to 0.2)                      | 0.2<br>(0.1 to 0.2)               | 7.3<br>(3.1 to 11.7)                              | -3.3<br>(-6.8 to 0.5)                               |
| Low back and neck pain                                     | 7.8<br>(7.2 to 8.3)                  | 3.3<br>(2.9 to 3.6)                      | 0.9<br>(0.6 to 1.2)               | 5.1<br>(0.7 to 9.3)                               | -0.8<br>(-3.9 to 2.2)                               |
| Low back pain                                              | 5.4<br>(4.8 to 6.2)                  | 2.6<br>(2.3 to 3.0)                      | 0.6<br>(0.4 to 0.8)               | 5.6<br>(-0.5 to 11.7)                             | -1.2<br>(-5.7 to 3.2)                               |
| Neck pain                                                  | 2.8<br>(2.4 to 3.2)                  | 0.6<br>(0.6 to 0.8)                      | 0.3<br>(0.2 to 0.4)               | 4.0<br>(-0.3 to 8.4)                              | 0.0<br>(-2.1 to 2.3)                                |
| Gout                                                       | 0.3<br>(0.3 to 0.4)                  | 0.1<br>(0.1 to 0.1)                      | < 0.05<br>(< 0.05 to < 0.05)      | 11.5<br>(-4.7 to 29.8)                            | 0.1<br>(-12.4 to 13.9)                              |
| Other musculoskeletal disorders                            | 4.1<br>(3.5 to 4.8)                  | 3.4<br>(2.8 to 4.0)                      | 0.4<br>(0.2 to 0.5)               | -1.6<br>(-9.6 to 6.5)                             | -8.1<br>(-15.1 to -1.0)                             |
| <b>Other non-communicable diseases</b>                     | <b>74.6</b><br><b>(73.1 to 76.0)</b> | <b>226.9†</b><br><b>(211.3 to 243.1)</b> | <b>1.9</b><br><b>(1.3 to 2.6)</b> | <b>1.0</b><br><b>(-0.5 to 2.4)</b>                | <b>-0.8</b><br><b>(-1.8 to 0.2)</b>                 |
| Congenital anomalies                                       | 1.1<br>(0.9 to 1.2)                  | --                                       | 0.1<br>(0.1 to 0.2)               | -1.9<br>(-8.7 to 5.2)                             | 0.9<br>(-5.8 to 7.9)                                |
| Neural tube defects                                        | 0.1<br>(< 0.05 to 0.1)               | --                                       | < 0.05<br>(< 0.05 to < 0.05)      | -0.7<br>(-16.2 to 17.4)                           | 0.7<br>(-13.5 to 16.2)                              |
| Congenital heart anomalies                                 | 0.3<br>(0.2 to 0.3)                  | --                                       | < 0.05<br>(< 0.05 to < 0.05)      | 0.4<br>(-11.3 to 14.0)                            | 7.7<br>(-4.1 to 21.9)                               |
| Orofacial clefts                                           | 0.1<br>(< 0.05 to 0.1)               | --                                       | < 0.05<br>(< 0.05 to < 0.05)      | -10.7<br>(-21.0 to 1.1)                           | -8.9<br>(-19.4 to 3.2)                              |
| Down's syndrome                                            | < 0.05<br>(< 0.05 to < 0.05)         | --                                       | < 0.05<br>(< 0.05 to < 0.05)      | -2.9<br>(-10.0 to 4.7)                            | 0.2<br>(-7.4 to 8.0)                                |
| Turner syndrome                                            | < 0.05<br>(< 0.05 to < 0.05)         | --                                       | < 0.05<br>(< 0.05 to < 0.05)      | 3.0<br>(-34.6 to 61.8)                            | 4.7<br>(-30.2 to 62.0)                              |
| Klinefelter syndrome                                       | < 0.05<br>(< 0.05 to < 0.05)         | --                                       | < 0.05<br>(< 0.05 to < 0.05)      | 4.5<br>(-26.0 to 49.0)                            | 1.8<br>(-25.7 to 42.6)                              |



| Cause                                         | Prevalence in thousands (95% UI)     | Incidence in thousands (95% UI)    | YLDs in thousands (95% UI)        |                                                   |                                                     |
|-----------------------------------------------|--------------------------------------|------------------------------------|-----------------------------------|---------------------------------------------------|-----------------------------------------------------|
|                                               | 2016 counts                          | 2016 counts                        | 2016 counts                       | Percentage change in counts between 2006 and 2016 | Percentage change in age-standardised rates between |
| Other chromosomal abnormalities               | < 0.05<br>(< 0.05 to < 0.05)         | --                                 | < 0.05<br>(< 0.05 to < 0.05)      | -12.4<br>(-29.5 to 6.4)                           | -0.2<br>(-20.1 to 22.4)                             |
| Congenital musculoskeletal and limb anomalies | 0.1<br>(0.1 to 0.1)                  | --                                 | < 0.05<br>(< 0.05 to < 0.05)      | 8.5<br>(-3.7 to 21.9)                             | 10.2<br>(-0.4 to 22.6)                              |
| Urogenital congenital anomalies               | 0.1<br>(0.1 to 0.1)                  | --                                 | < 0.05<br>(< 0.05 to < 0.05)      | -8.4<br>(-16.4 to 0.1)                            | -0.1<br>(-8.2 to 8.6)                               |
| Digestive congenital anomalies                | 0.1<br>(0.1 to 0.2)                  | --                                 | < 0.05<br>(< 0.05 to < 0.05)      | 1.4<br>(-12.4 to 19.3)                            | 3.1<br>(-9.2 to 19.0)                               |
| Other congenital anomalies                    | 0.4<br>(0.3 to 0.6)                  | --                                 | 0.1<br>(< 0.05 to 0.1)            | -4.1<br>(-14.7 to 7.2)                            | -2.3<br>(-12.4 to 8.7)                              |
| Skin and subcutaneous diseases                | 32.5<br>(31.6 to 33.6)               | 68.8<br>(65.2 to 73.0)             | 0.9<br>(0.6 to 1.2)               | -2.6<br>(-4.7 to -0.5)                            | 0.1<br>(-1.4 to 1.8)                                |
| Dermatitis                                    | 4.6<br>(4.3 to 5.0)                  | 5.4<br>(5.0 to 5.8)                | 0.2<br>(0.1 to 0.3)               | -7.6<br>(-11.1 to -3.4)                           | -0.1<br>(-3.4 to 3.6)                               |
| Psoriasis                                     | 0.6<br>(0.5 to 0.6)                  | 0.1<br>(0.1 to 0.1)                | < 0.05<br>(< 0.05 to 0.1)         | 7.8<br>(-3.9 to 20.3)                             | 4.9<br>(-4.8 to 14.9)                               |
| Cellulitis                                    | < 0.05<br>(< 0.05 to < 0.05)         | 0.5<br>(0.5 to 0.6)                | < 0.05<br>(< 0.05 to < 0.05)      | 0.5<br>(-13.2 to 16.4)                            | 0.3<br>(-13.1 to 15.7)                              |
| Pyoderma                                      | 0.1<br>(0.1 to 0.1)                  | 2.7<br>(2.6 to 2.8)                | < 0.05<br>(< 0.05 to < 0.05)      | 1.9<br>(-7.5 to 12.1)                             | -0.7<br>(-7.7 to 7.1)                               |
| Scabies                                       | 4.5<br>(3.9 to 5.2)                  | 14.1<br>(12.1 to 16.4)             | 0.1<br>(0.1 to 0.2)               | -4.8<br>(-8.5 to -0.5)                            | -4.1<br>(-7.0 to -0.8)                              |
| Fungal skin diseases                          | 7.7<br>(6.9 to 8.6)                  | 26.0<br>(23.2 to 29.2)             | < 0.05<br>(< 0.05 to 0.1)         | -1.3<br>(-3.7 to 1.1)                             | -0.0<br>(-1.1 to 1.1)                               |
| Viral skin diseases                           | 3.0<br>(2.9 to 3.2)                  | 4.3<br>(4.0 to 4.7)                | 0.1<br>(0.1 to 0.1)               | -4.4<br>(-7.8 to -0.8)                            | -0.3<br>(-3.4 to 3.0)                               |
| Acne vulgaris                                 | 10.9<br>(9.6 to 12.3)                | 7.7<br>(6.2 to 9.6)                | 0.3<br>(0.2 to 0.4)               | 0.5<br>(-4.0 to 5.6)                              | 1.9<br>(-2.6 to 6.7)                                |
| Alopecia areata                               | 0.2<br>(0.2 to 0.2)                  | 0.3<br>(0.3 to 0.3)                | < 0.05<br>(< 0.05 to < 0.05)      | 6.5<br>(-5.4 to 19.1)                             | -0.0<br>(-9.6 to 11.0)                              |
| Pruritus                                      | 0.8<br>(0.7 to 0.9)                  | 0.6<br>(0.5 to 0.7)                | < 0.05<br>(< 0.05 to < 0.05)      | 2.2<br>(-4.2 to 9.0)                              | 0.1<br>(-4.8 to 5.2)                                |
| Urticaria                                     | 0.9<br>(0.8 to 1.1)                  | 1.6<br>(1.4 to 1.9)                | 0.1<br>(< 0.05 to 0.1)            | -6.6<br>(-12.4 to 0.1)                            | -0.1<br>(-5.7 to 5.7)                               |
| Decubitus ulcer                               | < 0.05<br>(< 0.05 to < 0.05)         | < 0.05<br>(< 0.05 to 0.1)          | < 0.05<br>(< 0.05 to < 0.05)      | -1.6<br>(-12.3 to 10.7)                           | -3.2<br>(-16.0 to 11.4)                             |
| Other skin and subcutaneous diseases          | 4.9<br>(4.7 to 5.0)                  | 5.4<br>(5.2 to 5.6)                | < 0.05<br>(< 0.05 to < 0.05)      | 3.6<br>(0.7 to 6.8)                               | -0.7<br>(-3.1 to 1.8)                               |
| Sense organ diseases                          | 18.9<br>(18.5 to 19.4)               | 9.2†<br>(8.7 to 9.9)               | 0.7<br>(0.5 to 1.0)               | 4.9<br>(2.5 to 7.4)                               | -1.7<br>(-3.3 to -0.1)                              |
| Glaucoma                                      | < 0.05<br>(< 0.05 to < 0.05)         | --                                 | < 0.05<br>(< 0.05 to < 0.05)      | 22.7<br>(4.9 to 42.4)                             | 0.2<br>(-12.9 to 14.2)                              |
| Cataract                                      | 0.5<br>(0.5 to 0.6)                  | --                                 | < 0.05<br>(< 0.05 to < 0.05)      | 4.3<br>(-2.7 to 11.4)                             | -3.1<br>(-8.5 to 2.7)                               |
| Macular degeneration                          | < 0.05<br>(< 0.05 to < 0.05)         | --                                 | < 0.05<br>(< 0.05 to < 0.05)      | 23.0<br>(6.6 to 43.8)                             | 1.7<br>(-10.4 to 16.3)                              |
| Refraction and accommodation disorders        | 9.6<br>(9.1 to 10.0)                 | --                                 | 0.2<br>(0.1 to 0.3)               | 3.4<br>(-0.1 to 6.9)                              | -2.2<br>(-5.0 to 0.5)                               |
| Age-related and other hearing loss            | 11.8<br>(11.1 to 12.5)               | --                                 | 0.4<br>(0.3 to 0.6)               | 4.8<br>(0.9 to 8.4)                               | -1.8<br>(-4.1 to 0.5)                               |
| Other vision loss                             | 0.3<br>(0.3 to 0.3)                  | --                                 | < 0.05<br>(< 0.05 to < 0.05)      | 9.4<br>(0.2 to 18.3)                              | -0.0<br>(-7.1 to 7.4)                               |
| Other sense organ diseases                    | 2.2<br>(2.1 to 2.4)                  | 9.2<br>(8.7 to 9.9)                | 0.1<br>(< 0.05 to 0.1)            | 8.4<br>(3.4 to 13.5)                              | 0.5<br>(-3.1 to 4.4)                                |
| Oral disorders                                | 55.3<br>(52.7 to 57.5)               | 148.8†<br>(133.9 to 163.9)         | 0.1<br>(0.1 to 0.2)               | 6.6<br>(4.0 to 9.7)                               | -0.0<br>(-2.0 to 2.0)                               |
| Caries of deciduous teeth                     | 5.4<br>(3.7 to 6.9)                  | 23.9<br>(14.4 to 33.9)             | < 0.05<br>(< 0.05 to < 0.05)      | -17.4<br>(-27.6 to -5.4)                          | -0.3<br>(-12.2 to 13.5)                             |
| Caries of permanent teeth                     | 48.1<br>(44.9 to 51.1)               | 124.6<br>(113.5 to 135.6)          | < 0.05<br>(< 0.05 to 0.1)         | 2.5<br>(-1.0 to 6.3)                              | 0.4<br>(-2.7 to 3.5)                                |
| Periodontal disease                           | 1.1<br>(0.9 to 1.4)                  | 0.1<br>(0.1 to 0.2)                | < 0.05<br>(< 0.05 to < 0.05)      | 10.5<br>(4.4 to 17.2)                             | 1.1<br>(-2.5 to 4.9)                                |
| Edentulism and severe tooth loss              | 1.7<br>(1.5 to 1.9)                  | 0.1<br>(0.1 to 0.2)                | < 0.05<br>(< 0.05 to 0.1)         | 13.0<br>(8.2 to 18.4)                             | -0.2<br>(-3.5 to 3.5)                               |
| Other oral disorders                          | 1.7<br>(1.6 to 1.8)                  | --                                 | 0.1<br>(< 0.05 to 0.1)            | 3.6<br>(0.1 to 7.8)                               | -0.2<br>(-3.3 to 3.1)                               |
| <b>Injuries</b>                               | <b>11.4</b><br><b>(10.8 to 12.0)</b> | <b>5.9†</b><br><b>(5.6 to 6.2)</b> | <b>0.5</b><br><b>(0.3 to 0.7)</b> | <b>10.9</b><br><b>(8.2 to 13.5)</b>               | <b>6.7</b><br><b>(4.6 to 8.6)</b>                   |
| <b>Transport injuries</b>                     | <b>2.1</b><br><b>(1.9 to 2.3)</b>    | <b>0.8</b><br><b>(0.7 to 0.9)</b>  | <b>0.1</b><br><b>(0.1 to 0.2)</b> | <b>18.9</b><br><b>(15.8 to 21.9)</b>              | <b>14.0</b><br><b>(11.3 to 16.4)</b>                |
| Road injuries                                 | 1.4<br>(1.2 to 1.5)                  | 0.6<br>(0.5 to 0.7)                | 0.1<br>(< 0.05 to 0.1)            | 34.3<br>(31.1 to 37.4)                            | 25.9<br>(23.3 to 28.5)                              |
| Pedestrian road injuries                      | 0.2<br>(0.1 to 0.2)                  | 0.1<br>(< 0.05 to 0.1)             | < 0.05<br>(< 0.05 to < 0.05)      | 55.9<br>(52.0 to 59.8)                            | 45.9<br>(42.6 to 49.2)                              |
| Cyclist road injuries                         | 0.2<br>(0.1 to 0.2)                  | 0.1<br>(0.1 to 0.1)                | < 0.05<br>(< 0.05 to < 0.05)      | 40.8<br>(37.2 to 44.4)                            | 32.2<br>(29.4 to 35.3)                              |
| Motorcyclist road injuries                    | 0.3<br>(0.3 to 0.4)                  | 0.1<br>(0.1 to 0.1)                | < 0.05<br>(< 0.05 to < 0.05)      | 38.8<br>(35.4 to 42.1)                            | 31.0<br>(28.1 to 33.8)                              |
| Motor vehicle road injuries                   | 0.5<br>(0.4 to 0.6)                  | 0.3<br>(0.2 to 0.3)                | < 0.05<br>(< 0.05 to < 0.05)      | 23.0<br>(20.0 to 25.8)                            | 14.9<br>(12.4 to 17.2)                              |
| Other road injuries                           | 0.2<br>(0.2 to 0.2)                  | 0.1<br>(0.1 to 0.1)                | < 0.05<br>(< 0.05 to < 0.05)      | 42.7<br>(39.2 to 46.3)                            | 34.8<br>(32.1 to 37.6)                              |
| Other transport injuries                      | 0.8<br>(0.6 to 0.9)                  | 0.2<br>(0.2 to 0.2)                | < 0.05<br>(< 0.05 to 0.1)         | -0.5<br>(-3.6 to 2.7)                             | -3.5<br>(-6.0 to -1.0)                              |
| <b>Unintentional injuries</b>                 | <b>8.2</b><br><b>(7.7 to 8.7)</b>    | <b>4.5</b><br><b>(4.2 to 4.8)</b>  | <b>0.3</b><br><b>(0.2 to 0.4)</b> | <b>11.2</b><br><b>(8.3 to 13.8)</b>               | <b>6.7</b><br><b>(4.5 to 8.7)</b>                   |
| Falls                                         | 1.9<br>(1.7 to 2.2)                  | 0.9<br>(0.8 to 1.1)                | 0.1<br>(0.1 to 0.1)               | 28.1<br>(24.7 to 31.2)                            | 21.2<br>(18.6 to 23.6)                              |
| Drowning                                      | 0.1<br>(0.1 to 0.1)                  | < 0.05<br>(< 0.05 to < 0.05)       | < 0.05<br>(< 0.05 to < 0.05)      | -1.4<br>(-4.7 to 1.8)                             | -7.8<br>(-10.7 to -5.1)                             |
| Fire, heat, and hot substances                | 0.8<br>(0.7 to 1.0)                  | 0.1<br>(0.1 to 0.1)                | < 0.05<br>(< 0.05 to < 0.05)      | 8.7<br>(2.7 to 14.1)                              | 2.8<br>(-2.1 to 7.0)                                |
| Poisonings                                    | < 0.05<br>(< 0.05 to < 0.05)         | < 0.05<br>(< 0.05 to 0.1)          | < 0.05<br>(< 0.05 to < 0.05)      | 24.3<br>(13.7 to 36.4)                            | 20.2<br>(11.6 to 29.5)                              |
| Exposure to mechanical forces                 | 1.4<br>(1.2 to 1.8)                  | 0.7<br>(0.6 to 0.8)                | < 0.05<br>(< 0.05 to 0.1)         | 22.2<br>(18.6 to 25.2)                            | 15.2<br>(12.5 to 17.7)                              |
| Unintentional firearm injuries                | 0.1<br>(0.1 to 0.1)                  | < 0.05<br>(< 0.05 to < 0.05)       | < 0.05<br>(< 0.05 to < 0.05)      | 15.8<br>(11.9 to 19.0)                            | 9.0<br>(6.0 to 11.5)                                |
| Unintentional suffocation                     | 0.1<br>(0.1 to 0.1)                  | < 0.05<br>(< 0.05 to < 0.05)       | < 0.05<br>(< 0.05 to < 0.05)      | 7.0<br>(3.8 to 10.0)                              | 3.5<br>(0.9 to 6.0)                                 |
| Other exposure to mechanical forces           | 1.3<br>(1.1 to 1.6)                  | 0.7<br>(0.6 to 0.8)                | < 0.05<br>(< 0.05 to < 0.05)      | 24.7<br>(21.0 to 27.9)                            | 17.1<br>(14.2 to 19.5)                              |

| Cause                                                                               | Prevalence in thousands (95% UI)  | Incidence in thousands (95% UI)                      | YLDs in thousands (95% UI)                          |                                                   |                                                     |
|-------------------------------------------------------------------------------------|-----------------------------------|------------------------------------------------------|-----------------------------------------------------|---------------------------------------------------|-----------------------------------------------------|
|                                                                                     | 2016 counts                       | 2016 counts                                          | 2016 counts                                         | Percentage change in counts between 2006 and 2016 | Percentage change in age-standardised rates between |
| Adverse effects of medical treatment                                                | < 0.05<br>(< 0.05 to 0.1)         | 0.6<br>(0.5 to 0.6)                                  | < 0.05<br>(< 0.05 to < 0.05)                        | -6.4<br>(-11.1 to -1.5)                           | -2.9<br>(-7.4 to 1.7)                               |
| Animal contact                                                                      | 0.6<br>(0.5 to 0.7)               | 0.7<br>(0.6 to 0.9)                                  | < 0.05<br>(< 0.05 to < 0.05)                        | 7.0<br>(0.5 to 14.2)                              | 4.7<br>(-0.4 to 10.1)                               |
| Venomous animal contact                                                             | 0.2<br>(0.2 to 0.3)               | 0.3<br>(0.2 to 0.4)                                  | < 0.05<br>(< 0.05 to < 0.05)                        | 9.3<br>(0.0 to 20.1)                              | 7.3<br>(-0.1 to 15.6)                               |
| Non-venomous animal contact                                                         | 0.3<br>(0.3 to 0.4)               | 0.4<br>(0.3 to 0.5)                                  | < 0.05<br>(< 0.05 to < 0.05)                        | 2.0<br>(-2.9 to 5.8)                              | -0.4<br>(-3.9 to 2.6)                               |
| Foreign body                                                                        | 0.6<br>(0.5 to 0.7)               | 0.3<br>(0.3 to 0.4)                                  | < 0.05<br>(< 0.05 to < 0.05)                        | -1.0<br>(-4.8 to 2.3)                             | -2.9<br>(-5.7 to -0.4)                              |
| Pulmonary aspiration and foreign body in airway                                     | 0.4<br>(0.3 to 0.5)               | 0.1<br>(0.1 to 0.2)                                  | < 0.05<br>(< 0.05 to < 0.05)                        | -1.8<br>(-5.7 to 1.6)                             | -3.5<br>(-6.4 to -1.0)                              |
| Foreign body in eyes                                                                | < 0.05<br>(< 0.05 to < 0.05)      | 0.1<br>(0.1 to 0.1)                                  | < 0.05<br>(< 0.05 to < 0.05)                        | 5.1<br>(-0.1 to 10.9)                             | 2.1<br>(-1.1 to 4.9)                                |
| Foreign body in other body part                                                     | 0.2<br>(0.1 to 0.2)               | 0.1<br>(0.1 to 0.1)                                  | < 0.05<br>(< 0.05 to < 0.05)                        | 0.5<br>(-4.2 to 4.6)                              | -1.6<br>(-5.3 to 1.6)                               |
| Environmental heat and cold exposure                                                | 1.2<br>(1.0 to 1.4)               | 0.4<br>(0.3 to 0.5)                                  | < 0.05<br>(< 0.05 to 0.1)                           | 2.7<br>(-0.3 to 5.5)                              | -1.6<br>(-3.8 to 0.5)                               |
| Other unintentional injuries                                                        | 1.6<br>(1.3 to 1.9)               | 0.6<br>(0.5 to 0.8)                                  | < 0.05<br>(< 0.05 to 0.1)                           | 2.0<br>(-0.3 to 4.1)                              | -1.8<br>(-3.7 to -0.1)                              |
| <b>Self-harm and interpersonal violence</b>                                         | <b>3.6</b><br><b>(3.2 to 4.0)</b> | <b>0.6†</b><br><b>(0.5 to 0.7)</b>                   | <b>0.1</b><br><b>(&lt; 0.05 to 0.1)</b>             | <b>2.0</b><br><b>(-0.4 to 4.7)</b>                | <b>-3.2</b><br><b>(-5.1 to -1.3)</b>                |
| Self-harm                                                                           | 0.1<br>(0.1 to 0.1)               | 0.1<br>(0.1 to 0.1)                                  | < 0.05<br>(< 0.05 to < 0.05)                        | -3.3<br>(-6.9 to 0.1)                             | -11.5<br>(-14.2 to -8.9)                            |
| Self-harm by firearm                                                                | < 0.05<br>(< 0.05 to < 0.05)      | < 0.05<br>(< 0.05 to < 0.05)                         | < 0.05<br>(< 0.05 to < 0.05)                        | 0.5<br>(-3.8 to 4.3)                              | -7.5<br>(-10.8 to -4.7)                             |
| Self-harm by other specified means                                                  | 0.1<br>(0.1 to 0.1)               | 0.1<br>(0.1 to 0.1)                                  | < 0.05<br>(< 0.05 to < 0.05)                        | -3.5<br>(-7.1 to -0.1)                            | -11.6<br>(-14.4 to -9.0)                            |
| Interpersonal violence                                                              | 3.5<br>(3.1 to 3.9)               | 0.6†<br>(0.5 to 0.7)                                 | 0.1<br>(< 0.05 to 0.1)                              | 2.6<br>(-0.1 to 5.6)                              | -2.1<br>(-4.1 to -0.2)                              |
| Assault by firearm                                                                  | < 0.05<br>(< 0.05 to < 0.05)      | < 0.05<br>(< 0.05 to < 0.05)                         | < 0.05<br>(< 0.05 to < 0.05)                        | -1.8<br>(-5.5 to 1.9)                             | -7.5<br>(-10.3 to -4.7)                             |
| Assault by sharp object                                                             | 0.2<br>(0.1 to 0.2)               | 0.1<br>(0.1 to 0.1)                                  | < 0.05<br>(< 0.05 to < 0.05)                        | -0.6<br>(-3.9 to 3.0)                             | -7.8<br>(-10.6 to -5.0)                             |
| Sexual violence                                                                     | 2.6<br>(2.3 to 3.0)               | --                                                   | < 0.05<br>(< 0.05 to < 0.05)                        | -3.4<br>(-7.9 to 1.2)                             | -6.0<br>(-9.3 to -2.4)                              |
| Assault by other means                                                              | 0.7<br>(0.6 to 0.8)               | 0.5<br>(0.4 to 0.6)                                  | < 0.05<br>(< 0.05 to < 0.05)                        | 9.1<br>(6.4 to 11.7)                              | 1.4<br>(-0.8 to 3.4)                                |
| <b>Forces of nature, conflict and terrorism, and executions and police conflict</b> | <b>0.1</b><br><b>(0.1 to 0.2)</b> | <b>&lt; 0.05†</b><br><b>(&lt; 0.05 to &lt; 0.05)</b> | <b>&lt; 0.05</b><br><b>(&lt; 0.05 to &lt; 0.05)</b> | <b>-30.7</b><br><b>(-33.8 to -27.7)</b>           | <b>-25.3</b><br><b>(-28.1 to -22.5)</b>             |
| Exposure to forces of nature                                                        | 0.1<br>(0.1 to 0.2)               | --                                                   | < 0.05<br>(< 0.05 to < 0.05)                        | -31.8<br>(-34.9 to -28.7)                         | -26.4<br>(-29.1 to -23.6)                           |
| Conflict and terrorism                                                              | --                                | --                                                   | --                                                  | --                                                | --                                                  |
| Executions and police conflict                                                      | < 0.05<br>(< 0.05 to < 0.05)      | < 0.05<br>(< 0.05 to < 0.05)                         | < 0.05<br>(< 0.05 to < 0.05)                        | 12.9<br>(6.4 to 17.5)                             | 15.5<br>(10.2 to 19.3)                              |
| <b>Impairments</b>                                                                  | --                                | --                                                   | --                                                  | --                                                | --                                                  |
| Anaemia                                                                             | 29.9<br>(26.5 to 33.8)            | --                                                   | 0.9<br>(0.6 to 1.3)                                 | -3.9<br>(-18.5 to 18.2)                           | -0.0<br>(-14.4 to 30.5)                             |
| Developmental intellectual disability                                               | 2.3<br>(1.8 to 2.9)               | --                                                   | 0.2<br>(0.2 to 0.3)                                 | -2.6<br>(-7.4 to 2.2)                             | -1.3<br>(-5.8 to 3.2)                               |
| Epilepsy                                                                            | 0.6<br>(0.4 to 0.7)               | --                                                   | 0.2<br>(0.1 to 0.3)                                 | -4.1<br>(-45.5 to 63.1)                           | -3.0<br>(-45.8 to 71.5)                             |
| Guillain-Barre syndrome                                                             | < 0.05<br>(< 0.05 to < 0.05)      | --                                                   | < 0.05<br>(< 0.05 to < 0.05)                        | 3.2<br>(-2.2 to 11.4)                             | 2.9<br>(1.0 to 9.1)                                 |
| Hearing loss                                                                        | 13.5<br>(12.9 to 14.2)            | --                                                   | 0.5<br>(0.4 to 0.7)                                 | 2.4<br>(-0.9 to 5.5)                              | -2.0<br>(-4.0 to -0.2)                              |
| Heart failure                                                                       | 0.4<br>(0.3 to 0.4)               | --                                                   | < 0.05<br>(< 0.05 to 0.1)                           | 9.1<br>(1.0 to 17.6)                              | 1.3<br>(-6.2 to 8.9)                                |
| Infertility                                                                         | 2.0<br>(1.6 to 2.6)               | --                                                   | < 0.05<br>(< 0.05 to < 0.05)                        | 0.9<br>(-6.0 to 8.2)                              | -4.3<br>(-9.2 to 1.3)                               |
| Pelvic inflammatory disease                                                         | 0.1<br>(0.1 to 0.1)               | --                                                   | < 0.05<br>(< 0.05 to < 0.05)                        | -5.1<br>(-18.7 to 9.9)                            | -8.3<br>(-20.0 to 5.7)                              |
| Vision loss                                                                         | 10.8<br>(10.4 to 11.4)            | --                                                   | 0.3<br>(0.2 to 0.4)                                 | 2.6<br>(-0.8 to 5.6)                              | -2.2<br>(-4.4 to -0.0)                              |

We did not calculate incidence for the nine impairments, certain NTDs, and causes with only birth prevalence. Blank cells mean that no estimate is available.

† Incidence for aggregate causes represents the sum of the incidence of the causes below the aggregate.

‡ Incidence estimates for stroke represent first-ever stroke only.

^ Incidence of HIV/AIDS represents new infections of HIV only and does not include new infections of Tuberculosis in HIV positive cases.

SR Table 14: Prevalence, incidence, and YLDs for 2016, percentage change of YLD counts and percentage change of age-standardised YLD rates between 2006 and 2016 by cause and impairments, for all ages, Fiji.

| Cause                                                                                | Prevalence in thousands (95% UI) | Incidence in thousands (95% UI)         | YLDs in thousands (95% UI)     |                                                   |                                                     |
|--------------------------------------------------------------------------------------|----------------------------------|-----------------------------------------|--------------------------------|---------------------------------------------------|-----------------------------------------------------|
|                                                                                      | 2016 counts                      | 2016 counts                             | 2016 counts                    | Percentage change in counts between 2006 and 2016 | Percentage change in age-standardised rates between |
| <b>All causes</b>                                                                    | <b>839.6</b><br>(837.1 to 841.9) | <b>5,059.4†</b><br>(4,799.4 to 5,342.2) | <b>95.4</b><br>(70.6 to 123.6) | <b>12.5</b><br>(10.2 to 14.9)                     | <b>-1.9</b><br>(-3.7 to -0.1)                       |
| <b>Communicable, maternal, neonatal, and nutritional disorders</b>                   | <b>704.6</b><br>(685.0 to 723.5) | <b>2,891.9†</b><br>(2,651.7 to 3,158.5) | <b>10.9</b><br>(7.7 to 15.2)   | <b>-9.8</b><br>(-18.1 to -1.9)                    | <b>-15.2</b><br>(-23.1 to -7.8)                     |
| <b>HIV/AIDS and tuberculosis</b>                                                     | <b>261.4</b><br>(242.0 to 275.7) | <b>0.6†</b><br>(0.5 to 0.6)             | <b>0.2</b><br>(0.1 to 0.3)     | <b>18.5</b><br>(3.6 to 34.6)                      | <b>2.3</b><br>(-9.3 to 15.1)                        |
| Tuberculosis                                                                         | 247.0<br>(231.3 to 264.3)        | 0.5†<br>(0.4 to 0.6)                    | 0.2<br>(0.1 to 0.2)            | 12.0<br>(-2.4 to 28.8)                            | -3.9<br>(-14.7 to 8.8)                              |
| Drug-susceptible tuberculosis                                                        | 0.6<br>(0.5 to 0.7)              | 0.5<br>(0.4 to 0.6)                     | 0.2<br>(0.1 to 0.2)            | 12.1<br>(-2.6 to 29.1)                            | -3.8<br>(-14.6 to 8.9)                              |
| Multidrug-resistant tuberculosis without extensive drug resistance                   | < 0.05<br>(< 0.05 to < 0.05)     | < 0.05<br>(< 0.05 to < 0.05)            | < 0.05<br>(< 0.05 to < 0.05)   | -14.7<br>(-97.8 to 4,450.4)                       | -27.2<br>(-98.1 to 3,698.7)                         |
| Extensively drug-resistant tuberculosis                                              | < 0.05<br>(< 0.05 to < 0.05)     | < 0.05<br>(< 0.05 to < 0.05)            | < 0.05<br>(< 0.05 to < 0.05)   | 180.8<br>(-92.7 to 14,883.8)                      | 139.8<br>(-93.8 to 12,408.7)                        |
| Latent tuberculosis infection                                                        | 246.4<br>(230.7 to 263.6)        | --                                      | --                             | --                                                | --                                                  |
| HIV/AIDS                                                                             | 0.5<br>(0.3 to 0.7)              | 0.1 <sup>a</sup><br>(< 0.05 to 0.1)     | 0.1<br>(< 0.05 to 0.1)         | 45.9<br>(12.1 to 77.0)                            | 31.2<br>(1.2 to 59.8)                               |
| Drug-susceptible HIV/AIDS - Tuberculosis                                             | < 0.05<br>(< 0.05 to < 0.05)     | < 0.05<br>(< 0.05 to < 0.05)            | < 0.05<br>(< 0.05 to < 0.05)   | -6.0<br>(-11.8 to -0.1)                           | -13.4<br>(-18.8 to -8.0)                            |
| Multidrug-resistant HIV/AIDS - Tuberculosis without extensive drug resistance        | < 0.05<br>(< 0.05 to < 0.05)     | < 0.05<br>(< 0.05 to < 0.05)            | < 0.05<br>(< 0.05 to < 0.05)   | -27.3<br>(-98.2 to 3,660.8)                       | -33.0<br>(-98.3 to 3,364.6)                         |
| Extensively drug-resistant HIV/AIDS - Tuberculosis                                   | < 0.05<br>(< 0.05 to < 0.05)     | < 0.05<br>(< 0.05 to < 0.05)            | < 0.05<br>(< 0.05 to < 0.05)   | 139.4<br>(-93.9 to 12,297.1)                      | 120.4<br>(-94.4 to 11,319.7)                        |
| HIV/AIDS resulting in other diseases                                                 | 0.4<br>(0.3 to 0.7)              | 0.1<br>(< 0.05 to 0.1)                  | < 0.05<br>(< 0.05 to 0.1)      | 54.5<br>(15.0 to 104.5)                           | 38.4<br>(3.5 to 85.0)                               |
| <b>Diarrhoea, lower respiratory infections, and other common infectious diseases</b> | <b>51.0</b><br>(48.1 to 54.2)    | <b>2,756.3†</b><br>(2,515.5 to 3,021.1) | <b>2.8</b><br>(2.0 to 3.9)     | <b>6.1</b><br>(2.6 to 9.5)                        | <b>-0.3</b><br>(-3.4 to 2.6)                        |
| Diarrhoeal diseases                                                                  | 11.0<br>(10.3 to 11.8)           | 746.2<br>(695.8 to 797.3)               | 1.2<br>(0.9 to 1.7)            | 8.6<br>(2.7 to 15.2)                              | 1.2<br>(-3.6 to 6.7)                                |
| Intestinal infectious diseases                                                       | 0.1<br>(< 0.05 to 0.1)           | 1.1†<br>(1.0 to 1.3)                    | < 0.05<br>(< 0.05 to < 0.05)   | -17.2<br>(-31.5 to 0.5)                           | -21.8<br>(-34.1 to -6.4)                            |
| Typhoid fever                                                                        | 0.1<br>(< 0.05 to 0.1)           | 0.9<br>(0.7 to 1.0)                     | < 0.05<br>(< 0.05 to < 0.05)   | -17.0<br>(-32.6 to 2.5)                           | -21.6<br>(-35.2 to -4.4)                            |
| Paratyphoid fever                                                                    | < 0.05<br>(< 0.05 to < 0.05)     | 0.2<br>(0.2 to 0.3)                     | < 0.05<br>(< 0.05 to < 0.05)   | -14.3<br>(-28.6 to 1.3)                           | -19.2<br>(-31.7 to -5.6)                            |
| Other intestinal infectious diseases                                                 | --                               | --                                      | < 0.05<br>(< 0.05 to < 0.05)   | -43.3<br>(-53.4 to -31.1)                         | -42.1<br>(-51.6 to -30.2)                           |
| Lower respiratory infections                                                         | 1.5<br>(1.4 to 1.7)              | 66.1<br>(60.3 to 72.4)                  | 0.1<br>(0.1 to 0.1)            | 28.8<br>(15.4 to 43.2)                            | 16.3<br>(5.0 to 28.1)                               |
| Upper respiratory infections                                                         | 25.3<br>(22.3 to 28.8)           | 1,893.9<br>(1,664.4 to 2,165.5)         | 0.6<br>(0.4 to 1.0)            | 5.7<br>(0.4 to 11.1)                              | 0.4<br>(-4.4 to 5.4)                                |
| Otitis media                                                                         | 9.7<br>(8.7 to 10.8)             | 28.0<br>(22.8 to 34.5)                  | 0.3<br>(0.2 to 0.4)            | -0.2<br>(-7.5 to 8.2)                             | -3.7<br>(-10.4 to 3.7)                              |
| Meningitis                                                                           | 2.5<br>(2.2 to 2.9)              | 0.3<br>(0.3 to 0.4)                     | 0.3<br>(0.2 to 0.4)            | -1.0<br>(-8.7 to 7.1)                             | -7.1<br>(-14.0 to 0.4)                              |
| Pneumococcal meningitis                                                              | 1.4<br>(1.2 to 1.6)              | 0.1<br>(0.1 to 0.1)                     | 0.2<br>(0.1 to 0.2)            | -9.2<br>(-21.1 to 3.2)                            | -15.2<br>(-26.0 to -3.6)                            |
| H influenzae type B meningitis                                                       | 0.3<br>(0.2 to 0.3)              | < 0.05<br>(< 0.05 to < 0.05)            | < 0.05<br>(< 0.05 to 0.1)      | 5.0<br>(0.6 to 9.2)                               | -0.6<br>(-4.8 to 3.5)                               |
| Meningococcal infection                                                              | 0.2<br>(0.2 to 0.3)              | 0.1<br>(< 0.05 to 0.1)                  | < 0.05<br>(< 0.05 to < 0.05)   | 2.5<br>(-1.9 to 7.4)                              | -4.1<br>(-8.5 to 0.4)                               |
| Other meningitis                                                                     | 0.6<br>(0.5 to 0.8)              | 0.2<br>(0.1 to 0.2)                     | 0.1<br>(< 0.05 to 0.1)         | 27.1<br>(17.6 to 38.2)                            | 19.9<br>(11.0 to 30.3)                              |
| Encephalitis                                                                         | 2.5<br>(1.7 to 3.7)              | 1.0<br>(0.9 to 1.2)                     | 0.3<br>(0.2 to 0.4)            | 7.4<br>(-4.1 to 21.2)                             | -0.4<br>(-10.8 to 12.0)                             |
| Diphtheria                                                                           | < 0.05<br>(< 0.05 to < 0.05)     | < 0.05<br>(< 0.05 to < 0.05)            | < 0.05<br>(< 0.05 to < 0.05)   | -45.0<br>(-69.5 to -0.4)                          | -45.1<br>(-70.4 to 2.0)                             |
| Whooping cough                                                                       | 0.1<br>(0.1 to 0.1)              | 0.8<br>(0.6 to 1.0)                     | < 0.05<br>(< 0.05 to < 0.05)   | -52.0<br>(-60.8 to -42.1)                         | -43.1<br>(-53.5 to -31.1)                           |
| Tetanus                                                                              | < 0.05<br>(< 0.05 to < 0.05)     | < 0.05<br>(< 0.05 to < 0.05)            | < 0.05<br>(< 0.05 to < 0.05)   | 6.8<br>(-5.9 to 19.7)                             | 2.4<br>(-9.4 to 14.2)                               |
| Measles                                                                              | 0.1<br>(< 0.05 to 0.1)           | 1.9<br>(0.7 to 4.1)                     | < 0.05<br>(< 0.05 to < 0.05)   | -36.1<br>(-56.5 to -8.3)                          | -26.2<br>(-52.1 to 8.6)                             |
| Varicella and herpes zoster                                                          | 1.0<br>(0.9 to 1.1)              | 16.9<br>(15.9 to 17.8)                  | < 0.05<br>(< 0.05 to 0.1)      | 17.8<br>(5.0 to 31.7)                             | 0.3<br>(-9.0 to 10.5)                               |
| <b>Neglected tropical diseases and malaria</b>                                       | <b>448.7</b><br>(391.2 to 506.3) | <b>12.6†</b><br>(8.1 to 18.7)           | <b>2.1</b><br>(1.3 to 3.4)     | <b>-35.8</b><br>(-54.8 to -11.6)                  | <b>-40.8</b><br>(-58.0 to -18.3)                    |
| Malaria                                                                              | --                               | --                                      | --                             | --                                                | --                                                  |
| Chagas disease                                                                       | --                               | --                                      | --                             | --                                                | --                                                  |
| Leishmaniasis                                                                        | --                               | --                                      | --                             | --                                                | --                                                  |
| Visceral leishmaniasis                                                               | --                               | --                                      | --                             | --                                                | --                                                  |
| Cutaneous and mucocutaneous leishmaniasis                                            | --                               | --                                      | --                             | --                                                | --                                                  |
| African trypanosomiasis                                                              | --                               | --                                      | --                             | --                                                | --                                                  |
| Schistosomiasis                                                                      | --                               | --                                      | --                             | --                                                | --                                                  |
| Cysticercosis                                                                        | 0.1<br>(< 0.05 to 0.1)           | --                                      | < 0.05<br>(< 0.05 to < 0.05)   | -23.0<br>(-67.7 to 85.3)                          | -33.8<br>(-71.8 to 54.7)                            |
| Cystic echinococcosis                                                                | --                               | --                                      | --                             | --                                                | --                                                  |
| Lymphatic filariasis                                                                 | 0.8<br>(0.5 to 1.4)              | 0.2<br>(0.2 to 0.3)                     | 0.1<br>(< 0.05 to 0.1)         | -95.3<br>(-97.6 to -93.2)                         | -95.8<br>(-97.8 to -94.0)                           |
| Onchocerciasis                                                                       | --                               | --                                      | --                             | --                                                | --                                                  |
| Trachoma                                                                             | 1.5<br>(0.9 to 2.3)              | --                                      | 0.1<br>(< 0.05 to 0.1)         | 29.9<br>(-10.8 to 80.8)                           | -15.2<br>(-43.4 to 20.1)                            |
| Dengue                                                                               | 0.7<br>(0.4 to 1.2)              | 12.1<br>(7.5 to 18.0)                   | 0.1<br>(0.1 to 0.2)            | 287.2<br>(192.1 to 712.8)                         | 259.7<br>(177.7 to 653.3)                           |
| Yellow fever                                                                         | --                               | --                                      | --                             | --                                                | --                                                  |
| Rabies                                                                               | < 0.05<br>(< 0.05 to < 0.05)     | < 0.05<br>(< 0.05 to < 0.05)            | < 0.05<br>(< 0.05 to < 0.05)   | 56.2<br>(-17.9 to 198.0)                          | 14.1<br>(-41.7 to 116.5)                            |
| Intestinal nematode infections                                                       | 443.9<br>(385.6 to 502.3)        | --                                      | 1.7<br>(1.0 to 2.9)            | 2.4<br>(-19.8 to 33.2)                            | -4.6<br>(-25.5 to 24.4)                             |
| Ascariasis                                                                           | 251.7<br>(194.2 to 322.4)        | --                                      | 0.4<br>(0.2 to 0.7)            | -6.7<br>(-34.9 to 35.4)                           | -9.9<br>(-37.5 to 31.7)                             |



| Cause                                                                   | Prevalence in thousands (95% UI)        | Incidence in thousands (95% UI)                | YLDs in thousands (95% UI)                    |                                                   |                                                     |
|-------------------------------------------------------------------------|-----------------------------------------|------------------------------------------------|-----------------------------------------------|---------------------------------------------------|-----------------------------------------------------|
|                                                                         | 2016 counts                             | 2016 counts                                    | 2016 counts                                   | Percentage change in counts between 2006 and 2016 | Percentage change in age-standardised rates between |
| Trichuriasis                                                            | 50.1<br>(42.7 to 59.5)                  | --                                             | 0.2<br>(0.1 to 0.3)                           | 5.5<br>(-18.8 to 35.8)                            | -4.0<br>(-26.5 to 24.0)                             |
| Hookworm disease                                                        | 250.6<br>(202.0 to 308.1)               | --                                             | 1.2<br>(0.7 to 1.9)                           | 5.4<br>(-25.5 to 50.8)                            | -2.7<br>(-31.5 to 39.4)                             |
| Food-borne trematodiasis                                                | --                                      | --                                             | --                                            | --                                                | --                                                  |
| Leprosy                                                                 | < 0.05<br>(< 0.05 to < 0.05)            | < 0.05<br>(< 0.05 to < 0.05)                   | < 0.05<br>(< 0.05 to < 0.05)                  | -5.0<br>(-24.1 to 37.7)                           | -21.6<br>(-38.8 to 19.5)                            |
| Ebola virus disease                                                     | --                                      | --                                             | --                                            | --                                                | --                                                  |
| Zika virus disease                                                      | < 0.05<br>(< 0.05 to < 0.05)            | 0.3<br>(0.1 to 0.9)                            | < 0.05<br>(< 0.05 to < 0.05)                  | --                                                | --                                                  |
| Guinea worm disease                                                     | --                                      | --                                             | --                                            | --                                                | --                                                  |
| Other neglected tropical diseases                                       | 6.8<br>(6.3 to 7.3)                     | --                                             | 0.1<br>(0.1 to 0.2)                           | -7.3<br>(-17.4 to 5.4)                            | -7.6<br>(-17.6 to 4.3)                              |
| <b>Maternal disorders</b>                                               | <b>0.6</b><br><b>(0.5 to 0.8)</b>       | <b>12.1†</b><br><b>(10.1 to 14.6)</b>          | <b>&lt; 0.05</b><br><b>(&lt; 0.05 to 0.1)</b> | <b>-2.5</b><br><b>(-28.4 to 33.4)</b>             | <b>-5.8</b><br><b>(-30.6 to 29.2)</b>               |
| Maternal haemorrhage                                                    | 0.1<br>(0.1 to 0.1)                     | 1.0<br>(0.7 to 1.3)                            | < 0.05<br>(< 0.05 to < 0.05)                  | -27.7<br>(-52.7 to 10.2)                          | -29.9<br>(-53.8 to 6.5)                             |
| Maternal sepsis and other pregnancy related infections                  | < 0.05<br>(< 0.05 to 0.1)               | 0.4<br>(0.3 to 0.6)                            | < 0.05<br>(< 0.05 to < 0.05)                  | -16.1<br>(-69.7 to 114.2)                         | -17.9<br>(-70.3 to 105.0)                           |
| Maternal hypertensive disorders                                         | 0.4<br>(0.3 to 0.6)                     | 1.9<br>(1.5 to 2.3)                            | < 0.05<br>(< 0.05 to < 0.05)                  | 8.4<br>(-36.6 to 84.2)                            | 4.3<br>(-38.5 to 77.8)                              |
| Maternal obstructed labour and uterine rupture                          | < 0.05<br>(< 0.05 to < 0.05)            | 0.7<br>(0.5 to 0.9)                            | < 0.05<br>(< 0.05 to < 0.05)                  | -14.2<br>(-59.8 to 135.0)                         | -17.2<br>(-60.6 to 118.9)                           |
| Maternal abortion, miscarriage, and ectopic pregnancy                   | 0.1<br>(< 0.05 to 0.1)                  | 8.1<br>(6.1 to 10.5)                           | < 0.05<br>(< 0.05 to < 0.05)                  | 7.4<br>(-45.8 to 124.3)                           | 3.9<br>(-47.0 to 116.3)                             |
| Other maternal disorders                                                | --                                      | --                                             | < 0.05<br>(< 0.05 to < 0.05)                  | -7.2<br>(-32.2 to 26.7)                           | -10.0<br>(-33.8 to 23.2)                            |
| <b>Neonatal disorders</b>                                               | <b>10.9</b><br><b>(8.6 to 14.6)</b>     | --                                             | <b>1.4</b><br><b>(1.0 to 1.9)</b>             | <b>8.1</b><br><b>(-10.1 to 28.6)</b>              | <b>5.3</b><br><b>(-12.4 to 26.0)</b>                |
| Neonatal preterm birth complications                                    | 10.1<br>(7.6 to 13.9)                   | --                                             | 1.1<br>(0.7 to 1.6)                           | 9.3<br>(-12.1 to 33.6)                            | 5.9<br>(-14.7 to 29.6)                              |
| Neonatal encephalopathy due to birth asphyxia and trauma                | 0.4<br>(0.2 to 0.8)                     | --                                             | 0.1<br>(< 0.05 to 0.1)                        | -0.1<br>(-36.3 to 100.9)                          | -3.6<br>(-37.5 to 91.7)                             |
| Neonatal sepsis and other neonatal infections                           | 0.3<br>(0.1 to 0.8)                     | --                                             | 0.1<br>(< 0.05 to 0.4)                        | 11.1<br>(-34.9 to 191.9)                          | 8.5<br>(-35.2 to 186.2)                             |
| Hemolytic disease and other neonatal jaundice                           | 0.2<br>(0.1 to 0.2)                     | --                                             | 0.1<br>(< 0.05 to 0.1)                        | 1.6<br>(-8.9 to 14.3)                             | -2.8<br>(-13.1 to 9.2)                              |
| Other neonatal disorders                                                | --                                      | --                                             | < 0.05<br>(< 0.05 to < 0.05)                  | -15.1<br>(-32.2 to 5.8)                           | 3.8<br>(-16.9 to 29.3)                              |
| <b>Nutritional deficiencies</b>                                         | <b>191.1</b><br><b>(182.1 to 199.1)</b> | <b>20.8†</b><br><b>(13.8 to 31.7)</b>          | <b>3.8</b><br><b>(2.5 to 5.6)</b>             | <b>-7.5</b><br><b>(-13.4 to -1.9)</b>             | <b>-12.1</b><br><b>(-17.4 to -6.9)</b>              |
| Protein-energy malnutrition                                             | 3.2<br>(2.3 to 4.3)                     | 1.2<br>(0.9 to 1.7)                            | 0.1<br>(0.1 to 0.2)                           | -17.0<br>(-51.0 to 44.3)                          | 1.4<br>(-39.9 to 75.2)                              |
| Iodine deficiency                                                       | 0.4<br>(0.3 to 0.4)                     | < 0.05<br>(< 0.05 to < 0.05)                   | < 0.05<br>(< 0.05 to < 0.05)                  | 9.3<br>(-2.0 to 21.5)                             | -7.2<br>(-17.1 to 2.9)                              |
| Vitamin A deficiency                                                    | 23.9<br>(15.4 to 36.6)                  | 19.5<br>(12.5 to 30.5)                         | < 0.05<br>(< 0.05 to < 0.05)                  | 2.3<br>(-14.8 to 24.2)                            | -1.4<br>(-17.2 to 19.0)                             |
| Iron-deficiency anaemia                                                 | 172.1<br>(163.5 to 181.4)               | --                                             | 3.7<br>(2.4 to 5.5)                           | -7.3<br>(-13.2 to -1.6)                           | -12.6<br>(-18.2 to -7.4)                            |
| Other nutritional deficiencies                                          | --                                      | --                                             | < 0.05<br>(< 0.05 to < 0.05)                  | -17.1<br>(-51.7 to 47.8)                          | 1.2<br>(-40.9 to 79.2)                              |
| <b>Other communicable, maternal, neonatal, and nutritional diseases</b> | <b>255.1</b><br><b>(239.1 to 269.5)</b> | <b>89.5</b><br><b>(81.7 to 97.6)</b>           | <b>0.5</b><br><b>(0.3 to 0.7)</b>             | <b>4.0</b><br><b>(-1.2 to 9.1)</b>                | <b>-2.4</b><br><b>(-7.2 to 2.3)</b>                 |
| Sexually transmitted diseases excluding HIV                             | 194.6<br>(180.0 to 207.6)               | 73.7<br>(66.5 to 81.1)                         | 0.3<br>(0.2 to 0.5)                           | 5.0<br>(-1.2 to 11.8)                             | -3.1<br>(-8.7 to 2.9)                               |
| Syphilis                                                                | 21.4<br>(16.3 to 27.8)                  | 12.6<br>(9.4 to 16.6)                          | < 0.05<br>(< 0.05 to < 0.05)                  | 17.9<br>(3.9 to 33.4)                             | -3.4<br>(-14.6 to 9.0)                              |
| Chlamydial infection                                                    | 26.1<br>(20.3 to 32.4)                  | 20.5<br>(15.7 to 26.1)                         | 0.1<br>(< 0.05 to 0.1)                        | 1.4<br>(-9.4 to 12.6)                             | -3.5<br>(-13.6 to 6.8)                              |
| Gonococcal infection                                                    | 2.4<br>(2.0 to 2.9)                     | 5.2<br>(4.2 to 6.5)                            | < 0.05<br>(< 0.05 to < 0.05)                  | 2.7<br>(-16.2 to 23.7)                            | -3.0<br>(-21.0 to 15.8)                             |
| Trichomoniasis                                                          | 20.1<br>(17.2 to 23.1)                  | 17.3<br>(14.8 to 20.0)                         | < 0.05<br>(< 0.05 to 0.1)                     | 8.1<br>(0.5 to 16.0)                              | 0.2<br>(-6.4 to 7.0)                                |
| Genital herpes                                                          | 140.7<br>(121.3 to 162.2)               | 9.4<br>(8.0 to 11.2)                           | < 0.05<br>(< 0.05 to 0.1)                     | 13.1<br>(4.0 to 22.6)                             | -0.0<br>(-7.4 to 8.0)                               |
| Other sexually transmitted diseases                                     | 8.1<br>(6.9 to 9.0)                     | 8.6<br>(7.3 to 10.1)                           | 0.1<br>(0.1 to 0.2)                           | 2.6<br>(-7.2 to 13.7)                             | -4.3<br>(-13.7 to 6.0)                              |
| Hepatitis                                                               | 76.4<br>(65.2 to 90.4)                  | 15.8<br>(13.2 to 18.3)                         | < 0.05<br>(< 0.05 to < 0.05)                  | 18.4<br>(-5.1 to 49.1)                            | 7.8<br>(-12.4 to 33.8)                              |
| Acute hepatitis A                                                       | 0.5<br>(0.3 to 0.6)                     | 6.4<br>(4.4 to 7.7)                            | < 0.05<br>(< 0.05 to < 0.05)                  | 22.7<br>(-17.2 to 82.3)                           | 14.9<br>(-21.5 to 67.0)                             |
| Hepatitis B                                                             | 55.8<br>(45.0 to 69.0)                  | 8.2<br>(6.3 to 10.5)                           | < 0.05<br>(< 0.05 to < 0.05)                  | 16.1<br>(-13.6 to 55.9)                           | 3.4<br>(-22.3 to 37.9)                              |
| Hepatitis C                                                             | 20.1<br>(17.8 to 22.6)                  | 0.6<br>(0.5 to 0.6)                            | < 0.05<br>(< 0.05 to < 0.05)                  | -1.1<br>(-17.7 to 16.7)                           | 3.6<br>(-15.7 to 25.5)                              |
| Acute hepatitis E                                                       | < 0.05<br>(< 0.05 to 0.1)               | 0.6<br>(0.5 to 0.7)                            | < 0.05<br>(< 0.05 to < 0.05)                  | 23.9<br>(12.4 to 37.7)                            | 12.6<br>(3.6 to 24.2)                               |
| Other infectious diseases                                               | 5.7<br>(5.3 to 6.1)                     | < 0.05<br>(< 0.05 to < 0.05)                   | 0.1<br>(0.1 to 0.2)                           | -0.0<br>(-9.8 to 11.0)                            | -2.4<br>(-11.9 to 8.0)                              |
| <b>Non-communicable diseases</b>                                        | <b>771.3</b><br><b>(766.3 to 776.4)</b> | <b>2,120.2†</b><br><b>(2,010.8 to 2,237.7)</b> | <b>79.6</b><br><b>(58.5 to 103.3)</b>         | <b>15.8</b><br><b>(13.3 to 18.2)</b>              | <b>-0.5</b><br><b>(-2.3 to 1.3)</b>                 |
| <b>Neoplasms</b>                                                        | <b>4.9</b><br><b>(4.6 to 5.2)</b>       | <b>1.6</b><br><b>(1.2 to 1.7)</b>              | <b>0.6</b><br><b>(0.4 to 0.7)</b>             | <b>50.8</b><br><b>(40.3 to 61.2)</b>              | <b>19.3</b><br><b>(10.8 to 26.4)</b>                |
| Lip and oral cavity cancer                                              | 0.2<br>(0.1 to 0.2)                     | < 0.05<br>(< 0.05 to < 0.05)                   | < 0.05<br>(< 0.05 to < 0.05)                  | 46.2<br>(27.4 to 66.6)                            | 12.0<br>(-3.0 to 27.4)                              |
| Nasopharynx cancer                                                      | < 0.05<br>(< 0.05 to < 0.05)            | < 0.05<br>(< 0.05 to < 0.05)                   | < 0.05<br>(< 0.05 to < 0.05)                  | 44.6<br>(23.9 to 68.8)                            | 19.4<br>(3.3 to 37.5)                               |
| Other pharynx cancer                                                    | < 0.05<br>(< 0.05 to < 0.05)            | < 0.05<br>(< 0.05 to < 0.05)                   | < 0.05<br>(< 0.05 to < 0.05)                  | 64.0<br>(42.0 to 88.1)                            | 24.6<br>(9.1 to 41.6)                               |
| Oesophageal cancer                                                      | < 0.05<br>(< 0.05 to < 0.05)            | < 0.05<br>(< 0.05 to < 0.05)                   | < 0.05<br>(< 0.05 to < 0.05)                  | 46.3<br>(30.9 to 63.8)                            | 8.2<br>(-3.8 to 22.7)                               |
| Stomach cancer                                                          | 0.1<br>(0.1 to 0.1)                     | < 0.05<br>(< 0.05 to < 0.05)                   | < 0.05<br>(< 0.05 to < 0.05)                  | 34.4<br>(20.6 to 48.6)                            | 0.1<br>(-12.3 to 12.4)                              |
| Colon and rectum cancer                                                 | 0.4<br>(0.3 to 0.4)                     | 0.1<br>(0.1 to 0.1)                            | < 0.05<br>(< 0.05 to 0.1)                     | 71.4<br>(46.2 to 99.2)                            | 27.4<br>(9.1 to 47.4)                               |
| Liver cancer                                                            | < 0.05<br>(< 0.05 to < 0.05)            | 0.1<br>(0.1 to 0.1)                            | < 0.05<br>(< 0.05 to < 0.05)                  | 68.9<br>(47.0 to 90.5)                            | 26.5<br>(11.7 to 41.2)                              |
| Liver cancer due to hepatitis B                                         | < 0.05<br>(< 0.05 to < 0.05)            | < 0.05<br>(< 0.05 to < 0.05)                   | < 0.05<br>(< 0.05 to < 0.05)                  | 66.2<br>(45.5 to 88.0)                            | 26.9<br>(11.8 to 42.4)                              |

| Cause                                              | Prevalence in thousands (95% UI)      | Incidence in thousands (95% UI)       | YLDs in thousands (95% UI)        |                                                   |                                                     |
|----------------------------------------------------|---------------------------------------|---------------------------------------|-----------------------------------|---------------------------------------------------|-----------------------------------------------------|
|                                                    | 2016 counts                           | 2016 counts                           | 2016 counts                       | Percentage change in counts between 2006 and 2016 | Percentage change in age-standardised rates between |
| Liver cancer due to hepatitis C                    | < 0.05<br>(< 0.05 to < 0.05)          | < 0.05<br>(< 0.05 to < 0.05)          | < 0.05<br>(< 0.05 to < 0.05)      | 77.6<br>(53.8 to 101.6)                           | 26.3<br>(10.3 to 42.9)                              |
| Liver cancer due to alcohol use                    | < 0.05<br>(< 0.05 to < 0.05)          | < 0.05<br>(< 0.05 to < 0.05)          | < 0.05<br>(< 0.05 to < 0.05)      | 80.5<br>(53.8 to 105.7)                           | 32.4<br>(14.3 to 50.4)                              |
| Liver cancer due to other causes                   | < 0.05<br>(< 0.05 to < 0.05)          | < 0.05<br>(< 0.05 to < 0.05)          | < 0.05<br>(< 0.05 to < 0.05)      | 64.9<br>(42.6 to 88.0)                            | 23.8<br>(8.0 to 40.6)                               |
| Gallbladder and biliary tract cancer               | < 0.05<br>(< 0.05 to < 0.05)          | < 0.05<br>(< 0.05 to < 0.05)          | < 0.05<br>(< 0.05 to < 0.05)      | 45.9<br>(31.5 to 60.9)                            | 6.4<br>(-3.6 to 16.2)                               |
| Pancreatic cancer                                  | < 0.05<br>(< 0.05 to < 0.05)          | < 0.05<br>(< 0.05 to < 0.05)          | < 0.05<br>(< 0.05 to < 0.05)      | 38.5<br>(26.7 to 50.8)                            | 0.5<br>(-9.0 to 10.9)                               |
| Larynx cancer                                      | < 0.05<br>(< 0.05 to < 0.05)          | < 0.05<br>(< 0.05 to < 0.05)          | < 0.05<br>(< 0.05 to < 0.05)      | 59.1<br>(39.3 to 81.2)                            | 16.1<br>(1.4 to 34.7)                               |
| Tracheal, bronchus, and lung cancer                | 0.1<br>(< 0.05 to 0.1)                | 0.1<br>(< 0.05 to 0.1)                | < 0.05<br>(< 0.05 to < 0.05)      | 32.2<br>(7.0 to 59.3)                             | -2.8<br>(-21.3 to 17.8)                             |
| Malignant skin melanoma                            | < 0.05<br>(< 0.05 to < 0.05)          | < 0.05<br>(< 0.05 to < 0.05)          | < 0.05<br>(< 0.05 to < 0.05)      | 35.8<br>(15.3 to 57.3)                            | 6.4<br>(-8.4 to 22.4)                               |
| Non-melanoma skin cancer                           | < 0.05<br>(< 0.05 to < 0.05)          | < 0.05<br>(< 0.05 to < 0.05)          | < 0.05<br>(< 0.05 to < 0.05)      | -22.0<br>(-76.6 to 67.6)                          | -52.6<br>(-86.6 to 10.3)                            |
| Non-melanoma skin cancer (squamous-cell carcinoma) | < 0.05<br>(< 0.05 to < 0.05)          | < 0.05<br>(< 0.05 to < 0.05)          | < 0.05<br>(< 0.05 to < 0.05)      | -22.2<br>(-76.8 to 68.8)                          | -52.7<br>(-86.7 to 10.3)                            |
| Non-melanoma skin cancer (basal-cell carcinoma)    | < 0.05<br>(< 0.05 to < 0.05)          | < 0.05<br>(< 0.05 to < 0.05)          | < 0.05<br>(< 0.05 to < 0.05)      | 14.2<br>(-0.7 to 29.9)                            | -1.1<br>(-12.6 to 12.3)                             |
| Breast cancer                                      | 1.6<br>(0.9 to 1.9)                   | 0.4<br>(0.2 to 0.4)                   | 0.1<br>(0.1 to 0.2)               | 58.0<br>(27.7 to 87.1)                            | 29.6<br>(5.9 to 51.9)                               |
| Cervical cancer                                    | 1.0<br>(0.5 to 1.2)                   | 0.2<br>(0.1 to 0.3)                   | 0.1<br>(< 0.05 to 0.1)            | 22.5<br>(-2.9 to 52.6)                            | 3.7<br>(-16.1 to 27.5)                              |
| Uterine cancer                                     | 0.4<br>(0.3 to 0.4)                   | 0.1<br>(0.1 to 0.1)                   | < 0.05<br>(< 0.05 to < 0.05)      | 77.0<br>(37.4 to 123.4)                           | 36.1<br>(7.2 to 69.8)                               |
| Ovarian cancer                                     | 0.1<br>(0.1 to 0.1)                   | < 0.05<br>(< 0.05 to < 0.05)          | < 0.05<br>(< 0.05 to < 0.05)      | 27.9<br>(3.0 to 59.7)                             | 6.2<br>(-15.7 to 34.7)                              |
| Prostate cancer                                    | 0.5<br>(0.2 to 0.6)                   | 0.1<br>(0.1 to 0.2)                   | 0.1<br>(< 0.05 to 0.1)            | 84.6<br>(46.8 to 122.2)                           | 22.8<br>(-1.3 to 47.0)                              |
| Testicular cancer                                  | 0.1<br>(0.1 to 0.1)                   | < 0.05<br>(< 0.05 to < 0.05)          | < 0.05<br>(< 0.05 to < 0.05)      | 113.0<br>(53.2 to 186.9)                          | 85.9<br>(37.4 to 141.5)                             |
| Kidney cancer                                      | 0.1<br>(0.1 to 0.1)                   | < 0.05<br>(< 0.05 to < 0.05)          | < 0.05<br>(< 0.05 to < 0.05)      | 31.1<br>(12.5 to 53.4)                            | 7.9<br>(-6.8 to 24.9)                               |
| Bladder cancer                                     | 0.1<br>(0.1 to 0.1)                   | < 0.05<br>(< 0.05 to < 0.05)          | < 0.05<br>(< 0.05 to < 0.05)      | 72.1<br>(49.1 to 97.2)                            | 24.4<br>(8.6 to 41.5)                               |
| Brain and nervous system cancer                    | < 0.05<br>(< 0.05 to < 0.05)          | < 0.05<br>(< 0.05 to < 0.05)          | < 0.05<br>(< 0.05 to < 0.05)      | 33.9<br>(17.5 to 57.4)                            | 14.4<br>(0.9 to 35.0)                               |
| Thyroid cancer                                     | 0.3<br>(0.1 to 0.3)                   | 0.1<br>(< 0.05 to 0.1)                | < 0.05<br>(< 0.05 to < 0.05)      | 85.7<br>(52.6 to 125.7)                           | 46.3<br>(22.0 to 73.1)                              |
| Mesothelioma                                       | < 0.05<br>(< 0.05 to < 0.05)          | < 0.05<br>(< 0.05 to < 0.05)          | < 0.05<br>(< 0.05 to < 0.05)      | 61.0<br>(29.7 to 85.4)                            | 23.5<br>(-0.7 to 43.3)                              |
| Hodgkin lymphoma                                   | < 0.05<br>(< 0.05 to 0.1)             | < 0.05<br>(< 0.05 to < 0.05)          | < 0.05<br>(< 0.05 to < 0.05)      | 53.4<br>(16.4 to 108.5)                           | 31.0<br>(3.8 to 73.2)                               |
| Non-Hodgkin's lymphoma                             | 0.1<br>(0.1 to 0.1)                   | < 0.05<br>(< 0.05 to < 0.05)          | < 0.05<br>(< 0.05 to < 0.05)      | 55.8<br>(34.4 to 76.1)                            | 25.5<br>(7.5 to 42.6)                               |
| Multiple myeloma                                   | < 0.05<br>(< 0.05 to < 0.05)          | < 0.05<br>(< 0.05 to < 0.05)          | < 0.05<br>(< 0.05 to < 0.05)      | 65.4<br>(43.4 to 85.1)                            | 21.6<br>(5.2 to 36.3)                               |
| Leukaemia                                          | 0.2<br>(0.1 to 0.2)                   | 0.1<br>(0.1 to 0.1)                   | < 0.05<br>(< 0.05 to < 0.05)      | 20.0<br>(6.8 to 34.0)                             | 5.3<br>(-6.1 to 18.4)                               |
| Acute lymphoid leukaemia                           | < 0.05<br>(< 0.05 to < 0.05)          | < 0.05<br>(< 0.05 to < 0.05)          | < 0.05<br>(< 0.05 to < 0.05)      | 6.4<br>(-20.2 to 39.6)                            | 5.7<br>(-21.4 to 44.0)                              |
| Chronic lymphoid leukaemia                         | < 0.05<br>(< 0.05 to < 0.05)          | < 0.05<br>(< 0.05 to < 0.05)          | < 0.05<br>(< 0.05 to < 0.05)      | 49.9<br>(14.5 to 97.8)                            | 7.5<br>(-18.3 to 44.0)                              |
| Acute myeloid leukaemia                            | 0.1<br>(< 0.05 to 0.1)                | < 0.05<br>(< 0.05 to < 0.05)          | < 0.05<br>(< 0.05 to < 0.05)      | 20.5<br>(4.2 to 37.7)                             | 9.7<br>(-5.0 to 27.4)                               |
| Chronic myeloid leukaemia                          | < 0.05<br>(< 0.05 to < 0.05)          | < 0.05<br>(< 0.05 to < 0.05)          | < 0.05<br>(< 0.05 to < 0.05)      | 12.4<br>(-5.5 to 31.3)                            | -10.6<br>(-23.5 to 3.9)                             |
| Other leukaemia                                    | 0.1<br>(< 0.05 to 0.1)                | < 0.05<br>(< 0.05 to < 0.05)          | < 0.05<br>(< 0.05 to < 0.05)      | 23.8<br>(7.5 to 44.5)                             | 4.9<br>(-9.5 to 23.5)                               |
| Other neoplasms                                    | 0.2<br>(0.2 to 0.3)                   | 0.1<br>(0.1 to 0.1)                   | < 0.05<br>(< 0.05 to < 0.05)      | 50.0<br>(30.3 to 70.4)                            | 24.9<br>(8.1 to 43.8)                               |
| <b>Cardiovascular diseases</b>                     | <b>50.9</b><br><b>(49.0 to 53.0)</b>  | <b>5.0†</b><br><b>(4.8 to 5.3)</b>    | <b>3.5</b><br><b>(2.6 to 4.6)</b> | <b>22.0</b><br><b>(17.0 to 27.6)</b>              | <b>-3.8</b><br><b>(-7.3 to -0.3)</b>                |
| Rheumatic heart disease                            | 8.8<br>(7.9 to 9.8)                   | 0.2<br>(0.2 to 0.3)                   | 0.4<br>(0.3 to 0.6)               | -16.0<br>(-23.4 to -7.8)                          | -23.4<br>(-29.9 to -16.0)                           |
| Ischaemic heart disease                            | 13.5<br>(12.7 to 14.2)                | 1.6<br>(1.5 to 1.8)                   | 0.6<br>(0.4 to 0.8)               | 27.2<br>(20.6 to 34.0)                            | -2.8<br>(-7.2 to 1.7)                               |
| Cerebrovascular disease                            | 7.7<br>(7.3 to 8.2)                   | 1.2‡<br>(1.1 to 1.3)                  | 1.5<br>(1.1 to 1.9)               | 31.6<br>(22.5 to 41.5)                            | -1.7<br>(-8.2 to 5.3)                               |
| Ischaemic stroke                                   | 6.5<br>(5.8 to 7.1)                   | 0.8‡<br>(0.7 to 0.8)                  | 1.2<br>(0.9 to 1.6)               | 33.6<br>(22.9 to 45.1)                            | -1.3<br>(-9.1 to 7.0)                               |
| Hemorrhagic stroke                                 | 1.6<br>(1.4 to 1.8)                   | 0.4‡<br>(0.4 to 0.5)                  | 0.3<br>(0.2 to 0.4)               | 24.1<br>(11.3 to 38.5)                            | -3.0<br>(-11.9 to 7.1)                              |
| Hypertensive heart disease                         | 1.6<br>(1.3 to 1.8)                   | --                                    | 0.1<br>(0.1 to 0.2)               | 37.5<br>(23.9 to 52.3)                            | 1.3<br>(-6.9 to 10.9)                               |
| Cardiomyopathy and myocarditis                     | 0.4<br>(0.4 to 0.5)                   | 0.2†<br>(0.2 to 0.3)                  | < 0.05<br>(< 0.05 to 0.1)         | 18.0<br>(5.5 to 31.6)                             | -0.1<br>(-9.8 to 10.7)                              |
| Myocarditis                                        | 0.3<br>(0.3 to 0.4)                   | 0.2<br>(0.2 to 0.3)                   | < 0.05<br>(< 0.05 to < 0.05)      | 16.5<br>(0.6 to 37.7)                             | -0.1<br>(-13.1 to 17.0)                             |
| Alcoholic cardiomyopathy                           | < 0.05<br>(< 0.05 to < 0.05)          | --                                    | < 0.05<br>(< 0.05 to < 0.05)      | 32.2<br>(21.2 to 44.3)                            | -0.0<br>(-9.1 to 9.3)                               |
| Other cardiomyopathy                               | 0.2<br>(0.2 to 0.3)                   | --                                    | < 0.05<br>(< 0.05 to < 0.05)      | 19.0<br>(1.7 to 38.2)                             | -0.1<br>(-12.2 to 13.7)                             |
| Atrial fibrillation and flutter                    | 3.4<br>(2.9 to 3.9)                   | 0.3<br>(0.3 to 0.4)                   | 0.3<br>(0.2 to 0.4)               | 41.4<br>(30.5 to 53.0)                            | -0.3<br>(-6.8 to 6.5)                               |
| Peripheral vascular disease                        | 11.3<br>(9.8 to 13.2)                 | 1.1<br>(0.9 to 1.3)                   | 0.1<br>(< 0.05 to 0.1)            | 48.2<br>(35.5 to 60.2)                            | -1.4<br>(-8.9 to 6.0)                               |
| Endocarditis                                       | 0.1<br>(0.1 to 0.1)                   | 0.4<br>(0.3 to 0.4)                   | < 0.05<br>(< 0.05 to < 0.05)      | 26.3<br>(14.7 to 38.9)                            | 0.1<br>(-12.1 to 12.8)                              |
| Other cardiovascular and circulatory diseases      | 9.5<br>(8.1 to 11.0)                  | --                                    | 0.5<br>(0.3 to 0.7)               | 20.6<br>(10.7 to 31.2)                            | 0.5<br>(-6.7 to 8.1)                                |
| <b>Chronic respiratory diseases</b>                | <b>99.3</b><br><b>(95.3 to 103.2)</b> | <b>20.7†</b><br><b>(19.4 to 22.0)</b> | <b>5.0</b><br><b>(3.9 to 6.4)</b> | <b>35.2</b><br><b>(30.1 to 40.3)</b>              | <b>15.2</b><br><b>(10.9 to 19.3)</b>                |
| Chronic obstructive pulmonary disease              | 23.4<br>(22.4 to 24.4)                | 1.6<br>(1.6 to 1.7)                   | 1.7<br>(1.5 to 1.9)               | 32.5<br>(24.4 to 42.0)                            | 4.8<br>(-1.7 to 12.1)                               |
| Pneumoconiosis                                     | 0.1<br>(0.1 to 0.1)                   | < 0.05<br>(< 0.05 to < 0.05)          | < 0.05<br>(< 0.05 to < 0.05)      | 32.5<br>(10.8 to 57.0)                            | -4.3<br>(-19.9 to 15.4)                             |
| Silicosis                                          | 0.1<br>(< 0.05 to 0.1)                | < 0.05<br>(< 0.05 to < 0.05)          | < 0.05<br>(< 0.05 to < 0.05)      | 30.9<br>(-3.9 to 73.3)                            | -5.3<br>(-29.6 to 25.6)                             |



| Cause                                                          | Prevalence in thousands (95% UI)        | Incidence in thousands (95% UI)        | YLDs in thousands (95% UI)           |                                                   |                                                     |
|----------------------------------------------------------------|-----------------------------------------|----------------------------------------|--------------------------------------|---------------------------------------------------|-----------------------------------------------------|
|                                                                | 2016 counts                             | 2016 counts                            | 2016 counts                          | Percentage change in counts between 2006 and 2016 | Percentage change in age-standardised rates between |
| Asbestosis                                                     | < 0.05<br>(< 0.05 to < 0.05)            | < 0.05<br>(< 0.05 to < 0.05)           | < 0.05<br>(< 0.05 to < 0.05)         | 36.7<br>(28.3 to 47.4)                            | -0.6<br>(-6.4 to 7.3)                               |
| Coal workers pneumoconiosis                                    | --                                      | --                                     | --                                   | --                                                | --                                                  |
| Other pneumoconiosis                                           | < 0.05<br>(< 0.05 to < 0.05)            | < 0.05<br>(< 0.05 to < 0.05)           | < 0.05<br>(< 0.05 to < 0.05)         | 33.6<br>(10.8 to 65.3)                            | -4.3<br>(-25.1 to 22.9)                             |
| Asthma                                                         | 80.3<br>(75.5 to 85.5)                  | 19.0<br>(17.7 to 20.4)                 | 3.1<br>(2.0 to 4.4)                  | 36.2<br>(29.8 to 42.7)                            | 22.8<br>(17.1 to 28.5)                              |
| Interstitial lung disease and pulmonary sarcoidosis            | 0.7<br>(0.6 to 0.8)                     | 0.1<br>(0.1 to 0.1)                    | 0.1<br>(< 0.05 to 0.1)               | 34.4<br>(17.7 to 53.3)                            | 1.1<br>(-9.9 to 13.7)                               |
| Other chronic respiratory diseases                             | --                                      | --                                     | 0.1<br>(0.1 to 0.1)                  | 49.3<br>(27.3 to 75.7)                            | 39.1<br>(20.0 to 61.3)                              |
| <b>Cirrhosis and other chronic liver diseases</b>              | <b>3.4</b><br><b>(3.2 to 3.6)</b>       | <b>0.2</b><br><b>(0.2 to 0.2)</b>      | <b>0.1</b><br><b>(0.1 to 0.2)</b>    | <b>23.7</b><br><b>(9.4 to 39.1)</b>               | <b>10.8</b><br><b>(-0.6 to 23.1)</b>                |
| Cirrhosis and other chronic liver diseases due to hepatitis B  | 1.1<br>(1.0 to 1.2)                     | 0.1<br>(0.1 to 0.1)                    | < 0.05<br>(< 0.05 to 0.1)            | 35.0<br>(9.0 to 70.4)                             | 12.3<br>(-7.4 to 37.6)                              |
| Cirrhosis and other chronic liver diseases due to hepatitis C  | 0.5<br>(0.5 to 0.6)                     | < 0.05<br>(< 0.05 to < 0.05)           | < 0.05<br>(< 0.05 to < 0.05)         | 32.7<br>(-0.2 to 70.4)                            | 11.4<br>(-14.8 to 41.6)                             |
| Cirrhosis and other chronic liver diseases due to alcohol use  | 0.5<br>(0.4 to 0.5)                     | < 0.05<br>(< 0.05 to < 0.05)           | < 0.05<br>(< 0.05 to < 0.05)         | 39.1<br>(5.0 to 87.0)                             | 13.7<br>(-13.2 to 47.8)                             |
| Cirrhosis and other chronic liver diseases due to other causes | 1.3<br>(1.2 to 1.4)                     | 0.1<br>(< 0.05 to 0.1)                 | 0.1<br>(0.1 to 0.1)                  | 15.4<br>(-3.5 to 36.5)                            | 9.5<br>(-7.7 to 28.2)                               |
| <b>Digestive diseases</b>                                      | <b>13.9</b><br><b>(13.2 to 14.7)</b>    | <b>18.1†</b><br><b>(17.1 to 19.3)</b>  | <b>0.4</b><br><b>(0.3 to 0.6)</b>    | <b>24.4</b><br><b>(16.5 to 32.8)</b>              | <b>4.1</b><br><b>(-1.5 to 10.4)</b>                 |
| Peptic ulcer disease                                           | 4.4<br>(4.0 to 4.8)                     | 1.5<br>(1.4 to 1.7)                    | 0.1<br>(0.1 to 0.1)                  | 27.2<br>(14.7 to 39.8)                            | 4.2<br>(-5.1 to 13.9)                               |
| Gastritis and duodenitis                                       | 6.5<br>(5.6 to 7.4)                     | 6.2<br>(5.5 to 7.0)                    | 0.1<br>(0.1 to 0.1)                  | 27.4<br>(16.1 to 39.9)                            | 4.5<br>(-3.9 to 13.6)                               |
| Appendicitis                                                   | 0.1<br>(0.1 to 0.1)                     | 3.5<br>(3.3 to 3.7)                    | < 0.05<br>(< 0.05 to 0.1)            | 11.0<br>(-15.3 to 46.0)                           | 1.0<br>(-21.5 to 30.2)                              |
| Paralytic ileus and intestinal obstruction                     | < 0.05<br>(< 0.05 to < 0.05)            | 0.3<br>(0.2 to 0.3)                    | < 0.05<br>(< 0.05 to < 0.05)         | 16.6<br>(12.4 to 21.1)                            | -0.8<br>(-4.3 to 3.0)                               |
| Inguinal, femoral, and abdominal hernia                        | 1.9<br>(1.7 to 2.2)                     | 2.0<br>(1.7 to 2.2)                    | 0.1<br>(0.1 to 0.1)                  | 27.5<br>(11.2 to 47.0)                            | 5.9<br>(-6.5 to 19.7)                               |
| Inflammatory bowel disease                                     | 0.1<br>(0.1 to 0.1)                     | 0.7<br>(0.6 to 0.8)                    | < 0.05<br>(< 0.05 to < 0.05)         | 1.2<br>(-13.2 to 17.4)                            | -13.6<br>(-26.5 to 0.1)                             |
| Vascular intestinal disorders                                  | < 0.05<br>(< 0.05 to < 0.05)            | < 0.05<br>(< 0.05 to < 0.05)           | < 0.05<br>(< 0.05 to < 0.05)         | 17.6<br>(11.8 to 23.6)                            | 3.0<br>(-1.0 to 7.0)                                |
| Gallbladder and biliary diseases                               | 1.3<br>(1.2 to 1.5)                     | 3.8<br>(3.3 to 4.4)                    | < 0.05<br>(< 0.05 to < 0.05)         | 23.3<br>(-0.8 to 54.2)                            | 5.4<br>(-14.0 to 30.7)                              |
| Pancreatitis                                                   | < 0.05<br>(< 0.05 to < 0.05)            | 0.2<br>(0.1 to 0.2)                    | < 0.05<br>(< 0.05 to < 0.05)         | 18.7<br>(13.9 to 23.4)                            | 0.3<br>(-3.6 to 3.6)                                |
| Other digestive diseases                                       | --                                      | --                                     | < 0.05<br>(< 0.05 to < 0.05)         | 31.0<br>(22.6 to 40.1)                            | 8.6<br>(2.2 to 15.4)                                |
| <b>Neurological disorders</b>                                  | <b>260.8</b><br><b>(249.5 to 273.5)</b> | <b>115.7</b><br><b>(98.5 to 134.0)</b> | <b>6.6</b><br><b>(4.4 to 9.0)</b>    | <b>11.8</b><br><b>(-11.2 to 37.4)</b>             | <b>0.5</b><br><b>(-18.9 to 21.2)</b>                |
| Alzheimer's disease and other dementias                        | 3.2<br>(2.7 to 3.8)                     | 0.5<br>(0.5 to 0.7)                    | 0.4<br>(0.3 to 0.6)                  | 53.0<br>(45.1 to 61.8)                            | 0.0<br>(-4.2 to 4.4)                                |
| Parkinson's disease                                            | 0.4<br>(0.3 to 0.5)                     | < 0.05<br>(< 0.05 to 0.1)              | < 0.05<br>(< 0.05 to 0.1)            | 50.1<br>(28.2 to 75.9)                            | 4.4<br>(-8.4 to 19.2)                               |
| Epilepsy                                                       | 3.0<br>(1.1 to 4.6)                     | 0.3<br>(0.1 to 0.5)                    | 1.2<br>(0.4 to 2.1)                  | 7.5<br>(-70.1 to 267.6)                           | -0.2<br>(-72.5 to 239.4)                            |
| Multiple sclerosis                                             | < 0.05<br>(< 0.05 to < 0.05)            | < 0.05<br>(< 0.05 to < 0.05)           | < 0.05<br>(< 0.05 to < 0.05)         | 24.6<br>(19.9 to 29.5)                            | 10.6<br>(6.6 to 14.7)                               |
| Motor neuron disease                                           | < 0.05<br>(< 0.05 to < 0.05)            | < 0.05<br>(< 0.05 to < 0.05)           | < 0.05<br>(< 0.05 to < 0.05)         | 16.9<br>(12.5 to 21.8)                            | 3.8<br>(0.4 to 7.4)                                 |
| Migraine                                                       | 97.0<br>(91.5 to 102.8)                 | 10.8<br>(10.2 to 11.5)                 | 4.0<br>(2.6 to 5.6)                  | 9.1<br>(5.0 to 13.8)                              | -0.3<br>(-3.9 to 4.0)                               |
| Tension-type headache                                          | 189.8<br>(167.5 to 214.8)               | 104.0<br>(86.5 to 122.2)               | 0.6<br>(0.4 to 0.9)                  | 9.8<br>(3.6 to 16.3)                              | -0.4<br>(-5.7 to 5.1)                               |
| Other neurological disorders                                   | < 0.05<br>(< 0.05 to < 0.05)            | < 0.05<br>(< 0.05 to < 0.05)           | 0.3<br>(0.1 to 0.5)                  | 27.0<br>(-59.9 to 275.4)                          | 20.2<br>(-60.5 to 234.3)                            |
| <b>Mental and substance use disorders</b>                      | <b>114.2</b><br><b>(109.9 to 118.3)</b> | <b>38.3†</b><br><b>(35.7 to 41.1)</b>  | <b>14.9</b><br><b>(10.9 to 19.3)</b> | <b>10.1</b><br><b>(7.7 to 12.7)</b>               | <b>0.1</b><br><b>(-2.1 to 2.2)</b>                  |
| Schizophrenia                                                  | 2.7<br>(2.4 to 3.1)                     | 0.2<br>(0.1 to 0.2)                    | 1.7<br>(1.3 to 2.2)                  | 11.5<br>(2.7 to 21.4)                             | 0.0<br>(-7.9 to 8.5)                                |
| Alcohol use disorders                                          | 7.2<br>(6.2 to 8.4)                     | 4.0<br>(3.4 to 4.6)                    | 0.7<br>(0.5 to 1.0)                  | 12.0<br>(2.8 to 22.6)                             | 3.0<br>(-5.4 to 11.9)                               |
| Drug use disorders                                             | 6.4<br>(5.7 to 7.0)                     | 0.9<br>(0.8 to 1.1)                    | 1.0<br>(0.7 to 1.3)                  | 10.5<br>(0.0 to 21.4)                             | 1.9<br>(-7.7 to 11.7)                               |
| Opioid use disorders                                           | 1.6<br>(1.3 to 2.0)                     | 0.2<br>(0.2 to 0.2)                    | 0.7<br>(0.5 to 0.9)                  | 12.3<br>(-1.9 to 26.8)                            | 1.4<br>(-11.0 to 13.8)                              |
| Cocaine use disorders                                          | 0.1<br>(0.1 to 0.2)                     | < 0.05<br>(< 0.05 to < 0.05)           | < 0.05<br>(< 0.05 to < 0.05)         | 12.2<br>(5.6 to 19.3)                             | 1.5<br>(-4.0 to 7.7)                                |
| Amphetamine use disorders                                      | 0.6<br>(0.4 to 0.9)                     | 0.1<br>(< 0.05 to 0.1)                 | 0.1<br>(< 0.05 to 0.1)               | 7.4<br>(-20.2 to 43.9)                            | 5.7<br>(-21.1 to 41.0)                              |
| Cannabis use disorders                                         | 3.8<br>(3.1 to 4.7)                     | 0.6<br>(0.5 to 0.7)                    | 0.1<br>(0.1 to 0.2)                  | 2.8<br>(-10.7 to 17.6)                            | 0.1<br>(-12.7 to 13.7)                              |
| Other drug use disorders                                       | 0.3<br>(0.3 to 0.4)                     | 0.1<br>(0.1 to 0.1)                    | 0.1<br>(0.1 to 0.1)                  | 10.7<br>(-12.3 to 39.6)                           | 4.6<br>(-16.5 to 31.3)                              |
| Depressive disorders                                           | 28.0<br>(26.2 to 30.0)                  | 24.2<br>(21.8 to 26.8)                 | 4.3<br>(3.0 to 5.8)                  | 11.9<br>(6.8 to 17.3)                             | -0.7<br>(-4.8 to 3.6)                               |
| Major depressive disorder                                      | 14.6<br>(13.2 to 16.4)                  | 22.0<br>(19.6 to 24.6)                 | 3.0<br>(2.0 to 4.1)                  | 9.5<br>(2.6 to 16.7)                              | -1.2<br>(-6.9 to 4.8)                               |
| Dysthymia                                                      | 13.8<br>(12.0 to 15.8)                  | 2.1<br>(1.9 to 2.4)                    | 1.3<br>(0.9 to 1.9)                  | 17.8<br>(13.3 to 22.6)                            | 0.4<br>(-2.4 to 3.6)                                |
| Bipolar disorder                                               | 3.9<br>(3.4 to 4.5)                     | 0.4<br>(0.3 to 0.4)                    | 0.8<br>(0.5 to 1.2)                  | 10.0<br>(2.4 to 19.0)                             | 0.1<br>(-6.6 to 8.1)                                |
| Anxiety disorders                                              | 29.7<br>(26.9 to 32.5)                  | 4.9<br>(4.5 to 5.3)                    | 2.8<br>(2.0 to 3.9)                  | 10.3<br>(3.5 to 18.0)                             | 0.4<br>(-5.4 to 6.7)                                |
| Eating disorders                                               | 0.9<br>(0.7 to 1.1)                     | 0.6<br>(0.4 to 0.8)                    | 0.2<br>(0.1 to 0.3)                  | 8.7<br>(-5.9 to 25.1)                             | 4.3<br>(-9.5 to 20.7)                               |
| Anorexia nervosa                                               | 0.3<br>(0.2 to 0.4)                     | 0.1<br>(0.1 to 0.2)                    | 0.1<br>(< 0.05 to 0.1)               | 6.1<br>(-17.1 to 36.0)                            | 4.1<br>(-18.9 to 32.2)                              |
| Bulimia nervosa                                                | 0.6<br>(0.5 to 0.8)                     | 0.5<br>(0.3 to 0.6)                    | 0.1<br>(0.1 to 0.2)                  | 9.9<br>(-6.8 to 30.3)                             | 4.4<br>(-11.2 to 24.4)                              |
| Autistic spectrum disorders                                    | 7.0<br>(6.3 to 7.9)                     | < 0.05<br>(< 0.05 to 0.1)              | 1.0<br>(0.7 to 1.4)                  | 6.4<br>(1.3 to 11.7)                              | 0.1<br>(-4.8 to 4.8)                                |
| Autism                                                         | 2.0<br>(1.7 to 2.3)                     | < 0.05<br>(< 0.05 to < 0.05)           | 0.5<br>(0.3 to 0.7)                  | 6.4<br>(-2.6 to 15.8)                             | 0.1<br>(-8.0 to 8.9)                                |
| Asperger syndrome and other autistic spectrum disorders        | 5.1<br>(4.2 to 6.1)                     | < 0.05<br>(< 0.05 to 0.1)              | 0.5<br>(0.3 to 0.7)                  | 6.5<br>(1.2 to 11.9)                              | 0.0<br>(-4.8 to 4.7)                                |

| Cause                                                      | Prevalence in thousands (95% UI)        | Incidence in thousands (95% UI)                | YLDs in thousands (95% UI)           |                                                   |                                                     |
|------------------------------------------------------------|-----------------------------------------|------------------------------------------------|--------------------------------------|---------------------------------------------------|-----------------------------------------------------|
|                                                            | 2016 counts                             | 2016 counts                                    | 2016 counts                          | Percentage change in counts between 2006 and 2016 | Percentage change in age-standardised rates between |
| Attention-deficit/hyperactivity disorder                   | 7.1<br>(6.4 to 8.0)                     | 0.3<br>(0.3 to 0.4)                            | 0.1<br>(0.1 to 0.1)                  | 4.1<br>(-3.9 to 12.9)                             | -0.1<br>(-7.5 to 8.1)                               |
| Conduct disorder                                           | 6.6<br>(5.4 to 7.9)                     | 2.3<br>(1.8 to 2.8)                            | 0.8<br>(0.5 to 1.2)                  | 1.7<br>(-4.8 to 9.2)                              | 0.1<br>(-6.2 to 7.3)                                |
| Idiopathic developmental intellectual disability           | 6.7<br>(3.0 to 10.4)                    | --                                             | 0.3<br>(0.1 to 0.5)                  | 1.7<br>(-6.5 to 10.3)                             | -4.5<br>(-12.3 to 3.5)                              |
| Other mental and substance use disorders                   | 16.2<br>(14.3 to 18.7)                  | 0.6<br>(0.5 to 0.6)                            | 1.2<br>(0.8 to 1.7)                  | 12.8<br>(6.8 to 19.1)                             | 0.2<br>(-4.7 to 5.3)                                |
| <b>Diabetes, urogenital, blood, and endocrine diseases</b> | <b>367.4</b><br><b>(360.6 to 375.0)</b> | <b>105.9†</b><br><b>(100.4 to 112.0)</b>       | <b>17.7</b><br><b>(12.5 to 24.2)</b> | <b>18.8</b><br><b>(15.2 to 22.4)</b>              | <b>-3.1</b><br><b>(-5.7 to -0.6)</b>                |
| Diabetes mellitus                                          | 205.5<br>(194.0 to 220.1)               | 21.0<br>(19.5 to 22.5)                         | 14.0<br>(9.6 to 19.2)                | 19.8<br>(14.9 to 24.4)                            | -3.4<br>(-6.7 to -0.3)                              |
| Acute glomerulonephritis                                   | < 0.05<br>(< 0.05 to < 0.05)            | 0.2<br>(0.2 to 0.2)                            | < 0.05<br>(< 0.05 to < 0.05)         | 14.1<br>(9.1 to 19.5)                             | 0.5<br>(-3.5 to 5.1)                                |
| Chronic kidney disease                                     | 36.1<br>(32.6 to 39.7)                  | 3.0<br>(2.6 to 3.4)                            | 1.6<br>(1.2 to 2.0)                  | 25.3<br>(17.1 to 34.3)                            | 0.6<br>(-5.0 to 6.5)                                |
| Chronic kidney disease due to diabetes mellitus            | 20.4<br>(17.9 to 23.2)                  | 1.7<br>(1.4 to 2.0)                            | 0.9<br>(0.7 to 1.2)                  | 26.0<br>(15.3 to 37.7)                            | 1.0<br>(-6.7 to 9.0)                                |
| Chronic kidney disease due to hypertension                 | 5.9<br>(5.1 to 6.8)                     | 0.3<br>(0.2 to 0.3)                            | 0.4<br>(0.3 to 0.5)                  | 32.5<br>(16.4 to 49.9)                            | -0.8<br>(-11.4 to 10.3)                             |
| Chronic kidney disease due to glomerulonephritis           | 6.4<br>(5.5 to 7.5)                     | 0.8<br>(0.6 to 0.9)                            | 0.2<br>(0.1 to 0.2)                  | 12.6<br>(-2.8 to 30.5)                            | 0.6<br>(-11.2 to 14.3)                              |
| Chronic kidney disease due to other causes                 | 3.3<br>(2.7 to 4.0)                     | 0.3<br>(0.2 to 0.4)                            | 0.2<br>(0.1 to 0.2)                  | 20.1<br>(5.9 to 35.9)                             | 2.1<br>(-8.6 to 13.8)                               |
| Urinary diseases and male infertility                      | 13.3<br>(11.8 to 14.9)                  | 45.5†<br>(40.8 to 50.7)                        | 0.3<br>(0.2 to 0.4)                  | 26.0<br>(18.2 to 34.4)                            | -4.0<br>(-9.8 to 1.6)                               |
| Interstitial nephritis and urinary tract infections        | 0.8<br>(0.7 to 0.9)                     | 39.6<br>(35.0 to 44.7)                         | < 0.05<br>(< 0.05 to < 0.05)         | 7.1<br>(-8.8 to 25.8)                             | -1.4<br>(-15.3 to 15.8)                             |
| Urolithiasis                                               | 0.2<br>(0.2 to 0.2)                     | 4.9<br>(4.2 to 5.6)                            | < 0.05<br>(< 0.05 to < 0.05)         | 19.9<br>(10.1 to 31.3)                            | 0.7<br>(-8.6 to 10.5)                               |
| Benign prostatic hyperplasia                               | 6.8<br>(5.7 to 8.0)                     | 1.0<br>(0.8 to 1.2)                            | 0.2<br>(0.1 to 0.3)                  | 36.2<br>(25.6 to 47.4)                            | -4.1<br>(-10.8 to 3.1)                              |
| Male infertility                                           | 4.9<br>(3.8 to 6.2)                     | --                                             | < 0.05<br>(< 0.05 to 0.1)            | 5.3<br>(-1.3 to 12.7)                             | 0.2<br>(-6.2 to 7.3)                                |
| Other urinary diseases                                     | --                                      | --                                             | < 0.05<br>(< 0.05 to < 0.05)         | -8.9<br>(-18.5 to 2.0)                            | -17.4<br>(-26.2 to -7.8)                            |
| Gynecological diseases                                     | 88.5<br>(83.8 to 92.7)                  | 33.9†<br>(31.5 to 36.5)                        | 1.2<br>(0.8 to 1.7)                  | 3.5<br>(-0.7 to 7.8)                              | -3.3<br>(-7.2 to 0.7)                               |
| Uterine fibroids                                           | 12.2<br>(10.7 to 13.8)                  | 1.3<br>(1.1 to 1.5)                            | 0.2<br>(0.1 to 0.3)                  | 2.3<br>(-5.5 to 9.6)                              | -7.2<br>(-13.9 to -0.7)                             |
| Polycystic ovarian syndrome                                | 0.8<br>(0.6 to 1.0)                     | 0.4<br>(0.3 to 0.6)                            | < 0.05<br>(< 0.05 to < 0.05)         | 5.7<br>(-8.7 to 23.0)                             | -0.7<br>(-13.8 to 15.2)                             |
| Female infertility                                         | 4.4<br>(2.0 to 8.6)                     | --                                             | < 0.05<br>(< 0.05 to 0.1)            | 9.3<br>(-8.8 to 34.4)                             | 4.2<br>(-12.2 to 26.1)                              |
| Endometriosis                                              | 0.2<br>(0.2 to 0.3)                     | 1.1<br>(0.8 to 1.3)                            | < 0.05<br>(< 0.05 to < 0.05)         | 3.2<br>(-21.3 to 36.9)                            | -0.3<br>(-23.8 to 32.1)                             |
| Genital prolapse                                           | 14.9<br>(12.9 to 17.2)                  | 0.9<br>(0.8 to 1.1)                            | < 0.05<br>(< 0.05 to 0.1)            | 5.8<br>(-4.5 to 18.8)                             | -16.5<br>(-25.0 to -6.1)                            |
| Premenstrual syndrome                                      | 54.1<br>(50.8 to 57.7)                  | 19.4<br>(18.0 to 20.9)                         | 0.5<br>(0.3 to 0.7)                  | 3.6<br>(-4.0 to 11.4)                             | -0.2<br>(-7.5 to 7.2)                               |
| Other gynecological diseases                               | 12.7<br>(11.2 to 14.5)                  | 10.8<br>(9.1 to 12.9)                          | 0.4<br>(0.3 to 0.6)                  | 3.4<br>(-4.0 to 10.5)                             | -3.1<br>(-9.8 to 3.9)                               |
| Hemoglobinopathies and hemolytic anaemias                  | 143.5<br>(141.3 to 146.1)               | --                                             | 0.2<br>(0.1 to 0.3)                  | 1.5<br>(-7.1 to 10.8)                             | -9.0<br>(-15.8 to -1.9)                             |
| Thalassemias                                               | < 0.05<br>(< 0.05 to < 0.05)            | --                                             | < 0.05<br>(< 0.05 to < 0.05)         | 7.1<br>(-7.2 to 22.9)                             | 20.2<br>(2.1 to 40.5)                               |
| Thalassaemias trait                                        | 4.9<br>(4.7 to 5.1)                     | --                                             | < 0.05<br>(< 0.05 to < 0.05)         | 13.6<br>(-5.4 to 35.7)                            | 7.6<br>(-9.5 to 27.4)                               |
| Sickle cell disorders                                      | < 0.05<br>(< 0.05 to < 0.05)            | --                                             | < 0.05<br>(< 0.05 to < 0.05)         | 0.7<br>(-7.9 to 8.1)                              | 1.2<br>(-7.9 to 9.0)                                |
| Sickle cell trait                                          | 1.0<br>(0.9 to 1.2)                     | --                                             | < 0.05<br>(< 0.05 to < 0.05)         | 3.5<br>(-5.2 to 13.2)                             | -4.7<br>(-12.5 to 4.4)                              |
| G6PD deficiency                                            | 20.8<br>(19.7 to 22.0)                  | --                                             | < 0.05<br>(< 0.05 to < 0.05)         | 16.4<br>(6.7 to 28.1)                             | 8.0<br>(-0.8 to 18.6)                               |
| G6PD trait                                                 | 112.3<br>(110.6 to 114.3)               | --                                             | < 0.05<br>(< 0.05 to < 0.05)         | 15.6<br>(5.4 to 26.9)                             | 7.7<br>(-1.9 to 18.6)                               |
| Other hemoglobinopathies and hemolytic anaemias            | 9.4<br>(8.8 to 10.0)                    | --                                             | 0.1<br>(0.1 to 0.2)                  | -0.1<br>(-9.5 to 9.5)                             | -11.2<br>(-18.3 to -3.9)                            |
| Endocrine, metabolic, blood, and immune disorders          | 17.9<br>(16.5 to 19.3)                  | 2.4<br>(2.1 to 2.7)                            | 0.5<br>(0.4 to 0.7)                  | 17.1<br>(10.0 to 24.8)                            | -2.5<br>(-7.8 to 3.1)                               |
| <b>Musculoskeletal disorders</b>                           | <b>139.8</b><br><b>(133.3 to 146.1)</b> | <b>67.8</b><br><b>(61.7 to 74.2)</b>           | <b>14.8</b><br><b>(10.8 to 19.4)</b> | <b>15.7</b><br><b>(12.6 to 19.2)</b>              | <b>-1.4</b><br><b>(-3.7 to 1.0)</b>                 |
| Rheumatoid arthritis                                       | 1.3<br>(1.1 to 1.5)                     | 0.1<br>(0.1 to 0.1)                            | 0.3<br>(0.2 to 0.4)                  | 23.4<br>(11.1 to 37.7)                            | 4.0<br>(-5.6 to 14.6)                               |
| Osteoarthritis                                             | 35.5<br>(33.1 to 38.0)                  | 1.9<br>(1.7 to 2.0)                            | 2.2<br>(1.5 to 2.9)                  | 27.7<br>(22.8 to 33.2)                            | -0.8<br>(-4.2 to 3.2)                               |
| Low back and neck pain                                     | 80.1<br>(74.5 to 86.7)                  | 32.9<br>(29.3 to 36.8)                         | 9.1<br>(6.5 to 12.0)                 | 15.3<br>(11.6 to 19.4)                            | -1.0<br>(-3.6 to 1.8)                               |
| Low back pain                                              | 53.3<br>(47.0 to 60.3)                  | 25.9<br>(22.5 to 29.9)                         | 6.0<br>(4.2 to 7.9)                  | 14.5<br>(9.3 to 20.4)                             | -1.7<br>(-5.5 to 2.5)                               |
| Neck pain                                                  | 31.9<br>(27.4 to 37.0)                  | 7.0<br>(6.0 to 8.3)                            | 3.1<br>(2.1 to 4.4)                  | 16.9<br>(13.1 to 20.9)                            | 0.3<br>(-2.0 to 2.5)                                |
| Gout                                                       | 3.6<br>(3.1 to 4.1)                     | 0.7<br>(0.6 to 0.8)                            | 0.1<br>(0.1 to 0.1)                  | 25.6<br>(6.8 to 47.3)                             | -0.4<br>(-13.9 to 14.7)                             |
| Other musculoskeletal disorders                            | 36.7<br>(31.4 to 42.9)                  | 32.3<br>(26.9 to 38.1)                         | 3.1<br>(2.1 to 4.5)                  | 9.0<br>(0.6 to 17.9)                              | -3.5<br>(-10.5 to 3.5)                              |
| <b>Other non-communicable diseases</b>                     | <b>612.1</b><br><b>(600.3 to 623.4)</b> | <b>1,746.9†</b><br><b>(1,639.0 to 1,862.1)</b> | <b>15.9</b><br><b>(10.8 to 22.3)</b> | <b>12.0</b><br><b>(10.3 to 13.7)</b>              | <b>-1.8</b><br><b>(-3.0 to -0.7)</b>                |
| Congenital anomalies                                       | 7.2<br>(6.2 to 8.4)                     | --                                             | 0.8<br>(0.6 to 1.1)                  | 8.8<br>(1.7 to 16.3)                              | 2.6<br>(-4.3 to 9.4)                                |
| Neural tube defects                                        | 0.4<br>(0.4 to 0.5)                     | --                                             | 0.1<br>(0.1 to 0.2)                  | 16.7<br>(1.5 to 34.5)                             | 8.7<br>(-4.8 to 25.1)                               |
| Congenital heart anomalies                                 | 1.7<br>(1.5 to 1.9)                     | --                                             | 0.1<br>(< 0.05 to 0.1)               | 8.5<br>(-3.6 to 22.9)                             | 5.2<br>(-5.8 to 18.8)                               |
| Orofacial clefts                                           | 0.5<br>(0.4 to 0.5)                     | --                                             | < 0.05<br>(< 0.05 to < 0.05)         | 12.9<br>(-0.1 to 28.5)                            | 5.7<br>(-6.4 to 20.0)                               |
| Down's syndrome                                            | 0.2<br>(0.2 to 0.2)                     | --                                             | < 0.05<br>(< 0.05 to < 0.05)         | 6.1<br>(-2.4 to 15.2)                             | 2.8<br>(-5.4 to 11.8)                               |
| Turner syndrome                                            | 0.2<br>(0.2 to 0.3)                     | --                                             | < 0.05<br>(< 0.05 to < 0.05)         | 10.6<br>(-24.3 to 69.1)                           | 7.9<br>(-25.9 to 64.7)                              |
| Klinefelter syndrome                                       | 0.2<br>(0.2 to 0.3)                     | --                                             | < 0.05<br>(< 0.05 to < 0.05)         | 4.0<br>(-24.1 to 44.0)                            | 1.2<br>(-25.1 to 38.6)                              |

| Cause                                         | Prevalence in thousands (95% UI)        | Incidence in thousands (95% UI)       | YLDs in thousands (95% UI)        |                                                   |                                                     |
|-----------------------------------------------|-----------------------------------------|---------------------------------------|-----------------------------------|---------------------------------------------------|-----------------------------------------------------|
|                                               | 2016 counts                             | 2016 counts                           | 2016 counts                       | Percentage change in counts between 2006 and 2016 | Percentage change in age-standardised rates between |
| Other chromosomal abnormalities               | 0.2<br>(0.2 to 0.2)                     | --                                    | < 0.05<br>(< 0.05 to < 0.05)      | -5.8<br>(-22.8 to 15.2)                           | -1.0<br>(-20.4 to 24.7)                             |
| Congenital musculoskeletal and limb anomalies | 0.7<br>(0.6 to 0.8)                     | --                                    | 0.1<br>(0.1 to 0.1)               | 22.0<br>(9.7 to 35.5)                             | 13.4<br>(2.4 to 25.0)                               |
| Urogenital congenital anomalies               | 0.6<br>(0.6 to 0.7)                     | --                                    | < 0.05<br>(< 0.05 to < 0.05)      | -0.2<br>(-8.5 to 8.5)                             | -0.3<br>(-8.4 to 8.2)                               |
| Digestive congenital anomalies                | 1.3<br>(1.2 to 1.5)                     | --                                    | 0.1<br>(< 0.05 to 0.1)            | 14.3<br>(-1.4 to 33.7)                            | 7.0<br>(-6.9 to 24.1)                               |
| Other congenital anomalies                    | 3.0<br>(2.0 to 4.4)                     | --                                    | 0.4<br>(0.2 to 0.6)               | 4.2<br>(-7.5 to 17.1)                             | -2.5<br>(-13.3 to 9.2)                              |
| Skin and subcutaneous diseases                | 275.0<br>(268.8 to 282.8)               | 604.2<br>(573.0 to 640.6)             | 6.9<br>(4.6 to 10.1)              | 3.1<br>(1.0 to 5.4)                               | -1.9<br>(-3.7 to 0.2)                               |
| Dermatitis                                    | 36.3<br>(33.9 to 39.1)                  | 48.9<br>(45.4 to 52.6)                | 1.4<br>(0.8 to 2.2)               | 4.5<br>(0.8 to 8.5)                               | 0.2<br>(-3.0 to 3.7)                                |
| Psoriasis                                     | 5.9<br>(5.6 to 6.3)                     | 0.8<br>(0.8 to 0.8)                   | 0.5<br>(0.4 to 0.7)               | 17.4<br>(7.5 to 28.9)                             | 5.2<br>(-3.3 to 14.7)                               |
| Cellulitis                                    | 0.3<br>(0.3 to 0.3)                     | 4.8<br>(4.5 to 5.1)                   | < 0.05<br>(< 0.05 to < 0.05)      | 11.3<br>(-5.3 to 30.3)                            | 0.7<br>(-13.3 to 17.4)                              |
| Pyoderma                                      | 1.3<br>(1.3 to 1.4)                     | 27.0<br>(25.9 to 28.0)                | < 0.05<br>(< 0.05 to < 0.05)      | 18.6<br>(8.4 to 29.4)                             | -0.2<br>(-7.7 to 7.6)                               |
| Scabies                                       | 38.6<br>(33.8 to 44.3)                  | 121.0<br>(103.9 to 139.5)             | 1.0<br>(0.6 to 1.6)               | -13.2<br>(-17.4 to -9.0)                          | -16.6<br>(-20.4 to -12.8)                           |
| Fungal skin diseases                          | 67.3<br>(60.7 to 74.7)                  | 230.7<br>(206.0 to 259.4)             | 0.4<br>(0.1 to 0.8)               | 12.5<br>(10.2 to 14.7)                            | 0.1<br>(-1.0 to 1.2)                                |
| Viral skin diseases                           | 23.5<br>(22.2 to 25.0)                  | 33.9<br>(31.9 to 36.2)                | 0.7<br>(0.5 to 1.1)               | 5.8<br>(2.4 to 9.5)                               | 0.2<br>(-2.9 to 3.4)                                |
| Acne vulgaris                                 | 81.5<br>(73.7 to 89.7)                  | 55.7<br>(45.9 to 67.7)                | 2.1<br>(1.4 to 3.0)               | 3.2<br>(-1.3 to 8.0)                              | 1.4<br>(-3.0 to 6.0)                                |
| Alopecia areata                               | 1.7<br>(1.6 to 1.7)                     | 2.9<br>(2.8 to 3.0)                   | 0.1<br>(< 0.05 to 0.1)            | 8.9<br>(-1.9 to 21.7)                             | 0.1<br>(-9.4 to 11.1)                               |
| Pruritus                                      | 7.3<br>(6.4 to 8.3)                     | 5.8<br>(5.2 to 6.6)                   | 0.1<br>(< 0.05 to 0.1)            | 13.3<br>(7.1 to 20.6)                             | 0.6<br>(-4.3 to 5.9)                                |
| Urticaria                                     | 6.9<br>(6.1 to 8.0)                     | 12.2<br>(10.8 to 14.1)                | 0.4<br>(0.3 to 0.6)               | 2.7<br>(-3.6 to 9.5)                              | 0.1<br>(-5.6 to 6.2)                                |
| Decubitus ulcer                               | 0.1<br>(0.1 to 0.1)                     | 0.4<br>(0.4 to 0.5)                   | < 0.05<br>(< 0.05 to < 0.05)      | 34.6<br>(20.6 to 51.7)                            | 3.5<br>(-10.1 to 19.7)                              |
| Other skin and subcutaneous diseases          | 52.8<br>(51.1 to 54.4)                  | 60.1<br>(58.2 to 62.2)                | 0.3<br>(0.1 to 0.5)               | 17.5<br>(14.5 to 20.7)                            | 1.3<br>(-1.1 to 3.6)                                |
| Sense organ diseases                          | 186.4<br>(182.1 to 191.6)               | 80.2†<br>(74.9 to 85.9)               | 6.8<br>(4.8 to 9.5)               | 21.6<br>(18.9 to 24.4)                            | -2.5<br>(-4.4 to -0.7)                              |
| Glaucoma                                      | 0.4<br>(0.3 to 0.4)                     | --                                    | < 0.05<br>(< 0.05 to < 0.05)      | 47.1<br>(24.5 to 71.8)                            | -0.1<br>(-13.3 to 14.4)                             |
| Cataract                                      | 6.4<br>(5.5 to 7.4)                     | --                                    | 0.3<br>(0.2 to 0.5)               | 36.4<br>(26.4 to 46.2)                            | -5.5<br>(-12.0 to 0.8)                              |
| Macular degeneration                          | 0.4<br>(0.3 to 0.5)                     | --                                    | < 0.05<br>(< 0.05 to < 0.05)      | 46.8<br>(25.8 to 71.5)                            | -0.8<br>(-14.1 to 13.8)                             |
| Refraction and accommodation disorders        | 81.1<br>(77.5 to 85.1)                  | --                                    | 1.6<br>(1.0 to 2.5)               | 15.8<br>(11.2 to 20.8)                            | -4.4<br>(-8.1 to -0.6)                              |
| Age-related and other hearing loss            | 126.8<br>(119.6 to 134.8)               | --                                    | 3.9<br>(2.8 to 5.4)               | 22.4<br>(18.5 to 26.5)                            | -2.0<br>(-4.7 to 0.3)                               |
| Other vision loss                             | 3.0<br>(2.7 to 3.5)                     | --                                    | 0.2<br>(0.1 to 0.3)               | 24.9<br>(14.9 to 36.7)                            | -2.0<br>(-8.8 to 5.7)                               |
| Other sense organ diseases                    | 22.8<br>(21.0 to 24.7)                  | 80.2<br>(74.9 to 85.9)                | 0.7<br>(0.4 to 1.1)               | 22.2<br>(17.2 to 27.6)                            | 1.0<br>(-2.8 to 4.8)                                |
| Oral disorders                                | 414.0<br>(394.4 to 429.9)               | 1,062.5†<br>(960.5 to 1,168.2)        | 1.3<br>(0.8 to 1.9)               | 19.4<br>(16.2 to 22.9)                            | 0.2<br>(-1.8 to 2.5)                                |
| Caries of deciduous teeth                     | 37.1<br>(26.0 to 47.2)                  | 181.0<br>(112.3 to 252.7)             | < 0.05<br>(< 0.05 to < 0.05)      | -17.2<br>(-32.9 to 0.5)                           | -16.8<br>(-31.7 to -1.6)                            |
| Caries of permanent teeth                     | 351.1<br>(328.6 to 372.5)               | 878.5<br>(799.5 to 954.4)             | 0.2<br>(0.1 to 0.4)               | 8.6<br>(5.0 to 12.5)                              | -0.5<br>(-3.6 to 2.7)                               |
| Periodontal disease                           | 12.9<br>(10.5 to 15.6)                  | 1.4<br>(1.1 to 1.7)                   | 0.1<br>(< 0.05 to 0.2)            | 24.4<br>(18.1 to 31.2)                            | 1.1<br>(-3.1 to 5.7)                                |
| Edentulism and severe tooth loss              | 19.8<br>(17.0 to 22.4)                  | 1.6<br>(1.4 to 1.9)                   | 0.5<br>(0.4 to 0.8)               | 32.9<br>(27.6 to 38.8)                            | 0.5<br>(-2.8 to 4.2)                                |
| Other oral disorders                          | 15.9<br>(15.2 to 16.6)                  | --                                    | 0.5<br>(0.3 to 0.7)               | 11.2<br>(7.4 to 15.3)                             | 0.1<br>(-3.0 to 3.5)                                |
| <b>Injuries</b>                               | <b>117.5</b><br><b>(111.7 to 124.2)</b> | <b>47.3†</b><br><b>(45.1 to 49.5)</b> | <b>4.8</b><br><b>(3.3 to 6.8)</b> | <b>24.7</b><br><b>(22.2 to 27.1)</b>              | <b>9.7</b><br><b>(7.9 to 11.6)</b>                  |
| <b>Transport injuries</b>                     | <b>21.6</b><br><b>(19.9 to 23.4)</b>    | <b>6.8</b><br><b>(6.1 to 7.5)</b>     | <b>1.2</b><br><b>(0.8 to 1.8)</b> | <b>36.5</b><br><b>(33.4 to 39.5)</b>              | <b>19.2</b><br><b>(16.6 to 21.7)</b>                |
| Road injuries                                 | 14.4<br>(13.3 to 15.6)                  | 5.3<br>(4.6 to 6.0)                   | 0.8<br>(0.6 to 1.2)               | 50.8<br>(47.8 to 54.0)                            | 30.2<br>(27.8 to 32.6)                              |
| Pedestrian road injuries                      | 2.0<br>(1.7 to 2.3)                     | 0.5<br>(0.4 to 0.6)                   | 0.1<br>(0.1 to 0.2)               | 63.6<br>(60.1 to 67.4)                            | 39.8<br>(37.3 to 42.6)                              |
| Cyclist road injuries                         | 2.0<br>(1.7 to 2.4)                     | 0.8<br>(0.6 to 1.0)                   | 0.1<br>(0.1 to 0.1)               | 60.6<br>(57.0 to 64.3)                            | 38.9<br>(36.3 to 41.6)                              |
| Motorcyclist road injuries                    | 3.7<br>(3.2 to 4.6)                     | 0.9<br>(0.7 to 1.1)                   | 0.2<br>(0.1 to 0.3)               | 62.5<br>(59.0 to 66.2)                            | 40.6<br>(38.1 to 43.4)                              |
| Motor vehicle road injuries                   | 4.8<br>(4.0 to 5.5)                     | 2.1<br>(1.8 to 2.5)                   | 0.3<br>(0.2 to 0.4)               | 35.5<br>(32.5 to 38.6)                            | 17.2<br>(14.9 to 19.7)                              |
| Other road injuries                           | 1.9<br>(1.6 to 2.2)                     | 0.9<br>(0.7 to 1.1)                   | 0.1<br>(0.1 to 0.1)               | 55.3<br>(51.9 to 58.7)                            | 33.9<br>(31.3 to 36.5)                              |
| Other transport injuries                      | 7.2<br>(6.0 to 8.6)                     | 1.5<br>(1.3 to 1.8)                   | 0.4<br>(0.3 to 0.6)               | 16.0<br>(12.7 to 19.2)                            | 3.0<br>(0.4 to 5.6)                                 |
| <b>Unintentional injuries</b>                 | <b>84.5</b><br><b>(79.4 to 90.5)</b>    | <b>35.1</b><br><b>(33.1 to 37.1)</b>  | <b>2.9</b><br><b>(2.0 to 4.1)</b> | <b>23.1</b><br><b>(20.4 to 25.6)</b>              | <b>8.2</b><br><b>(6.2 to 10.1)</b>                  |
| Falls                                         | 17.7<br>(15.3 to 20.1)                  | 7.1<br>(6.2 to 8.3)                   | 0.7<br>(0.5 to 1.0)               | 46.6<br>(43.6 to 49.7)                            | 27.4<br>(25.1 to 29.6)                              |
| Drowning                                      | 0.9<br>(0.8 to 1.0)                     | 0.2<br>(0.1 to 0.2)                   | 0.1<br>(< 0.05 to 0.1)            | 15.0<br>(11.5 to 18.6)                            | -0.5<br>(-3.4 to 2.4)                               |
| Fire, heat, and hot substances                | 14.1<br>(12.0 to 16.6)                  | 1.6<br>(1.4 to 1.8)                   | 0.4<br>(0.3 to 0.6)               | 13.1<br>(7.9 to 18.1)                             | 0.4<br>(-3.8 to 4.5)                                |
| Poisonings                                    | 0.3<br>(0.2 to 0.3)                     | 0.4<br>(0.3 to 0.5)                   | < 0.05<br>(< 0.05 to < 0.05)      | 41.4<br>(30.9 to 51.4)                            | 26.7<br>(18.1 to 34.7)                              |
| Exposure to mechanical forces                 | 17.2<br>(14.7 to 20.8)                  | 6.5<br>(5.6 to 7.3)                   | 0.5<br>(0.3 to 0.7)               | 37.9<br>(34.6 to 41.1)                            | 20.8<br>(18.2 to 23.2)                              |
| Unintentional firearm injuries                | 0.8<br>(0.6 to 1.0)                     | 0.2<br>(0.1 to 0.3)                   | < 0.05<br>(< 0.05 to 0.1)         | 31.7<br>(28.2 to 35.2)                            | 16.5<br>(13.8 to 19.4)                              |
| Unintentional suffocation                     | 1.7<br>(1.3 to 2.2)                     | 0.3<br>(0.3 to 0.4)                   | 0.1<br>(< 0.05 to 0.1)            | 17.7<br>(14.9 to 20.6)                            | 5.1<br>(2.7 to 7.5)                                 |
| Other exposure to mechanical forces           | 14.7<br>(12.3 to 18.2)                  | 6.0<br>(5.1 to 6.8)                   | 0.4<br>(0.2 to 0.5)               | 42.7<br>(39.2 to 46.2)                            | 24.3<br>(21.5 to 26.9)                              |



| Cause                                                                               | Prevalence in thousands (95% UI) | Incidence in thousands (95% UI)                | YLDs in thousands (95% UI)              |                                                   |                                                     |
|-------------------------------------------------------------------------------------|----------------------------------|------------------------------------------------|-----------------------------------------|---------------------------------------------------|-----------------------------------------------------|
|                                                                                     | 2016 counts                      | 2016 counts                                    | 2016 counts                             | Percentage change in counts between 2006 and 2016 | Percentage change in age-standardised rates between |
| Adverse effects of medical treatment                                                | 0.3<br>(0.2 to 0.4)              | 4.2<br>(3.7 to 4.7)                            | < 0.05<br>(< 0.05 to 0.1)               | 8.0<br>(3.0 to 13.5)                              | 3.1<br>(-1.5 to 8.3)                                |
| Animal contact                                                                      | 4.3<br>(3.8 to 5.0)              | 4.9<br>(4.0 to 5.8)                            | 0.1<br>(0.1 to 0.2)                     | 14.5<br>(8.3 to 20.6)                             | 2.3<br>(-2.9 to 7.1)                                |
| Venomous animal contact                                                             | 1.8<br>(1.5 to 2.2)              | 2.2<br>(1.7 to 2.8)                            | 0.1<br>(0.1 to 0.1)                     | 17.0<br>(8.3 to 25.7)                             | 5.3<br>(-1.8 to 12.5)                               |
| Non-venomous animal contact                                                         | 2.5<br>(2.0 to 3.1)              | 2.7<br>(2.1 to 3.3)                            | < 0.05<br>(< 0.05 to 0.1)               | 8.9<br>(4.7 to 12.8)                              | -4.0<br>(-7.1 to -1.0)                              |
| Foreign body                                                                        | 6.9<br>(5.6 to 8.2)              | 2.9<br>(2.6 to 3.3)                            | 0.3<br>(0.2 to 0.5)                     | 8.6<br>(5.1 to 11.8)                              | -3.0<br>(-5.9 to -0.4)                              |
| Pulmonary aspiration and foreign body in airway                                     | 4.9<br>(3.8 to 6.2)              | 1.5<br>(1.3 to 1.7)                            | 0.2<br>(0.1 to 0.3)                     | 6.8<br>(3.0 to 10.2)                              | -4.5<br>(-7.5 to -1.8)                              |
| Foreign body in eyes                                                                | 0.1<br>(0.1 to 0.2)              | 0.8<br>(0.6 to 1.1)                            | < 0.05<br>(< 0.05 to < 0.05)            | 13.1<br>(9.2 to 18.5)                             | -0.2<br>(-3.2 to 3.0)                               |
| Foreign body in other body part                                                     | 1.9<br>(1.5 to 2.4)              | 0.7<br>(0.6 to 0.8)                            | 0.1<br>(< 0.05 to 0.1)                  | 14.9<br>(10.7 to 18.9)                            | 2.4<br>(-1.0 to 5.5)                                |
| Environmental heat and cold exposure                                                | 7.9<br>(6.7 to 9.2)              | 2.1<br>(1.7 to 2.5)                            | 0.3<br>(0.2 to 0.5)                     | 15.4<br>(12.8 to 18.0)                            | 1.3<br>(-0.8 to 3.2)                                |
| Other unintentional injuries                                                        | 14.9<br>(12.3 to 17.8)           | 5.2<br>(4.4 to 6.0)                            | 0.5<br>(0.3 to 0.7)                     | 10.3<br>(8.2 to 12.4)                             | -4.2<br>(-6.0 to -2.4)                              |
| <b>Self-harm and interpersonal violence</b>                                         | <b>29.6<br/>(26.8 to 32.7)</b>   | <b>5.4†<br/>(4.6 to 6.2)</b>                   | <b>0.6<br/>(0.4 to 0.8)</b>             | <b>13.5<br/>(10.6 to 16.2)</b>                    | <b>1.4<br/>(-0.7 to 3.4)</b>                        |
| Self-harm                                                                           | 1.2<br>(1.1 to 1.5)              | 0.6<br>(0.5 to 0.7)                            | 0.1<br>(< 0.05 to 0.1)                  | 17.8<br>(14.0 to 21.2)                            | 2.3<br>(-0.6 to 5.0)                                |
| Self-harm by firearm                                                                | < 0.05<br>(< 0.05 to 0.1)        | < 0.05<br>(< 0.05 to < 0.05)                   | < 0.05<br>(< 0.05 to < 0.05)            | 29.0<br>(24.3 to 33.8)                            | 15.5<br>(11.5 to 19.4)                              |
| Self-harm by other specified means                                                  | 1.2<br>(1.0 to 1.4)              | 0.5<br>(0.5 to 0.6)                            | 0.1<br>(< 0.05 to 0.1)                  | 17.5<br>(13.6 to 20.9)                            | 2.0<br>(-1.0 to 4.8)                                |
| Interpersonal violence                                                              | 28.3<br>(25.5 to 31.5)           | 4.8†<br>(4.1 to 5.6)                           | 0.5<br>(0.4 to 0.7)                     | 13.0<br>(10.0 to 15.9)                            | 1.2<br>(-0.9 to 3.2)                                |
| Assault by firearm                                                                  | 0.1<br>(0.1 to 0.1)              | < 0.05<br>(< 0.05 to < 0.05)                   | < 0.05<br>(< 0.05 to < 0.05)            | 30.7<br>(26.5 to 35.1)                            | 13.9<br>(10.7 to 17.1)                              |
| Assault by sharp object                                                             | 1.2<br>(1.0 to 1.5)              | 0.4<br>(0.3 to 0.6)                            | < 0.05<br>(< 0.05 to 0.1)               | 21.0<br>(17.1 to 24.7)                            | 6.9<br>(3.9 to 10.0)                                |
| Sexual violence                                                                     | 19.1<br>(16.6 to 21.9)           | --                                             | 0.2<br>(0.1 to 0.2)                     | -1.1<br>(-4.8 to 3.0)                             | -6.3<br>(-9.5 to -2.6)                              |
| Assault by other means                                                              | 7.9<br>(6.5 to 9.6)              | 4.4<br>(3.7 to 5.1)                            | 0.3<br>(0.2 to 0.5)                     | 20.4<br>(17.4 to 23.5)                            | 4.3<br>(2.0 to 6.5)                                 |
| <b>Forces of nature, conflict and terrorism, and executions and police conflict</b> | <b>0.9<br/>(0.6 to 1.3)</b>      | <b>&lt; 0.05†<br/>(&lt; 0.05 to &lt; 0.05)</b> | <b>&lt; 0.05<br/>(&lt; 0.05 to 0.1)</b> | <b>-9.4<br/>(-13.0 to -6.6)</b>                   | <b>-16.8<br/>(-19.7 to -14.4)</b>                   |
| Exposure to forces of nature                                                        | 0.9<br>(0.5 to 1.3)              | --                                             | < 0.05<br>(< 0.05 to 0.1)               | -11.3<br>(-14.8 to -8.5)                          | -18.5<br>(-21.3 to -16.1)                           |
| Conflict and terrorism                                                              | --                               | --                                             | --                                      | --                                                | --                                                  |
| Executions and police conflict                                                      | 0.1<br>(< 0.05 to 0.1)           | < 0.05<br>(< 0.05 to < 0.05)                   | < 0.05<br>(< 0.05 to < 0.05)            | 31.1<br>(23.2 to 36.5)                            | 19.1<br>(12.7 to 23.5)                              |
| <b>Impairments</b>                                                                  | --                               | --                                             | --                                      | --                                                | --                                                  |
| Anaemia                                                                             | 243.0<br>(231.3 to 255.7)        | --                                             | 6.2<br>(4.2 to 8.8)                     | 0.4<br>(-5.3 to 6.2)                              | -8.0<br>(-13.2 to -3.1)                             |
| Developmental intellectual disability                                               | 15.4<br>(11.9 to 19.0)           | --                                             | 1.7<br>(1.2 to 2.2)                     | 4.9<br>(-1.1 to 11.5)                             | -0.7<br>(-6.3 to 5.6)                               |
| Epilepsy                                                                            | 4.7<br>(2.7 to 6.4)              | --                                             | 1.8<br>(1.0 to 2.8)                     | 7.0<br>(-47.3 to 106.5)                           | 0.5<br>(-51.8 to 97.5)                              |
| Guillain-Barre syndrome                                                             | < 0.05<br>(< 0.05 to < 0.05)     | --                                             | < 0.05<br>(< 0.05 to < 0.05)            | 12.8<br>(9.4 to 16.9)                             | 0.6<br>(0.1 to 1.8)                                 |
| Hearing loss                                                                        | 138.4<br>(131.1 to 146.3)        | --                                             | 4.5<br>(3.2 to 6.2)                     | 18.9<br>(15.5 to 22.2)                            | -2.5<br>(-4.6 to -0.4)                              |
| Heart failure                                                                       | 3.7<br>(3.3 to 4.3)              | --                                             | 0.3<br>(0.2 to 0.5)                     | 35.3<br>(25.4 to 45.9)                            | -0.3<br>(-6.8 to 6.9)                               |
| Infertility                                                                         | 20.1<br>(15.7 to 25.9)           | --                                             | 0.1<br>(< 0.05 to 0.2)                  | 5.7<br>(0.7 to 11.5)                              | 0.5<br>(-4.2 to 5.7)                                |
| Pelvic inflammatory disease                                                         | 0.8<br>(0.6 to 0.9)              | --                                             | 0.1<br>(0.1 to 0.1)                     | 2.0<br>(-11.0 to 16.8)                            | -6.0<br>(-18.0 to 8.0)                              |
| Vision loss                                                                         | 95.9<br>(91.1 to 100.8)          | --                                             | 2.6<br>(1.8 to 3.8)                     | 18.6<br>(14.0 to 23.7)                            | -4.0<br>(-7.4 to -0.4)                              |

We did not calculate incidence for the nine impairments, certain NTDs, and causes with only birth prevalence. Blank cells mean that no estimate is available.

† Incidence for aggregate causes represents the sum of the incidence of the causes below the aggregate.

‡ Incidence estimates for stroke represent first-ever stroke only.

^ Incidence of HIV/AIDS represents new infections of HIV only and does not include new infections of Tuberculosis in HIV positive cases.



SR Table 14: Prevalence, incidence, and YLDs for 2016, percentage change of YLD counts and percentage change of age-standardised YLD rates between 2006 and 2016 by cause and impairments, for all ages, Finland.

| Cause                                                                                | Prevalence in thousands (95% UI)       | Incidence in thousands (95% UI)            | YLDs in thousands (95% UI)             |                                                   |                                                     |
|--------------------------------------------------------------------------------------|----------------------------------------|--------------------------------------------|----------------------------------------|---------------------------------------------------|-----------------------------------------------------|
|                                                                                      | 2016 counts                            | 2016 counts                                | 2016 counts                            | Percentage change in counts between 2006 and 2016 | Percentage change in age-standardised rates between |
| <b>All causes</b>                                                                    | <b>5,191.8</b><br>(5,164.1 to 5,219.6) | <b>38,894.1†</b><br>(36,817.8 to 41,105.9) | <b>746.3</b><br>(556.4 to 964.2)       | <b>6.3</b><br>(5.1 to 7.7)                        | <b>-1.9</b><br>(-3.1 to -0.6)                       |
| <b>Communicable, maternal, neonatal, and nutritional disorders</b>                   | <b>1,694.7</b><br>(1,610.0 to 1,778.7) | <b>21,058.4†</b><br>(19,004.8 to 23,194.9) | <b>23.0</b><br>(16.7 to 30.7)          | <b>0.1</b><br>(-4.6 to 5.1)                       | <b>-3.4</b><br>(-7.9 to 1.9)                        |
| <b>HIV/AIDS and tuberculosis</b>                                                     | <b>575.8</b><br>(475.8 to 668.4)       | <b>0.5†</b><br>(0.3 to 0.6)                | <b>0.3</b><br>(0.2 to 0.6)             | <b>17.8</b><br>(-0.4 to 35.6)                     | <b>11.0</b><br>(-5.6 to 27.5)                       |
| Tuberculosis                                                                         | 513.8<br>(414.3 to 629.8)              | 0.3†<br>(0.2 to 0.4)                       | 0.1<br>(0.1 to 0.1)                    | -16.1<br>(-24.4 to -6.6)                          | -18.4<br>(-25.9 to -10.2)                           |
| Drug-susceptible tuberculosis                                                        | 0.2<br>(0.2 to 0.3)                    | 0.3<br>(0.2 to 0.4)                        | 0.1<br>(< 0.05 to 0.1)                 | -17.0<br>(-25.4 to -7.7)                          | -19.3<br>(-26.7 to -11.3)                           |
| Multidrug-resistant tuberculosis without extensive drug resistance                   | < 0.05<br>(< 0.05 to < 0.05)           | < 0.05<br>(< 0.05 to < 0.05)               | < 0.05<br>(< 0.05 to < 0.05)           | 87.1<br>(24.2 to 176.0)                           | 82.5<br>(21.3 to 169.3)                             |
| Extensively drug-resistant tuberculosis                                              | < 0.05<br>(< 0.05 to < 0.05)           | < 0.05<br>(< 0.05 to < 0.05)               | < 0.05<br>(< 0.05 to < 0.05)           | 302.4<br>(167.4 to 493.4)                         | 292.6<br>(160.9 to 479.3)                           |
| Latent tuberculosis infection                                                        | 513.6<br>(414.1 to 629.5)              | --                                         | --                                     | --                                                | --                                                  |
| HIV/AIDS                                                                             | 2.8<br>(1.4 to 4.8)                    | 0.1 <sup>a</sup><br>(< 0.05 to 0.3)        | 0.2<br>(0.1 to 0.5)                    | 35.6<br>(11.9 to 59.5)                            | 26.1<br>(3.2 to 49.4)                               |
| Drug-susceptible HIV/AIDS - Tuberculosis                                             | < 0.05<br>(< 0.05 to < 0.05)           | < 0.05<br>(< 0.05 to < 0.05)               | < 0.05<br>(< 0.05 to < 0.05)           | -40.8<br>(-45.8 to -35.5)                         | -45.3<br>(-49.9 to -40.5)                           |
| Multidrug-resistant HIV/AIDS - Tuberculosis without extensive drug resistance        | < 0.05<br>(< 0.05 to < 0.05)           | < 0.05<br>(< 0.05 to < 0.05)               | < 0.05<br>(< 0.05 to < 0.05)           | 35.9<br>(-10.4 to 101.5)                          | 25.6<br>(-17.2 to 86.1)                             |
| Extensively drug-resistant HIV/AIDS - Tuberculosis                                   | < 0.05<br>(< 0.05 to < 0.05)           | < 0.05<br>(< 0.05 to < 0.05)               | < 0.05<br>(< 0.05 to < 0.05)           | 192.4<br>(92.8 to 333.5)                          | 170.1<br>(78.2 to 300.3)                            |
| HIV/AIDS resulting in other diseases                                                 | 2.8<br>(1.4 to 4.7)                    | 0.1<br>(< 0.05 to 0.3)                     | 0.2<br>(0.1 to 0.5)                    | 37.0<br>(13.1 to 62.3)                            | 27.5<br>(4.2 to 51.8)                               |
| <b>Diarrhoea, lower respiratory infections, and other common infectious diseases</b> | <b>332.5</b><br>(311.7 to 354.4)       | <b>20,864.8†</b><br>(18,796.8 to 23,006.7) | <b>10.8</b><br>(7.1 to 15.5)           | <b>-0.5</b><br>(-3.8 to 2.5)                      | <b>-4.3</b><br>(-7.7 to -1.2)                       |
| Diarrhoeal diseases                                                                  | 20.8<br>(19.4 to 22.4)                 | 1,373.0<br>(1,279.4 to 1,476.8)            | 2.3<br>(1.6 to 3.2)                    | -10.8<br>(-16.1 to -4.7)                          | -15.3<br>(-20.8 to -9.0)                            |
| Intestinal infectious diseases                                                       | < 0.05<br>(< 0.05 to < 0.05)           | < 0.05†<br>(< 0.05 to < 0.05)              | < 0.05<br>(< 0.05 to < 0.05)           | -8.2<br>(-19.7 to 3.9)                            | -14.2<br>(-25.2 to -2.4)                            |
| Typhoid fever                                                                        | < 0.05<br>(< 0.05 to < 0.05)           | < 0.05<br>(< 0.05 to < 0.05)               | < 0.05<br>(< 0.05 to < 0.05)           | -4.9<br>(-19.3 to 11.1)                           | -9.1<br>(-23.1 to 5.2)                              |
| Paratyphoid fever                                                                    | < 0.05<br>(< 0.05 to < 0.05)           | < 0.05<br>(< 0.05 to < 0.05)               | < 0.05<br>(< 0.05 to < 0.05)           | -6.3<br>(-20.6 to 11.0)                           | -10.2<br>(-23.8 to 4.9)                             |
| Other intestinal infectious diseases                                                 | --                                     | --                                         | < 0.05<br>(< 0.05 to < 0.05)           | -33.0<br>(-51.1 to -5.4)                          | -38.0<br>(-57.1 to -9.6)                            |
| Lower respiratory infections                                                         | 2.8<br>(2.6 to 3.0)                    | 129.0<br>(117.8 to 140.8)                  | 0.2<br>(0.1 to 0.2)                    | -2.3<br>(-14.5 to 11.4)                           | -11.6<br>(-22.3 to 0.7)                             |
| Upper respiratory infections                                                         | 247.2<br>(221.5 to 273.7)              | 18,906.4<br>(16,847.6 to 21,060.3)         | 6.1<br>(3.7 to 9.4)                    | 3.2<br>(-1.4 to 7.4)                              | 0.3<br>(-4.0 to 4.4)                                |
| Otitis media                                                                         | 60.9<br>(54.4 to 67.5)                 | 368.1<br>(302.4 to 454.9)                  | 1.5<br>(0.9 to 2.3)                    | -0.1<br>(-6.6 to 6.6)                             | -1.8<br>(-8.1 to 4.5)                               |
| Meningitis                                                                           | 1.2<br>(1.0 to 1.5)                    | 0.3<br>(0.3 to 0.4)                        | 0.1<br>(0.1 to 0.1)                    | -1.6<br>(-4.9 to 1.9)                             | -4.5<br>(-7.8 to -1.3)                              |
| Pneumococcal meningitis                                                              | 0.3<br>(0.2 to 0.3)                    | < 0.05<br>(< 0.05 to < 0.05)               | < 0.05<br>(< 0.05 to < 0.05)           | -14.1<br>(-20.8 to -7.9)                          | -16.8<br>(-23.2 to -10.4)                           |
| H influenzae type B meningitis                                                       | 0.1<br>(0.1 to 0.1)                    | < 0.05<br>(< 0.05 to < 0.05)               | < 0.05<br>(< 0.05 to < 0.05)           | 0.9<br>(-4.2 to 5.8)                              | -2.7<br>(-8.2 to 2.4)                               |
| Meningococcal infection                                                              | 0.2<br>(0.2 to 0.3)                    | 0.1<br>(0.1 to 0.1)                        | < 0.05<br>(< 0.05 to < 0.05)           | -0.5<br>(-5.9 to 6.5)                             | -5.2<br>(-10.5 to 1.0)                              |
| Other meningitis                                                                     | 0.7<br>(0.5 to 0.9)                    | 0.2<br>(0.2 to 0.2)                        | 0.1<br>(< 0.05 to 0.1)                 | 4.1<br>(-1.0 to 9.4)                              | 1.7<br>(-3.7 to 6.6)                                |
| Encephalitis                                                                         | 3.2<br>(2.1 to 4.7)                    | 3.0<br>(3.0 to 3.1)                        | 0.3<br>(0.2 to 0.4)                    | 7.1<br>(3.5 to 11.1)                              | 0.6<br>(-2.6 to 3.9)                                |
| Diphtheria                                                                           | < 0.05<br>(< 0.05 to < 0.05)           | < 0.05<br>(< 0.05 to < 0.05)               | < 0.05<br>(< 0.05 to < 0.05)           | -41.8<br>(-69.9 to 12.1)                          | -40.0<br>(-66.2 to 7.5)                             |
| Whooping cough                                                                       | 0.1<br>(0.1 to 0.1)                    | 0.6<br>(0.4 to 0.8)                        | < 0.05<br>(< 0.05 to < 0.05)           | -35.3<br>(-64.4 to 9.1)                           | -36.0<br>(-65.1 to 8.6)                             |
| Tetanus                                                                              | < 0.05<br>(< 0.05 to < 0.05)           | < 0.05<br>(< 0.05 to < 0.05)               | < 0.05<br>(< 0.05 to < 0.05)           | -41.8<br>(-52.6 to -28.7)                         | -44.7<br>(-54.7 to -32.8)                           |
| Measles                                                                              | < 0.05<br>(0.0 to < 0.05)              | < 0.05<br>(0.0 to < 0.05)                  | < 0.05<br>(0.0 to < 0.05)              | 40.4<br>(-100.0 to 9.1e+75)                       | 38.4<br>(-100.0 to 1.2e+76)                         |
| Varicella and herpes zoster                                                          | 5.8<br>(5.2 to 6.5)                    | 84.4<br>(80.9 to 88.4)                     | 0.3<br>(0.2 to 0.4)                    | 11.2<br>(-2.0 to 24.9)                            | 0.4<br>(-11.4 to 13.8)                              |
| <b>Neglected tropical diseases and malaria</b>                                       | <b>&lt; 0.05</b><br>(< 0.05 to < 0.05) | <b>&lt; 0.05†</b><br>(< 0.05 to < 0.05)    | <b>&lt; 0.05</b><br>(< 0.05 to < 0.05) | <b>-42.4</b><br>(-96.7 to 882.7)                  | <b>-45.7</b><br>(-96.9 to 869.1)                    |
| Malaria                                                                              | --                                     | --                                         | --                                     | --                                                | --                                                  |
| Chagas disease                                                                       | --                                     | --                                         | --                                     | --                                                | --                                                  |
| Leishmaniasis                                                                        | --                                     | --                                         | --                                     | --                                                | --                                                  |
| Visceral leishmaniasis                                                               | --                                     | --                                         | --                                     | --                                                | --                                                  |
| Cutaneous and mucocutaneous leishmaniasis                                            | --                                     | --                                         | --                                     | --                                                | --                                                  |
| African trypanosomiasis                                                              | --                                     | --                                         | --                                     | --                                                | --                                                  |
| Schistosomiasis                                                                      | --                                     | --                                         | --                                     | --                                                | --                                                  |
| Cysticercosis                                                                        | --                                     | --                                         | --                                     | --                                                | --                                                  |
| Cystic echinococcosis                                                                | < 0.05<br>(< 0.05 to < 0.05)           | < 0.05<br>(< 0.05 to < 0.05)               | < 0.05<br>(< 0.05 to < 0.05)           | -42.4<br>(-96.7 to 882.9)                         | -45.7<br>(-96.9 to 869.3)                           |
| Lymphatic filariasis                                                                 | --                                     | --                                         | --                                     | --                                                | --                                                  |
| Onchocerciasis                                                                       | --                                     | --                                         | --                                     | --                                                | --                                                  |
| Trachoma                                                                             | --                                     | --                                         | --                                     | --                                                | --                                                  |
| Dengue                                                                               | --                                     | --                                         | --                                     | --                                                | --                                                  |
| Yellow fever                                                                         | --                                     | --                                         | --                                     | --                                                | --                                                  |
| Rabies                                                                               | < 0.05<br>(< 0.05 to < 0.05)           | < 0.05<br>(< 0.05 to < 0.05)               | < 0.05<br>(< 0.05 to < 0.05)           | -6.7<br>(-26.0 to 20.5)                           | -26.0<br>(-41.8 to -6.8)                            |
| Intestinal nematode infections                                                       | --                                     | --                                         | --                                     | --                                                | --                                                  |
| Ascariasis                                                                           | --                                     | --                                         | --                                     | --                                                | --                                                  |

| Cause                                                                   | Prevalence in thousands (95% UI)              | Incidence in thousands (95% UI)                   | YLDs in thousands (95% UI)              |                                                   |                                                     |
|-------------------------------------------------------------------------|-----------------------------------------------|---------------------------------------------------|-----------------------------------------|---------------------------------------------------|-----------------------------------------------------|
|                                                                         | 2016 counts                                   | 2016 counts                                       | 2016 counts                             | Percentage change in counts between 2006 and 2016 | Percentage change in age-standardised rates between |
| Trichuriasis                                                            | --                                            | --                                                | --                                      | --                                                | --                                                  |
| Hookworm disease                                                        | --                                            | --                                                | --                                      | --                                                | --                                                  |
| Food-borne trematodiasis                                                | --                                            | --                                                | --                                      | --                                                | --                                                  |
| Leprosy                                                                 | --                                            | --                                                | --                                      | --                                                | --                                                  |
| Ebola virus disease                                                     | --                                            | --                                                | --                                      | --                                                | --                                                  |
| Zika virus disease                                                      | --                                            | --                                                | --                                      | --                                                | --                                                  |
| Guinea worm disease                                                     | --                                            | --                                                | --                                      | --                                                | --                                                  |
| Other neglected tropical diseases                                       | --                                            | --                                                | < 0.05<br>(< 0.05 to < 0.05)            | --                                                | --                                                  |
| <b>Maternal disorders</b>                                               | <b>3.0</b><br><b>(2.3 to 4.0)</b>             | <b>25.9†</b><br><b>(24.2 to 27.8)</b>             | <b>0.2</b><br><b>(0.1 to 0.2)</b>       | <b>-5.2</b><br><b>(-33.0 to 36.6)</b>             | <b>-10.6</b><br><b>(-37.0 to 28.9)</b>              |
| Maternal haemorrhage                                                    | 0.3<br>(0.2 to 0.6)                           | 2.4<br>(2.0 to 3.1)                               | < 0.05<br>(< 0.05 to < 0.05)            | -9.2<br>(-43.2 to 41.9)                           | -15.2<br>(-47.0 to 32.5)                            |
| Maternal sepsis and other pregnancy related infections                  | 0.8<br>(0.6 to 0.9)                           | 2.9<br>(2.5 to 3.3)                               | < 0.05<br>(< 0.05 to < 0.05)            | 11.2<br>(-43.5 to 123.7)                          | 7.5<br>(-46.6 to 123.0)                             |
| Maternal hypertensive disorders                                         | 1.9<br>(1.3 to 2.6)                           | 7.8<br>(6.9 to 8.7)                               | 0.1<br>(< 0.05 to 0.1)                  | -5.6<br>(-43.3 to 60.4)                           | -11.2<br>(-46.1 to 51.2)                            |
| Maternal obstructed labour and uterine rupture                          | < 0.05<br>(< 0.05 to < 0.05)                  | 2.0<br>(1.7 to 2.3)                               | < 0.05<br>(< 0.05 to < 0.05)            | 3.7<br>(-44.8 to 92.6)                            | -3.1<br>(-48.5 to 79.8)                             |
| Maternal abortion, miscarriage, and ectopic pregnancy                   | 0.1<br>(0.1 to 0.1)                           | 10.9<br>(9.7 to 12.2)                             | < 0.05<br>(< 0.05 to < 0.05)            | -10.4<br>(-54.7 to 67.8)                          | -15.0<br>(-56.9 to 60.5)                            |
| Other maternal disorders                                                | --                                            | --                                                | < 0.05<br>(< 0.05 to < 0.05)            | -9.9<br>(-36.2 to 29.9)                           | -14.9<br>(-39.8 to 23.1)                            |
| <b>Neonatal disorders</b>                                               | <b>45.4</b><br><b>(38.6 to 56.5)</b>          | <b>--</b>                                         | <b>7.8</b><br><b>(5.6 to 10.6)</b>      | <b>-0.9</b><br><b>(-11.7 to 12.1)</b>             | <b>-3.1</b><br><b>(-13.5 to 10.0)</b>               |
| Neonatal preterm birth complications                                    | 30.4<br>(23.6 to 41.6)                        | --                                                | 3.1<br>(2.1 to 4.6)                     | -3.2<br>(-24.4 to 26.9)                           | -4.7<br>(-25.9 to 24.9)                             |
| Neonatal encephalopathy due to birth asphyxia and trauma                | 18.8<br>(13.9 to 25.3)                        | --                                                | 3.6<br>(2.3 to 5.3)                     | 2.0<br>(-12.2 to 17.5)                            | -0.5<br>(-14.4 to 14.6)                             |
| Neonatal sepsis and other neonatal infections                           | 2.2<br>(1.0 to 4.7)                           | --                                                | 0.9<br>(0.4 to 2.2)                     | -3.2<br>(-19.8 to 21.2)                           | -6.3<br>(-23.9 to 19.4)                             |
| Hemolytic disease and other neonatal jaundice                           | 0.4<br>(0.3 to 0.4)                           | --                                                | 0.1<br>(0.1 to 0.1)                     | 1.8<br>(-6.3 to 9.4)                              | -0.6<br>(-8.3 to 6.8)                               |
| Other neonatal disorders                                                | --                                            | --                                                | 0.1<br>(0.1 to 0.2)                     | -6.2<br>(-22.4 to 13.4)                           | -7.6<br>(-23.6 to 11.7)                             |
| <b>Nutritional deficiencies</b>                                         | <b>240.4</b><br><b>(211.8 to 272.3)</b>       | <b>36.2†</b><br><b>(28.7 to 45.1)</b>             | <b>3.3</b><br><b>(2.2 to 5.0)</b>       | <b>3.8</b><br><b>(-9.2 to 19.4)</b>               | <b>-1.2</b><br><b>(-14.0 to 14.3)</b>               |
| Protein-energy malnutrition                                             | 2.7<br>(2.6 to 2.8)                           | 1.7<br>(1.7 to 1.7)                               | 0.3<br>(0.2 to 0.4)                     | 0.1<br>(-12.2 to 13.1)                            | -1.4<br>(-13.5 to 11.5)                             |
| Iodine deficiency                                                       | 65.1<br>(49.5 to 84.2)                        | 0.9<br>(0.7 to 1.1)                               | 1.6<br>(1.0 to 2.5)                     | 4.4<br>(-6.2 to 15.5)                             | -0.9<br>(-12.1 to 9.7)                              |
| Vitamin A deficiency                                                    | 41.4<br>(32.9 to 51.8)                        | 33.6<br>(26.2 to 42.6)                            | --                                      | --                                                | --                                                  |
| Iron-deficiency anaemia                                                 | 127.0<br>(99.0 to 158.5)                      | --                                                | 1.4<br>(0.8 to 2.4)                     | 4.0<br>(-23.4 to 43.6)                            | -1.5<br>(-27.4 to 34.7)                             |
| Other nutritional deficiencies                                          | --                                            | --                                                | < 0.05<br>(< 0.05 to < 0.05)            | -0.2<br>(-12.8 to 13.3)                           | -1.7<br>(-14.1 to 11.7)                             |
| <b>Other communicable, maternal, neonatal, and nutritional diseases</b> | <b>803.4</b><br><b>(746.2 to 869.3)</b>       | <b>131.1</b><br><b>(113.6 to 158.3)</b>           | <b>0.6</b><br><b>(0.3 to 1.0)</b>       | <b>-3.9</b><br><b>(-11.1 to 1.6)</b>              | <b>-6.3</b><br><b>(-13.6 to -0.0)</b>               |
| Sexually transmitted diseases excluding HIV                             | 676.1<br>(620.8 to 740.2)                     | 124.0<br>(106.6 to 151.3)                         | 0.4<br>(0.2 to 0.8)                     | -6.9<br>(-17.2 to 0.5)                            | -10.2<br>(-20.6 to -2.6)                            |
| Syphilis                                                                | 2.2<br>(1.6 to 2.9)                           | 2.2<br>(1.5 to 2.9)                               | < 0.05<br>(< 0.05 to < 0.05)            | 11.6<br>(-1.1 to 25.4)                            | -1.1<br>(-11.9 to 10.4)                             |
| Chlamydial infection                                                    | 12.8<br>(10.1 to 15.8)                        | 10.6<br>(8.5 to 13.0)                             | 0.1<br>(< 0.05 to 0.1)                  | -17.9<br>(-34.3 to 1.6)                           | -17.5<br>(-34.4 to 2.6)                             |
| Gonococcal infection                                                    | 4.9<br>(2.4 to 12.1)                          | 13.5<br>(4.2 to 40.2)                             | < 0.05<br>(< 0.05 to 0.1)               | -20.9<br>(-38.4 to 0.1)                           | -21.1<br>(-39.5 to 1.6)                             |
| Trichomoniasis                                                          | 89.7<br>(76.1 to 104.8)                       | 74.1<br>(62.9 to 87.1)                            | 0.1<br>(< 0.05 to 0.2)                  | 1.5<br>(-7.0 to 9.9)                              | -0.6<br>(-9.0 to 8.0)                               |
| Genital herpes                                                          | 575.6<br>(491.9 to 676.2)                     | 20.7<br>(17.5 to 24.5)                            | 0.1<br>(< 0.05 to 0.3)                  | 8.3<br>(-1.4 to 18.4)                             | 1.7<br>(-7.5 to 11.6)                               |
| Other sexually transmitted diseases                                     | 4.4<br>(3.9 to 5.0)                           | 2.9<br>(2.4 to 3.5)                               | 0.1<br>(< 0.05 to 0.1)                  | -20.4<br>(-34.4 to -4.0)                          | -19.7<br>(-34.6 to -2.6)                            |
| Hepatitis                                                               | 153.7<br>(136.3 to 172.7)                     | 7.1<br>(6.1 to 8.1)                               | < 0.05<br>(< 0.05 to < 0.05)            | -36.2<br>(-48.8 to -21.1)                         | -37.5<br>(-51.8 to -18.9)                           |
| Acute hepatitis A                                                       | 0.2<br>(0.1 to 0.2)                           | 2.6<br>(2.0 to 3.2)                               | < 0.05<br>(< 0.05 to < 0.05)            | -38.6<br>(-56.5 to -11.8)                         | -39.6<br>(-59.5 to -7.6)                            |
| Hepatitis B                                                             | 64.9<br>(51.2 to 81.2)                        | 3.4<br>(2.6 to 4.3)                               | < 0.05<br>(< 0.05 to < 0.05)            | -38.7<br>(-47.7 to -28.4)                         | -43.9<br>(-52.0 to -35.1)                           |
| Hepatitis C                                                             | 88.7<br>(79.2 to 98.6)                        | 0.9<br>(0.8 to 1.1)                               | < 0.05<br>(< 0.05 to < 0.05)            | -7.4<br>(-9.3 to -6.1)                            | -5.8<br>(-7.1 to -5.0)                              |
| Acute hepatitis E                                                       | < 0.05<br>(< 0.05 to < 0.05)                  | 0.2<br>(0.1 to 0.2)                               | < 0.05<br>(< 0.05 to < 0.05)            | -31.3<br>(-37.5 to -24.9)                         | -38.3<br>(-42.9 to -33.3)                           |
| Other infectious diseases                                               | 3.7<br>(2.8 to 4.8)                           | < 0.05<br>(< 0.05 to < 0.05)                      | 0.2<br>(0.1 to 0.3)                     | 6.1<br>(-3.1 to 15.9)                             | 4.7<br>(-7.0 to 18.1)                               |
| <b>Non-communicable diseases</b>                                        | <b>5,083.6</b><br><b>(5,049.4 to 5,119.3)</b> | <b>17,107.7†</b><br><b>(16,547.4 to 17,664.4)</b> | <b>654.0</b><br><b>(487.1 to 842.7)</b> | <b>8.3</b><br><b>(6.8 to 9.8)</b>                 | <b>-0.4</b><br><b>(-1.8 to 1.1)</b>                 |
| <b>Neoplasms</b>                                                        | <b>110.9</b><br><b>(105.8 to 116.3)</b>       | <b>34.6</b><br><b>(31.9 to 37.6)</b>              | <b>10.7</b><br><b>(7.8 to 14.0)</b>     | <b>19.1</b><br><b>(11.6 to 27.0)</b>              | <b>-0.9</b><br><b>(-7.2 to 6.1)</b>                 |
| Lip and oral cavity cancer                                              | 1.2<br>(1.1 to 1.4)                           | 0.3<br>(0.3 to 0.4)                               | 0.1<br>(0.1 to 0.2)                     | 24.2<br>(5.7 to 44.8)                             | 4.1<br>(-11.3 to 21.6)                              |
| Nasopharynx cancer                                                      | 0.1<br>(0.1 to 0.1)                           | < 0.05<br>(< 0.05 to < 0.05)                      | < 0.05<br>(< 0.05 to < 0.05)            | -1.5<br>(-17.3 to 18.9)                           | -15.7<br>(-27.9 to 1.1)                             |
| Other pharynx cancer                                                    | 0.6<br>(0.5 to 0.6)                           | 0.2<br>(0.1 to 0.2)                               | 0.1<br>(< 0.05 to 0.1)                  | 43.0<br>(20.2 to 67.8)                            | 24.0<br>(4.5 to 45.5)                               |
| Oesophageal cancer                                                      | 0.5<br>(0.4 to 0.6)                           | 0.3<br>(0.3 to 0.4)                               | 0.1<br>(0.1 to 0.1)                     | 19.2<br>(-0.8 to 42.4)                            | -2.4<br>(-19.2 to 16.5)                             |
| Stomach cancer                                                          | 1.6<br>(1.4 to 1.8)                           | 0.8<br>(0.7 to 0.8)                               | 0.2<br>(0.1 to 0.3)                     | -0.3<br>(-16.4 to 18.9)                           | -19.3<br>(-31.5 to -4.8)                            |
| Colon and rectum cancer                                                 | 12.0<br>(11.0 to 13.7)                        | 3.1<br>(2.8 to 3.5)                               | 1.1<br>(0.8 to 1.4)                     | 20.6<br>(6.2 to 38.3)                             | -2.3<br>(-14.3 to 13.2)                             |
| Liver cancer                                                            | 0.6<br>(0.4 to 0.7)                           | 0.6<br>(0.5 to 0.7)                               | 0.1<br>(0.1 to 0.2)                     | 28.4<br>(6.8 to 53.2)                             | 4.3<br>(-12.7 to 23.6)                              |
| Liver cancer due to hepatitis B                                         | 0.1<br>(0.1 to 0.2)                           | 0.1<br>(0.1 to 0.1)                               | < 0.05<br>(< 0.05 to < 0.05)            | 28.9<br>(4.0 to 55.6)                             | 7.7<br>(-11.9 to 29.5)                              |

| Cause                                              | Prevalence in thousands (95% UI)        | Incidence in thousands (95% UI)       | YLDs in thousands (95% UI)           |                                                   |                                                     |
|----------------------------------------------------|-----------------------------------------|---------------------------------------|--------------------------------------|---------------------------------------------------|-----------------------------------------------------|
|                                                    | 2016 counts                             | 2016 counts                           | 2016 counts                          | Percentage change in counts between 2006 and 2016 | Percentage change in age-standardised rates between |
| Liver cancer due to hepatitis C                    | 0.3<br>(0.2 to 0.4)                     | 0.2<br>(0.2 to 0.3)                   | < 0.05<br>(< 0.05 to 0.1)            | 31.8<br>(7.5 to 60.0)                             | 5.5<br>(-13.3 to 28.3)                              |
| Liver cancer due to alcohol use                    | 0.3<br>(0.2 to 0.4)                     | 0.2<br>(0.1 to 0.3)                   | < 0.05<br>(< 0.05 to 0.1)            | 21.5<br>(-0.9 to 48.2)                            | -1.3<br>(-18.9 to 20.4)                             |
| Liver cancer due to other causes                   | 0.2<br>(0.1 to 0.2)                     | 0.1<br>(0.1 to 0.1)                   | < 0.05<br>(< 0.05 to < 0.05)         | 35.7<br>(10.8 to 70.5)                            | 10.6<br>(-9.8 to 38.3)                              |
| Gallbladder and biliary tract cancer               | 0.3<br>(0.2 to 0.4)                     | 0.3<br>(0.2 to 0.4)                   | 0.1<br>(< 0.05 to 0.1)               | 7.5<br>(-11.8 to 33.7)                            | -14.6<br>(-30.2 to 6.3)                             |
| Pancreatic cancer                                  | 1.3<br>(1.1 to 1.5)                     | 1.2<br>(1.1 to 1.4)                   | 0.2<br>(0.2 to 0.3)                  | 23.3<br>(0.3 to 49.4)                             | -0.9<br>(-19.4 to 19.6)                             |
| Larynx cancer                                      | 0.5<br>(0.4 to 0.6)                     | 0.1<br>(0.1 to 0.1)                   | 0.1<br>(< 0.05 to 0.1)               | 5.0<br>(-13.6 to 26.3)                            | -12.3<br>(-26.9 to 4.7)                             |
| Tracheal, bronchus, and lung cancer                | 4.2<br>(3.7 to 4.7)                     | 2.7<br>(2.5 to 2.9)                   | 0.6<br>(0.5 to 0.8)                  | 13.7<br>(-4.4 to 35.1)                            | -8.1<br>(-22.9 to 9.0)                              |
| Malignant skin melanoma                            | 6.4<br>(4.9 to 7.4)                     | 1.3<br>(1.0 to 1.5)                   | 0.4<br>(0.3 to 0.6)                  | 39.1<br>(16.3 to 60.2)                            | 20.8<br>(1.3 to 39.1)                               |
| Non-melanoma skin cancer                           | 1.4<br>(0.8 to 2.4)                     | 3.7<br>(2.1 to 5.9)                   | < 0.05<br>(< 0.05 to 0.1)            | -29.8<br>(-55.9 to 52.5)                          | -43.3<br>(-64.7 to 20.9)                            |
| Non-melanoma skin cancer (squamous-cell carcinoma) | 1.0<br>(0.5 to 2.2)                     | 0.9<br>(0.5 to 2.1)                   | < 0.05<br>(< 0.05 to 0.1)            | -31.5<br>(-57.2 to 55.3)                          | -44.9<br>(-65.9 to 23.4)                            |
| Non-melanoma skin cancer (basal-cell carcinoma)    | 0.3<br>(0.1 to 0.5)                     | 2.8<br>(1.4 to 4.7)                   | < 0.05<br>(< 0.05 to < 0.05)         | 18.9<br>(-12.8 to 63.6)                           | -0.3<br>(-25.5 to 32.7)                             |
| Breast cancer                                      | 20.8<br>(19.1 to 23.0)                  | 4.2<br>(3.8 to 4.6)                   | 1.9<br>(1.3 to 2.5)                  | 6.8<br>(-3.8 to 19.6)                             | -7.4<br>(-16.7 to 4.9)                              |
| Cervical cancer                                    | 0.8<br>(0.7 to 1.0)                     | 0.2<br>(0.2 to 0.2)                   | 0.1<br>(0.1 to 0.1)                  | -17.4<br>(-30.4 to 0.1)                           | -25.9<br>(-38.3 to -8.7)                            |
| Uterine cancer                                     | 4.5<br>(3.9 to 5.3)                     | 1.0<br>(0.8 to 1.1)                   | 0.3<br>(0.2 to 0.5)                  | 14.4<br>(-10.8 to 45.7)                           | -4.8<br>(-25.3 to 21.8)                             |
| Ovarian cancer                                     | 2.0<br>(1.6 to 2.2)                     | 0.6<br>(0.5 to 0.7)                   | 0.3<br>(0.2 to 0.4)                  | 7.5<br>(-21.4 to 39.6)                            | -8.4<br>(-33.1 to 17.9)                             |
| Prostate cancer                                    | 27.0<br>(20.3 to 32.4)                  | 6.4<br>(5.1 to 7.4)                   | 2.2<br>(1.5 to 3.0)                  | 27.2<br>(7.4 to 53.0)                             | 0.6<br>(-15.7 to 21.8)                              |
| Testicular cancer                                  | 0.7<br>(0.6 to 0.9)                     | 0.1<br>(0.1 to 0.2)                   | < 0.05<br>(< 0.05 to 0.1)            | 32.7<br>(-5.5 to 84.3)                            | 29.7<br>(-10.1 to 82.2)                             |
| Kidney cancer                                      | 3.6<br>(3.2 to 4.1)                     | 1.0<br>(0.9 to 1.1)                   | 0.3<br>(0.2 to 0.4)                  | 19.1<br>(-1.0 to 40.2)                            | -0.0<br>(-17.0 to 17.3)                             |
| Bladder cancer                                     | 3.8<br>(3.3 to 4.2)                     | 0.9<br>(0.8 to 1.0)                   | 0.4<br>(0.2 to 0.5)                  | 17.8<br>(1.5 to 36.9)                             | -5.4<br>(-18.4 to 10.1)                             |
| Brain and nervous system cancer                    | 2.7<br>(2.1 to 3.3)                     | 1.0<br>(0.8 to 1.2)                   | 0.3<br>(0.2 to 0.4)                  | 8.5<br>(-14.8 to 32.2)                            | -1.0<br>(-22.0 to 20.5)                             |
| Thyroid cancer                                     | 1.9<br>(1.7 to 2.3)                     | 0.4<br>(0.3 to 0.4)                   | 0.1<br>(0.1 to 0.2)                  | 19.6<br>(0.7 to 46.0)                             | 6.7<br>(-11.0 to 31.7)                              |
| Mesothelioma                                       | 0.2<br>(0.1 to 0.2)                     | 0.1<br>(0.1 to 0.1)                   | < 0.05<br>(< 0.05 to 0.1)            | 19.2<br>(0.3 to 35.1)                             | -3.0<br>(-18.6 to 9.3)                              |
| Hodgkin lymphoma                                   | 0.7<br>(0.6 to 1.0)                     | 0.1<br>(0.1 to 0.2)                   | 0.1<br>(< 0.05 to 0.1)               | 10.3<br>(-11.7 to 36.8)                           | 4.8<br>(-19.1 to 35.0)                              |
| Non-Hodgkin's lymphoma                             | 5.8<br>(4.9 to 6.5)                     | 1.4<br>(1.2 to 1.6)                   | 0.5<br>(0.3 to 0.6)                  | 39.8<br>(16.1 to 63.4)                            | 19.1<br>(-1.6 to 39.1)                              |
| Multiple myeloma                                   | 1.3<br>(0.9 to 1.6)                     | 0.4<br>(0.3 to 0.5)                   | 0.2<br>(0.1 to 0.3)                  | 33.0<br>(0.1 to 73.1)                             | 9.3<br>(-17.4 to 42.2)                              |
| Leukaemia                                          | 3.0<br>(2.6 to 3.5)                     | 0.9<br>(0.8 to 1.0)                   | 0.4<br>(0.3 to 0.5)                  | 38.9<br>(16.4 to 62.5)                            | 10.9<br>(-9.3 to 31.7)                              |
| Acute lymphoid leukaemia                           | 0.4<br>(0.3 to 0.5)                     | 0.1<br>(0.1 to 0.1)                   | < 0.05<br>(< 0.05 to 0.1)            | 17.6<br>(-18.6 to 65.5)                           | 7.9<br>(-31.1 to 65.8)                              |
| Chronic lymphoid leukaemia                         | 1.5<br>(1.1 to 1.8)                     | 0.3<br>(0.3 to 0.4)                   | 0.2<br>(0.1 to 0.2)                  | 41.1<br>(9.2 to 77.0)                             | 10.8<br>(-13.2 to 38.9)                             |
| Acute myeloid leukaemia                            | 0.3<br>(0.3 to 0.4)                     | 0.2<br>(0.2 to 0.3)                   | 0.1<br>(< 0.05 to 0.1)               | 36.4<br>(12.9 to 63.1)                            | 8.4<br>(-9.0 to 28.7)                               |
| Chronic myeloid leukaemia                          | 0.2<br>(0.2 to 0.2)                     | 0.1<br>(0.1 to 0.1)                   | < 0.05<br>(< 0.05 to < 0.05)         | 16.0<br>(-7.0 to 42.3)                            | -6.1<br>(-24.4 to 14.4)                             |
| Other leukaemia                                    | 0.6<br>(0.5 to 0.8)                     | 0.1<br>(0.1 to 0.2)                   | 0.1<br>(0.1 to 0.1)                  | 62.4<br>(16.5 to 115.0)                           | 25.8<br>(-8.0 to 65.9)                              |
| Other neoplasms                                    | 5.1<br>(4.2 to 5.9)                     | 1.3<br>(1.1 to 1.5)                   | 0.4<br>(0.3 to 0.5)                  | 36.5<br>(9.5 to 64.1)                             | 16.8<br>(-6.2 to 39.0)                              |
| <b>Cardiovascular diseases</b>                     | <b>723.4</b><br><b>(698.0 to 755.3)</b> | <b>77.0†</b><br><b>(72.9 to 81.5)</b> | <b>52.1</b><br><b>(38.3 to 66.9)</b> | <b>12.0</b><br><b>(7.5 to 16.7)</b>               | <b>-7.5</b><br><b>(-11.0 to -3.8)</b>               |
| Rheumatic heart disease                            | 0.3<br>(0.2 to 0.3)                     | 0.1<br>(0.1 to 0.1)                   | < 0.05<br>(< 0.05 to < 0.05)         | 12.8<br>(3.4 to 23.0)                             | -1.8<br>(-9.1 to 5.7)                               |
| Ischaemic heart disease                            | 222.2<br>(206.0 to 242.3)               | 25.7<br>(23.6 to 28.2)                | 12.2<br>(8.6 to 16.4)                | 10.9<br>(5.0 to 16.7)                             | -8.6<br>(-13.2 to -4.1)                             |
| Cerebrovascular disease                            | 133.0<br>(125.0 to 141.2)               | 17.4‡<br>(16.0 to 19.0)               | 21.2<br>(15.3 to 26.8)               | 12.3<br>(5.0 to 22.3)                             | -6.5<br>(-12.5 to 1.0)                              |
| Ischaemic stroke                                   | 112.1<br>(101.8 to 124.3)               | 12.7‡<br>(11.3 to 14.1)               | 17.1<br>(12.3 to 22.0)               | 8.8<br>(0.6 to 20.5)                              | -9.8<br>(-16.5 to -0.8)                             |
| Hemorrhagic stroke                                 | 27.3<br>(24.2 to 30.6)                  | 4.7‡<br>(4.2 to 5.3)                  | 4.1<br>(2.9 to 5.2)                  | 29.9<br>(17.2 to 43.5)                            | 8.7<br>(-1.4 to 18.8)                               |
| Hypertensive heart disease                         | 18.5<br>(15.6 to 21.9)                  | --                                    | 1.5<br>(1.0 to 2.0)                  | 8.9<br>(-3.5 to 23.9)                             | -12.7<br>(-22.4 to -1.4)                            |
| Cardiomyopathy and myocarditis                     | 14.4<br>(12.9 to 16.3)                  | 3.7+<br>(3.3 to 4.2)                  | 1.2<br>(0.8 to 1.7)                  | 9.2<br>(-2.2 to 21.6)                             | -5.5<br>(-15.1 to 5.2)                              |
| Myocarditis                                        | 2.8<br>(2.6 to 3.1)                     | 3.7<br>(3.3 to 4.2)                   | 0.2<br>(0.1 to 0.3)                  | 3.6<br>(-10.2 to 20.3)                            | -4.3<br>(-17.6 to 11.5)                             |
| Alcoholic cardiomyopathy                           | 6.2<br>(5.1 to 7.3)                     | --                                    | 0.5<br>(0.3 to 0.7)                  | 9.6<br>(-7.9 to 30.5)                             | -2.4<br>(-18.7 to 15.3)                             |
| Other cardiomyopathy                               | 6.0<br>(5.0 to 7.3)                     | --                                    | 0.5<br>(0.3 to 0.7)                  | 11.4<br>(-3.8 to 28.1)                            | -9.6<br>(-21.7 to 2.9)                              |
| Atrial fibrillation and flutter                    | 90.6<br>(78.7 to 105.8)                 | 7.4<br>(6.3 to 8.7)                   | 7.0<br>(4.8 to 9.7)                  | 21.4<br>(14.8 to 28.5)                            | -2.1<br>(-7.6 to 3.4)                               |
| Peripheral vascular disease                        | 264.1<br>(231.0 to 302.4)               | 21.6<br>(18.5 to 25.7)                | 1.0<br>(0.5 to 1.9)                  | 15.1<br>(6.8 to 23.1)                             | -9.1<br>(-15.4 to -2.8)                             |
| Endocarditis                                       | 0.5<br>(0.4 to 0.6)                     | 1.1<br>(1.0 to 1.2)                   | < 0.05<br>(< 0.05 to 0.1)            | 6.6<br>(-15.6 to 36.6)                            | -11.7<br>(-27.8 to 10.6)                            |
| Other cardiovascular and circulatory diseases      | 156.2<br>(131.4 to 184.3)               | --                                    | 8.0<br>(5.5 to 11.4)                 | 6.0<br>(-4.6 to 17.7)                             | -11.8<br>(-19.9 to -2.8)                            |
| <b>Chronic respiratory diseases</b>                | <b>665.9</b><br><b>(643.3 to 690.1)</b> | <b>61.7†</b><br><b>(58.3 to 65.5)</b> | <b>26.5</b><br><b>(19.9 to 34.7)</b> | <b>5.9</b><br><b>(0.1 to 11.6)</b>                | <b>-1.8</b><br><b>(-6.4 to 2.5)</b>                 |
| Chronic obstructive pulmonary disease              | 254.0<br>(241.3 to 267.1)               | 14.2<br>(13.4 to 15.1)                | 8.7<br>(6.8 to 10.5)                 | 8.5<br>(-6.8 to 24.8)                             | -7.0<br>(-20.1 to 6.4)                              |
| Pneumoconiosis                                     | 0.3<br>(0.3 to 0.3)                     | < 0.05<br>(< 0.05 to < 0.05)          | 0.1<br>(< 0.05 to 0.1)               | -18.8<br>(-26.5 to -10.0)                         | -36.7<br>(-42.7 to -29.8)                           |
| Silicosis                                          | 0.1<br>(0.1 to 0.1)                     | < 0.05<br>(< 0.05 to < 0.05)          | < 0.05<br>(< 0.05 to < 0.05)         | 16.9<br>(8.5 to 26.3)                             | -8.7<br>(-15.0 to -1.5)                             |



| Cause                                                          | Prevalence in thousands (95% UI)        | Incidence in thousands (95% UI)    | YLDs in thousands (95% UI)        |                                                   |                                                     |
|----------------------------------------------------------------|-----------------------------------------|------------------------------------|-----------------------------------|---------------------------------------------------|-----------------------------------------------------|
|                                                                | 2016 counts                             | 2016 counts                        | 2016 counts                       | Percentage change in counts between 2006 and 2016 | Percentage change in age-standardised rates between |
| Asbestosis                                                     | 0.1<br>(0.1 to 0.2)                     | < 0.05<br>(< 0.05 to < 0.05)       | < 0.05<br>(< 0.05 to < 0.05)      | -32.5<br>(-43.4 to -19.7)                         | -47.6<br>(-56.0 to -37.8)                           |
| Coal workers pneumoconiosis                                    | --                                      | --                                 | --                                | --                                                | --                                                  |
| Other pneumoconiosis                                           | 0.1<br>(0.1 to 0.1)                     | < 0.05<br>(< 0.05 to < 0.05)       | < 0.05<br>(< 0.05 to < 0.05)      | -9.2<br>(-18.7 to 0.6)                            | -28.0<br>(-35.5 to -19.9)                           |
| Asthma                                                         | 437.3<br>(408.2 to 467.8)               | 46.9<br>(43.5 to 50.6)             | 16.9<br>(11.2 to 24.0)            | 4.3<br>(0.3 to 8.2)                               | -0.2<br>(-4.1 to 3.6)                               |
| Interstitial lung disease and pulmonary sarcoidosis            | 5.5<br>(5.0 to 6.1)                     | 0.6<br>(0.6 to 0.7)                | 0.6<br>(0.4 to 0.8)               | 12.6<br>(-0.5 to 28.0)                            | -6.8<br>(-16.7 to 4.5)                              |
| Other chronic respiratory diseases                             | --                                      | --                                 | 0.3<br>(0.2 to 0.3)               | 27.2<br>(7.1 to 48.4)                             | 25.7<br>(2.9 to 51.5)                               |
| <b>Cirrhosis and other chronic liver diseases</b>              | <b>58.7<br/>(56.1 to 61.3)</b>          | <b>1.3<br/>(1.2 to 1.3)</b>        | <b>1.3<br/>(0.9 to 1.8)</b>       | <b>15.1<br/>(4.2 to 26.2)</b>                     | <b>8.0<br/>(-2.4 to 18.8)</b>                       |
| Cirrhosis and other chronic liver diseases due to hepatitis B  | 8.2<br>(6.5 to 10.1)                    | 0.2<br>(0.1 to 0.2)                | 0.2<br>(0.1 to 0.3)               | 18.4<br>(-7.6 to 52.3)                            | 10.0<br>(-15.2 to 43.6)                             |
| Cirrhosis and other chronic liver diseases due to hepatitis C  | 18.0<br>(14.0 to 22.9)                  | 0.4<br>(0.3 to 0.5)                | 0.4<br>(0.2 to 0.6)               | 16.3<br>(-4.2 to 40.7)                            | 9.2<br>(-10.6 to 31.2)                              |
| Cirrhosis and other chronic liver diseases due to alcohol use  | 27.6<br>(23.6 to 31.8)                  | 0.6<br>(0.5 to 0.7)                | 0.6<br>(0.4 to 0.8)               | 15.4<br>(-0.2 to 33.7)                            | 7.7<br>(-6.9 to 24.7)                               |
| Cirrhosis and other chronic liver diseases due to other causes | 4.9<br>(3.9 to 6.3)                     | 0.1<br>(0.1 to 0.1)                | 0.2<br>(0.1 to 0.3)               | 8.8<br>(-14.3 to 36.7)                            | 5.7<br>(-17.6 to 36.5)                              |
| <b>Digestive diseases</b>                                      | <b>110.3<br/>(103.2 to 117.4)</b>       | <b>179.5†<br/>(167.7 to 191.4)</b> | <b>4.1<br/>(3.0 to 5.6)</b>       | <b>-3.0<br/>(-10.5 to 4.9)</b>                    | <b>-10.0<br/>(-17.1 to -2.4)</b>                    |
| Peptic ulcer disease                                           | 38.0<br>(34.1 to 42.4)                  | 7.5<br>(6.8 to 8.3)                | 0.3<br>(0.2 to 0.5)               | -15.4<br>(-37.4 to 12.6)                          | -21.8<br>(-43.3 to 7.5)                             |
| Gastritis and duodenitis                                       | 31.6<br>(27.5 to 36.1)                  | 22.7<br>(20.0 to 25.6)             | 0.3<br>(0.2 to 0.4)               | -2.0<br>(-25.4 to 25.8)                           | -11.2<br>(-32.5 to 15.9)                            |
| Appendicitis                                                   | 0.2<br>(0.2 to 0.3)                     | 6.2<br>(5.8 to 6.7)                | 0.1<br>(0.1 to 0.1)               | 3.6<br>(-13.6 to 24.9)                            | 3.0<br>(-17.9 to 31.2)                              |
| Paralytic ileus and intestinal obstruction                     | 0.1<br>(0.1 to 0.1)                     | 3.5<br>(3.2 to 3.9)                | < 0.05<br>(< 0.05 to 0.1)         | 8.4<br>(-9.1 to 28.6)                             | -1.5<br>(-13.8 to 12.6)                             |
| Inguinal, femoral, and abdominal hernia                        | 27.9<br>(25.3 to 30.7)                  | 76.5<br>(66.7 to 85.9)             | 1.9<br>(1.3 to 2.7)               | 0.0<br>(-10.1 to 11.9)                            | -6.6<br>(-16.2 to 4.5)                              |
| Inflammatory bowel disease                                     | 5.1<br>(4.8 to 5.4)                     | 1.5<br>(1.5 to 1.6)                | 0.7<br>(0.5 to 1.0)               | -10.8<br>(-22.3 to 2.3)                           | -15.6<br>(-27.2 to -1.6)                            |
| Vascular intestinal disorders                                  | 0.3<br>(0.2 to 0.3)                     | 1.2<br>(1.1 to 1.4)                | 0.1<br>(0.1 to 0.1)               | 22.8<br>(-6.9 to 60.5)                            | 2.5<br>(-19.1 to 29.7)                              |
| Gallbladder and biliary diseases                               | 9.7<br>(8.8 to 10.7)                    | 53.5<br>(47.0 to 60.2)             | 0.3<br>(0.2 to 0.4)               | -1.8<br>(-20.1 to 22.2)                           | -11.3<br>(-27.5 to 7.8)                             |
| Pancreatitis                                                   | 0.8<br>(0.7 to 0.8)                     | 6.8<br>(6.2 to 7.5)                | 0.1<br>(0.1 to 0.1)               | -2.8<br>(-14.9 to 11.0)                           | -12.1<br>(-21.5 to -2.0)                            |
| Other digestive diseases                                       | --                                      | --                                 | 0.3<br>(0.2 to 0.5)               | 2.6<br>(-5.3 to 10.8)                             | -6.0<br>(-13.4 to 1.4)                              |
| <b>Neurological disorders</b>                                  | <b>2,088.6<br/>(2,014.3 to 2,175.8)</b> | <b>794.7<br/>(696.1 to 905.0)</b>  | <b>70.6<br/>(48.8 to 94.5)</b>    | <b>6.4<br/>(-1.5 to 16.4)</b>                     | <b>-0.5<br/>(-8.7 to 9.9)</b>                       |
| Alzheimer's disease and other dementias                        | 84.0<br>(70.8 to 99.8)                  | 16.9<br>(14.0 to 20.6)             | 12.6<br>(8.8 to 16.6)             | 29.7<br>(24.0 to 36.0)                            | -1.0<br>(-5.3 to 3.1)                               |
| Parkinson's disease                                            | 10.3<br>(8.1 to 12.8)                   | 1.3<br>(1.0 to 1.6)                | 1.2<br>(0.7 to 1.7)               | 31.1<br>(18.0 to 45.2)                            | 5.0<br>(-5.7 to 16.8)                               |
| Epilepsy                                                       | 14.3<br>(3.2 to 24.7)                   | 1.2<br>(0.3 to 2.1)                | 3.3<br>(0.6 to 8.1)               | 3.4<br>(-80.0 to 490.7)                           | -1.6<br>(-81.1 to 458.7)                            |
| Multiple sclerosis                                             | 8.2<br>(7.4 to 9.1)                     | 0.2<br>(0.2 to 0.2)                | 2.1<br>(1.5 to 2.8)               | -0.3<br>(-25.1 to 17.4)                           | -5.8<br>(-28.7 to 11.1)                             |
| Motor neuron disease                                           | 1.2<br>(1.1 to 1.3)                     | 0.2<br>(0.2 to 0.2)                | 0.3<br>(0.2 to 0.3)               | 15.7<br>(10.0 to 21.6)                            | 2.6<br>(-1.6 to 7.1)                                |
| Migraine                                                       | 1,012.1<br>(955.8 to 1,065.6)           | 88.0<br>(82.1 to 95.0)             | 43.8<br>(28.4 to 61.0)            | 1.4<br>(-1.9 to 5.0)                              | -0.6<br>(-4.0 to 3.0)                               |
| Tension-type headache                                          | 1,351.8<br>(1,212.0 to 1,501.5)         | 686.8<br>(588.8 to 796.9)          | 6.5<br>(4.1 to 9.7)               | 3.6<br>(-1.5 to 9.1)                              | 0.2<br>(-4.7 to 5.5)                                |
| Other neurological disorders                                   | < 0.05<br>(< 0.05 to < 0.05)            | < 0.05<br>(< 0.05 to 0.1)          | 1.0<br>(0.5 to 1.8)               | 12.1<br>(-43.1 to 133.0)                          | 13.4<br>(-49.7 to 168.5)                            |
| <b>Mental and substance use disorders</b>                      | <b>976.6<br/>(949.2 to 1,004.5)</b>     | <b>383.0†<br/>(361.3 to 408.7)</b> | <b>139.8<br/>(101.3 to 181.3)</b> | <b>1.4<br/>(-0.9 to 3.7)</b>                      | <b>-1.7<br/>(-4.0 to 0.6)</b>                       |
| Schizophrenia                                                  | 16.1<br>(14.2 to 18.0)                  | 0.8<br>(0.7 to 0.8)                | 10.1<br>(7.5 to 12.6)             | 2.1<br>(-6.3 to 10.5)                             | -1.6<br>(-9.7 to 6.9)                               |
| Alcohol use disorders                                          | 145.3<br>(128.9 to 163.7)               | 41.8<br>(36.1 to 47.4)             | 14.4<br>(10.0 to 20.0)            | -5.0<br>(-13.8 to 5.0)                            | -7.5<br>(-16.3 to 2.8)                              |
| Drug use disorders                                             | 52.5<br>(49.8 to 55.5)                  | 6.3<br>(5.9 to 6.8)                | 11.5<br>(8.4 to 14.7)             | 4.8<br>(-6.9 to 16.1)                             | 3.0<br>(-8.9 to 15.1)                               |
| Opioid use disorders                                           | 16.9<br>(16.7 to 17.2)                  | 2.0<br>(1.9 to 2.1)                | 7.0<br>(5.0 to 8.9)               | 12.3<br>(-2.5 to 29.7)                            | 11.3<br>(-4.3 to 29.7)                              |
| Cocaine use disorders                                          | 3.3<br>(2.9 to 3.8)                     | 0.2<br>(0.2 to 0.3)                | 0.5<br>(0.3 to 0.7)               | 8.8<br>(-15.2 to 40.1)                            | 6.0<br>(-18.4 to 37.2)                              |
| Amphetamine use disorders                                      | 11.8<br>(9.4 to 15.1)                   | 0.9<br>(0.7 to 1.2)                | 1.6<br>(0.9 to 2.5)               | -13.9<br>(-33.8 to 11.5)                          | -14.8<br>(-35.3 to 11.9)                            |
| Cannabis use disorders                                         | 14.7<br>(12.5 to 17.1)                  | 2.3<br>(1.9 to 2.7)                | 0.4<br>(0.3 to 0.6)               | 19.8<br>(-0.1 to 43.9)                            | 22.1<br>(0.8 to 49.3)                               |
| Other drug use disorders                                       | 7.1<br>(6.5 to 7.7)                     | 0.9<br>(0.8 to 1.0)                | 2.1<br>(1.4 to 3.0)               | -4.6<br>(-23.2 to 18.7)                           | -6.9<br>(-26.2 to 17.9)                             |
| Depressive disorders                                           | 293.3<br>(277.5 to 311.9)               | 282.9<br>(261.5 to 307.8)          | 47.6<br>(33.3 to 64.5)            | -0.6<br>(-4.8 to 3.9)                             | -4.6<br>(-8.8 to -0.3)                              |
| Major depressive disorder                                      | 178.6<br>(166.1 to 192.2)               | 268.1<br>(246.8 to 292.8)          | 36.1<br>(25.1 to 49.4)            | -1.9<br>(-6.9 to 3.3)                             | -5.4<br>(-10.7 to -0.2)                             |
| Dysthymia                                                      | 121.1<br>(105.6 to 139.9)               | 14.8<br>(13.1 to 16.8)             | 11.5<br>(7.6 to 16.7)             | 4.0<br>(-3.5 to 11.7)                             | -1.6<br>(-8.7 to 5.6)                               |
| Bipolar disorder                                               | 55.1<br>(48.1 to 63.0)                  | 3.4<br>(3.0 to 3.8)                | 11.1<br>(7.0 to 16.3)             | 3.1<br>(-1.2 to 8.0)                              | 0.0<br>(-4.6 to 5.0)                                |
| Anxiety disorders                                              | 210.6<br>(193.0 to 229.0)               | 29.7<br>(27.5 to 32.1)             | 20.0<br>(14.1 to 27.1)            | 5.4<br>(-0.7 to 12.0)                             | 1.8<br>(-4.2 to 7.8)                                |
| Eating disorders                                               | 19.6<br>(16.0 to 23.7)                  | 5.1<br>(4.0 to 6.5)                | 4.1<br>(2.6 to 5.8)               | 5.0<br>(-4.2 to 14.1)                             | 4.7<br>(-4.0 to 13.8)                               |
| Anorexia nervosa                                               | 5.8<br>(4.3 to 7.6)                     | 1.4<br>(1.1 to 1.8)                | 1.2<br>(0.7 to 1.8)               | 3.0<br>(-11.1 to 20.4)                            | 3.1<br>(-10.7 to 20.4)                              |
| Bulimia nervosa                                                | 13.5<br>(10.1 to 17.7)                  | 3.7<br>(2.6 to 5.0)                | 2.8<br>(1.8 to 4.3)               | 5.9<br>(-5.4 to 17.9)                             | 5.5<br>(-5.4 to 17.7)                               |
| Autistic spectrum disorders                                    | 40.9<br>(37.1 to 45.6)                  | 0.2<br>(0.1 to 0.3)                | 6.5<br>(4.4 to 9.1)               | 3.9<br>(-1.2 to 9.2)                              | 0.4<br>(-4.6 to 5.7)                                |
| Autism                                                         | 16.1<br>(13.8 to 18.9)                  | < 0.05<br>(< 0.05 to < 0.05)       | 4.0<br>(2.6 to 5.8)               | 4.0<br>(-3.3 to 11.9)                             | 0.3<br>(-6.8 to 8.7)                                |
| Asperger syndrome and other autistic spectrum disorders        | 24.7<br>(20.8 to 29.4)                  | 0.2<br>(0.1 to 0.2)                | 2.4<br>(1.6 to 3.5)               | 3.7<br>(-1.1 to 8.9)                              | 0.5<br>(-4.5 to 6.3)                                |



| Cause                                                      | Prevalence in thousands (95% UI)              | Incidence in thousands (95% UI)                   | YLDs in thousands (95% UI)              |                                                   |                                                     |
|------------------------------------------------------------|-----------------------------------------------|---------------------------------------------------|-----------------------------------------|---------------------------------------------------|-----------------------------------------------------|
|                                                            | 2016 counts                                   | 2016 counts                                       | 2016 counts                             | Percentage change in counts between 2006 and 2016 | Percentage change in age-standardised rates between |
| Attention-deficit/hyperactivity disorder                   | 55.7<br>(50.2 to 62.5)                        | 2.3<br>(2.0 to 2.7)                               | 0.7<br>(0.4 to 1.1)                     | -1.1<br>(-7.5 to 5.0)                             | 0.3<br>(-6.1 to 6.7)                                |
| Conduct disorder                                           | 24.0<br>(19.7 to 28.4)                        | 7.6<br>(6.1 to 9.2)                               | 2.9<br>(1.8 to 4.5)                     | -5.3<br>(-11.8 to 1.4)                            | 0.1<br>(-6.7 to 7.2)                                |
| Idiopathic developmental intellectual disability           | 30.6<br>(13.1 to 47.6)                        | --                                                | 1.5<br>(0.7 to 2.5)                     | 1.5<br>(-5.7 to 9.4)                              | -1.4<br>(-9.1 to 6.7)                               |
| Other mental and substance use disorders                   | 129.6<br>(113.0 to 149.8)                     | 2.9<br>(2.6 to 3.2)                               | 9.5<br>(6.5 to 13.3)                    | 6.2<br>(1.7 to 11.0)                              | 0.6<br>(-4.1 to 5.5)                                |
| <b>Diabetes, urogenital, blood, and endocrine diseases</b> | <b>2,037.0</b><br><b>(1,834.1 to 2,261.8)</b> | <b>527.4†</b><br><b>(496.0 to 561.8)</b>          | <b>50.1</b><br><b>(35.1 to 67.0)</b>    | <b>8.2</b><br><b>(3.3 to 13.4)</b>                | <b>-3.9</b><br><b>(-8.1 to 0.7)</b>                 |
| Diabetes mellitus                                          | 339.5<br>(305.5 to 378.9)                     | 16.5<br>(14.6 to 18.7)                            | 27.3<br>(18.6 to 37.7)                  | 9.2<br>(0.8 to 18.5)                              | -4.6<br>(-11.8 to 2.9)                              |
| Acute glomerulonephritis                                   | 0.1<br>(0.1 to 0.1)                           | 1.1<br>(1.0 to 1.2)                               | < 0.05<br>(< 0.05 to < 0.05)            | 1.8<br>(-3.5 to 7.0)                              | -4.9<br>(-9.6 to -0.4)                              |
| Chronic kidney disease                                     | 200.2<br>(178.5 to 222.0)                     | 16.5<br>(14.2 to 18.7)                            | 4.8<br>(3.6 to 6.1)                     | 23.2<br>(13.0 to 34.1)                            | 4.8<br>(-3.2 to 13.4)                               |
| Chronic kidney disease due to diabetes mellitus            | 85.4<br>(75.6 to 95.5)                        | 7.3<br>(6.2 to 8.3)                               | 2.0<br>(1.5 to 2.6)                     | 19.8<br>(6.3 to 34.5)                             | 1.9<br>(-9.2 to 14.2)                               |
| Chronic kidney disease due to hypertension                 | 29.1<br>(25.6 to 32.8)                        | 2.8<br>(2.4 to 3.2)                               | 0.4<br>(0.3 to 0.6)                     | 52.0<br>(29.7 to 76.6)                            | 19.5<br>(2.9 to 37.8)                               |
| Chronic kidney disease due to glomerulonephritis           | 24.9<br>(21.5 to 28.3)                        | 1.5<br>(1.2 to 1.9)                               | 0.9<br>(0.7 to 1.2)                     | 11.8<br>(0.3 to 24.1)                             | -1.2<br>(-9.7 to 8.5)                               |
| Chronic kidney disease due to other causes                 | 60.7<br>(53.5 to 67.6)                        | 4.9<br>(4.3 to 5.6)                               | 1.4<br>(1.1 to 1.9)                     | 29.7<br>(15.2 to 47.8)                            | 10.6<br>(-0.3 to 24.7)                              |
| Urinary diseases and male infertility                      | 173.8<br>(161.5 to 187.4)                     | 314.7†<br>(283.2 to 347.5)                        | 5.6<br>(3.7 to 8.0)                     | 13.5<br>(7.6 to 19.0)                             | -3.1<br>(-8.0 to 1.6)                               |
| Interstitial nephritis and urinary tract infections        | 4.4<br>(3.8 to 5.0)                           | 229.1<br>(199.2 to 259.5)                         | 0.1<br>(0.1 to 0.2)                     | -0.2<br>(-14.2 to 15.2)                           | -2.0<br>(-16.2 to 13.1)                             |
| Urolithiasis                                               | 2.5<br>(2.2 to 2.8)                           | 65.6<br>(57.8 to 74.7)                            | 0.2<br>(0.1 to 0.3)                     | 10.1<br>(-7.5 to 30.4)                            | 1.0<br>(-12.8 to 17.3)                              |
| Benign prostatic hyperplasia                               | 158.3<br>(144.6 to 171.5)                     | 20.1<br>(17.4 to 22.9)                            | 5.1<br>(3.4 to 7.4)                     | 15.0<br>(8.8 to 21.4)                             | -2.8<br>(-8.1 to 2.8)                               |
| Male infertility                                           | 6.4<br>(4.7 to 8.6)                           | --                                                | < 0.05<br>(< 0.05 to 0.1)               | -11.0<br>(-22.6 to 1.8)                           | -8.3<br>(-19.0 to 4.6)                              |
| Other urinary diseases                                     | --                                            | --                                                | 0.1<br>(0.1 to 0.1)                     | -12.1<br>(-21.6 to -2.1)                          | -16.3<br>(-24.6 to -6.8)                            |
| Gynecological diseases                                     | 700.4<br>(661.1 to 738.5)                     | 149.2†<br>(140.8 to 158.0)                        | 5.4<br>(3.6 to 7.9)                     | -0.8<br>(-5.8 to 4.3)                             | -1.9<br>(-7.0 to 3.4)                               |
| Uterine fibroids                                           | 48.4<br>(43.6 to 53.8)                        | 4.0<br>(3.5 to 4.6)                               | 0.4<br>(0.2 to 0.8)                     | 1.2<br>(-7.6 to 10.6)                             | 1.8<br>(-7.7 to 12.7)                               |
| Polycystic ovarian syndrome                                | 1.4<br>(1.1 to 1.9)                           | 4.7<br>(3.3 to 6.4)                               | < 0.05<br>(< 0.05 to < 0.05)            | -1.1<br>(-23.4 to 25.7)                           | -1.0<br>(-23.5 to 25.5)                             |
| Female infertility                                         | 13.6<br>(8.8 to 19.8)                         | --                                                | 0.1<br>(< 0.05 to 0.2)                  | 4.3<br>(-6.6 to 18.3)                             | 8.0<br>(-3.2 to 22.1)                               |
| Endometriosis                                              | 4.0<br>(3.4 to 4.8)                           | 9.1<br>(7.1 to 11.6)                              | 0.4<br>(0.2 to 0.5)                     | -8.6<br>(-24.5 to 11.9)                           | -9.1<br>(-24.7 to 10.8)                             |
| Genital prolapse                                           | 401.8<br>(358.6 to 450.1)                     | 15.1<br>(13.2 to 17.2)                            | 1.2<br>(0.6 to 2.2)                     | 7.7<br>(-1.0 to 18.1)                             | -4.3<br>(-11.6 to 4.4)                              |
| Premenstrual syndrome                                      | 251.1<br>(234.7 to 268.3)                     | 83.9<br>(77.0 to 90.7)                            | 2.1<br>(1.3 to 3.2)                     | -3.3<br>(-10.4 to 4.5)                            | -1.2<br>(-8.8 to 6.8)                               |
| Other gynecological diseases                               | 33.0<br>(29.6 to 37.4)                        | 32.4<br>(29.1 to 36.7)                            | 1.1<br>(0.8 to 1.6)                     | -3.0<br>(-14.9 to 11.1)                           | -0.5<br>(-13.0 to 14.6)                             |
| Hemoglobinopathies and hemolytic anaemias                  | 1,009.2<br>(738.9 to 1,323.3)                 | --                                                | 2.1<br>(0.6 to 4.8)                     | 1.4<br>(-25.9 to 34.8)                            | -3.4<br>(-30.2 to 31.2)                             |
| Thalassemias                                               | 0.6<br>(0.1 to 2.3)                           | --                                                | < 0.05<br>(< 0.05 to 0.1)               | 13.7<br>(-34.2 to 70.9)                           | 11.9<br>(-35.9 to 73.7)                             |
| Thalassaemias trait                                        | 421.6<br>(124.0 to 929.6)                     | --                                                | 1.9<br>(0.5 to 4.5)                     | 1.8<br>(-27.6 to 38.0)                            | -2.7<br>(-30.9 to 33.0)                             |
| Sickle cell disorders                                      | < 0.05<br>(< 0.05 to 0.1)                     | --                                                | < 0.05<br>(< 0.05 to < 0.05)            | 0.3<br>(-17.3 to 22.2)                            | -0.0<br>(-17.6 to 20.2)                             |
| Sickle cell trait                                          | 75.2<br>(44.8 to 115.4)                       | --                                                | 0.1<br>(< 0.05 to 0.2)                  | -5.3<br>(-31.6 to 33.2)                           | -10.4<br>(-36.4 to 27.8)                            |
| G6PD deficiency                                            | 81.1<br>(68.0 to 96.9)                        | --                                                | < 0.05<br>(< 0.05 to < 0.05)            | -3.8<br>(-29.5 to 27.8)                           | -8.0<br>(-33.6 to 25.1)                             |
| G6PD trait                                                 | 466.3<br>(429.5 to 503.8)                     | --                                                | < 0.05<br>(< 0.05 to < 0.05)            | -3.5<br>(-41.7 to 54.1)                           | -0.9<br>(-40.7 to 61.7)                             |
| Other hemoglobinopathies and hemolytic anaemias            | 5.8<br>(4.9 to 6.8)                           | --                                                | 0.1<br>(0.1 to 0.2)                     | -2.0<br>(-17.7 to 18.8)                           | -15.0<br>(-30.5 to 6.4)                             |
| Endocrine, metabolic, blood, and immune disorders          | 142.5<br>(128.8 to 157.5)                     | 29.5<br>(26.4 to 32.8)                            | 4.9<br>(3.3 to 6.7)                     | -1.5<br>(-8.8 to 5.6)                             | -10.5<br>(-16.8 to -4.3)                            |
| <b>Musculoskeletal disorders</b>                           | <b>1,518.0</b><br><b>(1,463.3 to 1,580.6)</b> | <b>701.3</b><br><b>(637.6 to 779.1)</b>           | <b>165.5</b><br><b>(120.1 to 215.8)</b> | <b>12.1</b><br><b>(8.8 to 15.8)</b>               | <b>3.7</b><br><b>(0.6 to 7.0)</b>                   |
| Rheumatoid arthritis                                       | 35.0<br>(31.4 to 38.9)                        | 1.7<br>(1.5 to 1.9)                               | 8.1<br>(5.5 to 10.8)                    | 3.8<br>(-4.0 to 12.8)                             | -7.4<br>(-14.0 to 0.5)                              |
| Osteoarthritis                                             | 438.0<br>(412.3 to 466.0)                     | 18.2<br>(16.9 to 19.6)                            | 15.2<br>(9.9 to 22.0)                   | 17.4<br>(13.5 to 21.4)                            | 0.9<br>(-2.5 to 4.1)                                |
| Low back and neck pain                                     | 1,038.9<br>(981.5 to 1,106.0)                 | 430.6<br>(379.4 to 482.4)                         | 124.9<br>(88.4 to 164.0)                | 10.9<br>(6.9 to 15.3)                             | 3.3<br>(-0.5 to 7.2)                                |
| Low back pain                                              | 740.4<br>(658.6 to 830.2)                     | 362.4<br>(313.3 to 415.1)                         | 83.1<br>(58.3 to 110.2)                 | 12.8<br>(7.5 to 18.5)                             | 4.9<br>(-0.5 to 10.3)                               |
| Neck pain                                                  | 424.5<br>(367.9 to 484.8)                     | 68.2<br>(59.5 to 79.3)                            | 41.8<br>(28.2 to 59.1)                  | 7.3<br>(2.0 to 13.5)                              | 0.3<br>(-4.1 to 5.6)                                |
| Gout                                                       | 64.4<br>(57.0 to 72.8)                        | 10.3<br>(8.9 to 11.8)                             | 2.0<br>(1.3 to 2.8)                     | 14.7<br>(2.6 to 28.1)                             | 1.9<br>(-9.4 to 13.5)                               |
| Other musculoskeletal disorders                            | 180.1<br>(140.1 to 229.6)                     | 240.6<br>(197.1 to 301.0)                         | 15.2<br>(9.9 to 22.4)                   | 22.6<br>(9.2 to 38.9)                             | 14.7<br>(2.6 to 28.7)                               |
| <b>Other non-communicable diseases</b>                     | <b>4,157.7</b><br><b>(4,113.1 to 4,208.4)</b> | <b>14,347.1†</b><br><b>(13,802.4 to 14,905.1)</b> | <b>133.4</b><br><b>(93.0 to 186.2)</b>  | <b>11.1</b><br><b>(9.6 to 12.7)</b>               | <b>0.4</b><br><b>(-0.8 to 1.7)</b>                  |
| Congenital anomalies                                       | 81.5<br>(77.8 to 85.3)                        | --                                                | 8.5<br>(6.2 to 11.1)                    | 3.0<br>(-2.1 to 8.4)                              | -1.4<br>(-6.0 to 3.8)                               |
| Neural tube defects                                        | 4.7<br>(4.2 to 5.2)                           | --                                                | 1.4<br>(1.0 to 1.9)                     | -2.8<br>(-14.9 to 11.3)                           | -6.8<br>(-18.9 to 7.2)                              |
| Congenital heart anomalies                                 | 22.8<br>(20.5 to 25.3)                        | --                                                | 1.2<br>(0.5 to 2.1)                     | 16.0<br>(4.5 to 29.4)                             | 7.5<br>(-3.5 to 20.3)                               |
| Orofacial clefts                                           | 4.0<br>(3.6 to 4.6)                           | --                                                | < 0.05<br>(< 0.05 to 0.1)               | 2.8<br>(-10.9 to 17.2)                            | -1.9<br>(-15.7 to 11.9)                             |
| Down's syndrome                                            | 3.4<br>(3.0 to 3.8)                           | --                                                | 0.3<br>(0.2 to 0.4)                     | -6.3<br>(-16.8 to 5.0)                            | -5.5<br>(-16.9 to 6.5)                              |
| Turner syndrome                                            | 3.4<br>(3.0 to 3.9)                           | --                                                | 0.1<br>(< 0.05 to 0.1)                  | -8.2<br>(-29.0 to 16.5)                           | -8.7<br>(-30.3 to 15.9)                             |
| Klinefelter syndrome                                       | 6.5<br>(5.7 to 7.4)                           | --                                                | < 0.05<br>(< 0.05 to 0.1)               | -8.3<br>(-22.9 to 7.3)                            | -9.5<br>(-23.6 to 5.3)                              |

| Cause                                         | Prevalence in thousands (95% UI)              | Incidence in thousands (95% UI)          | YLDs in thousands (95% UI)           |                                                   |                                                     |
|-----------------------------------------------|-----------------------------------------------|------------------------------------------|--------------------------------------|---------------------------------------------------|-----------------------------------------------------|
|                                               | 2016 counts                                   | 2016 counts                              | 2016 counts                          | Percentage change in counts between 2006 and 2016 | Percentage change in age-standardised rates between |
| Other chromosomal abnormalities               | 10.3<br>(9.0 to 11.6)                         | --                                       | 1.0<br>(0.7 to 1.3)                  | -7.7<br>(-18.2 to 4.0)                            | -6.2<br>(-16.9 to 5.8)                              |
| Congenital musculoskeletal and limb anomalies | 17.7<br>(16.1 to 19.2)                        | --                                       | 2.4<br>(1.6 to 3.2)                  | 6.5<br>(-2.9 to 16.6)                             | 1.5<br>(-7.2 to 10.6)                               |
| Urogenital congenital anomalies               | 8.7<br>(7.8 to 9.7)                           | --                                       | 0.2<br>(0.1 to 0.3)                  | -0.8<br>(-10.7 to 9.2)                            | -4.2<br>(-13.8 to 5.8)                              |
| Digestive congenital anomalies                | 10.2<br>(9.1 to 11.6)                         | --                                       | 0.5<br>(0.3 to 0.7)                  | -6.5<br>(-19.0 to 6.2)                            | -10.5<br>(-22.6 to 1.9)                             |
| Other congenital anomalies                    | 5.0<br>(3.5 to 7.4)                           | --                                       | 1.5<br>(1.0 to 2.0)                  | 9.0<br>(0.1 to 18.7)                              | 2.8<br>(-5.8 to 11.7)                               |
| Skin and subcutaneous diseases                | 2,015.5<br>(1,972.2 to 2,057.9)               | 4,499.9<br>(4,233.6 to 4,787.4)          | 52.6<br>(35.7 to 75.4)               | 4.6<br>(2.8 to 6.6)                               | 0.8<br>(-1.1 to 2.8)                                |
| Dermatitis                                    | 393.4<br>(370.5 to 415.5)                     | 385.5<br>(334.6 to 444.2)                | 14.9<br>(8.9 to 24.1)                | 3.4<br>(0.1 to 6.9)                               | -0.5<br>(-4.1 to 3.4)                               |
| Psoriasis                                     | 118.4<br>(111.4 to 126.0)                     | 10.2<br>(9.6 to 10.9)                    | 10.1<br>(7.2 to 13.2)                | 9.9<br>(4.7 to 15.4)                              | 3.2<br>(-2.0 to 8.9)                                |
| Cellulitis                                    | 2.1<br>(1.9 to 2.2)                           | 33.7<br>(31.7 to 35.8)                   | 0.1<br>(0.1 to 0.2)                  | 10.1<br>(-8.0 to 31.3)                            | 1.6<br>(-14.7 to 21.2)                              |
| Pyoderma                                      | 23.8<br>(23.0 to 24.6)                        | 642.5<br>(620.6 to 665.4)                | 0.1<br>(0.1 to 0.3)                  | 11.4<br>(6.0 to 17.8)                             | 0.7<br>(-4.7 to 6.5)                                |
| Scabies                                       | 4.8<br>(3.5 to 6.5)                           | 14.4<br>(10.7 to 19.7)                   | 0.1<br>(0.1 to 0.2)                  | 1.7<br>(-9.5 to 14.2)                             | -0.1<br>(-11.3 to 12.6)                             |
| Fungal skin diseases                          | 445.3<br>(394.5 to 498.8)                     | 1,762.8<br>(1,523.0 to 2,025.3)          | 2.4<br>(1.0 to 5.1)                  | 13.9<br>(11.6 to 16.0)                            | 0.3<br>(-0.9 to 1.6)                                |
| Viral skin diseases                           | 154.1<br>(132.8 to 178.4)                     | 205.0<br>(177.0 to 237.4)                | 4.7<br>(2.9 to 7.1)                  | 2.6<br>(-0.7 to 6.4)                              | -0.1<br>(-2.9 to 3.0)                               |
| Acne vulgaris                                 | 483.7<br>(441.5 to 527.5)                     | 366.3<br>(296.1 to 467.7)                | 12.4<br>(8.3 to 17.9)                | -1.8<br>(-5.2 to 2.2)                             | 1.3<br>(-2.4 to 5.5)                                |
| Alopecia areata                               | 16.5<br>(16.0 to 17.0)                        | 29.0<br>(28.0 to 30.0)                   | 0.5<br>(0.3 to 0.8)                  | 3.6<br>(-4.5 to 12.2)                             | -0.1<br>(-7.9 to 8.5)                               |
| Pruritus                                      | 53.9<br>(47.9 to 61.0)                        | 42.5<br>(37.6 to 48.0)                   | 0.6<br>(0.3 to 1.0)                  | 8.4<br>(2.6 to 14.4)                              | 0.1<br>(-5.0 to 5.5)                                |
| Urticaria                                     | 34.1<br>(30.2 to 38.2)                        | 60.3<br>(53.6 to 67.4)                   | 2.0<br>(1.3 to 2.9)                  | 3.5<br>(-2.9 to 10.0)                             | 0.0<br>(-6.2 to 6.5)                                |
| Decubitus ulcer                               | 5.1<br>(4.5 to 5.7)                           | 19.1<br>(16.8 to 21.5)                   | 0.8<br>(0.5 to 1.0)                  | 14.0<br>(0.1 to 30.0)                             | -2.9<br>(-13.7 to 9.1)                              |
| Other skin and subcutaneous diseases          | 715.1<br>(694.5 to 735.5)                     | 928.7<br>(893.1 to 963.9)                | 3.9<br>(1.9 to 7.0)                  | 14.5<br>(12.1 to 17.0)                            | 2.7<br>(0.4 to 4.7)                                 |
| Sense organ diseases                          | 1,469.8<br>(1,433.9 to 1,502.5)               | 617.2†<br>(583.4 to 652.6)               | 46.3<br>(31.9 to 66.3)               | 18.2<br>(15.4 to 21.4)                            | -0.2<br>(-2.4 to 2.3)                               |
| Glaucoma                                      | 3.8<br>(2.8 to 5.1)                           | --                                       | 0.4<br>(0.2 to 0.5)                  | 24.9<br>(6.3 to 47.0)                             | 0.2<br>(-15.3 to 18.1)                              |
| Cataract                                      | 28.5<br>(20.4 to 40.1)                        | --                                       | 2.2<br>(1.4 to 3.1)                  | 20.9<br>(11.3 to 31.5)                            | -3.1<br>(-11.2 to 5.5)                              |
| Macular degeneration                          | 7.4<br>(5.4 to 10.2)                          | --                                       | 0.6<br>(0.4 to 0.9)                  | 28.8<br>(13.0 to 45.9)                            | 1.6<br>(-10.8 to 15.4)                              |
| Refraction and accommodation disorders        | 420.3<br>(378.3 to 467.6)                     | --                                       | 7.7<br>(4.6 to 12.3)                 | 8.2<br>(3.4 to 13.6)                              | -2.5<br>(-6.6 to 2.0)                               |
| Age-related and other hearing loss            | 1,163.9<br>(1,107.2 to 1,218.0)               | --                                       | 26.7<br>(17.7 to 38.9)               | 21.9<br>(17.5 to 27.0)                            | 0.5<br>(-2.8 to 4.4)                                |
| Other vision loss                             | 17.1<br>(13.1 to 21.9)                        | --                                       | 1.2<br>(0.8 to 1.7)                  | 15.1<br>(5.3 to 25.5)                             | 0.3<br>(-8.8 to 9.9)                                |
| Other sense organ diseases                    | 240.9<br>(221.6 to 260.2)                     | 617.2<br>(583.4 to 652.6)                | 7.5<br>(4.7 to 11.4)                 | 15.2<br>(11.1 to 19.9)                            | 0.9<br>(-2.7 to 4.9)                                |
| Oral disorders                                | 2,878.2<br>(2,809.7 to 2,957.0)               | 9,230.0†<br>(8,783.9 to 9,719.4)         | 26.0<br>(16.4 to 38.1)               | 16.1<br>(12.7 to 20.6)                            | 1.1<br>(-1.0 to 3.8)                                |
| Caries of deciduous teeth                     | 155.0<br>(108.2 to 193.5)                     | 604.2<br>(340.8 to 887.0)                | 0.1<br>(< 0.05 to 0.1)               | 4.4<br>(-6.8 to 17.3)                             | 0.1<br>(-10.6 to 12.6)                              |
| Caries of permanent teeth                     | 2,126.4<br>(2,031.7 to 2,224.1)               | 8,522.9<br>(8,126.4 to 8,900.9)          | 2.1<br>(0.9 to 3.9)                  | 2.9<br>(-0.1 to 5.8)                              | -2.0<br>(-4.9 to 0.8)                               |
| Periodontal disease                           | 509.7<br>(417.9 to 613.4)                     | 53.6<br>(41.8 to 66.8)                   | 3.3<br>(1.3 to 6.8)                  | 5.1<br>(0.7 to 9.5)                               | -0.4<br>(-4.0 to 2.9)                               |
| Edentulism and severe tooth loss              | 635.7<br>(558.6 to 714.6)                     | 49.3<br>(40.5 to 59.2)                   | 17.4<br>(11.3 to 24.4)               | 22.8<br>(18.1 to 28.7)                            | 2.5<br>(-1.0 to 6.8)                                |
| Other oral disorders                          | 109.1<br>(104.3 to 114.2)                     | --                                       | 3.2<br>(2.0 to 4.8)                  | 4.7<br>(1.6 to 8.1)                               | 0.0<br>(-3.1 to 3.4)                                |
| <b>Injuries</b>                               | <b>2,161.3</b><br><b>(2,019.9 to 2,326.3)</b> | <b>728.0†</b><br><b>(681.3 to 772.5)</b> | <b>69.2</b><br><b>(46.8 to 97.6)</b> | <b>-7.3</b><br><b>(-8.6 to -6.0)</b>              | <b>-15.0</b><br><b>(-16.6 to -13.6)</b>             |
| <b>Transport injuries</b>                     | <b>257.3</b><br><b>(238.9 to 277.0)</b>       | <b>56.8</b><br><b>(51.5 to 62.6)</b>     | <b>11.5</b><br><b>(7.5 to 16.6)</b>  | <b>-16.7</b><br><b>(-18.3 to -15.1)</b>           | <b>-22.0</b><br><b>(-23.8 to -20.2)</b>             |
| Road injuries                                 | 230.8<br>(213.8 to 249.7)                     | 53.0<br>(47.8 to 59.0)                   | 10.5<br>(6.9 to 15.2)                | -18.8<br>(-20.4 to -17.3)                         | -23.9<br>(-25.7 to -22.1)                           |
| Pedestrian road injuries                      | 33.9<br>(29.6 to 39.3)                        | 4.9<br>(4.0 to 5.9)                      | 1.7<br>(1.1 to 2.5)                  | -6.0<br>(-7.9 to -4.1)                            | -10.2<br>(-12.7 to -7.8)                            |
| Cyclist road injuries                         | 73.9<br>(61.6 to 87.3)                        | 21.3<br>(18.3 to 24.7)                   | 3.1<br>(2.0 to 4.5)                  | -19.1<br>(-20.7 to -17.6)                         | -23.8<br>(-25.8 to -22.0)                           |
| Motorcyclist road injuries                    | 42.5<br>(35.8 to 50.1)                        | 5.9<br>(4.8 to 7.2)                      | 2.0<br>(1.3 to 2.9)                  | -9.8<br>(-11.4 to -7.9)                           | -16.6<br>(-18.4 to -14.6)                           |
| Motor vehicle road injuries                   | 67.4<br>(56.7 to 77.5)                        | 18.3<br>(15.8 to 21.1)                   | 3.2<br>(2.1 to 4.6)                  | -31.0<br>(-32.5 to -29.5)                         | -35.6<br>(-37.3 to -34.0)                           |
| Other road injuries                           | 13.2<br>(10.9 to 15.7)                        | 2.7<br>(2.1 to 3.3)                      | 0.5<br>(0.3 to 0.7)                  | 16.9<br>(14.0 to 19.9)                            | 9.0<br>(6.0 to 12.3)                                |
| Other transport injuries                      | 26.5<br>(22.1 to 31.0)                        | 3.7<br>(3.4 to 4.1)                      | 0.9<br>(0.6 to 1.4)                  | 19.3<br>(17.6 to 21.0)                            | 8.5<br>(6.6 to 10.4)                                |
| <b>Unintentional injuries</b>                 | <b>1,810.9</b><br><b>(1,673.9 to 1,968.6)</b> | <b>636.5</b><br><b>(589.9 to 680.9)</b>  | <b>54.6</b><br><b>(37.1 to 77.2)</b> | <b>-4.9</b><br><b>(-6.3 to -3.4)</b>              | <b>-13.4</b><br><b>(-15.1 to -11.8)</b>             |
| Falls                                         | 1,021.2<br>(906.3 to 1,140.0)                 | 400.1<br>(357.4 to 442.4)                | 37.6<br>(26.3 to 51.5)               | -7.1<br>(-8.7 to -5.4)                            | -16.4<br>(-18.2 to -14.9)                           |
| Drowning                                      | 2.9<br>(2.6 to 3.2)                           | 0.3<br>(0.3 to 0.4)                      | 0.1<br>(0.1 to 0.2)                  | 8.4<br>(3.4 to 13.6)                              | -0.7<br>(-5.9 to 4.7)                               |
| Fire, heat, and hot substances                | 159.7<br>(137.3 to 185.3)                     | 8.4<br>(7.1 to 9.5)                      | 2.7<br>(1.5 to 4.6)                  | 1.2<br>(-1.9 to 4.4)                              | -6.0<br>(-9.0 to -2.9)                              |
| Poisonings                                    | 4.0<br>(3.2 to 5.0)                           | 3.4<br>(2.7 to 4.1)                      | 0.3<br>(0.2 to 0.5)                  | 46.0<br>(34.0 to 59.8)                            | 39.4<br>(27.2 to 54.0)                              |
| Exposure to mechanical forces                 | 319.9<br>(268.1 to 406.0)                     | 72.5<br>(61.9 to 84.3)                   | 5.7<br>(3.6 to 8.9)                  | -0.1<br>(-1.6 to 1.2)                             | -6.8<br>(-8.5 to -5.3)                              |
| Unintentional firearm injuries                | 8.7<br>(7.2 to 10.8)                          | 0.7<br>(0.5 to 1.0)                      | 0.1<br>(0.1 to 0.2)                  | 19.8<br>(17.9 to 21.9)                            | 10.6<br>(8.5 to 12.7)                               |
| Unintentional suffocation                     | 2.4<br>(1.9 to 3.0)                           | 0.4<br>(0.2 to 0.5)                      | 0.1<br>(< 0.05 to 0.1)               | 4.8<br>(3.0 to 6.9)                               | -4.5<br>(-6.5 to -2.5)                              |
| Other exposure to mechanical forces           | 308.9<br>(256.7 to 395.0)                     | 71.5<br>(61.1 to 83.2)                   | 5.5<br>(3.5 to 8.6)                  | -0.6<br>(-2.0 to 0.8)                             | -7.2<br>(-8.8 to -5.6)                              |

| Cause                                                                               | Prevalence in thousands (95% UI)        | Incidence in thousands (95% UI)       | YLDs in thousands (95% UI)              |                                                   |                                                     |
|-------------------------------------------------------------------------------------|-----------------------------------------|---------------------------------------|-----------------------------------------|---------------------------------------------------|-----------------------------------------------------|
|                                                                                     | 2016 counts                             | 2016 counts                           | 2016 counts                             | Percentage change in counts between 2006 and 2016 | Percentage change in age-standardised rates between |
| Adverse effects of medical treatment                                                | 1.7<br>(1.3 to 2.1)                     | 22.1<br>(19.2 to 25.2)                | 0.2<br>(0.1 to 0.3)                     | 24.6<br>(19.3 to 31.0)                            | 14.1<br>(9.4 to 19.0)                               |
| Animal contact                                                                      | 25.5<br>(22.5 to 29.7)                  | 13.1<br>(11.0 to 15.2)                | 0.5<br>(0.3 to 0.7)                     | -6.7<br>(-11.3 to -2.6)                           | -15.0<br>(-19.5 to -10.9)                           |
| Venomous animal contact                                                             | 3.3<br>(2.8 to 4.0)                     | 3.7<br>(2.8 to 4.8)                   | 0.2<br>(0.1 to 0.3)                     | -15.4<br>(-22.6 to -7.6)                          | -20.6<br>(-27.3 to -13.1)                           |
| Non-venomous animal contact                                                         | 22.1<br>(19.2 to 26.3)                  | 9.4<br>(7.7 to 11.1)                  | 0.3<br>(0.2 to 0.5)                     | 0.2<br>(-1.7 to 2.2)                              | -9.7<br>(-11.8 to -7.8)                             |
| Foreign body                                                                        | 33.9<br>(29.6 to 39.8)                  | 22.3<br>(19.6 to 26.1)                | 1.0<br>(0.6 to 1.4)                     | -3.0<br>(-4.5 to -1.4)                            | -10.3<br>(-12.0 to -8.6)                            |
| Pulmonary aspiration and foreign body in airway                                     | 6.0<br>(4.8 to 7.2)                     | 5.8<br>(5.2 to 6.6)                   | 0.1<br>(0.1 to 0.2)                     | 13.4<br>(11.5 to 15.6)                            | 1.8<br>(-0.3 to 4.1)                                |
| Foreign body in eyes                                                                | 2.9<br>(2.0 to 4.0)                     | 11.4<br>(8.8 to 15.0)                 | 0.2<br>(0.1 to 0.3)                     | 13.9<br>(10.1 to 18.3)                            | 6.0<br>(2.8 to 9.3)                                 |
| Foreign body in other body part                                                     | 25.0<br>(21.1 to 30.3)                  | 5.1<br>(4.7 to 5.5)                   | 0.6<br>(0.4 to 0.9)                     | -10.6<br>(-11.9 to -9.1)                          | -17.4<br>(-18.9 to -15.8)                           |
| Environmental heat and cold exposure                                                | 24.1<br>(21.7 to 27.0)                  | 6.3<br>(5.6 to 7.1)                   | 0.9<br>(0.6 to 1.3)                     | 15.0<br>(10.8 to 19.4)                            | -0.2<br>(-3.8 to 3.9)                               |
| Other unintentional injuries                                                        | 218.2<br>(185.0 to 257.6)               | 88.1<br>(74.7 to 102.1)               | 5.5<br>(3.6 to 8.2)                     | -2.8<br>(-4.8 to -1.0)                            | -9.6<br>(-12.2 to -7.1)                             |
| <b>Self-harm and interpersonal violence</b>                                         | <b>154.2</b><br><b>(141.2 to 166.8)</b> | <b>34.6†</b><br><b>(31.3 to 37.9)</b> | <b>3.2</b><br><b>(2.1 to 4.6)</b>       | <b>-9.7</b><br><b>(-11.5 to -7.7)</b>             | <b>-13.3</b><br><b>(-15.3 to -11.4)</b>             |
| Self-harm                                                                           | 24.5<br>(19.9 to 29.9)                  | 16.8<br>(15.0 to 19.1)                | 1.0<br>(0.6 to 1.4)                     | -5.6<br>(-10.3 to -0.7)                           | -11.6<br>(-16.3 to -6.6)                            |
| Self-harm by firearm                                                                | 0.2<br>(0.2 to 0.3)                     | < 0.05<br>(< 0.05 to < 0.05)          | < 0.05<br>(< 0.05 to < 0.05)            | -9.4<br>(-11.3 to -7.4)                           | -14.9<br>(-17.1 to -12.7)                           |
| Self-harm by other specified means                                                  | 24.3<br>(19.7 to 29.6)                  | 16.8<br>(14.9 to 19.0)                | 1.0<br>(0.6 to 1.4)                     | -5.6<br>(-10.3 to -0.7)                           | -11.6<br>(-16.3 to -6.5)                            |
| Interpersonal violence                                                              | 129.7<br>(118.1 to 141.8)               | 17.8†<br>(15.3 to 20.6)               | 2.2<br>(1.5 to 3.2)                     | -11.3<br>(-12.7 to -9.8)                          | -14.0<br>(-15.8 to -12.2)                           |
| Assault by firearm                                                                  | 3.5<br>(2.9 to 4.2)                     | 0.4<br>(0.3 to 0.5)                   | 0.1<br>(< 0.05 to 0.1)                  | -3.3<br>(-5.2 to -1.4)                            | -9.2<br>(-11.2 to -7.3)                             |
| Assault by sharp object                                                             | 14.2<br>(11.8 to 17.0)                  | 3.4<br>(2.6 to 4.3)                   | 0.3<br>(0.2 to 0.4)                     | -17.8<br>(-19.6 to -16.1)                         | -21.5<br>(-23.4 to -19.6)                           |
| Sexual violence                                                                     | 63.6<br>(56.3 to 72.2)                  | --                                    | 0.5<br>(0.4 to 0.7)                     | -2.7<br>(-6.6 to 0.9)                             | -4.1<br>(-8.6 to -0.2)                              |
| Assault by other means                                                              | 48.4<br>(39.7 to 59.0)                  | 14.0<br>(11.9 to 16.3)                | 1.4<br>(0.9 to 2.0)                     | -13.2<br>(-14.8 to -11.7)                         | -17.3<br>(-19.0 to -15.6)                           |
| <b>Forces of nature, conflict and terrorism, and executions and police conflict</b> | <b>2.5</b><br><b>(1.4 to 3.8)</b>       | <b>0.2†</b><br><b>(0.1 to 0.2)</b>    | <b>0.1</b><br><b>(&lt; 0.05 to 0.1)</b> | <b>-1.3</b><br><b>(-3.0 to 1.1)</b>               | <b>-12.6</b><br><b>(-14.4 to -9.4)</b>              |
| Exposure to forces of nature                                                        | 1.7<br>(0.7 to 3.0)                     | --                                    | < 0.05<br>(< 0.05 to 0.1)               | -10.1<br>(-11.9 to -7.6)                          | -22.4<br>(-24.4 to -19.9)                           |
| Conflict and terrorism                                                              | --                                      | --                                    | --                                      | --                                                | --                                                  |
| Executions and police conflict                                                      | 0.8<br>(0.4 to 1.3)                     | 0.2<br>(0.1 to 0.2)                   | < 0.05<br>(< 0.05 to 0.1)               | 22.4<br>(19.1 to 24.6)                            | 13.4<br>(11.1 to 15.5)                              |
| <b>Impairments</b>                                                                  | --                                      | --                                    | --                                      | --                                                | --                                                  |
| Anaemia                                                                             | 425.7<br>(294.0 to 642.0)               | --                                    | 7.2<br>(4.4 to 11.3)                    | 9.0<br>(-13.0 to 34.2)                            | -1.3<br>(-21.4 to 23.3)                             |
| Developmental intellectual disability                                               | 96.0<br>(78.3 to 113.7)                 | --                                    | 11.1<br>(8.5 to 14.2)                   | 2.0<br>(-1.8 to 6.2)                              | -1.4<br>(-5.2 to 3.0)                               |
| Epilepsy                                                                            | 23.8<br>(12.5 to 34.5)                  | --                                    | 6.6<br>(3.5 to 11.6)                    | 1.5<br>(-49.9 to 115.5)                           | -2.6<br>(-50.4 to 100.3)                            |
| Guillain-Barre syndrome                                                             | 0.1<br>(< 0.05 to 0.1)                  | --                                    | < 0.05<br>(< 0.05 to < 0.05)            | 9.9<br>(6.1 to 14.2)                              | 0.2<br>(0.1 to 0.3)                                 |
| Hearing loss                                                                        | 1,205.3<br>(1,148.9 to 1,258.9)         | --                                    | 28.4<br>(18.9 to 41.2)                  | 20.2<br>(16.2 to 25.0)                            | 0.1<br>(-2.9 to 3.7)                                |
| Heart failure                                                                       | 124.5<br>(107.8 to 141.4)               | --                                    | 12.8<br>(9.3 to 16.5)                   | 12.5<br>(2.8 to 22.5)                             | -10.3<br>(-17.7 to -2.8)                            |
| Infertility                                                                         | 34.9<br>(28.3 to 43.8)                  | --                                    | 0.3<br>(0.1 to 0.5)                     | -4.4<br>(-11.7 to 2.3)                            | -3.1<br>(-10.8 to 3.8)                              |
| Pelvic inflammatory disease                                                         | 0.5<br>(0.4 to 0.6)                     | --                                    | 0.1<br>(< 0.05 to 0.1)                  | -35.1<br>(-50.3 to -16.7)                         | -35.0<br>(-50.7 to -15.2)                           |
| Vision loss                                                                         | 486.8<br>(436.9 to 541.6)               | --                                    | 14.0<br>(9.8 to 19.9)                   | 10.7<br>(6.6 to 14.9)                             | -2.4<br>(-5.6 to 1.1)                               |

We did not calculate incidence for the nine impairments, certain NTDs, and causes with only birth prevalence. Blank cells mean that no estimate is available.

† Incidence for aggregate causes represents the sum of the incidence of the causes below the aggregate.

‡ Incidence estimates for stroke represent first-ever stroke only.

^ Incidence of HIV/AIDS represents new infections of HIV only and does not include new infections of Tuberculosis in HIV positive cases.



SR Table 14: Prevalence, incidence, and YLDs for 2016, percentage change of YLD counts and percentage change of age-standardised YLD rates between 2006 and 2016 by cause and impairments, for all ages, France.

| Cause                                                                                | Prevalence in thousands (95% UI)          | Incidence in thousands (95% UI)               | YLDs in thousands (95% UI)              |                                                   |                                                     |
|--------------------------------------------------------------------------------------|-------------------------------------------|-----------------------------------------------|-----------------------------------------|---------------------------------------------------|-----------------------------------------------------|
|                                                                                      | 2016 counts                               | 2016 counts                                   | 2016 counts                             | Percentage change in counts between 2006 and 2016 | Percentage change in age-standardised rates between |
| <b>All causes</b>                                                                    | <b>60,794.4</b><br>(60,516.6 to 61,013.6) | <b>461,162.8†</b><br>(434,706.2 to 487,993.6) | <b>8,050.0</b><br>(5,950.7 to 10,462.9) | <b>9.2</b><br>(7.1 to 11.3)                       | <b>0.2</b><br>(-2.0 to 2.3)                         |
| <b>Communicable, maternal, neonatal, and nutritional disorders</b>                   | <b>19,741.3</b><br>(18,716.1 to 20,813.6) | <b>247,778.9†</b><br>(222,018.3 to 273,823.8) | <b>241.8</b><br>(171.6 to 325.5)        | <b>3.6</b><br>(-1.1 to 9.6)                       | <b>-1.1</b><br>(-5.7 to 4.4)                        |
| <b>HIV/AIDS and tuberculosis</b>                                                     | <b>6,697.9</b><br>(5,508.2 to 7,782.5)    | <b>7.7†</b><br>(5.5 to 10.4)                  | <b>6.4</b><br>(2.7 to 13.0)             | <b>1.1</b><br>(-20.4 to 20.2)                     | <b>-7.7</b><br>(-26.2 to 9.2)                       |
| Tuberculosis                                                                         | 5,946.8<br>(4,786.1 to 7,273.9)           | 4.7†<br>(3.7 to 5.9)                          | 1.2<br>(0.8 to 1.9)                     | -19.9<br>(-36.6 to 3.2)                           | -22.5<br>(-40.3 to 0.6)                             |
| Drug-susceptible tuberculosis                                                        | 3.7<br>(2.9 to 4.9)                       | 4.6<br>(3.6 to 5.8)                           | 1.2<br>(0.7 to 1.9)                     | -20.0<br>(-37.0 to 3.4)                           | -22.6<br>(-40.6 to 0.9)                             |
| Multidrug-resistant tuberculosis without extensive drug resistance                   | 0.1<br>(< 0.05 to 0.1)                    | 0.1<br>(< 0.05 to 0.1)                        | < 0.05<br>(< 0.05 to < 0.05)            | -17.9<br>(-41.5 to 13.7)                          | -20.1<br>(-43.1 to 9.8)                             |
| Extensively drug-resistant tuberculosis                                              | < 0.05<br>(< 0.05 to < 0.05)              | < 0.05<br>(< 0.05 to < 0.05)                  | < 0.05<br>(< 0.05 to < 0.05)            | 76.6<br>(26.0 to 144.6)                           | 71.9<br>(22.4 to 136.4)                             |
| Latent tuberculosis infection                                                        | 5,943.0<br>(4,782.7 to 7,269.7)           | --                                            | --                                      | --                                                | --                                                  |
| HIV/AIDS                                                                             | 56.7<br>(19.4 to 120.8)                   | 3.0^<br>(1.2 to 5.5)                          | 5.1<br>(1.7 to 11.6)                    | 8.0<br>(-18.6 to 31.6)                            | -2.7<br>(-26.4 to 18.5)                             |
| Drug-susceptible HIV/AIDS - Tuberculosis                                             | 0.3<br>(0.2 to 0.5)                       | 0.4<br>(0.2 to 0.6)                           | 0.1<br>(0.1 to 0.2)                     | -47.6<br>(-53.2 to -41.1)                         | -52.9<br>(-58.0 to -47.1)                           |
| Multidrug-resistant HIV/AIDS - Tuberculosis without extensive drug resistance        | < 0.05<br>(< 0.05 to < 0.05)              | < 0.05<br>(< 0.05 to < 0.05)                  | < 0.05<br>(< 0.05 to < 0.05)            | -44.4<br>(-60.0 to -21.7)                         | -50.0<br>(-64.1 to -29.6)                           |
| Extensively drug-resistant HIV/AIDS - Tuberculosis                                   | < 0.05<br>(< 0.05 to < 0.05)              | < 0.05<br>(< 0.05 to < 0.05)                  | < 0.05<br>(< 0.05 to < 0.05)            | 19.7<br>(-14.1 to 68.2)                           | 7.5<br>(-22.8 to 51.1)                              |
| HIV/AIDS resulting in other diseases                                                 | 56.4<br>(19.2 to 120.5)                   | 3.0<br>(1.2 to 5.5)                           | 5.0<br>(1.6 to 11.4)                    | 11.0<br>(-15.2 to 36.5)                           | 0.0<br>(-23.3 to 22.9)                              |
| <b>Diarrhoea, lower respiratory infections, and other common infectious diseases</b> | <b>3,917.5</b><br>(3,659.1 to 4,196.8)    | <b>244,836.4†</b><br>(219,253.2 to 271,164.5) | <b>120.7</b><br>(78.8 to 176.0)         | <b>6.3</b><br>(2.6 to 12.5)                       | <b>0.9</b><br>(-2.2 to 4.8)                         |
| Diarrhoeal diseases                                                                  | 150.7<br>(140.1 to 162.7)                 | 10,063.4<br>(9,346.6 to 10,830.9)             | 16.8<br>(11.5 to 23.2)                  | 15.6<br>(7.5 to 24.4)                             | 6.7<br>(-1.8 to 15.2)                               |
| Intestinal infectious diseases                                                       | < 0.05<br>(< 0.05 to < 0.05)              | 0.4†<br>(0.3 to 0.5)                          | < 0.05<br>(< 0.05 to < 0.05)            | 15.0<br>(-1.9 to 34.4)                            | 7.9<br>(-8.7 to 26.5)                               |
| Typhoid fever                                                                        | < 0.05<br>(< 0.05 to < 0.05)              | 0.3<br>(0.2 to 0.4)                           | < 0.05<br>(< 0.05 to < 0.05)            | 27.6<br>(7.0 to 52.6)                             | 20.2<br>(-0.2 to 44.1)                              |
| Paratyphoid fever                                                                    | < 0.05<br>(< 0.05 to < 0.05)              | 0.1<br>(0.1 to 0.1)                           | < 0.05<br>(< 0.05 to < 0.05)            | -43.1<br>(-53.0 to -30.9)                         | -45.9<br>(-55.6 to -34.8)                           |
| Other intestinal infectious diseases                                                 | --                                        | --                                            | < 0.05<br>(< 0.05 to < 0.05)            | -5.4<br>(-25.2 to 23.2)                           | -14.1<br>(-36.3 to 20.0)                            |
| Lower respiratory infections                                                         | 67.9<br>(62.8 to 73.2)                    | 2,751.6<br>(2,528.3 to 3,011.6)               | 4.0<br>(2.6 to 5.6)                     | 23.7<br>(10.8 to 38.2)                            | 8.5<br>(-4.3 to 21.2)                               |
| Upper respiratory infections                                                         | 2,959.7<br>(2,646.6 to 3,278.9)           | 226,552.9<br>(201,169.9 to 252,491.9)         | 73.4<br>(44.1 to 113.3)                 | 3.9<br>(-0.5 to 8.7)                              | 0.1<br>(-4.2 to 4.8)                                |
| Otitis media                                                                         | 713.1<br>(616.1 to 844.8)                 | 4,307.4<br>(2,914.5 to 6,799.3)               | 18.0<br>(11.2 to 27.3)                  | 2.2<br>(-4.3 to 9.0)                              | -1.7<br>(-7.6 to 4.6)                               |
| Meningitis                                                                           | 11.5<br>(7.2 to 48.9)                     | 1.8<br>(1.5 to 2.1)                           | 1.6<br>(0.8 to 7.3)                     | 44.5<br>(-3.3 to 593.7)                           | 11.2<br>(-7.6 to 203.0)                             |
| Pneumococcal meningitis                                                              | 1.4<br>(1.2 to 1.6)                       | < 0.05<br>(< 0.05 to 0.1)                     | 0.2<br>(0.2 to 0.3)                     | -0.2<br>(-4.8 to 4.2)                             | -4.3<br>(-8.6 to -0.1)                              |
| H influenzae type B meningitis                                                       | 0.9<br>(0.8 to 1.2)                       | 0.1<br>(0.1 to 0.2)                           | 0.1<br>(0.1 to 0.2)                     | -0.1<br>(-5.5 to 5.4)                             | -4.8<br>(-10.5 to 0.8)                              |
| Meningococcal infection                                                              | 3.7<br>(0.7 to 40.9)                      | 0.1<br>(0.1 to 0.2)                           | 0.7<br>(0.1 to 6.4)                     | 331.0<br>(-3.6 to 4,096.6)                        | 121.0<br>(-6.2 to 1,522.4)                          |
| Other meningitis                                                                     | 5.4<br>(4.2 to 6.8)                       | 1.5<br>(1.3 to 1.7)                           | 0.6<br>(0.4 to 0.8)                     | -1.0<br>(-5.5 to 3.7)                             | -5.5<br>(-10.0 to -0.8)                             |
| Encephalitis                                                                         | 29.1<br>(19.0 to 43.5)                    | 20.2<br>(17.3 to 23.5)                        | 3.4<br>(2.3 to 4.5)                     | 6.0<br>(2.4 to 9.9)                               | -0.3<br>(-3.6 to 3.2)                               |
| Diphtheria                                                                           | < 0.05<br>(< 0.05 to < 0.05)              | < 0.05<br>(< 0.05 to < 0.05)                  | < 0.05<br>(< 0.05 to < 0.05)            | -22.2<br>(-58.2 to 54.4)                          | -22.6<br>(-56.3 to 42.7)                            |
| Whooping cough                                                                       | 1.1<br>(0.8 to 1.5)                       | 8.1<br>(5.9 to 11.0)                          | 0.1<br>(< 0.05 to 0.1)                  | -39.8<br>(-61.2 to -10.7)                         | -40.6<br>(-62.0 to -11.5)                           |
| Tetanus                                                                              | < 0.05<br>(< 0.05 to < 0.05)              | < 0.05<br>(< 0.05 to < 0.05)                  | < 0.05<br>(< 0.05 to < 0.05)            | -56.0<br>(-65.3 to -38.6)                         | -57.9<br>(-66.4 to -43.9)                           |
| Measles                                                                              | < 0.05<br>(< 0.05 to < 0.05)              | 0.2<br>(0.1 to 0.2)                           | < 0.05<br>(< 0.05 to < 0.05)            | 62.4<br>(20.3 to 140.4)                           | 59.2<br>(18.0 to 135.7)                             |
| Varicella and herpes zoster                                                          | 75.7<br>(68.2 to 84.3)                    | 1,130.4<br>(1,086.2 to 1,180.9)               | 3.4<br>(2.0 to 5.2)                     | 11.0<br>(-1.3 to 24.0)                            | -0.2<br>(-10.8 to 11.6)                             |
| <b>Neglected tropical diseases and malaria</b>                                       | <b>3.6</b><br>(3.0 to 4.4)                | <b>0.1†</b><br>(< 0.05 to 0.3)                | <b>0.1</b><br>(< 0.05 to 0.2)           | <b>-14.8</b><br>(-79.8 to 196.3)                  | <b>-21.9</b><br>(-82.4 to 199.6)                    |
| Malaria                                                                              | --                                        | --                                            | --                                      | --                                                | --                                                  |
| Chagas disease                                                                       | 3.5<br>(2.9 to 4.2)                       | --                                            | < 0.05<br>(< 0.05 to 0.1)               | 8.7<br>(0.9 to 16.9)                              | 1.4<br>(-5.5 to 8.5)                                |
| Leishmaniasis                                                                        | < 0.05<br>(< 0.05 to < 0.05)              | < 0.05<br>(< 0.05 to < 0.05)                  | < 0.05<br>(< 0.05 to < 0.05)            | -8.1<br>(-59.6 to 102.6)                          | -9.3<br>(-67.2 to 133.8)                            |
| Visceral leishmaniasis                                                               | < 0.05<br>(< 0.05 to < 0.05)              | < 0.05<br>(< 0.05 to < 0.05)                  | < 0.05<br>(< 0.05 to < 0.05)            | -29.1<br>(-47.0 to -5.7)                          | -36.3<br>(-54.4 to -10.7)                           |
| Cutaneous and mucocutaneous leishmaniasis                                            | < 0.05<br>(< 0.05 to < 0.05)              | < 0.05<br>(< 0.05 to < 0.05)                  | < 0.05<br>(< 0.05 to < 0.05)            | 89.0<br>(-93.5 to 949,249.0)                      | 78.2<br>(-93.9 to 917,433.1)                        |
| African trypanosomiasis                                                              | --                                        | --                                            | --                                      | --                                                | --                                                  |
| Schistosomiasis                                                                      | --                                        | --                                            | --                                      | --                                                | --                                                  |
| Cysticercosis                                                                        | --                                        | --                                            | --                                      | --                                                | --                                                  |
| Cystic echinococcosis                                                                | 0.3<br>(< 0.05 to 1.2)                    | 0.1<br>(< 0.05 to 0.2)                        | < 0.05<br>(< 0.05 to 0.1)               | -35.2<br>(-96.1 to 912.7)                         | -39.5<br>(-96.7 to 852.6)                           |
| Lymphatic filariasis                                                                 | --                                        | --                                            | --                                      | --                                                | --                                                  |
| Onchocerciasis                                                                       | --                                        | --                                            | --                                      | --                                                | --                                                  |
| Trachoma                                                                             | --                                        | --                                            | --                                      | --                                                | --                                                  |
| Dengue                                                                               | --                                        | --                                            | --                                      | --                                                | --                                                  |
| Yellow fever                                                                         | --                                        | --                                            | --                                      | --                                                | --                                                  |
| Rabies                                                                               | < 0.05<br>(< 0.05 to < 0.05)              | < 0.05<br>(< 0.05 to < 0.05)                  | < 0.05<br>(< 0.05 to < 0.05)            | 0.4<br>(-24.3 to 22.7)                            | -14.5<br>(-34.9 to 6.5)                             |
| Intestinal nematode infections                                                       | --                                        | --                                            | --                                      | --                                                | --                                                  |
| Ascariasis                                                                           | --                                        | --                                            | --                                      | --                                                | --                                                  |



| Cause                                                                   | Prevalence in thousands (95% UI)                 | Incidence in thousands (95% UI)                      | YLDs in thousands (95% UI)                    |                                                   |                                                     |
|-------------------------------------------------------------------------|--------------------------------------------------|------------------------------------------------------|-----------------------------------------------|---------------------------------------------------|-----------------------------------------------------|
|                                                                         | 2016 counts                                      | 2016 counts                                          | 2016 counts                                   | Percentage change in counts between 2006 and 2016 | Percentage change in age-standardised rates between |
| Trichuriasis                                                            | --                                               | --                                                   | --                                            | --                                                | --                                                  |
| Hookworm disease                                                        | --                                               | --                                                   | --                                            | --                                                | --                                                  |
| Food-borne trematodiasis                                                | --                                               | --                                                   | --                                            | --                                                | --                                                  |
| Leprosy                                                                 | --                                               | --                                                   | --                                            | --                                                | --                                                  |
| Ebola virus disease                                                     | --                                               | --                                                   | --                                            | --                                                | --                                                  |
| Zika virus disease                                                      | --                                               | --                                                   | --                                            | --                                                | --                                                  |
| Guinea worm disease                                                     | --                                               | --                                                   | --                                            | --                                                | --                                                  |
| Other neglected tropical diseases                                       | --                                               | --                                                   | < 0.05<br>(< 0.05 to < 0.05)                  | --                                                | --                                                  |
| <b>Maternal disorders</b>                                               | <b>67.7</b><br><b>(53.7 to 83.3)</b>             | <b>835.8†</b><br><b>(568.6 to 1,247.4)</b>           | <b>3.6</b><br><b>(2.2 to 5.4)</b>             | <b>25.2</b><br><b>(-7.8 to 74.9)</b>              | <b>28.6</b><br><b>(-5.3 to 78.3)</b>                |
| Maternal haemorrhage                                                    | 19.3<br>(13.2 to 27.0)                           | 46.2<br>(32.9 to 62.1)                               | 0.4<br>(0.2 to 0.7)                           | 38.0<br>(-9.6 to 103.1)                           | 43.8<br>(-5.9 to 111.9)                             |
| Maternal sepsis and other pregnancy related infections                  | 10.0<br>(7.2 to 13.8)                            | 66.1<br>(47.0 to 90.7)                               | 0.3<br>(0.1 to 0.6)                           | -0.7<br>(-52.6 to 117.1)                          | 1.2<br>(-53.8 to 122.6)                             |
| Maternal hypertensive disorders                                         | 36.5<br>(22.7 to 51.3)                           | 146.8<br>(114.1 to 179.5)                            | 1.7<br>(0.9 to 2.9)                           | 46.0<br>(-13.6 to 147.0)                          | 50.1<br>(-10.5 to 153.3)                            |
| Maternal obstructed labour and uterine rupture                          | 0.5<br>(0.2 to 0.8)                              | 35.5<br>(22.5 to 51.9)                               | 0.2<br>(0.1 to 0.3)                           | 1.1<br>(-47.5 to 91.2)                            | 3.2<br>(-46.3 to 95.1)                              |
| Maternal abortion, miscarriage, and ectopic pregnancy                   | 4.4<br>(2.1 to 8.3)                              | 541.2<br>(270.9 to 952.9)                            | 0.5<br>(0.2 to 1.0)                           | -3.1<br>(-51.2 to 85.0)                           | -0.9<br>(-49.3 to 88.6)                             |
| Other maternal disorders                                                | --                                               | --                                                   | 0.5<br>(0.3 to 0.8)                           | 19.0<br>(-12.3 to 66.1)                           | 22.2<br>(-9.9 to 69.9)                              |
| <b>Neonatal disorders</b>                                               | <b>444.1</b><br><b>(372.6 to 551.9)</b>          | --                                                   | <b>68.6</b><br><b>(47.4 to 97.1)</b>          | <b>4.7</b><br><b>(-10.2 to 20.6)</b>              | <b>1.8</b><br><b>(-13.0 to 17.8)</b>                |
| Neonatal preterm birth complications                                    | 410.2<br>(319.5 to 539.2)                        | --                                                   | 41.2<br>(26.9 to 60.1)                        | 3.8<br>(-18.5 to 27.4)                            | 1.2<br>(-20.9 to 25.0)                              |
| Neonatal encephalopathy due to birth asphyxia and trauma                | 40.4<br>(25.5 to 57.6)                           | --                                                   | 8.1<br>(4.3 to 13.5)                          | -2.8<br>(-28.1 to 14.4)                           | -6.1<br>(-30.3 to 12.0)                             |
| Neonatal sepsis and other neonatal infections                           | 42.0<br>(19.5 to 90.0)                           | --                                                   | 16.6<br>(6.9 to 38.7)                         | 11.8<br>(-2.7 to 30.0)                            | 8.1<br>(-6.0 to 26.5)                               |
| Hemolytic disease and other neonatal jaundice                           | 4.4<br>(3.8 to 5.1)                              | --                                                   | 1.3<br>(1.0 to 1.7)                           | 1.7<br>(-6.0 to 9.9)                              | -1.4<br>(-9.0 to 6.5)                               |
| Other neonatal disorders                                                | --                                               | --                                                   | 1.4<br>(0.9 to 2.1)                           | 2.1<br>(-17.1 to 24.1)                            | 0.4<br>(-18.5 to 22.1)                              |
| <b>Nutritional deficiencies</b>                                         | <b>2,091.7</b><br><b>(1,886.4 to 2,293.3)</b>    | <b>362.9†</b><br><b>(279.8 to 459.0)</b>             | <b>34.4</b><br><b>(22.4 to 49.9)</b>          | <b>-7.1</b><br><b>(-14.2 to 1.2)</b>              | <b>-13.1</b><br><b>(-20.4 to -5.5)</b>              |
| Protein-energy malnutrition                                             | 38.3<br>(37.5 to 39.1)                           | 22.5<br>(22.0 to 22.9)                               | 4.2<br>(2.7 to 6.0)                           | 0.8<br>(-8.1 to 10.5)                             | -0.9<br>(-9.6 to 8.7)                               |
| Iodine deficiency                                                       | 758.2<br>(579.0 to 992.4)                        | 11.5<br>(9.0 to 14.6)                                | 19.2<br>(12.1 to 29.7)                        | 4.7<br>(-6.1 to 18.7)                             | -1.2<br>(-11.7 to 12.8)                             |
| Vitamin A deficiency                                                    | 408.2<br>(308.4 to 530.3)                        | 329.0<br>(247.0 to 424.8)                            | --                                            | --                                                | --                                                  |
| Iron-deficiency anaemia                                                 | 923.8<br>(816.6 to 1,037.6)                      | --                                                   | 10.8<br>(6.5 to 17.9)                         | -24.5<br>(-33.9 to -12.4)                         | -29.9<br>(-40.0 to -18.2)                           |
| Other nutritional deficiencies                                          | --                                               | --                                                   | 0.1<br>(0.1 to 0.2)                           | 0.6<br>(-8.5 to 10.7)                             | -1.2<br>(-10.1 to 8.7)                              |
| <b>Other communicable, maternal, neonatal, and nutritional diseases</b> | <b>9,943.3</b><br><b>(9,155.9 to 10,945.7)</b>   | <b>1,736.0</b><br><b>(1,528.3 to 2,053.2)</b>        | <b>8.0</b><br><b>(4.5 to 14.0)</b>            | <b>-0.0</b><br><b>(-4.1 to 4.1)</b>               | <b>-3.1</b><br><b>(-7.9 to 1.6)</b>                 |
| Sexually transmitted diseases excluding HIV                             | 8,587.9<br>(7,850.9 to 9,542.6)                  | 1,633.2<br>(1,426.2 to 1,947.9)                      | 5.9<br>(3.0 to 10.8)                          | 1.1<br>(-4.5 to 6.7)                              | -2.1<br>(-8.3 to 4.0)                               |
| Syphilis                                                                | 40.2<br>(26.9 to 60.1)                           | 35.6<br>(21.0 to 55.1)                               | 0.7<br>(0.5 to 1.0)                           | 14.6<br>(0.2 to 29.8)                             | 0.2<br>(-12.9 to 13.2)                              |
| Chlamydial infection                                                    | 229.3<br>(164.0 to 310.4)                        | 160.3<br>(111.1 to 219.8)                            | 0.9<br>(0.4 to 1.6)                           | -6.8<br>(-23.1 to 13.1)                           | -4.4<br>(-22.7 to 17.6)                             |
| Gonococcal infection                                                    | 59.4<br>(28.7 to 143.1)                          | 145.2<br>(35.8 to 456.1)                             | 0.3<br>(0.1 to 0.7)                           | -10.7<br>(-21.7 to 3.1)                           | -9.0<br>(-20.5 to 5.6)                              |
| Trichomoniasis                                                          | 1,221.9<br>(1,072.9 to 1,384.4)                  | 1,006.6<br>(880.0 to 1,146.7)                        | 1.3<br>(0.5 to 2.7)                           | 1.8<br>(-4.6 to 9.0)                              | 0.1<br>(-6.5 to 7.1)                                |
| Genital herpes                                                          | 7,197.1<br>(6,143.7 to 8,431.4)                  | 264.6<br>(224.7 to 314.9)                            | 1.8<br>(0.6 to 4.1)                           | 6.5<br>(0.1 to 13.2)                              | 0.1<br>(-6.3 to 6.8)                                |
| Other sexually transmitted diseases                                     | 61.1<br>(54.9 to 66.8)                           | 20.8<br>(13.5 to 29.8)                               | 0.8<br>(0.4 to 1.5)                           | -6.3<br>(-18.6 to 6.1)                            | -4.3<br>(-17.4 to 8.9)                              |
| Hepatitis                                                               | 1,645.8<br>(1,458.6 to 1,886.8)                  | 102.7<br>(89.1 to 118.7)                             | 0.1<br>(0.1 to 0.2)                           | -49.5<br>(-57.2 to -41.5)                         | -51.4<br>(-59.3 to -42.8)                           |
| Acute hepatitis A                                                       | 2.7<br>(2.1 to 3.2)                              | 34.9<br>(26.9 to 41.8)                               | 0.1<br>(< 0.05 to 0.1)                        | -48.6<br>(-62.2 to -31.9)                         | -49.5<br>(-63.2 to -32.2)                           |
| Hepatitis B                                                             | 900.6<br>(728.4 to 1,130.8)                      | 54.9<br>(43.7 to 68.7)                               | 0.1<br>(< 0.05 to 0.1)                        | -53.1<br>(-60.7 to -44.6)                         | -57.6<br>(-64.4 to -50.2)                           |
| Hepatitis C                                                             | 742.2<br>(667.5 to 823.8)                        | 8.6<br>(7.5 to 9.9)                                  | < 0.05<br>(< 0.05 to < 0.05)                  | -22.4<br>(-25.7 to -19.7)                         | -16.7<br>(-19.8 to -14.4)                           |
| Acute hepatitis E                                                       | 0.3<br>(0.2 to 0.5)                              | 4.3<br>(3.0 to 5.8)                                  | < 0.05<br>(< 0.05 to < 0.05)                  | -47.8<br>(-54.4 to -39.6)                         | -55.2<br>(-59.0 to -50.6)                           |
| Other infectious diseases                                               | 28.7<br>(24.0 to 34.4)                           | 0.1<br>(0.1 to 0.1)                                  | 2.0<br>(1.2 to 3.1)                           | 4.0<br>(-2.3 to 10.8)                             | -0.2<br>(-7.6 to 7.8)                               |
| <b>Non-communicable diseases</b>                                        | <b>59,524.7</b><br><b>(59,216.2 to 59,754.8)</b> | <b>205,590.4†</b><br><b>(199,793.9 to 211,891.7)</b> | <b>7,107.0</b><br><b>(5,221.5 to 9,176.5)</b> | <b>9.6</b><br><b>(7.2 to 11.9)</b>                | <b>0.7</b><br><b>(-1.9 to 3.0)</b>                  |
| <b>Neoplasms</b>                                                        | <b>1,190.8</b><br><b>(1,144.6 to 1,243.6)</b>    | <b>399.8</b><br><b>(375.0 to 427.1)</b>              | <b>123.3</b><br><b>(90.8 to 159.1)</b>        | <b>17.0</b><br><b>(11.5 to 23.1)</b>              | <b>-1.2</b><br><b>(-5.9 to 4.0)</b>                 |
| Lip and oral cavity cancer                                              | 23.2<br>(20.3 to 26.5)                           | 6.1<br>(5.4 to 6.9)                                  | 2.3<br>(1.6 to 3.1)                           | 4.0<br>(-15.8 to 28.1)                            | -10.9<br>(-27.9 to 9.6)                             |
| Nasopharynx cancer                                                      | 3.3<br>(2.8 to 3.9)                              | 1.0<br>(0.8 to 1.1)                                  | 0.4<br>(0.3 to 0.5)                           | -8.3<br>(-25.3 to 13.0)                           | -18.9<br>(-34.6 to 0.7)                             |
| Other pharynx cancer                                                    | 17.3<br>(15.6 to 19.2)                           | 4.9<br>(4.4 to 5.4)                                  | 1.7<br>(1.2 to 2.4)                           | 12.7<br>(-13.6 to 46.3)                           | -1.5<br>(-23.8 to 27.9)                             |
| Oesophageal cancer                                                      | 6.7<br>(5.8 to 7.6)                              | 5.3<br>(4.7 to 5.9)                                  | 1.4<br>(0.9 to 1.9)                           | 4.6<br>(-20.1 to 33.9)                            | -12.0<br>(-32.8 to 13.9)                            |
| Stomach cancer                                                          | 18.0<br>(15.9 to 20.9)                           | 9.4<br>(8.6 to 10.4)                                 | 2.4<br>(1.7 to 3.2)                           | 9.6<br>(-6.3 to 27.5)                             | -8.7<br>(-21.6 to 5.9)                              |
| Colon and rectum cancer                                                 | 175.2<br>(161.5 to 194.0)                        | 46.1<br>(42.6 to 50.7)                               | 16.2<br>(11.9 to 21.1)                        | 16.5<br>(4.3 to 30.2)                             | -4.1<br>(-14.7 to 8.0)                              |
| Liver cancer                                                            | 6.3<br>(4.7 to 8.5)                              | 9.9<br>(8.7 to 11.4)                                 | 2.2<br>(1.5 to 3.0)                           | 25.3<br>(4.5 to 48.4)                             | 5.5<br>(-12.5 to 25.4)                              |
| Liver cancer due to hepatitis B                                         | 1.5<br>(1.0 to 2.2)                              | 1.3<br>(0.9 to 1.8)                                  | 0.3<br>(0.2 to 0.4)                           | 22.2<br>(0.3 to 47.4)                             | 5.1<br>(-14.6 to 26.2)                              |

| Cause                                              | Prevalence in thousands (95% UI)              | Incidence in thousands (95% UI)          | YLDs in thousands (95% UI)              |                                                   |                                                     |
|----------------------------------------------------|-----------------------------------------------|------------------------------------------|-----------------------------------------|---------------------------------------------------|-----------------------------------------------------|
|                                                    | 2016 counts                                   | 2016 counts                              | 2016 counts                             | Percentage change in counts between 2006 and 2016 | Percentage change in age-standardised rates between |
| Liver cancer due to hepatitis C                    | 4.5<br>(3.2 to 6.4)                           | 3.8<br>(2.9 to 4.8)                      | 0.8<br>(0.5 to 1.2)                     | 26.7<br>(4.9 to 51.9)                             | 5.2<br>(-13.4 to 26.5)                              |
| Liver cancer due to alcohol use                    | 4.0<br>(2.2 to 5.9)                           | 3.3<br>(1.9 to 4.4)                      | 0.8<br>(0.4 to 1.1)                     | 23.2<br>(-1.9 to 53.8)                            | 4.5<br>(-16.6 to 31.1)                              |
| Liver cancer due to other causes                   | 1.9<br>(1.3 to 2.8)                           | 1.6<br>(1.2 to 2.1)                      | 0.4<br>(0.2 to 0.5)                     | 29.3<br>(5.0 to 58.4)                             | 9.1<br>(-11.7 to 33.8)                              |
| Gallbladder and biliary tract cancer               | 2.4<br>(1.8 to 4.3)                           | 2.5<br>(2.2 to 3.6)                      | 0.6<br>(0.4 to 0.8)                     | 0.8<br>(-22.5 to 34.6)                            | -18.4<br>(-35.5 to 2.4)                             |
| Pancreatic cancer                                  | 8.7<br>(7.6 to 10.3)                          | 10.8<br>(9.8 to 11.9)                    | 2.1<br>(1.5 to 2.9)                     | 22.8<br>(0.3 to 47.4)                             | 0.9<br>(-16.2 to 19.4)                              |
| Larynx cancer                                      | 15.2<br>(13.1 to 17.7)                        | 4.0<br>(3.5 to 4.6)                      | 1.7<br>(1.2 to 2.2)                     | 9.0<br>(-11.5 to 36.8)                            | -6.4<br>(-24.0 to 17.8)                             |
| Tracheal, bronchus, and lung cancer                | 52.3<br>(46.3 to 59.8)                        | 37.4<br>(34.5 to 40.8)                   | 8.8<br>(6.3 to 11.7)                    | 17.0<br>(-0.6 to 39.3)                            | -0.9<br>(-16.5 to 18.4)                             |
| Malignant skin melanoma                            | 56.3<br>(44.3 to 64.0)                        | 11.5<br>(9.1 to 13.0)                    | 3.7<br>(2.4 to 5.2)                     | 25.5<br>(10.6 to 42.8)                            | 11.5<br>(-1.8 to 27.2)                              |
| Non-melanoma skin cancer                           | 23.5<br>(13.8 to 41.6)                        | 43.7<br>(26.7 to 68.6)                   | 0.8<br>(0.4 to 2.0)                     | 15.7<br>(-26.3 to 102.3)                          | -7.4<br>(-40.0 to 63.1)                             |
| Non-melanoma skin cancer (squamous-cell carcinoma) | 17.8<br>(9.4 to 40.7)                         | 16.4<br>(9.3 to 32.9)                    | 0.8<br>(0.4 to 1.9)                     | 17.1<br>(-26.8 to 110.3)                          | -6.5<br>(-40.9 to 69.6)                             |
| Non-melanoma skin cancer (basal-cell carcinoma)    | 3.8<br>(1.9 to 7.1)                           | 27.3<br>(14.4 to 45.2)                   | < 0.05<br>(< 0.05 to 0.1)               | -7.1<br>(-51.4 to 62.6)                           | -20.9<br>(-57.3 to 32.7)                            |
| Breast cancer                                      | 236.4<br>(218.8 to 258.9)                     | 48.4<br>(44.7 to 53.1)                   | 22.0<br>(15.8 to 29.4)                  | 11.1<br>(0.8 to 23.4)                             | -4.6<br>(-13.8 to 6.1)                              |
| Cervical cancer                                    | 13.4<br>(11.2 to 16.0)                        | 3.3<br>(2.9 to 3.9)                      | 1.2<br>(0.8 to 1.7)                     | -2.1<br>(-19.7 to 20.3)                           | -10.8<br>(-28.6 to 11.1)                            |
| Uterine cancer                                     | 40.1<br>(34.8 to 46.8)                        | 8.5<br>(7.4 to 9.9)                      | 3.0<br>(2.1 to 4.2)                     | 30.0<br>(4.6 to 66.0)                             | 10.6<br>(-11.7 to 40.4)                             |
| Ovarian cancer                                     | 17.4<br>(14.3 to 21.0)                        | 5.5<br>(4.6 to 6.6)                      | 2.4<br>(1.6 to 3.5)                     | 13.2<br>(-16.7 to 52.8)                           | -3.6<br>(-29.4 to 31.4)                             |
| Prostate cancer                                    | 211.4<br>(174.7 to 266.9)                     | 53.2<br>(45.7 to 64.5)                   | 19.3<br>(13.1 to 26.8)                  | 17.2<br>(-1.4 to 43.4)                            | -5.3<br>(-20.4 to 18.8)                             |
| Testicular cancer                                  | 10.0<br>(8.0 to 12.3)                         | 1.9<br>(1.5 to 2.3)                      | 0.7<br>(0.4 to 1.0)                     | 2.9<br>(-24.1 to 37.1)                            | 3.3<br>(-24.2 to 39.2)                              |
| Kidney cancer                                      | 34.1<br>(30.0 to 38.0)                        | 9.4<br>(8.5 to 10.3)                     | 3.0<br>(2.1 to 4.2)                     | 20.0<br>(2.9 to 39.1)                             | 3.4<br>(-11.8 to 20.5)                              |
| Bladder cancer                                     | 68.3<br>(61.6 to 75.7)                        | 16.2<br>(14.6 to 17.9)                   | 6.0<br>(4.3 to 8.1)                     | 30.4<br>(13.0 to 49.1)                            | 7.2<br>(-7.9 to 22.8)                               |
| Brain and nervous system cancer                    | 16.1<br>(11.3 to 21.2)                        | 6.4<br>(4.7 to 8.0)                      | 2.1<br>(1.3 to 3.0)                     | 28.4<br>(-0.8 to 62.4)                            | 15.8<br>(-7.8 to 43.9)                              |
| Thyroid cancer                                     | 24.8<br>(22.2 to 28.2)                        | 4.7<br>(4.2 to 5.4)                      | 1.6<br>(1.1 to 2.2)                     | -3.9<br>(-18.6 to 15.0)                           | -12.5<br>(-26.0 to 5.0)                             |
| Mesothelioma                                       | 2.7<br>(2.4 to 3.0)                           | 1.8<br>(1.5 to 2.0)                      | 0.6<br>(0.4 to 0.8)                     | 34.8<br>(16.0 to 52.0)                            | 15.7<br>(-0.5 to 30.7)                              |
| Hodgkin lymphoma                                   | 8.2<br>(7.0 to 10.5)                          | 1.8<br>(1.5 to 2.3)                      | 0.7<br>(0.5 to 1.0)                     | -3.3<br>(-22.1 to 19.2)                           | -6.5<br>(-26.4 to 17.5)                             |
| Non-Hodgkin's lymphoma                             | 49.6<br>(42.8 to 58.3)                        | 13.0<br>(11.3 to 15.2)                   | 4.1<br>(2.9 to 5.6)                     | 25.7<br>(7.6 to 44.5)                             | 7.4<br>(-7.7 to 22.9)                               |
| Multiple myeloma                                   | 12.6<br>(9.7 to 15.7)                         | 4.9<br>(3.8 to 6.0)                      | 2.3<br>(1.5 to 3.2)                     | 17.2<br>(-8.1 to 50.2)                            | -2.1<br>(-24.0 to 26.7)                             |
| Leukaemia                                          | 40.1<br>(34.9 to 45.6)                        | 11.4<br>(10.0 to 12.9)                   | 5.1<br>(3.6 to 6.8)                     | 21.3<br>(5.2 to 39.4)                             | -0.4<br>(-12.7 to 13.9)                             |
| Acute lymphoid leukaemia                           | 3.5<br>(2.7 to 4.5)                           | 0.8<br>(0.7 to 1.1)                      | 0.4<br>(0.3 to 0.6)                     | 28.8<br>(3.3 to 63.0)                             | 26.7<br>(-4.0 to 70.4)                              |
| Chronic lymphoid leukaemia                         | 17.3<br>(14.3 to 20.5)                        | 4.0<br>(3.3 to 4.7)                      | 2.1<br>(1.5 to 2.9)                     | 23.2<br>(-0.5 to 56.6)                            | -2.4<br>(-21.2 to 22.9)                             |
| Acute myeloid leukaemia                            | 3.8<br>(2.9 to 4.4)                           | 2.6<br>(2.0 to 3.0)                      | 0.7<br>(0.5 to 1.0)                     | 26.6<br>(7.6 to 48.8)                             | 4.4<br>(-10.7 to 22.3)                              |
| Chronic myeloid leukaemia                          | 3.2<br>(2.7 to 3.8)                           | 1.1<br>(0.9 to 1.3)                      | 0.4<br>(0.3 to 0.5)                     | -10.6<br>(-24.3 to 6.0)                           | -27.8<br>(-38.4 to -15.9)                           |
| Other leukaemia                                    | 12.4<br>(10.2 to 14.8)                        | 2.9<br>(2.3 to 3.4)                      | 1.5<br>(1.0 to 2.0)                     | 25.6<br>(1.7 to 55.9)                             | -2.1<br>(-19.5 to 18.5)                             |
| Other neoplasms                                    | 63.8<br>(52.4 to 76.9)                        | 16.9<br>(14.1 to 20.0)                   | 4.9<br>(3.5 to 6.8)                     | 43.8<br>(18.6 to 73.9)                            | 23.5<br>(1.9 to 46.5)                               |
| <b>Cardiovascular diseases</b>                     | <b>8,441.3</b><br><b>(8,090.9 to 8,821.7)</b> | <b>747.1†</b><br><b>(706.3 to 791.4)</b> | <b>540.0</b><br><b>(394.1 to 709.4)</b> | <b>15.0</b><br><b>(10.5 to 19.6)</b>              | <b>-1.9</b><br><b>(-5.5 to 1.9)</b>                 |
| Rheumatic heart disease                            | 6.2<br>(5.5 to 6.9)                           | 3.3<br>(3.1 to 3.5)                      | 0.5<br>(0.3 to 0.7)                     | 3.5<br>(-16.4 to 29.3)                            | -9.7<br>(-24.6 to 7.3)                              |
| Ischaemic heart disease                            | 2,000.8<br>(1,884.0 to 2,129.0)               | 251.6<br>(231.8 to 272.4)                | 92.0<br>(64.7 to 124.5)                 | 22.0<br>(15.8 to 29.1)                            | 2.8<br>(-2.2 to 8.4)                                |
| Cerebrovascular disease                            | 936.2<br>(867.1 to 999.0)                     | 131.4‡<br>(121.0 to 142.1)               | 152.4<br>(108.6 to 195.1)               | 13.0<br>(4.6 to 21.3)                             | -4.3<br>(-11.0 to 2.2)                              |
| Ischaemic stroke                                   | 757.3<br>(670.1 to 837.5)                     | 89.0‡<br>(79.5 to 98.9)                  | 118.8<br>(83.1 to 152.9)                | 10.5<br>(-0.1 to 20.5)                            | -6.7<br>(-14.6 to 1.2)                              |
| Hemorrhagic stroke                                 | 218.9<br>(196.6 to 243.6)                     | 42.4‡<br>(38.3 to 46.4)                  | 33.6<br>(24.0 to 43.2)                  | 23.0<br>(8.9 to 38.7)                             | 4.4<br>(-7.3 to 16.8)                               |
| Hypertensive heart disease                         | 209.3<br>(176.4 to 251.2)                     | --                                       | 16.6<br>(11.2 to 23.5)                  | -25.4<br>(-34.6 to -15.8)                         | -39.9<br>(-47.1 to -32.5)                           |
| Cardiomyopathy and myocarditis                     | 166.6<br>(146.2 to 189.7)                     | 35.8†<br>(30.4 to 42.3)                  | 13.4<br>(9.2 to 19.2)                   | 8.4<br>(-2.3 to 19.5)                             | -7.5<br>(-16.0 to 1.2)                              |
| Myocarditis                                        | 15.3<br>(13.7 to 17.2)                        | 35.8<br>(30.4 to 42.3)                   | 1.0<br>(0.7 to 1.4)                     | 1.7<br>(-9.0 to 12.8)                             | -4.7<br>(-13.3 to 4.7)                              |
| Alcoholic cardiomyopathy                           | 25.1<br>(20.7 to 30.0)                        | --                                       | 2.1<br>(1.3 to 3.0)                     | 3.0<br>(-15.8 to 24.5)                            | -8.7<br>(-25.5 to 11.3)                             |
| Other cardiomyopathy                               | 128.8<br>(108.2 to 153.7)                     | --                                       | 10.3<br>(7.0 to 14.8)                   | 10.3<br>(-2.3 to 23.0)                            | -7.6<br>(-17.4 to 2.4)                              |
| Atrial fibrillation and flutter                    | 1,001.4<br>(868.8 to 1,156.5)                 | 77.8<br>(66.0 to 90.9)                   | 78.1<br>(52.5 to 109.3)                 | 17.0<br>(10.9 to 23.3)                            | -2.9<br>(-8.3 to 2.5)                               |
| Peripheral vascular disease                        | 2,875.5<br>(2,522.0 to 3,251.2)               | 231.2<br>(198.2 to 269.0)                | 11.1<br>(5.0 to 20.5)                   | 11.5<br>(4.3 to 19.4)                             | -8.5<br>(-14.0 to -2.4)                             |
| Endocarditis                                       | 17.9<br>(15.1 to 21.2)                        | 15.9<br>(14.5 to 17.5)                   | 1.4<br>(0.9 to 2.1)                     | 17.2<br>(-3.0 to 42.5)                            | 1.2<br>(-15.4 to 21.2)                              |
| Other cardiovascular and circulatory diseases      | 3,362.8<br>(2,893.0 to 3,848.8)               | --                                       | 174.5<br>(118.5 to 242.0)               | 19.2<br>(10.4 to 29.3)                            | 4.1<br>(-3.2 to 12.2)                               |
| <b>Chronic respiratory diseases</b>                | <b>7,055.8</b><br><b>(6,716.8 to 7,412.3)</b> | <b>562.9†</b><br><b>(531.8 to 595.3)</b> | <b>190.8</b><br><b>(132.1 to 265.0)</b> | <b>5.0</b><br><b>(0.8 to 9.3)</b>                 | <b>0.1</b><br><b>(-4.4 to 4.3)</b>                  |
| Chronic obstructive pulmonary disease              | 2,847.3<br>(2,561.2 to 3,209.2)               | 161.6<br>(146.4 to 181.6)                | 14.4<br>(10.1 to 21.0)                  | 11.6<br>(-14.3 to 45.4)                           | -2.3<br>(-25.8 to 27.7)                             |
| Pneumoconiosis                                     | 0.9<br>(0.8 to 1.0)                           | 0.4<br>(0.4 to 0.5)                      | 0.1<br>(0.1 to 0.2)                     | -6.2<br>(-13.7 to 0.9)                            | -21.8<br>(-28.1 to -15.8)                           |
| Silicosis                                          | 0.8<br>(0.7 to 0.9)                           | 0.4<br>(0.4 to 0.5)                      | 0.1<br>(0.1 to 0.2)                     | -8.4<br>(-16.8 to -0.5)                           | -24.2<br>(-31.1 to -17.5)                           |



| Cause                                                          | Prevalence in thousands (95% UI)                 | Incidence in thousands (95% UI)                | YLDs in thousands (95% UI)                    |                                                   |                                                     |
|----------------------------------------------------------------|--------------------------------------------------|------------------------------------------------|-----------------------------------------------|---------------------------------------------------|-----------------------------------------------------|
|                                                                | 2016 counts                                      | 2016 counts                                    | 2016 counts                                   | Percentage change in counts between 2006 and 2016 | Percentage change in age-standardised rates between |
| Asbestosis                                                     | 0.1<br>(0.1 to 0.1)                              | < 0.05<br>(< 0.05 to < 0.05)                   | < 0.05<br>(< 0.05 to < 0.05)                  | 9.2<br>(-0.8 to 19.9)                             | -5.6<br>(-15.1 to 4.0)                              |
| Coal workers pneumoconiosis                                    | --                                               | --                                             | --                                            | --                                                | --                                                  |
| Other pneumoconiosis                                           | < 0.05<br>(< 0.05 to < 0.05)                     | < 0.05<br>(< 0.05 to < 0.05)                   | < 0.05<br>(< 0.05 to < 0.05)                  | 5.5<br>(-7.4 to 44.4)                             | -11.8<br>(-21.6 to 10.8)                            |
| Asthma                                                         | 4,406.2<br>(4,143.4 to 4,681.7)                  | 396.4<br>(370.8 to 423.5)                      | 171.2<br>(113.5 to 244.1)                     | 4.1<br>(0.0 to 8.1)                               | 0.1<br>(-4.5 to 4.4)                                |
| Interstitial lung disease and pulmonary sarcoidosis            | 40.0<br>(36.0 to 44.7)                           | 4.5<br>(4.1 to 4.9)                            | 4.3<br>(2.9 to 6.2)                           | 20.4<br>(4.6 to 37.2)                             | 2.0<br>(-9.2 to 15.0)                               |
| Other chronic respiratory diseases                             | --                                               | --                                             | 0.7<br>(0.5 to 1.1)                           | 37.1<br>(12.4 to 69.2)                            | 32.0<br>(9.0 to 60.3)                               |
| <b>Cirrhosis and other chronic liver diseases</b>              | <b>633.0</b><br><b>(603.9 to 662.8)</b>          | <b>14.5</b><br><b>(14.0 to 15.1)</b>           | <b>15.9</b><br><b>(11.0 to 21.9)</b>          | <b>10.4</b><br><b>(1.2 to 19.7)</b>               | <b>0.9</b><br><b>(-7.7 to 10.0)</b>                 |
| Cirrhosis and other chronic liver diseases due to hepatitis B  | 83.3<br>(65.6 to 104.2)                          | 1.9<br>(1.6 to 2.4)                            | 2.0<br>(1.2 to 2.9)                           | 11.7<br>(-12.2 to 38.2)                           | 1.3<br>(-20.8 to 25.3)                              |
| Cirrhosis and other chronic liver diseases due to hepatitis C  | 190.8<br>(149.6 to 241.3)                        | 4.2<br>(3.2 to 5.1)                            | 4.4<br>(2.8 to 6.5)                           | 12.1<br>(-5.2 to 32.4)                            | 2.1<br>(-14.2 to 22.1)                              |
| Cirrhosis and other chronic liver diseases due to alcohol use  | 303.6<br>(261.6 to 348.5)                        | 7.1<br>(6.2 to 8.0)                            | 7.0<br>(4.7 to 9.9)                           | 9.3<br>(-3.3 to 23.0)                             | -1.8<br>(-13.5 to 12.4)                             |
| Cirrhosis and other chronic liver diseases due to other causes | 55.2<br>(43.2 to 69.6)                           | 1.4<br>(1.2 to 1.7)                            | 2.5<br>(1.6 to 3.7)                           | 9.2<br>(-10.7 to 34.9)                            | 4.4<br>(-15.8 to 29.8)                              |
| <b>Digestive diseases</b>                                      | <b>1,477.2</b><br><b>(1,390.9 to 1,552.1)</b>    | <b>1,916.6†</b><br><b>(1,782.7 to 2,056.5)</b> | <b>51.1</b><br><b>(36.3 to 68.7)</b>          | <b>12.8</b><br><b>(6.0 to 20.5)</b>               | <b>3.9</b><br><b>(-2.7 to 11.2)</b>                 |
| Peptic ulcer disease                                           | 334.3<br>(303.3 to 370.7)                        | 72.1<br>(64.2 to 80.8)                         | 3.6<br>(2.3 to 5.9)                           | 30.8<br>(13.0 to 50.9)                            | 31.6<br>(12.1 to 55.6)                              |
| Gastritis and duodenitis                                       | 603.4<br>(526.8 to 683.1)                        | 412.9<br>(362.3 to 474.6)                      | 4.4<br>(2.8 to 7.0)                           | 30.3<br>(15.9 to 46.2)                            | 25.7<br>(10.6 to 43.1)                              |
| Appendicitis                                                   | 2.9<br>(2.7 to 3.2)                              | 76.7<br>(70.7 to 83.5)                         | 0.9<br>(0.6 to 1.4)                           | 1.3<br>(-16.1 to 22.9)                            | -0.7<br>(-20.3 to 24.1)                             |
| Paralytic ileus and intestinal obstruction                     | 1.6<br>(1.5 to 1.8)                              | 46.2<br>(41.9 to 50.5)                         | 0.5<br>(0.3 to 0.7)                           | 17.4<br>(2.4 to 36.0)                             | 2.9<br>(-4.9 to 11.7)                               |
| Inguinal, femoral, and abdominal hernia                        | 416.4<br>(375.0 to 460.1)                        | 793.9<br>(683.3 to 894.1)                      | 26.4<br>(17.9 to 36.4)                        | 9.9<br>(0.3 to 21.1)                              | 0.0<br>(-9.4 to 10.4)                               |
| Inflammatory bowel disease                                     | 49.2<br>(46.4 to 52.5)                           | 17.0<br>(16.6 to 17.4)                         | 7.1<br>(4.9 to 10.0)                          | 4.5<br>(-10.7 to 20.5)                            | -2.7<br>(-17.3 to 12.9)                             |
| Vascular intestinal disorders                                  | 3.5<br>(3.1 to 3.8)                              | 14.8<br>(13.2 to 16.7)                         | 1.0<br>(0.6 to 1.4)                           | 21.4<br>(-4.5 to 58.7)                            | 3.3<br>(-16.7 to 30.1)                              |
| Gallbladder and biliary diseases                               | 102.5<br>(91.0 to 114.8)                         | 445.0<br>(390.1 to 505.6)                      | 2.4<br>(1.6 to 3.5)                           | 11.6<br>(-8.8 to 36.3)                            | 0.3<br>(-16.4 to 20.4)                              |
| Pancreatitis                                                   | 4.3<br>(3.9 to 4.7)                              | 38.0<br>(34.4 to 41.9)                         | 0.6<br>(0.4 to 0.8)                           | 8.5<br>(4.2 to 13.5)                              | -2.4<br>(-5.8 to 1.3)                               |
| Other digestive diseases                                       | --                                               | --                                             | 4.2<br>(3.0 to 5.6)                           | 19.0<br>(11.7 to 27.1)                            | 7.8<br>(0.4 to 15.4)                                |
| <b>Neurological disorders</b>                                  | <b>22,611.1</b><br><b>(21,852.0 to 23,520.2)</b> | <b>8,093.0</b><br><b>(7,058.9 to 9,158.6)</b>  | <b>842.6</b><br><b>(568.1 to 1,146.4)</b>     | <b>7.6</b><br><b>(-8.9 to 25.5)</b>               | <b>-0.1</b><br><b>(-16.9 to 18.4)</b>               |
| Alzheimer's disease and other dementias                        | 877.8<br>(739.2 to 1,050.7)                      | 172.6<br>(140.8 to 209.3)                      | 135.2<br>(92.8 to 180.7)                      | 36.4<br>(27.4 to 47.7)                            | 3.8<br>(-2.1 to 11.7)                               |
| Parkinson's disease                                            | 120.5<br>(94.9 to 151.9)                         | 14.2<br>(11.1 to 18.2)                         | 14.0<br>(8.9 to 19.8)                         | 11.6<br>(-2.5 to 26.0)                            | -7.1<br>(-18.8 to 5.8)                              |
| Epilepsy                                                       | 304.5<br>(76.3 to 531.2)                         | 37.6<br>(9.5 to 66.2)                          | 70.2<br>(12.5 to 163.4)                       | 0.2<br>(-82.7 to 439.2)                           | -6.9<br>(-83.9 to 402.7)                            |
| Multiple sclerosis                                             | 65.5<br>(58.4 to 72.7)                           | 1.4<br>(1.2 to 1.5)                            | 16.8<br>(11.8 to 22.2)                        | 11.5<br>(-2.0 to 29.0)                            | 4.5<br>(-8.3 to 20.9)                               |
| Motor neuron disease                                           | 11.7<br>(10.8 to 12.6)                           | 2.1<br>(2.0 to 2.1)                            | 2.5<br>(1.8 to 3.3)                           | 16.0<br>(11.6 to 20.8)                            | 4.5<br>(0.6 to 8.7)                                 |
| Migraine                                                       | 11,893.0<br>(11,406.9 to 12,378.8)               | 1,028.2<br>(979.4 to 1,079.7)                  | 517.5<br>(333.0 to 715.8)                     | 2.8<br>(-0.1 to 6.1)                              | -0.2<br>(-3.1 to 3.1)                               |
| Tension-type headache                                          | 13,357.1<br>(11,965.8 to 14,888.6)               | 6,836.4<br>(5,841.0 to 7,897.2)                | 71.8<br>(45.9 to 103.3)                       | 5.3<br>(0.4 to 10.8)                              | 1.1<br>(-3.5 to 6.5)                                |
| Other neurological disorders                                   | 0.3<br>(0.2 to 0.4)                              | 0.5<br>(0.3 to 0.7)                            | 14.6<br>(6.0 to 29.2)                         | 15.8<br>(-62.0 to 224.2)                          | 12.9<br>(-66.9 to 255.7)                            |
| <b>Mental and substance use disorders</b>                      | <b>11,266.4</b><br><b>(10,894.3 to 11,657.7)</b> | <b>4,429.4†</b><br><b>(4,114.6 to 4,786.4)</b> | <b>1,606.9</b><br><b>(1,166.3 to 2,078.0)</b> | <b>4.2</b><br><b>(1.4 to 6.8)</b>                 | <b>-0.3</b><br><b>(-2.9 to 2.2)</b>                 |
| Schizophrenia                                                  | 175.5<br>(155.2 to 197.3)                        | 7.8<br>(6.9 to 8.8)                            | 111.5<br>(83.8 to 139.3)                      | 4.7<br>(-2.9 to 13.1)                             | 0.1<br>(-7.4 to 8.5)                                |
| Alcohol use disorders                                          | 874.3<br>(777.1 to 969.0)                        | 333.9<br>(290.2 to 377.5)                      | 86.9<br>(60.3 to 119.4)                       | -0.5<br>(-9.6 to 8.5)                             | -1.6<br>(-10.5 to 7.8)                              |
| Drug use disorders                                             | 654.1<br>(599.5 to 702.6)                        | 83.5<br>(74.2 to 92.7)                         | 107.3<br>(77.0 to 139.3)                      | 5.6<br>(-3.6 to 15.2)                             | 3.4<br>(-5.6 to 13.0)                               |
| Opioid use disorders                                           | 169.0<br>(145.5 to 196.6)                        | 20.5<br>(17.6 to 23.9)                         | 69.4<br>(48.3 to 91.8)                        | 0.5<br>(-10.7 to 12.2)                            | -3.8<br>(-15.3 to 7.7)                              |
| Cocaine use disorders                                          | 74.9<br>(65.5 to 86.2)                           | 4.9<br>(4.1 to 5.8)                            | 10.1<br>(6.2 to 14.8)                         | 13.3<br>(-5.6 to 38.1)                            | 12.8<br>(-7.4 to 40.6)                              |
| Amphetamine use disorders                                      | 24.2<br>(18.7 to 31.6)                           | 3.1<br>(2.3 to 4.1)                            | 3.2<br>(1.8 to 5.2)                           | 56.7<br>(10.0 to 117.7)                           | 65.6<br>(12.3 to 137.6)                             |
| Cannabis use disorders                                         | 341.3<br>(283.4 to 390.6)                        | 46.1<br>(37.5 to 54.6)                         | 10.0<br>(6.2 to 14.8)                         | 12.0<br>(-8.1 to 31.0)                            | 15.0<br>(-6.7 to 35.4)                              |
| Other drug use disorders                                       | 54.4<br>(49.4 to 59.8)                           | 8.9<br>(8.1 to 9.7)                            | 14.6<br>(9.6 to 20.8)                         | 15.1<br>(-5.6 to 39.6)                            | 15.4<br>(-6.3 to 42.2)                              |
| Depressive disorders                                           | 3,019.2<br>(2,853.4 to 3,205.2)                  | 3,288.2<br>(2,990.3 to 3,643.8)                | 517.9<br>(357.0 to 698.7)                     | 6.9<br>(1.0 to 12.9)                              | 0.2<br>(-5.5 to 5.5)                                |
| Major depressive disorder                                      | 2,095.9<br>(1,916.4 to 2,286.0)                  | 3,148.7<br>(2,846.3 to 3,503.9)                | 424.8<br>(290.2 to 576.2)                     | 5.9<br>(-1.0 to 12.9)                             | -0.8<br>(-7.2 to 5.7)                               |
| Dysthymia                                                      | 976.0<br>(853.8 to 1,121.4)                      | 139.5<br>(122.7 to 158.9)                      | 93.2<br>(62.3 to 134.1)                       | 11.6<br>(3.8 to 20.0)                             | 5.0<br>(-2.4 to 12.9)                               |
| Bipolar disorder                                               | 713.4<br>(478.8 to 1,013.5)                      | 45.5<br>(31.8 to 63.3)                         | 144.1<br>(78.8 to 234.7)                      | 3.7<br>(-1.1 to 8.9)                              | -0.1<br>(-4.6 to 4.5)                               |
| Anxiety disorders                                              | 3,673.4<br>(3,343.7 to 4,017.0)                  | 441.9<br>(410.5 to 476.0)                      | 351.2<br>(247.0 to 477.3)                     | 1.7<br>(-4.8 to 8.4)                              | -2.5<br>(-8.9 to 4.2)                               |
| Eating disorders                                               | 209.2<br>(173.1 to 257.3)                        | 54.8<br>(41.2 to 71.6)                         | 43.2<br>(27.7 to 62.8)                        | -2.5<br>(-11.8 to 6.0)                            | 0.1<br>(-9.7 to 9.1)                                |
| Anorexia nervosa                                               | 57.8<br>(42.6 to 76.0)                           | 10.7<br>(7.8 to 13.9)                          | 12.3<br>(7.6 to 18.4)                         | -0.7<br>(-14.1 to 14.8)                           | 2.0<br>(-12.0 to 17.5)                              |
| Bulimia nervosa                                                | 147.0<br>(111.5 to 194.2)                        | 44.1<br>(31.1 to 60.2)                         | 30.9<br>(18.6 to 46.1)                        | -3.2<br>(-14.4 to 8.1)                            | -0.6<br>(-13.1 to 11.1)                             |
| Autistic spectrum disorders                                    | 453.5<br>(406.3 to 518.6)                        | 2.4<br>(1.7 to 3.4)                            | 70.8<br>(48.0 to 100.5)                       | 5.7<br>(0.7 to 11.9)                              | 1.3<br>(-3.7 to 7.1)                                |
| Autism                                                         | 167.2<br>(141.6 to 197.1)                        | 0.2<br>(0.1 to 0.4)                            | 42.1<br>(26.9 to 62.1)                        | 6.7<br>(-1.6 to 16.1)                             | 2.1<br>(-6.5 to 11.0)                               |
| Asperger syndrome and other autistic spectrum disorders        | 288.4<br>(238.2 to 347.4)                        | 2.2<br>(1.4 to 3.1)                            | 28.7<br>(18.3 to 42.5)                        | 4.3<br>(-0.0 to 9.2)                              | 0.2<br>(-4.1 to 5.2)                                |

| Cause                                                      | Prevalence in thousands (95% UI)                 | Incidence in thousands (95% UI)                                 | YLDs in thousands (95% UI)                    |                                                   |                                                     |
|------------------------------------------------------------|--------------------------------------------------|-----------------------------------------------------------------|-----------------------------------------------|---------------------------------------------------|-----------------------------------------------------|
|                                                            | 2016 counts                                      | 2016 counts                                                     | 2016 counts                                   | Percentage change in counts between 2006 and 2016 | Percentage change in age-standardised rates between |
| Attention-deficit/hyperactivity disorder                   | 421.7<br>(385.2 to 464.3)                        | 20.7<br>(18.2 to 24.0)                                          | 5.1<br>(3.1 to 8.2)                           | 1.4<br>(-5.3 to 9.6)                              | -0.1<br>(-6.8 to 8.1)                               |
| Conduct disorder                                           | 357.5<br>(269.4 to 454.4)                        | 117.0<br>(86.9 to 145.4)                                        | 43.5<br>(26.0 to 67.5)                        | 3.0<br>(-2.8 to 9.1)                              | 0.0<br>(-5.5 to 6.0)                                |
| Idiopathic developmental intellectual disability           | 330.4<br>(148.9 to 519.4)                        | --                                                              | 16.5<br>(7.5 to 28.4)                         | 0.4<br>(-8.0 to 9.6)                              | -2.9<br>(-11.2 to 6.3)                              |
| Other mental and substance use disorders                   | 1,477.8<br>(1,290.2 to 1,708.2)                  | 33.8<br>(30.1 to 38.3)                                          | 108.9<br>(74.6 to 155.4)                      | 5.7<br>(0.9 to 10.5)                              | 0.2<br>(-4.6 to 4.9)                                |
| <b>Diabetes, urogenital, blood, and endocrine diseases</b> | <b>20,982.6</b><br><b>(20,488.2 to 21,536.4)</b> | <b>5,861.3<sup>+</sup></b><br><b>(5,516.7 to 6,231.6)</b>       | <b>472.5</b><br><b>(337.2 to 628.2)</b>       | <b>15.0</b><br><b>(11.0 to 19.7)</b>              | <b>2.3</b><br><b>(-1.0 to 6.2)</b>                  |
| Diabetes mellitus                                          | 2,454.2<br>(2,205.7 to 2,740.8)                  | 125.1<br>(111.0 to 141.1)                                       | 193.9<br>(134.5 to 265.5)                     | 14.0<br>(6.0 to 24.1)                             | -1.0<br>(-7.7 to 8.2)                               |
| Acute glomerulonephritis                                   | 0.6<br>(0.5 to 0.7)                              | 9.1<br>(7.9 to 10.3)                                            | < 0.05<br>(< 0.05 to < 0.05)                  | 7.6<br>(3.0 to 13.1)                              | 0.3<br>(-4.1 to 5.2)                                |
| Chronic kidney disease                                     | 2,491.2<br>(2,236.6 to 2,731.4)                  | 206.4<br>(179.2 to 235.4)                                       | 68.2<br>(51.6 to 85.3)                        | 36.7<br>(26.6 to 48.3)                            | 19.1<br>(10.5 to 28.5)                              |
| Chronic kidney disease due to diabetes mellitus            | 709.7<br>(635.0 to 783.2)                        | 61.6<br>(53.6 to 69.5)                                          | 20.9<br>(15.7 to 26.3)                        | 48.9<br>(29.1 to 72.5)                            | 29.5<br>(12.6 to 49.2)                              |
| Chronic kidney disease due to hypertension                 | 500.1<br>(440.7 to 556.1)                        | 37.9<br>(33.0 to 43.2)                                          | 12.4<br>(9.0 to 15.9)                         | 51.6<br>(32.2 to 75.9)                            | 23.7<br>(8.5 to 42.3)                               |
| Chronic kidney disease due to glomerulonephritis           | 514.8<br>(453.2 to 572.5)                        | 43.3<br>(34.9 to 52.0)                                          | 13.9<br>(10.3 to 17.7)                        | -4.7<br>(-17.3 to 11.1)                           | -12.3<br>(-23.7 to 2.3)                             |
| Chronic kidney disease due to other causes                 | 766.6<br>(678.4 to 850.6)                        | 63.6<br>(55.4 to 72.7)                                          | 21.0<br>(15.7 to 26.3)                        | 60.2<br>(37.5 to 88.5)                            | 42.5<br>(22.9 to 66.2)                              |
| Urinary diseases and male infertility                      | 1,957.4<br>(1,765.1 to 2,174.6)                  | 3,233.5 <sup>+</sup><br>(2,918.7 to 3,580.5)                    | 59.2<br>(39.0 to 85.4)                        | 14.8<br>(8.4 to 21.9)                             | 0.4<br>(-5.3 to 6.2)                                |
| Interstitial nephritis and urinary tract infections        | 44.6<br>(38.6 to 51.0)                           | 2,325.1<br>(2,016.5 to 2,656.7)                                 | 1.5<br>(0.9 to 2.3)                           | 1.9<br>(-13.2 to 21.0)                            | 0.7<br>(-14.7 to 20.0)                              |
| Urolithiasis                                               | 27.5<br>(24.3 to 31.2)                           | 723.9<br>(636.4 to 820.0)                                       | 2.0<br>(1.3 to 2.9)                           | 9.9<br>(-5.5 to 29.2)                             | 1.1<br>(-12.5 to 16.9)                              |
| Benign prostatic hyperplasia                               | 1,623.8<br>(1,392.6 to 1,908.4)                  | 184.5<br>(155.2 to 218.3)                                       | 53.2<br>(34.6 to 78.1)                        | 16.8<br>(9.6 to 24.7)                             | 1.0<br>(-5.7 to 7.7)                                |
| Male infertility                                           | 201.7<br>(155.7 to 259.5)                        | --                                                              | 1.3<br>(0.5 to 2.6)                           | -4.0<br>(-12.8 to 6.0)                            | -0.9<br>(-10.0 to 9.9)                              |
| Other urinary diseases                                     | --                                               | --                                                              | 1.2<br>(0.8 to 1.7)                           | -11.6<br>(-21.5 to -1.0)                          | -15.3<br>(-24.3 to -5.1)                            |
| Gynecological diseases                                     | 8,809.6<br>(8,274.1 to 9,438.7)                  | 1,897.2 <sup>+</sup><br>(1,793.8 to 2,013.9)                    | 68.3<br>(45.2 to 100.6)                       | 1.5<br>(-3.0 to 6.2)                              | -0.3<br>(-4.5 to 4.5)                               |
| Uterine fibroids                                           | 703.6<br>(616.0 to 806.8)                        | 60.3<br>(51.5 to 70.6)                                          | 5.8<br>(2.9 to 10.9)                          | 2.2<br>(-3.6 to 7.5)                              | -2.7<br>(-8.6 to 2.7)                               |
| Polycystic ovarian syndrome                                | 17.0<br>(12.8 to 22.5)                           | 57.7<br>(41.0 to 80.4)                                          | 0.2<br>(0.1 to 0.3)                           | -4.3<br>(-23.7 to 18.1)                           | -0.1<br>(-20.7 to 24.2)                             |
| Female infertility                                         | 462.6<br>(346.7 to 619.5)                        | --                                                              | 2.8<br>(1.1 to 5.8)                           | -0.1<br>(-6.9 to 7.7)                             | 2.9<br>(-4.1 to 10.6)                               |
| Endometriosis                                              | 34.1<br>(27.6 to 41.2)                           | 94.6<br>(70.4 to 125.3)                                         | 3.2<br>(2.0 to 4.7)                           | -3.8<br>(-21.9 to 22.0)                           | -0.4<br>(-19.6 to 27.5)                             |
| Genital prolapse                                           | 5,009.4<br>(4,318.1 to 5,760.8)                  | 208.2<br>(173.3 to 249.2)                                       | 15.6<br>(7.4 to 28.6)                         | 14.2<br>(3.3 to 25.8)                             | 0.4<br>(-8.6 to 9.8)                                |
| Premenstrual syndrome                                      | 2,934.4<br>(2,766.8 to 3,100.4)                  | 1,011.4<br>(946.8 to 1,076.3)                                   | 24.5<br>(15.2 to 37.7)                        | -2.4<br>(-10.1 to 5.6)                            | -0.5<br>(-8.5 to 7.6)                               |
| Other gynecological diseases                               | 460.5<br>(388.0 to 533.8)                        | 465.1<br>(389.9 to 547.5)                                       | 16.3<br>(10.6 to 23.6)                        | -1.9<br>(-10.4 to 7.5)                            | -0.3<br>(-8.8 to 9.4)                               |
| Hemoglobinopathies and hemolytic anaemias                  | 8,096.6<br>(7,861.3 to 8,366.1)                  | --                                                              | 14.7<br>(9.1 to 22.8)                         | 24.0<br>(11.0 to 38.4)                            | 22.6<br>(7.6 to 39.2)                               |
| Thalassemias                                               | 0.5<br>(0.4 to 0.7)                              | --                                                              | < 0.05<br>(< 0.05 to < 0.05)                  | 16.9<br>(4.4 to 30.7)                             | 15.4<br>(2.2 to 30.3)                               |
| Thalassaemias trait                                        | 756.2<br>(691.5 to 833.8)                        | --                                                              | 6.8<br>(4.1 to 10.7)                          | 27.4<br>(11.6 to 46.0)                            | 26.5<br>(8.8 to 46.6)                               |
| Sickle cell disorders                                      | 5.4<br>(4.8 to 5.9)                              | --                                                              | 0.5<br>(0.4 to 0.8)                           | 17.7<br>(7.1 to 28.7)                             | 14.5<br>(2.7 to 27.2)                               |
| Sickle cell trait                                          | 2,322.2<br>(2,217.9 to 2,439.7)                  | --                                                              | 5.5<br>(3.2 to 9.0)                           | 27.3<br>(10.2 to 47.5)                            | 27.8<br>(9.3 to 50.1)                               |
| G6PD deficiency                                            | 810.4<br>(722.8 to 913.4)                        | --                                                              | 0.1<br>(0.1 to 0.1)                           | 47.8<br>(26.0 to 73.7)                            | 55.6<br>(29.3 to 87.9)                              |
| G6PD trait                                                 | 4,478.4<br>(4,304.4 to 4,687.0)                  | --                                                              | < 0.05<br>(< 0.05 to < 0.05)                  | 41.1<br>(14.1 to 75.4)                            | 51.7<br>(21.7 to 90.2)                              |
| Other hemoglobinopathies and hemolytic anaemias            | 49.1<br>(44.3 to 53.8)                           | --                                                              | 1.6<br>(1.1 to 2.3)                           | 4.1<br>(-7.1 to 17.6)                             | -15.4<br>(-25.8 to -3.0)                            |
| Endocrine, metabolic, blood, and immune disorders          | 1,949.2<br>(1,753.8 to 2,172.5)                  | 390.0<br>(347.4 to 434.4)                                       | 68.2<br>(45.9 to 95.1)                        | 13.6<br>(6.8 to 20.3)                             | -1.4<br>(-6.7 to 4.2)                               |
| <b>Musculoskeletal disorders</b>                           | <b>16,217.6</b><br><b>(15,560.3 to 16,921.5)</b> | <b>8,184.6</b><br><b>(7,454.8 to 9,053.0)</b>                   | <b>1,731.8</b><br><b>(1,254.2 to 2,251.8)</b> | <b>12.2</b><br><b>(8.0 to 16.4)</b>               | <b>3.0</b><br><b>(-0.7 to 6.9)</b>                  |
| Rheumatoid arthritis                                       | 318.6<br>(284.9 to 354.2)                        | 14.9<br>(13.3 to 16.7)                                          | 74.1<br>(50.4 to 98.4)                        | 16.1<br>(7.4 to 25.1)                             | 3.6<br>(-4.1 to 12.1)                               |
| Osteoarthritis                                             | 4,650.9<br>(4,401.7 to 4,925.9)                  | 195.2<br>(182.3 to 208.2)                                       | 162.5<br>(107.0 to 234.5)                     | 18.7<br>(14.8 to 23.1)                            | 2.2<br>(-1.3 to 6.1)                                |
| Low back and neck pain                                     | 10,519.2<br>(9,855.0 to 11,212.7)                | 4,643.3<br>(4,104.9 to 5,206.2)                                 | 1,252.1<br>(881.5 to 1,656.3)                 | 11.2<br>(5.8 to 16.7)                             | 3.0<br>(-1.9 to 7.9)                                |
| Low back pain                                              | 8,197.2<br>(7,331.4 to 9,185.1)                  | 4,026.9<br>(3,492.8 to 4,592.1)                                 | 926.5<br>(656.3 to 1,235.1)                   | 10.0<br>(3.0 to 17.4)                             | 1.9<br>(-4.4 to 8.2)                                |
| Neck pain                                                  | 3,285.6<br>(2,853.3 to 3,783.4)                  | 616.3<br>(540.1 to 714.2)                                       | 325.7<br>(222.0 to 459.5)                     | 14.9<br>(8.2 to 23.9)                             | 6.3<br>(0.1 to 15.1)                                |
| Gout                                                       | 715.1<br>(628.5 to 810.1)                        | 113.4<br>(98.0 to 130.3)                                        | 22.4<br>(15.1 to 30.8)                        | 13.9<br>(3.2 to 27.1)                             | 0.6<br>(-9.2 to 12.7)                               |
| Other musculoskeletal disorders                            | 2,593.7<br>(2,075.3 to 3,195.2)                  | 3,217.7<br>(2,702.0 to 3,876.2)                                 | 220.7<br>(145.3 to 315.2)                     | 11.3<br>(0.1 to 24.2)                             | 3.7<br>(-6.3 to 14.8)                               |
| <b>Other non-communicable diseases</b>                     | <b>50,740.3</b><br><b>(50,167.5 to 51,269.7)</b> | <b>175,381.2<sup>+</sup></b><br><b>(169,661.2 to 181,430.5)</b> | <b>1,532.0</b><br><b>(1,058.1 to 2,141.4)</b> | <b>10.6</b><br><b>(9.4 to 11.9)</b>               | <b>0.2</b><br><b>(-0.8 to 1.4)</b>                  |
| Congenital anomalies                                       | 681.1<br>(640.5 to 717.6)                        | --                                                              | 67.5<br>(48.7 to 89.0)                        | 10.0<br>(5.3 to 14.7)                             | 4.7<br>(0.2 to 9.2)                                 |
| Neural tube defects                                        | 16.8<br>(15.3 to 18.7)                           | --                                                              | 5.3<br>(3.7 to 7.2)                           | 20.7<br>(10.8 to 32.6)                            | 14.5<br>(5.2 to 25.8)                               |
| Congenital heart anomalies                                 | 156.9<br>(142.4 to 172.1)                        | --                                                              | 8.5<br>(3.5 to 14.9)                          | 6.1<br>(-4.0 to 16.8)                             | 1.1<br>(-8.5 to 11.0)                               |
| Orofacial clefts                                           | 30.8<br>(27.0 to 35.2)                           | --                                                              | 0.3<br>(0.2 to 0.4)                           | 1.4<br>(-10.8 to 15.3)                            | -3.7<br>(-15.4 to 9.6)                              |
| Down's syndrome                                            | 25.8<br>(22.6 to 29.3)                           | --                                                              | 2.4<br>(1.7 to 3.4)                           | 2.9<br>(-6.4 to 12.8)                             | 1.5<br>(-7.8 to 11.1)                               |
| Turner syndrome                                            | 15.8<br>(13.8 to 18.1)                           | --                                                              | 0.3<br>(0.1 to 0.5)                           | -4.4<br>(-31.4 to 32.0)                           | -5.3<br>(-33.6 to 31.4)                             |
| Klinefelter syndrome                                       | 54.9<br>(47.8 to 62.5)                           | --                                                              | 0.3<br>(0.2 to 0.6)                           | -7.1<br>(-23.0 to 11.9)                           | -5.5<br>(-21.8 to 13.5)                             |



| Cause                                         | Prevalence in thousands (95% UI)                 | Incidence in thousands (95% UI)                | YLDs in thousands (95% UI)              |                                                   |                                                     |
|-----------------------------------------------|--------------------------------------------------|------------------------------------------------|-----------------------------------------|---------------------------------------------------|-----------------------------------------------------|
|                                               | 2016 counts                                      | 2016 counts                                    | 2016 counts                             | Percentage change in counts between 2006 and 2016 | Percentage change in age-standardised rates between |
| Other chromosomal abnormalities               | 78.7<br>(66.5 to 92.9)                           | --                                             | 7.2<br>(4.7 to 10.1)                    | 6.1<br>(-4.5 to 19.1)                             | 3.7<br>(-6.9 to 16.3)                               |
| Congenital musculoskeletal and limb anomalies | 177.8<br>(164.5 to 192.2)                        | --                                             | 23.8<br>(16.4 to 32.4)                  | 10.9<br>(1.0 to 20.6)                             | 5.0<br>(-4.8 to 14.4)                               |
| Urogenital congenital anomalies               | 77.8<br>(71.5 to 85.2)                           | --                                             | 2.0<br>(1.2 to 3.1)                     | 2.7<br>(-6.2 to 12.4)                             | -0.6<br>(-9.9 to 9.4)                               |
| Digestive congenital anomalies                | 116.1<br>(105.0 to 127.2)                        | --                                             | 5.1<br>(3.3 to 7.4)                     | 1.4<br>(-10.9 to 14.0)                            | -3.5<br>(-15.2 to 9.0)                              |
| Other congenital anomalies                    | 98.5<br>(60.7 to 153.2)                          | --                                             | 12.4<br>(8.0 to 17.9)                   | 17.5<br>(9.3 to 26.1)                             | 10.4<br>(2.9 to 18.3)                               |
| Skin and subcutaneous diseases                | 23,436.5<br>(22,955.4 to 23,924.7)               | 53,151.8<br>(50,033.8 to 56,540.0)             | 601.5<br>(407.2 to 859.9)               | 5.3<br>(3.6 to 7.2)                               | 0.4<br>(-1.3 to 2.3)                                |
| Dermatitis                                    | 4,260.6<br>(4,077.7 to 4,458.8)                  | 4,103.8<br>(3,804.1 to 4,406.8)                | 161.3<br>(94.5 to 263.7)                | 4.5<br>(1.0 to 8.1)                               | -0.4<br>(-4.0 to 3.5)                               |
| Psoriasis                                     | 1,228.5<br>(1,173.7 to 1,286.5)                  | 108.9<br>(104.2 to 113.5)                      | 105.6<br>(75.1 to 138.1)                | 8.7<br>(3.4 to 14.4)                              | 1.7<br>(-3.5 to 7.2)                                |
| Cellulitis                                    | 30.1<br>(28.3 to 32.0)                           | 564.8<br>(529.1 to 601.9)                      | 1.7<br>(1.1 to 2.4)                     | 9.2<br>(-10.2 to 29.4)                            | 0.6<br>(-17.9 to 20.6)                              |
| Pyoderma                                      | 279.4<br>(271.2 to 287.5)                        | 7,508.7<br>(7,256.4 to 7,748.6)                | 1.5<br>(0.6 to 3.2)                     | 10.5<br>(5.3 to 16.6)                             | 0.6<br>(-4.4 to 6.8)                                |
| Scabies                                       | 25.8<br>(22.6 to 29.5)                           | 80.7<br>(70.8 to 92.2)                         | 0.7<br>(0.4 to 1.1)                     | 4.3<br>(-11.1 to 22.3)                            | 2.3<br>(-12.2 to 21.5)                              |
| Fungal skin diseases                          | 5,254.1<br>(4,683.2 to 5,858.5)                  | 21,051.7<br>(18,191.2 to 24,071.0)             | 28.9<br>(11.6 to 60.3)                  | 13.2<br>(11.2 to 15.2)                            | 0.1<br>(-1.1 to 1.2)                                |
| Viral skin diseases                           | 1,859.7<br>(1,606.1 to 2,137.5)                  | 2,454.9<br>(2,120.2 to 2,837.7)                | 56.7<br>(35.2 to 84.7)                  | 3.9<br>(0.9 to 7.1)                               | -0.2<br>(-2.9 to 2.6)                               |
| Acne vulgaris                                 | 5,957.6<br>(5,464.9 to 6,438.8)                  | 4,639.7<br>(3,722.2 to 5,896.4)                | 153.2<br>(102.5 to 222.3)               | 0.8<br>(-3.0 to 4.6)                              | 0.9<br>(-2.9 to 4.8)                                |
| Alopecia areata                               | 190.7<br>(184.5 to 197.2)                        | 335.4<br>(324.2 to 346.8)                      | 6.2<br>(4.0 to 9.3)                     | 2.5<br>(-5.3 to 10.8)                             | -0.2<br>(-8.0 to 8.6)                               |
| Pruritus                                      | 629.3<br>(560.8 to 708.6)                        | 494.5<br>(440.1 to 557.6)                      | 6.6<br>(3.1 to 12.1)                    | 8.2<br>(2.6 to 14.1)                              | 0.1<br>(-4.9 to 6.0)                                |
| Urticaria                                     | 434.7<br>(384.9 to 487.7)                        | 766.9<br>(682.1 to 859.7)                      | 25.8<br>(17.0 to 36.7)                  | 3.8<br>(-2.3 to 10.1)                             | -0.1<br>(-5.8 to 5.5)                               |
| Decubitus ulcer                               | 55.8<br>(48.9 to 63.2)                           | 205.0<br>(178.0 to 233.7)                      | 8.5<br>(5.9 to 11.5)                    | 13.3<br>(-0.0 to 27.7)                            | -6.4<br>(-16.3 to 3.7)                              |
| Other skin and subcutaneous diseases          | 8,267.9<br>(8,052.4 to 8,494.9)                  | 10,837.0<br>(10,463.2 to 11,217.4)             | 44.9<br>(21.8 to 81.5)                  | 13.6<br>(11.4 to 16.1)                            | 2.1<br>(0.1 to 4.3)                                 |
| Sense organ diseases                          | 18,443.2<br>(18,040.8 to 18,912.5)               | 7,206.0†<br>(6,811.2 to 7,669.5)               | 613.9<br>(426.2 to 855.5)               | 16.2<br>(14.0 to 18.7)                            | -0.4<br>(-2.1 to 1.6)                               |
| Glaucoma                                      | 32.8<br>(26.4 to 39.3)                           | --                                             | 3.2<br>(2.1 to 4.6)                     | 20.6<br>(2.3 to 42.5)                             | -0.5<br>(-16.8 to 18.4)                             |
| Cataract                                      | 279.4<br>(221.8 to 350.4)                        | --                                             | 22.3<br>(15.3 to 32.0)                  | 20.5<br>(11.3 to 31.6)                            | -3.8<br>(-11.5 to 4.8)                              |
| Macular degeneration                          | 64.1<br>(51.3 to 78.2)                           | --                                             | 5.9<br>(3.8 to 8.4)                     | 26.1<br>(10.0 to 43.5)                            | 0.8<br>(-12.7 to 15.3)                              |
| Refraction and accommodation disorders        | 4,234.6<br>(4,054.8 to 4,419.1)                  | --                                             | 73.7<br>(45.7 to 116.2)                 | 8.3<br>(5.0 to 12.3)                              | -2.5<br>(-5.5 to 1.0)                               |
| Age-related and other hearing loss            | 15,656.7<br>(14,967.7 to 16,341.3)               | --                                             | 412.4<br>(286.8 to 586.9)               | 17.9<br>(14.9 to 21.4)                            | -0.0<br>(-2.5 to 2.6)                               |
| Other vision loss                             | 148.2<br>(127.8 to 171.0)                        | --                                             | 11.5<br>(7.8 to 15.7)                   | 15.2<br>(4.9 to 27.2)                             | 0.2<br>(-9.4 to 11.3)                               |
| Other sense organ diseases                    | 2,716.4<br>(2,494.7 to 2,937.5)                  | 7,206.0<br>(6,811.2 to 7,669.5)                | 84.8<br>(53.6 to 128.1)                 | 13.7<br>(9.2 to 18.0)                             | 0.6<br>(-3.5 to 4.3)                                |
| Oral disorders                                | 37,522.6<br>(36,586.8 to 38,487.8)               | 115,023.5†<br>(110,154.2 to 119,870.6)         | 249.0<br>(157.7 to 368.9)               | 10.8<br>(8.5 to 13.4)                             | -0.8<br>(-2.7 to 0.9)                               |
| Caries of deciduous teeth                     | 2,131.9<br>(1,470.6 to 2,675.8)                  | 6,664.0<br>(3,476.3 to 10,599.5)               | 0.8<br>(0.3 to 1.6)                     | 76.8<br>(31.0 to 124.5)                           | 69.0<br>(24.8 to 115.7)                             |
| Caries of permanent teeth                     | 31,302.5<br>(30,047.1 to 32,476.0)               | 107,465.8<br>(104,415.0 to 110,531.8)          | 30.5<br>(13.5 to 57.8)                  | 5.0<br>(2.7 to 7.6)                               | 0.1<br>(-2.3 to 2.7)                                |
| Periodontal disease                           | 5,197.7<br>(4,311.4 to 6,205.4)                  | 509.5<br>(403.9 to 636.4)                      | 33.9<br>(13.3 to 71.7)                  | 8.4<br>(4.1 to 12.4)                              | -0.6<br>(-4.4 to 2.9)                               |
| Edentulism and severe tooth loss              | 5,338.3<br>(4,666.9 to 6,034.6)                  | 384.1<br>(325.1 to 454.3)                      | 147.1<br>(96.2 to 205.7)                | 14.1<br>(10.2 to 17.8)                            | -2.0<br>(-5.1 to 1.3)                               |
| Other oral disorders                          | 1,261.7<br>(1,208.2 to 1,320.0)                  | --                                             | 36.8<br>(22.6 to 55.7)                  | 5.1<br>(2.1 to 8.2)                               | -0.0<br>(-3.2 to 3.0)                               |
| <b>Injuries</b>                               | <b>21,463.5</b><br><b>(20,077.8 to 23,044.3)</b> | <b>7,793.5†</b><br><b>(7,353.6 to 8,268.0)</b> | <b>701.1</b><br><b>(473.5 to 984.3)</b> | <b>7.3</b><br><b>(6.1 to 8.8)</b>                 | <b>-4.0</b><br><b>(-5.1 to -3.0)</b>                |
| <b>Transport injuries</b>                     | <b>3,013.5</b><br><b>(2,798.6 to 3,241.1)</b>    | <b>679.1</b><br><b>(621.1 to 741.2)</b>        | <b>135.1</b><br><b>(88.6 to 197.3)</b>  | <b>-6.7</b><br><b>(-8.1 to -5.2)</b>              | <b>-14.3</b><br><b>(-15.8 to -12.8)</b>             |
| Road injuries                                 | 2,734.9<br>(2,529.3 to 2,950.5)                  | 641.9<br>(582.6 to 703.9)                      | 125.2<br>(82.4 to 182.5)                | -7.5<br>(-9.0 to -6.1)                            | -15.1<br>(-16.6 to -13.6)                           |
| Pedestrian road injuries                      | 442.9<br>(388.6 to 510.6)                        | 69.8<br>(58.2 to 83.5)                         | 22.2<br>(14.5 to 32.6)                  | -11.3<br>(-12.7 to -9.8)                          | -18.8<br>(-20.4 to -17.3)                           |
| Cyclist road injuries                         | 742.0<br>(618.8 to 877.6)                        | 222.8<br>(187.0 to 261.0)                      | 31.1<br>(20.2 to 45.5)                  | 3.5<br>(2.0 to 5.1)                               | -5.6<br>(-7.0 to -4.0)                              |
| Motorcyclist road injuries                    | 604.8<br>(510.2 to 732.8)                        | 88.2<br>(72.9 to 105.3)                        | 28.5<br>(18.8 to 41.5)                  | -3.9<br>(-5.5 to -1.9)                            | -11.1<br>(-12.9 to -9.2)                            |
| Motor vehicle road injuries                   | 775.7<br>(650.3 to 897.4)                        | 221.6<br>(192.4 to 253.0)                      | 37.2<br>(24.7 to 53.4)                  | -16.0<br>(-17.5 to -14.5)                         | -22.8<br>(-24.4 to -21.2)                           |
| Other road injuries                           | 169.5<br>(142.3 to 199.9)                        | 39.5<br>(30.9 to 50.8)                         | 6.2<br>(4.0 to 9.1)                     | -3.3<br>(-4.9 to -1.4)                            | -10.8<br>(-12.6 to -8.9)                            |
| Other transport injuries                      | 278.6<br>(229.1 to 330.0)                        | 37.2<br>(32.0 to 42.7)                         | 9.8<br>(6.2 to 14.4)                    | 6.2<br>(5.0 to 7.5)                               | -3.0<br>(-4.3 to -1.7)                              |
| <b>Unintentional injuries</b>                 | <b>17,676.3</b><br><b>(16,377.7 to 19,151.2)</b> | <b>6,802.5</b><br><b>(6,349.6 to 7,267.1)</b>  | <b>537.4</b><br><b>(363.6 to 760.5)</b> | <b>11.5</b><br><b>(10.2 to 13.2)</b>              | <b>-1.1</b><br><b>(-2.2 to 0.1)</b>                 |
| Falls                                         | 9,725.3<br>(8,613.6 to 10,813.4)                 | 3,881.8<br>(3,476.5 to 4,305.9)                | 360.9<br>(251.8 to 496.2)               | 12.3<br>(10.6 to 14.4)                            | -1.6<br>(-3.0 to -0.3)                              |
| Drowning                                      | 30.7<br>(27.2 to 34.2)                           | 3.6<br>(3.2 to 4.1)                            | 1.4<br>(0.9 to 2.1)                     | 7.8<br>(3.4 to 13.2)                              | -1.3<br>(-6.0 to 3.8)                               |
| Fire, heat, and hot substances                | 1,503.5<br>(1,281.6 to 1,745.4)                  | 84.9<br>(70.5 to 98.4)                         | 25.9<br>(14.4 to 43.2)                  | 8.1<br>(5.6 to 10.7)                              | -0.2<br>(-2.6 to 2.4)                               |
| Poisonings                                    | 59.0<br>(47.4 to 74.5)                           | 53.1<br>(43.3 to 63.3)                         | 5.2<br>(3.3 to 7.5)                     | 3.4<br>(-4.6 to 12.4)                             | -2.1<br>(-10.4 to 7.3)                              |
| Exposure to mechanical forces                 | 3,259.7<br>(2,743.2 to 4,114.7)                  | 813.7<br>(705.0 to 933.2)                      | 59.4<br>(37.3 to 91.6)                  | 9.8<br>(8.6 to 11.0)                              | 0.8<br>(-0.5 to 2.0)                                |
| Unintentional firearm injuries                | 119.2<br>(98.0 to 146.4)                         | 11.6<br>(8.3 to 15.7)                          | 1.8<br>(1.0 to 3.0)                     | 4.5<br>(3.0 to 6.2)                               | -4.4<br>(-5.9 to -2.8)                              |
| Unintentional suffocation                     | 47.8<br>(39.9 to 56.4)                           | 10.5<br>(7.4 to 14.4)                          | 1.2<br>(0.8 to 1.9)                     | 15.2<br>(13.7 to 17.0)                            | 2.5<br>(1.0 to 4.0)                                 |
| Other exposure to mechanical forces           | 3,092.7<br>(2,582.5 to 3,940.9)                  | 791.6<br>(684.8 to 909.1)                      | 56.4<br>(35.4 to 86.9)                  | 9.9<br>(8.7 to 11.1)                              | 0.9<br>(-0.5 to 2.2)                                |

| Cause                                                                               | Prevalence in thousands (95% UI)              | Incidence in thousands (95% UI)          | YLDs in thousands (95% UI)           |                                                   |                                                     |
|-------------------------------------------------------------------------------------|-----------------------------------------------|------------------------------------------|--------------------------------------|---------------------------------------------------|-----------------------------------------------------|
|                                                                                     | 2016 counts                                   | 2016 counts                              | 2016 counts                          | Percentage change in counts between 2006 and 2016 | Percentage change in age-standardised rates between |
| Adverse effects of medical treatment                                                | 36.2<br>(29.0 to 44.0)                        | 473.4<br>(433.1 to 518.8)                | 4.8<br>(3.1 to 7.1)                  | 6.6<br>(1.8 to 12.2)                              | -7.4<br>(-10.9 to -3.8)                             |
| Animal contact                                                                      | 254.3<br>(225.9 to 292.5)                     | 139.5<br>(114.5 to 170.1)                | 4.6<br>(2.9 to 7.1)                  | 6.6<br>(3.2 to 9.8)                               | -2.0<br>(-5.4 to 1.6)                               |
| Venomous animal contact                                                             | 36.5<br>(31.5 to 42.3)                        | 42.1<br>(30.9 to 55.8)                   | 1.8<br>(1.1 to 2.7)                  | 4.5<br>(-2.5 to 12.2)                             | -1.6<br>(-8.9 to 6.5)                               |
| Non-venomous animal contact                                                         | 217.8<br>(189.2 to 255.2)                     | 97.5<br>(79.3 to 118.7)                  | 2.8<br>(1.6 to 4.7)                  | 7.9<br>(6.2 to 9.8)                               | -2.4<br>(-3.9 to -0.8)                              |
| Foreign body                                                                        | 422.9<br>(371.1 to 494.7)                     | 375.9<br>(339.2 to 421.5)                | 12.5<br>(8.0 to 18.5)                | 11.4<br>(10.0 to 12.9)                            | 0.3<br>(-1.0 to 1.7)                                |
| Pulmonary aspiration and foreign body in airway                                     | 111.5<br>(92.1 to 131.5)                      | 185.3<br>(170.4 to 202.2)                | 3.3<br>(2.1 to 4.9)                  | 11.0<br>(9.1 to 13.5)                             | -6.9<br>(-8.4 to -5.3)                              |
| Foreign body in eyes                                                                | 33.8<br>(22.7 to 46.3)                        | 133.2<br>(103.1 to 174.2)                | 2.3<br>(1.5 to 3.6)                  | 10.9<br>(7.6 to 14.5)                             | 3.3<br>(0.5 to 6.3)                                 |
| Foreign body in other body part                                                     | 277.6<br>(231.8 to 343.4)                     | 57.4<br>(48.0 to 67.8)                   | 6.9<br>(4.3 to 10.4)                 | 11.8<br>(10.4 to 13.4)                            | 2.0<br>(0.6 to 3.6)                                 |
| Environmental heat and cold exposure                                                | 210.6<br>(190.5 to 236.2)                     | 58.6<br>(51.0 to 67.0)                   | 7.6<br>(4.9 to 11.2)                 | 13.0<br>(9.6 to 16.6)                             | -1.1<br>(-4.5 to 2.1)                               |
| Other unintentional injuries                                                        | 2,174.1<br>(1,839.9 to 2,556.8)               | 917.9<br>(786.4 to 1,052.3)              | 55.2<br>(35.6 to 82.1)               | 11.6<br>(10.5 to 12.9)                            | 0.4<br>(-0.9 to 1.6)                                |
| <b>Self-harm and interpersonal violence</b>                                         | <b>1,537.0</b><br><b>(1,404.2 to 1,663.6)</b> | <b>309.8†</b><br><b>(278.4 to 345.1)</b> | <b>28.2</b><br><b>(18.8 to 40.3)</b> | <b>6.5</b><br><b>(4.3 to 8.5)</b>                 | <b>-0.1</b><br><b>(-2.3 to 1.9)</b>                 |
| Self-harm                                                                           | 214.8<br>(173.8 to 258.2)                     | 165.3<br>(146.8 to 188.5)                | 7.9<br>(5.0 to 11.5)                 | 3.1<br>(-0.8 to 7.4)                              | -5.0<br>(-9.0 to -0.7)                              |
| Self-harm by firearm                                                                | 1.8<br>(1.4 to 2.1)                           | 0.3<br>(0.2 to 0.5)                      | < 0.05<br>(< 0.05 to 0.1)            | -6.7<br>(-9.1 to -4.6)                            | -13.8<br>(-16.2 to -11.7)                           |
| Self-harm by other specified means                                                  | 213.0<br>(172.1 to 256.4)                     | 165.0<br>(146.5 to 188.2)                | 7.9<br>(5.0 to 11.5)                 | 3.2<br>(-0.8 to 7.4)                              | -5.0<br>(-9.0 to -0.7)                              |
| Interpersonal violence                                                              | 1,322.2<br>(1,203.8 to 1,444.4)               | 144.5†<br>(119.8 to 171.4)               | 20.3<br>(13.7 to 28.8)               | 7.8<br>(5.5 to 10.0)                              | 1.6<br>(-0.6 to 3.9)                                |
| Assault by firearm                                                                  | 36.0<br>(29.7 to 43.5)                        | 4.4<br>(3.1 to 5.9)                      | 0.8<br>(0.5 to 1.2)                  | 13.9<br>(12.3 to 15.8)                            | 5.4<br>(3.6 to 7.4)                                 |
| Assault by sharp object                                                             | 101.6<br>(82.1 to 122.8)                      | 24.5<br>(18.0 to 32.8)                   | 1.9<br>(1.1 to 2.9)                  | 13.4<br>(11.6 to 15.3)                            | 5.3<br>(3.5 to 7.3)                                 |
| Sexual violence                                                                     | 783.1<br>(692.8 to 878.1)                     | --                                       | 6.4<br>(4.3 to 9.2)                  | -1.6<br>(-5.6 to 2.7)                             | -3.1<br>(-7.5 to 1.6)                               |
| Assault by other means                                                              | 401.4<br>(329.8 to 496.3)                     | 115.6<br>(95.4 to 137.5)                 | 11.2<br>(7.2 to 16.9)                | 12.6<br>(11.1 to 14.3)                            | 4.7<br>(3.1 to 6.4)                                 |
| <b>Forces of nature, conflict and terrorism, and executions and police conflict</b> | <b>19.8</b><br><b>(11.2 to 30.4)</b>          | <b>2.2†</b><br><b>(1.4 to 3.0)</b>       | <b>0.4</b><br><b>(0.1 to 1.3)</b>    | <b>103.9</b><br><b>(66.5 to 120.4)</b>            | <b>97.4</b><br><b>(58.1 to 115.1)</b>               |
| Exposure to forces of nature                                                        | 4.5<br>(1.8 to 7.6)                           | --                                       | 0.1<br>(< 0.05 to 0.3)               | 14.2<br>(12.1 to 17.4)                            | 3.4<br>(1.0 to 6.6)                                 |
| Conflict and terrorism                                                              | 8.1<br>(3.1 to 15.0)                          | --                                       | 0.2<br>(< 0.05 to 0.5)               | --                                                | --                                                  |
| Executions and police conflict                                                      | 7.2<br>(4.1 to 11.6)                          | 2.2<br>(1.4 to 3.0)                      | 0.2<br>(0.1 to 0.5)                  | 35.2<br>(24.9 to 39.3)                            | 25.1<br>(16.6 to 28.6)                              |
| <b>Impairments</b>                                                                  | --                                            | --                                       | --                                   | --                                                | --                                                  |
| Anaemia                                                                             | 3,695.4<br>(3,331.7 to 4,042.4)               | --                                       | 77.3<br>(53.1 to 108.9)              | 11.3<br>(2.6 to 21.9)                             | -0.4<br>(-8.4 to 8.8)                               |
| Developmental intellectual disability                                               | 905.9<br>(717.9 to 1,099.8)                   | --                                       | 110.5<br>(83.0 to 147.4)             | 5.1<br>(0.7 to 9.7)                               | 1.4<br>(-3.1 to 5.7)                                |
| Epilepsy                                                                            | 399.2<br>(163.5 to 629.2)                     | --                                       | 106.0<br>(44.4 to 206.5)             | 1.7<br>(-63.9 to 172.1)                           | -3.9<br>(-64.8 to 147.3)                            |
| Guillain-Barre syndrome                                                             | 0.7<br>(0.6 to 0.9)                           | --                                       | 0.2<br>(0.1 to 0.3)                  | 9.5<br>(7.2 to 12.0)                              | 0.1<br>(0.0 to 0.2)                                 |
| Hearing loss                                                                        | 16,225.5<br>(15,548.6 to 16,935.8)            | --                                       | 434.8<br>(302.2 to 618.7)            | 17.2<br>(14.3 to 20.3)                            | 0.0<br>(-2.3 to 2.4)                                |
| Heart failure                                                                       | 1,080.7<br>(942.8 to 1,240.0)                 | --                                       | 96.2<br>(70.9 to 127.5)              | 15.4<br>(7.3 to 24.0)                             | -4.7<br>(-10.8 to 2.1)                              |
| Infertility                                                                         | 821.9<br>(664.4 to 1,036.9)                   | --                                       | 5.5<br>(2.5 to 10.7)                 | -2.1<br>(-6.8 to 2.8)                             | 0.7<br>(-4.2 to 5.6)                                |
| Pelvic inflammatory disease                                                         | 2.4<br>(1.6 to 3.4)                           | --                                       | 0.3<br>(0.2 to 0.5)                  | -7.2<br>(-29.2 to 18.4)                           | -5.7<br>(-28.7 to 21.8)                             |
| Vision loss                                                                         | 4,861.0<br>(4,652.5 to 5,069.4)               | --                                       | 138.8<br>(98.7 to 193.8)             | 11.7<br>(8.3 to 15.3)                             | -0.8<br>(-3.8 to 3.2)                               |

We did not calculate incidence for the nine impairments, certain NTDs, and causes with only birth prevalence. Blank cells mean that no estimate is available.

† Incidence for aggregate causes represents the sum of the incidence of the causes below the aggregate.

‡ Incidence estimates for stroke represent first-ever stroke only.

^ Incidence of HIV/AIDS represents new infections of HIV only and does not include new infections of Tuberculosis in HIV positive cases.

SR Table 14: Prevalence, incidence, and YLDs for 2016, percentage change of YLD counts and percentage change of age-standardised YLD rates between 2006 and 2016 by cause and impairments, for all ages, Gabon.

| Cause                                                                                | Prevalence in thousands (95% UI)       | Incidence in thousands (95% UI)            | YLDs in thousands (95% UI)       |                                                   |                                                     |
|--------------------------------------------------------------------------------------|----------------------------------------|--------------------------------------------|----------------------------------|---------------------------------------------------|-----------------------------------------------------|
|                                                                                      | 2016 counts                            | 2016 counts                                | 2016 counts                      | Percentage change in counts between 2006 and 2016 | Percentage change in age-standardised rates between |
| <b>All causes</b>                                                                    | <b>1,745.7</b><br>(1,743.4 to 1,747.7) | <b>12,870.1†</b><br>(12,046.1 to 13,727.9) | <b>185.9</b><br>(137.2 to 243.9) | <b>22.4</b><br>(19.1 to 25.3)                     | <b>-2.9</b><br>(-5.1 to -0.9)                       |
| <b>Communicable, maternal, neonatal, and nutritional disorders</b>                   | <b>1,625.7</b><br>(1,612.3 to 1,640.3) | <b>8,651.8†</b><br>(7,861.7 to 9,441.7)    | <b>47.3</b><br>(32.6 to 65.8)    | <b>16.1</b><br>(9.2 to 22.0)                      | <b>-8.3</b><br>(-14.8 to -3.4)                      |
| <b>HIV/AIDS and tuberculosis</b>                                                     | <b>490.0</b><br>(449.1 to 526.1)       | <b>7.3†</b><br>(6.1 to 8.8)                | <b>5.2</b><br>(3.3 to 7.4)       | <b>-6.7</b><br>(-27.3 to 17.5)                    | <b>-28.5</b><br>(-45.3 to -9.3)                     |
| Tuberculosis                                                                         | 438.7<br>(395.9 to 485.4)              | 4.7†<br>(3.9 to 5.8)                       | 0.7<br>(0.4 to 1.0)              | -5.8<br>(-16.6 to 6.9)                            | -25.0<br>(-32.8 to -15.7)                           |
| Drug-susceptible tuberculosis                                                        | 2.2<br>(1.8 to 2.7)                    | 4.7<br>(3.9 to 5.7)                        | 0.7<br>(0.4 to 1.0)              | -5.7<br>(-16.6 to 7.1)                            | -25.0<br>(-33.0 to -15.6)                           |
| Multidrug-resistant tuberculosis without extensive drug resistance                   | < 0.05<br>(< 0.05 to < 0.05)           | < 0.05<br>(< 0.05 to 0.1)                  | < 0.05<br>(< 0.05 to < 0.05)     | -9.8<br>(-46.7 to 63.6)                           | -28.3<br>(-57.3 to 28.8)                            |
| Extensively drug-resistant tuberculosis                                              | < 0.05<br>(< 0.05 to < 0.05)           | < 0.05<br>(< 0.05 to < 0.05)               | < 0.05<br>(< 0.05 to < 0.05)     | 174.8<br>(62.7 to 398.6)                          | 118.5<br>(30.0 to 292.6)                            |
| Latent tuberculosis infection                                                        | 436.5<br>(393.7 to 482.8)              | --                                         | --                               | --                                                | --                                                  |
| HIV/AIDS                                                                             | 43.4<br>(36.6 to 51.5)                 | 2.6^<br>(1.7 to 3.6)                       | 4.5<br>(2.9 to 6.7)              | -6.8<br>(-29.8 to 21.0)                           | -29.0<br>(-47.3 to -6.5)                            |
| Drug-susceptible HIV/AIDS - Tuberculosis                                             | 0.8<br>(0.5 to 1.2)                    | 1.7<br>(1.1 to 2.4)                        | 0.3<br>(0.2 to 0.5)              | -38.9<br>(-48.3 to -28.5)                         | -51.7<br>(-58.9 to -43.9)                           |
| Multidrug-resistant HIV/AIDS - Tuberculosis without extensive drug resistance        | < 0.05<br>(< 0.05 to < 0.05)           | < 0.05<br>(< 0.05 to < 0.05)               | < 0.05<br>(< 0.05 to < 0.05)     | -41.7<br>(-65.7 to 4.6)                           | -54.0<br>(-73.0 to -17.8)                           |
| Extensively drug-resistant HIV/AIDS - Tuberculosis                                   | < 0.05<br>(< 0.05 to < 0.05)           | < 0.05<br>(< 0.05 to < 0.05)               | < 0.05<br>(< 0.05 to < 0.05)     | 77.7<br>(4.6 to 218.9)                            | 40.3<br>(-17.6 to 150.7)                            |
| HIV/AIDS resulting in other diseases                                                 | 42.6<br>(35.8 to 50.7)                 | 2.6<br>(1.7 to 3.6)                        | 4.2<br>(2.6 to 6.3)              | -3.1<br>(-29.4 to 30.1)                           | -26.5<br>(-46.9 to -0.1)                            |
| <b>Diarrhoea, lower respiratory infections, and other common infectious diseases</b> | <b>134.1</b><br>(126.9 to 142.0)       | <b>7,687.2†</b><br>(6,953.2 to 8,440.1)    | <b>7.0</b><br>(4.9 to 9.5)       | <b>23.9</b><br>(20.3 to 27.9)                     | <b>-0.2</b><br>(-2.9 to 2.5)                        |
| Diarrhoeal diseases                                                                  | 26.2<br>(24.3 to 28.1)                 | 1,767.4<br>(1,634.9 to 1,886.5)            | 2.9<br>(2.0 to 4.0)              | 23.1<br>(16.8 to 30.2)                            | -1.5<br>(-6.0 to 3.2)                               |
| Intestinal infectious diseases                                                       | < 0.05<br>(< 0.05 to 0.1)              | 0.9†<br>(0.7 to 1.1)                       | < 0.05<br>(< 0.05 to < 0.05)     | 2.0<br>(-14.5 to 22.4)                            | -16.9<br>(-28.6 to -2.5)                            |
| Typhoid fever                                                                        | < 0.05<br>(< 0.05 to 0.1)              | 0.8<br>(0.6 to 1.0)                        | < 0.05<br>(< 0.05 to < 0.05)     | 2.3<br>(-15.1 to 23.3)                            | -16.8<br>(-29.1 to -1.8)                            |
| Paratyphoid fever                                                                    | < 0.05<br>(< 0.05 to < 0.05)           | 0.1<br>(0.1 to 0.1)                        | < 0.05<br>(< 0.05 to < 0.05)     | 9.9<br>(-11.2 to 36.2)                            | -10.9<br>(-26.2 to 7.5)                             |
| Other intestinal infectious diseases                                                 | --                                     | --                                         | < 0.05<br>(< 0.05 to < 0.05)     | -21.4<br>(-40.9 to 7.0)                           | -35.2<br>(-48.5 to -16.6)                           |
| Lower respiratory infections                                                         | 2.3<br>(2.1 to 2.5)                    | 102.0<br>(92.9 to 112.2)                   | 0.1<br>(0.1 to 0.2)              | 12.4<br>(-0.9 to 26.0)                            | -8.0<br>(-17.1 to 1.6)                              |
| Upper respiratory infections                                                         | 74.0<br>(65.0 to 83.6)                 | 5,617.8<br>(4,890.7 to 6,391.7)            | 1.8<br>(1.1 to 2.9)              | 25.2<br>(17.8 to 32.2)                            | 0.9<br>(-4.6 to 5.9)                                |
| Otitis media                                                                         | 24.6<br>(21.9 to 27.4)                 | 141.6<br>(110.5 to 178.1)                  | 0.7<br>(0.4 to 1.1)              | 20.4<br>(10.8 to 31.2)                            | -1.1<br>(-8.3 to 7.2)                               |
| Meningitis                                                                           | 10.2<br>(8.6 to 11.9)                  | 2.2<br>(1.9 to 2.6)                        | 0.9<br>(0.7 to 1.2)              | 32.2<br>(23.0 to 42.9)                            | 5.4<br>(-1.3 to 13.2)                               |
| Pneumococcal meningitis                                                              | 7.2<br>(5.9 to 8.8)                    | 1.1<br>(0.9 to 1.3)                        | 0.6<br>(0.4 to 0.8)              | 37.2<br>(23.5 to 53.9)                            | 9.2<br>(-0.9 to 20.6)                               |
| H influenzae type B meningitis                                                       | 1.1<br>(0.8 to 1.4)                    | 0.3<br>(0.2 to 0.4)                        | 0.1<br>(0.1 to 0.2)              | 12.8<br>(-2.0 to 30.2)                            | -10.2<br>(-21.1 to 3.1)                             |
| Meningococcal infection                                                              | 0.4<br>(0.3 to 0.5)                    | 0.2<br>(0.1 to 0.2)                        | < 0.05<br>(< 0.05 to 0.1)        | 29.4<br>(23.3 to 35.3)                            | 2.9<br>(-1.8 to 7.5)                                |
| Other meningitis                                                                     | 1.5<br>(1.2 to 1.9)                    | 0.6<br>(0.5 to 0.7)                        | 0.2<br>(0.1 to 0.2)              | 34.1<br>(23.2 to 46.6)                            | 6.9<br>(-1.2 to 16.0)                               |
| Encephalitis                                                                         | 2.6<br>(1.7 to 3.7)                    | 1.7<br>(1.5 to 1.9)                        | 0.3<br>(0.2 to 0.4)              | 35.7<br>(19.5 to 57.1)                            | 6.3<br>(-5.7 to 20.8)                               |
| Diphtheria                                                                           | < 0.05<br>(< 0.05 to < 0.05)           | < 0.05<br>(< 0.05 to < 0.05)               | < 0.05<br>(< 0.05 to < 0.05)     | -83.2<br>(-92.3 to -63.2)                         | -86.1<br>(-93.0 to -73.0)                           |
| Whooping cough                                                                       | 0.9<br>(0.7 to 1.1)                    | 6.6<br>(5.1 to 8.3)                        | < 0.05<br>(< 0.05 to 0.1)        | -33.1<br>(-42.2 to -22.5)                         | -44.2<br>(-51.8 to -35.3)                           |
| Tetanus                                                                              | < 0.05<br>(< 0.05 to < 0.05)           | < 0.05<br>(< 0.05 to < 0.05)               | < 0.05<br>(< 0.05 to < 0.05)     | -13.2<br>(-45.1 to 16.1)                          | -33.6<br>(-61.1 to -7.9)                            |
| Measles                                                                              | 0.1<br>(< 0.05 to 0.2)                 | 4.0<br>(1.4 to 8.7)                        | < 0.05<br>(< 0.05 to < 0.05)     | -24.7<br>(-62.2 to 50.0)                          | -37.3<br>(-68.3 to 23.9)                            |
| Varicella and herpes zoster                                                          | 1.6<br>(1.5 to 1.7)                    | 43.1<br>(40.7 to 45.5)                     | 0.1<br>(< 0.05 to 0.1)           | 24.8<br>(8.9 to 43.7)                             | 0.2<br>(-10.7 to 12.4)                              |
| <b>Neglected tropical diseases and malaria</b>                                       | <b>1,312.5</b><br>(1,270.0 to 1,363.7) | <b>566.8†</b><br>(371.9 to 794.7)          | <b>11.8</b><br>(7.4 to 18.9)     | <b>36.6</b><br>(28.9 to 45.0)                     | <b>6.5</b><br>(0.7 to 13.3)                         |
| Malaria                                                                              | 284.3<br>(239.5 to 334.3)              | 420.7<br>(221.4 to 653.2)                  | 3.4<br>(2.5 to 4.7)              | 79.1<br>(58.2 to 102.9)                           | 43.9<br>(28.2 to 62.1)                              |
| Chagas disease                                                                       | --                                     | --                                         | --                               | --                                                | --                                                  |
| Leishmaniasis                                                                        | --                                     | --                                         | --                               | --                                                | --                                                  |
| Visceral leishmaniasis                                                               | --                                     | --                                         | --                               | --                                                | --                                                  |
| Cutaneous and mucocutaneous leishmaniasis                                            | --                                     | --                                         | --                               | --                                                | --                                                  |
| African trypanosomiasis                                                              | 0.1<br>(< 0.05 to 0.2)                 | < 0.05<br>(< 0.05 to 0.1)                  | < 0.05<br>(< 0.05 to 0.1)        | -61.7<br>(-76.1 to -42.0)                         | -69.3<br>(-81.3 to -49.1)                           |
| Schistosomiasis                                                                      | 358.9<br>(253.2 to 431.6)              | 125.6<br>(97.1 to 145.1)                   | 2.6<br>(1.2 to 5.1)              | 29.1<br>(22.8 to 35.6)                            | -1.4<br>(-6.0 to 3.3)                               |
| Cysticercosis                                                                        | 2.2<br>(1.4 to 3.0)                    | --                                         | 0.4<br>(0.2 to 0.6)              | 3.8<br>(-32.4 to 44.0)                            | -20.1<br>(-47.5 to 7.8)                             |
| Cystic echinococcosis                                                                | < 0.05<br>(< 0.05 to 0.1)              | < 0.05<br>(< 0.05 to < 0.05)               | < 0.05<br>(< 0.05 to < 0.05)     | -33.0<br>(-94.8 to 759.6)                         | -47.7<br>(-95.4 to 607.7)                           |
| Lymphatic filariasis                                                                 | 14.7<br>(4.1 to 38.4)                  | 0.6<br>(0.4 to 0.7)                        | 1.4<br>(0.2 to 4.5)              | 31.5<br>(22.0 to 40.8)                            | 2.0<br>(-5.1 to 7.8)                                |
| Onchocerciasis                                                                       | --                                     | --                                         | --                               | --                                                | --                                                  |
| Trachoma                                                                             | --                                     | --                                         | --                               | --                                                | --                                                  |
| Dengue                                                                               | 1.2<br>(0.7 to 1.9)                    | 19.7<br>(13.0 to 28.1)                     | 0.2<br>(0.1 to 0.4)              | 173.4<br>(102.5 to 547.0)                         | 120.5<br>(65.2 to 434.9)                            |
| Yellow fever                                                                         | < 0.05<br>(< 0.05 to < 0.05)           | 0.3<br>(0.1 to 0.8)                        | < 0.05<br>(< 0.05 to < 0.05)     | -30.0<br>(-52.7 to 1.5)                           | -43.8<br>(-60.4 to -20.9)                           |
| Rabies                                                                               | < 0.05<br>(< 0.05 to < 0.05)           | < 0.05<br>(< 0.05 to < 0.05)               | < 0.05<br>(< 0.05 to < 0.05)     | -30.0<br>(-59.6 to 14.5)                          | -41.7<br>(-61.4 to -12.6)                           |
| Intestinal nematode infections                                                       | 1,081.7<br>(1,021.7 to 1,153.7)        | --                                         | 2.9<br>(1.6 to 4.9)              | 24.1<br>(6.8 to 44.2)                             | 0.2<br>(-15.2 to 19.3)                              |
| Ascariasis                                                                           | 607.2<br>(536.6 to 682.5)              | --                                         | 1.0<br>(0.5 to 1.7)              | 24.2<br>(-4.0 to 60.1)                            | 0.8<br>(-24.8 to 35.0)                              |



| Cause                                                                   | Prevalence in thousands (95% UI)              | Incidence in thousands (95% UI)                | YLDs in thousands (95% UI)             |                                                   |                                                     |
|-------------------------------------------------------------------------|-----------------------------------------------|------------------------------------------------|----------------------------------------|---------------------------------------------------|-----------------------------------------------------|
|                                                                         | 2016 counts                                   | 2016 counts                                    | 2016 counts                            | Percentage change in counts between 2006 and 2016 | Percentage change in age-standardised rates between |
| Trichuriasis                                                            | 546.9<br>(477.4 to 623.4)                     | --                                             | 0.7<br>(0.4 to 1.3)                    | 24.8<br>(-5.6 to 65.8)                            | 1.2<br>(-26.6 to 39.4)                              |
| Hookworm disease                                                        | 325.5<br>(284.8 to 373.5)                     | --                                             | 1.2<br>(0.7 to 2.0)                    | 23.7<br>(0.3 to 51.2)                             | -0.8<br>(-21.4 to 25.3)                             |
| Food-borne trematodiasis                                                | --                                            | --                                             | --                                     | --                                                | --                                                  |
| Leprosy                                                                 | 0.3<br>(0.2 to 0.3)                           | < 0.05<br>(< 0.05 to < 0.05)                   | < 0.05<br>(< 0.05 to < 0.05)           | 4.5<br>(-14.5 to 31.8)                            | -16.0<br>(-30.3 to 5.3)                             |
| Ebola virus disease                                                     | --                                            | --                                             | --                                     | --                                                | --                                                  |
| Zika virus disease                                                      | --                                            | --                                             | --                                     | --                                                | --                                                  |
| Guinea worm disease                                                     | --                                            | --                                             | --                                     | --                                                | --                                                  |
| Other neglected tropical diseases                                       | 26.8<br>(25.3 to 28.6)                        | --                                             | 0.8<br>(0.5 to 1.2)                    | 9.1<br>(-1.0 to 20.3)                             | -9.7<br>(-17.5 to -0.9)                             |
| <b>Maternal disorders</b>                                               | <b>4.8</b><br><b>(3.8 to 6.2)</b>             | <b>34.9†</b><br><b>(31.3 to 38.6)</b>          | <b>0.4</b><br><b>(0.2 to 0.5)</b>      | <b>14.1</b><br><b>(-12.1 to 51.1)</b>             | <b>-12.7</b><br><b>(-32.2 to 13.9)</b>              |
| Maternal haemorrhage                                                    | 0.5<br>(0.4 to 0.7)                           | 3.6<br>(2.7 to 4.7)                            | < 0.05<br>(< 0.05 to < 0.05)           | 9.8<br>(-24.0 to 56.1)                            | -14.7<br>(-41.3 to 20.5)                            |
| Maternal sepsis and other pregnancy related infections                  | 0.7<br>(0.5 to 0.8)                           | 2.9<br>(2.2 to 3.9)                            | < 0.05<br>(< 0.05 to < 0.05)           | 15.2<br>(-41.1 to 131.5)                          | -9.6<br>(-52.0 to 73.0)                             |
| Maternal hypertensive disorders                                         | 3.4<br>(2.2 to 4.5)                           | 15.6<br>(13.8 to 17.1)                         | 0.2<br>(0.1 to 0.3)                    | 19.0<br>(-26.8 to 92.1)                           | -7.6<br>(-43.2 to 48.3)                             |
| Maternal obstructed labour and uterine rupture                          | 0.3<br>(0.2 to 0.4)                           | 1.7<br>(1.3 to 2.3)                            | 0.1<br>(0.1 to 0.1)                    | 10.8<br>(-16.3 to 46.1)                           | -17.4<br>(-36.7 to 8.7)                             |
| Maternal abortion, miscarriage, and ectopic pregnancy                   | 0.1<br>(0.1 to 0.1)                           | 11.1<br>(8.6 to 14.1)                          | < 0.05<br>(< 0.05 to < 0.05)           | 16.2<br>(-41.1 to 132.2)                          | -10.2<br>(-55.0 to 81.6)                            |
| Other maternal disorders                                                | --                                            | --                                             | 0.1<br>(< 0.05 to 0.1)                 | 8.1<br>(-16.9 to 43.5)                            | -17.0<br>(-35.5 to 8.2)                             |
| <b>Neonatal disorders</b>                                               | <b>22.0</b><br><b>(17.3 to 28.6)</b>          | --                                             | <b>4.1</b><br><b>(2.1 to 7.9)</b>      | <b>21.8</b><br><b>(-14.8 to 54.2)</b>             | <b>0.3</b><br><b>(-31.3 to 27.8)</b>                |
| Neonatal preterm birth complications                                    | 13.9<br>(10.5 to 18.8)                        | --                                             | 1.1<br>(0.7 to 1.7)                    | 1.9<br>(-20.4 to 28.6)                            | -16.6<br>(-34.3 to 4.7)                             |
| Neonatal encephalopathy due to birth asphyxia and trauma                | 4.0<br>(1.9 to 7.3)                           | --                                             | 0.4<br>(0.1 to 1.2)                    | 5.4<br>(-54.7 to 88.9)                            | -13.2<br>(-63.5 to 51.0)                            |
| Neonatal sepsis and other neonatal infections                           | 5.4<br>(1.6 to 12.8)                          | --                                             | 2.2<br>(0.5 to 5.8)                    | 40.1<br>(-37.6 to 115.1)                          | 16.1<br>(-51.7 to 81.3)                             |
| Hemolytic disease and other neonatal jaundice                           | 0.5<br>(0.4 to 0.6)                           | --                                             | 0.1<br>(0.1 to 0.2)                    | 24.5<br>(2.6 to 48.3)                             | -0.4<br>(-15.6 to 16.4)                             |
| Other neonatal disorders                                                | --                                            | --                                             | 0.3<br>(0.2 to 0.5)                    | 14.5<br>(-12.3 to 40.5)                           | -4.8<br>(-27.2 to 16.8)                             |
| <b>Nutritional deficiencies</b>                                         | <b>559.4</b><br><b>(541.3 to 575.7)</b>       | <b>66.2†</b><br><b>(54.5 to 81.5)</b>          | <b>17.2</b><br><b>(11.5 to 24.8)</b>   | <b>8.5</b><br><b>(2.9 to 14.9)</b>                | <b>-12.9</b><br><b>(-16.8 to -8.4)</b>              |
| Protein-energy malnutrition                                             | 10.1<br>(8.4 to 12.0)                         | 7.5<br>(6.3 to 8.8)                            | 0.4<br>(0.3 to 0.7)                    | 10.5<br>(-16.5 to 45.4)                           | -8.0<br>(-30.9 to 21.0)                             |
| Iodine deficiency                                                       | 26.1<br>(22.5 to 29.9)                        | 0.9<br>(0.7 to 1.0)                            | 0.7<br>(0.4 to 1.0)                    | -2.4<br>(-13.1 to 10.7)                           | -23.4<br>(-31.1 to -14.0)                           |
| Vitamin A deficiency                                                    | 66.6<br>(54.4 to 84.5)                        | 57.8<br>(46.2 to 73.1)                         | 0.2<br>(0.1 to 0.3)                    | 13.8<br>(-5.9 to 37.8)                            | -8.5<br>(-23.9 to 9.8)                              |
| Iron-deficiency anaemia                                                 | 518.3<br>(496.8 to 540.0)                     | --                                             | 15.9<br>(10.6 to 23.3)                 | 8.9<br>(2.8 to 16.1)                              | -12.4<br>(-16.6 to -7.5)                            |
| Other nutritional deficiencies                                          | --                                            | --                                             | < 0.05<br>(< 0.05 to < 0.05)           | 9.8<br>(-18.6 to 46.2)                            | -8.6<br>(-32.2 to 21.6)                             |
| <b>Other communicable, maternal, neonatal, and nutritional diseases</b> | <b>632.6</b><br><b>(601.2 to 667.5)</b>       | <b>289.4</b><br><b>(247.8 to 348.7)</b>        | <b>1.6</b><br><b>(1.0 to 2.4)</b>      | <b>22.4</b><br><b>(16.6 to 28.7)</b>              | <b>-4.5</b><br><b>(-8.8 to -0.2)</b>                |
| Sexually transmitted diseases excluding HIV                             | 446.5<br>(416.6 to 477.0)                     | 221.3<br>(196.7 to 249.4)                      | 0.9<br>(0.6 to 1.4)                    | 29.4<br>(21.9 to 38.1)                            | -2.9<br>(-8.1 to 3.4)                               |
| Syphilis                                                                | 72.0<br>(56.7 to 87.9)                        | 52.8<br>(39.4 to 68.5)                         | 0.1<br>(< 0.05 to 0.1)                 | 28.7<br>(14.4 to 44.1)                            | 0.6<br>(-11.2 to 14.1)                              |
| Chlamydial infection                                                    | 19.4<br>(16.5 to 22.9)                        | 15.7<br>(13.2 to 18.5)                         | 0.2<br>(0.1 to 0.3)                    | 28.6<br>(14.1 to 45.6)                            | -4.1<br>(-14.9 to 7.8)                              |
| Gonococcal infection                                                    | 19.4<br>(15.4 to 24.2)                        | 62.2<br>(46.9 to 81.9)                         | 0.2<br>(0.1 to 0.3)                    | 32.7<br>(18.4 to 49.9)                            | -0.6<br>(-10.7 to 12.0)                             |
| Trichomoniasis                                                          | 45.1<br>(38.4 to 52.2)                        | 39.7<br>(33.5 to 46.7)                         | < 0.05<br>(< 0.05 to 0.1)              | 30.6<br>(22.0 to 39.9)                            | -0.8<br>(-6.8 to 5.9)                               |
| Genital herpes                                                          | 336.3<br>(289.8 to 393.1)                     | 32.7<br>(27.1 to 39.9)                         | 0.1<br>(< 0.05 to 0.2)                 | 28.0<br>(15.4 to 40.3)                            | -1.7<br>(-10.1 to 6.6)                              |
| Other sexually transmitted diseases                                     | 19.2<br>(17.7 to 20.7)                        | 18.2<br>(15.0 to 21.9)                         | 0.3<br>(0.2 to 0.5)                    | 28.3<br>(18.1 to 40.8)                            | -5.1<br>(-12.7 to 4.2)                              |
| Hepatitis                                                               | 243.6<br>(209.8 to 282.8)                     | 68.1<br>(40.3 to 117.6)                        | 0.1<br>(< 0.05 to 0.1)                 | -4.5<br>(-24.6 to 23.1)                           | -22.2<br>(-36.8 to -3.9)                            |
| Acute hepatitis A                                                       | 1.9<br>(0.2 to 5.8)                           | 24.5<br>(2.0 to 75.5)                          | < 0.05<br>(< 0.05 to < 0.05)           | -4.6<br>(-73.6 to 288.8)                          | -20.2<br>(-72.3 to 184.8)                           |
| Hepatitis B                                                             | 160.0<br>(126.5 to 199.2)                     | 35.9<br>(27.2 to 47.6)                         | < 0.05<br>(< 0.05 to 0.1)              | -6.3<br>(-26.5 to 18.3)                           | -23.7<br>(-39.5 to -4.6)                            |
| Hepatitis C                                                             | 81.5<br>(71.9 to 91.6)                        | 5.1<br>(4.5 to 5.7)                            | < 0.05<br>(< 0.05 to < 0.05)           | 15.9<br>(-25.4 to 83.2)                           | -8.0<br>(-34.0 to 29.9)                             |
| Acute hepatitis E                                                       | 0.2<br>(0.2 to 0.2)                           | 2.6<br>(2.2 to 3.0)                            | < 0.05<br>(< 0.05 to < 0.05)           | -3.3<br>(-28.2 to 34.5)                           | -18.6<br>(-35.7 to 4.9)                             |
| Other infectious diseases                                               | 20.1<br>(19.0 to 21.2)                        | < 0.05<br>(< 0.05 to < 0.05)                   | 0.6<br>(0.4 to 0.9)                    | 16.7<br>(7.6 to 28.3)                             | -4.6<br>(-11.2 to 3.6)                              |
| <b>Non-communicable diseases</b>                                        | <b>1,588.4</b><br><b>(1,577.9 to 1,599.5)</b> | <b>4,076.6†</b><br><b>(3,826.8 to 4,354.3)</b> | <b>128.0</b><br><b>(94.5 to 165.8)</b> | <b>24.9</b><br><b>(21.2 to 28.6)</b>              | <b>-1.2</b><br><b>(-3.6 to 1.2)</b>                 |
| <b>Neoplasms</b>                                                        | <b>3.1</b><br><b>(2.9 to 3.4)</b>             | <b>1.6</b><br><b>(1.5 to 1.7)</b>              | <b>0.5</b><br><b>(0.4 to 0.7)</b>      | <b>13.7</b><br><b>(2.5 to 30.3)</b>               | <b>-7.2</b><br><b>(-16.3 to 5.9)</b>                |
| Lip and oral cavity cancer                                              | 0.1<br>(0.1 to 0.1)                           | < 0.05<br>(< 0.05 to < 0.05)                   | < 0.05<br>(< 0.05 to < 0.05)           | 18.5<br>(-0.8 to 40.6)                            | -3.7<br>(-19.4 to 14.1)                             |
| Nasopharynx cancer                                                      | < 0.05<br>(< 0.05 to < 0.05)                  | < 0.05<br>(< 0.05 to < 0.05)                   | < 0.05<br>(< 0.05 to < 0.05)           | 9.0<br>(-8.1 to 37.5)                             | -14.6<br>(-27.4 to 7.4)                             |
| Other pharynx cancer                                                    | < 0.05<br>(< 0.05 to < 0.05)                  | < 0.05<br>(< 0.05 to < 0.05)                   | < 0.05<br>(< 0.05 to < 0.05)           | 14.3<br>(-3.6 to 39.3)                            | -6.7<br>(-21.2 to 14.0)                             |
| Oesophageal cancer                                                      | 0.1<br>(0.1 to 0.1)                           | 0.1<br>(0.1 to 0.1)                            | < 0.05<br>(< 0.05 to < 0.05)           | 2.3<br>(-16.7 to 27.0)                            | -14.9<br>(-30.8 to 6.1)                             |
| Stomach cancer                                                          | 0.1<br>(0.1 to 0.1)                           | 0.1<br>(< 0.05 to 0.1)                         | < 0.05<br>(< 0.05 to < 0.05)           | -8.2<br>(-19.5 to 4.6)                            | -23.5<br>(-33.1 to -12.6)                           |
| Colon and rectum cancer                                                 | 0.3<br>(0.3 to 0.4)                           | 0.1<br>(0.1 to 0.1)                            | < 0.05<br>(< 0.05 to < 0.05)           | 19.2<br>(-2.9 to 50.2)                            | -1.5<br>(-19.9 to 24.1)                             |
| Liver cancer                                                            | 0.1<br>(< 0.05 to 0.1)                        | 0.1<br>(0.1 to 0.2)                            | < 0.05<br>(< 0.05 to < 0.05)           | 17.8<br>(-0.1 to 36.9)                            | -2.8<br>(-17.4 to 13.5)                             |
| Liver cancer due to hepatitis B                                         | < 0.05<br>(< 0.05 to < 0.05)                  | < 0.05<br>(< 0.05 to 0.1)                      | < 0.05<br>(< 0.05 to < 0.05)           | 19.2<br>(1.0 to 38.9)                             | -3.2<br>(-17.9 to 13.1)                             |



| Cause                                              | Prevalence in thousands (95% UI)        | Incidence in thousands (95% UI)       | YLDs in thousands (95% UI)        |                                                   |                                                     |
|----------------------------------------------------|-----------------------------------------|---------------------------------------|-----------------------------------|---------------------------------------------------|-----------------------------------------------------|
|                                                    | 2016 counts                             | 2016 counts                           | 2016 counts                       | Percentage change in counts between 2006 and 2016 | Percentage change in age-standardised rates between |
| Liver cancer due to hepatitis C                    | < 0.05<br>(< 0.05 to 0.1)               | 0.1<br>(< 0.05 to 0.1)                | < 0.05<br>(< 0.05 to < 0.05)      | 15.0<br>(-5.7 to 37.4)                            | -3.9<br>(-20.4 to 14.7)                             |
| Liver cancer due to alcohol use                    | < 0.05<br>(< 0.05 to < 0.05)            | < 0.05<br>(< 0.05 to < 0.05)          | < 0.05<br>(< 0.05 to < 0.05)      | 22.8<br>(2.7 to 45.3)                             | 2.1<br>(-14.0 to 20.9)                              |
| Liver cancer due to other causes                   | < 0.05<br>(< 0.05 to < 0.05)            | < 0.05<br>(< 0.05 to < 0.05)          | < 0.05<br>(< 0.05 to < 0.05)      | 17.1<br>(-1.4 to 36.3)                            | -3.8<br>(-18.7 to 12.0)                             |
| Gallbladder and biliary tract cancer               | < 0.05<br>(< 0.05 to < 0.05)            | < 0.05<br>(< 0.05 to < 0.05)          | < 0.05<br>(< 0.05 to < 0.05)      | -2.8<br>(-15.2 to 16.6)                           | -18.4<br>(-28.9 to -2.9)                            |
| Pancreatic cancer                                  | < 0.05<br>(< 0.05 to < 0.05)            | 0.1<br>(< 0.05 to 0.1)                | < 0.05<br>(< 0.05 to < 0.05)      | 17.4<br>(3.9 to 31.7)                             | -1.6<br>(-12.7 to 10.2)                             |
| Larynx cancer                                      | < 0.05<br>(< 0.05 to 0.1)               | < 0.05<br>(< 0.05 to < 0.05)          | < 0.05<br>(< 0.05 to < 0.05)      | 10.1<br>(-3.5 to 27.7)                            | -8.5<br>(-20.2 to 6.3)                              |
| Tracheal, bronchus, and lung cancer                | 0.1<br>(0.1 to 0.1)                     | 0.1<br>(0.1 to 0.1)                   | < 0.05<br>(< 0.05 to < 0.05)      | 10.0<br>(-12.8 to 37.0)                           | -8.4<br>(-27.6 to 14.6)                             |
| Malignant skin melanoma                            | 0.1<br>(< 0.05 to 0.1)                  | < 0.05<br>(< 0.05 to < 0.05)          | < 0.05<br>(< 0.05 to < 0.05)      | 40.5<br>(11.0 to 68.0)                            | 10.7<br>(-11.7 to 32.6)                             |
| Non-melanoma skin cancer                           | < 0.05<br>(< 0.05 to < 0.05)            | 0.1<br>(0.1 to 0.2)                   | < 0.05<br>(< 0.05 to < 0.05)      | 31.8<br>(-5.9 to 89.3)                            | 7.5<br>(-24.7 to 61.2)                              |
| Non-melanoma skin cancer (squamous-cell carcinoma) | < 0.05<br>(< 0.05 to < 0.05)            | < 0.05<br>(< 0.05 to < 0.05)          | < 0.05<br>(< 0.05 to < 0.05)      | 32.8<br>(-10.6 to 99.9)                           | 8.4<br>(-28.4 to 69.9)                              |
| Non-melanoma skin cancer (basal-cell carcinoma)    | < 0.05<br>(< 0.05 to < 0.05)            | 0.1<br>(< 0.05 to 0.1)                | < 0.05<br>(< 0.05 to < 0.05)      | 25.5<br>(9.8 to 41.1)                             | 1.1<br>(-10.4 to 11.4)                              |
| Breast cancer                                      | 0.9<br>(0.7 to 1.2)                     | 0.2<br>(0.2 to 0.3)                   | 0.1<br>(0.1 to 0.1)               | 15.0<br>(-9.5 to 54.0)                            | -9.3<br>(-28.4 to 21.1)                             |
| Cervical cancer                                    | 0.7<br>(0.5 to 0.9)                     | 0.2<br>(0.1 to 0.2)                   | 0.1<br>(< 0.05 to 0.1)            | -7.3<br>(-28.4 to 35.1)                           | -28.9<br>(-44.8 to 3.5)                             |
| Uterine cancer                                     | 0.1<br>(0.1 to 0.2)                     | < 0.05<br>(< 0.05 to < 0.05)          | < 0.05<br>(< 0.05 to < 0.05)      | 10.9<br>(-11.8 to 50.6)                           | -9.2<br>(-27.9 to 22.8)                             |
| Ovarian cancer                                     | 0.1<br>(0.1 to 0.2)                     | < 0.05<br>(< 0.05 to 0.1)             | < 0.05<br>(< 0.05 to < 0.05)      | 15.7<br>(-18.3 to 65.6)                           | -8.3<br>(-36.6 to 33.8)                             |
| Prostate cancer                                    | 0.5<br>(0.3 to 0.7)                     | 0.1<br>(0.1 to 0.2)                   | 0.1<br>(< 0.05 to 0.1)            | 39.1<br>(8.7 to 69.9)                             | 16.9<br>(-7.0 to 41.6)                              |
| Testicular cancer                                  | < 0.05<br>(< 0.05 to < 0.05)            | < 0.05<br>(< 0.05 to < 0.05)          | < 0.05<br>(< 0.05 to < 0.05)      | 41.8<br>(13.4 to 76.9)                            | 6.5<br>(-12.8 to 30.7)                              |
| Kidney cancer                                      | 0.1<br>(0.1 to 0.2)                     | < 0.05<br>(< 0.05 to < 0.05)          | < 0.05<br>(< 0.05 to < 0.05)      | 27.1<br>(1.1 to 62.3)                             | 4.8<br>(-13.7 to 28.8)                              |
| Bladder cancer                                     | 0.1<br>(0.1 to 0.2)                     | < 0.05<br>(< 0.05 to < 0.05)          | < 0.05<br>(< 0.05 to < 0.05)      | 22.9<br>(1.9 to 46.5)                             | 2.4<br>(-15.0 to 21.1)                              |
| Brain and nervous system cancer                    | 0.1<br>(< 0.05 to 0.1)                  | < 0.05<br>(< 0.05 to 0.1)             | < 0.05<br>(< 0.05 to < 0.05)      | 22.0<br>(9.0 to 39.5)                             | -0.8<br>(-9.7 to 11.3)                              |
| Thyroid cancer                                     | 0.1<br>(0.1 to 0.1)                     | < 0.05<br>(< 0.05 to < 0.05)          | < 0.05<br>(< 0.05 to < 0.05)      | 27.2<br>(-2.1 to 71.2)                            | -1.6<br>(-23.9 to 32.3)                             |
| Mesothelioma                                       | < 0.05<br>(< 0.05 to < 0.05)            | < 0.05<br>(< 0.05 to < 0.05)          | < 0.05<br>(< 0.05 to < 0.05)      | -0.9<br>(-16.6 to 21.3)                           | -18.9<br>(-32.0 to -0.8)                            |
| Hodgkin lymphoma                                   | < 0.05<br>(< 0.05 to < 0.05)            | < 0.05<br>(< 0.05 to < 0.05)          | < 0.05<br>(< 0.05 to < 0.05)      | -2.0<br>(-10.5 to 9.2)                            | -23.3<br>(-29.3 to -15.0)                           |
| Non-Hodgkin's lymphoma                             | 0.1<br>(0.1 to 0.1)                     | < 0.05<br>(< 0.05 to 0.1)             | < 0.05<br>(< 0.05 to < 0.05)      | 20.6<br>(4.8 to 36.5)                             | -1.9<br>(-14.9 to 11.4)                             |
| Multiple myeloma                                   | < 0.05<br>(< 0.05 to < 0.05)            | < 0.05<br>(< 0.05 to < 0.05)          | < 0.05<br>(< 0.05 to < 0.05)      | 15.4<br>(-1.7 to 32.9)                            | -4.0<br>(-18.2 to 10.6)                             |
| Leukaemia                                          | 0.1<br>(0.1 to 0.1)                     | < 0.05<br>(< 0.05 to < 0.05)          | < 0.05<br>(< 0.05 to < 0.05)      | 4.4<br>(-9.7 to 23.4)                             | -14.0<br>(-24.2 to -0.9)                            |
| Acute lymphoid leukaemia                           | < 0.05<br>(< 0.05 to < 0.05)            | < 0.05<br>(< 0.05 to < 0.05)          | < 0.05<br>(< 0.05 to < 0.05)      | 9.7<br>(-14.2 to 40.0)                            | -8.1<br>(-26.1 to 12.3)                             |
| Chronic lymphoid leukaemia                         | < 0.05<br>(< 0.05 to < 0.05)            | < 0.05<br>(< 0.05 to < 0.05)          | < 0.05<br>(< 0.05 to < 0.05)      | 6.5<br>(-12.1 to 29.6)                            | -11.2<br>(-26.5 to 7.8)                             |
| Acute myeloid leukaemia                            | < 0.05<br>(< 0.05 to < 0.05)            | < 0.05<br>(< 0.05 to < 0.05)          | < 0.05<br>(< 0.05 to < 0.05)      | 19.1<br>(0.7 to 40.1)                             | -1.5<br>(-14.0 to 12.1)                             |
| Chronic myeloid leukaemia                          | < 0.05<br>(< 0.05 to < 0.05)            | < 0.05<br>(< 0.05 to < 0.05)          | < 0.05<br>(< 0.05 to < 0.05)      | -1.1<br>(-18.6 to 26.8)                           | -21.7<br>(-34.9 to -0.9)                            |
| Other leukaemia                                    | < 0.05<br>(< 0.05 to 0.1)               | < 0.05<br>(< 0.05 to < 0.05)          | < 0.05<br>(< 0.05 to < 0.05)      | -5.3<br>(-23.7 to 17.5)                           | -20.9<br>(-35.0 to -4.2)                            |
| Other neoplasms                                    | 0.2<br>(0.2 to 0.3)                     | 0.1<br>(0.1 to 0.1)                   | < 0.05<br>(< 0.05 to < 0.05)      | 19.7<br>(-0.6 to 38.2)                            | -2.6<br>(-16.6 to 11.9)                             |
| <b>Cardiovascular diseases</b>                     | <b>71.4</b><br><b>(67.6 to 75.1)</b>    | <b>6.5†</b><br><b>(6.2 to 6.9)</b>    | <b>4.1</b><br><b>(3.0 to 5.4)</b> | <b>19.1</b><br><b>(14.1 to 24.1)</b>              | <b>-2.8</b><br><b>(-6.6 to 1.1)</b>                 |
| Rheumatic heart disease                            | 0.1<br>(0.1 to 0.1)                     | < 0.05<br>(< 0.05 to < 0.05)          | < 0.05<br>(< 0.05 to < 0.05)      | 4.7<br>(-10.5 to 24.9)                            | -15.2<br>(-29.3 to 3.8)                             |
| Ischaemic heart disease                            | 17.4<br>(16.5 to 18.3)                  | 2.3<br>(2.1 to 2.5)                   | 0.7<br>(0.5 to 1.0)               | 20.4<br>(14.0 to 26.9)                            | -1.7<br>(-6.5 to 2.9)                               |
| Cerebrovascular disease                            | 7.9<br>(7.4 to 8.4)                     | 1.3‡<br>(1.2 to 1.4)                  | 1.2<br>(0.8 to 1.5)               | 11.4<br>(3.1 to 19.9)                             | -7.9<br>(-14.7 to -0.7)                             |
| Ischaemic stroke                                   | 6.8<br>(6.2 to 7.5)                     | 0.9‡<br>(0.8 to 1.0)                  | 1.0<br>(0.7 to 1.2)               | 12.2<br>(3.1 to 22.4)                             | -7.2<br>(-14.9 to 1.2)                              |
| Hemorrhagic stroke                                 | 1.5<br>(1.3 to 1.6)                     | 0.4‡<br>(0.4 to 0.5)                  | 0.2<br>(0.1 to 0.3)               | 7.9<br>(-5.3 to 21.3)                             | -11.1<br>(-22.4 to 0.4)                             |
| Hypertensive heart disease                         | 1.8<br>(1.4 to 2.2)                     | --                                    | 0.1<br>(0.1 to 0.2)               | 15.7<br>(4.6 to 29.5)                             | -4.6<br>(-13.0 to 5.5)                              |
| Cardiomyopathy and myocarditis                     | 1.2<br>(1.1 to 1.4)                     | 0.4†<br>(0.4 to 0.5)                  | 0.1<br>(0.1 to 0.2)               | 25.0<br>(12.1 to 40.1)                            | 0.1<br>(-10.2 to 12.6)                              |
| Myocarditis                                        | 0.2<br>(0.2 to 0.3)                     | 0.4<br>(0.4 to 0.5)                   | < 0.05<br>(< 0.05 to < 0.05)      | 25.2<br>(17.6 to 33.5)                            | 0.0<br>(-7.2 to 8.3)                                |
| Alcoholic cardiomyopathy                           | 0.2<br>(0.1 to 0.2)                     | --                                    | < 0.05<br>(< 0.05 to < 0.05)      | 29.2<br>(0.6 to 65.0)                             | 2.1<br>(-21.0 to 31.0)                              |
| Other cardiomyopathy                               | 1.0<br>(0.8 to 1.2)                     | --                                    | 0.1<br>(0.1 to 0.1)               | 24.2<br>(8.6 to 43.0)                             | -0.3<br>(-12.5 to 14.7)                             |
| Atrial fibrillation and flutter                    | 5.1<br>(4.4 to 5.8)                     | 0.4<br>(0.4 to 0.5)                   | 0.4<br>(0.3 to 0.6)               | 21.2<br>(13.1 to 30.0)                            | 1.2<br>(-4.9 to 7.9)                                |
| Peripheral vascular disease                        | 19.6<br>(17.1 to 22.6)                  | 1.8<br>(1.5 to 2.1)                   | 0.1<br>(< 0.05 to 0.2)            | 11.2<br>(3.2 to 20.2)                             | -4.8<br>(-11.5 to 2.4)                              |
| Endocarditis                                       | 0.1<br>(0.1 to 0.1)                     | 0.3<br>(0.3 to 0.3)                   | < 0.05<br>(< 0.05 to < 0.05)      | 24.4<br>(8.6 to 40.6)                             | -1.7<br>(-15.5 to 13.8)                             |
| Other cardiovascular and circulatory diseases      | 27.6<br>(22.8 to 33.7)                  | --                                    | 1.4<br>(1.0 to 2.1)               | 25.6<br>(15.5 to 36.3)                            | 1.2<br>(-7.3 to 9.3)                                |
| <b>Chronic respiratory diseases</b>                | <b>147.8</b><br><b>(139.7 to 155.8)</b> | <b>27.8†</b><br><b>(25.5 to 30.2)</b> | <b>7.0</b><br><b>(5.2 to 9.2)</b> | <b>26.3</b><br><b>(20.8 to 31.7)</b>              | <b>0.3</b><br><b>(-3.5 to 4.4)</b>                  |
| Chronic obstructive pulmonary disease              | 26.1<br>(25.0 to 27.3)                  | 1.8<br>(1.7 to 1.8)                   | 2.0<br>(1.8 to 2.2)               | 16.4<br>(9.2 to 24.2)                             | -5.7<br>(-11.4 to 0.6)                              |
| Pneumoconiosis                                     | < 0.05<br>(< 0.05 to < 0.05)            | < 0.05<br>(< 0.05 to < 0.05)          | < 0.05<br>(< 0.05 to < 0.05)      | 24.9<br>(18.1 to 32.7)                            | -0.3<br>(-5.9 to 6.0)                               |
| Silicosis                                          | < 0.05<br>(< 0.05 to < 0.05)            | < 0.05<br>(< 0.05 to < 0.05)          | < 0.05<br>(< 0.05 to < 0.05)      | 34.3<br>(22.8 to 46.2)                            | 0.9<br>(-6.3 to 8.3)                                |

| Cause                                                          | Prevalence in thousands (95% UI)  | Incidence in thousands (95% UI)    | YLDs in thousands (95% UI)        |                                                                             |                                                                             |
|----------------------------------------------------------------|-----------------------------------|------------------------------------|-----------------------------------|-----------------------------------------------------------------------------|-----------------------------------------------------------------------------|
|                                                                | 2016 counts<br>(< 0.05 to < 0.05) | 2016 counts<br>(< 0.05 to < 0.05)  | 2016 counts<br>(< 0.05 to < 0.05) | Percentage change in counts between 2006 and 2016<br>27.5<br>(18.8 to 35.7) | Percentage change in age-standardised rates between<br>1.4<br>(-4.6 to 7.2) |
| Asbestosis                                                     | < 0.05<br>(< 0.05 to < 0.05)      | < 0.05<br>(< 0.05 to < 0.05)       | < 0.05<br>(< 0.05 to < 0.05)      | 27.5<br>(18.8 to 35.7)                                                      | 1.4<br>(-4.6 to 7.2)                                                        |
| Coal workers pneumoconiosis                                    | --                                | --                                 | --                                | --                                                                          | --                                                                          |
| Other pneumoconiosis                                           | < 0.05<br>(< 0.05 to < 0.05)      | < 0.05<br>(< 0.05 to < 0.05)       | < 0.05<br>(< 0.05 to < 0.05)      | 22.1<br>(11.2 to 34.9)                                                      | -1.6<br>(-10.8 to 9.3)                                                      |
| Asthma                                                         | 123.4<br>(113.4 to 134.2)         | 26.0<br>(23.7 to 28.4)             | 4.8<br>(3.1 to 7.0)               | 29.9<br>(23.4 to 37.0)                                                      | 4.2<br>(-0.3 to 8.9)                                                        |
| Interstitial lung disease and pulmonary sarcoidosis            | 0.2<br>(0.2 to 0.2)               | < 0.05<br>(< 0.05 to < 0.05)       | < 0.05<br>(< 0.05 to < 0.05)      | 20.3<br>(12.9 to 28.6)                                                      | -2.9<br>(-10.0 to 5.0)                                                      |
| Other chronic respiratory diseases                             | --                                | --                                 | 0.2<br>(0.1 to 0.2)               | 61.1<br>(29.1 to 99.7)                                                      | 28.6<br>(8.5 to 51.8)                                                       |
| <b>Cirrhosis and other chronic liver diseases</b>              | <b>4.3<br/>(4.1 to 4.6)</b>       | <b>0.5<br/>(0.5 to 0.5)</b>        | <b>0.4<br/>(0.2 to 0.5)</b>       | <b>20.9<br/>(9.7 to 34.2)</b>                                               | <b>-3.0<br/>(-10.4 to 5.6)</b>                                              |
| Cirrhosis and other chronic liver diseases due to hepatitis B  | 1.2<br>(1.1 to 1.3)               | 0.1<br>(0.1 to 0.2)                | 0.1<br>(0.1 to 0.1)               | 23.5<br>(4.8 to 44.8)                                                       | -2.6<br>(-16.2 to 12.4)                                                     |
| Cirrhosis and other chronic liver diseases due to hepatitis C  | 1.2<br>(1.0 to 1.3)               | 0.1<br>(0.1 to 0.2)                | 0.1<br>(0.1 to 0.1)               | 21.8<br>(3.8 to 43.8)                                                       | -4.0<br>(-17.0 to 11.8)                                                     |
| Cirrhosis and other chronic liver diseases due to alcohol use  | 0.8<br>(0.7 to 0.9)               | 0.1<br>(0.1 to 0.1)                | 0.1<br>(< 0.05 to 0.1)            | 23.4<br>(4.7 to 46.7)                                                       | -2.5<br>(-17.4 to 13.7)                                                     |
| Cirrhosis and other chronic liver diseases due to other causes | 1.2<br>(1.2 to 1.3)               | 0.1<br>(0.1 to 0.1)                | 0.1<br>(0.1 to 0.2)               | 17.9<br>(-3.3 to 42.7)                                                      | -2.8<br>(-18.2 to 16.0)                                                     |
| <b>Digestive diseases</b>                                      | <b>26.3<br/>(24.8 to 27.7)</b>    | <b>36.4†<br/>(34.7 to 38.2)</b>    | <b>0.8<br/>(0.6 to 1.1)</b>       | <b>25.7<br/>(17.2 to 35.1)</b>                                              | <b>-1.0<br/>(-6.7 to 4.9)</b>                                               |
| Peptic ulcer disease                                           | 6.5<br>(6.0 to 7.1)               | 2.5<br>(2.2 to 2.8)                | 0.1<br>(0.1 to 0.2)               | 21.1<br>(10.8 to 33.0)                                                      | -6.0<br>(-13.2 to 2.0)                                                      |
| Gastritis and duodenitis                                       | 9.7<br>(8.6 to 10.8)              | 11.2<br>(10.1 to 12.4)             | 0.1<br>(0.1 to 0.2)               | 31.6<br>(19.7 to 44.0)                                                      | 4.2<br>(-3.9 to 13.0)                                                       |
| Appendicitis                                                   | 0.3<br>(0.3 to 0.4)               | 8.6<br>(8.0 to 9.3)                | 0.1<br>(0.1 to 0.1)               | 20.8<br>(-8.6 to 62.4)                                                      | -2.9<br>(-23.8 to 24.6)                                                     |
| Paralytic ileus and intestinal obstruction                     | < 0.05<br>(< 0.05 to < 0.05)      | 1.2<br>(1.1 to 1.3)                | < 0.05<br>(< 0.05 to < 0.05)      | 24.9<br>(13.6 to 36.8)                                                      | 0.0<br>(-11.7 to 13.3)                                                      |
| Inguinal, femoral, and abdominal hernia                        | 9.1<br>(7.6 to 10.7)              | 5.6<br>(4.9 to 6.2)                | 0.3<br>(0.2 to 0.4)               | 24.4<br>(7.8 to 44.3)                                                       | -2.1<br>(-13.6 to 10.3)                                                     |
| Inflammatory bowel disease                                     | 0.2<br>(0.2 to 0.2)               | 0.6<br>(0.6 to 0.6)                | < 0.05<br>(< 0.05 to < 0.05)      | 50.5<br>(46.0 to 55.2)                                                      | 18.1<br>(14.4 to 21.8)                                                      |
| Vascular intestinal disorders                                  | < 0.05<br>(< 0.05 to < 0.05)      | 0.1<br>(0.1 to 0.1)                | < 0.05<br>(< 0.05 to < 0.05)      | 23.9<br>(18.1 to 29.8)                                                      | 0.2<br>(-4.0 to 4.7)                                                        |
| Gallbladder and biliary diseases                               | 1.4<br>(1.3 to 1.6)               | 6.4<br>(5.6 to 7.3)                | < 0.05<br>(< 0.05 to 0.1)         | 19.6<br>(-1.9 to 45.6)                                                      | -7.5<br>(-25.3 to 14.5)                                                     |
| Pancreatitis                                                   | < 0.05<br>(< 0.05 to < 0.05)      | 0.4<br>(0.3 to 0.4)                | < 0.05<br>(< 0.05 to < 0.05)      | 20.2<br>(15.8 to 25.1)                                                      | -6.2<br>(-9.8 to -2.5)                                                      |
| Other digestive diseases                                       | --                                | --                                 | 0.1<br>(< 0.05 to 0.1)            | 29.3<br>(18.2 to 41.0)                                                      | 3.0<br>(-3.2 to 9.5)                                                        |
| <b>Neurological disorders</b>                                  | <b>518.5<br/>(496.4 to 545.5)</b> | <b>247.8<br/>(209.2 to 288.9)</b>  | <b>13.1<br/>(8.5 to 18.6)</b>     | <b>26.0<br/>(-4.2 to 66.8)</b>                                              | <b>-1.1<br/>(-21.6 to 25.0)</b>                                             |
| Alzheimer's disease and other dementias                        | 6.2<br>(5.1 to 7.4)               | 1.1<br>(0.9 to 1.3)                | 0.9<br>(0.6 to 1.2)               | 19.8<br>(14.6 to 25.1)                                                      | -0.6<br>(-4.7 to 3.7)                                                       |
| Parkinson's disease                                            | 0.4<br>(0.4 to 0.6)               | 0.1<br>(< 0.05 to 0.1)             | 0.1<br>(< 0.05 to 0.1)            | 27.2<br>(11.5 to 46.8)                                                      | 6.8<br>(-5.7 to 22.5)                                                       |
| Epilepsy                                                       | 6.5<br>(1.6 to 11.8)              | 0.8<br>(0.2 to 1.4)                | 2.4<br>(0.5 to 4.9)               | 15.7<br>(-77.0 to 379.4)                                                    | -7.7<br>(-81.3 to 282.0)                                                    |
| Multiple sclerosis                                             | 0.1<br>(0.1 to 0.1)               | < 0.05<br>(< 0.05 to < 0.05)       | < 0.05<br>(< 0.05 to < 0.05)      | 40.8<br>(36.5 to 45.5)                                                      | 7.5<br>(4.3 to 11.2)                                                        |
| Motor neuron disease                                           | < 0.05<br>(< 0.05 to < 0.05)      | < 0.05<br>(< 0.05 to < 0.05)       | < 0.05<br>(< 0.05 to < 0.05)      | 27.3<br>(21.9 to 32.9)                                                      | 1.8<br>(-1.5 to 5.5)                                                        |
| Migraine                                                       | 186.2<br>(175.2 to 197.0)         | 23.1<br>(21.8 to 24.6)             | 7.9<br>(5.1 to 11.1)              | 28.8<br>(23.7 to 34.0)                                                      | -0.2<br>(-3.9 to 3.4)                                                       |
| Tension-type headache                                          | 386.3<br>(342.3 to 435.1)         | 222.8<br>(183.9 to 264.9)          | 1.3<br>(0.8 to 1.9)               | 28.8<br>(21.8 to 36.9)                                                      | -0.3<br>(-5.0 to 5.2)                                                       |
| Other neurological disorders                                   | < 0.05<br>(< 0.05 to < 0.05)      | < 0.05<br>(< 0.05 to < 0.05)       | 0.5<br>(0.1 to 1.1)               | 41.1<br>(-68.1 to 418.4)                                                    | 11.6<br>(-71.7 to 278.4)                                                    |
| <b>Mental and substance use disorders</b>                      | <b>247.4<br/>(238.6 to 256.3)</b> | <b>112.4†<br/>(103.5 to 123.2)</b> | <b>32.6<br/>(23.7 to 42.2)</b>    | <b>26.1<br/>(23.2 to 29.0)</b>                                              | <b>-1.4<br/>(-3.6 to 0.9)</b>                                               |
| Schizophrenia                                                  | 2.9<br>(2.5 to 3.3)               | 0.2<br>(0.2 to 0.3)                | 1.8<br>(1.3 to 2.4)               | 33.6<br>(20.9 to 46.0)                                                      | 0.5<br>(-7.8 to 9.1)                                                        |
| Alcohol use disorders                                          | 24.0<br>(20.5 to 27.4)            | 12.8<br>(10.8 to 14.8)             | 2.4<br>(1.6 to 3.3)               | 29.6<br>(18.0 to 40.9)                                                      | -2.4<br>(-10.5 to 5.7)                                                      |
| Drug use disorders                                             | 8.2<br>(7.2 to 9.0)               | 1.3<br>(1.2 to 1.5)                | 2.0<br>(1.4 to 2.8)               | 27.8<br>(15.3 to 43.4)                                                      | -3.1<br>(-12.2 to 7.7)                                                      |
| Opioid use disorders                                           | 4.3<br>(3.6 to 5.3)               | 0.5<br>(0.5 to 0.7)                | 1.8<br>(1.2 to 2.5)               | 27.2<br>(12.9 to 44.4)                                                      | -3.7<br>(-14.2 to 8.1)                                                      |
| Cocaine use disorders                                          | 0.2<br>(0.2 to 0.3)               | < 0.05<br>(< 0.05 to < 0.05)       | < 0.05<br>(< 0.05 to 0.1)         | 33.2<br>(25.9 to 40.8)                                                      | 2.6<br>(-2.9 to 8.1)                                                        |
| Amphetamine use disorders                                      | 0.1<br>(0.1 to 0.2)               | < 0.05<br>(< 0.05 to < 0.05)       | < 0.05<br>(< 0.05 to < 0.05)      | 32.1<br>(20.8 to 45.3)                                                      | 1.6<br>(-6.8 to 11.3)                                                       |
| Cannabis use disorders                                         | 3.3<br>(2.8 to 4.0)               | 0.6<br>(0.5 to 0.8)                | 0.1<br>(0.1 to 0.1)               | 29.9<br>(6.5 to 63.6)                                                       | 0.6<br>(-17.4 to 24.8)                                                      |
| Other drug use disorders                                       | 0.5<br>(0.5 to 0.6)               | 0.1<br>(0.1 to 0.1)                | 0.1<br>(0.1 to 0.1)               | 35.0<br>(16.2 to 60.5)                                                      | 2.4<br>(-10.9 to 21.0)                                                      |
| Depressive disorders                                           | 65.7<br>(61.5 to 70.4)            | 77.5<br>(69.1 to 87.5)             | 11.6<br>(8.0 to 15.8)             | 24.4<br>(18.5 to 30.5)                                                      | -2.8<br>(-7.2 to 1.8)                                                       |
| Major depressive disorder                                      | 47.7<br>(42.6 to 53.8)            | 74.2<br>(65.7 to 84.2)             | 9.7<br>(6.7 to 13.3)              | 23.6<br>(16.6 to 30.8)                                                      | -3.3<br>(-8.4 to 2.1)                                                       |
| Dysthymia                                                      | 19.1<br>(16.6 to 22.1)            | 3.3<br>(2.9 to 3.8)                | 1.8<br>(1.2 to 2.6)               | 29.0<br>(23.9 to 33.8)                                                      | -0.0<br>(-3.4 to 3.2)                                                       |
| Bipolar disorder                                               | 9.9<br>(8.4 to 11.6)              | 1.0<br>(0.9 to 1.2)                | 2.0<br>(1.2 to 3.0)               | 28.9<br>(20.4 to 38.5)                                                      | 0.2<br>(-6.0 to 6.7)                                                        |
| Anxiety disorders                                              | 52.6<br>(47.5 to 58.1)            | 9.4<br>(8.6 to 10.3)               | 5.1<br>(3.5 to 6.9)               | 26.2<br>(18.0 to 35.1)                                                      | -0.2<br>(-6.1 to 6.2)                                                       |
| Eating disorders                                               | 2.8<br>(2.2 to 3.4)               | 1.6<br>(1.2 to 2.1)                | 0.6<br>(0.4 to 0.8)               | 30.9<br>(15.1 to 47.5)                                                      | 1.8<br>(-9.9 to 14.6)                                                       |
| Anorexia nervosa                                               | 0.7<br>(0.5 to 1.0)               | 0.3<br>(0.2 to 0.4)                | 0.1<br>(0.1 to 0.2)               | 27.0<br>(1.9 to 61.8)                                                       | 1.6<br>(-18.0 to 27.9)                                                      |
| Bulimia nervosa                                                | 2.0<br>(1.5 to 2.7)               | 1.3<br>(0.9 to 1.8)                | 0.4<br>(0.2 to 0.6)               | 32.4<br>(13.3 to 52.3)                                                      | 1.9<br>(-12.6 to 16.3)                                                      |
| Autistic spectrum disorders                                    | 14.7<br>(13.2 to 16.6)            | 0.2<br>(0.1 to 0.2)                | 2.1<br>(1.4 to 2.9)               | 24.8<br>(18.3 to 32.0)                                                      | 0.4<br>(-4.3 to 5.5)                                                        |
| Autism                                                         | 4.0<br>(3.5 to 4.7)               | < 0.05<br>(< 0.05 to < 0.05)       | 1.0<br>(0.7 to 1.5)               | 24.3<br>(12.8 to 38.3)                                                      | 0.2<br>(-8.7 to 10.2)                                                       |
| Asperger syndrome and other autistic spectrum disorders        | 10.7<br>(8.9 to 12.9)             | 0.1<br>(0.1 to 0.2)                | 1.1<br>(0.7 to 1.6)               | 25.2<br>(18.8 to 32.1)                                                      | 0.7<br>(-3.9 to 5.5)                                                        |



| Cause                                                      | Prevalence in thousands (95% UI)        | Incidence in thousands (95% UI)          | YLDs in thousands (95% UI)     |                                                   |                                                     |
|------------------------------------------------------------|-----------------------------------------|------------------------------------------|--------------------------------|---------------------------------------------------|-----------------------------------------------------|
|                                                            | 2016 counts                             | 2016 counts                              | 2016 counts                    | Percentage change in counts between 2006 and 2016 | Percentage change in age-standardised rates between |
| Attention-deficit/hyperactivity disorder                   | 22.5<br>(20.2 to 25.3)                  | 1.3<br>(1.1 to 1.5)                      | 0.3<br>(0.2 to 0.4)            | 23.3<br>(15.2 to 32.5)                            | 0.3<br>(-6.2 to 7.3)                                |
| Conduct disorder                                           | 16.5<br>(13.6 to 19.5)                  | 5.8<br>(4.7 to 7.0)                      | 2.0<br>(1.2 to 3.0)            | 17.2<br>(10.2 to 24.8)                            | 0.0<br>(-5.9 to 6.6)                                |
| Idiopathic developmental intellectual disability           | 22.4<br>(12.2 to 32.6)                  | --                                       | 0.8<br>(0.4 to 1.5)            | 23.3<br>(14.5 to 32.8)                            | -1.7<br>(-8.8 to 6.2)                               |
| Other mental and substance use disorders                   | 26.9<br>(23.6 to 31.2)                  | 1.2<br>(1.1 to 1.4)                      | 2.0<br>(1.4 to 2.9)            | 31.7<br>(24.8 to 39.2)                            | 0.5<br>(-4.1 to 5.4)                                |
| <b>Diabetes, urogenital, blood, and endocrine diseases</b> | <b>885.0<br/>(871.7 to 898.9)</b>       | <b>171.6†<br/>(160.5 to 184.0)</b>       | <b>13.3<br/>(9.5 to 18.1)</b>  | <b>24.2<br/>(20.9 to 28.0)</b>                    | <b>-1.4<br/>(-4.2 to 1.9)</b>                       |
| Diabetes mellitus                                          | 70.5<br>(63.2 to 78.2)                  | 4.5<br>(4.0 to 5.0)                      | 5.6<br>(3.9 to 7.8)            | 24.3<br>(17.3 to 32.6)                            | -1.2<br>(-6.8 to 5.2)                               |
| Acute glomerulonephritis                                   | < 0.05<br>(< 0.05 to < 0.05)            | 0.2<br>(0.2 to 0.3)                      | < 0.05<br>(< 0.05 to < 0.05)   | 24.6<br>(19.0 to 30.5)                            | 0.1<br>(-3.7 to 4.5)                                |
| Chronic kidney disease                                     | 77.5<br>(69.9 to 85.3)                  | 5.7<br>(5.0 to 6.4)                      | 2.2<br>(1.6 to 2.8)            | 27.4<br>(20.6 to 34.5)                            | 1.9<br>(-3.5 to 7.6)                                |
| Chronic kidney disease due to diabetes mellitus            | 25.2<br>(21.4 to 29.4)                  | 1.8<br>(1.5 to 2.1)                      | 0.7<br>(0.5 to 0.9)            | 28.6<br>(18.7 to 40.1)                            | 3.4<br>(-4.7 to 11.8)                               |
| Chronic kidney disease due to hypertension                 | 16.4<br>(14.1 to 18.7)                  | 1.4<br>(1.1 to 1.6)                      | 0.4<br>(0.3 to 0.5)            | 21.1<br>(9.7 to 35.5)                             | -0.5<br>(-9.9 to 11.1)                              |
| Chronic kidney disease due to glomerulonephritis           | 15.5<br>(13.4 to 17.5)                  | 1.0<br>(0.8 to 1.2)                      | 0.5<br>(0.4 to 0.7)            | 30.2<br>(18.2 to 43.8)                            | 2.7<br>(-5.7 to 12.1)                               |
| Chronic kidney disease due to other causes                 | 20.4<br>(16.9 to 23.7)                  | 1.6<br>(1.3 to 1.8)                      | 0.6<br>(0.4 to 0.8)            | 28.2<br>(18.1 to 39.9)                            | 1.5<br>(-6.3 to 10.2)                               |
| Urinary diseases and male infertility                      | 33.6<br>(30.8 to 36.5)                  | 87.4†<br>(78.2 to 98.7)                  | 0.8<br>(0.5 to 1.2)            | 25.4<br>(17.4 to 33.8)                            | 2.0<br>(-4.6 to 9.2)                                |
| Interstitial nephritis and urinary tract infections        | 1.4<br>(1.3 to 1.7)                     | 75.1<br>(65.9 to 86.4)                   | < 0.05<br>(< 0.05 to 0.1)      | 24.7<br>(5.1 to 45.7)                             | -1.9<br>(-16.3 to 13.7)                             |
| Urolithiasis                                               | 0.4<br>(0.3 to 0.4)                     | 9.8<br>(8.7 to 11.3)                     | < 0.05<br>(< 0.05 to < 0.05)   | 31.2<br>(21.3 to 41.3)                            | 1.4<br>(-7.1 to 10.1)                               |
| Benign prostatic hyperplasia                               | 19.4<br>(16.5 to 22.5)                  | 2.5<br>(2.1 to 2.9)                      | 0.6<br>(0.4 to 0.9)            | 24.9<br>(15.3 to 35.2)                            | 2.8<br>(-4.6 to 11.2)                               |
| Male infertility                                           | 11.6<br>(10.4 to 13.0)                  | --                                       | 0.1<br>(< 0.05 to 0.1)         | 40.5<br>(28.7 to 52.3)                            | 2.3<br>(-6.4 to 10.6)                               |
| Other urinary diseases                                     | --                                      | --                                       | < 0.05<br>(< 0.05 to < 0.05)   | 4.6<br>(-7.3 to 16.9)                             | -17.2<br>(-25.0 to -8.9)                            |
| Gynecological diseases                                     | 204.4<br>(193.9 to 214.7)               | 72.4†<br>(67.0 to 78.4)                  | 2.5<br>(1.7 to 3.5)            | 29.1<br>(23.7 to 34.2)                            | -3.8<br>(-7.2 to -0.3)                              |
| Uterine fibroids                                           | 13.5<br>(11.9 to 15.2)                  | 1.6<br>(1.4 to 1.9)                      | 0.4<br>(0.2 to 0.5)            | 28.4<br>(19.0 to 37.6)                            | -6.1<br>(-13.2 to 0.7)                              |
| Polycystic ovarian syndrome                                | 1.7<br>(1.2 to 2.2)                     | 3.0<br>(2.1 to 4.0)                      | < 0.05<br>(< 0.05 to < 0.05)   | 33.5<br>(16.7 to 51.8)                            | -1.3<br>(-13.4 to 12.1)                             |
| Female infertility                                         | 4.2<br>(2.5 to 6.5)                     | --                                       | < 0.05<br>(< 0.05 to 0.1)      | 93.4<br>(19.9 to 210.5)                           | 32.4<br>(-18.6 to 105.4)                            |
| Endometriosis                                              | 0.4<br>(0.3 to 0.4)                     | 1.4<br>(1.1 to 1.7)                      | < 0.05<br>(< 0.05 to 0.1)      | 32.6<br>(-3.0 to 78.5)                            | -0.2<br>(-24.7 to 31.3)                             |
| Genital prolapse                                           | 95.4<br>(84.3 to 107.4)                 | 7.6<br>(6.4 to 9.0)                      | 0.3<br>(0.1 to 0.5)            | 18.3<br>(10.7 to 26.6)                            | -6.2<br>(-12.5 to 0.5)                              |
| Premenstrual syndrome                                      | 90.7<br>(84.3 to 96.8)                  | 34.1<br>(31.3 to 36.9)                   | 0.8<br>(0.5 to 1.2)            | 30.5<br>(19.7 to 42.5)                            | -2.1<br>(-9.8 to 6.3)                               |
| Other gynecological diseases                               | 29.1<br>(25.3 to 33.2)                  | 24.7<br>(20.1 to 29.7)                   | 1.0<br>(0.7 to 1.4)            | 30.5<br>(21.7 to 39.4)                            | -3.6<br>(-9.8 to 2.7)                               |
| Hemoglobinopathies and hemolytic anaemias                  | 691.2<br>(677.8 to 707.3)               | --                                       | 1.5<br>(1.0 to 2.1)            | 18.1<br>(10.6 to 27.7)                            | -4.4<br>(-9.6 to 1.7)                               |
| Thalassemias                                               | < 0.05<br>(< 0.05 to < 0.05)            | --                                       | < 0.05<br>(< 0.05 to < 0.05)   | 24.0<br>(8.7 to 47.4)                             | 3.3<br>(-9.2 to 22.6)                               |
| Thalassaemias trait                                        | 7.2<br>(6.8 to 7.8)                     | --                                       | 0.1<br>(0.1 to 0.1)            | 27.0<br>(11.3 to 42.5)                            | 2.1<br>(-8.7 to 13.4)                               |
| Sickle cell disorders                                      | 1.3<br>(1.2 to 1.5)                     | --                                       | 0.1<br>(0.1 to 0.2)            | 27.8<br>(6.4 to 53.8)                             | 6.5<br>(-10.2 to 26.5)                              |
| Sickle cell trait                                          | 196.0<br>(186.4 to 206.8)               | --                                       | 0.7<br>(0.4 to 1.0)            | 22.9<br>(13.4 to 33.9)                            | -0.0<br>(-7.2 to 7.9)                               |
| G6PD deficiency                                            | 232.9<br>(217.6 to 249.5)               | --                                       | < 0.05<br>(< 0.05 to < 0.05)   | 4.0<br>(-24.5 to 47.5)                            | -12.3<br>(-31.6 to 14.0)                            |
| G6PD trait                                                 | 325.4<br>(321.4 to 329.8)               | --                                       | < 0.05<br>(< 0.05 to < 0.05)   | 21.9<br>(9.5 to 34.8)                             | -3.2<br>(-11.1 to 6.0)                              |
| Other hemoglobinopathies and hemolytic anaemias            | 23.1<br>(22.1 to 24.1)                  | --                                       | 0.6<br>(0.4 to 0.8)            | 10.6<br>(1.4 to 21.2)                             | -11.0<br>(-16.7 to -4.0)                            |
| Endocrine, metabolic, blood, and immune disorders          | 26.3<br>(25.2 to 27.4)                  | 1.4<br>(1.3 to 1.6)                      | 0.8<br>(0.5 to 1.1)            | 12.5<br>(5.0 to 20.7)                             | -7.7<br>(-12.5 to -2.5)                             |
| <b>Musculoskeletal disorders</b>                           | <b>202.2<br/>(192.1 to 212.1)</b>       | <b>94.6<br/>(85.2 to 104.3)</b>          | <b>22.2<br/>(16.1 to 29.0)</b> | <b>26.9<br/>(23.5 to 30.2)</b>                    | <b>-0.9<br/>(-3.3 to 1.6)</b>                       |
| Rheumatoid arthritis                                       | 3.4<br>(3.0 to 3.8)                     | 0.2<br>(0.2 to 0.2)                      | 0.8<br>(0.5 to 1.1)            | 24.6<br>(14.8 to 36.0)                            | -2.3<br>(-9.5 to 6.1)                               |
| Osteoarthritis                                             | 43.7<br>(40.9 to 46.5)                  | 2.3<br>(2.1 to 2.5)                      | 2.6<br>(1.9 to 3.6)            | 28.0<br>(23.5 to 32.9)                            | 3.1<br>(-0.4 to 6.9)                                |
| Low back and neck pain                                     | 135.6<br>(126.3 to 145.5)               | 62.5<br>(55.7 to 69.9)                   | 15.5<br>(11.0 to 20.4)         | 26.5<br>(22.3 to 30.7)                            | -1.3<br>(-4.4 to 1.6)                               |
| Low back pain                                              | 105.8<br>(94.2 to 119.2)                | 53.4<br>(46.9 to 60.7)                   | 11.8<br>(8.4 to 15.6)          | 25.5<br>(20.0 to 30.8)                            | -1.7<br>(-5.6 to 2.1)                               |
| Neck pain                                                  | 37.1<br>(32.2 to 42.9)                  | 9.1<br>(7.9 to 10.6)                     | 3.7<br>(2.5 to 5.2)            | 30.0<br>(26.2 to 33.8)                            | -0.1<br>(-2.5 to 2.3)                               |
| Gout                                                       | 4.7<br>(4.1 to 5.3)                     | 1.0<br>(0.8 to 1.1)                      | 0.1<br>(0.1 to 0.2)            | 28.2<br>(10.3 to 48.3)                            | 1.8<br>(-10.9 to 17.4)                              |
| Other musculoskeletal disorders                            | 36.1<br>(28.9 to 43.9)                  | 28.6<br>(22.4 to 35.7)                   | 3.1<br>(2.0 to 4.5)            | 28.1<br>(16.9 to 39.8)                            | -2.9<br>(-11.5 to 5.8)                              |
| <b>Other non-communicable diseases</b>                     | <b>1,208.2<br/>(1,186.3 to 1,232.2)</b> | <b>3,377.4†<br/>(3,133.8 to 3,659.9)</b> | <b>34.0<br/>(23.1 to 47.9)</b> | <b>22.9<br/>(21.3 to 24.4)</b>                    | <b>-0.9<br/>(-2.0 to 0.1)</b>                       |
| Congenital anomalies                                       | 18.3<br>(15.7 to 22.0)                  | --                                       | 3.0<br>(2.1 to 4.1)            | 22.1<br>(14.5 to 30.5)                            | -1.9<br>(-7.5 to 4.8)                               |
| Neural tube defects                                        | 3.2<br>(2.8 to 3.6)                     | --                                       | 1.0<br>(0.7 to 1.3)            | 24.5<br>(11.8 to 38.5)                            | -0.2<br>(-9.4 to 10.2)                              |
| Congenital heart anomalies                                 | 1.8<br>(1.5 to 2.1)                     | --                                       | 0.1<br>(< 0.05 to 0.1)         | 28.8<br>(10.9 to 50.0)                            | 5.0<br>(-8.8 to 21.9)                               |
| Orofacial clefts                                           | 0.5<br>(0.5 to 0.6)                     | --                                       | < 0.05<br>(< 0.05 to < 0.05)   | 18.0<br>(5.5 to 33.5)                             | -5.0<br>(-15.0 to 7.5)                              |
| Down's syndrome                                            | 0.3<br>(0.2 to 0.4)                     | --                                       | < 0.05<br>(< 0.05 to < 0.05)   | 25.9<br>(17.2 to 34.9)                            | 1.4<br>(-5.8 to 8.5)                                |
| Turner syndrome                                            | 0.8<br>(0.7 to 0.9)                     | --                                       | < 0.05<br>(< 0.05 to < 0.05)   | 11.7<br>(-22.8 to 60.7)                           | -9.4<br>(-36.7 to 28.5)                             |
| Klinefelter syndrome                                       | 1.0<br>(0.8 to 1.1)                     | --                                       | < 0.05<br>(< 0.05 to < 0.05)   | 27.3<br>(-3.4 to 66.5)                            | 0.2<br>(-22.4 to 32.2)                              |

| Cause                                         | Prevalence in thousands (95% UI)        | Incidence in thousands (95% UI)          | YLDs in thousands (95% UI)          |                                                   |                                                     |
|-----------------------------------------------|-----------------------------------------|------------------------------------------|-------------------------------------|---------------------------------------------------|-----------------------------------------------------|
|                                               | 2016 counts                             | 2016 counts                              | 2016 counts                         | Percentage change in counts between 2006 and 2016 | Percentage change in age-standardised rates between |
| Other chromosomal abnormalities               | 0.3<br>(0.3 to 0.4)                     | --                                       | 0.1<br>( $< 0.05$ to 0.1)           | 21.1<br>(-13.4 to 67.2)                           | 1.4<br>(-26.5 to 38.0)                              |
| Congenital musculoskeletal and limb anomalies | 2.1<br>(1.8 to 2.3)                     | --                                       | 0.3<br>(0.2 to 0.4)                 | 23.8<br>(8.4 to 42.0)                             | -1.1<br>(-12.4 to 12.2)                             |
| Urogenital congenital anomalies               | 1.2<br>(1.1 to 1.4)                     | --                                       | $< 0.05$<br>( $< 0.05$ to 0.1)      | 21.0<br>(12.2 to 30.6)                            | 0.3<br>(-6.6 to 7.7)                                |
| Digestive congenital anomalies                | 1.5<br>(1.3 to 1.7)                     | --                                       | 0.1<br>( $< 0.05$ to 0.1)           | 24.7<br>(3.4 to 51.3)                             | 0.3<br>(-15.2 to 19.0)                              |
| Other congenital anomalies                    | 9.5<br>(6.8 to 13.5)                    | --                                       | 1.5<br>(1.0 to 2.3)                 | 19.9<br>(9.0 to 32.7)                             | -3.6<br>(-12.3 to 6.3)                              |
| Skin and subcutaneous diseases                | 608.5<br>(590.2 to 628.5)               | 1,342.0<br>(1,269.5 to 1,424.6)          | 14.2<br>(9.5 to 20.8)               | 24.9<br>(22.3 to 27.7)                            | 1.8<br>(0.0 to 3.9)                                 |
| Dermatitis                                    | 92.1<br>(83.8 to 100.2)                 | 82.4<br>(76.2 to 89.0)                   | 3.7<br>(2.1 to 6.0)                 | 22.0<br>(17.3 to 27.0)                            | 0.1<br>(-3.4 to 3.7)                                |
| Psoriasis                                     | 12.8<br>(12.3 to 13.3)                  | 1.8<br>(1.7 to 1.9)                      | 1.1<br>(0.8 to 1.5)                 | 34.9<br>(22.5 to 47.4)                            | 6.4<br>(-1.7 to 15.2)                               |
| Cellulitis                                    | 0.7<br>(0.7 to 0.8)                     | 12.1<br>(11.3 to 12.9)                   | $< 0.05$<br>( $< 0.05$ to 0.1)      | 25.9<br>(-1.8 to 57.6)                            | 1.2<br>(-18.2 to 23.5)                              |
| Pyoderma                                      | 10.5<br>(10.0 to 10.9)                  | 204.3<br>(195.9 to 213.4)                | 0.1<br>( $< 0.05$ to 0.1)           | 23.4<br>(16.5 to 30.3)                            | 0.8<br>(-4.1 to 5.7)                                |
| Scabies                                       | 20.1<br>(17.4 to 23.3)                  | 62.1<br>(53.2 to 72.3)                   | 0.5<br>(0.3 to 0.8)                 | 24.4<br>(18.4 to 31.2)                            | 0.6<br>(-3.9 to 5.4)                                |
| Fungal skin diseases                          | 235.5<br>(208.7 to 265.6)               | 616.4<br>(547.1 to 692.4)                | 1.3<br>(0.5 to 2.8)                 | 21.9<br>(20.6 to 23.4)                            | -0.0<br>(-0.9 to 0.8)                               |
| Viral skin diseases                           | 45.2<br>(42.7 to 47.9)                  | 65.8<br>(62.2 to 69.7)                   | 1.4<br>(0.8 to 2.1)                 | 22.4<br>(17.9 to 27.0)                            | -0.3<br>(-3.8 to 3.3)                               |
| Acne vulgaris                                 | 164.2<br>(147.3 to 182.6)               | 115.8<br>(95.9 to 144.1)                 | 4.2<br>(2.8 to 6.0)                 | 27.5<br>(21.4 to 34.4)                            | 4.5<br>(-0.2 to 10.0)                               |
| Alopecia areata                               | 2.9<br>(2.8 to 3.0)                     | 5.2<br>(5.0 to 5.4)                      | 0.1<br>(0.1 to 0.1)                 | 29.5<br>(15.2 to 45.6)                            | -0.1<br>(-10.1 to 11.7)                             |
| Pruritus                                      | 13.9<br>(12.3 to 15.7)                  | 11.1<br>(9.9 to 12.5)                    | 0.1<br>(0.1 to 0.3)                 | 26.1<br>(18.9 to 33.2)                            | 0.2<br>(-4.8 to 5.2)                                |
| Urticaria                                     | 16.6<br>(14.3 to 19.5)                  | 29.9<br>(25.5 to 34.9)                   | 1.0<br>(0.6 to 1.4)                 | 23.0<br>(15.6 to 31.4)                            | 0.0<br>(-5.6 to 6.2)                                |
| Decubitus ulcer                               | 0.3<br>(0.2 to 0.3)                     | 1.0<br>(0.9 to 1.1)                      | $< 0.05$<br>( $< 0.05$ to 0.1)      | 17.0<br>(1.9 to 35.1)                             | -4.6<br>(-17.3 to 10.8)                             |
| Other skin and subcutaneous diseases          | 114.1<br>(110.9 to 117.4)               | 134.1<br>(129.9 to 138.2)                | 0.6<br>(0.3 to 1.2)                 | 25.1<br>(22.0 to 28.0)                            | 0.4<br>(-1.7 to 2.5)                                |
| Sense organ diseases                          | 392.9<br>(384.5 to 401.5)               | 164.1†<br>(152.8 to 176.0)               | 13.5<br>(9.2 to 18.8)               | 19.8<br>(17.2 to 22.3)                            | -2.8<br>(-4.5 to -1.1)                              |
| Glaucoma                                      | 0.9<br>(0.7 to 1.0)                     | --                                       | 0.1<br>(0.1 to 0.1)                 | 16.2<br>(4.0 to 30.9)                             | -0.2<br>(-10.5 to 12.1)                             |
| Cataract                                      | 10.7<br>(9.4 to 12.2)                   | --                                       | 0.9<br>(0.7 to 1.3)                 | 15.3<br>(9.8 to 21.1)                             | -4.4<br>(-8.6 to 0.1)                               |
| Macular degeneration                          | 1.1<br>(0.9 to 1.3)                     | --                                       | 0.1<br>(0.1 to 0.1)                 | 17.9<br>(4.9 to 33.0)                             | 1.6<br>(-9.3 to 14.3)                               |
| Refraction and accommodation disorders        | 225.7<br>(217.8 to 233.6)               | --                                       | 3.2<br>(1.9 to 5.3)                 | 15.3<br>(12.2 to 18.6)                            | -7.4<br>(-10.0 to -4.8)                             |
| Age-related and other hearing loss            | 232.3<br>(219.8 to 245.3)               | --                                       | 7.6<br>(5.3 to 10.5)                | 21.4<br>(17.2 to 25.4)                            | -1.4<br>(-4.1 to 1.4)                               |
| Other vision loss                             | 6.0<br>(5.3 to 6.7)                     | --                                       | 0.5<br>(0.3 to 0.6)                 | 22.4<br>(13.9 to 31.1)                            | -0.9<br>(-7.3 to 5.4)                               |
| Other sense organ diseases                    | 37.6<br>(34.7 to 40.4)                  | 164.1<br>(152.8 to 176.0)                | 1.1<br>(0.7 to 1.7)                 | 25.6<br>(19.9 to 31.6)                            | 0.8<br>(-3.0 to 5.0)                                |
| Oral disorders                                | 712.5<br>(669.8 to 751.5)               | 1,871.4†<br>(1,641.4 to 2,136.2)         | 3.3<br>(2.0 to 5.1)                 | 28.0<br>(24.9 to 30.9)                            | 0.2<br>(-1.8 to 2.2)                                |
| Caries of deciduous teeth                     | 153.0<br>(117.9 to 185.5)               | 608.4<br>(417.1 to 832.5)                | $< 0.05$<br>( $< 0.05$ to 0.1)      | 18.6<br>(5.4 to 33.9)                             | -0.9<br>(-12.2 to 12.0)                             |
| Caries of permanent teeth                     | 416.0<br>(377.8 to 457.2)               | 1,243.7<br>(1,111.2 to 1,403.9)          | 0.2<br>(0.1 to 0.5)                 | 29.3<br>(23.4 to 35.1)                            | 1.7<br>(-2.2 to 5.6)                                |
| Periodontal disease                           | 132.5<br>(107.1 to 160.0)               | 16.4<br>(13.0 to 20.4)                   | 0.9<br>(0.3 to 1.8)                 | 30.0<br>(25.1 to 34.8)                            | 0.5<br>(-2.8 to 3.9)                                |
| Edentulism and severe tooth loss              | 48.2<br>(41.9 to 54.9)                  | 2.9<br>(2.5 to 3.2)                      | 1.3<br>(0.9 to 1.9)                 | 26.9<br>(21.6 to 31.8)                            | -0.2<br>(-3.8 to 3.2)                               |
| Other oral disorders                          | 27.9<br>(26.7 to 29.3)                  | --                                       | 0.8<br>(0.5 to 1.2)                 | 27.8<br>(23.2 to 32.6)                            | 0.0<br>(-3.1 to 3.2)                                |
| <b>Injuries</b>                               | <b>257.1</b><br><b>(242.2 to 273.8)</b> | <b>141.6†</b><br><b>(133.9 to 149.6)</b> | <b>10.7</b><br><b>(7.2 to 15.0)</b> | <b>23.2</b><br><b>(20.9 to 25.2)</b>              | <b>-2.8</b><br><b>(-4.3 to -1.3)</b>                |
| <b>Transport injuries</b>                     | <b>38.5</b><br><b>(35.9 to 41.3)</b>    | <b>16.2</b><br><b>(14.4 to 18.1)</b>     | <b>2.2</b><br><b>(1.5 to 3.1)</b>   | <b>23.7</b><br><b>(21.3 to 26.2)</b>              | <b>-2.9</b><br><b>(-4.7 to -1.1)</b>                |
| Road injuries                                 | 30.4<br>(28.4 to 32.5)                  | 13.7<br>(12.0 to 15.6)                   | 1.7<br>(1.1 to 2.4)                 | 24.2<br>(21.8 to 26.5)                            | -2.8<br>(-4.5 to -1.0)                              |
| Pedestrian road injuries                      | 8.7<br>(7.6 to 9.9)                     | 3.0<br>(2.5 to 3.6)                      | 0.5<br>(0.3 to 0.7)                 | 20.6<br>(18.3 to 23.0)                            | -5.6<br>(-7.2 to -3.9)                              |
| Cyclist road injuries                         | 5.7<br>(4.8 to 6.7)                     | 3.0<br>(2.4 to 3.7)                      | 0.3<br>(0.2 to 0.4)                 | 27.0<br>(24.8 to 29.7)                            | -0.1<br>(-1.7 to 1.8)                               |
| Motorcyclist road injuries                    | 5.9<br>(5.1 to 7.2)                     | 1.9<br>(1.5 to 2.4)                      | 0.3<br>(0.2 to 0.5)                 | 24.2<br>(21.7 to 27.0)                            | -3.6<br>(-5.4 to -1.8)                              |
| Motor vehicle road injuries                   | 8.1<br>(6.9 to 9.2)                     | 4.6<br>(3.9 to 5.4)                      | 0.5<br>(0.3 to 0.7)                 | 23.8<br>(21.2 to 26.4)                            | -2.9<br>(-4.8 to -1.1)                              |
| Other road injuries                           | 2.0<br>(1.7 to 2.3)                     | 1.2<br>(0.9 to 1.5)                      | 0.1<br>(0.1 to 0.1)                 | 36.1<br>(33.3 to 38.9)                            | 7.7<br>(5.8 to 9.6)                                 |
| Other transport injuries                      | 8.2<br>(6.9 to 9.8)                     | 2.5<br>(2.1 to 3.0)                      | 0.5<br>(0.3 to 0.7)                 | 22.2<br>(18.8 to 25.6)                            | -3.2<br>(-5.6 to -0.9)                              |
| <b>Unintentional injuries</b>                 | <b>206.4</b><br><b>(190.9 to 223.1)</b> | <b>118.0</b><br><b>(110.5 to 125.9)</b>  | <b>7.5</b><br><b>(5.1 to 10.5)</b>  | <b>23.1</b><br><b>(20.6 to 25.2)</b>              | <b>-2.7</b><br><b>(-4.3 to -1.2)</b>                |
| Falls                                         | 76.4<br>(66.9 to 85.9)                  | 43.2<br>(38.1 to 49.7)                   | 3.3<br>(2.3 to 4.5)                 | 20.9<br>(18.6 to 23.0)                            | -4.5<br>(-6.1 to -3.0)                              |
| Drowning                                      | 0.9<br>(0.8 to 1.1)                     | 0.2<br>(0.2 to 0.3)                      | 0.1<br>( $< 0.05$ to 0.1)           | 17.8<br>(14.5 to 21.1)                            | -6.5<br>(-8.8 to -4.2)                              |
| Fire, heat, and hot substances                | 22.8<br>(19.4 to 27.7)                  | 3.9<br>(3.1 to 4.6)                      | 0.7<br>(0.4 to 0.9)                 | 24.2<br>(18.7 to 29.4)                            | -1.9<br>(-5.5 to 1.6)                               |
| Poisonings                                    | 0.8<br>(0.6 to 0.9)                     | 1.2<br>(1.0 to 1.5)                      | 0.1<br>( $< 0.05$ to 0.1)           | 24.4<br>(14.4 to 35.3)                            | -0.7<br>(-7.4 to 6.7)                               |
| Exposure to mechanical forces                 | 39.1<br>(33.3 to 47.3)                  | 18.7<br>(15.8 to 21.8)                   | 1.0<br>(0.7 to 1.4)                 | 25.7<br>(22.6 to 28.7)                            | -0.9<br>(-3.0 to 1.2)                               |
| Unintentional firearm injuries                | 1.3<br>(1.1 to 1.6)                     | 0.4<br>(0.3 to 0.6)                      | 0.1<br>( $< 0.05$ to 0.1)           | 28.9<br>(25.4 to 32.4)                            | 1.0<br>(-1.4 to 3.4)                                |
| Unintentional suffocation                     | 3.1<br>(2.2 to 4.2)                     | 0.9<br>(0.6 to 1.3)                      | 0.1<br>(0.1 to 0.2)                 | 26.4<br>(22.5 to 30.5)                            | 1.2<br>(-1.1 to 3.8)                                |
| Other exposure to mechanical forces           | 34.7<br>(29.1 to 42.7)                  | 17.4<br>(14.7 to 20.2)                   | 0.8<br>(0.6 to 1.2)                 | 25.4<br>(22.1 to 28.4)                            | -1.2<br>(-3.5 to 0.8)                               |



| Cause                                                                               | Prevalence in thousands (95% UI)        | Incidence in thousands (95% UI)                      | YLDs in thousands (95% UI)                          |                                                   |                                                     |
|-------------------------------------------------------------------------------------|-----------------------------------------|------------------------------------------------------|-----------------------------------------------------|---------------------------------------------------|-----------------------------------------------------|
|                                                                                     | 2016 counts                             | 2016 counts                                          | 2016 counts                                         | Percentage change in counts between 2006 and 2016 | Percentage change in age-standardised rates between |
| Adverse effects of medical treatment                                                | 0.7<br>(0.6 to 0.9)                     | 9.7<br>(8.3 to 11.3)                                 | 0.1<br>(0.1 to 0.1)                                 | 16.7<br>(9.3 to 24.1)                             | -6.6<br>(-11.3 to -2.1)                             |
| Animal contact                                                                      | 9.4<br>(8.3 to 10.8)                    | 13.9<br>(11.6 to 16.2)                               | 0.3<br>(0.2 to 0.5)                                 | 26.7<br>(20.5 to 33.2)                            | -0.4<br>(-4.4 to 3.8)                               |
| Venomous animal contact                                                             | 4.2<br>(3.5 to 5.0)                     | 6.3<br>(5.0 to 7.8)                                  | 0.2<br>(0.1 to 0.3)                                 | 27.7<br>(19.4 to 36.6)                            | 0.3<br>(-5.1 to 6.2)                                |
| Non-venomous animal contact                                                         | 5.2<br>(4.4 to 6.3)                     | 7.6<br>(6.2 to 9.2)                                  | 0.1<br>(0.1 to 0.1)                                 | 24.2<br>(19.4 to 28.2)                            | -2.0<br>(-5.5 to 1.0)                               |
| Foreign body                                                                        | 14.2<br>(11.5 to 17.2)                  | 9.7<br>(8.5 to 11.1)                                 | 0.6<br>(0.4 to 0.9)                                 | 20.7<br>(16.7 to 24.5)                            | -3.3<br>(-5.8 to -0.9)                              |
| Pulmonary aspiration and foreign body in airway                                     | 8.6<br>(6.4 to 11.7)                    | 4.1<br>(3.3 to 5.0)                                  | 0.4<br>(0.3 to 0.6)                                 | 19.3<br>(15.3 to 23.3)                            | -4.4<br>(-6.9 to -1.9)                              |
| Foreign body in eyes                                                                | 0.6<br>(0.3 to 0.9)                     | 3.1<br>(2.4 to 4.1)                                  | < 0.05<br>(< 0.05 to 0.1)                           | 28.6<br>(23.7 to 32.9)                            | 2.3<br>(-0.7 to 5.0)                                |
| Foreign body in other body part                                                     | 5.1<br>(4.0 to 6.6)                     | 2.5<br>(2.0 to 3.0)                                  | 0.2<br>(0.1 to 0.2)                                 | 22.8<br>(18.1 to 27.5)                            | -1.8<br>(-5.0 to 1.3)                               |
| Environmental heat and cold exposure                                                | 13.9<br>(11.7 to 16.5)                  | 4.8<br>(3.9 to 5.9)                                  | 0.6<br>(0.4 to 0.8)                                 | 27.4<br>(24.4 to 30.3)                            | 1.5<br>(-0.5 to 3.4)                                |
| Other unintentional injuries                                                        | 28.1<br>(22.3 to 35.5)                  | 12.7<br>(10.4 to 15.3)                               | 0.8<br>(0.5 to 1.2)                                 | 26.6<br>(24.0 to 29.0)                            | 0.3<br>(-1.4 to 1.9)                                |
| <b>Self-harm and interpersonal violence</b>                                         | <b>65.1</b><br><b>(58.3 to 72.0)</b>    | <b>7.4†</b><br><b>(6.3 to 8.6)</b>                   | <b>1.0</b><br><b>(0.7 to 1.4)</b>                   | <b>23.1</b><br><b>(19.4 to 27.0)</b>              | <b>-3.0</b><br><b>(-5.5 to -0.4)</b>                |
| Self-harm                                                                           | 2.0<br>(1.8 to 2.3)                     | 1.2<br>(1.0 to 1.4)                                  | 0.1<br>(0.1 to 0.1)                                 | 23.4<br>(20.2 to 26.4)                            | -2.8<br>(-5.0 to -0.6)                              |
| Self-harm by firearm                                                                | 0.1<br>(0.1 to 0.1)                     | < 0.05<br>(< 0.05 to 0.1)                            | < 0.05<br>(< 0.05 to < 0.05)                        | 21.5<br>(16.9 to 26.0)                            | -2.5<br>(-5.9 to 0.8)                               |
| Self-harm by other specified means                                                  | 1.9<br>(1.7 to 2.2)                     | 1.1<br>(1.0 to 1.3)                                  | 0.1<br>(0.1 to 0.1)                                 | 23.5<br>(20.2 to 26.5)                            | -2.8<br>(-5.1 to -0.5)                              |
| Interpersonal violence                                                              | 63.1<br>(56.2 to 70.0)                  | 6.2‡<br>(5.2 to 7.3)                                 | 0.9<br>(0.6 to 1.2)                                 | 23.0<br>(19.0 to 27.2)                            | -3.1<br>(-5.8 to -0.0)                              |
| Assault by firearm                                                                  | 0.4<br>(0.3 to 0.5)                     | 0.2<br>(0.1 to 0.2)                                  | < 0.05<br>(< 0.05 to < 0.05)                        | 24.8<br>(20.8 to 28.9)                            | -3.4<br>(-6.3 to -0.6)                              |
| Assault by sharp object                                                             | 3.7<br>(3.0 to 4.5)                     | 1.9<br>(1.5 to 2.4)                                  | 0.1<br>(0.1 to 0.2)                                 | 33.1<br>(29.4 to 36.6)                            | 3.5<br>(1.0 to 5.9)                                 |
| Sexual violence                                                                     | 53.0<br>(46.5 to 59.8)                  | --                                                   | 0.5<br>(0.3 to 0.7)                                 | 15.9<br>(10.2 to 22.5)                            | -9.0<br>(-13.3 to -3.7)                             |
| Assault by other means                                                              | 6.0<br>(5.0 to 7.2)                     | 4.2<br>(3.4 to 5.0)                                  | 0.3<br>(0.2 to 0.4)                                 | 32.9<br>(30.0 to 35.8)                            | 3.2<br>(1.2 to 5.2)                                 |
| <b>Forces of nature, conflict and terrorism, and executions and police conflict</b> | <b>0.1</b><br><b>(&lt; 0.05 to 0.1)</b> | <b>&lt; 0.05†</b><br><b>(&lt; 0.05 to &lt; 0.05)</b> | <b>&lt; 0.05</b><br><b>(&lt; 0.05 to &lt; 0.05)</b> | <b>24.0</b><br><b>(13.2 to 34.1)</b>              | <b>2.2</b><br><b>(-4.6 to 10.6)</b>                 |
| Exposure to forces of nature                                                        | --                                      | --                                                   | --                                                  | --                                                | --                                                  |
| Conflict and terrorism                                                              | --                                      | --                                                   | --                                                  | --                                                | --                                                  |
| Executions and police conflict                                                      | 0.1<br>(< 0.05 to 0.1)                  | < 0.05<br>(< 0.05 to < 0.05)                         | < 0.05<br>(< 0.05 to < 0.05)                        | 24.0<br>(13.2 to 34.1)                            | 2.2<br>(-4.6 to 10.6)                               |
| <b>Impairments</b>                                                                  | --                                      | --                                                   | --                                                  | --                                                | --                                                  |
| Anaemia                                                                             | 831.6<br>(798.3 to 864.5)               | --                                                   | 29.5<br>(20.0 to 41.7)                              | 12.8<br>(3.4 to 20.3)                             | -10.8<br>(-19.3 to -4.4)                            |
| Developmental intellectual disability                                               | 45.6<br>(34.8 to 57.2)                  | --                                                   | 6.1<br>(4.0 to 9.8)                                 | 27.3<br>(6.1 to 47.1)                             | 2.7<br>(-13.9 to 18.5)                              |
| Epilepsy                                                                            | 16.8<br>(10.2 to 24.9)                  | --                                                   | 6.1<br>(3.2 to 10.3)                                | 21.8<br>(-31.7 to 110.1)                          | -2.9<br>(-46.6 to 71.7)                             |
| Guillain-Barre syndrome                                                             | < 0.05<br>(< 0.05 to < 0.05)            | --                                                   | < 0.05<br>(< 0.05 to < 0.05)                        | 24.2<br>(22.4 to 26.2)                            | 0.0<br>(-0.1 to 0.2)                                |
| Hearing loss                                                                        | 260.5<br>(248.7 to 273.9)               | --                                                   | 9.4<br>(6.6 to 12.8)                                | 20.7<br>(17.4 to 23.9)                            | -1.8<br>(-4.1 to 0.5)                               |
| Heart failure                                                                       | 6.2<br>(5.4 to 7.0)                     | --                                                   | 0.7<br>(0.5 to 0.9)                                 | 13.0<br>(3.8 to 22.7)                             | -6.1<br>(-13.8 to 1.8)                              |
| Infertility                                                                         | 46.1<br>(42.5 to 50.5)                  | --                                                   | 0.3<br>(0.1 to 0.5)                                 | 35.1<br>(26.8 to 43.8)                            | -2.5<br>(-8.4 to 4.0)                               |
| Pelvic inflammatory disease                                                         | 1.8<br>(1.5 to 2.2)                     | --                                                   | 0.2<br>(0.1 to 0.3)                                 | 26.0<br>(9.2 to 45.5)                             | -6.5<br>(-18.7 to 7.9)                              |
| Vision loss                                                                         | 256.6<br>(247.4 to 266.7)               | --                                                   | 7.2<br>(4.7 to 11.0)                                | 21.5<br>(6.2 to 37.4)                             | -2.6<br>(-10.8 to 6.5)                              |

We did not calculate incidence for the nine impairments, certain NTDs, and causes with only birth prevalence. Blank cells mean that no estimate is available.

† Incidence for aggregate causes represents the sum of the incidence of the causes below the aggregate.

‡ Incidence estimates for stroke represent first-ever stroke only.

^ Incidence of HIV/AIDS represents new infections of HIV only and does not include new infections of Tuberculosis in HIV positive cases.

SR Table 14: Prevalence, incidence, and YLDs for 2016, percentage change of YLD counts and percentage change of age-standardised YLD rates between 2006 and 2016 by cause and impairments, for all ages, Georgia.

| Cause                                                                                | Prevalence in thousands (95% UI)       | Incidence in thousands (95% UI)            | YLDs in thousands (95% UI)       |                                                   |                                                     |
|--------------------------------------------------------------------------------------|----------------------------------------|--------------------------------------------|----------------------------------|---------------------------------------------------|-----------------------------------------------------|
|                                                                                      | 2016 counts                            | 2016 counts                                | 2016 counts                      | Percentage change in counts between 2006 and 2016 | Percentage change in age-standardised rates between |
| <b>All causes</b>                                                                    | <b>3,869.2</b><br>(3,857.0 to 3,883.2) | <b>19,423.7†</b><br>(18,474.0 to 20,417.8) | <b>472.8</b><br>(352.5 to 612.1) | <b>-6.0</b><br>(-7.7 to -4.3)                     | <b>1.3</b><br>(-0.6 to 3.4)                         |
| <b>Communicable, maternal, neonatal, and nutritional disorders</b>                   | <b>2,276.6</b><br>(2,228.2 to 2,332.9) | <b>7,531.0†</b><br>(6,771.1 to 8,381.9)    | <b>34.9</b><br>(24.7 to 47.6)    | <b>-18.5</b><br>(-22.4 to -14.1)                  | <b>-10.7</b><br>(-15.1 to -5.7)                     |
| <b>HIV/AIDS and tuberculosis</b>                                                     | <b>870.0</b><br>(798.2 to 922.8)       | <b>3.1†</b><br>(2.7 to 3.5)                | <b>0.5</b><br>(0.4 to 0.8)       | <b>-4.3</b><br>(-18.7 to 13.2)                    | <b>3.2</b><br>(-12.1 to 21.6)                       |
| Tuberculosis                                                                         | 818.1<br>(757.8 to 886.7)              | 3.0†<br>(2.6 to 3.3)                       | 0.4<br>(0.3 to 0.6)              | -20.9<br>(-33.1 to -6.4)                          | -14.1<br>(-27.2 to 1.4)                             |
| Drug-susceptible tuberculosis                                                        | 1.1<br>(1.0 to 1.3)                    | 2.5<br>(2.2 to 2.8)                        | 0.4<br>(0.2 to 0.5)              | -29.1<br>(-42.0 to -13.9)                         | -22.9<br>(-36.7 to -7.2)                            |
| Multidrug-resistant tuberculosis without extensive drug resistance                   | 0.2<br>(0.1 to 0.2)                    | 0.4<br>(0.3 to 0.5)                        | 0.1<br>(< 0.05 to 0.1)           | 51.5<br>(-3.0 to 136.7)                           | 64.1<br>(5.1 to 155.9)                              |
| Extensively drug-resistant tuberculosis                                              | < 0.05<br>(< 0.05 to 0.1)              | 0.1<br>(0.1 to 0.1)                        | < 0.05<br>(< 0.05 to < 0.05)     | 368.2<br>(198.5 to 631.7)                         | 406.7<br>(223.7 to 690.2)                           |
| Latent tuberculosis infection                                                        | 816.8<br>(756.4 to 885.1)              | --                                         | --                               | --                                                | --                                                  |
| HIV/AIDS                                                                             | 1.2<br>(0.8 to 1.8)                    | 0.1 <sup>a</sup><br>(0.1 to 0.2)           | 0.1<br>(0.1 to 0.2)              | 266.0<br>(188.2 to 360.7)                         | 286.2<br>(208.3 to 381.8)                           |
| Drug-susceptible HIV/AIDS - Tuberculosis                                             | < 0.05<br>(< 0.05 to 0.1)              | 0.1<br>(< 0.05 to 0.1)                     | < 0.05<br>(< 0.05 to < 0.05)     | 89.2<br>(57.6 to 129.1)                           | 98.8<br>(65.7 to 140.8)                             |
| Multidrug-resistant HIV/AIDS - Tuberculosis without extensive drug resistance        | < 0.05<br>(< 0.05 to < 0.05)           | < 0.05<br>(< 0.05 to < 0.05)               | < 0.05<br>(< 0.05 to < 0.05)     | 311.4<br>(161.8 to 575.2)                         | 332.3<br>(175.1 to 609.3)                           |
| Extensively drug-resistant HIV/AIDS - Tuberculosis                                   | < 0.05<br>(< 0.05 to < 0.05)           | < 0.05<br>(< 0.05 to < 0.05)               | < 0.05<br>(< 0.05 to < 0.05)     | 1,168.1<br>(707.1 to 1,977.9)                     | 1,232.7<br>(748.2 to 2,082.8)                       |
| HIV/AIDS resulting in other diseases                                                 | 1.1<br>(0.7 to 1.7)                    | 0.1<br>(0.1 to 0.2)                        | 0.1<br>(0.1 to 0.2)              | 328.3<br>(202.6 to 518.7)                         | 352.7<br>(223.9 to 554.7)                           |
| <b>Diarrhoea, lower respiratory infections, and other common infectious diseases</b> | <b>144.5</b><br>(135.2 to 154.2)       | <b>6,926.8†</b><br>(6,152.3 to 7,775.5)    | <b>7.2</b><br>(4.9 to 9.9)       | <b>-13.7</b><br>(-16.5 to -10.9)                  | <b>-7.3</b><br>(-10.2 to -4.5)                      |
| Diarrhoeal diseases                                                                  | 22.3<br>(20.8 to 24.0)                 | 1,452.4<br>(1,354.3 to 1,569.6)            | 2.5<br>(1.7 to 3.5)              | -10.9<br>(-16.5 to -5.1)                          | -8.3<br>(-14.4 to -2.4)                             |
| Intestinal infectious diseases                                                       | < 0.05<br>(< 0.05 to < 0.05)           | < 0.05†<br>(< 0.05 to < 0.05)              | < 0.05<br>(< 0.05 to < 0.05)     | -15.8<br>(-29.1 to -1.2)                          | -10.5<br>(-24.0 to 4.6)                             |
| Typhoid fever                                                                        | < 0.05<br>(< 0.05 to < 0.05)           | < 0.05<br>(< 0.05 to < 0.05)               | < 0.05<br>(< 0.05 to < 0.05)     | -17.9<br>(-32.1 to -2.4)                          | -11.9<br>(-25.7 to 4.1)                             |
| Paratyphoid fever                                                                    | < 0.05<br>(< 0.05 to < 0.05)           | < 0.05<br>(< 0.05 to < 0.05)               | < 0.05<br>(< 0.05 to < 0.05)     | 36.1<br>(7.5 to 72.3)                             | 44.0<br>(14.3 to 82.8)                              |
| Other intestinal infectious diseases                                                 | --                                     | --                                         | < 0.05<br>(< 0.05 to < 0.05)     | -28.2<br>(-43.9 to -7.5)                          | -35.5<br>(-51.3 to -14.6)                           |
| Lower respiratory infections                                                         | 4.3<br>(4.0 to 4.6)                    | 198.8<br>(185.2 to 214.3)                  | 0.2<br>(0.2 to 0.4)              | -11.6<br>(-20.9 to -0.3)                          | -11.6<br>(-21.7 to 0.7)                             |
| Upper respiratory infections                                                         | 67.3<br>(56.9 to 78.4)                 | 4,990.7<br>(4,202.3 to 5,827.3)            | 1.7<br>(1.0 to 2.6)              | -11.1<br>(-17.6 to -3.7)                          | -0.4<br>(-6.9 to 7.1)                               |
| Otitis media                                                                         | 48.1<br>(43.2 to 53.0)                 | 207.7<br>(169.0 to 258.3)                  | 1.4<br>(0.9 to 2.1)              | -21.4<br>(-27.0 to -15.7)                         | -13.9<br>(-19.7 to -7.9)                            |
| Meningitis                                                                           | 6.7<br>(6.0 to 7.5)                    | 0.8<br>(0.7 to 0.9)                        | 0.8<br>(0.6 to 1.1)              | -13.9<br>(-19.6 to -7.9)                          | -3.2<br>(-9.5 to 3.6)                               |
| Pneumococcal meningitis                                                              | 3.0<br>(2.6 to 3.5)                    | 0.1<br>(0.1 to 0.2)                        | 0.4<br>(0.2 to 0.5)              | -13.7<br>(-24.6 to -0.0)                          | -2.8<br>(-15.3 to 12.8)                             |
| H influenzae type B meningitis                                                       | 0.9<br>(0.8 to 1.1)                    | 0.1<br>(0.1 to 0.1)                        | 0.1<br>(0.1 to 0.2)              | -23.1<br>(-28.4 to -18.2)                         | -12.9<br>(-19.0 to -7.2)                            |
| Meningococcal infection                                                              | 1.3<br>(1.0 to 1.6)                    | 0.2<br>(0.2 to 0.3)                        | 0.1<br>(0.1 to 0.2)              | -13.7<br>(-17.3 to -10.3)                         | -3.1<br>(-7.3 to 0.9)                               |
| Other meningitis                                                                     | 1.5<br>(1.2 to 1.8)                    | 0.3<br>(0.2 to 0.3)                        | 0.2<br>(0.1 to 0.2)              | -4.7<br>(-8.7 to -0.2)                            | 6.3<br>(2.0 to 11.4)                                |
| Encephalitis                                                                         | 2.4<br>(1.8 to 3.2)                    | 0.9<br>(0.8 to 0.9)                        | 0.3<br>(0.2 to 0.4)              | -13.9<br>(-23.6 to -2.9)                          | -4.7<br>(-15.2 to 7.1)                              |
| Diphtheria                                                                           | < 0.05<br>(< 0.05 to < 0.05)           | < 0.05<br>(< 0.05 to < 0.05)               | < 0.05<br>(< 0.05 to < 0.05)     | -51.7<br>(-74.3 to -11.1)                         | -51.8<br>(-74.2 to -10.6)                           |
| Whooping cough                                                                       | 0.8<br>(0.6 to 1.0)                    | 5.6<br>(4.4 to 7.1)                        | < 0.05<br>(< 0.05 to 0.1)        | -16.8<br>(-29.4 to -1.6)                          | -28.2<br>(-39.1 to -14.2)                           |
| Tetanus                                                                              | < 0.05<br>(< 0.05 to < 0.05)           | < 0.05<br>(< 0.05 to < 0.05)               | < 0.05<br>(< 0.05 to < 0.05)     | -29.4<br>(-48.3 to -15.8)                         | -21.1<br>(-42.1 to -6.6)                            |
| Measles                                                                              | < 0.05<br>(< 0.05 to < 0.05)           | 0.4<br>(0.4 to 0.5)                        | < 0.05<br>(< 0.05 to < 0.05)     | -27.5<br>(-36.4 to -17.7)                         | -37.4<br>(-45.1 to -29.0)                           |
| Varicella and herpes zoster                                                          | 3.5<br>(3.2 to 3.8)                    | 69.4<br>(67.5 to 71.5)                     | 0.1<br>(0.1 to 0.2)              | -7.0<br>(-17.9 to 6.1)                            | -0.3<br>(-12.7 to 14.0)                             |
| <b>Neglected tropical diseases and malaria</b>                                       | <b>53.0</b><br>(46.6 to 60.9)          | <b>0.3†</b><br>(0.2 to 0.5)                | <b>0.6</b><br>(0.4 to 0.9)       | <b>-13.8</b><br>(-36.6 to 7.9)                    | <b>-11.1</b><br>(-31.0 to 7.4)                      |
| Malaria                                                                              | --                                     | --                                         | --                               | --                                                | --                                                  |
| Chagas disease                                                                       | --                                     | --                                         | --                               | --                                                | --                                                  |
| Leishmaniasis                                                                        | 0.1<br>(< 0.05 to 0.1)                 | 0.2<br>(0.2 to 0.3)                        | < 0.05<br>(< 0.05 to < 0.05)     | -55.1<br>(-67.2 to -40.4)                         | -53.2<br>(-66.1 to -36.3)                           |
| Visceral leishmaniasis                                                               | 0.1<br>(< 0.05 to 0.1)                 | 0.2<br>(0.2 to 0.3)                        | < 0.05<br>(< 0.05 to < 0.05)     | -54.3<br>(-66.2 to -40.6)                         | -52.3<br>(-64.3 to -36.4)                           |
| Cutaneous and mucocutaneous leishmaniasis                                            | < 0.05<br>(< 0.05 to < 0.05)           | < 0.05<br>(< 0.05 to < 0.05)               | < 0.05<br>(< 0.05 to < 0.05)     | -68.4<br>(-99.7 to 168.1)                         | -65.2<br>(-99.7 to 195.0)                           |
| African trypanosomiasis                                                              | --                                     | --                                         | --                               | --                                                | --                                                  |
| Schistosomiasis                                                                      | --                                     | --                                         | --                               | --                                                | --                                                  |
| Cysticercosis                                                                        | --                                     | --                                         | --                               | --                                                | --                                                  |
| Cystic echinococcosis                                                                | 0.4<br>(0.1 to 1.2)                    | 0.1<br>(< 0.05 to 0.3)                     | < 0.05<br>(< 0.05 to 0.1)        | -56.0<br>(-94.5 to 293.1)                         | -52.1<br>(-93.9 to 315.0)                           |
| Lymphatic filariasis                                                                 | --                                     | --                                         | --                               | --                                                | --                                                  |
| Onchocerciasis                                                                       | --                                     | --                                         | --                               | --                                                | --                                                  |
| Trachoma                                                                             | --                                     | --                                         | --                               | --                                                | --                                                  |
| Dengue                                                                               | --                                     | --                                         | --                               | --                                                | --                                                  |
| Yellow fever                                                                         | --                                     | --                                         | --                               | --                                                | --                                                  |
| Rabies                                                                               | < 0.05<br>(< 0.05 to < 0.05)           | < 0.05<br>(< 0.05 to < 0.05)               | < 0.05<br>(< 0.05 to < 0.05)     | -26.6<br>(-54.0 to 22.1)                          | -15.4<br>(-49.2 to 43.4)                            |
| Intestinal nematode infections                                                       | 26.8<br>(20.7 to 34.5)                 | --                                         | < 0.05<br>(< 0.05 to < 0.05)     | -6.4<br>(-44.2 to 58.2)                           | 2.9<br>(-38.6 to 73.5)                              |
| Ascariasis                                                                           | 18.7<br>(12.8 to 27.5)                 | --                                         | < 0.05<br>(< 0.05 to < 0.05)     | -1.0<br>(-80.3 to 471.9)                          | 4.9<br>(-77.5 to 418.0)                             |

| Cause                                                                   | Prevalence in thousands (95% UI)              | Incidence in thousands (95% UI)                   | YLDs in thousands (95% UI)              |                                                   |                                                     |
|-------------------------------------------------------------------------|-----------------------------------------------|---------------------------------------------------|-----------------------------------------|---------------------------------------------------|-----------------------------------------------------|
|                                                                         | 2016 counts                                   | 2016 counts                                       | 2016 counts                             | Percentage change in counts between 2006 and 2016 | Percentage change in age-standardised rates between |
| Trichuriasis                                                            | 3.8<br>(2.5 to 5.8)                           | --                                                | --                                      | --                                                | --                                                  |
| Hookworm disease                                                        | 3.5<br>(2.3 to 5.0)                           | --                                                | < 0.05<br>(< 0.05 to < 0.05)            | -6.4<br>(-44.2 to 58.0)                           | 2.9<br>(-38.6 to 73.3)                              |
| Food-borne trematodiasis                                                | --                                            | --                                                | --                                      | --                                                | --                                                  |
| Leprosy                                                                 | --                                            | --                                                | --                                      | --                                                | --                                                  |
| Ebola virus disease                                                     | --                                            | --                                                | --                                      | --                                                | --                                                  |
| Zika virus disease                                                      | --                                            | --                                                | --                                      | --                                                | --                                                  |
| Guinea worm disease                                                     | --                                            | --                                                | --                                      | --                                                | --                                                  |
| Other neglected tropical diseases                                       | 27.3<br>(25.3 to 29.8)                        | --                                                | 0.5<br>(0.3 to 0.8)                     | -7.4<br>(-18.2 to 5.6)                            | -6.7<br>(-18.5 to 6.3)                              |
| <b>Maternal disorders</b>                                               | <b>3.0</b><br><b>(2.3 to 3.7)</b>             | <b>60.8†</b><br><b>(54.6 to 67.5)</b>             | <b>0.2</b><br><b>(0.1 to 0.2)</b>       | <b>-9.1</b><br><b>(-34.5 to 25.6)</b>             | <b>3.8</b><br><b>(-25.0 to 42.8)</b>                |
| Maternal haemorrhage                                                    | 0.5<br>(0.4 to 0.7)                           | 3.3<br>(2.7 to 4.2)                               | < 0.05<br>(< 0.05 to < 0.05)            | -14.7<br>(-43.8 to 28.7)                          | -2.7<br>(-35.2 to 47.3)                             |
| Maternal sepsis and other pregnancy related infections                  | 1.7<br>(1.3 to 2.3)                           | 10.6<br>(7.8 to 14.3)                             | < 0.05<br>(< 0.05 to 0.1)               | -3.7<br>(-52.1 to 96.5)                           | 13.1<br>(-44.3 to 131.9)                            |
| Maternal hypertensive disorders                                         | 0.5<br>(0.3 to 0.7)                           | 2.4<br>(2.0 to 2.8)                               | < 0.05<br>(< 0.05 to < 0.05)            | -28.1<br>(-60.7 to 28.8)                          | -18.8<br>(-56.0 to 49.7)                            |
| Maternal obstructed labour and uterine rupture                          | < 0.05<br>(< 0.05 to < 0.05)                  | 1.7<br>(1.3 to 2.1)                               | < 0.05<br>(< 0.05 to < 0.05)            | 8.5<br>(-42.7 to 106.9)                           | 19.9<br>(-37.0 to 129.7)                            |
| Maternal abortion, miscarriage, and ectopic pregnancy                   | 0.4<br>(0.2 to 0.5)                           | 42.8<br>(37.6 to 48.4)                            | < 0.05<br>(< 0.05 to 0.1)               | 7.4<br>(-42.1 to 111.6)                           | 19.5<br>(-35.4 to 135.8)                            |
| Other maternal disorders                                                | --                                            | --                                                | < 0.05<br>(< 0.05 to < 0.05)            | -14.9<br>(-38.7 to 17.3)                          | -2.1<br>(-29.1 to 34.9)                             |
| <b>Neonatal disorders</b>                                               | <b>42.7</b><br><b>(35.4 to 51.0)</b>          | --                                                | <b>7.6</b><br><b>(5.0 to 11.2)</b>      | <b>-19.0</b><br><b>(-31.4 to -2.3)</b>            | <b>-10.3</b><br><b>(-24.0 to 8.2)</b>               |
| Neonatal preterm birth complications                                    | 29.2<br>(22.4 to 40.2)                        | --                                                | 2.9<br>(1.9 to 4.1)                     | -26.3<br>(-41.3 to -8.2)                          | -16.9<br>(-33.7 to 3.9)                             |
| Neonatal encephalopathy due to birth asphyxia and trauma                | 14.5<br>(7.4 to 24.1)                         | --                                                | 2.4<br>(0.7 to 5.0)                     | 22.8<br>(-14.9 to 232.7)                          | 37.1<br>(-4.4 to 272.0)                             |
| Neonatal sepsis and other neonatal infections                           | 3.7<br>(1.7 to 7.6)                           | --                                                | 1.6<br>(0.6 to 3.6)                     | -42.1<br>(-52.1 to -24.0)                         | -36.1<br>(-47.2 to -17.2)                           |
| Hemolytic disease and other neonatal jaundice                           | 1.9<br>(1.7 to 2.2)                           | --                                                | 0.6<br>(0.4 to 0.8)                     | -11.7<br>(-22.2 to 1.3)                           | -0.6<br>(-13.0 to 14.4)                             |
| Other neonatal disorders                                                | --                                            | --                                                | 0.2<br>(0.1 to 0.4)                     | 2.2<br>(-15.5 to 25.3)                            | -15.6<br>(-30.1 to 3.5)                             |
| <b>Nutritional deficiencies</b>                                         | <b>826.5</b><br><b>(788.4 to 858.8)</b>       | <b>94.0†</b><br><b>(73.7 to 123.5)</b>            | <b>16.7</b><br><b>(11.1 to 24.4)</b>    | <b>-21.0</b><br><b>(-26.1 to -15.6)</b>           | <b>-13.0</b><br><b>(-18.6 to -7.0)</b>              |
| Protein-energy malnutrition                                             | 8.2<br>(5.9 to 11.1)                          | 3.0<br>(2.2 to 4.0)                               | 0.5<br>(0.3 to 0.9)                     | 9.5<br>(-37.5 to 80.5)                            | -8.8<br>(-47.7 to 50.3)                             |
| Iodine deficiency                                                       | 88.9<br>(73.3 to 106.4)                       | 1.2<br>(1.0 to 1.4)                               | 2.3<br>(1.5 to 3.3)                     | -19.8<br>(-27.9 to -12.0)                         | -10.2<br>(-19.5 to -1.3)                            |
| Vitamin A deficiency                                                    | 103.0<br>(80.2 to 135.3)                      | 89.9<br>(69.5 to 119.5)                           | --                                      | --                                                | --                                                  |
| Iron-deficiency anaemia                                                 | 677.8<br>(641.4 to 718.1)                     | --                                                | 13.9<br>(9.1 to 20.6)                   | -22.1<br>(-27.8 to -16.4)                         | -13.5<br>(-20.0 to -7.0)                            |
| Other nutritional deficiencies                                          | --                                            | --                                                | < 0.05<br>(< 0.05 to < 0.05)            | 9.3<br>(-39.0 to 85.2)                            | -9.5<br>(-49.4 to 53.9)                             |
| <b>Other communicable, maternal, neonatal, and nutritional diseases</b> | <b>1,104.2</b><br><b>(1,043.2 to 1,169.7)</b> | <b>446.0</b><br><b>(400.0 to 497.3)</b>           | <b>2.0</b><br><b>(1.3 to 3.1)</b>       | <b>-10.9</b><br><b>(-15.6 to -5.5)</b>            | <b>-2.4</b><br><b>(-7.7 to 3.2)</b>                 |
| Sexually transmitted diseases excluding HIV                             | 652.9<br>(610.6 to 704.6)                     | 342.9<br>(302.0 to 390.7)                         | 1.5<br>(1.0 to 2.4)                     | -12.9<br>(-18.1 to -7.2)                          | -3.7<br>(-9.8 to 2.8)                               |
| Syphilis                                                                | 10.5<br>(8.8 to 12.7)                         | 7.7<br>(6.0 to 10.3)                              | 0.2<br>(0.1 to 0.3)                     | 0.3<br>(-13.7 to 19.1)                            | 4.4<br>(-9.9 to 23.1)                               |
| Chlamydial infection                                                    | 65.8<br>(51.7 to 82.4)                        | 51.3<br>(39.9 to 64.8)                            | 0.3<br>(0.2 to 0.5)                     | -11.3<br>(-22.8 to 1.4)                           | -3.9<br>(-16.4 to 9.2)                              |
| Gonococcal infection                                                    | 45.0<br>(35.5 to 57.1)                        | 149.1<br>(113.8 to 193.6)                         | 0.3<br>(0.2 to 0.5)                     | -18.2<br>(-29.2 to -5.0)                          | -2.7<br>(-15.3 to 12.5)                             |
| Trichomoniasis                                                          | 112.4<br>(97.9 to 129.3)                      | 95.0<br>(81.6 to 109.7)                           | 0.1<br>(0.1 to 0.3)                     | -11.4<br>(-16.6 to -5.7)                          | -2.5<br>(-8.0 to 3.7)                               |
| Genital herpes                                                          | 451.4<br>(390.8 to 527.0)                     | 20.6<br>(17.4 to 25.1)                            | 0.1<br>(< 0.05 to 0.3)                  | -7.4<br>(-12.1 to -2.9)                           | -0.6<br>(-5.6 to 4.3)                               |
| Other sexually transmitted diseases                                     | 17.7<br>(13.8 to 22.3)                        | 19.2<br>(16.3 to 22.4)                            | 0.4<br>(0.3 to 0.7)                     | -17.7<br>(-26.9 to -9.2)                          | -8.0<br>(-18.0 to 1.6)                              |
| Hepatitis                                                               | 542.2<br>(477.3 to 618.6)                     | 103.1<br>(75.3 to 122.1)                          | 0.1<br>(< 0.05 to 0.1)                  | 42.2<br>(13.4 to 75.5)                            | 46.1<br>(15.7 to 82.7)                              |
| Acute hepatitis A                                                       | 4.9<br>(2.8 to 6.2)                           | 63.6<br>(35.8 to 80.7)                            | < 0.05<br>(< 0.05 to < 0.05)            | 33.9<br>(-13.8 to 108.9)                          | 42.2<br>(-11.0 to 129.4)                            |
| Hepatitis B                                                             | 288.2<br>(231.0 to 360.4)                     | 30.5<br>(23.5 to 39.8)                            | < 0.05<br>(< 0.05 to 0.1)               | 51.3<br>(14.6 to 98.3)                            | 59.0<br>(22.0 to 107.3)                             |
| Hepatitis C                                                             | 249.0<br>(222.3 to 278.9)                     | 7.4<br>(6.5 to 8.4)                               | < 0.05<br>(< 0.05 to < 0.05)            | 27.9<br>(-14.8 to 87.6)                           | 7.8<br>(-29.0 to 61.8)                              |
| Acute hepatitis E                                                       | 0.1<br>(0.1 to 0.1)                           | 1.6<br>(1.3 to 1.8)                               | < 0.05<br>(< 0.05 to < 0.05)            | 52.1<br>(35.7 to 71.6)                            | 72.2<br>(53.9 to 92.0)                              |
| Other infectious diseases                                               | 23.4<br>(21.8 to 25.3)                        | < 0.05<br>(< 0.05 to < 0.05)                      | 0.5<br>(0.3 to 0.7)                     | -9.4<br>(-19.0 to 1.6)                            | -3.7<br>(-14.4 to 7.7)                              |
| <b>Non-communicable diseases</b>                                        | <b>3,695.8</b><br><b>(3,675.1 to 3,719.6)</b> | <b>11,458.3†</b><br><b>(10,971.6 to 11,971.3)</b> | <b>390.8</b><br><b>(288.3 to 503.8)</b> | <b>-6.2</b><br><b>(-8.1 to -4.1)</b>              | <b>1.4</b><br><b>(-0.9 to 3.8)</b>                  |
| <b>Neoplasms</b>                                                        | <b>26.2</b><br><b>(24.5 to 28.2)</b>          | <b>12.2</b><br><b>(10.9 to 14.0)</b>              | <b>3.2</b><br><b>(2.4 to 4.2)</b>       | <b>12.0</b><br><b>(5.9 to 17.8)</b>               | <b>17.8</b><br><b>(11.2 to 23.8)</b>                |
| Lip and oral cavity cancer                                              | 0.8<br>(0.7 to 0.8)                           | 0.2<br>(0.2 to 0.2)                               | 0.1<br>(0.1 to 0.1)                     | 0.8<br>(-10.5 to 13.7)                            | 5.5<br>(-6.5 to 18.8)                               |
| Nasopharynx cancer                                                      | 0.1<br>(0.1 to 0.1)                           | < 0.05<br>(< 0.05 to < 0.05)                      | < 0.05<br>(< 0.05 to < 0.05)            | -9.9<br>(-21.3 to 3.7)                            | -2.5<br>(-16.8 to 14.0)                             |
| Other pharynx cancer                                                    | 0.2<br>(0.2 to 0.2)                           | 0.1<br>(0.1 to 0.1)                               | < 0.05<br>(< 0.05 to < 0.05)            | 47.3<br>(26.6 to 73.8)                            | 54.2<br>(31.4 to 81.8)                              |
| Oesophageal cancer                                                      | 0.1<br>(0.1 to 0.1)                           | 0.1<br>(0.1 to 0.1)                               | < 0.05<br>(< 0.05 to < 0.05)            | -15.7<br>(-22.6 to -8.4)                          | -11.3<br>(-18.6 to -3.4)                            |
| Stomach cancer                                                          | 1.1<br>(1.0 to 1.2)                           | 0.7<br>(0.7 to 0.8)                               | 0.2<br>(0.1 to 0.2)                     | -9.6<br>(-22.9 to 7.3)                            | -4.9<br>(-18.2 to 12.9)                             |
| Colon and rectum cancer                                                 | 2.2<br>(2.1 to 2.4)                           | 0.7<br>(0.6 to 0.7)                               | 0.2<br>(0.2 to 0.3)                     | 14.1<br>(-1.9 to 31.7)                            | 19.3<br>(3.5 to 37.2)                               |
| Liver cancer                                                            | 0.1<br>(0.1 to 0.1)                           | 0.4<br>(0.3 to 0.4)                               | 0.1<br>(0.1 to 0.1)                     | 28.7<br>(18.9 to 39.3)                            | 34.7<br>(25.0 to 45.4)                              |
| Liver cancer due to hepatitis B                                         | 0.1<br>(0.1 to 0.1)                           | 0.1<br>(0.1 to 0.1)                               | < 0.05<br>(< 0.05 to < 0.05)            | 27.4<br>(16.0 to 40.4)                            | 33.4<br>(22.8 to 45.8)                              |



| Cause                                              | Prevalence in thousands (95% UI)        | Incidence in thousands (95% UI)       | YLDs in thousands (95% UI)           |                                                   |                                                     |
|----------------------------------------------------|-----------------------------------------|---------------------------------------|--------------------------------------|---------------------------------------------------|-----------------------------------------------------|
|                                                    | 2016 counts                             | 2016 counts                           | 2016 counts                          | Percentage change in counts between 2006 and 2016 | Percentage change in age-standardised rates between |
| Liver cancer due to hepatitis C                    | 0.1<br>(0.1 to 0.1)                     | 0.1<br>(0.1 to 0.1)                   | < 0.05<br>(< 0.05 to < 0.05)         | 29.0<br>(18.0 to 40.8)                            | 33.0<br>(21.8 to 44.5)                              |
| Liver cancer due to alcohol use                    | 0.1<br>(0.1 to 0.1)                     | 0.1<br>(0.1 to 0.1)                   | < 0.05<br>(< 0.05 to < 0.05)         | 33.3<br>(21.5 to 46.3)                            | 42.1<br>(29.6 to 55.7)                              |
| Liver cancer due to other causes                   | 0.1<br>(< 0.05 to 0.1)                  | 0.1<br>(< 0.05 to 0.1)                | < 0.05<br>(< 0.05 to < 0.05)         | 24.4<br>(13.2 to 37.3)                            | 30.7<br>(19.4 to 44.2)                              |
| Gallbladder and biliary tract cancer               | 0.1<br>(0.1 to 0.1)                     | 0.1<br>(0.1 to 0.1)                   | < 0.05<br>(< 0.05 to < 0.05)         | -21.2<br>(-26.4 to -14.8)                         | -17.7<br>(-22.7 to -11.5)                           |
| Pancreatic cancer                                  | 0.2<br>(0.2 to 0.2)                     | 0.3<br>(0.3 to 0.3)                   | 0.1<br>(< 0.05 to 0.1)               | 14.9<br>(7.1 to 24.5)                             | 20.5<br>(12.4 to 30.4)                              |
| Larynx cancer                                      | 0.7<br>(0.7 to 0.8)                     | 0.2<br>(0.2 to 0.2)                   | 0.1<br>(0.1 to 0.1)                  | -2.1<br>(-22.1 to 22.9)                           | 2.9<br>(-17.0 to 29.5)                              |
| Tracheal, bronchus, and lung cancer                | 1.4<br>(1.2 to 1.5)                     | 1.2<br>(1.1 to 1.3)                   | 0.3<br>(0.2 to 0.4)                  | 15.4<br>(-7.3 to 41.5)                            | 21.4<br>(-1.9 to 49.0)                              |
| Malignant skin melanoma                            | 0.7<br>(0.6 to 0.8)                     | 0.2<br>(0.1 to 0.2)                   | 0.1<br>(< 0.05 to 0.1)               | 50.0<br>(20.0 to 81.5)                            | 53.0<br>(23.3 to 82.9)                              |
| Non-melanoma skin cancer                           | 2.2<br>(1.1 to 3.6)                     | 2.9<br>(1.6 to 4.6)                   | 0.1<br>(< 0.05 to 0.2)               | -4.2<br>(-44.3 to 44.4)                           | -2.1<br>(-42.4 to 46.8)                             |
| Non-melanoma skin cancer (squamous-cell carcinoma) | 1.7<br>(0.7 to 3.4)                     | 1.4<br>(0.5 to 3.0)                   | 0.1<br>(< 0.05 to 0.2)               | -4.5<br>(-46.2 to 45.1)                           | -2.5<br>(-43.8 to 47.4)                             |
| Non-melanoma skin cancer (basal-cell carcinoma)    | 0.2<br>(0.1 to 0.4)                     | 1.4<br>(0.8 to 2.3)                   | < 0.05<br>(< 0.05 to < 0.05)         | 7.7<br>(-24.8 to 51.8)                            | 11.5<br>(-20.5 to 51.9)                             |
| Breast cancer                                      | 6.6<br>(5.9 to 7.4)                     | 1.4<br>(1.2 to 1.6)                   | 0.6<br>(0.4 to 0.8)                  | 9.5<br>(-6.7 to 32.0)                             | 14.7<br>(-2.7 to 38.0)                              |
| Cervical cancer                                    | 1.6<br>(1.4 to 1.8)                     | 0.4<br>(0.4 to 0.5)                   | 0.1<br>(0.1 to 0.2)                  | -0.0<br>(-15.8 to 17.9)                           | 6.4<br>(-9.8 to 25.4)                               |
| Uterine cancer                                     | 2.8<br>(2.5 to 3.2)                     | 0.6<br>(0.5 to 0.7)                   | 0.2<br>(0.1 to 0.3)                  | 10.2<br>(-10.3 to 33.8)                           | 13.8<br>(-6.0 to 39.0)                              |
| Ovarian cancer                                     | 0.7<br>(0.6 to 0.8)                     | 0.2<br>(0.2 to 0.2)                   | 0.1<br>(0.1 to 0.1)                  | 15.2<br>(-20.1 to 65.2)                           | 23.1<br>(-14.0 to 73.6)                             |
| Prostate cancer                                    | 2.2<br>(1.5 to 2.6)                     | 0.6<br>(0.4 to 0.6)                   | 0.2<br>(0.1 to 0.3)                  | 27.6<br>(-0.4 to 56.8)                            | 37.8<br>(7.7 to 68.4)                               |
| Testicular cancer                                  | 0.4<br>(0.3 to 0.4)                     | 0.1<br>(0.1 to 0.1)                   | < 0.05<br>(< 0.05 to < 0.05)         | 59.4<br>(9.5 to 118.2)                            | 77.3<br>(19.7 to 146.9)                             |
| Kidney cancer                                      | 1.0<br>(0.9 to 1.1)                     | 0.3<br>(0.3 to 0.3)                   | 0.1<br>(0.1 to 0.1)                  | 29.8<br>(11.8 to 48.2)                            | 36.3<br>(18.5 to 55.6)                              |
| Bladder cancer                                     | 1.6<br>(1.5 to 1.8)                     | 0.4<br>(0.4 to 0.5)                   | 0.1<br>(0.1 to 0.2)                  | 27.8<br>(6.6 to 53.9)                             | 34.1<br>(12.0 to 60.9)                              |
| Brain and nervous system cancer                    | 0.4<br>(0.3 to 0.5)                     | 0.2<br>(0.1 to 0.2)                   | 0.1<br>(< 0.05 to 0.1)               | 41.3<br>(-4.7 to 63.3)                            | 48.0<br>(1.1 to 71.0)                               |
| Thyroid cancer                                     | 0.6<br>(0.5 to 0.7)                     | 0.1<br>(0.1 to 0.1)                   | < 0.05<br>(< 0.05 to 0.1)            | 118.6<br>(67.5 to 174.9)                          | 134.0<br>(80.2 to 194.1)                            |
| Mesothelioma                                       | < 0.05<br>(< 0.05 to < 0.05)            | < 0.05<br>(< 0.05 to < 0.05)          | < 0.05<br>(< 0.05 to < 0.05)         | 12.8<br>(-12.0 to 23.4)                           | 21.5<br>(-6.6 to 32.4)                              |
| Hodgkin lymphoma                                   | 0.3<br>(0.2 to 0.4)                     | 0.1<br>(0.1 to 0.1)                   | < 0.05<br>(< 0.05 to < 0.05)         | -1.4<br>(-16.8 to 20.2)                           | 9.5<br>(-9.2 to 39.0)                               |
| Non-Hodgkin's lymphoma                             | 0.5<br>(0.4 to 0.6)                     | 0.2<br>(0.1 to 0.2)                   | 0.1<br>(< 0.05 to 0.1)               | 50.0<br>(13.0 to 71.6)                            | 59.9<br>(20.7 to 82.1)                              |
| Multiple myeloma                                   | 0.1<br>(0.1 to 0.1)                     | < 0.05<br>(< 0.05 to 0.1)             | < 0.05<br>(< 0.05 to < 0.05)         | 20.8<br>(3.7 to 34.4)                             | 28.7<br>(9.8 to 43.6)                               |
| Leukaemia                                          | 1.0<br>(0.9 to 1.1)                     | 0.3<br>(0.3 to 0.3)                   | 0.1<br>(0.1 to 0.2)                  | -16.0<br>(-23.4 to -6.9)                          | -11.4<br>(-19.2 to -2.2)                            |
| Acute lymphoid leukaemia                           | 0.1<br>(0.1 to 0.2)                     | < 0.05<br>(< 0.05 to < 0.05)          | < 0.05<br>(< 0.05 to < 0.05)         | -19.3<br>(-30.0 to -6.7)                          | -12.0<br>(-23.7 to 2.6)                             |
| Chronic lymphoid leukaemia                         | 0.3<br>(0.2 to 0.3)                     | 0.1<br>(0.1 to 0.1)                   | < 0.05<br>(< 0.05 to 0.1)            | 7.9<br>(-24.3 to 31.7)                            | 15.0<br>(-18.5 to 39.1)                             |
| Acute myeloid leukaemia                            | 0.1<br>(0.1 to 0.1)                     | 0.1<br>(< 0.05 to 0.1)                | < 0.05<br>(< 0.05 to < 0.05)         | 31.9<br>(9.1 to 50.7)                             | 42.3<br>(16.5 to 64.4)                              |
| Chronic myeloid leukaemia                          | < 0.05<br>(< 0.05 to < 0.05)            | < 0.05<br>(< 0.05 to < 0.05)          | < 0.05<br>(< 0.05 to < 0.05)         | 74.1<br>(46.7 to 107.5)                           | 93.7<br>(61.1 to 131.5)                             |
| Other leukaemia                                    | 0.4<br>(0.4 to 0.5)                     | 0.1<br>(0.1 to 0.1)                   | 0.1<br>(< 0.05 to 0.1)               | -35.0<br>(-44.8 to -21.1)                         | -32.2<br>(-41.7 to -19.6)                           |
| Other neoplasms                                    | 1.1<br>(1.1 to 1.2)                     | 0.4<br>(0.4 to 0.4)                   | 0.1<br>(0.1 to 0.1)                  | 38.7<br>(20.2 to 57.6)                            | 46.2<br>(26.2 to 65.5)                              |
| <b>Cardiovascular diseases</b>                     | <b>402.4</b><br><b>(388.1 to 417.1)</b> | <b>47.1†</b><br><b>(45.1 to 49.2)</b> | <b>34.0</b><br><b>(24.9 to 43.4)</b> | <b>-1.6</b><br><b>(-5.7 to 2.5)</b>               | <b>2.0</b><br><b>(-2.0 to 6.1)</b>                  |
| Rheumatic heart disease                            | 38.2<br>(34.1 to 42.9)                  | 0.8<br>(0.7 to 0.9)                   | 1.9<br>(1.2 to 2.7)                  | -14.2<br>(-22.2 to -7.2)                          | -4.3<br>(-13.7 to 3.8)                              |
| Ischaemic heart disease                            | 140.3<br>(131.5 to 149.0)               | 17.9<br>(16.7 to 19.0)                | 8.8<br>(6.2 to 11.9)                 | -0.8<br>(-5.3 to 3.8)                             | 2.6<br>(-1.9 to 7.1)                                |
| Cerebrovascular disease                            | 73.4<br>(68.2 to 79.2)                  | 14.2‡<br>(13.4 to 15.0)               | 14.9<br>(10.5 to 19.1)               | -0.3<br>(-7.9 to 7.7)                             | 2.4<br>(-5.0 to 10.2)                               |
| Ischaemic stroke                                   | 59.0<br>(52.1 to 66.0)                  | 9.1‡<br>(8.3 to 9.7)                  | 11.5<br>(8.0 to 14.9)                | 2.6<br>(-7.2 to 13.0)                             | 5.3<br>(-4.4 to 15.8)                               |
| Hemorrhagic stroke                                 | 17.9<br>(16.0 to 19.9)                  | 5.1‡<br>(4.7 to 5.6)                  | 3.4<br>(2.5 to 4.4)                  | -8.9<br>(-17.5 to 0.6)                            | -5.8<br>(-14.2 to 3.4)                              |
| Hypertensive heart disease                         | 26.3<br>(21.9 to 31.3)                  | --                                    | 2.1<br>(1.4 to 2.9)                  | 1.4<br>(-8.8 to 11.9)                             | 3.9<br>(-5.9 to 14.3)                               |
| Cardiomyopathy and myocarditis                     | 4.3<br>(3.8 to 4.9)                     | 0.8†<br>(0.7 to 0.9)                  | 0.4<br>(0.3 to 0.6)                  | -2.8<br>(-13.1 to 9.2)                            | 4.0<br>(-7.0 to 16.6)                               |
| Myocarditis                                        | 1.9<br>(1.7 to 2.2)                     | 0.8<br>(0.7 to 0.9)                   | 0.2<br>(0.1 to 0.2)                  | -4.4<br>(-19.4 to 14.0)                           | 3.9<br>(-12.0 to 23.1)                              |
| Alcoholic cardiomyopathy                           | 0.3<br>(0.2 to 0.3)                     | --                                    | < 0.05<br>(< 0.05 to < 0.05)         | 2.1<br>(-9.0 to 14.8)                             | 7.1<br>(-4.1 to 20.1)                               |
| Other cardiomyopathy                               | 2.8<br>(2.4 to 3.2)                     | --                                    | 0.2<br>(0.1 to 0.3)                  | -2.2<br>(-16.2 to 13.4)                           | 3.9<br>(-10.4 to 20.1)                              |
| Atrial fibrillation and flutter                    | 40.2<br>(34.9 to 46.8)                  | 3.1<br>(2.7 to 3.6)                   | 3.1<br>(2.1 to 4.3)                  | -0.8<br>(-6.8 to 5.4)                             | 0.8<br>(-5.4 to 7.0)                                |
| Peripheral vascular disease                        | 105.7<br>(92.6 to 122.1)                | 9.8<br>(8.5 to 11.5)                  | 0.5<br>(0.2 to 1.0)                  | 0.7<br>(-8.4 to 10.7)                             | 2.5<br>(-5.3 to 10.8)                               |
| Endocarditis                                       | 0.2<br>(0.1 to 0.2)                     | 0.5<br>(0.4 to 0.5)                   | < 0.05<br>(< 0.05 to < 0.05)         | -1.0<br>(-8.6 to 8.3)                             | 2.6<br>(-4.1 to 10.3)                               |
| Other cardiovascular and circulatory diseases      | 44.3<br>(37.6 to 51.6)                  | --                                    | 2.3<br>(1.6 to 3.2)                  | -5.6<br>(-13.7 to 2.5)                            | 3.7<br>(-4.2 to 11.7)                               |
| <b>Chronic respiratory diseases</b>                | <b>314.9</b><br><b>(304.2 to 325.4)</b> | <b>42.7†</b><br><b>(40.5 to 45.0)</b> | <b>11.3</b><br><b>(8.6 to 14.5)</b>  | <b>0.9</b><br><b>(-4.2 to 6.2)</b>                | <b>10.2</b><br><b>(5.0 to 16.0)</b>                 |
| Chronic obstructive pulmonary disease              | 148.5<br>(140.8 to 156.1)               | 8.7<br>(8.2 to 9.1)                   | 3.7<br>(2.9 to 4.6)                  | 5.1<br>(-7.9 to 19.1)                             | 10.6<br>(-2.9 to 25.0)                              |
| Pneumoconiosis                                     | 0.4<br>(0.4 to 0.5)                     | < 0.05<br>(< 0.05 to < 0.05)          | 0.1<br>(< 0.05 to 0.1)               | 12.3<br>(-6.7 to 37.3)                            | 19.3<br>(0.4 to 44.3)                               |
| Silicosis                                          | < 0.05<br>(< 0.05 to 0.1)               | < 0.05<br>(< 0.05 to < 0.05)          | < 0.05<br>(< 0.05 to < 0.05)         | 22.3<br>(15.0 to 29.7)                            | 34.2<br>(26.8 to 41.8)                              |



| Cause                                                          | Prevalence in thousands (95% UI)        | Incidence in thousands (95% UI)    | YLDs in thousands (95% UI)     |                                                   |                                                     |
|----------------------------------------------------------------|-----------------------------------------|------------------------------------|--------------------------------|---------------------------------------------------|-----------------------------------------------------|
|                                                                | 2016 counts                             | 2016 counts                        | 2016 counts                    | Percentage change in counts between 2006 and 2016 | Percentage change in age-standardised rates between |
| Asbestosis                                                     | 0.1<br>(0.1 to 0.1)                     | < 0.05<br>(< 0.05 to < 0.05)       | < 0.05<br>(< 0.05 to < 0.05)   | -2.4<br>(-8.2 to 4.5)                             | 3.1<br>(-3.0 to 10.2)                               |
| Coal workers pneumoconiosis                                    | --                                      | --                                 | --                             | --                                                | --                                                  |
| Other pneumoconiosis                                           | 0.3<br>(0.3 to 0.4)                     | < 0.05<br>(< 0.05 to < 0.05)       | < 0.05<br>(< 0.05 to 0.1)      | 16.4<br>(-13.2 to 59.4)                           | 23.7<br>(-5.8 to 65.2)                              |
| Asthma                                                         | 173.4<br>(163.4 to 184.7)               | 33.7<br>(31.6 to 36.0)             | 6.7<br>(4.4 to 9.6)            | -2.0<br>(-6.7 to 3.6)                             | 9.2<br>(3.7 to 16.3)                                |
| Interstitial lung disease and pulmonary sarcoidosis            | 5.7<br>(5.1 to 6.2)                     | 0.3<br>(0.3 to 0.4)                | 0.6<br>(0.4 to 0.8)            | 1.7<br>(-11.1 to 16.1)                            | 8.7<br>(-5.3 to 24.6)                               |
| Other chronic respiratory diseases                             | --                                      | --                                 | 0.2<br>(0.2 to 0.3)            | 23.2<br>(8.3 to 40.3)                             | 43.3<br>(23.8 to 65.2)                              |
| <b>Cirrhosis and other chronic liver diseases</b>              | <b>29.6<br/>(28.1 to 31.1)</b>          | <b>1.6<br/>(1.6 to 1.7)</b>        | <b>1.2<br/>(0.9 to 1.7)</b>    | <b>2.6<br/>(-5.9 to 11.0)</b>                     | <b>12.6<br/>(3.1 to 22.3)</b>                       |
| Cirrhosis and other chronic liver diseases due to hepatitis B  | 9.8<br>(9.1 to 10.6)                    | 0.6<br>(0.5 to 0.6)                | 0.4<br>(0.3 to 0.5)            | 4.7<br>(-9.1 to 20.6)                             | 12.6<br>(-3.1 to 30.3)                              |
| Cirrhosis and other chronic liver diseases due to hepatitis C  | 5.6<br>(5.0 to 6.3)                     | 0.3<br>(0.3 to 0.4)                | 0.2<br>(0.1 to 0.3)            | 2.9<br>(-14.7 to 24.4)                            | 10.3<br>(-8.7 to 34.1)                              |
| Cirrhosis and other chronic liver diseases due to alcohol use  | 7.2<br>(6.6 to 8.0)                     | 0.4<br>(0.4 to 0.5)                | 0.3<br>(0.2 to 0.4)            | 8.7<br>(-8.7 to 29.8)                             | 15.6<br>(-2.9 to 37.4)                              |
| Cirrhosis and other chronic liver diseases due to other causes | 7.0<br>(6.5 to 7.6)                     | 0.3<br>(0.3 to 0.3)                | 0.4<br>(0.3 to 0.6)            | -3.1<br>(-16.3 to 13.3)                           | 12.0<br>(-4.0 to 31.8)                              |
| <b>Digestive diseases</b>                                      | <b>126.5<br/>(120.5 to 132.4)</b>       | <b>160.4†<br/>(149.8 to 170.3)</b> | <b>4.6<br/>(3.3 to 6.2)</b>    | <b>1.9<br/>(-4.7 to 9.2)</b>                      | <b>6.0<br/>(-1.2 to 13.5)</b>                       |
| Peptic ulcer disease                                           | 36.4<br>(33.4 to 39.8)                  | 5.7<br>(5.2 to 6.3)                | 0.7<br>(0.5 to 1.1)            | 38.2<br>(23.8 to 55.1)                            | 47.0<br>(31.5 to 63.7)                              |
| Gastritis and duodenitis                                       | 47.4<br>(42.0 to 52.7)                  | 44.6<br>(39.7 to 49.8)             | 0.8<br>(0.5 to 1.2)            | 16.4<br>(6.2 to 27.9)                             | 21.5<br>(10.7 to 32.9)                              |
| Appendicitis                                                   | 0.5<br>(0.5 to 0.5)                     | 12.7<br>(11.7 to 13.7)             | 0.1<br>(0.1 to 0.2)            | -20.8<br>(-39.3 to 5.5)                           | -2.0<br>(-25.7 to 34.2)                             |
| Paralytic ileus and intestinal obstruction                     | 0.1<br>(0.1 to 0.1)                     | 1.7<br>(1.5 to 1.8)                | < 0.05<br>(< 0.05 to < 0.05)   | 11.3<br>(6.3 to 16.7)                             | 13.3<br>(9.0 to 18.0)                               |
| Inguinal, femoral, and abdominal hernia                        | 31.8<br>(28.9 to 34.9)                  | 48.6<br>(41.6 to 56.2)             | 2.1<br>(1.4 to 2.9)            | -9.8<br>(-18.1 to -0.8)                           | -7.2<br>(-15.8 to 2.2)                              |
| Inflammatory bowel disease                                     | 1.4<br>(1.3 to 1.5)                     | 2.0<br>(1.9 to 2.0)                | 0.2<br>(0.1 to 0.3)            | -8.4<br>(-23.5 to 10.4)                           | -1.0<br>(-16.9 to 18.4)                             |
| Vascular intestinal disorders                                  | < 0.05<br>(< 0.05 to < 0.05)            | 0.3<br>(0.3 to 0.3)                | < 0.05<br>(< 0.05 to < 0.05)   | 5.7<br>(0.6 to 11.2)                              | 7.7<br>(3.0 to 12.3)                                |
| Gallbladder and biliary diseases                               | 12.4<br>(11.0 to 13.9)                  | 43.2<br>(37.4 to 49.5)             | 0.2<br>(0.1 to 0.3)            | 14.0<br>(-6.3 to 37.8)                            | 19.4<br>(-1.5 to 43.9)                              |
| Pancreatitis                                                   | 0.2<br>(0.2 to 0.2)                     | 1.7<br>(1.6 to 1.9)                | < 0.05<br>(< 0.05 to < 0.05)   | 23.5<br>(18.0 to 29.5)                            | 28.1<br>(23.2 to 33.5)                              |
| Other digestive diseases                                       | --                                      | --                                 | 0.4<br>(0.3 to 0.5)            | 7.1<br>(0.3 to 14.7)                              | 6.9<br>(-0.7 to 15.7)                               |
| <b>Neurological disorders</b>                                  | <b>1,550.6<br/>(1,490.6 to 1,624.1)</b> | <b>684.7<br/>(584.9 to 795.7)</b>  | <b>43.4<br/>(29.0 to 59.0)</b> | <b>-8.1<br/>(-22.4 to 8.5)</b>                    | <b>0.9<br/>(-16.5 to 20.7)</b>                      |
| Alzheimer's disease and other dementias                        | 30.3<br>(25.2 to 36.1)                  | 5.3<br>(4.4 to 6.4)                | 4.5<br>(3.1 to 6.0)            | 11.1<br>(4.3 to 18.3)                             | -0.6<br>(-5.5 to 4.5)                               |
| Parkinson's disease                                            | 5.9<br>(4.6 to 7.4)                     | 0.7<br>(0.5 to 0.8)                | 0.7<br>(0.4 to 1.0)            | 1.9<br>(-9.0 to 14.7)                             | 4.5<br>(-6.2 to 17.0)                               |
| Epilepsy                                                       | 13.4<br>(2.7 to 25.9)                   | 1.4<br>(0.3 to 2.7)                | 4.3<br>(0.7 to 9.8)            | -0.8<br>(-84.8 to 525.8)                          | 10.7<br>(-82.7 to 609.9)                            |
| Multiple sclerosis                                             | 1.1<br>(1.0 to 1.2)                     | < 0.05<br>(< 0.05 to < 0.05)       | 0.3<br>(0.2 to 0.4)            | 11.2<br>(-5.4 to 30.3)                            | 19.1<br>(1.4 to 39.2)                               |
| Motor neuron disease                                           | 0.1<br>(0.1 to 0.1)                     | < 0.05<br>(< 0.05 to < 0.05)       | < 0.05<br>(< 0.05 to < 0.05)   | -2.9<br>(-6.3 to 0.6)                             | 5.4<br>(1.7 to 9.2)                                 |
| Migraine                                                       | 647.2<br>(607.4 to 688.2)               | 60.8<br>(57.0 to 65.0)             | 28.2<br>(18.2 to 39.5)         | -12.0<br>(-14.8 to -9.1)                          | -1.1<br>(-4.5 to 2.0)                               |
| Tension-type headache                                          | 1,123.3<br>(1,004.2 to 1,246.4)         | 616.5<br>(517.6 to 726.9)          | 4.5<br>(2.9 to 6.7)            | -10.5<br>(-14.8 to -5.7)                          | -0.8<br>(-5.5 to 4.5)                               |
| Other neurological disorders                                   | < 0.05<br>(< 0.05 to < 0.05)            | < 0.05<br>(< 0.05 to < 0.05)       | 0.9<br>(0.3 to 1.9)            | 12.0<br>(-71.4 to 302.1)                          | 30.3<br>(-69.7 to 416.1)                            |
| <b>Mental and substance use disorders</b>                      | <b>543.0<br/>(523.6 to 562.1)</b>       | <b>206.7†<br/>(192.7 to 221.5)</b> | <b>72.5<br/>(53.1 to 93.6)</b> | <b>-10.4<br/>(-12.2 to -8.5)</b>                  | <b>0.7<br/>(-1.2 to 2.8)</b>                        |
| Schizophrenia                                                  | 9.5<br>(8.3 to 10.7)                    | 0.5<br>(0.5 to 0.6)                | 6.1<br>(4.5 to 7.6)            | -5.3<br>(-13.2 to 2.9)                            | 1.6<br>(-7.0 to 11.1)                               |
| Alcohol use disorders                                          | 70.9<br>(62.0 to 80.2)                  | 38.1<br>(32.9 to 43.4)             | 7.1<br>(4.8 to 9.8)            | -4.8<br>(-12.3 to 2.7)                            | 4.6<br>(-3.6 to 13.5)                               |
| Drug use disorders                                             | 25.9<br>(24.0 to 28.2)                  | 3.5<br>(3.2 to 3.9)                | 5.8<br>(4.1 to 7.6)            | -4.3<br>(-12.4 to 3.7)                            | 5.3<br>(-3.4 to 14.4)                               |
| Opioid use disorders                                           | 9.6<br>(8.1 to 11.3)                    | 1.4<br>(1.2 to 1.6)                | 4.0<br>(2.7 to 5.4)            | -3.9<br>(-12.9 to 6.4)                            | 3.7<br>(-6.5 to 15.1)                               |
| Cocaine use disorders                                          | 2.9<br>(2.5 to 3.4)                     | 0.2<br>(0.2 to 0.2)                | 0.4<br>(0.2 to 0.6)            | -3.9<br>(-22.6 to 19.0)                           | 9.3<br>(-12.8 to 36.8)                              |
| Amphetamine use disorders                                      | 2.6<br>(1.9 to 3.6)                     | 0.2<br>(0.2 to 0.3)                | 0.4<br>(0.2 to 0.6)            | -5.2<br>(-26.2 to 23.9)                           | 11.7<br>(-13.6 to 45.6)                             |
| Cannabis use disorders                                         | 9.1<br>(7.6 to 10.7)                    | 1.3<br>(1.1 to 1.5)                | 0.3<br>(0.2 to 0.4)            | -16.3<br>(-29.1 to -1.9)                          | 0.5<br>(-15.4 to 18.0)                              |
| Other drug use disorders                                       | 2.5<br>(2.2 to 2.8)                     | 0.5<br>(0.4 to 0.5)                | 0.8<br>(0.5 to 1.1)            | -1.6<br>(-19.5 to 21.7)                           | 10.8<br>(-9.6 to 37.8)                              |
| Depressive disorders                                           | 135.2<br>(126.7 to 145.0)               | 133.5<br>(121.4 to 146.5)          | 21.6<br>(14.9 to 29.4)         | -9.9<br>(-13.9 to -5.7)                           | -0.4<br>(-4.8 to 4.0)                               |
| Major depressive disorder                                      | 80.7<br>(73.0 to 88.5)                  | 124.4<br>(112.2 to 137.7)          | 16.2<br>(11.1 to 22.1)         | -10.4<br>(-15.7 to -5.0)                          | -0.4<br>(-6.0 to 5.2)                               |
| Dysthymia                                                      | 56.5<br>(49.8 to 64.8)                  | 9.1<br>(8.0 to 10.5)               | 5.4<br>(3.6 to 7.9)            | -8.3<br>(-11.3 to -4.9)                           | -0.5<br>(-3.9 to 3.2)                               |
| Bipolar disorder                                               | 26.8<br>(23.2 to 30.8)                  | 1.9<br>(1.6 to 2.1)                | 5.5<br>(3.5 to 8.0)            | -12.0<br>(-17.1 to -6.6)                          | -0.3<br>(-6.3 to 6.0)                               |
| Anxiety disorders                                              | 108.9<br>(99.5 to 118.5)                | 17.4<br>(16.1 to 18.9)             | 10.4<br>(7.2 to 14.2)          | -12.1<br>(-17.6 to -6.6)                          | -0.4<br>(-6.9 to 6.1)                               |
| Eating disorders                                               | 3.6<br>(2.9 to 4.3)                     | 1.9<br>(1.4 to 2.5)                | 0.7<br>(0.5 to 1.1)            | 2.5<br>(-12.0 to 19.4)                            | 22.0<br>(5.9 to 41.2)                               |
| Anorexia nervosa                                               | 0.7<br>(0.6 to 1.0)                     | 0.3<br>(0.2 to 0.4)                | 0.2<br>(0.1 to 0.2)            | -8.3<br>(-31.1 to 23.3)                           | 16.9<br>(-11.4 to 53.5)                             |
| Bulimia nervosa                                                | 2.7<br>(2.0 to 3.6)                     | 1.6<br>(1.1 to 2.1)                | 0.6<br>(0.3 to 0.9)            | 6.1<br>(-11.0 to 25.9)                            | 23.7<br>(3.7 to 46.0)                               |
| Autistic spectrum disorders                                    | 32.1<br>(29.0 to 36.1)                  | 0.2<br>(0.1 to 0.3)                | 4.7<br>(3.2 to 6.6)            | -10.6<br>(-14.8 to -6.0)                          | 0.9<br>(-3.7 to 5.9)                                |
| Autism                                                         | 9.8<br>(8.4 to 11.5)                    | < 0.05<br>(< 0.05 to < 0.05)       | 2.5<br>(1.6 to 3.6)            | -11.0<br>(-18.1 to -3.3)                          | 0.6<br>(-7.4 to 9.3)                                |
| Asperger syndrome and other autistic spectrum disorders        | 22.4<br>(18.6 to 26.9)                  | 0.2<br>(0.1 to 0.3)                | 2.2<br>(1.4 to 3.2)            | -10.1<br>(-14.1 to -5.9)                          | 1.3<br>(-3.3 to 6.0)                                |

| Cause                                                      | Prevalence in thousands (95% UI)              | Incidence in thousands (95% UI)                | YLDs in thousands (95% UI)            |                                                   |                                                     |
|------------------------------------------------------------|-----------------------------------------------|------------------------------------------------|---------------------------------------|---------------------------------------------------|-----------------------------------------------------|
|                                                            | 2016 counts                                   | 2016 counts                                    | 2016 counts                           | Percentage change in counts between 2006 and 2016 | Percentage change in age-standardised rates between |
| Attention-deficit/hyperactivity disorder                   | 25.7<br>(23.3 to 28.7)                        | 1.1<br>(1.0 to 1.3)                            | 0.3<br>(0.2 to 0.5)                   | -18.5<br>(-25.0 to -11.3)                         | 0.8<br>(-7.2 to 9.6)                                |
| Conduct disorder                                           | 19.6<br>(16.2 to 23.0)                        | 6.5<br>(5.2 to 7.8)                            | 2.4<br>(1.5 to 3.6)                   | -34.1<br>(-38.4 to -29.3)                         | 0.8<br>(-5.2 to 7.9)                                |
| Idiopathic developmental intellectual disability           | 38.7<br>(20.4 to 57.0)                        | --                                             | 1.7<br>(0.8 to 2.9)                   | -24.7<br>(-30.4 to -19.4)                         | -13.2<br>(-19.8 to -6.7)                            |
| Other mental and substance use disorders                   | 85.7<br>(75.9 to 98.4)                        | 2.1<br>(1.9 to 2.4)                            | 6.3<br>(4.4 to 9.1)                   | -7.4<br>(-11.5 to -3.0)                           | 0.1<br>(-4.6 to 5.0)                                |
| <b>Diabetes, urogenital, blood, and endocrine diseases</b> | <b>1,339.3</b><br><b>(1,318.7 to 1,361.8)</b> | <b>536.2†</b><br><b>(498.1 to 578.9)</b>       | <b>36.5</b><br><b>(26.2 to 48.9)</b>  | <b>0.5</b><br><b>(-3.3 to 4.5)</b>                | <b>6.0</b><br><b>(2.1 to 10.2)</b>                  |
| Diabetes mellitus                                          | 166.7<br>(149.6 to 186.2)                     | 8.2<br>(7.3 to 9.2)                            | 14.4<br>(10.0 to 19.9)                | 7.4<br>(-1.2 to 16.8)                             | 13.0<br>(4.1 to 22.8)                               |
| Acute glomerulonephritis                                   | 0.1<br>(0.1 to 0.1)                           | 1.2<br>(1.0 to 1.3)                            | < 0.05<br>(< 0.05 to < 0.05)          | -16.5<br>(-22.3 to -10.3)                         | -7.9<br>(-13.7 to -1.5)                             |
| Chronic kidney disease                                     | 344.0<br>(310.8 to 378.1)                     | 24.9<br>(21.1 to 28.9)                         | 9.8<br>(7.2 to 12.6)                  | 7.4<br>(1.2 to 14.2)                              | 11.1<br>(4.7 to 18.2)                               |
| Chronic kidney disease due to diabetes mellitus            | 164.0<br>(145.5 to 183.7)                     | 12.2<br>(10.1 to 14.4)                         | 4.5<br>(3.3 to 5.9)                   | 9.7<br>(-1.4 to 24.2)                             | 16.0<br>(4.1 to 30.8)                               |
| Chronic kidney disease due to hypertension                 | 47.0<br>(40.6 to 53.8)                        | 4.8<br>(4.0 to 5.9)                            | 0.7<br>(0.5 to 0.9)                   | 11.2<br>(-5.4 to 31.1)                            | 3.7<br>(-9.8 to 18.6)                               |
| Chronic kidney disease due to glomerulonephritis           | 42.9<br>(36.7 to 49.2)                        | 1.5<br>(1.2 to 1.9)                            | 2.0<br>(1.4 to 2.6)                   | 2.1<br>(-10.2 to 16.9)                            | 6.3<br>(-5.7 to 20.5)                               |
| Chronic kidney disease due to other causes                 | 90.2<br>(77.7 to 104.1)                       | 6.4<br>(5.2 to 7.7)                            | 2.6<br>(1.9 to 3.4)                   | 6.8<br>(-6.4 to 22.7)                             | 8.6<br>(-3.3 to 23.2)                               |
| Urinary diseases and male infertility                      | 97.2<br>(88.6 to 107.4)                       | 344.1†<br>(308.4 to 383.9)                     | 2.9<br>(1.9 to 4.0)                   | -7.8<br>(-12.9 to -2.7)                           | -2.9<br>(-8.1 to 2.6)                               |
| Interstitial nephritis and urinary tract infections        | 5.6<br>(4.9 to 6.4)                           | 289.7<br>(253.8 to 329.5)                      | 0.2<br>(0.1 to 0.3)                   | -10.0<br>(-20.4 to 2.0)                           | -0.2<br>(-10.8 to 13.1)                             |
| Urolithiasis                                               | 1.7<br>(1.5 to 1.9)                           | 45.0<br>(39.9 to 50.6)                         | 0.1<br>(0.1 to 0.2)                   | -11.7<br>(-24.1 to 2.7)                           | -5.9<br>(-18.4 to 8.4)                              |
| Benign prostatic hyperplasia                               | 72.4<br>(64.0 to 82.4)                        | 9.4<br>(8.0 to 11.0)                           | 2.3<br>(1.5 to 3.3)                   | -6.3<br>(-12.6 to 0.3)                            | -1.8<br>(-8.3 to 5.1)                               |
| Male infertility                                           | 14.1<br>(10.6 to 18.6)                        | --                                             | 0.1<br>(< 0.05 to 0.2)                | -9.4<br>(-16.8 to -1.3)                           | -0.8<br>(-8.9 to 7.9)                               |
| Other urinary diseases                                     | --                                            | --                                             | 0.1<br>(0.1 to 0.2)                   | -25.3<br>(-32.2 to -18.0)                         | -19.6<br>(-26.8 to -11.9)                           |
| Gynecological diseases                                     | 459.5<br>(437.4 to 481.1)                     | 146.9†<br>(138.2 to 156.1)                     | 5.4<br>(3.6 to 7.7)                   | -15.6<br>(-19.1 to -12.0)                         | -5.4<br>(-9.3 to -1.5)                              |
| Uterine fibroids                                           | 80.4<br>(70.4 to 91.2)                        | 7.3<br>(6.2 to 8.6)                            | 1.0<br>(0.6 to 1.7)                   | -18.4<br>(-24.7 to -12.4)                         | -11.3<br>(-18.2 to -4.8)                            |
| Polycystic ovarian syndrome                                | 4.1<br>(3.1 to 5.3)                           | 1.4<br>(1.1 to 1.7)                            | < 0.05<br>(< 0.05 to 0.1)             | -12.3<br>(-22.1 to -0.8)                          | -3.0<br>(-13.6 to 9.6)                              |
| Female infertility                                         | 6.2<br>(2.5 to 12.6)                          | --                                             | < 0.05<br>(< 0.05 to 0.1)             | -1.5<br>(-22.7 to 28.7)                           | 8.4<br>(-13.2 to 41.3)                              |
| Endometriosis                                              | 1.6<br>(1.4 to 1.9)                           | 4.8<br>(3.8 to 6.0)                            | 0.1<br>(0.1 to 0.2)                   | -14.3<br>(-33.4 to 9.6)                           | -3.0<br>(-24.4 to 24.5)                             |
| Genital prolapse                                           | 114.9<br>(100.5 to 131.2)                     | 5.2<br>(4.5 to 5.9)                            | 0.4<br>(0.2 to 0.7)                   | 14.9<br>(4.4 to 27.5)                             | 18.8<br>(8.1 to 30.9)                               |
| Premenstrual syndrome                                      | 256.6<br>(242.4 to 271.2)                     | 87.1<br>(80.8 to 93.5)                         | 2.2<br>(1.3 to 3.3)                   | -16.9<br>(-22.3 to -11.4)                         | -3.5<br>(-9.9 to 2.8)                               |
| Other gynecological diseases                               | 48.0<br>(42.2 to 54.7)                        | 41.1<br>(34.8 to 48.5)                         | 1.6<br>(1.1 to 2.3)                   | -17.4<br>(-24.4 to -9.5)                          | -8.3<br>(-15.8 to 0.8)                              |
| Hemoglobinopathies and hemolytic anaemias                  | 519.7<br>(508.8 to 528.7)                     | --                                             | 1.8<br>(1.2 to 2.7)                   | -10.9<br>(-17.7 to -3.6)                          | -3.8<br>(-11.3 to 4.3)                              |
| Thalassemias                                               | < 0.05<br>(< 0.05 to < 0.05)                  | --                                             | < 0.05<br>(< 0.05 to < 0.05)          | 8.8<br>(-9.5 to 26.9)                             | -3.8<br>(-18.3 to 12.1)                             |
| Thalassaemias trait                                        | 55.6<br>(50.4 to 60.5)                        | --                                             | 0.9<br>(0.6 to 1.3)                   | -6.2<br>(-15.7 to 3.4)                            | -1.1<br>(-11.8 to 9.2)                              |
| Sickle cell disorders                                      | 0.1<br>(< 0.05 to 0.1)                        | --                                             | < 0.05<br>(< 0.05 to < 0.05)          | -10.4<br>(-17.0 to -3.1)                          | 0.0<br>(-7.0 to 8.5)                                |
| Sickle cell trait                                          | 77.9<br>(74.6 to 81.7)                        | --                                             | 0.2<br>(0.1 to 0.3)                   | -5.5<br>(-16.7 to 7.5)                            | -0.8<br>(-13.0 to 12.9)                             |
| G6PD deficiency                                            | 41.2<br>(39.4 to 43.4)                        | --                                             | < 0.05<br>(< 0.05 to < 0.05)          | 9.0<br>(1.0 to 18.5)                              | 16.2<br>(7.0 to 26.2)                               |
| G6PD trait                                                 | 322.6<br>(314.4 to 330.9)                     | --                                             | < 0.05<br>(< 0.05 to < 0.05)          | -7.7<br>(-15.8 to 1.9)                            | -1.4<br>(-10.7 to 8.7)                              |
| Other hemoglobinopathies and hemolytic anaemias            | 41.6<br>(39.1 to 44.3)                        | --                                             | 0.7<br>(0.5 to 1.0)                   | -17.9<br>(-25.1 to -9.7)                          | -8.1<br>(-16.4 to 1.6)                              |
| Endocrine, metabolic, blood, and immune disorders          | 79.6<br>(74.0 to 85.6)                        | 11.0<br>(9.8 to 12.3)                          | 2.3<br>(1.6 to 3.2)                   | -1.0<br>(-6.4 to 4.8)                             | 4.9<br>(-0.5 to 11.0)                               |
| <b>Musculoskeletal disorders</b>                           | <b>753.5</b><br><b>(720.6 to 792.6)</b>       | <b>307.8</b><br><b>(274.5 to 341.8)</b>        | <b>84.8</b><br><b>(61.2 to 110.5)</b> | <b>-4.4</b><br><b>(-7.8 to -0.6)</b>              | <b>1.6</b><br><b>(-1.8 to 5.5)</b>                  |
| Rheumatoid arthritis                                       | 13.3<br>(11.8 to 15.0)                        | 0.6<br>(0.6 to 0.7)                            | 3.1<br>(2.1 to 4.1)                   | 1.7<br>(-5.9 to 10.1)                             | 7.6<br>(-0.8 to 16.4)                               |
| Osteoarthritis                                             | 216.6<br>(203.1 to 231.0)                     | 9.5<br>(8.8 to 10.2)                           | 13.2<br>(9.3 to 17.9)                 | -2.7<br>(-6.2 to 1.0)                             | 1.1<br>(-2.5 to 5.2)                                |
| Low back and neck pain                                     | 542.3<br>(507.7 to 583.4)                     | 251.2<br>(221.9 to 282.9)                      | 63.9<br>(45.1 to 84.1)                | -4.4<br>(-9.0 to 0.4)                             | 2.1<br>(-2.5 to 6.7)                                |
| Low back pain                                              | 413.4<br>(366.0 to 467.9)                     | 213.6<br>(184.4 to 245.4)                      | 46.4<br>(32.7 to 61.0)                | -3.4<br>(-9.8 to 3.2)                             | 3.0<br>(-3.3 to 9.5)                                |
| Neck pain                                                  | 177.0<br>(152.8 to 205.2)                     | 37.6<br>(32.8 to 44.3)                         | 17.5<br>(12.0 to 24.7)                | -6.9<br>(-9.7 to -4.1)                            | -0.4<br>(-2.5 to 1.8)                               |
| Gout                                                       | 20.1<br>(17.8 to 22.9)                        | 3.9<br>(3.4 to 4.4)                            | 0.6<br>(0.4 to 0.9)                   | -4.0<br>(-15.5 to 9.9)                            | 0.9<br>(-10.9 to 15.9)                              |
| Other musculoskeletal disorders                            | 46.8<br>(35.6 to 60.8)                        | 42.5<br>(31.0 to 58.7)                         | 4.0<br>(2.5 to 6.1)                   | -12.7<br>(-22.9 to -0.5)                          | -6.2<br>(-17.2 to 7.4)                              |
| <b>Other non-communicable diseases</b>                     | <b>3,117.6</b><br><b>(3,076.7 to 3,166.5)</b> | <b>9,458.9†</b><br><b>(8,994.6 to 9,955.8)</b> | <b>99.1</b><br><b>(68.4 to 139.1)</b> | <b>-8.9</b><br><b>(-9.9 to -7.8)</b>              | <b>-1.5</b><br><b>(-2.5 to -0.6)</b>                |
| Congenital anomalies                                       | 39.5<br>(35.5 to 44.1)                        | --                                             | 4.4<br>(3.2 to 5.9)                   | -7.7<br>(-12.8 to -2.3)                           | 0.8<br>(-4.5 to 6.7)                                |
| Neural tube defects                                        | 2.2<br>(2.0 to 2.5)                           | --                                             | 0.7<br>(0.5 to 0.9)                   | -7.3<br>(-20.0 to 7.8)                            | 2.6<br>(-12.2 to 20.0)                              |
| Congenital heart anomalies                                 | 11.6<br>(10.3 to 13.0)                        | --                                             | 0.6<br>(0.2 to 1.0)                   | -0.5<br>(-11.0 to 11.4)                           | 7.7<br>(-3.6 to 20.8)                               |
| Orofacial clefts                                           | 1.6<br>(1.4 to 1.9)                           | --                                             | < 0.05<br>(< 0.05 to < 0.05)          | -23.1<br>(-33.7 to -12.2)                         | -17.1<br>(-28.5 to -5.3)                            |
| Down's syndrome                                            | 3.4<br>(2.9 to 3.9)                           | --                                             | 0.3<br>(0.2 to 0.5)                   | -15.5<br>(-24.7 to -4.4)                          | -6.7<br>(-17.3 to 6.5)                              |
| Turner syndrome                                            | 2.7<br>(2.3 to 3.1)                           | --                                             | < 0.05<br>(< 0.05 to 0.1)             | -6.1<br>(-27.7 to 18.2)                           | 7.6<br>(-16.6 to 35.1)                              |
| Klinefelter syndrome                                       | 2.2<br>(1.9 to 2.6)                           | --                                             | < 0.05<br>(< 0.05 to < 0.05)          | -8.2<br>(-26.4 to 15.6)                           | 2.8<br>(-16.1 to 29.0)                              |



| Cause                                         | Prevalence in thousands (95% UI)              | Incidence in thousands (95% UI)          | YLDs in thousands (95% UI)           |                                                   |                                                     |
|-----------------------------------------------|-----------------------------------------------|------------------------------------------|--------------------------------------|---------------------------------------------------|-----------------------------------------------------|
|                                               | 2016 counts                                   | 2016 counts                              | 2016 counts                          | Percentage change in counts between 2006 and 2016 | Percentage change in age-standardised rates between |
| Other chromosomal abnormalities               | 1.4<br>(1.3 to 1.7)                           | --                                       | 0.3<br>(0.2 to 0.4)                  | 1.0<br>(-15.2 to 20.4)                            | -0.5<br>(-16.1 to 19.2)                             |
| Congenital musculoskeletal and limb anomalies | 3.9<br>(3.6 to 4.2)                           | --                                       | 0.6<br>(0.4 to 0.8)                  | -0.8<br>(-11.6 to 11.7)                           | 10.3<br>(-1.6 to 23.9)                              |
| Urogenital congenital anomalies               | 3.5<br>(3.1 to 3.9)                           | --                                       | 0.1<br>(0.1 to 0.2)                  | -5.8<br>(-18.6 to 7.2)                            | 4.6<br>(-10.0 to 20.3)                              |
| Digestive congenital anomalies                | 4.7<br>(4.1 to 5.2)                           | --                                       | 0.2<br>(0.1 to 0.3)                  | -10.3<br>(-23.0 to 3.6)                           | -0.9<br>(-15.1 to 14.1)                             |
| Other congenital anomalies                    | 12.5<br>(8.0 to 18.5)                         | --                                       | 1.6<br>(1.1 to 2.4)                  | -11.7<br>(-19.7 to -1.2)                          | -3.2<br>(-12.0 to 7.8)                              |
| Skin and subcutaneous diseases                | 1,143.9<br>(1,113.1 to 1,172.0)               | 2,735.6<br>(2,558.7 to 2,920.8)          | 24.8<br>(16.6 to 36.0)               | -13.3<br>(-15.1 to -11.4)                         | 1.3<br>(-0.7 to 3.3)                                |
| Dermatitis                                    | 111.9<br>(105.0 to 119.5)                     | 181.2<br>(165.9 to 197.9)                | 3.9<br>(2.4 to 6.2)                  | -7.6<br>(-11.8 to -3.1)                           | 1.5<br>(-3.4 to 6.5)                                |
| Psoriasis                                     | 40.8<br>(38.9 to 42.7)                        | 5.4<br>(5.2 to 5.6)                      | 3.5<br>(2.5 to 4.6)                  | -4.8<br>(-11.2 to 1.9)                            | 5.1<br>(-2.2 to 13.0)                               |
| Cellulitis                                    | 1.6<br>(1.5 to 1.7)                           | 29.8<br>(27.9 to 31.6)                   | 0.1<br>(0.1 to 0.1)                  | -6.5<br>(-23.5 to 14.6)                           | 2.3<br>(-15.4 to 23.7)                              |
| Pyoderma                                      | 9.2<br>(8.9 to 9.6)                           | 195.8<br>(188.7 to 203.7)                | 0.1<br>(< 0.05 to 0.1)               | -4.7<br>(-11.5 to 2.2)                            | 1.7<br>(-5.7 to 9.2)                                |
| Scabies                                       | 40.8<br>(36.2 to 46.3)                        | 122.1<br>(107.6 to 138.6)                | 1.1<br>(0.6 to 1.7)                  | -17.2<br>(-21.2 to -13.1)                         | -5.7<br>(-9.5 to -1.6)                              |
| Fungal skin diseases                          | 381.1<br>(342.4 to 420.6)                     | 1,433.0<br>(1,263.1 to 1,619.3)          | 2.1<br>(0.8 to 4.4)                  | -5.9<br>(-7.6 to -4.2)                            | -0.1<br>(-1.2 to 1.0)                               |
| Viral skin diseases                           | 92.6<br>(88.9 to 96.3)                        | 138.5<br>(132.7 to 144.9)                | 2.8<br>(1.8 to 4.2)                  | -13.5<br>(-16.2 to -10.7)                         | -0.7<br>(-3.8 to 2.6)                               |
| Acne vulgaris                                 | 245.2<br>(222.5 to 269.0)                     | 151.2<br>(128.1 to 178.8)                | 6.3<br>(4.2 to 9.2)                  | -27.0<br>(-30.5 to -22.9)                         | 0.7<br>(-3.8 to 5.9)                                |
| Alopecia areata                               | 7.7<br>(7.5 to 8.1)                           | 13.6<br>(13.1 to 14.2)                   | 0.2<br>(0.2 to 0.4)                  | -9.1<br>(-18.1 to 1.3)                            | -0.1<br>(-10.1 to 11.7)                             |
| Pruritus                                      | 40.4<br>(35.5 to 45.5)                        | 32.0<br>(28.5 to 36.2)                   | 0.4<br>(0.2 to 0.8)                  | -5.2<br>(-10.2 to 0.4)                            | 2.2<br>(-2.9 to 7.6)                                |
| Urticaria                                     | 38.0<br>(33.5 to 43.1)                        | 67.9<br>(60.0 to 77.5)                   | 2.3<br>(1.5 to 3.2)                  | -5.7<br>(-10.8 to -0.3)                           | -0.2<br>(-5.2 to 5.4)                               |
| Decubitus ulcer                               | 1.5<br>(1.3 to 1.7)                           | 5.3<br>(4.6 to 6.0)                      | 0.2<br>(0.2 to 0.3)                  | 0.0<br>(-13.8 to 16.6)                            | 3.5<br>(-9.1 to 18.6)                               |
| Other skin and subcutaneous diseases          | 309.0<br>(299.7 to 318.3)                     | 359.8<br>(347.6 to 372.3)                | 1.7<br>(0.8 to 3.1)                  | 1.8<br>(-0.7 to 4.3)                              | 9.6<br>(7.1 to 12.3)                                |
| Sense organ diseases                          | 1,292.8<br>(1,267.7 to 1,317.9)               | 426.5†<br>(401.9 to 453.4)               | 53.2<br>(37.1 to 74.3)               | -7.8<br>(-9.1 to -6.3)                            | -3.9<br>(-5.3 to -2.6)                              |
| Glaucoma                                      | 7.4<br>(6.2 to 8.6)                           | --                                       | 0.8<br>(0.5 to 1.0)                  | -3.3<br>(-12.9 to 6.5)                            | 0.2<br>(-8.9 to 10.0)                               |
| Cataract                                      | 93.2<br>(79.4 to 108.2)                       | --                                       | 5.0<br>(3.5 to 6.9)                  | -4.2<br>(-9.5 to 1.2)                             | -4.5<br>(-8.8 to 0.2)                               |
| Macular degeneration                          | 3.0<br>(2.4 to 3.7)                           | --                                       | 0.2<br>(0.1 to 0.2)                  | 0.5<br>(-12.6 to 14.7)                            | 2.1<br>(-10.9 to 17.1)                              |
| Refraction and accommodation disorders        | 711.3<br>(680.7 to 742.4)                     | --                                       | 12.3<br>(7.6 to 19.6)                | -11.8<br>(-14.4 to -9.0)                          | -6.4<br>(-8.8 to -3.6)                              |
| Age-related and other hearing loss            | 933.2<br>(893.1 to 976.1)                     | --                                       | 28.1<br>(19.9 to 38.6)               | -7.3<br>(-9.4 to -5.2)                            | -3.7<br>(-5.9 to -1.6)                              |
| Other vision loss                             | 34.7<br>(30.4 to 39.4)                        | --                                       | 2.2<br>(1.6 to 3.0)                  | -4.0<br>(-9.9 to 1.9)                             | -0.6<br>(-6.5 to 5.9)                               |
| Other sense organ diseases                    | 149.1<br>(136.9 to 161.4)                     | 426.5<br>(401.9 to 453.4)                | 4.6<br>(2.9 to 7.0)                  | -5.6<br>(-9.0 to -2.0)                            | 0.4<br>(-3.1 to 4.1)                                |
| Oral disorders                                | 2,353.5<br>(2,285.2 to 2,427.1)               | 6,296.9†<br>(5,871.1 to 6,755.9)         | 16.7<br>(10.6 to 24.7)               | -6.1<br>(-9.0 to -3.4)                            | -0.0<br>(-2.7 to 2.6)                               |
| Caries of deciduous teeth                     | 263.0<br>(220.2 to 308.1)                     | 1,021.8<br>(790.7 to 1,297.6)            | 0.1<br>(< 0.05 to 0.1)               | 13.5<br>(2.3 to 26.4)                             | -0.5<br>(-10.0 to 10.3)                             |
| Caries of permanent teeth                     | 1,711.1<br>(1,626.3 to 1,793.5)               | 5,191.7<br>(4,828.4 to 5,547.2)          | 1.0<br>(0.5 to 1.9)                  | -16.2<br>(-18.8 to -13.4)                         | -4.6<br>(-7.5 to -1.6)                              |
| Periodontal disease                           | 409.8<br>(339.3 to 485.7)                     | 53.6<br>(42.6 to 65.1)                   | 2.7<br>(1.1 to 5.5)                  | -5.5<br>(-9.1 to -2.2)                            | -0.5<br>(-3.9 to 3.0)                               |
| Edentulism and severe tooth loss              | 390.2<br>(343.1 to 438.9)                     | 29.8<br>(25.3 to 35.1)                   | 10.7<br>(7.1 to 15.1)                | -4.3<br>(-9.4 to -0.2)                            | 0.8<br>(-3.9 to 5.1)                                |
| Other oral disorders                          | 78.0<br>(74.8 to 81.2)                        | --                                       | 2.3<br>(1.4 to 3.4)                  | -10.2<br>(-13.1 to -7.3)                          | -0.4<br>(-3.6 to 2.7)                               |
| <b>Injuries</b>                               | <b>1,299.5</b><br><b>(1,219.9 to 1,407.5)</b> | <b>434.4†</b><br><b>(410.2 to 458.1)</b> | <b>47.1</b><br><b>(32.0 to 66.8)</b> | <b>7.9</b><br><b>(6.0 to 9.6)</b>                 | <b>15.0</b><br><b>(13.1 to 16.7)</b>                |
| <b>Transport injuries</b>                     | <b>139.4</b><br><b>(128.8 to 150.1)</b>       | <b>40.3</b><br><b>(36.7 to 44.0)</b>     | <b>7.2</b><br><b>(4.8 to 10.3)</b>   | <b>21.7</b><br><b>(19.3 to 23.9)</b>              | <b>29.6</b><br><b>(27.1 to 31.9)</b>                |
| Road injuries                                 | 129.5<br>(119.0 to 139.6)                     | 38.4<br>(34.8 to 42.2)                   | 6.7<br>(4.5 to 9.6)                  | 24.9<br>(22.5 to 27.1)                            | 33.1<br>(30.6 to 35.5)                              |
| Pedestrian road injuries                      | 29.0<br>(26.0 to 32.7)                        | 6.3<br>(5.4 to 7.3)                      | 1.5<br>(1.0 to 2.1)                  | 37.7<br>(35.0 to 40.5)                            | 46.1<br>(43.2 to 48.9)                              |
| Cyclist road injuries                         | 19.4<br>(16.4 to 22.9)                        | 6.0<br>(4.9 to 7.4)                      | 0.9<br>(0.6 to 1.4)                  | 18.6<br>(16.2 to 20.8)                            | 27.2<br>(24.7 to 29.6)                              |
| Motorcyclist road injuries                    | 18.8<br>(16.1 to 23.2)                        | 3.7<br>(3.0 to 4.4)                      | 0.9<br>(0.6 to 1.3)                  | 27.1<br>(24.6 to 29.5)                            | 36.0<br>(33.1 to 38.6)                              |
| Motor vehicle road injuries                   | 55.3<br>(46.2 to 64.0)                        | 19.8<br>(17.3 to 22.3)                   | 3.1<br>(2.1 to 4.3)                  | 24.3<br>(21.9 to 26.6)                            | 32.4<br>(29.7 to 34.8)                              |
| Other road injuries                           | 7.0<br>(5.9 to 8.2)                           | 2.6<br>(2.1 to 3.3)                      | 0.3<br>(0.2 to 0.5)                  | -1.8<br>(-3.8 to -0.1)                            | 5.1<br>(3.1 to 7.0)                                 |
| Other transport injuries                      | 9.9<br>(8.4 to 11.6)                          | 1.9<br>(1.7 to 2.1)                      | 0.5<br>(0.3 to 0.7)                  | -9.5<br>(-11.7 to -7.5)                           | -3.4<br>(-5.8 to -1.2)                              |
| <b>Unintentional injuries</b>                 | <b>1,078.2</b><br><b>(1,003.7 to 1,181.0)</b> | <b>377.9</b><br><b>(354.7 to 402.5)</b>  | <b>36.9</b><br><b>(25.6 to 50.8)</b> | <b>6.6</b><br><b>(4.7 to 8.2)</b>                 | <b>13.6</b><br><b>(11.8 to 15.3)</b>                |
| Falls                                         | 521.2<br>(460.4 to 595.7)                     | 197.4<br>(179.1 to 218.7)                | 21.5<br>(15.2 to 29.1)               | 9.8<br>(7.9 to 11.6)                              | 16.5<br>(14.6 to 18.3)                              |
| Drowning                                      | 3.5<br>(3.0 to 4.0)                           | 0.5<br>(0.4 to 0.6)                      | 0.2<br>(0.1 to 0.2)                  | -0.8<br>(-4.0 to 2.3)                             | 7.5<br>(4.2 to 10.7)                                |
| Fire, heat, and hot substances                | 130.1<br>(112.8 to 152.4)                     | 13.3<br>(11.8 to 14.8)                   | 3.3<br>(2.2 to 4.7)                  | -5.5<br>(-8.6 to -2.8)                            | 1.5<br>(-1.9 to 4.7)                                |
| Poisonings                                    | 2.7<br>(2.4 to 3.2)                           | 3.4<br>(2.8 to 4.0)                      | 0.2<br>(0.1 to 0.3)                  | 10.3<br>(3.5 to 17.6)                             | 21.9<br>(13.9 to 30.8)                              |
| Exposure to mechanical forces                 | 224.2<br>(194.6 to 267.8)                     | 71.9<br>(64.3 to 80.2)                   | 5.3<br>(3.6 to 7.7)                  | 13.7<br>(11.2 to 16.1)                            | 22.1<br>(19.5 to 24.5)                              |
| Unintentional firearm injuries                | 5.2<br>(4.2 to 6.4)                           | 1.0<br>(0.8 to 1.3)                      | 0.2<br>(0.1 to 0.3)                  | 0.7<br>(-1.9 to 2.8)                              | 8.7<br>(6.1 to 11.0)                                |
| Unintentional suffocation                     | 13.4<br>(10.9 to 16.4)                        | 2.5<br>(1.9 to 3.2)                      | 0.5<br>(0.3 to 0.7)                  | -1.3<br>(-3.3 to 0.7)                             | 6.7<br>(4.5 to 8.7)                                 |
| Other exposure to mechanical forces           | 205.6<br>(175.8 to 249.8)                     | 68.5<br>(61.1 to 76.2)                   | 4.7<br>(3.1 to 6.7)                  | 16.1<br>(13.5 to 18.6)                            | 24.5<br>(21.8 to 27.1)                              |

| Cause                                                                               | Prevalence in thousands (95% UI)     | Incidence in thousands (95% UI)       | YLDs in thousands (95% UI)        |                                                   |                                                     |
|-------------------------------------------------------------------------------------|--------------------------------------|---------------------------------------|-----------------------------------|---------------------------------------------------|-----------------------------------------------------|
|                                                                                     | 2016 counts                          | 2016 counts                           | 2016 counts                       | Percentage change in counts between 2006 and 2016 | Percentage change in age-standardised rates between |
| Adverse effects of medical treatment                                                | 1.2<br>(1.0 to 1.5)                  | 15.6<br>(14.0 to 17.5)                | 0.2<br>(0.1 to 0.2)               | 14.9<br>(9.6 to 20.4)                             | 13.8<br>(9.3 to 18.7)                               |
| Animal contact                                                                      | 16.1<br>(14.1 to 18.6)               | 15.0<br>(12.6 to 18.2)                | 0.5<br>(0.3 to 0.7)               | -24.3<br>(-27.7 to -20.9)                         | -16.6<br>(-20.8 to -12.6)                           |
| Venomous animal contact                                                             | 6.0<br>(5.0 to 7.2)                  | 5.9<br>(4.6 to 7.6)                   | 0.3<br>(0.2 to 0.5)               | -21.5<br>(-26.8 to -16.3)                         | -12.6<br>(-19.1 to -6.2)                            |
| Non-venomous animal contact                                                         | 10.1<br>(8.6 to 12.5)                | 9.1<br>(7.4 to 11.2)                  | 0.2<br>(0.1 to 0.2)               | -29.6<br>(-31.6 to -27.7)                         | -24.4<br>(-26.5 to -22.4)                           |
| Foreign body                                                                        | 51.4<br>(43.6 to 59.5)               | 26.2<br>(23.5 to 29.5)                | 1.8<br>(1.2 to 2.6)               | -4.7<br>(-7.1 to -2.6)                            | 2.8<br>(0.2 to 5.2)                                 |
| Pulmonary aspiration and foreign body in airway                                     | 21.2<br>(16.6 to 27.3)               | 6.5<br>(5.5 to 7.7)                   | 0.9<br>(0.6 to 1.3)               | -8.2<br>(-10.5 to -5.8)                           | -0.0<br>(-2.7 to 2.7)                               |
| Foreign body in eyes                                                                | 2.2<br>(1.4 to 3.1)                  | 10.1<br>(7.9 to 13.0)                 | 0.1<br>(0.1 to 0.2)               | -11.8<br>(-15.6 to -8.0)                          | -4.9<br>(-8.4 to -1.3)                              |
| Foreign body in other body part                                                     | 28.0<br>(23.5 to 34.4)               | 9.7<br>(8.5 to 11.1)                  | 0.8<br>(0.5 to 1.2)               | 0.5<br>(-2.5 to 3.1)                              | 7.7<br>(4.5 to 10.5)                                |
| Environmental heat and cold exposure                                                | 43.1<br>(37.5 to 49.2)               | 9.7<br>(8.3 to 11.2)                  | 1.6<br>(1.1 to 2.2)               | -1.9<br>(-3.8 to -0.1)                            | 5.8<br>(3.7 to 7.7)                                 |
| Other unintentional injuries                                                        | 84.7<br>(69.6 to 101.4)              | 24.9<br>(21.1 to 29.1)                | 2.4<br>(1.6 to 3.5)               | 6.3<br>(4.6 to 8.0)                               | 14.3<br>(12.6 to 16.0)                              |
| <b>Self-harm and interpersonal violence</b>                                         | <b>85.7</b><br><b>(79.0 to 93.3)</b> | <b>16.1†</b><br><b>(14.0 to 18.5)</b> | <b>1.9</b><br><b>(1.3 to 2.7)</b> | <b>-5.4</b><br><b>(-7.2 to -3.8)</b>              | <b>3.3</b><br><b>(1.5 to 5.0)</b>                   |
| Self-harm                                                                           | 5.5<br>(4.7 to 6.3)                  | 2.0<br>(1.7 to 2.3)                   | 0.2<br>(0.2 to 0.4)               | 10.9<br>(7.9 to 13.9)                             | 19.8<br>(16.7 to 22.8)                              |
| Self-harm by firearm                                                                | 0.2<br>(0.1 to 0.2)                  | < 0.05<br>(< 0.05 to 0.1)             | < 0.05<br>(< 0.05 to < 0.05)      | -32.3<br>(-34.4 to -30.2)                         | -24.4<br>(-26.7 to -22.2)                           |
| Self-harm by other specified means                                                  | 5.3<br>(4.5 to 6.1)                  | 1.9<br>(1.7 to 2.2)                   | 0.2<br>(0.2 to 0.3)               | 12.7<br>(9.7 to 15.9)                             | 21.6<br>(18.4 to 24.7)                              |
| Interpersonal violence                                                              | 80.3<br>(73.4 to 88.1)               | 14.2†<br>(12.1 to 16.4)               | 1.7<br>(1.1 to 2.3)               | -7.4<br>(-9.3 to -5.8)                            | 1.4<br>(-0.5 to 3.1)                                |
| Assault by firearm                                                                  | 1.0<br>(0.9 to 1.2)                  | 0.3<br>(0.2 to 0.4)                   | < 0.05<br>(< 0.05 to 0.1)         | -26.4<br>(-28.5 to -24.1)                         | -19.9<br>(-22.4 to -17.4)                           |
| Assault by sharp object                                                             | 8.4<br>(6.8 to 10.0)                 | 2.5<br>(1.9 to 3.1)                   | 0.2<br>(0.1 to 0.3)               | -3.8<br>(-6.2 to -1.6)                            | 4.1<br>(1.5 to 6.6)                                 |
| Sexual violence                                                                     | 44.0<br>(38.6 to 49.6)               | --                                    | 0.3<br>(0.2 to 0.5)               | -18.5<br>(-21.6 to -15.3)                         | -4.4<br>(-7.8 to -1.1)                              |
| Assault by other means                                                              | 26.8<br>(22.4 to 32.6)               | 11.4<br>(9.6 to 13.4)                 | 1.0<br>(0.7 to 1.5)               | -2.8<br>(-4.7 to -1.0)                            | 4.5<br>(2.4 to 6.6)                                 |
| <b>Forces of nature, conflict and terrorism, and executions and police conflict</b> | <b>40.2</b><br><b>(21.9 to 65.2)</b> | <b>0.1†</b><br><b>(0.1 to 0.1)</b>    | <b>1.1</b><br><b>(0.3 to 2.9)</b> | <b>-1.2</b><br><b>(-6.1 to 2.5)</b>               | <b>3.9</b><br><b>(-1.5 to 8.0)</b>                  |
| Exposure to forces of nature                                                        | 0.5<br>(0.2 to 0.8)                  | --                                    | < 0.05<br>(< 0.05 to < 0.05)      | 47.2<br>(-61.4 to 437.6)                          | 59.6<br>(-57.8 to 480.0)                            |
| Conflict and terrorism                                                              | 39.5<br>(21.4 to 64.5)               | --                                    | 1.1<br>(0.3 to 2.8)               | -1.7<br>(-5.6 to 1.7)                             | 3.1<br>(-1.2 to 6.8)                                |
| Executions and police conflict                                                      | 0.2<br>(0.1 to 0.4)                  | 0.1<br>(0.1 to 0.1)                   | < 0.05<br>(< 0.05 to < 0.05)      | 9.5<br>(2.7 to 14.0)                              | 21.7<br>(15.0 to 26.3)                              |
| <b>Impairments</b>                                                                  | --                                   | --                                    | --                                | --                                                | --                                                  |
| Anaemia                                                                             | 1,078.7<br>(1,024.2 to 1,141.5)      | --                                    | 27.9<br>(18.9 to 39.2)            | -11.5<br>(-16.6 to -5.5)                          | -5.8<br>(-11.5 to 0.5)                              |
| Developmental intellectual disability                                               | 83.0<br>(64.7 to 101.3)              | --                                    | 9.2<br>(6.8 to 12.1)              | -22.0<br>(-28.6 to -16.6)                         | -12.3<br>(-20.3 to -5.9)                            |
| Epilepsy                                                                            | 22.9<br>(11.4 to 36.0)               | --                                    | 8.0<br>(3.8 to 13.5)              | -15.9<br>(-59.8 to 77.8)                          | -6.2<br>(-54.5 to 95.6)                             |
| Guillain-Barre syndrome                                                             | < 0.05<br>(< 0.05 to 0.1)            | --                                    | < 0.05<br>(< 0.05 to < 0.05)      | -7.9<br>(-11.3 to -3.9)                           | 0.1<br>(0.0 to 0.3)                                 |
| Hearing loss                                                                        | 983.4<br>(943.9 to 1,026.4)          | --                                    | 30.6<br>(21.8 to 42.0)            | -8.6<br>(-10.6 to -6.7)                           | -4.8<br>(-6.6 to -2.9)                              |
| Heart failure                                                                       | 91.5<br>(79.6 to 105.2)              | --                                    | 8.5<br>(6.2 to 11.1)              | 3.1<br>(-4.6 to 10.5)                             | 5.9<br>(-1.6 to 13.2)                               |
| Infertility                                                                         | 50.8<br>(39.1 to 65.5)               | --                                    | 0.3<br>(0.1 to 0.6)               | -9.1<br>(-15.3 to -2.6)                           | 0.3<br>(-6.4 to 7.6)                                |
| Pelvic inflammatory disease                                                         | 1.9<br>(1.7 to 2.3)                  | --                                    | 0.3<br>(0.2 to 0.4)               | -24.4<br>(-36.6 to -10.6)                         | -18.0<br>(-31.3 to -2.9)                            |
| Vision loss                                                                         | 860.3<br>(820.5 to 898.9)            | --                                    | 22.8<br>(15.9 to 32.6)            | -11.3<br>(-15.9 to -8.4)                          | -7.8<br>(-12.7 to -4.6)                             |

We did not calculate incidence for the nine impairments, certain NTDs, and causes with only birth prevalence. Blank cells mean that no estimate is available.

† Incidence for aggregate causes represents the sum of the incidence of the causes below the aggregate.

‡ Incidence estimates for stroke represent first-ever stroke only.

^ Incidence of HIV/AIDS represents new infections of HIV only and does not include new infections of Tuberculosis in HIV positive cases.



SR Table 14: Prevalence, incidence, and YLDs for 2016, percentage change of YLD counts and percentage change of age-standardised YLD rates between 2006 and 2016 by cause and impairments, for all ages, Germany.

| Cause                                                                                | Prevalence in thousands (95% UI)          | Incidence in thousands (95% UI)               | YLDs in thousands (95% UI)               |                                                   |                                                     |
|--------------------------------------------------------------------------------------|-------------------------------------------|-----------------------------------------------|------------------------------------------|---------------------------------------------------|-----------------------------------------------------|
|                                                                                      | 2016 counts                               | 2016 counts                                   | 2016 counts                              | Percentage change in counts between 2006 and 2016 | Percentage change in age-standardised rates between |
| <b>All causes</b>                                                                    | <b>77,950.0</b><br>(77,686.4 to 78,198.0) | <b>540,714.2†</b><br>(509,796.7 to 573,631.7) | <b>11,381.2</b><br>(8,482.8 to 14,654.7) | <b>5.5</b><br>(3.6 to 7.5)                        | <b>-0.7</b><br>(-2.6 to 1.5)                        |
| <b>Communicable, maternal, neonatal, and nutritional disorders</b>                   | <b>28,496.3</b><br>(27,185.2 to 29,728.7) | <b>298,171.4†</b><br>(267,755.7 to 329,792.2) | <b>376.0</b><br>(271.9 to 502.4)         | <b>-1.5</b><br>(-5.4 to 3.1)                      | <b>-0.7</b><br>(-4.8 to 3.7)                        |
| <b>HIV/AIDS and tuberculosis</b>                                                     | <b>9,196.5</b><br>(7,636.5 to 10,625.2)   | <b>9.9†</b><br>(7.2 to 13.0)                  | <b>15.0</b><br>(7.4 to 27.0)             | <b>29.1</b><br>(13.4 to 45.0)                     | <b>24.6</b><br>(10.4 to 40.4)                       |
| Tuberculosis                                                                         | 8,145.5<br>(6,495.4 to 9,943.0)           | 5.0†<br>(3.8 to 6.3)                          | 1.3<br>(0.8 to 1.9)                      | -10.3<br>(-18.3 to -1.7)                          | -6.3<br>(-15.3 to 2.7)                              |
| Drug-susceptible tuberculosis                                                        | 3.8<br>(2.9 to 4.9)                       | 4.9<br>(3.8 to 6.2)                           | 1.2<br>(0.8 to 1.9)                      | -10.9<br>(-18.7 to -2.3)                          | -6.9<br>(-15.9 to 2.1)                              |
| Multidrug-resistant tuberculosis without extensive drug resistance                   | 0.1<br>(0.1 to 0.1)                       | 0.1<br>(0.1 to 0.1)                           | < 0.05<br>(< 0.05 to < 0.05)             | 11.0<br>(-18.4 to 48.5)                           | 16.0<br>(-14.7 to 55.9)                             |
| Extensively drug-resistant tuberculosis                                              | < 0.05<br>(< 0.05 to < 0.05)              | < 0.05<br>(< 0.05 to < 0.05)                  | < 0.05<br>(< 0.05 to < 0.05)             | 138.7<br>(75.5 to 219.1)                          | 149.4<br>(83.3 to 235.2)                            |
| Latent tuberculosis infection                                                        | 8,141.7<br>(6,492.0 to 9,938.1)           | --                                            | --                                       | --                                                | --                                                  |
| HIV/AIDS                                                                             | 159.0<br>(78.0 to 258.1)                  | 4.9^<br>(2.5 to 7.8)                          | 13.7<br>(6.3 to 25.8)                    | 34.6<br>(18.5 to 52.6)                            | 29.0<br>(14.0 to 46.1)                              |
| Drug-susceptible HIV/AIDS - Tuberculosis                                             | 0.2<br>(0.1 to 0.3)                       | 0.2<br>(0.1 to 0.4)                           | 0.1<br>(< 0.05 to 0.1)                   | -28.3<br>(-34.9 to -21.0)                         | -31.4<br>(-37.7 to -24.4)                           |
| Multidrug-resistant HIV/AIDS - Tuberculosis without extensive drug resistance        | < 0.05<br>(< 0.05 to < 0.05)              | < 0.05<br>(< 0.05 to < 0.05)                  | < 0.05<br>(< 0.05 to < 0.05)             | -10.6<br>(-34.4 to 19.7)                          | -14.5<br>(-37.2 to 14.4)                            |
| Extensively drug-resistant HIV/AIDS - Tuberculosis                                   | < 0.05<br>(< 0.05 to < 0.05)              | < 0.05<br>(< 0.05 to < 0.05)                  | < 0.05<br>(< 0.05 to < 0.05)             | 92.2<br>(41.2 to 157.4)                           | 83.9<br>(35.1 to 146.1)                             |
| HIV/AIDS resulting in other diseases                                                 | 158.8<br>(77.7 to 257.8)                  | 4.9<br>(2.5 to 7.8)                           | 13.6<br>(6.2 to 25.7)                    | 35.3<br>(19.1 to 53.6)                            | 29.7<br>(14.8 to 46.9)                              |
| <b>Diarrhoea, lower respiratory infections, and other common infectious diseases</b> | <b>4,665.5</b><br>(4,359.8 to 4,967.9)    | <b>294,692.9†</b><br>(264,552.8 to 326,373.9) | <b>148.4</b><br>(97.5 to 214.7)          | <b>-0.2</b><br>(-3.7 to 4.7)                      | <b>-0.8</b><br>(-4.2 to 2.9)                        |
| Diarrhoeal diseases                                                                  | 240.1<br>(225.6 to 255.5)                 | 15,978.4<br>(14,993.4 to 17,043.4)            | 26.6<br>(18.2 to 36.3)                   | 1.4<br>(-5.4 to 9.2)                              | -3.3<br>(-10.5 to 4.2)                              |
| Intestinal infectious diseases                                                       | < 0.05<br>(< 0.05 to < 0.05)              | 0.1†<br>(0.1 to 0.2)                          | < 0.05<br>(< 0.05 to < 0.05)             | -14.3<br>(-27.6 to 0.4)                           | -18.7<br>(-30.9 to -6.5)                            |
| Typhoid fever                                                                        | < 0.05<br>(< 0.05 to < 0.05)              | 0.1<br>(< 0.05 to 0.1)                        | < 0.05<br>(< 0.05 to < 0.05)             | -14.6<br>(-30.2 to 2.3)                           | -17.3<br>(-31.6 to -2.6)                            |
| Paratyphoid fever                                                                    | < 0.05<br>(< 0.05 to < 0.05)              | 0.1<br>(0.1 to 0.1)                           | < 0.05<br>(< 0.05 to < 0.05)             | -8.5<br>(-24.8 to 11.6)                           | -11.5<br>(-26.7 to 6.4)                             |
| Other intestinal infectious diseases                                                 | --                                        | --                                            | < 0.05<br>(< 0.05 to < 0.05)             | -33.1<br>(-49.3 to -12.4)                         | -42.9<br>(-59.7 to -19.0)                           |
| Lower respiratory infections                                                         | 59.0<br>(55.1 to 63.2)                    | 2,563.9<br>(2,367.9 to 2,798.2)               | 3.4<br>(2.3 to 5.0)                      | 14.4<br>(0.5 to 31.1)                             | 1.0<br>(-11.2 to 14.8)                              |
| Upper respiratory infections                                                         | 3,564.8<br>(3,193.5 to 3,962.7)           | 272,157.9<br>(242,515.8 to 304,168.6)         | 87.9<br>(53.0 to 135.0)                  | -1.3<br>(-6.0 to 3.3)                             | 0.2<br>(-4.4 to 4.2)                                |
| Otitis media                                                                         | 735.8<br>(661.1 to 812.2)                 | 2,795.8<br>(2,329.0 to 3,374.0)               | 19.6<br>(12.3 to 29.4)                   | -2.7<br>(-10.4 to 5.3)                            | -1.1<br>(-9.3 to 8.1)                               |
| Meningitis                                                                           | 10.3<br>(6.2 to 53.1)                     | 0.6<br>(0.5 to 0.7)                           | 1.8<br>(0.8 to 8.0)                      | 45.8<br>(-4.1 to 630.1)                           | 17.4<br>(-4.6 to 256.6)                             |
| Pneumococcal meningitis                                                              | 1.9<br>(1.5 to 2.2)                       | < 0.05<br>(< 0.05 to 0.1)                     | 0.3<br>(0.2 to 0.4)                      | -3.8<br>(-8.7 to 0.8)                             | -4.5<br>(-9.0 to 0.1)                               |
| H influenzae type B meningitis                                                       | 0.9<br>(0.7 to 1.1)                       | < 0.05<br>(< 0.05 to < 0.05)                  | 0.2<br>(0.1 to 0.2)                      | -0.5<br>(-5.2 to 4.7)                             | -1.1<br>(-6.0 to 4.7)                               |
| Meningococcal infection                                                              | 4.5<br>(0.9 to 46.9)                      | 0.1<br>(0.1 to 0.2)                           | 0.8<br>(0.1 to 7.1)                      | 285.8<br>(-8.3 to 3,443.9)                        | 119.3<br>(-9.1 to 1,422.7)                          |
| Other meningitis                                                                     | 3.1<br>(2.6 to 3.6)                       | 0.3<br>(0.3 to 0.4)                           | 0.5<br>(0.4 to 0.7)                      | -0.4<br>(-4.4 to 3.7)                             | -0.1<br>(-4.2 to 4.1)                               |
| Encephalitis                                                                         | 56.0<br>(34.2 to 85.5)                    | 45.5<br>(44.7 to 46.4)                        | 5.0<br>(3.4 to 6.7)                      | -0.1<br>(-7.7 to 8.2)                             | -2.7<br>(-8.8 to 4.0)                               |
| Diphtheria                                                                           | < 0.05<br>(< 0.05 to < 0.05)              | < 0.05<br>(< 0.05 to < 0.05)                  | < 0.05<br>(< 0.05 to < 0.05)             | -26.2<br>(-62.4 to 47.2)                          | -30.5<br>(-61.0 to 25.1)                            |
| Whooping cough                                                                       | 1.5<br>(1.1 to 2.0)                       | 10.9<br>(8.2 to 14.5)                         | 0.1<br>(< 0.05 to 0.1)                   | -53.5<br>(-69.6 to -31.0)                         | -53.0<br>(-69.5 to -29.9)                           |
| Tetanus                                                                              | < 0.05<br>(< 0.05 to < 0.05)              | < 0.05<br>(< 0.05 to < 0.05)                  | < 0.05<br>(< 0.05 to < 0.05)             | -39.8<br>(-51.9 to -25.9)                         | -41.5<br>(-53.0 to -28.7)                           |
| Measles                                                                              | 0.1<br>(0.1 to 0.1)                       | 2.5<br>(2.4 to 2.6)                           | < 0.05<br>(< 0.05 to < 0.05)             | 221.3<br>(199.1 to 247.4)                         | 231.3<br>(208.4 to 258.2)                           |
| Varicella and herpes zoster                                                          | 88.8<br>(78.4 to 99.8)                    | 1,137.3<br>(1,078.7 to 1,200.1)               | 4.1<br>(2.5 to 6.3)                      | 3.1<br>(-9.8 to 17.6)                             | -3.1<br>(-15.6 to 11.2)                             |
| <b>Neglected tropical diseases and malaria</b>                                       | <b>2.3</b><br>(1.8 to 3.5)                | <b>0.1†</b><br>(< 0.05 to 0.3)                | <b>0.1</b><br>(< 0.05 to 0.2)            | <b>-27.1</b><br>(-85.9 to 315.7)                  | <b>-30.3</b><br>(-87.1 to 336.8)                    |
| Malaria                                                                              | --                                        | --                                            | --                                       | --                                                | --                                                  |
| Chagas disease                                                                       | 2.2<br>(1.8 to 2.6)                       | --                                            | < 0.05<br>(< 0.05 to < 0.05)             | 0.2<br>(-6.7 to 6.9)                              | -1.6<br>(-8.3 to 4.9)                               |
| Leishmaniasis                                                                        | --                                        | --                                            | --                                       | --                                                | --                                                  |
| Visceral leishmaniasis                                                               | --                                        | --                                            | --                                       | --                                                | --                                                  |
| Cutaneous and mucocutaneous leishmaniasis                                            | --                                        | --                                            | --                                       | --                                                | --                                                  |
| African trypanosomiasis                                                              | --                                        | --                                            | --                                       | --                                                | --                                                  |
| Schistosomiasis                                                                      | --                                        | --                                            | --                                       | --                                                | --                                                  |
| Cysticercosis                                                                        | --                                        | --                                            | --                                       | --                                                | --                                                  |
| Cystic echinococcosis                                                                | 0.4<br>(< 0.05 to 1.8)                    | 0.1<br>(< 0.05 to 0.3)                        | < 0.05<br>(< 0.05 to 0.2)                | -38.7<br>(-95.7 to 767.2)                         | -40.7<br>(-95.8 to 683.5)                           |
| Lymphatic filariasis                                                                 | --                                        | --                                            | --                                       | --                                                | --                                                  |
| Onchocerciasis                                                                       | --                                        | --                                            | --                                       | --                                                | --                                                  |
| Trachoma                                                                             | --                                        | --                                            | --                                       | --                                                | --                                                  |
| Dengue                                                                               | --                                        | --                                            | --                                       | --                                                | --                                                  |
| Yellow fever                                                                         | --                                        | --                                            | --                                       | --                                                | --                                                  |
| Rabies                                                                               | < 0.05<br>(< 0.05 to < 0.05)              | < 0.05<br>(< 0.05 to < 0.05)                  | < 0.05<br>(< 0.05 to < 0.05)             | -4.3<br>(-29.2 to 28.2)                           | -17.6<br>(-37.1 to 7.9)                             |
| Intestinal nematode infections                                                       | --                                        | --                                            | --                                       | --                                                | --                                                  |
| Ascariasis                                                                           | --                                        | --                                            | --                                       | --                                                | --                                                  |

| Cause                                                                   | Prevalence in thousands (95% UI)                 | Incidence in thousands (95% UI)                      | YLDs in thousands (95% UI)                      |                                                   |                                                     |
|-------------------------------------------------------------------------|--------------------------------------------------|------------------------------------------------------|-------------------------------------------------|---------------------------------------------------|-----------------------------------------------------|
|                                                                         | 2016 counts                                      | 2016 counts                                          | 2016 counts                                     | Percentage change in counts between 2006 and 2016 | Percentage change in age-standardised rates between |
| Trichuriasis                                                            | --                                               | --                                                   | --                                              | --                                                | --                                                  |
| Hookworm disease                                                        | --                                               | --                                                   | --                                              | --                                                | --                                                  |
| Food-borne trematodiasis                                                | --                                               | --                                                   | --                                              | --                                                | --                                                  |
| Leprosy                                                                 | --                                               | --                                                   | --                                              | --                                                | --                                                  |
| Ebola virus disease                                                     | --                                               | --                                                   | --                                              | --                                                | --                                                  |
| Zika virus disease                                                      | --                                               | --                                                   | --                                              | --                                                | --                                                  |
| Guinea worm disease                                                     | --                                               | --                                                   | --                                              | --                                                | --                                                  |
| Other neglected tropical diseases                                       | --                                               | --                                                   | < 0.05<br>(< 0.05 to < 0.05)                    | --                                                | --                                                  |
| <b>Maternal disorders</b>                                               | <b>46.1</b><br><b>(36.5 to 55.5)</b>             | <b>637.3†</b><br><b>(595.0 to 689.6)</b>             | <b>2.8</b><br><b>(1.8 to 4.1)</b>               | <b>-2.4</b><br><b>(-26.7 to 30.9)</b>             | <b>-2.4</b><br><b>(-26.4 to 31.3)</b>               |
| Maternal haemorrhage                                                    | 7.3<br>(5.7 to 9.3)                              | 100.5<br>(90.4 to 112.9)                             | 0.4<br>(0.3 to 0.7)                             | 4.4<br>(-35.2 to 70.7)                            | 3.4<br>(-36.6 to 70.9)                              |
| Maternal sepsis and other pregnancy related infections                  | 16.3<br>(12.2 to 21.6)                           | 110.7<br>(92.9 to 120.3)                             | 0.5<br>(0.2 to 0.9)                             | -4.2<br>(-54.7 to 100.5)                          | -5.5<br>(-56.4 to 100.8)                            |
| Maternal hypertensive disorders                                         | 22.5<br>(15.3 to 30.0)                           | 95.2<br>(91.5 to 99.1)                               | 1.1<br>(0.6 to 1.7)                             | -3.7<br>(-41.8 to 57.2)                           | -3.5<br>(-41.1 to 57.3)                             |
| Maternal obstructed labour and uterine rupture                          | 0.4<br>(0.2 to 0.7)                              | 32.0<br>(19.7 to 47.5)                               | 0.1<br>(0.1 to 0.3)                             | 6.5<br>(-44.5 to 95.6)                            | 6.5<br>(-45.3 to 97.9)                              |
| Maternal abortion, miscarriage, and ectopic pregnancy                   | 2.5<br>(1.7 to 3.3)                              | 298.9<br>(261.9 to 344.1)                            | 0.3<br>(0.1 to 0.5)                             | 0.3<br>(-48.8 to 95.2)                            | 3.5<br>(-47.7 to 103.7)                             |
| Other maternal disorders                                                | --                                               | --                                                   | 0.4<br>(0.3 to 0.6)                             | -7.8<br>(-30.6 to 24.1)                           | -7.8<br>(-30.6 to 24.1)                             |
| <b>Neonatal disorders</b>                                               | <b>699.1</b><br><b>(591.5 to 813.7)</b>          | --                                                   | <b>123.0</b><br><b>(88.4 to 167.4)</b>          | <b>-2.1</b><br><b>(-11.4 to 8.6)</b>              | <b>-0.2</b><br><b>(-10.2 to 11.2)</b>               |
| Neonatal preterm birth complications                                    | 481.1<br>(375.1 to 639.0)                        | --                                                   | 47.4<br>(31.1 to 69.7)                          | -1.1<br>(-22.1 to 22.5)                           | 1.4<br>(-20.9 to 26.6)                              |
| Neonatal encephalopathy due to birth asphyxia and trauma                | 257.3<br>(193.2 to 346.7)                        | --                                                   | 46.1<br>(28.9 to 69.9)                          | -3.0<br>(-15.5 to 13.1)                           | -1.3<br>(-14.0 to 15.5)                             |
| Neonatal sepsis and other neonatal infections                           | 63.0<br>(31.7 to 126.1)                          | --                                                   | 26.1<br>(11.2 to 56.4)                          | -1.9<br>(-15.3 to 14.6)                           | -0.5<br>(-14.9 to 16.1)                             |
| Hemolytic disease and other neonatal jaundice                           | 5.9<br>(5.0 to 6.8)                              | --                                                   | 1.7<br>(1.2 to 2.2)                             | -2.7<br>(-9.7 to 4.5)                             | -1.2<br>(-8.3 to 6.2)                               |
| Other neonatal disorders                                                | --                                               | --                                                   | 1.8<br>(1.2 to 2.6)                             | -3.9<br>(-20.2 to 15.0)                           | -2.1<br>(-18.8 to 16.9)                             |
| <b>Nutritional deficiencies</b>                                         | <b>5,133.6</b><br><b>(4,764.0 to 5,489.1)</b>    | <b>423.2†</b><br><b>(331.2 to 530.3)</b>             | <b>72.3</b><br><b>(45.6 to 109.5)</b>           | <b>-6.2</b><br><b>(-14.0 to 2.2)</b>              | <b>-3.0</b><br><b>(-12.3 to 7.1)</b>                |
| Protein-energy malnutrition                                             | 31.3<br>(30.6 to 32.1)                           | 20.0<br>(19.5 to 20.4)                               | 4.0<br>(2.5 to 5.6)                             | -4.2<br>(-15.0 to 8.1)                            | -2.5<br>(-13.4 to 10.1)                             |
| Iodine deficiency                                                       | 977.0<br>(742.3 to 1,260.5)                      | 11.1<br>(8.8 to 14.0)                                | 24.5<br>(15.5 to 37.2)                          | 1.2<br>(-8.5 to 13.6)                             | -1.4<br>(-11.7 to 11.0)                             |
| Vitamin A deficiency                                                    | 473.6<br>(371.4 to 601.3)                        | 392.1<br>(300.3 to 501.4)                            | --                                              | --                                                | --                                                  |
| Iron-deficiency anaemia                                                 | 3,707.8<br>(3,334.9 to 4,128.0)                  | --                                                   | 43.6<br>(26.7 to 69.1)                          | -10.0<br>(-20.4 to 2.1)                           | -3.7<br>(-16.9 to 11.1)                             |
| Other nutritional deficiencies                                          | --                                               | --                                                   | 0.1<br>(0.1 to 0.2)                             | -4.5<br>(-15.6 to 7.8)                            | -2.7<br>(-13.9 to 9.8)                              |
| <b>Other communicable, maternal, neonatal, and nutritional diseases</b> | <b>14,402.5</b><br><b>(13,447.3 to 15,418.2)</b> | <b>2,408.1</b><br><b>(2,114.6 to 2,829.8)</b>        | <b>14.3</b><br><b>(8.7 to 23.5)</b>             | <b>-7.7</b><br><b>(-12.6 to -2.1)</b>             | <b>-7.1</b><br><b>(-13.2 to -0.6)</b>               |
| Sexually transmitted diseases excluding HIV                             | 13,273.2<br>(12,373.7 to 14,301.2)               | 2,186.7<br>(1,892.5 to 2,601.0)                      | 10.7<br>(6.3 to 18.5)                           | -7.1<br>(-13.1 to -0.0)                           | -8.4<br>(-15.5 to -0.7)                             |
| Syphilis                                                                | 51.3<br>(40.7 to 64.4)                           | 41.7<br>(29.6 to 57.0)                               | 2.0<br>(1.4 to 2.8)                             | 20.6<br>(3.9 to 36.5)                             | 8.9<br>(-6.9 to 23.9)                               |
| Chlamydial infection                                                    | 530.8<br>(394.8 to 693.0)                        | 375.7<br>(277.9 to 494.7)                            | 2.3<br>(1.2 to 4.1)                             | -15.1<br>(-28.9 to -1.4)                          | -11.7<br>(-26.3 to 3.6)                             |
| Gonococcal infection                                                    | 72.5<br>(33.8 to 176.5)                          | 193.7<br>(55.3 to 588.0)                             | 0.5<br>(0.2 to 1.0)                             | -19.6<br>(-30.8 to -6.2)                          | -12.3<br>(-25.0 to 4.1)                             |
| Trichomoniasis                                                          | 1,385.9<br>(1,184.7 to 1,627.1)                  | 1,139.6<br>(971.5 to 1,338.7)                        | 1.2<br>(0.5 to 2.6)                             | -0.8<br>(-9.7 to 8.2)                             | -0.3<br>(-9.6 to 8.1)                               |
| Genital herpes                                                          | 11,497.2<br>(10,078.5 to 13,129.4)               | 370.3<br>(318.8 to 429.9)                            | 2.8<br>(0.8 to 6.4)                             | -7.7<br>(-16.8 to 1.9)                            | -11.5<br>(-20.0 to -1.2)                            |
| Other sexually transmitted diseases                                     | 68.4<br>(60.8 to 77.9)                           | 65.7<br>(51.0 to 82.9)                               | 1.8<br>(1.1 to 2.9)                             | -18.2<br>(-28.9 to -4.2)                          | -12.3<br>(-24.3 to 2.0)                             |
| Hepatitis                                                               | 1,412.8<br>(1,202.6 to 1,634.8)                  | 221.2<br>(190.2 to 255.0)                            | 0.5<br>(0.3 to 0.7)                             | -44.4<br>(-53.0 to -33.3)                         | -47.6<br>(-55.5 to -37.2)                           |
| Acute hepatitis A                                                       | 8.4<br>(7.1 to 9.4)                              | 109.1<br>(92.8 to 122.2)                             | 0.3<br>(0.2 to 0.4)                             | -45.2<br>(-59.1 to -25.4)                         | -47.2<br>(-59.4 to -30.6)                           |
| Hepatitis B                                                             | 671.8<br>(469.8 to 869.7)                        | 86.3<br>(62.7 to 115.5)                              | 0.2<br>(0.1 to 0.3)                             | -44.0<br>(-54.2 to -31.5)                         | -49.5<br>(-57.9 to -39.9)                           |
| Hepatitis C                                                             | 731.5<br>(657.9 to 811.3)                        | 12.4<br>(11.2 to 13.8)                               | < 0.05<br>(< 0.05 to < 0.05)                    | -35.9<br>(-37.6 to -34.2)                         | -28.9<br>(-31.5 to -26.4)                           |
| Acute hepatitis E                                                       | 1.0<br>(0.6 to 1.5)                              | 13.3<br>(8.2 to 19.5)                                | < 0.05<br>(< 0.05 to 0.1)                       | -41.6<br>(-49.0 to -32.6)                         | -49.4<br>(-54.5 to -43.7)                           |
| Other infectious diseases                                               | 98.0<br>(84.7 to 115.0)                          | 0.2<br>(0.1 to 0.2)                                  | 3.1<br>(1.9 to 4.9)                             | 0.1<br>(-7.9 to 9.4)                              | 3.9<br>(-7.3 to 18.1)                               |
| <b>Non-communicable diseases</b>                                        | <b>76,360.9</b><br><b>(76,055.9 to 76,638.3)</b> | <b>234,006.9†</b><br><b>(224,402.6 to 243,901.4)</b> | <b>10,126.8</b><br><b>(7,542.6 to 13,103.7)</b> | <b>5.5</b><br><b>(3.4 to 7.7)</b>                 | <b>-0.8</b><br><b>(-2.9 to 1.8)</b>                 |
| <b>Neoplasms</b>                                                        | <b>1,965.3</b><br><b>(1,900.7 to 2,044.5)</b>    | <b>619.8</b><br><b>(591.1 to 646.4)</b>              | <b>196.6</b><br><b>(146.4 to 255.2)</b>         | <b>20.6</b><br><b>(15.3 to 26.1)</b>              | <b>4.8</b><br><b>(0.1 to 9.5)</b>                   |
| Lip and oral cavity cancer                                              | 32.1<br>(28.7 to 35.9)                           | 8.2<br>(7.3 to 9.1)                                  | 3.1<br>(2.2 to 4.2)                             | 16.1<br>(-1.1 to 37.2)                            | 1.7<br>(-13.4 to 20.7)                              |
| Nasopharynx cancer                                                      | 3.0<br>(2.6 to 3.5)                              | 0.8<br>(0.8 to 1.0)                                  | 0.4<br>(0.2 to 0.5)                             | 1.8<br>(-12.0 to 18.6)                            | -8.0<br>(-20.1 to 6.4)                              |
| Other pharynx cancer                                                    | 21.0<br>(19.2 to 22.9)                           | 6.0<br>(5.5 to 6.5)                                  | 2.1<br>(1.5 to 2.9)                             | 18.4<br>(-0.0 to 41.2)                            | 4.6<br>(-11.8 to 25.4)                              |
| Oesophageal cancer                                                      | 13.1<br>(11.2 to 15.1)                           | 7.7<br>(6.8 to 8.6)                                  | 2.1<br>(1.5 to 2.9)                             | 28.4<br>(-0.3 to 61.0)                            | 11.4<br>(-13.0 to 39.9)                             |
| Stomach cancer                                                          | 48.3<br>(42.7 to 54.2)                           | 22.4<br>(20.4 to 24.5)                               | 5.9<br>(4.2 to 7.8)                             | 19.5<br>(0.4 to 40.3)                             | 0.7<br>(-14.1 to 17.2)                              |
| Colon and rectum cancer                                                 | 299.8<br>(278.0 to 327.3)                        | 77.1<br>(71.6 to 83.8)                               | 26.9<br>(19.4 to 35.1)                          | 15.1<br>(4.0 to 28.3)                             | -2.5<br>(-12.1 to 8.6)                              |
| Liver cancer                                                            | 10.4<br>(8.2 to 12.7)                            | 10.8<br>(9.2 to 12.3)                                | 2.6<br>(1.8 to 3.5)                             | 43.6<br>(18.9 to 69.7)                            | 23.4<br>(2.8 to 45.4)                               |
| Liver cancer due to hepatitis B                                         | 1.9<br>(1.4 to 2.6)                              | 1.2<br>(0.9 to 1.5)                                  | 0.3<br>(0.2 to 0.4)                             | 43.8<br>(17.4 to 72.8)                            | 26.2<br>(3.3 to 52.5)                               |

| Cause                                              | Prevalence in thousands (95% UI)                 | Incidence in thousands (95% UI)                | YLDs in thousands (95% UI)                |                                                   |                                                     |
|----------------------------------------------------|--------------------------------------------------|------------------------------------------------|-------------------------------------------|---------------------------------------------------|-----------------------------------------------------|
|                                                    | 2016 counts                                      | 2016 counts                                    | 2016 counts                               | Percentage change in counts between 2006 and 2016 | Percentage change in age-standardised rates between |
| Liver cancer due to hepatitis C                    | 5.6<br>(4.3 to 7.0)                              | 3.6<br>(3.0 to 4.2)                            | 0.9<br>(0.6 to 1.2)                       | 51.6<br>(21.4 to 86.8)                            | 28.2<br>(3.5 to 55.7)                               |
| Liver cancer due to alcohol use                    | 7.8<br>(5.8 to 9.8)                              | 4.8<br>(4.0 to 5.6)                            | 1.2<br>(0.8 to 1.6)                       | 35.0<br>(9.0 to 63.9)                             | 17.0<br>(-5.1 to 41.6)                              |
| Liver cancer due to other causes                   | 2.0<br>(1.4 to 2.6)                              | 1.2<br>(1.0 to 1.5)                            | 0.3<br>(0.2 to 0.4)                       | 58.3<br>(26.3 to 98.6)                            | 35.5<br>(10.3 to 67.3)                              |
| Gallbladder and biliary tract cancer               | 10.0<br>(7.8 to 14.0)                            | 7.8<br>(6.6 to 9.8)                            | 1.8<br>(1.2 to 2.5)                       | 20.1<br>(-5.9 to 58.4)                            | 1.1<br>(-19.2 to 30.9)                              |
| Pancreatic cancer                                  | 20.7<br>(17.8 to 24.2)                           | 20.2<br>(18.4 to 22.3)                         | 4.1<br>(2.9 to 5.5)                       | 29.4<br>(6.1 to 57.0)                             | 8.1<br>(-8.4 to 28.6)                               |
| Larynx cancer                                      | 16.0<br>(14.2 to 18.0)                           | 4.2<br>(3.8 to 4.7)                            | 1.8<br>(1.3 to 2.4)                       | 7.2<br>(-8.6 to 26.4)                             | -6.5<br>(-20.1 to 9.9)                              |
| Tracheal, bronchus, and lung cancer                | 102.2<br>(91.5 to 114.6)                         | 62.6<br>(57.5 to 68.2)                         | 15.1<br>(10.8 to 19.7)                    | 23.5<br>(5.6 to 44.2)                             | 7.2<br>(-8.3 to 25.2)                               |
| Malignant skin melanoma                            | 107.1<br>(79.2 to 121.4)                         | 21.7<br>(16.0 to 24.6)                         | 6.9<br>(4.4 to 9.9)                       | 35.3<br>(16.5 to 51.7)                            | 21.9<br>(5.6 to 36.4)                               |
| Non-melanoma skin cancer                           | 21.6<br>(18.7 to 25.0)                           | 43.6<br>(34.3 to 56.6)                         | 0.9<br>(0.6 to 1.3)                       | 171.3<br>(131.4 to 217.3)                         | 124.4<br>(93.1 to 161.4)                            |
| Non-melanoma skin cancer (squamous-cell carcinoma) | 18.9<br>(16.1 to 22.7)                           | 17.5<br>(15.5 to 19.4)                         | 0.9<br>(0.5 to 1.3)                       | 176.2<br>(134.7 to 225.3)                         | 128.0<br>(95.0 to 167.7)                            |
| Non-melanoma skin cancer (basal-cell carcinoma)    | 3.7<br>(2.3 to 6.3)                              | 26.2<br>(17.3 to 39.2)                         | < 0.05<br>(< 0.05 to 0.1)                 | 93.7<br>(35.0 to 181.7)                           | 69.7<br>(23.1 to 137.8)                             |
| Breast cancer                                      | 351.9<br>(326.6 to 383.4)                        | 72.7<br>(67.2 to 79.1)                         | 32.3<br>(23.2 to 43.1)                    | 9.0<br>(-1.3 to 19.7)                             | -3.2<br>(-12.4 to 6.8)                              |
| Cervical cancer                                    | 20.8<br>(18.1 to 24.2)                           | 5.2<br>(4.6 to 5.9)                            | 1.9<br>(1.3 to 2.6)                       | -3.4<br>(-17.8 to 13.8)                           | -7.7<br>(-23.1 to 12.1)                             |
| Uterine cancer                                     | 72.3<br>(63.0 to 83.2)                           | 15.4<br>(13.4 to 17.6)                         | 5.4<br>(3.7 to 7.4)                       | 27.4<br>(3.3 to 54.1)                             | 12.5<br>(-8.1 to 36.1)                              |
| Ovarian cancer                                     | 28.8<br>(25.3 to 32.5)                           | 9.1<br>(8.1 to 10.2)                           | 4.0<br>(2.7 to 5.4)                       | 3.1<br>(-21.6 to 32.9)                            | -9.1<br>(-30.6 to 15.9)                             |
| Prostate cancer                                    | 389.4<br>(318.3 to 479.3)                        | 92.9<br>(79.4 to 110.3)                        | 33.2<br>(22.9 to 45.4)                    | 27.0<br>(9.2 to 45.7)                             | 8.2<br>(-6.5 to 24.0)                               |
| Testicular cancer                                  | 22.5<br>(18.4 to 27.7)                           | 4.3<br>(3.5 to 5.2)                            | 1.5<br>(1.0 to 2.2)                       | 7.2<br>(-16.3 to 37.4)                            | 10.6<br>(-14.3 to 44.0)                             |
| Kidney cancer                                      | 70.7<br>(63.8 to 77.5)                           | 18.5<br>(16.9 to 20.1)                         | 6.0<br>(4.3 to 8.0)                       | 18.2<br>(2.0 to 37.1)                             | 2.7<br>(-10.8 to 18.8)                              |
| Bladder cancer                                     | 83.8<br>(76.2 to 91.7)                           | 20.1<br>(18.3 to 21.9)                         | 7.6<br>(5.5 to 10.3)                      | 24.7<br>(8.7 to 42.5)                             | 4.4<br>(-8.7 to 18.9)                               |
| Brain and nervous system cancer                    | 19.6<br>(14.1 to 23.7)                           | 8.3<br>(6.0 to 9.8)                            | 2.7<br>(1.7 to 3.6)                       | 22.7<br>(4.0 to 44.9)                             | 16.0<br>(-2.9 to 36.0)                              |
| Thyroid cancer                                     | 33.3<br>(30.0 to 37.2)                           | 6.4<br>(5.8 to 7.1)                            | 2.1<br>(1.5 to 3.0)                       | 27.8<br>(10.3 to 49.3)                            | 19.1<br>(2.7 to 39.9)                               |
| Mesothelioma                                       | 3.0<br>(2.7 to 3.5)                              | 2.0<br>(1.8 to 2.3)                            | 0.7<br>(0.4 to 0.9)                       | 19.4<br>(4.9 to 34.4)                             | 1.2<br>(-10.0 to 13.1)                              |
| Hodgkin lymphoma                                   | 12.1<br>(10.5 to 16.9)                           | 2.6<br>(2.3 to 3.6)                            | 1.0<br>(0.7 to 1.5)                       | 5.7<br>(-10.7 to 26.4)                            | 0.1<br>(-17.1 to 22.2)                              |
| Non-Hodgkin's lymphoma                             | 90.3<br>(80.0 to 100.1)                          | 22.2<br>(19.6 to 24.5)                         | 7.0<br>(5.0 to 9.6)                       | 42.3<br>(23.5 to 65.2)                            | 25.2<br>(10.0 to 42.3)                              |
| Multiple myeloma                                   | 24.6<br>(17.4 to 28.8)                           | 7.7<br>(5.6 to 8.9)                            | 4.1<br>(2.6 to 5.6)                       | 30.6<br>(3.1 to 62.9)                             | 11.0<br>(-12.3 to 38.4)                             |
| Leukaemia                                          | 42.9<br>(38.3 to 48.2)                           | 12.7<br>(11.5 to 14.2)                         | 5.6<br>(3.9 to 7.4)                       | 13.8<br>(-1.2 to 29.5)                            | -7.2<br>(-17.8 to 3.8)                              |
| Acute lymphoid leukaemia                           | 2.4<br>(2.0 to 2.7)                              | 0.6<br>(0.6 to 0.7)                            | 0.3<br>(0.2 to 0.4)                       | -1.6<br>(-14.6 to 12.6)                           | -5.3<br>(-22.7 to 17.1)                             |
| Chronic lymphoid leukaemia                         | 22.9<br>(19.5 to 26.6)                           | 5.3<br>(4.5 to 6.1)                            | 2.8<br>(1.9 to 3.8)                       | 21.8<br>(-2.5 to 51.7)                            | -1.3<br>(-19.7 to 19.9)                             |
| Acute myeloid leukaemia                            | 4.4<br>(3.6 to 5.2)                              | 3.2<br>(2.7 to 3.7)                            | 0.9<br>(0.6 to 1.2)                       | 19.8<br>(4.3 to 38.5)                             | -1.4<br>(-13.0 to 11.8)                             |
| Chronic myeloid leukaemia                          | 4.0<br>(3.3 to 4.8)                              | 1.4<br>(1.1 to 1.6)                            | 0.5<br>(0.3 to 0.7)                       | -5.9<br>(-22.1 to 13.7)                           | -23.6<br>(-34.9 to -10.5)                           |
| Other leukaemia                                    | 9.2<br>(7.8 to 11.1)                             | 2.1<br>(1.8 to 2.6)                            | 1.1<br>(0.8 to 1.6)                       | 6.5<br>(-13.5 to 30.6)                            | -16.8<br>(-30.5 to -0.7)                            |
| Other neoplasms                                    | 102.7<br>(86.1 to 118.6)                         | 26.7<br>(22.6 to 30.5)                         | 7.7<br>(5.5 to 10.6)                      | 37.9<br>(14.3 to 63.7)                            | 20.4<br>(1.1 to 40.2)                               |
| <b>Cardiovascular diseases</b>                     | <b>11,952.8</b><br><b>(11,494.7 to 12,426.8)</b> | <b>1,175.9†</b><br><b>(1,117.0 to 1,241.7)</b> | <b>800.6</b><br><b>(585.4 to 1,047.2)</b> | <b>10.8</b><br><b>(6.2 to 15.4)</b>               | <b>-5.0</b><br><b>(-8.5 to -1.3)</b>                |
| Rheumatic heart disease                            | 8.7<br>(7.8 to 9.7)                              | 5.4<br>(5.1 to 5.7)                            | 0.7<br>(0.5 to 1.0)                       | 6.4<br>(-15.0 to 33.5)                            | -7.1<br>(-22.0 to 11.3)                             |
| Ischaemic heart disease                            | 3,460.1<br>(3,178.9 to 3,746.8)                  | 384.9<br>(362.7 to 408.4)                      | 166.9<br>(117.3 to 227.0)                 | 7.0<br>(1.4 to 13.1)                              | -8.1<br>(-12.5 to -3.2)                             |
| Cerebrovascular disease                            | 1,681.4<br>(1,537.0 to 1,795.2)                  | 242.5‡<br>(221.8 to 265.2)                     | 267.5<br>(190.2 to 342.4)                 | 10.6<br>(0.6 to 20.5)                             | -6.0<br>(-13.8 to 1.6)                              |
| Ischaemic stroke                                   | 1,424.3<br>(1,245.7 to 1,607.5)                  | 175.7‡<br>(155.9 to 196.4)                     | 219.9<br>(154.5 to 282.7)                 | 9.4<br>(-2.8 to 20.8)                             | -7.4<br>(-17.0 to 1.4)                              |
| Hemorrhagic stroke                                 | 316.1<br>(280.1 to 355.3)                        | 66.8‡<br>(59.8 to 73.8)                        | 47.6<br>(34.5 to 61.8)                    | 16.5<br>(4.3 to 30.4)                             | 0.4<br>(-9.5 to 12.0)                               |
| Hypertensive heart disease                         | 466.9<br>(392.6 to 563.5)                        | --                                             | 37.0<br>(25.3 to 52.3)                    | 19.5<br>(7.2 to 32.6)                             | 0.0<br>(-10.4 to 10.2)                              |
| Cardiomyopathy and myocarditis                     | 234.0<br>(206.5 to 268.3)                        | 71.5†<br>(64.8 to 79.5)                        | 19.0<br>(12.8 to 27.3)                    | 13.4<br>(2.1 to 27.0)                             | -0.9<br>(-10.7 to 9.5)                              |
| Myocarditis                                        | 32.6<br>(29.8 to 35.5)                           | 71.5<br>(64.8 to 79.5)                         | 2.2<br>(1.4 to 3.1)                       | -0.7<br>(-15.0 to 15.5)                           | -4.9<br>(-18.9 to 10.6)                             |
| Alcoholic cardiomyopathy                           | 116.2<br>(97.1 to 137.8)                         | --                                             | 9.5<br>(6.4 to 13.7)                      | 10.9<br>(-4.1 to 29.2)                            | 0.5<br>(-13.2 to 16.6)                              |
| Other cardiomyopathy                               | 92.0<br>(76.7 to 111.3)                          | --                                             | 7.3<br>(4.9 to 10.7)                      | 22.2<br>(5.9 to 40.6)                             | -0.7<br>(-13.5 to 13.6)                             |
| Atrial fibrillation and flutter                    | 1,453.5<br>(1,249.3 to 1,690.2)                  | 116.5<br>(98.7 to 136.5)                       | 112.8<br>(76.1 to 157.3)                  | 16.4<br>(9.4 to 23.4)                             | -2.5<br>(-8.2 to 3.4)                               |
| Peripheral vascular disease                        | 4,092.2<br>(3,590.4 to 4,683.4)                  | 329.4<br>(281.2 to 385.2)                      | 16.0<br>(7.4 to 29.4)                     | 5.2<br>(-8.1 to 19.6)                             | -11.1<br>(-21.7 to 0.1)                             |
| Endocarditis                                       | 18.3<br>(15.3 to 21.9)                           | 25.7<br>(23.4 to 28.3)                         | 1.4<br>(0.9 to 2.0)                       | 16.4<br>(-6.1 to 44.6)                            | -3.1<br>(-19.5 to 16.4)                             |
| Other cardiovascular and circulatory diseases      | 3,483.9<br>(2,973.4 to 4,066.3)                  | --                                             | 179.3<br>(121.8 to 252.9)                 | 9.8<br>(0.9 to 19.2)                              | -3.1<br>(-10.3 to 4.1)                              |
| <b>Chronic respiratory diseases</b>                | <b>9,336.1</b><br><b>(9,068.1 to 9,608.2)</b>    | <b>728.1†</b><br><b>(697.8 to 760.3)</b>       | <b>347.6</b><br><b>(265.4 to 441.7)</b>   | <b>6.9</b><br><b>(0.8 to 13.3)</b>                | <b>1.3</b><br><b>(-3.6 to 6.5)</b>                  |
| Chronic obstructive pulmonary disease              | 5,050.3<br>(4,815.0 to 5,282.3)                  | 289.6<br>(273.6 to 305.2)                      | 154.1<br>(123.1 to 187.2)                 | 7.3<br>(-4.6 to 20.1)                             | -5.7<br>(-16.2 to 6.2)                              |
| Pneumoconiosis                                     | 1.9<br>(1.6 to 2.2)                              | 0.5<br>(0.5 to 0.6)                            | 0.3<br>(0.2 to 0.5)                       | -3.2<br>(-11.0 to 4.7)                            | -14.9<br>(-21.3 to -8.6)                            |
| Silicosis                                          | 1.4<br>(1.2 to 1.7)                              | 0.5<br>(0.4 to 0.6)                            | 0.2<br>(0.2 to 0.4)                       | -5.0<br>(-14.6 to 4.9)                            | -16.6<br>(-24.8 to -8.2)                            |



| Cause                                                          | Prevalence in thousands (95% UI)           | Incidence in thousands (95% UI)            | YLDs in thousands (95% UI)              |                                                   |                                                     |
|----------------------------------------------------------------|--------------------------------------------|--------------------------------------------|-----------------------------------------|---------------------------------------------------|-----------------------------------------------------|
|                                                                | 2016 counts                                | 2016 counts                                | 2016 counts                             | Percentage change in counts between 2006 and 2016 | Percentage change in age-standardised rates between |
| Asbestosis                                                     | 0.3<br>(0.3 to 0.4)                        | < 0.05<br>(< 0.05 to < 0.05)               | 0.1<br>(< 0.05 to 0.1)                  | 0.8<br>(-8.2 to 10.7)                             | -11.4<br>(-19.3 to -2.5)                            |
| Coal workers pneumoconiosis                                    | 0.1<br>(0.1 to 0.3)                        | < 0.05<br>(< 0.05 to < 0.05)               | < 0.05<br>(< 0.05 to < 0.05)            | 11.4<br>(-2.4 to 24.7)                            | -1.9<br>(-14.1 to 10.5)                             |
| Other pneumoconiosis                                           | < 0.05<br>(< 0.05 to < 0.05)               | < 0.05<br>(< 0.05 to < 0.05)               | < 0.05<br>(< 0.05 to < 0.05)            | 10.7<br>(-0.9 to 25.9)                            | -6.5<br>(-15.8 to 4.4)                              |
| Asthma                                                         | 4,720.9<br>(4,457.3 to 5,024.1)            | 431.0<br>(404.3 to 459.7)                  | 181.7<br>(120.7 to 257.8)               | 5.9<br>(1.1 to 10.7)                              | 4.7<br>(-0.4 to 9.7)                                |
| Interstitial lung disease and pulmonary sarcoidosis            | 70.0<br>(63.0 to 77.3)                     | 7.0<br>(6.4 to 7.6)                        | 7.5<br>(5.0 to 10.9)                    | 18.3<br>(3.9 to 35.5)                             | 2.3<br>(-8.6 to 14.1)                               |
| Other chronic respiratory diseases                             | --                                         | --                                         | 4.0<br>(3.2 to 4.9)                     | 22.7<br>(7.7 to 38.7)                             | 24.8<br>(6.7 to 46.0)                               |
| <b>Cirrhosis and other chronic liver diseases</b>              | <b>1,111.0<br/>(1,059.0 to 1,164.9)</b>    | <b>23.4<br/>(22.5 to 24.3)</b>             | <b>22.2<br/>(15.2 to 30.9)</b>          | <b>6.2<br/>(-2.7 to 16.4)</b>                     | <b>0.0<br/>(-8.7 to 9.9)</b>                        |
| Cirrhosis and other chronic liver diseases due to hepatitis B  | 148.7<br>(117.1 to 185.0)                  | 3.2<br>(2.6 to 3.9)                        | 2.9<br>(1.8 to 4.3)                     | 7.8<br>(-14.9 to 36.6)                            | 0.4<br>(-20.1 to 25.1)                              |
| Cirrhosis and other chronic liver diseases due to hepatitis C  | 322.8<br>(247.0 to 409.9)                  | 6.5<br>(5.0 to 8.1)                        | 6.1<br>(3.9 to 9.1)                     | 8.7<br>(-9.2 to 28.9)                             | 1.5<br>(-14.8 to 20.1)                              |
| Cirrhosis and other chronic liver diseases due to alcohol use  | 549.5<br>(473.7 to 628.5)                  | 11.8<br>(10.2 to 13.3)                     | 10.4<br>(6.9 to 14.9)                   | 5.4<br>(-7.4 to 20.2)                             | -3.0<br>(-15.2 to 10.5)                             |
| Cirrhosis and other chronic liver diseases due to other causes | 90.0<br>(69.4 to 117.3)                    | 1.9<br>(1.6 to 2.5)                        | 2.8<br>(1.8 to 4.1)                     | 1.9<br>(-18.8 to 28.3)                            | 4.1<br>(-17.9 to 32.9)                              |
| <b>Digestive diseases</b>                                      | <b>3,198.8<br/>(3,015.8 to 3,409.6)</b>    | <b>3,573.9†<br/>(3,340.6 to 3,818.3)</b>   | <b>81.4<br/>(57.5 to 109.0)</b>         | <b>6.9<br/>(0.6 to 13.4)</b>                      | <b>-0.4<br/>(-6.2 to 6.0)</b>                       |
| Peptic ulcer disease                                           | 542.9<br>(501.6 to 588.4)                  | 127.1<br>(115.0 to 141.4)                  | 4.8<br>(3.0 to 7.5)                     | 7.5<br>(-7.7 to 23.7)                             | 2.0<br>(-11.7 to 17.7)                              |
| Gastritis and duodenitis                                       | 1,714.3<br>(1,506.1 to 1,945.5)            | 1,155.1<br>(1,022.5 to 1,298.7)            | 9.2<br>(5.8 to 14.1)                    | 19.1<br>(5.7 to 34.9)                             | 10.3<br>(-1.7 to 23.9)                              |
| Appendicitis                                                   | 4.4<br>(4.1 to 4.7)                        | 113.9<br>(105.9 to 122.7)                  | 1.4<br>(0.9 to 2.0)                     | -2.2<br>(-24.0 to 27.4)                           | 1.0<br>(-27.5 to 42.4)                              |
| Paralytic ileus and intestinal obstruction                     | 3.0<br>(2.6 to 3.3)                        | 82.3<br>(74.5 to 90.4)                     | 0.9<br>(0.6 to 1.3)                     | 15.5<br>(2.7 to 30.7)                             | 4.6<br>(-2.4 to 12.3)                               |
| Inguinal, femoral, and abdominal hernia                        | 591.5<br>(534.5 to 653.3)                  | 1,171.9<br>(1,005.5 to 1,333.5)            | 38.0<br>(25.8 to 52.3)                  | 4.9<br>(-4.7 to 15.2)                             | -2.3<br>(-11.1 to 7.6)                              |
| Inflammatory bowel disease                                     | 95.5<br>(89.9 to 101.4)                    | 23.5<br>(22.9 to 24.2)                     | 13.7<br>(9.2 to 18.7)                   | 0.4<br>(-12.2 to 13.6)                            | -3.8<br>(-15.7 to 9.8)                              |
| Vascular intestinal disorders                                  | 5.8<br>(5.2 to 6.4)                        | 28.1<br>(25.1 to 31.4)                     | 1.7<br>(1.1 to 2.4)                     | 18.1<br>(-9.2 to 55.9)                            | 1.8<br>(-18.0 to 29.6)                              |
| Gallbladder and biliary diseases                               | 330.6<br>(293.7 to 369.1)                  | 787.0<br>(691.6 to 886.7)                  | 3.9<br>(2.6 to 5.5)                     | 10.6<br>(-7.7 to 31.6)                            | 1.6<br>(-14.6 to 20.4)                              |
| Pancreatitis                                                   | 9.6<br>(8.6 to 10.5)                       | 85.0<br>(77.0 to 93.7)                     | 1.2<br>(0.8 to 1.8)                     | 6.0<br>(1.0 to 11.0)                              | -2.7<br>(-6.4 to 1.2)                               |
| Other digestive diseases                                       | --                                         | --                                         | 6.6<br>(4.7 to 8.8)                     | 14.0<br>(7.7 to 20.7)                             | 3.9<br>(-2.5 to 10.9)                               |
| <b>Neurological disorders</b>                                  | <b>31,466.1<br/>(30,394.7 to 32,858.4)</b> | <b>11,628.7<br/>(10,071.2 to 13,292.6)</b> | <b>1,061.3<br/>(726.2 to 1,423.5)</b>   | <b>3.6<br/>(-11.7 to 22.5)</b>                    | <b>0.2<br/>(-16.4 to 21.7)</b>                      |
| Alzheimer's disease and other dementias                        | 1,201.7<br>(996.4 to 1,425.8)              | 226.8<br>(183.3 to 275.2)                  | 181.1<br>(124.2 to 241.5)               | 20.1<br>(7.6 to 28.9)                             | -6.1<br>(-15.4 to 0.6)                              |
| Parkinson's disease                                            | 162.2<br>(126.4 to 204.0)                  | 19.8<br>(15.4 to 25.6)                     | 18.7<br>(11.7 to 26.8)                  | 24.6<br>(12.0 to 39.1)                            | 2.9<br>(-8.0 to 15.7)                               |
| Epilepsy                                                       | 429.4<br>(109.6 to 761.7)                  | 32.9<br>(8.2 to 58.9)                      | 101.0<br>(18.6 to 244.5)                | 10.1<br>(-78.6 to 478.2)                          | 6.2<br>(-79.5 to 461.1)                             |
| Multiple sclerosis                                             | 112.0<br>(100.7 to 123.2)                  | 2.2<br>(2.0 to 2.4)                        | 28.6<br>(20.2 to 38.0)                  | 9.9<br>(-3.3 to 25.3)                             | 6.7<br>(-6.8 to 22.9)                               |
| Motor neuron disease                                           | 12.5<br>(11.4 to 13.7)                     | 2.2<br>(2.1 to 2.3)                        | 2.7<br>(1.9 to 3.5)                     | 15.5<br>(10.3 to 20.7)                            | 6.2<br>(2.2 to 10.3)                                |
| Migraine                                                       | 14,731.0<br>(14,105.0 to 15,352.8)         | 1,205.3<br>(1,145.3 to 1,268.9)            | 620.7<br>(401.7 to 869.2)               | -2.0<br>(-4.7 to 0.9)                             | -0.8<br>(-3.9 to 2.4)                               |
| Tension-type headache                                          | 20,673.3<br>(18,543.3 to 22,985.2)         | 10,138.6<br>(8,605.8 to 11,812.2)          | 87.5<br>(55.7 to 128.3)                 | -0.5<br>(-6.1 to 5.1)                             | -0.2<br>(-5.4 to 5.3)                               |
| Other neurological disorders                                   | 0.5<br>(0.3 to 0.6)                        | 0.9<br>(0.6 to 1.2)                        | 21.1<br>(9.4 to 41.4)                   | 20.5<br>(-55.3 to 224.0)                          | 24.8<br>(-61.9 to 296.2)                            |
| <b>Mental and substance use disorders</b>                      | <b>14,045.1<br/>(13,620.4 to 14,514.3)</b> | <b>4,837.9†<br/>(4,523.4 to 5,180.4)</b>   | <b>1,940.4<br/>(1,404.4 to 2,519.0)</b> | <b>0.4<br/>(-1.9 to 2.9)</b>                      | <b>-0.4<br/>(-2.9 to 1.9)</b>                       |
| Schizophrenia                                                  | 222.9<br>(197.2 to 252.0)                  | 9.8<br>(8.6 to 11.2)                       | 140.4<br>(105.2 to 173.4)               | 0.7<br>(-7.1 to 9.1)                              | -0.5<br>(-8.6 to 8.0)                               |
| Alcohol use disorders                                          | 1,452.0<br>(1,307.8 to 1,618.0)            | 493.0<br>(427.4 to 567.9)                  | 144.1<br>(100.6 to 199.1)               | -9.6<br>(-17.6 to -0.8)                           | -10.8<br>(-19.2 to -1.4)                            |
| Drug use disorders                                             | 646.2<br>(611.7 to 686.8)                  | 79.0<br>(72.5 to 85.4)                     | 119.0<br>(85.7 to 154.6)                | 5.8<br>(-4.2 to 16.4)                             | 6.3<br>(-4.6 to 18.0)                               |
| Opioid use disorders                                           | 154.7<br>(133.6 to 179.3)                  | 20.6<br>(17.7 to 23.9)                     | 63.5<br>(43.6 to 84.9)                  | 3.9<br>(-10.2 to 19.4)                            | 2.0<br>(-12.8 to 19.6)                              |
| Cocaine use disorders                                          | 111.4<br>(98.4 to 125.7)                   | 5.9<br>(5.0 to 7.0)                        | 15.0<br>(9.2 to 21.8)                   | 14.6<br>(-4.7 to 36.7)                            | 17.7<br>(-3.1 to 42.5)                              |
| Amphetamine use disorders                                      | 69.0<br>(50.2 to 92.4)                     | 6.4<br>(4.7 to 8.5)                        | 9.1<br>(5.1 to 14.5)                    | 8.2<br>(-22.6 to 47.2)                            | 12.3<br>(-21.8 to 55.6)                             |
| Cannabis use disorders                                         | 250.6<br>(220.0 to 278.9)                  | 34.6<br>(30.0 to 39.5)                     | 7.3<br>(4.7 to 10.8)                    | -4.0<br>(-17.1 to 11.5)                           | -1.0<br>(-15.2 to 15.9)                             |
| Other drug use disorders                                       | 77.9<br>(70.8 to 85.5)                     | 11.5<br>(10.4 to 12.6)                     | 24.1<br>(15.8 to 33.5)                  | 8.3<br>(-10.9 to 30.6)                            | 11.5<br>(-9.7 to 37.2)                              |
| Depressive disorders                                           | 3,755.2<br>(3,539.0 to 4,022.1)            | 3,450.3<br>(3,140.7 to 3,769.0)            | 590.2<br>(408.0 to 796.3)               | 3.1<br>(-2.0 to 8.2)                              | 0.4<br>(-4.1 to 5.1)                                |
| Major depressive disorder                                      | 2,138.3<br>(1,953.8 to 2,330.8)            | 3,237.4<br>(2,930.6 to 3,551.7)            | 430.1<br>(294.2 to 586.2)               | 2.9<br>(-3.4 to 9.8)                              | 0.6<br>(-5.5 to 6.4)                                |
| Dysthymia                                                      | 1,689.0<br>(1,478.3 to 1,933.7)            | 212.9<br>(186.5 to 242.5)                  | 160.1<br>(104.9 to 231.6)               | 3.5<br>(-2.9 to 10.6)                             | 0.1<br>(-5.8 to 6.7)                                |
| Bipolar disorder                                               | 666.3<br>(594.2 to 745.9)                  | 43.3<br>(38.5 to 48.4)                     | 134.1<br>(83.3 to 197.3)                | 0.4<br>(-6.6 to 7.5)                              | -0.1<br>(-7.8 to 7.4)                               |
| Anxiety disorders                                              | 4,760.6<br>(4,354.2 to 5,221.4)            | 541.9<br>(502.9 to 583.5)                  | 451.4<br>(314.5 to 608.7)               | 0.1<br>(-6.4 to 6.0)                              | -0.9<br>(-7.5 to 5.3)                               |
| Eating disorders                                               | 265.3<br>(223.6 to 314.1)                  | 59.5<br>(45.9 to 75.3)                     | 55.6<br>(36.1 to 78.8)                  | -1.9<br>(-10.1 to 7.2)                            | 5.5<br>(-3.1 to 14.5)                               |
| Anorexia nervosa                                               | 92.1<br>(69.0 to 119.6)                    | 13.1<br>(9.7 to 17.2)                      | 19.5<br>(12.0 to 28.8)                  | -1.1<br>(-14.0 to 14.8)                           | 4.5<br>(-9.6 to 20.8)                               |
| Bulimia nervosa                                                | 171.9<br>(132.4 to 220.5)                  | 46.4<br>(33.6 to 61.7)                     | 36.1<br>(22.2 to 51.8)                  | -2.2<br>(-12.1 to 9.0)                            | 6.0<br>(-4.3 to 17.4)                               |
| Autistic spectrum disorders                                    | 597.3<br>(538.3 to 664.2)                  | 2.1<br>(1.5 to 2.9)                        | 95.1<br>(64.1 to 134.2)                 | 0.4<br>(-4.4 to 5.4)                              | 0.6<br>(-4.5 to 5.9)                                |
| Autism                                                         | 238.1<br>(202.4 to 278.2)                  | 0.2<br>(0.1 to 0.4)                        | 59.5<br>(38.1 to 86.7)                  | 0.7<br>(-6.6 to 8.1)                              | 0.6<br>(-7.1 to 8.4)                                |
| Asperger syndrome and other autistic spectrum disorders        | 361.6<br>(298.8 to 434.1)                  | 1.9<br>(1.3 to 2.7)                        | 35.7<br>(23.2 to 52.2)                  | -0.0<br>(-4.8 to 5.1)                             | 0.5<br>(-4.5 to 6.0)                                |



| Cause                                                      | Prevalence in thousands (95% UI)                 | Incidence in thousands (95% UI)                      | YLDs in thousands (95% UI)                    |                                                   |                                                     |
|------------------------------------------------------------|--------------------------------------------------|------------------------------------------------------|-----------------------------------------------|---------------------------------------------------|-----------------------------------------------------|
|                                                            | 2016 counts                                      | 2016 counts                                          | 2016 counts                                   | Percentage change in counts between 2006 and 2016 | Percentage change in age-standardised rates between |
| Attention-deficit/hyperactivity disorder                   | 265.9<br>(223.0 to 315.3)                        | 12.6<br>(10.3 to 15.6)                               | 3.2<br>(1.9 to 5.2)                           | -6.4<br>(-19.0 to 8.2)                            | 0.7<br>(-13.0 to 15.7)                              |
| Conduct disorder                                           | 343.6<br>(259.7 to 431.1)                        | 105.7<br>(78.6 to 131.4)                             | 41.9<br>(24.8 to 64.6)                        | -11.0<br>(-16.3 to -5.3)                          | 0.3<br>(-5.7 to 6.7)                                |
| Idiopathic developmental intellectual disability           | 341.0<br>(141.9 to 552.7)                        | --                                                   | 17.4<br>(7.8 to 30.2)                         | -3.1<br>(-11.2 to 6.4)                            | -2.3<br>(-10.7 to 7.1)                              |
| Other mental and substance use disorders                   | 2,023.8<br>(1,767.7 to 2,340.3)                  | 40.7<br>(36.2 to 45.8)                               | 148.0<br>(103.0 to 207.7)                     | 3.0<br>(-1.2 to 7.5)                              | 0.2<br>(-4.0 to 4.6)                                |
| <b>Diabetes, urogenital, blood, and endocrine diseases</b> | <b>29,220.7</b><br><b>(28,367.9 to 30,105.8)</b> | <b>8,598.1†</b><br><b>(8,135.0 to 9,149.8)</b>       | <b>808.4</b><br><b>(577.1 to 1,075.5)</b>     | <b>9.8</b><br><b>(5.2 to 14.9)</b>                | <b>-0.9</b><br><b>(-5.0 to 3.3)</b>                 |
| Diabetes mellitus                                          | 5,450.7<br>(4,931.9 to 5,934.6)                  | 265.9<br>(240.0 to 291.7)                            | 407.8<br>(284.0 to 554.9)                     | 10.3<br>(1.8 to 19.2)                             | -1.2<br>(-8.7 to 6.9)                               |
| Acute glomerulonephritis                                   | 1.0<br>(0.9 to 1.2)                              | 15.2<br>(13.4 to 17.3)                               | 0.1<br>(< 0.05 to 0.1)                        | 4.0<br>(-1.1 to 8.9)                              | -0.5<br>(-4.3 to 3.6)                               |
| Chronic kidney disease                                     | 4,167.3<br>(3,652.4 to 4,612.8)                  | 368.7<br>(317.0 to 426.4)                            | 101.0<br>(75.1 to 128.3)                      | 7.0<br>(-1.8 to 16.4)                             | -7.2<br>(-14.2 to -0.2)                             |
| Chronic kidney disease due to diabetes mellitus            | 1,667.2<br>(1,380.0 to 1,969.8)                  | 154.2<br>(124.1 to 185.8)                            | 40.5<br>(29.3 to 53.1)                        | 1.7<br>(-13.0 to 17.2)                            | -11.4<br>(-23.3 to 1.4)                             |
| Chronic kidney disease due to hypertension                 | 730.8<br>(593.9 to 865.5)                        | 75.2<br>(57.5 to 97.3)                               | 11.6<br>(7.8 to 15.7)                         | 10.7<br>(-10.7 to 35.1)                           | -10.8<br>(-26.9 to 7.2)                             |
| Chronic kidney disease due to glomerulonephritis           | 671.5<br>(545.8 to 800.9)                        | 43.6<br>(33.5 to 57.7)                               | 22.1<br>(15.7 to 29.9)                        | 7.9<br>(-12.1 to 30.6)                            | -4.3<br>(-20.9 to 13.6)                             |
| Chronic kidney disease due to other causes                 | 1,097.9<br>(852.9 to 1,347.0)                    | 95.7<br>(73.8 to 120.5)                              | 26.8<br>(19.0 to 35.5)                        | 13.4<br>(-5.5 to 36.6)                            | -1.8<br>(-16.3 to 15.8)                             |
| Urinary diseases and male infertility                      | 3,216.8<br>(2,837.2 to 3,593.2)                  | 4,993.6†<br>(4,525.6 to 5,507.3)                     | 104.1<br>(68.6 to 147.8)                      | 16.2<br>(8.1 to 24.2)                             | 2.1<br>(-4.8 to 9.0)                                |
| Interstitial nephritis and urinary tract infections        | 65.1<br>(56.7 to 73.8)                           | 3,395.1<br>(2,960.1 to 3,861.4)                      | 2.1<br>(1.3 to 3.2)                           | -0.3<br>(-14.9 to 15.8)                           | 0.3<br>(-14.4 to 17.5)                              |
| Urolithiasis                                               | 48.8<br>(43.6 to 55.5)                           | 1,288.9<br>(1,146.2 to 1,460.4)                      | 3.5<br>(2.3 to 5.0)                           | 8.5<br>(-8.8 to 31.7)                             | 2.6<br>(-12.7 to 22.2)                              |
| Benign prostatic hyperplasia                               | 2,940.6<br>(2,503.3 to 3,361.8)                  | 309.6<br>(259.4 to 363.3)                            | 95.9<br>(63.0 to 137.3)                       | 18.1<br>(9.1 to 27.0)                             | 2.9<br>(-4.9 to 10.8)                               |
| Male infertility                                           | 94.7<br>(68.3 to 129.9)                          | --                                                   | 0.6<br>(0.2 to 1.2)                           | -17.2<br>(-27.3 to -6.2)                          | -0.5<br>(-10.9 to 10.7)                             |
| Other urinary diseases                                     | --                                               | --                                                   | 1.9<br>(1.3 to 2.6)                           | -13.1<br>(-23.2 to -0.8)                          | -14.8<br>(-24.4 to -3.3)                            |
| Gynecological diseases                                     | 12,036.9<br>(11,350.9 to 12,818.8)               | 2,407.6†<br>(2,287.0 to 2,534.6)                     | 91.4<br>(61.0 to 136.1)                       | -0.8<br>(-5.6 to 4.1)                             | -0.6<br>(-5.2 to 4.3)                               |
| Uterine fibroids                                           | 1,241.9<br>(1,093.4 to 1,398.0)                  | 93.6<br>(79.2 to 109.0)                              | 11.7<br>(6.1 to 21.2)                         | -1.6<br>(-8.1 to 4.8)                             | -1.9<br>(-8.5 to 4.9)                               |
| Polycystic ovarian syndrome                                | 20.0<br>(15.2 to 25.7)                           | 65.7<br>(45.3 to 91.3)                               | 0.2<br>(0.1 to 0.4)                           | -14.4<br>(-32.3 to 7.3)                           | -1.1<br>(-21.3 to 24.1)                             |
| Female infertility                                         | 125.6<br>(73.4 to 191.3)                         | --                                                   | 0.8<br>(0.3 to 1.6)                           | -12.5<br>(-24.2 to 5.5)                           | 7.4<br>(-5.5 to 23.9)                               |
| Endometriosis                                              | 45.5<br>(37.8 to 54.6)                           | 124.6<br>(100.6 to 153.5)                            | 4.2<br>(2.8 to 6.2)                           | -6.1<br>(-25.5 to 17.5)                           | -0.9<br>(-21.1 to 23.7)                             |
| Genital prolapse                                           | 7,090.0<br>(6,148.3 to 8,055.9)                  | 295.2<br>(248.0 to 349.9)                            | 21.9<br>(10.7 to 38.9)                        | 14.6<br>(4.4 to 27.8)                             | 2.0<br>(-6.8 to 13.3)                               |
| Premenstrual syndrome                                      | 4,088.9<br>(3,855.2 to 4,312.4)                  | 1,323.3<br>(1,237.0 to 1,405.9)                      | 33.9<br>(21.2 to 52.2)                        | -5.7<br>(-12.6 to 2.1)                            | -1.0<br>(-8.3 to 6.9)                               |
| Other gynecological diseases                               | 575.1<br>(507.1 to 651.9)                        | 505.2<br>(437.7 to 581.4)                            | 18.7<br>(12.5 to 26.3)                        | -4.5<br>(-14.5 to 6.0)                            | -1.2<br>(-11.4 to 9.4)                              |
| Hemoglobinopathies and hemolytic anaemias                  | 9,671.6<br>(8,995.6 to 10,306.2)                 | --                                                   | 6.5<br>(4.2 to 9.8)                           | 6.6<br>(-4.2 to 18.6)                             | 4.2<br>(-9.1 to 20.3)                               |
| Thalassemias                                               | 0.3<br>(0.2 to 0.4)                              | --                                                   | < 0.05<br>(< 0.05 to < 0.05)                  | -6.2<br>(-25.8 to 17.8)                           | -0.8<br>(-24.0 to 27.8)                             |
| Thalassaemias trait                                        | 546.5<br>(505.2 to 593.5)                        | --                                                   | 3.3<br>(2.0 to 5.0)                           | 10.3<br>(-5.3 to 29.2)                            | 10.0<br>(-6.7 to 31.1)                              |
| Sickle cell disorders                                      | < 0.05<br>(< 0.05 to < 0.05)                     | --                                                   | < 0.05<br>(< 0.05 to < 0.05)                  | -11.9<br>(-34.2 to 15.2)                          | -8.2<br>(-31.0 to 21.0)                             |
| Sickle cell trait                                          | 171.3<br>(152.4 to 184.7)                        | --                                                   | 0.2<br>(0.1 to 0.3)                           | 7.0<br>(-20.6 to 45.9)                            | 16.5<br>(-17.2 to 66.1)                             |
| G6PD deficiency                                            | 1,406.6<br>(1,167.8 to 1,674.2)                  | --                                                   | 0.1<br>(0.1 to 0.1)                           | 23.7<br>(7.6 to 42.2)                             | 21.2<br>(1.8 to 44.6)                               |
| G6PD trait                                                 | 7,532.3<br>(6,931.4 to 8,137.6)                  | --                                                   | < 0.05<br>(< 0.05 to < 0.05)                  | 5.8<br>(-9.8 to 23.4)                             | 2.9<br>(-13.1 to 23.4)                              |
| Other hemoglobinopathies and hemolytic anaemias            | 168.3<br>(152.3 to 187.7)                        | --                                                   | 3.0<br>(1.9 to 4.3)                           | 2.4<br>(-8.9 to 14.5)                             | -2.8<br>(-17.8 to 13.9)                             |
| Endocrine, metabolic, blood, and immune disorders          | 2,871.1<br>(2,604.7 to 3,162.8)                  | 547.2<br>(487.3 to 616.0)                            | 97.7<br>(66.6 to 135.2)                       | 15.7<br>(8.8 to 22.1)                             | 3.0<br>(-2.3 to 8.8)                                |
| <b>Musculoskeletal disorders</b>                           | <b>24,620.5</b><br><b>(23,556.3 to 25,853.5)</b> | <b>11,860.7</b><br><b>(10,777.5 to 13,149.0)</b>     | <b>2,673.3</b><br><b>(1,943.7 to 3,464.0)</b> | <b>4.7</b><br><b>(1.2 to 8.1)</b>                 | <b>-1.9</b><br><b>(-5.1 to 1.2)</b>                 |
| Rheumatoid arthritis                                       | 428.3<br>(383.3 to 475.6)                        | 19.2<br>(17.0 to 21.5)                               | 99.0<br>(67.2 to 131.1)                       | 6.0<br>(-1.9 to 14.3)                             | -2.1<br>(-9.2 to 5.7)                               |
| Osteoarthritis                                             | 7,443.5<br>(6,783.2 to 8,214.6)                  | 309.2<br>(275.9 to 347.6)                            | 258.6<br>(166.3 to 376.9)                     | 14.0<br>(10.2 to 17.8)                            | 0.9<br>(-2.3 to 4.2)                                |
| Low back and neck pain                                     | 16,630.1<br>(15,634.2 to 17,831.7)               | 7,159.4<br>(6,307.5 to 8,115.8)                      | 2,009.1<br>(1,421.5 to 2,643.1)               | 3.4<br>(-1.0 to 7.8)                              | -2.9<br>(-6.8 to 1.0)                               |
| Low back pain                                              | 12,726.4<br>(11,347.1 to 14,312.8)               | 6,172.8<br>(5,322.8 to 7,153.0)                      | 1,429.9<br>(1,016.8 to 1,888.3)               | 2.6<br>(-3.5 to 8.4)                              | -3.9<br>(-9.2 to 1.6)                               |
| Neck pain                                                  | 5,879.6<br>(5,079.2 to 6,727.7)                  | 986.7<br>(855.8 to 1,153.5)                          | 579.1<br>(395.2 to 807.8)                     | 5.5<br>(2.6 to 8.5)                               | -0.1<br>(-1.9 to 1.5)                               |
| Gout                                                       | 1,015.1<br>(893.4 to 1,154.1)                    | 161.9<br>(139.8 to 184.8)                            | 31.5<br>(21.2 to 43.4)                        | 11.3<br>(-1.0 to 24.4)                            | 0.8<br>(-9.9 to 13.1)                               |
| Other musculoskeletal disorders                            | 3,246.7<br>(2,564.8 to 4,098.7)                  | 4,211.0<br>(3,536.5 to 5,135.7)                      | 275.2<br>(178.8 to 402.2)                     | 5.5<br>(-4.7 to 17.4)                             | 2.6<br>(-6.4 to 12.5)                               |
| <b>Other non-communicable diseases</b>                     | <b>64,835.2</b><br><b>(64,110.2 to 65,611.2)</b> | <b>190,960.4†</b><br><b>(181,420.1 to 200,571.8)</b> | <b>2,194.9</b><br><b>(1,519.1 to 3,079.7)</b> | <b>7.1</b><br><b>(5.8 to 8.6)</b>                 | <b>0.1</b><br><b>(-1.2 to 1.3)</b>                  |
| Congenital anomalies                                       | 1,246.6<br>(1,137.6 to 1,372.3)                  | --                                                   | 115.8<br>(82.9 to 153.2)                      | -4.5<br>(-9.3 to 0.0)                             | -4.7<br>(-9.3 to -0.1)                              |
| Neural tube defects                                        | 41.9<br>(37.8 to 46.0)                           | --                                                   | 12.4<br>(8.6 to 16.6)                         | -14.2<br>(-26.3 to -0.7)                          | -14.9<br>(-27.8 to -0.7)                            |
| Congenital heart anomalies                                 | 238.1<br>(214.0 to 265.2)                        | --                                                   | 12.8<br>(5.3 to 22.1)                         | 2.9<br>(-6.4 to 13.1)                             | 2.2<br>(-7.7 to 12.4)                               |
| Orofacial clefts                                           | 53.4<br>(47.4 to 59.4)                           | --                                                   | 0.5<br>(0.3 to 0.8)                           | -1.7<br>(-13.3 to 11.9)                           | -3.0<br>(-14.2 to 10.1)                             |
| Down's syndrome                                            | 28.3<br>(25.3 to 31.9)                           | --                                                   | 2.7<br>(1.8 to 3.7)                           | -6.7<br>(-13.3 to -0.2)                           | -2.6<br>(-9.9 to 4.4)                               |
| Turner syndrome                                            | 27.8<br>(24.4 to 31.3)                           | --                                                   | 0.5<br>(0.2 to 0.8)                           | -6.7<br>(-30.2 to 28.9)                           | -2.2<br>(-28.8 to 36.2)                             |
| Klinefelter syndrome                                       | 58.6<br>(51.0 to 66.7)                           | --                                                   | 0.4<br>(0.2 to 0.7)                           | -14.9<br>(-29.4 to 1.2)                           | -9.7<br>(-24.5 to 6.8)                              |

| Cause                                         | Prevalence in thousands (95% UI)                 | Incidence in thousands (95% UI)                | YLDs in thousands (95% UI)                |                                                   |                                                     |
|-----------------------------------------------|--------------------------------------------------|------------------------------------------------|-------------------------------------------|---------------------------------------------------|-----------------------------------------------------|
|                                               | 2016 counts                                      | 2016 counts                                    | 2016 counts                               | Percentage change in counts between 2006 and 2016 | Percentage change in age-standardised rates between |
| Other chromosomal abnormalities               | 44.3<br>(37.7 to 50.8)                           | --                                             | 4.7<br>(3.1 to 6.5)                       | -10.1<br>(-25.4 to 7.9)                           | -1.5<br>(-18.4 to 17.5)                             |
| Congenital musculoskeletal and limb anomalies | 288.7<br>(264.4 to 314.6)                        | --                                             | 38.5<br>(26.0 to 52.3)                    | -4.6<br>(-12.5 to 3.6)                            | -6.0<br>(-14.1 to 2.2)                              |
| Urogenital congenital anomalies               | 120.2<br>(108.1 to 132.5)                        | --                                             | 2.5<br>(1.4 to 4.1)                       | -9.4<br>(-18.2 to -0.4)                           | -9.2<br>(-18.6 to 1.7)                              |
| Digestive congenital anomalies                | 153.5<br>(137.5 to 171.8)                        | --                                             | 6.7<br>(4.3 to 9.5)                       | -5.5<br>(-16.3 to 7.9)                            | -6.0<br>(-17.3 to 7.3)                              |
| Other congenital anomalies                    | 372.6<br>(263.3 to 507.6)                        | --                                             | 34.2<br>(22.5 to 51.7)                    | -1.4<br>(-10.4 to 8.6)                            | -2.1<br>(-11.3 to 7.8)                              |
| Skin and subcutaneous diseases                | 28,680.6<br>(28,046.3 to 29,250.0)               | 71,012.2<br>(66,756.6 to 75,671.9)             | 675.6<br>(465.3 to 964.8)                 | 2.1<br>(0.1 to 3.9)                               | 1.9<br>(-0.1 to 3.9)                                |
| Dermatitis                                    | 3,735.8<br>(3,589.2 to 3,893.9)                  | 4,851.4<br>(4,482.2 to 5,237.5)                | 133.8<br>(79.9 to 216.2)                  | 0.6<br>(-3.2 to 4.5)                              | 0.8<br>(-3.3 to 5.4)                                |
| Psoriasis                                     | 1,723.1<br>(1,654.9 to 1,790.1)                  | 146.2<br>(140.0 to 152.3)                      | 146.7<br>(103.9 to 191.1)                 | 7.2<br>(2.0 to 12.6)                              | 3.5<br>(-2.0 to 9.0)                                |
| Cellulitis                                    | 47.7<br>(44.9 to 51.0)                           | 1,068.4<br>(1,003.4 to 1,135.4)                | 2.6<br>(1.7 to 3.7)                       | 5.8<br>(-13.7 to 26.7)                            | 0.6<br>(-18.5 to 21.2)                              |
| Pyoderma                                      | 430.3<br>(417.9 to 443.8)                        | 12,162.6<br>(11,764.6 to 12,584.5)             | 2.4<br>(1.0 to 4.9)                       | 8.6<br>(3.0 to 14.5)                              | 0.4<br>(-5.2 to 6.3)                                |
| Scabies                                       | 85.6<br>(75.4 to 97.7)                           | 248.8<br>(219.1 to 283.4)                      | 2.2<br>(1.2 to 3.5)                       | -3.4<br>(-13.4 to 7.4)                            | -0.9<br>(-11.4 to 11.3)                             |
| Fungal skin diseases                          | 6,998.6<br>(6,167.5 to 7,915.5)                  | 27,879.2<br>(23,971.7 to 32,186.0)             | 38.2<br>(15.3 to 80.3)                    | 10.4<br>(8.5 to 12.2)                             | 0.1<br>(-1.1 to 1.3)                                |
| Viral skin diseases                           | 2,187.7<br>(1,884.5 to 2,547.7)                  | 2,956.3<br>(2,530.2 to 3,432.8)                | 66.3<br>(40.9 to 99.8)                    | -2.2<br>(-5.8 to 1.6)                             | -0.2<br>(-3.2 to 3.0)                               |
| Acne vulgaris                                 | 6,385.3<br>(5,920.3 to 6,839.4)                  | 4,615.8<br>(3,829.7 to 5,635.9)                | 163.7<br>(110.2 to 237.3)                 | -4.6<br>(-8.2 to -0.9)                            | 3.1<br>(-1.0 to 7.2)                                |
| Alopecia areata                               | 249.7<br>(241.2 to 258.4)                        | 438.3<br>(423.4 to 453.2)                      | 8.1<br>(5.2 to 12.1)                      | -0.7<br>(-8.6 to 7.7)                             | -0.1<br>(-8.3 to 8.7)                               |
| Pruritus                                      | 834.2<br>(732.5 to 951.1)                        | 656.1<br>(579.7 to 750.8)                      | 8.7<br>(4.1 to 16.1)                      | 5.3<br>(-0.3 to 11.0)                             | 0.1<br>(-5.1 to 5.4)                                |
| Urticaria                                     | 524.4<br>(463.0 to 587.8)                        | 924.4<br>(818.9 to 1,037.8)                    | 30.9<br>(20.3 to 43.5)                    | -0.1<br>(-6.5 to 6.7)                             | -0.3<br>(-6.1 to 6.3)                               |
| Decubitus ulcer                               | 71.3<br>(63.3 to 80.0)                           | 265.1<br>(232.3 to 299.8)                      | 10.9<br>(7.5 to 15.0)                     | 23.1<br>(6.4 to 41.1)                             | 3.4<br>(-8.5 to 17.1)                               |
| Other skin and subcutaneous diseases          | 11,313.3<br>(10,992.4 to 11,627.6)               | 14,799.6<br>(14,256.8 to 15,332.3)             | 61.1<br>(29.8 to 110.7)                   | 11.6<br>(9.2 to 13.9)                             | 3.3<br>(1.2 to 5.3)                                 |
| Sense organ diseases                          | 28,915.8<br>(28,350.0 to 29,590.8)               | 9,315.2†<br>(8,812.9 to 9,878.1)               | 991.0<br>(681.5 to 1,388.3)               | 10.8<br>(8.6 to 13.4)                             | -2.0<br>(-4.1 to 0.1)                               |
| Glaucoma                                      | 63.0<br>(46.4 to 83.6)                           | --                                             | 6.0<br>(3.6 to 8.9)                       | 18.7<br>(2.0 to 38.6)                             | -0.0<br>(-15.0 to 17.5)                             |
| Cataract                                      | 493.3<br>(350.1 to 688.2)                        | --                                             | 38.8<br>(25.3 to 58.0)                    | 15.8<br>(6.1 to 26.2)                             | -4.7<br>(-12.2 to 3.7)                              |
| Macular degeneration                          | 121.5<br>(88.6 to 165.8)                         | --                                             | 10.8<br>(6.7 to 16.4)                     | 22.8<br>(8.2 to 40.0)                             | 0.7<br>(-11.4 to 14.8)                              |
| Refraction and accommodation disorders        | 7,005.9<br>(6,445.2 to 7,619.9)                  | --                                             | 128.1<br>(78.2 to 205.0)                  | 4.1<br>(0.4 to 8.2)                               | -3.4<br>(-6.9 to 0.5)                               |
| Age-related and other hearing loss            | 25,375.5<br>(24,467.3 to 26,346.7)               | --                                             | 668.2<br>(459.4 to 940.0)                 | 11.6<br>(8.4 to 14.9)                             | -2.1<br>(-5.1 to 0.8)                               |
| Other vision loss                             | 279.5<br>(213.6 to 358.3)                        | --                                             | 21.3<br>(13.8 to 30.2)                    | 11.4<br>(0.7 to 22.1)                             | -0.8<br>(-9.9 to 8.5)                               |
| Other sense organ diseases                    | 3,787.5<br>(3,488.5 to 4,094.1)                  | 9,315.2<br>(8,812.9 to 9,878.1)                | 117.9<br>(74.1 to 177.0)                  | 10.8<br>(6.5 to 15.1)                             | 0.8<br>(-3.1 to 4.9)                                |
| Oral disorders                                | 46,085.7<br>(44,763.6 to 47,480.6)               | 110,633.1†<br>(102,657.5 to 118,722.4)         | 412.5<br>(254.7 to 641.1)                 | 11.2<br>(7.6 to 14.9)                             | 2.4<br>(-0.9 to 6.2)                                |
| Caries of deciduous teeth                     | 2,070.6<br>(1,499.2 to 2,540.1)                  | 6,805.5<br>(3,989.7 to 9,969.0)                | 0.8<br>(0.3 to 1.6)                       | 1.9<br>(-19.9 to 24.6)                            | 14.3<br>(-9.9 to 40.1)                              |
| Caries of permanent teeth                     | 30,235.2<br>(28,694.4 to 32,014.4)               | 101,371.5<br>(93,618.0 to 108,668.4)           | 29.3<br>(12.8 to 55.8)                    | -0.8<br>(-3.7 to 2.5)                             | -2.5<br>(-5.5 to 0.6)                               |
| Periodontal disease                           | 16,829.8<br>(14,593.5 to 19,229.0)               | 1,876.7<br>(1,545.0 to 2,191.6)                | 109.5<br>(43.7 to 227.5)                  | 9.2<br>(-0.2 to 19.0)                             | 5.1<br>(-4.6 to 16.6)                               |
| Edentulism and severe tooth loss              | 8,196.9<br>(7,190.2 to 9,244.4)                  | 579.3<br>(490.1 to 683.9)                      | 224.5<br>(146.3 to 315.8)                 | 16.5<br>(11.8 to 21.8)                            | 2.5<br>(-1.5 to 6.9)                                |
| Other oral disorders                          | 1,674.7<br>(1,602.8 to 1,752.5)                  | --                                             | 48.5<br>(29.9 to 73.5)                    | 1.5<br>(-1.7 to 4.7)                              | -0.2<br>(-3.3 to 3.0)                               |
| <b>Injuries</b>                               | <b>27,806.4</b><br><b>(25,940.0 to 29,934.4)</b> | <b>8,536.0†</b><br><b>(8,032.6 to 9,100.4)</b> | <b>878.5</b><br><b>(591.2 to 1,239.4)</b> | <b>9.0</b><br><b>(7.6 to 10.4)</b>                | <b>1.0</b><br><b>(-0.3 to 2.2)</b>                  |
| <b>Transport injuries</b>                     | <b>3,872.2</b><br><b>(3,587.2 to 4,170.2)</b>    | <b>779.6</b><br><b>(700.7 to 866.4)</b>        | <b>171.5</b><br><b>(112.3 to 247.6)</b>   | <b>-4.6</b><br><b>(-6.1 to -3.0)</b>              | <b>-10.1</b><br><b>(-11.7 to -8.4)</b>              |
| Road injuries                                 | 3,497.1<br>(3,237.1 to 3,781.6)                  | 734.8<br>(657.2 to 820.1)                      | 158.4<br>(104.0 to 227.9)                 | -5.6<br>(-7.1 to -4.0)                            | -11.0<br>(-12.7 to -9.3)                            |
| Pedestrian road injuries                      | 543.1<br>(471.2 to 634.7)                        | 72.7<br>(59.9 to 88.2)                         | 27.0<br>(17.6 to 39.2)                    | 3.8<br>(2.2 to 5.5)                               | -2.1<br>(-4.0 to -0.2)                              |
| Cyclist road injuries                         | 1,003.9<br>(833.2 to 1,194.0)                    | 268.2<br>(225.1 to 315.0)                      | 41.8<br>(27.3 to 60.5)                    | 0.9<br>(-0.7 to 2.6)                              | -5.2<br>(-6.8 to -3.5)                              |
| Motorcyclist road injuries                    | 714.8<br>(601.2 to 848.0)                        | 93.2<br>(75.7 to 112.6)                        | 33.5<br>(22.1 to 47.9)                    | -9.4<br>(-11.2 to -7.6)                           | -14.3<br>(-16.1 to -12.3)                           |
| Motor vehicle road injuries                   | 1,004.3<br>(838.6 to 1,169.3)                    | 254.0<br>(217.4 to 293.5)                      | 47.8<br>(31.7 to 68.7)                    | -13.4<br>(-14.9 to -11.8)                         | -18.4<br>(-20.1 to -16.7)                           |
| Other road injuries                           | 231.0<br>(193.7 to 274.0)                        | 46.8<br>(36.2 to 58.8)                         | 8.4<br>(5.4 to 12.3)                      | 1.8<br>(-0.4 to 4.0)                              | -3.1<br>(-5.5 to -0.6)                              |
| Other transport injuries                      | 375.1<br>(307.4 to 445.8)                        | 44.8<br>(38.2 to 52.4)                         | 13.1<br>(8.3 to 19.2)                     | 9.0<br>(7.6 to 10.4)                              | 2.4<br>(0.9 to 3.8)                                 |
| <b>Unintentional injuries</b>                 | <b>22,936.6</b><br><b>(21,143.9 to 24,907.5)</b> | <b>7,403.4</b><br><b>(6,904.7 to 7,946.7)</b>  | <b>670.7</b><br><b>(451.7 to 956.3)</b>   | <b>13.4</b><br><b>(12.0 to 15.0)</b>              | <b>4.5</b><br><b>(3.2 to 5.8)</b>                   |
| Falls                                         | 12,245.2<br>(10,726.2 to 13,795.1)               | 4,218.9<br>(3,754.2 to 4,686.0)                | 440.7<br>(304.8 to 607.8)                 | 14.1<br>(12.3 to 16.0)                            | 4.1<br>(2.5 to 5.6)                                 |
| Drowning                                      | 29.2<br>(25.9 to 32.9)                           | 2.6<br>(2.3 to 3.1)                            | 1.3<br>(0.9 to 2.0)                       | 11.5<br>(6.3 to 17.7)                             | 5.6<br>(-0.3 to 12.3)                               |
| Fire, heat, and hot substances                | 2,044.7<br>(1,740.0 to 2,411.8)                  | 92.4<br>(76.1 to 108.9)                        | 34.8<br>(19.3 to 58.2)                    | 8.5<br>(6.1 to 11.2)                              | 3.5<br>(1.1 to 6.4)                                 |
| Poisonings                                    | 76.5<br>(62.0 to 95.3)                           | 58.9<br>(47.8 to 71.3)                         | 6.5<br>(4.2 to 9.3)                       | 6.0<br>(-2.7 to 15.2)                             | 4.3<br>(-6.2 to 15.3)                               |
| Exposure to mechanical forces                 | 4,465.4<br>(3,734.3 to 5,651.9)                  | 919.3<br>(778.4 to 1,077.0)                    | 79.6<br>(50.2 to 123.0)                   | 12.8<br>(11.4 to 14.3)                            | 6.8<br>(5.4 to 8.2)                                 |
| Unintentional firearm injuries                | 146.0<br>(119.8 to 181.2)                        | 11.5<br>(7.9 to 16.2)                          | 2.1<br>(1.2 to 3.6)                       | 8.8<br>(7.1 to 10.9)                              | 3.0<br>(1.3 to 4.9)                                 |
| Unintentional suffocation                     | 61.3<br>(50.1 to 73.8)                           | 8.4<br>(5.6 to 12.3)                           | 1.5<br>(0.9 to 2.2)                       | 11.1<br>(9.4 to 12.9)                             | 4.5<br>(2.6 to 6.5)                                 |
| Other exposure to mechanical forces           | 4,258.1<br>(3,533.6 to 5,436.6)                  | 899.4<br>(761.5 to 1,053.2)                    | 76.0<br>(47.9 to 117.2)                   | 12.9<br>(11.5 to 14.5)                            | 7.0<br>(5.5 to 8.4)                                 |

| Cause                                                                               | Prevalence in thousands (95% UI)              | Incidence in thousands (95% UI)          | YLDs in thousands (95% UI)           |                                                   |                                                     |
|-------------------------------------------------------------------------------------|-----------------------------------------------|------------------------------------------|--------------------------------------|---------------------------------------------------|-----------------------------------------------------|
|                                                                                     | 2016 counts                                   | 2016 counts                              | 2016 counts                          | Percentage change in counts between 2006 and 2016 | Percentage change in age-standardised rates between |
| Adverse effects of medical treatment                                                | 34.8<br>(27.4 to 42.4)                        | 455.4<br>(405.7 to 509.4)                | 4.6<br>(2.9 to 6.9)                  | 16.1<br>(10.4 to 21.8)                            | 4.2<br>(0.6 to 8.2)                                 |
| Animal contact                                                                      | 335.6<br>(296.5 to 384.4)                     | 164.0<br>(133.6 to 203.2)                | 6.0<br>(3.8 to 9.2)                  | 1.4<br>(-2.0 to 4.7)                              | -3.9<br>(-7.8 to -0.1)                              |
| Venomous animal contact                                                             | 49.4<br>(42.6 to 57.1)                        | 51.4<br>(37.6 to 68.9)                   | 2.3<br>(1.5 to 3.4)                  | -0.8<br>(-8.2 to 6.9)                             | -3.5<br>(-11.3 to 5.3)                              |
| Non-venomous animal contact                                                         | 286.2<br>(248.4 to 335.9)                     | 112.6<br>(90.6 to 139.8)                 | 3.7<br>(2.1 to 6.1)                  | 2.9<br>(1.3 to 4.5)                               | -4.2<br>(-5.8 to -2.5)                              |
| Foreign body                                                                        | 511.3<br>(445.4 to 603.6)                     | 337.8<br>(295.6 to 392.8)                | 14.8<br>(9.4 to 22.0)                | 9.8<br>(8.2 to 11.6)                              | 3.2<br>(1.6 to 4.8)                                 |
| Pulmonary aspiration and foreign body in airway                                     | 87.9<br>(71.6 to 104.4)                       | 99.8<br>(89.5 to 111.6)                  | 2.3<br>(1.5 to 3.5)                  | 13.6<br>(11.5 to 16.0)                            | 3.3<br>(1.2 to 5.3)                                 |
| Foreign body in eyes                                                                | 45.4<br>(31.3 to 61.1)                        | 167.6<br>(129.0 to 218.3)                | 3.2<br>(2.0 to 4.8)                  | 8.0<br>(4.6 to 11.6)                              | 3.8<br>(0.8 to 6.6)                                 |
| Foreign body in other body part                                                     | 378.0<br>(317.2 to 464.8)                     | 70.4<br>(58.2 to 84.4)                   | 9.3<br>(5.8 to 14.1)                 | 9.6<br>(8.1 to 11.4)                              | 3.0<br>(1.4 to 4.8)                                 |
| Environmental heat and cold exposure                                                | 254.9<br>(227.9 to 286.5)                     | 52.6<br>(44.1 to 62.0)                   | 8.9<br>(5.7 to 13.2)                 | 15.8<br>(11.7 to 20.4)                            | 5.2<br>(1.3 to 9.6)                                 |
| Other unintentional injuries                                                        | 2,939.0<br>(2,479.9 to 3,458.3)               | 1,101.6<br>(933.2 to 1,279.5)            | 73.4<br>(47.5 to 110.0)              | 14.6<br>(13.3 to 16.0)                            | 5.7<br>(4.5 to 7.0)                                 |
| <b>Self-harm and interpersonal violence</b>                                         | <b>1,903.1</b><br><b>(1,737.4 to 2,060.0)</b> | <b>350.2†</b><br><b>(312.4 to 393.8)</b> | <b>36.0</b><br><b>(23.9 to 51.8)</b> | <b>3.6</b><br><b>(1.3 to 5.6)</b>                 | <b>0.1</b><br><b>(-2.2 to 2.2)</b>                  |
| Self-harm                                                                           | 262.7<br>(214.4 to 313.1)                     | 177.8<br>(156.6 to 201.8)                | 10.2<br>(6.6 to 14.8)                | 0.3<br>(-4.2 to 5.2)                              | -4.6<br>(-9.6 to 0.7)                               |
| Self-harm by firearm                                                                | 2.5<br>(2.0 to 3.0)                           | 0.3<br>(0.1 to 0.4)                      | < 0.05<br>(< 0.05 to 0.1)            | 9.3<br>(7.1 to 11.5)                              | 5.4<br>(3.1 to 8.0)                                 |
| Self-harm by other specified means                                                  | 260.3<br>(212.1 to 310.6)                     | 177.5<br>(156.3 to 201.6)                | 10.2<br>(6.6 to 14.7)                | 0.2<br>(-4.2 to 5.1)                              | -4.7<br>(-9.6 to 0.6)                               |
| Interpersonal violence                                                              | 1,640.3<br>(1,493.6 to 1,799.1)               | 172.4†<br>(141.6 to 208.0)               | 25.8<br>(17.2 to 36.9)               | 4.9<br>(2.6 to 6.9)                               | 1.8<br>(-0.8 to 3.9)                                |
| Assault by firearm                                                                  | 49.3<br>(40.5 to 59.8)                        | 5.2<br>(3.7 to 7.0)                      | 1.1<br>(0.7 to 1.7)                  | 16.9<br>(14.9 to 18.9)                            | 11.3<br>(9.0 to 13.4)                               |
| Assault by sharp object                                                             | 136.4<br>(110.5 to 165.4)                     | 29.4<br>(21.4 to 39.7)                   | 2.5<br>(1.5 to 3.9)                  | 10.6<br>(8.7 to 12.5)                             | 5.6<br>(3.5 to 7.8)                                 |
| Sexual violence                                                                     | 915.9<br>(807.4 to 1,038.7)                   | --                                       | 7.3<br>(4.9 to 10.4)                 | -5.7<br>(-9.7 to -1.9)                            | -3.4<br>(-7.8 to 0.9)                               |
| Assault by other means                                                              | 538.7<br>(440.0 to 668.1)                     | 137.7<br>(112.8 to 168.1)                | 14.9<br>(9.6 to 22.4)                | 9.2<br>(7.5 to 10.9)                              | 4.6<br>(2.8 to 6.3)                                 |
| <b>Forces of nature, conflict and terrorism, and executions and police conflict</b> | <b>10.4</b><br><b>(5.9 to 16.7)</b>           | <b>2.8†</b><br><b>(1.9 to 3.9)</b>       | <b>0.2</b><br><b>(0.1 to 0.7)</b>    | <b>32.7</b><br><b>(23.0 to 36.4)</b>              | <b>25.4</b><br><b>(17.2 to 29.0)</b>                |
| Exposure to forces of nature                                                        | --                                            | --                                       | --                                   | --                                                | --                                                  |
| Conflict and terrorism                                                              | --                                            | --                                       | --                                   | --                                                | --                                                  |
| Executions and police conflict                                                      | 10.4<br>(5.9 to 16.7)                         | 2.8<br>(1.9 to 3.9)                      | 0.2<br>(0.1 to 0.7)                  | 32.7<br>(23.0 to 36.4)                            | 25.4<br>(17.2 to 29.0)                              |
| <b>Impairments</b>                                                                  | --                                            | --                                       | --                                   | --                                                | --                                                  |
| Anaemia                                                                             | 7,742.5<br>(7,057.4 to 8,451.9)               | --                                       | 147.5<br>(104.0 to 209.7)            | 9.5<br>(0.4 to 20.5)                              | 3.0<br>(-6.3 to 13.3)                               |
| Developmental intellectual disability                                               | 1,088.3<br>(873.5 to 1,319.6)                 | --                                       | 147.7<br>(112.0 to 194.2)            | -1.8<br>(-6.0 to 2.4)                             | -1.1<br>(-5.7 to 3.4)                               |
| Epilepsy                                                                            | 584.2<br>(248.8 to 923.8)                     | --                                       | 158.3<br>(71.1 to 304.3)             | 5.2<br>(-59.1 to 175.4)                           | 3.1<br>(-58.3 to 156.1)                             |
| Guillain-Barre syndrome                                                             | 1.2<br>(1.0 to 1.4)                           | --                                       | 0.4<br>(0.2 to 0.5)                  | 13.9<br>(6.5 to 22.0)                             | 5.8<br>(-0.3 to 13.0)                               |
| Hearing loss                                                                        | 26,307.4<br>(25,400.3 to 27,233.9)            | --                                       | 711.1<br>(491.4 to 997.4)            | 10.6<br>(7.5 to 13.6)                             | -2.4<br>(-5.1 to 0.2)                               |
| Heart failure                                                                       | 2,089.7<br>(1,815.8 to 2,400.7)               | --                                       | 215.2<br>(162.3 to 276.4)            | 12.6<br>(5.5 to 20.4)                             | -5.4<br>(-11.1 to 0.7)                              |
| Infertility                                                                         | 410.6<br>(330.2 to 512.0)                     | --                                       | 3.2<br>(1.6 to 5.8)                  | -12.9<br>(-19.0 to -5.2)                          | 0.1<br>(-6.9 to 8.1)                                |
| Pelvic inflammatory disease                                                         | 7.3<br>(5.7 to 9.2)                           | --                                       | 1.0<br>(0.6 to 1.5)                  | -23.2<br>(-38.6 to -2.8)                          | -18.9<br>(-35.4 to 3.0)                             |
| Vision loss                                                                         | 8,132.3<br>(7,416.5 to 8,923.4)               | --                                       | 241.3<br>(170.1 to 342.5)            | 6.8<br>(3.3 to 10.8)                              | -2.4<br>(-5.8 to 1.1)                               |

We did not calculate incidence for the nine impairments, certain NTDs, and causes with only birth prevalence. Blank cells mean that no estimate is available.

† Incidence for aggregate causes represents the sum of the incidence of the causes below the aggregate.

‡ Incidence estimates for stroke represent first-ever stroke only.

^ Incidence of HIV/AIDS represents new infections of HIV only and does not include new infections of Tuberculosis in HIV positive cases.



SR Table 14: Prevalence, incidence, and YLDs for 2016, percentage change of YLD counts and percentage change of age-standardised YLD rates between 2006 and 2016 by cause and impairments, for all ages, Ghana.

| Cause                                                                                | Prevalence in thousands (95% UI)          | Incidence in thousands (95% UI)               | YLDs in thousands (95% UI)             |                                                   |                                                     |
|--------------------------------------------------------------------------------------|-------------------------------------------|-----------------------------------------------|----------------------------------------|---------------------------------------------------|-----------------------------------------------------|
|                                                                                      | 2016 counts                               | 2016 counts                                   | 2016 counts                            | Percentage change in counts between 2006 and 2016 | Percentage change in age-standardised rates between |
| <b>All causes</b>                                                                    | <b>27,416.4</b><br>(27,336.5 to 27,491.2) | <b>161,705.2†</b><br>(152,610.0 to 171,647.2) | <b>2,587.0</b><br>(1,913.6 to 3,368.2) | <b>24.0</b><br>(20.2 to 28.1)                     | <b>-3.9</b><br>(-6.4 to -1.4)                       |
| <b>Communicable, maternal, neonatal, and nutritional disorders</b>                   | <b>22,413.7</b><br>(22,038.2 to 22,755.0) | <b>102,482.8†</b><br>(94,358.3 to 111,402.3)  | <b>643.2</b><br>(452.4 to 879.9)       | <b>3.5</b><br>(-1.8 to 8.7)                       | <b>-22.5</b><br>(-27.0 to -18.4)                    |
| <b>HIV/AIDS and tuberculosis</b>                                                     | <b>5,855.2</b><br>(5,156.4 to 6,486.1)    | <b>60.6†</b><br>(48.6 to 75.0)                | <b>51.2</b><br>(34.1 to 72.9)          | <b>-18.5</b><br>(-32.9 to -2.0)                   | <b>-38.9</b><br>(-50.4 to -25.3)                    |
| Tuberculosis                                                                         | 5,222.9<br>(4,566.9 to 6,050.8)           | 44.0†<br>(34.9 to 56.0)                       | 9.5<br>(6.1 to 13.6)                   | 7.4<br>(-7.8 to 24.9)                             | -16.9<br>(-26.8 to -5.7)                            |
| Drug-susceptible tuberculosis                                                        | 30.4<br>(24.2 to 38.7)                    | 43.4<br>(34.4 to 55.2)                        | 9.3<br>(6.0 to 13.4)                   | 7.6<br>(-7.5 to 25.9)                             | -16.8<br>(-26.2 to -5.6)                            |
| Multidrug-resistant tuberculosis without extensive drug resistance                   | 0.5<br>(0.1 to 1.2)                       | 0.7<br>(0.2 to 1.7)                           | 0.1<br>(< 0.05 to 0.4)                 | -3.7<br>(-67.7 to 218.6)                          | -25.1<br>(-74.9 to 156.7)                           |
| Extensively drug-resistant tuberculosis                                              | < 0.05<br>(< 0.05 to < 0.05)              | < 0.05<br>(< 0.05 to < 0.05)                  | < 0.05<br>(< 0.05 to < 0.05)           | 191.0<br>(0.2 to 819.9)                           | 124.1<br>(-23.1 to 610.9)                           |
| Latent tuberculosis infection                                                        | 5,192.0<br>(4,538.6 to 6,013.6)           | --                                            | --                                     | --                                                | --                                                  |
| HIV/AIDS                                                                             | 313.8<br>(263.1 to 369.9)                 | 16.6^<br>(9.0 to 25.2)                        | 41.8<br>(27.3 to 61.6)                 | -22.7<br>(-37.2 to -4.8)                          | -42.8<br>(-54.7 to -27.9)                           |
| Drug-susceptible HIV/AIDS - Tuberculosis                                             | 8.3<br>(5.0 to 12.6)                      | 11.8<br>(7.3 to 18.2)                         | 3.2<br>(1.7 to 5.4)                    | -30.7<br>(-43.7 to -15.2)                         | -45.6<br>(-55.7 to -33.3)                           |
| Multidrug-resistant HIV/AIDS - Tuberculosis without extensive drug resistance        | 0.1<br>(< 0.05 to 0.4)                    | 0.2<br>(0.1 to 0.6)                           | 0.1<br>(< 0.05 to 0.2)                 | -38.6<br>(-78.9 to 95.4)                          | -51.8<br>(-83.4 to 53.6)                            |
| Extensively drug-resistant HIV/AIDS - Tuberculosis                                   | < 0.05<br>(< 0.05 to < 0.05)              | < 0.05<br>(< 0.05 to < 0.05)                  | < 0.05<br>(< 0.05 to < 0.05)           | 87.0<br>(-35.7 to 494.2)                          | 46.9<br>(-49.4 to 367.2)                            |
| HIV/AIDS resulting in other diseases                                                 | 305.4<br>(255.8 to 360.0)                 | 16.6<br>(9.0 to 25.2)                         | 38.6<br>(24.7 to 58.1)                 | -21.9<br>(-37.8 to -1.0)                          | -42.6<br>(-55.1 to -24.9)                           |
| <b>Diarrhoea, lower respiratory infections, and other common infectious diseases</b> | <b>1,789.5</b><br>(1,705.2 to 1,884.4)    | <b>85,224.3†</b><br>(77,246.5 to 93,488.3)    | <b>96.6</b><br>(67.9 to 130.5)         | <b>17.7</b><br>(14.2 to 21.3)                     | <b>-9.0</b><br>(-11.4 to -6.4)                      |
| Diarrhoeal diseases                                                                  | 322.1<br>(298.9 to 346.0)                 | 21,737.0<br>(20,226.8 to 23,320.1)            | 36.4<br>(25.2 to 50.2)                 | 10.5<br>(4.4 to 16.8)                             | -14.8<br>(-18.9 to -10.6)                           |
| Intestinal infectious diseases                                                       | 3.5<br>(2.8 to 4.2)                       | 63.1†<br>(52.3 to 75.3)                       | 0.6<br>(0.4 to 0.8)                    | -13.0<br>(-32.1 to 11.2)                          | -32.8<br>(-45.2 to -18.1)                           |
| Typhoid fever                                                                        | 3.4<br>(2.7 to 4.2)                       | 52.9<br>(43.6 to 63.6)                        | 0.5<br>(0.3 to 0.8)                    | -12.2<br>(-32.9 to 14.4)                          | -32.3<br>(-45.4 to -16.2)                           |
| Paratyphoid fever                                                                    | 0.5<br>(0.3 to 0.6)                       | 10.2<br>(7.7 to 13.2)                         | < 0.05<br>(< 0.05 to < 0.05)           | -9.9<br>(-28.6 to 14.7)                           | -31.0<br>(-43.7 to -16.5)                           |
| Other intestinal infectious diseases                                                 | --                                        | --                                            | < 0.05<br>(< 0.05 to < 0.05)           | -37.2<br>(-55.7 to -13.3)                         | -51.4<br>(-63.4 to -36.5)                           |
| Lower respiratory infections                                                         | 36.3<br>(33.7 to 38.8)                    | 1,578.5<br>(1,452.9 to 1,717.5)               | 2.2<br>(1.4 to 3.1)                    | 13.0<br>(-1.0 to 25.7)                            | -9.0<br>(-17.7 to -0.9)                             |
| Upper respiratory infections                                                         | 782.3<br>(681.4 to 887.6)                 | 58,581.1<br>(50,821.0 to 66,863.5)            | 19.5<br>(11.6 to 30.9)                 | 28.2<br>(20.0 to 35.9)                            | -0.4<br>(-5.9 to 5.0)                               |
| Otitis media                                                                         | 571.4<br>(510.3 to 634.6)                 | 2,411.0<br>(1,875.0 to 3,081.0)               | 17.9<br>(11.1 to 26.5)                 | 17.4<br>(9.2 to 26.4)                             | -8.8<br>(-15.1 to -2.0)                             |
| Meningitis                                                                           | 109.2<br>(93.1 to 129.5)                  | 29.4<br>(25.4 to 35.1)                        | 12.0<br>(8.5 to 15.7)                  | 25.3<br>(16.8 to 34.1)                            | -3.8<br>(-10.0 to 2.6)                              |
| Pneumococcal meningitis                                                              | 31.7<br>(27.2 to 37.1)                    | 2.7<br>(2.0 to 3.6)                           | 4.3<br>(3.0 to 5.9)                    | 14.5<br>(-3.1 to 33.5)                            | -13.0<br>(-25.1 to -0.1)                            |
| H influenzae type B meningitis                                                       | 13.8<br>(10.8 to 18.5)                    | 2.7<br>(1.5 to 4.6)                           | 2.0<br>(1.4 to 2.7)                    | 20.7<br>(10.7 to 30.3)                            | -5.9<br>(-13.1 to 0.8)                              |
| Meningococcal infection                                                              | 24.2<br>(17.9 to 32.8)                    | 8.4<br>(6.0 to 11.5)                          | 2.8<br>(1.9 to 3.9)                    | 22.2<br>(9.0 to 36.9)                             | -6.3<br>(-16.3 to 4.6)                              |
| Other meningitis                                                                     | 39.4<br>(27.8 to 53.3)                    | 15.6<br>(12.5 to 19.3)                        | 2.9<br>(1.9 to 3.9)                    | 55.4<br>(42.5 to 70.8)                            | 19.9<br>(11.0 to 30.7)                              |
| Encephalitis                                                                         | 60.8<br>(40.2 to 89.9)                    | 30.9<br>(26.9 to 35.1)                        | 6.8<br>(4.8 to 9.0)                    | 26.3<br>(11.3 to 42.5)                            | -2.4<br>(-13.0 to 8.9)                              |
| Diphtheria                                                                           | < 0.05<br>(< 0.05 to < 0.05)              | < 0.05<br>(< 0.05 to < 0.05)                  | < 0.05<br>(< 0.05 to < 0.05)           | -33.9<br>(-69.4 to 45.2)                          | -46.9<br>(-71.4 to 3.1)                             |
| Whooping cough                                                                       | 6.6<br>(5.2 to 8.4)                       | 48.5<br>(37.7 to 61.6)                        | 0.3<br>(0.2 to 0.5)                    | -13.8<br>(-31.8 to 9.5)                           | -34.9<br>(-48.7 to -17.3)                           |
| Tetanus                                                                              | 0.4<br>(0.4 to 0.5)                       | 0.4<br>(0.2 to 0.7)                           | < 0.05<br>(< 0.05 to < 0.05)           | -8.5<br>(-30.0 to 15.9)                           | -28.6<br>(-42.8 to -13.3)                           |
| Measles                                                                              | 0.6<br>(0.2 to 1.2)                       | 20.5<br>(7.0 to 45.4)                         | 0.1<br>(< 0.05 to 0.1)                 | -11.6<br>(-32.3 to 19.1)                          | -34.0<br>(-49.2 to -11.9)                           |
| Varicella and herpes zoster                                                          | 25.7<br>(24.0 to 27.6)                    | 724.1<br>(680.0 to 769.6)                     | 0.8<br>(0.5 to 1.2)                    | 30.7<br>(12.3 to 52.8)                            | 0.3<br>(-11.7 to 13.6)                              |
| <b>Neglected tropical diseases and malaria</b>                                       | <b>10,261.4</b><br>(9,563.1 to 10,960.7)  | <b>9,840.6†</b><br>(7,942.2 to 11,933.5)      | <b>121.3</b><br>(85.3 to 170.8)        | <b>-23.4</b><br>(-31.0 to -15.4)                  | <b>-44.4</b><br>(-50.5 to -38.0)                    |
| Malaria                                                                              | 5,374.7<br>(4,590.8 to 6,306.8)           | 8,244.5<br>(6,371.2 to 10,320.4)              | 65.0<br>(46.5 to 89.3)                 | -6.4<br>(-17.4 to 4.9)                            | -27.2<br>(-34.4 to -19.2)                           |
| Chagas disease                                                                       | --                                        | --                                            | --                                     | --                                                | --                                                  |
| Leishmaniasis                                                                        | 1.6<br>(1.0 to 2.5)                       | 0.1<br>(< 0.05 to 0.6)                        | 0.1<br>(< 0.05 to 0.2)                 | -7.2<br>(-39.0 to 61.3)                           | -24.1<br>(-49.2 to 26.6)                            |
| Visceral leishmaniasis                                                               | --                                        | --                                            | --                                     | --                                                | --                                                  |
| Cutaneous and mucocutaneous leishmaniasis                                            | 1.4<br>(0.7 to 2.4)                       | 0.1<br>(< 0.05 to 0.6)                        | 0.1<br>(< 0.05 to 0.2)                 | -7.2<br>(-39.0 to 61.3)                           | -24.1<br>(-49.2 to 26.6)                            |
| African trypanosomiasis                                                              | --                                        | --                                            | --                                     | --                                                | --                                                  |
| Schistosomiasis                                                                      | 2,890.1<br>(2,655.8 to 3,135.3)           | 1,194.2<br>(1,095.9 to 1,287.9)               | 22.5<br>(11.2 to 42.4)                 | -40.8<br>(-43.0 to -38.2)                         | -54.6<br>(-56.2 to -52.6)                           |
| Cysticercosis                                                                        | 41.9<br>(31.9 to 52.5)                    | --                                            | 7.3<br>(4.0 to 11.7)                   | 12.8<br>(-5.6 to 30.6)                            | -14.0<br>(-26.6 to -1.3)                            |
| Cystic echinococcosis                                                                | 4.5<br>(0.9 to 17.1)                      | 1.0<br>(0.2 to 3.7)                           | 0.4<br>(0.1 to 1.7)                    | -35.6<br>(-91.0 to 433.5)                         | -51.1<br>(-93.0 to 275.9)                           |
| Lymphatic filariasis                                                                 | 50.1<br>(35.4 to 69.8)                    | 16.2<br>(14.6 to 17.8)                        | 3.5<br>(1.6 to 6.2)                    | -86.5<br>(-93.5 to -80.3)                         | -89.3<br>(-94.6 to -84.5)                           |
| Onchocerciasis                                                                       | --                                        | --                                            | --                                     | --                                                | --                                                  |
| Trachoma                                                                             | 7.8<br>(4.8 to 11.8)                      | --                                            | 0.6<br>(0.3 to 0.9)                    | -8.9<br>(-31.6 to 22.9)                           | -28.8<br>(-49.8 to 3.5)                             |
| Dengue                                                                               | 22.9<br>(13.6 to 36.3)                    | 383.2<br>(261.9 to 533.0)                     | 3.8<br>(1.8 to 6.9)                    | 187.2<br>(115.9 to 548.1)                         | 124.1<br>(72.5 to 399.2)                            |
| Yellow fever                                                                         | < 0.05<br>(< 0.05 to 0.1)                 | 1.1<br>(0.3 to 3.0)                           | < 0.05<br>(< 0.05 to < 0.05)           | -43.4<br>(-57.1 to -26.3)                         | -55.8<br>(-65.3 to -43.9)                           |
| Rabies                                                                               | < 0.05<br>(< 0.05 to < 0.05)              | 0.1<br>(< 0.05 to 0.2)                        | < 0.05<br>(< 0.05 to < 0.05)           | -28.0<br>(-56.8 to 21.5)                          | -43.5<br>(-64.1 to -11.3)                           |
| Intestinal nematode infections                                                       | 3,175.2<br>(2,599.7 to 3,855.1)           | --                                            | 3.8<br>(2.2 to 6.0)                    | 34.3<br>(12.7 to 62.6)                            | 4.8<br>(-12.7 to 28.1)                              |
| Ascariasis                                                                           | 1,093.3<br>(810.2 to 1,533.8)             | --                                            | 0.1<br>(< 0.05 to 0.1)                 | 28.7<br>(-8.5 to 79.7)                            | 0.1<br>(-27.5 to 38.6)                              |



| Cause                                                                   | Prevalence in thousands (95% UI)                 | Incidence in thousands (95% UI)                   | YLDs in thousands (95% UI)                    |                                                   |                                                     |
|-------------------------------------------------------------------------|--------------------------------------------------|---------------------------------------------------|-----------------------------------------------|---------------------------------------------------|-----------------------------------------------------|
|                                                                         | 2016 counts                                      | 2016 counts                                       | 2016 counts                                   | Percentage change in counts between 2006 and 2016 | Percentage change in age-standardised rates between |
| Trichuriasis                                                            | 726.6<br>(509.6 to 1,053.5)                      | --                                                | < 0.05<br>(< 0.05 to < 0.05)                  | 28.0<br>(-6.4 to 72.2)                            | 0.4<br>(-30.4 to 40.5)                              |
| Hookworm disease                                                        | 1,466.4<br>(1,070.4 to 1,978.1)                  | --                                                | 3.7<br>(2.2 to 5.9)                           | 34.5<br>(12.3 to 63.5)                            | 4.9<br>(-12.7 to 28.9)                              |
| Food-borne trematodiasis                                                | --                                               | --                                                | --                                            | --                                                | --                                                  |
| Leprosy                                                                 | 0.8<br>(0.7 to 0.9)                              | 0.1<br>(0.1 to 0.1)                               | < 0.05<br>(< 0.05 to 0.1)                     | -10.8<br>(-27.8 to 12.6)                          | -30.2<br>(-44.7 to -10.3)                           |
| Ebola virus disease                                                     | --                                               | --                                                | --                                            | --                                                | --                                                  |
| Zika virus disease                                                      | --                                               | --                                                | --                                            | --                                                | --                                                  |
| Guinea worm disease                                                     | --                                               | --                                                | --                                            | --                                                | --                                                  |
| Other neglected tropical diseases                                       | 424.5<br>(409.3 to 439.5)                        | --                                                | 14.2<br>(9.4 to 20.7)                         | 13.6<br>(5.7 to 21.8)                             | -11.9<br>(-17.7 to -5.5)                            |
| <b>Maternal disorders</b>                                               | <b>89.6</b><br><b>(69.1 to 114.2)</b>            | <b>644.2†</b><br><b>(574.3 to 733.3)</b>          | <b>7.5</b><br><b>(4.9 to 10.9)</b>            | <b>4.5</b><br><b>(-17.1 to 34.3)</b>              | <b>-21.6</b><br><b>(-37.5 to -0.5)</b>              |
| Maternal haemorrhage                                                    | 8.3<br>(6.3 to 11.0)                             | 67.2<br>(43.2 to 98.4)                            | 0.4<br>(0.2 to 0.6)                           | 19.8<br>(-18.8 to 75.5)                           | -6.5<br>(-36.5 to 35.9)                             |
| Maternal sepsis and other pregnancy related infections                  | 12.6<br>(9.9 to 16.1)                            | 63.7<br>(48.5 to 84.4)                            | 0.3<br>(0.1 to 0.5)                           | 23.5<br>(-38.1 to 146.9)                          | -4.2<br>(-49.4 to 85.7)                             |
| Maternal hypertensive disorders                                         | 60.7<br>(40.4 to 81.8)                           | 266.4<br>(241.8 to 284.8)                         | 2.9<br>(1.6 to 4.6)                           | 40.1<br>(-13.8 to 133.0)                          | 8.6<br>(-33.0 to 80.9)                              |
| Maternal obstructed labour and uterine rupture                          | 7.9<br>(5.5 to 10.9)                             | 38.1<br>(25.7 to 55.0)                            | 2.6<br>(1.5 to 4.0)                           | -20.2<br>(-37.5 to 2.1)                           | -40.3<br>(-53.3 to -24.6)                           |
| Maternal abortion, miscarriage, and ectopic pregnancy                   | 1.7<br>(1.0 to 2.6)                              | 208.7<br>(151.9 to 288.2)                         | 0.2<br>(0.1 to 0.3)                           | 17.9<br>(-40.1 to 129.7)                          | -9.4<br>(-54.6 to 76.7)                             |
| Other maternal disorders                                                | --                                               | --                                                | 1.1<br>(0.8 to 1.7)                           | -0.4<br>(-20.9 to 27.9)                           | -25.3<br>(-40.4 to -5.0)                            |
| <b>Neonatal disorders</b>                                               | <b>401.4</b><br><b>(314.8 to 496.4)</b>          | --                                                | <b>63.4</b><br><b>(35.4 to 110.3)</b>         | <b>36.5</b><br><b>(1.9 to 74.0)</b>               | <b>7.5</b><br><b>(-20.5 to 37.0)</b>                |
| Neonatal preterm birth complications                                    | 260.6<br>(193.3 to 354.9)                        | --                                                | 19.8<br>(12.5 to 29.9)                        | 7.9<br>(-17.3 to 37.8)                            | -15.4<br>(-34.6 to 7.4)                             |
| Neonatal encephalopathy due to birth asphyxia and trauma                | 102.2<br>(52.8 to 190.8)                         | --                                                | 9.5<br>(1.7 to 33.9)                          | 30.8<br>(-67.7 to 147.2)                          | 4.3<br>(-74.1 to 95.4)                              |
| Neonatal sepsis and other neonatal infections                           | 69.7<br>(22.7 to 158.6)                          | --                                                | 27.5<br>(7.3 to 70.2)                         | 75.1<br>(8.9 to 207.5)                            | 39.8<br>(-15.6 to 154.5)                            |
| Hemolytic disease and other neonatal jaundice                           | 5.5<br>(4.7 to 6.4)                              | --                                                | 1.8<br>(1.3 to 2.3)                           | 25.6<br>(8.7 to 45.6)                             | -2.3<br>(-13.1 to 10.1)                             |
| Other neonatal disorders                                                | --                                               | --                                                | 4.9<br>(2.9 to 8.1)                           | 29.7<br>(1.2 to 61.7)                             | -3.4<br>(-24.9 to 20.4)                             |
| <b>Nutritional deficiencies</b>                                         | <b>9,061.3</b><br><b>(8,816.0 to 9,380.0)</b>    | <b>1,983.3†</b><br><b>(1,683.9 to 2,488.8)</b>    | <b>276.1</b><br><b>(183.5 to 399.4)</b>       | <b>13.5</b><br><b>(8.7 to 18.4)</b>               | <b>-11.9</b><br><b>(-15.1 to -8.7)</b>              |
| Protein-energy malnutrition                                             | 335.3<br>(276.8 to 403.0)                        | 225.4<br>(188.5 to 265.2)                         | 13.8<br>(8.5 to 21.4)                         | 5.6<br>(-22.9 to 43.0)                            | -21.9<br>(-43.2 to 6.1)                             |
| Iodine deficiency                                                       | 319.3<br>(241.5 to 414.8)                        | 11.0<br>(8.4 to 14.2)                             | 9.0<br>(5.7 to 13.7)                          | 2.2<br>(-10.4 to 15.2)                            | -20.3<br>(-29.2 to -11.2)                           |
| Vitamin A deficiency                                                    | 1,942.5<br>(1,637.8 to 2,461.2)                  | 1,746.9<br>(1,457.4 to 2,255.3)                   | 1.4<br>(0.8 to 2.3)                           | 23.3<br>(-2.6 to 55.6)                            | -5.0<br>(-24.4 to 18.4)                             |
| Iron-deficiency anaemia                                                 | 7,798.7<br>(7,580.0 to 8,007.2)                  | --                                                | 251.4<br>(166.6 to 366.8)                     | 14.4<br>(9.8 to 19.4)                             | -11.1<br>(-14.2 to -7.6)                            |
| Other nutritional deficiencies                                          | --                                               | --                                                | 0.5<br>(0.3 to 0.7)                           | 5.5<br>(-24.1 to 44.1)                            | -22.1<br>(-44.0 to 6.6)                             |
| <b>Other communicable, maternal, neonatal, and nutritional diseases</b> | <b>10,011.7</b><br><b>(9,373.4 to 10,678.4)</b>  | <b>4,729.8</b><br><b>(4,158.2 to 5,501.8)</b>     | <b>27.1</b><br><b>(17.4 to 41.0)</b>          | <b>26.2</b><br><b>(19.1 to 32.5)</b>              | <b>-2.5</b><br><b>(-7.7 to 2.1)</b>                 |
| Sexually transmitted diseases excluding HIV                             | 5,690.2<br>(5,318.5 to 6,088.5)                  | 3,367.3<br>(3,054.4 to 3,734.6)                   | 15.0<br>(9.3 to 23.8)                         | 33.2<br>(24.2 to 42.1)                            | 1.7<br>(-5.1 to 8.4)                                |
| Syphilis                                                                | 593.3<br>(498.6 to 711.2)                        | 405.7<br>(324.8 to 501.3)                         | 0.8<br>(0.5 to 1.0)                           | 29.7<br>(14.3 to 48.2)                            | -3.0<br>(-15.2 to 11.8)                             |
| Chlamydial infection                                                    | 601.7<br>(480.7 to 736.3)                        | 462.1<br>(377.4 to 559.0)                         | 4.2<br>(2.5 to 6.7)                           | 33.6<br>(18.9 to 49.8)                            | 3.5<br>(-8.0 to 16.0)                               |
| Gonococcal infection                                                    | 277.4<br>(226.2 to 340.3)                        | 913.5<br>(721.2 to 1,148.2)                       | 2.3<br>(1.4 to 3.7)                           | 32.1<br>(13.2 to 52.2)                            | 0.6<br>(-13.3 to 14.7)                              |
| Trichomoniasis                                                          | 1,038.3<br>(851.6 to 1,240.2)                    | 948.2<br>(759.6 to 1,156.7)                       | 1.4<br>(0.5 to 3.0)                           | 30.4<br>(22.0 to 40.0)                            | 0.1<br>(-5.7 to 6.6)                                |
| Genital herpes                                                          | 3,832.4<br>(3,335.7 to 4,448.7)                  | 354.9<br>(302.2 to 422.8)                         | 1.0<br>(0.3 to 2.4)                           | 32.5<br>(20.2 to 44.1)                            | 0.1<br>(-7.4 to 7.7)                                |
| Other sexually transmitted diseases                                     | 222.5<br>(170.1 to 292.3)                        | 282.9<br>(234.0 to 342.8)                         | 5.3<br>(3.4 to 8.1)                           | 34.7<br>(19.8 to 49.6)                            | 2.7<br>(-8.8 to 14.0)                               |
| Hepatitis                                                               | 5,282.6<br>(4,419.7 to 6,396.7)                  | 1,362.5<br>(930.7 to 2,026.8)                     | 1.5<br>(0.9 to 2.3)                           | -6.8<br>(-27.2 to 18.5)                           | -24.0<br>(-38.5 to -6.2)                            |
| Acute hepatitis A                                                       | 21.8<br>(2.6 to 62.4)                            | 283.8<br>(34.5 to 811.8)                          | 0.2<br>(< 0.05 to 0.4)                        | -10.7<br>(-79.6 to 304.4)                         | -25.2<br>(-77.2 to 186.4)                           |
| Hepatitis B                                                             | 4,032.9<br>(3,173.2 to 5,132.0)                  | 930.2<br>(662.1 to 1,298.9)                       | 1.1<br>(0.6 to 1.8)                           | -6.6<br>(-26.6 to 19.2)                           | -24.0<br>(-39.8 to -5.3)                            |
| Hepatitis C                                                             | 1,223.3<br>(1,078.3 to 1,381.4)                  | 89.7<br>(80.4 to 100.0)                           | 0.1<br>(< 0.05 to 0.2)                        | 24.4<br>(-20.0 to 100.0)                          | -7.5<br>(-32.9 to 31.8)                             |
| Acute hepatitis E                                                       | 4.5<br>(3.8 to 5.6)                              | 58.7<br>(48.8 to 72.3)                            | 0.1<br>(0.1 to 0.2)                           | -18.4<br>(-43.3 to 17.9)                          | -30.0<br>(-48.6 to -5.7)                            |
| Other infectious diseases                                               | 316.7<br>(305.7 to 327.6)                        | < 0.05<br>(< 0.05 to < 0.05)                      | 10.6<br>(6.9 to 15.6)                         | 23.1<br>(14.6 to 32.5)                            | -5.1<br>(-11.2 to 1.7)                              |
| <b>Non-communicable diseases</b>                                        | <b>24,741.7</b><br><b>(24,552.7 to 24,949.2)</b> | <b>57,157.2†</b><br><b>(53,346.8 to 61,825.0)</b> | <b>1,802.8</b><br><b>(1,318.9 to 2,332.8)</b> | <b>32.4</b><br><b>(27.2 to 38.2)</b>              | <b>1.4</b><br><b>(-1.6 to 4.8)</b>                  |
| <b>Neoplasms</b>                                                        | <b>27.1</b><br><b>(24.4 to 30.2)</b>             | <b>16.1</b><br><b>(15.1 to 17.2)</b>              | <b>5.1</b><br><b>(3.7 to 6.7)</b>             | <b>31.6</b><br><b>(23.9 to 40.1)</b>              | <b>-0.6</b><br><b>(-5.7 to 4.9)</b>                 |
| Lip and oral cavity cancer                                              | 1.3<br>(1.2 to 1.5)                              | 0.4<br>(0.3 to 0.4)                               | 0.1<br>(0.1 to 0.2)                           | 40.3<br>(18.2 to 64.7)                            | 4.7<br>(-10.1 to 21.1)                              |
| Nasopharynx cancer                                                      | 0.1<br>(0.1 to 0.1)                              | < 0.05<br>(< 0.05 to < 0.05)                      | < 0.05<br>(< 0.05 to < 0.05)                  | 29.6<br>(8.4 to 56.9)                             | -4.1<br>(-18.1 to 13.1)                             |
| Other pharynx cancer                                                    | 0.2<br>(0.2 to 0.2)                              | 0.1<br>(0.1 to 0.1)                               | < 0.05<br>(< 0.05 to < 0.05)                  | 34.9<br>(18.7 to 53.5)                            | 2.4<br>(-9.6 to 15.7)                               |
| Oesophageal cancer                                                      | 0.3<br>(0.3 to 0.3)                              | 0.3<br>(0.3 to 0.3)                               | 0.1<br>(0.1 to 0.1)                           | 29.1<br>(14.3 to 46.9)                            | -2.1<br>(-13.1 to 11.4)                             |
| Stomach cancer                                                          | 1.1<br>(0.9 to 1.2)                              | 0.8<br>(0.7 to 0.8)                               | 0.2<br>(0.1 to 0.2)                           | 22.6<br>(10.0 to 37.0)                            | -5.4<br>(-16.5 to 7.7)                              |
| Colon and rectum cancer                                                 | 1.8<br>(1.7 to 2.0)                              | 0.7<br>(0.6 to 0.7)                               | 0.2<br>(0.2 to 0.3)                           | 35.1<br>(18.0 to 55.6)                            | 2.5<br>(-11.8 to 17.9)                              |
| Liver cancer                                                            | 1.2<br>(1.1 to 1.4)                              | 2.1<br>(1.9 to 2.3)                               | 0.5<br>(0.3 to 0.6)                           | 32.0<br>(15.5 to 50.5)                            | -0.3<br>(-12.3 to 13.1)                             |
| Liver cancer due to hepatitis B                                         | 1.2<br>(1.0 to 1.4)                              | 1.2<br>(1.0 to 1.4)                               | 0.3<br>(0.2 to 0.4)                           | 31.5<br>(13.6 to 52.3)                            | -1.2<br>(-15.2 to 15.6)                             |

| Cause                                              | Prevalence in thousands (95% UI)              | Incidence in thousands (95% UI)          | YLDs in thousands (95% UI)            |                                                   |                                                     |
|----------------------------------------------------|-----------------------------------------------|------------------------------------------|---------------------------------------|---------------------------------------------------|-----------------------------------------------------|
|                                                    | 2016 counts                                   | 2016 counts                              | 2016 counts                           | Percentage change in counts between 2006 and 2016 | Percentage change in age-standardised rates between |
| Liver cancer due to hepatitis C                    | 0.2<br>(0.1 to 0.2)                           | 0.2<br>(0.1 to 0.2)                      | < 0.05<br>(< 0.05 to 0.1)             | 27.7<br>(10.6 to 45.6)                            | -2.9<br>(-15.5 to 10.9)                             |
| Liver cancer due to alcohol use                    | 0.3<br>(0.2 to 0.3)                           | 0.3<br>(0.2 to 0.3)                      | 0.1<br>(< 0.05 to 0.1)                | 49.3<br>(30.1 to 71.4)                            | 12.7<br>(-2.2 to 28.7)                              |
| Liver cancer due to other causes                   | 0.5<br>(0.4 to 0.6)                           | 0.5<br>(0.4 to 0.5)                      | 0.1<br>(0.1 to 0.1)                   | 26.1<br>(8.5 to 45.9)                             | -4.5<br>(-16.6 to 8.6)                              |
| Gallbladder and biliary tract cancer               | 0.1<br>(0.1 to 0.2)                           | 0.2<br>(0.1 to 0.2)                      | < 0.05<br>(< 0.05 to 0.1)             | 19.1<br>(8.0 to 32.2)                             | -8.3<br>(-16.7 to 1.7)                              |
| Pancreatic cancer                                  | 0.6<br>(0.5 to 0.6)                           | 0.8<br>(0.7 to 0.8)                      | 0.2<br>(0.1 to 0.2)                   | 36.3<br>(19.1 to 56.1)                            | 3.7<br>(-10.8 to 20.9)                              |
| Larynx cancer                                      | 0.4<br>(0.3 to 0.4)                           | 0.1<br>(0.1 to 0.1)                      | 0.1<br>(< 0.05 to 0.1)                | 32.2<br>(15.3 to 53.6)                            | -0.7<br>(-13.4 to 14.9)                             |
| Tracheal, bronchus, and lung cancer                | 0.7<br>(0.6 to 0.8)                           | 0.6<br>(0.5 to 0.7)                      | 0.1<br>(0.1 to 0.2)                   | 30.4<br>(7.0 to 56.4)                             | -0.4<br>(-19.8 to 20.5)                             |
| Malignant skin melanoma                            | 0.2<br>(0.1 to 0.2)                           | 0.1<br>(< 0.05 to 0.1)                   | < 0.05<br>(< 0.05 to < 0.05)          | 46.9<br>(30.8 to 63.0)                            | 9.2<br>(-2.2 to 20.2)                               |
| Non-melanoma skin cancer                           | 0.2<br>(0.2 to 0.3)                           | 0.8<br>(0.6 to 1.3)                      | < 0.05<br>(< 0.05 to < 0.05)          | 40.5<br>(-21.0 to 98.9)                           | 8.5<br>(-44.9 to 66.0)                              |
| Non-melanoma skin cancer (squamous-cell carcinoma) | 0.2<br>(0.1 to 0.3)                           | 0.2<br>(0.2 to 0.4)                      | < 0.05<br>(< 0.05 to < 0.05)          | 40.6<br>(-24.7 to 106.0)                          | 8.8<br>(-46.2 to 70.4)                              |
| Non-melanoma skin cancer (basal-cell carcinoma)    | 0.1<br>(< 0.05 to 0.2)                        | 0.6<br>(0.3 to 1.1)                      | < 0.05<br>(< 0.05 to < 0.05)          | 39.3<br>(23.9 to 55.5)                            | 3.6<br>(-7.8 to 14.6)                               |
| Breast cancer                                      | 6.0<br>(5.0 to 6.8)                           | 1.4<br>(1.2 to 1.6)                      | 0.6<br>(0.5 to 0.9)                   | 41.8<br>(14.4 to 75.5)                            | 4.3<br>(-15.0 to 28.9)                              |
| Cervical cancer                                    | 8.7<br>(5.3 to 11.4)                          | 2.4<br>(1.5 to 3.1)                      | 0.8<br>(0.5 to 1.3)                   | 28.9<br>(-0.5 to 64.8)                            | -5.0<br>(-26.0 to 19.5)                             |
| Uterine cancer                                     | 1.5<br>(1.3 to 1.8)                           | 0.4<br>(0.3 to 0.4)                      | 0.1<br>(0.1 to 0.2)                   | 39.2<br>(13.0 to 73.0)                            | 4.6<br>(-15.3 to 28.9)                              |
| Ovarian cancer                                     | 1.0<br>(0.8 to 1.2)                           | 0.3<br>(0.3 to 0.4)                      | 0.2<br>(0.1 to 0.2)                   | 37.9<br>(19.5 to 61.6)                            | 2.2<br>(-11.0 to 18.4)                              |
| Prostate cancer                                    | 3.5<br>(2.8 to 5.0)                           | 1.1<br>(0.9 to 1.5)                      | 0.5<br>(0.3 to 0.7)                   | 30.5<br>(3.3 to 58.6)                             | -1.6<br>(-20.8 to 17.2)                             |
| Testicular cancer                                  | 0.1<br>(< 0.05 to 0.1)                        | < 0.05<br>(< 0.05 to < 0.05)             | < 0.05<br>(< 0.05 to < 0.05)          | 19.5<br>(-1.2 to 44.5)                            | -10.9<br>(-26.1 to 7.8)                             |
| Kidney cancer                                      | 1.9<br>(1.4 to 2.6)                           | 0.5<br>(0.4 to 0.6)                      | 0.2<br>(0.1 to 0.2)                   | 35.9<br>(-5.7 to 96.4)                            | 6.1<br>(-14.6 to 32.5)                              |
| Bladder cancer                                     | 1.1<br>(1.0 to 1.3)                           | 0.3<br>(0.3 to 0.4)                      | 0.1<br>(0.1 to 0.2)                   | 34.1<br>(14.5 to 54.6)                            | 0.0<br>(-12.5 to 14.0)                              |
| Brain and nervous system cancer                    | 1.4<br>(1.1 to 1.6)                           | 0.6<br>(0.5 to 0.7)                      | 0.2<br>(0.1 to 0.3)                   | 30.7<br>(12.8 to 48.5)                            | 0.7<br>(-9.2 to 9.9)                                |
| Thyroid cancer                                     | 0.1<br>(0.1 to 0.1)                           | < 0.05<br>(< 0.05 to < 0.05)             | < 0.05<br>(< 0.05 to < 0.05)          | 36.7<br>(17.5 to 56.1)                            | -0.5<br>(-16.0 to 16.7)                             |
| Mesothelioma                                       | < 0.05<br>(< 0.05 to 0.1)                     | < 0.05<br>(< 0.05 to < 0.05)             | < 0.05<br>(< 0.05 to < 0.05)          | 20.5<br>(4.3 to 38.0)                             | -10.2<br>(-20.6 to 0.7)                             |
| Hodgkin lymphoma                                   | 0.1<br>(0.1 to 0.2)                           | < 0.05<br>(< 0.05 to 0.1)                | < 0.05<br>(< 0.05 to < 0.05)          | 0.6<br>(-15.0 to 28.5)                            | -21.4<br>(-29.8 to -10.0)                           |
| Non-Hodgkin's lymphoma                             | 2.6<br>(2.2 to 3.1)                           | 0.9<br>(0.7 to 1.1)                      | 0.3<br>(0.2 to 0.4)                   | 27.4<br>(10.4 to 50.4)                            | -1.6<br>(-12.7 to 11.3)                             |
| Multiple myeloma                                   | 0.2<br>(0.2 to 0.3)                           | 0.2<br>(0.1 to 0.2)                      | 0.1<br>(< 0.05 to 0.1)                | 32.8<br>(18.8 to 42.8)                            | 0.5<br>(-9.9 to 8.7)                                |
| Leukaemia                                          | 1.5<br>(1.3 to 1.9)                           | 0.5<br>(0.4 to 0.6)                      | 0.2<br>(0.1 to 0.3)                   | 18.6<br>(1.4 to 39.4)                             | -7.7<br>(-16.2 to 3.4)                              |
| Acute lymphoid leukaemia                           | 0.2<br>(0.1 to 0.3)                           | 0.1<br>(< 0.05 to 0.1)                   | < 0.05<br>(< 0.05 to < 0.05)          | 15.3<br>(-9.2 to 45.5)                            | -8.5<br>(-23.4 to 7.9)                              |
| Chronic lymphoid leukaemia                         | 0.2<br>(0.2 to 0.3)                           | 0.1<br>(< 0.05 to 0.1)                   | < 0.05<br>(< 0.05 to < 0.05)          | 28.6<br>(9.3 to 51.6)                             | 0.5<br>(-15.6 to 20.8)                              |
| Acute myeloid leukaemia                            | 0.4<br>(0.3 to 0.6)                           | 0.2<br>(0.1 to 0.2)                      | 0.1<br>(< 0.05 to 0.1)                | 24.6<br>(-13.5 to 77.8)                           | -2.2<br>(-21.6 to 22.1)                             |
| Chronic myeloid leukaemia                          | 0.2<br>(0.1 to 0.2)                           | 0.1<br>(< 0.05 to 0.1)                   | < 0.05<br>(< 0.05 to < 0.05)          | 21.1<br>(3.0 to 45.8)                             | -10.0<br>(-22.1 to 5.9)                             |
| Other leukaemia                                    | 0.6<br>(0.5 to 0.7)                           | 0.1<br>(0.1 to 0.2)                      | 0.1<br>(< 0.05 to 0.1)                | 11.3<br>(-6.8 to 35.5)                            | -13.9<br>(-25.6 to 0.4)                             |
| Other neoplasms                                    | 2.4<br>(1.9 to 2.9)                           | 0.7<br>(0.6 to 0.8)                      | 0.2<br>(0.1 to 0.3)                   | 24.5<br>(-4.0 to 54.5)                            | -2.7<br>(-14.9 to 9.2)                              |
| <b>Cardiovascular diseases</b>                     | <b>1,479.5</b><br><b>(1,408.1 to 1,569.5)</b> | <b>99.8†</b><br><b>(95.6 to 104.2)</b>   | <b>87.6</b><br><b>(63.3 to 116.1)</b> | <b>29.7</b><br><b>(24.7 to 35.2)</b>              | <b>-1.2</b><br><b>(-4.6 to 2.3)</b>                 |
| Rheumatic heart disease                            | 212.6<br>(186.8 to 241.9)                     | 8.4<br>(7.5 to 9.6)                      | 10.5<br>(6.6 to 15.4)                 | 30.2<br>(18.7 to 41.5)                            | -0.4<br>(-9.0 to 7.8)                               |
| Ischaemic heart disease                            | 270.5<br>(255.3 to 285.4)                     | 36.0<br>(33.7 to 38.7)                   | 11.7<br>(7.8 to 16.4)                 | 29.7<br>(22.7 to 37.0)                            | -2.4<br>(-6.6 to 2.1)                               |
| Cerebrovascular disease                            | 116.6<br>(108.5 to 124.7)                     | 18.8‡<br>(17.3 to 20.3)                  | 17.2<br>(12.4 to 21.9)                | 25.5<br>(16.1 to 35.2)                            | -3.7<br>(-10.4 to 3.2)                              |
| Ischaemic stroke                                   | 98.9<br>(89.2 to 110.1)                       | 12.4‡<br>(11.0 to 13.8)                  | 14.0<br>(10.1 to 17.9)                | 27.1<br>(16.4 to 38.9)                            | -2.5<br>(-10.3 to 6.0)                              |
| Hemorrhagic stroke                                 | 23.6<br>(21.2 to 26.1)                        | 6.4‡<br>(5.7 to 7.0)                     | 3.3<br>(2.3 to 4.2)                   | 19.2<br>(4.8 to 34.2)                             | -9.0<br>(-19.7 to 2.1)                              |
| Hypertensive heart disease                         | 19.5<br>(15.8 to 23.7)                        | --                                       | 1.6<br>(1.0 to 2.2)                   | 26.6<br>(12.0 to 43.5)                            | -6.4<br>(-16.2 to 4.0)                              |
| Cardiomyopathy and myocarditis                     | 13.1<br>(11.3 to 15.2)                        | 6.3†<br>(5.5 to 7.2)                     | 1.2<br>(0.8 to 1.8)                   | 32.1<br>(16.6 to 49.2)                            | -3.6<br>(-15.1 to 9.3)                              |
| Myocarditis                                        | 3.0<br>(2.6 to 3.4)                           | 6.3<br>(5.5 to 7.2)                      | 0.2<br>(0.1 to 0.3)                   | 29.9<br>(20.3 to 39.0)                            | -1.7<br>(-11.1 to 8.1)                              |
| Alcoholic cardiomyopathy                           | 2.3<br>(1.7 to 2.9)                           | --                                       | 0.2<br>(0.1 to 0.3)                   | 33.9<br>(-1.9 to 82.9)                            | -4.0<br>(-28.2 to 27.7)                             |
| Other cardiomyopathy                               | 9.8<br>(7.8 to 12.0)                          | --                                       | 0.8<br>(0.5 to 1.2)                   | 32.3<br>(13.9 to 54.5)                            | -3.9<br>(-17.0 to 12.0)                             |
| Atrial fibrillation and flutter                    | 57.7<br>(50.4 to 66.1)                        | 5.1<br>(4.3 to 5.9)                      | 4.6<br>(3.0 to 6.4)                   | 31.3<br>(21.2 to 42.8)                            | 0.2<br>(-6.6 to 7.2)                                |
| Peripheral vascular disease                        | 210.1<br>(181.5 to 243.2)                     | 20.5<br>(17.6 to 23.8)                   | 1.0<br>(0.5 to 1.8)                   | 25.1<br>(15.7 to 34.8)                            | -2.6<br>(-9.2 to 4.7)                               |
| Endocarditis                                       | 3.7<br>(3.1 to 4.3)                           | 4.7<br>(4.2 to 5.2)                      | 0.3<br>(0.2 to 0.4)                   | 31.1<br>(17.0 to 47.0)                            | -0.7<br>(-12.7 to 13.6)                             |
| Other cardiovascular and circulatory diseases      | 748.1<br>(635.8 to 878.2)                     | --                                       | 39.5<br>(26.5 to 55.4)                | 31.5<br>(21.9 to 41.7)                            | 1.0<br>(-5.9 to 8.0)                                |
| <b>Chronic respiratory diseases</b>                | <b>1,330.6</b><br><b>(1,261.1 to 1,407.8)</b> | <b>281.4†</b><br><b>(260.2 to 305.1)</b> | <b>63.2</b><br><b>(47.2 to 83.0)</b>  | <b>31.3</b><br><b>(25.4 to 37.9)</b>              | <b>1.5</b><br><b>(-2.8 to 6.2)</b>                  |
| Chronic obstructive pulmonary disease              | 294.1<br>(281.1 to 307.0)                     | 20.5<br>(19.6 to 21.3)                   | 20.0<br>(17.3 to 22.4)                | 33.6<br>(23.4 to 44.1)                            | 0.4<br>(-6.7 to 8.1)                                |
| Pneumoconiosis                                     | 0.3<br>(0.2 to 0.3)                           | < 0.05<br>(< 0.05 to < 0.05)             | < 0.05<br>(< 0.05 to 0.1)             | 36.9<br>(29.1 to 44.4)                            | 2.2<br>(-3.6 to 8.1)                                |
| Silicosis                                          | < 0.05<br>(< 0.05 to < 0.05)                  | < 0.05<br>(< 0.05 to < 0.05)             | < 0.05<br>(< 0.05 to < 0.05)          | 38.1<br>(26.8 to 52.6)                            | 1.1<br>(-5.5 to 9.5)                                |



| Cause                                                          | Prevalence in thousands (95% UI)        | Incidence in thousands (95% UI)                     | YLDs in thousands (95% UI)        |                                                   |                                                     |
|----------------------------------------------------------------|-----------------------------------------|-----------------------------------------------------|-----------------------------------|---------------------------------------------------|-----------------------------------------------------|
|                                                                | 2016 counts                             | 2016 counts                                         | 2016 counts                       | Percentage change in counts between 2006 and 2016 | Percentage change in age-standardised rates between |
| Asbestosis                                                     | 0.1<br>(0.1 to 0.1)                     | < 0.05<br>(< 0.05 to < 0.05)                        | < 0.05<br>(< 0.05 to < 0.05)      | 35.3<br>(25.5 to 45.5)                            | 1.2<br>(-4.6 to 7.2)                                |
| Coal workers pneumoconiosis                                    | --                                      | --                                                  | --                                | --                                                | --                                                  |
| Other pneumoconiosis                                           | 0.1<br>(0.1 to 0.1)                     | < 0.05<br>(< 0.05 to < 0.05)                        | < 0.05<br>(< 0.05 to < 0.05)      | 38.2<br>(24.2 to 51.5)                            | 3.2<br>(-7.9 to 14.5)                               |
| Asthma                                                         | 1,043.0<br>(966.6 to 1,137.6)           | 260.7<br>(239.4 to 283.9)                           | 41.0<br>(27.2 to 59.1)            | 28.9<br>(22.3 to 36.2)                            | 1.4<br>(-2.9 to 6.0)                                |
| Interstitial lung disease and pulmonary sarcoidosis            | 2.2<br>(1.9 to 2.5)                     | 0.2<br>(0.2 to 0.2)                                 | 0.2<br>(0.2 to 0.4)               | 30.2<br>(25.9 to 34.7)                            | -1.2<br>(-6.2 to 4.2)                               |
| Other chronic respiratory diseases                             | --                                      | --                                                  | 1.9<br>(1.5 to 2.4)               | 69.6<br>(30.8 to 116.9)                           | 32.4<br>(8.5 to 58.7)                               |
| <b>Cirrhosis and other chronic liver diseases</b>              | <b>79.9<br/>(75.7 to 84.3)</b>          | <b>7.7<br/>(7.3 to 8.1)</b>                         | <b>6.9<br/>(4.7 to 9.7)</b>       | <b>28.7<br/>(16.5 to 42.1)</b>                    | <b>-0.9<br/>(-8.5 to 7.0)</b>                       |
| Cirrhosis and other chronic liver diseases due to hepatitis B  | 31.4<br>(27.1 to 35.7)                  | 3.0<br>(2.7 to 3.4)                                 | 2.2<br>(1.5 to 3.1)               | 31.2<br>(12.4 to 53.5)                            | -0.2<br>(-12.2 to 12.7)                             |
| Cirrhosis and other chronic liver diseases due to hepatitis C  | 11.6<br>(8.3 to 16.4)                   | 1.2<br>(0.9 to 1.7)                                 | 0.8<br>(0.5 to 1.3)               | 26.3<br>(1.1 to 56.2)                             | -5.7<br>(-22.4 to 13.4)                             |
| Cirrhosis and other chronic liver diseases due to alcohol use  | 13.0<br>(11.2 to 14.9)                  | 1.5<br>(1.3 to 1.7)                                 | 0.9<br>(0.6 to 1.3)               | 36.7<br>(11.4 to 64.3)                            | 1.4<br>(-13.8 to 18.6)                              |
| Cirrhosis and other chronic liver diseases due to other causes | 23.9<br>(21.8 to 26.1)                  | 2.0<br>(1.8 to 2.1)                                 | 3.0<br>(2.0 to 4.4)               | 25.3<br>(3.8 to 50.0)                             | -0.7<br>(-15.9 to 17.0)                             |
| <b>Digestive diseases</b>                                      | <b>390.2<br/>(361.4 to 422.3)</b>       | <b>378.7<sup>†</sup><br/>(359.3 to 399.8)</b>       | <b>11.9<br/>(8.3 to 16.1)</b>     | <b>29.7<br/>(19.0 to 39.7)</b>                    | <b>-1.6<br/>(-7.5 to 4.5)</b>                       |
| Peptic ulcer disease                                           | 73.4<br>(67.2 to 80.5)                  | 32.4<br>(28.8 to 36.1)                              | 1.4<br>(0.9 to 2.1)               | 40.1<br>(25.3 to 56.7)                            | 6.4<br>(-3.1 to 17.3)                               |
| Gastritis and duodenitis                                       | 132.8<br>(115.8 to 150.1)               | 125.1<br>(111.0 to 141.8)                           | 1.9<br>(1.2 to 2.7)               | 44.5<br>(30.0 to 60.0)                            | 11.3<br>(2.4 to 21.4)                               |
| Appendicitis                                                   | 2.9<br>(2.7 to 3.1)                     | 76.0<br>(70.1 to 82.8)                              | 0.9<br>(0.6 to 1.3)               | 25.1<br>(-10.6 to 72.9)                           | -2.2<br>(-22.9 to 24.8)                             |
| Paralytic ileus and intestinal obstruction                     | 0.5<br>(0.5 to 0.6)                     | 14.9<br>(13.5 to 16.6)                              | 0.2<br>(0.1 to 0.2)               | 30.3<br>(24.7 to 36.1)                            | -2.0<br>(-10.7 to 7.3)                              |
| Inguinal, femoral, and abdominal hernia                        | 176.6<br>(143.8 to 214.6)               | 48.9<br>(43.0 to 55.6)                              | 5.6<br>(3.7 to 8.0)               | 21.9<br>(6.9 to 38.8)                             | -9.0<br>(-18.5 to 0.4)                              |
| Inflammatory bowel disease                                     | 2.3<br>(2.2 to 2.5)                     | 9.6<br>(9.2 to 10.1)                                | 0.4<br>(0.2 to 0.5)               | 47.4<br>(42.8 to 52.6)                            | 12.1<br>(8.6 to 15.8)                               |
| Vascular intestinal disorders                                  | 0.2<br>(0.1 to 0.2)                     | 0.9<br>(0.8 to 1.1)                                 | 0.1<br>(< 0.05 to 0.1)            | 34.4<br>(26.5 to 41.9)                            | 3.3<br>(-1.2 to 7.9)                                |
| Gallbladder and biliary diseases                               | 13.9<br>(12.2 to 15.7)                  | 65.5<br>(56.5 to 74.8)                              | 0.4<br>(0.2 to 0.5)               | 36.5<br>(22.8 to 51.6)                            | 2.8<br>(-8.7 to 15.5)                               |
| Pancreatitis                                                   | 0.6<br>(0.5 to 0.7)                     | 5.4<br>(4.8 to 6.0)                                 | 0.1<br>(< 0.05 to 0.1)            | 40.3<br>(34.6 to 46.5)                            | 5.2<br>(0.8 to 9.7)                                 |
| Other digestive diseases                                       | --                                      | --                                                  | 1.1<br>(0.7 to 1.4)               | 33.0<br>(19.4 to 47.5)                            | 1.6<br>(-5.2 to 8.1)                                |
| <b>Neurological disorders</b>                                  | <b>8,877.8<br/>(8,451.5 to 9,318.7)</b> | <b>4,465.5<br/>(3,777.3 to 5,251.4)</b>             | <b>225.3<br/>(141.0 to 334.5)</b> | <b>32.5<br/>(-3.0 to 84.2)</b>                    | <b>1.8<br/>(-21.9 to 35.5)</b>                      |
| Alzheimer's disease and other dementias                        | 32.4<br>(27.2 to 38.5)                  | 5.6<br>(4.7 to 6.7)                                 | 4.6<br>(3.2 to 6.1)               | 28.5<br>(21.4 to 35.8)                            | -0.9<br>(-5.5 to 3.6)                               |
| Parkinson's disease                                            | 4.0<br>(3.2 to 5.1)                     | 0.5<br>(0.4 to 0.7)                                 | 0.5<br>(0.3 to 0.7)               | 37.0<br>(16.9 to 62.0)                            | 5.3<br>(-8.5 to 20.9)                               |
| Epilepsy                                                       | 137.8<br>(34.8 to 240.7)                | 18.9<br>(4.8 to 33.1)                               | 50.6<br>(11.1 to 106.4)           | 33.2<br>(-69.1 to 529.4)                          | 3.9<br>(-75.8 to 400.4)                             |
| Multiple sclerosis                                             | 1.1<br>(1.0 to 1.3)                     | 0.1<br>(0.1 to 0.1)                                 | 0.3<br>(0.2 to 0.4)               | 45.9<br>(41.4 to 50.5)                            | 8.9<br>(5.4 to 12.3)                                |
| Motor neuron disease                                           | 0.3<br>(0.3 to 0.4)                     | 0.1<br>(0.1 to 0.1)                                 | 0.1<br>(< 0.05 to 0.1)            | 34.6<br>(29.5 to 41.2)                            | 3.8<br>(0.8 to 7.8)                                 |
| Migraine                                                       | 3,249.9<br>(3,046.6 to 3,438.5)         | 393.6<br>(370.2 to 419.6)                           | 136.1<br>(87.0 to 192.2)          | 30.3<br>(24.9 to 35.8)                            | 0.4<br>(-3.2 to 4.0)                                |
| Tension-type headache                                          | 6,765.0<br>(6,001.7 to 7,607.4)         | 4,046.6<br>(3,355.1 to 4,819.9)                     | 21.4<br>(13.3 to 32.0)            | 31.4<br>(24.4 to 39.0)                            | 0.8<br>(-4.0 to 6.1)                                |
| Other neurological disorders                                   | 0.1<br>(< 0.05 to 0.1)                  | 0.1<br>(0.1 to 0.2)                                 | 11.8<br>(2.9 to 24.8)             | 63.2<br>(-59.9 to 611.7)                          | 24.6<br>(-66.9 to 372.3)                            |
| <b>Mental and substance use disorders</b>                      | <b>3,723.7<br/>(3,540.9 to 3,881.7)</b> | <b>1,376.9<sup>†</sup><br/>(1,278.4 to 1,486.7)</b> | <b>462.6<br/>(337.7 to 602.7)</b> | <b>29.9<br/>(26.9 to 33.0)</b>                    | <b>0.3<br/>(-2.0 to 2.4)</b>                        |
| Schizophrenia                                                  | 43.2<br>(37.8 to 49.1)                  | 3.6<br>(3.2 to 4.1)                                 | 27.9<br>(19.8 to 35.6)            | 37.2<br>(24.7 to 50.4)                            | 2.1<br>(-6.4 to 10.9)                               |
| Alcohol use disorders                                          | 296.1<br>(253.2 to 344.4)               | 162.1<br>(136.5 to 188.2)                           | 29.7<br>(20.1 to 42.0)            | 34.0<br>(23.4 to 45.6)                            | 2.5<br>(-4.9 to 10.7)                               |
| Drug use disorders                                             | 120.9<br>(108.6 to 133.7)               | 19.4<br>(17.3 to 21.6)                              | 34.0<br>(23.1 to 45.6)            | 45.5<br>(31.9 to 62.3)                            | 11.1<br>(1.7 to 23.2)                               |
| Opioid use disorders                                           | 73.1<br>(61.1 to 88.3)                  | 8.9<br>(7.5 to 10.6)                                | 30.7<br>(20.5 to 41.4)            | 47.1<br>(31.5 to 66.1)                            | 12.1<br>(1.7 to 25.5)                               |
| Cocaine use disorders                                          | 3.5<br>(2.9 to 4.2)                     | 0.5<br>(0.4 to 0.6)                                 | 0.5<br>(0.3 to 0.8)               | 33.1<br>(25.8 to 40.5)                            | 3.0<br>(-2.0 to 8.1)                                |
| Amphetamine use disorders                                      | 1.8<br>(1.2 to 2.5)                     | 0.3<br>(0.2 to 0.5)                                 | 0.2<br>(0.1 to 0.4)               | 31.6<br>(20.5 to 47.1)                            | 3.5<br>(-5.2 to 15.0)                               |
| Cannabis use disorders                                         | 39.3<br>(32.7 to 47.0)                  | 7.8<br>(6.4 to 9.5)                                 | 1.2<br>(0.7 to 1.8)               | 28.6<br>(2.2 to 61.2)                             | 0.3<br>(-18.6 to 22.4)                              |
| Other drug use disorders                                       | 8.6<br>(7.6 to 9.9)                     | 1.8<br>(1.6 to 2.0)                                 | 1.4<br>(1.0 to 2.1)               | 35.5<br>(15.3 to 58.8)                            | 3.2<br>(-11.1 to 20.3)                              |
| Depressive disorders                                           | 808.9<br>(755.1 to 875.0)               | 875.6<br>(783.7 to 977.2)                           | 137.1<br>(94.9 to 188.1)          | 29.8<br>(23.4 to 36.3)                            | -1.3<br>(-5.9 to 3.2)                               |
| Major depressive disorder                                      | 529.0<br>(473.4 to 594.0)               | 823.6<br>(729.5 to 926.7)                           | 108.7<br>(74.1 to 149.4)          | 29.2<br>(21.8 to 37.2)                            | -1.7<br>(-7.0 to 3.8)                               |
| Dysthymia                                                      | 294.2<br>(254.3 to 341.3)               | 52.1<br>(45.5 to 60.0)                              | 28.4<br>(18.9 to 41.1)            | 32.1<br>(26.5 to 37.7)                            | 0.2<br>(-3.3 to 3.6)                                |
| Bipolar disorder                                               | 154.9<br>(131.2 to 182.5)               | 16.2<br>(13.8 to 19.1)                              | 31.9<br>(19.4 to 47.6)            | 29.7<br>(20.9 to 39.2)                            | 0.2<br>(-5.9 to 6.5)                                |
| Anxiety disorders                                              | 766.2<br>(690.6 to 849.0)               | 142.0<br>(129.1 to 157.2)                           | 74.7<br>(51.9 to 103.5)           | 28.3<br>(19.5 to 38.6)                            | 0.2<br>(-6.0 to 7.3)                                |
| Eating disorders                                               | 28.2<br>(23.1 to 34.0)                  | 19.4<br>(14.1 to 25.9)                              | 5.7<br>(3.6 to 8.3)               | 43.3<br>(24.9 to 66.7)                            | 13.6<br>(-1.1 to 31.4)                              |
| Anorexia nervosa                                               | 7.3<br>(5.2 to 10.0)                    | 3.2<br>(2.3 to 4.4)                                 | 1.6<br>(0.9 to 2.5)               | 38.0<br>(4.3 to 80.4)                             | 11.5<br>(-14.9 to 43.9)                             |
| Bulimia nervosa                                                | 19.6<br>(14.5 to 26.2)                  | 16.2<br>(11.2 to 22.8)                              | 4.1<br>(2.5 to 6.3)               | 45.4<br>(24.2 to 73.2)                            | 14.3<br>(-2.7 to 36.0)                              |
| Autistic spectrum disorders                                    | 233.8<br>(210.8 to 268.6)               | 2.8<br>(1.9 to 3.9)                                 | 33.3<br>(22.6 to 47.1)            | 28.8<br>(21.6 to 35.7)                            | 0.3<br>(-4.8 to 5.3)                                |
| Autism                                                         | 63.2<br>(54.2 to 73.7)                  | 0.4<br>(0.2 to 0.6)                                 | 16.2<br>(10.4 to 23.6)            | 28.5<br>(16.4 to 41.6)                            | 0.3<br>(-8.5 to 9.3)                                |
| Asperger syndrome and other autistic spectrum disorders        | 169.7<br>(140.4 to 205.7)               | 2.4<br>(1.6 to 3.5)                                 | 17.1<br>(11.0 to 25.0)            | 29.1<br>(22.1 to 36.4)                            | 0.3<br>(-4.4 to 5.3)                                |

| Cause                                                      | Prevalence in thousands (95% UI)                 | Incidence in thousands (95% UI)                              | YLDs in thousands (95% UI)              |                                                   |                                                     |
|------------------------------------------------------------|--------------------------------------------------|--------------------------------------------------------------|-----------------------------------------|---------------------------------------------------|-----------------------------------------------------|
|                                                            | 2016 counts                                      | 2016 counts                                                  | 2016 counts                             | Percentage change in counts between 2006 and 2016 | Percentage change in age-standardised rates between |
| Attention-deficit/hyperactivity disorder                   | 371.8<br>(333.3 to 415.5)                        | 22.9<br>(20.0 to 26.7)                                       | 4.5<br>(2.7 to 7.2)                     | 25.7<br>(17.4 to 34.7)                            | 0.4<br>(-6.0 to 7.1)                                |
| Conduct disorder                                           | 262.4<br>(215.3 to 312.7)                        | 93.8<br>(74.6 to 113.0)                                      | 31.8<br>(19.4 to 49.0)                  | 20.7<br>(13.1 to 29.2)                            | 0.4<br>(-6.0 to 7.5)                                |
| Idiopathic developmental intellectual disability           | 527.2<br>(307.5 to 749.5)                        | --                                                           | 21.1<br>(9.7 to 37.1)                   | 12.2<br>(3.3 to 20.5)                             | -12.2<br>(-19.1 to -5.8)                            |
| Other mental and substance use disorders                   | 412.5<br>(361.2 to 478.3)                        | 18.9<br>(16.7 to 21.8)                                       | 30.9<br>(21.2 to 44.4)                  | 33.1<br>(25.6 to 40.7)                            | 0.3<br>(-4.8 to 5.1)                                |
| <b>Diabetes, urogenital, blood, and endocrine diseases</b> | <b>13,169.6</b><br><b>(12,916.3 to 13,437.7)</b> | <b>3,125.7<sup>+</sup></b><br><b>(2,919.0 to 3,361.1)</b>    | <b>187.0</b><br><b>(132.2 to 254.2)</b> | <b>35.7</b><br><b>(32.0 to 39.4)</b>              | <b>3.5</b><br><b>(0.4 to 6.4)</b>                   |
| Diabetes mellitus                                          | 748.7<br>(671.8 to 828.2)                        | 50.2<br>(45.5 to 55.4)                                       | 52.9<br>(36.7 to 74.1)                  | 47.1<br>(37.9 to 55.9)                            | 10.4<br>(3.4 to 16.7)                               |
| Acute glomerulonephritis                                   | 0.2<br>(0.2 to 0.3)                              | 3.5<br>(3.0 to 4.1)                                          | < 0.05<br>(< 0.05 to < 0.05)            | 29.6<br>(23.8 to 34.6)                            | 0.4<br>(-3.4 to 3.9)                                |
| Chronic kidney disease                                     | 1,530.7<br>(1,374.8 to 1,697.4)                  | 114.9<br>(101.4 to 129.4)                                    | 40.0<br>(28.7 to 52.4)                  | 41.8<br>(33.3 to 50.6)                            | 4.7<br>(-0.5 to 10.0)                               |
| Chronic kidney disease due to diabetes mellitus            | 492.1<br>(418.8 to 574.4)                        | 34.6<br>(28.7 to 41.8)                                       | 12.2<br>(8.6 to 16.4)                   | 43.4<br>(31.4 to 55.9)                            | 4.8<br>(-2.8 to 12.6)                               |
| Chronic kidney disease due to hypertension                 | 322.1<br>(276.8 to 368.3)                        | 29.2<br>(24.4 to 34.4)                                       | 6.7<br>(4.5 to 9.1)                     | 36.4<br>(22.8 to 50.9)                            | 1.1<br>(-8.5 to 10.7)                               |
| Chronic kidney disease due to glomerulonephritis           | 304.9<br>(262.2 to 347.9)                        | 18.0<br>(14.4 to 22.2)                                       | 10.0<br>(7.1 to 13.4)                   | 42.3<br>(28.3 to 57.8)                            | 6.7<br>(-2.1 to 16.2)                               |
| Chronic kidney disease due to other causes                 | 411.6<br>(343.7 to 486.3)                        | 33.0<br>(27.4 to 39.0)                                       | 11.1<br>(7.8 to 15.0)                   | 43.0<br>(30.8 to 56.7)                            | 6.0<br>(-1.3 to 14.0)                               |
| Urinary diseases and male infertility                      | 563.7<br>(486.2 to 644.8)                        | 1,733.2 <sup>+</sup><br>(1,546.7 to 1,947.2)                 | 11.7<br>(7.6 to 17.1)                   | 32.5<br>(23.9 to 41.8)                            | -1.4<br>(-7.1 to 5.2)                               |
| Interstitial nephritis and urinary tract infections        | 29.8<br>(26.2 to 33.9)                           | 1,552.2<br>(1,365.3 to 1,752.3)                              | 1.0<br>(0.6 to 1.5)                     | 29.4<br>(10.4 to 51.4)                            | 0.3<br>(-13.2 to 15.0)                              |
| Urolithiasis                                               | 5.6<br>(4.9 to 6.4)                              | 147.6<br>(130.2 to 169.9)                                    | 0.4<br>(0.3 to 0.6)                     | 34.8<br>(25.8 to 44.6)                            | 1.3<br>(-6.2 to 9.7)                                |
| Benign prostatic hyperplasia                               | 255.3<br>(214.3 to 297.8)                        | 33.4<br>(27.7 to 39.7)                                       | 8.4<br>(5.3 to 12.3)                    | 31.9<br>(22.0 to 43.6)                            | -2.0<br>(-8.2 to 5.2)                               |
| Male infertility                                           | 242.8<br>(186.1 to 317.3)                        | --                                                           | 1.4<br>(0.5 to 2.8)                     | 52.6<br>(21.9 to 91.2)                            | 14.6<br>(-9.6 to 46.1)                              |
| Other urinary diseases                                     | --                                               | --                                                           | 0.5<br>(0.4 to 0.8)                     | 7.5<br>(-5.1 to 20.5)                             | -16.5<br>(-24.6 to -7.9)                            |
| Gynecological diseases                                     | 3,135.5<br>(2,988.2 to 3,298.9)                  | 1,200.4 <sup>+</sup><br>(1,111.4 to 1,297.1)                 | 39.0<br>(26.5 to 55.6)                  | 31.4<br>(26.1 to 36.7)                            | -1.6<br>(-5.2 to 2.0)                               |
| Uterine fibroids                                           | 230.5<br>(202.7 to 260.1)                        | 28.4<br>(24.4 to 32.8)                                       | 5.6<br>(3.5 to 8.5)                     | 30.0<br>(21.2 to 38.4)                            | -6.2<br>(-12.4 to -0.2)                             |
| Polycystic ovarian syndrome                                | 26.6<br>(19.8 to 34.1)                           | 77.1<br>(55.2 to 104.7)                                      | 0.2<br>(0.1 to 0.4)                     | 37.5<br>(19.6 to 57.6)                            | 4.1<br>(-9.4 to 19.4)                               |
| Female infertility                                         | 19.8<br>(13.1 to 36.6)                           | --                                                           | 0.1<br>(< 0.05 to 0.3)                  | 88.7<br>(26.1 to 245.3)                           | 39.4<br>(-6.2 to 154.9)                             |
| Endometriosis                                              | 5.7<br>(4.7 to 6.8)                              | 22.1<br>(18.0 to 27.5)                                       | 0.5<br>(0.3 to 0.8)                     | 32.2<br>(-3.1 to 81.5)                            | 1.8<br>(-23.6 to 37.2)                              |
| Genital prolapse                                           | 1,456.3<br>(1,288.7 to 1,632.1)                  | 132.6<br>(111.5 to 158.1)                                    | 4.6<br>(2.2 to 8.3)                     | 31.9<br>(24.0 to 40.0)                            | -2.2<br>(-8.4 to 4.2)                               |
| Premenstrual syndrome                                      | 1,401.4<br>(1,307.6 to 1,500.3)                  | 522.4<br>(479.1 to 563.4)                                    | 11.7<br>(7.2 to 18.0)                   | 29.2<br>(18.5 to 41.1)                            | -1.0<br>(-8.7 to 7.7)                               |
| Other gynecological diseases                               | 471.9<br>(407.6 to 543.3)                        | 417.8<br>(341.5 to 504.2)                                    | 16.2<br>(10.9 to 23.3)                  | 33.1<br>(24.6 to 41.8)                            | -0.0<br>(-6.5 to 6.5)                               |
| Hemoglobinopathies and hemolytic anaemias                  | 9,889.7<br>(9,579.2 to 10,210.8)                 | --                                                           | 30.8<br>(20.6 to 44.2)                  | 23.9<br>(16.5 to 33.9)                            | -3.9<br>(-9.2 to 2.9)                               |
| Thalassemias                                               | < 0.05<br>(< 0.05 to < 0.05)                     | --                                                           | < 0.05<br>(< 0.05 to < 0.05)            | 31.4<br>(6.5 to 53.0)                             | -1.0<br>(-19.7 to 14.8)                             |
| Thalassaemias trait                                        | 113.4<br>(99.4 to 126.7)                         | --                                                           | 1.7<br>(1.1 to 2.5)                     | 32.7<br>(7.0 to 53.6)                             | 2.3<br>(-16.4 to 17.1)                              |
| Sickle cell disorders                                      | 60.3<br>(54.1 to 66.5)                           | --                                                           | 5.0<br>(3.5 to 6.9)                     | 30.6<br>(13.9 to 52.4)                            | 4.0<br>(-8.7 to 21.4)                               |
| Sickle cell trait                                          | 4,132.5<br>(3,869.7 to 4,367.9)                  | --                                                           | 14.4<br>(9.4 to 21.0)                   | 28.6<br>(18.5 to 42.8)                            | 1.8<br>(-5.7 to 12.8)                               |
| G6PD deficiency                                            | 2,192.7<br>(2,018.9 to 2,406.6)                  | --                                                           | 0.2<br>(0.1 to 0.3)                     | 23.8<br>(-12.8 to 78.5)                           | 0.5<br>(-21.3 to 29.3)                              |
| G6PD trait                                                 | 4,428.1<br>(4,232.4 to 4,638.0)                  | --                                                           | < 0.05<br>(< 0.05 to < 0.05)            | 41.3<br>(31.0 to 51.8)                            | 9.9<br>(2.8 to 17.3)                                |
| Other hemoglobinopathies and hemolytic anaemias            | 353.2<br>(341.9 to 364.7)                        | --                                                           | 9.6<br>(6.3 to 13.8)                    | 13.4<br>(5.4 to 22.5)                             | -13.6<br>(-18.8 to -7.7)                            |
| Endocrine, metabolic, blood, and immune disorders          | 405.1<br>(391.7 to 419.8)                        | 23.4<br>(21.1 to 26.1)                                       | 12.6<br>(8.6 to 17.9)                   | 22.2<br>(15.1 to 29.8)                            | -2.4<br>(-7.0 to 2.7)                               |
| <b>Musculoskeletal disorders</b>                           | <b>2,839.6</b><br><b>(2,684.6 to 2,987.6)</b>    | <b>1,325.9</b><br><b>(1,189.2 to 1,457.0)</b>                | <b>308.4</b><br><b>(219.7 to 404.6)</b> | <b>40.0</b><br><b>(35.0 to 45.2)</b>              | <b>5.1</b><br><b>(1.9 to 8.5)</b>                   |
| Rheumatoid arthritis                                       | 30.2<br>(26.6 to 34.4)                           | 1.9<br>(1.7 to 2.2)                                          | 7.2<br>(4.9 to 9.8)                     | 39.0<br>(23.8 to 56.5)                            | 4.7<br>(-4.9 to 15.7)                               |
| Osteoarthritis                                             | 533.7<br>(499.2 to 569.9)                        | 31.2<br>(28.9 to 33.7)                                       | 33.0<br>(23.0 to 44.7)                  | 41.7<br>(36.2 to 47.2)                            | 5.0<br>(1.4 to 8.8)                                 |
| Low back and neck pain                                     | 1,908.8<br>(1,765.3 to 2,058.7)                  | 846.6<br>(756.2 to 944.7)                                    | 219.4<br>(154.5 to 291.3)               | 42.2<br>(35.9 to 49.1)                            | 6.8<br>(2.4 to 11.4)                                |
| Low back pain                                              | 1,381.2<br>(1,221.7 to 1,568.4)                  | 697.0<br>(607.8 to 792.3)                                    | 156.6<br>(109.9 to 208.2)               | 44.8<br>(36.2 to 54.6)                            | 9.7<br>(3.2 to 16.5)                                |
| Neck pain                                                  | 626.1<br>(539.5 to 723.8)                        | 149.7<br>(128.4 to 175.5)                                    | 62.8<br>(42.3 to 88.8)                  | 36.1<br>(32.3 to 40.0)                            | 0.5<br>(-1.6 to 3.0)                                |
| Gout                                                       | 63.9<br>(56.4 to 72.5)                           | 13.2<br>(11.5 to 15.1)                                       | 2.0<br>(1.4 to 2.9)                     | 34.9<br>(16.3 to 55.1)                            | 0.2<br>(-12.8 to 13.9)                              |
| Other musculoskeletal disorders                            | 538.5<br>(425.8 to 650.9)                        | 433.0<br>(331.5 to 538.8)                                    | 46.7<br>(30.3 to 67.2)                  | 29.7<br>(17.6 to 42.4)                            | -3.0<br>(-11.5 to 6.2)                              |
| <b>Other non-communicable diseases</b>                     | <b>18,132.2</b><br><b>(17,659.9 to 18,566.2)</b> | <b>46,079.5<sup>+</sup></b><br><b>(42,270.5 to 50,439.6)</b> | <b>444.9</b><br><b>(300.4 to 637.2)</b> | <b>29.6</b><br><b>(27.5 to 31.7)</b>              | <b>-0.6</b><br><b>(-1.8 to 0.7)</b>                 |
| Congenital anomalies                                       | 258.9<br>(226.1 to 305.0)                        | --                                                           | 39.4<br>(27.9 to 53.2)                  | 24.8<br>(16.9 to 33.5)                            | -3.3<br>(-9.1 to 3.2)                               |
| Neural tube defects                                        | 40.2<br>(35.6 to 45.1)                           | --                                                           | 12.1<br>(8.4 to 16.3)                   | 25.5<br>(10.8 to 42.7)                            | -2.7<br>(-13.1 to 8.9)                              |
| Congenital heart anomalies                                 | 58.7<br>(48.7 to 69.4)                           | --                                                           | 2.9<br>(1.4 to 4.9)                     | 26.4<br>(10.8 to 44.8)                            | -0.9<br>(-12.4 to 12.5)                             |
| Orofacial clefts                                           | 7.5<br>(6.5 to 8.5)                              | --                                                           | 0.1<br>(0.1 to 0.2)                     | 25.1<br>(11.7 to 40.9)                            | -3.3<br>(-13.8 to 8.8)                              |
| Down's syndrome                                            | 4.7<br>(4.0 to 5.5)                              | --                                                           | 0.4<br>(0.3 to 0.6)                     | 29.1<br>(18.4 to 39.4)                            | 1.1<br>(-7.0 to 9.3)                                |
| Turner syndrome                                            | 13.6<br>(11.3 to 16.1)                           | --                                                           | 0.2<br>(0.1 to 0.4)                     | 16.9<br>(-20.3 to 70.2)                           | -7.2<br>(-34.9 to 33.0)                             |
| Klinefelter syndrome                                       | 15.4<br>(12.8 to 18.3)                           | --                                                           | 0.1<br>(< 0.05 to 0.1)                  | 28.9<br>(-0.9 to 67.1)                            | 0.3<br>(-23.1 to 29.6)                              |



| Cause                                         | Prevalence in thousands (95% UI)              | Incidence in thousands (95% UI)                | YLDs in thousands (95% UI)             |                                                   |                                                     |
|-----------------------------------------------|-----------------------------------------------|------------------------------------------------|----------------------------------------|---------------------------------------------------|-----------------------------------------------------|
|                                               | 2016 counts                                   | 2016 counts                                    | 2016 counts                            | Percentage change in counts between 2006 and 2016 | Percentage change in age-standardised rates between |
| Other chromosomal abnormalities               | 5.1<br>(4.4 to 6.1)                           | --                                             | 1.0<br>(0.6 to 1.4)                    | 31.6<br>(-8.2 to 84.1)                            | 0.5<br>(-28.6 to 39.4)                              |
| Congenital musculoskeletal and limb anomalies | 26.2<br>(22.8 to 29.9)                        | --                                             | 3.8<br>(2.5 to 5.5)                    | 27.2<br>(10.4 to 46.2)                            | -0.2<br>(-12.0 to 12.6)                             |
| Urogenital congenital anomalies               | 18.4<br>(16.2 to 21.1)                        | --                                             | 0.4<br>(0.2 to 0.7)                    | 25.0<br>(13.9 to 36.9)                            | -2.0<br>(-10.0 to 6.4)                              |
| Digestive congenital anomalies                | 28.4<br>(25.2 to 31.9)                        | --                                             | 1.3<br>(0.8 to 1.9)                    | 31.4<br>(8.3 to 57.7)                             | 2.0<br>(-14.3 to 18.9)                              |
| Other congenital anomalies                    | 106.3<br>(67.5 to 162.3)                      | --                                             | 17.1<br>(11.0 to 25.5)                 | 22.7<br>(11.7 to 34.6)                            | -5.4<br>(-13.0 to 3.6)                              |
| Skin and subcutaneous diseases                | 8,356.2<br>(8,114.6 to 8,625.8)               | 19,717.6<br>(18,597.1 to 20,976.5)             | 186.6<br>(123.8 to 273.0)              | 33.4<br>(30.0 to 37.5)                            | 4.5<br>(2.2 to 7.4)                                 |
| Dermatitis                                    | 820.3<br>(760.6 to 883.4)                     | 1,105.1<br>(1,012.8 to 1,207.4)                | 30.8<br>(18.3 to 49.6)                 | 30.0<br>(23.0 to 38.4)                            | 0.6<br>(-4.2 to 6.0)                                |
| Psoriasis                                     | 167.3<br>(158.9 to 175.8)                     | 25.2<br>(24.0 to 26.4)                         | 14.7<br>(10.4 to 19.7)                 | 39.0<br>(25.5 to 54.3)                            | 6.8<br>(-1.8 to 16.3)                               |
| Cellulitis                                    | 10.2<br>(9.4 to 11.0)                         | 176.9<br>(164.0 to 190.5)                      | 0.6<br>(0.4 to 0.9)                    | 30.7<br>(6.9 to 63.0)                             | 2.1<br>(-15.5 to 23.3)                              |
| Pyoderma                                      | 153.9<br>(146.5 to 161.3)                     | 3,033.6<br>(2,897.8 to 3,182.3)                | 0.9<br>(0.4 to 1.8)                    | 31.5<br>(23.4 to 40.1)                            | 1.1<br>(-4.4 to 6.7)                                |
| Scabies                                       | 320.2<br>(271.8 to 376.7)                     | 1,006.9<br>(853.7 to 1,174.2)                  | 8.3<br>(4.6 to 13.5)                   | 26.8<br>(20.0 to 33.5)                            | -1.3<br>(-5.8 to 3.3)                               |
| Fungal skin diseases                          | 3,130.3<br>(2,764.2 to 3,537.8)               | 9,251.2<br>(8,195.5 to 10,414.6)               | 17.7<br>(7.1 to 36.6)                  | 29.3<br>(27.6 to 31.0)                            | 0.2<br>(-0.8 to 1.2)                                |
| Viral skin diseases                           | 801.0<br>(760.8 to 843.8)                     | 1,117.5<br>(1,058.3 to 1,188.8)                | 24.6<br>(15.3 to 36.7)                 | 27.3<br>(22.7 to 31.9)                            | 0.1<br>(-3.1 to 3.4)                                |
| Acne vulgaris                                 | 2,349.1<br>(2,077.5 to 2,654.9)               | 1,656.3<br>(1,362.5 to 2,071.7)                | 60.6<br>(40.2 to 87.6)                 | 39.1<br>(31.2 to 49.6)                            | 12.6<br>(6.5 to 20.8)                               |
| Alopecia areata                               | 46.5<br>(44.5 to 48.7)                        | 82.9<br>(79.2 to 86.8)                         | 1.5<br>(1.0 to 2.3)                    | 31.3<br>(17.4 to 48.2)                            | 0.4<br>(-9.7 to 11.9)                               |
| Pruritus                                      | 206.0<br>(181.1 to 232.1)                     | 166.2<br>(148.1 to 187.8)                      | 2.2<br>(1.0 to 4.1)                    | 32.7<br>(24.8 to 41.0)                            | 1.5<br>(-3.5 to 6.8)                                |
| Urticaria                                     | 275.3<br>(235.3 to 323.5)                     | 495.7<br>(420.7 to 579.5)                      | 16.6<br>(10.6 to 24.2)                 | 30.8<br>(22.7 to 39.1)                            | 0.2<br>(-5.5 to 5.9)                                |
| Decubitus ulcer                               | 2.2<br>(2.0 to 2.5)                           | 8.0<br>(7.1 to 8.9)                            | 0.4<br>(0.2 to 0.5)                    | 33.7<br>(23.4 to 44.5)                            | 1.6<br>(-10.5 to 15.9)                              |
| Other skin and subcutaneous diseases          | 1,398.3<br>(1,357.9 to 1,440.8)               | 1,592.1<br>(1,544.0 to 1,643.8)                | 7.7<br>(3.7 to 14.1)                   | 37.7<br>(33.8 to 41.5)                            | 4.9<br>(2.3 to 7.4)                                 |
| Sense organ diseases                          | 5,083.0<br>(4,953.3 to 5,226.5)               | 2,545.9†<br>(2,372.2 to 2,749.5)               | 173.1<br>(119.0 to 242.4)              | 25.8<br>(23.0 to 28.6)                            | -3.3<br>(-4.9 to -1.6)                              |
| Glaucoma                                      | 9.7<br>(8.1 to 11.4)                          | --                                             | 1.1<br>(0.7 to 1.5)                    | 34.7<br>(18.6 to 51.2)                            | 4.6<br>(-6.1 to 16.3)                               |
| Cataract                                      | 188.8<br>(164.7 to 215.0)                     | --                                             | 13.4<br>(9.4 to 18.3)                  | 30.8<br>(23.8 to 38.4)                            | 0.5<br>(-4.6 to 6.4)                                |
| Macular degeneration                          | 10.7<br>(8.1 to 13.9)                         | --                                             | 0.8<br>(0.5 to 1.1)                    | 38.8<br>(21.1 to 59.3)                            | 7.6<br>(-5.2 to 22.2)                               |
| Refraction and accommodation disorders        | 2,553.8<br>(2,451.9 to 2,668.3)               | --                                             | 45.2<br>(27.9 to 71.3)                 | 21.5<br>(17.9 to 25.3)                            | -7.0<br>(-9.6 to -4.2)                              |
| Age-related and other hearing loss            | 3,025.7<br>(2,828.1 to 3,244.6)               | --                                             | 89.8<br>(61.7 to 127.1)                | 25.2<br>(20.1 to 30.1)                            | -3.8<br>(-6.5 to -1.2)                              |
| Other vision loss                             | 76.5<br>(67.7 to 86.4)                        | --                                             | 6.4<br>(4.4 to 8.6)                    | 35.3<br>(25.3 to 46.0)                            | 2.7<br>(-4.2 to 10.1)                               |
| Other sense organ diseases                    | 539.0<br>(499.1 to 579.4)                     | 2,545.9<br>(2,372.2 to 2,749.5)                | 16.6<br>(10.3 to 24.8)                 | 33.3<br>(26.7 to 39.6)                            | 1.2<br>(-2.7 to 4.9)                                |
| Oral disorders                                | 11,327.7<br>(10,520.3 to 12,112.5)            | 23,816.0†<br>(20,211.5 to 27,997.7)            | 45.8<br>(24.7 to 80.2)                 | 33.4<br>(29.9 to 36.8)                            | 0.6<br>(-1.7 to 2.9)                                |
| Caries of deciduous teeth                     | 2,863.4<br>(2,244.7 to 3,515.2)               | 9,382.7<br>(6,258.9 to 13,203.6)               | 0.7<br>(0.3 to 1.3)                    | 29.1<br>(14.5 to 45.6)                            | -1.8<br>(-13.1 to 11.3)                             |
| Caries of permanent teeth                     | 5,461.1<br>(4,946.9 to 5,970.9)               | 14,046.2<br>(12,514.5 to 15,838.9)             | 3.2<br>(1.4 to 6.1)                    | 19.0<br>(13.5 to 24.7)                            | -7.0<br>(-10.7 to -3.1)                             |
| Periodontal disease                           | 3,213.3<br>(2,371.7 to 4,049.4)               | 369.2<br>(271.1 to 473.9)                      | 21.2<br>(8.1 to 46.1)                  | 35.9<br>(29.3 to 41.8)                            | 0.3<br>(-4.0 to 4.5)                                |
| Edentulism and severe tooth loss              | 278.9<br>(243.0 to 316.4)                     | 18.0<br>(15.7 to 20.4)                         | 7.8<br>(5.1 to 11.1)                   | 39.6<br>(31.8 to 47.7)                            | 3.8<br>(-0.5 to 8.4)                                |
| Other oral disorders                          | 438.6<br>(418.2 to 460.4)                     | --                                             | 12.9<br>(8.0 to 19.3)                  | 30.2<br>(25.1 to 35.3)                            | 0.3<br>(-2.9 to 3.4)                                |
| <b>Injuries</b>                               | <b>3,402.2</b><br><b>(3,192.5 to 3,630.4)</b> | <b>2,065.2†</b><br><b>(1,956.4 to 2,182.6)</b> | <b>141.0</b><br><b>(95.2 to 198.2)</b> | <b>38.0</b><br><b>(35.1 to 40.4)</b>              | <b>6.0</b><br><b>(4.2 to 7.5)</b>                   |
| <b>Transport injuries</b>                     | <b>407.2</b><br><b>(379.4 to 435.9)</b>       | <b>185.9</b><br><b>(165.0 to 209.8)</b>        | <b>23.8</b><br><b>(15.8 to 34.2)</b>   | <b>41.3</b><br><b>(38.2 to 44.4)</b>              | <b>7.7</b><br><b>(5.7 to 9.6)</b>                   |
| Road injuries                                 | 321.4<br>(300.3 to 343.5)                     | 157.5<br>(137.2 to 180.8)                      | 18.6<br>(12.4 to 26.8)                 | 43.8<br>(40.7 to 46.9)                            | 8.9<br>(6.8 to 10.7)                                |
| Pedestrian road injuries                      | 83.2<br>(73.8 to 94.4)                        | 29.5<br>(24.1 to 35.8)                         | 4.9<br>(3.2 to 6.9)                    | 36.2<br>(33.3 to 39.2)                            | 3.2<br>(1.1 to 5.1)                                 |
| Cyclist road injuries                         | 60.3<br>(50.9 to 70.6)                        | 32.8<br>(25.9 to 40.5)                         | 3.3<br>(2.1 to 4.7)                    | 44.8<br>(41.2 to 48.3)                            | 10.7<br>(8.5 to 12.7)                               |
| Motorcyclist road injuries                    | 43.5<br>(37.0 to 51.3)                        | 14.3<br>(11.4 to 18.1)                         | 2.4<br>(1.6 to 3.5)                    | 49.2<br>(45.7 to 52.5)                            | 12.4<br>(10.2 to 14.5)                              |
| Motor vehicle road injuries                   | 96.9<br>(83.2 to 110.0)                       | 57.2<br>(47.7 to 67.4)                         | 6.1<br>(4.1 to 8.7)                    | 47.9<br>(44.6 to 51.2)                            | 11.7<br>(9.5 to 13.8)                               |
| Other road injuries                           | 37.6<br>(32.3 to 44.0)                        | 23.7<br>(18.5 to 29.8)                         | 2.0<br>(1.3 to 2.9)                    | 42.9<br>(39.6 to 46.2)                            | 8.4<br>(6.3 to 10.4)                                |
| Other transport injuries                      | 85.8<br>(71.8 to 103.6)                       | 28.4<br>(23.7 to 34.8)                         | 5.2<br>(3.4 to 7.5)                    | 33.2<br>(28.9 to 37.5)                            | 3.1<br>(0.5 to 5.5)                                 |
| <b>Unintentional injuries</b>                 | <b>2,859.0</b><br><b>(2,646.9 to 3,080.9)</b> | <b>1,804.1</b><br><b>(1,695.9 to 1,916.5)</b>  | <b>106.0</b><br><b>(71.4 to 150.0)</b> | <b>39.5</b><br><b>(36.5 to 42.1)</b>              | <b>6.8</b><br><b>(5.0 to 8.5)</b>                   |
| Falls                                         | 1,008.0<br>(876.5 to 1,137.0)                 | 611.0<br>(536.5 to 701.8)                      | 44.1<br>(30.8 to 60.8)                 | 43.0<br>(40.1 to 45.6)                            | 9.2<br>(7.2 to 10.9)                                |
| Drowning                                      | 10.8<br>(9.2 to 12.6)                         | 2.9<br>(2.4 to 3.4)                            | 0.6<br>(0.4 to 0.9)                    | 35.9<br>(31.5 to 40.0)                            | 3.9<br>(1.2 to 6.5)                                 |
| Fire, heat, and hot substances                | 298.0<br>(251.4 to 361.4)                     | 53.3<br>(42.9 to 64.5)                         | 8.8<br>(6.0 to 12.5)                   | 39.3<br>(32.3 to 46.0)                            | 7.4<br>(2.9 to 11.7)                                |
| Poisonings                                    | 9.2<br>(7.4 to 11.1)                          | 16.2<br>(12.8 to 20.3)                         | 0.9<br>(0.6 to 1.4)                    | 67.3<br>(53.7 to 82.7)                            | 27.5<br>(18.9 to 37.0)                              |
| Exposure to mechanical forces                 | 482.9<br>(412.4 to 583.7)                     | 251.6<br>(213.0 to 292.9)                      | 12.8<br>(8.4 to 18.6)                  | 39.9<br>(36.3 to 43.1)                            | 6.2<br>(3.9 to 8.2)                                 |
| Unintentional firearm injuries                | 25.3<br>(21.0 to 30.7)                        | 8.8<br>(6.6 to 11.6)                           | 1.2<br>(0.8 to 1.7)                    | 44.7<br>(40.8 to 48.4)                            | 9.5<br>(7.1 to 11.8)                                |
| Unintentional suffocation                     | 37.9<br>(27.1 to 50.8)                        | 11.8<br>(8.0 to 16.5)                          | 1.3<br>(0.8 to 2.0)                    | 41.6<br>(37.1 to 46.2)                            | 8.3<br>(5.7 to 10.9)                                |
| Other exposure to mechanical forces           | 419.7<br>(351.4 to 516.6)                     | 231.0<br>(194.5 to 267.8)                      | 10.3<br>(6.8 to 14.9)                  | 39.2<br>(35.3 to 42.7)                            | 5.6<br>(3.2 to 7.7)                                 |

| Cause                                                                               | Prevalence in thousands (95% UI)        | Incidence in thousands (95% UI)       | YLDs in thousands (95% UI)          |                                                   |                                                     |
|-------------------------------------------------------------------------------------|-----------------------------------------|---------------------------------------|-------------------------------------|---------------------------------------------------|-----------------------------------------------------|
|                                                                                     | 2016 counts                             | 2016 counts                           | 2016 counts                         | Percentage change in counts between 2006 and 2016 | Percentage change in age-standardised rates between |
| Adverse effects of medical treatment                                                | 12.3<br>(9.7 to 15.2)                   | 160.4<br>(139.7 to 183.8)             | 1.6<br>(1.0 to 2.5)                 | 33.8<br>(26.3 to 41.5)                            | 2.4<br>(-1.8 to 7.2)                                |
| Animal contact                                                                      | 161.1<br>(142.6 to 187.1)               | 257.0<br>(217.6 to 298.0)             | 5.7<br>(3.8 to 8.1)                 | 27.1<br>(20.5 to 33.5)                            | -3.5<br>(-7.4 to 0.3)                               |
| Venomous animal contact                                                             | 69.7<br>(58.1 to 83.3)                  | 114.0<br>(90.8 to 140.5)              | 4.0<br>(2.7 to 5.8)                 | 29.6<br>(20.6 to 38.6)                            | -0.9<br>(-6.3 to 4.6)                               |
| Non-venomous animal contact                                                         | 91.4<br>(76.6 to 112.6)                 | 142.9<br>(116.7 to 171.9)             | 1.7<br>(1.1 to 2.4)                 | 21.4<br>(16.8 to 25.4)                            | -8.5<br>(-11.7 to -5.8)                             |
| Foreign body                                                                        | 223.0<br>(180.7 to 266.2)               | 166.9<br>(145.7 to 192.0)             | 9.6<br>(6.2 to 14.0)                | 32.1<br>(27.6 to 36.2)                            | 1.6<br>(-1.0 to 3.9)                                |
| Pulmonary aspiration and foreign body in airway                                     | 132.0<br>(98.9 to 178.0)                | 68.5<br>(56.7 to 82.9)                | 6.3<br>(4.0 to 9.4)                 | 30.0<br>(25.4 to 34.2)                            | 0.3<br>(-2.4 to 2.7)                                |
| Foreign body in eyes                                                                | 10.0<br>(5.3 to 15.5)                   | 55.6<br>(42.4 to 74.1)                | 0.6<br>(0.3 to 1.0)                 | 36.2<br>(31.4 to 40.9)                            | 3.9<br>(1.1 to 6.7)                                 |
| Foreign body in other body part                                                     | 81.0<br>(63.7 to 105.1)                 | 42.8<br>(34.4 to 52.2)                | 2.7<br>(1.7 to 4.0)                 | 36.5<br>(30.9 to 41.7)                            | 4.5<br>(1.2 to 7.7)                                 |
| Environmental heat and cold exposure                                                | 243.9<br>(205.0 to 289.9)               | 90.5<br>(74.3 to 110.9)               | 10.0<br>(6.6 to 14.3)               | 35.1<br>(31.7 to 38.1)                            | 3.4<br>(1.3 to 5.3)                                 |
| Other unintentional injuries                                                        | 409.9<br>(319.9 to 530.8)               | 194.4<br>(159.4 to 235.4)             | 11.9<br>(7.8 to 17.7)               | 42.6<br>(39.5 to 45.5)                            | 8.9<br>(7.0 to 10.5)                                |
| <b>Self-harm and interpersonal violence</b>                                         | <b>768.2</b><br><b>(676.2 to 864.3)</b> | <b>74.7†</b><br><b>(63.9 to 86.9)</b> | <b>10.6</b><br><b>(7.3 to 14.6)</b> | <b>21.8</b><br><b>(17.7 to 25.4)</b>              | <b>-5.4</b><br><b>(-7.8 to -3.2)</b>                |
| Self-harm                                                                           | 15.5<br>(13.5 to 17.7)                  | 9.2<br>(7.9 to 10.7)                  | 0.8<br>(0.5 to 1.2)                 | 39.8<br>(35.7 to 43.6)                            | 6.0<br>(3.3 to 8.4)                                 |
| Self-harm by firearm                                                                | 1.0<br>(0.9 to 1.1)                     | 0.4<br>(0.3 to 0.6)                   | < 0.05<br>(< 0.05 to 0.1)           | 29.9<br>(25.4 to 34.4)                            | -1.7<br>(-4.8 to 1.5)                               |
| Self-harm by other specified means                                                  | 14.5<br>(12.5 to 16.7)                  | 8.8<br>(7.5 to 10.2)                  | 0.8<br>(0.5 to 1.2)                 | 40.3<br>(36.2 to 44.3)                            | 6.5<br>(3.7 to 8.9)                                 |
| Interpersonal violence                                                              | 752.6<br>(661.2 to 848.5)               | 65.5†                                 | 9.8<br>(6.7 to 13.5)                | 20.4<br>(16.3 to 24.4)                            | -6.6<br>(-9.1 to -4.2)                              |
| Assault by firearm                                                                  | 5.7<br>(4.8 to 6.7)                     | 2.5<br>(1.8 to 3.4)                   | 0.3<br>(0.2 to 0.4)                 | 33.3<br>(28.8 to 37.5)                            | -0.3<br>(-3.0 to 2.4)                               |
| Assault by sharp object                                                             | 39.5<br>(32.5 to 47.2)                  | 21.6<br>(16.5 to 27.7)                | 1.3<br>(0.9 to 1.9)                 | 30.6<br>(26.9 to 33.8)                            | -1.2<br>(-3.5 to 0.8)                               |
| Sexual violence                                                                     | 650.5<br>(559.6 to 748.3)               | --                                    | 5.6<br>(3.8 to 8.0)                 | 15.1<br>(9.2 to 21.2)                             | -9.6<br>(-13.7 to -5.3)                             |
| Assault by other means                                                              | 56.9<br>(48.6 to 67.7)                  | 41.4<br>(33.9 to 49.9)                | 2.5<br>(1.7 to 3.6)                 | 26.9<br>(24.0 to 29.6)                            | -4.9<br>(-6.8 to -3.1)                              |
| <b>Forces of nature, conflict and terrorism, and executions and police conflict</b> | <b>18.4</b><br><b>(7.2 to 35.0)</b>     | <b>0.5†</b><br><b>(0.3 to 0.9)</b>    | <b>0.6</b><br><b>(0.1 to 1.8)</b>   | <b>-12.5</b><br><b>(-16.2 to -6.5)</b>            | <b>-22.4</b><br><b>(-25.3 to -17.4)</b>             |
| Exposure to forces of nature                                                        | 0.8<br>(0.4 to 1.3)                     | --                                    | < 0.05<br>(< 0.05 to 0.1)           | 55.5<br>(44.4 to 98.5)                            | 26.6<br>(17.3 to 62.8)                              |
| Conflict and terrorism                                                              | 16.2<br>(5.2 to 32.6)                   | --                                    | 0.5<br>(0.1 to 1.6)                 | -16.6<br>(-20.3 to -13.0)                         | -24.8<br>(-27.7 to -21.9)                           |
| Executions and police conflict                                                      | 1.4<br>(0.6 to 3.1)                     | 0.5<br>(0.3 to 0.9)                   | < 0.05<br>(< 0.05 to 0.1)           | 14.2<br>(3.1 to 39.2)                             | -15.5<br>(-30.0 to 14.0)                            |
| <b>Impairments</b>                                                                  | --                                      | --                                    | --                                  | --                                                | --                                                  |
| Anaemia                                                                             | 12,428.5<br>(12,014.9 to 12,826.6)      | --                                    | 450.6<br>(303.0 to 639.9)           | 7.7<br>(1.4 to 13.6)                              | -17.1<br>(-22.9 to -12.3)                           |
| Developmental intellectual disability                                               | 935.1<br>(713.3 to 1,162.2)             | --                                    | 103.5<br>(73.5 to 148.7)            | 28.1<br>(16.7 to 48.3)                            | -0.4<br>(-8.7 to 14.5)                              |
| Epilepsy                                                                            | 301.8<br>(186.3 to 427.6)               | --                                    | 108.0<br>(59.2 to 176.1)            | 34.5<br>(-24.8 to 139.4)                          | 4.1<br>(-42.7 to 90.2)                              |
| Guillain-Barre syndrome                                                             | 0.2<br>(0.1 to 0.2)                     | --                                    | 0.1<br>(< 0.05 to 0.1)              | 29.6<br>(27.8 to 31.4)                            | -0.0<br>(-0.1 to 0.1)                               |
| Hearing loss                                                                        | 3,587.4<br>(3,391.2 to 3,807.2)         | --                                    | 118.0<br>(82.0 to 163.6)            | 22.7<br>(18.9 to 26.6)                            | -4.8<br>(-7.2 to -2.5)                              |
| Heart failure                                                                       | 79.2<br>(70.4 to 89.3)                  | --                                    | 8.4<br>(6.0 to 11.3)                | 22.5<br>(13.8 to 31.7)                            | -6.3<br>(-13.3 to 1.2)                              |
| Infertility                                                                         | 612.4<br>(466.3 to 811.8)               | --                                    | 3.5<br>(1.4 to 7.0)                 | 57.2<br>(25.3 to 96.8)                            | 18.6<br>(-5.7 to 50.9)                              |
| Pelvic inflammatory disease                                                         | 28.5<br>(23.8 to 34.1)                  | --                                    | 3.7<br>(2.4 to 5.3)                 | 26.5<br>(9.4 to 45.8)                             | -4.1<br>(-16.8 to 9.8)                              |
| Vision loss                                                                         | 2,985.4<br>(2,861.4 to 3,121.8)         | --                                    | 98.1<br>(66.6 to 143.8)             | 32.0<br>(21.6 to 52.0)                            | -0.6<br>(-5.5 to 8.5)                               |

We did not calculate incidence for the nine impairments, certain NTDs, and causes with only birth prevalence. Blank cells mean that no estimate is available.

† Incidence for aggregate causes represents the sum of the incidence of the causes below the aggregate.

‡ Incidence estimates for stroke represent first-ever stroke only.

^ Incidence of HIV/AIDS represents new infections of HIV only and does not include new infections of Tuberculosis in HIV positive cases.

SR Table 14: Prevalence, incidence, and YLDs for 2016, percentage change of YLD counts and percentage change of age-standardised YLD rates between 2006 and 2016 by cause and impairments, for all ages, Greece.

| Cause                                                                                | Prevalence in thousands (95% UI)          | Incidence in thousands (95% UI)            | YLDs in thousands (95% UI)             |                                                   |                                                     |
|--------------------------------------------------------------------------------------|-------------------------------------------|--------------------------------------------|----------------------------------------|---------------------------------------------------|-----------------------------------------------------|
|                                                                                      | 2016 counts                               | 2016 counts                                | 2016 counts                            | Percentage change in counts between 2006 and 2016 | Percentage change in age-standardised rates between |
| <b>All causes</b>                                                                    | <b>10,345.4</b><br>(10,311.5 to 10,382.8) | <b>75,629.7†</b><br>(71,554.5 to 80,083.4) | <b>1,438.6</b><br>(1,079.7 to 1,848.3) | <b>2.5</b><br>(1.2 to 3.9)                        | <b>-0.4</b><br>(-1.8 to 1.0)                        |
| <b>Communicable, maternal, neonatal, and nutritional disorders</b>                   | <b>3,618.2</b><br>(3,422.1 to 3,813.7)    | <b>39,767.2†</b><br>(35,875.6 to 43,972.5) | <b>46.7</b><br>(33.1 to 63.0)          | <b>-3.1</b><br>(-7.9 to 2.2)                      | <b>1.2</b><br>(-3.8 to 7.0)                         |
| <b>HIV/AIDS and tuberculosis</b>                                                     | <b>1,285.6</b><br>(1,041.7 to 1,504.2)    | <b>1.1†</b><br>(0.8 to 1.5)                | <b>1.0</b><br>(0.5 to 1.7)             | <b>32.7</b><br>(10.5 to 55.0)                     | <b>36.3</b><br>(13.8 to 60.0)                       |
| Tuberculosis                                                                         | 1,142.0<br>(922.2 to 1,389.3)             | 0.6†<br>(0.4 to 0.7)                       | 0.2<br>(0.1 to 0.3)                    | -10.0<br>(-27.3 to 12.0)                          | -7.0<br>(-27.0 to 18.9)                             |
| Drug-susceptible tuberculosis                                                        | 0.6<br>(0.4 to 0.8)                       | 0.5<br>(0.4 to 0.7)                        | 0.2<br>(0.1 to 0.3)                    | -9.8<br>(-27.9 to 13.4)                           | -6.8<br>(-27.6 to 19.8)                             |
| Multidrug-resistant tuberculosis without extensive drug resistance                   | < 0.05<br>(< 0.05 to < 0.05)              | < 0.05<br>(< 0.05 to < 0.05)               | < 0.05<br>(< 0.05 to < 0.05)           | -19.1<br>(-47.8 to 25.2)                          | -16.3<br>(-46.7 to 29.6)                            |
| Extensively drug-resistant tuberculosis                                              | < 0.05<br>(< 0.05 to < 0.05)              | < 0.05<br>(< 0.05 to < 0.05)               | < 0.05<br>(< 0.05 to < 0.05)           | 74.0<br>(12.2 to 169.1)                           | 80.0<br>(14.7 to 178.8)                             |
| Latent tuberculosis infection                                                        | 1,141.5<br>(921.6 to 1,388.8)             | --                                         | --                                     | --                                                | --                                                  |
| HIV/AIDS                                                                             | 9.0<br>(4.5 to 14.9)                      | 0.5^<br>(0.3 to 0.9)                       | 0.8<br>(0.4 to 1.5)                    | 49.2<br>(22.2 to 78.7)                            | 52.6<br>(25.8 to 83.2)                              |
| Drug-susceptible HIV/AIDS - Tuberculosis                                             | < 0.05<br>(< 0.05 to 0.1)                 | < 0.05<br>(< 0.05 to 0.1)                  | < 0.05<br>(< 0.05 to < 0.05)           | -7.9<br>(-15.9 to 1.3)                            | -5.9<br>(-14.0 to 3.5)                              |
| Multidrug-resistant HIV/AIDS - Tuberculosis without extensive drug resistance        | < 0.05<br>(< 0.05 to < 0.05)              | < 0.05<br>(< 0.05 to < 0.05)               | < 0.05<br>(< 0.05 to < 0.05)           | -16.8<br>(-46.5 to 28.6)                          | -14.9<br>(-45.4 to 31.4)                            |
| Extensively drug-resistant HIV/AIDS - Tuberculosis                                   | < 0.05<br>(< 0.05 to < 0.05)              | < 0.05<br>(< 0.05 to < 0.05)               | < 0.05<br>(< 0.05 to < 0.05)           | 79.0<br>(14.9 to 176.6)                           | 82.9<br>(17.4 to 182.7)                             |
| HIV/AIDS resulting in other diseases                                                 | 9.0<br>(4.5 to 14.9)                      | 0.5<br>(0.3 to 0.9)                        | 0.8<br>(0.4 to 1.5)                    | 50.7<br>(23.1 to 81.0)                            | 54.2<br>(26.1 to 85.7)                              |
| <b>Diarrhoea, lower respiratory infections, and other common infectious diseases</b> | <b>632.3</b><br>(593.4 to 675.6)          | <b>39,236.1†</b><br>(35,324.0 to 43,453.3) | <b>19.0</b><br>(12.4 to 27.6)          | <b>-3.6</b><br>(-6.9 to -0.3)                     | <b>-0.1</b><br>(-3.4 to 3.1)                        |
| Diarrhoeal diseases                                                                  | 21.9<br>(20.5 to 23.6)                    | 1,462.9<br>(1,365.0 to 1,578.7)            | 2.5<br>(1.7 to 3.4)                    | -6.8<br>(-13.6 to 1.4)                            | -4.1<br>(-11.8 to 4.6)                              |
| Intestinal infectious diseases                                                       | < 0.05<br>(< 0.05 to < 0.05)              | 0.1†<br>(0.1 to 0.1)                       | < 0.05<br>(< 0.05 to < 0.05)           | -9.4<br>(-21.6 to 5.6)                            | -14.2<br>(-26.4 to -0.1)                            |
| Typhoid fever                                                                        | < 0.05<br>(< 0.05 to < 0.05)              | < 0.05<br>(< 0.05 to < 0.05)               | < 0.05<br>(< 0.05 to < 0.05)           | -19.9<br>(-35.2 to -3.0)                          | -22.4<br>(-35.8 to -5.7)                            |
| Paratyphoid fever                                                                    | < 0.05<br>(< 0.05 to < 0.05)              | 0.1<br>(0.1 to 0.1)                        | < 0.05<br>(< 0.05 to < 0.05)           | 1.3<br>(-14.9 to 21.4)                            | -1.2<br>(-16.6 to 18.5)                             |
| Other intestinal infectious diseases                                                 | --                                        | --                                         | < 0.05<br>(< 0.05 to < 0.05)           | -48.6<br>(-63.3 to -28.3)                         | -49.9<br>(-67.4 to -23.7)                           |
| Lower respiratory infections                                                         | 6.2<br>(5.7 to 6.7)                       | 280.7<br>(257.2 to 303.0)                  | 0.4<br>(0.2 to 0.5)                    | 9.2<br>(-3.9 to 24.1)                             | -0.5<br>(-13.2 to 13.0)                             |
| Upper respiratory infections                                                         | 478.9<br>(429.5 to 531.4)                 | 36,584.1<br>(32,599.6 to 40,843.1)         | 11.8<br>(7.1 to 18.2)                  | -4.3<br>(-8.8 to 0.5)                             | 0.3<br>(-4.3 to 4.9)                                |
| Otitis media                                                                         | 120.4<br>(107.8 to 133.1)                 | 742.1<br>(617.4 to 891.5)                  | 3.1<br>(1.9 to 4.6)                    | -2.2<br>(-8.6 to 5.0)                             | 2.2<br>(-4.3 to 10.2)                               |
| Meningitis                                                                           | 1.2<br>(1.0 to 2.0)                       | 0.1<br>(0.1 to 0.1)                        | 0.2<br>(0.1 to 0.3)                    | -0.8<br>(-10.5 to 77.4)                           | -3.0<br>(-8.5 to 25.8)                              |
| Pneumococcal meningitis                                                              | 0.3<br>(0.2 to 0.3)                       | < 0.05<br>(< 0.05 to < 0.05)               | < 0.05<br>(< 0.05 to 0.1)              | -12.4<br>(-17.8 to -7.1)                          | -10.6<br>(-16.3 to -4.9)                            |
| H influenzae type B meningitis                                                       | 0.1<br>(0.1 to 0.1)                       | < 0.05<br>(< 0.05 to < 0.05)               | < 0.05<br>(< 0.05 to < 0.05)           | -6.5<br>(-12.2 to -0.9)                           | -4.3<br>(-10.7 to 1.6)                              |
| Meningococcal infection                                                              | 0.4<br>(0.2 to 1.2)                       | 0.1<br>(0.1 to 0.1)                        | < 0.05<br>(< 0.05 to 0.2)              | 20.8<br>(-19.3 to 397.1)                          | -0.4<br>(-19.8 to 136.7)                            |
| Other meningitis                                                                     | 0.4<br>(0.4 to 0.5)                       | < 0.05<br>(< 0.05 to 0.1)                  | 0.1<br>(< 0.05 to 0.1)                 | -2.8<br>(-6.7 to 1.1)                             | 0.8<br>(-3.5 to 5.0)                                |
| Encephalitis                                                                         | 5.5<br>(3.5 to 8.2)                       | 3.5<br>(3.1 to 3.9)                        | 0.6<br>(0.4 to 0.8)                    | 1.4<br>(-1.9 to 4.7)                              | 1.8<br>(-1.3 to 5.0)                                |
| Diphtheria                                                                           | < 0.05<br>(< 0.05 to < 0.05)              | < 0.05<br>(< 0.05 to < 0.05)               | < 0.05<br>(< 0.05 to < 0.05)           | -16.1<br>(-54.4 to 54.2)                          | -15.8<br>(-50.2 to 45.7)                            |
| Whooping cough                                                                       | 0.1<br>(0.1 to 0.2)                       | 0.9<br>(0.7 to 1.3)                        | < 0.05<br>(< 0.05 to < 0.05)           | -52.6<br>(-72.7 to -21.4)                         | -45.6<br>(-69.1 to -9.2)                            |
| Tetanus                                                                              | < 0.05<br>(< 0.05 to < 0.05)              | < 0.05<br>(< 0.05 to < 0.05)               | < 0.05<br>(< 0.05 to < 0.05)           | -27.1<br>(-48.5 to -1.8)                          | -35.2<br>(-51.7 to -13.6)                           |
| Measles                                                                              | < 0.05<br>(0.0 to < 0.05)                 | < 0.05<br>(0.0 to < 0.05)                  | < 0.05<br>(0.0 to < 0.05)              | -99.2<br>(-100.0 to -97.7)                        | -99.1<br>(-100.0 to -97.5)                          |
| Varicella and herpes zoster                                                          | 11.8<br>(10.6 to 13.2)                    | 161.8<br>(154.1 to 170.4)                  | 0.5<br>(0.3 to 0.8)                    | 7.6<br>(-5.8 to 26.4)                             | 2.1<br>(-10.9 to 17.6)                              |
| <b>Neglected tropical diseases and malaria</b>                                       | <b>0.6</b><br>(0.1 to 2.2)                | <b>0.2†</b><br>(0.1 to 0.5)                | <b>0.1</b><br>(< 0.05 to 0.2)          | <b>-28.8</b><br>(-91.5 to 513.2)                  | <b>-29.3</b><br>(-91.7 to 518.0)                    |
| Malaria                                                                              | --                                        | --                                         | --                                     | --                                                | --                                                  |
| Chagas disease                                                                       | --                                        | --                                         | --                                     | --                                                | --                                                  |
| Leishmaniasis                                                                        | < 0.05<br>(< 0.05 to < 0.05)              | < 0.05<br>(< 0.05 to 0.1)                  | < 0.05<br>(< 0.05 to < 0.05)           | 11.9<br>(-24.5 to 62.7)                           | 4.4<br>(-38.7 to 80.8)                              |
| Visceral leishmaniasis                                                               | < 0.05<br>(< 0.05 to < 0.05)              | < 0.05<br>(< 0.05 to 0.1)                  | < 0.05<br>(< 0.05 to < 0.05)           | 13.1<br>(-6.3 to 37.6)                            | 4.8<br>(-18.6 to 35.1)                              |
| Cutaneous and mucocutaneous leishmaniasis                                            | < 0.05<br>(< 0.05 to < 0.05)              | < 0.05<br>(< 0.05 to < 0.05)               | < 0.05<br>(< 0.05 to < 0.05)           | 0.0<br>(-99.9 to 188,777.2)                       | 1.4<br>(-99.9 to 192,686.9)                         |
| African trypanosomiasis                                                              | --                                        | --                                         | --                                     | --                                                | --                                                  |
| Schistosomiasis                                                                      | --                                        | --                                         | --                                     | --                                                | --                                                  |
| Cysticercosis                                                                        | --                                        | --                                         | --                                     | --                                                | --                                                  |
| Cystic echinococcosis                                                                | 0.5<br>(0.1 to 2.2)                       | 0.1<br>(< 0.05 to 0.5)                     | 0.1<br>(< 0.05 to 0.2)                 | -29.3<br>(-91.9 to 534.4)                         | -29.7<br>(-92.0 to 527.6)                           |
| Lymphatic filariasis                                                                 | --                                        | --                                         | --                                     | --                                                | --                                                  |
| Onchocerciasis                                                                       | --                                        | --                                         | --                                     | --                                                | --                                                  |
| Trachoma                                                                             | --                                        | --                                         | --                                     | --                                                | --                                                  |
| Dengue                                                                               | --                                        | --                                         | --                                     | --                                                | --                                                  |
| Yellow fever                                                                         | --                                        | --                                         | --                                     | --                                                | --                                                  |
| Rabies                                                                               | < 0.05<br>(< 0.05 to < 0.05)              | < 0.05<br>(< 0.05 to < 0.05)               | < 0.05<br>(< 0.05 to < 0.05)           | 121.2<br>(64.3 to 200.4)                          | 36.1<br>(3.3 to 78.9)                               |
| Intestinal nematode infections                                                       | --                                        | --                                         | --                                     | --                                                | --                                                  |
| Ascariasis                                                                           | --                                        | --                                         | --                                     | --                                                | --                                                  |



| Cause                                                                   | Prevalence in thousands (95% UI)                 | Incidence in thousands (95% UI)                   | YLDs in thousands (95% UI)                  |                                                   |                                                     |
|-------------------------------------------------------------------------|--------------------------------------------------|---------------------------------------------------|---------------------------------------------|---------------------------------------------------|-----------------------------------------------------|
|                                                                         | 2016 counts                                      | 2016 counts                                       | 2016 counts                                 | Percentage change in counts between 2006 and 2016 | Percentage change in age-standardised rates between |
| Trichuriasis                                                            | --                                               | --                                                | --                                          | --                                                | --                                                  |
| Hookworm disease                                                        | --                                               | --                                                | --                                          | --                                                | --                                                  |
| Food-borne trematodiasis                                                | --                                               | --                                                | --                                          | --                                                | --                                                  |
| Leprosy                                                                 | < 0.05<br>(< 0.05 to < 0.05)                     | --                                                | < 0.05<br>(< 0.05 to < 0.05)                | -25.0<br>(-30.8 to -19.6)                         | -35.1<br>(-40.6 to -29.9)                           |
| Ebola virus disease                                                     | --                                               | --                                                | --                                          | --                                                | --                                                  |
| Zika virus disease                                                      | --                                               | --                                                | --                                          | --                                                | --                                                  |
| Guinea worm disease                                                     | --                                               | --                                                | --                                          | --                                                | --                                                  |
| Other neglected tropical diseases                                       | --                                               | --                                                | < 0.05<br>(< 0.05 to < 0.05)                | --                                                | --                                                  |
| <b>Maternal disorders</b>                                               | <b>7.5</b><br><b>(5.6 to 9.2)</b>                | <b>111.5†</b><br><b>(74.3 to 159.5)</b>           | <b>0.4</b><br><b>(0.3 to 0.7)</b>           | <b>-17.1</b><br><b>(-40.8 to 14.7)</b>            | <b>-4.6</b><br><b>(-31.8 to 33.3)</b>               |
| Maternal haemorrhage                                                    | 1.1<br>(0.6 to 2.0)                              | 7.6<br>(5.4 to 10.7)                              | < 0.05<br>(< 0.05 to 0.1)                   | -15.2<br>(-48.4 to 36.7)                          | -3.6<br>(-40.3 to 55.3)                             |
| Maternal sepsis and other pregnancy related infections                  | 1.6<br>(1.2 to 2.0)                              | 7.2<br>(5.2 to 10.0)                              | < 0.05<br>(< 0.05 to 0.1)                   | -21.2<br>(-62.7 to 66.7)                          | -9.7<br>(-57.8 to 89.3)                             |
| Maternal hypertensive disorders                                         | 4.4<br>(2.7 to 6.3)                              | 17.7<br>(13.0 to 22.2)                            | 0.2<br>(0.1 to 0.4)                         | -14.9<br>(-49.5 to 43.8)                          | -1.7<br>(-41.3 to 66.9)                             |
| Maternal obstructed labour and uterine rupture                          | 0.1<br>(< 0.05 to 0.1)                           | 4.2<br>(2.7 to 6.1)                               | < 0.05<br>(< 0.05 to < 0.05)                | -15.5<br>(-56.0 to 60.0)                          | -2.7<br>(-48.2 to 83.0)                             |
| Maternal abortion, miscarriage, and ectopic pregnancy                   | 0.6<br>(0.3 to 1.1)                              | 74.9<br>(37.2 to 121.2)                           | 0.1<br>(< 0.05 to 0.1)                      | -18.6<br>(-62.2 to 52.9)                          | -6.6<br>(-55.9 to 75.3)                             |
| Other maternal disorders                                                | --                                               | --                                                | 0.1<br>(< 0.05 to 0.1)                      | -21.6<br>(-43.6 to 8.4)                           | -9.7<br>(-35.5 to 26.2)                             |
| <b>Neonatal disorders</b>                                               | <b>92.8</b><br><b>(75.9 to 111.9)</b>            | --                                                | <b>15.3</b><br><b>(10.8 to 21.4)</b>        | <b>-4.0</b><br><b>(-14.2 to 7.1)</b>              | <b>2.0</b><br><b>(-8.9 to 14.1)</b>                 |
| Neonatal preterm birth complications                                    | 71.0<br>(55.3 to 93.7)                           | --                                                | 7.2<br>(4.8 to 10.4)                        | -8.6<br>(-24.9 to 10.1)                           | -2.9<br>(-20.7 to 17.4)                             |
| Neonatal encephalopathy due to birth asphyxia and trauma                | 29.7<br>(18.2 to 46.4)                           | --                                                | 5.9<br>(3.3 to 10.2)                        | -1.2<br>(-14.9 to 20.0)                           | 4.7<br>(-9.9 to 27.0)                               |
| Neonatal sepsis and other neonatal infections                           | 4.4<br>(1.9 to 9.4)                              | --                                                | 1.8<br>(0.7 to 4.0)                         | 9.5<br>(-8.3 to 32.1)                             | 16.0<br>(-5.2 to 42.3)                              |
| Hemolytic disease and other neonatal jaundice                           | 0.8<br>(0.7 to 1.0)                              | --                                                | 0.2<br>(0.2 to 0.3)                         | -5.8<br>(-12.8 to 1.7)                            | -0.5<br>(-8.0 to 7.2)                               |
| Other neonatal disorders                                                | --                                               | --                                                | 0.2<br>(0.1 to 0.3)                         | -11.7<br>(-27.1 to 4.7)                           | -0.3<br>(-17.7 to 18.3)                             |
| <b>Nutritional deficiencies</b>                                         | <b>576.0</b><br><b>(489.0 to 652.0)</b>          | <b>26.6†</b><br><b>(20.7 to 34.0)</b>             | <b>9.0</b><br><b>(5.8 to 13.5)</b>          | <b>-2.7</b><br><b>(-17.8 to 14.2)</b>             | <b>0.6</b><br><b>(-15.2 to 19.3)</b>                |
| Protein-energy malnutrition                                             | 4.7<br>(4.6 to 4.8)                              | 3.8<br>(3.7 to 3.9)                               | 0.5<br>(0.3 to 0.7)                         | -12.0<br>(-22.6 to -0.1)                          | -0.5<br>(-12.5 to 12.8)                             |
| Iodine deficiency                                                       | 162.7<br>(140.5 to 188.0)                        | 1.9<br>(1.7 to 2.2)                               | 4.1<br>(2.7 to 5.8)                         | -2.5<br>(-11.5 to 6.9)                            | -1.3<br>(-10.7 to 8.6)                              |
| Vitamin A deficiency                                                    | 25.2<br>(18.5 to 32.9)                           | 20.8<br>(14.9 to 28.2)                            | --                                          | --                                                | --                                                  |
| Iron-deficiency anaemia                                                 | 357.1<br>(276.7 to 448.3)                        | --                                                | 4.4<br>(2.5 to 7.4)                         | -1.6<br>(-30.0 to 37.0)                           | 2.2<br>(-26.0 to 41.1)                              |
| Other nutritional deficiencies                                          | --                                               | --                                                | < 0.05<br>(< 0.05 to < 0.05)                | -11.9<br>(-22.9 to 0.3)                           | -0.8<br>(-13.2 to 13.0)                             |
| <b>Other communicable, maternal, neonatal, and nutritional diseases</b> | <b>1,746.4</b><br><b>(1,611.0 to 1,891.9)</b>    | <b>391.8</b><br><b>(349.8 to 447.3)</b>           | <b>1.7</b><br><b>(1.0 to 3.0)</b>           | <b>-1.5</b><br><b>(-6.5 to 4.7)</b>               | <b>4.0</b><br><b>(-2.5 to 11.3)</b>                 |
| Sexually transmitted diseases excluding HIV                             | 1,409.2<br>(1,291.3 to 1,547.5)                  | 300.1<br>(261.1 to 352.1)                         | 1.2<br>(0.6 to 2.1)                         | -3.6<br>(-9.6 to 3.5)                             | 3.9<br>(-3.6 to 13.5)                               |
| Syphilis                                                                | 16.0<br>(12.0 to 20.9)                           | 15.0<br>(10.8 to 20.4)                            | 0.1<br>(0.1 to 0.2)                         | 10.7<br>(-2.0 to 26.1)                            | 0.2<br>(-10.8 to 14.2)                              |
| Chlamydial infection                                                    | 65.1<br>(46.1 to 88.8)                           | 43.2<br>(30.1 to 59.2)                            | 0.3<br>(0.1 to 0.5)                         | -6.2<br>(-20.0 to 12.5)                           | 12.8<br>(-4.7 to 35.8)                              |
| Gonococcal infection                                                    | 10.2<br>(4.9 to 23.4)                            | 24.9<br>(6.0 to 72.2)                             | 0.1<br>(< 0.05 to 0.1)                      | -16.5<br>(-30.0 to -0.9)                          | -8.3<br>(-19.3 to 6.3)                              |
| Trichomoniasis                                                          | 215.9<br>(189.4 to 245.9)                        | 176.7<br>(154.3 to 202.2)                         | 0.2<br>(0.1 to 0.5)                         | -7.2<br>(-14.2 to -0.3)                           | -1.6<br>(-9.3 to 6.1)                               |
| Genital herpes                                                          | 1,134.9<br>(972.0 to 1,326.4)                    | 36.8<br>(30.9 to 43.4)                            | 0.3<br>(0.1 to 0.7)                         | 1.9<br>(-7.4 to 11.3)                             | 1.2<br>(-8.1 to 11.3)                               |
| Other sexually transmitted diseases                                     | 10.5<br>(9.0 to 11.9)                            | 3.6<br>(2.3 to 5.3)                               | 0.2<br>(0.1 to 0.3)                         | -7.5<br>(-18.1 to 5.6)                            | 5.6<br>(-7.3 to 20.9)                               |
| Hepatitis                                                               | 399.3<br>(346.4 to 475.8)                        | 91.7<br>(76.1 to 108.7)                           | 0.2<br>(0.1 to 0.3)                         | 16.3<br>(-2.9 to 41.4)                            | 3.8<br>(-14.4 to 26.2)                              |
| Acute hepatitis A                                                       | 2.7<br>(2.1 to 3.3)                              | 34.6<br>(26.9 to 43.3)                            | 0.1<br>(< 0.05 to 0.1)                      | 17.1<br>(-17.2 to 69.8)                           | 8.0<br>(-22.2 to 54.6)                              |
| Hepatitis B                                                             | 237.6<br>(189.9 to 309.4)                        | 47.7<br>(35.1 to 63.0)                            | 0.1<br>(0.1 to 0.2)                         | 13.3<br>(-12.0 to 45.0)                           | -0.2<br>(-20.1 to 22.6)                             |
| Hepatitis C                                                             | 158.7<br>(142.5 to 176.3)                        | 5.1<br>(4.5 to 5.7)                               | < 0.05<br>(< 0.05 to < 0.05)                | 11.8<br>(8.2 to 15.9)                             | 2.6<br>(1.6 to 3.6)                                 |
| Acute hepatitis E                                                       | 0.3<br>(0.2 to 0.5)                              | 4.2<br>(2.5 to 6.4)                               | < 0.05<br>(< 0.05 to < 0.05)                | 53.6<br>(7.7 to 109.9)                            | 13.4<br>(-11.2 to 41.4)                             |
| Other infectious diseases                                               | 9.8<br>(7.7 to 12.2)                             | < 0.05<br>(< 0.05 to < 0.05)                      | 0.4<br>(0.2 to 0.6)                         | -2.4<br>(-12.4 to 8.7)                            | 4.1<br>(-10.1 to 19.3)                              |
| <b>Non-communicable diseases</b>                                        | <b>10,148.3</b><br><b>(10,108.8 to 10,187.7)</b> | <b>34,841.0†</b><br><b>(33,809.0 to 35,905.1)</b> | <b>1,277.0</b><br><b>(955.6 to 1,637.1)</b> | <b>2.8</b><br><b>(1.3 to 4.3)</b>                 | <b>-0.3</b><br><b>(-1.9 to 1.3)</b>                 |
| <b>Neoplasms</b>                                                        | <b>168.2</b><br><b>(161.9 to 175.5)</b>          | <b>63.2</b><br><b>(59.1 to 68.5)</b>              | <b>19.0</b><br><b>(14.0 to 24.5)</b>        | <b>13.3</b><br><b>(8.8 to 18.1)</b>               | <b>-0.1</b><br><b>(-4.1 to 3.9)</b>                 |
| Lip and oral cavity cancer                                              | 2.0<br>(1.9 to 2.3)                              | 0.5<br>(0.5 to 0.6)                               | 0.2<br>(0.1 to 0.3)                         | 17.4<br>(2.1 to 35.0)                             | 1.5<br>(-11.6 to 17.8)                              |
| Nasopharynx cancer                                                      | 0.6<br>(0.6 to 0.7)                              | 0.2<br>(0.2 to 0.2)                               | 0.1<br>(0.1 to 0.1)                         | -0.4<br>(-14.3 to 17.5)                           | -7.9<br>(-22.5 to 10.2)                             |
| Other pharynx cancer                                                    | 0.4<br>(0.4 to 0.5)                              | 0.1<br>(0.1 to 0.1)                               | < 0.05<br>(< 0.05 to 0.1)                   | 11.2<br>(1.3 to 22.7)                             | 3.3<br>(-5.9 to 14.5)                               |
| Oesophageal cancer                                                      | 0.3<br>(0.3 to 0.4)                              | 0.3<br>(0.3 to 0.3)                               | 0.1<br>(0.1 to 0.1)                         | 8.5<br>(-3.4 to 20.2)                             | -7.8<br>(-17.2 to 2.0)                              |
| Stomach cancer                                                          | 4.3<br>(3.9 to 4.9)                              | 2.3<br>(2.1 to 2.5)                               | 0.6<br>(0.4 to 0.8)                         | 7.1<br>(-9.9 to 25.2)                             | -8.0<br>(-21.8 to 6.8)                              |
| Colon and rectum cancer                                                 | 22.9<br>(21.0 to 25.1)                           | 6.1<br>(5.6 to 6.6)                               | 2.1<br>(1.5 to 2.8)                         | 19.8<br>(6.5 to 34.4)                             | 1.8<br>(-9.4 to 14.6)                               |
| Liver cancer                                                            | 0.7<br>(0.5 to 0.9)                              | 1.6<br>(1.4 to 1.8)                               | 0.3<br>(0.2 to 0.5)                         | -6.4<br>(-17.6 to 9.6)                            | -21.4<br>(-30.6 to -9.7)                            |
| Liver cancer due to hepatitis B                                         | 0.5<br>(0.4 to 0.7)                              | 0.5<br>(0.4 to 0.6)                               | 0.1<br>(0.1 to 0.1)                         | -7.3<br>(-19.5 to 8.5)                            | -20.5<br>(-30.4 to -7.9)                            |



| Cause                                              | Prevalence in thousands (95% UI)              | Incidence in thousands (95% UI)          | YLDs in thousands (95% UI)            |                                                   |                                                     |
|----------------------------------------------------|-----------------------------------------------|------------------------------------------|---------------------------------------|---------------------------------------------------|-----------------------------------------------------|
|                                                    | 2016 counts                                   | 2016 counts                              | 2016 counts                           | Percentage change in counts between 2006 and 2016 | Percentage change in age-standardised rates between |
| Liver cancer due to hepatitis C                    | 0.3<br>(0.2 to 0.4)                           | 0.3<br>(0.2 to 0.3)                      | 0.1<br>( $< 0.05$ to 0.1)             | -1.5<br>(-14.1 to 18.9)                           | -22.0<br>(-31.6 to -8.5)                            |
| Liver cancer due to alcohol use                    | 0.5<br>(0.4 to 0.7)                           | 0.5<br>(0.4 to 0.7)                      | 0.1<br>(0.1 to 0.2)                   | -10.1<br>(-23.6 to 5.4)                           | -23.1<br>(-34.2 to -10.1)                           |
| Liver cancer due to other causes                   | 0.3<br>(0.2 to 0.4)                           | 0.3<br>(0.2 to 0.4)                      | 0.1<br>( $< 0.05$ to 0.1)             | -1.6<br>(-17.7 to 17.7)                           | -19.2<br>(-31.4 to -4.3)                            |
| Gallbladder and biliary tract cancer               | 0.6<br>(0.5 to 1.0)                           | 0.6<br>(0.5 to 0.9)                      | 0.1<br>(0.1 to 0.2)                   | 23.4<br>(-2.6 to 56.4)                            | 3.8<br>(-15.9 to 29.9)                              |
| Pancreatic cancer                                  | 1.5<br>(1.4 to 1.7)                           | 1.9<br>(1.8 to 2.1)                      | 0.4<br>(0.2 to 0.5)                   | 17.1<br>(-0.2 to 36.6)                            | -0.3<br>(-12.5 to 13.5)                             |
| Larynx cancer                                      | 3.0<br>(2.6 to 3.4)                           | 0.8<br>(0.7 to 0.9)                      | 0.3<br>(0.2 to 0.4)                   | 2.7<br>(-18.2 to 29.3)                            | -7.3<br>(-26.4 to 15.8)                             |
| Tracheal, bronchus, and lung cancer                | 10.0<br>(8.9 to 11.3)                         | 7.7<br>(7.1 to 8.3)                      | 1.8<br>(1.2 to 2.3)                   | 6.7<br>(-8.8 to 25.2)                             | -4.9<br>(-18.6 to 11.7)                             |
| Malignant skin melanoma                            | 6.2<br>(4.7 to 7.0)                           | 1.3<br>(1.0 to 1.4)                      | 0.4<br>(0.3 to 0.6)                   | 23.8<br>(8.1 to 42.0)                             | 15.2<br>(-0.5 to 34.0)                              |
| Non-melanoma skin cancer                           | 5.5<br>(2.4 to 8.6)                           | 8.2<br>(4.6 to 12.6)                     | 0.2<br>(0.1 to 0.4)                   | -13.5<br>(-40.5 to 35.8)                          | -28.3<br>(-49.8 to 9.2)                             |
| Non-melanoma skin cancer (squamous-cell carcinoma) | 4.0<br>(1.6 to 7.9)                           | 3.7<br>(1.6 to 6.8)                      | 0.2<br>(0.1 to 0.4)                   | -14.2<br>(-41.5 to 38.7)                          | -29.2<br>(-50.6 to 10.5)                            |
| Non-melanoma skin cancer (basal-cell carcinoma)    | 0.6<br>(0.3 to 1.2)                           | 4.5<br>(2.3 to 7.5)                      | $< 0.05$<br>( $< 0.05$ to $< 0.05$ )  | 13.1<br>(-19.9 to 61.5)                           | -1.4<br>(-28.5 to 34.3)                             |
| Breast cancer                                      | 37.1<br>(34.7 to 39.9)                        | 7.8<br>(7.2 to 8.3)                      | 3.6<br>(2.5 to 4.7)                   | 13.3<br>(2.3 to 24.9)                             | 0.4<br>(-9.7 to 11.3)                               |
| Cervical cancer                                    | 2.5<br>(2.1 to 3.0)                           | 0.6<br>(0.6 to 0.7)                      | 0.2<br>(0.2 to 0.3)                   | 2.6<br>(-14.6 to 24.6)                            | -4.1<br>(-21.6 to 18.3)                             |
| Uterine cancer                                     | 6.6<br>(5.8 to 7.5)                           | 1.4<br>(1.2 to 1.6)                      | 0.5<br>(0.4 to 0.7)                   | 23.1<br>(1.7 to 49.6)                             | 13.1<br>(-7.5 to 38.2)                              |
| Ovarian cancer                                     | 3.1<br>(2.8 to 3.5)                           | 1.0<br>(0.9 to 1.1)                      | 0.4<br>(0.3 to 0.6)                   | 5.6<br>(-17.2 to 36.1)                            | -4.4<br>(-26.8 to 26.0)                             |
| Prostate cancer                                    | 27.7<br>(23.2 to 46.5)                        | 7.4<br>(6.4 to 11.2)                     | 2.7<br>(1.9 to 4.2)                   | 18.5<br>(3.0 to 35.9)                             | -0.4<br>(-13.4 to 14.4)                             |
| Testicular cancer                                  | 1.9<br>(1.5 to 2.3)                           | 0.4<br>(0.3 to 0.5)                      | 0.1<br>(0.1 to 0.2)                   | 9.2<br>(-20.1 to 50.0)                            | 23.8<br>(-12.2 to 72.6)                             |
| Kidney cancer                                      | 4.7<br>(4.3 to 5.2)                           | 1.3<br>(1.2 to 1.4)                      | 0.4<br>(0.3 to 0.6)                   | 13.0<br>(-2.5 to 31.4)                            | 2.6<br>(-10.2 to 19.0)                              |
| Bladder cancer                                     | 14.3<br>(13.1 to 15.7)                        | 3.4<br>(3.1 to 3.7)                      | 1.2<br>(0.9 to 1.7)                   | 14.8<br>(0.0 to 32.6)                             | -1.2<br>(-14.0 to 14.1)                             |
| Brain and nervous system cancer                    | 4.7<br>(3.6 to 6.6)                           | 1.9<br>(1.5 to 2.5)                      | 0.6<br>(0.4 to 0.9)                   | 15.7<br>(-9.9 to 50.8)                            | 8.9<br>(-11.9 to 35.0)                              |
| Thyroid cancer                                     | 2.6<br>(2.4 to 2.9)                           | 0.5<br>(0.5 to 0.6)                      | 0.2<br>(0.1 to 0.2)                   | 1.1<br>(-14.2 to 19.2)                            | -6.2<br>(-21.6 to 11.2)                             |
| Mesothelioma                                       | 0.1<br>(0.1 to 0.2)                           | 0.1<br>(0.1 to 0.1)                      | $< 0.05$<br>( $< 0.05$ to $< 0.05$ )  | 15.7<br>(0.5 to 28.7)                             | 3.5<br>(-10.1 to 15.0)                              |
| Hodgkin lymphoma                                   | 3.0<br>(2.6 to 3.5)                           | 0.7<br>(0.6 to 0.8)                      | 0.3<br>(0.2 to 0.4)                   | -4.2<br>(-18.9 to 14.7)                           | -2.1<br>(-19.1 to 20.6)                             |
| Non-Hodgkin's lymphoma                             | 3.5<br>(3.1 to 4.5)                           | 0.9<br>(0.8 to 1.2)                      | 0.3<br>(0.2 to 0.4)                   | 29.9<br>(15.3 to 47.7)                            | 18.1<br>(4.1 to 34.0)                               |
| Multiple myeloma                                   | 1.5<br>(1.3 to 1.8)                           | 0.6<br>(0.5 to 0.8)                      | 0.3<br>(0.2 to 0.4)                   | 24.0<br>(3.6 to 52.0)                             | 9.5<br>(-7.5 to 31.0)                               |
| Leukaemia                                          | 7.3<br>(6.6 to 8.1)                           | 2.0<br>(1.8 to 2.2)                      | 0.9<br>(0.6 to 1.2)                   | 11.3<br>(-2.6 to 25.7)                            | -3.9<br>(-14.6 to 7.2)                              |
| Acute lymphoid leukaemia                           | 0.4<br>(0.4 to 0.5)                           | 0.1<br>(0.1 to 0.1)                      | 0.1<br>( $< 0.05$ to 0.1)             | 16.0<br>(-3.8 to 38.9)                            | 24.0<br>(-5.9 to 62.0)                              |
| Chronic lymphoid leukaemia                         | 2.4<br>(2.1 to 3.1)                           | 0.6<br>(0.5 to 0.7)                      | 0.3<br>(0.2 to 0.4)                   | 15.6<br>(-6.5 to 42.5)                            | -3.2<br>(-20.3 to 16.1)                             |
| Acute myeloid leukaemia                            | 0.6<br>(0.4 to 0.7)                           | 0.4<br>(0.3 to 0.5)                      | 0.1<br>(0.1 to 0.1)                   | 22.7<br>(8.2 to 39.3)                             | 7.5<br>(-5.5 to 22.5)                               |
| Chronic myeloid leukaemia                          | 0.5<br>(0.5 to 0.6)                           | 0.2<br>(0.2 to 0.2)                      | 0.1<br>( $< 0.05$ to 0.1)             | -7.2<br>(-22.4 to 10.3)                           | -22.3<br>(-33.0 to -10.2)                           |
| Other leukaemia                                    | 3.3<br>(2.9 to 3.8)                           | 0.8<br>(0.7 to 0.9)                      | 0.4<br>(0.3 to 0.5)                   | 8.3<br>(-12.6 to 32.2)                            | -10.7<br>(-26.2 to 6.1)                             |
| Other neoplasms                                    | 6.3<br>(5.2 to 7.5)                           | 1.7<br>(1.5 to 2.0)                      | 0.5<br>(0.4 to 0.7)                   | 19.4<br>(0.6 to 44.3)                             | 6.0<br>(-9.7 to 25.7)                               |
| <b>Cardiovascular diseases</b>                     | <b>1,481.5</b><br><b>(1,422.2 to 1,543.0)</b> | <b>166.2†</b><br><b>(157.3 to 176.1)</b> | <b>99.5</b><br><b>(73.0 to 129.5)</b> | <b>9.9</b><br><b>(6.0 to 14.5)</b>                | <b>-4.8</b><br><b>(-7.9 to -1.0)</b>                |
| Rheumatic heart disease                            | 0.8<br>(0.7 to 0.9)                           | 0.4<br>(0.4 to 0.4)                      | 0.1<br>( $< 0.05$ to 0.1)             | -0.5<br>(-10.1 to 10.3)                           | -8.1<br>(-16.0 to 0.4)                              |
| Ischaemic heart disease                            | 422.6<br>(395.4 to 452.1)                     | 61.5<br>(56.5 to 67.0)                   | 24.3<br>(17.2 to 33.2)                | 17.8<br>(11.6 to 24.9)                            | 2.1<br>(-2.7 to 7.5)                                |
| Cerebrovascular disease                            | 211.0<br>(197.5 to 225.2)                     | 34.1‡<br>(31.5 to 36.9)                  | 34.5<br>(24.7 to 44.0)                | 9.0<br>(1.1 to 17.2)                              | -7.1<br>(-13.5 to -0.7)                             |
| Ischaemic stroke                                   | 170.1<br>(153.0 to 188.4)                     | 22.2‡<br>(19.7 to 24.7)                  | 26.8<br>(19.0 to 34.5)                | 10.1<br>(0.0 to 20.4)                             | -6.9<br>(-15.2 to 1.4)                              |
| Hemorrhagic stroke                                 | 50.4<br>(44.7 to 56.4)                        | 12.0‡<br>(10.8 to 13.1)                  | 7.7<br>(5.6 to 10.0)                  | 5.5<br>(-5.2 to 16.2)                             | -7.8<br>(-16.5 to 1.0)                              |
| Hypertensive heart disease                         | 43.0<br>(35.3 to 52.3)                        | --                                       | 3.4<br>(2.3 to 4.9)                   | 9.7<br>(-2.9 to 22.8)                             | -9.7<br>(-19.1 to -0.2)                             |
| Cardiomyopathy and myocarditis                     | 24.9<br>(21.7 to 28.0)                        | 6.5†<br>(5.5 to 7.6)                     | 2.0<br>(1.4 to 2.9)                   | -0.5<br>(-10.2 to 10.2)                           | -11.8<br>(-19.7 to -3.2)                            |
| Myocarditis                                        | 2.9<br>(2.6 to 3.2)                           | 6.5<br>(5.5 to 7.6)                      | 0.2<br>(0.1 to 0.3)                   | -8.0<br>(-16.9 to 2.2)                            | -6.3<br>(-14.0 to 2.7)                              |
| Alcoholic cardiomyopathy                           | 1.1<br>(0.9 to 1.4)                           | --                                       | 0.1<br>(0.1 to 0.1)                   | -14.0<br>(-36.3 to 18.2)                          | -18.3<br>(-39.5 to 11.2)                            |
| Other cardiomyopathy                               | 21.1<br>(17.8 to 25.2)                        | --                                       | 1.7<br>(1.1 to 2.5)                   | 1.4<br>(-9.6 to 13.3)                             | -12.2<br>(-21.1 to -2.2)                            |
| Atrial fibrillation and flutter                    | 177.6<br>(154.2 to 203.9)                     | 13.7<br>(11.6 to 16.1)                   | 13.8<br>(9.5 to 19.4)                 | 18.7<br>(11.6 to 26.8)                            | -0.9<br>(-6.9 to 5.9)                               |
| Peripheral vascular disease                        | 583.2<br>(510.9 to 662.4)                     | 47.1<br>(40.4 to 55.6)                   | 2.3<br>(1.0 to 4.3)                   | 9.1<br>(0.5 to 18.3)                              | -7.0<br>(-12.9 to -0.5)                             |
| Endocarditis                                       | 2.4<br>(2.0 to 2.9)                           | 2.9<br>(2.6 to 3.1)                      | 0.2<br>(0.1 to 0.3)                   | 8.9<br>(-10.6 to 33.1)                            | -7.8<br>(-21.5 to 8.5)                              |
| Other cardiovascular and circulatory diseases      | 366.5<br>(312.1 to 434.1)                     | --                                       | 18.9<br>(13.0 to 27.0)                | -1.5<br>(-9.2 to 6.4)                             | -8.4<br>(-14.9 to -1.4)                             |
| <b>Chronic respiratory diseases</b>                | <b>1,207.2</b><br><b>(1,170.2 to 1,245.1)</b> | <b>95.7†</b><br><b>(91.6 to 100.0)</b>   | <b>65.4</b><br><b>(53.6 to 79.0)</b>  | <b>7.0</b><br><b>(1.9 to 12.4)</b>                | <b>1.9</b><br><b>(-2.4 to 6.6)</b>                  |
| Chronic obstructive pulmonary disease              | 646.9<br>(621.9 to 673.5)                     | 37.6<br>(35.9 to 39.6)                   | 39.5<br>(33.9 to 46.4)                | 10.6<br>(2.4 to 19.9)                             | -1.3<br>(-8.5 to 6.6)                               |
| Pneumoconiosis                                     | 0.1<br>(0.1 to 0.1)                           | 0.1<br>( $< 0.05$ to 0.1)                | $< 0.05$<br>( $< 0.05$ to $< 0.05$ )  | 11.3<br>(4.5 to 18.4)                             | 1.2<br>(-4.4 to 7.0)                                |
| Silicosis                                          | 0.1<br>(0.1 to 0.1)                           | 0.1<br>( $< 0.05$ to 0.1)                | $< 0.05$<br>( $< 0.05$ to $< 0.05$ )  | 11.9<br>(4.6 to 19.9)                             | 2.2<br>(-4.1 to 8.7)                                |

| Cause                                                          | Prevalence in thousands (95% UI)        | Incidence in thousands (95% UI)         | YLDs in thousands (95% UI)        |                                                   |                                                     |
|----------------------------------------------------------------|-----------------------------------------|-----------------------------------------|-----------------------------------|---------------------------------------------------|-----------------------------------------------------|
|                                                                | 2016 counts                             | 2016 counts                             | 2016 counts                       | Percentage change in counts between 2006 and 2016 | Percentage change in age-standardised rates between |
| Asbestosis                                                     | < 0.05<br>(< 0.05 to < 0.05)            | < 0.05<br>(< 0.05 to < 0.05)            | < 0.05<br>(< 0.05 to < 0.05)      | 7.1<br>(-11.5 to 31.0)                            | -2.5<br>(-19.3 to 18.8)                             |
| Coal workers pneumoconiosis                                    | < 0.05<br>(< 0.05 to < 0.05)            | < 0.05<br>(< 0.05 to < 0.05)            | < 0.05<br>(< 0.05 to < 0.05)      | 10.2<br>(-3.0 to 26.2)                            | -1.4<br>(-12.4 to 9.9)                              |
| Other pneumoconiosis                                           | < 0.05<br>(< 0.05 to < 0.05)            | < 0.05<br>(< 0.05 to < 0.05)            | < 0.05<br>(< 0.05 to < 0.05)      | 5.0<br>(-7.7 to 17.6)                             | -16.2<br>(-24.6 to -8.9)                            |
| Asthma                                                         | 627.8<br>(592.4 to 668.1)               | 57.6<br>(54.0 to 61.4)                  | 24.3<br>(16.1 to 34.6)            | 0.9<br>(-2.8 to 5.3)                              | 4.1<br>(-0.1 to 9.3)                                |
| Interstitial lung disease and pulmonary sarcoidosis            | 4.2<br>(3.7 to 4.6)                     | 0.5<br>(0.4 to 0.5)                     | 0.5<br>(0.3 to 0.7)               | 24.2<br>(9.5 to 40.9)                             | 7.3<br>(-2.8 to 19.5)                               |
| Other chronic respiratory diseases                             | --                                      | --                                      | 1.1<br>(0.9 to 1.2)               | 25.6<br>(12.4 to 41.2)                            | 29.2<br>(11.2 to 52.9)                              |
| <b>Cirrhosis and other chronic liver diseases</b>              | <b>94.4<br/>(89.9 to 98.8)</b>          | <b>2.0<br/>(1.9 to 2.1)</b>             | <b>2.3<br/>(1.6 to 3.2)</b>       | <b>10.9<br/>(0.9 to 21.3)</b>                     | <b>7.5<br/>(-2.8 to 18.9)</b>                       |
| Cirrhosis and other chronic liver diseases due to hepatitis B  | 19.4<br>(15.8 to 23.4)                  | 0.4<br>(0.4 to 0.5)                     | 0.5<br>(0.3 to 0.7)               | 11.8<br>(-8.7 to 38.1)                            | 7.9<br>(-14.0 to 35.5)                              |
| Cirrhosis and other chronic liver diseases due to hepatitis C  | 23.9<br>(18.4 to 31.2)                  | 0.5<br>(0.4 to 0.6)                     | 0.6<br>(0.4 to 0.8)               | 12.6<br>(-7.6 to 37.4)                            | 9.1<br>(-12.3 to 34.9)                              |
| Cirrhosis and other chronic liver diseases due to alcohol use  | 43.1<br>(37.0 to 49.1)                  | 0.9<br>(0.8 to 1.1)                     | 1.0<br>(0.7 to 1.4)               | 13.2<br>(-2.9 to 32.8)                            | 6.6<br>(-10.1 to 26.3)                              |
| Cirrhosis and other chronic liver diseases due to other causes | 8.0<br>(6.3 to 10.2)                    | 0.2<br>(0.1 to 0.2)                     | 0.4<br>(0.2 to 0.5)               | 1.1<br>(-19.4 to 27.0)                            | 7.1<br>(-16.0 to 39.1)                              |
| <b>Digestive diseases</b>                                      | <b>257.3<br/>(240.6 to 273.3)</b>       | <b>336.9†<br/>(312.9 to 361.2)</b>      | <b>8.7<br/>(6.2 to 11.7)</b>      | <b>8.5<br/>(0.5 to 17.8)</b>                      | <b>3.4<br/>(-4.6 to 12.8)</b>                       |
| Peptic ulcer disease                                           | 58.6<br>(51.9 to 66.6)                  | 15.8<br>(14.4 to 17.4)                  | 0.6<br>(0.4 to 1.0)               | 4.3<br>(-22.2 to 39.4)                            | -5.8<br>(-30.8 to 28.2)                             |
| Gastritis and duodenitis                                       | 101.9<br>(86.7 to 117.4)                | 74.1<br>(64.3 to 84.9)                  | 0.7<br>(0.5 to 1.2)               | 9.7<br>(-16.0 to 39.7)                            | -1.9<br>(-25.9 to 24.3)                             |
| Appendicitis                                                   | 0.4<br>(0.4 to 0.5)                     | 11.2<br>(10.3 to 12.0)                  | 0.1<br>(0.1 to 0.2)               | -6.5<br>(-21.6 to 11.5)                           | 2.3<br>(-20.9 to 31.1)                              |
| Paralytic ileus and intestinal obstruction                     | 0.2<br>(0.2 to 0.3)                     | 6.9<br>(6.2 to 7.5)                     | 0.1<br>(0.1 to 0.1)               | 20.8<br>(12.6 to 30.0)                            | 7.7<br>(3.6 to 12.2)                                |
| Inguinal, femoral, and abdominal hernia                        | 73.0<br>(65.6 to 80.6)                  | 138.6<br>(119.1 to 156.5)               | 4.7<br>(3.1 to 6.4)               | 10.1<br>(-0.8 to 21.1)                            | 5.8<br>(-5.3 to 17.5)                               |
| Inflammatory bowel disease                                     | 7.9<br>(7.4 to 8.4)                     | 2.9<br>(2.8 to 3.0)                     | 1.1<br>(0.8 to 1.6)               | -0.8<br>(-15.4 to 15.5)                           | -1.4<br>(-16.1 to 15.9)                             |
| Vascular intestinal disorders                                  | 0.4<br>(0.4 to 0.5)                     | 2.0<br>(1.7 to 2.3)                     | 0.1<br>(0.1 to 0.2)               | 22.4<br>(-0.9 to 49.8)                            | 8.8<br>(-4.8 to 24.6)                               |
| Gallbladder and biliary diseases                               | 22.1<br>(19.4 to 24.9)                  | 78.0<br>(68.0 to 89.1)                  | 0.4<br>(0.3 to 0.6)               | 12.3<br>(-9.1 to 38.8)                            | 5.2<br>(-14.2 to 29.8)                              |
| Pancreatitis                                                   | 0.8<br>(0.7 to 0.9)                     | 7.4<br>(6.6 to 8.1)                     | 0.1<br>(0.1 to 0.1)               | 5.1<br>(0.2 to 10.1)                              | -1.6<br>(-5.6 to 2.3)                               |
| Other digestive diseases                                       | --                                      | --                                      | 0.7<br>(0.5 to 1.0)               | 16.4<br>(8.1 to 26.0)                             | 8.5<br>(-0.2 to 18.4)                               |
| <b>Neurological disorders</b>                                  | <b>4,151.2<br/>(4,004.0 to 4,322.0)</b> | <b>1,562.0<br/>(1,363.3 to 1,783.8)</b> | <b>143.6<br/>(98.5 to 192.3)</b>  | <b>3.3<br/>(-4.4 to 12.4)</b>                     | <b>-0.1<br/>(-9.3 to 10.2)</b>                      |
| Alzheimer's disease and other dementias                        | 192.6<br>(161.4 to 229.3)               | 37.5<br>(30.8 to 45.4)                  | 29.6<br>(20.2 to 39.8)            | 37.3<br>(30.0 to 44.4)                            | -1.8<br>(-5.9 to 2.4)                               |
| Parkinson's disease                                            | 22.8<br>(17.9 to 28.8)                  | 2.7<br>(2.1 to 3.5)                     | 2.6<br>(1.7 to 3.8)               | 24.5<br>(12.6 to 37.7)                            | 3.0<br>(-6.9 to 13.6)                               |
| Epilepsy                                                       | 28.3<br>(7.0 to 49.3)                   | 2.7<br>(0.7 to 4.7)                     | 6.6<br>(1.5 to 15.7)              | -2.3<br>(-81.6 to 449.5)                          | -1.5<br>(-81.3 to 451.0)                            |
| Multiple sclerosis                                             | 7.7<br>(6.9 to 8.7)                     | 0.1<br>(0.1 to 0.2)                     | 2.0<br>(1.4 to 2.7)               | 13.4<br>(-3.4 to 32.7)                            | 11.4<br>(-5.8 to 31.0)                              |
| Motor neuron disease                                           | 1.1<br>(1.0 to 1.3)                     | 0.2<br>(0.1 to 0.2)                     | 0.2<br>(0.2 to 0.3)               | 9.1<br>(5.5 to 12.8)                              | 5.9<br>(1.9 to 9.5)                                 |
| Migraine                                                       | 2,014.9<br>(1,917.2 to 2,108.6)         | 169.5<br>(158.3 to 181.1)               | 87.9<br>(57.1 to 122.6)           | -4.3<br>(-7.5 to -1.1)                            | -0.3<br>(-3.7 to 2.9)                               |
| Tension-type headache                                          | 2,669.2<br>(2,395.5 to 2,964.4)         | 1,349.2<br>(1,155.2 to 1,570.4)         | 13.0<br>(8.2 to 19.4)             | -2.4<br>(-7.8 to 3.2)                             | -0.2<br>(-5.2 to 5.0)                               |
| Other neurological disorders                                   | < 0.05<br>(< 0.05 to 0.1)               | 0.1<br>(< 0.05 to 0.1)                  | 1.7<br>(0.9 to 3.0)               | 13.8<br>(-50.5 to 159.5)                          | 17.4<br>(-59.0 to 219.7)                            |
| <b>Mental and substance use disorders</b>                      | <b>1,831.8<br/>(1,767.8 to 1,898.9)</b> | <b>692.6†<br/>(640.2 to 748.0)</b>      | <b>263.5<br/>(190.8 to 341.7)</b> | <b>-4.6<br/>(-6.8 to -2.4)</b>                    | <b>-0.6<br/>(-2.8 to 1.8)</b>                       |
| Schizophrenia                                                  | 31.9<br>(26.5 to 37.9)                  | 1.4<br>(1.1 to 1.7)                     | 20.2<br>(14.6 to 26.2)            | -1.2<br>(-9.1 to 7.3)                             | -0.1<br>(-8.5 to 8.5)                               |
| Alcohol use disorders                                          | 109.0<br>(93.9 to 125.4)                | 48.5<br>(41.2 to 56.1)                  | 10.9<br>(7.3 to 15.1)             | -5.5<br>(-13.5 to 3.3)                            | 4.5<br>(-4.3 to 13.8)                               |
| Drug use disorders                                             | 66.1<br>(61.0 to 71.1)                  | 8.8<br>(8.1 to 9.6)                     | 16.1<br>(11.5 to 20.9)            | 10.1<br>(-3.6 to 23.6)                            | 25.4<br>(8.8 to 41.9)                               |
| Opioid use disorders                                           | 31.3<br>(28.1 to 34.7)                  | 3.4<br>(3.0 to 3.8)                     | 13.1<br>(9.1 to 17.2)             | 14.1<br>(-3.5 to 31.4)                            | 30.7<br>(9.3 to 52.0)                               |
| Cocaine use disorders                                          | 5.2<br>(4.5 to 6.0)                     | 0.4<br>(0.3 to 0.4)                     | 0.7<br>(0.4 to 1.1)               | -8.6<br>(-28.4 to 17.0)                           | -0.3<br>(-24.1 to 31.8)                             |
| Amphetamine use disorders                                      | 1.2<br>(0.8 to 1.5)                     | 0.2<br>(0.1 to 0.3)                     | 0.2<br>(0.1 to 0.3)               | -12.9<br>(-40.3 to 24.9)                          | 1.5<br>(-34.8 to 53.2)                              |
| Cannabis use disorders                                         | 22.2<br>(19.1 to 26.5)                  | 3.5<br>(3.0 to 4.2)                     | 0.7<br>(0.4 to 1.0)               | 4.6<br>(-13.6 to 27.8)                            | 26.4<br>(1.6 to 56.5)                               |
| Other drug use disorders                                       | 8.7<br>(7.7 to 9.9)                     | 1.4<br>(1.2 to 1.5)                     | 1.5<br>(1.0 to 2.1)               | -4.8<br>(-18.4 to 12.0)                           | 2.2<br>(-13.6 to 21.5)                              |
| Depressive disorders                                           | 520.7<br>(491.6 to 557.2)               | 523.6<br>(472.5 to 577.1)               | 85.9<br>(59.3 to 116.7)           | -7.2<br>(-11.0 to -3.2)                           | -5.5<br>(-9.2 to -1.4)                              |
| Major depressive disorder                                      | 329.9<br>(298.8 to 363.4)               | 497.2<br>(445.6 to 552.0)               | 66.7<br>(45.5 to 91.0)            | -9.0<br>(-13.7 to -3.9)                           | -6.9<br>(-11.5 to -1.6)                             |
| Dysthymia                                                      | 201.3<br>(176.6 to 231.5)               | 26.4<br>(23.3 to 30.4)                  | 19.2<br>(12.8 to 28.0)            | -0.2<br>(-3.4 to 3.3)                             | 0.1<br>(-2.8 to 3.3)                                |
| Bipolar disorder                                               | 126.3<br>(84.2 to 177.5)                | 7.5<br>(5.2 to 10.2)                    | 25.5<br>(13.8 to 41.4)            | -3.0<br>(-8.1 to 2.8)                             | 0.2<br>(-4.5 to 4.8)                                |
| Anxiety disorders                                              | 588.8<br>(533.9 to 644.2)               | 71.0<br>(66.0 to 76.7)                  | 56.1<br>(39.1 to 75.9)            | -4.9<br>(-11.0 to 1.3)                            | -1.9<br>(-8.0 to 4.6)                               |
| Eating disorders                                               | 33.0<br>(27.5 to 40.0)                  | 8.1<br>(6.2 to 10.5)                    | 6.8<br>(4.3 to 10.0)              | -16.8<br>(-24.1 to -8.4)                          | -1.2<br>(-9.2 to 8.4)                               |
| Anorexia nervosa                                               | 8.4<br>(6.2 to 11.1)                    | 1.5<br>(1.1 to 2.0)                     | 1.8<br>(1.1 to 2.7)               | -18.4<br>(-30.2 to -3.8)                          | -0.5<br>(-14.8 to 16.5)                             |
| Bulimia nervosa                                                | 23.8<br>(18.0 to 31.3)                  | 6.6<br>(4.7 to 9.1)                     | 5.0<br>(3.0 to 7.6)               | -16.2<br>(-25.5 to -6.6)                          | -1.4<br>(-11.7 to 9.2)                              |
| Autistic spectrum disorders                                    | 79.4<br>(70.9 to 89.7)                  | 0.3<br>(0.2 to 0.4)                     | 12.7<br>(8.6 to 18.0)             | -3.8<br>(-8.4 to 1.1)                             | 0.1<br>(-5.1 to 5.3)                                |
| Autism                                                         | 31.7<br>(27.0 to 37.2)                  | < 0.05<br>(< 0.05 to 0.1)               | 8.0<br>(5.0 to 11.6)              | -3.4<br>(-10.0 to 3.7)                            | 0.2<br>(-7.3 to 7.9)                                |
| Asperger syndrome and other autistic spectrum disorders        | 47.9<br>(39.6 to 57.5)                  | 0.3<br>(0.2 to 0.4)                     | 4.7<br>(3.1 to 7.0)               | -4.5<br>(-9.5 to 0.2)                             | 0.0<br>(-5.1 to 5.5)                                |



| Cause                                                      | Prevalence in thousands (95% UI)              | Incidence in thousands (95% UI)                   | YLDs in thousands (95% UI)              |                                                   |                                                     |
|------------------------------------------------------------|-----------------------------------------------|---------------------------------------------------|-----------------------------------------|---------------------------------------------------|-----------------------------------------------------|
|                                                            | 2016 counts                                   | 2016 counts                                       | 2016 counts                             | Percentage change in counts between 2006 and 2016 | Percentage change in age-standardised rates between |
| Attention-deficit/hyperactivity disorder                   | 64.9<br>(47.8 to 87.1)                        | 2.6<br>(1.8 to 3.8)                               | 0.8<br>(0.4 to 1.3)                     | -10.0<br>(-17.4 to -2.3)                          | 0.1<br>(-7.8 to 9.1)                                |
| Conduct disorder                                           | 47.8<br>(36.1 to 60.6)                        | 15.5<br>(11.5 to 19.3)                            | 5.8<br>(3.5 to 9.0)                     | -10.0<br>(-15.8 to -3.6)                          | 0.1<br>(-6.3 to 7.0)                                |
| Idiopathic developmental intellectual disability           | 65.1<br>(26.2 to 109.9)                       | --                                                | 3.2<br>(1.4 to 5.9)                     | -5.0<br>(-12.9 to 4.3)                            | -0.2<br>(-8.9 to 9.4)                               |
| Other mental and substance use disorders                   | 264.7<br>(231.4 to 306.0)                     | 5.2<br>(4.7 to 5.9)                               | 19.5<br>(13.5 to 27.5)                  | -1.0<br>(-5.1 to 3.3)                             | 0.2<br>(-4.3 to 4.9)                                |
| <b>Diabetes, urogenital, blood, and endocrine diseases</b> | <b>3,944.2</b><br><b>(3,860.5 to 4,022.7)</b> | <b>1,010.4†</b><br><b>(952.4 to 1,072.4)</b>      | <b>84.9</b><br><b>(60.8 to 112.8)</b>   | <b>5.8</b><br><b>(1.2 to 10.8)</b>                | <b>-2.3</b><br><b>(-6.5 to 2.5)</b>                 |
| Diabetes mellitus                                          | 399.3<br>(354.8 to 451.8)                     | 18.9<br>(16.8 to 21.5)                            | 32.9<br>(22.9 to 45.8)                  | 2.7<br>(-5.9 to 13.4)                             | -6.7<br>(-14.4 to 3.3)                              |
| Acute glomerulonephritis                                   | 0.1<br>(0.1 to 0.1)                           | 1.9<br>(1.6 to 2.1)                               | < 0.05<br>(< 0.05 to < 0.05)            | 0.1<br>(-4.4 to 4.5)                              | -0.1<br>(-4.0 to 4.5)                               |
| Chronic kidney disease                                     | 543.9<br>(482.5 to 600.8)                     | 45.1<br>(39.1 to 51.3)                            | 15.6<br>(11.9 to 19.5)                  | 12.5<br>(3.7 to 21.3)                             | -1.9<br>(-8.8 to 5.1)                               |
| Chronic kidney disease due to diabetes mellitus            | 214.8<br>(190.9 to 239.5)                     | 18.7<br>(16.1 to 21.3)                            | 6.4<br>(4.9 to 8.0)                     | 17.2<br>(6.3 to 29.6)                             | 5.0<br>(-4.8 to 16.5)                               |
| Chronic kidney disease due to hypertension                 | 104.0<br>(90.9 to 116.3)                      | 8.4<br>(7.3 to 9.7)                               | 2.3<br>(1.7 to 3.0)                     | 27.9<br>(10.4 to 46.5)                            | -1.2<br>(-13.4 to 12.1)                             |
| Chronic kidney disease due to glomerulonephritis           | 93.5<br>(81.5 to 104.9)                       | 7.1<br>(5.7 to 8.7)                               | 3.1<br>(2.4 to 4.0)                     | -5.7<br>(-16.4 to 5.8)                            | -14.2<br>(-23.4 to -4.5)                            |
| Chronic kidney disease due to other causes                 | 131.6<br>(115.2 to 146.8)                     | 10.8<br>(9.3 to 12.5)                             | 3.8<br>(2.8 to 4.7)                     | 14.4<br>(1.9 to 27.8)                             | -0.5<br>(-10.6 to 10.8)                             |
| Urinary diseases and male infertility                      | 348.0<br>(311.7 to 389.0)                     | 553.4†<br>(497.2 to 610.6)                        | 10.7<br>(7.1 to 15.6)                   | 9.7<br>(2.6 to 16.3)                              | -0.9<br>(-7.1 to 4.8)                               |
| Interstitial nephritis and urinary tract infections        | 7.5<br>(6.4 to 8.5)                           | 387.8<br>(335.3 to 440.5)                         | 0.2<br>(0.1 to 0.4)                     | -8.0<br>(-22.1 to 9.4)                            | 1.5<br>(-14.2 to 21.4)                              |
| Urolithiasis                                               | 5.0<br>(4.4 to 5.7)                           | 131.7<br>(115.8 to 149.5)                         | 0.4<br>(0.2 to 0.5)                     | 3.2<br>(-11.8 to 19.7)                            | 0.3<br>(-13.1 to 14.5)                              |
| Benign prostatic hyperplasia                               | 298.5<br>(256.0 to 351.0)                     | 33.9<br>(28.5 to 40.4)                            | 9.7<br>(6.3 to 14.3)                    | 11.9<br>(4.0 to 19.4)                             | -0.3<br>(-8.0 to 6.6)                               |
| Male infertility                                           | 26.2<br>(18.9 to 36.5)                        | --                                                | 0.2<br>(0.1 to 0.3)                     | -14.5<br>(-22.3 to -6.7)                          | -5.4<br>(-13.5 to 2.6)                              |
| Other urinary diseases                                     | --                                            | --                                                | 0.2<br>(0.1 to 0.3)                     | -19.0<br>(-27.3 to -8.9)                          | -15.2<br>(-23.8 to -5.3)                            |
| Gynecological diseases                                     | 1,378.8<br>(1,290.9 to 1,474.3)               | 328.4†<br>(310.5 to 348.0)                        | 11.5<br>(7.8 to 16.8)                   | -4.6<br>(-9.6 to 0.2)                             | 0.5<br>(-4.2 to 5.5)                                |
| Uterine fibroids                                           | 99.2<br>(84.7 to 115.9)                       | 8.8<br>(7.2 to 10.7)                              | 0.9<br>(0.5 to 1.7)                     | 11.7<br>(-0.5 to 27.6)                            | 9.8<br>(-2.8 to 26.9)                               |
| Polycystic ovarian syndrome                                | 3.3<br>(2.4 to 4.3)                           | 10.4<br>(7.0 to 14.6)                             | < 0.05<br>(< 0.05 to 0.1)               | -13.0<br>(-30.6 to 9.8)                           | -0.5<br>(-20.7 to 25.9)                             |
| Female infertility                                         | 45.4<br>(28.0 to 70.2)                        | --                                                | 0.3<br>(0.1 to 0.6)                     | -4.1<br>(-13.7 to 6.5)                            | 3.9<br>(-5.5 to 15.1)                               |
| Endometriosis                                              | 5.5<br>(4.5 to 6.8)                           | 13.4<br>(10.3 to 17.8)                            | 0.5<br>(0.3 to 0.8)                     | -16.3<br>(-33.1 to 6.3)                           | 0.5<br>(-19.6 to 27.0)                              |
| Genital prolapse                                           | 693.5<br>(594.7 to 805.7)                     | 28.2<br>(23.8 to 33.5)                            | 2.1<br>(1.0 to 3.9)                     | 7.4<br>(-2.0 to 16.9)                             | -1.4<br>(-10.3 to 7.3)                              |
| Premenstrual syndrome                                      | 565.5<br>(534.0 to 596.1)                     | 186.3<br>(175.0 to 198.0)                         | 4.7<br>(2.9 to 7.3)                     | -8.7<br>(-15.5 to -1.8)                           | -0.5<br>(-7.6 to 7.0)                               |
| Other gynecological diseases                               | 86.4<br>(73.4 to 100.2)                       | 81.3<br>(67.9 to 95.4)                            | 2.9<br>(1.9 to 4.2)                     | -7.5<br>(-16.1 to 2.0)                            | 0.6<br>(-8.6 to 10.9)                               |
| Hemoglobinopathies and hemolytic anaemias                  | 1,928.2<br>(1,858.3 to 1,994.3)               | --                                                | 3.7<br>(2.2 to 6.1)                     | -3.9<br>(-27.2 to 25.1)                           | -2.9<br>(-27.2 to 27.9)                             |
| Thalassemias                                               | 1.0<br>(0.8 to 1.1)                           | --                                                | < 0.05<br>(< 0.05 to 0.1)               | -2.9<br>(-19.9 to 15.4)                           | 9.4<br>(-13.8 to 36.4)                              |
| Thalassaemias trait                                        | 576.2<br>(530.9 to 626.3)                     | --                                                | 3.0<br>(1.7 to 5.1)                     | -3.0<br>(-28.0 to 31.8)                           | -1.3<br>(-27.9 to 33.4)                             |
| Sickle cell disorders                                      | < 0.05<br>(< 0.05 to 0.1)                     | --                                                | < 0.05<br>(< 0.05 to < 0.05)            | -14.1<br>(-22.0 to -5.8)                          | -3.3<br>(-13.0 to 7.0)                              |
| Sickle cell trait                                          | 102.2<br>(90.1 to 115.2)                      | --                                                | 0.1<br>(0.1 to 0.2)                     | -16.2<br>(-43.1 to 19.5)                          | -12.0<br>(-40.4 to 27.3)                            |
| G6PD deficiency                                            | 252.7<br>(228.3 to 282.5)                     | --                                                | < 0.05<br>(< 0.05 to < 0.05)            | 5.8<br>(-20.0 to 41.1)                            | 14.4<br>(-14.8 to 55.4)                             |
| G6PD trait                                                 | 1,093.6<br>(1,048.7 to 1,142.8)               | --                                                | < 0.05<br>(< 0.05 to < 0.05)            | -65.3<br>(-79.2 to -44.3)                         | -62.1<br>(-77.5 to -37.2)                           |
| Other hemoglobinopathies and hemolytic anaemias            | 16.9<br>(14.6 to 19.8)                        | --                                                | 0.5<br>(0.3 to 0.7)                     | -5.6<br>(-19.8 to 9.9)                            | -15.0<br>(-29.5 to 1.4)                             |
| Endocrine, metabolic, blood, and immune disorders          | 305.6<br>(274.9 to 339.1)                     | 62.7<br>(55.5 to 70.3)                            | 10.4<br>(7.0 to 14.4)                   | 20.8<br>(13.6 to 28.2)                            | 6.5<br>(1.3 to 12.3)                                |
| <b>Musculoskeletal disorders</b>                           | <b>3,007.0</b><br><b>(2,884.8 to 3,140.0)</b> | <b>1,455.4</b><br><b>(1,318.0 to 1,610.4)</b>     | <b>320.8</b><br><b>(232.1 to 419.5)</b> | <b>2.7</b><br><b>(-1.0 to 6.8)</b>                | <b>0.2</b><br><b>(-3.6 to 3.9)</b>                  |
| Rheumatoid arthritis                                       | 49.3<br>(44.7 to 54.7)                        | 2.2<br>(2.0 to 2.5)                               | 11.5<br>(7.8 to 15.1)                   | -1.7<br>(-10.6 to 7.0)                            | -7.0<br>(-15.8 to 1.7)                              |
| Osteoarthritis                                             | 894.9<br>(842.5 to 948.9)                     | 36.9<br>(34.3 to 39.7)                            | 31.2<br>(20.6 to 45.0)                  | 10.6<br>(7.0 to 14.3)                             | -0.8<br>(-4.2 to 2.8)                               |
| Low back and neck pain                                     | 2,009.3<br>(1,891.5 to 2,145.0)               | 841.3<br>(747.1 to 940.7)                         | 241.0<br>(169.0 to 316.3)               | 1.4<br>(-3.4 to 6.6)                              | -0.2<br>(-5.0 to 4.5)                               |
| Low back pain                                              | 1,435.8<br>(1,274.1 to 1,620.8)               | 707.0<br>(614.5 to 808.6)                         | 161.9<br>(114.1 to 214.9)               | 1.2<br>(-5.5 to 8.3)                              | 0.6<br>(-5.9 to 7.4)                                |
| Neck pain                                                  | 799.6<br>(689.7 to 918.2)                     | 134.3<br>(117.3 to 156.8)                         | 79.1<br>(53.9 to 110.6)                 | 2.1<br>(-3.4 to 7.4)                              | -2.0<br>(-6.9 to 2.9)                               |
| Gout                                                       | 127.2<br>(112.4 to 144.1)                     | 20.3<br>(17.7 to 23.3)                            | 4.0<br>(2.7 to 5.4)                     | 7.7<br>(-3.3 to 20.9)                             | -1.3<br>(-12.1 to 11.3)                             |
| Other musculoskeletal disorders                            | 388.4<br>(299.0 to 491.8)                     | 554.7<br>(463.2 to 665.6)                         | 33.1<br>(21.4 to 49.1)                  | 5.9<br>(-4.7 to 17.4)                             | 6.1<br>(-3.8 to 16.4)                               |
| <b>Other non-communicable diseases</b>                     | <b>8,666.1</b><br><b>(8,573.2 to 8,760.4)</b> | <b>29,456.6†</b><br><b>(28,494.0 to 30,459.3)</b> | <b>269.4</b><br><b>(188.2 to 378.7)</b> | <b>5.3</b><br><b>(3.9 to 7.0)</b>                 | <b>0.3</b><br><b>(-0.9 to 1.7)</b>                  |
| Congenital anomalies                                       | 109.6<br>(103.7 to 116.5)                     | --                                                | 12.4<br>(8.8 to 16.8)                   | -2.8<br>(-7.4 to 1.4)                             | 1.1<br>(-3.5 to 5.8)                                |
| Neural tube defects                                        | 5.5<br>(4.9 to 6.2)                           | --                                                | 1.7<br>(1.1 to 2.2)                     | -5.9<br>(-18.9 to 8.3)                            | -3.5<br>(-17.1 to 11.7)                             |
| Congenital heart anomalies                                 | 27.1<br>(23.8 to 30.5)                        | --                                                | 1.5<br>(0.6 to 2.6)                     | -2.1<br>(-10.9 to 7.8)                            | 2.4<br>(-7.0 to 13.3)                               |
| Orofacial clefts                                           | 5.9<br>(5.2 to 6.7)                           | --                                                | 0.1<br>(< 0.05 to 0.1)                  | -4.9<br>(-16.0 to 7.3)                            | -2.3<br>(-13.6 to 10.1)                             |
| Down's syndrome                                            | 5.5<br>(4.7 to 6.4)                           | --                                                | 0.5<br>(0.4 to 0.7)                     | -4.0<br>(-12.2 to 5.5)                            | 3.8<br>(-5.8 to 14.3)                               |
| Turner syndrome                                            | 3.8<br>(3.3 to 4.4)                           | --                                                | 0.1<br>(< 0.05 to 0.1)                  | -10.8<br>(-34.5 to 23.3)                          | -3.1<br>(-29.3 to 33.6)                             |
| Klinefelter syndrome                                       | 8.2<br>(7.0 to 9.7)                           | --                                                | 0.1<br>(< 0.05 to 0.1)                  | -10.3<br>(-25.4 to 8.4)                           | 3.7<br>(-12.7 to 25.0)                              |

| Cause                                         | Prevalence in thousands (95% UI)              | Incidence in thousands (95% UI)                         | YLDs in thousands (95% UI)             |                                                   |                                                     |
|-----------------------------------------------|-----------------------------------------------|---------------------------------------------------------|----------------------------------------|---------------------------------------------------|-----------------------------------------------------|
|                                               | 2016 counts                                   | 2016 counts                                             | 2016 counts                            | Percentage change in counts between 2006 and 2016 | Percentage change in age-standardised rates between |
| Other chromosomal abnormalities               | 10.1<br>(8.2 to 12.0)                         | --                                                      | 1.0<br>(0.6 to 1.4)                    | -4.8<br>(-16.9 to 9.1)                            | 5.4<br>(-7.9 to 20.7)                               |
| Congenital musculoskeletal and limb anomalies | 27.0<br>(24.6 to 29.5)                        | --                                                      | 3.7<br>(2.5 to 5.1)                    | -1.6<br>(-9.5 to 7.3)                             | 0.2<br>(-8.1 to 9.7)                                |
| Urogenital congenital anomalies               | 10.9<br>(9.8 to 12.2)                         | --                                                      | 0.2<br>(0.1 to 0.4)                    | -6.8<br>(-14.1 to 0.5)                            | 0.2<br>(-8.2 to 9.2)                                |
| Digestive congenital anomalies                | 17.6<br>(15.6 to 20.1)                        | --                                                      | 0.8<br>(0.5 to 1.1)                    | -2.9<br>(-14.0 to 11.2)                           | -0.1<br>(-12.4 to 15.0)                             |
| Other congenital anomalies                    | 15.7<br>(6.3 to 28.6)                         | --                                                      | 2.9<br>(1.5 to 5.2)                    | -1.1<br>(-10.4 to 9.2)                            | 1.7<br>(-7.8 to 12.2)                               |
| Skin and subcutaneous diseases                | 3,692.9<br>(3,613.3 to 3,775.1)               | 9,113.7<br>(8,532.2 to 9,737.8)                         | 85.3<br>(58.0 to 122.3)                | -2.9<br>(-4.9 to -1.0)                            | 1.0<br>(-1.0 to 3.2)                                |
| Dermatitis                                    | 427.4<br>(397.5 to 459.9)                     | 757.5<br>(652.9 to 884.2)                               | 14.0<br>(8.6 to 21.5)                  | -2.2<br>(-5.9 to 1.5)                             | 0.4<br>(-3.6 to 4.5)                                |
| Psoriasis                                     | 223.0<br>(209.9 to 237.2)                     | 19.4<br>(18.2 to 20.6)                                  | 19.1<br>(13.6 to 25.2)                 | 2.1<br>(-3.1 to 8.1)                              | 2.0<br>(-3.6 to 8.4)                                |
| Cellulitis                                    | 5.0<br>(4.7 to 5.4)                           | 96.2<br>(90.0 to 102.8)                                 | 0.3<br>(0.2 to 0.4)                    | 1.5<br>(-14.7 to 21.4)                            | -0.3<br>(-17.7 to 21.4)                             |
| Pyoderma                                      | 49.3<br>(47.6 to 51.1)                        | 1,339.2<br>(1,291.4 to 1,385.8)                         | 0.3<br>(0.1 to 0.6)                    | 5.7<br>(0.3 to 11.3)                              | 0.4<br>(-5.2 to 6.3)                                |
| Scabies                                       | 9.2<br>(6.8 to 12.6)                          | 27.6<br>(20.4 to 37.5)                                  | 0.2<br>(0.1 to 0.4)                    | -7.6<br>(-17.5 to 3.7)                            | -0.2<br>(-11.2 to 12.1)                             |
| Fungal skin diseases                          | 931.9<br>(826.2 to 1,053.3)                   | 3,747.4<br>(3,217.6 to 4,325.1)                         | 5.1<br>(2.0 to 10.6)                   | 9.4<br>(7.2 to 11.8)                              | 0.1<br>(-1.1 to 1.3)                                |
| Viral skin diseases                           | 294.7<br>(254.0 to 342.4)                     | 395.4<br>(338.8 to 460.9)                               | 9.0<br>(5.5 to 13.5)                   | -5.0<br>(-8.2 to -1.6)                            | 0.0<br>(-2.7 to 2.9)                                |
| Acne vulgaris                                 | 870.1<br>(801.9 to 935.4)                     | 637.6<br>(520.5 to 793.0)                               | 22.3<br>(15.1 to 32.5)                 | -11.9<br>(-15.8 to -8.1)                          | 1.6<br>(-3.2 to 6.3)                                |
| Alopecia areata                               | 33.1<br>(32.0 to 34.3)                        | 58.1<br>(56.1 to 60.1)                                  | 1.1<br>(0.7 to 1.6)                    | -5.4<br>(-12.8 to 2.7)                            | 0.3<br>(-7.6 to 9.1)                                |
| Pruritus                                      | 108.2<br>(95.6 to 122.9)                      | 85.3<br>(75.0 to 97.1)                                  | 1.1<br>(0.5 to 2.1)                    | 1.5<br>(-3.8 to 7.2)                              | -0.4<br>(-5.5 to 4.5)                               |
| Urticaria                                     | 68.6<br>(60.6 to 77.4)                        | 120.9<br>(106.7 to 135.6)                               | 4.1<br>(2.6 to 5.7)                    | -4.1<br>(-9.9 to 1.9)                             | -0.0<br>(-6.2 to 6.3)                               |
| Decubitus ulcer                               | 7.5<br>(6.6 to 8.6)                           | 27.8<br>(24.1 to 31.8)                                  | 1.2<br>(0.8 to 1.6)                    | 23.7<br>(9.1 to 41.9)                             | 3.2<br>(-6.8 to 15.4)                               |
| Other skin and subcutaneous diseases          | 1,393.9<br>(1,354.5 to 1,434.1)               | 1,801.4<br>(1,733.5 to 1,873.4)                         | 7.5<br>(3.7 to 13.7)                   | 6.0<br>(3.6 to 8.4)                               | 0.6<br>(-1.6 to 2.8)                                |
| Sense organ diseases                          | 3,368.5<br>(3,187.3 to 3,549.2)               | 1,227.2 <sup>†</sup><br>(1,161.5 to 1,299.3)            | 117.3<br>(82.4 to 164.0)               | 13.6<br>(10.8 to 16.9)                            | -0.0<br>(-2.1 to 2.2)                               |
| Glaucoma                                      | 7.3<br>(5.9 to 8.9)                           | --                                                      | 0.7<br>(0.5 to 1.0)                    | 19.4<br>(2.1 to 41.1)                             | 1.6<br>(-14.2 to 20.3)                              |
| Cataract                                      | 61.4<br>(48.6 to 76.8)                        | --                                                      | 4.8<br>(3.2 to 6.7)                    | 24.8<br>(14.8 to 35.5)                            | -2.7<br>(-10.5 to 5.5)                              |
| Macular degeneration                          | 14.0<br>(11.2 to 17.4)                        | --                                                      | 1.3<br>(0.8 to 1.8)                    | 27.9<br>(12.4 to 45.1)                            | 2.0<br>(-10.0 to 16.0)                              |
| Refraction and accommodation disorders        | 628.5<br>(597.4 to 660.2)                     | --                                                      | 12.5<br>(7.9 to 19.4)                  | 5.0<br>(1.4 to 9.3)                               | -1.6<br>(-4.8 to 2.0)                               |
| Age-related and other hearing loss            | 2,926.8<br>(2,613.3 to 3,246.1)               | --                                                      | 80.5<br>(56.2 to 114.8)                | 15.3<br>(11.5 to 20.1)                            | 0.1<br>(-2.9 to 3.3)                                |
| Other vision loss                             | 31.4<br>(27.1 to 36.3)                        | --                                                      | 2.4<br>(1.6 to 3.2)                    | 13.5<br>(3.6 to 25.4)                             | 0.6<br>(-8.6 to 11.5)                               |
| Other sense organ diseases                    | 489.0<br>(450.8 to 528.2)                     | 1,227.2<br>(1,161.5 to 1,299.3)                         | 15.2<br>(9.6 to 23.0)                  | 8.4<br>(4.7 to 12.3)                              | 1.0<br>(-2.6 to 4.8)                                |
| Oral disorders                                | 6,690.5<br>(6,530.2 to 6,835.6)               | 19,115.7 <sup>†</sup><br>(18,330.4 to 19,911.3)         | 54.4<br>(34.1 to 79.9)                 | 4.6<br>(1.1 to 7.8)                               | -0.9<br>(-3.8 to 1.6)                               |
| Caries of deciduous teeth                     | 328.4<br>(243.0 to 405.6)                     | 987.8<br>(563.8 to 1,483.5)                             | 0.1<br>(0.1 to 0.3)                    | 11.7<br>(-13.7 to 34.4)                           | 15.7<br>(-11.0 to 38.9)                             |
| Caries of permanent teeth                     | 5,404.9<br>(5,199.7 to 5,607.8)               | 17,906.1<br>(17,181.5 to 18,511.0)                      | 5.3<br>(2.3 to 10.0)                   | 0.0<br>(-2.5 to 2.7)                              | 4.1<br>(0.9 to 7.5)                                 |
| Periodontal disease                           | 1,262.1<br>(1,053.9 to 1,497.0)               | 134.6<br>(107.0 to 166.5)                               | 8.2<br>(3.3 to 17.4)                   | 7.1<br>(2.5 to 11.7)                              | 2.6<br>(-1.5 to 7.3)                                |
| Edentulism and severe tooth loss              | 1,248.6<br>(1,093.1 to 1,405.1)               | 87.2<br>(72.9 to 103.3)                                 | 34.4<br>(22.4 to 47.9)                 | 6.0<br>(0.4 to 10.8)                              | -3.6<br>(-8.5 to 0.4)                               |
| Other oral disorders                          | 219.7<br>(210.3 to 229.9)                     | --                                                      | 6.4<br>(3.9 to 9.6)                    | -1.7<br>(-4.5 to 1.1)                             | 0.1<br>(-2.9 to 3.2)                                |
| <b>Injuries</b>                               | <b>3,614.9</b><br><b>(3,381.9 to 3,891.8)</b> | <b>1,021.4<sup>†</sup></b><br><b>(961.9 to 1,083.5)</b> | <b>114.9</b><br><b>(76.6 to 163.4)</b> | <b>1.8</b><br><b>(0.5 to 3.0)</b>                 | <b>-2.4</b><br><b>(-3.7 to -1.1)</b>                |
| <b>Transport injuries</b>                     | <b>687.6</b><br><b>(633.5 to 741.5)</b>       | <b>148.2</b><br><b>(134.9 to 161.0)</b>                 | <b>30.9</b><br><b>(20.4 to 44.1)</b>   | <b>-5.5</b><br><b>(-7.0 to -4.1)</b>              | <b>-9.1</b><br><b>(-10.6 to -7.5)</b>               |
| Road injuries                                 | 642.7<br>(588.8 to 694.5)                     | 142.7<br>(129.2 to 155.5)                               | 29.4<br>(19.4 to 41.9)                 | -6.2<br>(-7.6 to -4.8)                            | -9.7<br>(-11.3 to -8.2)                             |
| Pedestrian road injuries                      | 92.3<br>(81.1 to 105.9)                       | 14.2<br>(11.9 to 16.9)                                  | 4.6<br>(3.0 to 6.7)                    | -7.2<br>(-8.5 to -5.8)                            | -12.0<br>(-13.4 to -10.6)                           |
| Cyclist road injuries                         | 156.0<br>(130.5 to 185.0)                     | 42.8<br>(35.5 to 49.9)                                  | 6.5<br>(4.2 to 9.5)                    | 3.8<br>(2.3 to 5.5)                               | -0.8<br>(-2.4 to 0.8)                               |
| Motorcyclist road injuries                    | 113.4<br>(96.1 to 135.9)                      | 14.7<br>(11.9 to 17.9)                                  | 5.3<br>(3.5 to 7.7)                    | -2.9<br>(-4.6 to -1.0)                            | -5.8<br>(-7.8 to -3.9)                              |
| Motor vehicle road injuries                   | 246.2<br>(202.3 to 288.4)                     | 63.8<br>(56.5 to 72.2)                                  | 11.7<br>(7.8 to 16.6)                  | -12.7<br>(-14.1 to -11.2)                         | -15.6<br>(-17.2 to -13.9)                           |
| Other road injuries                           | 34.8<br>(29.1 to 41.1)                        | 7.2<br>(5.7 to 9.2)                                     | 1.3<br>(0.8 to 1.8)                    | 3.2<br>(1.3 to 5.4)                               | -0.1<br>(-2.2 to 2.1)                               |
| Other transport injuries                      | 44.9<br>(36.6 to 53.5)                        | 5.5<br>(4.7 to 6.5)                                     | 1.6<br>(1.0 to 2.3)                    | 8.6<br>(7.2 to 9.9)                               | 4.0<br>(2.4 to 5.5)                                 |
| <b>Unintentional injuries</b>                 | <b>2,796.8</b><br><b>(2,579.8 to 3,048.8)</b> | <b>834.0</b><br><b>(778.4 to 896.3)</b>                 | <b>79.3</b><br><b>(52.7 to 114.1)</b>  | <b>4.9</b><br><b>(3.6 to 6.1)</b>                 | <b>0.1</b><br><b>(-1.2 to 1.4)</b>                  |
| Falls                                         | 1,438.5<br>(1,258.7 to 1,633.4)               | 416.7<br>(370.6 to 467.2)                               | 49.7<br>(33.8 to 69.5)                 | 4.2<br>(2.8 to 5.7)                               | -0.9<br>(-2.4 to 0.6)                               |
| Drowning                                      | 7.7<br>(6.9 to 8.5)                           | 0.8<br>(0.7 to 0.9)                                     | 0.4<br>(0.2 to 0.5)                    | 9.6<br>(4.7 to 14.8)                              | 4.7<br>(-0.4 to 10.3)                               |
| Fire, heat, and hot substances                | 273.9<br>(234.6 to 323.0)                     | 13.0<br>(10.8 to 15.1)                                  | 4.7<br>(2.6 to 7.9)                    | 7.5<br>(5.2 to 10.3)                              | 4.7<br>(2.5 to 7.3)                                 |
| Poisonings                                    | 10.4<br>(8.5 to 13.0)                         | 8.3<br>(6.7 to 10.0)                                    | 0.9<br>(0.6 to 1.3)                    | 4.2<br>(-4.6 to 14.4)                             | 6.3<br>(-4.0 to 17.4)                               |
| Exposure to mechanical forces                 | 541.4<br>(452.8 to 686.3)                     | 115.2<br>(97.7 to 132.9)                                | 9.7<br>(6.1 to 15.0)                   | 5.9<br>(4.6 to 7.2)                               | 3.0<br>(1.6 to 4.5)                                 |
| Unintentional firearm injuries                | 18.8<br>(15.2 to 23.7)                        | 1.5<br>(1.0 to 2.1)                                     | 0.3<br>(0.1 to 0.5)                    | 1.1<br>(-0.6 to 2.9)                              | -2.1<br>(-3.8 to -0.3)                              |
| Unintentional suffocation                     | 7.2<br>(6.0 to 8.6)                           | 1.1<br>(0.7 to 1.6)                                     | 0.2<br>(0.1 to 0.3)                    | 14.4<br>(12.8 to 16.2)                            | 8.6<br>(6.7 to 10.6)                                |
| Other exposure to mechanical forces           | 515.4<br>(429.5 to 658.0)                     | 112.6<br>(95.5 to 130.1)                                | 9.3<br>(5.8 to 14.3)                   | 5.9<br>(4.6 to 7.2)                               | 3.1<br>(1.6 to 4.6)                                 |



| Cause                                                                               | Prevalence in thousands (95% UI)        | Incidence in thousands (95% UI)       | YLDs in thousands (95% UI)              |                                                   |                                                     |
|-------------------------------------------------------------------------------------|-----------------------------------------|---------------------------------------|-----------------------------------------|---------------------------------------------------|-----------------------------------------------------|
|                                                                                     | 2016 counts                             | 2016 counts                           | 2016 counts                             | Percentage change in counts between 2006 and 2016 | Percentage change in age-standardised rates between |
| Adverse effects of medical treatment                                                | 5.0<br>(4.0 to 6.1)                     | 64.9<br>(58.1 to 72.6)                | 0.7<br>(0.4 to 1.0)                     | -4.3<br>(-9.3 to 0.6)                             | -10.4<br>(-14.1 to -6.8)                            |
| Animal contact                                                                      | 49.2<br>(43.2 to 56.9)                  | 24.5<br>(19.8 to 30.3)                | 0.9<br>(0.6 to 1.3)                     | 5.5<br>(1.6 to 9.4)                               | 2.5<br>(-1.6 to 6.8)                                |
| Venomous animal contact                                                             | 6.9<br>(5.9 to 7.9)                     | 7.4<br>(5.4 to 9.9)                   | 0.3<br>(0.2 to 0.5)                     | 1.0<br>(-6.7 to 9.8)                              | 1.9<br>(-6.7 to 11.0)                               |
| Non-venomous animal contact                                                         | 42.4<br>(36.6 to 49.8)                  | 17.1<br>(13.7 to 21.3)                | 0.5<br>(0.3 to 0.9)                     | 8.4<br>(6.6 to 10.2)                              | 3.0<br>(1.2 to 4.7)                                 |
| Foreign body                                                                        | 66.5<br>(57.8 to 78.3)                  | 42.8<br>(37.2 to 50.4)                | 1.9<br>(1.2 to 2.9)                     | 5.8<br>(4.0 to 7.5)                               | 1.7<br>(0.1 to 3.3)                                 |
| Pulmonary aspiration and foreign body in airway                                     | 12.9<br>(10.2 to 16.1)                  | 11.7<br>(10.2 to 13.3)                | 0.3<br>(0.2 to 0.5)                     | 4.9<br>(2.7 to 7.3)                               | -2.8<br>(-4.8 to -0.7)                              |
| Foreign body in eyes                                                                | 5.9<br>(4.0 to 8.0)                     | 21.9<br>(16.9 to 28.9)                | 0.4<br>(0.3 to 0.6)                     | 3.8<br>(-0.1 to 8.1)                              | 2.7<br>(-0.4 to 5.8)                                |
| Foreign body in other body part                                                     | 47.8<br>(40.1 to 59.0)                  | 9.2<br>(7.6 to 10.9)                  | 1.2<br>(0.7 to 1.8)                     | 6.8<br>(5.1 to 8.5)                               | 2.6<br>(0.8 to 4.4)                                 |
| Environmental heat and cold exposure                                                | 35.1<br>(31.4 to 39.5)                  | 7.3<br>(6.1 to 8.6)                   | 1.2<br>(0.8 to 1.8)                     | 13.8<br>(10.0 to 17.9)                            | 4.5<br>(0.8 to 8.5)                                 |
| Other unintentional injuries                                                        | 369.1<br>(311.1 to 433.0)               | 140.6<br>(119.0 to 164.0)             | 9.2<br>(6.0 to 13.8)                    | 5.7<br>(4.4 to 7.0)                               | -1.3<br>(-2.6 to 0.0)                               |
| <b>Self-harm and interpersonal violence</b>                                         | <b>257.6</b><br><b>(235.8 to 279.5)</b> | <b>38.9†</b><br><b>(34.4 to 43.7)</b> | <b>4.6</b><br><b>(3.1 to 6.6)</b>       | <b>3.5</b><br><b>(1.0 to 5.6)</b>                 | <b>3.6</b><br><b>(1.3 to 5.7)</b>                   |
| Self-harm                                                                           | 19.8<br>(16.4 to 23.4)                  | 12.7<br>(10.9 to 14.9)                | 0.8<br>(0.5 to 1.2)                     | 9.7<br>(3.2 to 16.6)                              | 7.7<br>(0.8 to 15.0)                                |
| Self-harm by firearm                                                                | 0.3<br>(0.2 to 0.4)                     | < 0.05<br>(< 0.05 to 0.1)             | < 0.05<br>(< 0.05 to < 0.05)            | 5.6<br>(3.6 to 7.8)                               | 3.9<br>(1.9 to 6.0)                                 |
| Self-harm by other specified means                                                  | 19.5<br>(16.1 to 23.1)                  | 12.7<br>(10.8 to 14.9)                | 0.8<br>(0.5 to 1.2)                     | 9.7<br>(3.2 to 16.6)                              | 7.7<br>(0.8 to 15.1)                                |
| Interpersonal violence                                                              | 237.8<br>(216.6 to 260.2)               | 26.2†<br>(22.1 to 30.6)               | 3.8<br>(2.5 to 5.4)                     | 2.2<br>(-0.2 to 4.4)                              | 2.8<br>(0.7 to 4.8)                                 |
| Assault by firearm                                                                  | 7.2<br>(5.9 to 8.6)                     | 0.8<br>(0.6 to 1.1)                   | 0.2<br>(0.1 to 0.2)                     | 10.8<br>(8.8 to 12.6)                             | 8.0<br>(6.0 to 9.8)                                 |
| Assault by sharp object                                                             | 19.8<br>(16.0 to 23.8)                  | 4.5<br>(3.3 to 5.9)                   | 0.4<br>(0.2 to 0.6)                     | 9.1<br>(7.0 to 10.8)                              | 6.7<br>(4.8 to 8.5)                                 |
| Sexual violence                                                                     | 132.2<br>(117.4 to 148.9)               | --                                    | 1.1<br>(0.7 to 1.5)                     | -11.6<br>(-15.4 to -8.0)                          | -3.3<br>(-7.5 to 0.6)                               |
| Assault by other means                                                              | 78.6<br>(64.8 to 97.2)                  | 20.9<br>(17.6 to 24.5)                | 2.2<br>(1.4 to 3.3)                     | 8.7<br>(7.1 to 10.3)                              | 6.6<br>(4.9 to 8.3)                                 |
| <b>Forces of nature, conflict and terrorism, and executions and police conflict</b> | <b>5.2</b><br><b>(2.7 to 8.1)</b>       | <b>0.3†</b><br><b>(0.2 to 0.5)</b>    | <b>0.1</b><br><b>(&lt; 0.05 to 0.3)</b> | <b>-7.9</b><br><b>(-9.5 to -6.2)</b>              | <b>-13.4</b><br><b>(-15.2 to -10.7)</b>             |
| Exposure to forces of nature                                                        | 3.9<br>(1.6 to 6.7)                     | --                                    | 0.1<br>(< 0.05 to 0.2)                  | -16.0<br>(-17.7 to -14.1)                         | -23.3<br>(-25.2 to -21.2)                           |
| Conflict and terrorism                                                              | --                                      | --                                    | --                                      | --                                                | --                                                  |
| Executions and police conflict                                                      | 1.3<br>(0.7 to 2.0)                     | 0.3<br>(0.2 to 0.5)                   | < 0.05<br>(< 0.05 to 0.1)               | 25.5<br>(16.1 to 29.2)                            | 24.5<br>(16.4 to 28.0)                              |
| <b>Impairments</b>                                                                  | --                                      | --                                    | --                                      | --                                                | --                                                  |
| Anaemia                                                                             | 1,012.4<br>(829.9 to 1,211.1)           | --                                    | 18.5<br>(12.4 to 27.4)                  | 7.9<br>(-13.8 to 31.8)                            | 1.5<br>(-19.5 to 26.4)                              |
| Developmental intellectual disability                                               | 167.7<br>(124.8 to 216.2)               | --                                    | 20.4<br>(14.8 to 26.6)                  | -3.4<br>(-7.8 to 1.1)                             | 1.6<br>(-3.1 to 6.3)                                |
| Epilepsy                                                                            | 47.5<br>(25.2 to 69.4)                  | --                                    | 13.5<br>(7.2 to 22.6)                   | -2.7<br>(-52.0 to 100.4)                          | 0.7<br>(-50.7 to 101.0)                             |
| Guillain-Barre syndrome                                                             | 0.1<br>(0.1 to 0.2)                     | --                                    | < 0.05<br>(< 0.05 to 0.1)               | 15.7<br>(2.8 to 27.7)                             | 11.8<br>(1.3 to 21.5)                               |
| Hearing loss                                                                        | 3,023.2<br>(2,712.5 to 3,338.8)         | --                                    | 84.9<br>(59.2 to 120.8)                 | 14.2<br>(10.6 to 18.3)                            | 0.1<br>(-2.6 to 3.0)                                |
| Heart failure                                                                       | 293.3<br>(253.7 to 339.9)               | --                                    | 33.4<br>(24.1 to 43.5)                  | 16.3<br>(7.9 to 25.8)                             | -3.7<br>(-10.2 to 3.6)                              |
| Infertility                                                                         | 99.6<br>(74.1 to 133.6)                 | --                                    | 0.7<br>(0.3 to 1.3)                     | -9.0<br>(-15.2 to -2.9)                           | 0.1<br>(-6.1 to 6.6)                                |
| Pelvic inflammatory disease                                                         | 0.4<br>(0.3 to 0.6)                     | --                                    | 0.1<br>(< 0.05 to 0.1)                  | -12.1<br>(-30.8 to 14.2)                          | -2.8<br>(-23.3 to 26.1)                             |
| Vision loss                                                                         | 762.4<br>(724.1 to 801.3)               | --                                    | 25.2<br>(18.0 to 34.9)                  | 9.9<br>(6.7 to 13.3)                              | 0.3<br>(-2.9 to 3.7)                                |

We did not calculate incidence for the nine impairments, certain NTDs, and causes with only birth prevalence. Blank cells mean that no estimate is available.

† Incidence for aggregate causes represents the sum of the incidence of the causes below the aggregate.

‡ Incidence estimates for stroke represent first-ever stroke only.

^ Incidence of HIV/AIDS represents new infections of HIV only and does not include new infections of Tuberculosis in HIV positive cases.

SR Table 14: Prevalence, incidence, and YLDs for 2016, percentage change of YLD counts and percentage change of age-standardised YLD rates between 2006 and 2016 by cause and impairments, for all ages, Greenland.

| Cause                                                                                | Prevalence in thousands (95% UI)       | Incidence in thousands (95% UI)         | YLDs in thousands (95% UI)             |                                                   |                                                     |
|--------------------------------------------------------------------------------------|----------------------------------------|-----------------------------------------|----------------------------------------|---------------------------------------------------|-----------------------------------------------------|
|                                                                                      | 2016 counts                            | 2016 counts                             | 2016 counts                            | Percentage change in counts between 2006 and 2016 | Percentage change in age-standardised rates between |
| <b>All causes</b>                                                                    | <b>45.3</b><br>(45.0 to 45.5)          | <b>277.6†</b><br>(258.5 to 297.6)       | <b>5.9</b><br>(4.3 to 7.5)             | <b>4.4</b><br>(2.4 to 6.6)                        | <b>-1.5</b><br>(-3.2 to 0.3)                        |
| <b>Communicable, maternal, neonatal, and nutritional disorders</b>                   | <b>15.6</b><br>(15.0 to 16.3)          | <b>168.3†</b><br>(149.8 to 187.7)       | <b>0.2</b><br>(0.1 to 0.3)             | <b>-2.7</b><br>(-7.9 to 3.1)                      | <b>0.0</b><br>(-5.3 to 6.1)                         |
| <b>HIV/AIDS and tuberculosis</b>                                                     | <b>4.0</b><br>(3.8 to 4.2)             | <b>&lt; 0.05†</b><br>(< 0.05 to < 0.05) | <b>&lt; 0.05</b><br>(< 0.05 to 0.1)    | <b>15.4</b><br>(-2.9 to 34.1)                     | <b>12.2</b><br>(-6.7 to 30.9)                       |
| Tuberculosis                                                                         | 3.6<br>(3.4 to 3.8)                    | < 0.05†<br>(< 0.05 to < 0.05)           | < 0.05<br>(< 0.05 to < 0.05)           | -13.8<br>(-32.3 to 9.2)                           | -22.4<br>(-37.5 to -3.3)                            |
| Drug-susceptible tuberculosis                                                        | < 0.05<br>(< 0.05 to < 0.05)           | < 0.05<br>(< 0.05 to < 0.05)            | < 0.05<br>(< 0.05 to < 0.05)           | -13.8<br>(-32.7 to 9.3)                           | -22.4<br>(-37.7 to -3.2)                            |
| Multidrug-resistant tuberculosis without extensive drug resistance                   | < 0.05<br>(< 0.05 to < 0.05)           | < 0.05<br>(< 0.05 to < 0.05)            | < 0.05<br>(< 0.05 to < 0.05)           | -14.8<br>(-31.2 to 2.5)                           | -23.7<br>(-38.4 to -7.8)                            |
| Extensively drug-resistant tuberculosis                                              | < 0.05<br>(< 0.05 to < 0.05)           | < 0.05<br>(< 0.05 to < 0.05)            | < 0.05<br>(< 0.05 to < 0.05)           | 83.2<br>(48.0 to 120.5)                           | 64.1<br>(32.5 to 98.2)                              |
| Latent tuberculosis infection                                                        | 3.6<br>(3.4 to 3.8)                    | --                                      | --                                     | --                                                | --                                                  |
| HIV/AIDS                                                                             | 0.4<br>(0.2 to 0.6)                    | < 0.05^<br>(< 0.05 to < 0.05)           | < 0.05<br>(< 0.05 to 0.1)              | 19.2<br>(-0.8 to 40.4)                            | 17.7<br>(-2.8 to 38.9)                              |
| Drug-susceptible HIV/AIDS - Tuberculosis                                             | < 0.05<br>(< 0.05 to < 0.05)           | < 0.05<br>(< 0.05 to < 0.05)            | < 0.05<br>(< 0.05 to < 0.05)           | -40.1<br>(-49.0 to -30.7)                         | -40.6<br>(-51.7 to -29.0)                           |
| Multidrug-resistant HIV/AIDS - Tuberculosis without extensive drug resistance        | < 0.05<br>(< 0.05 to < 0.05)           | < 0.05<br>(< 0.05 to < 0.05)            | < 0.05<br>(< 0.05 to < 0.05)           | -41.0<br>(-52.6 to -28.8)                         | -41.6<br>(-53.1 to -29.6)                           |
| Extensively drug-resistant HIV/AIDS - Tuberculosis                                   | < 0.05<br>(< 0.05 to < 0.05)           | < 0.05<br>(< 0.05 to < 0.05)            | < 0.05<br>(< 0.05 to < 0.05)           | 26.8<br>(1.7 to 52.9)                             | 25.6<br>(0.7 to 51.4)                               |
| HIV/AIDS resulting in other diseases                                                 | 0.4<br>(0.2 to 0.6)                    | < 0.05<br>(< 0.05 to < 0.05)            | < 0.05<br>(< 0.05 to 0.1)              | 20.9<br>(0.4 to 42.7)                             | 19.4<br>(-1.6 to 41.5)                              |
| <b>Diarrhoea, lower respiratory infections, and other common infectious diseases</b> | <b>2.6</b><br>(2.4 to 2.8)             | <b>165.8†</b><br>(147.4 to 185.3)       | <b>0.1</b><br>(0.1 to 0.1)             | <b>-2.1</b><br>(-5.7 to 1.9)                      | <b>0.6</b><br>(-3.0 to 3.8)                         |
| Diarrhoeal diseases                                                                  | 0.1<br>(0.1 to 0.1)                    | 5.5<br>(5.0 to 5.9)                     | < 0.05<br>(< 0.05 to < 0.05)           | 6.8<br>(-3.1 to 18.7)                             | 12.1<br>(1.6 to 23.8)                               |
| Intestinal infectious diseases                                                       | < 0.05<br>(< 0.05 to < 0.05)           | < 0.05†<br>(< 0.05 to < 0.05)           | < 0.05<br>(< 0.05 to < 0.05)           | 41.9<br>(20.8 to 66.5)                            | 36.6<br>(17.5 to 57.7)                              |
| Typhoid fever                                                                        | < 0.05<br>(< 0.05 to < 0.05)           | < 0.05<br>(< 0.05 to < 0.05)            | < 0.05<br>(< 0.05 to < 0.05)           | 176.1<br>(122.7 to 247.9)                         | 163.7<br>(117.8 to 220.3)                           |
| Paratyphoid fever                                                                    | < 0.05<br>(< 0.05 to < 0.05)           | < 0.05<br>(< 0.05 to < 0.05)            | < 0.05<br>(< 0.05 to < 0.05)           | -25.6<br>(-39.1 to -9.5)                          | -28.0<br>(-39.0 to -14.6)                           |
| Other intestinal infectious diseases                                                 | --                                     | --                                      | < 0.05<br>(< 0.05 to < 0.05)           | -12.4<br>(-38.1 to 22.7)                          | -7.0<br>(-34.3 to 29.8)                             |
| Lower respiratory infections                                                         | < 0.05<br>(< 0.05 to < 0.05)           | 1.8<br>(1.6 to 1.9)                     | < 0.05<br>(< 0.05 to < 0.05)           | 1.1<br>(-11.5 to 15.6)                            | -3.6<br>(-14.1 to 9.3)                              |
| Upper respiratory infections                                                         | 2.0<br>(1.8 to 2.3)                    | 155.2<br>(136.6 to 174.7)               | 0.1<br>(< 0.05 to 0.1)                 | -2.9<br>(-7.8 to 2.7)                             | -0.0<br>(-4.7 to 4.5)                               |
| Otitis media                                                                         | 0.4<br>(0.4 to 0.4)                    | 2.4<br>(2.0 to 2.9)                     | < 0.05<br>(< 0.05 to < 0.05)           | -7.7<br>(-15.7 to 0.6)                            | -3.8<br>(-11.8 to 4.0)                              |
| Meningitis                                                                           | < 0.05<br>(< 0.05 to < 0.05)           | < 0.05<br>(< 0.05 to < 0.05)            | < 0.05<br>(< 0.05 to < 0.05)           | 0.7<br>(-4.4 to 6.9)                              | -1.3<br>(-5.8 to 4.6)                               |
| Pneumococcal meningitis                                                              | < 0.05<br>(< 0.05 to < 0.05)           | < 0.05<br>(< 0.05 to < 0.05)            | < 0.05<br>(< 0.05 to < 0.05)           | 0.9<br>(-4.5 to 7.6)                              | -1.1<br>(-6.0 to 5.2)                               |
| H influenzae type B meningitis                                                       | < 0.05<br>(< 0.05 to < 0.05)           | < 0.05<br>(< 0.05 to < 0.05)            | < 0.05<br>(< 0.05 to < 0.05)           | 1.2<br>(-6.9 to 9.6)                              | -0.3<br>(-8.5 to 8.1)                               |
| Meningococcal infection                                                              | < 0.05<br>(< 0.05 to < 0.05)           | < 0.05<br>(< 0.05 to < 0.05)            | < 0.05<br>(< 0.05 to < 0.05)           | 2.6<br>(-5.2 to 13.5)                             | 0.7<br>(-9.0 to 36.4)                               |
| Other meningitis                                                                     | < 0.05<br>(< 0.05 to < 0.05)           | < 0.05<br>(< 0.05 to < 0.05)            | < 0.05<br>(< 0.05 to < 0.05)           | -1.8<br>(-7.2 to 4.0)                             | -4.2<br>(-9.1 to 1.0)                               |
| Encephalitis                                                                         | < 0.05<br>(< 0.05 to < 0.05)           | < 0.05<br>(< 0.05 to < 0.05)            | < 0.05<br>(< 0.05 to < 0.05)           | 10.2<br>(4.5 to 16.8)                             | 6.2<br>(0.8 to 12.1)                                |
| Diphtheria                                                                           | < 0.05<br>(< 0.05 to < 0.05)           | < 0.05<br>(< 0.05 to < 0.05)            | < 0.05<br>(< 0.05 to < 0.05)           | -36.3<br>(-63.8 to 10.5)                          | -36.1<br>(-62.9 to 10.1)                            |
| Whooping cough                                                                       | < 0.05<br>(< 0.05 to < 0.05)           | < 0.05<br>(< 0.05 to < 0.05)            | < 0.05<br>(< 0.05 to < 0.05)           | -37.9<br>(-52.9 to -19.8)                         | -30.8<br>(-47.5 to -10.8)                           |
| Tetanus                                                                              | < 0.05<br>(< 0.05 to < 0.05)           | < 0.05<br>(< 0.05 to < 0.05)            | < 0.05<br>(< 0.05 to < 0.05)           | -3.6<br>(-18.2 to 13.1)                           | 0.4<br>(-14.7 to 16.4)                              |
| Measles                                                                              | < 0.05<br>(< 0.05 to < 0.05)           | 0.1<br>(< 0.05 to 0.1)                  | < 0.05<br>(< 0.05 to < 0.05)           | -37.4<br>(-61.6 to 4.8)                           | -29.1<br>(-56.7 to 19.3)                            |
| Varicella and herpes zoster                                                          | < 0.05<br>(< 0.05 to < 0.05)           | 0.9<br>(0.8 to 0.9)                     | < 0.05<br>(< 0.05 to < 0.05)           | 10.7<br>(-5.8 to 30.0)                            | 0.4<br>(-13.1 to 15.0)                              |
| <b>Neglected tropical diseases and malaria</b>                                       | <b>&lt; 0.05</b><br>(< 0.05 to < 0.05) | <b>&lt; 0.05†</b><br>(< 0.05 to < 0.05) | <b>&lt; 0.05</b><br>(< 0.05 to < 0.05) | <b>8.2</b><br>(-36.4 to 81.7)                     | <b>4.2</b><br>(-36.1 to 71.7)                       |
| Malaria                                                                              | --                                     | --                                      | --                                     | --                                                | --                                                  |
| Chagas disease                                                                       | --                                     | --                                      | --                                     | --                                                | --                                                  |
| Leishmaniasis                                                                        | --                                     | --                                      | --                                     | --                                                | --                                                  |
| Visceral leishmaniasis                                                               | --                                     | --                                      | --                                     | --                                                | --                                                  |
| Cutaneous and mucocutaneous leishmaniasis                                            | --                                     | --                                      | --                                     | --                                                | --                                                  |
| African trypanosomiasis                                                              | --                                     | --                                      | --                                     | --                                                | --                                                  |
| Schistosomiasis                                                                      | --                                     | --                                      | --                                     | --                                                | --                                                  |
| Cysticercosis                                                                        | --                                     | --                                      | --                                     | --                                                | --                                                  |
| Cystic echinococcosis                                                                | --                                     | --                                      | --                                     | --                                                | --                                                  |
| Lymphatic filariasis                                                                 | --                                     | --                                      | --                                     | --                                                | --                                                  |
| Onchocerciasis                                                                       | --                                     | --                                      | --                                     | --                                                | --                                                  |
| Trachoma                                                                             | --                                     | --                                      | --                                     | --                                                | --                                                  |
| Dengue                                                                               | --                                     | --                                      | --                                     | --                                                | --                                                  |
| Yellow fever                                                                         | --                                     | --                                      | --                                     | --                                                | --                                                  |
| Rabies                                                                               | < 0.05<br>(< 0.05 to < 0.05)           | < 0.05<br>(< 0.05 to < 0.05)            | < 0.05<br>(< 0.05 to < 0.05)           | 1.6<br>(-42.1 to 71.5)                            | -3.8<br>(-41.5 to 58.7)                             |
| Intestinal nematode infections                                                       | --                                     | --                                      | --                                     | --                                                | --                                                  |
| Ascariasis                                                                           | --                                     | --                                      | --                                     | --                                                | --                                                  |

| Cause                                                                   | Prevalence in thousands (95% UI)                    | Incidence in thousands (95% UI)         | YLDs in thousands (95% UI)                          |                                                   |                                                     |
|-------------------------------------------------------------------------|-----------------------------------------------------|-----------------------------------------|-----------------------------------------------------|---------------------------------------------------|-----------------------------------------------------|
|                                                                         | 2016 counts                                         | 2016 counts                             | 2016 counts                                         | Percentage change in counts between 2006 and 2016 | Percentage change in age-standardised rates between |
| Trichuriasis                                                            | --                                                  | --                                      | --                                                  | --                                                | --                                                  |
| Hookworm disease                                                        | --                                                  | --                                      | --                                                  | --                                                | --                                                  |
| Food-borne trematodiasis                                                | --                                                  | --                                      | --                                                  | --                                                | --                                                  |
| Leprosy                                                                 | --                                                  | --                                      | --                                                  | --                                                | --                                                  |
| Ebola virus disease                                                     | --                                                  | --                                      | --                                                  | --                                                | --                                                  |
| Zika virus disease                                                      | --                                                  | --                                      | --                                                  | --                                                | --                                                  |
| Guinea worm disease                                                     | --                                                  | --                                      | --                                                  | --                                                | --                                                  |
| Other neglected tropical diseases                                       | --                                                  | --                                      | < 0.05<br>(< 0.05 to < 0.05)                        | --                                                | --                                                  |
| <b>Maternal disorders</b>                                               | <b>&lt; 0.05</b><br><b>(&lt; 0.05 to &lt; 0.05)</b> | <b>0.3†</b><br><b>(0.2 to 0.4)</b>      | <b>&lt; 0.05</b><br><b>(&lt; 0.05 to &lt; 0.05)</b> | <b>2.5</b><br><b>(-24.4 to 37.1)</b>              | <b>-3.0</b><br><b>(-27.6 to 29.0)</b>               |
| Maternal haemorrhage                                                    | < 0.05<br>(< 0.05 to < 0.05)                        | < 0.05<br>(< 0.05 to < 0.1)             | < 0.05<br>(< 0.05 to < 0.05)                        | 3.6<br>(-33.8 to 60.0)                            | -1.6<br>(-38.0 to 50.5)                             |
| Maternal sepsis and other pregnancy related infections                  | < 0.05<br>(< 0.05 to < 0.05)                        | < 0.05<br>(< 0.05 to < 0.05)            | < 0.05<br>(< 0.05 to < 0.05)                        | -5.8<br>(-50.5 to 76.6)                           | -8.0<br>(-53.3 to 84.3)                             |
| Maternal hypertensive disorders                                         | < 0.05<br>(< 0.05 to < 0.05)                        | < 0.05<br>(< 0.05 to < 0.05)            | < 0.05<br>(< 0.05 to < 0.05)                        | 18.8<br>(-35.6 to 116.9)                          | 11.8<br>(-38.2 to 102.4)                            |
| Maternal obstructed labour and uterine rupture                          | < 0.05<br>(< 0.05 to < 0.05)                        | < 0.05<br>(< 0.05 to < 0.05)            | < 0.05<br>(< 0.05 to < 0.05)                        | -2.1<br>(-45.1 to 84.5)                           | -9.4<br>(-49.5 to 71.4)                             |
| Maternal abortion, miscarriage, and ectopic pregnancy                   | < 0.05<br>(< 0.05 to < 0.05)                        | 0.2<br>(0.1 to 0.3)                     | < 0.05<br>(< 0.05 to < 0.05)                        | -12.8<br>(-56.8 to 61.0)                          | -17.0<br>(-59.1 to 53.8)                            |
| Other maternal disorders                                                | --                                                  | --                                      | < 0.05<br>(< 0.05 to < 0.05)                        | -2.7<br>(-28.4 to 29.9)                           | -7.9<br>(-31.4 to 22.8)                             |
| <b>Neonatal disorders</b>                                               | <b>0.5</b><br><b>(0.4 to 0.7)</b>                   | --                                      | <b>0.1</b><br><b>(&lt; 0.05 to 0.1)</b>             | <b>-2.6</b><br><b>(-18.6 to 13.1)</b>             | <b>1.6</b><br><b>(-15.1 to 18.2)</b>                |
| Neonatal preterm birth complications                                    | 0.5<br>(0.4 to 0.7)                                 | --                                      | < 0.05<br>(< 0.05 to 0.1)                           | -5.4<br>(-24.6 to 13.8)                           | -1.3<br>(-21.5 to 18.6)                             |
| Neonatal encephalopathy due to birth asphyxia and trauma                | < 0.05<br>(< 0.05 to 0.1)                           | --                                      | < 0.05<br>(< 0.05 to < 0.05)                        | 13.9<br>(-17.8 to 90.6)                           | 17.0<br>(-16.1 to 97.8)                             |
| Neonatal sepsis and other neonatal infections                           | < 0.05<br>(< 0.05 to < 0.05)                        | --                                      | < 0.05<br>(< 0.05 to < 0.05)                        | 5.2<br>(-16.9 to 97.7)                            | 9.9<br>(-13.8 to 107.1)                             |
| Hemolytic disease and other neonatal jaundice                           | < 0.05<br>(< 0.05 to < 0.05)                        | --                                      | < 0.05<br>(< 0.05 to < 0.05)                        | 3.0<br>(-6.6 to 15.5)                             | 5.2<br>(-4.2 to 17.1)                               |
| Other neonatal disorders                                                | --                                                  | --                                      | < 0.05<br>(< 0.05 to < 0.05)                        | -20.3<br>(-36.4 to -3.1)                          | -9.3<br>(-27.6 to 10.1)                             |
| <b>Nutritional deficiencies</b>                                         | <b>2.2</b><br><b>(2.0 to 2.3)</b>                   | <b>0.3†</b><br><b>(0.2 to 0.4)</b>      | <b>&lt; 0.05</b><br><b>(&lt; 0.05 to &lt; 0.05)</b> | <b>-16.9</b><br><b>(-24.5 to -8.8)</b>            | <b>-10.3</b><br><b>(-19.4 to -1.2)</b>              |
| Protein-energy malnutrition                                             | < 0.05<br>(< 0.05 to < 0.05)                        | < 0.05<br>(< 0.05 to < 0.05)            | < 0.05<br>(< 0.05 to < 0.05)                        | -10.5<br>(-28.8 to 12.4)                          | 1.9<br>(-18.7 to 27.9)                              |
| Iodine deficiency                                                       | 0.4<br>(0.3 to 0.4)                                 | < 0.05<br>(< 0.05 to < 0.05)            | < 0.05<br>(< 0.05 to < 0.05)                        | -10.1<br>(-19.7 to -0.2)                          | -13.0<br>(-22.2 to -2.5)                            |
| Vitamin A deficiency                                                    | 0.3<br>(0.3 to 0.4)                                 | 0.3<br>(0.2 to 0.4)                     | --                                                  | --                                                | --                                                  |
| Iron-deficiency anaemia                                                 | 1.4<br>(1.3 to 1.7)                                 | --                                      | < 0.05<br>(< 0.05 to < 0.05)                        | -20.5<br>(-30.5 to -9.1)                          | -11.5<br>(-22.9 to 1.9)                             |
| Other nutritional deficiencies                                          | --                                                  | --                                      | < 0.05<br>(< 0.05 to < 0.05)                        | -10.9<br>(-29.8 to 12.8)                          | 1.6<br>(-19.8 to 28.5)                              |
| <b>Other communicable, maternal, neonatal, and nutritional diseases</b> | <b>8.6</b><br><b>(7.9 to 9.4)</b>                   | <b>1.9</b><br><b>(1.7 to 2.1)</b>       | <b>&lt; 0.05</b><br><b>(&lt; 0.05 to &lt; 0.05)</b> | <b>-1.0</b><br><b>(-5.7 to 3.3)</b>               | <b>-1.9</b><br><b>(-6.4 to 2.4)</b>                 |
| Sexually transmitted diseases excluding HIV                             | 7.5<br>(6.8 to 8.2)                                 | 1.7<br>(1.5 to 1.9)                     | < 0.05<br>(< 0.05 to < 0.05)                        | 1.9<br>(-3.5 to 7.1)                              | -0.3<br>(-5.4 to 4.2)                               |
| Syphilis                                                                | 0.1<br>(0.1 to 0.2)                                 | 0.1<br>(0.1 to 0.2)                     | < 0.05<br>(< 0.05 to < 0.05)                        | 9.2<br>(-6.0 to 25.4)                             | -4.4<br>(-16.9 to 9.8)                              |
| Chlamydial infection                                                    | 0.1<br>(0.1 to 0.1)                                 | 0.1<br>(0.1 to 0.1)                     | < 0.05<br>(< 0.05 to < 0.05)                        | -3.9<br>(-12.3 to 6.1)                            | -0.4<br>(-8.8 to 9.1)                               |
| Gonococcal infection                                                    | < 0.05<br>(< 0.05 to < 0.05)                        | < 0.05<br>(< 0.05 to 0.1)               | < 0.05<br>(< 0.05 to < 0.05)                        | -10.0<br>(-20.6 to 0.8)                           | -2.1<br>(-12.4 to 8.9)                              |
| Trichomoniasis                                                          | 1.3<br>(1.1 to 1.5)                                 | 1.1<br>(0.9 to 1.3)                     | < 0.05<br>(< 0.05 to < 0.05)                        | 4.9<br>(-3.2 to 13.0)                             | 2.8<br>(-2.9 to 9.7)                                |
| Genital herpes                                                          | 6.2<br>(5.4 to 7.2)                                 | 0.3<br>(0.3 to 0.4)                     | < 0.05<br>(< 0.05 to < 0.05)                        | 5.6<br>(-1.5 to 12.7)                             | 0.2<br>(-6.2 to 6.7)                                |
| Other sexually transmitted diseases                                     | 0.1<br>(< 0.05 to 0.1)                              | 0.1<br>(0.1 to 0.1)                     | < 0.05<br>(< 0.05 to < 0.05)                        | -9.4<br>(-24.3 to 10.3)                           | -0.9<br>(-16.4 to 16.9)                             |
| Hepatitis                                                               | 1.4<br>(1.2 to 1.6)                                 | 0.1<br>(0.1 to 0.2)                     | < 0.05<br>(< 0.05 to < 0.05)                        | -31.3<br>(-51.1 to -5.4)                          | -40.1<br>(-57.4 to -16.8)                           |
| Acute hepatitis A                                                       | < 0.05<br>(< 0.05 to < 0.05)                        | 0.1<br>(< 0.05 to 0.1)                  | < 0.05<br>(< 0.05 to < 0.05)                        | -34.8<br>(-65.2 to 17.7)                          | -42.2<br>(-68.9 to 2.5)                             |
| Hepatitis B                                                             | 0.8<br>(0.6 to 1.0)                                 | 0.1<br>(0.1 to 0.1)                     | < 0.05<br>(< 0.05 to < 0.05)                        | -28.4<br>(-44.1 to -9.3)                          | -39.9<br>(-52.5 to -25.4)                           |
| Hepatitis C                                                             | 0.6<br>(0.5 to 0.6)                                 | < 0.05<br>(< 0.05 to < 0.05)            | < 0.05<br>(< 0.05 to < 0.05)                        | -16.3<br>(-17.9 to -14.8)                         | -14.3<br>(-16.7 to -11.9)                           |
| Acute hepatitis E                                                       | < 0.05<br>(< 0.05 to < 0.05)                        | < 0.05<br>(< 0.05 to < 0.05)            | < 0.05<br>(< 0.05 to < 0.05)                        | -25.0<br>(-33.7 to -16.4)                         | -38.0<br>(-43.1 to -33.2)                           |
| Other infectious diseases                                               | < 0.05<br>(< 0.05 to 0.1)                           | < 0.05<br>(< 0.05 to < 0.05)            | < 0.05<br>(< 0.05 to < 0.05)                        | -4.1<br>(-13.3 to 6.2)                            | 0.9<br>(-9.5 to 13.3)                               |
| <b>Non-communicable diseases</b>                                        | <b>43.9</b><br><b>(43.6 to 44.1)</b>                | <b>103.0†</b><br><b>(98.5 to 108.0)</b> | <b>5.2</b><br><b>(3.8 to 6.6)</b>                   | <b>5.0</b><br><b>(2.8 to 7.5)</b>                 | <b>-0.8</b><br><b>(-2.7 to 1.3)</b>                 |
| <b>Neoplasms</b>                                                        | <b>0.5</b><br><b>(0.4 to 0.5)</b>                   | <b>0.2</b><br><b>(0.2 to 0.2)</b>       | <b>0.1</b><br><b>(&lt; 0.05 to 0.1)</b>             | <b>17.8</b><br><b>(10.4 to 27.7)</b>              | <b>-7.1</b><br><b>(-13.0 to 1.0)</b>                |
| Lip and oral cavity cancer                                              | < 0.05<br>(< 0.05 to < 0.05)                        | < 0.05<br>(< 0.05 to < 0.05)            | < 0.05<br>(< 0.05 to < 0.05)                        | 18.6<br>(-3.4 to 45.2)                            | -10.4<br>(-26.8 to 8.3)                             |
| Nasopharynx cancer                                                      | < 0.05<br>(< 0.05 to < 0.05)                        | < 0.05<br>(< 0.05 to < 0.05)            | < 0.05<br>(< 0.05 to < 0.05)                        | 1.0<br>(-25.6 to 39.5)                            | -13.9<br>(-33.5 to 14.5)                            |
| Other pharynx cancer                                                    | < 0.05<br>(< 0.05 to < 0.05)                        | < 0.05<br>(< 0.05 to < 0.05)            | < 0.05<br>(< 0.05 to < 0.05)                        | 17.5<br>(-12.3 to 52.7)                           | -10.9<br>(-31.6 to 15.7)                            |
| Oesophageal cancer                                                      | < 0.05<br>(< 0.05 to < 0.05)                        | < 0.05<br>(< 0.05 to < 0.05)            | < 0.05<br>(< 0.05 to < 0.05)                        | 11.3<br>(-14.9 to 41.7)                           | -16.3<br>(-33.9 to 4.6)                             |
| Stomach cancer                                                          | < 0.05<br>(< 0.05 to < 0.05)                        | < 0.05<br>(< 0.05 to < 0.05)            | < 0.05<br>(< 0.05 to < 0.05)                        | 12.4<br>(-8.2 to 37.5)                            | -12.9<br>(-26.9 to 4.0)                             |
| Colon and rectum cancer                                                 | 0.1<br>(0.1 to 0.1)                                 | < 0.05<br>(< 0.05 to < 0.05)            | < 0.05<br>(< 0.05 to < 0.05)                        | 26.7<br>(8.1 to 48.6)                             | -4.1<br>(-17.3 to 13.8)                             |
| Liver cancer                                                            | < 0.05<br>(< 0.05 to < 0.05)                        | < 0.05<br>(< 0.05 to < 0.05)            | < 0.05<br>(< 0.05 to < 0.05)                        | 23.5<br>(7.3 to 41.8)                             | -5.9<br>(-17.8 to 8.0)                              |
| Liver cancer due to hepatitis B                                         | < 0.05<br>(< 0.05 to < 0.05)                        | < 0.05<br>(< 0.05 to < 0.05)            | < 0.05<br>(< 0.05 to < 0.05)                        | 23.0<br>(5.9 to 44.4)                             | -4.2<br>(-17.0 to 11.8)                             |



| Cause                                              | Prevalence in thousands (95% UI)  | Incidence in thousands (95% UI)    | YLDs in thousands (95% UI)        |                                                   |                                                     |
|----------------------------------------------------|-----------------------------------|------------------------------------|-----------------------------------|---------------------------------------------------|-----------------------------------------------------|
|                                                    | 2016 counts                       | 2016 counts                        | 2016 counts                       | Percentage change in counts between 2006 and 2016 | Percentage change in age-standardised rates between |
| Liver cancer due to hepatitis C                    | < 0.05<br>(< 0.05 to < 0.05)      | < 0.05<br>(< 0.05 to < 0.05)       | < 0.05<br>(< 0.05 to < 0.05)      | 28.0<br>(7.5 to 49.7)                             | -5.0<br>(-19.4 to 11.6)                             |
| Liver cancer due to alcohol use                    | < 0.05<br>(< 0.05 to < 0.05)      | < 0.05<br>(< 0.05 to < 0.05)       | < 0.05<br>(< 0.05 to < 0.05)      | 19.5<br>(1.6 to 38.6)                             | -9.0<br>(-23.6 to 6.0)                              |
| Liver cancer due to other causes                   | < 0.05<br>(< 0.05 to < 0.05)      | < 0.05<br>(< 0.05 to < 0.05)       | < 0.05<br>(< 0.05 to < 0.05)      | 24.2<br>(5.8 to 46.2)                             | -4.1<br>(-18.0 to 11.7)                             |
| Gallbladder and biliary tract cancer               | < 0.05<br>(< 0.05 to < 0.05)      | < 0.05<br>(< 0.05 to < 0.05)       | < 0.05<br>(< 0.05 to < 0.05)      | 7.2<br>(-9.7 to 23.9)                             | -19.4<br>(-34.9 to -1.4)                            |
| Pancreatic cancer                                  | < 0.05<br>(< 0.05 to < 0.05)      | < 0.05<br>(< 0.05 to < 0.05)       | < 0.05<br>(< 0.05 to < 0.05)      | 19.9<br>(-1.9 to 46.7)                            | -9.2<br>(-25.8 to 11.4)                             |
| Larynx cancer                                      | < 0.05<br>(< 0.05 to < 0.05)      | < 0.05<br>(< 0.05 to < 0.05)       | < 0.05<br>(< 0.05 to < 0.05)      | 35.1<br>(8.9 to 67.5)                             | 3.9<br>(-16.7 to 30.3)                              |
| Tracheal, bronchus, and lung cancer                | < 0.05<br>(< 0.05 to 0.1)         | < 0.05<br>(< 0.05 to < 0.05)       | < 0.05<br>(< 0.05 to < 0.05)      | 17.2<br>(0.8 to 34.7)                             | -9.3<br>(-20.1 to 2.3)                              |
| Malignant skin melanoma                            | < 0.05<br>(< 0.05 to < 0.05)      | < 0.05<br>(< 0.05 to < 0.05)       | < 0.05<br>(< 0.05 to < 0.05)      | 27.2<br>(1.4 to 56.9)                             | 7.5<br>(-12.8 to 31.3)                              |
| Non-melanoma skin cancer                           | < 0.05<br>(< 0.05 to < 0.05)      | < 0.05<br>(< 0.05 to < 0.05)       | < 0.05<br>(< 0.05 to < 0.05)      | -9.1<br>(-40.1 to 60.1)                           | -29.3<br>(-53.0 to 23.2)                            |
| Non-melanoma skin cancer (squamous-cell carcinoma) | < 0.05<br>(< 0.05 to < 0.05)      | < 0.05<br>(< 0.05 to < 0.05)       | < 0.05<br>(< 0.05 to < 0.05)      | -9.5<br>(-40.6 to 60.6)                           | -29.6<br>(-53.3 to 23.8)                            |
| Non-melanoma skin cancer (basal-cell carcinoma)    | < 0.05<br>(< 0.05 to < 0.05)      | < 0.05<br>(< 0.05 to < 0.05)       | < 0.05<br>(< 0.05 to < 0.05)      | 21.8<br>(9.4 to 36.2)                             | 0.4<br>(-13.9 to 16.6)                              |
| Breast cancer                                      | 0.1<br>(0.1 to 0.1)               | < 0.05<br>(< 0.05 to < 0.05)       | < 0.05<br>(< 0.05 to < 0.05)      | 11.3<br>(-9.9 to 45.1)                            | -12.7<br>(-28.8 to 12.1)                            |
| Cervical cancer                                    | < 0.05<br>(< 0.05 to < 0.05)      | < 0.05<br>(< 0.05 to < 0.05)       | < 0.05<br>(< 0.05 to < 0.05)      | -19.6<br>(-40.0 to 8.7)                           | -24.5<br>(-41.7 to 1.4)                             |
| Uterine cancer                                     | < 0.05<br>(< 0.05 to < 0.05)      | < 0.05<br>(< 0.05 to < 0.05)       | < 0.05<br>(< 0.05 to < 0.05)      | 31.8<br>(1.0 to 77.6)                             | -2.8<br>(-23.8 to 29.8)                             |
| Ovarian cancer                                     | < 0.05<br>(< 0.05 to < 0.05)      | < 0.05<br>(< 0.05 to < 0.05)       | < 0.05<br>(< 0.05 to < 0.05)      | 3.4<br>(-24.1 to 41.6)                            | -14.6<br>(-35.0 to 13.0)                            |
| Prostate cancer                                    | < 0.05<br>(< 0.05 to < 0.05)      | < 0.05<br>(< 0.05 to < 0.05)       | < 0.05<br>(< 0.05 to < 0.05)      | 58.4<br>(21.2 to 102.4)                           | 16.9<br>(-8.3 to 43.6)                              |
| Testicular cancer                                  | < 0.05<br>(< 0.05 to < 0.05)      | < 0.05<br>(< 0.05 to < 0.05)       | < 0.05<br>(< 0.05 to < 0.05)      | 11.7<br>(-21.7 to 58.6)                           | 3.0<br>(-29.0 to 47.8)                              |
| Kidney cancer                                      | < 0.05<br>(< 0.05 to < 0.05)      | < 0.05<br>(< 0.05 to < 0.05)       | < 0.05<br>(< 0.05 to < 0.05)      | 29.7<br>(10.2 to 53.9)                            | 1.5<br>(-14.0 to 20.7)                              |
| Bladder cancer                                     | < 0.05<br>(< 0.05 to < 0.05)      | < 0.05<br>(< 0.05 to < 0.05)       | < 0.05<br>(< 0.05 to < 0.05)      | 22.7<br>(2.2 to 48.3)                             | -6.1<br>(-22.6 to 13.7)                             |
| Brain and nervous system cancer                    | < 0.05<br>(< 0.05 to < 0.05)      | < 0.05<br>(< 0.05 to < 0.05)       | < 0.05<br>(< 0.05 to < 0.05)      | 7.5<br>(-10.9 to 24.5)                            | -6.8<br>(-22.8 to 8.8)                              |
| Thyroid cancer                                     | < 0.05<br>(< 0.05 to < 0.05)      | < 0.05<br>(< 0.05 to < 0.05)       | < 0.05<br>(< 0.05 to < 0.05)      | 45.2<br>(8.6 to 94.1)                             | 26.8<br>(-1.7 to 65.9)                              |
| Mesothelioma                                       | < 0.05<br>(< 0.05 to < 0.05)      | < 0.05<br>(< 0.05 to < 0.05)       | < 0.05<br>(< 0.05 to < 0.05)      | 30.4<br>(-3.6 to 77.6)                            | 2.5<br>(-23.8 to 40.4)                              |
| Hodgkin lymphoma                                   | < 0.05<br>(< 0.05 to < 0.05)      | < 0.05<br>(< 0.05 to < 0.05)       | < 0.05<br>(< 0.05 to < 0.05)      | 11.8<br>(-2.4 to 29.0)                            | 0.1<br>(-12.5 to 14.1)                              |
| Non-Hodgkin's lymphoma                             | < 0.05<br>(< 0.05 to < 0.05)      | < 0.05<br>(< 0.05 to < 0.05)       | < 0.05<br>(< 0.05 to < 0.05)      | 35.2<br>(15.4 to 56.7)                            | 7.0<br>(-9.5 to 25.2)                               |
| Multiple myeloma                                   | < 0.05<br>(< 0.05 to < 0.05)      | < 0.05<br>(< 0.05 to < 0.05)       | < 0.05<br>(< 0.05 to < 0.05)      | 31.3<br>(-0.7 to 71.7)                            | -1.1<br>(-27.2 to 32.3)                             |
| Leukaemia                                          | < 0.05<br>(< 0.05 to < 0.05)      | < 0.05<br>(< 0.05 to < 0.05)       | < 0.05<br>(< 0.05 to < 0.05)      | 9.4<br>(-5.5 to 26.2)                             | -10.8<br>(-24.4 to 6.0)                             |
| Acute lymphoid leukaemia                           | < 0.05<br>(< 0.05 to < 0.05)      | < 0.05<br>(< 0.05 to < 0.05)       | < 0.05<br>(< 0.05 to < 0.05)      | 2.6<br>(-23.0 to 28.6)                            | 2.1<br>(-23.6 to 27.8)                              |
| Chronic lymphoid leukaemia                         | < 0.05<br>(< 0.05 to < 0.05)      | < 0.05<br>(< 0.05 to < 0.05)       | < 0.05<br>(< 0.05 to < 0.05)      | 11.9<br>(-7.8 to 34.8)                            | -13.5<br>(-29.5 to 6.7)                             |
| Acute myeloid leukaemia                            | < 0.05<br>(< 0.05 to < 0.05)      | < 0.05<br>(< 0.05 to < 0.05)       | < 0.05<br>(< 0.05 to < 0.05)      | 16.0<br>(-1.7 to 35.0)                            | -0.6<br>(-16.6 to 16.9)                             |
| Chronic myeloid leukaemia                          | < 0.05<br>(< 0.05 to < 0.05)      | < 0.05<br>(< 0.05 to < 0.05)       | < 0.05<br>(< 0.05 to < 0.05)      | 17.5<br>(-5.2 to 40.9)                            | -5.2<br>(-24.5 to 14.9)                             |
| Other leukaemia                                    | < 0.05<br>(< 0.05 to < 0.05)      | < 0.05<br>(< 0.05 to < 0.05)       | < 0.05<br>(< 0.05 to < 0.05)      | 4.7<br>(-21.2 to 39.1)                            | -20.6<br>(-40.3 to 10.3)                            |
| Other neoplasms                                    | < 0.05<br>(< 0.05 to < 0.05)      | < 0.05<br>(< 0.05 to < 0.05)       | < 0.05<br>(< 0.05 to < 0.05)      | 30.5<br>(7.6 to 56.2)                             | 6.8<br>(-12.3 to 27.9)                              |
| <b>Cardiovascular diseases</b>                     | <b>3.5</b><br><b>(3.3 to 3.7)</b> | <b>0.3†</b><br><b>(0.3 to 0.4)</b> | <b>0.2</b><br><b>(0.2 to 0.3)</b> | <b>20.7</b><br><b>(16.3 to 25.4)</b>              | <b>-1.5</b><br><b>(-4.4 to 1.6)</b>                 |
| Rheumatic heart disease                            | < 0.05<br>(< 0.05 to < 0.05)      | < 0.05<br>(< 0.05 to < 0.05)       | < 0.05<br>(< 0.05 to < 0.05)      | 5.0<br>(-9.1 to 21.8)                             | -15.4<br>(-25.9 to -3.0)                            |
| Ischaemic heart disease                            | 0.8<br>(0.7 to 0.8)               | 0.1<br>(0.1 to 0.1)                | < 0.05<br>(< 0.05 to < 0.05)      | 15.2<br>(7.8 to 23.1)                             | -6.9<br>(-11.5 to -1.6)                             |
| Cerebrovascular disease                            | 0.7<br>(0.6 to 0.7)               | 0.1‡<br>(0.1 to 0.1)               | 0.1<br>(0.1 to 0.1)               | 27.4<br>(20.8 to 34.1)                            | 2.7<br>(-1.5 to 7.0)                                |
| Ischaemic stroke                                   | 0.5<br>(0.5 to 0.6)               | 0.1‡<br>(0.1 to 0.1)               | 0.1<br>(0.1 to 0.1)               | 28.4<br>(20.2 to 36.2)                            | 2.8<br>(-2.0 to 7.8)                                |
| Hemorrhagic stroke                                 | 0.1<br>(0.1 to 0.2)               | < 0.05‡<br>(< 0.05 to < 0.05)      | < 0.05<br>(< 0.05 to < 0.05)      | 23.6<br>(12.0 to 36.7)                            | 2.4<br>(-5.7 to 10.9)                               |
| Hypertensive heart disease                         | 0.1<br>(< 0.05 to 0.1)            | --                                 | < 0.05<br>(< 0.05 to < 0.05)      | 12.0<br>(-1.9 to 29.8)                            | -6.5<br>(-15.3 to 4.7)                              |
| Cardiomyopathy and myocarditis                     | 0.1<br>(0.1 to 0.1)               | < 0.05†<br>(< 0.05 to < 0.05)      | < 0.05<br>(< 0.05 to < 0.05)      | 11.7<br>(-1.7 to 26.1)                            | -5.0<br>(-14.5 to 5.9)                              |
| Myocarditis                                        | < 0.05<br>(< 0.05 to < 0.05)      | < 0.05<br>(< 0.05 to < 0.05)       | < 0.05<br>(< 0.05 to < 0.05)      | 4.4<br>(-13.7 to 25.1)                            | -5.6<br>(-20.8 to 12.3)                             |
| Alcoholic cardiomyopathy                           | < 0.05<br>(< 0.05 to < 0.05)      | --                                 | < 0.05<br>(< 0.05 to < 0.05)      | 10.9<br>(-16.3 to 45.1)                           | -6.0<br>(-26.2 to 19.3)                             |
| Other cardiomyopathy                               | 0.1<br>(< 0.05 to 0.1)            | --                                 | < 0.05<br>(< 0.05 to < 0.05)      | 13.4<br>(-2.8 to 32.4)                            | -4.7<br>(-15.8 to 8.1)                              |
| Atrial fibrillation and flutter                    | 0.4<br>(0.4 to 0.5)               | < 0.05<br>(< 0.05 to < 0.05)       | < 0.05<br>(< 0.05 to < 0.05)      | 24.4<br>(15.5 to 33.2)                            | -0.7<br>(-6.4 to 4.9)                               |
| Peripheral vascular disease                        | 1.0<br>(0.9 to 1.2)               | 0.1<br>(0.1 to 0.1)                | < 0.05<br>(< 0.05 to < 0.05)      | 25.9<br>(16.0 to 36.1)                            | -4.8<br>(-12.0 to 2.2)                              |
| Endocarditis                                       | < 0.05<br>(< 0.05 to < 0.05)      | < 0.05<br>(< 0.05 to < 0.05)       | < 0.05<br>(< 0.05 to < 0.05)      | 16.5<br>(-0.2 to 36.6)                            | -5.9<br>(-21.5 to 11.6)                             |
| Other cardiovascular and circulatory diseases      | 1.0<br>(0.8 to 1.2)               | --                                 | 0.1<br>(< 0.05 to 0.1)            | 12.2<br>(2.7 to 22.3)                             | -5.9<br>(-12.1 to 0.6)                              |
| <b>Chronic respiratory diseases</b>                | <b>6.2</b><br><b>(6.0 to 6.4)</b> | <b>0.9†</b><br><b>(0.9 to 1.0)</b> | <b>0.3</b><br><b>(0.2 to 0.4)</b> | <b>7.3</b><br><b>(2.0 to 13.6)</b>                | <b>-4.4</b><br><b>(-8.7 to 0.2)</b>                 |
| Chronic obstructive pulmonary disease              | 3.1<br>(3.0 to 3.3)               | 0.2<br>(0.2 to 0.3)                | 0.1<br>(0.1 to 0.2)               | 19.1<br>(8.1 to 31.1)                             | -7.4<br>(-15.5 to 1.8)                              |
| Pneumoconiosis                                     | < 0.05<br>(< 0.05 to < 0.05)      | < 0.05<br>(< 0.05 to < 0.05)       | < 0.05<br>(< 0.05 to < 0.05)      | 22.4<br>(3.2 to 45.7)                             | -0.6<br>(-16.6 to 17.1)                             |
| Silicosis                                          | < 0.05<br>(< 0.05 to < 0.05)      | < 0.05<br>(< 0.05 to < 0.05)       | < 0.05<br>(< 0.05 to < 0.05)      | 17.2<br>(11.6 to 22.5)                            | -4.4<br>(-7.9 to -1.1)                              |



| Cause                                                          | Prevalence in thousands (95% UI)     | Incidence in thousands (95% UI)                     | YLDs in thousands (95% UI)                          |                                                   |                                                     |
|----------------------------------------------------------------|--------------------------------------|-----------------------------------------------------|-----------------------------------------------------|---------------------------------------------------|-----------------------------------------------------|
|                                                                | 2016 counts                          | 2016 counts                                         | 2016 counts                                         | Percentage change in counts between 2006 and 2016 | Percentage change in age-standardised rates between |
| Asbestosis                                                     | < 0.05<br>(< 0.05 to < 0.05)         | < 0.05<br>(< 0.05 to < 0.05)                        | < 0.05<br>(< 0.05 to < 0.05)                        | 28.1<br>(-4.4 to 73.4)                            | 0.1<br>(-25.4 to 32.8)                              |
| Coal workers pneumoconiosis                                    | < 0.05<br>(< 0.05 to < 0.05)         | < 0.05<br>(< 0.05 to < 0.05)                        | < 0.05<br>(< 0.05 to < 0.05)                        | 23.5<br>(16.9 to 30.7)                            | 2.9<br>(-2.6 to 8.8)                                |
| Other pneumoconiosis                                           | < 0.05<br>(< 0.05 to < 0.05)         | < 0.05<br>(< 0.05 to < 0.05)                        | < 0.05<br>(< 0.05 to < 0.05)                        | 7.7<br>(-2.3 to 17.8)                             | -4.8<br>(-12.9 to 3.7)                              |
| Asthma                                                         | 3.4<br>(3.2 to 3.7)                  | 0.7<br>(0.6 to 0.7)                                 | 0.1<br>(0.1 to 0.2)                                 | -3.8<br>(-7.7 to 0.4)                             | -2.3<br>(-6.3 to 1.8)                               |
| Interstitial lung disease and pulmonary sarcoidosis            | < 0.05<br>(< 0.05 to < 0.05)         | < 0.05<br>(< 0.05 to < 0.05)                        | < 0.05<br>(< 0.05 to < 0.05)                        | 17.5<br>(2.5 to 37.9)                             | -1.4<br>(-12.2 to 11.9)                             |
| Other chronic respiratory diseases                             | --                                   | --                                                  | < 0.05<br>(< 0.05 to < 0.05)                        | 34.6<br>(19.2 to 53.3)                            | 29.2<br>(13.4 to 48.9)                              |
| <b>Cirrhosis and other chronic liver diseases</b>              | <b>0.5</b><br><b>(0.4 to 0.5)</b>    | <b>&lt; 0.05</b><br><b>(&lt; 0.05 to &lt; 0.05)</b> | <b>&lt; 0.05</b><br><b>(&lt; 0.05 to &lt; 0.05)</b> | <b>18.3</b><br><b>(4.3 to 34.2)</b>               | <b>2.9</b><br><b>(-8.3 to 14.4)</b>                 |
| Cirrhosis and other chronic liver diseases due to hepatitis B  | < 0.05<br>(< 0.05 to < 0.05)         | < 0.05<br>(< 0.05 to < 0.05)                        | < 0.05<br>(< 0.05 to < 0.05)                        | 19.0<br>(-9.6 to 53.6)                            | 4.4<br>(-19.6 to 36.0)                              |
| Cirrhosis and other chronic liver diseases due to hepatitis C  | 0.1<br>(0.1 to 0.1)                  | < 0.05<br>(< 0.05 to < 0.05)                        | < 0.05<br>(< 0.05 to < 0.05)                        | 19.3<br>(-6.2 to 51.2)                            | 3.4<br>(-16.0 to 26.8)                              |
| Cirrhosis and other chronic liver diseases due to alcohol use  | 0.2<br>(0.1 to 0.2)                  | < 0.05<br>(< 0.05 to < 0.05)                        | < 0.05<br>(< 0.05 to < 0.05)                        | 22.4<br>(-0.2 to 53.7)                            | 4.2<br>(-11.9 to 24.4)                              |
| Cirrhosis and other chronic liver diseases due to other causes | 0.1<br>(0.1 to 0.1)                  | < 0.05<br>(< 0.05 to < 0.05)                        | < 0.05<br>(< 0.05 to < 0.05)                        | 12.6<br>(-9.3 to 39.3)                            | 0.7<br>(-17.8 to 22.4)                              |
| <b>Digestive diseases</b>                                      | <b>2.5</b><br><b>(2.3 to 2.6)</b>    | <b>1.8†</b><br><b>(1.7 to 1.9)</b>                  | <b>&lt; 0.05</b><br><b>(&lt; 0.05 to &lt; 0.05)</b> | <b>6.4</b><br><b>(-2.2 to 15.1)</b>               | <b>-1.9</b><br><b>(-8.1 to 4.7)</b>                 |
| Peptic ulcer disease                                           | 1.1<br>(1.0 to 1.2)                  | 0.1<br>(0.1 to 0.1)                                 | < 0.05<br>(< 0.05 to < 0.05)                        | -1.5<br>(-15.0 to 14.4)                           | -6.0<br>(-16.6 to 5.8)                              |
| Gastritis and duodenitis                                       | 0.9<br>(0.8 to 1.0)                  | 0.7<br>(0.6 to 0.8)                                 | < 0.05<br>(< 0.05 to < 0.05)                        | 7.6<br>(-6.7 to 23.1)                             | 1.9<br>(-8.6 to 13.8)                               |
| Appendicitis                                                   | < 0.05<br>(< 0.05 to < 0.05)         | < 0.05<br>(< 0.05 to 0.1)                           | < 0.05<br>(< 0.05 to < 0.05)                        | -6.8<br>(-10.0 to -3.3)                           | -7.4<br>(-10.0 to -4.6)                             |
| Paralytic ileus and intestinal obstruction                     | < 0.05<br>(< 0.05 to < 0.05)         | < 0.05<br>(< 0.05 to 0.1)                           | < 0.05<br>(< 0.05 to < 0.05)                        | 12.8<br>(-3.5 to 31.4)                            | -2.4<br>(-20.3 to 17.6)                             |
| Inguinal, femoral, and abdominal hernia                        | 0.4<br>(0.4 to 0.5)                  | 0.2<br>(0.1 to 0.2)                                 | < 0.05<br>(< 0.05 to < 0.05)                        | 11.2<br>(-7.2 to 31.2)                            | -3.8<br>(-15.3 to 9.5)                              |
| Inflammatory bowel disease                                     | < 0.05<br>(< 0.05 to < 0.05)         | < 0.05<br>(< 0.05 to < 0.05)                        | < 0.05<br>(< 0.05 to < 0.05)                        | 10.8<br>(-7.4 to 33.0)                            | 2.2<br>(-12.6 to 20.2)                              |
| Vascular intestinal disorders                                  | < 0.05<br>(< 0.05 to < 0.05)         | < 0.05<br>(< 0.05 to < 0.05)                        | < 0.05<br>(< 0.05 to < 0.05)                        | 31.8<br>(1.4 to 72.0)                             | 9.0<br>(-15.0 to 42.5)                              |
| Gallbladder and biliary diseases                               | 0.2<br>(0.1 to 0.2)                  | 0.6<br>(0.5 to 0.7)                                 | < 0.05<br>(< 0.05 to < 0.05)                        | 2.7<br>(-15.2 to 24.4)                            | -7.4<br>(-21.1 to 9.7)                              |
| Pancreatitis                                                   | < 0.05<br>(< 0.05 to < 0.05)         | 0.1<br>(0.1 to 0.2)                                 | < 0.05<br>(< 0.05 to < 0.05)                        | 10.9<br>(-10.9 to 37.1)                           | -1.3<br>(-16.5 to 17.8)                             |
| Other digestive diseases                                       | --                                   | --                                                  | < 0.05<br>(< 0.05 to < 0.05)                        | 13.3<br>(4.5 to 22.1)                             | 1.6<br>(-4.4 to 7.9)                                |
| <b>Neurological disorders</b>                                  | <b>17.2</b><br><b>(16.6 to 18.1)</b> | <b>7.0</b><br><b>(6.0 to 8.0)</b>                   | <b>0.5</b><br><b>(0.4 to 0.7)</b>                   | <b>-1.0</b><br><b>(-16.9 to 19.2)</b>             | <b>-2.2</b><br><b>(-18.2 to 17.9)</b>               |
| Alzheimer's disease and other dementias                        | 0.1<br>(0.1 to 0.2)                  | < 0.05<br>(< 0.05 to < 0.05)                        | < 0.05<br>(< 0.05 to < 0.05)                        | 23.8<br>(16.0 to 32.5)                            | -1.1<br>(-5.2 to 3.8)                               |
| Parkinson's disease                                            | < 0.05<br>(< 0.05 to 0.1)            | < 0.05<br>(< 0.05 to < 0.05)                        | < 0.05<br>(< 0.05 to < 0.05)                        | 35.2<br>(16.8 to 57.9)                            | 5.7<br>(-5.7 to 18.1)                               |
| Epilepsy                                                       | 0.2<br>(< 0.05 to 0.4)               | < 0.05<br>(< 0.05 to < 0.05)                        | 0.1<br>(< 0.05 to 0.1)                              | -2.0<br>(-81.1 to 387.4)                          | -5.3<br>(-81.9 to 368.8)                            |
| Multiple sclerosis                                             | 0.2<br>(0.1 to 0.2)                  | < 0.05<br>(< 0.05 to < 0.05)                        | < 0.05<br>(< 0.05 to 0.1)                           | 9.1<br>(-0.5 to 19.8)                             | 5.0<br>(-3.7 to 14.2)                               |
| Motor neuron disease                                           | < 0.05<br>(< 0.05 to < 0.05)         | < 0.05<br>(< 0.05 to < 0.05)                        | < 0.05<br>(< 0.05 to < 0.05)                        | 19.9<br>(14.6 to 25.4)                            | 10.2<br>(5.8 to 14.8)                               |
| Migraine                                                       | 8.1<br>(7.7 to 8.5)                  | 0.8<br>(0.7 to 0.8)                                 | 0.3<br>(0.2 to 0.5)                                 | -4.2<br>(-7.4 to -0.6)                            | -3.7<br>(-6.9 to -0.3)                              |
| Tension-type headache                                          | 11.7<br>(10.4 to 13.1)               | 6.2<br>(5.2 to 7.2)                                 | < 0.05<br>(< 0.05 to 0.1)                           | -1.5<br>(-7.1 to 4.3)                             | -1.5<br>(-6.7 to 3.7)                               |
| Other neurological disorders                                   | < 0.05<br>(< 0.05 to < 0.05)         | < 0.05<br>(< 0.05 to < 0.05)                        | < 0.05<br>(< 0.05 to < 0.05)                        | 14.1<br>(-47.6 to 151.8)                          | 14.3<br>(-49.5 to 159.7)                            |
| <b>Mental and substance use disorders</b>                      | <b>10.3</b><br><b>(10.1 to 10.6)</b> | <b>5.0†</b><br><b>(4.6 to 5.4)</b>                  | <b>1.6</b><br><b>(1.1 to 2.0)</b>                   | <b>-0.8</b><br><b>(-3.1 to 1.7)</b>               | <b>-1.9</b><br><b>(-4.0 to 0.5)</b>                 |
| Schizophrenia                                                  | 0.2<br>(0.1 to 0.2)                  | < 0.05<br>(< 0.05 to < 0.05)                        | 0.1<br>(0.1 to 0.1)                                 | 5.3<br>(-2.8 to 14.5)                             | 1.9<br>(-5.6 to 10.4)                               |
| Alcohol use disorders                                          | 1.5<br>(1.3 to 1.7)                  | 0.6<br>(0.5 to 0.7)                                 | 0.1<br>(0.1 to 0.2)                                 | -9.3<br>(-17.1 to -1.2)                           | -12.3<br>(-19.1 to -4.5)                            |
| Drug use disorders                                             | 1.0<br>(0.9 to 1.0)                  | 0.1<br>(0.1 to 0.1)                                 | 0.2<br>(0.1 to 0.2)                                 | 8.5<br>(-0.3 to 17.6)                             | 4.2<br>(-4.2 to 12.4)                               |
| Opioid use disorders                                           | 0.3<br>(0.2 to 0.3)                  | < 0.05<br>(< 0.05 to < 0.05)                        | 0.1<br>(0.1 to 0.2)                                 | 11.4<br>(-0.1 to 23.2)                            | 5.4<br>(-5.1 to 16.6)                               |
| Cocaine use disorders                                          | 0.2<br>(0.1 to 0.2)                  | < 0.05<br>(< 0.05 to < 0.05)                        | < 0.05<br>(< 0.05 to < 0.05)                        | 3.3<br>(-10.0 to 18.1)                            | 1.5<br>(-11.1 to 15.7)                              |
| Amphetamine use disorders                                      | 0.1<br>(< 0.05 to 0.1)               | < 0.05<br>(< 0.05 to < 0.05)                        | < 0.05<br>(< 0.05 to < 0.05)                        | 5.0<br>(-14.6 to 31.8)                            | 2.4<br>(-15.9 to 27.9)                              |
| Cannabis use disorders                                         | 0.4<br>(0.4 to 0.5)                  | < 0.05<br>(< 0.05 to < 0.05)                        | < 0.05<br>(< 0.05 to < 0.05)                        | 2.7<br>(-9.0 to 17.3)                             | 1.8<br>(-9.6 to 16.0)                               |
| Other drug use disorders                                       | < 0.05<br>(< 0.05 to 0.1)            | < 0.05<br>(< 0.05 to < 0.05)                        | < 0.05<br>(< 0.05 to < 0.05)                        | 4.7<br>(-18.0 to 33.9)                            | 3.0<br>(-18.9 to 31.5)                              |
| Depressive disorders                                           | 3.0<br>(2.8 to 3.2)                  | 3.6<br>(3.2 to 4.0)                                 | 0.6<br>(0.4 to 0.8)                                 | -4.0<br>(-9.0 to 1.0)                             | -5.0<br>(-9.8 to -0.2)                              |
| Major depressive disorder                                      | 2.3<br>(2.1 to 2.6)                  | 3.5<br>(3.1 to 3.9)                                 | 0.5<br>(0.3 to 0.7)                                 | -5.3<br>(-10.9 to 0.6)                            | -5.8<br>(-11.2 to -0.3)                             |
| Dysthymia                                                      | 0.8<br>(0.7 to 0.9)                  | 0.1<br>(0.1 to 0.1)                                 | 0.1<br>(0.1 to 0.1)                                 | 5.0<br>(1.0 to 9.2)                               | 0.4<br>(-2.8 to 3.8)                                |
| Bipolar disorder                                               | 0.4<br>(0.3 to 0.4)                  | < 0.05<br>(< 0.05 to < 0.05)                        | 0.1<br>(< 0.05 to 0.1)                              | 2.4<br>(-3.8 to 8.9)                              | 0.4<br>(-5.4 to 6.1)                                |
| Anxiety disorders                                              | 2.7<br>(2.4 to 3.0)                  | 0.4<br>(0.3 to 0.4)                                 | 0.3<br>(0.2 to 0.4)                                 | 0.9<br>(-2.4 to 4.2)                              | 0.4<br>(-2.6 to 3.5)                                |
| Eating disorders                                               | 0.2<br>(0.1 to 0.2)                  | 0.1<br>(< 0.05 to 0.1)                              | < 0.05<br>(< 0.05 to < 0.05)                        | 3.5<br>(-6.1 to 14.8)                             | 8.1<br>(-1.6 to 18.7)                               |
| Anorexia nervosa                                               | < 0.05<br>(< 0.05 to 0.1)            | < 0.05<br>(< 0.05 to < 0.05)                        | < 0.05<br>(< 0.05 to < 0.05)                        | 6.6<br>(-8.4 to 25.7)                             | 7.8<br>(-7.6 to 26.6)                               |
| Bulimia nervosa                                                | 0.1<br>(0.1 to 0.1)                  | < 0.05<br>(< 0.05 to 0.1)                           | < 0.05<br>(< 0.05 to < 0.05)                        | 2.1<br>(-10.3 to 15.8)                            | 8.2<br>(-3.5 to 21.3)                               |
| Autistic spectrum disorders                                    | 0.4<br>(0.4 to 0.5)                  | < 0.05<br>(< 0.05 to < 0.05)                        | 0.1<br>(< 0.05 to 0.1)                              | -1.2<br>(-6.3 to 4.0)                             | 0.4<br>(-4.6 to 5.7)                                |
| Autism                                                         | 0.1<br>(0.1 to 0.2)                  | < 0.05<br>(< 0.05 to < 0.05)                        | < 0.05<br>(< 0.05 to 0.1)                           | -0.8<br>(-9.0 to 7.7)                             | 0.7<br>(-7.2 to 9.0)                                |
| Asperger syndrome and other autistic spectrum disorders        | 0.3<br>(0.2 to 0.3)                  | < 0.05<br>(< 0.05 to < 0.05)                        | < 0.05<br>(< 0.05 to < 0.05)                        | -1.7<br>(-6.7 to 3.4)                             | -0.1<br>(-5.1 to 5.2)                               |

| Cause                                                      | Prevalence in thousands (95% UI)     | Incidence in thousands (95% UI)       | YLDs in thousands (95% UI)        |                                                   |                                                     |
|------------------------------------------------------------|--------------------------------------|---------------------------------------|-----------------------------------|---------------------------------------------------|-----------------------------------------------------|
|                                                            | 2016 counts                          | 2016 counts                           | 2016 counts                       | Percentage change in counts between 2006 and 2016 | Percentage change in age-standardised rates between |
| Attention-deficit/hyperactivity disorder                   | 0.5<br>(0.5 to 0.6)                  | < 0.05<br>(< 0.05 to < 0.05)          | < 0.05<br>(< 0.05 to < 0.05)      | -7.5<br>(-14.2 to -0.8)                           | 0.3<br>(-7.0 to 7.4)                                |
| Conduct disorder                                           | 0.3<br>(0.3 to 0.4)                  | 0.1<br>(0.1 to 0.1)                   | < 0.05<br>(< 0.05 to 0.1)         | -14.9<br>(-19.9 to -9.6)                          | 0.4<br>(-5.7 to 6.3)                                |
| Idiopathic developmental intellectual disability           | 0.3<br>(0.1 to 0.5)                  | --                                    | < 0.05<br>(< 0.05 to < 0.05)      | 48.3<br>(26.3 to 88.4)                            | 49.4<br>(27.0 to 87.6)                              |
| Other mental and substance use disorders                   | 1.2<br>(1.0 to 1.4)                  | < 0.05<br>(< 0.05 to < 0.05)          | 0.1<br>(0.1 to 0.1)               | 4.7<br>(-0.0 to 9.9)                              | -0.1<br>(-4.5 to 4.4)                               |
| <b>Diabetes, urogenital, blood, and endocrine diseases</b> | <b>13.7</b><br><b>(13.4 to 13.9)</b> | <b>5.8†</b><br><b>(5.5 to 6.2)</b>    | <b>0.3</b><br><b>(0.2 to 0.4)</b> | <b>13.4</b><br><b>(8.6 to 18.4)</b>               | <b>-1.0</b><br><b>(-5.0 to 2.9)</b>                 |
| Diabetes mellitus                                          | 2.2<br>(1.9 to 2.4)                  | 0.1<br>(0.1 to 0.2)                   | 0.2<br>(0.1 to 0.2)               | 15.8<br>(7.1 to 25.1)                             | -3.5<br>(-10.7 to 3.9)                              |
| Acute glomerulonephritis                                   | < 0.05<br>(< 0.05 to < 0.05)         | < 0.05<br>(< 0.05 to < 0.05)          | < 0.05<br>(< 0.05 to < 0.05)      | 4.4<br>(-2.0 to 10.8)                             | 0.2<br>(-4.2 to 4.8)                                |
| Chronic kidney disease                                     | 1.3<br>(1.1 to 1.4)                  | 0.1<br>(0.1 to 0.1)                   | < 0.05<br>(< 0.05 to 0.1)         | 17.1<br>(8.5 to 26.5)                             | 1.6<br>(-4.5 to 8.1)                                |
| Chronic kidney disease due to diabetes mellitus            | 0.7<br>(0.6 to 0.8)                  | 0.1<br>(0.1 to 0.1)                   | < 0.05<br>(< 0.05 to < 0.05)      | 17.9<br>(6.2 to 32.2)                             | 0.7<br>(-8.0 to 10.3)                               |
| Chronic kidney disease due to hypertension                 | 0.2<br>(0.1 to 0.2)                  | < 0.05<br>(< 0.05 to < 0.05)          | < 0.05<br>(< 0.05 to < 0.05)      | 22.9<br>(5.5 to 42.3)                             | 1.4<br>(-10.3 to 13.9)                              |
| Chronic kidney disease due to glomerulonephritis           | 0.2<br>(0.1 to 0.2)                  | < 0.05<br>(< 0.05 to < 0.05)          | < 0.05<br>(< 0.05 to < 0.05)      | 15.1<br>(0.9 to 32.2)                             | 5.8<br>(-5.0 to 18.4)                               |
| Chronic kidney disease due to other causes                 | 0.2<br>(0.2 to 0.3)                  | < 0.05<br>(< 0.05 to < 0.05)          | < 0.05<br>(< 0.05 to < 0.05)      | 12.3<br>(-2.3 to 29.4)                            | 1.6<br>(-9.0 to 13.1)                               |
| Urinary diseases and male infertility                      | 1.2<br>(1.0 to 1.3)                  | 3.9†<br>(3.6 to 4.2)                  | < 0.05<br>(< 0.05 to 0.1)         | 26.2<br>(17.2 to 35.4)                            | 1.2<br>(-4.9 to 7.7)                                |
| Interstitial nephritis and urinary tract infections        | 0.1<br>(< 0.05 to 0.1)               | 2.9<br>(2.6 to 3.2)                   | < 0.05<br>(< 0.05 to < 0.05)      | 2.5<br>(-10.3 to 17.1)                            | -5.2<br>(-15.5 to 6.5)                              |
| Urolithiasis                                               | < 0.05<br>(< 0.05 to < 0.05)         | 0.8<br>(0.7 to 1.0)                   | < 0.05<br>(< 0.05 to < 0.05)      | 11.0<br>(-11.8 to 39.9)                           | 1.9<br>(-16.4 to 23.5)                              |
| Benign prostatic hyperplasia                               | 0.9<br>(0.8 to 1.1)                  | 0.1<br>(0.1 to 0.2)                   | < 0.05<br>(< 0.05 to < 0.05)      | 33.0<br>(22.4 to 44.4)                            | 2.8<br>(-4.5 to 10.9)                               |
| Male infertility                                           | 0.1<br>(0.1 to 0.1)                  | --                                    | < 0.05<br>(< 0.05 to < 0.05)      | -14.3<br>(-25.2 to -2.4)                          | -3.1<br>(-12.4 to 6.9)                              |
| Other urinary diseases                                     | --                                   | --                                    | < 0.05<br>(< 0.05 to < 0.05)      | -11.7<br>(-23.2 to 0.6)                           | -17.1<br>(-26.6 to -7.4)                            |
| Gynecological diseases                                     | 4.7<br>(4.5 to 4.9)                  | 1.5†<br>(1.4 to 1.6)                  | < 0.05<br>(< 0.05 to 0.1)         | -4.3<br>(-9.1 to 0.6)                             | 0.3<br>(-4.3 to 5.1)                                |
| Uterine fibroids                                           | 0.4<br>(0.3 to 0.4)                  | < 0.05<br>(< 0.05 to < 0.05)          | < 0.05<br>(< 0.05 to < 0.05)      | -9.7<br>(-18.8 to -1.7)                           | -2.2<br>(-11.0 to 6.0)                              |
| Polycystic ovarian syndrome                                | 0.3<br>(0.2 to 0.4)                  | < 0.05<br>(< 0.05 to < 0.05)          | < 0.05<br>(< 0.05 to < 0.05)      | -20.0<br>(-26.6 to -13.5)                         | 0.3<br>(-4.4 to 5.2)                                |
| Female infertility                                         | < 0.05<br>(< 0.05 to 0.1)            | --                                    | < 0.05<br>(< 0.05 to < 0.05)      | 19.1<br>(-22.3 to 55.8)                           | 12.0<br>(-15.9 to 53.2)                             |
| Endometriosis                                              | < 0.05<br>(< 0.05 to < 0.05)         | 0.1<br>(0.1 to 0.1)                   | < 0.05<br>(< 0.05 to < 0.05)      | -6.6<br>(-23.9 to 14.9)                           | 2.1<br>(-17.3 to 24.6)                              |
| Genital prolapse                                           | 1.1<br>(0.9 to 1.2)                  | 0.1<br>(0.1 to 0.1)                   | < 0.05<br>(< 0.05 to < 0.05)      | 7.1<br>(-2.6 to 17.1)                             | -11.4<br>(-18.7 to -3.9)                            |
| Premenstrual syndrome                                      | 3.1<br>(2.9 to 3.3)                  | 1.0<br>(1.0 to 1.1)                   | < 0.05<br>(< 0.05 to < 0.05)      | -3.3<br>(-10.5 to 4.2)                            | 1.6<br>(-6.1 to 9.2)                                |
| Other gynecological diseases                               | 0.3<br>(0.2 to 0.3)                  | 0.2<br>(0.2 to 0.3)                   | < 0.05<br>(< 0.05 to < 0.05)      | -2.5<br>(-13.8 to 10.8)                           | 1.4<br>(-9.2 to 12.9)                               |
| Hemoglobinopathies and hemolytic anaemias                  | 6.0<br>(5.9 to 6.1)                  | --                                    | < 0.05<br>(< 0.05 to < 0.05)      | 16.7<br>(2.2 to 34.1)                             | 18.0<br>(2.8 to 35.2)                               |
| Thalassemias                                               | < 0.05<br>(< 0.05 to < 0.05)         | --                                    | < 0.05<br>(< 0.05 to < 0.05)      | -2.9<br>(-10.6 to 6.7)                            | 6.1<br>(-2.8 to 17.1)                               |
| Thalassaemias trait                                        | 0.8<br>(0.8 to 0.9)                  | --                                    | < 0.05<br>(< 0.05 to < 0.05)      | 21.6<br>(5.0 to 40.0)                             | 22.8<br>(5.6 to 42.0)                               |
| Sickle cell disorders                                      | < 0.05<br>(< 0.05 to < 0.05)         | --                                    | < 0.05<br>(< 0.05 to < 0.05)      | 7.6<br>(1.5 to 13.8)                              | 12.9<br>(6.3 to 19.9)                               |
| Sickle cell trait                                          | 1.1<br>(1.0 to 1.2)                  | --                                    | < 0.05<br>(< 0.05 to < 0.05)      | 21.0<br>(0.0 to 45.2)                             | 27.2<br>(5.5 to 54.2)                               |
| G6PD deficiency                                            | 0.9<br>(0.8 to 0.9)                  | --                                    | < 0.05<br>(< 0.05 to < 0.05)      | 31.8<br>(15.0 to 50.1)                            | 29.1<br>(10.6 to 50.0)                              |
| G6PD trait                                                 | 3.4<br>(3.3 to 3.5)                  | --                                    | < 0.05<br>(< 0.05 to < 0.05)      | 15.6<br>(0.4 to 33.7)                             | 14.0<br>(-1.2 to 32.1)                              |
| Other hemoglobinopathies and hemolytic anaemias            | < 0.05<br>(< 0.05 to 0.1)            | --                                    | < 0.05<br>(< 0.05 to < 0.05)      | -14.8<br>(-28.9 to 4.1)                           | -15.4<br>(-28.2 to -0.2)                            |
| Endocrine, metabolic, blood, and immune disorders          | 0.8<br>(0.7 to 0.9)                  | 0.2<br>(0.1 to 0.2)                   | < 0.05<br>(< 0.05 to < 0.05)      | 13.6<br>(6.1 to 21.8)                             | -0.9<br>(-6.2 to 5.0)                               |
| <b>Musculoskeletal disorders</b>                           | <b>11.3</b><br><b>(10.8 to 12.0)</b> | <b>6.7</b><br><b>(6.0 to 7.5)</b>     | <b>1.2</b><br><b>(0.9 to 1.5)</b> | <b>10.7</b><br><b>(6.7 to 14.8)</b>               | <b>1.5</b><br><b>(-1.1 to 4.5)</b>                  |
| Rheumatoid arthritis                                       | 0.3<br>(0.2 to 0.3)                  | < 0.05<br>(< 0.05 to < 0.05)          | 0.1<br>(< 0.05 to 0.1)            | 21.7<br>(12.3 to 31.6)                            | 4.5<br>(-3.1 to 11.7)                               |
| Osteoarthritis                                             | 3.1<br>(2.9 to 3.3)                  | 0.2<br>(0.2 to 0.2)                   | 0.1<br>(0.1 to 0.2)               | 24.0<br>(19.1 to 28.8)                            | 2.0<br>(-1.4 to 5.4)                                |
| Low back and neck pain                                     | 5.7<br>(5.3 to 6.2)                  | 2.5<br>(2.1 to 2.8)                   | 0.7<br>(0.5 to 0.9)               | 9.4<br>(4.5 to 14.9)                              | 1.4<br>(-1.9 to 4.8)                                |
| Low back pain                                              | 4.2<br>(3.7 to 4.8)                  | 2.1<br>(1.8 to 2.4)                   | 0.5<br>(0.3 to 0.6)               | 9.4<br>(2.7 to 16.9)                              | 1.8<br>(-2.6 to 6.5)                                |
| Neck pain                                                  | 1.9<br>(1.6 to 2.2)                  | 0.4<br>(0.3 to 0.4)                   | 0.2<br>(0.1 to 0.3)               | 9.5<br>(3.7 to 15.7)                              | 0.3<br>(-2.0 to 2.4)                                |
| Gout                                                       | 0.4<br>(0.4 to 0.5)                  | 0.1<br>(0.1 to 0.1)                   | < 0.05<br>(< 0.05 to < 0.05)      | 15.4<br>(0.2 to 33.1)                             | 1.1<br>(-10.5 to 14.5)                              |
| Other musculoskeletal disorders                            | 3.8<br>(3.2 to 4.5)                  | 4.0<br>(3.3 to 4.7)                   | 0.3<br>(0.2 to 0.5)               | 7.2<br>(-1.8 to 16.9)                             | 1.1<br>(-6.4 to 8.8)                                |
| <b>Other non-communicable diseases</b>                     | <b>32.7</b><br><b>(32.1 to 33.3)</b> | <b>75.4†</b><br><b>(71.1 to 80.0)</b> | <b>0.9</b><br><b>(0.6 to 1.3)</b> | <b>4.8</b><br><b>(3.2 to 6.4)</b>                 | <b>0.9</b><br><b>(-0.3 to 2.2)</b>                  |
| Congenital anomalies                                       | 0.5<br>(0.5 to 0.6)                  | --                                    | 0.1<br>(< 0.05 to 0.1)            | -0.3<br>(-5.6 to 5.1)                             | 1.4<br>(-3.9 to 6.7)                                |
| Neural tube defects                                        | < 0.05<br>(< 0.05 to < 0.05)         | --                                    | < 0.05<br>(< 0.05 to < 0.05)      | 1.1<br>(-13.4 to 17.6)                            | 1.4<br>(-13.0 to 18.1)                              |
| Congenital heart anomalies                                 | 0.1<br>(0.1 to 0.1)                  | --                                    | < 0.05<br>(< 0.05 to < 0.05)      | -2.5<br>(-12.5 to 8.9)                            | 1.6<br>(-8.7 to 13.5)                               |
| Orofacial clefts                                           | < 0.05<br>(< 0.05 to < 0.05)         | --                                    | < 0.05<br>(< 0.05 to < 0.05)      | -4.2<br>(-14.9 to 8.0)                            | -3.1<br>(-14.1 to 9.4)                              |
| Down's syndrome                                            | < 0.05<br>(< 0.05 to < 0.05)         | --                                    | < 0.05<br>(< 0.05 to < 0.05)      | -4.5<br>(-13.9 to 5.6)                            | 2.5<br>(-8.0 to 13.4)                               |
| Turner syndrome                                            | < 0.05<br>(< 0.05 to < 0.05)         | --                                    | < 0.05<br>(< 0.05 to < 0.05)      | -7.1<br>(-35.4 to 35.0)                           | -1.7<br>(-32.5 to 44.3)                             |
| Klinefelter syndrome                                       | < 0.05<br>(< 0.05 to < 0.05)         | --                                    | < 0.05<br>(< 0.05 to < 0.05)      | -5.8<br>(-26.7 to 23.3)                           | -3.0<br>(-25.2 to 27.8)                             |

| Cause                                         | Prevalence in thousands (95% UI)     | Incidence in thousands (95% UI)    | YLDs in thousands (95% UI)              |                                                   |                                                     |
|-----------------------------------------------|--------------------------------------|------------------------------------|-----------------------------------------|---------------------------------------------------|-----------------------------------------------------|
|                                               | 2016 counts                          | 2016 counts                        | 2016 counts                             | Percentage change in counts between 2006 and 2016 | Percentage change in age-standardised rates between |
| Other chromosomal abnormalities               | < 0.05<br>(< 0.05 to < 0.05)         | --                                 | < 0.05<br>(< 0.05 to < 0.05)            | -13.8<br>(-28.8 to 2.2)                           | -1.4<br>(-18.6 to 17.7)                             |
| Congenital musculoskeletal and limb anomalies | 0.1<br>(0.1 to 0.1)                  | --                                 | < 0.05<br>(< 0.05 to < 0.05)            | 5.4<br>(-4.1 to 15.8)                             | 4.5<br>(-4.4 to 14.6)                               |
| Urogenital congenital anomalies               | 0.1<br>(0.1 to 0.1)                  | --                                 | < 0.05<br>(< 0.05 to < 0.05)            | -8.3<br>(-18.0 to 2.6)                            | 0.3<br>(-10.7 to 13.3)                              |
| Digestive congenital anomalies                | 0.1<br>(0.1 to 0.1)                  | --                                 | < 0.05<br>(< 0.05 to < 0.05)            | -7.5<br>(-19.6 to 7.8)                            | -7.0<br>(-19.1 to 8.7)                              |
| Other congenital anomalies                    | 0.1<br>(0.1 to 0.1)                  | --                                 | < 0.05<br>(< 0.05 to < 0.05)            | 0.9<br>(-10.0 to 14.3)                            | 0.8<br>(-10.0 to 13.7)                              |
| Skin and subcutaneous diseases                | 16.7<br>(16.4 to 17.0)               | 26.8<br>(25.7 to 28.0)             | 0.5<br>(0.3 to 0.7)                     | -1.3<br>(-3.2 to 0.6)                             | 1.7<br>(-0.1 to 3.4)                                |
| Dermatitis                                    | 3.5<br>(3.3 to 3.7)                  | 4.2<br>(3.8 to 4.6)                | 0.1<br>(0.1 to 0.2)                     | -3.8<br>(-6.9 to -0.8)                            | 0.1<br>(-2.9 to 2.9)                                |
| Psoriasis                                     | 0.8<br>(0.7 to 0.8)                  | 0.1<br>(0.1 to 0.1)                | 0.1<br>(< 0.05 to 0.1)                  | 9.6<br>(3.3 to 16.6)                              | 5.2<br>(-0.4 to 11.5)                               |
| Cellulitis                                    | 0.1<br>(0.1 to 0.1)                  | 1.6<br>(1.5 to 1.7)                | < 0.05<br>(< 0.05 to < 0.05)            | 4.0<br>(-10.1 to 19.6)                            | 1.1<br>(-11.0 to 15.4)                              |
| Pyoderma                                      | < 0.05<br>(< 0.05 to < 0.05)         | 0.7<br>(0.6 to 0.7)                | < 0.05<br>(< 0.05 to < 0.05)            | -1.2<br>(-13.7 to 12.0)                           | 0.3<br>(-12.3 to 13.2)                              |
| Scabies                                       | 0.2<br>(0.2 to 0.3)                  | 0.7<br>(0.6 to 0.8)                | < 0.05<br>(< 0.05 to < 0.05)            | -3.0<br>(-8.4 to 2.7)                             | 0.2<br>(-5.2 to 5.5)                                |
| Fungal skin diseases                          | 1.2<br>(1.1 to 1.3)                  | 4.3<br>(3.8 to 4.8)                | < 0.05<br>(< 0.05 to < 0.05)            | 5.9<br>(2.4 to 9.3)                               | 0.1<br>(-1.8 to 2.1)                                |
| Viral skin diseases                           | 1.6<br>(1.5 to 1.6)                  | 1.9<br>(1.8 to 1.9)                | < 0.05<br>(< 0.05 to 0.1)               | -5.2<br>(-7.9 to -2.3)                            | 0.1<br>(-2.6 to 2.9)                                |
| Acne vulgaris                                 | 6.1<br>(5.7 to 6.4)                  | 5.0<br>(4.2 to 6.0)                | 0.2<br>(0.1 to 0.2)                     | -5.2<br>(-8.5 to -2.0)                            | 2.1<br>(-1.5 to 5.5)                                |
| Alopecia areata                               | 0.2<br>(0.2 to 0.2)                  | 0.3<br>(0.3 to 0.3)                | < 0.05<br>(< 0.05 to < 0.05)            | 2.4<br>(-4.9 to 10.4)                             | 0.4<br>(-6.8 to 7.9)                                |
| Pruritus                                      | 0.4<br>(0.4 to 0.5)                  | 0.3<br>(0.3 to 0.4)                | < 0.05<br>(< 0.05 to < 0.05)            | 6.8<br>(-0.1 to 14.6)                             | 1.3<br>(-3.5 to 7.4)                                |
| Urticaria                                     | 0.4<br>(0.4 to 0.5)                  | 0.8<br>(0.7 to 0.9)                | < 0.05<br>(< 0.05 to < 0.05)            | -3.7<br>(-9.2 to 3.0)                             | 0.3<br>(-5.0 to 6.1)                                |
| Decubitus ulcer                               | < 0.05<br>(< 0.05 to < 0.05)         | 0.1<br>(< 0.05 to 0.1)             | < 0.05<br>(< 0.05 to < 0.05)            | 20.6<br>(3.8 to 39.9)                             | 2.2<br>(-9.8 to 17.4)                               |
| Other skin and subcutaneous diseases          | 5.4<br>(5.3 to 5.6)                  | 6.8<br>(6.6 to 7.1)                | < 0.05<br>(< 0.05 to 0.1)               | 14.6<br>(11.6 to 17.6)                            | 4.6<br>(2.4 to 6.9)                                 |
| Sense organ diseases                          | 9.5<br>(9.2 to 9.8)                  | 4.5†<br>(4.3 to 4.8)               | 0.3<br>(0.2 to 0.4)                     | 14.7<br>(11.6 to 17.6)                            | -0.2<br>(-2.7 to 2.3)                               |
| Glaucoma                                      | < 0.05<br>(< 0.05 to < 0.05)         | --                                 | < 0.05<br>(< 0.05 to < 0.05)            | 31.8<br>(7.4 to 60.7)                             | -0.4<br>(-14.2 to 15.1)                             |
| Cataract                                      | 0.1<br>(0.1 to 0.1)                  | --                                 | < 0.05<br>(< 0.05 to < 0.05)            | 14.3<br>(0.6 to 30.2)                             | -2.4<br>(-9.9 to 5.9)                               |
| Macular degeneration                          | < 0.05<br>(< 0.05 to < 0.05)         | --                                 | < 0.05<br>(< 0.05 to < 0.05)            | 32.4<br>(6.5 to 67.7)                             | 0.8<br>(-12.2 to 16.6)                              |
| Refraction and accommodation disorders        | 2.7<br>(2.5 to 2.8)                  | --                                 | < 0.05<br>(< 0.05 to 0.1)               | 2.6<br>(-1.2 to 6.5)                              | -1.6<br>(-4.8 to 1.6)                               |
| Age-related and other hearing loss            | 7.0<br>(6.5 to 7.4)                  | --                                 | 0.2<br>(0.1 to 0.2)                     | 18.1<br>(12.6 to 22.5)                            | -0.0<br>(-4.0 to 3.9)                               |
| Other vision loss                             | 0.1<br>(0.1 to 0.1)                  | --                                 | < 0.05<br>(< 0.05 to < 0.05)            | 9.2<br>(-3.8 to 23.8)                             | -1.9<br>(-11.5 to 8.6)                              |
| Other sense organ diseases                    | 1.4<br>(1.3 to 1.5)                  | 4.5<br>(4.3 to 4.8)                | < 0.05<br>(< 0.05 to 0.1)               | 14.7<br>(9.7 to 20.3)                             | 0.9<br>(-3.0 to 4.9)                                |
| Oral disorders                                | 18.5<br>(17.6 to 19.3)               | 44.0†<br>(39.8 to 48.6)            | 0.1<br>(0.1 to 0.2)                     | 13.3<br>(10.3 to 16.6)                            | 0.0<br>(-1.9 to 2.0)                                |
| Caries of deciduous teeth                     | 1.7<br>(1.2 to 2.1)                  | 6.7<br>(3.9 to 10.2)               | < 0.05<br>(< 0.05 to < 0.05)            | -13.6<br>(-24.9 to 0.5)                           | -1.0<br>(-14.0 to 14.7)                             |
| Caries of permanent teeth                     | 11.4<br>(10.7 to 12.1)               | 36.6<br>(33.6 to 39.6)             | < 0.05<br>(< 0.05 to < 0.05)            | -1.4<br>(-6.0 to 3.0)                             | -3.9<br>(-7.8 to -0.3)                              |
| Periodontal disease                           | 4.4<br>(3.5 to 5.5)                  | 0.5<br>(0.4 to 0.7)                | < 0.05<br>(< 0.05 to 0.1)               | 10.5<br>(4.3 to 17.3)                             | -0.1<br>(-4.0 to 3.7)                               |
| Edentulism and severe tooth loss              | 2.6<br>(2.3 to 3.0)                  | 0.2<br>(0.2 to 0.2)                | 0.1<br>(< 0.05 to 0.1)                  | 20.6<br>(16.2 to 25.6)                            | 0.3<br>(-2.6 to 3.4)                                |
| Other oral disorders                          | 0.9<br>(0.9 to 1.0)                  | --                                 | < 0.05<br>(< 0.05 to < 0.05)            | 3.4<br>(-0.2 to 7.4)                              | 0.3<br>(-2.8 to 3.6)                                |
| <b>Injuries</b>                               | <b>15.5</b><br><b>(14.6 to 16.7)</b> | <b>6.3†</b><br><b>(5.9 to 6.7)</b> | <b>0.5</b><br><b>(0.3 to 0.7)</b>       | <b>0.8</b><br><b>(-1.4 to 2.6)</b>                | <b>-8.8</b><br><b>(-10.6 to -7.4)</b>               |
| <b>Transport injuries</b>                     | <b>1.8</b><br><b>(1.6 to 1.9)</b>    | <b>0.4</b><br><b>(0.4 to 0.5)</b>  | <b>0.1</b><br><b>(&lt; 0.05 to 0.1)</b> | <b>-5.0</b><br><b>(-7.2 to -2.9)</b>              | <b>-12.8</b><br><b>(-14.7 to -11.2)</b>             |
| Road injuries                                 | 0.9<br>(0.9 to 1.0)                  | 0.3<br>(0.2 to 0.3)                | < 0.05<br>(< 0.05 to 0.1)               | 4.0<br>(1.4 to 6.5)                               | -3.9<br>(-6.2 to -1.9)                              |
| Pedestrian road injuries                      | 0.2<br>(0.1 to 0.2)                  | < 0.05<br>(< 0.05 to < 0.05)       | < 0.05<br>(< 0.05 to < 0.05)            | 1.2<br>(-1.3 to 3.5)                              | -6.9<br>(-9.1 to -4.9)                              |
| Cyclist road injuries                         | 0.2<br>(0.2 to 0.2)                  | 0.1<br>(0.1 to 0.1)                | < 0.05<br>(< 0.05 to < 0.05)            | 2.3<br>(-0.6 to 4.9)                              | -4.2<br>(-6.7 to -2.0)                              |
| Motorcyclist road injuries                    | 0.2<br>(0.1 to 0.2)                  | < 0.05<br>(< 0.05 to < 0.05)       | < 0.05<br>(< 0.05 to < 0.05)            | 9.7<br>(6.7 to 12.7)                              | 0.6<br>(-1.8 to 2.9)                                |
| Motor vehicle road injuries                   | 0.4<br>(0.3 to 0.4)                  | 0.1<br>(0.1 to 0.2)                | < 0.05<br>(< 0.05 to < 0.05)            | 4.2<br>(1.5 to 6.8)                               | -4.0<br>(-6.2 to -2.0)                              |
| Other road injuries                           | < 0.05<br>(< 0.05 to < 0.05)         | < 0.05<br>(< 0.05 to < 0.05)       | < 0.05<br>(< 0.05 to < 0.05)            | -1.2<br>(-3.8 to 1.0)                             | -8.4<br>(-10.6 to -6.5)                             |
| Other transport injuries                      | 0.8<br>(0.7 to 1.0)                  | 0.2<br>(0.1 to 0.2)                | < 0.05<br>(< 0.05 to < 0.05)            | -15.3<br>(-17.6 to -13.2)                         | -22.7<br>(-24.4 to -21.2)                           |
| <b>Unintentional injuries</b>                 | <b>12.3</b><br><b>(11.4 to 13.5)</b> | <b>5.1</b><br><b>(4.8 to 5.5)</b>  | <b>0.4</b><br><b>(0.2 to 0.5)</b>       | <b>2.3</b><br><b>(0.0 to 4.2)</b>                 | <b>-8.3</b><br><b>(-10.1 to -6.8)</b>               |
| Falls                                         | 5.6<br>(5.0 to 6.3)                  | 2.6<br>(2.3 to 2.9)                | 0.2<br>(0.1 to 0.3)                     | 5.0<br>(2.0 to 7.6)                               | -8.1<br>(-10.4 to -6.2)                             |
| Drowning                                      | < 0.05<br>(< 0.05 to 0.1)            | < 0.05<br>(< 0.05 to < 0.05)       | < 0.05<br>(< 0.05 to < 0.05)            | 0.6<br>(-4.7 to 5.6)                              | -6.8<br>(-11.0 to -2.6)                             |
| Fire, heat, and hot substances                | 1.6<br>(1.4 to 1.9)                  | 0.1<br>(0.1 to 0.1)                | < 0.05<br>(< 0.05 to < 0.05)            | -10.4<br>(-13.1 to -8.1)                          | -16.2<br>(-18.5 to -14.2)                           |
| Poisonings                                    | < 0.05<br>(< 0.05 to 0.1)            | 0.1<br>(< 0.05 to 0.1)             | < 0.05<br>(< 0.05 to < 0.05)            | 14.9<br>(6.1 to 24.3)                             | 13.2<br>(4.3 to 22.9)                               |
| Exposure to mechanical forces                 | 3.1<br>(2.6 to 4.0)                  | 0.9<br>(0.8 to 1.1)                | 0.1<br>(< 0.05 to 0.1)                  | 2.5<br>(0.3 to 4.4)                               | -4.8<br>(-6.6 to -3.4)                              |
| Unintentional firearm injuries                | 0.2<br>(0.1 to 0.2)                  | < 0.05<br>(< 0.05 to < 0.05)       | < 0.05<br>(< 0.05 to < 0.05)            | -5.9<br>(-8.1 to -3.9)                            | -11.9<br>(-13.8 to -10.2)                           |
| Unintentional suffocation                     | < 0.05<br>(< 0.05 to < 0.05)         | < 0.05<br>(< 0.05 to < 0.05)       | < 0.05<br>(< 0.05 to < 0.05)            | 16.9<br>(13.9 to 19.6)                            | 12.0<br>(9.1 to 14.5)                               |
| Other exposure to mechanical forces           | 2.9<br>(2.4 to 3.8)                  | 0.9<br>(0.8 to 1.0)                | 0.1<br>(< 0.05 to 0.1)                  | 2.7<br>(0.4 to 4.6)                               | -4.7<br>(-6.6 to -3.2)                              |



| Cause                                                                               | Prevalence in thousands (95% UI)              | Incidence in thousands (95% UI)                      | YLDs in thousands (95% UI)                          |                                                   |                                                     |
|-------------------------------------------------------------------------------------|-----------------------------------------------|------------------------------------------------------|-----------------------------------------------------|---------------------------------------------------|-----------------------------------------------------|
|                                                                                     | 2016 counts                                   | 2016 counts                                          | 2016 counts                                         | Percentage change in counts between 2006 and 2016 | Percentage change in age-standardised rates between |
| Adverse effects of medical treatment                                                | < 0.05<br>(< 0.05 to < 0.05)                  | 0.4<br>(0.4 to 0.5)                                  | < 0.05<br>(< 0.05 to < 0.05)                        | 9.1<br>(2.9 to 15.9)                              | -0.3<br>(-4.1 to 4.2)                               |
| Animal contact                                                                      | 0.4<br>(0.4 to 0.5)                           | 0.3<br>(0.2 to 0.3)                                  | < 0.05<br>(< 0.05 to < 0.05)                        | -13.8<br>(-18.5 to -9.6)                          | -17.5<br>(-21.5 to -13.9)                           |
| Venomous animal contact                                                             | 0.1<br>(< 0.05 to 0.1)                        | 0.1<br>(< 0.05 to 0.1)                               | < 0.05<br>(< 0.05 to < 0.05)                        | -18.0<br>(-25.0 to -10.7)                         | -19.3<br>(-26.2 to -12.4)                           |
| Non-venomous animal contact                                                         | 0.4<br>(0.3 to 0.4)                           | 0.2<br>(0.1 to 0.2)                                  | < 0.05<br>(< 0.05 to < 0.05)                        | -9.8<br>(-12.8 to -7.5)                           | -15.8<br>(-18.2 to -14.0)                           |
| Foreign body                                                                        | 0.3<br>(0.3 to 0.4)                           | 0.2<br>(0.2 to 0.3)                                  | < 0.05<br>(< 0.05 to < 0.05)                        | -1.9<br>(-5.7 to 1.2)                             | -8.3<br>(-11.5 to -5.6)                             |
| Pulmonary aspiration and foreign body in airway                                     | < 0.05<br>(< 0.05 to 0.1)                     | 0.1<br>(< 0.05 to 0.1)                               | < 0.05<br>(< 0.05 to < 0.05)                        | -7.5<br>(-10.5 to -4.8)                           | -14.7<br>(-16.9 to -12.8)                           |
| Foreign body in eyes                                                                | < 0.05<br>(< 0.05 to < 0.05)                  | 0.1<br>(0.1 to 0.1)                                  | < 0.05<br>(< 0.05 to < 0.05)                        | 4.7<br>(-0.8 to 10.2)                             | 0.4<br>(-2.7 to 3.7)                                |
| Foreign body in other body part                                                     | 0.3<br>(0.2 to 0.3)                           | 0.1<br>(0.1 to 0.1)                                  | < 0.05<br>(< 0.05 to < 0.05)                        | -2.4<br>(-7.0 to 1.4)                             | -8.8<br>(-12.7 to -5.6)                             |
| Environmental heat and cold exposure                                                | 0.3<br>(0.3 to 0.4)                           | 0.1<br>(0.1 to 0.1)                                  | < 0.05<br>(< 0.05 to < 0.05)                        | -0.6<br>(-4.1 to 2.8)                             | -13.5<br>(-16.1 to -10.9)                           |
| Other unintentional injuries                                                        | 0.9<br>(0.7 to 1.0)                           | 0.4<br>(0.4 to 0.5)                                  | < 0.05<br>(< 0.05 to < 0.05)                        | 3.9<br>(1.1 to 6.1)                               | -6.0<br>(-8.2 to -4.0)                              |
| <b>Self-harm and interpersonal violence</b>                                         | <b>2.1</b><br><b>(1.9 to 2.3)</b>             | <b>0.7†</b><br><b>(0.6 to 0.8)</b>                   | <b>0.1</b><br><b>(&lt; 0.05 to 0.1)</b>             | <b>-1.5</b><br><b>(-3.8 to 0.9)</b>               | <b>-7.1</b><br><b>(-9.1 to -5.2)</b>                |
| Self-harm                                                                           | 0.4<br>(0.3 to 0.5)                           | 0.4<br>(0.3 to 0.4)                                  | < 0.05<br>(< 0.05 to < 0.05)                        | -0.3<br>(-5.2 to 4.5)                             | -6.4<br>(-10.7 to -2.2)                             |
| Self-harm by firearm                                                                | < 0.05<br>(< 0.05 to < 0.05)                  | < 0.05<br>(< 0.05 to < 0.05)                         | < 0.05<br>(< 0.05 to < 0.05)                        | -8.0<br>(-11.0 to -5.3)                           | -11.0<br>(-13.6 to -8.6)                            |
| Self-harm by other specified means                                                  | 0.4<br>(0.3 to 0.5)                           | 0.4<br>(0.3 to 0.4)                                  | < 0.05<br>(< 0.05 to < 0.05)                        | -0.3<br>(-5.2 to 4.5)                             | -6.4<br>(-10.7 to -2.2)                             |
| Interpersonal violence                                                              | 1.7<br>(1.6 to 1.9)                           | 0.4†<br>(0.3 to 0.4)                                 | < 0.05<br>(< 0.05 to < 0.05)                        | -2.1<br>(-4.2 to -0.1)                            | -7.4<br>(-9.1 to -5.8)                              |
| Assault by firearm                                                                  | < 0.05<br>(< 0.05 to 0.1)                     | < 0.05<br>(< 0.05 to < 0.05)                         | < 0.05<br>(< 0.05 to < 0.05)                        | 10.4<br>(7.7 to 12.8)                             | 3.5<br>(1.5 to 5.4)                                 |
| Assault by sharp object                                                             | 0.3<br>(0.2 to 0.3)                           | 0.1<br>(0.1 to 0.1)                                  | < 0.05<br>(< 0.05 to < 0.05)                        | 4.3<br>(1.6 to 6.8)                               | -3.6<br>(-5.6 to -2.0)                              |
| Sexual violence                                                                     | 0.8<br>(0.7 to 0.9)                           | --                                                   | < 0.05<br>(< 0.05 to < 0.05)                        | -7.3<br>(-12.2 to -2.3)                           | -4.4<br>(-8.9 to 0.7)                               |
| Assault by other means                                                              | 0.6<br>(0.5 to 0.8)                           | 0.3<br>(0.2 to 0.3)                                  | < 0.05<br>(< 0.05 to < 0.05)                        | -2.3<br>(-4.5 to -0.2)                            | -10.0<br>(-11.7 to -8.4)                            |
| <b>Forces of nature, conflict and terrorism, and executions and police conflict</b> | <b>&lt; 0.05</b><br><b>(&lt; 0.05 to 0.1)</b> | <b>&lt; 0.05†</b><br><b>(&lt; 0.05 to &lt; 0.05)</b> | <b>&lt; 0.05</b><br><b>(&lt; 0.05 to &lt; 0.05)</b> | <b>53.9</b><br><b>(40.6 to 61.2)</b>              | <b>50.2</b><br><b>(38.5 to 57.4)</b>                |
| Exposure to forces of nature                                                        | < 0.05<br>(< 0.05 to 0.1)                     | --                                                   | < 0.05<br>(< 0.05 to < 0.05)                        | 63.5<br>(55.3 to 73.0)                            | 59.1<br>(50.8 to 68.9)                              |
| Conflict and terrorism                                                              | --                                            | --                                                   | --                                                  | --                                                | --                                                  |
| Executions and police conflict                                                      | < 0.05<br>(< 0.05 to < 0.05)                  | < 0.05<br>(< 0.05 to < 0.05)                         | < 0.05<br>(< 0.05 to < 0.05)                        | 19.0<br>(9.2 to 24.8)                             | 17.0<br>(9.4 to 21.9)                               |
| <b>Impairments</b>                                                                  | --                                            | --                                                   | --                                                  | --                                                | --                                                  |
| Anaemia                                                                             | 4.5<br>(4.1 to 5.0)                           | --                                                   | 0.1<br>(0.1 to 0.1)                                 | 4.3<br>(-5.5 to 14.6)                             | 3.2<br>(-5.4 to 12.6)                               |
| Developmental intellectual disability                                               | 0.8<br>(0.6 to 0.9)                           | --                                                   | 0.1<br>(0.1 to 0.1)                                 | 13.4<br>(4.2 to 23.6)                             | 15.9<br>(6.7 to 25.6)                               |
| Epilepsy                                                                            | 0.3<br>(0.1 to 0.4)                           | --                                                   | 0.1<br>(< 0.05 to 0.2)                              | 3.3<br>(-58.5 to 179.7)                           | 1.9<br>(-59.3 to 181.5)                             |
| Guillain-Barre syndrome                                                             | < 0.05<br>(< 0.05 to < 0.05)                  | --                                                   | < 0.05<br>(< 0.05 to < 0.05)                        | 6.9<br>(-0.3 to 13.3)                             | 0.3<br>(0.1 to 0.6)                                 |
| Hearing loss                                                                        | 7.3<br>(6.8 to 7.8)                           | --                                                   | 0.2<br>(0.1 to 0.3)                                 | 15.0<br>(10.0 to 19.1)                            | -0.5<br>(-3.9 to 2.9)                               |
| Heart failure                                                                       | 0.4<br>(0.3 to 0.4)                           | --                                                   | < 0.05<br>(< 0.05 to 0.1)                           | 13.6<br>(5.8 to 23.3)                             | -9.2<br>(-15.1 to -2.4)                             |
| Infertility                                                                         | 0.3<br>(0.2 to 0.4)                           | --                                                   | < 0.05<br>(< 0.05 to < 0.05)                        | -11.1<br>(-18.6 to -2.6)                          | 0.9<br>(-5.2 to 7.2)                                |
| Pelvic inflammatory disease                                                         | < 0.05<br>(< 0.05 to < 0.05)                  | --                                                   | < 0.05<br>(< 0.05 to < 0.05)                        | -6.2<br>(-24.9 to 16.8)                           | -2.5<br>(-21.1 to 19.7)                             |
| Vision loss                                                                         | 2.9<br>(2.8 to 3.0)                           | --                                                   | 0.1<br>(< 0.05 to 0.1)                              | 5.4<br>(1.3 to 10.9)                              | 0.1<br>(-3.1 to 4.7)                                |

We did not calculate incidence for the nine impairments, certain NTDs, and causes with only birth prevalence. Blank cells mean that no estimate is available.

† Incidence for aggregate causes represents the sum of the incidence of the causes below the aggregate.

‡ Incidence estimates for stroke represent first-ever stroke only.

^ Incidence of HIV/AIDS represents new infections of HIV only and does not include new infections of Tuberculosis in HIV positive cases.



SR Table 14: Prevalence, incidence, and YLDs for 2016, percentage change of YLD counts and percentage change of age-standardised YLD rates between 2006 and 2016 by cause and impairments, for all ages, Grenada.

| Cause                                                                                | Prevalence in thousands (95% UI) | Incidence in thousands (95% UI)         | YLDs in thousands (95% UI)             |                                                   |                                                     |
|--------------------------------------------------------------------------------------|----------------------------------|-----------------------------------------|----------------------------------------|---------------------------------------------------|-----------------------------------------------------|
|                                                                                      | 2016 counts                      | 2016 counts                             | 2016 counts                            | Percentage change in counts between 2006 and 2016 | Percentage change in age-standardised rates between |
| <b>All causes</b>                                                                    | <b>103.0</b><br>(102.7 to 103.3) | <b>717.5†</b><br>(680.9 to 758.5)       | <b>11.2</b><br>(8.3 to 14.5)           | <b>7.3</b><br>(5.0 to 9.7)                        | <b>0.2</b><br>(-1.7 to 2.3)                         |
| <b>Communicable, maternal, neonatal, and nutritional disorders</b>                   | <b>73.4</b><br>(71.0 to 75.8)    | <b>416.1†</b><br>(382.6 to 453.4)       | <b>1.2</b><br>(0.8 to 1.6)             | <b>3.6</b><br>(-2.4 to 9.9)                       | <b>3.5</b><br>(-2.1 to 9.8)                         |
| <b>HIV/AIDS and tuberculosis</b>                                                     | <b>25.7</b><br>(23.0 to 27.8)    | <b>&lt; 0.05†</b><br>(< 0.05 to < 0.05) | <b>&lt; 0.05</b><br>(< 0.05 to < 0.05) | <b>-12.4</b><br>(-27.2 to 1.3)                    | <b>-27.2</b><br>(-38.8 to -16.7)                    |
| Tuberculosis                                                                         | 23.7<br>(21.3 to 26.5)           | < 0.05†<br>(< 0.05 to < 0.05)           | < 0.05<br>(< 0.05 to < 0.05)           | -6.5<br>(-13.3 to 1.6)                            | -12.8<br>(-18.8 to -6.7)                            |
| Drug-susceptible tuberculosis                                                        | < 0.05<br>(< 0.05 to < 0.05)     | < 0.05<br>(< 0.05 to < 0.05)            | < 0.05<br>(< 0.05 to < 0.05)           | -6.3<br>(-13.2 to 2.0)                            | -12.6<br>(-18.9 to -5.9)                            |
| Multidrug-resistant tuberculosis without extensive drug resistance                   | < 0.05<br>(< 0.05 to < 0.05)     | < 0.05<br>(< 0.05 to < 0.05)            | < 0.05<br>(< 0.05 to < 0.05)           | -35.4<br>(-90.3 to 250.3)                         | -39.7<br>(-90.8 to 225.9)                           |
| Extensively drug-resistant tuberculosis                                              | < 0.05<br>(< 0.05 to < 0.05)     | < 0.05<br>(< 0.05 to < 0.05)            | < 0.05<br>(< 0.05 to < 0.05)           | 72.1<br>(-74.2 to 834.0)                          | 60.6<br>(-75.5 to 767.4)                            |
| Latent tuberculosis infection                                                        | 23.7<br>(21.3 to 26.5)           | --                                      | --                                     | --                                                | --                                                  |
| HIV/AIDS                                                                             | 0.1<br>(0.1 to 0.2)              | < 0.05^<br>(< 0.05 to < 0.05)           | < 0.05<br>(< 0.05 to < 0.05)           | -12.9<br>(-29.8 to 1.9)                           | -28.2<br>(-41.2 to -17.2)                           |
| Drug-susceptible HIV/AIDS - Tuberculosis                                             | < 0.05<br>(< 0.05 to < 0.05)     | < 0.05<br>(< 0.05 to < 0.05)            | < 0.05<br>(< 0.05 to < 0.05)           | -17.7<br>(-23.8 to -10.6)                         | -31.5<br>(-36.6 to -25.6)                           |
| Multidrug-resistant HIV/AIDS - Tuberculosis without extensive drug resistance        | < 0.05<br>(< 0.05 to < 0.05)     | < 0.05<br>(< 0.05 to < 0.05)            | < 0.05<br>(< 0.05 to < 0.05)           | -43.0<br>(-91.5 to 213.2)                         | -52.5<br>(-92.9 to 161.1)                           |
| Extensively drug-resistant HIV/AIDS - Tuberculosis                                   | < 0.05<br>(< 0.05 to < 0.05)     | < 0.05<br>(< 0.05 to < 0.05)            | < 0.05<br>(< 0.05 to < 0.05)           | 51.7<br>(-77.4 to 733.6)                          | 26.4<br>(-81.2 to 595.0)                            |
| HIV/AIDS resulting in other diseases                                                 | 0.1<br>(0.1 to 0.2)              | < 0.05<br>(< 0.05 to < 0.05)            | < 0.05<br>(< 0.05 to < 0.05)           | -12.8<br>(-30.0 to 2.1)                           | -28.1<br>(-41.5 to -16.9)                           |
| <b>Diarrhoea, lower respiratory infections, and other common infectious diseases</b> | <b>6.7</b><br>(6.3 to 7.1)       | <b>392.4†</b><br>(358.9 to 428.1)       | <b>0.4</b><br>(0.2 to 0.5)             | <b>5.9</b><br>(2.0 to 10.0)                       | <b>7.4</b><br>(3.7 to 11.3)                         |
| Diarrhoeal diseases                                                                  | 1.7<br>(1.6 to 1.9)              | 115.1<br>(106.8 to 124.2)               | 0.2<br>(0.1 to 0.3)                    | 12.2<br>(5.7 to 19.0)                             | 14.2<br>(8.4 to 20.5)                               |
| Intestinal infectious diseases                                                       | < 0.05<br>(< 0.05 to < 0.05)     | < 0.05†<br>(< 0.05 to < 0.05)           | < 0.05<br>(< 0.05 to < 0.05)           | 0.7<br>(-11.9 to 15.1)                            | -7.4<br>(-18.8 to 5.5)                              |
| Typhoid fever                                                                        | < 0.05<br>(< 0.05 to < 0.05)     | < 0.05<br>(< 0.05 to < 0.05)            | < 0.05<br>(< 0.05 to < 0.05)           | 3.0<br>(-11.5 to 19.2)                            | -5.9<br>(-19.2 to 8.2)                              |
| Paratyphoid fever                                                                    | < 0.05<br>(< 0.05 to < 0.05)     | < 0.05<br>(< 0.05 to < 0.05)            | < 0.05<br>(< 0.05 to < 0.05)           | 2.0<br>(-16.2 to 25.5)                            | -6.4<br>(-22.9 to 13.5)                             |
| Other intestinal infectious diseases                                                 | --                               | --                                      | < 0.05<br>(< 0.05 to < 0.05)           | -36.3<br>(-53.9 to -10.5)                         | -33.3<br>(-50.8 to -7.8)                            |
| Lower respiratory infections                                                         | 0.2<br>(0.2 to 0.2)              | 7.4<br>(6.8 to 8.1)                     | < 0.05<br>(< 0.05 to < 0.05)           | 17.8<br>(7.5 to 29.3)                             | 15.2<br>(5.7 to 26.1)                               |
| Upper respiratory infections                                                         | 3.5<br>(3.1 to 3.9)              | 261.6<br>(229.2 to 298.4)               | 0.1<br>(0.1 to 0.1)                    | 0.1<br>(-5.5 to 6.2)                              | 0.1<br>(-4.7 to 4.8)                                |
| Otitis media                                                                         | 1.4<br>(1.2 to 1.5)              | 6.2<br>(5.0 to 7.7)                     | < 0.05<br>(< 0.05 to 0.1)              | -8.1<br>(-14.9 to -0.6)                           | -3.7<br>(-10.5 to 3.7)                              |
| Meningitis                                                                           | 0.1<br>(0.1 to 0.1)              | < 0.05<br>(< 0.05 to < 0.05)            | < 0.05<br>(< 0.05 to < 0.05)           | 0.8<br>(-1.8 to 3.5)                              | -2.2<br>(-4.6 to 0.3)                               |
| Pneumococcal meningitis                                                              | < 0.05<br>(< 0.05 to 0.1)        | < 0.05<br>(< 0.05 to < 0.05)            | < 0.05<br>(< 0.05 to < 0.05)           | 0.6<br>(-3.0 to 4.6)                              | -2.7<br>(-6.0 to 1.0)                               |
| H influenzae type B meningitis                                                       | < 0.05<br>(< 0.05 to < 0.05)     | < 0.05<br>(< 0.05 to < 0.05)            | < 0.05<br>(< 0.05 to < 0.05)           | 0.5<br>(-3.6 to 4.9)                              | -1.8<br>(-5.8 to 2.3)                               |
| Meningococcal infection                                                              | < 0.05<br>(< 0.05 to < 0.05)     | < 0.05<br>(< 0.05 to < 0.05)            | < 0.05<br>(< 0.05 to < 0.05)           | 2.0<br>(-2.8 to 6.5)                              | -2.6<br>(-6.8 to 1.6)                               |
| Other meningitis                                                                     | < 0.05<br>(< 0.05 to < 0.05)     | < 0.05<br>(< 0.05 to < 0.05)            | < 0.05<br>(< 0.05 to < 0.05)           | 0.9<br>(-3.3 to 5.1)                              | -1.6<br>(-5.5 to 2.3)                               |
| Encephalitis                                                                         | 0.1<br>(< 0.05 to 0.1)           | < 0.05<br>(< 0.05 to < 0.05)            | < 0.05<br>(< 0.05 to < 0.05)           | 0.6<br>(-15.6 to 19.2)                            | -3.4<br>(-18.0 to 13.1)                             |
| Diphtheria                                                                           | < 0.05<br>(< 0.05 to < 0.05)     | < 0.05<br>(< 0.05 to < 0.05)            | < 0.05<br>(< 0.05 to < 0.05)           | -3.2<br>(-44.9 to 68.8)                           | -9.5<br>(-49.6 to 55.8)                             |
| Whooping cough                                                                       | < 0.05<br>(< 0.05 to < 0.05)     | < 0.05<br>(< 0.05 to < 0.05)            | < 0.05<br>(< 0.05 to < 0.05)           | -44.3<br>(-60.7 to -22.7)                         | -38.5<br>(-56.6 to -14.7)                           |
| Tetanus                                                                              | < 0.05<br>(< 0.05 to < 0.05)     | < 0.05<br>(< 0.05 to < 0.05)            | < 0.05<br>(< 0.05 to < 0.05)           | -58.4<br>(-69.2 to -36.1)                         | -62.8<br>(-72.4 to -42.9)                           |
| Measles                                                                              | < 0.05<br>(0.0 to < 0.05)        | < 0.05<br>(0.0 to < 0.05)               | < 0.05<br>(0.0 to < 0.05)              | --                                                | --                                                  |
| Varicella and herpes zoster                                                          | 0.1<br>(0.1 to 0.1)              | 2.0<br>(2.0 to 2.1)                     | < 0.05<br>(< 0.05 to < 0.05)           | 7.4<br>(-5.6 to 22.4)                             | -0.1<br>(-10.9 to 12.3)                             |
| <b>Neglected tropical diseases and malaria</b>                                       | <b>32.2</b><br>(27.7 to 37.2)    | <b>5.9†</b><br>(3.6 to 10.6)            | <b>0.1</b><br>(0.1 to 0.2)             | <b>241.4</b><br>(153.6 to 380.7)                  | <b>243.2</b><br>(154.1 to 383.7)                    |
| Malaria                                                                              | --                               | --                                      | --                                     | --                                                | --                                                  |
| Chagas disease                                                                       | < 0.05<br>(< 0.05 to < 0.05)     | --                                      | < 0.05<br>(< 0.05 to < 0.05)           | -18.6<br>(-57.3 to 41.1)                          | -30.0<br>(-66.2 to 25.3)                            |
| Leishmaniasis                                                                        | --                               | --                                      | --                                     | --                                                | --                                                  |
| Visceral leishmaniasis                                                               | --                               | --                                      | --                                     | --                                                | --                                                  |
| Cutaneous and mucocutaneous leishmaniasis                                            | --                               | --                                      | --                                     | --                                                | --                                                  |
| African trypanosomiasis                                                              | --                               | --                                      | --                                     | --                                                | --                                                  |
| Schistosomiasis                                                                      | --                               | --                                      | --                                     | --                                                | --                                                  |
| Cysticercosis                                                                        | --                               | --                                      | --                                     | --                                                | --                                                  |
| Cystic echinococcosis                                                                | --                               | --                                      | --                                     | --                                                | --                                                  |
| Lymphatic filariasis                                                                 | --                               | --                                      | --                                     | --                                                | --                                                  |
| Onchocerciasis                                                                       | --                               | --                                      | --                                     | --                                                | --                                                  |
| Trachoma                                                                             | --                               | --                                      | --                                     | --                                                | --                                                  |
| Dengue                                                                               | 0.1<br>(0.1 to 0.2)              | 1.9<br>(1.3 to 2.7)                     | < 0.05<br>(< 0.05 to < 0.05)           | 95.8<br>(50.2 to 323.3)                           | 94.5<br>(50.7 to 320.9)                             |
| Yellow fever                                                                         | --                               | --                                      | --                                     | --                                                | --                                                  |
| Rabies                                                                               | < 0.05<br>(< 0.05 to < 0.05)     | < 0.05<br>(< 0.05 to < 0.05)            | < 0.05<br>(< 0.05 to < 0.05)           | 67.4<br>(9.5 to 166.5)                            | 61.5<br>(9.5 to 146.9)                              |
| Intestinal nematode infections                                                       | 31.7<br>(27.1 to 36.7)           | --                                      | 0.1<br>(< 0.05 to 0.1)                 | 1,267.5<br>(572.4 to 2,314.5)                     | 1,218.4<br>(535.5 to 2,251.5)                       |
| Ascariasis                                                                           | 12.3<br>(8.8 to 17.1)            | --                                      | < 0.05<br>(< 0.05 to < 0.05)           | 6.5<br>(-60.1 to 188.3)                           | 3.1<br>(-62.1 to 185.2)                             |

| Cause                                                                   | Prevalence in thousands (95% UI)     | Incidence in thousands (95% UI)          | YLDs in thousands (95% UI)                          |                                                   |                                                     |
|-------------------------------------------------------------------------|--------------------------------------|------------------------------------------|-----------------------------------------------------|---------------------------------------------------|-----------------------------------------------------|
|                                                                         | 2016 counts                          | 2016 counts                              | 2016 counts                                         | Percentage change in counts between 2006 and 2016 | Percentage change in age-standardised rates between |
| Trichuriasis                                                            | 4.9<br>(3.3 to 7.0)                  | --                                       | < 0.05<br>(< 0.05 to < 0.05)                        | 6.5<br>(-82.5 to 494.1)                           | 2.0<br>(-83.6 to 474.9)                             |
| Hookworm disease                                                        | 17.9<br>(13.6 to 22.8)               | --                                       | 0.1<br>(< 0.05 to 0.1)                              | 5,945.4<br>(3,419.4 to 9,955.9)                   | 5,696.2<br>(3,277.4 to 9,573.9)                     |
| Food-borne trematodiasis                                                | --                                   | --                                       | --                                                  | --                                                | --                                                  |
| Leprosy                                                                 | < 0.05<br>(< 0.05 to < 0.05)         | < 0.05<br>(< 0.05 to < 0.05)             | < 0.05<br>(< 0.05 to < 0.05)                        | 20.4<br>(16.2 to 24.4)                            | 5.6<br>(2.3 to 9.1)                                 |
| Ebola virus disease                                                     | --                                   | --                                       | --                                                  | --                                                | --                                                  |
| Zika virus disease                                                      | 0.1<br>(< 0.05 to 0.1)               | 3.9<br>(1.9 to 8.8)                      | < 0.05<br>(< 0.05 to < 0.05)                        | --                                                | --                                                  |
| Guinea worm disease                                                     | --                                   | --                                       | --                                                  | --                                                | --                                                  |
| Other neglected tropical diseases                                       | 0.6<br>(0.5 to 0.7)                  | --                                       | < 0.05<br>(< 0.05 to < 0.05)                        | -18.7<br>(-30.9 to -4.0)                          | -13.7<br>(-26.4 to 1.0)                             |
| <b>Maternal disorders</b>                                               | <b>0.1</b><br><b>(0.1 to 0.2)</b>    | <b>3.3†</b><br><b>(2.8 to 3.8)</b>       | <b>&lt; 0.05</b><br><b>(&lt; 0.05 to &lt; 0.05)</b> | <b>-8.4</b><br><b>(-32.4 to 24.9)</b>             | <b>-19.0</b><br><b>(-40.3 to 11.6)</b>              |
| Maternal haemorrhage                                                    | < 0.05<br>(< 0.05 to < 0.05)         | 0.1<br>(0.1 to 0.1)                      | < 0.05<br>(< 0.05 to < 0.05)                        | -7.2<br>(-39.6 to 37.4)                           | -17.4<br>(-46.1 to 22.1)                            |
| Maternal sepsis and other pregnancy related infections                  | < 0.05<br>(< 0.05 to < 0.05)         | 0.2<br>(0.2 to 0.3)                      | < 0.05<br>(< 0.05 to < 0.05)                        | -11.1<br>(-56.9 to 84.4)                          | -19.4<br>(-59.5 to 68.3)                            |
| Maternal hypertensive disorders                                         | 0.1<br>(0.1 to 0.1)                  | 0.4<br>(0.3 to 0.5)                      | < 0.05<br>(< 0.05 to < 0.05)                        | -4.1<br>(-40.1 to 60.8)                           | -15.8<br>(-48.2 to 42.0)                            |
| Maternal obstructed labour and uterine rupture                          | < 0.05<br>(< 0.05 to < 0.05)         | 0.1<br>(0.1 to 0.1)                      | < 0.05<br>(< 0.05 to < 0.05)                        | -11.2<br>(-52.0 to 65.4)                          | -21.2<br>(-56.9 to 44.5)                            |
| Maternal abortion, miscarriage, and ectopic pregnancy                   | < 0.05<br>(< 0.05 to < 0.05)         | 2.5<br>(1.9 to 2.9)                      | < 0.05<br>(< 0.05 to < 0.05)                        | -11.0<br>(-49.9 to 52.6)                          | -22.0<br>(-55.3 to 33.0)                            |
| Other maternal disorders                                                | --                                   | --                                       | < 0.05<br>(< 0.05 to < 0.05)                        | -13.8<br>(-36.2 to 17.6)                          | -22.8<br>(-43.1 to 6.4)                             |
| <b>Neonatal disorders</b>                                               | <b>1.9</b><br><b>(1.6 to 2.5)</b>    | <b>--</b>                                | <b>0.3</b><br><b>(0.2 to 0.5)</b>                   | <b>7.5</b><br><b>(-11.3 to 26.8)</b>              | <b>8.9</b><br><b>(-10.0 to 28.6)</b>                |
| Neonatal preterm birth complications                                    | 1.6<br>(1.3 to 2.2)                  | --                                       | 0.2<br>(0.1 to 0.3)                                 | 7.0<br>(-13.8 to 34.0)                            | 8.0<br>(-13.3 to 35.2)                              |
| Neonatal encephalopathy due to birth asphyxia and trauma                | 0.1<br>(< 0.05 to 0.1)               | --                                       | < 0.05<br>(< 0.05 to < 0.05)                        | -17.6<br>(-47.2 to 18.8)                          | -17.4<br>(-46.5 to 18.7)                            |
| Neonatal sepsis and other neonatal infections                           | 0.3<br>(0.1 to 0.7)                  | --                                       | 0.1<br>(< 0.05 to 0.3)                              | 11.9<br>(-26.8 to 46.0)                           | 13.4<br>(-25.3 to 48.9)                             |
| Hemolytic disease and other neonatal jaundice                           | < 0.05<br>(< 0.05 to < 0.05)         | --                                       | < 0.05<br>(< 0.05 to < 0.05)                        | -2.9<br>(-21.5 to 18.4)                           | -3.8<br>(-21.2 to 16.8)                             |
| Other neonatal disorders                                                | --                                   | --                                       | < 0.05<br>(< 0.05 to < 0.05)                        | -3.5<br>(-20.3 to 15.5)                           | 7.0<br>(-11.6 to 27.9)                              |
| <b>Nutritional deficiencies</b>                                         | <b>18.5</b><br><b>(16.9 to 20.2)</b> | <b>4.7†</b><br><b>(3.2 to 7.6)</b>       | <b>0.3</b><br><b>(0.2 to 0.5)</b>                   | <b>-18.7</b><br><b>(-25.1 to -12.0)</b>           | <b>-18.3</b><br><b>(-24.3 to -12.1)</b>             |
| Protein-energy malnutrition                                             | 0.2<br>(0.2 to 0.3)                  | 0.1<br>(0.1 to 0.2)                      | < 0.05<br>(< 0.05 to < 0.05)                        | -17.7<br>(-44.2 to 18.6)                          | -8.7<br>(-37.9 to 31.6)                             |
| Iodine deficiency                                                       | 0.3<br>(0.3 to 0.4)                  | < 0.05<br>(< 0.05 to < 0.05)             | < 0.05<br>(< 0.05 to < 0.05)                        | 6.7<br>(-7.2 to 25.4)                             | -1.0<br>(-13.9 to 15.8)                             |
| Vitamin A deficiency                                                    | 5.4<br>(3.6 to 8.2)                  | 4.6<br>(3.0 to 7.5)                      | < 0.05<br>(< 0.05 to < 0.05)                        | -1.7<br>(-17.1 to 18.9)                           | 0.0<br>(-14.9 to 19.5)                              |
| Iron-deficiency anaemia                                                 | 13.7<br>(12.7 to 14.8)               | --                                       | 0.3<br>(0.2 to 0.4)                                 | -19.4<br>(-26.3 to -12.4)                         | -19.2<br>(-25.6 to -12.8)                           |
| Other nutritional deficiencies                                          | --                                   | --                                       | < 0.05<br>(< 0.05 to < 0.05)                        | -19.0<br>(-46.4 to 19.2)                          | -10.3<br>(-40.4 to 31.1)                            |
| <b>Other communicable, maternal, neonatal, and nutritional diseases</b> | <b>27.6</b><br><b>(25.6 to 29.7)</b> | <b>9.8</b><br><b>(7.9 to 12.6)</b>       | <b>&lt; 0.05</b><br><b>(&lt; 0.05 to 0.1)</b>       | <b>7.4</b><br><b>(-0.9 to 16.9)</b>               | <b>-0.7</b><br><b>(-7.6 to 7.7)</b>                 |
| Sexually transmitted diseases excluding HIV                             | 24.6<br>(22.6 to 26.6)               | 9.4<br>(7.5 to 12.2)                     | < 0.05<br>(< 0.05 to 0.1)                           | 14.9<br>(5.1 to 26.2)                             | 2.0<br>(-6.2 to 12.2)                               |
| Syphilis                                                                | 1.2<br>(1.0 to 1.5)                  | 0.9<br>(0.7 to 1.1)                      | < 0.05<br>(< 0.05 to < 0.05)                        | 17.9<br>(4.4 to 33.4)                             | 2.9<br>(-9.1 to 17.1)                               |
| Chlamydial infection                                                    | 1.1<br>(0.8 to 1.4)                  | 0.8<br>(0.7 to 1.1)                      | < 0.05<br>(< 0.05 to < 0.05)                        | 14.4<br>(-5.6 to 34.9)                            | 0.2<br>(-15.8 to 17.5)                              |
| Gonococcal infection                                                    | 0.8<br>(0.3 to 1.5)                  | 2.8<br>(1.0 to 5.6)                      | < 0.05<br>(< 0.05 to < 0.05)                        | 17.5<br>(-4.3 to 44.6)                            | 5.5<br>(-14.3 to 27.9)                              |
| Trichomoniasis                                                          | 3.7<br>(3.1 to 4.2)                  | 3.2<br>(2.7 to 3.7)                      | < 0.05<br>(< 0.05 to < 0.05)                        | 11.0<br>(2.4 to 20.2)                             | -0.3<br>(-7.2 to 6.8)                               |
| Genital herpes                                                          | 19.7<br>(17.1 to 22.8)               | 1.5<br>(1.2 to 1.8)                      | < 0.05<br>(< 0.05 to < 0.05)                        | 13.4<br>(5.0 to 21.8)                             | -0.1<br>(-5.7 to 6.4)                               |
| Other sexually transmitted diseases                                     | 0.2<br>(0.2 to 0.2)                  | 0.2<br>(0.2 to 0.2)                      | < 0.05<br>(< 0.05 to < 0.05)                        | 14.1<br>(0.7 to 28.1)                             | 1.3<br>(-10.1 to 13.8)                              |
| Hepatitis                                                               | 3.9<br>(3.4 to 4.3)                  | 0.4<br>(0.3 to 0.5)                      | < 0.05<br>(< 0.05 to < 0.05)                        | -34.8<br>(-52.0 to -9.9)                          | -38.8<br>(-52.3 to -19.4)                           |
| Acute hepatitis A                                                       | < 0.05<br>(< 0.05 to < 0.05)         | 0.1<br>(< 0.05 to 0.2)                   | < 0.05<br>(< 0.05 to < 0.05)                        | -36.4<br>(-78.5 to 93.7)                          | -36.6<br>(-76.1 to 70.0)                            |
| Hepatitis B                                                             | 1.7<br>(1.4 to 2.1)                  | 0.2<br>(0.2 to 0.3)                      | < 0.05<br>(< 0.05 to < 0.05)                        | -35.7<br>(-47.1 to -22.6)                         | -43.1<br>(-52.0 to -32.8)                           |
| Hepatitis C                                                             | 2.1<br>(1.9 to 2.4)                  | 0.1<br>(< 0.05 to 0.1)                   | < 0.05<br>(< 0.05 to < 0.05)                        | -16.9<br>(-33.2 to 4.7)                           | -15.2<br>(-32.3 to 7.4)                             |
| Acute hepatitis E                                                       | < 0.05<br>(< 0.05 to < 0.05)         | < 0.05<br>(< 0.05 to < 0.05)             | < 0.05<br>(< 0.05 to < 0.05)                        | -37.3<br>(-42.9 to -31.9)                         | -37.6<br>(-42.0 to -33.0)                           |
| Other infectious diseases                                               | 0.5<br>(0.4 to 0.5)                  | < 0.05<br>(< 0.05 to < 0.05)             | < 0.05<br>(< 0.05 to < 0.05)                        | -8.6<br>(-20.3 to 4.0)                            | -5.1<br>(-17.2 to 8.2)                              |
| <b>Non-communicable diseases</b>                                        | <b>97.7</b><br><b>(97.2 to 98.3)</b> | <b>293.5†</b><br><b>(278.0 to 310.1)</b> | <b>9.3</b><br><b>(6.9 to 12.1)</b>                  | <b>7.2</b><br><b>(4.5 to 9.9)</b>                 | <b>-0.6</b><br><b>(-2.8 to 1.7)</b>                 |
| <b>Neoplasms</b>                                                        | <b>0.7</b><br><b>(0.7 to 0.8)</b>    | <b>0.3</b><br><b>(0.3 to 0.3)</b>        | <b>0.1</b><br><b>(0.1 to 0.1)</b>                   | <b>29.7</b><br><b>(22.8 to 37.2)</b>              | <b>16.5</b><br><b>(10.3 to 23.3)</b>                |
| Lip and oral cavity cancer                                              | < 0.05<br>(< 0.05 to < 0.05)         | < 0.05<br>(< 0.05 to < 0.05)             | < 0.05<br>(< 0.05 to < 0.05)                        | 23.6<br>(6.8 to 42.5)                             | 7.7<br>(-8.1 to 24.9)                               |
| Nasopharynx cancer                                                      | < 0.05<br>(< 0.05 to < 0.05)         | < 0.05<br>(< 0.05 to < 0.05)             | < 0.05<br>(< 0.05 to < 0.05)                        | 4.2<br>(-5.8 to 15.7)                             | -6.6<br>(-14.6 to 2.7)                              |
| Other pharynx cancer                                                    | < 0.05<br>(< 0.05 to < 0.05)         | < 0.05<br>(< 0.05 to < 0.05)             | < 0.05<br>(< 0.05 to < 0.05)                        | 21.0<br>(5.6 to 38.2)                             | 2.8<br>(-10.6 to 17.0)                              |
| Oesophageal cancer                                                      | < 0.05<br>(< 0.05 to < 0.05)         | < 0.05<br>(< 0.05 to < 0.05)             | < 0.05<br>(< 0.05 to < 0.05)                        | -2.9<br>(-23.1 to 21.2)                           | -14.0<br>(-33.4 to 8.2)                             |
| Stomach cancer                                                          | < 0.05<br>(< 0.05 to < 0.05)         | < 0.05<br>(< 0.05 to < 0.05)             | < 0.05<br>(< 0.05 to < 0.05)                        | 8.4<br>(-8.3 to 27.9)                             | -1.8<br>(-17.3 to 15.8)                             |
| Colon and rectum cancer                                                 | 0.1<br>(0.1 to 0.1)                  | < 0.05<br>(< 0.05 to < 0.05)             | < 0.05<br>(< 0.05 to < 0.05)                        | 45.4<br>(28.4 to 65.6)                            | 30.9<br>(15.0 to 49.1)                              |
| Liver cancer                                                            | < 0.05<br>(< 0.05 to < 0.05)         | < 0.05<br>(< 0.05 to < 0.05)             | < 0.05<br>(< 0.05 to < 0.05)                        | 24.7<br>(13.0 to 36.8)                            | 12.1<br>(0.7 to 23.3)                               |
| Liver cancer due to hepatitis B                                         | < 0.05<br>(< 0.05 to < 0.05)         | < 0.05<br>(< 0.05 to < 0.05)             | < 0.05<br>(< 0.05 to < 0.05)                        | 29.6<br>(16.8 to 43.1)                            | 13.2<br>(1.9 to 24.9)                               |

| Cause                                              | Prevalence in thousands (95% UI)     | Incidence in thousands (95% UI)    | YLDs in thousands (95% UI)        |                                                   |                                                     |
|----------------------------------------------------|--------------------------------------|------------------------------------|-----------------------------------|---------------------------------------------------|-----------------------------------------------------|
|                                                    | 2016 counts                          | 2016 counts                        | 2016 counts                       | Percentage change in counts between 2006 and 2016 | Percentage change in age-standardised rates between |
| Liver cancer due to hepatitis C                    | < 0.05<br>(< 0.05 to < 0.05)         | < 0.05<br>(< 0.05 to < 0.05)       | < 0.05<br>(< 0.05 to < 0.05)      | 22.0<br>(7.9 to 37.5)                             | 12.5<br>(0.2 to 26.5)                               |
| Liver cancer due to alcohol use                    | < 0.05<br>(< 0.05 to < 0.05)         | < 0.05<br>(< 0.05 to < 0.05)       | < 0.05<br>(< 0.05 to < 0.05)      | 17.9<br>(4.7 to 33.0)                             | 6.7<br>(-5.3 to 19.7)                               |
| Liver cancer due to other causes                   | < 0.05<br>(< 0.05 to < 0.05)         | < 0.05<br>(< 0.05 to < 0.05)       | < 0.05<br>(< 0.05 to < 0.05)      | 28.2<br>(15.0 to 42.2)                            | 16.7<br>(4.2 to 29.4)                               |
| Gallbladder and biliary tract cancer               | < 0.05<br>(< 0.05 to < 0.05)         | < 0.05<br>(< 0.05 to < 0.05)       | < 0.05<br>(< 0.05 to < 0.05)      | 2.1<br>(-4.4 to 9.2)                              | -7.7<br>(-13.7 to -1.4)                             |
| Pancreatic cancer                                  | < 0.05<br>(< 0.05 to < 0.05)         | < 0.05<br>(< 0.05 to < 0.05)       | < 0.05<br>(< 0.05 to < 0.05)      | 11.2<br>(-5.1 to 29.5)                            | 0.1<br>(-13.7 to 15.6)                              |
| Larynx cancer                                      | < 0.05<br>(< 0.05 to < 0.05)         | < 0.05<br>(< 0.05 to < 0.05)       | < 0.05<br>(< 0.05 to < 0.05)      | 27.1<br>(9.2 to 46.5)                             | 10.5<br>(-4.9 to 28.3)                              |
| Tracheal, bronchus, and lung cancer                | < 0.05<br>(< 0.05 to < 0.05)         | < 0.05<br>(< 0.05 to < 0.05)       | < 0.05<br>(< 0.05 to < 0.05)      | 17.9<br>(-1.2 to 42.0)                            | 3.5<br>(-13.9 to 25.1)                              |
| Malignant skin melanoma                            | < 0.05<br>(< 0.05 to < 0.05)         | < 0.05<br>(< 0.05 to < 0.05)       | < 0.05<br>(< 0.05 to < 0.05)      | 46.7<br>(23.8 to 70.8)                            | 28.3<br>(8.0 to 50.2)                               |
| Non-melanoma skin cancer                           | < 0.05<br>(< 0.05 to < 0.05)         | < 0.05<br>(< 0.05 to < 0.05)       | < 0.05<br>(< 0.05 to < 0.05)      | -48.1<br>(-65.1 to 34.1)                          | -53.6<br>(-68.6 to 19.5)                            |
| Non-melanoma skin cancer (squamous-cell carcinoma) | < 0.05<br>(< 0.05 to < 0.05)         | < 0.05<br>(< 0.05 to < 0.05)       | < 0.05<br>(< 0.05 to < 0.05)      | -49.4<br>(-66.1 to 37.4)                          | -54.7<br>(-69.5 to 21.4)                            |
| Non-melanoma skin cancer (basal-cell carcinoma)    | < 0.05<br>(< 0.05 to < 0.05)         | < 0.05<br>(< 0.05 to < 0.05)       | < 0.05<br>(< 0.05 to < 0.05)      | 13.4<br>(-3.3 to 29.4)                            | -1.0<br>(-13.3 to 11.8)                             |
| Breast cancer                                      | 0.1<br>(0.1 to 0.2)                  | < 0.05<br>(< 0.05 to < 0.05)       | < 0.05<br>(< 0.05 to < 0.05)      | 39.2<br>(19.2 to 59.5)                            | 20.5<br>(2.8 to 38.0)                               |
| Cervical cancer                                    | 0.1<br>(0.1 to 0.1)                  | < 0.05<br>(< 0.05 to < 0.05)       | < 0.05<br>(< 0.05 to < 0.05)      | 12.1<br>(-6.7 to 33.9)                            | -5.4<br>(-21.3 to 13.2)                             |
| Uterine cancer                                     | 0.1<br>(< 0.05 to 0.1)               | < 0.05<br>(< 0.05 to < 0.05)       | < 0.05<br>(< 0.05 to < 0.05)      | 82.1<br>(48.8 to 119.5)                           | 59.5<br>(30.9 to 93.7)                              |
| Ovarian cancer                                     | < 0.05<br>(< 0.05 to < 0.05)         | < 0.05<br>(< 0.05 to < 0.05)       | < 0.05<br>(< 0.05 to < 0.05)      | 1.4<br>(-25.3 to 34.7)                            | -13.3<br>(-36.8 to 17.1)                            |
| Prostate cancer                                    | 0.2<br>(0.2 to 0.3)                  | 0.1<br>(0.1 to 0.1)                | < 0.05<br>(< 0.05 to < 0.05)      | 32.0<br>(15.9 to 51.1)                            | 24.0<br>(8.9 to 43.4)                               |
| Testicular cancer                                  | < 0.05<br>(< 0.05 to < 0.05)         | < 0.05<br>(< 0.05 to < 0.05)       | < 0.05<br>(< 0.05 to < 0.05)      | -9.9<br>(-27.7 to 10.4)                           | -18.2<br>(-33.8 to -1.5)                            |
| Kidney cancer                                      | < 0.05<br>(< 0.05 to < 0.05)         | < 0.05<br>(< 0.05 to < 0.05)       | < 0.05<br>(< 0.05 to < 0.05)      | 36.6<br>(20.5 to 54.5)                            | 21.0<br>(6.4 to 37.9)                               |
| Bladder cancer                                     | < 0.05<br>(< 0.05 to < 0.05)         | < 0.05<br>(< 0.05 to < 0.05)       | < 0.05<br>(< 0.05 to < 0.05)      | 28.2<br>(11.3 to 45.8)                            | 16.1<br>(1.4 to 32.1)                               |
| Brain and nervous system cancer                    | < 0.05<br>(< 0.05 to < 0.05)         | < 0.05<br>(< 0.05 to < 0.05)       | < 0.05<br>(< 0.05 to < 0.05)      | 19.1<br>(8.6 to 31.1)                             | 7.0<br>(-2.5 to 17.7)                               |
| Thyroid cancer                                     | < 0.05<br>(< 0.05 to < 0.05)         | < 0.05<br>(< 0.05 to < 0.05)       | < 0.05<br>(< 0.05 to < 0.05)      | 50.2<br>(26.0 to 78.4)                            | 28.8<br>(8.8 to 51.2)                               |
| Mesothelioma                                       | < 0.05<br>(< 0.05 to < 0.05)         | < 0.05<br>(< 0.05 to < 0.05)       | < 0.05<br>(< 0.05 to < 0.05)      | -12.0<br>(-18.7 to -0.6)                          | -22.5<br>(-28.4 to -11.5)                           |
| Hodgkin lymphoma                                   | < 0.05<br>(< 0.05 to < 0.05)         | < 0.05<br>(< 0.05 to < 0.05)       | < 0.05<br>(< 0.05 to < 0.05)      | -1.3<br>(-12.0 to 26.1)                           | -13.0<br>(-21.6 to 10.7)                            |
| Non-Hodgkin's lymphoma                             | < 0.05<br>(< 0.05 to < 0.05)         | < 0.05<br>(< 0.05 to < 0.05)       | < 0.05<br>(< 0.05 to < 0.05)      | 19.3<br>(5.4 to 38.2)                             | 4.8<br>(-7.3 to 21.9)                               |
| Multiple myeloma                                   | < 0.05<br>(< 0.05 to < 0.05)         | < 0.05<br>(< 0.05 to < 0.05)       | < 0.05<br>(< 0.05 to < 0.05)      | 21.2<br>(-4.0 to 58.5)                            | 6.0<br>(-16.8 to 38.8)                              |
| Leukaemia                                          | < 0.05<br>(< 0.05 to < 0.05)         | < 0.05<br>(< 0.05 to < 0.05)       | < 0.05<br>(< 0.05 to < 0.05)      | 13.8<br>(3.9 to 24.6)                             | 4.9<br>(-4.5 to 16.0)                               |
| Acute lymphoid leukaemia                           | < 0.05<br>(< 0.05 to < 0.05)         | < 0.05<br>(< 0.05 to < 0.05)       | < 0.05<br>(< 0.05 to < 0.05)      | 12.7<br>(-2.1 to 28.9)                            | 18.1<br>(3.4 to 33.6)                               |
| Chronic lymphoid leukaemia                         | < 0.05<br>(< 0.05 to < 0.05)         | < 0.05<br>(< 0.05 to < 0.05)       | < 0.05<br>(< 0.05 to < 0.05)      | 45.2<br>(19.7 to 79.3)                            | 27.5<br>(3.2 to 58.5)                               |
| Acute myeloid leukaemia                            | < 0.05<br>(< 0.05 to < 0.05)         | < 0.05<br>(< 0.05 to < 0.05)       | < 0.05<br>(< 0.05 to < 0.05)      | 47.3<br>(27.1 to 66.6)                            | 39.3<br>(19.7 to 57.2)                              |
| Chronic myeloid leukaemia                          | < 0.05<br>(< 0.05 to < 0.05)         | < 0.05<br>(< 0.05 to < 0.05)       | < 0.05<br>(< 0.05 to < 0.05)      | 25.5<br>(8.3 to 46.2)                             | 8.8<br>(-6.7 to 27.3)                               |
| Other leukaemia                                    | < 0.05<br>(< 0.05 to < 0.05)         | < 0.05<br>(< 0.05 to < 0.05)       | < 0.05<br>(< 0.05 to < 0.05)      | -3.1<br>(-15.1 to 11.5)                           | -10.8<br>(-22.2 to 3.6)                             |
| Other neoplasms                                    | 0.1<br>(< 0.05 to 0.1)               | < 0.05<br>(< 0.05 to < 0.05)       | < 0.05<br>(< 0.05 to < 0.05)      | 60.7<br>(38.9 to 85.3)                            | 46.4<br>(25.8 to 69.5)                              |
| <b>Cardiovascular diseases</b>                     | <b>6.6</b><br><b>(6.4 to 6.8)</b>    | <b>0.7†</b><br><b>(0.7 to 0.7)</b> | <b>0.4</b><br><b>(0.3 to 0.5)</b> | <b>6.7</b><br><b>(3.6 to 10.0)</b>                | <b>-1.7</b><br><b>(-4.7 to 1.3)</b>                 |
| Rheumatic heart disease                            | 1.0<br>(0.9 to 1.1)                  | < 0.05<br>(< 0.05 to < 0.05)       | < 0.05<br>(< 0.05 to 0.1)         | 4.9<br>(-3.6 to 14.1)                             | -3.5<br>(-11.3 to 4.7)                              |
| Ischaemic heart disease                            | 2.1<br>(2.0 to 2.3)                  | 0.3<br>(0.3 to 0.3)                | 0.1<br>(0.1 to 0.1)               | 9.2<br>(4.6 to 14.0)                              | -1.9<br>(-5.6 to 2.2)                               |
| Cerebrovascular disease                            | 1.0<br>(0.9 to 1.0)                  | 0.1‡<br>(0.1 to 0.1)               | 0.1<br>(0.1 to 0.1)               | 4.3<br>(-2.6 to 11.8)                             | -3.1<br>(-9.6 to 4.0)                               |
| Ischaemic stroke                                   | 0.8<br>(0.7 to 0.9)                  | 0.1‡<br>(0.1 to 0.1)               | 0.1<br>(0.1 to 0.1)               | 3.1<br>(-5.2 to 12.4)                             | -4.0<br>(-12.0 to 4.6)                              |
| Hemorrhagic stroke                                 | 0.2<br>(0.2 to 0.2)                  | < 0.05‡<br>(< 0.05 to 0.1)         | < 0.05<br>(< 0.05 to < 0.05)      | 9.0<br>(-1.8 to 20.8)                             | 0.6<br>(-10.1 to 12.1)                              |
| Hypertensive heart disease                         | 0.2<br>(0.2 to 0.2)                  | --                                 | < 0.05<br>(< 0.05 to < 0.05)      | 6.7<br>(-3.4 to 16.6)                             | -1.0<br>(-10.1 to 8.0)                              |
| Cardiomyopathy and myocarditis                     | 0.1<br>(0.1 to 0.1)                  | < 0.05†<br>(< 0.05 to < 0.05)      | < 0.05<br>(< 0.05 to < 0.05)      | 9.2<br>(-1.3 to 22.3)                             | -0.1<br>(-9.8 to 11.2)                              |
| Myocarditis                                        | < 0.05<br>(< 0.05 to < 0.05)         | < 0.05<br>(< 0.05 to < 0.05)       | < 0.05<br>(< 0.05 to < 0.05)      | 4.8<br>(-7.1 to 17.7)                             | -0.5<br>(-13.6 to 13.4)                             |
| Alcoholic cardiomyopathy                           | < 0.05<br>(< 0.05 to < 0.05)         | --                                 | < 0.05<br>(< 0.05 to < 0.05)      | 17.6<br>(-4.8 to 45.1)                            | 1.3<br>(-17.9 to 24.9)                              |
| Other cardiomyopathy                               | 0.1<br>(0.1 to 0.1)                  | --                                 | < 0.05<br>(< 0.05 to < 0.05)      | 9.4<br>(-4.4 to 26.9)                             | -0.3<br>(-12.5 to 13.8)                             |
| Atrial fibrillation and flutter                    | 0.6<br>(0.5 to 0.7)                  | < 0.05<br>(< 0.05 to 0.1)          | < 0.05<br>(< 0.05 to 0.1)         | 8.0<br>(1.4 to 14.5)                              | 0.7<br>(-5.5 to 6.9)                                |
| Peripheral vascular disease                        | 1.4<br>(1.2 to 1.7)                  | 0.1<br>(0.1 to 0.2)                | < 0.05<br>(< 0.05 to < 0.05)      | 3.9<br>(-4.3 to 12.2)                             | -2.8<br>(-9.8 to 4.2)                               |
| Endocarditis                                       | < 0.05<br>(< 0.05 to < 0.05)         | < 0.05<br>(< 0.05 to < 0.05)       | < 0.05<br>(< 0.05 to < 0.05)      | 5.1<br>(-12.0 to 24.2)                            | -1.1<br>(-17.9 to 17.2)                             |
| Other cardiovascular and circulatory diseases      | 1.1<br>(0.9 to 1.3)                  | --                                 | 0.1<br>(< 0.05 to 0.1)            | 7.4<br>(-0.5 to 16.6)                             | -0.1<br>(-7.0 to 7.8)                               |
| <b>Chronic respiratory diseases</b>                | <b>12.6</b><br><b>(11.8 to 13.3)</b> | <b>2.0†</b><br><b>(1.8 to 2.2)</b> | <b>0.5</b><br><b>(0.3 to 0.6)</b> | <b>-0.2</b><br><b>(-7.0 to 5.3)</b>               | <b>2.4</b><br><b>(-4.6 to 7.2)</b>                  |
| Chronic obstructive pulmonary disease              | 2.6<br>(2.5 to 2.9)                  | 0.2<br>(0.1 to 0.2)                | < 0.05<br>(< 0.05 to 0.1)         | 8.5<br>(-5.7 to 25.2)                             | -3.1<br>(-16.7 to 12.7)                             |
| Pneumoconiosis                                     | < 0.05<br>(< 0.05 to < 0.05)         | < 0.05<br>(< 0.05 to < 0.05)       | < 0.05<br>(< 0.05 to < 0.05)      | 14.2<br>(3.4 to 26.0)                             | 5.1<br>(-4.2 to 14.8)                               |
| Silicosis                                          | < 0.05<br>(< 0.05 to < 0.05)         | < 0.05<br>(< 0.05 to < 0.05)       | < 0.05<br>(< 0.05 to < 0.05)      | 21.9<br>(16.8 to 27.4)                            | 6.4<br>(1.5 to 11.6)                                |



| Cause                                                          | Prevalence in thousands (95% UI)  | Incidence in thousands (95% UI)               | YLDs in thousands (95% UI)                    |                                                                     |                                                                        |
|----------------------------------------------------------------|-----------------------------------|-----------------------------------------------|-----------------------------------------------|---------------------------------------------------------------------|------------------------------------------------------------------------|
|                                                                | 2016 counts<br>(< 0.05 to < 0.05) | 2016 counts<br>(< 0.05 to < 0.05)             | 2016 counts<br>(< 0.05 to < 0.05)             | Percentage change in counts between 2006 and 2016<br>(-9.5 to 32.0) | Percentage change in age-standardised rates between<br>(-13.6 to 22.9) |
| Asbestosis                                                     | < 0.05<br>(< 0.05 to < 0.05)      | < 0.05<br>(< 0.05 to < 0.05)                  | < 0.05<br>(< 0.05 to < 0.05)                  | 9.6<br>(-9.5 to 32.0)                                               | 2.8<br>(-13.6 to 22.9)                                                 |
| Coal workers pneumoconiosis                                    | --                                | --                                            | --                                            | --                                                                  | --                                                                     |
| Other pneumoconiosis                                           | < 0.05<br>(< 0.05 to < 0.05)      | < 0.05<br>(< 0.05 to < 0.05)                  | < 0.05<br>(< 0.05 to < 0.05)                  | 14.5<br>(-2.0 to 34.5)                                              | 6.2<br>(-8.3 to 23.6)                                                  |
| Asthma                                                         | 10.1<br>(9.1 to 11.0)             | 1.8<br>(1.7 to 2.0)                           | 0.4<br>(0.3 to 0.6)                           | -1.5<br>(-8.9 to 4.3)                                               | 2.9<br>(-4.7 to 8.4)                                                   |
| Interstitial lung disease and pulmonary sarcoidosis            | < 0.05<br>(< 0.05 to < 0.05)      | < 0.05<br>(< 0.05 to < 0.05)                  | < 0.05<br>(< 0.05 to < 0.05)                  | 11.6<br>(2.3 to 21.7)                                               | 6.0<br>(-3.3 to 16.0)                                                  |
| Other chronic respiratory diseases                             | --                                | --                                            | < 0.05<br>(< 0.05 to < 0.05)                  | 28.8<br>(1.0 to 66.8)                                               | 33.4<br>(5.8 to 70.9)                                                  |
| <b>Cirrhosis and other chronic liver diseases</b>              | <b>0.7<br/>(0.7 to 0.7)</b>       | <b>&lt; 0.05<br/>(&lt; 0.05 to &lt; 0.05)</b> | <b>&lt; 0.05<br/>(&lt; 0.05 to &lt; 0.05)</b> | <b>12.2<br/>(0.7 to 24.0)</b>                                       | <b>4.5<br/>(-5.2 to 14.6)</b>                                          |
| Cirrhosis and other chronic liver diseases due to hepatitis B  | 0.1<br>(0.1 to 0.1)               | < 0.05<br>(< 0.05 to < 0.05)                  | < 0.05<br>(< 0.05 to < 0.05)                  | 20.3<br>(-3.2 to 49.1)                                              | 5.2<br>(-15.6 to 31.0)                                                 |
| Cirrhosis and other chronic liver diseases due to hepatitis C  | 0.2<br>(0.2 to 0.2)               | < 0.05<br>(< 0.05 to < 0.05)                  | < 0.05<br>(< 0.05 to < 0.05)                  | 23.1<br>(1.3 to 48.6)                                               | 6.7<br>(-11.0 to 27.6)                                                 |
| Cirrhosis and other chronic liver diseases due to alcohol use  | 0.2<br>(0.2 to 0.3)               | < 0.05<br>(< 0.05 to < 0.05)                  | < 0.05<br>(< 0.05 to < 0.05)                  | 18.4<br>(0.4 to 38.2)                                               | 2.6<br>(-12.7 to 19.1)                                                 |
| Cirrhosis and other chronic liver diseases due to other causes | 0.2<br>(0.1 to 0.2)               | < 0.05<br>(< 0.05 to < 0.05)                  | < 0.05<br>(< 0.05 to < 0.05)                  | -0.6<br>(-19.1 to 23.2)                                             | 4.5<br>(-13.7 to 28.0)                                                 |
| <b>Digestive diseases</b>                                      | <b>3.1<br/>(3.0 to 3.3)</b>       | <b>2.6†<br/>(2.4 to 2.8)</b>                  | <b>0.1<br/>(0.1 to 0.1)</b>                   | <b>19.8<br/>(11.8 to 28.7)</b>                                      | <b>10.6<br/>(4.3 to 17.8)</b>                                          |
| Peptic ulcer disease                                           | 1.1<br>(1.0 to 1.2)               | 0.1<br>(0.1 to 0.1)                           | < 0.05<br>(< 0.05 to < 0.05)                  | 41.7<br>(27.2 to 58.3)                                              | 23.2<br>(10.4 to 38.1)                                                 |
| Gastritis and duodenitis                                       | 1.1<br>(1.0 to 1.2)               | 0.7<br>(0.6 to 0.7)                           | < 0.05<br>(< 0.05 to < 0.05)                  | 48.3<br>(33.5 to 63.2)                                              | 30.7<br>(17.8 to 44.4)                                                 |
| Appendicitis                                                   | < 0.05<br>(< 0.05 to < 0.05)      | 0.2<br>(0.2 to 0.2)                           | < 0.05<br>(< 0.05 to < 0.05)                  | -5.1<br>(-32.9 to 40.3)                                             | -0.1<br>(-27.6 to 40.1)                                                |
| Paralytic ileus and intestinal obstruction                     | < 0.05<br>(< 0.05 to < 0.05)      | 0.1<br>(< 0.05 to 0.1)                        | < 0.05<br>(< 0.05 to < 0.05)                  | 6.7<br>(2.3 to 11.7)                                                | 3.1<br>(-1.1 to 7.4)                                                   |
| Inguinal, femoral, and abdominal hernia                        | 0.8<br>(0.8 to 0.9)               | 0.6<br>(0.6 to 0.7)                           | 0.1<br>(< 0.05 to 0.1)                        | 8.4<br>(-1.2 to 19.2)                                               | 1.8<br>(-5.9 to 11.1)                                                  |
| Inflammatory bowel disease                                     | < 0.05<br>(< 0.05 to < 0.05)      | < 0.05<br>(< 0.05 to < 0.05)                  | < 0.05<br>(< 0.05 to < 0.05)                  | 4.5<br>(1.4 to 7.7)                                                 | -4.4<br>(-7.1 to -1.6)                                                 |
| Vascular intestinal disorders                                  | < 0.05<br>(< 0.05 to < 0.05)      | < 0.05<br>(< 0.05 to < 0.05)                  | < 0.05<br>(< 0.05 to < 0.05)                  | 11.8<br>(5.4 to 18.6)                                               | 8.2<br>(3.2 to 13.1)                                                   |
| Gallbladder and biliary diseases                               | 0.1<br>(0.1 to 0.2)               | 0.9<br>(0.8 to 1.0)                           | < 0.05<br>(< 0.05 to < 0.05)                  | 25.4<br>(5.4 to 50.0)                                               | 8.3<br>(-10.5 to 31.5)                                                 |
| Pancreatitis                                                   | < 0.05<br>(< 0.05 to < 0.05)      | < 0.05<br>(< 0.05 to < 0.05)                  | < 0.05<br>(< 0.05 to < 0.05)                  | 26.4<br>(21.6 to 31.7)                                              | 14.6<br>(11.3 to 18.4)                                                 |
| Other digestive diseases                                       | --                                | --                                            | < 0.05<br>(< 0.05 to < 0.05)                  | 20.5<br>(11.8 to 30.1)                                              | 14.4<br>(7.5 to 22.8)                                                  |
| <b>Neurological disorders</b>                                  | <b>41.0<br/>(39.2 to 42.7)</b>    | <b>19.7<br/>(16.9 to 22.7)</b>                | <b>1.1<br/>(0.7 to 1.5)</b>                   | <b>7.0<br/>(-12.2 to 31.4)</b>                                      | <b>-0.3<br/>(-17.3 to 21.6)</b>                                        |
| Alzheimer's disease and other dementias                        | 0.5<br>(0.4 to 0.5)               | 0.1<br>(0.1 to 0.1)                           | 0.1<br>(< 0.05 to 0.1)                        | 1.7<br>(-3.0 to 6.7)                                                | -1.1<br>(-5.3 to 3.5)                                                  |
| Parkinson's disease                                            | 0.1<br>(< 0.05 to 0.1)            | < 0.05<br>(< 0.05 to < 0.05)                  | < 0.05<br>(< 0.05 to < 0.05)                  | 12.5<br>(-1.1 to 27.2)                                              | 6.9<br>(-5.7 to 21.6)                                                  |
| Epilepsy                                                       | 0.4<br>(0.1 to 0.8)               | < 0.05<br>(< 0.05 to 0.1)                     | 0.1<br>(< 0.05 to 0.3)                        | 1.5<br>(-78.6 to 370.9)                                             | -0.2<br>(-79.3 to 364.1)                                               |
| Multiple sclerosis                                             | < 0.05<br>(< 0.05 to < 0.05)      | < 0.05<br>(< 0.05 to < 0.05)                  | < 0.05<br>(< 0.05 to < 0.05)                  | 10.2<br>(-2.3 to 29.9)                                              | -6.6<br>(-17.3 to 11.0)                                                |
| Motor neuron disease                                           | < 0.05<br>(< 0.05 to < 0.05)      | < 0.05<br>(< 0.05 to < 0.05)                  | < 0.05<br>(< 0.05 to < 0.05)                  | 9.4<br>(4.7 to 14.8)                                                | 3.7<br>(-0.1 to 7.9)                                                   |
| Migraine                                                       | 15.2<br>(14.3 to 16.1)            | 1.7<br>(1.6 to 1.9)                           | 0.7<br>(0.5 to 1.0)                           | 8.1<br>(4.0 to 12.6)                                                | -0.7<br>(-4.1 to 2.9)                                                  |
| Tension-type headache                                          | 31.5<br>(28.2 to 35.2)            | 17.8<br>(15.1 to 20.8)                        | 0.1<br>(0.1 to 0.2)                           | 8.0<br>(2.3 to 14.5)                                                | -1.1<br>(-5.7 to 3.8)                                                  |
| Other neurological disorders                                   | < 0.05<br>(< 0.05 to < 0.05)      | < 0.05<br>(< 0.05 to < 0.05)                  | < 0.05<br>(< 0.05 to 0.1)                     | 16.3<br>(-71.0 to 368.6)                                            | 18.5<br>(-69.3 to 349.8)                                               |
| <b>Mental and substance use disorders</b>                      | <b>16.6<br/>(16.1 to 17.0)</b>    | <b>6.0†<br/>(5.6 to 6.5)</b>                  | <b>2.1<br/>(1.5 to 2.8)</b>                   | <b>6.4<br/>(4.2 to 8.9)</b>                                         | <b>-0.3<br/>(-2.2 to 1.6)</b>                                          |
| Schizophrenia                                                  | 0.2<br>(0.2 to 0.2)               | < 0.05<br>(< 0.05 to < 0.05)                  | 0.1<br>(0.1 to 0.2)                           | 19.5<br>(8.8 to 31.2)                                               | 0.7<br>(-7.9 to 10.6)                                                  |
| Alcohol use disorders                                          | 1.9<br>(1.6 to 2.1)               | 1.0<br>(0.8 to 1.1)                           | 0.2<br>(0.1 to 0.3)                           | 11.7<br>(1.9 to 22.4)                                               | -0.3<br>(-8.4 to 8.4)                                                  |
| Drug use disorders                                             | 0.8<br>(0.8 to 0.9)               | 0.1<br>(0.1 to 0.1)                           | 0.2<br>(0.1 to 0.2)                           | 13.7<br>(3.7 to 24.0)                                               | 1.7<br>(-6.3 to 10.3)                                                  |
| Opioid use disorders                                           | 0.3<br>(0.2 to 0.4)               | < 0.05<br>(< 0.05 to < 0.05)                  | 0.1<br>(0.1 to 0.2)                           | 19.6<br>(6.4 to 34.1)                                               | 3.1<br>(-7.5 to 14.5)                                                  |
| Cocaine use disorders                                          | 0.1<br>(0.1 to 0.2)               | < 0.05<br>(< 0.05 to < 0.05)                  | < 0.05<br>(< 0.05 to < 0.05)                  | 3.1<br>(-16.3 to 26.9)                                              | -1.6<br>(-19.9 to 18.6)                                                |
| Amphetamine use disorders                                      | < 0.05<br>(< 0.05 to < 0.05)      | < 0.05<br>(< 0.05 to < 0.05)                  | < 0.05<br>(< 0.05 to < 0.05)                  | 6.6<br>(-31.7 to 66.1)                                              | 0.1<br>(-32.8 to 49.8)                                                 |
| Cannabis use disorders                                         | 0.4<br>(0.3 to 0.5)               | 0.1<br>(< 0.05 to 0.1)                        | < 0.05<br>(< 0.05 to < 0.05)                  | -9.8<br>(-25.3 to 7.7)                                              | -4.0<br>(-19.3 to 13.6)                                                |
| Other drug use disorders                                       | < 0.05<br>(< 0.05 to 0.1)         | < 0.05<br>(< 0.05 to < 0.05)                  | < 0.05<br>(< 0.05 to < 0.05)                  | 7.1<br>(-15.5 to 37.2)                                              | -0.3<br>(-21.4 to 26.4)                                                |
| Depressive disorders                                           | 3.3<br>(3.1 to 3.6)               | 3.7<br>(3.3 to 4.1)                           | 0.6<br>(0.4 to 0.8)                           | 7.0<br>(2.0 to 12.7)                                                | -1.5<br>(-6.0 to 3.0)                                                  |
| Major depressive disorder                                      | 2.3<br>(2.1 to 2.6)               | 3.5<br>(3.1 to 3.9)                           | 0.5<br>(0.3 to 0.7)                           | 6.0<br>(-0.2 to 12.8)                                               | -1.9<br>(-7.0 to 3.4)                                                  |
| Dysthymia                                                      | 1.1<br>(0.9 to 1.2)               | 0.2<br>(0.2 to 0.2)                           | 0.1<br>(0.1 to 0.1)                           | 12.1<br>(6.8 to 17.3)                                               | -0.1<br>(-4.1 to 3.8)                                                  |
| Bipolar disorder                                               | 0.9<br>(0.8 to 1.1)               | 0.1<br>(0.1 to 0.1)                           | 0.2<br>(0.1 to 0.3)                           | 4.6<br>(-1.8 to 11.0)                                               | -0.2<br>(-5.8 to 5.4)                                                  |
| Anxiety disorders                                              | 4.4<br>(4.0 to 4.8)               | 0.7<br>(0.6 to 0.7)                           | 0.4<br>(0.3 to 0.6)                           | 5.2<br>(1.2 to 9.3)                                                 | -0.3<br>(-3.7 to 3.1)                                                  |
| Eating disorders                                               | 0.2<br>(0.2 to 0.2)               | 0.1<br>(0.1 to 0.1)                           | < 0.05<br>(< 0.05 to 0.1)                     | 9.2<br>(-3.9 to 24.5)                                               | 5.8<br>(-6.0 to 19.5)                                                  |
| Anorexia nervosa                                               | < 0.05<br>(< 0.05 to < 0.05)      | < 0.05<br>(< 0.05 to < 0.05)                  | < 0.05<br>(< 0.05 to < 0.05)                  | -2.2<br>(-23.6 to 29.1)                                             | 4.8<br>(-17.4 to 37.0)                                                 |
| Bulimia nervosa                                                | 0.1<br>(0.1 to 0.2)               | 0.1<br>(0.1 to 0.1)                           | < 0.05<br>(< 0.05 to < 0.05)                  | 12.2<br>(-3.5 to 31.7)                                              | 6.0<br>(-7.6 to 21.9)                                                  |
| Autistic spectrum disorders                                    | 0.9<br>(0.8 to 1.0)               | < 0.05<br>(< 0.05 to < 0.05)                  | 0.1<br>(0.1 to 0.2)                           | 1.3<br>(-3.6 to 6.9)                                                | 0.5<br>(-4.2 to 5.6)                                                   |
| Autism                                                         | 0.3<br>(0.2 to 0.3)               | < 0.05<br>(< 0.05 to < 0.05)                  | 0.1<br>(< 0.05 to 0.1)                        | 1.4<br>(-6.7 to 10.4)                                               | 0.5<br>(-7.4 to 8.7)                                                   |
| Asperger syndrome and other autistic spectrum disorders        | 0.6<br>(0.5 to 0.8)               | < 0.05<br>(< 0.05 to < 0.05)                  | 0.1<br>(< 0.05 to 0.1)                        | 1.3<br>(-3.6 to 6.9)                                                | 0.6<br>(-3.8 to 5.7)                                                   |



| Cause                                                      | Prevalence in thousands (95% UI)     | Incidence in thousands (95% UI)          | YLDs in thousands (95% UI)        |                                                   |                                                     |
|------------------------------------------------------------|--------------------------------------|------------------------------------------|-----------------------------------|---------------------------------------------------|-----------------------------------------------------|
|                                                            | 2016 counts                          | 2016 counts                              | 2016 counts                       | Percentage change in counts between 2006 and 2016 | Percentage change in age-standardised rates between |
| Attention-deficit/hyperactivity disorder                   | 2.1<br>(1.9 to 2.3)                  | 0.1<br>(0.1 to 0.1)                      | < 0.05<br>(< 0.05 to < 0.05)      | -4.5<br>(-10.1 to 1.1)                            | 0.3<br>(-5.2 to 5.9)                                |
| Conduct disorder                                           | 0.7<br>(0.6 to 0.9)                  | 0.2<br>(0.2 to 0.3)                      | 0.1<br>(0.1 to 0.1)               | -20.5<br>(-26.3 to -14.3)                         | 0.2<br>(-6.9 to 7.9)                                |
| Idiopathic developmental intellectual disability           | 0.6<br>(0.2 to 0.9)                  | --                                       | < 0.05<br>(< 0.05 to < 0.05)      | -0.8<br>(-8.3 to 7.2)                             | -2.2<br>(-9.7 to 5.4)                               |
| Other mental and substance use disorders                   | 2.0<br>(1.7 to 2.3)                  | 0.1<br>(0.1 to 0.1)                      | 0.1<br>(0.1 to 0.2)               | 14.6<br>(9.2 to 20.3)                             | 0.1<br>(-4.4 to 4.6)                                |
| <b>Diabetes, urogenital, blood, and endocrine diseases</b> | <b>44.4</b><br><b>(43.2 to 45.5)</b> | <b>12.0†</b><br><b>(11.2 to 13.0)</b>    | <b>1.1</b><br><b>(0.8 to 1.5)</b> | <b>11.6</b><br><b>(7.0 to 16.4)</b>               | <b>-1.7</b><br><b>(-6.1 to 2.6)</b>                 |
| Diabetes mellitus                                          | 8.3<br>(7.6 to 9.2)                  | 0.5<br>(0.5 to 0.6)                      | 0.7<br>(0.5 to 1.0)               | 14.5<br>(7.2 to 21.6)                             | -1.7<br>(-8.1 to 4.5)                               |
| Acute glomerulonephritis                                   | < 0.05<br>(< 0.05 to < 0.05)         | < 0.05<br>(< 0.05 to < 0.05)             | < 0.05<br>(< 0.05 to < 0.05)      | 4.4<br>(-0.7 to 9.8)                              | 0.5<br>(-3.0 to 4.0)                                |
| Chronic kidney disease                                     | 4.2<br>(3.9 to 4.6)                  | 0.3<br>(0.3 to 0.4)                      | 0.1<br>(0.1 to 0.2)               | 14.1<br>(7.0 to 21.4)                             | 3.2<br>(-2.9 to 9.8)                                |
| Chronic kidney disease due to diabetes mellitus            | 1.5<br>(1.3 to 1.7)                  | 0.1<br>(0.1 to 0.1)                      | < 0.05<br>(< 0.05 to 0.1)         | 18.9<br>(8.1 to 30.4)                             | 5.2<br>(-4.0 to 14.9)                               |
| Chronic kidney disease due to hypertension                 | 1.0<br>(0.8 to 1.1)                  | 0.1<br>(0.1 to 0.1)                      | < 0.05<br>(< 0.05 to < 0.05)      | 10.2<br>(-1.9 to 22.7)                            | 2.1<br>(-8.5 to 13.6)                               |
| Chronic kidney disease due to glomerulonephritis           | 0.8<br>(0.7 to 1.0)                  | < 0.05<br>(< 0.05 to < 0.05)             | < 0.05<br>(< 0.05 to 0.1)         | 13.0<br>(2.0 to 25.9)                             | 2.5<br>(-6.4 to 13.5)                               |
| Chronic kidney disease due to other causes                 | 0.9<br>(0.8 to 1.1)                  | 0.1<br>(0.1 to 0.1)                      | < 0.05<br>(< 0.05 to < 0.05)      | 11.4<br>(0.7 to 23.4)                             | 2.0<br>(-7.5 to 12.4)                               |
| Urinary diseases and male infertility                      | 1.7<br>(1.5 to 1.9)                  | 7.4†<br>(6.6 to 8.4)                     | < 0.05<br>(< 0.05 to 0.1)         | 14.3<br>(7.3 to 20.9)                             | 0.9<br>(-5.2 to 6.8)                                |
| Interstitial nephritis and urinary tract infections        | 0.1<br>(0.1 to 0.1)                  | 6.8<br>(6.1 to 7.9)                      | < 0.05<br>(< 0.05 to < 0.05)      | 6.2<br>(-8.6 to 23.9)                             | 1.0<br>(-12.0 to 18.0)                              |
| Urolithiasis                                               | < 0.05<br>(< 0.05 to < 0.05)         | 0.4<br>(0.4 to 0.5)                      | < 0.05<br>(< 0.05 to < 0.05)      | 13.5<br>(8.0 to 19.3)                             | 0.8<br>(-3.5 to 5.3)                                |
| Benign prostatic hyperplasia                               | 0.9<br>(0.8 to 1.1)                  | 0.1<br>(0.1 to 0.1)                      | < 0.05<br>(< 0.05 to < 0.05)      | 18.2<br>(9.1 to 26.8)                             | 2.3<br>(-4.7 to 9.8)                                |
| Male infertility                                           | 0.6<br>(0.5 to 0.8)                  | --                                       | < 0.05<br>(< 0.05 to < 0.05)      | 11.5<br>(3.0 to 20.0)                             | -3.5<br>(-9.9 to 3.2)                               |
| Other urinary diseases                                     | --                                   | --                                       | < 0.05<br>(< 0.05 to < 0.05)      | -10.7<br>(-21.3 to 2.6)                           | -16.5<br>(-25.6 to -5.2)                            |
| Gynecological diseases                                     | 11.3<br>(10.8 to 11.8)               | 3.6†<br>(3.3 to 3.8)                     | 0.1<br>(0.1 to 0.2)               | 2.7<br>(-2.2 to 7.8)                              | -7.4<br>(-11.3 to -2.9)                             |
| Uterine fibroids                                           | 0.8<br>(0.7 to 0.9)                  | 0.1<br>(0.1 to 0.1)                      | < 0.05<br>(< 0.05 to < 0.05)      | 0.7<br>(-9.7 to 10.6)                             | -12.9<br>(-21.9 to -4.5)                            |
| Polycystic ovarian syndrome                                | < 0.05<br>(< 0.05 to < 0.05)         | 0.1<br>(0.1 to 0.1)                      | < 0.05<br>(< 0.05 to < 0.05)      | 12.6<br>(-20.5 to 58.4)                           | -2.1<br>(-31.3 to 39.4)                             |
| Female infertility                                         | 1.2<br>(0.8 to 1.7)                  | --                                       | < 0.05<br>(< 0.05 to < 0.05)      | 21.3<br>(10.3 to 34.1)                            | 2.7<br>(-5.0 to 11.3)                               |
| Endometriosis                                              | < 0.05<br>(< 0.05 to < 0.05)         | < 0.05<br>(< 0.05 to < 0.05)             | < 0.05<br>(< 0.05 to < 0.05)      | 2.7<br>(-21.6 to 35.8)                            | -2.3<br>(-25.7 to 30.7)                             |
| Genital prolapse                                           | 3.0<br>(2.6 to 3.4)                  | 0.2<br>(0.1 to 0.2)                      | < 0.05<br>(< 0.05 to < 0.05)      | -7.4<br>(-15.1 to 0.7)                            | -20.3<br>(-27.1 to -13.2)                           |
| Premenstrual syndrome                                      | 6.7<br>(6.3 to 7.1)                  | 2.4<br>(2.2 to 2.6)                      | 0.1<br>(< 0.05 to 0.1)            | 1.9<br>(-5.7 to 10.6)                             | -3.5<br>(-10.5 to 4.5)                              |
| Other gynecological diseases                               | 0.9<br>(0.8 to 1.1)                  | 0.8<br>(0.6 to 0.9)                      | < 0.05<br>(< 0.05 to < 0.05)      | 4.9<br>(-4.1 to 15.8)                             | -7.5<br>(-15.2 to 1.7)                              |
| Hemoglobinopathies and hemolytic anaemias                  | 28.2<br>(26.7 to 29.6)               | --                                       | 0.1<br>(< 0.05 to 0.1)            | -3.4<br>(-11.9 to 5.9)                            | -3.0<br>(-11.1 to 6.2)                              |
| Thalassemias                                               | < 0.05<br>(< 0.05 to < 0.05)         | --                                       | < 0.05<br>(< 0.05 to < 0.05)      | -8.7<br>(-25.3 to 9.9)                            | 0.9<br>(-17.4 to 21.5)                              |
| Thalassaemias trait                                        | 0.2<br>(0.1 to 0.2)                  | --                                       | < 0.05<br>(< 0.05 to < 0.05)      | 14.6<br>(-12.7 to 41.0)                           | 12.2<br>(-15.1 to 36.9)                             |
| Sickle cell disorders                                      | 0.1<br>(0.1 to 0.1)                  | --                                       | < 0.05<br>(< 0.05 to < 0.05)      | -0.6<br>(-15.5 to 18.9)                           | 5.3<br>(-9.5 to 24.9)                               |
| Sickle cell trait                                          | 12.5<br>(11.0 to 14.0)               | --                                       | < 0.05<br>(< 0.05 to 0.1)         | 3.0<br>(-8.2 to 14.8)                             | 3.3<br>(-7.4 to 14.6)                               |
| G6PD deficiency                                            | 5.4<br>(4.7 to 6.2)                  | --                                       | < 0.05<br>(< 0.05 to < 0.05)      | 38.0<br>(16.7 to 60.1)                            | 34.4<br>(15.2 to 54.5)                              |
| G6PD trait                                                 | 11.9<br>(11.1 to 12.8)               | --                                       | < 0.05<br>(< 0.05 to < 0.05)      | 19.4<br>(6.2 to 33.5)                             | 16.7<br>(4.5 to 29.9)                               |
| Other hemoglobinopathies and hemolytic anaemias            | 0.7<br>(0.6 to 0.7)                  | --                                       | < 0.05<br>(< 0.05 to < 0.05)      | -22.8<br>(-30.8 to -13.7)                         | -23.3<br>(-30.8 to -15.0)                           |
| Endocrine, metabolic, blood, and immune disorders          | 1.5<br>(1.4 to 1.6)                  | 0.2<br>(0.2 to 0.2)                      | < 0.05<br>(< 0.05 to 0.1)         | 3.9<br>(-2.8 to 11.3)                             | -2.3<br>(-8.1 to 3.7)                               |
| <b>Musculoskeletal disorders</b>                           | <b>17.2</b><br><b>(16.4 to 17.9)</b> | <b>9.1</b><br><b>(8.3 to 10.2)</b>       | <b>1.8</b><br><b>(1.3 to 2.4)</b> | <b>12.5</b><br><b>(9.1 to 16.2)</b>               | <b>-1.5</b><br><b>(-4.3 to 1.3)</b>                 |
| Rheumatoid arthritis                                       | 0.3<br>(0.3 to 0.4)                  | < 0.05<br>(< 0.05 to < 0.05)             | 0.1<br>(0.1 to 0.1)               | 18.1<br>(9.0 to 26.7)                             | 3.2<br>(-5.0 to 10.5)                               |
| Osteoarthritis                                             | 3.4<br>(3.2 to 3.6)                  | 0.2<br>(0.2 to 0.2)                      | 0.2<br>(0.1 to 0.3)               | 17.9<br>(13.9 to 22.4)                            | 2.0<br>(-1.5 to 5.8)                                |
| Low back and neck pain                                     | 8.1<br>(7.5 to 8.7)                  | 3.2<br>(2.9 to 3.5)                      | 0.9<br>(0.7 to 1.2)               | 13.4<br>(9.5 to 17.6)                             | -0.0<br>(-2.9 to 2.8)                               |
| Low back pain                                              | 5.0<br>(4.5 to 5.7)                  | 2.4<br>(2.1 to 2.7)                      | 0.6<br>(0.4 to 0.8)               | 12.2<br>(6.2 to 18.6)                             | 0.1<br>(-4.5 to 4.7)                                |
| Neck pain                                                  | 3.4<br>(3.0 to 4.0)                  | 0.8<br>(0.7 to 0.9)                      | 0.3<br>(0.2 to 0.5)               | 15.4<br>(11.8 to 19.6)                            | -0.3<br>(-2.5 to 1.9)                               |
| Gout                                                       | 0.3<br>(0.2 to 0.3)                  | 0.1<br>(< 0.05 to 0.1)                   | < 0.05<br>(< 0.05 to < 0.05)      | 18.0<br>(1.7 to 37.6)                             | 1.2<br>(-12.7 to 17.7)                              |
| Other musculoskeletal disorders                            | 7.4<br>(6.5 to 8.4)                  | 5.7<br>(4.9 to 6.7)                      | 0.6<br>(0.4 to 0.9)               | 8.9<br>(0.8 to 17.4)                              | -5.4<br>(-12.2 to 1.9)                              |
| <b>Other non-communicable diseases</b>                     | <b>77.8</b><br><b>(76.4 to 79.2)</b> | <b>241.1†</b><br><b>(226.4 to 257.6)</b> | <b>2.1</b><br><b>(1.4 to 3.0)</b> | <b>1.9</b><br><b>(0.4 to 3.2)</b>                 | <b>-1.3</b><br><b>(-2.2 to -0.4)</b>                |
| Congenital anomalies                                       | 0.9<br>(0.8 to 1.0)                  | --                                       | 0.1<br>(0.1 to 0.1)               | -2.0<br>(-8.3 to 4.6)                             | -1.2<br>(-7.2 to 5.4)                               |
| Neural tube defects                                        | < 0.05<br>(< 0.05 to < 0.05)         | --                                       | < 0.05<br>(< 0.05 to < 0.05)      | 5.4<br>(-9.3 to 21.9)                             | 3.2<br>(-10.2 to 18.2)                              |
| Congenital heart anomalies                                 | 0.2<br>(0.2 to 0.2)                  | --                                       | < 0.05<br>(< 0.05 to < 0.05)      | 1.3<br>(-9.8 to 13.9)                             | 4.1<br>(-6.7 to 16.5)                               |
| Orofacial clefts                                           | 0.1<br>(0.1 to 0.1)                  | --                                       | < 0.05<br>(< 0.05 to < 0.05)      | -11.0<br>(-20.2 to 0.4)                           | -12.3<br>(-21.4 to -1.2)                            |
| Down's syndrome                                            | 0.1<br>(< 0.05 to 0.1)               | --                                       | < 0.05<br>(< 0.05 to < 0.05)      | 5.6<br>(-2.5 to 14.3)                             | 5.0<br>(-3.0 to 13.3)                               |
| Turner syndrome                                            | < 0.05<br>(< 0.05 to < 0.05)         | --                                       | < 0.05<br>(< 0.05 to < 0.05)      | 1.8<br>(-33.6 to 60.3)                            | 2.5<br>(-31.5 to 56.9)                              |
| Klinefelter syndrome                                       | < 0.05<br>(< 0.05 to < 0.05)         | --                                       | < 0.05<br>(< 0.05 to < 0.05)      | 3.9<br>(-22.9 to 40.8)                            | 0.1<br>(-24.6 to 33.4)                              |

| Cause                                         | Prevalence in thousands (95% UI)     | Incidence in thousands (95% UI)    | YLDs in thousands (95% UI)        |                                                   |                                                     |
|-----------------------------------------------|--------------------------------------|------------------------------------|-----------------------------------|---------------------------------------------------|-----------------------------------------------------|
|                                               | 2016 counts                          | 2016 counts                        | 2016 counts                       | Percentage change in counts between 2006 and 2016 | Percentage change in age-standardised rates between |
| Other chromosomal abnormalities               | 0.1<br>(0.1 to 0.1)                  | --                                 | < 0.05<br>(< 0.05 to < 0.05)      | -13.9<br>(-28.1 to 2.4)                           | 0.7<br>(-15.7 to 20.3)                              |
| Congenital musculoskeletal and limb anomalies | 0.1<br>(0.1 to 0.1)                  | --                                 | < 0.05<br>(< 0.05 to < 0.05)      | 7.2<br>(-2.9 to 17.8)                             | 4.1<br>(-5.3 to 14.0)                               |
| Urogenital congenital anomalies               | 0.1<br>(0.1 to 0.1)                  | --                                 | < 0.05<br>(< 0.05 to < 0.05)      | -11.8<br>(-23.8 to 1.6)                           | 0.2<br>(-12.9 to 15.3)                              |
| Digestive congenital anomalies                | 0.1<br>(0.1 to 0.1)                  | --                                 | < 0.05<br>(< 0.05 to < 0.05)      | 8.4<br>(-11.3 to 33.5)                            | 6.7<br>(-11.0 to 29.6)                              |
| Other congenital anomalies                    | 0.4<br>(0.2 to 0.6)                  | --                                 | < 0.05<br>(< 0.05 to 0.1)         | -4.9<br>(-16.0 to 7.3)                            | -6.2<br>(-16.5 to 5.8)                              |
| Skin and subcutaneous diseases                | 34.6<br>(33.7 to 35.6)               | 79.8<br>(75.2 to 84.6)             | 0.8<br>(0.6 to 1.2)               | -3.2<br>(-5.1 to -1.1)                            | 1.1<br>(-0.7 to 3.1)                                |
| Dermatitis                                    | 5.2<br>(4.9 to 5.6)                  | 5.6<br>(5.1 to 6.0)                | 0.2<br>(0.1 to 0.3)               | -3.9<br>(-7.4 to -0.1)                            | -0.1<br>(-3.4 to 3.1)                               |
| Psoriasis                                     | 1.0<br>(0.9 to 1.0)                  | 0.1<br>(0.1 to 0.1)                | 0.1<br>(0.1 to 0.1)               | 14.3<br>(5.9 to 23.9)                             | 6.5<br>(-0.6 to 14.5)                               |
| Cellulitis                                    | < 0.05<br>(< 0.05 to < 0.05)         | 0.8<br>(0.7 to 0.8)                | < 0.05<br>(< 0.05 to < 0.05)      | 1.9<br>(-19.5 to 28.8)                            | 1.2<br>(-18.0 to 24.8)                              |
| Pyoderma                                      | 0.3<br>(0.3 to 0.3)                  | 6.6<br>(6.4 to 6.9)                | < 0.05<br>(< 0.05 to < 0.05)      | 8.4<br>(1.5 to 15.4)                              | 1.3<br>(-4.4 to 7.0)                                |
| Scabies                                       | 2.0<br>(1.8 to 2.3)                  | 6.2<br>(5.4 to 7.2)                | 0.1<br>(< 0.05 to 0.1)            | -8.0<br>(-12.5 to -3.4)                           | -4.5<br>(-8.2 to -0.9)                              |
| Fungal skin diseases                          | 11.0<br>(9.9 to 12.1)                | 38.6<br>(34.1 to 43.3)             | 0.1<br>(< 0.05 to 0.1)            | 2.8<br>(0.6 to 5.3)                               | 0.0<br>(-0.9 to 1.0)                                |
| Viral skin diseases                           | 3.0<br>(2.9 to 3.1)                  | 4.5<br>(4.2 to 4.7)                | 0.1<br>(0.1 to 0.1)               | -2.6<br>(-5.9 to 0.6)                             | -0.4<br>(-3.4 to 2.5)                               |
| Acne vulgaris                                 | 9.1<br>(8.2 to 10.1)                 | 6.2<br>(5.1 to 7.7)                | 0.2<br>(0.2 to 0.3)               | -11.1<br>(-15.7 to -5.9)                          | 2.7<br>(-2.6 to 8.1)                                |
| Alopecia areata                               | 0.2<br>(0.2 to 0.2)                  | 0.3<br>(0.3 to 0.4)                | < 0.05<br>(< 0.05 to < 0.05)      | 10.6<br>(-1.9 to 24.7)                            | -0.2<br>(-10.3 to 11.4)                             |
| Pruritus                                      | 0.9<br>(0.8 to 1.0)                  | 0.7<br>(0.7 to 0.8)                | < 0.05<br>(< 0.05 to < 0.05)      | 8.2<br>(2.0 to 14.8)                              | 0.8<br>(-4.1 to 5.9)                                |
| Urticaria                                     | 1.0<br>(0.8 to 1.1)                  | 1.7<br>(1.5 to 1.9)                | 0.1<br>(< 0.05 to 0.1)            | -1.8<br>(-8.3 to 5.1)                             | -0.1<br>(-5.8 to 5.9)                               |
| Decubitus ulcer                               | 0.1<br>(< 0.05 to 0.1)               | 0.2<br>(0.2 to 0.2)                | < 0.05<br>(< 0.05 to < 0.05)      | 9.4<br>(-2.2 to 22.0)                             | 3.4<br>(-8.7 to 16.1)                               |
| Other skin and subcutaneous diseases          | 7.2<br>(7.0 to 7.4)                  | 8.4<br>(8.1 to 8.7)                | < 0.05<br>(< 0.05 to 0.1)         | 9.7<br>(6.9 to 12.4)                              | 1.7<br>(-0.7 to 4.0)                                |
| Sense organ diseases                          | 23.6<br>(23.1 to 24.2)               | 10.0†<br>(9.4 to 10.6)             | 0.8<br>(0.6 to 1.1)               | 4.3<br>(2.5 to 6.2)                               | -3.6<br>(-5.0 to -2.1)                              |
| Glaucoma                                      | 0.1<br>(0.1 to 0.1)                  | --                                 | < 0.05<br>(< 0.05 to < 0.05)      | 7.2<br>(-2.9 to 18.6)                             | -1.4<br>(-10.1 to 8.3)                              |
| Cataract                                      | 0.9<br>(0.8 to 1.0)                  | --                                 | 0.1<br>(< 0.05 to 0.1)            | 1.0<br>(-3.9 to 5.7)                              | -4.1<br>(-8.5 to 0.3)                               |
| Macular degeneration                          | < 0.05<br>(< 0.05 to < 0.05)         | --                                 | < 0.05<br>(< 0.05 to < 0.05)      | 9.5<br>(-6.7 to 28.7)                             | 1.2<br>(-14.0 to 19.8)                              |
| Refraction and accommodation disorders        | 10.8<br>(10.4 to 11.2)               | --                                 | 0.2<br>(0.1 to 0.3)               | -0.9<br>(-3.9 to 2.5)                             | -8.3<br>(-11.2 to -5.4)                             |
| Age-related and other hearing loss            | 16.0<br>(15.2 to 16.9)               | --                                 | 0.5<br>(0.3 to 0.7)               | 5.3<br>(2.0 to 8.3)                               | -2.8<br>(-4.9 to -0.8)                              |
| Other vision loss                             | 0.2<br>(0.2 to 0.3)                  | --                                 | < 0.05<br>(< 0.05 to < 0.05)      | 9.3<br>(0.4 to 19.1)                              | -1.9<br>(-9.2 to 6.5)                               |
| Other sense organ diseases                    | 2.8<br>(2.6 to 3.0)                  | 10.0<br>(9.4 to 10.6)              | 0.1<br>(0.1 to 0.1)               | 10.6<br>(6.0 to 15.0)                             | 0.6<br>(-3.1 to 4.3)                                |
| Oral disorders                                | 55.7<br>(53.5 to 58.0)               | 151.3†<br>(137.7 to 166.2)         | 0.3<br>(0.2 to 0.5)               | 12.3<br>(9.9 to 14.6)                             | -0.3<br>(-2.0 to 1.3)                               |
| Caries of deciduous teeth                     | 8.0<br>(6.5 to 9.6)                  | 27.4<br>(19.4 to 38.0)             | < 0.05<br>(< 0.05 to < 0.05)      | -7.6<br>(-17.7 to 3.3)                            | -0.8<br>(-11.6 to 10.6)                             |
| Caries of permanent teeth                     | 36.1<br>(33.3 to 39.0)               | 121.6<br>(109.5 to 133.5)          | < 0.05<br>(< 0.05 to < 0.05)      | 2.1<br>(-2.1 to 6.7)                              | -1.7<br>(-4.8 to 1.6)                               |
| Periodontal disease                           | 15.3<br>(13.1 to 18.0)               | 1.9<br>(1.5 to 2.2)                | 0.1<br>(< 0.05 to 0.2)            | 17.6<br>(13.9 to 21.6)                            | -0.6<br>(-3.5 to 2.3)                               |
| Edentulism and severe tooth loss              | 5.0<br>(4.3 to 5.6)                  | 0.4<br>(0.4 to 0.5)                | 0.1<br>(0.1 to 0.2)               | 12.4<br>(8.9 to 16.2)                             | 0.0<br>(-3.1 to 2.9)                                |
| Other oral disorders                          | 1.9<br>(1.8 to 2.0)                  | --                                 | 0.1<br>(< 0.05 to 0.1)            | 8.0<br>(4.1 to 12.0)                              | -0.1<br>(-3.1 to 3.0)                               |
| <b>Injuries</b>                               | <b>17.5</b><br><b>(16.4 to 18.9)</b> | <b>7.9†</b><br><b>(7.5 to 8.4)</b> | <b>0.7</b><br><b>(0.5 to 0.9)</b> | <b>16.3</b><br><b>(14.2 to 18.4)</b>              | <b>6.7</b><br><b>(4.9 to 8.3)</b>                   |
| <b>Transport injuries</b>                     | <b>1.7</b><br><b>(1.5 to 1.8)</b>    | <b>0.6</b><br><b>(0.6 to 0.7)</b>  | <b>0.1</b><br><b>(0.1 to 0.1)</b> | <b>28.3</b><br><b>(25.6 to 31.2)</b>              | <b>14.8</b><br><b>(12.5 to 17.1)</b>                |
| Road injuries                                 | 1.5<br>(1.4 to 1.7)                  | 0.6<br>(0.5 to 0.7)                | 0.1<br>(0.1 to 0.1)               | 30.8<br>(28.1 to 33.7)                            | 16.8<br>(14.5 to 19.2)                              |
| Pedestrian road injuries                      | 0.2<br>(0.1 to 0.2)                  | < 0.05<br>(< 0.05 to 0.1)          | < 0.05<br>(< 0.05 to < 0.05)      | 31.1<br>(28.1 to 34.1)                            | 19.2<br>(16.9 to 21.6)                              |
| Cyclist road injuries                         | 0.4<br>(0.3 to 0.5)                  | 0.2<br>(0.1 to 0.2)                | < 0.05<br>(< 0.05 to < 0.05)      | 32.9<br>(29.6 to 36.3)                            | 20.3<br>(17.8 to 22.9)                              |
| Motorcyclist road injuries                    | 0.4<br>(0.3 to 0.4)                  | 0.1<br>(0.1 to 0.1)                | < 0.05<br>(< 0.05 to < 0.05)      | 31.1<br>(28.1 to 34.3)                            | 15.1<br>(12.7 to 17.6)                              |
| Motor vehicle road injuries                   | 0.5<br>(0.4 to 0.5)                  | 0.2<br>(0.2 to 0.2)                | < 0.05<br>(< 0.05 to < 0.05)      | 28.9<br>(25.9 to 32.0)                            | 14.4<br>(12.0 to 16.8)                              |
| Other road injuries                           | 0.2<br>(0.1 to 0.2)                  | 0.1<br>(0.1 to 0.1)                | < 0.05<br>(< 0.05 to < 0.05)      | 31.4<br>(28.5 to 34.5)                            | 18.6<br>(16.3 to 21.0)                              |
| Other transport injuries                      | 0.1<br>(0.1 to 0.1)                  | < 0.05<br>(< 0.05 to < 0.05)       | < 0.05<br>(< 0.05 to < 0.05)      | 4.1<br>(1.5 to 6.8)                               | -4.7<br>(-6.9 to -2.4)                              |
| <b>Unintentional injuries</b>                 | <b>15.1</b><br><b>(14.1 to 16.6)</b> | <b>7.0</b><br><b>(6.6 to 7.5)</b>  | <b>0.5</b><br><b>(0.4 to 0.8)</b> | <b>15.7</b><br><b>(13.4 to 17.8)</b>              | <b>6.0</b><br><b>(4.2 to 7.7)</b>                   |
| Falls                                         | 6.0<br>(5.3 to 6.9)                  | 2.9<br>(2.5 to 3.3)                | 0.2<br>(0.2 to 0.4)               | 22.3<br>(20.2 to 24.5)                            | 10.5<br>(8.7 to 12.2)                               |
| Drowning                                      | 0.1<br>(0.1 to 0.1)                  | < 0.05<br>(< 0.05 to < 0.05)       | < 0.05<br>(< 0.05 to < 0.05)      | 4.5<br>(1.7 to 7.3)                               | -6.0<br>(-8.4 to -3.5)                              |
| Fire, heat, and hot substances                | 1.6<br>(1.4 to 2.0)                  | 0.2<br>(0.2 to 0.2)                | < 0.05<br>(< 0.05 to 0.1)         | 13.5<br>(8.0 to 18.1)                             | 5.4<br>(0.8 to 9.2)                                 |
| Poisonings                                    | < 0.05<br>(< 0.05 to < 0.05)         | 0.1<br>(< 0.05 to 0.1)             | < 0.05<br>(< 0.05 to < 0.05)      | 18.1<br>(8.6 to 28.0)                             | 12.7<br>(4.8 to 21.5)                               |
| Exposure to mechanical forces                 | 3.3<br>(2.8 to 3.9)                  | 1.3<br>(1.2 to 1.5)                | 0.1<br>(0.1 to 0.1)               | 12.3<br>(9.8 to 14.7)                             | 0.3<br>(-1.7 to 2.4)                                |
| Unintentional firearm injuries                | 0.2<br>(0.2 to 0.3)                  | 0.1<br>(< 0.05 to 0.1)             | < 0.05<br>(< 0.05 to < 0.05)      | 0.6<br>(-1.9 to 3.2)                              | -12.1<br>(-14.2 to -10.2)                           |
| Unintentional suffocation                     | 0.1<br>(0.1 to 0.2)                  | < 0.05<br>(< 0.05 to < 0.05)       | < 0.05<br>(< 0.05 to < 0.05)      | 3.4<br>(0.5 to 6.2)                               | -1.1<br>(-3.7 to 1.4)                               |
| Other exposure to mechanical forces           | 2.9<br>(2.5 to 3.6)                  | 1.2<br>(1.1 to 1.4)                | 0.1<br>(< 0.05 to 0.1)            | 14.7<br>(12.1 to 17.1)                            | 2.4<br>(0.3 to 4.4)                                 |

| Cause                                                                               | Prevalence in thousands (95% UI)                     | Incidence in thousands (95% UI)                                                             | YLDs in thousands (95% UI)                                                                 |                                                   |                                                     |
|-------------------------------------------------------------------------------------|------------------------------------------------------|---------------------------------------------------------------------------------------------|--------------------------------------------------------------------------------------------|---------------------------------------------------|-----------------------------------------------------|
|                                                                                     | 2016 counts                                          | 2016 counts                                                                                 | 2016 counts                                                                                | Percentage change in counts between 2006 and 2016 | Percentage change in age-standardised rates between |
| Adverse effects of medical treatment                                                | 0.1<br>( $< 0.05$ to 0.1)                            | 0.7<br>(0.6 to 0.8)                                                                         | $< 0.05$<br>( $< 0.05$ to $< 0.05$ )                                                       | 6.5<br>(2.1 to 11.5)                              | 4.6<br>(0.3 to 9.3)                                 |
| Animal contact                                                                      | 0.3<br>(0.3 to 0.4)                                  | 0.4<br>(0.3 to 0.5)                                                                         | $< 0.05$<br>( $< 0.05$ to $< 0.05$ )                                                       | 0.9<br>(-4.8 to 6.9)                              | -4.7<br>(-9.6 to 0.3)                               |
| Venomous animal contact                                                             | 0.2<br>(0.1 to 0.2)                                  | 0.2<br>(0.1 to 0.2)                                                                         | $< 0.05$<br>( $< 0.05$ to $< 0.05$ )                                                       | 2.7<br>(-4.9 to 10.5)                             | -2.1<br>(-8.6 to 4.7)                               |
| Non-venomous animal contact                                                         | 0.2<br>(0.1 to 0.2)                                  | 0.2<br>(0.2 to 0.3)                                                                         | $< 0.05$<br>( $< 0.05$ to $< 0.05$ )                                                       | -4.3<br>(-7.6 to -1.4)                            | -11.4<br>(-14.0 to -9.1)                            |
| Foreign body                                                                        | 0.8<br>(0.6 to 0.9)                                  | 0.6<br>(0.5 to 0.7)                                                                         | $< 0.05$<br>( $< 0.05$ to $< 0.05$ )                                                       | 4.9<br>(2.0 to 7.6)                               | 0.2<br>(-2.3 to 2.5)                                |
| Pulmonary aspiration and foreign body in airway                                     | 0.6<br>(0.4 to 0.7)                                  | 0.2<br>(0.2 to 0.2)                                                                         | $< 0.05$<br>( $< 0.05$ to $< 0.05$ )                                                       | 4.1<br>(0.9 to 7.4)                               | -0.1<br>(-2.9 to 2.4)                               |
| Foreign body in eyes                                                                | 0.1<br>( $< 0.05$ to 0.1)                            | 0.3<br>(0.2 to 0.4)                                                                         | $< 0.05$<br>( $< 0.05$ to $< 0.05$ )                                                       | 7.1<br>(2.9 to 11.4)                              | 1.0<br>(-1.4 to 3.5)                                |
| Foreign body in other body part                                                     | 0.2<br>(0.1 to 0.2)                                  | 0.1<br>(0.1 to 0.1)                                                                         | $< 0.05$<br>( $< 0.05$ to $< 0.05$ )                                                       | 6.8<br>(3.0 to 10.0)                              | 1.3<br>(-1.8 to 4.0)                                |
| Environmental heat and cold exposure                                                | 1.2<br>(1.0 to 1.4)                                  | 0.3<br>(0.3 to 0.4)                                                                         | $< 0.05$<br>( $< 0.05$ to 0.1)                                                             | 7.9<br>(5.4 to 10.3)                              | 0.6<br>(-1.4 to 2.6)                                |
| Other unintentional injuries                                                        | 1.7<br>(1.4 to 2.2)                                  | 0.6<br>(0.5 to 0.7)                                                                         | $< 0.05$<br>( $< 0.05$ to 0.1)                                                             | 13.2<br>(11.0 to 15.3)                            | 6.7<br>(4.8 to 8.4)                                 |
| <b>Self-harm and interpersonal violence</b>                                         | <b>3.1</b><br><b>(2.7 to 3.5)</b>                    | <b>0.3†</b><br><b>(0.3 to 0.4)</b>                                                          | <b><math>&lt; 0.05</math></b><br><b>(<math>&lt; 0.05</math> to 0.1)</b>                    | <b>5.8</b><br><b>(1.8 to 9.5)</b>                 | <b>0.7</b><br><b>(-1.8 to 3.2)</b>                  |
| Self-harm                                                                           | 0.1<br>(0.1 to 0.1)                                  | $< 0.05$<br>( $< 0.05$ to $< 0.05$ )                                                        | $< 0.05$<br>( $< 0.05$ to $< 0.05$ )                                                       | 10.8<br>(7.9 to 14.0)                             | -1.7<br>(-4.0 to 0.8)                               |
| Self-harm by firearm                                                                | $< 0.05$<br>( $< 0.05$ to $< 0.05$ )                 | $< 0.05$<br>( $< 0.05$ to $< 0.05$ )                                                        | $< 0.05$<br>( $< 0.05$ to $< 0.05$ )                                                       | 1.5<br>(-2.0 to 5.0)                              | -8.3<br>(-11.0 to -5.6)                             |
| Self-harm by other specified means                                                  | 0.1<br>(0.1 to 0.1)                                  | $< 0.05$<br>( $< 0.05$ to $< 0.05$ )                                                        | $< 0.05$<br>( $< 0.05$ to $< 0.05$ )                                                       | 11.4<br>(8.4 to 14.6)                             | -1.3<br>(-3.6 to 1.3)                               |
| Interpersonal violence                                                              | 3.0<br>(2.7 to 3.4)                                  | 0.3†<br>(0.2 to 0.3)                                                                        | $< 0.05$<br>( $< 0.05$ to 0.1)                                                             | 5.4<br>(1.2 to 9.3)                               | 1.0<br>(-1.7 to 3.6)                                |
| Assault by firearm                                                                  | $< 0.05$<br>( $< 0.05$ to $< 0.05$ )                 | $< 0.05$<br>( $< 0.05$ to $< 0.05$ )                                                        | $< 0.05$<br>( $< 0.05$ to $< 0.05$ )                                                       | 30.5<br>(26.4 to 34.5)                            | 19.3<br>(16.1 to 22.6)                              |
| Assault by sharp object                                                             | 0.2<br>(0.1 to 0.2)                                  | 0.1<br>(0.1 to 0.1)                                                                         | $< 0.05$<br>( $< 0.05$ to $< 0.05$ )                                                       | 26.6<br>(23.1 to 30.2)                            | 16.8<br>(14.0 to 19.5)                              |
| Sexual violence                                                                     | 2.5<br>(2.1 to 2.8)                                  | --                                                                                          | $< 0.05$<br>( $< 0.05$ to $< 0.05$ )                                                       | -7.7<br>(-12.3 to -2.8)                           | -8.6<br>(-11.8 to -5.3)                             |
| Assault by other means                                                              | 0.3<br>(0.3 to 0.4)                                  | 0.2<br>(0.1 to 0.2)                                                                         | $< 0.05$<br>( $< 0.05$ to $< 0.05$ )                                                       | 22.0<br>(19.2 to 24.8)                            | 9.5<br>(7.2 to 11.6)                                |
| <b>Forces of nature, conflict and terrorism, and executions and police conflict</b> | <b>0.1</b><br><b>(<math>&lt; 0.05</math> to 0.1)</b> | <b><math>&lt; 0.05†</math></b><br><b>(<math>&lt; 0.05</math> to <math>&lt; 0.05</math>)</b> | <b><math>&lt; 0.05</math></b><br><b>(<math>&lt; 0.05</math> to <math>&lt; 0.05</math>)</b> | <b>-21.5</b><br><b>(-24.1 to -17.8)</b>           | <b>-25.7</b><br><b>(-28.0 to -22.2)</b>             |
| Exposure to forces of nature                                                        | $< 0.05$<br>( $< 0.05$ to 0.1)                       | --                                                                                          | $< 0.05$<br>( $< 0.05$ to $< 0.05$ )                                                       | -21.2<br>(-24.3 to -17.4)                         | -26.2<br>(-28.9 to -22.8)                           |
| Conflict and terrorism                                                              | $< 0.05$<br>( $< 0.05$ to $< 0.05$ )                 | --                                                                                          | $< 0.05$<br>( $< 0.05$ to $< 0.05$ )                                                       | -25.2<br>(-28.2 to -22.1)                         | -26.5<br>(-29.0 to -23.8)                           |
| Executions and police conflict                                                      | $< 0.05$<br>( $< 0.05$ to $< 0.05$ )                 | $< 0.05$<br>( $< 0.05$ to $< 0.05$ )                                                        | $< 0.05$<br>( $< 0.05$ to $< 0.05$ )                                                       | 17.3<br>(9.6 to 23.0)                             | 19.3<br>(12.4 to 24.3)                              |
| <b>Impairments</b>                                                                  | --                                                   | --                                                                                          | --                                                                                         | --                                                | --                                                  |
| Anaemia                                                                             | 22.8<br>(21.1 to 24.5)                               | --                                                                                          | 0.6<br>(0.4 to 0.8)                                                                        | -6.8<br>(-13.6 to 0.2)                            | -8.9<br>(-15.1 to -2.5)                             |
| Developmental intellectual disability                                               | 1.8<br>(1.4 to 2.2)                                  | --                                                                                          | 0.3<br>(0.2 to 0.5)                                                                        | 7.1<br>(-8.3 to 19.4)                             | 7.1<br>(-8.2 to 19.9)                               |
| Epilepsy                                                                            | 0.8<br>(0.4 to 1.3)                                  | --                                                                                          | 0.3<br>(0.1 to 0.5)                                                                        | 5.9<br>(-43.1 to 108.7)                           | 5.3<br>(-45.4 to 110.9)                             |
| Guillain-Barre syndrome                                                             | $< 0.05$<br>( $< 0.05$ to $< 0.05$ )                 | --                                                                                          | $< 0.05$<br>( $< 0.05$ to $< 0.05$ )                                                       | 53.2<br>(23.7 to 114.0)                           | 46.4<br>(21.3 to 97.6)                              |
| Hearing loss                                                                        | 17.4<br>(16.6 to 18.2)                               | --                                                                                          | 0.5<br>(0.4 to 0.8)                                                                        | 3.3<br>(0.7 to 6.1)                               | -3.3<br>(-5.3 to -1.5)                              |
| Heart failure                                                                       | 0.6<br>(0.5 to 0.7)                                  | --                                                                                          | 0.1<br>( $< 0.05$ to 0.1)                                                                  | 6.7<br>(-1.6 to 16.0)                             | 0.0<br>(-7.3 to 8.2)                                |
| Infertility                                                                         | 2.1<br>(1.7 to 2.8)                                  | --                                                                                          | $< 0.05$<br>( $< 0.05$ to $< 0.05$ )                                                       | 16.0<br>(8.3 to 24.2)                             | 0.1<br>(-5.2 to 5.4)                                |
| Pelvic inflammatory disease                                                         | $< 0.05$<br>( $< 0.05$ to $< 0.05$ )                 | --                                                                                          | $< 0.05$<br>( $< 0.05$ to $< 0.05$ )                                                       | 9.4<br>(-10.9 to 33.9)                            | -4.0<br>(-21.1 to 16.1)                             |
| Vision loss                                                                         | 12.6<br>(12.1 to 13.2)                               | --                                                                                          | 0.4<br>(0.3 to 0.6)                                                                        | 3.7<br>(-5.6 to 11.1)                             | -1.9<br>(-9.5 to 5.0)                               |

We did not calculate incidence for the nine impairments, certain NTDs, and causes with only birth prevalence. Blank cells mean that no estimate is available.

† Incidence for aggregate causes represents the sum of the incidence of the causes below the aggregate.

‡ Incidence estimates for stroke represent first-ever stroke only.

^ Incidence of HIV/AIDS represents new infections of HIV only and does not include new infections of Tuberculosis in HIV positive cases.



SR Table 14: Prevalence, incidence, and YLDs for 2016, percentage change of YLD counts and percentage change of age-standardised YLD rates between 2006 and 2016 by cause and impairments, for all ages, Guam.

| Cause                                                                                | Prevalence in thousands (95% UI) | Incidence in thousands (95% UI)         | YLDs in thousands (95% UI)             |                                                   |                                                     |
|--------------------------------------------------------------------------------------|----------------------------------|-----------------------------------------|----------------------------------------|---------------------------------------------------|-----------------------------------------------------|
|                                                                                      | 2016 counts                      | 2016 counts                             | 2016 counts                            | Percentage change in counts between 2006 and 2016 | Percentage change in age-standardised rates between |
| <b>All causes</b>                                                                    | <b>163.8</b><br>(163.0 to 164.6) | <b>1,022.7†</b><br>(973.6 to 1,078.0)   | <b>18.8</b><br>(14.0 to 24.3)          | <b>20.8</b><br>(18.8 to 22.9)                     | <b>2.8</b><br>(1.1 to 4.5)                          |
| <b>Communicable, maternal, neonatal, and nutritional disorders</b>                   | <b>103.8</b><br>(101.4 to 106.5) | <b>617.8†</b><br>(571.3 to 666.9)       | <b>1.8</b><br>(1.2 to 2.4)             | <b>10.7</b><br>(2.4 to 19.2)                      | <b>3.9</b><br>(-3.6 to 11.3)                        |
| <b>HIV/AIDS and tuberculosis</b>                                                     | <b>47.7</b><br>(44.2 to 50.3)    | <b>0.1†</b><br>(0.1 to 0.2)             | <b>0.1</b><br>(< 0.05 to 0.1)          | <b>50.4</b><br>(16.0 to 118.8)                    | <b>28.1</b><br>(-1.0 to 85.8)                       |
| Tuberculosis                                                                         | 45.1<br>(42.1 to 48.2)           | 0.1†<br>(0.1 to 0.1)                    | < 0.05<br>(< 0.05 to < 0.05)           | 32.2<br>(15.4 to 55.2)                            | 10.5<br>(-3.2 to 28.5)                              |
| Drug-susceptible tuberculosis                                                        | 0.1<br>(0.1 to 0.1)              | 0.1<br>(0.1 to 0.1)                     | < 0.05<br>(< 0.05 to < 0.05)           | 34.2<br>(15.4 to 59.4)                            | 12.3<br>(-3.2 to 33.1)                              |
| Multidrug-resistant tuberculosis without extensive drug resistance                   | < 0.05<br>(< 0.05 to < 0.05)     | < 0.05<br>(< 0.05 to < 0.05)            | < 0.05<br>(< 0.05 to < 0.05)           | -37.7<br>(-98.3 to 634.6)                         | -48.3<br>(-98.6 to 505.5)                           |
| Extensively drug-resistant tuberculosis                                              | < 0.05<br>(< 0.05 to < 0.05)     | < 0.05<br>(< 0.05 to < 0.05)            | < 0.05<br>(< 0.05 to < 0.05)           | 105.1<br>(-94.5 to 2,317.4)                       | 70.2<br>(-95.4 to 1,892.6)                          |
| Latent tuberculosis infection                                                        | 44.9<br>(42.0 to 48.1)           | --                                      | --                                     | --                                                | --                                                  |
| HIV/AIDS                                                                             | 0.1<br>(< 0.05 to 0.7)           | < 0.05^<br>(< 0.05 to 0.1)              | < 0.05<br>(< 0.05 to 0.1)              | 107.6<br>(-7.8 to 522.6)                          | 87.4<br>(-17.0 to 462.3)                            |
| Drug-susceptible HIV/AIDS - Tuberculosis                                             | < 0.05<br>(< 0.05 to < 0.05)     | < 0.05<br>(< 0.05 to < 0.05)            | < 0.05<br>(< 0.05 to < 0.05)           | 94.7<br>(73.9 to 124.3)                           | 76.7<br>(57.9 to 102.9)                             |
| Multidrug-resistant HIV/AIDS - Tuberculosis without extensive drug resistance        | < 0.05<br>(< 0.05 to < 0.05)     | < 0.05<br>(< 0.05 to < 0.05)            | < 0.05<br>(< 0.05 to < 0.05)           | -11.3<br>(-97.6 to 964.8)                         | -19.4<br>(-97.8 to 866.0)                           |
| Extensively drug-resistant HIV/AIDS - Tuberculosis                                   | < 0.05<br>(< 0.05 to < 0.05)     | < 0.05<br>(< 0.05 to < 0.05)            | < 0.05<br>(< 0.05 to < 0.05)           | 192.1<br>(-92.1 to 3,402.0)                       | 165.2<br>(-92.8 to 3,077.2)                         |
| HIV/AIDS resulting in other diseases                                                 | 0.1<br>(< 0.05 to 0.7)           | < 0.05<br>(< 0.05 to 0.1)               | < 0.05<br>(< 0.05 to 0.1)              | 109.9<br>(-23.8 to 900.4)                         | 89.3<br>(-33.5 to 816.0)                            |
| <b>Diarrhoea, lower respiratory infections, and other common infectious diseases</b> | <b>10.4</b><br>(9.9 to 10.9)     | <b>594.7†</b><br>(547.9 to 644.7)       | <b>0.6</b><br>(0.4 to 0.8)             | <b>17.0</b><br>(13.4 to 21.1)                     | <b>8.0</b><br>(4.8 to 11.5)                         |
| Diarrhoeal diseases                                                                  | 2.8<br>(2.6 to 3.0)              | 186.9<br>(173.7 to 200.5)               | 0.3<br>(0.2 to 0.4)                    | 23.7<br>(17.2 to 30.3)                            | 13.1<br>(7.3 to 18.9)                               |
| Intestinal infectious diseases                                                       | < 0.05<br>(< 0.05 to < 0.05)     | 0.2†<br>(0.2 to 0.2)                    | < 0.05<br>(< 0.05 to < 0.05)           | -16.3<br>(-29.3 to -0.4)                          | -20.4<br>(-31.7 to -5.9)                            |
| Typhoid fever                                                                        | < 0.05<br>(< 0.05 to < 0.05)     | 0.2<br>(0.1 to 0.2)                     | < 0.05<br>(< 0.05 to < 0.05)           | -16.2<br>(-30.6 to 0.8)                           | -20.2<br>(-32.8 to -4.5)                            |
| Paratyphoid fever                                                                    | < 0.05<br>(< 0.05 to < 0.05)     | < 0.05<br>(< 0.05 to 0.1)               | < 0.05<br>(< 0.05 to < 0.05)           | -12.9<br>(-26.5 to 1.9)                           | -17.7<br>(-30.1 to -4.4)                            |
| Other intestinal infectious diseases                                                 | --                               | --                                      | < 0.05<br>(< 0.05 to < 0.05)           | -35.5<br>(-47.6 to -20.5)                         | -41.0<br>(-50.7 to -29.1)                           |
| Lower respiratory infections                                                         | 0.3<br>(0.3 to 0.4)              | 14.2<br>(13.0 to 15.5)                  | < 0.05<br>(< 0.05 to < 0.05)           | 42.3<br>(28.4 to 58.0)                            | 21.5<br>(10.0 to 34.3)                              |
| Upper respiratory infections                                                         | 5.1<br>(4.5 to 5.8)              | 382.4<br>(337.6 to 433.3)               | 0.1<br>(0.1 to 0.2)                    | 5.8<br>(-0.2 to 12.1)                             | -0.2<br>(-5.6 to 5.2)                               |
| Otitis media                                                                         | 1.6<br>(1.4 to 1.7)              | 6.4<br>(5.2 to 8.1)                     | < 0.05<br>(< 0.05 to 0.1)              | 2.4<br>(-5.8 to 11.1)                             | -1.6<br>(-8.9 to 6.6)                               |
| Meningitis                                                                           | 0.5<br>(0.4 to 0.6)              | 0.1<br>(0.1 to 0.1)                     | 0.1<br>(< 0.05 to 0.1)                 | 11.0<br>(2.3 to 20.2)                             | 3.5<br>(-4.6 to 12.2)                               |
| Pneumococcal meningitis                                                              | 0.4<br>(0.3 to 0.4)              | < 0.05<br>(< 0.05 to < 0.05)            | < 0.05<br>(< 0.05 to < 0.05)           | 12.6<br>(-0.9 to 26.9)                            | 4.7<br>(-7.5 to 18.0)                               |
| H influenzae type B meningitis                                                       | 0.1<br>(0.1 to 0.1)              | < 0.05<br>(< 0.05 to < 0.05)            | < 0.05<br>(< 0.05 to < 0.05)           | 8.8<br>(4.4 to 13.1)                              | 2.5<br>(-1.5 to 6.7)                                |
| Meningococcal infection                                                              | < 0.05<br>(< 0.05 to < 0.05)     | < 0.05<br>(< 0.05 to < 0.05)            | < 0.05<br>(< 0.05 to < 0.05)           | 8.9<br>(4.6 to 13.1)                              | 1.1<br>(-2.8 to 5.0)                                |
| Other meningitis                                                                     | < 0.05<br>(< 0.05 to < 0.05)     | < 0.05<br>(< 0.05 to < 0.05)            | < 0.05<br>(< 0.05 to < 0.05)           | 7.1<br>(1.2 to 13.7)                              | 0.1<br>(-5.2 to 5.8)                                |
| Encephalitis                                                                         | 0.4<br>(0.3 to 0.6)              | 0.2<br>(0.2 to 0.2)                     | 0.1<br>(< 0.05 to 0.1)                 | 21.3<br>(8.2 to 36.1)                             | 11.2<br>(-0.9 to 24.3)                              |
| Diphtheria                                                                           | < 0.05<br>(< 0.05 to < 0.05)     | < 0.05<br>(< 0.05 to < 0.05)            | < 0.05<br>(< 0.05 to < 0.05)           | 22.4<br>(-30.7 to 117.5)                          | 14.7<br>(-34.6 to 105.5)                            |
| Whooping cough                                                                       | < 0.05<br>(< 0.05 to < 0.05)     | 0.1<br>(0.1 to 0.1)                     | < 0.05<br>(< 0.05 to < 0.05)           | 31.9<br>(-12.5 to 112.9)                          | 32.4<br>(-12.0 to 111.5)                            |
| Tetanus                                                                              | < 0.05<br>(< 0.05 to < 0.05)     | < 0.05<br>(< 0.05 to < 0.05)            | < 0.05<br>(< 0.05 to < 0.05)           | 10.0<br>(0.7 to 19.5)                             | 2.8<br>(-5.9 to 11.6)                               |
| Measles                                                                              | < 0.05<br>(< 0.05 to < 0.05)     | 0.3<br>(0.1 to 0.7)                     | < 0.05<br>(< 0.05 to < 0.05)           | --                                                | --                                                  |
| Varicella and herpes zoster                                                          | 0.2<br>(0.2 to 0.2)              | 3.9<br>(3.8 to 4.0)                     | < 0.05<br>(< 0.05 to < 0.05)           | 19.9<br>(7.7 to 32.4)                             | -0.3<br>(-9.4 to 9.1)                               |
| <b>Neglected tropical diseases and malaria</b>                                       | <b>1.4</b><br>(1.2 to 1.6)       | <b>&lt; 0.05†</b><br>(< 0.05 to < 0.05) | <b>&lt; 0.05</b><br>(< 0.05 to < 0.05) | <b>-6.4</b><br>(-25.2 to 16.6)                    | <b>-5.7</b><br>(-24.6 to 16.9)                      |
| Malaria                                                                              | --                               | --                                      | --                                     | --                                                | --                                                  |
| Chagas disease                                                                       | --                               | --                                      | --                                     | --                                                | --                                                  |
| Leishmaniasis                                                                        | --                               | --                                      | --                                     | --                                                | --                                                  |
| Visceral leishmaniasis                                                               | --                               | --                                      | --                                     | --                                                | --                                                  |
| Cutaneous and mucocutaneous leishmaniasis                                            | --                               | --                                      | --                                     | --                                                | --                                                  |
| African trypanosomiasis                                                              | --                               | --                                      | --                                     | --                                                | --                                                  |
| Schistosomiasis                                                                      | --                               | --                                      | --                                     | --                                                | --                                                  |
| Cysticercosis                                                                        | --                               | --                                      | --                                     | --                                                | --                                                  |
| Cystic echinococcosis                                                                | --                               | --                                      | --                                     | --                                                | --                                                  |
| Lymphatic filariasis                                                                 | --                               | --                                      | --                                     | --                                                | --                                                  |
| Onchocerciasis                                                                       | --                               | --                                      | --                                     | --                                                | --                                                  |
| Trachoma                                                                             | --                               | --                                      | --                                     | --                                                | --                                                  |
| Dengue                                                                               | --                               | --                                      | --                                     | --                                                | --                                                  |
| Yellow fever                                                                         | --                               | --                                      | --                                     | --                                                | --                                                  |
| Rabies                                                                               | < 0.05<br>(< 0.05 to < 0.05)     | < 0.05<br>(< 0.05 to < 0.05)            | < 0.05<br>(< 0.05 to < 0.05)           | 18.5<br>(-26.5 to 86.5)                           | -17.4<br>(-47.9 to 28.9)                            |
| Intestinal nematode infections                                                       | < 0.05<br>(< 0.05 to < 0.05)     | --                                      | < 0.05<br>(< 0.05 to < 0.05)           | -27.8<br>(-42.6 to -9.3)                          | -32.6<br>(-46.9 to -15.0)                           |
| Ascariasis                                                                           | < 0.05<br>(< 0.05 to < 0.05)     | --                                      | --                                     | --                                                | --                                                  |



| Cause                                                                   | Prevalence in thousands (95% UI)        | Incidence in thousands (95% UI)          | YLDs in thousands (95% UI)                          |                                                   |                                                     |
|-------------------------------------------------------------------------|-----------------------------------------|------------------------------------------|-----------------------------------------------------|---------------------------------------------------|-----------------------------------------------------|
|                                                                         | 2016 counts                             | 2016 counts                              | 2016 counts                                         | Percentage change in counts between 2006 and 2016 | Percentage change in age-standardised rates between |
| Trichuriasis                                                            | < 0.05<br>(< 0.05 to < 0.05)            | --                                       | --                                                  | --                                                | --                                                  |
| Hookworm disease                                                        | < 0.05<br>(< 0.05 to < 0.05)            | --                                       | < 0.05<br>(< 0.05 to < 0.05)                        | -27.8<br>(-42.6 to -9.3)                          | -32.6<br>(-46.9 to -15.0)                           |
| Food-borne trematodiasis                                                | --                                      | --                                       | --                                                  | --                                                | --                                                  |
| Leprosy                                                                 | --                                      | --                                       | --                                                  | --                                                | --                                                  |
| Ebola virus disease                                                     | --                                      | --                                       | --                                                  | --                                                | --                                                  |
| Zika virus disease                                                      | --                                      | --                                       | --                                                  | --                                                | --                                                  |
| Guinea worm disease                                                     | --                                      | --                                       | --                                                  | --                                                | --                                                  |
| Other neglected tropical diseases                                       | 1.2<br>(1.0 to 1.4)                     | --                                       | < 0.05<br>(< 0.05 to < 0.05)                        | -6.3<br>(-25.1 to 16.8)                           | -5.6<br>(-24.5 to 17.1)                             |
| <b>Maternal disorders</b>                                               | <b>0.1</b><br><b>(0.1 to 0.2)</b>       | <b>3.9†</b><br><b>(3.1 to 4.8)</b>       | <b>&lt; 0.05</b><br><b>(&lt; 0.05 to &lt; 0.05)</b> | <b>2.8</b><br><b>(-22.1 to 34.9)</b>              | <b>-5.0</b><br><b>(-27.9 to 25.0)</b>               |
| Maternal haemorrhage                                                    | < 0.05<br>(< 0.05 to 0.1)               | 0.3<br>(0.2 to 0.5)                      | < 0.05<br>(< 0.05 to < 0.05)                        | 4.8<br>(-29.5 to 52.5)                            | -2.4<br>(-34.1 to 41.0)                             |
| Maternal sepsis and other pregnancy related infections                  | < 0.05<br>(< 0.05 to < 0.05)            | 0.2<br>(0.1 to 0.2)                      | < 0.05<br>(< 0.05 to < 0.05)                        | 7.0<br>(-54.2 to 146.9)                           | -2.8<br>(-57.8 to 119.7)                            |
| Maternal hypertensive disorders                                         | 0.1<br>(< 0.05 to 0.1)                  | 0.2<br>(0.2 to 0.3)                      | < 0.05<br>(< 0.05 to < 0.05)                        | 6.3<br>(-38.0 to 80.7)                            | -1.5<br>(-42.3 to 69.4)                             |
| Maternal obstructed labour and uterine rupture                          | < 0.05<br>(< 0.05 to < 0.05)            | 0.2<br>(0.2 to 0.3)                      | < 0.05<br>(< 0.05 to < 0.05)                        | 3.5<br>(-60.5 to 143.7)                           | -5.6<br>(-63.3 to 125.3)                            |
| Maternal abortion, miscarriage, and ectopic pregnancy                   | < 0.05<br>(< 0.05 to < 0.05)            | 2.9<br>(2.2 to 3.8)                      | < 0.05<br>(< 0.05 to < 0.05)                        | -0.6<br>(-45.6 to 73.0)                           | -8.1<br>(-49.2 to 60.5)                             |
| Other maternal disorders                                                | --                                      | --                                       | < 0.05<br>(< 0.05 to < 0.05)                        | -1.3<br>(-25.5 to 29.4)                           | -9.2<br>(-31.2 to 19.9)                             |
| <b>Neonatal disorders</b>                                               | <b>2.0</b><br><b>(1.7 to 2.4)</b>       | --                                       | <b>0.3</b><br><b>(0.2 to 0.4)</b>                   | <b>13.3</b><br><b>(-5.8 to 39.2)</b>              | <b>8.3</b><br><b>(-9.9 to 33.3)</b>                 |
| Neonatal preterm birth complications                                    | 1.9<br>(1.5 to 2.3)                     | --                                       | 0.2<br>(0.1 to 0.3)                                 | 20.4<br>(-3.6 to 54.4)                            | 14.9<br>(-7.9 to 47.2)                              |
| Neonatal encephalopathy due to birth asphyxia and trauma                | 0.1<br>(< 0.05 to 0.1)                  | --                                       | < 0.05<br>(< 0.05 to < 0.05)                        | 4.1<br>(-32.6 to 64.3)                            | -1.4<br>(-36.4 to 55.4)                             |
| Neonatal sepsis and other neonatal infections                           | 0.1<br>(< 0.05 to 0.2)                  | --                                       | < 0.05<br>(< 0.05 to 0.1)                           | -13.3<br>(-35.2 to 7.8)                           | -17.4<br>(-38.4 to 2.6)                             |
| Hemolytic disease and other neonatal jaundice                           | < 0.05<br>(< 0.05 to < 0.05)            | --                                       | < 0.05<br>(< 0.05 to < 0.05)                        | 6.4<br>(-2.1 to 15.1)                             | 0.3<br>(-7.8 to 8.6)                                |
| Other neonatal disorders                                                | --                                      | --                                       | < 0.05<br>(< 0.05 to < 0.05)                        | 8.3<br>(-14.9 to 38.3)                            | 9.9<br>(-13.6 to 40.4)                              |
| <b>Nutritional deficiencies</b>                                         | <b>34.3</b><br><b>(30.3 to 37.3)</b>    | <b>1.6†</b><br><b>(1.0 to 2.2)</b>       | <b>0.7</b><br><b>(0.5 to 1.0)</b>                   | <b>4.0</b><br><b>(-9.6 to 20.6)</b>               | <b>-1.7</b><br><b>(-14.3 to 13.1)</b>               |
| Protein-energy malnutrition                                             | 0.9<br>(0.6 to 1.2)                     | 0.3<br>(0.2 to 0.4)                      | < 0.05<br>(< 0.05 to 0.1)                           | 19.4<br>(-28.3 to 96.2)                           | 20.7<br>(-27.3 to 98.2)                             |
| Iodine deficiency                                                       | 0.1<br>(0.1 to 0.1)                     | < 0.05<br>(< 0.05 to < 0.05)             | < 0.05<br>(< 0.05 to < 0.05)                        | 23.3<br>(11.2 to 36.6)                            | 3.1<br>(-6.7 to 13.9)                               |
| Vitamin A deficiency                                                    | 1.6<br>(0.9 to 2.4)                     | 1.3<br>(0.7 to 1.9)                      | --                                                  | --                                                | --                                                  |
| Iron-deficiency anaemia                                                 | 30.1<br>(26.2 to 33.7)                  | --                                       | 0.7<br>(0.4 to 1.0)                                 | 3.1<br>(-10.9 to 20.0)                            | -2.8<br>(-16.0 to 12.4)                             |
| Other nutritional deficiencies                                          | --                                      | --                                       | < 0.05<br>(< 0.05 to < 0.05)                        | 18.7<br>(-29.8 to 100.2)                          | 20.3<br>(-28.7 to 101.8)                            |
| <b>Other communicable, maternal, neonatal, and nutritional diseases</b> | <b>50.7</b><br><b>(47.7 to 53.4)</b>    | <b>17.5</b><br><b>(15.6 to 19.6)</b>     | <b>0.1</b><br><b>(0.1 to 0.1)</b>                   | <b>6.9</b><br><b>(0.5 to 13.6)</b>                | <b>0.8</b><br><b>(-5.0 to 6.8)</b>                  |
| Sexually transmitted diseases excluding HIV                             | 38.4<br>(35.6 to 41.1)                  | 13.7<br>(12.0 to 15.7)                   | 0.1<br>(< 0.05 to 0.1)                              | 6.4<br>(0.4 to 12.5)                              | -0.6<br>(-6.2 to 4.9)                               |
| Syphilis                                                                | 4.5<br>(3.1 to 6.5)                     | 2.8<br>(1.8 to 4.2)                      | < 0.05<br>(< 0.05 to < 0.05)                        | 21.5<br>(9.1 to 37.6)                             | -1.4<br>(-11.9 to 10.6)                             |
| Chlamydial infection                                                    | 2.7<br>(1.8 to 3.7)                     | 2.2<br>(1.5 to 3.1)                      | < 0.05<br>(< 0.05 to < 0.05)                        | 5.0<br>(-7.3 to 16.8)                             | -0.3<br>(-11.8 to 11.1)                             |
| Gonococcal infection                                                    | 0.4<br>(0.3 to 0.6)                     | 1.1<br>(0.6 to 1.8)                      | < 0.05<br>(< 0.05 to < 0.05)                        | 4.0<br>(-12.6 to 22.3)                            | -0.1<br>(-15.8 to 17.6)                             |
| Trichomoniasis                                                          | 4.9<br>(4.0 to 5.8)                     | 4.2<br>(3.5 to 5.1)                      | < 0.05<br>(< 0.05 to < 0.05)                        | 9.9<br>(2.6 to 17.2)                              | 0.2<br>(-6.0 to 6.7)                                |
| Genital herpes                                                          | 28.8<br>(24.8 to 33.2)                  | 1.7<br>(1.5 to 2.0)                      | < 0.05<br>(< 0.05 to < 0.05)                        | 14.4<br>(5.6 to 23.2)                             | -0.3<br>(-7.8 to 7.2)                               |
| Other sexually transmitted diseases                                     | 1.5<br>(1.3 to 1.7)                     | 1.7<br>(1.4 to 2.0)                      | < 0.05<br>(< 0.05 to < 0.05)                        | 1.6<br>(-7.5 to 13.0)                             | -0.9<br>(-10.0 to 9.6)                              |
| Hepatitis                                                               | 15.9<br>(13.6 to 18.8)                  | 3.8<br>(3.1 to 4.4)                      | < 0.05<br>(< 0.05 to < 0.05)                        | 35.1<br>(9.5 to 66.6)                             | 18.4<br>(-2.8 to 44.7)                              |
| Acute hepatitis A                                                       | 0.1<br>(0.1 to 0.1)                     | 1.6<br>(1.0 to 1.9)                      | < 0.05<br>(< 0.05 to < 0.05)                        | 35.3<br>(-8.7 to 104.0)                           | 20.7<br>(-17.0 to 79.3)                             |
| Hepatitis B                                                             | 11.5<br>(9.3 to 14.2)                   | 1.9<br>(1.5 to 2.4)                      | < 0.05<br>(< 0.05 to < 0.05)                        | 35.8<br>(2.2 to 79.5)                             | 17.4<br>(-10.3 to 52.8)                             |
| Hepatitis C                                                             | 4.3<br>(3.8 to 4.8)                     | 0.2<br>(0.1 to 0.2)                      | < 0.05<br>(< 0.05 to < 0.05)                        | 14.5<br>(-6.8 to 37.4)                            | 8.8<br>(-10.9 to 30.0)                              |
| Acute hepatitis E                                                       | < 0.05<br>(< 0.05 to < 0.05)            | 0.1<br>(0.1 to 0.2)                      | < 0.05<br>(< 0.05 to < 0.05)                        | 41.6<br>(26.6 to 57.8)                            | 22.3<br>(10.3 to 35.2)                              |
| Other infectious diseases                                               | 1.0<br>(0.9 to 1.2)                     | < 0.05<br>(< 0.05 to < 0.05)             | < 0.05<br>(< 0.05 to < 0.05)                        | 3.4<br>(-13.8 to 23.8)                            | 1.1<br>(-15.7 to 19.3)                              |
| <b>Non-communicable diseases</b>                                        | <b>153.0</b><br><b>(151.9 to 154.0)</b> | <b>393.4†</b><br><b>(373.9 to 414.4)</b> | <b>15.9</b><br><b>(11.8 to 20.7)</b>                | <b>21.0</b><br><b>(18.9 to 23.1)</b>              | <b>1.8</b><br><b>(0.1 to 3.5)</b>                   |
| <b>Neoplasms</b>                                                        | <b>1.2</b><br><b>(1.2 to 1.2)</b>       | <b>0.5</b><br><b>(0.4 to 0.5)</b>        | <b>0.1</b><br><b>(0.1 to 0.2)</b>                   | <b>48.6</b><br><b>(39.9 to 57.4)</b>              | <b>12.7</b><br><b>(6.2 to 19.0)</b>                 |
| Lip and oral cavity cancer                                              | < 0.05<br>(< 0.05 to < 0.05)            | < 0.05<br>(< 0.05 to < 0.05)             | < 0.05<br>(< 0.05 to < 0.05)                        | 43.0<br>(24.1 to 66.2)                            | 7.2<br>(-7.0 to 23.9)                               |
| Nasopharynx cancer                                                      | < 0.05<br>(< 0.05 to < 0.05)            | < 0.05<br>(< 0.05 to < 0.05)             | < 0.05<br>(< 0.05 to < 0.05)                        | 40.5<br>(12.7 to 72.3)                            | 13.8<br>(-8.2 to 38.7)                              |
| Other pharynx cancer                                                    | < 0.05<br>(< 0.05 to < 0.05)            | < 0.05<br>(< 0.05 to < 0.05)             | < 0.05<br>(< 0.05 to < 0.05)                        | 39.4<br>(17.8 to 63.1)                            | 6.3<br>(-9.4 to 24.2)                               |
| Oesophageal cancer                                                      | < 0.05<br>(< 0.05 to < 0.05)            | < 0.05<br>(< 0.05 to < 0.05)             | < 0.05<br>(< 0.05 to < 0.05)                        | 51.4<br>(26.3 to 84.9)                            | 8.4<br>(-11.2 to 34.9)                              |
| Stomach cancer                                                          | < 0.05<br>(< 0.05 to < 0.05)            | < 0.05<br>(< 0.05 to < 0.05)             | < 0.05<br>(< 0.05 to < 0.05)                        | 55.3<br>(36.6 to 76.4)                            | 12.1<br>(-1.6 to 28.9)                              |
| Colon and rectum cancer                                                 | 0.2<br>(0.2 to 0.2)                     | 0.1<br>(0.1 to 0.1)                      | < 0.05<br>(< 0.05 to < 0.05)                        | 57.6<br>(36.3 to 82.6)                            | 14.5<br>(-0.1 to 31.9)                              |
| Liver cancer                                                            | < 0.05<br>(< 0.05 to < 0.05)            | < 0.05<br>(< 0.05 to < 0.05)             | < 0.05<br>(< 0.05 to < 0.05)                        | 44.7<br>(26.4 to 66.5)                            | 8.1<br>(-5.0 to 23.4)                               |
| Liver cancer due to hepatitis B                                         | < 0.05<br>(< 0.05 to < 0.05)            | < 0.05<br>(< 0.05 to < 0.05)             | < 0.05<br>(< 0.05 to < 0.05)                        | 42.3<br>(22.8 to 66.4)                            | 8.6<br>(-5.6 to 25.9)                               |

| Cause                                              | Prevalence in thousands (95% UI)     | Incidence in thousands (95% UI)    | YLDs in thousands (95% UI)        |                                                   |                                                     |
|----------------------------------------------------|--------------------------------------|------------------------------------|-----------------------------------|---------------------------------------------------|-----------------------------------------------------|
|                                                    | 2016 counts                          | 2016 counts                        | 2016 counts                       | Percentage change in counts between 2006 and 2016 | Percentage change in age-standardised rates between |
| Liver cancer due to hepatitis C                    | < 0.05<br>(< 0.05 to < 0.05)         | < 0.05<br>(< 0.05 to < 0.05)       | < 0.05<br>(< 0.05 to < 0.05)      | 53.4<br>(33.8 to 75.2)                            | 7.7<br>(-5.6 to 22.6)                               |
| Liver cancer due to alcohol use                    | < 0.05<br>(< 0.05 to < 0.05)         | < 0.05<br>(< 0.05 to < 0.05)       | < 0.05<br>(< 0.05 to < 0.05)      | 49.2<br>(28.6 to 74.7)                            | 9.0<br>(-5.4 to 26.3)                               |
| Liver cancer due to other causes                   | < 0.05<br>(< 0.05 to < 0.05)         | < 0.05<br>(< 0.05 to < 0.05)       | < 0.05<br>(< 0.05 to < 0.05)      | 42.7<br>(22.4 to 67.3)                            | 7.0<br>(-7.2 to 25.2)                               |
| Gallbladder and biliary tract cancer               | < 0.05<br>(< 0.05 to < 0.05)         | < 0.05<br>(< 0.05 to < 0.05)       | < 0.05<br>(< 0.05 to < 0.05)      | 49.2<br>(33.6 to 65.2)                            | 6.0<br>(-4.6 to 16.9)                               |
| Pancreatic cancer                                  | < 0.05<br>(< 0.05 to < 0.05)         | < 0.05<br>(< 0.05 to < 0.05)       | < 0.05<br>(< 0.05 to < 0.05)      | 40.1<br>(27.8 to 54.5)                            | -0.6<br>(-9.9 to 9.8)                               |
| Larynx cancer                                      | < 0.05<br>(< 0.05 to < 0.05)         | < 0.05<br>(< 0.05 to < 0.05)       | < 0.05<br>(< 0.05 to < 0.05)      | 51.9<br>(28.4 to 77.9)                            | 8.9<br>(-8.8 to 28.6)                               |
| Tracheal, bronchus, and lung cancer                | 0.1<br>(0.1 to 0.1)                  | 0.1<br>(0.1 to 0.1)                | < 0.05<br>(< 0.05 to < 0.05)      | 51.1<br>(26.5 to 79.0)                            | 7.8<br>(-8.5 to 26.8)                               |
| Malignant skin melanoma                            | < 0.05<br>(< 0.05 to < 0.05)         | < 0.05<br>(< 0.05 to < 0.05)       | < 0.05<br>(< 0.05 to < 0.05)      | 40.2<br>(12.6 to 74.9)                            | 1.1<br>(-17.4 to 24.3)                              |
| Non-melanoma skin cancer                           | < 0.05<br>(< 0.05 to < 0.05)         | < 0.05<br>(< 0.05 to < 0.05)       | < 0.05<br>(< 0.05 to < 0.05)      | -20.4<br>(-69.7 to 138.7)                         | -47.3<br>(-80.3 to 62.0)                            |
| Non-melanoma skin cancer (squamous-cell carcinoma) | < 0.05<br>(< 0.05 to < 0.05)         | < 0.05<br>(< 0.05 to < 0.05)       | < 0.05<br>(< 0.05 to < 0.05)      | -20.6<br>(-69.9 to 140.1)                         | -47.4<br>(-80.4 to 62.4)                            |
| Non-melanoma skin cancer (basal-cell carcinoma)    | < 0.05<br>(< 0.05 to < 0.05)         | < 0.05<br>(< 0.05 to < 0.05)       | < 0.05<br>(< 0.05 to < 0.05)      | 16.9<br>(1.5 to 41.7)                             | 0.5<br>(-10.6 to 15.6)                              |
| Breast cancer                                      | 0.2<br>(0.2 to 0.3)                  | 0.1<br>(< 0.05 to 0.1)             | < 0.05<br>(< 0.05 to < 0.05)      | 48.6<br>(25.0 to 75.7)                            | 18.7<br>(1.7 to 39.6)                               |
| Cervical cancer                                    | < 0.05<br>(< 0.05 to 0.1)            | < 0.05<br>(< 0.05 to < 0.05)       | < 0.05<br>(< 0.05 to < 0.05)      | 13.0<br>(-8.6 to 36.2)                            | -2.0<br>(-20.2 to 16.6)                             |
| Uterine cancer                                     | 0.1<br>(0.1 to 0.1)                  | < 0.05<br>(< 0.05 to < 0.05)       | < 0.05<br>(< 0.05 to < 0.05)      | 48.4<br>(19.5 to 80.9)                            | 19.4<br>(-2.7 to 45.3)                              |
| Ovarian cancer                                     | < 0.05<br>(< 0.05 to < 0.05)         | < 0.05<br>(< 0.05 to < 0.05)       | < 0.05<br>(< 0.05 to < 0.05)      | 30.8<br>(-0.5 to 70.7)                            | 2.7<br>(-22.4 to 33.2)                              |
| Prostate cancer                                    | 0.2<br>(0.2 to 0.3)                  | 0.1<br>(< 0.05 to 0.1)             | < 0.05<br>(< 0.05 to < 0.05)      | 64.2<br>(40.2 to 93.5)                            | 12.0<br>(-3.5 to 31.7)                              |
| Testicular cancer                                  | < 0.05<br>(< 0.05 to < 0.05)         | < 0.05<br>(< 0.05 to < 0.05)       | < 0.05<br>(< 0.05 to < 0.05)      | 35.3<br>(-4.2 to 97.5)                            | 17.5<br>(-16.3 to 71.7)                             |
| Kidney cancer                                      | < 0.05<br>(< 0.05 to < 0.05)         | < 0.05<br>(< 0.05 to < 0.05)       | < 0.05<br>(< 0.05 to < 0.05)      | 28.1<br>(6.4 to 53.4)                             | 2.4<br>(-13.0 to 21.3)                              |
| Bladder cancer                                     | 0.1<br>(0.1 to 0.1)                  | < 0.05<br>(< 0.05 to < 0.05)       | < 0.05<br>(< 0.05 to < 0.05)      | 63.8<br>(38.1 to 94.9)                            | 19.7<br>(0.9 to 41.3)                               |
| Brain and nervous system cancer                    | < 0.05<br>(< 0.05 to < 0.05)         | < 0.05<br>(< 0.05 to < 0.05)       | < 0.05<br>(< 0.05 to < 0.05)      | 31.8<br>(13.6 to 53.9)                            | 13.3<br>(-2.0 to 31.2)                              |
| Thyroid cancer                                     | 0.1<br>(< 0.05 to 0.1)               | < 0.05<br>(< 0.05 to < 0.05)       | < 0.05<br>(< 0.05 to < 0.05)      | 18.8<br>(-2.8 to 47.7)                            | -0.3<br>(-17.0 to 22.5)                             |
| Mesothelioma                                       | < 0.05<br>(< 0.05 to < 0.05)         | < 0.05<br>(< 0.05 to < 0.05)       | < 0.05<br>(< 0.05 to < 0.05)      | 94.4<br>(45.7 to 133.1)                           | 45.0<br>(8.2 to 73.1)                               |
| Hodgkin lymphoma                                   | < 0.05<br>(< 0.05 to < 0.05)         | < 0.05<br>(< 0.05 to < 0.05)       | < 0.05<br>(< 0.05 to < 0.05)      | 37.2<br>(-9.3 to 102.0)                           | 20.9<br>(-17.8 to 74.8)                             |
| Non-Hodgkin's lymphoma                             | < 0.05<br>(< 0.05 to 0.1)            | < 0.05<br>(< 0.05 to < 0.05)       | < 0.05<br>(< 0.05 to < 0.05)      | 44.0<br>(25.1 to 66.9)                            | 14.6<br>(0.0 to 31.1)                               |
| Multiple myeloma                                   | < 0.05<br>(< 0.05 to < 0.05)         | < 0.05<br>(< 0.05 to < 0.05)       | < 0.05<br>(< 0.05 to < 0.05)      | 65.3<br>(33.6 to 104.4)                           | 20.2<br>(-3.2 to 48.8)                              |
| Leukaemia                                          | 0.1<br>(< 0.05 to 0.1)               | < 0.05<br>(< 0.05 to < 0.05)       | < 0.05<br>(< 0.05 to < 0.05)      | 47.3<br>(18.0 to 84.3)                            | 22.3<br>(0.3 to 49.2)                               |
| Acute lymphoid leukaemia                           | < 0.05<br>(< 0.05 to < 0.05)         | < 0.05<br>(< 0.05 to < 0.05)       | < 0.05<br>(< 0.05 to < 0.05)      | 51.9<br>(-13.4 to 166.4)                          | 41.8<br>(-15.0 to 139.8)                            |
| Chronic lymphoid leukaemia                         | < 0.05<br>(< 0.05 to < 0.05)         | < 0.05<br>(< 0.05 to < 0.05)       | < 0.05<br>(< 0.05 to < 0.05)      | 69.4<br>(28.5 to 120.2)                           | 21.9<br>(-4.8 to 56.6)                              |
| Acute myeloid leukaemia                            | < 0.05<br>(< 0.05 to < 0.05)         | < 0.05<br>(< 0.05 to < 0.05)       | < 0.05<br>(< 0.05 to < 0.05)      | 35.9<br>(1.4 to 79.4)                             | 19.0<br>(-7.9 to 52.0)                              |
| Chronic myeloid leukaemia                          | < 0.05<br>(< 0.05 to < 0.05)         | < 0.05<br>(< 0.05 to < 0.05)       | < 0.05<br>(< 0.05 to < 0.05)      | 66.2<br>(31.1 to 108.6)                           | 28.4<br>(2.2 to 60.7)                               |
| Other leukaemia                                    | < 0.05<br>(< 0.05 to < 0.05)         | < 0.05<br>(< 0.05 to < 0.05)       | < 0.05<br>(< 0.05 to < 0.05)      | 39.7<br>(6.2 to 78.0)                             | 12.8<br>(-12.0 to 41.7)                             |
| Other neoplasms                                    | 0.1<br>(0.1 to 0.1)                  | < 0.05<br>(< 0.05 to < 0.05)       | < 0.05<br>(< 0.05 to < 0.05)      | 54.6<br>(34.1 to 80.4)                            | 30.1<br>(13.2 to 51.0)                              |
| <b>Cardiovascular diseases</b>                     | <b>12.4</b><br><b>(11.9 to 12.8)</b> | <b>1.1†</b><br><b>(1.1 to 1.2)</b> | <b>0.9</b><br><b>(0.7 to 1.2)</b> | <b>32.2</b><br><b>(27.7 to 37.2)</b>              | <b>-0.3</b><br><b>(-3.8 to 3.4)</b>                 |
| Rheumatic heart disease                            | 2.8<br>(2.5 to 3.1)                  | 0.1<br>(0.1 to 0.1)                | 0.1<br>(0.1 to 0.2)               | 22.2<br>(12.7 to 32.6)                            | 9.7<br>(1.0 to 18.9)                                |
| Ischaemic heart disease                            | 2.9<br>(2.8 to 3.1)                  | 0.3<br>(0.3 to 0.4)                | 0.1<br>(0.1 to 0.2)               | 32.7<br>(26.5 to 39.1)                            | -1.6<br>(-5.7 to 2.8)                               |
| Cerebrovascular disease                            | 2.1<br>(2.0 to 2.2)                  | 0.3‡<br>(0.3 to 0.3)               | 0.4<br>(0.3 to 0.5)               | 35.1<br>(25.4 to 44.8)                            | -2.5<br>(-9.1 to 4.5)                               |
| Ischaemic stroke                                   | 1.7<br>(1.6 to 1.9)                  | 0.2‡<br>(0.2 to 0.2)               | 0.3<br>(0.2 to 0.4)               | 36.4<br>(24.1 to 48.9)                            | -2.8<br>(-11.2 to 5.9)                              |
| Hemorrhagic stroke                                 | 0.5<br>(0.4 to 0.5)                  | 0.1‡<br>(0.1 to 0.1)               | 0.1<br>(0.1 to 0.1)               | 30.4<br>(18.0 to 44.1)                            | -1.5<br>(-10.3 to 7.9)                              |
| Hypertensive heart disease                         | 0.6<br>(0.5 to 0.7)                  | --                                 | < 0.05<br>(< 0.05 to 0.1)         | 36.6<br>(24.9 to 50.2)                            | -0.8<br>(-8.4 to 8.6)                               |
| Cardiomyopathy and myocarditis                     | 0.1<br>(0.1 to 0.1)                  | 0.1†<br>(< 0.05 to 0.1)            | < 0.05<br>(< 0.05 to < 0.05)      | 20.6<br>(7.8 to 34.4)                             | -0.7<br>(-10.4 to 10.4)                             |
| Myocarditis                                        | < 0.05<br>(< 0.05 to 0.1)            | 0.1<br>(< 0.05 to 0.1)             | < 0.05<br>(< 0.05 to < 0.05)      | 16.6<br>(-1.2 to 37.0)                            | -0.5<br>(-15.4 to 16.9)                             |
| Alcoholic cardiomyopathy                           | < 0.05<br>(< 0.05 to < 0.05)         | --                                 | < 0.05<br>(< 0.05 to < 0.05)      | 32.6<br>(14.5 to 53.4)                            | -0.7<br>(-15.3 to 16.8)                             |
| Other cardiomyopathy                               | 0.1<br>(0.1 to 0.1)                  | --                                 | < 0.05<br>(< 0.05 to < 0.05)      | 20.9<br>(3.8 to 40.5)                             | -0.8<br>(-14.0 to 13.9)                             |
| Atrial fibrillation and flutter                    | 0.9<br>(0.8 to 1.1)                  | 0.1<br>(0.1 to 0.1)                | 0.1<br>(< 0.05 to 0.1)            | 43.4<br>(33.7 to 53.5)                            | 0.2<br>(-6.3 to 6.8)                                |
| Peripheral vascular disease                        | 2.7<br>(2.4 to 3.2)                  | 0.2<br>(0.2 to 0.3)                | < 0.05<br>(< 0.05 to < 0.05)      | 55.9<br>(43.9 to 68.2)                            | 3.8<br>(-3.8 to 11.6)                               |
| Endocarditis                                       | < 0.05<br>(< 0.05 to < 0.05)         | 0.1<br>(0.1 to 0.1)                | < 0.05<br>(< 0.05 to < 0.05)      | 34.3<br>(18.9 to 50.2)                            | 0.9<br>(-12.4 to 14.8)                              |
| Other cardiovascular and circulatory diseases      | 1.6<br>(1.4 to 1.9)                  | --                                 | 0.1<br>(0.1 to 0.1)               | 22.5<br>(13.4 to 33.2)                            | -0.6<br>(-7.4 to 6.8)                               |
| <b>Chronic respiratory diseases</b>                | <b>21.9</b><br><b>(21.1 to 22.6)</b> | <b>4.4†</b><br><b>(4.2 to 4.7)</b> | <b>1.2</b><br><b>(1.0 to 1.5)</b> | <b>40.6</b><br><b>(35.7 to 45.9)</b>              | <b>16.0</b><br><b>(11.5 to 20.8)</b>                |
| Chronic obstructive pulmonary disease              | 7.8<br>(7.5 to 8.1)                  | 0.5<br>(0.5 to 0.6)                | 0.6<br>(0.5 to 0.6)               | 34.2<br>(26.7 to 42.5)                            | 2.9<br>(-2.8 to 9.0)                                |
| Pneumoconiosis                                     | < 0.05<br>(< 0.05 to < 0.05)         | < 0.05<br>(< 0.05 to < 0.05)       | < 0.05<br>(< 0.05 to < 0.05)      | 34.4<br>(13.1 to 60.6)                            | -4.7<br>(-19.4 to 13.8)                             |
| Silicosis                                          | < 0.05<br>(< 0.05 to < 0.05)         | < 0.05<br>(< 0.05 to < 0.05)       | < 0.05<br>(< 0.05 to < 0.05)      | 34.0<br>(2.3 to 79.2)                             | -4.6<br>(-26.6 to 27.8)                             |

| Cause                                                          | Prevalence in thousands (95% UI)  | Incidence in thousands (95% UI)   | YLDs in thousands (95% UI)              |                                                   |                                                     |
|----------------------------------------------------------------|-----------------------------------|-----------------------------------|-----------------------------------------|---------------------------------------------------|-----------------------------------------------------|
|                                                                | 2016 counts<br>(< 0.05 to < 0.05) | 2016 counts<br>(< 0.05 to < 0.05) | 2016 counts<br>(< 0.05 to < 0.05)       | Percentage change in counts between 2006 and 2016 | Percentage change in age-standardised rates between |
| Asbestosis                                                     | < 0.05<br>(< 0.05 to < 0.05)      | < 0.05<br>(< 0.05 to < 0.05)      | < 0.05<br>(< 0.05 to < 0.05)            | 39.4<br>(28.9 to 50.7)                            | -0.4<br>(-8.1 to 7.7)                               |
| Coal workers pneumoconiosis                                    | --                                | --                                | --                                      | --                                                | --                                                  |
| Other pneumoconiosis                                           | < 0.05<br>(< 0.05 to < 0.05)      | < 0.05<br>(< 0.05 to < 0.05)      | < 0.05<br>(< 0.05 to < 0.05)            | 31.7<br>(-5.6 to 78.3)                            | -8.0<br>(-34.2 to 25.1)                             |
| Asthma                                                         | 15.3<br>(14.3 to 16.3)            | 3.9<br>(3.6 to 4.1)               | 0.6<br>(0.4 to 0.8)                     | 47.6<br>(41.5 to 54.3)                            | 33.0<br>(27.9 to 38.6)                              |
| Interstitial lung disease and pulmonary sarcoidosis            | 0.4<br>(0.3 to 0.4)               | < 0.05<br>(< 0.05 to < 0.05)      | < 0.05<br>(< 0.05 to 0.1)               | 35.9<br>(22.7 to 50.3)                            | -0.5<br>(-9.5 to 9.2)                               |
| Other chronic respiratory diseases                             | --                                | --                                | < 0.05<br>(< 0.05 to < 0.05)            | 44.5<br>(26.4 to 65.5)                            | 37.3<br>(20.8 to 56.1)                              |
| <b>Cirrhosis and other chronic liver diseases</b>              | <b>1.1<br/>(1.1 to 1.2)</b>       | <b>0.1<br/>(&lt; 0.05 to 0.1)</b> | <b>&lt; 0.05<br/>(&lt; 0.05 to 0.1)</b> | <b>21.1<br/>(10.3 to 32.0)</b>                    | <b>4.0<br/>(-4.8 to 13.0)</b>                       |
| Cirrhosis and other chronic liver diseases due to hepatitis B  | 0.4<br>(0.4 to 0.5)               | < 0.05<br>(< 0.05 to < 0.05)      | < 0.05<br>(< 0.05 to < 0.05)            | 27.9<br>(9.4 to 50.0)                             | 3.7<br>(-10.8 to 20.4)                              |
| Cirrhosis and other chronic liver diseases due to hepatitis C  | 0.2<br>(0.2 to 0.2)               | < 0.05<br>(< 0.05 to < 0.05)      | < 0.05<br>(< 0.05 to < 0.05)            | 26.7<br>(0.1 to 61.7)                             | 4.0<br>(-17.1 to 31.0)                              |
| Cirrhosis and other chronic liver diseases due to alcohol use  | 0.2<br>(0.1 to 0.2)               | < 0.05<br>(< 0.05 to < 0.05)      | < 0.05<br>(< 0.05 to < 0.05)            | 30.0<br>(3.3 to 64.3)                             | 4.1<br>(-15.9 to 29.5)                              |
| Cirrhosis and other chronic liver diseases due to other causes | 0.4<br>(0.3 to 0.4)               | < 0.05<br>(< 0.05 to < 0.05)      | < 0.05<br>(< 0.05 to < 0.05)            | 13.5<br>(-2.8 to 32.6)                            | 4.1<br>(-10.0 to 20.6)                              |
| <b>Digestive diseases</b>                                      | <b>3.3<br/>(3.1 to 3.6)</b>       | <b>4.0†<br/>(3.8 to 4.2)</b>      | <b>0.1<br/>(0.1 to 0.1)</b>             | <b>19.1<br/>(8.0 to 31.2)</b>                     | <b>0.0<br/>(-9.0 to 9.7)</b>                        |
| Peptic ulcer disease                                           | 1.1<br>(1.0 to 1.3)               | 0.3<br>(0.3 to 0.3)               | < 0.05<br>(< 0.05 to < 0.05)            | 24.4<br>(6.3 to 46.4)                             | 4.8<br>(-10.5 to 23.2)                              |
| Gastritis and duodenitis                                       | 1.6<br>(1.4 to 1.9)               | 1.4<br>(1.2 to 1.5)               | < 0.05<br>(< 0.05 to < 0.05)            | 25.2<br>(7.0 to 46.4)                             | 4.1<br>(-10.1 to 21.3)                              |
| Appendicitis                                                   | < 0.05<br>(< 0.05 to < 0.05)      | 0.7<br>(0.6 to 0.7)               | < 0.05<br>(< 0.05 to < 0.05)            | 11.1<br>(-14.3 to 42.5)                           | 0.7<br>(-21.5 to 27.3)                              |
| Paralytic ileus and intestinal obstruction                     | < 0.05<br>(< 0.05 to < 0.05)      | < 0.05<br>(< 0.05 to 0.1)         | < 0.05<br>(< 0.05 to < 0.05)            | 18.2<br>(13.3 to 23.1)                            | -0.7<br>(-4.1 to 2.6)                               |
| Inguinal, femoral, and abdominal hernia                        | 0.3<br>(0.3 to 0.4)               | 0.6<br>(0.5 to 0.7)               | < 0.05<br>(< 0.05 to < 0.05)            | 31.1<br>(12.0 to 56.4)                            | 7.2<br>(-7.7 to 25.5)                               |
| Inflammatory bowel disease                                     | 0.1<br>(< 0.05 to 0.1)            | 0.1<br>(0.1 to 0.1)               | < 0.05<br>(< 0.05 to < 0.05)            | -21.9<br>(-34.8 to -7.4)                          | -34.7<br>(-45.3 to -23.1)                           |
| Vascular intestinal disorders                                  | < 0.05<br>(< 0.05 to < 0.05)      | < 0.05<br>(< 0.05 to < 0.05)      | < 0.05<br>(< 0.05 to < 0.05)            | 23.7<br>(17.2 to 30.9)                            | 1.2<br>(-3.5 to 6.0)                                |
| Gallbladder and biliary diseases                               | 0.3<br>(0.3 to 0.3)               | 0.9<br>(0.8 to 1.0)               | < 0.05<br>(< 0.05 to < 0.05)            | 23.0<br>(-2.1 to 54.4)                            | 4.7<br>(-15.9 to 28.7)                              |
| Pancreatitis                                                   | < 0.05<br>(< 0.05 to < 0.05)      | < 0.05<br>(< 0.05 to < 0.05)      | < 0.05<br>(< 0.05 to < 0.05)            | 24.1<br>(19.5 to 29.0)                            | 1.6<br>(-1.8 to 4.8)                                |
| Other digestive diseases                                       | --                                | --                                | < 0.05<br>(< 0.05 to < 0.05)            | 25.7<br>(14.2 to 37.6)                            | 4.0<br>(-5.0 to 13.7)                               |
| <b>Neurological disorders</b>                                  | <b>49.6<br/>(47.5 to 52.2)</b>    | <b>21.3<br/>(18.3 to 24.6)</b>    | <b>1.3<br/>(0.8 to 1.8)</b>             | <b>15.6<br/>(-3.0 to 38.3)</b>                    | <b>0.9<br/>(-14.4 to 19.4)</b>                      |
| Alzheimer's disease and other dementias                        | 1.1<br>(0.9 to 1.3)               | 0.2<br>(0.1 to 0.2)               | 0.1<br>(0.1 to 0.2)                     | 52.8<br>(45.6 to 59.7)                            | -0.9<br>(-4.9 to 3.4)                               |
| Parkinson's disease                                            | 0.1<br>(0.1 to 0.1)               | < 0.05<br>(< 0.05 to < 0.05)      | < 0.05<br>(< 0.05 to < 0.05)            | 47.8<br>(30.0 to 67.7)                            | 2.0<br>(-9.7 to 14.8)                               |
| Epilepsy                                                       | 0.5<br>(0.2 to 0.8)               | 0.1<br>(< 0.05 to 0.1)            | 0.2<br>(< 0.05 to 0.3)                  | 16.1<br>(-69.3 to 333.5)                          | 5.4<br>(-72.2 to 289.0)                             |
| Multiple sclerosis                                             | < 0.05<br>(< 0.05 to < 0.05)      | < 0.05<br>(< 0.05 to < 0.05)      | < 0.05<br>(< 0.05 to < 0.05)            | 21.8<br>(17.0 to 26.8)                            | 6.5<br>(2.4 to 10.7)                                |
| Motor neuron disease                                           | < 0.05<br>(< 0.05 to < 0.05)      | < 0.05<br>(< 0.05 to < 0.05)      | < 0.05<br>(< 0.05 to < 0.05)            | 10.1<br>(6.2 to 14.2)                             | -9.3<br>(-12.8 to -5.9)                             |
| Migraine                                                       | 18.6<br>(17.6 to 19.7)            | 2.0<br>(1.9 to 2.1)               | 0.8<br>(0.5 to 1.1)                     | 9.9<br>(5.7 to 14.2)                              | -0.4<br>(-4.2 to 3.4)                               |
| Tension-type headache                                          | 35.3<br>(31.4 to 39.8)            | 19.0<br>(16.0 to 22.3)            | 0.1<br>(0.1 to 0.2)                     | 10.9<br>(4.7 to 17.9)                             | -0.2<br>(-5.8 to 5.8)                               |
| Other neurological disorders                                   | < 0.05<br>(< 0.05 to < 0.05)      | < 0.05<br>(< 0.05 to < 0.05)      | < 0.05<br>(< 0.05 to 0.1)               | 35.6<br>(-52.7 to 300.2)                          | 24.8<br>(-56.4 to 251.0)                            |
| <b>Mental and substance use disorders</b>                      | <b>23.0<br/>(22.2 to 23.8)</b>    | <b>8.4†<br/>(7.9 to 9.0)</b>      | <b>3.2<br/>(2.3 to 4.1)</b>             | <b>12.8<br/>(10.3 to 15.4)</b>                    | <b>0.4<br/>(-1.7 to 2.7)</b>                        |
| Schizophrenia                                                  | 0.6<br>(0.5 to 0.7)               | < 0.05<br>(< 0.05 to < 0.05)      | 0.4<br>(0.3 to 0.5)                     | 10.2<br>(2.9 to 18.1)                             | -0.8<br>(-7.5 to 6.1)                               |
| Alcohol use disorders                                          | 1.6<br>(1.4 to 1.8)               | 0.8<br>(0.7 to 1.0)               | 0.2<br>(0.1 to 0.2)                     | 12.9<br>(4.0 to 23.3)                             | 1.9<br>(-6.3 to 11.4)                               |
| Drug use disorders                                             | 1.2<br>(1.1 to 1.4)               | 0.2<br>(0.2 to 0.2)               | 0.2<br>(0.1 to 0.3)                     | 15.0<br>(5.1 to 25.6)                             | 2.4<br>(-6.2 to 11.3)                               |
| Opioid use disorders                                           | 0.3<br>(0.3 to 0.4)               | < 0.05<br>(< 0.05 to 0.1)         | 0.1<br>(0.1 to 0.2)                     | 14.8<br>(2.7 to 29.6)                             | 2.2<br>(-8.4 to 14.7)                               |
| Cocaine use disorders                                          | < 0.05<br>(< 0.05 to < 0.05)      | < 0.05<br>(< 0.05 to < 0.05)      | < 0.05<br>(< 0.05 to < 0.05)            | 15.4<br>(3.5 to 31.4)                             | 1.0<br>(-9.2 to 14.6)                               |
| Amphetamine use disorders                                      | 0.1<br>(0.1 to 0.2)               | < 0.05<br>(< 0.05 to < 0.05)      | < 0.05<br>(< 0.05 to < 0.05)            | 20.3<br>(-7.2 to 53.8)                            | 6.7<br>(-17.8 to 37.1)                              |
| Cannabis use disorders                                         | 0.7<br>(0.6 to 0.9)               | 0.1<br>(0.1 to 0.1)               | < 0.05<br>(< 0.05 to < 0.05)            | 11.4<br>(-0.5 to 24.8)                            | 0.5<br>(-10.5 to 12.5)                              |
| Other drug use disorders                                       | 0.1<br>(0.1 to 0.1)               | < 0.05<br>(< 0.05 to < 0.05)      | < 0.05<br>(< 0.05 to < 0.05)            | 16.2<br>(-6.2 to 45.5)                            | 3.4<br>(-16.1 to 29.7)                              |
| Depressive disorders                                           | 6.3<br>(5.9 to 6.8)               | 5.7<br>(5.2 to 6.2)               | 1.0<br>(0.7 to 1.4)                     | 17.9<br>(12.5 to 23.2)                            | 1.1<br>(-3.4 to 5.3)                                |
| Major depressive disorder                                      | 3.5<br>(3.2 to 3.9)               | 5.2<br>(4.7 to 5.8)               | 0.7<br>(0.5 to 1.0)                     | 17.4<br>(10.4 to 24.4)                            | 1.6<br>(-4.3 to 7.3)                                |
| Dysthymia                                                      | 2.9<br>(2.6 to 3.4)               | 0.4<br>(0.4 to 0.5)               | 0.3<br>(0.2 to 0.4)                     | 19.3<br>(15.0 to 23.9)                            | -0.2<br>(-3.1 to 2.7)                               |
| Bipolar disorder                                               | 0.8<br>(0.7 to 0.9)               | 0.1<br>(0.1 to 0.1)               | 0.2<br>(0.1 to 0.2)                     | 12.7<br>(5.4 to 21.0)                             | -0.4<br>(-6.7 to 6.4)                               |
| Anxiety disorders                                              | 5.9<br>(5.4 to 6.5)               | 0.9<br>(0.9 to 1.0)               | 0.6<br>(0.4 to 0.8)                     | 11.7<br>(5.2 to 19.1)                             | -0.1<br>(-5.8 to 6.1)                               |
| Eating disorders                                               | 0.2<br>(0.2 to 0.3)               | 0.1<br>(0.1 to 0.2)               | 0.1<br>(< 0.05 to 0.1)                  | 7.8<br>(-3.6 to 21.1)                             | 2.2<br>(-8.3 to 15.1)                               |
| Anorexia nervosa                                               | 0.1<br>(0.1 to 0.1)               | < 0.05<br>(< 0.05 to < 0.05)      | < 0.05<br>(< 0.05 to < 0.05)            | 10.6<br>(-9.2 to 36.3)                            | 2.5<br>(-14.7 to 25.8)                              |
| Bulimia nervosa                                                | 0.2<br>(0.1 to 0.2)               | 0.1<br>(0.1 to 0.1)               | < 0.05<br>(< 0.05 to 0.1)               | 6.7<br>(-6.4 to 23.6)                             | 2.1<br>(-10.3 to 18.3)                              |
| Autistic spectrum disorders                                    | 1.4<br>(1.3 to 1.6)               | < 0.05<br>(< 0.05 to < 0.05)      | 0.2<br>(0.1 to 0.3)                     | 7.2<br>(2.3 to 12.6)                              | -0.3<br>(-4.9 to 4.6)                               |
| Autism                                                         | 0.4<br>(0.4 to 0.5)               | < 0.05<br>(< 0.05 to < 0.05)      | 0.1<br>(0.1 to 0.1)                     | 7.3<br>(-0.9 to 16.9)                             | -0.3<br>(-8.0 to 8.3)                               |
| Asperger syndrome and other autistic spectrum disorders        | 1.0<br>(0.8 to 1.2)               | < 0.05<br>(< 0.05 to < 0.05)      | 0.1<br>(0.1 to 0.1)                     | 7.1<br>(2.4 to 12.2)                              | -0.3<br>(-4.6 to 4.3)                               |



| Cause                                                      | Prevalence in thousands (95% UI)        | Incidence in thousands (95% UI)          | YLDs in thousands (95% UI)        |                                                   |                                                     |
|------------------------------------------------------------|-----------------------------------------|------------------------------------------|-----------------------------------|---------------------------------------------------|-----------------------------------------------------|
|                                                            | 2016 counts                             | 2016 counts                              | 2016 counts                       | Percentage change in counts between 2006 and 2016 | Percentage change in age-standardised rates between |
| Attention-deficit/hyperactivity disorder                   | 1.3<br>(1.2 to 1.5)                     | 0.1<br>(0.1 to 0.1)                      | < 0.05<br>(< 0.05 to < 0.05)      | 3.5<br>(-4.8 to 11.7)                             | -0.1<br>(-7.9 to 7.9)                               |
| Conduct disorder                                           | 1.2<br>(1.0 to 1.4)                     | 0.4<br>(0.3 to 0.5)                      | 0.1<br>(0.1 to 0.2)               | 1.4<br>(-4.5 to 7.9)                              | 0.1<br>(-5.7 to 6.2)                                |
| Idiopathic developmental intellectual disability           | 0.8<br>(0.3 to 1.4)                     | --                                       | < 0.05<br>(< 0.05 to 0.1)         | 3.8<br>(-5.5 to 12.6)                             | -3.4<br>(-11.9 to 4.7)                              |
| Other mental and substance use disorders                   | 3.3<br>(2.9 to 3.8)                     | 0.1<br>(0.1 to 0.1)                      | 0.2<br>(0.2 to 0.4)               | 13.5<br>(8.0 to 19.3)                             | -0.4<br>(-5.1 to 4.7)                               |
| <b>Diabetes, urogenital, blood, and endocrine diseases</b> | <b>69.6</b><br><b>(68.0 to 71.4)</b>    | <b>18.4†</b><br><b>(17.4 to 19.5)</b>    | <b>2.5</b><br><b>(1.7 to 3.3)</b> | <b>29.7</b><br><b>(23.3 to 36.4)</b>              | <b>4.8</b><br><b>(-0.3 to 10.0)</b>                 |
| Diabetes mellitus                                          | 24.8<br>(22.4 to 27.4)                  | 1.4<br>(1.3 to 1.6)                      | 1.7<br>(1.2 to 2.4)               | 32.6<br>(23.8 to 42.2)                            | 5.6<br>(-1.3 to 13.0)                               |
| Acute glomerulonephritis                                   | < 0.05<br>(< 0.05 to < 0.05)            | < 0.05<br>(< 0.05 to 0.1)                | < 0.05<br>(< 0.05 to < 0.05)      | 16.0<br>(10.4 to 21.9)                            | -0.1<br>(-4.6 to 4.1)                               |
| Chronic kidney disease                                     | 6.6<br>(6.0 to 7.3)                     | 0.5<br>(0.4 to 0.6)                      | 0.3<br>(0.2 to 0.4)               | 42.3<br>(32.5 to 53.5)                            | 9.7<br>(2.3 to 17.5)                                |
| Chronic kidney disease due to diabetes mellitus            | 3.7<br>(3.3 to 4.2)                     | 0.3<br>(0.2 to 0.3)                      | 0.1<br>(0.1 to 0.2)               | 42.6<br>(30.3 to 56.7)                            | 11.3<br>(2.1 to 21.3)                               |
| Chronic kidney disease due to hypertension                 | 1.2<br>(1.0 to 1.4)                     | < 0.05<br>(< 0.05 to < 0.05)             | 0.1<br>(0.1 to 0.1)               | 46.8<br>(28.5 to 66.1)                            | 5.2<br>(-6.7 to 18.6)                               |
| Chronic kidney disease due to glomerulonephritis           | 1.2<br>(1.0 to 1.4)                     | 0.1<br>(0.1 to 0.2)                      | < 0.05<br>(< 0.05 to < 0.05)      | 35.4<br>(21.9 to 51.5)                            | 14.5<br>(2.9 to 27.5)                               |
| Chronic kidney disease due to other causes                 | 0.6<br>(0.5 to 0.7)                     | < 0.05<br>(< 0.05 to 0.1)                | < 0.05<br>(< 0.05 to < 0.05)      | 35.7<br>(22.1 to 53.6)                            | 10.0<br>(-1.0 to 23.0)                              |
| Urinary diseases and male infertility                      | 2.9<br>(2.6 to 3.3)                     | 9.5†<br>(8.6 to 10.4)                    | 0.1<br>(< 0.05 to 0.1)            | 28.6<br>(20.9 to 37.1)                            | -3.6<br>(-9.2 to 1.9)                               |
| Interstitial nephritis and urinary tract infections        | 0.2<br>(0.1 to 0.2)                     | 8.2<br>(7.3 to 9.1)                      | < 0.05<br>(< 0.05 to < 0.05)      | 7.1<br>(-6.2 to 22.0)                             | -3.4<br>(-15.4 to 9.9)                              |
| Urolithiasis                                               | < 0.05<br>(< 0.05 to < 0.05)            | 1.1<br>(0.9 to 1.2)                      | < 0.05<br>(< 0.05 to < 0.05)      | 20.0<br>(8.2 to 33.2)                             | -1.1<br>(-11.0 to 10.3)                             |
| Benign prostatic hyperplasia                               | 1.7<br>(1.4 to 2.0)                     | 0.2<br>(0.2 to 0.3)                      | 0.1<br>(< 0.05 to 0.1)            | 38.9<br>(28.6 to 50.0)                            | -2.9<br>(-9.6 to 4.5)                               |
| Male infertility                                           | 0.9<br>(0.7 to 1.1)                     | --                                       | < 0.05<br>(< 0.05 to < 0.05)      | -1.3<br>(-8.5 to 6.2)                             | -2.4<br>(-8.5 to 4.4)                               |
| Other urinary diseases                                     | --                                      | --                                       | < 0.05<br>(< 0.05 to < 0.05)      | -9.7<br>(-18.4 to -0.3)                           | -18.9<br>(-26.5 to -10.7)                           |
| Gynecological diseases                                     | 18.4<br>(17.4 to 19.4)                  | 6.3†<br>(5.9 to 6.8)                     | 0.2<br>(0.1 to 0.3)               | 6.5<br>(1.6 to 11.6)                              | -0.7<br>(-5.2 to 3.9)                               |
| Uterine fibroids                                           | 2.5<br>(2.2 to 2.9)                     | 0.2<br>(0.2 to 0.3)                      | < 0.05<br>(< 0.05 to 0.1)         | 7.6<br>(-5.3 to 21.9)                             | 0.3<br>(-11.6 to 13.2)                              |
| Polycystic ovarian syndrome                                | 0.1<br>(0.1 to 0.2)                     | 0.1<br>(0.1 to 0.1)                      | < 0.05<br>(< 0.05 to < 0.05)      | 0.1<br>(-13.6 to 15.3)                            | 1.4<br>(-12.9 to 16.1)                              |
| Female infertility                                         | 0.8<br>(0.4 to 1.5)                     | --                                       | < 0.05<br>(< 0.05 to < 0.05)      | 10.7<br>(-8.5 to 35.7)                            | 5.1<br>(-12.5 to 27.9)                              |
| Endometriosis                                              | < 0.05<br>(< 0.05 to 0.1)               | 0.2<br>(0.2 to 0.2)                      | < 0.05<br>(< 0.05 to < 0.05)      | 7.4<br>(-17.9 to 39.8)                            | 0.2<br>(-23.6 to 29.7)                              |
| Genital prolapse                                           | 5.3<br>(4.5 to 6.1)                     | 0.3<br>(0.2 to 0.4)                      | < 0.05<br>(< 0.05 to < 0.05)      | 21.0<br>(10.5 to 33.1)                            | -7.7<br>(-15.8 to 1.8)                              |
| Premenstrual syndrome                                      | 9.7<br>(9.1 to 10.3)                    | 3.5<br>(3.2 to 3.8)                      | 0.1<br>(0.1 to 0.1)               | 6.2<br>(-1.2 to 14.5)                             | 0.1<br>(-6.9 to 8.1)                                |
| Other gynecological diseases                               | 2.3<br>(2.0 to 2.7)                     | 2.0<br>(1.7 to 2.4)                      | 0.1<br>(0.1 to 0.1)               | 3.4<br>(-4.6 to 10.9)                             | -0.7<br>(-8.2 to 6.9)                               |
| Hemoglobinopathies and hemolytic anaemias                  | 33.6<br>(31.9 to 35.4)                  | --                                       | 0.1<br>(< 0.05 to 0.1)            | 9.6<br>(-13.9 to 31.1)                            | -1.3<br>(-22.0 to 16.4)                             |
| Thalassemias                                               | < 0.05<br>(< 0.05 to < 0.05)            | --                                       | < 0.05<br>(< 0.05 to < 0.05)      | -2.3<br>(-27.3 to 33.6)                           | 1.3<br>(-24.0 to 37.4)                              |
| Thalassaemias trait                                        | 2.0<br>(1.0 to 3.7)                     | --                                       | < 0.05<br>(< 0.05 to < 0.05)      | 3.1<br>(-39.8 to 36.9)                            | -4.7<br>(-44.6 to 25.6)                             |
| Sickle cell disorders                                      | < 0.05<br>(< 0.05 to < 0.05)            | --                                       | < 0.05<br>(< 0.05 to < 0.05)      | 4.2<br>(-3.4 to 18.5)                             | 2.0<br>(-5.1 to 16.1)                               |
| Sickle cell trait                                          | 0.2<br>(0.2 to 0.2)                     | --                                       | < 0.05<br>(< 0.05 to < 0.05)      | 6.6<br>(-16.7 to 38.1)                            | 2.7<br>(-18.5 to 31.4)                              |
| G6PD deficiency                                            | 7.5<br>(6.5 to 8.7)                     | --                                       | < 0.05<br>(< 0.05 to < 0.05)      | 14.6<br>(-7.8 to 42.5)                            | 7.0<br>(-12.6 to 31.2)                              |
| G6PD trait                                                 | 23.4<br>(22.5 to 24.3)                  | --                                       | < 0.05<br>(< 0.05 to < 0.05)      | 14.7<br>(-8.9 to 44.6)                            | 8.0<br>(-14.1 to 35.6)                              |
| Other hemoglobinopathies and hemolytic anaemias            | 1.7<br>(1.5 to 1.9)                     | --                                       | < 0.05<br>(< 0.05 to < 0.05)      | 15.0<br>(-0.8 to 33.6)                            | 1.0<br>(-12.6 to 15.8)                              |
| Endocrine, metabolic, blood, and immune disorders          | 4.5<br>(4.1 to 4.9)                     | 0.7<br>(0.6 to 0.7)                      | 0.1<br>(0.1 to 0.2)               | 26.7<br>(18.4 to 34.6)                            | 1.6<br>(-4.5 to 7.7)                                |
| <b>Musculoskeletal disorders</b>                           | <b>30.9</b><br><b>(29.5 to 32.3)</b>    | <b>14.7</b><br><b>(13.4 to 16.2)</b>     | <b>3.3</b><br><b>(2.4 to 4.3)</b> | <b>18.7</b><br><b>(15.7 to 22.0)</b>              | <b>-1.3</b><br><b>(-3.4 to 1.0)</b>                 |
| Rheumatoid arthritis                                       | 0.3<br>(0.3 to 0.4)                     | < 0.05<br>(< 0.05 to < 0.05)             | 0.1<br>(0.1 to 0.1)               | 27.0<br>(15.1 to 39.1)                            | 3.5<br>(-5.4 to 12.8)                               |
| Osteoarthritis                                             | 9.3<br>(8.7 to 9.9)                     | 0.4<br>(0.4 to 0.5)                      | 0.6<br>(0.4 to 0.8)               | 29.5<br>(24.7 to 34.9)                            | -0.8<br>(-4.4 to 3.1)                               |
| Low back and neck pain                                     | 16.7<br>(15.7 to 18.0)                  | 6.8<br>(6.1 to 7.7)                      | 1.9<br>(1.4 to 2.5)               | 17.6<br>(13.7 to 22.0)                            | -0.7<br>(-3.6 to 2.3)                               |
| Low back pain                                              | 11.0<br>(9.7 to 12.5)                   | 5.4<br>(4.7 to 6.2)                      | 1.2<br>(0.9 to 1.6)               | 17.7<br>(11.9 to 23.7)                            | -1.0<br>(-5.2 to 3.7)                               |
| Neck pain                                                  | 6.8<br>(5.9 to 7.9)                     | 1.5<br>(1.3 to 1.7)                      | 0.7<br>(0.5 to 1.0)               | 17.5<br>(13.6 to 21.6)                            | -0.3<br>(-2.3 to 1.7)                               |
| Gout                                                       | 0.8<br>(0.7 to 0.9)                     | 0.2<br>(0.1 to 0.2)                      | < 0.05<br>(< 0.05 to < 0.05)      | 27.2<br>(9.8 to 48.4)                             | -0.5<br>(-13.0 to 14.9)                             |
| Other musculoskeletal disorders                            | 8.3<br>(7.2 to 9.5)                     | 7.2<br>(6.2 to 8.6)                      | 0.7<br>(0.5 to 1.0)               | 12.8<br>(4.5 to 21.2)                             | -3.4<br>(-10.1 to 3.3)                              |
| <b>Other non-communicable diseases</b>                     | <b>117.4</b><br><b>(115.4 to 119.5)</b> | <b>320.4†</b><br><b>(301.4 to 340.2)</b> | <b>3.3</b><br><b>(2.2 to 4.6)</b> | <b>17.8</b><br><b>(16.2 to 19.5)</b>              | <b>0.2</b><br><b>(-0.9 to 1.3)</b>                  |
| Congenital anomalies                                       | 1.4<br>(1.2 to 1.6)                     | --                                       | 0.2<br>(0.1 to 0.2)               | 13.1<br>(5.9 to 20.7)                             | 4.4<br>(-2.0 to 11.2)                               |
| Neural tube defects                                        | 0.1<br>(0.1 to 0.1)                     | --                                       | < 0.05<br>(< 0.05 to < 0.05)      | 16.4<br>(0.8 to 34.4)                             | 7.0<br>(-6.9 to 23.5)                               |
| Congenital heart anomalies                                 | 0.3<br>(0.3 to 0.4)                     | --                                       | < 0.05<br>(< 0.05 to < 0.05)      | 12.1<br>(0.2 to 25.4)                             | 3.6<br>(-7.5 to 15.5)                               |
| Orofacial clefts                                           | 0.1<br>(0.1 to 0.1)                     | --                                       | < 0.05<br>(< 0.05 to < 0.05)      | 6.9<br>(-5.1 to 20.5)                             | -1.3<br>(-12.6 to 10.9)                             |
| Down's syndrome                                            | < 0.05<br>(< 0.05 to < 0.05)            | --                                       | < 0.05<br>(< 0.05 to < 0.05)      | 5.6<br>(-2.7 to 14.2)                             | 0.8<br>(-7.0 to 8.9)                                |
| Turner syndrome                                            | < 0.05<br>(< 0.05 to < 0.05)            | --                                       | < 0.05<br>(< 0.05 to < 0.05)      | 27.8<br>(4.4 to 56.7)                             | 21.7<br>(-0.3 to 49.2)                              |
| Klinefelter syndrome                                       | < 0.05<br>(< 0.05 to < 0.05)            | --                                       | < 0.05<br>(< 0.05 to < 0.05)      | 5.6<br>(-22.6 to 47.4)                            | 0.7<br>(-26.1 to 39.7)                              |



| Cause                                         | Prevalence in thousands (95% UI)     | Incidence in thousands (95% UI)       | YLDs in thousands (95% UI)        |                                                   |                                                     |
|-----------------------------------------------|--------------------------------------|---------------------------------------|-----------------------------------|---------------------------------------------------|-----------------------------------------------------|
|                                               | 2016 counts                          | 2016 counts                           | 2016 counts                       | Percentage change in counts between 2006 and 2016 | Percentage change in age-standardised rates between |
| Other chromosomal abnormalities               | < 0.05<br>(< 0.05 to 0.1)            | --                                    | < 0.05<br>(< 0.05 to < 0.05)      | -1.0<br>(-20.4 to 22.6)                           | -0.1<br>(-19.1 to 23.7)                             |
| Congenital musculoskeletal and limb anomalies | 0.2<br>(0.1 to 0.2)                  | --                                    | < 0.05<br>(< 0.05 to < 0.05)      | 18.1<br>(6.4 to 31.2)                             | 7.5<br>(-2.8 to 19.3)                               |
| Urogenital congenital anomalies               | 0.1<br>(0.1 to 0.1)                  | --                                    | < 0.05<br>(< 0.05 to < 0.05)      | 1.4<br>(-6.7 to 9.5)                              | -0.6<br>(-8.4 to 7.4)                               |
| Digestive congenital anomalies                | 0.3<br>(0.2 to 0.3)                  | --                                    | < 0.05<br>(< 0.05 to < 0.05)      | 11.6<br>(-2.4 to 28.4)                            | 2.8<br>(-10.0 to 17.9)                              |
| Other congenital anomalies                    | 0.6<br>(0.4 to 0.8)                  | --                                    | 0.1<br>(< 0.05 to 0.1)            | 12.9<br>(0.9 to 26.1)                             | 3.5<br>(-7.4 to 16.1)                               |
| Skin and subcutaneous diseases                | 56.8<br>(55.3 to 58.3)               | 125.7<br>(119.5 to 133.0)             | 1.4<br>(0.9 to 2.0)               | 8.0<br>(5.8 to 9.8)                               | 0.0<br>(-1.7 to 1.8)                                |
| Dermatitis                                    | 7.5<br>(7.0 to 8.0)                  | 9.8<br>(9.1 to 10.5)                  | 0.3<br>(0.2 to 0.5)               | 3.9<br>(0.2 to 7.6)                               | -0.1<br>(-3.5 to 3.3)                               |
| Psoriasis                                     | 1.3<br>(1.3 to 1.4)                  | 0.2<br>(0.2 to 0.2)                   | 0.1<br>(0.1 to 0.1)               | 15.0<br>(6.7 to 24.2)                             | 1.8<br>(-5.3 to 9.8)                                |
| Cellulitis                                    | 0.1<br>(0.1 to 0.1)                  | 1.0<br>(0.9 to 1.1)                   | < 0.05<br>(< 0.05 to < 0.05)      | 11.2<br>(-4.5 to 29.1)                            | -2.5<br>(-15.9 to 12.7)                             |
| Pyoderma                                      | 0.3<br>(0.3 to 0.3)                  | 6.2<br>(6.0 to 6.5)                   | < 0.05<br>(< 0.05 to < 0.05)      | 21.3<br>(12.2 to 31.4)                            | -0.2<br>(-7.0 to 7.1)                               |
| Scabies                                       | 6.0<br>(5.2 to 6.8)                  | 18.9<br>(16.5 to 21.8)                | 0.1<br>(0.1 to 0.2)               | 5.2<br>(1.8 to 9.1)                               | -3.1<br>(-6.1 to 0.0)                               |
| Fungal skin diseases                          | 14.6<br>(13.2 to 16.1)               | 51.5<br>(46.0 to 57.8)                | 0.1<br>(< 0.05 to 0.2)            | 14.3<br>(11.9 to 16.9)                            | -0.2<br>(-1.2 to 0.9)                               |
| Viral skin diseases                           | 4.6<br>(4.3 to 4.9)                  | 6.6<br>(6.2 to 7.0)                   | 0.1<br>(0.1 to 0.2)               | 5.5<br>(2.1 to 8.7)                               | -0.1<br>(-3.0 to 2.7)                               |
| Acne vulgaris                                 | 15.6<br>(14.1 to 17.2)               | 10.6<br>(8.8 to 12.9)                 | 0.4<br>(0.3 to 0.6)               | 8.1<br>(3.1 to 13.0)                              | 1.1<br>(-3.6 to 5.7)                                |
| Alopecia areata                               | 0.3<br>(0.3 to 0.3)                  | 0.6<br>(0.6 to 0.6)                   | < 0.05<br>(< 0.05 to < 0.05)      | 9.0<br>(-2.1 to 20.3)                             | -0.1<br>(-10.0 to 9.8)                              |
| Pruritus                                      | 1.6<br>(1.4 to 1.8)                  | 1.3<br>(1.2 to 1.4)                   | < 0.05<br>(< 0.05 to < 0.05)      | 14.6<br>(8.6 to 21.4)                             | 0.2<br>(-4.6 to 5.5)                                |
| Urticaria                                     | 1.5<br>(1.3 to 1.7)                  | 2.6<br>(2.3 to 3.0)                   | 0.1<br>(0.1 to 0.1)               | 4.2<br>(-1.8 to 10.0)                             | -0.1<br>(-5.6 to 5.2)                               |
| Decubitus ulcer                               | < 0.05<br>(< 0.05 to < 0.05)         | 0.1<br>(0.1 to 0.1)                   | < 0.05<br>(< 0.05 to < 0.05)      | 34.7<br>(15.7 to 56.0)                            | -2.8<br>(-16.3 to 12.7)                             |
| Other skin and subcutaneous diseases          | 13.8<br>(13.4 to 14.2)               | 16.3<br>(15.7 to 16.8)                | 0.1<br>(< 0.05 to 0.1)            | 18.5<br>(15.5 to 21.2)                            | -0.2<br>(-2.6 to 2.0)                               |
| Sense organ diseases                          | 40.2<br>(39.3 to 41.3)               | 17.4†<br>(16.3 to 18.5)               | 1.5<br>(1.0 to 2.1)               | 28.5<br>(25.9 to 31.5)                            | -0.1<br>(-1.9 to 1.9)                               |
| Glaucoma                                      | 0.1<br>(0.1 to 0.1)                  | --                                    | < 0.05<br>(< 0.05 to < 0.05)      | 47.8<br>(27.4 to 71.3)                            | 0.2<br>(-12.8 to 14.8)                              |
| Cataract                                      | 1.7<br>(1.4 to 2.0)                  | --                                    | 0.1<br>(0.1 to 0.1)               | 42.1<br>(33.8 to 50.6)                            | -2.6<br>(-8.3 to 2.8)                               |
| Macular degeneration                          | 0.1<br>(0.1 to 0.2)                  | --                                    | < 0.05<br>(< 0.05 to < 0.05)      | 50.3<br>(31.6 to 73.4)                            | 1.1<br>(-11.0 to 15.8)                              |
| Refraction and accommodation disorders        | 16.4<br>(15.6 to 17.2)               | --                                    | 0.4<br>(0.2 to 0.5)               | 23.5<br>(19.4 to 28.0)                            | -0.9<br>(-4.2 to 2.0)                               |
| Age-related and other hearing loss            | 29.2<br>(27.6 to 30.8)               | --                                    | 0.8<br>(0.6 to 1.1)               | 29.7<br>(25.7 to 34.4)                            | 0.6<br>(-2.3 to 3.8)                                |
| Other vision loss                             | 0.8<br>(0.7 to 0.9)                  | --                                    | 0.1<br>(< 0.05 to 0.1)            | 30.3<br>(19.9 to 41.3)                            | -0.6<br>(-7.7 to 7.0)                               |
| Other sense organ diseases                    | 5.2<br>(4.8 to 5.7)                  | 17.4<br>(16.3 to 18.5)                | 0.2<br>(0.1 to 0.2)               | 24.4<br>(19.4 to 29.7)                            | 0.1<br>(-3.6 to 3.9)                                |
| Oral disorders                                | 69.9<br>(66.4 to 73.1)               | 177.4†<br>(160.0 to 196.3)            | 0.3<br>(0.2 to 0.4)               | 22.5<br>(19.5 to 25.8)                            | -0.1<br>(-2.1 to 1.8)                               |
| Caries of deciduous teeth                     | 7.2<br>(5.0 to 9.2)                  | 33.1<br>(19.8 to 46.3)                | < 0.05<br>(< 0.05 to < 0.05)      | -6.9<br>(-19.6 to 7.6)                            | -0.2<br>(-13.8 to 15.2)                             |
| Caries of permanent teeth                     | 55.3<br>(51.4 to 59.4)               | 143.6<br>(131.6 to 157.7)             | < 0.05<br>(< 0.05 to 0.1)         | 11.1<br>(7.1 to 15.1)                             | -0.1<br>(-3.3 to 3.3)                               |
| Periodontal disease                           | 3.0<br>(2.4 to 3.6)                  | 0.3<br>(0.2 to 0.4)                   | < 0.05<br>(< 0.05 to < 0.05)      | 25.7<br>(19.0 to 32.4)                            | 0.3<br>(-4.0 to 4.8)                                |
| Edentulism and severe tooth loss              | 5.0<br>(4.3 to 5.7)                  | 0.4<br>(0.3 to 0.5)                   | 0.1<br>(0.1 to 0.2)               | 34.5<br>(29.5 to 39.6)                            | -0.1<br>(-3.3 to 3.3)                               |
| Other oral disorders                          | 3.1<br>(3.0 to 3.3)                  | --                                    | 0.1<br>(0.1 to 0.1)               | 11.8<br>(8.2 to 15.6)                             | -0.1<br>(-3.4 to 3.1)                               |
| <b>Injuries</b>                               | <b>28.6</b><br><b>(27.2 to 30.0)</b> | <b>11.6†</b><br><b>(11.1 to 12.2)</b> | <b>1.1</b><br><b>(0.7 to 1.6)</b> | <b>36.3</b><br><b>(33.9 to 38.9)</b>              | <b>16.5</b><br><b>(14.5 to 18.8)</b>                |
| <b>Transport injuries</b>                     | <b>6.4</b><br><b>(6.0 to 7.0)</b>    | <b>1.9</b><br><b>(1.8 to 2.2)</b>     | <b>0.3</b><br><b>(0.2 to 0.5)</b> | <b>48.3</b><br><b>(45.4 to 51.3)</b>              | <b>25.5</b><br><b>(23.1 to 28.0)</b>                |
| Road injuries                                 | 4.6<br>(4.3 to 5.0)                  | 1.5<br>(1.4 to 1.8)                   | 0.2<br>(0.2 to 0.3)               | 61.7<br>(58.5 to 64.9)                            | 35.5<br>(33.0 to 38.2)                              |
| Pedestrian road injuries                      | 0.9<br>(0.8 to 1.0)                  | 0.2<br>(0.2 to 0.3)                   | < 0.05<br>(< 0.05 to 0.1)         | 75.9<br>(72.4 to 79.5)                            | 45.2<br>(42.7 to 48.1)                              |
| Cyclist road injuries                         | 0.5<br>(0.5 to 0.6)                  | 0.2<br>(0.2 to 0.2)                   | < 0.05<br>(< 0.05 to < 0.05)      | 68.1<br>(64.8 to 71.8)                            | 40.9<br>(38.4 to 43.6)                              |
| Motorcyclist road injuries                    | 1.2<br>(1.0 to 1.4)                  | 0.3<br>(0.2 to 0.3)                   | 0.1<br>(< 0.05 to 0.1)            | 72.4<br>(69.0 to 76.2)                            | 46.4<br>(43.7 to 49.2)                              |
| Motor vehicle road injuries                   | 1.6<br>(1.3 to 1.8)                  | 0.7<br>(0.6 to 0.8)                   | 0.1<br>(0.1 to 0.1)               | 48.6<br>(45.5 to 51.9)                            | 24.2<br>(21.8 to 26.9)                              |
| Other road injuries                           | 0.5<br>(0.4 to 0.6)                  | 0.2<br>(0.2 to 0.3)                   | < 0.05<br>(< 0.05 to < 0.05)      | 58.3<br>(55.1 to 61.7)                            | 33.2<br>(30.7 to 35.8)                              |
| Other transport injuries                      | 1.8<br>(1.5 to 2.1)                  | 0.4<br>(0.4 to 0.5)                   | 0.1<br>(0.1 to 0.1)               | 22.3<br>(19.3 to 25.6)                            | 5.7<br>(3.1 to 8.4)                                 |
| <b>Unintentional injuries</b>                 | <b>19.2</b><br><b>(18.1 to 20.4)</b> | <b>8.4</b><br><b>(8.0 to 8.9)</b>     | <b>0.6</b><br><b>(0.4 to 0.9)</b> | <b>32.6</b><br><b>(30.3 to 35.3)</b>              | <b>13.5</b><br><b>(11.7 to 15.7)</b>                |
| Falls                                         | 4.7<br>(4.1 to 5.3)                  | 2.0<br>(1.8 to 2.3)                   | 0.2<br>(0.1 to 0.3)               | 52.0<br>(49.3 to 55.2)                            | 27.5<br>(25.4 to 29.7)                              |
| Drowning                                      | 0.2<br>(0.2 to 0.2)                  | < 0.05<br>(< 0.05 to < 0.05)          | < 0.05<br>(< 0.05 to < 0.05)      | 32.7<br>(29.0 to 36.9)                            | 12.1<br>(9.1 to 15.6)                               |
| Fire, heat, and hot substances                | 2.1<br>(1.8 to 2.5)                  | 0.2<br>(0.2 to 0.3)                   | 0.1<br>(< 0.05 to 0.1)            | 27.9<br>(23.4 to 32.9)                            | 12.3<br>(8.6 to 16.7)                               |
| Poisonings                                    | 0.1<br>(0.1 to 0.1)                  | 0.1<br>(0.1 to 0.1)                   | < 0.05<br>(< 0.05 to < 0.05)      | 30.5<br>(21.6 to 40.2)                            | 16.7<br>(8.8 to 24.8)                               |
| Exposure to mechanical forces                 | 3.6<br>(3.1 to 4.3)                  | 1.3<br>(1.1 to 1.5)                   | 0.1<br>(0.1 to 0.1)               | 46.3<br>(43.4 to 49.4)                            | 24.7<br>(22.5 to 27.2)                              |
| Unintentional firearm injuries                | 0.2<br>(0.1 to 0.2)                  | < 0.05<br>(< 0.05 to 0.1)             | < 0.05<br>(< 0.05 to < 0.05)      | 31.8<br>(29.0 to 35.0)                            | 13.5<br>(11.1 to 16.1)                              |
| Unintentional suffocation                     | 0.2<br>(0.2 to 0.3)                  | < 0.05<br>(< 0.05 to 0.1)             | < 0.05<br>(< 0.05 to < 0.05)      | 26.9<br>(24.1 to 30.0)                            | 11.7<br>(9.5 to 14.4)                               |
| Other exposure to mechanical forces           | 3.2<br>(2.7 to 3.9)                  | 1.2<br>(1.1 to 1.4)                   | 0.1<br>(< 0.05 to 0.1)            | 50.1<br>(47.1 to 53.5)                            | 27.3<br>(25.0 to 30.0)                              |

| Cause                                                                               | Prevalence in thousands (95% UI)  | Incidence in thousands (95% UI)                      | YLDs in thousands (95% UI)                          |                                                   |                                                     |
|-------------------------------------------------------------------------------------|-----------------------------------|------------------------------------------------------|-----------------------------------------------------|---------------------------------------------------|-----------------------------------------------------|
|                                                                                     | 2016 counts                       | 2016 counts                                          | 2016 counts                                         | Percentage change in counts between 2006 and 2016 | Percentage change in age-standardised rates between |
| Adverse effects of medical treatment                                                | 0.1<br>(0.1 to 0.1)               | 1.2<br>(1.1 to 1.4)                                  | < 0.05<br>(< 0.05 to < 0.05)                        | 19.1<br>(13.1 to 25.7)                            | 5.3<br>(0.4 to 10.6)                                |
| Animal contact                                                                      | 0.8<br>(0.7 to 0.9)               | 0.9<br>(0.7 to 1.1)                                  | < 0.05<br>(< 0.05 to < 0.05)                        | 15.9<br>(9.9 to 22.4)                             | 1.8<br>(-3.5 to 7.3)                                |
| Venomous animal contact                                                             | 0.4<br>(0.3 to 0.5)               | 0.5<br>(0.4 to 0.6)                                  | < 0.05<br>(< 0.05 to < 0.05)                        | 16.8<br>(9.0 to 25.0)                             | 3.3<br>(-3.4 to 10.5)                               |
| Non-venomous animal contact                                                         | 0.4<br>(0.3 to 0.5)               | 0.4<br>(0.4 to 0.6)                                  | < 0.05<br>(< 0.05 to < 0.05)                        | 13.1<br>(10.3 to 16.7)                            | -2.7<br>(-5.0 to 0.1)                               |
| Foreign body                                                                        | 1.2<br>(1.0 to 1.4)               | 0.6<br>(0.5 to 0.7)                                  | < 0.05<br>(< 0.05 to 0.1)                           | 20.0<br>(17.2 to 23.4)                            | 4.3<br>(2.0 to 7.4)                                 |
| Pulmonary aspiration and foreign body in airway                                     | 0.8<br>(0.6 to 1.0)               | 0.3<br>(0.2 to 0.3)                                  | < 0.05<br>(< 0.05 to < 0.05)                        | 19.9<br>(16.8 to 23.6)                            | 4.3<br>(1.6 to 7.4)                                 |
| Foreign body in eyes                                                                | < 0.05<br>(< 0.05 to < 0.05)      | 0.2<br>(0.1 to 0.2)                                  | < 0.05<br>(< 0.05 to < 0.05)                        | 12.8<br>(7.7 to 18.2)                             | -1.2<br>(-4.4 to 1.5)                               |
| Foreign body in other body part                                                     | 0.4<br>(0.3 to 0.5)               | 0.1<br>(0.1 to 0.2)                                  | < 0.05<br>(< 0.05 to < 0.05)                        | 21.6<br>(18.3 to 25.7)                            | 5.5<br>(2.8 to 9.0)                                 |
| Environmental heat and cold exposure                                                | 2.9<br>(2.5 to 3.3)               | 0.7<br>(0.6 to 0.9)                                  | 0.1<br>(0.1 to 0.1)                                 | 23.4<br>(20.9 to 26.1)                            | 6.1<br>(4.1 to 8.4)                                 |
| Other unintentional injuries                                                        | 3.7<br>(3.0 to 4.5)               | 1.3<br>(1.1 to 1.5)                                  | 0.1<br>(0.1 to 0.1)                                 | 18.8<br>(16.4 to 21.0)                            | 1.2<br>(-0.6 to 3.1)                                |
| <b>Self-harm and interpersonal violence</b>                                         | <b>6.0</b><br><b>(5.5 to 6.6)</b> | <b>1.2†</b><br><b>(1.1 to 1.4)</b>                   | <b>0.1</b><br><b>(0.1 to 0.2)</b>                   | <b>23.1</b><br><b>(20.4 to 25.9)</b>              | <b>6.6</b><br><b>(4.6 to 8.9)</b>                   |
| Self-harm                                                                           | 0.5<br>(0.4 to 0.6)               | 0.2<br>(0.2 to 0.2)                                  | < 0.05<br>(< 0.05 to < 0.05)                        | 24.5<br>(21.1 to 28.5)                            | 5.1<br>(2.4 to 8.4)                                 |
| Self-harm by firearm                                                                | < 0.05<br>(< 0.05 to < 0.05)      | < 0.05<br>(< 0.05 to < 0.05)                         | < 0.05<br>(< 0.05 to < 0.05)                        | 20.9<br>(17.2 to 24.7)                            | 3.9<br>(0.7 to 7.0)                                 |
| Self-harm by other specified means                                                  | 0.5<br>(0.4 to 0.5)               | 0.2<br>(0.2 to 0.2)                                  | < 0.05<br>(< 0.05 to < 0.05)                        | 24.7<br>(21.1 to 28.6)                            | 5.2<br>(2.3 to 8.5)                                 |
| Interpersonal violence                                                              | 5.5<br>(5.0 to 6.2)               | 1.0†<br>(0.9 to 1.2)                                 | 0.1<br>(0.1 to 0.1)                                 | 22.8<br>(19.9 to 25.7)                            | 6.9<br>(4.7 to 9.3)                                 |
| Assault by firearm                                                                  | < 0.05<br>(< 0.05 to 0.1)         | < 0.05<br>(< 0.05 to < 0.05)                         | < 0.05<br>(< 0.05 to < 0.05)                        | 14.0<br>(10.9 to 17.1)                            | -3.0<br>(-5.5 to -0.2)                              |
| Assault by sharp object                                                             | 0.5<br>(0.4 to 0.5)               | 0.2<br>(0.1 to 0.2)                                  | < 0.05<br>(< 0.05 to < 0.05)                        | 19.3<br>(16.4 to 22.6)                            | 3.0<br>(0.4 to 6.0)                                 |
| Sexual violence                                                                     | 3.3<br>(2.9 to 3.8)               | --                                                   | < 0.05<br>(< 0.05 to < 0.05)                        | 4.4<br>(0.6 to 8.8)                               | -3.3<br>(-6.8 to 0.3)                               |
| Assault by other means                                                              | 1.7<br>(1.4 to 2.1)               | 0.9<br>(0.7 to 1.0)                                  | 0.1<br>(< 0.05 to 0.1)                              | 33.8<br>(31.0 to 36.7)                            | 13.2<br>(11.0 to 15.6)                              |
| <b>Forces of nature, conflict and terrorism, and executions and police conflict</b> | <b>0.2</b><br><b>(0.1 to 0.4)</b> | <b>&lt; 0.05†</b><br><b>(&lt; 0.05 to &lt; 0.05)</b> | <b>&lt; 0.05</b><br><b>(&lt; 0.05 to &lt; 0.05)</b> | <b>458.4</b><br><b>(406.1 to 498.3)</b>           | <b>428.5</b><br><b>(381.2 to 468.0)</b>             |
| Exposure to forces of nature                                                        | --                                | --                                                   | --                                                  | --                                                | --                                                  |
| Conflict and terrorism                                                              | 0.2<br>(0.1 to 0.4)               | --                                                   | < 0.05<br>(< 0.05 to < 0.05)                        | 594.3<br>(539.6 to 658.7)                         | 557.6<br>(505.4 to 620.5)                           |
| Executions and police conflict                                                      | < 0.05<br>(< 0.05 to < 0.05)      | < 0.05<br>(< 0.05 to < 0.05)                         | < 0.05<br>(< 0.05 to < 0.05)                        | 36.1<br>(25.4 to 42.2)                            | 22.5<br>(14.6 to 27.3)                              |
| <b>Impairments</b>                                                                  | --                                | --                                                   | --                                                  | --                                                | --                                                  |
| Anaemia                                                                             | 42.3<br>(37.3 to 47.3)            | --                                                   | 1.1<br>(0.7 to 1.6)                                 | 11.1<br>(-2.0 to 27.9)                            | 0.8<br>(-10.9 to 14.2)                              |
| Developmental intellectual disability                                               | 2.4<br>(1.8 to 2.9)               | --                                                   | 0.3<br>(0.2 to 0.4)                                 | 4.6<br>(-1.6 to 9.8)                              | -2.5<br>(-8.2 to 2.2)                               |
| Epilepsy                                                                            | 0.8<br>(0.4 to 1.1)               | --                                                   | 0.3<br>(0.1 to 0.5)                                 | 11.4<br>(-44.0 to 123.8)                          | 2.9<br>(-48.6 to 109.1)                             |
| Guillain-Barre syndrome                                                             | < 0.05<br>(< 0.05 to < 0.05)      | --                                                   | < 0.05<br>(< 0.05 to < 0.05)                        | 13.6<br>(9.5 to 18.2)                             | -0.1<br>(-0.1 to 0.0)                               |
| Hearing loss                                                                        | 31.0<br>(29.4 to 32.7)            | --                                                   | 0.9<br>(0.6 to 1.2)                                 | 26.9<br>(23.1 to 30.8)                            | 0.5<br>(-2.1 to 3.5)                                |
| Heart failure                                                                       | 1.3<br>(1.2 to 1.5)               | --                                                   | 0.1<br>(0.1 to 0.2)                                 | 38.2<br>(29.1 to 48.8)                            | -1.4<br>(-7.7 to 5.6)                               |
| Infertility                                                                         | 3.6<br>(2.9 to 4.7)               | --                                                   | < 0.05<br>(< 0.05 to < 0.05)                        | 1.6<br>(-4.1 to 7.6)                              | 1.8<br>(-3.3 to 7.0)                                |
| Pelvic inflammatory disease                                                         | 0.1<br>(0.1 to 0.2)               | --                                                   | < 0.05<br>(< 0.05 to < 0.05)                        | 2.4<br>(-11.0 to 18.0)                            | -2.6<br>(-15.1 to 12.2)                             |
| Vision loss                                                                         | 19.5<br>(18.6 to 20.6)            | --                                                   | 0.6<br>(0.4 to 0.8)                                 | 23.9<br>(19.5 to 27.5)                            | -1.7<br>(-4.5 to 0.7)                               |

We did not calculate incidence for the nine impairments, certain NTDs, and causes with only birth prevalence. Blank cells mean that no estimate is available.

† Incidence for aggregate causes represents the sum of the incidence of the causes below the aggregate.

‡ Incidence estimates for stroke represent first-ever stroke only.

^ Incidence of HIV/AIDS represents new infections of HIV only and does not include new infections of Tuberculosis in HIV positive cases.

SR Table 14: Prevalence, incidence, and YLDs for 2016, percentage change of YLD counts and percentage change of age-standardised YLD rates between 2006 and 2016 by cause and impairments, for all ages, Guatemala.

| Cause                                                                                | Prevalence in thousands (95% UI)          | Incidence in thousands (95% UI)             | YLDs in thousands (95% UI)             |                                                   |                                                     |
|--------------------------------------------------------------------------------------|-------------------------------------------|---------------------------------------------|----------------------------------------|---------------------------------------------------|-----------------------------------------------------|
|                                                                                      | 2016 counts                               | 2016 counts                                 | 2016 counts                            | Percentage change in counts between 2006 and 2016 | Percentage change in age-standardised rates between |
| <b>All causes</b>                                                                    | <b>15,836.7</b><br>(15,756.6 to 15,909.2) | <b>95,417.1†</b><br>(89,825.2 to 101,593.4) | <b>1,420.6</b><br>(1,045.4 to 1,842.0) | <b>24.9</b><br>(21.6 to 28.7)                     | <b>-3.1</b><br>(-5.3 to -0.7)                       |
| <b>Communicable, maternal, neonatal, and nutritional disorders</b>                   | <b>12,329.9</b><br>(11,914.2 to 12,779.6) | <b>58,858.9†</b><br>(53,856.0 to 64,407.3)  | <b>156.1</b><br>(108.7 to 221.1)       | <b>-2.4</b><br>(-11.6 to 7.2)                     | <b>-18.8</b><br>(-27.9 to -9.6)                     |
| <b>HIV/AIDS and tuberculosis</b>                                                     | <b>3,632.9</b><br>(3,234.3 to 3,943.7)    | <b>4.8†</b><br>(3.6 to 6.6)                 | <b>2.9</b><br>(1.6 to 5.3)             | <b>33.6</b><br>(2.0 to 70.2)                      | <b>3.1</b><br>(-22.5 to 34.4)                       |
| Tuberculosis                                                                         | 3,343.0<br>(2,997.2 to 3,727.4)           | 2.9†<br>(2.4 to 3.4)                        | 0.4<br>(0.3 to 0.6)                    | 3.0<br>(-15.5 to 25.7)                            | -18.9<br>(-35.3 to 2.3)                             |
| Drug-susceptible tuberculosis                                                        | 1.2<br>(1.0 to 1.4)                       | 2.8<br>(2.4 to 3.3)                         | 0.4<br>(0.2 to 0.5)                    | 3.3<br>(-15.6 to 27.3)                            | -18.7<br>(-35.5 to 3.0)                             |
| Multidrug-resistant tuberculosis without extensive drug resistance                   | < 0.05<br>(< 0.05 to 0.1)                 | 0.1<br>(< 0.05 to 0.1)                      | < 0.05<br>(< 0.05 to < 0.05)           | -10.0<br>(-51.5 to 60.8)                          | -29.3<br>(-61.9 to 27.9)                            |
| Extensively drug-resistant tuberculosis                                              | < 0.05<br>(< 0.05 to < 0.05)              | < 0.05<br>(< 0.05 to < 0.05)                | < 0.05<br>(< 0.05 to < 0.05)           | 139.5<br>(29.2 to 328.2)                          | 88.2<br>(1.5 to 240.7)                              |
| Latent tuberculosis infection                                                        | 3,341.8<br>(2,995.8 to 3,726.0)           | --                                          | --                                     | --                                                | --                                                  |
| HIV/AIDS                                                                             | 26.3<br>(17.5 to 39.6)                    | 1.9^<br>(0.9 to 3.7)                        | 2.5<br>(1.3 to 4.9)                    | 40.2<br>(2.2 to 89.9)                             | 7.8<br>(-23.4 to 50.4)                              |
| Drug-susceptible HIV/AIDS - Tuberculosis                                             | 0.2<br>(0.1 to 0.4)                       | 0.6<br>(0.4 to 0.9)                         | 0.1<br>(0.1 to 0.2)                    | -25.1<br>(-32.2 to -18.6)                         | -40.6<br>(-46.3 to -35.5)                           |
| Multidrug-resistant HIV/AIDS - Tuberculosis without extensive drug resistance        | < 0.05<br>(< 0.05 to < 0.05)              | < 0.05<br>(< 0.05 to < 0.05)                | < 0.05<br>(< 0.05 to < 0.05)           | -33.3<br>(-64.9 to 18.9)                          | -47.2<br>(-72.2 to -6.0)                            |
| Extensively drug-resistant HIV/AIDS - Tuberculosis                                   | < 0.05<br>(< 0.05 to < 0.05)              | < 0.05<br>(< 0.05 to < 0.05)                | < 0.05<br>(< 0.05 to < 0.05)           | 77.5<br>(-6.5 to 216.8)                           | 40.5<br>(-26.0 to 150.6)                            |
| HIV/AIDS resulting in other diseases                                                 | 26.1<br>(17.2 to 39.4)                    | 1.9<br>(0.9 to 3.7)                         | 2.4<br>(1.2 to 4.8)                    | 45.8<br>(4.6 to 106.4)                            | 11.9<br>(-21.8 to 66.2)                             |
| <b>Diarrhoea, lower respiratory infections, and other common infectious diseases</b> | <b>1,012.9</b><br>(963.1 to 1,071.0)      | <b>55,808.8†</b><br>(50,769.5 to 61,373.4)  | <b>51.5</b><br>(35.3 to 71.4)          | <b>7.6</b><br>(3.8 to 11.5)                       | <b>-6.7</b><br>(-9.9 to -3.8)                       |
| Diarrhoeal diseases                                                                  | 233.8<br>(222.0 to 246.4)                 | 15,461.5<br>(14,645.8 to 16,314.1)          | 26.7<br>(18.2 to 36.7)                 | 0.8<br>(-4.7 to 6.5)                              | -10.7<br>(-15.1 to -6.3)                            |
| Intestinal infectious diseases                                                       | 0.3<br>(0.2 to 0.3)                       | 4.1†<br>(3.4 to 5.0)                        | < 0.05<br>(< 0.05 to 0.1)              | 27.7<br>(12.7 to 44.7)                            | 0.2<br>(-11.8 to 13.7)                              |
| Typhoid fever                                                                        | 0.3<br>(0.2 to 0.3)                       | 4.1<br>(3.4 to 4.9)                         | < 0.05<br>(< 0.05 to 0.1)              | 31.0<br>(15.2 to 48.9)                            | 1.4<br>(-10.9 to 15.7)                              |
| Paratyphoid fever                                                                    | < 0.05<br>(< 0.05 to < 0.05)              | < 0.05<br>(< 0.05 to < 0.05)                | < 0.05<br>(< 0.05 to < 0.05)           | 25.4<br>(-0.6 to 53.0)                            | -1.6<br>(-23.2 to 20.3)                             |
| Other intestinal infectious diseases                                                 | --                                        | --                                          | < 0.05<br>(< 0.05 to < 0.05)           | -30.6<br>(-49.5 to -2.0)                          | -30.6<br>(-44.7 to -12.3)                           |
| Lower respiratory infections                                                         | 18.1<br>(16.5 to 19.9)                    | 744.8<br>(676.5 to 824.8)                   | 1.1<br>(0.7 to 1.6)                    | 23.0<br>(7.5 to 40.5)                             | 1.5<br>(-8.3 to 12.2)                               |
| Upper respiratory infections                                                         | 504.9<br>(439.3 to 576.0)                 | 37,940.3<br>(32,836.7 to 43,548.9)          | 12.7<br>(7.5 to 20.0)                  | 18.8<br>(12.5 to 25.2)                            | -0.3<br>(-4.7 to 4.7)                               |
| Otitis media                                                                         | 269.6<br>(241.3 to 299.5)                 | 1,231.4<br>(979.5 to 1,547.7)               | 8.0<br>(5.0 to 12.1)                   | 9.4<br>(1.2 to 17.3)                              | -3.9<br>(-10.2 to 2.3)                              |
| Meningitis                                                                           | 12.0<br>(10.3 to 13.8)                    | 2.9<br>(2.5 to 3.3)                         | 1.3<br>(0.9 to 1.8)                    | 15.7<br>(11.4 to 19.8)                            | -8.4<br>(-11.8 to -5.2)                             |
| Pneumococcal meningitis                                                              | 4.9<br>(4.2 to 5.7)                       | 0.5<br>(0.4 to 0.6)                         | 0.6<br>(0.4 to 0.8)                    | 2.4<br>(-4.8 to 10.1)                             | -19.8<br>(-25.8 to -13.8)                           |
| H influenzae type B meningitis                                                       | 1.2<br>(1.0 to 1.4)                       | 0.2<br>(0.2 to 0.3)                         | 0.2<br>(0.1 to 0.2)                    | 11.3<br>(4.2 to 18.1)                             | -8.8<br>(-14.1 to -3.5)                             |
| Meningococcal infection                                                              | 0.8<br>(0.6 to 1.0)                       | 0.3<br>(0.2 to 0.4)                         | 0.1<br>(0.1 to 0.1)                    | 21.1<br>(14.1 to 27.3)                            | -3.9<br>(-8.7 to 0.6)                               |
| Other meningitis                                                                     | 5.1<br>(3.9 to 6.4)                       | 1.9<br>(1.7 to 2.2)                         | 0.5<br>(0.3 to 0.6)                    | 41.2<br>(34.5 to 48.6)                            | 11.8<br>(6.2 to 17.5)                               |
| Encephalitis                                                                         | 8.4<br>(6.0 to 12.0)                      | 3.8<br>(3.3 to 4.4)                         | 1.0<br>(0.7 to 1.4)                    | 25.9<br>(21.2 to 30.8)                            | -1.2<br>(-4.7 to 2.4)                               |
| Diphtheria                                                                           | < 0.05<br>(< 0.05 to < 0.05)              | < 0.05<br>(< 0.05 to < 0.05)                | < 0.05<br>(< 0.05 to < 0.05)           | -12.5<br>(-56.9 to 76.2)                          | -18.9<br>(-56.6 to 50.6)                            |
| Whooping cough                                                                       | 1.7<br>(1.3 to 2.1)                       | 12.1<br>(9.3 to 15.7)                       | 0.1<br>(< 0.05 to 0.1)                 | 19.2<br>(-9.7 to 58.2)                            | 19.1<br>(-9.6 to 57.6)                              |
| Tetanus                                                                              | < 0.05<br>(< 0.05 to < 0.05)              | < 0.05<br>(< 0.05 to < 0.05)                | < 0.05<br>(< 0.05 to < 0.05)           | -28.3<br>(-45.1 to -4.4)                          | -46.8<br>(-60.1 to -27.7)                           |
| Measles                                                                              | < 0.05<br>(0.0 to < 0.05)                 | < 0.05<br>(0.0 to < 0.05)                   | < 0.05<br>(0.0 to < 0.05)              | --                                                | --                                                  |
| Varicella and herpes zoster                                                          | 15.3<br>(14.3 to 16.4)                    | 407.9<br>(396.3 to 421.9)                   | 0.5<br>(0.3 to 0.8)                    | 27.8<br>(11.5 to 47.6)                            | 0.2<br>(-10.6 to 12.3)                              |
| <b>Neglected tropical diseases and malaria</b>                                       | <b>8,601.5</b><br>(7,737.0 to 9,603.4)    | <b>406.5†</b><br>(278.9 to 641.1)           | <b>40.7</b><br>(24.4 to 67.3)          | <b>-21.4</b><br>(-41.2 to 4.8)                    | <b>-35.8</b><br>(-53.1 to -13.8)                    |
| Malaria                                                                              | 0.4<br>(0.3 to 0.5)                       | 6.9<br>(6.9 to 6.9)                         | < 0.05<br>(< 0.05 to < 0.05)           | -89.0<br>(-93.2 to -67.6)                         | -91.0<br>(-94.3 to -73.9)                           |
| Chagas disease                                                                       | 66.0<br>(51.8 to 84.3)                    | 2.5<br>(1.9 to 3.2)                         | 0.5<br>(0.3 to 0.8)                    | 34.6<br>(15.6 to 56.7)                            | -1.7<br>(-14.9 to 13.2)                             |
| Leishmaniasis                                                                        | 7.5<br>(5.7 to 10.2)                      | 1.7<br>(< 0.05 to 7.0)                      | 0.4<br>(0.2 to 0.7)                    | 146.2<br>(25.1 to 551.8)                          | 103.9<br>(4.6 to 444.2)                             |
| Visceral leishmaniasis                                                               | < 0.05<br>(< 0.05 to < 0.05)              | < 0.05<br>(< 0.05 to < 0.05)                | < 0.05<br>(< 0.05 to < 0.05)           | -53.1<br>(-100.0 to 1,131.8)                      | -64.8<br>(-100.0 to 928.5)                          |
| Cutaneous and mucocutaneous leishmaniasis                                            | 6.3<br>(4.3 to 9.7)                       | 1.7<br>(< 0.05 to 7.0)                      | 0.4<br>(0.2 to 0.7)                    | 146.2<br>(25.2 to 551.8)                          | 103.9<br>(4.6 to 445.0)                             |
| African trypanosomiasis                                                              | --                                        | --                                          | --                                     | --                                                | --                                                  |
| Schistosomiasis                                                                      | --                                        | --                                          | --                                     | --                                                | --                                                  |
| Cysticercosis                                                                        | 5.6<br>(2.4 to 9.9)                       | --                                          | 0.9<br>(0.3 to 1.8)                    | 8.6<br>(-49.3 to 79.9)                            | -19.7<br>(-61.9 to 31.9)                            |
| Cystic echinococcosis                                                                | --                                        | --                                          | --                                     | --                                                | --                                                  |
| Lymphatic filariasis                                                                 | --                                        | --                                          | --                                     | --                                                | --                                                  |
| Onchocerciasis                                                                       | --                                        | --                                          | --                                     | --                                                | --                                                  |
| Trachoma                                                                             | 7.8<br>(5.2 to 11.5)                      | --                                          | 0.6<br>(0.4 to 0.9)                    | 12.5<br>(-19.9 to 59.1)                           | -21.9<br>(-46.2 to 15.7)                            |
| Dengue                                                                               | 14.8<br>(8.8 to 23.3)                     | 246.7<br>(170.5 to 339.5)                   | 2.4<br>(1.1 to 4.4)                    | 256.7<br>(164.0 to 775.2)                         | 191.7<br>(117.3 to 599.4)                           |
| Yellow fever                                                                         | --                                        | --                                          | --                                     | --                                                | --                                                  |
| Rabies                                                                               | < 0.05<br>(< 0.05 to < 0.05)              | < 0.05<br>(< 0.05 to < 0.05)                | < 0.05<br>(< 0.05 to < 0.05)           | 59.4<br>(-8.6 to 176.4)                           | 3.5<br>(-38.8 to 64.6)                              |
| Intestinal nematode infections                                                       | 8,511.0<br>(7,639.8 to 9,520.8)           | --                                          | 34.0<br>(19.1 to 59.2)                 | -27.4<br>(-47.4 to 2.1)                           | -40.5<br>(-58.3 to -14.9)                           |
| Ascariasis                                                                           | 2,789.3<br>(2,080.7 to 3,731.2)           | --                                          | 3.3<br>(1.4 to 7.0)                    | -43.9<br>(-72.4 to 13.5)                          | -52.1<br>(-77.9 to 3.8)                             |



| Cause                                                                   | Prevalence in thousands (95% UI)                 | Incidence in thousands (95% UI)                   | YLDs in thousands (95% UI)                  |                                                   |                                                     |
|-------------------------------------------------------------------------|--------------------------------------------------|---------------------------------------------------|---------------------------------------------|---------------------------------------------------|-----------------------------------------------------|
|                                                                         | 2016 counts                                      | 2016 counts                                       | 2016 counts                                 | Percentage change in counts between 2006 and 2016 | Percentage change in age-standardised rates between |
| Trichuriasis                                                            | 4,306.6<br>(3,435.5 to 5,360.9)                  | --                                                | 8.4<br>(3.3 to 17.3)                        | -36.0<br>(-70.6 to 25.0)                          | -47.1<br>(-77.3 to 8.0)                             |
| Hookworm disease                                                        | 4,107.2<br>(3,378.7 to 4,969.5)                  | --                                                | 22.2<br>(12.7 to 38.3)                      | -19.8<br>(-44.5 to 15.9)                          | -34.8<br>(-56.6 to -1.4)                            |
| Food-borne trematodiasis                                                | --                                               | --                                                | --                                          | --                                                | --                                                  |
| Leprosy                                                                 | < 0.05<br>(< 0.05 to < 0.05)                     | < 0.05<br>(< 0.05 to < 0.05)                      | < 0.05<br>(< 0.05 to < 0.05)                | 5.6<br>(-17.5 to 54.9)                            | -20.7<br>(-37.5 to 15.6)                            |
| Ebola virus disease                                                     | --                                               | --                                                | --                                          | --                                                | --                                                  |
| Zika virus disease                                                      | 2.5<br>(1.0 to 6.1)                              | 148.8<br>(59.7 to 366.9)                          | 0.1<br>(< 0.05 to 0.1)                      | --                                                | --                                                  |
| Guinea worm disease                                                     | --                                               | --                                                | --                                          | --                                                | --                                                  |
| Other neglected tropical diseases                                       | 83.8<br>(74.0 to 93.9)                           | --                                                | 1.9<br>(1.2 to 3.0)                         | -6.4<br>(-22.8 to 12.3)                           | -11.1<br>(-26.2 to 6.0)                             |
| <b>Maternal disorders</b>                                               | <b>28.3</b><br><b>(23.0 to 35.7)</b>             | <b>607.5†</b><br><b>(496.4 to 728.5)</b>          | <b>1.8</b><br><b>(1.1 to 2.7)</b>           | <b>13.2</b><br><b>(-14.5 to 47.9)</b>             | <b>-14.0</b><br><b>(-34.7 to 12.3)</b>              |
| Maternal haemorrhage                                                    | 6.7<br>(5.0 to 8.9)                              | 24.3<br>(17.7 to 31.9)                            | 0.2<br>(0.1 to 0.3)                         | 5.2<br>(-26.5 to 51.4)                            | -18.2<br>(-42.7 to 16.9)                            |
| Maternal sepsis and other pregnancy related infections                  | 6.7<br>(4.5 to 9.6)                              | 52.9<br>(38.6 to 71.7)                            | 0.2<br>(0.1 to 0.4)                         | 1.8<br>(-54.1 to 104.3)                           | -21.8<br>(-63.9 to 55.9)                            |
| Maternal hypertensive disorders                                         | 12.4<br>(7.7 to 18.2)                            | 65.0<br>(51.6 to 80.9)                            | 0.6<br>(0.3 to 1.1)                         | 41.5<br>(-13.0 to 128.0)                          | 6.4<br>(-34.0 to 72.0)                              |
| Maternal obstructed labour and uterine rupture                          | 0.2<br>(0.1 to 0.4)                              | 17.7<br>(12.9 to 23.6)                            | 0.1<br>(< 0.05 to 0.1)                      | 2.1<br>(-51.1 to 146.7)                           | -22.6<br>(-62.0 to 78.8)                            |
| Maternal abortion, miscarriage, and ectopic pregnancy                   | 3.7<br>(2.3 to 5.4)                              | 447.6<br>(339.6 to 567.2)                         | 0.4<br>(0.2 to 0.7)                         | -2.0<br>(-43.7 to 73.5)                           | -26.1<br>(-57.2 to 29.9)                            |
| Other maternal disorders                                                | --                                               | --                                                | 0.3<br>(0.2 to 0.4)                         | 7.7<br>(-18.4 to 40.9)                            | -17.9<br>(-37.5 to 7.0)                             |
| <b>Neonatal disorders</b>                                               | <b>114.7</b><br><b>(98.2 to 136.1)</b>           | --                                                | <b>20.2</b><br><b>(13.4 to 29.4)</b>        | <b>28.9</b><br><b>(10.3 to 51.1)</b>              | <b>9.2</b><br><b>(-6.1 to 26.9)</b>                 |
| Neonatal preterm birth complications                                    | 90.2<br>(71.7 to 117.8)                          | --                                                | 8.8<br>(6.0 to 12.5)                        | 28.3<br>(1.4 to 59.0)                             | 6.9<br>(-15.3 to 32.3)                              |
| Neonatal encephalopathy due to birth asphyxia and trauma                | 30.5<br>(14.4 to 53.5)                           | --                                                | 4.2<br>(0.7 to 10.3)                        | 47.1<br>(-9.4 to 226.0)                           | 23.8<br>(-24.1 to 185.9)                            |
| Neonatal sepsis and other neonatal infections                           | 7.5<br>(3.1 to 16.8)                             | --                                                | 3.2<br>(1.1 to 7.8)                         | 33.8<br>(-1.3 to 123.3)                           | 15.8<br>(-13.3 to 108.1)                            |
| Hemolytic disease and other neonatal jaundice                           | 10.6<br>(9.2 to 12.1)                            | --                                                | 3.1<br>(2.3 to 4.1)                         | 15.3<br>(-2.3 to 36.3)                            | -4.3<br>(-17.1 to 11.1)                             |
| Other neonatal disorders                                                | --                                               | --                                                | 0.8<br>(0.5 to 1.2)                         | 2.0<br>(-16.7 to 25.6)                            | 3.0<br>(-15.9 to 26.7)                              |
| <b>Nutritional deficiencies</b>                                         | <b>2,243.9</b><br><b>(2,083.6 to 2,410.6)</b>    | <b>739.5†</b><br><b>(615.7 to 931.2)</b>          | <b>33.6</b><br><b>(22.0 to 50.3)</b>        | <b>-7.2</b><br><b>(-16.8 to 4.6)</b>              | <b>-21.7</b><br><b>(-28.7 to -13.1)</b>             |
| Protein-energy malnutrition                                             | 26.7<br>(20.2 to 34.7)                           | 11.6<br>(8.8 to 15.2)                             | 1.2<br>(0.7 to 1.9)                         | -39.4<br>(-61.9 to -5.3)                          | -38.9<br>(-61.6 to -4.4)                            |
| Iodine deficiency                                                       | 215.5<br>(189.9 to 245.5)                        | 6.7<br>(5.9 to 7.6)                               | 5.6<br>(3.7 to 7.8)                         | 22.1<br>(10.8 to 35.0)                            | -5.7<br>(-13.6 to 3.8)                              |
| Vitamin A deficiency                                                    | 835.4<br>(708.4 to 1,043.5)                      | 721.1<br>(596.2 to 915.6)                         | 0.7<br>(0.4 to 1.1)                         | 13.5<br>(-6.7 to 37.6)                            | -1.3<br>(-16.9 to 15.9)                             |
| Iron-deficiency anaemia                                                 | 1,283.7<br>(1,175.3 to 1,408.4)                  | --                                                | 26.1<br>(16.4 to 40.2)                      | -10.0<br>(-21.4 to 4.3)                           | -24.9<br>(-33.5 to -14.1)                           |
| Other nutritional deficiencies                                          | --                                               | --                                                | < 0.05<br>(< 0.05 to 0.1)                   | -41.2<br>(-64.0 to -6.2)                          | -40.7<br>(-63.7 to -5.3)                            |
| <b>Other communicable, maternal, neonatal, and nutritional diseases</b> | <b>3,469.8</b><br><b>(3,236.4 to 3,733.6)</b>    | <b>1,291.8</b><br><b>(1,149.8 to 1,458.5)</b>     | <b>5.0</b><br><b>(2.9 to 8.4)</b>           | <b>18.6</b><br><b>(9.3 to 28.1)</b>               | <b>-4.6</b><br><b>(-10.6 to 1.4)</b>                |
| Sexually transmitted diseases excluding HIV                             | 2,878.0<br>(2,659.5 to 3,134.4)                  | 1,105.5<br>(995.3 to 1,221.4)                     | 3.2<br>(1.7 to 5.7)                         | 33.2<br>(23.6 to 43.1)                            | -0.9<br>(-6.8 to 5.4)                               |
| Syphilis                                                                | 50.3<br>(42.2 to 60.2)                           | 36.7<br>(29.6 to 45.1)                            | 0.2<br>(0.1 to 0.3)                         | 39.9<br>(25.2 to 55.3)                            | -0.1<br>(-11.0 to 11.0)                             |
| Chlamydial infection                                                    | 279.8<br>(210.5 to 352.7)                        | 215.1<br>(163.1 to 275.7)                         | 0.8<br>(0.4 to 1.4)                         | 32.9<br>(12.6 to 57.0)                            | 0.5<br>(-14.4 to 17.9)                              |
| Gonococcal infection                                                    | 57.3<br>(44.9 to 73.2)                           | 188.2<br>(142.4 to 240.8)                         | 0.4<br>(0.2 to 0.6)                         | 36.5<br>(7.5 to 69.0)                             | 0.4<br>(-19.7 to 23.1)                              |
| Trichomoniasis                                                          | 499.8<br>(427.7 to 577.6)                        | 446.2<br>(377.4 to 520.6)                         | 0.7<br>(0.3 to 1.4)                         | 27.9<br>(18.0 to 38.1)                            | -3.9<br>(-10.6 to 2.8)                              |
| Genital herpes                                                          | 2,238.3<br>(1,920.8 to 2,612.0)                  | 205.2<br>(173.2 to 245.3)                         | 0.6<br>(0.2 to 1.3)                         | 35.4<br>(24.7 to 45.4)                            | 0.1<br>(-5.6 to 6.1)                                |
| Other sexually transmitted diseases                                     | 17.3<br>(15.7 to 19.1)                           | 14.2<br>(11.9 to 16.8)                            | 0.6<br>(0.4 to 1.0)                         | 33.9<br>(19.1 to 51.1)                            | -1.1<br>(-12.0 to 11.2)                             |
| Hepatitis                                                               | 707.1<br>(618.2 to 811.3)                        | 186.2<br>(105.6 to 302.7)                         | 0.2<br>(0.1 to 0.3)                         | -11.4<br>(-40.7 to 32.7)                          | -25.0<br>(-44.4 to 3.1)                             |
| Acute hepatitis A                                                       | 7.1<br>(1.1 to 16.2)                             | 92.6<br>(14.4 to 210.3)                           | 0.1<br>(< 0.05 to 0.1)                      | -10.9<br>(-74.8 to 229.0)                         | -22.7<br>(-71.8 to 113.3)                           |
| Hepatitis B                                                             | 312.4<br>(240.4 to 406.6)                        | 70.0<br>(54.3 to 90.5)                            | 0.1<br>(< 0.05 to 0.1)                      | -14.4<br>(-28.4 to 1.4)                           | -28.5<br>(-41.1 to -15.4)                           |
| Hepatitis C                                                             | 387.1<br>(341.6 to 436.4)                        | 17.2<br>(15.2 to 19.7)                            | < 0.05<br>(< 0.05 to < 0.05)                | -1.7<br>(-20.8 to 21.3)                           | -9.1<br>(-24.0 to 8.0)                              |
| Acute hepatitis E                                                       | 0.5<br>(0.4 to 0.6)                              | 6.3<br>(5.5 to 7.3)                               | < 0.05<br>(< 0.05 to < 0.05)                | -2.5<br>(-11.2 to 6.7)                            | -20.2<br>(-26.6 to -13.5)                           |
| Other infectious diseases                                               | 63.1<br>(56.6 to 70.4)                           | < 0.05<br>(< 0.05 to < 0.05)                      | 1.6<br>(1.0 to 2.5)                         | 0.4<br>(-14.1 to 19.1)                            | -10.0<br>(-22.5 to 5.7)                             |
| <b>Non-communicable diseases</b>                                        | <b>14,361.1</b><br><b>(14,210.0 to 14,496.5)</b> | <b>35,571.2†</b><br><b>(32,987.9 to 38,308.0)</b> | <b>1,191.7</b><br><b>(874.4 to 1,550.4)</b> | <b>29.1</b><br><b>(25.3 to 33.2)</b>              | <b>-1.6</b><br><b>(-3.9 to 0.9)</b>                 |
| <b>Neoplasms</b>                                                        | <b>24.5</b><br><b>(23.1 to 26.2)</b>             | <b>15.6</b><br><b>(14.6 to 17.0)</b>              | <b>4.3</b><br><b>(3.1 to 5.5)</b>           | <b>35.1</b><br><b>(29.0 to 41.8)</b>              | <b>-1.4</b><br><b>(-6.2 to 3.9)</b>                 |
| Lip and oral cavity cancer                                              | 0.7<br>(0.7 to 0.8)                              | 0.2<br>(0.2 to 0.2)                               | 0.1<br>(0.1 to 0.1)                         | 21.7<br>(9.6 to 34.2)                             | -12.4<br>(-21.7 to -2.9)                            |
| Nasopharynx cancer                                                      | 0.2<br>(0.2 to 0.3)                              | 0.1<br>(0.1 to 0.1)                               | < 0.05<br>(< 0.05 to < 0.05)                | 2.3<br>(-9.3 to 15.3)                             | -23.3<br>(-30.3 to -15.5)                           |
| Other pharynx cancer                                                    | 0.1<br>(0.1 to 0.2)                              | 0.1<br>(0.1 to 0.1)                               | < 0.05<br>(< 0.05 to < 0.05)                | 22.9<br>(14.3 to 31.9)                            | -10.7<br>(-17.1 to -3.9)                            |
| Oesophageal cancer                                                      | 0.2<br>(0.1 to 0.2)                              | 0.1<br>(0.1 to 0.2)                               | < 0.05<br>(< 0.05 to 0.1)                   | 30.9<br>(20.8 to 42.2)                            | -6.5<br>(-14.7 to 2.4)                              |
| Stomach cancer                                                          | 2.8<br>(2.7 to 3.0)                              | 1.9<br>(1.8 to 2.0)                               | 0.5<br>(0.3 to 0.6)                         | 15.7<br>(2.8 to 32.5)                             | -17.5<br>(-27.5 to -4.5)                            |
| Colon and rectum cancer                                                 | 2.4<br>(2.3 to 2.6)                              | 0.8<br>(0.7 to 0.8)                               | 0.3<br>(0.2 to 0.4)                         | 59.0<br>(39.3 to 80.8)                            | 12.4<br>(-1.9 to 28.8)                              |
| Liver cancer                                                            | 0.6<br>(0.5 to 0.7)                              | 1.6<br>(1.5 to 1.6)                               | 0.3<br>(0.2 to 0.4)                         | 42.7<br>(32.9 to 53.8)                            | 3.2<br>(-4.1 to 11.2)                               |
| Liver cancer due to hepatitis B                                         | 0.3<br>(0.3 to 0.4)                              | 0.4<br>(0.3 to 0.5)                               | 0.1<br>(0.1 to 0.1)                         | 45.8<br>(34.5 to 58.4)                            | 7.1<br>(-1.1 to 16.8)                               |



| Cause                                              | Prevalence in thousands (95% UI)              | Incidence in thousands (95% UI)          | YLDs in thousands (95% UI)           |                                                   |                                                     |
|----------------------------------------------------|-----------------------------------------------|------------------------------------------|--------------------------------------|---------------------------------------------------|-----------------------------------------------------|
|                                                    | 2016 counts                                   | 2016 counts                              | 2016 counts                          | Percentage change in counts between 2006 and 2016 | Percentage change in age-standardised rates between |
| Liver cancer due to hepatitis C                    | 0.5<br>(0.4 to 0.6)                           | 0.5<br>(0.4 to 0.6)                      | 0.1<br>(0.1 to 0.1)                  | 51.9<br>(35.6 to 69.6)                            | 8.7<br>(-3.4 to 22.7)                               |
| Liver cancer due to alcohol use                    | 0.3<br>(0.2 to 0.4)                           | 0.3<br>(0.3 to 0.4)                      | 0.1<br>( $< 0.05$ to 0.1)            | 26.4<br>(13.5 to 40.8)                            | -9.8<br>(-19.2 to 0.6)                              |
| Liver cancer due to other causes                   | 0.3<br>(0.2 to 0.3)                           | 0.3<br>(0.3 to 0.4)                      | 0.1<br>( $< 0.05$ to 0.1)            | 44.5<br>(34.4 to 56.1)                            | 6.6<br>(-1.2 to 15.7)                               |
| Gallbladder and biliary tract cancer               | 0.1<br>(0.1 to 0.1)                           | 0.2<br>(0.2 to 0.2)                      | $< 0.05$<br>( $< 0.05$ to 0.1)       | 16.5<br>(8.4 to 25.2)                             | -16.9<br>(-23.3 to -10.1)                           |
| Pancreatic cancer                                  | 0.2<br>(0.2 to 0.2)                           | 0.3<br>(0.3 to 0.3)                      | 0.1<br>( $< 0.05$ to 0.1)            | 35.3<br>(26.3 to 46.0)                            | -3.5<br>(-10.3 to 4.5)                              |
| Larynx cancer                                      | 0.3<br>(0.2 to 0.3)                           | 0.1<br>(0.1 to 0.1)                      | $< 0.05$<br>( $< 0.05$ to $< 0.05$ ) | 35.6<br>(23.5 to 48.0)                            | -1.8<br>(-11.3 to 7.8)                              |
| Tracheal, bronchus, and lung cancer                | 0.7<br>(0.6 to 0.7)                           | 0.6<br>(0.6 to 0.6)                      | 0.1<br>(0.1 to 0.2)                  | 17.4<br>(1.2 to 37.2)                             | -14.6<br>(-27.5 to 1.8)                             |
| Malignant skin melanoma                            | 0.2<br>(0.2 to 0.3)                           | 0.1<br>( $< 0.05$ to 0.1)                | $< 0.05$<br>( $< 0.05$ to $< 0.05$ ) | 49.7<br>(28.9 to 86.2)                            | 4.5<br>(-10.8 to 32.1)                              |
| Non-melanoma skin cancer                           | 0.8<br>(0.5 to 1.2)                           | 2.8<br>(1.7 to 4.0)                      | $< 0.05$<br>( $< 0.05$ to 0.1)       | -12.4<br>(-54.2 to 64.9)                          | -40.7<br>(-69.2 to 15.8)                            |
| Non-melanoma skin cancer (squamous-cell carcinoma) | 0.6<br>(0.3 to 1.1)                           | 0.6<br>(0.3 to 1.0)                      | $< 0.05$<br>( $< 0.05$ to 0.1)       | -15.9<br>(-56.5 to 68.2)                          | -43.0<br>(-70.7 to 17.2)                            |
| Non-melanoma skin cancer (basal-cell carcinoma)    | 0.3<br>(0.2 to 0.5)                           | 2.2<br>(1.2 to 3.4)                      | $< 0.05$<br>( $< 0.05$ to $< 0.05$ ) | 40.3<br>(10.8 to 82.4)                            | 0.6<br>(-22.8 to 34.5)                              |
| Breast cancer                                      | 4.0<br>(3.5 to 4.5)                           | 0.9<br>(0.8 to 1.0)                      | 0.4<br>(0.3 to 0.5)                  | 62.0<br>(32.6 to 97.1)                            | 16.8<br>(-4.5 to 42.5)                              |
| Cervical cancer                                    | 6.0<br>(5.4 to 6.7)                           | 1.6<br>(1.5 to 1.8)                      | 0.6<br>(0.4 to 0.8)                  | 25.7<br>(2.1 to 56.5)                             | -8.7<br>(-25.6 to 13.4)                             |
| Uterine cancer                                     | 1.5<br>(1.4 to 1.6)                           | 0.3<br>(0.3 to 0.4)                      | 0.1<br>(0.1 to 0.2)                  | 44.9<br>(25.4 to 67.1)                            | 4.2<br>(-9.8 to 20.9)                               |
| Ovarian cancer                                     | 0.7<br>(0.6 to 0.8)                           | 0.2<br>(0.2 to 0.3)                      | 0.1<br>(0.1 to 0.1)                  | 67.2<br>(39.9 to 100.0)                           | 20.4<br>(-0.6 to 45.5)                              |
| Prostate cancer                                    | 4.7<br>(4.1 to 5.5)                           | 1.2<br>(1.1 to 1.4)                      | 0.5<br>(0.4 to 0.7)                  | 66.6<br>(42.1 to 96.5)                            | 13.3<br>(-3.4 to 32.9)                              |
| Testicular cancer                                  | 0.2<br>(0.2 to 0.3)                           | 0.1<br>( $< 0.05$ to 0.1)                | $< 0.05$<br>( $< 0.05$ to $< 0.05$ ) | 64.3<br>(38.8 to 96.6)                            | 20.6<br>(5.3 to 41.0)                               |
| Kidney cancer                                      | 1.2<br>(1.1 to 1.2)                           | 0.3<br>(0.3 to 0.3)                      | 0.1<br>(0.1 to 0.1)                  | 49.3<br>(33.1 to 67.8)                            | 14.6<br>(0.8 to 30.2)                               |
| Bladder cancer                                     | 0.4<br>(0.4 to 0.5)                           | 0.1<br>(0.1 to 0.1)                      | $< 0.05$<br>( $< 0.05$ to 0.1)       | 55.9<br>(42.6 to 72.8)                            | 8.8<br>(-1.3 to 21.1)                               |
| Brain and nervous system cancer                    | 0.7<br>(0.5 to 1.0)                           | 0.3<br>(0.3 to 0.4)                      | 0.1<br>(0.1 to 0.1)                  | 4.7<br>(-11.9 to 38.0)                            | -17.3<br>(-29.6 to 10.1)                            |
| Thyroid cancer                                     | 0.4<br>(0.4 to 0.5)                           | 0.1<br>(0.1 to 0.1)                      | $< 0.05$<br>( $< 0.05$ to $< 0.05$ ) | 81.8<br>(53.9 to 114.3)                           | 26.6<br>(5.9 to 51.0)                               |
| Mesothelioma                                       | $< 0.05$<br>( $< 0.05$ to $< 0.05$ )          | $< 0.05$<br>( $< 0.05$ to $< 0.05$ )     | $< 0.05$<br>( $< 0.05$ to $< 0.05$ ) | 22.7<br>(12.4 to 33.8)                            | -9.1<br>(-16.6 to -0.6)                             |
| Hodgkin lymphoma                                   | 0.1<br>(0.1 to 0.2)                           | 0.1<br>( $< 0.05$ to 0.1)                | $< 0.05$<br>( $< 0.05$ to $< 0.05$ ) | 3.1<br>(-6.2 to 12.1)                             | -18.4<br>(-24.8 to -12.3)                           |
| Non-Hodgkin's lymphoma                             | 0.6<br>(0.5 to 0.7)                           | 0.2<br>(0.2 to 0.2)                      | 0.1<br>( $< 0.05$ to 0.1)            | 31.6<br>(21.2 to 42.2)                            | 0.8<br>(-8.3 to 11.8)                               |
| Multiple myeloma                                   | 0.1<br>(0.1 to 0.2)                           | 0.1<br>(0.1 to 0.1)                      | $< 0.05$<br>( $< 0.05$ to 0.1)       | 49.6<br>(36.1 to 66.2)                            | 7.7<br>(-2.6 to 21.2)                               |
| Leukaemia                                          | 3.0<br>(2.8 to 3.3)                           | 0.8<br>(0.8 to 0.9)                      | 0.4<br>(0.3 to 0.5)                  | 13.1<br>(3.8 to 22.5)                             | -10.5<br>(-16.6 to -4.0)                            |
| Acute lymphoid leukaemia                           | 0.9<br>(0.8 to 1.0)                           | 0.2<br>(0.2 to 0.3)                      | 0.1<br>(0.1 to 0.2)                  | 53.6<br>(20.2 to 75.1)                            | 21.5<br>(-1.2 to 34.8)                              |
| Chronic lymphoid leukaemia                         | 0.4<br>(0.4 to 0.5)                           | 0.1<br>(0.1 to 0.1)                      | 0.1<br>( $< 0.05$ to 0.1)            | 34.3<br>(13.9 to 56.5)                            | -2.5<br>(-17.6 to 13.8)                             |
| Acute myeloid leukaemia                            | 0.2<br>(0.1 to 0.2)                           | 0.1<br>(0.1 to 0.1)                      | $< 0.05$<br>( $< 0.05$ to $< 0.05$ ) | 36.4<br>(19.0 to 56.4)                            | 11.5<br>(-0.4 to 24.4)                              |
| Chronic myeloid leukaemia                          | 0.1<br>(0.1 to 0.1)                           | $< 0.05$<br>( $< 0.05$ to $< 0.05$ )     | $< 0.05$<br>( $< 0.05$ to $< 0.05$ ) | 28.3<br>(13.5 to 43.8)                            | -6.9<br>(-17.6 to 4.3)                              |
| Other leukaemia                                    | 1.4<br>(1.3 to 1.6)                           | 0.3<br>(0.3 to 0.3)                      | 0.2<br>(0.1 to 0.2)                  | -11.4<br>(-20.7 to 0.3)                           | -28.2<br>(-35.1 to -18.9)                           |
| Other neoplasms                                    | 1.6<br>(1.5 to 1.8)                           | 0.6<br>(0.5 to 0.6)                      | 0.2<br>(0.1 to 0.2)                  | 45.3<br>(30.2 to 62.4)                            | 10.3<br>(-1.0 to 23.8)                              |
| <b>Cardiovascular diseases</b>                     | <b>664.6</b><br><b>(634.1 to 694.1)</b>       | <b>54.7†</b><br><b>(52.1 to 57.7)</b>    | <b>36.4</b><br><b>(26.1 to 47.9)</b> | <b>42.6</b><br><b>(37.9 to 47.5)</b>              | <b>4.1</b><br><b>(0.8 to 7.4)</b>                   |
| Rheumatic heart disease                            | 125.3<br>(109.7 to 141.2)                     | 4.7<br>(4.1 to 5.3)                      | 6.0<br>(3.7 to 8.9)                  | 55.5<br>(41.6 to 78.5)                            | 18.3<br>(8.7 to 33.9)                               |
| Ischaemic heart disease                            | 133.1<br>(125.2 to 141.2)                     | 14.8<br>(14.0 to 15.7)                   | 8.0<br>(5.5 to 10.9)                 | 46.6<br>(39.8 to 53.8)                            | 5.7<br>(1.1 to 10.5)                                |
| Cerebrovascular disease                            | 64.4<br>(60.4 to 68.8)                        | 10.0‡<br>(9.2 to 10.9)                   | 6.5<br>(4.7 to 8.3)                  | 39.0<br>(28.5 to 49.8)                            | 0.2<br>(-8.0 to 8.2)                                |
| Ischaemic stroke                                   | 53.8<br>(48.3 to 59.4)                        | 6.7‡<br>(5.8 to 7.5)                     | 5.1<br>(3.7 to 6.6)                  | 39.3<br>(26.3 to 52.6)                            | -1.0<br>(-10.6 to 8.3)                              |
| Hemorrhagic stroke                                 | 14.7<br>(13.3 to 16.1)                        | 3.4‡<br>(3.0 to 3.7)                     | 1.4<br>(1.0 to 1.8)                  | 37.7<br>(24.3 to 52.6)                            | 5.5<br>(-5.8 to 18.9)                               |
| Hypertensive heart disease                         | 19.1<br>(16.3 to 22.7)                        | --                                       | 1.5<br>(1.0 to 2.1)                  | 47.2<br>(34.2 to 63.2)                            | 3.1<br>(-6.4 to 14.0)                               |
| Cardiomyopathy and myocarditis                     | 3.1<br>(2.7 to 3.5)                           | 3.1†<br>(2.7 to 3.5)                     | 0.4<br>(0.2 to 0.6)                  | 35.0<br>(24.4 to 46.1)                            | 4.3<br>(-5.2 to 14.4)                               |
| Myocarditis                                        | 2.4<br>(2.1 to 2.8)                           | 3.1<br>(2.7 to 3.5)                      | 0.2<br>(0.1 to 0.3)                  | 32.1<br>(22.3 to 43.2)                            | 3.6<br>(-5.1 to 12.8)                               |
| Alcoholic cardiomyopathy                           | 0.2<br>(0.1 to 0.2)                           | --                                       | $< 0.05$<br>( $< 0.05$ to $< 0.05$ ) | 46.1<br>(34.6 to 58.2)                            | 4.8<br>(-3.5 to 13.7)                               |
| Other cardiomyopathy                               | 2.1<br>(1.8 to 2.5)                           | --                                       | 0.2<br>(0.1 to 0.3)                  | 37.1<br>(21.2 to 54.6)                            | 4.8<br>(-10.5 to 22.6)                              |
| Atrial fibrillation and flutter                    | 59.6<br>(52.0 to 68.6)                        | 4.8<br>(4.1 to 5.6)                      | 4.7<br>(3.1 to 6.5)                  | 41.4<br>(31.6 to 51.1)                            | -0.2<br>(-6.5 to 6.1)                               |
| Peripheral vascular disease                        | 162.4<br>(140.7 to 188.1)                     | 15.9<br>(13.8 to 18.5)                   | 0.8<br>(0.4 to 1.6)                  | 38.9<br>(27.8 to 50.8)                            | -2.1<br>(-9.3 to 5.6)                               |
| Endocarditis                                       | 0.8<br>(0.7 to 0.9)                           | 1.4<br>(1.3 to 1.5)                      | 0.1<br>( $< 0.05$ to 0.1)            | 32.4<br>(20.8 to 45.6)                            | 3.2<br>(-9.1 to 16.9)                               |
| Other cardiovascular and circulatory diseases      | 158.7<br>(132.7 to 188.0)                     | --                                       | 8.5<br>(5.6 to 12.1)                 | 34.7<br>(23.8 to 46.9)                            | 3.7<br>(-3.4 to 12.2)                               |
| <b>Chronic respiratory diseases</b>                | <b>1,063.5</b><br><b>(1,010.0 to 1,123.3)</b> | <b>201.3†</b><br><b>(186.2 to 218.3)</b> | <b>38.5</b><br><b>(27.7 to 51.8)</b> | <b>20.0</b><br><b>(13.8 to 27.2)</b>              | <b>-0.9</b><br><b>(-6.0 to 4.5)</b>                 |
| Chronic obstructive pulmonary disease              | 317.1<br>(296.0 to 343.7)                     | 20.9<br>(19.6 to 22.6)                   | 6.9<br>(5.7 to 8.4)                  | 32.4<br>(15.6 to 52.1)                            | -1.2<br>(-13.7 to 13.7)                             |
| Pneumoconiosis                                     | 1.4<br>(1.2 to 1.5)                           | 0.1<br>(0.1 to 0.1)                      | 0.2<br>(0.1 to 0.3)                  | 34.5<br>(14.8 to 58.5)                            | -3.1<br>(-18.6 to 16.3)                             |
| Silicosis                                          | 0.3<br>(0.3 to 0.4)                           | $< 0.05$<br>( $< 0.05$ to $< 0.05$ )     | $< 0.05$<br>( $< 0.05$ to 0.1)       | 42.5<br>(5.1 to 92.5)                             | 3.8<br>(-26.5 to 45.3)                              |

| Cause                                                          | Prevalence in thousands (95% UI)        | Incidence in thousands (95% UI)         | YLDs in thousands (95% UI)        |                                                   |                                                     |
|----------------------------------------------------------------|-----------------------------------------|-----------------------------------------|-----------------------------------|---------------------------------------------------|-----------------------------------------------------|
|                                                                | 2016 counts                             | 2016 counts                             | 2016 counts                       | Percentage change in counts between 2006 and 2016 | Percentage change in age-standardised rates between |
| Asbestosis                                                     | 0.3<br>(0.3 to 0.4)                     | < 0.05<br>(< 0.05 to < 0.05)            | < 0.05<br>(< 0.05 to 0.1)         | 37.6<br>(19.6 to 58.1)                            | -1.4<br>(-16.3 to 16.7)                             |
| Coal workers pneumoconiosis                                    | --                                      | --                                      | --                                | --                                                | --                                                  |
| Other pneumoconiosis                                           | 0.7<br>(0.6 to 0.8)                     | 0.1<br>(< 0.05 to 0.1)                  | 0.1<br>(0.1 to 0.1)               | 29.7<br>(0.5 to 72.8)                             | -6.5<br>(-28.5 to 26.5)                             |
| Asthma                                                         | 752.3<br>(685.7 to 821.8)               | 179.7<br>(164.3 to 196.7)               | 29.9<br>(19.6 to 43.1)            | 16.4<br>(9.6 to 23.6)                             | -1.5<br>(-6.6 to 3.7)                               |
| Interstitial lung disease and pulmonary sarcoidosis            | 4.8<br>(4.3 to 5.2)                     | 0.5<br>(0.5 to 0.6)                     | 0.5<br>(0.3 to 0.7)               | 39.9<br>(29.2 to 52.6)                            | 4.6<br>(-5.2 to 16.5)                               |
| Other chronic respiratory diseases                             | --                                      | --                                      | 1.0<br>(0.8 to 1.3)               | 46.8<br>(9.2 to 98.2)                             | 26.5<br>(-1.0 to 63.5)                              |
| <b>Cirrhosis and other chronic liver diseases</b>              | <b>123.3<br/>(116.8 to 130.1)</b>       | <b>4.9<br/>(4.7 to 5.1)</b>             | <b>3.3<br/>(2.3 to 4.6)</b>       | <b>31.9<br/>(20.8 to 44.4)</b>                    | <b>2.2<br/>(-4.7 to 10.0)</b>                       |
| Cirrhosis and other chronic liver diseases due to hepatitis B  | 4.2<br>(3.7 to 4.7)                     | 0.2<br>(0.1 to 0.2)                     | 0.1<br>(0.1 to 0.1)               | 40.2<br>(7.9 to 80.7)                             | 2.5<br>(-22.9 to 33.3)                              |
| Cirrhosis and other chronic liver diseases due to hepatitis C  | 38.6<br>(35.3 to 42.1)                  | 1.6<br>(1.4 to 1.7)                     | 0.8<br>(0.6 to 1.2)               | 36.1<br>(19.2 to 58.1)                            | -0.1<br>(-11.1 to 13.8)                             |
| Cirrhosis and other chronic liver diseases due to alcohol use  | 51.9<br>(47.9 to 56.0)                  | 2.1<br>(1.9 to 2.2)                     | 1.2<br>(0.8 to 1.6)               | 45.5<br>(30.6 to 62.1)                            | 5.2<br>(-4.4 to 16.1)                               |
| Cirrhosis and other chronic liver diseases due to other causes | 28.7<br>(26.4 to 31.3)                  | 1.1<br>(1.0 to 1.1)                     | 1.2<br>(0.8 to 1.7)               | 18.1<br>(-2.8 to 43.9)                            | 0.3<br>(-13.7 to 16.8)                              |
| <b>Digestive diseases</b>                                      | <b>420.9<br/>(389.0 to 456.7)</b>       | <b>277.5†<br/>(258.6 to 296.4)</b>      | <b>19.9<br/>(13.9 to 27.3)</b>    | <b>40.8<br/>(30.2 to 54.1)</b>                    | <b>8.3<br/>(0.9 to 17.5)</b>                        |
| Peptic ulcer disease                                           | 207.1<br>(188.3 to 229.9)               | 12.8<br>(11.7 to 14.0)                  | 5.5<br>(3.5 to 8.3)               | 63.9<br>(43.3 to 89.2)                            | 17.5<br>(3.0 to 35.1)                               |
| Gastritis and duodenitis                                       | 91.7<br>(79.6 to 105.4)                 | 30.4<br>(27.4 to 33.8)                  | 3.3<br>(2.1 to 4.9)               | 71.8<br>(50.6 to 97.7)                            | 23.7<br>(8.9 to 41.8)                               |
| Appendicitis                                                   | 1.2<br>(1.1 to 1.4)                     | 32.6<br>(29.5 to 35.9)                  | 0.4<br>(0.2 to 0.6)               | 12.5<br>(-28.4 to 76.3)                           | -6.7<br>(-33.0 to 31.1)                             |
| Paralytic ileus and intestinal obstruction                     | 0.2<br>(0.1 to 0.2)                     | 4.5<br>(4.0 to 5.2)                     | 0.1<br>(< 0.05 to 0.1)            | 19.1<br>(14.5 to 23.6)                            | 1.4<br>(-2.1 to 5.0)                                |
| Inguinal, femoral, and abdominal hernia                        | 122.1<br>(109.5 to 135.6)               | 68.0<br>(60.1 to 76.7)                  | 8.2<br>(5.5 to 11.5)              | 21.5<br>(10.6 to 33.8)                            | -3.0<br>(-10.3 to 5.3)                              |
| Inflammatory bowel disease                                     | 1.2<br>(1.2 to 1.3)                     | 3.8<br>(3.6 to 3.9)                     | 0.2<br>(0.1 to 0.2)               | 44.8<br>(27.8 to 64.2)                            | 9.0<br>(-7.2 to 27.9)                               |
| Vascular intestinal disorders                                  | 0.1<br>(0.1 to 0.1)                     | 0.6<br>(0.6 to 0.7)                     | < 0.05<br>(< 0.05 to 0.1)         | 32.4<br>(23.5 to 41.7)                            | 13.0<br>(6.9 to 19.4)                               |
| Gallbladder and biliary diseases                               | 13.2<br>(12.0 to 14.4)                  | 118.2<br>(102.3 to 135.0)               | 0.5<br>(0.4 to 0.8)               | 53.1<br>(26.4 to 86.2)                            | 13.9<br>(-6.9 to 39.3)                              |
| Pancreatitis                                                   | 0.7<br>(0.7 to 0.8)                     | 6.7<br>(6.1 to 7.4)                     | 0.1<br>(0.1 to 0.1)               | 37.6<br>(33.1 to 42.9)                            | 5.2<br>(1.6 to 9.0)                                 |
| Other digestive diseases                                       | --                                      | --                                      | 1.6<br>(1.1 to 2.2)               | 39.7<br>(28.2 to 53.6)                            | 11.8<br>(4.3 to 20.8)                               |
| <b>Neurological disorders</b>                                  | <b>5,930.9<br/>(5,630.4 to 6,219.7)</b> | <b>2,871.3<br/>(2,451.1 to 3,335.8)</b> | <b>152.5<br/>(100.1 to 210.9)</b> | <b>30.1<br/>(3.4 to 66.5)</b>                     | <b>-0.8<br/>(-17.6 to 21.3)</b>                     |
| Alzheimer's disease and other dementias                        | 57.5<br>(48.1 to 67.9)                  | 10.1<br>(8.3 to 12.2)                   | 8.4<br>(5.8 to 11.1)              | 52.2<br>(44.7 to 60.0)                            | 0.0<br>(-4.4 to 4.2)                                |
| Parkinson's disease                                            | 5.2<br>(4.1 to 6.4)                     | 0.6<br>(0.5 to 0.8)                     | 0.6<br>(0.4 to 0.8)               | 51.6<br>(32.9 to 74.2)                            | 6.8<br>(-5.6 to 22.4)                               |
| Epilepsy                                                       | 66.2<br>(17.9 to 121.4)                 | 8.5<br>(2.3 to 15.6)                    | 21.3<br>(5.0 to 48.6)             | 13.7<br>(-73.2 to 432.5)                          | -7.4<br>(-78.4 to 332.4)                            |
| Multiple sclerosis                                             | 0.8<br>(0.7 to 1.0)                     | < 0.05<br>(< 0.05 to 0.1)               | 0.2<br>(0.2 to 0.3)               | 54.7<br>(49.2 to 62.0)                            | 13.7<br>(9.9 to 18.9)                               |
| Motor neuron disease                                           | 0.4<br>(0.3 to 0.4)                     | 0.1<br>(0.1 to 0.1)                     | 0.1<br>(0.1 to 0.1)               | 30.6<br>(25.4 to 36.3)                            | 3.6<br>(0.6 to 7.2)                                 |
| Migraine                                                       | 2,118.2<br>(1,984.9 to 2,241.7)         | 257.3<br>(241.4 to 273.7)               | 98.4<br>(63.2 to 136.7)           | 31.9<br>(26.7 to 37.1)                            | -0.1<br>(-3.6 to 3.4)                               |
| Tension-type headache                                          | 4,583.6<br>(4,085.5 to 5,140.3)         | 2,594.6<br>(2,168.1 to 3,059.2)         | 18.5<br>(11.8 to 27.2)            | 31.4<br>(24.8 to 39.3)                            | -0.4<br>(-5.0 to 4.8)                               |
| Other neurological disorders                                   | 0.1<br>(< 0.05 to 0.1)                  | 0.1<br>(0.1 to 0.2)                     | 4.9<br>(1.4 to 10.9)              | 36.0<br>(-64.4 to 466.3)                          | 11.3<br>(-68.0 to 315.4)                            |
| <b>Mental and substance use disorders</b>                      | <b>2,191.9<br/>(2,113.0 to 2,265.4)</b> | <b>928.2†<br/>(860.8 to 1,005.6)</b>    | <b>304.0<br/>(218.5 to 393.4)</b> | <b>26.0<br/>(22.7 to 29.5)</b>                    | <b>-4.6<br/>(-7.1 to -2.1)</b>                      |
| Schizophrenia                                                  | 25.5<br>(22.1 to 29.1)                  | 2.1<br>(1.8 to 2.4)                     | 16.5<br>(12.1 to 20.9)            | 38.9<br>(26.4 to 53.7)                            | 1.1<br>(-7.3 to 11.0)                               |
| Alcohol use disorders                                          | 376.1<br>(327.7 to 431.4)               | 184.0<br>(157.4 to 212.9)               | 38.0<br>(26.0 to 53.1)            | 26.4<br>(14.1 to 40.6)                            | -7.1<br>(-16.0 to 3.1)                              |
| Drug use disorders                                             | 90.4<br>(81.5 to 101.6)                 | 12.9<br>(11.7 to 14.4)                  | 27.7<br>(19.2 to 36.5)            | 22.5<br>(9.3 to 35.1)                             | -7.5<br>(-16.6 to 1.2)                              |
| Opioid use disorders                                           | 52.2<br>(43.7 to 63.0)                  | 6.3<br>(5.4 to 7.5)                     | 22.0<br>(14.7 to 29.7)            | 19.9<br>(5.8 to 35.4)                             | -9.5<br>(-19.4 to 0.5)                              |
| Cocaine use disorders                                          | 2.9<br>(2.3 to 3.6)                     | 0.3<br>(0.2 to 0.4)                     | 0.4<br>(0.2 to 0.7)               | 44.7<br>(35.4 to 55.6)                            | 9.4<br>(2.4 to 17.1)                                |
| Amphetamine use disorders                                      | 16.3<br>(10.9 to 23.2)                  | 1.8<br>(1.2 to 2.5)                     | 2.2<br>(1.2 to 3.6)               | 36.7<br>(5.5 to 78.7)                             | 6.3<br>(-17.2 to 37.2)                              |
| Cannabis use disorders                                         | 13.3<br>(11.0 to 16.1)                  | 2.8<br>(2.3 to 3.3)                     | 0.4<br>(0.2 to 0.6)               | 35.4<br>(1.6 to 79.0)                             | 4.2<br>(-18.0 to 30.5)                              |
| Other drug use disorders                                       | 9.4<br>(8.4 to 10.4)                    | 1.8<br>(1.6 to 1.9)                     | 2.7<br>(1.7 to 4.1)               | 29.6<br>(4.7 to 58.2)                             | -2.6<br>(-18.8 to 15.9)                             |
| Depressive disorders                                           | 458.0<br>(426.3 to 496.4)               | 549.2<br>(487.1 to 619.1)               | 82.6<br>(55.8 to 111.9)           | 22.6<br>(15.2 to 30.1)                            | -9.6<br>(-15.0 to -4.3)                             |
| Major depressive disorder                                      | 344.8<br>(307.3 to 388.5)               | 525.8<br>(463.6 to 596.5)               | 71.0<br>(47.6 to 96.7)            | 20.8<br>(12.5 to 29.2)                            | -11.1<br>(-17.0 to -5.0)                            |
| Dysthymia                                                      | 119.4<br>(104.1 to 137.1)               | 23.3<br>(20.5 to 26.8)                  | 11.6<br>(7.6 to 17.0)             | 34.6<br>(28.6 to 41.5)                            | 0.3<br>(-3.7 to 4.5)                                |
| Bipolar disorder                                               | 115.0<br>(97.2 to 136.0)                | 11.8<br>(10.0 to 14.1)                  | 23.9<br>(14.7 to 36.0)            | 31.9<br>(23.9 to 40.8)                            | 0.3<br>(-5.0 to 6.0)                                |
| Anxiety disorders                                              | 440.9<br>(397.1 to 485.7)               | 77.5<br>(71.0 to 84.8)                  | 43.0<br>(29.7 to 58.9)            | 29.5<br>(23.7 to 35.7)                            | 0.1<br>(-3.7 to 4.3)                                |
| Eating disorders                                               | 25.3<br>(20.1 to 31.0)                  | 14.1<br>(10.4 to 18.7)                  | 5.2<br>(3.2 to 7.5)               | 34.9<br>(18.2 to 53.6)                            | 3.8<br>(-8.3 to 18.2)                               |
| Anorexia nervosa                                               | 6.0<br>(4.4 to 8.2)                     | 2.6<br>(1.8 to 3.4)                     | 1.3<br>(0.8 to 2.0)               | 29.2<br>(0.7 to 65.2)                             | 3.1<br>(-20.0 to 30.9)                              |
| Bulimia nervosa                                                | 18.2<br>(13.5 to 24.6)                  | 11.6<br>(8.0 to 16.2)                   | 3.9<br>(2.3 to 5.8)               | 37.0<br>(17.2 to 59.8)                            | 4.0<br>(-10.1 to 20.1)                              |
| Autistic spectrum disorders                                    | 143.8<br>(128.5 to 160.0)               | 1.3<br>(0.9 to 1.9)                     | 21.2<br>(14.2 to 30.1)            | 22.7<br>(17.0 to 29.4)                            | 0.6<br>(-4.0 to 5.4)                                |
| Autism                                                         | 42.7<br>(36.7 to 49.8)                  | 0.2<br>(0.1 to 0.3)                     | 11.0<br>(7.1 to 16.0)             | 23.3<br>(13.6 to 34.3)                            | 0.8<br>(-6.6 to 9.0)                                |
| Asperger syndrome and other autistic spectrum disorders        | 101.5<br>(84.1 to 122.9)                | 1.2<br>(0.8 to 1.7)                     | 10.2<br>(6.6 to 15.0)             | 22.1<br>(15.9 to 28.5)                            | 0.3<br>(-4.3 to 5.1)                                |



| Cause                                                      | Prevalence in thousands (95% UI)                 | Incidence in thousands (95% UI)                   | YLDs in thousands (95% UI)              |                                                   |                                                     |
|------------------------------------------------------------|--------------------------------------------------|---------------------------------------------------|-----------------------------------------|---------------------------------------------------|-----------------------------------------------------|
|                                                            | 2016 counts                                      | 2016 counts                                       | 2016 counts                             | Percentage change in counts between 2006 and 2016 | Percentage change in age-standardised rates between |
| Attention-deficit/hyperactivity disorder                   | 150.2<br>(117.2 to 189.3)                        | 8.1<br>(6.0 to 10.6)                              | 1.8<br>(1.0 to 2.9)                     | 21.2<br>(10.3 to 32.8)                            | 0.6<br>(-7.7 to 9.8)                                |
| Conduct disorder                                           | 160.7<br>(129.5 to 193.3)                        | 55.3<br>(43.1 to 67.4)                            | 19.6<br>(12.1 to 30.0)                  | 17.3<br>(10.1 to 25.2)                            | 0.5<br>(-5.7 to 7.1)                                |
| Idiopathic developmental intellectual disability           | 137.9<br>(74.6 to 201.6)                         | --                                                | 5.6<br>(2.3 to 9.8)                     | 16.8<br>(6.6 to 27.2)                             | -7.3<br>(-15.8 to 0.4)                              |
| Other mental and substance use disorders                   | 252.6<br>(221.1 to 292.5)                        | 11.9<br>(10.5 to 13.7)                            | 18.9<br>(13.0 to 27.1)                  | 36.2<br>(29.0 to 43.5)                            | 0.3<br>(-4.3 to 5.2)                                |
| <b>Diabetes, urogenital, blood, and endocrine diseases</b> | <b>4,994.0</b><br><b>(4,794.0 to 5,220.5)</b>    | <b>1,163.7†</b><br><b>(1,092.8 to 1,235.6)</b>    | <b>121.6</b><br><b>(86.5 to 165.2)</b>  | <b>40.1</b><br><b>(33.9 to 46.4)</b>              | <b>3.2</b><br><b>(-1.8 to 8.3)</b>                  |
| Diabetes mellitus                                          | 842.9<br>(766.9 to 932.9)                        | 52.4<br>(47.6 to 58.2)                            | 73.9<br>(51.5 to 103.7)                 | 44.3<br>(33.8 to 54.6)                            | 5.0<br>(-2.6 to 13.1)                               |
| Acute glomerulonephritis                                   | 0.2<br>(0.2 to 0.2)                              | 2.8<br>(2.4 to 3.1)                               | < 0.05<br>(< 0.05 to < 0.05)            | 29.5<br>(23.6 to 35.4)                            | 0.5<br>(-3.5 to 4.9)                                |
| Chronic kidney disease                                     | 685.1<br>(620.5 to 751.4)                        | 60.8<br>(53.5 to 68.5)                            | 20.5<br>(15.4 to 26.1)                  | 48.0<br>(37.5 to 58.9)                            | 5.5<br>(-2.8 to 13.1)                               |
| Chronic kidney disease due to diabetes mellitus            | 260.9<br>(217.9 to 305.4)                        | 24.1<br>(19.7 to 29.1)                            | 7.0<br>(5.0 to 9.2)                     | 50.5<br>(36.0 to 64.9)                            | 7.4<br>(-2.9 to 17.4)                               |
| Chronic kidney disease due to hypertension                 | 134.5<br>(114.9 to 153.2)                        | 17.1<br>(13.9 to 20.3)                            | 2.4<br>(1.7 to 3.2)                     | 50.1<br>(31.9 to 69.8)                            | 1.7<br>(-10.6 to 15.1)                              |
| Chronic kidney disease due to glomerulonephritis           | 148.5<br>(128.9 to 166.2)                        | 7.1<br>(5.5 to 8.7)                               | 6.6<br>(4.9 to 8.7)                     | 46.1<br>(32.6 to 61.7)                            | 6.2<br>(-2.5 to 16.2)                               |
| Chronic kidney disease due to other causes                 | 141.2<br>(116.0 to 168.6)                        | 12.6<br>(10.2 to 15.2)                            | 4.5<br>(3.2 to 6.0)                     | 46.0<br>(31.1 to 62.3)                            | 4.1<br>(-5.5 to 14.9)                               |
| Urinary diseases and male infertility                      | 176.8<br>(156.6 to 197.6)                        | 545.5†<br>(488.4 to 610.0)                        | 4.5<br>(3.0 to 6.6)                     | 32.0<br>(24.1 to 40.2)                            | -3.6<br>(-9.5 to 2.6)                               |
| Interstitial nephritis and urinary tract infections        | 9.4<br>(8.3 to 10.7)                             | 493.4<br>(437.1 to 557.6)                         | 0.3<br>(0.2 to 0.5)                     | 29.2<br>(6.5 to 58.1)                             | 3.3<br>(-12.5 to 22.5)                              |
| Urolithiasis                                               | 1.4<br>(1.2 to 1.6)                              | 36.7<br>(32.7 to 41.4)                            | 0.1<br>(0.1 to 0.1)                     | 35.4<br>(30.7 to 40.5)                            | 1.8<br>(-1.9 to 6.0)                                |
| Benign prostatic hyperplasia                               | 114.0<br>(96.8 to 134.2)                         | 15.4<br>(12.7 to 18.6)                            | 3.7<br>(2.4 to 5.4)                     | 32.9<br>(23.7 to 42.4)                            | -3.9<br>(-10.6 to 2.7)                              |
| Male infertility                                           | 43.5<br>(32.4 to 58.8)                           | --                                                | 0.2<br>(0.1 to 0.5)                     | 43.6<br>(29.4 to 58.3)                            | 4.0<br>(-5.4 to 14.2)                               |
| Other urinary diseases                                     | --                                               | --                                                | 0.2<br>(0.1 to 0.2)                     | 5.7<br>(-9.5 to 23.2)                             | -14.8<br>(-24.9 to -3.1)                            |
| Gynecological diseases                                     | 1,523.8<br>(1,431.4 to 1,610.2)                  | 484.7†<br>(448.0 to 521.9)                        | 13.6<br>(9.0 to 20.2)                   | 24.2<br>(16.2 to 32.5)                            | -8.6<br>(-13.6 to -3.3)                             |
| Uterine fibroids                                           | 98.5<br>(85.8 to 113.0)                          | 12.4<br>(10.6 to 14.5)                            | 0.9<br>(0.5 to 1.7)                     | 13.7<br>(0.1 to 23.9)                             | -17.9<br>(-26.8 to -11.0)                           |
| Polycystic ovarian syndrome                                | 1.9<br>(1.4 to 2.6)                              | 10.5<br>(7.7 to 14.1)                             | < 0.05<br>(< 0.05 to < 0.05)            | 33.6<br>(-3.6 to 86.2)                            | -4.0<br>(-31.0 to 32.6)                             |
| Female infertility                                         | 124.8<br>(84.6 to 177.6)                         | --                                                | 0.7<br>(0.2 to 1.5)                     | 28.0<br>(15.7 to 40.7)                            | -8.7<br>(-16.8 to 0.5)                              |
| Endometriosis                                              | 0.7<br>(0.6 to 0.8)                              | 3.4<br>(2.8 to 4.1)                               | 0.1<br>(< 0.05 to 0.1)                  | 31.4<br>(8.7 to 56.7)                             | -0.9<br>(-22.9 to 26.1)                             |
| Genital prolapse                                           | 432.4<br>(374.2 to 496.9)                        | 30.8<br>(26.1 to 36.0)                            | 1.4<br>(0.6 to 2.4)                     | 14.0<br>(4.6 to 25.1)                             | -16.0<br>(-23.2 to -7.7)                            |
| Premenstrual syndrome                                      | 923.6<br>(837.3 to 1,000.8)                      | 346.9<br>(313.4 to 378.7)                         | 7.8<br>(4.7 to 12.1)                    | 23.4<br>(10.6 to 37.0)                            | -7.3<br>(-15.8 to 1.7)                              |
| Other gynecological diseases                               | 80.6<br>(68.5 to 93.4)                           | 80.6<br>(67.2 to 95.3)                            | 2.8<br>(1.8 to 4.0)                     | 35.4<br>(20.7 to 52.0)                            | -2.0<br>(-12.3 to 9.6)                              |
| Hemoglobinopathies and hemolytic anaemias                  | 2,746.5<br>(2,531.0 to 2,981.8)                  | --                                                | 5.5<br>(3.2 to 8.6)                     | 25.7<br>(8.9 to 43.1)                             | 4.2<br>(-8.8 to 18.0)                               |
| Thalassemias                                               | 0.1<br>(0.1 to 0.2)                              | --                                                | < 0.05<br>(< 0.05 to < 0.05)            | 3.0<br>(-24.7 to 26.6)                            | 2.3<br>(-25.5 to 25.8)                              |
| Thalassaemias trait                                        | 78.7<br>(27.0 to 137.1)                          | --                                                | 1.2<br>(0.3 to 2.6)                     | 36.2<br>(-6.8 to 94.7)                            | 10.3<br>(-24.2 to 63.2)                             |
| Sickle cell disorders                                      | 1.5<br>(0.7 to 2.9)                              | --                                                | 0.1<br>(0.1 to 0.3)                     | 39.2<br>(8.4 to 87.0)                             | 19.1<br>(-6.6 to 56.6)                              |
| Sickle cell trait                                          | 683.9<br>(467.7 to 968.4)                        | --                                                | 2.9<br>(1.6 to 4.9)                     | 34.4<br>(15.3 to 57.4)                            | 11.6<br>(-3.2 to 28.6)                              |
| G6PD deficiency                                            | 352.6<br>(305.2 to 406.1)                        | --                                                | < 0.05<br>(< 0.05 to 0.1)               | 13.8<br>(-1.1 to 36.6)                            | -5.8<br>(-16.0 to 8.8)                              |
| G6PD trait                                                 | 1,694.2<br>(1,560.6 to 1,833.8)                  | --                                                | < 0.05<br>(< 0.05 to < 0.05)            | 44.7<br>(29.3 to 65.2)                            | 16.4<br>(5.3 to 31.0)                               |
| Other hemoglobinopathies and hemolytic anaemias            | 70.6<br>(64.8 to 77.0)                           | --                                                | 1.2<br>(0.7 to 1.8)                     | 0.6<br>(-13.5 to 17.5)                            | -15.6<br>(-25.8 to -3.8)                            |
| Endocrine, metabolic, blood, and immune disorders          | 125.2<br>(116.7 to 134.0)                        | 17.5<br>(15.8 to 19.4)                            | 3.6<br>(2.4 to 5.0)                     | 20.7<br>(10.6 to 31.8)                            | -1.2<br>(-7.5 to 5.6)                               |
| <b>Musculoskeletal disorders</b>                           | <b>1,856.2</b><br><b>(1,746.2 to 1,944.5)</b>    | <b>909.3</b><br><b>(819.2 to 1,008.4)</b>         | <b>200.4</b><br><b>(144.5 to 261.9)</b> | <b>32.1</b><br><b>(27.2 to 36.6)</b>              | <b>-2.4</b><br><b>(-5.6 to 0.6)</b>                 |
| Rheumatoid arthritis                                       | 25.2<br>(22.4 to 28.3)                           | 1.6<br>(1.5 to 1.8)                               | 6.0<br>(4.1 to 8.0)                     | 44.5<br>(31.1 to 59.2)                            | 7.0<br>(-1.6 to 16.9)                               |
| Osteoarthritis                                             | 331.8<br>(310.3 to 354.6)                        | 17.4<br>(16.2 to 18.7)                            | 20.4<br>(14.5 to 27.6)                  | 44.1<br>(38.8 to 49.5)                            | 3.8<br>(0.1 to 7.5)                                 |
| Low back and neck pain                                     | 1,124.3<br>(1,047.1 to 1,205.1)                  | 453.2<br>(409.2 to 503.6)                         | 128.1<br>(90.2 to 170.7)                | 27.8<br>(21.6 to 33.6)                            | -5.5<br>(-9.9 to -1.5)                              |
| Low back pain                                              | 761.1<br>(671.6 to 867.0)                        | 354.1<br>(313.8 to 404.9)                         | 86.3<br>(60.7 to 115.2)                 | 23.4<br>(14.5 to 31.8)                            | -8.4<br>(-15.1 to -2.5)                             |
| Neck pain                                                  | 415.9<br>(356.7 to 478.8)                        | 99.0<br>(85.8 to 116.0)                           | 41.7<br>(28.2 to 59.7)                  | 37.8<br>(34.1 to 41.4)                            | 0.3<br>(-1.8 to 2.5)                                |
| Gout                                                       | 25.1<br>(22.3 to 28.2)                           | 5.2<br>(4.6 to 5.9)                               | 0.8<br>(0.5 to 1.1)                     | 39.2<br>(16.9 to 65.5)                            | 0.4<br>(-14.8 to 17.9)                              |
| Other musculoskeletal disorders                            | 519.4<br>(433.8 to 611.4)                        | 431.8<br>(353.2 to 521.3)                         | 45.1<br>(30.0 to 64.2)                  | 38.3<br>(28.4 to 49.7)                            | 2.6<br>(-4.5 to 10.2)                               |
| <b>Other non-communicable diseases</b>                     | <b>11,513.8</b><br><b>(11,242.4 to 11,784.1)</b> | <b>29,144.9†</b><br><b>(26,556.2 to 31,863.9)</b> | <b>310.9</b><br><b>(213.0 to 437.9)</b> | <b>24.9</b><br><b>(23.1 to 26.6)</b>              | <b>-2.3</b><br><b>(-3.4 to -1.2)</b>                |
| Congenital anomalies                                       | 179.8<br>(156.9 to 205.4)                        | --                                                | 21.4<br>(15.0 to 29.1)                  | 15.8<br>(8.8 to 23.2)                             | -3.1<br>(-8.9 to 2.8)                               |
| Neural tube defects                                        | 11.1<br>(9.8 to 12.5)                            | --                                                | 3.3<br>(2.3 to 4.5)                     | 18.6<br>(1.4 to 38.5)                             | -2.9<br>(-15.9 to 12.1)                             |
| Congenital heart anomalies                                 | 20.1<br>(17.1 to 23.3)                           | --                                                | 0.9<br>(0.4 to 1.6)                     | 16.6<br>(0.6 to 34.7)                             | 3.4<br>(-9.9 to 18.5)                               |
| Orofacial clefts                                           | 14.3<br>(12.5 to 16.2)                           | --                                                | 0.2<br>(0.1 to 0.3)                     | 9.6<br>(-2.5 to 23.7)                             | -9.5<br>(-19.4 to 1.8)                              |
| Down's syndrome                                            | 15.2<br>(13.1 to 17.8)                           | --                                                | 1.4<br>(0.9 to 1.9)                     | 25.9<br>(11.5 to 41.2)                            | 4.8<br>(-6.2 to 16.0)                               |
| Turner syndrome                                            | 6.4<br>(5.4 to 7.5)                              | --                                                | 0.1<br>(< 0.05 to 0.2)                  | 20.4<br>(-18.5 to 83.5)                           | -0.0<br>(-30.2 to 45.6)                             |
| Klinefelter syndrome                                       | 9.2<br>(7.8 to 10.9)                             | --                                                | < 0.05<br>(< 0.05 to 0.1)               | 25.7<br>(-2.3 to 62.9)                            | 2.5<br>(-20.2 to 31.2)                              |

| Cause                                         | Prevalence in thousands (95% UI)              | Incidence in thousands (95% UI)            | YLDs in thousands (95% UI)            |                                                   |                                                     |
|-----------------------------------------------|-----------------------------------------------|--------------------------------------------|---------------------------------------|---------------------------------------------------|-----------------------------------------------------|
|                                               | 2016 counts                                   | 2016 counts                                | 2016 counts                           | Percentage change in counts between 2006 and 2016 | Percentage change in age-standardised rates between |
| Other chromosomal abnormalities               | 18.2<br>(15.1 to 22.1)                        | --                                         | 2.1<br>(1.4 to 3.0)                   | 10.9<br>(-5.0 to 30.4)                            | 3.8<br>(-10.9 to 21.4)                              |
| Congenital musculoskeletal and limb anomalies | 19.4<br>(17.6 to 21.3)                        | --                                         | 2.6<br>(1.8 to 3.7)                   | 29.2<br>(14.7 to 43.4)                            | 5.1<br>(-5.5 to 15.9)                               |
| Urogenital congenital anomalies               | 23.1<br>(20.4 to 26.1)                        | --                                         | 0.7<br>(0.4 to 1.1)                   | 10.5<br>(-3.1 to 25.2)                            | -1.1<br>(-12.6 to 11.0)                             |
| Digestive congenital anomalies                | 16.6<br>(14.6 to 18.6)                        | --                                         | 0.7<br>(0.5 to 1.1)                   | 32.9<br>(9.9 to 61.6)                             | 9.4<br>(-8.0 to 29.9)                               |
| Other congenital anomalies                    | 70.6<br>(46.3 to 103.7)                       | --                                         | 9.3<br>(5.8 to 14.1)                  | 10.7<br>(-1.0 to 23.0)                            | -8.6<br>(-18.0 to 0.9)                              |
| Skin and subcutaneous diseases                | 4,739.2<br>(4,601.5 to 4,877.2)               | 9,157.4<br>(8,738.6 to 9,658.2)            | 128.7<br>(85.9 to 186.2)              | 21.6<br>(18.8 to 24.5)                            | 1.1<br>(-0.8 to 3.1)                                |
| Dermatitis                                    | 840.9<br>(744.2 to 943.8)                     | 796.7<br>(734.9 to 860.3)                  | 33.7<br>(19.4 to 55.9)                | 16.0<br>(11.8 to 20.2)                            | 0.1<br>(-3.1 to 3.1)                                |
| Psoriasis                                     | 105.5<br>(100.6 to 110.8)                     | 16.2<br>(15.5 to 17.0)                     | 9.3<br>(6.6 to 12.3)                  | 39.0<br>(26.2 to 53.4)                            | 8.1<br>(-0.5 to 17.4)                               |
| Cellulitis                                    | 5.6<br>(5.1 to 6.1)                           | 94.8<br>(87.6 to 102.9)                    | 0.3<br>(0.2 to 0.5)                   | 21.1<br>(-6.8 to 56.9)                            | 1.1<br>(-18.4 to 24.7)                              |
| Pyoderma                                      | 31.1<br>(30.1 to 32.0)                        | 672.9<br>(651.5 to 696.0)                  | 0.2<br>(0.1 to 0.4)                   | 25.8<br>(15.8 to 36.0)                            | 1.1<br>(-5.1 to 8.1)                                |
| Scabies                                       | 266.8<br>(229.6 to 309.8)                     | 816.1<br>(696.5 to 951.4)                  | 6.9<br>(3.9 to 11.1)                  | 13.3<br>(8.2 to 18.6)                             | -4.4<br>(-8.0 to -0.7)                              |
| Fungal skin diseases                          | 993.1<br>(898.0 to 1,111.9)                   | 3,465.2<br>(3,125.2 to 3,859.3)            | 5.6<br>(2.3 to 11.7)                  | 22.7<br>(20.2 to 25.2)                            | 0.1<br>(-1.1 to 1.3)                                |
| Viral skin diseases                           | 494.8<br>(471.2 to 519.4)                     | 729.4<br>(692.9 to 765.3)                  | 15.2<br>(9.5 to 22.8)                 | 19.3<br>(15.3 to 23.4)                            | -0.1<br>(-3.1 to 2.9)                               |
| Acne vulgaris                                 | 1,526.2<br>(1,352.0 to 1,719.4)               | 1,074.5<br>(870.8 to 1,341.2)              | 39.5<br>(26.1 to 57.8)                | 26.1<br>(19.5 to 33.0)                            | 2.0<br>(-3.0 to 7.3)                                |
| Alopecia areata                               | 26.7<br>(25.6 to 27.8)                        | 47.6<br>(45.6 to 49.5)                     | 0.9<br>(0.6 to 1.3)                   | 30.2<br>(15.4 to 48.1)                            | -0.1<br>(-10.1 to 11.6)                             |
| Pruritus                                      | 126.6<br>(111.7 to 143.0)                     | 101.8<br>(91.0 to 114.9)                   | 1.4<br>(0.6 to 2.5)                   | 27.5<br>(20.2 to 34.8)                            | 0.7<br>(-4.1 to 5.4)                                |
| Urticaria                                     | 165.4<br>(142.8 to 193.2)                     | 296.0<br>(256.6 to 345.8)                  | 10.1<br>(6.4 to 14.5)                 | 14.2<br>(7.6 to 21.2)                             | 0.2<br>(-5.0 to 5.6)                                |
| Decubitus ulcer                               | 3.8<br>(3.4 to 4.2)                           | 13.8<br>(12.3 to 15.3)                     | 0.6<br>(0.4 to 0.8)                   | 28.0<br>(15.3 to 41.2)                            | -3.7<br>(-15.8 to 9.5)                              |
| Other skin and subcutaneous diseases          | 903.4<br>(876.1 to 929.6)                     | 1,032.5<br>(999.1 to 1,065.0)              | 5.0<br>(2.4 to 9.1)                   | 30.8<br>(27.5 to 34.3)                            | 1.8<br>(-0.5 to 4.1)                                |
| Sense organ diseases                          | 3,144.8<br>(3,067.0 to 3,228.7)               | 1,501.3†<br>(1,400.0 to 1,608.6)           | 120.2<br>(83.7 to 167.4)              | 27.1<br>(24.3 to 30.2)                            | -5.2<br>(-6.8 to -3.4)                              |
| Glaucoma                                      | 9.7<br>(8.2 to 11.6)                          | --                                         | 1.0<br>(0.7 to 1.4)                   | 39.3<br>(24.4 to 55.9)                            | 0.2<br>(-10.3 to 11.7)                              |
| Cataract                                      | 164.0<br>(145.9 to 182.8)                     | --                                         | 13.2<br>(9.3 to 17.9)                 | 29.5<br>(22.1 to 36.6)                            | -10.7<br>(-15.8 to -5.8)                            |
| Macular degeneration                          | 4.8<br>(3.8 to 6.0)                           | --                                         | 0.4<br>(0.2 to 0.5)                   | 45.6<br>(25.8 to 68.3)                            | 3.2<br>(-10.5 to 18.3)                              |
| Refraction and accommodation disorders        | 1,606.2<br>(1,537.4 to 1,684.6)               | --                                         | 29.5<br>(18.1 to 46.6)                | 17.9<br>(13.7 to 22.7)                            | -8.5<br>(-11.4 to -4.9)                             |
| Age-related and other hearing loss            | 1,854.9<br>(1,752.5 to 1,964.0)               | --                                         | 60.1<br>(42.1 to 83.3)                | 29.8<br>(25.2 to 34.3)                            | -3.6<br>(-6.0 to -1.5)                              |
| Other vision loss                             | 63.9<br>(57.3 to 71.0)                        | --                                         | 5.4<br>(3.8 to 7.3)                   | 31.9<br>(21.1 to 43.7)                            | -1.6<br>(-8.3 to 5.7)                               |
| Other sense organ diseases                    | 346.0<br>(319.6 to 371.6)                     | 1,501.3<br>(1,400.0 to 1,608.6)            | 10.7<br>(6.7 to 16.0)                 | 33.9<br>(27.8 to 40.1)                            | 1.3<br>(-2.5 to 5.0)                                |
| Oral disorders                                | 8,409.2<br>(7,948.1 to 8,827.2)               | 18,486.1†<br>(15,896.9 to 21,114.1)        | 40.6<br>(24.5 to 63.8)                | 34.6<br>(31.9 to 37.5)                            | 0.5<br>(-1.4 to 2.6)                                |
| Caries of deciduous teeth                     | 1,325.4<br>(1,041.5 to 1,608.2)               | 5,022.1<br>(3,276.5 to 6,957.3)            | 0.5<br>(0.2 to 1.0)                   | 2.2<br>(-7.0 to 12.7)                             | -0.8<br>(-9.7 to 9.5)                               |
| Caries of permanent teeth                     | 5,958.8<br>(5,361.0 to 6,524.8)               | 13,234.1<br>(11,424.3 to 15,220.3)         | 5.9<br>(2.6 to 11.3)                  | 26.4<br>(21.5 to 31.3)                            | -0.8<br>(-4.2 to 2.6)                               |
| Periodontal disease                           | 1,394.0<br>(1,164.6 to 1,655.1)               | 177.6<br>(143.4 to 217.4)                  | 9.2<br>(3.6 to 18.7)                  | 40.1<br>(35.3 to 45.1)                            | 1.3<br>(-2.0 to 4.7)                                |
| Edentulism and severe tooth loss              | 617.5<br>(541.0 to 687.6)                     | 52.4<br>(44.4 to 60.4)                     | 17.1<br>(11.3 to 24.1)                | 38.4<br>(33.1 to 43.6)                            | 0.7<br>(-2.9 to 4.2)                                |
| Other oral disorders                          | 268.2<br>(256.2 to 281.4)                     | --                                         | 7.9<br>(4.9 to 11.8)                  | 29.9<br>(25.3 to 34.7)                            | 0.0<br>(-2.9 to 3.2)                                |
| <b>Injuries</b>                               | <b>1,823.5</b><br><b>(1,699.7 to 1,987.2)</b> | <b>987.0†</b><br><b>(924.6 to 1,057.2)</b> | <b>72.7</b><br><b>(48.5 to 103.6)</b> | <b>35.9</b><br><b>(31.8 to 40.1)</b>              | <b>3.5</b><br><b>(1.0 to 6.0)</b>                   |
| <b>Transport injuries</b>                     | <b>197.7</b><br><b>(183.2 to 211.9)</b>       | <b>92.9</b><br><b>(81.6 to 104.6)</b>      | <b>11.1</b><br><b>(7.4 to 15.9)</b>   | <b>58.2</b><br><b>(53.4 to 63.0)</b>              | <b>17.8</b><br><b>(14.9 to 20.6)</b>                |
| Road injuries                                 | 189.9<br>(176.2 to 203.7)                     | 90.6<br>(79.2 to 102.2)                    | 10.6<br>(7.1 to 15.3)                 | 59.0<br>(54.2 to 63.8)                            | 18.2<br>(15.4 to 21.0)                              |
| Pedestrian road injuries                      | 33.8<br>(29.8 to 38.3)                        | 11.3<br>(9.3 to 13.5)                      | 1.9<br>(1.2 to 2.7)                   | 64.4<br>(59.5 to 69.4)                            | 22.1<br>(19.2 to 25.0)                              |
| Cyclist road injuries                         | 31.5<br>(25.6 to 37.4)                        | 16.3<br>(12.6 to 20.4)                     | 1.6<br>(1.1 to 2.4)                   | 50.2<br>(44.8 to 55.3)                            | 13.6<br>(10.6 to 16.6)                              |
| Motorcyclist road injuries                    | 29.7<br>(25.3 to 35.9)                        | 9.4<br>(7.6 to 11.4)                       | 1.6<br>(1.0 to 2.3)                   | 51.1<br>(46.3 to 55.8)                            | 10.7<br>(8.0 to 13.5)                               |
| Motor vehicle road injuries                   | 68.3<br>(58.7 to 77.9)                        | 37.7<br>(31.7 to 43.9)                     | 4.1<br>(2.8 to 5.9)                   | 64.8<br>(60.0 to 69.7)                            | 22.2<br>(19.1 to 25.2)                              |
| Other road injuries                           | 26.6<br>(23.1 to 31.1)                        | 15.9<br>(12.6 to 19.9)                     | 1.4<br>(0.9 to 2.0)                   | 55.3<br>(50.3 to 60.3)                            | 15.7<br>(12.8 to 18.5)                              |
| Other transport injuries                      | 7.8<br>(6.6 to 9.2)                           | 2.3<br>(1.9 to 2.7)                        | 0.4<br>(0.3 to 0.6)                   | 41.4<br>(36.5 to 46.8)                            | 7.7<br>(4.5 to 10.7)                                |
| <b>Unintentional injuries</b>                 | <b>1,364.9</b><br><b>(1,253.5 to 1,530.7)</b> | <b>787.2</b><br><b>(727.2 to 856.6)</b>    | <b>50.1</b><br><b>(33.8 to 70.4)</b>  | <b>38.8</b><br><b>(35.1 to 42.4)</b>              | <b>5.1</b><br><b>(2.9 to 7.3)</b>                   |
| Falls                                         | 622.3<br>(536.2 to 717.7)                     | 359.9<br>(307.8 to 420.7)                  | 27.2<br>(19.1 to 37.2)                | 43.1<br>(39.3 to 47.1)                            | 6.4<br>(4.1 to 8.6)                                 |
| Drowning                                      | 6.3<br>(5.6 to 7.1)                           | 1.9<br>(1.7 to 2.0)                        | 0.4<br>(0.2 to 0.5)                   | 25.1<br>(20.6 to 29.4)                            | -11.0<br>(-13.8 to -8.2)                            |
| Fire, heat, and hot substances                | 111.9<br>(90.6 to 145.6)                      | 18.4<br>(14.2 to 23.1)                     | 3.2<br>(2.1 to 4.6)                   | 21.1<br>(13.2 to 28.6)                            | -5.6<br>(-10.7 to -1.1)                             |
| Poisonings                                    | 4.0<br>(3.3 to 4.8)                           | 7.0<br>(5.7 to 8.4)                        | 0.4<br>(0.2 to 0.6)                   | 45.8<br>(30.9 to 60.9)                            | 14.0<br>(4.9 to 23.5)                               |
| Exposure to mechanical forces                 | 351.9<br>(304.7 to 420.3)                     | 177.7<br>(153.9 to 202.2)                  | 9.0<br>(5.9 to 13.0)                  | 57.5<br>(52.3 to 62.9)                            | 19.9<br>(16.5 to 23.2)                              |
| Unintentional firearm injuries                | 29.5<br>(23.8 to 37.2)                        | 10.2<br>(7.8 to 12.8)                      | 1.3<br>(0.8 to 1.9)                   | 87.5<br>(80.8 to 94.2)                            | 39.1<br>(35.1 to 43.1)                              |
| Unintentional suffocation                     | 8.3<br>(6.2 to 10.8)                          | 2.1<br>(1.5 to 3.0)                        | 0.3<br>(0.2 to 0.5)                   | -1.5<br>(-5.9 to 2.7)                             | -21.7<br>(-24.6 to -19.0)                           |
| Other exposure to mechanical forces           | 314.1<br>(268.0 to 383.3)                     | 165.3<br>(142.7 to 188.2)                  | 7.4<br>(4.9 to 10.6)                  | 57.0<br>(51.5 to 62.3)                            | 19.1<br>(15.7 to 22.4)                              |



| Cause                                                                               | Prevalence in thousands (95% UI)        | Incidence in thousands (95% UI)         | YLDs in thousands (95% UI)         |                                                   |                                                     |
|-------------------------------------------------------------------------------------|-----------------------------------------|-----------------------------------------|------------------------------------|---------------------------------------------------|-----------------------------------------------------|
|                                                                                     | 2016 counts                             | 2016 counts                             | 2016 counts                        | Percentage change in counts between 2006 and 2016 | Percentage change in age-standardised rates between |
| Adverse effects of medical treatment                                                | 2.3<br>(1.8 to 2.8)                     | 29.6<br>(26.4 to 33.1)                  | 0.3<br>(0.2 to 0.5)                | 1.4<br>(-3.3 to 7.0)                              | -14.4<br>(-18.3 to -10.6)                           |
| Animal contact                                                                      | 49.8<br>(43.4 to 59.2)                  | 70.4<br>(57.0 to 84.9)                  | 1.9<br>(1.2 to 2.7)                | 28.4<br>(18.2 to 38.0)                            | -0.2<br>(-6.1 to 6.2)                               |
| Venomous animal contact                                                             | 23.6<br>(19.4 to 29.2)                  | 31.9<br>(24.4 to 40.7)                  | 1.4<br>(0.9 to 2.1)                | 31.6<br>(18.6 to 44.3)                            | 3.0<br>(-5.0 to 11.8)                               |
| Non-venomous animal contact                                                         | 26.2<br>(21.7 to 32.6)                  | 38.5<br>(30.4 to 47.8)                  | 0.5<br>(0.3 to 0.7)                | 18.9<br>(14.0 to 24.0)                            | -8.2<br>(-11.4 to -5.0)                             |
| Foreign body                                                                        | 88.7<br>(74.4 to 102.5)                 | 70.3<br>(62.8 to 79.4)                  | 3.9<br>(2.5 to 5.7)                | 28.4<br>(23.6 to 33.1)                            | 1.3<br>(-1.6 to 3.8)                                |
| Pulmonary aspiration and foreign body in airway                                     | 67.8<br>(55.4 to 82.1)                  | 32.0<br>(29.0 to 35.3)                  | 3.1<br>(2.0 to 4.5)                | 28.3<br>(23.2 to 33.3)                            | 1.5<br>(-1.6 to 4.3)                                |
| Foreign body in eyes                                                                | 5.7<br>(3.2 to 8.6)                     | 30.3<br>(23.4 to 38.8)                  | 0.3<br>(0.2 to 0.6)                | 28.8<br>(22.7 to 34.3)                            | 1.1<br>(-1.6 to 4.1)                                |
| Foreign body in other body part                                                     | 15.2<br>(12.2 to 19.3)                  | 8.0<br>(6.6 to 9.6)                     | 0.5<br>(0.3 to 0.8)                | 28.9<br>(22.8 to 34.9)                            | 0.1<br>(-3.5 to 3.5)                                |
| Environmental heat and cold exposure                                                | 22.5<br>(18.9 to 28.0)                  | 7.4<br>(6.0 to 8.8)                     | 0.9<br>(0.6 to 1.3)                | 28.6<br>(24.5 to 32.9)                            | 0.0<br>(-2.5 to 2.4)                                |
| Other unintentional injuries                                                        | 105.2<br>(85.3 to 131.7)                | 44.7<br>(37.6 to 53.2)                  | 3.1<br>(1.9 to 4.5)                | 11.2<br>(8.2 to 14.2)                             | -16.7<br>(-18.6 to -14.7)                           |
| <b>Self-harm and interpersonal violence</b>                                         | <b>425.8</b><br><b>(389.2 to 461.8)</b> | <b>106.9†</b><br><b>(91.7 to 124.7)</b> | <b>8.9</b><br><b>(6.1 to 12.6)</b> | <b>22.2</b><br><b>(18.1 to 26.5)</b>              | <b>-7.5</b><br><b>(-9.9 to -5.0)</b>                |
| Self-harm                                                                           | 6.9<br>(6.0 to 7.8)                     | 3.8<br>(3.4 to 4.3)                     | 0.4<br>(0.2 to 0.5)                | 0.4<br>(-3.3 to 4.0)                              | -28.5<br>(-30.6 to -26.5)                           |
| Self-harm by firearm                                                                | 0.7<br>(0.6 to 0.8)                     | 0.2<br>(0.1 to 0.4)                     | < 0.05<br>(< 0.05 to < 0.05)       | -28.7<br>(-31.5 to -26.0)                         | -50.1<br>(-51.8 to -48.5)                           |
| Self-harm by other specified means                                                  | 6.2<br>(5.3 to 7.1)                     | 3.6<br>(3.1 to 4.0)                     | 0.3<br>(0.2 to 0.5)                | 3.9<br>(-0.2 to 7.8)                              | -26.0<br>(-28.3 to -23.8)                           |
| Interpersonal violence                                                              | 418.9<br>(382.2 to 455.2)               | 103.0†<br>(88.0 to 120.8)               | 8.5<br>(5.8 to 12.1)               | 23.3<br>(19.1 to 27.9)                            | -6.2<br>(-8.7 to -3.6)                              |
| Assault by firearm                                                                  | 23.6<br>(19.1 to 28.5)                  | 10.5<br>(8.1 to 13.2)                   | 1.2<br>(0.8 to 1.7)                | 87.1<br>(80.2 to 93.9)                            | 37.4<br>(33.5 to 41.1)                              |
| Assault by sharp object                                                             | 59.0<br>(48.9 to 70.5)                  | 34.7<br>(27.4 to 42.7)                  | 1.9<br>(1.3 to 2.8)                | 46.4<br>(40.6 to 52.0)                            | 8.6<br>(5.4 to 11.8)                                |
| Sexual violence                                                                     | 262.9<br>(230.8 to 296.3)               | --                                      | 2.3<br>(1.5 to 3.2)                | 5.5<br>(-2.5 to 13.9)                             | -17.6<br>(-23.4 to -11.1)                           |
| Assault by other means                                                              | 73.5<br>(61.6 to 89.1)                  | 57.9<br>(48.4 to 68.5)                  | 3.2<br>(2.1 to 4.6)                | 12.0<br>(8.7 to 15.3)                             | -16.7<br>(-18.7 to -14.7)                           |
| <b>Forces of nature, conflict and terrorism, and executions and police conflict</b> | <b>98.0</b><br><b>(55.1 to 162.7)</b>   | <b>0.1†</b><br><b>(0.1 to 0.1)</b>      | <b>2.7</b><br><b>(0.7 to 6.7)</b>  | <b>-15.1</b><br><b>(-22.3 to -9.9)</b>            | <b>-26.4</b><br><b>(-31.3 to -23.0)</b>             |
| Exposure to forces of nature                                                        | 7.5<br>(3.6 to 12.1)                    | --                                      | 0.3<br>(0.1 to 0.7)                | 3.3<br>(-16.9 to 11.9)                            | -12.1<br>(-26.0 to -6.5)                            |
| Conflict and terrorism                                                              | 90.3<br>(48.3 to 154.1)                 | --                                      | 2.4<br>(0.7 to 6.0)                | -16.7<br>(-23.3 to -11.6)                         | -27.4<br>(-32.0 to -24.0)                           |
| Executions and police conflict                                                      | 0.3<br>(0.2 to 0.5)                     | 0.1<br>(0.1 to 0.1)                     | < 0.05<br>(< 0.05 to < 0.05)       | 9.5<br>(3.3 to 20.1)                              | -29.9<br>(-35.7 to -4.6)                            |
| <b>Impairments</b>                                                                  | --                                      | --                                      | --                                 | --                                                | --                                                  |
| Anaemia                                                                             | 2,800.8<br>(2,573.6 to 3,050.8)         | --                                      | 72.6<br>(48.8 to 103.4)            | 10.6<br>(1.4 to 21.5)                             | -7.5<br>(-14.2 to -0.0)                             |
| Developmental intellectual disability                                               | 272.6<br>(210.8 to 336.4)               | --                                      | 30.0<br>(21.7 to 40.6)             | 21.8<br>(15.6 to 28.5)                            | 0.2<br>(-4.5 to 5.4)                                |
| Epilepsy                                                                            | 94.0<br>(44.5 to 149.4)                 | --                                      | 30.9<br>(13.6 to 57.6)             | 17.8<br>(-52.4 to 213.8)                          | -4.4<br>(-62.0 to 153.0)                            |
| Guillain-Barre syndrome                                                             | 0.2<br>(0.1 to 0.2)                     | --                                      | 0.1<br>(< 0.05 to 0.1)             | 34.0<br>(24.3 to 56.6)                            | 10.6<br>(4.4 to 26.4)                               |
| Hearing loss                                                                        | 2,129.8<br>(2,023.5 to 2,241.2)         | --                                      | 75.1<br>(52.6 to 102.9)            | 25.0<br>(21.5 to 28.3)                            | -4.3<br>(-6.3 to -2.4)                              |
| Heart failure                                                                       | 62.7<br>(54.9 to 71.7)                  | --                                      | 6.8<br>(4.9 to 8.7)                | 48.2<br>(38.3 to 58.7)                            | 4.6<br>(-2.6 to 12.5)                               |
| Infertility                                                                         | 205.6<br>(155.2 to 275.1)               | --                                      | 1.2<br>(0.5 to 2.5)                | 31.9<br>(22.2 to 41.3)                            | -4.8<br>(-11.4 to 2.0)                              |
| Pelvic inflammatory disease                                                         | 1.4<br>(1.2 to 1.7)                     | --                                      | 0.2<br>(0.1 to 0.3)                | 28.4<br>(2.6 to 59.5)                             | -5.6<br>(-24.8 to 18.0)                             |
| Vision loss                                                                         | 1,914.0<br>(1,833.2 to 2,003.5)         | --                                      | 58.0<br>(40.5 to 82.4)             | 23.4<br>(19.5 to 27.6)                            | -7.3<br>(-10.1 to -4.4)                             |

We did not calculate incidence for the nine impairments, certain NTDs, and causes with only birth prevalence. Blank cells mean that no estimate is available.

† Incidence for aggregate causes represents the sum of the incidence of the causes below the aggregate.

‡ Incidence estimates for stroke represent first-ever stroke only.

^ Incidence of HIV/AIDS represents new infections of HIV only and does not include new infections of Tuberculosis in HIV positive cases.

SR Table 14: Prevalence, incidence, and YLDs for 2016, percentage change of YLD counts and percentage change of age-standardised YLD rates between 2006 and 2016 by cause and impairments, for all ages, Guinea.

| Cause                                                                                | Prevalence in thousands (95% UI)          | Incidence in thousands (95% UI)            | YLDs in thousands (95% UI)           |                                                   |                                                     |
|--------------------------------------------------------------------------------------|-------------------------------------------|--------------------------------------------|--------------------------------------|---------------------------------------------------|-----------------------------------------------------|
|                                                                                      | 2016 counts                               | 2016 counts                                | 2016 counts                          | Percentage change in counts between 2006 and 2016 | Percentage change in age-standardised rates between |
| <b>All causes</b>                                                                    | <b>12,727.8</b><br>(12,704.2 to 12,749.8) | <b>84,479.4†</b><br>(80,106.0 to 89,536.4) | <b>1,249.9</b><br>(921.4 to 1,650.4) | <b>28.8</b><br>(25.4 to 32.6)                     | <b>-1.8</b><br>(-3.8 to 0.5)                        |
| <b>Communicable, maternal, neonatal, and nutritional disorders</b>                   | <b>11,677.1</b><br>(11,531.4 to 11,819.3) | <b>52,771.1†</b><br>(48,819.2 to 56,816.1) | <b>351.9</b><br>(244.6 to 497.2)     | <b>20.9</b><br>(16.8 to 25.6)                     | <b>-7.4</b><br>(-10.4 to -4.3)                      |
| <b>HIV/AIDS and tuberculosis</b>                                                     | <b>3,005.9</b><br>(2,611.2 to 3,330.6)    | <b>26.1†</b><br>(20.7 to 32.4)             | <b>18.9</b><br>(12.7 to 27.1)        | <b>35.9</b><br>(7.0 to 68.1)                      | <b>2.3</b><br>(-20.0 to 26.4)                       |
| Tuberculosis                                                                         | 2,690.2<br>(2,332.3 to 3,086.4)           | 19.1†<br>(15.2 to 23.8)                    | 3.7<br>(2.4 to 5.4)                  | 23.3<br>(5.9 to 40.7)                             | -9.1<br>(-19.0 to 1.1)                              |
| Drug-susceptible tuberculosis                                                        | 11.9<br>(9.4 to 15.1)                     | 18.8<br>(15.0 to 23.4)                     | 3.6<br>(2.3 to 5.3)                  | 23.5<br>(6.1 to 40.8)                             | -8.9<br>(-18.9 to 1.6)                              |
| Multidrug-resistant tuberculosis without extensive drug resistance                   | 0.2<br>(0.1 to 0.5)                       | 0.3<br>(0.1 to 0.8)                        | 0.1<br>(< 0.05 to 0.2)               | 9.8<br>(-65.6 to 247.7)                           | -19.4<br>(-74.8 to 154.0)                           |
| Extensively drug-resistant tuberculosis                                              | < 0.05<br>(< 0.05 to < 0.05)              | < 0.05<br>(< 0.05 to < 0.05)               | < 0.05<br>(< 0.05 to < 0.05)         | 234.7<br>(5.0 to 958.3)                           | 145.5<br>(-23.2 to 673.5)                           |
| Latent tuberculosis infection                                                        | 2,678.1<br>(2,321.7 to 3,072.8)           | --                                         | --                                   | --                                                | --                                                  |
| HIV/AIDS                                                                             | 118.1<br>(97.9 to 142.2)                  | 7.0^<br>(3.4 to 11.7)                      | 15.2<br>(9.9 to 22.3)                | 39.4<br>(4.8 to 82.8)                             | 5.8<br>(-21.2 to 40.2)                              |
| Drug-susceptible HIV/AIDS - Tuberculosis                                             | 3.3<br>(2.0 to 5.0)                       | 5.2<br>(3.2 to 7.9)                        | 1.3<br>(0.7 to 2.1)                  | 8.9<br>(-10.6 to 32.5)                            | -13.3<br>(-27.8 to 5.5)                             |
| Multidrug-resistant HIV/AIDS - Tuberculosis without extensive drug resistance        | 0.1<br>(< 0.05 to 0.2)                    | 0.1<br>(< 0.05 to 0.2)                     | < 0.05<br>(< 0.05 to 0.1)            | -2.2<br>(-69.5 to 204.9)                          | -22.3<br>(-75.8 to 142.3)                           |
| Extensively drug-resistant HIV/AIDS - Tuberculosis                                   | < 0.05<br>(< 0.05 to < 0.05)              | < 0.05<br>(< 0.05 to < 0.05)               | < 0.05<br>(< 0.05 to < 0.05)         | 198.1<br>(-6.9 to 829.7)                          | 136.9<br>(-26.1 to 638.9)                           |
| HIV/AIDS resulting in other diseases                                                 | 114.7<br>(94.4 to 139.3)                  | 7.0<br>(3.4 to 11.7)                       | 13.9<br>(9.1 to 20.9)                | 43.1<br>(4.4 to 97.5)                             | 8.0<br>(-22.0 to 50.9)                              |
| <b>Diarrhoea, lower respiratory infections, and other common infectious diseases</b> | <b>960.4</b><br>(918.9 to 1,009.2)        | <b>41,502.5†</b><br>(37,927.7 to 45,232.7) | <b>55.0</b><br>(38.9 to 74.5)        | <b>24.1</b><br>(20.2 to 28.0)                     | <b>-4.7</b><br>(-7.4 to -1.9)                       |
| Diarrhoeal diseases                                                                  | 199.3<br>(184.2 to 213.8)                 | 13,393.1<br>(12,356.8 to 14,411.3)         | 22.4<br>(15.5 to 31.0)               | 21.2<br>(14.5 to 28.1)                            | -6.9<br>(-11.3 to -2.4)                             |
| Intestinal infectious diseases                                                       | 1.2<br>(0.8 to 1.9)                       | 25.4†<br>(16.5 to 38.0)                    | 0.2<br>(0.1 to 0.4)                  | -39.9<br>(-52.2 to -22.1)                         | -54.8<br>(-62.4 to -45.0)                           |
| Typhoid fever                                                                        | 1.2<br>(0.8 to 1.9)                       | 19.3<br>(12.3 to 29.2)                     | 0.2<br>(0.1 to 0.3)                  | -40.0<br>(-53.5 to -20.6)                         | -54.8<br>(-63.2 to -43.6)                           |
| Paratyphoid fever                                                                    | 0.3<br>(0.1 to 0.5)                       | 6.0<br>(3.4 to 10.3)                       | < 0.05<br>(< 0.05 to < 0.05)         | -35.8<br>(-50.3 to -17.3)                         | -51.8<br>(-61.4 to -40.4)                           |
| Other intestinal infectious diseases                                                 | --                                        | --                                         | < 0.05<br>(< 0.05 to < 0.05)         | -54.6<br>(-65.9 to -39.4)                         | -65.1<br>(-71.3 to -57.5)                           |
| Lower respiratory infections                                                         | 19.4<br>(17.8 to 21.2)                    | 826.7<br>(755.4 to 916.7)                  | 1.2<br>(0.8 to 1.7)                  | 22.8<br>(8.5 to 38.5)                             | -4.3<br>(-13.3 to 5.1)                              |
| Upper respiratory infections                                                         | 341.9<br>(299.6 to 389.7)                 | 25,604.4<br>(22,310.7 to 29,307.6)         | 8.5<br>(5.1 to 13.5)                 | 23.8<br>(16.4 to 32.2)                            | -4.0<br>(-8.8 to 1.3)                               |
| Otitis media                                                                         | 313.7<br>(279.9 to 349.2)                 | 1,142.4<br>(886.5 to 1,463.8)              | 10.6<br>(6.6 to 15.7)                | 28.9<br>(20.1 to 38.3)                            | -0.9<br>(-7.5 to 5.8)                               |
| Meningitis                                                                           | 95.8<br>(79.7 to 114.5)                   | 23.7<br>(20.4 to 28.4)                     | 7.5<br>(5.4 to 9.9)                  | 27.2<br>(19.0 to 36.0)                            | -3.2<br>(-9.3 to 3.0)                               |
| Pneumococcal meningitis                                                              | 39.2<br>(30.2 to 50.5)                    | 5.7<br>(4.3 to 7.7)                        | 3.0<br>(2.0 to 4.0)                  | 31.8<br>(16.7 to 48.1)                            | -0.2<br>(-10.4 to 10.9)                             |
| H influenzae type B meningitis                                                       | 15.2<br>(9.8 to 23.1)                     | 4.0<br>(2.1 to 6.5)                        | 1.3<br>(0.9 to 1.7)                  | 5.5<br>(-7.0 to 19.2)                             | -20.8<br>(-30.3 to -11.4)                           |
| Meningococcal infection                                                              | 31.6<br>(21.2 to 43.9)                    | 11.8<br>(8.9 to 14.9)                      | 2.3<br>(1.6 to 3.1)                  | 30.0<br>(17.4 to 44.0)                            | -0.9<br>(-10.4 to 9.9)                              |
| Other meningitis                                                                     | 9.9<br>(7.5 to 12.9)                      | 2.2<br>(1.6 to 3.1)                        | 1.0<br>(0.7 to 1.4)                  | 42.0<br>(29.7 to 56.0)                            | 8.5<br>(1.3 to 17.1)                                |
| Encephalitis                                                                         | 32.7<br>(21.0 to 49.1)                    | 13.7<br>(11.9 to 15.7)                     | 3.5<br>(2.5 to 4.6)                  | 33.4<br>(18.9 to 48.5)                            | 0.7<br>(-9.0 to 11.2)                               |
| Diphtheria                                                                           | < 0.05<br>(< 0.05 to < 0.05)              | < 0.05<br>(< 0.05 to 0.1)                  | < 0.05<br>(< 0.05 to < 0.05)         | -24.9<br>(-71.6 to 102.8)                         | -37.9<br>(-73.2 to 45.7)                            |
| Whooping cough                                                                       | 11.2<br>(8.6 to 14.1)                     | 81.6<br>(62.7 to 103.1)                    | 0.6<br>(0.3 to 0.9)                  | 19.2<br>(3.1 to 36.5)                             | -6.5<br>(-19.5 to 7.5)                              |
| Tetanus                                                                              | 0.2<br>(0.2 to 0.3)                       | 0.6<br>(0.3 to 1.2)                        | < 0.05<br>(< 0.05 to < 0.05)         | -8.0<br>(-42.1 to 29.4)                           | -25.6<br>(-44.2 to -6.9)                            |
| Measles                                                                              | 1.1<br>(0.4 to 2.5)                       | 41.1<br>(14.2 to 90.1)                     | 0.1<br>(< 0.05 to 0.2)               | 17.4<br>(-36.4 to 109.2)                          | -8.3<br>(-50.5 to 63.9)                             |
| Varicella and herpes zoster                                                          | 11.9<br>(11.1 to 12.8)                    | 349.8<br>(328.2 to 373.3)                  | 0.4<br>(0.2 to 0.6)                  | 31.6<br>(11.6 to 53.1)                            | 0.0<br>(-11.2 to 12.5)                              |
| <b>Neglected tropical diseases and malaria</b>                                       | <b>8,693.5</b><br>(8,311.4 to 9,073.0)    | <b>6,407.1†</b><br>(5,451.7 to 7,659.3)    | <b>106.1</b><br>(68.8 to 166.9)      | <b>20.6</b><br>(13.4 to 27.8)                     | <b>-7.9</b><br>(-13.7 to -3.0)                      |
| Malaria                                                                              | 3,924.4<br>(3,422.8 to 4,496.8)           | 4,742.8<br>(3,848.6 to 6,008.9)            | 42.0<br>(29.8 to 58.4)               | 17.0<br>(6.8 to 28.9)                             | -9.3<br>(-16.6 to -1.1)                             |
| Chagas disease                                                                       | --                                        | --                                         | --                                   | --                                                | --                                                  |
| Leishmaniasis                                                                        | 1.6<br>(1.2 to 2.3)                       | 0.1<br>(< 0.05 to 0.1)                     | 0.1<br>(< 0.05 to 0.1)               | -3.2<br>(-22.6 to 26.8)                           | -24.1<br>(-38.2 to -3.1)                            |
| Visceral leishmaniasis                                                               | --                                        | --                                         | --                                   | --                                                | --                                                  |
| Cutaneous and mucocutaneous leishmaniasis                                            | 1.4<br>(0.9 to 2.2)                       | 0.1<br>(< 0.05 to 0.1)                     | 0.1<br>(< 0.05 to 0.1)               | -3.2<br>(-22.6 to 26.8)                           | -24.1<br>(-38.2 to -3.1)                            |
| African trypanosomiasis                                                              | 0.3<br>(0.1 to 0.7)                       | 0.1<br>(0.1 to 0.2)                        | 0.1<br>(< 0.05 to 0.2)               | -56.9<br>(-73.3 to -29.7)                         | -67.4<br>(-82.0 to -40.1)                           |
| Schistosomiasis                                                                      | 3,671.6<br>(3,120.1 to 4,514.0)           | 1,540.8<br>(1,329.9 to 1,849.2)            | 28.4<br>(13.8 to 56.1)               | 24.6<br>(18.0 to 30.9)                            | -6.3<br>(-11.0 to -1.8)                             |
| Cysticercosis                                                                        | 1.8<br>(1.3 to 2.4)                       | --                                         | 0.4<br>(0.2 to 0.6)                  | 14.8<br>(-18.9 to 55.6)                           | -14.3<br>(-38.2 to 13.1)                            |
| Cystic echinococcosis                                                                | 9.4<br>(2.4 to 31.4)                      | 2.0<br>(0.5 to 6.7)                        | 0.9<br>(0.2 to 2.9)                  | -11.6<br>(-85.5 to 428.8)                         | -33.6<br>(-88.2 to 257.6)                           |
| Lymphatic filariasis                                                                 | 193.2<br>(105.0 to 351.8)                 | 30.1<br>(21.4 to 41.1)                     | 13.2<br>(3.2 to 33.7)                | 22.6<br>(-9.0 to 37.0)                            | -7.6<br>(-31.3 to 2.7)                              |
| Onchocerciasis                                                                       | --                                        | --                                         | --                                   | --                                                | --                                                  |
| Trachoma                                                                             | 8.7<br>(5.5 to 12.5)                      | --                                         | 0.8<br>(0.5 to 1.3)                  | 1.9<br>(-19.4 to 26.7)                            | -22.2<br>(-42.4 to 3.6)                             |
| Dengue                                                                               | 5.3<br>(2.7 to 9.2)                       | 88.8<br>(50.4 to 141.2)                    | 0.9<br>(0.4 to 1.7)                  | 190.7<br>(101.5 to 583.4)                         | 120.8<br>(59.0 to 414.9)                            |
| Yellow fever                                                                         | 0.1<br>(< 0.05 to 0.1)                    | 2.0<br>(0.6 to 5.6)                        | < 0.05<br>(< 0.05 to < 0.05)         | -63.7<br>(-72.6 to -51.6)                         | -72.5<br>(-78.3 to -64.9)                           |
| Rabies                                                                               | < 0.05<br>(< 0.05 to < 0.05)              | 0.1<br>(< 0.05 to 0.2)                     | < 0.05<br>(< 0.05 to < 0.05)         | -12.2<br>(-49.8 to 52.1)                          | -30.0<br>(-53.3 to 5.7)                             |
| Intestinal nematode infections                                                       | 4,602.5<br>(3,984.4 to 5,253.4)           | --                                         | 12.7<br>(7.7 to 19.9)                | 30.0<br>(16.6 to 46.3)                            | -1.2<br>(-12.3 to 11.8)                             |
| Ascariasis                                                                           | 1,063.4<br>(774.5 to 1,440.4)             | --                                         | 0.3<br>(0.2 to 0.5)                  | 31.0<br>(2.7 to 66.0)                             | 0.4<br>(-23.3 to 32.6)                              |

| Cause                                                                   | Prevalence in thousands (95% UI)                 | Incidence in thousands (95% UI)                   | YLDs in thousands (95% UI)                |                                                   |                                                     |
|-------------------------------------------------------------------------|--------------------------------------------------|---------------------------------------------------|-------------------------------------------|---------------------------------------------------|-----------------------------------------------------|
|                                                                         | 2016 counts                                      | 2016 counts                                       | 2016 counts                               | Percentage change in counts between 2006 and 2016 | Percentage change in age-standardised rates between |
| Trichuriasis                                                            | 1,228.2<br>(899.1 to 1,669.0)                    | --                                                | 0.2<br>(0.1 to 0.4)                       | 30.8<br>(-4.4 to 79.5)                            | -0.3<br>(-31.1 to 42.3)                             |
| Hookworm disease                                                        | 3,021.8<br>(2,413.8 to 3,702.9)                  | --                                                | 12.2<br>(7.4 to 18.9)                     | 30.0<br>(16.0 to 46.7)                            | -1.3<br>(-12.9 to 12.7)                             |
| Food-borne trematodiasis                                                | --                                               | --                                                | --                                        | --                                                | --                                                  |
| Leprosy                                                                 | 4.3<br>(3.9 to 4.7)                              | 0.1<br>(0.1 to 0.2)                               | 0.3<br>(0.2 to 0.4)                       | -21.2<br>(-30.3 to -11.5)                         | -37.0<br>(-42.5 to -30.9)                           |
| Ebola virus disease                                                     | 0.2<br>( $< 0.05$ to 1.2)                        | $< 0.05$<br>( $< 0.05$ to $< 0.05$ )              | $< 0.05$<br>( $< 0.05$ to 0.3)            | --                                                | --                                                  |
| Zika virus disease                                                      | --                                               | --                                                | --                                        | --                                                | --                                                  |
| Guinea worm disease                                                     | --                                               | --                                                | --                                        | --                                                | --                                                  |
| Other neglected tropical diseases                                       | 183.1<br>(174.7 to 191.7)                        | --                                                | 6.5<br>(4.3 to 9.6)                       | 11.2<br>(0.7 to 22.0)                             | -12.9<br>(-21.0 to -5.2)                            |
| <b>Maternal disorders</b>                                               | <b>44.4</b><br><b>(36.0 to 56.1)</b>             | <b>323.2†</b><br><b>(279.1 to 370.6)</b>          | <b>5.4</b><br><b>(3.7 to 7.5)</b>         | <b>-9.2</b><br><b>(-23.5 to 7.3)</b>              | <b>-34.4</b><br><b>(-43.9 to -22.9)</b>             |
| Maternal haemorrhage                                                    | 4.3<br>(3.3 to 5.6)                              | 36.1<br>(24.2 to 52.4)                            | 0.2<br>(0.1 to 0.3)                       | 21.9<br>(-14.6 to 73.2)                           | -10.1<br>(-37.4 to 27.0)                            |
| Maternal sepsis and other pregnancy related infections                  | 6.0<br>(4.5 to 7.8)                              | 35.2<br>(27.2 to 46.9)                            | 0.2<br>(0.1 to 0.3)                       | 26.7<br>(-37.9 to 150.7)                          | -5.9<br>(-51.9 to 79.8)                             |
| Maternal hypertensive disorders                                         | 25.1<br>(15.8 to 35.3)                           | 113.0<br>(90.7 to 133.3)                          | 1.2<br>(0.6 to 2.0)                       | 25.1<br>(-23.1 to 108.5)                          | -8.3<br>(-43.7 to 52.4)                             |
| Maternal obstructed labour and uterine rupture                          | 9.1<br>(7.5 to 10.8)                             | 19.9<br>(14.0 to 27.2)                            | 2.9<br>(1.9 to 4.2)                       | -20.4<br>(-32.7 to -7.0)                          | -41.7<br>(-50.5 to -32.0)                           |
| Maternal abortion, miscarriage, and ectopic pregnancy                   | 1.0<br>(0.6 to 1.5)                              | 119.1<br>(86.5 to 160.1)                          | 0.1<br>(0.1 to 0.2)                       | 20.9<br>(-38.1 to 139.5)                          | -11.7<br>(-53.2 to 71.9)                            |
| Other maternal disorders                                                | --                                               | --                                                | 0.8<br>(0.6 to 1.2)                       | -13.5<br>(-27.1 to 2.2)                           | -37.4<br>(-46.6 to -26.5)                           |
| <b>Neonatal disorders</b>                                               | <b>176.1</b><br><b>(136.3 to 228.4)</b>          | --                                                | <b>18.0</b><br><b>(9.6 to 33.5)</b>       | <b>72.2</b><br><b>(26.4 to 132.4)</b>             | <b>35.7</b><br><b>(-1.2 to 83.7)</b>                |
| Neonatal preterm birth complications                                    | 110.6<br>(77.1 to 159.3)                         | --                                                | 5.0<br>(3.4 to 7.4)                       | 29.5<br>(-1.1 to 68.2)                            | 0.9<br>(-24.5 to 35.6)                              |
| Neonatal encephalopathy due to birth asphyxia and trauma                | 60.2<br>(29.7 to 109.4)                          | --                                                | 4.6<br>(1.0 to 16.0)                      | 126.9<br>(-11.9 to 325.6)                         | 78.0<br>(-36.2 to 244.6)                            |
| Neonatal sepsis and other neonatal infections                           | 15.6<br>(5.2 to 39.0)                            | --                                                | 5.8<br>(1.3 to 17.0)                      | 114.4<br>(25.1 to 226.7)                          | 75.9<br>(-0.0 to 181.7)                             |
| Hemolytic disease and other neonatal jaundice                           | 2.7<br>(2.3 to 3.1)                              | --                                                | 0.9<br>(0.7 to 1.2)                       | 29.5<br>(13.0 to 48.1)                            | -0.1<br>(-11.1 to 11.8)                             |
| Other neonatal disorders                                                | --                                               | --                                                | 1.6<br>(1.0 to 2.8)                       | 46.6<br>(15.0 to 85.0)                            | 15.8<br>(-9.2 to 46.9)                              |
| <b>Nutritional deficiencies</b>                                         | <b>5,061.4</b><br><b>(4,694.1 to 5,631.8)</b>    | <b>2,256.0†</b><br><b>(1,491.2 to 3,509.7)</b>    | <b>137.0</b><br><b>(92.7 to 195.6)</b>    | <b>14.9</b><br><b>(9.8 to 20.1)</b>               | <b>-11.5</b><br><b>(-14.5 to -8.3)</b>              |
| Protein-energy malnutrition                                             | 165.5<br>(136.2 to 198.4)                        | 115.8<br>(96.4 to 136.9)                          | 6.8<br>(4.1 to 10.2)                      | 0.5<br>(-25.2 to 36.4)                            | -21.3<br>(-41.8 to 7.0)                             |
| Iodine deficiency                                                       | 610.6<br>(537.5 to 688.5)                        | 22.8<br>(20.0 to 25.6)                            | 16.8<br>(11.4 to 23.3)                    | 19.3<br>(11.6 to 28.1)                            | -10.2<br>(-15.7 to -4.1)                            |
| Vitamin A deficiency                                                    | 2,105.6<br>(1,445.0 to 3,001.6)                  | 2,117.4<br>(1,357.8 to 3,359.1)                   | 1.0<br>(0.5 to 1.6)                       | 26.7<br>(-5.8 to 68.3)                            | -3.1<br>(-26.2 to 24.5)                             |
| Iron-deficiency anaemia                                                 | 3,238.1<br>(3,126.7 to 3,351.8)                  | --                                                | 112.2<br>(74.2 to 162.3)                  | 15.2<br>(9.5 to 20.9)                             | -11.4<br>(-14.9 to -7.9)                            |
| Other nutritional deficiencies                                          | --                                               | --                                                | 0.2<br>(0.1 to 0.4)                       | -0.3<br>(-27.0 to 36.4)                           | -21.8<br>(-43.0 to 7.7)                             |
| <b>Other communicable, maternal, neonatal, and nutritional diseases</b> | <b>4,419.0</b><br><b>(4,056.0 to 4,792.5)</b>    | <b>2,256.3</b><br><b>(1,881.2 to 2,767.4)</b>     | <b>115.5</b><br><b>(7.5 to 17.0)</b>      | <b>25.4</b><br><b>(18.4 to 31.6)</b>              | <b>-5.1</b><br><b>(-9.4 to -1.0)</b>                |
| Sexually transmitted diseases excluding HIV                             | 2,298.4<br>(2,144.3 to 2,472.1)                  | 1,400.8<br>(1,196.6 to 1,654.5)                   | 5.7<br>(3.6 to 9.3)                       | 33.4<br>(25.3 to 41.6)                            | -1.9<br>(-7.6 to 3.7)                               |
| Syphilis                                                                | 192.1<br>(158.8 to 235.3)                        | 132.2<br>(106.1 to 164.1)                         | 0.3<br>(0.2 to 0.4)                       | 34.7<br>(17.8 to 55.5)                            | 1.9<br>(-11.2 to 18.2)                              |
| Chlamydial infection                                                    | 147.3<br>(105.5 to 202.9)                        | 125.9<br>(93.0 to 171.9)                          | 1.1<br>(0.7 to 1.7)                       | 33.1<br>(17.9 to 50.1)                            | -3.2<br>(-13.1 to 9.1)                              |
| Gonococcal infection                                                    | 133.4<br>(90.3 to 194.1)                         | 435.2<br>(263.1 to 677.7)                         | 1.1<br>(0.6 to 1.9)                       | 34.7<br>(18.1 to 53.2)                            | -0.2<br>(-12.3 to 12.6)                             |
| Trichomoniasis                                                          | 445.4<br>(366.8 to 533.5)                        | 410.2<br>(331.0 to 500.7)                         | 0.6<br>(0.2 to 1.2)                       | 34.8<br>(26.1 to 44.8)                            | -0.6<br>(-6.5 to 6.0)                               |
| Genital herpes                                                          | 1,608.9<br>(1,392.2 to 1,865.8)                  | 163.2<br>(138.6 to 195.4)                         | 0.4<br>(0.1 to 1.0)                       | 34.1<br>(22.6 to 47.3)                            | -0.1<br>(-7.5 to 8.0)                               |
| Other sexually transmitted diseases                                     | 121.4<br>(112.6 to 131.5)                        | 134.1<br>(111.7 to 161.5)                         | 2.2<br>(1.4 to 3.3)                       | 32.1<br>(21.1 to 45.0)                            | -3.5<br>(-11.5 to 5.6)                              |
| Hepatitis                                                               | 2,472.5<br>(1,963.2 to 3,072.5)                  | 855.5<br>(561.4 to 1,279.9)                       | 0.9<br>(0.5 to 1.4)                       | -4.0<br>(-25.5 to 22.3)                           | -23.6<br>(-38.4 to -6.5)                            |
| Acute hepatitis A                                                       | 16.8<br>(1.7 to 47.3)                            | 217.7<br>(21.6 to 614.8)                          | 0.1<br>( $< 0.05$ to 0.3)                 | -7.9<br>(-79.0 to 359.8)                          | -25.7<br>(-78.5 to 191.4)                           |
| Hepatitis B                                                             | 2,007.8<br>(1,498.2 to 2,615.6)                  | 546.7<br>(383.8 to 750.7)                         | 0.6<br>(0.4 to 1.1)                       | -3.6<br>(-23.9 to 19.3)                           | -23.4<br>(-39.0 to -6.3)                            |
| Hepatitis C                                                             | 443.8<br>(392.1 to 500.8)                        | 36.9<br>(33.2 to 40.8)                            | $< 0.05$<br>( $< 0.05$ to 0.1)            | 17.7<br>(-26.9 to 86.9)                           | -9.9<br>(-34.3 to 23.1)                             |
| Acute hepatitis E                                                       | 4.2<br>(3.4 to 5.3)                              | 54.2<br>(43.6 to 69.0)                            | 0.1<br>( $< 0.05$ to 0.1)                 | -7.7<br>(-33.4 to 24.5)                           | -26.7<br>(-43.5 to -5.1)                            |
| Other infectious diseases                                               | 134.5<br>(128.9 to 140.5)                        | $< 0.05$<br>( $< 0.05$ to $< 0.05$ )              | 4.9<br>(3.2 to 7.0)                       | 23.5<br>(13.2 to 34.2)                            | -4.9<br>(-12.0 to 2.5)                              |
| <b>Non-communicable diseases</b>                                        | <b>11,589.8</b><br><b>(11,478.6 to 11,689.4)</b> | <b>30,817.0†</b><br><b>(28,147.3 to 33,540.2)</b> | <b>837.4</b><br><b>(616.5 to 1,092.0)</b> | <b>32.5</b><br><b>(27.6 to 37.7)</b>              | <b>0.0</b><br><b>(-2.7 to 2.8)</b>                  |
| <b>Neoplasms</b>                                                        | <b>14.0</b><br><b>(12.5 to 15.8)</b>             | <b>8.3</b><br><b>(7.7 to 8.8)</b>                 | <b>2.6</b><br><b>(1.9 to 3.4)</b>         | <b>31.8</b><br><b>(24.5 to 40.7)</b>              | <b>1.0</b><br><b>(-4.2 to 7.0)</b>                  |
| Lip and oral cavity cancer                                              | 0.8<br>(0.7 to 0.9)                              | 0.2<br>(0.2 to 0.2)                               | 0.1<br>(0.1 to 0.1)                       | 38.5<br>(20.7 to 59.9)                            | 4.9<br>(-7.7 to 19.9)                               |
| Nasopharynx cancer                                                      | 0.1<br>(0.1 to 0.1)                              | $< 0.05$<br>( $< 0.05$ to $< 0.05$ )              | $< 0.05$<br>( $< 0.05$ to $< 0.05$ )      | 33.9<br>(12.5 to 60.2)                            | -0.8<br>(-14.2 to 15.2)                             |
| Other pharynx cancer                                                    | 0.1<br>(0.1 to 0.2)                              | 0.1<br>(0.1 to 0.1)                               | $< 0.05$<br>( $< 0.05$ to $< 0.05$ )      | 28.5<br>(13.2 to 44.9)                            | -2.1<br>(-13.2 to 9.1)                              |
| Oesophageal cancer                                                      | 0.1<br>(0.1 to 0.1)                              | 0.1<br>(0.1 to 0.1)                               | $< 0.05$<br>( $< 0.05$ to $< 0.05$ )      | 33.1<br>(20.4 to 46.4)                            | 2.3<br>(-7.3 to 11.7)                               |
| Stomach cancer                                                          | 0.8<br>(0.8 to 0.9)                              | 0.5<br>(0.5 to 0.6)                               | 0.1<br>(0.1 to 0.2)                       | 24.4<br>(12.6 to 37.5)                            | -4.4<br>(-13.9 to 6.7)                              |
| Colon and rectum cancer                                                 | 0.7<br>(0.6 to 0.8)                              | 0.3<br>(0.2 to 0.3)                               | 0.1<br>(0.1 to 0.1)                       | 36.0<br>(19.2 to 53.8)                            | 4.2<br>(-8.6 to 18.7)                               |
| Liver cancer                                                            | 1.2<br>(1.0 to 1.4)                              | 1.7<br>(1.5 to 1.9)                               | 0.4<br>(0.3 to 0.5)                       | 31.1<br>(13.5 to 51.3)                            | -0.0<br>(-12.9 to 14.4)                             |
| Liver cancer due to hepatitis B                                         | 1.1<br>(0.9 to 1.3)                              | 1.0<br>(0.8 to 1.1)                               | 0.2<br>(0.1 to 0.3)                       | 31.3<br>(12.1 to 55.1)                            | 0.0<br>(-14.4 to 17.3)                              |



| Cause                                              | Prevalence in thousands (95% UI)        | Incidence in thousands (95% UI)          | YLDs in thousands (95% UI)           |                                                   |                                                     |
|----------------------------------------------------|-----------------------------------------|------------------------------------------|--------------------------------------|---------------------------------------------------|-----------------------------------------------------|
|                                                    | 2016 counts                             | 2016 counts                              | 2016 counts                          | Percentage change in counts between 2006 and 2016 | Percentage change in age-standardised rates between |
| Liver cancer due to hepatitis C                    | 0.1<br>(0.1 to 0.2)                     | 0.1<br>(0.1 to 0.2)                      | < 0.05<br>(< 0.05 to < 0.05)         | 30.3<br>(12.4 to 49.8)                            | 0.3<br>(-12.1 to 14.0)                              |
| Liver cancer due to alcohol use                    | 0.2<br>(0.1 to 0.2)                     | 0.2<br>(0.1 to 0.2)                      | < 0.05<br>(< 0.05 to 0.1)            | 29.6<br>(11.5 to 51.1)                            | -0.5<br>(-13.2 to 14.6)                             |
| Liver cancer due to other causes                   | 0.5<br>(0.4 to 0.6)                     | 0.4<br>(0.4 to 0.5)                      | 0.1<br>(0.1 to 0.1)                  | 31.2<br>(13.2 to 51.8)                            | -0.0<br>(-13.2 to 14.9)                             |
| Gallbladder and biliary tract cancer               | 0.1<br>(< 0.05 to 0.1)                  | 0.1<br>(0.1 to 0.1)                      | < 0.05<br>(< 0.05 to < 0.05)         | 23.8<br>(12.8 to 35.3)                            | -5.4<br>(-13.5 to 2.7)                              |
| Pancreatic cancer                                  | 0.1<br>(0.1 to 0.1)                     | 0.2<br>(0.2 to 0.2)                      | < 0.05<br>(< 0.05 to 0.1)            | 38.4<br>(26.5 to 51.2)                            | 6.0<br>(-3.0 to 16.2)                               |
| Larynx cancer                                      | 0.2<br>(0.1 to 0.2)                     | 0.1<br>(< 0.05 to 0.1)                   | < 0.05<br>(< 0.05 to < 0.05)         | 37.4<br>(20.5 to 57.2)                            | 4.9<br>(-7.8 to 20.6)                               |
| Tracheal, bronchus, and lung cancer                | 0.5<br>(0.5 to 0.6)                     | 0.5<br>(0.4 to 0.5)                      | 0.1<br>(0.1 to 0.1)                  | 36.8<br>(15.8 to 63.1)                            | 5.1<br>(-12.5 to 27.9)                              |
| Malignant skin melanoma                            | 0.2<br>(0.2 to 0.3)                     | 0.1<br>(< 0.05 to 0.1)                   | < 0.05<br>(< 0.05 to < 0.05)         | 35.6<br>(17.0 to 58.0)                            | 4.1<br>(-11.0 to 20.4)                              |
| Non-melanoma skin cancer                           | 0.1<br>(< 0.05 to 0.1)                  | 0.3<br>(0.2 to 0.5)                      | < 0.05<br>(< 0.05 to < 0.05)         | 31.8<br>(-5.2 to 70.6)                            | -3.1<br>(-36.1 to 31.8)                             |
| Non-melanoma skin cancer (squamous-cell carcinoma) | 0.1<br>(< 0.05 to 0.1)                  | 0.1<br>(0.1 to 0.1)                      | < 0.05<br>(< 0.05 to < 0.05)         | 27.5<br>(-11.4 to 69.8)                           | -5.2<br>(-39.0 to 31.6)                             |
| Non-melanoma skin cancer (basal-cell carcinoma)    | < 0.05<br>(< 0.05 to 0.1)               | 0.2<br>(0.1 to 0.4)                      | < 0.05<br>(< 0.05 to < 0.05)         | 79.9<br>(46.1 to 118.5)                           | 32.7<br>(9.7 to 59.9)                               |
| Breast cancer                                      | 2.2<br>(1.8 to 2.6)                     | 0.5<br>(0.5 to 0.6)                      | 0.2<br>(0.2 to 0.3)                  | 40.4<br>(9.0 to 79.7)                             | 6.6<br>(-16.0 to 34.7)                              |
| Cervical cancer                                    | 6.0<br>(3.9 to 7.6)                     | 1.7<br>(1.1 to 2.0)                      | 0.6<br>(0.4 to 0.8)                  | 24.5<br>(-0.1 to 56.2)                            | -5.4<br>(-22.9 to 16.8)                             |
| Uterine cancer                                     | 0.4<br>(0.3 to 0.4)                     | 0.1<br>(0.1 to 0.1)                      | < 0.05<br>(< 0.05 to < 0.05)         | 30.8<br>(5.6 to 61.2)                             | 0.2<br>(-17.6 to 21.4)                              |
| Ovarian cancer                                     | 0.4<br>(0.4 to 0.5)                     | 0.1<br>(0.1 to 0.2)                      | 0.1<br>(< 0.05 to 0.1)               | 41.2<br>(20.0 to 64.8)                            | 6.6<br>(-8.1 to 23.3)                               |
| Prostate cancer                                    | 1.0<br>(0.7 to 1.1)                     | 0.3<br>(0.2 to 0.4)                      | 0.1<br>(0.1 to 0.2)                  | 37.9<br>(6.0 to 76.5)                             | 5.4<br>(-14.8 to 28.4)                              |
| Testicular cancer                                  | 0.1<br>(0.1 to 0.1)                     | < 0.05<br>(< 0.05 to < 0.05)             | < 0.05<br>(< 0.05 to < 0.05)         | 31.4<br>(3.2 to 68.1)                             | -0.4<br>(-21.7 to 28.4)                             |
| Kidney cancer                                      | 0.6<br>(0.4 to 0.7)                     | 0.2<br>(0.1 to 0.2)                      | 0.1<br>(< 0.05 to 0.1)               | 46.8<br>(26.4 to 72.1)                            | 14.0<br>(-2.4 to 34.3)                              |
| Bladder cancer                                     | 0.6<br>(0.5 to 0.7)                     | 0.2<br>(0.2 to 0.2)                      | 0.1<br>(< 0.05 to 0.1)               | 38.7<br>(20.5 to 59.4)                            | 5.4<br>(-9.2 to 22.4)                               |
| Brain and nervous system cancer                    | 0.4<br>(0.3 to 0.4)                     | 0.2<br>(0.1 to 0.2)                      | 0.1<br>(< 0.05 to 0.1)               | 36.6<br>(22.2 to 52.4)                            | 6.2<br>(-7.3 to 22.0)                               |
| Thyroid cancer                                     | 0.2<br>(0.1 to 0.2)                     | < 0.05<br>(< 0.05 to < 0.05)             | < 0.05<br>(< 0.05 to < 0.05)         | 26.8<br>(-2.1 to 65.1)                            | -4.8<br>(-23.9 to 18.3)                             |
| Mesothelioma                                       | < 0.05<br>(< 0.05 to < 0.05)            | < 0.05<br>(< 0.05 to < 0.05)             | < 0.05<br>(< 0.05 to < 0.05)         | 23.3<br>(9.0 to 40.0)                             | -4.9<br>(-14.8 to 6.7)                              |
| Hodgkin lymphoma                                   | 0.1<br>(0.1 to 0.1)                     | < 0.05<br>(< 0.05 to < 0.05)             | < 0.05<br>(< 0.05 to < 0.05)         | 13.0<br>(-5.7 to 38.1)                            | -11.4<br>(-22.5 to 2.5)                             |
| Non-Hodgkin's lymphoma                             | 0.5<br>(0.4 to 0.5)                     | 0.2<br>(0.2 to 0.2)                      | 0.1<br>(< 0.05 to 0.1)               | 32.4<br>(20.3 to 46.3)                            | 1.8<br>(-8.2 to 12.0)                               |
| Multiple myeloma                                   | 0.1<br>(0.1 to 0.1)                     | 0.1<br>(< 0.05 to 0.1)                   | < 0.05<br>(< 0.05 to < 0.05)         | 36.0<br>(20.0 to 53.1)                            | 3.5<br>(-8.6 to 16.5)                               |
| Leukaemia                                          | 0.6<br>(0.5 to 0.7)                     | 0.2<br>(0.2 to 0.2)                      | 0.1<br>(0.1 to 0.1)                  | 27.7<br>(16.5 to 40.2)                            | -1.2<br>(-8.0 to 6.5)                               |
| Acute lymphoid leukaemia                           | 0.1<br>(0.1 to 0.2)                     | < 0.05<br>(< 0.05 to < 0.05)             | < 0.05<br>(< 0.05 to < 0.05)         | 20.1<br>(0.1 to 43.8)                             | -5.5<br>(-17.2 to 7.9)                              |
| Chronic lymphoid leukaemia                         | 0.1<br>(0.1 to 0.1)                     | < 0.05<br>(< 0.05 to < 0.05)             | < 0.05<br>(< 0.05 to < 0.05)         | 37.0<br>(16.8 to 60.1)                            | 3.0<br>(-12.2 to 19.9)                              |
| Acute myeloid leukaemia                            | 0.1<br>(0.1 to 0.2)                     | 0.1<br>(0.1 to 0.1)                      | < 0.05<br>(< 0.05 to < 0.05)         | 30.9<br>(11.5 to 54.8)                            | 2.4<br>(-7.7 to 15.1)                               |
| Chronic myeloid leukaemia                          | 0.1<br>(0.1 to 0.1)                     | < 0.05<br>(< 0.05 to < 0.05)             | < 0.05<br>(< 0.05 to < 0.05)         | 29.0<br>(11.1 to 49.8)                            | -3.0<br>(-15.0 to 10.4)                             |
| Other leukaemia                                    | 0.1<br>(0.1 to 0.2)                     | < 0.05<br>(< 0.05 to < 0.05)             | < 0.05<br>(< 0.05 to < 0.05)         | 23.5<br>(8.0 to 41.4)                             | -4.4<br>(-15.4 to 7.1)                              |
| Other neoplasms                                    | 1.3<br>(1.1 to 1.4)                     | 0.4<br>(0.4 to 0.5)                      | 0.1<br>(0.1 to 0.2)                  | 30.8<br>(12.7 to 51.4)                            | 0.8<br>(-11.1 to 14.9)                              |
| <b>Cardiovascular diseases</b>                     | <b>591.4</b><br><b>(558.9 to 628.8)</b> | <b>42.5†</b><br><b>(40.5 to 44.7)</b>    | <b>33.9</b><br><b>(24.4 to 45.4)</b> | <b>34.2</b><br><b>(28.5 to 40.4)</b>              | <b>1.5</b><br><b>(-2.4 to 5.5)</b>                  |
| Rheumatic heart disease                            | 59.8<br>(52.9 to 66.9)                  | 2.7<br>(2.4 to 3.0)                      | 3.0<br>(1.9 to 4.3)                  | 24.9<br>(13.1 to 36.6)                            | -6.9<br>(-14.7 to 1.5)                              |
| Ischaemic heart disease                            | 118.5<br>(110.0 to 127.2)               | 16.6<br>(15.4 to 18.0)                   | 5.0<br>(3.4 to 7.0)                  | 33.4<br>(25.8 to 41.4)                            | 1.2<br>(-3.8 to 6.3)                                |
| Cerebrovascular disease                            | 42.9<br>(40.2 to 45.7)                  | 7.6‡<br>(7.0 to 8.3)                     | 6.2<br>(4.5 to 7.9)                  | 32.6<br>(22.3 to 43.5)                            | 1.7<br>(-6.0 to 9.7)                                |
| Ischaemic stroke                                   | 36.3<br>(32.6 to 40.3)                  | 4.9‡<br>(4.4 to 5.5)                     | 5.0<br>(3.5 to 6.4)                  | 34.5<br>(22.3 to 47.7)                            | 2.8<br>(-6.2 to 12.2)                               |
| Hemorrhagic stroke                                 | 9.0<br>(8.0 to 10.1)                    | 2.8‡<br>(2.5 to 3.1)                     | 1.2<br>(0.9 to 1.6)                  | 25.4<br>(10.8 to 41.5)                            | -3.2<br>(-13.7 to 9.0)                              |
| Hypertensive heart disease                         | 10.3<br>(8.4 to 12.5)                   | --                                       | 0.8<br>(0.6 to 1.2)                  | 27.7<br>(13.8 to 43.7)                            | -2.8<br>(-11.7 to 7.5)                              |
| Cardiomyopathy and myocarditis                     | 3.8<br>(3.3 to 4.4)                     | 2.8†<br>(2.5 to 3.2)                     | 0.4<br>(0.2 to 0.5)                  | 36.6<br>(21.7 to 52.9)                            | 2.6<br>(-9.2 to 15.8)                               |
| Myocarditis                                        | 1.3<br>(1.2 to 1.5)                     | 2.8<br>(2.5 to 3.2)                      | 0.1<br>(0.1 to 0.1)                  | 35.9<br>(25.9 to 46.8)                            | 2.6<br>(-7.4 to 14.1)                               |
| Alcoholic cardiomyopathy                           | 0.5<br>(0.4 to 0.6)                     | --                                       | < 0.05<br>(< 0.05 to 0.1)            | 34.5<br>(-3.4 to 89.3)                            | 3.2<br>(-24.2 to 42.4)                              |
| Other cardiomyopathy                               | 2.9<br>(2.3 to 3.6)                     | --                                       | 0.2<br>(0.1 to 0.4)                  | 37.2<br>(17.2 to 58.6)                            | 2.5<br>(-12.9 to 19.6)                              |
| Atrial fibrillation and flutter                    | 23.9<br>(20.7 to 27.4)                  | 2.2<br>(1.8 to 2.6)                      | 1.9<br>(1.2 to 2.6)                  | 31.6<br>(20.5 to 42.8)                            | 1.0<br>(-5.6 to 7.8)                                |
| Peripheral vascular disease                        | 85.7<br>(73.7 to 99.7)                  | 8.6<br>(7.4 to 10.2)                     | 0.5<br>(0.2 to 0.8)                  | 31.9<br>(22.6 to 42.3)                            | 0.9<br>(-5.6 to 8.4)                                |
| Endocarditis                                       | 0.9<br>(0.8 to 1.1)                     | 2.0<br>(1.8 to 2.2)                      | 0.1<br>(0.1 to 0.1)                  | 35.2<br>(19.7 to 51.6)                            | 1.5<br>(-12.7 to 17.4)                              |
| Other cardiovascular and circulatory diseases      | 305.4<br>(256.6 to 362.7)               | --                                       | 16.1<br>(10.8 to 22.9)               | 37.7<br>(26.6 to 49.7)                            | 3.1<br>(-4.7 to 12.2)                               |
| <b>Chronic respiratory diseases</b>                | <b>817.1</b><br><b>(770.4 to 870.7)</b> | <b>162.5†</b><br><b>(149.3 to 177.3)</b> | <b>36.9</b><br><b>(26.9 to 49.9)</b> | <b>34.6</b><br><b>(28.8 to 41.0)</b>              | <b>2.1</b><br><b>(-1.7 to 6.4)</b>                  |
| Chronic obstructive pulmonary disease              | 131.8<br>(126.1 to 137.5)               | 9.5<br>(9.1 to 9.9)                      | 8.9<br>(7.6 to 9.9)                  | 31.9<br>(22.2 to 41.5)                            | 0.3<br>(-6.5 to 6.9)                                |
| Pneumoconiosis                                     | 0.1<br>(0.1 to 0.1)                     | < 0.05<br>(< 0.05 to < 0.05)             | < 0.05<br>(< 0.05 to < 0.05)         | 35.7<br>(27.9 to 44.3)                            | 2.7<br>(-3.1 to 9.4)                                |
| Silicosis                                          | < 0.05<br>(< 0.05 to < 0.05)            | < 0.05<br>(< 0.05 to < 0.05)             | < 0.05<br>(< 0.05 to < 0.05)         | 34.1<br>(24.0 to 46.4)                            | 1.2<br>(-5.3 to 9.0)                                |



| Cause                                                          | Prevalence in thousands (95% UI)        | Incidence in thousands (95% UI)         | YLDs in thousands (95% UI)        |                                                   |                                                     |
|----------------------------------------------------------------|-----------------------------------------|-----------------------------------------|-----------------------------------|---------------------------------------------------|-----------------------------------------------------|
|                                                                | 2016 counts                             | 2016 counts                             | 2016 counts                       | Percentage change in counts between 2006 and 2016 | Percentage change in age-standardised rates between |
| Asbestosis                                                     | 0.1<br>(< 0.05 to 0.1)                  | < 0.05<br>(< 0.05 to < 0.05)            | < 0.05<br>(< 0.05 to < 0.05)      | 35.2<br>(25.1 to 45.4)                            | 2.1<br>(-3.8 to 8.2)                                |
| Coal workers pneumoconiosis                                    | --                                      | --                                      | --                                | --                                                | --                                                  |
| Other pneumoconiosis                                           | 0.1<br>(< 0.05 to 0.1)                  | < 0.05<br>(< 0.05 to < 0.05)            | < 0.05<br>(< 0.05 to < 0.05)      | 36.4<br>(23.6 to 54.8)                            | 3.4<br>(-7.6 to 17.5)                               |
| Asthma                                                         | 687.2<br>(628.8 to 757.1)               | 152.9<br>(139.8 to 167.7)               | 27.0<br>(17.6 to 39.2)            | 34.4<br>(27.4 to 41.9)                            | 2.6<br>(-1.7 to 7.1)                                |
| Interstitial lung disease and pulmonary sarcoidosis            | 0.9<br>(0.8 to 1.0)                     | 0.1<br>(0.1 to 0.1)                     | 0.1<br>(0.1 to 0.1)               | 31.9<br>(28.1 to 35.6)                            | -1.1<br>(-5.1 to 3.3)                               |
| Other chronic respiratory diseases                             | --                                      | --                                      | 0.9<br>(0.7 to 1.2)               | 75.3<br>(36.0 to 128.9)                           | 33.2<br>(11.0 to 60.6)                              |
| <b>Cirrhosis and other chronic liver diseases</b>              | <b>30.4<br/>(28.8 to 32.0)</b>          | <b>3.2<br/>(3.1 to 3.4)</b>             | <b>2.9<br/>(2.0 to 4.1)</b>       | <b>31.5<br/>(17.6 to 46.8)</b>                    | <b>-0.0<br/>(-7.8 to 8.8)</b>                       |
| Cirrhosis and other chronic liver diseases due to hepatitis B  | 10.9<br>(9.4 to 12.4)                   | 1.2<br>(1.0 to 1.3)                     | 0.8<br>(0.6 to 1.2)               | 33.7<br>(13.5 to 56.6)                            | 0.3<br>(-11.9 to 13.5)                              |
| Cirrhosis and other chronic liver diseases due to hepatitis C  | 4.9<br>(3.6 to 6.5)                     | 0.6<br>(0.4 to 0.8)                     | 0.4<br>(0.2 to 0.6)               | 31.4<br>(6.4 to 56.5)                             | -1.2<br>(-18.1 to 16.2)                             |
| Cirrhosis and other chronic liver diseases due to alcohol use  | 4.4<br>(3.8 to 5.1)                     | 0.6<br>(0.5 to 0.7)                     | 0.3<br>(0.2 to 0.5)               | 33.6<br>(9.4 to 63.1)                             | 0.8<br>(-15.4 to 19.3)                              |
| Cirrhosis and other chronic liver diseases due to other causes | 10.2<br>(9.3 to 11.1)                   | 0.9<br>(0.8 to 1.0)                     | 1.3<br>(0.9 to 1.9)               | 29.6<br>(5.3 to 58.5)                             | -0.2<br>(-16.5 to 18.0)                             |
| <b>Digestive diseases</b>                                      | <b>204.2<br/>(186.9 to 224.7)</b>       | <b>189.3†<br/>(180.4 to 199.3)</b>      | <b>6.7<br/>(4.7 to 9.1)</b>       | <b>32.3<br/>(21.5 to 43.8)</b>                    | <b>0.9<br/>(-5.3 to 7.1)</b>                        |
| Peptic ulcer disease                                           | 31.0<br>(28.2 to 33.8)                  | 15.8<br>(14.2 to 17.6)                  | 0.6<br>(0.4 to 0.9)               | 28.9<br>(16.3 to 43.0)                            | -2.0<br>(-10.3 to 7.0)                              |
| Gastritis and duodenitis                                       | 56.9<br>(50.1 to 64.1)                  | 60.4<br>(53.8 to 67.4)                  | 0.8<br>(0.5 to 1.2)               | 37.5<br>(22.5 to 53.5)                            | 6.0<br>(-3.6 to 15.3)                               |
| Appendicitis                                                   | 2.1<br>(1.9 to 2.2)                     | 54.7<br>(50.4 to 59.3)                  | 0.6<br>(0.4 to 0.9)               | 37.3<br>(1.4 to 86.9)                             | 2.9<br>(-17.4 to 27.6)                              |
| Paralytic ileus and intestinal obstruction                     | 0.2<br>(0.2 to 0.3)                     | 6.6<br>(6.0 to 7.4)                     | 0.1<br>(0.1 to 0.1)               | 30.7<br>(26.2 to 35.3)                            | -1.4<br>(-8.3 to 5.8)                               |
| Inguinal, femoral, and abdominal hernia                        | 111.2<br>(90.8 to 135.5)                | 16.6<br>(14.7 to 18.8)                  | 3.7<br>(2.5 to 5.2)               | 30.8<br>(16.3 to 47.0)                            | -0.2<br>(-8.5 to 8.9)                               |
| Inflammatory bowel disease                                     | 0.5<br>(0.5 to 0.6)                     | 4.4<br>(4.2 to 4.6)                     | 0.1<br>(0.1 to 0.1)               | 26.0<br>(22.4 to 30.1)                            | -7.1<br>(-9.9 to -4.3)                              |
| Vascular intestinal disorders                                  | 0.1<br>(0.1 to 0.1)                     | 0.4<br>(0.4 to 0.5)                     | < 0.05<br>(< 0.05 to < 0.05)      | 32.8<br>(24.9 to 40.4)                            | 2.8<br>(-1.5 to 7.2)                                |
| Gallbladder and biliary diseases                               | 6.0<br>(5.3 to 6.7)                     | 28.0<br>(24.4 to 32.0)                  | 0.2<br>(0.1 to 0.2)               | 33.1<br>(17.9 to 48.8)                            | 0.2<br>(-13.4 to 14.4)                              |
| Pancreatitis                                                   | 0.2<br>(0.2 to 0.3)                     | 2.4<br>(2.1 to 2.6)                     | < 0.05<br>(< 0.05 to < 0.05)      | 33.7<br>(27.8 to 39.6)                            | 1.0<br>(-3.1 to 5.3)                                |
| Other digestive diseases                                       | --                                      | --                                      | 0.6<br>(0.4 to 0.8)               | 34.6<br>(20.0 to 51.3)                            | 4.4<br>(-2.2 to 11.5)                               |
| <b>Neurological disorders</b>                                  | <b>4,086.5<br/>(3,895.4 to 4,313.4)</b> | <b>2,106.3<br/>(1,784.7 to 2,476.7)</b> | <b>91.7<br/>(57.4 to 135.6)</b>   | <b>34.1<br/>(-3.3 to 88.0)</b>                    | <b>0.3<br/>(-23.2 to 31.7)</b>                      |
| Alzheimer's disease and other dementias                        | 13.3<br>(11.2 to 15.7)                  | 2.3<br>(1.9 to 2.8)                     | 1.8<br>(1.3 to 2.5)               | 26.1<br>(19.1 to 33.1)                            | -1.4<br>(-6.3 to 3.4)                               |
| Parkinson's disease                                            | 1.4<br>(1.1 to 1.8)                     | 0.2<br>(0.1 to 0.2)                     | 0.2<br>(0.1 to 0.2)               | 37.2<br>(14.8 to 62.4)                            | 5.7<br>(-10.2 to 23.5)                              |
| Epilepsy                                                       | 40.3<br>(7.7 to 89.1)                   | 5.8<br>(1.1 to 12.6)                    | 16.4<br>(2.7 to 39.6)             | 30.7<br>(-80.1 to 853.3)                          | -0.7<br>(-84.8 to 600.7)                            |
| Multiple sclerosis                                             | 0.4<br>(0.4 to 0.5)                     | < 0.05<br>(< 0.05 to < 0.05)            | 0.1<br>(0.1 to 0.2)               | 43.5<br>(39.1 to 47.4)                            | 7.5<br>(4.3 to 10.6)                                |
| Motor neuron disease                                           | 0.1<br>(0.1 to 0.1)                     | < 0.05<br>(< 0.05 to < 0.05)            | < 0.05<br>(< 0.05 to < 0.05)      | 34.1<br>(29.4 to 39.5)                            | 1.9<br>(-0.9 to 4.8)                                |
| Migraine                                                       | 1,450.5<br>(1,361.2 to 1,539.9)         | 181.7<br>(170.9 to 193.8)               | 59.8<br>(38.5 to 85.0)            | 33.8<br>(28.6 to 39.7)                            | -0.1<br>(-3.5 to 3.8)                               |
| Tension-type headache                                          | 3,176.9<br>(2,843.0 to 3,559.6)         | 1,916.2<br>(1,593.8 to 2,286.0)         | 9.4<br>(5.9 to 14.2)              | 34.3<br>(27.4 to 41.3)                            | 0.4<br>(-4.5 to 5.2)                                |
| Other neurological disorders                                   | < 0.05<br>(< 0.05 to < 0.05)            | 0.1<br>(< 0.05 to 0.1)                  | 3.9<br>(0.7 to 9.3)               | 60.0<br>(-72.8 to 845.2)                          | 19.2<br>(-76.4 to 494.0)                            |
| <b>Mental and substance use disorders</b>                      | <b>1,743.1<br/>(1,642.8 to 1,829.0)</b> | <b>637.3†<br/>(591.6 to 689.2)</b>      | <b>207.3<br/>(150.5 to 269.9)</b> | <b>34.1<br/>(31.2 to 37.2)</b>                    | <b>0.6<br/>(-1.7 to 2.8)</b>                        |
| Schizophrenia                                                  | 17.3<br>(15.1 to 19.8)                  | 1.6<br>(1.4 to 1.8)                     | 11.1<br>(8.0 to 14.2)             | 34.7<br>(20.9 to 49.5)                            | 0.0<br>(-9.3 to 9.5)                                |
| Alcohol use disorders                                          | 123.6<br>(104.0 to 144.5)               | 68.5<br>(57.6 to 79.8)                  | 12.3<br>(8.3 to 17.2)             | 38.6<br>(28.2 to 50.6)                            | 2.2<br>(-4.8 to 10.1)                               |
| Drug use disorders                                             | 49.5<br>(44.0 to 55.5)                  | 8.4<br>(7.5 to 9.4)                     | 13.2<br>(9.0 to 17.7)             | 48.1<br>(32.4 to 64.9)                            | 8.2<br>(-2.4 to 18.6)                               |
| Opioid use disorders                                           | 28.3<br>(23.4 to 34.0)                  | 3.7<br>(3.1 to 4.5)                     | 11.8<br>(7.8 to 16.1)             | 49.5<br>(30.8 to 68.3)                            | 9.1<br>(-2.8 to 21.0)                               |
| Cocaine use disorders                                          | 1.5<br>(1.3 to 1.8)                     | 0.2<br>(0.2 to 0.3)                     | 0.2<br>(0.1 to 0.3)               | 38.7<br>(31.4 to 46.0)                            | 3.1<br>(-2.0 to 8.3)                                |
| Amphetamine use disorders                                      | 0.8<br>(0.5 to 1.1)                     | 0.1<br>(0.1 to 0.2)                     | 0.1<br>(0.1 to 0.2)               | 38.6<br>(26.3 to 53.0)                            | 1.9<br>(-7.2 to 11.8)                               |
| Cannabis use disorders                                         | 17.4<br>(14.4 to 20.9)                  | 3.6<br>(2.9 to 4.4)                     | 0.5<br>(0.3 to 0.8)               | 36.6<br>(7.3 to 71.5)                             | 0.5<br>(-18.7 to 23.4)                              |
| Other drug use disorders                                       | 3.6<br>(3.1 to 4.1)                     | 0.8<br>(0.7 to 0.9)                     | 0.6<br>(0.4 to 0.8)               | 38.5<br>(18.3 to 64.5)                            | 2.4<br>(-12.4 to 20.4)                              |
| Depressive disorders                                           | 369.6<br>(345.9 to 395.8)               | 410.2<br>(364.4 to 460.8)               | 62.8<br>(43.0 to 86.0)            | 33.7<br>(27.9 to 40.0)                            | 0.3<br>(-4.0 to 5.2)                                |
| Major depressive disorder                                      | 248.5<br>(220.6 to 279.7)               | 387.4<br>(341.8 to 439.3)               | 50.7<br>(34.4 to 69.4)            | 33.6<br>(26.6 to 41.0)                            | 0.3<br>(-5.2 to 6.2)                                |
| Dysthymia                                                      | 126.4<br>(109.3 to 146.4)               | 22.8<br>(19.9 to 26.3)                  | 12.2<br>(8.1 to 17.8)             | 33.9<br>(28.3 to 39.3)                            | 0.1<br>(-3.1 to 3.5)                                |
| Bipolar disorder                                               | 67.3<br>(57.0 to 80.5)                  | 7.6<br>(6.4 to 9.1)                     | 13.8<br>(8.5 to 20.6)             | 34.3<br>(24.8 to 43.6)                            | 0.1<br>(-6.3 to 6.0)                                |
| Anxiety disorders                                              | 344.2<br>(310.1 to 381.7)               | 65.0<br>(59.0 to 72.0)                  | 33.4<br>(22.9 to 46.0)            | 32.8<br>(23.6 to 43.4)                            | -0.1<br>(-6.2 to 6.5)                               |
| Eating disorders                                               | 9.1<br>(7.4 to 10.8)                    | 7.7<br>(5.6 to 10.5)                    | 1.8<br>(1.2 to 2.7)               | 36.3<br>(15.3 to 61.1)                            | 0.7<br>(-14.8 to 18.5)                              |
| Anorexia nervosa                                               | 2.5<br>(1.8 to 3.4)                     | 1.2<br>(0.9 to 1.7)                     | 0.5<br>(0.3 to 0.8)               | 33.4<br>(-1.2 to 78.6)                            | -0.4<br>(-26.3 to 33.3)                             |
| Bulimia nervosa                                                | 6.2<br>(4.6 to 8.3)                     | 6.5<br>(4.4 to 9.2)                     | 1.3<br>(0.8 to 2.0)               | 37.5<br>(13.0 to 68.5)                            | 1.1<br>(-16.6 to 22.7)                              |
| Autistic spectrum disorders                                    | 106.7<br>(94.5 to 120.0)                | 1.3<br>(0.9 to 1.9)                     | 15.0<br>(10.1 to 21.2)            | 32.3<br>(24.9 to 39.8)                            | 0.5<br>(-4.6 to 5.5)                                |
| Autism                                                         | 28.2<br>(24.3 to 32.8)                  | 0.2<br>(0.1 to 0.3)                     | 7.2<br>(4.6 to 10.5)              | 32.6<br>(19.8 to 47.0)                            | 0.6<br>(-8.4 to 10.6)                               |
| Asperger syndrome and other autistic spectrum disorders        | 78.1<br>(64.5 to 94.8)                  | 1.2<br>(0.8 to 1.7)                     | 7.8<br>(5.0 to 11.4)              | 32.0<br>(25.4 to 39.5)                            | 0.3<br>(-4.2 to 5.1)                                |

| Cause                                                      | Prevalence in thousands (95% UI)              | Incidence in thousands (95% UI)                   | YLDs in thousands (95% UI)              |                                                   |                                                     |
|------------------------------------------------------------|-----------------------------------------------|---------------------------------------------------|-----------------------------------------|---------------------------------------------------|-----------------------------------------------------|
|                                                            | 2016 counts                                   | 2016 counts                                       | 2016 counts                             | Percentage change in counts between 2006 and 2016 | Percentage change in age-standardised rates between |
| Attention-deficit/hyperactivity disorder                   | 175.2<br>(156.9 to 195.9)                     | 11.2<br>(9.8 to 13.0)                             | 2.1<br>(1.3 to 3.3)                     | 31.8<br>(23.1 to 41.6)                            | 0.2<br>(-6.1 to 7.2)                                |
| Conduct disorder                                           | 130.3<br>(106.8 to 155.3)                     | 47.0<br>(37.3 to 56.7)                            | 15.7<br>(9.6 to 23.9)                   | 30.1<br>(21.9 to 39.3)                            | 0.1<br>(-6.1 to 7.2)                                |
| Idiopathic developmental intellectual disability           | 319.3<br>(191.5 to 449.6)                     | --                                                | 13.0<br>(6.1 to 22.3)                   | 28.2<br>(19.4 to 37.4)                            | -3.0<br>(-9.5 to 3.5)                               |
| Other mental and substance use disorders                   | 176.2<br>(154.1 to 204.3)                     | 8.8<br>(7.7 to 10.2)                              | 13.1<br>(8.9 to 19.0)                   | 34.9<br>(27.4 to 43.2)                            | 0.2<br>(-4.5 to 5.3)                                |
| <b>Diabetes, urogenital, blood, and endocrine diseases</b> | <b>6,233.2</b><br><b>(6,074.0 to 6,419.9)</b> | <b>1,340.3†</b><br><b>(1,249.6 to 1,428.9)</b>    | <b>83.0</b><br><b>(58.6 to 114.2)</b>   | <b>32.9</b><br><b>(29.0 to 36.6)</b>              | <b>1.7</b><br><b>(-0.9 to 4.2)</b>                  |
| Diabetes mellitus                                          | 237.4<br>(212.0 to 263.6)                     | 15.9<br>(14.3 to 17.5)                            | 16.6<br>(11.4 to 23.1)                  | 40.7<br>(31.5 to 48.8)                            | 6.7<br>(-0.1 to 12.8)                               |
| Acute glomerulonephritis                                   | 0.1<br>(0.1 to 0.1)                           | 1.6<br>(1.4 to 1.8)                               | < 0.05<br>(< 0.05 to < 0.05)            | 32.4<br>(27.7 to 37.4)                            | 0.5<br>(-2.5 to 3.9)                                |
| Chronic kidney disease                                     | 648.9<br>(583.8 to 717.0)                     | 49.5<br>(43.5 to 55.7)                            | 16.8<br>(12.2 to 21.9)                  | 39.9<br>(32.1 to 48.8)                            | 4.8<br>(-0.4 to 10.3)                               |
| Chronic kidney disease due to diabetes mellitus            | 202.2<br>(170.7 to 237.7)                     | 14.3<br>(11.8 to 17.4)                            | 5.0<br>(3.6 to 6.8)                     | 42.0<br>(31.2 to 54.5)                            | 6.5<br>(-1.0 to 14.3)                               |
| Chronic kidney disease due to hypertension                 | 139.2<br>(119.4 to 158.7)                     | 12.8<br>(10.7 to 15.1)                            | 2.9<br>(2.0 to 3.9)                     | 37.3<br>(24.3 to 52.1)                            | 2.9<br>(-5.7 to 13.6)                               |
| Chronic kidney disease due to glomerulonephritis           | 131.2<br>(112.5 to 148.5)                     | 8.0<br>(6.4 to 9.7)                               | 4.3<br>(3.0 to 5.8)                     | 40.1<br>(27.5 to 54.2)                            | 5.3<br>(-2.9 to 14.2)                               |
| Chronic kidney disease due to other causes                 | 176.3<br>(146.8 to 207.8)                     | 14.4<br>(12.0 to 16.9)                            | 4.7<br>(3.3 to 6.3)                     | 39.1<br>(26.8 to 54.1)                            | 4.1<br>(-3.5 to 13.0)                               |
| Urinary diseases and male infertility                      | 259.3<br>(239.1 to 277.1)                     | 770.3†<br>(687.6 to 855.2)                        | 5.4<br>(3.4 to 8.0)                     | 31.9<br>(24.9 to 40.2)                            | 0.1<br>(-5.4 to 6.1)                                |
| Interstitial nephritis and urinary tract infections        | 13.3<br>(11.7 to 14.9)                        | 692.2<br>(610.5 to 778.7)                         | 0.4<br>(0.3 to 0.7)                     | 31.8<br>(11.7 to 53.8)                            | -0.6<br>(-13.2 to 14.5)                             |
| Urolithiasis                                               | 2.4<br>(2.1 to 2.7)                           | 62.9<br>(55.7 to 72.2)                            | 0.2<br>(0.1 to 0.3)                     | 35.7<br>(26.6 to 46.0)                            | 1.9<br>(-6.0 to 10.9)                               |
| Benign prostatic hyperplasia                               | 119.1<br>(100.6 to 138.0)                     | 15.2<br>(12.7 to 17.9)                            | 3.9<br>(2.4 to 5.7)                     | 31.7<br>(23.1 to 42.6)                            | 0.5<br>(-5.8 to 7.8)                                |
| Male infertility                                           | 119.4<br>(108.7 to 130.7)                     | --                                                | 0.7<br>(0.3 to 1.4)                     | 43.3<br>(33.6 to 54.1)                            | 2.2<br>(-4.8 to 9.8)                                |
| Other urinary diseases                                     | --                                            | --                                                | 0.2<br>(0.1 to 0.3)                     | 8.3<br>(-4.5 to 22.6)                             | -16.7<br>(-24.1 to -7.9)                            |
| Gynecological diseases                                     | 1,347.8<br>(1,282.6 to 1,418.9)               | 494.2†<br>(456.9 to 532.8)                        | 16.0<br>(10.9 to 23.0)                  | 30.0<br>(24.6 to 35.5)                            | -3.6<br>(-7.0 to 0.1)                               |
| Uterine fibroids                                           | 91.3<br>(80.4 to 102.8)                       | 11.1<br>(9.6 to 12.7)                             | 2.2<br>(1.4 to 3.3)                     | 22.2<br>(13.1 to 30.5)                            | -8.6<br>(-15.2 to -2.6)                             |
| Polycystic ovarian syndrome                                | 11.3<br>(8.5 to 14.7)                         | 25.7<br>(18.8 to 34.7)                            | 0.1<br>(< 0.05 to 0.2)                  | 35.5<br>(19.0 to 54.9)                            | -1.4<br>(-13.4 to 11.8)                             |
| Female infertility                                         | 20.4<br>(13.3 to 29.4)                        | --                                                | 0.1<br>(< 0.05 to 0.2)                  | 98.3<br>(21.5 to 210.3)                           | 26.2<br>(-23.8 to 92.9)                             |
| Endometriosis                                              | 2.5<br>(2.0 to 3.0)                           | 9.9<br>(8.0 to 12.4)                              | 0.2<br>(0.1 to 0.4)                     | 35.5<br>(-1.0 to 84.9)                            | -0.3<br>(-25.9 to 33.0)                             |
| Genital prolapse                                           | 657.8<br>(578.4 to 733.9)                     | 59.6<br>(49.8 to 70.8)                            | 2.0<br>(1.0 to 3.7)                     | 23.8<br>(16.0 to 32.0)                            | -5.8<br>(-11.8 to 0.7)                              |
| Premenstrual syndrome                                      | 577.8<br>(530.4 to 626.1)                     | 219.4<br>(199.5 to 239.6)                         | 4.8<br>(3.0 to 7.4)                     | 31.8<br>(19.7 to 44.4)                            | -2.0<br>(-10.3 to 6.6)                              |
| Other gynecological diseases                               | 188.7<br>(163.2 to 217.0)                     | 168.7<br>(138.0 to 203.0)                         | 6.5<br>(4.3 to 9.3)                     | 32.5<br>(23.7 to 40.9)                            | -1.8<br>(-8.1 to 4.1)                               |
| Hemoglobinopathies and hemolytic anaemias                  | 4,911.0<br>(4,727.2 to 5,132.7)               | --                                                | 22.9<br>(15.2 to 33.7)                  | 28.9<br>(20.4 to 37.2)                            | -1.4<br>(-6.9 to 4.0)                               |
| Thalassemias                                               | 0.1<br>(< 0.05 to 0.4)                        | --                                                | < 0.05<br>(< 0.05 to < 0.05)            | 31.4<br>(-1.6 to 59.5)                            | 2.7<br>(-23.0 to 24.8)                              |
| Thalassaemias trait                                        | 241.0<br>(98.7 to 440.4)                      | --                                                | 3.9<br>(1.4 to 7.8)                     | 29.6<br>(10.6 to 44.7)                            | 0.9<br>(-13.7 to 11.4)                              |
| Sickle cell disorders                                      | 43.0<br>(36.1 to 55.5)                        | --                                                | 3.6<br>(2.4 to 5.2)                     | 34.8<br>(18.6 to 54.6)                            | 4.7<br>(-7.6 to 19.8)                               |
| Sickle cell trait                                          | 2,921.5<br>(2,776.4 to 3,151.0)               | --                                                | 11.1<br>(7.3 to 16.4)                   | 33.2<br>(23.4 to 41.9)                            | 2.6<br>(-3.9 to 8.6)                                |
| G6PD deficiency                                            | 714.0<br>(621.3 to 814.5)                     | --                                                | 0.1<br>(< 0.05 to 0.1)                  | 22.7<br>(9.2 to 38.1)                             | -7.6<br>(-15.9 to 2.4)                              |
| G6PD trait                                                 | 1,587.2<br>(1,494.3 to 1,679.4)               | --                                                | < 0.05<br>(< 0.05 to < 0.05)            | 38.9<br>(27.9 to 51.5)                            | 6.0<br>(-1.5 to 14.1)                               |
| Other hemoglobinopathies and hemolytic anaemias            | 141.5<br>(136.4 to 146.5)                     | --                                                | 4.2<br>(2.8 to 6.0)                     | 14.4<br>(4.8 to 24.6)                             | -15.5<br>(-21.0 to -9.8)                            |
| Endocrine, metabolic, blood, and immune disorders          | 162.5<br>(156.7 to 168.3)                     | 8.7<br>(7.8 to 9.7)                               | 5.3<br>(3.6 to 7.5)                     | 17.7<br>(8.6 to 25.8)                             | -7.2<br>(-12.4 to -1.9)                             |
| <b>Musculoskeletal disorders</b>                           | <b>1,308.0</b><br><b>(1,234.8 to 1,381.8)</b> | <b>630.5</b><br><b>(569.1 to 698.5)</b>           | <b>144.5</b><br><b>(103.3 to 189.4)</b> | <b>32.3</b><br><b>(28.6 to 36.4)</b>              | <b>-0.4</b><br><b>(-2.9 to 2.2)</b>                 |
| Rheumatoid arthritis                                       | 11.9<br>(10.5 to 13.5)                        | 0.8<br>(0.7 to 0.9)                               | 2.8<br>(1.9 to 3.8)                     | 36.1<br>(21.6 to 52.2)                            | 2.8<br>(-7.0 to 13.1)                               |
| Osteoarthritis                                             | 202.4<br>(188.5 to 216.6)                     | 11.6<br>(10.7 to 12.5)                            | 12.4<br>(8.8 to 16.9)                   | 34.4<br>(29.3 to 39.9)                            | 2.3<br>(-1.5 to 6.1)                                |
| Low back and neck pain                                     | 938.2<br>(872.9 to 1,008.2)                   | 422.5<br>(375.6 to 474.2)                         | 107.9<br>(75.8 to 141.8)                | 31.4<br>(27.1 to 35.9)                            | -1.1<br>(-4.2 to 2.0)                               |
| Low back pain                                              | 727.0<br>(642.3 to 829.6)                     | 360.0<br>(314.5 to 411.2)                         | 81.9<br>(57.4 to 108.4)                 | 31.1<br>(25.2 to 37.0)                            | -1.5<br>(-5.4 to 2.6)                               |
| Neck pain                                                  | 261.3<br>(225.8 to 301.0)                     | 62.5<br>(53.7 to 73.1)                            | 26.0<br>(17.5 to 36.8)                  | 32.6<br>(28.9 to 36.3)                            | 0.1<br>(-2.1 to 2.3)                                |
| Gout                                                       | 27.8<br>(24.5 to 31.8)                        | 5.8<br>(5.0 to 6.5)                               | 0.9<br>(0.6 to 1.2)                     | 32.9<br>(13.9 to 54.4)                            | 0.4<br>(-12.3 to 13.8)                              |
| Other musculoskeletal disorders                            | 237.8<br>(192.6 to 287.9)                     | 189.9<br>(150.0 to 236.1)                         | 20.5<br>(13.4 to 29.7)                  | 35.6<br>(23.4 to 48.4)                            | 0.9<br>(-7.7 to 9.7)                                |
| <b>Other non-communicable diseases</b>                     | <b>9,022.1</b><br><b>(8,755.8 to 9,268.2)</b> | <b>25,696.8†</b><br><b>(23,075.9 to 28,395.6)</b> | <b>228.0</b><br><b>(155.1 to 321.8)</b> | <b>29.7</b><br><b>(27.6 to 31.7)</b>              | <b>-1.6</b><br><b>(-2.9 to -0.3)</b>                |
| Congenital anomalies                                       | 143.4<br>(125.6 to 166.0)                     | --                                                | 21.4<br>(15.2 to 29.0)                  | 27.4<br>(19.2 to 36.8)                            | -3.3<br>(-9.2 to 3.2)                               |
| Neural tube defects                                        | 19.8<br>(17.6 to 22.3)                        | --                                                | 5.9<br>(4.1 to 8.0)                     | 26.4<br>(11.1 to 43.1)                            | -3.8<br>(-13.8 to 7.0)                              |
| Congenital heart anomalies                                 | 34.2<br>(28.0 to 40.9)                        | --                                                | 1.7<br>(0.8 to 2.9)                     | 34.2<br>(18.2 to 52.8)                            | 4.0<br>(-7.5 to 17.6)                               |
| Orofacial clefts                                           | 3.7<br>(3.2 to 4.2)                           | --                                                | 0.1<br>(< 0.05 to 0.1)                  | 24.7<br>(10.1 to 40.8)                            | -4.7<br>(-15.8 to 7.7)                              |
| Down's syndrome                                            | 2.1<br>(1.8 to 2.5)                           | --                                                | 0.2<br>(0.1 to 0.3)                     | 32.9<br>(23.7 to 42.8)                            | 1.2<br>(-5.9 to 8.6)                                |
| Turner syndrome                                            | 8.1<br>(6.9 to 9.5)                           | --                                                | 0.1<br>(0.1 to 0.2)                     | 28.9<br>(-10.0 to 86.1)                           | -1.7<br>(-29.5 to 36.6)                             |
| Klinefelter syndrome                                       | 7.2<br>(6.0 to 8.6)                           | --                                                | < 0.05<br>(< 0.05 to 0.1)               | 33.2<br>(1.0 to 75.8)                             | -0.3<br>(-23.8 to 30.6)                             |



| Cause                                         | Prevalence in thousands (95% UI)              | Incidence in thousands (95% UI)          | YLDs in thousands (95% UI)           |                                                   |                                                     |
|-----------------------------------------------|-----------------------------------------------|------------------------------------------|--------------------------------------|---------------------------------------------------|-----------------------------------------------------|
|                                               | 2016 counts                                   | 2016 counts                              | 2016 counts                          | Percentage change in counts between 2006 and 2016 | Percentage change in age-standardised rates between |
| Other chromosomal abnormalities               | 2.3<br>(1.9 to 2.7)                           | --                                       | 0.5<br>(0.3 to 0.7)                  | 29.1<br>(-11.7 to 79.0)                           | 0.8<br>(-30.0 to 38.8)                              |
| Congenital musculoskeletal and limb anomalies | 12.4<br>(10.8 to 14.2)                        | --                                       | 1.8<br>(1.2 to 2.6)                  | 32.1<br>(15.3 to 52.7)                            | -0.1<br>(-11.3 to 12.5)                             |
| Urogenital congenital anomalies               | 9.7<br>(8.5 to 11.0)                          | --                                       | 0.2<br>(0.1 to 0.4)                  | 28.7<br>(16.1 to 41.9)                            | -0.9<br>(-10.0 to 8.5)                              |
| Digestive congenital anomalies                | 13.0<br>(11.5 to 14.5)                        | --                                       | 0.6<br>(0.4 to 0.8)                  | 32.5<br>(9.5 to 60.8)                             | 0.8<br>(-15.0 to 19.0)                              |
| Other congenital anomalies                    | 60.8<br>(40.8 to 90.2)                        | --                                       | 10.2<br>(6.5 to 15.6)                | 25.5<br>(14.4 to 37.1)                            | -4.8<br>(-12.7 to 3.8)                              |
| Skin and subcutaneous diseases                | 4,271.1<br>(4,108.2 to 4,453.9)               | 10,171.2<br>(9,318.8 to 11,131.1)        | 99.1<br>(64.5 to 145.2)              | 33.0<br>(30.1 to 36.0)                            | 1.2<br>(-0.6 to 3.2)                                |
| Dermatitis                                    | 597.1<br>(496.3 to 711.0)                     | 557.5<br>(488.2 to 645.9)                | 23.7<br>(13.2 to 39.6)               | 30.3<br>(24.5 to 36.0)                            | 0.0<br>(-3.9 to 3.8)                                |
| Psoriasis                                     | 62.1<br>(58.4 to 66.2)                        | 9.8<br>(9.3 to 10.5)                     | 5.4<br>(3.8 to 7.3)                  | 40.3<br>(24.9 to 57.8)                            | 5.7<br>(-3.9 to 16.0)                               |
| Cellulitis                                    | 4.5<br>(4.2 to 4.9)                           | 78.6<br>(72.6 to 84.8)                   | 0.3<br>(0.2 to 0.4)                  | 33.1<br>(7.6 to 63.6)                             | 1.6<br>(-16.5 to 23.6)                              |
| Pyoderma                                      | 69.6<br>(66.0 to 73.2)                        | 1,374.7<br>(1,310.6 to 1,439.6)          | 0.4<br>(0.2 to 0.8)                  | 30.6<br>(21.7 to 39.7)                            | 0.6<br>(-5.2 to 6.3)                                |
| Scabies                                       | 223.6<br>(179.2 to 285.1)                     | 692.5<br>(558.5 to 876.8)                | 5.8<br>(3.1 to 9.7)                  | 25.4<br>(18.7 to 32.1)                            | -4.5<br>(-8.7 to 0.0)                               |
| Fungal skin diseases                          | 1,830.1<br>(1,541.4 to 2,157.6)               | 5,173.5<br>(4,373.9 to 6,072.7)          | 10.3<br>(4.1 to 22.3)                | 30.8<br>(29.2 to 32.3)                            | 0.1<br>(-0.7 to 0.9)                                |
| Viral skin diseases                           | 375.6<br>(355.6 to 396.9)                     | 520.9<br>(492.1 to 555.3)                | 11.5<br>(7.1 to 17.2)                | 31.1<br>(26.1 to 35.9)                            | 0.1<br>(-3.3 to 3.5)                                |
| Acne vulgaris                                 | 1,137.1<br>(975.8 to 1,325.7)                 | 819.8<br>(636.9 to 1,093.8)              | 29.2<br>(19.0 to 42.6)               | 38.1<br>(31.5 to 45.6)                            | 4.0<br>(-1.0 to 9.5)                                |
| Alopecia areata                               | 21.2<br>(19.9 to 22.5)                        | 37.9<br>(35.5 to 40.3)                   | 0.7<br>(0.4 to 1.0)                  | 35.0<br>(19.0 to 53.9)                            | 0.2<br>(-10.4 to 11.8)                              |
| Pruritus                                      | 88.4<br>(77.4 to 100.1)                       | 72.0<br>(64.2 to 80.9)                   | 0.9<br>(0.4 to 1.7)                  | 32.1<br>(23.9 to 40.8)                            | 0.0<br>(-5.0 to 5.1)                                |
| Urticaria                                     | 128.0<br>(109.1 to 150.9)                     | 231.0<br>(195.5 to 271.4)                | 7.7<br>(4.9 to 11.1)                 | 30.3<br>(21.6 to 40.3)                            | 0.1<br>(-5.8 to 6.4)                                |
| Decubitus ulcer                               | 1.0<br>(0.9 to 1.1)                           | 3.5<br>(3.2 to 3.9)                      | 0.2<br>(0.1 to 0.2)                  | 33.7<br>(24.2 to 44.6)                            | 3.7<br>(-8.4 to 17.6)                               |
| Other skin and subcutaneous diseases          | 533.7<br>(518.1 to 551.0)                     | 599.6<br>(581.3 to 619.3)                | 2.9<br>(1.4 to 5.4)                  | 31.8<br>(27.7 to 36.0)                            | -0.1<br>(-2.6 to 2.4)                               |
| Sense organ diseases                          | 2,355.6<br>(2,267.5 to 2,457.4)               | 1,135.3†<br>(1,050.5 to 1,221.3)         | 85.5<br>(59.7 to 119.7)              | 25.9<br>(22.2 to 29.6)                            | -3.4<br>(-5.6 to -1.1)                              |
| Glaucoma                                      | 3.9<br>(3.1 to 4.8)                           | --                                       | 0.4<br>(0.3 to 0.6)                  | 35.6<br>(18.0 to 56.6)                            | 2.6<br>(-9.4 to 16.4)                               |
| Cataract                                      | 98.6<br>(84.9 to 112.9)                       | --                                       | 9.0<br>(6.1 to 12.9)                 | 28.5<br>(20.8 to 37.7)                            | -1.6<br>(-7.5 to 4.8)                               |
| Macular degeneration                          | 4.6<br>(3.4 to 6.1)                           | --                                       | 0.4<br>(0.2 to 0.6)                  | 38.8<br>(21.0 to 61.8)                            | 5.0<br>(-7.2 to 20.1)                               |
| Refraction and accommodation disorders        | 1,290.3<br>(1,169.9 to 1,418.3)               | --                                       | 22.1<br>(13.5 to 35.4)               | 21.8<br>(14.7 to 28.9)                            | -7.2<br>(-12.1 to -1.9)                             |
| Age-related and other hearing loss            | 1,299.2<br>(1,212.7 to 1,394.1)               | --                                       | 42.9<br>(29.7 to 60.4)               | 25.9<br>(20.1 to 30.9)                            | -3.3<br>(-6.0 to -0.9)                              |
| Other vision loss                             | 38.3<br>(33.2 to 44.2)                        | --                                       | 3.8<br>(2.6 to 5.4)                  | 30.8<br>(18.8 to 43.6)                            | 0.4<br>(-7.0 to 8.5)                                |
| Other sense organ diseases                    | 229.3<br>(212.0 to 247.1)                     | 1,135.3<br>(1,050.5 to 1,221.3)          | 7.0<br>(4.4 to 10.6)                 | 33.3<br>(26.4 to 40.5)                            | 0.9<br>(-2.8 to 4.9)                                |
| Oral disorders                                | 6,187.5<br>(5,711.6 to 6,610.2)               | 14,390.2†<br>(11,997.9 to 16,960.4)      | 22.1<br>(12.2 to 37.6)               | 33.2<br>(30.0 to 36.5)                            | 0.2<br>(-1.8 to 2.2)                                |
| Caries of deciduous teeth                     | 1,443.4<br>(1,126.1 to 1,772.5)               | 4,705.8<br>(3,161.7 to 6,546.1)          | 0.3<br>(0.1 to 0.7)                  | 27.3<br>(13.3 to 43.3)                            | -0.4<br>(-11.2 to 12.3)                             |
| Caries of permanent teeth                     | 3,652.1<br>(3,144.1 to 4,187.2)               | 9,516.4<br>(7,761.9 to 11,361.2)         | 2.1<br>(0.9 to 4.2)                  | 32.4<br>(25.5 to 39.8)                            | -0.3<br>(-4.7 to 4.4)                               |
| Periodontal disease                           | 1,328.4<br>(984.7 to 1,670.2)                 | 156.3<br>(115.8 to 200.6)                | 8.7<br>(3.3 to 18.8)                 | 33.6<br>(28.4 to 40.0)                            | 0.3<br>(-3.2 to 4.4)                                |
| Edentulism and severe tooth loss              | 185.1<br>(156.0 to 217.8)                     | 11.7<br>(9.7 to 13.6)                    | 5.2<br>(3.3 to 7.4)                  | 33.1<br>(26.9 to 39.1)                            | 0.1<br>(-3.6 to 3.9)                                |
| Other oral disorders                          | 193.7<br>(184.9 to 203.7)                     | --                                       | 5.7<br>(3.5 to 8.5)                  | 33.4<br>(28.3 to 38.8)                            | 0.1<br>(-2.9 to 3.3)                                |
| <b>Injuries</b>                               | <b>1,404.5</b><br><b>(1,317.3 to 1,504.0)</b> | <b>891.2†</b><br><b>(840.8 to 942.9)</b> | <b>60.6</b><br><b>(41.4 to 85.5)</b> | <b>29.4</b><br><b>(27.1 to 31.7)</b>              | <b>-1.2</b><br><b>(-2.5 to 0.3)</b>                 |
| <b>Transport injuries</b>                     | <b>152.0</b><br><b>(141.2 to 163.3)</b>       | <b>71.6</b><br><b>(63.7 to 80.8)</b>     | <b>9.4</b><br><b>(6.2 to 13.5)</b>   | <b>33.4</b><br><b>(30.5 to 36.2)</b>              | <b>1.1</b><br><b>(-0.7 to 2.9)</b>                  |
| Road injuries                                 | 118.4<br>(111.0 to 126.6)                     | 60.1<br>(52.6 to 68.3)                   | 7.2<br>(4.8 to 10.3)                 | 32.4<br>(29.5 to 35.1)                            | 0.5<br>(-1.3 to 2.3)                                |
| Pedestrian road injuries                      | 28.3<br>(25.2 to 32.1)                        | 10.5<br>(8.5 to 12.7)                    | 1.8<br>(1.2 to 2.5)                  | 29.4<br>(26.6 to 32.2)                            | -1.3<br>(-3.3 to 0.6)                               |
| Cyclist road injuries                         | 20.5<br>(17.2 to 24.2)                        | 11.7<br>(9.0 to 14.7)                    | 1.2<br>(0.8 to 1.7)                  | 38.3<br>(34.7 to 41.4)                            | 4.8<br>(2.8 to 6.9)                                 |
| Motorcyclist road injuries                    | 19.6<br>(16.8 to 23.2)                        | 6.8<br>(5.5 to 8.4)                      | 1.2<br>(0.8 to 1.7)                  | 29.3<br>(26.4 to 32.1)                            | -2.1<br>(-3.9 to -0.2)                              |
| Motor vehicle road injuries                   | 35.2<br>(30.4 to 39.9)                        | 21.4<br>(17.9 to 25.0)                   | 2.3<br>(1.6 to 3.3)                  | 30.6<br>(27.4 to 33.6)                            | -0.6<br>(-2.5 to 1.4)                               |
| Other road injuries                           | 14.8<br>(12.8 to 17.3)                        | 9.7<br>(7.5 to 12.3)                     | 0.8<br>(0.6 to 1.2)                  | 40.8<br>(37.9 to 43.9)                            | 6.2<br>(4.3 to 8.1)                                 |
| Other transport injuries                      | 33.6<br>(27.8 to 41.1)                        | 11.5<br>(9.4 to 14.5)                    | 2.2<br>(1.5 to 3.2)                  | 37.0<br>(32.8 to 41.4)                            | 3.5<br>(1.1 to 5.8)                                 |
| <b>Unintentional injuries</b>                 | <b>1,199.3</b><br><b>(1,111.7 to 1,295.7)</b> | <b>792.3</b><br><b>(745.7 to 842.7)</b>  | <b>46.4</b><br><b>(31.5 to 65.2)</b> | <b>28.9</b><br><b>(26.5 to 31.4)</b>              | <b>-1.5</b><br><b>(-2.9 to -0.1)</b>                |
| Falls                                         | 409.2<br>(355.0 to 465.2)                     | 256.9<br>(225.3 to 300.4)                | 18.6<br>(13.1 to 25.3)               | 32.3<br>(29.8 to 34.7)                            | 0.2<br>(-1.3 to 1.7)                                |
| Drowning                                      | 4.9<br>(4.1 to 5.7)                           | 1.4<br>(1.2 to 1.7)                      | 0.3<br>(0.2 to 0.5)                  | 22.4<br>(18.7 to 26.2)                            | -5.8<br>(-7.9 to -3.6)                              |
| Fire, heat, and hot substances                | 129.4<br>(108.3 to 159.2)                     | 24.8<br>(20.1 to 29.6)                   | 4.0<br>(2.8 to 5.7)                  | 25.3<br>(18.2 to 32.4)                            | -4.5<br>(-8.7 to -0.2)                              |
| Poisonings                                    | 4.0<br>(3.1 to 4.9)                           | 7.2<br>(5.7 to 9.1)                      | 0.4<br>(0.3 to 0.6)                  | 32.8<br>(21.4 to 45.2)                            | 0.6<br>(-6.3 to 8.3)                                |
| Exposure to mechanical forces                 | 209.1<br>(180.0 to 250.9)                     | 113.0<br>(95.9 to 131.0)                 | 5.9<br>(3.9 to 8.6)                  | 28.6<br>(25.6 to 31.6)                            | -2.4<br>(-4.3 to -0.5)                              |
| Unintentional firearm injuries                | 11.9<br>(9.8 to 14.5)                         | 4.3<br>(3.2 to 5.6)                      | 0.6<br>(0.4 to 0.8)                  | 33.0<br>(29.5 to 36.4)                            | 0.3<br>(-2.0 to 2.6)                                |
| Unintentional suffocation                     | 18.3<br>(13.0 to 24.8)                        | 6.0<br>(4.1 to 8.5)                      | 0.6<br>(0.4 to 1.0)                  | 30.4<br>(25.8 to 34.8)                            | -0.9<br>(-3.4 to 1.4)                               |
| Other exposure to mechanical forces           | 179.0<br>(150.6 to 218.3)                     | 102.7<br>(87.1 to 118.9)                 | 4.7<br>(3.1 to 6.7)                  | 27.8<br>(24.7 to 30.9)                            | -2.9<br>(-4.8 to -0.9)                              |

| Cause                                                                               | Prevalence in thousands (95% UI)        | Incidence in thousands (95% UI)       | YLDs in thousands (95% UI)        |                                                   |                                                     |
|-------------------------------------------------------------------------------------|-----------------------------------------|---------------------------------------|-----------------------------------|---------------------------------------------------|-----------------------------------------------------|
|                                                                                     | 2016 counts                             | 2016 counts                           | 2016 counts                       | Percentage change in counts between 2006 and 2016 | Percentage change in age-standardised rates between |
| Adverse effects of medical treatment                                                | 4.9<br>(3.9 to 6.1)                     | 63.9<br>(55.4 to 73.1)                | 0.7<br>(0.4 to 1.0)               | 18.2<br>(11.5 to 25.0)                            | -6.9<br>(-10.8 to -2.9)                             |
| Animal contact                                                                      | 77.0<br>(67.8 to 89.5)                  | 127.1<br>(106.8 to 148.0)             | 2.7<br>(1.8 to 3.9)               | 27.9<br>(21.9 to 34.5)                            | -3.1<br>(-6.5 to 0.6)                               |
| Venomous animal contact                                                             | 29.1<br>(24.4 to 35.0)                  | 52.5<br>(41.3 to 65.2)                | 1.8<br>(1.2 to 2.6)               | 25.4<br>(16.9 to 34.7)                            | -5.1<br>(-10.2 to 0.5)                              |
| Non-venomous animal contact                                                         | 47.9<br>(40.2 to 58.2)                  | 74.7<br>(60.6 to 89.2)                | 0.9<br>(0.6 to 1.4)               | 33.0<br>(28.4 to 37.3)                            | 0.5<br>(-2.7 to 3.2)                                |
| Foreign body                                                                        | 92.6<br>(74.6 to 111.5)                 | 73.5<br>(63.9 to 84.8)                | 4.4<br>(2.8 to 6.4)               | 25.2<br>(21.0 to 29.7)                            | -3.8<br>(-6.1 to -1.5)                              |
| Pulmonary aspiration and foreign body in airway                                     | 54.9<br>(40.5 to 74.3)                  | 29.7<br>(24.5 to 37.0)                | 2.9<br>(1.9 to 4.3)               | 21.9<br>(17.5 to 26.7)                            | -6.1<br>(-8.4 to -3.7)                              |
| Foreign body in eyes                                                                | 4.5<br>(2.4 to 7.0)                     | 25.3<br>(19.2 to 33.4)                | 0.2<br>(0.1 to 0.4)               | 38.8<br>(34.1 to 43.5)                            | 5.1<br>(2.3 to 8.1)                                 |
| Foreign body in other body part                                                     | 33.2<br>(26.1 to 43.2)                  | 18.4<br>(14.9 to 22.4)                | 1.2<br>(0.8 to 1.8)               | 30.6<br>(25.8 to 35.5)                            | -0.1<br>(-3.0 to 2.7)                               |
| Environmental heat and cold exposure                                                | 94.4<br>(79.9 to 110.9)                 | 37.3<br>(31.0 to 45.1)                | 4.2<br>(2.8 to 6.1)               | 33.0<br>(30.2 to 36.1)                            | 1.1<br>(-0.6 to 3.0)                                |
| Other unintentional injuries                                                        | 173.8<br>(138.7 to 220.0)               | 87.2<br>(73.9 to 105.0)               | 5.3<br>(3.5 to 7.6)               | 22.9<br>(20.2 to 25.7)                            | -4.3<br>(-5.8 to -2.7)                              |
| <b>Self-harm and interpersonal violence</b>                                         | <b>341.8</b><br><b>(301.1 to 387.0)</b> | <b>27.1†</b><br><b>(23.1 to 31.5)</b> | <b>4.4</b><br><b>(3.1 to 6.1)</b> | <b>28.2</b><br><b>(24.6 to 32.3)</b>              | <b>-2.4</b><br><b>(-4.7 to 0.1)</b>                 |
| Self-harm                                                                           | 5.8<br>(5.1 to 6.6)                     | 3.6<br>(3.0 to 4.2)                   | 0.3<br>(0.2 to 0.5)               | 38.4<br>(35.0 to 42.0)                            | 4.0<br>(1.8 to 6.3)                                 |
| Self-harm by firearm                                                                | 0.5<br>(0.4 to 0.6)                     | 0.2<br>(0.1 to 0.3)                   | < 0.05<br>(< 0.05 to < 0.05)      | 32.4<br>(27.9 to 36.8)                            | -0.5<br>(-3.5 to 2.6)                               |
| Self-harm by other specified means                                                  | 5.3<br>(4.6 to 6.1)                     | 3.4<br>(2.9 to 4.0)                   | 0.3<br>(0.2 to 0.5)               | 38.9<br>(35.3 to 42.6)                            | 4.4<br>(2.1 to 6.8)                                 |
| Interpersonal violence                                                              | 336.0<br>(295.4 to 381.3)               | 23.5†<br>(19.7 to 27.7)               | 4.1<br>(2.8 to 5.6)               | 27.4<br>(23.7 to 31.8)                            | -3.2<br>(-5.5 to -0.4)                              |
| Assault by firearm                                                                  | 1.8<br>(1.5 to 2.1)                     | 0.8<br>(0.6 to 1.1)                   | 0.1<br>(0.1 to 0.1)               | 33.6<br>(29.0 to 38.4)                            | 0.5<br>(-2.4 to 3.7)                                |
| Assault by sharp object                                                             | 14.2<br>(11.6 to 17.0)                  | 8.1<br>(6.2 to 10.4)                  | 0.5<br>(0.3 to 0.8)               | 37.6<br>(34.0 to 41.3)                            | 4.0<br>(1.7 to 6.5)                                 |
| Sexual violence                                                                     | 301.0<br>(261.0 to 346.0)               | --                                    | 2.6<br>(1.7 to 3.7)               | 22.2<br>(17.0 to 28.2)                            | -8.0<br>(-11.4 to -4.0)                             |
| Assault by other means                                                              | 19.0<br>(16.3 to 22.6)                  | 14.6<br>(11.8 to 17.6)                | 0.9<br>(0.6 to 1.3)               | 38.1<br>(34.8 to 41.4)                            | 3.8<br>(1.7 to 5.9)                                 |
| <b>Forces of nature, conflict and terrorism, and executions and police conflict</b> | <b>12.4</b><br><b>(6.8 to 20.1)</b>     | <b>0.2†</b><br><b>(0.1 to 0.4)</b>    | <b>0.4</b><br><b>(0.1 to 1.2)</b> | <b>16.2</b><br><b>(11.2 to 23.5)</b>              | <b>0.5</b><br><b>(-3.2 to 6.9)</b>                  |
| Exposure to forces of nature                                                        | 0.5<br>(0.1 to 1.0)                     | --                                    | < 0.05<br>(< 0.05 to 0.1)         | -25.5<br>(-27.8 to -23.0)                         | -33.3<br>(-35.2 to -31.1)                           |
| Conflict and terrorism                                                              | 11.4<br>(6.1 to 19.1)                   | --                                    | 0.4<br>(0.1 to 1.1)               | 18.7<br>(13.5 to 25.7)                            | 4.0<br>(-0.2 to 10.0)                               |
| Executions and police conflict                                                      | 0.5<br>(0.2 to 1.4)                     | 0.2<br>(0.1 to 0.4)                   | < 0.05<br>(< 0.05 to 0.1)         | 31.0<br>(9.5 to 57.6)                             | 7.8<br>(-18.9 to 30.7)                              |
| <b>Impairments</b>                                                                  | --                                      | --                                    | --                                | --                                                | --                                                  |
| Anaemia                                                                             | 6,012.3<br>(5,793.4 to 6,271.0)         | --                                    | 225.1<br>(152.8 to 320.8)         | 19.5<br>(14.1 to 25.6)                            | -6.7<br>(-10.4 to -2.7)                             |
| Developmental intellectual disability                                               | 524.4<br>(399.7 to 651.2)               | --                                    | 47.2<br>(33.8 to 64.1)            | 37.6<br>(28.9 to 51.8)                            | 3.8<br>(-2.4 to 13.8)                               |
| Epilepsy                                                                            | 81.7<br>(44.2 to 133.2)                 | --                                    | 32.6<br>(16.5 to 57.9)            | 44.5<br>(-39.2 to 223.1)                          | 8.6<br>(-56.4 to 158.3)                             |
| Guillain-Barre syndrome                                                             | 0.1<br>(0.1 to 0.1)                     | --                                    | < 0.05<br>(< 0.05 to < 0.05)      | 31.3<br>(30.4 to 32.7)                            | 0.0<br>(-0.0 to 0.0)                                |
| Hearing loss                                                                        | 1,629.5<br>(1,541.2 to 1,727.7)         | --                                    | 61.0<br>(42.5 to 83.2)            | 25.6<br>(21.5 to 29.5)                            | -3.6<br>(-5.8 to -1.6)                              |
| Heart failure                                                                       | 30.6<br>(27.2 to 34.4)                  | --                                    | 3.6<br>(2.6 to 4.6)               | 27.5<br>(18.9 to 37.0)                            | -1.5<br>(-8.2 to 5.8)                               |
| Infertility                                                                         | 331.6<br>(309.0 to 356.1)               | --                                    | 1.9<br>(0.8 to 3.8)               | 35.7<br>(27.3 to 44.3)                            | -3.3<br>(-9.5 to 3.2)                               |
| Pelvic inflammatory disease                                                         | 13.3<br>(11.2 to 15.8)                  | --                                    | 1.7<br>(1.2 to 2.4)               | 33.2<br>(16.0 to 53.1)                            | -2.2<br>(-14.8 to 11.5)                             |
| Vision loss                                                                         | 1,509.1<br>(1,381.7 to 1,640.2)         | --                                    | 46.2<br>(32.4 to 65.5)            | 30.6<br>(22.9 to 42.8)                            | -2.4<br>(-6.9 to 3.4)                               |

We did not calculate incidence for the nine impairments, certain NTDs, and causes with only birth prevalence. Blank cells mean that no estimate is available.

† Incidence for aggregate causes represents the sum of the incidence of the causes below the aggregate.

‡ Incidence estimates for stroke represent first-ever stroke only.

^ Incidence of HIV/AIDS represents new infections of HIV only and does not include new infections of Tuberculosis in HIV positive cases.



SR Table 14: Prevalence, incidence, and YLDs for 2016, percentage change of YLD counts and percentage change of age-standardised YLD rates between 2006 and 2016 by cause and impairments, for all ages, Guinea-Bissau.

| Cause                                                                                | Prevalence in thousands (95% UI)       | Incidence in thousands (95% UI)            | YLDs in thousands (95% UI)       |                                                   |                                                     |
|--------------------------------------------------------------------------------------|----------------------------------------|--------------------------------------------|----------------------------------|---------------------------------------------------|-----------------------------------------------------|
|                                                                                      | 2016 counts                            | 2016 counts                                | 2016 counts                      | Percentage change in counts between 2006 and 2016 | Percentage change in age-standardised rates between |
| <b>All causes</b>                                                                    | <b>1,858.2</b><br>(1,853.2 to 1,863.2) | <b>11,736.2†</b><br>(11,108.8 to 12,443.4) | <b>188.2</b><br>(138.3 to 245.8) | <b>25.0</b><br>(21.3 to 28.9)                     | <b>-2.6</b><br>(-4.9 to -0.2)                       |
| <b>Communicable, maternal, neonatal, and nutritional disorders</b>                   | <b>1,561.4</b><br>(1,535.8 to 1,586.6) | <b>6,890.4†</b><br>(6,335.2 to 7,486.1)    | <b>54.4</b><br>(37.9 to 75.1)    | <b>18.0</b><br>(11.2 to 25.0)                     | <b>-9.0</b><br>(-14.4 to -4.1)                      |
| <b>HIV/AIDS and tuberculosis</b>                                                     | <b>524.4</b><br>(466.7 to 582.2)       | <b>6.0†</b><br>(4.4 to 7.9)                | <b>5.8</b><br>(3.9 to 8.1)       | <b>28.8</b><br>(-3.4 to 69.6)                     | <b>-4.7</b><br>(-28.8 to 26.9)                      |
| Tuberculosis                                                                         | 462.4<br>(400.2 to 536.4)              | 3.8†<br>(2.9 to 4.9)                       | 0.6<br>(0.4 to 0.9)              | 20.0<br>(5.6 to 38.5)                             | -11.7<br>(-20.9 to -1.6)                            |
| Drug-susceptible tuberculosis                                                        | 2.0<br>(1.5 to 2.7)                    | 3.7<br>(2.8 to 4.8)                        | 0.6<br>(0.4 to 0.9)              | 20.3<br>(5.2 to 39.1)                             | -11.5<br>(-20.5 to -1.1)                            |
| Multidrug-resistant tuberculosis without extensive drug resistance                   | < 0.05<br>(< 0.05 to 0.1)              | 0.1<br>(< 0.05 to 0.1)                     | < 0.05<br>(< 0.05 to < 0.05)     | 6.9<br>(-61.6 to 205.5)                           | -21.4<br>(-71.5 to 123.2)                           |
| Extensively drug-resistant tuberculosis                                              | < 0.05<br>(< 0.05 to < 0.05)           | < 0.05<br>(< 0.05 to < 0.05)               | < 0.05<br>(< 0.05 to < 0.05)     | 223.9<br>(15.5 to 829.2)                          | 135.9<br>(-15.0 to 566.7)                           |
| Latent tuberculosis infection                                                        | 460.4<br>(398.0 to 534.0)              | --                                         | --                               | --                                                | --                                                  |
| HIV/AIDS                                                                             | 41.5<br>(35.4 to 49.4)                 | 2.2^<br>(1.0 to 3.9)                       | 5.2<br>(3.5 to 7.3)              | 30.0<br>(-5.6 to 80.2)                            | -3.7<br>(-30.5 to 35.7)                             |
| Drug-susceptible HIV/AIDS - Tuberculosis                                             | 1.3<br>(0.9 to 1.9)                    | 2.4<br>(1.7 to 3.3)                        | 0.5<br>(0.3 to 0.8)              | 12.8<br>(-3.4 to 33.8)                            | -10.4<br>(-22.5 to 5.2)                             |
| Multidrug-resistant HIV/AIDS - Tuberculosis without extensive drug resistance        | < 0.05<br>(< 0.05 to 0.1)              | < 0.05<br>(< 0.05 to 0.1)                  | < 0.05<br>(< 0.05 to < 0.05)     | -0.3<br>(-65.1 to 184.4)                          | -20.8<br>(-72.3 to 125.9)                           |
| Extensively drug-resistant HIV/AIDS - Tuberculosis                                   | < 0.05<br>(< 0.05 to < 0.05)           | < 0.05<br>(< 0.05 to < 0.05)               | < 0.05<br>(< 0.05 to < 0.05)     | 203.9<br>(6.4 to 766.3)                           | 141.3<br>(-15.5 to 587.9)                           |
| HIV/AIDS resulting in other diseases                                                 | 40.1<br>(33.9 to 48.1)                 | 2.2<br>(1.0 to 3.9)                        | 4.6<br>(3.1 to 6.7)              | 32.2<br>(-7.5 to 93.7)                            | -2.8<br>(-31.7 to 46.5)                             |
| <b>Diarrhoea, lower respiratory infections, and other common infectious diseases</b> | <b>141.3</b><br>(135.5 to 148.8)       | <b>5,976.5†</b><br>(5,428.5 to 6,541.8)    | <b>7.8</b><br>(5.5 to 10.6)      | <b>16.3</b><br>(12.5 to 20.1)                     | <b>-8.0</b><br>(-10.6 to -5.2)                      |
| Diarrhoeal diseases                                                                  | 26.1<br>(24.1 to 28.5)                 | 1,757.5<br>(1,613.3 to 1,919.7)            | 2.9<br>(2.0 to 4.1)              | 11.3<br>(5.2 to 18.1)                             | -11.4<br>(-15.6 to -6.8)                            |
| Intestinal infectious diseases                                                       | < 0.05<br>(< 0.05 to < 0.05)           | 0.8†<br>(0.6 to 0.9)                       | < 0.05<br>(< 0.05 to < 0.05)     | -7.0<br>(-21.9 to 11.4)                           | -26.4<br>(-36.1 to -14.9)                           |
| Typhoid fever                                                                        | < 0.05<br>(< 0.05 to < 0.05)           | 0.5<br>(0.4 to 0.7)                        | < 0.05<br>(< 0.05 to < 0.05)     | -6.9<br>(-23.6 to 13.8)                           | -26.4<br>(-37.6 to -13.0)                           |
| Paratyphoid fever                                                                    | < 0.05<br>(< 0.05 to < 0.05)           | 0.2<br>(0.1 to 0.3)                        | < 0.05<br>(< 0.05 to < 0.05)     | 2.9<br>(-20.5 to 32.7)                            | -18.9<br>(-35.0 to -0.4)                            |
| Other intestinal infectious diseases                                                 | --                                     | --                                         | < 0.05<br>(< 0.05 to < 0.05)     | -34.6<br>(-52.0 to -8.5)                          | -46.9<br>(-58.7 to -30.1)                           |
| Lower respiratory infections                                                         | 2.4<br>(2.2 to 2.6)                    | 105.1<br>(95.9 to 114.5)                   | 0.1<br>(0.1 to 0.2)              | 10.7<br>(-2.3 to 25.7)                            | -10.7<br>(-18.7 to -1.5)                            |
| Upper respiratory infections                                                         | 51.8<br>(44.9 to 59.1)                 | 3,874.3<br>(3,344.4 to 4,452.2)            | 1.3<br>(0.8 to 2.0)              | 26.0<br>(18.6 to 33.1)                            | -0.6<br>(-6.0 to 4.7)                               |
| Otitis media                                                                         | 45.3<br>(40.5 to 50.5)                 | 169.4<br>(131.5 to 216.9)                  | 1.5<br>(0.9 to 2.2)              | 23.9<br>(16.2 to 32.1)                            | -0.8<br>(-6.8 to 5.3)                               |
| Meningitis                                                                           | 14.6<br>(12.0 to 17.6)                 | 4.2<br>(3.6 to 5.0)                        | 1.1<br>(0.8 to 1.5)              | 18.9<br>(11.1 to 27.2)                            | -6.5<br>(-12.5 to -0.2)                             |
| Pneumococcal meningitis                                                              | 4.3<br>(3.4 to 5.5)                    | 0.6<br>(0.4 to 0.8)                        | 0.4<br>(0.3 to 0.5)              | 3.1<br>(-10.1 to 18.1)                            | -20.1<br>(-29.1 to -9.8)                            |
| H influenzae type B meningitis                                                       | 2.0<br>(1.4 to 3.1)                    | 0.6<br>(0.3 to 0.9)                        | 0.2<br>(0.1 to 0.2)              | -3.5<br>(-16.4 to 10.5)                           | -25.1<br>(-35.2 to -14.6)                           |
| Meningococcal infection                                                              | 5.7<br>(3.9 to 8.0)                    | 2.3<br>(1.8 to 2.8)                        | 0.4<br>(0.3 to 0.5)              | 30.3<br>(16.4 to 47.9)                            | 2.8<br>(-7.8 to 16.0)                               |
| Other meningitis                                                                     | 2.5<br>(1.8 to 3.5)                    | 0.8<br>(0.5 to 1.1)                        | 0.2<br>(0.1 to 0.3)              | 75.5<br>(52.4 to 102.3)                           | 42.6<br>(25.4 to 65.0)                              |
| Encephalitis                                                                         | 7.7<br>(4.4 to 12.3)                   | 3.9<br>(3.5 to 4.4)                        | 0.7<br>(0.5 to 0.8)              | 9.6<br>(-4.5 to 25.8)                             | -14.3<br>(-23.8 to -3.6)                            |
| Diphtheria                                                                           | < 0.05<br>(< 0.05 to < 0.05)           | < 0.05<br>(< 0.05 to < 0.05)               | < 0.05<br>(< 0.05 to < 0.05)     | -63.4<br>(-85.3 to -4.5)                          | -68.4<br>(-85.1 to -33.9)                           |
| Whooping cough                                                                       | 0.8<br>(0.7 to 1.1)                    | 6.1<br>(4.8 to 7.7)                        | < 0.05<br>(< 0.05 to 0.1)        | -21.7<br>(-35.3 to -5.9)                          | -37.6<br>(-48.7 to -24.8)                           |
| Tetanus                                                                              | < 0.05<br>(< 0.05 to < 0.05)           | 0.1<br>(< 0.05 to 0.2)                     | < 0.05<br>(< 0.05 to < 0.05)     | -32.2<br>(-57.2 to -0.7)                          | -42.1<br>(-58.8 to -24.2)                           |
| Measles                                                                              | 0.1<br>(< 0.05 to 0.2)                 | 2.9<br>(1.0 to 6.9)                        | < 0.05<br>(< 0.05 to < 0.05)     | -70.0<br>(-86.3 to -47.1)                         | -76.2<br>(-89.0 to -58.6)                           |
| Varicella and herpes zoster                                                          | 1.8<br>(1.7 to 1.9)                    | 52.2<br>(48.9 to 55.8)                     | 0.1<br>(< 0.05 to 0.1)           | 28.6<br>(10.3 to 50.7)                            | 0.4<br>(-11.0 to 13.1)                              |
| <b>Neglected tropical diseases and malaria</b>                                       | <b>702.9</b><br>(658.5 to 749.1)       | <b>342.9†</b><br>(244.5 to 541.9)          | <b>11.1</b><br>(7.1 to 17.6)     | <b>4.1</b><br>(-6.7 to 13.3)                      | <b>-19.9</b><br>(-28.2 to -12.7)                    |
| Malaria                                                                              | 54.5<br>(46.2 to 63.7)                 | 137.0<br>(48.7 to 344.2)                   | 1.8<br>(1.4 to 2.3)              | 3.6<br>(-10.6 to 21.1)                            | -17.6<br>(-28.2 to -4.4)                            |
| Chagas disease                                                                       | --                                     | --                                         | --                               | --                                                | --                                                  |
| Leishmaniasis                                                                        | --                                     | --                                         | --                               | --                                                | --                                                  |
| Visceral leishmaniasis                                                               | --                                     | --                                         | --                               | --                                                | --                                                  |
| Cutaneous and mucocutaneous leishmaniasis                                            | --                                     | --                                         | --                               | --                                                | --                                                  |
| African trypanosomiasis                                                              | --                                     | --                                         | --                               | --                                                | --                                                  |
| Schistosomiasis                                                                      | 429.8<br>(336.2 to 526.7)              | 168.8<br>(139.6 to 198.1)                  | 3.2<br>(1.5 to 6.3)              | 13.7<br>(5.1 to 22.9)                             | -14.0<br>(-20.3 to -7.4)                            |
| Cysticercosis                                                                        | 0.9<br>(0.5 to 1.4)                    | --                                         | 0.2<br>(0.1 to 0.3)              | 4.5<br>(-46.4 to 58.3)                            | -20.2<br>(-59.0 to 17.5)                            |
| Cystic echinococcosis                                                                | 1.6<br>(0.4 to 5.3)                    | 0.3<br>(0.1 to 1.1)                        | 0.1<br>(< 0.05 to 0.5)           | -17.4<br>(-85.3 to 368.3)                         | -36.1<br>(-88.0 to 263.7)                           |
| Lymphatic filariasis                                                                 | 75.5<br>(51.3 to 106.9)                | 16.2<br>(11.7 to 21.6)                     | 3.5<br>(1.3 to 7.4)              | 15.5<br>(-17.2 to 30.6)                           | -10.7<br>(-35.7 to 0.6)                             |
| Onchocerciasis                                                                       | --                                     | --                                         | --                               | --                                                | --                                                  |
| Trachoma                                                                             | 1.6<br>(1.1 to 2.4)                    | --                                         | 0.1<br>(0.1 to 0.2)              | -37.2<br>(-48.8 to -22.4)                         | -50.3<br>(-61.3 to -35.5)                           |
| Dengue                                                                               | 1.2<br>(0.7 to 2.0)                    | 20.3<br>(13.2 to 29.2)                     | 0.2<br>(0.1 to 0.4)              | 178.9<br>(99.7 to 559.3)                          | 120.7<br>(64.6 to 427.4)                            |
| Yellow fever                                                                         | < 0.05<br>(< 0.05 to < 0.05)           | 0.2<br>(0.1 to 0.6)                        | < 0.05<br>(< 0.05 to < 0.05)     | -27.6<br>(-64.4 to 51.6)                          | -42.8<br>(-69.5 to 8.4)                             |
| Rabies                                                                               | < 0.05<br>(< 0.05 to < 0.05)           | < 0.05<br>(< 0.05 to 0.1)                  | < 0.05<br>(< 0.05 to < 0.05)     | -8.1<br>(-46.7 to 58.0)                           | -25.2<br>(-52.5 to 16.8)                            |
| Intestinal nematode infections                                                       | 235.7<br>(215.8 to 258.5)              | --                                         | 0.6<br>(0.3 to 0.9)              | -57.0<br>(-62.4 to -50.9)                         | -66.0<br>(-70.9 to -60.7)                           |
| Ascariasis                                                                           | 33.2<br>(28.2 to 39.1)                 | --                                         | < 0.05<br>(< 0.05 to < 0.05)     | -55.9<br>(-65.5 to -41.7)                         | -65.1<br>(-73.7 to -52.5)                           |

| Cause                                                                   | Prevalence in thousands (95% UI)              | Incidence in thousands (95% UI)                | YLDs in thousands (95% UI)             |                                                   |                                                     |
|-------------------------------------------------------------------------|-----------------------------------------------|------------------------------------------------|----------------------------------------|---------------------------------------------------|-----------------------------------------------------|
|                                                                         | 2016 counts                                   | 2016 counts                                    | 2016 counts                            | Percentage change in counts between 2006 and 2016 | Percentage change in age-standardised rates between |
| Trichuriasis                                                            | 49.9<br>(41.4 to 59.3)                        | --                                             | < 0.05<br>(< 0.05 to < 0.05)           | -57.8<br>(-70.5 to -40.5)                         | -66.4<br>(-77.1 to -51.0)                           |
| Hookworm disease                                                        | 163.3<br>(145.0 to 185.2)                     | --                                             | 0.6<br>(0.3 to 0.9)                    | -57.0<br>(-62.4 to -50.9)                         | -66.0<br>(-70.9 to -60.7)                           |
| Food-borne trematodiasis                                                | --                                            | --                                             | --                                     | --                                                | --                                                  |
| Leprosy                                                                 | 0.1<br>(0.1 to 0.1)                           | < 0.05<br>(< 0.05 to < 0.05)                   | < 0.05<br>(< 0.05 to < 0.05)           | -26.4<br>(-41.3 to -6.6)                          | -38.4<br>(-48.9 to -24.0)                           |
| Ebola virus disease                                                     | --                                            | --                                             | --                                     | --                                                | --                                                  |
| Zika virus disease                                                      | < 0.05<br>(< 0.05 to < 0.05)                  | < 0.05<br>(< 0.05 to < 0.05)                   | < 0.05<br>(< 0.05 to < 0.05)           | --                                                | --                                                  |
| Guinea worm disease                                                     | --                                            | --                                             | --                                     | --                                                | --                                                  |
| Other neglected tropical diseases                                       | 35.9<br>(33.0 to 38.6)                        | --                                             | 1.3<br>(0.8 to 1.9)                    | 25.7<br>(10.3 to 43.6)                            | 0.2<br>(-11.6 to 13.2)                              |
| <b>Maternal disorders</b>                                               | <b>6.0</b><br><b>(4.8 to 7.7)</b>             | <b>42.3†</b><br><b>(37.6 to 46.9)</b>          | <b>0.6</b><br><b>(0.4 to 0.8)</b>      | <b>-6.6</b><br><b>(-24.2 to 17.2)</b>             | <b>-31.5</b><br><b>(-44.0 to -14.8)</b>             |
| Maternal haemorrhage                                                    | 0.8<br>(0.7 to 1.1)                           | 9.2<br>(7.0 to 11.8)                           | < 0.05<br>(< 0.05 to 0.1)              | 15.7<br>(-26.0 to 72.9)                           | -11.2<br>(-42.4 to 32.2)                            |
| Maternal sepsis and other pregnancy related infections                  | 0.9<br>(0.7 to 1.1)                           | 4.8<br>(3.7 to 6.5)                            | < 0.05<br>(< 0.05 to < 0.05)           | 15.9<br>(-43.1 to 129.0)                          | -10.8<br>(-54.9 to 72.1)                            |
| Maternal hypertensive disorders                                         | 3.8<br>(2.4 to 5.2)                           | 17.7<br>(14.4 to 20.4)                         | 0.2<br>(0.1 to 0.3)                    | 23.0<br>(-25.1 to 102.4)                          | -7.1<br>(-43.2 to 51.0)                             |
| Maternal obstructed labour and uterine rupture                          | 0.7<br>(0.5 to 0.9)                           | 2.8<br>(1.9 to 4.0)                            | 0.2<br>(0.1 to 0.3)                    | -25.7<br>(-40.8 to -7.2)                          | -45.2<br>(-56.0 to -32.2)                           |
| Maternal abortion, miscarriage, and ectopic pregnancy                   | 0.1<br>(< 0.05 to 0.1)                        | 7.8<br>(5.9 to 10.5)                           | < 0.05<br>(< 0.05 to < 0.05)           | 16.1<br>(-40.5 to 125.1)                          | -13.4<br>(-54.8 to 65.5)                            |
| Other maternal disorders                                                | --                                            | --                                             | 0.1<br>(0.1 to 0.1)                    | -11.3<br>(-27.8 to 11.4)                          | -34.8<br>(-46.5 to -18.9)                           |
| <b>Neonatal disorders</b>                                               | <b>28.8</b><br><b>(22.6 to 35.9)</b>          | --                                             | <b>3.0</b><br><b>(1.6 to 5.5)</b>      | <b>56.8</b><br><b>(9.5 to 116.6)</b>              | <b>27.3</b><br><b>(-11.5 to 77.7)</b>               |
| Neonatal preterm birth complications                                    | 18.1<br>(13.1 to 25.9)                        | --                                             | 0.9<br>(0.6 to 1.2)                    | 33.5<br>(2.6 to 73.5)                             | 6.4<br>(-19.9 to 41.7)                              |
| Neonatal encephalopathy due to birth asphyxia and trauma                | 9.9<br>(5.0 to 17.3)                          | --                                             | 0.9<br>(0.2 to 2.7)                    | 102.7<br>(0.7 to 295.8)                           | 64.7<br>(-24.2 to 224.7)                            |
| Neonatal sepsis and other neonatal infections                           | 2.2<br>(0.7 to 5.2)                           | --                                             | 0.8<br>(0.2 to 2.4)                    | 62.8<br>(-37.8 to 213.2)                          | 35.7<br>(-54.4 to 179.9)                            |
| Hemolytic disease and other neonatal jaundice                           | 0.4<br>(0.3 to 0.5)                           | --                                             | 0.1<br>(0.1 to 0.2)                    | 21.3<br>(4.1 to 39.0)                             | -2.4<br>(-14.4 to 9.2)                              |
| Other neonatal disorders                                                | --                                            | --                                             | 0.3<br>(0.2 to 0.5)                    | 36.4<br>(2.7 to 76.0)                             | 9.1<br>(-18.5 to 41.1)                              |
| <b>Nutritional deficiencies</b>                                         | <b>734.7</b><br><b>(705.6 to 759.1)</b>       | <b>158.4†</b><br><b>(132.8 to 189.1)</b>       | <b>24.2</b><br><b>(15.9 to 34.6)</b>   | <b>19.8</b><br><b>(10.5 to 29.7)</b>              | <b>-5.5</b><br><b>(-11.8 to 0.5)</b>                |
| Protein-energy malnutrition                                             | 21.4<br>(17.5 to 26.4)                        | 14.4<br>(11.9 to 17.4)                         | 0.7<br>(0.4 to 1.1)                    | -25.6<br>(-45.5 to -0.3)                          | -40.9<br>(-56.9 to -20.6)                           |
| Iodine deficiency                                                       | 42.6<br>(35.9 to 49.8)                        | 1.5<br>(1.3 to 1.8)                            | 1.2<br>(0.8 to 1.7)                    | 5.2<br>(-5.5 to 16.6)                             | -17.7<br>(-25.8 to -9.3)                            |
| Vitamin A deficiency                                                    | 155.9<br>(130.9 to 185.7)                     | 142.5<br>(116.2 to 172.0)                      | 0.2<br>(0.1 to 0.2)                    | 15.8<br>(-10.1 to 48.1)                           | -8.1<br>(-27.5 to 14.4)                             |
| Iron-deficiency anaemia                                                 | 639.2<br>(599.9 to 679.7)                     | --                                             | 22.1<br>(14.3 to 31.8)                 | 23.2<br>(12.3 to 34.8)                            | -3.2<br>(-10.1 to 3.6)                              |
| Other nutritional deficiencies                                          | --                                            | --                                             | < 0.05<br>(< 0.05 to < 0.05)           | -26.0<br>(-46.8 to 0.2)                           | -41.2<br>(-57.9 to -19.9)                           |
| <b>Other communicable, maternal, neonatal, and nutritional diseases</b> | <b>671.5</b><br><b>(620.9 to 729.4)</b>       | <b>364.4</b><br><b>(308.4 to 432.3)</b>        | <b>2.0</b><br><b>(1.3 to 3.0)</b>      | <b>27.3</b><br><b>(18.9 to 35.9)</b>              | <b>-2.5</b><br><b>(-7.8 to 2.6)</b>                 |
| Sexually transmitted diseases excluding HIV                             | 360.0<br>(337.8 to 383.4)                     | 228.5<br>(195.4 to 268.9)                      | 0.9<br>(0.6 to 1.4)                    | 30.9<br>(23.1 to 39.1)                            | -1.8<br>(-7.5 to 4.1)                               |
| Syphilis                                                                | 46.7<br>(37.2 to 58.4)                        | 32.5<br>(25.6 to 41.7)                         | < 0.05<br>(< 0.05 to 0.1)              | 21.3<br>(3.1 to 40.9)                             | -4.0<br>(-17.0 to 11.5)                             |
| Chlamydial infection                                                    | 21.9<br>(15.1 to 30.9)                        | 20.1<br>(14.8 to 27.3)                         | 0.2<br>(0.1 to 0.3)                    | 31.1<br>(16.0 to 48.5)                            | -2.7<br>(-13.4 to 10.4)                             |
| Gonococcal infection                                                    | 20.1<br>(13.5 to 29.1)                        | 66.6<br>(39.9 to 103.2)                        | 0.2<br>(0.1 to 0.3)                    | 32.7<br>(16.9 to 52.5)                            | 0.5<br>(-11.5 to 13.6)                              |
| Trichomoniasis                                                          | 68.0<br>(55.7 to 81.6)                        | 62.5<br>(50.0 to 77.4)                         | 0.1<br>(< 0.05 to 0.2)                 | 31.6<br>(24.2 to 40.4)                            | 0.1<br>(-5.0 to 6.1)                                |
| Genital herpes                                                          | 244.7<br>(213.1 to 282.4)                     | 24.2<br>(20.6 to 28.7)                         | 0.1<br>(< 0.05 to 0.1)                 | 31.6<br>(19.7 to 44.9)                            | 0.0<br>(-7.7 to 8.3)                                |
| Other sexually transmitted diseases                                     | 17.0<br>(13.2 to 21.2)                        | 22.6<br>(18.8 to 27.4)                         | 0.4<br>(0.2 to 0.5)                    | 31.1<br>(19.2 to 44.4)                            | -2.9<br>(-11.4 to 6.8)                              |
| Hepatitis                                                               | 365.5<br>(292.3 to 457.7)                     | 135.9<br>(93.2 to 193.5)                       | 0.2<br>(0.1 to 0.3)                    | -6.0<br>(-25.5 to 20.1)                           | -22.8<br>(-37.1 to -5.4)                            |
| Acute hepatitis A                                                       | 2.0<br>(0.3 to 5.1)                           | 26.2<br>(3.6 to 66.7)                          | < 0.05<br>(< 0.05 to < 0.05)           | -9.5<br>(-79.9 to 356.3)                          | -23.4<br>(-77.3 to 200.1)                           |
| Hepatitis B                                                             | 290.5<br>(217.8 to 380.3)                     | 94.5<br>(65.5 to 134.4)                        | 0.1<br>(0.1 to 0.2)                    | -5.4<br>(-24.3 to 18.5)                           | -22.7<br>(-37.8 to -5.8)                            |
| Hepatitis C                                                             | 72.3<br>(63.5 to 81.3)                        | 6.7<br>(6.0 to 7.4)                            | < 0.05<br>(< 0.05 to < 0.05)           | 15.8<br>(-22.7 to 74.3)                           | -9.4<br>(-31.2 to 21.3)                             |
| Acute hepatitis E                                                       | 0.7<br>(0.5 to 0.8)                           | 8.4<br>(6.6 to 11.1)                           | < 0.05<br>(< 0.05 to < 0.05)           | -13.2<br>(-33.8 to 16.3)                          | -26.7<br>(-43.0 to -5.4)                            |
| Other infectious diseases                                               | 26.6<br>(24.6 to 28.6)                        | < 0.05<br>(< 0.05 to < 0.05)                   | 1.0<br>(0.6 to 1.4)                    | 31.9<br>(16.9 to 49.6)                            | 4.0<br>(-6.5 to 16.4)                               |
| <b>Non-communicable diseases</b>                                        | <b>1,701.2</b><br><b>(1,684.4 to 1,715.9)</b> | <b>4,703.0†</b><br><b>(4,385.1 to 5,045.0)</b> | <b>123.9</b><br><b>(90.8 to 160.2)</b> | <b>28.4</b><br><b>(23.4 to 33.4)</b>              | <b>-0.2</b><br><b>(-3.0 to 2.6)</b>                 |
| <b>Neoplasms</b>                                                        | <b>1.7</b><br><b>(1.5 to 1.9)</b>             | <b>1.2</b><br><b>(1.0 to 1.4)</b>              | <b>0.4</b><br><b>(0.3 to 0.5)</b>      | <b>30.2</b><br><b>(22.6 to 38.7)</b>              | <b>2.4</b><br><b>(-3.1 to 8.6)</b>                  |
| Lip and oral cavity cancer                                              | 0.1<br>(0.1 to 0.1)                           | < 0.05<br>(< 0.05 to < 0.05)                   | < 0.05<br>(< 0.05 to < 0.05)           | 37.0<br>(19.2 to 55.7)                            | 6.3<br>(-7.5 to 20.3)                               |
| Nasopharynx cancer                                                      | < 0.05<br>(< 0.05 to < 0.05)                  | < 0.05<br>(< 0.05 to < 0.05)                   | < 0.05<br>(< 0.05 to < 0.05)           | 34.2<br>(15.4 to 55.6)                            | 1.9<br>(-10.9 to 15.9)                              |
| Other pharynx cancer                                                    | < 0.05<br>(< 0.05 to < 0.05)                  | < 0.05<br>(< 0.05 to < 0.05)                   | < 0.05<br>(< 0.05 to < 0.05)           | 28.1<br>(16.5 to 40.6)                            | 2.0<br>(-7.0 to 11.5)                               |
| Oesophageal cancer                                                      | < 0.05<br>(< 0.05 to < 0.05)                  | < 0.05<br>(< 0.05 to < 0.05)                   | < 0.05<br>(< 0.05 to < 0.05)           | 48.1<br>(24.8 to 73.6)                            | 16.7<br>(-1.3 to 39.4)                              |
| Stomach cancer                                                          | 0.2<br>(0.1 to 0.2)                           | 0.1<br>(0.1 to 0.1)                            | < 0.05<br>(< 0.05 to < 0.05)           | 25.8<br>(8.3 to 46.2)                             | -0.5<br>(-14.2 to 15.7)                             |
| Colon and rectum cancer                                                 | 0.2<br>(0.1 to 0.2)                           | 0.1<br>(0.1 to 0.1)                            | < 0.05<br>(< 0.05 to < 0.05)           | 35.1<br>(17.5 to 54.8)                            | 6.1<br>(-9.3 to 22.8)                               |
| Liver cancer                                                            | 0.1<br>(0.1 to 0.1)                           | 0.1<br>(0.1 to 0.2)                            | < 0.05<br>(< 0.05 to < 0.05)           | 16.5<br>(2.4 to 34.0)                             | -9.3<br>(-19.6 to 2.4)                              |
| Liver cancer due to hepatitis B                                         | 0.1<br>(0.1 to 0.1)                           | 0.1<br>(0.1 to 0.1)                            | < 0.05<br>(< 0.05 to < 0.05)           | 17.0<br>(1.8 to 35.1)                             | -9.3<br>(-20.8 to 3.8)                              |

| Cause                                              | Prevalence in thousands (95% UI)        | Incidence in thousands (95% UI)       | YLDs in thousands (95% UI)        |                                                   |                                                     |
|----------------------------------------------------|-----------------------------------------|---------------------------------------|-----------------------------------|---------------------------------------------------|-----------------------------------------------------|
|                                                    | 2016 counts                             | 2016 counts                           | 2016 counts                       | Percentage change in counts between 2006 and 2016 | Percentage change in age-standardised rates between |
| Liver cancer due to hepatitis C                    | < 0.05<br>(< 0.05 to < 0.05)            | < 0.05<br>(< 0.05 to < 0.05)          | < 0.05<br>(< 0.05 to < 0.05)      | 16.9<br>(2.2 to 34.4)                             | -7.4<br>(-18.6 to 5.7)                              |
| Liver cancer due to alcohol use                    | < 0.05<br>(< 0.05 to < 0.05)            | < 0.05<br>(< 0.05 to < 0.05)          | < 0.05<br>(< 0.05 to < 0.05)      | 13.7<br>(-1.0 to 30.5)                            | -11.2<br>(-21.9 to 1.5)                             |
| Liver cancer due to other causes                   | < 0.05<br>(< 0.05 to < 0.05)            | < 0.05<br>(< 0.05 to < 0.05)          | < 0.05<br>(< 0.05 to < 0.05)      | 16.6<br>(2.0 to 34.7)                             | -8.9<br>(-19.3 to 2.9)                              |
| Gallbladder and biliary tract cancer               | < 0.05<br>(< 0.05 to < 0.05)            | < 0.05<br>(< 0.05 to < 0.05)          | < 0.05<br>(< 0.05 to < 0.05)      | 18.6<br>(7.2 to 31.5)                             | -8.3<br>(-16.6 to 0.9)                              |
| Pancreatic cancer                                  | < 0.05<br>(< 0.05 to < 0.05)            | < 0.05<br>(< 0.05 to < 0.05)          | < 0.05<br>(< 0.05 to < 0.05)      | 38.3<br>(25.4 to 52.5)                            | 7.2<br>(-2.6 to 18.4)                               |
| Larynx cancer                                      | < 0.05<br>(< 0.05 to < 0.05)            | < 0.05<br>(< 0.05 to < 0.05)          | < 0.05<br>(< 0.05 to < 0.05)      | 31.8<br>(16.7 to 51.8)                            | 3.2<br>(-8.2 to 17.3)                               |
| Tracheal, bronchus, and lung cancer                | 0.1<br>(0.1 to 0.1)                     | 0.1<br>(0.1 to 0.1)                   | < 0.05<br>(< 0.05 to < 0.05)      | 39.6<br>(19.4 to 61.6)                            | 9.4<br>(-7.1 to 28.4)                               |
| Malignant skin melanoma                            | < 0.05<br>(< 0.05 to < 0.05)            | < 0.05<br>(< 0.05 to < 0.05)          | < 0.05<br>(< 0.05 to < 0.05)      | 24.6<br>(11.0 to 43.0)                            | -2.1<br>(-12.3 to 9.8)                              |
| Non-melanoma skin cancer                           | < 0.05<br>(< 0.05 to < 0.05)            | 0.1<br>(< 0.05 to 0.1)                | < 0.05<br>(< 0.05 to < 0.05)      | 6.0<br>(-52.6 to 55.6)                            | -20.4<br>(-70.9 to 22.1)                            |
| Non-melanoma skin cancer (squamous-cell carcinoma) | < 0.05<br>(< 0.05 to < 0.05)            | < 0.05<br>(< 0.05 to < 0.05)          | < 0.05<br>(< 0.05 to < 0.05)      | 3.1<br>(-57.6 to 59.2)                            | -21.9<br>(-73.4 to 23.4)                            |
| Non-melanoma skin cancer (basal-cell carcinoma)    | < 0.05<br>(< 0.05 to < 0.05)            | < 0.05<br>(< 0.05 to 0.1)             | < 0.05<br>(< 0.05 to < 0.05)      | 32.4<br>(19.4 to 43.6)                            | 2.0<br>(-7.2 to 10.3)                               |
| Breast cancer                                      | 0.4<br>(0.3 to 0.6)                     | 0.1<br>(0.1 to 0.1)                   | < 0.05<br>(< 0.05 to 0.1)         | 39.4<br>(10.3 to 78.1)                            | 7.1<br>(-14.3 to 34.2)                              |
| Cervical cancer                                    | 0.7<br>(0.4 to 0.9)                     | 0.2<br>(0.1 to 0.3)                   | 0.1<br>(< 0.05 to 0.1)            | 23.7<br>(-1.0 to 54.6)                            | -5.5<br>(-23.8 to 16.3)                             |
| Uterine cancer                                     | 0.1<br>(< 0.05 to 0.1)                  | < 0.05<br>(< 0.05 to < 0.05)          | < 0.05<br>(< 0.05 to < 0.05)      | 32.2<br>(6.9 to 63.9)                             | 2.9<br>(-15.8 to 26.0)                              |
| Ovarian cancer                                     | 0.1<br>(< 0.05 to 0.1)                  | < 0.05<br>(< 0.05 to < 0.05)          | < 0.05<br>(< 0.05 to < 0.05)      | 34.4<br>(15.6 to 55.8)                            | 3.5<br>(-10.0 to 19.9)                              |
| Prostate cancer                                    | 0.2<br>(0.1 to 0.3)                     | 0.1<br>(< 0.05 to 0.1)                | < 0.05<br>(< 0.05 to 0.1)         | 49.2<br>(15.2 to 87.0)                            | 16.5<br>(-8.1 to 44.2)                              |
| Testicular cancer                                  | < 0.05<br>(< 0.05 to < 0.05)            | < 0.05<br>(< 0.05 to < 0.05)          | < 0.05<br>(< 0.05 to < 0.05)      | 20.3<br>(-1.7 to 48.2)                            | -7.5<br>(-24.8 to 13.8)                             |
| Kidney cancer                                      | 0.1<br>(0.1 to 0.1)                     | < 0.05<br>(< 0.05 to < 0.05)          | < 0.05<br>(< 0.05 to < 0.05)      | 35.2<br>(6.9 to 72.6)                             | 8.6<br>(-6.6 to 28.2)                               |
| Bladder cancer                                     | 0.1<br>(0.1 to 0.1)                     | < 0.05<br>(< 0.05 to < 0.05)          | < 0.05<br>(< 0.05 to < 0.05)      | 27.4<br>(12.3 to 44.3)                            | -0.9<br>(-13.5 to 13.4)                             |
| Brain and nervous system cancer                    | 0.1<br>(< 0.05 to 0.1)                  | < 0.05<br>(< 0.05 to < 0.05)          | < 0.05<br>(< 0.05 to < 0.05)      | 36.6<br>(26.7 to 51.6)                            | 7.0<br>(-1.8 to 18.6)                               |
| Thyroid cancer                                     | < 0.05<br>(< 0.05 to < 0.05)            | < 0.05<br>(< 0.05 to < 0.05)          | < 0.05<br>(< 0.05 to < 0.05)      | 16.6<br>(2.5 to 32.0)                             | -10.4<br>(-21.1 to 1.3)                             |
| Mesothelioma                                       | < 0.05<br>(< 0.05 to < 0.05)            | < 0.05<br>(< 0.05 to < 0.05)          | < 0.05<br>(< 0.05 to < 0.05)      | 16.9<br>(2.5 to 35.6)                             | -9.2<br>(-19.3 to 3.4)                              |
| Hodgkin lymphoma                                   | < 0.05<br>(< 0.05 to < 0.05)            | < 0.05<br>(< 0.05 to < 0.05)          | < 0.05<br>(< 0.05 to < 0.05)      | 7.5<br>(-4.0 to 21.8)                             | -12.6<br>(-19.5 to -3.1)                            |
| Non-Hodgkin's lymphoma                             | 0.1<br>(0.1 to 0.1)                     | < 0.05<br>(< 0.05 to < 0.05)          | < 0.05<br>(< 0.05 to < 0.05)      | 24.8<br>(11.1 to 39.8)                            | -0.8<br>(-10.5 to 8.9)                              |
| Multiple myeloma                                   | < 0.05<br>(< 0.05 to < 0.05)            | < 0.05<br>(< 0.05 to < 0.05)          | < 0.05<br>(< 0.05 to < 0.05)      | 30.5<br>(15.4 to 43.6)                            | 0.4<br>(-11.2 to 10.5)                              |
| Leukaemia                                          | 0.1<br>(0.1 to 0.2)                     | < 0.05<br>(< 0.05 to < 0.05)          | < 0.05<br>(< 0.05 to < 0.05)      | 23.7<br>(10.5 to 40.3)                            | -1.8<br>(-9.3 to 7.5)                               |
| Acute lymphoid leukaemia                           | < 0.05<br>(< 0.05 to < 0.05)            | < 0.05<br>(< 0.05 to < 0.05)          | < 0.05<br>(< 0.05 to < 0.05)      | 15.7<br>(-9.9 to 49.3)                            | -6.0<br>(-21.3 to 11.7)                             |
| Chronic lymphoid leukaemia                         | < 0.05<br>(< 0.05 to < 0.05)            | < 0.05<br>(< 0.05 to < 0.05)          | < 0.05<br>(< 0.05 to < 0.05)      | 32.9<br>(12.8 to 58.8)                            | 1.2<br>(-14.2 to 20.8)                              |
| Acute myeloid leukaemia                            | < 0.05<br>(< 0.05 to < 0.05)            | < 0.05<br>(< 0.05 to < 0.05)          | < 0.05<br>(< 0.05 to < 0.05)      | 26.7<br>(4.6 to 55.6)                             | 2.3<br>(-9.3 to 17.9)                               |
| Chronic myeloid leukaemia                          | < 0.05<br>(< 0.05 to < 0.05)            | < 0.05<br>(< 0.05 to < 0.05)          | < 0.05<br>(< 0.05 to < 0.05)      | 24.1<br>(6.3 to 47.7)                             | -5.0<br>(-17.0 to 10.4)                             |
| Other leukaemia                                    | < 0.05<br>(< 0.05 to 0.1)               | < 0.05<br>(< 0.05 to < 0.05)          | < 0.05<br>(< 0.05 to < 0.05)      | 22.3<br>(6.8 to 42.0)                             | -2.6<br>(-14.1 to 10.2)                             |
| Other neoplasms                                    | 0.2<br>(0.2 to 0.2)                     | 0.1<br>(0.1 to 0.1)                   | < 0.05<br>(< 0.05 to < 0.05)      | 24.8<br>(4.8 to 49.4)                             | 0.3<br>(-11.3 to 13.1)                              |
| <b>Cardiovascular diseases</b>                     | <b>87.4</b><br><b>(83.0 to 92.0)</b>    | <b>7.2†</b><br><b>(6.9 to 7.5)</b>    | <b>5.0</b><br><b>(3.7 to 6.7)</b> | <b>29.3</b><br><b>(24.2 to 34.8)</b>              | <b>0.3</b><br><b>(-3.2 to 3.8)</b>                  |
| Rheumatic heart disease                            | 15.1<br>(13.4 to 16.8)                  | 0.6<br>(0.6 to 0.7)                   | 0.7<br>(0.5 to 1.1)               | 24.0<br>(14.3 to 35.9)                            | -4.1<br>(-11.3 to 4.2)                              |
| Ischaemic heart disease                            | 20.1<br>(18.7 to 21.6)                  | 2.8<br>(2.6 to 3.0)                   | 0.8<br>(0.6 to 1.2)               | 30.5<br>(22.6 to 38.6)                            | 0.2<br>(-4.7 to 5.5)                                |
| Cerebrovascular disease                            | 7.6<br>(7.0 to 8.0)                     | 1.3‡<br>(1.2 to 1.4)                  | 1.1<br>(0.8 to 1.4)               | 25.7<br>(16.5 to 35.7)                            | -1.6<br>(-8.5 to 5.7)                               |
| Ischaemic stroke                                   | 6.4<br>(5.7 to 7.0)                     | 0.8‡<br>(0.7 to 0.9)                  | 0.9<br>(0.6 to 1.1)               | 27.8<br>(16.2 to 40.1)                            | -0.3<br>(-9.0 to 8.6)                               |
| Hemorrhagic stroke                                 | 1.6<br>(1.4 to 1.8)                     | 0.5‡<br>(0.5 to 0.5)                  | 0.2<br>(0.2 to 0.3)               | 17.9<br>(3.6 to 33.8)                             | -7.0<br>(-18.2 to 4.2)                              |
| Hypertensive heart disease                         | 1.4<br>(1.2 to 1.7)                     | --                                    | 0.1<br>(0.1 to 0.2)               | 23.3<br>(9.3 to 38.1)                             | -5.4<br>(-15.0 to 4.1)                              |
| Cardiomyopathy and myocarditis                     | 0.8<br>(0.7 to 0.9)                     | 0.4†<br>(0.4 to 0.5)                  | 0.1<br>(0.1 to 0.1)               | 30.8<br>(16.7 to 45.6)                            | -0.5<br>(-12.1 to 11.3)                             |
| Myocarditis                                        | 0.2<br>(0.2 to 0.3)                     | 0.4<br>(0.4 to 0.5)                   | < 0.05<br>(< 0.05 to < 0.05)      | 30.3<br>(18.9 to 44.2)                            | 0.9<br>(-10.4 to 14.5)                              |
| Alcoholic cardiomyopathy                           | 0.1<br>(0.1 to 0.2)                     | --                                    | < 0.05<br>(< 0.05 to < 0.05)      | 30.8<br>(-1.1 to 71.8)                            | 0.0<br>(-22.9 to 29.9)                              |
| Other cardiomyopathy                               | 0.6<br>(0.5 to 0.8)                     | --                                    | 0.1<br>(< 0.05 to 0.1)            | 31.0<br>(11.2 to 51.3)                            | -1.0<br>(-14.9 to 15.1)                             |
| Atrial fibrillation and flutter                    | 3.7<br>(3.2 to 4.2)                     | 0.3<br>(0.3 to 0.4)                   | 0.3<br>(0.2 to 0.4)               | 29.8<br>(20.1 to 40.4)                            | 1.1<br>(-4.9 to 8.1)                                |
| Peripheral vascular disease                        | 13.8<br>(11.8 to 16.0)                  | 1.4<br>(1.2 to 1.6)                   | 0.1<br>(< 0.05 to 0.1)            | 28.8<br>(18.3 to 39.8)                            | -0.3<br>(-7.4 to 7.2)                               |
| Endocarditis                                       | 0.1<br>(0.1 to 0.1)                     | 0.3<br>(0.2 to 0.3)                   | < 0.05<br>(< 0.05 to < 0.05)      | 30.0<br>(14.3 to 46.4)                            | 1.6<br>(-12.9 to 18.8)                              |
| Other cardiovascular and circulatory diseases      | 34.5<br>(28.1 to 41.1)                  | --                                    | 1.8<br>(1.2 to 2.6)               | 33.5<br>(21.8 to 47.1)                            | 3.8<br>(-5.2 to 12.4)                               |
| <b>Chronic respiratory diseases</b>                | <b>111.0</b><br><b>(105.2 to 117.3)</b> | <b>22.5†</b><br><b>(20.7 to 24.4)</b> | <b>5.2</b><br><b>(3.8 to 6.8)</b> | <b>25.8</b><br><b>(20.5 to 31.2)</b>              | <b>-1.1</b><br><b>(-4.8 to 2.7)</b>                 |
| Chronic obstructive pulmonary disease              | 22.1<br>(21.1 to 23.0)                  | 1.6<br>(1.5 to 1.7)                   | 1.5<br>(1.3 to 1.7)               | 26.2<br>(17.1 to 36.5)                            | -2.0<br>(-8.6 to 5.5)                               |
| Pneumoconiosis                                     | < 0.05<br>(< 0.05 to < 0.05)            | < 0.05<br>(< 0.05 to < 0.05)          | < 0.05<br>(< 0.05 to < 0.05)      | 33.1<br>(25.6 to 41.1)                            | 1.8<br>(-3.5 to 7.8)                                |
| Silicosis                                          | < 0.05<br>(< 0.05 to < 0.05)            | < 0.05<br>(< 0.05 to < 0.05)          | < 0.05<br>(< 0.05 to < 0.05)      | 32.7<br>(22.4 to 46.0)                            | 0.5<br>(-6.3 to 8.2)                                |



| Cause                                                          | Prevalence in thousands (95% UI)  | Incidence in thousands (95% UI)   | YLDs in thousands (95% UI)        |                                                                     |                                                                      |
|----------------------------------------------------------------|-----------------------------------|-----------------------------------|-----------------------------------|---------------------------------------------------------------------|----------------------------------------------------------------------|
|                                                                | 2016 counts<br>(< 0.05 to < 0.05) | 2016 counts<br>(< 0.05 to < 0.05) | 2016 counts<br>(< 0.05 to < 0.05) | Percentage change in counts between 2006 and 2016<br>(22.1 to 42.4) | Percentage change in age-standardised rates between<br>(-4.5 to 7.9) |
| Asbestosis                                                     | < 0.05<br>(< 0.05 to < 0.05)      | < 0.05<br>(< 0.05 to < 0.05)      | < 0.05<br>(< 0.05 to < 0.05)      | 32.8<br>(22.1 to 42.4)                                              | 1.6<br>(-4.5 to 7.9)                                                 |
| Coal workers pneumoconiosis                                    | --                                | --                                | --                                | --                                                                  | --                                                                   |
| Other pneumoconiosis                                           | < 0.05<br>(< 0.05 to < 0.05)      | < 0.05<br>(< 0.05 to < 0.05)      | < 0.05<br>(< 0.05 to < 0.05)      | 33.4<br>(22.0 to 46.2)                                              | 2.1<br>(-6.7 to 12.4)                                                |
| Asthma                                                         | 89.6<br>(82.3 to 97.3)            | 20.9<br>(19.0 to 22.8)            | 3.5<br>(2.3 to 5.1)               | 24.4<br>(17.8 to 31.4)                                              | -1.4<br>(-5.8 to 3.1)                                                |
| Interstitial lung disease and pulmonary sarcoidosis            | 0.1<br>(0.1 to 0.1)               | < 0.05<br>(< 0.05 to < 0.05)      | < 0.05<br>(< 0.05 to < 0.05)      | 27.6<br>(23.9 to 31.1)                                              | -2.2<br>(-6.5 to 2.4)                                                |
| Other chronic respiratory diseases                             | --                                | --                                | 0.1<br>(0.1 to 0.2)               | 62.8<br>(28.5 to 106.7)                                             | 28.9<br>(8.7 to 54.0)                                                |
| <b>Cirrhosis and other chronic liver diseases</b>              | <b>4.5<br/>(4.3 to 4.8)</b>       | <b>0.6<br/>(0.5 to 0.6)</b>       | <b>0.4<br/>(0.3 to 0.6)</b>       | <b>26.6<br/>(13.2 to 41.9)</b>                                      | <b>-0.4<br/>(-8.2 to 8.3)</b>                                        |
| Cirrhosis and other chronic liver diseases due to hepatitis B  | 1.6<br>(1.4 to 1.9)               | 0.2<br>(0.2 to 0.2)               | 0.1<br>(0.1 to 0.2)               | 30.7<br>(10.2 to 54.7)                                              | 0.2<br>(-11.8 to 13.8)                                               |
| Cirrhosis and other chronic liver diseases due to hepatitis C  | 0.7<br>(0.5 to 0.9)               | 0.1<br>(0.1 to 0.1)               | 0.1<br>(< 0.05 to 0.1)            | 28.7<br>(4.1 to 58.0)                                               | -1.2<br>(-18.0 to 18.5)                                              |
| Cirrhosis and other chronic liver diseases due to alcohol use  | 0.7<br>(0.6 to 0.8)               | 0.1<br>(0.1 to 0.1)               | 0.1<br>(< 0.05 to 0.1)            | 31.1<br>(6.3 to 62.4)                                               | 0.4<br>(-16.3 to 20.1)                                               |
| Cirrhosis and other chronic liver diseases due to other causes | 1.6<br>(1.4 to 1.7)               | 0.1<br>(0.1 to 0.2)               | 0.2<br>(0.1 to 0.3)               | 22.7<br>(0.5 to 49.6)                                               | -1.0<br>(-16.5 to 17.9)                                              |
| <b>Digestive diseases</b>                                      | <b>31.8<br/>(29.2 to 34.8)</b>    | <b>28.8†<br/>(27.4 to 30.3)</b>   | <b>1.0<br/>(0.7 to 1.4)</b>       | <b>26.1<br/>(15.9 to 36.5)</b>                                      | <b>-1.7<br/>(-7.7 to 4.1)</b>                                        |
| Peptic ulcer disease                                           | 5.2<br>(4.8 to 5.7)               | 2.7<br>(2.5 to 3.0)               | 0.1<br>(0.1 to 0.1)               | 25.7<br>(11.8 to 41.3)                                              | -3.0<br>(-12.2 to 7.0)                                               |
| Gastritis and duodenitis                                       | 8.7<br>(7.7 to 9.8)               | 9.2<br>(8.2 to 10.3)              | 0.1<br>(0.1 to 0.2)               | 38.6<br>(22.1 to 57.3)                                              | 8.2<br>(-2.6 to 19.4)                                                |
| Appendicitis                                                   | 0.3<br>(0.3 to 0.3)               | 7.8<br>(7.2 to 8.5)               | 0.1<br>(0.1 to 0.1)               | 14.7<br>(-15.9 to 58.1)                                             | -9.2<br>(-28.2 to 13.2)                                              |
| Paralytic ileus and intestinal obstruction                     | < 0.05<br>(< 0.05 to < 0.05)      | 1.0<br>(0.9 to 1.1)               | < 0.05<br>(< 0.05 to < 0.05)      | 23.9<br>(19.0 to 28.4)                                              | -4.0<br>(-10.5 to 2.8)                                               |
| Inguinal, femoral, and abdominal hernia                        | 17.2<br>(14.2 to 20.8)            | 2.6<br>(2.3 to 3.0)               | 0.6<br>(0.4 to 0.8)               | 25.0<br>(11.8 to 39.1)                                              | -2.9<br>(-10.9 to 5.5)                                               |
| Inflammatory bowel disease                                     | 0.1<br>(0.1 to 0.1)               | 0.7<br>(0.6 to 0.7)               | < 0.05<br>(< 0.05 to < 0.05)      | 25.8<br>(23.0 to 29.0)                                              | -3.4<br>(-5.6 to -1.2)                                               |
| Vascular intestinal disorders                                  | < 0.05<br>(< 0.05 to < 0.05)      | 0.1<br>(0.1 to 0.1)               | < 0.05<br>(< 0.05 to < 0.05)      | 27.8<br>(20.4 to 34.1)                                              | 0.7<br>(-3.6 to 4.7)                                                 |
| Gallbladder and biliary diseases                               | 0.9<br>(0.8 to 1.1)               | 4.4<br>(3.8 to 5.0)               | < 0.05<br>(< 0.05 to < 0.05)      | 28.4<br>(14.3 to 43.2)                                              | -2.3<br>(-13.8 to 11.0)                                              |
| Pancreatitis                                                   | < 0.05<br>(< 0.05 to < 0.05)      | 0.4<br>(0.4 to 0.4)               | < 0.05<br>(< 0.05 to < 0.05)      | 29.3<br>(23.2 to 34.9)                                              | -1.3<br>(-5.6 to 3.3)                                                |
| Other digestive diseases                                       | --                                | --                                | 0.1<br>(0.1 to 0.1)               | 29.4<br>(16.5 to 43.2)                                              | 2.2<br>(-4.5 to 8.8)                                                 |
| <b>Neurological disorders</b>                                  | <b>607.3<br/>(578.6 to 639.5)</b> | <b>312.9<br/>(264.7 to 367.3)</b> | <b>13.1<br/>(8.3 to 19.2)</b>     | <b>29.2<br/>(-7.0 to 78.5)</b>                                      | <b>0.0<br/>(-23.8 to 30.3)</b>                                       |
| Alzheimer's disease and other dementias                        | 2.0<br>(1.7 to 2.4)               | 0.3<br>(0.3 to 0.4)               | 0.3<br>(0.2 to 0.4)               | 21.1<br>(14.3 to 29.0)                                              | -1.3<br>(-5.8 to 3.5)                                                |
| Parkinson's disease                                            | 0.2<br>(0.2 to 0.3)               | < 0.05<br>(< 0.05 to < 0.05)      | < 0.05<br>(< 0.05 to < 0.05)      | 32.7<br>(12.9 to 58.6)                                              | 5.0<br>(-9.2 to 22.0)                                                |
| Epilepsy                                                       | 4.7<br>(0.8 to 12.0)              | 0.7<br>(0.1 to 1.7)               | 1.9<br>(0.3 to 5.2)               | 24.1<br>(-83.0 to 884.7)                                            | -2.3<br>(-86.6 to 686.4)                                             |
| Multiple sclerosis                                             | 0.1<br>(0.1 to 0.1)               | < 0.05<br>(< 0.05 to < 0.05)      | < 0.05<br>(< 0.05 to < 0.05)      | 41.6<br>(36.2 to 46.4)                                              | 7.7<br>(3.8 to 11.2)                                                 |
| Motor neuron disease                                           | < 0.05<br>(< 0.05 to < 0.05)      | < 0.05<br>(< 0.05 to < 0.05)      | < 0.05<br>(< 0.05 to < 0.05)      | 30.3<br>(24.8 to 35.8)                                              | 1.9<br>(-1.2 to 5.2)                                                 |
| Migraine                                                       | 216.5<br>(203.5 to 230.1)         | 26.7<br>(25.0 to 28.4)            | 8.9<br>(5.7 to 12.6)              | 29.4<br>(24.0 to 35.3)                                              | -0.0<br>(-3.6 to 3.9)                                                |
| Tension-type headache                                          | 472.2<br>(420.4 to 529.5)         | 285.2<br>(237.1 to 339.6)         | 1.4<br>(0.9 to 2.1)               | 30.3<br>(23.4 to 37.3)                                              | 0.4<br>(-4.4 to 5.5)                                                 |
| Other neurological disorders                                   | < 0.05<br>(< 0.05 to < 0.05)      | < 0.05<br>(< 0.05 to < 0.05)      | 0.5<br>(0.1 to 1.2)               | 50.9<br>(-76.4 to 917.5)                                            | 17.1<br>(-78.6 to 554.1)                                             |
| <b>Mental and substance use disorders</b>                      | <b>257.6<br/>(244.4 to 270.0)</b> | <b>96.9†<br/>(89.4 to 105.3)</b>  | <b>31.2<br/>(22.6 to 40.6)</b>    | <b>29.8<br/>(27.0 to 32.7)</b>                                      | <b>0.8<br/>(-1.3 to 3.0)</b>                                         |
| Schizophrenia                                                  | 2.6<br>(2.2 to 2.9)               | 0.2<br>(0.2 to 0.3)               | 1.6<br>(1.2 to 2.1)               | 33.4<br>(20.6 to 47.7)                                              | 0.3<br>(-8.2 to 9.8)                                                 |
| Alcohol use disorders                                          | 19.6<br>(16.6 to 22.8)            | 10.8<br>(9.1 to 12.6)             | 1.9<br>(1.3 to 2.7)               | 32.8<br>(22.5 to 43.8)                                              | 0.5<br>(-6.8 to 8.3)                                                 |
| Drug use disorders                                             | 7.8<br>(7.0 to 8.7)               | 1.3<br>(1.1 to 1.4)               | 2.2<br>(1.5 to 2.9)               | 43.0<br>(28.7 to 59.3)                                              | 7.3<br>(-2.4 to 18.2)                                                |
| Opioid use disorders                                           | 4.7<br>(3.9 to 5.7)               | 0.6<br>(0.5 to 0.7)               | 1.9<br>(1.3 to 2.7)               | 44.3<br>(28.0 to 62.9)                                              | 7.9<br>(-3.0 to 20.0)                                                |
| Cocaine use disorders                                          | 0.2<br>(0.2 to 0.3)               | < 0.05<br>(< 0.05 to < 0.05)      | < 0.05<br>(< 0.05 to < 0.05)      | 33.3<br>(25.5 to 40.4)                                              | 2.5<br>(-2.6 to 7.5)                                                 |
| Amphetamine use disorders                                      | 0.1<br>(0.1 to 0.2)               | < 0.05<br>(< 0.05 to < 0.05)      | < 0.05<br>(< 0.05 to < 0.05)      | 32.1<br>(18.9 to 45.5)                                              | 1.8<br>(-7.6 to 12.2)                                                |
| Cannabis use disorders                                         | 2.6<br>(2.2 to 3.1)               | 0.5<br>(0.4 to 0.6)               | 0.1<br>(< 0.05 to 0.1)            | 29.9<br>(2.6 to 66.1)                                               | 0.1<br>(-18.9 to 24.8)                                               |
| Other drug use disorders                                       | 0.5<br>(0.5 to 0.6)               | 0.1<br>(0.1 to 0.1)               | 0.1<br>(0.1 to 0.1)               | 35.2<br>(15.0 to 58.4)                                              | 2.4<br>(-12.2 to 18.8)                                               |
| Depressive disorders                                           | 56.5<br>(52.9 to 60.8)            | 63.2<br>(56.0 to 71.4)            | 9.7<br>(6.7 to 13.1)              | 30.4<br>(24.4 to 36.5)                                              | 0.6<br>(-3.7 to 5.0)                                                 |
| Major depressive disorder                                      | 38.5<br>(34.0 to 43.5)            | 59.8<br>(52.6 to 68.0)            | 7.8<br>(5.4 to 10.6)              | 30.2<br>(23.4 to 37.9)                                              | 0.7<br>(-4.5 to 6.0)                                                 |
| Dysthymia                                                      | 19.0<br>(16.5 to 22.1)            | 3.4<br>(3.0 to 3.9)               | 1.8<br>(1.2 to 2.7)               | 30.9<br>(25.7 to 36.0)                                              | 0.2<br>(-3.1 to 3.7)                                                 |
| Bipolar disorder                                               | 9.9<br>(8.4 to 11.7)              | 1.1<br>(1.0 to 1.3)               | 2.0<br>(1.2 to 3.0)               | 29.3<br>(19.7 to 38.9)                                              | 0.1<br>(-5.9 to 6.5)                                                 |
| Anxiety disorders                                              | 50.9<br>(45.8 to 56.7)            | 9.5<br>(8.7 to 10.5)              | 4.9<br>(3.4 to 6.7)               | 27.5<br>(18.0 to 37.1)                                              | 0.1<br>(-6.5 to 6.9)                                                 |
| Eating disorders                                               | 1.4<br>(1.1 to 1.7)               | 1.1<br>(0.8 to 1.5)               | 0.3<br>(0.2 to 0.4)               | 30.9<br>(11.9 to 54.8)                                              | 1.2<br>(-13.8 to 18.2)                                               |
| Anorexia nervosa                                               | 0.4<br>(0.3 to 0.5)               | 0.2<br>(0.1 to 0.2)               | 0.1<br>(< 0.05 to 0.1)            | 27.6<br>(-6.0 to 70.9)                                              | 1.4<br>(-24.5 to 34.6)                                               |
| Bulimia nervosa                                                | 1.0<br>(0.7 to 1.3)               | 1.0<br>(0.7 to 1.3)               | 0.2<br>(0.1 to 0.3)               | 32.3<br>(9.5 to 63.6)                                               | 1.1<br>(-16.6 to 23.4)                                               |
| Autistic spectrum disorders                                    | 15.7<br>(14.0 to 17.8)            | 0.2<br>(0.1 to 0.3)               | 2.2<br>(1.5 to 3.1)               | 26.9<br>(19.8 to 34.4)                                              | 0.2<br>(-4.8 to 5.7)                                                 |
| Autism                                                         | 4.1<br>(3.5 to 4.8)               | < 0.05<br>(< 0.05 to < 0.05)      | 1.1<br>(0.7 to 1.6)               | 26.9<br>(14.7 to 40.3)                                              | 0.3<br>(-8.7 to 10.3)                                                |
| Asperger syndrome and other autistic spectrum disorders        | 11.4<br>(9.5 to 13.9)             | 0.2<br>(0.1 to 0.2)               | 1.1<br>(0.7 to 1.7)               | 27.0<br>(20.1 to 34.5)                                              | 0.1<br>(-4.7 to 5.0)                                                 |



| Cause                                                      | Prevalence in thousands (95% UI)        | Incidence in thousands (95% UI)          | YLDs in thousands (95% UI)     |                                                   |                                                     |
|------------------------------------------------------------|-----------------------------------------|------------------------------------------|--------------------------------|---------------------------------------------------|-----------------------------------------------------|
|                                                            | 2016 counts                             | 2016 counts                              | 2016 counts                    | Percentage change in counts between 2006 and 2016 | Percentage change in age-standardised rates between |
| Attention-deficit/hyperactivity disorder                   | 25.3<br>(22.6 to 28.2)                  | 1.6<br>(1.4 to 1.9)                      | 0.3<br>(0.2 to 0.5)            | 25.1<br>(16.3 to 34.6)                            | 0.1<br>(-6.3 to 7.5)                                |
| Conduct disorder                                           | 18.3<br>(15.0 to 21.8)                  | 6.5<br>(5.2 to 7.9)                      | 2.2<br>(1.4 to 3.4)            | 20.8<br>(13.4 to 29.2)                            | 0.2<br>(-6.0 to 7.1)                                |
| Idiopathic developmental intellectual disability           | 44.6<br>(26.6 to 63.5)                  | --                                       | 1.9<br>(0.9 to 3.2)            | 26.7<br>(18.4 to 36.3)                            | 0.6<br>(-6.0 to 8.2)                                |
| Other mental and substance use disorders                   | 26.6<br>(23.3 to 30.9)                  | 1.3<br>(1.1 to 1.5)                      | 2.0<br>(1.4 to 2.9)            | 32.2<br>(25.0 to 39.4)                            | 0.2<br>(-4.4 to 4.7)                                |
| <b>Diabetes, urogenital, blood, and endocrine diseases</b> | <b>805.6<br/>(775.8 to 833.7)</b>       | <b>210.6†<br/>(197.2 to 225.2)</b>       | <b>12.3<br/>(8.7 to 16.7)</b>  | <b>30.0<br/>(25.4 to 34.3)</b>                    | <b>0.5<br/>(-2.5 to 3.4)</b>                        |
| Diabetes mellitus                                          | 46.1<br>(41.4 to 51.1)                  | 3.1<br>(2.8 to 3.4)                      | 3.2<br>(2.2 to 4.5)            | 33.8<br>(26.0 to 41.7)                            | 3.2<br>(-2.3 to 9.5)                                |
| Acute glomerulonephritis                                   | < 0.05<br>(< 0.05 to < 0.05)            | 0.2<br>(0.2 to 0.3)                      | < 0.05<br>(< 0.05 to < 0.05)   | 28.0<br>(22.9 to 33.5)                            | 0.5<br>(-2.9 to 4.6)                                |
| Chronic kidney disease                                     | 112.0<br>(100.9 to 124.4)               | 8.6<br>(7.5 to 9.6)                      | 3.0<br>(2.2 to 3.9)            | 32.8<br>(24.1 to 42.1)                            | 1.1<br>(-4.8 to 7.4)                                |
| Chronic kidney disease due to diabetes mellitus            | 34.8<br>(29.5 to 40.8)                  | 2.5<br>(2.0 to 3.0)                      | 0.9<br>(0.6 to 1.2)            | 36.1<br>(24.2 to 48.7)                            | 3.0<br>(-4.8 to 11.4)                               |
| Chronic kidney disease due to hypertension                 | 24.0<br>(20.4 to 27.4)                  | 2.2<br>(1.9 to 2.6)                      | 0.5<br>(0.3 to 0.7)            | 30.0<br>(15.7 to 46.0)                            | -0.5<br>(-10.0 to 10.9)                             |
| Chronic kidney disease due to glomerulonephritis           | 22.6<br>(19.4 to 25.8)                  | 1.4<br>(1.1 to 1.7)                      | 0.8<br>(0.5 to 1.0)            | 32.1<br>(20.2 to 47.2)                            | 0.6<br>(-7.1 to 9.5)                                |
| Chronic kidney disease due to other causes                 | 30.6<br>(25.4 to 36.1)                  | 2.5<br>(2.1 to 3.0)                      | 0.8<br>(0.6 to 1.1)            | 31.8<br>(20.4 to 44.9)                            | 0.7<br>(-7.0 to 8.2)                                |
| Urinary diseases and male infertility                      | 37.5<br>(32.7 to 43.0)                  | 121.9†<br>(110.1 to 135.9)               | 0.8<br>(0.5 to 1.2)            | 27.1<br>(18.5 to 35.2)                            | -0.8<br>(-7.0 to 5.2)                               |
| Interstitial nephritis and urinary tract infections        | 2.1<br>(1.9 to 2.4)                     | 110.2<br>(98.5 to 123.5)                 | 0.1<br>(< 0.05 to 0.1)         | 23.2<br>(5.9 to 43.4)                             | -3.6<br>(-14.9 to 9.8)                              |
| Urolithiasis                                               | 0.4<br>(0.3 to 0.4)                     | 9.5<br>(8.3 to 10.8)                     | < 0.05<br>(< 0.05 to < 0.05)   | 32.9<br>(23.5 to 41.9)                            | 1.5<br>(-6.0 to 9.6)                                |
| Benign prostatic hyperplasia                               | 17.2<br>(14.5 to 20.2)                  | 2.2<br>(1.8 to 2.6)                      | 0.6<br>(0.4 to 0.8)            | 27.7<br>(16.3 to 38.1)                            | -0.2<br>(-7.6 to 7.1)                               |
| Male infertility                                           | 15.8<br>(12.2 to 20.6)                  | --                                       | 0.1<br>(< 0.05 to 0.2)         | 37.6<br>(28.5 to 46.2)                            | 2.0<br>(-4.7 to 8.7)                                |
| Other urinary diseases                                     | --                                      | --                                       | < 0.05<br>(< 0.05 to 0.1)      | 3.1<br>(-7.8 to 16.1)                             | -18.5<br>(-25.8 to -10.3)                           |
| Gynecological diseases                                     | 204.9<br>(194.7 to 217.1)               | 75.5†<br>(69.5 to 81.7)                  | 2.5<br>(1.7 to 3.5)            | 28.3<br>(23.0 to 34.1)                            | -2.9<br>(-6.5 to 0.7)                               |
| Uterine fibroids                                           | 14.0<br>(12.3 to 15.7)                  | 1.7<br>(1.5 to 2.0)                      | 0.3<br>(0.2 to 0.5)            | 25.0<br>(14.6 to 36.2)                            | -5.4<br>(-13.4 to 2.9)                              |
| Polycystic ovarian syndrome                                | 1.7<br>(1.3 to 2.2)                     | 4.1<br>(2.9 to 5.5)                      | < 0.05<br>(< 0.05 to < 0.05)   | 33.5<br>(16.1 to 51.8)                            | -1.7<br>(-14.1 to 11.4)                             |
| Female infertility                                         | 2.1<br>(1.1 to 5.3)                     | --                                       | < 0.05<br>(< 0.05 to < 0.05)   | -15.3<br>(-52.8 to 36.0)                          | -38.8<br>(-68.0 to 0.0)                             |
| Endometriosis                                              | 0.4<br>(0.3 to 0.4)                     | 1.5<br>(1.2 to 1.9)                      | < 0.05<br>(< 0.05 to 0.1)      | 32.1<br>(-2.5 to 82.3)                            | 0.7<br>(-24.1 to 33.4)                              |
| Genital prolapse                                           | 98.4<br>(86.6 to 110.6)                 | 8.9<br>(7.4 to 10.5)                     | 0.3<br>(0.1 to 0.6)            | 21.6<br>(14.1 to 29.7)                            | -5.9<br>(-11.9 to 1.1)                              |
| Premenstrual syndrome                                      | 88.1<br>(80.8 to 95.0)                  | 33.2<br>(30.3 to 36.0)                   | 0.7<br>(0.5 to 1.1)            | 27.0<br>(14.0 to 40.3)                            | -2.6<br>(-11.3 to 6.5)                              |
| Other gynecological diseases                               | 30.9<br>(26.9 to 35.2)                  | 26.1<br>(21.3 to 31.5)                   | 1.1<br>(0.7 to 1.5)            | 33.0<br>(24.4 to 41.8)                            | -0.2<br>(-6.5 to 5.8)                               |
| Hemoglobinopathies and hemolytic anaemias                  | 570.5<br>(534.6 to 604.8)               | --                                       | 1.8<br>(1.1 to 2.8)            | 25.8<br>(13.4 to 39.0)                            | -1.6<br>(-9.7 to 6.2)                               |
| Thalassemias                                               | < 0.05<br>(< 0.05 to 0.1)               | --                                       | < 0.05<br>(< 0.05 to < 0.05)   | 26.0<br>(0.1 to 58.6)                             | 0.5<br>(-20.1 to 25.8)                              |
| Thalassaemias trait                                        | 35.6<br>(14.5 to 65.3)                  | --                                       | 0.6<br>(0.2 to 1.2)            | 29.9<br>(15.9 to 49.1)                            | 3.6<br>(-6.3 to 17.5)                               |
| Sickle cell disorders                                      | 0.2<br>(0.1 to 0.2)                     | --                                       | < 0.05<br>(< 0.05 to < 0.05)   | 29.8<br>(10.0 to 50.8)                            | 4.0<br>(-10.3 to 19.5)                              |
| Sickle cell trait                                          | 101.0<br>(83.1 to 122.8)                | --                                       | 0.4<br>(0.2 to 0.6)            | 31.2<br>(14.6 to 48.9)                            | 5.6<br>(-6.1 to 18.0)                               |
| G6PD deficiency                                            | 148.1<br>(124.4 to 172.6)               | --                                       | < 0.05<br>(< 0.05 to < 0.05)   | 29.3<br>(-2.5 to 68.8)                            | -2.3<br>(-18.7 to 18.2)                             |
| G6PD trait                                                 | 307.7<br>(288.1 to 326.8)               | --                                       | < 0.05<br>(< 0.05 to < 0.05)   | 39.3<br>(18.7 to 62.5)                            | 8.8<br>(-5.3 to 23.5)                               |
| Other hemoglobinopathies and hemolytic anaemias            | 28.5<br>(26.5 to 30.7)                  | --                                       | 0.8<br>(0.5 to 1.1)            | 20.4<br>(6.7 to 36.0)                             | -8.3<br>(-16.7 to 0.6)                              |
| Endocrine, metabolic, blood, and immune disorders          | 30.8<br>(29.1 to 32.6)                  | 1.4<br>(1.2 to 1.5)                      | 1.0<br>(0.7 to 1.4)            | 25.1<br>(13.0 to 38.1)                            | -1.4<br>(-8.0 to 5.8)                               |
| <b>Musculoskeletal disorders</b>                           | <b>197.4<br/>(186.1 to 208.3)</b>       | <b>94.2<br/>(85.0 to 103.9)</b>          | <b>21.7<br/>(15.5 to 28.3)</b> | <b>29.8<br/>(26.1 to 33.9)</b>                    | <b>-0.5<br/>(-3.1 to 2.3)</b>                       |
| Rheumatoid arthritis                                       | 1.9<br>(1.6 to 2.1)                     | 0.1<br>(0.1 to 0.1)                      | 0.4<br>(0.3 to 0.6)            | 33.9<br>(19.7 to 50.5)                            | 2.9<br>(-6.8 to 14.1)                               |
| Osteoarthritis                                             | 31.5<br>(29.4 to 33.7)                  | 1.8<br>(1.7 to 1.9)                      | 1.9<br>(1.4 to 2.6)            | 33.6<br>(28.4 to 39.5)                            | 2.7<br>(-1.1 to 6.6)                                |
| Low back and neck pain                                     | 139.7<br>(129.7 to 150.7)               | 62.6<br>(55.9 to 70.3)                   | 16.0<br>(11.3 to 21.2)         | 28.9<br>(24.4 to 33.7)                            | -1.1<br>(-4.3 to 2.2)                               |
| Low back pain                                              | 107.5<br>(94.9 to 122.9)                | 53.2<br>(46.6 to 60.9)                   | 12.1<br>(8.5 to 16.1)          | 28.2<br>(22.4 to 34.7)                            | -1.6<br>(-5.7 to 2.8)                               |
| Neck pain                                                  | 39.5<br>(34.1 to 45.6)                  | 9.5<br>(8.1 to 11.1)                     | 3.9<br>(2.6 to 5.5)            | 31.2<br>(27.7 to 35.2)                            | 0.2<br>(-1.9 to 2.6)                                |
| Gout                                                       | 4.2<br>(3.7 to 4.8)                     | 0.9<br>(0.8 to 1.0)                      | 0.1<br>(0.1 to 0.2)            | 31.6<br>(12.9 to 52.6)                            | 0.4<br>(-12.1 to 14.3)                              |
| Other musculoskeletal disorders                            | 36.7<br>(29.5 to 44.3)                  | 28.7<br>(22.4 to 35.4)                   | 3.1<br>(2.1 to 4.5)            | 31.6<br>(19.4 to 45.6)                            | -0.5<br>(-9.1 to 9.0)                               |
| <b>Other non-communicable diseases</b>                     | <b>1,384.2<br/>(1,347.7 to 1,415.8)</b> | <b>3,928.1†<br/>(3,611.8 to 4,269.4)</b> | <b>33.6<br/>(22.8 to 47.5)</b> | <b>25.8<br/>(23.8 to 27.7)</b>                    | <b>-1.3<br/>(-2.5 to -0.0)</b>                      |
| Congenital anomalies                                       | 21.6<br>(18.9 to 25.2)                  | --                                       | 3.2<br>(2.2 to 4.3)            | 20.5<br>(13.0 to 28.5)                            | -5.4<br>(-11.0 to 0.8)                              |
| Neural tube defects                                        | 3.0<br>(2.7 to 3.4)                     | --                                       | 0.9<br>(0.6 to 1.2)            | 17.0<br>(4.0 to 31.0)                             | -7.8<br>(-17.1 to 2.3)                              |
| Congenital heart anomalies                                 | 5.2<br>(4.4 to 6.3)                     | --                                       | 0.3<br>(0.1 to 0.4)            | 30.2<br>(14.3 to 48.0)                            | 4.0<br>(-8.4 to 17.5)                               |
| Orofacial clefts                                           | 0.6<br>(0.5 to 0.6)                     | --                                       | < 0.05<br>(< 0.05 to < 0.05)   | 25.3<br>(11.3 to 41.1)                            | -1.0<br>(-12.0 to 11.6)                             |
| Down's syndrome                                            | 0.3<br>(0.3 to 0.4)                     | --                                       | < 0.05<br>(< 0.05 to < 0.05)   | 26.4<br>(16.1 to 37.2)                            | -0.1<br>(-8.2 to 8.2)                               |
| Turner syndrome                                            | 1.3<br>(1.1 to 1.5)                     | --                                       | < 0.05<br>(< 0.05 to < 0.05)   | 21.8<br>(-12.7 to 67.0)                           | -2.8<br>(-29.5 to 31.4)                             |
| Klinefelter syndrome                                       | 1.2<br>(1.0 to 1.4)                     | --                                       | < 0.05<br>(< 0.05 to < 0.05)   | 28.0<br>(-3.0 to 69.2)                            | -0.5<br>(-23.6 to 30.6)                             |

| Cause                                         | Prevalence in thousands (95% UI)        | Incidence in thousands (95% UI)          | YLDs in thousands (95% UI)         |                                                   |                                                     |
|-----------------------------------------------|-----------------------------------------|------------------------------------------|------------------------------------|---------------------------------------------------|-----------------------------------------------------|
|                                               | 2016 counts                             | 2016 counts                              | 2016 counts                        | Percentage change in counts between 2006 and 2016 | Percentage change in age-standardised rates between |
| Other chromosomal abnormalities               | 0.4<br>(0.3 to 0.5)                     | --                                       | 0.1<br>(< 0.05 to 0.1)             | 27.3<br>(-9.7 to 75.1)                            | 2.0<br>(-26.2 to 38.3)                              |
| Congenital musculoskeletal and limb anomalies | 1.9<br>(1.7 to 2.2)                     | --                                       | 0.3<br>(0.2 to 0.4)                | 27.9<br>(11.7 to 47.8)                            | 0.7<br>(-10.9 to 13.2)                              |
| Urogenital congenital anomalies               | 1.5<br>(1.3 to 1.7)                     | --                                       | < 0.05<br>(< 0.05 to 0.1)          | 24.0<br>(12.7 to 36.9)                            | -0.7<br>(-8.9 to 8.2)                               |
| Digestive congenital anomalies                | 1.9<br>(1.7 to 2.1)                     | --                                       | 0.1<br>(0.1 to 0.1)                | 25.9<br>(4.5 to 52.1)                             | -0.8<br>(-16.5 to 17.8)                             |
| Other congenital anomalies                    | 8.7<br>(5.8 to 13.1)                    | --                                       | 1.5<br>(1.0 to 2.2)                | 18.8<br>(8.2 to 29.6)                             | -6.8<br>(-14.5 to 1.4)                              |
| Skin and subcutaneous diseases                | 629.2<br>(606.0 to 657.9)               | 1,504.8<br>(1,378.3 to 1,645.3)          | 14.6<br>(9.5 to 21.2)              | 27.5<br>(24.6 to 30.4)                            | 1.6<br>(-0.4 to 3.5)                                |
| Dermatitis                                    | 87.5<br>(73.0 to 103.9)                 | 83.2<br>(72.7 to 96.5)                   | 3.5<br>(2.0 to 5.8)                | 25.8<br>(21.2 to 31.1)                            | 0.2<br>(-3.2 to 3.7)                                |
| Psoriasis                                     | 9.4<br>(8.9 to 10.0)                    | 1.5<br>(1.4 to 1.6)                      | 0.8<br>(0.6 to 1.1)                | 36.9<br>(21.7 to 54.2)                            | 6.2<br>(-3.1 to 17.0)                               |
| Cellulitis                                    | 0.7<br>(0.6 to 0.7)                     | 11.6<br>(10.8 to 12.5)                   | < 0.05<br>(< 0.05 to 0.1)          | 27.7<br>(4.8 to 56.0)                             | 0.9<br>(-17.7 to 22.6)                              |
| Pyoderma                                      | 10.3<br>(9.8 to 10.8)                   | 203.1<br>(193.0 to 213.4)                | 0.1<br>(< 0.05 to 0.1)             | 26.8<br>(19.1 to 35.6)                            | 0.6<br>(-4.8 to 6.1)                                |
| Scabies                                       | 34.3<br>(27.6 to 43.5)                  | 106.2<br>(85.3 to 135.2)                 | 0.9<br>(0.5 to 1.5)                | 23.1<br>(16.7 to 30.3)                            | -2.4<br>(-6.8 to 2.3)                               |
| Fungal skin diseases                          | 268.5<br>(226.6 to 315.8)               | 763.0<br>(643.2 to 896.7)                | 1.5<br>(0.6 to 3.3)                | 26.5<br>(24.9 to 28.2)                            | 0.1<br>(-0.7 to 1.0)                                |
| Viral skin diseases                           | 54.9<br>(52.0 to 57.8)                  | 76.3<br>(72.1 to 81.3)                   | 1.7<br>(1.0 to 2.5)                | 25.8<br>(21.1 to 30.2)                            | 0.2<br>(-3.2 to 3.3)                                |
| Acne vulgaris                                 | 164.9<br>(140.5 to 191.8)               | 117.9<br>(90.3 to 157.3)                 | 4.2<br>(2.8 to 6.1)                | 29.2<br>(22.3 to 36.1)                            | 4.5<br>(-0.8 to 9.6)                                |
| Alopecia areata                               | 3.2<br>(3.0 to 3.4)                     | 5.7<br>(5.3 to 6.0)                      | 0.1<br>(0.1 to 0.2)                | 31.2<br>(16.4 to 46.7)                            | 0.4<br>(-9.7 to 10.8)                               |
| Pruritus                                      | 13.2<br>(11.6 to 15.0)                  | 10.8<br>(9.6 to 12.1)                    | 0.1<br>(0.1 to 0.3)                | 29.1<br>(22.0 to 37.5)                            | 0.3<br>(-4.7 to 6.0)                                |
| Urticaria                                     | 19.0<br>(16.2 to 22.4)                  | 34.3<br>(29.0 to 40.1)                   | 1.1<br>(0.7 to 1.7)                | 26.9<br>(19.1 to 35.2)                            | 0.3<br>(-5.6 to 6.2)                                |
| Decubitus ulcer                               | 0.1<br>(0.1 to 0.2)                     | 0.5<br>(0.5 to 0.6)                      | < 0.05<br>(< 0.05 to < 0.05)       | 29.6<br>(19.8 to 41.6)                            | 3.5<br>(-9.6 to 19.8)                               |
| Other skin and subcutaneous diseases          | 80.7<br>(78.2 to 83.2)                  | 90.8<br>(88.0 to 93.6)                   | 0.4<br>(0.2 to 0.8)                | 28.6<br>(24.8 to 32.8)                            | 0.1<br>(-2.3 to 2.7)                                |
| Sense organ diseases                          | 348.3<br>(334.4 to 363.2)               | 168.2†<br>(156.8 to 180.7)               | 12.5<br>(8.7 to 17.5)              | 23.9<br>(20.5 to 27.6)                            | -2.6<br>(-4.7 to -0.6)                              |
| Glaucoma                                      | 0.6<br>(0.5 to 0.7)                     | --                                       | 0.1<br>(< 0.05 to 0.1)             | 38.3<br>(20.1 to 60.1)                            | 6.7<br>(-5.7 to 21.2)                               |
| Cataract                                      | 14.5<br>(12.5 to 16.7)                  | --                                       | 1.3<br>(0.9 to 1.9)                | 28.8<br>(22.2 to 36.0)                            | 1.2<br>(-4.4 to 7.0)                                |
| Macular degeneration                          | 0.7<br>(0.5 to 0.9)                     | --                                       | 0.1<br>(< 0.05 to 0.1)             | 39.4<br>(20.8 to 61.0)                            | 7.6<br>(-5.5 to 22.7)                               |
| Refraction and accommodation disorders        | 188.2<br>(171.8 to 209.9)               | --                                       | 3.2<br>(1.9 to 5.1)                | 18.7<br>(12.5 to 24.9)                            | -7.1<br>(-12.0 to -2.5)                             |
| Age-related and other hearing loss            | 194.6<br>(182.1 to 209.1)               | --                                       | 6.3<br>(4.4 to 8.9)                | 23.8<br>(18.0 to 29.9)                            | -3.0<br>(-5.6 to -0.3)                              |
| Other vision loss                             | 5.5<br>(4.8 to 6.4)                     | --                                       | 0.5<br>(0.4 to 0.8)                | 29.5<br>(16.9 to 41.6)                            | 2.1<br>(-6.1 to 9.5)                                |
| Other sense organ diseases                    | 34.4<br>(31.8 to 37.1)                  | 168.2<br>(156.8 to 180.7)                | 1.0<br>(0.7 to 1.6)                | 30.8<br>(24.4 to 37.6)                            | 1.2<br>(-2.6 to 5.2)                                |
| Oral disorders                                | 1,005.8<br>(942.5 to 1,060.0)           | 2,255.0†<br>(1,973.3 to 2,558.1)         | 3.4<br>(1.9 to 5.8)                | 30.7<br>(27.9 to 33.5)                            | 0.2<br>(-1.9 to 2.2)                                |
| Caries of deciduous teeth                     | 210.3<br>(163.5 to 258.9)               | 673.9<br>(451.9 to 940.3)                | < 0.05<br>(< 0.05 to 0.1)          | 24.9<br>(10.3 to 41.2)                            | -0.3<br>(-12.0 to 12.5)                             |
| Caries of permanent teeth                     | 662.5<br>(602.7 to 716.9)               | 1,555.9<br>(1,391.1 to 1,734.7)          | 0.4<br>(0.2 to 0.8)                | 28.2<br>(23.3 to 33.1)                            | 0.2<br>(-3.0 to 3.6)                                |
| Periodontal disease                           | 200.0<br>(149.0 to 251.5)               | 23.5<br>(17.4 to 30.2)                   | 1.3<br>(0.5 to 2.8)                | 31.9<br>(26.4 to 37.6)                            | -0.1<br>(-3.6 to 3.7)                               |
| Edentulism and severe tooth loss              | 28.0<br>(23.5 to 32.7)                  | 1.8<br>(1.5 to 2.0)                      | 0.8<br>(0.5 to 1.1)                | 32.1<br>(25.8 to 38.2)                            | 0.5<br>(-3.6 to 4.3)                                |
| Other oral disorders                          | 28.8<br>(27.5 to 30.3)                  | --                                       | 0.8<br>(0.5 to 1.3)                | 29.2<br>(24.1 to 34.5)                            | 0.2<br>(-3.1 to 3.5)                                |
| <b>Injuries</b>                               | <b>229.1</b><br><b>(215.3 to 244.2)</b> | <b>142.8†</b><br><b>(135.3 to 151.0)</b> | <b>9.9</b><br><b>(6.8 to 14.1)</b> | <b>23.7</b><br><b>(21.3 to 25.9)</b>              | <b>-3.5</b><br><b>(-4.9 to -2.1)</b>                |
| <b>Transport injuries</b>                     | <b>25.2</b><br><b>(23.4 to 27.0)</b>    | <b>11.9</b><br><b>(10.7 to 13.4)</b>     | <b>1.6</b><br><b>(1.0 to 2.2)</b>  | <b>25.4</b><br><b>(22.7 to 28.1)</b>              | <b>-3.0</b><br><b>(-4.8 to -1.2)</b>                |
| Road injuries                                 | 20.2<br>(18.9 to 21.7)                  | 10.2<br>(9.0 to 11.6)                    | 1.2<br>(0.8 to 1.8)                | 25.2<br>(22.6 to 27.8)                            | -3.6<br>(-5.4 to -1.9)                              |
| Pedestrian road injuries                      | 4.9<br>(4.3 to 5.5)                     | 1.8<br>(1.5 to 2.2)                      | 0.3<br>(0.2 to 0.4)                | 21.7<br>(19.2 to 24.4)                            | -6.0<br>(-7.7 to -4.2)                              |
| Cyclist road injuries                         | 3.3<br>(2.8 to 3.9)                     | 1.9<br>(1.5 to 2.3)                      | 0.2<br>(0.1 to 0.3)                | 32.1<br>(29.0 to 35.0)                            | 2.1<br>(0.2 to 4.0)                                 |
| Motorcyclist road injuries                    | 3.6<br>(3.1 to 4.4)                     | 1.3<br>(1.0 to 1.6)                      | 0.2<br>(0.1 to 0.3)                | 20.9<br>(18.2 to 23.5)                            | -7.3<br>(-9.0 to -5.6)                              |
| Motor vehicle road injuries                   | 6.3<br>(5.4 to 7.1)                     | 3.9<br>(3.3 to 4.5)                      | 0.4<br>(0.3 to 0.6)                | 24.4<br>(21.5 to 27.3)                            | -4.0<br>(-5.8 to -2.2)                              |
| Other road injuries                           | 2.1<br>(1.8 to 2.5)                     | 1.4<br>(1.1 to 1.8)                      | 0.1<br>(0.1 to 0.2)                | 35.4<br>(32.6 to 38.4)                            | 4.1<br>(2.2 to 6.0)                                 |
| Other transport injuries                      | 5.0<br>(4.1 to 6.1)                     | 1.7<br>(1.4 to 2.1)                      | 0.3<br>(0.2 to 0.5)                | 26.1<br>(21.8 to 30.4)                            | -0.6<br>(-3.1 to 1.9)                               |
| <b>Unintentional injuries</b>                 | <b>190.7</b><br><b>(177.2 to 205.0)</b> | <b>125.6</b><br><b>(118.4 to 133.3)</b>  | <b>7.4</b><br><b>(5.1 to 10.5)</b> | <b>24.4</b><br><b>(21.9 to 26.8)</b>              | <b>-3.2</b><br><b>(-4.6 to -1.8)</b>                |
| Falls                                         | 65.1<br>(56.5 to 73.5)                  | 40.6<br>(35.7 to 47.0)                   | 3.0<br>(2.1 to 4.0)                | 26.5<br>(23.9 to 28.9)                            | -2.2<br>(-3.8 to -0.7)                              |
| Drowning                                      | 0.9<br>(0.8 to 1.0)                     | 0.2<br>(0.2 to 0.3)                      | 0.1<br>(< 0.05 to 0.1)             | 20.2<br>(16.5 to 23.9)                            | -6.3<br>(-8.5 to -4.1)                              |
| Fire, heat, and hot substances                | 20.1<br>(16.9 to 24.3)                  | 3.8<br>(3.1 to 4.5)                      | 0.6<br>(0.4 to 0.9)                | 22.6<br>(16.4 to 29.2)                            | -4.5<br>(-8.4 to -0.4)                              |
| Poisonings                                    | 0.6<br>(0.5 to 0.7)                     | 1.1<br>(0.8 to 1.4)                      | 0.1<br>(< 0.05 to 0.1)             | 27.5<br>(17.1 to 38.3)                            | -0.4<br>(-7.1 to 6.4)                               |
| Exposure to mechanical forces                 | 32.7<br>(28.1 to 39.3)                  | 17.7<br>(15.0 to 20.4)                   | 0.9<br>(0.6 to 1.4)                | 23.8<br>(20.7 to 26.7)                            | -4.1<br>(-6.0 to -2.2)                              |
| Unintentional firearm injuries                | 1.9<br>(1.6 to 2.3)                     | 0.7<br>(0.5 to 0.9)                      | 0.1<br>(0.1 to 0.1)                | 28.1<br>(24.6 to 31.6)                            | -1.9<br>(-4.1 to 0.3)                               |
| Unintentional suffocation                     | 2.8<br>(2.0 to 3.7)                     | 0.9<br>(0.6 to 1.3)                      | 0.1<br>(0.1 to 0.1)                | 26.0<br>(21.7 to 30.3)                            | -1.3<br>(-4.0 to 1.2)                               |
| Other exposure to mechanical forces           | 28.1<br>(23.6 to 34.2)                  | 16.1<br>(13.7 to 18.5)                   | 0.7<br>(0.5 to 1.1)                | 23.0<br>(19.7 to 26.0)                            | -4.7<br>(-6.7 to -2.8)                              |

| Cause                                                                               | Prevalence in thousands (95% UI) | Incidence in thousands (95% UI)                | YLDs in thousands (95% UI)        |                                                   |                                                     |
|-------------------------------------------------------------------------------------|----------------------------------|------------------------------------------------|-----------------------------------|---------------------------------------------------|-----------------------------------------------------|
|                                                                                     | 2016 counts                      | 2016 counts                                    | 2016 counts                       | Percentage change in counts between 2006 and 2016 | Percentage change in age-standardised rates between |
| Adverse effects of medical treatment                                                | 0.8<br>(0.6 to 1.0)              | 10.2<br>(9.0 to 11.7)                          | 0.1<br>(0.1 to 0.2)               | 15.8<br>(9.7 to 23.1)                             | -8.0<br>(-11.6 to -3.8)                             |
| Animal contact                                                                      | 12.4<br>(10.9 to 14.3)           | 20.3<br>(17.3 to 23.5)                         | 0.5<br>(0.3 to 0.6)               | 22.8<br>(17.5 to 28.3)                            | -5.0<br>(-8.1 to -1.8)                              |
| Venomous animal contact                                                             | 4.9<br>(4.1 to 5.9)              | 8.6<br>(6.9 to 10.6)                           | 0.3<br>(0.2 to 0.4)               | 21.1<br>(13.6 to 28.8)                            | -6.3<br>(-10.7 to -1.6)                             |
| Non-venomous animal contact                                                         | 7.5<br>(6.3 to 9.1)              | 11.7<br>(9.6 to 14.1)                          | 0.1<br>(0.1 to 0.2)               | 26.4<br>(22.2 to 30.6)                            | -2.5<br>(-5.4 to 0.1)                               |
| Foreign body                                                                        | 14.1<br>(11.3 to 16.9)           | 11.1<br>(9.6 to 12.8)                          | 0.7<br>(0.4 to 1.0)               | 21.8<br>(17.8 to 25.9)                            | -4.1<br>(-6.4 to -1.8)                              |
| Pulmonary aspiration and foreign body in airway                                     | 8.5<br>(6.2 to 11.4)             | 4.7<br>(3.8 to 5.8)                            | 0.5<br>(0.3 to 0.7)               | 19.5<br>(15.2 to 24.0)                            | -5.8<br>(-7.9 to -3.4)                              |
| Foreign body in eyes                                                                | 0.7<br>(0.4 to 1.0)              | 3.7<br>(2.8 to 4.9)                            | < 0.05<br>(< 0.05 to 0.1)         | 32.0<br>(27.5 to 37.0)                            | 2.7<br>(-0.1 to 5.5)                                |
| Foreign body in other body part                                                     | 5.0<br>(3.9 to 6.5)              | 2.8<br>(2.2 to 3.4)                            | 0.2<br>(0.1 to 0.3)               | 25.8<br>(21.0 to 31.1)                            | -1.3<br>(-4.1 to 1.7)                               |
| Environmental heat and cold exposure                                                | 16.8<br>(14.3 to 19.7)           | 6.6<br>(5.5 to 8.1)                            | 0.8<br>(0.5 to 1.1)               | 30.6<br>(27.7 to 33.4)                            | 1.4<br>(-0.4 to 3.1)                                |
| Other unintentional injuries                                                        | 27.3<br>(21.8 to 34.2)           | 13.9<br>(11.8 to 16.4)                         | 0.8<br>(0.6 to 1.2)               | 18.1<br>(15.7 to 20.6)                            | -6.5<br>(-7.9 to -5.0)                              |
| <b>Self-harm and interpersonal violence</b>                                         | <b>56.5<br/>(49.8 to 64.0)</b>   | <b>5.3†<br/>(4.5 to 6.0)</b>                   | <b>0.8<br/>(0.5 to 1.1)</b>       | <b>21.1<br/>(18.0 to 24.2)</b>                    | <b>-5.7<br/>(-7.6 to -3.8)</b>                      |
| Self-harm                                                                           | 1.0<br>(0.8 to 1.1)              | 0.6<br>(0.5 to 0.7)                            | 0.1<br>(< 0.05 to 0.1)            | 32.1<br>(28.4 to 35.6)                            | 1.2<br>(-1.1 to 3.3)                                |
| Self-harm by firearm                                                                | 0.1<br>(0.1 to 0.1)              | < 0.05<br>(< 0.05 to 0.1)                      | < 0.05<br>(< 0.05 to < 0.05)      | 23.0<br>(19.0 to 27.3)                            | -5.2<br>(-7.9 to -2.3)                              |
| Self-harm by other specified means                                                  | 0.9<br>(0.8 to 1.0)              | 0.6<br>(0.5 to 0.7)                            | 0.1<br>(< 0.05 to 0.1)            | 32.8<br>(29.1 to 36.5)                            | 1.7<br>(-0.6 to 4.0)                                |
| Interpersonal violence                                                              | 55.5<br>(48.8 to 63.1)           | 4.7†<br>(3.9 to 5.4)                           | 0.7<br>(0.5 to 1.0)               | 20.3<br>(17.1 to 23.5)                            | -6.5<br>(-8.4 to -4.5)                              |
| Assault by firearm                                                                  | 0.3<br>(0.3 to 0.4)              | 0.1<br>(0.1 to 0.2)                            | < 0.05<br>(< 0.05 to < 0.05)      | 26.7<br>(22.6 to 31.1)                            | -3.5<br>(-6.1 to -0.9)                              |
| Assault by sharp object                                                             | 2.9<br>(2.4 to 3.5)              | 1.6<br>(1.2 to 2.0)                            | 0.1<br>(0.1 to 0.1)               | 30.6<br>(27.3 to 33.9)                            | 0.2<br>(-1.9 to 2.3)                                |
| Sexual violence                                                                     | 48.3<br>(41.7 to 55.7)           | --                                             | 0.4<br>(0.3 to 0.6)               | 16.0<br>(11.6 to 21.0)                            | -9.8<br>(-12.7 to -6.4)                             |
| Assault by other means                                                              | 4.0<br>(3.4 to 4.7)              | 2.9<br>(2.4 to 3.5)                            | 0.2<br>(0.1 to 0.3)               | 24.6<br>(21.7 to 27.2)                            | -4.6<br>(-6.5 to -2.8)                              |
| <b>Forces of nature, conflict and terrorism, and executions and police conflict</b> | <b>5.0<br/>(2.8 to 8.1)</b>      | <b>&lt; 0.05†<br/>(&lt; 0.05 to &lt; 0.05)</b> | <b>0.2<br/>(&lt; 0.05 to 0.5)</b> | <b>-3.7<br/>(-8.6 to 0.3)</b>                     | <b>-11.7<br/>(-15.1 to -8.5)</b>                    |
| Exposure to forces of nature                                                        | --                               | --                                             | --                                | --                                                | --                                                  |
| Conflict and terrorism                                                              | 5.0<br>(2.8 to 8.1)              | --                                             | 0.2<br>(< 0.05 to 0.5)            | -4.1<br>(-9.1 to -0.1)                            | -12.0<br>(-15.4 to -8.8)                            |
| Executions and police conflict                                                      | 0.1<br>(< 0.05 to 0.2)           | < 0.05<br>(< 0.05 to < 0.05)                   | < 0.05<br>(< 0.05 to < 0.05)      | 27.5<br>(7.4 to 50.3)                             | 6.5<br>(-17.0 to 31.6)                              |
| <b>Impairments</b>                                                                  | --                               | --                                             | --                                | --                                                | --                                                  |
| Anaemia                                                                             | 941.2<br>(884.2 to 999.3)        | --                                             | 36.6<br>(24.7 to 51.3)            | 22.6<br>(12.3 to 32.9)                            | -4.3<br>(-12.5 to 2.8)                              |
| Developmental intellectual disability                                               | 76.7<br>(59.0 to 95.0)           | --                                             | 6.9<br>(5.0 to 9.4)               | 30.3<br>(19.6 to 44.4)                            | 2.5<br>(-5.2 to 12.6)                               |
| Epilepsy                                                                            | 11.7<br>(6.9 to 19.8)            | --                                             | 4.6<br>(2.4 to 8.4)               | 35.2<br>(-40.4 to 187.0)                          | 5.2<br>(-54.3 to 138.4)                             |
| Guillain-Barre syndrome                                                             | < 0.05<br>(< 0.05 to < 0.05)     | --                                             | < 0.05<br>(< 0.05 to < 0.05)      | 27.1<br>(25.5 to 29.1)                            | 0.0<br>(-0.0 to 0.0)                                |
| Hearing loss                                                                        | 242.2<br>(229.5 to 256.5)        | --                                             | 8.9<br>(6.2 to 12.2)              | 22.3<br>(18.0 to 26.5)                            | -3.6<br>(-5.8 to -1.3)                              |
| Heart failure                                                                       | 4.6<br>(4.1 to 5.1)              | --                                             | 0.5<br>(0.3 to 0.6)               | 23.9<br>(15.8 to 33.1)                            | -3.0<br>(-10.0 to 4.1)                              |
| Infertility                                                                         | 44.6<br>(34.0 to 58.5)           | --                                             | 0.2<br>(0.1 to 0.5)               | 24.9<br>(16.8 to 32.7)                            | -8.5<br>(-14.5 to -2.3)                             |
| Pelvic inflammatory disease                                                         | 2.2<br>(1.9 to 2.7)              | --                                             | 0.3<br>(0.2 to 0.4)               | 33.8<br>(16.4 to 52.7)                            | -0.4<br>(-12.5 to 13.4)                             |
| Vision loss                                                                         | 222.2<br>(204.2 to 244.7)        | --                                             | 6.8<br>(4.8 to 9.6)               | 24.1<br>(15.5 to 35.5)                            | -4.5<br>(-8.5 to 0.4)                               |

We did not calculate incidence for the nine impairments, certain NTDs, and causes with only birth prevalence. Blank cells mean that no estimate is available.

† Incidence for aggregate causes represents the sum of the incidence of the causes below the aggregate.

‡ Incidence estimates for stroke represent first-ever stroke only.

^ Incidence of HIV/AIDS represents new infections of HIV only and does not include new infections of Tuberculosis in HIV positive cases.



SR Table 14: Prevalence, incidence, and YLDs for 2016, percentage change of YLD counts and percentage change of age-standardised YLD rates between 2006 and 2016 by cause and impairments, for all ages, Guyana.

| Cause                                                                                | Prevalence in thousands (95% UI)     | Incidence in thousands (95% UI)         | YLDs in thousands (95% UI)           |                                                   |                                                     |
|--------------------------------------------------------------------------------------|--------------------------------------|-----------------------------------------|--------------------------------------|---------------------------------------------------|-----------------------------------------------------|
|                                                                                      | 2016 counts                          | 2016 counts                             | 2016 counts                          | Percentage change in counts between 2006 and 2016 | Percentage change in age-standardised rates between |
| <b>All causes</b>                                                                    | <b>743.2</b><br>(741.3 to 745.1)     | <b>4,779.1†</b><br>(4,519.1 to 5,060.9) | <b>83.0</b><br>(61.9 to 107.8)       | <b>8.5</b><br>(6.3 to 11.0)                       | <b>-1.6</b><br>(-3.4 to 0.4)                        |
| <b>Communicable, maternal, neonatal, and nutritional disorders</b>                   | <b>533.3</b><br>(518.6 to 548.9)     | <b>2,599.2†</b><br>(2,368.8 to 2,840.2) | <b>12.7</b><br>(9.2 to 17.2)         | <b>-5.8</b><br>(-11.2 to -0.2)                    | <b>-3.8</b><br>(-9.8 to 2.8)                        |
| <b>HIV/AIDS and tuberculosis</b>                                                     | <b>206.7</b><br>(188.3 to 222.8)     | <b>1.1†</b><br>(0.9 to 1.4)             | <b>1.5</b><br>(0.8 to 2.6)           | <b>12.1</b><br>(-20.7 to 73.7)                    | <b>13.3</b><br>(-21.6 to 87.2)                      |
| Tuberculosis                                                                         | 184.9<br>(167.0 to 205.9)            | 0.4†<br>(0.4 to 0.5)                    | 0.1<br>( $< 0.05$ to 0.1)            | -10.3<br>(-29.9 to 13.8)                          | -17.0<br>(-33.9 to 4.3)                             |
| Drug-susceptible tuberculosis                                                        | 0.2<br>(0.1 to 0.2)                  | 0.4<br>(0.4 to 0.5)                     | 0.1<br>( $< 0.05$ to 0.1)            | -10.2<br>(-30.0 to 14.5)                          | -16.9<br>(-34.2 to 4.4)                             |
| Multidrug-resistant tuberculosis without extensive drug resistance                   | $< 0.05$<br>( $< 0.05$ to $< 0.05$ ) | $< 0.05$<br>( $< 0.05$ to $< 0.05$ )    | $< 0.05$<br>( $< 0.05$ to $< 0.05$ ) | -34.5<br>(-88.5 to 313.8)                         | -40.1<br>(-89.3 to 275.3)                           |
| Extensively drug-resistant tuberculosis                                              | $< 0.05$<br>( $< 0.05$ to $< 0.05$ ) | $< 0.05$<br>( $< 0.05$ to $< 0.05$ )    | $< 0.05$<br>( $< 0.05$ to $< 0.05$ ) | 74.3<br>(-69.3 to 1,000.8)                        | 59.5<br>(-71.5 to 899.2)                            |
| Latent tuberculosis infection                                                        | 184.7<br>(166.8 to 205.8)            | --                                      | --                                   | --                                                | --                                                  |
| HIV/AIDS                                                                             | 15.5<br>(10.5 to 23.6)               | 0.7^<br>(0.5 to 1.0)                    | 1.4<br>(0.7 to 2.5)                  | 13.2<br>(-21.0 to 81.5)                           | 14.8<br>(-21.8 to 95.8)                             |
| Drug-susceptible HIV/AIDS - Tuberculosis                                             | $< 0.05$<br>( $< 0.05$ to 0.1)       | 0.1<br>(0.1 to 0.1)                     | $< 0.05$<br>( $< 0.05$ to $< 0.05$ ) | -35.2<br>(-48.4 to -14.9)                         | -35.4<br>(-48.5 to -15.8)                           |
| Multidrug-resistant HIV/AIDS - Tuberculosis without extensive drug resistance        | $< 0.05$<br>( $< 0.05$ to $< 0.05$ ) | $< 0.05$<br>( $< 0.05$ to $< 0.05$ )    | $< 0.05$<br>( $< 0.05$ to $< 0.05$ ) | -55.5<br>(-92.2 to 185.3)                         | -55.7<br>(-92.2 to 184.9)                           |
| Extensively drug-resistant HIV/AIDS - Tuberculosis                                   | $< 0.05$<br>( $< 0.05$ to $< 0.05$ ) | $< 0.05$<br>( $< 0.05$ to $< 0.05$ )    | $< 0.05$<br>( $< 0.05$ to $< 0.05$ ) | 18.4<br>(-79.2 to 660.0)                          | 18.0<br>(-79.1 to 658.7)                            |
| HIV/AIDS resulting in other diseases                                                 | 15.5<br>(10.5 to 23.6)               | 0.7<br>(0.5 to 1.0)                     | 1.4<br>(0.7 to 2.5)                  | 14.2<br>(-20.9 to 85.3)                           | 15.9<br>(-21.7 to 98.6)                             |
| <b>Diarrhoea, lower respiratory infections, and other common infectious diseases</b> | <b>43.8</b><br>(41.2 to 46.7)        | <b>2,423.0†</b><br>(2,193.7 to 2,664.7) | <b>2.0</b><br>(1.3 to 2.8)           | <b>-6.4</b><br>(-9.6 to -2.9)                     | <b>-3.8</b><br>(-6.7 to -0.8)                       |
| Diarrhoeal diseases                                                                  | 7.2<br>(6.7 to 7.6)                  | 475.2<br>(445.3 to 506.9)               | 0.8<br>(0.6 to 1.1)                  | -8.3<br>(-13.7 to -2.8)                           | -4.9<br>(-9.8 to 0.0)                               |
| Intestinal infectious diseases                                                       | $< 0.05$<br>( $< 0.05$ to $< 0.05$ ) | $< 0.05†$<br>( $< 0.05$ to $< 0.05$ )   | $< 0.05$<br>( $< 0.05$ to $< 0.05$ ) | 56.1<br>(34.1 to 82.0)                            | 39.1<br>(21.6 to 57.8)                              |
| Typhoid fever                                                                        | $< 0.05$<br>( $< 0.05$ to $< 0.05$ ) | $< 0.05$<br>( $< 0.05$ to $< 0.05$ )    | $< 0.05$<br>( $< 0.05$ to $< 0.05$ ) | 60.1<br>(35.3 to 89.7)                            | 41.2<br>(21.7 to 62.5)                              |
| Paratyphoid fever                                                                    | $< 0.05$<br>( $< 0.05$ to $< 0.05$ ) | $< 0.05$<br>( $< 0.05$ to $< 0.05$ )    | $< 0.05$<br>( $< 0.05$ to $< 0.05$ ) | 56.9<br>(28.1 to 98.7)                            | 40.9<br>(17.9 to 74.0)                              |
| Other intestinal infectious diseases                                                 | --                                   | --                                      | $< 0.05$<br>( $< 0.05$ to $< 0.05$ ) | -18.1<br>(-41.5 to 16.2)                          | -7.0<br>(-28.9 to 23.1)                             |
| Lower respiratory infections                                                         | 0.8<br>(0.7 to 0.8)                  | 34.5<br>(31.8 to 37.5)                  | $< 0.05$<br>( $< 0.05$ to 0.1)       | 3.5<br>(-8.2 to 17.0)                             | 7.4<br>(-2.7 to 18.6)                               |
| Upper respiratory infections                                                         | 24.6<br>(21.7 to 27.6)               | 1,852.5<br>(1,627.6 to 2,093.8)         | 0.6<br>(0.4 to 1.0)                  | -1.7<br>(-7.5 to 4.6)                             | 0.0<br>(-4.8 to 4.8)                                |
| Otitis media                                                                         | 11.3<br>(10.2 to 12.6)               | 45.0<br>(36.5 to 55.5)                  | 0.3<br>(0.2 to 0.5)                  | -12.0<br>(-18.9 to -5.4)                          | -6.9<br>(-13.1 to -0.4)                             |
| Meningitis                                                                           | 0.6<br>(0.5 to 0.7)                  | 0.1<br>(0.1 to 0.1)                     | 0.1<br>( $< 0.05$ to 0.1)            | -4.2<br>(-7.7 to -0.7)                            | -7.5<br>(-10.8 to -4.1)                             |
| Pneumococcal meningitis                                                              | 0.2<br>(0.2 to 0.2)                  | $< 0.05$<br>( $< 0.05$ to $< 0.05$ )    | $< 0.05$<br>( $< 0.05$ to $< 0.05$ ) | -12.5<br>(-18.4 to -6.4)                          | -16.5<br>(-22.5 to -10.5)                           |
| H influenzae type B meningitis                                                       | 0.1<br>(0.1 to 0.1)                  | $< 0.05$<br>( $< 0.05$ to $< 0.05$ )    | $< 0.05$<br>( $< 0.05$ to $< 0.05$ ) | -10.3<br>(-16.8 to -3.9)                          | -11.2<br>(-17.3 to -5.5)                            |
| Meningococcal infection                                                              | $< 0.05$<br>( $< 0.05$ to $< 0.05$ ) | $< 0.05$<br>( $< 0.05$ to $< 0.05$ )    | $< 0.05$<br>( $< 0.05$ to $< 0.05$ ) | -2.9<br>(-8.1 to 2.0)                             | -7.6<br>(-12.4 to -2.8)                             |
| Other meningitis                                                                     | 0.3<br>(0.2 to 0.3)                  | 0.1<br>(0.1 to 0.1)                     | $< 0.05$<br>( $< 0.05$ to $< 0.05$ ) | 13.2<br>(7.7 to 19.8)                             | 9.9<br>(4.4 to 15.7)                                |
| Encephalitis                                                                         | 0.5<br>(0.4 to 0.8)                  | 0.2<br>(0.2 to 0.2)                     | 0.1<br>( $< 0.05$ to 0.1)            | -2.7<br>(-15.7 to 12.0)                           | -7.7<br>(-18.8 to 4.7)                              |
| Diphtheria                                                                           | $< 0.05$<br>( $< 0.05$ to $< 0.05$ ) | $< 0.05$<br>( $< 0.05$ to $< 0.05$ )    | $< 0.05$<br>( $< 0.05$ to $< 0.05$ ) | -39.7<br>(-65.9 to 3.0)                           | -40.0<br>(-65.3 to 1.0)                             |
| Whooping cough                                                                       | 0.1<br>( $< 0.05$ to 0.1)            | 0.5<br>(0.3 to 0.6)                     | $< 0.05$<br>( $< 0.05$ to $< 0.05$ ) | -61.6<br>(-71.1 to -49.8)                         | -52.8<br>(-64.4 to -38.5)                           |
| Tetanus                                                                              | $< 0.05$<br>( $< 0.05$ to $< 0.05$ ) | $< 0.05$<br>( $< 0.05$ to $< 0.05$ )    | $< 0.05$<br>( $< 0.05$ to $< 0.05$ ) | -37.8<br>(-51.6 to -18.6)                         | -48.2<br>(-60.3 to -30.6)                           |
| Measles                                                                              | $< 0.05$<br>(0.0 to $< 0.05$ )       | $< 0.05$<br>(0.0 to $< 0.05$ )          | $< 0.05$<br>(0.0 to $< 0.05$ )       | --                                                | --                                                  |
| Varicella and herpes zoster                                                          | 0.7<br>(0.6 to 0.8)                  | 15.0<br>(14.6 to 15.5)                  | $< 0.05$<br>( $< 0.05$ to $< 0.05$ ) | 13.2<br>(-0.7 to 29.8)                            | 0.0<br>(-10.0 to 11.2)                              |
| <b>Neglected tropical diseases and malaria</b>                                       | <b>197.4</b><br>(170.8 to 231.1)     | <b>58.1†</b><br>(50.6 to 66.5)          | <b>1.9</b><br>(1.1 to 3.1)           | <b>-1.8</b><br>(-17.0 to 9.5)                     | <b>-7.4</b><br>(-22.0 to 4.3)                       |
| Malaria                                                                              | 2.1<br>(1.4 to 3.2)                  | 29.9<br>(25.2 to 35.9)                  | $< 0.05$<br>( $< 0.05$ to 0.1)       | -20.0<br>(-32.1 to 0.2)                           | -14.8<br>(-27.5 to 6.2)                             |
| Chagas disease                                                                       | 0.1<br>(0.1 to 0.1)                  | $< 0.05$<br>( $< 0.05$ to $< 0.05$ )    | $< 0.05$<br>( $< 0.05$ to $< 0.05$ ) | 8.2<br>(-4.1 to 21.8)                             | -11.4<br>(-20.6 to -0.5)                            |
| Leishmaniasis                                                                        | 0.1<br>( $< 0.05$ to 0.3)            | 0.1<br>( $< 0.05$ to 0.6)               | $< 0.05$<br>( $< 0.05$ to $< 0.05$ ) | 312.1<br>(-99.4 to 7,248.1)                       | 305.7<br>(-99.5 to 7,138.7)                         |
| Visceral leishmaniasis                                                               | --                                   | --                                      | --                                   | --                                                | --                                                  |
| Cutaneous and mucocutaneous leishmaniasis                                            | 0.1<br>( $< 0.05$ to 0.3)            | 0.1<br>( $< 0.05$ to 0.6)               | $< 0.05$<br>( $< 0.05$ to $< 0.05$ ) | 312.1<br>(-99.4 to 7,248.1)                       | 305.7<br>(-99.5 to 7,138.7)                         |
| African trypanosomiasis                                                              | --                                   | --                                      | --                                   | --                                                | --                                                  |
| Schistosomiasis                                                                      | --                                   | --                                      | --                                   | --                                                | --                                                  |
| Cysticercosis                                                                        | 0.3<br>(0.2 to 0.4)                  | --                                      | $< 0.05$<br>( $< 0.05$ to 0.1)       | -1.6<br>(-38.2 to 44.5)                           | -14.8<br>(-45.3 to 23.0)                            |
| Cystic echinococcosis                                                                | --                                   | --                                      | --                                   | --                                                | --                                                  |
| Lymphatic filariasis                                                                 | 30.3<br>(24.2 to 37.6)               | 11.6<br>(9.9 to 13.3)                   | 1.4<br>(0.7 to 2.5)                  | -5.9<br>(-24.3 to 4.4)                            | -14.6<br>(-31.0 to -5.3)                            |
| Onchocerciasis                                                                       | --                                   | --                                      | --                                   | --                                                | --                                                  |
| Trachoma                                                                             | --                                   | --                                      | --                                   | --                                                | --                                                  |
| Dengue                                                                               | 1.0<br>(0.6 to 1.5)                  | 16.2<br>(11.2 to 22.4)                  | 0.2<br>(0.1 to 0.3)                  | 248.8<br>(169.5 to 616.5)                         | 242.7<br>(168.0 to 596.6)                           |
| Yellow fever                                                                         | $< 0.05$<br>( $< 0.05$ to $< 0.05$ ) | $< 0.05$<br>( $< 0.05$ to $< 0.05$ )    | $< 0.05$<br>( $< 0.05$ to $< 0.05$ ) | -43.1<br>(-59.1 to -21.7)                         | -43.6<br>(-58.2 to -24.9)                           |
| Rabies                                                                               | $< 0.05$<br>( $< 0.05$ to $< 0.05$ ) | $< 0.05$<br>( $< 0.05$ to $< 0.05$ )    | $< 0.05$<br>( $< 0.05$ to $< 0.05$ ) | -35.4<br>(-62.2 to 5.7)                           | -24.1<br>(-50.6 to 12.9)                            |
| Intestinal nematode infections                                                       | 167.9<br>(141.2 to 204.5)            | --                                      | 0.1<br>( $< 0.05$ to 0.2)            | -1.8<br>(-35.1 to 51.6)                           | 1.3<br>(-35.6 to 58.6)                              |
| Ascariasis                                                                           | 97.0<br>(69.3 to 134.6)              | --                                      | $< 0.05$<br>( $< 0.05$ to 0.1)       | -1.4<br>(-55.4 to 131.3)                          | 1.2<br>(-56.5 to 144.7)                             |



| Cause                                                                   | Prevalence in thousands (95% UI)        | Incidence in thousands (95% UI)                | YLDs in thousands (95% UI)              |                                                   |                                                     |
|-------------------------------------------------------------------------|-----------------------------------------|------------------------------------------------|-----------------------------------------|---------------------------------------------------|-----------------------------------------------------|
|                                                                         | 2016 counts                             | 2016 counts                                    | 2016 counts                             | Percentage change in counts between 2006 and 2016 | Percentage change in age-standardised rates between |
| Trichuriasis                                                            | 64.2<br>(45.5 to 87.1)                  | --                                             | < 0.05<br>(< 0.05 to < 0.05)            | -7.9<br>(-67.4 to 158.0)                          | -2.9<br>(-67.5 to 184.7)                            |
| Hookworm disease                                                        | 21.2<br>(15.7 to 27.7)                  | --                                             | < 0.05<br>(< 0.05 to 0.1)               | -1.1<br>(-32.9 to 46.6)                           | 2.0<br>(-33.9 to 55.5)                              |
| Food-borne trematodiasis                                                | --                                      | --                                             | --                                      | --                                                | --                                                  |
| Leprosy                                                                 | 0.1<br>(0.1 to 0.1)                     | < 0.05<br>(< 0.05 to < 0.05)                   | < 0.05<br>(< 0.05 to < 0.05)            | -14.8<br>(-33.6 to 14.8)                          | -28.2<br>(-41.6 to -6.3)                            |
| Ebola virus disease                                                     | --                                      | --                                             | --                                      | --                                                | --                                                  |
| Zika virus disease                                                      | < 0.05<br>(< 0.05 to < 0.05)            | 0.4<br>(0.1 to 0.9)                            | < 0.05<br>(< 0.05 to < 0.05)            | --                                                | --                                                  |
| Guinea worm disease                                                     | --                                      | --                                             | --                                      | --                                                | --                                                  |
| Other neglected tropical diseases                                       | 6.5<br>(6.1 to 6.9)                     | --                                             | 0.2<br>(0.1 to 0.2)                     | -22.1<br>(-31.5 to -10.0)                         | -2.1<br>(-13.7 to 12.4)                             |
| <b>Maternal disorders</b>                                               | <b>1.1</b><br><b>(0.8 to 1.5)</b>       | <b>29.2†</b><br><b>(26.7 to 30.9)</b>          | <b>0.1</b><br><b>(&lt; 0.05 to 0.1)</b> | <b>-8.1</b><br><b>(-31.8 to 24.2)</b>             | <b>-22.1</b><br><b>(-41.9 to 3.9)</b>               |
| Maternal haemorrhage                                                    | 0.1<br>(0.1 to 0.1)                     | 0.8<br>(0.6 to 1.2)                            | < 0.05<br>(< 0.05 to < 0.05)            | -9.6<br>(-39.5 to 40.3)                           | -22.8<br>(-47.5 to 17.3)                            |
| Maternal sepsis and other pregnancy related infections                  | 0.3<br>(0.2 to 0.4)                     | 2.0<br>(1.5 to 2.9)                            | < 0.05<br>(< 0.05 to < 0.05)            | -6.5<br>(-56.0 to 83.0)                           | -22.5<br>(-63.4 to 54.2)                            |
| Maternal hypertensive disorders                                         | 0.6<br>(0.4 to 0.8)                     | 2.6<br>(2.0 to 3.2)                            | < 0.05<br>(< 0.05 to < 0.05)            | -3.3<br>(-40.8 to 61.0)                           | -17.1<br>(-47.6 to 38.0)                            |
| Maternal obstructed labour and uterine rupture                          | < 0.05<br>(< 0.05 to < 0.05)            | 0.7<br>(0.5 to 1.0)                            | < 0.05<br>(< 0.05 to < 0.05)            | -10.8<br>(-55.7 to 75.2)                          | -25.0<br>(-62.4 to 52.9)                            |
| Maternal abortion, miscarriage, and ectopic pregnancy                   | 0.2<br>(0.1 to 0.3)                     | 23.1<br>(20.7 to 24.3)                         | < 0.05<br>(< 0.05 to < 0.05)            | -12.2<br>(-47.6 to 46.5)                          | -25.5<br>(-55.7 to 24.0)                            |
| Other maternal disorders                                                | --                                      | --                                             | < 0.05<br>(< 0.05 to < 0.05)            | -10.7<br>(-33.6 to 20.9)                          | -25.5<br>(-44.5 to -0.4)                            |
| <b>Neonatal disorders</b>                                               | <b>15.8</b><br><b>(13.0 to 20.5)</b>    | <b>2.6</b><br><b>--</b>                        | <b>2.6</b><br><b>(1.7 to 4.4)</b>       | <b>0.0</b><br><b>(-13.9 to 16.4)</b>              | <b>4.5</b><br><b>(-9.7 to 22.0)</b>                 |
| Neonatal preterm birth complications                                    | 12.7<br>(9.7 to 18.0)                   | --                                             | 1.2<br>(0.8 to 1.7)                     | -5.4<br>(-24.1 to 14.9)                           | -2.4<br>(-22.0 to 18.9)                             |
| Neonatal encephalopathy due to birth asphyxia and trauma                | 0.7<br>(0.4 to 1.3)                     | --                                             | 0.1<br>(< 0.05 to 0.2)                  | 2.1<br>(-36.6 to 112.9)                           | 4.3<br>(-35.2 to 116.6)                             |
| Neonatal sepsis and other neonatal infections                           | 2.6<br>(1.1 to 6.2)                     | --                                             | 1.2<br>(0.4 to 3.0)                     | 9.6<br>(-11.1 to 96.9)                            | 14.8<br>(-7.0 to 117.2)                             |
| Hemolytic disease and other neonatal jaundice                           | 0.5<br>(0.4 to 0.5)                     | --                                             | 0.1<br>(0.1 to 0.2)                     | -6.0<br>(-19.8 to 9.6)                            | -5.5<br>(-18.8 to 9.4)                              |
| Other neonatal disorders                                                | --                                      | --                                             | 0.1<br>(0.1 to 0.2)                     | -21.7<br>(-33.6 to -6.2)                          | -2.2<br>(-17.1 to 16.5)                             |
| <b>Nutritional deficiencies</b>                                         | <b>175.8</b><br><b>(168.8 to 183.6)</b> | <b>18.3†</b><br><b>(11.6 to 28.6)</b>          | <b>4.2</b><br><b>(2.8 to 6.1)</b>       | <b>-14.6</b><br><b>(-19.8 to -8.9)</b>            | <b>-10.9</b><br><b>(-16.0 to -5.6)</b>              |
| Protein-energy malnutrition                                             | 4.2<br>(3.4 to 5.2)                     | 2.0<br>(1.6 to 2.5)                            | 0.1<br>(0.1 to 0.2)                     | -37.9<br>(-54.8 to -16.2)                         | -22.9<br>(-43.6 to 3.5)                             |
| Iodine deficiency                                                       | 1.4<br>(1.2 to 1.6)                     | < 0.05<br>(< 0.05 to < 0.05)                   | < 0.05<br>(< 0.05 to 0.1)               | 3.9<br>(-5.3 to 14.3)                             | -8.3<br>(-16.5 to 0.5)                              |
| Vitamin A deficiency                                                    | 19.5<br>(11.4 to 32.0)                  | 16.2<br>(9.6 to 26.5)                          | < 0.05<br>(< 0.05 to 0.1)               | -6.0<br>(-21.4 to 13.1)                           | 0.1<br>(-15.1 to 19.4)                              |
| Iron-deficiency anaemia                                                 | 160.7<br>(154.1 to 168.2)               | --                                             | 4.0<br>(2.6 to 5.8)                     | -13.7<br>(-18.8 to -7.6)                          | -10.5<br>(-15.6 to -5.0)                            |
| Other nutritional deficiencies                                          | --                                      | --                                             | < 0.05<br>(< 0.05 to < 0.05)            | -39.2<br>(-56.6 to -16.8)                         | -24.2<br>(-45.6 to 3.6)                             |
| <b>Other communicable, maternal, neonatal, and nutritional diseases</b> | <b>188.0</b><br><b>(175.6 to 201.8)</b> | <b>69.4</b><br><b>(56.2 to 87.4)</b>           | <b>0.4</b><br><b>(0.2 to 0.6)</b>       | <b>-3.6</b><br><b>(-12.2 to 4.8)</b>              | <b>0.0</b><br><b>(-6.1 to 7.4)</b>                  |
| Sexually transmitted diseases excluding HIV                             | 163.6<br>(151.7 to 177.6)               | 60.2<br>(47.1 to 77.4)                         | 0.2<br>(0.1 to 0.4)                     | 4.0<br>(-9.8 to 16.0)                             | 0.9<br>(-7.6 to 9.8)                                |
| Syphilis                                                                | 4.7<br>(2.9 to 7.0)                     | 3.7<br>(2.1 to 5.7)                            | < 0.05<br>(< 0.05 to < 0.05)            | 11.2<br>(-2.6 to 25.4)                            | -8.1<br>(-19.1 to 4.5)                              |
| Chlamydial infection                                                    | 6.2<br>(4.9 to 7.8)                     | 5.0<br>(3.9 to 6.2)                            | < 0.05<br>(< 0.05 to 0.1)               | 6.5<br>(-9.2 to 26.9)                             | 5.4<br>(-9.9 to 24.3)                               |
| Gonococcal infection                                                    | 5.2<br>(2.1 to 9.7)                     | 18.2<br>(6.7 to 34.8)                          | 0.1<br>(< 0.05 to 0.1)                  | -0.3<br>(-24.7 to 25.6)                           | 3.7<br>(-15.4 to 25.1)                              |
| Trichomoniasis                                                          | 24.4<br>(21.2 to 28.0)                  | 21.6<br>(18.5 to 24.9)                         | < 0.05<br>(< 0.05 to 0.1)               | 7.1<br>(-0.7 to 16.2)                             | -3.2<br>(-8.9 to 2.9)                               |
| Genital herpes                                                          | 133.8<br>(116.5 to 154.8)               | 10.5<br>(8.8 to 12.6)                          | < 0.05<br>(< 0.05 to 0.1)               | 12.1<br>(2.7 to 21.8)                             | -0.3<br>(-8.6 to 7.3)                               |
| Other sexually transmitted diseases                                     | 1.4<br>(1.3 to 1.6)                     | 1.3<br>(1.1 to 1.5)                            | 0.1<br>(< 0.05 to 0.1)                  | -0.3<br>(-14.9 to 14.5)                           | 1.2<br>(-9.8 to 13.5)                               |
| Hepatitis                                                               | 28.8<br>(25.3 to 32.8)                  | 9.2<br>(6.9 to 12.1)                           | < 0.05<br>(< 0.05 to < 0.05)            | -15.9<br>(-39.2 to 14.1)                          | -23.1<br>(-42.9 to 2.5)                             |
| Acute hepatitis A                                                       | 0.2<br>(0.1 to 0.4)                     | 2.7<br>(1.0 to 5.2)                            | < 0.05<br>(< 0.05 to < 0.05)            | -13.6<br>(-71.6 to 143.1)                         | -22.7<br>(-71.9 to 119.7)                           |
| Hepatitis B                                                             | 13.2<br>(10.4 to 16.9)                  | 4.7<br>(3.5 to 6.5)                            | < 0.05<br>(< 0.05 to < 0.05)            | -18.1<br>(-39.3 to 6.7)                           | -24.2<br>(-42.5 to -3.0)                            |
| Hepatitis C                                                             | 15.3<br>(13.6 to 17.1)                  | 0.8<br>(0.7 to 0.8)                            | < 0.05<br>(< 0.05 to < 0.05)            | -12.3<br>(-21.1 to -2.9)                          | -12.2<br>(-20.1 to -2.8)                            |
| Acute hepatitis E                                                       | 0.1<br>(0.1 to 0.1)                     | 0.9<br>(0.7 to 1.2)                            | < 0.05<br>(< 0.05 to < 0.05)            | -13.1<br>(-29.7 to 9.1)                           | -22.6<br>(-37.3 to -4.7)                            |
| Other infectious diseases                                               | 5.3<br>(5.0 to 5.6)                     | < 0.05<br>(< 0.05 to < 0.05)                   | 0.1<br>(0.1 to 0.2)                     | -13.0<br>(-21.8 to -2.5)                          | 1.8<br>(-8.2 to 13.1)                               |
| <b>Non-communicable diseases</b>                                        | <b>705.6</b><br><b>(701.6 to 709.3)</b> | <b>2,127.6†</b><br><b>(2,016.0 to 2,248.5)</b> | <b>65.8</b><br><b>(48.7 to 85.4)</b>    | <b>11.3</b><br><b>(8.6 to 14.3)</b>               | <b>-1.5</b><br><b>(-3.6 to 0.8)</b>                 |
| <b>Neoplasms</b>                                                        | <b>2.7</b><br><b>(2.6 to 2.9)</b>       | <b>1.1</b><br><b>(1.0 to 1.1)</b>              | <b>0.4</b><br><b>(0.3 to 0.5)</b>       | <b>28.3</b><br><b>(21.0 to 36.4)</b>              | <b>3.8</b><br><b>(-2.2 to 9.7)</b>                  |
| Lip and oral cavity cancer                                              | 0.1<br>(0.1 to 0.1)                     | < 0.05<br>(< 0.05 to < 0.05)                   | < 0.05<br>(< 0.05 to < 0.05)            | 29.9<br>(15.7 to 47.5)                            | 0.2<br>(-9.8 to 12.4)                               |
| Nasopharynx cancer                                                      | < 0.05<br>(< 0.05 to < 0.05)            | < 0.05<br>(< 0.05 to < 0.05)                   | < 0.05<br>(< 0.05 to < 0.05)            | 12.2<br>(0.4 to 26.1)                             | -4.2<br>(-13.0 to 6.4)                              |
| Other pharynx cancer                                                    | < 0.05<br>(< 0.05 to < 0.05)            | < 0.05<br>(< 0.05 to < 0.05)                   | < 0.05<br>(< 0.05 to < 0.05)            | 43.6<br>(27.8 to 61.5)                            | 5.0<br>(-4.9 to 17.1)                               |
| Oesophageal cancer                                                      | < 0.05<br>(< 0.05 to < 0.05)            | < 0.05<br>(< 0.05 to < 0.05)                   | < 0.05<br>(< 0.05 to < 0.05)            | 20.0<br>(6.7 to 33.2)                             | -10.5<br>(-19.9 to -1.1)                            |
| Stomach cancer                                                          | 0.1<br>(0.1 to 0.1)                     | < 0.05<br>(< 0.05 to < 0.05)                   | < 0.05<br>(< 0.05 to < 0.05)            | 6.0<br>(-7.0 to 21.2)                             | -17.2<br>(-29.1 to -3.5)                            |
| Colon and rectum cancer                                                 | 0.3<br>(0.3 to 0.3)                     | 0.1<br>(0.1 to 0.1)                            | < 0.05<br>(< 0.05 to < 0.05)            | 40.5<br>(18.4 to 66.2)                            | 9.3<br>(-6.6 to 27.9)                               |
| Liver cancer                                                            | < 0.05<br>(< 0.05 to < 0.05)            | < 0.05<br>(< 0.05 to < 0.05)                   | < 0.05<br>(< 0.05 to < 0.05)            | 18.9<br>(8.4 to 32.1)                             | -6.7<br>(-14.5 to 2.6)                              |
| Liver cancer due to hepatitis B                                         | < 0.05<br>(< 0.05 to < 0.05)            | < 0.05<br>(< 0.05 to < 0.05)                   | < 0.05<br>(< 0.05 to < 0.05)            | 15.9<br>(4.1 to 30.6)                             | -7.1<br>(-15.9 to 3.2)                              |

| Cause                                              | Prevalence in thousands (95% UI)     | Incidence in thousands (95% UI)       | YLDs in thousands (95% UI)        |                                                   |                                                     |
|----------------------------------------------------|--------------------------------------|---------------------------------------|-----------------------------------|---------------------------------------------------|-----------------------------------------------------|
|                                                    | 2016 counts                          | 2016 counts                           | 2016 counts                       | Percentage change in counts between 2006 and 2016 | Percentage change in age-standardised rates between |
| Liver cancer due to hepatitis C                    | < 0.05<br>(< 0.05 to < 0.05)         | < 0.05<br>(< 0.05 to < 0.05)          | < 0.05<br>(< 0.05 to < 0.05)      | 24.2<br>(12.1 to 39.1)                            | -3.7<br>(-13.2 to 5.6)                              |
| Liver cancer due to alcohol use                    | < 0.05<br>(< 0.05 to < 0.05)         | < 0.05<br>(< 0.05 to < 0.05)          | < 0.05<br>(< 0.05 to < 0.05)      | 17.1<br>(4.9 to 30.9)                             | -13.7<br>(-22.5 to -3.8)                            |
| Liver cancer due to other causes                   | < 0.05<br>(< 0.05 to < 0.05)         | < 0.05<br>(< 0.05 to < 0.05)          | < 0.05<br>(< 0.05 to < 0.05)      | 20.5<br>(8.3 to 36.3)                             | -2.3<br>(-12.1 to 9.4)                              |
| Gallbladder and biliary tract cancer               | < 0.05<br>(< 0.05 to < 0.05)         | < 0.05<br>(< 0.05 to < 0.05)          | < 0.05<br>(< 0.05 to < 0.05)      | 16.0<br>(7.9 to 25.3)                             | -11.9<br>(-17.8 to -4.9)                            |
| Pancreatic cancer                                  | < 0.05<br>(< 0.05 to < 0.05)         | < 0.05<br>(< 0.05 to < 0.05)          | < 0.05<br>(< 0.05 to < 0.05)      | 32.5<br>(22.8 to 42.8)                            | 0.7<br>(-6.8 to 8.9)                                |
| Larynx cancer                                      | < 0.05<br>(< 0.05 to < 0.05)         | < 0.05<br>(< 0.05 to < 0.05)          | < 0.05<br>(< 0.05 to < 0.05)      | 22.3<br>(6.6 to 39.9)                             | -9.7<br>(-20.5 to 3.0)                              |
| Tracheal, bronchus, and lung cancer                | < 0.05<br>(< 0.05 to 0.1)            | < 0.05<br>(< 0.05 to < 0.05)          | < 0.05<br>(< 0.05 to < 0.05)      | 22.4<br>(3.6 to 44.5)                             | -7.0<br>(-23.6 to 12.8)                             |
| Malignant skin melanoma                            | < 0.05<br>(< 0.05 to < 0.05)         | < 0.05<br>(< 0.05 to < 0.05)          | < 0.05<br>(< 0.05 to < 0.05)      | 56.8<br>(31.0 to 80.2)                            | 27.1<br>(6.2 to 45.9)                               |
| Non-melanoma skin cancer                           | < 0.05<br>(< 0.05 to < 0.05)         | 0.1<br>(< 0.05 to 0.1)                | < 0.05<br>(< 0.05 to < 0.05)      | -5.0<br>(-41.4 to 66.7)                           | -29.7<br>(-55.2 to 32.4)                            |
| Non-melanoma skin cancer (squamous-cell carcinoma) | < 0.05<br>(< 0.05 to < 0.05)         | < 0.05<br>(< 0.05 to < 0.05)          | < 0.05<br>(< 0.05 to < 0.05)      | -7.3<br>(-44.1 to 70.1)                           | -31.2<br>(-57.0 to 34.9)                            |
| Non-melanoma skin cancer (basal-cell carcinoma)    | < 0.05<br>(< 0.05 to < 0.05)         | < 0.05<br>(< 0.05 to 0.1)             | < 0.05<br>(< 0.05 to < 0.05)      | 32.5<br>(12.3 to 51.2)                            | 2.3<br>(-9.9 to 15.1)                               |
| Breast cancer                                      | 0.6<br>(0.5 to 0.7)                  | 0.1<br>(0.1 to 0.1)                   | 0.1<br>(< 0.05 to 0.1)            | 28.8<br>(4.1 to 60.4)                             | 4.5<br>(-13.7 to 27.3)                              |
| Cervical cancer                                    | 0.5<br>(0.4 to 0.5)                  | 0.1<br>(0.1 to 0.1)                   | < 0.05<br>(< 0.05 to 0.1)         | 1.0<br>(-18.4 to 24.8)                            | -12.3<br>(-28.4 to 6.0)                             |
| Uterine cancer                                     | 0.2<br>(0.2 to 0.2)                  | < 0.05<br>(< 0.05 to 0.1)             | < 0.05<br>(< 0.05 to < 0.05)      | 57.2<br>(28.8 to 94.5)                            | 16.9<br>(-3.2 to 41.2)                              |
| Ovarian cancer                                     | 0.1<br>(0.1 to 0.1)                  | < 0.05<br>(< 0.05 to < 0.05)          | < 0.05<br>(< 0.05 to < 0.05)      | 35.4<br>(1.2 to 78.9)                             | 7.2<br>(-17.4 to 39.4)                              |
| Prostate cancer                                    | 0.7<br>(0.6 to 0.8)                  | 0.2<br>(0.2 to 0.2)                   | 0.1<br>(0.1 to 0.1)               | 44.3<br>(23.4 to 67.3)                            | 11.1<br>(-3.5 to 28.0)                              |
| Testicular cancer                                  | < 0.05<br>(< 0.05 to < 0.05)         | < 0.05<br>(< 0.05 to < 0.05)          | < 0.05<br>(< 0.05 to < 0.05)      | 48.8<br>(17.5 to 85.5)                            | 29.3<br>(1.7 to 60.0)                               |
| Kidney cancer                                      | 0.1<br>(0.1 to 0.1)                  | < 0.05<br>(< 0.05 to < 0.05)          | < 0.05<br>(< 0.05 to < 0.05)      | 35.8<br>(19.8 to 54.4)                            | 14.8<br>(2.1 to 28.3)                               |
| Bladder cancer                                     | 0.1<br>(< 0.05 to 0.1)               | < 0.05<br>(< 0.05 to < 0.05)          | < 0.05<br>(< 0.05 to < 0.05)      | 40.7<br>(24.7 to 59.0)                            | 7.5<br>(-4.8 to 20.9)                               |
| Brain and nervous system cancer                    | < 0.05<br>(< 0.05 to < 0.05)         | < 0.05<br>(< 0.05 to < 0.05)          | < 0.05<br>(< 0.05 to < 0.05)      | 14.2<br>(-3.1 to 28.5)                            | 0.5<br>(-14.1 to 13.2)                              |
| Thyroid cancer                                     | < 0.05<br>(< 0.05 to 0.1)            | < 0.05<br>(< 0.05 to < 0.05)          | < 0.05<br>(< 0.05 to < 0.05)      | 62.0<br>(32.5 to 95.2)                            | 31.3<br>(8.5 to 59.1)                               |
| Mesothelioma                                       | < 0.05<br>(< 0.05 to < 0.05)         | < 0.05<br>(< 0.05 to < 0.05)          | < 0.05<br>(< 0.05 to < 0.05)      | 8.8<br>(-0.1 to 18.2)                             | -11.7<br>(-18.3 to -5.1)                            |
| Hodgkin lymphoma                                   | < 0.05<br>(< 0.05 to < 0.05)         | < 0.05<br>(< 0.05 to < 0.05)          | < 0.05<br>(< 0.05 to < 0.05)      | 10.7<br>(0.6 to 22.9)                             | -5.6<br>(-13.2 to 3.5)                              |
| Non-Hodgkin's lymphoma                             | 0.1<br>(0.1 to 0.1)                  | < 0.05<br>(< 0.05 to < 0.05)          | < 0.05<br>(< 0.05 to < 0.05)      | 21.4<br>(9.2 to 34.4)                             | 2.6<br>(-7.8 to 12.8)                               |
| Multiple myeloma                                   | < 0.05<br>(< 0.05 to < 0.05)         | < 0.05<br>(< 0.05 to < 0.05)          | < 0.05<br>(< 0.05 to < 0.05)      | 62.9<br>(42.0 to 83.6)                            | 19.3<br>(2.8 to 35.7)                               |
| Leukaemia                                          | 0.1<br>(0.1 to 0.1)                  | < 0.05<br>(< 0.05 to < 0.05)          | < 0.05<br>(< 0.05 to < 0.05)      | 7.4<br>(-2.6 to 20.9)                             | -4.6<br>(-14.0 to 7.2)                              |
| Acute lymphoid leukaemia                           | < 0.05<br>(< 0.05 to < 0.05)         | < 0.05<br>(< 0.05 to < 0.05)          | < 0.05<br>(< 0.05 to < 0.05)      | 4.6<br>(-13.7 to 23.3)                            | 9.3<br>(-8.9 to 27.3)                               |
| Chronic lymphoid leukaemia                         | < 0.05<br>(< 0.05 to < 0.05)         | < 0.05<br>(< 0.05 to < 0.05)          | < 0.05<br>(< 0.05 to < 0.05)      | 44.6<br>(23.6 to 70.7)                            | 10.2<br>(-5.8 to 30.6)                              |
| Acute myeloid leukaemia                            | < 0.05<br>(< 0.05 to < 0.05)         | < 0.05<br>(< 0.05 to < 0.05)          | < 0.05<br>(< 0.05 to < 0.05)      | 14.5<br>(0.6 to 30.7)                             | 6.2<br>(-5.9 to 20.7)                               |
| Chronic myeloid leukaemia                          | < 0.05<br>(< 0.05 to < 0.05)         | < 0.05<br>(< 0.05 to < 0.05)          | < 0.05<br>(< 0.05 to < 0.05)      | 35.3<br>(19.3 to 53.1)                            | 13.0<br>(0.8 to 27.0)                               |
| Other leukaemia                                    | 0.1<br>(0.1 to 0.1)                  | < 0.05<br>(< 0.05 to < 0.05)          | < 0.05<br>(< 0.05 to < 0.05)      | -4.8<br>(-17.0 to 11.8)                           | -16.0<br>(-28.3 to -0.2)                            |
| Other neoplasms                                    | 0.2<br>(0.2 to 0.2)                  | 0.1<br>(0.1 to 0.1)                   | < 0.05<br>(< 0.05 to < 0.05)      | 33.1<br>(16.6 to 52.9)                            | 14.0<br>(-0.3 to 30.2)                              |
| <b>Cardiovascular diseases</b>                     | <b>42.4</b><br><b>(40.9 to 43.9)</b> | <b>4.5†</b><br><b>(4.3 to 4.8)</b>    | <b>2.3</b><br><b>(1.7 to 3.0)</b> | <b>20.4</b><br><b>(16.4 to 24.5)</b>              | <b>-2.0</b><br><b>(-4.8 to 0.8)</b>                 |
| Rheumatic heart disease                            | 6.8<br>(6.1 to 7.7)                  | 0.2<br>(0.2 to 0.2)                   | 0.3<br>(0.2 to 0.5)               | 8.5<br>(-0.0 to 19.3)                             | -0.5<br>(-8.0 to 9.0)                               |
| Ischaemic heart disease                            | 13.9<br>(13.1 to 14.7)               | 1.8<br>(1.7 to 2.0)                   | 0.6<br>(0.4 to 0.8)               | 28.1<br>(22.0 to 34.6)                            | 0.7<br>(-3.5 to 4.9)                                |
| Cerebrovascular disease                            | 6.4<br>(6.0 to 6.9)                  | 1.0‡<br>(0.9 to 1.0)                  | 0.6<br>(0.4 to 0.8)               | 16.1<br>(7.3 to 24.3)                             | -7.3<br>(-13.7 to -0.8)                             |
| Ischaemic stroke                                   | 5.1<br>(4.6 to 5.7)                  | 0.6‡<br>(0.5 to 0.7)                  | 0.5<br>(0.3 to 0.6)               | 17.7<br>(7.1 to 28.6)                             | -6.3<br>(-14.2 to 1.8)                              |
| Hemorrhagic stroke                                 | 1.7<br>(1.5 to 1.8)                  | 0.4‡<br>(0.3 to 0.4)                  | 0.1<br>(0.1 to 0.2)               | 11.4<br>(-0.5 to 24.2)                            | -10.5<br>(-19.1 to -0.6)                            |
| Hypertensive heart disease                         | 1.8<br>(1.5 to 2.1)                  | --                                    | 0.1<br>(0.1 to 0.2)               | 26.3<br>(14.5 to 39.5)                            | 0.9<br>(-7.7 to 10.3)                               |
| Cardiomyopathy and myocarditis                     | 0.4<br>(0.3 to 0.4)                  | 0.2†<br>(0.1 to 0.2)                  | < 0.05<br>(< 0.05 to 0.1)         | 16.6<br>(3.7 to 31.0)                             | 0.9<br>(-8.9 to 12.4)                               |
| Myocarditis                                        | 0.2<br>(0.1 to 0.2)                  | 0.2<br>(0.1 to 0.2)                   | < 0.05<br>(< 0.05 to < 0.05)      | 11.4<br>(-0.4 to 24.1)                            | 0.7<br>(-10.3 to 14.1)                              |
| Alcoholic cardiomyopathy                           | 0.1<br>(< 0.05 to 0.1)               | --                                    | < 0.05<br>(< 0.05 to < 0.05)      | 30.2<br>(7.2 to 54.7)                             | 1.0<br>(-17.6 to 23.3)                              |
| Other cardiomyopathy                               | 0.3<br>(0.2 to 0.3)                  | --                                    | < 0.05<br>(< 0.05 to < 0.05)      | 17.0<br>(-2.1 to 38.7)                            | 1.0<br>(-13.6 to 17.4)                              |
| Atrial fibrillation and flutter                    | 3.4<br>(2.9 to 3.8)                  | 0.3<br>(0.2 to 0.4)                   | 0.3<br>(0.2 to 0.4)               | 26.9<br>(17.6 to 36.6)                            | 0.5<br>(-5.2 to 6.6)                                |
| Peripheral vascular disease                        | 9.1<br>(7.8 to 10.8)                 | 1.0<br>(0.8 to 1.1)                   | < 0.05<br>(< 0.05 to 0.1)         | 26.9<br>(15.8 to 38.4)                            | -5.0<br>(-11.6 to 2.8)                              |
| Endocarditis                                       | < 0.05<br>(< 0.05 to < 0.05)         | 0.1<br>(0.1 to 0.1)                   | < 0.05<br>(< 0.05 to < 0.05)      | 16.4<br>(5.5 to 29.2)                             | 1.1<br>(-11.4 to 16.9)                              |
| Other cardiovascular and circulatory diseases      | 5.2<br>(4.4 to 6.0)                  | --                                    | 0.3<br>(0.2 to 0.4)               | 20.8<br>(9.4 to 33.6)                             | 1.3<br>(-6.7 to 9.7)                                |
| <b>Chronic respiratory diseases</b>                | <b>83.0</b><br><b>(78.5 to 88.2)</b> | <b>13.2†</b><br><b>(12.1 to 14.3)</b> | <b>3.0</b><br><b>(2.1 to 4.2)</b> | <b>2.5</b><br><b>(-3.0 to 8.1)</b>                | <b>5.0</b><br><b>(0.2 to 10.0)</b>                  |
| Chronic obstructive pulmonary disease              | 16.6<br>(15.4 to 18.2)               | 1.1<br>(1.0 to 1.2)                   | 0.3<br>(0.2 to 0.4)               | 24.6<br>(5.8 to 45.6)                             | 1.2<br>(-13.2 to 16.5)                              |
| Pneumoconiosis                                     | < 0.05<br>(< 0.05 to < 0.05)         | < 0.05<br>(< 0.05 to < 0.05)          | < 0.05<br>(< 0.05 to < 0.05)      | 30.6<br>(21.6 to 41.2)                            | 4.5<br>(-5.6 to 18.1)                               |
| Silicosis                                          | < 0.05<br>(< 0.05 to < 0.05)         | < 0.05<br>(< 0.05 to < 0.05)          | < 0.05<br>(< 0.05 to < 0.05)      | 36.0<br>(28.9 to 43.5)                            | 4.4<br>(-0.4 to 9.7)                                |

| Cause                                                          | Prevalence in thousands (95% UI)  | Incidence in thousands (95% UI)   | YLDs in thousands (95% UI)        |                                                                    |                                                                        |
|----------------------------------------------------------------|-----------------------------------|-----------------------------------|-----------------------------------|--------------------------------------------------------------------|------------------------------------------------------------------------|
|                                                                | 2016 counts<br>(< 0.05 to < 0.05) | 2016 counts<br>(< 0.05 to < 0.05) | 2016 counts<br>(< 0.05 to < 0.05) | Percentage change in counts between 2006 and 2016<br>(0.5 to 41.0) | Percentage change in age-standardised rates between<br>(-20.7 to 34.9) |
| Asbestosis                                                     | < 0.05<br>(< 0.05 to < 0.05)      | < 0.05<br>(< 0.05 to < 0.05)      | < 0.05<br>(< 0.05 to < 0.05)      | 18.1<br>(0.5 to 41.0)                                              | 2.4<br>(-20.7 to 34.9)                                                 |
| Coal workers pneumoconiosis                                    | --                                | --                                | --                                | --                                                                 | --                                                                     |
| Other pneumoconiosis                                           | < 0.05<br>(< 0.05 to < 0.05)      | < 0.05<br>(< 0.05 to < 0.05)      | < 0.05<br>(< 0.05 to < 0.05)      | 38.6<br>(23.6 to 57.1)                                             | 6.5<br>(-3.6 to 19.3)                                                  |
| Asthma                                                         | 67.4<br>(61.9 to 73.5)            | 12.1<br>(11.0 to 13.2)            | 2.7<br>(1.7 to 3.8)               | 0.2<br>(-5.3 to 5.9)                                               | 5.3<br>(0.2 to 10.6)                                                   |
| Interstitial lung disease and pulmonary sarcoidosis            | 0.2<br>(0.2 to 0.2)               | < 0.05<br>(< 0.05 to < 0.05)      | < 0.05<br>(< 0.05 to < 0.05)      | 18.6<br>(9.7 to 28.9)                                              | 5.2<br>(-5.6 to 17.6)                                                  |
| Other chronic respiratory diseases                             | --                                | --                                | < 0.05<br>(< 0.05 to < 0.05)      | 24.1<br>(-6.2 to 66.2)                                             | 36.1<br>(5.8 to 76.0)                                                  |
| <b>Cirrhosis and other chronic liver diseases</b>              | <b>5.9<br/>(5.6 to 6.2)</b>       | <b>0.2<br/>(0.2 to 0.2)</b>       | <b>0.1<br/>(0.1 to 0.2)</b>       | <b>18.2<br/>(5.7 to 32.0)</b>                                      | <b>3.9<br/>(-5.2 to 14.0)</b>                                          |
| Cirrhosis and other chronic liver diseases due to hepatitis B  | 0.6<br>(0.5 to 0.8)               | < 0.05<br>(< 0.05 to < 0.05)      | < 0.05<br>(< 0.05 to < 0.05)      | 30.4<br>(-0.3 to 69.2)                                             | 6.1<br>(-14.3 to 32.2)                                                 |
| Cirrhosis and other chronic liver diseases due to hepatitis C  | 1.9<br>(1.7 to 2.1)               | 0.1<br>(0.1 to 0.1)               | < 0.05<br>(< 0.05 to 0.1)         | 33.0<br>(11.3 to 60.1)                                             | 8.6<br>(-7.0 to 27.9)                                                  |
| Cirrhosis and other chronic liver diseases due to alcohol use  | 2.0<br>(1.8 to 2.3)               | 0.1<br>(0.1 to 0.1)               | < 0.05<br>(< 0.05 to 0.1)         | 23.5<br>(3.4 to 46.6)                                              | 0.8<br>(-12.8 to 15.9)                                                 |
| Cirrhosis and other chronic liver diseases due to other causes | 1.3<br>(1.2 to 1.4)               | < 0.05<br>(< 0.05 to < 0.05)      | < 0.05<br>(< 0.05 to 0.1)         | 2.4<br>(-17.8 to 27.9)                                             | 2.2<br>(-14.6 to 23.8)                                                 |
| <b>Digestive diseases</b>                                      | <b>22.4<br/>(21.3 to 23.6)</b>    | <b>18.3†<br/>(17.1 to 19.6)</b>   | <b>0.9<br/>(0.6 to 1.2)</b>       | <b>7.1<br/>(-0.6 to 15.3)</b>                                      | <b>2.4<br/>(-3.4 to 8.8)</b>                                           |
| Peptic ulcer disease                                           | 7.6<br>(6.9 to 8.4)               | 0.8<br>(0.8 to 0.9)               | 0.1<br>(0.1 to 0.2)               | 25.1<br>(12.3 to 39.4)                                             | 7.8<br>(-2.0 to 18.5)                                                  |
| Gastritis and duodenitis                                       | 6.7<br>(5.9 to 7.5)               | 4.3<br>(3.9 to 4.8)               | 0.1<br>(0.1 to 0.2)               | 41.1<br>(28.2 to 56.6)                                             | 23.7<br>(13.3 to 34.4)                                                 |
| Appendicitis                                                   | 0.1<br>(0.1 to 0.1)               | 1.7<br>(1.5 to 1.8)               | < 0.05<br>(< 0.05 to < 0.05)      | -3.5<br>(-30.6 to 35.1)                                            | -0.7<br>(-25.1 to 29.5)                                                |
| Paralytic ileus and intestinal obstruction                     | < 0.05<br>(< 0.05 to < 0.05)      | 0.3<br>(0.2 to 0.3)               | < 0.05<br>(< 0.05 to < 0.05)      | 7.8<br>(1.8 to 13.4)                                               | 7.9<br>(3.9 to 12.4)                                                   |
| Inguinal, femoral, and abdominal hernia                        | 7.6<br>(6.7 to 8.4)               | 3.8<br>(3.3 to 4.5)               | 0.5<br>(0.4 to 0.7)               | -2.1<br>(-11.1 to 7.9)                                             | -4.0<br>(-11.4 to 4.1)                                                 |
| Inflammatory bowel disease                                     | < 0.05<br>(< 0.05 to < 0.05)      | 0.1<br>(0.1 to 0.1)               | < 0.05<br>(< 0.05 to < 0.05)      | 11.8<br>(7.8 to 15.5)                                              | 1.5<br>(-1.3 to 4.5)                                                   |
| Vascular intestinal disorders                                  | < 0.05<br>(< 0.05 to < 0.05)      | < 0.05<br>(< 0.05 to < 0.05)      | < 0.05<br>(< 0.05 to < 0.05)      | 5.8<br>(-2.2 to 14.2)                                              | 9.3<br>(4.2 to 14.2)                                                   |
| Gallbladder and biliary diseases                               | 1.1<br>(1.0 to 1.3)               | 6.9<br>(6.0 to 8.0)               | < 0.05<br>(< 0.05 to < 0.05)      | 26.5<br>(1.2 to 58.6)                                              | 9.1<br>(-11.2 to 33.5)                                                 |
| Pancreatitis                                                   | < 0.05<br>(< 0.05 to < 0.05)      | 0.3<br>(0.3 to 0.3)               | < 0.05<br>(< 0.05 to < 0.05)      | 30.1<br>(24.2 to 36.5)                                             | 16.2<br>(12.1 to 20.1)                                                 |
| Other digestive diseases                                       | --                                | --                                | 0.1<br>(0.1 to 0.1)               | 4.7<br>(-3.8 to 13.8)                                              | 6.6<br>(0.2 to 13.4)                                                   |
| <b>Neurological disorders</b>                                  | <b>299.6<br/>(286.7 to 314.6)</b> | <b>143.8<br/>(122.3 to 167.8)</b> | <b>7.4<br/>(4.9 to 10.2)</b>      | <b>8.0<br/>(-12.8 to 36.4)</b>                                     | <b>-1.1<br/>(-18.4 to 21.3)</b>                                        |
| Alzheimer's disease and other dementias                        | 1.9<br>(1.6 to 2.2)               | 0.3<br>(0.3 to 0.4)               | 0.3<br>(0.2 to 0.3)               | 9.7<br>(3.1 to 16.6)                                               | -1.4<br>(-5.6 to 3.1)                                                  |
| Parkinson's disease                                            | 0.3<br>(0.2 to 0.4)               | < 0.05<br>(< 0.05 to < 0.05)      | < 0.05<br>(< 0.05 to 0.1)         | 35.9<br>(16.5 to 57.6)                                             | 6.8<br>(-6.9 to 22.0)                                                  |
| Epilepsy                                                       | 2.8<br>(0.7 to 5.0)               | 0.3<br>(0.1 to 0.6)               | 1.0<br>(0.2 to 2.0)               | -1.5<br>(-78.6 to 357.9)                                           | -5.4<br>(-79.3 to 342.3)                                               |
| Multiple sclerosis                                             | < 0.05<br>(< 0.05 to < 0.05)      | < 0.05<br>(< 0.05 to < 0.05)      | < 0.05<br>(< 0.05 to < 0.05)      | 20.8<br>(15.7 to 25.3)                                             | 10.3<br>(6.0 to 14.0)                                                  |
| Motor neuron disease                                           | < 0.05<br>(< 0.05 to < 0.05)      | < 0.05<br>(< 0.05 to < 0.05)      | < 0.05<br>(< 0.05 to < 0.05)      | 11.5<br>(6.2 to 16.8)                                              | 3.9<br>(0.1 to 7.5)                                                    |
| Migraine                                                       | 108.3<br>(101.6 to 114.8)         | 12.5<br>(11.7 to 13.4)            | 5.0<br>(3.2 to 7.0)               | 9.1<br>(4.9 to 13.6)                                               | -0.8<br>(-4.2 to 2.6)                                                  |
| Tension-type headache                                          | 233.4<br>(210.0 to 262.7)         | 130.7<br>(109.2 to 154.7)         | 0.9<br>(0.6 to 1.4)               | 9.7<br>(3.7 to 16.3)                                               | -1.1<br>(-5.8 to 4.1)                                                  |
| Other neurological disorders                                   | < 0.05<br>(< 0.05 to < 0.05)      | < 0.05<br>(< 0.05 to < 0.05)      | 0.2<br>(0.1 to 0.4)               | 18.5<br>(-69.2 to 371.9)                                           | 13.1<br>(-69.2 to 329.9)                                               |
| <b>Mental and substance use disorders</b>                      | <b>129.2<br/>(124.8 to 133.2)</b> | <b>61.3†<br/>(56.7 to 66.8)</b>   | <b>17.7<br/>(12.7 to 23.0)</b>    | <b>10.4<br/>(7.5 to 13.3)</b>                                      | <b>-0.6<br/>(-3.0 to 1.8)</b>                                          |
| Schizophrenia                                                  | 1.3<br>(1.2 to 1.5)               | 0.1<br>(0.1 to 0.1)               | 0.8<br>(0.6 to 1.0)               | 9.9<br>(-0.3 to 21.6)                                              | 1.9<br>(-6.7 to 11.9)                                                  |
| Alcohol use disorders                                          | 13.3<br>(11.7 to 15.1)            | 6.8<br>(5.8 to 7.8)               | 1.3<br>(0.9 to 1.8)               | 8.9<br>(-0.5 to 19.7)                                              | 0.2<br>(-7.9 to 9.5)                                                   |
| Drug use disorders                                             | 5.4<br>(5.0 to 5.9)               | 0.8<br>(0.7 to 0.9)               | 1.2<br>(0.9 to 1.6)               | 11.7<br>(0.9 to 23.7)                                              | 2.4<br>(-7.0 to 12.0)                                                  |
| Opioid use disorders                                           | 2.3<br>(1.9 to 2.7)               | 0.3<br>(0.2 to 0.3)               | 0.9<br>(0.7 to 1.2)               | 9.3<br>(-2.9 to 22.9)                                              | 2.1<br>(-8.6 to 13.4)                                                  |
| Cocaine use disorders                                          | 0.8<br>(0.7 to 1.0)               | 0.1<br>(0.1 to 0.1)               | 0.1<br>(0.1 to 0.2)               | 20.1<br>(-2.8 to 47.7)                                             | 3.3<br>(-15.8 to 25.8)                                                 |
| Amphetamine use disorders                                      | < 0.05<br>(< 0.05 to 0.1)         | < 0.05<br>(< 0.05 to < 0.05)      | < 0.05<br>(< 0.05 to < 0.05)      | 12.8<br>(1.3 to 26.0)                                              | 0.8<br>(-8.1 to 11.3)                                                  |
| Cannabis use disorders                                         | 2.1<br>(1.7 to 2.6)               | 0.4<br>(0.3 to 0.5)               | 0.1<br>(< 0.05 to 0.1)            | 29.8<br>(4.2 to 61.0)                                              | 5.2<br>(-13.8 to 29.3)                                                 |
| Other drug use disorders                                       | 0.3<br>(0.2 to 0.3)               | 0.1<br>(< 0.05 to 0.1)            | 0.1<br>(0.1 to 0.2)               | 16.2<br>(-9.1 to 50.4)                                             | 3.2<br>(-19.4 to 33.1)                                                 |
| Depressive disorders                                           | 35.2<br>(33.0 to 37.6)            | 44.3<br>(39.5 to 49.3)            | 6.5<br>(4.4 to 8.7)               | 12.5<br>(6.3 to 19.7)                                              | -2.4<br>(-7.3 to 2.7)                                                  |
| Major depressive disorder                                      | 28.2<br>(25.5 to 31.2)            | 43.0<br>(38.2 to 48.0)            | 5.8<br>(3.9 to 7.8)               | 12.2<br>(5.3 to 20.2)                                              | -2.7<br>(-8.4 to 3.1)                                                  |
| Dysthymia                                                      | 7.6<br>(6.6 to 8.7)               | 1.4<br>(1.2 to 1.6)               | 0.7<br>(0.5 to 1.1)               | 15.1<br>(9.6 to 20.7)                                              | -0.1<br>(-3.8 to 3.7)                                                  |
| Bipolar disorder                                               | 6.5<br>(5.6 to 7.6)               | 0.7<br>(0.6 to 0.8)               | 1.3<br>(0.8 to 2.0)               | 15.0<br>(8.0 to 22.3)                                              | -0.3<br>(-5.8 to 5.5)                                                  |
| Anxiety disorders                                              | 31.5<br>(28.6 to 34.7)            | 4.7<br>(4.4 to 5.2)               | 3.0<br>(2.1 to 4.1)               | 8.8<br>(5.0 to 12.4)                                               | -0.6<br>(-3.6 to 2.5)                                                  |
| Eating disorders                                               | 1.1<br>(0.8 to 1.3)               | 0.7<br>(0.5 to 0.9)               | 0.2<br>(0.1 to 0.3)               | 15.9<br>(2.3 to 31.6)                                              | 8.0<br>(-4.3 to 21.5)                                                  |
| Anorexia nervosa                                               | 0.2<br>(0.2 to 0.3)               | 0.1<br>(0.1 to 0.1)               | < 0.05<br>(< 0.05 to 0.1)         | 19.9<br>(-6.7 to 52.2)                                             | 5.5<br>(-17.1 to 34.4)                                                 |
| Bulimia nervosa                                                | 0.8<br>(0.6 to 1.1)               | 0.6<br>(0.4 to 0.8)               | 0.2<br>(0.1 to 0.2)               | 14.8<br>(-1.9 to 34.2)                                             | 8.7<br>(-6.0 to 26.1)                                                  |
| Autistic spectrum disorders                                    | 6.5<br>(5.8 to 7.3)               | < 0.05<br>(< 0.05 to 0.1)         | 1.0<br>(0.6 to 1.4)               | 2.8<br>(-2.6 to 8.6)                                               | 1.6<br>(-3.6 to 7.1)                                                   |
| Autism                                                         | 2.0<br>(1.7 to 2.4)               | < 0.05<br>(< 0.05 to < 0.05)      | 0.5<br>(0.3 to 0.8)               | 2.8<br>(-6.0 to 13.2)                                              | 1.4<br>(-6.7 to 10.7)                                                  |
| Asperger syndrome and other autistic spectrum disorders        | 4.5<br>(3.7 to 5.4)               | < 0.05<br>(< 0.05 to 0.1)         | 0.5<br>(0.3 to 0.7)               | 2.7<br>(-2.5 to 8.4)                                               | 1.8<br>(-3.0 to 6.8)                                                   |



| Cause                                                      | Prevalence in thousands (95% UI)        | Incidence in thousands (95% UI)                | YLDs in thousands (95% UI)          |                                                   |                                                     |
|------------------------------------------------------------|-----------------------------------------|------------------------------------------------|-------------------------------------|---------------------------------------------------|-----------------------------------------------------|
|                                                            | 2016 counts                             | 2016 counts                                    | 2016 counts                         | Percentage change in counts between 2006 and 2016 | Percentage change in age-standardised rates between |
| Attention-deficit/hyperactivity disorder                   | 15.5<br>(14.0 to 17.3)                  | 0.6<br>(0.5 to 0.7)                            | 0.2<br>(0.1 to 0.3)                 | 1.1<br>(-4.7 to 7.0)                              | 1.1<br>(-4.5 to 6.6)                                |
| Conduct disorder                                           | 6.6<br>(5.3 to 7.9)                     | 2.1<br>(1.6 to 2.5)                            | 0.8<br>(0.5 to 1.2)                 | 6.9<br>(-1.7 to 15.4)                             | 0.5<br>(-6.2 to 7.2)                                |
| Idiopathic developmental intellectual disability           | 5.4<br>(2.5 to 8.4)                     | --                                             | 0.2<br>(0.1 to 0.4)                 | -0.9<br>(-8.4 to 7.2)                             | -5.8<br>(-13.0 to 1.5)                              |
| Other mental and substance use disorders                   | 13.3<br>(11.7 to 15.4)                  | 0.6<br>(0.5 to 0.6)                            | 1.0<br>(0.7 to 1.4)                 | 11.5<br>(5.9 to 17.8)                             | 0.7<br>(-3.9 to 5.9)                                |
| <b>Diabetes, urogenital, blood, and endocrine diseases</b> | <b>324.4</b><br><b>(316.1 to 333.8)</b> | <b>84.8†</b><br><b>(79.2 to 90.8)</b>          | <b>8.1</b><br><b>(5.7 to 10.9)</b>  | <b>14.1</b><br><b>(8.7 to 20.0)</b>               | <b>-6.9</b><br><b>(-10.9 to -2.7)</b>               |
| Diabetes mellitus                                          | 60.8<br>(55.2 to 68.4)                  | 4.2<br>(3.8 to 4.7)                            | 5.3<br>(3.7 to 7.2)                 | 18.1<br>(10.0 to 27.2)                            | -8.6<br>(-14.3 to -2.4)                             |
| Acute glomerulonephritis                                   | < 0.05<br>(< 0.05 to < 0.05)            | 0.1<br>(0.1 to 0.1)                            | < 0.05<br>(< 0.05 to < 0.05)        | 4.4<br>(-1.4 to 10.5)                             | -0.0<br>(-3.2 to 3.2)                               |
| Chronic kidney disease                                     | 23.9<br>(21.6 to 26.6)                  | 2.0<br>(1.8 to 2.2)                            | 0.8<br>(0.6 to 1.0)                 | 17.8<br>(9.8 to 27.0)                             | -3.3<br>(-9.0 to 3.4)                               |
| Chronic kidney disease due to diabetes mellitus            | 9.1<br>(7.6 to 10.7)                    | 0.8<br>(0.6 to 0.9)                            | 0.3<br>(0.2 to 0.4)                 | 28.3<br>(13.9 to 43.7)                            | 0.4<br>(-9.0 to 9.8)                                |
| Chronic kidney disease due to hypertension                 | 5.3<br>(4.6 to 6.1)                     | 0.6<br>(0.5 to 0.7)                            | 0.1<br>(0.1 to 0.1)                 | 19.6<br>(6.2 to 35.9)                             | -3.8<br>(-13.3 to 8.2)                              |
| Chronic kidney disease due to glomerulonephritis           | 4.4<br>(3.8 to 5.1)                     | 0.2<br>(0.2 to 0.3)                            | 0.2<br>(0.2 to 0.3)                 | 11.4<br>(-1.4 to 25.7)                            | -5.1<br>(-13.8 to 5.0)                              |
| Chronic kidney disease due to other causes                 | 5.1<br>(4.1 to 6.2)                     | 0.4<br>(0.4 to 0.5)                            | 0.2<br>(0.1 to 0.2)                 | 11.5<br>(-0.4 to 24.0)                            | -5.9<br>(-14.1 to 2.6)                              |
| Urinary diseases and male infertility                      | 12.9<br>(11.4 to 14.4)                  | 50.9†<br>(45.8 to 56.8)                        | 0.3<br>(0.2 to 0.4)                 | 30.2<br>(21.8 to 40.8)                            | 1.0<br>(-4.7 to 7.6)                                |
| Interstitial nephritis and urinary tract infections        | 0.9<br>(0.8 to 1.0)                     | 47.1<br>(42.1 to 52.9)                         | < 0.05<br>(< 0.05 to < 0.05)        | 4.9<br>(-7.7 to 19.4)                             | -0.3<br>(-12.2 to 12.0)                             |
| Urolithiasis                                               | 0.1<br>(0.1 to 0.1)                     | 2.8<br>(2.5 to 3.2)                            | < 0.05<br>(< 0.05 to < 0.05)        | 14.0<br>(7.4 to 20.2)                             | 3.0<br>(-1.0 to 6.9)                                |
| Benign prostatic hyperplasia                               | 6.7<br>(5.5 to 7.9)                     | 0.9<br>(0.8 to 1.1)                            | 0.2<br>(0.1 to 0.3)                 | 43.5<br>(31.8 to 57.3)                            | 0.5<br>(-6.1 to 8.7)                                |
| Male infertility                                           | 4.5<br>(3.6 to 5.8)                     | --                                             | < 0.05<br>(< 0.05 to 0.1)           | 11.8<br>(-6.2 to 34.2)                            | 20.6<br>(-0.4 to 47.6)                              |
| Other urinary diseases                                     | --                                      | --                                             | < 0.05<br>(< 0.05 to < 0.05)        | -15.9<br>(-24.4 to -6.5)                          | -17.2<br>(-25.3 to -8.6)                            |
| Gynecological diseases                                     | 85.4<br>(80.6 to 90.3)                  | 26.2†<br>(24.6 to 27.9)                        | 1.0<br>(0.6 to 1.4)                 | 2.0<br>(-2.4 to 6.8)                              | -6.0<br>(-10.0 to -1.8)                             |
| Uterine fibroids                                           | 6.7<br>(5.9 to 7.7)                     | 0.6<br>(0.5 to 0.7)                            | 0.2<br>(0.1 to 0.2)                 | 5.2<br>(-3.3 to 15.1)                             | -5.4<br>(-12.6 to 2.4)                              |
| Polycystic ovarian syndrome                                | 0.1<br>(0.1 to 0.1)                     | 0.7<br>(0.5 to 0.9)                            | < 0.05<br>(< 0.05 to < 0.05)        | -10.4<br>(-37.7 to 26.0)                          | -0.2<br>(-29.3 to 42.0)                             |
| Female infertility                                         | 9.9<br>(7.1 to 13.7)                    | --                                             | 0.1<br>(< 0.05 to 0.1)              | 3.9<br>(-19.9 to 34.9)                            | 13.8<br>(-13.3 to 48.7)                             |
| Endometriosis                                              | 0.1<br>(0.1 to 0.1)                     | 0.3<br>(0.2 to 0.4)                            | < 0.05<br>(< 0.05 to < 0.05)        | 9.9<br>(-16.2 to 46.6)                            | -2.0<br>(-25.7 to 29.3)                             |
| Genital prolapse                                           | 25.7<br>(22.3 to 29.2)                  | 1.7<br>(1.4 to 1.9)                            | 0.1<br>(< 0.05 to 0.1)              | 6.5<br>(-2.4 to 15.4)                             | -17.5<br>(-24.0 to -10.7)                           |
| Premenstrual syndrome                                      | 46.8<br>(43.9 to 49.8)                  | 17.4<br>(16.1 to 18.6)                         | 0.4<br>(0.2 to 0.6)                 | 1.2<br>(-6.3 to 9.0)                              | -6.7<br>(-13.2 to 0.0)                              |
| Other gynecological diseases                               | 7.9<br>(7.0 to 8.8)                     | 5.5<br>(4.6 to 6.5)                            | 0.3<br>(0.2 to 0.4)                 | -0.6<br>(-8.7 to 8.0)                             | -5.0<br>(-12.1 to 3.4)                              |
| Hemoglobinopathies and hemolytic anaemias                  | 207.7<br>(197.5 to 218.6)               | --                                             | 0.5<br>(0.3 to 0.7)                 | -4.5<br>(-11.6 to 2.9)                            | -3.1<br>(-10.0 to 3.7)                              |
| Thalassemias                                               | < 0.05<br>(< 0.05 to < 0.05)            | --                                             | < 0.05<br>(< 0.05 to < 0.05)        | -23.8<br>(-39.5 to -7.7)                          | -2.6<br>(-23.0 to 18.1)                             |
| Thalassaemias trait                                        | 1.3<br>(1.0 to 1.7)                     | --                                             | < 0.05<br>(< 0.05 to < 0.05)        | 0.8<br>(-14.0 to 39.1)                            | -0.1<br>(-14.4 to 37.5)                             |
| Sickle cell disorders                                      | 0.6<br>(0.4 to 0.7)                     | --                                             | < 0.05<br>(< 0.05 to 0.1)           | -1.4<br>(-17.9 to 20.3)                           | 4.8<br>(-11.6 to 25.5)                              |
| Sickle cell trait                                          | 83.4<br>(72.5 to 93.4)                  | --                                             | 0.2<br>(0.2 to 0.4)                 | -4.2<br>(-12.8 to 4.8)                            | -0.8<br>(-9.4 to 8.2)                               |
| G6PD deficiency                                            | 44.1<br>(38.2 to 50.1)                  | --                                             | < 0.05<br>(< 0.05 to < 0.05)        | 47.4<br>(4.4 to 112.7)                            | 56.3<br>(16.9 to 111.8)                             |
| G6PD trait                                                 | 89.8<br>(83.3 to 96.1)                  | --                                             | < 0.05<br>(< 0.05 to < 0.05)        | 7.8<br>(-2.2 to 19.9)                             | 5.5<br>(-3.4 to 16.5)                               |
| Other hemoglobinopathies and hemolytic anaemias            | 7.7<br>(7.4 to 8.1)                     | --                                             | 0.1<br>(0.1 to 0.2)                 | -6.9<br>(-15.4 to 2.3)                            | -8.9<br>(-16.3 to -1.6)                             |
| Endocrine, metabolic, blood, and immune disorders          | 12.4<br>(11.7 to 13.2)                  | 1.5<br>(1.3 to 1.6)                            | 0.4<br>(0.2 to 0.5)                 | 2.7<br>(-3.6 to 9.6)                              | -2.6<br>(-7.6 to 2.8)                               |
| <b>Musculoskeletal disorders</b>                           | <b>106.5</b><br><b>(100.8 to 111.8)</b> | <b>52.9</b><br><b>(47.2 to 59.3)</b>           | <b>11.3</b><br><b>(8.3 to 14.8)</b> | <b>16.4</b><br><b>(12.3 to 20.3)</b>              | <b>-0.8</b><br><b>(-3.2 to 1.8)</b>                 |
| Rheumatoid arthritis                                       | 2.2<br>(2.0 to 2.5)                     | 0.1<br>(0.1 to 0.1)                            | 0.5<br>(0.4 to 0.7)                 | 26.6<br>(16.1 to 39.0)                            | 4.4<br>(-3.4 to 13.1)                               |
| Osteoarthritis                                             | 22.3<br>(20.8 to 23.9)                  | 1.2<br>(1.1 to 1.4)                            | 1.4<br>(1.0 to 1.9)                 | 29.4<br>(24.5 to 35.0)                            | -0.5<br>(-3.9 to 3.5)                               |
| Low back and neck pain                                     | 57.2<br>(53.0 to 61.7)                  | 22.2<br>(19.8 to 24.9)                         | 6.4<br>(4.5 to 8.5)                 | 15.5<br>(10.7 to 20.3)                            | -0.3<br>(-3.2 to 2.3)                               |
| Low back pain                                              | 35.0<br>(30.8 to 40.0)                  | 16.6<br>(14.4 to 19.2)                         | 3.9<br>(2.8 to 5.2)                 | 14.6<br>(7.9 to 21.6)                             | -0.6<br>(-5.0 to 3.6)                               |
| Neck pain                                                  | 25.1<br>(21.3 to 29.3)                  | 5.6<br>(4.8 to 6.6)                            | 2.5<br>(1.7 to 3.6)                 | 16.9<br>(11.5 to 22.6)                            | 0.1<br>(-2.0 to 2.4)                                |
| Gout                                                       | 2.0<br>(1.7 to 2.2)                     | 0.4<br>(0.4 to 0.5)                            | 0.1<br>(< 0.05 to 0.1)              | 21.0<br>(2.1 to 44.7)                             | 0.7<br>(-13.3 to 16.8)                              |
| Other musculoskeletal disorders                            | 34.1<br>(28.9 to 39.8)                  | 29.0<br>(23.7 to 35.0)                         | 2.9<br>(2.0 to 4.1)                 | 11.3<br>(1.7 to 21.4)                             | -3.1<br>(-10.1 to 4.0)                              |
| <b>Other non-communicable diseases</b>                     | <b>570.2</b><br><b>(561.0 to 579.3)</b> | <b>1,747.5†</b><br><b>(1,643.5 to 1,871.5)</b> | <b>14.6</b><br><b>(9.8 to 20.9)</b> | <b>9.5</b><br><b>(7.5 to 11.3)</b>                | <b>-1.3</b><br><b>(-2.2 to -0.3)</b>                |
| Congenital anomalies                                       | 6.7<br>(5.8 to 7.8)                     | --                                             | 0.7<br>(0.5 to 1.0)                 | -3.8<br>(-9.5 to 2.4)                             | -2.9<br>(-8.6 to 3.2)                               |
| Neural tube defects                                        | 0.2<br>(0.2 to 0.3)                     | --                                             | 0.1<br>(0.1 to 0.1)                 | -0.6<br>(-15.0 to 15.4)                           | -2.8<br>(-16.5 to 12.4)                             |
| Congenital heart anomalies                                 | 1.7<br>(1.5 to 2.0)                     | --                                             | 0.1<br>(< 0.05 to 0.1)              | -6.4<br>(-17.7 to 6.0)                            | 2.7<br>(-9.0 to 16.0)                               |
| Orofacial clefts                                           | 0.5<br>(0.4 to 0.5)                     | --                                             | < 0.05<br>(< 0.05 to < 0.05)        | -3.8<br>(-13.7 to 7.7)                            | -4.4<br>(-14.3 to 7.1)                              |
| Down's syndrome                                            | 0.4<br>(0.3 to 0.5)                     | --                                             | < 0.05<br>(< 0.05 to 0.1)           | 5.6<br>(-3.9 to 14.8)                             | 6.1<br>(-3.3 to 15.1)                               |
| Turner syndrome                                            | 0.2<br>(0.2 to 0.2)                     | --                                             | < 0.05<br>(< 0.05 to < 0.05)        | -0.7<br>(-32.0 to 46.3)                           | -0.7<br>(-31.4 to 47.8)                             |
| Klinefelter syndrome                                       | 0.2<br>(0.2 to 0.3)                     | --                                             | < 0.05<br>(< 0.05 to < 0.05)        | 1.9<br>(-25.1 to 40.1)                            | 4.2<br>(-23.6 to 41.6)                              |



| Cause                                         | Prevalence in thousands (95% UI)        | Incidence in thousands (95% UI)       | YLDs in thousands (95% UI)        |                                                   |                                                     |
|-----------------------------------------------|-----------------------------------------|---------------------------------------|-----------------------------------|---------------------------------------------------|-----------------------------------------------------|
|                                               | 2016 counts                             | 2016 counts                           | 2016 counts                       | Percentage change in counts between 2006 and 2016 | Percentage change in age-standardised rates between |
| Other chromosomal abnormalities               | 0.5<br>(0.4 to 0.6)                     | --                                    | < 0.05<br>(< 0.05 to 0.1)         | -8.8<br>(-24.1 to 8.2)                            | 1.7<br>(-15.2 to 21.2)                              |
| Congenital musculoskeletal and limb anomalies | 0.5<br>(0.5 to 0.6)                     | --                                    | 0.1<br>(0.1 to 0.1)               | 7.2<br>(-4.1 to 18.4)                             | 3.3<br>(-6.6 to 13.3)                               |
| Urogenital congenital anomalies               | 0.8<br>(0.7 to 1.0)                     | --                                    | < 0.05<br>(< 0.05 to 0.1)         | -7.0<br>(-18.5 to 8.1)                            | 0.8<br>(-11.5 to 16.1)                              |
| Digestive congenital anomalies                | 0.7<br>(0.6 to 0.8)                     | --                                    | < 0.05<br>(< 0.05 to < 0.05)      | 2.5<br>(-16.0 to 24.8)                            | 1.2<br>(-16.0 to 20.9)                              |
| Other congenital anomalies                    | 2.8<br>(1.8 to 4.1)                     | --                                    | 0.3<br>(0.2 to 0.5)               | -6.5<br>(-16.2 to 4.1)                            | -7.4<br>(-17.0 to 3.2)                              |
| Skin and subcutaneous diseases                | 249.5<br>(242.3 to 256.9)               | 555.1<br>(523.5 to 589.3)             | 6.3<br>(4.2 to 9.1)               | 5.1<br>(1.7 to 8.1)                               | 1.2<br>(-0.6 to 3.3)                                |
| Dermatitis                                    | 38.2<br>(35.4 to 41.1)                  | 39.0<br>(36.2 to 42.0)                | 1.5<br>(0.9 to 2.5)               | -7.8<br>(-11.1 to -4.1)                           | -0.0<br>(-3.0 to 3.4)                               |
| Psoriasis                                     | 6.3<br>(6.1 to 6.7)                     | 0.9<br>(0.9 to 1.0)                   | 0.6<br>(0.4 to 0.7)               | 16.0<br>(6.9 to 25.5)                             | 6.5<br>(-1.2 to 14.3)                               |
| Cellulitis                                    | 0.3<br>(0.3 to 0.3)                     | 5.3<br>(4.9 to 5.7)                   | < 0.05<br>(< 0.05 to < 0.05)      | 1.4<br>(-21.3 to 27.7)                            | 0.8<br>(-18.2 to 24.3)                              |
| Pyoderma                                      | 1.9<br>(1.9 to 2.0)                     | 46.3<br>(44.4 to 48.4)                | < 0.05<br>(< 0.05 to < 0.05)      | 13.4<br>(5.5 to 21.2)                             | 2.0<br>(-4.1 to 8.0)                                |
| Scabies                                       | 16.3<br>(14.2 to 18.9)                  | 50.2<br>(43.2 to 58.3)                | 0.4<br>(0.2 to 0.7)               | -5.6<br>(-11.2 to 0.4)                            | -5.9<br>(-9.4 to -2.5)                              |
| Fungal skin diseases                          | 75.1<br>(67.1 to 83.2)                  | 255.2<br>(226.6 to 287.6)             | 0.4<br>(0.2 to 0.9)               | 4.0<br>(0.3 to 7.8)                               | 0.1<br>(-0.8 to 1.0)                                |
| Viral skin diseases                           | 22.0<br>(20.9 to 23.2)                  | 32.6<br>(30.8 to 34.5)                | 0.7<br>(0.4 to 1.0)               | -1.7<br>(-4.9 to 1.8)                             | -0.9<br>(-3.7 to 2.3)                               |
| Acne vulgaris                                 | 73.6<br>(64.6 to 83.5)                  | 52.1<br>(41.7 to 65.8)                | 1.9<br>(1.2 to 2.8)               | 23.2<br>(16.5 to 29.9)                            | 3.7<br>(-1.4 to 8.9)                                |
| Alopecia areata                               | 1.3<br>(1.2 to 1.3)                     | 2.2<br>(2.2 to 2.3)                   | < 0.05<br>(< 0.05 to 0.1)         | 4.5<br>(-7.6 to 16.8)                             | -0.1<br>(-10.5 to 11.0)                             |
| Pruritus                                      | 6.3<br>(5.5 to 7.1)                     | 5.0<br>(4.5 to 5.7)                   | 0.1<br>(< 0.05 to 0.1)            | 8.7<br>(1.6 to 15.5)                              | 1.4<br>(-3.4 to 6.2)                                |
| Urticaria                                     | 6.9<br>(6.0 to 8.0)                     | 12.2<br>(10.7 to 14.1)                | 0.4<br>(0.3 to 0.6)               | -7.2<br>(-12.9 to -0.2)                           | -0.1<br>(-5.1 to 5.6)                               |
| Decubitus ulcer                               | 0.2<br>(0.2 to 0.2)                     | 0.7<br>(0.6 to 0.8)                   | < 0.05<br>(< 0.05 to < 0.05)      | 16.5<br>(5.7 to 29.7)                             | 4.9<br>(-6.0 to 17.4)                               |
| Other skin and subcutaneous diseases          | 46.4<br>(45.0 to 47.9)                  | 53.4<br>(51.6 to 55.2)                | 0.2<br>(0.1 to 0.5)               | 17.9<br>(14.6 to 21.4)                            | 3.7<br>(1.4 to 6.4)                                 |
| Sense organ diseases                          | 172.1<br>(168.0 to 176.9)               | 69.7†<br>(65.3 to 74.3)               | 5.4<br>(3.7 to 7.7)               | 14.1<br>(11.6 to 16.4)                            | -3.5<br>(-4.9 to -2.1)                              |
| Glaucoma                                      | 0.6<br>(0.5 to 0.7)                     | --                                    | 0.1<br>(< 0.05 to 0.1)            | 38.3<br>(24.7 to 55.2)                            | 0.0<br>(-8.7 to 10.5)                               |
| Cataract                                      | 4.6<br>(4.0 to 5.2)                     | --                                    | 0.4<br>(0.2 to 0.5)               | 15.8<br>(9.9 to 21.8)                             | -4.1<br>(-7.7 to -0.0)                              |
| Macular degeneration                          | 0.1<br>(0.1 to 0.2)                     | --                                    | < 0.05<br>(< 0.05 to < 0.05)      | 37.6<br>(16.2 to 62.3)                            | 2.1<br>(-11.4 to 18.1)                              |
| Refraction and accommodation disorders        | 84.2<br>(80.9 to 87.7)                  | --                                    | 1.2<br>(0.7 to 2.0)               | 5.0<br>(1.4 to 8.7)                               | -8.1<br>(-10.8 to -5.4)                             |
| Age-related and other hearing loss            | 109.6<br>(103.1 to 116.7)               | --                                    | 3.1<br>(2.1 to 4.4)               | 16.3<br>(11.7 to 20.5)                            | -2.8<br>(-5.0 to -0.9)                              |
| Other vision loss                             | 1.5<br>(1.3 to 1.7)                     | --                                    | 0.1<br>(0.1 to 0.2)               | 20.0<br>(9.1 to 32.0)                             | 0.1<br>(-8.1 to 8.7)                                |
| Other sense organ diseases                    | 18.9<br>(17.4 to 20.4)                  | 69.7<br>(65.3 to 74.3)                | 0.6<br>(0.4 to 0.9)               | 18.3<br>(12.9 to 23.9)                            | 0.9<br>(-3.1 to 4.8)                                |
| Oral disorders                                | 413.9<br>(398.3 to 429.0)               | 1,122.7†<br>(1,022.1 to 1,235.4)      | 2.2<br>(1.3 to 3.5)               | 17.8<br>(14.4 to 21.6)                            | -0.2<br>(-1.9 to 1.6)                               |
| Caries of deciduous teeth                     | 56.6<br>(46.0 to 67.4)                  | 190.1<br>(138.7 to 256.9)             | < 0.05<br>(< 0.05 to < 0.05)      | -30.5<br>(-37.6 to -22.9)                         | 0.1<br>(-10.1 to 10.8)                              |
| Caries of permanent teeth                     | 279.9<br>(259.1 to 299.8)               | 916.8<br>(825.1 to 1,005.4)           | 0.2<br>(0.1 to 0.3)               | 4.5<br>(0.2 to 9.3)                               | -3.8<br>(-7.1 to -0.2)                              |
| Periodontal disease                           | 109.9<br>(93.3 to 127.0)                | 12.7<br>(10.4 to 15.2)                | 0.7<br>(0.3 to 1.5)               | 12.9<br>(8.2 to 18.1)                             | -0.4<br>(-3.0 to 2.1)                               |
| Edentulism and severe tooth loss              | 31.7<br>(27.4 to 36.0)                  | 3.1<br>(2.6 to 3.6)                   | 0.9<br>(0.6 to 1.2)               | 32.2<br>(27.0 to 37.6)                            | 0.5<br>(-2.6 to 3.7)                                |
| Other oral disorders                          | 13.5<br>(12.9 to 14.1)                  | --                                    | 0.4<br>(0.2 to 0.6)               | 8.5<br>(4.7 to 12.5)                              | -0.3<br>(-3.2 to 2.9)                               |
| <b>Injuries</b>                               | <b>109.2</b><br><b>(102.6 to 118.0)</b> | <b>52.3†</b><br><b>(49.5 to 55.3)</b> | <b>4.5</b><br><b>(3.0 to 6.3)</b> | <b>15.6</b><br><b>(13.3 to 17.9)</b>              | <b>2.6</b><br><b>(0.9 to 4.3)</b>                   |
| <b>Transport injuries</b>                     | <b>11.9</b><br><b>(11.0 to 12.8)</b>    | <b>4.7</b><br><b>(4.1 to 5.4)</b>     | <b>0.7</b><br><b>(0.4 to 1.0)</b> | <b>28.3</b><br><b>(25.2 to 31.4)</b>              | <b>13.0</b><br><b>(10.6 to 15.3)</b>                |
| Road injuries                                 | 11.1<br>(10.2 to 11.9)                  | 4.5<br>(3.9 to 5.2)                   | 0.6<br>(0.4 to 0.9)               | 30.8<br>(27.6 to 34.0)                            | 15.1<br>(12.7 to 17.4)                              |
| Pedestrian road injuries                      | 1.3<br>(1.1 to 1.5)                     | 0.4<br>(0.3 to 0.5)                   | 0.1<br>(0.1 to 0.1)               | 26.3<br>(23.1 to 29.6)                            | 10.7<br>(8.4 to 13.0)                               |
| Cyclist road injuries                         | 2.7<br>(2.2 to 3.2)                     | 1.2<br>(1.0 to 1.5)                   | 0.1<br>(0.1 to 0.2)               | 38.4<br>(34.6 to 42.4)                            | 22.9<br>(20.2 to 25.9)                              |
| Motorcyclist road injuries                    | 2.7<br>(2.3 to 3.3)                     | 0.7<br>(0.6 to 0.9)                   | 0.1<br>(0.1 to 0.2)               | 32.0<br>(28.8 to 35.4)                            | 17.1<br>(14.5 to 19.7)                              |
| Motor vehicle road injuries                   | 3.2<br>(2.8 to 3.7)                     | 1.6<br>(1.3 to 1.9)                   | 0.2<br>(0.1 to 0.3)               | 24.8<br>(21.6 to 28.0)                            | 9.2<br>(6.9 to 11.6)                                |
| Other road injuries                           | 1.1<br>(0.9 to 1.2)                     | 0.6<br>(0.4 to 0.7)                   | 0.1<br>(< 0.05 to 0.1)            | 38.1<br>(34.5 to 41.6)                            | 20.4<br>(18.0 to 22.9)                              |
| Other transport injuries                      | 0.8<br>(0.7 to 1.0)                     | 0.2<br>(0.2 to 0.2)                   | < 0.05<br>(< 0.05 to 0.1)         | 3.5<br>(0.6 to 6.5)                               | -7.4<br>(-9.5 to -5.2)                              |
| <b>Unintentional injuries</b>                 | <b>91.3</b><br><b>(84.6 to 99.7)</b>    | <b>44.6</b><br><b>(41.9 to 47.6)</b>  | <b>3.4</b><br><b>(2.3 to 4.8)</b> | <b>14.5</b><br><b>(12.1 to 16.9)</b>              | <b>1.4</b><br><b>(-0.4 to 3.2)</b>                  |
| Falls                                         | 36.9<br>(32.1 to 42.2)                  | 18.6<br>(16.3 to 21.2)                | 1.6<br>(1.2 to 2.2)               | 22.7<br>(20.0 to 25.2)                            | 4.4<br>(2.5 to 6.3)                                 |
| Drowning                                      | 0.5<br>(0.4 to 0.5)                     | 0.1<br>(0.1 to 0.1)                   | < 0.05<br>(< 0.05 to < 0.05)      | 5.7<br>(2.5 to 9.3)                               | -7.0<br>(-9.6 to -4.5)                              |
| Fire, heat, and hot substances                | 9.3<br>(7.7 to 11.7)                    | 1.2<br>(1.0 to 1.5)                   | 0.3<br>(0.2 to 0.4)               | 8.1<br>(2.8 to 13.2)                              | -0.4<br>(-4.8 to 3.8)                               |
| Poisonings                                    | 0.2<br>(0.2 to 0.3)                     | 0.3<br>(0.2 to 0.4)                   | < 0.05<br>(< 0.05 to < 0.05)      | 25.2<br>(15.8 to 35.4)                            | 16.4<br>(7.9 to 24.9)                               |
| Exposure to mechanical forces                 | 14.4<br>(12.3 to 17.5)                  | 5.8<br>(5.1 to 6.7)                   | 0.4<br>(0.2 to 0.5)               | 17.7<br>(14.6 to 20.9)                            | 4.8<br>(2.4 to 7.3)                                 |
| Unintentional firearm injuries                | 0.8<br>(0.7 to 1.0)                     | 0.2<br>(0.2 to 0.3)                   | < 0.05<br>(< 0.05 to 0.1)         | 12.6<br>(9.4 to 15.6)                             | -0.6<br>(-3.0 to 1.7)                               |
| Unintentional suffocation                     | 0.5<br>(0.4 to 0.6)                     | 0.1<br>(0.1 to 0.1)                   | < 0.05<br>(< 0.05 to < 0.05)      | 8.0<br>(4.7 to 11.2)                              | 2.3<br>(-0.3 to 4.9)                                |
| Other exposure to mechanical forces           | 13.1<br>(11.1 to 16.1)                  | 5.5<br>(4.8 to 6.3)                   | 0.3<br>(0.2 to 0.5)               | 18.9<br>(15.7 to 22.2)                            | 5.6<br>(3.1 to 8.1)                                 |

| Cause                                                                               | Prevalence in thousands (95% UI)     | Incidence in thousands (95% UI)                      | YLDs in thousands (95% UI)                          |                                                   |                                                     |
|-------------------------------------------------------------------------------------|--------------------------------------|------------------------------------------------------|-----------------------------------------------------|---------------------------------------------------|-----------------------------------------------------|
|                                                                                     | 2016 counts                          | 2016 counts                                          | 2016 counts                                         | Percentage change in counts between 2006 and 2016 | Percentage change in age-standardised rates between |
| Adverse effects of medical treatment                                                | 0.3<br>(0.2 to 0.4)                  | 3.9<br>(3.5 to 4.3)                                  | < 0.05<br>(< 0.05 to 0.1)                           | -0.2<br>(-4.7 to 5.2)                             | 1.1<br>(-3.0 to 5.8)                                |
| Animal contact                                                                      | 3.1<br>(2.7 to 3.5)                  | 3.9<br>(3.4 to 4.5)                                  | 0.1<br>(0.1 to 0.1)                                 | -3.4<br>(-8.4 to 1.7)                             | -12.0<br>(-16.0 to -7.9)                            |
| Venomous animal contact                                                             | 1.7<br>(1.4 to 2.0)                  | 2.0<br>(1.7 to 2.5)                                  | 0.1<br>(0.1 to 0.1)                                 | -2.7<br>(-8.8 to 3.8)                             | -11.0<br>(-16.1 to -5.7)                            |
| Non-venomous animal contact                                                         | 1.4<br>(1.2 to 1.8)                  | 1.9<br>(1.5 to 2.3)                                  | < 0.05<br>(< 0.05 to < 0.05)                        | -5.6<br>(-9.7 to -1.9)                            | -15.1<br>(-18.1 to -12.6)                           |
| Foreign body                                                                        | 5.4<br>(4.5 to 6.4)                  | 4.0<br>(3.5 to 4.6)                                  | 0.2<br>(0.2 to 0.4)                                 | -0.3<br>(-3.8 to 2.8)                             | -6.2<br>(-8.7 to -3.9)                              |
| Pulmonary aspiration and foreign body in airway                                     | 3.7<br>(2.8 to 4.6)                  | 1.3<br>(1.2 to 1.5)                                  | 0.2<br>(0.1 to 0.3)                                 | -2.4<br>(-5.8 to 0.8)                             | -7.3<br>(-10.0 to -4.9)                             |
| Foreign body in eyes                                                                | 0.4<br>(0.2 to 0.6)                  | 2.1<br>(1.7 to 2.7)                                  | < 0.05<br>(< 0.05 to < 0.05)                        | 11.2<br>(5.4 to 17.4)                             | 1.5<br>(-1.0 to 4.1)                                |
| Foreign body in other body part                                                     | 1.4<br>(1.1 to 1.7)                  | 0.6<br>(0.5 to 0.7)                                  | < 0.05<br>(< 0.05 to 0.1)                           | 2.6<br>(-1.6 to 6.0)                              | -5.6<br>(-8.8 to -2.9)                              |
| Environmental heat and cold exposure                                                | 9.7<br>(8.3 to 11.4)                 | 2.8<br>(2.4 to 3.3)                                  | 0.4<br>(0.3 to 0.6)                                 | 6.0<br>(3.5 to 8.2)                               | -5.0<br>(-7.1 to -3.2)                              |
| Other unintentional injuries                                                        | 11.5<br>(9.2 to 14.4)                | 4.0<br>(3.4 to 4.7)                                  | 0.3<br>(0.2 to 0.5)                                 | 12.1<br>(9.8 to 14.4)                             | 3.0<br>(1.2 to 4.6)                                 |
| <b>Self-harm and interpersonal violence</b>                                         | <b>23.9</b><br><b>(21.4 to 27.0)</b> | <b>2.9†</b><br><b>(2.6 to 3.3)</b>                   | <b>0.4</b><br><b>(0.3 to 0.6)</b>                   | <b>6.3</b><br><b>(3.1 to 9.2)</b>                 | <b>-3.7</b><br><b>(-5.7 to -1.9)</b>                |
| Self-harm                                                                           | 1.1<br>(1.0 to 1.3)                  | 0.6<br>(0.5 to 0.7)                                  | 0.1<br>(< 0.05 to 0.1)                              | 7.4<br>(4.3 to 10.7)                              | -7.7<br>(-10.1 to -5.2)                             |
| Self-harm by firearm                                                                | 0.1<br>(< 0.05 to 0.1)               | < 0.05<br>(< 0.05 to < 0.05)                         | < 0.05<br>(< 0.05 to < 0.05)                        | -12.5<br>(-16.1 to -8.7)                          | -25.1<br>(-27.7 to -22.5)                           |
| Self-harm by other specified means                                                  | 1.1<br>(0.9 to 1.2)                  | 0.6<br>(0.5 to 0.6)                                  | 0.1<br>(< 0.05 to 0.1)                              | 8.4<br>(5.2 to 11.8)                              | -6.8<br>(-9.3 to -4.4)                              |
| Interpersonal violence                                                              | 22.8<br>(20.2 to 25.9)               | 2.3‡<br>(2.0 to 2.7)                                 | 0.3<br>(0.2 to 0.5)                                 | 6.1<br>(2.6 to 9.4)                               | -2.9<br>(-5.2 to -0.9)                              |
| Assault by firearm                                                                  | 0.3<br>(0.3 to 0.4)                  | 0.1<br>(0.1 to 0.1)                                  | < 0.05<br>(< 0.05 to < 0.05)                        | 12.2<br>(8.7 to 16.3)                             | 0.4<br>(-2.4 to 3.2)                                |
| Assault by sharp object                                                             | 2.0<br>(1.7 to 2.4)                  | 0.9<br>(0.8 to 1.1)                                  | 0.1<br>(< 0.05 to 0.1)                              | 22.3<br>(18.7 to 25.6)                            | 10.0<br>(7.2 to 12.6)                               |
| Sexual violence                                                                     | 18.4<br>(15.9 to 21.4)               | --                                                   | 0.2<br>(0.1 to 0.2)                                 | -2.8<br>(-8.3 to 3.4)                             | -9.7<br>(-12.9 to -6.1)                             |
| Assault by other means                                                              | 2.1<br>(1.8 to 2.5)                  | 1.3<br>(1.1 to 1.5)                                  | 0.1<br>(0.1 to 0.1)                                 | 11.6<br>(9.1 to 14.3)                             | -0.8<br>(-2.8 to 1.2)                               |
| <b>Forces of nature, conflict and terrorism, and executions and police conflict</b> | <b>0.4</b><br><b>(0.2 to 0.7)</b>    | <b>&lt; 0.05†</b><br><b>(&lt; 0.05 to &lt; 0.05)</b> | <b>&lt; 0.05</b><br><b>(&lt; 0.05 to &lt; 0.05)</b> | <b>30.4</b><br><b>(21.3 to 88.6)</b>              | <b>18.2</b><br><b>(9.6 to 73.6)</b>                 |
| Exposure to forces of nature                                                        | 0.1<br>(< 0.05 to 0.2)               | --                                                   | < 0.05<br>(< 0.05 to < 0.05)                        | 31.0<br>(25.8 to 38.1)                            | 20.2<br>(15.8 to 26.4)                              |
| Conflict and terrorism                                                              | 0.3<br>(0.1 to 0.5)                  | --                                                   | < 0.05<br>(< 0.05 to < 0.05)                        | 27.0<br>(15.9 to 127.7)                           | 13.7<br>(3.7 to 103.3)                              |
| Executions and police conflict                                                      | < 0.05<br>(< 0.05 to 0.1)            | < 0.05<br>(< 0.05 to < 0.05)                         | < 0.05<br>(< 0.05 to < 0.05)                        | 57.8<br>(40.1 to 82.6)                            | 53.3<br>(37.0 to 74.4)                              |
| <b>Impairments</b>                                                                  | --                                   | --                                                   | --                                                  | --                                                | --                                                  |
| Anaemia                                                                             | 238.2<br>(227.5 to 250.3)            | --                                                   | 7.3<br>(4.9 to 10.6)                                | -5.9<br>(-13.1 to 2.3)                            | -4.0<br>(-12.4 to 5.5)                              |
| Developmental intellectual disability                                               | 15.1<br>(11.6 to 19.0)               | --                                                   | 2.4<br>(1.5 to 4.2)                                 | 3.5<br>(-5.8 to 19.3)                             | 4.3<br>(-5.2 to 19.9)                               |
| Epilepsy                                                                            | 6.6<br>(3.8 to 10.2)                 | --                                                   | 2.6<br>(1.4 to 4.4)                                 | 2.0<br>(-41.0 to 75.6)                            | 1.7<br>(-42.8 to 79.8)                              |
| Guillain-Barre syndrome                                                             | < 0.05<br>(< 0.05 to < 0.05)         | --                                                   | < 0.05<br>(< 0.05 to < 0.05)                        | 5.0<br>(-2.0 to 12.7)                             | 1.1<br>(0.6 to 2.1)                                 |
| Hearing loss                                                                        | 121.4<br>(114.9 to 128.5)            | --                                                   | 3.7<br>(2.6 to 5.1)                                 | 11.0<br>(7.1 to 14.8)                             | -3.6<br>(-5.6 to -1.8)                              |
| Heart failure                                                                       | 3.5<br>(3.0 to 3.9)                  | --                                                   | 0.3<br>(0.2 to 0.4)                                 | 24.3<br>(15.5 to 34.3)                            | 1.2<br>(-6.1 to 9.2)                                |
| Infertility                                                                         | 16.9<br>(13.1 to 21.9)               | --                                                   | 0.1<br>(< 0.05 to 0.2)                              | 4.5<br>(-12.7 to 28.2)                            | 13.2<br>(-7.4 to 39.9)                              |
| Pelvic inflammatory disease                                                         | 0.1<br>(0.1 to 0.1)                  | --                                                   | < 0.05<br>(< 0.05 to < 0.05)                        | -2.3<br>(-19.0 to 19.2)                           | -8.2<br>(-24.0 to 10.9)                             |
| Vision loss                                                                         | 95.5<br>(91.5 to 100.1)              | --                                                   | 3.0<br>(2.0 to 4.7)                                 | 8.5<br>(1.1 to 21.4)                              | -1.0<br>(-6.3 to 7.7)                               |

We did not calculate incidence for the nine impairments, certain NTDs, and causes with only birth prevalence. Blank cells mean that no estimate is available.

† Incidence for aggregate causes represents the sum of the incidence of the causes below the aggregate.

‡ Incidence estimates for stroke represent first-ever stroke only.

^ Incidence of HIV/AIDS represents new infections of HIV only and does not include new infections of Tuberculosis in HIV positive cases.

SR Table 14: Prevalence, incidence, and YLDs for 2016, percentage change of YLD counts and percentage change of age-standardised YLD rates between 2006 and 2016 by cause and impairments, for all ages, Haiti.

| Cause                                                                                | Prevalence in thousands (95% UI)          | Incidence in thousands (95% UI)            | YLDs in thousands (95% UI)           |                                                   |                                                     |
|--------------------------------------------------------------------------------------|-------------------------------------------|--------------------------------------------|--------------------------------------|---------------------------------------------------|-----------------------------------------------------|
|                                                                                      | 2016 counts                               | 2016 counts                                | 2016 counts                          | Percentage change in counts between 2006 and 2016 | Percentage change in age-standardised rates between |
| <b>All causes</b>                                                                    | <b>10,864.0</b><br>(10,837.0 to 10,888.2) | <b>84,990.6†</b><br>(80,508.6 to 89,905.4) | <b>1,137.5</b><br>(838.6 to 1,492.1) | <b>16.1</b><br>(11.9 to 20.7)                     | <b>-3.3</b><br>(-6.9 to 0.5)                        |
| <b>Communicable, maternal, neonatal, and nutritional disorders</b>                   | <b>8,133.0</b><br>(7,972.0 to 8,287.5)    | <b>51,871.2†</b><br>(47,665.3 to 56,554.3) | <b>229.9</b><br>(163.5 to 311.4)     | <b>-6.0</b><br>(-15.2 to 2.1)                     | <b>-21.0</b><br>(-30.7 to -13.2)                    |
| <b>HIV/AIDS and tuberculosis</b>                                                     | <b>2,287.4</b><br>(2,081.8 to 2,461.9)    | <b>11.7†</b><br>(9.4 to 15.0)              | <b>17.2</b><br>(11.3 to 26.2)        | <b>-57.1</b><br>(-65.9 to -46.2)                  | <b>-66.0</b><br>(-73.7 to -55.7)                    |
| Tuberculosis                                                                         | 2,063.6<br>(1,864.6 to 2,305.5)           | 9.1†<br>(7.6 to 10.8)                      | 1.0<br>(0.7 to 1.4)                  | 6.0<br>(-15.6 to 35.1)                            | -13.5<br>(-30.0 to 7.2)                             |
| Drug-susceptible tuberculosis                                                        | 3.2<br>(2.7 to 3.8)                       | 9.1<br>(7.5 to 10.7)                       | 1.0<br>(0.7 to 1.4)                  | 6.2<br>(-16.2 to 36.2)                            | -13.3<br>(-29.7 to 8.1)                             |
| Multidrug-resistant tuberculosis without extensive drug resistance                   | < 0.05<br>(< 0.05 to 0.1)                 | < 0.05<br>(< 0.05 to 0.2)                  | < 0.05<br>(< 0.05 to < 0.05)         | -22.4<br>(-87.1 to 366.4)                         | -37.0<br>(-89.6 to 281.1)                           |
| Extensively drug-resistant tuberculosis                                              | < 0.05<br>(< 0.05 to < 0.05)              | < 0.05<br>(< 0.05 to < 0.05)               | < 0.05<br>(< 0.05 to < 0.05)         | 106.6<br>(-65.6 to 1,142.1)                       | 67.6<br>(-72.2 to 914.9)                            |
| Latent tuberculosis infection                                                        | 2,060.3<br>(1,861.3 to 2,302.2)           | --                                         | --                                   | --                                                | --                                                  |
| HIV/AIDS                                                                             | 138.9<br>(124.1 to 155.0)                 | 2.6^<br>(1.1 to 5.4)                       | 16.2<br>(10.5 to 25.0)               | -58.6<br>(-67.3 to -48.0)                         | -67.1<br>(-74.7 to -56.8)                           |
| Drug-susceptible HIV/AIDS - Tuberculosis                                             | 0.6<br>(0.3 to 0.9)                       | 1.6<br>(1.0 to 2.5)                        | 0.2<br>(0.1 to 0.4)                  | -49.5<br>(-61.2 to -35.7)                         | -56.3<br>(-66.9 to -43.8)                           |
| Multidrug-resistant HIV/AIDS - Tuberculosis without extensive drug resistance        | < 0.05<br>(< 0.05 to < 0.05)              | < 0.05<br>(< 0.05 to < 0.05)               | < 0.05<br>(< 0.05 to < 0.05)         | -63.6<br>(-94.0 to 124.2)                         | -68.6<br>(-94.9 to 93.1)                            |
| Extensively drug-resistant HIV/AIDS - Tuberculosis                                   | < 0.05<br>(< 0.05 to < 0.05)              | < 0.05<br>(< 0.05 to < 0.05)               | < 0.05<br>(< 0.05 to < 0.05)         | -3.1<br>(-84.1 to 496.7)                          | -16.5<br>(-86.3 to 413.8)                           |
| HIV/AIDS resulting in other diseases                                                 | 138.3<br>(123.4 to 154.1)                 | 2.6<br>(1.1 to 5.4)                        | 16.0<br>(10.4 to 24.8)               | -58.7<br>(-67.5 to -47.9)                         | -67.2<br>(-74.8 to -56.9)                           |
| <b>Diarrhoea, lower respiratory infections, and other common infectious diseases</b> | <b>847.2</b><br>(805.4 to 900.6)          | <b>47,092.5†</b><br>(43,010.2 to 51,605.9) | <b>43.0</b><br>(29.6 to 59.4)        | <b>6.2</b><br>(2.5 to 10.0)                       | <b>-4.7</b><br>(-7.5 to -1.8)                       |
| Diarrhoeal diseases                                                                  | 186.5<br>(173.7 to 200.8)                 | 12,009.7<br>(11,200.8 to 12,905.1)         | 21.1<br>(14.6 to 28.8)               | 1.8<br>(-4.2 to 8.1)                              | -7.6<br>(-12.2 to -2.7)                             |
| Intestinal infectious diseases                                                       | < 0.05<br>(< 0.05 to < 0.05)              | 0.8†<br>(0.6 to 1.0)                       | < 0.05<br>(< 0.05 to < 0.05)         | 35.6<br>(19.2 to 53.0)                            | 10.8<br>(-1.9 to 24.6)                              |
| Typhoid fever                                                                        | < 0.05<br>(< 0.05 to < 0.05)              | 0.6<br>(0.4 to 0.8)                        | < 0.05<br>(< 0.05 to < 0.05)         | 38.6<br>(20.1 to 58.9)                            | 12.0<br>(-2.7 to 27.9)                              |
| Paratyphoid fever                                                                    | < 0.05<br>(< 0.05 to < 0.05)              | 0.2<br>(0.1 to 0.3)                        | < 0.05<br>(< 0.05 to < 0.05)         | 34.9<br>(10.5 to 64.6)                            | 11.8<br>(-7.2 to 35.8)                              |
| Other intestinal infectious diseases                                                 | --                                        | --                                         | < 0.05<br>(< 0.05 to < 0.05)         | -16.5<br>(-39.2 to 16.6)                          | -19.4<br>(-34.6 to -0.4)                            |
| Lower respiratory infections                                                         | 17.6<br>(15.7 to 19.7)                    | 739.8<br>(660.0 to 832.0)                  | 1.1<br>(0.7 to 1.5)                  | 5.6<br>(-6.0 to 19.4)                             | -1.9<br>(-10.6 to 7.9)                              |
| Upper respiratory infections                                                         | 437.1<br>(385.5 to 495.2)                 | 33,144.2<br>(29,003.8 to 37,736.7)         | 10.9<br>(6.4 to 17.0)                | 12.4<br>(6.6 to 18.2)                             | -1.2<br>(-6.0 to 3.5)                               |
| Otitis media                                                                         | 217.1<br>(193.9 to 241.1)                 | 867.1<br>(681.6 to 1,100.4)                | 7.1<br>(4.5 to 10.6)                 | 10.8<br>(3.3 to 18.8)                             | -0.2<br>(-6.5 to 6.6)                               |
| Meningitis                                                                           | 14.0<br>(11.7 to 16.6)                    | 2.8<br>(2.4 to 3.4)                        | 1.3<br>(0.9 to 1.8)                  | 9.7<br>(4.7 to 15.0)                              | -4.9<br>(-9.0 to -0.6)                              |
| Pneumococcal meningitis                                                              | 6.4<br>(5.2 to 7.9)                       | 0.8<br>(0.6 to 1.0)                        | 0.6<br>(0.4 to 0.8)                  | 14.1<br>(7.7 to 21.6)                             | -2.1<br>(-7.5 to 4.4)                               |
| H influenzae type B meningitis                                                       | 2.1<br>(1.6 to 2.8)                       | 0.4<br>(0.3 to 0.6)                        | 0.2<br>(0.2 to 0.3)                  | -19.7<br>(-29.2 to -8.4)                          | -29.9<br>(-38.3 to -19.6)                           |
| Meningococcal infection                                                              | 0.9<br>(0.6 to 1.2)                       | 0.3<br>(0.2 to 0.4)                        | 0.1<br>(0.1 to 0.1)                  | 11.2<br>(4.4 to 17.9)                             | -4.4<br>(-9.8 to 1.4)                               |
| Other meningitis                                                                     | 4.5<br>(3.3 to 6.1)                       | 1.3<br>(1.0 to 1.6)                        | 0.4<br>(0.3 to 0.5)                  | 32.3<br>(20.2 to 45.6)                            | 14.7<br>(5.3 to 25.0)                               |
| Encephalitis                                                                         | 8.9<br>(5.5 to 13.8)                      | 3.4<br>(3.0 to 4.0)                        | 0.9<br>(0.6 to 1.2)                  | 13.4<br>(4.5 to 23.8)                             | -3.1<br>(-9.5 to 4.5)                               |
| Diphtheria                                                                           | < 0.05<br>(< 0.05 to < 0.05)              | < 0.05<br>(< 0.05 to < 0.05)               | < 0.05<br>(< 0.05 to < 0.05)         | -62.8<br>(-83.2 to -19.8)                         | -64.7<br>(-82.5 to -31.5)                           |
| Whooping cough                                                                       | 5.0<br>(3.9 to 6.2)                       | 36.2<br>(28.3 to 45.5)                     | 0.2<br>(0.1 to 0.4)                  | -27.5<br>(-37.9 to -15.0)                         | -32.5<br>(-42.3 to -20.8)                           |
| Tetanus                                                                              | < 0.05<br>(< 0.05 to 0.1)                 | 0.3<br>(0.1 to 0.6)                        | < 0.05<br>(< 0.05 to < 0.05)         | -58.8<br>(-76.3 to -34.5)                         | -61.7<br>(-74.7 to -45.2)                           |
| Measles                                                                              | < 0.05<br>(0.0 to < 0.05)                 | < 0.05<br>(0.0 to < 0.05)                  | < 0.05<br>(0.0 to < 0.05)            | --                                                | --                                                  |
| Varicella and herpes zoster                                                          | 10.6<br>(9.9 to 11.3)                     | 288.2<br>(275.0 to 301.1)                  | 0.3<br>(0.2 to 0.5)                  | 20.9<br>(4.7 to 41.5)                             | 0.1<br>(-11.4 to 12.6)                              |
| <b>Neglected tropical diseases and malaria</b>                                       | <b>1,406.8</b><br>(1,257.2 to 1,580.4)    | <b>557.2†</b><br>(454.7 to 689.8)          | <b>35.1</b><br>(20.8 to 53.3)        | <b>-5.4</b><br>(-35.9 to 16.1)                    | <b>-21.0</b><br>(-47.4 to -2.0)                     |
| Malaria                                                                              | 6.5<br>(4.2 to 11.5)                      | 46.8<br>(30.5 to 58.0)                     | 0.2<br>(0.1 to 0.3)                  | -33.0<br>(-61.9 to 4.0)                           | -40.6<br>(-66.6 to -9.4)                            |
| Chagas disease                                                                       | 0.3<br>(0.2 to 0.4)                       | --                                         | < 0.05<br>(< 0.05 to < 0.05)         | -22.1<br>(-36.2 to -6.0)                          | -40.5<br>(-55.1 to -21.1)                           |
| Leishmaniasis                                                                        | --                                        | --                                         | --                                   | --                                                | --                                                  |
| Visceral leishmaniasis                                                               | --                                        | --                                         | --                                   | --                                                | --                                                  |
| Cutaneous and mucocutaneous leishmaniasis                                            | --                                        | --                                         | --                                   | --                                                | --                                                  |
| African trypanosomiasis                                                              | --                                        | --                                         | --                                   | --                                                | --                                                  |
| Schistosomiasis                                                                      | --                                        | --                                         | --                                   | --                                                | --                                                  |
| Cysticercosis                                                                        | 11.1<br>(8.7 to 13.6)                     | --                                         | 2.1<br>(1.2 to 3.1)                  | 7.0<br>(-13.7 to 29.2)                            | -14.8<br>(-31.0 to 1.6)                             |
| Cystic echinococcosis                                                                | --                                        | --                                         | --                                   | --                                                | --                                                  |
| Lymphatic filariasis                                                                 | 479.1<br>(384.1 to 594.9)                 | 191.8<br>(169.2 to 215.8)                  | 25.2<br>(12.8 to 41.8)               | -5.4<br>(-46.7 to 24.3)                           | -21.9<br>(-55.4 to 2.8)                             |
| Onchocerciasis                                                                       | --                                        | --                                         | --                                   | --                                                | --                                                  |
| Trachoma                                                                             | --                                        | --                                         | --                                   | --                                                | --                                                  |
| Dengue                                                                               | 17.7<br>(10.3 to 28.4)                    | 295.0<br>(197.2 to 416.1)                  | 2.9<br>(1.3 to 5.2)                  | 242.2<br>(163.7 to 628.6)                         | 197.0<br>(134.2 to 534.8)                           |
| Yellow fever                                                                         | --                                        | --                                         | --                                   | --                                                | --                                                  |
| Rabies                                                                               | < 0.05<br>(< 0.05 to < 0.05)              | < 0.05<br>(< 0.05 to < 0.05)               | < 0.05<br>(< 0.05 to < 0.05)         | -49.8<br>(-76.4 to 13.8)                          | -54.0<br>(-75.2 to -11.2)                           |
| Intestinal nematode infections                                                       | 803.1<br>(654.9 to 965.8)                 | --                                         | 0.5<br>(0.3 to 0.8)                  | -81.6<br>(-85.2 to -77.2)                         | -85.0<br>(-88.1 to -81.3)                           |
| Ascariasis                                                                           | 431.4<br>(320.0 to 583.2)                 | --                                         | 0.1<br>(< 0.05 to 0.2)               | -93.5<br>(-95.5 to -90.7)                         | -94.5<br>(-96.3 to -92.0)                           |



| Cause                                                                   | Prevalence in thousands (95% UI)                 | Incidence in thousands (95% UI)                   | YLDs in thousands (95% UI)                |                                                   |                                                     |
|-------------------------------------------------------------------------|--------------------------------------------------|---------------------------------------------------|-------------------------------------------|---------------------------------------------------|-----------------------------------------------------|
|                                                                         | 2016 counts<br>(166.3 to 336.3)                  | 2016 counts                                       | 2016 counts                               | Percentage change in counts between 2006 and 2016 | Percentage change in age-standardised rates between |
| Trichuriasis                                                            | 239.0<br>(166.3 to 336.3)                        | --                                                | < 0.05<br>(< 0.05 to 0.1)                 | -87.1<br>(-93.1 to -76.1)                         | -89.1<br>(-94.4 to -78.4)                           |
| Hookworm disease                                                        | 149.7<br>(110.4 to 200.7)                        | --                                                | 0.4<br>(0.2 to 0.6)                       | -64.6<br>(-71.9 to -55.0)                         | -70.7<br>(-77.0 to -62.6)                           |
| Food-borne trematodiasis                                                | --                                               | --                                                | --                                        | --                                                | --                                                  |
| Leprosy                                                                 | < 0.05<br>(< 0.05 to 0.1)                        | < 0.05<br>(< 0.05 to < 0.05)                      | < 0.05<br>(< 0.05 to < 0.05)              | -7.1<br>(-27.3 to 63.9)                           | -26.5<br>(-40.8 to 26.5)                            |
| Ebola virus disease                                                     | --                                               | --                                                | --                                        | --                                                | --                                                  |
| Zika virus disease                                                      | 0.4<br>(0.2 to 1.1)                              | 23.7<br>(10.5 to 66.4)                            | < 0.05<br>(< 0.05 to < 0.05)              | --                                                | --                                                  |
| Guinea worm disease                                                     | --                                               | --                                                | --                                        | --                                                | --                                                  |
| Other neglected tropical diseases                                       | 157.9<br>(146.1 to 170.0)                        | --                                                | 4.2<br>(2.7 to 6.3)                       | -9.0<br>(-20.1 to 1.7)                            | -15.4<br>(-24.8 to -6.8)                            |
| <b>Maternal disorders</b>                                               | <b>17.6</b><br><b>(13.5 to 21.9)</b>             | <b>544.9†</b><br><b>(445.0 to 639.4)</b>          | <b>1.3</b><br><b>(0.8 to 2.0)</b>         | <b>4.7</b><br><b>(-21.1 to 37.4)</b>              | <b>-16.2</b><br><b>(-36.7 to 10.6)</b>              |
| Maternal haemorrhage                                                    | 2.0<br>(1.6 to 2.6)                              | 21.3<br>(16.1 to 27.8)                            | 0.1<br>(0.1 to 0.2)                       | 2.2<br>(-30.1 to 47.7)                            | -17.7<br>(-43.2 to 18.1)                            |
| Maternal sepsis and other pregnancy related infections                  | 5.5<br>(3.7 to 8.0)                              | 45.3<br>(33.9 to 60.5)                            | 0.2<br>(0.1 to 0.4)                       | 5.5<br>(-52.3 to 119.9)                           | -14.8<br>(-60.6 to 76.9)                            |
| Maternal hypertensive disorders                                         | 7.3<br>(4.6 to 10.5)                             | 32.8<br>(25.6 to 41.0)                            | 0.4<br>(0.2 to 0.6)                       | 8.4<br>(-32.6 to 77.2)                            | -13.8<br>(-46.3 to 41.3)                            |
| Maternal obstructed labour and uterine rupture                          | 0.2<br>(0.1 to 0.4)                              | 16.9<br>(12.3 to 22.8)                            | 0.1<br>(< 0.05 to 0.1)                    | 3.6<br>(-65.3 to 169.9)                           | -17.0<br>(-70.0 to 101.6)                           |
| Maternal abortion, miscarriage, and ectopic pregnancy                   | 3.5<br>(2.3 to 5.0)                              | 428.7<br>(328.2 to 524.7)                         | 0.4<br>(0.2 to 0.7)                       | 4.9<br>(-37.9 to 78.0)                            | -16.5<br>(-50.8 to 39.1)                            |
| Other maternal disorders                                                | --                                               | --                                                | 0.2<br>(0.1 to 0.3)                       | -0.5<br>(-24.8 to 30.8)                           | -19.9<br>(-39.6 to 5.7)                             |
| <b>Neonatal disorders</b>                                               | <b>234.3</b><br><b>(184.8 to 306.4)</b>          | --                                                | <b>24.7</b><br><b>(15.2 to 42.8)</b>      | <b>53.7</b><br><b>(12.7 to 104.8)</b>             | <b>39.1</b><br><b>(0.6 to 89.5)</b>                 |
| Neonatal preterm birth complications                                    | 199.4<br>(151.2 to 286.7)                        | --                                                | 12.2<br>(8.2 to 17.5)                     | 17.6<br>(-8.4 to 45.6)                            | 4.7<br>(-18.6 to 29.9)                              |
| Neonatal encephalopathy due to birth asphyxia and trauma                | 11.1<br>(5.9 to 20.3)                            | --                                                | 0.8<br>(0.2 to 2.9)                       | 44.8<br>(-44.4 to 159.4)                          | 40.9<br>(-47.5 to 160.1)                            |
| Neonatal sepsis and other neonatal infections                           | 20.4<br>(5.3 to 52.5)                            | --                                                | 8.2<br>(1.3 to 24.4)                      | 278.7<br>(46.7 to 604.9)                          | 307.2<br>(52.4 to 699.2)                            |
| Hemolytic disease and other neonatal jaundice                           | 6.7<br>(5.8 to 7.7)                              | --                                                | 2.1<br>(1.5 to 2.7)                       | 11.7<br>(-3.9 to 30.8)                            | -2.4<br>(-14.5 to 13.0)                             |
| Other neonatal disorders                                                | --                                               | --                                                | 1.5<br>(0.9 to 2.6)                       | 29.8<br>(-1.9 to 59.7)                            | 20.5<br>(-8.9 to 48.5)                              |
| <b>Nutritional deficiencies</b>                                         | <b>4,864.5</b><br><b>(4,621.5 to 5,138.9)</b>    | <b>2,588.8†</b><br><b>(2,072.5 to 3,270.5)</b>    | <b>100.9</b><br><b>(67.3 to 147.2)</b>    | <b>-1.2</b><br><b>(-6.9 to 4.0)</b>               | <b>-12.2</b><br><b>(-16.4 to -8.4)</b>              |
| Protein-energy malnutrition                                             | 92.3<br>(72.7 to 118.1)                          | 44.6<br>(35.5 to 56.9)                            | 3.6<br>(2.1 to 5.5)                       | -11.9<br>(-36.4 to 21.0)                          | -18.7<br>(-41.5 to 12.3)                            |
| Iodine deficiency                                                       | 24.7<br>(20.9 to 28.9)                           | 0.8<br>(0.7 to 1.0)                               | 0.7<br>(0.4 to 1.1)                       | -8.6<br>(-20.8 to 6.2)                            | -24.1<br>(-34.2 to -12.2)                           |
| Vitamin A deficiency                                                    | 2,316.1<br>(1,968.3 to 2,735.7)                  | 2,543.5<br>(2,032.0 to 3,222.1)                   | 0.7<br>(0.4 to 1.0)                       | 9.5<br>(-9.1 to 32.2)                             | -3.0<br>(-18.2 to 14.8)                             |
| Iron-deficiency anaemia                                                 | 3,397.9<br>(3,243.8 to 3,554.4)                  | --                                                | 95.8<br>(63.0 to 139.7)                   | -0.7<br>(-6.5 to 4.6)                             | -12.0<br>(-16.2 to -8.0)                            |
| Other nutritional deficiencies                                          | --                                               | --                                                | 0.1<br>(0.1 to 0.2)                       | -13.4<br>(-38.7 to 22.5)                          | -20.1<br>(-43.4 to 13.2)                            |
| <b>Other communicable, maternal, neonatal, and nutritional diseases</b> | <b>2,712.8</b><br><b>(2,518.4 to 2,891.3)</b>    | <b>1,076.1</b><br><b>(943.7 to 1,261.2)</b>       | <b>6.5</b><br><b>(4.2 to 10.1)</b>        | <b>8.9</b><br><b>(0.1 to 17.2)</b>                | <b>-6.1</b><br><b>(-13.0 to 0.6)</b>                |
| Sexually transmitted diseases excluding HIV                             | 2,251.9<br>(2,082.8 to 2,433.9)                  | 839.2<br>(767.9 to 909.5)                         | 3.0<br>(1.8 to 4.9)                       | 26.3<br>(9.5 to 45.5)                             | 0.1<br>(-12.2 to 13.3)                              |
| Syphilis                                                                | 148.6<br>(130.4 to 169.8)                        | 108.3<br>(90.8 to 129.1)                          | 0.2<br>(0.2 to 0.3)                       | 17.8<br>(2.9 to 32.9)                             | -8.8<br>(-20.6 to 5.0)                              |
| Chlamydial infection                                                    | 109.7<br>(84.1 to 137.1)                         | 84.9<br>(65.9 to 107.2)                           | 0.6<br>(0.3 to 1.0)                       | 31.0<br>(11.0 to 55.8)                            | 4.7<br>(-10.7 to 23.9)                              |
| Gonococcal infection                                                    | 54.0<br>(43.5 to 67.0)                           | 159.7<br>(130.0 to 195.4)                         | 0.7<br>(0.4 to 1.1)                       | 27.8<br>(-14.9 to 94.4)                           | 2.0<br>(-31.7 to 51.4)                              |
| Trichomoniasis                                                          | 346.0<br>(296.0 to 399.2)                        | 305.3<br>(257.0 to 356.8)                         | 0.3<br>(0.1 to 0.7)                       | 23.6<br>(14.8 to 33.1)                            | -0.2<br>(-6.3 to 6.8)                               |
| Genital herpes                                                          | 1,781.5<br>(1,536.5 to 2,058.4)                  | 159.6<br>(134.4 to 191.2)                         | 0.5<br>(0.1 to 1.1)                       | 25.6<br>(13.8 to 38.0)                            | -0.2<br>(-8.0 to 8.6)                               |
| Other sexually transmitted diseases                                     | 21.5<br>(20.1 to 23.0)                           | 21.4<br>(18.0 to 25.1)                            | 0.7<br>(0.4 to 1.1)                       | 26.2<br>(5.4 to 52.3)                             | 0.2<br>(-15.8 to 19.6)                              |
| Hepatitis                                                               | 494.0<br>(433.4 to 565.2)                        | 236.9<br>(134.4 to 418.3)                         | 0.2<br>(0.1 to 0.4)                       | -8.3<br>(-35.0 to 30.6)                           | -19.6<br>(-39.0 to 7.8)                             |
| Acute hepatitis A                                                       | 9.0<br>(1.4 to 22.8)                             | 116.5<br>(18.7 to 296.4)                          | 0.1<br>(< 0.05 to 0.1)                    | -12.8<br>(-71.3 to 173.1)                         | -20.4<br>(-69.1 to 121.3)                           |
| Hepatitis B                                                             | 230.7<br>(181.7 to 293.9)                        | 87.1<br>(66.0 to 115.3)                           | 0.1<br>(0.1 to 0.2)                       | -6.0<br>(-25.9 to 19.0)                           | -20.0<br>(-36.1 to -0.5)                            |
| Hepatitis C                                                             | 253.0<br>(223.1 to 284.1)                        | 15.1<br>(13.5 to 16.9)                            | < 0.05<br>(< 0.05 to < 0.05)              | 6.7<br>(-11.6 to 29.4)                            | -6.7<br>(-18.7 to 7.4)                              |
| Acute hepatitis E                                                       | 1.4<br>(1.1 to 1.8)                              | 18.1<br>(14.6 to 23.7)                            | < 0.05<br>(< 0.05 to 0.1)                 | -11.9<br>(-40.7 to 27.9)                          | -20.8<br>(-43.2 to 7.1)                             |
| Other infectious diseases                                               | 123.3<br>(115.4 to 131.6)                        | < 0.05<br>(< 0.05 to < 0.05)                      | 3.3<br>(2.1 to 4.9)                       | -2.0<br>(-12.2 to 7.6)                            | -11.0<br>(-19.1 to -3.6)                            |
| <b>Non-communicable diseases</b>                                        | <b>10,211.3</b><br><b>(10,149.8 to 10,274.2)</b> | <b>32,387.0†</b><br><b>(30,696.9 to 34,317.9)</b> | <b>828.0</b><br><b>(608.2 to 1,086.8)</b> | <b>20.0</b><br><b>(16.8 to 23.3)</b>              | <b>-1.3</b><br><b>(-3.5 to 0.9)</b>                 |
| <b>Neoplasms</b>                                                        | <b>21.5</b><br><b>(19.4 to 23.7)</b>             | <b>12.2</b><br><b>(10.6 to 13.7)</b>              | <b>4.1</b><br><b>(2.9 to 5.5)</b>         | <b>25.7</b><br><b>(17.3 to 34.6)</b>              | <b>-1.2</b><br><b>(-6.7 to 4.9)</b>                 |
| Lip and oral cavity cancer                                              | 0.7<br>(0.6 to 0.9)                              | 0.2<br>(0.2 to 0.3)                               | 0.1<br>(0.1 to 0.1)                       | 28.7<br>(12.8 to 44.8)                            | -0.8<br>(-13.4 to 12.3)                             |
| Nasopharynx cancer                                                      | 0.2<br>(0.1 to 0.3)                              | 0.1<br>(< 0.05 to 0.1)                            | < 0.05<br>(< 0.05 to < 0.05)              | 18.4<br>(3.9 to 36.0)                             | -4.6<br>(-14.5 to 7.3)                              |
| Other pharynx cancer                                                    | 0.1<br>(0.1 to 0.2)                              | 0.1<br>(< 0.05 to 0.1)                            | < 0.05<br>(< 0.05 to < 0.05)              | 24.5<br>(10.5 to 39.6)                            | -3.7<br>(-14.0 to 7.5)                              |
| Oesophageal cancer                                                      | 0.2<br>(0.2 to 0.2)                              | 0.2<br>(0.2 to 0.2)                               | < 0.05<br>(< 0.05 to 0.1)                 | 22.3<br>(8.8 to 37.5)                             | -5.7<br>(-17.6 to 7.4)                              |
| Stomach cancer                                                          | 1.3<br>(1.1 to 1.4)                              | 0.9<br>(0.8 to 1.0)                               | 0.2<br>(0.2 to 0.3)                       | 16.6<br>(1.3 to 34.6)                             | -10.3<br>(-22.5 to 4.4)                             |
| Colon and rectum cancer                                                 | 2.4<br>(1.9 to 3.4)                              | 0.9<br>(0.7 to 1.3)                               | 0.3<br>(0.2 to 0.4)                       | 36.1<br>(15.0 to 61.8)                            | 4.6<br>(-11.8 to 23.7)                              |
| Liver cancer                                                            | 0.1<br>(0.1 to 0.2)                              | 0.3<br>(0.3 to 0.5)                               | 0.1<br>(< 0.05 to 0.1)                    | 30.3<br>(14.6 to 47.9)                            | 0.4<br>(-11.1 to 13.4)                              |
| Liver cancer due to hepatitis B                                         | 0.1<br>(0.1 to 0.1)                              | 0.1<br>(0.1 to 0.2)                               | < 0.05<br>(< 0.05 to < 0.05)              | 30.0<br>(13.6 to 47.4)                            | 0.8<br>(-11.9 to 14.0)                              |



| Cause                                              | Prevalence in thousands (95% UI)              | Incidence in thousands (95% UI)          | YLDs in thousands (95% UI)           |                                                   |                                                     |
|----------------------------------------------------|-----------------------------------------------|------------------------------------------|--------------------------------------|---------------------------------------------------|-----------------------------------------------------|
|                                                    | 2016 counts                                   | 2016 counts                              | 2016 counts                          | Percentage change in counts between 2006 and 2016 | Percentage change in age-standardised rates between |
| Liver cancer due to hepatitis C                    | 0.1<br>(0.1 to 0.1)                           | 0.1<br>(0.1 to 0.1)                      | < 0.05<br>(< 0.05 to < 0.05)         | 30.9<br>(13.8 to 49.7)                            | -0.0<br>(-13.1 to 14.2)                             |
| Liver cancer due to alcohol use                    | 0.1<br>(< 0.05 to 0.1)                        | 0.1<br>(< 0.05 to 0.1)                   | < 0.05<br>(< 0.05 to < 0.05)         | 31.9<br>(13.3 to 53.1)                            | 0.5<br>(-13.1 to 16.0)                              |
| Liver cancer due to other causes                   | 0.1<br>(< 0.05 to 0.1)                        | 0.1<br>(< 0.05 to 0.1)                   | < 0.05<br>(< 0.05 to < 0.05)         | 28.5<br>(13.0 to 45.3)                            | 0.4<br>(-11.9 to 14.3)                              |
| Gallbladder and biliary tract cancer               | 0.1<br>(0.1 to 0.1)                           | 0.1<br>(0.1 to 0.2)                      | < 0.05<br>(< 0.05 to 0.1)            | 16.1<br>(6.7 to 26.8)                             | -10.5<br>(-17.5 to -2.8)                            |
| Pancreatic cancer                                  | 0.2<br>(0.2 to 0.2)                           | 0.2<br>(0.2 to 0.3)                      | 0.1<br>(< 0.05 to 0.1)               | 35.2<br>(23.0 to 46.9)                            | 3.5<br>(-5.9 to 13.2)                               |
| Larynx cancer                                      | 0.4<br>(0.3 to 0.5)                           | 0.1<br>(0.1 to 0.2)                      | 0.1<br>(< 0.05 to 0.1)               | 26.8<br>(10.8 to 43.9)                            | -2.3<br>(-15.8 to 12.6)                             |
| Tracheal, bronchus, and lung cancer                | 1.0<br>(0.9 to 1.2)                           | 0.9<br>(0.8 to 1.1)                      | 0.2<br>(0.1 to 0.3)                  | 32.4<br>(9.1 to 63.5)                             | 1.8<br>(-16.0 to 25.4)                              |
| Malignant skin melanoma                            | 0.2<br>(0.1 to 0.3)                           | < 0.05<br>(< 0.05 to 0.1)                | < 0.05<br>(< 0.05 to < 0.05)         | 32.9<br>(16.5 to 52.6)                            | 2.5<br>(-10.9 to 18.4)                              |
| Non-melanoma skin cancer                           | 0.1<br>(0.1 to 0.2)                           | 0.6<br>(0.4 to 0.9)                      | < 0.05<br>(< 0.05 to < 0.05)         | 30.0<br>(-16.7 to 82.8)                           | -1.8<br>(-38.7 to 38.7)                             |
| Non-melanoma skin cancer (squamous-cell carcinoma) | 0.1<br>(0.1 to 0.2)                           | 0.2<br>(0.1 to 0.2)                      | < 0.05<br>(< 0.05 to < 0.05)         | 29.7<br>(-20.1 to 88.9)                           | -2.1<br>(-42.3 to 42.6)                             |
| Non-melanoma skin cancer (basal-cell carcinoma)    | 0.1<br>(< 0.05 to 0.1)                        | 0.4<br>(0.2 to 0.7)                      | < 0.05<br>(< 0.05 to < 0.05)         | 33.0<br>(18.3 to 48.6)                            | 1.7<br>(-11.8 to 15.9)                              |
| Breast cancer                                      | 5.9<br>(3.6 to 9.3)                           | 1.4<br>(0.9 to 2.3)                      | 0.6<br>(0.4 to 1.0)                  | 36.5<br>(11.6 to 70.2)                            | 5.7<br>(-12.6 to 29.2)                              |
| Cervical cancer                                    | 6.1<br>(3.3 to 8.0)                           | 1.8<br>(1.0 to 2.3)                      | 0.6<br>(0.3 to 0.9)                  | 14.3<br>(-10.0 to 42.4)                           | -11.9<br>(-29.0 to 7.8)                             |
| Uterine cancer                                     | 1.2<br>(0.8 to 1.5)                           | 0.3<br>(0.2 to 0.4)                      | 0.1<br>(0.1 to 0.1)                  | 32.0<br>(1.4 to 70.4)                             | 1.6<br>(-21.8 to 32.1)                              |
| Ovarian cancer                                     | 0.6<br>(0.5 to 0.7)                           | 0.2<br>(0.2 to 0.2)                      | 0.1<br>(0.1 to 0.1)                  | 36.6<br>(2.1 to 86.0)                             | 6.1<br>(-23.4 to 45.9)                              |
| Prostate cancer                                    | 4.2<br>(3.0 to 5.4)                           | 1.4<br>(1.0 to 1.7)                      | 0.6<br>(0.4 to 0.9)                  | 37.7<br>(18.5 to 61.6)                            | 3.0<br>(-10.0 to 19.4)                              |
| Testicular cancer                                  | 0.1<br>(< 0.05 to 0.1)                        | < 0.05<br>(< 0.05 to < 0.05)             | < 0.05<br>(< 0.05 to < 0.05)         | 29.2<br>(2.8 to 63.8)                             | 1.8<br>(-16.8 to 25.6)                              |
| Kidney cancer                                      | 0.8<br>(0.7 to 0.9)                           | 0.2<br>(0.2 to 0.2)                      | 0.1<br>(< 0.05 to 0.1)               | 23.3<br>(-7.0 to 54.4)                            | 4.5<br>(-13.8 to 22.6)                              |
| Bladder cancer                                     | 0.5<br>(0.4 to 0.7)                           | 0.2<br>(0.1 to 0.2)                      | 0.1<br>(< 0.05 to 0.1)               | 36.9<br>(22.2 to 54.0)                            | 4.0<br>(-7.8 to 17.2)                               |
| Brain and nervous system cancer                    | 0.5<br>(0.4 to 0.6)                           | 0.2<br>(0.1 to 0.2)                      | 0.1<br>(< 0.05 to 0.1)               | 18.5<br>(-3.4 to 37.1)                            | 1.1<br>(-8.1 to 13.1)                               |
| Thyroid cancer                                     | 0.2<br>(0.2 to 0.3)                           | 0.1<br>(< 0.05 to 0.1)                   | < 0.05<br>(< 0.05 to < 0.05)         | 31.6<br>(12.0 to 56.6)                            | -0.5<br>(-15.9 to 18.5)                             |
| Mesothelioma                                       | < 0.05<br>(< 0.05 to < 0.05)                  | < 0.05<br>(< 0.05 to < 0.05)             | < 0.05<br>(< 0.05 to < 0.05)         | 22.4<br>(9.4 to 37.1)                             | -5.8<br>(-15.3 to 5.1)                              |
| Hodgkin lymphoma                                   | 0.2<br>(0.2 to 0.3)                           | 0.1<br>(0.1 to 0.1)                      | < 0.05<br>(< 0.05 to 0.1)            | 3.9<br>(-5.9 to 16.5)                             | -15.2<br>(-21.7 to -6.2)                            |
| Non-Hodgkin's lymphoma                             | 0.8<br>(0.7 to 1.0)                           | 0.3<br>(0.2 to 0.4)                      | 0.1<br>(0.1 to 0.1)                  | 23.6<br>(10.7 to 37.6)                            | -1.3<br>(-10.5 to 10.8)                             |
| Multiple myeloma                                   | 0.2<br>(0.1 to 0.2)                           | 0.1<br>(0.1 to 0.2)                      | 0.1<br>(< 0.05 to 0.1)               | 34.1<br>(17.9 to 53.4)                            | 3.1<br>(-10.4 to 20.1)                              |
| Leukaemia                                          | 2.6<br>(1.7 to 3.5)                           | 0.7<br>(0.5 to 0.8)                      | 0.3<br>(0.2 to 0.5)                  | 5.1<br>(-11.6 to 28.2)                            | -8.5<br>(-17.9 to 4.7)                              |
| Acute lymphoid leukaemia                           | 0.4<br>(0.3 to 0.8)                           | 0.1<br>(0.1 to 0.2)                      | 0.1<br>(< 0.05 to 0.1)               | -5.7<br>(-35.8 to 43.1)                           | -11.1<br>(-36.7 to 23.4)                            |
| Chronic lymphoid leukaemia                         | 0.2<br>(0.1 to 0.3)                           | 0.1<br>(< 0.05 to 0.1)                   | < 0.05<br>(< 0.05 to < 0.05)         | 35.3<br>(16.5 to 59.6)                            | 4.7<br>(-10.6 to 23.3)                              |
| Acute myeloid leukaemia                            | 0.1<br>(0.1 to 0.3)                           | 0.1<br>(0.1 to 0.1)                      | < 0.05<br>(< 0.05 to < 0.05)         | 19.5<br>(-8.7 to 46.8)                            | 4.9<br>(-13.0 to 23.2)                              |
| Chronic myeloid leukaemia                          | 0.1<br>(0.1 to 0.2)                           | 0.1<br>(< 0.05 to 0.1)                   | < 0.05<br>(< 0.05 to < 0.05)         | 19.0<br>(0.9 to 42.2)                             | -6.4<br>(-20.1 to 10.0)                             |
| Other leukaemia                                    | 1.6<br>(0.9 to 2.5)                           | 0.4<br>(0.2 to 0.5)                      | 0.2<br>(0.1 to 0.3)                  | 2.0<br>(-13.1 to 29.3)                            | -11.6<br>(-23.2 to 5.9)                             |
| Other neoplasms                                    | 1.7<br>(1.5 to 1.9)                           | 0.6<br>(0.5 to 0.7)                      | 0.2<br>(0.1 to 0.2)                  | 20.0<br>(0.7 to 38.3)                             | -1.4<br>(-12.5 to 13.0)                             |
| <b>Cardiovascular diseases</b>                     | <b>489.8</b><br><b>(474.4 to 508.7)</b>       | <b>55.3†</b><br><b>(53.0 to 57.8)</b>    | <b>27.1</b><br><b>(19.5 to 35.8)</b> | <b>21.9</b><br><b>(17.8 to 26.0)</b>              | <b>-3.5</b><br><b>(-6.3 to -0.4)</b>                |
| Rheumatic heart disease                            | 103.4<br>(92.0 to 115.9)                      | 3.8<br>(3.4 to 4.3)                      | 4.9<br>(3.1 to 7.1)                  | 7.8<br>(-2.2 to 17.9)                             | -11.4<br>(-19.1 to -3.9)                            |
| Ischaemic heart disease                            | 152.7<br>(144.7 to 161.1)                     | 23.9<br>(22.2 to 25.7)                   | 6.7<br>(4.5 to 9.2)                  | 30.5<br>(24.4 to 36.7)                            | 1.0<br>(-3.2 to 5.3)                                |
| Cerebrovascular disease                            | 69.9<br>(65.0 to 74.9)                        | 11.0‡<br>(10.1 to 11.8)                  | 6.8<br>(5.0 to 8.8)                  | 19.3<br>(11.6 to 27.7)                            | -7.1<br>(-13.1 to -0.4)                             |
| Ischaemic stroke                                   | 57.7<br>(51.9 to 64.8)                        | 7.0‡<br>(6.2 to 7.8)                     | 5.4<br>(3.9 to 7.0)                  | 20.4<br>(10.7 to 31.0)                            | -6.5<br>(-14.1 to 1.7)                              |
| Hemorrhagic stroke                                 | 15.9<br>(14.2 to 17.8)                        | 4.0‡<br>(3.6 to 4.4)                     | 1.5<br>(1.1 to 1.9)                  | 15.5<br>(4.2 to 28.2)                             | -9.3<br>(-18.9 to 0.8)                              |
| Hypertensive heart disease                         | 13.7<br>(11.7 to 15.9)                        | --                                       | 1.1<br>(0.8 to 1.6)                  | 32.2<br>(19.4 to 46.2)                            | 1.2<br>(-8.0 to 10.7)                               |
| Cardiomyopathy and myocarditis                     | 3.6<br>(3.2 to 4.0)                           | 2.1†<br>(1.9 to 2.4)                     | 0.4<br>(0.3 to 0.6)                  | 28.1<br>(13.3 to 43.9)                            | 4.0<br>(-7.2 to 15.7)                               |
| Myocarditis                                        | 1.6<br>(1.4 to 1.8)                           | 2.1<br>(1.9 to 2.4)                      | 0.1<br>(0.1 to 0.2)                  | 23.1<br>(13.8 to 33.1)                            | 3.2<br>(-7.5 to 14.9)                               |
| Alcoholic cardiomyopathy                           | 0.5<br>(0.4 to 0.6)                           | --                                       | < 0.05<br>(< 0.05 to 0.1)            | 35.9<br>(17.1 to 56.6)                            | 4.5<br>(-11.8 to 22.8)                              |
| Other cardiomyopathy                               | 2.8<br>(2.4 to 3.2)                           | --                                       | 0.2<br>(0.1 to 0.4)                  | 29.4<br>(7.0 to 54.2)                             | 4.3<br>(-11.4 to 21.4)                              |
| Atrial fibrillation and flutter                    | 39.3<br>(34.5 to 45.0)                        | 3.3<br>(2.8 to 3.8)                      | 3.1<br>(2.1 to 4.3)                  | 30.9<br>(22.1 to 39.9)                            | -0.4<br>(-6.2 to 5.9)                               |
| Peripheral vascular disease                        | 91.9<br>(79.5 to 106.9)                       | 9.7<br>(8.3 to 11.4)                     | 0.5<br>(0.2 to 1.0)                  | 25.0<br>(15.5 to 36.6)                            | -4.3<br>(-11.4 to 3.8)                              |
| Endocarditis                                       | 0.3<br>(0.3 to 0.4)                           | 1.4<br>(1.3 to 1.6)                      | < 0.05<br>(< 0.05 to < 0.05)         | 25.5<br>(16.2 to 36.9)                            | 0.2<br>(-11.4 to 13.3)                              |
| Other cardiovascular and circulatory diseases      | 67.8<br>(58.1 to 78.8)                        | --                                       | 3.6<br>(2.4 to 5.0)                  | 22.7<br>(12.3 to 34.1)                            | -0.5<br>(-8.4 to 7.6)                               |
| <b>Chronic respiratory diseases</b>                | <b>1,229.6</b><br><b>(1,160.4 to 1,299.6)</b> | <b>227.6†</b><br><b>(207.4 to 249.0)</b> | <b>45.7</b><br><b>(31.1 to 64.1)</b> | <b>8.5</b><br><b>(3.4 to 13.8)</b>                | <b>-3.6</b><br><b>(-7.6 to 0.4)</b>                 |
| Chronic obstructive pulmonary disease              | 197.4<br>(184.1 to 213.4)                     | 13.9<br>(13.0 to 14.9)                   | 3.7<br>(2.9 to 4.8)                  | 24.8<br>(6.7 to 43.6)                             | -1.9<br>(-16.7 to 12.5)                             |
| Pneumoconiosis                                     | 0.2<br>(0.2 to 0.2)                           | < 0.05<br>(< 0.05 to < 0.05)             | < 0.05<br>(< 0.05 to < 0.05)         | 32.0<br>(22.6 to 41.7)                            | 0.7<br>(-9.0 to 10.6)                               |
| Silicosis                                          | 0.1<br>(< 0.05 to 0.1)                        | < 0.05<br>(< 0.05 to < 0.05)             | < 0.05<br>(< 0.05 to < 0.05)         | 33.5<br>(27.7 to 39.7)                            | 3.6<br>(-1.3 to 8.7)                                |

| Cause                                                          | Prevalence in thousands (95% UI)        | Incidence in thousands (95% UI)               | YLDs in thousands (95% UI)        |                                                   |                                                     |
|----------------------------------------------------------------|-----------------------------------------|-----------------------------------------------|-----------------------------------|---------------------------------------------------|-----------------------------------------------------|
|                                                                | 2016 counts                             | 2016 counts                                   | 2016 counts                       | Percentage change in counts between 2006 and 2016 | Percentage change in age-standardised rates between |
| Asbestosis                                                     | 0.1<br>(0.1 to 0.1)                     | < 0.05<br>(< 0.05 to < 0.05)                  | < 0.05<br>(< 0.05 to < 0.05)      | 30.8<br>(10.2 to 54.2)                            | -1.4<br>(-22.1 to 22.5)                             |
| Coal workers pneumoconiosis                                    | --                                      | --                                            | --                                | --                                                | --                                                  |
| Other pneumoconiosis                                           | 0.1<br>(0.1 to 0.1)                     | < 0.05<br>(< 0.05 to < 0.05)                  | < 0.05<br>(< 0.05 to < 0.05)      | 32.1<br>(18.5 to 45.8)                            | 1.2<br>(-9.3 to 11.6)                               |
| Asthma                                                         | 1,046.3<br>(962.1 to 1,134.7)           | 213.5<br>(193.2 to 234.7)                     | 41.2<br>(27.2 to 60.2)            | 6.8<br>(1.7 to 12.2)                              | -4.2<br>(-8.1 to 0.1)                               |
| Interstitial lung disease and pulmonary sarcoidosis            | 2.3<br>(2.0 to 2.5)                     | 0.2<br>(0.2 to 0.3)                           | 0.2<br>(0.2 to 0.4)               | 26.4<br>(16.6 to 37.9)                            | 3.1<br>(-7.2 to 15.3)                               |
| Other chronic respiratory diseases                             | --                                      | --                                            | 0.5<br>(0.4 to 0.6)               | 48.5<br>(12.8 to 95.6)                            | 33.0<br>(4.6 to 70.7)                               |
| <b>Cirrhosis and other chronic liver diseases</b>              | <b>47.9<br/>(45.2 to 51.0)</b>          | <b>1.9<br/>(1.8 to 1.9)</b>                   | <b>1.3<br/>(0.9 to 1.8)</b>       | <b>26.0<br/>(11.1 to 43.4)</b>                    | <b>5.6<br/>(-4.3 to 16.1)</b>                       |
| Cirrhosis and other chronic liver diseases due to hepatitis B  | 4.6<br>(3.8 to 5.5)                     | 0.2<br>(0.2 to 0.2)                           | 0.1<br>(0.1 to 0.1)               | 35.7<br>(8.6 to 69.0)                             | 5.5<br>(-16.2 to 33.3)                              |
| Cirrhosis and other chronic liver diseases due to hepatitis C  | 14.1<br>(12.6 to 15.8)                  | 0.5<br>(0.5 to 0.6)                           | 0.3<br>(0.2 to 0.4)               | 35.1<br>(10.8 to 62.0)                            | 5.8<br>(-11.2 to 25.9)                              |
| Cirrhosis and other chronic liver diseases due to alcohol use  | 15.6<br>(14.2 to 17.3)                  | 0.6<br>(0.6 to 0.7)                           | 0.3<br>(0.2 to 0.5)               | 38.4<br>(16.1 to 64.6)                            | 6.7<br>(-8.7 to 25.1)                               |
| Cirrhosis and other chronic liver diseases due to other causes | 13.6<br>(12.5 to 14.8)                  | 0.5<br>(0.5 to 0.5)                           | 0.6<br>(0.4 to 0.8)               | 14.9<br>(-9.4 to 46.3)                            | 4.4<br>(-14.9 to 28.4)                              |
| <b>Digestive diseases</b>                                      | <b>329.5<br/>(314.3 to 345.2)</b>       | <b>204.7<sup>†</sup><br/>(192.3 to 217.9)</b> | <b>15.7<br/>(10.9 to 21.1)</b>    | <b>21.0<br/>(14.2 to 28.6)</b>                    | <b>2.3<br/>(-2.6 to 7.5)</b>                        |
| Peptic ulcer disease                                           | 94.2<br>(86.4 to 103.1)                 | 13.2<br>(12.0 to 14.6)                        | 1.7<br>(1.1 to 2.5)               | 29.5<br>(18.4 to 41.7)                            | 1.7<br>(-6.9 to 10.4)                               |
| Gastritis and duodenitis                                       | 77.2<br>(69.4 to 85.7)                  | 48.5<br>(43.7 to 54.2)                        | 1.5<br>(1.0 to 2.2)               | 46.7<br>(34.8 to 59.3)                            | 16.0<br>(7.6 to 25.4)                               |
| Appendicitis                                                   | 0.8<br>(0.7 to 0.9)                     | 21.2<br>(19.2 to 23.1)                        | 0.2<br>(0.2 to 0.4)               | 3.3<br>(-29.1 to 57.9)                            | -7.4<br>(-31.6 to 28.1)                             |
| Paralytic ileus and intestinal obstruction                     | 0.1<br>(0.1 to 0.2)                     | 4.2<br>(3.6 to 4.8)                           | < 0.05<br>(< 0.05 to 0.1)         | 22.8<br>(17.7 to 27.7)                            | 7.1<br>(2.7 to 11.2)                                |
| Inguinal, femoral, and abdominal hernia                        | 152.2<br>(136.6 to 169.5)               | 35.6<br>(31.0 to 41.2)                        | 10.3<br>(6.9 to 14.3)             | 16.7<br>(8.3 to 26.1)                             | -0.1<br>(-6.4 to 6.5)                               |
| Inflammatory bowel disease                                     | 0.2<br>(0.2 to 0.2)                     | 1.8<br>(1.7 to 1.9)                           | < 0.05<br>(< 0.05 to < 0.05)      | 9.7<br>(7.7 to 11.9)                              | -9.1<br>(-10.8 to -7.3)                             |
| Vascular intestinal disorders                                  | 0.1<br>(0.1 to 0.1)                     | 0.4<br>(0.3 to 0.4)                           | < 0.05<br>(< 0.05 to < 0.05)      | 24.5<br>(17.2 to 32.0)                            | 10.4<br>(5.3 to 15.1)                               |
| Gallbladder and biliary diseases                               | 13.1<br>(11.7 to 14.5)                  | 76.7<br>(67.0 to 87.2)                        | 0.3<br>(0.2 to 0.5)               | 35.0<br>(11.2 to 63.1)                            | 6.7<br>(-12.8 to 30.6)                              |
| Pancreatitis                                                   | 0.3<br>(0.3 to 0.4)                     | 3.1<br>(2.8 to 3.5)                           | < 0.05<br>(< 0.05 to 0.1)         | 37.2<br>(32.8 to 41.9)                            | 12.9<br>(9.8 to 16.4)                               |
| Other digestive diseases                                       | --                                      | --                                            | 1.4<br>(1.0 to 2.0)               | 21.7<br>(12.9 to 31.3)                            | 6.2<br>(0.7 to 12.3)                                |
| <b>Neurological disorders</b>                                  | <b>4,269.0<br/>(4,075.7 to 4,464.5)</b> | <b>2,154.6<br/>(1,839.4 to 2,498.7)</b>       | <b>94.4<br/>(62.5 to 134.5)</b>   | <b>21.7<br/>(-0.6 to 49.3)</b>                    | <b>-0.2<br/>(-16.2 to 19.6)</b>                     |
| Alzheimer's disease and other dementias                        | 24.6<br>(20.6 to 29.2)                  | 4.2<br>(3.5 to 5.1)                           | 3.5<br>(2.4 to 4.7)               | 32.6<br>(26.1 to 40.0)                            | -1.8<br>(-6.2 to 3.1)                               |
| Parkinson's disease                                            | 3.0<br>(2.4 to 3.8)                     | 0.4<br>(0.3 to 0.5)                           | 0.4<br>(0.2 to 0.5)               | 38.9<br>(19.4 to 61.2)                            | 5.3<br>(-8.0 to 19.9)                               |
| Epilepsy                                                       | 24.4<br>(4.0 to 56.7)                   | 3.4<br>(0.6 to 7.8)                           | 9.6<br>(1.4 to 24.9)              | 14.6<br>(-85.0 to 682.8)                          | -1.4<br>(-87.4 to 571.5)                            |
| Multiple sclerosis                                             | 0.7<br>(0.6 to 0.8)                     | < 0.05<br>(< 0.05 to < 0.05)                  | 0.2<br>(0.1 to 0.3)               | 38.5<br>(32.9 to 44.4)                            | 9.0<br>(4.7 to 13.5)                                |
| Motor neuron disease                                           | 0.2<br>(0.2 to 0.3)                     | 0.1<br>(< 0.05 to 0.1)                        | < 0.05<br>(< 0.05 to 0.1)         | 21.2<br>(15.2 to 26.9)                            | 2.6<br>(-1.1 to 6.4)                                |
| Migraine                                                       | 1,491.5<br>(1,395.5 to 1,583.9)         | 178.7<br>(166.7 to 192.1)                     | 66.3<br>(42.6 to 92.2)            | 21.9<br>(16.9 to 26.5)                            | -0.3<br>(-4.0 to 2.9)                               |
| Tension-type headache                                          | 3,393.7<br>(3,058.6 to 3,768.7)         | 1,967.8<br>(1,652.3 to 2,312.5)               | 12.2<br>(7.7 to 18.0)             | 21.0<br>(14.9 to 27.8)                            | -1.0<br>(-5.5 to 3.9)                               |
| Other neurological disorders                                   | < 0.05<br>(< 0.05 to 0.1)               | 0.1<br>(< 0.05 to 0.1)                        | 2.2<br>(0.5 to 5.6)               | 36.2<br>(-77.1 to 614.4)                          | 17.4<br>(-76.1 to 419.7)                            |
| <b>Mental and substance use disorders</b>                      | <b>1,652.5<br/>(1,596.0 to 1,708.4)</b> | <b>618.7<sup>†</sup><br/>(571.7 to 672.3)</b> | <b>204.9<br/>(147.9 to 265.8)</b> | <b>20.9<br/>(18.3 to 23.4)</b>                    | <b>0.1<br/>(-2.0 to 2.0)</b>                        |
| Schizophrenia                                                  | 15.5<br>(13.6 to 17.6)                  | 1.3<br>(1.1 to 1.5)                           | 9.9<br>(7.2 to 12.6)              | 29.0<br>(16.5 to 42.8)                            | 0.5<br>(-8.1 to 10.3)                               |
| Alcohol use disorders                                          | 172.2<br>(149.0 to 196.3)               | 90.2<br>(77.0 to 103.8)                       | 17.2<br>(11.8 to 24.0)            | 25.4<br>(15.2 to 36.1)                            | 0.7<br>(-7.0 to 8.5)                                |
| Drug use disorders                                             | 69.7<br>(63.0 to 76.4)                  | 10.1<br>(9.0 to 11.5)                         | 14.4<br>(10.1 to 19.4)            | 29.1<br>(17.4 to 41.4)                            | 3.7<br>(-5.0 to 12.3)                               |
| Opioid use disorders                                           | 23.6<br>(19.2 to 29.2)                  | 3.1<br>(2.6 to 3.8)                           | 9.8<br>(6.5 to 13.5)              | 30.8<br>(16.4 to 47.3)                            | 3.4<br>(-6.9 to 15.0)                               |
| Cocaine use disorders                                          | 13.9<br>(11.4 to 16.7)                  | 1.0<br>(0.8 to 1.2)                           | 1.9<br>(1.1 to 2.9)               | 26.0<br>(3.0 to 55.3)                             | 4.5<br>(-12.9 to 26.7)                              |
| Amphetamine use disorders                                      | 1.1<br>(0.8 to 1.5)                     | 0.2<br>(0.1 to 0.3)                           | 0.1<br>(0.1 to 0.2)               | 22.0<br>(-12.8 to 74.8)                           | 1.4<br>(-23.2 to 37.2)                              |
| Cannabis use disorders                                         | 29.2<br>(23.8 to 36.0)                  | 5.0<br>(4.0 to 6.2)                           | 0.8<br>(0.5 to 1.3)               | 21.6<br>(-0.0 to 50.1)                            | 4.5<br>(-13.0 to 26.9)                              |
| Other drug use disorders                                       | 3.7<br>(3.2 to 4.2)                     | 0.8<br>(0.7 to 0.9)                           | 1.7<br>(1.1 to 2.6)               | 27.7<br>(-2.0 to 65.0)                            | 4.7<br>(-18.1 to 33.4)                              |
| Depressive disorders                                           | 327.7<br>(305.7 to 354.6)               | 382.1<br>(339.2 to 432.7)                     | 57.6<br>(39.4 to 78.4)            | 21.6<br>(15.7 to 27.8)                            | -1.0<br>(-5.3 to 3.6)                               |
| Major depressive disorder                                      | 237.3<br>(209.3 to 269.0)               | 364.2<br>(320.8 to 412.9)                     | 48.5<br>(32.9 to 66.8)            | 21.0<br>(13.9 to 28.4)                            | -1.2<br>(-6.2 to 4.5)                               |
| Dysthymia                                                      | 95.7<br>(83.2 to 109.3)                 | 17.9<br>(15.7 to 20.6)                        | 9.2<br>(6.2 to 13.3)              | 24.9<br>(19.5 to 30.6)                            | -0.1<br>(-3.6 to 3.6)                               |
| Bipolar disorder                                               | 84.3<br>(71.1 to 99.3)                  | 8.6<br>(7.4 to 10.2)                          | 17.3<br>(10.6 to 25.5)            | 20.4<br>(13.2 to 28.2)                            | 0.1<br>(-5.1 to 5.9)                                |
| Anxiety disorders                                              | 425.0<br>(384.4 to 469.1)               | 67.0<br>(61.4 to 73.1)                        | 41.0<br>(28.4 to 55.6)            | 20.0<br>(15.6 to 25.0)                            | -0.0<br>(-3.2 to 3.3)                               |
| Eating disorders                                               | 11.2<br>(9.0 to 13.6)                   | 7.6<br>(5.5 to 10.3)                          | 2.2<br>(1.4 to 3.3)               | 19.8<br>(2.6 to 40.5)                             | 0.5<br>(-13.9 to 16.1)                              |
| Anorexia nervosa                                               | 2.3<br>(1.7 to 3.1)                     | 1.1<br>(0.8 to 1.5)                           | 0.5<br>(0.3 to 0.8)               | 13.5<br>(-16.4 to 53.3)                           | 0.2<br>(-25.2 to 32.7)                              |
| Bulimia nervosa                                                | 8.3<br>(6.2 to 11.2)                    | 6.4<br>(4.4 to 9.2)                           | 1.7<br>(1.0 to 2.7)               | 21.6<br>(1.9 to 45.2)                             | 0.5<br>(-15.6 to 18.9)                              |
| Autistic spectrum disorders                                    | 93.9<br>(83.8 to 104.5)                 | 0.9<br>(0.6 to 1.3)                           | 13.8<br>(9.3 to 19.2)             | 15.7<br>(9.5 to 22.0)                             | 0.7<br>(-4.2 to 5.6)                                |
| Autism                                                         | 28.2<br>(24.3 to 32.9)                  | 0.1<br>(0.1 to 0.2)                           | 7.2<br>(4.6 to 10.5)              | 15.7<br>(5.2 to 26.8)                             | 0.9<br>(-7.4 to 9.9)                                |
| Asperger syndrome and other autistic spectrum disorders        | 65.6<br>(54.1 to 79.4)                  | 0.8<br>(0.5 to 1.2)                           | 6.6<br>(4.3 to 9.7)               | 15.7<br>(9.8 to 21.6)                             | 0.5<br>(-4.2 to 5.0)                                |



| Cause                                                      | Prevalence in thousands (95% UI)              | Incidence in thousands (95% UI)                   | YLDs in thousands (95% UI)              |                                                   |                                                     |
|------------------------------------------------------------|-----------------------------------------------|---------------------------------------------------|-----------------------------------------|---------------------------------------------------|-----------------------------------------------------|
|                                                            | 2016 counts                                   | 2016 counts                                       | 2016 counts                             | Percentage change in counts between 2006 and 2016 | Percentage change in age-standardised rates between |
| Attention-deficit/hyperactivity disorder                   | 226.3<br>(204.7 to 252.3)                     | 12.1<br>(10.6 to 14.0)                            | 2.7<br>(1.6 to 4.4)                     | 12.3<br>(6.5 to 19.0)                             | 0.2<br>(-4.8 to 6.0)                                |
| Conduct disorder                                           | 89.5<br>(72.4 to 107.7)                       | 31.2<br>(23.9 to 38.2)                            | 10.8<br>(6.6 to 16.6)                   | 4.8<br>(-2.0 to 12.6)                             | 0.1<br>(-6.5 to 7.4)                                |
| Idiopathic developmental intellectual disability           | 112.3<br>(55.6 to 169.8)                      | --                                                | 5.0<br>(2.2 to 8.7)                     | 14.0<br>(3.4 to 24.7)                             | -2.3<br>(-10.9 to 6.3)                              |
| Other mental and substance use disorders                   | 175.0<br>(153.3 to 202.7)                     | 7.7<br>(6.8 to 8.8)                               | 13.0<br>(8.9 to 18.7)                   | 26.8<br>(20.3 to 33.6)                            | 0.3<br>(-4.4 to 5.3)                                |
| <b>Diabetes, urogenital, blood, and endocrine diseases</b> | <b>4,560.6</b><br><b>(4,448.3 to 4,664.7)</b> | <b>1,102.5†</b><br><b>(1,024.3 to 1,187.1)</b>    | <b>84.6</b><br><b>(59.6 to 115.7)</b>   | <b>21.6</b><br><b>(17.9 to 25.6)</b>              | <b>-2.3</b><br><b>(-5.3 to 1.0)</b>                 |
| Diabetes mellitus                                          | 487.2<br>(439.1 to 536.8)                     | 31.9<br>(28.9 to 35.0)                            | 41.3<br>(28.5 to 57.3)                  | 26.3<br>(19.2 to 33.9)                            | -1.8<br>(-7.4 to 4.1)                               |
| Acute glomerulonephritis                                   | 0.1<br>(0.1 to 0.1)                           | 1.8<br>(1.5 to 2.0)                               | < 0.05<br>(< 0.05 to < 0.05)            | 18.3<br>(12.8 to 23.2)                            | 0.2<br>(-3.7 to 3.7)                                |
| Chronic kidney disease                                     | 297.4<br>(268.9 to 328.1)                     | 23.5<br>(20.9 to 26.2)                            | 9.9<br>(7.4 to 12.9)                    | 29.8<br>(22.8 to 37.8)                            | 0.5<br>(-4.8 to 5.9)                                |
| Chronic kidney disease due to diabetes mellitus            | 101.1<br>(85.2 to 118.2)                      | 7.9<br>(6.5 to 9.5)                               | 3.1<br>(2.3 to 4.2)                     | 33.5<br>(22.4 to 45.4)                            | 1.9<br>(-5.8 to 10.5)                               |
| Chronic kidney disease due to hypertension                 | 70.8<br>(61.0 to 80.8)                        | 7.5<br>(6.3 to 8.7)                               | 1.1<br>(0.8 to 1.5)                     | 28.8<br>(16.6 to 42.4)                            | -2.9<br>(-12.2 to 7.5)                              |
| Chronic kidney disease due to glomerulonephritis           | 58.2<br>(50.6 to 66.8)                        | 2.6<br>(2.1 to 3.3)                               | 3.3<br>(2.4 to 4.5)                     | 29.0<br>(16.8 to 42.3)                            | 1.3<br>(-6.8 to 9.8)                                |
| Chronic kidney disease due to other causes                 | 67.2<br>(55.5 to 78.7)                        | 5.5<br>(4.6 to 6.5)                               | 2.4<br>(1.7 to 3.2)                     | 26.6<br>(17.4 to 37.0)                            | -0.5<br>(-7.5 to 7.3)                               |
| Urinary diseases and male infertility                      | 139.6<br>(128.0 to 150.2)                     | 660.8†<br>(587.8 to 740.6)                        | 3.3<br>(2.2 to 4.8)                     | 26.3<br>(18.6 to 33.7)                            | -1.4<br>(-7.7 to 4.6)                               |
| Interstitial nephritis and urinary tract infections        | 11.8<br>(10.4 to 13.3)                        | 616.8<br>(543.2 to 696.9)                         | 0.4<br>(0.2 to 0.6)                     | 20.2<br>(2.8 to 39.8)                             | 2.5<br>(-10.7 to 17.0)                              |
| Urolithiasis                                               | 1.3<br>(1.2 to 1.5)                           | 34.4<br>(30.4 to 39.0)                            | 0.1<br>(0.1 to 0.1)                     | 26.4<br>(21.6 to 31.7)                            | 1.7<br>(-2.0 to 5.8)                                |
| Benign prostatic hyperplasia                               | 71.8<br>(60.2 to 84.5)                        | 9.7<br>(8.0 to 11.4)                              | 2.3<br>(1.5 to 3.5)                     | 28.8<br>(18.2 to 39.0)                            | -1.7<br>(-9.2 to 5.6)                               |
| Male infertility                                           | 50.0<br>(45.2 to 55.3)                        | --                                                | 0.3<br>(0.1 to 0.6)                     | 39.4<br>(26.9 to 51.6)                            | 9.3<br>(-0.2 to 18.3)                               |
| Other urinary diseases                                     | --                                            | --                                                | 0.2<br>(0.1 to 0.3)                     | -1.2<br>(-13.3 to 12.2)                           | -15.5<br>(-24.4 to -5.9)                            |
| Gynecological diseases                                     | 1,192.8<br>(1,140.7 to 1,243.2)               | 368.1†<br>(344.2 to 392.8)                        | 13.6<br>(9.3 to 19.5)                   | 19.7<br>(14.5 to 24.5)                            | -4.2<br>(-8.0 to -0.5)                              |
| Uterine fibroids                                           | 73.2<br>(63.8 to 83.6)                        | 8.7<br>(7.4 to 10.1)                              | 2.1<br>(1.3 to 3.1)                     | 24.1<br>(16.3 to 32.6)                            | -2.8<br>(-8.9 to 3.8)                               |
| Polycystic ovarian syndrome                                | 1.2<br>(0.8 to 1.6)                           | 7.0<br>(4.9 to 9.5)                               | < 0.05<br>(< 0.05 to < 0.05)            | 26.0<br>(-14.0 to 78.7)                           | -0.5<br>(-30.7 to 40.3)                             |
| Female infertility                                         | 111.4<br>(99.6 to 124.3)                      | --                                                | 0.6<br>(0.2 to 1.3)                     | 25.7<br>(14.9 to 38.1)                            | -4.4<br>(-12.6 to 5.2)                              |
| Endometriosis                                              | 0.8<br>(0.7 to 1.0)                           | 4.0<br>(3.3 to 4.9)                               | 0.1<br>(< 0.05 to 0.1)                  | 22.0<br>(-7.5 to 57.4)                            | 0.5<br>(-24.4 to 33.0)                              |
| Genital prolapse                                           | 379.2<br>(330.6 to 433.1)                     | 28.1<br>(24.1 to 32.9)                            | 1.2<br>(0.6 to 2.1)                     | 10.4<br>(2.1 to 18.9)                             | -13.6<br>(-20.2 to -7.2)                            |
| Premenstrual syndrome                                      | 667.0<br>(619.0 to 715.4)                     | 247.0<br>(226.7 to 266.8)                         | 5.5<br>(3.5 to 8.5)                     | 19.0<br>(9.5 to 28.0)                             | -2.3<br>(-9.7 to 4.9)                               |
| Other gynecological diseases                               | 119.7<br>(108.8 to 132.6)                     | 73.3<br>(60.9 to 86.6)                            | 4.1<br>(2.8 to 5.6)                     | 20.5<br>(11.9 to 29.6)                            | -3.4<br>(-9.8 to 3.9)                               |
| Hemoglobinopathies and hemolytic anaemias                  | 3,187.8<br>(3,054.6 to 3,307.9)               | --                                                | 10.9<br>(7.2 to 15.9)                   | 8.4<br>(1.5 to 15.9)                              | -4.7<br>(-10.0 to 0.7)                              |
| Thalassemias                                               | 0.1<br>(0.1 to 0.1)                           | --                                                | < 0.05<br>(< 0.05 to < 0.05)            | 7.0<br>(-9.3 to 22.2)                             | -0.3<br>(-15.2 to 13.8)                             |
| Thalassaemias trait                                        | 32.5<br>(28.4 to 36.3)                        | --                                                | 0.4<br>(0.3 to 0.6)                     | 21.2<br>(5.2 to 38.2)                             | 4.0<br>(-8.5 to 17.5)                               |
| Sickle cell disorders                                      | 15.2<br>(12.6 to 18.0)                        | --                                                | 1.2<br>(0.8 to 1.8)                     | 16.9<br>(-0.7 to 39.8)                            | 8.8<br>(-7.6 to 29.9)                               |
| Sickle cell trait                                          | 1,620.6<br>(1,490.1 to 1,755.8)               | --                                                | 5.6<br>(3.7 to 8.3)                     | 12.8<br>(4.0 to 22.1)                             | -0.4<br>(-7.2 to 7.1)                               |
| G6PD deficiency                                            | 504.1<br>(437.6 to 572.2)                     | --                                                | 0.1<br>(< 0.05 to 0.1)                  | 6.2<br>(-7.6 to 23.0)                             | -5.7<br>(-16.8 to 6.8)                              |
| G6PD trait                                                 | 1,211.9<br>(1,125.1 to 1,294.9)               | --                                                | < 0.05<br>(< 0.05 to < 0.05)            | 26.8<br>(16.2 to 37.3)                            | 8.1<br>(0.1 to 16.3)                                |
| Other hemoglobinopathies and hemolytic anaemias            | 159.7<br>(152.4 to 167.7)                     | --                                                | 3.5<br>(2.3 to 5.0)                     | -1.6<br>(-9.3 to 6.0)                             | -13.8<br>(-19.3 to -8.5)                            |
| Endocrine, metabolic, blood, and immune disorders          | 196.6<br>(187.3 to 205.4)                     | 16.5<br>(15.0 to 18.1)                            | 5.7<br>(3.8 to 7.9)                     | 7.8<br>(1.0 to 14.9)                              | -5.1<br>(-10.0 to -0.1)                             |
| <b>Musculoskeletal disorders</b>                           | <b>1,332.5</b><br><b>(1,258.4 to 1,403.5)</b> | <b>730.9</b><br><b>(657.8 to 813.0)</b>           | <b>143.0</b><br><b>(101.5 to 188.5)</b> | <b>24.1</b><br><b>(18.7 to 28.6)</b>              | <b>-1.8</b><br><b>(-5.6 to 1.7)</b>                 |
| Rheumatoid arthritis                                       | 26.4<br>(23.7 to 29.5)                        | 1.6<br>(1.5 to 1.8)                               | 6.2<br>(4.2 to 8.3)                     | 31.1<br>(19.3 to 43.1)                            | 3.4<br>(-4.5 to 11.4)                               |
| Osteoarthritis                                             | 207.1<br>(193.9 to 220.8)                     | 11.2<br>(10.4 to 12.1)                            | 12.7<br>(9.1 to 17.1)                   | 36.6<br>(31.4 to 42.4)                            | 4.8<br>(1.1 to 8.8)                                 |
| Low back and neck pain                                     | 726.8<br>(675.6 to 783.6)                     | 290.9<br>(261.4 to 322.5)                         | 81.9<br>(57.9 to 108.1)                 | 26.0<br>(21.9 to 30.6)                            | -0.4<br>(-3.3 to 2.8)                               |
| Low back pain                                              | 471.2<br>(416.7 to 538.8)                     | 222.5<br>(195.2 to 253.3)                         | 53.0<br>(37.0 to 70.1)                  | 24.7<br>(18.9 to 31.5)                            | -0.7<br>(-5.0 to 4.1)                               |
| Neck pain                                                  | 289.7<br>(248.5 to 335.0)                     | 68.4<br>(58.9 to 80.3)                            | 28.8<br>(19.4 to 41.1)                  | 28.4<br>(24.9 to 32.0)                            | 0.2<br>(-1.9 to 2.5)                                |
| Gout                                                       | 22.0<br>(19.5 to 25.0)                        | 4.5<br>(4.0 to 5.1)                               | 0.7<br>(0.5 to 1.0)                     | 30.2<br>(10.4 to 54.8)                            | 0.0<br>(-14.0 to 18.3)                              |
| Other musculoskeletal disorders                            | 482.9<br>(398.5 to 568.6)                     | 422.6<br>(354.3 to 501.0)                         | 41.6<br>(26.9 to 59.9)                  | 16.3<br>(2.0 to 29.1)                             | -7.8<br>(-18.6 to 2.2)                              |
| <b>Other non-communicable diseases</b>                     | <b>8,359.7</b><br><b>(8,200.0 to 8,499.8)</b> | <b>27,278.7†</b><br><b>(25,665.0 to 29,129.4)</b> | <b>207.2</b><br><b>(140.5 to 296.0)</b> | <b>17.3</b><br><b>(15.8 to 18.7)</b>              | <b>-1.7</b><br><b>(-2.5 to -0.8)</b>                |
| Congenital anomalies                                       | 129.1<br>(112.4 to 149.7)                     | --                                                | 14.3<br>(10.0 to 19.5)                  | 11.9<br>(4.9 to 20.2)                             | -2.0<br>(-8.1 to 5.4)                               |
| Neural tube defects                                        | 4.3<br>(3.8 to 4.8)                           | --                                                | 1.3<br>(0.9 to 1.8)                     | 9.0<br>(-6.3 to 27.8)                             | -5.8<br>(-18.6 to 9.3)                              |
| Congenital heart anomalies                                 | 38.0<br>(32.3 to 44.4)                        | --                                                | 1.7<br>(0.7 to 2.9)                     | 17.2<br>(2.8 to 34.1)                             | 7.4<br>(-5.8 to 22.3)                               |
| Orofacial clefts                                           | 7.4<br>(6.5 to 8.4)                           | --                                                | 0.1<br>(0.1 to 0.2)                     | 8.7<br>(-3.2 to 22.1)                             | -5.8<br>(-16.1 to 6.0)                              |
| Down's syndrome                                            | 6.8<br>(5.9 to 8.1)                           | --                                                | 0.6<br>(0.4 to 0.8)                     | 21.6<br>(9.8 to 34.7)                             | 6.9<br>(-2.9 to 17.2)                               |
| Turner syndrome                                            | 3.9<br>(3.3 to 4.6)                           | --                                                | 0.1<br>(< 0.05 to 0.1)                  | 16.0<br>(-24.1 to 76.3)                           | 3.2<br>(-29.6 to 52.7)                              |
| Klinefelter syndrome                                       | 4.0<br>(3.3 to 4.7)                           | --                                                | < 0.05<br>(< 0.05 to < 0.05)            | 18.4<br>(-14.8 to 62.4)                           | 2.1<br>(-25.6 to 38.2)                              |

| Cause                                         | Prevalence in thousands (95% UI)              | Incidence in thousands (95% UI)          | YLDs in thousands (95% UI)            |                                                   |                                                     |
|-----------------------------------------------|-----------------------------------------------|------------------------------------------|---------------------------------------|---------------------------------------------------|-----------------------------------------------------|
|                                               | 2016 counts                                   | 2016 counts                              | 2016 counts                           | Percentage change in counts between 2006 and 2016 | Percentage change in age-standardised rates between |
| Other chromosomal abnormalities               | 8.9<br>(7.4 to 10.7)                          | --                                       | 1.0<br>(0.6 to 1.3)                   | 7.2<br>(-11.3 to 28.0)                            | 1.1<br>(-15.8 to 20.4)                              |
| Congenital musculoskeletal and limb anomalies | 8.6<br>(7.8 to 9.4)                           | --                                       | 1.2<br>(0.8 to 1.8)                   | 20.3<br>(8.2 to 34.3)                             | 3.7<br>(-5.6 to 14.2)                               |
| Urogenital congenital anomalies               | 13.2<br>(11.2 to 15.6)                        | --                                       | 0.5<br>(0.3 to 0.8)                   | 7.3<br>(-8.2 to 25.4)                             | 0.0<br>(-14.1 to 15.9)                              |
| Digestive congenital anomalies                | 9.7<br>(8.5 to 10.9)                          | --                                       | 0.4<br>(0.3 to 0.6)                   | 16.5<br>(-5.5 to 44.0)                            | 0.9<br>(-16.8 to 22.2)                              |
| Other congenital anomalies                    | 52.2<br>(35.6 to 76.3)                        | --                                       | 7.4<br>(4.6 to 11.2)                  | 10.0<br>(-1.8 to 23.9)                            | -4.9<br>(-15.0 to 6.7)                              |
| Skin and subcutaneous diseases                | 3,420.3<br>(3,324.0 to 3,527.5)               | 7,756.2<br>(7,329.6 to 8,198.1)          | 88.6<br>(58.7 to 127.5)               | 13.4<br>(11.1 to 15.7)                            | 0.6<br>(-1.2 to 2.4)                                |
| Dermatitis                                    | 604.0<br>(557.5 to 653.0)                     | 547.8<br>(507.0 to 590.3)                | 24.2<br>(13.9 to 40.6)                | 11.5<br>(7.3 to 15.7)                             | 0.2<br>(-3.0 to 3.5)                                |
| Psoriasis                                     | 65.8<br>(62.7 to 69.1)                        | 10.5<br>(10.0 to 11.0)                   | 5.7<br>(4.2 to 7.6)                   | 26.6<br>(14.9 to 41.1)                            | 5.2<br>(-3.6 to 14.9)                               |
| Cellulitis                                    | 4.3<br>(3.9 to 4.7)                           | 77.9<br>(71.9 to 84.5)                   | 0.2<br>(0.1 to 0.4)                   | 16.0<br>(-11.4 to 50.7)                           | 1.4<br>(-19.5 to 26.1)                              |
| Pyoderma                                      | 24.2<br>(23.5 to 25.1)                        | 571.9<br>(550.8 to 594.1)                | 0.1<br>(0.1 to 0.3)                   | 21.5<br>(12.8 to 31.1)                            | 1.4<br>(-4.6 to 7.6)                                |
| Scabies                                       | 317.0<br>(274.2 to 364.6)                     | 968.4<br>(836.7 to 1,128.7)              | 8.2<br>(4.6 to 13.0)                  | 8.9<br>(4.9 to 13.7)                              | -3.2<br>(-6.3 to 0.2)                               |
| Fungal skin diseases                          | 1,063.0<br>(954.7 to 1,178.3)                 | 3,590.5<br>(3,198.0 to 3,999.4)          | 6.0<br>(2.4 to 12.7)                  | 17.4<br>(15.4 to 19.5)                            | 0.1<br>(-0.9 to 1.0)                                |
| Viral skin diseases                           | 330.8<br>(314.4 to 348.3)                     | 484.1<br>(457.3 to 512.2)                | 10.1<br>(6.3 to 14.9)                 | 13.0<br>(9.1 to 17.1)                             | -0.1<br>(-3.2 to 3.1)                               |
| Acne vulgaris                                 | 874.2<br>(768.6 to 986.5)                     | 620.9<br>(502.0 to 791.5)                | 22.4<br>(14.9 to 32.7)                | 12.1<br>(6.2 to 18.1)                             | 1.9<br>(-3.3 to 7.0)                                |
| Alopecia areata                               | 18.2<br>(17.5 to 19.0)                        | 32.4<br>(31.1 to 33.8)                   | 0.6<br>(0.4 to 0.9)                   | 22.8<br>(8.1 to 37.5)                             | 0.1<br>(-10.3 to 11.0)                              |
| Pruritus                                      | 81.8<br>(72.0 to 92.7)                        | 67.0<br>(59.5 to 75.3)                   | 0.9<br>(0.4 to 1.6)                   | 20.5<br>(13.7 to 27.7)                            | 0.3<br>(-4.6 to 5.4)                                |
| Urticaria                                     | 113.9<br>(98.1 to 132.7)                      | 205.0<br>(177.6 to 238.7)                | 6.9<br>(4.3 to 10.0)                  | 12.7<br>(6.1 to 19.9)                             | 0.2<br>(-5.4 to 5.8)                                |
| Decubitus ulcer                               | 2.6<br>(2.3 to 2.9)                           | 9.4<br>(8.4 to 10.5)                     | 0.4<br>(0.3 to 0.6)                   | 28.4<br>(15.5 to 42.2)                            | 4.0<br>(-8.6 to 18.1)                               |
| Other skin and subcutaneous diseases          | 506.7<br>(491.6 to 521.4)                     | 570.4<br>(553.1 to 587.8)                | 2.8<br>(1.4 to 5.0)                   | 20.8<br>(17.2 to 24.3)                            | -0.7<br>(-3.1 to 1.8)                               |
| Sense organ diseases                          | 2,360.1<br>(2,310.2 to 2,420.0)               | 995.1†<br>(929.5 to 1,068.9)             | 77.9<br>(53.4 to 109.8)               | 20.2<br>(17.8 to 22.8)                            | -3.6<br>(-5.1 to -2.0)                              |
| Glaucoma                                      | 6.4<br>(5.3 to 7.5)                           | --                                       | 0.7<br>(0.5 to 1.0)                   | 28.7<br>(15.6 to 43.8)                            | -1.1<br>(-10.6 to 9.3)                              |
| Cataract                                      | 61.9<br>(54.5 to 70.1)                        | --                                       | 4.9<br>(3.4 to 6.6)                   | 24.8<br>(18.9 to 31.2)                            | -5.3<br>(-9.2 to -1.1)                              |
| Macular degeneration                          | 1.5<br>(1.2 to 1.9)                           | --                                       | 0.1<br>(0.1 to 0.2)                   | 33.3<br>(10.9 to 60.2)                            | 1.8<br>(-14.1 to 20.2)                              |
| Refraction and accommodation disorders        | 1,452.5<br>(1,396.6 to 1,508.0)               | --                                       | 20.0<br>(11.0 to 33.5)                | 13.3<br>(9.9 to 16.7)                             | -7.5<br>(-10.2 to -4.8)                             |
| Age-related and other hearing loss            | 1,281.4<br>(1,206.7 to 1,361.7)               | --                                       | 43.6<br>(30.6 to 60.5)                | 22.1<br>(18.0 to 26.3)                            | -2.5<br>(-4.6 to -0.2)                              |
| Other vision loss                             | 18.3<br>(16.2 to 20.5)                        | --                                       | 1.7<br>(1.1 to 2.3)                   | 23.8<br>(12.3 to 35.5)                            | -2.3<br>(-10.1 to 5.7)                              |
| Other sense organ diseases                    | 230.0<br>(213.1 to 246.9)                     | 995.1<br>(929.5 to 1,068.9)              | 7.0<br>(4.4 to 10.6)                  | 25.2<br>(19.4 to 31.4)                            | 0.7<br>(-3.1 to 5.0)                                |
| Oral disorders                                | 6,379.2<br>(6,116.0 to 6,621.8)               | 18,527.4†<br>(16,975.2 to 20,240.6)      | 26.4<br>(15.5 to 42.5)                | 26.2<br>(23.9 to 28.4)                            | -0.1<br>(-1.9 to 1.7)                               |
| Caries of deciduous teeth                     | 1,235.0<br>(990.0 to 1,475.8)                 | 3,928.7<br>(2,846.1 to 5,249.6)          | 0.3<br>(0.1 to 0.6)                   | 7.0<br>(-4.5 to 19.9)                             | 1.0<br>(-10.3 to 13.5)                              |
| Caries of permanent teeth                     | 4,414.5<br>(4,132.1 to 4,698.9)               | 14,406.7<br>(13,285.3 to 15,459.2)       | 2.6<br>(1.2 to 5.0)                   | 18.6<br>(14.3 to 22.8)                            | 0.3<br>(-2.6 to 3.5)                                |
| Periodontal disease                           | 1,299.5<br>(1,104.1 to 1,534.2)               | 160.1<br>(131.3 to 193.2)                | 8.5<br>(3.4 to 18.0)                  | 28.2<br>(23.9 to 32.6)                            | -0.6<br>(-3.9 to 2.5)                               |
| Edentulism and severe tooth loss              | 351.0<br>(304.1 to 396.3)                     | 31.9<br>(26.9 to 37.2)                   | 9.7<br>(6.4 to 13.6)                  | 30.3<br>(25.6 to 34.4)                            | 0.2<br>(-3.2 to 3.3)                                |
| Other oral disorders                          | 180.5<br>(172.1 to 189.2)                     | --                                       | 5.3<br>(3.3 to 7.9)                   | 21.1<br>(16.4 to 25.5)                            | 0.0<br>(-3.2 to 3.1)                                |
| <b>Injuries</b>                               | <b>1,756.5</b><br><b>(1,294.5 to 2,250.4)</b> | <b>732.4†</b><br><b>(688.7 to 780.3)</b> | <b>79.6</b><br><b>(39.8 to 128.8)</b> | <b>75.1</b><br><b>(16.1 to 139.5)</b>             | <b>41.0</b><br><b>(-6.0 to 92.7)</b>                |
| <b>Transport injuries</b>                     | <b>128.8</b><br><b>(119.3 to 138.6)</b>       | <b>57.6</b><br><b>(50.3 to 65.9)</b>     | <b>8.0</b><br><b>(4.6 to 12.7)</b>    | <b>34.7</b><br><b>(5.1 to 73.1)</b>               | <b>9.8</b><br><b>(-13.8 to 39.7)</b>                |
| Road injuries                                 | 121.8<br>(112.4 to 131.3)                     | 55.5<br>(48.1 to 63.7)                   | 7.5<br>(4.4 to 11.9)                  | 35.6<br>(6.3 to 73.3)                             | 10.4<br>(-13.0 to 40.1)                             |
| Pedestrian road injuries                      | 16.0<br>(13.5 to 18.8)                        | 5.2<br>(4.1 to 6.5)                      | 1.0<br>(0.6 to 1.7)                   | 28.4<br>(-2.9 to 67.5)                            | 7.0<br>(-17.7 to 37.0)                              |
| Cyclist road injuries                         | 25.4<br>(20.3 to 30.4)                        | 12.9<br>(10.2 to 15.9)                   | 1.5<br>(0.8 to 2.4)                   | 44.5<br>(11.1 to 87.2)                            | 20.5<br>(-6.2 to 54.5)                              |
| Motorcyclist road injuries                    | 30.9<br>(26.1 to 37.8)                        | 9.8<br>(8.0 to 12.1)                     | 1.8<br>(1.1 to 2.9)                   | 36.1<br>(7.2 to 73.3)                             | 8.4<br>(-14.3 to 37.2)                              |
| Motor vehicle road injuries                   | 37.8<br>(32.6 to 43.1)                        | 20.8<br>(17.3 to 24.5)                   | 2.5<br>(1.5 to 4.0)                   | 32.2<br>(4.4 to 66.8)                             | 7.3<br>(-15.0 to 34.2)                              |
| Other road injuries                           | 11.7<br>(10.0 to 14.0)                        | 6.9<br>(5.3 to 8.9)                      | 0.7<br>(0.4 to 1.1)                   | 40.3<br>(12.6 to 75.2)                            | 14.5<br>(-7.1 to 41.5)                              |
| Other transport injuries                      | 7.0<br>(5.9 to 8.5)                           | 2.1<br>(1.8 to 2.5)                      | 0.5<br>(0.3 to 0.8)                   | 22.9<br>(-10.3 to 64.3)                           | 1.8<br>(-24.8 to 33.9)                              |
| <b>Unintentional injuries</b>                 | <b>1,024.3</b><br><b>(948.2 to 1,118.6)</b>   | <b>592.9</b><br><b>(554.2 to 634.9)</b>  | <b>42.1</b><br><b>(24.1 to 65.7)</b>  | <b>25.7</b><br><b>(-6.0 to 66.3)</b>              | <b>3.5</b><br><b>(-21.7 to 35.2)</b>                |
| Falls                                         | 404.6<br>(350.9 to 465.5)                     | 222.7<br>(191.5 to 257.4)                | 19.0<br>(11.3 to 28.8)                | 35.8<br>(2.1 to 77.7)                             | 9.5<br>(-17.0 to 42.0)                              |
| Drowning                                      | 6.4<br>(5.6 to 7.3)                           | 1.6<br>(1.4 to 1.8)                      | 0.4<br>(0.2 to 0.7)                   | 9.0<br>(-22.6 to 47.1)                            | -10.8<br>(-35.8 to 18.5)                            |
| Fire, heat, and hot substances                | 119.9<br>(98.9 to 148.2)                      | 19.6<br>(16.1 to 23.6)                   | 3.9<br>(2.0 to 6.7)                   | 16.8<br>(-23.9 to 80.0)                           | -0.9<br>(-34.0 to 50.3)                             |
| Poisonings                                    | 2.7<br>(2.1 to 3.2)                           | 4.4<br>(3.4 to 5.4)                      | 0.3<br>(0.1 to 0.5)                   | 21.7<br>(-11.1 to 66.7)                           | 3.6<br>(-20.2 to 35.9)                              |
| Exposure to mechanical forces                 | 182.8<br>(157.0 to 218.9)                     | 87.4<br>(73.8 to 101.0)                  | 5.3<br>(2.9 to 8.7)                   | 25.9<br>(-6.2 to 64.2)                            | 2.0<br>(-23.9 to 32.4)                              |
| Unintentional firearm injuries                | 13.4<br>(10.6 to 17.0)                        | 4.4<br>(3.2 to 5.8)                      | 0.7<br>(0.4 to 1.1)                   | 25.1<br>(-5.7 to 61.2)                            | -0.8<br>(-25.4 to 27.8)                             |
| Unintentional suffocation                     | 8.3<br>(6.0 to 11.1)                          | 2.3<br>(1.5 to 3.3)                      | 0.3<br>(0.1 to 0.6)                   | 13.4<br>(-18.0 to 49.7)                           | -2.7<br>(-30.0 to 28.9)                             |
| Other exposure to mechanical forces           | 161.1<br>(135.7 to 198.3)                     | 80.7<br>(68.2 to 93.3)                   | 4.4<br>(2.4 to 7.1)                   | 27.1<br>(-5.6 to 66.5)                            | 2.8<br>(-23.2 to 33.1)                              |



| Cause                                                                               | Prevalence in thousands (95% UI)          | Incidence in thousands (95% UI)       | YLDs in thousands (95% UI)          |                                                   |                                                     |
|-------------------------------------------------------------------------------------|-------------------------------------------|---------------------------------------|-------------------------------------|---------------------------------------------------|-----------------------------------------------------|
|                                                                                     | 2016 counts                               | 2016 counts                           | 2016 counts                         | Percentage change in counts between 2006 and 2016 | Percentage change in age-standardised rates between |
| Adverse effects of medical treatment                                                | 5.2<br>(4.1 to 6.4)                       | 67.5<br>(59.2 to 77.3)                | 0.7<br>(0.4 to 1.0)                 | 2.1<br>(-3.3 to 8.8)                              | -10.2<br>(-13.4 to -6.2)                            |
| Animal contact                                                                      | 36.1<br>(31.6 to 42.2)                    | 50.8<br>(41.8 to 61.2)                | 1.4<br>(0.8 to 2.3)                 | 27.8<br>(-3.4 to 72.6)                            | 5.6<br>(-18.1 to 40.0)                              |
| Venomous animal contact                                                             | 15.4<br>(12.8 to 18.4)                    | 22.1<br>(17.0 to 28.1)                | 1.0<br>(0.6 to 1.6)                 | 29.5<br>(-2.5 to 76.7)                            | 7.9<br>(-15.1 to 40.4)                              |
| Non-venomous animal contact                                                         | 20.7<br>(17.2 to 26.2)                    | 28.7<br>(22.9 to 35.4)                | 0.4<br>(0.2 to 0.7)                 | 24.0<br>(-7.3 to 70.3)                            | 0.9<br>(-26.2 to 38.6)                              |
| Foreign body                                                                        | 59.3<br>(47.1 to 72.6)                    | 55.4<br>(47.7 to 65.0)                | 3.1<br>(1.6 to 5.5)                 | 13.3<br>(-18.3 to 55.8)                           | -3.5<br>(-29.6 to 30.4)                             |
| Pulmonary aspiration and foreign body in airway                                     | 39.7<br>(29.4 to 54.1)                    | 18.7<br>(15.2 to 23.3)                | 2.2<br>(1.1 to 4.0)                 | 10.0<br>(-23.6 to 53.9)                           | -5.4<br>(-33.7 to 29.2)                             |
| Foreign body in eyes                                                                | 5.5<br>(3.1 to 8.3)                       | 29.7<br>(23.1 to 38.6)                | 0.3<br>(0.1 to 0.5)                 | 20.4<br>(12.0 to 33.3)                            | -0.4<br>(-8.0 to 9.5)                               |
| Foreign body in other body part                                                     | 14.1<br>(11.2 to 17.8)                    | 7.0<br>(5.7 to 8.6)                   | 0.6<br>(0.3 to 1.1)                 | 23.6<br>(-19.0 to 77.0)                           | 2.1<br>(-33.0 to 44.8)                              |
| Environmental heat and cold exposure                                                | 85.7<br>(72.6 to 100.4)                   | 29.8<br>(24.8 to 35.7)                | 4.0<br>(2.2 to 6.5)                 | 14.7<br>(-16.2 to 53.2)                           | -6.3<br>(-30.6 to 23.7)                             |
| Other unintentional injuries                                                        | 121.8<br>(98.6 to 148.2)                  | 53.8<br>(46.1 to 63.2)                | 3.9<br>(2.2 to 6.2)                 | 20.4<br>(-6.2 to 53.7)                            | -0.1<br>(-21.5 to 25.5)                             |
| <b>Self-harm and interpersonal violence</b>                                         | <b>421.4</b><br><b>(373.9 to 477.0)</b>   | <b>23.3†</b><br><b>(20.0 to 27.1)</b> | <b>5.2</b><br><b>(3.5 to 7.2)</b>   | <b>10.1</b><br><b>(0.6 to 24.7)</b>               | <b>-7.6</b><br><b>(-16.4 to 5.1)</b>                |
| Self-harm                                                                           | 5.6<br>(4.9 to 6.4)                       | 3.1<br>(2.7 to 3.6)                   | 0.3<br>(0.2 to 0.6)                 | 29.9<br>(-2.2 to 69.9)                            | 2.3<br>(-22.7 to 33.0)                              |
| Self-harm by firearm                                                                | 0.8<br>(0.7 to 1.0)                       | 0.3<br>(0.2 to 0.5)                   | < 0.05<br>(< 0.05 to 0.1)           | 7.1<br>(-20.1 to 39.7)                            | -16.6<br>(-37.6 to 8.1)                             |
| Self-harm by other specified means                                                  | 4.8<br>(4.1 to 5.6)                       | 2.8<br>(2.4 to 3.3)                   | 0.3<br>(0.2 to 0.5)                 | 33.5<br>(0.5 to 75.1)                             | 5.3<br>(-20.6 to 37.1)                              |
| Interpersonal violence                                                              | 415.8<br>(368.4 to 471.5)                 | 20.1†<br>(16.8 to 23.8)               | 4.9<br>(3.3 to 6.7)                 | 9.0<br>(0.4 to 21.8)                              | -8.4<br>(-16.2 to 2.8)                              |
| Assault by firearm                                                                  | 2.3<br>(1.9 to 2.8)                       | 1.0<br>(0.7 to 1.3)                   | 0.1<br>(0.1 to 0.2)                 | 16.1<br>(-8.5 to 46.7)                            | -8.2<br>(-28.2 to 16.0)                             |
| Assault by sharp object                                                             | 15.9<br>(12.9 to 19.3)                    | 8.5<br>(6.7 to 10.8)                  | 0.6<br>(0.3 to 1.0)                 | 25.6<br>(-2.9 to 61.6)                            | 1.7<br>(-21.9 to 30.0)                              |
| Sexual violence                                                                     | 382.3<br>(334.1 to 438.0)                 | --                                    | 3.4<br>(2.2 to 4.9)                 | 4.1<br>(-3.0 to 10.3)                             | -11.9<br>(-17.7 to -6.6)                            |
| Assault by other means                                                              | 15.2<br>(13.1 to 18.1)                    | 10.6<br>(8.6 to 12.8)                 | 0.7<br>(0.4 to 1.2)                 | 20.7<br>(-5.8 to 54.0)                            | -2.0<br>(-23.6 to 24.4)                             |
| <b>Forces of nature, conflict and terrorism, and executions and police conflict</b> | <b>564.2</b><br><b>(116.2 to 1,047.5)</b> | <b>58.7†</b><br><b>(38.7 to 81.6)</b> | <b>24.4</b><br><b>(6.6 to 45.5)</b> | <b>1,653.3</b><br><b>(896.9 to 3,858.4)</b>       | <b>1,410.9</b><br><b>(785.1 to 3,181.5)</b>         |
| Exposure to forces of nature                                                        | 559.7<br>(113.8 to 1,040.9)               | 58.4<br>(38.4 to 81.4)                | 24.2<br>(6.6 to 45.2)               | 1,878.2<br>(1,033.4 to 4,625.7)                   | 1,592.7<br>(908.8 to 3,740.7)                       |
| Conflict and terrorism                                                              | 3.9<br>(1.3 to 7.5)                       | --                                    | 0.1<br>(< 0.05 to 0.4)              | -8.6<br>(-32.5 to 22.3)                           | -16.2<br>(-37.6 to 11.9)                            |
| Executions and police conflict                                                      | 0.6<br>(0.3 to 1.3)                       | 0.2<br>(0.1 to 0.5)                   | < 0.05<br>(< 0.05 to 0.1)           | 28.8<br>(-0.1 to 61.0)                            | 8.2<br>(-13.8 to 33.8)                              |
| <b>Impairments</b>                                                                  | --                                        | --                                    | --                                  | --                                                | --                                                  |
| Anaemia                                                                             | 4,661.9<br>(4,464.4 to 4,867.3)           | --                                    | 147.9<br>(99.6 to 211.2)            | -12.2<br>(-22.5 to -3.6)                          | -25.9<br>(-36.6 to -17.0)                           |
| Developmental intellectual disability                                               | 255.9<br>(201.3 to 315.6)                 | --                                    | 29.7<br>(20.1 to 46.8)              | 41.3<br>(16.7 to 82.0)                            | 22.9<br>(2.0 to 60.3)                               |
| Epilepsy                                                                            | 66.7<br>(38.2 to 107.8)                   | --                                    | 25.2<br>(12.5 to 45.2)              | 46.5<br>(-35.1 to 194.2)                          | 23.3<br>(-47.0 to 153.8)                            |
| Guillain-Barre syndrome                                                             | 0.1<br>(0.1 to 0.1)                       | --                                    | < 0.05<br>(< 0.05 to < 0.05)        | 19.6<br>(15.5 to 26.1)                            | 2.8<br>(1.2 to 7.3)                                 |
| Hearing loss                                                                        | 1,506.2<br>(1,432.8 to 1,584.8)           | --                                    | 56.4<br>(39.6 to 76.6)              | 18.9<br>(15.8 to 21.8)                            | -2.8<br>(-4.6 to -1.1)                              |
| Heart failure                                                                       | 36.4<br>(32.1 to 41.4)                    | --                                    | 3.6<br>(2.6 to 4.9)                 | 33.1<br>(23.7 to 43.4)                            | 2.3<br>(-4.6 to 10.3)                               |
| Infertility                                                                         | 199.5<br>(183.8 to 216.8)                 | --                                    | 1.2<br>(0.5 to 2.4)                 | 28.6<br>(20.0 to 37.0)                            | -0.4<br>(-6.5 to 6.4)                               |
| Pelvic inflammatory disease                                                         | 2.1<br>(1.8 to 2.5)                       | --                                    | 0.3<br>(0.2 to 0.4)                 | 19.0<br>(-2.1 to 46.4)                            | -5.2<br>(-22.1 to 15.1)                             |
| Vision loss                                                                         | 1,593.8<br>(1,534.8 to 1,655.9)           | --                                    | 37.4<br>(24.2 to 57.3)              | 31.6<br>(16.9 to 60.8)                            | 2.4<br>(-5.8 to 19.4)                               |

We did not calculate incidence for the nine impairments, certain NTDs, and causes with only birth prevalence. Blank cells mean that no estimate is available.

† Incidence for aggregate causes represents the sum of the incidence of the causes below the aggregate.

‡ Incidence estimates for stroke represent first-ever stroke only.

^ Incidence of HIV/AIDS represents new infections of HIV only and does not include new infections of Tuberculosis in HIV positive cases.

SR Table 14: Prevalence, incidence, and YLDs for 2016, percentage change of YLD counts and percentage change of age-standardised YLD rates between 2006 and 2016 by cause and impairments, for all ages, Honduras.

| Cause                                                                                | Prevalence in thousands (95% UI)       | Incidence in thousands (95% UI)            | YLDs in thousands (95% UI)       |                                                   |                                                     |
|--------------------------------------------------------------------------------------|----------------------------------------|--------------------------------------------|----------------------------------|---------------------------------------------------|-----------------------------------------------------|
|                                                                                      | 2016 counts                            | 2016 counts                                | 2016 counts                      | Percentage change in counts between 2006 and 2016 | Percentage change in age-standardised rates between |
| <b>All causes</b>                                                                    | <b>8,005.8</b><br>(7,970.0 to 8,040.2) | <b>51,042.8†</b><br>(48,161.0 to 54,367.8) | <b>715.4</b><br>(530.2 to 934.8) | <b>26.2</b><br>(22.1 to 30.4)                     | <b>-0.8</b><br>(-3.4 to 2.0)                        |
| <b>Communicable, maternal, neonatal, and nutritional disorders</b>                   | <b>6,202.5</b><br>(5,997.5 to 6,434.8) | <b>32,143.4†</b><br>(29,441.2 to 35,088.6) | <b>77.9</b><br>(54.9 to 109.0)   | <b>6.6</b><br>(1.0 to 12.0)                       | <b>-9.7</b><br>(-14.5 to -5.1)                      |
| <b>HIV/AIDS and tuberculosis</b>                                                     | <b>1,877.2</b><br>(1,689.0 to 2,037.2) | <b>4.0†</b><br>(3.5 to 4.7)                | <b>2.1</b><br>(1.3 to 3.2)       | <b>26.1</b><br>(-1.3 to 59.8)                     | <b>-0.6</b><br>(-25.2 to 28.5)                      |
| Tuberculosis                                                                         | 1,725.2<br>(1,541.4 to 1,924.6)        | 3.1†<br>(2.7 to 3.6)                       | 0.4<br>(0.2 to 0.6)              | 6.2<br>(-16.9 to 36.0)                            | -19.3<br>(-34.9 to -0.4)                            |
| Drug-susceptible tuberculosis                                                        | 1.2<br>(1.0 to 1.4)                    | 3.1<br>(2.6 to 3.6)                        | 0.4<br>(0.2 to 0.5)              | 6.2<br>(-17.2 to 37.0)                            | -19.3<br>(-35.1 to 0.3)                             |
| Multidrug-resistant tuberculosis without extensive drug resistance                   | < 0.05<br>(< 0.05 to < 0.05)           | 0.1<br>(< 0.05 to 0.1)                     | < 0.05<br>(< 0.05 to < 0.05)     | 0.4<br>(-43.7 to 80.5)                            | -24.0<br>(-57.4 to 36.2)                            |
| Extensively drug-resistant tuberculosis                                              | < 0.05<br>(< 0.05 to < 0.05)           | < 0.05<br>(< 0.05 to < 0.05)               | < 0.05<br>(< 0.05 to < 0.05)     | 167.2<br>(50.0 to 380.9)                          | 102.4<br>(13.5 to 262.6)                            |
| Latent tuberculosis infection                                                        | 1,724.0<br>(1,540.1 to 1,923.4)        | --                                         | --                               | --                                                | --                                                  |
| HIV/AIDS                                                                             | 18.4<br>(14.7 to 23.7)                 | 0.9 <sup>a</sup><br>(0.6 to 1.3)           | 1.7<br>(1.0 to 2.8)              | 31.6<br>(-3.0 to 78.4)                            | 5.3<br>(-25.7 to 47.8)                              |
| Drug-susceptible HIV/AIDS - Tuberculosis                                             | 0.1<br>(0.1 to 0.2)                    | 0.3<br>(0.2 to 0.5)                        | 0.1<br>(< 0.05 to 0.1)           | -16.5<br>(-22.0 to -10.4)                         | -30.7<br>(-35.2 to -25.6)                           |
| Multidrug-resistant HIV/AIDS - Tuberculosis without extensive drug resistance        | < 0.05<br>(< 0.05 to < 0.05)           | < 0.05<br>(< 0.05 to < 0.05)               | < 0.05<br>(< 0.05 to < 0.05)     | -21.1<br>(-55.7 to 41.6)                          | -34.5<br>(-63.2 to 17.5)                            |
| Extensively drug-resistant HIV/AIDS - Tuberculosis                                   | < 0.05<br>(< 0.05 to < 0.05)           | < 0.05<br>(< 0.05 to < 0.05)               | < 0.05<br>(< 0.05 to < 0.05)     | 110.1<br>(18.0 to 277.0)                          | 74.5<br>(-2.1 to 212.9)                             |
| HIV/AIDS resulting in other diseases                                                 | 18.3<br>(14.6 to 23.5)                 | 0.9<br>(0.6 to 1.3)                        | 1.7<br>(1.0 to 2.7)              | 34.1<br>(-2.4 to 85.3)                            | 7.2<br>(-25.6 to 53.3)                              |
| <b>Diarrhoea, lower respiratory infections, and other common infectious diseases</b> | <b>537.8</b><br>(509.4 to 568.4)       | <b>30,225.3†</b><br>(27,538.5 to 33,145.6) | <b>26.0</b><br>(17.8 to 36.4)    | <b>14.7</b><br>(10.7 to 19.3)                     | <b>-0.5</b><br>(-3.5 to 2.6)                        |
| Diarrhoeal diseases                                                                  | 110.2<br>(102.9 to 117.3)              | 7,287.5<br>(6,818.7 to 7,772.3)            | 12.6<br>(8.7 to 17.2)            | 15.8<br>(9.0 to 23.8)                             | 0.4<br>(-4.8 to 5.8)                                |
| Intestinal infectious diseases                                                       | < 0.05<br>(< 0.05 to 0.1)              | 0.6†<br>(0.3 to 1.0)                       | < 0.05<br>(< 0.05 to < 0.05)     | 36.6<br>(16.3 to 62.7)                            | 7.3<br>(-6.3 to 23.4)                               |
| Typhoid fever                                                                        | < 0.05<br>(< 0.05 to 0.1)              | 0.6<br>(0.3 to 1.0)                        | < 0.05<br>(< 0.05 to < 0.05)     | 37.5<br>(17.3 to 64.2)                            | 7.9<br>(-6.1 to 24.5)                               |
| Paratyphoid fever                                                                    | < 0.05<br>(< 0.05 to < 0.05)           | < 0.05<br>(< 0.05 to < 0.05)               | < 0.05<br>(< 0.05 to < 0.05)     | 48.1<br>(-3.3 to 123.6)                           | 18.2<br>(-22.4 to 71.6)                             |
| Other intestinal infectious diseases                                                 | --                                     | --                                         | < 0.05<br>(< 0.05 to < 0.05)     | -1.6<br>(-31.7 to 30.5)                           | -17.3<br>(-34.3 to 0.0)                             |
| Lower respiratory infections                                                         | 6.5<br>(5.7 to 7.4)                    | 278.5<br>(243.6 to 317.2)                  | 0.4<br>(0.2 to 0.6)              | 33.0<br>(14.5 to 55.4)                            | 16.2<br>(2.5 to 31.3)                               |
| Upper respiratory infections                                                         | 289.6<br>(257.2 to 326.0)              | 21,864.5<br>(19,277.9 to 24,746.3)         | 7.3<br>(4.3 to 11.5)             | 17.5<br>(11.5 to 23.6)                            | 0.8<br>(-3.8 to 5.7)                                |
| Otitis media                                                                         | 139.2<br>(123.8 to 154.3)              | 585.5<br>(465.6 to 733.7)                  | 4.2<br>(2.7 to 6.3)              | 5.6<br>(-1.9 to 14.0)                             | -5.0<br>(-11.0 to 1.8)                              |
| Meningitis                                                                           | 5.7<br>(5.0 to 6.5)                    | 1.2<br>(1.0 to 1.3)                        | 0.7<br>(0.5 to 0.9)              | 13.1<br>(9.1 to 16.8)                             | -8.3<br>(-11.6 to -5.3)                             |
| Pneumococcal meningitis                                                              | 2.3<br>(2.0 to 2.7)                    | 0.2<br>(0.1 to 0.2)                        | 0.3<br>(0.2 to 0.4)              | 1.1<br>(-5.8 to 7.7)                              | -18.8<br>(-24.3 to -13.4)                           |
| H influenzae type B meningitis                                                       | 0.6<br>(0.5 to 0.7)                    | 0.1<br>(0.1 to 0.1)                        | 0.1<br>(0.1 to 0.1)              | 16.2<br>(10.5 to 22.0)                            | -3.6<br>(-8.1 to 0.8)                               |
| Meningococcal infection                                                              | 0.4<br>(0.3 to 0.5)                    | 0.1<br>(0.1 to 0.1)                        | < 0.05<br>(< 0.05 to 0.1)        | 16.6<br>(10.5 to 22.4)                            | -5.5<br>(-10.0 to -1.4)                             |
| Other meningitis                                                                     | 2.4<br>(1.9 to 3.0)                    | 0.8<br>(0.7 to 0.9)                        | 0.2<br>(0.1 to 0.3)              | 32.6<br>(26.9 to 38.9)                            | 7.8<br>(3.5 to 12.8)                                |
| Encephalitis                                                                         | 5.7<br>(3.8 to 8.5)                    | 2.8<br>(2.6 to 3.2)                        | 0.6<br>(0.4 to 0.8)              | 17.3<br>(7.1 to 28.0)                             | -5.2<br>(-11.1 to 1.0)                              |
| Diphtheria                                                                           | < 0.05<br>(< 0.05 to < 0.05)           | < 0.05<br>(< 0.05 to < 0.05)               | < 0.05<br>(< 0.05 to < 0.05)     | -9.6<br>(-54.8 to 79.2)                           | -20.3<br>(-57.8 to 45.1)                            |
| Whooping cough                                                                       | 1.1<br>(0.8 to 1.4)                    | 7.8<br>(6.0 to 10.0)                       | 0.1<br>(< 0.05 to 0.1)           | 2.8<br>(-23.6 to 33.6)                            | -6.1<br>(-30.2 to 21.7)                             |
| Tetanus                                                                              | < 0.05<br>(< 0.05 to < 0.05)           | < 0.05<br>(< 0.05 to < 0.05)               | < 0.05<br>(< 0.05 to < 0.05)     | -12.4<br>(-39.6 to 19.1)                          | -30.5<br>(-49.1 to -5.7)                            |
| Measles                                                                              | < 0.05<br>(0.0 to < 0.05)              | < 0.05<br>(0.0 to < 0.05)                  | < 0.05<br>(0.0 to < 0.05)        | --                                                | --                                                  |
| Varicella and herpes zoster                                                          | 7.7<br>(7.2 to 8.2)                    | 196.9<br>(192.0 to 202.6)                  | 0.3<br>(0.2 to 0.4)              | 27.3<br>(9.4 to 46.3)                             | -0.1<br>(-11.3 to 11.8)                             |
| <b>Neglected tropical diseases and malaria</b>                                       | <b>4,029.5</b><br>(3,574.4 to 4,550.4) | <b>703.7†</b><br>(392.2 to 1,422.5)        | <b>14.9</b><br>(9.5 to 22.5)     | <b>6.6</b><br>(-9.9 to 27.2)                      | <b>-13.1</b><br>(-27.7 to 5.1)                      |
| Malaria                                                                              | 0.2<br>(0.1 to 0.3)                    | 3.6<br>(3.6 to 3.6)                        | < 0.05<br>(< 0.05 to < 0.05)     | -81.0<br>(-86.7 to -73.3)                         | -83.8<br>(-88.6 to -77.2)                           |
| Chagas disease                                                                       | 40.2<br>(31.1 to 51.3)                 | 1.4<br>(1.1 to 1.8)                        | 0.3<br>(0.2 to 0.5)              | 36.9<br>(16.4 to 59.8)                            | -0.2<br>(-13.4 to 14.9)                             |
| Leishmaniasis                                                                        | 3.9<br>(2.7 to 5.2)                    | 6.5<br>(3.6 to 9.8)                        | 0.2<br>(0.1 to 0.4)              | 41.9<br>(-26.3 to 149.5)                          | 17.1<br>(-40.3 to 98.8)                             |
| Visceral leishmaniasis                                                               | < 0.05<br>(< 0.05 to < 0.05)           | < 0.05<br>(< 0.05 to < 0.05)               | < 0.05<br>(< 0.05 to < 0.05)     | -32.4<br>(-63.3 to 16.2)                          | -51.3<br>(-75.7 to -8.9)                            |
| Cutaneous and mucocutaneous leishmaniasis                                            | 3.3<br>(1.8 to 4.9)                    | 6.5<br>(3.6 to 9.7)                        | 0.2<br>(0.1 to 0.4)              | 41.9<br>(-26.2 to 149.7)                          | 17.2<br>(-40.2 to 99.1)                             |
| African trypanosomiasis                                                              | --                                     | --                                         | --                               | --                                                | --                                                  |
| Schistosomiasis                                                                      | --                                     | --                                         | --                               | --                                                | --                                                  |
| Cysticercosis                                                                        | 9.7<br>(3.8 to 15.6)                   | --                                         | 1.6<br>(0.5 to 3.1)              | 25.8<br>(-53.1 to 178.8)                          | -8.1<br>(-64.8 to 92.7)                             |
| Cystic echinococcosis                                                                | --                                     | --                                         | --                               | --                                                | --                                                  |
| Lymphatic filariasis                                                                 | --                                     | --                                         | --                               | --                                                | --                                                  |
| Onchocerciasis                                                                       | --                                     | --                                         | --                               | --                                                | --                                                  |
| Trachoma                                                                             | --                                     | --                                         | --                               | --                                                | --                                                  |
| Dengue                                                                               | 12.4<br>(6.9 to 20.4)                  | 206.7<br>(132.2 to 301.4)                  | 2.0<br>(0.9 to 3.8)              | 99.2<br>(55.8 to 340.2)                           | 69.3<br>(34.0 to 275.7)                             |
| Yellow fever                                                                         | --                                     | --                                         | --                               | --                                                | --                                                  |
| Rabies                                                                               | < 0.05<br>(< 0.05 to < 0.05)           | < 0.05<br>(< 0.05 to < 0.05)               | < 0.05<br>(< 0.05 to < 0.05)     | -35.7<br>(-80.3 to 111.5)                         | -38.0<br>(-78.2 to 78.9)                            |
| Intestinal nematode infections                                                       | 3,965.4<br>(3,507.9 to 4,490.9)        | --                                         | 9.5<br>(5.2 to 16.3)             | -5.7<br>(-23.4 to 15.5)                           | -23.3<br>(-38.7 to -4.9)                            |
| Ascariasis                                                                           | 2,008.0<br>(1,550.9 to 2,627.3)        | --                                         | 2.9<br>(1.5 to 5.1)              | -5.9<br>(-29.1 to 24.4)                           | -22.9<br>(-43.1 to 4.9)                             |

| Cause                                                                   | Prevalence in thousands (95% UI)              | Incidence in thousands (95% UI)                   | YLDs in thousands (95% UI)              |                                                   |                                                     |
|-------------------------------------------------------------------------|-----------------------------------------------|---------------------------------------------------|-----------------------------------------|---------------------------------------------------|-----------------------------------------------------|
|                                                                         | 2016 counts                                   | 2016 counts                                       | 2016 counts                             | Percentage change in counts between 2006 and 2016 | Percentage change in age-standardised rates between |
| Trichuriasis                                                            | 2,430.1<br>(1,933.2 to 3,048.6)               | --                                                | 5.6<br>(2.9 to 9.8)                     | -6.2<br>(-29.0 to 28.6)                           | -24.2<br>(-44.0 to 5.3)                             |
| Hookworm disease                                                        | 350.4<br>(265.4 to 472.4)                     | --                                                | 1.0<br>(0.6 to 1.6)                     | -1.8<br>(-25.6 to 28.7)                           | -18.8<br>(-39.2 to 7.6)                             |
| Food-borne trematodiasis                                                | --                                            | --                                                | --                                      | --                                                | --                                                  |
| Leprosy                                                                 | < 0.05<br>(< 0.05 to < 0.05)                  | < 0.05<br>(< 0.05 to < 0.05)                      | < 0.05<br>(< 0.05 to < 0.05)            | 33.2<br>(-2.7 to 119.3)                           | -4.4<br>(-28.8 to 57.6)                             |
| Ebola virus disease                                                     | --                                            | --                                                | --                                      | --                                                | --                                                  |
| Zika virus disease                                                      | 8.0<br>(3.4 to 19.9)                          | 485.5<br>(201.9 to 1,198.7)                       | 0.2<br>(0.1 to 0.4)                     | --                                                | --                                                  |
| Guinea worm disease                                                     | --                                            | --                                                | --                                      | --                                                | --                                                  |
| Other neglected tropical diseases                                       | 50.3<br>(43.7 to 55.9)                        | --                                                | 1.0<br>(0.6 to 1.6)                     | -11.7<br>(-28.7 to 2.2)                           | -15.8<br>(-31.1 to -3.4)                            |
| <b>Maternal disorders</b>                                               | <b>12.3</b><br><b>(9.3 to 15.1)</b>           | <b>259.1†</b><br><b>(214.7 to 314.7)</b>          | <b>0.8</b><br><b>(0.5 to 1.2)</b>       | <b>16.3</b><br><b>(-11.4 to 53.2)</b>             | <b>-9.5</b><br><b>(-30.8 to 19.1)</b>               |
| Maternal haemorrhage                                                    | 1.6<br>(1.2 to 2.1)                           | 11.4<br>(8.4 to 15.1)                             | 0.1<br>(< 0.05 to 0.1)                  | 5.7<br>(-30.1 to 55.2)                            | -17.7<br>(-44.9 to 20.2)                            |
| Maternal sepsis and other pregnancy related infections                  | 3.3<br>(2.3 to 4.6)                           | 25.1<br>(18.5 to 34.3)                            | 0.1<br>(< 0.05 to 0.2)                  | 9.7<br>(-47.9 to 119.6)                           | -13.4<br>(-58.5 to 73.5)                            |
| Maternal hypertensive disorders                                         | 6.6<br>(4.2 to 9.7)                           | 34.7<br>(28.1 to 42.5)                            | 0.3<br>(0.2 to 0.6)                     | 31.6<br>(-16.4 to 109.2)                          | 2.0<br>(-35.7 to 62.6)                              |
| Maternal obstructed labour and uterine rupture                          | 0.1<br>(0.1 to 0.2)                           | 7.8<br>(5.6 to 10.6)                              | < 0.05<br>(< 0.05 to 0.1)               | 7.3<br>(-41.6 to 93.8)                            | -16.1<br>(-54.1 to 51.5)                            |
| Maternal abortion, miscarriage, and ectopic pregnancy                   | 1.5<br>(0.9 to 2.2)                           | 180.0<br>(137.3 to 234.0)                         | 0.2<br>(0.1 to 0.3)                     | 6.0<br>(-40.6 to 89.4)                            | -18.1<br>(-53.8 to 44.2)                            |
| Other maternal disorders                                                | --                                            | --                                                | 0.1<br>(0.1 to 0.2)                     | 10.5<br>(-15.9 to 45.5)                           | -13.6<br>(-34.0 to 13.7)                            |
| <b>Neonatal disorders</b>                                               | <b>61.3</b><br><b>(52.4 to 72.8)</b>          | --                                                | <b>10.7</b><br><b>(7.1 to 15.2)</b>     | <b>24.0</b><br><b>(7.3 to 45.0)</b>               | <b>6.1</b><br><b>(-8.0 to 24.1)</b>                 |
| Neonatal preterm birth complications                                    | 51.4<br>(40.6 to 65.4)                        | --                                                | 5.6<br>(3.7 to 7.9)                     | 21.9<br>(-2.0 to 49.8)                            | 3.9<br>(-16.0 to 27.7)                              |
| Neonatal encephalopathy due to birth asphyxia and trauma                | 13.0<br>(6.1 to 23.2)                         | --                                                | 1.9<br>(0.3 to 4.8)                     | 41.8<br>(-9.7 to 240.0)                           | 21.0<br>(-20.6 to 193.5)                            |
| Neonatal sepsis and other neonatal infections                           | 3.5<br>(1.3 to 7.8)                           | --                                                | 1.5<br>(0.5 to 3.8)                     | 24.6<br>(-4.6 to 59.0)                            | 8.8<br>(-15.4 to 36.3)                              |
| Hemolytic disease and other neonatal jaundice                           | 4.5<br>(3.9 to 5.1)                           | --                                                | 1.3<br>(1.0 to 1.7)                     | 14.0<br>(-2.6 to 33.7)                            | -3.8<br>(-16.7 to 10.8)                             |
| Other neonatal disorders                                                | --                                            | --                                                | 0.4<br>(0.3 to 0.6)                     | 13.6<br>(-10.3 to 41.2)                           | 2.6<br>(-19.0 to 27.6)                              |
| <b>Nutritional deficiencies</b>                                         | <b>1,250.9</b><br><b>(1,189.3 to 1,314.4)</b> | <b>251.9†</b><br><b>(205.1 to 305.3)</b>          | <b>20.5</b><br><b>(13.3 to 30.5)</b>    | <b>-10.4</b><br><b>(-19.2 to -2.2)</b>            | <b>-23.8</b><br><b>(-30.5 to -17.7)</b>             |
| Protein-energy malnutrition                                             | 12.9<br>(9.9 to 16.5)                         | 6.6<br>(5.1 to 8.5)                               | 0.5<br>(0.2 to 0.8)                     | -11.9<br>(-43.8 to 38.3)                          | -20.4<br>(-49.3 to 25.0)                            |
| Iodine deficiency                                                       | 96.2<br>(84.3 to 109.3)                       | 2.7<br>(2.4 to 3.0)                               | 2.5<br>(1.6 to 3.6)                     | 25.6<br>(13.5 to 40.6)                            | -0.5<br>(-9.2 to 10.3)                              |
| Vitamin A deficiency                                                    | 282.8<br>(234.3 to 341.3)                     | 242.6<br>(195.7 to 295.7)                         | 0.2<br>(0.1 to 0.4)                     | 14.6<br>(-5.1 to 40.2)                            | 1.1<br>(-14.8 to 20.9)                              |
| Iron-deficiency anaemia                                                 | 920.2<br>(845.7 to 998.3)                     | --                                                | 17.3<br>(10.9 to 26.0)                  | -14.2<br>(-24.4 to -5.0)                          | -27.1<br>(-35.1 to -20.2)                           |
| Other nutritional deficiencies                                          | --                                            | --                                                | < 0.05<br>(< 0.05 to < 0.05)            | -14.5<br>(-47.5 to 36.8)                          | -22.8<br>(-52.6 to 23.4)                            |
| <b>Other communicable, maternal, neonatal, and nutritional diseases</b> | <b>1,947.8</b><br><b>(1,804.0 to 2,073.7)</b> | <b>699.5</b><br><b>(597.4 to 833.1)</b>           | <b>2.7</b><br><b>(1.6 to 4.5)</b>       | <b>15.4</b><br><b>(6.3 to 23.6)</b>               | <b>-5.2</b><br><b>(-11.1 to 0.6)</b>                |
| Sexually transmitted diseases excluding HIV                             | 1,643.4<br>(1,497.1 to 1,766.3)               | 555.4<br>(499.2 to 615.4)                         | 1.7<br>(0.9 to 3.0)                     | 30.4<br>(21.3 to 40.7)                            | -1.6<br>(-7.5 to 5.2)                               |
| Syphilis                                                                | 15.8<br>(12.6 to 19.7)                        | 11.6<br>(8.9 to 14.8)                             | 0.1<br>(0.1 to 0.1)                     | 43.8<br>(27.3 to 63.7)                            | 1.9<br>(-10.1 to 16.3)                              |
| Chlamydial infection                                                    | 131.1<br>(98.2 to 169.6)                      | 101.8<br>(76.2 to 134.5)                          | 0.4<br>(0.2 to 0.7)                     | 29.0<br>(10.0 to 53.4)                            | -1.3<br>(-15.2 to 16.3)                             |
| Gonococcal infection                                                    | 27.1<br>(21.4 to 35.1)                        | 91.8<br>(69.9 to 119.8)                           | 0.2<br>(0.1 to 0.3)                     | 30.3<br>(0.1 to 68.4)                             | -1.7<br>(-23.5 to 26.4)                             |
| Trichomoniasis                                                          | 250.4<br>(214.6 to 288.9)                     | 222.2<br>(187.5 to 259.1)                         | 0.3<br>(0.1 to 0.7)                     | 28.9<br>(19.5 to 38.1)                            | -2.1<br>(-8.6 to 4.2)                               |
| Genital herpes                                                          | 1,344.4<br>(1,152.4 to 1,561.1)               | 121.2<br>(101.7 to 143.8)                         | 0.4<br>(0.1 to 0.8)                     | 30.9<br>(18.8 to 43.9)                            | -2.6<br>(-9.9 to 5.9)                               |
| Other sexually transmitted diseases                                     | 8.4<br>(7.8 to 9.1)                           | 6.8<br>(5.8 to 8.0)                               | 0.3<br>(0.2 to 0.5)                     | 29.6<br>(14.7 to 46.3)                            | -1.9<br>(-12.3 to 10.2)                             |
| Hepatitis                                                               | 371.6<br>(325.8 to 424.1)                     | 144.0<br>(65.2 to 264.8)                          | 0.1<br>(0.1 to 0.2)                     | -7.7<br>(-46.6 to 67.6)                           | -17.6<br>(-47.4 to 32.5)                            |
| Acute hepatitis A                                                       | 6.9<br>(0.9 to 16.1)                          | 89.9<br>(12.1 to 209.9)                           | < 0.05<br>(< 0.05 to 0.1)               | -11.1<br>(-79.1 to 334.5)                         | -17.3<br>(-77.7 to 206.6)                           |
| Hepatitis B                                                             | 159.8<br>(123.0 to 204.6)                     | 40.5<br>(30.9 to 52.8)                            | < 0.05<br>(< 0.05 to 0.1)               | -7.2<br>(-24.0 to 13.6)                           | -20.2<br>(-33.5 to -4.7)                            |
| Hepatitis C                                                             | 204.4<br>(179.4 to 230.3)                     | 8.8<br>(7.8 to 10.0)                              | < 0.05<br>(< 0.05 to < 0.05)            | 6.0<br>(-12.0 to 29.9)                            | -5.0<br>(-19.4 to 13.3)                             |
| Acute hepatitis E                                                       | 0.4<br>(0.3 to 0.4)                           | 4.8<br>(4.2 to 5.6)                               | < 0.05<br>(< 0.05 to < 0.05)            | -3.0<br>(-14.6 to 10.4)                           | -11.5<br>(-20.9 to -0.9)                            |
| Other infectious diseases                                               | 38.9<br>(34.7 to 42.7)                        | < 0.05<br>(< 0.05 to < 0.05)                      | 0.9<br>(0.6 to 1.4)                     | -2.3<br>(-16.2 to 10.7)                           | -10.5<br>(-21.7 to 0.6)                             |
| <b>Non-communicable diseases</b>                                        | <b>7,328.9</b><br><b>(7,259.7 to 7,394.2)</b> | <b>18,447.3†</b><br><b>(17,142.5 to 19,789.3)</b> | <b>600.4</b><br><b>(444.0 to 780.8)</b> | <b>28.9</b><br><b>(23.6 to 34.0)</b>              | <b>-0.0</b><br><b>(-3.2 to 3.2)</b>                 |
| <b>Neoplasms</b>                                                        | <b>12.7</b><br><b>(11.8 to 13.7)</b>          | <b>7.7</b><br><b>(7.0 to 8.6)</b>                 | <b>2.2</b><br><b>(1.6 to 2.8)</b>       | <b>41.4</b><br><b>(35.3 to 48.0)</b>              | <b>1.9</b><br><b>(-3.1 to 6.7)</b>                  |
| Lip and oral cavity cancer                                              | 0.7<br>(0.6 to 0.7)                           | 0.2<br>(0.1 to 0.2)                               | 0.1<br>(< 0.05 to 0.1)                  | 41.4<br>(19.8 to 67.5)                            | 1.1<br>(-13.5 to 17.5)                              |
| Nasopharynx cancer                                                      | 0.2<br>(0.1 to 0.2)                           | 0.1<br>(< 0.05 to 0.1)                            | < 0.05<br>(< 0.05 to < 0.05)            | 31.1<br>(13.0 to 51.8)                            | -4.7<br>(-19.3 to 11.8)                             |
| Other pharynx cancer                                                    | 0.2<br>(0.2 to 0.3)                           | 0.1<br>(0.1 to 0.1)                               | < 0.05<br>(< 0.05 to < 0.05)            | 38.1<br>(18.2 to 60.0)                            | -3.6<br>(-18.4 to 12.1)                             |
| Oesophageal cancer                                                      | 0.1<br>(< 0.05 to 0.1)                        | 0.1<br>(< 0.05 to 0.1)                            | < 0.05<br>(< 0.05 to < 0.05)            | 38.1<br>(24.8 to 53.0)                            | -2.9<br>(-12.2 to 7.3)                              |
| Stomach cancer                                                          | 0.9<br>(0.8 to 1.0)                           | 0.6<br>(0.6 to 0.7)                               | 0.1<br>(0.1 to 0.2)                     | 22.8<br>(6.8 to 41.8)                             | -13.7<br>(-25.9 to 1.1)                             |
| Colon and rectum cancer                                                 | 1.3<br>(1.0 to 1.5)                           | 0.4<br>(0.3 to 0.5)                               | 0.1<br>(0.1 to 0.2)                     | 58.3<br>(34.0 to 84.0)                            | 10.9<br>(-7.1 to 30.6)                              |
| Liver cancer                                                            | 0.1<br>(0.1 to 0.1)                           | 0.3<br>(0.3 to 0.4)                               | 0.1<br>(< 0.05 to 0.1)                  | 40.9<br>(24.2 to 59.2)                            | -0.5<br>(-12.6 to 12.9)                             |
| Liver cancer due to hepatitis B                                         | 0.1<br>(< 0.05 to 0.1)                        | 0.1<br>(0.1 to 0.1)                               | < 0.05<br>(< 0.05 to < 0.05)            | 48.2<br>(31.0 to 68.2)                            | 5.5<br>(-7.9 to 20.4)                               |



| Cause                                              | Prevalence in thousands (95% UI)        | Incidence in thousands (95% UI)          | YLDs in thousands (95% UI)           |                                                   |                                                     |
|----------------------------------------------------|-----------------------------------------|------------------------------------------|--------------------------------------|---------------------------------------------------|-----------------------------------------------------|
|                                                    | 2016 counts                             | 2016 counts                              | 2016 counts                          | Percentage change in counts between 2006 and 2016 | Percentage change in age-standardised rates between |
| Liver cancer due to hepatitis C                    | 0.1<br>(0.1 to 0.1)                     | 0.1<br>(0.1 to 0.2)                      | < 0.05<br>(< 0.05 to < 0.05)         | 50.9<br>(31.2 to 74.3)                            | 5.9<br>(-8.3 to 22.2)                               |
| Liver cancer due to alcohol use                    | 0.1<br>(< 0.05 to 0.1)                  | 0.1<br>(< 0.05 to 0.1)                   | < 0.05<br>(< 0.05 to < 0.05)         | 16.0<br>(-3.9 to 37.8)                            | -18.9<br>(-32.6 to -3.7)                            |
| Liver cancer due to other causes                   | 0.1<br>(< 0.05 to 0.1)                  | 0.1<br>(0.1 to 0.1)                      | < 0.05<br>(< 0.05 to < 0.05)         | 49.0<br>(31.1 to 68.3)                            | 8.0<br>(-6.3 to 22.9)                               |
| Gallbladder and biliary tract cancer               | 0.1<br>(0.1 to 0.1)                     | 0.2<br>(0.2 to 0.2)                      | < 0.05<br>(< 0.05 to 0.1)            | 30.3<br>(8.9 to 53.7)                             | -8.8<br>(-24.3 to 9.5)                              |
| Pancreatic cancer                                  | 0.2<br>(0.1 to 0.2)                     | 0.2<br>(0.2 to 0.2)                      | < 0.05<br>(< 0.05 to 0.1)            | 48.7<br>(37.5 to 60.3)                            | 4.2<br>(-3.9 to 12.9)                               |
| Larynx cancer                                      | 0.2<br>(0.2 to 0.3)                     | 0.1<br>(0.1 to 0.1)                      | < 0.05<br>(< 0.05 to < 0.05)         | 38.9<br>(18.6 to 60.8)                            | -2.1<br>(-17.0 to 14.5)                             |
| Tracheal, bronchus, and lung cancer                | 0.5<br>(0.4 to 0.5)                     | 0.4<br>(0.4 to 0.5)                      | 0.1<br>(0.1 to 0.1)                  | 38.8<br>(12.4 to 71.1)                            | -2.5<br>(-22.3 to 21.2)                             |
| Malignant skin melanoma                            | 0.1<br>(0.1 to 0.2)                     | < 0.05<br>(< 0.05 to < 0.05)             | < 0.05<br>(< 0.05 to < 0.05)         | 62.0<br>(41.3 to 82.8)                            | 16.1<br>(2.7 to 29.6)                               |
| Non-melanoma skin cancer                           | 0.3<br>(0.2 to 0.5)                     | 1.4<br>(0.9 to 2.0)                      | < 0.05<br>(< 0.05 to < 0.05)         | 31.9<br>(-22.0 to 102.7)                          | -10.0<br>(-48.4 to 42.9)                            |
| Non-melanoma skin cancer (squamous-cell carcinoma) | 0.2<br>(0.1 to 0.4)                     | 0.2<br>(0.2 to 0.3)                      | < 0.05<br>(< 0.05 to < 0.05)         | 30.4<br>(-28.0 to 113.7)                          | -11.1<br>(-52.8 to 50.8)                            |
| Non-melanoma skin cancer (basal-cell carcinoma)    | 0.2<br>(0.1 to 0.3)                     | 1.2<br>(0.7 to 1.8)                      | < 0.05<br>(< 0.05 to < 0.05)         | 42.6<br>(14.1 to 83.6)                            | -0.2<br>(-22.3 to 34.3)                             |
| Breast cancer                                      | 2.0<br>(1.7 to 3.6)                     | 0.5<br>(0.4 to 0.8)                      | 0.2<br>(0.1 to 0.3)                  | 54.3<br>(22.4 to 90.7)                            | 8.3<br>(-13.4 to 32.0)                              |
| Cervical cancer                                    | 1.7<br>(1.2 to 2.4)                     | 0.5<br>(0.3 to 0.7)                      | 0.2<br>(0.1 to 0.2)                  | 26.6<br>(4.2 to 56.9)                             | -10.1<br>(-27.4 to 12.3)                            |
| Uterine cancer                                     | 1.8<br>(1.5 to 2.3)                     | 0.4<br>(0.3 to 0.5)                      | 0.1<br>(0.1 to 0.2)                  | 63.5<br>(30.1 to 103.6)                           | 12.4<br>(-10.8 to 41.4)                             |
| Ovarian cancer                                     | 0.5<br>(0.4 to 0.6)                     | 0.2<br>(0.1 to 0.2)                      | 0.1<br>(0.1 to 0.1)                  | 50.5<br>(13.4 to 103.4)                           | 6.1<br>(-21.9 to 46.2)                              |
| Prostate cancer                                    | 2.5<br>(2.0 to 3.2)                     | 0.7<br>(0.5 to 0.8)                      | 0.3<br>(0.2 to 0.4)                  | 62.1<br>(35.8 to 93.9)                            | 12.9<br>(-5.8 to 34.5)                              |
| Testicular cancer                                  | < 0.05<br>(< 0.05 to < 0.05)            | < 0.05<br>(< 0.05 to < 0.05)             | < 0.05<br>(< 0.05 to < 0.05)         | 39.0<br>(5.8 to 78.4)                             | 4.4<br>(-18.5 to 29.9)                              |
| Kidney cancer                                      | 0.4<br>(0.4 to 0.5)                     | 0.1<br>(0.1 to 0.1)                      | < 0.05<br>(< 0.05 to 0.1)            | 52.0<br>(31.0 to 74.5)                            | 14.5<br>(-1.9 to 30.5)                              |
| Bladder cancer                                     | 0.3<br>(0.2 to 0.4)                     | 0.1<br>(0.1 to 0.1)                      | < 0.05<br>(< 0.05 to < 0.05)         | 53.3<br>(35.2 to 72.9)                            | 7.2<br>(-5.8 to 21.7)                               |
| Brain and nervous system cancer                    | 0.4<br>(0.2 to 0.5)                     | 0.2<br>(0.1 to 0.2)                      | 0.1<br>(< 0.05 to 0.1)               | 39.1<br>(22.5 to 61.2)                            | 6.6<br>(-7.9 to 22.6)                               |
| Thyroid cancer                                     | 0.1<br>(0.1 to 0.1)                     | < 0.05<br>(< 0.05 to < 0.05)             | < 0.05<br>(< 0.05 to < 0.05)         | 62.0<br>(41.1 to 86.8)                            | 11.5<br>(-4.0 to 31.6)                              |
| Mesothelioma                                       | < 0.05<br>(< 0.05 to < 0.05)            | < 0.05<br>(< 0.05 to < 0.05)             | < 0.05<br>(< 0.05 to < 0.05)         | 43.1<br>(27.9 to 59.6)                            | 1.9<br>(-9.4 to 14.9)                               |
| Hodgkin lymphoma                                   | 0.1<br>(0.1 to 0.2)                     | 0.1<br>(< 0.05 to 0.1)                   | < 0.05<br>(< 0.05 to < 0.05)         | 11.6<br>(0.3 to 22.4)                             | -15.3<br>(-23.2 to -7.8)                            |
| Non-Hodgkin's lymphoma                             | 0.4<br>(0.4 to 0.5)                     | 0.1<br>(0.1 to 0.2)                      | < 0.05<br>(< 0.05 to 0.1)            | 38.1<br>(25.0 to 53.8)                            | 2.2<br>(-8.7 to 15.1)                               |
| Multiple myeloma                                   | 0.1<br>(0.1 to 0.1)                     | 0.1<br>(0.1 to 0.1)                      | < 0.05<br>(< 0.05 to < 0.05)         | 50.4<br>(37.2 to 63.9)                            | 5.6<br>(-3.7 to 15.7)                               |
| Leukaemia                                          | 2.1<br>(1.8 to 2.8)                     | 0.6<br>(0.5 to 0.8)                      | 0.3<br>(0.2 to 0.4)                  | 22.6<br>(11.1 to 36.0)                            | -4.5<br>(-12.4 to 4.6)                              |
| Acute lymphoid leukaemia                           | 0.9<br>(0.7 to 1.3)                     | 0.2<br>(0.2 to 0.3)                      | 0.1<br>(0.1 to 0.2)                  | 14.0<br>(-2.6 to 35.0)                            | -4.4<br>(-15.2 to 8.3)                              |
| Chronic lymphoid leukaemia                         | 0.5<br>(0.4 to 0.7)                     | 0.1<br>(0.1 to 0.1)                      | 0.1<br>(< 0.05 to 0.1)               | 44.0<br>(20.5 to 72.2)                            | 1.6<br>(-16.4 to 22.5)                              |
| Acute myeloid leukaemia                            | 0.2<br>(0.1 to 0.3)                     | 0.1<br>(0.1 to 0.2)                      | < 0.05<br>(< 0.05 to 0.1)            | 27.8<br>(14.8 to 43.7)                            | 0.5<br>(-9.5 to 11.5)                               |
| Chronic myeloid leukaemia                          | 0.3<br>(0.2 to 0.3)                     | 0.1<br>(0.1 to 0.1)                      | < 0.05<br>(< 0.05 to < 0.05)         | 21.7<br>(5.3 to 41.3)                             | -12.9<br>(-25.5 to 1.4)                             |
| Other leukaemia                                    | 0.3<br>(0.2 to 0.4)                     | 0.1<br>(< 0.05 to 0.1)                   | < 0.05<br>(< 0.05 to 0.1)            | 13.7<br>(-3.0 to 35.9)                            | -13.4<br>(-26.8 to 1.7)                             |
| Other neoplasms                                    | 0.6<br>(0.5 to 0.8)                     | 0.2<br>(0.2 to 0.3)                      | 0.1<br>(< 0.05 to 0.1)               | 36.5<br>(18.4 to 55.1)                            | 5.0<br>(-7.8 to 19.2)                               |
| <b>Cardiovascular diseases</b>                     | <b>335.4</b><br><b>(322.5 to 348.9)</b> | <b>31.6†</b><br><b>(30.2 to 33.1)</b>    | <b>19.0</b><br><b>(13.6 to 24.9)</b> | <b>38.7</b><br><b>(34.2 to 43.4)</b>              | <b>0.9</b><br><b>(-2.4 to 4.1)</b>                  |
| Rheumatic heart disease                            | 70.0<br>(62.4 to 79.0)                  | 2.4<br>(2.2 to 2.7)                      | 3.3<br>(2.1 to 4.9)                  | 40.8<br>(27.5 to 54.0)                            | 9.5<br>(-0.1 to 19.2)                               |
| Ischaemic heart disease                            | 83.6<br>(79.0 to 88.2)                  | 10.3<br>(9.7 to 10.9)                    | 4.9<br>(3.4 to 6.7)                  | 40.1<br>(33.5 to 47.0)                            | -0.3<br>(-4.8 to 4.5)                               |
| Cerebrovascular disease                            | 41.5<br>(39.0 to 44.3)                  | 6.3‡<br>(5.8 to 6.8)                     | 4.1<br>(3.0 to 5.2)                  | 36.8<br>(27.8 to 46.6)                            | -2.1<br>(-9.0 to 5.2)                               |
| Ischaemic stroke                                   | 35.1<br>(31.8 to 38.7)                  | 4.3‡<br>(3.8 to 4.8)                     | 3.3<br>(2.4 to 4.2)                  | 36.5<br>(25.2 to 48.6)                            | -3.4<br>(-11.5 to 5.2)                              |
| Hemorrhagic stroke                                 | 8.6<br>(7.8 to 9.5)                     | 2.0‡<br>(1.8 to 2.2)                     | 0.8<br>(0.6 to 1.0)                  | 38.5<br>(25.2 to 53.6)                            | 3.9<br>(-7.1 to 16.6)                               |
| Hypertensive heart disease                         | 11.1<br>(9.5 to 13.1)                   | --                                       | 0.9<br>(0.6 to 1.2)                  | 50.0<br>(35.4 to 65.9)                            | 4.9<br>(-4.9 to 15.8)                               |
| Cardiomyopathy and myocarditis                     | 1.5<br>(1.3 to 1.8)                     | 1.6†<br>(1.4 to 1.9)                     | 0.2<br>(0.1 to 0.3)                  | 31.4<br>(16.7 to 46.8)                            | 4.9<br>(-5.2 to 17.1)                               |
| Myocarditis                                        | 1.0<br>(0.8 to 1.1)                     | 1.6<br>(1.4 to 1.9)                      | 0.1<br>(< 0.05 to 0.1)               | 26.1<br>(16.4 to 36.8)                            | 3.9<br>(-5.4 to 13.9)                               |
| Alcoholic cardiomyopathy                           | 0.1<br>(0.1 to 0.1)                     | --                                       | < 0.05<br>(< 0.05 to < 0.05)         | 50.1<br>(37.5 to 63.7)                            | 5.7<br>(-3.1 to 15.1)                               |
| Other cardiomyopathy                               | 1.3<br>(1.1 to 1.6)                     | --                                       | 0.1<br>(0.1 to 0.2)                  | 33.2<br>(11.7 to 56.6)                            | 5.4<br>(-10.3 to 23.8)                              |
| Atrial fibrillation and flutter                    | 32.0<br>(28.2 to 36.3)                  | 2.6<br>(2.2 to 3.0)                      | 2.5<br>(1.7 to 3.5)                  | 41.7<br>(32.6 to 52.1)                            | -0.6<br>(-6.6 to 5.8)                               |
| Peripheral vascular disease                        | 76.3<br>(65.8 to 88.9)                  | 7.7<br>(6.6 to 9.0)                      | 0.4<br>(0.2 to 0.7)                  | 39.4<br>(30.0 to 50.0)                            | -3.0<br>(-9.6 to 4.4)                               |
| Endocarditis                                       | 0.2<br>(0.2 to 0.2)                     | 0.7<br>(0.6 to 0.8)                      | < 0.05<br>(< 0.05 to < 0.05)         | 32.5<br>(23.6 to 41.8)                            | 3.6<br>(-2.2 to 10.1)                               |
| Other cardiovascular and circulatory diseases      | 49.9<br>(41.1 to 59.3)                  | --                                       | 2.7<br>(1.7 to 3.8)                  | 31.4<br>(19.0 to 45.3)                            | 3.4<br>(-5.0 to 12.8)                               |
| <b>Chronic respiratory diseases</b>                | <b>706.8</b><br><b>(668.6 to 747.3)</b> | <b>125.2†</b><br><b>(116.0 to 135.1)</b> | <b>25.6</b><br><b>(18.4 to 34.6)</b> | <b>11.9</b><br><b>(6.3 to 18.0)</b>               | <b>-3.5</b><br><b>(-8.0 to 1.5)</b>                 |
| Chronic obstructive pulmonary disease              | 208.5<br>(194.5 to 226.2)               | 14.9<br>(13.9 to 16.1)                   | 4.5<br>(3.7 to 5.5)                  | 31.9<br>(15.8 to 51.3)                            | -4.0<br>(-15.5 to 10.6)                             |
| Pneumoconiosis                                     | 0.7<br>(0.7 to 0.8)                     | 0.1<br>(0.1 to 0.1)                      | 0.1<br>(0.1 to 0.1)                  | 45.9<br>(26.6 to 68.7)                            | 3.4<br>(-11.9 to 22.0)                              |
| Silicosis                                          | 0.2<br>(0.1 to 0.2)                     | < 0.05<br>(< 0.05 to < 0.05)             | < 0.05<br>(< 0.05 to < 0.05)         | 47.0<br>(24.9 to 73.8)                            | 3.6<br>(-15.5 to 26.8)                              |



| Cause                                                          | Prevalence in thousands (95% UI)        | Incidence in thousands (95% UI)         | YLDs in thousands (95% UI)        |                                                   |                                                     |
|----------------------------------------------------------------|-----------------------------------------|-----------------------------------------|-----------------------------------|---------------------------------------------------|-----------------------------------------------------|
|                                                                | 2016 counts                             | 2016 counts                             | 2016 counts                       | Percentage change in counts between 2006 and 2016 | Percentage change in age-standardised rates between |
| Asbestosis                                                     | 0.2<br>(0.1 to 0.2)                     | < 0.05<br>(< 0.05 to < 0.05)            | < 0.05<br>(< 0.05 to < 0.05)      | 40.4<br>(22.9 to 59.7)                            | 0.3<br>(-15.4 to 17.7)                              |
| Coal workers pneumoconiosis                                    | --                                      | --                                      | --                                | --                                                | --                                                  |
| Other pneumoconiosis                                           | 0.4<br>(0.3 to 0.4)                     | < 0.05<br>(< 0.05 to < 0.05)            | 0.1<br>(< 0.05 to 0.1)            | 48.3<br>(13.4 to 94.2)                            | 4.8<br>(-21.9 to 40.6)                              |
| Asthma                                                         | 507.6<br>(467.4 to 551.5)               | 110.0<br>(100.8 to 120.0)               | 20.1<br>(13.1 to 29.2)            | 7.2<br>(1.3 to 13.1)                              | -4.2<br>(-8.8 to 0.4)                               |
| Interstitial lung disease and pulmonary sarcoidosis            | 2.7<br>(2.4 to 2.9)                     | 0.3<br>(0.3 to 0.3)                     | 0.3<br>(0.2 to 0.4)               | 37.6<br>(27.1 to 48.0)                            | 4.8<br>(-5.4 to 15.8)                               |
| Other chronic respiratory diseases                             | --                                      | --                                      | 0.5<br>(0.4 to 0.7)               | 42.9<br>(9.3 to 89.4)                             | 30.5<br>(3.4 to 64.3)                               |
| <b>Cirrhosis and other chronic liver diseases</b>              | <b>58.7<br/>(55.2 to 62.5)</b>          | <b>2.3<br/>(2.2 to 2.4)</b>             | <b>1.6<br/>(1.1 to 2.2)</b>       | <b>34.6<br/>(23.4 to 49.1)</b>                    | <b>2.2<br/>(-4.8 to 10.2)</b>                       |
| Cirrhosis and other chronic liver diseases due to hepatitis B  | 2.0<br>(1.8 to 2.3)                     | 0.1<br>(0.1 to 0.1)                     | < 0.05<br>(< 0.05 to 0.1)         | 46.1<br>(12.7 to 82.5)                            | 3.8<br>(-22.2 to 33.0)                              |
| Cirrhosis and other chronic liver diseases due to hepatitis C  | 22.0<br>(20.2 to 24.1)                  | 0.9<br>(0.8 to 0.9)                     | 0.5<br>(0.3 to 0.7)               | 42.8<br>(23.4 to 65.5)                            | 1.6<br>(-10.3 to 16.2)                              |
| Cirrhosis and other chronic liver diseases due to alcohol use  | 21.6<br>(19.8 to 23.7)                  | 0.9<br>(0.8 to 0.9)                     | 0.5<br>(0.3 to 0.7)               | 48.9<br>(30.2 to 69.7)                            | 4.1<br>(-7.1 to 16.5)                               |
| Cirrhosis and other chronic liver diseases due to other causes | 13.1<br>(12.0 to 14.3)                  | 0.5<br>(0.5 to 0.5)                     | 0.5<br>(0.4 to 0.8)               | 17.3<br>(-3.9 to 45.0)                            | 0.4<br>(-14.5 to 18.4)                              |
| <b>Digestive diseases</b>                                      | <b>188.8<br/>(178.9 to 200.1)</b>       | <b>169.3†<br/>(156.7 to 183.7)</b>      | <b>9.1<br/>(6.4 to 12.4)</b>      | <b>42.0<br/>(31.2 to 53.3)</b>                    | <b>9.8<br/>(2.6 to 17.2)</b>                        |
| Peptic ulcer disease                                           | 78.9<br>(71.8 to 87.4)                  | 5.3<br>(4.8 to 5.8)                     | 1.6<br>(1.0 to 2.4)               | 123.8<br>(96.2 to 156.0)                          | 57.9<br>(39.1 to 80.1)                              |
| Gastritis and duodenitis                                       | 31.6<br>(28.2 to 36.2)                  | 18.2<br>(16.4 to 20.2)                  | 1.0<br>(0.6 to 1.4)               | 100.7<br>(75.9 to 131.7)                          | 44.1<br>(26.4 to 64.5)                              |
| Appendicitis                                                   | 0.7<br>(0.6 to 0.7)                     | 17.7<br>(16.2 to 19.5)                  | 0.2<br>(0.1 to 0.3)               | 7.6<br>(-26.8 to 58.4)                            | -5.5<br>(-30.4 to 26.9)                             |
| Paralytic ileus and intestinal obstruction                     | 0.1<br>(0.1 to 0.1)                     | 2.1<br>(1.8 to 2.4)                     | < 0.05<br>(< 0.05 to < 0.05)      | 18.4<br>(13.3 to 23.2)                            | 1.9<br>(-1.3 to 5.3)                                |
| Inguinal, femoral, and abdominal hernia                        | 73.2<br>(66.1 to 80.1)                  | 32.2<br>(28.3 to 36.5)                  | 4.9<br>(3.3 to 6.8)               | 23.1<br>(13.8 to 33.3)                            | -3.6<br>(-10.1 to 3.1)                              |
| Inflammatory bowel disease                                     | 0.6<br>(0.6 to 0.6)                     | 2.0<br>(1.9 to 2.1)                     | 0.1<br>(0.1 to 0.1)               | 41.0<br>(25.6 to 58.4)                            | 5.0<br>(-10.0 to 22.7)                              |
| Vascular intestinal disorders                                  | 0.1<br>(0.1 to 0.1)                     | 0.5<br>(0.4 to 0.5)                     | < 0.05<br>(< 0.05 to < 0.05)      | 35.5<br>(26.1 to 46.4)                            | 9.2<br>(-0.9 to 20.1)                               |
| Gallbladder and biliary diseases                               | 10.6<br>(9.7 to 11.5)                   | 87.8<br>(76.7 to 100.9)                 | 0.5<br>(0.3 to 0.7)               | 41.0<br>(20.0 to 64.5)                            | 1.7<br>(-12.5 to 17.9)                              |
| Pancreatitis                                                   | 0.4<br>(0.4 to 0.4)                     | 3.6<br>(3.3 to 4.0)                     | 0.1<br>(< 0.05 to 0.1)            | 39.7<br>(34.8 to 45.4)                            | 6.3<br>(2.6 to 10.4)                                |
| Other digestive diseases                                       | --                                      | --                                      | 0.8<br>(0.5 to 1.0)               | 40.6<br>(29.0 to 52.8)                            | 12.7<br>(5.5 to 20.4)                               |
| <b>Neurological disorders</b>                                  | <b>3,051.3<br/>(2,911.7 to 3,189.5)</b> | <b>1,456.8<br/>(1,243.0 to 1,688.2)</b> | <b>83.2<br/>(54.3 to 116.7)</b>   | <b>28.4<br/>(-3.3 to 67.5)</b>                    | <b>0.2<br/>(-22.0 to 26.8)</b>                      |
| Alzheimer's disease and other dementias                        | 30.0<br>(25.3 to 35.7)                  | 5.2<br>(4.4 to 6.3)                     | 4.4<br>(3.1 to 5.9)               | 44.1<br>(37.5 to 51.3)                            | -1.3<br>(-5.7 to 2.9)                               |
| Parkinson's disease                                            | 2.7<br>(2.2 to 3.4)                     | 0.3<br>(0.2 to 0.4)                     | 0.3<br>(0.2 to 0.5)               | 51.2<br>(31.5 to 72.8)                            | 6.0<br>(-7.7 to 20.4)                               |
| Epilepsy                                                       | 42.2<br>(10.9 to 75.2)                  | 4.9<br>(1.3 to 8.8)                     | 14.2<br>(3.3 to 29.8)             | 18.6<br>(-75.8 to 431.0)                          | -1.3<br>(-79.9 to 345.2)                            |
| Multiple sclerosis                                             | 0.5<br>(0.4 to 0.5)                     | < 0.05<br>(< 0.05 to < 0.05)            | 0.1<br>(0.1 to 0.2)               | 49.6<br>(44.0 to 54.7)                            | 9.9<br>(5.8 to 13.9)                                |
| Motor neuron disease                                           | 0.2<br>(0.2 to 0.2)                     | < 0.05<br>(< 0.05 to < 0.05)            | < 0.05<br>(< 0.05 to 0.1)         | 27.4<br>(21.2 to 34.5)                            | 3.2<br>(-0.5 to 7.2)                                |
| Migraine                                                       | 1,099.4<br>(1,029.3 to 1,165.0)         | 130.1<br>(121.8 to 138.8)               | 51.3<br>(32.9 to 72.1)            | 29.1<br>(24.3 to 34.6)                            | 0.0<br>(-2.9 to 3.8)                                |
| Tension-type headache                                          | 2,345.5<br>(2,102.9 to 2,628.2)         | 1,316.2<br>(1,106.0 to 1,555.2)         | 9.7<br>(6.2 to 14.4)              | 29.0<br>(22.5 to 36.2)                            | -0.3<br>(-4.5 to 4.0)                               |
| Other neurological disorders                                   | < 0.05<br>(< 0.05 to < 0.05)            | 0.1<br>(< 0.05 to 0.1)                  | 3.1<br>(0.8 to 6.5)               | 40.0<br>(-67.5 to 446.2)                          | 18.2<br>(-70.3 to 312.5)                            |
| <b>Mental and substance use disorders</b>                      | <b>1,038.9<br/>(999.8 to 1,078.6)</b>   | <b>397.4†<br/>(368.1 to 427.5)</b>      | <b>140.6<br/>(101.0 to 183.1)</b> | <b>27.9<br/>(25.4 to 30.9)</b>                    | <b>0.4<br/>(-1.6 to 2.5)</b>                        |
| Schizophrenia                                                  | 13.8<br>(12.0 to 15.7)                  | 1.1<br>(1.0 to 1.2)                     | 9.0<br>(6.5 to 11.4)              | 38.0<br>(25.4 to 53.1)                            | 0.8<br>(-7.7 to 10.6)                               |
| Alcohol use disorders                                          | 127.3<br>(110.1 to 146.3)               | 68.3<br>(58.4 to 78.7)                  | 12.9<br>(8.7 to 17.9)             | 36.0<br>(24.4 to 47.6)                            | 1.8<br>(-6.2 to 10.0)                               |
| Drug use disorders                                             | 40.4<br>(36.2 to 44.9)                  | 5.9<br>(5.3 to 6.6)                     | 11.2<br>(7.7 to 15.1)             | 35.2<br>(21.5 to 49.8)                            | 2.6<br>(-6.5 to 12.5)                               |
| Opioid use disorders                                           | 18.9<br>(15.1 to 23.4)                  | 2.5<br>(2.0 to 3.0)                     | 8.0<br>(5.2 to 11.1)              | 37.2<br>(21.5 to 54.9)                            | 2.7<br>(-8.0 to 14.8)                               |
| Cocaine use disorders                                          | 3.4<br>(2.9 to 4.0)                     | 0.3<br>(0.3 to 0.4)                     | 0.5<br>(0.3 to 0.7)               | 31.3<br>(-1.8 to 74.3)                            | 0.3<br>(-22.1 to 28.1)                              |
| Amphetamine use disorders                                      | 8.4<br>(5.7 to 11.9)                    | 0.9<br>(0.6 to 1.2)                     | 1.1<br>(0.6 to 1.9)               | 28.4<br>(-1.1 to 66.7)                            | 2.6<br>(-19.9 to 31.6)                              |
| Cannabis use disorders                                         | 8.0<br>(6.6 to 9.7)                     | 1.6<br>(1.3 to 1.9)                     | 0.2<br>(0.1 to 0.4)               | 29.5<br>(-1.7 to 71.1)                            | 2.2<br>(-19.2 to 29.9)                              |
| Other drug use disorders                                       | 3.1<br>(2.7 to 3.5)                     | 0.6<br>(0.6 to 0.7)                     | 1.4<br>(0.8 to 2.1)               | 32.1<br>(2.2 to 70.3)                             | 2.6<br>(-19.8 to 28.8)                              |
| Depressive disorders                                           | 206.1<br>(192.2 to 221.3)               | 235.2<br>(209.8 to 262.0)               | 36.1<br>(24.7 to 49.5)            | 32.3<br>(26.1 to 38.4)                            | 0.1<br>(-4.0 to 4.3)                                |
| Major depressive disorder                                      | 145.2<br>(129.6 to 163.0)               | 222.9<br>(198.0 to 250.2)               | 29.9<br>(20.5 to 41.0)            | 32.1<br>(24.8 to 39.3)                            | 0.1<br>(-4.8 to 5.4)                                |
| Dysthymia                                                      | 63.4<br>(55.3 to 72.9)                  | 12.2<br>(10.8 to 14.1)                  | 6.2<br>(4.1 to 9.0)               | 33.7<br>(27.0 to 40.8)                            | 0.1<br>(-4.1 to 4.6)                                |
| Bipolar disorder                                               | 61.6<br>(52.2 to 72.9)                  | 5.8<br>(5.0 to 7.0)                     | 12.8<br>(7.8 to 18.9)             | 28.4<br>(20.6 to 37.6)                            | 0.1<br>(-5.3 to 6.3)                                |
| Anxiety disorders                                              | 226.8<br>(204.4 to 249.3)               | 39.2<br>(35.9 to 42.8)                  | 22.2<br>(15.3 to 30.4)            | 25.4<br>(19.3 to 31.9)                            | 0.0<br>(-4.2 to 4.5)                                |
| Eating disorders                                               | 11.4<br>(9.1 to 14.0)                   | 6.6<br>(4.9 to 8.9)                     | 2.3<br>(1.4 to 3.4)               | 32.0<br>(15.3 to 50.6)                            | 5.7<br>(-7.9 to 19.8)                               |
| Anorexia nervosa                                               | 2.6<br>(1.9 to 3.5)                     | 1.1<br>(0.8 to 1.5)                     | 0.6<br>(0.3 to 0.9)               | 25.9<br>(-3.3 to 65.4)                            | 6.4<br>(-18.2 to 38.7)                              |
| Bulimia nervosa                                                | 8.3<br>(6.2 to 11.1)                    | 5.5<br>(3.7 to 7.7)                     | 1.8<br>(1.1 to 2.7)               | 34.1<br>(13.9 to 55.9)                            | 5.5<br>(-9.7 to 22.3)                               |
| Autistic spectrum disorders                                    | 73.7<br>(65.5 to 82.6)                  | 0.6<br>(0.4 to 0.8)                     | 10.9<br>(7.3 to 15.2)             | 18.8<br>(12.8 to 25.4)                            | 0.2<br>(-4.3 to 5.3)                                |
| Autism                                                         | 22.3<br>(19.2 to 26.1)                  | 0.1<br>(< 0.05 to 0.1)                  | 5.7<br>(3.7 to 8.3)               | 19.1<br>(9.7 to 29.6)                             | 0.2<br>(-6.8 to 8.5)                                |
| Asperger syndrome and other autistic spectrum disorders        | 51.6<br>(42.8 to 62.3)                  | 0.5<br>(0.4 to 0.8)                     | 5.2<br>(3.3 to 7.7)               | 18.4<br>(12.6 to 24.9)                            | 0.1<br>(-4.2 to 5.0)                                |

| Cause                                                      | Prevalence in thousands (95% UI)              | Incidence in thousands (95% UI)                   | YLDs in thousands (95% UI)              |                                                   |                                                     |
|------------------------------------------------------------|-----------------------------------------------|---------------------------------------------------|-----------------------------------------|---------------------------------------------------|-----------------------------------------------------|
|                                                            | 2016 counts                                   | 2016 counts                                       | 2016 counts                             | Percentage change in counts between 2006 and 2016 | Percentage change in age-standardised rates between |
| Attention-deficit/hyperactivity disorder                   | 73.8<br>(57.8 to 93.0)                        | 3.6<br>(2.6 to 4.7)                               | 0.9<br>(0.5 to 1.4)                     | 12.4<br>(2.6 to 22.9)                             | 0.1<br>(-7.7 to 8.6)                                |
| Conduct disorder                                           | 75.5<br>(61.0 to 90.6)                        | 25.0<br>(19.5 to 30.7)                            | 9.2<br>(5.6 to 14.2)                    | 4.2<br>(-2.6 to 12.2)                             | 0.2<br>(-6.5 to 7.6)                                |
| Idiopathic developmental intellectual disability           | 71.5<br>(38.2 to 104.7)                       | --                                                | 2.9<br>(1.2 to 5.0)                     | 13.3<br>(4.0 to 22.4)                             | -6.5<br>(-14.5 to 0.4)                              |
| Other mental and substance use disorders                   | 136.2<br>(119.3 to 157.8)                     | 6.1<br>(5.4 to 7.0)                               | 10.2<br>(6.9 to 14.7)                   | 34.9<br>(27.5 to 42.5)                            | -0.1<br>(-5.1 to 5.0)                               |
| <b>Diabetes, urogenital, blood, and endocrine diseases</b> | <b>2,503.9</b><br><b>(2,394.1 to 2,612.3)</b> | <b>634.1†</b><br><b>(598.0 to 672.9)</b>          | <b>54.6</b><br><b>(38.9 to 74.4)</b>    | <b>39.3</b><br><b>(34.9 to 44.2)</b>              | <b>2.1</b><br><b>(-1.1 to 5.6)</b>                  |
| Diabetes mellitus                                          | 352.8<br>(315.8 to 392.8)                     | 20.8<br>(18.6 to 23.3)                            | 30.9<br>(21.2 to 43.0)                  | 42.0<br>(34.9 to 49.7)                            | 1.9<br>(-3.2 to 7.3)                                |
| Acute glomerulonephritis                                   | 0.1<br>(0.1 to 0.1)                           | 1.4<br>(1.2 to 1.6)                               | < 0.05<br>(< 0.05 to < 0.05)            | 27.2<br>(21.7 to 33.4)                            | 0.1<br>(-3.8 to 4.5)                                |
| Chronic kidney disease                                     | 346.3<br>(314.3 to 381.6)                     | 30.8<br>(26.9 to 35.0)                            | 9.2<br>(6.8 to 12.0)                    | 56.1<br>(46.1 to 66.4)                            | 11.0<br>(3.9 to 18.1)                               |
| Chronic kidney disease due to diabetes mellitus            | 122.3<br>(102.4 to 144.0)                     | 11.4<br>(9.2 to 14.0)                             | 3.0<br>(2.1 to 3.9)                     | 61.6<br>(47.6 to 76.0)                            | 12.9<br>(3.1 to 22.6)                               |
| Chronic kidney disease due to hypertension                 | 74.8<br>(64.5 to 85.5)                        | 9.0<br>(7.3 to 10.7)                              | 1.2<br>(0.8 to 1.6)                     | 57.6<br>(39.9 to 78.5)                            | 8.3<br>(-3.7 to 22.5)                               |
| Chronic kidney disease due to glomerulonephritis           | 74.4<br>(64.5 to 84.3)                        | 3.7<br>(2.9 to 4.7)                               | 3.0<br>(2.2 to 4.0)                     | 51.8<br>(36.5 to 68.9)                            | 10.7<br>(0.6 to 21.4)                               |
| Chronic kidney disease due to other causes                 | 74.8<br>(61.3 to 88.5)                        | 6.7<br>(5.4 to 8.2)                               | 2.1<br>(1.5 to 2.8)                     | 54.2<br>(40.0 to 69.3)                            | 10.6<br>(0.8 to 21.1)                               |
| Urinary diseases and male infertility                      | 94.0<br>(85.9 to 103.0)                       | 317.3†<br>(285.7 to 349.9)                        | 2.5<br>(1.6 to 3.6)                     | 39.3<br>(30.7 to 48.3)                            | -1.1<br>(-6.8 to 4.9)                               |
| Interstitial nephritis and urinary tract infections        | 5.5<br>(4.9 to 6.1)                           | 289.3<br>(257.7 to 321.9)                         | 0.2<br>(0.1 to 0.3)                     | 26.7<br>(5.4 to 52.8)                             | 0.8<br>(-13.7 to 17.2)                              |
| Urolithiasis                                               | 0.7<br>(0.7 to 0.8)                           | 19.4<br>(17.3 to 22.0)                            | 0.1<br>(< 0.05 to 0.1)                  | 34.6<br>(29.4 to 39.5)                            | 1.5<br>(-2.6 to 5.2)                                |
| Benign prostatic hyperplasia                               | 63.4<br>(54.1 to 74.1)                        | 8.5<br>(7.2 to 10.2)                              | 2.1<br>(1.3 to 3.0)                     | 40.3<br>(31.1 to 50.6)                            | -1.6<br>(-7.9 to 4.9)                               |
| Male infertility                                           | 21.3<br>(19.1 to 23.6)                        | --                                                | 0.1<br>(< 0.05 to 0.2)                  | 97.1<br>(75.0 to 123.7)                           | 43.1<br>(28.0 to 62.1)                              |
| Other urinary diseases                                     | --                                            | --                                                | 0.1<br>(0.1 to 0.1)                     | 5.0<br>(-9.3 to 21.5)                             | -15.7<br>(-25.2 to -5.2)                            |
| Gynecological diseases                                     | 782.6<br>(742.0 to 829.6)                     | 252.9†<br>(236.4 to 271.9)                        | 7.3<br>(5.0 to 10.8)                    | 24.2<br>(16.8 to 31.8)                            | -7.2<br>(-11.9 to -2.4)                             |
| Uterine fibroids                                           | 50.5<br>(44.0 to 57.8)                        | 6.3<br>(5.4 to 7.4)                               | 0.6<br>(0.4 to 1.1)                     | 12.7<br>(1.5 to 24.0)                             | -19.8<br>(-27.9 to -12.0)                           |
| Polycystic ovarian syndrome                                | 1.0<br>(0.7 to 1.3)                           | 5.1<br>(3.8 to 6.7)                               | < 0.05<br>(< 0.05 to < 0.05)            | 33.3<br>(-5.1 to 82.3)                            | -0.1<br>(-28.8 to 36.7)                             |
| Female infertility                                         | 53.2<br>(48.0 to 59.0)                        | --                                                | 0.3<br>(0.1 to 0.6)                     | 109.4<br>(88.5 to 134.1)                          | 50.9<br>(35.6 to 68.4)                              |
| Endometriosis                                              | 0.4<br>(0.3 to 0.4)                           | 1.7<br>(1.4 to 2.1)                               | < 0.05<br>(< 0.05 to 0.1)               | 29.2<br>(8.4 to 56.3)                             | 0.2<br>(-20.1 to 27.4)                              |
| Genital prolapse                                           | 205.8<br>(178.3 to 237.2)                     | 14.8<br>(12.5 to 17.2)                            | 0.6<br>(0.3 to 1.2)                     | 24.2<br>(14.0 to 36.0)                            | -12.8<br>(-20.8 to -3.9)                            |
| Premenstrual syndrome                                      | 490.7<br>(452.5 to 529.8)                     | 183.3<br>(167.6 to 199.7)                         | 4.1<br>(2.5 to 6.4)                     | 21.2<br>(10.2 to 32.3)                            | -6.3<br>(-14.0 to 1.7)                              |
| Other gynecological diseases                               | 49.5<br>(43.2 to 56.1)                        | 41.6<br>(34.7 to 49.2)                            | 1.6<br>(1.0 to 2.3)                     | 27.9<br>(14.1 to 42.7)                            | -4.8<br>(-14.3 to 5.6)                              |
| Hemoglobinopathies and hemolytic anaemias                  | 1,379.1<br>(1,262.9 to 1,502.0)               | --                                                | 2.4<br>(1.4 to 3.7)                     | 23.4<br>(9.4 to 36.7)                             | 2.9<br>(-8.4 to 13.1)                               |
| Thalassemias                                               | 0.1<br>(0.1 to 0.1)                           | --                                                | < 0.05<br>(< 0.05 to < 0.05)            | 12.3<br>(-6.9 to 30.3)                            | 4.7<br>(-12.8 to 21.7)                              |
| Thalassaemias trait                                        | 38.6<br>(13.5 to 69.0)                        | --                                                | 0.5<br>(0.1 to 1.1)                     | 39.7<br>(8.0 to 68.0)                             | 14.1<br>(-12.1 to 38.1)                             |
| Sickle cell disorders                                      | 0.7<br>(0.3 to 1.3)                           | --                                                | 0.1<br>(< 0.05 to 0.1)                  | 26.4<br>(-0.8 to 64.8)                            | 13.1<br>(-10.1 to 41.8)                             |
| Sickle cell trait                                          | 336.1<br>(226.8 to 470.8)                     | --                                                | 1.1<br>(0.6 to 1.8)                     | 45.3<br>(25.2 to 65.4)                            | 22.2<br>(6.5 to 38.1)                               |
| G6PD deficiency                                            | 181.9<br>(156.2 to 209.8)                     | --                                                | < 0.05<br>(< 0.05 to < 0.05)            | 28.7<br>(13.6 to 44.4)                            | 7.6<br>(-3.0 to 19.8)                               |
| G6PD trait                                                 | 840.3<br>(773.0 to 912.5)                     | --                                                | < 0.05<br>(< 0.05 to < 0.05)            | 54.1<br>(40.0 to 69.9)                            | 26.4<br>(14.5 to 38.4)                              |
| Other hemoglobinopathies and hemolytic anaemias            | 46.8<br>(43.3 to 50.8)                        | --                                                | 0.7<br>(0.5 to 1.1)                     | -4.9<br>(-18.0 to 8.5)                            | -20.7<br>(-29.6 to -11.3)                           |
| Endocrine, metabolic, blood, and immune disorders          | 80.3<br>(75.3 to 85.9)                        | 10.8<br>(9.8 to 12.0)                             | 2.2<br>(1.5 to 3.1)                     | 18.7<br>(9.2 to 27.9)                             | -3.2<br>(-9.0 to 2.8)                               |
| <b>Musculoskeletal disorders</b>                           | <b>1,010.7</b><br><b>(959.2 to 1,059.2)</b>   | <b>509.7</b><br><b>(459.4 to 561.3)</b>           | <b>108.0</b><br><b>(77.9 to 142.5)</b>  | <b>36.1</b><br><b>(31.8 to 40.0)</b>              | <b>0.1</b><br><b>(-2.5 to 2.5)</b>                  |
| Rheumatoid arthritis                                       | 14.3<br>(12.8 to 16.0)                        | 0.9<br>(0.8 to 1.0)                               | 3.4<br>(2.3 to 4.6)                     | 44.0<br>(30.9 to 57.4)                            | 5.2<br>(-3.5 to 13.8)                               |
| Osteoarthritis                                             | 189.6<br>(177.8 to 201.9)                     | 10.2<br>(9.4 to 10.9)                             | 11.7<br>(8.3 to 16.0)                   | 48.9<br>(43.4 to 54.6)                            | 4.1<br>(0.4 to 7.9)                                 |
| Low back and neck pain                                     | 550.5<br>(512.3 to 590.7)                     | 219.9<br>(197.7 to 243.2)                         | 62.6<br>(44.0 to 83.1)                  | 34.8<br>(30.3 to 39.3)                            | -0.5<br>(-3.3 to 2.5)                               |
| Low back pain                                              | 352.4<br>(309.4 to 402.4)                     | 166.8<br>(146.6 to 190.3)                         | 40.1<br>(28.0 to 53.9)                  | 32.8<br>(26.6 to 39.6)                            | -0.8<br>(-5.2 to 3.7)                               |
| Neck pain                                                  | 223.2<br>(191.8 to 258.1)                     | 53.1<br>(45.9 to 62.3)                            | 22.5<br>(15.1 to 32.2)                  | 38.4<br>(34.6 to 42.1)                            | 0.1<br>(-2.1 to 2.3)                                |
| Gout                                                       | 13.6<br>(12.1 to 15.3)                        | 2.8<br>(2.5 to 3.2)                               | 0.4<br>(0.3 to 0.6)                     | 41.5<br>(17.3 to 68.4)                            | 0.5<br>(-15.2 to 17.4)                              |
| Other musculoskeletal disorders                            | 342.6<br>(295.4 to 392.1)                     | 275.9<br>(231.5 to 327.4)                         | 29.9<br>(20.1 to 42.5)                  | 33.5<br>(23.1 to 44.4)                            | -1.2<br>(-8.5 to 6.4)                               |
| <b>Other non-communicable diseases</b>                     | <b>5,973.0</b><br><b>(5,828.5 to 6,094.5)</b> | <b>15,113.2†</b><br><b>(13,850.1 to 16,446.0)</b> | <b>156.6</b><br><b>(106.9 to 220.5)</b> | <b>23.4</b><br><b>(21.5 to 25.1)</b>              | <b>-1.6</b><br><b>(-2.6 to -0.6)</b>                |
| Congenital anomalies                                       | 89.2<br>(78.6 to 103.0)                       | --                                                | 10.8<br>(7.5 to 14.7)                   | 14.4<br>(8.2 to 21.3)                             | -2.4<br>(-7.5 to 3.5)                               |
| Neural tube defects                                        | 5.7<br>(5.1 to 6.4)                           | --                                                | 1.7<br>(1.2 to 2.3)                     | 16.8<br>(1.6 to 34.2)                             | -2.4<br>(-13.8 to 10.7)                             |
| Congenital heart anomalies                                 | 9.8<br>(8.3 to 11.3)                          | --                                                | 0.5<br>(0.2 to 0.8)                     | 14.6<br>(-0.6 to 33.2)                            | 3.0<br>(-9.9 to 17.8)                               |
| Orofacial clefts                                           | 7.4<br>(6.5 to 8.4)                           | --                                                | 0.1<br>(0.1 to 0.1)                     | 11.3<br>(-1.4 to 24.4)                            | -6.3<br>(-16.9 to 4.9)                              |
| Down's syndrome                                            | 7.6<br>(6.6 to 8.8)                           | --                                                | 0.7<br>(0.5 to 1.0)                     | 24.1<br>(10.3 to 40.8)                            | 5.4<br>(-4.9 to 17.8)                               |
| Turner syndrome                                            | 3.3<br>(2.8 to 3.9)                           | --                                                | 0.1<br>(< 0.05 to 0.1)                  | 20.3<br>(-18.0 to 74.7)                           | 3.0<br>(-28.5 to 44.5)                              |
| Klinefelter syndrome                                       | 4.2<br>(3.6 to 5.0)                           | --                                                | < 0.05<br>(< 0.05 to < 0.05)            | 22.1<br>(-7.2 to 58.2)                            | 0.5<br>(-22.9 to 29.9)                              |



| Cause                                         | Prevalence in thousands (95% UI)        | Incidence in thousands (95% UI)          | YLDs in thousands (95% UI)           |                                                   |                                                     |
|-----------------------------------------------|-----------------------------------------|------------------------------------------|--------------------------------------|---------------------------------------------------|-----------------------------------------------------|
|                                               | 2016 counts                             | 2016 counts                              | 2016 counts                          | Percentage change in counts between 2006 and 2016 | Percentage change in age-standardised rates between |
| Other chromosomal abnormalities               | 8.8<br>(7.4 to 10.6)                    | --                                       | 1.0<br>(0.7 to 1.5)                  | 9.4<br>(-6.3 to 29.5)                             | 3.8<br>(-11.5 to 23.1)                              |
| Congenital musculoskeletal and limb anomalies | 10.2<br>(9.3 to 11.2)                   | --                                       | 1.4<br>(1.0 to 2.0)                  | 24.4<br>(11.8 to 37.6)                            | 3.8<br>(-6.2 to 14.1)                               |
| Urogenital congenital anomalies               | 10.8<br>(9.5 to 12.3)                   | --                                       | 0.3<br>(0.2 to 0.5)                  | 6.8<br>(-4.0 to 18.8)                             | -0.9<br>(-10.6 to 9.5)                              |
| Digestive congenital anomalies                | 8.5<br>(7.5 to 9.6)                     | --                                       | 0.4<br>(0.2 to 0.5)                  | 19.6<br>(1.5 to 42.7)                             | 0.7<br>(-12.6 to 17.2)                              |
| Other congenital anomalies                    | 35.2<br>(23.2 to 52.4)                  | --                                       | 4.6<br>(2.8 to 7.1)                  | 10.8<br>(0.4 to 23.4)                             | -6.8<br>(-15.2 to 3.8)                              |
| Skin and subcutaneous diseases                | 2,329.3<br>(2,263.8 to 2,399.3)         | 4,532.4<br>(4,325.7 to 4,771.6)          | 62.9<br>(42.0 to 91.1)               | 17.2<br>(14.4 to 19.9)                            | 1.4<br>(-0.6 to 3.5)                                |
| Dermatitis                                    | 411.6<br>(366.4 to 460.9)               | 413.3<br>(381.0 to 446.2)                | 16.4<br>(9.5 to 27.4)                | 12.3<br>(7.9 to 17.1)                             | 0.1<br>(-3.3 to 3.5)                                |
| Psoriasis                                     | 54.9<br>(52.3 to 57.6)                  | 8.4<br>(8.0 to 8.8)                      | 4.8<br>(3.4 to 6.4)                  | 34.0<br>(20.9 to 47.9)                            | 6.5<br>(-2.5 to 16.2)                               |
| Cellulitis                                    | 2.8<br>(2.6 to 3.0)                     | 47.3<br>(43.7 to 51.0)                   | 0.2<br>(0.1 to 0.2)                  | 18.2<br>(-9.8 to 54.2)                            | 1.0<br>(-18.7 to 25.9)                              |
| Pyoderma                                      | 16.0<br>(15.5 to 16.5)                  | 349.8<br>(338.0 to 361.8)                | 0.1<br>(< 0.05 to 0.2)               | 26.8<br>(16.7 to 37.2)                            | 1.1<br>(-5.6 to 8.3)                                |
| Scabies                                       | 120.1<br>(104.5 to 139.0)               | 368.5<br>(316.1 to 427.4)                | 3.1<br>(1.8 to 5.0)                  | 11.4<br>(6.1 to 17.1)                             | -3.1<br>(-6.9 to 1.0)                               |
| Fungal skin diseases                          | 496.8<br>(449.3 to 555.2)               | 1,744.8<br>(1,573.0 to 1,935.5)          | 2.8<br>(1.1 to 5.8)                  | 19.7<br>(16.7 to 22.6)                            | 0.0<br>(-1.3 to 1.3)                                |
| Viral skin diseases                           | 241.6<br>(230.2 to 253.6)               | 358.3<br>(340.9 to 376.4)                | 7.5<br>(4.7 to 11.0)                 | 14.2<br>(10.2 to 18.3)                            | 0.0<br>(-3.2 to 3.4)                                |
| Acne vulgaris                                 | 741.5<br>(655.1 to 834.2)               | 510.3<br>(417.2 to 634.4)                | 19.2<br>(12.8 to 28.1)               | 18.0<br>(12.0 to 24.4)                            | 2.9<br>(-2.2 to 8.0)                                |
| Alopecia areata                               | 14.0<br>(13.4 to 14.6)                  | 24.9<br>(23.9 to 26.0)                   | 0.5<br>(0.3 to 0.7)                  | 29.1<br>(14.2 to 45.7)                            | 0.3<br>(-9.7 to 11.6)                               |
| Pruritus                                      | 64.0<br>(56.0 to 71.9)                  | 51.7<br>(46.1 to 58.2)                   | 0.7<br>(0.3 to 1.2)                  | 26.9<br>(19.6 to 34.7)                            | 1.0<br>(-4.2 to 6.2)                                |
| Urticaria                                     | 81.0<br>(70.2 to 94.0)                  | 145.0<br>(126.2 to 168.6)                | 4.9<br>(3.1 to 7.2)                  | 13.9<br>(7.0 to 21.7)                             | -0.0<br>(-5.2 to 5.6)                               |
| Decubitus ulcer                               | 1.9<br>(1.7 to 2.1)                     | 6.9<br>(6.2 to 7.7)                      | 0.3<br>(0.2 to 0.4)                  | 33.4<br>(21.8 to 47.3)                            | 5.2<br>(-7.1 to 20.6)                               |
| Other skin and subcutaneous diseases          | 442.4<br>(428.8 to 455.4)               | 503.3<br>(486.7 to 518.8)                | 2.4<br>(1.2 to 4.5)                  | 31.6<br>(28.0 to 35.4)                            | 2.3<br>(-0.0 to 4.6)                                |
| Sense organ diseases                          | 1,738.7<br>(1,697.4 to 1,786.8)         | 749.6†<br>(698.8 to 806.2)               | 63.0<br>(43.6 to 88.0)               | 28.3<br>(25.7 to 31.1)                            | -3.8<br>(-5.4 to -2.3)                              |
| Glaucoma                                      | 5.3<br>(4.5 to 6.1)                     | --                                       | 0.6<br>(0.4 to 0.8)                  | 40.6<br>(26.6 to 56.9)                            | -1.9<br>(-11.6 to 8.9)                              |
| Cataract                                      | 65.8<br>(59.5 to 72.6)                  | --                                       | 5.2<br>(3.7 to 7.0)                  | 33.8<br>(27.2 to 40.6)                            | -6.7<br>(-11.2 to -2.0)                             |
| Macular degeneration                          | 2.6<br>(2.1 to 3.2)                     | --                                       | 0.2<br>(0.1 to 0.3)                  | 43.2<br>(24.1 to 64.6)                            | -0.3<br>(-13.4 to 13.9)                             |
| Refraction and accommodation disorders        | 1,006.9<br>(955.7 to 1,060.2)           | --                                       | 17.8<br>(10.8 to 28.2)               | 20.2<br>(16.2 to 24.4)                            | -6.2<br>(-9.1 to -2.8)                              |
| Age-related and other hearing loss            | 979.1<br>(923.0 to 1,038.5)             | --                                       | 31.6<br>(22.1 to 44.1)               | 30.9<br>(26.4 to 34.9)                            | -3.0<br>(-5.0 to -1.0)                              |
| Other vision loss                             | 23.1<br>(20.6 to 25.4)                  | --                                       | 2.0<br>(1.4 to 2.8)                  | 34.1<br>(24.0 to 44.7)                            | -1.7<br>(-8.2 to 5.8)                               |
| Other sense organ diseases                    | 179.9<br>(165.6 to 193.7)               | 749.6<br>(698.8 to 806.2)                | 5.6<br>(3.5 to 8.5)                  | 33.8<br>(27.8 to 40.1)                            | 0.8<br>(-3.0 to 4.6)                                |
| Oral disorders                                | 4,472.4<br>(4,243.1 to 4,673.6)         | 9,831.1†<br>(8,594.6 to 11,056.6)        | 19.9<br>(12.0 to 31.2)               | 35.6<br>(33.0 to 38.4)                            | 0.1<br>(-1.8 to 2.0)                                |
| Caries of deciduous teeth                     | 601.3<br>(470.2 to 722.3)               | 2,215.6<br>(1,452.4 to 3,047.3)          | 0.1<br>(0.1 to 0.3)                  | -1.8<br>(-13.4 to 11.4)                           | -1.0<br>(-12.7 to 12.2)                             |
| Caries of permanent teeth                     | 3,268.3<br>(2,984.8 to 3,547.4)         | 7,492.9<br>(6,588.9 to 8,477.5)          | 1.9<br>(0.8 to 3.7)                  | 19.4<br>(14.7 to 24.6)                            | -2.6<br>(-5.8 to 0.7)                               |
| Periodontal disease                           | 766.1<br>(643.4 to 914.4)               | 96.3<br>(77.9 to 118.6)                  | 5.0<br>(2.0 to 10.5)                 | 41.4<br>(36.6 to 46.3)                            | 1.2<br>(-2.1 to 4.6)                                |
| Edentulism and severe tooth loss              | 311.0<br>(272.1 to 349.1)               | 26.3<br>(22.3 to 30.5)                   | 8.7<br>(5.7 to 12.2)                 | 42.1<br>(37.7 to 46.8)                            | 0.1<br>(-2.8 to 3.2)                                |
| Other oral disorders                          | 138.8<br>(132.3 to 145.5)               | --                                       | 4.1<br>(2.5 to 6.2)                  | 26.7<br>(22.4 to 31.4)                            | 0.1<br>(-2.9 to 3.3)                                |
| <b>Injuries</b>                               | <b>894.1</b><br><b>(822.6 to 982.9)</b> | <b>452.1†</b><br><b>(423.0 to 483.8)</b> | <b>37.1</b><br><b>(24.9 to 52.5)</b> | <b>32.0</b><br><b>(26.6 to 37.6)</b>              | <b>3.0</b><br><b>(0.0 to 6.0)</b>                   |
| <b>Transport injuries</b>                     | <b>90.3</b><br><b>(84.0 to 96.5)</b>    | <b>39.5</b><br><b>(34.5 to 44.7)</b>     | <b>5.1</b><br><b>(3.4 to 7.5)</b>    | <b>48.9</b><br><b>(44.5 to 53.3)</b>              | <b>12.0</b><br><b>(9.6 to 14.5)</b>                 |
| Road injuries                                 | 86.1<br>(79.9 to 92.2)                  | 38.4<br>(33.4 to 43.6)                   | 4.9<br>(3.2 to 7.1)                  | 50.3<br>(45.9 to 54.7)                            | 12.8<br>(10.4 to 15.3)                              |
| Pedestrian road injuries                      | 15.9<br>(14.0 to 18.1)                  | 5.0<br>(4.1 to 6.1)                      | 0.9<br>(0.6 to 1.3)                  | 45.5<br>(41.2 to 49.7)                            | 9.2<br>(6.8 to 11.6)                                |
| Cyclist road injuries                         | 16.4<br>(13.3 to 19.6)                  | 7.7<br>(6.0 to 9.7)                      | 0.9<br>(0.6 to 1.3)                  | 45.6<br>(40.1 to 50.8)                            | 12.8<br>(9.7 to 15.6)                               |
| Motorcyclist road injuries                    | 11.0<br>(9.3 to 12.9)                   | 3.2<br>(2.5 to 4.0)                      | 0.6<br>(0.4 to 0.9)                  | 55.3<br>(50.8 to 60.1)                            | 15.6<br>(12.9 to 18.3)                              |
| Motor vehicle road injuries                   | 28.8<br>(25.0 to 32.8)                  | 14.8<br>(12.5 to 17.3)                   | 1.8<br>(1.2 to 2.6)                  | 54.8<br>(50.5 to 59.0)                            | 14.7<br>(12.2 to 17.2)                              |
| Other road injuries                           | 13.9<br>(12.0 to 16.2)                  | 7.7<br>(6.0 to 9.7)                      | 0.7<br>(0.5 to 1.1)                  | 48.1<br>(44.0 to 52.4)                            | 11.3<br>(8.8 to 13.8)                               |
| Other transport injuries                      | 4.2<br>(3.5 to 5.0)                     | 1.1<br>(0.9 to 1.4)                      | 0.2<br>(0.2 to 0.4)                  | 24.1<br>(19.0 to 29.6)                            | -3.7<br>(-6.7 to -0.7)                              |
| <b>Unintentional injuries</b>                 | <b>654.2</b><br><b>(595.8 to 729.4)</b> | <b>364.6</b><br><b>(336.8 to 396.1)</b>  | <b>24.9</b><br><b>(17.0 to 34.7)</b> | <b>40.9</b><br><b>(35.9 to 45.9)</b>              | <b>8.1</b><br><b>(5.5 to 10.8)</b>                  |
| Falls                                         | 336.4<br>(291.2 to 386.0)               | 185.8<br>(162.4 to 212.5)                | 14.9<br>(10.5 to 20.4)               | 44.8<br>(40.1 to 49.8)                            | 9.2<br>(6.7 to 12.0)                                |
| Drowning                                      | 2.3<br>(2.0 to 2.7)                     | 0.6<br>(0.5 to 0.7)                      | 0.1<br>(0.1 to 0.2)                  | 42.0<br>(35.6 to 48.7)                            | 4.6<br>(1.0 to 8.3)                                 |
| Fire, heat, and hot substances                | 57.7<br>(45.7 to 75.4)                  | 8.4<br>(6.4 to 10.8)                     | 1.7<br>(1.1 to 2.4)                  | 32.9<br>(22.4 to 44.0)                            | 6.5<br>(0.2 to 12.9)                                |
| Poisonings                                    | 2.1<br>(1.7 to 2.5)                     | 3.3<br>(2.7 to 3.9)                      | 0.2<br>(0.1 to 0.3)                  | 28.6<br>(17.2 to 42.1)                            | 4.4<br>(-3.5 to 12.7)                               |
| Exposure to mechanical forces                 | 134.1<br>(114.5 to 162.0)               | 62.4<br>(53.3 to 72.5)                   | 3.5<br>(2.3 to 5.0)                  | 51.8<br>(46.5 to 57.1)                            | 15.1<br>(12.0 to 18.1)                              |
| Unintentional firearm injuries                | 9.3<br>(7.6 to 11.4)                    | 3.0<br>(2.2 to 3.9)                      | 0.4<br>(0.3 to 0.6)                  | 55.1<br>(50.4 to 60.1)                            | 15.0<br>(12.0 to 18.1)                              |
| Unintentional suffocation                     | 3.3<br>(2.4 to 4.3)                     | 0.8<br>(0.5 to 1.1)                      | 0.1<br>(0.1 to 0.2)                  | 25.4<br>(19.4 to 32.3)                            | 2.5<br>(-1.2 to 6.4)                                |
| Other exposure to mechanical forces           | 121.5<br>(102.2 to 149.1)               | 58.6<br>(50.1 to 68.0)                   | 3.0<br>(1.9 to 4.3)                  | 52.6<br>(47.1 to 58.0)                            | 15.6<br>(12.4 to 18.7)                              |

| Cause                                                                               | Prevalence in thousands (95% UI)        | Incidence in thousands (95% UI)          | YLDs in thousands (95% UI)        |                                                   |                                                     |
|-------------------------------------------------------------------------------------|-----------------------------------------|------------------------------------------|-----------------------------------|---------------------------------------------------|-----------------------------------------------------|
|                                                                                     | 2016 counts                             | 2016 counts                              | 2016 counts                       | Percentage change in counts between 2006 and 2016 | Percentage change in age-standardised rates between |
| Adverse effects of medical treatment                                                | 1.0<br>(0.8 to 1.2)                     | 13.0<br>(11.5 to 14.8)                   | 0.1<br>(0.1 to 0.2)               | 12.0<br>(6.5 to 18.0)                             | -7.0<br>(-11.0 to -2.7)                             |
| Animal contact                                                                      | 30.7<br>(27.0 to 36.1)                  | 41.9<br>(34.8 to 50.6)                   | 1.1<br>(0.7 to 1.6)               | 23.1<br>(15.2 to 32.1)                            | -2.6<br>(-7.6 to 2.6)                               |
| Venomous animal contact                                                             | 13.9<br>(11.4 to 17.0)                  | 18.8<br>(14.8 to 23.6)                   | 0.8<br>(0.6 to 1.2)               | 25.4<br>(15.4 to 37.4)                            | 0.2<br>(-6.4 to 7.5)                                |
| Non-venomous animal contact                                                         | 16.8<br>(14.0 to 21.2)                  | 23.1<br>(18.5 to 28.4)                   | 0.3<br>(0.2 to 0.5)               | 16.8<br>(11.1 to 22.1)                            | -9.0<br>(-12.4 to -5.9)                             |
| Foreign body                                                                        | 30.2<br>(24.5 to 36.0)                  | 26.7<br>(22.9 to 31.3)                   | 1.4<br>(0.9 to 2.0)               | 28.3<br>(22.1 to 34.5)                            | 2.8<br>(-0.8 to 6.1)                                |
| Pulmonary aspiration and foreign body in airway                                     | 21.1<br>(16.3 to 27.2)                  | 8.7<br>(7.3 to 10.6)                     | 1.0<br>(0.6 to 1.5)               | 29.8<br>(23.2 to 37.0)                            | 4.6<br>(0.5 to 8.5)                                 |
| Foreign body in eyes                                                                | 2.9<br>(1.6 to 4.3)                     | 15.1<br>(11.8 to 19.3)                   | 0.2<br>(0.1 to 0.3)               | 27.0<br>(21.6 to 32.9)                            | 0.4<br>(-2.2 to 3.0)                                |
| Foreign body in other body part                                                     | 6.1<br>(4.9 to 7.9)                     | 2.9<br>(2.4 to 3.5)                      | 0.2<br>(0.1 to 0.3)               | 22.2<br>(14.6 to 29.9)                            | -2.9<br>(-7.2 to 1.2)                               |
| Environmental heat and cold exposure                                                | 11.7<br>(9.8 to 14.6)                   | 3.6<br>(2.9 to 4.4)                      | 0.5<br>(0.3 to 0.7)               | 28.6<br>(23.4 to 34.0)                            | 1.8<br>(-1.1 to 4.5)                                |
| Other unintentional injuries                                                        | 48.1<br>(38.4 to 61.4)                  | 18.8<br>(15.3 to 23.0)                   | 1.4<br>(0.9 to 2.1)               | 25.8<br>(21.4 to 29.8)                            | -0.8<br>(-3.2 to 1.5)                               |
| <b>Self-harm and interpersonal violence</b>                                         | <b>229.1</b><br><b>(209.2 to 250.6)</b> | <b>47.9†</b><br><b>(41.0 to 55.3)</b>    | <b>4.5</b><br><b>(3.1 to 6.4)</b> | <b>10.6</b><br><b>(6.2 to 14.8)</b>               | <b>-14.5</b><br><b>(-17.2 to -11.9)</b>             |
| Self-harm                                                                           | 5.0<br>(4.3 to 5.6)                     | 2.9<br>(2.5 to 3.2)                      | 0.3<br>(0.2 to 0.4)               | 45.6<br>(40.7 to 50.9)                            | 6.5<br>(3.2 to 9.7)                                 |
| Self-harm by firearm                                                                | 0.5<br>(0.5 to 0.6)                     | 0.2<br>(0.1 to 0.3)                      | < 0.05<br>(< 0.05 to < 0.05)      | 11.9<br>(8.3 to 15.7)                             | -19.6<br>(-21.8 to -17.1)                           |
| Self-harm by other specified means                                                  | 4.5<br>(3.8 to 5.1)                     | 2.7<br>(2.4 to 3.0)                      | 0.2<br>(0.1 to 0.4)               | 49.6<br>(44.2 to 55.5)                            | 9.5<br>(6.0 to 13.0)                                |
| Interpersonal violence                                                              | 224.1<br>(204.4 to 245.9)               | 45.1†<br>(38.1 to 52.4)                  | 4.2<br>(2.9 to 5.9)               | 9.0<br>(4.5 to 13.2)                              | -15.7<br>(-18.5 to -13.0)                           |
| Assault by firearm                                                                  | 8.5<br>(7.2 to 10.1)                    | 3.5<br>(2.7 to 4.5)                      | 0.4<br>(0.3 to 0.6)               | 14.8<br>(11.3 to 18.4)                            | -15.1<br>(-17.2 to -13.0)                           |
| Assault by sharp object                                                             | 27.2<br>(22.5 to 32.5)                  | 15.1<br>(12.1 to 18.4)                   | 0.9<br>(0.6 to 1.3)               | 26.3<br>(22.5 to 30.2)                            | -5.4<br>(-7.7 to -3.1)                              |
| Sexual violence                                                                     | 152.5<br>(135.5 to 172.8)               | --                                       | 1.3<br>(0.9 to 1.9)               | -2.5<br>(-12.7 to 8.0)                            | -21.1<br>(-28.7 to -12.5)                           |
| Assault by other means                                                              | 35.9<br>(30.3 to 43.2)                  | 26.4<br>(22.2 to 30.9)                   | 1.6<br>(1.1 to 2.3)               | 9.6<br>(6.9 to 12.3)                              | -17.4<br>(-19.0 to -15.6)                           |
| <b>Forces of nature, conflict and terrorism, and executions and police conflict</b> | <b>73.0</b><br><b>(37.1 to 117.6)</b>   | <b>0.1†</b><br><b>(&lt; 0.05 to 0.1)</b> | <b>2.5</b><br><b>(0.9 to 5.3)</b> | <b>-12.6</b><br><b>(-18.9 to -7.3)</b>            | <b>-24.6</b><br><b>(-28.2 to -21.6)</b>             |
| Exposure to forces of nature                                                        | 71.2<br>(35.3 to 114.9)                 | --                                       | 2.4<br>(0.8 to 5.2)               | -13.9<br>(-19.8 to -9.0)                          | -25.6<br>(-29.1 to -22.9)                           |
| Conflict and terrorism                                                              | 1.7<br>(0.9 to 2.9)                     | --                                       | 0.1<br>(< 0.05 to 0.1)            | 180.0<br>(161.7 to 199.9)                         | 140.3<br>(127.6 to 153.5)                           |
| Executions and police conflict                                                      | 0.1<br>(0.1 to 0.2)                     | 0.1<br>(< 0.05 to 0.1)                   | < 0.05<br>(< 0.05 to < 0.05)      | 37.7<br>(26.7 to 47.5)                            | 20.6<br>(13.0 to 27.8)                              |
| <b>Impairments</b>                                                                  | --                                      | --                                       | --                                | --                                                | --                                                  |
| Anaemia                                                                             | 1,484.1<br>(1,380.0 to 1,598.4)         | --                                       | 34.8<br>(23.5 to 49.7)            | 5.8<br>(-3.4 to 14.2)                             | -8.8<br>(-15.1 to -2.3)                             |
| Developmental intellectual disability                                               | 140.3<br>(108.4 to 173.6)               | --                                       | 15.5<br>(11.2 to 20.4)            | 17.2<br>(12.4 to 23.0)                            | -1.0<br>(-5.0 to 3.5)                               |
| Epilepsy                                                                            | 63.8<br>(30.3 to 97.5)                  | --                                       | 20.4<br>(8.5 to 36.1)             | 19.9<br>(-54.8 to 185.0)                          | -1.2<br>(-62.3 to 137.2)                            |
| Guillain-Barre syndrome                                                             | 0.1<br>(0.1 to 0.2)                     | --                                       | < 0.05<br>(< 0.05 to 0.1)         | 111.4<br>(52.2 to 266.9)                          | 73.5<br>(29.0 to 191.8)                             |
| Hearing loss                                                                        | 1,122.5<br>(1,066.5 to 1,181.6)         | --                                       | 39.3<br>(27.5 to 54.3)            | 25.3<br>(21.4 to 28.6)                            | -3.6<br>(-5.6 to -1.8)                              |
| Heart failure                                                                       | 34.6<br>(30.5 to 39.3)                  | --                                       | 4.0<br>(2.9 to 5.1)               | 46.5<br>(35.6 to 58.4)                            | 3.6<br>(-4.6 to 12.4)                               |
| Infertility                                                                         | 93.1<br>(86.2 to 100.3)                 | --                                       | 0.6<br>(0.2 to 1.1)               | 79.0<br>(63.6 to 94.9)                            | 31.9<br>(21.7 to 42.6)                              |
| Pelvic inflammatory disease                                                         | 0.7<br>(0.6 to 0.8)                     | --                                       | 0.1<br>(0.1 to 0.1)               | 26.6<br>(3.4 to 60.0)                             | -5.5<br>(-23.3 to 18.3)                             |
| Vision loss                                                                         | 1,127.0<br>(1,074.4 to 1,181.8)         | --                                       | 29.3<br>(20.1 to 42.2)            | 24.3<br>(21.1 to 27.9)                            | -4.9<br>(-7.3 to -2.4)                              |

We did not calculate incidence for the nine impairments, certain NTDs, and causes with only birth prevalence. Blank cells mean that no estimate is available.

† Incidence for aggregate causes represents the sum of the incidence of the causes below the aggregate.

‡ Incidence estimates for stroke represent first-ever stroke only.

^ Incidence of HIV/AIDS represents new infections of HIV only and does not include new infections of Tuberculosis in HIV positive cases.



SR Table 14: Prevalence, incidence, and YLDs for 2016, percentage change of YLD counts and percentage change of age-standardised YLD rates between 2006 and 2016 by cause and impairments, for all ages, Hungary.

| Cause                                                                                | Prevalence in thousands (95% UI)       | Incidence in thousands (95% UI)            | YLDs in thousands (95% UI)             |                                                   |                                                     |
|--------------------------------------------------------------------------------------|----------------------------------------|--------------------------------------------|----------------------------------------|---------------------------------------------------|-----------------------------------------------------|
|                                                                                      | 2016 counts                            | 2016 counts                                | 2016 counts                            | Percentage change in counts between 2006 and 2016 | Percentage change in age-standardised rates between |
| <b>All causes</b>                                                                    | <b>9,469.2</b><br>(9,441.7 to 9,498.7) | <b>51,786.4†</b><br>(49,774.0 to 53,818.7) | <b>1,370.8</b><br>(1,026.5 to 1,769.1) | <b>2.7</b><br>(1.1 to 4.3)                        | <b>-0.8</b><br>(-2.5 to 1.0)                        |
| <b>Communicable, maternal, neonatal, and nutritional disorders</b>                   | <b>4,499.5</b><br>(4,354.3 to 4,639.7) | <b>19,361.2†</b><br>(17,816.9 to 21,077.9) | <b>57.4</b><br>(41.0 to 79.1)          | <b>-4.3</b><br>(-10.0 to 1.8)                     | <b>-1.0</b><br>(-7.0 to 5.6)                        |
| <b>HIV/AIDS and tuberculosis</b>                                                     | <b>2,420.3</b><br>(2,218.2 to 2,573.6) | <b>1.0†</b><br>(0.9 to 1.1)                | <b>0.4</b><br>(0.2 to 0.6)             | <b>-25.6</b><br>(-36.0 to -14.1)                  | <b>-27.5</b><br>(-36.7 to -17.4)                    |
| Tuberculosis                                                                         | 2,279.2<br>(2,113.2 to 2,463.6)        | 0.9†<br>(0.8 to 1.0)                       | 0.2<br>(0.1 to 0.3)                    | -29.5<br>(-43.0 to -12.9)                         | -30.4<br>(-42.2 to -17.0)                           |
| Drug-susceptible tuberculosis                                                        | 0.7<br>(0.6 to 0.8)                    | 0.9<br>(0.8 to 1.0)                        | 0.2<br>(0.1 to 0.3)                    | -29.3<br>(-44.2 to -10.8)                         | -30.2<br>(-43.0 to -14.6)                           |
| Multidrug-resistant tuberculosis without extensive drug resistance                   | < 0.05<br>(< 0.05 to 0.1)              | < 0.05<br>(< 0.05 to 0.1)                  | < 0.05<br>(< 0.05 to < 0.05)           | -44.1<br>(-91.9 to 231.5)                         | -45.1<br>(-92.0 to 222.8)                           |
| Extensively drug-resistant tuberculosis                                              | < 0.05<br>(< 0.05 to < 0.05)           | < 0.05<br>(< 0.05 to < 0.05)               | < 0.05<br>(< 0.05 to < 0.05)           | 72.4<br>(-75.1 to 922.2)                          | 69.2<br>(-75.2 to 895.8)                            |
| Latent tuberculosis infection                                                        | 2,278.5<br>(2,112.4 to 2,462.8)        | --                                         | --                                     | --                                                | --                                                  |
| HIV/AIDS                                                                             | 1.1<br>(0.6 to 1.9)                    | 0.1 <sup>a</sup><br>(< 0.05 to 0.1)        | 0.1<br>(0.1 to 0.3)                    | -18.7<br>(-29.6 to -4.0)                          | -22.2<br>(-32.2 to -8.9)                            |
| Drug-susceptible HIV/AIDS - Tuberculosis                                             | < 0.05<br>(< 0.05 to < 0.05)           | < 0.05<br>(< 0.05 to < 0.05)               | < 0.05<br>(< 0.05 to < 0.05)           | -54.4<br>(-59.8 to -48.7)                         | -56.5<br>(-61.7 to -51.0)                           |
| Multidrug-resistant HIV/AIDS - Tuberculosis without extensive drug resistance        | < 0.05<br>(< 0.05 to < 0.05)           | < 0.05<br>(< 0.05 to < 0.05)               | < 0.05<br>(< 0.05 to < 0.05)           | -63.4<br>(-95.0 to 123.5)                         | -65.1<br>(-95.2 to 113.9)                           |
| Extensively drug-resistant HIV/AIDS - Tuberculosis                                   | < 0.05<br>(< 0.05 to < 0.05)           | < 0.05<br>(< 0.05 to < 0.05)               | < 0.05<br>(< 0.05 to < 0.05)           | 12.8<br>(-84.5 to 589.1)                          | 7.7<br>(-85.2 to 559.6)                             |
| HIV/AIDS resulting in other diseases                                                 | 1.1<br>(0.6 to 1.9)                    | 0.1<br>(< 0.05 to 0.1)                     | 0.1<br>(0.1 to 0.3)                    | -16.3<br>(-28.5 to 0.2)                           | -19.9<br>(-30.9 to -5.1)                            |
| <b>Diarrhoea, lower respiratory infections, and other common infectious diseases</b> | <b>346.2</b><br>(327.4 to 368.2)       | <b>18,512.5†</b><br>(16,957.7 to 20,221.0) | <b>16.7</b><br>(11.5 to 22.9)          | <b>2.3</b><br>(-0.9 to 5.9)                       | <b>3.9</b><br>(0.4 to 7.7)                          |
| Diarrhoeal diseases                                                                  | 66.5<br>(61.9 to 71.5)                 | 4,370.9<br>(4,075.7 to 4,682.8)            | 7.4<br>(5.1 to 10.1)                   | 10.8<br>(5.0 to 17.9)                             | 9.4<br>(3.3 to 16.7)                                |
| Intestinal infectious diseases                                                       | < 0.05<br>(< 0.05 to < 0.05)           | 0.1†<br>(< 0.05 to 0.1)                    | < 0.05<br>(< 0.05 to < 0.05)           | 3.3<br>(-11.6 to 19.3)                            | -1.1<br>(-14.0 to 14.0)                             |
| Typhoid fever                                                                        | < 0.05<br>(< 0.05 to < 0.05)           | < 0.05<br>(< 0.05 to < 0.05)               | < 0.05<br>(< 0.05 to < 0.05)           | 10.8<br>(-9.0 to 32.2)                            | 10.8<br>(-8.5 to 32.9)                              |
| Paratyphoid fever                                                                    | < 0.05<br>(< 0.05 to < 0.05)           | < 0.05<br>(< 0.05 to 0.1)                  | < 0.05<br>(< 0.05 to < 0.05)           | 1.5<br>(-16.3 to 21.5)                            | -3.5<br>(-18.8 to 13.6)                             |
| Other intestinal infectious diseases                                                 | --                                     | --                                         | < 0.05<br>(< 0.05 to < 0.05)           | -32.9<br>(-49.6 to -13.0)                         | -41.3<br>(-59.3 to -17.4)                           |
| Lower respiratory infections                                                         | 8.1<br>(7.5 to 8.9)                    | 372.5<br>(340.3 to 405.5)                  | 0.5<br>(0.3 to 0.7)                    | 26.3<br>(10.8 to 41.6)                            | 24.1<br>(7.9 to 41.6)                               |
| Upper respiratory infections                                                         | 178.8<br>(158.7 to 201.1)              | 13,252.7<br>(11,733.9 to 14,930.3)         | 4.4<br>(2.6 to 7.0)                    | -3.5<br>(-9.1 to 1.9)                             | -0.0<br>(-5.5 to 5.7)                               |
| Otitis media                                                                         | 88.0<br>(79.5 to 97.1)                 | 381.8<br>(315.7 to 461.2)                  | 2.5<br>(1.5 to 3.7)                    | -8.5<br>(-15.6 to -1.2)                           | -4.1<br>(-12.0 to 3.7)                              |
| Meningitis                                                                           | 6.8<br>(6.0 to 7.6)                    | 0.9<br>(0.8 to 1.1)                        | 0.9<br>(0.6 to 1.2)                    | -5.6<br>(-8.0 to -3.1)                            | -3.1<br>(-5.7 to -0.7)                              |
| Pneumococcal meningitis                                                              | 2.6<br>(2.2 to 3.1)                    | 0.1<br>(0.1 to 0.2)                        | 0.4<br>(0.2 to 0.5)                    | -9.1<br>(-13.8 to -5.0)                           | -6.8<br>(-11.6 to -2.6)                             |
| H influenzae type B meningitis                                                       | 0.7<br>(0.6 to 0.8)                    | < 0.05<br>(< 0.05 to < 0.05)               | 0.1<br>(0.1 to 0.2)                    | -4.0<br>(-7.1 to -0.5)                            | -0.3<br>(-3.6 to 3.5)                               |
| Meningococcal infection                                                              | 1.2<br>(0.9 to 1.5)                    | 0.2<br>(0.2 to 0.3)                        | 0.1<br>(0.1 to 0.2)                    | -5.3<br>(-9.2 to -2.1)                            | -3.1<br>(-7.5 to 0.5)                               |
| Other meningitis                                                                     | 2.3<br>(1.8 to 2.9)                    | 0.6<br>(0.5 to 0.7)                        | 0.2<br>(0.2 to 0.3)                    | -0.8<br>(-4.5 to 3.4)                             | 1.2<br>(-2.5 to 5.6)                                |
| Encephalitis                                                                         | 6.8<br>(4.8 to 9.6)                    | 3.2<br>(2.9 to 3.6)                        | 0.8<br>(0.5 to 1.1)                    | -1.3<br>(-14.6 to 12.3)                           | -0.7<br>(-13.0 to 12.1)                             |
| Diphtheria                                                                           | < 0.05<br>(< 0.05 to < 0.05)           | < 0.05<br>(< 0.05 to < 0.05)               | < 0.05<br>(< 0.05 to < 0.05)           | -27.5<br>(-65.8 to 46.4)                          | -24.1<br>(-60.5 to 42.5)                            |
| Whooping cough                                                                       | 0.1<br>(0.1 to 0.1)                    | 0.8<br>(0.6 to 1.1)                        | < 0.05<br>(< 0.05 to < 0.05)           | -37.6<br>(-66.7 to 3.4)                           | -33.7<br>(-65.1 to 11.5)                            |
| Tetanus                                                                              | < 0.05<br>(< 0.05 to < 0.05)           | < 0.05<br>(< 0.05 to < 0.05)               | < 0.05<br>(< 0.05 to < 0.05)           | -31.2<br>(-45.6 to -16.8)                         | -29.0<br>(-42.4 to -16.1)                           |
| Measles                                                                              | < 0.05<br>(0.0 to < 0.05)              | < 0.05<br>(0.0 to < 0.05)                  | < 0.05<br>(0.0 to < 0.05)              | --                                                | --                                                  |
| Varicella and herpes zoster                                                          | 8.0<br>(7.1 to 8.8)                    | 129.7<br>(124.0 to 135.4)                  | 0.3<br>(0.2 to 0.5)                    | 4.1<br>(-9.6 to 19.0)                             | -0.2<br>(-13.9 to 15.0)                             |
| <b>Neglected tropical diseases and malaria</b>                                       | <b>2.5</b><br>(0.8 to 4.8)             | <b>0.1†</b><br>(< 0.05 to 0.5)             | <b>0.3</b><br>(< 0.05 to 0.7)          | <b>-19.8</b><br>(-92.2 to 386.1)                  | <b>-23.7</b><br>(-92.6 to 332.7)                    |
| Malaria                                                                              | --                                     | --                                         | --                                     | --                                                | --                                                  |
| Chagas disease                                                                       | --                                     | --                                         | --                                     | --                                                | --                                                  |
| Leishmaniasis                                                                        | --                                     | --                                         | --                                     | --                                                | --                                                  |
| Visceral leishmaniasis                                                               | --                                     | --                                         | --                                     | --                                                | --                                                  |
| Cutaneous and mucocutaneous leishmaniasis                                            | --                                     | --                                         | --                                     | --                                                | --                                                  |
| African trypanosomiasis                                                              | --                                     | --                                         | --                                     | --                                                | --                                                  |
| Schistosomiasis                                                                      | --                                     | --                                         | --                                     | --                                                | --                                                  |
| Cysticercosis                                                                        | 1.5<br>(< 0.05 to 3.8)                 | --                                         | 0.2<br>(< 0.05 to 0.6)                 | --                                                | --                                                  |
| Cystic echinococcosis                                                                | 0.6<br>(0.1 to 2.5)                    | 0.1<br>(< 0.05 to 0.5)                     | 0.1<br>(< 0.05 to 0.3)                 | -45.1<br>(-94.2 to 353.5)                         | -46.2<br>(-93.9 to 299.3)                           |
| Lymphatic filariasis                                                                 | --                                     | --                                         | --                                     | --                                                | --                                                  |
| Onchocerciasis                                                                       | --                                     | --                                         | --                                     | --                                                | --                                                  |
| Trachoma                                                                             | --                                     | --                                         | --                                     | --                                                | --                                                  |
| Dengue                                                                               | --                                     | --                                         | --                                     | --                                                | --                                                  |
| Yellow fever                                                                         | --                                     | --                                         | --                                     | --                                                | --                                                  |
| Rabies                                                                               | < 0.05<br>(< 0.05 to < 0.05)           | < 0.05<br>(< 0.05 to < 0.05)               | < 0.05<br>(< 0.05 to < 0.05)           | -70.9<br>(-78.2 to -65.1)                         | -75.0<br>(-81.3 to -69.8)                           |
| Intestinal nematode infections                                                       | --                                     | --                                         | --                                     | --                                                | --                                                  |
| Ascariasis                                                                           | --                                     | --                                         | --                                     | --                                                | --                                                  |

| Cause                                                                   | Prevalence in thousands (95% UI)              | Incidence in thousands (95% UI)                   | YLDs in thousands (95% UI)                  |                                                   |                                                     |
|-------------------------------------------------------------------------|-----------------------------------------------|---------------------------------------------------|---------------------------------------------|---------------------------------------------------|-----------------------------------------------------|
|                                                                         | 2016 counts                                   | 2016 counts                                       | 2016 counts                                 | Percentage change in counts between 2006 and 2016 | Percentage change in age-standardised rates between |
| Trichuriasis                                                            | --                                            | --                                                | --                                          | --                                                | --                                                  |
| Hookworm disease                                                        | --                                            | --                                                | --                                          | --                                                | --                                                  |
| Food-borne trematodiasis                                                | --                                            | --                                                | --                                          | --                                                | --                                                  |
| Leprosy                                                                 | --                                            | --                                                | --                                          | --                                                | --                                                  |
| Ebola virus disease                                                     | --                                            | --                                                | --                                          | --                                                | --                                                  |
| Zika virus disease                                                      | --                                            | --                                                | --                                          | --                                                | --                                                  |
| Guinea worm disease                                                     | --                                            | --                                                | --                                          | --                                                | --                                                  |
| Other neglected tropical diseases                                       | --                                            | --                                                | < 0.05<br>(< 0.05 to < 0.05)                | --                                                | --                                                  |
| <b>Maternal disorders</b>                                               | <b>6.0</b><br><b>(4.7 to 7.6)</b>             | <b>98.4†</b><br><b>(79.5 to 119.9)</b>            | <b>0.3</b><br><b>(0.2 to 0.4)</b>           | <b>-10.2</b><br><b>(-32.2 to 18.5)</b>            | <b>0.7</b><br><b>(-24.2 to 33.0)</b>                |
| Maternal haemorrhage                                                    | 3.1<br>(1.9 to 4.5)                           | 15.4<br>(11.6 to 20.6)                            | 0.1<br>(0.1 to 0.1)                         | -8.1<br>(-40.0 to 42.1)                           | 6.1<br>(-29.6 to 60.1)                              |
| Maternal sepsis and other pregnancy related infections                  | 1.4<br>(1.1 to 1.9)                           | 9.0<br>(6.8 to 12.2)                              | < 0.05<br>(< 0.05 to 0.1)                   | -18.0<br>(-63.1 to 80.6)                          | -7.2<br>(-58.0 to 109.3)                            |
| Maternal hypertensive disorders                                         | 1.1<br>(0.7 to 1.6)                           | 4.5<br>(3.3 to 6.0)                               | 0.1<br>(< 0.05 to 0.1)                      | -10.6<br>(-51.9 to 73.6)                          | -0.8<br>(-47.2 to 90.0)                             |
| Maternal obstructed labour and uterine rupture                          | < 0.05<br>(< 0.05 to 0.1)                     | 2.8<br>(1.6 to 4.5)                               | < 0.05<br>(< 0.05 to < 0.05)                | -5.4<br>(-50.0 to 79.6)                           | 5.4<br>(-44.3 to 98.7)                              |
| Maternal abortion, miscarriage, and ectopic pregnancy                   | 0.6<br>(0.3 to 0.8)                           | 66.7<br>(49.3 to 87.1)                            | 0.1<br>(< 0.05 to 0.1)                      | -4.2<br>(-52.2 to 104.1)                          | 4.0<br>(-45.8 to 114.4)                             |
| Other maternal disorders                                                | --                                            | --                                                | < 0.05<br>(< 0.05 to 0.1)                   | -15.3<br>(-36.2 to 12.5)                          | -5.1<br>(-28.7 to 25.3)                             |
| <b>Neonatal disorders</b>                                               | <b>94.2</b><br><b>(77.3 to 112.5)</b>         | --                                                | <b>16.3</b><br><b>(11.3 to 23.0)</b>        | <b>-3.3</b><br><b>(-13.9 to 9.2)</b>              | <b>0.8</b><br><b>(-10.5 to 14.6)</b>                |
| Neonatal preterm birth complications                                    | 64.9<br>(53.1 to 80.9)                        | --                                                | 7.0<br>(4.5 to 10.1)                        | -6.3<br>(-25.1 to 16.1)                           | -1.4<br>(-21.7 to 22.7)                             |
| Neonatal encephalopathy due to birth asphyxia and trauma                | 34.8<br>(19.8 to 54.5)                        | --                                                | 6.3<br>(3.2 to 11.4)                        | -5.2<br>(-20.3 to 18.1)                           | -2.0<br>(-17.9 to 21.5)                             |
| Neonatal sepsis and other neonatal infections                           | 6.0<br>(2.9 to 12.3)                          | --                                                | 2.5<br>(1.0 to 5.7)                         | 13.3<br>(-3.3 to 31.9)                            | 16.8<br>(-0.1 to 37.3)                              |
| Hemolytic disease and other neonatal jaundice                           | 0.8<br>(0.7 to 0.9)                           | --                                                | 0.2<br>(0.2 to 0.3)                         | -7.2<br>(-13.9 to -0.6)                           | -3.7<br>(-10.5 to 3.1)                              |
| Other neonatal disorders                                                | --                                            | --                                                | 0.3<br>(0.2 to 0.4)                         | -6.8<br>(-22.6 to 11.9)                           | -1.7<br>(-18.3 to 18.0)                             |
| <b>Nutritional deficiencies</b>                                         | <b>1,292.9</b><br><b>(1,163.1 to 1,390.8)</b> | <b>38.4†</b><br><b>(28.8 to 48.3)</b>             | <b>20.1</b><br><b>(12.5 to 30.3)</b>        | <b>-9.3</b><br><b>(-20.5 to 3.7)</b>              | <b>-5.8</b><br><b>(-17.8 to 9.2)</b>                |
| Protein-energy malnutrition                                             | 8.2<br>(4.8 to 13.8)                          | 3.5<br>(2.0 to 5.9)                               | 0.2<br>(0.1 to 0.3)                         | -11.1<br>(-53.5 to 57.7)                          | -6.2<br>(-50.8 to 66.3)                             |
| Iodine deficiency                                                       | 101.0<br>(89.7 to 114.8)                      | 1.3<br>(1.2 to 1.5)                               | 2.5<br>(1.7 to 3.6)                         | 1.0<br>(-8.9 to 11.8)                             | 2.2<br>(-8.6 to 13.9)                               |
| Vitamin A deficiency                                                    | 40.1<br>(29.1 to 51.6)                        | 33.6<br>(24.1 to 44.0)                            | --                                          | --                                                | --                                                  |
| Iron-deficiency anaemia                                                 | 1,098.6<br>(963.2 to 1,220.7)                 | --                                                | 17.4<br>(10.5 to 26.2)                      | -10.6<br>(-23.6 to 4.3)                           | -6.7<br>(-20.4 to 10.2)                             |
| Other nutritional deficiencies                                          | --                                            | --                                                | < 0.05<br>(< 0.05 to < 0.05)                | -11.5<br>(-55.1 to 60.7)                          | -6.7<br>(-52.7 to 69.1)                             |
| <b>Other communicable, maternal, neonatal, and nutritional diseases</b> | <b>1,557.8</b><br><b>(1,458.6 to 1,660.5)</b> | <b>710.7</b><br><b>(606.1 to 834.3)</b>           | <b>3.3</b><br><b>(2.1 to 5.2)</b>           | <b>-3.1</b><br><b>(-8.5 to 3.4)</b>               | <b>1.3</b><br><b>(-5.1 to 8.6)</b>                  |
| Sexually transmitted diseases excluding HIV                             | 1,159.3<br>(1,081.4 to 1,253.3)               | 691.6<br>(587.3 to 815.7)                         | 2.6<br>(1.6 to 4.1)                         | -5.3<br>(-11.4 to 1.1)                            | -1.8<br>(-8.4 to 4.6)                               |
| Syphilis                                                                | 13.6<br>(10.9 to 16.7)                        | 8.8<br>(6.2 to 12.1)                              | 0.4<br>(0.3 to 0.6)                         | 7.3<br>(-11.8 to 29.6)                            | -0.4<br>(-16.9 to 18.4)                             |
| Chlamydial infection                                                    | 105.1<br>(69.7 to 155.5)                      | 80.6<br>(54.8 to 119.5)                           | 0.5<br>(0.3 to 0.8)                         | -10.3<br>(-21.6 to 1.7)                           | -2.4<br>(-14.7 to 10.7)                             |
| Gonococcal infection                                                    | 101.9<br>(77.3 to 133.5)                      | 348.1<br>(256.3 to 462.8)                         | 0.4<br>(0.2 to 0.7)                         | -8.0<br>(-19.2 to 3.9)                            | 0.1<br>(-12.4 to 13.0)                              |
| Trichomoniasis                                                          | 221.1<br>(192.6 to 254.7)                     | 184.2<br>(159.3 to 212.7)                         | 0.2<br>(0.1 to 0.5)                         | -4.4<br>(-10.5 to 1.9)                            | -0.9<br>(-7.0 to 5.2)                               |
| Genital herpes                                                          | 737.4<br>(627.8 to 866.2)                     | 27.9<br>(23.4 to 33.3)                            | 0.2<br>(0.1 to 0.4)                         | 2.1<br>(-5.9 to 10.1)                             | -0.3<br>(-7.9 to 7.9)                               |
| Other sexually transmitted diseases                                     | 39.5<br>(31.1 to 50.4)                        | 42.1<br>(35.5 to 50.3)                            | 0.8<br>(0.5 to 1.3)                         | -8.5<br>(-19.7 to 3.1)                            | -3.5<br>(-15.6 to 8.0)                              |
| Hepatitis                                                               | 425.5<br>(370.4 to 494.8)                     | 19.1<br>(15.7 to 22.6)                            | < 0.05<br>(< 0.05 to < 0.05)                | -14.2<br>(-25.9 to -1.4)                          | -15.3<br>(-27.5 to -0.8)                            |
| Acute hepatitis A                                                       | 0.4<br>(0.2 to 0.6)                           | 5.7<br>(3.1 to 7.6)                               | < 0.05<br>(< 0.05 to < 0.05)                | -16.8<br>(-40.5 to 13.8)                          | -16.1<br>(-42.2 to 19.5)                            |
| Hepatitis B                                                             | 248.1<br>(199.4 to 313.4)                     | 11.3<br>(8.9 to 14.1)                             | < 0.05<br>(< 0.05 to < 0.05)                | -14.3<br>(-28.0 to 0.9)                           | -19.3<br>(-31.1 to -6.2)                            |
| Hepatitis C                                                             | 177.0<br>(157.8 to 196.0)                     | 1.6<br>(1.4 to 1.9)                               | < 0.05<br>(< 0.05 to < 0.05)                | -5.9<br>(-6.9 to -5.2)                            | -1.3<br>(-2.1 to -0.6)                              |
| Acute hepatitis E                                                       | < 0.05<br>(< 0.05 to 0.1)                     | 0.5<br>(0.4 to 0.7)                               | < 0.05<br>(< 0.05 to < 0.05)                | -7.4<br>(-15.5 to 1.0)                            | -13.1<br>(-18.9 to -6.7)                            |
| Other infectious diseases                                               | 36.6<br>(32.2 to 41.0)                        | < 0.05<br>(< 0.05 to < 0.05)                      | 0.7<br>(0.4 to 1.1)                         | 6.0<br>(-9.9 to 25.9)                             | 11.6<br>(-8.7 to 36.1)                              |
| <b>Non-communicable diseases</b>                                        | <b>9,171.2</b><br><b>(9,133.2 to 9,209.7)</b> | <b>30,508.3†</b><br><b>(29,358.1 to 31,752.9)</b> | <b>1,128.7</b><br><b>(840.9 to 1,450.0)</b> | <b>2.8</b><br><b>(1.0 to 4.7)</b>                 | <b>-0.9</b><br><b>(-2.8 to 1.3)</b>                 |
| <b>Neoplasms</b>                                                        | <b>155.3</b><br><b>(149.0 to 162.6)</b>       | <b>59.7</b><br><b>(56.3 to 64.7)</b>              | <b>17.4</b><br><b>(12.9 to 22.3)</b>        | <b>3.3</b><br><b>(-1.4 to 7.9)</b>                | <b>-5.7</b><br><b>(-10.1 to -1.7)</b>               |
| Lip and oral cavity cancer                                              | 5.0<br>(4.5 to 5.6)                           | 1.4<br>(1.3 to 1.6)                               | 0.5<br>(0.4 to 0.7)                         | -10.3<br>(-27.0 to 9.7)                           | -16.8<br>(-32.1 to 2.0)                             |
| Nasopharynx cancer                                                      | 0.3<br>(0.3 to 0.4)                           | 0.1<br>(0.1 to 0.1)                               | < 0.05<br>(< 0.05 to 0.1)                   | -14.7<br>(-27.7 to 0.2)                           | -18.4<br>(-31.8 to -2.9)                            |
| Other pharynx cancer                                                    | 3.4<br>(3.0 to 3.8)                           | 1.1<br>(1.0 to 1.2)                               | 0.4<br>(0.2 to 0.5)                         | -9.0<br>(-29.7 to 18.8)                           | -13.6<br>(-33.4 to 14.0)                            |
| Oesophageal cancer                                                      | 0.8<br>(0.7 to 0.8)                           | 0.7<br>(0.6 to 0.7)                               | 0.2<br>(0.1 to 0.2)                         | -10.6<br>(-35.4 to 25.4)                          | -17.5<br>(-40.1 to 14.1)                            |
| Stomach cancer                                                          | 3.1<br>(2.7 to 3.8)                           | 1.9<br>(1.7 to 2.1)                               | 0.5<br>(0.3 to 0.6)                         | -9.3<br>(-26.4 to 10.6)                           | -18.9<br>(-33.9 to -1.6)                            |
| Colon and rectum cancer                                                 | 31.1<br>(29.0 to 33.5)                        | 9.0<br>(8.4 to 9.7)                               | 3.0<br>(2.2 to 3.9)                         | 8.4<br>(-3.8 to 21.5)                             | -2.8<br>(-13.6 to 8.8)                              |
| Liver cancer                                                            | 0.3<br>(0.3 to 0.4)                           | 0.9<br>(0.8 to 1.0)                               | 0.2<br>(0.1 to 0.2)                         | -4.2<br>(-14.6 to 9.3)                            | -13.4<br>(-22.5 to -1.7)                            |
| Liver cancer due to hepatitis B                                         | 0.2<br>(0.1 to 0.2)                           | 0.2<br>(0.1 to 0.3)                               | < 0.05<br>(< 0.05 to 0.1)                   | -1.1<br>(-13.8 to 13.4)                           | -10.1<br>(-21.2 to 2.7)                             |

| Cause                                              | Prevalence in thousands (95% UI)              | Incidence in thousands (95% UI)          | YLDs in thousands (95% UI)             |                                                   |                                                     |
|----------------------------------------------------|-----------------------------------------------|------------------------------------------|----------------------------------------|---------------------------------------------------|-----------------------------------------------------|
|                                                    | 2016 counts                                   | 2016 counts                              | 2016 counts                            | Percentage change in counts between 2006 and 2016 | Percentage change in age-standardised rates between |
| Liver cancer due to hepatitis C                    | 0.2<br>(0.1 to 0.2)                           | 0.2<br>(0.1 to 0.3)                      | < 0.05<br>(< 0.05 to 0.1)              | 1.1<br>(-11.3 to 16.2)                            | -9.4<br>(-20.1 to 3.8)                              |
| Liver cancer due to alcohol use                    | 0.3<br>(0.3 to 0.4)                           | 0.3<br>(0.3 to 0.4)                      | 0.1<br>(0.1 to 0.1)                    | -12.3<br>(-22.3 to 0.3)                           | -21.0<br>(-29.6 to -9.7)                            |
| Liver cancer due to other causes                   | 0.1<br>(0.1 to 0.1)                           | 0.1<br>(0.1 to 0.1)                      | < 0.05<br>(< 0.05 to < 0.05)           | 10.6<br>(-4.4 to 29.0)                            | 0.1<br>(-13.1 to 16.4)                              |
| Gallbladder and biliary tract cancer               | 0.5<br>(0.5 to 0.6)                           | 0.7<br>(0.7 to 0.8)                      | 0.1<br>(0.1 to 0.2)                    | -10.2<br>(-26.5 to 8.4)                           | -20.6<br>(-34.1 to -5.3)                            |
| Pancreatic cancer                                  | 1.5<br>(1.4 to 1.7)                           | 2.0<br>(1.9 to 2.1)                      | 0.4<br>(0.3 to 0.5)                    | 7.4<br>(-10.2 to 32.7)                            | -3.6<br>(-18.4 to 17.8)                             |
| Larynx cancer                                      | 3.2<br>(2.9 to 3.6)                           | 0.9<br>(0.8 to 1.0)                      | 0.4<br>(0.2 to 0.5)                    | -10.0<br>(-29.0 to 17.1)                          | -16.2<br>(-34.1 to 8.6)                             |
| Tracheal, bronchus, and lung cancer                | 10.5<br>(9.8 to 11.2)                         | 8.4<br>(8.0 to 8.9)                      | 1.9<br>(1.4 to 2.5)                    | -6.3<br>(-19.4 to 8.1)                            | -15.0<br>(-26.6 to -1.6)                            |
| Malignant skin melanoma                            | 6.0<br>(5.2 to 7.2)                           | 1.3<br>(1.1 to 1.6)                      | 0.4<br>(0.3 to 0.6)                    | 17.6<br>(1.0 to 36.1)                             | 8.2<br>(-6.3 to 25.1)                               |
| Non-melanoma skin cancer                           | 3.9<br>(1.7 to 7.5)                           | 6.5<br>(3.5 to 11.2)                     | 0.1<br>(< 0.05 to 0.3)                 | -21.4<br>(-42.9 to 8.3)                           | -31.3<br>(-49.8 to -6.8)                            |
| Non-melanoma skin cancer (squamous-cell carcinoma) | 2.6<br>(1.0 to 7.2)                           | 2.5<br>(1.0 to 6.7)                      | 0.1<br>(< 0.05 to 0.3)                 | -22.8<br>(-44.5 to 7.0)                           | -32.7<br>(-51.0 to -7.9)                            |
| Non-melanoma skin cancer (basal-cell carcinoma)    | 0.6<br>(0.3 to 1.1)                           | 4.0<br>(2.0 to 6.8)                      | < 0.05<br>(< 0.05 to < 0.05)           | 20.0<br>(-15.1 to 68.9)                           | 8.4<br>(-20.4 to 46.5)                              |
| Breast cancer                                      | 28.3<br>(25.5 to 31.4)                        | 6.0<br>(5.5 to 6.7)                      | 2.5<br>(1.8 to 3.2)                    | 3.6<br>(-8.8 to 18.3)                             | -5.5<br>(-16.9 to 8.4)                              |
| Cervical cancer                                    | 3.9<br>(3.4 to 4.4)                           | 1.0<br>(0.9 to 1.1)                      | 0.4<br>(0.2 to 0.5)                    | -14.1<br>(-28.2 to 2.8)                           | -19.3<br>(-34.0 to -1.7)                            |
| Uterine cancer                                     | 8.7<br>(7.7 to 9.8)                           | 1.9<br>(1.7 to 2.1)                      | 0.7<br>(0.5 to 0.9)                    | 23.7<br>(0.5 to 54.6)                             | 13.6<br>(-7.2 to 41.1)                              |
| Ovarian cancer                                     | 3.2<br>(2.7 to 3.7)                           | 1.0<br>(0.9 to 1.2)                      | 0.5<br>(0.3 to 0.6)                    | 6.0<br>(-22.0 to 41.7)                            | -2.0<br>(-26.9 to 30.7)                             |
| Prostate cancer                                    | 15.4<br>(12.0 to 21.6)                        | 3.9<br>(3.2 to 5.2)                      | 1.5<br>(1.0 to 2.1)                    | 15.4<br>(-6.4 to 45.8)                            | 2.0<br>(-17.4 to 28.1)                              |
| Testicular cancer                                  | 2.2<br>(1.8 to 2.7)                           | 0.4<br>(0.4 to 0.5)                      | 0.1<br>(0.1 to 0.2)                    | -8.4<br>(-30.7 to 22.7)                           | -2.1<br>(-28.1 to 30.6)                             |
| Kidney cancer                                      | 6.7<br>(6.1 to 7.4)                           | 1.9<br>(1.7 to 2.0)                      | 0.6<br>(0.4 to 0.8)                    | 2.1<br>(-12.7 to 20.2)                            | -6.5<br>(-19.4 to 9.3)                              |
| Bladder cancer                                     | 9.1<br>(8.4 to 9.8)                           | 2.2<br>(2.1 to 2.4)                      | 0.8<br>(0.6 to 1.1)                    | 8.2<br>(-5.4 to 24.4)                             | -2.9<br>(-15.0 to 11.4)                             |
| Brain and nervous system cancer                    | 1.8<br>(1.5 to 2.4)                           | 0.8<br>(0.7 to 1.1)                      | 0.3<br>(0.2 to 0.4)                    | -8.9<br>(-22.8 to 18.9)                           | -13.4<br>(-27.1 to 14.3)                            |
| Thyroid cancer                                     | 3.3<br>(2.9 to 3.7)                           | 0.6<br>(0.6 to 0.7)                      | 0.2<br>(0.1 to 0.3)                    | 10.9<br>(-8.7 to 33.9)                            | 3.8<br>(-14.6 to 24.6)                              |
| Mesothelioma                                       | 0.1<br>(0.1 to 0.1)                           | < 0.05<br>(< 0.05 to 0.1)                | < 0.05<br>(< 0.05 to < 0.05)           | 9.6<br>(-1.7 to 20.1)                             | 0.5<br>(-10.1 to 10.4)                              |
| Hodgkin lymphoma                                   | 0.6<br>(0.5 to 0.8)                           | 0.1<br>(0.1 to 0.2)                      | 0.1<br>(< 0.05 to 0.1)                 | -16.6<br>(-31.1 to 0.9)                           | -13.3<br>(-31.2 to 9.8)                             |
| Non-Hodgkin's lymphoma                             | 4.8<br>(4.2 to 5.4)                           | 1.3<br>(1.2 to 1.5)                      | 0.4<br>(0.3 to 0.6)                    | 22.3<br>(5.4 to 40.5)                             | 11.9<br>(-2.7 to 28.5)                              |
| Multiple myeloma                                   | 0.8<br>(0.7 to 1.1)                           | 0.4<br>(0.3 to 0.5)                      | 0.2<br>(0.1 to 0.3)                    | 10.7<br>(-15.4 to 44.5)                           | 0.2<br>(-22.9 to 29.4)                              |
| Leukaemia                                          | 5.3<br>(4.8 to 5.9)                           | 1.5<br>(1.4 to 1.7)                      | 0.7<br>(0.5 to 0.9)                    | 14.3<br>(-0.6 to 31.8)                            | 8.7<br>(-5.2 to 24.9)                               |
| Acute lymphoid leukaemia                           | 0.6<br>(0.4 to 0.7)                           | 0.1<br>(0.1 to 0.2)                      | 0.1<br>(< 0.05 to 0.1)                 | 38.7<br>(7.1 to 81.0)                             | 55.6<br>(6.9 to 123.1)                              |
| Chronic lymphoid leukaemia                         | 3.3<br>(2.9 to 3.7)                           | 0.8<br>(0.7 to 0.9)                      | 0.4<br>(0.3 to 0.5)                    | 23.9<br>(-1.2 to 57.1)                            | 11.8<br>(-11.0 to 40.5)                             |
| Acute myeloid leukaemia                            | 0.5<br>(0.4 to 0.6)                           | 0.4<br>(0.3 to 0.4)                      | 0.1<br>(0.1 to 0.1)                    | 22.5<br>(5.6 to 39.8)                             | 15.3<br>(-2.3 to 37.7)                              |
| Chronic myeloid leukaemia                          | 0.2<br>(0.2 to 0.3)                           | 0.1<br>(0.1 to 0.1)                      | < 0.05<br>(< 0.05 to < 0.05)           | -15.3<br>(-26.9 to -1.7)                          | -20.9<br>(-31.5 to -8.6)                            |
| Other leukaemia                                    | 0.8<br>(0.7 to 0.9)                           | 0.2<br>(0.2 to 0.2)                      | 0.1<br>(0.1 to 0.1)                    | -17.3<br>(-30.6 to 0.6)                           | -25.0<br>(-36.1 to -9.6)                            |
| Other neoplasms                                    | 5.7<br>(5.1 to 6.4)                           | 1.7<br>(1.5 to 1.9)                      | 0.5<br>(0.3 to 0.6)                    | 6.1<br>(-7.8 to 22.6)                             | -0.8<br>(-13.1 to 13.9)                             |
| <b>Cardiovascular diseases</b>                     | <b>1,377.6</b><br><b>(1,323.5 to 1,432.4)</b> | <b>158.7†</b><br><b>(151.3 to 166.7)</b> | <b>115.3</b><br><b>(84.5 to 148.9)</b> | <b>5.2</b><br><b>(0.7 to 9.4)</b>                 | <b>-4.9</b><br><b>(-8.9 to -1.3)</b>                |
| Rheumatic heart disease                            | 1.3<br>(1.2 to 1.5)                           | 0.4<br>(0.4 to 0.4)                      | 0.1<br>(0.1 to 0.1)                    | 3.5<br>(-18.9 to 29.7)                            | -4.9<br>(-23.3 to 17.6)                             |
| Ischaemic heart disease                            | 535.8<br>(507.0 to 565.0)                     | 70.2<br>(65.7 to 74.5)                   | 29.0<br>(20.4 to 39.1)                 | 7.7<br>(3.7 to 12.0)                              | -2.3<br>(-5.8 to 1.6)                               |
| Cerebrovascular disease                            | 235.9<br>(218.7 to 254.2)                     | 40.0‡<br>(36.3 to 43.8)                  | 46.6<br>(32.2 to 59.1)                 | -0.2<br>(-9.0 to 8.7)                             | -10.4<br>(-17.7 to -2.9)                            |
| Ischaemic stroke                                   | 214.5<br>(188.8 to 241.3)                     | 32.7‡<br>(29.0 to 36.4)                  | 41.2<br>(28.5 to 52.4)                 | -0.8<br>(-10.5 to 8.9)                            | -11.3<br>(-19.5 to -3.3)                            |
| Hemorrhagic stroke                                 | 28.8<br>(25.5 to 32.4)                        | 7.3‡<br>(6.6 to 8.1)                     | 5.5<br>(3.9 to 7.0)                    | 4.9<br>(-8.0 to 18.8)                             | -3.6<br>(-14.6 to 8.4)                              |
| Hypertensive heart disease                         | 84.4<br>(70.8 to 100.2)                       | --                                       | 6.6<br>(4.5 to 9.2)                    | 11.2<br>(1.1 to 21.4)                             | -1.3<br>(-9.8 to 7.1)                               |
| Cardiomyopathy and myocarditis                     | 46.1<br>(40.8 to 51.9)                        | 5.0†<br>(4.4 to 5.7)                     | 3.6<br>(2.4 to 5.1)                    | 6.4<br>(-2.9 to 16.0)                             | -1.2<br>(-9.1 to 7.8)                               |
| Myocarditis                                        | 3.5<br>(3.1 to 3.9)                           | 5.0<br>(4.4 to 5.7)                      | 0.2<br>(0.2 to 0.4)                    | -6.7<br>(-21.1 to 11.9)                           | -2.5<br>(-19.2 to 18.2)                             |
| Alcoholic cardiomyopathy                           | 24.1<br>(19.9 to 28.7)                        | --                                       | 1.9<br>(1.3 to 2.7)                    | 9.0<br>(-3.1 to 22.5)                             | 2.7<br>(-8.8 to 15.6)                               |
| Other cardiomyopathy                               | 18.3<br>(15.1 to 22.1)                        | --                                       | 1.4<br>(1.0 to 2.0)                    | 5.6<br>(-7.3 to 19.8)                             | -5.7<br>(-16.1 to 6.3)                              |
| Atrial fibrillation and flutter                    | 129.7<br>(112.3 to 150.5)                     | 10.4<br>(8.8 to 12.2)                    | 9.9<br>(6.7 to 13.8)                   | 12.8<br>(6.0 to 20.1)                             | -0.1<br>(-6.0 to 6.1)                               |
| Peripheral vascular disease                        | 348.2<br>(302.3 to 401.4)                     | 30.7<br>(26.3 to 36.2)                   | 1.5<br>(0.7 to 2.8)                    | 6.7<br>(-1.0 to 15.4)                             | -7.4<br>(-14.0 to -0.4)                             |
| Endocarditis                                       | 0.9<br>(0.8 to 1.0)                           | 2.0<br>(1.8 to 2.2)                      | 0.1<br>(< 0.05 to 0.1)                 | 8.0<br>(-11.9 to 32.9)                            | 0.6<br>(-15.5 to 20.6)                              |
| Other cardiovascular and circulatory diseases      | 355.6<br>(299.2 to 416.4)                     | --                                       | 18.0<br>(12.2 to 25.7)                 | 9.8<br>(0.8 to 18.2)                              | 1.4<br>(-6.6 to 9.2)                                |
| <b>Chronic respiratory diseases</b>                | <b>858.0</b><br><b>(833.6 to 881.1)</b>       | <b>102.3†</b><br><b>(97.5 to 107.2)</b>  | <b>32.0</b><br><b>(25.1 to 39.8)</b>   | <b>2.6</b><br><b>(-4.0 to 9.1)</b>                | <b>-0.5</b><br><b>(-5.9 to 5.3)</b>                 |
| Chronic obstructive pulmonary disease              | 536.7<br>(511.5 to 562.5)                     | 29.9<br>(28.5 to 31.4)                   | 16.4<br>(13.2 to 19.8)                 | 2.4<br>(-9.1 to 14.5)                             | -5.3<br>(-15.4 to 6.0)                              |
| Pneumoconiosis                                     | 2.7<br>(2.5 to 2.9)                           | 0.2<br>(0.1 to 0.2)                      | 0.4<br>(0.3 to 0.6)                    | 15.2<br>(-3.2 to 37.9)                            | 4.8<br>(-11.3 to 24.6)                              |
| Silicosis                                          | 0.8<br>(0.7 to 0.9)                           | 0.1<br>(0.1 to 0.1)                      | 0.1<br>(0.1 to 0.2)                    | 12.1<br>(-20.3 to 61.0)                           | 0.2<br>(-27.9 to 42.7)                              |



| Cause                                                          | Prevalence in thousands (95% UI)              | Incidence in thousands (95% UI)               | YLDs in thousands (95% UI)              |                                                   |                                                     |
|----------------------------------------------------------------|-----------------------------------------------|-----------------------------------------------|-----------------------------------------|---------------------------------------------------|-----------------------------------------------------|
|                                                                | 2016 counts                                   | 2016 counts                                   | 2016 counts                             | Percentage change in counts between 2006 and 2016 | Percentage change in age-standardised rates between |
| Asbestosis                                                     | 0.4<br>(0.4 to 0.5)                           | < 0.05<br>(< 0.05 to < 0.05)                  | 0.1<br>(< 0.05 to 0.1)                  | 9.3<br>(1.3 to 16.7)                              | 0.4<br>(-7.0 to 6.9)                                |
| Coal workers pneumoconiosis                                    | 0.8<br>(0.7 to 0.9)                           | < 0.05<br>(< 0.05 to < 0.05)                  | 0.1<br>(0.1 to 0.2)                     | 21.4<br>(-17.1 to 82.0)                           | 12.8<br>(-21.9 to 65.5)                             |
| Other pneumoconiosis                                           | 0.6<br>(0.5 to 0.7)                           | < 0.05<br>(< 0.05 to < 0.05)                  | 0.1<br>(0.1 to 0.1)                     | 16.0<br>(-12.3 to 55.6)                           | 4.4<br>(-20.0 to 37.1)                              |
| Asthma                                                         | 349.1<br>(327.7 to 373.2)                     | 71.6<br>(67.0 to 76.3)                        | 13.4<br>(8.9 to 18.9)                   | 1.4<br>(-3.5 to 7.1)                              | 2.5<br>(-2.7 to 8.6)                                |
| Interstitial lung disease and pulmonary sarcoidosis            | 12.5<br>(11.3 to 13.7)                        | 0.6<br>(0.6 to 0.7)                           | 1.3<br>(0.9 to 1.8)                     | 6.8<br>(-7.2 to 23.2)                             | 0.6<br>(-11.7 to 15.0)                              |
| Other chronic respiratory diseases                             | --                                            | --                                            | 0.6<br>(0.4 to 0.7)                     | 22.8<br>(12.3 to 34.6)                            | 25.8<br>(14.9 to 38.1)                              |
| <b>Cirrhosis and other chronic liver diseases</b>              | <b>133.5</b><br><b>(127.5 to 140.0)</b>       | <b>4.6</b><br><b>(4.4 to 4.8)</b>             | <b>3.1</b><br><b>(2.2 to 4.3)</b>       | <b>-6.0</b><br><b>(-13.7 to 1.9)</b>              | <b>-9.3</b><br><b>(-16.5 to -1.5)</b>               |
| Cirrhosis and other chronic liver diseases due to hepatitis B  | 17.3<br>(15.0 to 20.1)                        | 0.6<br>(0.5 to 0.7)                           | 0.4<br>(0.2 to 0.6)                     | -3.5<br>(-22.0 to 21.1)                           | -8.5<br>(-26.1 to 13.6)                             |
| Cirrhosis and other chronic liver diseases due to hepatitis C  | 36.9<br>(30.5 to 43.4)                        | 1.3<br>(1.1 to 1.6)                           | 0.8<br>(0.6 to 1.2)                     | -2.0<br>(-16.9 to 14.4)                           | -7.0<br>(-21.1 to 8.5)                              |
| Cirrhosis and other chronic liver diseases due to alcohol use  | 52.7<br>(47.2 to 58.3)                        | 1.9<br>(1.7 to 2.1)                           | 1.2<br>(0.8 to 1.7)                     | -7.4<br>(-18.4 to 5.3)                            | -13.3<br>(-23.4 to -1.6)                            |
| Cirrhosis and other chronic liver diseases due to other causes | 26.5<br>(24.0 to 29.4)                        | 0.8<br>(0.7 to 0.8)                           | 0.7<br>(0.5 to 1.0)                     | -9.3<br>(-23.9 to 7.2)                            | -6.6<br>(-21.6 to 10.0)                             |
| <b>Digestive diseases</b>                                      | <b>518.9</b><br><b>(481.8 to 557.0)</b>       | <b>686.9†</b><br><b>(638.4 to 740.3)</b>      | <b>19.1</b><br><b>(13.4 to 25.7)</b>    | <b>10.2</b><br><b>(-0.9 to 22.0)</b>              | <b>6.2</b><br><b>(-3.8 to 17.5)</b>                 |
| Peptic ulcer disease                                           | 219.6<br>(195.2 to 249.7)                     | 17.4<br>(15.8 to 19.0)                        | 4.2<br>(2.6 to 6.5)                     | 4.0<br>(-17.4 to 30.7)                            | 3.6<br>(-18.4 to 31.6)                              |
| Gastritis and duodenitis                                       | 168.1<br>(146.2 to 190.5)                     | 129.8<br>(115.4 to 145.4)                     | 3.6<br>(2.3 to 5.4)                     | 5.3<br>(-13.0 to 27.6)                            | 1.3<br>(-16.2 to 22.4)                              |
| Appendicitis                                                   | 0.6<br>(0.5 to 0.6)                           | 15.0<br>(14.0 to 16.2)                        | 0.2<br>(0.1 to 0.3)                     | -5.3<br>(-25.9 to 21.8)                           | 1.2<br>(-27.0 to 42.3)                              |
| Paralytic ileus and intestinal obstruction                     | 0.2<br>(0.1 to 0.2)                           | 4.8<br>(4.3 to 5.3)                           | 0.1<br>(< 0.05 to 0.1)                  | 11.8<br>(5.8 to 17.7)                             | 4.0<br>(0.1 to 8.3)                                 |
| Inguinal, femoral, and abdominal hernia                        | 90.5<br>(81.4 to 100.3)                       | 278.3<br>(243.4 to 315.0)                     | 6.5<br>(4.3 to 8.8)                     | 18.0<br>(8.1 to 28.4)                             | 11.5<br>(2.0 to 21.7)                               |
| Inflammatory bowel disease                                     | 12.4<br>(11.6 to 13.3)                        | 5.5<br>(5.3 to 5.7)                           | 1.8<br>(1.2 to 2.4)                     | 4.3<br>(-7.0 to 18.6)                             | 1.5<br>(-10.3 to 15.1)                              |
| Vascular intestinal disorders                                  | 0.3<br>(0.2 to 0.3)                           | 1.6<br>(1.4 to 1.8)                           | 0.1<br>(0.1 to 0.1)                     | 5.7<br>(-14.2 to 30.9)                            | -2.3<br>(-16.4 to 14.7)                             |
| Gallbladder and biliary diseases                               | 46.2<br>(41.0 to 52.1)                        | 217.8<br>(187.6 to 251.5)                     | 1.0<br>(0.6 to 1.3)                     | 13.7<br>(-4.1 to 33.5)                            | 6.7<br>(-9.7 to 26.4)                               |
| Pancreatitis                                                   | 1.9<br>(1.7 to 2.1)                           | 16.7<br>(15.2 to 18.4)                        | 0.2<br>(0.1 to 0.3)                     | 16.2<br>(-4.1 to 39.4)                            | 8.8<br>(-6.4 to 26.1)                               |
| Other digestive diseases                                       | --                                            | --                                            | 1.6<br>(1.1 to 2.1)                     | 16.2<br>(5.2 to 27.4)                             | 10.2<br>(0.7 to 21.4)                               |
| <b>Neurological disorders</b>                                  | <b>3,662.3</b><br><b>(3,515.2 to 3,831.7)</b> | <b>1,494.8</b><br><b>(1,298.4 to 1,723.2)</b> | <b>118.0</b><br><b>(80.7 to 160.6)</b>  | <b>-0.1</b><br><b>(-11.7 to 13.5)</b>             | <b>-0.8</b><br><b>(-14.0 to 14.7)</b>               |
| Alzheimer's disease and other dementias                        | 94.6<br>(79.0 to 113.5)                       | 16.2<br>(13.4 to 19.7)                        | 13.7<br>(9.5 to 18.3)                   | 17.1<br>(10.7 to 23.4)                            | -1.0<br>(-6.0 to 3.9)                               |
| Parkinson's disease                                            | 20.9<br>(16.2 to 26.3)                        | 2.4<br>(1.8 to 3.1)                           | 2.4<br>(1.5 to 3.4)                     | 16.0<br>(4.4 to 28.1)                             | 3.0<br>(-7.0 to 13.2)                               |
| Epilepsy                                                       | 30.2<br>(5.8 to 60.4)                         | 3.0<br>(0.6 to 6.0)                           | 7.7<br>(1.4 to 21.0)                    | -7.3<br>(-84.5 to 516.8)                          | -5.4<br>(-84.0 to 519.3)                            |
| Multiple sclerosis                                             | 6.7<br>(5.9 to 7.5)                           | 0.2<br>(0.2 to 0.2)                           | 1.7<br>(1.2 to 2.3)                     | 16.4<br>(0.3 to 36.7)                             | 13.8<br>(-2.2 to 32.5)                              |
| Motor neuron disease                                           | 0.4<br>(0.4 to 0.4)                           | 0.1<br>(0.1 to 0.1)                           | 0.1<br>(0.1 to 0.1)                     | 4.7<br>(0.7 to 8.8)                               | 1.3<br>(-2.9 to 5.8)                                |
| Migraine                                                       | 1,629.5<br>(1,531.9 to 1,723.6)               | 161.1<br>(149.6 to 173.5)                     | 76.9<br>(50.4 to 107.4)                 | -2.5<br>(-5.9 to 1.0)                             | -0.8<br>(-4.0 to 2.6)                               |
| Tension-type headache                                          | 2,492.1<br>(2,243.8 to 2,761.2)               | 1,311.7<br>(1,116.7 to 1,540.5)               | 13.8<br>(8.7 to 20.4)                   | -1.6<br>(-6.7 to 3.6)                             | -1.5<br>(-6.4 to 3.5)                               |
| Other neurological disorders                                   | < 0.05<br>(< 0.05 to 0.1)                     | 0.1<br>(0.1 to 0.1)                           | 1.8<br>(0.7 to 3.9)                     | 9.1<br>(-61.7 to 221.9)                           | 15.3<br>(-66.6 to 316.1)                            |
| <b>Mental and substance use disorders</b>                      | <b>1,458.9</b><br><b>(1,409.6 to 1,510.8)</b> | <b>585.5†</b><br><b>(542.5 to 631.0)</b>      | <b>196.3</b><br><b>(142.4 to 254.7)</b> | <b>-2.4</b><br><b>(-4.9 to 0.0)</b>               | <b>-1.1</b><br><b>(-3.4 to 1.1)</b>                 |
| Schizophrenia                                                  | 25.9<br>(21.8 to 30.4)                        | 1.2<br>(1.0 to 1.4)                           | 16.4<br>(11.8 to 20.9)                  | 0.8<br>(-7.4 to 10.0)                             | 0.7<br>(-7.5 to 9.9)                                |
| Alcohol use disorders                                          | 194.7<br>(173.0 to 217.2)                     | 101.2<br>(88.6 to 114.7)                      | 19.2<br>(13.3 to 26.3)                  | -5.8<br>(-14.0 to 3.2)                            | -2.5<br>(-10.9 to 6.3)                              |
| Drug use disorders                                             | 60.4<br>(55.4 to 66.1)                        | 7.6<br>(6.9 to 8.3)                           | 12.2<br>(8.6 to 16.4)                   | -4.6<br>(-14.7 to 6.6)                            | 2.3<br>(-9.5 to 15.5)                               |
| Opioid use disorders                                           | 15.6<br>(13.2 to 18.7)                        | 2.2<br>(1.9 to 2.6)                           | 6.4<br>(4.4 to 8.8)                     | 0.4<br>(-11.2 to 12.6)                            | 4.7<br>(-8.1 to 18.1)                               |
| Cocaine use disorders                                          | 4.3<br>(3.8 to 4.9)                           | 0.3<br>(0.3 to 0.4)                           | 0.6<br>(0.4 to 0.9)                     | -2.2<br>(-23.2 to 26.7)                           | 1.9<br>(-22.5 to 33.9)                              |
| Amphetamine use disorders                                      | 16.2<br>(11.6 to 22.3)                        | 1.1<br>(0.8 to 1.5)                           | 2.1<br>(1.2 to 3.5)                     | -13.6<br>(-33.0 to 8.8)                           | -1.1<br>(-24.0 to 25.6)                             |
| Cannabis use disorders                                         | 20.5<br>(17.4 to 24.0)                        | 3.0<br>(2.5 to 3.5)                           | 0.6<br>(0.4 to 0.9)                     | -9.1<br>(-25.0 to 8.8)                            | 0.1<br>(-19.3 to 21.3)                              |
| Other drug use disorders                                       | 6.2<br>(5.5 to 6.8)                           | 1.1<br>(1.0 to 1.2)                           | 2.5<br>(1.5 to 3.7)                     | -7.5<br>(-27.6 to 15.3)                           | 1.1<br>(-22.2 to 28.5)                              |
| Depressive disorders                                           | 360.4<br>(335.7 to 384.8)                     | 392.0<br>(351.7 to 434.0)                     | 60.0<br>(41.4 to 81.6)                  | -0.7<br>(-6.0 to 4.9)                             | -3.8<br>(-8.8 to 1.1)                               |
| Major depressive disorder                                      | 246.3<br>(221.5 to 271.1)                     | 371.5<br>(331.7 to 412.8)                     | 48.7<br>(33.5 to 66.7)                  | -1.2<br>(-7.4 to 5.6)                             | -4.6<br>(-10.6 to 1.4)                              |
| Dysthymia                                                      | 119.8<br>(105.2 to 137.0)                     | 20.4<br>(17.9 to 23.3)                        | 11.3<br>(7.7 to 16.3)                   | 1.7<br>(-2.3 to 5.7)                              | -0.3<br>(-4.2 to 3.9)                               |
| Bipolar disorder                                               | 67.7<br>(59.0 to 77.9)                        | 4.7<br>(4.1 to 5.3)                           | 13.7<br>(8.5 to 20.2)                   | -2.9<br>(-9.1 to 3.1)                             | -0.1<br>(-6.3 to 6.6)                               |
| Anxiety disorders                                              | 365.6<br>(332.6 to 399.2)                     | 51.7<br>(47.8 to 56.0)                        | 34.5<br>(23.9 to 46.5)                  | -1.8<br>(-8.1 to 4.8)                             | -0.4<br>(-6.7 to 6.1)                               |
| Eating disorders                                               | 13.0<br>(10.6 to 15.3)                        | 5.1<br>(3.8 to 6.6)                           | 2.6<br>(1.6 to 3.8)                     | -3.5<br>(-14.2 to 9.6)                            | 7.1<br>(-4.2 to 21.4)                               |
| Anorexia nervosa                                               | 2.2<br>(1.6 to 2.9)                           | 0.8<br>(0.6 to 1.1)                           | 0.5<br>(0.3 to 0.7)                     | -7.5<br>(-28.7 to 19.9)                           | 5.4<br>(-19.0 to 35.6)                              |
| Bulimia nervosa                                                | 10.2<br>(7.8 to 13.4)                         | 4.2<br>(3.1 to 5.8)                           | 2.2<br>(1.3 to 3.2)                     | -2.5<br>(-15.0 to 13.5)                           | 7.6<br>(-5.5 to 23.5)                               |
| Autistic spectrum disorders                                    | 79.9<br>(71.7 to 89.0)                        | 0.3<br>(0.2 to 0.5)                           | 11.8<br>(8.1 to 16.7)                   | -2.7<br>(-7.2 to 2.1)                             | 0.6<br>(-4.2 to 5.6)                                |
| Autism                                                         | 25.9<br>(22.2 to 30.2)                        | < 0.05<br>(< 0.05 to 0.1)                     | 6.5<br>(4.1 to 9.4)                     | -2.6<br>(-9.8 to 5.0)                             | 0.5<br>(-7.5 to 8.8)                                |
| Asperger syndrome and other autistic spectrum disorders        | 54.1<br>(45.0 to 64.7)                        | 0.3<br>(0.2 to 0.4)                           | 5.3<br>(3.4 to 7.8)                     | -2.8<br>(-6.9 to 1.7)                             | 0.6<br>(-3.8 to 5.3)                                |



| Cause                                                      | Prevalence in thousands (95% UI)              | Incidence in thousands (95% UI)                   | YLDs in thousands (95% UI)              |                                                   |                                                     |
|------------------------------------------------------------|-----------------------------------------------|---------------------------------------------------|-----------------------------------------|---------------------------------------------------|-----------------------------------------------------|
|                                                            | 2016 counts                                   | 2016 counts                                       | 2016 counts                             | Percentage change in counts between 2006 and 2016 | Percentage change in age-standardised rates between |
| Attention-deficit/hyperactivity disorder                   | 59.1<br>(53.6 to 65.7)                        | 2.0<br>(1.8 to 2.4)                               | 0.7<br>(0.4 to 1.1)                     | -8.9<br>(-16.4 to -0.9)                           | 0.4<br>(-7.8 to 8.7)                                |
| Conduct disorder                                           | 45.0<br>(37.2 to 53.2)                        | 14.9<br>(11.9 to 17.8)                            | 5.5<br>(3.4 to 8.4)                     | -14.5<br>(-20.1 to -8.9)                          | 0.2<br>(-6.2 to 6.7)                                |
| Idiopathic developmental intellectual disability           | 76.7<br>(39.8 to 115.4)                       | --                                                | 3.2<br>(1.4 to 5.6)                     | -8.8<br>(-14.7 to -2.3)                           | -4.9<br>(-11.4 to 2.0)                              |
| Other mental and substance use disorders                   | 225.0<br>(200.0 to 257.8)                     | 4.9<br>(4.4 to 5.5)                               | 16.4<br>(11.4 to 23.3)                  | 0.6<br>(-4.3 to 5.2)                              | 0.3<br>(-4.7 to 5.1)                                |
| <b>Diabetes, urogenital, blood, and endocrine diseases</b> | <b>3,343.0</b><br><b>(3,259.9 to 3,429.5)</b> | <b>1,305.2†</b><br><b>(1,236.5 to 1,379.7)</b>    | <b>102.1</b><br><b>(72.5 to 136.9)</b>  | <b>5.5</b><br><b>(0.2 to 11.3)</b>                | <b>-0.7</b><br><b>(-5.3 to 4.4)</b>                 |
| Diabetes mellitus                                          | 577.4<br>(518.8 to 645.7)                     | 29.0<br>(25.9 to 33.1)                            | 49.7<br>(34.7 to 68.2)                  | 5.8<br>(-5.0 to 17.5)                             | -2.7<br>(-12.4 to 8.0)                              |
| Acute glomerulonephritis                                   | 0.2<br>(0.2 to 0.2)                           | 2.7<br>(2.4 to 3.1)                               | < 0.05<br>(< 0.05 to < 0.05)            | -1.4<br>(-5.8 to 3.6)                             | -0.6<br>(-5.0 to 3.4)                               |
| Chronic kidney disease                                     | 415.3<br>(367.6 to 460.4)                     | 29.7<br>(25.3 to 33.5)                            | 13.3<br>(9.7 to 17.0)                   | 16.8<br>(7.9 to 27.3)                             | 6.3<br>(-1.5 to 15.2)                               |
| Chronic kidney disease due to diabetes mellitus            | 154.6<br>(128.2 to 181.0)                     | 11.4<br>(9.2 to 13.7)                             | 4.8<br>(3.5 to 6.3)                     | 11.7<br>(-4.0 to 28.2)                            | 2.1<br>(-11.8 to 16.6)                              |
| Chronic kidney disease due to hypertension                 | 69.3<br>(56.9 to 81.4)                        | 5.1<br>(3.9 to 6.3)                               | 2.0<br>(1.3 to 2.6)                     | 23.8<br>(3.1 to 46.5)                             | 5.3<br>(-11.0 to 23.2)                              |
| Chronic kidney disease due to glomerulonephritis           | 62.5<br>(51.4 to 73.5)                        | 4.1<br>(3.1 to 5.1)                               | 2.4<br>(1.7 to 3.3)                     | 24.8<br>(1.3 to 63.0)                             | 17.2<br>(-2.6 to 49.4)                              |
| Chronic kidney disease due to other causes                 | 128.8<br>(105.1 to 155.0)                     | 9.2<br>(7.4 to 11.2)                              | 4.1<br>(2.9 to 5.5)                     | 15.7<br>(-3.0 to 36.4)                            | 5.5<br>(-10.3 to 23.3)                              |
| Urinary diseases and male infertility                      | 306.1<br>(274.7 to 342.1)                     | 768.8†<br>(709.1 to 838.7)                        | 9.3<br>(6.0 to 13.3)                    | 8.0<br>(1.9 to 14.5)                              | 0.1<br>(-5.3 to 5.9)                                |
| Interstitial nephritis and urinary tract infections        | 10.1<br>(9.1 to 11.3)                         | 525.6<br>(474.0 to 583.4)                         | 0.3<br>(0.2 to 0.5)                     | -5.3<br>(-16.9 to 8.5)                            | -0.8<br>(-13.5 to 13.2)                             |
| Urolithiasis                                               | 8.0<br>(7.1 to 9.2)                           | 211.5<br>(186.3 to 241.0)                         | 0.6<br>(0.4 to 0.8)                     | -0.9<br>(-17.2 to 17.9)                           | -4.5<br>(-18.7 to 11.9)                             |
| Benign prostatic hyperplasia                               | 247.6<br>(209.9 to 291.1)                     | 31.7<br>(25.8 to 38.8)                            | 7.9<br>(5.0 to 11.5)                    | 11.3<br>(4.2 to 19.4)                             | 2.4<br>(-4.4 to 9.5)                                |
| Male infertility                                           | 30.4<br>(23.3 to 40.1)                        | --                                                | 0.2<br>(0.1 to 0.4)                     | -14.5<br>(-22.2 to -6.0)                          | -10.2<br>(-17.6 to -2.7)                            |
| Other urinary diseases                                     | --                                            | --                                                | 0.3<br>(0.2 to 0.4)                     | -19.3<br>(-28.1 to -9.7)                          | -19.4<br>(-27.8 to -10.6)                           |
| Gynecological diseases                                     | 1,189.9<br>(1,127.1 to 1,280.9)               | 417.1†<br>(386.2 to 454.1)                        | 13.8<br>(9.4 to 19.6)                   | -5.5<br>(-9.6 to -1.2)                            | -0.9<br>(-4.9 to 3.4)                               |
| Uterine fibroids                                           | 126.9<br>(111.7 to 145.1)                     | 12.0<br>(10.2 to 14.1)                            | 1.4<br>(0.8 to 2.5)                     | 2.2<br>(-7.5 to 14.8)                             | -1.4<br>(-11.0 to 10.5)                             |
| Polycystic ovarian syndrome                                | 9.8<br>(7.4 to 12.9)                          | 5.1<br>(3.5 to 7.0)                               | 0.1<br>(< 0.05 to 0.2)                  | -0.4<br>(-13.4 to 13.6)                           | -0.1<br>(-12.1 to 14.0)                             |
| Female infertility                                         | 8.8<br>(3.2 to 19.6)                          | --                                                | < 0.05<br>(< 0.05 to 0.1)               | 8.8<br>(-18.4 to 70.2)                            | 24.0<br>(-8.2 to 85.1)                              |
| Endometriosis                                              | 3.9<br>(3.1 to 4.8)                           | 15.1<br>(11.6 to 19.4)                            | 0.4<br>(0.2 to 0.6)                     | -12.4<br>(-33.0 to 14.3)                          | -1.6<br>(-24.4 to 29.7)                             |
| Genital prolapse                                           | 401.8<br>(341.8 to 469.7)                     | 14.7<br>(12.4 to 17.5)                            | 1.2<br>(0.6 to 2.2)                     | 10.1<br>(-1.6 to 22.4)                            | 2.9<br>(-7.8 to 14.2)                               |
| Premenstrual syndrome                                      | 595.1<br>(564.1 to 627.5)                     | 204.2<br>(189.5 to 219.8)                         | 5.0<br>(3.1 to 7.7)                     | -6.7<br>(-13.3 to -0.0)                           | -1.5<br>(-8.5 to 5.3)                               |
| Other gynecological diseases                               | 162.6<br>(138.6 to 190.8)                     | 166.0<br>(137.8 to 199.7)                         | 5.7<br>(3.7 to 8.1)                     | -8.7<br>(-14.8 to -2.1)                           | -0.9<br>(-7.5 to 5.7)                               |
| Hemoglobinopathies and hemolytic anaemias                  | 1,239.3<br>(1,153.4 to 1,326.2)               | --                                                | 3.6<br>(2.2 to 5.5)                     | -2.5<br>(-16.3 to 12.6)                           | -4.4<br>(-19.4 to 12.3)                             |
| Thalassemias                                               | < 0.05<br>(< 0.05 to < 0.05)                  | --                                                | < 0.05<br>(< 0.05 to < 0.05)            | -10.1<br>(-29.1 to 11.9)                          | -4.9<br>(-25.2 to 19.6)                             |
| Thalassaemias trait                                        | 117.0<br>(83.0 to 158.2)                      | --                                                | 2.0<br>(1.1 to 3.2)                     | -1.5<br>(-17.8 to 20.3)                           | -4.1<br>(-21.6 to 16.8)                             |
| Sickle cell disorders                                      | 0.1<br>(0.1 to 0.1)                           | --                                                | < 0.05<br>(< 0.05 to < 0.05)            | -8.2<br>(-13.6 to -1.4)                           | -0.3<br>(-6.7 to 7.6)                               |
| Sickle cell trait                                          | 127.1<br>(123.6 to 130.7)                     | --                                                | 0.5<br>(0.3 to 0.7)                     | -1.3<br>(-21.8 to 24.9)                           | -5.3<br>(-29.0 to 26.8)                             |
| G6PD deficiency                                            | 176.7<br>(152.1 to 204.0)                     | --                                                | < 0.05<br>(< 0.05 to < 0.05)            | -13.3<br>(-30.5 to 8.8)                           | -17.3<br>(-39.5 to 13.1)                            |
| G6PD trait                                                 | 775.1<br>(700.0 to 845.7)                     | --                                                | < 0.05<br>(< 0.05 to < 0.05)            | 10.4<br>(-18.0 to 49.8)                           | 11.1<br>(-17.6 to 51.3)                             |
| Other hemoglobinopathies and hemolytic anaemias            | 75.6<br>(66.9 to 83.6)                        | --                                                | 1.1<br>(0.7 to 1.7)                     | -4.4<br>(-17.0 to 11.3)                           | -4.0<br>(-18.1 to 13.4)                             |
| Endocrine, metabolic, blood, and immune disorders          | 383.2<br>(347.5 to 422.3)                     | 57.9<br>(51.1 to 65.4)                            | 12.5<br>(8.3 to 17.2)                   | 7.2<br>(1.7 to 13.0)                              | 1.7<br>(-3.3 to 6.7)                                |
| <b>Musculoskeletal disorders</b>                           | <b>2,432.1</b><br><b>(2,325.5 to 2,558.0)</b> | <b>1,055.0</b><br><b>(935.7 to 1,184.7)</b>       | <b>286.9</b><br><b>(206.9 to 374.9)</b> | <b>4.5</b><br><b>(0.9 to 8.1)</b>                 | <b>-0.4</b><br><b>(-3.7 to 2.6)</b>                 |
| Rheumatoid arthritis                                       | 46.8<br>(41.7 to 52.7)                        | 2.2<br>(1.9 to 2.5)                               | 10.7<br>(7.3 to 14.1)                   | 5.7<br>(-3.8 to 16.6)                             | -1.1<br>(-10.1 to 8.9)                              |
| Osteoarthritis                                             | 664.8<br>(622.3 to 709.0)                     | 27.8<br>(25.8 to 30.0)                            | 40.1<br>(28.3 to 54.5)                  | 8.4<br>(4.4 to 12.5)                              | -0.7<br>(-4.3 to 3.0)                               |
| Low back and neck pain                                     | 1,875.1<br>(1,759.2 to 2,010.3)               | 916.5<br>(797.9 to 1,039.4)                       | 224.1<br>(158.5 to 294.4)               | 4.2<br>(-0.1 to 8.5)                              | -0.0<br>(-3.9 to 3.8)                               |
| Low back pain                                              | 1,585.7<br>(1,413.3 to 1,780.1)               | 814.4<br>(695.8 to 942.4)                         | 176.5<br>(125.8 to 233.4)               | 4.3<br>(-1.1 to 9.8)                              | -0.0<br>(-4.9 to 4.8)                               |
| Neck pain                                                  | 486.5<br>(418.3 to 563.6)                     | 102.1<br>(88.5 to 119.7)                          | 47.6<br>(32.6 to 67.2)                  | 3.9<br>(0.9 to 6.5)                               | -0.1<br>(-2.4 to 1.9)                               |
| Gout                                                       | 52.7<br>(46.1 to 60.0)                        | 10.3<br>(8.9 to 11.7)                             | 1.6<br>(1.1 to 2.3)                     | 9.7<br>(-4.5 to 25.7)                             | 1.8<br>(-12.0 to 16.8)                              |
| Other musculoskeletal disorders                            | 124.1<br>(99.7 to 156.9)                      | 98.2<br>(77.4 to 124.9)                           | 10.4<br>(6.9 to 15.5)                   | -4.7<br>(-17.4 to 9.3)                            | -6.6<br>(-19.2 to 7.0)                              |
| <b>Other non-communicable diseases</b>                     | <b>7,597.3</b><br><b>(7,503.7 to 7,687.3)</b> | <b>25,055.6†</b><br><b>(23,876.1 to 26,299.4)</b> | <b>238.4</b><br><b>(165.5 to 333.5)</b> | <b>4.0</b><br><b>(2.8 to 5.2)</b>                 | <b>0.1</b><br><b>(-0.9 to 1.3)</b>                  |
| Congenital anomalies                                       | 116.7<br>(107.3 to 127.0)                     | --                                                | 12.4<br>(9.0 to 16.5)                   | 4.8<br>(-1.1 to 10.6)                             | 7.6<br>(1.7 to 13.6)                                |
| Neural tube defects                                        | 4.5<br>(4.0 to 5.0)                           | --                                                | 1.3<br>(0.9 to 1.8)                     | 24.2<br>(4.8 to 47.0)                             | 26.7<br>(7.0 to 49.8)                               |
| Congenital heart anomalies                                 | 37.9<br>(33.7 to 42.4)                        | --                                                | 2.0<br>(0.8 to 3.3)                     | 3.0<br>(-8.8 to 15.1)                             | 5.8<br>(-6.4 to 18.9)                               |
| Orofacial clefts                                           | 4.0<br>(3.5 to 4.5)                           | --                                                | < 0.05<br>(< 0.05 to 0.1)               | -5.8<br>(-17.7 to 8.1)                            | -4.0<br>(-15.9 to 10.1)                             |
| Down's syndrome                                            | 4.9<br>(4.3 to 5.6)                           | --                                                | 0.5<br>(0.3 to 0.7)                     | -6.7<br>(-16.2 to 3.8)                            | -2.3<br>(-12.6 to 9.1)                              |
| Turner syndrome                                            | 2.6<br>(2.3 to 3.1)                           | --                                                | < 0.05<br>(< 0.05 to 0.1)               | 8.6<br>(-24.0 to 58.4)                            | 14.8<br>(-21.6 to 69.0)                             |
| Klinefelter syndrome                                       | 2.9<br>(2.5 to 3.4)                           | --                                                | < 0.05<br>(< 0.05 to < 0.05)            | 4.2<br>(-22.5 to 37.4)                            | 13.7<br>(-14.3 to 49.5)                             |

| Cause                                         | Prevalence in thousands (95% UI)              | Incidence in thousands (95% UI)                | YLDs in thousands (95% UI)              |                                                   |                                                     |
|-----------------------------------------------|-----------------------------------------------|------------------------------------------------|-----------------------------------------|---------------------------------------------------|-----------------------------------------------------|
|                                               | 2016 counts                                   | 2016 counts                                    | 2016 counts                             | Percentage change in counts between 2006 and 2016 | Percentage change in age-standardised rates between |
| Other chromosomal abnormalities               | 7.0<br>(5.9 to 8.3)                           | --                                             | 0.7<br>(0.5 to 1.0)                     | 2.3<br>(-12.7 to 20.0)                            | 12.9<br>(-4.1 to 34.2)                              |
| Congenital musculoskeletal and limb anomalies | 27.8<br>(24.9 to 30.2)                        | --                                             | 3.7<br>(2.5 to 5.0)                     | 7.7<br>(-3.7 to 20.4)                             | 9.1<br>(-2.4 to 21.8)                               |
| Urogenital congenital anomalies               | 10.3<br>(9.5 to 11.1)                         | --                                             | 0.4<br>(0.2 to 0.5)                     | -2.7<br>(-15.1 to 10.5)                           | 3.7<br>(-10.6 to 19.0)                              |
| Digestive congenital anomalies                | 10.0<br>(8.8 to 11.3)                         | --                                             | 0.4<br>(0.3 to 0.6)                     | -7.2<br>(-21.3 to 10.7)                           | -5.2<br>(-20.0 to 13.3)                             |
| Other congenital anomalies                    | 26.4<br>(16.5 to 39.9)                        | --                                             | 3.4<br>(2.2 to 5.0)                     | 1.5<br>(-8.1 to 12.6)                             | 3.8<br>(-6.4 to 14.8)                               |
| Skin and subcutaneous diseases                | 3,068.2<br>(2,989.5 to 3,141.8)               | 8,109.9<br>(7,606.3 to 8,649.2)                | 66.0<br>(44.8 to 95.5)                  | -3.0<br>(-4.8 to -1.2)                            | 0.5<br>(-1.4 to 2.5)                                |
| Dermatitis                                    | 384.8<br>(362.4 to 409.2)                     | 477.2<br>(436.2 to 521.7)                      | 14.2<br>(8.5 to 22.8)                   | -3.1<br>(-7.3 to 1.0)                             | -0.8<br>(-5.7 to 3.7)                               |
| Psoriasis                                     | 119.8<br>(113.9 to 126.5)                     | 14.9<br>(14.2 to 15.7)                         | 10.2<br>(7.2 to 13.3)                   | 3.7<br>(-2.8 to 11.0)                             | 3.1<br>(-3.5 to 10.4)                               |
| Cellulitis                                    | 4.2<br>(3.9 to 4.5)                           | 83.6<br>(78.3 to 89.2)                         | 0.2<br>(0.1 to 0.3)                     | -0.0<br>(-18.4 to 21.9)                           | 1.0<br>(-19.0 to 25.6)                              |
| Pyoderma                                      | 52.1<br>(50.1 to 54.1)                        | 1,390.5<br>(1,331.9 to 1,449.8)                | 0.3<br>(0.1 to 0.6)                     | 6.2<br>(0.9 to 12.2)                              | 0.5<br>(-4.7 to 6.2)                                |
| Scabies                                       | 61.3<br>(54.4 to 69.0)                        | 186.4<br>(164.8 to 210.7)                      | 1.6<br>(0.9 to 2.5)                     | -5.0<br>(-9.8 to -0.1)                            | 0.2<br>(-4.8 to 5.4)                                |
| Fungal skin diseases                          | 1,002.1<br>(892.8 to 1,115.1)                 | 3,818.8<br>(3,328.5 to 4,355.4)                | 5.5<br>(2.2 to 11.5)                    | 4.3<br>(2.7 to 5.9)                               | 0.1<br>(-1.0 to 1.2)                                |
| Viral skin diseases                           | 218.8<br>(210.3 to 227.8)                     | 330.8<br>(317.2 to 345.0)                      | 6.6<br>(4.2 to 9.8)                     | -4.4<br>(-7.3 to -1.4)                            | -0.2<br>(-3.3 to 3.1)                               |
| Acne vulgaris                                 | 567.5<br>(514.9 to 623.5)                     | 356.5<br>(300.7 to 428.4)                      | 14.6<br>(9.8 to 21.2)                   | -12.3<br>(-16.3 to -7.9)                          | 0.6<br>(-3.9 to 5.8)                                |
| Alopecia areata                               | 19.1<br>(18.4 to 19.9)                        | 33.5<br>(32.3 to 34.9)                         | 0.6<br>(0.4 to 0.9)                     | -3.5<br>(-12.8 to 7.0)                            | -0.1<br>(-10.5 to 11.2)                             |
| Pruritus                                      | 110.0<br>(96.6 to 125.4)                      | 85.9<br>(75.6 to 98.3)                         | 1.2<br>(0.5 to 2.1)                     | 2.9<br>(-2.2 to 8.5)                              | 0.7<br>(-4.1 to 5.7)                                |
| Urticaria                                     | 84.7<br>(75.3 to 95.0)                        | 150.0<br>(132.6 to 170.5)                      | 5.0<br>(3.3 to 7.1)                     | -3.5<br>(-8.4 to 1.8)                             | -0.3<br>(-5.1 to 5.1)                               |
| Decubitus ulcer                               | 5.2<br>(4.6 to 5.9)                           | 18.7<br>(16.3 to 21.6)                         | 0.8<br>(0.5 to 1.1)                     | 14.2<br>(-4.6 to 36.6)                            | 3.6<br>(-11.8 to 20.8)                              |
| Other skin and subcutaneous diseases          | 969.7<br>(941.3 to 999.9)                     | 1,163.1<br>(1,122.1 to 1,206.3)                | 5.2<br>(2.5 to 9.5)                     | 6.5<br>(4.1 to 8.9)                               | 2.5<br>(0.2 to 4.8)                                 |
| Sense organ diseases                          | 3,249.6<br>(3,190.1 to 3,320.8)               | 1,100.4†<br>(1,040.3 to 1,163.4)               | 120.3<br>(84.1 to 167.8)                | 6.7<br>(5.0 to 8.5)                               | -1.7<br>(-3.4 to -0.1)                              |
| Glaucoma                                      | 11.4<br>(9.2 to 13.7)                         | --                                             | 0.8<br>(0.5 to 1.1)                     | 14.2<br>(0.1 to 30.6)                             | 0.3<br>(-12.1 to 14.6)                              |
| Cataract                                      | 198.4<br>(168.4 to 232.3)                     | --                                             | 9.1<br>(6.2 to 12.8)                    | 9.1<br>(3.3 to 15.6)                              | -4.5<br>(-9.4 to 1.1)                               |
| Macular degeneration                          | 7.0<br>(5.6 to 8.9)                           | --                                             | 0.4<br>(0.2 to 0.5)                     | 17.1<br>(0.4 to 36.7)                             | 2.3<br>(-12.2 to 18.8)                              |
| Refraction and accommodation disorders        | 1,073.7<br>(1,017.6 to 1,130.7)               | --                                             | 21.2<br>(13.4 to 32.9)                  | 2.8<br>(-0.8 to 6.7)                              | -2.5<br>(-5.5 to 0.9)                               |
| Age-related and other hearing loss            | 2,686.0<br>(2,577.3 to 2,798.1)               | --                                             | 72.0<br>(50.1 to 100.5)                 | 7.4<br>(4.8 to 9.7)                               | -1.6<br>(-4.2 to 0.6)                               |
| Other vision loss                             | 70.5<br>(60.9 to 81.8)                        | --                                             | 3.8<br>(2.6 to 5.2)                     | 9.7<br>(1.9 to 18.4)                              | -0.3<br>(-7.3 to 7.0)                               |
| Other sense organ diseases                    | 425.4<br>(390.7 to 460.4)                     | 1,100.4<br>(1,040.3 to 1,163.4)                | 13.1<br>(8.2 to 19.7)                   | 6.9<br>(3.0 to 10.8)                              | 0.4<br>(-3.1 to 4.1)                                |
| Oral disorders                                | 5,419.0<br>(5,267.4 to 5,569.0)               | 15,845.3†<br>(14,852.4 to 16,862.6)            | 39.6<br>(25.4 to 58.0)                  | 8.1<br>(4.7 to 11.8)                              | 1.3<br>(-1.5 to 4.0)                                |
| Caries of deciduous teeth                     | 444.2<br>(379.4 to 511.4)                     | 1,800.8<br>(1,411.6 to 2,296.9)                | 0.2<br>(0.1 to 0.3)                     | -10.7<br>(-20.5 to 0.6)                           | -9.3<br>(-18.6 to 1.7)                              |
| Caries of permanent teeth                     | 4,237.5<br>(4,028.1 to 4,447.5)               | 13,905.2<br>(12,962.1 to 14,786.3)             | 4.1<br>(1.8 to 7.7)                     | -0.4<br>(-3.3 to 2.4)                             | 0.5<br>(-2.4 to 3.3)                                |
| Periodontal disease                           | 573.6<br>(468.7 to 689.3)                     | 67.2<br>(53.1 to 83.9)                         | 3.7<br>(1.5 to 7.6)                     | 8.9<br>(-1.4 to 21.7)                             | 3.4<br>(-6.4 to 16.2)                               |
| Edentulism and severe tooth loss              | 953.9<br>(835.3 to 1,081.5)                   | 72.1<br>(60.7 to 85.1)                         | 25.9<br>(16.8 to 36.5)                  | 11.8<br>(7.1 to 17.3)                             | 1.8<br>(-2.5 to 6.3)                                |
| Other oral disorders                          | 201.8<br>(193.3 to 210.4)                     | --                                             | 5.8<br>(3.6 to 8.8)                     | -0.7<br>(-3.7 to 2.5)                             | -0.1<br>(-3.0 to 3.0)                               |
| <b>Injuries</b>                               | <b>5,067.2</b><br><b>(4,717.7 to 5,520.9)</b> | <b>1,916.8†</b><br><b>(1,773.6 to 2,069.4)</b> | <b>184.7</b><br><b>(129.1 to 253.8)</b> | <b>4.5</b><br><b>(3.1 to 5.8)</b>                 | <b>0.1</b><br><b>(-1.4 to 1.5)</b>                  |
| <b>Transport injuries</b>                     | <b>541.2</b><br><b>(501.3 to 586.8)</b>       | <b>134.8</b><br><b>(122.6 to 147.8)</b>        | <b>25.5</b><br><b>(16.8 to 36.7)</b>    | <b>-1.7</b><br><b>(-2.9 to -0.4)</b>              | <b>-4.9</b><br><b>(-6.3 to -3.6)</b>                |
| Road injuries                                 | 518.9<br>(479.5 to 562.6)                     | 131.3<br>(119.1 to 144.5)                      | 24.5<br>(16.2 to 35.3)                  | -2.0<br>(-3.3 to -0.8)                            | -5.4<br>(-6.8 to -4.0)                              |
| Pedestrian road injuries                      | 103.1<br>(89.0 to 119.7)                      | 18.6<br>(15.7 to 22.1)                         | 4.7<br>(3.1 to 6.9)                     | 4.0<br>(2.6 to 5.3)                               | 1.3<br>(-0.4 to 2.8)                                |
| Cyclist road injuries                         | 149.0<br>(125.6 to 175.0)                     | 42.8<br>(36.4 to 49.6)                         | 6.7<br>(4.4 to 9.6)                     | -3.7<br>(-5.0 to -2.4)                            | -6.9<br>(-8.4 to -5.5)                              |
| Motorcyclist road injuries                    | 58.1<br>(49.1 to 70.7)                        | 9.3<br>(7.6 to 11.5)                           | 2.6<br>(1.7 to 3.8)                     | -0.1<br>(-1.5 to 1.3)                             | -3.8<br>(-5.2 to -2.4)                              |
| Motor vehicle road injuries                   | 190.9<br>(160.1 to 220.1)                     | 55.3<br>(48.2 to 62.6)                         | 9.8<br>(6.5 to 14.0)                    | -4.7<br>(-6.1 to -3.3)                            | -8.3<br>(-9.8 to -6.9)                              |
| Other road injuries                           | 17.8<br>(15.4 to 21.0)                        | 5.4<br>(4.2 to 6.9)                            | 0.8<br>(0.5 to 1.1)                     | 8.3<br>(6.8 to 9.8)                               | 4.3<br>(2.7 to 5.8)                                 |
| Other transport injuries                      | 22.3<br>(18.9 to 26.0)                        | 3.4<br>(3.0 to 3.9)                            | 1.0<br>(0.6 to 1.4)                     | 9.1<br>(7.4 to 10.7)                              | 6.8<br>(4.9 to 8.6)                                 |
| <b>Unintentional injuries</b>                 | <b>4,402.7</b><br><b>(4,056.2 to 4,840.0)</b> | <b>1,740.8</b><br><b>(1,598.4 to 1,894.1)</b>  | <b>154.0</b><br><b>(107.4 to 211.8)</b> | <b>5.7</b><br><b>(4.2 to 7.2)</b>                 | <b>1.1</b><br><b>(-0.6 to 2.6)</b>                  |
| Falls                                         | 2,965.3<br>(2,651.0 to 3,333.1)               | 1,321.8<br>(1,186.2 to 1,468.8)                | 119.0<br>(84.5 to 162.2)                | 2.9<br>(1.3 to 4.5)                               | -2.6<br>(-4.2 to -1.2)                              |
| Drowning                                      | 4.3<br>(3.8 to 4.9)                           | 0.5<br>(0.5 to 0.6)                            | 0.2<br>(0.1 to 0.3)                     | 2.6<br>(0.0 to 5.3)                               | 0.6<br>(-1.7 to 3.1)                                |
| Fire, heat, and hot substances                | 188.8<br>(163.0 to 221.9)                     | 17.1<br>(14.5 to 19.5)                         | 4.2<br>(2.6 to 6.4)                     | 10.1<br>(7.2 to 12.7)                             | 8.6<br>(5.6 to 11.3)                                |
| Poisonings                                    | 9.6<br>(8.1 to 11.4)                          | 8.7<br>(6.9 to 10.7)                           | 0.8<br>(0.5 to 1.1)                     | 31.6<br>(23.3 to 41.3)                            | 32.4<br>(23.7 to 43.0)                              |
| Exposure to mechanical forces                 | 755.2<br>(644.6 to 941.5)                     | 205.6<br>(175.7 to 237.9)                      | 16.0<br>(10.4 to 23.5)                  | 20.2<br>(18.5 to 21.8)                            | 16.8<br>(15.3 to 18.3)                              |
| Unintentional firearm injuries                | 6.8<br>(5.7 to 8.0)                           | 1.2<br>(0.8 to 1.6)                            | 0.2<br>(0.2 to 0.4)                     | 13.4<br>(11.5 to 15.3)                            | 9.9<br>(8.1 to 11.6)                                |
| Unintentional suffocation                     | 8.5<br>(6.9 to 10.4)                          | 1.1<br>(0.8 to 1.5)                            | 0.3<br>(0.2 to 0.4)                     | 8.0<br>(6.2 to 9.8)                               | 6.8<br>(4.9 to 8.7)                                 |
| Other exposure to mechanical forces           | 740.0<br>(629.9 to 926.3)                     | 203.4<br>(173.9 to 235.5)                      | 15.5<br>(10.1 to 22.8)                  | 20.5<br>(18.9 to 22.1)                            | 17.2<br>(15.6 to 18.6)                              |

| Cause                                                                               | Prevalence in thousands (95% UI)        | Incidence in thousands (95% UI)       | YLDs in thousands (95% UI)                    |                                                   |                                                     |
|-------------------------------------------------------------------------------------|-----------------------------------------|---------------------------------------|-----------------------------------------------|---------------------------------------------------|-----------------------------------------------------|
|                                                                                     | 2016 counts                             | 2016 counts                           | 2016 counts                                   | Percentage change in counts between 2006 and 2016 | Percentage change in age-standardised rates between |
| Adverse effects of medical treatment                                                | 2.2<br>(1.7 to 2.6)                     | 28.3<br>(25.1 to 32.0)                | 0.3<br>(0.2 to 0.4)                           | 14.0<br>(9.2 to 19.4)                             | 7.0<br>(3.3 to 11.3)                                |
| Animal contact                                                                      | 38.6<br>(34.0 to 44.9)                  | 32.3<br>(26.7 to 39.2)                | 1.1<br>(0.7 to 1.6)                           | -5.0<br>(-9.5 to -0.2)                            | -5.2<br>(-10.0 to -0.1)                             |
| Venomous animal contact                                                             | 14.6<br>(12.2 to 17.7)                  | 12.8<br>(9.7 to 16.4)                 | 0.7<br>(0.5 to 1.1)                           | -4.1<br>(-10.4 to 2.9)                            | -3.2<br>(-10.1 to 4.3)                              |
| Non-venomous animal contact                                                         | 24.1<br>(20.4 to 29.6)                  | 19.5<br>(15.8 to 24.1)                | 0.3<br>(0.2 to 0.5)                           | -6.9<br>(-8.8 to -5.2)                            | -9.9<br>(-11.8 to -8.3)                             |
| Foreign body                                                                        | 85.2<br>(73.3 to 97.0)                  | 48.4<br>(42.5 to 56.4)                | 2.8<br>(1.8 to 4.1)                           | 1.9<br>(0.4 to 3.3)                               | -0.3<br>(-2.1 to 1.3)                               |
| Pulmonary aspiration and foreign body in airway                                     | 50.4<br>(41.1 to 61.2)                  | 15.0<br>(13.6 to 16.8)                | 1.8<br>(1.1 to 2.6)                           | -1.6<br>(-3.2 to -0.1)                            | -3.8<br>(-5.8 to -1.9)                              |
| Foreign body in eyes                                                                | 5.9<br>(3.7 to 8.2)                     | 25.4<br>(19.7 to 32.5)                | 0.3<br>(0.2 to 0.5)                           | 6.0<br>(2.8 to 9.8)                               | 4.4<br>(1.3 to 7.5)                                 |
| Foreign body in other body part                                                     | 28.9<br>(24.2 to 35.6)                  | 8.0<br>(6.7 to 9.5)                   | 0.7<br>(0.4 to 1.0)                           | 10.0<br>(8.1 to 11.7)                             | 7.4<br>(5.3 to 9.3)                                 |
| Environmental heat and cold exposure                                                | 95.2<br>(82.3 to 111.9)                 | 18.8<br>(16.3 to 21.4)                | 3.0<br>(2.0 to 4.5)                           | 3.5<br>(2.1 to 4.9)                               | 1.1<br>(-0.5 to 2.5)                                |
| Other unintentional injuries                                                        | 258.4<br>(209.6 to 314.7)               | 59.3<br>(49.4 to 70.1)                | 6.7<br>(4.3 to 10.0)                          | 29.9<br>(28.2 to 31.7)                            | 26.3<br>(24.7 to 27.9)                              |
| <b>Self-harm and interpersonal violence</b>                                         | <b>247.6</b><br><b>(228.1 to 268.4)</b> | <b>41.1†</b><br><b>(36.4 to 46.1)</b> | <b>5.1</b><br><b>(3.4 to 7.3)</b>             | <b>0.5</b><br><b>(-1.1 to 2.0)</b>                | <b>-0.2</b><br><b>(-1.7 to 1.2)</b>                 |
| Self-harm                                                                           | 30.7<br>(25.9 to 35.4)                  | 11.3<br>(10.1 to 12.9)                | 1.1<br>(0.7 to 1.7)                           | -1.8<br>(-3.9 to 0.3)                             | -5.0<br>(-7.2 to -3.1)                              |
| Self-harm by firearm                                                                | 0.6<br>(0.5 to 0.7)                     | 0.1<br>(0.1 to 0.2)                   | < 0.05<br>(< 0.05 to < 0.05)                  | -17.0<br>(-20.1 to -14.6)                         | -15.1<br>(-18.2 to -12.4)                           |
| Self-harm by other specified means                                                  | 30.1<br>(25.3 to 34.8)                  | 11.2<br>(9.9 to 12.7)                 | 1.1<br>(0.7 to 1.7)                           | -1.5<br>(-3.7 to 0.6)                             | -4.9<br>(-7.0 to -2.8)                              |
| Interpersonal violence                                                              | 216.9<br>(197.8 to 236.9)               | 29.8†<br>(25.4 to 34.6)               | 4.0<br>(2.7 to 5.6)                           | 1.1<br>(-0.7 to 2.8)                              | 1.1<br>(-0.7 to 2.7)                                |
| Assault by firearm                                                                  | 1.6<br>(1.4 to 1.9)                     | 0.3<br>(0.2 to 0.4)                   | 0.1<br>(< 0.05 to 0.1)                        | 12.2<br>(9.7 to 14.5)                             | 10.6<br>(8.2 to 13.1)                               |
| Assault by sharp object                                                             | 15.5<br>(12.7 to 18.6)                  | 3.6<br>(2.7 to 4.7)                   | 0.4<br>(0.2 to 0.5)                           | 3.9<br>(1.8 to 5.7)                               | 2.9<br>(0.9 to 4.9)                                 |
| Sexual violence                                                                     | 125.8<br>(111.7 to 142.4)               | --                                    | 1.0<br>(0.7 to 1.4)                           | -8.7<br>(-12.4 to -5.1)                           | -4.0<br>(-7.4 to -0.5)                              |
| Assault by other means                                                              | 74.0<br>(61.9 to 89.2)                  | 25.9<br>(22.1 to 30.4)                | 2.5<br>(1.7 to 3.7)                           | 4.9<br>(3.4 to 6.2)                               | 3.3<br>(1.8 to 4.8)                                 |
| <b>Forces of nature, conflict and terrorism, and executions and police conflict</b> | <b>1.5</b><br><b>(0.9 to 2.3)</b>       | <b>0.1†</b><br><b>(0.1 to 0.2)</b>    | <b>&lt; 0.05</b><br><b>(&lt; 0.05 to 0.1)</b> | <b>-6.8</b><br><b>(-8.3 to -3.7)</b>              | <b>-11.5</b><br><b>(-13.2 to -6.6)</b>              |
| Exposure to forces of nature                                                        | 0.7<br>(0.3 to 1.2)                     | --                                    | < 0.05<br>(< 0.05 to 0.1)                     | -18.6<br>(-20.0 to -16.9)                         | -25.7<br>(-27.2 to -23.9)                           |
| Conflict and terrorism                                                              | --                                      | --                                    | --                                            | --                                                | --                                                  |
| Executions and police conflict                                                      | 0.8<br>(0.5 to 1.3)                     | 0.1<br>(0.1 to 0.2)                   | < 0.05<br>(< 0.05 to < 0.05)                  | 10.5<br>(8.0 to 13.8)                             | 7.7<br>(5.6 to 12.5)                                |
| <b>Impairments</b>                                                                  | --                                      | --                                    | --                                            | --                                                | --                                                  |
| Anaemia                                                                             | 1,901.0<br>(1,673.0 to 2,105.9)         | --                                    | 40.3<br>(26.2 to 58.5)                        | -1.5<br>(-12.7 to 10.7)                           | -3.1<br>(-15.0 to 9.9)                              |
| Developmental intellectual disability                                               | 182.8<br>(144.9 to 220.3)               | --                                    | 19.4<br>(14.3 to 25.2)                        | -2.6<br>(-6.4 to 1.7)                             | 1.4<br>(-2.8 to 6.0)                                |
| Epilepsy                                                                            | 51.4<br>(26.2 to 81.7)                  | --                                    | 15.0<br>(7.7 to 27.8)                         | -5.3<br>(-58.7 to 122.4)                          | -2.6<br>(-56.5 to 125.0)                            |
| Guillain-Barre syndrome                                                             | 0.1<br>(0.1 to 0.1)                     | --                                    | < 0.05<br>(< 0.05 to 0.1)                     | 2.4<br>(-0.8 to 5.5)                              | 0.1<br>(0.0 to 0.2)                                 |
| Hearing loss                                                                        | 2,780.4<br>(2,673.4 to 2,888.9)         | --                                    | 76.4<br>(53.6 to 106.7)                       | 6.3<br>(3.9 to 8.6)                               | -1.9<br>(-4.2 to 0.0)                               |
| Heart failure                                                                       | 279.3<br>(242.1 to 323.2)               | --                                    | 26.4<br>(19.6 to 34.3)                        | 12.6<br>(5.0 to 19.7)                             | 0.2<br>(-6.3 to 6.3)                                |
| Infertility                                                                         | 103.5<br>(79.7 to 135.8)                | --                                    | 0.6<br>(0.3 to 1.2)                           | -2.3<br>(-10.0 to 6.2)                            | 1.2<br>(-4.7 to 8.2)                                |
| Pelvic inflammatory disease                                                         | 4.2<br>(3.6 to 5.0)                     | --                                    | 0.6<br>(0.4 to 0.8)                           | -13.2<br>(-27.8 to 2.9)                           | -8.8<br>(-24.0 to 8.8)                              |
| Vision loss                                                                         | 1,384.1<br>(1,307.8 to 1,462.2)         | --                                    | 39.3<br>(27.0 to 56.7)                        | 5.3<br>(2.5 to 8.1)                               | -1.2<br>(-3.8 to 1.8)                               |

We did not calculate incidence for the nine impairments, certain NTDs, and causes with only birth prevalence. Blank cells mean that no estimate is available.

† Incidence for aggregate causes represents the sum of the incidence of the causes below the aggregate.

‡ Incidence estimates for stroke represent first-ever stroke only.

^ Incidence of HIV/AIDS represents new infections of HIV only and does not include new infections of Tuberculosis in HIV positive cases.



SR Table 14: Prevalence, incidence, and YLDs for 2016, percentage change of YLD counts and percentage change of age-standardised YLD rates between 2006 and 2016 by cause and impairments, for all ages, Iceland.

| Cause                                                                                | Prevalence in thousands (95% UI)                          | Incidence in thousands (95% UI)                             | YLDs in thousands (95% UI)                                |                                                   |                                                     |
|--------------------------------------------------------------------------------------|-----------------------------------------------------------|-------------------------------------------------------------|-----------------------------------------------------------|---------------------------------------------------|-----------------------------------------------------|
|                                                                                      | 2016 counts                                               | 2016 counts                                                 | 2016 counts                                               | Percentage change in counts between 2006 and 2016 | Percentage change in age-standardised rates between |
| <b>All causes</b>                                                                    | <b>312.2</b><br>(310.1 to 314.1)                          | <b>2,319.6†</b><br>(2,176.4 to 2,471.6)                     | <b>39.1</b><br>(29.1 to 50.6)                             | <b>12.8</b><br>(11.0 to 14.6)                     | <b>-0.4</b><br>(-2.0 to 1.2)                        |
| <b>Communicable, maternal, neonatal, and nutritional disorders</b>                   | <b>96.7</b><br>(92.0 to 102.0)                            | <b>1,306.9†</b><br>(1,171.9 to 1,449.4)                     | <b>1.4</b><br>(1.0 to 1.9)                                | <b>5.4</b><br>(0.2 to 11.5)                       | <b>-1.7</b><br>(-6.6 to 3.9)                        |
| <b>HIV/AIDS and tuberculosis</b>                                                     | <b>28.4</b><br>(23.3 to 32.9)                             | <b>0.1†</b><br>( $< 0.05$ to 0.1)                           | <b>0.1</b><br>( $< 0.05$ to 0.1)                          | <b>30.7</b><br>(9.1 to 50.5)                      | <b>19.3</b><br>(-1.6 to 38.4)                       |
| Tuberculosis                                                                         | 25.0<br>(20.1 to 30.4)                                    | $< 0.05^†$<br>( $< 0.05$ to $< 0.05$ )                      | $< 0.05$<br>( $< 0.05$ to $< 0.05$ )                      | -12.7<br>(-26.6 to 2.7)                           | -19.8<br>(-32.9 to -5.3)                            |
| Drug-susceptible tuberculosis                                                        | $< 0.05$<br>( $< 0.05$ to $< 0.05$ )                      | $< 0.05$<br>( $< 0.05$ to $< 0.05$ )                        | $< 0.05$<br>( $< 0.05$ to $< 0.05$ )                      | -12.7<br>(-26.6 to 2.7)                           | -19.8<br>(-32.9 to -5.3)                            |
| Multidrug-resistant tuberculosis without extensive drug resistance                   | $< 0.05$<br>( $< 0.05$ to $< 0.05$ )                      | $< 0.05$<br>( $< 0.05$ to $< 0.05$ )                        | $< 0.05$<br>( $< 0.05$ to $< 0.05$ )                      | -53.3<br>(-71.0 to -25.0)                         | -57.2<br>(-73.6 to -31.6)                           |
| Extensively drug-resistant tuberculosis                                              | $< 0.05$<br>( $< 0.05$ to $< 0.05$ )                      | $< 0.05$<br>( $< 0.05$ to $< 0.05$ )                        | $< 0.05$<br>( $< 0.05$ to $< 0.05$ )                      | 0.4<br>(-37.7 to 61.4)                            | -7.9<br>(-43.2 to 47.1)                             |
| Latent tuberculosis infection                                                        | 24.9<br>(20.0 to 30.4)                                    | --                                                          | --                                                        | --                                                | --                                                  |
| HIV/AIDS                                                                             | 0.6<br>(0.3 to 1.0)                                       | $< 0.05^†$<br>( $< 0.05$ to $< 0.05$ )                      | 0.1<br>( $< 0.05$ to 0.1)                                 | 38.5<br>(13.6 to 60.8)                            | 26.5<br>(2.9 to 48.2)                               |
| Drug-susceptible HIV/AIDS - Tuberculosis                                             | $< 0.05$<br>( $< 0.05$ to $< 0.05$ )                      | $< 0.05$<br>( $< 0.05$ to $< 0.05$ )                        | $< 0.05$<br>( $< 0.05$ to $< 0.05$ )                      | -34.0<br>(-39.5 to -28.2)                         | -39.5<br>(-44.6 to -34.2)                           |
| Multidrug-resistant HIV/AIDS - Tuberculosis without extensive drug resistance        | $< 0.05$<br>( $< 0.05$ to $< 0.05$ )                      | $< 0.05$<br>( $< 0.05$ to $< 0.05$ )                        | $< 0.05$<br>( $< 0.05$ to $< 0.05$ )                      | -64.0<br>(-77.7 to -42.1)                         | -67.1<br>(-79.6 to -47.0)                           |
| Extensively drug-resistant HIV/AIDS - Tuberculosis                                   | $< 0.05$<br>( $< 0.05$ to $< 0.05$ )                      | $< 0.05$<br>( $< 0.05$ to $< 0.05$ )                        | $< 0.05$<br>( $< 0.05$ to $< 0.05$ )                      | -22.6<br>(-52.0 to 24.5)                          | -29.2<br>(-56.1 to 14.0)                            |
| HIV/AIDS resulting in other diseases                                                 | 0.6<br>(0.3 to 1.0)                                       | $< 0.05$<br>( $< 0.05$ to $< 0.05$ )                        | 0.1<br>( $< 0.05$ to 0.1)                                 | 39.3<br>(14.3 to 62.4)                            | 27.3<br>(3.6 to 49.3)                               |
| <b>Diarrhoea, lower respiratory infections, and other common infectious diseases</b> | <b>20.5</b><br>(19.1 to 22.0)                             | <b>1,293.4†</b><br>(1,158.8 to 1,434.9)                     | <b>0.6</b><br>(0.4 to 0.9)                                | <b>7.3</b><br>(3.6 to 11.7)                       | <b>-0.3</b><br>(-3.7 to 3.3)                        |
| Diarrhoeal diseases                                                                  | 0.9<br>(0.8 to 1.0)                                       | 59.6<br>(55.1 to 64.6)                                      | 0.1<br>(0.1 to 0.1)                                       | 7.5<br>(-0.0 to 16.0)                             | -0.2<br>(-7.7 to 8.2)                               |
| Intestinal infectious diseases                                                       | $< 0.05$<br>( $< 0.05$ to $< 0.05$ )                      | $< 0.05^†$<br>( $< 0.05$ to $< 0.05$ )                      | $< 0.05$<br>( $< 0.05$ to $< 0.05$ )                      | 11.6<br>(-4.6 to 31.1)                            | -0.0<br>(-14.3 to 16.8)                             |
| Typhoid fever                                                                        | $< 0.05$<br>( $< 0.05$ to $< 0.05$ )                      | $< 0.05$<br>( $< 0.05$ to $< 0.05$ )                        | $< 0.05$<br>( $< 0.05$ to $< 0.05$ )                      | 20.0<br>(0.7 to 43.3)                             | 7.7<br>(-9.5 to 28.2)                               |
| Paratyphoid fever                                                                    | $< 0.05$<br>( $< 0.05$ to $< 0.05$ )                      | $< 0.05$<br>( $< 0.05$ to $< 0.05$ )                        | $< 0.05$<br>( $< 0.05$ to $< 0.05$ )                      | -11.4<br>(-27.2 to 6.1)                           | -20.6<br>(-34.2 to -4.9)                            |
| Other intestinal infectious diseases                                                 | --                                                        | --                                                          | $< 0.05$<br>( $< 0.05$ to $< 0.05$ )                      | -17.4<br>(-39.3 to 12.0)                          | -22.9<br>(-44.2 to 8.4)                             |
| Lower respiratory infections                                                         | 0.2<br>(0.2 to 0.2)                                       | 8.9<br>(8.2 to 9.7)                                         | $< 0.05$<br>( $< 0.05$ to $< 0.05$ )                      | 16.5<br>(4.9 to 30.4)                             | -2.6<br>(-12.5 to 9.5)                              |
| Upper respiratory infections                                                         | 15.6<br>(14.0 to 17.3)                                    | 1,195.6<br>(1,061.8 to 1,335.9)                             | 0.4<br>(0.2 to 0.6)                                       | 7.3<br>(2.3 to 12.6)                              | 0.3<br>(-4.2 to 5.1)                                |
| Otitis media                                                                         | 3.7<br>(3.1 to 4.4)                                       | 23.6<br>(15.8 to 37.2)                                      | 0.1<br>(0.1 to 0.1)                                       | 4.2<br>(-2.4 to 11.0)                             | -2.1<br>(-8.6 to 4.4)                               |
| Meningitis                                                                           | $< 0.05$<br>( $< 0.05$ to 0.1)                            | $< 0.05$<br>( $< 0.05$ to $< 0.05$ )                        | $< 0.05$<br>( $< 0.05$ to $< 0.05$ )                      | 39.2<br>(3.0 to 450.4)                            | 15.8<br>(-6.0 to 252.1)                             |
| Pneumococcal meningitis                                                              | $< 0.05$<br>( $< 0.05$ to $< 0.05$ )                      | $< 0.05$<br>( $< 0.05$ to $< 0.05$ )                        | $< 0.05$<br>( $< 0.05$ to $< 0.05$ )                      | 3.2<br>(-2.1 to 8.2)                              | -6.0<br>(-10.9 to -1.5)                             |
| H influenzae type B meningitis                                                       | $< 0.05$<br>( $< 0.05$ to $< 0.05$ )                      | $< 0.05$<br>( $< 0.05$ to $< 0.05$ )                        | $< 0.05$<br>( $< 0.05$ to $< 0.05$ )                      | 7.5<br>(2.0 to 13.0)                              | -1.8<br>(-7.1 to 3.2)                               |
| Meningococcal infection                                                              | $< 0.05$<br>( $< 0.05$ to 0.1)                            | $< 0.05$<br>( $< 0.05$ to $< 0.05$ )                        | $< 0.05$<br>( $< 0.05$ to $< 0.05$ )                      | 209.7<br>(-2.2 to 2,666.6)                        | 113.8<br>(-11.6 to 1,534.5)                         |
| Other meningitis                                                                     | $< 0.05$<br>( $< 0.05$ to $< 0.05$ )                      | $< 0.05$<br>( $< 0.05$ to $< 0.05$ )                        | $< 0.05$<br>( $< 0.05$ to $< 0.05$ )                      | 7.5<br>(2.5 to 12.4)                              | -1.4<br>(-6.1 to 3.2)                               |
| Encephalitis                                                                         | 0.2<br>(0.1 to 0.4)                                       | 0.2<br>(0.2 to 0.2)                                         | $< 0.05$<br>( $< 0.05$ to $< 0.05$ )                      | 4.2<br>(0.1 to 8.4)                               | -6.9<br>(-10.6 to -3.3)                             |
| Diphtheria                                                                           | $< 0.05$<br>( $< 0.05$ to $< 0.05$ )                      | $< 0.05$<br>( $< 0.05$ to $< 0.05$ )                        | $< 0.05$<br>( $< 0.05$ to $< 0.05$ )                      | -2.1<br>(-45.6 to 74.2)                           | -9.1<br>(-48.1 to 57.1)                             |
| Whooping cough                                                                       | $< 0.05$<br>( $< 0.05$ to $< 0.05$ )                      | 0.2<br>(0.1 to 0.2)                                         | $< 0.05$<br>( $< 0.05$ to $< 0.05$ )                      | 24.6<br>(-5.3 to 64.4)                            | 23.7<br>(-6.5 to 63.3)                              |
| Tetanus                                                                              | $< 0.05$<br>( $< 0.05$ to $< 0.05$ )                      | $< 0.05$<br>( $< 0.05$ to $< 0.05$ )                        | $< 0.05$<br>( $< 0.05$ to $< 0.05$ )                      | -15.7<br>(-44.1 to -0.4)                          | -26.2<br>(-48.8 to -13.7)                           |
| Measles                                                                              | $< 0.05$<br>(0.0 to $< 0.05$ )                            | $< 0.05$<br>(0.0 to $< 0.05$ )                              | $< 0.05$<br>(0.0 to $< 0.05$ )                            | --                                                | --                                                  |
| Varicella and herpes zoster                                                          | 0.3<br>(0.3 to 0.3)                                       | 5.3<br>(5.2 to 5.5)                                         | $< 0.05$<br>( $< 0.05$ to $< 0.05$ )                      | 15.8<br>(2.0 to 31.6)                             | 0.3<br>(-12.0 to 13.7)                              |
| <b>Neglected tropical diseases and malaria</b>                                       | <b><math>&lt; 0.05</math></b><br>( $< 0.05$ to $< 0.05$ ) | <b><math>&lt; 0.05^†</math></b><br>( $< 0.05$ to $< 0.05$ ) | <b><math>&lt; 0.05</math></b><br>( $< 0.05$ to $< 0.05$ ) | <b>55.5</b><br>(-40.8 to 322.8)                   | <b>36.5</b><br>(-45.4 to 275.7)                     |
| Malaria                                                                              | --                                                        | --                                                          | --                                                        | --                                                | --                                                  |
| Chagas disease                                                                       | $< 0.05$<br>( $< 0.05$ to $< 0.05$ )                      | --                                                          | $< 0.05$<br>( $< 0.05$ to $< 0.05$ )                      | 55.6<br>(-40.8 to 323.4)                          | 36.5<br>(-45.4 to 276.2)                            |
| Leishmaniasis                                                                        | --                                                        | --                                                          | --                                                        | --                                                | --                                                  |
| Visceral leishmaniasis                                                               | --                                                        | --                                                          | --                                                        | --                                                | --                                                  |
| Cutaneous and mucocutaneous leishmaniasis                                            | --                                                        | --                                                          | --                                                        | --                                                | --                                                  |
| African trypanosomiasis                                                              | --                                                        | --                                                          | --                                                        | --                                                | --                                                  |
| Schistosomiasis                                                                      | --                                                        | --                                                          | --                                                        | --                                                | --                                                  |
| Cysticercosis                                                                        | --                                                        | --                                                          | --                                                        | --                                                | --                                                  |
| Cystic echinococcosis                                                                | --                                                        | --                                                          | --                                                        | --                                                | --                                                  |
| Lymphatic filariasis                                                                 | --                                                        | --                                                          | --                                                        | --                                                | --                                                  |
| Onchocerciasis                                                                       | --                                                        | --                                                          | --                                                        | --                                                | --                                                  |
| Trachoma                                                                             | --                                                        | --                                                          | --                                                        | --                                                | --                                                  |
| Dengue                                                                               | --                                                        | --                                                          | --                                                        | --                                                | --                                                  |
| Yellow fever                                                                         | --                                                        | --                                                          | --                                                        | --                                                | --                                                  |
| Rabies                                                                               | $< 0.05$<br>( $< 0.05$ to $< 0.05$ )                      | $< 0.05$<br>( $< 0.05$ to $< 0.05$ )                        | $< 0.05$<br>( $< 0.05$ to $< 0.05$ )                      | 21.2<br>(-12.2 to 68.4)                           | -8.7<br>(-33.7 to 24.7)                             |
| Intestinal nematode infections                                                       | --                                                        | --                                                          | --                                                        | --                                                | --                                                  |
| Ascariasis                                                                           | --                                                        | --                                                          | --                                                        | --                                                | --                                                  |



| Cause                                                                   | Prevalence in thousands (95% UI)        | Incidence in thousands (95% UI)            | YLDs in thousands (95% UI)                          |                                                   |                                                     |
|-------------------------------------------------------------------------|-----------------------------------------|--------------------------------------------|-----------------------------------------------------|---------------------------------------------------|-----------------------------------------------------|
|                                                                         | 2016 counts                             | 2016 counts                                | 2016 counts                                         | Percentage change in counts between 2006 and 2016 | Percentage change in age-standardised rates between |
| Trichuriasis                                                            | --                                      | --                                         | --                                                  | --                                                | --                                                  |
| Hookworm disease                                                        | --                                      | --                                         | --                                                  | --                                                | --                                                  |
| Food-borne trematodiasis                                                | --                                      | --                                         | --                                                  | --                                                | --                                                  |
| Leprosy                                                                 | --                                      | --                                         | --                                                  | --                                                | --                                                  |
| Ebola virus disease                                                     | --                                      | --                                         | --                                                  | --                                                | --                                                  |
| Zika virus disease                                                      | --                                      | --                                         | --                                                  | --                                                | --                                                  |
| Guinea worm disease                                                     | --                                      | --                                         | --                                                  | --                                                | --                                                  |
| Other neglected tropical diseases                                       | --                                      | --                                         | < 0.05<br>(< 0.05 to < 0.05)                        | --                                                | --                                                  |
| <b>Maternal disorders</b>                                               | <b>0.2</b><br><b>(0.2 to 0.2)</b>       | <b>2.1†</b><br><b>(1.9 to 2.3)</b>         | <b>&lt; 0.05</b><br><b>(&lt; 0.05 to &lt; 0.05)</b> | <b>-2.2</b><br><b>(-30.8 to 38.2)</b>             | <b>-8.1</b><br><b>(-35.4 to 30.4)</b>               |
| Maternal haemorrhage                                                    | < 0.05<br>(< 0.05 to < 0.05)            | 0.2<br>(0.1 to 0.2)                        | < 0.05<br>(< 0.05 to < 0.05)                        | 6.3<br>(-32.9 to 63.0)                            | 0.6<br>(-35.9 to 54.8)                              |
| Maternal sepsis and other pregnancy related infections                  | 0.1<br>(< 0.05 to 0.1)                  | 0.2<br>(0.2 to 0.3)                        | < 0.05<br>(< 0.05 to < 0.05)                        | -6.2<br>(-54.8 to 98.7)                           | -11.6<br>(-57.9 to 88.4)                            |
| Maternal hypertensive disorders                                         | 0.1<br>(0.1 to 0.1)                     | 0.5<br>(0.4 to 0.5)                        | < 0.05<br>(< 0.05 to < 0.05)                        | -2.0<br>(-41.9 to 65.3)                           | -8.1<br>(-45.4 to 55.8)                             |
| Maternal obstructed labour and uterine rupture                          | < 0.05<br>(< 0.05 to < 0.05)            | 0.3<br>(0.2 to 0.3)                        | < 0.05<br>(< 0.05 to < 0.05)                        | 1.2<br>(-60.4 to 184.8)                           | -4.1<br>(-61.9 to 166.1)                            |
| Maternal abortion, miscarriage, and ectopic pregnancy                   | < 0.05<br>(< 0.05 to < 0.05)            | 1.0<br>(0.8 to 1.1)                        | < 0.05<br>(< 0.05 to < 0.05)                        | -1.2<br>(-56.1 to 101.7)                          | -7.8<br>(-60.1 to 88.8)                             |
| Other maternal disorders                                                | --                                      | --                                         | < 0.05<br>(< 0.05 to < 0.05)                        | -7.6<br>(-34.6 to 31.0)                           | -13.3<br>(-39.1 to 23.0)                            |
| <b>Neonatal disorders</b>                                               | <b>2.6</b><br><b>(2.2 to 3.1)</b>       | <b>--</b>                                  | <b>0.5</b><br><b>(0.3 to 0.6)</b>                   | <b>4.6</b><br><b>(-6.8 to 19.0)</b>               | <b>-2.1</b><br><b>(-12.8 to 11.5)</b>               |
| Neonatal preterm birth complications                                    | 2.0<br>(1.5 to 2.6)                     | --                                         | 0.2<br>(0.1 to 0.3)                                 | 3.3<br>(-18.6 to 30.8)                            | -3.1<br>(-23.7 to 23.5)                             |
| Neonatal encephalopathy due to birth asphyxia and trauma                | 0.7<br>(0.5 to 1.0)                     | --                                         | 0.1<br>(0.1 to 0.2)                                 | 23.7<br>(8.7 to 41.5)                             | 15.3<br>(1.6 to 31.6)                               |
| Neonatal sepsis and other neonatal infections                           | 0.3<br>(0.1 to 0.5)                     | --                                         | 0.1<br>(< 0.05 to 0.2)                              | -10.9<br>(-23.0 to 1.8)                           | -16.6<br>(-27.6 to -4.3)                            |
| Hemolytic disease and other neonatal jaundice                           | < 0.05<br>(< 0.05 to < 0.05)            | --                                         | < 0.05<br>(< 0.05 to < 0.05)                        | 8.0<br>(-0.3 to 16.2)                             | 0.6<br>(-7.1 to 8.4)                                |
| Other neonatal disorders                                                | --                                      | --                                         | < 0.05<br>(< 0.05 to < 0.05)                        | -2.8<br>(-20.8 to 19.0)                           | -4.8<br>(-22.4 to 16.6)                             |
| <b>Nutritional deficiencies</b>                                         | <b>13.6</b><br><b>(11.9 to 15.5)</b>    | <b>2.9†</b><br><b>(2.3 to 3.6)</b>         | <b>0.2</b><br><b>(0.1 to 0.2)</b>                   | <b>-4.2</b><br><b>(-17.7 to 13.1)</b>             | <b>-9.2</b><br><b>(-22.4 to 7.2)</b>                |
| Protein-energy malnutrition                                             | 0.2<br>(0.2 to 0.2)                     | 0.1<br>(0.1 to 0.1)                        | < 0.05<br>(< 0.05 to < 0.05)                        | 0.0<br>(-12.1 to 13.5)                            | -2.0<br>(-13.7 to 11.2)                             |
| Iodine deficiency                                                       | 2.7<br>(2.2 to 3.2)                     | < 0.05<br>(< 0.05 to 0.1)                  | 0.1<br>(< 0.05 to 0.1)                              | 8.4<br>(-3.4 to 21.7)                             | -2.0<br>(-13.1 to 10.2)                             |
| Vitamin A deficiency                                                    | 3.4<br>(2.7 to 4.3)                     | 2.7<br>(2.1 to 3.4)                        | --                                                  | --                                                | --                                                  |
| Iron-deficiency anaemia                                                 | 6.9<br>(5.2 to 8.9)                     | --                                         | 0.1<br>(< 0.05 to 0.1)                              | -14.4<br>(-36.9 to 17.8)                          | -16.1<br>(-38.4 to 15.5)                            |
| Other nutritional deficiencies                                          | --                                      | --                                         | < 0.05<br>(< 0.05 to < 0.05)                        | -0.0<br>(-12.5 to 13.7)                           | -2.3<br>(-14.3 to 11.2)                             |
| <b>Other communicable, maternal, neonatal, and nutritional diseases</b> | <b>47.2</b><br><b>(43.7 to 51.4)</b>    | <b>8.4</b><br><b>(7.2 to 10.6)</b>         | <b>&lt; 0.05</b><br><b>(&lt; 0.05 to 0.1)</b>       | <b>1.7</b><br><b>(-6.1 to 9.8)</b>                | <b>-4.9</b><br><b>(-12.2 to 3.2)</b>                |
| Sexually transmitted diseases excluding HIV                             | 40.1<br>(36.8 to 44.4)                  | 8.1<br>(6.8 to 10.2)                       | < 0.05<br>(< 0.05 to 0.1)                           | -1.6<br>(-10.8 to 9.3)                            | -8.8<br>(-17.7 to 1.4)                              |
| Syphilis                                                                | 0.2<br>(0.1 to 0.2)                     | 0.2<br>(0.1 to 0.2)                        | < 0.05<br>(< 0.05 to < 0.05)                        | 18.8<br>(3.2 to 37.8)                             | -1.0<br>(-14.2 to 15.7)                             |
| Chlamydial infection                                                    | 1.5<br>(0.7 to 2.9)                     | 1.1<br>(0.5 to 2.1)                        | < 0.05<br>(< 0.05 to < 0.05)                        | -2.3<br>(-21.8 to 25.9)                           | -4.3<br>(-23.9 to 23.5)                             |
| Gonococcal infection                                                    | 0.3<br>(0.1 to 0.8)                     | 0.7<br>(0.2 to 2.9)                        | < 0.05<br>(< 0.05 to < 0.05)                        | -51.4<br>(-68.9 to -13.8)                         | -53.8<br>(-70.7 to -14.0)                           |
| Trichomoniasis                                                          | 5.3<br>(4.6 to 6.0)                     | 4.4<br>(3.8 to 5.1)                        | < 0.05<br>(< 0.05 to < 0.05)                        | 13.1<br>(3.5 to 24.8)                             | 4.6<br>(-4.5 to 15.6)                               |
| Genital herpes                                                          | 33.6<br>(28.9 to 39.3)                  | 1.5<br>(1.3 to 1.8)                        | < 0.05<br>(< 0.05 to < 0.05)                        | 10.6<br>(1.0 to 19.9)                             | -1.4<br>(-10.2 to 7.2)                              |
| Other sexually transmitted diseases                                     | 0.3<br>(0.3 to 0.3)                     | 0.2<br>(0.1 to 0.2)                        | < 0.05<br>(< 0.05 to < 0.05)                        | -12.0<br>(-26.9 to 5.1)                           | -14.2<br>(-29.2 to 2.8)                             |
| Hepatitis                                                               | 8.5<br>(7.5 to 9.6)                     | 0.4<br>(0.3 to 0.5)                        | < 0.05<br>(< 0.05 to < 0.05)                        | -1.1<br>(-17.2 to 17.9)                           | -10.5<br>(-26.2 to 7.8)                             |
| Acute hepatitis A                                                       | < 0.05<br>(< 0.05 to < 0.05)            | 0.1<br>(0.1 to 0.1)                        | < 0.05<br>(< 0.05 to < 0.05)                        | -1.4<br>(-33.6 to 46.7)                           | -9.0<br>(-40.0 to 37.6)                             |
| Hepatitis B                                                             | 3.7<br>(2.9 to 4.6)                     | 0.2<br>(0.2 to 0.3)                        | < 0.05<br>(< 0.05 to < 0.05)                        | -2.9<br>(-17.4 to 13.6)                           | -16.8<br>(-29.4 to -3.7)                            |
| Hepatitis C                                                             | 4.8<br>(4.3 to 5.3)                     | 0.1<br>(0.1 to 0.1)                        | < 0.05<br>(< 0.05 to < 0.05)                        | 1.8<br>(1.1 to 2.3)                               | -1.6<br>(-2.1 to -1.2)                              |
| Acute hepatitis E                                                       | < 0.05<br>(< 0.05 to < 0.05)            | < 0.05<br>(< 0.05 to < 0.05)               | < 0.05<br>(< 0.05 to < 0.05)                        | 5.2<br>(-2.5 to 13.4)                             | -10.4<br>(-16.4 to -3.5)                            |
| Other infectious diseases                                               | 0.2<br>(0.2 to 0.3)                     | < 0.05<br>(< 0.05 to < 0.05)               | < 0.05<br>(< 0.05 to < 0.05)                        | 11.8<br>(1.0 to 23.3)                             | 6.1<br>(-5.7 to 18.9)                               |
| <b>Non-communicable diseases</b>                                        | <b>306.4</b><br><b>(303.9 to 308.6)</b> | <b>980.1†</b><br><b>(942.7 to 1,020.1)</b> | <b>34.7</b><br><b>(25.7 to 44.8)</b>                | <b>12.7</b><br><b>(10.7 to 14.7)</b>              | <b>-0.6</b><br><b>(-2.3 to 1.2)</b>                 |
| <b>Neoplasms</b>                                                        | <b>6.2</b><br><b>(6.0 to 6.4)</b>       | <b>2.0</b><br><b>(1.9 to 2.1)</b>          | <b>0.6</b><br><b>(0.5 to 0.8)</b>                   | <b>34.8</b><br><b>(29.2 to 40.4)</b>              | <b>8.9</b><br><b>(4.4 to 13.3)</b>                  |
| Lip and oral cavity cancer                                              | 0.1<br>(0.1 to 0.1)                     | < 0.05<br>(< 0.05 to < 0.05)               | < 0.05<br>(< 0.05 to < 0.05)                        | 42.2<br>(24.7 to 61.9)                            | 14.5<br>(0.9 to 29.7)                               |
| Nasopharynx cancer                                                      | < 0.05<br>(< 0.05 to < 0.05)            | < 0.05<br>(< 0.05 to < 0.05)               | < 0.05<br>(< 0.05 to < 0.05)                        | -8.5<br>(-19.4 to 3.1)                            | -21.7<br>(-31.1 to -11.5)                           |
| Other pharynx cancer                                                    | < 0.05<br>(< 0.05 to < 0.05)            | < 0.05<br>(< 0.05 to < 0.05)               | < 0.05<br>(< 0.05 to < 0.05)                        | 40.7<br>(19.0 to 64.6)                            | 12.0<br>(-4.7 to 31.4)                              |
| Oesophageal cancer                                                      | < 0.05<br>(< 0.05 to < 0.05)            | < 0.05<br>(< 0.05 to < 0.05)               | < 0.05<br>(< 0.05 to < 0.05)                        | 41.1<br>(18.2 to 71.0)                            | 11.5<br>(-7.2 to 36.1)                              |
| Stomach cancer                                                          | 0.1<br>(0.1 to 0.1)                     | 0.1<br>(< 0.05 to 0.1)                     | < 0.05<br>(< 0.05 to < 0.05)                        | 18.4<br>(0.4 to 39.3)                             | -6.4<br>(-20.9 to 9.8)                              |
| Colon and rectum cancer                                                 | 0.7<br>(0.6 to 0.7)                     | 0.2<br>(0.2 to 0.2)                        | 0.1<br>(< 0.05 to 0.1)                              | 30.5<br>(17.9 to 44.0)                            | 2.8<br>(-7.3 to 13.8)                               |
| Liver cancer                                                            | < 0.05<br>(< 0.05 to < 0.05)            | < 0.05<br>(< 0.05 to < 0.05)               | < 0.05<br>(< 0.05 to < 0.05)                        | 87.1<br>(56.6 to 126.0)                           | 47.6<br>(23.7 to 77.3)                              |
| Liver cancer due to hepatitis B                                         | < 0.05<br>(< 0.05 to < 0.05)            | < 0.05<br>(< 0.05 to < 0.05)               | < 0.05<br>(< 0.05 to < 0.05)                        | 82.6<br>(52.7 to 122.5)                           | 45.9<br>(22.2 to 77.2)                              |

| Cause                                              | Prevalence in thousands (95% UI)     | Incidence in thousands (95% UI)    | YLDs in thousands (95% UI)        |                                                   |                                                     |
|----------------------------------------------------|--------------------------------------|------------------------------------|-----------------------------------|---------------------------------------------------|-----------------------------------------------------|
|                                                    | 2016 counts                          | 2016 counts                        | 2016 counts                       | Percentage change in counts between 2006 and 2016 | Percentage change in age-standardised rates between |
| Liver cancer due to hepatitis C                    | < 0.05<br>(< 0.05 to < 0.05)         | < 0.05<br>(< 0.05 to < 0.05)       | < 0.05<br>(< 0.05 to < 0.05)      | 85.2<br>(51.9 to 129.3)                           | 44.5<br>(19.9 to 75.8)                              |
| Liver cancer due to alcohol use                    | < 0.05<br>(< 0.05 to < 0.05)         | < 0.05<br>(< 0.05 to < 0.05)       | < 0.05<br>(< 0.05 to < 0.05)      | 96.0<br>(58.3 to 146.2)                           | 54.6<br>(26.0 to 93.3)                              |
| Liver cancer due to other causes                   | < 0.05<br>(< 0.05 to < 0.05)         | < 0.05<br>(< 0.05 to < 0.05)       | < 0.05<br>(< 0.05 to < 0.05)      | 81.0<br>(47.2 to 125.4)                           | 44.0<br>(17.7 to 77.9)                              |
| Gallbladder and biliary tract cancer               | < 0.05<br>(< 0.05 to < 0.05)         | < 0.05<br>(< 0.05 to < 0.05)       | < 0.05<br>(< 0.05 to < 0.05)      | 14.6<br>(-12.7 to 47.3)                           | -10.8<br>(-31.4 to 12.7)                            |
| Pancreatic cancer                                  | < 0.05<br>(< 0.05 to < 0.05)         | < 0.05<br>(< 0.05 to 0.1)          | < 0.05<br>(< 0.05 to < 0.05)      | 34.2<br>(12.6 to 59.5)                            | 4.6<br>(-11.6 to 24.6)                              |
| Larynx cancer                                      | < 0.05<br>(< 0.05 to < 0.05)         | < 0.05<br>(< 0.05 to < 0.05)       | < 0.05<br>(< 0.05 to < 0.05)      | 34.7<br>(15.2 to 59.6)                            | 6.9<br>(-8.8 to 26.6)                               |
| Tracheal, bronchus, and lung cancer                | 0.3<br>(0.3 to 0.4)                  | 0.2<br>(0.2 to 0.2)                | < 0.05<br>(< 0.05 to 0.1)         | 33.1<br>(14.5 to 55.3)                            | 5.1<br>(-9.8 to 22.8)                               |
| Malignant skin melanoma                            | 0.4<br>(0.3 to 0.4)                  | 0.1<br>(0.1 to 0.1)                | < 0.05<br>(< 0.05 to < 0.05)      | 54.5<br>(34.2 to 76.2)                            | 30.7<br>(13.3 to 49.0)                              |
| Non-melanoma skin cancer                           | < 0.05<br>(< 0.05 to 0.1)            | 0.2<br>(0.1 to 0.2)                | < 0.05<br>(< 0.05 to < 0.05)      | -18.3<br>(-52.5 to 61.0)                          | -35.6<br>(-62.5 to 25.1)                            |
| Non-melanoma skin cancer (squamous-cell carcinoma) | < 0.05<br>(< 0.05 to 0.1)            | < 0.05<br>(< 0.05 to 0.1)          | < 0.05<br>(< 0.05 to < 0.05)      | -20.5<br>(-55.5 to 64.7)                          | -37.5<br>(-65.3 to 27.4)                            |
| Non-melanoma skin cancer (basal-cell carcinoma)    | < 0.05<br>(< 0.05 to < 0.05)         | 0.1<br>(0.1 to 0.2)                | < 0.05<br>(< 0.05 to < 0.05)      | 24.8<br>(-11.7 to 70.2)                           | -0.0<br>(-27.7 to 38.0)                             |
| Breast cancer                                      | 1.3<br>(1.2 to 1.4)                  | 0.3<br>(0.2 to 0.3)                | 0.1<br>(0.1 to 0.1)               | 31.6<br>(19.4 to 46.0)                            | 7.5<br>(-2.5 to 19.2)                               |
| Cervical cancer                                    | 0.1<br>(< 0.05 to 0.1)               | < 0.05<br>(< 0.05 to < 0.05)       | < 0.05<br>(< 0.05 to < 0.05)      | -5.3<br>(-24.7 to 17.2)                           | -15.4<br>(-34.0 to 5.5)                             |
| Uterine cancer                                     | 0.1<br>(0.1 to 0.2)                  | < 0.05<br>(< 0.05 to < 0.05)       | < 0.05<br>(< 0.05 to < 0.05)      | 16.3<br>(-6.4 to 43.0)                            | -7.9<br>(-26.5 to 13.9)                             |
| Ovarian cancer                                     | 0.1<br>(0.1 to 0.1)                  | < 0.05<br>(< 0.05 to < 0.05)       | < 0.05<br>(< 0.05 to < 0.05)      | 12.2<br>(-14.0 to 47.8)                           | -9.1<br>(-30.4 to 20.2)                             |
| Prostate cancer                                    | 1.3<br>(1.1 to 1.6)                  | 0.3<br>(0.3 to 0.4)                | 0.1<br>(0.1 to 0.1)               | 38.5<br>(20.4 to 57.9)                            | 7.7<br>(-6.9 to 22.4)                               |
| Testicular cancer                                  | < 0.05<br>(< 0.05 to < 0.05)         | < 0.05<br>(< 0.05 to < 0.05)       | < 0.05<br>(< 0.05 to < 0.05)      | 4.2<br>(-22.5 to 42.1)                            | -2.4<br>(-27.9 to 34.3)                             |
| Kidney cancer                                      | 0.2<br>(0.2 to 0.3)                  | 0.1<br>(0.1 to 0.1)                | < 0.05<br>(< 0.05 to < 0.05)      | 34.4<br>(17.0 to 52.3)                            | 8.8<br>(-6.1 to 23.7)                               |
| Bladder cancer                                     | 0.2<br>(0.2 to 0.3)                  | 0.1<br>(0.1 to 0.1)                | < 0.05<br>(< 0.05 to < 0.05)      | 24.7<br>(9.8 to 42.1)                             | -2.4<br>(-14.0 to 11.5)                             |
| Brain and nervous system cancer                    | 0.2<br>(0.2 to 0.3)                  | 0.1<br>(0.1 to 0.1)                | < 0.05<br>(< 0.05 to < 0.05)      | 42.5<br>(14.6 to 80.3)                            | 23.4<br>(-0.2 to 52.6)                              |
| Thyroid cancer                                     | 0.4<br>(0.4 to 0.4)                  | 0.1<br>(0.1 to 0.1)                | < 0.05<br>(< 0.05 to < 0.05)      | 50.8<br>(31.7 to 71.6)                            | 29.7<br>(13.6 to 47.1)                              |
| Mesothelioma                                       | < 0.05<br>(< 0.05 to < 0.05)         | < 0.05<br>(< 0.05 to < 0.05)       | < 0.05<br>(< 0.05 to < 0.05)      | 31.2<br>(19.0 to 44.2)                            | 3.0<br>(-6.8 to 13.5)                               |
| Hodgkin lymphoma                                   | 0.1<br>(< 0.05 to 0.1)               | < 0.05<br>(< 0.05 to < 0.05)       | < 0.05<br>(< 0.05 to < 0.05)      | 12.0<br>(-8.7 to 37.3)                            | 1.6<br>(-17.5 to 27.0)                              |
| Non-Hodgkin's lymphoma                             | 0.3<br>(0.2 to 0.3)                  | 0.1<br>(0.1 to 0.1)                | < 0.05<br>(< 0.05 to < 0.05)      | 58.4<br>(38.5 to 80.9)                            | 30.2<br>(13.3 to 48.5)                              |
| Multiple myeloma                                   | 0.1<br>(0.1 to 0.1)                  | < 0.05<br>(< 0.05 to < 0.05)       | < 0.05<br>(< 0.05 to < 0.05)      | 48.8<br>(18.9 to 87.5)                            | 18.2<br>(-6.2 to 50.5)                              |
| Leukaemia                                          | 0.2<br>(0.2 to 0.2)                  | 0.1<br>(0.1 to 0.1)                | < 0.05<br>(< 0.05 to < 0.05)      | 34.3<br>(18.1 to 53.3)                            | 7.7<br>(-6.2 to 24.6)                               |
| Acute lymphoid leukaemia                           | < 0.05<br>(< 0.05 to < 0.05)         | < 0.05<br>(< 0.05 to < 0.05)       | < 0.05<br>(< 0.05 to < 0.05)      | 9.4<br>(-18.4 to 53.0)                            | -0.9<br>(-28.4 to 45.0)                             |
| Chronic lymphoid leukaemia                         | 0.1<br>(0.1 to 0.1)                  | < 0.05<br>(< 0.05 to < 0.05)       | < 0.05<br>(< 0.05 to < 0.05)      | 16.5<br>(-11.2 to 65.2)                           | -8.3<br>(-30.7 to 29.3)                             |
| Acute myeloid leukaemia                            | < 0.05<br>(< 0.05 to < 0.05)         | < 0.05<br>(< 0.05 to < 0.05)       | < 0.05<br>(< 0.05 to < 0.05)      | 28.1<br>(5.8 to 68.1)                             | 2.8<br>(-14.1 to 33.3)                              |
| Chronic myeloid leukaemia                          | < 0.05<br>(< 0.05 to < 0.05)         | < 0.05<br>(< 0.05 to < 0.05)       | < 0.05<br>(< 0.05 to < 0.05)      | 33.7<br>(-3.9 to 66.0)                            | 7.1<br>(-21.6 to 32.5)                              |
| Other leukaemia                                    | 0.1<br>(< 0.05 to 0.1)               | < 0.05<br>(< 0.05 to < 0.05)       | < 0.05<br>(< 0.05 to < 0.05)      | 102.6<br>(47.9 to 150.9)                          | 57.7<br>(16.2 to 95.4)                              |
| Other neoplasms                                    | 0.4<br>(0.3 to 0.4)                  | 0.1<br>(0.1 to 0.1)                | < 0.05<br>(< 0.05 to < 0.05)      | 46.9<br>(27.6 to 72.3)                            | 22.4<br>(6.2 to 42.1)                               |
| <b>Cardiovascular diseases</b>                     | <b>33.9</b><br><b>(32.6 to 35.1)</b> | <b>3.6†</b><br><b>(3.4 to 3.9)</b> | <b>2.1</b><br><b>(1.5 to 2.7)</b> | <b>15.0</b><br><b>(10.7 to 19.4)</b>              | <b>-6.8</b><br><b>(-10.1 to -3.4)</b>               |
| Rheumatic heart disease                            | < 0.05<br>(< 0.05 to < 0.05)         | < 0.05<br>(< 0.05 to < 0.05)       | < 0.05<br>(< 0.05 to < 0.05)      | 18.5<br>(9.3 to 27.6)                             | -1.4<br>(-8.4 to 6.4)                               |
| Ischaemic heart disease                            | 10.8<br>(10.1 to 11.4)               | 1.5<br>(1.4 to 1.7)                | 0.5<br>(0.3 to 0.7)               | 15.9<br>(10.4 to 21.3)                            | -7.0<br>(-11.3 to -2.6)                             |
| Cerebrovascular disease                            | 4.2<br>(3.8 to 4.5)                  | 0.6†<br>(0.6 to 0.7)               | 0.7<br>(0.5 to 0.8)               | 16.9<br>(7.8 to 26.6)                             | -5.3<br>(-12.2 to 2.1)                              |
| Ischaemic stroke                                   | 3.4<br>(3.0 to 3.8)                  | 0.4†<br>(0.4 to 0.5)               | 0.5<br>(0.4 to 0.7)               | 14.4<br>(3.1 to 26.5)                             | -7.6<br>(-16.6 to 2.0)                              |
| Hemorrhagic stroke                                 | 0.9<br>(0.8 to 1.0)                  | 0.2†<br>(0.2 to 0.2)               | 0.1<br>(0.1 to 0.2)               | 27.7<br>(14.9 to 42.1)                            | 4.2<br>(-6.2 to 15.6)                               |
| Hypertensive heart disease                         | 0.6<br>(0.5 to 0.7)                  | --                                 | < 0.05<br>(< 0.05 to 0.1)         | 15.5<br>(4.2 to 29.5)                             | -8.3<br>(-17.6 to 3.3)                              |
| Cardiomyopathy and myocarditis                     | 0.3<br>(0.3 to 0.4)                  | 0.2†<br>(0.1 to 0.2)               | < 0.05<br>(< 0.05 to < 0.05)      | 10.6<br>(-0.1 to 22.4)                            | -6.8<br>(-15.4 to 2.9)                              |
| Myocarditis                                        | 0.1<br>(0.1 to 0.1)                  | 0.2<br>(0.1 to 0.2)                | < 0.05<br>(< 0.05 to < 0.05)      | 3.9<br>(-9.1 to 19.7)                             | -6.1<br>(-18.0 to 7.8)                              |
| Alcoholic cardiomyopathy                           | < 0.05<br>(< 0.05 to 0.1)            | --                                 | < 0.05<br>(< 0.05 to < 0.05)      | 9.6<br>(-17.8 to 45.7)                            | -8.5<br>(-30.6 to 20.8)                             |
| Other cardiomyopathy                               | 0.2<br>(0.2 to 0.2)                  | --                                 | < 0.05<br>(< 0.05 to < 0.05)      | 14.8<br>(1.3 to 31.1)                             | -6.9<br>(-17.8 to 5.9)                              |
| Atrial fibrillation and flutter                    | 3.7<br>(3.2 to 4.3)                  | 0.3<br>(0.3 to 0.4)                | 0.3<br>(0.2 to 0.4)               | 22.2<br>(16.1 to 29.8)                            | -2.9<br>(-7.9 to 3.2)                               |
| Peripheral vascular disease                        | 11.6<br>(10.2 to 13.2)               | 1.0<br>(0.8 to 1.1)                | < 0.05<br>(< 0.05 to 0.1)         | 18.0<br>(9.1 to 27.5)                             | -8.8<br>(-15.6 to -2.0)                             |
| Endocarditis                                       | < 0.05<br>(< 0.05 to < 0.05)         | 0.1<br>(0.1 to 0.1)                | < 0.05<br>(< 0.05 to < 0.05)      | 10.3<br>(-8.9 to 37.4)                            | -9.1<br>(-24.1 to 11.8)                             |
| Other cardiovascular and circulatory diseases      | 10.0<br>(8.7 to 11.5)                | --                                 | 0.5<br>(0.4 to 0.7)               | 8.2<br>(1.0 to 15.9)                              | -10.0<br>(-15.9 to -4.0)                            |
| <b>Chronic respiratory diseases</b>                | <b>37.0</b><br><b>(35.6 to 38.5)</b> | <b>3.0†</b><br><b>(2.8 to 3.2)</b> | <b>1.6</b><br><b>(1.2 to 2.1)</b> | <b>6.9</b><br><b>(2.3 to 11.9)</b>                | <b>-5.7</b><br><b>(-9.6 to -1.8)</b>                |
| Chronic obstructive pulmonary disease              | 13.3<br>(12.7 to 13.9)               | 0.8<br>(0.8 to 0.8)                | 0.6<br>(0.5 to 0.7)               | 11.1<br>(0.5 to 22.4)                             | -9.2<br>(-17.9 to -0.3)                             |
| Pneumoconiosis                                     | < 0.05<br>(< 0.05 to < 0.05)         | < 0.05<br>(< 0.05 to < 0.05)       | < 0.05<br>(< 0.05 to < 0.05)      | 30.0<br>(22.0 to 38.5)                            | 2.2<br>(-4.0 to 8.6)                                |
| Silicosis                                          | < 0.05<br>(< 0.05 to < 0.05)         | < 0.05<br>(< 0.05 to < 0.05)       | < 0.05<br>(< 0.05 to < 0.05)      | 33.8<br>(24.2 to 43.7)                            | 4.6<br>(-2.4 to 11.8)                               |

| Cause                                                          | Prevalence in thousands (95% UI)        | Incidence in thousands (95% UI)                     | YLDs in thousands (95% UI)        |                                                   |                                                     |
|----------------------------------------------------------------|-----------------------------------------|-----------------------------------------------------|-----------------------------------|---------------------------------------------------|-----------------------------------------------------|
|                                                                | 2016 counts                             | 2016 counts                                         | 2016 counts                       | Percentage change in counts between 2006 and 2016 | Percentage change in age-standardised rates between |
| Asbestosis                                                     | < 0.05<br>(< 0.05 to < 0.05)            | < 0.05<br>(< 0.05 to < 0.05)                        | < 0.05<br>(< 0.05 to < 0.05)      | 5.1<br>(-10.7 to 25.4)                            | -13.7<br>(-27.5 to 2.7)                             |
| Coal workers pneumoconiosis                                    | --                                      | --                                                  | --                                | --                                                | --                                                  |
| Other pneumoconiosis                                           | < 0.05<br>(< 0.05 to < 0.05)            | < 0.05<br>(< 0.05 to < 0.05)                        | < 0.05<br>(< 0.05 to < 0.05)      | 7.4<br>(-3.4 to 25.8)                             | -13.4<br>(-22.4 to 0.3)                             |
| Asthma                                                         | 25.1<br>(23.3 to 27.3)                  | 2.2<br>(2.0 to 2.4)                                 | 1.0<br>(0.7 to 1.4)               | 3.7<br>(-0.4 to 8.0)                              | -4.5<br>(-8.4 to -0.5)                              |
| Interstitial lung disease and pulmonary sarcoidosis            | 0.1<br>(0.1 to 0.2)                     | < 0.05<br>(< 0.05 to < 0.05)                        | < 0.05<br>(< 0.05 to < 0.05)      | 28.2<br>(13.1 to 45.4)                            | 3.5<br>(-8.3 to 17.2)                               |
| Other chronic respiratory diseases                             | --                                      | --                                                  | < 0.05<br>(< 0.05 to < 0.05)      | 34.2<br>(17.5 to 53.6)                            | 25.4<br>(7.7 to 45.6)                               |
| <b>Cirrhosis and other chronic liver diseases</b>              | <b>1.7</b><br><b>(1.6 to 1.8)</b>       | <b>&lt; 0.05</b><br><b>(&lt; 0.05 to &lt; 0.05)</b> | <b>0.1</b><br><b>(0.1 to 0.1)</b> | <b>27.1</b><br><b>(16.6 to 38.5)</b>              | <b>13.1</b><br><b>(3.5 to 23.4)</b>                 |
| Cirrhosis and other chronic liver diseases due to hepatitis B  | 0.4<br>(0.3 to 0.4)                     | < 0.05<br>(< 0.05 to < 0.05)                        | < 0.05<br>(< 0.05 to < 0.05)      | 26.6<br>(4.2 to 53.9)                             | 12.5<br>(-7.9 to 36.8)                              |
| Cirrhosis and other chronic liver diseases due to hepatitis C  | 0.3<br>(0.2 to 0.4)                     | < 0.05<br>(< 0.05 to < 0.05)                        | < 0.05<br>(< 0.05 to < 0.05)      | 24.9<br>(-0.2 to 57.0)                            | 10.9<br>(-10.6 to 39.0)                             |
| Cirrhosis and other chronic liver diseases due to alcohol use  | 1.0<br>(0.8 to 1.1)                     | < 0.05<br>(< 0.05 to < 0.05)                        | < 0.05<br>(< 0.05 to 0.1)         | 32.7<br>(16.6 to 50.0)                            | 15.3<br>(0.8 to 31.2)                               |
| Cirrhosis and other chronic liver diseases due to other causes | 0.1<br>(0.1 to 0.1)                     | < 0.05<br>(< 0.05 to < 0.05)                        | < 0.05<br>(< 0.05 to < 0.05)      | 13.5<br>(-9.7 to 44.0)                            | 10.8<br>(-12.8 to 41.1)                             |
| <b>Digestive diseases</b>                                      | <b>5.9</b><br><b>(5.5 to 6.3)</b>       | <b>8.2†</b><br><b>(7.7 to 8.6)</b>                  | <b>0.2</b><br><b>(0.1 to 0.2)</b> | <b>13.8</b><br><b>(5.5 to 22.9)</b>               | <b>-0.8</b><br><b>(-8.5 to 7.5)</b>                 |
| Peptic ulcer disease                                           | 1.4<br>(1.2 to 1.6)                     | 0.4<br>(0.3 to 0.4)                                 | < 0.05<br>(< 0.05 to < 0.05)      | 12.3<br>(-16.1 to 53.3)                           | 2.2<br>(-25.0 to 41.0)                              |
| Gastritis and duodenitis                                       | 2.7<br>(2.3 to 3.1)                     | 1.7<br>(1.5 to 1.9)                                 | < 0.05<br>(< 0.05 to < 0.05)      | 17.6<br>(-7.7 to 52.3)                            | 3.3<br>(-19.2 to 35.8)                              |
| Appendicitis                                                   | < 0.05<br>(< 0.05 to < 0.05)            | 0.5<br>(0.5 to 0.6)                                 | < 0.05<br>(< 0.05 to < 0.05)      | 3.9<br>(-23.7 to 42.9)                            | -1.3<br>(-29.7 to 39.9)                             |
| Paralytic ileus and intestinal obstruction                     | < 0.05<br>(< 0.05 to < 0.05)            | 0.2<br>(0.2 to 0.2)                                 | < 0.05<br>(< 0.05 to < 0.05)      | 25.3<br>(18.7 to 32.6)                            | 6.6<br>(2.5 to 11.1)                                |
| Inguinal, femoral, and abdominal hernia                        | 1.3<br>(1.2 to 1.4)                     | 2.7<br>(2.4 to 3.1)                                 | 0.1<br>(< 0.05 to 0.1)            | 13.7<br>(1.4 to 29.0)                             | -2.3<br>(-13.2 to 10.7)                             |
| Inflammatory bowel disease                                     | 0.3<br>(0.3 to 0.3)                     | 0.1<br>(0.1 to 0.1)                                 | < 0.05<br>(< 0.05 to 0.1)         | 9.0<br>(-5.2 to 26.9)                             | -3.5<br>(-16.4 to 12.9)                             |
| Vascular intestinal disorders                                  | < 0.05<br>(< 0.05 to < 0.05)            | 0.1<br>(< 0.05 to 0.1)                              | < 0.05<br>(< 0.05 to < 0.05)      | 30.1<br>(-4.9 to 73.0)                            | 5.4<br>(-20.9 to 38.7)                              |
| Gallbladder and biliary diseases                               | 0.4<br>(0.3 to 0.4)                     | 2.3<br>(2.0 to 2.6)                                 | < 0.05<br>(< 0.05 to < 0.05)      | 20.6<br>(-2.7 to 48.8)                            | 2.3<br>(-16.7 to 24.7)                              |
| Pancreatitis                                                   | < 0.05<br>(< 0.05 to < 0.05)            | 0.2<br>(0.2 to 0.2)                                 | < 0.05<br>(< 0.05 to < 0.05)      | 19.7<br>(15.5 to 24.8)                            | 1.7<br>(-1.7 to 5.4)                                |
| Other digestive diseases                                       | --                                      | --                                                  | < 0.05<br>(< 0.05 to < 0.05)      | 19.9<br>(11.1 to 29.5)                            | 3.2<br>(-4.7 to 12.0)                               |
| <b>Neurological disorders</b>                                  | <b>125.1</b><br><b>(120.5 to 130.1)</b> | <b>49.2</b><br><b>(42.8 to 56.4)</b>                | <b>4.0</b><br><b>(2.7 to 5.5)</b> | <b>11.4</b><br><b>(1.2 to 22.2)</b>               | <b>0.5</b><br><b>(-9.1 to 10.9)</b>                 |
| Alzheimer's disease and other dementias                        | 3.4<br>(2.8 to 4.0)                     | 0.7<br>(0.5 to 0.8)                                 | 0.5<br>(0.4 to 0.7)               | 27.1<br>(19.7 to 34.1)                            | -2.2<br>(-7.4 to 2.8)                               |
| Parkinson's disease                                            | 0.5<br>(0.4 to 0.6)                     | 0.1<br>(< 0.05 to 0.1)                              | 0.1<br>(< 0.05 to 0.1)            | 31.1<br>(17.1 to 45.9)                            | 4.1<br>(-7.3 to 16.2)                               |
| Epilepsy                                                       | 0.9<br>(0.2 to 1.5)                     | 0.1<br>(< 0.05 to 0.2)                              | 0.2<br>(< 0.05 to 0.5)            | 8.0<br>(-80.3 to 488.4)                           | -2.6<br>(-82.3 to 425.4)                            |
| Multiple sclerosis                                             | 0.5<br>(0.5 to 0.6)                     | < 0.05<br>(< 0.05 to < 0.05)                        | 0.1<br>(0.1 to 0.2)               | 23.8<br>(7.8 to 42.9)                             | 10.6<br>(-3.8 to 27.9)                              |
| Motor neuron disease                                           | 0.1<br>(0.1 to 0.1)                     | < 0.05<br>(< 0.05 to < 0.05)                        | < 0.05<br>(< 0.05 to < 0.05)      | 22.6<br>(16.5 to 28.6)                            | 4.5<br>(-0.3 to 9.4)                                |
| Migraine                                                       | 61.9<br>(58.4 to 65.2)                  | 5.7<br>(5.3 to 6.1)                                 | 2.7<br>(1.7 to 3.8)               | 8.1<br>(4.5 to 11.5)                              | 0.3<br>(-3.1 to 3.5)                                |
| Tension-type headache                                          | 81.7<br>(73.5 to 90.9)                  | 42.6<br>(36.2 to 49.8)                              | 0.4<br>(0.2 to 0.6)               | 9.9<br>(4.3 to 16.2)                              | 0.6<br>(-4.5 to 6.2)                                |
| Other neurological disorders                                   | < 0.05<br>(< 0.05 to < 0.05)            | < 0.05<br>(< 0.05 to < 0.05)                        | 0.1<br>(< 0.05 to 0.1)            | 26.3<br>(-42.5 to 163.1)                          | 17.4<br>(-50.1 to 161.4)                            |
| <b>Mental and substance use disorders</b>                      | <b>52.4</b><br><b>(50.4 to 54.4)</b>    | <b>16.8†</b><br><b>(15.6 to 18.0)</b>               | <b>7.2</b><br><b>(5.2 to 9.3)</b> | <b>8.9</b><br><b>(6.5 to 11.1)</b>                | <b>0.1</b><br><b>(-2.0 to 2.2)</b>                  |
| Schizophrenia                                                  | 0.9<br>(0.8 to 1.1)                     | < 0.05<br>(< 0.05 to 0.1)                           | 0.6<br>(0.4 to 0.8)               | 10.9<br>(2.3 to 19.8)                             | 0.4<br>(-7.5 to 8.3)                                |
| Alcohol use disorders                                          | 3.9<br>(3.4 to 4.5)                     | 1.7<br>(1.4 to 1.9)                                 | 0.4<br>(0.3 to 0.5)               | 12.7<br>(3.1 to 23.3)                             | 4.1<br>(-4.9 to 13.6)                               |
| Drug use disorders                                             | 2.7<br>(2.6 to 3.0)                     | 0.4<br>(0.3 to 0.4)                                 | 0.6<br>(0.4 to 0.8)               | 10.8<br>(2.5 to 20.0)                             | 2.3<br>(-5.4 to 11.1)                               |
| Opioid use disorders                                           | 0.9<br>(0.8 to 1.1)                     | 0.1<br>(0.1 to 0.1)                                 | 0.4<br>(0.3 to 0.5)               | 12.5<br>(1.6 to 23.9)                             | 3.2<br>(-7.1 to 13.6)                               |
| Cocaine use disorders                                          | 0.4<br>(0.4 to 0.5)                     | < 0.05<br>(< 0.05 to < 0.05)                        | 0.1<br>(< 0.05 to 0.1)            | 5.7<br>(-10.9 to 26.3)                            | -2.2<br>(-17.9 to 17.0)                             |
| Amphetamine use disorders                                      | 0.2<br>(0.2 to 0.3)                     | < 0.05<br>(< 0.05 to < 0.05)                        | < 0.05<br>(< 0.05 to 0.1)         | 8.4<br>(-15.2 to 36.4)                            | 2.1<br>(-20.5 to 28.5)                              |
| Cannabis use disorders                                         | 0.9<br>(0.7 to 1.0)                     | 0.1<br>(0.1 to 0.2)                                 | < 0.05<br>(< 0.05 to < 0.05)      | 9.4<br>(-7.2 to 29.4)                             | 4.4<br>(-11.6 to 24.3)                              |
| Other drug use disorders                                       | 0.4<br>(0.3 to 0.4)                     | 0.1<br>(< 0.05 to 0.1)                              | 0.1<br>(0.1 to 0.1)               | 8.7<br>(-9.5 to 30.2)                             | 1.2<br>(-16.2 to 21.4)                              |
| Depressive disorders                                           | 12.0<br>(11.3 to 12.8)                  | 11.0<br>(10.0 to 12.2)                              | 1.9<br>(1.3 to 2.6)               | 8.3<br>(3.8 to 13.2)                              | -2.1<br>(-6.1 to 2.3)                               |
| Major depressive disorder                                      | 6.7<br>(6.1 to 7.4)                     | 10.2<br>(9.2 to 11.5)                               | 1.4<br>(0.9 to 1.9)               | 6.8<br>(0.8 to 13.5)                              | -3.0<br>(-8.4 to 3.0)                               |
| Dysthymia                                                      | 5.5<br>(4.9 to 6.4)                     | 0.8<br>(0.7 to 0.9)                                 | 0.5<br>(0.4 to 0.8)               | 12.4<br>(8.6 to 16.1)                             | 0.4<br>(-2.7 to 3.5)                                |
| Bipolar disorder                                               | 3.1<br>(2.6 to 3.5)                     | 0.2<br>(0.2 to 0.2)                                 | 0.6<br>(0.4 to 0.9)               | 9.9<br>(1.7 to 18.7)                              | 0.8<br>(-7.0 to 9.3)                                |
| Anxiety disorders                                              | 17.0<br>(15.0 to 19.2)                  | 2.2<br>(1.9 to 2.5)                                 | 1.6<br>(1.1 to 2.2)               | 8.9<br>(4.9 to 13.2)                              | 0.4<br>(-3.4 to 4.3)                                |
| Eating disorders                                               | 1.2<br>(1.0 to 1.5)                     | 0.3<br>(0.2 to 0.4)                                 | 0.2<br>(0.2 to 0.4)               | 8.4<br>(-0.0 to 18.6)                             | 4.9<br>(-3.1 to 14.8)                               |
| Anorexia nervosa                                               | 0.3<br>(0.2 to 0.4)                     | 0.1<br>(< 0.05 to 0.1)                              | 0.1<br>(< 0.05 to 0.1)            | 8.5<br>(-6.6 to 27.3)                             | 4.5<br>(-9.8 to 22.4)                               |
| Bulimia nervosa                                                | 0.9<br>(0.7 to 1.1)                     | 0.3<br>(0.2 to 0.4)                                 | 0.2<br>(0.1 to 0.3)               | 8.4<br>(-2.4 to 20.6)                             | 5.1<br>(-5.0 to 16.7)                               |
| Autistic spectrum disorders                                    | 2.4<br>(2.1 to 2.7)                     | < 0.05<br>(< 0.05 to < 0.05)                        | 0.4<br>(0.2 to 0.5)               | 7.5<br>(2.2 to 13.1)                              | -0.4<br>(-5.4 to 4.7)                               |
| Autism                                                         | 0.9<br>(0.7 to 1.0)                     | < 0.05<br>(< 0.05 to < 0.05)                        | 0.2<br>(0.1 to 0.3)               | 7.9<br>(0.4 to 16.9)                              | -0.3<br>(-7.1 to 7.8)                               |
| Asperger syndrome and other autistic spectrum disorders        | 1.5<br>(1.3 to 1.8)                     | < 0.05<br>(< 0.05 to < 0.05)                        | 0.1<br>(0.1 to 0.2)               | 7.0<br>(1.5 to 12.7)                              | -0.4<br>(-5.7 to 4.9)                               |



| Cause                                                      | Prevalence in thousands (95% UI)        | Incidence in thousands (95% UI)          | YLDs in thousands (95% UI)         |                                                   |                                                     |
|------------------------------------------------------------|-----------------------------------------|------------------------------------------|------------------------------------|---------------------------------------------------|-----------------------------------------------------|
|                                                            | 2016 counts                             | 2016 counts                              | 2016 counts                        | Percentage change in counts between 2006 and 2016 | Percentage change in age-standardised rates between |
| Attention-deficit/hyperactivity disorder                   | 2.5<br>(2.1 to 3.0)                     | 0.1<br>(0.1 to 0.1)                      | < 0.05<br>(< 0.05 to 0.1)          | 1.7<br>(-9.1 to 14.8)                             | -1.0<br>(-12.2 to 11.5)                             |
| Conduct disorder                                           | 2.0<br>(1.5 to 2.5)                     | 0.6<br>(0.5 to 0.8)                      | 0.2<br>(0.1 to 0.4)                | -2.2<br>(-7.4 to 3.9)                             | -0.2<br>(-5.5 to 5.9)                               |
| Idiopathic developmental intellectual disability           | 1.9<br>(0.7 to 3.2)                     | --                                       | 0.1<br>(< 0.05 to 0.2)             | 3.9<br>(-6.5 to 14.7)                             | -3.6<br>(-13.3 to 6.4)                              |
| Other mental and substance use disorders                   | 7.4<br>(6.4 to 8.5)                     | 0.2<br>(0.2 to 0.2)                      | 0.6<br>(0.4 to 0.8)                | 11.1<br>(6.6 to 15.6)                             | -0.1<br>(-4.3 to 4.0)                               |
| <b>Diabetes, urogenital, blood, and endocrine diseases</b> | <b>115.8</b><br><b>(104.0 to 131.0)</b> | <b>28.7†</b><br><b>(26.8 to 31.0)</b>    | <b>2.1</b><br><b>(1.5 to 2.9)</b>  | <b>18.7</b><br><b>(14.0 to 23.9)</b>              | <b>1.0</b><br><b>(-2.9 to 5.6)</b>                  |
| Diabetes mellitus                                          | 11.8<br>(10.5 to 13.2)                  | 0.6<br>(0.6 to 0.7)                      | 0.9<br>(0.6 to 1.3)                | 24.6<br>(15.5 to 33.9)                            | 2.5<br>(-4.8 to 10.0)                               |
| Acute glomerulonephritis                                   | < 0.05<br>(< 0.05 to < 0.05)            | 0.1<br>(< 0.05 to 0.1)                   | < 0.05<br>(< 0.05 to < 0.05)       | 10.7<br>(5.6 to 16.5)                             | 0.0<br>(-4.0 to 5.1)                                |
| Chronic kidney disease                                     | 8.8<br>(7.9 to 9.8)                     | 0.7<br>(0.6 to 0.8)                      | 0.2<br>(0.1 to 0.3)                | 22.1<br>(11.7 to 32.9)                            | 1.3<br>(-6.5 to 9.8)                                |
| Chronic kidney disease due to diabetes mellitus            | 2.0<br>(1.8 to 2.3)                     | 0.2<br>(0.1 to 0.2)                      | < 0.05<br>(< 0.05 to 0.1)          | 58.3<br>(34.6 to 85.4)                            | 29.6<br>(9.8 to 52.0)                               |
| Chronic kidney disease due to hypertension                 | 2.0<br>(1.8 to 2.3)                     | 0.2<br>(0.1 to 0.2)                      | < 0.05<br>(< 0.05 to < 0.05)       | 15.5<br>(0.6 to 32.4)                             | -9.0<br>(-20.5 to 4.1)                              |
| Chronic kidney disease due to glomerulonephritis           | 1.8<br>(1.6 to 2.0)                     | 0.1<br>(0.1 to 0.2)                      | 0.1<br>(< 0.05 to 0.1)             | 20.6<br>(7.6 to 34.8)                             | 3.7<br>(-6.7 to 14.9)                               |
| Chronic kidney disease due to other causes                 | 3.0<br>(2.7 to 3.4)                     | 0.2<br>(0.2 to 0.3)                      | 0.1<br>(0.1 to 0.1)                | 8.9<br>(-3.0 to 23.2)                             | -9.3<br>(-19.1 to 2.1)                              |
| Urinary diseases and male infertility                      | 8.4<br>(7.6 to 9.3)                     | 14.9†<br>(13.4 to 16.6)                  | 0.3<br>(0.2 to 0.4)                | 19.8<br>(12.1 to 27.8)                            | -1.2<br>(-7.6 to 5.4)                               |
| Interstitial nephritis and urinary tract infections        | 0.2<br>(0.2 to 0.2)                     | 11.2<br>(9.8 to 12.8)                    | < 0.05<br>(< 0.05 to < 0.05)       | 8.9<br>(-8.3 to 29.9)                             | 1.5<br>(-14.7 to 20.5)                              |
| Urolithiasis                                               | 0.1<br>(0.1 to 0.1)                     | 2.9<br>(2.6 to 3.3)                      | < 0.05<br>(< 0.05 to < 0.05)       | 14.7<br>(-0.4 to 30.1)                            | 0.5<br>(-11.8 to 13.5)                              |
| Benign prostatic hyperplasia                               | 7.0<br>(6.0 to 8.1)                     | 0.8<br>(0.7 to 1.0)                      | 0.2<br>(0.1 to 0.3)                | 22.0<br>(13.3 to 30.8)                            | -0.7<br>(-7.8 to 6.5)                               |
| Male infertility                                           | 0.8<br>(0.6 to 1.1)                     | --                                       | < 0.05<br>(< 0.05 to < 0.05)       | -7.4<br>(-16.4 to 1.7)                            | -7.9<br>(-16.5 to 0.3)                              |
| Other urinary diseases                                     | --                                      | --                                       | < 0.05<br>(< 0.05 to < 0.05)       | -7.0<br>(-16.7 to 3.4)                            | -15.1<br>(-23.9 to -5.5)                            |
| Gynecological diseases                                     | 46.2<br>(43.4 to 49.0)                  | 10.8†<br>(9.8 to 12.3)                   | 0.4<br>(0.2 to 0.5)                | 6.8<br>(1.7 to 11.8)                              | -0.5<br>(-5.0 to 4.4)                               |
| Uterine fibroids                                           | 2.2<br>(1.9 to 2.5)                     | 0.2<br>(0.2 to 0.2)                      | < 0.05<br>(< 0.05 to < 0.05)       | 8.1<br>(-2.8 to 18.9)                             | -0.1<br>(-10.1 to 10.3)                             |
| Polycystic ovarian syndrome                                | 0.1<br>(0.1 to 0.1)                     | 0.3<br>(0.2 to 0.4)                      | < 0.05<br>(< 0.05 to < 0.05)       | 3.7<br>(-17.1 to 30.1)                            | 0.8<br>(-19.6 to 26.7)                              |
| Female infertility                                         | 1.3<br>(0.8 to 2.0)                     | --                                       | < 0.05<br>(< 0.05 to < 0.05)       | 8.0<br>(-1.9 to 20.1)                             | 7.6<br>(-2.2 to 19.1)                               |
| Endometriosis                                              | 0.1<br>(0.1 to 0.2)                     | 0.3<br>(0.2 to 0.4)                      | < 0.05<br>(< 0.05 to < 0.05)       | -4.9<br>(-25.5 to 20.6)                           | -9.7<br>(-29.4 to 15.1)                             |
| Genital prolapse                                           | 27.4<br>(24.0 to 30.7)                  | 1.4<br>(1.2 to 1.7)                      | 0.1<br>(< 0.05 to 0.2)             | 15.6<br>(7.0 to 25.2)                             | -4.8<br>(-11.9 to 2.9)                              |
| Premenstrual syndrome                                      | 16.4<br>(15.3 to 17.6)                  | 5.6<br>(5.1 to 6.0)                      | 0.1<br>(0.1 to 0.2)                | 3.7<br>(-4.1 to 12.4)                             | 1.1<br>(-6.7 to 9.7)                                |
| Other gynecological diseases                               | 2.9<br>(2.2 to 4.0)                     | 2.9<br>(2.1 to 4.1)                      | 0.1<br>(0.1 to 0.2)                | 5.7<br>(-4.4 to 15.9)                             | 1.5<br>(-8.2 to 11.5)                               |
| Hemoglobinopathies and hemolytic anaemias                  | 60.6<br>(44.5 to 80.9)                  | --                                       | 0.1<br>(< 0.05 to 0.3)             | 10.4<br>(-17.0 to 48.6)                           | 3.1<br>(-24.1 to 38.3)                              |
| Thalassemias                                               | < 0.05<br>(< 0.05 to 0.2)               | --                                       | < 0.05<br>(< 0.05 to < 0.05)       | 20.7<br>(-25.7 to 94.0)                           | 17.8<br>(-27.2 to 89.3)                             |
| Thalassaemias trait                                        | 25.8<br>(7.7 to 58.1)                   | --                                       | 0.1<br>(< 0.05 to 0.3)             | 12.1<br>(-16.7 to 53.8)                           | 4.8<br>(-22.3 to 44.4)                              |
| Sickle cell disorders                                      | < 0.05<br>(< 0.05 to < 0.05)            | --                                       | < 0.05<br>(< 0.05 to < 0.05)       | 10.1<br>(-9.1 to 35.6)                            | 5.6<br>(-12.7 to 29.0)                              |
| Sickle cell trait                                          | 4.4<br>(2.7 to 6.7)                     | --                                       | < 0.05<br>(< 0.05 to < 0.05)       | -1.2<br>(-32.1 to 36.3)                           | -8.7<br>(-37.7 to 27.8)                             |
| G6PD deficiency                                            | 4.9<br>(4.1 to 5.8)                     | --                                       | < 0.05<br>(< 0.05 to < 0.05)       | 41.3<br>(5.8 to 88.1)                             | 28.3<br>(-3.3 to 70.0)                              |
| G6PD trait                                                 | 27.5<br>(25.3 to 29.7)                  | --                                       | < 0.05<br>(< 0.05 to < 0.05)       | 48.8<br>(0.3 to 131.2)                            | 31.3<br>(-10.0 to 99.3)                             |
| Other hemoglobinopathies and hemolytic anaemias            | 0.3<br>(0.3 to 0.4)                     | --                                       | < 0.05<br>(< 0.05 to < 0.05)       | -10.0<br>(-29.0 to 12.1)                          | -21.0<br>(-38.2 to 0.2)                             |
| Endocrine, metabolic, blood, and immune disorders          | 7.8<br>(7.0 to 8.5)                     | 1.6<br>(1.4 to 1.7)                      | 0.3<br>(0.2 to 0.4)                | 18.7<br>(12.2 to 25.4)                            | -0.8<br>(-6.3 to 4.6)                               |
| <b>Musculoskeletal disorders</b>                           | <b>82.9</b><br><b>(79.3 to 86.7)</b>    | <b>40.9</b><br><b>(37.1 to 45.2)</b>     | <b>9.1</b><br><b>(6.5 to 11.8)</b> | <b>13.3</b><br><b>(7.5 to 19.4)</b>               | <b>-1.1</b><br><b>(-6.4 to 4.1)</b>                 |
| Rheumatoid arthritis                                       | 1.4<br>(1.3 to 1.6)                     | 0.1<br>(0.1 to 0.1)                      | 0.3<br>(0.2 to 0.4)                | 18.5<br>(9.6 to 27.8)                             | 0.4<br>(-7.3 to 8.4)                                |
| Osteoarthritis                                             | 23.0<br>(21.7 to 24.4)                  | 1.1<br>(1.0 to 1.2)                      | 0.8<br>(0.5 to 1.2)                | 25.1<br>(21.2 to 28.7)                            | 1.1<br>(-2.1 to 4.1)                                |
| Low back and neck pain                                     | 56.5<br>(53.0 to 60.6)                  | 24.4<br>(21.5 to 27.4)                   | 6.8<br>(4.8 to 9.0)                | 11.9<br>(4.2 to 19.6)                             | -1.5<br>(-8.4 to 5.1)                               |
| Low back pain                                              | 43.0<br>(38.4 to 48.5)                  | 20.9<br>(18.1 to 23.9)                   | 4.9<br>(3.4 to 6.5)                | 11.0<br>(0.5 to 21.5)                             | -2.2<br>(-11.5 to 7.0)                              |
| Neck pain                                                  | 19.8<br>(17.1 to 22.7)                  | 3.5<br>(3.1 to 4.1)                      | 2.0<br>(1.3 to 2.8)                | 14.3<br>(11.5 to 17.2)                            | 0.3<br>(-1.4 to 2.1)                                |
| Gout                                                       | 3.2<br>(2.9 to 3.7)                     | 0.5<br>(0.5 to 0.6)                      | 0.1<br>(0.1 to 0.1)                | 18.6<br>(6.3 to 31.4)                             | -1.0<br>(-11.3 to 9.7)                              |
| Other musculoskeletal disorders                            | 11.6<br>(9.1 to 14.6)                   | 14.8<br>(12.3 to 17.9)                   | 1.0<br>(0.7 to 1.4)                | 12.0<br>(1.3 to 23.7)                             | -0.5<br>(-9.7 to 9.3)                               |
| <b>Other non-communicable diseases</b>                     | <b>264.2</b><br><b>(260.2 to 268.1)</b> | <b>827.8†</b><br><b>(790.8 to 868.2)</b> | <b>7.7</b><br><b>(5.3 to 10.9)</b> | <b>13.8</b><br><b>(12.2 to 15.3)</b>              | <b>0.4</b><br><b>(-0.8 to 1.6)</b>                  |
| Congenital anomalies                                       | 4.6<br>(4.4 to 4.9)                     | --                                       | 0.5<br>(0.3 to 0.6)                | 8.7<br>(4.4 to 13.4)                              | 0.9<br>(-3.2 to 5.2)                                |
| Neural tube defects                                        | 0.2<br>(0.1 to 0.2)                     | --                                       | < 0.05<br>(< 0.05 to 0.1)          | 10.6<br>(-4.5 to 29.0)                            | 1.8<br>(-12.1 to 18.9)                              |
| Congenital heart anomalies                                 | 1.3<br>(1.1 to 1.4)                     | --                                       | 0.1<br>(< 0.05 to 0.1)             | 9.8<br>(0.5 to 19.8)                              | 2.0<br>(-6.8 to 11.3)                               |
| Orofacial clefts                                           | 0.2<br>(0.2 to 0.2)                     | --                                       | < 0.05<br>(< 0.05 to < 0.05)       | 6.1<br>(-5.4 to 19.7)                             | -2.0<br>(-12.6 to 10.5)                             |
| Down's syndrome                                            | 0.2<br>(0.2 to 0.2)                     | --                                       | < 0.05<br>(< 0.05 to < 0.05)       | 7.6<br>(-1.3 to 18.1)                             | 2.4<br>(-6.7 to 12.3)                               |
| Turner syndrome                                            | 0.1<br>(0.1 to 0.1)                     | --                                       | < 0.05<br>(< 0.05 to < 0.05)       | 5.1<br>(-22.6 to 47.3)                            | -0.1<br>(-28.4 to 40.7)                             |
| Klinefelter syndrome                                       | 0.3<br>(0.2 to 0.3)                     | --                                       | < 0.05<br>(< 0.05 to < 0.05)       | 4.3<br>(-13.2 to 24.6)                            | -0.0<br>(-16.8 to 19.7)                             |



| Cause                                         | Prevalence in thousands (95% UI)      | Incidence in thousands (95% UI)       | YLDs in thousands (95% UI)        |                                                   |                                                     |
|-----------------------------------------------|---------------------------------------|---------------------------------------|-----------------------------------|---------------------------------------------------|-----------------------------------------------------|
|                                               | 2016 counts                           | 2016 counts                           | 2016 counts                       | Percentage change in counts between 2006 and 2016 | Percentage change in age-standardised rates between |
| Other chromosomal abnormalities               | 0.5<br>(0.4 to 0.6)                   | --                                    | < 0.05<br>(< 0.05 to 0.1)         | 2.7<br>(-8.6 to 15.9)                             | 1.4<br>(-10.0 to 14.3)                              |
| Congenital musculoskeletal and limb anomalies | 1.1<br>(1.0 to 1.2)                   | --                                    | 0.1<br>(0.1 to 0.2)               | 8.2<br>(0.1 to 17.0)                              | -0.9<br>(-8.3 to 7.3)                               |
| Urogenital congenital anomalies               | 0.5<br>(0.4 to 0.5)                   | --                                    | < 0.05<br>(< 0.05 to < 0.05)      | 5.9<br>(-1.9 to 14.4)                             | 1.0<br>(-6.7 to 9.7)                                |
| Digestive congenital anomalies                | 0.8<br>(0.7 to 0.9)                   | --                                    | < 0.05<br>(< 0.05 to 0.1)         | 9.4<br>(-1.4 to 22.0)                             | 0.9<br>(-9.2 to 12.9)                               |
| Other congenital anomalies                    | 0.4<br>(0.2 to 0.8)                   | --                                    | 0.1<br>(< 0.05 to 0.1)            | 11.9<br>(1.9 to 23.6)                             | 2.1<br>(-7.5 to 12.2)                               |
| Skin and subcutaneous diseases                | 119.0<br>(116.6 to 121.3)             | 243.0<br>(229.8 to 257.9)             | 3.3<br>(2.2 to 4.7)               | 8.6<br>(6.6 to 10.5)                              | 1.1<br>(-0.8 to 2.8)                                |
| Dermatitis                                    | 24.4<br>(23.1 to 25.7)                | 23.0<br>(19.9 to 26.7)                | 0.9<br>(0.6 to 1.6)               | 6.7<br>(3.2 to 10.3)                              | -0.5<br>(-4.0 to 3.0)                               |
| Psoriasis                                     | 6.7<br>(6.3 to 7.2)                   | 0.6<br>(0.6 to 0.7)                   | 0.6<br>(0.4 to 0.8)               | 15.8<br>(9.7 to 21.9)                             | 3.2<br>(-2.3 to 8.7)                                |
| Cellulitis                                    | 0.3<br>(0.2 to 0.3)                   | 6.8<br>(6.4 to 7.1)                   | < 0.05<br>(< 0.05 to < 0.05)      | 11.7<br>(-4.5 to 31.2)                            | 0.3<br>(-14.9 to 18.4)                              |
| Pyoderma                                      | 1.1<br>(1.1 to 1.1)                   | 26.2<br>(25.3 to 27.1)                | < 0.05<br>(< 0.05 to < 0.05)      | 14.3<br>(7.5 to 21.5)                             | 0.6<br>(-5.6 to 7.0)                                |
| Scabies                                       | 0.3<br>(0.2 to 0.4)                   | 0.9<br>(0.7 to 1.3)                   | < 0.05<br>(< 0.05 to < 0.05)      | 5.7<br>(-5.2 to 18.7)                             | 0.1<br>(-10.3 to 12.1)                              |
| Fungal skin diseases                          | 23.1<br>(20.6 to 25.6)                | 89.4<br>(78.0 to 101.7)               | 0.1<br>(0.1 to 0.3)               | 15.8<br>(13.8 to 18.0)                            | 0.0<br>(-1.2 to 1.2)                                |
| Viral skin diseases                           | 9.8<br>(8.4 to 11.3)                  | 12.8<br>(11.0 to 14.9)                | 0.3<br>(0.2 to 0.5)               | 7.1<br>(3.9 to 10.3)                              | 0.3<br>(-2.3 to 3.1)                                |
| Acne vulgaris                                 | 34.4<br>(31.6 to 37.3)                | 26.5<br>(21.5 to 34.0)                | 0.9<br>(0.6 to 1.3)               | 2.8<br>(-0.7 to 6.2)                              | 1.7<br>(-1.9 to 5.0)                                |
| Alopecia areata                               | 1.0<br>(1.0 to 1.0)                   | 1.8<br>(1.7 to 1.8)                   | < 0.05<br>(< 0.05 to < 0.05)      | 8.6<br>(-0.0 to 17.2)                             | 0.1<br>(-7.7 to 8.3)                                |
| Pruritus                                      | 3.0<br>(2.6 to 3.4)                   | 2.4<br>(2.1 to 2.7)                   | < 0.05<br>(< 0.05 to 0.1)         | 13.5<br>(7.4 to 20.0)                             | 0.5<br>(-4.6 to 5.9)                                |
| Urticaria                                     | 2.1<br>(1.9 to 2.4)                   | 3.7<br>(3.3 to 4.2)                   | 0.1<br>(0.1 to 0.2)               | 8.3<br>(1.9 to 15.2)                              | 0.4<br>(-5.5 to 6.6)                                |
| Decubitus ulcer                               | 0.3<br>(0.2 to 0.3)                   | 1.0<br>(0.9 to 1.2)                   | < 0.05<br>(< 0.05 to 0.1)         | 25.9<br>(11.3 to 42.2)                            | 4.3<br>(-6.8 to 17.2)                               |
| Other skin and subcutaneous diseases          | 37.6<br>(36.6 to 38.6)                | 47.9<br>(46.2 to 49.6)                | 0.2<br>(0.1 to 0.4)               | 19.3<br>(16.9 to 21.7)                            | 2.7<br>(0.7 to 4.8)                                 |
| Sense organ diseases                          | 82.0<br>(76.5 to 86.8)                | 34.5+<br>(32.5 to 36.6)               | 2.5<br>(1.7 to 3.6)               | 20.1<br>(17.0 to 23.3)                            | -0.6<br>(-2.9 to 1.9)                               |
| Glaucoma                                      | 0.2<br>(0.2 to 0.2)                   | --                                    | < 0.05<br>(< 0.05 to < 0.05)      | 27.9<br>(10.3 to 47.7)                            | -0.5<br>(-14.3 to 15.3)                             |
| Cataract                                      | 0.8<br>(0.7 to 0.9)                   | --                                    | 0.1<br>(< 0.05 to 0.1)            | 19.0<br>(9.5 to 28.4)                             | -4.7<br>(-12.7 to 3.2)                              |
| Macular degeneration                          | 0.3<br>(0.2 to 0.3)                   | --                                    | < 0.05<br>(< 0.05 to < 0.05)      | 30.2<br>(16.6 to 45.2)                            | 0.3<br>(-10.1 to 12.4)                              |
| Refraction and accommodation disorders        | 19.6<br>(18.0 to 21.2)                | --                                    | 0.3<br>(0.2 to 0.5)               | 10.9<br>(6.4 to 16.1)                             | -3.5<br>(-7.2 to 0.7)                               |
| Age-related and other hearing loss            | 66.8<br>(58.4 to 75.1)                | --                                    | 1.6<br>(1.0 to 2.3)               | 22.2<br>(17.4 to 26.9)                            | -0.1<br>(-3.7 to 3.5)                               |
| Other vision loss                             | 0.7<br>(0.7 to 0.8)                   | --                                    | 0.1<br>(< 0.05 to 0.1)            | 18.7<br>(8.9 to 30.1)                             | 0.2<br>(-7.7 to 9.9)                                |
| Other sense organ diseases                    | 12.0<br>(11.1 to 13.0)                | 34.5<br>(32.5 to 36.6)                | 0.4<br>(0.2 to 0.6)               | 20.3<br>(15.9 to 24.7)                            | 1.1<br>(-2.6 to 4.9)                                |
| Oral disorders                                | 207.4<br>(200.2 to 213.8)             | 550.4+<br>(515.8 to 588.4)            | 1.4<br>(0.9 to 2.2)               | 17.7<br>(14.8 to 20.8)                            | -0.3<br>(-2.1 to 1.7)                               |
| Caries of deciduous teeth                     | 15.4<br>(10.6 to 20.6)                | 61.0<br>(36.7 to 88.3)                | < 0.05<br>(< 0.05 to < 0.05)      | 4.8<br>(-5.8 to 15.6)                             | -1.0<br>(-11.0 to 9.4)                              |
| Caries of permanent teeth                     | 164.4<br>(158.0 to 170.8)             | 481.5<br>(456.2 to 508.2)             | 0.2<br>(0.1 to 0.3)               | 7.5<br>(4.8 to 9.9)                               | -1.7<br>(-4.3 to 0.6)                               |
| Periodontal disease                           | 49.1<br>(35.7 to 63.8)                | 5.7<br>(4.2 to 7.2)                   | 0.3<br>(0.1 to 0.7)               | 13.9<br>(7.2 to 21.2)                             | -0.2<br>(-5.8 to 4.7)                               |
| Edentulism and severe tooth loss              | 27.5<br>(23.6 to 31.5)                | 2.2<br>(1.8 to 2.6)                   | 0.8<br>(0.5 to 1.1)               | 24.0<br>(20.3 to 28.2)                            | -0.1<br>(-2.9 to 3.1)                               |
| Other oral disorders                          | 6.3<br>(6.1 to 6.6)                   | --                                    | 0.2<br>(0.1 to 0.3)               | 10.7<br>(7.4 to 14.1)                             | 0.3<br>(-2.8 to 3.3)                                |
| <b>Injuries</b>                               | <b>96.3</b><br><b>(89.8 to 104.0)</b> | <b>32.6+</b><br><b>(30.6 to 35.0)</b> | <b>3.0</b><br><b>(2.0 to 4.2)</b> | <b>18.4</b><br><b>(16.8 to 20.1)</b>              | <b>2.9</b><br><b>(1.5 to 4.2)</b>                   |
| <b>Transport injuries</b>                     | <b>13.6</b><br><b>(12.6 to 14.6)</b>  | <b>3.3</b><br><b>(3.0 to 3.7)</b>     | <b>0.6</b><br><b>(0.4 to 0.9)</b> | <b>9.0</b><br><b>(7.0 to 11.0)</b>                | <b>-4.8</b><br><b>(-6.7 to -2.8)</b>                |
| Road injuries                                 | 11.2<br>(10.3 to 12.0)                | 2.9<br>(2.6 to 3.3)                   | 0.5<br>(0.3 to 0.7)               | 9.7<br>(7.6 to 11.9)                              | -4.1<br>(-6.0 to -2.0)                              |
| Pedestrian road injuries                      | 1.8<br>(1.6 to 2.1)                   | 0.3<br>(0.2 to 0.4)                   | 0.1<br>(0.1 to 0.1)               | 22.6<br>(20.3 to 25.2)                            | 7.4<br>(5.2 to 9.7)                                 |
| Cyclist road injuries                         | 3.2<br>(2.7 to 3.8)                   | 1.1<br>(0.9 to 1.2)                   | 0.1<br>(0.1 to 0.2)               | 13.6<br>(11.6 to 15.8)                            | -1.0<br>(-2.9 to 1.0)                               |
| Motorcyclist road injuries                    | 2.0<br>(1.7 to 2.4)                   | 0.3<br>(0.3 to 0.4)                   | 0.1<br>(0.1 to 0.1)               | 16.7<br>(14.2 to 19.4)                            | 2.4<br>(0.1 to 4.8)                                 |
| Motor vehicle road injuries                   | 3.2<br>(2.7 to 3.7)                   | 1.0<br>(0.9 to 1.2)                   | 0.2<br>(0.1 to 0.2)               | -2.8<br>(-4.8 to -0.5)                            | -15.0<br>(-16.9 to -12.9)                           |
| Other road injuries                           | 0.9<br>(0.7 to 1.0)                   | 0.2<br>(0.2 to 0.3)                   | < 0.05<br>(< 0.05 to < 0.05)      | 9.0<br>(6.3 to 11.7)                              | -4.1<br>(-6.5 to -1.5)                              |
| Other transport injuries                      | 2.4<br>(2.0 to 2.9)                   | 0.4<br>(0.4 to 0.4)                   | 0.1<br>(0.1 to 0.1)               | 4.9<br>(3.1 to 6.6)                               | -9.3<br>(-10.8 to -7.8)                             |
| <b>Unintentional injuries</b>                 | <b>78.2</b><br><b>(72.0 to 85.6)</b>  | <b>27.7</b><br><b>(25.7 to 30.0)</b>  | <b>2.2</b><br><b>(1.5 to 3.2)</b> | <b>22.0</b><br><b>(20.5 to 23.6)</b>              | <b>5.8</b><br><b>(4.4 to 7.1)</b>                   |
| Falls                                         | 39.9<br>(34.7 to 45.6)                | 14.5<br>(12.8 to 16.4)                | 1.4<br>(0.9 to 1.9)               | 22.5<br>(20.5 to 24.4)                            | 5.6<br>(3.9 to 7.2)                                 |
| Drowning                                      | 0.2<br>(0.1 to 0.2)                   | < 0.05<br>(< 0.05 to < 0.05)          | < 0.05<br>(< 0.05 to < 0.05)      | 25.0<br>(18.3 to 30.9)                            | 10.3<br>(4.3 to 15.8)                               |
| Fire, heat, and hot substances                | 7.2<br>(6.1 to 8.6)                   | 0.4<br>(0.4 to 0.5)                   | 0.1<br>(0.1 to 0.2)               | 20.8<br>(17.8 to 23.6)                            | 6.9<br>(4.3 to 9.6)                                 |
| Poisonings                                    | 0.3<br>(0.2 to 0.4)                   | 0.3<br>(0.2 to 0.3)                   | < 0.05<br>(< 0.05 to < 0.05)      | 15.5<br>(6.0 to 26.6)                             | 5.5<br>(-4.0 to 15.9)                               |
| Exposure to mechanical forces                 | 16.5<br>(13.8 to 21.0)                | 4.4<br>(3.7 to 5.1)                   | 0.3<br>(0.2 to 0.5)               | 22.2<br>(20.5 to 23.8)                            | 7.1<br>(5.6 to 8.6)                                 |
| Unintentional firearm injuries                | 0.5<br>(0.4 to 0.6)                   | 0.1<br>(< 0.05 to 0.1)                | < 0.05<br>(< 0.05 to < 0.05)      | 22.1<br>(20.0 to 24.3)                            | 6.9<br>(5.1 to 8.7)                                 |
| Unintentional suffocation                     | 0.2<br>(0.2 to 0.2)                   | < 0.05<br>(< 0.05 to 0.1)             | < 0.05<br>(< 0.05 to < 0.05)      | 23.9<br>(21.9 to 26.1)                            | 8.8<br>(6.9 to 10.6)                                |
| Other exposure to mechanical forces           | 15.8<br>(13.1 to 20.2)                | 4.3<br>(3.6 to 5.0)                   | 0.3<br>(0.2 to 0.4)               | 22.2<br>(20.5 to 23.8)                            | 7.1<br>(5.6 to 8.6)                                 |

| Cause                                                                               | Prevalence in thousands (95% UI) | Incidence in thousands (95% UI)                | YLDs in thousands (95% UI)              |                                                   |                                                     |
|-------------------------------------------------------------------------------------|----------------------------------|------------------------------------------------|-----------------------------------------|---------------------------------------------------|-----------------------------------------------------|
|                                                                                     | 2016 counts                      | 2016 counts                                    | 2016 counts                             | Percentage change in counts between 2006 and 2016 | Percentage change in age-standardised rates between |
| Adverse effects of medical treatment                                                | 0.1<br>(0.1 to 0.1)              | 1.5<br>(1.3 to 1.7)                            | < 0.05<br>(< 0.05 to < 0.05)            | 17.4<br>(11.9 to 22.9)                            | 2.2<br>(-1.7 to 6.0)                                |
| Animal contact                                                                      | 1.2<br>(1.0 to 1.3)              | 0.7<br>(0.6 to 0.8)                            | < 0.05<br>(< 0.05 to < 0.05)            | 11.2<br>(7.2 to 15.3)                             | -2.0<br>(-5.6 to 1.8)                               |
| Venomous animal contact                                                             | 0.2<br>(0.1 to 0.2)              | 0.2<br>(0.2 to 0.3)                            | < 0.05<br>(< 0.05 to < 0.05)            | 9.2<br>(1.2 to 18.6)                              | -1.2<br>(-9.0 to 7.3)                               |
| Non-venomous animal contact                                                         | 1.0<br>(0.8 to 1.2)              | 0.5<br>(0.4 to 0.6)                            | < 0.05<br>(< 0.05 to < 0.05)            | 12.7<br>(10.9 to 14.6)                            | -2.6<br>(-4.2 to -0.9)                              |
| Foreign body                                                                        | 1.8<br>(1.6 to 2.2)              | 1.4<br>(1.2 to 1.6)                            | 0.1<br>(< 0.05 to 0.1)                  | 18.0<br>(16.1 to 19.9)                            | 3.7<br>(2.1 to 5.4)                                 |
| Pulmonary aspiration and foreign body in airway                                     | 0.3<br>(0.2 to 0.3)              | 0.3<br>(0.3 to 0.4)                            | < 0.05<br>(< 0.05 to < 0.05)            | 20.5<br>(18.1 to 22.9)                            | 4.4<br>(2.4 to 6.5)                                 |
| Foreign body in eyes                                                                | 0.2<br>(0.1 to 0.3)              | 0.8<br>(0.6 to 1.0)                            | < 0.05<br>(< 0.05 to < 0.05)            | 16.9<br>(13.4 to 21.4)                            | 4.9<br>(1.7 to 8.5)                                 |
| Foreign body in other body part                                                     | 1.4<br>(1.1 to 1.7)              | 0.3<br>(0.2 to 0.4)                            | < 0.05<br>(< 0.05 to 0.1)               | 17.8<br>(16.0 to 19.8)                            | 3.1<br>(1.5 to 4.8)                                 |
| Environmental heat and cold exposure                                                | 0.8<br>(0.7 to 0.9)              | 0.2<br>(0.2 to 0.2)                            | < 0.05<br>(< 0.05 to < 0.05)            | 17.8<br>(13.9 to 22.2)                            | -0.4<br>(-3.9 to 3.3)                               |
| Other unintentional injuries                                                        | 10.3<br>(8.6 to 12.2)            | 4.4<br>(3.7 to 5.2)                            | 0.2<br>(0.2 to 0.4)                     | 23.3<br>(21.7 to 24.9)                            | 6.5<br>(5.2 to 7.9)                                 |
| <b>Self-harm and interpersonal violence</b>                                         | <b>7.5<br/>(6.8 to 8.1)</b>      | <b>1.5†<br/>(1.4 to 1.7)</b>                   | <b>0.1<br/>(0.1 to 0.2)</b>             | <b>12.9<br/>(10.3 to 15.2)</b>                    | <b>1.2<br/>(-1.0 to 3.2)</b>                        |
| Self-harm                                                                           | 0.8<br>(0.7 to 1.0)              | 0.7<br>(0.6 to 0.8)                            | < 0.05<br>(< 0.05 to < 0.05)            | 10.0<br>(4.1 to 15.9)                             | -3.4<br>(-8.5 to 2.0)                               |
| Self-harm by firearm                                                                | < 0.05<br>(< 0.05 to < 0.05)     | < 0.05<br>(< 0.05 to < 0.05)                   | < 0.05<br>(< 0.05 to < 0.05)            | 11.5<br>(8.7 to 14.0)                             | -1.1<br>(-3.4 to 1.3)                               |
| Self-harm by other specified means                                                  | 0.8<br>(0.7 to 1.0)              | 0.7<br>(0.6 to 0.8)                            | < 0.05<br>(< 0.05 to < 0.05)            | 10.0<br>(4.1 to 15.9)                             | -3.4<br>(-8.5 to 2.1)                               |
| Interpersonal violence                                                              | 6.6<br>(6.0 to 7.3)              | 0.8†<br>(0.7 to 1.0)                           | 0.1<br>(0.1 to 0.1)                     | 13.8<br>(11.5 to 16.1)                            | 2.6<br>(0.5 to 4.5)                                 |
| Assault by firearm                                                                  | 0.2<br>(0.1 to 0.2)              | < 0.05<br>(< 0.05 to < 0.05)                   | < 0.05<br>(< 0.05 to < 0.05)            | 26.1<br>(23.9 to 28.4)                            | 11.0<br>(9.1 to 13.1)                               |
| Assault by sharp object                                                             | 0.5<br>(0.4 to 0.6)              | 0.1<br>(0.1 to 0.2)                            | < 0.05<br>(< 0.05 to < 0.05)            | 20.5<br>(18.5 to 22.6)                            | 6.4<br>(4.5 to 8.4)                                 |
| Sexual violence                                                                     | 4.0<br>(3.4 to 4.5)              | --                                             | < 0.05<br>(< 0.05 to < 0.05)            | 3.0<br>(-0.5 to 6.7)                              | -2.6<br>(-6.1 to 1.2)                               |
| Assault by other means                                                              | 2.0<br>(1.6 to 2.5)              | 0.7<br>(0.5 to 0.8)                            | 0.1<br>(< 0.05 to 0.1)                  | 19.3<br>(17.3 to 21.4)                            | 5.4<br>(3.6 to 7.3)                                 |
| <b>Forces of nature, conflict and terrorism, and executions and police conflict</b> | <b>1.0<br/>(0.5 to 1.5)</b>      | <b>&lt; 0.05†<br/>(&lt; 0.05 to &lt; 0.05)</b> | <b>&lt; 0.05<br/>(&lt; 0.05 to 0.1)</b> | <b>-14.7<br/>(-34.4 to -6.8)</b>                  | <b>-26.7<br/>(-44.3 to -19.5)</b>                   |
| Exposure to forces of nature                                                        | 0.9<br>(0.5 to 1.4)              | --                                             | < 0.05<br>(< 0.05 to < 0.05)            | -17.6<br>(-38.2 to -9.3)                          | -29.6<br>(-48.0 to -22.0)                           |
| Conflict and terrorism                                                              | --                               | --                                             | --                                      | --                                                | --                                                  |
| Executions and police conflict                                                      | 0.1<br>(< 0.05 to 0.1)           | < 0.05<br>(< 0.05 to < 0.05)                   | < 0.05<br>(< 0.05 to < 0.05)            | 23.1<br>(18.4 to 34.4)                            | 10.6<br>(6.1 to 22.6)                               |
| <b>Impairments</b>                                                                  | --                               | --                                             | --                                      | --                                                | --                                                  |
| Anaemia                                                                             | 23.1<br>(15.5 to 35.8)           | --                                             | 0.4<br>(0.2 to 0.7)                     | 8.9<br>(-9.5 to 32.9)                             | -1.1<br>(-18.3 to 21.6)                             |
| Developmental intellectual disability                                               | 5.5<br>(4.3 to 7.0)              | --                                             | 0.7<br>(0.5 to 0.9)                     | 3.8<br>(-1.0 to 8.7)                              | -3.5<br>(-8.2 to 1.2)                               |
| Epilepsy                                                                            | 1.5<br>(0.9 to 2.2)              | --                                             | 0.4<br>(0.2 to 0.7)                     | 3.2<br>(-47.4 to 103.3)                           | -5.6<br>(-51.1 to 84.6)                             |
| Guillain-Barre syndrome                                                             | < 0.05<br>(< 0.05 to < 0.05)     | --                                             | < 0.05<br>(< 0.05 to < 0.05)            | 14.1<br>(10.6 to 17.7)                            | -0.1<br>(-0.2 to -0.0)                              |
| Hearing loss                                                                        | 69.6<br>(61.1 to 77.8)           | --                                             | 1.7<br>(1.1 to 2.5)                     | 20.6<br>(16.2 to 25.1)                            | -0.5<br>(-3.8 to 3.1)                               |
| Heart failure                                                                       | 5.0<br>(4.4 to 5.7)              | --                                             | 0.6<br>(0.4 to 0.7)                     | 13.3<br>(5.6 to 20.5)                             | -10.0<br>(-16.1 to -4.3)                            |
| Infertility                                                                         | 2.9<br>(2.2 to 3.9)              | --                                             | < 0.05<br>(< 0.05 to < 0.05)            | 1.8<br>(-4.4 to 7.9)                              | 0.4<br>(-6.1 to 6.5)                                |
| Pelvic inflammatory disease                                                         | < 0.05<br>(< 0.05 to < 0.05)     | --                                             | < 0.05<br>(< 0.05 to < 0.05)            | -15.6<br>(-32.9 to 5.7)                           | -18.2<br>(-36.0 to 3.6)                             |
| Vision loss                                                                         | 22.2<br>(20.5 to 23.9)           | --                                             | 0.7<br>(0.5 to 1.0)                     | 10.1<br>(4.9 to 14.5)                             | -5.0<br>(-9.3 to -1.4)                              |

We did not calculate incidence for the nine impairments, certain NTDs, and causes with only birth prevalence. Blank cells mean that no estimate is available.

† Incidence for aggregate causes represents the sum of the incidence of the causes below the aggregate.

‡ Incidence estimates for stroke represent first-ever stroke only.

^ Incidence of HIV/AIDS represents new infections of HIV only and does not include new infections of Tuberculosis in HIV positive cases.

SR Table 14: Prevalence, incidence, and YLDs for 2016, percentage change of YLD counts and percentage change of age-standardised YLD rates between 2006 and 2016 by cause and impairments, for all ages, India.

| Cause                                                                                | Prevalence in thousands (95% UI)                   | Incidence in thousands (95% UI)                     | YLDs in thousands (95% UI)                   |                                                   |                                                     |
|--------------------------------------------------------------------------------------|----------------------------------------------------|-----------------------------------------------------|----------------------------------------------|---------------------------------------------------|-----------------------------------------------------|
|                                                                                      | 2016 counts                                        | 2016 counts                                         | 2016 counts                                  | Percentage change in counts between 2006 and 2016 | Percentage change in age-standardised rates between |
| <b>All causes</b>                                                                    | <b>1,296,043.7</b><br>(1,294,704.1 to 1,298,549.2) | <b>7,703,719.6†</b><br>(7,346,296.7 to 8,106,460.6) | <b>153,012.1</b><br>(114,642.3 to 197,878.6) | <b>18.3</b><br>(17.5 to 19.2)                     | <b>-1.4</b><br>(-2.0 to -0.8)                       |
| <b>Communicable, maternal, neonatal, and nutritional disorders</b>                   | <b>1,084,095.4</b><br>(1,078,126.5 to 1,090,147.5) | <b>4,520,537.5†</b><br>(4,183,563.9 to 4,873,643.2) | <b>32,726.7</b><br>(23,482.4 to 44,253.8)    | <b>9.3</b><br>(6.7 to 12.4)                       | <b>-1.5</b><br>(-3.9 to 1.3)                        |
| <b>HIV/AIDS and tuberculosis</b>                                                     | <b>535,850.3</b><br>(509,021.4 to 549,634.3)       | <b>3,111.7†</b><br>(2,880.6 to 3,399.8)             | <b>1,230.9</b><br>(844.2 to 1,650.6)         | <b>-0.8</b><br>(-8.6 to 5.6)                      | <b>-19.6</b><br>(-25.3 to -14.7)                    |
| Tuberculosis                                                                         | 516,224.2<br>(497,559.5 to 535,500.8)              | 2,979.9†<br>(2,756.8 to 3,249.0)                    | 937.6<br>(626.1 to 1,262.3)                  | 8.2<br>(5.1 to 11.5)                              | -14.4<br>(-16.3 to -12.2)                           |
| Drug-susceptible tuberculosis                                                        | 3,005.8<br>(2,719.5 to 3,335.3)                    | 2,862.0<br>(2,644.1 to 3,117.8)                     | 899.7<br>(599.0 to 1,211.7)                  | 7.9<br>(4.9 to 11.3)                              | -14.5<br>(-16.5 to -12.3)                           |
| Multidrug-resistant tuberculosis without extensive drug resistance                   | 121.0<br>(107.1 to 135.9)                          | 115.1<br>(104.2 to 126.9)                           | 37.0<br>(25.0 to 50.5)                       | 11.4<br>(2.0 to 21.2)                             | -11.8<br>(-19.1 to -4.4)                            |
| Extensively drug-resistant tuberculosis                                              | 3.0<br>(2.6 to 3.3)                                | 2.8<br>(2.6 to 3.1)                                 | 1.0<br>(0.7 to 1.4)                          | 193.3<br>(175.2 to 213.5)                         | 131.0<br>(117.0 to 146.2)                           |
| Latent tuberculosis infection                                                        | 513,094.5<br>(494,348.6 to 532,430.8)              | --                                                  | --                                           | --                                                | --                                                  |
| HIV/AIDS                                                                             | 2,275.8<br>(2,051.2 to 2,509.8)                    | 131.8^<br>(65.6 to 212.9)                           | 293.3<br>(195.1 to 420.8)                    | -21.7<br>(-35.9 to -3.8)                          | -34.2<br>(-46.8 to -17.6)                           |
| Drug-susceptible HIV/AIDS - Tuberculosis                                             | 92.5<br>(57.2 to 147.3)                            | 90.0<br>(54.4 to 142.8)                             | 36.7<br>(19.6 to 62.9)                       | -39.9<br>(-46.1 to -33.4)                         | -48.0<br>(-53.4 to -42.4)                           |
| Multidrug-resistant HIV/AIDS - Tuberculosis without extensive drug resistance        | 4.6<br>(2.7 to 7.5)                                | 4.4<br>(2.6 to 7.3)                                 | 1.9<br>(1.0 to 3.4)                          | -38.2<br>(-44.8 to -31.4)                         | -46.6<br>(-52.3 to -40.7)                           |
| Extensively drug-resistant HIV/AIDS - Tuberculosis                                   | 0.1<br>(0.1 to 0.2)                                | 0.1<br>(0.1 to 0.2)                                 | < 0.05<br>(< 0.05 to 0.1)                    | 63.0<br>(45.5 to 80.8)                            | 40.9<br>(25.7 to 56.5)                              |
| HIV/AIDS resulting in other diseases                                                 | 2,178.6<br>(1,954.6 to 2,430.5)                    | 131.8<br>(65.6 to 212.9)                            | 254.6<br>(168.0 to 377.8)                    | -17.9<br>(-35.4 to 7.1)                           | -31.5<br>(-46.5 to -8.8)                            |
| <b>Diarrhoea, lower respiratory infections, and other common infectious diseases</b> | <b>84,090.4</b><br>(82,270.8 to 85,708.6)          | <b>3,937,039.8†</b><br>(3,622,837.7 to 4,295,190.3) | <b>4,468.2</b><br>(3,157.8 to 6,073.4)       | <b>3.8</b><br>(2.1 to 5.3)                        | <b>-8.1</b><br>(-9.6 to -6.6)                       |
| Diarrhoeal diseases                                                                  | 16,715.1<br>(15,774.7 to 17,699.4)                 | 1,133,257.3<br>(1,071,395.3 to 1,198,805.7)         | 1,836.4<br>(1,281.5 to 2,491.0)              | 2.6<br>(0.8 to 4.6)                               | -11.3<br>(-12.7 to -10.0)                           |
| Intestinal infectious diseases                                                       | 461.7<br>(423.0 to 504.5)                          | 8,907.1†<br>(7,961.9 to 9,985.1)                    | 69.7<br>(46.7 to 96.9)                       | -22.4<br>(-27.9 to -15.7)                         | -27.2<br>(-31.8 to -21.7)                           |
| Typhoid fever                                                                        | 415.3<br>(367.2 to 471.4)                          | 6,567.2<br>(5,800.8 to 7,429.3)                     | 62.5<br>(41.7 to 86.2)                       | -22.7<br>(-28.5 to -15.3)                         | -27.1<br>(-32.3 to -21.3)                           |
| Paratyphoid fever                                                                    | 102.6<br>(91.9 to 115.8)                           | 2,339.9<br>(2,098.2 to 2,623.0)                     | 6.5<br>(4.2 to 9.3)                          | -16.3<br>(-22.6 to -9.6)                          | -24.5<br>(-29.5 to -19.2)                           |
| Other intestinal infectious diseases                                                 | --                                                 | --                                                  | 0.7<br>(0.5 to 0.9)                          | -46.5<br>(-50.9 to -41.7)                         | -45.1<br>(-48.8 to -41.2)                           |
| Lower respiratory infections                                                         | 1,817.5<br>(1,751.6 to 1,890.2)                    | 68,207.2<br>(64,660.4 to 71,728.7)                  | 108.2<br>(72.3 to 151.4)                     | 58.6<br>(48.8 to 70.1)                            | 54.7<br>(47.0 to 63.7)                              |
| Upper respiratory infections                                                         | 34,510.5<br>(30,463.0 to 38,987.1)                 | 2,579,174.7<br>(2,264,769.1 to 2,921,776.3)         | 855.9<br>(503.9 to 1,346.3)                  | 17.1<br>(14.8 to 19.3)                            | 4.7<br>(2.5 to 6.8)                                 |
| Otitis media                                                                         | 26,900.9<br>(24,147.4 to 29,833.6)                 | 112,038.2<br>(90,839.6 to 138,192.2)                | 790.5<br>(491.6 to 1,186.5)                  | 2.6<br>(-0.4 to 5.7)                              | -4.0<br>(-6.9 to -1.0)                              |
| Meningitis                                                                           | 3,518.8<br>(3,059.8 to 4,051.5)                    | 505.0<br>(445.5 to 582.3)                           | 355.4<br>(251.4 to 465.9)                    | 1.3<br>(-2.0 to 4.7)                              | -11.4<br>(-14.3 to -8.4)                            |
| Pneumococcal meningitis                                                              | 1,850.7<br>(1,545.6 to 2,217.7)                    | 160.5<br>(133.1 to 191.2)                           | 174.6<br>(122.2 to 231.3)                    | 7.5<br>(2.6 to 12.3)                              | -6.7<br>(-10.7 to -2.6)                             |
| H influenzae type B meningitis                                                       | 367.9<br>(289.2 to 465.6)                          | 55.8<br>(42.0 to 74.7)                              | 44.1<br>(30.4 to 59.0)                       | -50.1<br>(-53.4 to -47.1)                         | -55.5<br>(-58.5 to -52.8)                           |
| Meningococcal infection                                                              | 215.0<br>(160.1 to 277.9)                          | 52.4<br>(40.7 to 66.2)                              | 24.4<br>(16.5 to 33.3)                       | 5.4<br>(2.1 to 8.6)                               | -8.6<br>(-11.6 to -5.7)                             |
| Other meningitis                                                                     | 1,085.2<br>(842.8 to 1,365.4)                      | 236.3<br>(202.6 to 276.9)                           | 112.3<br>(77.7 to 153.5)                     | 46.0<br>(42.1 to 49.8)                            | 26.2<br>(22.7 to 29.7)                              |
| Encephalitis                                                                         | 3,602.2<br>(2,352.2 to 5,315.1)                    | 1,823.1<br>(1,674.0 to 1,974.9)                     | 380.2<br>(270.9 to 495.9)                    | -4.6<br>(-7.8 to -0.8)                            | -19.1<br>(-21.8 to -16.1)                           |
| Diphtheria                                                                           | < 0.05<br>(< 0.05 to < 0.05)                       | 0.2<br>(0.2 to 0.2)                                 | < 0.05<br>(< 0.05 to < 0.05)                 | -83.5<br>(-87.7 to -77.8)                         | -83.8<br>(-87.8 to -78.3)                           |
| Whooping cough                                                                       | 302.9<br>(235.8 to 380.9)                          | 2,211.0<br>(1,721.1 to 2,780.9)                     | 14.9<br>(8.9 to 23.7)                        | -52.5<br>(-55.6 to -49.0)                         | -47.0<br>(-50.4 to -43.1)                           |
| Tetanus                                                                              | 109.7<br>(108.5 to 110.9)                          | 17.9<br>(7.9 to 25.5)                               | 2.3<br>(1.3 to 3.9)                          | -7.8<br>(-22.6 to 9.2)                            | -16.8<br>(-29.7 to -2.8)                            |
| Measles                                                                              | 121.7<br>(43.9 to 266.2)                           | 4,441.9<br>(1,600.4 to 9,716.0)                     | 10.9<br>(3.5 to 25.0)                        | -69.1<br>(-74.1 to -63.3)                         | -66.4<br>(-71.8 to -60.1)                           |
| Varicella and herpes zoster                                                          | 1,188.0<br>(1,094.7 to 1,280.5)                    | 26,456.3<br>(25,687.9 to 27,265.1)                  | 43.7<br>(26.6 to 66.6)                       | 21.7<br>(17.8 to 26.1)                            | 0.1<br>(-2.4 to 2.7)                                |
| <b>Neglected tropical diseases and malaria</b>                                       | <b>382,071.5</b><br>(351,615.2 to 404,535.2)       | <b>71,189.1†</b><br>(48,761.9 to 100,692.2)         | <b>2,310.2</b><br>(1,560.7 to 3,278.8)       | <b>-2.1</b><br>(-17.1 to 12.9)                    | <b>-14.9</b><br>(-28.2 to -1.3)                     |
| Malaria                                                                              | 2,023.3<br>(1,538.6 to 2,743.9)                    | 15,887.8<br>(9,731.8 to 22,498.5)                   | 113.1<br>(83.4 to 147.4)                     | -6.7<br>(-16.3 to 1.4)                            | -16.3<br>(-25.1 to -9.0)                            |
| Chagas disease                                                                       | --                                                 | --                                                  | --                                           | --                                                | --                                                  |
| Leishmaniasis                                                                        | 23.3<br>(21.2 to 25.2)                             | 54.5<br>(49.3 to 59.9)                              | 1.5<br>(1.0 to 2.1)                          | -59.1<br>(-64.5 to -53.2)                         | -63.4<br>(-67.7 to -58.4)                           |
| Visceral leishmaniasis                                                               | 13.5<br>(12.2 to 14.9)                             | 54.1<br>(48.9 to 59.5)                              | 1.0<br>(0.6 to 1.4)                          | -69.7<br>(-74.4 to -64.3)                         | -72.9<br>(-76.9 to -68.1)                           |
| Cutaneous and mucocutaneous leishmaniasis                                            | 8.4<br>(7.2 to 9.9)                                | 0.4<br>(0.3 to 0.5)                                 | 0.6<br>(0.4 to 0.8)                          | 4.8<br>(-6.3 to 17.5)                             | -13.2<br>(-23.5 to -1.8)                            |
| African trypanosomiasis                                                              | --                                                 | --                                                  | --                                           | --                                                | --                                                  |
| Schistosomiasis                                                                      | --                                                 | --                                                  | --                                           | --                                                | --                                                  |
| Cysticercosis                                                                        | 819.5<br>(605.5 to 1,021.7)                        | --                                                  | 123.9<br>(77.2 to 177.0)                     | -7.8<br>(-23.0 to 4.5)                            | -24.9<br>(-35.1 to -15.9)                           |
| Cystic echinococcosis                                                                | 119.3<br>(65.6 to 243.4)                           | 24.9<br>(14.7 to 48.9)                              | 11.2<br>(5.3 to 22.9)                        | -46.4<br>(-76.5 to 18.6)                          | -55.0<br>(-79.4 to -4.3)                            |
| Lymphatic filariasis                                                                 | 8,665.9<br>(7,724.7 to 10,132.1)                   | 1,979.8<br>(1,633.3 to 2,395.4)                     | 212.2<br>(94.7 to 410.1)                     | -61.0<br>(-83.0 to -41.0)                         | -67.3<br>(-85.5 to -50.7)                           |
| Onchocerciasis                                                                       | --                                                 | --                                                  | --                                           | --                                                | --                                                  |
| Trachoma                                                                             | 1,758.7<br>(1,263.2 to 2,371.7)                    | --                                                  | 128.9<br>(84.7 to 185.8)                     | 20.7<br>(12.2 to 29.2)                            | -14.7<br>(-21.0 to -8.6)                            |
| Dengue                                                                               | 3,183.0<br>(1,687.4 to 5,457.2)                    | 53,210.7<br>(31,478.2 to 82,244.0)                  | 514.3<br>(225.7 to 979.0)                    | 61.2<br>(30.8 to 273.2)                           | 42.4<br>(15.6 to 228.6)                             |
| Yellow fever                                                                         | --                                                 | --                                                  | --                                           | --                                                | --                                                  |
| Rabies                                                                               | 0.2<br>(0.1 to 0.2)                                | 4.4<br>(2.3 to 5.5)                                 | < 0.05<br>(< 0.05 to < 0.05)                 | -60.8<br>(-69.4 to -50.9)                         | -66.1<br>(-73.3 to -57.5)                           |
| Intestinal nematode infections                                                       | 363,130.3<br>(329,301.1 to 387,818.1)              | --                                                  | 643.0<br>(382.3 to 1,016.2)                  | 12.3<br>(-1.1 to 28.4)                            | -1.6<br>(-13.6 to 13.1)                             |
| Ascariasis                                                                           | 222,188.8<br>(178,955.5 to 273,861.0)              | --                                                  | 243.1<br>(133.0 to 409.3)                    | 11.0<br>(-9.4 to 36.7)                            | -2.3<br>(-21.0 to 21.9)                             |



| Cause                                                                   | Prevalence in thousands (95% UI)                    | Incidence in thousands (95% UI)                      | YLDs in thousands (95% UI)                   |                                                                         |                                                                            |
|-------------------------------------------------------------------------|-----------------------------------------------------|------------------------------------------------------|----------------------------------------------|-------------------------------------------------------------------------|----------------------------------------------------------------------------|
|                                                                         | 2016 counts<br>(53,067.6 to 86,700.8)               | 2016 counts                                          | 2016 counts<br>(15.9 to 50.1)                | Percentage change in counts<br>between 2006 and 2016<br>(-21.3 to 64.3) | Percentage change in age-<br>standardised rates between<br>(-32.2 to 48.3) |
| Trichuriasis                                                            | 67,836.1<br>(53,067.6 to 86,700.8)                  | --                                                   | 29.4<br>(15.9 to 50.1)                       | 12.9<br>(-21.3 to 64.3)                                                 | -0.4<br>(-32.2 to 48.3)                                                    |
| Hookworm disease                                                        | 102,389.8<br>(84,464.5 to 123,980.8)                | --                                                   | 370.6<br>(225.1 to 575.9)                    | 13.1<br>(-4.8 to 35.6)                                                  | -1.3<br>(-17.0 to 18.7)                                                    |
| Food-borne trematodiasis                                                | --                                                  | --                                                   | --                                           | --                                                                      | --                                                                         |
| Leprosy                                                                 | 187.7<br>(179.0 to 196.6)                           | 26.9<br>(25.3 to 29.0)                               | 11.0<br>(7.5 to 15.4)                        | -6.5<br>(-10.8 to -2.5)                                                 | -26.9<br>(-29.9 to -24.0)                                                  |
| Ebola virus disease                                                     | --                                                  | --                                                   | --                                           | --                                                                      | --                                                                         |
| Zika virus disease                                                      | --                                                  | --                                                   | --                                           | --                                                                      | --                                                                         |
| Guinea worm disease                                                     | --                                                  | --                                                   | --                                           | --                                                                      | --                                                                         |
| Other neglected tropical diseases                                       | 16,673.2<br>(16,186.6 to 17,209.0)                  | --                                                   | 551.0<br>(365.2 to 793.0)                    | 4.8<br>(1.4 to 8.1)                                                     | 4.2<br>(0.9 to 7.6)                                                        |
| <b>Maternal disorders</b>                                               | <b>1,209.6<br/>(1,117.5 to 1,300.4)</b>             | <b>19,943.7†<br/>(16,088.7 to 25,503.2)</b>          | <b>158.1<br/>(109.9 to 211.7)</b>            | <b>-23.1<br/>(-31.7 to -12.9)</b>                                       | <b>-34.2<br/>(-41.2 to -25.7)</b>                                          |
| Maternal haemorrhage                                                    | 95.5<br>(74.2 to 126.2)                             | 787.8<br>(578.6 to 1,054.4)                          | 7.1<br>(4.5 to 10.2)                         | -15.0<br>(-30.5 to 3.8)                                                 | -26.4<br>(-39.5 to -10.3)                                                  |
| Maternal sepsis and other pregnancy related infections                  | 273.5<br>(219.5 to 345.1)                           | 1,305.2<br>(950.0 to 1,819.9)                        | 6.1<br>(3.0 to 11.3)                         | -17.6<br>(-55.0 to 55.4)                                                | -27.8<br>(-60.0 to 36.1)                                                   |
| Maternal hypertensive disorders                                         | 558.8<br>(350.4 to 810.2)                           | 2,825.9<br>(2,262.0 to 3,502.0)                      | 27.3<br>(14.2 to 44.7)                       | -28.9<br>(-55.2 to 14.2)                                                | -36.7<br>(-60.2 to 1.2)                                                    |
| Maternal obstructed labour and uterine rupture                          | 249.7<br>(209.8 to 296.2)                           | 896.7<br>(661.8 to 1,221.7)                          | 80.7<br>(52.1 to 113.4)                      | -21.9<br>(-27.9 to -15.6)                                               | -34.4<br>(-39.4 to -29.6)                                                  |
| Maternal abortion, miscarriage, and ectopic pregnancy                   | 115.9<br>(71.0 to 178.4)                            | 14,128.2<br>(10,283.0 to 19,747.4)                   | 12.6<br>(6.8 to 21.8)                        | -14.8<br>(-48.6 to 37.6)                                                | -26.7<br>(-55.6 to 18.1)                                                   |
| Other maternal disorders                                                | --                                                  | --                                                   | 24.3<br>(17.0 to 32.6)                       | -26.9<br>(-35.1 to -17.0)                                               | -37.3<br>(-44.1 to -29.1)                                                  |
| <b>Neonatal disorders</b>                                               | <b>21,739.0<br/>(19,732.7 to 24,239.0)</b>          | --                                                   | <b>4,333.9<br/>(3,159.5 to 5,980.6)</b>      | <b>34.4<br/>(16.9 to 53.6)</b>                                          | <b>25.1<br/>(9.1 to 43.0)</b>                                              |
| Neonatal preterm birth complications                                    | 19,121.8<br>(15,650.4 to 23,475.7)                  | --                                                   | 3,233.5<br>(2,287.0 to 4,508.9)              | 36.3<br>(13.8 to 61.3)                                                  | 25.9<br>(5.2 to 48.8)                                                      |
| Neonatal encephalopathy due to birth asphyxia and trauma                | 1,933.2<br>(1,095.8 to 3,494.4)                     | --                                                   | 220.1<br>(38.9 to 697.4)                     | 38.4<br>(6.1 to 81.8)                                                   | 27.5<br>(-1.2 to 67.9)                                                     |
| Neonatal sepsis and other neonatal infections                           | 1,492.0<br>(423.9 to 3,508.8)                       | --                                                   | 559.7<br>(127.6 to 1,443.3)                  | 35.8<br>(17.7 to 74.5)                                                  | 26.7<br>(9.3 to 68.4)                                                      |
| Hemolytic disease and other neonatal jaundice                           | 540.1<br>(480.1 to 600.1)                           | --                                                   | 167.3<br>(128.2 to 211.2)                    | 36.1<br>(28.5 to 44.0)                                                  | 23.6<br>(16.7 to 30.7)                                                     |
| Other neonatal disorders                                                | --                                                  | --                                                   | 153.3<br>(110.1 to 212.4)                    | -3.5<br>(-15.1 to 9.9)                                                  | 7.2<br>(-5.7 to 22.1)                                                      |
| <b>Nutritional deficiencies</b>                                         | <b>602,587.6<br/>(594,956.4 to 608,571.7)</b>       | <b>232,055.5†<br/>(199,789.3 to 277,918.5)</b>       | <b>19,150.0<br/>(12,919.6 to 26,955.7)</b>   | <b>8.8<br/>(7.0 to 10.7)</b>                                            | <b>-0.2<br/>(-1.9 to 1.6)</b>                                              |
| Protein-energy malnutrition                                             | 26,455.1<br>(26,241.9 to 26,686.0)                  | 20,500.4<br>(20,362.6 to 20,650.4)                   | 1,721.5<br>(1,111.8 to 2,442.1)              | 23.7<br>(14.3 to 34.1)                                                  | 37.1<br>(26.7 to 48.6)                                                     |
| Iodine deficiency                                                       | 38,923.4<br>(34,703.0 to 43,558.0)                  | 953.9<br>(852.0 to 1,065.4)                          | 1,054.2<br>(720.1 to 1,472.1)                | -19.8<br>(-22.8 to -16.9)                                               | -31.8<br>(-34.3 to -29.3)                                                  |
| Vitamin A deficiency                                                    | 190,572.8<br>(166,927.5 to 222,451.6)               | 210,601.2<br>(178,304.3 to 256,523.2)                | 75.7<br>(48.6 to 114.1)                      | 6.9<br>(2.1 to 11.9)                                                    | -1.8<br>(-6.2 to 2.2)                                                      |
| Iron-deficiency anaemia                                                 | 496,654.1<br>(486,600.9 to 507,929.0)               | --                                                   | 16,239.8<br>(10,832.2 to 23,184.2)           | 9.9<br>(8.0 to 11.9)                                                    | -0.4<br>(-2.1 to 1.3)                                                      |
| Other nutritional deficiencies                                          | --                                                  | --                                                   | 59.0<br>(38.1 to 83.6)                       | 25.2<br>(15.3 to 36.3)                                                  | 38.2<br>(27.3 to 50.4)                                                     |
| <b>Other communicable, maternal, neonatal, and nutritional diseases</b> | <b>227,276.6<br/>(217,934.9 to 235,072.4)</b>       | <b>257,197.7<br/>(171,187.5 to 383,585.0)</b>        | <b>1,075.2<br/>(704.2 to 1,568.5)</b>        | <b>7.2<br/>(2.4 to 11.5)</b>                                            | <b>-3.4<br/>(-7.2 to 0.4)</b>                                              |
| Sexually transmitted diseases excluding HIV                             | 146,480.0<br>(141,330.4 to 151,024.6)               | 93,877.7<br>(81,467.7 to 108,679.3)                  | 397.4<br>(250.3 to 612.6)                    | 20.0<br>(17.9 to 22.5)                                                  | -1.0<br>(-2.7 to 1.0)                                                      |
| Syphilis                                                                | 15,998.3<br>(11,950.1 to 20,474.8)                  | 10,815.2<br>(7,624.3 to 14,667.4)                    | 38.4<br>(26.8 to 51.4)                       | 35.5<br>(25.9 to 44.3)                                                  | 6.4<br>(0.8 to 12.7)                                                       |
| Chlamydial infection                                                    | 6,948.1<br>(5,980.4 to 8,037.1)                     | 5,572.2<br>(4,768.1 to 6,460.9)                      | 51.3<br>(32.6 to 79.8)                       | 14.9<br>(9.6 to 19.9)                                                   | -4.3<br>(-8.7 to -0.1)                                                     |
| Gonococcal infection                                                    | 13,183.3<br>(10,393.7 to 16,675.0)                  | 45,353.6<br>(34,516.4 to 58,744.6)                   | 135.1<br>(76.1 to 221.0)                     | 21.4<br>(17.7 to 24.8)                                                  | 0.6<br>(-2.4 to 3.4)                                                       |
| Trichomoniasis                                                          | 24,530.5<br>(21,089.7 to 28,036.9)                  | 20,931.5<br>(17,881.3 to 24,124.2)                   | 26.3<br>(10.1 to 55.4)                       | 14.2<br>(11.8 to 16.6)                                                  | -4.4<br>(-6.0 to -2.9)                                                     |
| Genital herpes                                                          | 90,048.9<br>(77,855.4 to 105,043.7)                 | 6,383.1<br>(5,447.4 to 7,573.3)                      | 23.2<br>(7.4 to 52.9)                        | 21.6<br>(16.1 to 26.8)                                                  | -1.9<br>(-5.8 to 2.3)                                                      |
| Other sexually transmitted diseases                                     | 4,897.0<br>(4,356.5 to 5,282.7)                     | 4,822.1<br>(4,099.7 to 5,652.1)                      | 123.2<br>(78.5 to 184.6)                     | 17.5<br>(14.1 to 21.1)                                                  | -3.0<br>(-6.0 to 0.0)                                                      |
| Hepatitis                                                               | 72,719.9<br>(59,540.7 to 89,439.2)                  | 163,318.1<br>(81,110.2 to 289,273.6)                 | 140.1<br>(87.2 to 209.9)                     | -25.2<br>(-39.2 to -6.8)                                                | -31.4<br>(-42.9 to -17.1)                                                  |
| Acute hepatitis A                                                       | 7,345.5<br>(1,022.4 to 16,901.4)                    | 95,491.4<br>(13,290.9 to 219,717.9)                  | 32.9<br>(15.7 to 57.6)                       | -35.0<br>(-69.6 to 56.4)                                                | -39.2<br>(-69.1 to 35.4)                                                   |
| Hepatitis B                                                             | 56,360.2<br>(45,245.0 to 70,051.9)                  | 53,622.9<br>(41,643.1 to 69,419.5)                   | 81.0<br>(48.3 to 127.8)                      | -18.4<br>(-30.7 to -4.2)                                                | -26.4<br>(-36.4 to -15.3)                                                  |
| Hepatitis C                                                             | 8,015.5<br>(7,041.9 to 9,028.8)                     | 1,221.0<br>(1,096.2 to 1,362.7)                      | 1.1<br>(0.6 to 2.1)                          | -9.3<br>(-11.8 to -6.7)                                                 | -22.9<br>(-24.8 to -20.9)                                                  |
| Acute hepatitis E                                                       | 998.7<br>(895.9 to 1,106.8)                         | 12,982.8<br>(11,646.1 to 14,388.9)                   | 25.2<br>(16.1 to 37.8)                       | -30.6<br>(-36.6 to -23.7)                                               | -36.5<br>(-41.6 to -30.8)                                                  |
| Other infectious diseases                                               | 17,072.0<br>(16,617.0 to 17,553.7)                  | 2.0<br>(1.3 to 2.8)                                  | 537.6<br>(355.7 to 771.5)                    | 10.8<br>(8.0 to 14.1)                                                   | 7.1<br>(4.3 to 10.3)                                                       |
| <b>Non-communicable diseases</b>                                        | <b>1,208,484.2<br/>(1,205,415.6 to 1,211,204.4)</b> | <b>3,050,578.9†<br/>(2,902,216.4 to 3,224,764.5)</b> | <b>109,686.1<br/>(82,055.1 to 140,508.5)</b> | <b>20.8<br/>(20.1 to 21.6)</b>                                          | <b>-1.4<br/>(-1.9 to -0.9)</b>                                             |
| <b>Neoplasms</b>                                                        | <b>2,035.5<br/>(2,004.5 to 2,068.4)</b>             | <b>1,069.2<br/>(1,043.3 to 1,101.3)</b>              | <b>355.6<br/>(259.0 to 459.4)</b>            | <b>36.2<br/>(31.4 to 41.6)</b>                                          | <b>3.9<br/>(0.4 to 8.3)</b>                                                |
| Lip and oral cavity cancer                                              | 396.8<br>(371.1 to 412.2)                           | 113.3<br>(105.9 to 117.6)                            | 41.4<br>(30.3 to 54.0)                       | 34.6<br>(24.2 to 42.0)                                                  | 1.7<br>(-6.1 to 7.7)                                                       |
| Nasopharynx cancer                                                      | 32.4<br>(30.0 to 34.3)                              | 10.0<br>(9.2 to 10.5)                                | 4.2<br>(3.0 to 5.5)                          | 26.6<br>(18.5 to 38.1)                                                  | -1.9<br>(-8.5 to 7.4)                                                      |
| Other pharynx cancer                                                    | 151.9<br>(136.5 to 163.3)                           | 64.8<br>(58.3 to 69.7)                               | 21.0<br>(15.1 to 27.4)                       | 40.8<br>(23.1 to 55.1)                                                  | 5.3<br>(-7.8 to 16.4)                                                      |
| Oesophageal cancer                                                      | 40.6<br>(39.3 to 41.8)                              | 37.0<br>(36.0 to 38.0)                               | 9.5<br>(6.6 to 12.4)                         | 21.2<br>(16.6 to 25.7)                                                  | -9.2<br>(-12.6 to -5.7)                                                    |
| Stomach cancer                                                          | 112.2<br>(108.6 to 116.3)                           | 75.1<br>(72.8 to 77.9)                               | 19.2<br>(13.6 to 25.0)                       | 9.8<br>(4.6 to 15.6)                                                    | -16.6<br>(-20.8 to -12.0)                                                  |
| Colon and rectum cancer                                                 | 185.4<br>(170.8 to 194.8)                           | 63.1<br>(58.3 to 66.4)                               | 22.1<br>(16.2 to 28.6)                       | 45.6<br>(30.9 to 55.9)                                                  | 9.2<br>(-1.7 to 17.4)                                                      |
| Liver cancer                                                            | 12.0<br>(10.8 to 13.5)                              | 30.2<br>(28.6 to 31.7)                               | 6.5<br>(4.5 to 8.7)                          | 41.9<br>(34.3 to 49.7)                                                  | 5.6<br>(0.2 to 11.3)                                                       |
| Liver cancer due to hepatitis B                                         | 11.2<br>(9.2 to 13.2)                               | 12.5<br>(10.3 to 14.7)                               | 2.7<br>(1.8 to 3.8)                          | 37.1<br>(29.8 to 44.7)                                                  | 2.6<br>(-2.4 to 8.3)                                                       |



| Cause                                              | Prevalence in thousands (95% UI)                 | Incidence in thousands (95% UI)                   | YLDs in thousands (95% UI)                    |                                                   |                                                     |
|----------------------------------------------------|--------------------------------------------------|---------------------------------------------------|-----------------------------------------------|---------------------------------------------------|-----------------------------------------------------|
|                                                    | 2016 counts                                      | 2016 counts                                       | 2016 counts                                   | Percentage change in counts between 2006 and 2016 | Percentage change in age-standardised rates between |
| Liver cancer due to hepatitis C                    | 4.8<br>(4.1 to 5.6)                              | 5.4<br>(4.7 to 6.2)                               | 1.2<br>(0.8 to 1.6)                           | 41.0<br>(33.0 to 50.1)                            | 3.1<br>(-2.5 to 9.9)                                |
| Liver cancer due to alcohol use                    | 3.3<br>(2.7 to 4.0)                              | 3.7<br>(3.1 to 4.5)                               | 0.8<br>(0.5 to 1.1)                           | 57.0<br>(46.5 to 69.0)                            | 16.3<br>(8.8 to 24.9)                               |
| Liver cancer due to other causes                   | 7.7<br>(6.8 to 8.8)                              | 8.6<br>(7.5 to 9.8)                               | 1.9<br>(1.3 to 2.5)                           | 43.9<br>(35.9 to 52.7)                            | 7.2<br>(1.4 to 13.3)                                |
| Gallbladder and biliary tract cancer               | 20.7<br>(17.9 to 22.7)                           | 26.1<br>(22.7 to 29.0)                            | 5.9<br>(4.0 to 7.9)                           | 30.2<br>(21.3 to 36.9)                            | -2.5<br>(-9.0 to 2.4)                               |
| Pancreatic cancer                                  | 16.5<br>(16.0 to 17.1)                           | 22.6<br>(22.0 to 23.2)                            | 4.8<br>(3.3 to 6.3)                           | 42.4<br>(37.3 to 48.1)                            | 4.5<br>(0.6 to 9.1)                                 |
| Larynx cancer                                      | 96.0<br>(92.8 to 99.5)                           | 31.3<br>(30.3 to 32.5)                            | 12.5<br>(9.0 to 16.2)                         | 29.2<br>(21.6 to 35.8)                            | -3.9<br>(-10.0 to 1.0)                              |
| Tracheal, bronchus, and lung cancer                | 74.3<br>(69.6 to 79.5)                           | 67.0<br>(63.1 to 71.6)                            | 16.1<br>(11.4 to 20.9)                        | 41.5<br>(30.6 to 49.6)                            | 5.3<br>(-2.6 to 11.1)                               |
| Malignant skin melanoma                            | 12.5<br>(11.3 to 14.8)                           | 3.2<br>(2.9 to 3.8)                               | 1.1<br>(0.8 to 1.5)                           | 76.7<br>(58.1 to 96.4)                            | 32.5<br>(19.2 to 46.9)                              |
| Non-melanoma skin cancer                           | 2.4<br>(1.6 to 3.7)                              | 21.7<br>(14.2 to 34.9)                            | 0.1<br>(0.1 to 0.2)                           | 42.9<br>(20.3 to 71.0)                            | -6.5<br>(-22.1 to 10.5)                             |
| Non-melanoma skin cancer (squamous-cell carcinoma) | 2.0<br>(1.2 to 3.2)                              | 4.2<br>(3.3 to 5.7)                               | 0.1<br>( $< 0.05$ to 0.2)                     | 44.0<br>(17.5 to 75.1)                            | -7.6<br>(-25.2 to 11.2)                             |
| Non-melanoma skin cancer (basal-cell carcinoma)    | 1.3<br>(0.7 to 2.3)                              | 17.5<br>(10.1 to 30.0)                            | $< 0.05$<br>( $< 0.05$ to $< 0.05$ )          | 35.6<br>(29.2 to 42.1)                            | 3.2<br>(-0.2 to 6.4)                                |
| Breast cancer                                      | 525.6<br>(474.0 to 573.5)                        | 118.1<br>(106.9 to 130.0)                         | 50.7<br>(36.1 to 66.5)                        | 56.6<br>(38.2 to 72.5)                            | 19.1<br>(5.1 to 31.3)                               |
| Cervical cancer                                    | 287.8<br>(246.6 to 342.4)                        | 77.3<br>(68.3 to 95.8)                            | 28.1<br>(19.6 to 38.4)                        | 10.5<br>(-1.7 to 22.9)                            | -14.1<br>(-23.7 to -5.5)                            |
| Uterine cancer                                     | 64.8<br>(60.5 to 68.2)                           | 14.5<br>(13.5 to 15.2)                            | 5.4<br>(3.8 to 7.1)                           | 52.8<br>(42.2 to 68.5)                            | 11.7<br>(4.2 to 23.1)                               |
| Ovarian cancer                                     | 76.0<br>(69.2 to 80.4)                           | 25.7<br>(23.8 to 27.4)                            | 12.1<br>(8.7 to 15.6)                         | 48.8<br>(39.2 to 59.5)                            | 12.9<br>(5.1 to 21.7)                               |
| Prostate cancer                                    | 112.2<br>(86.5 to 137.4)                         | 32.7<br>(26.0 to 39.8)                            | 14.4<br>(9.8 to 18.8)                         | 64.8<br>(47.5 to 78.6)                            | 14.5<br>(4.0 to 23.3)                               |
| Testicular cancer                                  | 13.2<br>(12.0 to 14.1)                           | 2.9<br>(2.7 to 3.1)                               | 1.1<br>(0.8 to 1.5)                           | 25.6<br>(13.7 to 35.5)                            | 0.6<br>(-9.1 to 8.6)                                |
| Kidney cancer                                      | 46.1<br>(44.6 to 47.4)                           | 13.2<br>(12.7 to 13.6)                            | 4.5<br>(3.2 to 6.0)                           | 52.0<br>(41.3 to 65.7)                            | 17.2<br>(8.3 to 29.1)                               |
| Bladder cancer                                     | 67.7<br>(65.9 to 69.4)                           | 18.9<br>(18.5 to 19.4)                            | 7.4<br>(5.4 to 9.8)                           | 51.6<br>(39.5 to 59.8)                            | 10.2<br>(2.1 to 16.6)                               |
| Brain and nervous system cancer                    | 48.7<br>(44.1 to 57.4)                           | 23.3<br>(21.4 to 28.3)                            | 7.4<br>(5.2 to 10.1)                          | 26.4<br>(13.3 to 66.1)                            | 3.3<br>(-7.9 to 37.0)                               |
| Thyroid cancer                                     | 105.6<br>(101.1 to 114.5)                        | 21.1<br>(20.1 to 22.9)                            | 7.1<br>(4.9 to 9.6)                           | 76.0<br>(62.0 to 92.4)                            | 29.7<br>(19.6 to 40.9)                              |
| Mesothelioma                                       | 4.3<br>(3.6 to 5.1)                              | 2.9<br>(2.4 to 3.5)                               | 0.9<br>(0.6 to 1.3)                           | 37.1<br>(22.0 to 53.7)                            | 3.7<br>(-7.7 to 17.4)                               |
| Hodgkin lymphoma                                   | 20.0<br>(16.6 to 26.4)                           | 6.8<br>(5.7 to 9.2)                               | 2.7<br>(1.9 to 4.0)                           | -10.7<br>(-17.5 to -2.3)                          | -25.8<br>(-31.6 to -18.4)                           |
| Non-Hodgkin's lymphoma                             | 68.2<br>(54.0 to 72.3)                           | 25.0<br>(20.7 to 26.3)                            | 7.9<br>(5.4 to 10.6)                          | 38.8<br>(31.4 to 50.9)                            | 7.9<br>(1.6 to 19.1)                                |
| Multiple myeloma                                   | 14.6<br>(10.4 to 16.1)                           | 8.9<br>(7.1 to 9.7)                               | 4.0<br>(2.7 to 5.4)                           | 51.6<br>(37.1 to 72.2)                            | 12.2<br>(1.9 to 28.9)                               |
| Leukaemia                                          | 105.3<br>(96.3 to 120.4)                         | 33.5<br>(30.3 to 37.8)                            | 14.6<br>(10.4 to 19.5)                        | 6.9<br>(2.0 to 14.3)                              | -10.4<br>(-14.3 to -4.5)                            |
| Acute lymphoid leukaemia                           | 29.3<br>(25.8 to 34.5)                           | 8.1<br>(7.2 to 9.5)                               | 3.7<br>(2.6 to 5.1)                           | -1.6<br>(-18.8 to 11.1)                           | -10.8<br>(-24.8 to -0.5)                            |
| Chronic lymphoid leukaemia                         | 23.1<br>(19.4 to 29.7)                           | 5.3<br>(4.5 to 6.8)                               | 3.1<br>(2.1 to 4.4)                           | 36.2<br>(24.9 to 48.9)                            | 1.3<br>(-6.8 to 10.8)                               |
| Acute myeloid leukaemia                            | 14.3<br>(11.9 to 16.4)                           | 9.5<br>(8.0 to 10.8)                              | 2.7<br>(1.9 to 3.7)                           | 20.0<br>(9.6 to 29.5)                             | 1.7<br>(-7.0 to 9.8)                                |
| Chronic myeloid leukaemia                          | 13.2<br>(10.4 to 16.4)                           | 4.8<br>(3.8 to 6.1)                               | 1.7<br>(1.2 to 2.5)                           | 10.2<br>(0.4 to 20.8)                             | -13.3<br>(-20.6 to -5.5)                            |
| Other leukaemia                                    | 25.3<br>(21.1 to 28.4)                           | 5.7<br>(4.8 to 6.4)                               | 3.2<br>(2.2 to 4.4)                           | -12.1<br>(-19.0 to -1.5)                          | -24.6<br>(-30.2 to -16.1)                           |
| Other neoplasms                                    | 220.4<br>(147.1 to 232.0)                        | 79.0<br>(54.5 to 82.8)                            | 23.0<br>(14.8 to 30.7)                        | 53.1<br>(29.4 to 65.9)                            | 21.1<br>(0.8 to 34.0)                               |
| <b>Cardiovascular diseases</b>                     | <b>54,540.0</b><br><b>(53,648.9 to 55,379.5)</b> | <b>7,009.5†</b><br><b>(6,707.7 to 7,322.4)</b>    | <b>3,133.1</b><br><b>(2,290.4 to 4,056.6)</b> | <b>36.4</b><br><b>(33.2 to 39.6)</b>              | <b>3.7</b><br><b>(1.6 to 5.9)</b>                   |
| Rheumatic heart disease                            | 8,048.0<br>(7,190.3 to 8,950.1)                  | 254.5<br>(228.6 to 283.4)                         | 391.3<br>(249.1 to 568.9)                     | 5.9<br>(2.1 to 9.7)                               | -11.9<br>(-15.2 to -8.9)                            |
| Ischaemic heart disease                            | 23,782.8<br>(22,601.8 to 24,916.6)               | 3,317.0<br>(3,104.8 to 3,555.0)                   | 1,027.7<br>(713.1 to 1,400.9)                 | 41.2<br>(39.7 to 42.7)                            | 6.0<br>(5.0 to 6.9)                                 |
| Cerebrovascular disease                            | 6,530.4<br>(6,254.2 to 6,803.9)                  | 1,175.8‡<br>(1,076.0 to 1,274.4)                  | 979.9<br>(702.7 to 1,249.7)                   | 47.5<br>(38.9 to 56.2)                            | 9.1<br>(2.6 to 15.6)                                |
| Ischaemic stroke                                   | 5,719.2<br>(5,110.4 to 6,348.7)                  | 819.6‡<br>(727.7 to 911.9)                        | 823.7<br>(589.4 to 1,056.4)                   | 50.9<br>(40.9 to 61.1)                            | 11.0<br>(3.2 to 18.9)                               |
| Hemorrhagic stroke                                 | 1,068.0<br>(967.7 to 1,182.1)                    | 356.2‡<br>(320.2 to 395.5)                        | 156.2<br>(111.8 to 199.2)                     | 31.9<br>(24.6 to 39.5)                            | -0.5<br>(-6.1 to 5.2)                               |
| Hypertensive heart disease                         | 2,117.5<br>(1,825.7 to 2,473.4)                  | --                                                | 168.1<br>(115.8 to 233.0)                     | 38.8<br>(35.5 to 41.9)                            | 2.4<br>(0.4 to 4.3)                                 |
| Cardiomyopathy and myocarditis                     | 311.6<br>(286.0 to 341.6)                        | 342.5†<br>(299.5 to 390.8)                        | 35.6<br>(23.1 to 53.1)                        | 21.2<br>(17.7 to 24.9)                            | 4.1<br>(1.5 to 6.8)                                 |
| Myocarditis                                        | 239.8<br>(209.3 to 274.6)                        | 342.5<br>(299.5 to 390.8)                         | 18.0<br>(11.8 to 26.6)                        | 18.7<br>(14.9 to 22.7)                            | 3.7<br>(0.7 to 6.9)                                 |
| Alcoholic cardiomyopathy                           | 11.3<br>(9.4 to 13.6)                            | --                                                | 1.0<br>(0.7 to 1.5)                           | 33.8<br>(31.3 to 36.4)                            | 3.9<br>(2.3 to 5.5)                                 |
| Other cardiomyopathy                               | 189.4<br>(158.2 to 225.8)                        | --                                                | 16.6<br>(10.9 to 24.7)                        | 23.4<br>(18.0 to 29.8)                            | 4.5<br>(0.7 to 9.2)                                 |
| Atrial fibrillation and flutter                    | 5,125.9<br>(4,484.8 to 5,884.1)                  | 450.5<br>(385.5 to 525.9)                         | 393.9<br>(264.2 to 548.5)                     | 39.0<br>(37.0 to 41.2)                            | 1.0<br>(-0.3 to 2.2)                                |
| Peripheral vascular disease                        | 13,075.3<br>(11,344.5 to 15,170.7)               | 1,285.9<br>(1,107.9 to 1,499.7)                   | 65.3<br>(30.6 to 117.3)                       | 34.1<br>(31.4 to 36.9)                            | -4.3<br>(-6.0 to -2.4)                              |
| Endocarditis                                       | 49.8<br>(44.3 to 56.2)                           | 183.4<br>(163.0 to 203.8)                         | 3.9<br>(2.6 to 5.5)                           | 31.3<br>(28.5 to 34.1)                            | 3.9<br>(1.3 to 6.7)                                 |
| Other cardiovascular and circulatory diseases      | 1,310.3<br>(1,129.1 to 1,527.5)                  | --                                                | 67.5<br>(46.1 to 95.6)                        | 33.8<br>(29.1 to 38.1)                            | 3.2<br>(0.6 to 5.9)                                 |
| <b>Chronic respiratory diseases</b>                | <b>86,462.8</b><br><b>(85,154.1 to 87,573.9)</b> | <b>14,228.6†</b><br><b>(13,633.4 to 14,879.6)</b> | <b>8,258.0</b><br><b>(7,122.6 to 9,234.8)</b> | <b>37.0</b><br><b>(33.4 to 40.9)</b>              | <b>5.5</b><br><b>(2.5 to 8.6)</b>                   |
| Chronic obstructive pulmonary disease              | 55,320.4<br>(53,060.5 to 57,613.5)               | 4,491.1<br>(4,291.0 to 4,686.5)                   | 6,410.7<br>(5,616.9 to 6,987.8)               | 37.1<br>(32.5 to 41.8)                            | 3.8<br>(0.5 to 7.4)                                 |
| Pneumoconiosis                                     | 43.1<br>(38.4 to 47.8)                           | 6.0<br>(5.4 to 6.5)                               | 6.8<br>(4.6 to 9.6)                           | 36.6<br>(34.2 to 39.0)                            | 3.8<br>(2.2 to 5.6)                                 |
| Silicosis                                          | 2.8<br>(2.3 to 3.2)                              | 1.4<br>(1.2 to 1.6)                               | 0.4<br>(0.3 to 0.6)                           | 31.9<br>(30.0 to 34.0)                            | 2.1<br>(1.0 to 3.3)                                 |

| Cause                                                          | Prevalence in thousands (95% UI)                    | Incidence in thousands (95% UI)                     | YLDs in thousands (95% UI)                       |                                                   |                                                     |
|----------------------------------------------------------------|-----------------------------------------------------|-----------------------------------------------------|--------------------------------------------------|---------------------------------------------------|-----------------------------------------------------|
|                                                                | 2016 counts                                         | 2016 counts                                         | 2016 counts                                      | Percentage change in counts between 2006 and 2016 | Percentage change in age-standardised rates between |
| Asbestosis                                                     | 10.8<br>(9.1 to 12.6)                               | 0.8<br>(0.7 to 1.0)                                 | 1.7<br>(1.1 to 2.5)                              | 27.7<br>(25.8 to 29.8)                            | -1.1<br>(-2.1 to 0.0)                               |
| Coal workers pneumoconiosis                                    | 2.0<br>(1.7 to 2.4)                                 | 0.4<br>(0.3 to 0.4)                                 | 0.3<br>(0.2 to 0.5)                              | 37.0<br>(33.5 to 40.8)                            | 3.4<br>(0.8 to 6.1)                                 |
| Other pneumoconiosis                                           | 27.5<br>(23.3 to 31.9)                              | 3.4<br>(2.9 to 3.8)                                 | 4.4<br>(2.9 to 6.2)                              | 40.9<br>(37.2 to 44.7)                            | 6.0<br>(3.3 to 8.6)                                 |
| Asthma                                                         | 37,866.8<br>(35,736.4 to 40,154.5)                  | 9,688.4<br>(9,130.8 to 10,290.7)                    | 1,441.0<br>(967.1 to 2,041.7)                    | 33.2<br>(30.8 to 36.0)                            | 9.4<br>(7.5 to 11.3)                                |
| Interstitial lung disease and pulmonary sarcoidosis            | 327.1<br>(295.1 to 361.0)                           | 43.2<br>(39.2 to 47.4)                              | 36.7<br>(24.2 to 53.1)                           | 34.1<br>(31.5 to 36.7)                            | 4.7<br>(2.6 to 6.9)                                 |
| Other chronic respiratory diseases                             | --                                                  | --                                                  | 362.7<br>(317.2 to 400.9)                        | 54.0<br>(47.0 to 61.0)                            | 35.0<br>(29.5 to 40.5)                              |
| <b>Cirrhosis and other chronic liver diseases</b>              | <b>3,565.4</b><br><b>(3,385.2 to 3,759.6)</b>       | <b>273.9</b><br><b>(261.3 to 287.7)</b>             | <b>328.8</b><br><b>(228.7 to 454.2)</b>          | <b>22.4</b><br><b>(19.9 to 25.2)</b>              | <b>3.0</b><br><b>(1.0 to 5.0)</b>                   |
| Cirrhosis and other chronic liver diseases due to hepatitis B  | 977.6<br>(899.1 to 1,060.2)                         | 80.7<br>(74.7 to 87.2)                              | 80.4<br>(56.1 to 110.8)                          | 29.6<br>(25.0 to 34.6)                            | 2.5<br>(-0.9 to 6.0)                                |
| Cirrhosis and other chronic liver diseases due to hepatitis C  | 694.5<br>(635.2 to 754.6)                           | 58.3<br>(53.8 to 63.2)                              | 58.4<br>(40.3 to 80.9)                           | 30.8<br>(25.7 to 36.1)                            | 3.7<br>(0.0 to 7.8)                                 |
| Cirrhosis and other chronic liver diseases due to alcohol use  | 766.7<br>(695.6 to 847.2)                           | 68.8<br>(62.7 to 75.5)                              | 63.6<br>(44.8 to 88.5)                           | 33.1<br>(26.0 to 39.8)                            | 3.1<br>(-1.7 to 7.8)                                |
| Cirrhosis and other chronic liver diseases due to other causes | 1,126.6<br>(1,038.0 to 1,225.0)                     | 66.1<br>(61.4 to 71.4)                              | 126.5<br>(86.4 to 178.2)                         | 10.8<br>(6.6 to 15.4)                             | 2.9<br>(-0.8 to 6.8)                                |
| <b>Digestive diseases</b>                                      | <b>30,691.9</b><br><b>(29,903.8 to 31,477.1)</b>    | <b>30,094.9†</b><br><b>(28,691.6 to 31,628.1)</b>   | <b>797.2</b><br><b>(566.7 to 1,070.5)</b>        | <b>16.5</b><br><b>(13.5 to 19.6)</b>              | <b>-3.7</b><br><b>(-5.9 to -1.4)</b>                |
| Peptic ulcer disease                                           | 9,521.8<br>(8,750.7 to 10,419.3)                    | 2,117.2<br>(1,899.0 to 2,363.5)                     | 167.9<br>(109.3 to 241.2)                        | 30.3<br>(26.1 to 34.8)                            | 4.2<br>(1.0 to 7.4)                                 |
| Gastritis and duodenitis                                       | 6,568.1<br>(5,916.8 to 7,205.7)                     | 9,986.3<br>(8,935.1 to 11,270.1)                    | 143.5<br>(94.9 to 203.4)                         | 35.6<br>(31.5 to 39.6)                            | 9.5<br>(6.7 to 12.2)                                |
| Appendicitis                                                   | 332.2<br>(309.2 to 357.1)                           | 8,753.9<br>(8,135.2 to 9,417.9)                     | 99.7<br>(67.7 to 136.2)                          | 6.4<br>(1.0 to 12.1)                              | -6.3<br>(-10.7 to -1.8)                             |
| Paralytic ileus and intestinal obstruction                     | 49.0<br>(44.0 to 54.4)                              | 1,343.0<br>(1,211.5 to 1,484.4)                     | 15.7<br>(10.4 to 21.7)                           | 26.7<br>(23.6 to 29.9)                            | 6.3<br>(3.6 to 9.1)                                 |
| Inguinal, femoral, and abdominal hernia                        | 11,983.9<br>(10,172.9 to 13,990.1)                  | 3,201.1<br>(2,795.2 to 3,631.4)                     | 256.8<br>(175.7 to 357.4)                        | 1.6<br>(-2.2 to 5.4)                              | -16.0<br>(-18.7 to -13.3)                           |
| Inflammatory bowel disease                                     | 168.9<br>(154.3 to 186.0)                           | 734.1<br>(672.3 to 800.7)                           | 25.2<br>(17.1 to 35.1)                           | 30.9<br>(26.6 to 35.5)                            | 6.2<br>(2.5 to 9.9)                                 |
| Vascular intestinal disorders                                  | 8.6<br>(7.5 to 9.8)                                 | 58.4<br>(52.1 to 66.2)                              | 2.8<br>(1.8 to 3.9)                              | 31.0<br>(27.2 to 35.2)                            | 8.2<br>(6.4 to 10.1)                                |
| Gallbladder and biliary diseases                               | 2,976.0<br>(2,643.7 to 3,348.0)                     | 3,584.9<br>(3,145.8 to 4,085.6)                     | 18.2<br>(12.2 to 26.2)                           | 33.5<br>(29.3 to 37.6)                            | 6.7<br>(3.6 to 10.1)                                |
| Pancreatitis                                                   | 33.7<br>(30.1 to 37.7)                              | 316.0<br>(284.3 to 351.1)                           | 4.4<br>(2.9 to 6.3)                              | 41.7<br>(38.6 to 44.6)                            | 14.7<br>(12.9 to 16.5)                              |
| Other digestive diseases                                       | --                                                  | --                                                  | 62.9<br>(44.8 to 84.7)                           | 19.7<br>(16.1 to 23.2)                            | 0.4<br>(-1.9 to 2.8)                                |
| <b>Neurological disorders</b>                                  | <b>529,158.0</b><br><b>(518,260.9 to 540,988.1)</b> | <b>252,021.2</b><br><b>(215,104.6 to 292,550.7)</b> | <b>13,030.2</b><br><b>(8,702.8 to 17,663.8)</b>  | <b>19.4</b><br><b>(15.9 to 22.9)</b>              | <b>0.1</b><br><b>(-2.6 to 2.7)</b>                  |
| Alzheimer's disease and other dementias                        | 2,933.8<br>(2,466.6 to 3,493.1)                     | 502.1<br>(421.5 to 604.2)                           | 408.0<br>(284.8 to 541.1)                        | 49.6<br>(47.1 to 52.1)                            | 4.4<br>(3.0 to 5.7)                                 |
| Parkinson's disease                                            | 576.0<br>(458.3 to 712.2)                           | 67.0<br>(52.6 to 83.9)                              | 66.5<br>(42.3 to 92.7)                           | 53.1<br>(48.3 to 58.4)                            | 10.8<br>(7.9 to 14.0)                               |
| Epilepsy                                                       | 3,934.7<br>(3,176.0 to 4,766.5)                     | 470.2<br>(378.7 to 573.1)                           | 1,192.0<br>(765.2 to 1,704.9)                    | 12.1<br>(-12.6 to 41.5)                           | -2.0<br>(-23.2 to 24.3)                             |
| Multiple sclerosis                                             | 204.5<br>(182.4 to 231.5)                           | 8.5<br>(7.6 to 9.6)                                 | 56.7<br>(38.8 to 76.0)                           | 41.9<br>(38.1 to 45.9)                            | 13.9<br>(10.9 to 17.1)                              |
| Motor neuron disease                                           | 25.3<br>(21.4 to 30.1)                              | 4.5<br>(3.9 to 5.3)                                 | 5.4<br>(3.7 to 7.4)                              | 27.8<br>(25.4 to 30.5)                            | 8.8<br>(7.8 to 10.0)                                |
| Migraine                                                       | 231,458.6<br>(221,593.9 to 240,869.6)               | 24,304.2<br>(23,265.6 to 25,401.5)                  | 9,642.5<br>(6,188.4 to 13,483.4)                 | 18.8<br>(17.8 to 19.9)                            | -0.5<br>(-1.2 to 0.2)                               |
| Tension-type headache                                          | 384,460.8<br>(346,179.1 to 429,907.7)               | 226,654.4<br>(189,583.2 to 267,390.3)               | 1,392.1<br>(883.8 to 2,038.2)                    | 18.5<br>(15.7 to 21.6)                            | -1.2<br>(-3.0 to 0.7)                               |
| Other neurological disorders                                   | 5.0<br>(3.2 to 7.0)                                 | 10.3<br>(6.8 to 14.3)                               | 267.1<br>(175.6 to 381.3)                        | 33.0<br>(5.9 to 65.1)                             | 18.4<br>(-4.7 to 46.5)                              |
| <b>Mental and substance use disorders</b>                      | <b>192,853.0</b><br><b>(189,120.4 to 198,287.4)</b> | <b>72,388.5†</b><br><b>(67,669.0 to 77,695.3)</b>   | <b>24,641.1</b><br><b>(17,998.6 to 31,940.9)</b> | <b>14.9</b><br><b>(13.8 to 16.1)</b>              | <b>-4.5</b><br><b>(-5.4 to -3.5)</b>                |
| Schizophrenia                                                  | 3,161.7<br>(2,780.3 to 3,560.7)                     | 182.8<br>(162.1 to 205.8)                           | 2,002.1<br>(1,455.8 to 2,496.1)                  | 24.1<br>(21.9 to 26.2)                            | -0.1<br>(-1.7 to 1.5)                               |
| Alcohol use disorders                                          | 15,532.5<br>(13,850.9 to 17,509.7)                  | 8,285.4<br>(7,198.2 to 9,375.0)                     | 1,543.7<br>(1,058.3 to 2,113.8)                  | -0.4<br>(-4.7 to 3.3)                             | -18.0<br>(-21.1 to -15.0)                           |
| Drug use disorders                                             | 7,409.3<br>(7,159.3 to 7,684.4)                     | 1,057.8<br>(945.4 to 1,177.3)                       | 1,818.0<br>(1,274.4 to 2,389.4)                  | 27.2<br>(24.2 to 30.2)                            | 5.6<br>(3.2 to 8.1)                                 |
| Opioid use disorders                                           | 3,848.3<br>(3,286.3 to 4,522.5)                     | 420.0<br>(357.2 to 492.8)                           | 1,595.2<br>(1,097.7 to 2,135.6)                  | 28.4<br>(25.0 to 31.8)                            | 6.3<br>(3.6 to 8.9)                                 |
| Cocaine use disorders                                          | 318.3<br>(275.4 to 373.7)                           | 35.5<br>(30.0 to 41.9)                              | 44.5<br>(26.6 to 64.1)                           | 24.0<br>(16.2 to 31.5)                            | 3.2<br>(-2.8 to 9.2)                                |
| Amphetamine use disorders                                      | 66.7<br>(47.1 to 90.8)                              | 12.7<br>(9.0 to 17.5)                               | 9.3<br>(5.1 to 15.2)                             | 20.1<br>(16.7 to 23.7)                            | 2.0<br>(-0.5 to 4.5)                                |
| Cannabis use disorders                                         | 2,947.8<br>(2,451.3 to 3,530.4)                     | 500.8<br>(415.2 to 608.0)                           | 86.3<br>(53.2 to 126.8)                          | 10.3<br>(0.9 to 19.4)                             | -4.3<br>(-11.8 to 3.1)                              |
| Other drug use disorders                                       | 441.2<br>(389.7 to 496.2)                           | 88.9<br>(78.7 to 100.2)                             | 82.8<br>(55.4 to 112.6)                          | 28.0<br>(22.8 to 33.4)                            | 6.1<br>(2.0 to 10.2)                                |
| Depressive disorders                                           | 45,972.9<br>(44,647.0 to 47,105.9)                  | 49,469.0<br>(45,098.0 to 54,801.2)                  | 7,647.1<br>(5,311.8 to 10,332.9)                 | 13.2<br>(11.1 to 15.3)                            | -8.8<br>(-10.4 to -7.1)                             |
| Major depressive disorder                                      | 30,018.7<br>(27,286.1 to 33,141.9)                  | 46,546.9<br>(42,060.9 to 51,843.0)                  | 6,033.6<br>(4,155.5 to 8,171.5)                  | 10.3<br>(8.4 to 12.1)                             | -11.2<br>(-12.6 to -9.7)                            |
| Dysthymia                                                      | 16,952.7<br>(14,796.5 to 19,531.5)                  | 2,922.1<br>(2,561.3 to 3,350.4)                     | 1,613.5<br>(1,086.3 to 2,332.0)                  | 25.7<br>(19.3 to 32.0)                            | 1.8<br>(-2.9 to 7.0)                                |
| Bipolar disorder                                               | 6,682.7<br>(5,767.5 to 7,701.3)                     | 639.4<br>(554.8 to 736.9)                           | 1,355.2<br>(843.9 to 1,980.2)                    | 20.2<br>(18.1 to 22.5)                            | 0.2<br>(-1.2 to 1.7)                                |
| Anxiety disorders                                              | 42,667.3<br>(40,064.4 to 45,370.9)                  | 7,256.3<br>(6,812.0 to 7,733.4)                     | 4,081.9<br>(2,870.9 to 5,523.1)                  | 17.0<br>(14.1 to 20.0)                            | -1.9<br>(-4.1 to 0.6)                               |
| Eating disorders                                               | 1,390.2<br>(1,229.7 to 1,588.0)                     | 1,017.4<br>(740.9 to 1,367.7)                       | 281.0<br>(180.0 to 405.4)                        | 38.3<br>(33.8 to 42.8)                            | 21.1<br>(17.4 to 24.8)                              |
| Anorexia nervosa                                               | 332.9<br>(243.4 to 449.3)                           | 147.4<br>(107.5 to 197.5)                           | 70.8<br>(42.8 to 108.5)                          | 29.0<br>(21.6 to 37.0)                            | 16.2<br>(9.8 to 23.4)                               |
| Bulimia nervosa                                                | 1,002.4<br>(749.5 to 1,345.2)                       | 870.0<br>(603.8 to 1,215.6)                         | 210.2<br>(126.7 to 317.9)                        | 41.7<br>(36.5 to 47.2)                            | 22.9<br>(18.4 to 27.2)                              |
| Autistic spectrum disorders                                    | 11,746.7<br>(11,177.1 to 12,271.6)                  | 92.2<br>(62.2 to 127.2)                             | 1,624.0<br>(1,098.6 to 2,275.6)                  | 12.9<br>(11.7 to 14.3)                            | 0.2<br>(-0.8 to 1.3)                                |
| Autism                                                         | 2,969.1<br>(2,558.4 to 3,450.9)                     | 9.4<br>(4.8 to 15.9)                                | 752.5<br>(484.7 to 1,087.6)                      | 13.0<br>(10.7 to 15.5)                            | 0.3<br>(-1.5 to 2.2)                                |
| Asperger syndrome and other autistic spectrum disorders        | 8,753.4<br>(7,236.6 to 10,525.3)                    | 82.9<br>(53.6 to 117.8)                             | 871.4<br>(569.9 to 1,270.1)                      | 12.9<br>(11.6 to 14.2)                            | 0.2<br>(-0.8 to 1.2)                                |



| Cause                                                      | Prevalence in thousands (95% UI)                    | Incidence in thousands (95% UI)                            | YLDs in thousands (95% UI)                       |                                                   |                                                     |
|------------------------------------------------------------|-----------------------------------------------------|------------------------------------------------------------|--------------------------------------------------|---------------------------------------------------|-----------------------------------------------------|
|                                                            | 2016 counts                                         | 2016 counts                                                | 2016 counts                                      | Percentage change in counts between 2006 and 2016 | Percentage change in age-standardised rates between |
| Attention-deficit/hyperactivity disorder                   | 4,840.9<br>(4,445.2 to 5,281.6)                     | 231.0<br>(207.9 to 259.9)                                  | 58.2<br>(35.0 to 91.2)                           | 10.4<br>(3.8 to 16.9)                             | 0.9<br>(-4.9 to 6.5)                                |
| Conduct disorder                                           | 9,690.6<br>(8,220.0 to 11,210.7)                    | 3,300.8<br>(2,668.4 to 3,949.1)                            | 1,170.1<br>(727.5 to 1,780.9)                    | 7.6<br>(2.8 to 12.9)                              | 2.6<br>(-1.8 to 7.6)                                |
| Idiopathic developmental intellectual disability           | 37,073.5<br>(23,888.8 to 50,176.0)                  | --                                                         | 1,380.5<br>(643.2 to 2,390.5)                    | 2.9<br>(-1.8 to 6.2)                              | -9.2<br>(-13.6 to -6.3)                             |
| Other mental and substance use disorders                   | 22,747.1<br>(19,665.8 to 26,464.8)                  | 856.3<br>(746.0 to 984.1)                                  | 1,679.4<br>(1,137.6 to 2,405.7)                  | 23.4<br>(22.1 to 24.8)                            | 0.2<br>(-0.8 to 1.2)                                |
| <b>Diabetes, urogenital, blood, and endocrine diseases</b> | <b>627,092.3</b><br><b>(625,409.3 to 629,133.6)</b> | <b>141,230.6†</b><br><b>(132,897.2 to 150,391.5)</b>       | <b>10,937.8</b><br><b>(7,687.5 to 15,043.3)</b>  | <b>15.0</b><br><b>(13.0 to 17.1)</b>              | <b>-6.7</b><br><b>(-8.4 to -5.0)</b>                |
| Diabetes mellitus                                          | 64,991.1<br>(58,679.6 to 71,121.6)                  | 3,775.8<br>(3,414.7 to 4,157.5)                            | 4,461.5<br>(3,083.4 to 6,237.0)                  | 10.9<br>(6.7 to 15.4)                             | -13.1<br>(-16.3 to -9.7)                            |
| Acute glomerulonephritis                                   | 14.4<br>(12.3 to 16.4)                              | 215.8<br>(189.8 to 246.8)                                  | 0.7<br>(0.5 to 1.1)                              | 18.4<br>(15.3 to 21.8)                            | -1.3<br>(-3.1 to 0.6)                               |
| Chronic kidney disease                                     | 44,099.8<br>(39,990.1 to 48,562.3)                  | 3,350.0<br>(2,956.1 to 3,749.3)                            | 1,381.0<br>(1,015.9 to 1,778.2)                  | 25.6<br>(22.4 to 29.0)                            | -1.9<br>(-4.1 to 0.3)                               |
| Chronic kidney disease due to diabetes mellitus            | 17,697.6<br>(15,134.1 to 20,476.4)                  | 1,347.5<br>(1,124.9 to 1,608.1)                            | 523.0<br>(371.9 to 692.8)                        | 33.6<br>(29.2 to 38.5)                            | 1.0<br>(-2.0 to 4.3)                                |
| Chronic kidney disease due to hypertension                 | 7,138.8<br>(6,255.7 to 8,098.7)                     | 463.4<br>(389.2 to 547.7)                                  | 264.0<br>(186.7 to 348.2)                        | 28.9<br>(23.1 to 34.7)                            | -2.4<br>(-6.2 to 1.4)                               |
| Chronic kidney disease due to glomerulonephritis           | 7,607.5<br>(6,648.1 to 8,680.6)                     | 634.1<br>(529.8 to 751.5)                                  | 217.8<br>(154.2 to 292.0)                        | 14.8<br>(11.1 to 18.8)                            | -5.3<br>(-8.1 to -2.5)                              |
| Chronic kidney disease due to other causes                 | 11,655.9<br>(9,937.9 to 13,367.3)                   | 904.9<br>(763.5 to 1,045.3)                                | 376.2<br>(271.8 to 502.3)                        | 19.9<br>(15.9 to 23.9)                            | -4.0<br>(-6.6 to -1.4)                              |
| Urinary diseases and male infertility                      | 21,550.4<br>(19,763.9 to 23,394.2)                  | 87,395.1†<br>(79,364.4 to 96,285.8)                        | 592.8<br>(392.0 to 850.8)                        | 29.9<br>(27.6 to 32.3)                            | -1.2<br>(-2.8 to 0.5)                               |
| Interstitial nephritis and urinary tract infections        | 1,424.3<br>(1,268.7 to 1,589.5)                     | 74,212.8<br>(66,193.6 to 82,997.4)                         | 46.9<br>(28.9 to 71.0)                           | 14.6<br>(10.4 to 18.5)                            | 0.3<br>(-2.9 to 3.3)                                |
| Urolithiasis                                               | 434.8<br>(385.4 to 492.2)                           | 11,530.4<br>(10,248.7 to 13,096.8)                         | 32.1<br>(21.5 to 44.9)                           | 18.8<br>(14.0 to 23.4)                            | -4.5<br>(-8.3 to -0.8)                              |
| Benign prostatic hyperplasia                               | 14,012.8<br>(11,774.8 to 16,268.2)                  | 1,651.9<br>(1,404.4 to 1,930.0)                            | 454.0<br>(286.9 to 662.6)                        | 35.0<br>(32.1 to 37.7)                            | -0.9<br>(-2.8 to 0.9)                               |
| Male infertility                                           | 4,913.6<br>(3,895.2 to 6,155.5)                     | --                                                         | 30.8<br>(12.3 to 63.6)                           | 42.6<br>(29.0 to 55.3)                            | 22.3<br>(10.7 to 32.7)                              |
| Other urinary diseases                                     | --                                                  | --                                                         | 29.1<br>(19.1 to 41.2)                           | -5.0<br>(-7.8 to -2.2)                            | -18.7<br>(-20.8 to -16.8)                           |
| Gynecological diseases                                     | 150,811.6<br>(148,069.5 to 154,383.6)               | 44,356.7†<br>(42,316.2 to 46,527.8)                        | 1,827.5<br>(1,226.7 to 2,609.9)                  | 16.8<br>(14.9 to 18.7)                            | -3.9<br>(-5.7 to -2.3)                              |
| Uterine fibroids                                           | 13,452.9<br>(11,800.7 to 15,168.4)                  | 1,492.9<br>(1,296.9 to 1,712.4)                            | 397.9<br>(257.3 to 589.1)                        | 26.0<br>(24.4 to 27.7)                            | 1.1<br>(-0.2 to 2.4)                                |
| Polycystic ovarian syndrome                                | 1,484.2<br>(1,107.0 to 1,920.0)                     | 1,799.8<br>(1,281.5 to 2,399.0)                            | 13.1<br>(5.9 to 24.6)                            | 21.3<br>(17.6 to 25.5)                            | 1.4<br>(-1.8 to 4.7)                                |
| Female infertility                                         | 8,673.5<br>(5,610.1 to 12,673.1)                    | --                                                         | 52.3<br>(19.2 to 112.0)                          | 67.9<br>(41.0 to 102.6)                           | 47.4<br>(23.1 to 79.3)                              |
| Endometriosis                                              | 395.1<br>(336.0 to 464.7)                           | 1,019.0<br>(840.6 to 1,245.2)                              | 36.9<br>(23.8 to 52.1)                           | 16.7<br>(9.7 to 24.1)                             | -0.2<br>(-5.9 to 5.8)                               |
| Genital prolapse                                           | 51,016.8<br>(44,867.8 to 57,563.3)                  | 3,554.6<br>(3,054.1 to 4,158.5)                            | 157.2<br>(77.5 to 286.5)                         | 2.2<br>(0.1 to 4.2)                               | -22.2<br>(-24.0 to -20.7)                           |
| Premenstrual syndrome                                      | 81,321.3<br>(77,347.4 to 85,199.7)                  | 29,992.7<br>(28,354.1 to 31,573.6)                         | 673.8<br>(420.4 to 1,040.4)                      | 16.4<br>(14.1 to 18.8)                            | -1.2<br>(-3.1 to 0.6)                               |
| Other gynecological diseases                               | 13,847.6<br>(12,854.1 to 14,933.3)                  | 6,497.6<br>(5,395.0 to 7,680.2)                            | 496.4<br>(347.2 to 687.4)                        | 12.2<br>(8.1 to 16.5)                             | -5.9<br>(-9.6 to -2.0)                              |
| Hemoglobinopathies and hemolytic anaemias                  | 464,293.1<br>(462,803.5 to 465,831.7)               | --                                                         | 1,799.9<br>(1,208.8 to 2,557.0)                  | 11.2<br>(9.1 to 13.6)                             | -0.1<br>(-1.8 to 1.7)                               |
| Thalassemias                                               | 15.8<br>(15.0 to 16.6)                              | --                                                         | 1.8<br>(1.2 to 2.5)                              | -10.9<br>(-20.4 to -3.5)                          | -2.6<br>(-13.2 to 5.7)                              |
| Thalassaemias trait                                        | 31,104.6<br>(30,171.9 to 31,958.3)                  | --                                                         | 390.2<br>(260.8 to 559.8)                        | 14.2<br>(11.6 to 16.7)                            | 2.6<br>(0.4 to 4.7)                                 |
| Sickle cell disorders                                      | 1,219.7<br>(1,170.8 to 1,272.4)                     | --                                                         | 101.4<br>(71.2 to 139.9)                         | 8.2<br>(3.9 to 13.3)                              | 6.1<br>(1.9 to 10.7)                                |
| Sickle cell trait                                          | 186,035.5<br>(182,751.1 to 189,577.4)               | --                                                         | 679.9<br>(452.6 to 967.0)                        | 8.1<br>(5.8 to 10.2)                              | -1.7<br>(-3.6 to 0.2)                               |
| G6PD deficiency                                            | 91,232.2<br>(88,686.6 to 94,026.2)                  | --                                                         | 8.9<br>(6.0 to 12.4)                             | 12.5<br>(8.2 to 17.4)                             | 1.0<br>(-2.6 to 5.5)                                |
| G6PD trait                                                 | 200,910.8<br>(198,741.5 to 203,226.6)               | --                                                         | 0.1<br>(0.1 to 0.1)                              | 18.1<br>(14.5 to 22.2)                            | 4.1<br>(1.1 to 7.8)                                 |
| Other hemoglobinopathies and hemolytic anaemias            | 24,704.4<br>(24,145.9 to 25,275.7)                  | --                                                         | 617.6<br>(413.5 to 877.3)                        | 13.5<br>(10.7 to 16.9)                            | -0.9<br>(-2.9 to 1.4)                               |
| Endocrine, metabolic, blood, and immune disorders          | 28,447.6<br>(27,383.4 to 29,657.7)                  | 2,137.3<br>(1,909.7 to 2,394.1)                            | 874.3<br>(595.8 to 1,216.9)                      | 16.9<br>(14.6 to 19.4)                            | 2.4<br>(0.9 to 3.8)                                 |
| <b>Musculoskeletal disorders</b>                           | <b>201,343.9</b><br><b>(196,269.2 to 205,854.0)</b> | <b>119,656.7</b><br><b>(106,041.9 to 135,154.0)</b>        | <b>21,423.4</b><br><b>(15,638.0 to 27,940.3)</b> | <b>25.1</b><br><b>(23.3 to 27.0)</b>              | <b>0.1</b><br><b>(-1.1 to 1.3)</b>                  |
| Rheumatoid arthritis                                       | 3,298.8<br>(2,950.0 to 3,700.2)                     | 201.8<br>(181.0 to 225.3)                                  | 764.0<br>(521.8 to 1,016.9)                      | 40.0<br>(36.5 to 43.5)                            | 9.1<br>(6.7 to 11.6)                                |
| Osteoarthritis                                             | 39,001.1<br>(36,718.1 to 41,319.2)                  | 2,047.4<br>(1,911.0 to 2,181.7)                            | 2,368.4<br>(1,673.2 to 3,188.6)                  | 37.5<br>(36.4 to 38.6)                            | 2.9<br>(2.1 to 3.6)                                 |
| Low back and neck pain                                     | 93,822.7<br>(90,651.8 to 96,725.9)                  | 40,658.6<br>(36,315.1 to 45,521.3)                         | 10,601.0<br>(7,484.0 to 13,937.6)                | 29.9<br>(27.2 to 32.6)                            | 4.2<br>(2.5 to 5.9)                                 |
| Low back pain                                              | 66,156.1<br>(58,245.1 to 75,042.8)                  | 32,433.8<br>(28,258.2 to 37,189.0)                         | 7,382.4<br>(5,219.4 to 9,694.8)                  | 25.6<br>(22.9 to 28.5)                            | 1.5<br>(-0.0 to 3.0)                                |
| Neck pain                                                  | 32,595.4<br>(28,139.9 to 37,747.4)                  | 8,224.8<br>(7,138.8 to 9,590.9)                            | 3,218.5<br>(2,176.1 to 4,508.7)                  | 40.8<br>(35.3 to 46.6)                            | 11.2<br>(7.0 to 15.6)                               |
| Gout                                                       | 3,761.8<br>(3,342.9 to 4,245.5)                     | 791.1<br>(690.0 to 894.3)                                  | 117.9<br>(81.2 to 161.2)                         | 37.2<br>(32.4 to 42.2)                            | 4.9<br>(1.8 to 8.4)                                 |
| Other musculoskeletal disorders                            | 89,225.3<br>(76,692.3 to 102,090.0)                 | 75,957.8<br>(62,752.0 to 91,396.7)                         | 7,572.2<br>(5,166.3 to 10,664.1)                 | 14.7<br>(11.9 to 17.4)                            | -7.2<br>(-9.0 to -5.3)                              |
| <b>Other non-communicable diseases</b>                     | <b>954,036.3</b><br><b>(946,067.9 to 961,541.9)</b> | <b>2,412,605.8†</b><br><b>(2,268,237.9 to 2,577,446.0)</b> | <b>26,780.9</b><br><b>(18,315.2 to 38,000.2)</b> | <b>20.4</b><br><b>(19.6 to 21.1)</b>              | <b>-1.4</b><br><b>(-1.9 to -0.9)</b>                |
| Congenital anomalies                                       | 14,057.7<br>(13,213.0 to 14,814.0)                  | --                                                         | 1,566.8<br>(1,113.4 to 2,110.6)                  | 4.8<br>(0.8 to 9.5)                               | -5.5<br>(-9.5 to -1.2)                              |
| Neural tube defects                                        | 943.8<br>(842.5 to 1,066.9)                         | --                                                         | 279.9<br>(196.8 to 375.5)                        | 12.9<br>(8.1 to 17.5)                             | -0.3<br>(-4.5 to 3.8)                               |
| Congenital heart anomalies                                 | 2,262.7<br>(1,953.7 to 2,591.3)                     | --                                                         | 110.1<br>(48.6 to 184.4)                         | 3.6<br>(-0.7 to 7.7)                              | 1.3<br>(-2.2 to 4.8)                                |
| Orofacial clefts                                           | 423.5<br>(373.4 to 478.8)                           | --                                                         | 7.6<br>(4.8 to 11.0)                             | 4.2<br>(-6.3 to 16.4)                             | -6.9<br>(-16.4 to 3.9)                              |
| Down's syndrome                                            | 157.8<br>(133.5 to 186.2)                           | --                                                         | 13.8<br>(9.2 to 19.8)                            | 10.6<br>(7.9 to 13.4)                             | 2.1<br>(-0.5 to 4.6)                                |
| Turner syndrome                                            | 579.9<br>(500.6 to 665.1)                           | --                                                         | 10.1<br>(4.8 to 16.3)                            | 0.6<br>(-7.1 to 8.9)                              | -7.2<br>(-13.8 to -0.4)                             |
| Klinefelter syndrome                                       | 627.4<br>(539.6 to 718.9)                           | --                                                         | 3.5<br>(1.7 to 6.5)                              | 10.6<br>(4.3 to 16.6)                             | -0.8<br>(-6.1 to 4.6)                               |

| Cause                                         | Prevalence in thousands (95% UI)                    | Incidence in thousands (95% UI)                      | YLDs in thousands (95% UI)                      |                                                   |                                                     |
|-----------------------------------------------|-----------------------------------------------------|------------------------------------------------------|-------------------------------------------------|---------------------------------------------------|-----------------------------------------------------|
|                                               | 2016 counts<br>(173.6 to 237.5)                     | 2016 counts                                          | 2016 counts                                     | Percentage change in counts between 2006 and 2016 | Percentage change in age-standardised rates between |
| Other chromosomal abnormalities               | 204.2<br>(173.6 to 237.5)                           | --                                                   | 45.3<br>(30.6 to 63.4)                          | -8.5<br>(-14.6 to -1.9)                           | -1.5<br>(-8.2 to 5.7)                               |
| Congenital musculoskeletal and limb anomalies | 1,176.8<br>(1,069.7 to 1,286.2)                     | --                                                   | 172.2<br>(117.5 to 237.1)                       | 15.4<br>(12.6 to 18.4)                            | 1.9<br>(-0.4 to 4.3)                                |
| Urogenital congenital anomalies               | 1,137.7<br>(1,015.1 to 1,270.2)                     | --                                                   | 34.3<br>(20.6 to 53.0)                          | -0.1<br>(-2.5 to 2.2)                             | -2.5<br>(-4.7 to -0.2)                              |
| Digestive congenital anomalies                | 977.0<br>(875.3 to 1,079.2)                         | --                                                   | 41.9<br>(27.6 to 59.3)                          | 12.4<br>(7.6 to 17.8)                             | -0.2<br>(-4.2 to 4.3)                               |
| Other congenital anomalies                    | 8,181.5<br>(6,054.6 to 10,900.3)                    | --                                                   | 848.3<br>(560.9 to 1,240.3)                     | 1.3<br>(-5.2 to 9.3)                              | -9.8<br>(-15.5 to -2.7)                             |
| Skin and subcutaneous diseases                | 349,871.1<br>(345,358.0 to 353,447.4)               | 751,996.3<br>(717,210.3 to 790,042.7)                | 8,373.9<br>(5,667.4 to 12,118.1)                | 16.1<br>(15.1 to 17.1)                            | 3.9<br>(3.2 to 4.8)                                 |
| Dermatitis                                    | 40,168.9<br>(38,237.0 to 42,371.6)                  | 71,911.3<br>(66,434.7 to 77,271.7)                   | 1,401.4<br>(851.0 to 2,214.7)                   | 12.5<br>(10.0 to 15.2)                            | 2.0<br>(0.0 to 4.0)                                 |
| Psoriasis                                     | 9,648.9<br>(9,332.1 to 9,980.4)                     | 1,395.1<br>(1,349.9 to 1,439.5)                      | 833.4<br>(601.7 to 1,091.6)                     | 31.8<br>(29.4 to 34.4)                            | 10.6<br>(8.7 to 12.4)                               |
| Cellulitis                                    | 367.6<br>(342.0 to 394.7)                           | 6,114.3<br>(5,707.0 to 6,522.0)                      | 21.3<br>(13.7 to 30.7)                          | 17.4<br>(15.6 to 19.4)                            | 2.8<br>(1.0 to 4.8)                                 |
| Pyoderma                                      | 2,892.9<br>(2,824.8 to 2,963.5)                     | 56,998.1<br>(55,470.6 to 58,658.0)                   | 16.1<br>(6.5 to 33.5)                           | 19.7<br>(17.8 to 21.7)                            | 2.2<br>(0.8 to 3.7)                                 |
| Scabies                                       | 23,813.3<br>(20,810.3 to 27,512.7)                  | 73,014.7<br>(62,912.2 to 84,215.9)                   | 611.9<br>(340.1 to 978.2)                       | 7.9<br>(6.5 to 9.3)                               | -2.4<br>(-3.5 to -1.3)                              |
| Fungal skin diseases                          | 89,168.2<br>(80,671.8 to 98,973.7)                  | 305,637.2<br>(275,432.2 to 340,560.9)                | 497.6<br>(199.6 to 1,041.2)                     | 15.4<br>(13.8 to 17.1)                            | 0.1<br>(-0.2 to 0.3)                                |
| Viral skin diseases                           | 31,260.0<br>(30,172.0 to 32,472.5)                  | 46,569.6<br>(44,652.6 to 48,494.0)                   | 953.2<br>(585.0 to 1,407.8)                     | 9.9<br>(9.0 to 10.8)                              | -0.0<br>(-0.8 to 0.7)                               |
| Acne vulgaris                                 | 100,994.6<br>(91,379.0 to 111,704.2)                | 67,865.6<br>(57,296.0 to 81,397.3)                   | 2,594.0<br>(1,741.2 to 3,773.5)                 | 18.8<br>(17.0 to 20.9)                            | 8.2<br>(6.7 to 10.2)                                |
| Alopecia areata                               | 2,352.1<br>(2,258.1 to 2,447.4)                     | 4,170.1<br>(4,006.1 to 4,346.4)                      | 76.7<br>(48.9 to 115.6)                         | 18.6<br>(15.6 to 21.8)                            | 0.1<br>(-2.2 to 2.6)                                |
| Pruritus                                      | 11,873.0<br>(10,455.8 to 13,382.4)                  | 9,430.4<br>(8,457.7 to 10,616.0)                     | 125.7<br>(58.4 to 229.1)                        | 19.8<br>(17.6 to 21.9)                            | 0.9<br>(-0.1 to 2.0)                                |
| Urticaria                                     | 13,555.3<br>(11,851.9 to 15,677.5)                  | 24,086.5<br>(21,088.0 to 27,690.7)                   | 810.2<br>(516.4 to 1,163.1)                     | 6.9<br>(4.8 to 9.0)                               | 0.0<br>(-1.1 to 1.2)                                |
| Decubitus ulcer                               | 173.3<br>(155.1 to 191.6)                           | 624.8<br>(558.5 to 698.5)                            | 28.8<br>(19.6 to 38.8)                          | 31.2<br>(27.9 to 34.8)                            | 6.6<br>(3.6 to 9.4)                                 |
| Other skin and subcutaneous diseases          | 74,099.2<br>(72,172.2 to 76,058.7)                  | 84,178.9<br>(81,807.5 to 86,509.6)                   | 403.8<br>(196.1 to 741.0)                       | 31.0<br>(30.2 to 31.8)                            | 7.8<br>(7.3 to 8.3)                                 |
| Sense organ diseases                          | 352,541.5<br>(348,753.4 to 356,337.1)               | 119,808.0†<br>(112,557.0 to 127,786.4)               | 13,464.9<br>(9,403.9 to 18,537.0)               | 24.4<br>(23.2 to 25.6)                            | -3.4<br>(-4.2 to -2.6)                              |
| Glaucoma                                      | 617.5<br>(503.8 to 739.6)                           | --                                                   | 61.9<br>(41.1 to 87.2)                          | 47.1<br>(41.7 to 52.6)                            | 5.8<br>(2.1 to 9.6)                                 |
| Cataract                                      | 27,287.3<br>(24,176.5 to 30,451.0)                  | --                                                   | 1,963.5<br>(1,393.6 to 2,657.3)                 | 40.9<br>(38.3 to 43.6)                            | 2.0<br>(0.2 to 3.8)                                 |
| Macular degeneration                          | 706.1<br>(564.4 to 875.9)                           | --                                                   | 52.7<br>(34.9 to 73.5)                          | 35.2<br>(30.0 to 40.6)                            | -3.0<br>(-6.6 to 0.7)                               |
| Refraction and accommodation disorders        | 197,986.7<br>(190,741.2 to 205,472.2)               | --                                                   | 3,611.0<br>(2,295.8 to 5,520.7)                 | 13.9<br>(11.5 to 16.0)                            | -10.9<br>(-13.2 to -9.0)                            |
| Age-related and other hearing loss            | 228,741.0<br>(217,384.4 to 241,232.2)               | --                                                   | 6,494.5<br>(4,509.7 to 9,102.6)                 | 25.3<br>(22.8 to 27.5)                            | -2.1<br>(-3.7 to -0.7)                              |
| Other vision loss                             | 3,424.7<br>(2,923.5 to 4,007.2)                     | --                                                   | 293.7<br>(201.1 to 405.4)                       | 30.5<br>(26.0 to 34.8)                            | 1.6<br>(-1.2 to 4.5)                                |
| Other sense organ diseases                    | 32,224.2<br>(29,965.5 to 34,356.2)                  | 119,808.0<br>(112,557.0 to 127,786.4)                | 987.6<br>(625.4 to 1,488.5)                     | 27.9<br>(26.6 to 29.2)                            | 1.8<br>(0.9 to 2.6)                                 |
| Oral disorders                                | 685,998.8<br>(664,366.5 to 701,227.0)               | 1,540,801.4†<br>(1,396,792.9 to 1,700,467.0)         | 3,375.3<br>(1,960.7 to 5,494.3)                 | 24.8<br>(23.7 to 26.1)                            | -1.0<br>(-1.5 to -0.5)                              |
| Caries of deciduous teeth                     | 103,959.2<br>(85,094.2 to 124,274.2)                | 353,703.2<br>(253,983.2 to 481,931.4)                | 24.3<br>(10.6 to 48.9)                          | -4.0<br>(-7.1 to -1.0)                            | -0.4<br>(-3.5 to 2.8)                               |
| Caries of permanent teeth                     | 433,050.2<br>(404,890.0 to 461,742.5)               | 1,160,362.9<br>(1,062,255.2 to 1,260,921.2)          | 253.5<br>(113.0 to 481.9)                       | 7.4<br>(5.9 to 8.9)                               | -8.4<br>(-9.3 to -7.5)                              |
| Periodontal disease                           | 194,914.4<br>(168,277.8 to 223,528.1)               | 23,460.0<br>(19,691.8 to 27,461.0)                   | 1,268.3<br>(510.3 to 2,624.8)                   | 27.6<br>(26.4 to 28.7)                            | 0.1<br>(-0.4 to 0.8)                                |
| Edentulism and severe tooth loss              | 41,949.6<br>(36,442.3 to 47,498.7)                  | 3,275.2<br>(2,779.0 to 3,794.3)                      | 1,147.2<br>(759.3 to 1,620.8)                   | 30.7<br>(28.8 to 32.8)                            | -1.3<br>(-2.2 to -0.3)                              |
| Other oral disorders                          | 23,395.8<br>(22,356.7 to 24,489.6)                  | --                                                   | 682.0<br>(421.2 to 1,020.5)                     | 19.5<br>(18.4 to 20.5)                            | 0.1<br>(-0.6 to 0.8)                                |
| <b>Injuries</b>                               | <b>247,489.0</b><br><b>(234,824.6 to 260,933.4)</b> | <b>132,603.2†</b><br><b>(126,637.2 to 138,914.0)</b> | <b>10,599.3</b><br><b>(7,298.4 to 14,850.6)</b> | <b>22.6</b><br><b>(21.0 to 24.3)</b>              | <b>-0.8</b><br><b>(-1.9 to 0.4)</b>                 |
| <b>Transport injuries</b>                     | <b>42,559.2</b><br><b>(39,544.1 to 45,944.8)</b>    | <b>15,328.7</b><br><b>(13,696.2 to 17,039.0)</b>     | <b>2,437.7</b><br><b>(1,637.7 to 3,469.1)</b>   | <b>27.3</b><br><b>(25.7 to 29.1)</b>              | <b>2.5</b><br><b>(1.3 to 3.8)</b>                   |
| Road injuries                                 | 31,812.2<br>(29,607.9 to 34,379.6)                  | 12,656.1<br>(11,118.8 to 14,292.3)                   | 1,799.5<br>(1,206.7 to 2,565.7)                 | 30.7<br>(29.1 to 32.3)                            | 4.6<br>(3.6 to 5.7)                                 |
| Pedestrian road injuries                      | 7,576.1<br>(6,651.3 to 8,613.2)                     | 2,428.6<br>(2,026.2 to 2,899.5)                      | 439.9<br>(297.6 to 626.9)                       | 22.6<br>(21.0 to 24.3)                            | -1.3<br>(-2.5 to -0.1)                              |
| Cyclist road injuries                         | 6,138.3<br>(5,161.9 to 7,319.3)                     | 3,001.1<br>(2,453.4 to 3,626.5)                      | 329.2<br>(220.9 to 471.1)                       | 35.2<br>(33.6 to 36.8)                            | 9.4<br>(8.3 to 10.5)                                |
| Motorcyclist road injuries                    | 11,163.8<br>(9,590.9 to 13,668.0)                   | 3,445.1<br>(2,866.1 to 4,116.2)                      | 615.6<br>(414.4 to 875.5)                       | 29.8<br>(28.2 to 31.5)                            | 3.5<br>(2.5 to 4.6)                                 |
| Motor vehicle road injuries                   | 5,070.8<br>(4,261.4 to 5,818.6)                     | 2,722.9<br>(2,231.3 to 3,227.4)                      | 315.9<br>(211.9 to 453.9)                       | 34.6<br>(33.1 to 36.2)                            | 6.8<br>(5.8 to 7.8)                                 |
| Other road injuries                           | 1,863.2<br>(1,593.6 to 2,177.9)                     | 1,058.4<br>(814.7 to 1,377.6)                        | 98.9<br>(65.5 to 144.4)                         | 50.6<br>(48.6 to 52.5)                            | 19.2<br>(17.9 to 20.5)                              |
| Other transport injuries                      | 10,746.9<br>(9,105.3 to 12,529.1)                   | 2,672.6<br>(2,344.0 to 3,077.6)                      | 638.2<br>(435.8 to 906.6)                       | 18.6<br>(16.9 to 20.6)                            | -3.1<br>(-4.5 to -1.5)                              |
| <b>Unintentional injuries</b>                 | <b>195,532.6</b><br><b>(183,995.4 to 207,844.5)</b> | <b>113,105.8</b><br><b>(107,063.1 to 119,327.0)</b>  | <b>7,425.7</b><br><b>(5,102.9 to 10,299.7)</b>  | <b>22.2</b><br><b>(20.5 to 23.9)</b>              | <b>-1.3</b><br><b>(-2.6 to -0.1)</b>                |
| Falls                                         | 70,940.4<br>(63,110.1 to 78,152.4)                  | 37,639.5<br>(34,050.7 to 41,635.1)                   | 3,266.6<br>(2,329.2 to 4,460.4)                 | 30.2<br>(28.7 to 31.7)                            | 1.9<br>(0.7 to 3.2)                                 |
| Drowning                                      | 714.1<br>(626.1 to 817.8)                           | 144.0<br>(127.0 to 162.6)                            | 41.5<br>(27.6 to 59.6)                          | 8.2<br>(6.2 to 10.4)                              | -11.6<br>(-13.1 to -9.9)                            |
| Fire, heat, and hot substances                | 15,723.3<br>(13,482.2 to 18,668.2)                  | 1,958.2<br>(1,631.5 to 2,291.4)                      | 444.4<br>(304.6 to 638.8)                       | 17.2<br>(14.5 to 19.7)                            | -3.8<br>(-5.8 to -2.1)                              |
| Poisonings                                    | 435.1<br>(365.9 to 514.9)                           | 650.8<br>(516.4 to 811.2)                            | 39.9<br>(24.9 to 59.0)                          | 36.8<br>(34.7 to 38.9)                            | 15.7<br>(13.9 to 17.3)                              |
| Exposure to mechanical forces                 | 19,694.4<br>(16,839.3 to 23,864.3)                  | 8,135.3<br>(6,918.9 to 9,349.3)                      | 530.2<br>(350.4 to 765.3)                       | 20.6<br>(18.6 to 22.7)                            | -2.0<br>(-3.5 to -0.5)                              |
| Unintentional firearm injuries                | 509.4<br>(425.9 to 609.3)                           | 133.1<br>(91.0 to 187.9)                             | 23.3<br>(15.2 to 34.0)                          | 24.2<br>(22.1 to 26.4)                            | 1.3<br>(-0.2 to 2.8)                                |
| Unintentional suffocation                     | 919.9<br>(702.5 to 1,175.3)                         | 179.8<br>(126.2 to 248.7)                            | 34.2<br>(21.5 to 52.2)                          | 10.7<br>(8.8 to 12.8)                             | -5.2<br>(-6.4 to -4.0)                              |
| Other exposure to mechanical forces           | 18,265.0<br>(15,452.7 to 22,490.5)                  | 7,822.5<br>(6,675.0 to 8,992.0)                      | 472.7<br>(313.1 to 679.1)                       | 21.2<br>(19.1 to 23.3)                            | -1.9<br>(-3.5 to -0.3)                              |



| Cause                                                                               | Prevalence in thousands (95% UI)                 | Incidence in thousands (95% UI)                | YLDs in thousands (95% UI)              |                                                   |                                                     |
|-------------------------------------------------------------------------------------|--------------------------------------------------|------------------------------------------------|-----------------------------------------|---------------------------------------------------|-----------------------------------------------------|
|                                                                                     | 2016 counts                                      | 2016 counts                                    | 2016 counts                             | Percentage change in counts between 2006 and 2016 | Percentage change in age-standardised rates between |
| Adverse effects of medical treatment                                                | 619.9<br>(495.3 to 761.5)                        | 8,106.7<br>(7,201.5 to 9,023.0)                | 82.6<br>(51.5 to 123.2)                 | 7.1<br>(4.8 to 9.6)                               | -7.7<br>(-9.7 to -5.7)                              |
| Animal contact                                                                      | 23,029.0<br>(20,434.7 to 26,356.8)               | 30,910.0<br>(27,204.0 to 34,724.8)             | 768.2<br>(522.5 to 1,062.3)             | 3.3<br>(1.6 to 5.2)                               | -14.6<br>(-15.9 to -13.3)                           |
| Venomous animal contact                                                             | 13,940.5<br>(11,721.1 to 16,560.2)               | 17,121.1<br>(14,308.2 to 20,507.4)             | 610.9<br>(421.7 to 843.1)               | 2.7<br>(1.0 to 4.5)                               | -14.6<br>(-15.9 to -13.3)                           |
| Non-venomous animal contact                                                         | 9,088.6<br>(7,641.4 to 10,850.9)                 | 13,789.0<br>(11,321.3 to 16,502.9)             | 157.3<br>(104.7 to 231.9)               | 5.6<br>(3.2 to 7.9)                               | -14.6<br>(-16.6 to -12.7)                           |
| Foreign body                                                                        | 11,351.0<br>(9,239.3 to 13,476.3)                | 7,308.8<br>(6,296.0 to 8,583.2)                | 463.0<br>(299.9 to 679.4)               | 21.4<br>(19.1 to 23.9)                            | 3.3<br>(1.6 to 5.2)                                 |
| Pulmonary aspiration and foreign body in airway                                     | 4,934.1<br>(3,598.3 to 6,797.2)                  | 1,585.0<br>(1,293.7 to 1,978.0)                | 233.5<br>(147.0 to 352.5)               | 14.2<br>(12.3 to 16.4)                            | -1.7<br>(-3.1 to -0.1)                              |
| Foreign body in eyes                                                                | 703.0<br>(401.9 to 1,041.9)                      | 3,608.2<br>(2,776.4 to 4,751.4)                | 39.4<br>(20.0 to 66.6)                  | 19.6<br>(17.2 to 23.1)                            | 0.6<br>(-0.2 to 1.3)                                |
| Foreign body in other body part                                                     | 5,713.9<br>(4,548.6 to 7,356.4)                  | 2,115.7<br>(1,746.0 to 2,563.9)                | 190.1<br>(124.2 to 276.1)               | 32.1<br>(29.0 to 35.4)                            | 10.9<br>(8.5 to 13.4)                               |
| Environmental heat and cold exposure                                                | 18,464.5<br>(15,671.4 to 21,707.5)               | 5,284.3<br>(4,468.9 to 6,219.0)                | 758.1<br>(505.5 to 1,087.1)             | 16.9<br>(15.0 to 19.0)                            | -4.9<br>(-6.5 to -3.2)                              |
| Other unintentional injuries                                                        | 34,561.0<br>(28,327.7 to 41,375.7)               | 12,968.2<br>(11,291.8 to 14,959.1)             | 1,031.3<br>(689.0 to 1,470.4)           | 24.4<br>(22.9 to 25.8)                            | 1.3<br>(0.1 to 2.4)                                 |
| <b>Self-harm and interpersonal violence</b>                                         | <b>47,671.6</b><br><b>(43,141.3 to 52,661.7)</b> | <b>4,070.5†</b><br><b>(3,571.3 to 4,582.6)</b> | <b>694.2</b><br><b>(483.5 to 962.7)</b> | <b>13.5</b><br><b>(11.9 to 15.0)</b>              | <b>-5.2</b><br><b>(-6.3 to -4.3)</b>                |
| Self-harm                                                                           | 2,473.2<br>(2,077.4 to 2,906.9)                  | 1,203.6<br>(1,028.0 to 1,394.9)                | 128.0<br>(82.5 to 186.6)                | 16.1<br>(14.1 to 18.4)                            | -7.2<br>(-8.6 to -5.6)                              |
| Self-harm by firearm                                                                | 104.6<br>(89.4 to 120.4)                         | 30.0<br>(17.6 to 49.9)                         | 4.2<br>(2.7 to 6.2)                     | -8.7<br>(-10.2 to -7.0)                           | -26.7<br>(-27.7 to -25.5)                           |
| Self-harm by other specified means                                                  | 2,368.6<br>(1,959.0 to 2,806.1)                  | 1,173.5<br>(998.6 to 1,365.0)                  | 123.8<br>(79.9 to 180.3)                | 17.2<br>(15.1 to 19.5)                            | -6.4<br>(-7.9 to -4.7)                              |
| Interpersonal violence                                                              | 45,198.4<br>(40,659.3 to 50,165.3)               | 2,866.9†<br>(2,424.8 to 3,350.5)               | 566.2<br>(394.4 to 784.2)               | 12.9<br>(11.1 to 14.5)                            | -4.7<br>(-5.9 to -3.7)                              |
| Assault by firearm                                                                  | 143.5<br>(125.5 to 166.4)                        | 46.6<br>(33.6 to 63.5)                         | 6.9<br>(4.6 to 10.2)                    | 17.0<br>(15.0 to 18.8)                            | -5.4<br>(-6.8 to -4.2)                              |
| Assault by sharp object                                                             | 1,463.9<br>(1,181.6 to 1,748.0)                  | 564.9<br>(426.9 to 740.2)                      | 46.2<br>(30.5 to 66.6)                  | 18.6<br>(16.2 to 21.0)                            | -2.7<br>(-4.3 to -1.2)                              |
| Sexual violence                                                                     | 39,495.4<br>(35,009.6 to 44,436.2)               | --                                             | 341.5<br>(229.2 to 487.1)               | 9.7<br>(7.2 to 11.8)                              | -5.2<br>(-7.1 to -3.7)                              |
| Assault by other means                                                              | 4,095.6<br>(3,485.1 to 4,870.4)                  | 2,255.4<br>(1,891.5 to 2,644.6)                | 171.6<br>(114.9 to 246.6)               | 18.0<br>(16.5 to 19.4)                            | -4.4<br>(-5.4 to -3.4)                              |
| <b>Forces of nature, conflict and terrorism, and executions and police conflict</b> | <b>1,221.1</b><br><b>(713.3 to 1,868.6)</b>      | <b>98.2†</b><br><b>(57.2 to 144.0)</b>         | <b>41.6</b><br><b>(11.1 to 111.4)</b>   | <b>-0.1</b><br><b>(-2.4 to 3.4)</b>               | <b>-12.8</b><br><b>(-14.9 to -9.6)</b>              |
| Exposure to forces of nature                                                        | 613.1<br>(250.9 to 1,072.4)                      | 78.3<br>(38.2 to 122.4)                        | 23.2<br>(6.6 to 58.2)                   | 2.9<br>(0.3 to 6.7)                               | -10.8<br>(-13.2 to -7.3)                            |
| Conflict and terrorism                                                              | 550.6<br>(325.0 to 860.0)                        | --                                             | 16.7<br>(4.0 to 48.4)                   | -6.0<br>(-8.3 to -3.2)                            | -17.0<br>(-18.9 to -14.4)                           |
| Executions and police conflict                                                      | 57.3<br>(33.0 to 91.1)                           | 19.9<br>(13.1 to 26.1)                         | 1.8<br>(0.6 to 4.8)                     | 26.8<br>(20.8 to 31.3)                            | 9.0<br>(4.1 to 13.4)                                |
| <b>Impairments</b>                                                                  | --                                               | --                                             | --                                      | --                                                | --                                                  |
| Anaemia                                                                             | 660,788.1<br>(647,305.4 to 675,621.5)            | --                                             | 22,136.6<br>(14,827.2 to 31,402.2)      | 10.7<br>(8.7 to 12.6)                             | -0.5<br>(-2.2 to 1.1)                               |
| Developmental intellectual disability                                               | 54,984.3<br>(41,716.2 to 68,081.4)               | --                                             | 5,194.2<br>(3,819.5 to 6,865.2)         | 12.7<br>(9.2 to 17.7)                             | 0.8<br>(-2.3 to 5.7)                                |
| Epilepsy                                                                            | 10,318.3<br>(8,965.1 to 12,115.1)                | --                                             | 3,433.0<br>(2,606.6 to 4,540.3)         | 21.5<br>(9.0 to 34.5)                             | 8.0<br>(-3.4 to 19.9)                               |
| Guillain-Barre syndrome                                                             | 13.3<br>(10.4 to 17.0)                           | --                                             | 3.9<br>(2.5 to 5.9)                     | 17.1<br>(14.0 to 20.5)                            | 0.0<br>(-0.0 to 0.1)                                |
| Hearing loss                                                                        | 258,445.8<br>(247,364.4 to 270,870.5)            | --                                             | 7,938.7<br>(5,558.0 to 11,046.2)        | 19.9<br>(17.8 to 21.8)                            | -3.2<br>(-4.5 to -2.0)                              |
| Heart failure                                                                       | 8,189.2<br>(7,213.1 to 9,348.9)                  | --                                             | 1,277.4<br>(932.4 to 1,655.3)           | 44.0<br>(41.3 to 46.7)                            | 5.1<br>(3.0 to 7.1)                                 |
| Infertility                                                                         | 22,899.2<br>(18,682.0 to 28,319.2)               | --                                             | 145.9<br>(62.8 to 280.1)                | 37.3<br>(27.6 to 46.5)                            | 16.8<br>(8.5 to 24.7)                               |
| Pelvic inflammatory disease                                                         | 529.8<br>(454.2 to 614.3)                        | --                                             | 69.1<br>(46.6 to 96.7)                  | 10.7<br>(6.7 to 14.8)                             | -8.6<br>(-11.8 to -5.4)                             |
| Vision loss                                                                         | 238,271.0<br>(228,790.0 to 247,660.0)            | --                                             | 7,252.0<br>(5,208.7 to 10,075.4)        | 23.8<br>(21.9 to 26.2)                            | -3.5<br>(-4.9 to -1.4)                              |

We did not calculate incidence for the nine impairments, certain NTDs, and causes with only birth prevalence. Blank cells mean that no estimate is available.

† Incidence for aggregate causes represents the sum of the incidence of the causes below the aggregate.

‡ Incidence estimates for stroke represent first-ever stroke only.

^ Incidence of HIV/AIDS represents new infections of HIV only and does not include new infections of Tuberculosis in HIV positive cases.

SR Table 14: Prevalence, incidence, and YLDs for 2016, percentage change of YLD counts and percentage change of age-standardised YLD rates between 2006 and 2016 by cause and impairments, for all ages, Indonesia.

| Cause                                                                                | Prevalence in thousands (95% UI)             | Incidence in thousands (95% UI)                     | YLDs in thousands (95% UI)                |                                                   |                                                     |
|--------------------------------------------------------------------------------------|----------------------------------------------|-----------------------------------------------------|-------------------------------------------|---------------------------------------------------|-----------------------------------------------------|
|                                                                                      | 2016 counts                                  | 2016 counts                                         | 2016 counts                               | Percentage change in counts between 2006 and 2016 | Percentage change in age-standardised rates between |
| <b>All causes</b>                                                                    | <b>248,424.1</b><br>(248,070.5 to 248,782.8) | <b>1,723,691.2†</b><br>(1,630,091.0 to 1,822,974.5) | <b>24,978.0</b><br>(18,544.8 to 32,505.2) | <b>18.4</b><br>(17.3 to 19.5)                     | <b>0.3</b><br>(-0.6 to 1.1)                         |
| <b>Communicable, maternal, neonatal, and nutritional disorders</b>                   | <b>184,007.8</b><br>(182,363.3 to 185,602.6) | <b>1,031,759.2†</b><br>(946,160.2 to 1,125,829.9)   | <b>3,403.5</b><br>(2,432.4 to 4,535.0)    | <b>0.5</b><br>(-2.8 to 3.8)                       | <b>-9.3</b><br>(-12.3 to -6.2)                      |
| <b>HIV/AIDS and tuberculosis</b>                                                     | <b>72,637.3</b><br>(66,877.0 to 76,444.6)    | <b>642.2†</b><br>(549.6 to 748.1)                   | <b>348.4</b><br>(231.8 to 469.9)          | <b>11.2</b><br>(8.0 to 15.0)                      | <b>-8.7</b><br>(-11.0 to -6.1)                      |
| Tuberculosis                                                                         | 68,403.1<br>(63,647.3 to 73,470.3)           | 622.9†<br>(530.1 to 726.8)                          | 228.7<br>(153.1 to 319.9)                 | 2.5<br>(-0.9 to 6.6)                              | -16.4<br>(-18.5 to -13.9)                           |
| Drug-susceptible tuberculosis                                                        | 754.0<br>(641.9 to 884.7)                    | 619.7<br>(527.2 to 723.1)                           | 227.4<br>(152.0 to 317.8)                 | 3.0<br>(-0.4 to 7.3)                              | -16.0<br>(-18.1 to -13.3)                           |
| Multidrug-resistant tuberculosis without extensive drug resistance                   | 3.6<br>(1.8 to 7.7)                          | 3.0<br>(1.6 to 6.0)                                 | 1.2<br>(0.5 to 2.5)                       | -48.1<br>(-74.9 to 8.4)                           | -56.8<br>(-79.0 to -9.2)                            |
| Extensively drug-resistant tuberculosis                                              | 0.3<br>(0.2 to 0.7)                          | 0.3<br>(0.1 to 0.6)                                 | 0.1<br>(< 0.05 to 0.2)                    | 64.4<br>(-20.7 to 242.7)                          | 33.9<br>(-35.2 to 188.4)                            |
| Latent tuberculosis infection                                                        | 67,645.2<br>(62,924.3 to 72,733.2)           | --                                                  | --                                        | --                                                | --                                                  |
| HIV/AIDS                                                                             | 404.8<br>(295.8 to 538.2)                    | 19.3^<br>(11.9 to 31.5)                             | 119.8<br>(74.7 to 175.3)                  | 32.7<br>(21.2 to 47.4)                            | 16.7<br>(6.2 to 30.0)                               |
| Drug-susceptible HIV/AIDS - Tuberculosis                                             | 281.2<br>(206.7 to 372.9)                    | 253.3<br>(184.7 to 337.1)                           | 108.9<br>(66.3 to 160.1)                  | 30.1<br>(19.6 to 43.8)                            | 14.3<br>(4.6 to 26.3)                               |
| Multidrug-resistant HIV/AIDS - Tuberculosis without extensive drug resistance        | 1.6<br>(0.8 to 3.2)                          | 1.5<br>(0.8 to 2.8)                                 | 0.7<br>(0.3 to 1.3)                       | -37.7<br>(-68.0 to 20.3)                          | -45.6<br>(-72.2 to 5.7)                             |
| Extensively drug-resistant HIV/AIDS - Tuberculosis                                   | 0.1<br>(0.1 to 0.3)                          | 0.1<br>(0.1 to 0.2)                                 | 0.1<br>(< 0.05 to 0.1)                    | 105.0<br>(5.4 to 296.0)                           | 79.1<br>(-8.5 to 247.8)                             |
| HIV/AIDS resulting in other diseases                                                 | 121.9<br>(55.4 to 228.0)                     | 19.3<br>(11.9 to 31.5)                              | 10.1<br>(4.1 to 20.1)                     | 87.1<br>(38.7 to 125.9)                           | 65.9<br>(21.4 to 100.3)                             |
| <b>Diarrhoea, lower respiratory infections, and other common infectious diseases</b> | <b>16,496.4</b><br>(16,027.5 to 16,921.2)    | <b>966,061.7†</b><br>(880,413.6 to 1,062,475.7)     | <b>850.6</b><br>(594.5 to 1,167.5)        | <b>4.4</b><br>(3.1 to 5.6)                        | <b>-5.0</b><br>(-6.1 to -3.9)                       |
| Diarrhoeal diseases                                                                  | 3,134.5<br>(2,943.4 to 3,335.1)              | 209,668.9<br>(196,996.6 to 223,275.8)               | 353.7<br>(244.8 to 486.0)                 | 3.9<br>(2.0 to 5.9)                               | -5.9<br>(-7.5 to -4.1)                              |
| Intestinal infectious diseases                                                       | 57.0<br>(50.2 to 64.2)                       | 1,068.2†<br>(956.4 to 1,196.4)                      | 9.0<br>(5.9 to 12.7)                      | -2.8<br>(-18.0 to 13.9)                           | -8.7<br>(-22.0 to 6.1)                              |
| Typhoid fever                                                                        | 53.7<br>(45.5 to 62.0)                       | 845.9<br>(752.1 to 952.5)                           | 8.3<br>(5.4 to 11.7)                      | -2.7<br>(-18.6 to 15.6)                           | -8.5<br>(-23.2 to 7.8)                              |
| Paratyphoid fever                                                                    | 9.8<br>(8.4 to 11.2)                         | 222.3<br>(198.9 to 251.4)                           | 0.6<br>(0.4 to 0.9)                       | 3.5<br>(-12.7 to 22.2)                            | -4.0<br>(-18.1 to 11.9)                             |
| Other intestinal infectious diseases                                                 | --                                           | --                                                  | 0.1<br>(0.1 to 0.1)                       | -33.8<br>(-46.3 to -17.7)                         | -33.5<br>(-44.7 to -19.9)                           |
| Lower respiratory infections                                                         | 270.6<br>(243.7 to 300.9)                    | 11,391.0<br>(10,219.1 to 12,789.9)                  | 16.5<br>(10.9 to 23.8)                    | 4.7<br>(0.2 to 9.3)                               | -1.3<br>(-5.2 to 2.5)                               |
| Upper respiratory infections                                                         | 9,593.8<br>(8,508.4 to 10,777.4)             | 725,474.9<br>(639,563.6 to 821,938.0)               | 239.7<br>(140.0 to 371.1)                 | 9.0<br>(6.9 to 11.3)                              | 0.1<br>(-1.4 to 1.5)                                |
| Otitis media                                                                         | 2,840.6<br>(2,535.5 to 3,130.4)              | 11,027.5<br>(8,889.2 to 13,737.2)                   | 85.4<br>(52.6 to 127.0)                   | -2.7<br>(-6.0 to 0.6)                             | -9.6<br>(-12.4 to -6.7)                             |
| Meningitis                                                                           | 540.8<br>(467.5 to 618.9)                    | 78.0<br>(66.5 to 91.0)                              | 59.5<br>(41.5 to 78.2)                    | 2.8<br>(-0.5 to 5.8)                              | -7.9<br>(-10.8 to -5.3)                             |
| Pneumococcal meningitis                                                              | 287.2<br>(238.2 to 342.2)                    | 24.4<br>(19.8 to 29.5)                              | 29.7<br>(20.8 to 39.1)                    | 9.5<br>(4.2 to 14.3)                              | -2.4<br>(-7.0 to 1.7)                               |
| H influenzae type B meningitis                                                       | 89.6<br>(70.2 to 113.4)                      | 15.9<br>(12.2 to 20.8)                              | 10.9<br>(7.5 to 14.5)                     | -31.4<br>(-34.3 to -28.2)                         | -37.9<br>(-40.6 to -35.0)                           |
| Meningococcal infection                                                              | 22.1<br>(16.4 to 28.9)                       | 5.6<br>(4.2 to 7.4)                                 | 2.7<br>(1.8 to 3.7)                       | 6.9<br>(3.6 to 10.2)                              | -5.0<br>(-7.8 to -2.3)                              |
| Other meningitis                                                                     | 141.8<br>(111.2 to 176.7)                    | 32.1<br>(26.9 to 38.2)                              | 16.2<br>(11.0 to 22.2)                    | 31.3<br>(28.2 to 34.5)                            | 17.0<br>(14.1 to 20.0)                              |
| Encephalitis                                                                         | 576.6<br>(382.4 to 845.0)                    | 249.5<br>(218.0 to 286.3)                           | 67.0<br>(47.5 to 87.4)                    | 3.0<br>(-2.0 to 8.3)                              | -9.2<br>(-13.5 to -4.8)                             |
| Diphtheria                                                                           | < 0.05<br>(< 0.05 to 0.1)                    | 0.6<br>(0.5 to 0.7)                                 | < 0.05<br>(< 0.05 to < 0.05)              | -55.5<br>(-62.9 to -46.5)                         | -58.7<br>(-65.5 to -50.4)                           |
| Whooping cough                                                                       | 109.8<br>(84.8 to 138.8)                     | 801.8<br>(619.2 to 1,013.6)                         | 5.5<br>(3.3 to 8.6)                       | -17.5<br>(-21.1 to -14.2)                         | -13.0<br>(-16.7 to -9.5)                            |
| Tetanus                                                                              | 15.0<br>(14.5 to 15.3)                       | 10.0<br>(1.8 to 13.8)                               | 0.4<br>(0.2 to 0.6)                       | -12.4<br>(-25.1 to 4.5)                           | -25.1<br>(-37.1 to -7.8)                            |
| Measles                                                                              | 21.5<br>(7.7 to 47.0)                        | 784.5<br>(280.2 to 1,716.5)                         | 1.9<br>(0.6 to 4.5)                       | 10.4<br>(-4.2 to 26.1)                            | 14.6<br>(-0.6 to 30.8)                              |
| Varicella and herpes zoster                                                          | 293.2<br>(266.9 to 318.9)                    | 5,506.9<br>(5,341.6 to 5,675.0)                     | 12.0<br>(7.4 to 18.8)                     | 20.7<br>(16.0 to 25.6)                            | -0.2<br>(-3.3 to 3.1)                               |
| <b>Neglected tropical diseases and malaria</b>                                       | <b>69,840.1</b><br>(66,921.6 to 72,822.2)    | <b>12,117.0†</b><br>(7,692.6 to 17,995.4)           | <b>381.4</b><br>(240.4 to 578.2)          | <b>-22.1</b><br>(-30.8 to -9.7)                   | <b>-32.2</b><br>(-40.5 to -20.8)                    |
| Malaria                                                                              | 140.6<br>(116.0 to 175.6)                    | 950.8<br>(602.2 to 1,425.0)                         | 7.2<br>(5.4 to 9.4)                       | -23.4<br>(-29.8 to -15.8)                         | -30.1<br>(-35.9 to -22.9)                           |
| Chagas disease                                                                       | --                                           | --                                                  | --                                        | --                                                | --                                                  |
| Leishmaniasis                                                                        | --                                           | --                                                  | --                                        | --                                                | --                                                  |
| Visceral leishmaniasis                                                               | --                                           | --                                                  | --                                        | --                                                | --                                                  |
| Cutaneous and mucocutaneous leishmaniasis                                            | --                                           | --                                                  | --                                        | --                                                | --                                                  |
| African trypanosomiasis                                                              | --                                           | --                                                  | --                                        | --                                                | --                                                  |
| Schistosomiasis                                                                      | 22.0<br>(15.0 to 30.2)                       | 2.6<br>(2.2 to 3.0)                                 | 0.3<br>(0.1 to 0.5)                       | -39.5<br>(-45.8 to -31.7)                         | -48.9<br>(-53.8 to -42.6)                           |
| Cysticercosis                                                                        | 4.4<br>(3.7 to 5.1)                          | --                                                  | 0.9<br>(0.6 to 1.2)                       | -12.6<br>(-21.0 to -3.5)                          | -29.3<br>(-36.1 to -21.7)                           |
| Cystic echinococcosis                                                                | 1.3<br>(0.6 to 2.9)                          | 0.3<br>(0.1 to 0.6)                                 | 0.1<br>(0.1 to 0.3)                       | -44.8<br>(-77.8 to 51.2)                          | -53.2<br>(-81.9 to 25.5)                            |
| Lymphatic filariasis                                                                 | 3,562.2<br>(3,054.7 to 4,258.6)              | 474.9<br>(414.9 to 550.5)                           | 142.2<br>(74.0 to 246.1)                  | -46.9<br>(-47.6 to -46.1)                         | -55.9<br>(-56.5 to -55.2)                           |
| Onchocerciasis                                                                       | --                                           | --                                                  | --                                        | --                                                | --                                                  |
| Trachoma                                                                             | --                                           | --                                                  | --                                        | --                                                | --                                                  |
| Dengue                                                                               | 639.1<br>(337.2 to 1,095.8)                  | 10,683.3<br>(6,297.2 to 16,554.2)                   | 104.4<br>(45.5 to 198.8)                  | 26.1<br>(3.0 to 183.5)                            | 13.1<br>(-7.5 to 153.7)                             |
| Yellow fever                                                                         | --                                           | --                                                  | --                                        | --                                                | --                                                  |
| Rabies                                                                               | < 0.05<br>(< 0.05 to < 0.05)                 | < 0.05<br>(< 0.05 to < 0.05)                        | < 0.05<br>(< 0.05 to < 0.05)              | -62.1<br>(-76.3 to -28.8)                         | -59.8<br>(-73.1 to -36.6)                           |
| Intestinal nematode infections                                                       | 65,476.6<br>(62,592.1 to 68,473.4)           | --                                                  | 92.2<br>(52.1 to 148.6)                   | 11.4<br>(-4.2 to 30.1)                            | -0.6<br>(-14.6 to 16.6)                             |
| Ascariasis                                                                           | 33,764.7<br>(26,912.2 to 41,832.4)           | --                                                  | 34.6<br>(18.2 to 59.3)                    | 6.6<br>(-20.4 to 46.3)                            | -4.2<br>(-29.1 to 31.8)                             |

| Cause                                                                   | Prevalence in thousands (95% UI)              | Incidence in thousands (95% UI)                | YLDs in thousands (95% UI)                 |                                                   |                                                     |
|-------------------------------------------------------------------------|-----------------------------------------------|------------------------------------------------|--------------------------------------------|---------------------------------------------------|-----------------------------------------------------|
|                                                                         | 2016 counts<br>(17,820.5 to 27,312.5)         | 2016 counts                                    | 2016 counts                                | Percentage change in counts between 2006 and 2016 | Percentage change in age-standardised rates between |
| Trichuriasis                                                            | 22,121.2<br>(17,820.5 to 27,312.5)            | --                                             | 9.2<br>(4.9 to 15.7)                       | 7.6<br>(-19.2 to 44.2)                            | -5.6<br>(-29.5 to 26.7)                             |
| Hookworm disease                                                        | 16,097.7<br>(13,287.2 to 19,153.8)            | --                                             | 48.4<br>(28.3 to 77.8)                     | 16.0<br>(-1.0 to 34.5)                            | 3.2<br>(-12.3 to 20.0)                              |
| Food-borne trematodiasis                                                | --                                            | --                                             | --                                         | --                                                | --                                                  |
| Leprosy                                                                 | 44.0<br>(42.0 to 45.9)                        | 5.1<br>(4.9 to 5.3)                            | 2.7<br>(1.8 to 3.8)                        | 24.6<br>(16.4 to 33.5)                            | -2.2<br>(-7.6 to 4.0)                               |
| Ebola virus disease                                                     | --                                            | --                                             | --                                         | --                                                | --                                                  |
| Zika virus disease                                                      | --                                            | --                                             | --                                         | --                                                | --                                                  |
| Guinea worm disease                                                     | --                                            | --                                             | --                                         | --                                                | --                                                  |
| Other neglected tropical diseases                                       | 1,649.8<br>(1,581.4 to 1,728.8)               | --                                             | 31.4<br>(19.8 to 47.8)                     | -26.6<br>(-31.1 to -21.6)                         | -27.0<br>(-31.1 to -22.2)                           |
| <b>Maternal disorders</b>                                               | <b>381.2<br/>(342.4 to 421.3)</b>             | <b>4,750.9†<br/>(4,476.0 to 5,029.9)</b>       | <b>26.6<br/>(17.1 to 38.5)</b>             | <b>-10.0<br/>(-32.0 to 20.6)</b>                  | <b>-14.0<br/>(-35.0 to 15.4)</b>                    |
| Maternal haemorrhage                                                    | 64.2<br>(57.0 to 72.3)                        | 605.0<br>(534.4 to 678.6)                      | 3.3<br>(2.2 to 4.7)                        | -2.9<br>(-28.5 to 33.3)                           | -7.8<br>(-32.0 to 26.8)                             |
| Maternal sepsis and other pregnancy related infections                  | 44.2<br>(23.8 to 71.4)                        | 516.8<br>(393.1 to 705.0)                      | 2.1<br>(1.0 to 4.0)                        | -11.7<br>(-57.3 to 86.2)                          | -15.3<br>(-59.2 to 78.9)                            |
| Maternal hypertensive disorders                                         | 268.5<br>(184.4 to 360.2)                     | 1,361.5<br>(1,327.8 to 1,394.4)                | 13.3<br>(7.5 to 21.5)                      | -9.4<br>(-41.9 to 42.6)                           | -13.2<br>(-44.4 to 36.3)                            |
| Maternal obstructed labour and uterine rupture                          | 6.9<br>(4.0 to 11.1)                          | 503.2<br>(378.1 to 664.1)                      | 2.1<br>(1.1 to 3.7)                        | -6.6<br>(-51.0 to 76.0)                           | -10.4<br>(-53.1 to 68.3)                            |
| Maternal abortion, miscarriage, and ectopic pregnancy                   | 14.5<br>(10.0 to 19.6)                        | 1,764.4<br>(1,601.9 to 1,957.3)                | 1.6<br>(0.9 to 2.5)                        | -18.7<br>(-51.3 to 33.0)                          | -23.4<br>(-53.7 to 25.9)                            |
| Other maternal disorders                                                | --                                            | --                                             | 4.1<br>(2.6 to 5.9)                        | -14.2<br>(-35.2 to 14.8)                          | -17.9<br>(-38.0 to 10.0)                            |
| <b>Neonatal disorders</b>                                               | <b>2,899.9<br/>(2,572.4 to 3,261.6)</b>       | <b>--</b>                                      | <b>392.8<br/>(273.9 to 552.1)</b>          | <b>11.1<br/>(-4.4 to 28.5)</b>                    | <b>3.1<br/>(-11.3 to 19.1)</b>                      |
| Neonatal preterm birth complications                                    | 2,663.7<br>(2,229.9 to 3,192.0)               | --                                             | 279.0<br>(189.7 to 395.2)                  | 9.2<br>(-10.6 to 32.0)                            | 0.7<br>(-17.6 to 21.7)                              |
| Neonatal encephalopathy due to birth asphyxia and trauma                | 154.2<br>(78.0 to 295.2)                      | --                                             | 22.9<br>(3.9 to 69.0)                      | 31.5<br>(-0.3 to 119.8)                           | 21.0<br>(-7.8 to 104.9)                             |
| Neonatal sepsis and other neonatal infections                           | 129.0<br>(45.1 to 302.7)                      | --                                             | 55.0<br>(16.8 to 141.6)                    | 11.7<br>(-13.8 to 59.1)                           | 3.8<br>(-20.1 to 54.0)                              |
| Hemolytic disease and other neonatal jaundice                           | 70.7<br>(62.8 to 78.9)                        | --                                             | 23.3<br>(17.8 to 29.5)                     | 30.5<br>(21.0 to 40.6)                            | 19.4<br>(10.7 to 28.8)                              |
| Other neonatal disorders                                                | --                                            | --                                             | 12.6<br>(8.6 to 18.1)                      | -5.6<br>(-19.1 to 10.3)                           | -1.1<br>(-15.2 to 15.5)                             |
| <b>Nutritional deficiencies</b>                                         | <b>71,043.2<br/>(69,263.9 to 72,429.7)</b>    | <b>25,324.7†<br/>(21,662.1 to 30,958.5)</b>    | <b>1,263.4<br/>(841.5 to 1,820.8)</b>      | <b>2.2<br/>(-1.1 to 5.7)</b>                      | <b>-5.2<br/>(-7.8 to -2.5)</b>                      |
| Protein-energy malnutrition                                             | 2,771.3<br>(2,638.9 to 2,920.2)               | 1,430.0<br>(1,369.3 to 1,496.7)                | 153.5<br>(98.3 to 222.1)                   | -15.6<br>(-25.3 to -3.5)                          | -11.2<br>(-21.4 to 1.2)                             |
| Iodine deficiency                                                       | 1,614.8<br>(1,458.2 to 1,789.1)               | 48.0<br>(44.0 to 53.0)                         | 41.1<br>(28.0 to 58.6)                     | -1.7<br>(-6.4 to 3.3)                             | -15.9<br>(-19.7 to -11.9)                           |
| Vitamin A deficiency                                                    | 24,369.2<br>(21,158.7 to 29,563.6)            | 23,846.6<br>(20,198.6 to 29,517.4)             | 7.1<br>(4.4 to 11.0)                       | 2.7<br>(-4.7 to 9.5)                              | -4.5<br>(-11.1 to 1.7)                              |
| Iron-deficiency anaemia                                                 | 49,633.5<br>(48,131.7 to 51,438.8)            | --                                             | 1,056.5<br>(693.2 to 1,558.5)              | 5.8<br>(2.6 to 9.1)                               | -3.8<br>(-6.2 to -1.3)                              |
| Other nutritional deficiencies                                          | --                                            | --                                             | 5.1<br>(3.3 to 7.4)                        | -16.8<br>(-27.1 to -4.0)                          | -12.8<br>(-23.5 to 0.3)                             |
| <b>Other communicable, maternal, neonatal, and nutritional diseases</b> | <b>56,721.8<br/>(54,812.7 to 58,568.5)</b>    | <b>22,862.7<br/>(20,900.7 to 24,869.8)</b>     | <b>124.6<br/>(80.9 to 187.2)</b>           | <b>-1.1<br/>(-4.6 to 2.5)</b>                     | <b>-12.3<br/>(-15.3 to -9.2)</b>                    |
| Sexually transmitted diseases excluding HIV                             | 38,652.0<br>(37,012.3 to 40,313.6)            | 14,201.5<br>(13,064.4 to 15,454.0)             | 82.2<br>(53.3 to 125.1)                    | 11.7<br>(7.8 to 15.6)                             | -2.8<br>(-6.1 to 0.5)                               |
| Syphilis                                                                | 2,847.8<br>(2,134.9 to 3,664.5)               | 1,714.7<br>(1,255.3 to 2,267.7)                | 6.4<br>(4.5 to 8.5)                        | 22.7<br>(17.4 to 28.4)                            | -4.6<br>(-9.4 to 0.2)                               |
| Chlamydial infection                                                    | 3,718.3<br>(2,986.7 to 4,559.6)               | 3,068.1<br>(2,515.9 to 3,720.7)                | 23.8<br>(14.6 to 36.9)                     | 8.0<br>(3.5 to 12.4)                              | -1.4<br>(-5.5 to 2.7)                               |
| Gonococcal infection                                                    | 448.6<br>(376.4 to 534.1)                     | 1,183.7<br>(911.1 to 1,507.2)                  | 3.1<br>(1.9 to 4.8)                        | 9.3<br>(1.4 to 17.1)                              | -3.0<br>(-10.1 to 3.8)                              |
| Trichomoniasis                                                          | 4,577.5<br>(3,925.9 to 5,251.6)               | 3,879.4<br>(3,313.8 to 4,468.5)                | 4.3<br>(1.6 to 9.1)                        | 14.5<br>(11.0 to 18.2)                            | -0.7<br>(-3.1 to 1.8)                               |
| Genital herpes                                                          | 27,926.0<br>(24,104.4 to 32,530.7)            | 1,838.7<br>(1,566.9 to 2,181.9)                | 7.2<br>(2.3 to 16.2)                       | 19.9<br>(13.4 to 25.9)                            | -0.5<br>(-5.5 to 4.6)                               |
| Other sexually transmitted diseases                                     | 2,011.0<br>(1,704.1 to 2,309.5)               | 2,516.9<br>(2,146.8 to 2,970.7)                | 37.5<br>(24.9 to 54.9)                     | 10.8<br>(5.3 to 16.5)                             | -3.9<br>(-8.7 to 1.1)                               |
| Hepatitis                                                               | 20,824.0<br>(17,669.0 to 24,862.1)            | 8,661.0<br>(7,111.9 to 10,120.4)               | 11.8<br>(7.5 to 17.7)                      | -31.4<br>(-40.2 to -21.7)                         | -40.2<br>(-47.4 to -32.9)                           |
| Acute hepatitis A                                                       | 302.0<br>(207.8 to 359.9)                     | 3,926.0<br>(2,701.1 to 4,679.3)                | 3.9<br>(2.5 to 5.8)                        | -42.3<br>(-53.0 to -28.1)                         | -47.0<br>(-56.4 to -35.8)                           |
| Hepatitis B                                                             | 15,829.8<br>(12,835.2 to 19,712.8)            | 4,223.0<br>(3,248.5 to 5,441.3)                | 7.1<br>(4.2 to 11.5)                       | -23.0<br>(-36.2 to -7.7)                          | -35.7<br>(-46.1 to -24.2)                           |
| Hepatitis C                                                             | 4,670.6<br>(4,141.6 to 5,224.9)               | 231.6<br>(209.6 to 254.9)                      | 0.2<br>(0.1 to 0.4)                        | -18.4<br>(-22.9 to -13.9)                         | -28.4<br>(-32.9 to -24.2)                           |
| Acute hepatitis E                                                       | 21.6<br>(19.6 to 23.8)                        | 280.4<br>(254.2 to 309.7)                      | 0.6<br>(0.4 to 0.8)                        | -38.9<br>(-45.0 to -31.7)                         | -44.6<br>(-49.6 to -39.4)                           |
| Other infectious diseases                                               | 1,434.7<br>(1,381.4 to 1,493.1)               | 0.3<br>(0.2 to 0.4)                            | 30.6<br>(19.6 to 46.3)                     | -13.0<br>(-17.1 to -8.4)                          | -16.4<br>(-19.9 to -12.7)                           |
| <b>Non-communicable diseases</b>                                        | <b>230,987.6<br/>(230,274.6 to 231,636.1)</b> | <b>678,555.8†<br/>(645,900.9 to 715,596.1)</b> | <b>20,217.5<br/>(15,015.4 to 26,188.7)</b> | <b>21.3<br/>(20.2 to 22.5)</b>                    | <b>1.4<br/>(0.7 to 2.3)</b>                         |
| <b>Neoplasms</b>                                                        | <b>565.8<br/>(550.9 to 581.1)</b>             | <b>248.3<br/>(238.2 to 259.8)</b>              | <b>83.7<br/>(61.0 to 109.1)</b>            | <b>35.6<br/>(29.9 to 43.2)</b>                    | <b>4.0<br/>(0.1 to 8.8)</b>                         |
| Lip and oral cavity cancer                                              | 23.6<br>(22.6 to 24.5)                        | 6.4<br>(6.2 to 6.7)                            | 2.5<br>(1.8 to 3.2)                        | 36.2<br>(28.1 to 44.7)                            | 3.2<br>(-2.3 to 8.9)                                |
| Nasopharynx cancer                                                      | 12.6<br>(9.6 to 15.8)                         | 3.8<br>(2.9 to 4.7)                            | 1.6<br>(1.0 to 2.3)                        | 22.2<br>(13.3 to 33.4)                            | -3.5<br>(-10.2 to 4.9)                              |
| Other pharynx cancer                                                    | 6.7<br>(6.0 to 7.2)                           | 2.6<br>(2.4 to 2.8)                            | 0.9<br>(0.6 to 1.2)                        | 41.9<br>(25.7 to 53.7)                            | 5.7<br>(-6.2 to 14.4)                               |
| Oesophageal cancer                                                      | 1.9<br>(1.8 to 2.0)                           | 1.7<br>(1.7 to 1.8)                            | 0.5<br>(0.3 to 0.6)                        | 23.8<br>(18.5 to 29.3)                            | -8.0<br>(-12.3 to -3.7)                             |
| Stomach cancer                                                          | 18.7<br>(17.2 to 20.2)                        | 12.6<br>(11.7 to 13.6)                         | 3.2<br>(2.3 to 4.3)                        | 10.7<br>(4.2 to 17.4)                             | -14.6<br>(-20.2 to -9.0)                            |
| Colon and rectum cancer                                                 | 53.6<br>(51.3 to 55.6)                        | 16.7<br>(16.0 to 17.3)                         | 6.0<br>(4.4 to 7.9)                        | 39.8<br>(26.7 to 51.1)                            | 6.1<br>(-3.6 to 13.8)                               |
| Liver cancer                                                            | 4.7<br>(3.5 to 5.6)                           | 10.3<br>(8.0 to 12.2)                          | 2.2<br>(1.4 to 3.1)                        | 32.8<br>(21.0 to 42.2)                            | 1.1<br>(-7.7 to 8.1)                                |
| Liver cancer due to hepatitis B                                         | 1.9<br>(1.3 to 2.6)                           | 2.1<br>(1.4 to 2.9)                            | 0.5<br>(0.3 to 0.7)                        | 33.3<br>(18.7 to 44.5)                            | 1.7<br>(-8.8 to 9.6)                                |



| Cause                                              | Prevalence in thousands (95% UI)                 | Incidence in thousands (95% UI)                | YLDs in thousands (95% UI)                    |                                                   |                                                     |
|----------------------------------------------------|--------------------------------------------------|------------------------------------------------|-----------------------------------------------|---------------------------------------------------|-----------------------------------------------------|
|                                                    | 2016 counts                                      | 2016 counts                                    | 2016 counts                                   | Percentage change in counts between 2006 and 2016 | Percentage change in age-standardised rates between |
| Liver cancer due to hepatitis C                    | 3.5<br>(2.6 to 4.3)                              | 4.0<br>(3.0 to 4.8)                            | 0.9<br>(0.6 to 1.2)                           | 31.8<br>(17.2 to 42.2)                            | 0.3<br>(-10.3 to 8.1)                               |
| Liver cancer due to alcohol use                    | 0.8<br>(0.6 to 1.0)                              | 0.9<br>(0.6 to 1.1)                            | 0.2<br>(0.1 to 0.3)                           | 35.9<br>(23.2 to 46.4)                            | 2.9<br>(-6.8 to 11.2)                               |
| Liver cancer due to other causes                   | 3.1<br>(2.2 to 3.9)                              | 3.4<br>(2.5 to 4.2)                            | 0.7<br>(0.5 to 1.1)                           | 32.8<br>(23.2 to 43.0)                            | 1.3<br>(-5.6 to 9.2)                                |
| Gallbladder and biliary tract cancer               | 2.3<br>(2.0 to 2.7)                              | 2.9<br>(2.6 to 3.5)                            | 0.7<br>(0.5 to 0.9)                           | 22.5<br>(13.6 to 31.1)                            | -6.8<br>(-13.0 to -0.6)                             |
| Pancreatic cancer                                  | 5.3<br>(4.7 to 6.0)                              | 7.1<br>(6.4 to 8.1)                            | 1.5<br>(1.0 to 2.1)                           | 39.5<br>(34.5 to 44.6)                            | 5.7<br>(2.2 to 9.3)                                 |
| Larynx cancer                                      | 8.6<br>(7.1 to 10.9)                             | 2.7<br>(2.2 to 3.4)                            | 1.1<br>(0.7 to 1.6)                           | 43.0<br>(34.4 to 51.9)                            | 7.5<br>(1.3 to 13.7)                                |
| Tracheal, bronchus, and lung cancer                | 14.7<br>(14.0 to 15.3)                           | 13.2<br>(12.6 to 13.8)                         | 3.2<br>(2.3 to 4.1)                           | 15.9<br>(6.0 to 25.9)                             | -13.0<br>(-20.4 to -5.6)                            |
| Malignant skin melanoma                            | 3.1<br>(2.6 to 3.5)                              | 0.8<br>(0.7 to 1.0)                            | 0.3<br>(0.2 to 0.4)                           | 45.5<br>(30.7 to 58.9)                            | 11.8<br>(1.6 to 22.1)                               |
| Non-melanoma skin cancer                           | 1.5<br>(0.9 to 2.3)                              | 12.2<br>(7.9 to 18.8)                          | 0.1<br>(< 0.05 to 0.1)                        | 3.6<br>(-27.9 to 37.0)                            | -24.5<br>(-51.5 to 2.0)                             |
| Non-melanoma skin cancer (squamous-cell carcinoma) | 1.0<br>(0.6 to 1.5)                              | 2.4<br>(2.0 to 3.0)                            | < 0.05<br>(< 0.05 to 0.1)                     | -0.6<br>(-33.2 to 39.6)                           | -27.2<br>(-55.4 to 3.0)                             |
| Non-melanoma skin cancer (basal-cell carcinoma)    | 1.0<br>(0.5 to 1.9)                              | 9.8<br>(5.5 to 16.2)                           | < 0.05<br>(< 0.05 to < 0.05)                  | 26.7<br>(16.8 to 33.6)                            | -2.6<br>(-6.0 to 1.5)                               |
| Breast cancer                                      | 196.7<br>(181.3 to 212.6)                        | 42.2<br>(39.0 to 46.8)                         | 18.3<br>(13.2 to 24.7)                        | 42.1<br>(24.5 to 68.0)                            | 6.8<br>(-6.2 to 25.8)                               |
| Cervical cancer                                    | 96.3<br>(68.1 to 109.6)                          | 25.2<br>(18.0 to 28.8)                         | 9.0<br>(5.5 to 12.4)                          | 14.7<br>(4.0 to 32.2)                             | -12.6<br>(-20.5 to 0.8)                             |
| Uterine cancer                                     | 32.6<br>(26.2 to 36.7)                           | 7.2<br>(5.8 to 8.1)                            | 2.7<br>(1.8 to 3.6)                           | 52.5<br>(38.0 to 72.2)                            | 11.1<br>(1.0 to 24.4)                               |
| Ovarian cancer                                     | 31.3<br>(26.4 to 38.6)                           | 10.0<br>(8.4 to 12.4)                          | 4.6<br>(3.2 to 6.5)                           | 40.9<br>(24.9 to 60.2)                            | 7.8<br>(-4.1 to 22.8)                               |
| Prostate cancer                                    | 58.7<br>(35.8 to 70.1)                           | 15.7<br>(10.3 to 18.4)                         | 6.6<br>(3.8 to 9.0)                           | 64.7<br>(49.4 to 79.3)                            | 22.6<br>(12.4 to 32.9)                              |
| Testicular cancer                                  | 4.0<br>(3.6 to 5.7)                              | 0.8<br>(0.8 to 1.2)                            | 0.3<br>(0.2 to 0.5)                           | 42.3<br>(29.6 to 56.6)                            | 22.4<br>(12.5 to 33.9)                              |
| Kidney cancer                                      | 23.6<br>(20.7 to 27.3)                           | 6.3<br>(5.5 to 7.3)                            | 2.1<br>(1.5 to 2.9)                           | 48.1<br>(38.7 to 58.1)                            | 17.0<br>(9.6 to 24.2)                               |
| Bladder cancer                                     | 23.4<br>(20.0 to 26.2)                           | 6.2<br>(5.3 to 6.9)                            | 2.4<br>(1.7 to 3.2)                           | 53.5<br>(42.9 to 64.0)                            | 14.9<br>(7.0 to 22.8)                               |
| Brain and nervous system cancer                    | 13.8<br>(9.4 to 18.2)                            | 6.3<br>(4.4 to 8.4)                            | 2.0<br>(1.2 to 3.0)                           | 30.5<br>(23.0 to 43.2)                            | 7.8<br>(0.5 to 19.7)                                |
| Thyroid cancer                                     | 32.0<br>(27.9 to 36.1)                           | 6.3<br>(5.5 to 7.1)                            | 2.1<br>(1.4 to 2.9)                           | 76.1<br>(57.4 to 102.1)                           | 28.6<br>(16.1 to 46.0)                              |
| Mesothelioma                                       | 0.8<br>(0.8 to 1.0)                              | 0.6<br>(0.5 to 0.7)                            | 0.2<br>(0.1 to 0.2)                           | 27.6<br>(16.8 to 37.0)                            | -1.2<br>(-8.9 to 6.4)                               |
| Hodgkin lymphoma                                   | 5.4<br>(4.4 to 7.5)                              | 1.6<br>(1.3 to 2.3)                            | 0.7<br>(0.4 to 1.0)                           | 21.6<br>(14.2 to 29.9)                            | -2.3<br>(-8.4 to 4.6)                               |
| Non-Hodgkin's lymphoma                             | 20.7<br>(19.1 to 24.9)                           | 7.3<br>(6.7 to 8.7)                            | 2.3<br>(1.6 to 3.1)                           | 37.3<br>(28.4 to 46.5)                            | 9.4<br>(2.4 to 18.6)                                |
| Multiple myeloma                                   | 3.0<br>(2.2 to 3.6)                              | 1.7<br>(1.4 to 2.1)                            | 0.8<br>(0.5 to 1.1)                           | 53.6<br>(42.8 to 65.5)                            | 15.9<br>(8.1 to 25.2)                               |
| Leukaemia                                          | 15.9<br>(14.7 to 18.7)                           | 4.7<br>(4.4 to 5.5)                            | 2.1<br>(1.5 to 2.9)                           | 13.1<br>(6.2 to 21.9)                             | -6.3<br>(-12.4 to 0.7)                              |
| Acute lymphoid leukaemia                           | 3.9<br>(3.3 to 5.7)                              | 1.2<br>(1.0 to 1.6)                            | 0.5<br>(0.4 to 0.8)                           | 21.5<br>(9.8 to 33.0)                             | 2.0<br>(-6.5 to 10.6)                               |
| Chronic lymphoid leukaemia                         | 1.4<br>(1.2 to 1.8)                              | 0.3<br>(0.3 to 0.4)                            | 0.2<br>(0.1 to 0.3)                           | 32.7<br>(19.0 to 48.0)                            | 5.1<br>(-5.8 to 16.7)                               |
| Acute myeloid leukaemia                            | 1.3<br>(1.1 to 1.9)                              | 0.9<br>(0.8 to 1.1)                            | 0.2<br>(0.2 to 0.3)                           | 27.7<br>(17.4 to 37.3)                            | 7.6<br>(-0.2 to 15.1)                               |
| Chronic myeloid leukaemia                          | 1.3<br>(1.0 to 1.6)                              | 0.5<br>(0.4 to 0.6)                            | 0.2<br>(0.1 to 0.2)                           | 17.0<br>(7.4 to 31.6)                             | -8.2<br>(-15.8 to 1.7)                              |
| Other leukaemia                                    | 7.9<br>(6.6 to 9.2)                              | 1.8<br>(1.5 to 2.1)                            | 1.0<br>(0.7 to 1.4)                           | 3.0<br>(-8.3 to 15.2)                             | -13.2<br>(-22.2 to -4.1)                            |
| Other neoplasms                                    | 38.5<br>(33.3 to 42.2)                           | 12.9<br>(11.5 to 14.2)                         | 3.8<br>(2.7 to 5.0)                           | 34.1<br>(27.8 to 41.0)                            | 7.5<br>(1.8 to 13.1)                                |
| <b>Cardiovascular diseases</b>                     | <b>14,048.6</b><br><b>(13,831.8 to 14,279.5)</b> | <b>1,508.4†</b><br><b>(1,440.7 to 1,575.0)</b> | <b>1,004.5</b><br><b>(725.9 to 1,314.1)</b>   | <b>31.7</b><br><b>(29.0 to 34.5)</b>              | <b>3.6</b><br><b>(1.6 to 5.7)</b>                   |
| Rheumatic heart disease                            | 897.5<br>(811.4 to 995.6)                        | 29.4<br>(26.9 to 32.1)                         | 43.5<br>(27.4 to 63.2)                        | 7.6<br>(1.9 to 13.1)                              | -7.8<br>(-12.6 to -3.1)                             |
| Ischaemic heart disease                            | 5,352.0<br>(5,089.7 to 5,625.3)                  | 673.1<br>(628.7 to 725.4)                      | 253.2<br>(173.2 to 349.0)                     | 33.2<br>(31.1 to 35.5)                            | 2.1<br>(0.7 to 3.6)                                 |
| Cerebrovascular disease                            | 2,011.9<br>(1,947.2 to 2,078.7)                  | 334.3‡<br>(306.1 to 360.2)                     | 404.5<br>(287.0 to 518.8)                     | 40.4<br>(34.4 to 46.1)                            | 8.5<br>(4.2 to 12.9)                                |
| Ischaemic stroke                                   | 1,602.1<br>(1,438.3 to 1,767.4)                  | 207.2‡<br>(182.4 to 231.5)                     | 310.1<br>(219.5 to 398.7)                     | 42.0<br>(34.3 to 49.7)                            | 9.5<br>(3.7 to 15.5)                                |
| Hemorrhagic stroke                                 | 496.4<br>(449.1 to 550.4)                        | 127.1‡<br>(115.3 to 139.7)                     | 94.4<br>(66.0 to 120.9)                       | 35.4<br>(28.1 to 42.9)                            | 5.3<br>(-0.5 to 10.9)                               |
| Hypertensive heart disease                         | 601.5<br>(536.5 to 675.1)                        | --                                             | 49.0<br>(34.2 to 66.7)                        | 32.4<br>(27.2 to 37.3)                            | -1.1<br>(-4.5 to 2.1)                               |
| Cardiomyopathy and myocarditis                     | 147.6<br>(138.9 to 156.0)                        | 47.1†<br>(41.2 to 53.6)                        | 15.9<br>(10.7 to 22.7)                        | 20.1<br>(15.2 to 25.2)                            | 1.7<br>(-1.8 to 5.6)                                |
| Myocarditis                                        | 55.8<br>(49.2 to 62.7)                           | 47.1<br>(41.2 to 53.6)                         | 4.5<br>(2.9 to 6.4)                           | 12.5<br>(6.4 to 19.3)                             | 1.7<br>(-3.3 to 7.3)                                |
| Alcoholic cardiomyopathy                           | 28.3<br>(24.1 to 33.0)                           | --                                             | 2.4<br>(1.6 to 3.5)                           | 35.9<br>(26.8 to 45.6)                            | 2.3<br>(-4.1 to 9.3)                                |
| Other cardiomyopathy                               | 106.5<br>(94.1 to 120.3)                         | --                                             | 9.0<br>(6.0 to 12.8)                          | 20.4<br>(13.2 to 27.5)                            | 1.5<br>(-3.4 to 6.7)                                |
| Atrial fibrillation and flutter                    | 1,030.7<br>(899.2 to 1,176.9)                    | 91.2<br>(78.5 to 106.8)                        | 81.1<br>(54.3 to 113.9)                       | 30.2<br>(27.0 to 33.6)                            | -0.1<br>(-2.2 to 2.3)                               |
| Peripheral vascular disease                        | 2,931.9<br>(2,530.1 to 3,417.3)                  | 284.9<br>(245.2 to 333.1)                      | 15.1<br>(7.0 to 27.4)                         | 27.6<br>(23.1 to 31.8)                            | -1.8<br>(-4.9 to 1.5)                               |
| Endocarditis                                       | 17.7<br>(15.9 to 19.9)                           | 48.4<br>(44.1 to 53.3)                         | 1.4<br>(1.0 to 2.0)                           | 17.5<br>(13.0 to 21.6)                            | -0.9<br>(-4.9 to 2.7)                               |
| Other cardiovascular and circulatory diseases      | 2,657.7<br>(2,304.3 to 3,033.8)                  | --                                             | 140.7<br>(94.6 to 201.0)                      | 18.7<br>(14.6 to 22.7)                            | -0.5<br>(-3.3 to 2.2)                               |
| <b>Chronic respiratory diseases</b>                | <b>21,449.3</b><br><b>(20,915.9 to 22,047.6)</b> | <b>4,832.5†</b><br><b>(4,565.6 to 5,100.6)</b> | <b>1,344.5</b><br><b>(1,089.2 to 1,630.0)</b> | <b>28.4</b><br><b>(25.1 to 32.8)</b>              | <b>6.0</b><br><b>(3.4 to 9.0)</b>                   |
| Chronic obstructive pulmonary disease              | 6,326.0<br>(6,014.7 to 6,645.2)                  | 500.6<br>(473.3 to 529.6)                      | 666.6<br>(590.2 to 728.5)                     | 38.6<br>(32.8 to 45.2)                            | 6.9<br>(2.6 to 11.9)                                |
| Pneumoconiosis                                     | 39.3<br>(36.1 to 43.0)                           | 3.6<br>(3.4 to 4.0)                            | 5.8<br>(3.9 to 8.2)                           | 40.1<br>(31.5 to 48.5)                            | 5.4<br>(-1.2 to 11.7)                               |
| Silicosis                                          | 14.4<br>(12.5 to 16.5)                           | 1.5<br>(1.3 to 1.7)                            | 2.1<br>(1.4 to 3.0)                           | 39.3<br>(24.4 to 54.9)                            | 4.7<br>(-6.4 to 16.9)                               |



| Cause                                                          | Prevalence in thousands (95% UI)                 | Incidence in thousands (95% UI)                  | YLDs in thousands (95% UI)                    |                                                   |                                                     |
|----------------------------------------------------------------|--------------------------------------------------|--------------------------------------------------|-----------------------------------------------|---------------------------------------------------|-----------------------------------------------------|
|                                                                | 2016 counts                                      | 2016 counts                                      | 2016 counts                                   | Percentage change in counts between 2006 and 2016 | Percentage change in age-standardised rates between |
| Asbestosis                                                     | 2.7<br>(2.3 to 3.2)                              | 0.2<br>(0.2 to 0.2)                              | 0.4<br>(0.3 to 0.6)                           | 35.1<br>(32.1 to 38.4)                            | 2.2<br>(0.1 to 4.4)                                 |
| Coal workers pneumoconiosis                                    | 15.3<br>(12.9 to 17.8)                           | 1.2<br>(1.0 to 1.4)                              | 2.2<br>(1.4 to 3.1)                           | 41.8<br>(26.2 to 58.3)                            | 4.9<br>(-6.4 to 17.3)                               |
| Other pneumoconiosis                                           | 6.9<br>(5.8 to 8.2)                              | 0.7<br>(0.6 to 0.9)                              | 1.1<br>(0.7 to 1.5)                           | 40.5<br>(33.1 to 48.7)                            | 9.5<br>(3.2 to 16.9)                                |
| Asthma                                                         | 15,743.8<br>(14,821.1 to 16,765.0)               | 4,312.7<br>(4,056.0 to 4,575.3)                  | 617.1<br>(406.6 to 883.3)                     | 17.5<br>(15.6 to 19.5)                            | 3.2<br>(1.8 to 4.9)                                 |
| Interstitial lung disease and pulmonary sarcoidosis            | 165.5<br>(147.6 to 186.1)                        | 15.5<br>(13.8 to 17.3)                           | 16.8<br>(11.2 to 24.3)                        | 33.2<br>(27.6 to 39.2)                            | 3.7<br>(-0.4 to 8.0)                                |
| Other chronic respiratory diseases                             | --                                               | --                                               | 38.2<br>(33.0 to 42.4)                        | 59.1<br>(50.6 to 68.3)                            | 40.5<br>(33.4 to 48.0)                              |
| <b>Cirrhosis and other chronic liver diseases</b>              | <b>1,222.2</b><br><b>(1,156.6 to 1,291.5)</b>    | <b>56.1</b><br><b>(52.5 to 59.4)</b>             | <b>26.6</b><br><b>(18.5 to 37.1)</b>          | <b>-1.6</b><br><b>(-7.7 to 3.1)</b>               | <b>-18.7</b><br><b>(-24.3 to -15.1)</b>             |
| Cirrhosis and other chronic liver diseases due to hepatitis B  | 298.3<br>(266.9 to 332.5)                        | 14.5<br>(13.1 to 16.1)                           | 5.4<br>(3.7 to 7.8)                           | 6.1<br>(-4.7 to 16.0)                             | -17.3<br>(-25.8 to -10.3)                           |
| Cirrhosis and other chronic liver diseases due to hepatitis C  | 239.2<br>(213.1 to 268.9)                        | 11.3<br>(10.2 to 12.7)                           | 4.5<br>(3.0 to 6.3)                           | 5.3<br>(-4.9 to 16.2)                             | -18.6<br>(-26.2 to -10.8)                           |
| Cirrhosis and other chronic liver diseases due to alcohol use  | 251.4<br>(223.3 to 283.5)                        | 13.0<br>(11.5 to 14.5)                           | 4.5<br>(3.1 to 6.4)                           | 8.9<br>(-2.1 to 18.5)                             | -17.2<br>(-25.3 to -10.0)                           |
| Cirrhosis and other chronic liver diseases due to other causes | 433.3<br>(392.2 to 478.8)                        | 17.4<br>(15.5 to 19.3)                           | 12.2<br>(8.2 to 17.0)                         | -9.9<br>(-16.4 to -3.6)                           | -19.9<br>(-25.4 to -14.7)                           |
| <b>Digestive diseases</b>                                      | <b>2,976.0</b><br><b>(2,909.2 to 3,040.3)</b>    | <b>3,973.8†</b><br><b>(3,788.8 to 4,180.4)</b>   | <b>97.8</b><br><b>(69.1 to 133.3)</b>         | <b>20.1</b><br><b>(16.5 to 23.3)</b>              | <b>-2.5</b><br><b>(-4.9 to -0.1)</b>                |
| Peptic ulcer disease                                           | 835.6<br>(765.6 to 922.8)                        | 555.0<br>(505.0 to 609.6)                        | 26.7<br>(17.6 to 38.7)                        | 22.8<br>(18.2 to 27.4)                            | -2.6<br>(-5.7 to 0.6)                               |
| Gastritis and duodenitis                                       | 1,593.2<br>(1,444.9 to 1,746.2)                  | 1,333.6<br>(1,213.7 to 1,466.0)                  | 26.4<br>(17.6 to 38.2)                        | 33.3<br>(29.1 to 37.7)                            | 6.3<br>(3.4 to 9.3)                                 |
| Appendicitis                                                   | 20.8<br>(19.4 to 22.3)                           | 550.8<br>(514.4 to 589.8)                        | 6.5<br>(4.3 to 9.0)                           | 5.8<br>(-1.9 to 13.4)                             | -6.8<br>(-12.8 to -0.7)                             |
| Paralytic ileus and intestinal obstruction                     | 1.9<br>(1.7 to 2.1)                              | 56.0<br>(50.8 to 61.5)                           | 0.6<br>(0.4 to 0.8)                           | -22.5<br>(-25.7 to -18.5)                         | -32.1<br>(-35.9 to -27.5)                           |
| Inguinal, femoral, and abdominal hernia                        | 464.7<br>(416.5 to 513.6)                        | 434.2<br>(383.9 to 486.1)                        | 19.9<br>(13.7 to 27.7)                        | 5.7<br>(-1.3 to 13.0)                             | -12.9<br>(-18.1 to -7.3)                            |
| Inflammatory bowel disease                                     | 21.8<br>(19.8 to 23.8)                           | 87.3<br>(80.7 to 94.7)                           | 3.4<br>(2.3 to 4.8)                           | 24.1<br>(21.6 to 26.8)                            | 1.4<br>(-0.2 to 3.1)                                |
| Vascular intestinal disorders                                  | 1.9<br>(1.6 to 2.1)                              | 13.1<br>(11.6 to 14.9)                           | 0.6<br>(0.4 to 0.8)                           | 26.0<br>(22.1 to 30.2)                            | 7.3<br>(4.8 to 10.0)                                |
| Gallbladder and biliary diseases                               | 194.7<br>(172.2 to 218.6)                        | 844.6<br>(734.6 to 975.0)                        | 4.5<br>(3.1 to 6.5)                           | 28.1<br>(19.4 to 37.1)                            | 0.5<br>(-6.5 to 7.8)                                |
| Pancreatitis                                                   | 10.7<br>(9.7 to 11.9)                            | 99.3<br>(89.8 to 109.8)                          | 1.4<br>(0.9 to 2.0)                           | 26.2<br>(23.5 to 28.9)                            | 3.1<br>(1.6 to 4.7)                                 |
| Other digestive diseases                                       | --                                               | --                                               | 7.7<br>(5.5 to 10.5)                          | 24.4<br>(20.3 to 28.0)                            | 1.2<br>(-1.5 to 3.7)                                |
| <b>Neurological disorders</b>                                  | <b>93,035.3</b><br><b>(90,581.8 to 95,894.8)</b> | <b>45,807.3</b><br><b>(38,955.9 to 53,304.8)</b> | <b>2,196.4</b><br><b>(1,482.2 to 2,997.8)</b> | <b>17.3</b><br><b>(10.7 to 25.0)</b>              | <b>1.1</b><br><b>(-4.3 to 7.3)</b>                  |
| Alzheimer's disease and other dementias                        | 1,111.1<br>(942.8 to 1,320.2)                    | 186.5<br>(156.1 to 224.2)                        | 154.5<br>(107.9 to 207.3)                     | 29.0<br>(26.7 to 31.3)                            | -0.0<br>(-1.7 to 1.6)                               |
| Parkinson's disease                                            | 146.2<br>(117.5 to 178.8)                        | 15.9<br>(12.5 to 19.7)                           | 17.4<br>(11.1 to 24.1)                        | 40.4<br>(33.6 to 47.1)                            | 8.1<br>(3.6 to 12.5)                                |
| Epilepsy                                                       | 961.3<br>(745.7 to 1,181.1)                      | 137.4<br>(107.3 to 171.0)                        | 368.9<br>(229.5 to 531.7)                     | 16.4<br>(-13.3 to 59.4)                           | 4.9<br>(-21.8 to 44.7)                              |
| Multiple sclerosis                                             | 7.1<br>(6.1 to 8.1)                              | 0.4<br>(0.4 to 0.5)                              | 2.0<br>(1.4 to 2.7)                           | 39.9<br>(37.6 to 42.4)                            | 14.8<br>(13.4 to 16.3)                              |
| Motor neuron disease                                           | 6.2<br>(5.2 to 7.3)                              | 1.1<br>(1.0 to 1.3)                              | 1.3<br>(0.9 to 1.8)                           | 23.3<br>(20.0 to 26.6)                            | 6.7<br>(5.3 to 8.1)                                 |
| Migraine                                                       | 33,131.0<br>(31,667.1 to 34,597.3)               | 3,542.1<br>(3,380.3 to 3,710.9)                  | 1,359.2<br>(865.1 to 1,909.5)                 | 15.3<br>(13.8 to 16.8)                            | -0.8<br>(-1.9 to 0.5)                               |
| Tension-type headache                                          | 71,377.9<br>(63,879.6 to 79,957.5)               | 41,922.6<br>(35,130.2 to 49,502.8)               | 208.6<br>(129.4 to 317.6)                     | 15.7<br>(13.1 to 18.7)                            | -0.8<br>(-2.3 to 1.1)                               |
| Other neurological disorders                                   | 0.7<br>(0.4 to 1.0)                              | 1.4<br>(0.9 to 1.9)                              | 84.5<br>(54.2 to 120.2)                       | 38.9<br>(7.3 to 83.8)                             | 24.5<br>(-2.6 to 62.9)                              |
| <b>Mental and substance use disorders</b>                      | <b>31,831.2</b><br><b>(31,283.5 to 32,348.2)</b> | <b>8,855.6†</b><br><b>(8,213.3 to 9,506.8)</b>   | <b>4,138.0</b><br><b>(3,011.2 to 5,379.7)</b> | <b>15.9</b><br><b>(14.4 to 17.5)</b>              | <b>0.4</b><br><b>(-0.7 to 1.6)</b>                  |
| Schizophrenia                                                  | 715.9<br>(627.3 to 814.0)                        | 43.8<br>(38.3 to 49.8)                           | 463.5<br>(335.2 to 584.7)                     | 20.7<br>(17.3 to 24.4)                            | 1.6<br>(-1.0 to 4.3)                                |
| Alcohol use disorders                                          | 1,524.5<br>(1,309.4 to 1,753.3)                  | 844.3<br>(722.7 to 961.0)                        | 153.1<br>(102.6 to 214.6)                     | 24.3<br>(20.1 to 28.6)                            | 8.5<br>(5.3 to 11.7)                                |
| Drug use disorders                                             | 1,827.0<br>(1,748.5 to 1,922.1)                  | 267.7<br>(235.6 to 305.4)                        | 308.7<br>(222.8 to 409.0)                     | 16.8<br>(13.1 to 20.6)                            | 6.0<br>(3.0 to 9.2)                                 |
| Opioid use disorders                                           | 461.8<br>(391.9 to 541.5)                        | 58.5<br>(50.5 to 68.4)                           | 192.9<br>(133.1 to 258.6)                     | 19.2<br>(14.6 to 23.8)                            | 5.7<br>(2.1 to 9.3)                                 |
| Cocaine use disorders                                          | 38.7<br>(32.8 to 45.9)                           | 4.7<br>(3.9 to 5.6)                              | 5.7<br>(3.4 to 8.2)                           | 20.3<br>(17.3 to 23.5)                            | 6.2<br>(4.4 to 8.1)                                 |
| Amphetamine use disorders                                      | 303.2<br>(196.8 to 431.4)                        | 32.5<br>(21.2 to 46.4)                           | 40.4<br>(22.0 to 67.0)                        | 13.3<br>(5.1 to 22.0)                             | 9.9<br>(2.0 to 18.3)                                |
| Cannabis use disorders                                         | 989.4<br>(817.6 to 1,201.5)                      | 152.8<br>(124.0 to 186.1)                        | 29.0<br>(17.7 to 43.2)                        | 5.6<br>(-2.3 to 14.1)                             | -1.0<br>(-8.1 to 6.7)                               |
| Other drug use disorders                                       | 99.3<br>(87.2 to 111.2)                          | 19.2<br>(16.9 to 21.6)                           | 40.8<br>(25.9 to 61.4)                        | 17.4<br>(8.0 to 26.6)                             | 9.5<br>(1.1 to 17.9)                                |
| Depressive disorders                                           | 6,835.8<br>(6,537.7 to 7,113.2)                  | 5,023.8<br>(4,439.3 to 5,627.9)                  | 983.6<br>(679.1 to 1,346.8)                   | 19.8<br>(17.6 to 22.1)                            | -0.1<br>(-1.3 to 1.1)                               |
| Major depressive disorder                                      | 2,906.6<br>(2,537.4 to 3,325.5)                  | 4,389.2<br>(3,815.8 to 4,996.7)                  | 598.2<br>(400.3 to 829.6)                     | 17.5<br>(14.4 to 20.8)                            | 0.1<br>(-2.0 to 1.9)                                |
| Dysthymia                                                      | 4,016.1<br>(3,475.6 to 4,604.7)                  | 634.6<br>(554.7 to 726.0)                        | 385.3<br>(259.3 to 555.2)                     | 23.6<br>(21.2 to 25.8)                            | -0.3<br>(-1.2 to 0.7)                               |
| Bipolar disorder                                               | 1,392.4<br>(1,205.3 to 1,606.4)                  | 125.7<br>(109.3 to 144.9)                        | 286.0<br>(177.9 to 422.1)                     | 16.2<br>(13.2 to 19.3)                            | -0.1<br>(-2.2 to 1.9)                               |
| Anxiety disorders                                              | 8,850.0<br>(8,250.4 to 9,478.9)                  | 1,444.3<br>(1,345.5 to 1,555.4)                  | 856.9<br>(598.6 to 1,165.8)                   | 16.1<br>(10.9 to 21.7)                            | -0.0<br>(-4.5 to 4.7)                               |
| Eating disorders                                               | 269.1<br>(240.8 to 302.6)                        | 187.0<br>(138.6 to 246.0)                        | 55.7<br>(36.7 to 80.4)                        | 23.7<br>(18.9 to 28.7)                            | 16.5<br>(12.0 to 21.3)                              |
| Anorexia nervosa                                               | 80.7<br>(59.2 to 107.9)                          | 35.2<br>(26.2 to 46.8)                           | 17.3<br>(10.3 to 26.6)                        | 19.3<br>(10.5 to 28.8)                            | 14.2<br>(5.8 to 23.1)                               |
| Bulimia nervosa                                                | 181.4<br>(136.5 to 240.5)                        | 151.7<br>(105.5 to 210.4)                        | 38.4<br>(23.2 to 58.8)                        | 25.7<br>(19.1 to 32.3)                            | 17.6<br>(11.5 to 23.9)                              |
| Autistic spectrum disorders                                    | 2,183.3<br>(2,069.0 to 2,306.9)                  | 16.9<br>(11.3 to 23.6)                           | 315.9<br>(213.9 to 445.4)                     | 11.0<br>(9.3 to 12.6)                             | 0.4<br>(-1.0 to 1.8)                                |
| Autism                                                         | 627.6<br>(540.9 to 728.8)                        | 1.8<br>(0.9 to 3.0)                              | 160.6<br>(102.9 to 234.0)                     | 11.2<br>(8.1 to 14.0)                             | 0.5<br>(-2.1 to 3.1)                                |
| Asperger syndrome and other autistic spectrum disorders        | 1,546.2<br>(1,277.1 to 1,856.8)                  | 15.2<br>(9.7 to 21.7)                            | 155.3<br>(101.0 to 226.8)                     | 10.7<br>(9.0 to 12.5)                             | 0.3<br>(-1.2 to 1.6)                                |

| Cause                                                      | Prevalence in thousands (95% UI)                    | Incidence in thousands (95% UI)                      | YLDs in thousands (95% UI)                    |                                                   |                                                     |
|------------------------------------------------------------|-----------------------------------------------------|------------------------------------------------------|-----------------------------------------------|---------------------------------------------------|-----------------------------------------------------|
|                                                            | 2016 counts                                         | 2016 counts                                          | 2016 counts                                   | Percentage change in counts between 2006 and 2016 | Percentage change in age-standardised rates between |
| Attention-deficit/hyperactivity disorder                   | 1,343.7<br>(1,192.2 to 1,510.2)                     | 62.0<br>(52.9 to 72.7)                               | 16.2<br>(9.6 to 25.8)                         | 6.4<br>(3.1 to 10.1)                              | 0.2<br>(-2.8 to 3.7)                                |
| Conduct disorder                                           | 2,006.9<br>(1,699.6 to 2,326.3)                     | 682.0<br>(548.9 to 808.6)                            | 244.8<br>(152.8 to 370.9)                     | 4.1<br>(2.0 to 6.1)                               | 0.4<br>(-1.5 to 2.4)                                |
| Idiopathic developmental intellectual disability           | 2,582.2<br>(1,360.5 to 3,847.7)                     | --                                                   | 112.6<br>(52.4 to 198.6)                      | -11.6<br>(-17.5 to -7.8)                          | -20.0<br>(-25.2 to -16.6)                           |
| Other mental and substance use disorders                   | 4,564.5<br>(3,958.1 to 5,301.1)                     | 158.2<br>(137.8 to 181.2)                            | 341.0<br>(231.9 to 488.2)                     | 18.9<br>(17.0 to 21.2)                            | -0.1<br>(-1.6 to 1.5)                               |
| <b>Diabetes, urogenital, blood, and endocrine diseases</b> | <b>91,422.0</b><br><b>(90,872.4 to 91,929.5)</b>    | <b>22,090.9†</b><br><b>(20,905.5 to 23,433.2)</b>    | <b>1,925.4</b><br><b>(1,338.7 to 2,673.3)</b> | <b>40.7</b><br><b>(37.5 to 44.0)</b>              | <b>13.1</b><br><b>(10.8 to 15.4)</b>                |
| Diabetes mellitus                                          | 14,586.3<br>(13,006.6 to 16,209.0)                  | 876.8<br>(787.2 to 974.6)                            | 1,051.3<br>(714.3 to 1,483.0)                 | 56.2<br>(50.8 to 61.9)                            | 20.9<br>(16.9 to 25.0)                              |
| Acute glomerulonephritis                                   | 2.5<br>(2.0 to 3.0)                                 | 37.6<br>(30.8 to 45.1)                               | 0.1<br>(0.1 to 0.2)                           | 3.4<br>(-4.4 to 11.6)                             | -8.8<br>(-14.6 to -2.6)                             |
| Chronic kidney disease                                     | 5,273.7<br>(4,758.3 to 5,847.5)                     | 362.0<br>(322.7 to 402.7)                            | 193.5<br>(143.6 to 248.2)                     | 33.0<br>(28.9 to 37.7)                            | 5.0<br>(2.2 to 8.2)                                 |
| Chronic kidney disease due to diabetes mellitus            | 3,023.2<br>(2,634.3 to 3,427.2)                     | 202.2<br>(173.8 to 231.1)                            | 109.2<br>(80.5 to 140.3)                      | 34.6<br>(28.3 to 41.8)                            | 4.8<br>(0.2 to 10.2)                                |
| Chronic kidney disease due to hypertension                 | 868.9<br>(752.9 to 992.3)                           | 33.5<br>(27.3 to 40.1)                               | 51.1<br>(36.1 to 68.2)                        | 37.5<br>(25.6 to 49.6)                            | 5.5<br>(-2.9 to 13.5)                               |
| Chronic kidney disease due to glomerulonephritis           | 1,008.8<br>(867.5 to 1,182.3)                       | 95.6<br>(79.4 to 113.3)                              | 17.4<br>(11.9 to 23.6)                        | 19.7<br>(14.2 to 25.4)                            | 5.4<br>(1.3 to 9.9)                                 |
| Chronic kidney disease due to other causes                 | 372.8<br>(306.1 to 449.6)                           | 30.7<br>(25.5 to 36.7)                               | 15.8<br>(10.8 to 21.6)                        | 24.4<br>(18.4 to 30.7)                            | 4.3<br>(0.1 to 9.1)                                 |
| Urinary diseases and male infertility                      | 3,800.3<br>(3,424.0 to 4,166.4)                     | 11,848.0†<br>(10,677.9 to 13,081.4)                  | 78.9<br>(51.0 to 112.7)                       | 30.9<br>(27.2 to 34.9)                            | 0.8<br>(-1.9 to 3.9)                                |
| Interstitial nephritis and urinary tract infections        | 210.2<br>(187.8 to 234.8)                           | 10,969.0<br>(9,800.3 to 12,215.6)                    | 7.0<br>(4.3 to 10.6)                          | 13.2<br>(8.0 to 18.9)                             | -0.3<br>(-4.5 to 4.2)                               |
| Urolithiasis                                               | 24.9<br>(22.2 to 27.8)                              | 662.7<br>(591.6 to 739.5)                            | 1.9<br>(1.3 to 2.7)                           | 14.0<br>(8.4 to 20.5)                             | -9.0<br>(-13.4 to -3.8)                             |
| Benign prostatic hyperplasia                               | 1,749.8<br>(1,529.3 to 2,007.7)                     | 216.3<br>(186.5 to 250.6)                            | 57.4<br>(37.2 to 83.2)                        | 34.0<br>(29.9 to 38.0)                            | -0.9<br>(-3.4 to 1.6)                               |
| Male infertility                                           | 1,621.9<br>(1,265.8 to 2,121.8)                     | --                                                   | 9.4<br>(3.6 to 19.4)                          | 54.9<br>(38.9 to 71.2)                            | 42.1<br>(27.3 to 56.5)                              |
| Other urinary diseases                                     | --                                                  | --                                                   | 3.3<br>(2.1 to 4.9)                           | -7.7<br>(-11.5 to -3.9)                           | -19.5<br>(-22.5 to -16.2)                           |
| Gynecological diseases                                     | 27,056.5<br>(26,494.3 to 27,636.7)                  | 8,492.6†<br>(8,115.8 to 8,851.9)                     | 308.1<br>(204.1 to 449.1)                     | 22.7<br>(18.8 to 27.6)                            | 3.3<br>(0.6 to 6.5)                                 |
| Uterine fibroids                                           | 3,774.8<br>(3,299.7 to 4,338.2)                     | 425.6<br>(362.9 to 504.8)                            | 70.7<br>(42.8 to 113.6)                       | 39.8<br>(36.2 to 44.1)                            | 8.3<br>(5.5 to 11.8)                                |
| Polycystic ovarian syndrome                                | 221.0<br>(164.5 to 284.5)                           | 190.4<br>(137.8 to 251.1)                            | 1.9<br>(0.9 to 3.6)                           | 13.2<br>(7.4 to 19.9)                             | 1.6<br>(-3.6 to 7.2)                                |
| Female infertility                                         | 1,994.8<br>(1,045.7 to 3,339.6)                     | --                                                   | 11.0<br>(3.7 to 26.5)                         | 306.9<br>(178.5 to 612.5)                         | 288.8<br>(171.7 to 561.3)                           |
| Endometriosis                                              | 18.6<br>(16.0 to 21.4)                              | 211.1<br>(174.2 to 257.9)                            | 1.8<br>(1.2 to 2.6)                           | 14.7<br>(5.2 to 25.4)                             | 0.3<br>(-7.9 to 9.1)                                |
| Genital prolapse                                           | 5,423.9<br>(4,711.6 to 6,125.6)                     | 381.2<br>(326.4 to 444.0)                            | 16.9<br>(8.2 to 30.8)                         | 12.9<br>(9.4 to 16.6)                             | -15.0<br>(-17.7 to -12.2)                           |
| Premenstrual syndrome                                      | 16,531.4<br>(15,748.7 to 17,267.5)                  | 5,969.3<br>(5,658.5 to 6,269.5)                      | 138.5<br>(85.7 to 212.4)                      | 12.9<br>(10.1 to 15.7)                            | -0.6<br>(-3.1 to 1.7)                               |
| Other gynecological diseases                               | 2,189.6<br>(2,049.7 to 2,329.8)                     | 1,315.1<br>(1,172.0 to 1,456.8)                      | 67.3<br>(46.1 to 94.3)                        | 18.2<br>(10.9 to 25.9)                            | 1.5<br>(-4.9 to 8.2)                                |
| Hemoglobinopathies and hemolytic anaemias                  | 54,783.0<br>(54,467.9 to 55,107.7)                  | --                                                   | 186.1<br>(122.9 to 276.3)                     | 25.1<br>(22.0 to 28.4)                            | 10.7<br>(8.3 to 13.3)                               |
| Thalassemias                                               | 31.8<br>(24.2 to 43.4)                              | --                                                   | 1.7<br>(1.0 to 2.7)                           | -8.8<br>(-17.0 to 0.4)                            | -5.7<br>(-14.5 to 4.0)                              |
| Thalassaemia trait                                         | 14,788.8<br>(14,446.5 to 15,120.7)                  | --                                                   | 140.1<br>(92.6 to 207.1)                      | 30.8<br>(27.2 to 34.6)                            | 16.3<br>(13.3 to 19.5)                              |
| Sickle cell disorders                                      | 0.1<br>(0.1 to 0.1)                                 | --                                                   | < 0.05<br>(< 0.05 to < 0.05)                  | 19.4<br>(13.6 to 24.6)                            | 18.3<br>(12.6 to 23.8)                              |
| Sickle cell trait                                          | 1,034.4<br>(1,001.1 to 1,067.9)                     | --                                                   | 3.1<br>(2.0 to 4.6)                           | 56.5<br>(45.0 to 68.4)                            | 40.2<br>(30.1 to 50.4)                              |
| G6PD deficiency                                            | 10,509.1<br>(10,177.1 to 10,900.4)                  | --                                                   | 1.0<br>(0.7 to 1.4)                           | 16.9<br>(8.6 to 24.6)                             | 2.2<br>(-3.4 to 7.9)                                |
| G6PD trait                                                 | 29,525.6<br>(29,090.5 to 29,981.9)                  | --                                                   | < 0.05<br>(< 0.05 to < 0.05)                  | -0.3<br>(-3.4 to 3.1)                             | -10.6<br>(-13.2 to -7.3)                            |
| Other hemoglobinopathies and hemolytic anaemias            | 2,640.0<br>(2,565.4 to 2,726.9)                     | --                                                   | 40.2<br>(26.3 to 60.4)                        | 8.7<br>(4.2 to 13.4)                              | -3.1<br>(-6.3 to 0.1)                               |
| Endocrine, metabolic, blood, and immune disorders          | 3,932.3<br>(3,694.0 to 4,209.9)                     | 473.9<br>(419.2 to 534.6)                            | 107.3<br>(72.7 to 149.3)                      | 20.1<br>(16.5 to 23.9)                            | 1.1<br>(-0.9 to 3.1)                                |
| <b>Musculoskeletal disorders</b>                           | <b>39,101.1</b><br><b>(38,137.8 to 39,993.8)</b>    | <b>20,915.5</b><br><b>(18,868.9 to 23,066.4)</b>     | <b>4,304.1</b><br><b>(3,092.1 to 5,641.2)</b> | <b>23.4</b><br><b>(20.5 to 26.2)</b>              | <b>-0.8</b><br><b>(-2.7 to 1.1)</b>                 |
| Rheumatoid arthritis                                       | 305.9<br>(268.9 to 346.3)                           | 18.0<br>(16.1 to 20.3)                               | 72.8<br>(49.5 to 97.8)                        | 35.8<br>(30.5 to 41.4)                            | 8.1<br>(4.2 to 12.0)                                |
| Osteoarthritis                                             | 7,024.0<br>(6,571.2 to 7,504.1)                     | 386.3<br>(357.3 to 417.0)                            | 434.3<br>(304.9 to 590.4)                     | 39.3<br>(35.1 to 44.0)                            | 4.3<br>(1.3 to 7.6)                                 |
| Low back and neck pain                                     | 24,496.0<br>(23,519.9 to 25,432.8)                  | 10,750.9<br>(9,558.1 to 12,048.1)                    | 2,854.8<br>(1,993.7 to 3,791.2)               | 22.2<br>(18.3 to 25.9)                            | -1.7<br>(-4.2 to 1.0)                               |
| Low back pain                                              | 17,932.5<br>(15,917.3 to 20,453.6)                  | 8,751.7<br>(7,573.9 to 10,041.3)                     | 2,040.5<br>(1,426.3 to 2,724.6)               | 20.5<br>(15.4 to 25.7)                            | -2.2<br>(-5.7 to 1.4)                               |
| Neck pain                                                  | 8,114.4<br>(6,954.7 to 9,456.2)                     | 1,999.2<br>(1,727.3 to 2,373.8)                      | 814.2<br>(544.0 to 1,157.5)                   | 26.4<br>(24.1 to 28.8)                            | -0.1<br>(-0.8 to 0.6)                               |
| Gout                                                       | 978.6<br>(867.6 to 1,109.2)                         | 199.1<br>(173.6 to 226.1)                            | 31.2<br>(21.3 to 43.0)                        | 30.3<br>(24.2 to 36.4)                            | 0.1<br>(-4.1 to 4.4)                                |
| Other musculoskeletal disorders                            | 10,581.1<br>(9,016.1 to 12,431.8)                   | 9,561.2<br>(8,001.9 to 11,351.5)                     | 911.1<br>(614.7 to 1,297.9)                   | 19.9<br>(15.5 to 24.1)                            | -1.5<br>(-4.3 to 1.0)                               |
| <b>Other non-communicable diseases</b>                     | <b>188,339.4</b><br><b>(187,156.7 to 189,687.7)</b> | <b>570,267.5†</b><br><b>(537,673.6 to 604,867.4)</b> | <b>5,096.4</b><br><b>(3,453.3 to 7,272.6)</b> | <b>16.2</b><br><b>(15.2 to 17.1)</b>              | <b>-1.2</b><br><b>(-1.8 to -0.6)</b>                |
| Congenital anomalies                                       | 1,925.7<br>(1,821.4 to 2,049.6)                     | --                                                   | 233.1<br>(168.1 to 314.2)                     | 7.0<br>(4.7 to 9.1)                               | -2.6<br>(-4.8 to -0.5)                              |
| Neural tube defects                                        | 154.5<br>(143.3 to 166.5)                           | --                                                   | 46.3<br>(32.4 to 62.2)                        | 8.3<br>(4.2 to 12.6)                              | -2.8<br>(-6.3 to 0.9)                               |
| Congenital heart anomalies                                 | 498.8<br>(436.5 to 564.6)                           | --                                                   | 22.2<br>(9.6 to 37.8)                         | 7.8<br>(3.2 to 12.1)                              | 2.3<br>(-1.6 to 6.3)                                |
| Orofacial clefts                                           | 130.9<br>(116.0 to 146.2)                           | --                                                   | 2.0<br>(1.3 to 2.8)                           | 15.3<br>(4.9 to 28.0)                             | 4.1<br>(-5.4 to 15.8)                               |
| Down's syndrome                                            | 92.4<br>(83.6 to 102.8)                             | --                                                   | 8.3<br>(5.7 to 11.4)                          | -4.2<br>(-8.7 to 0.2)                             | -12.0<br>(-16.1 to -8.0)                            |
| Turner syndrome                                            | 63.2<br>(54.8 to 73.0)                              | --                                                   | 1.1<br>(0.5 to 1.8)                           | 10.1<br>(-2.9 to 25.2)                            | 3.8<br>(-8.0 to 17.9)                               |
| Klinefelter syndrome                                       | 62.9<br>(53.9 to 72.6)                              | --                                                   | 0.4<br>(0.2 to 0.7)                           | 7.4<br>(-2.6 to 18.1)                             | 1.9<br>(-7.7 to 12.1)                               |



| Cause                                         | Prevalence in thousands (95% UI)                 | Incidence in thousands (95% UI)                   | YLDs in thousands (95% UI)                  |                                                   |                                                     |
|-----------------------------------------------|--------------------------------------------------|---------------------------------------------------|---------------------------------------------|---------------------------------------------------|-----------------------------------------------------|
|                                               | 2016 counts                                      | 2016 counts                                       | 2016 counts                                 | Percentage change in counts between 2006 and 2016 | Percentage change in age-standardised rates between |
| Other chromosomal abnormalities               | 63.8<br>(53.6 to 75.8)                           | --                                                | 7.6<br>(5.2 to 10.3)                        | 0.8<br>(-5.6 to 7.1)                              | 1.7<br>(-4.8 to 8.2)                                |
| Congenital musculoskeletal and limb anomalies | 141.2<br>(131.5 to 152.1)                        | --                                                | 19.6<br>(13.4 to 27.0)                      | 11.1<br>(8.2 to 14.3)                             | 0.7<br>(-1.9 to 3.5)                                |
| Urogenital congenital anomalies               | 178.0<br>(159.5 to 197.4)                        | --                                                | 3.8<br>(2.1 to 6.3)                         | 1.9<br>(-0.8 to 4.6)                              | -1.0<br>(-3.6 to 1.6)                               |
| Digestive congenital anomalies                | 155.7<br>(138.6 to 175.4)                        | --                                                | 7.3<br>(4.8 to 10.5)                        | 3.8<br>(-1.2 to 9.1)                              | -6.3<br>(-10.8 to -1.8)                             |
| Other congenital anomalies                    | 894.1<br>(634.6 to 1,244.8)                      | --                                                | 114.5<br>(75.9 to 168.2)                    | 7.2<br>(3.9 to 11.1)                              | -3.6<br>(-6.6 to -0.2)                              |
| Skin and subcutaneous diseases                | 83,841.9<br>(82,963.3 to 85,000.1)               | 193,283.9<br>(182,405.8 to 205,460.5)             | 2,015.8<br>(1,344.9 to 2,947.0)             | 11.5<br>(10.6 to 12.5)                            | 2.4<br>(1.7 to 3.1)                                 |
| Dermatitis                                    | 8,538.8<br>(8,130.2 to 9,015.3)                  | 14,693.2<br>(13,598.9 to 15,822.5)                | 304.0<br>(185.0 to 487.8)                   | 10.3<br>(7.7 to 13.1)                             | 1.6<br>(-0.6 to 3.8)                                |
| Psoriasis                                     | 1,799.0<br>(1,733.9 to 1,867.0)                  | 250.5<br>(242.0 to 258.5)                         | 157.6<br>(113.0 to 207.4)                   | 26.8<br>(23.2 to 30.4)                            | 9.0<br>(6.0 to 11.8)                                |
| Cellulitis                                    | 108.2<br>(100.9 to 116.6)                        | 2,315.6<br>(2,166.2 to 2,475.5)                   | 6.1<br>(4.0 to 8.8)                         | 14.6<br>(6.9 to 23.2)                             | 2.5<br>(-4.0 to 9.4)                                |
| Pyoderma                                      | 209.0<br>(203.3 to 214.8)                        | 4,076.6<br>(3,961.0 to 4,203.6)                   | 1.2<br>(0.5 to 2.5)                         | 19.7<br>(15.2 to 24.2)                            | 0.7<br>(-2.5 to 4.1)                                |
| Scabies                                       | 10,868.8<br>(9,539.1 to 12,463.7)                | 34,346.7<br>(29,798.8 to 39,708.3)                | 281.1<br>(156.3 to 442.7)                   | 8.8<br>(5.4 to 12.3)                              | 0.5<br>(-2.3 to 3.3)                                |
| Fungal skin diseases                          | 25,010.0<br>(22,321.1 to 27,678.4)               | 84,633.0<br>(75,573.9 to 94,643.0)                | 140.8<br>(55.6 to 298.4)                    | 14.3<br>(12.7 to 16.2)                            | -0.0<br>(-0.3 to 0.2)                               |
| Viral skin diseases                           | 7,138.8<br>(6,850.6 to 7,441.1)                  | 10,375.5<br>(9,907.5 to 10,819.0)                 | 219.5<br>(135.5 to 328.3)                   | 8.0<br>(6.8 to 9.1)                               | -0.1<br>(-1.1 to 0.8)                               |
| Acne vulgaris                                 | 24,577.7<br>(22,188.6 to 27,099.5)               | 17,907.8<br>(14,591.4 to 22,479.2)                | 635.6<br>(425.8 to 918.2)                   | 9.5<br>(8.1 to 11.1)                              | 3.6<br>(2.2 to 5.1)                                 |
| Alopecia areata                               | 495.7<br>(477.9 to 514.6)                        | 876.8<br>(845.2 to 911.5)                         | 16.3<br>(10.4 to 24.6)                      | 13.3<br>(9.7 to 17.2)                             | -0.1<br>(-3.3 to 3.3)                               |
| Pruritus                                      | 2,322.8<br>(2,041.0 to 2,627.1)                  | 1,843.1<br>(1,650.1 to 2,083.4)                   | 24.8<br>(11.4 to 45.5)                      | 18.5<br>(15.6 to 21.5)                            | 1.6<br>(0.0 to 3.2)                                 |
| Urticaria                                     | 2,300.5<br>(2,006.5 to 2,659.2)                  | 4,088.4<br>(3,568.0 to 4,685.7)                   | 139.2<br>(87.8 to 199.7)                    | 6.9<br>(4.7 to 9.3)                               | 0.1<br>(-1.6 to 1.8)                                |
| Decubitus ulcer                               | 22.8<br>(20.4 to 25.4)                           | 84.3<br>(75.0 to 95.0)                            | 3.7<br>(2.6 to 5.1)                         | 34.9<br>(28.7 to 41.6)                            | 8.0<br>(2.1 to 14.6)                                |
| Other skin and subcutaneous diseases          | 15,610.1<br>(15,179.5 to 16,030.6)               | 17,792.4<br>(17,275.5 to 18,305.7)                | 86.0<br>(41.4 to 158.1)                     | 27.0<br>(25.8 to 28.2)                            | 6.3<br>(5.5 to 7.2)                                 |
| Sense organ diseases                          | 56,438.8<br>(55,754.4 to 57,032.8)               | 23,793.9†<br>(22,376.3 to 25,387.2)               | 2,209.0<br>(1,561.4 to 3,069.9)             | 19.8<br>(18.3 to 21.2)                            | -3.6<br>(-4.5 to -2.7)                              |
| Glaucoma                                      | 82.4<br>(68.7 to 97.6)                           | --                                                | 9.2<br>(6.1 to 12.9)                        | 31.9<br>(24.7 to 39.6)                            | 0.8<br>(-4.3 to 5.9)                                |
| Cataract                                      | 2,658.5<br>(2,324.3 to 2,989.1)                  | --                                                | 196.3<br>(139.2 to 267.9)                   | 17.0<br>(15.0 to 19.1)                            | -9.0<br>(-10.5 to -7.6)                             |
| Macular degeneration                          | 54.2<br>(43.3 to 66.8)                           | --                                                | 4.0<br>(2.6 to 5.6)                         | 34.7<br>(26.1 to 44.9)                            | 2.7<br>(-3.3 to 9.7)                                |
| Refraction and accommodation disorders        | 32,014.9<br>(30,836.1 to 33,231.7)               | --                                                | 547.0<br>(340.7 to 865.6)                   | 16.2<br>(14.0 to 17.9)                            | -4.8<br>(-6.5 to -3.6)                              |
| Age-related and other hearing loss            | 31,013.5<br>(29,268.4 to 33,013.4)               | --                                                | 1,174.3<br>(836.2 to 1,585.6)               | 20.8<br>(18.5 to 23.2)                            | -2.7<br>(-4.0 to -1.5)                              |
| Other vision loss                             | 903.6<br>(779.8 to 1,048.7)                      | --                                                | 77.9<br>(53.0 to 106.0)                     | 26.6<br>(22.3 to 31.0)                            | -0.4<br>(-3.2 to 2.6)                               |
| Other sense organ diseases                    | 6,437.3<br>(5,994.7 to 6,872.0)                  | 23,793.9<br>(22,376.3 to 25,387.2)                | 200.3<br>(126.5 to 304.2)                   | 23.8<br>(22.1 to 25.6)                            | 0.8<br>(-0.5 to 2.1)                                |
| Oral disorders                                | 134,223.9<br>(130,629.3 to 137,126.0)            | 353,189.8†<br>(322,457.2 to 385,147.4)            | 638.6<br>(363.3 to 1,053.5)                 | 23.5<br>(21.9 to 24.9)                            | -0.2<br>(-0.8 to 0.4)                               |
| Caries of deciduous teeth                     | 14,502.8<br>(10,881.6 to 17,557.2)               | 57,941.7<br>(37,511.2 to 79,212.7)                | 5.5<br>(2.4 to 10.9)                        | -0.6<br>(-3.6 to 2.7)                             | 0.2<br>(-2.8 to 3.4)                                |
| Caries of permanent teeth                     | 96,675.6<br>(90,698.5 to 102,513.3)              | 290,526.1<br>(267,694.6 to 314,314.0)             | 95.0<br>(41.6 to 181.0)                     | 10.6<br>(9.2 to 12.0)                             | -2.8<br>(-3.7 to -1.9)                              |
| Periodontal disease                           | 34,994.7<br>(29,579.8 to 40,632.1)               | 4,227.8<br>(3,516.1 to 5,002.3)                   | 229.4<br>(91.1 to 472.7)                    | 29.2<br>(27.2 to 31.2)                            | -0.2<br>(-1.3 to 0.7)                               |
| Edentulism and severe tooth loss              | 6,176.2<br>(5,315.6 to 7,016.3)                  | 494.2<br>(419.5 to 570.2)                         | 171.6<br>(112.0 to 243.7)                   | 31.7<br>(29.7 to 33.8)                            | 0.8<br>(-0.4 to 2.1)                                |
| Other oral disorders                          | 4,661.9<br>(4,456.0 to 4,877.8)                  | --                                                | 137.1<br>(84.5 to 207.6)                    | 16.2<br>(14.8 to 17.8)                            | -0.1<br>(-1.1 to 1.0)                               |
| <b>Injuries</b>                               | <b>32,541.9</b><br><b>(30,618.0 to 34,489.6)</b> | <b>13,376.3†</b><br><b>(12,679.8 to 14,055.1)</b> | <b>1,357.0</b><br><b>(906.7 to 1,947.3)</b> | <b>30.1</b><br><b>(26.7 to 33.3)</b>              | <b>8.4</b><br><b>(6.1 to 10.7)</b>                  |
| <b>Transport injuries</b>                     | <b>6,750.8</b><br><b>(6,232.6 to 7,312.9)</b>    | <b>2,306.4</b><br><b>(2,059.2 to 2,583.6)</b>     | <b>388.7</b><br><b>(261.5 to 554.8)</b>     | <b>44.3</b><br><b>(41.4 to 47.1)</b>              | <b>18.6</b><br><b>(16.6 to 20.5)</b>                |
| Road injuries                                 | 4,850.3<br>(4,511.5 to 5,216.9)                  | 1,883.9<br>(1,644.3 to 2,136.0)                   | 277.2<br>(186.7 to 395.8)                   | 65.4<br>(62.4 to 68.2)                            | 32.4<br>(30.4 to 34.2)                              |
| Pedestrian road injuries                      | 677.7<br>(602.6 to 773.7)                        | 199.9<br>(162.3 to 244.2)                         | 39.7<br>(26.7 to 56.7)                      | 54.9<br>(52.0 to 57.6)                            | 23.1<br>(21.1 to 25.0)                              |
| Cyclist road injuries                         | 811.0<br>(681.8 to 959.4)                        | 353.9<br>(279.7 to 437.4)                         | 44.2<br>(29.5 to 63.4)                      | 70.8<br>(67.9 to 73.6)                            | 35.8<br>(33.8 to 37.6)                              |
| Motorcyclist road injuries                    | 1,359.2<br>(1,160.7 to 1,663.8)                  | 350.2<br>(287.9 to 427.1)                         | 74.9<br>(50.6 to 107.0)                     | 64.8<br>(61.5 to 68.2)                            | 33.3<br>(31.1 to 35.5)                              |
| Motor vehicle road injuries                   | 1,315.0<br>(1,105.9 to 1,515.3)                  | 630.2<br>(520.7 to 743.1)                         | 81.8<br>(55.6 to 116.2)                     | 62.4<br>(59.6 to 65.2)                            | 29.7<br>(27.8 to 31.4)                              |
| Other road injuries                           | 687.5<br>(580.9 to 812.4)                        | 349.6<br>(272.4 to 438.1)                         | 36.6<br>(24.5 to 53.0)                      | 80.7<br>(77.3 to 83.9)                            | 45.6<br>(43.4 to 47.7)                              |
| Other transport injuries                      | 1,900.5<br>(1,567.2 to 2,300.9)                  | 422.5<br>(358.9 to 507.3)                         | 111.5<br>(75.0 to 158.8)                    | 9.6<br>(7.0 to 11.8)                              | -6.6<br>(-8.4 to -4.8)                              |
| <b>Unintentional injuries</b>                 | <b>22,497.1</b><br><b>(20,942.1 to 24,022.5)</b> | <b>10,170.2</b><br><b>(9,576.3 to 10,820.1)</b>   | <b>809.6</b><br><b>(547.1 to 1,154.2)</b>   | <b>30.2</b><br><b>(27.4 to 32.8)</b>              | <b>8.0</b><br><b>(6.0 to 9.8)</b>                   |
| Falls                                         | 6,780.6<br>(5,998.7 to 7,555.7)                  | 3,138.3<br>(2,791.1 to 3,593.9)                   | 293.3<br>(203.0 to 405.7)                   | 38.7<br>(36.0 to 41.2)                            | 11.9<br>(9.9 to 13.7)                               |
| Drowning                                      | 141.8<br>(123.5 to 163.8)                        | 27.1<br>(23.6 to 31.2)                            | 8.1<br>(5.3 to 11.7)                        | 2.6<br>(-0.3 to 5.7)                              | -12.8<br>(-14.9 to -10.7)                           |
| Fire, heat, and hot substances                | 1,967.7<br>(1,659.4 to 2,387.9)                  | 235.7<br>(187.7 to 285.1)                         | 56.5<br>(38.2 to 81.0)                      | 35.2<br>(30.6 to 39.2)                            | 12.8<br>(9.6 to 15.5)                               |
| Poisonings                                    | 64.8<br>(55.3 to 74.8)                           | 114.7<br>(90.0 to 142.9)                          | 5.2<br>(3.3 to 7.7)                         | 65.8<br>(61.3 to 71.0)                            | 40.0<br>(36.5 to 43.8)                              |
| Exposure to mechanical forces                 | 3,408.8<br>(2,920.1 to 4,158.5)                  | 1,396.2<br>(1,161.1 to 1,633.8)                   | 92.0<br>(60.7 to 133.8)                     | 43.3<br>(40.1 to 46.3)                            | 16.7<br>(14.5 to 18.8)                              |
| Unintentional firearm injuries                | 138.2<br>(114.2 to 167.8)                        | 35.0<br>(23.8 to 49.3)                            | 6.2<br>(4.0 to 9.1)                         | 42.7<br>(39.4 to 45.9)                            | 18.0<br>(15.6 to 20.1)                              |
| Unintentional suffocation                     | 189.8<br>(153.1 to 234.9)                        | 41.0<br>(29.1 to 56.3)                            | 7.0<br>(4.4 to 10.5)                        | 30.0<br>(27.0 to 33.0)                            | 10.2<br>(8.2 to 12.1)                               |
| Other exposure to mechanical forces           | 3,080.8<br>(2,592.1 to 3,804.1)                  | 1,320.2<br>(1,102.6 to 1,552.7)                   | 78.8<br>(51.9 to 114.6)                     | 44.7<br>(41.5 to 47.7)                            | 17.2<br>(15.0 to 19.4)                              |

| Cause                                                                               | Prevalence in thousands (95% UI)              | Incidence in thousands (95% UI)            | YLDs in thousands (95% UI)             |                                                   |                                                     |
|-------------------------------------------------------------------------------------|-----------------------------------------------|--------------------------------------------|----------------------------------------|---------------------------------------------------|-----------------------------------------------------|
|                                                                                     | 2016 counts                                   | 2016 counts                                | 2016 counts                            | Percentage change in counts between 2006 and 2016 | Percentage change in age-standardised rates between |
| Adverse effects of medical treatment                                                | 64.4<br>(50.7 to 80.2)                        | 841.6<br>(733.0 to 962.9)                  | 8.6<br>(5.3 to 12.7)                   | 6.6<br>(3.5 to 9.8)                               | -2.2<br>(-4.4 to 0.1)                               |
| Animal contact                                                                      | 879.1<br>(764.7 to 1,030.2)                   | 1,076.9<br>(895.5 to 1,263.3)              | 25.8<br>(16.9 to 37.1)                 | 11.0<br>(8.8 to 13.3)                             | -6.3<br>(-8.1 to -4.6)                              |
| Venomous animal contact                                                             | 252.5<br>(212.8 to 294.8)                     | 394.3<br>(303.2 to 502.7)                  | 14.8<br>(9.7 to 21.6)                  | 18.4<br>(15.0 to 22.1)                            | 1.5<br>(-1.2 to 4.3)                                |
| Non-venomous animal contact                                                         | 626.6<br>(522.9 to 776.5)                     | 682.6<br>(555.8 to 824.7)                  | 10.9<br>(7.1 to 16.2)                  | 2.2<br>(-0.7 to 5.0)                              | -14.8<br>(-17.0 to -12.8)                           |
| Foreign body                                                                        | 1,726.6<br>(1,393.2 to 2,091.9)               | 890.8<br>(787.5 to 1,023.2)                | 74.4<br>(48.1 to 109.0)                | 11.6<br>(8.8 to 14.5)                             | -2.6<br>(-4.8 to -0.6)                              |
| Pulmonary aspiration and foreign body in airway                                     | 1,161.0<br>(873.2 to 1,565.5)                 | 379.6<br>(318.8 to 462.1)                  | 54.1<br>(34.6 to 79.7)                 | 7.9<br>(5.3 to 10.6)                              | -4.9<br>(-6.9 to -3.0)                              |
| Foreign body in eyes                                                                | 59.3<br>(34.4 to 87.7)                        | 304.0<br>(232.0 to 414.1)                  | 3.3<br>(1.7 to 5.7)                    | 19.0<br>(14.5 to 23.8)                            | 1.0<br>(-1.6 to 3.8)                                |
| Foreign body in other body part                                                     | 506.3<br>(412.0 to 626.5)                     | 207.2<br>(174.8 to 248.0)                  | 16.9<br>(10.9 to 25.0)                 | 23.8<br>(19.8 to 27.4)                            | 4.3<br>(1.4 to 6.8)                                 |
| Environmental heat and cold exposure                                                | 2,370.8<br>(1,975.2 to 2,813.7)               | 628.0<br>(506.1 to 771.4)                  | 95.3<br>(63.3 to 136.6)                | 24.8<br>(21.7 to 28.0)                            | 5.8<br>(3.5 to 7.9)                                 |
| Other unintentional injuries                                                        | 5,092.6<br>(4,128.4 to 6,143.7)               | 1,820.8<br>(1,535.0 to 2,155.1)            | 150.5<br>(100.8 to 216.5)              | 26.3<br>(24.0 to 28.1)                            | 5.0<br>(3.3 to 6.4)                                 |
| <b>Self-harm and interpersonal violence</b>                                         | <b>6,093.6</b><br><b>(5,505.8 to 6,767.8)</b> | <b>857.8†</b><br><b>(721.6 to 1,009.1)</b> | <b>106.7</b><br><b>(73.5 to 148.6)</b> | <b>21.0</b><br><b>(17.8 to 24.0)</b>              | <b>3.7</b><br><b>(1.9 to 5.4)</b>                   |
| Self-harm                                                                           | 153.5<br>(131.3 to 176.8)                     | 62.8<br>(52.3 to 74.3)                     | 8.1<br>(5.3 to 11.9)                   | 26.3<br>(23.4 to 29.3)                            | 3.1<br>(1.0 to 5.1)                                 |
| Self-harm by firearm                                                                | 7.5<br>(6.2 to 9.1)                           | 1.6<br>(0.9 to 2.7)                        | 0.3<br>(0.2 to 0.5)                    | 23.9<br>(20.7 to 26.8)                            | 4.5<br>(2.0 to 6.6)                                 |
| Self-harm by other specified means                                                  | 146.0<br>(123.7 to 169.3)                     | 61.2<br>(51.1 to 72.3)                     | 7.9<br>(5.1 to 11.5)                   | 26.4<br>(23.5 to 29.4)                            | 3.0<br>(1.0 to 5.1)                                 |
| Interpersonal violence                                                              | 5,940.1<br>(5,343.1 to 6,610.6)               | 795.0†<br>(658.3 to 944.2)                 | 98.6<br>(68.2 to 136.9)                | 20.5<br>(17.3 to 23.6)                            | 3.7<br>(1.9 to 5.5)                                 |
| Assault by firearm                                                                  | 38.0<br>(33.5 to 43.6)                        | 12.5<br>(8.7 to 17.4)                      | 1.8<br>(1.2 to 2.7)                    | 53.6<br>(50.3 to 56.9)                            | 24.6<br>(22.5 to 26.8)                              |
| Assault by sharp object                                                             | 391.1<br>(317.2 to 469.3)                     | 151.4<br>(112.3 to 199.0)                  | 12.5<br>(8.3 to 18.1)                  | 30.4<br>(27.1 to 33.8)                            | 9.0<br>(6.6 to 11.1)                                |
| Sexual violence                                                                     | 4,397.4<br>(3,823.4 to 5,037.7)               | --                                         | 36.5<br>(24.4 to 52.2)                 | -0.4<br>(-2.1 to 1.4)                             | -9.6<br>(-10.5 to -8.6)                             |
| Assault by other means                                                              | 1,113.6<br>(936.0 to 1,345.9)                 | 631.1<br>(521.5 to 754.0)                  | 47.8<br>(32.3 to 68.6)                 | 38.9<br>(36.4 to 41.4)                            | 13.2<br>(11.4 to 14.8)                              |
| <b>Forces of nature, conflict and terrorism, and executions and police conflict</b> | <b>1,597.8</b><br><b>(972.4 to 2,337.8)</b>   | <b>42.0†</b><br><b>(12.9 to 59.8)</b>      | <b>51.9</b><br><b>(16.2 to 119.8)</b>  | <b>-18.7</b><br><b>(-29.1 to -12.7)</b>           | <b>-28.6</b><br><b>(-36.3 to -24.5)</b>             |
| Exposure to forces of nature                                                        | 808.1<br>(447.3 to 1,254.8)                   | 10.5<br>(5.9 to 15.5)                      | 29.6<br>(11.6 to 55.5)                 | -19.2<br>(-31.9 to -8.2)                          | -27.8<br>(-38.2 to -19.5)                           |
| Conflict and terrorism                                                              | 698.9<br>(324.7 to 1,244.8)                   | --                                         | 19.5<br>(3.9 to 56.7)                  | -20.7<br>(-24.1 to -18.2)                         | -30.9<br>(-33.5 to -28.9)                           |
| Executions and police conflict                                                      | 90.8<br>(12.5 to 159.2)                       | 31.5<br>(4.9 to 46.9)                      | 2.8<br>(0.5 to 9.4)                    | 7.3<br>(-7.0 to 21.3)                             | -19.4<br>(-29.6 to -8.2)                            |
| <b>Impairments</b>                                                                  | --                                            | --                                         | --                                     | --                                                | --                                                  |
| Anaemia                                                                             | 70,836.6<br>(68,628.3 to 73,266.8)            | --                                         | 1,757.2<br>(1,179.1 to 2,502.9)        | 12.1<br>(9.3 to 15.3)                             | 0.1<br>(-1.9 to 2.2)                                |
| Developmental intellectual disability                                               | 5,071.4<br>(3,857.0 to 6,354.7)               | --                                         | 537.9<br>(392.3 to 710.6)              | 1.0<br>(-2.3 to 4.9)                              | -8.2<br>(-11.1 to -4.7)                             |
| Epilepsy                                                                            | 1,467.7<br>(1,217.4 to 1,761.2)               | --                                         | 570.1<br>(404.9 to 764.6)              | 12.2<br>(-8.4 to 37.9)                            | 2.0<br>(-17.0 to 25.5)                              |
| Guillain-Barre syndrome                                                             | 1.8<br>(1.4 to 2.3)                           | --                                         | 0.5<br>(0.3 to 0.8)                    | 15.3<br>(11.7 to 19.2)                            | 0.1<br>(0.0 to 0.1)                                 |
| Hearing loss                                                                        | 34,226.9<br>(32,412.1 to 36,176.0)            | --                                         | 1,347.0<br>(959.6 to 1,827.7)          | 17.8<br>(15.7 to 19.9)                            | -3.3<br>(-4.5 to -2.2)                              |
| Heart failure                                                                       | 1,648.4<br>(1,498.3 to 1,812.4)               | --                                         | 177.6<br>(128.3 to 234.7)              | 30.1<br>(26.0 to 33.8)                            | -0.5<br>(-3.4 to 2.2)                               |
| Infertility                                                                         | 6,343.8<br>(4,885.7 to 8,450.7)               | --                                         | 36.4<br>(14.6 to 75.4)                 | 64.8<br>(48.5 to 81.0)                            | 49.8<br>(34.9 to 64.7)                              |
| Pelvic inflammatory disease                                                         | 225.7<br>(192.3 to 262.7)                     | --                                         | 29.4<br>(19.8 to 41.0)                 | 7.5<br>(2.5 to 12.7)                              | -9.2<br>(-13.4 to -5.2)                             |
| Vision loss                                                                         | 36,580.4<br>(35,220.8 to 37,987.3)            | --                                         | 960.3<br>(673.8 to 1,370.2)            | 17.1<br>(15.1 to 18.8)                            | -4.8<br>(-6.0 to -3.6)                              |

We did not calculate incidence for the nine impairments, certain NTDs, and causes with only birth prevalence. Blank cells mean that no estimate is available.

† Incidence for aggregate causes represents the sum of the incidence of the causes below the aggregate.

‡ Incidence estimates for stroke represent first-ever stroke only.

^ Incidence of HIV/AIDS represents new infections of HIV only and does not include new infections of Tuberculosis in HIV positive cases.



SR Table 14: Prevalence, incidence, and YLDs for 2016, percentage change of YLD counts and percentage change of age-standardised YLD rates between 2006 and 2016 by cause and impairments, for all ages, Iran.

| Cause                                                                                | Prevalence in thousands (95% UI)          | Incidence in thousands (95% UI)               | YLDs in thousands (95% UI)              |                                                   |                                                     |
|--------------------------------------------------------------------------------------|-------------------------------------------|-----------------------------------------------|-----------------------------------------|---------------------------------------------------|-----------------------------------------------------|
|                                                                                      | 2016 counts                               | 2016 counts                                   | 2016 counts                             | Percentage change in counts between 2006 and 2016 | Percentage change in age-standardised rates between |
| <b>All causes</b>                                                                    | <b>76,888.0</b><br>(76,506.7 to 77,245.5) | <b>513,623.9†</b><br>(486,965.3 to 543,829.5) | <b>9,512.7</b><br>(7,106.1 to 12,256.4) | <b>19.8</b><br>(17.3 to 22.4)                     | <b>-0.2</b><br>(-2.1 to 1.5)                        |
| <b>Communicable, maternal, neonatal, and nutritional disorders</b>                   | <b>37,339.1</b><br>(36,347.1 to 38,468.2) | <b>283,342.0†</b><br>(258,157.9 to 310,560.1) | <b>664.9</b><br>(479.7 to 903.3)        | <b>4.8</b><br>(-1.3 to 10.9)                      | <b>-6.7</b><br>(-12.0 to -1.4)                      |
| <b>HIV/AIDS and tuberculosis</b>                                                     | <b>14,497.6</b><br>(13,332.6 to 15,477.5) | <b>15.1†</b><br>(13.1 to 17.1)                | <b>4.0</b><br>(2.6 to 5.8)              | <b>9.7</b><br>(-11.8 to 40.6)                     | <b>-12.2</b><br>(-27.9 to 8.8)                      |
| Tuberculosis                                                                         | 13,625.7<br>(12,583.3 to 14,777.6)        | 13.3†<br>(11.6 to 15.3)                       | 2.3<br>(1.4 to 3.3)                     | -8.4<br>(-30.5 to 25.6)                           | -25.3<br>(-41.4 to -1.5)                            |
| Drug-susceptible tuberculosis                                                        | 7.2<br>(6.1 to 8.5)                       | 13.2<br>(11.4 to 15.2)                        | 2.2<br>(1.4 to 3.3)                     | -8.2<br>(-30.8 to 27.4)                           | -25.2<br>(-41.4 to -0.1)                            |
| Multidrug-resistant tuberculosis without extensive drug resistance                   | 0.1<br>(< 0.05 to 0.2)                    | 0.1<br>(< 0.05 to 0.3)                        | < 0.05<br>(< 0.05 to 0.1)               | -22.5<br>(-83.6 to 537.3)                         | -36.4<br>(-86.8 to 424.7)                           |
| Extensively drug-resistant tuberculosis                                              | < 0.05<br>(< 0.05 to < 0.05)              | < 0.05<br>(< 0.05 to < 0.05)                  | < 0.05<br>(< 0.05 to < 0.05)            | 76.0<br>(-62.7 to 1,347.9)                        | 44.4<br>(-70.0 to 1,092.5)                          |
| Latent tuberculosis infection                                                        | 13,618.5<br>(12,575.9 to 14,770.3)        | --                                            | --                                      | --                                                | --                                                  |
| HIV/AIDS                                                                             | 14.6<br>(9.9 to 21.7)                     | 1.7^<br>(1.2 to 2.7)                          | 1.7<br>(1.0 to 2.9)                     | 48.4<br>(12.8 to 102.2)                           | 21.4<br>(-6.9 to 65.9)                              |
| Drug-susceptible HIV/AIDS - Tuberculosis                                             | 1.1<br>(0.6 to 1.7)                       | 2.0<br>(1.2 to 3.2)                           | 0.5<br>(0.2 to 0.8)                     | -31.4<br>(-37.1 to -25.9)                         | -43.8<br>(-48.4 to -39.3)                           |
| Multidrug-resistant HIV/AIDS - Tuberculosis without extensive drug resistance        | < 0.05<br>(< 0.05 to < 0.05)              | < 0.05<br>(< 0.05 to 0.1)                     | < 0.05<br>(< 0.05 to < 0.05)            | -40.5<br>(-87.2 to 384.6)                         | -51.1<br>(-89.5 to 298.4)                           |
| Extensively drug-resistant HIV/AIDS - Tuberculosis                                   | < 0.05<br>(< 0.05 to < 0.05)              | < 0.05<br>(< 0.05 to < 0.05)                  | < 0.05<br>(< 0.05 to < 0.05)            | 35.2<br>(-71.0 to 1,001.2)                        | 11.2<br>(-76.2 to 805.2)                            |
| HIV/AIDS resulting in other diseases                                                 | 13.5<br>(8.8 to 20.5)                     | 1.7<br>(1.2 to 2.7)                           | 1.2<br>(0.7 to 2.4)                     | 157.1<br>(82.6 to 287.2)                          | 109.2<br>(38.5 to 221.5)                            |
| <b>Diarrhoea, lower respiratory infections, and other common infectious diseases</b> | <b>4,751.2</b><br>(4,478.0 to 5,051.8)    | <b>268,903.8†</b><br>(243,722.0 to 295,864.3) | <b>246.2</b><br>(172.1 to 338.3)        | <b>14.4</b><br>(10.6 to 18.6)                     | <b>3.3</b><br>(0.2 to 6.6)                          |
| Diarrhoeal diseases                                                                  | 952.1<br>(873.8 to 1,040.3)               | 62,465.3<br>(57,551.5 to 67,956.9)            | 107.9<br>(74.6 to 149.6)                | 20.4<br>(13.0 to 28.2)                            | 9.6<br>(3.3 to 16.1)                                |
| Intestinal infectious diseases                                                       | 1.6<br>(1.3 to 1.9)                       | 30.3†<br>(26.6 to 34.7)                       | 0.3<br>(0.2 to 0.4)                     | -18.8<br>(-30.3 to -5.1)                          | -19.9<br>(-30.4 to -7.6)                            |
| Typhoid fever                                                                        | 1.6<br>(1.3 to 1.9)                       | 24.7<br>(21.5 to 28.4)                        | 0.2<br>(0.2 to 0.4)                     | -19.1<br>(-31.3 to -4.8)                          | -19.9<br>(-31.0 to -7.3)                            |
| Paratyphoid fever                                                                    | 0.2<br>(0.2 to 0.3)                       | 5.6<br>(4.8 to 6.5)                           | < 0.05<br>(< 0.05 to < 0.05)            | -11.3<br>(-25.9 to 5.3)                           | -15.2<br>(-28.2 to -0.1)                            |
| Other intestinal infectious diseases                                                 | --                                        | --                                            | < 0.05<br>(< 0.05 to < 0.05)            | -32.0<br>(-45.1 to -16.0)                         | -38.9<br>(-48.4 to -27.5)                           |
| Lower respiratory infections                                                         | 91.7<br>(83.1 to 100.9)                   | 4,078.0<br>(3,682.9 to 4,514.1)               | 5.5<br>(3.6 to 7.9)                     | 15.2<br>(3.4 to 28.6)                             | -0.5<br>(-9.9 to 9.9)                               |
| Upper respiratory infections                                                         | 2,587.4<br>(2,282.7 to 2,928.9)           | 194,663.5<br>(171,063.4 to 221,160.3)         | 64.4<br>(37.1 to 100.8)                 | 9.1<br>(2.4 to 17.0)                              | -0.6<br>(-5.7 to 4.6)                               |
| Otitis media                                                                         | 1,007.8<br>(902.0 to 1,120.1)             | 5,831.4<br>(4,653.1 to 7,286.0)               | 28.1<br>(17.5 to 42.1)                  | 1.3<br>(-7.1 to 10.4)                             | -5.4<br>(-12.1 to 1.8)                              |
| Meningitis                                                                           | 137.6<br>(120.9 to 156.5)                 | 21.5<br>(18.3 to 25.4)                        | 16.3<br>(11.3 to 21.5)                  | 14.8<br>(9.1 to 20.8)                             | 0.9<br>(-3.6 to 5.9)                                |
| Pneumococcal meningitis                                                              | 64.7<br>(53.6 to 78.6)                    | 5.5<br>(4.2 to 7.0)                           | 6.9<br>(4.7 to 9.2)                     | 18.6<br>(6.3 to 32.3)                             | 3.8<br>(-6.3 to 15.1)                               |
| H influenzae type B meningitis                                                       | 25.1<br>(20.1 to 31.7)                    | 3.9<br>(2.4 to 5.9)                           | 3.7<br>(2.5 to 5.0)                     | -0.7<br>(-7.5 to 5.9)                             | -11.9<br>(-17.9 to -6.3)                            |
| Meningococcal infection                                                              | 22.0<br>(16.8 to 28.5)                    | 6.1<br>(4.5 to 8.1)                           | 2.6<br>(1.8 to 3.5)                     | 15.3<br>(9.7 to 20.9)                             | 0.7<br>(-3.7 to 5.3)                                |
| Other meningitis                                                                     | 25.8<br>(19.9 to 33.0)                    | 6.0<br>(4.3 to 8.3)                           | 3.1<br>(2.1 to 4.3)                     | 29.4<br>(21.0 to 40.3)                            | 13.7<br>(6.4 to 23.1)                               |
| Encephalitis                                                                         | 180.7<br>(127.1 to 256.4)                 | 90.6<br>(79.7 to 102.7)                       | 21.1<br>(14.9 to 27.8)                  | 21.4<br>(7.3 to 37.3)                             | 1.3<br>(-9.4 to 14.0)                               |
| Diphtheria                                                                           | < 0.05<br>(< 0.05 to < 0.05)              | < 0.05<br>(< 0.05 to < 0.05)                  | < 0.05<br>(< 0.05 to < 0.05)            | -19.7<br>(-57.3 to 60.4)                          | -28.6<br>(-61.6 to 37.3)                            |
| Whooping cough                                                                       | 0.5<br>(0.3 to 0.7)                       | 3.6<br>(2.4 to 5.3)                           | < 0.05<br>(< 0.05 to < 0.05)            | -33.6<br>(-54.3 to -5.4)                          | -39.5<br>(-59.0 to -14.4)                           |
| Tetanus                                                                              | 0.1<br>(0.1 to 0.1)                       | < 0.05<br>(< 0.05 to < 0.05)                  | < 0.05<br>(< 0.05 to < 0.05)            | 13.5<br>(2.0 to 28.0)                             | -1.4<br>(-12.2 to 11.8)                             |
| Measles                                                                              | 0.2<br>(0.1 to 0.5)                       | 7.5<br>(2.5 to 17.9)                          | < 0.05<br>(< 0.05 to < 0.05)            | 87.3<br>(29.6 to 171.9)                           | 66.8<br>(15.4 to 142.2)                             |
| Varicella and herpes zoster                                                          | 74.4<br>(68.9 to 80.5)                    | 1,712.1<br>(1,661.4 to 1,774.3)               | 2.7<br>(1.6 to 4.2)                     | 21.8<br>(5.9 to 40.7)                             | -0.0<br>(-10.7 to 12.2)                             |
| <b>Neglected tropical diseases and malaria</b>                                       | <b>2,462.6</b><br>(2,167.7 to 2,823.2)    | <b>78.2†</b><br>(37.2 to 146.1)               | <b>14.5</b><br>(9.2 to 21.4)            | <b>-3.7</b><br>(-24.2 to 19.9)                    | <b>-18.4</b><br>(-35.5 to 1.3)                      |
| Malaria                                                                              | 3.3<br>(2.8 to 3.9)                       | 0.8<br>(0.8 to 0.8)                           | 1.1<br>(0.8 to 1.4)                     | -10.0<br>(-60.6 to 17.6)                          | -19.5<br>(-65.7 to 5.6)                             |
| Chagas disease                                                                       | --                                        | --                                            | --                                      | --                                                | --                                                  |
| Leishmaniasis                                                                        | 43.3<br>(24.9 to 71.5)                    | 69.2<br>(27.8 to 136.8)                       | 2.2<br>(0.8 to 4.6)                     | -15.1<br>(-67.6 to 82.3)                          | -22.5<br>(-70.5 to 64.3)                            |
| Visceral leishmaniasis                                                               | < 0.05<br>(< 0.05 to 0.1)                 | 0.2<br>(0.2 to 0.2)                           | < 0.05<br>(< 0.05 to < 0.05)            | -52.7<br>(-60.5 to -44.0)                         | -64.1<br>(-71.4 to -54.7)                           |
| Cutaneous and mucocutaneous leishmaniasis                                            | 34.5<br>(13.8 to 68.3)                    | 69.0<br>(27.7 to 136.6)                       | 2.2<br>(0.8 to 4.6)                     | -15.0<br>(-67.6 to 83.0)                          | -22.3<br>(-70.5 to 65.1)                            |
| African trypanosomiasis                                                              | --                                        | --                                            | --                                      | --                                                | --                                                  |
| Schistosomiasis                                                                      | 10.8<br>(7.3 to 17.8)                     | 2.0<br>(1.7 to 2.4)                           | 0.2<br>(0.1 to 0.6)                     | -40.1<br>(-69.9 to -2.0)                          | -52.4<br>(-76.2 to -23.9)                           |
| Cysticercosis                                                                        | --                                        | --                                            | --                                      | --                                                | --                                                  |
| Cystic echinococcosis                                                                | 5.0<br>(0.9 to 16.7)                      | 1.1<br>(0.2 to 3.5)                           | 0.5<br>(0.1 to 1.6)                     | -37.0<br>(-94.1 to 394.5)                         | -47.2<br>(-93.5 to 318.4)                           |
| Lymphatic filariasis                                                                 | --                                        | --                                            | --                                      | --                                                | --                                                  |
| Onchocerciasis                                                                       | --                                        | --                                            | --                                      | --                                                | --                                                  |
| Trachoma                                                                             | 52.3<br>(35.2 to 75.1)                    | --                                            | 3.5<br>(2.2 to 5.0)                     | 9.9<br>(-22.6 to 52.4)                            | -16.9<br>(-43.6 to 21.0)                            |
| Dengue                                                                               | --                                        | --                                            | --                                      | --                                                | --                                                  |
| Yellow fever                                                                         | --                                        | --                                            | --                                      | --                                                | --                                                  |
| Rabies                                                                               | < 0.05<br>(< 0.05 to < 0.05)              | < 0.05<br>(< 0.05 to < 0.05)                  | < 0.05<br>(< 0.05 to < 0.05)            | -26.9<br>(-57.4 to 31.1)                          | -32.6<br>(-60.1 to 18.0)                            |
| Intestinal nematode infections                                                       | 2,078.0<br>(1,801.3 to 2,436.7)           | --                                            | 0.8<br>(0.4 to 1.4)                     | 12.8<br>(-27.9 to 72.6)                           | 1.9<br>(-35.5 to 57.1)                              |
| Ascariasis                                                                           | 1,628.3<br>(1,316.8 to 2,003.2)           | --                                            | 0.4<br>(0.1 to 0.8)                     | 14.2<br>(-53.7 to 177.9)                          | 0.8<br>(-59.0 to 147.2)                             |

| Cause                                                                   | Prevalence in thousands (95% UI)                 | Incidence in thousands (95% UI)                      | YLDs in thousands (95% UI)                     |                                                   |                                                     |
|-------------------------------------------------------------------------|--------------------------------------------------|------------------------------------------------------|------------------------------------------------|---------------------------------------------------|-----------------------------------------------------|
|                                                                         | 2016 counts                                      | 2016 counts                                          | 2016 counts                                    | Percentage change in counts between 2006 and 2016 | Percentage change in age-standardised rates between |
| Trichuriasis                                                            | 194.3<br>(152.7 to 246.2)                        | --                                                   | < 0.05<br>(< 0.05 to < 0.05)                   | 5.7<br>(-81.8 to 536.5)                           | -6.9<br>(-84.1 to 456.4)                            |
| Hookworm disease                                                        | 244.6<br>(201.4 to 296.5)                        | --                                                   | 0.4<br>(0.2 to 0.7)                            | 11.6<br>(-17.1 to 52.1)                           | 2.9<br>(-22.9 to 39.8)                              |
| Food-borne trematodiasis                                                | 43.2<br>(30.9 to 56.9)                           | 5.2<br>(3.8 to 6.8)                                  | 0.7<br>(0.2 to 1.7)                            | 34.9<br>(-0.2 to 80.5)                            | 1.1<br>(-25.5 to 36.6)                              |
| Leprosy                                                                 | 0.8<br>(0.6 to 1.1)                              | < 0.05<br>(< 0.05 to < 0.05)                         | 0.1<br>(< 0.05 to 0.1)                         | -11.3<br>(-23.7 to 2.5)                           | -31.9<br>(-43.9 to -17.0)                           |
| Ebola virus disease                                                     | --                                               | --                                                   | --                                             | --                                                | --                                                  |
| Zika virus disease                                                      | --                                               | --                                                   | --                                             | --                                                | --                                                  |
| Guinea worm disease                                                     | --                                               | --                                                   | --                                             | --                                                | --                                                  |
| Other neglected tropical diseases                                       | 286.1<br>(241.4 to 334.9)                        | --                                                   | 5.5<br>(3.0 to 8.9)                            | -3.3<br>(-20.2 to 19.1)                           | -15.8<br>(-30.5 to 2.9)                             |
| <b>Maternal disorders</b>                                               | <b>122.3</b><br><b>(94.4 to 160.5)</b>           | <b>998.4†</b><br><b>(871.7 to 1,144.0)</b>           | <b>7.2</b><br><b>(4.3 to 10.9)</b>             | <b>-9.4</b><br><b>(-36.6 to 31.8)</b>             | <b>-18.8</b><br><b>(-43.1 to 16.9)</b>              |
| Maternal haemorrhage                                                    | 17.5<br>(12.5 to 25.5)                           | 95.1<br>(61.3 to 148.6)                              | 0.6<br>(0.3 to 0.9)                            | 3.6<br>(-34.6 to 64.7)                            | -8.8<br>(-39.9 to 41.5)                             |
| Maternal sepsis and other pregnancy related infections                  | 20.1<br>(12.1 to 31.0)                           | 191.2<br>(134.8 to 264.1)                            | 0.8<br>(0.4 to 1.5)                            | -6.3<br>(-55.4 to 107.6)                          | -14.0<br>(-58.8 to 89.6)                            |
| Maternal hypertensive disorders                                         | 86.4<br>(54.7 to 119.6)                          | 350.6<br>(287.3 to 411.0)                            | 4.1<br>(2.1 to 6.6)                            | -10.7<br>(-46.1 to 49.1)                          | -20.3<br>(-51.4 to 30.8)                            |
| Maternal obstructed labour and uterine rupture                          | 1.2<br>(0.6 to 1.9)                              | 84.0<br>(58.2 to 120.3)                              | 0.4<br>(0.2 to 0.7)                            | -3.8<br>(-52.6 to 103.4)                          | -13.1<br>(-56.8 to 81.9)                            |
| Maternal abortion, miscarriage, and ectopic pregnancy                   | 2.3<br>(1.5 to 3.4)                              | 277.5<br>(208.7 to 372.0)                            | 0.2<br>(0.1 to 0.5)                            | -1.0<br>(-56.6 to 136.6)                          | -17.0<br>(-60.1 to 90.5)                            |
| Other maternal disorders                                                | --                                               | --                                                   | 1.1<br>(0.7 to 1.6)                            | -15.6<br>(-40.9 to 22.7)                          | -22.9<br>(-46.0 to 11.1)                            |
| <b>Neonatal disorders</b>                                               | <b>680.4</b><br><b>(556.6 to 962.1)</b>          | --                                                   | <b>141.2</b><br><b>(86.1 to 267.7)</b>         | <b>-1.8</b><br><b>(-17.4 to 20.7)</b>             | <b>-10.6</b><br><b>(-24.7 to 9.9)</b>               |
| Neonatal preterm birth complications                                    | 564.3<br>(431.8 to 729.7)                        | --                                                   | 73.4<br>(44.6 to 116.1)                        | 6.1<br>(-18.3 to 37.8)                            | -3.4<br>(-25.6 to 24.8)                             |
| Neonatal encephalopathy due to birth asphyxia and trauma                | 75.3<br>(37.3 to 136.3)                          | --                                                   | 10.3<br>(2.0 to 27.4)                          | 36.5<br>(-13.8 to 129.1)                          | 22.8<br>(-22.5 to 107.5)                            |
| Neonatal sepsis and other neonatal infections                           | 110.0<br>(37.1 to 360.5)                         | --                                                   | 46.0<br>(13.0 to 164.4)                        | -17.6<br>(-32.1 to 17.8)                          | -24.4<br>(-37.8 to 8.3)                             |
| Hemolytic disease and other neonatal jaundice                           | 21.2<br>(18.4 to 24.3)                           | --                                                   | 6.6<br>(4.9 to 8.6)                            | 8.8<br>(-4.5 to 24.9)                             | -2.5<br>(-14.4 to 12.1)                             |
| Other neonatal disorders                                                | --                                               | --                                                   | 4.9<br>(2.8 to 9.4)                            | -6.4<br>(-23.9 to 17.7)                           | -17.7<br>(-33.2 to 3.3)                             |
| <b>Nutritional deficiencies</b>                                         | <b>8,593.9</b><br><b>(8,013.6 to 9,156.7)</b>    | <b>489.0†</b><br><b>(400.8 to 597.7)</b>             | <b>178.4</b><br><b>(116.1 to 258.4)</b>        | <b>-4.4</b><br><b>(-12.6 to 5.9)</b>              | <b>-15.0</b><br><b>(-22.3 to -6.8)</b>              |
| Protein-energy malnutrition                                             | 620.2<br>(458.9 to 822.2)                        | 292.2<br>(220.7 to 381.6)                            | 22.1<br>(13.4 to 34.5)                         | 1.2<br>(-28.2 to 42.1)                            | -10.9<br>(-37.1 to 25.8)                            |
| Iodine deficiency                                                       | 2,223.7<br>(1,925.2 to 2,543.1)                  | 42.3<br>(36.9 to 48.0)                               | 56.5<br>(37.9 to 81.0)                         | 9.8<br>(0.0 to 20.4)                              | -3.0<br>(-11.6 to 6.0)                              |
| Vitamin A deficiency                                                    | 183.4<br>(131.4 to 239.4)                        | 154.5<br>(110.5 to 203.3)                            | --                                             | --                                                | --                                                  |
| Iron-deficiency anaemia                                                 | 5,804.3<br>(5,030.0 to 6,582.7)                  | --                                                   | 99.0<br>(59.0 to 153.7)                        | -12.1<br>(-23.2 to 2.7)                           | -21.7<br>(-31.5 to -10.3)                           |
| Other nutritional deficiencies                                          | --                                               | --                                                   | 0.8<br>(0.5 to 1.2)                            | 1.5<br>(-29.3 to 44.0)                            | -11.3<br>(-38.0 to 26.9)                            |
| <b>Other communicable, maternal, neonatal, and nutritional diseases</b> | <b>16,421.8</b><br><b>(15,332.2 to 17,601.5)</b> | <b>12,857.5</b><br><b>(11,030.8 to 14,812.3)</b>     | <b>69.9</b><br><b>(42.9 to 112.5)</b>          | <b>21.7</b><br><b>(12.5 to 31.1)</b>              | <b>-0.8</b><br><b>(-7.2 to 6.1)</b>                 |
| Sexually transmitted diseases excluding HIV                             | 14,472.7<br>(13,459.5 to 15,657.1)               | 11,811.7<br>(10,105.6 to 13,690.5)                   | 62.6<br>(37.6 to 101.9)                        | 24.6<br>(14.7 to 35.5)                            | 1.0<br>(-6.0 to 8.4)                                |
| Syphilis                                                                | 50.8<br>(38.4 to 66.5)                           | 34.3<br>(23.5 to 47.0)                               | 0.9<br>(0.6 to 1.2)                            | 40.9<br>(26.9 to 56.8)                            | 4.1<br>(-6.6 to 17.5)                               |
| Chlamydial infection                                                    | 1,818.3<br>(1,419.6 to 2,284.9)                  | 1,242.5<br>(980.6 to 1,542.4)                        | 7.4<br>(4.2 to 12.6)                           | 10.5<br>(-3.7 to 28.4)                            | -1.2<br>(-12.9 to 12.1)                             |
| Gonococcal infection                                                    | 2,339.8<br>(1,918.4 to 2,834.1)                  | 8,449.4<br>(6,802.5 to 10,262.6)                     | 30.9<br>(18.2 to 51.2)                         | 27.4<br>(13.8 to 41.9)                            | 1.5<br>(-8.4 to 11.8)                               |
| Trichomoniasis                                                          | 1,235.1<br>(1,050.9 to 1,423.9)                  | 1,034.6<br>(880.8 to 1,201.9)                        | 1.3<br>(0.5 to 2.7)                            | 9.4<br>(-1.7 to 22.1)                             | -6.1<br>(-13.7 to 2.1)                              |
| Genital herpes                                                          | 9,794.2<br>(8,465.1 to 11,396.5)                 | 617.0<br>(518.5 to 746.2)                            | 2.5<br>(0.8 to 5.7)                            | 20.2<br>(6.1 to 34.7)                             | -3.9<br>(-13.8 to 7.1)                              |
| Other sexually transmitted diseases                                     | 344.2<br>(287.0 to 413.3)                        | 433.8<br>(331.2 to 557.4)                            | 19.6<br>(12.3 to 30.9)                         | 27.6<br>(16.1 to 39.6)                            | 2.1<br>(-6.2 to 11.0)                               |
| Hepatitis                                                               | 2,253.8<br>(1,889.6 to 2,673.7)                  | 1,045.7<br>(666.8 to 1,675.6)                        | 1.4<br>(0.8 to 2.1)                            | -11.2<br>(-32.4 to 13.8)                          | -23.4<br>(-39.1 to -4.0)                            |
| Acute hepatitis A                                                       | 32.8<br>(6.6 to 80.3)                            | 426.1<br>(85.7 to 1,043.3)                           | 0.3<br>(0.1 to 0.6)                            | -18.2<br>(-67.1 to 136.3)                         | -20.6<br>(-67.4 to 92.5)                            |
| Hepatitis B                                                             | 1,785.9<br>(1,423.3 to 2,187.6)                  | 539.7<br>(419.5 to 671.1)                            | 1.0<br>(0.6 to 1.5)                            | -9.4<br>(-28.3 to 15.3)                           | -25.4<br>(-41.0 to -5.3)                            |
| Hepatitis C                                                             | 431.2<br>(384.8 to 479.3)                        | 28.1<br>(25.4 to 31.2)                               | < 0.05<br>(< 0.05 to < 0.05)                   | 17.4<br>(13.7 to 21.3)                            | -5.0<br>(-6.2 to -3.9)                              |
| Acute hepatitis E                                                       | 4.0<br>(3.2 to 4.8)                              | 51.7<br>(41.9 to 62.3)                               | 0.1<br>(0.1 to 0.2)                            | -10.5<br>(-25.3 to 7.1)                           | -16.8<br>(-27.4 to -2.5)                            |
| Other infectious diseases                                               | 230.5<br>(196.3 to 267.8)                        | 0.1<br>(0.1 to 0.2)                                  | 5.9<br>(3.5 to 9.2)                            | 4.7<br>(-8.5 to 20.5)                             | -7.5<br>(-19.3 to 6.0)                              |
| <b>Non-communicable diseases</b>                                        | <b>74,053.3</b><br><b>(73,546.4 to 74,485.8)</b> | <b>224,112.3†</b><br><b>(213,744.6 to 235,642.5)</b> | <b>8,232.8</b><br><b>(6,143.2 to 10,673.8)</b> | <b>22.0</b><br><b>(19.0 to 25.0)</b>              | <b>1.0</b><br><b>(-1.1 to 3.0)</b>                  |
| <b>Neoplasms</b>                                                        | <b>196.8</b><br><b>(187.9 to 205.9)</b>          | <b>86.9</b><br><b>(76.9 to 91.5)</b>                 | <b>27.9</b><br><b>(20.1 to 36.8)</b>           | <b>60.0</b><br><b>(39.2 to 72.7)</b>              | <b>18.8</b><br><b>(4.0 to 28.2)</b>                 |
| Lip and oral cavity cancer                                              | 3.5<br>(3.2 to 3.7)                              | 0.9<br>(0.9 to 1.0)                                  | 0.4<br>(0.3 to 0.5)                            | 46.3<br>(28.8 to 66.3)                            | 6.9<br>(-6.9 to 22.5)                               |
| Nasopharynx cancer                                                      | 0.6<br>(0.6 to 0.7)                              | 0.2<br>(0.2 to 0.2)                                  | 0.1<br>(0.1 to 0.1)                            | 23.1<br>(3.2 to 48.4)                             | -3.8<br>(-16.8 to 15.1)                             |
| Other pharynx cancer                                                    | 0.6<br>(0.6 to 0.7)                              | 0.2<br>(0.2 to 0.2)                                  | 0.1<br>(0.1 to 0.1)                            | 61.6<br>(43.6 to 82.3)                            | 15.9<br>(3.4 to 30.7)                               |
| Oesophageal cancer                                                      | 2.4<br>(2.2 to 2.6)                              | 2.3<br>(2.1 to 2.5)                                  | 0.6<br>(0.4 to 0.8)                            | 3.7<br>(-13.4 to 24.6)                            | -22.6<br>(-36.1 to -5.3)                            |
| Stomach cancer                                                          | 14.0<br>(13.2 to 14.8)                           | 9.2<br>(8.7 to 9.7)                                  | 2.2<br>(1.6 to 2.9)                            | 23.0<br>(6.5 to 42.9)                             | -8.6<br>(-21.3 to 6.7)                              |
| Colon and rectum cancer                                                 | 22.9<br>(21.2 to 24.9)                           | 6.6<br>(6.1 to 7.2)                                  | 2.3<br>(1.7 to 3.1)                            | 96.2<br>(69.4 to 124.9)                           | 43.6<br>(22.9 to 66.0)                              |
| Liver cancer                                                            | 1.6<br>(1.2 to 1.9)                              | 3.7<br>(2.9 to 4.1)                                  | 0.8<br>(0.5 to 1.1)                            | 56.8<br>(37.1 to 74.7)                            | 17.7<br>(2.1 to 32.0)                               |
| Liver cancer due to hepatitis B                                         | 0.8<br>(0.5 to 1.1)                              | 1.0<br>(0.7 to 1.3)                                  | 0.2<br>(0.1 to 0.3)                            | 56.4<br>(34.9 to 75.0)                            | 15.2<br>(-0.4 to 30.1)                              |



| Cause                                              | Prevalence in thousands (95% UI)              | Incidence in thousands (95% UI)                | YLDs in thousands (95% UI)              |                                                   |                                                     |
|----------------------------------------------------|-----------------------------------------------|------------------------------------------------|-----------------------------------------|---------------------------------------------------|-----------------------------------------------------|
|                                                    | 2016 counts                                   | 2016 counts                                    | 2016 counts                             | Percentage change in counts between 2006 and 2016 | Percentage change in age-standardised rates between |
| Liver cancer due to hepatitis C                    | 0.6<br>(0.4 to 0.8)                           | 0.7<br>(0.5 to 0.9)                            | 0.1<br>(0.1 to 0.2)                     | 62.0<br>(36.5 to 85.7)                            | 20.8<br>(2.2 to 38.1)                               |
| Liver cancer due to alcohol use                    | 0.2<br>(0.1 to 0.3)                           | 0.2<br>(0.2 to 0.3)                            | 0.1<br>( $< 0.05$ to 0.1)               | 60.6<br>(36.3 to 83.7)                            | 20.7<br>(2.2 to 38.4)                               |
| Liver cancer due to other causes                   | 1.5<br>(1.2 to 1.8)                           | 1.8<br>(1.4 to 2.1)                            | 0.4<br>(0.2 to 0.5)                     | 54.7<br>(35.3 to 74.3)                            | 17.3<br>(2.2 to 32.6)                               |
| Gallbladder and biliary tract cancer               | 0.5<br>(0.4 to 0.6)                           | 0.7<br>(0.6 to 0.8)                            | 0.2<br>(0.1 to 0.2)                     | 12.3<br>(0.4 to 23.8)                             | -15.8<br>(-24.5 to -6.7)                            |
| Pancreatic cancer                                  | 1.4<br>(1.3 to 1.5)                           | 1.9<br>(1.8 to 2.0)                            | 0.4<br>(0.3 to 0.5)                     | 71.9<br>(58.8 to 85.0)                            | 26.2<br>(16.1 to 36.7)                              |
| Larynx cancer                                      | 7.5<br>(7.0 to 8.2)                           | 2.2<br>(2.1 to 2.4)                            | 0.9<br>(0.6 to 1.1)                     | 49.0<br>(29.0 to 73.6)                            | 8.6<br>(-7.0 to 27.6)                               |
| Tracheal, bronchus, and lung cancer                | 7.9<br>(7.2 to 8.4)                           | 7.1<br>(6.5 to 7.6)                            | 1.6<br>(1.1 to 2.2)                     | 55.8<br>(29.6 to 86.2)                            | 16.2<br>(-3.9 to 39.5)                              |
| Malignant skin melanoma                            | 3.3<br>(2.9 to 4.1)                           | 0.7<br>(0.7 to 0.9)                            | 0.2<br>(0.2 to 0.4)                     | 42.4<br>(20.1 to 84.4)                            | 4.6<br>(-13.2 to 35.7)                              |
| Non-melanoma skin cancer                           | 1.1<br>(0.8 to 1.4)                           | 3.9<br>(3.2 to 4.7)                            | 0.1<br>( $< 0.05$ to 0.1)               | 41.3<br>(19.1 to 63.0)                            | 5.4<br>(-10.6 to 23.5)                              |
| Non-melanoma skin cancer (squamous-cell carcinoma) | 1.0<br>(0.7 to 1.4)                           | 1.0<br>(0.8 to 1.3)                            | $< 0.05$<br>( $< 0.05$ to 0.1)          | 41.7<br>(17.5 to 66.4)                            | 5.7<br>(-11.9 to 25.4)                              |
| Non-melanoma skin cancer (basal-cell carcinoma)    | 0.4<br>(0.3 to 0.7)                           | 3.0<br>(2.3 to 3.7)                            | $< 0.05$<br>( $< 0.05$ to $< 0.05$ )    | 37.9<br>(19.7 to 60.6)                            | 2.0<br>(-11.8 to 19.5)                              |
| Breast cancer                                      | 53.7<br>(37.9 to 61.6)                        | 11.1<br>(7.9 to 12.7)                          | 4.5<br>(2.9 to 6.2)                     | 87.7<br>(32.9 to 131.1)                           | 31.0<br>(-5.0 to 60.4)                              |
| Cervical cancer                                    | 5.0<br>(3.6 to 5.9)                           | 1.3<br>(1.0 to 1.5)                            | 0.5<br>(0.3 to 0.7)                     | 16.2<br>(-5.0 to 43.2)                            | -17.0<br>(-31.0 to 1.5)                             |
| Uterine cancer                                     | 7.9<br>(6.8 to 9.2)                           | 1.7<br>(1.4 to 1.9)                            | 0.6<br>(0.4 to 0.9)                     | 173.1<br>(109.6 to 241.4)                         | 83.2<br>(44.1 to 130.5)                             |
| Ovarian cancer                                     | 4.4<br>(3.5 to 4.8)                           | 1.4<br>(1.2 to 1.5)                            | 0.7<br>(0.5 to 0.9)                     | 66.1<br>(38.1 to 92.5)                            | 22.0<br>(-0.9 to 44.5)                              |
| Prostate cancer                                    | 31.2<br>(20.3 to 37.0)                        | 7.4<br>(5.0 to 8.6)                            | 3.0<br>(1.8 to 4.1)                     | 83.6<br>(31.2 to 131.4)                           | 36.2<br>(-0.7 to 71.3)                              |
| Testicular cancer                                  | 2.6<br>(2.2 to 3.1)                           | 0.5<br>(0.4 to 0.6)                            | 0.2<br>(0.1 to 0.3)                     | 90.4<br>(42.3 to 162.8)                           | 51.7<br>(21.7 to 95.2)                              |
| Kidney cancer                                      | 6.9<br>(6.0 to 7.6)                           | 1.8<br>(1.6 to 2.0)                            | 0.6<br>(0.4 to 0.8)                     | 66.7<br>(42.9 to 92.5)                            | 26.1<br>(8.8 to 45.3)                               |
| Bladder cancer                                     | 12.3<br>(11.1 to 13.4)                        | 3.0<br>(2.8 to 3.3)                            | 1.2<br>(0.8 to 1.6)                     | 61.5<br>(39.2 to 86.9)                            | 17.7<br>(1.1 to 36.3)                               |
| Brain and nervous system cancer                    | 8.6<br>(5.7 to 10.0)                          | 3.9<br>(2.7 to 4.6)                            | 1.2<br>(0.7 to 1.8)                     | 61.6<br>(27.3 to 86.7)                            | 27.1<br>(-1.3 to 48.1)                              |
| Thyroid cancer                                     | 10.4<br>(8.6 to 11.8)                         | 2.0<br>(1.7 to 2.2)                            | 0.7<br>(0.4 to 1.0)                     | 123.6<br>(67.2 to 189.3)                          | 59.9<br>(21.7 to 104.0)                             |
| Mesothelioma                                       | 0.7<br>(0.7 to 0.8)                           | 0.5<br>(0.4 to 0.5)                            | 0.2<br>(0.1 to 0.2)                     | 29.4<br>(8.6 to 50.0)                             | -2.8<br>(-18.2 to 12.8)                             |
| Hodgkin lymphoma                                   | 3.0<br>(2.2 to 3.6)                           | 0.8<br>(0.6 to 0.9)                            | 0.3<br>(0.2 to 0.4)                     | 49.4<br>(14.8 to 84.8)                            | 24.9<br>(-1.5 to 51.1)                              |
| Non-Hodgkin's lymphoma                             | 6.0<br>(5.1 to 6.5)                           | 1.8<br>(1.6 to 2.0)                            | 0.6<br>(0.4 to 0.8)                     | 94.0<br>(46.3 to 129.4)                           | 47.8<br>(12.2 to 76.0)                              |
| Multiple myeloma                                   | 1.2<br>(0.9 to 1.4)                           | 0.6<br>(0.5 to 0.7)                            | 0.3<br>(0.2 to 0.4)                     | 97.7<br>(40.0 to 138.1)                           | 43.6<br>(1.8 to 73.0)                               |
| Leukaemia                                          | 20.6<br>(14.5 to 23.1)                        | 5.4<br>(3.9 to 6.0)                            | 2.6<br>(1.6 to 3.5)                     | 24.3<br>(4.0 to 40.9)                             | 2.7<br>(-14.5 to 17.6)                              |
| Acute lymphoid leukaemia                           | 3.1<br>(2.1 to 3.9)                           | 0.8<br>(0.6 to 1.0)                            | 0.4<br>(0.2 to 0.5)                     | 19.9<br>(-7.9 to 54.9)                            | 11.0<br>(-13.3 to 41.3)                             |
| Chronic lymphoid leukaemia                         | 4.2<br>(3.6 to 4.8)                           | 0.9<br>(0.8 to 1.1)                            | 0.5<br>(0.4 to 0.7)                     | 40.1<br>(12.8 to 70.8)                            | 6.0<br>(-15.0 to 30.3)                              |
| Acute myeloid leukaemia                            | 1.5<br>(1.1 to 1.8)                           | 0.9<br>(0.7 to 1.1)                            | 0.3<br>(0.2 to 0.4)                     | 23.2<br>(6.2 to 41.4)                             | 3.9<br>(-9.2 to 18.0)                               |
| Chronic myeloid leukaemia                          | 0.7<br>(0.6 to 0.8)                           | 0.2<br>(0.2 to 0.3)                            | 0.1<br>(0.1 to 0.1)                     | 13.2<br>(-6.8 to 39.7)                            | -9.8<br>(-24.1 to 9.2)                              |
| Other leukaemia                                    | 11.1<br>(6.3 to 12.8)                         | 2.5<br>(1.4 to 2.9)                            | 1.3<br>(0.7 to 1.8)                     | 21.2<br>(-4.0 to 46.5)                            | 0.5<br>(-20.7 to 23.6)                              |
| Other neoplasms                                    | 11.7<br>(9.2 to 12.7)                         | 3.9<br>(3.1 to 4.2)                            | 1.1<br>(0.8 to 1.5)                     | 63.9<br>(33.7 to 86.0)                            | 27.6<br>(5.4 to 44.6)                               |
| <b>Cardiovascular diseases</b>                     | <b>5,434.6</b><br><b>(5,215.9 to 5,657.9)</b> | <b>474.8†</b><br><b>(453.3 to 497.6)</b>       | <b>325.8</b><br><b>(236.6 to 428.5)</b> | <b>24.7</b><br><b>(20.2 to 29.2)</b>              | <b>-3.0</b><br><b>(-6.2 to 0.1)</b>                 |
| Rheumatic heart disease                            | 416.4<br>(369.6 to 470.9)                     | 11.4<br>(10.1 to 12.9)                         | 19.6<br>(12.3 to 28.9)                  | 28.8<br>(18.0 to 40.1)                            | 7.8<br>(-0.7 to 16.6)                               |
| Ischaemic heart disease                            | 1,840.0<br>(1,730.2 to 1,978.3)               | 231.3<br>(215.8 to 248.4)                      | 69.5<br>(48.0 to 94.6)                  | 37.7<br>(32.1 to 43.7)                            | 2.0<br>(-1.8 to 5.9)                                |
| Cerebrovascular disease                            | 590.0<br>(551.2 to 624.8)                     | 82.5‡<br>(74.5 to 90.1)                        | 89.1<br>(64.1 to 113.8)                 | 18.0<br>(10.0 to 26.7)                            | -12.6<br>(-18.8 to -6.1)                            |
| Ischaemic stroke                                   | 542.0<br>(490.3 to 595.9)                     | 67.2‡<br>(59.5 to 74.8)                        | 79.3<br>(57.0 to 101.2)                 | 16.5<br>(7.8 to 26.1)                             | -13.6<br>(-20.4 to -6.5)                            |
| Hemorrhagic stroke                                 | 66.6<br>(60.0 to 74.0)                        | 15.3‡<br>(13.6 to 17.1)                        | 9.8<br>(7.0 to 12.8)                    | 31.8<br>(16.1 to 48.0)                            | -2.1<br>(-13.4 to 9.5)                              |
| Hypertensive heart disease                         | 216.6<br>(187.1 to 252.3)                     | --                                             | 17.3<br>(11.9 to 23.9)                  | 38.7<br>(26.8 to 52.2)                            | 1.2<br>(-6.4 to 9.9)                                |
| Cardiomyopathy and myocarditis                     | 36.9<br>(33.0 to 41.2)                        | 29.4†<br>(25.3 to 34.0)                        | 4.1<br>(2.7 to 5.9)                     | 21.4<br>(7.0 to 38.0)                             | 2.8<br>(-7.4 to 14.3)                               |
| Myocarditis                                        | 23.5<br>(20.6 to 26.4)                        | 29.4<br>(25.3 to 34.0)                         | 1.8<br>(1.2 to 2.6)                     | 19.5<br>(4.4 to 37.2)                             | 2.8<br>(-7.9 to 15.6)                               |
| Alcoholic cardiomyopathy                           | 1.9<br>(1.6 to 2.3)                           | --                                             | 0.2<br>(0.1 to 0.3)                     | 43.3<br>(32.0 to 57.1)                            | 2.3<br>(-6.0 to 12.0)                               |
| Other cardiomyopathy                               | 24.9<br>(21.4 to 28.6)                        | --                                             | 2.1<br>(1.4 to 3.0)                     | 21.5<br>(-0.1 to 50.2)                            | 2.8<br>(-12.6 to 21.7)                              |
| Atrial fibrillation and flutter                    | 272.4<br>(238.1 to 312.0)                     | 23.5<br>(20.2 to 27.4)                         | 21.1<br>(14.0 to 29.6)                  | 35.0<br>(25.2 to 45.8)                            | 0.4<br>(-5.7 to 6.7)                                |
| Peripheral vascular disease                        | 867.2<br>(751.3 to 1,012.8)                   | 85.4<br>(73.4 to 100.8)                        | 3.5<br>(1.6 to 6.4)                     | 32.8<br>(21.6 to 44.8)                            | -1.4<br>(-8.8 to 6.5)                               |
| Endocarditis                                       | 2.4<br>(2.1 to 2.7)                           | 11.1<br>(9.8 to 12.5)                          | 0.2<br>(0.1 to 0.3)                     | 23.8<br>(16.9 to 31.5)                            | 2.3<br>(-3.9 to 8.8)                                |
| Other cardiovascular and circulatory diseases      | 1,936.9<br>(1,661.3 to 2,254.6)               | --                                             | 101.4<br>(68.2 to 143.1)                | 18.3<br>(9.3 to 27.9)                             | 1.7<br>(-4.9 to 8.4)                                |
| <b>Chronic respiratory diseases</b>                | <b>6,013.6</b><br><b>(5,758.9 to 6,302.5)</b> | <b>1,099.9†</b><br><b>(1,031.5 to 1,169.4)</b> | <b>249.7</b><br><b>(181.3 to 331.1)</b> | <b>23.9</b><br><b>(18.5 to 30.0)</b>              | <b>3.4</b><br><b>(-0.6 to 8.1)</b>                  |
| Chronic obstructive pulmonary disease              | 1,775.1<br>(1,699.0 to 1,857.7)               | 112.9<br>(107.9 to 117.9)                      | 70.8<br>(58.9 to 82.8)                  | 38.6<br>(27.7 to 51.7)                            | 3.6<br>(-4.3 to 12.9)                               |
| Pneumoconiosis                                     | 5.7<br>(5.2 to 6.2)                           | 0.4<br>(0.4 to 0.4)                            | 0.9<br>(0.6 to 1.3)                     | 41.7<br>(36.9 to 47.4)                            | 2.9<br>(-0.6 to 6.7)                                |
| Silicosis                                          | 1.0<br>(0.9 to 1.2)                           | 0.1<br>(0.1 to 0.1)                            | 0.2<br>(0.1 to 0.2)                     | 38.5<br>(31.2 to 46.6)                            | 0.8<br>(-4.0 to 5.8)                                |

| Cause                                                          | Prevalence in thousands (95% UI)           | Incidence in thousands (95% UI)                     | YLDs in thousands (95% UI)              |                                                   |                                                     |
|----------------------------------------------------------------|--------------------------------------------|-----------------------------------------------------|-----------------------------------------|---------------------------------------------------|-----------------------------------------------------|
|                                                                | 2016 counts                                | 2016 counts                                         | 2016 counts                             | Percentage change in counts between 2006 and 2016 | Percentage change in age-standardised rates between |
| Asbestosis                                                     | 1.2<br>(1.1 to 1.4)                        | 0.1<br>(0.1 to 0.1)                                 | 0.2<br>(0.1 to 0.3)                     | 36.3<br>(29.2 to 43.5)                            | 0.2<br>(-4.3 to 5.2)                                |
| Coal workers pneumoconiosis                                    | 1.2<br>(1.0 to 1.5)                        | 0.1<br>(0.1 to 0.1)                                 | 0.2<br>(0.1 to 0.3)                     | 44.1<br>(36.3 to 52.1)                            | 4.0<br>(-1.4 to 10.3)                               |
| Other pneumoconiosis                                           | 2.3<br>(1.9 to 2.6)                        | 0.1<br>(0.1 to 0.2)                                 | 0.4<br>(0.2 to 0.5)                     | 45.0<br>(34.0 to 57.1)                            | 4.6<br>(-3.2 to 13.5)                               |
| Asthma                                                         | 4,402.5<br>(4,091.9 to 4,742.5)            | 985.0<br>(916.0 to 1,055.2)                         | 171.1<br>(112.0 to 244.1)               | 17.8<br>(11.8 to 24.1)                            | 2.6<br>(-2.0 to 7.7)                                |
| Interstitial lung disease and pulmonary sarcoidosis            | 19.2<br>(17.1 to 21.4)                     | 1.6<br>(1.4 to 1.7)                                 | 2.1<br>(1.3 to 3.0)                     | 37.8<br>(23.2 to 53.6)                            | 5.2<br>(-7.6 to 19.5)                               |
| Other chronic respiratory diseases                             | --                                         | --                                                  | 4.8<br>(3.9 to 5.8)                     | 54.9<br>(31.5 to 83.1)                            | 37.2<br>(17.7 to 60.8)                              |
| <b>Cirrhosis and other chronic liver diseases</b>              | <b>325.0<br/>(307.0 to 344.4)</b>          | <b>11.9<br/>(11.3 to 12.4)</b>                      | <b>14.3<br/>(9.8 to 19.6)</b>           | <b>26.1<br/>(12.2 to 40.6)</b>                    | <b>8.3<br/>(-2.1 to 18.2)</b>                       |
| Cirrhosis and other chronic liver diseases due to hepatitis B  | 85.0<br>(72.7 to 98.7)                     | 3.2<br>(2.7 to 3.7)                                 | 3.1<br>(2.1 to 4.6)                     | 43.0<br>(14.4 to 80.9)                            | 8.2<br>(-10.1 to 30.9)                              |
| Cirrhosis and other chronic liver diseases due to hepatitis C  | 126.1<br>(110.1 to 142.6)                  | 4.5<br>(4.0 to 5.1)                                 | 4.7<br>(3.1 to 6.6)                     | 45.0<br>(21.7 to 76.1)                            | 10.4<br>(-5.4 to 28.5)                              |
| Cirrhosis and other chronic liver diseases due to alcohol use  | 15.8<br>(13.9 to 18.0)                     | 0.6<br>(0.5 to 0.7)                                 | 0.6<br>(0.4 to 0.8)                     | 48.4<br>(19.9 to 83.1)                            | 9.5<br>(-14.1 to 39.2)                              |
| Cirrhosis and other chronic liver diseases due to other causes | 98.0<br>(89.1 to 108.5)                    | 3.5<br>(3.2 to 3.8)                                 | 5.9<br>(3.9 to 8.2)                     | 6.9<br>(-11.7 to 28.8)                            | 6.5<br>(-10.7 to 25.7)                              |
| <b>Digestive diseases</b>                                      | <b>3,170.5<br/>(2,844.6 to 3,497.9)</b>    | <b>2,061.9<sup>†</sup><br/>(1,936.4 to 2,210.0)</b> | <b>95.6<br/>(65.4 to 131.2)</b>         | <b>41.6<br/>(28.5 to 57.8)</b>                    | <b>6.1<br/>(-1.8 to 15.6)</b>                       |
| Peptic ulcer disease                                           | 1,105.3<br>(935.1 to 1,309.5)              | 98.5<br>(86.5 to 111.3)                             | 24.6<br>(14.7 to 38.1)                  | 68.7<br>(41.6 to 100.8)                           | 17.4<br>(1.3 to 36.3)                               |
| Gastritis and duodenitis                                       | 1,142.3<br>(981.6 to 1,297.3)              | 883.7<br>(782.4 to 1,007.1)                         | 20.9<br>(12.8 to 31.3)                  | 60.6<br>(37.3 to 87.0)                            | 14.3<br>(1.0 to 30.4)                               |
| Appendicitis                                                   | 9.7<br>(8.9 to 10.6)                       | 252.4<br>(232.9 to 275.9)                           | 3.0<br>(1.8 to 4.4)                     | -1.6<br>(-28.7 to 39.9)                           | -2.9<br>(-26.6 to 29.8)                             |
| Paralytic ileus and intestinal obstruction                     | 1.0<br>(0.9 to 1.1)                        | 27.1<br>(23.8 to 30.4)                              | 0.3<br>(0.2 to 0.5)                     | 24.8<br>(19.4 to 30.6)                            | 1.1<br>(-2.1 to 4.5)                                |
| Inguinal, femoral, and abdominal hernia                        | 855.9<br>(747.1 to 968.7)                  | 368.2<br>(318.5 to 421.9)                           | 34.7<br>(23.4 to 49.4)                  | 23.6<br>(9.1 to 39.3)                             | -4.2<br>(-13.4 to 6.2)                              |
| Inflammatory bowel disease                                     | 16.7<br>(15.5 to 17.9)                     | 31.3<br>(29.9 to 32.7)                              | 2.5<br>(1.7 to 3.5)                     | 30.8<br>(8.8 to 57.2)                             | 3.4<br>(-13.9 to 25.6)                              |
| Vascular intestinal disorders                                  | 0.6<br>(0.5 to 0.7)                        | 3.0<br>(2.7 to 3.5)                                 | 0.2<br>(0.1 to 0.3)                     | 31.1<br>(23.1 to 39.4)                            | 2.3<br>(-2.4 to 7.4)                                |
| Gallbladder and biliary diseases                               | 143.8<br>(124.8 to 164.6)                  | 377.8<br>(325.9 to 432.7)                           | 2.0<br>(1.3 to 2.9)                     | 43.8<br>(19.7 to 72.5)                            | 6.5<br>(-13.6 to 29.6)                              |
| Pancreatitis                                                   | 2.2<br>(2.0 to 2.6)                        | 20.0<br>(17.5 to 22.9)                              | 0.3<br>(0.2 to 0.4)                     | 37.9<br>(31.2 to 43.9)                            | 6.1<br>(2.8 to 9.4)                                 |
| Other digestive diseases                                       | --                                         | --                                                  | 7.1<br>(4.9 to 9.7)                     | 45.0<br>(32.1 to 61.4)                            | 8.7<br>(0.6 to 18.0)                                |
| <b>Neurological disorders</b>                                  | <b>34,299.3<br/>(32,865.2 to 35,737.5)</b> | <b>16,925.9<br/>(14,253.0 to 19,831.5)</b>          | <b>998.1<br/>(673.0 to 1,373.9)</b>     | <b>18.9<br/>(1.9 to 37.7)</b>                     | <b>1.3<br/>(-12.5 to 16.1)</b>                      |
| Alzheimer's disease and other dementias                        | 368.5<br>(311.5 to 437.4)                  | 61.6<br>(51.5 to 74.1)                              | 51.7<br>(36.0 to 69.2)                  | 31.0<br>(25.0 to 37.4)                            | -0.6<br>(-4.7 to 3.4)                               |
| Parkinson's disease                                            | 59.6<br>(48.8 to 74.0)                     | 7.0<br>(5.7 to 8.7)                                 | 6.9<br>(4.6 to 9.6)                     | 46.9<br>(30.9 to 64.1)                            | 9.0<br>(-1.3 to 20.8)                               |
| Epilepsy                                                       | 345.0<br>(114.3 to 518.0)                  | 40.6<br>(13.5 to 61.7)                              | 113.1<br>(34.4 to 218.1)                | 5.1<br>(-68.9 to 254.8)                           | -2.8<br>(-71.5 to 221.8)                            |
| Multiple sclerosis                                             | 58.6<br>(53.7 to 64.0)                     | 2.5<br>(2.3 to 2.8)                                 | 15.2<br>(10.8 to 20.0)                  | 51.2<br>(27.3 to 78.2)                            | 13.0<br>(-2.4 to 31.6)                              |
| Motor neuron disease                                           | 2.0<br>(1.8 to 2.3)                        | 0.3<br>(0.3 to 0.3)                                 | 0.4<br>(0.3 to 0.6)                     | 22.7<br>(16.9 to 28.3)                            | 2.5<br>(-1.2 to 5.8)                                |
| Migraine                                                       | 13,617.0<br>(12,927.2 to 14,325.4)         | 1,434.4<br>(1,350.1 to 1,528.6)                     | 653.7<br>(425.8 to 905.8)               | 19.0<br>(15.2 to 23.1)                            | 1.4<br>(-1.3 to 4.2)                                |
| Tension-type headache                                          | 26,496.2<br>(23,627.8 to 29,527.4)         | 15,378.7<br>(12,701.9 to 18,316.2)                  | 128.7<br>(82.7 to 188.2)                | 21.7<br>(15.6 to 28.4)                            | 1.6<br>(-2.4 to 5.9)                                |
| Other neurological disorders                                   | 0.3<br>(0.2 to 0.5)                        | 0.7<br>(0.5 to 1.0)                                 | 28.4<br>(11.7 to 51.4)                  | 26.3<br>(-52.0 to 232.6)                          | 18.3<br>(-53.6 to 186.7)                            |
| <b>Mental and substance use disorders</b>                      | <b>15,811.0<br/>(15,322.5 to 16,385.1)</b> | <b>7,021.5<sup>†</sup><br/>(6,409.9 to 7,706.3)</b> | <b>2,393.6<br/>(1,735.2 to 3,109.3)</b> | <b>17.8<br/>(13.4 to 22.8)</b>                    | <b>2.4<br/>(-0.9 to 5.9)</b>                        |
| Schizophrenia                                                  | 168.4<br>(145.0 to 193.3)                  | 11.2<br>(9.6 to 12.9)                               | 106.5<br>(76.9 to 134.2)                | 34.0<br>(22.6 to 46.7)                            | 0.5<br>(-7.0 to 8.6)                                |
| Alcohol use disorders                                          | 418.8<br>(354.3 to 488.1)                  | 235.1<br>(196.8 to 273.1)                           | 41.8<br>(28.2 to 58.2)                  | 18.9<br>(6.7 to 32.9)                             | 2.1<br>(-6.5 to 12.0)                               |
| Drug use disorders                                             | 1,160.2<br>(1,054.6 to 1,289.8)            | 104.2<br>(94.3 to 115.4)                            | 393.6<br>(279.8 to 515.2)               | 7.3<br>(-4.2 to 20.7)                             | -11.1<br>(-19.5 to -1.3)                            |
| Opioid use disorders                                           | 866.9<br>(744.8 to 1,004.0)                | 65.4<br>(56.3 to 76.0)                              | 359.2<br>(250.8 to 472.9)               | 7.2<br>(-5.1 to 22.4)                             | -12.3<br>(-21.4 to -1.4)                            |
| Cocaine use disorders                                          | 67.2<br>(56.4 to 80.6)                     | 4.2<br>(3.6 to 5.0)                                 | 9.2<br>(5.4 to 13.8)                    | 1.3<br>(-23.2 to 31.8)                            | -1.6<br>(-22.4 to 23.4)                             |
| Amphetamine use disorders                                      | 43.6<br>(30.8 to 59.8)                     | 3.1<br>(2.3 to 4.0)                                 | 5.8<br>(3.1 to 9.6)                     | 17.3<br>(-19.5 to 72.9)                           | 17.0<br>(-18.1 to 67.1)                             |
| Cannabis use disorders                                         | 162.0<br>(138.3 to 187.8)                  | 23.4<br>(19.7 to 27.4)                              | 4.7<br>(2.9 to 7.0)                     | -0.1<br>(-21.5 to 29.9)                           | 0.8<br>(-18.0 to 27.1)                              |
| Other drug use disorders                                       | 46.6<br>(41.4 to 52.0)                     | 8.1<br>(7.1 to 9.1)                                 | 14.8<br>(9.6 to 20.9)                   | 12.5<br>(-11.1 to 47.1)                           | 3.3<br>(-17.5 to 32.9)                              |
| Depressive disorders                                           | 4,452.6<br>(4,169.6 to 4,765.3)            | 5,598.8<br>(4,986.0 to 6,280.4)                     | 819.3<br>(563.9 to 1,109.1)             | 30.5<br>(20.5 to 41.5)                            | 10.5<br>(3.4 to 18.2)                               |
| Major depressive disorder                                      | 3,535.7<br>(3,156.2 to 3,917.0)            | 5,427.0<br>(4,809.5 to 6,113.2)                     | 720.5<br>(494.1 to 981.5)               | 30.3<br>(19.2 to 43.0)                            | 11.1<br>(3.1 to 19.9)                               |
| Dysthymia                                                      | 1,035.2<br>(910.9 to 1,182.5)              | 171.8<br>(151.5 to 196.7)                           | 98.8<br>(66.7 to 143.3)                 | 31.9<br>(20.9 to 43.3)                            | 6.6<br>(-1.4 to 15.6)                               |
| Bipolar disorder                                               | 749.9<br>(640.0 to 889.2)                  | 53.8<br>(46.5 to 62.5)                              | 152.1<br>(93.5 to 226.3)                | 9.4<br>(3.1 to 16.4)                              | 0.1<br>(-4.9 to 5.0)                                |
| Anxiety disorders                                              | 5,208.0<br>(4,678.4 to 5,790.4)            | 669.5<br>(613.5 to 734.7)                           | 499.4<br>(347.3 to 680.1)               | 17.5<br>(8.6 to 28.5)                             | 4.2<br>(-3.0 to 13.1)                               |
| Eating disorders                                               | 180.1<br>(143.3 to 225.5)                  | 71.3<br>(53.0 to 94.1)                              | 35.6<br>(22.1 to 53.8)                  | 13.9<br>(-1.2 to 31.4)                            | 9.9<br>(-2.1 to 22.3)                               |
| Anorexia nervosa                                               | 24.1<br>(17.9 to 32.7)                     | 9.6<br>(7.2 to 12.6)                                | 5.1<br>(3.0 to 7.9)                     | -1.6<br>(-24.2 to 32.0)                           | 8.4<br>(-15.4 to 42.3)                              |
| Bulimia nervosa                                                | 145.5<br>(106.6 to 194.3)                  | 61.8<br>(43.9 to 84.8)                              | 30.4<br>(18.3 to 46.9)                  | 17.1<br>(-0.5 to 37.0)                            | 10.2<br>(-3.1 to 24.2)                              |
| Autistic spectrum disorders                                    | 740.7<br>(667.8 to 831.1)                  | 4.9<br>(3.4 to 6.9)                                 | 105.8<br>(72.1 to 148.6)                | 9.3<br>(4.2 to 14.8)                              | -0.5<br>(-4.8 to 4.1)                               |
| Autism                                                         | 208.4<br>(178.6 to 243.0)                  | 0.5<br>(0.3 to 0.9)                                 | 52.6<br>(33.8 to 76.3)                  | 9.6<br>(1.0 to 18.9)                              | -0.4<br>(-7.7 to 7.2)                               |
| Asperger syndrome and other autistic spectrum disorders        | 533.0<br>(448.2 to 641.1)                  | 4.3<br>(2.8 to 6.4)                                 | 53.2<br>(34.8 to 77.8)                  | 8.9<br>(3.8 to 14.6)                              | -0.6<br>(-5.0 to 4.1)                               |



| Cause                                                      | Prevalence in thousands (95% UI)                 | Incidence in thousands (95% UI)                      | YLDs in thousands (95% UI)                    |                                                   |                                                     |
|------------------------------------------------------------|--------------------------------------------------|------------------------------------------------------|-----------------------------------------------|---------------------------------------------------|-----------------------------------------------------|
|                                                            | 2016 counts                                      | 2016 counts                                          | 2016 counts                                   | Percentage change in counts between 2006 and 2016 | Percentage change in age-standardised rates between |
| Attention-deficit/hyperactivity disorder                   | 1,350.4<br>(1,250.3 to 1,483.1)                  | 50.3<br>(45.3 to 56.4)                               | 16.2<br>(9.8 to 25.4)                         | 1.4<br>(-4.5 to 7.7)                              | -0.0<br>(-5.5 to 6.0)                               |
| Conduct disorder                                           | 503.2<br>(422.9 to 589.3)                        | 172.3<br>(138.1 to 207.7)                            | 61.2<br>(37.1 to 92.7)                        | -21.3<br>(-26.8 to -15.3)                         | 0.6<br>(-5.5 to 7.7)                                |
| Idiopathic developmental intellectual disability           | 1,145.2<br>(657.8 to 1,671.2)                    | --                                                   | 44.7<br>(20.1 to 78.2)                        | 3.5<br>(-4.0 to 11.6)                             | -6.6<br>(-13.3 to 0.2)                              |
| Other mental and substance use disorders                   | 1,589.0<br>(1,397.0 to 1,835.7)                  | 50.2<br>(44.6 to 57.3)                               | 117.3<br>(80.8 to 168.2)                      | 25.5<br>(19.1 to 32.0)                            | -0.4<br>(-4.9 to 4.4)                               |
| <b>Diabetes, urogenital, blood, and endocrine diseases</b> | <b>31,009.9</b><br><b>(30,535.6 to 31,526.7)</b> | <b>9,851.7†</b><br><b>(9,205.9 to 10,565.3)</b>      | <b>884.1</b><br><b>(630.1 to 1,187.5)</b>     | <b>40.9</b><br><b>(35.2 to 47.3)</b>              | <b>7.1</b><br><b>(2.6 to 12.0)</b>                  |
| Diabetes mellitus                                          | 4,974.6<br>(4,473.7 to 5,534.9)                  | 309.7<br>(275.5 to 346.6)                            | 475.2<br>(329.8 to 670.3)                     | 54.6<br>(44.0 to 65.1)                            | 13.3<br>(5.7 to 21.4)                               |
| Acute glomerulonephritis                                   | 1.0<br>(0.8 to 1.1)                              | 13.5<br>(11.7 to 15.5)                               | < 0.05<br>(< 0.05 to 0.1)                     | 24.6<br>(17.1 to 33.4)                            | 6.2<br>(1.2 to 11.7)                                |
| Chronic kidney disease                                     | 3,931.0<br>(3,606.0 to 4,293.8)                  | 286.1<br>(255.8 to 321.9)                            | 126.4<br>(95.0 to 162.6)                      | 44.3<br>(34.5 to 55.2)                            | 6.8<br>(0.6 to 13.7)                                |
| Chronic kidney disease due to diabetes mellitus            | 1,711.2<br>(1,506.4 to 1,973.2)                  | 126.3<br>(106.3 to 150.1)                            | 51.4<br>(37.4 to 66.5)                        | 44.4<br>(28.9 to 61.6)                            | 4.6<br>(-6.1 to 16.6)                               |
| Chronic kidney disease due to hypertension                 | 577.1<br>(498.3 to 657.9)                        | 34.4<br>(28.0 to 41.6)                               | 20.8<br>(14.8 to 27.2)                        | 30.9<br>(12.6 to 50.6)                            | -4.8<br>(-16.6 to 7.3)                              |
| Chronic kidney disease due to glomerulonephritis           | 587.4<br>(500.9 to 676.0)                        | 46.3<br>(37.7 to 56.0)                               | 18.0<br>(12.6 to 24.7)                        | 48.4<br>(21.9 to 89.0)                            | 19.9<br>(1.4 to 58.7)                               |
| Chronic kidney disease due to other causes                 | 1,055.3<br>(885.5 to 1,228.7)                    | 79.2<br>(65.9 to 94.5)                               | 36.3<br>(25.7 to 48.3)                        | 50.8<br>(27.7 to 76.8)                            | 15.4<br>(-0.4 to 34.1)                              |
| Urinary diseases and male infertility                      | 1,867.8<br>(1,657.0 to 2,097.6)                  | 4,850.4†<br>(4,341.5 to 5,458.1)                     | 53.5<br>(34.6 to 78.2)                        | 25.2<br>(12.1 to 39.6)                            | -9.8<br>(-19.2 to -0.5)                             |
| Interstitial nephritis and urinary tract infections        | 72.8<br>(62.9 to 84.0)                           | 3,786.0<br>(3,296.4 to 4,366.7)                      | 2.4<br>(1.4 to 3.7)                           | 16.4<br>(-1.1 to 36.6)                            | 2.1<br>(-11.8 to 17.3)                              |
| Urolithiasis                                               | 34.2<br>(29.6 to 39.9)                           | 903.9<br>(786.8 to 1,050.4)                          | 2.5<br>(1.7 to 3.6)                           | 38.7<br>(20.0 to 57.6)                            | 5.4<br>(-9.5 to 21.7)                               |
| Benign prostatic hyperplasia                               | 1,361.7<br>(1,151.8 to 1,621.0)                  | 160.5<br>(134.9 to 188.7)                            | 44.5<br>(28.1 to 65.5)                        | 27.1<br>(11.3 to 44.0)                            | -10.8<br>(-21.2 to -0.3)                            |
| Male infertility                                           | 329.0<br>(254.4 to 430.0)                        | --                                                   | 2.3<br>(0.9 to 4.7)                           | 5.1<br>(-18.9 to 34.9)                            | -1.5<br>(-23.8 to 24.8)                             |
| Other urinary diseases                                     | --                                               | --                                                   | 1.9<br>(1.2 to 2.7)                           | 7.8<br>(-3.9 to 19.9)                             | -13.2<br>(-22.2 to -4.5)                            |
| Gynecological diseases                                     | 9,545.3<br>(9,107.7 to 10,075.4)                 | 4,224.5†<br>(3,882.7 to 4,630.4)                     | 124.5<br>(84.0 to 178.7)                      | 21.4<br>(15.3 to 27.4)                            | -2.0<br>(-5.6 to 2.0)                               |
| Uterine fibroids                                           | 890.8<br>(783.4 to 1,007.0)                      | 108.9<br>(93.4 to 126.2)                             | 9.3<br>(4.9 to 16.4)                          | 27.5<br>(14.1 to 39.7)                            | -7.9<br>(-16.6 to -0.6)                             |
| Polycystic ovarian syndrome                                | 98.4<br>(73.3 to 129.0)                          | 110.0<br>(76.5 to 152.5)                             | 0.9<br>(0.4 to 1.8)                           | 26.5<br>(9.2 to 49.1)                             | 5.0<br>(-8.6 to 21.8)                               |
| Female infertility                                         | 130.5<br>(68.4 to 241.7)                         | --                                                   | 0.9<br>(0.3 to 2.1)                           | -17.0<br>(-55.9 to 47.5)                          | 3.1<br>(-44.7 to 73.7)                              |
| Endometriosis                                              | 19.8<br>(16.2 to 23.9)                           | 51.3<br>(42.2 to 62.9)                               | 1.9<br>(1.2 to 2.9)                           | 10.7<br>(-20.4 to 51.3)                           | 2.0<br>(-23.8 to 35.3)                              |
| Genital prolapse                                           | 2,274.6<br>(1,977.0 to 2,598.8)                  | 164.8<br>(139.8 to 193.2)                            | 7.1<br>(3.4 to 12.9)                          | 18.8<br>(8.8 to 29.9)                             | -13.2<br>(-20.8 to -5.3)                            |
| Premenstrual syndrome                                      | 5,763.5<br>(5,376.9 to 6,168.1)                  | 2,069.5<br>(1,915.1 to 2,227.2)                      | 47.7<br>(29.7 to 73.9)                        | 10.7<br>(2.4 to 19.5)                             | -2.2<br>(-8.6 to 4.9)                               |
| Other gynecological diseases                               | 1,622.3<br>(1,356.9 to 1,929.8)                  | 1,720.0<br>(1,406.6 to 2,093.0)                      | 56.7<br>(36.7 to 83.9)                        | 33.0<br>(24.4 to 42.1)                            | 1.4<br>(-4.4 to 7.8)                                |
| Hemoglobinopathies and hemolytic anaemias                  | 17,244.2<br>(16,856.6 to 17,680.8)               | --                                                   | 75.6<br>(47.2 to 114.5)                       | 17.4<br>(3.1 to 35.6)                             | -0.7<br>(-11.8 to 11.9)                             |
| Thalassemias                                               | 4.6<br>(4.2 to 5.0)                              | --                                                   | 0.3<br>(0.2 to 0.4)                           | 9.9<br>(-24.8 to 59.7)                            | -0.8<br>(-31.4 to 43.4)                             |
| Thalassaemias trait                                        | 4,914.2<br>(4,682.8 to 5,163.9)                  | --                                                   | 63.7<br>(39.8 to 97.4)                        | 20.5<br>(5.3 to 39.9)                             | 1.1<br>(-10.4 to 14.7)                              |
| Sickle cell disorders                                      | 3.1<br>(2.6 to 3.8)                              | --                                                   | 0.4<br>(0.3 to 0.6)                           | 17.7<br>(5.3 to 29.4)                             | 8.8<br>(-1.6 to 18.9)                               |
| Sickle cell trait                                          | 2,480.4<br>(2,318.9 to 2,645.6)                  | --                                                   | 6.8<br>(4.0 to 10.7)                          | 14.2<br>(-1.5 to 35.2)                            | -0.4<br>(-13.9 to 16.2)                             |
| G6PD deficiency                                            | 3,008.0<br>(2,837.4 to 3,209.0)                  | --                                                   | 0.1<br>(0.1 to 0.2)                           | 20.0<br>(-3.9 to 47.0)                            | 1.0<br>(-18.1 to 22.0)                              |
| G6PD trait                                                 | 7,870.8<br>(7,626.1 to 8,176.0)                  | --                                                   | < 0.05<br>(< 0.05 to < 0.05)                  | 38.1<br>(8.1 to 81.2)                             | 18.4<br>(-5.0 to 46.9)                              |
| Other hemoglobinopathies and hemolytic anaemias            | 316.9<br>(269.1 to 369.3)                        | --                                                   | 4.3<br>(2.6 to 6.9)                           | -11.2<br>(-25.9 to 6.1)                           | -21.4<br>(-33.2 to -7.1)                            |
| Endocrine, metabolic, blood, and immune disorders          | 938.3<br>(859.5 to 1,020.2)                      | 167.5<br>(149.9 to 186.6)                            | 28.7<br>(19.2 to 40.0)                        | 26.8<br>(17.7 to 36.2)                            | 1.6<br>(-4.5 to 7.7)                                |
| <b>Musculoskeletal disorders</b>                           | <b>15,660.7</b><br><b>(14,888.1 to 16,458.5)</b> | <b>8,748.7</b><br><b>(7,852.8 to 9,704.6)</b>        | <b>1,785.1</b><br><b>(1,281.9 to 2,344.0)</b> | <b>26.6</b><br><b>(21.2 to 32.0)</b>              | <b>-2.0</b><br><b>(-5.3 to 1.5)</b>                 |
| Rheumatoid arthritis                                       | 275.1<br>(244.2 to 309.3)                        | 16.8<br>(15.0 to 18.8)                               | 64.1<br>(42.9 to 86.2)                        | 38.8<br>(28.1 to 50.1)                            | 4.9<br>(-2.0 to 12.3)                               |
| Osteoarthritis                                             | 3,028.2<br>(2,822.9 to 3,233.6)                  | 169.8<br>(156.5 to 183.2)                            | 185.4<br>(131.6 to 250.5)                     | 38.0<br>(32.6 to 43.6)                            | -2.2<br>(-5.8 to 1.7)                               |
| Low back and neck pain                                     | 9,565.0<br>(8,856.1 to 10,267.0)                 | 4,038.3<br>(3,575.3 to 4,523.7)                      | 1,119.0<br>(794.8 to 1,469.5)                 | 25.2<br>(18.3 to 32.3)                            | -2.7<br>(-7.1 to 2.1)                               |
| Low back pain                                              | 6,593.1<br>(5,850.1 to 7,497.3)                  | 3,229.2<br>(2,782.4 to 3,687.7)                      | 740.5<br>(520.3 to 983.9)                     | 20.4<br>(12.6 to 28.2)                            | -4.9<br>(-9.9 to 0.2)                               |
| Neck pain                                                  | 3,822.0<br>(3,263.1 to 4,436.7)                  | 809.1<br>(691.6 to 955.1)                            | 378.5<br>(253.9 to 538.3)                     | 35.8<br>(22.5 to 50.6)                            | 1.9<br>(-7.1 to 11.6)                               |
| Gout                                                       | 251.9<br>(222.5 to 284.6)                        | 52.1<br>(45.4 to 58.8)                               | 8.0<br>(5.4 to 11.0)                          | 42.1<br>(20.8 to 66.3)                            | 2.8<br>(-10.6 to 18.2)                              |
| Other musculoskeletal disorders                            | 4,809.8<br>(3,913.8 to 5,713.2)                  | 4,471.8<br>(3,674.2 to 5,411.3)                      | 408.7<br>(269.1 to 589.1)                     | 23.6<br>(10.7 to 38.1)                            | -1.2<br>(-9.8 to 7.9)                               |
| <b>Other non-communicable diseases</b>                     | <b>58,186.2</b><br><b>(57,102.8 to 59,263.5)</b> | <b>177,829.3†</b><br><b>(167,717.1 to 188,324.5)</b> | <b>1,458.8</b><br><b>(1,004.1 to 2,035.5)</b> | <b>13.8</b><br><b>(11.9 to 15.8)</b>              | <b>-0.9</b><br><b>(-2.2 to 0.3)</b>                 |
| Congenital anomalies                                       | 1,098.2<br>(1,001.7 to 1,207.9)                  | --                                                   | 136.5<br>(97.6 to 181.1)                      | 4.0<br>(-1.3 to 10.2)                             | -3.8<br>(-8.5 to 1.5)                               |
| Neural tube defects                                        | 90.3<br>(79.8 to 102.6)                          | --                                                   | 27.1<br>(18.6 to 36.4)                        | -2.1<br>(-14.8 to 14.1)                           | -12.5<br>(-23.3 to 0.9)                             |
| Congenital heart anomalies                                 | 175.5<br>(152.0 to 199.9)                        | --                                                   | 8.6<br>(3.8 to 14.6)                          | 16.4<br>(3.4 to 30.2)                             | 7.1<br>(-3.9 to 19.8)                               |
| Orofacial clefts                                           | 53.3<br>(46.3 to 60.3)                           | --                                                   | 0.7<br>(0.5 to 1.0)                           | -6.0<br>(-18.7 to 6.4)                            | -16.0<br>(-27.2 to -4.9)                            |
| Down's syndrome                                            | 47.5<br>(41.1 to 55.8)                           | --                                                   | 4.3<br>(2.9 to 6.1)                           | 4.2<br>(-6.7 to 16.7)                             | -4.2<br>(-14.0 to 6.7)                              |
| Turner syndrome                                            | 24.9<br>(21.4 to 28.8)                           | --                                                   | 0.5<br>(0.2 to 0.8)                           | 1.5<br>(-30.4 to 51.8)                            | -5.6<br>(-33.0 to 36.3)                             |
| Klinefelter syndrome                                       | 33.4<br>(28.2 to 39.1)                           | --                                                   | 0.2<br>(0.1 to 0.4)                           | 7.3<br>(-19.6 to 40.6)                            | -1.0<br>(-24.9 to 28.0)                             |

| Cause                                         | Prevalence in thousands (95% UI)                 | Incidence in thousands (95% UI)                | YLDs in thousands (95% UI)              |                                                   |                                                     |
|-----------------------------------------------|--------------------------------------------------|------------------------------------------------|-----------------------------------------|---------------------------------------------------|-----------------------------------------------------|
|                                               | 2016 counts                                      | 2016 counts                                    | 2016 counts                             | Percentage change in counts between 2006 and 2016 | Percentage change in age-standardised rates between |
| Other chromosomal abnormalities               | 193.4<br>(161.6 to 231.0)                        | --                                             | 18.6<br>(12.5 to 25.9)                  | -7.1<br>(-17.6 to 5.7)                            | 0.9<br>(-11.0 to 14.2)                              |
| Congenital musculoskeletal and limb anomalies | 194.5<br>(177.5 to 213.1)                        | --                                             | 28.7<br>(19.5 to 39.4)                  | 9.7<br>(-0.3 to 20.5)                             | -1.7<br>(-10.2 to 7.7)                              |
| Urogenital congenital anomalies               | 91.5<br>(79.0 to 105.6)                          | --                                             | 3.2<br>(2.0 to 5.0)                     | -3.9<br>(-17.1 to 10.8)                           | 1.3<br>(-12.8 to 16.4)                              |
| Digestive congenital anomalies                | 146.6<br>(129.7 to 165.1)                        | --                                             | 6.3<br>(4.1 to 9.0)                     | 10.4<br>(-4.8 to 27.4)                            | -1.1<br>(-13.6 to 14.0)                             |
| Other congenital anomalies                    | 257.9<br>(151.2 to 406.5)                        | --                                             | 38.4<br>(23.5 to 60.8)                  | 8.1<br>(-2.0 to 20.1)                             | -3.6<br>(-12.5 to 6.8)                              |
| Skin and subcutaneous diseases                | 21,918.7<br>(21,350.3 to 22,433.2)               | 45,939.3<br>(43,819.4 to 48,230.4)             | 538.1<br>(364.2 to 773.2)               | 2.9<br>(-0.1 to 5.8)                              | 2.1<br>(0.0 to 4.3)                                 |
| Dermatitis                                    | 2,866.1<br>(2,700.5 to 3,044.7)                  | 5,356.6<br>(4,878.4 to 5,847.1)                | 101.3<br>(61.3 to 162.9)                | 11.7<br>(6.0 to 16.9)                             | 2.1<br>(-2.4 to 6.7)                                |
| Psoriasis                                     | 677.1<br>(638.9 to 718.9)                        | 93.9<br>(88.2 to 99.4)                         | 58.5<br>(40.9 to 77.5)                  | 24.8<br>(14.1 to 36.3)                            | 4.8<br>(-2.8 to 13.1)                               |
| Cellulitis                                    | 39.1<br>(36.3 to 42.3)                           | 830.5<br>(771.9 to 886.9)                      | 2.2<br>(1.4 to 3.2)                     | 12.3<br>(-10.4 to 43.6)                           | 0.0<br>(-19.4 to 25.8)                              |
| Pyoderma                                      | 181.1<br>(174.3 to 187.7)                        | 4,144.9<br>(3,981.9 to 4,308.8)                | 1.0<br>(0.4 to 2.1)                     | 19.7<br>(10.4 to 29.5)                            | 0.9<br>(-5.8 to 7.6)                                |
| Scabies                                       | 827.3<br>(708.8 to 976.5)                        | 2,523.3<br>(2,154.5 to 3,007.9)                | 21.3<br>(11.9 to 34.6)                  | 0.5<br>(-6.8 to 8.3)                              | -2.9<br>(-7.1 to 1.8)                               |
| Fungal skin diseases                          | 4,902.1<br>(4,429.2 to 5,457.6)                  | 17,228.0<br>(15,441.4 to 19,112.5)             | 27.4<br>(11.0 to 56.8)                  | 16.5<br>(13.0 to 20.0)                            | 0.0<br>(-1.3 to 1.2)                                |
| Viral skin diseases                           | 2,112.4<br>(2,006.1 to 2,229.6)                  | 3,069.9<br>(2,896.2 to 3,250.1)                | 64.6<br>(40.1 to 95.9)                  | 5.2<br>(0.9 to 9.0)                               | 0.2<br>(-2.9 to 3.4)                                |
| Acne vulgaris                                 | 6,555.5<br>(5,931.4 to 7,303.5)                  | 4,306.5<br>(3,539.6 to 5,420.9)                | 168.3<br>(111.7 to 243.6)               | -14.7<br>(-19.3 to -9.6)                          | 3.3<br>(-1.6 to 8.4)                                |
| Alopecia areata                               | 168.4<br>(156.8 to 180.1)                        | 297.5<br>(276.6 to 318.5)                      | 5.5<br>(3.4 to 8.4)                     | 19.5<br>(5.8 to 33.4)                             | -0.0<br>(-10.3 to 10.6)                             |
| Pruritus                                      | 701.1<br>(613.8 to 799.5)                        | 561.0<br>(495.3 to 640.5)                      | 7.4<br>(3.4 to 13.4)                    | 22.0<br>(13.9 to 29.7)                            | 1.0<br>(-4.1 to 6.2)                                |
| Urticaria                                     | 804.9<br>(698.6 to 924.7)                        | 1,438.2<br>(1,255.6 to 1,655.8)                | 48.4<br>(30.5 to 69.8)                  | 11.9<br>(4.8 to 19.5)                             | 0.1<br>(-5.0 to 5.6)                                |
| Decubitus ulcer                               | 20.9<br>(18.7 to 23.2)                           | 76.1<br>(68.3 to 84.7)                         | 3.4<br>(2.2 to 4.6)                     | 32.7<br>(19.7 to 47.7)                            | 4.4<br>(-7.4 to 19.0)                               |
| Other skin and subcutaneous diseases          | 5,248.4<br>(5,092.5 to 5,401.1)                  | 6,013.0<br>(5,817.5 to 6,202.6)                | 28.7<br>(13.8 to 53.1)                  | 25.8<br>(22.3 to 29.6)                            | 3.2<br>(0.8 to 5.8)                                 |
| Sense organ diseases                          | 15,427.1<br>(15,008.9 to 15,912.5)               | 7,495.9†<br>(7,016.0 to 8,023.3)               | 604.0<br>(424.0 to 836.4)               | 23.6<br>(20.4 to 26.9)                            | -2.8<br>(-4.8 to -0.7)                              |
| Glaucoma                                      | 103.3<br>(87.0 to 120.8)                         | --                                             | 11.0<br>(7.4 to 15.3)                   | 35.5<br>(22.7 to 48.5)                            | -0.4<br>(-8.7 to 8.7)                               |
| Cataract                                      | 751.8<br>(661.5 to 851.0)                        | --                                             | 54.0<br>(38.6 to 73.5)                  | 32.2<br>(24.6 to 40.2)                            | -2.1<br>(-7.3 to 3.2)                               |
| Macular degeneration                          | 92.8<br>(75.9 to 112.7)                          | --                                             | 6.7<br>(4.6 to 9.3)                     | 43.2<br>(28.6 to 59.2)                            | 5.6<br>(-4.4 to 16.6)                               |
| Refraction and accommodation disorders        | 6,385.7<br>(6,102.4 to 6,689.0)                  | --                                             | 124.9<br>(78.4 to 194.3)                | 16.7<br>(11.5 to 22.9)                            | -3.1<br>(-7.0 to 1.5)                               |
| Age-related and other hearing loss            | 9,761.9<br>(9,129.2 to 10,449.1)                 | --                                             | 304.4<br>(212.0 to 428.5)               | 22.6<br>(17.1 to 28.3)                            | -4.2<br>(-7.2 to -1.3)                              |
| Other vision loss                             | 473.0<br>(424.2 to 528.8)                        | --                                             | 40.2<br>(28.1 to 54.1)                  | 30.2<br>(21.6 to 39.6)                            | 0.8<br>(-4.8 to 7.1)                                |
| Other sense organ diseases                    | 2,037.8<br>(1,873.6 to 2,201.7)                  | 7,495.9<br>(7,016.0 to 8,023.3)                | 62.8<br>(39.3 to 94.3)                  | 28.3<br>(22.4 to 34.5)                            | 0.8<br>(-2.9 to 4.5)                                |
| Oral disorders                                | 43,981.8<br>(42,412.4 to 45,517.4)               | 124,394.1†<br>(114,484.0 to 134,712.2)         | 180.2<br>(107.1 to 281.0)               | 29.8<br>(27.0 to 32.8)                            | 0.9<br>(-0.8 to 2.9)                                |
| Caries of deciduous teeth                     | 5,670.8<br>(4,712.9 to 6,539.0)                  | 23,500.0<br>(17,382.0 to 30,716.1)             | 1.3<br>(0.6 to 2.7)                     | 10.0<br>(-8.6 to 27.7)                            | -8.2<br>(-23.9 to 7.4)                              |
| Caries of permanent teeth                     | 33,289.9<br>(31,314.5 to 35,164.8)               | 99,792.7<br>(92,079.2 to 108,032.7)            | 19.5<br>(8.7 to 38.0)                   | 9.2<br>(5.0 to 13.9)                              | -2.3<br>(-5.5 to 1.2)                               |
| Periodontal disease                           | 7,755.6<br>(6,438.1 to 9,200.1)                  | 912.2<br>(727.6 to 1,124.5)                    | 50.4<br>(19.9 to 104.7)                 | 37.2<br>(31.9 to 43.0)                            | -0.3<br>(-3.8 to 3.1)                               |
| Edentulism and severe tooth loss              | 2,384.2<br>(2,086.3 to 2,683.5)                  | 189.1<br>(162.8 to 215.7)                      | 65.7<br>(43.9 to 92.5)                  | 41.6<br>(36.5 to 46.9)                            | 3.1<br>(-0.2 to 6.3)                                |
| Other oral disorders                          | 1,479.9<br>(1,409.2 to 1,552.6)                  | --                                             | 43.2<br>(26.7 to 64.9)                  | 18.2<br>(13.7 to 22.7)                            | 0.1<br>(-2.9 to 3.4)                                |
| <b>Injuries</b>                               | <b>18,933.2</b><br><b>(16,288.9 to 22,505.1)</b> | <b>6,169.6†</b><br><b>(5,843.8 to 6,500.1)</b> | <b>615.0</b><br><b>(379.1 to 952.4)</b> | <b>11.1</b><br><b>(5.0 to 18.5)</b>               | <b>-9.4</b><br><b>(-13.6 to -4.7)</b>               |
| <b>Transport injuries</b>                     | <b>3,075.7</b><br><b>(2,850.7 to 3,317.0)</b>    | <b>1,113.4</b><br><b>(996.7 to 1,246.7)</b>    | <b>155.0</b><br><b>(100.7 to 225.1)</b> | <b>17.9</b><br><b>(12.3 to 23.2)</b>              | <b>-8.2</b><br><b>(-11.4 to -5.2)</b>               |
| Road injuries                                 | 2,555.3<br>(2,357.0 to 2,756.9)                  | 993.2<br>(879.6 to 1,130.7)                    | 130.0<br>(84.6 to 188.5)                | 17.9<br>(12.6 to 22.9)                            | -9.1<br>(-12.2 to -6.4)                             |
| Pedestrian road injuries                      | 578.8<br>(508.2 to 657.5)                        | 166.7<br>(139.9 to 197.1)                      | 28.6<br>(18.4 to 41.6)                  | 11.2<br>(6.0 to 16.4)                             | -13.8<br>(-16.6 to -11.0)                           |
| Cyclist road injuries                         | 279.5<br>(233.0 to 331.2)                        | 113.3<br>(88.3 to 140.4)                       | 13.0<br>(8.3 to 19.1)                   | 30.3<br>(23.6 to 36.8)                            | 4.5<br>(0.5 to 8.2)                                 |
| Motorcyclist road injuries                    | 530.2<br>(450.0 to 643.9)                        | 140.4<br>(115.1 to 172.2)                      | 25.3<br>(16.1 to 37.3)                  | 13.5<br>(7.6 to 19.3)                             | -12.7<br>(-16.1 to -9.4)                            |
| Motor vehicle road injuries                   | 1,016.6<br>(863.8 to 1,159.6)                    | 498.2<br>(429.0 to 578.0)                      | 56.3<br>(37.1 to 80.9)                  | 19.0<br>(14.3 to 23.6)                            | -9.2<br>(-12.0 to -6.6)                             |
| Other road injuries                           | 150.2<br>(127.6 to 177.4)                        | 74.7<br>(57.1 to 96.6)                         | 6.9<br>(4.4 to 10.4)                    | 35.0<br>(29.0 to 40.3)                            | 5.4<br>(1.9 to 8.4)                                 |
| Other transport injuries                      | 520.4<br>(434.9 to 619.0)                        | 120.2<br>(103.1 to 142.1)                      | 25.0<br>(16.1 to 36.6)                  | 18.0<br>(11.4 to 25.1)                            | -2.7<br>(-7.1 to 2.0)                               |
| <b>Unintentional injuries</b>                 | <b>10,948.0</b><br><b>(10,165.3 to 11,761.6)</b> | <b>4,786.5</b><br><b>(4,491.3 to 5,107.8)</b>  | <b>336.6</b><br><b>(218.5 to 481.0)</b> | <b>18.4</b><br><b>(12.5 to 24.4)</b>              | <b>-3.5</b><br><b>(-7.2 to 0.1)</b>                 |
| Falls                                         | 3,543.8<br>(3,046.4 to 4,037.1)                  | 1,529.0<br>(1,353.5 to 1,748.0)                | 131.8<br>(88.1 to 184.4)                | 24.5<br>(17.7 to 31.9)                            | 1.4<br>(-3.2 to 5.9)                                |
| Drowning                                      | 25.5<br>(22.2 to 29.6)                           | 4.7<br>(4.1 to 5.3)                            | 1.2<br>(0.7 to 1.8)                     | 1.0<br>(-5.8 to 8.5)                              | -16.2<br>(-21.4 to -11.1)                           |
| Fire, heat, and hot substances                | 1,369.0<br>(1,173.0 to 1,645.7)                  | 169.5<br>(147.6 to 192.9)                      | 33.3<br>(20.6 to 50.0)                  | 0.9<br>(-4.6 to 6.2)                              | -19.2<br>(-22.6 to -16.2)                           |
| Poisonings                                    | 53.7<br>(46.8 to 62.1)                           | 88.0<br>(74.2 to 104.0)                        | 4.3<br>(2.7 to 6.4)                     | 5.5<br>(-1.2 to 13.7)                             | -10.1<br>(-15.0 to -4.4)                            |
| Exposure to mechanical forces                 | 1,710.4<br>(1,454.1 to 2,127.8)                  | 675.9<br>(560.6 to 804.3)                      | 38.8<br>(24.1 to 58.6)                  | 33.1<br>(26.2 to 40.0)                            | 7.0<br>(2.6 to 11.1)                                |
| Unintentional firearm injuries                | 83.8<br>(68.3 to 102.7)                          | 21.8<br>(14.7 to 30.8)                         | 3.2<br>(2.0 to 5.0)                     | 37.8<br>(30.9 to 44.7)                            | 8.1<br>(3.9 to 11.9)                                |
| Unintentional suffocation                     | 75.8<br>(57.7 to 98.1)                           | 15.5<br>(10.8 to 21.4)                         | 2.4<br>(1.4 to 3.8)                     | 0.7<br>(-5.2 to 7.6)                              | -13.0<br>(-17.4 to -8.3)                            |
| Other exposure to mechanical forces           | 1,550.8<br>(1,298.1 to 1,963.6)                  | 638.6<br>(529.7 to 762.5)                      | 33.1<br>(20.7 to 49.9)                  | 35.9<br>(29.0 to 42.5)                            | 8.7<br>(4.3 to 12.6)                                |

| Cause                                                                               | Prevalence in thousands (95% UI)              | Incidence in thousands (95% UI)          | YLDs in thousands (95% UI)            |                                                   |                                                     |
|-------------------------------------------------------------------------------------|-----------------------------------------------|------------------------------------------|---------------------------------------|---------------------------------------------------|-----------------------------------------------------|
|                                                                                     | 2016 counts                                   | 2016 counts                              | 2016 counts                           | Percentage change in counts between 2006 and 2016 | Percentage change in age-standardised rates between |
| Adverse effects of medical treatment                                                | 22.5<br>(17.6 to 28.1)                        | 294.6<br>(256.1 to 333.8)                | 3.0<br>(1.9 to 4.4)                   | 28.7<br>(22.4 to 35.6)                            | 8.9<br>(4.7 to 13.7)                                |
| Animal contact                                                                      | 429.7<br>(376.1 to 497.1)                     | 514.1<br>(421.1 to 616.4)                | 13.0<br>(8.4 to 18.8)                 | 16.0<br>(10.2 to 23.0)                            | -1.6<br>(-5.5 to 3.5)                               |
| Venomous animal contact                                                             | 181.7<br>(149.5 to 215.7)                     | 221.8<br>(169.9 to 284.2)                | 9.3<br>(6.1 to 13.4)                  | 15.8<br>(8.4 to 24.9)                             | 0.2<br>(-5.1 to 7.2)                                |
| Non-venomous animal contact                                                         | 247.9<br>(204.7 to 306.8)                     | 292.3<br>(230.9 to 360.7)                | 3.6<br>(2.2 to 5.6)                   | 16.6<br>(11.1 to 21.6)                            | -5.6<br>(-9.5 to -2.6)                              |
| Foreign body                                                                        | 677.8<br>(566.2 to 811.8)                     | 422.8<br>(366.1 to 495.2)                | 21.1<br>(12.9 to 32.5)                | 13.9<br>(6.9 to 21.1)                             | -3.7<br>(-8.7 to 1.2)                               |
| Pulmonary aspiration and foreign body in airway                                     | 208.3<br>(156.0 to 277.0)                     | 72.2<br>(59.8 to 89.2)                   | 8.0<br>(4.8 to 12.4)                  | 2.1<br>(-3.6 to 8.8)                              | -11.3<br>(-15.8 to -6.7)                            |
| Foreign body in eyes                                                                | 35.2<br>(19.9 to 52.6)                        | 180.8<br>(137.9 to 242.2)                | 2.0<br>(1.0 to 3.4)                   | 21.7<br>(14.5 to 28.9)                            | 0.5<br>(-2.3 to 3.7)                                |
| Foreign body in other body part                                                     | 434.3<br>(354.8 to 553.9)                     | 169.7<br>(141.2 to 202.7)                | 11.1<br>(6.7 to 17.1)                 | 22.6<br>(14.5 to 31.3)                            | 1.8<br>(-4.2 to 7.5)                                |
| Environmental heat and cold exposure                                                | 675.5<br>(565.4 to 798.1)                     | 179.2<br>(145.3 to 220.3)                | 22.8<br>(14.2 to 34.0)                | 20.4<br>(13.4 to 27.6)                            | -0.7<br>(-5.3 to 3.7)                               |
| Other unintentional injuries                                                        | 2,440.1<br>(2,003.9 to 2,910.5)               | 908.9<br>(781.8 to 1,056.1)              | 67.5<br>(42.8 to 99.7)                | 12.4<br>(7.8 to 16.9)                             | -9.7<br>(-12.5 to -7.2)                             |
| <b>Self-harm and interpersonal violence</b>                                         | <b>1,802.8</b><br><b>(1,612.4 to 2,019.9)</b> | <b>200.9†</b><br><b>(173.6 to 228.3)</b> | <b>27.2</b><br><b>(18.8 to 38.2)</b>  | <b>7.5</b><br><b>(3.3 to 11.3)</b>                | <b>-8.7</b><br><b>(-11.3 to -6.4)</b>               |
| Self-harm                                                                           | 110.0<br>(92.7 to 129.4)                      | 44.5<br>(37.0 to 52.2)                   | 4.7<br>(2.9 to 7.2)                   | 11.4<br>(5.4 to 18.0)                             | -9.8<br>(-13.7 to -5.7)                             |
| Self-harm by firearm                                                                | 4.1<br>(3.3 to 4.9)                           | 0.7<br>(0.4 to 1.1)                      | 0.1<br>(0.1 to 0.2)                   | 3.9<br>(-3.5 to 13.0)                             | -9.0<br>(-14.9 to -2.3)                             |
| Self-harm by other specified means                                                  | 105.9<br>(88.1 to 125.2)                      | 43.8<br>(36.5 to 51.4)                   | 4.6<br>(2.8 to 7.0)                   | 11.6<br>(5.7 to 18.2)                             | -9.8<br>(-13.6 to -5.8)                             |
| Interpersonal violence                                                              | 1,692.8<br>(1,500.3 to 1,909.9)               | 156.4†<br>(131.2 to 182.7)               | 22.5<br>(15.7 to 31.1)                | 6.7<br>(2.2 to 10.8)                              | -8.5<br>(-11.0 to -6.1)                             |
| Assault by firearm                                                                  | 11.9<br>(10.3 to 13.8)                        | 3.8<br>(2.8 to 5.1)                      | 0.5<br>(0.3 to 0.8)                   | 20.4<br>(13.7 to 27.6)                            | -4.6<br>(-8.5 to -0.3)                              |
| Assault by sharp object                                                             | 94.7<br>(76.3 to 113.9)                       | 37.4<br>(28.0 to 47.8)                   | 2.6<br>(1.6 to 3.9)                   | 17.0<br>(10.3 to 23.8)                            | -6.3<br>(-10.8 to -2.0)                             |
| Sexual violence                                                                     | 1,384.3<br>(1,193.1 to 1,606.4)               | --                                       | 11.5<br>(7.7 to 16.3)                 | -1.6<br>(-7.9 to 5.2)                             | -8.5<br>(-11.8 to -5.0)                             |
| Assault by other means                                                              | 201.9<br>(170.3 to 241.5)                     | 115.2<br>(95.7 to 136.0)                 | 7.9<br>(5.1 to 11.8)                  | 16.7<br>(11.3 to 21.8)                            | -9.5<br>(-12.9 to -6.4)                             |
| <b>Forces of nature, conflict and terrorism, and executions and police conflict</b> | <b>4,491.0</b><br><b>(1,972.3 to 7,978.8)</b> | <b>68.8†</b><br><b>(13.3 to 117.6)</b>   | <b>96.2</b><br><b>(27.1 to 215.1)</b> | <b>-14.7</b><br><b>(-21.8 to -9.0)</b>            | <b>-27.2</b><br><b>(-32.4 to -23.4)</b>             |
| Exposure to forces of nature                                                        | 305.2<br>(120.3 to 533.5)                     | --                                       | 9.4<br>(2.1 to 23.9)                  | -16.6<br>(-20.2 to -12.3)                         | -29.9<br>(-32.7 to -26.2)                           |
| Conflict and terrorism                                                              | 4,042.9<br>(1,591.7 to 7,438.5)               | --                                       | 83.2<br>(23.7 to 183.5)               | -16.2<br>(-23.8 to -10.3)                         | -28.1<br>(-33.8 to -24.1)                           |
| Executions and police conflict                                                      | 142.9<br>(72.5 to 231.8)                      | 68.8<br>(13.3 to 117.6)                  | 3.7<br>(1.2 to 9.2)                   | 59.7<br>(28.4 to 87.0)                            | 25.2<br>(5.6 to 42.7)                               |
| <b>Impairments</b>                                                                  | --                                            | --                                       | --                                    | --                                                | --                                                  |
| Anaemia                                                                             | 14,129.9<br>(12,563.8 to 15,700.0)            | --                                       | 334.7<br>(220.8 to 485.4)             | 15.3<br>(3.9 to 30.0)                             | -4.6<br>(-12.9 to 5.0)                              |
| Developmental intellectual disability                                               | 2,140.7<br>(1,634.6 to 2,681.2)               | --                                       | 221.6<br>(157.7 to 350.3)             | 0.9<br>(-9.8 to 9.4)                              | -8.3<br>(-17.3 to -1.2)                             |
| Epilepsy                                                                            | 544.7<br>(289.5 to 821.0)                     | --                                       | 193.0<br>(98.8 to 338.2)              | -0.2<br>(-48.1 to 85.2)                           | -8.5<br>(-53.3 to 72.2)                             |
| Guillain-Barre syndrome                                                             | 0.9<br>(0.7 to 1.1)                           | --                                       | 0.3<br>(0.2 to 0.4)                   | 16.0<br>(2.4 to 29.9)                             | -3.0<br>(-12.9 to 6.0)                              |
| Hearing loss                                                                        | 10,727.3<br>(10,093.8 to 11,395.6)            | --                                       | 355.3<br>(249.1 to 491.7)             | 19.3<br>(14.9 to 23.9)                            | -4.4<br>(-6.9 to -1.9)                              |
| Heart failure                                                                       | 526.8<br>(461.4 to 598.0)                     | --                                       | 49.6<br>(35.4 to 66.2)                | 36.5<br>(27.7 to 46.5)                            | 2.9<br>(-3.7 to 10.5)                               |
| Infertility                                                                         | 1,017.6<br>(825.2 to 1,258.0)                 | --                                       | 7.2<br>(3.2 to 14.0)                  | 16.2<br>(-4.6 to 41.2)                            | 5.4<br>(-12.3 to 27.3)                              |
| Pelvic inflammatory disease                                                         | 43.3<br>(33.3 to 55.4)                        | --                                       | 5.6<br>(3.5 to 8.6)                   | 34.7<br>(11.3 to 61.9)                            | 4.3<br>(-11.9 to 23.4)                              |
| Vision loss                                                                         | 8,155.2<br>(7,772.5 to 8,559.9)               | --                                       | 301.1<br>(211.8 to 431.6)             | 16.0<br>(1.8 to 24.3)                             | -4.3<br>(-11.6 to 0.2)                              |

We did not calculate incidence for the nine impairments, certain NTDs, and causes with only birth prevalence. Blank cells mean that no estimate is available.

† Incidence for aggregate causes represents the sum of the incidence of the causes below the aggregate.

‡ Incidence estimates for stroke represent first-ever stroke only.

^ Incidence of HIV/AIDS represents new infections of HIV only and does not include new infections of Tuberculosis in HIV positive cases.



SR Table 14: Prevalence, incidence, and YLDs for 2016, percentage change of YLD counts and percentage change of age-standardised YLD rates between 2006 and 2016 by cause and impairments, for all ages, Iraq.

| Cause                                                                                | Prevalence in thousands (95% UI)          | Incidence in thousands (95% UI)               | YLDs in thousands (95% UI)             |                                                   |                                                     |
|--------------------------------------------------------------------------------------|-------------------------------------------|-----------------------------------------------|----------------------------------------|---------------------------------------------------|-----------------------------------------------------|
|                                                                                      | 2016 counts                               | 2016 counts                                   | 2016 counts                            | Percentage change in counts between 2006 and 2016 | Percentage change in age-standardised rates between |
| <b>All causes</b>                                                                    | <b>37,467.9</b><br>(37,225.0 to 37,715.7) | <b>271,632.6†</b><br>(255,321.0 to 289,176.4) | <b>4,050.6</b><br>(3,028.2 to 5,225.2) | <b>39.2</b><br>(35.6 to 42.8)                     | <b>-0.4</b><br>(-2.3 to 1.4)                        |
| <b>Communicable, maternal, neonatal, and nutritional disorders</b>                   | <b>24,406.4</b><br>(22,848.2 to 26,068.9) | <b>155,398.0†</b><br>(140,273.1 to 171,236.2) | <b>601.5</b><br>(412.4 to 865.8)       | <b>41.2</b><br>(27.0 to 57.8)                     | <b>-3.2</b><br>(-11.8 to 6.5)                       |
| <b>HIV/AIDS and tuberculosis</b>                                                     | <b>12,931.1</b><br>(9,699.1 to 15,948.5)  | <b>15.9†</b><br>(11.1 to 22.2)                | <b>3.0</b><br>(1.5 to 5.0)             | <b>15.4</b><br>(-12.8 to 56.9)                    | <b>-16.5</b><br>(-34.3 to 10.2)                     |
| Tuberculosis                                                                         | 10,925.8<br>(7,914.6 to 14,472.0)         | 15.3†<br>(10.5 to 21.5)                       | 2.3<br>(1.3 to 3.7)                    | 2.8<br>(-19.5 to 31.8)                            | -24.6<br>(-38.5 to -6.1)                            |
| Drug-susceptible tuberculosis                                                        | 7.5<br>(5.1 to 10.7)                      | 15.0<br>(10.3 to 21.1)                        | 2.3<br>(1.3 to 3.7)                    | 2.7<br>(-19.3 to 32.9)                            | -24.6<br>(-38.8 to -6.2)                            |
| Multidrug-resistant tuberculosis without extensive drug resistance                   | 0.1<br>(< 0.05 to 0.3)                    | 0.2<br>(0.1 to 0.6)                           | < 0.05<br>(< 0.05 to 0.1)              | 2.8<br>(-80.9 to 609.6)                           | -24.1<br>(-86.0 to 425.4)                           |
| Extensively drug-resistant tuberculosis                                              | < 0.05<br>(< 0.05 to < 0.05)              | < 0.05<br>(< 0.05 to < 0.05)                  | < 0.05<br>(< 0.05 to < 0.05)           | 133.5<br>(-56.6 to 1,511.6)                       | 72.5<br>(-68.3 to 1,093.1)                          |
| Latent tuberculosis infection                                                        | 10,918.2<br>(7,905.4 to 14,464.8)         | --                                            | --                                     | --                                                | --                                                  |
| HIV/AIDS                                                                             | 4.5<br>(0.5 to 16.0)                      | 0.6 <sup>a</sup><br>(< 0.05 to 2.3)           | 0.6<br>(0.1 to 2.3)                    | 106.5<br>(-12.0 to 261.7)                         | 38.7<br>(-44.6 to 161.0)                            |
| Drug-susceptible HIV/AIDS - Tuberculosis                                             | < 0.05<br>(< 0.05 to < 0.05)              | < 0.05<br>(< 0.05 to < 0.05)                  | < 0.05<br>(< 0.05 to < 0.05)           | 23.6<br>(9.2 to 43.3)                             | -14.2<br>(-24.2 to -1.4)                            |
| Multidrug-resistant HIV/AIDS - Tuberculosis without extensive drug resistance        | < 0.05<br>(< 0.05 to < 0.05)              | < 0.05<br>(< 0.05 to < 0.05)                  | < 0.05<br>(< 0.05 to < 0.05)           | 21.8<br>(-77.1 to 827.5)                          | -15.4<br>(-84.1 to 534.7)                           |
| Extensively drug-resistant HIV/AIDS - Tuberculosis                                   | < 0.05<br>(< 0.05 to < 0.05)              | < 0.05<br>(< 0.05 to < 0.05)                  | < 0.05<br>(< 0.05 to < 0.05)           | 176.7<br>(-48.1 to 2,005.8)                       | 92.1<br>(-64.0 to 1,341.0)                          |
| HIV/AIDS resulting in other diseases                                                 | 4.5<br>(0.5 to 16.0)                      | 0.6<br>(< 0.05 to 2.3)                        | 0.6<br>(0.1 to 2.3)                    | 106.7<br>(-12.4 to 262.9)                         | 38.8<br>(-44.8 to 161.5)                            |
| <b>Diarrhoea, lower respiratory infections, and other common infectious diseases</b> | <b>2,671.8</b><br>(2,526.1 to 2,840.9)    | <b>146,499.3†</b><br>(131,530.9 to 161,876.9) | <b>134.9</b><br>(94.2 to 188.4)        | <b>42.7</b><br>(36.5 to 49.0)                     | <b>-2.7</b><br>(-5.8 to 0.5)                        |
| Diarrhoeal diseases                                                                  | 517.8<br>(465.3 to 567.9)                 | 33,239.3<br>(29,809.1 to 36,396.0)            | 59.0<br>(40.4 to 82.1)                 | 50.7<br>(38.4 to 64.0)                            | -0.4<br>(-6.5 to 6.5)                               |
| Intestinal infectious diseases                                                       | 1.1<br>(0.9 to 1.3)                       | 21.1†<br>(17.8 to 24.8)                       | 0.2<br>(0.1 to 0.3)                    | 13.7<br>(-4.4 to 35.8)                            | -16.6<br>(-27.6 to -4.2)                            |
| Typhoid fever                                                                        | 1.1<br>(0.9 to 1.3)                       | 17.4<br>(14.6 to 20.4)                        | 0.2<br>(0.1 to 0.2)                    | 13.6<br>(-5.7 to 36.8)                            | -16.5<br>(-28.3 to -3.4)                            |
| Paratyphoid fever                                                                    | 0.2<br>(0.1 to 0.2)                       | 3.8<br>(3.1 to 4.5)                           | < 0.05<br>(< 0.05 to < 0.05)           | 21.2<br>(-0.1 to 45.7)                            | -11.9<br>(-25.2 to 2.3)                             |
| Other intestinal infectious diseases                                                 | --                                        | --                                            | < 0.05<br>(< 0.05 to < 0.05)           | -4.4<br>(-27.7 to 26.4)                           | -36.5<br>(-46.7 to -25.0)                           |
| Lower respiratory infections                                                         | 59.6<br>(52.7 to 66.6)                    | 2,517.4<br>(2,221.2 to 2,851.7)               | 3.6<br>(2.3 to 5.2)                    | 36.8<br>(20.7 to 55.8)                            | -5.4<br>(-14.1 to 4.0)                              |
| Upper respiratory infections                                                         | 1,384.0<br>(1,204.2 to 1,581.4)           | 104,490.6<br>(90,413.7 to 120,024.8)          | 34.5<br>(20.5 to 54.0)                 | 41.9<br>(34.2 to 49.8)                            | -0.3<br>(-5.2 to 4.6)                               |
| Otitis media                                                                         | 658.2<br>(577.6 to 747.7)                 | 4,557.8<br>(3,493.4 to 5,902.5)               | 19.0<br>(11.9 to 28.4)                 | 34.7<br>(24.7 to 45.4)                            | -8.3<br>(-14.5 to -1.4)                             |
| Meningitis                                                                           | 67.0<br>(58.9 to 76.9)                    | 21.2<br>(17.9 to 26.1)                        | 7.7<br>(5.3 to 10.2)                   | 29.8<br>(21.8 to 37.9)                            | -6.4<br>(-11.6 to -1.0)                             |
| Pneumococcal meningitis                                                              | 22.8<br>(19.2 to 27.4)                    | 2.7<br>(1.9 to 3.8)                           | 2.7<br>(1.9 to 3.7)                    | 19.8<br>(2.0 to 39.7)                             | -12.9<br>(-24.6 to -0.1)                            |
| H influenzae type B meningitis                                                       | 15.3<br>(11.8 to 19.9)                    | 5.6<br>(3.2 to 8.3)                           | 1.9<br>(1.3 to 2.6)                    | 14.3<br>(5.5 to 21.8)                             | -16.6<br>(-22.9 to -11.1)                           |
| Meningococcal infection                                                              | 11.2<br>(8.3 to 15.0)                     | 5.2<br>(3.6 to 7.4)                           | 1.2<br>(0.8 to 1.7)                    | 30.3<br>(22.9 to 38.1)                            | -5.9<br>(-10.9 to -0.5)                             |
| Other meningitis                                                                     | 17.7<br>(13.4 to 23.2)                    | 7.6<br>(5.4 to 10.5)                          | 1.8<br>(1.2 to 2.5)                    | 77.5<br>(58.0 to 102.5)                           | 24.6<br>(13.7 to 39.0)                              |
| Encephalitis                                                                         | 76.1<br>(53.5 to 108.0)                   | 52.5<br>(45.9 to 59.3)                        | 8.2<br>(5.7 to 10.8)                   | 29.3<br>(14.1 to 46.7)                            | -6.5<br>(-15.9 to 3.8)                              |
| Diphtheria                                                                           | < 0.05<br>(< 0.05 to < 0.05)              | < 0.05<br>(< 0.05 to 0.1)                     | < 0.05<br>(< 0.05 to < 0.05)           | -19.9<br>(-57.5 to 46.7)                          | -43.4<br>(-67.5 to -2.5)                            |
| Whooping cough                                                                       | 30.5<br>(23.7 to 38.3)                    | 222.7<br>(172.8 to 279.8)                     | 1.5<br>(0.9 to 2.4)                    | 45.6<br>(24.7 to 68.7)                            | -12.0<br>(-24.8 to 2.5)                             |
| Tetanus                                                                              | < 0.05<br>(< 0.05 to 0.1)                 | < 0.05<br>(< 0.05 to < 0.05)                  | < 0.05<br>(< 0.05 to < 0.05)           | 41.7<br>(16.2 to 62.1)                            | 2.7<br>(-10.9 to 14.2)                              |
| Measles                                                                              | 0.7<br>(0.2 to 1.5)                       | 24.2<br>(8.4 to 53.2)                         | 0.1<br>(< 0.05 to 0.1)                 | -6.7<br>(-30.7 to 23.1)                           | -43.7<br>(-57.8 to -25.9)                           |
| Varicella and herpes zoster                                                          | 41.3<br>(38.7 to 44.3)                    | 1,352.5<br>(1,250.5 to 1,456.7)               | 1.1<br>(0.6 to 1.7)                    | 40.9<br>(20.8 to 63.4)                            | 0.1<br>(-11.2 to 12.1)                              |
| <b>Neglected tropical diseases and malaria</b>                                       | <b>1,465.8</b><br>(1,310.0 to 1,627.6)    | <b>293.2†</b><br>(234.3 to 364.2)             | <b>27.1</b><br>(16.8 to 41.1)          | <b>48.1</b><br>(23.0 to 77.4)                     | <b>-3.7</b><br>(-18.1 to 11.8)                      |
| Malaria                                                                              | --                                        | --                                            | --                                     | --                                                | --                                                  |
| Chagas disease                                                                       | --                                        | --                                            | --                                     | --                                                | --                                                  |
| Leishmaniasis                                                                        | 108.0<br>(90.7 to 129.1)                  | 36.1<br>(12.0 to 75.8)                        | 6.4<br>(4.0 to 9.7)                    | 153.0<br>(91.7 to 251.8)                          | 82.8<br>(43.2 to 143.5)                             |
| Visceral leishmaniasis                                                               | 0.4<br>(0.3 to 0.5)                       | 1.7<br>(1.4 to 2.0)                           | < 0.05<br>(< 0.05 to < 0.05)           | -68.5<br>(-74.6 to -61.0)                         | -76.4<br>(-81.7 to -69.6)                           |
| Cutaneous and mucocutaneous leishmaniasis                                            | 99.6<br>(79.5 to 126.5)                   | 34.5<br>(10.4 to 74.2)                        | 6.4<br>(4.0 to 9.7)                    | 161.4<br>(96.9 to 265.7)                          | 94.1<br>(49.9 to 161.8)                             |
| African trypanosomiasis                                                              | --                                        | --                                            | --                                     | --                                                | --                                                  |
| Schistosomiasis                                                                      | 736.6<br>(560.3 to 946.1)                 | 255.7<br>(205.6 to 321.9)                     | 5.2<br>(2.4 to 9.9)                    | 45.6<br>(32.1 to 63.0)                            | 3.9<br>(-5.5 to 16.0)                               |
| Cysticercosis                                                                        | --                                        | --                                            | --                                     | --                                                | --                                                  |
| Cystic echinococcosis                                                                | 6.5<br>(1.4 to 24.4)                      | 1.4<br>(0.3 to 5.3)                           | 0.6<br>(0.1 to 2.3)                    | -32.3<br>(-90.6 to 338.1)                         | -51.9<br>(-93.2 to 238.2)                           |
| Lymphatic filariasis                                                                 | --                                        | --                                            | --                                     | --                                                | --                                                  |
| Onchocerciasis                                                                       | --                                        | --                                            | --                                     | --                                                | --                                                  |
| Trachoma                                                                             | 34.9<br>(21.6 to 54.3)                    | --                                            | 2.2<br>(1.3 to 3.6)                    | -11.1<br>(-29.6 to 12.9)                          | -33.0<br>(-49.8 to -10.6)                           |
| Dengue                                                                               | --                                        | --                                            | --                                     | --                                                | --                                                  |
| Yellow fever                                                                         | --                                        | --                                            | --                                     | --                                                | --                                                  |
| Rabies                                                                               | < 0.05<br>(< 0.05 to < 0.05)              | < 0.05<br>(< 0.05 to < 0.05)                  | < 0.05<br>(< 0.05 to < 0.05)           | -7.4<br>(-58.9 to 105.0)                          | -31.9<br>(-68.3 to 54.2)                            |
| Intestinal nematode infections                                                       | 113.7<br>(83.9 to 147.0)                  | --                                            | < 0.05<br>(< 0.05 to < 0.05)           | 56.1<br>(-5.9 to 153.6)                           | 14.1<br>(-31.3 to 86.1)                             |
| Ascariasis                                                                           | 65.4<br>(43.7 to 97.7)                    | --                                            | < 0.05<br>(< 0.05 to < 0.05)           | 37.7<br>(-71.0 to 495.9)                          | -0.6<br>(-81.6 to 380.9)                            |



| Cause                                                                   | Prevalence in thousands (95% UI)                 | Incidence in thousands (95% UI)                      | YLDs in thousands (95% UI)                    |                                                   |                                                     |
|-------------------------------------------------------------------------|--------------------------------------------------|------------------------------------------------------|-----------------------------------------------|---------------------------------------------------|-----------------------------------------------------|
|                                                                         | 2016 counts                                      | 2016 counts                                          | 2016 counts                                   | Percentage change in counts between 2006 and 2016 | Percentage change in age-standardised rates between |
| Trichuriasis                                                            | 42.2<br>(26.0 to 63.9)                           | --                                                   | < 0.05<br>(< 0.05 to < 0.05)                  | 33.6<br>(-82.9 to 993.2)                          | -3.1<br>(-88.7 to 786.9)                            |
| Hookworm disease                                                        | 5.1<br>(3.6 to 7.0)                              | --                                                   | < 0.05<br>(< 0.05 to < 0.05)                  | 57.2<br>(-8.2 to 159.5)                           | 14.9<br>(-32.6 to 89.9)                             |
| Food-borne trematodiasis                                                | --                                               | --                                                   | --                                            | --                                                | --                                                  |
| Leprosy                                                                 | < 0.05<br>(< 0.05 to < 0.05)                     | < 0.05<br>(< 0.05 to < 0.05)                         | < 0.05<br>(< 0.05 to < 0.05)                  | -20.1<br>(-30.0 to 11.0)                          | -38.4<br>(-44.9 to -18.0)                           |
| Ebola virus disease                                                     | --                                               | --                                                   | --                                            | --                                                | --                                                  |
| Zika virus disease                                                      | --                                               | --                                                   | --                                            | --                                                | --                                                  |
| Guinea worm disease                                                     | --                                               | --                                                   | --                                            | --                                                | --                                                  |
| Other neglected tropical diseases                                       | 459.6<br>(367.9 to 552.8)                        | --                                                   | 12.6<br>(7.1 to 19.7)                         | 44.0<br>(9.5 to 90.3)                             | -6.6<br>(-27.9 to 21.2)                             |
| <b>Maternal disorders</b>                                               | <b>54.3</b><br><b>(40.0 to 71.5)</b>             | <b>821.5†</b><br><b>(706.3 to 954.8)</b>             | <b>3.5</b><br><b>(2.2 to 5.2)</b>             | <b>52.8</b><br><b>(10.6 to 107.6)</b>             | <b>12.5</b><br><b>(-18.1 to 52.6)</b>               |
| Maternal haemorrhage                                                    | 15.8<br>(10.7 to 22.4)                           | 104.2<br>(67.8 to 153.1)                             | 0.6<br>(0.3 to 1.0)                           | 64.5<br>(5.3 to 145.7)                            | 22.2<br>(-22.7 to 81.8)                             |
| Maternal sepsis and other pregnancy related infections                  | 19.5<br>(10.4 to 30.8)                           | 216.0<br>(158.2 to 299.8)                            | 0.9<br>(0.4 to 1.6)                           | 56.5<br>(-25.9 to 225.2)                          | 15.8<br>(-44.8 to 140.1)                            |
| Maternal hypertensive disorders                                         | 16.7<br>(9.5 to 26.4)                            | 73.5<br>(50.8 to 102.4)                              | 0.8<br>(0.4 to 1.4)                           | 46.1<br>(-17.0 to 157.2)                          | 6.4<br>(-39.0 to 84.9)                              |
| Maternal obstructed labour and uterine rupture                          | 1.3<br>(0.7 to 2.1)                              | 93.2<br>(66.5 to 129.7)                              | 0.4<br>(0.2 to 0.7)                           | 54.5<br>(-37.7 to 285.4)                          | 14.7<br>(-54.0 to 173.6)                            |
| Maternal abortion, miscarriage, and ectopic pregnancy                   | 2.8<br>(1.8 to 4.0)                              | 334.7<br>(256.6 to 441.2)                            | 0.3<br>(0.1 to 0.5)                           | 48.6<br>(-20.4 to 182.0)                          | 8.3<br>(-41.5 to 104.7)                             |
| Other maternal disorders                                                | --                                               | --                                                   | 0.5<br>(0.3 to 0.8)                           | 46.6<br>(5.7 to 99.4)                             | 8.0<br>(-21.4 to 47.1)                              |
| <b>Neonatal disorders</b>                                               | <b>588.9</b><br><b>(460.8 to 1,071.9)</b>        | --                                                   | <b>136.8</b><br><b>(74.1 to 333.4)</b>        | <b>50.1</b><br><b>(18.9 to 100.2)</b>             | <b>6.2</b><br><b>(-16.9 to 41.1)</b>                |
| Neonatal preterm birth complications                                    | 370.8<br>(290.8 to 478.3)                        | --                                                   | 40.6<br>(25.1 to 64.1)                        | 36.8<br>(6.1 to 76.3)                             | -2.0<br>(-23.9 to 25.3)                             |
| Neonatal encephalopathy due to birth asphyxia and trauma                | 54.8<br>(25.0 to 102.2)                          | --                                                   | 7.2<br>(1.3 to 18.1)                          | 48.2<br>(-22.2 to 209.0)                          | 7.1<br>(-44.1 to 131.2)                             |
| Neonatal sepsis and other neonatal infections                           | 155.0<br>(42.8 to 527.5)                         | --                                                   | 69.4<br>(15.5 to 258.7)                       | 61.0<br>(-5.2 to 273.9)                           | 15.8<br>(-39.0 to 189.0)                            |
| Hemolytic disease and other neonatal jaundice                           | 36.6<br>(32.0 to 42.6)                           | --                                                   | 10.2<br>(7.3 to 13.3)                         | 31.1<br>(12.7 to 51.1)                            | -6.1<br>(-18.3 to 7.7)                              |
| Other neonatal disorders                                                | --                                               | --                                                   | 9.6<br>(5.1 to 23.3)                          | 63.4<br>(29.3 to 119.5)                           | -4.2<br>(-24.1 to 29.3)                             |
| <b>Nutritional deficiencies</b>                                         | <b>10,584.4</b><br><b>(9,399.6 to 11,691.3)</b>  | <b>2,004.0†</b><br><b>(1,435.2 to 2,823.2)</b>       | <b>261.4</b><br><b>(162.4 to 386.9)</b>       | <b>36.0</b><br><b>(13.7 to 64.3)</b>              | <b>-8.0</b><br><b>(-21.3 to 7.6)</b>                |
| Protein-energy malnutrition                                             | 597.3<br>(471.5 to 760.4)                        | 301.7<br>(241.6 to 375.4)                            | 30.5<br>(18.8 to 44.8)                        | 50.9<br>(11.9 to 101.1)                           | -11.4<br>(-34.6 to 18.8)                            |
| Iodine deficiency                                                       | 667.8<br>(519.2 to 841.9)                        | 25.9<br>(20.2 to 32.5)                               | 14.4<br>(8.4 to 22.8)                         | 30.0<br>(14.7 to 46.9)                            | -4.5<br>(-15.4 to 7.2)                              |
| Vitamin A deficiency                                                    | 2,017.7<br>(1,352.0 to 2,890.2)                  | 1,676.4<br>(1,097.2 to 2,507.8)                      | 5.7<br>(3.2 to 9.3)                           | 44.1<br>(19.0 to 72.8)                            | -1.9<br>(-17.7 to 15.5)                             |
| Iron-deficiency anaemia                                                 | 8,148.2<br>(6,713.9 to 9,498.4)                  | --                                                   | 209.8<br>(125.3 to 322.2)                     | 34.2<br>(7.5 to 69.1)                             | -8.2<br>(-24.5 to 11.2)                             |
| Other nutritional deficiencies                                          | --                                               | --                                                   | 1.0<br>(0.6 to 1.5)                           | 49.9<br>(9.7 to 102.7)                            | -12.2<br>(-36.1 to 19.8)                            |
| <b>Other communicable, maternal, neonatal, and nutritional diseases</b> | <b>7,708.9</b><br><b>(7,174.2 to 8,261.6)</b>    | <b>5,764.1</b><br><b>(4,736.1 to 7,027.2)</b>        | <b>32.7</b><br><b>(20.7 to 51.5)</b>          | <b>43.3</b><br><b>(31.4 to 56.5)</b>              | <b>0.4</b><br><b>(-5.8 to 7.4)</b>                  |
| Sexually transmitted diseases excluding HIV                             | 4,960.1<br>(4,637.0 to 5,315.4)                  | 4,627.8<br>(3,868.8 to 5,449.1)                      | 22.3<br>(13.5 to 35.5)                        | 40.6<br>(30.5 to 51.7)                            | 1.2<br>(-5.4 to 8.3)                                |
| Syphilis                                                                | 142.9<br>(78.3 to 252.0)                         | 113.4<br>(59.8 to 201.8)                             | 0.3<br>(0.2 to 0.4)                           | 41.5<br>(25.1 to 56.4)                            | 1.1<br>(-11.2 to 11.9)                              |
| Chlamydial infection                                                    | 641.9<br>(514.5 to 793.3)                        | 467.4<br>(369.9 to 576.5)                            | 2.6<br>(1.5 to 4.4)                           | 32.1<br>(15.1 to 52.4)                            | -2.2<br>(-14.1 to 12.0)                             |
| Gonococcal infection                                                    | 851.5<br>(675.4 to 1,073.4)                      | 3,066.4<br>(2,327.5 to 3,869.1)                      | 10.8<br>(6.3 to 18.0)                         | 44.4<br>(30.7 to 60.4)                            | 3.3<br>(-5.8 to 14.1)                               |
| Trichomoniasis                                                          | 630.4<br>(538.7 to 721.6)                        | 544.1<br>(462.1 to 628.2)                            | 0.8<br>(0.3 to 1.7)                           | 26.8<br>(16.7 to 38.4)                            | -7.8<br>(-13.8 to -1.2)                             |
| Genital herpes                                                          | 3,001.8<br>(2,534.2 to 3,537.1)                  | 271.9<br>(227.3 to 322.3)                            | 0.8<br>(0.3 to 1.8)                           | 39.8<br>(28.9 to 50.7)                            | 0.0<br>(-5.9 to 6.0)                                |
| Other sexually transmitted diseases                                     | 164.3<br>(134.1 to 189.6)                        | 164.7<br>(127.9 to 208.7)                            | 7.1<br>(4.4 to 11.1)                          | 40.3<br>(29.8 to 52.4)                            | 0.7<br>(-6.5 to 8.5)                                |
| Hepatitis                                                               | 2,859.5<br>(2,267.4 to 3,526.6)                  | 1,136.2<br>(535.3 to 1,954.2)                        | 0.7<br>(0.4 to 1.1)                           | 9.0<br>(-16.4 to 43.6)                            | -19.1<br>(-34.4 to -0.7)                            |
| Acute hepatitis A                                                       | 49.2<br>(5.3 to 111.4)                           | 639.2<br>(68.9 to 1,447.9)                           | 0.2<br>(0.1 to 0.4)                           | 2.7<br>(-63.0 to 189.4)                           | -23.0<br>(-64.7 to 75.0)                            |
| Hepatitis B                                                             | 2,395.3<br>(1,814.9 to 3,056.5)                  | 445.9<br>(334.1 to 596.4)                            | 0.5<br>(0.3 to 0.7)                           | 10.4<br>(-7.6 to 32.5)                            | -18.2<br>(-33.6 to -0.4)                            |
| Hepatitis C                                                             | 413.4<br>(363.5 to 466.0)                        | 28.9<br>(25.2 to 33.2)                               | < 0.05<br>(< 0.05 to 0.1)                     | 47.7<br>(44.2 to 51.1)                            | -10.1<br>(-11.0 to -9.1)                            |
| Acute hepatitis E                                                       | 1.7<br>(1.4 to 2.1)                              | 22.2<br>(18.2 to 27.1)                               | < 0.05<br>(< 0.05 to < 0.05)                  | 2.4<br>(-7.7 to 13.5)                             | -17.9<br>(-28.4 to -5.8)                            |
| Other infectious diseases                                               | 342.6<br>(276.8 to 405.4)                        | < 0.05<br>(< 0.05 to 0.1)                            | 9.8<br>(5.7 to 15.3)                          | 53.4<br>(18.4 to 97.4)                            | 0.4<br>(-19.9 to 24.9)                              |
| <b>Non-communicable diseases</b>                                        | <b>34,851.8</b><br><b>(34,460.8 to 35,188.6)</b> | <b>112,554.3†</b><br><b>(106,131.2 to 119,544.2)</b> | <b>3,048.4</b><br><b>(2,238.5 to 3,965.6)</b> | <b>40.1</b><br><b>(36.6 to 43.4)</b>              | <b>0.4</b><br><b>(-1.4 to 2.1)</b>                  |
| <b>Neoplasms</b>                                                        | <b>38.0</b><br><b>(35.5 to 40.6)</b>             | <b>19.3</b><br><b>(18.3 to 20.2)</b>                 | <b>6.7</b><br><b>(4.8 to 8.8)</b>             | <b>29.6</b><br><b>(17.8 to 42.5)</b>              | <b>-6.7</b><br><b>(-14.2 to 1.6)</b>                |
| Lip and oral cavity cancer                                              | 1.0<br>(0.9 to 1.1)                              | 0.3<br>(0.3 to 0.3)                                  | 0.1<br>(0.1 to 0.1)                           | 35.2<br>(13.5 to 54.6)                            | -3.4<br>(-18.8 to 10.7)                             |
| Nasopharynx cancer                                                      | 0.4<br>(0.3 to 0.4)                              | 0.1<br>(0.1 to 0.1)                                  | < 0.05<br>(< 0.05 to 0.1)                     | 45.6<br>(24.7 to 70.6)                            | 0.8<br>(-11.7 to 16.0)                              |
| Other pharynx cancer                                                    | 0.2<br>(0.2 to 0.2)                              | 0.1<br>(0.1 to 0.1)                                  | < 0.05<br>(< 0.05 to < 0.05)                  | 26.9<br>(10.9 to 46.5)                            | -9.3<br>(-20.7 to 4.1)                              |
| Oesophageal cancer                                                      | 0.2<br>(0.2 to 0.2)                              | 0.2<br>(0.2 to 0.2)                                  | < 0.05<br>(< 0.05 to 0.1)                     | 23.7<br>(12.7 to 35.0)                            | -8.6<br>(-16.5 to 0.3)                              |
| Stomach cancer                                                          | 1.0<br>(1.0 to 1.1)                              | 0.7<br>(0.7 to 0.7)                                  | 0.2<br>(0.1 to 0.2)                           | 23.0<br>(12.4 to 34.0)                            | -9.4<br>(-18.7 to 0.3)                              |
| Colon and rectum cancer                                                 | 3.1<br>(2.8 to 3.3)                              | 1.1<br>(1.0 to 1.2)                                  | 0.4<br>(0.3 to 0.5)                           | 31.0<br>(12.3 to 57.4)                            | -3.7<br>(-18.7 to 16.0)                             |
| Liver cancer                                                            | 0.2<br>(0.2 to 0.3)                              | 0.6<br>(0.5 to 0.7)                                  | 0.1<br>(0.1 to 0.2)                           | 31.0<br>(13.9 to 48.8)                            | -4.7<br>(-17.1 to 7.8)                              |
| Liver cancer due to hepatitis B                                         | 0.2<br>(0.1 to 0.2)                              | 0.2<br>(0.2 to 0.3)                                  | < 0.05<br>(< 0.05 to 0.1)                     | 33.3<br>(15.3 to 53.4)                            | -5.0<br>(-17.7 to 9.3)                              |

| Cause                                              | Prevalence in thousands (95% UI)              | Incidence in thousands (95% UI)          | YLDs in thousands (95% UI)             |                                                   |                                                     |
|----------------------------------------------------|-----------------------------------------------|------------------------------------------|----------------------------------------|---------------------------------------------------|-----------------------------------------------------|
|                                                    | 2016 counts                                   | 2016 counts                              | 2016 counts                            | Percentage change in counts between 2006 and 2016 | Percentage change in age-standardised rates between |
| Liver cancer due to hepatitis C                    | 0.2<br>(0.1 to 0.2)                           | 0.2<br>(0.1 to 0.2)                      | < 0.05<br>(< 0.05 to 0.1)              | 28.4<br>(9.3 to 48.9)                             | -4.8<br>(-18.6 to 9.8)                              |
| Liver cancer due to alcohol use                    | < 0.05<br>(< 0.05 to 0.1)                     | < 0.05<br>(< 0.05 to 0.1)                | < 0.05<br>(< 0.05 to < 0.05)           | 32.7<br>(11.7 to 55.9)                            | -3.3<br>(-17.4 to 14.2)                             |
| Liver cancer due to other causes                   | 0.1<br>(0.1 to 0.2)                           | 0.1<br>(0.1 to 0.2)                      | < 0.05<br>(< 0.05 to < 0.05)           | 30.9<br>(11.9 to 51.3)                            | -4.6<br>(-18.8 to 11.3)                             |
| Gallbladder and biliary tract cancer               | 0.1<br>(0.1 to 0.1)                           | 0.1<br>(0.1 to 0.2)                      | < 0.05<br>(< 0.05 to < 0.05)           | 29.9<br>(15.3 to 45.4)                            | -4.1<br>(-14.5 to 6.4)                              |
| Pancreatic cancer                                  | 0.4<br>(0.4 to 0.4)                           | 0.5<br>(0.5 to 0.6)                      | 0.1<br>(0.1 to 0.1)                    | 34.9<br>(20.8 to 49.3)                            | -1.1<br>(-11.8 to 10.1)                             |
| Larynx cancer                                      | 1.2<br>(1.1 to 1.3)                           | 0.4<br>(0.4 to 0.4)                      | 0.2<br>(0.1 to 0.2)                    | 25.4<br>(10.6 to 42.9)                            | -9.9<br>(-20.4 to 3.1)                              |
| Tracheal, bronchus, and lung cancer                | 2.1<br>(1.9 to 2.3)                           | 1.9<br>(1.8 to 2.1)                      | 0.4<br>(0.3 to 0.6)                    | 29.6<br>(4.2 to 57.6)                             | -5.1<br>(-23.8 to 16.7)                             |
| Malignant skin melanoma                            | 0.2<br>(0.2 to 0.2)                           | 0.1<br>(0.1 to 0.1)                      | < 0.05<br>(< 0.05 to < 0.05)           | 35.7<br>(15.1 to 54.1)                            | -1.3<br>(-16.5 to 11.4)                             |
| Non-melanoma skin cancer                           | 0.1<br>(0.1 to 0.1)                           | 0.4<br>(0.4 to 0.5)                      | < 0.05<br>(< 0.05 to < 0.05)           | 45.7<br>(28.8 to 62.4)                            | 4.6<br>(-8.7 to 17.9)                               |
| Non-melanoma skin cancer (squamous-cell carcinoma) | 0.1<br>(0.1 to 0.1)                           | 0.1<br>(0.1 to 0.2)                      | < 0.05<br>(< 0.05 to < 0.05)           | 45.7<br>(27.7 to 63.2)                            | 4.6<br>(-9.7 to 18.6)                               |
| Non-melanoma skin cancer (basal-cell carcinoma)    | < 0.05<br>(< 0.05 to 0.1)                     | 0.3<br>(0.2 to 0.3)                      | < 0.05<br>(< 0.05 to < 0.05)           | 45.9<br>(33.0 to 58.4)                            | 5.0<br>(-4.4 to 15.1)                               |
| Breast cancer                                      | 16.5<br>(13.5 to 18.8)                        | 3.9<br>(3.2 to 4.4)                      | 1.6<br>(1.2 to 2.2)                    | 28.0<br>(-3.1 to 64.0)                            | -11.0<br>(-31.7 to 11.9)                            |
| Cervical cancer                                    | 1.1<br>(0.8 to 1.3)                           | 0.3<br>(0.2 to 0.4)                      | 0.1<br>(0.1 to 0.2)                    | 16.4<br>(-8.2 to 59.4)                            | -19.2<br>(-35.7 to 8.8)                             |
| Uterine cancer                                     | 1.1<br>(0.9 to 1.2)                           | 0.2<br>(0.2 to 0.3)                      | 0.1<br>(0.1 to 0.1)                    | 23.7<br>(-5.5 to 68.7)                            | -11.4<br>(-31.9 to 19.7)                            |
| Ovarian cancer                                     | 1.3<br>(1.1 to 1.5)                           | 0.4<br>(0.4 to 0.5)                      | 0.2<br>(0.1 to 0.3)                    | 42.0<br>(6.4 to 81.4)                             | 0.6<br>(-25.2 to 30.2)                              |
| Prostate cancer                                    | 1.6<br>(1.3 to 2.2)                           | 0.5<br>(0.4 to 0.7)                      | 0.2<br>(0.2 to 0.3)                    | 27.4<br>(-1.1 to 64.5)                            | -3.7<br>(-22.8 to 21.5)                             |
| Testicular cancer                                  | 0.4<br>(0.3 to 0.5)                           | 0.1<br>(0.1 to 0.1)                      | < 0.05<br>(< 0.05 to < 0.05)           | 26.7<br>(0.8 to 56.6)                             | -9.5<br>(-26.4 to 9.8)                              |
| Kidney cancer                                      | 1.8<br>(1.6 to 2.0)                           | 0.5<br>(0.5 to 0.6)                      | 0.2<br>(0.1 to 0.2)                    | 40.0<br>(17.8 to 64.7)                            | 0.7<br>(-14.8 to 18.7)                              |
| Bladder cancer                                     | 3.8<br>(3.5 to 4.2)                           | 1.1<br>(1.0 to 1.2)                      | 0.4<br>(0.3 to 0.6)                    | 30.5<br>(9.6 to 55.0)                             | -3.9<br>(-19.3 to 14.1)                             |
| Brain and nervous system cancer                    | 2.8<br>(2.4 to 3.1)                           | 1.2<br>(1.1 to 1.4)                      | 0.4<br>(0.3 to 0.5)                    | 34.5<br>(7.0 to 61.0)                             | -4.9<br>(-21.7 to 11.3)                             |
| Thyroid cancer                                     | 1.5<br>(1.1 to 1.7)                           | 0.3<br>(0.2 to 0.4)                      | 0.1<br>(0.1 to 0.1)                    | 41.0<br>(10.3 to 83.3)                            | -1.4<br>(-21.8 to 24.9)                             |
| Mesothelioma                                       | 0.1<br>(0.1 to 0.1)                           | 0.1<br>(< 0.05 to 0.1)                   | < 0.05<br>(< 0.05 to < 0.05)           | 22.8<br>(7.9 to 41.6)                             | -11.8<br>(-22.5 to 1.8)                             |
| Hodgkin lymphoma                                   | 0.6<br>(0.4 to 0.8)                           | 0.2<br>(0.1 to 0.3)                      | 0.1<br>(0.1 to 0.1)                    | 16.1<br>(-2.6 to 35.8)                            | -16.3<br>(-30.3 to -3.7)                            |
| Non-Hodgkin's lymphoma                             | 2.4<br>(2.1 to 2.7)                           | 0.9<br>(0.8 to 1.0)                      | 0.3<br>(0.2 to 0.4)                    | 42.9<br>(23.3 to 61.3)                            | 4.5<br>(-10.3 to 18.7)                              |
| Multiple myeloma                                   | 0.2<br>(0.1 to 0.2)                           | 0.1<br>(0.1 to 0.1)                      | < 0.05<br>(< 0.05 to 0.1)              | 13.8<br>(-1.8 to 38.1)                            | -17.0<br>(-28.2 to 0.8)                             |
| Leukaemia                                          | 6.1<br>(5.2 to 7.1)                           | 1.6<br>(1.3 to 1.8)                      | 0.8<br>(0.5 to 1.0)                    | 22.8<br>(5.1 to 42.0)                             | -10.1<br>(-22.4 to 3.0)                             |
| Acute lymphoid leukaemia                           | 0.8<br>(0.6 to 1.0)                           | 0.2<br>(0.1 to 0.2)                      | 0.1<br>(0.1 to 0.1)                    | 27.4<br>(0.1 to 66.1)                             | -8.7<br>(-24.9 to 12.3)                             |
| Chronic lymphoid leukaemia                         | 0.4<br>(0.3 to 0.6)                           | 0.1<br>(0.1 to 0.1)                      | 0.1<br>(< 0.05 to 0.1)                 | 22.7<br>(3.0 to 48.0)                             | -9.7<br>(-23.6 to 9.3)                              |
| Acute myeloid leukaemia                            | 0.4<br>(0.3 to 0.6)                           | 0.2<br>(0.2 to 0.3)                      | 0.1<br>(< 0.05 to 0.1)                 | 30.8<br>(10.7 to 57.0)                            | -6.1<br>(-18.0 to 8.7)                              |
| Chronic myeloid leukaemia                          | 0.4<br>(0.2 to 0.5)                           | 0.1<br>(0.1 to 0.2)                      | < 0.05<br>(< 0.05 to 0.1)              | 13.2<br>(-6.0 to 35.0)                            | -17.2<br>(-30.4 to -1.5)                            |
| Other leukaemia                                    | 4.2<br>(3.3 to 5.0)                           | 0.9<br>(0.7 to 1.1)                      | 0.5<br>(0.3 to 0.7)                    | 22.0<br>(0.2 to 45.1)                             | -9.8<br>(-25.3 to 7.3)                              |
| Other neoplasms                                    | 3.8<br>(3.3 to 4.1)                           | 1.3<br>(1.2 to 1.4)                      | 0.4<br>(0.3 to 0.5)                    | 34.2<br>(12.3 to 54.3)                            | -4.2<br>(-19.0 to 10.6)                             |
| <b>Cardiovascular diseases</b>                     | <b>1,812.2</b><br><b>(1,750.5 to 1,879.0)</b> | <b>218.7†</b><br><b>(207.8 to 229.3)</b> | <b>106.6</b><br><b>(77.1 to 139.1)</b> | <b>32.1</b><br><b>(27.9 to 36.6)</b>              | <b>-3.4</b><br><b>(-6.7 to -0.2)</b>                |
| Rheumatic heart disease                            | 191.2<br>(169.6 to 214.1)                     | 8.3<br>(7.3 to 9.2)                      | 9.0<br>(5.6 to 13.4)                   | 19.0<br>(8.4 to 29.2)                             | -14.2<br>(-20.7 to -7.4)                            |
| Ischaemic heart disease                            | 800.7<br>(753.7 to 847.5)                     | 117.1<br>(109.0 to 126.4)                | 28.5<br>(19.6 to 39.1)                 | 40.1<br>(34.2 to 46.6)                            | 1.2<br>(-2.6 to 5.4)                                |
| Cerebrovascular disease                            | 215.5<br>(201.5 to 229.5)                     | 33.4‡<br>(30.6 to 36.4)                  | 32.4<br>(23.2 to 41.1)                 | 25.1<br>(15.5 to 33.6)                            | -8.1<br>(-15.1 to -1.4)                             |
| Ischaemic stroke                                   | 189.2<br>(171.2 to 208.1)                     | 24.3‡<br>(21.7 to 27.3)                  | 27.1<br>(19.3 to 34.8)                 | 23.7<br>(13.2 to 33.6)                            | -9.0<br>(-16.9 to -1.0)                             |
| Hemorrhagic stroke                                 | 36.9<br>(33.2 to 40.9)                        | 9.1‡<br>(8.2 to 10.0)                    | 5.3<br>(3.8 to 6.8)                    | 33.1<br>(18.9 to 48.5)                            | -2.6<br>(-13.2 to 9.1)                              |
| Hypertensive heart disease                         | 40.2<br>(34.3 to 47.1)                        | --                                       | 3.2<br>(2.2 to 4.5)                    | 40.3<br>(27.2 to 55.7)                            | 1.8<br>(-7.0 to 11.8)                               |
| Cardiomyopathy and myocarditis                     | 20.6<br>(18.4 to 22.9)                        | 12.7†<br>(10.9 to 14.8)                  | 2.1<br>(1.4 to 3.0)                    | 40.7<br>(22.9 to 59.1)                            | 1.8<br>(-8.8 to 14.0)                               |
| Myocarditis                                        | 11.8<br>(10.4 to 13.6)                        | 12.7<br>(10.9 to 14.8)                   | 0.9<br>(0.6 to 1.4)                    | 39.6<br>(15.2 to 69.8)                            | 2.1<br>(-13.4 to 20.6)                              |
| Alcoholic cardiomyopathy                           | 1.2<br>(1.0 to 1.5)                           | --                                       | 0.1<br>(0.1 to 0.2)                    | 45.1<br>(25.8 to 67.7)                            | 2.1<br>(-13.0 to 20.8)                              |
| Other cardiomyopathy                               | 12.9<br>(11.2 to 14.7)                        | --                                       | 1.1<br>(0.7 to 1.6)                    | 41.3<br>(18.9 to 68.0)                            | 1.6<br>(-12.5 to 17.6)                              |
| Atrial fibrillation and flutter                    | 79.8<br>(70.0 to 91.4)                        | 7.0<br>(6.0 to 8.2)                      | 6.1<br>(4.1 to 8.5)                    | 34.5<br>(25.4 to 44.6)                            | -0.2<br>(-6.2 to 6.4)                               |
| Peripheral vascular disease                        | 309.7<br>(266.8 to 360.7)                     | 31.4<br>(27.1 to 36.8)                   | 1.3<br>(0.6 to 2.5)                    | 26.7<br>(17.7 to 36.1)                            | -3.4<br>(-9.9 to 3.7)                               |
| Endocarditis                                       | 2.5<br>(2.2 to 2.8)                           | 8.7<br>(7.9 to 9.6)                      | 0.2<br>(0.1 to 0.3)                    | 38.4<br>(20.9 to 56.5)                            | 0.7<br>(-15.9 to 19.1)                              |
| Other cardiovascular and circulatory diseases      | 463.1<br>(401.6 to 536.0)                     | --                                       | 23.9<br>(16.1 to 33.8)                 | 36.8<br>(27.2 to 47.9)                            | -0.8<br>(-7.7 to 6.5)                               |
| <b>Chronic respiratory diseases</b>                | <b>2,918.1</b><br><b>(2,772.1 to 3,063.7)</b> | <b>593.2†</b><br><b>(543.3 to 645.5)</b> | <b>120.6</b><br><b>(86.0 to 164.8)</b> | <b>42.6</b><br><b>(36.9 to 48.4)</b>              | <b>2.1</b><br><b>(-1.7 to 6.2)</b>                  |
| Chronic obstructive pulmonary disease              | 652.6<br>(626.5 to 681.6)                     | 43.7<br>(41.9 to 45.5)                   | 26.0<br>(21.7 to 30.3)                 | 41.2<br>(30.3 to 54.1)                            | 0.7<br>(-6.6 to 9.6)                                |
| Pneumoconiosis                                     | 1.4<br>(1.2 to 1.5)                           | 0.1<br>(0.1 to 0.1)                      | 0.2<br>(0.1 to 0.3)                    | 45.3<br>(39.5 to 52.0)                            | 1.8<br>(-2.4 to 6.8)                                |
| Silicosis                                          | 0.3<br>(0.3 to 0.4)                           | < 0.05<br>(< 0.05 to < 0.05)             | 0.1<br>(< 0.05 to 0.1)                 | 47.1<br>(37.9 to 55.7)                            | 2.0<br>(-3.3 to 7.1)                                |



| Cause                                                          | Prevalence in thousands (95% UI)           | Incidence in thousands (95% UI)          | YLDs in thousands (95% UI)          |                                                   |                                                     |
|----------------------------------------------------------------|--------------------------------------------|------------------------------------------|-------------------------------------|---------------------------------------------------|-----------------------------------------------------|
|                                                                | 2016 counts                                | 2016 counts                              | 2016 counts                         | Percentage change in counts between 2006 and 2016 | Percentage change in age-standardised rates between |
| Asbestosis                                                     | 0.4<br>(0.3 to 0.4)                        | < 0.05<br>(< 0.05 to < 0.05)             | 0.1<br>(< 0.05 to 0.1)              | 40.3<br>(33.4 to 47.8)                            | -1.0<br>(-5.6 to 3.4)                               |
| Coal workers pneumoconiosis                                    | --                                         | --                                       | --                                  | --                                                | --                                                  |
| Other pneumoconiosis                                           | 0.7<br>(0.6 to 0.8)                        | < 0.05<br>(< 0.05 to 0.1)                | 0.1<br>(0.1 to 0.1)                 | 47.0<br>(36.7 to 58.9)                            | 3.3<br>(-4.0 to 12.1)                               |
| Asthma                                                         | 2,324.1<br>(2,140.0 to 2,527.4)            | 548.8<br>(498.9 to 601.2)                | 90.7<br>(59.5 to 132.0)             | 42.0<br>(35.1 to 48.5)                            | 2.2<br>(-1.9 to 6.0)                                |
| Interstitial lung disease and pulmonary sarcoidosis            | 6.5<br>(5.9 to 7.2)                        | 0.6<br>(0.5 to 0.7)                      | 0.7<br>(0.5 to 1.0)                 | 41.1<br>(28.0 to 55.6)                            | 3.0<br>(-9.8 to 17.1)                               |
| Other chronic respiratory diseases                             | --                                         | --                                       | 2.9<br>(2.3 to 3.6)                 | 85.4<br>(46.7 to 132.3)                           | 34.5<br>(13.1 to 59.6)                              |
| <b>Cirrhosis and other chronic liver diseases</b>              | <b>110.9<br/>(104.8 to 118.0)</b>          | <b>5.1<br/>(4.9 to 5.4)</b>              | <b>6.0<br/>(4.1 to 8.3)</b>         | <b>46.1<br/>(26.8 to 67.5)</b>                    | <b>6.0<br/>(-4.0 to 16.3)</b>                       |
| Cirrhosis and other chronic liver diseases due to hepatitis B  | 27.3<br>(22.5 to 32.6)                     | 1.2<br>(1.0 to 1.4)                      | 1.0<br>(0.7 to 1.5)                 | 50.2<br>(21.5 to 84.2)                            | 7.6<br>(-9.0 to 27.6)                               |
| Cirrhosis and other chronic liver diseases due to hepatitis C  | 30.2<br>(24.1 to 37.5)                     | 1.3<br>(1.1 to 1.6)                      | 1.1<br>(0.7 to 1.6)                 | 47.7<br>(18.4 to 80.9)                            | 6.2<br>(-11.0 to 25.5)                              |
| Cirrhosis and other chronic liver diseases due to alcohol use  | 5.8<br>(4.9 to 6.7)                        | 0.3<br>(0.2 to 0.3)                      | 0.2<br>(0.1 to 0.3)                 | 52.5<br>(20.6 to 98.9)                            | 8.2<br>(-18.7 to 46.1)                              |
| Cirrhosis and other chronic liver diseases due to other causes | 47.6<br>(43.2 to 52.5)                     | 2.3<br>(2.2 to 2.5)                      | 3.7<br>(2.4 to 5.2)                 | 44.1<br>(16.9 to 76.2)                            | 4.6<br>(-11.8 to 24.6)                              |
| <b>Digestive diseases</b>                                      | <b>1,005.4<br/>(913.2 to 1,120.4)</b>      | <b>722.6†<br/>(679.3 to 770.0)</b>       | <b>34.1<br/>(23.3 to 48.5)</b>      | <b>56.3<br/>(38.1 to 78.7)</b>                    | <b>11.0<br/>(-1.4 to 25.5)</b>                      |
| Peptic ulcer disease                                           | 299.7<br>(244.6 to 371.1)                  | 24.2<br>(21.1 to 27.7)                   | 7.5<br>(4.2 to 12.7)                | 98.2<br>(47.2 to 164.1)                           | 36.0<br>(4.7 to 73.6)                               |
| Gastritis and duodenitis                                       | 341.9<br>(291.0 to 397.4)                  | 289.4<br>(254.9 to 327.8)                | 6.6<br>(4.0 to 10.8)                | 88.9<br>(46.3 to 143.1)                           | 32.2<br>(5.1 to 63.9)                               |
| Appendicitis                                                   | 5.1<br>(4.6 to 5.6)                        | 134.1<br>(122.4 to 147.4)                | 1.6<br>(1.0 to 2.3)                 | 38.0<br>(-0.3 to 98.8)                            | 3.0<br>(-22.9 to 42.6)                              |
| Paralytic ileus and intestinal obstruction                     | 0.4<br>(0.4 to 0.5)                        | 10.7<br>(9.2 to 12.3)                    | 0.1<br>(0.1 to 0.2)                 | 48.9<br>(44.2 to 53.7)                            | 5.2<br>(2.2 to 8.2)                                 |
| Inguinal, femoral, and abdominal hernia                        | 337.2<br>(297.9 to 378.3)                  | 119.0<br>(104.1 to 135.4)                | 14.1<br>(9.4 to 20.0)               | 32.7<br>(17.6 to 49.2)                            | -8.1<br>(-16.6 to 0.6)                              |
| Inflammatory bowel disease                                     | 4.3<br>(3.2 to 5.6)                        | 23.1<br>(16.6 to 30.5)                   | 0.7<br>(0.4 to 1.0)                 | 51.2<br>(38.8 to 65.8)                            | 8.2<br>(-0.2 to 18.1)                               |
| Vascular intestinal disorders                                  | 0.2<br>(0.2 to 0.3)                        | 1.1<br>(1.0 to 1.3)                      | 0.1<br>(< 0.05 to 0.1)              | 55.1<br>(46.8 to 64.3)                            | 8.7<br>(3.9 to 13.6)                                |
| Gallbladder and biliary diseases                               | 46.5<br>(40.3 to 53.1)                     | 114.9<br>(98.9 to 133.4)                 | 0.6<br>(0.4 to 0.9)                 | 53.0<br>(28.8 to 79.7)                            | 7.0<br>(-11.5 to 27.4)                              |
| Pancreatitis                                                   | 0.7<br>(0.6 to 0.8)                        | 6.2<br>(5.5 to 7.1)                      | 0.1<br>(0.1 to 0.1)                 | 51.2<br>(46.0 to 56.9)                            | 9.3<br>(6.2 to 12.7)                                |
| Other digestive diseases                                       | --                                         | --                                       | 2.8<br>(1.9 to 3.9)                 | 58.7<br>(40.1 to 80.4)                            | 13.6<br>(1.5 to 27.7)                               |
| <b>Neurological disorders</b>                                  | <b>13,896.1<br/>(13,307.0 to 14,518.4)</b> | <b>7,190.7<br/>(6,089.2 to 8,482.9)</b>  | <b>375.0<br/>(248.3 to 523.6)</b>   | <b>39.8<br/>(16.6 to 66.9)</b>                    | <b>0.6<br/>(-12.3 to 15.0)</b>                      |
| Alzheimer's disease and other dementias                        | 99.8<br>(84.1 to 119.5)                    | 16.7<br>(13.9 to 20.3)                   | 13.6<br>(9.5 to 18.2)               | 27.0<br>(20.8 to 33.1)                            | -0.8<br>(-5.2 to 3.6)                               |
| Parkinson's disease                                            | 9.8<br>(7.7 to 12.1)                       | 1.2<br>(1.0 to 1.5)                      | 1.1<br>(0.7 to 1.6)                 | 39.6<br>(22.3 to 59.1)                            | 4.3<br>(-6.8 to 16.5)                               |
| Epilepsy                                                       | 148.5<br>(47.6 to 225.0)                   | 24.0<br>(7.4 to 36.5)                    | 54.8<br>(15.8 to 104.1)             | 44.1<br>(-63.1 to 343.1)                          | 2.1<br>(-73.6 to 211.4)                             |
| Multiple sclerosis                                             | 9.7<br>(8.6 to 11.0)                       | 0.5<br>(0.4 to 0.6)                      | 2.6<br>(1.7 to 3.4)                 | 36.3<br>(13.2 to 63.5)                            | -3.4<br>(-19.6 to 14.8)                             |
| Motor neuron disease                                           | 0.8<br>(0.7 to 0.9)                        | 0.1<br>(0.1 to 0.2)                      | 0.2<br>(0.1 to 0.2)                 | 43.6<br>(35.9 to 52.4)                            | 3.4<br>(-0.6 to 7.6)                                |
| Migraine                                                       | 5,534.2<br>(5,162.5 to 5,886.8)            | 676.5<br>(624.8 to 726.1)                | 245.4<br>(157.3 to 342.8)           | 37.9<br>(32.5 to 43.8)                            | -0.0<br>(-3.4 to 3.5)                               |
| Tension-type headache                                          | 10,732.5<br>(9,576.8 to 11,948.0)          | 6,471.4<br>(5,361.7 to 7,772.9)          | 42.9<br>(27.4 to 64.4)              | 39.0<br>(32.0 to 46.2)                            | 0.2<br>(-4.1 to 4.8)                                |
| Other neurological disorders                                   | 0.1<br>(0.1 to 0.2)                        | 0.2<br>(0.2 to 0.4)                      | 14.5<br>(4.7 to 26.8)               | 80.8<br>(-47.9 to 391.9)                          | 21.6<br>(-58.4 to 195.6)                            |
| <b>Mental and substance use disorders</b>                      | <b>5,396.2<br/>(5,151.2 to 5,610.9)</b>    | <b>2,116.2†<br/>(1,938.8 to 2,300.7)</b> | <b>813.3<br/>(590.8 to 1,051.0)</b> | <b>38.8<br/>(34.0 to 43.5)</b>                    | <b>1.7<br/>(-1.6 to 4.8)</b>                        |
| Schizophrenia                                                  | 51.3<br>(44.3 to 58.9)                     | 4.1<br>(3.6 to 4.7)                      | 32.1<br>(22.9 to 40.7)              | 43.8<br>(30.4 to 59.2)                            | 1.2<br>(-7.4 to 10.9)                               |
| Alcohol use disorders                                          | 197.2<br>(165.7 to 230.8)                  | 110.1<br>(91.9 to 128.3)                 | 19.5<br>(13.2 to 27.4)              | 38.2<br>(24.2 to 53.4)                            | 0.4<br>(-8.9 to 10.7)                               |
| Drug use disorders                                             | 500.4<br>(446.3 to 564.0)                  | 53.6<br>(46.9 to 61.2)                   | 179.3<br>(126.3 to 238.1)           | 35.5<br>(18.7 to 51.6)                            | -0.3<br>(-11.3 to 10.4)                             |
| Opioid use disorders                                           | 419.6<br>(349.0 to 496.1)                  | 38.0<br>(31.8 to 45.0)                   | 172.6<br>(120.9 to 230.0)           | 35.4<br>(18.0 to 52.2)                            | -0.4<br>(-12.0 to 10.7)                             |
| Cocaine use disorders                                          | 13.8<br>(11.5 to 16.6)                     | 1.6<br>(1.3 to 2.0)                      | 1.9<br>(1.1 to 2.9)                 | 39.3<br>(-2.6 to 98.9)                            | 3.0<br>(-23.1 to 37.2)                              |
| Amphetamine use disorders                                      | 2.6<br>(1.8 to 3.5)                        | 0.5<br>(0.3 to 0.6)                      | 0.4<br>(0.2 to 0.6)                 | 37.6<br>(26.1 to 49.4)                            | 3.1<br>(-5.4 to 11.4)                               |
| Cannabis use disorders                                         | 57.6<br>(45.8 to 72.1)                     | 11.1<br>(8.9 to 13.7)                    | 1.7<br>(1.0 to 2.6)                 | 35.1<br>(6.3 to 70.7)                             | 1.1<br>(-18.4 to 25.0)                              |
| Other drug use disorders                                       | 12.2<br>(10.7 to 13.7)                     | 2.5<br>(2.2 to 2.8)                      | 2.8<br>(1.8 to 3.9)                 | 41.4<br>(13.1 to 81.1)                            | 3.5<br>(-14.6 to 27.3)                              |
| Depressive disorders                                           | 1,165.3<br>(1,095.8 to 1,255.3)            | 1,442.6<br>(1,264.0 to 1,623.2)          | 208.1<br>(143.5 to 282.5)           | 47.4<br>(38.0 to 57.7)                            | 6.2<br>(-0.2 to 13.2)                               |
| Major depressive disorder                                      | 886.1<br>(784.4 to 995.5)                  | 1,385.3<br>(1,205.7 to 1,565.0)          | 179.5<br>(122.9 to 244.8)           | 48.8<br>(37.6 to 60.5)                            | 7.4<br>(-0.3 to 15.6)                               |
| Dysthymia                                                      | 301.3<br>(262.0 to 346.5)                  | 57.3<br>(49.9 to 65.6)                   | 28.6<br>(19.3 to 42.1)              | 39.2<br>(32.7 to 45.9)                            | 0.0<br>(-3.5 to 3.7)                                |
| Bipolar disorder                                               | 226.5<br>(191.9 to 268.4)                  | 23.6<br>(20.0 to 28.4)                   | 45.9<br>(28.0 to 67.7)              | 36.6<br>(27.6 to 46.6)                            | -0.1<br>(-5.7 to 6.0)                               |
| Anxiety disorders                                              | 1,642.9<br>(1,484.5 to 1,804.7)            | 262.9<br>(239.8 to 288.2)                | 157.7<br>(110.2 to 215.8)           | 36.1<br>(27.6 to 45.8)                            | 0.6<br>(-5.2 to 7.5)                                |
| Eating disorders                                               | 68.3<br>(55.0 to 83.9)                     | 37.5<br>(27.2 to 50.3)                   | 13.5<br>(8.5 to 19.5)               | 52.1<br>(34.2 to 72.7)                            | 14.2<br>(1.0 to 29.5)                               |
| Anorexia nervosa                                               | 11.1<br>(8.0 to 14.9)                      | 5.0<br>(3.6 to 6.6)                      | 2.3<br>(1.3 to 3.6)                 | 47.1<br>(10.8 to 93.4)                            | 11.6<br>(-14.8 to 46.4)                             |
| Bulimia nervosa                                                | 53.3<br>(39.5 to 72.0)                     | 32.5<br>(22.3 to 45.4)                   | 11.1<br>(6.8 to 16.7)               | 53.2<br>(32.6 to 76.9)                            | 14.8<br>(0.2 to 31.8)                               |
| Autistic spectrum disorders                                    | 354.5<br>(312.6 to 400.8)                  | 4.4<br>(3.0 to 6.3)                      | 49.8<br>(33.4 to 69.8)              | 40.2<br>(32.9 to 48.2)                            | 0.3<br>(-4.4 to 5.2)                                |
| Autism                                                         | 92.4<br>(79.0 to 107.5)                    | 0.5<br>(0.2 to 0.8)                      | 23.5<br>(14.8 to 34.3)              | 39.6<br>(27.2 to 53.8)                            | 0.4<br>(-7.6 to 9.6)                                |
| Asperger syndrome and other autistic spectrum disorders        | 262.1<br>(219.1 to 317.1)                  | 3.9<br>(2.5 to 5.9)                      | 26.2<br>(17.1 to 38.6)              | 40.7<br>(32.9 to 48.2)                            | 0.2<br>(-4.4 to 4.8)                                |

| Cause                                                      | Prevalence in thousands (95% UI)                 | Incidence in thousands (95% UI)                    | YLDs in thousands (95% UI)              |                                                   |                                                     |
|------------------------------------------------------------|--------------------------------------------------|----------------------------------------------------|-----------------------------------------|---------------------------------------------------|-----------------------------------------------------|
|                                                            | 2016 counts                                      | 2016 counts                                        | 2016 counts                             | Percentage change in counts between 2006 and 2016 | Percentage change in age-standardised rates between |
| Attention-deficit/hyperactivity disorder                   | 237.9<br>(211.8 to 266.1)                        | 16.1<br>(14.0 to 18.6)                             | 2.9<br>(1.7 to 4.6)                     | 36.3<br>(19.0 to 55.4)                            | 1.8<br>(-10.4 to 15.3)                              |
| Conduct disorder                                           | 385.6<br>(320.7 to 453.1)                        | 136.0<br>(111.2 to 163.4)                          | 46.7<br>(28.3 to 71.5)                  | 26.4<br>(15.6 to 37.6)                            | -2.4<br>(-10.4 to 5.9)                              |
| Idiopathic developmental intellectual disability           | 543.4<br>(284.6 to 819.1)                        | --                                                 | 19.1<br>(7.3 to 34.5)                   | 22.4<br>(11.1 to 32.9)                            | -10.4<br>(-18.4 to -2.9)                            |
| Other mental and substance use disorders                   | 530.5<br>(464.4 to 614.9)                        | 25.4<br>(22.3 to 29.2)                             | 38.9<br>(26.9 to 56.0)                  | 39.8<br>(32.4 to 47.8)                            | 0.1<br>(-4.4 to 4.9)                                |
| <b>Diabetes, urogenital, blood, and endocrine diseases</b> | <b>16,594.4</b><br><b>(16,335.6 to 16,839.6)</b> | <b>4,236.1†</b><br><b>(3,942.6 to 4,610.6)</b>     | <b>397.5</b><br><b>(282.4 to 537.7)</b> | <b>42.9</b><br><b>(35.9 to 49.8)</b>              | <b>1.2</b><br><b>(-3.1 to 5.3)</b>                  |
| Diabetes mellitus                                          | 2,348.4<br>(2,117.3 to 2,617.4)                  | 166.3<br>(148.9 to 187.3)                          | 206.5<br>(141.8 to 298.1)               | 47.9<br>(39.5 to 58.1)                            | 3.6<br>(-2.4 to 10.4)                               |
| Acute glomerulonephritis                                   | 0.3<br>(0.3 to 0.4)                              | 4.9<br>(4.2 to 5.7)                                | < 0.05<br>(< 0.05 to < 0.05)            | 38.8<br>(31.8 to 45.7)                            | 0.4<br>(-3.4 to 4.4)                                |
| Chronic kidney disease                                     | 1,495.4<br>(1,360.2 to 1,648.0)                  | 114.9<br>(102.8 to 128.2)                          | 63.9<br>(46.9 to 82.1)                  | 38.0<br>(28.1 to 48.1)                            | -1.2<br>(-7.9 to 5.7)                               |
| Chronic kidney disease due to diabetes mellitus            | 639.4<br>(552.5 to 736.7)                        | 47.0<br>(38.9 to 56.4)                             | 25.3<br>(18.1 to 33.3)                  | 41.9<br>(29.3 to 55.1)                            | -1.0<br>(-8.8 to 8.1)                               |
| Chronic kidney disease due to hypertension                 | 218.2<br>(184.8 to 254.8)                        | 19.6<br>(16.0 to 23.7)                             | 7.9<br>(5.6 to 10.3)                    | 34.6<br>(16.8 to 54.9)                            | -1.2<br>(-12.9 to 12.4)                             |
| Chronic kidney disease due to glomerulonephritis           | 215.8<br>(182.3 to 249.5)                        | 13.6<br>(11.1 to 16.5)                             | 11.4<br>(7.8 to 15.5)                   | 35.6<br>(18.1 to 54.9)                            | -0.7<br>(-11.0 to 10.7)                             |
| Chronic kidney disease due to other causes                 | 422.1<br>(355.9 to 492.8)                        | 34.7<br>(29.2 to 40.5)                             | 19.2<br>(13.7 to 25.8)                  | 35.9<br>(23.6 to 50.1)                            | -1.8<br>(-9.6 to 7.0)                               |
| Urinary diseases and male infertility                      | 575.1<br>(499.5 to 650.5)                        | 2,277.9†<br>(2,028.0 to 2,622.8)                   | 15.0<br>(9.8 to 21.9)                   | 29.5<br>(14.4 to 45.3)                            | -8.6<br>(-20.2 to 3.2)                              |
| Interstitial nephritis and urinary tract infections        | 36.8<br>(32.1 to 43.4)                           | 1,914.5<br>(1,670.5 to 2,257.6)                    | 1.2<br>(0.7 to 1.9)                     | 32.7<br>(14.3 to 55.4)                            | -6.1<br>(-17.9 to 8.1)                              |
| Urolithiasis                                               | 12.0<br>(10.6 to 14.0)                           | 319.8<br>(281.4 to 369.2)                          | 0.9<br>(0.6 to 1.3)                     | 42.2<br>(21.3 to 66.0)                            | 0.9<br>(-15.7 to 19.1)                              |
| Benign prostatic hyperplasia                               | 345.7<br>(282.7 to 419.2)                        | 43.6<br>(35.1 to 53.0)                             | 11.1<br>(6.9 to 16.3)                   | 29.0<br>(9.3 to 50.3)                             | -9.0<br>(-21.9 to 4.6)                              |
| Male infertility                                           | 154.3<br>(120.0 to 199.5)                        | --                                                 | 1.0<br>(0.4 to 2.0)                     | 36.9<br>(27.4 to 47.1)                            | -0.1<br>(-6.6 to 6.6)                               |
| Other urinary diseases                                     | --                                               | --                                                 | 0.8<br>(0.5 to 1.2)                     | 12.7<br>(0.2 to 27.6)                             | -18.8<br>(-27.2 to -8.6)                            |
| Gynecological diseases                                     | 3,946.2<br>(3,750.7 to 4,127.8)                  | 1,610.9†<br>(1,485.0 to 1,747.6)                   | 48.5<br>(32.9 to 69.5)                  | 39.8<br>(32.9 to 47.1)                            | -1.6<br>(-6.0 to 3.1)                               |
| Uterine fibroids                                           | 284.1<br>(250.0 to 321.0)                        | 35.5<br>(30.6 to 41.1)                             | 4.8<br>(2.9 to 8.1)                     | 37.1<br>(14.2 to 62.5)                            | -7.7<br>(-22.2 to 9.7)                              |
| Polycystic ovarian syndrome                                | 28.1<br>(20.9 to 36.9)                           | 36.2<br>(26.2 to 47.5)                             | 0.2<br>(0.1 to 0.5)                     | 36.6<br>(16.7 to 60.1)                            | -1.6<br>(-15.9 to 14.9)                             |
| Female infertility                                         | 93.1<br>(49.7 to 159.7)                          | --                                                 | 0.6<br>(0.2 to 1.3)                     | 41.7<br>(23.2 to 66.1)                            | 6.6<br>(-7.8 to 26.8)                               |
| Endometriosis                                              | 7.6<br>(6.2 to 9.1)                              | 24.3<br>(19.6 to 30.5)                             | 0.7<br>(0.4 to 1.1)                     | 35.3<br>(-1.2 to 87.5)                            | -1.7<br>(-25.5 to 34.3)                             |
| Genital prolapse                                           | 1,405.1<br>(1,232.1 to 1,593.6)                  | 120.3<br>(102.9 to 139.8)                          | 4.3<br>(2.1 to 8.0)                     | 47.5<br>(37.0 to 57.0)                            | 3.8<br>(-3.6 to 11.0)                               |
| Premenstrual syndrome                                      | 2,151.1<br>(1,979.2 to 2,331.8)                  | 830.3<br>(754.0 to 909.3)                          | 17.7<br>(11.0 to 27.1)                  | 40.4<br>(29.0 to 54.5)                            | -1.1<br>(-8.7 to 8.1)                               |
| Other gynecological diseases                               | 597.6<br>(511.6 to 701.2)                        | 564.3<br>(464.2 to 680.3)                          | 20.1<br>(13.3 to 28.9)                  | 38.5<br>(28.1 to 49.6)                            | -2.2<br>(-8.6 to 4.8)                               |
| Hemoglobinopathies and hemolytic anaemias                  | 11,758.6<br>(11,537.0 to 11,977.3)               | --                                                 | 47.0<br>(28.6 to 71.0)                  | 36.9<br>(12.2 to 68.9)                            | -1.4<br>(-17.6 to 17.1)                             |
| Thalassemias                                               | 3.0<br>(2.7 to 3.3)                              | --                                                 | 0.2<br>(0.1 to 0.3)                     | 44.7<br>(-1.3 to 113.2)                           | -9.4<br>(-36.5 to 31.7)                             |
| Thalassaemias trait                                        | 1,878.5<br>(1,769.2 to 1,996.8)                  | --                                                 | 25.6<br>(15.6 to 38.5)                  | 36.6<br>(10.3 to 69.6)                            | -0.8<br>(-18.9 to 20.1)                             |
| Sickle cell disorders                                      | 19.9<br>(15.4 to 25.2)                           | --                                                 | 1.8<br>(1.2 to 2.6)                     | 47.0<br>(27.2 to 70.9)                            | 6.9<br>(-6.7 to 22.8)                               |
| Sickle cell trait                                          | 3,729.4<br>(3,444.9 to 4,052.1)                  | --                                                 | 11.6<br>(6.9 to 18.3)                   | 41.3<br>(11.6 to 80.0)                            | 3.1<br>(-16.2 to 26.9)                              |
| G6PD deficiency                                            | 1,915.6<br>(1,814.8 to 2,048.1)                  | --                                                 | 0.2<br>(0.1 to 0.3)                     | 31.8<br>(-2.2 to 79.4)                            | -5.3<br>(-26.8 to 21.9)                             |
| G6PD trait                                                 | 5,288.8<br>(5,211.7 to 5,388.6)                  | --                                                 | < 0.05<br>(< 0.05 to < 0.05)            | 70.7<br>(24.2 to 138.3)                           | 22.0<br>(-7.4 to 65.8)                              |
| Other hemoglobinopathies and hemolytic anaemias            | 373.5<br>(307.5 to 437.8)                        | --                                                 | 7.6<br>(4.5 to 11.9)                    | 29.5<br>(-0.7 to 64.5)                            | -10.2<br>(-27.4 to 8.9)                             |
| Endocrine, metabolic, blood, and immune disorders          | 575.4<br>(513.2 to 636.6)                        | 61.2<br>(54.8 to 68.1)                             | 16.7<br>(11.1 to 23.7)                  | 42.0<br>(25.6 to 61.6)                            | 0.1<br>(-7.4 to 8.1)                                |
| <b>Musculoskeletal disorders</b>                           | <b>4,541.0</b><br><b>(4,263.2 to 4,846.1)</b>    | <b>2,623.8</b><br><b>(2,346.1 to 2,893.2)</b>      | <b>503.7</b><br><b>(353.2 to 667.1)</b> | <b>42.4</b><br><b>(37.7 to 47.6)</b>              | <b>0.1</b><br><b>(-2.6 to 2.9)</b>                  |
| Rheumatoid arthritis                                       | 84.3<br>(74.7 to 94.6)                           | 5.6<br>(5.0 to 6.3)                                | 19.5<br>(13.4 to 26.2)                  | 48.0<br>(35.7 to 60.3)                            | 6.0<br>(-1.0 to 13.6)                               |
| Osteoarthritis                                             | 852.2<br>(795.6 to 912.4)                        | 49.9<br>(45.9 to 54.1)                             | 51.5<br>(36.4 to 68.9)                  | 46.9<br>(41.2 to 52.8)                            | 2.7<br>(-0.9 to 6.5)                                |
| Low back and neck pain                                     | 3,080.1<br>(2,860.0 to 3,305.9)                  | 1,317.9<br>(1,171.4 to 1,471.0)                    | 352.7<br>(249.6 to 463.8)               | 40.4<br>(35.9 to 45.3)                            | -0.8<br>(-3.6 to 2.1)                               |
| Low back pain                                              | 2,114.1<br>(1,865.8 to 2,412.5)                  | 1,051.2<br>(912.2 to 1,196.4)                      | 234.5<br>(165.1 to 307.4)               | 39.2<br>(33.0 to 46.1)                            | -1.3<br>(-5.3 to 3.2)                               |
| Neck pain                                                  | 1,204.5<br>(1,037.6 to 1,387.6)                  | 266.7<br>(228.7 to 312.5)                          | 118.2<br>(79.1 to 167.1)                | 42.7<br>(38.9 to 46.4)                            | 0.1<br>(-1.6 to 1.9)                                |
| Gout                                                       | 72.6<br>(64.5 to 82.2)                           | 15.3<br>(13.4 to 17.3)                             | 2.2<br>(1.5 to 3.2)                     | 41.1<br>(21.2 to 65.7)                            | -1.4<br>(-14.0 to 13.5)                             |
| Other musculoskeletal disorders                            | 913.8<br>(565.2 to 1,296.5)                      | 1,235.1<br>(993.9 to 1,507.7)                      | 77.8<br>(38.3 to 127.4)                 | 48.0<br>(24.7 to 78.5)                            | 0.2<br>(-13.5 to 15.2)                              |
| <b>Other non-communicable diseases</b>                     | <b>27,807.9</b><br><b>(27,132.1 to 28,475.8)</b> | <b>94,828.6†</b><br><b>(88,415.9 to 101,578.5)</b> | <b>684.9</b><br><b>(471.1 to 958.9)</b> | <b>38.6</b><br><b>(36.5 to 40.7)</b>              | <b>-0.8</b><br><b>(-2.1 to 0.4)</b>                 |
| Congenital anomalies                                       | 688.3<br>(624.6 to 771.8)                        | --                                                 | 88.2<br>(62.9 to 118.0)                 | 47.5<br>(39.6 to 55.7)                            | 3.6<br>(-1.6 to 9.3)                                |
| Neural tube defects                                        | 62.5<br>(54.8 to 71.6)                           | --                                                 | 18.6<br>(12.8 to 25.2)                  | 45.3<br>(28.9 to 63.7)                            | 2.7<br>(-8.1 to 14.4)                               |
| Congenital heart anomalies                                 | 130.3<br>(111.1 to 152.6)                        | --                                                 | 5.9<br>(2.6 to 10.0)                    | 45.0<br>(28.1 to 63.1)                            | 1.1<br>(-9.6 to 12.1)                               |
| Orofacial clefts                                           | 17.9<br>(15.6 to 20.4)                           | --                                                 | 0.3<br>(0.2 to 0.4)                     | 33.7<br>(18.8 to 52.2)                            | -7.2<br>(-17.6 to 5.5)                              |
| Down's syndrome                                            | 18.6<br>(16.0 to 21.9)                           | --                                                 | 1.6<br>(1.1 to 2.3)                     | 46.6<br>(34.3 to 57.8)                            | 3.6<br>(-4.8 to 11.3)                               |
| Turner syndrome                                            | 17.8<br>(15.0 to 20.7)                           | --                                                 | 0.3<br>(0.1 to 0.5)                     | 27.5<br>(-9.0 to 83.8)                            | -8.6<br>(-33.1 to 27.2)                             |
| Klinefelter syndrome                                       | 22.5<br>(19.0 to 26.5)                           | --                                                 | 0.1<br>(0.1 to 0.2)                     | 37.3<br>(4.8 to 79.8)                             | -0.3<br>(-22.8 to 28.2)                             |



| Cause                                         | Prevalence in thousands (95% UI)                 | Incidence in thousands (95% UI)                           | YLDs in thousands (95% UI)              |                                                   |                                                     |
|-----------------------------------------------|--------------------------------------------------|-----------------------------------------------------------|-----------------------------------------|---------------------------------------------------|-----------------------------------------------------|
|                                               | 2016 counts                                      | 2016 counts                                               | 2016 counts                             | Percentage change in counts between 2006 and 2016 | Percentage change in age-standardised rates between |
| Other chromosomal abnormalities               | 155.8<br>(131.1 to 185.2)                        | --                                                        | 15.2<br>(10.1 to 21.3)                  | 47.4<br>(31.0 to 66.5)                            | 1.4<br>(-10.1 to 13.8)                              |
| Congenital musculoskeletal and limb anomalies | 72.3<br>(65.6 to 79.9)                           | --                                                        | 10.8<br>(7.2 to 15.1)                   | 41.6<br>(27.2 to 59.1)                            | 1.1<br>(-7.9 to 11.3)                               |
| Urogenital congenital anomalies               | 52.2<br>(45.3 to 59.8)                           | --                                                        | 1.8<br>(1.1 to 2.8)                     | 44.1<br>(26.7 to 64.1)                            | 0.4<br>(-11.4 to 13.8)                              |
| Digestive congenital anomalies                | 48.7<br>(42.6 to 55.0)                           | --                                                        | 2.1<br>(1.3 to 3.0)                     | 43.5<br>(20.2 to 70.9)                            | 1.1<br>(-13.4 to 17.6)                              |
| Other congenital anomalies                    | 187.9<br>(112.5 to 290.8)                        | --                                                        | 31.6<br>(19.3 to 48.9)                  | 52.5<br>(39.4 to 68.7)                            | 6.7<br>(-2.4 to 17.5)                               |
| Skin and subcutaneous diseases                | 10,492.2<br>(10,209.4 to 10,827.6)               | 21,085.5<br>(20,057.2 to 22,289.0)                        | 274.1<br>(183.2 to 396.1)               | 39.6<br>(36.0 to 43.3)                            | 0.7<br>(-1.5 to 2.8)                                |
| Dermatitis                                    | 1,654.6<br>(1,522.7 to 1,804.2)                  | 2,179.3<br>(2,001.0 to 2,368.6)                           | 63.3<br>(37.3 to 104.4)                 | 44.6<br>(35.8 to 52.9)                            | 1.0<br>(-3.8 to 5.7)                                |
| Psoriasis                                     | 202.7<br>(192.2 to 213.1)                        | 32.8<br>(31.2 to 34.3)                                    | 17.5<br>(12.3 to 23.2)                  | 39.7<br>(25.5 to 55.8)                            | 0.3<br>(-7.9 to 9.2)                                |
| Cellulitis                                    | 18.1<br>(16.7 to 19.8)                           | 366.1<br>(340.2 to 394.2)                                 | 1.0<br>(0.6 to 1.5)                     | 41.3<br>(9.8 to 88.4)                             | 0.8<br>(-18.4 to 25.8)                              |
| Pyoderma                                      | 71.2<br>(68.7 to 73.9)                           | 1,612.8<br>(1,553.9 to 1,674.4)                           | 0.4<br>(0.2 to 0.8)                     | 44.2<br>(30.9 to 58.0)                            | 0.5<br>(-6.5 to 8.3)                                |
| Scabies                                       | 524.2<br>(448.4 to 609.4)                        | 1,608.0<br>(1,367.4 to 1,885.2)                           | 13.5<br>(7.6 to 21.7)                   | 36.6<br>(29.4 to 44.1)                            | -2.8<br>(-7.3 to 1.6)                               |
| Fungal skin diseases                          | 2,294.6<br>(2,054.6 to 2,582.1)                  | 7,757.6<br>(6,930.8 to 8,634.7)                           | 12.9<br>(5.2 to 26.7)                   | 40.9<br>(38.2 to 43.8)                            | -0.1<br>(-1.3 to 1.2)                               |
| Viral skin diseases                           | 1,152.1<br>(1,092.1 to 1,213.9)                  | 1,616.9<br>(1,526.9 to 1,713.2)                           | 35.3<br>(21.9 to 52.6)                  | 38.5<br>(33.4 to 44.1)                            | 0.0<br>(-3.2 to 3.5)                                |
| Acne vulgaris                                 | 3,239.4<br>(2,830.1 to 3,693.7)                  | 2,364.1<br>(1,866.2 to 3,069.9)                           | 83.2<br>(54.8 to 121.9)                 | 32.5<br>(25.7 to 40.8)                            | 0.8<br>(-4.1 to 6.9)                                |
| Alopecia areata                               | 63.6<br>(60.6 to 66.6)                           | 113.3<br>(108.0 to 118.8)                                 | 2.1<br>(1.3 to 3.1)                     | 38.5<br>(22.9 to 56.2)                            | -0.1<br>(-10.3 to 11.1)                             |
| Pruritus                                      | 289.3<br>(253.1 to 328.5)                        | 236.7<br>(210.2 to 267.6)                                 | 3.1<br>(1.4 to 5.6)                     | 43.9<br>(35.8 to 52.9)                            | 1.5<br>(-3.3 to 6.6)                                |
| Urticaria                                     | 488.5<br>(413.5 to 583.0)                        | 889.9<br>(753.7 to 1,052.2)                               | 29.6<br>(18.4 to 43.1)                  | 49.2<br>(40.5 to 58.8)                            | 0.1<br>(-4.7 to 5.5)                                |
| Decubitus ulcer                               | 6.5<br>(5.9 to 7.2)                              | 23.5<br>(21.0 to 26.3)                                    | 1.1<br>(0.7 to 1.4)                     | 44.0<br>(30.1 to 58.5)                            | 6.0<br>(-8.5 to 21.2)                               |
| Other skin and subcutaneous diseases          | 2,013.6<br>(1,951.8 to 2,075.2)                  | 2,284.7<br>(2,211.2 to 2,360.4)                           | 11.1<br>(5.3 to 20.3)                   | 49.8<br>(45.3 to 54.3)                            | 5.3<br>(2.9 to 7.9)                                 |
| Sense organ diseases                          | 7,001.1<br>(6,733.3 to 7,294.5)                  | 3,585.9 <sup>†</sup><br>(3,330.3 to 3,865.2)              | 253.8<br>(177.0 to 352.4)               | 34.4<br>(30.9 to 38.2)                            | -2.6<br>(-4.7 to -0.5)                              |
| Glaucoma                                      | 24.6<br>(19.6 to 30.4)                           | --                                                        | 2.2<br>(1.4 to 3.2)                     | 33.4<br>(20.3 to 47.7)                            | 0.5<br>(-9.2 to 10.8)                               |
| Cataract                                      | 308.7<br>(258.9 to 364.2)                        | --                                                        | 21.1<br>(14.6 to 29.5)                  | 29.5<br>(22.2 to 36.4)                            | -3.6<br>(-8.7 to 1.8)                               |
| Macular degeneration                          | 25.2<br>(18.8 to 34.0)                           | --                                                        | 1.6<br>(1.0 to 2.4)                     | 31.9<br>(17.6 to 47.6)                            | -0.1<br>(-10.3 to 11.5)                             |
| Refraction and accommodation disorders        | 4,530.5<br>(4,157.4 to 4,940.7)                  | --                                                        | 82.4<br>(50.0 to 131.3)                 | 35.9<br>(29.9 to 42.2)                            | -1.9<br>(-6.0 to 2.6)                               |
| Age-related and other hearing loss            | 3,161.7<br>(2,934.9 to 3,404.2)                  | --                                                        | 114.7<br>(78.5 to 159.8)                | 33.2<br>(27.4 to 40.0)                            | -3.2<br>(-6.2 to -0.2)                              |
| Other vision loss                             | 157.6<br>(134.9 to 187.1)                        | --                                                        | 10.9<br>(7.3 to 15.1)                   | 36.8<br>(25.6 to 48.4)                            | -1.8<br>(-8.4 to 5.4)                               |
| Other sense organ diseases                    | 698.2<br>(647.7 to 749.4)                        | 3,585.9<br>(3,330.3 to 3,865.2)                           | 20.9<br>(13.1 to 31.6)                  | 39.8<br>(33.4 to 47.4)                            | -0.2<br>(-4.0 to 3.9)                               |
| Oral disorders                                | 21,210.3<br>(20,107.9 to 22,255.9)               | 70,157.1 <sup>†</sup><br>(63,872.8 to 76,728.9)           | 68.9<br>(41.4 to 106.7)                 | 40.0<br>(37.3 to 42.8)                            | 0.1<br>(-1.5 to 1.9)                                |
| Caries of deciduous teeth                     | 4,911.3<br>(3,714.7 to 6,202.0)                  | 18,327.3<br>(12,869.8 to 24,408.4)                        | 1.2<br>(0.5 to 2.3)                     | 51.8<br>(35.3 to 70.2)                            | -0.2<br>(-10.6 to 12.0)                             |
| Caries of permanent teeth                     | 14,854.1<br>(14,008.7 to 15,673.8)               | 51,425.7<br>(48,795.6 to 53,677.9)                        | 8.7<br>(3.9 to 17.1)                    | 31.1<br>(26.5 to 35.4)                            | -3.0<br>(-6.0 to -0.5)                              |
| Periodontal disease                           | 2,602.7<br>(2,121.3 to 3,138.2)                  | 327.6<br>(263.6 to 405.0)                                 | 16.8<br>(6.7 to 34.8)                   | 44.5<br>(39.2 to 50.3)                            | 0.1<br>(-3.1 to 3.7)                                |
| Edentulism and severe tooth loss              | 936.8<br>(804.1 to 1,075.9)                      | 76.5<br>(64.2 to 88.2)                                    | 25.5<br>(16.6 to 36.5)                  | 41.8<br>(36.5 to 47.0)                            | 0.8<br>(-2.3 to 4.1)                                |
| Other oral disorders                          | 571.4<br>(545.4 to 600.1)                        | --                                                        | 16.7<br>(10.3 to 25.0)                  | 37.2<br>(32.1 to 42.5)                            | -0.0<br>(-3.0 to 3.3)                               |
| <b>Injuries</b>                               | <b>13,220.0</b><br><b>(10,013.9 to 17,185.0)</b> | <b>3,680.2<sup>†</sup></b><br><b>(3,474.4 to 3,901.5)</b> | <b>400.7</b><br><b>(218.6 to 664.6)</b> | <b>30.6</b><br><b>(18.9 to 44.8)</b>              | <b>-4.1</b><br><b>(-10.9 to 4.4)</b>                |
| <b>Transport injuries</b>                     | <b>679.0</b><br><b>(626.7 to 736.0)</b>          | <b>318.3</b><br><b>(281.9 to 357.8)</b>                   | <b>38.8</b><br><b>(21.1 to 65.7)</b>    | <b>42.3</b><br><b>(33.1 to 53.8)</b>              | <b>1.3</b><br><b>(-3.9 to 7.8)</b>                  |
| Road injuries                                 | 493.2<br>(457.0 to 529.9)                        | 250.2<br>(218.2 to 286.4)                                 | 28.0<br>(15.3 to 47.0)                  | 44.4<br>(35.2 to 56.6)                            | 2.3<br>(-2.9 to 8.9)                                |
| Pedestrian road injuries                      | 110.6<br>(96.9 to 126.1)                         | 40.1<br>(32.5 to 48.4)                                    | 6.2<br>(3.3 to 10.7)                    | 35.9<br>(27.0 to 47.1)                            | -3.9<br>(-8.7 to 2.1)                               |
| Cyclist road injuries                         | 77.4<br>(64.3 to 92.2)                           | 43.6<br>(33.4 to 55.6)                                    | 4.0<br>(2.2 to 6.8)                     | 48.2<br>(37.9 to 61.0)                            | 6.6<br>(0.7 to 13.9)                                |
| Motorcyclist road injuries                    | 68.3<br>(57.3 to 81.9)                           | 22.8<br>(17.8 to 28.8)                                    | 3.7<br>(1.9 to 6.4)                     | 50.2<br>(39.4 to 64.4)                            | 7.6<br>(1.3 to 15.4)                                |
| Motor vehicle road injuries                   | 195.1<br>(166.6 to 223.0)                        | 117.0<br>(98.4 to 137.1)                                  | 12.0<br>(6.7 to 19.5)                   | 45.5<br>(36.8 to 56.9)                            | 2.6<br>(-2.3 to 8.9)                                |
| Other road injuries                           | 41.8<br>(35.5 to 49.5)                           | 26.7<br>(19.9 to 35.1)                                    | 2.1<br>(1.2 to 3.6)                     | 48.1<br>(39.2 to 59.5)                            | 5.3<br>(0.4 to 11.6)                                |
| Other transport injuries                      | 185.8<br>(153.2 to 226.1)                        | 68.1<br>(55.2 to 86.2)                                    | 10.8<br>(5.7 to 18.6)                   | 37.0<br>(27.2 to 48.8)                            | -1.7<br>(-7.4 to 4.7)                               |
| <b>Unintentional injuries</b>                 | <b>5,019.7</b><br><b>(4,650.2 to 5,401.3)</b>    | <b>3,173.6</b><br><b>(2,975.0 to 3,398.7)</b>             | <b>169.0</b><br><b>(95.3 to 273.5)</b>  | <b>36.1</b><br><b>(27.6 to 46.9)</b>              | <b>-3.6</b><br><b>(-8.4 to 2.6)</b>                 |
| Falls                                         | 1,368.9<br>(1,165.9 to 1,558.1)                  | 855.8<br>(732.6 to 1,031.2)                               | 55.4<br>(31.5 to 90.4)                  | 40.3<br>(30.5 to 51.8)                            | -0.2<br>(-5.7 to 6.7)                               |
| Drowning                                      | 9.7<br>(8.3 to 11.3)                             | 2.9<br>(2.4 to 3.3)                                       | 0.6<br>(0.3 to 1.0)                     | 27.5<br>(16.6 to 41.5)                            | -8.6<br>(-14.8 to -0.9)                             |
| Fire, heat, and hot substances                | 419.5<br>(356.2 to 501.8)                        | 76.4<br>(63.8 to 90.3)                                    | 12.0<br>(6.1 to 21.0)                   | 34.6<br>(24.2 to 46.8)                            | -3.5<br>(-9.2 to 4.2)                               |
| Poisonings                                    | 19.1<br>(15.8 to 23.1)                           | 39.2<br>(30.6 to 49.0)                                    | 1.9<br>(1.0 to 3.3)                     | 56.9<br>(42.9 to 72.7)                            | 13.8<br>(5.3 to 22.7)                               |
| Exposure to mechanical forces                 | 1,215.4<br>(1,042.0 to 1,487.6)                  | 689.4<br>(588.1 to 785.0)                                 | 31.9<br>(17.8 to 53.6)                  | 35.7<br>(27.5 to 46.0)                            | -4.3<br>(-9.1 to 1.4)                               |
| Unintentional firearm injuries                | 48.5<br>(39.1 to 60.4)                           | 17.3<br>(12.9 to 22.6)                                    | 2.2<br>(1.1 to 3.9)                     | 34.2<br>(25.6 to 45.6)                            | -5.7<br>(-10.7 to 0.7)                              |
| Unintentional suffocation                     | 27.1<br>(20.9 to 34.5)                           | 9.6<br>(6.5 to 13.7)                                      | 1.1<br>(0.5 to 2.1)                     | 39.7<br>(27.0 to 56.1)                            | 0.3<br>(-7.2 to 10.1)                               |
| Other exposure to mechanical forces           | 1,139.7<br>(966.5 to 1,409.9)                    | 662.5<br>(565.5 to 756.8)                                 | 28.6<br>(16.1 to 47.6)                  | 35.7<br>(27.6 to 45.7)                            | -4.3<br>(-9.1 to 1.2)                               |

| Cause                                                                               | Prevalence in thousands (95% UI)               | Incidence in thousands (95% UI)          | YLDs in thousands (95% UI)             |                                                   |                                                     |
|-------------------------------------------------------------------------------------|------------------------------------------------|------------------------------------------|----------------------------------------|---------------------------------------------------|-----------------------------------------------------|
|                                                                                     | 2016 counts                                    | 2016 counts                              | 2016 counts                            | Percentage change in counts between 2006 and 2016 | Percentage change in age-standardised rates between |
| Adverse effects of medical treatment                                                | 12.8<br>(9.7 to 16.4)                          | 166.7<br>(138.2 to 198.7)                | 1.7<br>(1.0 to 2.6)                    | 56.5<br>(47.1 to 66.5)                            | 3.1<br>(-0.8 to 7.2)                                |
| Animal contact                                                                      | 192.9<br>(169.1 to 225.5)                      | 323.3<br>(270.2 to 381.1)                | 6.5<br>(4.0 to 10.3)                   | 30.4<br>(22.6 to 39.3)                            | -8.3<br>(-13.4 to -3.0)                             |
| Venomous animal contact                                                             | 71.5<br>(58.3 to 85.8)                         | 130.3<br>(101.9 to 166.8)                | 4.4<br>(2.5 to 7.2)                    | 38.2<br>(27.7 to 50.2)                            | -0.9<br>(-7.7 to 6.5)                               |
| Non-venomous animal contact                                                         | 121.4<br>(100.3 to 149.1)                      | 193.0<br>(157.3 to 234.1)                | 2.1<br>(1.3 to 3.2)                    | 16.5<br>(11.4 to 21.8)                            | -19.0<br>(-22.2 to -15.9)                           |
| Foreign body                                                                        | 266.8<br>(222.5 to 320.8)                      | 236.1<br>(204.5 to 276.8)                | 10.1<br>(5.4 to 17.7)                  | 36.9<br>(26.6 to 48.7)                            | -2.8<br>(-8.7 to 4.2)                               |
| Pulmonary aspiration and foreign body in airway                                     | 73.1<br>(53.8 to 98.2)                         | 44.1<br>(34.5 to 56.4)                   | 3.4<br>(1.8 to 6.3)                    | 34.6<br>(23.6 to 46.8)                            | -3.6<br>(-9.9 to 3.5)                               |
| Foreign body in eyes                                                                | 14.6<br>(7.6 to 22.7)                          | 82.7<br>(62.6 to 109.6)                  | 0.8<br>(0.4 to 1.5)                    | 42.3<br>(36.0 to 49.3)                            | 0.6<br>(-2.8 to 4.9)                                |
| Foreign body in other body part                                                     | 179.2<br>(145.1 to 228.7)                      | 109.3<br>(90.0 to 132.4)                 | 5.8<br>(3.0 to 10.2)                   | 37.5<br>(26.7 to 50.6)                            | -2.8<br>(-9.1 to 4.7)                               |
| Environmental heat and cold exposure                                                | 281.2<br>(235.8 to 332.6)                      | 115.2<br>(93.2 to 141.8)                 | 11.2<br>(5.9 to 19.4)                  | 33.2<br>(23.5 to 44.6)                            | -5.6<br>(-11.0 to 1.2)                              |
| Other unintentional injuries                                                        | 1,233.5<br>(1,022.2 to 1,467.8)                | 668.6<br>(577.6 to 774.3)                | 37.7<br>(21.2 to 61.4)                 | 31.4<br>(24.0 to 41.6)                            | -7.3<br>(-11.6 to -1.4)                             |
| <b>Self-harm and interpersonal violence</b>                                         | <b>1,073.5</b><br><b>(957.8 to 1,197.1)</b>    | <b>187.2†</b><br><b>(159.2 to 216.8)</b> | <b>18.3</b><br><b>(11.9 to 27.5)</b>   | <b>38.2</b><br><b>(32.1 to 45.3)</b>              | <b>-0.2</b><br><b>(-4.1 to 4.6)</b>                 |
| Self-harm                                                                           | 26.6<br>(22.6 to 30.8)                         | 14.3<br>(11.7 to 16.9)                   | 1.4<br>(0.7 to 2.5)                    | 34.1<br>(24.8 to 46.4)                            | -4.9<br>(-9.8 to 1.5)                               |
| Self-harm by firearm                                                                | 1.5<br>(1.2 to 1.8)                            | 0.4<br>(0.2 to 0.7)                      | 0.1<br>(< 0.05 to 0.1)                 | 20.1<br>(9.3 to 33.8)                             | -14.5<br>(-20.8 to -6.4)                            |
| Self-harm by other specified means                                                  | 25.0<br>(21.1 to 29.2)                         | 13.9<br>(11.4 to 16.4)                   | 1.3<br>(0.7 to 2.4)                    | 34.8<br>(25.5 to 47.1)                            | -4.4<br>(-9.4 to 1.8)                               |
| Interpersonal violence                                                              | 1,047.0<br>(931.4 to 1,168.6)                  | 173.0†<br>(145.6 to 202.3)               | 16.9<br>(11.1 to 25.2)                 | 38.6<br>(32.5 to 45.5)                            | 0.3<br>(-3.7 to 4.8)                                |
| Assault by firearm                                                                  | 18.7<br>(15.4 to 22.3)                         | 8.3<br>(6.1 to 11.1)                     | 0.9<br>(0.5 to 1.6)                    | 38.2<br>(28.1 to 51.6)                            | -2.7<br>(-8.4 to 4.9)                               |
| Assault by sharp object                                                             | 54.0<br>(44.0 to 64.7)                         | 29.2<br>(21.8 to 38.0)                   | 1.7<br>(0.9 to 2.8)                    | 46.6<br>(36.4 to 58.7)                            | 4.3<br>(-2.2 to 11.6)                               |
| Sexual violence                                                                     | 795.6<br>(689.8 to 914.6)                      | --                                       | 6.9<br>(4.5 to 9.8)                    | 31.3<br>(25.1 to 39.1)                            | -3.1<br>(-7.2 to 1.9)                               |
| Assault by other means                                                              | 178.7<br>(148.9 to 216.3)                      | 135.4<br>(112.7 to 159.3)                | 7.5<br>(4.2 to 12.4)                   | 44.1<br>(34.3 to 56.1)                            | 2.1<br>(-3.5 to 9.1)                                |
| <b>Forces of nature, conflict and terrorism, and executions and police conflict</b> | <b>7,243.4</b><br><b>(4,066.3 to 11,155.5)</b> | <b>1.2†</b><br><b>(0.8 to 1.7)</b>       | <b>174.6</b><br><b>(83.3 to 294.1)</b> | <b>22.8</b><br><b>(7.1 to 42.9)</b>               | <b>-6.1</b><br><b>(-15.1 to 5.9)</b>                |
| Exposure to forces of nature                                                        | 0.3<br>(0.1 to 0.6)                            | --                                       | < 0.05<br>(< 0.05 to < 0.05)           | 184.7<br>(153.3 to 279.2)                         | 95.8<br>(78.0 to 171.1)                             |
| Conflict and terrorism                                                              | 7,240.7<br>(4,063.5 to 11,151.4)               | --                                       | 174.6<br>(83.2 to 293.9)               | 22.8<br>(7.1 to 42.9)                             | -6.1<br>(-15.2 to 5.9)                              |
| Executions and police conflict                                                      | 2.3<br>(1.4 to 3.8)                            | 1.2<br>(0.8 to 1.7)                      | 0.1<br>(< 0.05 to 0.2)                 | 45.2<br>(34.3 to 59.0)                            | 11.4<br>(1.4 to 21.9)                               |
| <b>Impairments</b>                                                                  | --                                             | --                                       | --                                     | --                                                | --                                                  |
| Anaemia                                                                             | 12,463.2<br>(10,442.3 to 14,356.3)             | --                                       | 355.6<br>(224.7 to 534.2)              | 37.9<br>(13.4 to 67.6)                            | -2.9<br>(-17.4 to 12.9)                             |
| Developmental intellectual disability                                               | 1,222.5<br>(931.5 to 1,622.4)                  | --                                       | 160.2<br>(100.0 to 347.9)              | 43.0<br>(22.1 to 74.9)                            | 1.9<br>(-12.3 to 22.7)                              |
| Epilepsy                                                                            | 341.5<br>(193.0 to 734.7)                      | --                                       | 140.7<br>(72.9 to 332.8)               | 48.9<br>(-13.7 to 148.4)                          | 6.0<br>(-40.0 to 78.4)                              |
| Guillain-Barre syndrome                                                             | 0.3<br>(0.2 to 0.4)                            | --                                       | 0.1<br>(0.1 to 0.1)                    | 40.4<br>(37.8 to 43.6)                            | -0.0<br>(-0.1 to 0.1)                               |
| Hearing loss                                                                        | 3,768.8<br>(3,540.8 to 4,009.1)                | --                                       | 153.1<br>(107.0 to 208.4)              | 34.9<br>(30.4 to 40.0)                            | -3.0<br>(-5.6 to -0.5)                              |
| Heart failure                                                                       | 168.9<br>(148.7 to 192.9)                      | --                                       | 15.4<br>(10.9 to 20.7)                 | 37.8<br>(28.6 to 47.2)                            | 1.9<br>(-5.3 to 9.2)                                |
| Infertility                                                                         | 515.9<br>(409.6 to 649.3)                      | --                                       | 3.3<br>(1.4 to 6.4)                    | 38.7<br>(31.5 to 46.8)                            | -0.4<br>(-5.3 to 4.9)                               |
| Pelvic inflammatory disease                                                         | 16.4<br>(12.7 to 20.6)                         | --                                       | 2.1<br>(1.4 to 3.2)                    | 32.7<br>(11.2 to 59.1)                            | -4.5<br>(-18.8 to 13.2)                             |
| Vision loss                                                                         | 5,476.6<br>(5,026.2 to 6,031.6)                | --                                       | 200.4<br>(129.9 to 372.9)              | 41.9<br>(27.8 to 64.2)                            | -0.2<br>(-6.2 to 8.3)                               |

We did not calculate incidence for the nine impairments, certain NTDs, and causes with only birth prevalence. Blank cells mean that no estimate is available.

† Incidence for aggregate causes represents the sum of the incidence of the causes below the aggregate.

‡ Incidence estimates for stroke represent first-ever stroke only.

^ Incidence of HIV/AIDS represents new infections of HIV only and does not include new infections of Tuberculosis in HIV positive cases.

SR Table 14: Prevalence, incidence, and YLDs for 2016, percentage change of YLD counts and percentage change of age-standardised YLD rates between 2006 and 2016 by cause and impairments, for all ages, Ireland.

| Cause                                                                                | Prevalence in thousands (95% UI)       | Incidence in thousands (95% UI)                            | YLDs in thousands (95% UI)                                |                                                   |                                                     |
|--------------------------------------------------------------------------------------|----------------------------------------|------------------------------------------------------------|-----------------------------------------------------------|---------------------------------------------------|-----------------------------------------------------|
|                                                                                      | 2016 counts                            | 2016 counts                                                | 2016 counts                                               | Percentage change in counts between 2006 and 2016 | Percentage change in age-standardised rates between |
| <b>All causes</b>                                                                    | <b>4,321.6</b><br>(4,292.1 to 4,353.0) | <b>31,241.1†</b><br>(29,236.1 to 33,362.3)                 | <b>549.7</b><br>(408.9 to 711.6)                          | <b>12.0</b><br>(10.5 to 13.7)                     | <b>-0.1</b><br>(-1.5 to 1.4)                        |
| <b>Communicable, maternal, neonatal, and nutritional disorders</b>                   | <b>1,432.5</b><br>(1,355.9 to 1,512.3) | <b>18,533.5†</b><br>(16,536.7 to 20,557.1)                 | <b>18.1</b><br>(12.7 to 25.0)                             | <b>7.7</b><br>(2.2 to 13.7)                       | <b>0.0</b><br>(-5.0 to 5.7)                         |
| <b>HIV/AIDS and tuberculosis</b>                                                     | <b>483.4</b><br>(394.9 to 561.6)       | <b>0.8†</b><br>(0.4 to 1.1)                                | <b>0.5</b><br>(0.3 to 1.0)                                | <b>23.3</b><br>(5.5 to 41.5)                      | <b>12.0</b><br>(-4.3 to 28.8)                       |
| Tuberculosis                                                                         | 427.5<br>(347.0 to 520.2)              | 0.3†<br>(0.2 to 0.4)                                       | 0.1<br>( $< 0.05$ to 0.1)                                 | -14.7<br>(-26.2 to -2.1)                          | -20.3<br>(-30.7 to -10.0)                           |
| Drug-susceptible tuberculosis                                                        | 0.2<br>(0.2 to 0.3)                    | 0.3<br>(0.2 to 0.4)                                        | 0.1<br>( $< 0.05$ to 0.1)                                 | -14.9<br>(-26.5 to -2.2)                          | -20.4<br>(-30.9 to -10.1)                           |
| Multidrug-resistant tuberculosis without extensive drug resistance                   | $< 0.05$<br>( $< 0.05$ to $< 0.05$ )   | $< 0.05$<br>( $< 0.05$ to $< 0.05$ )                       | $< 0.05$<br>( $< 0.05$ to $< 0.05$ )                      | -3.5<br>(-37.1 to 46.7)                           | -9.8<br>(-41.1 to 38.1)                             |
| Extensively drug-resistant tuberculosis                                              | $< 0.05$<br>( $< 0.05$ to $< 0.05$ )   | $< 0.05$<br>( $< 0.05$ to $< 0.05$ )                       | $< 0.05$<br>( $< 0.05$ to $< 0.05$ )                      | 107.6<br>(35.2 to 215.7)                          | 94.0<br>(26.8 to 196.9)                             |
| Latent tuberculosis infection                                                        | 427.3<br>(346.8 to 520.0)              | --                                                         | --                                                        | --                                                | --                                                  |
| HIV/AIDS                                                                             | 5.3<br>(2.5 to 8.9)                    | 0.5 <sup>^</sup><br>(0.1 to 0.8)                           | 0.5<br>(0.2 to 0.8)                                       | 33.7<br>(11.4 to 57.7)                            | 21.2<br>(-0.1 to 43.2)                              |
| Drug-susceptible HIV/AIDS - Tuberculosis                                             | $< 0.05$<br>( $< 0.05$ to $< 0.05$ )   | $< 0.05$<br>( $< 0.05$ to $< 0.05$ )                       | $< 0.05$<br>( $< 0.05$ to $< 0.05$ )                      | -14.4<br>(-22.1 to -6.0)                          | -21.9<br>(-28.9 to -14.2)                           |
| Multidrug-resistant HIV/AIDS - Tuberculosis without extensive drug resistance        | $< 0.05$<br>( $< 0.05$ to $< 0.05$ )   | $< 0.05$<br>( $< 0.05$ to $< 0.05$ )                       | $< 0.05$<br>( $< 0.05$ to $< 0.05$ )                      | -1.1<br>(-36.2 to 49.7)                           | -9.8<br>(-41.7 to 36.6)                             |
| Extensively drug-resistant HIV/AIDS - Tuberculosis                                   | $< 0.05$<br>( $< 0.05$ to $< 0.05$ )   | $< 0.05$<br>( $< 0.05$ to $< 0.05$ )                       | $< 0.05$<br>( $< 0.05$ to $< 0.05$ )                      | 112.7<br>(37.2 to 222.0)                          | 94.1<br>(25.2 to 193.9)                             |
| HIV/AIDS resulting in other diseases                                                 | 5.3<br>(2.5 to 8.9)                    | 0.5<br>(0.1 to 0.8)                                        | 0.5<br>(0.2 to 0.8)                                       | 35.3<br>(12.1 to 60.2)                            | 22.6<br>(0.5 to 45.4)                               |
| <b>Diarrhoea, lower respiratory infections, and other common infectious diseases</b> | <b>289.3</b><br>(267.8 to 311.2)       | <b>18,343.7†</b><br>(16,348.8 to 20,358.5)                 | <b>8.8</b><br>(5.8 to 13.0)                               | <b>7.7</b><br>(3.6 to 11.5)                       | <b>-0.9</b><br>(-4.2 to 2.2)                        |
| Diarrhoeal diseases                                                                  | 12.3<br>(11.3 to 13.5)                 | 813.5<br>(746.0 to 891.6)                                  | 1.4<br>(1.0 to 1.9)                                       | 8.9<br>(0.9 to 18.0)                              | -1.0<br>(-8.1 to 7.5)                               |
| Intestinal infectious diseases                                                       | $< 0.05$<br>( $< 0.05$ to $< 0.05$ )   | $< 0.05†$<br>( $< 0.05$ to $< 0.05$ )                      | $< 0.05$<br>( $< 0.05$ to $< 0.05$ )                      | -7.2<br>(-21.1 to 7.5)                            | -18.1<br>(-30.2 to -5.0)                            |
| Typhoid fever                                                                        | $< 0.05$<br>( $< 0.05$ to $< 0.05$ )   | $< 0.05$<br>( $< 0.05$ to $< 0.05$ )                       | $< 0.05$<br>( $< 0.05$ to $< 0.05$ )                      | 6.0<br>(-12.6 to 27.6)                            | -3.7<br>(-20.7 to 16.1)                             |
| Paratyphoid fever                                                                    | $< 0.05$<br>( $< 0.05$ to $< 0.05$ )   | $< 0.05$<br>( $< 0.05$ to $< 0.05$ )                       | $< 0.05$<br>( $< 0.05$ to $< 0.05$ )                      | -5.5<br>(-21.1 to 11.9)                           | -17.0<br>(-31.0 to -2.1)                            |
| Other intestinal infectious diseases                                                 | --                                     | --                                                         | $< 0.05$<br>( $< 0.05$ to $< 0.05$ )                      | -56.4<br>(-72.4 to -34.0)                         | -59.3<br>(-75.1 to -37.3)                           |
| Lower respiratory infections                                                         | 2.5<br>(2.3 to 2.7)                    | 108.4<br>(99.2 to 118.8)                                   | 0.1<br>(0.1 to 0.2)                                       | 9.0<br>(-5.0 to 23.7)                             | -9.3<br>(-20.8 to 2.9)                              |
| Upper respiratory infections                                                         | 221.4<br>(197.2 to 246.6)              | 16,980.4<br>(15,006.3 to 19,028.0)                         | 5.5<br>(3.2 to 8.5)                                       | 7.7<br>(2.2 to 12.9)                              | 0.1<br>(-4.7 to 4.5)                                |
| Otitis media                                                                         | 52.0<br>(43.8 to 63.3)                 | 354.0<br>(235.2 to 568.2)                                  | 1.3<br>(0.8 to 2.0)                                       | 6.2<br>(-0.8 to 13.6)                             | -2.8<br>(-8.9 to 3.4)                               |
| Meningitis                                                                           | 0.6<br>(0.5 to 0.8)                    | 0.1<br>(0.1 to 0.1)                                        | 0.1<br>(0.1 to 0.1)                                       | 3.8<br>(-2.8 to 39.5)                             | -5.4<br>(-10.7 to 17.9)                             |
| Pneumococcal meningitis                                                              | 0.1<br>(0.1 to 0.2)                    | $< 0.05$<br>( $< 0.05$ to $< 0.05$ )                       | $< 0.05$<br>( $< 0.05$ to $< 0.05$ )                      | -5.9<br>(-13.3 to 1.5)                            | -13.8<br>(-20.4 to -7.3)                            |
| H influenzae type B meningitis                                                       | 0.1<br>(0.1 to 0.1)                    | $< 0.05$<br>( $< 0.05$ to $< 0.05$ )                       | $< 0.05$<br>( $< 0.05$ to $< 0.05$ )                      | 1.6<br>(-5.1 to 7.1)                              | -6.7<br>(-12.7 to -1.5)                             |
| Meningococcal infection                                                              | 0.1<br>(0.1 to 0.3)                    | $< 0.05$<br>( $< 0.05$ to $< 0.05$ )                       | $< 0.05$<br>( $< 0.05$ to $< 0.05$ )                      | 20.4<br>(-6.3 to 230.3)                           | 4.6<br>(-14.9 to 141.2)                             |
| Other meningitis                                                                     | 0.3<br>(0.2 to 0.4)                    | 0.1<br>(0.1 to 0.1)                                        | $< 0.05$<br>( $< 0.05$ to 0.1)                            | 3.9<br>(-1.3 to 9.0)                              | -3.8<br>(-8.9 to 0.6)                               |
| Encephalitis                                                                         | 1.8<br>(1.3 to 2.6)                    | 1.3<br>(1.1 to 1.4)                                        | 0.2<br>(0.1 to 0.3)                                       | 10.3<br>(6.9 to 13.7)                             | -0.6<br>(-3.5 to 2.5)                               |
| Diphtheria                                                                           | $< 0.05$<br>( $< 0.05$ to $< 0.05$ )   | $< 0.05$<br>( $< 0.05$ to $< 0.05$ )                       | $< 0.05$<br>( $< 0.05$ to $< 0.05$ )                      | -32.4<br>(-61.9 to 17.6)                          | -38.9<br>(-64.6 to 4.1)                             |
| Whooping cough                                                                       | 0.3<br>(0.2 to 0.4)                    | 2.4<br>(1.9 to 3.1)                                        | $< 0.05$<br>( $< 0.05$ to $< 0.05$ )                      | -39.0<br>(-52.9 to -24.6)                         | -42.6<br>(-55.7 to -29.2)                           |
| Tetanus                                                                              | $< 0.05$<br>( $< 0.05$ to $< 0.05$ )   | $< 0.05$<br>( $< 0.05$ to $< 0.05$ )                       | $< 0.05$<br>( $< 0.05$ to $< 0.05$ )                      | -41.7<br>(-56.5 to -22.6)                         | -48.7<br>(-61.9 to -32.9)                           |
| Measles                                                                              | $< 0.05$<br>( $< 0.05$ to $< 0.05$ )   | $< 0.05$<br>( $< 0.05$ to $< 0.05$ )                       | $< 0.05$<br>( $< 0.05$ to $< 0.05$ )                      | -97.0<br>(-99.9 to -93.9)                         | -97.3<br>(-99.9 to -94.4)                           |
| Varicella and herpes zoster                                                          | 4.6<br>(4.2 to 5.1)                    | 83.5<br>(80.9 to 86.5)                                     | 0.2<br>(0.1 to 0.3)                                       | 16.4<br>(3.9 to 31.3)                             | -0.0<br>(-10.6 to 13.4)                             |
| <b>Neglected tropical diseases and malaria</b>                                       | <b>0.7</b><br>(0.6 to 0.8)             | <b><math>&lt; 0.05†</math></b><br>( $< 0.05$ to $< 0.05$ ) | <b><math>&lt; 0.05</math></b><br>( $< 0.05$ to $< 0.05$ ) | <b>188.6</b><br>(4.1 to 387.3)                    | <b>141.0</b><br>(-14.7 to 315.7)                    |
| Malaria                                                                              | --                                     | --                                                         | --                                                        | --                                                | --                                                  |
| Chagas disease                                                                       | 0.6<br>(0.5 to 0.7)                    | --                                                         | $< 0.05$<br>( $< 0.05$ to $< 0.05$ )                      | 322.8<br>(268.4 to 386.3)                         | 254.8<br>(207.6 to 306.2)                           |
| Leishmaniasis                                                                        | --                                     | --                                                         | --                                                        | --                                                | --                                                  |
| Visceral leishmaniasis                                                               | --                                     | --                                                         | --                                                        | --                                                | --                                                  |
| Cutaneous and mucocutaneous leishmaniasis                                            | --                                     | --                                                         | --                                                        | --                                                | --                                                  |
| African trypanosomiasis                                                              | --                                     | --                                                         | --                                                        | --                                                | --                                                  |
| Schistosomiasis                                                                      | --                                     | --                                                         | --                                                        | --                                                | --                                                  |
| Cysticercosis                                                                        | --                                     | --                                                         | --                                                        | --                                                | --                                                  |
| Cystic echinococcosis                                                                | $< 0.05$<br>( $< 0.05$ to $< 0.05$ )   | $< 0.05$<br>( $< 0.05$ to $< 0.05$ )                       | $< 0.05$<br>( $< 0.05$ to $< 0.05$ )                      | -34.9<br>(-96.4 to 751.5)                         | -41.6<br>(-96.5 to 623.1)                           |
| Lymphatic filariasis                                                                 | --                                     | --                                                         | --                                                        | --                                                | --                                                  |
| Onchocerciasis                                                                       | --                                     | --                                                         | --                                                        | --                                                | --                                                  |
| Trachoma                                                                             | --                                     | --                                                         | --                                                        | --                                                | --                                                  |
| Dengue                                                                               | --                                     | --                                                         | --                                                        | --                                                | --                                                  |
| Yellow fever                                                                         | --                                     | --                                                         | --                                                        | --                                                | --                                                  |
| Rabies                                                                               | $< 0.05$<br>( $< 0.05$ to $< 0.05$ )   | $< 0.05$<br>( $< 0.05$ to $< 0.05$ )                       | $< 0.05$<br>( $< 0.05$ to $< 0.05$ )                      | 7.0<br>(-17.2 to 36.4)                            | -11.2<br>(-32.1 to 13.7)                            |
| Intestinal nematode infections                                                       | --                                     | --                                                         | --                                                        | --                                                | --                                                  |
| Ascariasis                                                                           | --                                     | --                                                         | --                                                        | --                                                | --                                                  |



| Cause                                                                   | Prevalence in thousands (95% UI)              | Incidence in thousands (95% UI)                   | YLDs in thousands (95% UI)              |                                                   |                                                     |
|-------------------------------------------------------------------------|-----------------------------------------------|---------------------------------------------------|-----------------------------------------|---------------------------------------------------|-----------------------------------------------------|
|                                                                         | 2016 counts                                   | 2016 counts                                       | 2016 counts                             | Percentage change in counts between 2006 and 2016 | Percentage change in age-standardised rates between |
| Trichuriasis                                                            | --                                            | --                                                | --                                      | --                                                | --                                                  |
| Hookworm disease                                                        | --                                            | --                                                | --                                      | --                                                | --                                                  |
| Food-borne trematodiasis                                                | --                                            | --                                                | --                                      | --                                                | --                                                  |
| Leprosy                                                                 | --                                            | --                                                | --                                      | --                                                | --                                                  |
| Ebola virus disease                                                     | --                                            | --                                                | --                                      | --                                                | --                                                  |
| Zika virus disease                                                      | --                                            | --                                                | --                                      | --                                                | --                                                  |
| Guinea worm disease                                                     | --                                            | --                                                | --                                      | --                                                | --                                                  |
| Other neglected tropical diseases                                       | --                                            | --                                                | < 0.05<br>(< 0.05 to < 0.05)            | --                                                | --                                                  |
| <b>Maternal disorders</b>                                               | <b>3.3</b><br><b>(2.4 to 4.4)</b>             | <b>36.6†</b><br><b>(27.1 to 50.1)</b>             | <b>0.2</b><br><b>(0.1 to 0.3)</b>       | <b>9.1</b><br><b>(-23.9 to 56.3)</b>              | <b>15.0</b><br><b>(-19.6 to 63.6)</b>               |
| Maternal haemorrhage                                                    | 0.9<br>(0.4 to 1.7)                           | 3.0<br>(2.2 to 4.0)                               | < 0.05<br>(< 0.05 to < 0.05)            | 22.6<br>(-22.1 to 105.0)                          | 24.0<br>(-20.2 to 101.9)                            |
| Maternal sepsis and other pregnancy related infections                  | 0.8<br>(0.6 to 1.1)                           | 5.0<br>(3.6 to 6.7)                               | < 0.05<br>(< 0.05 to < 0.05)            | -7.8<br>(-59.8 to 95.8)                           | 0.8<br>(-55.5 to 116.0)                             |
| Maternal hypertensive disorders                                         | 1.6<br>(1.0 to 2.4)                           | 6.5<br>(4.8 to 8.8)                               | 0.1<br>(< 0.05 to 0.1)                  | 20.3<br>(-32.8 to 121.3)                          | 26.8<br>(-28.9 to 132.7)                            |
| Maternal obstructed labour and uterine rupture                          | < 0.05<br>(< 0.05 to < 0.05)                  | 1.1<br>(0.7 to 1.5)                               | < 0.05<br>(< 0.05 to < 0.05)            | -1.3<br>(-47.1 to 78.6)                           | 4.4<br>(-43.6 to 90.0)                              |
| Maternal abortion, miscarriage, and ectopic pregnancy                   | 0.2<br>(0.1 to 0.3)                           | 21.1<br>(11.8 to 34.5)                            | < 0.05<br>(< 0.05 to < 0.05)            | -7.9<br>(-52.4 to 90.9)                           | -3.2<br>(-51.0 to 98.1)                             |
| Other maternal disorders                                                | --                                            | --                                                | < 0.05<br>(< 0.05 to < 0.05)            | 3.3<br>(-27.9 to 48.2)                            | 9.4<br>(-23.1 to 55.5)                              |
| <b>Neonatal disorders</b>                                               | <b>29.9</b><br><b>(25.7 to 35.9)</b>          | --                                                | <b>4.6</b><br><b>(3.2 to 6.5)</b>       | <b>9.3</b><br><b>(-4.3 to 26.4)</b>               | <b>3.0</b><br><b>(-9.9 to 19.2)</b>                 |
| Neonatal preterm birth complications                                    | 26.8<br>(21.7 to 35.5)                        | --                                                | 2.6<br>(1.7 to 3.8)                     | 14.5<br>(-7.5 to 43.2)                            | 8.3<br>(-12.8 to 35.4)                              |
| Neonatal encephalopathy due to birth asphyxia and trauma                | 4.4<br>(3.0 to 6.2)                           | --                                                | 0.8<br>(0.5 to 1.3)                     | -3.9<br>(-26.1 to 15.3)                           | -9.6<br>(-30.6 to 9.2)                              |
| Neonatal sepsis and other neonatal infections                           | 2.3<br>(1.1 to 5.0)                           | --                                                | 1.0<br>(0.4 to 2.2)                     | 8.7<br>(-6.5 to 27.4)                             | 2.0<br>(-13.1 to 21.3)                              |
| Hemolytic disease and other neonatal jaundice                           | 0.3<br>(0.3 to 0.4)                           | --                                                | 0.1<br>(0.1 to 0.1)                     | 5.9<br>(-1.9 to 14.8)                             | -0.7<br>(-8.1 to 7.5)                               |
| Other neonatal disorders                                                | --                                            | --                                                | 0.1<br>(0.1 to 0.1)                     | 9.7<br>(-11.4 to 35.0)                            | 0.2<br>(-19.1 to 23.8)                              |
| <b>Nutritional deficiencies</b>                                         | <b>237.1</b><br><b>(202.9 to 276.4)</b>       | <b>29.7†</b><br><b>(23.1 to 37.7)</b>             | <b>3.3</b><br><b>(2.0 to 5.0)</b>       | <b>4.2</b><br><b>(-12.6 to 21.7)</b>              | <b>-3.4</b><br><b>(-18.7 to 12.9)</b>               |
| Protein-energy malnutrition                                             | 3.2<br>(3.1 to 3.3)                           | 2.0<br>(2.0 to 2.1)                               | 0.4<br>(0.2 to 0.5)                     | 7.8<br>(-1.9 to 20.1)                             | -1.5<br>(-10.2 to 9.7)                              |
| Iodine deficiency                                                       | 59.8<br>(45.5 to 77.7)                        | 1.1<br>(0.8 to 1.4)                               | 1.5<br>(1.0 to 2.3)                     | 4.4<br>(-7.0 to 17.5)                             | -3.5<br>(-14.1 to 8.7)                              |
| Vitamin A deficiency                                                    | 33.6<br>(25.2 to 44.5)                        | 26.6<br>(20.0 to 34.6)                            | --                                      | --                                                | --                                                  |
| Iron-deficiency anaemia                                                 | 133.3<br>(99.8 to 176.8)                      | --                                                | 1.4<br>(0.7 to 2.6)                     | 3.1<br>(-27.7 to 44.9)                            | -3.8<br>(-31.7 to 33.5)                             |
| Other nutritional deficiencies                                          | --                                            | --                                                | < 0.05<br>(< 0.05 to < 0.05)            | 8.0<br>(-2.1 to 20.7)                             | -1.8<br>(-10.9 to 9.7)                              |
| <b>Other communicable, maternal, neonatal, and nutritional diseases</b> | <b>653.6</b><br><b>(603.9 to 706.8)</b>       | <b>122.7</b><br><b>(106.6 to 146.3)</b>           | <b>0.6</b><br><b>(0.3 to 1.0)</b>       | <b>2.3</b><br><b>(-3.9 to 9.3)</b>                | <b>-1.4</b><br><b>(-7.5 to 5.5)</b>                 |
| Sexually transmitted diseases excluding HIV                             | 557.4<br>(512.2 to 608.3)                     | 108.7<br>(92.6 to 132.1)                          | 0.4<br>(0.2 to 0.7)                     | 0.8<br>(-6.8 to 9.0)                              | -1.7<br>(-8.4 to 6.6)                               |
| Syphilis                                                                | 2.7<br>(2.1 to 3.6)                           | 2.5<br>(1.7 to 3.5)                               | < 0.05<br>(< 0.05 to 0.1)               | 22.3<br>(5.7 to 35.9)                             | -0.4<br>(-14.1 to 10.8)                             |
| Chlamydial infection                                                    | 16.2<br>(11.9 to 22.0)                        | 11.3<br>(8.0 to 15.4)                             | 0.1<br>(< 0.05 to 0.1)                  | -17.2<br>(-31.0 to 2.0)                           | -4.9<br>(-21.7 to 18.2)                             |
| Gonococcal infection                                                    | 4.6<br>(2.3 to 11.0)                          | 11.3<br>(2.8 to 33.7)                             | < 0.05<br>(< 0.05 to 0.1)               | -7.5<br>(-26.8 to 13.0)                           | -8.0<br>(-19.9 to 9.2)                              |
| Trichomoniasis                                                          | 75.8<br>(64.0 to 89.2)                        | 62.9<br>(52.9 to 74.0)                            | 0.1<br>(< 0.05 to 0.1)                  | 4.4<br>(-5.3 to 14.9)                             | 2.3<br>(-6.6 to 11.5)                               |
| Genital herpes                                                          | 468.6<br>(400.9 to 549.1)                     | 19.0<br>(16.0 to 22.6)                            | 0.1<br>(< 0.05 to 0.3)                  | 10.8<br>(3.3 to 17.7)                             | 0.2<br>(-5.8 to 6.6)                                |
| Other sexually transmitted diseases                                     | 4.8<br>(4.2 to 5.4)                           | 1.7<br>(1.0 to 2.4)                               | 0.1<br>(< 0.05 to 0.1)                  | -5.2<br>(-18.3 to 10.1)                           | -3.1<br>(-16.0 to 13.2)                             |
| Hepatitis                                                               | 113.2<br>(100.3 to 128.9)                     | 14.1<br>(12.1 to 16.3)                            | < 0.05<br>(< 0.05 to < 0.05)            | -32.6<br>(-46.7 to -13.4)                         | -37.5<br>(-51.3 to -18.8)                           |
| Acute hepatitis A                                                       | 0.5<br>(0.4 to 0.6)                           | 6.2<br>(4.9 to 7.4)                               | < 0.05<br>(< 0.05 to < 0.05)            | -35.8<br>(-57.1 to -2.8)                          | -38.7<br>(-59.0 to -6.7)                            |
| Hepatitis B                                                             | 53.8<br>(42.6 to 68.1)                        | 6.2<br>(4.7 to 8.1)                               | < 0.05<br>(< 0.05 to < 0.05)            | -29.9<br>(-45.4 to -11.5)                         | -37.9<br>(-51.0 to -22.0)                           |
| Hepatitis C                                                             | 58.9<br>(52.8 to 65.5)                        | 1.2<br>(1.1 to 1.4)                               | < 0.05<br>(< 0.05 to < 0.05)            | -9.5<br>(-12.1 to -7.1)                           | -15.3<br>(-17.7 to -13.1)                           |
| Acute hepatitis E                                                       | < 0.05<br>(< 0.05 to < 0.05)                  | 0.4<br>(0.3 to 0.6)                               | < 0.05<br>(< 0.05 to < 0.05)            | -29.3<br>(-36.3 to -22.6)                         | -37.3<br>(-40.9 to -33.6)                           |
| Other infectious diseases                                               | 4.7<br>(3.3 to 6.8)                           | < 0.05<br>(< 0.05 to < 0.05)                      | 0.2<br>(0.1 to 0.3)                     | 14.9<br>(0.8 to 33.4)                             | 7.7<br>(-6.2 to 26.5)                               |
| <b>Non-communicable diseases</b>                                        | <b>4,214.7</b><br><b>(4,178.4 to 4,251.1)</b> | <b>12,220.0†</b><br><b>(11,658.3 to 12,817.5)</b> | <b>487.4</b><br><b>(358.8 to 630.2)</b> | <b>11.9</b><br><b>(10.3 to 13.8)</b>              | <b>-0.1</b><br><b>(-1.6 to 1.5)</b>                 |
| <b>Neoplasms</b>                                                        | <b>76.4</b><br><b>(72.7 to 79.9)</b>          | <b>25.4</b><br><b>(23.5 to 28.1)</b>              | <b>7.6</b><br><b>(5.5 to 9.9)</b>       | <b>28.0</b><br><b>(21.8 to 34.8)</b>              | <b>1.4</b><br><b>(-3.5 to 6.8)</b>                  |
| Lip and oral cavity cancer                                              | 0.9<br>(0.8 to 1.1)                           | 0.2<br>(0.2 to 0.3)                               | 0.1<br>(0.1 to 0.1)                     | 23.0<br>(6.5 to 41.6)                             | -3.5<br>(-16.4 to 11.0)                             |
| Nasopharynx cancer                                                      | 0.1<br>(0.1 to 0.1)                           | < 0.05<br>(< 0.05 to < 0.05)                      | < 0.05<br>(< 0.05 to < 0.05)            | 10.7<br>(-4.7 to 28.1)                            | -9.8<br>(-22.7 to 4.5)                              |
| Other pharynx cancer                                                    | 0.4<br>(0.4 to 0.5)                           | 0.1<br>(0.1 to 0.1)                               | < 0.05<br>(< 0.05 to 0.1)               | 33.7<br>(14.7 to 56.2)                            | 5.0<br>(-9.9 to 22.9)                               |
| Oesophageal cancer                                                      | 0.5<br>(0.5 to 0.6)                           | 0.4<br>(0.4 to 0.5)                               | 0.1<br>(0.1 to 0.1)                     | 20.2<br>(-3.6 to 49.5)                            | -6.7<br>(-25.3 to 16.5)                             |
| Stomach cancer                                                          | 1.3<br>(1.2 to 1.5)                           | 0.7<br>(0.6 to 0.7)                               | 0.2<br>(0.1 to 0.2)                     | 15.8<br>(-1.7 to 35.9)                            | -9.9<br>(-23.6 to 5.7)                              |
| Colon and rectum cancer                                                 | 10.8<br>(9.8 to 12.2)                         | 2.8<br>(2.5 to 3.1)                               | 1.0<br>(0.7 to 1.3)                     | 25.3<br>(12.1 to 40.4)                            | -3.0<br>(-13.3 to 9.3)                              |
| Liver cancer                                                            | 0.2<br>(0.1 to 0.3)                           | 0.3<br>(0.2 to 0.3)                               | 0.1<br>(< 0.05 to 0.1)                  | 61.0<br>(33.0 to 95.3)                            | 26.1<br>(4.4 to 52.7)                               |
| Liver cancer due to hepatitis B                                         | 0.1<br>(< 0.05 to 0.1)                        | < 0.05<br>(< 0.05 to 0.1)                         | < 0.05<br>(< 0.05 to < 0.05)            | 60.4<br>(31.1 to 96.6)                            | 28.4<br>(5.0 to 57.3)                               |



| Cause                                              | Prevalence in thousands (95% UI)        | Incidence in thousands (95% UI)       | YLDs in thousands (95% UI)           |                                                   |                                                     |
|----------------------------------------------------|-----------------------------------------|---------------------------------------|--------------------------------------|---------------------------------------------------|-----------------------------------------------------|
|                                                    | 2016 counts                             | 2016 counts                           | 2016 counts                          | Percentage change in counts between 2006 and 2016 | Percentage change in age-standardised rates between |
| Liver cancer due to hepatitis C                    | 0.1<br>(0.1 to 0.2)                     | 0.1<br>(0.1 to 0.1)                   | < 0.05<br>(< 0.05 to < 0.05)         | 63.6<br>(32.7 to 103.8)                           | 26.8<br>(2.8 to 57.1)                               |
| Liver cancer due to alcohol use                    | 0.2<br>(0.1 to 0.2)                     | 0.1<br>(0.1 to 0.1)                   | < 0.05<br>(< 0.05 to < 0.05)         | 57.5<br>(28.7 to 97.2)                            | 22.8<br>(0.5 to 53.1)                               |
| Liver cancer due to other causes                   | 0.1<br>(< 0.05 to 0.1)                  | < 0.05<br>(< 0.05 to 0.1)             | < 0.05<br>(< 0.05 to < 0.05)         | 67.0<br>(29.6 to 111.4)                           | 32.4<br>(2.2 to 68.2)                               |
| Gallbladder and biliary tract cancer               | 0.1<br>(0.1 to 0.2)                     | 0.1<br>(0.1 to 0.2)                   | < 0.05<br>(< 0.05 to < 0.05)         | -3.7<br>(-26.4 to 23.8)                           | -25.7<br>(-42.9 to -4.6)                            |
| Pancreatic cancer                                  | 0.5<br>(0.4 to 0.6)                     | 0.6<br>(0.5 to 0.6)                   | 0.1<br>(0.1 to 0.1)                  | 25.7<br>(6.1 to 47.8)                             | -3.0<br>(-18.2 to 13.7)                             |
| Larynx cancer                                      | 0.7<br>(0.6 to 0.8)                     | 0.2<br>(0.1 to 0.2)                   | 0.1<br>(< 0.05 to 0.1)               | 16.0<br>(-4.2 to 37.9)                            | -9.4<br>(-25.0 to 7.8)                              |
| Tracheal, bronchus, and lung cancer                | 3.3<br>(2.8 to 3.8)                     | 2.2<br>(2.0 to 2.5)                   | 0.5<br>(0.4 to 0.7)                  | 21.1<br>(4.8 to 43.1)                             | -6.4<br>(-19.7 to 11.0)                             |
| Malignant skin melanoma                            | 5.0<br>(4.0 to 5.7)                     | 1.0<br>(0.8 to 1.2)                   | 0.3<br>(0.2 to 0.5)                  | 43.1<br>(22.9 to 63.2)                            | 20.7<br>(3.1 to 37.2)                               |
| Non-melanoma skin cancer                           | 2.3<br>(1.2 to 4.0)                     | 3.6<br>(2.1 to 6.0)                   | 0.1<br>(< 0.05 to 0.2)               | 62.4<br>(-22.2 to 272.3)                          | 24.3<br>(-40.2 to 181.3)                            |
| Non-melanoma skin cancer (squamous-cell carcinoma) | 1.7<br>(0.8 to 3.8)                     | 1.6<br>(0.8 to 3.6)                   | 0.1<br>(< 0.05 to 0.2)               | 67.8<br>(-22.5 to 292.9)                          | 28.3<br>(-39.3 to 199.9)                            |
| Non-melanoma skin cancer (basal-cell carcinoma)    | 0.3<br>(0.1 to 0.5)                     | 2.0<br>(1.1 to 3.2)                   | < 0.05<br>(< 0.05 to < 0.05)         | -11.5<br>(-53.9 to 49.5)                          | -29.8<br>(-63.2 to 17.1)                            |
| Breast cancer                                      | 15.1<br>(13.8 to 16.9)                  | 3.1<br>(2.8 to 3.5)                   | 1.4<br>(1.0 to 1.8)                  | 19.7<br>(8.1 to 33.1)                             | -4.7<br>(-14.0 to 6.0)                              |
| Cervical cancer                                    | 1.2<br>(1.0 to 1.5)                     | 0.3<br>(0.2 to 0.4)                   | 0.1<br>(0.1 to 0.2)                  | -0.2<br>(-19.6 to 25.5)                           | -13.8<br>(-30.5 to 8.7)                             |
| Uterine cancer                                     | 2.5<br>(2.1 to 3.0)                     | 0.5<br>(0.5 to 0.6)                   | 0.2<br>(0.1 to 0.3)                  | 41.5<br>(12.4 to 77.8)                            | 11.4<br>(-11.5 to 39.7)                             |
| Ovarian cancer                                     | 1.4<br>(1.2 to 1.6)                     | 0.5<br>(0.4 to 0.5)                   | 0.2<br>(0.1 to 0.3)                  | 15.5<br>(-10.8 to 45.4)                           | -7.0<br>(-28.1 to 16.6)                             |
| Prostate cancer                                    | 14.2<br>(11.3 to 17.1)                  | 3.4<br>(2.9 to 4.0)                   | 1.2<br>(0.8 to 1.7)                  | 35.9<br>(16.5 to 58.7)                            | 3.2<br>(-11.7 to 20.9)                              |
| Testicular cancer                                  | 0.8<br>(0.6 to 0.9)                     | 0.1<br>(0.1 to 0.2)                   | 0.1<br>(< 0.05 to 0.1)               | -5.5<br>(-29.4 to 27.5)                           | 0.0<br>(-25.9 to 34.6)                              |
| Kidney cancer                                      | 2.1<br>(1.8 to 2.3)                     | 0.6<br>(0.5 to 0.6)                   | 0.2<br>(0.1 to 0.2)                  | 27.3<br>(9.4 to 46.2)                             | 1.1<br>(-13.1 to 15.9)                              |
| Bladder cancer                                     | 2.8<br>(2.5 to 3.1)                     | 0.7<br>(0.6 to 0.7)                   | 0.2<br>(0.2 to 0.3)                  | 32.2<br>(15.3 to 50.9)                            | 2.3<br>(-10.7 to 16.8)                              |
| Brain and nervous system cancer                    | 1.5<br>(1.1 to 1.9)                     | 0.6<br>(0.4 to 0.7)                   | 0.2<br>(0.1 to 0.3)                  | 33.2<br>(3.8 to 65.3)                             | 12.5<br>(-10.9 to 38.7)                             |
| Thyroid cancer                                     | 1.3<br>(1.2 to 1.5)                     | 0.2<br>(0.2 to 0.3)                   | 0.1<br>(0.1 to 0.1)                  | 50.3<br>(23.9 to 86.5)                            | 26.2<br>(4.0 to 56.3)                               |
| Mesothelioma                                       | 0.1<br>(0.1 to 0.1)                     | 0.1<br>(< 0.05 to 0.1)                | < 0.05<br>(< 0.05 to < 0.05)         | 34.1<br>(13.8 to 52.2)                            | 3.6<br>(-12.1 to 17.8)                              |
| Hodgkin lymphoma                                   | 0.8<br>(0.7 to 0.9)                     | 0.2<br>(0.1 to 0.2)                   | 0.1<br>(< 0.05 to 0.1)               | 16.5<br>(-7.0 to 46.6)                            | 15.6<br>(-8.3 to 46.2)                              |
| Non-Hodgkin's lymphoma                             | 3.6<br>(3.1 to 4.1)                     | 0.9<br>(0.8 to 1.0)                   | 0.3<br>(0.2 to 0.4)                  | 50.1<br>(27.3 to 72.1)                            | 20.6<br>(2.3 to 38.0)                               |
| Multiple myeloma                                   | 0.8<br>(0.6 to 0.9)                     | 0.3<br>(0.2 to 0.3)                   | 0.1<br>(0.1 to 0.2)                  | 38.0<br>(9.7 to 74.0)                             | 7.2<br>(-14.8 to 35.1)                              |
| Leukaemia                                          | 2.5<br>(2.2 to 2.8)                     | 0.7<br>(0.6 to 0.8)                   | 0.3<br>(0.2 to 0.4)                  | 28.9<br>(11.5 to 48.2)                            | 2.6<br>(-11.4 to 18.0)                              |
| Acute lymphoid leukaemia                           | 0.4<br>(0.3 to 0.5)                     | 0.1<br>(0.1 to 0.1)                   | < 0.05<br>(< 0.05 to 0.1)            | 58.9<br>(12.2 to 124.2)                           | 40.5<br>(-3.3 to 105.5)                             |
| Chronic lymphoid leukaemia                         | 1.1<br>(0.9 to 1.4)                     | 0.3<br>(0.2 to 0.3)                   | 0.1<br>(0.1 to 0.2)                  | 47.9<br>(17.3 to 88.3)                            | 12.7<br>(-10.7 to 43.5)                             |
| Acute myeloid leukaemia                            | 0.2<br>(0.2 to 0.3)                     | 0.2<br>(0.1 to 0.2)                   | < 0.05<br>(< 0.05 to 0.1)            | 52.5<br>(24.7 to 80.8)                            | 20.8<br>(-1.5 to 42.6)                              |
| Chronic myeloid leukaemia                          | 0.1<br>(0.1 to 0.2)                     | < 0.05<br>(< 0.05 to 0.1)             | < 0.05<br>(< 0.05 to < 0.05)         | 5.5<br>(-9.6 to 22.2)                             | -16.0<br>(-28.1 to -2.9)                            |
| Other leukaemia                                    | 0.6<br>(0.5 to 0.7)                     | 0.1<br>(0.1 to 0.2)                   | 0.1<br>(< 0.05 to 0.1)               | -9.6<br>(-26.4 to 14.9)                           | -30.4<br>(-43.0 to -11.9)                           |
| Other neoplasms                                    | 3.9<br>(3.2 to 4.6)                     | 1.0<br>(0.8 to 1.2)                   | 0.3<br>(0.2 to 0.4)                  | 44.9<br>(20.8 to 72.4)                            | 18.5<br>(-0.5 to 41.2)                              |
| <b>Cardiovascular diseases</b>                     | <b>439.6</b><br><b>(421.4 to 459.8)</b> | <b>43.6†</b><br><b>(41.0 to 46.3)</b> | <b>27.2</b><br><b>(19.9 to 35.7)</b> | <b>16.6</b><br><b>(12.4 to 20.8)</b>              | <b>-7.7</b><br><b>(-11.0 to -4.4)</b>               |
| Rheumatic heart disease                            | 0.3<br>(0.3 to 0.3)                     | 0.1<br>(0.1 to 0.1)                   | < 0.05<br>(< 0.05 to < 0.05)         | 11.2<br>(-3.9 to 28.3)                            | -9.6<br>(-21.4 to 3.6)                              |
| Ischaemic heart disease                            | 126.2<br>(118.4 to 135.0)               | 15.6<br>(14.1 to 17.3)                | 6.4<br>(4.5 to 8.5)                  | 14.2<br>(9.0 to 20.0)                             | -10.2<br>(-14.4 to -5.7)                            |
| Cerebrovascular disease                            | 56.7<br>(52.9 to 60.2)                  | 7.5‡<br>(6.9 to 8.1)                  | 8.8<br>(6.3 to 11.1)                 | 20.6<br>(12.6 to 29.1)                            | -4.4<br>(-10.6 to 2.3)                              |
| Ischaemic stroke                                   | 45.2<br>(40.6 to 50.0)                  | 4.9‡<br>(4.4 to 5.5)                  | 6.8<br>(4.8 to 8.7)                  | 18.7<br>(8.6 to 29.4)                             | -6.2<br>(-14.2 to 1.9)                              |
| Hemorrhagic stroke                                 | 13.9<br>(12.5 to 15.5)                  | 2.5‡<br>(2.3 to 2.8)                  | 2.0<br>(1.5 to 2.6)                  | 27.4<br>(13.9 to 42.5)                            | 2.2<br>(-8.1 to 13.9)                               |
| Hypertensive heart disease                         | 6.0<br>(5.0 to 7.2)                     | --                                    | 0.5<br>(0.3 to 0.7)                  | 16.2<br>(3.2 to 30.1)                             | -10.1<br>(-20.2 to 0.6)                             |
| Cardiomyopathy and myocarditis                     | 9.0<br>(7.9 to 10.0)                    | 2.4†<br>(2.0 to 2.8)                  | 0.8<br>(0.5 to 1.1)                  | 6.6<br>(-3.4 to 17.0)                             | -11.5<br>(-19.7 to -3.1)                            |
| Myocarditis                                        | 1.4<br>(1.3 to 1.6)                     | 2.4<br>(2.0 to 2.8)                   | 0.1<br>(0.1 to 0.1)                  | -0.0<br>(-14.3 to 16.4)                           | -8.7<br>(-21.2 to 4.8)                              |
| Alcoholic cardiomyopathy                           | 1.7<br>(1.4 to 2.0)                     | --                                    | 0.1<br>(0.1 to 0.2)                  | 8.3<br>(-13.0 to 33.7)                            | -12.6<br>(-30.0 to 7.9)                             |
| Other cardiomyopathy                               | 6.4<br>(5.5 to 7.5)                     | --                                    | 0.5<br>(0.4 to 0.7)                  | 7.5<br>(-3.6 to 20.8)                             | -11.9<br>(-20.6 to -0.9)                            |
| Atrial fibrillation and flutter                    | 49.9<br>(44.1 to 57.0)                  | 4.2<br>(3.6 to 4.8)                   | 3.9<br>(2.7 to 5.4)                  | 22.9<br>(15.8 to 29.9)                            | -4.6<br>(-10.2 to 0.8)                              |
| Peripheral vascular disease                        | 157.4<br>(137.7 to 179.8)               | 13.0<br>(11.2 to 15.1)                | 0.6<br>(0.3 to 1.1)                  | 17.4<br>(8.5 to 26.7)                             | -10.3<br>(-17.3 to -3.4)                            |
| Endocarditis                                       | 0.6<br>(0.5 to 0.7)                     | 0.9<br>(0.8 to 1.0)                   | < 0.05<br>(< 0.05 to 0.1)            | 10.7<br>(-8.8 to 33.6)                            | -11.8<br>(-26.8 to 5.9)                             |
| Other cardiovascular and circulatory diseases      | 121.5<br>(103.9 to 141.5)               | --                                    | 6.3<br>(4.2 to 8.9)                  | 11.3<br>(2.9 to 20.1)                             | -10.2<br>(-17.0 to -3.4)                            |
| <b>Chronic respiratory diseases</b>                | <b>664.9</b><br><b>(642.9 to 687.8)</b> | <b>52.7†</b><br><b>(50.0 to 55.7)</b> | <b>25.2</b><br><b>(18.5 to 33.1)</b> | <b>6.7</b><br><b>(1.1 to 12.1)</b>                | <b>-5.5</b><br><b>(-10.4 to -1.3)</b>               |
| Chronic obstructive pulmonary disease              | 255.0<br>(243.2 to 267.8)               | 16.0<br>(15.1 to 16.9)                | 7.2<br>(5.7 to 8.8)                  | 10.6<br>(-5.6 to 27.4)                            | -10.7<br>(-23.6 to 2.7)                             |
| Pneumoconiosis                                     | < 0.05<br>(< 0.05 to < 0.05)            | < 0.05<br>(< 0.05 to < 0.05)          | < 0.05<br>(< 0.05 to < 0.05)         | 38.4<br>(30.5 to 47.0)                            | 5.6<br>(-0.6 to 12.0)                               |
| Silicosis                                          | < 0.05<br>(< 0.05 to < 0.05)            | < 0.05<br>(< 0.05 to < 0.05)          | < 0.05<br>(< 0.05 to < 0.05)         | 42.3<br>(33.1 to 52.3)                            | 7.8<br>(0.8 to 15.5)                                |

| Cause                                                          | Prevalence in thousands (95% UI)              | Incidence in thousands (95% UI)          | YLDs in thousands (95% UI)             |                                                   |                                                     |
|----------------------------------------------------------------|-----------------------------------------------|------------------------------------------|----------------------------------------|---------------------------------------------------|-----------------------------------------------------|
|                                                                | 2016 counts                                   | 2016 counts                              | 2016 counts                            | Percentage change in counts between 2006 and 2016 | Percentage change in age-standardised rates between |
| Asbestosis                                                     | < 0.05<br>(< 0.05 to < 0.05)                  | < 0.05<br>(< 0.05 to < 0.05)             | < 0.05<br>(< 0.05 to < 0.05)           | 20.2<br>(4.3 to 38.9)                             | -4.5<br>(-16.9 to 10.2)                             |
| Coal workers pneumoconiosis                                    | --                                            | --                                       | --                                     | --                                                | --                                                  |
| Other pneumoconiosis                                           | < 0.05<br>(< 0.05 to < 0.05)                  | < 0.05<br>(< 0.05 to < 0.05)             | < 0.05<br>(< 0.05 to < 0.05)           | 5.8<br>(-4.4 to 19.7)                             | -17.0<br>(-26.1 to -5.4)                            |
| Asthma                                                         | 443.8<br>(414.5 to 475.5)                     | 36.4<br>(33.6 to 39.3)                   | 17.3<br>(11.4 to 24.7)                 | 4.4<br>(0.2 to 8.8)                               | -4.1<br>(-8.3 to 0.1)                               |
| Interstitial lung disease and pulmonary sarcoidosis            | 2.9<br>(2.6 to 3.3)                           | 0.4<br>(0.4 to 0.4)                      | 0.3<br>(0.2 to 0.5)                    | 31.5<br>(15.6 to 50.2)                            | 4.2<br>(-8.0 to 18.5)                               |
| Other chronic respiratory diseases                             | --                                            | --                                       | 0.3<br>(0.2 to 0.3)                    | 33.7<br>(14.7 to 54.7)                            | 22.3<br>(3.5 to 43.1)                               |
| <b>Cirrhosis and other chronic liver diseases</b>              | <b>35.3</b><br><b>(33.4 to 37.0)</b>          | <b>0.7</b><br><b>(0.6 to 0.7)</b>        | <b>0.9</b><br><b>(0.6 to 1.2)</b>      | <b>28.3</b><br><b>(15.8 to 42.1)</b>              | <b>11.4</b><br><b>(0.1 to 24.2)</b>                 |
| Cirrhosis and other chronic liver diseases due to hepatitis B  | 4.6<br>(3.7 to 5.7)                           | 0.1<br>(0.1 to 0.1)                      | 0.1<br>(0.1 to 0.2)                    | 30.7<br>(-2.3 to 73.4)                            | 13.9<br>(-13.1 to 48.8)                             |
| Cirrhosis and other chronic liver diseases due to hepatitis C  | 8.9<br>(6.8 to 11.6)                          | 0.1<br>(0.1 to 0.2)                      | 0.2<br>(0.1 to 0.3)                    | 33.7<br>(5.2 to 67.0)                             | 16.3<br>(-6.9 to 45.5)                              |
| Cirrhosis and other chronic liver diseases due to alcohol use  | 18.3<br>(15.9 to 20.8)                        | 0.3<br>(0.3 to 0.4)                      | 0.4<br>(0.3 to 0.6)                    | 32.1<br>(13.4 to 55.4)                            | 11.4<br>(-4.2 to 31.3)                              |
| Cirrhosis and other chronic liver diseases due to other causes | 3.5<br>(2.8 to 4.4)                           | 0.1<br>(0.1 to 0.1)                      | 0.2<br>(0.1 to 0.3)                    | 14.5<br>(-9.4 to 45.8)                            | 6.6<br>(-16.1 to 36.4)                              |
| <b>Digestive diseases</b>                                      | <b>95.4</b><br><b>(88.9 to 101.0)</b>         | <b>125.8†</b><br><b>(116.7 to 134.8)</b> | <b>3.3</b><br><b>(2.3 to 4.4)</b>      | <b>9.8</b><br><b>(1.5 to 17.7)</b>                | <b>-5.9</b><br><b>(-13.0 to 1.1)</b>                |
| Peptic ulcer disease                                           | 21.4<br>(18.6 to 25.0)                        | 5.3<br>(4.7 to 5.9)                      | 0.2<br>(0.1 to 0.3)                    | 7.5<br>(-21.0 to 44.0)                            | -9.2<br>(-34.5 to 21.3)                             |
| Gastritis and duodenitis                                       | 37.1<br>(32.1 to 42.8)                        | 27.2<br>(23.7 to 31.0)                   | 0.2<br>(0.1 to 0.4)                    | 25.9<br>(-1.1 to 62.1)                            | 4.6<br>(-17.4 to 34.1)                              |
| Appendicitis                                                   | 0.2<br>(0.2 to 0.2)                           | 5.4<br>(4.9 to 5.8)                      | 0.1<br>(< 0.05 to 0.1)                 | 0.2<br>(-17.7 to 24.9)                            | -0.2<br>(-21.2 to 28.8)                             |
| Paralytic ileus and intestinal obstruction                     | 0.1<br>(0.1 to 0.1)                           | 2.2<br>(1.9 to 2.4)                      | < 0.05<br>(< 0.05 to < 0.05)           | 24.7<br>(18.6 to 31.4)                            | 4.6<br>(0.3 to 9.1)                                 |
| Inguinal, femoral, and abdominal hernia                        | 27.1<br>(24.4 to 30.0)                        | 52.3<br>(45.0 to 59.5)                   | 1.7<br>(1.2 to 2.4)                    | 6.0<br>(-4.9 to 17.4)                             | -9.9<br>(-19.0 to -0.3)                             |
| Inflammatory bowel disease                                     | 3.7<br>(3.5 to 4.0)                           | 1.3<br>(1.2 to 1.3)                      | 0.5<br>(0.4 to 0.8)                    | 9.0<br>(-5.1 to 23.9)                             | -2.5<br>(-14.8 to 11.1)                             |
| Vascular intestinal disorders                                  | 0.2<br>(0.1 to 0.2)                           | 0.7<br>(0.6 to 0.8)                      | 0.1<br>(< 0.05 to 0.1)                 | 43.2<br>(13.2 to 77.7)                            | 14.3<br>(-8.4 to 40.9)                              |
| Gallbladder and biliary diseases                               | 8.3<br>(7.4 to 9.4)                           | 28.8<br>(25.1 to 32.8)                   | 0.2<br>(0.1 to 0.2)                    | 20.0<br>(-2.0 to 45.2)                            | 1.3<br>(-16.8 to 21.9)                              |
| Pancreatitis                                                   | 0.3<br>(0.3 to 0.4)                           | 2.7<br>(2.4 to 3.0)                      | < 0.05<br>(< 0.05 to 0.1)              | 12.8<br>(8.6 to 17.1)                             | -4.9<br>(-8.0 to -1.6)                              |
| Other digestive diseases                                       | --                                            | --                                       | 0.3<br>(0.2 to 0.4)                    | 16.7<br>(8.1 to 25.2)                             | -1.6<br>(-9.0 to 5.8)                               |
| <b>Neurological disorders</b>                                  | <b>1,760.4</b><br><b>(1,693.0 to 1,836.0)</b> | <b>687.6</b><br><b>(593.1 to 792.8)</b>  | <b>56.7</b><br><b>(38.6 to 77.0)</b>   | <b>9.4</b><br><b>(-1.5 to 21.2)</b>               | <b>-0.0</b><br><b>(-10.4 to 11.9)</b>               |
| Alzheimer's disease and other dementias                        | 43.2<br>(36.7 to 51.3)                        | 8.4<br>(7.0 to 10.1)                     | 6.5<br>(4.5 to 8.8)                    | 29.1<br>(22.8 to 35.2)                            | -2.0<br>(-6.7 to 2.5)                               |
| Parkinson's disease                                            | 6.0<br>(4.7 to 7.5)                           | 0.7<br>(0.6 to 0.9)                      | 0.7<br>(0.4 to 1.0)                    | 34.5<br>(20.9 to 49.8)                            | 4.2<br>(-6.5 to 16.3)                               |
| Epilepsy                                                       | 13.2<br>(3.5 to 23.5)                         | 1.4<br>(0.4 to 2.4)                      | 3.1<br>(0.6 to 7.5)                    | -1.4<br>(-81.4 to 491.5)                          | -9.7<br>(-83.4 to 446.1)                            |
| Multiple sclerosis                                             | 8.1<br>(7.2 to 8.9)                           | 0.2<br>(0.2 to 0.2)                      | 2.1<br>(1.4 to 2.7)                    | 21.6<br>(8.4 to 37.1)                             | 7.0<br>(-4.7 to 20.8)                               |
| Motor neuron disease                                           | 0.8<br>(0.8 to 0.9)                           | 0.1<br>(0.1 to 0.2)                      | 0.2<br>(0.1 to 0.2)                    | 27.0<br>(21.1 to 33.6)                            | 8.4<br>(3.2 to 13.8)                                |
| Migraine                                                       | 880.5<br>(832.4 to 928.4)                     | 79.2<br>(73.8 to 85.2)                   | 37.9<br>(24.5 to 53.2)                 | 6.3<br>(2.6 to 10.1)                              | 0.4<br>(-2.8 to 3.7)                                |
| Tension-type headache                                          | 1,154.2<br>(1,036.7 to 1,286.3)               | 597.6<br>(505.0 to 703.9)                | 5.4<br>(3.4 to 8.1)                    | 8.7<br>(2.8 to 14.7)                              | 0.7<br>(-4.2 to 5.6)                                |
| Other neurological disorders                                   | < 0.05<br>(< 0.05 to < 0.05)                  | < 0.05<br>(< 0.05 to < 0.05)             | 1.0<br>(0.5 to 1.8)                    | 22.3<br>(-44.2 to 188.1)                          | 11.5<br>(-53.1 to 183.4)                            |
| <b>Mental and substance use disorders</b>                      | <b>798.1</b><br><b>(774.2 to 824.3)</b>       | <b>293.5†</b><br><b>(272.5 to 314.9)</b> | <b>114.0</b><br><b>(82.4 to 147.2)</b> | <b>3.8</b><br><b>(1.0 to 6.4)</b>                 | <b>-0.2</b><br><b>(-2.8 to 2.3)</b>                 |
| Schizophrenia                                                  | 14.7<br>(12.9 to 16.7)                        | 0.5<br>(0.5 to 0.6)                      | 9.3<br>(6.9 to 11.6)                   | 11.9<br>(3.1 to 21.2)                             | 2.4<br>(-5.8 to 10.7)                               |
| Alcohol use disorders                                          | 84.2<br>(72.8 to 96.0)                        | 30.2<br>(26.2 to 34.6)                   | 8.4<br>(5.8 to 11.8)                   | -1.6<br>(-10.8 to 9.9)                            | 4.1<br>(-5.2 to 14.4)                               |
| Drug use disorders                                             | 45.1<br>(42.6 to 48.2)                        | 5.6<br>(5.1 to 6.1)                      | 9.4<br>(6.8 to 12.1)                   | -8.5<br>(-16.3 to 0.5)                            | -3.9<br>(-12.3 to 5.7)                              |
| Opioid use disorders                                           | 15.2<br>(13.1 to 17.4)                        | 1.7<br>(1.5 to 2.0)                      | 6.3<br>(4.4 to 8.3)                    | -12.2<br>(-22.6 to -1.3)                          | -8.3<br>(-19.5 to 4.1)                              |
| Cocaine use disorders                                          | 6.7<br>(6.0 to 7.5)                           | 0.4<br>(0.4 to 0.5)                      | 0.9<br>(0.6 to 1.3)                    | 4.2<br>(-13.1 to 24.7)                            | 8.0<br>(-10.3 to 30.2)                              |
| Amphetamine use disorders                                      | 2.4<br>(1.9 to 3.2)                           | 0.3<br>(0.2 to 0.4)                      | 0.3<br>(0.2 to 0.5)                    | 0.9<br>(-24.0 to 34.6)                            | 17.3<br>(-12.5 to 57.0)                             |
| Cannabis use disorders                                         | 16.4<br>(14.6 to 18.5)                        | 2.5<br>(2.1 to 2.9)                      | 0.5<br>(0.3 to 0.7)                    | -16.4<br>(-29.0 to -3.7)                          | -7.5<br>(-21.8 to 7.0)                              |
| Other drug use disorders                                       | 5.2<br>(4.7 to 5.7)                           | 0.7<br>(0.6 to 0.8)                      | 1.4<br>(0.9 to 1.9)                    | 4.4<br>(-12.9 to 26.0)                            | 7.9<br>(-10.3 to 31.1)                              |
| Depressive disorders                                           | 200.6<br>(188.1 to 214.8)                     | 203.0<br>(183.4 to 223.7)                | 33.4<br>(22.8 to 45.6)                 | 2.0<br>(-4.1 to 8.3)                              | -3.7<br>(-9.6 to 1.9)                               |
| Major depressive disorder                                      | 127.2<br>(115.9 to 140.6)                     | 192.4<br>(173.2 to 213.6)                | 25.9<br>(17.6 to 35.7)                 | -0.1<br>(-7.6 to 7.8)                             | -4.7<br>(-11.8 to 2.4)                              |
| Dysthymia                                                      | 77.9<br>(67.9 to 90.2)                        | 10.6<br>(9.3 to 12.2)                    | 7.5<br>(5.0 to 10.8)                   | 10.0<br>(2.9 to 17.3)                             | 0.5<br>(-5.6 to 6.8)                                |
| Bipolar disorder                                               | 35.4<br>(31.1 to 40.6)                        | 2.4<br>(2.1 to 2.8)                      | 7.2<br>(4.4 to 10.5)                   | 4.6<br>(-1.2 to 10.8)                             | 0.2<br>(-5.2 to 5.7)                                |
| Anxiety disorders                                              | 255.3<br>(233.7 to 279.0)                     | 33.3<br>(30.9 to 36.2)                   | 24.5<br>(17.0 to 32.9)                 | 9.3<br>(2.7 to 16.8)                              | 2.5<br>(-3.5 to 9.2)                                |
| Eating disorders                                               | 17.5<br>(14.5 to 21.0)                        | 4.3<br>(3.2 to 5.5)                      | 3.6<br>(2.3 to 5.3)                    | -2.0<br>(-11.1 to 7.3)                            | 7.3<br>(-1.7 to 17.0)                               |
| Anorexia nervosa                                               | 4.4<br>(3.2 to 5.8)                           | 0.8<br>(0.6 to 1.1)                      | 0.9<br>(0.6 to 1.4)                    | -6.1<br>(-20.8 to 9.4)                            | 7.0<br>(-9.3 to 24.3)                               |
| Bulimia nervosa                                                | 12.9<br>(9.9 to 16.9)                         | 3.5<br>(2.4 to 4.7)                      | 2.7<br>(1.7 to 4.1)                    | -0.5<br>(-11.2 to 10.7)                           | 7.4<br>(-2.5 to 18.2)                               |
| Autistic spectrum disorders                                    | 36.4<br>(32.9 to 39.8)                        | 0.2<br>(0.1 to 0.3)                      | 5.9<br>(4.0 to 8.3)                    | 6.5<br>(1.7 to 12.0)                              | -0.5<br>(-5.3 to 4.7)                               |
| Autism                                                         | 14.6<br>(12.4 to 17.1)                        | < 0.05<br>(< 0.05 to < 0.05)             | 3.7<br>(2.4 to 5.4)                    | 6.9<br>(-0.3 to 14.9)                             | -0.4<br>(-7.0 to 7.4)                               |
| Asperger syndrome and other autistic spectrum disorders        | 21.8<br>(18.3 to 26.1)                        | 0.2<br>(0.1 to 0.3)                      | 2.2<br>(1.4 to 3.1)                    | 5.9<br>(0.8 to 11.1)                              | -0.6<br>(-5.8 to 4.5)                               |



| Cause                                                      | Prevalence in thousands (95% UI)              | Incidence in thousands (95% UI)                  | YLDs in thousands (95% UI)             |                                                   |                                                     |
|------------------------------------------------------------|-----------------------------------------------|--------------------------------------------------|----------------------------------------|---------------------------------------------------|-----------------------------------------------------|
|                                                            | 2016 counts                                   | 2016 counts                                      | 2016 counts                            | Percentage change in counts between 2006 and 2016 | Percentage change in age-standardised rates between |
| Attention-deficit/hyperactivity disorder                   | 38.6<br>(33.0 to 45.3)                        | 2.0<br>(1.7 to 2.4)                              | 0.5<br>(0.3 to 0.8)                    | 2.1<br>(-9.9 to 14.5)                             | -0.6<br>(-12.5 to 11.8)                             |
| Conduct disorder                                           | 27.9<br>(21.0 to 35.8)                        | 9.7<br>(7.1 to 12.1)                             | 3.4<br>(2.0 to 5.3)                    | 7.2<br>(-0.1 to 14.2)                             | -0.1<br>(-6.1 to 6.1)                               |
| Idiopathic developmental intellectual disability           | 20.1<br>(8.2 to 32.0)                         | --                                               | 1.0<br>(0.4 to 1.7)                    | 5.9<br>(-2.9 to 14.6)                             | 0.4<br>(-8.0 to 8.5)                                |
| Other mental and substance use disorders                   | 102.1<br>(89.0 to 118.2)                      | 2.3<br>(2.1 to 2.6)                              | 7.5<br>(5.2 to 10.7)                   | 7.7<br>(3.1 to 12.3)                              | -0.5<br>(-4.8 to 4.1)                               |
| <b>Diabetes, urogenital, blood, and endocrine diseases</b> | <b>1,617.4</b><br><b>(1,457.6 to 1,804.5)</b> | <b>424.9†</b><br><b>(399.6 to 453.1)</b>         | <b>32.5</b><br><b>(22.8 to 43.8)</b>   | <b>18.5</b><br><b>(13.0 to 24.8)</b>              | <b>-0.6</b><br><b>(-5.4 to 4.9)</b>                 |
| Diabetes mellitus                                          | 193.4<br>(172.8 to 220.4)                     | 11.0<br>(9.7 to 12.8)                            | 15.0<br>(10.1 to 20.9)                 | 22.0<br>(11.9 to 34.0)                            | -1.9<br>(-10.0 to 7.7)                              |
| Acute glomerulonephritis                                   | < 0.05<br>(< 0.05 to 0.1)                     | 0.7<br>(0.6 to 0.8)                              | < 0.05<br>(< 0.05 to < 0.05)           | 10.0<br>(5.1 to 15.3)                             | 0.4<br>(-3.4 to 4.3)                                |
| Chronic kidney disease                                     | 132.2<br>(117.8 to 145.8)                     | 11.7<br>(10.2 to 13.3)                           | 3.3<br>(2.4 to 4.2)                    | 18.0<br>(8.7 to 28.8)                             | -4.4<br>(-12.0 to 4.2)                              |
| Chronic kidney disease due to diabetes mellitus            | 43.9<br>(35.9 to 52.5)                        | 4.1<br>(3.3 to 5.0)                              | 1.1<br>(0.8 to 1.4)                    | 22.8<br>(8.9 to 39.2)                             | -2.8<br>(-14.3 to 10.5)                             |
| Chronic kidney disease due to hypertension                 | 25.2<br>(21.0 to 29.5)                        | 2.4<br>(1.9 to 3.1)                              | 0.4<br>(0.3 to 0.6)                    | 20.0<br>(3.3 to 39.5)                             | -7.8<br>(-20.1 to 6.9)                              |
| Chronic kidney disease due to glomerulonephritis           | 22.0<br>(18.4 to 25.8)                        | 1.6<br>(1.2 to 2.0)                              | 0.8<br>(0.5 to 1.0)                    | 13.1<br>(2.1 to 26.6)                             | -3.8<br>(-13.2 to 7.3)                              |
| Chronic kidney disease due to other causes                 | 41.1<br>(33.6 to 49.8)                        | 3.6<br>(2.9 to 4.5)                              | 1.0<br>(0.7 to 1.4)                    | 16.3<br>(3.5 to 30.5)                             | -5.2<br>(-15.4 to 5.8)                              |
| Urinary diseases and male infertility                      | 116.3<br>(104.6 to 129.8)                     | 231.2†<br>(206.4 to 257.5)                       | 3.6<br>(2.3 to 5.2)                    | 25.1<br>(16.3 to 33.6)                            | 0.9<br>(-6.1 to 7.7)                                |
| Interstitial nephritis and urinary tract infections        | 3.3<br>(2.8 to 3.8)                           | 171.0<br>(146.8 to 196.7)                        | 0.1<br>(0.1 to 0.2)                    | 0.6<br>(-14.6 to 18.4)                            | 3.3<br>(-11.4 to 20.6)                              |
| Urolithiasis                                               | 1.9<br>(1.6 to 2.1)                           | 49.0<br>(43.1 to 55.6)                           | 0.1<br>(0.1 to 0.2)                    | 15.8<br>(-2.1 to 36.4)                            | 0.9<br>(-14.4 to 17.8)                              |
| Benign prostatic hyperplasia                               | 95.9<br>(82.2 to 112.8)                       | 11.2<br>(9.4 to 13.4)                            | 3.1<br>(2.0 to 4.6)                    | 28.9<br>(19.2 to 39.4)                            | 1.6<br>(-6.2 to 9.6)                                |
| Male infertility                                           | 11.3<br>(8.0 to 15.8)                         | --                                               | 0.1<br>(< 0.05 to 0.1)                 | -5.4<br>(-14.9 to 4.8)                            | -7.8<br>(-16.1 to 1.2)                              |
| Other urinary diseases                                     | --                                            | --                                               | 0.1<br>(0.1 to 0.1)                    | -10.0<br>(-19.8 to 0.7)                           | -14.1<br>(-23.4 to -4.5)                            |
| Gynecological diseases                                     | 566.5<br>(531.8 to 601.3)                     | 148.6†<br>(139.4 to 158.9)                       | 4.9<br>(3.3 to 7.1)                    | 5.2<br>(-0.5 to 10.8)                             | 1.4<br>(-3.6 to 6.5)                                |
| Uterine fibroids                                           | 38.9<br>(33.1 to 45.5)                        | 3.9<br>(3.2 to 4.7)                              | 0.4<br>(0.2 to 0.7)                    | 22.0<br>(10.6 to 36.8)                            | 5.3<br>(-4.3 to 18.0)                               |
| Polycystic ovarian syndrome                                | 1.4<br>(1.1 to 1.9)                           | 5.0<br>(3.5 to 6.8)                              | < 0.05<br>(< 0.05 to < 0.05)           | 1.1<br>(-18.6 to 27.3)                            | 3.6<br>(-17.6 to 29.1)                              |
| Female infertility                                         | 21.3<br>(13.2 to 32.7)                        | --                                               | 0.1<br>(< 0.05 to 0.3)                 | 13.3<br>(1.6 to 26.2)                             | 8.0<br>(-1.8 to 19.1)                               |
| Endometriosis                                              | 2.5<br>(2.1 to 3.1)                           | 7.1<br>(5.3 to 9.5)                              | 0.2<br>(0.1 to 0.4)                    | -12.2<br>(-29.9 to 8.1)                           | 1.8<br>(-18.3 to 25.1)                              |
| Genital prolapse                                           | 280.5<br>(242.6 to 322.9)                     | 14.9<br>(12.5 to 17.8)                           | 0.9<br>(0.4 to 1.6)                    | 20.8<br>(10.9 to 31.5)                            | -1.5<br>(-9.4 to 7.4)                               |
| Premenstrual syndrome                                      | 238.2<br>(221.5 to 254.9)                     | 81.1<br>(74.7 to 87.9)                           | 2.0<br>(1.2 to 3.0)                    | 0.6<br>(-7.1 to 8.8)                              | 0.6<br>(-7.0 to 8.6)                                |
| Other gynecological diseases                               | 37.3<br>(31.3 to 43.6)                        | 36.6<br>(30.4 to 43.1)                           | 1.3<br>(0.8 to 1.9)                    | 2.7<br>(-7.3 to 13.4)                             | 2.6<br>(-7.2 to 12.6)                               |
| Hemoglobinopathies and hemolytic anaemias                  | 874.1<br>(661.6 to 1,107.8)                   | --                                               | 2.1<br>(0.6 to 5.1)                    | 17.3<br>(-15.9 to 62.5)                           | 5.8<br>(-24.8 to 50.5)                              |
| Thalassemias                                               | 0.6<br>(0.1 to 2.1)                           | --                                               | < 0.05<br>(< 0.05 to 0.1)              | 17.4<br>(-27.8 to 79.6)                           | 8.5<br>(-33.7 to 65.8)                              |
| Thalassaemias trait                                        | 346.1<br>(106.5 to 734.3)                     | --                                               | 1.9<br>(0.5 to 4.8)                    | 17.9<br>(-18.8 to 65.7)                           | 6.6<br>(-25.5 to 53.7)                              |
| Sickle cell disorders                                      | < 0.05<br>(< 0.05 to 0.1)                     | --                                               | < 0.05<br>(< 0.05 to < 0.05)           | -0.1<br>(-20.4 to 26.8)                           | -0.4<br>(-20.2 to 24.5)                             |
| Sickle cell trait                                          | 64.5<br>(38.0 to 101.4)                       | --                                               | 0.1<br>(< 0.05 to 0.2)                 | 13.6<br>(-25.0 to 75.0)                           | 4.1<br>(-32.0 to 64.2)                              |
| G6PD deficiency                                            | 77.9<br>(65.0 to 92.7)                        | --                                               | < 0.05<br>(< 0.05 to < 0.05)           | 22.7<br>(-11.9 to 69.4)                           | 9.1<br>(-22.2 to 55.1)                              |
| G6PD trait                                                 | 418.1<br>(385.4 to 450.9)                     | --                                               | < 0.05<br>(< 0.05 to < 0.05)           | 26.3<br>(-20.4 to 99.7)                           | 15.8<br>(-28.2 to 84.2)                             |
| Other hemoglobinopathies and hemolytic anaemias            | 6.2<br>(5.1 to 7.7)                           | --                                               | 0.1<br>(0.1 to 0.1)                    | 9.7<br>(-9.0 to 32.8)                             | -8.6<br>(-27.0 to 14.0)                             |
| Endocrine, metabolic, blood, and immune disorders          | 107.5<br>(97.3 to 118.7)                      | 21.5<br>(19.3 to 24.0)                           | 3.7<br>(2.5 to 5.1)                    | 19.8<br>(13.0 to 26.8)                            | -1.1<br>(-6.5 to 4.6)                               |
| <b>Musculoskeletal disorders</b>                           | <b>1,080.0</b><br><b>(1,031.2 to 1,132.9)</b> | <b>539.6</b><br><b>(488.1 to 597.5)</b>          | <b>115.6</b><br><b>(84.0 to 149.8)</b> | <b>17.4</b><br><b>(14.0 to 21.1)</b>              | <b>2.5</b><br><b>(-0.3 to 5.4)</b>                  |
| Rheumatoid arthritis                                       | 22.9<br>(20.4 to 25.6)                        | 1.2<br>(1.1 to 1.4)                              | 5.3<br>(3.6 to 7.1)                    | 18.3<br>(9.3 to 27.3)                             | -1.7<br>(-9.2 to 6.0)                               |
| Osteoarthritis                                             | 294.7<br>(268.0 to 324.6)                     | 14.2<br>(12.7 to 15.8)                           | 10.3<br>(6.7 to 15.1)                  | 27.1<br>(23.4 to 30.8)                            | 0.5<br>(-2.6 to 3.5)                                |
| Low back and neck pain                                     | 709.9<br>(664.5 to 764.4)                     | 296.5<br>(261.3 to 331.8)                        | 84.3<br>(59.4 to 111.1)                | 17.1<br>(13.1 to 21.4)                            | 3.4<br>(-0.1 to 7.0)                                |
| Low back pain                                              | 500.2<br>(444.5 to 569.2)                     | 247.3<br>(213.2 to 282.4)                        | 56.6<br>(39.8 to 75.2)                 | 17.9<br>(11.9 to 24.2)                            | 5.0<br>(0.0 to 10.1)                                |
| Neck pain                                                  | 278.4<br>(241.0 to 320.0)                     | 49.2<br>(42.7 to 57.8)                           | 27.7<br>(18.7 to 39.1)                 | 15.7<br>(12.7 to 18.3)                            | 0.2<br>(-1.5 to 2.0)                                |
| Gout                                                       | 44.2<br>(39.2 to 50.2)                        | 7.1<br>(6.2 to 8.2)                              | 1.4<br>(0.9 to 1.9)                    | 23.2<br>(9.4 to 37.8)                             | 0.1<br>(-11.0 to 11.9)                              |
| Other musculoskeletal disorders                            | 167.7<br>(129.9 to 208.9)                     | 220.6<br>(184.6 to 265.7)                        | 14.3<br>(9.2 to 20.7)                  | 12.3<br>(1.1 to 25.4)                             | 0.7<br>(-8.8 to 11.3)                               |
| <b>Other non-communicable diseases</b>                     | <b>3,413.1</b><br><b>(3,353.2 to 3,472.9)</b> | <b>10,026.4†</b><br><b>(9,486.8 to 10,614.5)</b> | <b>104.6</b><br><b>(72.7 to 147.2)</b> | <b>14.3</b><br><b>(12.8 to 15.9)</b>              | <b>0.5</b><br><b>(-0.8 to 1.7)</b>                  |
| Congenital anomalies                                       | 59.7<br>(56.6 to 63.0)                        | --                                               | 7.2<br>(5.2 to 9.6)                    | 11.4<br>(5.8 to 17.2)                             | 2.6<br>(-2.3 to 7.9)                                |
| Neural tube defects                                        | 4.3<br>(3.8 to 4.8)                           | --                                               | 1.3<br>(0.9 to 1.7)                    | 23.5<br>(7.1 to 42.7)                             | 13.9<br>(-1.1 to 31.1)                              |
| Congenital heart anomalies                                 | 10.8<br>(9.6 to 11.8)                         | --                                               | 0.6<br>(0.2 to 1.0)                    | 7.2<br>(-4.0 to 19.2)                             | -1.8<br>(-12.1 to 9.2)                              |
| Orofacial clefts                                           | 2.5<br>(2.2 to 2.9)                           | --                                               | < 0.05<br>(< 0.05 to < 0.05)           | 3.3<br>(-9.2 to 16.9)                             | -4.8<br>(-16.2 to 7.6)                              |
| Down's syndrome                                            | 5.0<br>(4.4 to 5.7)                           | --                                               | 0.5<br>(0.3 to 0.6)                    | 0.6<br>(-10.1 to 13.1)                            | -2.7<br>(-13.2 to 9.8)                              |
| Turner syndrome                                            | 1.5<br>(1.3 to 1.7)                           | --                                               | < 0.05<br>(< 0.05 to < 0.05)           | 2.9<br>(-27.9 to 48.6)                            | 0.6<br>(-30.4 to 46.1)                              |
| Klinefelter syndrome                                       | 4.5<br>(3.9 to 5.3)                           | --                                               | < 0.05<br>(< 0.05 to 0.1)              | -8.9<br>(-23.1 to 10.2)                           | -2.7<br>(-18.1 to 16.5)                             |

| Cause                                         | Prevalence in thousands (95% UI)              | Incidence in thousands (95% UI)          | YLDs in thousands (95% UI)           |                                                   |                                                     |
|-----------------------------------------------|-----------------------------------------------|------------------------------------------|--------------------------------------|---------------------------------------------------|-----------------------------------------------------|
|                                               | 2016 counts                                   | 2016 counts                              | 2016 counts                          | Percentage change in counts between 2006 and 2016 | Percentage change in age-standardised rates between |
| Other chromosomal abnormalities               | 7.7<br>(6.5 to 9.0)                           | --                                       | 0.7<br>(0.5 to 1.0)                  | 9.6<br>(-2.7 to 23.7)                             | 1.3<br>(-9.9 to 14.1)                               |
| Congenital musculoskeletal and limb anomalies | 17.3<br>(15.8 to 18.8)                        | --                                       | 2.3<br>(1.6 to 3.1)                  | 11.4<br>(2.8 to 21.9)                             | 2.6<br>(-5.8 to 11.9)                               |
| Urogenital congenital anomalies               | 3.9<br>(3.6 to 4.3)                           | --                                       | 0.1<br>(0.1 to 0.2)                  | 2.3<br>(-8.2 to 12.7)                             | -5.7<br>(-15.8 to 4.8)                              |
| Digestive congenital anomalies                | 8.0<br>(7.2 to 8.8)                           | --                                       | 0.4<br>(0.2 to 0.5)                  | -9.5<br>(-22.5 to 4.0)                            | -16.3<br>(-28.4 to -3.7)                            |
| Other congenital anomalies                    | 6.4<br>(2.6 to 11.5)                          | --                                       | 1.4<br>(0.8 to 2.2)                  | 16.3<br>(5.0 to 31.1)                             | 5.6<br>(-4.3 to 17.7)                               |
| Skin and subcutaneous diseases                | 1,603.0<br>(1,568.5 to 1,637.4)               | 3,386.2<br>(3,209.0 to 3,592.2)          | 42.5<br>(28.8 to 60.7)               | 8.2<br>(6.1 to 10.2)                              | 1.5<br>(-0.3 to 3.3)                                |
| Dermatitis                                    | 293.0<br>(275.5 to 311.3)                     | 320.7<br>(277.5 to 375.9)                | 11.1<br>(6.6 to 18.1)                | 10.2<br>(6.3 to 14.5)                             | 0.3<br>(-3.2 to 4.2)                                |
| Psoriasis                                     | 90.1<br>(84.5 to 96.2)                        | 8.2<br>(7.7 to 8.7)                      | 7.8<br>(5.5 to 10.2)                 | 15.0<br>(9.3 to 21.8)                             | 3.1<br>(-2.1 to 9.3)                                |
| Cellulitis                                    | 2.1<br>(2.0 to 2.2)                           | 37.8<br>(35.5 to 40.2)                   | 0.1<br>(0.1 to 0.2)                  | 10.3<br>(-7.0 to 33.3)                            | -0.1<br>(-15.8 to 21.9)                             |
| Pyoderma                                      | 17.7<br>(17.2 to 18.2)                        | 469.2<br>(454.3 to 485.6)                | 0.1<br>(< 0.05 to 0.2)               | 14.1<br>(8.0 to 20.4)                             | 0.6<br>(-4.8 to 6.4)                                |
| Scabies                                       | 4.3<br>(3.1 to 6.0)                           | 13.0<br>(9.4 to 18.1)                    | 0.1<br>(0.1 to 0.2)                  | 2.5<br>(-9.2 to 16.1)                             | -0.1<br>(-10.9 to 11.8)                             |
| Fungal skin diseases                          | 314.4<br>(280.5 to 349.5)                     | 1,206.8<br>(1,057.7 to 1,373.1)          | 1.7<br>(0.7 to 3.7)                  | 16.1<br>(13.6 to 18.2)                            | 0.1<br>(-1.3 to 1.3)                                |
| Viral skin diseases                           | 138.6<br>(119.4 to 160.0)                     | 180.4<br>(154.3 to 208.2)                | 4.2<br>(2.6 to 6.4)                  | 7.8<br>(3.0 to 12.4)                              | 0.3<br>(-2.2 to 3.0)                                |
| Acne vulgaris                                 | 447.1<br>(407.4 to 486.7)                     | 357.8<br>(283.1 to 467.9)                | 11.5<br>(7.8 to 16.8)                | -1.0<br>(-4.8 to 2.8)                             | 2.4<br>(-1.2 to 6.3)                                |
| Alopecia areata                               | 13.9<br>(13.4 to 14.4)                        | 24.4<br>(23.6 to 25.3)                   | 0.5<br>(0.3 to 0.7)                  | 4.0<br>(-4.1 to 13.2)                             | 0.1<br>(-7.9 to 8.9)                                |
| Pruritus                                      | 41.9<br>(37.0 to 47.5)                        | 33.0<br>(29.5 to 37.5)                   | 0.4<br>(0.2 to 0.8)                  | 13.1<br>(7.3 to 19.2)                             | 0.5<br>(-4.6 to 6.3)                                |
| Urticaria                                     | 29.9<br>(26.4 to 33.7)                        | 52.9<br>(46.8 to 59.8)                   | 1.8<br>(1.2 to 2.5)                  | 8.3<br>(1.4 to 15.5)                              | 0.7<br>(-5.2 to 6.9)                                |
| Decubitus ulcer                               | 2.3<br>(2.1 to 2.6)                           | 8.5<br>(7.5 to 9.7)                      | 0.4<br>(0.2 to 0.5)                  | 8.9<br>(-3.4 to 24.7)                             | -10.5<br>(-20.1 to 0.9)                             |
| Other skin and subcutaneous diseases          | 528.8<br>(513.5 to 544.0)                     | 673.4<br>(649.6 to 698.1)                | 2.9<br>(1.4 to 5.3)                  | 20.3<br>(17.7 to 22.9)                            | 3.3<br>(1.1 to 5.4)                                 |
| Sense organ diseases                          | 1,150.6<br>(1,075.3 to 1,221.1)               | 482.2†<br>(454.1 to 512.2)               | 34.6<br>(23.9 to 49.9)               | 20.7<br>(17.4 to 24.3)                            | -0.8<br>(-3.5 to 1.9)                               |
| Glaucoma                                      | 2.2<br>(1.7 to 3.0)                           | --                                       | 0.2<br>(0.1 to 0.3)                  | 29.7<br>(10.5 to 53.6)                            | -0.2<br>(-15.6 to 18.7)                             |
| Cataract                                      | 17.2<br>(12.5 to 23.3)                        | --                                       | 1.4<br>(0.9 to 2.1)                  | 24.3<br>(13.7 to 35.2)                            | -3.2<br>(-11.5 to 5.2)                              |
| Macular degeneration                          | 4.2<br>(3.1 to 5.7)                           | --                                       | 0.4<br>(0.2 to 0.6)                  | 31.2<br>(15.7 to 49.1)                            | 0.4<br>(-11.6 to 14.2)                              |
| Refraction and accommodation disorders        | 316.8<br>(284.4 to 351.7)                     | --                                       | 6.0<br>(3.6 to 9.6)                  | 12.1<br>(6.5 to 17.9)                             | -2.5<br>(-6.7 to 1.9)                               |
| Age-related and other hearing loss            | 908.1<br>(791.2 to 1,032.9)                   | --                                       | 20.5<br>(13.7 to 30.7)               | 22.9<br>(17.8 to 28.7)                            | -0.7<br>(-4.6 to 3.8)                               |
| Other vision loss                             | 12.1<br>(9.5 to 15.2)                         | --                                       | 1.0<br>(0.6 to 1.4)                  | 17.7<br>(7.3 to 29.6)                             | -0.5<br>(-8.7 to 9.0)                               |
| Other sense organ diseases                    | 164.5<br>(151.8 to 177.5)                     | 482.2<br>(454.1 to 512.2)                | 5.1<br>(3.2 to 7.7)                  | 21.0<br>(16.5 to 25.3)                            | 1.2<br>(-2.6 to 4.7)                                |
| Oral disorders                                | 2,368.2<br>(2,276.4 to 2,457.2)               | 6,157.9†<br>(5,639.9 to 6,693.0)         | 20.2<br>(12.6 to 30.1)               | 19.0<br>(16.1 to 22.1)                            | -1.0<br>(-3.2 to 1.1)                               |
| Caries of deciduous teeth                     | 179.5<br>(122.8 to 227.1)                     | 613.2<br>(318.8 to 946.4)                | 0.1<br>(< 0.05 to 0.1)               | 18.4<br>(5.1 to 34.0)                             | -1.3<br>(-12.5 to 11.1)                             |
| Caries of permanent teeth                     | 1,676.3<br>(1,576.4 to 1,777.3)               | 5,447.5<br>(5,016.0 to 5,842.5)          | 1.6<br>(0.7 to 3.1)                  | 4.8<br>(1.4 to 8.0)                               | -2.4<br>(-5.2 to 0.4)                               |
| Periodontal disease                           | 508.0<br>(379.7 to 663.7)                     | 60.7<br>(44.4 to 79.5)                   | 3.3<br>(1.2 to 7.1)                  | 19.5<br>(13.7 to 25.3)                            | 1.2<br>(-2.9 to 6.1)                                |
| Edentulism and severe tooth loss              | 453.6<br>(399.7 to 508.8)                     | 36.5<br>(30.4 to 43.3)                   | 12.6<br>(8.2 to 17.7)                | 23.4<br>(18.5 to 28.0)                            | -1.6<br>(-5.3 to 1.8)                               |
| Other oral disorders                          | 88.6<br>(84.7 to 92.8)                        | --                                       | 2.6<br>(1.6 to 3.9)                  | 9.0<br>(5.6 to 12.5)                              | 0.4<br>(-2.8 to 3.5)                                |
| <b>Injuries</b>                               | <b>1,452.4</b><br><b>(1,345.6 to 1,573.5)</b> | <b>487.6†</b><br><b>(456.2 to 524.4)</b> | <b>44.2</b><br><b>(29.4 to 63.1)</b> | <b>15.0</b><br><b>(13.5 to 16.5)</b>              | <b>0.3</b><br><b>(-0.9 to 1.5)</b>                  |
| <b>Transport injuries</b>                     | <b>176.7</b><br><b>(163.2 to 190.4)</b>       | <b>43.5</b><br><b>(39.0 to 48.6)</b>     | <b>7.9</b><br><b>(5.2 to 11.5)</b>   | <b>0.1</b><br><b>(-1.5 to 1.9)</b>                | <b>-12.3</b><br><b>(-13.7 to -10.7)</b>             |
| Road injuries                                 | 156.3<br>(144.3 to 169.0)                     | 40.5<br>(36.0 to 45.4)                   | 7.2<br>(4.7 to 10.4)                 | -2.3<br>(-3.9 to -0.5)                            | -14.4<br>(-15.8 to -12.8)                           |
| Pedestrian road injuries                      | 24.1<br>(20.7 to 28.3)                        | 4.0<br>(3.2 to 5.0)                      | 1.2<br>(0.8 to 1.8)                  | 0.5<br>(-1.2 to 2.4)                              | -12.0<br>(-13.5 to -10.5)                           |
| Cyclist road injuries                         | 45.5<br>(37.6 to 54.0)                        | 14.9<br>(12.3 to 17.5)                   | 1.9<br>(1.2 to 2.8)                  | 6.0<br>(4.2 to 8.0)                               | -7.6<br>(-9.0 to -6.0)                              |
| Motorcyclist road injuries                    | 30.4<br>(25.6 to 36.1)                        | 4.9<br>(3.9 to 6.0)                      | 1.4<br>(1.0 to 2.1)                  | 1.9<br>(-0.1 to 4.1)                              | -10.4<br>(-12.1 to -8.6)                            |
| Motor vehicle road injuries                   | 44.6<br>(37.4 to 51.9)                        | 13.7<br>(11.6 to 15.9)                   | 2.2<br>(1.4 to 3.1)                  | -14.3<br>(-15.9 to -12.5)                         | -24.7<br>(-26.3 to -23.1)                           |
| Other road injuries                           | 11.6<br>(9.7 to 13.8)                         | 3.0<br>(2.3 to 3.9)                      | 0.4<br>(0.3 to 0.6)                  | 12.8<br>(10.3 to 15.7)                            | -0.4<br>(-2.7 to 2.1)                               |
| Other transport injuries                      | 20.4<br>(16.6 to 24.2)                        | 3.0<br>(2.6 to 3.5)                      | 0.7<br>(0.5 to 1.1)                  | 32.4<br>(30.6 to 34.3)                            | 14.8<br>(13.3 to 16.3)                              |
| <b>Unintentional injuries</b>                 | <b>1,224.4</b><br><b>(1,122.4 to 1,336.9)</b> | <b>422.2</b><br><b>(391.5 to 459.0)</b>  | <b>34.4</b><br><b>(22.7 to 49.8)</b> | <b>19.4</b><br><b>(18.0 to 20.9)</b>              | <b>3.7</b><br><b>(2.4 to 5.0)</b>                   |
| Falls                                         | 647.1<br>(561.0 to 736.4)                     | 226.1<br>(199.9 to 258.7)                | 22.0<br>(15.0 to 30.6)               | 18.5<br>(16.8 to 20.2)                            | 2.6<br>(1.1 to 4.1)                                 |
| Drowning                                      | 2.4<br>(2.1 to 2.7)                           | 0.3<br>(0.2 to 0.3)                      | 0.1<br>(0.1 to 0.2)                  | 18.5<br>(13.0 to 24.6)                            | 5.1<br>(0.1 to 10.4)                                |
| Fire, heat, and hot substances                | 110.4<br>(94.0 to 130.8)                      | 6.7<br>(5.4 to 7.9)                      | 1.9<br>(1.1 to 3.2)                  | 14.2<br>(10.7 to 17.2)                            | 0.4<br>(-2.5 to 3.2)                                |
| Poisonings                                    | 4.4<br>(3.6 to 5.6)                           | 4.4<br>(3.6 to 5.3)                      | 0.4<br>(0.2 to 0.6)                  | 13.6<br>(4.9 to 23.4)                             | 4.7<br>(-3.9 to 14.2)                               |
| Exposure to mechanical forces                 | 250.1<br>(208.0 to 320.1)                     | 64.9<br>(54.3 to 75.5)                   | 4.5<br>(2.8 to 6.9)                  | 24.1<br>(22.4 to 26.0)                            | 8.9<br>(7.6 to 10.3)                                |
| Unintentional firearm injuries                | 7.6<br>(6.1 to 9.4)                           | 0.8<br>(0.5 to 1.1)                      | 0.1<br>(0.1 to 0.2)                  | 20.8<br>(18.3 to 23.5)                            | 5.5<br>(3.6 to 7.4)                                 |
| Unintentional suffocation                     | 3.2<br>(2.6 to 4.0)                           | 0.5<br>(0.3 to 0.8)                      | 0.1<br>(< 0.05 to 0.1)               | 19.4<br>(17.3 to 21.8)                            | 4.9<br>(3.3 to 6.7)                                 |
| Other exposure to mechanical forces           | 239.3<br>(197.3 to 309.9)                     | 63.6<br>(53.1 to 74.0)                   | 4.3<br>(2.7 to 6.6)                  | 24.2<br>(22.6 to 26.1)                            | 9.1<br>(7.8 to 10.5)                                |



| Cause                                                                               | Prevalence in thousands (95% UI)       | Incidence in thousands (95% UI)       | YLDs in thousands (95% UI)                          |                                                   |                                                     |
|-------------------------------------------------------------------------------------|----------------------------------------|---------------------------------------|-----------------------------------------------------|---------------------------------------------------|-----------------------------------------------------|
|                                                                                     | 2016 counts                            | 2016 counts                           | 2016 counts                                         | Percentage change in counts between 2006 and 2016 | Percentage change in age-standardised rates between |
| Adverse effects of medical treatment                                                | 1.6<br>(1.3 to 1.9)                    | 20.7<br>(18.2 to 23.5)                | 0.2<br>(0.1 to 0.3)                                 | 17.4<br>(12.7 to 22.6)                            | 1.6<br>(-2.4 to 5.6)                                |
| Animal contact                                                                      | 15.8<br>(13.9 to 18.4)                 | 9.6<br>(7.8 to 11.8)                  | 0.3<br>(0.2 to 0.5)                                 | 10.4<br>(6.6 to 14.3)                             | -2.5<br>(-5.8 to 1.2)                               |
| Venomous animal contact                                                             | 2.5<br>(2.1 to 2.9)                    | 3.0<br>(2.2 to 4.0)                   | 0.1<br>(0.1 to 0.2)                                 | 7.8<br>(0.2 to 16.0)                              | -1.3<br>(-8.2 to 6.7)                               |
| Non-venomous animal contact                                                         | 13.3<br>(11.5 to 15.7)                 | 6.6<br>(5.2 to 8.2)                   | 0.2<br>(0.1 to 0.3)                                 | 12.4<br>(10.5 to 14.6)                            | -3.5<br>(-4.9 to -1.9)                              |
| Foreign body                                                                        | 27.1<br>(23.2 to 32.2)                 | 21.1<br>(18.1 to 25.2)                | 0.8<br>(0.5 to 1.2)                                 | 24.4<br>(22.4 to 26.6)                            | 9.3<br>(7.8 to 11.1)                                |
| Pulmonary aspiration and foreign body in airway                                     | 4.2<br>(3.4 to 5.3)                    | 4.2<br>(3.6 to 5.0)                   | 0.1<br>(0.1 to 0.2)                                 | 23.6<br>(21.4 to 25.8)                            | 7.7<br>(5.7 to 9.5)                                 |
| Foreign body in eyes                                                                | 2.9<br>(1.9 to 4.0)                    | 12.3<br>(9.6 to 16.4)                 | 0.2<br>(0.1 to 0.3)                                 | 27.9<br>(22.2 to 33.8)                            | 14.5<br>(11.3 to 17.8)                              |
| Foreign body in other body part                                                     | 19.9<br>(16.5 to 24.9)                 | 4.5<br>(3.8 to 5.3)                   | 0.5<br>(0.3 to 0.8)                                 | 23.2<br>(21.4 to 25.4)                            | 7.6<br>(6.1 to 9.3)                                 |
| Environmental heat and cold exposure                                                | 11.5<br>(10.1 to 13.1)                 | 2.6<br>(2.2 to 3.1)                   | 0.4<br>(0.3 to 0.6)                                 | 20.9<br>(16.7 to 25.4)                            | 2.4<br>(-0.9 to 6.0)                                |
| Other unintentional injuries                                                        | 154.1<br>(128.4 to 183.6)              | 65.9<br>(55.4 to 77.5)                | 3.8<br>(2.4 to 5.7)                                 | 22.9<br>(21.3 to 24.6)                            | 5.5<br>(4.3 to 6.8)                                 |
| <b>Self-harm and interpersonal violence</b>                                         | <b>101.7</b><br><b>(92.9 to 110.1)</b> | <b>21.7†</b><br><b>(19.5 to 24.3)</b> | <b>1.9</b><br><b>(1.3 to 2.8)</b>                   | <b>9.3</b><br><b>(6.3 to 12.1)</b>                | <b>0.1</b><br><b>(-2.0 to 2.4)</b>                  |
| Self-harm                                                                           | 14.1<br>(11.3 to 17.1)                 | 10.9<br>(9.6 to 12.6)                 | 0.6<br>(0.4 to 0.8)                                 | 9.2<br>(3.0 to 14.7)                              | -2.3<br>(-7.7 to 2.9)                               |
| Self-harm by firearm                                                                | 0.1<br>(0.1 to 0.1)                    | < 0.05<br>(< 0.05 to < 0.05)          | < 0.05<br>(< 0.05 to < 0.05)                        | -6.8<br>(-9.2 to -4.1)                            | -15.1<br>(-17.1 to -13.1)                           |
| Self-harm by other specified means                                                  | 13.9<br>(11.2 to 16.9)                 | 10.9<br>(9.6 to 12.6)                 | 0.6<br>(0.4 to 0.8)                                 | 9.2<br>(3.0 to 14.8)                              | -2.3<br>(-7.6 to 2.9)                               |
| Interpersonal violence                                                              | 87.6<br>(79.7 to 95.8)                 | 10.8†                                 | 1.4<br>(0.9 to 2.0)                                 | 9.4<br>(6.2 to 12.0)                              | 1.1<br>(-0.8 to 2.8)                                |
| Assault by firearm                                                                  | 2.4<br>(1.9 to 2.9)                    | 0.3<br>(0.2 to 0.4)                   | 0.1<br>(< 0.05 to 0.1)                              | 21.7<br>(19.6 to 24.2)                            | 7.4<br>(5.6 to 9.2)                                 |
| Assault by sharp object                                                             | 6.9<br>(5.5 to 8.3)                    | 1.8<br>(1.3 to 2.5)                   | 0.1<br>(0.1 to 0.2)                                 | 15.2<br>(12.9 to 17.7)                            | 2.1<br>(0.4 to 3.9)                                 |
| Sexual violence                                                                     | 51.1<br>(44.8 to 58.1)                 | --                                    | 0.4<br>(0.3 to 0.6)                                 | -4.4<br>(-9.3 to 0.5)                             | -3.1<br>(-7.4 to 0.8)                               |
| Assault by other means                                                              | 27.3<br>(22.4 to 33.8)                 | 8.7<br>(7.1 to 10.4)                  | 0.8<br>(0.5 to 1.2)                                 | 16.8<br>(15.1 to 18.7)                            | 3.6<br>(2.2 to 5.2)                                 |
| <b>Forces of nature, conflict and terrorism, and executions and police conflict</b> | <b>0.7</b><br><b>(0.5 to 1.1)</b>      | <b>0.2†</b><br><b>(0.1 to 0.2)</b>    | <b>&lt; 0.05</b><br><b>(&lt; 0.05 to &lt; 0.05)</b> | <b>20.4</b><br><b>(16.6 to 22.9)</b>              | <b>10.2</b><br><b>(7.5 to 12.3)</b>                 |
| Exposure to forces of nature                                                        | 0.2<br>(0.1 to 0.3)                    | --                                    | < 0.05<br>(< 0.05 to < 0.05)                        | -11.8<br>(-14.0 to -9.4)                          | -26.0<br>(-27.8 to -24.0)                           |
| Conflict and terrorism                                                              | --                                     | --                                    | --                                                  | --                                                | --                                                  |
| Executions and police conflict                                                      | 0.5<br>(0.3 to 0.9)                    | 0.2<br>(0.1 to 0.2)                   | < 0.05<br>(< 0.05 to < 0.05)                        | 33.0<br>(24.8 to 37.1)                            | 23.4<br>(15.8 to 27.1)                              |
| <b>Impairments</b>                                                                  | --                                     | --                                    | --                                                  | --                                                | --                                                  |
| Anaemia                                                                             | 378.0<br>(259.1 to 558.1)              | --                                    | 6.6<br>(4.0 to 10.9)                                | 15.8<br>(-7.7 to 44.7)                            | 1.4<br>(-18.9 to 27.9)                              |
| Developmental intellectual disability                                               | 65.2<br>(52.5 to 77.8)                 | --                                    | 8.4<br>(6.2 to 11.1)                                | 8.0<br>(4.2 to 12.1)                              | 0.7<br>(-3.0 to 4.6)                                |
| Epilepsy                                                                            | 18.7<br>(8.8 to 29.1)                  | --                                    | 5.2<br>(2.5 to 9.9)                                 | 2.4<br>(-57.9 to 163.9)                           | -5.2<br>(-61.5 to 145.7)                            |
| Guillain-Barre syndrome                                                             | < 0.05<br>(< 0.05 to 0.1)              | --                                    | < 0.05<br>(< 0.05 to < 0.05)                        | 15.6<br>(11.5 to 18.9)                            | -0.1<br>(-0.2 to 0.1)                               |
| Hearing loss                                                                        | 946.5<br>(826.9 to 1,070.4)            | --                                    | 22.2<br>(14.8 to 33.0)                              | 21.3<br>(16.5 to 26.8)                            | -1.0<br>(-4.7 to 3.2)                               |
| Heart failure                                                                       | 66.3<br>(58.1 to 76.1)                 | --                                    | 7.8<br>(6.2 to 9.6)                                 | 17.0<br>(9.0 to 25.5)                             | -9.6<br>(-15.8 to -3.1)                             |
| Infertility                                                                         | 44.9<br>(33.2 to 60.6)                 | --                                    | 0.3<br>(0.1 to 0.6)                                 | 3.3<br>(-4.4 to 10.4)                             | 1.6<br>(-4.9 to 8.0)                                |
| Pelvic inflammatory disease                                                         | 0.2<br>(0.1 to 0.3)                    | --                                    | < 0.05<br>(< 0.05 to < 0.05)                        | -3.0<br>(-27.6 to 29.2)                           | -2.8<br>(-26.9 to 26.9)                             |
| Vision loss                                                                         | 359.7<br>(324.2 to 399.2)              | --                                    | 10.4<br>(7.3 to 14.8)                               | 14.7<br>(10.4 to 19.3)                            | -1.6<br>(-5.0 to 2.1)                               |

We did not calculate incidence for the nine impairments, certain NTDs, and causes with only birth prevalence. Blank cells mean that no estimate is available.

† Incidence for aggregate causes represents the sum of the incidence of the causes below the aggregate.

‡ Incidence estimates for stroke represent first-ever stroke only.

^ Incidence of HIV/AIDS represents new infections of HIV only and does not include new infections of Tuberculosis in HIV positive cases.

SR Table 14: Prevalence, incidence, and YLDs for 2016, percentage change of YLD counts and percentage change of age-standardised YLD rates between 2006 and 2016 by cause and impairments, for all ages, Israel.

| Cause                                                                                | Prevalence in thousands (95% UI)       | Incidence in thousands (95% UI)            | YLDs in thousands (95% UI)         |                                                   |                                                     |
|--------------------------------------------------------------------------------------|----------------------------------------|--------------------------------------------|------------------------------------|---------------------------------------------------|-----------------------------------------------------|
|                                                                                      | 2016 counts                            | 2016 counts                                | 2016 counts                        | Percentage change in counts between 2006 and 2016 | Percentage change in age-standardised rates between |
| <b>All causes</b>                                                                    | <b>7,526.6</b><br>(7,477.5 to 7,572.1) | <b>57,202.8†</b><br>(53,188.8 to 61,144.4) | <b>860.9</b><br>(640.3 to 1,114.9) | <b>22.5</b><br>(20.8 to 24.3)                     | <b>-0.8</b><br>(-2.2 to 0.6)                        |
| <b>Communicable, maternal, neonatal, and nutritional disorders</b>                   | <b>2,384.6</b><br>(2,275.0 to 2,517.2) | <b>34,071.8†</b><br>(30,221.1 to 37,850.6) | <b>40.1</b><br>(28.5 to 55.9)      | <b>17.7</b><br>(10.3 to 26.4)                     | <b>-1.6</b><br>(-7.8 to 5.4)                        |
| <b>HIV/AIDS and tuberculosis</b>                                                     | <b>612.7</b><br>(510.9 to 704.4)       | <b>0.9†</b><br>(0.6 to 1.3)                | <b>1.1</b><br>(0.6 to 2.0)         | <b>53.5</b><br>(25.2 to 77.7)                     | <b>26.7</b><br>(3.6 to 46.7)                        |
| Tuberculosis                                                                         | 540.7<br>(441.0 to 649.2)              | 0.4†<br>(0.3 to 0.5)                       | 0.1<br>(0.1 to 0.1)                | -12.0<br>(-23.9 to 1.5)                           | -27.2<br>(-37.0 to -15.9)                           |
| Drug-susceptible tuberculosis                                                        | 0.2<br>(0.2 to 0.3)                    | 0.3<br>(0.2 to 0.4)                        | 0.1<br>(0.1 to 0.1)                | -12.2<br>(-24.4 to 1.4)                           | -27.2<br>(-37.4 to -15.9)                           |
| Multidrug-resistant tuberculosis without extensive drug resistance                   | < 0.05<br>(< 0.05 to < 0.05)           | < 0.05<br>(< 0.05 to < 0.05)               | < 0.05<br>(< 0.05 to < 0.05)       | -15.1<br>(-40.1 to 19.8)                          | -29.7<br>(-50.4 to -1.0)                            |
| Extensively drug-resistant tuberculosis                                              | < 0.05<br>(< 0.05 to < 0.05)           | < 0.05<br>(< 0.05 to < 0.05)               | < 0.05<br>(< 0.05 to < 0.05)       | 82.5<br>(28.8 to 157.6)                           | 51.2<br>(6.7 to 113.2)                              |
| Latent tuberculosis infection                                                        | 540.4<br>(440.7 to 648.9)              | --                                         | --                                 | --                                                | --                                                  |
| HIV/AIDS                                                                             | 12.4<br>(5.9 to 19.6)                  | 0.6^<br>(0.2 to 0.9)                       | 1.1<br>(0.5 to 1.9)                | 63.5<br>(31.2 to 92.4)                            | 34.8<br>(8.4 to 58.5)                               |
| Drug-susceptible HIV/AIDS - Tuberculosis                                             | < 0.05<br>(< 0.05 to < 0.05)           | < 0.05<br>(< 0.05 to < 0.05)               | < 0.05<br>(< 0.05 to < 0.05)       | -20.3<br>(-27.1 to -11.0)                         | -34.2<br>(-39.8 to -26.5)                           |
| Multidrug-resistant HIV/AIDS - Tuberculosis without extensive drug resistance        | < 0.05<br>(< 0.05 to < 0.05)           | < 0.05<br>(< 0.05 to < 0.05)               | < 0.05<br>(< 0.05 to < 0.05)       | -22.4<br>(-45.0 to 9.1)                           | -35.9<br>(-54.6 to -9.9)                            |
| Extensively drug-resistant HIV/AIDS - Tuberculosis                                   | < 0.05<br>(< 0.05 to < 0.05)           | < 0.05<br>(< 0.05 to < 0.05)               | < 0.05<br>(< 0.05 to < 0.05)       | 66.9<br>(18.3 to 134.8)                           | 37.9<br>(-2.3 to 94.0)                              |
| HIV/AIDS resulting in other diseases                                                 | 12.4<br>(5.9 to 19.6)                  | 0.6<br>(0.2 to 0.9)                        | 1.1<br>(0.5 to 1.9)                | 64.3<br>(31.6 to 93.8)                            | 35.5<br>(8.6 to 60.4)                               |
| <b>Diarrhoea, lower respiratory infections, and other common infectious diseases</b> | <b>539.3</b><br>(497.1 to 583.0)       | <b>33,708.9†</b><br>(29,843.5 to 37,489.5) | <b>15.8</b><br>(10.2 to 23.2)      | <b>23.0</b><br>(18.8 to 28.3)                     | <b>2.5</b><br>(-1.0 to 6.6)                         |
| Diarrhoeal diseases                                                                  | 14.6<br>(13.2 to 16.3)                 | 963.1<br>(868.9 to 1,081.0)                | 1.7<br>(1.1 to 2.3)                | 65.2<br>(48.9 to 84.2)                            | 36.7<br>(23.2 to 53.1)                              |
| Intestinal infectious diseases                                                       | < 0.05<br>(< 0.05 to < 0.05)           | < 0.05†<br>(< 0.05 to < 0.05)              | < 0.05<br>(< 0.05 to < 0.05)       | 11.1<br>(-6.8 to 32.4)                            | -8.7<br>(-23.3 to 9.2)                              |
| Typhoid fever                                                                        | < 0.05<br>(< 0.05 to < 0.05)           | < 0.05<br>(< 0.05 to < 0.05)               | < 0.05<br>(< 0.05 to < 0.05)       | 20.8<br>(-1.5 to 47.5)                            | -1.8<br>(-19.6 to 20.2)                             |
| Paratyphoid fever                                                                    | < 0.05<br>(< 0.05 to < 0.05)           | < 0.05<br>(< 0.05 to < 0.05)               | < 0.05<br>(< 0.05 to < 0.05)       | 1.7<br>(-16.1 to 23.2)                            | -16.3<br>(-31.3 to 1.7)                             |
| Other intestinal infectious diseases                                                 | --                                     | --                                         | < 0.05<br>(< 0.05 to < 0.05)       | -32.1<br>(-54.2 to -2.0)                          | -42.9<br>(-61.6 to -18.1)                           |
| Lower respiratory infections                                                         | 4.0<br>(3.7 to 4.4)                    | 177.2<br>(161.8 to 193.2)                  | 0.2<br>(0.2 to 0.3)                | 37.0<br>(20.5 to 56.1)                            | 7.6<br>(-5.8 to 23.2)                               |
| Upper respiratory infections                                                         | 410.5<br>(364.7 to 454.5)              | 31,592.8<br>(27,803.5 to 35,298.3)         | 10.2<br>(6.1 to 15.9)              | 19.9<br>(14.6 to 25.6)                            | 0.3<br>(-4.0 to 5.1)                                |
| Otitis media                                                                         | 106.6<br>(88.6 to 134.3)               | 776.9<br>(500.9 to 1,324.2)                | 2.7<br>(1.7 to 4.1)                | 16.0<br>(7.7 to 23.9)                             | -2.4<br>(-9.6 to 4.3)                               |
| Meningitis                                                                           | 0.8<br>(0.6 to 3.2)                    | 0.1<br>(0.1 to 0.1)                        | 0.1<br>(0.1 to 0.5)                | 49.2<br>(13.6 to 469.5)                           | 15.9<br>(-5.5 to 262.9)                             |
| Pneumococcal meningitis                                                              | 0.1<br>(0.1 to 0.2)                    | < 0.05<br>(< 0.05 to < 0.05)               | < 0.05<br>(< 0.05 to < 0.05)       | 15.0<br>(9.2 to 19.8)                             | -4.4<br>(-9.1 to -0.2)                              |
| H influenzae type B meningitis                                                       | 0.1<br>(0.1 to 0.1)                    | < 0.05<br>(< 0.05 to < 0.05)               | < 0.05<br>(< 0.05 to < 0.05)       | 18.8<br>(12.2 to 24.6)                            | -1.3<br>(-6.9 to 3.5)                               |
| Meningococcal infection                                                              | 0.3<br>(0.1 to 2.7)                    | < 0.05<br>(< 0.05 to < 0.05)               | < 0.05<br>(< 0.05 to 0.4)          | 219.8<br>(8.8 to 2,590.0)                         | 113.7<br>(-9.5 to 1,467.7)                          |
| Other meningitis                                                                     | 0.3<br>(0.2 to 0.3)                    | < 0.05<br>(< 0.05 to 0.1)                  | 0.1<br>(< 0.05 to 0.1)             | 17.5<br>(11.9 to 23.4)                            | -2.0<br>(-6.5 to 3.0)                               |
| Encephalitis                                                                         | 3.3<br>(2.2 to 4.7)                    | 2.2<br>(2.0 to 2.5)                        | 0.4<br>(0.3 to 0.5)                | 20.2<br>(16.2 to 24.1)                            | -1.4<br>(-4.7 to 1.9)                               |
| Diphtheria                                                                           | < 0.05<br>(< 0.05 to < 0.05)           | < 0.05<br>(< 0.05 to < 0.05)               | < 0.05<br>(< 0.05 to < 0.05)       | -16.3<br>(-52.9 to 50.3)                          | -27.7<br>(-59.3 to 29.7)                            |
| Whooping cough                                                                       | 0.8<br>(0.6 to 1.0)                    | 5.7<br>(4.4 to 7.3)                        | < 0.05<br>(< 0.05 to 0.1)          | -1.4<br>(-26.6 to 33.4)                           | -16.0<br>(-37.4 to 13.6)                            |
| Tetanus                                                                              | < 0.05<br>(< 0.05 to < 0.05)           | < 0.05<br>(< 0.05 to < 0.05)               | < 0.05<br>(< 0.05 to < 0.05)       | -22.9<br>(-38.3 to -4.7)                          | -36.6<br>(-49.5 to -21.6)                           |
| Measles                                                                              | < 0.05<br>(< 0.05 to < 0.05)           | 0.1<br>(0.1 to 0.1)                        | < 0.05<br>(< 0.05 to < 0.05)       | 2,353.4<br>(1,016.0 to 9.7e+76)                   | 1,979.9<br>(846.1 to 7.4e+76)                       |
| Varicella and herpes zoster                                                          | 9.5<br>(8.7 to 10.2)                   | 190.8<br>(183.8 to 198.9)                  | 0.4<br>(0.2 to 0.6)                | 14.2<br>(1.7 to 27.6)                             | -8.4<br>(-18.9 to 2.8)                              |
| <b>Neglected tropical diseases and malaria</b>                                       | <b>2.8</b><br>(2.4 to 3.7)             | <b>0.4†</b><br>(0.2 to 0.7)                | <b>0.1</b><br>(< 0.05 to 0.2)      | <b>-18.4</b><br>(-71.8 to 141.3)                  | <b>-34.3</b><br>(-77.6 to 93.3)                     |
| Malaria                                                                              | --                                     | --                                         | --                                 | --                                                | --                                                  |
| Chagas disease                                                                       | 2.5<br>(2.1 to 2.9)                    | --                                         | < 0.05<br>(< 0.05 to < 0.05)       | -7.5<br>(-15.1 to 0.2)                            | -27.4<br>(-33.3 to -21.3)                           |
| Leishmaniasis                                                                        | 0.2<br>(0.1 to 0.3)                    | 0.3<br>(0.2 to 0.5)                        | < 0.05<br>(< 0.05 to < 0.05)       | -19.9<br>(-61.9 to 54.5)                          | -33.8<br>(-68.5 to 27.7)                            |
| Visceral leishmaniasis                                                               | < 0.05<br>(< 0.05 to < 0.05)           | < 0.05<br>(< 0.05 to < 0.05)               | < 0.05<br>(< 0.05 to < 0.05)       | -54.9<br>(-99.9 to 425.9)                         | -64.8<br>(-99.9 to 299.5)                           |
| Cutaneous and mucocutaneous leishmaniasis                                            | 0.2<br>(0.1 to 0.3)                    | 0.3<br>(0.2 to 0.5)                        | < 0.05<br>(< 0.05 to < 0.05)       | -19.9<br>(-62.1 to 54.7)                          | -33.8<br>(-68.7 to 27.9)                            |
| African trypanosomiasis                                                              | --                                     | --                                         | --                                 | --                                                | --                                                  |
| Schistosomiasis                                                                      | --                                     | --                                         | --                                 | --                                                | --                                                  |
| Cysticercosis                                                                        | --                                     | --                                         | --                                 | --                                                | --                                                  |
| Cystic echinococcosis                                                                | 0.3<br>(< 0.05 to 1.2)                 | 0.1<br>(< 0.05 to 0.2)                     | < 0.05<br>(< 0.05 to 0.1)          | -27.9<br>(-94.2 to 540.3)                         | -40.9<br>(-95.4 to 434.7)                           |
| Lymphatic filariasis                                                                 | --                                     | --                                         | --                                 | --                                                | --                                                  |
| Onchocerciasis                                                                       | --                                     | --                                         | --                                 | --                                                | --                                                  |
| Trachoma                                                                             | --                                     | --                                         | --                                 | --                                                | --                                                  |
| Dengue                                                                               | --                                     | --                                         | --                                 | --                                                | --                                                  |
| Yellow fever                                                                         | --                                     | --                                         | --                                 | --                                                | --                                                  |
| Rabies                                                                               | < 0.05<br>(< 0.05 to < 0.05)           | < 0.05<br>(< 0.05 to < 0.05)               | < 0.05<br>(< 0.05 to < 0.05)       | 9.8<br>(-19.1 to 47.9)                            | -11.3<br>(-35.6 to 21.3)                            |
| Intestinal nematode infections                                                       | --                                     | --                                         | --                                 | --                                                | --                                                  |
| Ascariasis                                                                           | --                                     | --                                         | --                                 | --                                                | --                                                  |

| Cause                                                                   | Prevalence in thousands (95% UI)              | Incidence in thousands (95% UI)                   | YLDs in thousands (95% UI)              |                                                   |                                                     |
|-------------------------------------------------------------------------|-----------------------------------------------|---------------------------------------------------|-----------------------------------------|---------------------------------------------------|-----------------------------------------------------|
|                                                                         | 2016 counts                                   | 2016 counts                                       | 2016 counts                             | Percentage change in counts between 2006 and 2016 | Percentage change in age-standardised rates between |
| Trichuriasis                                                            | --                                            | --                                                | --                                      | --                                                | --                                                  |
| Hookworm disease                                                        | --                                            | --                                                | --                                      | --                                                | --                                                  |
| Food-borne trematodiasis                                                | --                                            | --                                                | --                                      | --                                                | --                                                  |
| Leprosy                                                                 | < 0.05<br>(< 0.05 to < 0.05)                  | < 0.05<br>(< 0.05 to < 0.05)                      | < 0.05<br>(< 0.05 to < 0.05)            | 24.5<br>(20.8 to 28.4)                            | -2.8<br>(-5.9 to 0.2)                               |
| Ebola virus disease                                                     | --                                            | --                                                | --                                      | --                                                | --                                                  |
| Zika virus disease                                                      | --                                            | --                                                | --                                      | --                                                | --                                                  |
| Guinea worm disease                                                     | --                                            | --                                                | --                                      | --                                                | --                                                  |
| Other neglected tropical diseases                                       | --                                            | --                                                | < 0.05<br>(< 0.05 to < 0.05)            | --                                                | --                                                  |
| <b>Maternal disorders</b>                                               | <b>7.0</b><br><b>(5.5 to 8.6)</b>             | <b>150.3†</b><br><b>(103.8 to 224.5)</b>          | <b>0.5</b><br><b>(0.3 to 0.7)</b>       | <b>12.7</b><br><b>(-17.2 to 47.1)</b>             | <b>-1.5</b><br><b>(-27.3 to 28.5)</b>               |
| Maternal haemorrhage                                                    | 1.2<br>(0.7 to 1.7)                           | 14.6<br>(10.9 to 19.2)                            | 0.1<br>(< 0.05 to 0.1)                  | 12.3<br>(-28.8 to 77.9)                           | -1.9<br>(-38.0 to 54.0)                             |
| Maternal sepsis and other pregnancy related infections                  | 2.0<br>(1.4 to 2.8)                           | 14.6<br>(10.7 to 19.8)                            | 0.1<br>(< 0.05 to 0.1)                  | 9.3<br>(-47.4 to 138.6)                           | -3.1<br>(-53.6 to 115.1)                            |
| Maternal hypertensive disorders                                         | 3.3<br>(2.2 to 4.4)                           | 13.2<br>(11.7 to 14.6)                            | 0.1<br>(0.1 to 0.2)                     | 16.4<br>(-30.0 to 96.8)                           | 1.2<br>(-39.1 to 71.4)                              |
| Maternal obstructed labour and uterine rupture                          | 0.2<br>(0.1 to 0.3)                           | 14.6<br>(10.2 to 20.1)                            | 0.1<br>(< 0.05 to 0.1)                  | 13.0<br>(-56.3 to 191.2)                          | -1.1<br>(-62.0 to 155.0)                            |
| Maternal abortion, miscarriage, and ectopic pregnancy                   | 0.8<br>(0.4 to 1.4)                           | 93.4<br>(48.8 to 167.0)                           | 0.1<br>(< 0.05 to 0.2)                  | 13.8<br>(-40.1 to 116.0)                          | -0.8<br>(-47.0 to 85.0)                             |
| Other maternal disorders                                                | --                                            | --                                                | 0.1<br>(< 0.05 to 0.1)                  | 7.1<br>(-21.0 to 39.9)                            | -6.2<br>(-30.8 to 22.1)                             |
| <b>Neonatal disorders</b>                                               | <b>77.7</b><br><b>(64.5 to 94.0)</b>          | --                                                | <b>12.5</b><br><b>(8.7 to 18.1)</b>     | <b>12.8</b><br><b>(-0.8 to 27.7)</b>              | <b>-5.2</b><br><b>(-16.6 to 7.4)</b>                |
| Neonatal preterm birth complications                                    | 58.8<br>(46.7 to 77.7)                        | --                                                | 5.7<br>(3.6 to 8.2)                     | 11.3<br>(-12.3 to 36.4)                           | -6.5<br>(-26.5 to 14.6)                             |
| Neonatal encephalopathy due to birth asphyxia and trauma                | 23.1<br>(13.8 to 36.3)                        | --                                                | 4.4<br>(2.4 to 7.8)                     | 16.4<br>(-8.8 to 39.0)                            | -2.1<br>(-23.0 to 17.3)                             |
| Neonatal sepsis and other neonatal infections                           | 4.5<br>(2.1 to 9.3)                           | --                                                | 1.9<br>(0.7 to 4.3)                     | 9.8<br>(-6.9 to 29.5)                             | -7.7<br>(-21.7 to 8.8)                              |
| Hemolytic disease and other neonatal jaundice                           | 0.6<br>(0.5 to 0.7)                           | --                                                | 0.2<br>(0.1 to 0.2)                     | 18.5<br>(8.7 to 27.3)                             | -0.7<br>(-8.9 to 6.6)                               |
| Other neonatal disorders                                                | --                                            | --                                                | 0.4<br>(0.2 to 0.6)                     | 8.1<br>(-12.3 to 31.3)                            | -8.4<br>(-25.7 to 11.3)                             |
| <b>Nutritional deficiencies</b>                                         | <b>625.0</b><br><b>(531.8 to 714.0)</b>       | <b>36.6†</b><br><b>(28.9 to 45.1)</b>             | <b>9.2</b><br><b>(5.7 to 14.5)</b>      | <b>13.2</b><br><b>(-6.2 to 38.8)</b>              | <b>-5.5</b><br><b>(-22.2 to 16.0)</b>               |
| Protein-energy malnutrition                                             | 8.9<br>(8.7 to 9.1)                           | 5.4<br>(5.3 to 5.6)                               | 1.0<br>(0.6 to 1.4)                     | 17.3<br>(4.2 to 31.8)                             | -0.5<br>(-11.7 to 11.9)                             |
| Iodine deficiency                                                       | 91.4<br>(69.0 to 119.4)                       | 2.1<br>(1.6 to 2.7)                               | 2.3<br>(1.5 to 3.6)                     | 19.7<br>(6.6 to 36.1)                             | -1.2<br>(-11.7 to 12.4)                             |
| Vitamin A deficiency                                                    | 37.3<br>(27.1 to 48.3)                        | 29.1<br>(21.4 to 37.6)                            | --                                      | --                                                | --                                                  |
| Iron-deficiency anaemia                                                 | 446.5<br>(345.1 to 556.8)                     | --                                                | 5.9<br>(3.2 to 10.2)                    | 10.1<br>(-17.8 to 51.4)                           | -7.9<br>(-31.5 to 26.2)                             |
| Other nutritional deficiencies                                          | --                                            | --                                                | < 0.05<br>(< 0.05 to < 0.05)            | 17.0<br>(3.6 to 32.2)                             | -0.8<br>(-12.2 to 12.1)                             |
| <b>Other communicable, maternal, neonatal, and nutritional diseases</b> | <b>970.6</b><br><b>(894.2 to 1,051.0)</b>     | <b>174.7</b><br><b>(157.0 to 194.0)</b>           | <b>0.9</b><br><b>(0.5 to 1.5)</b>       | <b>21.7</b><br><b>(11.9 to 31.7)</b>              | <b>0.4</b><br><b>(-6.9 to 8.0)</b>                  |
| Sexually transmitted diseases excluding HIV                             | 786.7<br>(721.5 to 866.8)                     | 148.4<br>(131.1 to 167.4)                         | 0.5<br>(0.2 to 0.9)                     | 22.0<br>(15.6 to 29.5)                            | 0.1<br>(-5.2 to 6.3)                                |
| Syphilis                                                                | 2.0<br>(1.6 to 2.6)                           | 1.7<br>(1.2 to 2.3)                               | 0.1<br>(< 0.05 to 0.1)                  | 31.1<br>(15.7 to 48.5)                            | 1.9<br>(-10.1 to 15.8)                              |
| Chlamydial infection                                                    | 4.8<br>(4.2 to 5.4)                           | 2.7<br>(2.1 to 3.3)                               | < 0.05<br>(< 0.05 to 0.1)               | 28.1<br>(14.3 to 43.8)                            | 6.7<br>(-4.5 to 19.6)                               |
| Gonococcal infection                                                    | 2.3<br>(2.1 to 2.6)                           | 1.0<br>(0.7 to 1.5)                               | < 0.05<br>(< 0.05 to < 0.05)            | 18.6<br>(2.7 to 37.0)                             | -1.9<br>(-15.5 to 13.3)                             |
| Trichomoniasis                                                          | 124.4<br>(104.8 to 145.2)                     | 104.8<br>(87.5 to 123.0)                          | 0.1<br>(< 0.05 to 0.2)                  | 17.6<br>(7.1 to 28.6)                             | -0.8<br>(-9.5 to 8.3)                               |
| Genital herpes                                                          | 665.8<br>(571.3 to 775.6)                     | 35.4<br>(30.3 to 41.8)                            | 0.2<br>(0.1 to 0.4)                     | 21.2<br>(9.0 to 33.7)                             | -1.1<br>(-10.8 to 9.3)                              |
| Other sexually transmitted diseases                                     | 6.9<br>(6.0 to 7.8)                           | 2.8<br>(1.7 to 4.0)                               | 0.1<br>(< 0.05 to 0.1)                  | 21.7<br>(-2.9 to 49.6)                            | 0.3<br>(-19.4 to 23.0)                              |
| Hepatitis                                                               | 202.5<br>(178.8 to 229.6)                     | 26.2<br>(21.8 to 30.2)                            | < 0.05<br>(< 0.05 to 0.1)               | -7.4<br>(-22.4 to 10.1)                           | -25.6<br>(-38.1 to -11.5)                           |
| Acute hepatitis A                                                       | 1.0<br>(0.7 to 1.3)                           | 13.3<br>(9.3 to 16.6)                             | < 0.05<br>(< 0.05 to < 0.05)            | -10.2<br>(-34.6 to 24.6)                          | -26.6<br>(-47.0 to 1.0)                             |
| Hepatitis B                                                             | 95.2<br>(76.0 to 120.4)                       | 9.4<br>(7.4 to 11.5)                              | < 0.05<br>(< 0.05 to < 0.05)            | -7.1<br>(-22.1 to 9.7)                            | -26.9<br>(-38.9 to -13.8)                           |
| Hepatitis C                                                             | 106.2<br>(94.9 to 117.7)                      | 2.8<br>(2.4 to 3.3)                               | < 0.05<br>(< 0.05 to < 0.05)            | 11.6<br>(10.2 to 12.6)                            | -8.1<br>(-9.5 to -6.9)                              |
| Acute hepatitis E                                                       | 0.1<br>(< 0.05 to 0.1)                        | 0.7<br>(0.5 to 0.9)                               | < 0.05<br>(< 0.05 to < 0.05)            | -1.8<br>(-8.6 to 5.9)                             | -24.8<br>(-29.1 to -20.2)                           |
| Other infectious diseases                                               | 15.3<br>(11.1 to 20.4)                        | < 0.05<br>(< 0.05 to < 0.05)                      | 0.4<br>(0.2 to 0.7)                     | 24.6<br>(4.5 to 46.3)                             | 3.9<br>(-12.0 to 21.1)                              |
| <b>Non-communicable diseases</b>                                        | <b>7,296.2</b><br><b>(7,240.8 to 7,336.3)</b> | <b>22,338.7†</b><br><b>(21,355.1 to 23,397.9)</b> | <b>753.0</b><br><b>(556.8 to 972.9)</b> | <b>22.1</b><br><b>(20.3 to 24.0)</b>              | <b>-1.2</b><br><b>(-2.7 to 0.2)</b>                 |
| <b>Neoplasms</b>                                                        | <b>62.9</b><br><b>(60.6 to 65.4)</b>          | <b>24.2</b><br><b>(22.8 to 26.0)</b>              | <b>7.2</b><br><b>(5.4 to 9.4)</b>       | <b>23.0</b><br><b>(17.9 to 28.9)</b>              | <b>-7.2</b><br><b>(-11.1 to -2.7)</b>               |
| Lip and oral cavity cancer                                              | 0.8<br>(0.7 to 0.9)                           | 0.2<br>(0.2 to 0.2)                               | 0.1<br>(0.1 to 0.1)                     | 40.9<br>(22.3 to 62.7)                            | 6.3<br>(-7.5 to 22.1)                               |
| Nasopharynx cancer                                                      | 0.2<br>(0.1 to 0.2)                           | < 0.05<br>(< 0.05 to 0.1)                         | < 0.05<br>(< 0.05 to < 0.05)            | -21.8<br>(-32.5 to -8.9)                          | -39.4<br>(-48.1 to -28.9)                           |
| Other pharynx cancer                                                    | 0.1<br>(0.1 to 0.1)                           | < 0.05<br>(< 0.05 to < 0.05)                      | < 0.05<br>(< 0.05 to < 0.05)            | 17.7<br>(7.8 to 28.0)                             | -9.6<br>(-17.4 to -1.8)                             |
| Oesophageal cancer                                                      | 0.1<br>(0.1 to 0.2)                           | 0.1<br>(0.1 to 0.1)                               | < 0.05<br>(< 0.05 to < 0.05)            | 22.2<br>(10.1 to 36.2)                            | -9.2<br>(-18.0 to 0.6)                              |
| Stomach cancer                                                          | 1.2<br>(1.1 to 1.2)                           | 0.7<br>(0.7 to 0.8)                               | 0.2<br>(0.1 to 0.2)                     | 7.7<br>(-6.7 to 25.5)                             | -19.4<br>(-30.3 to -6.0)                            |
| Colon and rectum cancer                                                 | 10.0<br>(9.3 to 10.9)                         | 2.8<br>(2.6 to 3.1)                               | 1.0<br>(0.7 to 1.3)                     | 19.2<br>(6.8 to 35.3)                             | -11.8<br>(-21.4 to 0.5)                             |
| Liver cancer                                                            | 0.1<br>(0.1 to 0.1)                           | 0.3<br>(0.3 to 0.4)                               | 0.1<br>(0.1 to 0.1)                     | 35.2<br>(22.3 to 48.6)                            | 1.8<br>(-8.0 to 11.8)                               |
| Liver cancer due to hepatitis B                                         | < 0.05<br>(< 0.05 to 0.1)                     | 0.1<br>(< 0.05 to 0.1)                            | < 0.05<br>(< 0.05 to < 0.05)            | 34.3<br>(18.4 to 52.4)                            | 2.6<br>(-9.0 to 15.4)                               |



| Cause                                              | Prevalence in thousands (95% UI)        | Incidence in thousands (95% UI)       | YLDs in thousands (95% UI)           |                                                   |                                                     |
|----------------------------------------------------|-----------------------------------------|---------------------------------------|--------------------------------------|---------------------------------------------------|-----------------------------------------------------|
|                                                    | 2016 counts                             | 2016 counts                           | 2016 counts                          | Percentage change in counts between 2006 and 2016 | Percentage change in age-standardised rates between |
| Liver cancer due to hepatitis C                    | 0.1<br>(0.1 to 0.1)                     | 0.1<br>(0.1 to 0.2)                   | < 0.05<br>(< 0.05 to < 0.05)         | 35.0<br>(20.4 to 50.7)                            | 0.6<br>(-9.9 to 11.9)                               |
| Liver cancer due to alcohol use                    | 0.1<br>(< 0.05 to 0.1)                  | 0.1<br>(0.1 to 0.1)                   | < 0.05<br>(< 0.05 to < 0.05)         | 39.5<br>(23.6 to 60.8)                            | 5.4<br>(-6.9 to 20.4)                               |
| Liver cancer due to other causes                   | 0.1<br>(0.1 to 0.1)                     | 0.1<br>(0.1 to 0.1)                   | < 0.05<br>(< 0.05 to < 0.05)         | 32.2<br>(15.7 to 50.9)                            | -0.0<br>(-12.3 to 14.1)                             |
| Gallbladder and biliary tract cancer               | 0.1<br>(0.1 to 0.2)                     | 0.1<br>(0.1 to 0.2)                   | < 0.05<br>(< 0.05 to < 0.05)         | -2.1<br>(-19.8 to 22.1)                           | -28.5<br>(-41.1 to -11.3)                           |
| Pancreatic cancer                                  | 0.7<br>(0.6 to 0.8)                     | 1.0<br>(0.9 to 1.0)                   | 0.2<br>(0.1 to 0.2)                  | 30.4<br>(10.2 to 54.4)                            | -2.8<br>(-17.5 to 15.5)                             |
| Larynx cancer                                      | 0.5<br>(0.5 to 0.6)                     | 0.1<br>(0.1 to 0.2)                   | 0.1<br>(< 0.05 to 0.1)               | 27.0<br>(7.5 to 50.3)                             | -4.0<br>(-19.3 to 13.4)                             |
| Tracheal, bronchus, and lung cancer                | 2.5<br>(2.3 to 2.7)                     | 2.1<br>(2.0 to 2.2)                   | 0.5<br>(0.3 to 0.6)                  | 20.7<br>(2.2 to 41.9)                             | -9.3<br>(-23.5 to 6.5)                              |
| Malignant skin melanoma                            | 4.3<br>(3.7 to 5.4)                     | 0.9<br>(0.8 to 1.1)                   | 0.3<br>(0.2 to 0.4)                  | 28.0<br>(12.5 to 49.4)                            | -1.0<br>(-13.4 to 16.4)                             |
| Non-melanoma skin cancer                           | 1.7<br>(1.2 to 2.5)                     | 3.5<br>(2.2 to 5.0)                   | 0.1<br>(< 0.05 to 0.1)               | 11.2<br>(-34.1 to 83.3)                           | -18.7<br>(-52.0 to 33.3)                            |
| Non-melanoma skin cancer (squamous-cell carcinoma) | 1.4<br>(0.8 to 2.3)                     | 1.4<br>(0.8 to 2.2)                   | 0.1<br>(< 0.05 to 0.1)               | 10.5<br>(-35.2 to 88.4)                           | -19.4<br>(-53.1 to 37.4)                            |
| Non-melanoma skin cancer (basal-cell carcinoma)    | 0.3<br>(0.1 to 0.5)                     | 2.1<br>(1.1 to 3.4)                   | < 0.05<br>(< 0.05 to < 0.05)         | 28.2<br>(-3.3 to 71.2)                            | -2.4<br>(-25.9 to 31.9)                             |
| Breast cancer                                      | 16.8<br>(15.7 to 18.1)                  | 3.5<br>(3.3 to 3.8)                   | 1.6<br>(1.2 to 2.2)                  | 18.2<br>(6.7 to 31.4)                             | -9.9<br>(-19.3 to 0.1)                              |
| Cervical cancer                                    | 1.2<br>(1.0 to 1.4)                     | 0.3<br>(0.3 to 0.4)                   | 0.1<br>(0.1 to 0.2)                  | 10.9<br>(-9.1 to 34.9)                            | -13.2<br>(-29.2 to 5.9)                             |
| Uterine cancer                                     | 2.3<br>(2.0 to 2.7)                     | 0.5<br>(0.4 to 0.6)                   | 0.2<br>(0.1 to 0.2)                  | 38.3<br>(11.4 to 70.1)                            | 4.0<br>(-16.2 to 28.0)                              |
| Ovarian cancer                                     | 1.5<br>(1.2 to 1.7)                     | 0.5<br>(0.4 to 0.5)                   | 0.2<br>(0.1 to 0.3)                  | 17.7<br>(-10.9 to 55.8)                           | -9.3<br>(-31.5 to 20.2)                             |
| Prostate cancer                                    | 6.9<br>(5.8 to 10.5)                    | 2.0<br>(1.7 to 2.7)                   | 0.7<br>(0.5 to 1.1)                  | 29.6<br>(11.0 to 54.4)                            | -5.7<br>(-19.7 to 13.2)                             |
| Testicular cancer                                  | 0.4<br>(0.3 to 0.5)                     | 0.1<br>(0.1 to 0.1)                   | < 0.05<br>(< 0.05 to < 0.05)         | 65.2<br>(15.3 to 139.5)                           | 40.5<br>(-2.1 to 101.8)                             |
| Kidney cancer                                      | 2.1<br>(1.9 to 2.3)                     | 0.6<br>(0.5 to 0.7)                   | 0.2<br>(0.1 to 0.3)                  | 28.7<br>(11.4 to 49.6)                            | -1.9<br>(-15.3 to 13.4)                             |
| Bladder cancer                                     | 3.8<br>(3.4 to 4.1)                     | 0.9<br>(0.9 to 1.0)                   | 0.4<br>(0.2 to 0.5)                  | 30.2<br>(14.4 to 48.2)                            | -3.7<br>(-15.5 to 10.1)                             |
| Brain and nervous system cancer                    | 1.4<br>(1.0 to 1.7)                     | 0.6<br>(0.4 to 0.7)                   | 0.2<br>(0.1 to 0.3)                  | 29.2<br>(5.2 to 55.7)                             | 1.9<br>(-16.2 to 22.9)                              |
| Thyroid cancer                                     | 1.7<br>(1.5 to 1.9)                     | 0.3<br>(0.3 to 0.4)                   | 0.1<br>(0.1 to 0.2)                  | 25.2<br>(5.2 to 49.4)                             | -2.6<br>(-18.6 to 16.2)                             |
| Mesothelioma                                       | 0.1<br>(0.1 to 0.1)                     | 0.1<br>(< 0.05 to 0.1)                | < 0.05<br>(< 0.05 to < 0.05)         | 19.7<br>(8.1 to 32.9)                             | -9.2<br>(-17.9 to 0.4)                              |
| Hodgkin lymphoma                                   | 0.5<br>(0.5 to 0.7)                     | 0.1<br>(0.1 to 0.1)                   | < 0.05<br>(< 0.05 to 0.1)            | 10.9<br>(-8.4 to 34.5)                            | -7.5<br>(-23.8 to 12.5)                             |
| Non-Hodgkin's lymphoma                             | 2.9<br>(2.6 to 3.2)                     | 0.9<br>(0.8 to 0.9)                   | 0.3<br>(0.2 to 0.4)                  | 33.3<br>(15.0 to 53.6)                            | 1.8<br>(-12.2 to 17.3)                              |
| Multiple myeloma                                   | 0.7<br>(0.5 to 0.8)                     | 0.3<br>(0.3 to 0.4)                   | 0.1<br>(0.1 to 0.2)                  | 36.4<br>(7.4 to 71.1)                             | 2.8<br>(-18.9 to 30.6)                              |
| Leukaemia                                          | 2.3<br>(2.1 to 2.5)                     | 0.7<br>(0.7 to 0.8)                   | 0.3<br>(0.2 to 0.4)                  | 12.7<br>(0.7 to 25.9)                             | -15.8<br>(-24.6 to -5.6)                            |
| Acute lymphoid leukaemia                           | 0.2<br>(0.1 to 0.2)                     | < 0.05<br>(< 0.05 to 0.1)             | < 0.05<br>(< 0.05 to < 0.05)         | 5.9<br>(-9.4 to 20.0)                             | -14.6<br>(-26.6 to -3.5)                            |
| Chronic lymphoid leukaemia                         | 1.4<br>(1.2 to 1.6)                     | 0.3<br>(0.3 to 0.4)                   | 0.2<br>(0.1 to 0.2)                  | 16.4<br>(-3.3 to 39.5)                            | -14.4<br>(-29.4 to 2.6)                             |
| Acute myeloid leukaemia                            | 0.3<br>(0.2 to 0.3)                     | 0.2<br>(0.2 to 0.2)                   | 0.1<br>(< 0.05 to 0.1)               | 21.8<br>(3.1 to 37.8)                             | -6.3<br>(-20.0 to 5.6)                              |
| Chronic myeloid leukaemia                          | 0.1<br>(0.1 to 0.1)                     | < 0.05<br>(< 0.05 to < 0.05)          | < 0.05<br>(< 0.05 to < 0.05)         | -18.4<br>(-29.2 to -5.9)                          | -39.0<br>(-46.9 to -29.9)                           |
| Other leukaemia                                    | 0.4<br>(0.3 to 0.5)                     | 0.1<br>(0.1 to 0.1)                   | < 0.05<br>(< 0.05 to 0.1)            | 7.2<br>(-10.2 to 27.5)                            | -21.0<br>(-33.1 to -6.2)                            |
| Other neoplasms                                    | 2.7<br>(2.3 to 3.1)                     | 0.8<br>(0.7 to 0.9)                   | 0.2<br>(0.2 to 0.3)                  | 45.0<br>(24.5 to 70.2)                            | 11.3<br>(-4.5 to 30.6)                              |
| <b>Cardiovascular diseases</b>                     | <b>669.2</b><br><b>(640.1 to 697.5)</b> | <b>67.0†</b><br><b>(63.1 to 71.0)</b> | <b>41.0</b><br><b>(29.9 to 53.6)</b> | <b>24.7</b><br><b>(19.9 to 29.8)</b>              | <b>-5.1</b><br><b>(-8.8 to -1.3)</b>                |
| Rheumatic heart disease                            | 0.6<br>(0.5 to 0.7)                     | 0.2<br>(0.2 to 0.3)                   | < 0.05<br>(< 0.05 to 0.1)            | 18.3<br>(0.8 to 41.0)                             | -8.7<br>(-22.6 to 8.9)                              |
| Ischaemic heart disease                            | 184.0<br>(173.4 to 194.9)               | 22.4<br>(20.3 to 24.6)                | 9.7<br>(6.8 to 13.2)                 | 24.0<br>(17.9 to 30.4)                            | -5.9<br>(-10.6 to -1.0)                             |
| Cerebrovascular disease                            | 82.1<br>(75.5 to 87.2)                  | 11.4‡<br>(10.5 to 12.3)               | 12.8<br>(9.1 to 16.5)                | 27.1<br>(18.7 to 36.8)                            | -3.2<br>(-9.5 to 4.4)                               |
| Ischaemic stroke                                   | 65.9<br>(58.4 to 73.3)                  | 7.7‡<br>(6.8 to 8.6)                  | 9.9<br>(6.9 to 12.8)                 | 23.6<br>(14.0 to 35.7)                            | -6.1<br>(-13.7 to 3.0)                              |
| Hemorrhagic stroke                                 | 19.9<br>(17.9 to 22.2)                  | 3.7‡<br>(3.4 to 4.1)                  | 2.9<br>(2.1 to 3.7)                  | 40.6<br>(26.4 to 56.7)                            | 8.0<br>(-3.4 to 20.4)                               |
| Hypertensive heart disease                         | 12.8<br>(10.7 to 15.2)                  | --                                    | 1.0<br>(0.7 to 1.4)                  | 24.9<br>(10.5 to 42.0)                            | -7.4<br>(-18.2 to 4.8)                              |
| Cardiomyopathy and myocarditis                     | 9.4<br>(8.4 to 10.3)                    | 3.7+<br>(3.1 to 4.4)                  | 0.8<br>(0.6 to 1.2)                  | 19.6<br>(7.8 to 33.1)                             | -6.2<br>(-15.5 to 4.3)                              |
| Myocarditis                                        | 2.4<br>(2.2 to 2.7)                     | 3.7<br>(3.1 to 4.4)                   | 0.2<br>(0.1 to 0.2)                  | 13.5<br>(-0.4 to 28.9)                            | -5.8<br>(-17.1 to 7.4)                              |
| Alcoholic cardiomyopathy                           | 0.3<br>(0.3 to 0.4)                     | --                                    | < 0.05<br>(< 0.05 to < 0.05)         | 18.4<br>(3.8 to 35.4)                             | -6.1<br>(-17.5 to 7.7)                              |
| Other cardiomyopathy                               | 7.7<br>(6.5 to 9.0)                     | --                                    | 0.6<br>(0.4 to 0.9)                  | 21.5<br>(6.9 to 38.5)                             | -6.3<br>(-17.5 to 6.6)                              |
| Atrial fibrillation and flutter                    | 76.2<br>(66.2 to 88.1)                  | 6.2<br>(5.3 to 7.3)                   | 5.9<br>(4.0 to 8.3)                  | 30.3<br>(22.5 to 38.6)                            | -2.3<br>(-8.3 to 3.9)                               |
| Peripheral vascular disease                        | 258.1<br>(226.7 to 293.6)               | 21.3<br>(18.4 to 24.7)                | 1.0<br>(0.5 to 1.8)                  | 24.1<br>(15.3 to 33.8)                            | -8.8<br>(-14.6 to -1.9)                             |
| Endocarditis                                       | 1.1<br>(0.9 to 1.3)                     | 1.6<br>(1.5 to 1.8)                   | 0.1<br>(0.1 to 0.1)                  | 19.8<br>(0.7 to 45.2)                             | -7.5<br>(-21.9 to 12.4)                             |
| Other cardiovascular and circulatory diseases      | 184.5<br>(158.4 to 213.1)               | --                                    | 9.5<br>(6.5 to 13.5)                 | 19.8<br>(10.4 to 31.5)                            | -7.7<br>(-14.9 to 1.4)                              |
| <b>Chronic respiratory diseases</b>                | <b>747.2</b><br><b>(720.0 to 773.7)</b> | <b>67.5†</b><br><b>(63.8 to 71.8)</b> | <b>27.9</b><br><b>(20.2 to 37.4)</b> | <b>20.2</b><br><b>(14.2 to 26.4)</b>              | <b>-2.4</b><br><b>(-7.3 to 2.4)</b>                 |
| Chronic obstructive pulmonary disease              | 261.5<br>(248.4 to 274.7)               | 15.4<br>(14.6 to 16.1)                | 7.4<br>(5.8 to 9.0)                  | 21.5<br>(3.3 to 41.1)                             | -5.7<br>(-19.5 to 9.4)                              |
| Pneumoconiosis                                     | < 0.05<br>(< 0.05 to 0.1)               | < 0.05<br>(< 0.05 to < 0.05)          | < 0.05<br>(< 0.05 to < 0.05)         | 39.6<br>(31.9 to 49.2)                            | 4.0<br>(-1.6 to 10.8)                               |
| Silicosis                                          | < 0.05<br>(< 0.05 to 0.1)               | < 0.05<br>(< 0.05 to < 0.05)          | < 0.05<br>(< 0.05 to < 0.05)         | 42.3<br>(33.9 to 53.4)                            | 5.6<br>(-0.4 to 13.5)                               |



| Cause                                                          | Prevalence in thousands (95% UI)              | Incidence in thousands (95% UI)               | YLDs in thousands (95% UI)              |                                                   |                                                     |
|----------------------------------------------------------------|-----------------------------------------------|-----------------------------------------------|-----------------------------------------|---------------------------------------------------|-----------------------------------------------------|
|                                                                | 2016 counts                                   | 2016 counts                                   | 2016 counts                             | Percentage change in counts between 2006 and 2016 | Percentage change in age-standardised rates between |
| Asbestosis                                                     | < 0.05<br>(< 0.05 to < 0.05)                  | < 0.05<br>(< 0.05 to < 0.05)                  | < 0.05<br>(< 0.05 to < 0.05)            | 22.7<br>(1.2 to 51.6)                             | -5.1<br>(-22.6 to 17.5)                             |
| Coal workers pneumoconiosis                                    | --                                            | --                                            | --                                      | --                                                | --                                                  |
| Other pneumoconiosis                                           | < 0.05<br>(< 0.05 to < 0.05)                  | < 0.05<br>(< 0.05 to < 0.05)                  | < 0.05<br>(< 0.05 to < 0.05)            | 11.0<br>(-0.5 to 20.6)                            | -18.8<br>(-27.0 to -11.8)                           |
| Asthma                                                         | 507.8<br>(475.9 to 542.8)                     | 51.8<br>(48.1 to 56.2)                        | 19.9<br>(13.1 to 28.4)                  | 19.0<br>(14.5 to 23.8)                            | -1.6<br>(-5.4 to 2.3)                               |
| Interstitial lung disease and pulmonary sarcoidosis            | 2.7<br>(2.4 to 3.1)                           | 0.3<br>(0.3 to 0.3)                           | 0.3<br>(0.2 to 0.4)                     | 33.0<br>(16.8 to 49.7)                            | 1.6<br>(-10.4 to 14.0)                              |
| Other chronic respiratory diseases                             | --                                            | --                                            | 0.4<br>(0.3 to 0.4)                     | 55.7<br>(31.7 to 85.4)                            | 29.0<br>(9.1 to 53.9)                               |
| <b>Cirrhosis and other chronic liver diseases</b>              | <b>58.5</b><br><b>(55.4 to 61.6)</b>          | <b>1.2</b><br><b>(1.1 to 1.2)</b>             | <b>1.5</b><br><b>(1.0 to 2.0)</b>       | <b>32.2</b><br><b>(20.2 to 45.3)</b>              | <b>6.6</b><br><b>(-3.1 to 17.2)</b>                 |
| Cirrhosis and other chronic liver diseases due to hepatitis B  | 8.2<br>(6.5 to 10.1)                          | 0.2<br>(0.1 to 0.2)                           | 0.2<br>(0.1 to 0.3)                     | 34.1<br>(7.3 to 68.5)                             | 7.2<br>(-14.9 to 34.9)                              |
| Cirrhosis and other chronic liver diseases due to hepatitis C  | 19.7<br>(15.7 to 24.4)                        | 0.4<br>(0.3 to 0.4)                           | 0.4<br>(0.3 to 0.6)                     | 31.6<br>(10.1 to 56.2)                            | 5.4<br>(-12.1 to 26.0)                              |
| Cirrhosis and other chronic liver diseases due to alcohol use  | 24.3<br>(20.4 to 28.2)                        | 0.5<br>(0.4 to 0.6)                           | 0.5<br>(0.3 to 0.7)                     | 36.0<br>(15.7 to 59.2)                            | 7.4<br>(-9.0 to 26.3)                               |
| Cirrhosis and other chronic liver diseases due to other causes | 6.3<br>(5.1 to 7.7)                           | 0.2<br>(0.2 to 0.2)                           | 0.4<br>(0.2 to 0.5)                     | 27.1<br>(0.5 to 59.9)                             | 6.6<br>(-15.8 to 34.4)                              |
| <b>Digestive diseases</b>                                      | <b>132.3</b><br><b>(124.7 to 139.5)</b>       | <b>193.1†</b><br><b>(180.4 to 206.5)</b>      | <b>4.5</b><br><b>(3.2 to 6.1)</b>       | <b>25.1</b><br><b>(16.9 to 34.3)</b>              | <b>0.3</b><br><b>(-6.4 to 8.0)</b>                  |
| Peptic ulcer disease                                           | 24.6<br>(21.9 to 27.6)                        | 7.1<br>(6.3 to 8.0)                           | 0.2<br>(0.1 to 0.3)                     | 27.6<br>(-6.2 to 72.2)                            | 2.0<br>(-25.0 to 38.2)                              |
| Gastritis and duodenitis                                       | 54.4<br>(47.1 to 61.5)                        | 38.7<br>(33.9 to 44.2)                        | 0.4<br>(0.2 to 0.5)                     | 41.3<br>(7.1 to 86.5)                             | 12.0<br>(-15.2 to 47.4)                             |
| Appendicitis                                                   | 0.4<br>(0.3 to 0.4)                           | 9.5<br>(8.7 to 10.4)                          | 0.1<br>(0.1 to 0.2)                     | 19.8<br>(-8.0 to 53.4)                            | 1.6<br>(-21.9 to 29.3)                              |
| Paralytic ileus and intestinal obstruction                     | 0.1<br>(0.1 to 0.1)                           | 3.6<br>(3.3 to 4.0)                           | < 0.05<br>(< 0.05 to 0.1)               | 34.0<br>(25.9 to 42.5)                            | 5.8<br>(0.6 to 11.1)                                |
| Inguinal, femoral, and abdominal hernia                        | 39.1<br>(35.3 to 43.2)                        | 82.8<br>(72.1 to 93.6)                        | 2.5<br>(1.7 to 3.5)                     | 22.0<br>(10.6 to 34.7)                            | -2.3<br>(-11.1 to 7.8)                              |
| Inflammatory bowel disease                                     | 4.5<br>(4.2 to 4.8)                           | 2.2<br>(2.1 to 2.2)                           | 0.7<br>(0.4 to 0.9)                     | 24.4<br>(6.0 to 48.8)                             | 1.9<br>(-13.5 to 21.7)                              |
| Vascular intestinal disorders                                  | 0.2<br>(0.2 to 0.3)                           | 1.1<br>(1.0 to 1.2)                           | 0.1<br>(< 0.05 to 0.1)                  | 35.2<br>(7.0 to 70.5)                             | 4.1<br>(-18.4 to 31.1)                              |
| Gallbladder and biliary diseases                               | 13.0<br>(11.5 to 14.6)                        | 44.8<br>(39.2 to 51.0)                        | 0.2<br>(0.2 to 0.3)                     | 25.6<br>(3.6 to 50.8)                             | -0.9<br>(-18.5 to 18.7)                             |
| Pancreatitis                                                   | 0.4<br>(0.3 to 0.4)                           | 3.1<br>(2.8 to 3.5)                           | < 0.05<br>(< 0.05 to 0.1)               | 26.6<br>(21.8 to 31.4)                            | 0.0<br>(-3.5 to 3.7)                                |
| Other digestive diseases                                       | --                                            | --                                            | 0.4<br>(0.3 to 0.5)                     | 31.0<br>(20.8 to 41.8)                            | 4.6<br>(-3.2 to 13.3)                               |
| <b>Neurological disorders</b>                                  | <b>2,999.3</b><br><b>(2,895.0 to 3,125.2)</b> | <b>1,231.6</b><br><b>(1,061.3 to 1,413.8)</b> | <b>89.9</b><br><b>(60.4 to 122.3)</b>   | <b>21.7</b><br><b>(11.0 to 35.2)</b>              | <b>-0.7</b><br><b>(-9.4 to 10.0)</b>                |
| Alzheimer's disease and other dementias                        | 69.6<br>(58.9 to 83.0)                        | 13.6<br>(11.3 to 16.6)                        | 10.5<br>(7.2 to 14.1)                   | 39.3<br>(32.7 to 46.2)                            | -1.2<br>(-5.5 to 3.3)                               |
| Parkinson's disease                                            | 9.4<br>(7.5 to 11.9)                          | 1.1<br>(0.9 to 1.4)                           | 1.1<br>(0.7 to 1.5)                     | 29.8<br>(16.7 to 45.5)                            | -2.5<br>(-12.8 to 9.6)                              |
| Epilepsy                                                       | 20.2<br>(5.8 to 34.0)                         | 2.4<br>(0.7 to 3.9)                           | 5.0<br>(1.0 to 11.3)                    | 15.2<br>(-77.1 to 509.4)                          | -5.3<br>(-81.1 to 397.3)                            |
| Multiple sclerosis                                             | 4.1<br>(3.6 to 4.6)                           | 0.1<br>(0.1 to 0.1)                           | 1.1<br>(0.7 to 1.5)                     | 23.6<br>(5.5 to 46.1)                             | 0.1<br>(-14.8 to 18.6)                              |
| Motor neuron disease                                           | 0.8<br>(0.7 to 0.9)                           | 0.1<br>(0.1 to 0.1)                           | 0.2<br>(0.1 to 0.2)                     | 28.3<br>(23.3 to 33.2)                            | 3.0<br>(-0.8 to 7.0)                                |
| Migraine                                                       | 1,457.6<br>(1,379.3 to 1,535.8)               | 143.0<br>(133.3 to 153.0)                     | 62.1<br>(40.1 to 88.0)                  | 19.3<br>(15.4 to 23.3)                            | -0.6<br>(-3.9 to 2.7)                               |
| Tension-type headache                                          | 2,011.0<br>(1,798.8 to 2,248.7)               | 1,071.2<br>(903.6 to 1,251.3)                 | 8.6<br>(5.4 to 12.9)                    | 21.1<br>(15.0 to 27.7)                            | -0.1<br>(-4.9 to 5.2)                               |
| Other neurological disorders                                   | < 0.05<br>(< 0.05 to < 0.05)                  | 0.1<br>(< 0.05 to 0.1)                        | 1.3<br>(0.5 to 2.5)                     | 35.7<br>(-50.1 to 259.0)                          | 12.4<br>(-58.4 to 193.7)                            |
| <b>Mental and substance use disorders</b>                      | <b>1,122.4</b><br><b>(1,086.0 to 1,161.1)</b> | <b>427.8†</b><br><b>(396.8 to 462.0)</b>      | <b>157.0</b><br><b>(112.9 to 204.4)</b> | <b>16.9</b><br><b>(14.1 to 19.6)</b>              | <b>-2.8</b><br><b>(-5.1 to -0.4)</b>                |
| Schizophrenia                                                  | 18.2<br>(16.0 to 20.7)                        | 1.0<br>(0.9 to 1.1)                           | 11.7<br>(8.4 to 14.6)                   | 22.5<br>(12.9 to 33.0)                            | 0.5<br>(-7.6 to 9.0)                                |
| Alcohol use disorders                                          | 40.1<br>(34.1 to 46.4)                        | 21.7<br>(18.4 to 25.1)                        | 4.0<br>(2.7 to 5.7)                     | 14.3<br>(3.4 to 25.9)                             | -2.5<br>(-11.9 to 7.2)                              |
| Drug use disorders                                             | 54.3<br>(50.3 to 58.8)                        | 8.3<br>(7.5 to 9.3)                           | 11.0<br>(7.8 to 14.6)                   | 21.5<br>(11.8 to 32.5)                            | 3.3<br>(-5.2 to 12.7)                               |
| Opioid use disorders                                           | 17.4<br>(14.4 to 21.3)                        | 2.4<br>(2.0 to 2.9)                           | 7.2<br>(4.9 to 9.9)                     | 24.8<br>(11.7 to 39.1)                            | 5.4<br>(-5.8 to 18.1)                               |
| Cocaine use disorders                                          | 5.6<br>(4.8 to 6.5)                           | 0.5<br>(0.4 to 0.6)                           | 0.8<br>(0.4 to 1.1)                     | 19.8<br>(-5.7 to 49.3)                            | 1.8<br>(-20.1 to 26.8)                              |
| Amphetamine use disorders                                      | 5.7<br>(3.9 to 8.1)                           | 0.7<br>(0.4 to 0.9)                           | 0.8<br>(0.4 to 1.3)                     | 11.7<br>(-12.6 to 42.5)                           | -1.7<br>(-23.2 to 24.9)                             |
| Cannabis use disorders                                         | 20.5<br>(17.2 to 24.6)                        | 3.7<br>(3.1 to 4.5)                           | 0.6<br>(0.4 to 0.9)                     | 9.0<br>(-9.5 to 33.6)                             | -4.7<br>(-21.1 to 16.6)                             |
| Other drug use disorders                                       | 6.6<br>(5.9 to 7.3)                           | 1.1<br>(0.9 to 1.2)                           | 1.7<br>(1.1 to 2.4)                     | 18.3<br>(-1.8 to 42.7)                            | 1.1<br>(-16.2 to 22.1)                              |
| Depressive disorders                                           | 308.1<br>(289.2 to 330.0)                     | 309.0<br>(280.2 to 342.6)                     | 50.9<br>(35.0 to 69.5)                  | 8.8<br>(3.8 to 13.9)                              | -10.3<br>(-14.6 to -6.0)                            |
| Major depressive disorder                                      | 191.4<br>(174.0 to 211.6)                     | 291.6<br>(262.4 to 325.0)                     | 39.1<br>(27.0 to 53.1)                  | 5.5<br>(-0.5 to 12.1)                             | -13.0<br>(-18.0 to -7.5)                            |
| Dysthymia                                                      | 122.4<br>(107.4 to 141.3)                     | 17.4<br>(15.3 to 20.0)                        | 11.7<br>(7.8 to 17.2)                   | 21.5<br>(17.7 to 25.9)                            | -0.3<br>(-3.4 to 3.1)                               |
| Bipolar disorder                                               | 70.2<br>(60.9 to 81.6)                        | 5.1<br>(4.5 to 6.0)                           | 14.3<br>(8.8 to 21.2)                   | 20.1<br>(11.8 to 29.5)                            | 0.5<br>(-6.5 to 8.3)                                |
| Anxiety disorders                                              | 290.3<br>(264.7 to 316.7)                     | 45.9<br>(42.4 to 50.0)                        | 28.0<br>(19.6 to 38.0)                  | 23.3<br>(15.8 to 31.8)                            | 2.7<br>(-3.6 to 9.9)                                |
| Eating disorders                                               | 22.6<br>(18.5 to 27.1)                        | 6.1<br>(4.5 to 8.2)                           | 4.6<br>(2.9 to 6.7)                     | 21.8<br>(10.5 to 34.4)                            | 5.4<br>(-4.5 to 15.9)                               |
| Anorexia nervosa                                               | 5.3<br>(3.9 to 7.1)                           | 0.9<br>(0.7 to 1.2)                           | 1.1<br>(0.7 to 1.7)                     | 20.2<br>(1.1 to 44.5)                             | 5.2<br>(-11.7 to 26.2)                              |
| Bulimia nervosa                                                | 16.5<br>(12.3 to 21.8)                        | 5.2<br>(3.6 to 7.3)                           | 3.5<br>(2.1 to 5.3)                     | 22.4<br>(9.0 to 36.8)                             | 5.4<br>(-6.3 to 17.7)                               |
| Autistic spectrum disorders                                    | 62.2<br>(56.2 to 70.5)                        | 0.5<br>(0.3 to 0.7)                           | 10.0<br>(6.8 to 14.0)                   | 20.3<br>(14.3 to 26.4)                            | 0.5<br>(-4.5 to 5.4)                                |
| Autism                                                         | 24.2<br>(20.6 to 28.4)                        | 0.1<br>(< 0.05 to 0.1)                        | 6.2<br>(4.0 to 9.0)                     | 20.4<br>(11.7 to 29.2)                            | 0.4<br>(-6.8 to 7.7)                                |
| Asperger syndrome and other autistic spectrum disorders        | 38.1<br>(31.3 to 46.1)                        | 0.4<br>(0.3 to 0.6)                           | 3.8<br>(2.5 to 5.7)                     | 20.2<br>(14.3 to 26.5)                            | 0.6<br>(-4.3 to 6.0)                                |

| Cause                                                      | Prevalence in thousands (95% UI)              | Incidence in thousands (95% UI)                   | YLDs in thousands (95% UI)              |                                                   |                                                     |
|------------------------------------------------------------|-----------------------------------------------|---------------------------------------------------|-----------------------------------------|---------------------------------------------------|-----------------------------------------------------|
|                                                            | 2016 counts                                   | 2016 counts                                       | 2016 counts                             | Percentage change in counts between 2006 and 2016 | Percentage change in age-standardised rates between |
| Attention-deficit/hyperactivity disorder                   | 74.6<br>(64.7 to 86.0)                        | 4.5<br>(3.8 to 5.3)                               | 0.9<br>(0.5 to 1.4)                     | 16.5<br>(4.5 to 31.4)                             | -1.0<br>(-11.1 to 11.4)                             |
| Conduct disorder                                           | 60.9<br>(45.8 to 77.5)                        | 20.6<br>(15.2 to 25.7)                            | 7.4<br>(4.4 to 11.6)                    | 18.9<br>(11.6 to 26.9)                            | 0.1<br>(-6.0 to 6.9)                                |
| Idiopathic developmental intellectual disability           | 47.7<br>(18.6 to 82.2)                        | --                                                | 2.3<br>(0.9 to 4.2)                     | 15.3<br>(4.1 to 26.3)                             | -3.2<br>(-12.5 to 6.1)                              |
| Other mental and substance use disorders                   | 161.0<br>(140.0 to 185.9)                     | 5.0<br>(4.4 to 5.7)                               | 11.9<br>(8.3 to 16.8)                   | 21.6<br>(16.1 to 27.3)                            | 0.3<br>(-4.3 to 5.0)                                |
| <b>Diabetes, urogenital, blood, and endocrine diseases</b> | <b>2,730.7</b><br><b>(2,678.3 to 2,788.1)</b> | <b>735.9†</b><br><b>(692.6 to 783.4)</b>          | <b>60.1</b><br><b>(42.9 to 80.8)</b>    | <b>23.3</b><br><b>(18.3 to 28.3)</b>              | <b>-3.5</b><br><b>(-7.4 to 0.6)</b>                 |
| Diabetes mellitus                                          | 364.9<br>(326.4 to 403.9)                     | 22.4<br>(20.0 to 24.8)                            | 28.3<br>(19.3 to 39.4)                  | 20.9<br>(12.1 to 31.3)                            | -6.7<br>(-13.4 to 1.5)                              |
| Acute glomerulonephritis                                   | 0.1<br>(0.1 to 0.1)                           | 1.2<br>(1.1 to 1.4)                               | < 0.05<br>(< 0.05 to < 0.05)            | 21.6<br>(16.7 to 26.6)                            | -0.1<br>(-4.0 to 3.5)                               |
| Chronic kidney disease                                     | 289.7<br>(259.1 to 319.7)                     | 25.9<br>(22.6 to 29.2)                            | 10.1<br>(7.6 to 12.6)                   | 29.9<br>(20.3 to 40.2)                            | -0.4<br>(-7.5 to 7.2)                               |
| Chronic kidney disease due to diabetes mellitus            | 177.0<br>(157.0 to 200.2)                     | 16.4<br>(14.1 to 18.9)                            | 6.2<br>(4.6 to 7.8)                     | 28.1<br>(15.7 to 43.8)                            | -1.9<br>(-11.2 to 10.1)                             |
| Chronic kidney disease due to hypertension                 | 37.3<br>(29.6 to 44.4)                        | 2.8<br>(1.7 to 3.8)                               | 1.1<br>(0.8 to 1.5)                     | 37.7<br>(17.6 to 60.2)                            | 0.8<br>(-13.1 to 16.9)                              |
| Chronic kidney disease due to glomerulonephritis           | 32.5<br>(25.4 to 38.9)                        | 3.0<br>(2.4 to 3.7)                               | 1.3<br>(0.7 to 1.8)                     | 34.3<br>(-19.6 to 82.9)                           | 6.6<br>(-35.6 to 44.6)                              |
| Chronic kidney disease due to other causes                 | 43.0<br>(36.0 to 52.8)                        | 3.8<br>(3.1 to 4.7)                               | 1.5<br>(1.1 to 2.0)                     | 28.4<br>(8.5 to 57.0)                             | -0.5<br>(-16.1 to 20.7)                             |
| Urinary diseases and male infertility                      | 177.0<br>(159.3 to 196.6)                     | 396.1†<br>(354.3 to 442.7)                        | 5.1<br>(3.4 to 7.5)                     | 28.7<br>(21.1 to 36.3)                            | 0.9<br>(-5.3 to 6.7)                                |
| Interstitial nephritis and urinary tract infections        | 5.9<br>(5.1 to 6.7)                           | 307.4<br>(267.8 to 353.4)                         | 0.2<br>(0.1 to 0.3)                     | 17.0<br>(-0.7 to 38.6)                            | -0.1<br>(-15.5 to 18.1)                             |
| Urolithiasis                                               | 2.8<br>(2.5 to 3.1)                           | 73.0<br>(64.7 to 82.8)                            | 0.2<br>(0.1 to 0.3)                     | 25.4<br>(9.7 to 43.8)                             | 0.9<br>(-11.7 to 16.0)                              |
| Benign prostatic hyperplasia                               | 134.1<br>(114.9 to 158.0)                     | 15.7<br>(13.1 to 18.6)                            | 4.4<br>(2.8 to 6.5)                     | 31.0<br>(21.9 to 40.6)                            | 1.8<br>(-5.4 to 8.8)                                |
| Male infertility                                           | 28.5<br>(21.1 to 38.7)                        | --                                                | 0.2<br>(0.1 to 0.4)                     | 20.5<br>(11.8 to 30.5)                            | -1.1<br>(-7.9 to 5.9)                               |
| Other urinary diseases                                     | --                                            | --                                                | 0.1<br>(0.1 to 0.2)                     | 1.2<br>(-8.6 to 12.2)                             | -15.5<br>(-23.6 to -6.4)                            |
| Gynecological diseases                                     | 1,006.8<br>(942.0 to 1,073.9)                 | 253.5†<br>(236.5 to 271.2)                        | 8.3<br>(5.6 to 12.2)                    | 17.9<br>(12.2 to 23.8)                            | -1.3<br>(-5.9 to 3.5)                               |
| Uterine fibroids                                           | 55.9<br>(47.9 to 65.1)                        | 5.7<br>(4.6 to 6.8)                               | 0.6<br>(0.3 to 1.1)                     | 22.7<br>(5.3 to 41.8)                             | -0.4<br>(-14.3 to 14.9)                             |
| Polycystic ovarian syndrome                                | 2.3<br>(1.8 to 3.1)                           | 7.6<br>(5.4 to 10.2)                              | < 0.05<br>(< 0.05 to < 0.05)            | 18.9<br>(-6.6 to 51.6)                            | -0.7<br>(-22.1 to 26.1)                             |
| Female infertility                                         | 23.0<br>(13.7 to 36.2)                        | --                                                | 0.1<br>(< 0.05 to 0.3)                  | 27.4<br>(13.1 to 44.0)                            | 2.3<br>(-8.2 to 14.7)                               |
| Endometriosis                                              | 4.9<br>(3.9 to 5.9)                           | 14.6<br>(10.8 to 19.3)                            | 0.5<br>(0.3 to 0.7)                     | 12.2<br>(-11.2 to 40.7)                           | -1.1<br>(-21.6 to 24.2)                             |
| Genital prolapse                                           | 563.6<br>(492.9 to 641.5)                     | 30.4<br>(25.6 to 36.2)                            | 1.8<br>(0.8 to 3.2)                     | 25.7<br>(16.5 to 35.3)                            | -1.0<br>(-8.4 to 6.3)                               |
| Premenstrual syndrome                                      | 384.8<br>(356.6 to 414.9)                     | 136.2<br>(123.9 to 149.0)                         | 3.2<br>(2.0 to 4.9)                     | 15.2<br>(5.7 to 24.8)                             | -2.0<br>(-10.0 to 6.3)                              |
| Other gynecological diseases                               | 64.7<br>(55.1 to 75.0)                        | 59.1<br>(49.6 to 69.6)                            | 2.1<br>(1.4 to 3.1)                     | 15.4<br>(4.5 to 25.8)                             | -1.0<br>(-10.4 to 7.7)                              |
| Hemoglobinopathies and hemolytic anaemias                  | 1,398.7<br>(1,373.4 to 1,423.9)               | --                                                | 1.6<br>(1.0 to 2.6)                     | 24.0<br>(0.0 to 57.4)                             | 1.7<br>(-18.8 to 29.7)                              |
| Thalassemias                                               | 0.1<br>(0.1 to 0.1)                           | --                                                | < 0.05<br>(< 0.05 to < 0.05)            | 19.4<br>(-6.0 to 53.0)                            | 1.3<br>(-19.4 to 27.8)                              |
| Thalassaemia trait                                         | 96.8<br>(85.6 to 108.7)                       | --                                                | 0.7<br>(0.4 to 1.1)                     | 33.2<br>(1.9 to 79.3)                             | 9.7<br>(-16.5 to 49.0)                              |
| Sickle cell disorders                                      | 0.9<br>(0.8 to 1.0)                           | --                                                | 0.1<br>(0.1 to 0.1)                     | 23.5<br>(10.4 to 38.5)                            | 5.7<br>(-5.3 to 18.5)                               |
| Sickle cell trait                                          | 336.1<br>(320.8 to 354.3)                     | --                                                | 0.5<br>(0.3 to 0.9)                     | 24.0<br>(-5.8 to 63.2)                            | 2.7<br>(-23.5 to 36.3)                              |
| G6PD deficiency                                            | 198.5<br>(182.9 to 216.3)                     | --                                                | < 0.05<br>(< 0.05 to < 0.05)            | 29.3<br>(-2.4 to 76.8)                            | 6.5<br>(-20.5 to 48.4)                              |
| G6PD trait                                                 | 822.5<br>(809.4 to 837.0)                     | --                                                | < 0.05<br>(< 0.05 to < 0.05)            | 22.1<br>(-42.8 to 160.6)                          | 7.1<br>(-49.8 to 129.7)                             |
| Other hemoglobinopathies and hemolytic anaemias            | 18.2<br>(15.0 to 21.9)                        | --                                                | 0.3<br>(0.2 to 0.5)                     | 7.3<br>(-11.0 to 29.8)                            | -15.9<br>(-30.9 to 2.6)                             |
| Endocrine, metabolic, blood, and immune disorders          | 195.8<br>(177.5 to 215.2)                     | 36.8<br>(33.2 to 40.7)                            | 6.6<br>(4.4 to 9.2)                     | 27.5<br>(21.1 to 34.3)                            | -0.9<br>(-6.2 to 4.4)                               |
| <b>Musculoskeletal disorders</b>                           | <b>1,711.3</b><br><b>(1,633.8 to 1,787.6)</b> | <b>877.7</b><br><b>(798.9 to 962.8)</b>           | <b>186.5</b><br><b>(134.1 to 243.6)</b> | <b>24.4</b><br><b>(21.0 to 27.9)</b>              | <b>0.5</b><br><b>(-2.2 to 3.4)</b>                  |
| Rheumatoid arthritis                                       | 28.4<br>(25.5 to 31.8)                        | 1.5<br>(1.3 to 1.6)                               | 6.7<br>(4.6 to 8.9)                     | 29.1<br>(19.2 to 38.8)                            | 2.2<br>(-5.6 to 10.2)                               |
| Osteoarthritis                                             | 427.5<br>(402.3 to 455.1)                     | 20.1<br>(18.7 to 21.6)                            | 14.9<br>(9.8 to 21.4)                   | 30.9<br>(26.6 to 35.2)                            | 0.4<br>(-3.0 to 3.8)                                |
| Low back and neck pain                                     | 1,170.2<br>(1,099.7 to 1,242.8)               | 502.9<br>(447.2 to 562.5)                         | 140.2<br>(98.5 to 183.8)                | 24.7<br>(20.6 to 29.3)                            | 1.3<br>(-2.0 to 5.1)                                |
| Low back pain                                              | 869.8<br>(776.5 to 974.6)                     | 426.7<br>(371.4 to 485.9)                         | 98.5<br>(69.8 to 130.8)                 | 25.2<br>(19.2 to 31.5)                            | 1.9<br>(-2.6 to 7.2)                                |
| Neck pain                                                  | 418.8<br>(364.9 to 478.3)                     | 76.2<br>(66.5 to 88.5)                            | 41.7<br>(28.4 to 59.0)                  | 23.6<br>(20.9 to 26.3)                            | -0.1<br>(-2.0 to 1.6)                               |
| Gout                                                       | 65.6<br>(58.4 to 74.5)                        | 10.5<br>(9.1 to 12.0)                             | 2.1<br>(1.4 to 2.8)                     | 29.3<br>(15.2 to 45.7)                            | 1.0<br>(-10.0 to 14.3)                              |
| Other musculoskeletal disorders                            | 263.9<br>(204.5 to 328.9)                     | 342.6<br>(289.0 to 404.4)                         | 22.6<br>(14.4 to 33.2)                  | 16.9<br>(5.5 to 27.9)                             | -4.9<br>(-13.9 to 3.7)                              |
| <b>Other non-communicable diseases</b>                     | <b>6,117.9</b><br><b>(6,005.9 to 6,215.5)</b> | <b>18,713.0†</b><br><b>(17,747.7 to 19,723.8)</b> | <b>177.3</b><br><b>(121.5 to 250.3)</b> | <b>24.0</b><br><b>(22.5 to 25.6)</b>              | <b>0.1</b><br><b>(-1.2 to 1.4)</b>                  |
| Congenital anomalies                                       | 94.3<br>(87.4 to 101.4)                       | --                                                | 10.0<br>(7.0 to 13.6)                   | 23.4<br>(16.6 to 30.6)                            | 2.9<br>(-2.6 to 8.9)                                |
| Neural tube defects                                        | 4.0<br>(3.6 to 4.5)                           | --                                                | 1.2<br>(0.8 to 1.6)                     | 17.9<br>(-0.2 to 36.1)                            | -2.0<br>(-17.0 to 13.3)                             |
| Congenital heart anomalies                                 | 32.5<br>(28.8 to 36.9)                        | --                                                | 1.7<br>(0.7 to 3.0)                     | 34.7<br>(19.5 to 53.2)                            | 12.2<br>(-0.6 to 27.6)                              |
| Orofacial clefts                                           | 3.0<br>(2.6 to 3.4)                           | --                                                | < 0.05<br>(< 0.05 to < 0.05)            | 16.8<br>(2.7 to 32.4)                             | -2.7<br>(-14.5 to 10.2)                             |
| Down's syndrome                                            | 4.8<br>(4.1 to 5.6)                           | --                                                | 0.4<br>(0.3 to 0.6)                     | 13.5<br>(-0.7 to 28.3)                            | -3.8<br>(-15.7 to 8.9)                              |
| Turner syndrome                                            | 3.6<br>(3.1 to 4.2)                           | --                                                | 0.1<br>(< 0.05 to 0.1)                  | 13.4<br>(-18.3 to 54.5)                           | -4.2<br>(-30.2 to 30.0)                             |
| Klinefelter syndrome                                       | 8.1<br>(6.9 to 9.5)                           | --                                                | < 0.05<br>(< 0.05 to 0.1)               | 18.0<br>(-2.0 to 40.4)                            | 1.8<br>(-15.4 to 21.3)                              |



| Cause                                         | Prevalence in thousands (95% UI)              | Incidence in thousands (95% UI)          | YLDs in thousands (95% UI)            |                                                   |                                                     |
|-----------------------------------------------|-----------------------------------------------|------------------------------------------|---------------------------------------|---------------------------------------------------|-----------------------------------------------------|
|                                               | 2016 counts                                   | 2016 counts                              | 2016 counts                           | Percentage change in counts between 2006 and 2016 | Percentage change in age-standardised rates between |
| Other chromosomal abnormalities               | 14.6<br>(12.2 to 17.5)                        | --                                       | 1.4<br>(1.0 to 2.0)                   | 22.4<br>(6.8 to 40.7)                             | 3.5<br>(-9.5 to 19.0)                               |
| Congenital musculoskeletal and limb anomalies | 12.7<br>(11.6 to 13.8)                        | --                                       | 1.7<br>(1.1 to 2.3)                   | 23.3<br>(11.7 to 36.6)                            | 2.1<br>(-7.8 to 13.2)                               |
| Urogenital congenital anomalies               | 10.9<br>(9.5 to 12.6)                         | --                                       | 0.4<br>(0.2 to 0.6)                   | -0.0<br>(-18.6 to 22.6)                           | -14.8<br>(-30.0 to 3.4)                             |
| Digestive congenital anomalies                | 8.8<br>(7.9 to 10.0)                          | --                                       | 0.4<br>(0.2 to 0.6)                   | 23.4<br>(5.8 to 44.5)                             | 2.7<br>(-12.0 to 20.2)                              |
| Other congenital anomalies                    | 12.8<br>(5.3 to 22.7)                         | --                                       | 2.6<br>(1.4 to 4.4)                   | 26.5<br>(14.5 to 40.6)                            | 4.7<br>(-4.9 to 16.4)                               |
| Skin and subcutaneous diseases                | 2,721.5<br>(2,660.7 to 2,785.4)               | 5,641.3<br>(5,339.0 to 5,997.7)          | 72.8<br>(49.0 to 104.1)               | 21.1<br>(18.9 to 23.6)                            | 1.0<br>(-0.8 to 3.1)                                |
| Dermatitis                                    | 469.9<br>(436.8 to 506.5)                     | 527.7<br>(454.8 to 616.0)                | 17.8<br>(10.6 to 29.3)                | 21.2<br>(16.5 to 26.9)                            | 1.0<br>(-2.8 to 5.8)                                |
| Psoriasis                                     | 130.9<br>(123.3 to 139.1)                     | 13.0<br>(12.3 to 13.8)                   | 11.3<br>(8.0 to 15.1)                 | 25.1<br>(17.8 to 32.1)                            | 2.3<br>(-3.8 to 8.0)                                |
| Cellulitis                                    | 3.6<br>(3.4 to 3.9)                           | 65.2<br>(61.2 to 69.5)                   | 0.2<br>(0.1 to 0.3)                   | 23.2<br>(3.5 to 47.6)                             | 1.0<br>(-15.6 to 20.7)                              |
| Pyoderma                                      | 29.0<br>(28.2 to 29.9)                        | 760.5<br>(738.0 to 784.6)                | 0.2<br>(0.1 to 0.3)                   | 24.2<br>(17.4 to 31.5)                            | 0.7<br>(-5.0 to 6.8)                                |
| Scabies                                       | 8.3<br>(5.9 to 11.6)                          | 25.1<br>(17.9 to 35.5)                   | 0.2<br>(0.1 to 0.4)                   | 17.8<br>(3.8 to 31.9)                             | -0.1<br>(-11.8 to 11.5)                             |
| Fungal skin diseases                          | 520.3<br>(465.9 to 576.6)                     | 1,990.0<br>(1,750.5 to 2,263.9)          | 2.9<br>(1.2 to 6.1)                   | 25.6<br>(23.7 to 27.7)                            | 0.1<br>(-1.1 to 1.4)                                |
| Viral skin diseases                           | 261.5<br>(224.9 to 303.9)                     | 333.7<br>(282.4 to 385.8)                | 8.0<br>(5.0 to 12.2)                  | 19.2<br>(15.6 to 22.9)                            | -0.2<br>(-3.0 to 2.8)                               |
| Acne vulgaris                                 | 864.6<br>(779.7 to 950.3)                     | 712.7<br>(551.9 to 960.1)                | 22.3<br>(14.9 to 32.2)                | 18.1<br>(13.7 to 22.6)                            | 1.1<br>(-2.6 to 4.9)                                |
| Alopecia areata                               | 23.4<br>(22.6 to 24.2)                        | 41.3<br>(39.9 to 42.8)                   | 0.8<br>(0.5 to 1.2)                   | 19.1<br>(9.3 to 29.8)                             | -0.3<br>(-8.4 to 8.8)                               |
| Pruritus                                      | 67.3<br>(59.6 to 75.3)                        | 53.7<br>(48.2 to 60.2)                   | 0.7<br>(0.3 to 1.3)                   | 22.3<br>(15.5 to 29.1)                            | -0.4<br>(-5.6 to 4.9)                               |
| Urticaria                                     | 51.5<br>(45.9 to 58.1)                        | 91.8<br>(81.9 to 103.4)                  | 3.1<br>(2.0 to 4.4)                   | 19.5<br>(11.8 to 27.6)                            | -0.2<br>(-6.4 to 6.2)                               |
| Decubitus ulcer                               | 6.1<br>(5.5 to 6.8)                           | 21.9<br>(19.5 to 24.7)                   | 0.9<br>(0.7 to 1.3)                   | 28.0<br>(15.8 to 41.6)                            | -4.9<br>(-14.2 to 5.4)                              |
| Other skin and subcutaneous diseases          | 800.8<br>(779.9 to 821.1)                     | 1,004.7<br>(971.4 to 1,036.3)            | 4.4<br>(2.1 to 7.9)                   | 28.5<br>(25.6 to 31.2)                            | 2.7<br>(0.5 to 4.9)                                 |
| Sense organ diseases                          | 1,938.3<br>(1,843.3 to 2,029.5)               | 825.5†<br>(775.4 to 880.3)               | 65.2<br>(45.0 to 92.1)                | 26.7<br>(24.2 to 29.4)                            | -1.2<br>(-3.1 to 0.8)                               |
| Glaucoma                                      | 4.6<br>(3.7 to 5.5)                           | --                                       | 0.4<br>(0.2 to 0.5)                   | 34.9<br>(18.5 to 55.3)                            | 0.1<br>(-12.6 to 15.8)                              |
| Cataract                                      | 45.7<br>(36.4 to 57.2)                        | --                                       | 3.5<br>(2.4 to 4.9)                   | 32.9<br>(23.3 to 42.1)                            | -2.1<br>(-9.2 to 4.7)                               |
| Macular degeneration                          | 8.6<br>(6.8 to 10.7)                          | --                                       | 0.6<br>(0.4 to 0.8)                   | 38.7<br>(24.0 to 54.4)                            | 1.4<br>(-9.5 to 13.0)                               |
| Refraction and accommodation disorders        | 770.9<br>(732.5 to 808.8)                     | --                                       | 16.8<br>(10.8 to 25.6)                | 19.9<br>(16.1 to 24.2)                            | -3.1<br>(-6.4 to 0.3)                               |
| Age-related and other hearing loss            | 1,373.7<br>(1,201.6 to 1,552.8)               | --                                       | 34.2<br>(23.4 to 49.7)                | 29.1<br>(24.9 to 33.3)                            | -0.6<br>(-3.8 to 2.4)                               |
| Other vision loss                             | 28.5<br>(24.9 to 32.4)                        | --                                       | 1.9<br>(1.3 to 2.6)                   | 28.6<br>(19.1 to 39.1)                            | 0.6<br>(-7.3 to 9.0)                                |
| Other sense organ diseases                    | 252.8<br>(233.0 to 272.3)                     | 825.5<br>(775.4 to 880.3)                | 7.8<br>(4.9 to 11.8)                  | 27.6<br>(22.8 to 32.5)                            | 0.5<br>(-3.3 to 4.3)                                |
| Oral disorders                                | 4,525.1<br>(4,352.8 to 4,678.7)               | 12,246.2†<br>(11,370.3 to 13,220.6)      | 29.4<br>(18.0 to 46.2)                | 25.9<br>(23.0 to 28.7)                            | -0.7<br>(-2.9 to 1.4)                               |
| Caries of deciduous teeth                     | 452.8<br>(326.3 to 561.2)                     | 1,434.9<br>(778.1 to 2,147.4)            | 0.2<br>(0.1 to 0.4)                   | 20.0<br>(6.9 to 34.1)                             | 0.5<br>(-10.5 to 12.3)                              |
| Caries of permanent teeth                     | 3,407.2<br>(3,238.7 to 3,582.8)               | 10,648.6<br>(10,043.8 to 11,302.0)       | 3.3<br>(1.5 to 6.3)                   | 19.9<br>(16.6 to 23.1)                            | -0.6<br>(-3.3 to 1.8)                               |
| Periodontal disease                           | 1,017.4<br>(714.7 to 1,334.7)                 | 120.2<br>(87.5 to 153.9)                 | 6.7<br>(2.5 to 14.8)                  | 24.6<br>(19.2 to 30.9)                            | -0.1<br>(-4.3 to 4.4)                               |
| Edentulism and severe tooth loss              | 543.8<br>(476.6 to 613.2)                     | 42.5<br>(35.5 to 50.7)                   | 15.0<br>(9.7 to 21.0)                 | 29.5<br>(24.3 to 34.2)                            | -1.1<br>(-4.9 to 2.4)                               |
| Other oral disorders                          | 144.8<br>(138.6 to 151.7)                     | --                                       | 4.2<br>(2.6 to 6.4)                   | 20.9<br>(17.1 to 25.0)                            | -0.1<br>(-3.1 to 3.2)                               |
| <b>Injuries</b>                               | <b>2,334.1</b><br><b>(2,116.6 to 2,598.3)</b> | <b>792.3†</b><br><b>(740.7 to 854.4)</b> | <b>67.8</b><br><b>(43.0 to 100.2)</b> | <b>30.5</b><br><b>(27.0 to 33.8)</b>              | <b>5.0</b><br><b>(1.5 to 8.0)</b>                   |
| <b>Transport injuries</b>                     | <b>274.5</b><br><b>(254.7 to 295.4)</b>       | <b>83.0</b><br><b>(74.9 to 91.2)</b>     | <b>12.4</b><br><b>(8.2 to 18.2)</b>   | <b>13.7</b><br><b>(10.9 to 16.6)</b>              | <b>-8.8</b><br><b>(-11.5 to -6.3)</b>               |
| Road injuries                                 | 244.5<br>(226.6 to 264.0)                     | 77.7<br>(70.0 to 86.0)                   | 11.4<br>(7.5 to 16.6)                 | 12.5<br>(9.6 to 15.4)                             | -9.9<br>(-12.5 to -7.3)                             |
| Pedestrian road injuries                      | 41.1<br>(35.9 to 47.2)                        | 8.8<br>(7.3 to 10.7)                     | 2.1<br>(1.4 to 3.0)                   | 8.9<br>(6.3 to 11.7)                              | -13.6<br>(-16.1 to -11.1)                           |
| Cyclist road injuries                         | 70.8<br>(58.7 to 84.1)                        | 27.6<br>(23.0 to 32.7)                   | 3.0<br>(1.9 to 4.5)                   | 22.0<br>(19.3 to 24.9)                            | -2.1<br>(-4.6 to 0.5)                               |
| Motorcyclist road injuries                    | 43.8<br>(37.0 to 52.1)                        | 8.6<br>(6.9 to 10.6)                     | 2.1<br>(1.4 to 3.0)                   | 19.7<br>(16.6 to 23.2)                            | -3.4<br>(-6.1 to -0.5)                              |
| Motor vehicle road injuries                   | 71.2<br>(59.7 to 82.4)                        | 27.2<br>(23.6 to 31.2)                   | 3.5<br>(2.3 to 5.0)                   | 2.1<br>(-0.9 to 5.1)                              | -18.3<br>(-21.1 to -15.7)                           |
| Other road injuries                           | 17.7<br>(14.9 to 21.0)                        | 5.5<br>(4.2 to 7.1)                      | 0.7<br>(0.4 to 1.0)                   | 24.4<br>(21.0 to 28.0)                            | 0.3<br>(-2.7 to 3.3)                                |
| Other transport injuries                      | 30.0<br>(24.6 to 35.7)                        | 5.2<br>(4.4 to 6.3)                      | 1.1<br>(0.7 to 1.6)                   | 29.0<br>(26.0 to 31.9)                            | 4.1<br>(1.5 to 6.6)                                 |
| <b>Unintentional injuries</b>                 | <b>1,610.3</b><br><b>(1,478.4 to 1,759.8)</b> | <b>664.5</b><br><b>(612.0 to 728.1)</b>  | <b>45.2</b><br><b>(30.0 to 64.8)</b>  | <b>33.7</b><br><b>(31.1 to 36.4)</b>              | <b>7.0</b><br><b>(4.4 to 9.3)</b>                   |
| Falls                                         | 794.8<br>(687.0 to 913.4)                     | 323.0<br>(280.8 to 375.7)                | 27.3<br>(18.5 to 37.9)                | 38.4<br>(35.5 to 41.4)                            | 10.3<br>(7.6 to 12.9)                               |
| Drowning                                      | 2.7<br>(2.4 to 3.0)                           | 0.4<br>(0.3 to 0.5)                      | 0.1<br>(0.1 to 0.2)                   | 31.5<br>(23.7 to 39.9)                            | 6.5<br>(-0.5 to 13.5)                               |
| Fire, heat, and hot substances                | 162.8<br>(137.3 to 193.5)                     | 12.2<br>(9.8 to 14.6)                    | 2.8<br>(1.6 to 4.7)                   | 23.3<br>(18.0 to 29.3)                            | 0.1<br>(-4.7 to 5.4)                                |
| Poisonings                                    | 6.1<br>(4.9 to 7.8)                           | 7.2<br>(5.7 to 8.8)                      | 0.6<br>(0.4 to 0.8)                   | 27.5<br>(16.2 to 40.2)                            | 5.6<br>(-3.4 to 15.8)                               |
| Exposure to mechanical forces                 | 329.0<br>(275.1 to 422.1)                     | 104.1<br>(86.3 to 122.6)                 | 5.9<br>(3.6 to 9.1)                   | 28.5<br>(25.3 to 31.7)                            | 3.8<br>(0.8 to 6.7)                                 |
| Unintentional firearm injuries                | 11.0<br>(8.9 to 13.9)                         | 1.4<br>(0.9 to 1.9)                      | 0.2<br>(0.1 to 0.3)                   | -1.4<br>(-4.0 to 2.0)                             | -20.7<br>(-22.9 to -17.7)                           |
| Unintentional suffocation                     | 4.2<br>(3.5 to 5.1)                           | 1.0<br>(0.6 to 1.4)                      | 0.1<br>(0.1 to 0.2)                   | 28.2<br>(25.2 to 31.4)                            | 1.7<br>(-1.1 to 4.4)                                |
| Other exposure to mechanical forces           | 313.8<br>(260.8 to 406.1)                     | 101.8<br>(84.0 to 120.0)                 | 5.7<br>(3.5 to 8.7)                   | 29.6<br>(26.3 to 33.0)                            | 4.7<br>(1.6 to 7.7)                                 |

| Cause                                                                               | Prevalence in thousands (95% UI)        | Incidence in thousands (95% UI)       | YLDs in thousands (95% UI)         |                                                   |                                                     |
|-------------------------------------------------------------------------------------|-----------------------------------------|---------------------------------------|------------------------------------|---------------------------------------------------|-----------------------------------------------------|
|                                                                                     | 2016 counts                             | 2016 counts                           | 2016 counts                        | Percentage change in counts between 2006 and 2016 | Percentage change in age-standardised rates between |
| Adverse effects of medical treatment                                                | 3.4<br>(2.7 to 4.2)                     | 44.5<br>(39.6 to 50.2)                | 0.5<br>(0.3 to 0.7)                | 17.6<br>(13.3 to 22.7)                            | -7.1<br>(-10.4 to -3.2)                             |
| Animal contact                                                                      | 27.0<br>(23.7 to 31.7)                  | 18.4<br>(14.8 to 22.4)                | 0.5<br>(0.3 to 0.8)                | 14.2<br>(9.7 to 18.6)                             | -7.3<br>(-11.1 to -3.5)                             |
| Venomous animal contact                                                             | 4.0<br>(3.4 to 4.7)                     | 5.5<br>(3.9 to 7.3)                   | 0.2<br>(0.1 to 0.3)                | 10.2<br>(1.5 to 19.2)                             | -8.9<br>(-16.1 to -1.5)                             |
| Non-venomous animal contact                                                         | 23.0<br>(19.8 to 27.2)                  | 12.9<br>(10.3 to 15.9)                | 0.3<br>(0.2 to 0.5)                | 17.6<br>(14.8 to 20.9)                            | -5.9<br>(-8.5 to -3.1)                              |
| Foreign body                                                                        | 42.4<br>(36.5 to 50.5)                  | 39.1<br>(33.9 to 45.9)                | 1.3<br>(0.8 to 1.9)                | 26.4<br>(23.8 to 29.4)                            | 1.5<br>(-0.9 to 4.0)                                |
| Pulmonary aspiration and foreign body in airway                                     | 7.1<br>(5.8 to 8.6)                     | 10.6<br>(9.3 to 12.1)                 | 0.2<br>(0.1 to 0.3)                | 34.5<br>(31.6 to 37.6)                            | 2.8<br>(0.3 to 5.2)                                 |
| Foreign body in eyes                                                                | 4.4<br>(2.6 to 6.3)                     | 20.2<br>(15.4 to 26.8)                | 0.3<br>(0.2 to 0.5)                | 30.8<br>(26.3 to 36.0)                            | 7.2<br>(3.6 to 11.2)                                |
| Foreign body in other body part                                                     | 30.9<br>(25.7 to 38.7)                  | 8.3<br>(7.0 to 9.9)                   | 0.8<br>(0.5 to 1.2)                | 23.0<br>(20.1 to 25.9)                            | -0.8<br>(-3.5 to 1.8)                               |
| Environmental heat and cold exposure                                                | 20.7<br>(18.2 to 23.5)                  | 5.6<br>(4.7 to 6.5)                   | 0.7<br>(0.5 to 1.1)                | 27.3<br>(22.2 to 33.4)                            | 0.1<br>(-4.4 to 5.3)                                |
| Other unintentional injuries                                                        | 221.4<br>(184.4 to 262.4)               | 109.9<br>(92.5 to 129.1)              | 5.5<br>(3.5 to 8.2)                | 30.0<br>(27.3 to 32.8)                            | 3.7<br>(1.1 to 6.0)                                 |
| <b>Self-harm and interpersonal violence</b>                                         | <b>209.5</b><br><b>(190.0 to 229.5)</b> | <b>44.6†</b><br><b>(39.5 to 50.4)</b> | <b>3.8</b><br><b>(2.5 to 5.4)</b>  | <b>10.2</b><br><b>(8.1 to 12.7)</b>               | <b>-9.4</b><br><b>(-11.2 to -7.4)</b>               |
| Self-harm                                                                           | 14.8<br>(12.2 to 17.6)                  | 13.3<br>(11.5 to 15.4)                | 0.6<br>(0.4 to 0.9)                | 14.8<br>(9.0 to 21.1)                             | -6.6<br>(-11.7 to -1.5)                             |
| Self-harm by firearm                                                                | 0.2<br>(0.1 to 0.2)                     | < 0.05<br>(< 0.05 to 0.1)             | < 0.05<br>(< 0.05 to < 0.05)       | 1.3<br>(-1.9 to 4.9)                              | -17.1<br>(-19.9 to -14.0)                           |
| Self-harm by other specified means                                                  | 14.6<br>(12.0 to 17.4)                  | 13.2<br>(11.5 to 15.4)                | 0.6<br>(0.4 to 0.9)                | 14.9<br>(9.0 to 21.2)                             | -6.6<br>(-11.7 to -1.4)                             |
| Interpersonal violence                                                              | 194.6<br>(175.3 to 214.9)               | 31.3†<br>(26.5 to 36.5)               | 3.2<br>(2.1 to 4.5)                | 9.3<br>(7.2 to 11.8)                              | -10.0<br>(-11.7 to -8.0)                            |
| Assault by firearm                                                                  | 7.2<br>(5.9 to 8.8)                     | 1.2<br>(0.9 to 1.6)                   | 0.2<br>(0.1 to 0.3)                | 2.1<br>(-0.7 to 5.4)                              | -17.3<br>(-19.9 to -14.5)                           |
| Assault by sharp object                                                             | 18.0<br>(14.5 to 22.1)                  | 6.3<br>(4.7 to 8.3)                   | 0.4<br>(0.2 to 0.5)                | -7.3<br>(-10.0 to -4.2)                           | -24.7<br>(-27.1 to -22.0)                           |
| Sexual violence                                                                     | 111.6<br>(97.0 to 128.1)                | --                                    | 1.0<br>(0.6 to 1.4)                | 14.1<br>(9.6 to 18.8)                             | -2.7<br>(-6.4 to 1.0)                               |
| Assault by other means                                                              | 57.8<br>(46.8 to 72.2)                  | 23.7<br>(19.9 to 28.0)                | 1.7<br>(1.1 to 2.5)                | 11.6<br>(8.8 to 14.7)                             | -9.4<br>(-11.9 to -6.8)                             |
| <b>Forces of nature, conflict and terrorism, and executions and police conflict</b> | <b>351.5</b><br><b>(188.4 to 575.9)</b> | <b>0.3†</b><br><b>(0.2 to 0.5)</b>    | <b>6.4</b><br><b>(1.8 to 14.7)</b> | <b>69.2</b><br><b>(58.8 to 88.0)</b>              | <b>40.4</b><br><b>(31.1 to 57.0)</b>                |
| Exposure to forces of nature                                                        | 0.2<br>(0.1 to 0.3)                     | --                                    | < 0.05<br>(< 0.05 to < 0.05)       | -9.5<br>(-11.9 to -6.8)                           | -26.8<br>(-28.8 to -24.6)                           |
| Conflict and terrorism                                                              | 350.4<br>(187.6 to 574.7)               | --                                    | 6.4<br>(1.8 to 14.6)               | 69.4<br>(58.9 to 88.4)                            | 40.6<br>(31.2 to 57.3)                              |
| Executions and police conflict                                                      | 0.9<br>(0.5 to 1.4)                     | 0.3<br>(0.2 to 0.5)                   | < 0.05<br>(< 0.05 to 0.1)          | 45.5<br>(36.7 to 50.1)                            | 22.0<br>(14.9 to 25.8)                              |
| <b>Impairments</b>                                                                  | --                                      | --                                    | --                                 | --                                                | --                                                  |
| Anaemia                                                                             | 778.5<br>(636.8 to 925.1)               | --                                    | 15.2<br>(10.1 to 22.4)             | 25.6<br>(3.8 to 53.6)                             | 1.3<br>(-16.2 to 24.9)                              |
| Developmental intellectual disability                                               | 140.7<br>(109.2 to 177.0)               | --                                    | 16.6<br>(12.3 to 21.9)             | 18.2<br>(12.9 to 23.7)                            | -1.2<br>(-5.5 to 3.4)                               |
| Epilepsy                                                                            | 34.7<br>(20.1 to 48.5)                  | --                                    | 10.3<br>(5.6 to 17.2)              | 13.2<br>(-41.0 to 122.2)                          | -5.8<br>(-50.4 to 82.9)                             |
| Guillain-Barre syndrome                                                             | 0.1<br>(0.1 to 0.1)                     | --                                    | < 0.05<br>(< 0.05 to < 0.05)       | 23.9<br>(21.5 to 26.5)                            | 0.2<br>(0.1 to 0.2)                                 |
| Hearing loss                                                                        | 1,449.4<br>(1,277.5 to 1,628.6)         | --                                    | 37.9<br>(25.9 to 55.6)             | 27.7<br>(23.7 to 31.8)                            | -0.8<br>(-3.7 to 2.0)                               |
| Heart failure                                                                       | 95.6<br>(83.5 to 109.6)                 | --                                    | 10.1<br>(7.7 to 12.8)              | 25.9<br>(16.3 to 36.5)                            | -6.2<br>(-13.5 to 1.9)                              |
| Infertility                                                                         | 70.9<br>(53.8 to 94.1)                  | --                                    | 0.5<br>(0.2 to 0.9)                | 21.2<br>(12.5 to 29.2)                            | -0.0<br>(-6.4 to 6.0)                               |
| Pelvic inflammatory disease                                                         | 0.3<br>(0.2 to 0.5)                     | --                                    | < 0.05<br>(< 0.05 to 0.1)          | 14.2<br>(-13.9 to 48.7)                           | -3.4<br>(-26.7 to 25.3)                             |
| Vision loss                                                                         | 876.1<br>(834.9 to 918.4)               | --                                    | 26.4<br>(18.5 to 37.6)             | 21.8<br>(18.3 to 24.9)                            | -2.9<br>(-5.7 to -0.5)                              |

We did not calculate incidence for the nine impairments, certain NTDs, and causes with only birth prevalence. Blank cells mean that no estimate is available.

† Incidence for aggregate causes represents the sum of the incidence of the causes below the aggregate.

‡ Incidence estimates for stroke represent first-ever stroke only.

^ Incidence of HIV/AIDS represents new infections of HIV only and does not include new infections of Tuberculosis in HIV positive cases.



SR Table 14: Prevalence, incidence, and YLDs for 2016, percentage change of YLD counts and percentage change of age-standardised YLD rates between 2006 and 2016 by cause and impairments, for all ages, Italy.

| Cause                                                                                | Prevalence in thousands (95% UI)          | Incidence in thousands (95% UI)               | YLDs in thousands (95% UI)              |                                                   |                                                     |
|--------------------------------------------------------------------------------------|-------------------------------------------|-----------------------------------------------|-----------------------------------------|---------------------------------------------------|-----------------------------------------------------|
|                                                                                      | 2016 counts                               | 2016 counts                                   | 2016 counts                             | Percentage change in counts between 2006 and 2016 | Percentage change in age-standardised rates between |
| <b>All causes</b>                                                                    | <b>57,602.9</b><br>(57,429.6 to 57,772.9) | <b>370,881.5†</b><br>(348,893.8 to 394,787.8) | <b>8,040.9</b><br>(5,996.1 to 10,405.6) | <b>7.5</b><br>(6.1 to 9.1)                        | <b>-0.2</b><br>(-1.7 to 1.3)                        |
| <b>Communicable, maternal, neonatal, and nutritional disorders</b>                   | <b>19,676.7</b><br>(18,895.2 to 20,528.4) | <b>212,648.4†</b><br>(191,295.6 to 234,919.8) | <b>261.5</b><br>(186.4 to 354.1)        | <b>0.2</b><br>(-4.5 to 5.0)                       | <b>-3.4</b><br>(-8.0 to 1.3)                        |
| <b>HIV/AIDS and tuberculosis</b>                                                     | <b>7,336.2</b><br>(6,582.5 to 8,003.9)    | <b>9.5†</b><br>(6.4 to 13.2)                  | <b>23.1</b><br>(10.9 to 40.9)           | <b>22.1</b><br>(8.1 to 36.3)                      | <b>8.1</b><br>(-3.8 to 20.9)                        |
| Tuberculosis                                                                         | 6,627.7<br>(5,791.2 to 7,504.7)           | 3.4†<br>(2.8 to 4.1)                          | 0.9<br>(0.6 to 1.4)                     | -18.5<br>(-29.2 to -6.4)                          | -18.7<br>(-29.9 to -3.6)                            |
| Drug-susceptible tuberculosis                                                        | 2.7<br>(2.2 to 3.4)                       | 3.3<br>(2.7 to 4.0)                           | 0.9<br>(0.6 to 1.3)                     | -18.3<br>(-29.5 to -5.7)                          | -18.5<br>(-30.1 to -3.1)                            |
| Multidrug-resistant tuberculosis without extensive drug resistance                   | 0.1<br>(0.1 to 0.1)                       | 0.1<br>(0.1 to 0.1)                           | < 0.05<br>(< 0.05 to < 0.05)            | -28.3<br>(-48.6 to -0.1)                          | -28.4<br>(-48.4 to -1.2)                            |
| Extensively drug-resistant tuberculosis                                              | < 0.05<br>(< 0.05 to < 0.05)              | < 0.05<br>(< 0.05 to < 0.05)                  | < 0.05<br>(< 0.05 to < 0.05)            | 54.2<br>(10.5 to 114.9)                           | 54.1<br>(10.9 to 112.6)                             |
| Latent tuberculosis infection                                                        | 6,624.8<br>(5,788.5 to 7,501.9)           | --                                            | --                                      | --                                                | --                                                  |
| HIV/AIDS                                                                             | 259.8<br>(129.3 to 424.3)                 | 6.0^<br>(3.0 to 9.8)                          | 22.2<br>(10.1 to 39.9)                  | 24.7<br>(10.6 to 40.4)                            | 9.9<br>(-2.2 to 23.6)                               |
| Drug-susceptible HIV/AIDS - Tuberculosis                                             | 0.1<br>(< 0.05 to 0.1)                    | 0.1<br>(0.1 to 0.2)                           | < 0.05<br>(< 0.05 to 0.1)               | -36.8<br>(-42.1 to -30.9)                         | -44.2<br>(-48.9 to -39.0)                           |
| Multidrug-resistant HIV/AIDS - Tuberculosis without extensive drug resistance        | < 0.05<br>(< 0.05 to < 0.05)              | < 0.05<br>(< 0.05 to < 0.05)                  | < 0.05<br>(< 0.05 to < 0.05)            | -44.3<br>(-60.6 to -23.0)                         | -50.9<br>(-65.2 to -32.0)                           |
| Extensively drug-resistant HIV/AIDS - Tuberculosis                                   | < 0.05<br>(< 0.05 to < 0.05)              | < 0.05<br>(< 0.05 to < 0.05)                  | < 0.05<br>(< 0.05 to < 0.05)            | 19.8<br>(-15.3 to 65.8)                           | 5.7<br>(-25.2 to 46.4)                              |
| HIV/AIDS resulting in other diseases                                                 | 259.7<br>(129.2 to 424.2)                 | 6.0<br>(3.0 to 9.8)                           | 22.2<br>(10.1 to 39.9)                  | 24.9<br>(10.8 to 40.6)                            | 10.1<br>(-2.1 to 23.7)                              |
| <b>Diarrhoea, lower respiratory infections, and other common infectious diseases</b> | <b>3,330.8</b><br>(3,098.5 to 3,552.1)    | <b>210,203.2†</b><br>(188,798.1 to 232,311.7) | <b>96.5</b><br>(62.6 to 142.0)          | <b>3.9</b><br>(0.2 to 7.7)                        | <b>1.4</b><br>(-2.1 to 5.1)                         |
| Diarrhoeal diseases                                                                  | 68.4<br>(63.6 to 73.1)                    | 4,628.6<br>(4,311.8 to 4,942.9)               | 7.7<br>(5.3 to 10.7)                    | 12.0<br>(0.6 to 24.5)                             | 11.2<br>(-0.7 to 25.3)                              |
| Intestinal infectious diseases                                                       | < 0.05<br>(< 0.05 to < 0.05)              | 0.2†<br>(0.2 to 0.3)                          | < 0.05<br>(< 0.05 to < 0.05)            | -0.4<br>(-16.1 to 16.5)                           | -7.6<br>(-21.8 to 8.8)                              |
| Typhoid fever                                                                        | < 0.05<br>(< 0.05 to < 0.05)              | 0.1<br>(0.1 to 0.1)                           | < 0.05<br>(< 0.05 to < 0.05)            | 8.5<br>(-11.3 to 32.6)                            | 3.1<br>(-16.0 to 25.3)                              |
| Paratyphoid fever                                                                    | < 0.05<br>(< 0.05 to < 0.05)              | 0.1<br>(0.1 to 0.2)                           | < 0.05<br>(< 0.05 to < 0.05)            | -14.6<br>(-30.3 to 4.9)                           | -20.1<br>(-34.2 to -3.6)                            |
| Other intestinal infectious diseases                                                 | --                                        | --                                            | < 0.05<br>(< 0.05 to < 0.05)            | -32.4<br>(-49.9 to -10.4)                         | -43.1<br>(-60.8 to -16.8)                           |
| Lower respiratory infections                                                         | 24.2<br>(22.4 to 26.3)                    | 1,156.6<br>(1,066.4 to 1,263.6)               | 1.4<br>(1.0 to 2.0)                     | 21.2<br>(5.3 to 40.6)                             | 4.4<br>(-9.2 to 19.8)                               |
| Upper respiratory infections                                                         | 2,639.7<br>(2,374.0 to 2,922.9)           | 201,507.7<br>(180,207.9 to 223,891.3)         | 65.3<br>(39.1 to 101.8)                 | 1.9<br>(-3.0 to 6.6)                              | -0.1<br>(-4.6 to 4.5)                               |
| Otitis media                                                                         | 551.4<br>(488.8 to 613.2)                 | 2,047.2<br>(1,680.7 to 2,476.9)               | 14.9<br>(9.3 to 22.3)                   | 5.3<br>(-3.1 to 14.0)                             | 2.8<br>(-5.2 to 11.4)                               |
| Meningitis                                                                           | 11.1<br>(9.2 to 13.8)                     | 2.2<br>(2.0 to 2.5)                           | 1.2<br>(0.8 to 1.7)                     | 4.2<br>(-2.7 to 45.4)                             | -2.6<br>(-6.7 to 11.2)                              |
| Pneumococcal meningitis                                                              | 2.4<br>(2.0 to 2.9)                       | 0.1<br>(0.1 to 0.2)                           | 0.3<br>(0.2 to 0.4)                     | -4.1<br>(-9.3 to 0.7)                             | -8.8<br>(-14.4 to -3.8)                             |
| H influenzae type B meningitis                                                       | 1.1<br>(0.8 to 1.3)                       | 0.1<br>(0.1 to 0.2)                           | 0.1<br>(0.1 to 0.2)                     | -3.5<br>(-10.2 to 2.4)                            | -8.2<br>(-15.5 to -1.7)                             |
| Meningococcal infection                                                              | 1.9<br>(1.2 to 4.4)                       | 0.5<br>(0.4 to 0.6)                           | 0.2<br>(0.1 to 0.6)                     | 25.0<br>(-5.0 to 281.7)                           | 3.2<br>(-10.6 to 80.1)                              |
| Other meningitis                                                                     | 5.8<br>(4.5 to 7.3)                       | 1.5<br>(1.3 to 1.7)                           | 0.6<br>(0.4 to 0.8)                     | 3.7<br>(-0.5 to 7.8)                              | 0.3<br>(-3.9 to 4.4)                                |
| Encephalitis                                                                         | 26.4<br>(18.0 to 37.8)                    | 14.2<br>(13.8 to 14.6)                        | 3.1<br>(2.1 to 4.2)                     | 7.4<br>(4.2 to 10.7)                              | 2.5<br>(-0.4 to 5.6)                                |
| Diphtheria                                                                           | < 0.05<br>(< 0.05 to < 0.05)              | < 0.05<br>(< 0.05 to < 0.05)                  | < 0.05<br>(< 0.05 to < 0.05)            | -17.5<br>(-56.6 to 57.0)                          | -23.9<br>(-55.6 to 29.3)                            |
| Whooping cough                                                                       | 2.5<br>(1.9 to 3.2)                       | 18.4<br>(14.1 to 23.7)                        | 0.1<br>(0.1 to 0.2)                     | -20.7<br>(-42.2 to 6.2)                           | -14.4<br>(-38.1 to 15.0)                            |
| Tetanus                                                                              | < 0.05<br>(< 0.05 to < 0.05)              | < 0.05<br>(< 0.05 to < 0.05)                  | < 0.05<br>(< 0.05 to < 0.05)            | -33.7<br>(-52.0 to -2.9)                          | -43.6<br>(-56.4 to -18.7)                           |
| Measles                                                                              | < 0.05<br>(< 0.05 to < 0.05)              | 0.2<br>(0.1 to 0.2)                           | < 0.05<br>(< 0.05 to < 0.05)            | -5.7<br>(-25.1 to 17.5)                           | 0.0<br>(-20.6 to 24.6)                              |
| Varicella and herpes zoster                                                          | 61.7<br>(54.8 to 68.6)                    | 828.0<br>(785.8 to 871.6)                     | 2.8<br>(1.7 to 4.3)                     | 12.7<br>(-1.9 to 30.8)                            | 2.8<br>(-11.2 to 18.8)                              |
| <b>Neglected tropical diseases and malaria</b>                                       | <b>18.5</b><br>(15.4 to 25.0)             | <b>0.6†</b><br>(0.2 to 2.2)                   | <b>0.6</b><br>(0.3 to 1.6)              | <b>-5.4</b><br>(-67.8 to 189.2)                   | <b>-14.0</b><br>(-74.7 to 174.7)                    |
| Malaria                                                                              | --                                        | --                                            | --                                      | --                                                | --                                                  |
| Chagas disease                                                                       | 16.1<br>(13.4 to 19.0)                    | --                                            | 0.2<br>(0.1 to 0.2)                     | 96.1<br>(83.2 to 107.5)                           | 86.4<br>(74.0 to 98.4)                              |
| Leishmaniasis                                                                        | < 0.05<br>(< 0.05 to < 0.05)              | 0.1<br>(0.1 to 0.1)                           | < 0.05<br>(< 0.05 to < 0.05)            | -31.0<br>(-50.3 to -2.8)                          | -35.0<br>(-58.4 to 3.3)                             |
| Visceral leishmaniasis                                                               | < 0.05<br>(< 0.05 to < 0.05)              | 0.1<br>(0.1 to 0.1)                           | < 0.05<br>(< 0.05 to < 0.05)            | -30.6<br>(-41.0 to -19.8)                         | -36.6<br>(-49.5 to -21.5)                           |
| Cutaneous and mucocutaneous leishmaniasis                                            | < 0.05<br>(< 0.05 to < 0.05)              | < 0.05<br>(< 0.05 to 0.1)                     | < 0.05<br>(< 0.05 to < 0.05)            | -31.7<br>(-72.6 to 56.9)                          | -33.6<br>(-72.8 to 55.7)                            |
| African trypanosomiasis                                                              | --                                        | --                                            | --                                      | --                                                | --                                                  |
| Schistosomiasis                                                                      | --                                        | --                                            | --                                      | --                                                | --                                                  |
| Cysticercosis                                                                        | 1.9<br>(0.4 to 3.7)                       | --                                            | 0.2<br>(< 0.05 to 0.6)                  | -9.4<br>(-82.0 to 422.1)                          | -17.8<br>(-83.6 to 373.3)                           |
| Cystic echinococcosis                                                                | 2.3<br>(0.4 to 11.5)                      | 0.5<br>(0.1 to 2.0)                           | 0.2<br>(< 0.05 to 1.2)                  | -29.8<br>(-92.9 to 508.2)                         | -34.1<br>(-93.3 to 449.7)                           |
| Lymphatic filariasis                                                                 | --                                        | --                                            | --                                      | --                                                | --                                                  |
| Onchocerciasis                                                                       | --                                        | --                                            | --                                      | --                                                | --                                                  |
| Trachoma                                                                             | --                                        | --                                            | --                                      | --                                                | --                                                  |
| Dengue                                                                               | --                                        | --                                            | --                                      | --                                                | --                                                  |
| Yellow fever                                                                         | --                                        | --                                            | --                                      | --                                                | --                                                  |
| Rabies                                                                               | < 0.05<br>(< 0.05 to < 0.05)              | < 0.05<br>(< 0.05 to < 0.05)                  | < 0.05<br>(< 0.05 to < 0.05)            | -19.0<br>(-39.4 to 9.6)                           | -31.1<br>(-47.1 to -7.6)                            |
| Intestinal nematode infections                                                       | --                                        | --                                            | --                                      | --                                                | --                                                  |
| Ascariasis                                                                           | --                                        | --                                            | --                                      | --                                                | --                                                  |

| Cause                                                                   | Prevalence in thousands (95% UI)                 | Incidence in thousands (95% UI)                      | YLDs in thousands (95% UI)                    |                                                   |                                                     |
|-------------------------------------------------------------------------|--------------------------------------------------|------------------------------------------------------|-----------------------------------------------|---------------------------------------------------|-----------------------------------------------------|
|                                                                         | 2016 counts                                      | 2016 counts                                          | 2016 counts                                   | Percentage change in counts between 2006 and 2016 | Percentage change in age-standardised rates between |
| Trichuriasis                                                            | --                                               | --                                                   | --                                            | --                                                | --                                                  |
| Hookworm disease                                                        | --                                               | --                                                   | --                                            | --                                                | --                                                  |
| Food-borne trematodiasis                                                | --                                               | --                                                   | --                                            | --                                                | --                                                  |
| Leprosy                                                                 | < 0.05<br>(< 0.05 to < 0.05)                     | < 0.05<br>(< 0.05 to < 0.05)                         | < 0.05<br>(< 0.05 to < 0.05)                  | 8.0<br>(5.7 to 10.3)                              | -4.6<br>(-6.6 to -2.4)                              |
| Ebola virus disease                                                     | < 0.05<br>(0.0 to < 0.05)                        | --                                                   | < 0.05<br>(0.0 to < 0.05)                     | --                                                | --                                                  |
| Zika virus disease                                                      | --                                               | --                                                   | --                                            | --                                                | --                                                  |
| Guinea worm disease                                                     | --                                               | --                                                   | --                                            | --                                                | --                                                  |
| Other neglected tropical diseases                                       | --                                               | --                                                   | < 0.05<br>(< 0.05 to < 0.05)                  | --                                                | --                                                  |
| <b>Maternal disorders</b>                                               | <b>25.0</b><br><b>(20.0 to 31.2)</b>             | <b>518.3†</b><br><b>(321.9 to 774.5)</b>             | <b>1.5</b><br><b>(0.9 to 2.2)</b>             | <b>-8.4</b><br><b>(-32.8 to 24.9)</b>             | <b>1.7</b><br><b>(-25.0 to 37.8)</b>                |
| Maternal haemorrhage                                                    | 4.9<br>(2.9 to 8.0)                              | 32.5<br>(28.7 to 36.7)                               | 0.2<br>(0.1 to 0.3)                           | -3.1<br>(-40.6 to 57.0)                           | 6.6<br>(-34.6 to 70.2)                              |
| Maternal sepsis and other pregnancy related infections                  | 7.9<br>(6.6 to 9.5)                              | 29.2<br>(25.9 to 32.8)                               | 0.1<br>(0.1 to 0.3)                           | -9.2<br>(-54.1 to 88.6)                           | -2.4<br>(-50.6 to 109.8)                            |
| Maternal hypertensive disorders                                         | 10.2<br>(7.0 to 13.6)                            | 44.1<br>(42.4 to 45.8)                               | 0.5<br>(0.3 to 0.8)                           | -5.3<br>(-45.4 to 58.8)                           | 6.2<br>(-39.5 to 77.2)                              |
| Maternal obstructed labour and uterine rupture                          | 0.3<br>(0.2 to 0.5)                              | 22.6<br>(14.5 to 32.5)                               | 0.1<br>(< 0.05 to 0.2)                        | -9.4<br>(-52.0 to 72.3)                           | 1.6<br>(-46.5 to 92.5)                              |
| Maternal abortion, miscarriage, and ectopic pregnancy                   | 3.2<br>(1.4 to 5.6)                              | 390.0<br>(192.2 to 642.9)                            | 0.4<br>(0.1 to 0.7)                           | -11.7<br>(-57.1 to 77.7)                          | -1.5<br>(-52.9 to 95.9)                             |
| Other maternal disorders                                                | --                                               | --                                                   | 0.2<br>(0.1 to 0.3)                           | -12.3<br>(-35.6 to 19.3)                          | -3.0<br>(-28.4 to 30.6)                             |
| <b>Neonatal disorders</b>                                               | <b>444.8</b><br><b>(370.3 to 553.3)</b>          | --                                                   | <b>74.0</b><br><b>(52.2 to 100.1)</b>         | <b>2.2</b><br><b>(-9.2 to 14.7)</b>               | <b>0.9</b><br><b>(-11.0 to 13.7)</b>                |
| Neonatal preterm birth complications                                    | 349.2<br>(279.2 to 469.3)                        | --                                                   | 37.3<br>(25.1 to 53.1)                        | -7.3<br>(-25.2 to 15.0)                           | -8.3<br>(-26.2 to 14.6)                             |
| Neonatal encephalopathy due to birth asphyxia and trauma                | 131.1<br>(91.3 to 187.7)                         | --                                                   | 24.7<br>(14.3 to 40.2)                        | 25.5<br>(8.5 to 45.6)                             | 23.5<br>(6.9 to 43.5)                               |
| Neonatal sepsis and other neonatal infections                           | 23.4<br>(11.9 to 46.2)                           | --                                                   | 9.6<br>(4.1 to 20.9)                          | -4.4<br>(-20.0 to 14.7)                           | -6.4<br>(-23.0 to 14.0)                             |
| Hemolytic disease and other neonatal jaundice                           | 4.6<br>(4.0 to 5.3)                              | --                                                   | 1.4<br>(1.0 to 1.8)                           | 1.7<br>(-6.2 to 9.1)                              | 0.4<br>(-7.3 to 7.6)                                |
| Other neonatal disorders                                                | --                                               | --                                                   | 1.0<br>(0.7 to 1.4)                           | -7.6<br>(-24.9 to 13.0)                           | -0.6<br>(-19.1 to 21.7)                             |
| <b>Nutritional deficiencies</b>                                         | <b>2,999.4</b><br><b>(2,711.9 to 3,292.1)</b>    | <b>210.0†</b><br><b>(165.3 to 258.7)</b>             | <b>54.7</b><br><b>(36.6 to 78.2)</b>          | <b>-13.1</b><br><b>(-23.0 to -2.5)</b>            | <b>-18.1</b><br><b>(-28.4 to -7.4)</b>              |
| Protein-energy malnutrition                                             | 24.9<br>(24.4 to 25.4)                           | 15.4<br>(15.1 to 15.7)                               | 2.8<br>(1.8 to 3.9)                           | -7.7<br>(-18.6 to 5.0)                            | -0.7<br>(-12.3 to 13.1)                             |
| Iodine deficiency                                                       | 1,566.0<br>(1,396.5 to 1,766.9)                  | 16.8<br>(15.0 to 18.7)                               | 39.4<br>(26.6 to 55.6)                        | 0.8<br>(-6.3 to 9.2)                              | -3.7<br>(-10.9 to 4.0)                              |
| Vitamin A deficiency                                                    | 215.5<br>(162.2 to 272.6)                        | 177.9<br>(133.7 to 227.3)                            | --                                            | --                                                | --                                                  |
| Iron-deficiency anaemia                                                 | 1,207.0<br>(947.2 to 1,527.7)                    | --                                                   | 12.5<br>(7.1 to 21.1)                         | -40.0<br>(-57.2 to -14.2)                         | -42.6<br>(-58.4 to -18.7)                           |
| Other nutritional deficiencies                                          | --                                               | --                                                   | 0.1<br>(0.1 to 0.1)                           | -7.8<br>(-19.0 to 5.2)                            | -1.0<br>(-12.9 to 12.9)                             |
| <b>Other communicable, maternal, neonatal, and nutritional diseases</b> | <b>9,003.1</b><br><b>(8,320.9 to 9,749.4)</b>    | <b>1,706.8</b><br><b>(1,502.0 to 1,979.6)</b>        | <b>10.8</b><br><b>(7.4 to 16.1)</b>           | <b>-3.0</b><br><b>(-9.6 to 5.9)</b>               | <b>-7.6</b><br><b>(-13.3 to -0.3)</b>               |
| Sexually transmitted diseases excluding HIV                             | 7,027.3<br>(6,418.6 to 7,786.7)                  | 1,355.9<br>(1,159.2 to 1,610.7)                      | 8.2<br>(5.6 to 12.5)                          | 5.5<br>(-3.9 to 17.8)                             | 0.1<br>(-7.6 to 9.5)                                |
| Syphilis                                                                | 58.7<br>(44.3 to 78.9)                           | 36.7<br>(20.8 to 57.1)                               | 3.7<br>(2.6 to 5.1)                           | 15.4<br>(-3.8 to 40.8)                            | 2.9<br>(-14.0 to 23.6)                              |
| Chlamydial infection                                                    | 166.0<br>(122.9 to 217.0)                        | 121.8<br>(89.5 to 161.7)                             | 0.9<br>(0.5 to 1.5)                           | -4.9<br>(-20.0 to 12.6)                           | -0.5<br>(-17.5 to 21.9)                             |
| Gonococcal infection                                                    | 56.9<br>(28.2 to 123.6)                          | 140.1<br>(38.2 to 385.4)                             | 0.4<br>(0.2 to 0.7)                           | -9.6<br>(-22.4 to 4.3)                            | -5.8<br>(-16.2 to 7.5)                              |
| Trichomoniasis                                                          | 1,016.6<br>(863.4 to 1,195.8)                    | 836.2<br>(710.6 to 991.0)                            | 0.9<br>(0.4 to 1.9)                           | 0.7<br>(-7.5 to 9.7)                              | -0.5<br>(-8.4 to 8.2)                               |
| Genital herpes                                                          | 5,808.2<br>(4,981.2 to 6,820.3)                  | 177.6<br>(151.5 to 211.5)                            | 1.4<br>(0.4 to 3.3)                           | 4.7<br>(-4.1 to 13.2)                             | -1.1<br>(-9.4 to 7.4)                               |
| Other sexually transmitted diseases                                     | 62.4<br>(54.5 to 70.9)                           | 43.5<br>(35.1 to 54.0)                               | 1.0<br>(0.6 to 1.6)                           | -5.0<br>(-20.7 to 13.7)                           | -1.3<br>(-16.8 to 17.5)                             |
| Hepatitis                                                               | 2,318.0<br>(2,082.5 to 2,572.1)                  | 350.8<br>(304.9 to 402.4)                            | 0.8<br>(0.5 to 1.1)                           | -44.2<br>(-53.6 to -34.1)                         | -47.7<br>(-56.4 to -36.7)                           |
| Acute hepatitis A                                                       | 10.8<br>(9.3 to 12.4)                            | 141.1<br>(121.2 to 160.8)                            | 0.3<br>(0.2 to 0.5)                           | -46.7<br>(-60.5 to -28.6)                         | -49.1<br>(-63.3 to -29.6)                           |
| Hepatitis B                                                             | 873.6<br>(699.1 to 1,091.1)                      | 161.1<br>(121.2 to 207.2)                            | 0.3<br>(0.2 to 0.6)                           | -42.4<br>(-55.2 to -25.7)                         | -47.8<br>(-58.7 to -34.9)                           |
| Hepatitis C                                                             | 1,432.2<br>(1,288.0 to 1,579.1)                  | 31.4<br>(28.2 to 35.1)                               | < 0.05<br>(< 0.05 to 0.1)                     | -39.6<br>(-45.7 to -31.5)                         | -30.4<br>(-43.5 to -13.1)                           |
| Acute hepatitis E                                                       | 1.3<br>(0.9 to 1.9)                              | 17.2<br>(11.5 to 24.3)                               | < 0.05<br>(< 0.05 to 0.1)                     | -40.6<br>(-52.8 to -23.6)                         | -50.2<br>(-57.3 to -41.6)                           |
| Other infectious diseases                                               | 35.4<br>(27.8 to 44.6)                           | 0.1<br>(0.1 to 0.1)                                  | 1.9<br>(1.1 to 2.9)                           | -8.4<br>(-16.9 to 0.3)                            | -12.6<br>(-24.0 to -0.2)                            |
| <b>Non-communicable diseases</b>                                        | <b>56,602.1</b><br><b>(56,410.4 to 56,800.5)</b> | <b>151,745.1†</b><br><b>(145,464.7 to 158,451.5)</b> | <b>7,096.1</b><br><b>(5,267.9 to 9,147.6)</b> | <b>7.5</b><br><b>(5.9 to 9.2)</b>                 | <b>-0.2</b><br><b>(-1.9 to 1.5)</b>                 |
| <b>Neoplasms</b>                                                        | <b>1,492.3</b><br><b>(1,438.7 to 1,549.4)</b>    | <b>475.2</b><br><b>(457.5 to 495.1)</b>              | <b>148.7</b><br><b>(109.8 to 194.6)</b>       | <b>16.8</b><br><b>(12.1 to 22.0)</b>              | <b>1.1</b><br><b>(-3.2 to 5.9)</b>                  |
| Lip and oral cavity cancer                                              | 19.6<br>(17.5 to 22.0)                           | 5.1<br>(4.6 to 5.7)                                  | 1.9<br>(1.3 to 2.6)                           | 6.6<br>(-8.0 to 23.8)                             | -8.2<br>(-21.7 to 6.2)                              |
| Nasopharynx cancer                                                      | 3.5<br>(3.0 to 4.1)                              | 0.9<br>(0.8 to 1.1)                                  | 0.4<br>(0.3 to 0.5)                           | 4.2<br>(-13.0 to 23.9)                            | -7.4<br>(-22.5 to 11.2)                             |
| Other pharynx cancer                                                    | 7.5<br>(6.9 to 8.2)                              | 2.1<br>(1.9 to 2.3)                                  | 0.8<br>(0.6 to 1.0)                           | 10.5<br>(-4.9 to 27.6)                            | -1.6<br>(-15.8 to 14.0)                             |
| Oesophageal cancer                                                      | 3.8<br>(3.1 to 4.5)                              | 2.6<br>(2.3 to 3.0)                                  | 0.7<br>(0.5 to 1.0)                           | 12.5<br>(-6.1 to 33.2)                            | -3.9<br>(-20.1 to 14.0)                             |
| Stomach cancer                                                          | 45.5<br>(39.5 to 52.6)                           | 21.3<br>(19.2 to 23.8)                               | 5.5<br>(3.9 to 7.3)                           | 17.4<br>(-1.9 to 41.6)                            | -1.7<br>(-17.0 to 17.2)                             |
| Colon and rectum cancer                                                 | 227.2<br>(208.7 to 252.2)                        | 57.6<br>(53.1 to 63.8)                               | 20.2<br>(14.8 to 26.5)                        | 15.5<br>(3.8 to 29.8)                             | -2.3<br>(-12.4 to 10.1)                             |
| Liver cancer                                                            | 15.6<br>(12.3 to 19.6)                           | 13.6<br>(11.6 to 16.0)                               | 3.1<br>(2.1 to 4.3)                           | 17.3<br>(-4.5 to 44.4)                            | 1.0<br>(-18.1 to 23.5)                              |
| Liver cancer due to hepatitis B                                         | 2.2<br>(1.6 to 3.0)                              | 1.4<br>(1.1 to 1.9)                                  | 0.3<br>(0.2 to 0.5)                           | 21.5<br>(-3.0 to 49.8)                            | 6.3<br>(-14.9 to 30.7)                              |

| Cause                                              | Prevalence in thousands (95% UI)              | Incidence in thousands (95% UI)          | YLDs in thousands (95% UI)              |                                                   |                                                     |
|----------------------------------------------------|-----------------------------------------------|------------------------------------------|-----------------------------------------|---------------------------------------------------|-----------------------------------------------------|
|                                                    | 2016 counts                                   | 2016 counts                              | 2016 counts                             | Percentage change in counts between 2006 and 2016 | Percentage change in age-standardised rates between |
| Liver cancer due to hepatitis C                    | 12.0<br>(9.1 to 15.4)                         | 7.9<br>(6.6 to 9.3)                      | 1.8<br>(1.2 to 2.4)                     | 21.8<br>(-4.1 to 55.0)                            | 4.1<br>(-17.6 to 31.0)                              |
| Liver cancer due to alcohol use                    | 5.4<br>(3.8 to 7.2)                           | 3.5<br>(2.7 to 4.4)                      | 0.8<br>(0.5 to 1.2)                     | 5.1<br>(-18.0 to 33.9)                            | -8.7<br>(-29.1 to 15.5)                             |
| Liver cancer due to other causes                   | 1.4<br>(1.0 to 1.9)                           | 0.9<br>(0.7 to 1.1)                      | 0.2<br>(0.1 to 0.3)                     | 29.7<br>(2.9 to 62.2)                             | 11.5<br>(-12.1 to 37.3)                             |
| Gallbladder and biliary tract cancer               | 6.4<br>(4.6 to 10.6)                          | 5.8<br>(4.8 to 8.0)                      | 1.3<br>(0.8 to 1.9)                     | 16.5<br>(-11.4 to 65.6)                           | -3.0<br>(-24.5 to 29.6)                             |
| Pancreatic cancer                                  | 13.5<br>(11.2 to 16.8)                        | 13.9<br>(12.3 to 15.7)                   | 2.7<br>(1.9 to 3.7)                     | 21.5<br>(-1.6 to 52.1)                            | 1.2<br>(-16.8 to 22.7)                              |
| Larynx cancer                                      | 18.2<br>(16.0 to 21.0)                        | 4.7<br>(4.2 to 5.4)                      | 1.9<br>(1.3 to 2.6)                     | 1.2<br>(-18.7 to 29.0)                            | -10.9<br>(-29.3 to 15.2)                            |
| Tracheal, bronchus, and lung cancer                | 69.0<br>(60.6 to 79.2)                        | 45.0<br>(41.0 to 49.4)                   | 10.6<br>(7.5 to 14.0)                   | 15.2<br>(-1.6 to 34.5)                            | -0.8<br>(-15.5 to 15.5)                             |
| Malignant skin melanoma                            | 57.4<br>(43.8 to 65.7)                        | 11.7<br>(9.0 to 13.3)                    | 3.7<br>(2.4 to 5.3)                     | 25.7<br>(10.7 to 41.5)                            | 13.7<br>(-0.4 to 29.4)                              |
| Non-melanoma skin cancer                           | 15.5<br>(13.9 to 17.7)                        | 37.4<br>(34.4 to 40.5)                   | 0.6<br>(0.4 to 0.9)                     | 49.7<br>(33.9 to 67.8)                            | 25.8<br>(13.0 to 39.8)                              |
| Non-melanoma skin cancer (squamous-cell carcinoma) | 13.1<br>(12.2 to 14.3)                        | 12.6<br>(12.2 to 13.1)                   | 0.6<br>(0.4 to 0.9)                     | 51.8<br>(35.0 to 70.9)                            | 27.4<br>(13.7 to 42.9)                              |
| Non-melanoma skin cancer (basal-cell carcinoma)    | 3.5<br>(2.6 to 5.3)                           | 24.8<br>(21.8 to 27.8)                   | < 0.05<br>(< 0.05 to 0.1)               | 21.5<br>(-11.8 to 70.3)                           | 6.1<br>(-22.2 to 42.9)                              |
| Breast cancer                                      | 268.6<br>(247.4 to 292.2)                     | 55.0<br>(50.5 to 59.9)                   | 24.7<br>(17.6 to 33.0)                  | 12.2<br>(1.5 to 23.5)                             | -2.5<br>(-12.0 to 8.2)                              |
| Cervical cancer                                    | 11.3<br>(9.6 to 13.5)                         | 2.9<br>(2.5 to 3.4)                      | 1.1<br>(0.8 to 1.4)                     | 0.9<br>(-16.9 to 23.8)                            | -8.8<br>(-26.1 to 16.2)                             |
| Uterine cancer                                     | 69.5<br>(61.0 to 80.4)                        | 14.6<br>(12.9 to 16.9)                   | 5.1<br>(3.6 to 7.1)                     | 28.1<br>(5.5 to 57.8)                             | 13.3<br>(-7.8 to 40.3)                              |
| Ovarian cancer                                     | 18.5<br>(15.3 to 22.2)                        | 5.8<br>(4.8 to 6.8)                      | 2.5<br>(1.7 to 3.6)                     | 6.6<br>(-22.2 to 43.1)                            | -6.2<br>(-32.2 to 28.5)                             |
| Prostate cancer                                    | 236.7<br>(193.4 to 296.5)                     | 57.7<br>(49.5 to 69.2)                   | 20.6<br>(14.1 to 28.5)                  | 18.4<br>(2.5 to 37.1)                             | 1.7<br>(-12.8 to 18.6)                              |
| Testicular cancer                                  | 9.6<br>(7.7 to 12.1)                          | 1.8<br>(1.5 to 2.3)                      | 0.6<br>(0.4 to 1.0)                     | 1.7<br>(-23.6 to 37.9)                            | 6.4<br>(-22.0 to 46.6)                              |
| Kidney cancer                                      | 50.1<br>(44.2 to 55.7)                        | 12.6<br>(11.3 to 13.9)                   | 4.1<br>(2.9 to 5.7)                     | 10.2<br>(-6.7 to 28.5)                            | -2.8<br>(-18.0 to 13.3)                             |
| Bladder cancer                                     | 117.7<br>(106.2 to 128.7)                     | 27.3<br>(24.7 to 29.8)                   | 10.0<br>(7.2 to 13.6)                   | 15.0<br>(1.0 to 30.5)                             | -3.3<br>(-15.4 to 10.0)                             |
| Brain and nervous system cancer                    | 21.9<br>(14.8 to 28.8)                        | 8.5<br>(5.8 to 10.8)                     | 2.7<br>(1.7 to 3.9)                     | 36.1<br>(4.4 to 74.7)                             | 22.0<br>(-2.9 to 51.4)                              |
| Thyroid cancer                                     | 44.3<br>(39.5 to 50.4)                        | 8.4<br>(7.5 to 9.5)                      | 2.8<br>(1.9 to 4.0)                     | 10.9<br>(-5.1 to 29.2)                            | 0.4<br>(-14.5 to 16.7)                              |
| Mesothelioma                                       | 2.8<br>(2.5 to 3.3)                           | 1.8<br>(1.6 to 2.1)                      | 0.6<br>(0.4 to 0.8)                     | 16.6<br>(2.2 to 30.4)                             | 1.1<br>(-11.5 to 13.1)                              |
| Hodgkin lymphoma                                   | 10.1<br>(8.6 to 11.9)                         | 2.2<br>(1.9 to 2.6)                      | 0.9<br>(0.6 to 1.2)                     | 3.6<br>(-14.5 to 25.4)                            | 1.8<br>(-19.0 to 31.1)                              |
| Non-Hodgkin's lymphoma                             | 70.6<br>(61.1 to 81.7)                        | 17.3<br>(15.1 to 20.0)                   | 5.5<br>(3.9 to 7.6)                     | 27.7<br>(8.8 to 48.8)                             | 13.3<br>(-3.1 to 32.3)                              |
| Multiple myeloma                                   | 19.3<br>(15.9 to 24.2)                        | 6.2<br>(5.2 to 7.9)                      | 3.2<br>(2.1 to 4.4)                     | 21.9<br>(-1.6 to 51.1)                            | 4.9<br>(-16.1 to 30.5)                              |
| Leukaemia                                          | 39.7<br>(35.2 to 45.0)                        | 11.4<br>(10.1 to 12.9)                   | 5.0<br>(3.6 to 6.7)                     | 19.8<br>(4.2 to 37.6)                             | 1.8<br>(-11.9 to 17.1)                              |
| Acute lymphoid leukaemia                           | 3.8<br>(3.0 to 4.6)                           | 0.9<br>(0.8 to 1.1)                      | 0.4<br>(0.3 to 0.6)                     | 16.6<br>(-8.9 to 48.0)                            | 19.0<br>(-18.0 to 68.0)                             |
| Chronic lymphoid leukaemia                         | 18.6<br>(15.6 to 22.2)                        | 4.3<br>(3.6 to 5.1)                      | 2.2<br>(1.5 to 3.1)                     | 16.8<br>(-6.9 to 45.0)                            | -4.5<br>(-24.2 to 17.8)                             |
| Acute myeloid leukaemia                            | 3.8<br>(2.8 to 4.6)                           | 2.7<br>(2.0 to 3.2)                      | 0.7<br>(0.5 to 1.0)                     | 17.5<br>(-0.0 to 36.2)                            | -0.6<br>(-14.8 to 14.6)                             |
| Chronic myeloid leukaemia                          | 3.3<br>(2.7 to 4.0)                           | 1.1<br>(0.9 to 1.3)                      | 0.4<br>(0.3 to 0.5)                     | 2.5<br>(-14.8 to 23.7)                            | -17.2<br>(-30.1 to -2.3)                            |
| Other leukaemia                                    | 10.2<br>(8.3 to 12.5)                         | 2.4<br>(1.9 to 2.9)                      | 1.2<br>(0.8 to 1.7)                     | 36.3<br>(4.1 to 78.0)                             | 9.3<br>(-14.1 to 39.3)                              |
| Other neoplasms                                    | 77.2<br>(63.9 to 91.0)                        | 19.9<br>(16.8 to 23.3)                   | 5.8<br>(4.0 to 8.0)                     | 33.6<br>(11.9 to 59.7)                            | 16.3<br>(-1.2 to 35.9)                              |
| <b>Cardiovascular diseases</b>                     | <b>8,316.0</b><br><b>(7,973.2 to 8,631.5)</b> | <b>923.2†</b><br><b>(875.5 to 974.2)</b> | <b>497.1</b><br><b>(360.4 to 646.9)</b> | <b>9.9</b><br><b>(5.2 to 14.7)</b>                | <b>-5.0</b><br><b>(-8.8 to -1.3)</b>                |
| Rheumatic heart disease                            | 7.1<br>(6.4 to 7.8)                           | 3.5<br>(3.3 to 3.7)                      | 0.6<br>(0.4 to 0.8)                     | 0.4<br>(-20.2 to 23.9)                            | -10.5<br>(-25.6 to 5.9)                             |
| Ischaemic heart disease                            | 2,538.9<br>(2,393.5 to 2,673.7)               | 357.3<br>(328.7 to 386.5)                | 110.6<br>(77.6 to 148.5)                | 6.0<br>(0.6 to 12.6)                              | -8.1<br>(-12.7 to -2.8)                             |
| Cerebrovascular disease                            | 772.3<br>(715.8 to 825.6)                     | 166.0‡<br>(158.1 to 173.0)               | 126.0<br>(87.7 to 161.8)                | 11.5<br>(-1.2 to 23.0)                            | -4.7<br>(-13.7 to 4.2)                              |
| Ischaemic stroke                                   | 619.2<br>(547.7 to 710.9)                     | 110.9‡<br>(103.6 to 117.1)               | 97.4<br>(67.2 to 127.9)                 | 11.0<br>(-4.6 to 24.5)                            | -5.5<br>(-17.0 to 5.2)                              |
| Hemorrhagic stroke                                 | 184.8<br>(163.3 to 206.8)                     | 55.1‡<br>(51.7 to 58.3)                  | 28.6<br>(20.6 to 37.1)                  | 13.5<br>(0.8 to 27.3)                             | -2.0<br>(-12.6 to 9.2)                              |
| Hypertensive heart disease                         | 484.3<br>(414.9 to 568.2)                     | --                                       | 38.4<br>(26.5 to 52.2)                  | 21.1<br>(9.0 to 34.6)                             | 1.8<br>(-8.5 to 12.7)                               |
| Cardiomyopathy and myocarditis                     | 268.3<br>(236.0 to 299.7)                     | 42.6†<br>(38.4 to 47.2)                  | 21.1<br>(14.5 to 29.7)                  | 6.0<br>(-4.9 to 16.8)                             | -10.4<br>(-18.8 to -1.5)                            |
| Myocarditis                                        | 37.3<br>(33.6 to 41.4)                        | 42.6<br>(38.4 to 47.2)                   | 2.8<br>(1.9 to 3.9)                     | -4.7<br>(-17.8 to 11.6)                           | -11.1<br>(-23.1 to 2.9)                             |
| Alcoholic cardiomyopathy                           | 10.4<br>(8.8 to 12.2)                         | --                                       | 0.9<br>(0.6 to 1.3)                     | -2.4<br>(-26.5 to 28.9)                           | -11.5<br>(-32.9 to 16.7)                            |
| Other cardiomyopathy                               | 220.0<br>(186.1 to 258.9)                     | --                                       | 17.5<br>(11.9 to 24.7)                  | 8.3<br>(-3.4 to 20.2)                             | -10.1<br>(-19.4 to -0.6)                            |
| Atrial fibrillation and flutter                    | 1,014.5<br>(941.9 to 1,091.7)                 | 81.9<br>(74.4 to 89.0)                   | 78.7<br>(54.5 to 108.0)                 | 10.4<br>(3.7 to 18.7)                             | -7.4<br>(-13.2 to -0.8)                             |
| Peripheral vascular disease                        | 3,175.3<br>(2,787.2 to 3,635.4)               | 254.7<br>(218.7 to 298.3)                | 12.2<br>(5.7 to 22.3)                   | 6.3<br>(-1.9 to 14.4)                             | -9.4<br>(-16.2 to -2.1)                             |
| Endocarditis                                       | 12.8<br>(10.9 to 14.7)                        | 17.2<br>(15.8 to 18.9)                   | 1.0<br>(0.7 to 1.4)                     | 11.1<br>(-10.9 to 38.5)                           | -2.9<br>(-20.5 to 17.8)                             |
| Other cardiovascular and circulatory diseases      | 2,103.2<br>(1,830.2 to 2,394.3)               | --                                       | 108.6<br>(73.1 to 151.6)                | 9.5<br>(0.1 to 19.4)                              | -1.1<br>(-9.1 to 7.0)                               |
| <b>Chronic respiratory diseases</b>                | <b>5,527.8</b><br><b>(5,368.3 to 5,697.6)</b> | <b>409.6†</b><br><b>(391.8 to 427.3)</b> | <b>199.4</b><br><b>(149.9 to 256.7)</b> | <b>3.1</b><br><b>(-3.6 to 9.9)</b>                | <b>-3.1</b><br><b>(-8.2 to 2.2)</b>                 |
| Chronic obstructive pulmonary disease              | 2,687.9<br>(2,547.8 to 2,825.3)               | 162.4<br>(153.4 to 172.0)                | 75.9<br>(58.6 to 93.2)                  | 8.1<br>(-8.7 to 25.2)                             | -4.7<br>(-18.8 to 10.1)                             |
| Pneumoconiosis                                     | 1.0<br>(0.9 to 1.1)                           | 0.5<br>(0.5 to 0.5)                      | 0.2<br>(0.1 to 0.2)                     | -19.1<br>(-26.4 to -12.1)                         | -30.0<br>(-36.7 to -23.6)                           |
| Silicosis                                          | 0.8<br>(0.7 to 0.9)                           | 0.5<br>(0.4 to 0.5)                      | 0.1<br>(0.1 to 0.2)                     | -23.9<br>(-31.9 to -16.2)                         | -34.8<br>(-42.0 to -27.9)                           |



| Cause                                                          | Prevalence in thousands (95% UI)           | Incidence in thousands (95% UI)          | YLDs in thousands (95% UI)            |                                                   |                                                     |
|----------------------------------------------------------------|--------------------------------------------|------------------------------------------|---------------------------------------|---------------------------------------------------|-----------------------------------------------------|
|                                                                | 2016 counts                                | 2016 counts                              | 2016 counts                           | Percentage change in counts between 2006 and 2016 | Percentage change in age-standardised rates between |
| Asbestosis                                                     | 0.2<br>(0.1 to 0.2)                        | < 0.05<br>(< 0.05 to < 0.05)             | < 0.05<br>(< 0.05 to < 0.05)          | 12.7<br>(2.3 to 24.1)                             | -0.4<br>(-10.1 to 10.6)                             |
| Coal workers pneumoconiosis                                    | --                                         | --                                       | --                                    | --                                                | --                                                  |
| Other pneumoconiosis                                           | < 0.05<br>(< 0.05 to < 0.05)               | < 0.05<br>(< 0.05 to < 0.05)             | < 0.05<br>(< 0.05 to < 0.05)          | -3.4<br>(-13.2 to 13.1)                           | -12.3<br>(-21.5 to 0.8)                             |
| Asthma                                                         | 3,011.8<br>(2,832.0 to 3,196.3)            | 242.1<br>(226.8 to 258.4)                | 116.5<br>(77.0 to 165.6)              | -0.8<br>(-5.3 to 3.3)                             | -3.0<br>(-7.7 to 1.5)                               |
| Interstitial lung disease and pulmonary sarcoidosis            | 44.5<br>(40.1 to 49.3)                     | 4.6<br>(4.2 to 5.0)                      | 4.8<br>(3.2 to 6.9)                   | 21.1<br>(6.7 to 39.0)                             | 4.8<br>(-6.1 to 17.3)                               |
| Other chronic respiratory diseases                             | --                                         | --                                       | 2.1<br>(1.6 to 2.6)                   | 33.0<br>(16.2 to 51.9)                            | 30.4<br>(13.0 to 49.6)                              |
| <b>Cirrhosis and other chronic liver diseases</b>              | <b>825.9<br/>(785.7 to 864.8)</b>          | <b>16.4<br/>(15.8 to 17.1)</b>           | <b>17.2<br/>(11.9 to 23.6)</b>        | <b>9.5<br/>(1.1 to 19.0)</b>                      | <b>1.7<br/>(-6.9 to 10.8)</b>                       |
| Cirrhosis and other chronic liver diseases due to hepatitis B  | 119.8<br>(105.8 to 135.7)                  | 2.4<br>(2.1 to 2.8)                      | 2.4<br>(1.6 to 3.4)                   | 10.1<br>(-11.4 to 36.7)                           | 1.4<br>(-20.0 to 27.6)                              |
| Cirrhosis and other chronic liver diseases due to hepatitis C  | 457.0<br>(425.6 to 490.8)                  | 8.8<br>(8.2 to 9.5)                      | 8.9<br>(6.1 to 12.4)                  | 9.3<br>(-3.5 to 23.5)                             | 1.0<br>(-12.2 to 16.1)                              |
| Cirrhosis and other chronic liver diseases due to alcohol use  | 145.7<br>(129.0 to 162.8)                  | 2.9<br>(2.6 to 3.2)                      | 2.8<br>(1.9 to 3.9)                   | 9.8<br>(-10.9 to 35.2)                            | -0.8<br>(-19.9 to 23.1)                             |
| Cirrhosis and other chronic liver diseases due to other causes | 103.5<br>(88.4 to 120.2)                   | 2.3<br>(2.0 to 2.6)                      | 3.1<br>(2.1 to 4.5)                   | 9.1<br>(-10.0 to 35.4)                            | 4.2<br>(-15.5 to 28.4)                              |
| <b>Digestive diseases</b>                                      | <b>1,651.9<br/>(1,551.5 to 1,747.6)</b>    | <b>1,841.1†<br/>(1,716.7 to 1,962.9)</b> | <b>69.5<br/>(49.5 to 93.9)</b>        | <b>13.4<br/>(6.0 to 21.0)</b>                     | <b>5.0<br/>(-1.9 to 11.6)</b>                       |
| Peptic ulcer disease                                           | 408.6<br>(362.5 to 462.5)                  | 87.0<br>(78.4 to 96.6)                   | 4.0<br>(2.3 to 6.3)                   | 21.7<br>(-7.4 to 59.5)                            | 17.7<br>(-13.8 to 55.5)                             |
| Gastritis and duodenitis                                       | 375.5<br>(326.3 to 430.3)                  | 278.5<br>(247.6 to 310.5)                | 3.6<br>(2.1 to 5.6)                   | 15.6<br>(-9.0 to 48.1)                            | 8.8<br>(-15.9 to 40.2)                              |
| Appendicitis                                                   | 1.7<br>(1.6 to 1.8)                        | 43.8<br>(40.7 to 47.3)                   | 0.6<br>(0.4 to 0.8)                   | 1.2<br>(-1.7 to 4.2)                              | 1.5<br>(-1.6 to 4.8)                                |
| Paralytic ileus and intestinal obstruction                     | 1.4<br>(1.3 to 1.6)                        | 41.6<br>(38.2 to 44.9)                   | 0.5<br>(0.3 to 0.6)                   | 21.3<br>(6.0 to 40.0)                             | 3.6<br>(-4.2 to 12.5)                               |
| Inguinal, femoral, and abdominal hernia                        | 628.6<br>(573.2 to 683.1)                  | 799.4<br>(686.4 to 908.0)                | 39.9<br>(27.1 to 54.8)                | 12.4<br>(3.3 to 22.1)                             | 3.8<br>(-5.1 to 12.6)                               |
| Inflammatory bowel disease                                     | 77.6<br>(73.2 to 82.2)                     | 17.7<br>(17.2 to 18.1)                   | 11.2<br>(7.5 to 15.2)                 | 10.7<br>(-2.2 to 26.3)                            | 3.9<br>(-8.6 to 19.0)                               |
| Vascular intestinal disorders                                  | 3.0<br>(2.6 to 3.3)                        | 13.4<br>(11.8 to 15.2)                   | 0.8<br>(0.6 to 1.2)                   | 20.1<br>(-9.9 to 62.5)                            | 4.4<br>(-17.6 to 31.7)                              |
| Gallbladder and biliary diseases                               | 205.1<br>(182.0 to 231.7)                  | 516.9<br>(460.9 to 577.1)                | 2.7<br>(1.8 to 3.8)                   | 12.7<br>(-6.1 to 36.6)                            | 2.9<br>(-13.5 to 22.9)                              |
| Pancreatitis                                                   | 4.8<br>(4.4 to 5.3)                        | 42.9<br>(38.9 to 47.1)                   | 0.6<br>(0.4 to 0.9)                   | 10.1<br>(5.7 to 15.2)                             | -0.6<br>(-3.9 to 2.9)                               |
| Other digestive diseases                                       | --                                         | --                                       | 5.7<br>(4.0 to 7.6)                   | 19.4<br>(11.7 to 27.4)                            | 9.1<br>(1.6 to 16.6)                                |
| <b>Neurological disorders</b>                                  | <b>26,091.6<br/>(25,199.1 to 27,130.7)</b> | <b>9,640.5<br/>(8,420.1 to 11,004.1)</b> | <b>898.4<br/>(617.5 to 1,203.4)</b>   | <b>8.5<br/>(-0.2 to 18.1)</b>                     | <b>-0.3<br/>(-10.1 to 10.0)</b>                     |
| Alzheimer's disease and other dementias                        | 1,370.3<br>(1,152.2 to 1,583.6)            | 283.9<br>(227.4 to 338.9)                | 211.0<br>(146.1 to 284.1)             | 35.6<br>(24.6 to 44.6)                            | 3.4<br>(-4.4 to 9.7)                                |
| Parkinson's disease                                            | 144.6<br>(113.3 to 180.3)                  | 17.0<br>(13.3 to 21.7)                   | 16.6<br>(10.5 to 23.5)                | 31.3<br>(10.1 to 54.9)                            | 10.5<br>(-7.5 to 30.8)                              |
| Epilepsy                                                       | 164.0<br>(39.4 to 288.0)                   | 15.2<br>(3.7 to 26.6)                    | 37.5<br>(7.7 to 88.8)                 | -3.8<br>(-83.8 to 545.3)                          | -9.4<br>(-84.5 to 491.5)                            |
| Multiple sclerosis                                             | 72.4<br>(64.7 to 80.5)                     | 1.3<br>(1.2 to 1.5)                      | 18.5<br>(12.8 to 24.6)                | 6.0<br>(-7.9 to 22.9)                             | -0.3<br>(-14.7 to 15.0)                             |
| Motor neuron disease                                           | 9.6<br>(8.7 to 10.4)                       | 1.7<br>(1.6 to 1.7)                      | 2.0<br>(1.4 to 2.7)                   | 15.8<br>(10.2 to 21.6)                            | 5.8<br>(1.4 to 10.4)                                |
| Migraine                                                       | 12,977.7<br>(12,486.5 to 13,468.6)         | 1,005.4<br>(954.2 to 1,053.8)            | 534.3<br>(343.2 to 753.1)             | 1.5<br>(-1.5 to 4.5)                              | -0.5<br>(-3.5 to 2.5)                               |
| Tension-type headache                                          | 16,789.7<br>(15,107.2 to 18,628.3)         | 8,315.5<br>(7,098.3 to 9,684.3)          | 67.8<br>(43.1 to 99.6)                | 3.2<br>(-2.3 to 8.5)                              | -0.2<br>(-5.3 to 5.2)                               |
| Other neurological disorders                                   | 0.3<br>(0.2 to 0.4)                        | 0.5<br>(0.4 to 0.7)                      | 10.6<br>(5.9 to 18.1)                 | 15.1<br>(-47.0 to 151.7)                          | 10.0<br>(-59.0 to 193.1)                            |
| <b>Mental and substance use disorders</b>                      | <b>9,761.2<br/>(9,452.2 to 10,119.7)</b>   | <b>3,285.9†<br/>(3,048.8 to 3,540.9)</b> | <b>1,382.6<br/>(994.3 to 1,788.0)</b> | <b>1.6<br/>(-1.0 to 4.3)</b>                      | <b>-1.2<br/>(-3.8 to 1.2)</b>                       |
| Schizophrenia                                                  | 166.3<br>(151.1 to 180.1)                  | 7.2<br>(6.6 to 7.6)                      | 105.7<br>(79.6 to 127.5)              | 2.6<br>(-6.6 to 11.5)                             | -1.0<br>(-11.1 to 8.3)                              |
| Alcohol use disorders                                          | 261.2<br>(227.8 to 296.7)                  | 135.1<br>(117.0 to 153.4)                | 25.7<br>(17.4 to 35.8)                | 3.0<br>(-7.0 to 13.9)                             | 3.3<br>(-6.9 to 14.4)                               |
| Drug use disorders                                             | 581.7<br>(550.7 to 614.8)                  | 64.9<br>(60.6 to 69.9)                   | 129.9<br>(94.2 to 165.7)              | -19.1<br>(-25.5 to -12.2)                         | -18.1<br>(-25.0 to -10.6)                           |
| Opioid use disorders                                           | 193.0<br>(189.6 to 196.2)                  | 21.5<br>(20.2 to 23.2)                   | 80.0<br>(57.6 to 101.8)               | -12.5<br>(-20.4 to -3.5)                          | -9.7<br>(-17.5 to -0.2)                             |
| Cocaine use disorders                                          | 94.0<br>(84.4 to 104.5)                    | 4.6<br>(4.0 to 5.5)                      | 12.6<br>(7.8 to 18.0)                 | -34.0<br>(-43.6 to -22.9)                         | -36.1<br>(-46.3 to -24.4)                           |
| Amphetamine use disorders                                      | 86.4<br>(67.5 to 113.4)                    | 7.0<br>(5.3 to 9.3)                      | 11.4<br>(6.6 to 18.0)                 | -28.4<br>(-45.0 to -6.6)                          | -26.2<br>(-45.2 to -2.3)                            |
| Cannabis use disorders                                         | 172.2<br>(152.9 to 195.8)                  | 24.3<br>(21.0 to 28.3)                   | 5.0<br>(3.2 to 7.4)                   | -19.6<br>(-30.2 to -6.0)                          | -18.1<br>(-29.4 to -2.7)                            |
| Other drug use disorders                                       | 48.6<br>(43.4 to 54.3)                     | 7.5<br>(6.8 to 8.4)                      | 20.9<br>(13.8 to 29.7)                | -25.2<br>(-41.2 to -6.2)                          | -26.1<br>(-43.1 to -5.3)                            |
| Depressive disorders                                           | 2,543.9<br>(2,383.1 to 2,730.6)            | 2,480.9<br>(2,245.8 to 2,735.1)          | 410.4<br>(284.2 to 557.8)             | 4.4<br>(-0.8 to 10.3)                             | 0.7<br>(-3.9 to 5.7)                                |
| Major depressive disorder                                      | 1,538.9<br>(1,399.0 to 1,693.9)            | 2,338.8<br>(2,103.1 to 2,592.5)          | 310.4<br>(213.3 to 423.4)             | 2.6<br>(-3.4 to 9.8)                              | -0.7<br>(-6.2 to 5.6)                               |
| Dysthymia                                                      | 1,051.7<br>(923.5 to 1,207.2)              | 142.1<br>(124.9 to 162.8)                | 100.1<br>(67.5 to 144.1)              | 10.7<br>(3.1 to 19.6)                             | 5.2<br>(-1.9 to 13.5)                               |
| Bipolar disorder                                               | 569.6<br>(501.5 to 651.4)                  | 33.3<br>(29.4 to 37.8)                   | 115.1<br>(73.1 to 170.0)              | 3.3<br>(-4.1 to 10.6)                             | 0.6<br>(-7.2 to 8.1)                                |
| Anxiety disorders                                              | 3,324.7<br>(3,043.4 to 3,639.2)            | 393.4<br>(364.7 to 427.0)                | 316.5<br>(220.7 to 429.9)             | 8.2<br>(1.2 to 16.0)                              | 4.2<br>(-2.7 to 11.8)                               |
| Eating disorders                                               | 227.7<br>(190.8 to 279.4)                  | 41.9<br>(31.4 to 55.1)                   | 46.9<br>(30.1 to 68.1)                | -6.5<br>(-13.5 to 1.9)                            | 0.5<br>(-7.0 to 8.8)                                |
| Anorexia nervosa                                               | 57.2<br>(43.9 to 72.7)                     | 6.5<br>(4.9 to 8.5)                      | 12.1<br>(7.7 to 18.0)                 | -8.0<br>(-20.4 to 5.7)                            | -0.3<br>(-13.0 to 14.8)                             |
| Bulimia nervosa                                                | 165.3<br>(126.0 to 213.0)                  | 35.4<br>(24.9 to 49.2)                   | 34.8<br>(21.2 to 52.0)                | -6.0<br>(-14.4 to 4.0)                            | 0.8<br>(-7.9 to 11.4)                               |
| Autistic spectrum disorders                                    | 440.0<br>(392.2 to 493.2)                  | 1.7<br>(1.1 to 2.3)                      | 70.5<br>(47.4 to 99.0)                | 3.0<br>(-2.1 to 8.1)                              | 0.1<br>(-4.9 to 4.9)                                |
| Autism                                                         | 177.1<br>(150.5 to 206.9)                  | 0.2<br>(0.1 to 0.3)                      | 44.4<br>(28.4 to 65.0)                | 3.1<br>(-4.2 to 10.6)                             | 0.0<br>(-7.2 to 7.5)                                |
| Asperger syndrome and other autistic spectrum disorders        | 264.5<br>(218.6 to 317.5)                  | 1.5<br>(1.0 to 2.1)                      | 26.2<br>(16.9 to 38.5)                | 2.7<br>(-2.2 to 8.0)                              | 0.2<br>(-4.6 to 5.2)                                |



| Cause                                                      | Prevalence in thousands (95% UI)                 | Incidence in thousands (95% UI)                      | YLDs in thousands (95% UI)                    |                                                   |                                                     |
|------------------------------------------------------------|--------------------------------------------------|------------------------------------------------------|-----------------------------------------------|---------------------------------------------------|-----------------------------------------------------|
|                                                            | 2016 counts                                      | 2016 counts                                          | 2016 counts                                   | Percentage change in counts between 2006 and 2016 | Percentage change in age-standardised rates between |
| Attention-deficit/hyperactivity disorder                   | 416.5<br>(369.4 to 470.9)                        | 16.4<br>(14.3 to 19.1)                               | 5.0<br>(3.0 to 8.0)                           | -0.4<br>(-10.5 to 10.8)                           | 0.3<br>(-10.4 to 11.8)                              |
| Conduct disorder                                           | 256.6<br>(194.0 to 325.1)                        | 82.8<br>(61.5 to 102.9)                              | 31.3<br>(18.9 to 48.6)                        | 1.1<br>(-5.0 to 7.9)                              | 0.0<br>(-5.9 to 6.9)                                |
| Idiopathic developmental intellectual disability           | 333.0<br>(129.8 to 579.0)                        | --                                                   | 16.4<br>(6.7 to 30.0)                         | 0.4<br>(-8.7 to 10.6)                             | -2.0<br>(-11.1 to 8.0)                              |
| Other mental and substance use disorders                   | 1,483.7<br>(1,297.3 to 1,715.3)                  | 28.5<br>(25.4 to 32.0)                               | 109.1<br>(75.5 to 154.4)                      | 4.4<br>(0.1 to 9.2)                               | 0.1<br>(-4.6 to 4.8)                                |
| <b>Diabetes, urogenital, blood, and endocrine diseases</b> | <b>25,323.3</b><br><b>(24,908.2 to 25,676.4)</b> | <b>5,288.5†</b><br><b>(5,030.9 to 5,587.3)</b>       | <b>550.2</b><br><b>(393.2 to 729.7)</b>       | <b>11.8</b><br><b>(6.4 to 17.4)</b>               | <b>1.7</b><br><b>(-3.2 to 7.0)</b>                  |
| Diabetes mellitus                                          | 3,434.1<br>(3,098.7 to 3,796.1)                  | 176.6<br>(158.5 to 196.7)                            | 271.9<br>(187.5 to 369.6)                     | 13.5<br>(4.2 to 23.0)                             | 0.7<br>(-7.7 to 8.8)                                |
| Acute glomerulonephritis                                   | 0.8<br>(0.7 to 0.8)                              | 11.2<br>(9.9 to 12.6)                                | < 0.05<br>(< 0.05 to 0.1)                     | 6.9<br>(2.4 to 12.0)                              | 1.3<br>(-3.1 to 5.7)                                |
| Chronic kidney disease                                     | 2,868.5<br>(2,530.4 to 3,191.4)                  | 244.0<br>(210.5 to 278.2)                            | 72.4<br>(54.1 to 92.1)                        | 11.8<br>(1.8 to 23.7)                             | -3.5<br>(-11.0 to 5.8)                              |
| Chronic kidney disease due to diabetes mellitus            | 831.6<br>(671.0 to 1,004.2)                      | 74.8<br>(58.8 to 91.3)                               | 21.7<br>(15.5 to 28.7)                        | 18.6<br>(-0.6 to 39.6)                            | 2.4<br>(-14.3 to 19.9)                              |
| Chronic kidney disease due to hypertension                 | 605.3<br>(500.3 to 711.0)                        | 46.9<br>(36.6 to 59.6)                               | 13.6<br>(9.3 to 18.0)                         | -4.0<br>(-22.0 to 17.3)                           | -23.2<br>(-36.6 to -7.8)                            |
| Chronic kidney disease due to glomerulonephritis           | 559.2<br>(464.5 to 654.4)                        | 48.6<br>(37.8 to 62.0)                               | 15.1<br>(10.8 to 20.6)                        | 14.0<br>(-6.8 to 38.4)                            | 1.1<br>(-15.0 to 19.9)                              |
| Chronic kidney disease due to other causes                 | 872.4<br>(698.1 to 1,064.9)                      | 73.8<br>(58.0 to 92.1)                               | 22.0<br>(15.7 to 28.9)                        | 15.3<br>(-4.6 to 38.4)                            | -0.7<br>(-16.8 to 17.6)                             |
| Urinary diseases and male infertility                      | 1,741.6<br>(1,611.6 to 1,894.0)                  | 2,737.6†<br>(2,496.2 to 2,987.8)                     | 54.6<br>(36.6 to 78.6)                        | 14.5<br>(7.9 to 20.8)                             | 0.8<br>(-5.4 to 6.8)                                |
| Interstitial nephritis and urinary tract infections        | 38.0<br>(33.4 to 42.7)                           | 1,978.6<br>(1,745.6 to 2,222.3)                      | 1.3<br>(0.8 to 1.9)                           | -0.7<br>(-15.8 to 15.7)                           | 0.3<br>(-15.6 to 17.1)                              |
| Urolithiasis                                               | 22.6<br>(20.3 to 25.2)                           | 592.5<br>(530.3 to 656.6)                            | 1.7<br>(1.1 to 2.4)                           | -2.7<br>(-17.6 to 14.6)                           | -9.1<br>(-21.1 to 4.4)                              |
| Benign prostatic hyperplasia                               | 1,525.7<br>(1,372.2 to 1,680.9)                  | 166.5<br>(145.5 to 189.1)                            | 50.0<br>(33.2 to 72.0)                        | 17.2<br>(9.9 to 24.3)                             | 2.5<br>(-4.5 to 9.5)                                |
| Male infertility                                           | 119.8<br>(87.0 to 164.6)                         | --                                                   | 0.7<br>(0.3 to 1.5)                           | -17.2<br>(-25.7 to -7.8)                          | -11.6<br>(-20.6 to -1.8)                            |
| Other urinary diseases                                     | --                                               | --                                                   | 1.0<br>(0.7 to 1.4)                           | -18.9<br>(-27.4 to -9.1)                          | -19.6<br>(-27.7 to -10.5)                           |
| Gynecological diseases                                     | 6,859.1<br>(6,486.1 to 7,205.7)                  | 1,770.9†<br>(1,650.5 to 1,888.3)                     | 62.2<br>(43.0 to 90.4)                        | 1.4<br>(-3.9 to 7.1)                              | -0.6<br>(-5.9 to 5.2)                               |
| Uterine fibroids                                           | 846.5<br>(751.7 to 950.4)                        | 71.9<br>(61.7 to 83.9)                               | 6.9<br>(3.4 to 12.9)                          | 2.1<br>(-8.6 to 11.3)                             | -5.6<br>(-15.8 to 3.6)                              |
| Polycystic ovarian syndrome                                | 18.4<br>(14.2 to 23.8)                           | 57.0<br>(38.9 to 77.1)                               | 0.2<br>(0.1 to 0.3)                           | -8.9<br>(-25.9 to 11.5)                           | -0.6<br>(-18.8 to 22.0)                             |
| Female infertility                                         | 223.9<br>(146.1 to 329.7)                        | --                                                   | 1.3<br>(0.5 to 2.7)                           | -3.8<br>(-13.8 to 8.4)                            | 2.9<br>(-7.3 to 15.4)                               |
| Endometriosis                                              | 26.9<br>(23.1 to 31.0)                           | 34.4<br>(28.8 to 41.3)                               | 2.5<br>(1.6 to 3.6)                           | 0.2<br>(-20.9 to 27.5)                            | 4.6<br>(-18.4 to 32.2)                              |
| Genital prolapse                                           | 2,815.2<br>(2,469.7 to 3,203.2)                  | 113.8<br>(98.5 to 130.1)                             | 8.7<br>(4.3 to 15.7)                          | 11.4<br>(0.4 to 21.9)                             | -1.0<br>(-10.1 to 8.0)                              |
| Premenstrual syndrome                                      | 3,057.5<br>(2,857.5 to 3,274.6)                  | 1,001.1<br>(917.6 to 1,089.5)                        | 25.4<br>(15.8 to 38.9)                        | -0.2<br>(-7.8 to 8.4)                             | -0.5<br>(-8.0 to 7.8)                               |
| Other gynecological diseases                               | 494.8<br>(425.9 to 550.9)                        | 492.8<br>(421.4 to 552.5)                            | 17.2<br>(11.3 to 24.4)                        | -0.2<br>(-13.3 to 14.0)                           | -0.1<br>(-13.3 to 14.1)                             |
| Hemoglobinopathies and hemolytic anaemias                  | 15,181.9<br>(14,896.0 to 15,481.1)               | --                                                   | 30.0<br>(17.2 to 47.7)                        | 21.9<br>(-9.3 to 61.7)                            | 28.4<br>(-5.9 to 72.3)                              |
| Thalassemias                                               | 13.7<br>(13.1 to 14.5)                           | --                                                   | 0.6<br>(0.4 to 0.9)                           | 15.0<br>(-9.1 to 48.0)                            | 15.8<br>(-9.3 to 47.3)                              |
| Thalassaemias trait                                        | 4,987.5<br>(4,728.4 to 5,294.9)                  | --                                                   | 27.2<br>(15.3 to 43.4)                        | 26.4<br>(-8.2 to 72.2)                            | 33.2<br>(-4.8 to 82.8)                              |
| Sickle cell disorders                                      | < 0.05<br>(< 0.05 to < 0.05)                     | --                                                   | < 0.05<br>(< 0.05 to < 0.05)                  | 6.3<br>(-14.8 to 31.0)                            | 8.7<br>(-14.8 to 36.6)                              |
| Sickle cell trait                                          | 138.8<br>(130.4 to 148.4)                        | --                                                   | 0.2<br>(0.1 to 0.3)                           | 43.3<br>(-6.0 to 125.5)                           | 49.2<br>(-1.8 to 137.8)                             |
| G6PD deficiency                                            | 2,822.4<br>(2,725.8 to 2,936.6)                  | --                                                   | 0.1<br>(0.1 to 0.1)                           | -1.4<br>(-22.0 to 25.3)                           | 10.3<br>(-19.8 to 49.5)                             |
| G6PD trait                                                 | 8,433.0<br>(8,268.8 to 8,585.8)                  | --                                                   | < 0.05<br>(< 0.05 to < 0.05)                  | 1.3<br>(-39.4 to 57.3)                            | 5.3<br>(-37.8 to 61.2)                              |
| Other hemoglobinopathies and hemolytic anaemias            | 64.9<br>(55.5 to 75.8)                           | --                                                   | 1.9<br>(1.3 to 2.8)                           | -18.2<br>(-30.5 to -1.8)                          | -31.6<br>(-43.3 to -15.9)                           |
| Endocrine, metabolic, blood, and immune disorders          | 1,702.2<br>(1,560.3 to 1,857.7)                  | 348.2<br>(311.9 to 387.6)                            | 59.1<br>(40.2 to 81.8)                        | 9.5<br>(3.0 to 16.2)                              | -1.6<br>(-6.8 to 4.0)                               |
| <b>Musculoskeletal disorders</b>                           | <b>17,123.8</b><br><b>(16,414.2 to 17,922.2)</b> | <b>8,505.7</b><br><b>(7,724.6 to 9,389.3)</b>        | <b>1,835.4</b><br><b>(1,337.7 to 2,386.9)</b> | <b>7.7</b><br><b>(4.1 to 11.1)</b>                | <b>0.8</b><br><b>(-2.6 to 4.1)</b>                  |
| Rheumatoid arthritis                                       | 292.2<br>(276.2 to 309.0)                        | 13.7<br>(12.7 to 14.6)                               | 67.8<br>(47.1 to 88.7)                        | 13.9<br>(6.8 to 21.9)                             | 3.0<br>(-4.0 to 10.6)                               |
| Osteoarthritis                                             | 4,865.4<br>(4,579.8 to 5,165.6)                  | 200.1<br>(185.6 to 214.8)                            | 169.6<br>(111.5 to 244.0)                     | 10.6<br>(7.1 to 14.1)                             | -2.7<br>(-5.9 to 0.5)                               |
| Low back and neck pain                                     | 11,249.9<br>(10,561.6 to 12,053.5)               | 4,747.0<br>(4,193.1 to 5,339.2)                      | 1,346.2<br>(953.1 to 1,776.2)                 | 8.8<br>(4.6 to 12.8)                              | 2.5<br>(-1.2 to 6.4)                                |
| Low back pain                                              | 8,128.1<br>(7,202.5 to 9,194.9)                  | 4,008.5<br>(3,466.0 to 4,605.8)                      | 916.9<br>(644.3 to 1,213.7)                   | 9.2<br>(3.2 to 15.1)                              | 3.6<br>(-1.6 to 9.2)                                |
| Neck pain                                                  | 4,339.4<br>(3,751.8 to 4,972.2)                  | 738.5<br>(643.5 to 861.6)                            | 429.3<br>(292.6 to 604.1)                     | 8.1<br>(5.9 to 10.4)                              | -0.0<br>(-1.8 to 1.7)                               |
| Gout                                                       | 703.6<br>(616.2 to 797.0)                        | 113.2<br>(98.0 to 129.1)                             | 21.9<br>(14.6 to 29.9)                        | 12.4<br>(1.1 to 26.2)                             | 0.5<br>(-10.2 to 13.5)                              |
| Other musculoskeletal disorders                            | 2,698.6<br>(2,155.1 to 3,349.1)                  | 3,431.8<br>(2,873.3 to 4,090.9)                      | 229.9<br>(149.2 to 332.5)                     | -2.1<br>(-16.9 to 13.3)                           | -6.4<br>(-20.0 to 6.8)                              |
| <b>Other non-communicable diseases</b>                     | <b>45,940.7</b><br><b>(45,362.8 to 46,619.6)</b> | <b>121,358.9†</b><br><b>(115,113.4 to 127,843.3)</b> | <b>1,497.6</b><br><b>(1,042.6 to 2,101.2)</b> | <b>9.8</b><br><b>(8.5 to 11.3)</b>                | <b>0.6</b><br><b>(-0.5 to 1.8)</b>                  |
| Congenital anomalies                                       | 577.0<br>(539.5 to 617.4)                        | --                                                   | 62.6<br>(44.3 to 86.0)                        | 12.5<br>(6.8 to 18.6)                             | 10.0<br>(4.2 to 15.9)                               |
| Neural tube defects                                        | 21.9<br>(19.8 to 24.5)                           | --                                                   | 6.6<br>(4.7 to 9.0)                           | 25.4<br>(12.5 to 41.6)                            | 21.4<br>(7.3 to 37.2)                               |
| Congenital heart anomalies                                 | 111.1<br>(100.2 to 123.6)                        | --                                                   | 6.0<br>(2.5 to 10.5)                          | 0.5<br>(-10.1 to 12.1)                            | -2.4<br>(-12.8 to 8.8)                              |
| Orofacial clefts                                           | 25.2<br>(21.9 to 28.5)                           | --                                                   | 0.2<br>(0.2 to 0.4)                           | -3.8<br>(-15.7 to 9.1)                            | -6.6<br>(-18.1 to 5.9)                              |
| Down's syndrome                                            | 29.2<br>(25.7 to 32.9)                           | --                                                   | 2.8<br>(1.9 to 3.9)                           | 0.6<br>(-10.1 to 12.2)                            | 0.1<br>(-11.1 to 12.3)                              |
| Turner syndrome                                            | 34.1<br>(30.1 to 38.4)                           | --                                                   | 0.6<br>(0.3 to 1.0)                           | 42.5<br>(6.4 to 93.3)                             | 45.9<br>(9.1 to 97.0)                               |
| Klinefelter syndrome                                       | 57.2<br>(50.5 to 64.0)                           | --                                                   | 0.4<br>(0.2 to 0.7)                           | 21.9<br>(2.9 to 45.6)                             | 29.7<br>(11.0 to 54.1)                              |

| Cause                                         | Prevalence in thousands (95% UI)                 | Incidence in thousands (95% UI)                | YLDs in thousands (95% UI)              |                                                   |                                                     |
|-----------------------------------------------|--------------------------------------------------|------------------------------------------------|-----------------------------------------|---------------------------------------------------|-----------------------------------------------------|
|                                               | 2016 counts                                      | 2016 counts                                    | 2016 counts                             | Percentage change in counts between 2006 and 2016 | Percentage change in age-standardised rates between |
| Other chromosomal abnormalities               | 113.5<br>(98.8 to 130.1)                         | --                                             | 10.1<br>(6.7 to 14.2)                   | 15.9<br>(3.9 to 30.4)                             | 16.5<br>(4.5 to 30.6)                               |
| Congenital musculoskeletal and limb anomalies | 120.7<br>(111.2 to 131.8)                        | --                                             | 16.4<br>(11.2 to 22.9)                  | 18.1<br>(6.5 to 29.4)                             | 13.1<br>(2.0 to 25.2)                               |
| Urogenital congenital anomalies               | 50.6<br>(46.1 to 55.6)                           | --                                             | 1.3<br>(0.8 to 2.1)                     | 7.9<br>(-4.5 to 21.5)                             | 5.9<br>(-7.9 to 20.3)                               |
| Digestive congenital anomalies                | 80.1<br>(72.0 to 89.3)                           | --                                             | 3.5<br>(2.2 to 5.0)                     | 13.9<br>(-2.5 to 32.0)                            | 10.1<br>(-5.8 to 28.2)                              |
| Other congenital anomalies                    | 86.8<br>(35.2 to 156.7)                          | --                                             | 14.8<br>(7.1 to 27.3)                   | 6.8<br>(-4.0 to 19.7)                             | 3.0<br>(-7.2 to 15.1)                               |
| Skin and subcutaneous diseases                | 21,028.7<br>(20,524.4 to 21,486.6)               | 49,379.3<br>(46,147.4 to 52,876.0)             | 481.2<br>(326.6 to 690.6)               | 4.1<br>(2.3 to 5.9)                               | 0.8<br>(-1.0 to 2.9)                                |
| Dermatitis                                    | 2,968.7<br>(2,848.6 to 3,109.1)                  | 3,944.0<br>(3,626.6 to 4,292.0)                | 105.0<br>(63.3 to 167.5)                | 3.2<br>(-0.0 to 6.9)                              | 0.1<br>(-3.6 to 4.0)                                |
| Psoriasis                                     | 1,057.6<br>(1,014.2 to 1,098.5)                  | 89.3<br>(85.3 to 93.1)                         | 90.5<br>(65.1 to 118.2)                 | 7.9<br>(1.8 to 14.1)                              | 2.2<br>(-3.7 to 8.4)                                |
| Cellulitis                                    | 26.0<br>(24.3 to 27.6)                           | 456.0<br>(428.9 to 484.7)                      | 1.4<br>(0.9 to 2.1)                     | 7.6<br>(-12.9 to 29.4)                            | 0.6<br>(-18.6 to 23.4)                              |
| Pyoderma                                      | 228.8<br>(222.2 to 235.8)                        | 5,474.0<br>(5,290.9 to 5,676.3)                | 1.3<br>(0.5 to 2.6)                     | 9.5<br>(3.1 to 16.0)                              | 0.5<br>(-5.7 to 7.3)                                |
| Scabies                                       | 50.2<br>(37.4 to 68.6)                           | 150.8<br>(112.3 to 204.3)                      | 1.3<br>(0.7 to 2.2)                     | 0.9<br>(-10.2 to 13.1)                            | 0.1<br>(-10.8 to 12.3)                              |
| Fungal skin diseases                          | 5,284.2<br>(4,679.1 to 5,969.2)                  | 21,338.1<br>(18,332.0 to 24,579.7)             | 28.9<br>(11.6 to 60.5)                  | 12.3<br>(10.4 to 14.0)                            | 0.1<br>(-1.2 to 1.2)                                |
| Viral skin diseases                           | 1,621.7<br>(1,395.6 to 1,885.5)                  | 2,182.5<br>(1,863.7 to 2,541.8)                | 49.3<br>(30.4 to 74.2)                  | 2.1<br>(-1.3 to 5.7)                              | -0.1<br>(-2.8 to 2.8)                               |
| Acne vulgaris                                 | 4,734.3<br>(4,334.8 to 5,127.1)                  | 3,511.6<br>(2,840.6 to 4,484.5)                | 121.6<br>(82.1 to 177.1)                | -1.1<br>(-4.7 to 2.6)                             | 1.3<br>(-2.4 to 4.9)                                |
| Alopecia areata                               | 183.0<br>(176.8 to 189.4)                        | 320.6<br>(309.8 to 331.4)                      | 6.0<br>(3.8 to 8.9)                     | 0.2<br>(-8.0 to 8.4)                              | -0.2<br>(-8.3 to 8.2)                               |
| Pruritus                                      | 613.9<br>(541.9 to 694.6)                        | 481.4<br>(425.9 to 550.5)                      | 6.5<br>(3.0 to 11.9)                    | 6.3<br>(0.8 to 11.9)                              | -0.4<br>(-5.4 to 5.0)                               |
| Urticaria                                     | 323.0<br>(284.3 to 363.8)                        | 570.7<br>(502.5 to 642.6)                      | 19.1<br>(12.3 to 27.1)                  | 2.3<br>(-4.9 to 9.3)                              | 0.0<br>(-6.4 to 7.2)                                |
| Decubitus ulcer                               | 40.1<br>(35.5 to 45.3)                           | 146.2<br>(128.9 to 166.4)                      | 6.1<br>(4.2 to 8.3)                     | 19.9<br>(4.8 to 37.2)                             | -0.2<br>(-10.1 to 11.3)                             |
| Other skin and subcutaneous diseases          | 8,187.7<br>(7,962.7 to 8,397.1)                  | 10,714.1<br>(10,327.2 to 11,090.8)             | 44.3<br>(21.5 to 80.7)                  | 10.8<br>(8.6 to 13.2)                             | 1.1<br>(-0.9 to 3.3)                                |
| Sense organ diseases                          | 20,258.3<br>(19,150.1 to 21,296.4)               | 6,892.1†<br>(6,500.5 to 7,296.1)               | 732.9<br>(518.4 to 1,029.8)             | 14.3<br>(11.9 to 17.1)                            | -0.6<br>(-2.6 to 1.5)                               |
| Glaucoma                                      | 64.2<br>(54.5 to 75.0)                           | --                                             | 7.3<br>(4.9 to 10.3)                    | 17.3<br>(3.6 to 32.7)                             | -0.3<br>(-12.8 to 13.4)                             |
| Cataract                                      | 431.3<br>(367.4 to 511.7)                        | --                                             | 31.4<br>(22.0 to 43.0)                  | 17.4<br>(9.8 to 26.2)                             | -4.7<br>(-11.3 to 2.9)                              |
| Macular degeneration                          | 116.3<br>(99.2 to 135.8)                         | --                                             | 12.2<br>(8.4 to 17.0)                   | 23.8<br>(12.3 to 37.5)                            | -0.1<br>(-9.4 to 11.2)                              |
| Refraction and accommodation disorders        | 5,972.5<br>(5,748.8 to 6,211.6)                  | --                                             | 102.6<br>(63.3 to 161.0)                | 8.2<br>(4.6 to 12.4)                              | -2.2<br>(-5.5 to 1.6)                               |
| Age-related and other hearing loss            | 16,772.0<br>(14,921.9 to 18,675.2)               | --                                             | 469.7<br>(328.0 to 669.7)               | 15.7<br>(12.3 to 19.6)                            | -0.2<br>(-3.2 to 2.8)                               |
| Other vision loss                             | 250.6<br>(222.3 to 281.4)                        | --                                             | 22.9<br>(15.9 to 30.9)                  | 14.5<br>(5.6 to 23.2)                             | 0.1<br>(-7.8 to 9.1)                                |
| Other sense organ diseases                    | 2,778.4<br>(2,557.1 to 3,006.4)                  | 6,892.1<br>(6,500.5 to 7,296.1)                | 86.8<br>(54.4 to 131.1)                 | 11.4<br>(7.8 to 15.5)                             | 0.8<br>(-2.8 to 4.6)                                |
| Oral disorders                                | 30,403.6<br>(29,453.3 to 31,423.2)               | 65,087.6†<br>(60,078.0 to 70,419.3)            | 220.9<br>(136.7 to 336.7)               | 7.7<br>(5.1 to 10.5)                              | -1.0<br>(-3.2 to 1.1)                               |
| Caries of deciduous teeth                     | 1,473.4<br>(1,031.7 to 1,850.0)                  | 4,692.7<br>(2,325.1 to 7,561.6)                | 0.6<br>(0.2 to 1.1)                     | 45.1<br>(-0.1 to 85.5)                            | 42.9<br>(-2.8 to 80.6)                              |
| Caries of permanent teeth                     | 22,544.9<br>(21,407.6 to 23,810.0)               | 59,444.4<br>(54,952.9 to 64,169.6)             | 21.9<br>(9.7 to 41.8)                   | 4.9<br>(1.8 to 8.5)                               | 2.9<br>(-1.0 to 7.2)                                |
| Periodontal disease                           | 6,795.1<br>(5,638.3 to 8,067.7)                  | 654.7<br>(516.1 to 812.2)                      | 44.3<br>(17.5 to 91.9)                  | 8.1<br>(4.1 to 12.4)                              | -0.8<br>(-4.3 to 3.1)                               |
| Edentulism and severe tooth loss              | 4,313.7<br>(3,744.0 to 4,864.7)                  | 295.9<br>(251.0 to 346.1)                      | 118.4<br>(78.5 to 166.9)                | 9.0<br>(4.2 to 13.5)                              | -3.3<br>(-7.2 to 0.5)                               |
| Other oral disorders                          | 1,230.5<br>(1,177.9 to 1,287.9)                  | --                                             | 35.8<br>(22.2 to 54.3)                  | 4.2<br>(0.8 to 7.7)                               | 0.1<br>(-3.4 to 3.5)                                |
| <b>Injuries</b>                               | <b>21,461.8</b><br><b>(20,056.3 to 23,069.5)</b> | <b>6,488.1†</b><br><b>(6,130.2 to 6,880.1)</b> | <b>683.3</b><br><b>(457.4 to 969.0)</b> | <b>10.8</b><br><b>(9.3 to 12.3)</b>               | <b>1.0</b><br><b>(-0.3 to 2.3)</b>                  |
| <b>Transport injuries</b>                     | <b>3,433.9</b><br><b>(3,191.5 to 3,690.7)</b>    | <b>733.0</b><br><b>(675.4 to 795.3)</b>        | <b>154.1</b><br><b>(101.0 to 223.2)</b> | <b>-2.3</b><br><b>(-3.8 to -0.8)</b>              | <b>-9.9</b><br><b>(-11.4 to -8.4)</b>               |
| Road injuries                                 | 3,136.0<br>(2,904.9 to 3,380.7)                  | 697.0<br>(637.9 to 758.2)                      | 143.6<br>(94.5 to 207.4)                | -3.6<br>(-5.0 to -2.1)                            | -11.1<br>(-12.6 to -9.6)                            |
| Pedestrian road injuries                      | 491.8<br>(430.8 to 563.8)                        | 77.7<br>(65.6 to 92.4)                         | 24.8<br>(16.2 to 36.0)                  | -0.3<br>(-1.9 to 1.2)                             | -8.4<br>(-10.1 to -6.7)                             |
| Cyclist road injuries                         | 828.9<br>(695.0 to 980.8)                        | 230.9<br>(196.9 to 268.7)                      | 34.8<br>(22.7 to 50.7)                  | 6.7<br>(5.2 to 8.3)                               | -1.8<br>(-3.3 to -0.2)                              |
| Motorcyclist road injuries                    | 702.5<br>(598.3 to 848.8)                        | 92.9<br>(77.3 to 110.5)                        | 33.0<br>(21.9 to 47.6)                  | -2.8<br>(-4.4 to -1.1)                            | -9.7<br>(-11.5 to -8.1)                             |
| Motor vehicle road injuries                   | 910.7<br>(764.5 to 1,051.1)                      | 253.0<br>(222.8 to 287.2)                      | 43.6<br>(28.9 to 62.6)                  | -14.4<br>(-15.8 to -13.0)                         | -21.4<br>(-23.0 to -19.8)                           |
| Other road injuries                           | 202.1<br>(170.4 to 238.0)                        | 42.5<br>(33.4 to 53.2)                         | 7.5<br>(4.9 to 10.9)                    | 13.5<br>(11.3 to 15.9)                            | 5.3<br>(3.2 to 7.8)                                 |
| Other transport injuries                      | 297.9<br>(244.9 to 352.3)                        | 36.0<br>(31.1 to 41.6)                         | 10.5<br>(6.7 to 15.3)                   | 19.9<br>(18.5 to 21.4)                            | 10.3<br>(8.8 to 11.7)                               |
| <b>Unintentional injuries</b>                 | <b>17,176.8</b><br><b>(15,894.3 to 18,689.5)</b> | <b>5,477.0</b><br><b>(5,108.3 to 5,877.0)</b>  | <b>499.1</b><br><b>(335.2 to 710.5)</b> | <b>16.0</b><br><b>(14.4 to 17.6)</b>              | <b>5.2</b><br><b>(3.9 to 6.5)</b>                   |
| Falls                                         | 8,924.9<br>(7,831.5 to 10,108.2)                 | 2,976.2<br>(2,645.1 to 3,313.5)                | 320.2<br>(221.2 to 442.7)               | 17.0<br>(15.1 to 19.0)                            | 5.3<br>(3.8 to 6.9)                                 |
| Drowning                                      | 27.3<br>(24.2 to 30.7)                           | 2.6<br>(2.3 to 3.0)                            | 1.2<br>(0.8 to 1.8)                     | 15.5<br>(9.9 to 20.9)                             | 7.0<br>(1.1 to 12.9)                                |
| Fire, heat, and hot substances                | 1,511.8<br>(1,290.7 to 1,786.9)                  | 72.2<br>(60.2 to 84.3)                         | 25.8<br>(14.5 to 43.8)                  | 14.3<br>(11.6 to 17.0)                            | 6.8<br>(4.1 to 9.4)                                 |
| Poisonings                                    | 56.1<br>(45.7 to 69.5)                           | 44.4<br>(36.1 to 53.1)                         | 4.8<br>(3.1 to 6.7)                     | 6.3<br>(-2.6 to 15.4)                             | 2.1<br>(-7.4 to 12.8)                               |
| Exposure to mechanical forces                 | 3,524.0<br>(2,965.1 to 4,465.2)                  | 770.1<br>(664.1 to 885.8)                      | 63.8<br>(39.9 to 98.2)                  | 11.1<br>(9.7 to 12.4)                             | 3.3<br>(1.9 to 4.6)                                 |
| Unintentional firearm injuries                | 110.6<br>(90.6 to 137.8)                         | 9.4<br>(6.7 to 12.6)                           | 1.6<br>(0.9 to 2.7)                     | 8.1<br>(6.4 to 10.0)                              | -0.1<br>(-1.7 to 1.6)                               |
| Unintentional suffocation                     | 45.1<br>(38.1 to 53.1)                           | 9.2<br>(6.4 to 12.9)                           | 1.2<br>(0.7 to 1.8)                     | 15.1<br>(13.5 to 17.0)                            | 4.1<br>(2.4 to 5.9)                                 |
| Other exposure to mechanical forces           | 3,368.3<br>(2,820.2 to 4,312.3)                  | 751.5<br>(647.6 to 863.7)                      | 61.0<br>(38.2 to 93.9)                  | 11.1<br>(9.7 to 12.4)                             | 3.4<br>(1.9 to 4.7)                                 |

| Cause                                                                               | Prevalence in thousands (95% UI)              | Incidence in thousands (95% UI)          | YLDs in thousands (95% UI)           |                                                   |                                                     |
|-------------------------------------------------------------------------------------|-----------------------------------------------|------------------------------------------|--------------------------------------|---------------------------------------------------|-----------------------------------------------------|
|                                                                                     | 2016 counts                                   | 2016 counts                              | 2016 counts                          | Percentage change in counts between 2006 and 2016 | Percentage change in age-standardised rates between |
| Adverse effects of medical treatment                                                | 25.2<br>(20.1 to 31.2)                        | 329.7<br>(293.8 to 371.4)                | 3.4<br>(2.1 to 4.9)                  | 12.5<br>(7.5 to 19.0)                             | 0.0<br>(-3.2 to 3.8)                                |
| Animal contact                                                                      | 267.4<br>(235.8 to 306.1)                     | 135.7<br>(112.2 to 165.0)                | 4.8<br>(3.0 to 7.3)                  | 8.7<br>(5.4 to 12.3)                              | 0.8<br>(-2.9 to 5.1)                                |
| Venomous animal contact                                                             | 37.5<br>(32.5 to 43.3)                        | 40.7<br>(29.8 to 53.7)                   | 1.8<br>(1.1 to 2.6)                  | 6.1<br>(-1.7 to 14.1)                             | 0.9<br>(-7.2 to 10.0)                               |
| Non-venomous animal contact                                                         | 229.8<br>(198.5 to 268.9)                     | 95.0<br>(77.1 to 116.8)                  | 3.0<br>(1.7 to 4.9)                  | 10.4<br>(8.7 to 12.2)                             | 0.8<br>(-0.8 to 2.4)                                |
| Foreign body                                                                        | 396.9<br>(345.4 to 467.5)                     | 259.7<br>(227.8 to 300.0)                | 11.6<br>(7.3 to 17.2)                | 11.1<br>(9.5 to 12.7)                             | 2.0<br>(0.4 to 3.5)                                 |
| Pulmonary aspiration and foreign body in airway                                     | 62.4<br>(50.9 to 74.4)                        | 68.5<br>(60.1 to 79.0)                   | 1.7<br>(1.1 to 2.5)                  | 14.7<br>(12.2 to 17.6)                            | 1.4<br>(-0.6 to 3.3)                                |
| Foreign body in eyes                                                                | 34.8<br>(24.2 to 46.9)                        | 128.2<br>(100.4 to 166.7)                | 2.4<br>(1.5 to 3.7)                  | 12.9<br>(9.4 to 16.7)                             | 6.4<br>(3.5 to 9.5)                                 |
| Foreign body in other body part                                                     | 299.7<br>(252.1 to 367.2)                     | 63.0<br>(54.1 to 73.4)                   | 7.5<br>(4.7 to 11.3)                 | 9.8<br>(8.2 to 11.3)                              | 0.6<br>(-1.1 to 2.2)                                |
| Environmental heat and cold exposure                                                | 204.3<br>(183.5 to 229.7)                     | 48.1<br>(41.1 to 56.0)                   | 7.2<br>(4.7 to 10.7)                 | 15.2<br>(11.5 to 19.0)                            | 2.5<br>(-1.3 to 6.3)                                |
| Other unintentional injuries                                                        | 2,238.9<br>(1,887.7 to 2,655.8)               | 838.3<br>(713.9 to 982.0)                | 56.3<br>(36.2 to 83.8)               | 19.6<br>(18.2 to 20.9)                            | 8.6<br>(7.2 to 9.8)                                 |
| <b>Self-harm and interpersonal violence</b>                                         | <b>1,533.4</b><br><b>(1,399.3 to 1,667.0)</b> | <b>231.0†</b><br><b>(204.9 to 258.2)</b> | <b>27.1</b><br><b>(18.3 to 38.7)</b> | <b>3.2</b><br><b>(1.3 to 5.0)</b>                 | <b>-2.3</b><br><b>(-4.3 to -0.2)</b>                |
| Self-harm                                                                           | 140.9<br>(116.1 to 166.8)                     | 93.4<br>(81.5 to 107.1)                  | 5.6<br>(3.6 to 8.2)                  | 4.6<br>(-0.3 to 9.8)                              | -2.0<br>(-7.5 to 3.5)                               |
| Self-harm by firearm                                                                | 1.8<br>(1.4 to 2.1)                           | 0.2<br>(0.1 to 0.3)                      | < 0.05<br>(< 0.05 to 0.1)            | 2.2<br>(0.2 to 4.0)                               | -3.2<br>(-5.4 to -1.3)                              |
| Self-harm by other specified means                                                  | 139.1<br>(114.3 to 164.9)                     | 93.2<br>(81.4 to 107.0)                  | 5.6<br>(3.6 to 8.1)                  | 4.6<br>(-0.3 to 9.8)                              | -2.0<br>(-7.5 to 3.6)                               |
| Interpersonal violence                                                              | 1,392.5<br>(1,262.0 to 1,519.7)               | 137.6†<br>(114.5 to 163.1)               | 21.5<br>(14.6 to 30.6)               | 2.8<br>(1.1 to 4.5)                               | -2.3<br>(-4.3 to -0.5)                              |
| Assault by firearm                                                                  | 39.4<br>(32.4 to 47.8)                        | 4.2<br>(3.0 to 5.6)                      | 0.9<br>(0.5 to 1.3)                  | -2.1<br>(-3.7 to -0.3)                            | -8.3<br>(-10.0 to -6.7)                             |
| Assault by sharp object                                                             | 107.9<br>(87.5 to 131.0)                      | 23.1<br>(16.9 to 30.7)                   | 1.9<br>(1.2 to 3.1)                  | 3.7<br>(1.9 to 5.5)                               | -3.0<br>(-4.7 to -1.2)                              |
| Sexual violence                                                                     | 811.2<br>(723.4 to 912.6)                     | --                                       | 6.5<br>(4.3 to 9.4)                  | -1.7<br>(-5.2 to 2.2)                             | -3.0<br>(-7.0 to 1.0)                               |
| Assault by other means                                                              | 434.1<br>(355.2 to 537.0)                     | 110.3<br>(91.5 to 131.9)                 | 12.1<br>(7.8 to 18.1)                | 5.6<br>(4.0 to 7.2)                               | -1.1<br>(-2.8 to 0.5)                               |
| <b>Forces of nature, conflict and terrorism, and executions and police conflict</b> | <b>128.9</b><br><b>(56.9 to 215.5)</b>        | <b>47.1†</b><br><b>(14.6 to 80.4)</b>    | <b>3.1</b><br><b>(1.0 to 7.7)</b>    | <b>19.0</b><br><b>(2.4 to 99.3)</b>               | <b>13.0</b><br><b>(-9.3 to 122.5)</b>               |
| Exposure to forces of nature                                                        | 121.7<br>(50.5 to 208.1)                      | 45.3<br>(12.7 to 78.7)                   | 2.9<br>(1.0 to 7.2)                  | 18.1<br>(0.7 to 104.2)                            | 12.3<br>(-11.5 to 132.8)                            |
| Conflict and terrorism                                                              | --                                            | --                                       | --                                   | --                                                | --                                                  |
| Executions and police conflict                                                      | 7.1<br>(4.1 to 11.4)                          | 1.8<br>(1.2 to 2.5)                      | 0.2<br>(0.1 to 0.5)                  | 35.0<br>(25.3 to 38.6)                            | 23.3<br>(15.7 to 26.7)                              |
| <b>Impairments</b>                                                                  | --                                            | --                                       | --                                   | --                                                | --                                                  |
| Anaemia                                                                             | 5,504.5<br>(4,607.8 to 6,586.2)               | --                                       | 115.4<br>(76.8 to 167.0)             | 8.5<br>(-9.2 to 29.6)                             | -2.2<br>(-18.7 to 17.3)                             |
| Developmental intellectual disability                                               | 894.5<br>(677.3 to 1,153.7)                   | --                                       | 109.4<br>(80.4 to 143.0)             | 3.1<br>(-1.6 to 7.7)                              | 1.6<br>(-2.8 to 6.3)                                |
| Epilepsy                                                                            | 257.8<br>(128.3 to 387.7)                     | --                                       | 71.1<br>(37.4 to 122.2)              | -1.9<br>(-56.2 to 124.5)                          | -5.8<br>(-57.0 to 109.0)                            |
| Guillain-Barre syndrome                                                             | 0.8<br>(0.6 to 0.9)                           | --                                       | 0.2<br>(0.1 to 0.3)                  | 11.0<br>(3.2 to 20.3)                             | 3.7<br>(-3.4 to 11.8)                               |
| Hearing loss                                                                        | 17,281.2<br>(15,411.7 to 19,207.2)            | --                                       | 493.5<br>(345.1 to 701.6)            | 15.0<br>(11.9 to 18.6)                            | -0.3<br>(-2.9 to 2.6)                               |
| Heart failure                                                                       | 1,620.5<br>(1,441.9 to 1,818.9)               | --                                       | 159.4<br>(121.1 to 202.6)            | 13.4<br>(6.3 to 21.8)                             | -4.1<br>(-9.8 to 2.4)                               |
| Infertility                                                                         | 515.3<br>(398.6 to 664.0)                     | --                                       | 3.6<br>(1.7 to 6.8)                  | -0.8<br>(-7.2 to 8.0)                             | 5.4<br>(-1.3 to 14.7)                               |
| Pelvic inflammatory disease                                                         | 4.9<br>(4.0 to 5.9)                           | --                                       | 0.7<br>(0.4 to 1.0)                  | -5.3<br>(-25.7 to 22.8)                           | -0.4<br>(-21.2 to 29.2)                             |
| Vision loss                                                                         | 6,954.6<br>(6,692.0 to 7,235.8)               | --                                       | 197.8<br>(139.9 to 276.4)            | 10.5<br>(7.6 to 13.7)                             | -2.3<br>(-5.0 to 0.5)                               |

We did not calculate incidence for the nine impairments, certain NTDs, and causes with only birth prevalence. Blank cells mean that no estimate is available.

† Incidence for aggregate causes represents the sum of the incidence of the causes below the aggregate.

‡ Incidence estimates for stroke represent first-ever stroke only.

^ Incidence of HIV/AIDS represents new infections of HIV only and does not include new infections of Tuberculosis in HIV positive cases.



SR Table 14: Prevalence, incidence, and YLDs for 2016, percentage change of YLD counts and percentage change of age-standardised YLD rates between 2006 and 2016 by cause and impairments, for all ages, Jamaica.

| Cause                                                                                | Prevalence in thousands (95% UI)       | Incidence in thousands (95% UI)            | YLDs in thousands (95% UI)       |                                                   |                                                     |
|--------------------------------------------------------------------------------------|----------------------------------------|--------------------------------------------|----------------------------------|---------------------------------------------------|-----------------------------------------------------|
|                                                                                      | 2016 counts                            | 2016 counts                                | 2016 counts                      | Percentage change in counts between 2006 and 2016 | Percentage change in age-standardised rates between |
| <b>All causes</b>                                                                    | <b>2,804.9</b><br>(2,798.9 to 2,811.1) | <b>17,427.0†</b><br>(16,502.5 to 18,473.7) | <b>310.2</b><br>(230.5 to 402.4) | <b>11.7</b><br>(9.5 to 14.1)                      | <b>0.5</b><br>(-1.3 to 2.5)                         |
| <b>Communicable, maternal, neonatal, and nutritional disorders</b>                   | <b>2,094.5</b><br>(2,051.5 to 2,140.3) | <b>9,339.0†</b><br>(8,499.3 to 10,264.6)   | <b>35.6</b><br>(25.1 to 49.3)    | <b>1.0</b><br>(-4.7 to 6.9)                       | <b>-0.4</b><br>(-6.1 to 5.4)                        |
| <b>HIV/AIDS and tuberculosis</b>                                                     | <b>655.9</b><br>(590.6 to 707.7)       | <b>1.0†</b><br>(0.7 to 1.2)                | <b>1.1</b><br>(0.6 to 1.9)       | <b>2.3</b><br>(-34.2 to 61.1)                     | <b>-7.8</b><br>(-41.7 to 47.6)                      |
| Tuberculosis                                                                         | 604.1<br>(546.7 to 668.2)              | 0.2†<br>(0.2 to 0.3)                       | < 0.05<br>(< 0.05 to 0.1)        | 2.1<br>(-7.3 to 13.2)                             | -8.3<br>(-16.4 to 2.1)                              |
| Drug-susceptible tuberculosis                                                        | 0.1<br>(0.1 to 0.1)                    | 0.2<br>(0.2 to 0.3)                        | < 0.05<br>(< 0.05 to 0.1)        | 2.3<br>(-7.9 to 15.0)                             | -8.1<br>(-17.2 to 3.0)                              |
| Multidrug-resistant tuberculosis without extensive drug resistance                   | < 0.05<br>(< 0.05 to < 0.05)           | < 0.05<br>(< 0.05 to < 0.05)               | < 0.05<br>(< 0.05 to < 0.05)     | -11.2<br>(-85.4 to 487.4)                         | -20.2<br>(-86.9 to 428.0)                           |
| Extensively drug-resistant tuberculosis                                              | < 0.05<br>(< 0.05 to < 0.05)           | < 0.05<br>(< 0.05 to < 0.05)               | < 0.05<br>(< 0.05 to < 0.05)     | 136.4<br>(-61.2 to 1,464.2)                       | 112.4<br>(-65.2 to 1,305.3)                         |
| Latent tuberculosis infection                                                        | 604.0<br>(546.6 to 668.1)              | --                                         | --                               | --                                                | --                                                  |
| HIV/AIDS                                                                             | 12.3<br>(9.2 to 16.4)                  | 0.7^<br>(0.5 to 1.0)                       | 1.1<br>(0.6 to 1.8)              | 2.3<br>(-35.1 to 65.9)                            | -7.8<br>(-42.4 to 52.0)                             |
| Drug-susceptible HIV/AIDS - Tuberculosis                                             | < 0.05<br>(< 0.05 to < 0.05)           | 0.1<br>(< 0.05 to 0.1)                     | < 0.05<br>(< 0.05 to < 0.05)     | -48.5<br>(-55.5 to -41.5)                         | -52.9<br>(-59.3 to -46.6)                           |
| Multidrug-resistant HIV/AIDS - Tuberculosis without extensive drug resistance        | < 0.05<br>(< 0.05 to < 0.05)           | < 0.05<br>(< 0.05 to < 0.05)               | < 0.05<br>(< 0.05 to < 0.05)     | -55.3<br>(-92.5 to 198.9)                         | -59.2<br>(-93.2 to 172.7)                           |
| Extensively drug-resistant HIV/AIDS - Tuberculosis                                   | < 0.05<br>(< 0.05 to < 0.05)           | < 0.05<br>(< 0.05 to < 0.05)               | < 0.05<br>(< 0.05 to < 0.05)     | 18.9<br>(-80.0 to 695.6)                          | 8.5<br>(-81.8 to 625.9)                             |
| HIV/AIDS resulting in other diseases                                                 | 12.3<br>(9.1 to 16.3)                  | 0.7<br>(0.5 to 1.0)                        | 1.0<br>(0.6 to 1.8)              | 3.5<br>(-35.1 to 71.7)                            | -6.8<br>(-42.3 to 56.3)                             |
| <b>Diarrhoea, lower respiratory infections, and other common infectious diseases</b> | <b>156.5</b><br>(147.7 to 166.3)       | <b>8,786.5†</b><br>(7,971.1 to 9,724.7)    | <b>6.5</b><br>(4.5 to 9.1)       | <b>6.4</b><br>(2.9 to 10.4)                       | <b>4.7</b><br>(1.3 to 8.2)                          |
| Diarrhoeal diseases                                                                  | 20.4<br>(19.1 to 21.8)                 | 1,363.0<br>(1,282.0 to 1,458.8)            | 2.3<br>(1.6 to 3.1)              | 18.1<br>(11.3 to 25.7)                            | 15.2<br>(8.7 to 22.1)                               |
| Intestinal infectious diseases                                                       | < 0.05<br>(< 0.05 to < 0.05)           | 0.1†<br>(< 0.05 to 0.1)                    | < 0.05<br>(< 0.05 to < 0.05)     | 16.7<br>(3.1 to 32.3)                             | 3.3<br>(-9.3 to 16.8)                               |
| Typhoid fever                                                                        | < 0.05<br>(< 0.05 to < 0.05)           | < 0.05<br>(< 0.05 to < 0.05)               | < 0.05<br>(< 0.05 to < 0.05)     | 19.4<br>(3.6 to 37.2)                             | 5.0<br>(-8.6 to 21.1)                               |
| Paratyphoid fever                                                                    | < 0.05<br>(< 0.05 to < 0.05)           | < 0.05<br>(< 0.05 to < 0.05)               | < 0.05<br>(< 0.05 to < 0.05)     | 18.4<br>(-0.3 to 43.6)                            | 4.5<br>(-11.6 to 27.2)                              |
| Other intestinal infectious diseases                                                 | --                                     | --                                         | < 0.05<br>(< 0.05 to < 0.05)     | -23.2<br>(-44.3 to 6.9)                           | -26.1<br>(-45.8 to -0.4)                            |
| Lower respiratory infections                                                         | 3.5<br>(3.2 to 3.8)                    | 156.1<br>(142.3 to 170.8)                  | 0.2<br>(0.1 to 0.3)              | 14.6<br>(3.1 to 27.5)                             | 10.3<br>(-0.6 to 22.6)                              |
| Upper respiratory infections                                                         | 93.4<br>(83.0 to 105.3)                | 7,033.9<br>(6,201.9 to 7,968.9)            | 2.3<br>(1.4 to 3.6)              | 1.8<br>(-3.8 to 7.8)                              | 0.1<br>(-5.0 to 5.6)                                |
| Otitis media                                                                         | 38.9<br>(34.9 to 42.9)                 | 172.4<br>(138.2 to 215.4)                  | 1.1<br>(0.7 to 1.7)              | -3.6<br>(-10.9 to 3.7)                            | -1.1<br>(-8.3 to 6.1)                               |
| Meningitis                                                                           | 2.7<br>(2.3 to 3.1)                    | 0.5<br>(0.4 to 0.5)                        | 0.3<br>(0.2 to 0.4)              | 3.8<br>(1.0 to 6.6)                               | -1.6<br>(-4.2 to 0.9)                               |
| Pneumococcal meningitis                                                              | 1.4<br>(1.1 to 1.6)                    | 0.1<br>(0.1 to 0.2)                        | 0.1<br>(0.1 to 0.2)              | 4.5<br>(0.5 to 8.4)                               | -1.5<br>(-5.1 to 2.1)                               |
| H influenzae type B meningitis                                                       | 0.3<br>(0.3 to 0.4)                    | < 0.05<br>(< 0.05 to 0.1)                  | < 0.05<br>(< 0.05 to 0.1)        | -5.1<br>(-11.8 to 0.9)                            | -8.5<br>(-14.7 to -3.4)                             |
| Meningococcal infection                                                              | 0.1<br>(0.1 to 0.2)                    | < 0.05<br>(< 0.05 to 0.1)                  | < 0.05<br>(< 0.05 to < 0.05)     | 4.7<br>(0.2 to 8.9)                               | -2.1<br>(-5.9 to 2.0)                               |
| Other meningitis                                                                     | 0.8<br>(0.6 to 1.1)                    | 0.2<br>(0.2 to 0.3)                        | 0.1<br>(0.1 to 0.1)              | 8.0<br>(4.3 to 12.3)                              | 2.6<br>(-0.9 to 6.4)                                |
| Encephalitis                                                                         | 2.0<br>(1.4 to 3.0)                    | 0.9<br>(0.8 to 1.0)                        | 0.2<br>(0.1 to 0.3)              | 5.6<br>(-9.2 to 22.9)                             | -1.3<br>(-15.0 to 14.8)                             |
| Diphtheria                                                                           | < 0.05<br>(< 0.05 to < 0.05)           | < 0.05<br>(< 0.05 to < 0.05)               | < 0.05<br>(< 0.05 to < 0.05)     | -27.5<br>(-62.5 to 31.2)                          | -28.1<br>(-62.3 to 27.8)                            |
| Whooping cough                                                                       | 0.1<br>(0.1 to 0.2)                    | 1.1<br>(0.8 to 1.5)                        | < 0.05<br>(< 0.05 to < 0.05)     | -64.6<br>(-75.7 to -50.2)                         | -62.5<br>(-74.1 to -47.5)                           |
| Tetanus                                                                              | < 0.05<br>(< 0.05 to < 0.05)           | < 0.05<br>(< 0.05 to < 0.05)               | < 0.05<br>(< 0.05 to < 0.05)     | -12.9<br>(-30.1 to 6.8)                           | -20.1<br>(-36.5 to -1.6)                            |
| Measles                                                                              | < 0.05<br>(0.0 to < 0.05)              | < 0.05<br>(0.0 to < 0.05)                  | < 0.05<br>(0.0 to < 0.05)        | --                                                | --                                                  |
| Varicella and herpes zoster                                                          | 2.8<br>(2.6 to 3.0)                    | 58.5<br>(56.8 to 60.2)                     | 0.1<br>(0.1 to 0.2)              | 12.8<br>(0.9 to 26.6)                             | 0.0<br>(-9.5 to 12.1)                               |
| <b>Neglected tropical diseases and malaria</b>                                       | <b>1,029.8</b><br>(946.9 to 1,134.5)   | <b>150.4†</b><br>(97.6 to 242.2)           | <b>3.3</b><br>(1.9 to 5.2)       | <b>28.9</b><br>(1.8 to 67.3)                      | <b>32.0</b><br>(3.8 to 71.0)                        |
| Malaria                                                                              | --                                     | --                                         | --                               | --                                                | --                                                  |
| Chagas disease                                                                       | --                                     | --                                         | --                               | --                                                | --                                                  |
| Leishmaniasis                                                                        | --                                     | --                                         | --                               | --                                                | --                                                  |
| Visceral leishmaniasis                                                               | --                                     | --                                         | --                               | --                                                | --                                                  |
| Cutaneous and mucocutaneous leishmaniasis                                            | --                                     | --                                         | --                               | --                                                | --                                                  |
| African trypanosomiasis                                                              | --                                     | --                                         | --                               | --                                                | --                                                  |
| Schistosomiasis                                                                      | --                                     | --                                         | --                               | --                                                | --                                                  |
| Cysticercosis                                                                        | --                                     | --                                         | --                               | --                                                | --                                                  |
| Cystic echinococcosis                                                                | --                                     | --                                         | --                               | --                                                | --                                                  |
| Lymphatic filariasis                                                                 | --                                     | --                                         | --                               | --                                                | --                                                  |
| Onchocerciasis                                                                       | --                                     | --                                         | --                               | --                                                | --                                                  |
| Trachoma                                                                             | --                                     | --                                         | --                               | --                                                | --                                                  |
| Dengue                                                                               | 4.6<br>(2.7 to 7.4)                    | 77.3<br>(52.2 to 108.6)                    | 0.8<br>(0.4 to 1.3)              | 345.4<br>(244.8 to 805.4)                         | 330.2<br>(235.1 to 774.1)                           |
| Yellow fever                                                                         | --                                     | --                                         | --                               | --                                                | --                                                  |
| Rabies                                                                               | < 0.05<br>(< 0.05 to < 0.05)           | < 0.05<br>(< 0.05 to < 0.05)               | < 0.05<br>(< 0.05 to < 0.05)     | -27.4<br>(-58.7 to 37.8)                          | -28.4<br>(-59.1 to 37.7)                            |
| Intestinal nematode infections                                                       | 1,009.3<br>(926.6 to 1,115.3)          | --                                         | 1.9<br>(1.0 to 3.6)              | 11.2<br>(-20.7 to 60.1)                           | 12.5<br>(-20.7 to 62.1)                             |
| Ascariasis                                                                           | 747.3<br>(649.6 to 860.6)              | --                                         | 0.9<br>(0.4 to 1.9)              | -1.9<br>(-45.0 to 82.3)                           | 3.9<br>(-41.9 to 94.8)                              |



| Cause                                                                   | Prevalence in thousands (95% UI)              | Incidence in thousands (95% UI)                | YLDs in thousands (95% UI)              |                                                   |                                                     |
|-------------------------------------------------------------------------|-----------------------------------------------|------------------------------------------------|-----------------------------------------|---------------------------------------------------|-----------------------------------------------------|
|                                                                         | 2016 counts                                   | 2016 counts                                    | 2016 counts                             | Percentage change in counts between 2006 and 2016 | Percentage change in age-standardised rates between |
| Trichuriasis                                                            | 175.0<br>(164.5 to 186.3)                     | --                                             | 0.4<br>(0.2 to 0.8)                     | 82.0<br>(65.4 to 100.2)                           | 77.1<br>(61.3 to 94.9)                              |
| Hookworm disease                                                        | 202.9<br>(177.7 to 230.6)                     | --                                             | 0.6<br>(0.3 to 1.1)                     | 4.8<br>(-38.5 to 78.4)                            | -0.2<br>(-42.1 to 72.6)                             |
| Food-borne trematodiasis                                                | --                                            | --                                             | --                                      | --                                                | --                                                  |
| Leprosy                                                                 | < 0.05<br>(< 0.05 to < 0.05)                  | < 0.05<br>(< 0.05 to < 0.05)                   | < 0.05<br>(< 0.05 to < 0.05)            | -1.8<br>(-22.9 to 47.7)                           | -17.8<br>(-35.9 to 25.6)                            |
| Ebola virus disease                                                     | --                                            | --                                             | --                                      | --                                                | --                                                  |
| Zika virus disease                                                      | 1.2<br>(0.6 to 2.8)                           | 73.1<br>(33.1 to 168.8)                        | < 0.05<br>(< 0.05 to 0.1)               | --                                                | --                                                  |
| Guinea worm disease                                                     | --                                            | --                                             | --                                      | --                                                | --                                                  |
| Other neglected tropical diseases                                       | 26.4<br>(24.2 to 28.9)                        | --                                             | 0.6<br>(0.3 to 0.9)                     | -10.2<br>(-21.5 to 2.8)                           | -2.3<br>(-14.8 to 11.4)                             |
| <b>Maternal disorders</b>                                               | <b>4.2</b><br><b>(3.2 to 5.2)</b>             | <b>101.0†</b><br><b>(83.2 to 117.8)</b>        | <b>0.3</b><br><b>(0.2 to 0.4)</b>       | <b>-4.8</b><br><b>(-29.2 to 28.5)</b>             | <b>-14.6</b><br><b>(-36.5 to 14.5)</b>              |
| Maternal haemorrhage                                                    | 0.3<br>(0.2 to 0.4)                           | 3.4<br>(2.5 to 4.6)                            | < 0.05<br>(< 0.05 to < 0.05)            | 1.3<br>(-33.7 to 54.4)                            | -8.0<br>(-39.4 to 39.5)                             |
| Maternal sepsis and other pregnancy related infections                  | 1.1<br>(0.8 to 1.6)                           | 8.0<br>(5.9 to 11.0)                           | < 0.05<br>(< 0.05 to 0.1)               | -2.3<br>(-53.1 to 105.0)                          | -12.1<br>(-57.4 to 84.2)                            |
| Maternal hypertensive disorders                                         | 2.3<br>(1.4 to 3.3)                           | 10.2<br>(7.9 to 12.8)                          | 0.1<br>(0.1 to 0.2)                     | -5.0<br>(-41.8 to 59.0)                           | -15.0<br>(-47.7 to 42.4)                            |
| Maternal obstructed labour and uterine rupture                          | < 0.05<br>(< 0.05 to 0.1)                     | 2.8<br>(2.0 to 3.8)                            | < 0.05<br>(< 0.05 to < 0.05)            | -3.8<br>(-60.0 to 124.1)                          | -13.9<br>(-63.0 to 95.5)                            |
| Maternal abortion, miscarriage, and ectopic pregnancy                   | 0.6<br>(0.4 to 0.9)                           | 76.7<br>(58.5 to 93.0)                         | 0.1<br>(< 0.05 to 0.1)                  | -4.1<br>(-43.3 to 63.8)                           | -14.2<br>(-49.4 to 46.1)                            |
| Other maternal disorders                                                | --                                            | --                                             | < 0.05<br>(< 0.05 to 0.1)               | -9.3<br>(-33.1 to 22.5)                           | -18.6<br>(-39.5 to 9.4)                             |
| <b>Neonatal disorders</b>                                               | <b>51.6</b><br><b>(44.0 to 64.1)</b>          | --                                             | <b>9.1</b><br><b>(5.7 to 14.7)</b>      | <b>5.0</b><br><b>(-9.6 to 22.1)</b>               | <b>4.0</b><br><b>(-10.4 to 21.0)</b>                |
| Neonatal preterm birth complications                                    | 42.5<br>(33.0 to 57.4)                        | --                                             | 4.3<br>(2.8 to 6.4)                     | 3.5<br>(-19.1 to 29.5)                            | 2.0<br>(-19.9 to 27.0)                              |
| Neonatal encephalopathy due to birth asphyxia and trauma                | 2.0<br>(1.0 to 3.5)                           | --                                             | 0.2<br>(< 0.05 to 0.6)                  | 23.2<br>(-14.8 to 130.7)                          | 20.5<br>(-16.5 to 125.6)                            |
| Neonatal sepsis and other neonatal infections                           | 9.2<br>(3.9 to 19.6)                          | --                                             | 3.9<br>(1.3 to 9.2)                     | 6.9<br>(-14.4 to 31.3)                            | 5.8<br>(-15.2 to 31.0)                              |
| Hemolytic disease and other neonatal jaundice                           | 1.1<br>(0.9 to 1.2)                           | --                                             | 0.3<br>(0.2 to 0.4)                     | 4.2<br>(-16.3 to 27.3)                            | 1.1<br>(-18.0 to 22.6)                              |
| Other neonatal disorders                                                | --                                            | --                                             | 0.3<br>(0.2 to 0.5)                     | -5.0<br>(-19.6 to 14.1)                           | 1.0<br>(-14.6 to 21.2)                              |
| <b>Nutritional deficiencies</b>                                         | <b>666.3</b><br><b>(620.5 to 698.2)</b>       | <b>39.9†</b><br><b>(25.6 to 62.1)</b>          | <b>13.8</b><br><b>(9.0 to 20.2)</b>     | <b>-8.7</b><br><b>(-15.4 to -1.2)</b>             | <b>-9.5</b><br><b>(-15.9 to -2.4)</b>               |
| Protein-energy malnutrition                                             | 6.2<br>(4.7 to 8.3)                           | 3.0<br>(2.3 to 3.9)                            | 0.4<br>(0.2 to 0.6)                     | -11.6<br>(-36.0 to 24.6)                          | -6.3<br>(-32.1 to 31.4)                             |
| Iodine deficiency                                                       | 12.4<br>(10.8 to 14.2)                        | 0.3<br>(0.2 to 0.3)                            | 0.3<br>(0.2 to 0.5)                     | 9.4<br>(-4.6 to 26.0)                             | -1.4<br>(-13.4 to 13.3)                             |
| Vitamin A deficiency                                                    | 44.3<br>(27.3 to 69.7)                        | 36.7<br>(22.4 to 58.9)                         | 0.1<br>(0.1 to 0.2)                     | -2.1<br>(-17.2 to 16.5)                           | -0.9<br>(-15.7 to 17.1)                             |
| Iron-deficiency anaemia                                                 | 612.8<br>(571.4 to 656.1)                     | --                                             | 13.0<br>(8.3 to 19.2)                   | -9.1<br>(-16.0 to -1.0)                           | -9.8<br>(-16.7 to -2.4)                             |
| Other nutritional deficiencies                                          | --                                            | --                                             | < 0.05<br>(< 0.05 to < 0.05)            | -12.3<br>(-37.8 to 25.1)                          | -6.9<br>(-33.8 to 32.1)                             |
| <b>Other communicable, maternal, neonatal, and nutritional diseases</b> | <b>757.0</b><br><b>(707.4 to 811.8)</b>       | <b>260.2</b><br><b>(210.5 to 329.4)</b>        | <b>1.4</b><br><b>(0.8 to 2.2)</b>       | <b>7.9</b><br><b>(0.8 to 15.6)</b>                | <b>2.9</b><br><b>(-3.0 to 9.8)</b>                  |
| Sexually transmitted diseases excluding HIV                             | 669.0<br>(622.6 to 726.8)                     | 246.4<br>(198.1 to 314.8)                      | 0.9<br>(0.5 to 1.5)                     | 13.8<br>(4.8 to 23.7)                             | 2.8<br>(-4.8 to 11.6)                               |
| Syphilis                                                                | 41.0<br>(34.8 to 48.1)                        | 29.4<br>(23.6 to 36.2)                         | 0.1<br>(0.1 to 0.1)                     | 23.1<br>(7.4 to 42.0)                             | 3.5<br>(-8.9 to 19.2)                               |
| Chlamydial infection                                                    | 27.2<br>(21.2 to 34.2)                        | 20.7<br>(16.1 to 26.0)                         | 0.1<br>(0.1 to 0.2)                     | 15.1<br>(-2.0 to 35.3)                            | 2.3<br>(-12.8 to 19.7)                              |
| Gonococcal infection                                                    | 20.5<br>(8.7 to 38.3)                         | 71.2<br>(26.4 to 137.1)                        | 0.2<br>(0.1 to 0.5)                     | 13.7<br>(-6.7 to 36.3)                            | 6.5<br>(-11.6 to 26.9)                              |
| Trichomoniasis                                                          | 96.0<br>(82.7 to 110.1)                       | 83.5<br>(71.4 to 97.2)                         | 0.1<br>(< 0.05 to 0.2)                  | 11.9<br>(4.5 to 19.6)                             | -0.8<br>(-7.0 to 5.8)                               |
| Genital herpes                                                          | 535.0<br>(461.3 to 621.8)                     | 36.7<br>(30.7 to 43.9)                         | 0.1<br>(< 0.05 to 0.3)                  | 14.7<br>(7.1 to 21.8)                             | -0.0<br>(-5.8 to 5.8)                               |
| Other sexually transmitted diseases                                     | 5.9<br>(5.4 to 6.4)                           | 4.9<br>(4.1 to 5.8)                            | 0.2<br>(0.1 to 0.4)                     | 10.6<br>(-1.2 to 23.4)                            | 2.2<br>(-8.3 to 13.4)                               |
| Hepatitis                                                               | 104.4<br>(92.0 to 118.1)                      | 13.8<br>(9.7 to 19.8)                          | < 0.05<br>(< 0.05 to < 0.05)            | -1.5<br>(-28.2 to 34.4)                           | -10.3<br>(-32.7 to 18.9)                            |
| Acute hepatitis A                                                       | 0.4<br>(0.1 to 0.8)                           | 4.8<br>(1.3 to 10.2)                           | < 0.05<br>(< 0.05 to < 0.05)            | -9.1<br>(-65.2 to 138.5)                          | -14.1<br>(-64.3 to 113.8)                           |
| Hepatitis B                                                             | 46.1<br>(36.3 to 58.0)                        | 6.2<br>(4.6 to 8.1)                            | < 0.05<br>(< 0.05 to < 0.05)            | 6.7<br>(-12.6 to 30.4)                            | -8.0<br>(-24.8 to 13.1)                             |
| Hepatitis C                                                             | 57.9<br>(51.5 to 64.7)                        | 1.6<br>(1.4 to 1.9)                            | < 0.05<br>(< 0.05 to < 0.05)            | -2.2<br>(-24.8 to 25.0)                           | -2.6<br>(-24.8 to 23.3)                             |
| Acute hepatitis E                                                       | 0.1<br>(0.1 to 0.1)                           | 1.1<br>(0.9 to 1.4)                            | < 0.05<br>(< 0.05 to < 0.05)            | -8.2<br>(-16.3 to 0.8)                            | -14.0<br>(-20.7 to -6.7)                            |
| Other infectious diseases                                               | 21.6<br>(19.9 to 23.5)                        | < 0.05<br>(< 0.05 to < 0.05)                   | 0.5<br>(0.3 to 0.7)                     | -1.2<br>(-12.0 to 10.9)                           | 3.6<br>(-7.0 to 15.9)                               |
| <b>Non-communicable diseases</b>                                        | <b>2,653.6</b><br><b>(2,639.9 to 2,668.3)</b> | <b>7,902.2†</b><br><b>(7,511.2 to 8,312.8)</b> | <b>258.8</b><br><b>(190.7 to 336.3)</b> | <b>12.7</b><br><b>(10.3 to 15.3)</b>              | <b>0.2</b><br><b>(-1.8 to 2.4)</b>                  |
| <b>Neoplasms</b>                                                        | <b>19.8</b><br><b>(18.9 to 20.7)</b>          | <b>6.7</b><br><b>(5.9 to 7.0)</b>              | <b>2.3</b><br><b>(1.6 to 3.0)</b>       | <b>33.5</b><br><b>(26.2 to 40.8)</b>              | <b>10.8</b><br><b>(4.5 to 16.8)</b>                 |
| Lip and oral cavity cancer                                              | 0.2<br>(0.2 to 0.2)                           | 0.1<br>(0.1 to 0.1)                            | < 0.05<br>(< 0.05 to < 0.05)            | 18.4<br>(3.4 to 34.6)                             | -3.6<br>(-16.1 to 10.2)                             |
| Nasopharynx cancer                                                      | 0.1<br>(0.1 to 0.1)                           | < 0.05<br>(< 0.05 to < 0.05)                   | < 0.05<br>(< 0.05 to < 0.05)            | 15.8<br>(-0.7 to 34.4)                            | 3.0<br>(-11.4 to 18.8)                              |
| Other pharynx cancer                                                    | 0.1<br>(0.1 to 0.1)                           | < 0.05<br>(< 0.05 to < 0.05)                   | < 0.05<br>(< 0.05 to < 0.05)            | 58.6<br>(35.1 to 84.2)                            | 26.5<br>(6.8 to 47.3)                               |
| Oesophageal cancer                                                      | 0.1<br>(0.1 to 0.1)                           | 0.1<br>(0.1 to 0.1)                            | < 0.05<br>(< 0.05 to < 0.05)            | 29.9<br>(8.5 to 54.8)                             | 4.8<br>(-12.0 to 24.4)                              |
| Stomach cancer                                                          | 0.5<br>(0.5 to 0.5)                           | 0.3<br>(0.3 to 0.3)                            | 0.1<br>(0.1 to 0.1)                     | 30.0<br>(13.1 to 49.2)                            | 6.1<br>(-8.2 to 22.5)                               |
| Colon and rectum cancer                                                 | 2.4<br>(2.2 to 2.6)                           | 0.7<br>(0.6 to 0.8)                            | 0.2<br>(0.2 to 0.3)                     | 45.3<br>(27.7 to 67.7)                            | 18.7<br>(3.3 to 37.7)                               |
| Liver cancer                                                            | < 0.05<br>(< 0.05 to 0.1)                     | 0.1<br>(0.1 to 0.1)                            | < 0.05<br>(< 0.05 to < 0.05)            | 16.4<br>(4.4 to 31.8)                             | -4.7<br>(-14.6 to 8.3)                              |
| Liver cancer due to hepatitis B                                         | < 0.05<br>(< 0.05 to < 0.05)                  | < 0.05<br>(< 0.05 to < 0.05)                   | < 0.05<br>(< 0.05 to < 0.05)            | 16.6<br>(4.0 to 33.4)                             | -4.5<br>(-15.0 to 9.5)                              |

| Cause                                              | Prevalence in thousands (95% UI)        | Incidence in thousands (95% UI)       | YLDs in thousands (95% UI)          |                                                   |                                                     |
|----------------------------------------------------|-----------------------------------------|---------------------------------------|-------------------------------------|---------------------------------------------------|-----------------------------------------------------|
|                                                    | 2016 counts                             | 2016 counts                           | 2016 counts                         | Percentage change in counts between 2006 and 2016 | Percentage change in age-standardised rates between |
| Liver cancer due to hepatitis C                    | < 0.05<br>(< 0.05 to < 0.05)            | < 0.05<br>(< 0.05 to < 0.05)          | < 0.05<br>(< 0.05 to < 0.05)        | 15.4<br>(2.0 to 32.6)                             | -5.7<br>(-16.9 to 8.4)                              |
| Liver cancer due to alcohol use                    | < 0.05<br>(< 0.05 to < 0.05)            | < 0.05<br>(< 0.05 to < 0.05)          | < 0.05<br>(< 0.05 to < 0.05)        | 21.5<br>(7.7 to 40.5)                             | -1.6<br>(-12.9 to 13.8)                             |
| Liver cancer due to other causes                   | < 0.05<br>(< 0.05 to < 0.05)            | < 0.05<br>(< 0.05 to < 0.05)          | < 0.05<br>(< 0.05 to < 0.05)        | 13.3<br>(-0.3 to 29.4)                            | -6.2<br>(-17.4 to 7.3)                              |
| Gallbladder and biliary tract cancer               | < 0.05<br>(< 0.05 to 0.1)               | < 0.05<br>(< 0.05 to 0.1)             | < 0.05<br>(< 0.05 to < 0.05)        | 18.9<br>(6.5 to 31.5)                             | -3.6<br>(-14.1 to 6.4)                              |
| Pancreatic cancer                                  | 0.1<br>(0.1 to 0.1)                     | 0.1<br>(0.1 to 0.1)                   | < 0.05<br>(< 0.05 to < 0.05)        | 27.8<br>(15.8 to 42.2)                            | 3.6<br>(-5.8 to 15.0)                               |
| Larynx cancer                                      | 0.2<br>(0.2 to 0.2)                     | 0.1<br>(0.1 to 0.1)                   | < 0.05<br>(< 0.05 to < 0.05)        | 45.6<br>(20.1 to 70.9)                            | 17.2<br>(-3.5 to 38.4)                              |
| Tracheal, bronchus, and lung cancer                | 0.6<br>(0.5 to 0.6)                     | 0.5<br>(0.5 to 0.6)                   | 0.1<br>(0.1 to 0.2)                 | 30.1<br>(8.4 to 59.9)                             | 3.9<br>(-14.0 to 29.1)                              |
| Malignant skin melanoma                            | 0.1<br>(0.1 to 0.1)                     | < 0.05<br>(< 0.05 to < 0.05)          | < 0.05<br>(< 0.05 to < 0.05)        | 36.2<br>(19.3 to 55.5)                            | 13.0<br>(-2.0 to 30.0)                              |
| Non-melanoma skin cancer                           | 0.1<br>(< 0.05 to 0.1)                  | 0.2<br>(0.1 to 0.2)                   | < 0.05<br>(< 0.05 to < 0.05)        | 36.7<br>(7.1 to 104.0)                            | 11.5<br>(-12.8 to 71.2)                             |
| Non-melanoma skin cancer (squamous-cell carcinoma) | < 0.05<br>(< 0.05 to 0.1)               | 0.1<br>(< 0.05 to 0.1)                | < 0.05<br>(< 0.05 to < 0.05)        | 37.2<br>(4.2 to 113.0)                            | 12.0<br>(-14.1 to 75.5)                             |
| Non-melanoma skin cancer (basal-cell carcinoma)    | < 0.05<br>(< 0.05 to < 0.05)            | 0.1<br>(0.1 to 0.1)                   | < 0.05<br>(< 0.05 to < 0.05)        | 29.6<br>(5.5 to 57.6)                             | 5.6<br>(-14.2 to 29.6)                              |
| Breast cancer                                      | 4.1<br>(3.5 to 4.6)                     | 0.9<br>(0.8 to 1.0)                   | 0.4<br>(0.2 to 0.5)                 | 32.0<br>(15.2 to 51.4)                            | 9.7<br>(-4.1 to 26.0)                               |
| Cervical cancer                                    | 1.7<br>(1.3 to 2.0)                     | 0.5<br>(0.4 to 0.5)                   | 0.2<br>(0.1 to 0.2)                 | 12.9<br>(-8.6 to 40.7)                            | -3.3<br>(-22.5 to 20.6)                             |
| Uterine cancer                                     | 1.3<br>(1.1 to 1.5)                     | 0.3<br>(0.2 to 0.3)                   | 0.1<br>(0.1 to 0.1)                 | 61.7<br>(30.1 to 97.8)                            | 27.9<br>(1.8 to 58.0)                               |
| Ovarian cancer                                     | 0.4<br>(0.4 to 0.5)                     | 0.1<br>(0.1 to 0.2)                   | 0.1<br>(< 0.05 to 0.1)              | 29.8<br>(1.3 to 66.4)                             | 8.3<br>(-16.1 to 41.3)                              |
| Prostate cancer                                    | 5.7<br>(3.0 to 7.1)                     | 1.4<br>(0.8 to 1.8)                   | 0.6<br>(0.3 to 0.8)                 | 38.8<br>(23.0 to 57.6)                            | 14.0<br>(0.9 to 29.7)                               |
| Testicular cancer                                  | < 0.05<br>(< 0.05 to < 0.05)            | < 0.05<br>(< 0.05 to < 0.05)          | < 0.05<br>(< 0.05 to < 0.05)        | 27.3<br>(3.0 to 63.8)                             | 10.9<br>(-9.7 to 41.4)                              |
| Kidney cancer                                      | 0.4<br>(0.3 to 0.4)                     | 0.1<br>(0.1 to 0.1)                   | < 0.05<br>(< 0.05 to < 0.05)        | 26.8<br>(9.9 to 46.6)                             | 9.8<br>(-4.6 to 27.4)                               |
| Bladder cancer                                     | 0.5<br>(0.4 to 0.5)                     | 0.1<br>(0.1 to 0.1)                   | < 0.05<br>(< 0.05 to 0.1)           | 37.7<br>(19.1 to 59.5)                            | 12.6<br>(-2.8 to 29.9)                              |
| Brain and nervous system cancer                    | 0.1<br>(0.1 to 0.2)                     | 0.1<br>(< 0.05 to 0.1)                | < 0.05<br>(< 0.05 to < 0.05)        | 19.2<br>(3.8 to 39.8)                             | 7.0<br>(-5.2 to 25.0)                               |
| Thyroid cancer                                     | 0.3<br>(0.3 to 0.4)                     | 0.1<br>(0.1 to 0.1)                   | < 0.05<br>(< 0.05 to < 0.05)        | 56.0<br>(25.7 to 92.9)                            | 32.9<br>(6.9 to 62.9)                               |
| Mesothelioma                                       | < 0.05<br>(< 0.05 to < 0.05)            | < 0.05<br>(< 0.05 to < 0.05)          | < 0.05<br>(< 0.05 to < 0.05)        | 3.2<br>(-9.3 to 26.7)                             | -14.5<br>(-24.9 to 5.4)                             |
| Hodgkin lymphoma                                   | < 0.05<br>(< 0.05 to < 0.05)            | < 0.05<br>(< 0.05 to < 0.05)          | < 0.05<br>(< 0.05 to < 0.05)        | 25.3<br>(11.5 to 38.9)                            | 8.7<br>(-2.3 to 19.8)                               |
| Non-Hodgkin's lymphoma                             | 0.5<br>(0.4 to 0.6)                     | 0.2<br>(0.1 to 0.2)                   | 0.1<br>(< 0.05 to 0.1)              | 17.8<br>(4.1 to 39.5)                             | -0.1<br>(-12.2 to 18.5)                             |
| Multiple myeloma                                   | 0.1<br>(0.1 to 0.2)                     | 0.1<br>(0.1 to 0.1)                   | < 0.05<br>(< 0.05 to 0.1)           | 71.1<br>(22.8 to 113.5)                           | 36.8<br>(-0.9 to 70.2)                              |
| Leukaemia                                          | 0.7<br>(0.5 to 0.8)                     | 0.2<br>(0.1 to 0.2)                   | 0.1<br>(0.1 to 0.1)                 | 12.0<br>(0.2 to 25.7)                             | -1.1<br>(-11.7 to 11.5)                             |
| Acute lymphoid leukaemia                           | 0.1<br>(0.1 to 0.1)                     | < 0.05<br>(< 0.05 to < 0.05)          | < 0.05<br>(< 0.05 to < 0.05)        | -11.4<br>(-28.0 to 8.3)                           | -7.8<br>(-24.2 to 11.6)                             |
| Chronic lymphoid leukaemia                         | 0.1<br>(0.1 to 0.1)                     | < 0.05<br>(< 0.05 to < 0.05)          | < 0.05<br>(< 0.05 to < 0.05)        | 67.6<br>(40.7 to 100.3)                           | 35.3<br>(13.5 to 61.6)                              |
| Acute myeloid leukaemia                            | < 0.05<br>(< 0.05 to < 0.05)            | < 0.05<br>(< 0.05 to < 0.05)          | < 0.05<br>(< 0.05 to < 0.05)        | 21.9<br>(9.0 to 35.2)                             | 9.1<br>(-2.6 to 20.5)                               |
| Chronic myeloid leukaemia                          | < 0.05<br>(< 0.05 to 0.1)               | < 0.05<br>(< 0.05 to < 0.05)          | < 0.05<br>(< 0.05 to < 0.05)        | 38.8<br>(17.3 to 65.5)                            | 15.1<br>(-2.3 to 37.3)                              |
| Other leukaemia                                    | 0.4<br>(0.3 to 0.5)                     | 0.1<br>(0.1 to 0.1)                   | 0.1<br>(< 0.05 to 0.1)              | 4.8<br>(-9.6 to 24.8)                             | -9.1<br>(-22.0 to 8.7)                              |
| Other neoplasms                                    | 1.2<br>(1.0 to 1.4)                     | 0.4<br>(0.3 to 0.4)                   | 0.1<br>(0.1 to 0.1)                 | 43.9<br>(22.8 to 69.8)                            | 24.4<br>(6.4 to 47.2)                               |
| <b>Cardiovascular diseases</b>                     | <b>197.3</b><br><b>(191.2 to 203.7)</b> | <b>20.8†</b><br><b>(19.9 to 21.9)</b> | <b>11.3</b><br><b>(8.2 to 14.8)</b> | <b>20.1</b><br><b>(16.6 to 23.6)</b>              | <b>0.7</b><br><b>(-2.2 to 3.9)</b>                  |
| Rheumatic heart disease                            | 24.7<br>(22.0 to 27.5)                  | 0.7<br>(0.6 to 0.8)                   | 1.2<br>(0.7 to 1.7)                 | 17.2<br>(8.5 to 28.1)                             | 6.3<br>(-1.3 to 15.8)                               |
| Ischaemic heart disease                            | 63.7<br>(60.4 to 67.2)                  | 8.5<br>(7.9 to 9.2)                   | 2.7<br>(1.8 to 3.7)                 | 21.6<br>(17.1 to 27.2)                            | 0.5<br>(-3.3 to 5.0)                                |
| Cerebrovascular disease                            | 30.9<br>(29.0 to 32.9)                  | 4.6†<br>(4.2 to 4.9)                  | 3.2<br>(2.3 to 4.1)                 | 20.8<br>(12.6 to 30.0)                            | 0.2<br>(-6.6 to 7.8)                                |
| Ischaemic stroke                                   | 25.1<br>(22.8 to 28.1)                  | 3.0†<br>(2.6 to 3.3)                  | 2.5<br>(1.8 to 3.2)                 | 21.0<br>(11.1 to 32.4)                            | 0.1<br>(-8.3 to 9.6)                                |
| Hemorrhagic stroke                                 | 7.3<br>(6.5 to 8.1)                     | 1.6†<br>(1.5 to 1.8)                  | 0.7<br>(0.5 to 0.9)                 | 20.2<br>(7.8 to 33.9)                             | 0.3<br>(-10.7 to 12.6)                              |
| Hypertensive heart disease                         | 9.2<br>(7.9 to 10.9)                    | --                                    | 0.7<br>(0.5 to 1.0)                 | 17.8<br>(7.3 to 29.4)                             | -3.2<br>(-12.0 to 6.5)                              |
| Cardiomyopathy and myocarditis                     | 2.3<br>(2.1 to 2.6)                     | 0.7†<br>(0.6 to 0.8)                  | 0.2<br>(0.1 to 0.3)                 | 24.7<br>(11.0 to 40.7)                            | 7.1<br>(-4.7 to 20.6)                               |
| Myocarditis                                        | 0.5<br>(0.5 to 0.6)                     | 0.7<br>(0.6 to 0.8)                   | < 0.05<br>(< 0.05 to 0.1)           | 14.8<br>(3.4 to 27.2)                             | 4.8<br>(-6.4 to 17.2)                               |
| Alcoholic cardiomyopathy                           | 0.3<br>(0.2 to 0.4)                     | --                                    | < 0.05<br>(< 0.05 to < 0.05)        | 34.6<br>(6.9 to 71.5)                             | 8.8<br>(-14.2 to 38.6)                              |
| Other cardiomyopathy                               | 1.8<br>(1.6 to 2.1)                     | --                                    | 0.1<br>(0.1 to 0.2)                 | 26.0<br>(8.3 to 46.8)                             | 7.4<br>(-7.5 to 25.2)                               |
| Atrial fibrillation and flutter                    | 19.6<br>(17.1 to 22.4)                  | 1.5<br>(1.3 to 1.7)                   | 1.5<br>(1.0 to 2.1)                 | 20.3<br>(13.3 to 27.6)                            | -0.6<br>(-6.2 to 5.3)                               |
| Peripheral vascular disease                        | 46.2<br>(40.5 to 53.0)                  | 4.4<br>(3.8 to 5.1)                   | 0.2<br>(0.1 to 0.4)                 | 22.1<br>(13.8 to 31.3)                            | -0.8<br>(-7.8 to 6.7)                               |
| Endocarditis                                       | 0.2<br>(0.2 to 0.2)                     | 0.5<br>(0.4 to 0.5)                   | < 0.05<br>(< 0.05 to < 0.05)        | 21.7<br>(5.0 to 41.8)                             | 2.4<br>(-12.0 to 20.2)                              |
| Other cardiovascular and circulatory diseases      | 29.5<br>(25.5 to 34.2)                  | --                                    | 1.5<br>(1.1 to 2.2)                 | 18.0<br>(8.6 to 29.0)                             | 1.2<br>(-6.7 to 10.3)                               |
| <b>Chronic respiratory diseases</b>                | <b>319.6</b><br><b>(303.8 to 336.5)</b> | <b>53.1†</b><br><b>(49.1 to 57.2)</b> | <b>11.2</b><br><b>(7.9 to 15.3)</b> | <b>3.4</b><br><b>(-1.7 to 8.7)</b>                | <b>3.8</b><br><b>(-1.0 to 8.8)</b>                  |
| Chronic obstructive pulmonary disease              | 84.0<br>(78.2 to 91.4)                  | 5.4<br>(5.0 to 5.8)                   | 1.5<br>(1.2 to 1.9)                 | 17.0<br>(-0.3 to 35.4)                            | -2.4<br>(-17.1 to 13.5)                             |
| Pneumoconiosis                                     | 0.1<br>(0.1 to 0.1)                     | < 0.05<br>(< 0.05 to < 0.05)          | < 0.05<br>(< 0.05 to < 0.05)        | 19.2<br>(8.0 to 32.7)                             | -1.7<br>(-10.0 to 8.3)                              |
| Silicosis                                          | < 0.05<br>(< 0.05 to < 0.05)            | < 0.05<br>(< 0.05 to < 0.05)          | < 0.05<br>(< 0.05 to < 0.05)        | 30.2<br>(24.6 to 36.0)                            | 5.8<br>(1.2 to 10.5)                                |

| Cause                                                          | Prevalence in thousands (95% UI)              | Incidence in thousands (95% UI)          | YLDs in thousands (95% UI)           |                                                   |                                                     |
|----------------------------------------------------------------|-----------------------------------------------|------------------------------------------|--------------------------------------|---------------------------------------------------|-----------------------------------------------------|
|                                                                | 2016 counts                                   | 2016 counts                              | 2016 counts                          | Percentage change in counts between 2006 and 2016 | Percentage change in age-standardised rates between |
| Asbestosis                                                     | < 0.05<br>(< 0.05 to 0.1)                     | < 0.05<br>(< 0.05 to < 0.05)             | < 0.05<br>(< 0.05 to < 0.05)         | 19.1<br>(-6.0 to 54.2)                            | -0.2<br>(-19.3 to 25.9)                             |
| Coal workers pneumoconiosis                                    | --                                            | --                                       | --                                   | --                                                | --                                                  |
| Other pneumoconiosis                                           | 0.1<br>(< 0.05 to 0.1)                        | < 0.05<br>(< 0.05 to < 0.05)             | < 0.05<br>(< 0.05 to < 0.05)         | 14.2<br>(2.1 to 26.8)                             | -6.2<br>(-15.9 to 4.0)                              |
| Asthma                                                         | 240.6<br>(222.3 to 260.5)                     | 47.7<br>(43.7 to 51.8)                   | 9.5<br>(6.2 to 13.5)                 | 1.2<br>(-4.0 to 7.0)                              | 4.5<br>(-0.3 to 10.2)                               |
| Interstitial lung disease and pulmonary sarcoidosis            | 1.1<br>(1.0 to 1.2)                           | 0.1<br>(0.1 to 0.1)                      | 0.1<br>(0.1 to 0.2)                  | 21.8<br>(11.5 to 33.0)                            | 5.2<br>(-4.0 to 15.0)                               |
| Other chronic respiratory diseases                             | --                                            | --                                       | 0.1<br>(0.1 to 0.1)                  | 27.3<br>(2.4 to 57.5)                             | 33.7<br>(8.2 to 63.2)                               |
| <b>Cirrhosis and other chronic liver diseases</b>              | <b>17.4</b><br><b>(16.5 to 18.4)</b>          | <b>0.4</b><br><b>(0.4 to 0.5)</b>        | <b>0.4</b><br><b>(0.3 to 0.6)</b>    | <b>24.2</b><br><b>(12.7 to 37.6)</b>              | <b>10.9</b><br><b>(1.3 to 22.3)</b>                 |
| Cirrhosis and other chronic liver diseases due to hepatitis B  | 1.9<br>(1.6 to 2.2)                           | 0.1<br>(< 0.05 to 0.1)                   | < 0.05<br>(< 0.05 to 0.1)            | 34.5<br>(5.4 to 69.3)                             | 12.1<br>(-13.7 to 43.8)                             |
| Cirrhosis and other chronic liver diseases due to hepatitis C  | 5.5<br>(4.9 to 6.1)                           | 0.1<br>(0.1 to 0.1)                      | 0.1<br>(0.1 to 0.2)                  | 34.1<br>(12.8 to 63.5)                            | 11.8<br>(-6.0 to 36.3)                              |
| Cirrhosis and other chronic liver diseases due to alcohol use  | 5.9<br>(5.4 to 6.5)                           | 0.2<br>(0.1 to 0.2)                      | 0.1<br>(0.1 to 0.2)                  | 37.7<br>(17.7 to 64.4)                            | 14.3<br>(-2.7 to 36.8)                              |
| Cirrhosis and other chronic liver diseases due to other causes | 4.1<br>(3.8 to 4.5)                           | 0.1<br>(0.1 to 0.1)                      | 0.1<br>(0.1 to 0.2)                  | 6.4<br>(-12.7 to 32.6)                            | 7.0<br>(-11.0 to 31.6)                              |
| <b>Digestive diseases</b>                                      | <b>85.3</b><br><b>(81.2 to 90.1)</b>          | <b>68.2†</b><br><b>(63.7 to 72.9)</b>    | <b>3.1</b><br><b>(2.2 to 4.2)</b>    | <b>18.6</b><br><b>(11.4 to 27.1)</b>              | <b>9.2</b><br><b>(3.0 to 16.1)</b>                  |
| Peptic ulcer disease                                           | 28.9<br>(26.3 to 32.0)                        | 3.2<br>(2.9 to 3.5)                      | 0.5<br>(0.3 to 0.7)                  | 30.6<br>(16.8 to 48.5)                            | 11.7<br>(-0.3 to 26.7)                              |
| Gastritis and duodenitis                                       | 29.6<br>(26.4 to 33.4)                        | 15.6<br>(14.0 to 17.5)                   | 0.5<br>(0.3 to 0.7)                  | 45.7<br>(32.1 to 62.7)                            | 25.4<br>(13.3 to 40.4)                              |
| Appendicitis                                                   | 0.2<br>(0.2 to 0.2)                           | 5.2<br>(4.8 to 5.7)                      | 0.1<br>(< 0.05 to 0.1)               | -5.4<br>(-29.9 to 31.6)                           | -2.7<br>(-27.2 to 31.6)                             |
| Paralytic ileus and intestinal obstruction                     | < 0.05<br>(< 0.05 to < 0.05)                  | 1.2<br>(1.0 to 1.3)                      | < 0.05<br>(< 0.05 to < 0.05)         | 11.3<br>(6.7 to 15.7)                             | 6.3<br>(2.5 to 9.6)                                 |
| Inguinal, femoral, and abdominal hernia                        | 24.8<br>(22.2 to 27.6)                        | 16.1<br>(14.1 to 18.3)                   | 1.7<br>(1.1 to 2.4)                  | 11.0<br>(1.5 to 21.9)                             | 5.0<br>(-3.0 to 14.3)                               |
| Inflammatory bowel disease                                     | 0.2<br>(0.2 to 0.2)                           | 0.5<br>(0.5 to 0.5)                      | < 0.05<br>(< 0.05 to < 0.05)         | -1.0<br>(-7.4 to 6.0)                             | -14.3<br>(-20.3 to -7.4)                            |
| Vascular intestinal disorders                                  | < 0.05<br>(< 0.05 to < 0.05)                  | 0.1<br>(0.1 to 0.1)                      | < 0.05<br>(< 0.05 to < 0.05)         | 18.6<br>(11.6 to 26.6)                            | 10.8<br>(5.2 to 16.6)                               |
| Gallbladder and biliary diseases                               | 4.0<br>(3.6 to 4.5)                           | 25.2<br>(21.9 to 28.9)                   | 0.1<br>(0.1 to 0.1)                  | 27.4<br>(5.1 to 56.7)                             | 9.9<br>(-9.7 to 35.0)                               |
| Pancreatitis                                                   | 0.1<br>(0.1 to 0.1)                           | 1.0<br>(0.9 to 1.1)                      | < 0.05<br>(< 0.05 to < 0.05)         | 29.4<br>(24.7 to 34.1)                            | 14.1<br>(10.8 to 17.9)                              |
| Other digestive diseases                                       | --                                            | --                                       | 0.3<br>(0.2 to 0.4)                  | 18.6<br>(9.8 to 28.5)                             | 13.2<br>(6.1 to 21.4)                               |
| <b>Neurological disorders</b>                                  | <b>1,105.3</b><br><b>(1,058.5 to 1,156.0)</b> | <b>523.0</b><br><b>(447.1 to 604.5)</b>  | <b>28.9</b><br><b>(19.0 to 40.3)</b> | <b>10.8</b><br><b>(-7.7 to 33.5)</b>              | <b>0.2</b><br><b>(-15.9 to 20.0)</b>                |
| Alzheimer's disease and other dementias                        | 15.1<br>(12.7 to 17.8)                        | 2.6<br>(2.2 to 3.1)                      | 2.2<br>(1.6 to 3.0)                  | 18.5<br>(13.0 to 24.1)                            | -1.4<br>(-6.0 to 3.4)                               |
| Parkinson's disease                                            | 1.9<br>(1.5 to 2.4)                           | 0.2<br>(0.2 to 0.3)                      | 0.2<br>(0.1 to 0.3)                  | 25.9<br>(11.3 to 42.8)                            | 4.1<br>(-8.0 to 18.4)                               |
| Epilepsy                                                       | 11.0<br>(2.8 to 19.0)                         | 1.3<br>(0.3 to 2.2)                      | 3.2<br>(0.7 to 7.2)                  | 8.0<br>(-77.5 to 430.2)                           | 3.2<br>(-78.5 to 403.5)                             |
| Multiple sclerosis                                             | 0.3<br>(0.3 to 0.3)                           | < 0.05<br>(< 0.05 to < 0.05)             | 0.1<br>(0.1 to 0.1)                  | 22.7<br>(15.4 to 30.8)                            | 6.5<br>(0.1 to 13.6)                                |
| Motor neuron disease                                           | 0.1<br>(0.1 to 0.1)                           | < 0.05<br>(< 0.05 to < 0.05)             | < 0.05<br>(< 0.05 to < 0.05)         | 11.1<br>(6.8 to 15.5)                             | 1.6<br>(-2.0 to 4.9)                                |
| Migraine                                                       | 406.6<br>(381.8 to 432.0)                     | 45.5<br>(42.6 to 48.8)                   | 18.9<br>(12.1 to 26.4)               | 9.9<br>(6.2 to 13.9)                              | -0.7<br>(-3.9 to 2.6)                               |
| Tension-type headache                                          | 848.1<br>(762.2 to 943.0)                     | 473.4<br>(397.7 to 555.1)                | 3.6<br>(2.2 to 5.3)                  | 10.1<br>(4.8 to 16.4)                             | -1.1<br>(-5.5 to 4.1)                               |
| Other neurological disorders                                   | < 0.05<br>(< 0.05 to < 0.05)                  | < 0.05<br>(< 0.05 to < 0.05)             | 0.7<br>(0.2 to 1.4)                  | 25.7<br>(-67.4 to 381.0)                          | 23.2<br>(-67.3 to 349.8)                            |
| <b>Mental and substance use disorders</b>                      | <b>437.6</b><br><b>(424.1 to 451.4)</b>       | <b>152.4†</b><br><b>(141.8 to 164.3)</b> | <b>56.6</b><br><b>(40.5 to 73.4)</b> | <b>10.7</b><br><b>(8.6 to 12.8)</b>               | <b>0.6</b><br><b>(-1.3 to 2.4)</b>                  |
| Schizophrenia                                                  | 5.5<br>(4.9 to 6.3)                           | 0.4<br>(0.3 to 0.4)                      | 3.5<br>(2.6 to 4.5)                  | 14.9<br>(4.2 to 25.1)                             | 0.3<br>(-8.8 to 9.0)                                |
| Alcohol use disorders                                          | 41.3<br>(35.0 to 47.6)                        | 22.2<br>(18.7 to 25.5)                   | 4.2<br>(2.8 to 5.8)                  | 18.1<br>(9.7 to 27.2)                             | 4.9<br>(-2.7 to 12.8)                               |
| Drug use disorders                                             | 26.6<br>(24.3 to 28.9)                        | 3.1<br>(2.8 to 3.5)                      | 5.2<br>(3.7 to 7.0)                  | 14.5<br>(5.3 to 25.7)                             | 1.3<br>(-6.3 to 10.9)                               |
| Opioid use disorders                                           | 6.6<br>(5.3 to 8.2)                           | 0.8<br>(0.7 to 1.0)                      | 2.7<br>(1.8 to 3.9)                  | 17.5<br>(5.7 to 31.5)                             | 2.5<br>(-7.7 to 14.2)                               |
| Cocaine use disorders                                          | 8.7<br>(7.5 to 10.0)                          | 0.5<br>(0.4 to 0.6)                      | 1.2<br>(0.7 to 1.7)                  | 12.2<br>(-3.1 to 29.2)                            | 0.4<br>(-13.0 to 15.3)                              |
| Amphetamine use disorders                                      | 0.3<br>(0.2 to 0.4)                           | 0.1<br>(< 0.05 to 0.1)                   | < 0.05<br>(< 0.05 to 0.1)            | 14.6<br>(-6.9 to 46.2)                            | 1.6<br>(-16.3 to 26.6)                              |
| Cannabis use disorders                                         | 10.5<br>(8.6 to 12.7)                         | 1.5<br>(1.2 to 1.9)                      | 0.3<br>(0.2 to 0.5)                  | 3.2<br>(-15.5 to 24.1)                            | -4.5<br>(-21.5 to 14.0)                             |
| Other drug use disorders                                       | 1.2<br>(1.0 to 1.3)                           | 0.2<br>(0.2 to 0.3)                      | 0.9<br>(0.6 to 1.4)                  | 13.0<br>(-12.1 to 50.9)                           | 1.0<br>(-21.5 to 34.3)                              |
| Depressive disorders                                           | 86.8<br>(81.2 to 93.2)                        | 94.7<br>(84.9 to 105.1)                  | 14.7<br>(10.2 to 19.9)               | 14.1<br>(9.3 to 19.0)                             | 0.5<br>(-3.8 to 5.1)                                |
| Major depressive disorder                                      | 58.1<br>(52.0 to 65.0)                        | 89.4<br>(79.4 to 99.7)                   | 11.8<br>(8.1 to 16.1)                | 13.8<br>(8.1 to 19.9)                             | 0.6<br>(-4.6 to 6.1)                                |
| Dysthymia                                                      | 30.0<br>(26.3 to 34.2)                        | 5.3<br>(4.7 to 6.1)                      | 2.9<br>(2.0 to 4.2)                  | 15.0<br>(10.3 to 20.1)                            | -0.1<br>(-3.8 to 3.9)                               |
| Bipolar disorder                                               | 25.9<br>(22.3 to 30.3)                        | 2.1<br>(1.8 to 2.4)                      | 5.3<br>(3.3 to 7.8)                  | 10.9<br>(5.2 to 17.2)                             | -0.1<br>(-5.0 to 5.0)                               |
| Anxiety disorders                                              | 118.5<br>(107.2 to 130.1)                     | 17.4<br>(16.0 to 19.0)                   | 11.4<br>(7.9 to 15.3)                | 8.6<br>(4.9 to 12.6)                              | -0.3<br>(-3.5 to 3.1)                               |
| Eating disorders                                               | 4.6<br>(3.7 to 5.7)                           | 2.3<br>(1.7 to 3.1)                      | 0.9<br>(0.6 to 1.3)                  | 8.9<br>(-4.1 to 23.1)                             | 1.8<br>(-10.8 to 14.7)                              |
| Anorexia nervosa                                               | 0.8<br>(0.6 to 1.1)                           | 0.4<br>(0.2 to 0.5)                      | 0.2<br>(0.1 to 0.3)                  | 5.0<br>(-19.7 to 35.2)                            | 1.2<br>(-22.3 to 30.5)                              |
| Bulimia nervosa                                                | 3.5<br>(2.6 to 4.7)                           | 1.9<br>(1.3 to 2.7)                      | 0.7<br>(0.4 to 1.1)                  | 9.9<br>(-5.8 to 26.1)                             | 2.0<br>(-12.7 to 17.4)                              |
| Autistic spectrum disorders                                    | 24.5<br>(22.2 to 27.3)                        | 0.2<br>(0.1 to 0.2)                      | 3.7<br>(2.5 to 5.2)                  | 3.9<br>(-0.6 to 8.7)                              | 0.2<br>(-4.2 to 5.0)                                |
| Autism                                                         | 8.0<br>(6.9 to 9.4)                           | < 0.05<br>(< 0.05 to < 0.05)             | 2.0<br>(1.3 to 3.0)                  | 4.1<br>(-3.1 to 12.6)                             | 0.1<br>(-6.7 to 8.1)                                |
| Asperger syndrome and other autistic spectrum disorders        | 16.6<br>(13.8 to 20.0)                        | 0.1<br>(0.1 to 0.2)                      | 1.7<br>(1.1 to 2.4)                  | 3.7<br>(-1.0 to 8.0)                              | 0.4<br>(-4.2 to 4.6)                                |



| Cause                                                      | Prevalence in thousands (95% UI)              | Incidence in thousands (95% UI)                | YLDs in thousands (95% UI)           |                                                   |                                                     |
|------------------------------------------------------------|-----------------------------------------------|------------------------------------------------|--------------------------------------|---------------------------------------------------|-----------------------------------------------------|
|                                                            | 2016 counts                                   | 2016 counts                                    | 2016 counts                          | Percentage change in counts between 2006 and 2016 | Percentage change in age-standardised rates between |
| Attention-deficit/hyperactivity disorder                   | 52.9<br>(47.9 to 58.9)                        | 2.2<br>(1.9 to 2.5)                            | 0.6<br>(0.4 to 1.0)                  | -1.6<br>(-6.2 to 3.3)                             | -0.0<br>(-4.7 to 4.9)                               |
| Conduct disorder                                           | 19.0<br>(15.4 to 22.8)                        | 6.1<br>(4.8 to 7.5)                            | 2.3<br>(1.4 to 3.5)                  | -10.4<br>(-15.8 to -4.9)                          | -0.1<br>(-5.8 to 5.7)                               |
| Idiopathic developmental intellectual disability           | 16.7<br>(7.3 to 26.4)                         | --                                             | 0.8<br>(0.3 to 1.4)                  | 5.7<br>(-2.4 to 14.5)                             | 0.4<br>(-7.3 to 8.7)                                |
| Other mental and substance use disorders                   | 53.9<br>(47.5 to 62.2)                        | 1.9<br>(1.7 to 2.2)                            | 4.0<br>(2.8 to 5.8)                  | 15.1<br>(9.6 to 20.9)                             | 0.2<br>(-4.5 to 5.1)                                |
| <b>Diabetes, urogenital, blood, and endocrine diseases</b> | <b>1,269.6</b><br><b>(1,248.3 to 1,295.3)</b> | <b>325.1†</b><br><b>(304.5 to 348.8)</b>       | <b>34.8</b><br><b>(24.7 to 47.0)</b> | <b>22.7</b><br><b>(16.8 to 28.9)</b>              | <b>3.6</b><br><b>(-1.6 to 8.9)</b>                  |
| Diabetes mellitus                                          | 264.3<br>(241.1 to 289.8)                     | 17.5<br>(15.9 to 19.2)                         | 23.4<br>(16.3 to 31.8)               | 29.2<br>(20.6 to 38.2)                            | 6.0<br>(-1.2 to 13.7)                               |
| Acute glomerulonephritis                                   | < 0.05<br>(< 0.05 to < 0.05)                  | 0.5<br>(0.5 to 0.6)                            | < 0.05<br>(< 0.05 to < 0.05)         | 7.5<br>(3.1 to 12.0)                              | 0.4<br>(-3.0 to 3.5)                                |
| Chronic kidney disease                                     | 116.1<br>(105.5 to 127.7)                     | 8.5<br>(7.5 to 9.6)                            | 3.6<br>(2.7 to 4.7)                  | 22.2<br>(14.1 to 30.6)                            | 2.8<br>(-4.0 to 9.8)                                |
| Chronic kidney disease due to diabetes mellitus            | 42.2<br>(35.9 to 49.3)                        | 3.1<br>(2.6 to 3.7)                            | 1.2<br>(0.9 to 1.6)                  | 27.1<br>(15.7 to 39.6)                            | 4.5<br>(-5.2 to 15.6)                               |
| Chronic kidney disease due to hypertension                 | 26.6<br>(22.9 to 30.4)                        | 2.4<br>(2.0 to 2.8)                            | 0.5<br>(0.4 to 0.7)                  | 20.4<br>(7.0 to 36.3)                             | 0.1<br>(-11.3 to 13.0)                              |
| Chronic kidney disease due to glomerulonephritis           | 22.7<br>(19.6 to 25.9)                        | 1.2<br>(0.9 to 1.5)                            | 1.1<br>(0.8 to 1.4)                  | 20.1<br>(9.1 to 32.6)                             | 3.0<br>(-6.9 to 13.6)                               |
| Chronic kidney disease due to other causes                 | 24.5<br>(20.3 to 29.2)                        | 1.8<br>(1.5 to 2.2)                            | 0.8<br>(0.6 to 1.1)                  | 19.2<br>(8.1 to 31.0)                             | 1.9<br>(-7.5 to 12.1)                               |
| Urinary diseases and male infertility                      | 55.6<br>(49.5 to 61.9)                        | 192.7†<br>(173.1 to 216.2)                     | 1.3<br>(0.9 to 1.9)                  | 20.2<br>(13.1 to 26.9)                            | -0.9<br>(-7.1 to 5.0)                               |
| Interstitial nephritis and urinary tract infections        | 3.4<br>(3.0 to 3.8)                           | 177.3<br>(158.3 to 200.6)                      | 0.1<br>(0.1 to 0.2)                  | 7.8<br>(-5.5 to 23.3)                             | 0.6<br>(-11.3 to 14.7)                              |
| Urolithiasis                                               | 0.4<br>(0.4 to 0.5)                           | 11.2<br>(10.0 to 12.7)                         | < 0.05<br>(< 0.05 to < 0.05)         | 15.5<br>(10.5 to 20.1)                            | 1.6<br>(-2.3 to 5.2)                                |
| Benign prostatic hyperplasia                               | 32.0<br>(27.2 to 37.1)                        | 4.1<br>(3.4 to 4.9)                            | 1.0<br>(0.7 to 1.5)                  | 26.0<br>(17.2 to 35.0)                            | -0.1<br>(-7.2 to 7.4)                               |
| Male infertility                                           | 16.9<br>(13.3 to 21.7)                        | --                                             | 0.1<br>(< 0.05 to 0.2)               | 4.7<br>(-3.4 to 12.6)                             | -3.0<br>(-10.2 to 4.0)                              |
| Other urinary diseases                                     | --                                            | --                                             | 0.1<br>(< 0.05 to 0.1)               | -11.3<br>(-20.1 to -1.5)                          | -16.8<br>(-24.8 to -8.1)                            |
| Gynecological diseases                                     | 338.8<br>(322.9 to 355.9)                     | 99.9†<br>(94.2 to 106.2)                       | 3.5<br>(2.4 to 5.1)                  | 5.8<br>(1.3 to 10.4)                              | -4.6<br>(-8.8 to -0.6)                              |
| Uterine fibroids                                           | 24.2<br>(21.1 to 27.6)                        | 2.5<br>(2.2 to 3.0)                            | 0.5<br>(0.3 to 0.8)                  | 6.5<br>(-3.8 to 17.0)                             | -5.4<br>(-14.2 to 4.2)                              |
| Polycystic ovarian syndrome                                | 0.3<br>(0.2 to 0.4)                           | 2.1<br>(1.4 to 2.7)                            | < 0.05<br>(< 0.05 to < 0.05)         | 2.0<br>(-27.3 to 44.0)                            | -1.6<br>(-30.2 to 38.2)                             |
| Female infertility                                         | 40.0<br>(28.6 to 56.5)                        | --                                             | 0.2<br>(0.1 to 0.5)                  | 8.7<br>(0.6 to 16.6)                              | 2.2<br>(-5.1 to 9.2)                                |
| Endometriosis                                              | 0.2<br>(0.2 to 0.3)                           | 1.1<br>(0.9 to 1.3)                            | < 0.05<br>(< 0.05 to < 0.05)         | 8.9<br>(-18.5 to 46.7)                            | -1.2<br>(-26.2 to 33.3)                             |
| Genital prolapse                                           | 104.9<br>(91.9 to 118.8)                      | 6.2<br>(5.3 to 7.2)                            | 0.3<br>(0.2 to 0.6)                  | 5.9<br>(-1.7 to 14.9)                             | -12.9<br>(-19.3 to -5.6)                            |
| Premenstrual syndrome                                      | 184.0<br>(173.5 to 194.6)                     | 66.7<br>(62.2 to 71.4)                         | 1.5<br>(1.0 to 2.4)                  | 6.7<br>(-1.0 to 15.3)                             | -2.5<br>(-9.3 to 5.2)                               |
| Other gynecological diseases                               | 28.6<br>(25.2 to 32.2)                        | 21.3<br>(17.8 to 25.2)                         | 0.9<br>(0.6 to 1.3)                  | 3.2<br>(-5.5 to 13.0)                             | -5.9<br>(-13.8 to 2.5)                              |
| Hemoglobinopathies and hemolytic anaemias                  | 786.2<br>(760.7 to 813.8)                     | --                                             | 1.6<br>(1.1 to 2.4)                  | -1.9<br>(-9.7 to 7.0)                             | -3.4<br>(-10.5 to 4.6)                              |
| Thalassemias                                               | < 0.05<br>(< 0.05 to < 0.05)                  | --                                             | < 0.05<br>(< 0.05 to < 0.05)         | -10.1<br>(-25.9 to 6.7)                           | -1.8<br>(-18.4 to 16.3)                             |
| Thalassaemias trait                                        | 3.5<br>(3.0 to 3.9)                           | --                                             | < 0.05<br>(< 0.05 to 0.1)            | 4.3<br>(-6.6 to 17.0)                             | 0.3<br>(-9.1 to 11.1)                               |
| Sickle cell disorders                                      | 2.5<br>(2.3 to 2.7)                           | --                                             | 0.2<br>(0.1 to 0.3)                  | 1.5<br>(-11.7 to 18.2)                            | 4.3<br>(-9.5 to 20.8)                               |
| Sickle cell trait                                          | 313.0<br>(304.8 to 322.8)                     | --                                             | 0.8<br>(0.5 to 1.2)                  | -2.2<br>(-11.9 to 9.5)                            | -3.0<br>(-12.1 to 7.6)                              |
| G6PD deficiency                                            | 185.3<br>(169.9 to 204.1)                     | --                                             | < 0.05<br>(< 0.05 to < 0.05)         | -5.7<br>(-25.2 to 21.4)                           | -4.1<br>(-22.9 to 21.1)                             |
| G6PD trait                                                 | 321.0<br>(300.9 to 342.2)                     | --                                             | < 0.05<br>(< 0.05 to < 0.05)         | 12.4<br>(-0.6 to 28.7)                            | 6.2<br>(-5.7 to 20.8)                               |
| Other hemoglobinopathies and hemolytic anaemias            | 34.0<br>(31.6 to 36.8)                        | --                                             | 0.6<br>(0.4 to 0.8)                  | -2.9<br>(-11.7 to 8.0)                            | -6.6<br>(-14.4 to 3.0)                              |
| Endocrine, metabolic, blood, and immune disorders          | 49.9<br>(47.0 to 52.9)                        | 6.0<br>(5.4 to 6.6)                            | 1.4<br>(0.9 to 1.9)                  | 9.3<br>(2.9 to 16.6)                              | 0.1<br>(-5.6 to 6.3)                                |
| <b>Musculoskeletal disorders</b>                           | <b>469.1</b><br><b>(449.2 to 488.8)</b>       | <b>242.8</b><br><b>(219.8 to 268.6)</b>        | <b>50.2</b><br><b>(36.4 to 65.6)</b> | <b>13.6</b><br><b>(10.4 to 17.1)</b>              | <b>-2.9</b><br><b>(-5.5 to 0.1)</b>                 |
| Rheumatoid arthritis                                       | 9.8<br>(8.7 to 10.9)                          | 0.5<br>(0.5 to 0.6)                            | 2.3<br>(1.6 to 3.1)                  | 22.0<br>(12.7 to 31.1)                            | 2.6<br>(-4.8 to 9.9)                                |
| Osteoarthritis                                             | 101.5<br>(94.9 to 107.9)                      | 4.8<br>(4.5 to 5.2)                            | 6.2<br>(4.4 to 8.4)                  | 24.8<br>(20.4 to 29.3)                            | 1.7<br>(-1.9 to 5.2)                                |
| Low back and neck pain                                     | 233.1<br>(217.2 to 250.1)                     | 91.1<br>(82.0 to 101.1)                        | 26.3<br>(18.6 to 34.6)               | 15.3<br>(11.9 to 19.2)                            | -0.6<br>(-3.5 to 2.5)                               |
| Low back pain                                              | 145.7<br>(129.1 to 164.3)                     | 68.8<br>(60.5 to 78.2)                         | 16.4<br>(11.6 to 21.6)               | 14.4<br>(9.5 to 20.5)                             | -0.8<br>(-5.0 to 3.8)                               |
| Neck pain                                                  | 99.7<br>(85.9 to 115.1)                       | 22.3<br>(19.4 to 26.1)                         | 9.9<br>(6.7 to 14.1)                 | 16.9<br>(13.5 to 20.5)                            | -0.2<br>(-2.4 to 2.0)                               |
| Gout                                                       | 8.6<br>(7.7 to 9.7)                           | 1.7<br>(1.5 to 1.9)                            | 0.3<br>(0.2 to 0.4)                  | 20.4<br>(4.0 to 40.6)                             | 0.6<br>(-13.2 to 16.8)                              |
| Other musculoskeletal disorders                            | 176.0<br>(154.6 to 199.4)                     | 144.6<br>(124.5 to 169.9)                      | 15.1<br>(10.3 to 21.1)               | 5.6<br>(-1.9 to 13.9)                             | -9.1<br>(-15.4 to -1.9)                             |
| <b>Other non-communicable diseases</b>                     | <b>2,138.5</b><br><b>(2,102.8 to 2,176.4)</b> | <b>6,509.6†</b><br><b>(6,129.9 to 6,924.3)</b> | <b>60.0</b><br><b>(40.8 to 84.8)</b> | <b>9.3</b><br><b>(8.0 to 10.6)</b>                | <b>-0.8</b><br><b>(-1.7 to 0.2)</b>                 |
| Congenital anomalies                                       | 23.5<br>(20.2 to 27.4)                        | --                                             | 2.6<br>(1.9 to 3.5)                  | 2.6<br>(-3.2 to 8.8)                              | 0.6<br>(-5.2 to 6.4)                                |
| Neural tube defects                                        | 1.0<br>(0.8 to 1.1)                           | --                                             | 0.3<br>(0.2 to 0.4)                  | 7.7<br>(-8.0 to 26.2)                             | 2.9<br>(-11.7 to 20.0)                              |
| Congenital heart anomalies                                 | 5.7<br>(4.9 to 6.5)                           | --                                             | 0.3<br>(0.1 to 0.5)                  | 3.6<br>(-7.9 to 16.0)                             | 4.2<br>(-7.2 to 16.4)                               |
| Orofacial clefts                                           | 1.6<br>(1.4 to 1.9)                           | --                                             | < 0.05<br>(< 0.05 to < 0.05)         | 1.8<br>(-8.8 to 13.1)                             | -2.0<br>(-12.1 to 9.0)                              |
| Down's syndrome                                            | 1.5<br>(1.3 to 1.7)                           | --                                             | 0.1<br>(0.1 to 0.2)                  | 7.8<br>(-0.6 to 16.9)                             | 5.4<br>(-2.9 to 14.5)                               |
| Turner syndrome                                            | 0.6<br>(0.5 to 0.7)                           | --                                             | < 0.05<br>(< 0.05 to < 0.05)         | 8.2<br>(-30.9 to 68.8)                            | 5.5<br>(-31.2 to 62.1)                              |
| Klinefelter syndrome                                       | 0.7<br>(0.6 to 0.8)                           | --                                             | < 0.05<br>(< 0.05 to < 0.05)         | 5.9<br>(-21.4 to 44.6)                            | 0.9<br>(-24.9 to 36.3)                              |



| Cause                                         | Prevalence in thousands (95% UI)        | Incidence in thousands (95% UI)          | YLDs in thousands (95% UI)           |                                                   |                                                     |
|-----------------------------------------------|-----------------------------------------|------------------------------------------|--------------------------------------|---------------------------------------------------|-----------------------------------------------------|
|                                               | 2016 counts                             | 2016 counts                              | 2016 counts                          | Percentage change in counts between 2006 and 2016 | Percentage change in age-standardised rates between |
| Other chromosomal abnormalities               | 1.9<br>(1.6 to 2.2)                     | --                                       | 0.2<br>(0.1 to 0.3)                  | -8.8<br>(-23.8 to 8.3)                            | 1.2<br>(-14.9 to 19.3)                              |
| Congenital musculoskeletal and limb anomalies | 2.1<br>(1.9 to 2.3)                     | --                                       | 0.3<br>(0.2 to 0.4)                  | 7.0<br>(-3.0 to 18.1)                             | 1.0<br>(-8.2 to 11.2)                               |
| Urogenital congenital anomalies               | 2.7<br>(2.3 to 3.2)                     | --                                       | 0.1<br>(0.1 to 0.2)                  | -7.9<br>(-19.7 to 6.4)                            | 0.2<br>(-12.7 to 15.3)                              |
| Digestive congenital anomalies                | 2.8<br>(2.5 to 3.2)                     | --                                       | 0.1<br>(0.1 to 0.2)                  | 5.7<br>(-9.8 to 24.9)                             | 1.5<br>(-13.1 to 19.3)                              |
| Other congenital anomalies                    | 9.8<br>(6.3 to 14.6)                    | --                                       | 1.2<br>(0.7 to 1.8)                  | 2.4<br>(-9.1 to 14.3)                             | -1.5<br>(-12.3 to 9.7)                              |
| Skin and subcutaneous diseases                | 948.7<br>(921.1 to 976.9)               | 2,255.5<br>(2,121.4 to 2,395.6)          | 23.1<br>(15.6 to 33.2)               | 2.0<br>(-0.0 to 3.9)                              | 0.2<br>(-1.5 to 2.0)                                |
| Dermatitis                                    | 141.3<br>(131.5 to 151.5)               | 150.9<br>(139.9 to 162.1)                | 5.5<br>(3.2 to 9.1)                  | -3.0<br>(-6.3 to 0.6)                             | -0.1<br>(-3.2 to 3.2)                               |
| Psoriasis                                     | 26.0<br>(24.8 to 27.4)                  | 3.6<br>(3.4 to 3.8)                      | 2.3<br>(1.6 to 3.0)                  | 12.9<br>(4.3 to 21.5)                             | 2.6<br>(-4.8 to 10.5)                               |
| Cellulitis                                    | 1.1<br>(1.0 to 1.2)                     | 20.5<br>(19.2 to 22.0)                   | 0.1<br>(< 0.05 to 0.1)               | 4.6<br>(-17.0 to 30.1)                            | 0.9<br>(-18.3 to 24.5)                              |
| Pyoderma                                      | 8.1<br>(7.8 to 8.4)                     | 197.9<br>(190.5 to 205.7)                | < 0.05<br>(< 0.05 to 0.1)            | 13.4<br>(6.8 to 20.3)                             | 0.9<br>(-4.8 to 7.0)                                |
| Scabies                                       | 54.4<br>(47.7 to 62.1)                  | 167.9<br>(145.1 to 192.5)                | 1.4<br>(0.8 to 2.2)                  | -3.9<br>(-7.7 to 0.4)                             | -4.7<br>(-7.9 to -1.2)                              |
| Fungal skin diseases                          | 311.5<br>(281.7 to 342.3)               | 1,116.3<br>(988.4 to 1,257.9)            | 1.7<br>(0.7 to 3.7)                  | 7.2<br>(5.2 to 9.4)                               | -0.1<br>(-1.0 to 0.9)                               |
| Viral skin diseases                           | 79.5<br>(75.6 to 83.4)                  | 118.3<br>(112.0 to 124.9)                | 2.4<br>(1.5 to 3.6)                  | -0.0<br>(-3.1 to 3.2)                             | -0.3<br>(-3.0 to 2.7)                               |
| Acne vulgaris                                 | 244.8<br>(218.9 to 272.6)               | 165.5<br>(135.9 to 205.5)                | 6.3<br>(4.2 to 9.2)                  | 1.9<br>(-2.7 to 7.3)                              | 1.6<br>(-2.9 to 6.6)                                |
| Alopecia areata                               | 5.0<br>(4.8 to 5.2)                     | 8.8<br>(8.4 to 9.2)                      | 0.2<br>(0.1 to 0.2)                  | 9.8<br>(-1.4 to 24.6)                             | -0.2<br>(-10.1 to 12.8)                             |
| Pruritus                                      | 25.3<br>(22.4 to 28.6)                  | 20.2<br>(18.1 to 22.7)                   | 0.3<br>(0.1 to 0.5)                  | 10.2<br>(4.2 to 17.1)                             | 0.4<br>(-4.6 to 6.0)                                |
| Urticaria                                     | 26.0<br>(22.8 to 29.9)                  | 46.5<br>(41.0 to 53.2)                   | 1.6<br>(1.0 to 2.2)                  | -0.8<br>(-6.8 to 5.4)                             | -0.1<br>(-5.6 to 5.5)                               |
| Decubitus ulcer                               | 1.9<br>(1.7 to 2.1)                     | 6.8<br>(6.1 to 7.6)                      | 0.3<br>(0.2 to 0.4)                  | 12.7<br>(1.1 to 26.4)                             | -4.8<br>(-15.6 to 7.8)                              |
| Other skin and subcutaneous diseases          | 198.8<br>(193.2 to 204.5)               | 232.3<br>(225.1 to 239.7)                | 1.1<br>(0.5 to 2.0)                  | 13.1<br>(10.6 to 16.0)                            | -0.1<br>(-2.3 to 2.3)                               |
| Sense organ diseases                          | 695.0<br>(680.0 to 711.4)               | 279.2†<br>(262.3 to 299.2)               | 24.9<br>(17.3 to 34.4)               | 14.8<br>(12.8 to 16.6)                            | -2.1<br>(-3.6 to -0.6)                              |
| Glaucoma                                      | 3.1<br>(2.6 to 3.6)                     | --                                       | 0.3<br>(0.2 to 0.5)                  | 23.3<br>(11.2 to 35.8)                            | -0.8<br>(-10.8 to 9.8)                              |
| Cataract                                      | 29.9<br>(26.4 to 33.7)                  | --                                       | 2.3<br>(1.7 to 3.1)                  | 14.6<br>(9.8 to 19.4)                             | -4.6<br>(-8.6 to -0.6)                              |
| Macular degeneration                          | 0.8<br>(0.7 to 1.0)                     | --                                       | 0.1<br>(< 0.05 to 0.1)               | 24.7<br>(6.5 to 44.7)                             | 0.9<br>(-14.4 to 18.8)                              |
| Refraction and accommodation disorders        | 317.8<br>(306.1 to 330.1)               | --                                       | 4.6<br>(2.7 to 7.6)                  | 7.5<br>(4.3 to 10.9)                              | -5.0<br>(-7.6 to -1.9)                              |
| Age-related and other hearing loss            | 484.6<br>(461.2 to 510.2)               | --                                       | 14.3<br>(10.1 to 19.9)               | 16.8<br>(13.5 to 19.6)                            | -1.2<br>(-3.5 to 1.0)                               |
| Other vision loss                             | 6.8<br>(6.1 to 7.6)                     | --                                       | 0.7<br>(0.4 to 0.9)                  | 15.9<br>(6.8 to 26.4)                             | -1.8<br>(-9.5 to 6.9)                               |
| Other sense organ diseases                    | 82.4<br>(75.9 to 88.8)                  | 279.2<br>(262.3 to 299.2)                | 2.6<br>(1.6 to 3.8)                  | 16.6<br>(12.3 to 20.8)                            | 0.2<br>(-3.2 to 3.9)                                |
| Oral disorders                                | 1,541.4<br>(1,483.2 to 1,598.8)         | 3,974.8†<br>(3,628.5 to 4,345.6)         | 9.3<br>(5.6 to 14.7)                 | 17.2<br>(14.8 to 19.7)                            | -0.2<br>(-2.0 to 1.6)                               |
| Caries of deciduous teeth                     | 215.6<br>(179.1 to 256.3)               | 720.5<br>(530.8 to 954.1)                | 0.1<br>(< 0.05 to 0.1)               | -15.4<br>(-23.9 to -5.8)                          | -0.2<br>(-10.6 to 11.3)                             |
| Caries of permanent teeth                     | 983.8<br>(911.1 to 1,055.8)             | 3,188.8<br>(2,893.7 to 3,498.3)          | 0.6<br>(0.2 to 1.1)                  | 9.0<br>(5.3 to 13.4)                              | 0.9<br>(-2.3 to 4.5)                                |
| Periodontal disease                           | 441.1<br>(380.6 to 510.8)               | 52.5<br>(44.1 to 62.2)                   | 2.9<br>(1.2 to 6.0)                  | 15.8<br>(12.2 to 19.2)                            | -0.8<br>(-3.7 to 2.2)                               |
| Edentulism and severe tooth loss              | 156.0<br>(136.0 to 176.2)               | 13.0<br>(11.0 to 15.1)                   | 4.3<br>(2.8 to 6.0)                  | 22.9<br>(19.2 to 26.9)                            | -0.0<br>(-2.8 to 3.2)                               |
| Other oral disorders                          | 51.5<br>(49.3 to 53.8)                  | --                                       | 1.5<br>(0.9 to 2.3)                  | 9.9<br>(6.4 to 13.6)                              | -0.1<br>(-3.1 to 3.0)                               |
| <b>Injuries</b>                               | <b>427.4</b><br><b>(401.1 to 463.1)</b> | <b>185.8†</b><br><b>(174.7 to 197.3)</b> | <b>15.8</b><br><b>(10.6 to 22.3)</b> | <b>21.8</b><br><b>(19.8 to 23.7)</b>              | <b>7.6</b><br><b>(5.9 to 9.1)</b>                   |
| <b>Transport injuries</b>                     | <b>41.1</b><br><b>(38.2 to 44.0)</b>    | <b>14.1</b><br><b>(12.5 to 15.8)</b>     | <b>2.1</b><br><b>(1.4 to 3.1)</b>    | <b>34.8</b><br><b>(31.7 to 37.5)</b>              | <b>17.1</b><br><b>(14.6 to 19.3)</b>                |
| Road injuries                                 | 38.5<br>(35.8 to 41.4)                  | 13.5<br>(11.9 to 15.2)                   | 2.0<br>(1.3 to 2.9)                  | 36.6<br>(33.4 to 39.5)                            | 18.3<br>(15.8 to 20.6)                              |
| Pedestrian road injuries                      | 5.1<br>(4.5 to 5.9)                     | 1.3<br>(1.1 to 1.6)                      | 0.3<br>(0.2 to 0.4)                  | 46.2<br>(43.2 to 49.3)                            | 27.1<br>(24.7 to 29.5)                              |
| Cyclist road injuries                         | 10.6<br>(8.9 to 12.5)                   | 4.0<br>(3.3 to 4.9)                      | 0.5<br>(0.4 to 0.8)                  | 41.3<br>(37.9 to 44.6)                            | 23.5<br>(20.7 to 26.2)                              |
| Motorcyclist road injuries                    | 7.7<br>(6.5 to 9.1)                     | 1.8<br>(1.4 to 2.2)                      | 0.4<br>(0.2 to 0.6)                  | 29.3<br>(26.3 to 32.3)                            | 11.7<br>(9.1 to 14.0)                               |
| Motor vehicle road injuries                   | 10.4<br>(9.0 to 11.7)                   | 4.3<br>(3.6 to 5.0)                      | 0.6<br>(0.4 to 0.8)                  | 39.1<br>(35.7 to 42.2)                            | 19.9<br>(17.3 to 22.4)                              |
| Other road injuries                           | 4.8<br>(4.2 to 5.5)                     | 2.1<br>(1.7 to 2.7)                      | 0.2<br>(0.1 to 0.3)                  | 23.6<br>(20.8 to 26.3)                            | 6.7<br>(4.5 to 8.8)                                 |
| Other transport injuries                      | 2.6<br>(2.2 to 3.1)                     | 0.6<br>(0.5 to 0.7)                      | 0.1<br>(0.1 to 0.2)                  | 12.4<br>(9.2 to 15.3)                             | 0.9<br>(-1.7 to 3.3)                                |
| <b>Unintentional injuries</b>                 | <b>355.0</b><br><b>(328.5 to 390.2)</b> | <b>157.4</b><br><b>(146.9 to 168.7)</b>  | <b>11.9</b><br><b>(8.1 to 16.8)</b>  | <b>20.7</b><br><b>(18.6 to 22.6)</b>              | <b>6.5</b><br><b>(4.8 to 8.0)</b>                   |
| Falls                                         | 140.0<br>(122.0 to 160.9)               | 60.7<br>(52.9 to 70.2)                   | 5.7<br>(4.0 to 7.8)                  | 26.2<br>(23.9 to 28.4)                            | 9.3<br>(7.4 to 11.0)                                |
| Drowning                                      | 1.0<br>(0.8 to 1.1)                     | 0.2<br>(0.2 to 0.2)                      | < 0.05<br>(< 0.05 to 0.1)            | 13.5<br>(10.9 to 16.0)                            | -0.8<br>(-3.0 to 1.2)                               |
| Fire, heat, and hot substances                | 37.6<br>(30.9 to 47.3)                  | 4.5<br>(3.6 to 5.4)                      | 1.0<br>(0.6 to 1.4)                  | 19.7<br>(14.8 to 24.4)                            | 8.4<br>(4.4 to 12.6)                                |
| Poisonings                                    | 1.0<br>(0.8 to 1.2)                     | 1.4<br>(1.1 to 1.7)                      | 0.1<br>(0.1 to 0.1)                  | 28.3<br>(17.4 to 40.3)                            | 18.3<br>(8.5 to 28.6)                               |
| Exposure to mechanical forces                 | 74.4<br>(64.0 to 88.6)                  | 27.6<br>(23.7 to 31.7)                   | 1.8<br>(1.2 to 2.5)                  | 15.3<br>(13.0 to 17.4)                            | 0.4<br>(-1.5 to 2.2)                                |
| Unintentional firearm injuries                | 8.8<br>(7.1 to 11.1)                    | 2.3<br>(1.7 to 2.9)                      | 0.3<br>(0.2 to 0.5)                  | -0.2<br>(-2.3 to 2.1)                             | -14.3<br>(-16.1 to -12.4)                           |
| Unintentional suffocation                     | 1.8<br>(1.4 to 2.4)                     | 0.4<br>(0.2 to 0.5)                      | 0.1<br>(< 0.05 to 0.1)               | 15.9<br>(12.9 to 18.9)                            | 6.8<br>(4.2 to 9.4)                                 |
| Other exposure to mechanical forces           | 63.7<br>(53.6 to 78.1)                  | 25.0<br>(21.5 to 28.7)                   | 1.4<br>(0.9 to 2.0)                  | 19.9<br>(17.6 to 22.0)                            | 4.6<br>(2.7 to 6.5)                                 |

| Cause                                                                               | Prevalence in thousands (95% UI)      | Incidence in thousands (95% UI)                | YLDs in thousands (95% UI)              |                                                   |                                                     |
|-------------------------------------------------------------------------------------|---------------------------------------|------------------------------------------------|-----------------------------------------|---------------------------------------------------|-----------------------------------------------------|
|                                                                                     | 2016 counts                           | 2016 counts                                    | 2016 counts                             | Percentage change in counts between 2006 and 2016 | Percentage change in age-standardised rates between |
| Adverse effects of medical treatment                                                | 1.1<br>(0.8 to 1.3)                   | 13.9<br>(12.4 to 15.7)                         | 0.1<br>(0.1 to 0.2)                     | 16.7<br>(10.4 to 23.6)                            | 9.5<br>(3.9 to 15.8)                                |
| Animal contact                                                                      | 9.3<br>(8.2 to 10.8)                  | 10.4<br>(8.4 to 12.5)                          | 0.3<br>(0.2 to 0.4)                     | 12.4<br>(5.4 to 19.9)                             | 3.0<br>(-3.1 to 9.5)                                |
| Venomous animal contact                                                             | 4.7<br>(3.9 to 5.5)                   | 5.0<br>(3.8 to 6.3)                            | 0.2<br>(0.2 to 0.4)                     | 12.8<br>(3.8 to 22.5)                             | 4.1<br>(-3.8 to 12.6)                               |
| Non-venomous animal contact                                                         | 4.6<br>(3.9 to 5.7)                   | 5.4<br>(4.2 to 6.8)                            | 0.1<br>(< 0.05 to 0.1)                  | 11.0<br>(7.5 to 14.0)                             | -0.6<br>(-3.2 to 1.7)                               |
| Foreign body                                                                        | 16.4<br>(13.6 to 19.1)                | 15.9<br>(13.7 to 19.0)                         | 0.6<br>(0.4 to 1.0)                     | 15.4<br>(12.6 to 18.0)                            | 5.3<br>(3.0 to 7.6)                                 |
| Pulmonary aspiration and foreign body in airway                                     | 9.2<br>(7.1 to 11.9)                  | 3.5<br>(3.0 to 4.2)                            | 0.4<br>(0.2 to 0.6)                     | 14.2<br>(10.7 to 17.6)                            | 5.0<br>(2.1 to 8.0)                                 |
| Foreign body in eyes                                                                | 2.1<br>(1.3 to 3.1)                   | 10.3<br>(8.2 to 13.3)                          | 0.1<br>(0.1 to 0.2)                     | 17.6<br>(13.2 to 22.3)                            | 5.3<br>(2.6 to 8.2)                                 |
| Foreign body in other body part                                                     | 5.0<br>(4.0 to 6.3)                   | 2.1<br>(1.7 to 2.5)                            | 0.1<br>(0.1 to 0.2)                     | 16.8<br>(13.5 to 19.8)                            | 6.2<br>(3.4 to 8.8)                                 |
| Environmental heat and cold exposure                                                | 25.6<br>(21.8 to 29.9)                | 6.8<br>(5.7 to 8.2)                            | 0.9<br>(0.6 to 1.4)                     | 16.2<br>(14.0 to 18.3)                            | 3.7<br>(1.8 to 5.4)                                 |
| Other unintentional injuries                                                        | 48.7<br>(38.3 to 61.8)                | 16.0<br>(13.3 to 19.6)                         | 1.4<br>(0.9 to 2.0)                     | 14.8<br>(12.5 to 17.0)                            | 4.8<br>(2.9 to 6.6)                                 |
| <b>Self-harm and interpersonal violence</b>                                         | <b>94.8</b><br><b>(85.7 to 104.5)</b> | <b>14.2†</b><br><b>(12.3 to 16.3)</b>          | <b>1.7</b><br><b>(1.2 to 2.3)</b>       | <b>16.2</b><br><b>(13.1 to 19.1)</b>              | <b>4.5</b><br><b>(2.2 to 6.7)</b>                   |
| Self-harm                                                                           | 1.9<br>(1.6 to 2.1)                   | 0.8<br>(0.7 to 0.9)                            | 0.1<br>(0.1 to 0.1)                     | 23.8<br>(20.3 to 27.1)                            | 6.1<br>(3.3 to 8.9)                                 |
| Self-harm by firearm                                                                | 0.2<br>(0.1 to 0.2)                   | < 0.05<br>(< 0.05 to 0.1)                      | < 0.05<br>(< 0.05 to < 0.05)            | 7.7<br>(4.5 to 10.6)                              | -6.8<br>(-9.5 to -4.4)                              |
| Self-harm by other specified means                                                  | 1.7<br>(1.4 to 2.0)                   | 0.8<br>(0.7 to 0.9)                            | 0.1<br>(0.1 to 0.1)                     | 25.2<br>(21.4 to 28.8)                            | 7.3<br>(4.3 to 10.2)                                |
| Interpersonal violence                                                              | 92.9<br>(83.7 to 102.8)               | 13.4†<br>(11.5 to 15.5)                        | 1.6<br>(1.1 to 2.2)                     | 15.8<br>(12.6 to 18.8)                            | 4.4<br>(2.0 to 6.7)                                 |
| Assault by firearm                                                                  | 2.7<br>(2.2 to 3.2)                   | 0.9<br>(0.7 to 1.2)                            | 0.1<br>(0.1 to 0.2)                     | 62.0<br>(57.2 to 66.9)                            | 40.5<br>(36.7 to 44.5)                              |
| Assault by sharp object                                                             | 15.3<br>(12.6 to 18.2)                | 6.9<br>(5.7 to 8.3)                            | 0.5<br>(0.3 to 0.7)                     | 20.0<br>(17.4 to 22.4)                            | 4.4<br>(2.2 to 6.5)                                 |
| Sexual violence                                                                     | 65.3<br>(56.9 to 75.0)                | --                                             | 0.6<br>(0.4 to 0.8)                     | -0.7<br>(-4.5 to 3.3)                             | -6.1<br>(-9.2 to -2.7)                              |
| Assault by other means                                                              | 9.7<br>(8.4 to 11.5)                  | 5.6<br>(4.6 to 6.6)                            | 0.4<br>(0.3 to 0.6)                     | 27.1<br>(24.5 to 29.7)                            | 11.1<br>(8.9 to 13.2)                               |
| <b>Forces of nature, conflict and terrorism, and executions and police conflict</b> | <b>1.7</b><br><b>(0.7 to 3.1)</b>     | <b>&lt; 0.05†</b><br><b>(&lt; 0.05 to 0.1)</b> | <b>0.1</b><br><b>(&lt; 0.05 to 0.2)</b> | <b>2.6</b><br><b>(-1.3 to 6.4)</b>                | <b>-4.6</b><br><b>(-7.7 to -1.3)</b>                |
| Exposure to forces of nature                                                        | 0.5<br>(0.1 to 0.9)                   | --                                             | < 0.05<br>(< 0.05 to < 0.05)            | 8.5<br>(5.4 to 11.9)                              | -1.8<br>(-4.5 to 1.3)                               |
| Conflict and terrorism                                                              | 1.2<br>(0.5 to 2.3)                   | --                                             | < 0.05<br>(< 0.05 to 0.1)               | -3.6<br>(-9.1 to 0.2)                             | -9.3<br>(-14.1 to -6.0)                             |
| Executions and police conflict                                                      | 0.1<br>(< 0.05 to 0.2)                | < 0.05<br>(< 0.05 to 0.1)                      | < 0.05<br>(< 0.05 to < 0.05)            | 99.0<br>(65.5 to 157.0)                           | 77.2<br>(50.2 to 132.7)                             |
| <b>Impairments</b>                                                                  | --                                    | --                                             | --                                      | --                                                | --                                                  |
| Anaemia                                                                             | 890.1<br>(832.7 to 949.3)             | --                                             | 21.6<br>(14.1 to 30.6)                  | -2.8<br>(-9.8 to 4.9)                             | -6.0<br>(-12.9 to 1.0)                              |
| Developmental intellectual disability                                               | 49.8<br>(38.5 to 62.6)                | --                                             | 8.1<br>(5.2 to 13.9)                    | 5.6<br>(-3.6 to 15.0)                             | 2.9<br>(-6.0 to 12.0)                               |
| Epilepsy                                                                            | 23.1<br>(12.8 to 35.3)                | --                                             | 8.3<br>(4.3 to 14.6)                    | 7.0<br>(-38.2 to 86.8)                            | 4.0<br>(-40.6 to 83.2)                              |
| Guillain-Barre syndrome                                                             | < 0.05<br>(< 0.05 to 0.1)             | --                                             | < 0.05<br>(< 0.05 to < 0.05)            | 41.0<br>(20.4 to 89.3)                            | 32.1<br>(14.8 to 78.5)                              |
| Hearing loss                                                                        | 524.3<br>(501.5 to 549.0)             | --                                             | 16.3<br>(11.5 to 22.5)                  | 14.2<br>(11.4 to 16.7)                            | -1.4<br>(-3.2 to 0.6)                               |
| Heart failure                                                                       | 19.7<br>(17.2 to 22.4)                | --                                             | 2.0<br>(1.5 to 2.6)                     | 23.8<br>(15.7 to 33.4)                            | 2.7<br>(-4.5 to 10.9)                               |
| Infertility                                                                         | 67.1<br>(52.4 to 88.3)                | --                                             | 0.4<br>(0.2 to 0.8)                     | 7.0<br>(0.8 to 12.6)                              | 0.3<br>(-5.2 to 5.4)                                |
| Pelvic inflammatory disease                                                         | 0.5<br>(0.4 to 0.6)                   | --                                             | 0.1<br>(< 0.05 to 0.1)                  | 5.8<br>(-13.3 to 29.7)                            | -4.6<br>(-21.4 to 17.2)                             |
| Vision loss                                                                         | 374.6<br>(360.0 to 391.2)             | --                                             | 12.2<br>(8.3 to 18.0)                   | 9.5<br>(3.1 to 15.2)                              | -1.4<br>(-6.6 to 3.9)                               |

We did not calculate incidence for the nine impairments, certain NTDs, and causes with only birth prevalence. Blank cells mean that no estimate is available.

† Incidence for aggregate causes represents the sum of the incidence of the causes below the aggregate.

‡ Incidence estimates for stroke represent first-ever stroke only.

^ Incidence of HIV/AIDS represents new infections of HIV only and does not include new infections of Tuberculosis in HIV positive cases.

SR Table 14: Prevalence, incidence, and YLDs for 2016, percentage change of YLD counts and percentage change of age-standardised YLD rates between 2006 and 2016 by cause and impairments, for all ages, Japan.

| Cause                                                                                | Prevalence in thousands (95% UI)             | Incidence in thousands (95% UI)               | YLDs in thousands (95% UI)                |                                                   |                                                     |
|--------------------------------------------------------------------------------------|----------------------------------------------|-----------------------------------------------|-------------------------------------------|---------------------------------------------------|-----------------------------------------------------|
|                                                                                      | 2016 counts                                  | 2016 counts                                   | 2016 counts                               | Percentage change in counts between 2006 and 2016 | Percentage change in age-standardised rates between |
| <b>All causes</b>                                                                    | <b>118,628.9</b><br>(118,480.5 to 118,764.9) | <b>742,147.8†</b><br>(701,309.6 to 786,521.8) | <b>17,036.0</b><br>(12,737.8 to 21,916.6) | <b>8.0</b><br>(7.4 to 8.7)                        | <b>1.3</b><br>(0.8 to 1.9)                          |
| <b>Communicable, maternal, neonatal, and nutritional disorders</b>                   | <b>41,675.8</b><br>(41,091.2 to 42,205.5)    | <b>395,688.2†</b><br>(357,265.7 to 437,572.1) | <b>476.9</b><br>(334.6 to 664.5)          | <b>-3.8</b><br>(-6.7 to 0.5)                      | <b>-0.2</b><br>(-3.1 to 3.5)                        |
| <b>HIV/AIDS and tuberculosis</b>                                                     | <b>12,738.5</b><br>(11,805.4 to 13,338.6)    | <b>27.3†</b><br>(24.8 to 30.1)                | <b>7.7</b><br>(4.9 to 11.3)               | <b>-9.5</b><br>(-20.9 to 1.7)                     | <b>-8.4</b><br>(-20.6 to 3.9)                       |
| Tuberculosis                                                                         | 12,035.0<br>(11,247.1 to 12,912.5)           | 25.7†<br>(23.3 to 28.4)                       | 3.8<br>(2.5 to 5.2)                       | -34.0<br>(-39.3 to -27.8)                         | -37.2<br>(-42.2 to -31.6)                           |
| Drug-susceptible tuberculosis                                                        | 12.4<br>(11.0 to 14.0)                       | 25.5<br>(23.1 to 28.1)                        | 3.8<br>(2.5 to 5.2)                       | -33.9<br>(-39.3 to -27.7)                         | -37.1<br>(-42.2 to -31.5)                           |
| Multidrug-resistant tuberculosis without extensive drug resistance                   | 0.1<br>(0.1 to 0.1)                          | 0.2<br>(0.2 to 0.3)                           | < 0.05<br>(< 0.05 to 0.1)                 | -42.8<br>(-48.9 to -35.6)                         | -46.5<br>(-52.6 to -39.7)                           |
| Extensively drug-resistant tuberculosis                                              | < 0.05<br>(< 0.05 to < 0.05)                 | < 0.05<br>(< 0.05 to < 0.05)                  | < 0.05<br>(< 0.05 to < 0.05)              | 23.1<br>(9.9 to 38.4)                             | 15.0<br>(2.0 to 29.7)                               |
| Latent tuberculosis infection                                                        | 12,022.5<br>(11,235.0 to 12,899.7)           | --                                            | --                                        | --                                                | --                                                  |
| HIV/AIDS                                                                             | 42.2<br>(24.8 to 64.9)                       | 1.6^<br>(0.7 to 2.6)                          | 3.9<br>(2.0 to 6.6)                       | 41.7<br>(22.1 to 56.4)                            | 41.8<br>(19.9 to 57.1)                              |
| Drug-susceptible HIV/AIDS - Tuberculosis                                             | 0.1<br>(0.1 to 0.2)                          | 0.2<br>(0.1 to 0.4)                           | < 0.05<br>(< 0.05 to 0.1)                 | -45.3<br>(-48.6 to -42.1)                         | -45.3<br>(-48.6 to -42.1)                           |
| Multidrug-resistant HIV/AIDS - Tuberculosis without extensive drug resistance        | < 0.05<br>(< 0.05 to < 0.05)                 | < 0.05<br>(< 0.05 to < 0.05)                  | < 0.05<br>(< 0.05 to < 0.05)              | -51.9<br>(-57.6 to -45.1)                         | -51.9<br>(-57.7 to -45.1)                           |
| Extensively drug-resistant HIV/AIDS - Tuberculosis                                   | < 0.05<br>(< 0.05 to < 0.05)                 | < 0.05<br>(< 0.05 to < 0.05)                  | < 0.05<br>(< 0.05 to < 0.05)              | 3.6<br>(-8.9 to 18.0)                             | 3.5<br>(-9.0 to 18.1)                               |
| HIV/AIDS resulting in other diseases                                                 | 42.1<br>(24.7 to 64.7)                       | 1.6<br>(0.7 to 2.6)                           | 3.8<br>(1.9 to 6.6)                       | 44.2<br>(24.0 to 59.5)                            | 44.3<br>(22.0 to 60.1)                              |
| <b>Diarrhoea, lower respiratory infections, and other common infectious diseases</b> | <b>6,201.1</b><br>(5,862.7 to 6,453.4)       | <b>389,841.4†</b><br>(351,547.8 to 431,620.7) | <b>188.5</b><br>(122.9 to 276.3)          | <b>-1.4</b><br>(-3.6 to 7.4)                      | <b>0.4</b><br>(-0.6 to 2.6)                         |
| Diarrhoeal diseases                                                                  | 116.7<br>(110.2 to 123.3)                    | 7,775.4<br>(7,345.0 to 8,221.0)               | 13.1<br>(9.2 to 17.9)                     | 10.2<br>(6.8 to 13.6)                             | 11.1<br>(7.1 to 15.4)                               |
| Intestinal infectious diseases                                                       | < 0.05<br>(< 0.05 to < 0.05)                 | 0.6†<br>(0.5 to 0.7)                          | < 0.05<br>(< 0.05 to < 0.05)              | 4.3<br>(-7.0 to 17.0)                             | -10.7<br>(-20.3 to 0.2)                             |
| Typhoid fever                                                                        | < 0.05<br>(< 0.05 to < 0.05)                 | 0.3<br>(0.2 to 0.4)                           | < 0.05<br>(< 0.05 to < 0.05)              | 13.8<br>(-0.8 to 30.4)                            | 4.6<br>(-8.0 to 19.2)                               |
| Paratyphoid fever                                                                    | < 0.05<br>(< 0.05 to < 0.05)                 | 0.3<br>(0.2 to 0.4)                           | < 0.05<br>(< 0.05 to < 0.05)              | -4.3<br>(-18.8 to 13.9)                           | -18.2<br>(-29.6 to -5.5)                            |
| Other intestinal infectious diseases                                                 | --                                           | --                                            | < 0.05<br>(< 0.05 to < 0.05)              | -44.1<br>(-57.4 to -25.4)                         | -53.6<br>(-66.7 to -33.8)                           |
| Lower respiratory infections                                                         | 137.0<br>(128.2 to 146.2)                    | 6,223.1<br>(5,782.4 to 6,696.4)               | 8.0<br>(5.4 to 11.2)                      | 3.0<br>(-1.0 to 6.9)                              | -6.3<br>(-10.3 to -2.2)                             |
| Upper respiratory infections                                                         | 4,893.1<br>(4,410.5 to 5,417.8)              | 371,427.0<br>(333,250.2 to 413,004.7)         | 120.7<br>(72.4 to 188.8)                  | -3.8<br>(-5.9 to -1.7)                            | -0.1<br>(-1.2 to 1.0)                               |
| Otitis media                                                                         | 833.1<br>(752.1 to 919.4)                    | 2,351.7<br>(1,985.1 to 2,786.6)               | 24.9<br>(15.7 to 36.6)                    | -5.7<br>(-9.0 to -2.2)                            | -1.6<br>(-4.6 to 1.6)                               |
| Meningitis                                                                           | 17.7<br>(8.8 to 118.8)                       | 1.5<br>(1.3 to 1.7)                           | 2.6<br>(0.9 to 17.1)                      | 83.0<br>(-9.6 to 1,082.3)                         | 16.0<br>(-12.4 to 321.4)                            |
| Pneumococcal meningitis                                                              | 4.2<br>(3.5 to 5.1)                          | 0.4<br>(0.3 to 0.5)                           | 0.5<br>(0.3 to 0.7)                       | -10.7<br>(-14.8 to -6.9)                          | -13.5<br>(-17.3 to -10.0)                           |
| H influenzae type B meningitis                                                       | 2.8<br>(2.2 to 3.5)                          | 0.5<br>(0.4 to 0.7)                           | 0.3<br>(0.2 to 0.5)                       | -16.6<br>(-19.8 to -13.2)                         | -18.1<br>(-21.7 to -14.9)                           |
| Meningococcal infection                                                              | 8.6<br>(0.7 to 108.8)                        | 0.1<br>(0.1 to 0.1)                           | 1.5<br>(0.1 to 15.8)                      | 745.6<br>(4.4 to 5,268.1)                         | 256.6<br>(3.9 to 2,314.3)                           |
| Other meningitis                                                                     | 2.1<br>(1.7 to 2.5)                          | 0.5<br>(0.4 to 0.6)                           | 0.3<br>(0.2 to 0.4)                       | 3.1<br>(-0.4 to 6.8)                              | -0.6<br>(-4.0 to 2.6)                               |
| Encephalitis                                                                         | 108.3<br>(74.2 to 155.5)                     | 57.5<br>(51.9 to 63.2)                        | 11.5<br>(8.1 to 15.2)                     | 3.6<br>(-0.4 to 7.4)                              | 1.3<br>(-2.2 to 4.7)                                |
| Diphtheria                                                                           | < 0.05<br>(< 0.05 to < 0.05)                 | < 0.05<br>(< 0.05 to < 0.05)                  | < 0.05<br>(< 0.05 to < 0.05)              | -33.0<br>(-41.9 to -23.4)                         | -28.0<br>(-36.3 to -19.1)                           |
| Whooping cough                                                                       | 1.2<br>(0.9 to 1.7)                          | 8.8<br>(6.4 to 12.1)                          | 0.1<br>(< 0.05 to 0.1)                    | -57.4<br>(-65.7 to -48.0)                         | -52.2<br>(-61.7 to -41.7)                           |
| Tetanus                                                                              | < 0.05<br>(< 0.05 to < 0.05)                 | < 0.05<br>(< 0.05 to < 0.05)                  | < 0.05<br>(< 0.05 to < 0.05)              | -26.7<br>(-40.3 to -14.6)                         | -30.8<br>(-40.9 to -22.0)                           |
| Measles                                                                              | < 0.05<br>(< 0.05 to < 0.05)                 | < 0.05<br>(< 0.05 to < 0.05)                  | < 0.05<br>(< 0.05 to < 0.05)              | -99.3<br>(-99.5 to -99.0)                         | -99.2<br>(-99.5 to -98.9)                           |
| Varicella and herpes zoster                                                          | 163.7<br>(145.6 to 183.9)                    | 1,995.6<br>(1,892.1 to 2,110.4)               | 7.7<br>(4.6 to 11.8)                      | 11.4<br>(4.3 to 18.9)                             | 2.6<br>(-3.5 to 9.4)                                |
| <b>Neglected tropical diseases and malaria</b>                                       | <b>181.2</b><br>(161.7 to 205.0)             | <b>14.3†</b><br>(12.0 to 17.1)                | <b>2.9</b><br>(1.3 to 5.4)                | <b>17.8</b><br>(3.8 to 29.0)                      | <b>3.2</b><br>(-3.7 to 10.8)                        |
| Malaria                                                                              | --                                           | --                                            | --                                        | --                                                | --                                                  |
| Chagas disease                                                                       | 9.1<br>(7.5 to 10.7)                         | --                                            | 0.1<br>(0.1 to 0.1)                       | 11.4<br>(7.7 to 15.6)                             | 11.2<br>(7.0 to 15.5)                               |
| Leishmaniasis                                                                        | --                                           | --                                            | --                                        | --                                                | --                                                  |
| Visceral leishmaniasis                                                               | --                                           | --                                            | --                                        | --                                                | --                                                  |
| Cutaneous and mucocutaneous leishmaniasis                                            | --                                           | --                                            | --                                        | --                                                | --                                                  |
| African trypanosomiasis                                                              | --                                           | --                                            | --                                        | --                                                | --                                                  |
| Schistosomiasis                                                                      | --                                           | --                                            | --                                        | --                                                | --                                                  |
| Cysticercosis                                                                        | --                                           | --                                            | --                                        | --                                                | --                                                  |
| Cystic echinococcosis                                                                | --                                           | --                                            | --                                        | --                                                | --                                                  |
| Lymphatic filariasis                                                                 | --                                           | --                                            | --                                        | --                                                | --                                                  |
| Onchocerciasis                                                                       | --                                           | --                                            | --                                        | --                                                | --                                                  |
| Trachoma                                                                             | --                                           | --                                            | --                                        | --                                                | --                                                  |
| Dengue                                                                               | --                                           | --                                            | --                                        | --                                                | --                                                  |
| Yellow fever                                                                         | --                                           | --                                            | --                                        | --                                                | --                                                  |
| Rabies                                                                               | < 0.05<br>(< 0.05 to < 0.05)                 | < 0.05<br>(< 0.05 to < 0.05)                  | < 0.05<br>(< 0.05 to < 0.05)              | -0.3<br>(-8.1 to 7.6)                             | -40.0<br>(-45.1 to -34.3)                           |
| Intestinal nematode infections                                                       | --                                           | --                                            | --                                        | --                                                | --                                                  |
| Ascariasis                                                                           | --                                           | --                                            | --                                        | --                                                | --                                                  |



| Cause                                                                   | Prevalence in thousands (95% UI)                    | Incidence in thousands (95% UI)                      | YLDs in thousands (95% UI)                       |                                                   |                                                     |
|-------------------------------------------------------------------------|-----------------------------------------------------|------------------------------------------------------|--------------------------------------------------|---------------------------------------------------|-----------------------------------------------------|
|                                                                         | 2016 counts                                         | 2016 counts                                          | 2016 counts                                      | Percentage change in counts between 2006 and 2016 | Percentage change in age-standardised rates between |
| Trichuriasis                                                            | --                                                  | --                                                   | --                                               | --                                                | --                                                  |
| Hookworm disease                                                        | --                                                  | --                                                   | --                                               | --                                                | --                                                  |
| Food-borne trematodiasis                                                | 160.5<br>(131.7 to 194.9)                           | 14.3<br>(12.0 to 17.1)                               | 2.8<br>(1.2 to 5.3)                              | 18.1<br>(3.3 to 29.6)                             | 2.9<br>(-4.4 to 10.7)                               |
| Leprosy                                                                 | < 0.05<br>(< 0.05 to < 0.05)                        | < 0.05<br>(< 0.05 to < 0.05)                         | < 0.05<br>(< 0.05 to < 0.05)                     | -9.2<br>(-14.3 to -3.2)                           | -23.8<br>(-29.0 to -17.7)                           |
| Ebola virus disease                                                     | --                                                  | --                                                   | --                                               | --                                                | --                                                  |
| Zika virus disease                                                      | --                                                  | --                                                   | --                                               | --                                                | --                                                  |
| Guinea worm disease                                                     | --                                                  | --                                                   | --                                               | --                                                | --                                                  |
| Other neglected tropical diseases                                       | --                                                  | --                                                   | < 0.05<br>(< 0.05 to < 0.05)                     | --                                                | --                                                  |
| <b>Maternal disorders</b>                                               | <b>45.8</b><br><b>(42.5 to 49.1)</b>                | <b>919.4†</b><br><b>(731.1 to 1,179.0)</b>           | <b>2.5</b><br><b>(1.5 to 3.6)</b>                | <b>-14.8</b><br><b>(-35.3 to 10.9)</b>            | <b>2.3</b><br><b>(-22.2 to 33.2)</b>                |
| Maternal haemorrhage                                                    | 6.9<br>(5.3 to 8.8)                                 | 23.7<br>(18.5 to 30.7)                               | 0.2<br>(0.1 to 0.3)                              | -1.8<br>(-22.1 to 24.6)                           | 14.7<br>(-8.8 to 43.4)                              |
| Maternal sepsis and other pregnancy related infections                  | 17.0<br>(14.3 to 20.3)                              | 52.4<br>(39.5 to 70.5)                               | 0.3<br>(0.1 to 0.5)                              | -11.8<br>(-50.9 to 55.9)                          | 0.9<br>(-45.4 to 80.5)                              |
| Maternal hypertensive disorders                                         | 17.9<br>(11.2 to 26.1)                              | 73.6<br>(56.7 to 96.6)                               | 0.8<br>(0.4 to 1.4)                              | -14.9<br>(-47.3 to 39.2)                          | 4.5<br>(-35.1 to 71.7)                              |
| Maternal obstructed labour and uterine rupture                          | 0.3<br>(0.2 to 0.5)                                 | 22.7<br>(15.6 to 31.2)                               | 0.1<br>(< 0.05 to 0.2)                           | -11.9<br>(-53.4 to 66.7)                          | 5.4<br>(-45.1 to 100.8)                             |
| Maternal abortion, miscarriage, and ectopic pregnancy                   | 6.1<br>(3.8 to 9.1)                                 | 747.1<br>(557.8 to 1,006.8)                          | 0.7<br>(0.4 to 1.1)                              | -17.3<br>(-49.0 to 33.0)                          | -0.7<br>(-39.1 to 57.3)                             |
| Other maternal disorders                                                | --                                                  | --                                                   | 0.4<br>(0.2 to 0.5)                              | -18.7<br>(-38.3 to 5.8)                           | -2.5<br>(-25.7 to 26.8)                             |
| <b>Neonatal disorders</b>                                               | <b>660.8</b><br><b>(597.5 to 725.8)</b>             | --                                                   | <b>110.1</b><br><b>(78.3 to 150.1)</b>           | <b>-4.4</b><br><b>(-14.9 to 8.1)</b>              | <b>1.0</b><br><b>(-10.3 to 14.4)</b>                |
| Neonatal preterm birth complications                                    | 589.9<br>(501.7 to 692.0)                           | --                                                   | 62.5<br>(41.4 to 91.4)                           | -2.4<br>(-21.2 to 19.6)                           | 3.4<br>(-16.6 to 27.6)                              |
| Neonatal encephalopathy due to birth asphyxia and trauma                | 124.3<br>(90.1 to 171.5)                            | --                                                   | 24.2<br>(14.6 to 38.5)                           | -1.4<br>(-9.5 to 8.6)                             | 4.8<br>(-3.7 to 15.0)                               |
| Neonatal sepsis and other neonatal infections                           | 47.2<br>(22.4 to 96.3)                              | --                                                   | 19.4<br>(8.3 to 45.2)                            | -13.2<br>(-18.5 to -8.0)                          | -9.7<br>(-15.4 to -4.3)                             |
| Hemolytic disease and other neonatal jaundice                           | 8.7<br>(7.5 to 9.9)                                 | --                                                   | 2.6<br>(1.9 to 3.3)                              | -4.0<br>(-8.4 to 0.1)                             | 0.2<br>(-4.3 to 4.2)                                |
| Other neonatal disorders                                                | --                                                  | --                                                   | 1.5<br>(1.0 to 2.1)                              | -10.5<br>(-22.7 to 4.0)                           | -1.1<br>(-14.4 to 15.0)                             |
| <b>Nutritional deficiencies</b>                                         | <b>9,498.5</b><br><b>(9,082.1 to 9,731.5)</b>       | <b>656.1†</b><br><b>(536.0 to 789.4)</b>             | <b>147.6</b><br><b>(97.3 to 221.1)</b>           | <b>-5.9</b><br><b>(-7.8 to -3.8)</b>              | <b>-1.8</b><br><b>(-3.8 to 0.3)</b>                 |
| Protein-energy malnutrition                                             | 83.0<br>(78.2 to 88.4)                              | 63.2<br>(59.7 to 66.9)                               | 4.7<br>(3.0 to 6.6)                              | -6.6<br>(-13.9 to 1.6)                            | 3.3<br>(-4.7 to 12.3)                               |
| Iodine deficiency                                                       | 701.3<br>(623.3 to 791.1)                           | 9.1<br>(8.2 to 10.1)                                 | 17.6<br>(11.8 to 24.8)                           | 1.3<br>(-2.1 to 5.0)                              | -0.8<br>(-4.5 to 3.3)                               |
| Vitamin A deficiency                                                    | 698.5<br>(566.8 to 845.8)                           | 583.9<br>(462.8 to 717.3)                            | --                                               | --                                                | --                                                  |
| Iron-deficiency anaemia                                                 | 8,021.3<br>(7,584.0 to 8,493.7)                     | --                                                   | 125.2<br>(81.3 to 192.8)                         | -6.8<br>(-8.9 to -4.3)                            | -2.2<br>(-4.5 to 0.1)                               |
| Other nutritional deficiencies                                          | --                                                  | --                                                   | 0.2<br>(0.1 to 0.2)                              | -6.6<br>(-14.1 to 1.7)                            | 3.0<br>(-5.2 to 12.1)                               |
| <b>Other communicable, maternal, neonatal, and nutritional diseases</b> | <b>19,896.3</b><br><b>(19,242.8 to 20,450.5)</b>    | <b>4,229.6</b><br><b>(3,864.7 to 4,616.3)</b>        | <b>17.6</b><br><b>(9.9 to 30.2)</b>              | <b>-5.0</b><br><b>(-8.0 to -2.4)</b>              | <b>1.2</b><br><b>(-1.7 to 3.6)</b>                  |
| Sexually transmitted diseases excluding HIV                             | 13,660.5<br>(13,011.0 to 14,342.2)                  | 3,729.2<br>(3,368.9 to 4,117.6)                      | 11.7<br>(6.2 to 21.6)                            | 1.1<br>(-2.3 to 4.4)                              | 6.0<br>(2.7 to 9.3)                                 |
| Syphilis                                                                | 19.0<br>(16.2 to 22.3)                              | 14.1<br>(10.3 to 18.2)                               | 0.9<br>(0.6 to 1.2)                              | 16.7<br>(11.4 to 22.0)                            | 2.3<br>(-1.8 to 6.7)                                |
| Chlamydial infection                                                    | 808.4<br>(656.1 to 975.9)                           | 595.0<br>(483.1 to 726.3)                            | 2.6<br>(1.4 to 4.8)                              | -5.2<br>(-12.4 to 3.1)                            | 1.4<br>(-5.0 to 8.8)                                |
| Gonococcal infection                                                    | 225.1<br>(178.8 to 282.6)                           | 755.4<br>(580.6 to 970.8)                            | 1.2<br>(0.6 to 2.1)                              | 17.1<br>(6.1 to 27.0)                             | 36.1<br>(22.9 to 48.0)                              |
| Trichomoniasis                                                          | 2,462.1<br>(2,155.8 to 2,820.6)                     | 2,032.8<br>(1,779.0 to 2,327.5)                      | 2.6<br>(1.0 to 5.4)                              | -6.7<br>(-10.8 to -2.4)                           | -1.1<br>(-5.1 to 3.1)                               |
| Genital herpes                                                          | 10,489.7<br>(9,047.8 to 12,359.1)                   | 305.6<br>(261.6 to 363.8)                            | 2.6<br>(0.8 to 5.8)                              | 7.6<br>(2.0 to 12.8)                              | 4.1<br>(-1.6 to 9.4)                                |
| Other sexually transmitted diseases                                     | 49.8<br>(45.7 to 53.2)                              | 26.4<br>(22.1 to 31.6)                               | 1.9<br>(1.1 to 3.3)                              | -1.5<br>(-6.7 to 3.3)                             | 7.8<br>(2.7 to 12.7)                                |
| Hepatitis                                                               | 7,081.9<br>(6,095.4 to 8,238.8)                     | 500.2<br>(422.2 to 581.8)                            | 0.8<br>(0.5 to 1.2)                              | -48.9<br>(-55.0 to -41.9)                         | -52.0<br>(-57.5 to -46.5)                           |
| Acute hepatitis A                                                       | 10.2<br>(8.3 to 11.8)                               | 132.4<br>(108.4 to 153.0)                            | 0.3<br>(0.2 to 0.4)                              | -49.1<br>(-58.2 to -38.4)                         | -51.9<br>(-59.5 to -42.4)                           |
| Hepatitis B                                                             | 4,778.7<br>(3,854.9 to 5,950.7)                     | 319.1<br>(246.9 to 396.7)                            | 0.5<br>(0.3 to 0.8)                              | -49.7<br>(-58.3 to -39.0)                         | -53.7<br>(-61.4 to -44.9)                           |
| Hepatitis C                                                             | 2,291.2<br>(2,040.0 to 2,561.1)                     | 25.0<br>(22.1 to 28.3)                               | < 0.05<br>(< 0.05 to < 0.05)                     | -42.8<br>(-45.0 to -40.3)                         | -27.4<br>(-30.7 to -24.2)                           |
| Acute hepatitis E                                                       | 1.8<br>(1.5 to 2.2)                                 | 23.7<br>(18.9 to 28.8)                               | 0.1<br>(< 0.05 to 0.1)                           | -42.8<br>(-47.8 to -37.0)                         | -53.8<br>(-56.8 to -50.5)                           |
| Other infectious diseases                                               | 168.3<br>(154.4 to 185.6)                           | 0.2<br>(0.1 to 0.3)                                  | 5.2<br>(3.2 to 8.2)                              | -4.9<br>(-7.1 to -2.5)                            | 2.0<br>(-1.0 to 5.0)                                |
| <b>Non-communicable diseases</b>                                        | <b>116,003.1</b><br><b>(115,839.3 to 116,179.0)</b> | <b>331,878.9†</b><br><b>(319,250.3 to 346,165.4)</b> | <b>15,120.0</b><br><b>(11,298.7 to 19,414.1)</b> | <b>8.4</b><br><b>(7.6 to 9.2)</b>                 | <b>1.5</b><br><b>(0.9 to 2.1)</b>                   |
| <b>Neoplasms</b>                                                        | <b>2,578.6</b><br><b>(2,553.0 to 2,604.3)</b>       | <b>880.0</b><br><b>(847.6 to 917.2)</b>              | <b>271.8</b><br><b>(203.0 to 350.5)</b>          | <b>21.0</b><br><b>(17.4 to 26.0)</b>              | <b>-0.2</b><br><b>(-3.4 to 4.4)</b>                 |
| Lip and oral cavity cancer                                              | 43.3<br>(40.8 to 45.8)                              | 11.1<br>(10.4 to 11.7)                               | 4.1<br>(3.0 to 5.4)                              | 23.6<br>(15.4 to 31.2)                            | 0.7<br>(-6.7 to 7.2)                                |
| Nasopharynx cancer                                                      | 3.0<br>(2.8 to 3.4)                                 | 0.9<br>(0.9 to 1.0)                                  | 0.4<br>(0.3 to 0.5)                              | 2.0<br>(-5.7 to 13.3)                             | -14.9<br>(-22.1 to -4.7)                            |
| Other pharynx cancer                                                    | 15.5<br>(13.7 to 16.1)                              | 4.5<br>(4.0 to 4.7)                                  | 1.6<br>(1.2 to 2.2)                              | 22.0<br>(9.5 to 28.6)                             | 7.8<br>(-3.2 to 13.5)                               |
| Oesophageal cancer                                                      | 41.5<br>(37.4 to 45.3)                              | 21.4<br>(19.2 to 23.4)                               | 5.9<br>(4.2 to 7.9)                              | 14.0<br>(0.1 to 28.2)                             | -4.2<br>(-16.6 to 8.0)                              |
| Stomach cancer                                                          | 279.4<br>(271.8 to 287.2)                           | 119.0<br>(115.7 to 122.4)                            | 31.3<br>(23.3 to 39.9)                           | 9.3<br>(4.9 to 13.9)                              | -14.2<br>(-17.7 to -10.6)                           |
| Colon and rectum cancer                                                 | 586.0<br>(558.1 to 645.5)                           | 146.4<br>(139.8 to 160.8)                            | 51.9<br>(38.4 to 67.9)                           | 18.0<br>(12.2 to 29.3)                            | -4.5<br>(-9.4 to 5.3)                               |
| Liver cancer                                                            | 94.8<br>(91.7 to 97.9)                              | 57.0<br>(51.4 to 59.8)                               | 13.3<br>(9.5 to 17.5)                            | 31.3<br>(16.4 to 41.1)                            | 5.4<br>(-7.2 to 13.1)                               |
| Liver cancer due to hepatitis B                                         | 11.8<br>(8.1 to 16.6)                               | 6.4<br>(4.5 to 9.1)                                  | 1.6<br>(1.0 to 2.4)                              | 24.6<br>(8.4 to 36.8)                             | 5.5<br>(-8.7 to 13.3)                               |



| Cause                                              | Prevalence in thousands (95% UI)                 | Incidence in thousands (95% UI)                | YLDs in thousands (95% UI)                  |                                                   |                                                     |
|----------------------------------------------------|--------------------------------------------------|------------------------------------------------|---------------------------------------------|---------------------------------------------------|-----------------------------------------------------|
|                                                    | 2016 counts                                      | 2016 counts                                    | 2016 counts                                 | Percentage change in counts between 2006 and 2016 | Percentage change in age-standardised rates between |
| Liver cancer due to hepatitis C                    | 70.9<br>(63.5 to 76.3)                           | 38.0<br>(34.2 to 40.8)                         | 8.6<br>(6.3 to 11.3)                        | 32.7<br>(18.0 to 43.7)                            | 5.0<br>(-7.4 to 13.8)                               |
| Liver cancer due to alcohol use                    | 9.3<br>(8.0 to 10.4)                             | 5.0<br>(4.3 to 5.5)                            | 1.2<br>(0.9 to 1.7)                         | 30.9<br>(14.9 to 40.6)                            | 7.5<br>(-6.1 to 15.5)                               |
| Liver cancer due to other causes                   | 14.3<br>(12.5 to 15.8)                           | 7.6<br>(6.7 to 8.3)                            | 1.9<br>(1.3 to 2.5)                         | 31.6<br>(15.3 to 41.8)                            | 5.5<br>(-8.1 to 13.9)                               |
| Gallbladder and biliary tract cancer               | 29.2<br>(27.3 to 31.4)                           | 27.2<br>(25.5 to 29.2)                         | 5.7<br>(4.0 to 7.5)                         | 20.5<br>(14.0 to 29.6)                            | -10.2<br>(-15.3 to -3.1)                            |
| Pancreatic cancer                                  | 46.0<br>(41.4 to 48.9)                           | 40.1<br>(36.6 to 42.2)                         | 8.1<br>(5.8 to 10.7)                        | 39.6<br>(25.8 to 49.8)                            | 8.1<br>(-3.1 to 15.7)                               |
| Larynx cancer                                      | 19.2<br>(18.2 to 20.0)                           | 4.8<br>(4.6 to 5.0)                            | 2.1<br>(1.5 to 2.7)                         | 7.9<br>(1.8 to 14.0)                              | -9.9<br>(-15.0 to -5.1)                             |
| Tracheal, bronchus, and lung cancer                | 194.9<br>(188.3 to 202.1)                        | 110.8<br>(107.4 to 114.6)                      | 26.4<br>(19.7 to 33.3)                      | 25.0<br>(19.6 to 30.4)                            | -3.0<br>(-7.2 to 1.7)                               |
| Malignant skin melanoma                            | 16.5<br>(12.9 to 18.7)                           | 3.4<br>(2.7 to 3.9)                            | 1.1<br>(0.7 to 1.6)                         | 22.0<br>(10.4 to 31.1)                            | 7.4<br>(-3.0 to 16.0)                               |
| Non-melanoma skin cancer                           | 7.7<br>(5.5 to 11.5)                             | 15.0<br>(10.2 to 22.2)                         | 0.3<br>(0.2 to 0.6)                         | 11.2<br>(-40.2 to 55.1)                           | -29.3<br>(-60.5 to 0.3)                             |
| Non-melanoma skin cancer (squamous-cell carcinoma) | 6.6<br>(3.9 to 11.1)                             | 6.9<br>(4.5 to 10.6)                           | 0.3<br>(0.1 to 0.6)                         | 10.6<br>(-41.4 to 55.6)                           | -30.5<br>(-61.3 to 0.2)                             |
| Non-melanoma skin cancer (basal-cell carcinoma)    | 0.9<br>(0.5 to 1.7)                              | 8.2<br>(4.4 to 14.0)                           | < 0.05<br>(< 0.05 to < 0.05)                | 29.5<br>(16.0 to 41.6)                            | 5.8<br>(2.6 to 9.4)                                 |
| Breast cancer                                      | 330.2<br>(319.3 to 351.7)                        | 63.3<br>(60.7 to 68.7)                         | 30.0<br>(21.4 to 40.2)                      | 13.3<br>(8.9 to 20.2)                             | 1.5<br>(-2.8 to 8.5)                                |
| Cervical cancer                                    | 41.9<br>(39.2 to 46.4)                           | 9.9<br>(9.3 to 10.9)                           | 3.7<br>(2.7 to 4.9)                         | -3.8<br>(-10.0 to 6.7)                            | -7.5<br>(-13.9 to 1.9)                              |
| Uterine cancer                                     | 67.7<br>(62.7 to 76.7)                           | 14.2<br>(13.2 to 16.1)                         | 5.1<br>(3.6 to 7.1)                         | 19.6<br>(9.5 to 35.6)                             | 13.4<br>(3.8 to 28.8)                               |
| Ovarian cancer                                     | 34.5<br>(30.9 to 36.8)                           | 10.0<br>(9.0 to 10.7)                          | 4.5<br>(3.3 to 6.0)                         | 6.9<br>(-6.1 to 17.8)                             | -2.5<br>(-14.6 to 7.6)                              |
| Prostate cancer                                    | 296.5<br>(250.4 to 331.9)                        | 73.8<br>(63.2 to 80.4)                         | 25.9<br>(18.0 to 34.7)                      | 41.1<br>(27.6 to 53.5)                            | 11.0<br>(-0.5 to 22.1)                              |
| Testicular cancer                                  | 11.2<br>(10.1 to 13.2)                           | 2.1<br>(1.9 to 2.5)                            | 0.7<br>(0.5 to 1.1)                         | -8.7<br>(-20.4 to 10.6)                           | 1.8<br>(-11.2 to 21.9)                              |
| Kidney cancer                                      | 46.2<br>(41.0 to 49.0)                           | 12.9<br>(11.7 to 13.6)                         | 4.2<br>(3.0 to 5.6)                         | 17.1<br>(5.1 to 24.6)                             | -1.4<br>(-12.0 to 5.1)                              |
| Bladder cancer                                     | 99.5<br>(92.3 to 105.7)                          | 23.7<br>(22.1 to 25.0)                         | 8.8<br>(6.4 to 11.8)                        | 27.1<br>(18.4 to 34.7)                            | -0.9<br>(-8.3 to 5.3)                               |
| Brain and nervous system cancer                    | 25.1<br>(18.8 to 27.5)                           | 9.0<br>(6.8 to 9.8)                            | 3.0<br>(1.9 to 4.0)                         | 19.4<br>(3.3 to 29.2)                             | 9.7<br>(-3.6 to 18.9)                               |
| Thyroid cancer                                     | 62.5<br>(58.7 to 70.2)                           | 12.0<br>(11.3 to 13.5)                         | 4.0<br>(2.8 to 5.6)                         | 12.2<br>(4.9 to 24.7)                             | 1.9<br>(-4.8 to 13.5)                               |
| Mesothelioma                                       | 2.6<br>(2.3 to 2.9)                              | 1.7<br>(1.5 to 1.8)                            | 0.6<br>(0.4 to 0.7)                         | 32.6<br>(16.2 to 42.7)                            | 8.5<br>(-5.6 to 17.1)                               |
| Hodgkin lymphoma                                   | 5.5<br>(5.2 to 6.0)                              | 1.2<br>(1.1 to 1.3)                            | 0.5<br>(0.4 to 0.7)                         | 6.9<br>(0.2 to 16.1)                              | 6.3<br>(0.1 to 15.5)                                |
| Non-Hodgkin's lymphoma                             | 109.1<br>(96.8 to 115.8)                         | 27.6<br>(24.3 to 29.3)                         | 8.7<br>(6.2 to 11.6)                        | 39.1<br>(26.3 to 48.0)                            | 15.5<br>(4.6 to 22.5)                               |
| Multiple myeloma                                   | 20.6<br>(16.8 to 24.8)                           | 7.3<br>(6.0 to 8.8)                            | 3.6<br>(2.4 to 4.9)                         | 28.7<br>(15.6 to 42.0)                            | 4.6<br>(-6.2 to 17.1)                               |
| Leukaemia                                          | 48.4<br>(44.7 to 53.1)                           | 16.5<br>(15.1 to 18.0)                         | 6.6<br>(4.7 to 8.8)                         | 26.4<br>(17.1 to 37.6)                            | 9.7<br>(-0.6 to 20.4)                               |
| Acute lymphoid leukaemia                           | 11.3<br>(10.0 to 12.3)                           | 2.9<br>(2.6 to 3.1)                            | 1.4<br>(0.9 to 1.9)                         | 25.0<br>(12.2 to 36.6)                            | 21.9<br>(5.7 to 38.2)                               |
| Chronic lymphoid leukaemia                         | 5.6<br>(5.0 to 7.3)                              | 1.3<br>(1.1 to 1.6)                            | 0.7<br>(0.5 to 1.0)                         | 28.4<br>(16.4 to 42.1)                            | 8.1<br>(-3.0 to 20.2)                               |
| Acute myeloid leukaemia                            | 10.4<br>(8.7 to 11.4)                            | 7.2<br>(6.0 to 7.9)                            | 2.0<br>(1.4 to 2.7)                         | 33.2<br>(19.7 to 43.0)                            | 10.2<br>(-1.4 to 18.4)                              |
| Chronic myeloid leukaemia                          | 3.1<br>(2.8 to 3.5)                              | 1.1<br>(0.9 to 1.2)                            | 0.4<br>(0.3 to 0.5)                         | 2.3<br>(-7.4 to 15.7)                             | -12.5<br>(-21.8 to -0.7)                            |
| Other leukaemia                                    | 17.9<br>(16.1 to 20.5)                           | 4.0<br>(3.6 to 4.6)                            | 2.1<br>(1.5 to 2.9)                         | 26.0<br>(14.0 to 43.9)                            | 0.2<br>(-10.4 to 15.1)                              |
| Other neoplasms                                    | 126.6<br>(114.8 to 134.5)                        | 33.1<br>(30.2 to 35.1)                         | 9.6<br>(6.9 to 12.8)                        | 34.1<br>(21.6 to 42.6)                            | 13.1<br>(1.5 to 20.8)                               |
| <b>Cardiovascular diseases</b>                     | <b>15,878.6</b><br><b>(15,592.5 to 16,175.3)</b> | <b>1,492.9†</b><br><b>(1,412.9 to 1,585.2)</b> | <b>1,157.2</b><br><b>(851.1 to 1,492.2)</b> | <b>15.4</b><br><b>(12.7 to 18.2)</b>              | <b>-7.0</b><br><b>(-8.8 to -5.0)</b>                |
| Rheumatic heart disease                            | 21.4<br>(19.1 to 23.6)                           | 7.9<br>(7.5 to 8.4)                            | 1.7<br>(1.2 to 2.4)                         | 9.3<br>(3.6 to 15.4)                              | -4.1<br>(-8.0 to 0.2)                               |
| Ischaemic heart disease                            | 4,529.2<br>(4,283.6 to 4,785.3)                  | 498.2<br>(449.5 to 557.1)                      | 210.9<br>(149.3 to 284.2)                   | 11.6<br>(9.8 to 13.4)                             | -8.9<br>(-9.9 to -8.0)                              |
| Cerebrovascular disease                            | 2,528.4<br>(2,447.2 to 2,608.8)                  | 353.6‡<br>(326.5 to 381.1)                     | 483.5<br>(343.4 to 616.3)                   | 15.3<br>(9.4 to 21.2)                             | -7.0<br>(-11.3 to -2.8)                             |
| Ischaemic stroke                                   | 2,039.1<br>(1,814.9 to 2,260.5)                  | 245.0‡<br>(218.6 to 271.4)                     | 377.2<br>(263.9 to 483.5)                   | 15.9<br>(8.8 to 23.5)                             | -7.1<br>(-12.3 to -1.5)                             |
| Hemorrhagic stroke                                 | 587.1<br>(528.3 to 656.2)                        | 108.5‡<br>(98.1 to 119.1)                      | 106.3<br>(76.4 to 136.7)                    | 13.2<br>(3.6 to 22.7)                             | -6.9<br>(-13.7 to -0.2)                             |
| Hypertensive heart disease                         | 804.0<br>(677.1 to 954.7)                        | --                                             | 63.6<br>(43.8 to 89.8)                      | 21.0<br>(17.6 to 24.8)                            | -8.7<br>(-10.5 to -6.9)                             |
| Cardiomyopathy and myocarditis                     | 399.9<br>(369.0 to 427.1)                        | 58.3†<br>(50.9 to 67.1)                        | 32.7<br>(22.4 to 46.5)                      | 6.0<br>(2.6 to 9.6)                               | -8.5<br>(-10.6 to -6.3)                             |
| Myocarditis                                        | 77.2<br>(68.1 to 87.1)                           | 58.3<br>(50.9 to 67.1)                         | 6.0<br>(4.0 to 8.3)                         | -5.4<br>(-9.8 to -0.8)                            | -8.5<br>(-12.1 to -4.6)                             |
| Alcoholic cardiomyopathy                           | 23.5<br>(19.7 to 27.9)                           | --                                             | 2.0<br>(1.3 to 2.9)                         | -2.0<br>(-7.8 to 4.2)                             | -7.0<br>(-12.4 to -1.5)                             |
| Other cardiomyopathy                               | 307.3<br>(258.9 to 363.5)                        | --                                             | 24.8<br>(16.9 to 35.0)                      | 10.0<br>(5.9 to 14.0)                             | -8.6<br>(-11.3 to -6.0)                             |
| Atrial fibrillation and flutter                    | 1,849.5<br>(1,599.1 to 2,133.8)                  | 137.5<br>(116.3 to 160.7)                      | 143.8<br>(97.1 to 201.6)                    | 34.5<br>(31.9 to 37.4)                            | 4.6<br>(3.0 to 6.2)                                 |
| Peripheral vascular disease                        | 4,836.8<br>(4,249.9 to 5,512.0)                  | 404.4<br>(347.8 to 474.7)                      | 17.9<br>(8.3 to 32.8)                       | 15.4<br>(12.0 to 18.7)                            | -10.6<br>(-12.1 to -9.2)                            |
| Endocarditis                                       | 46.3<br>(38.9 to 55.6)                           | 33.0<br>(29.8 to 36.4)                         | 3.6<br>(2.5 to 5.2)                         | 17.5<br>(12.3 to 23.2)                            | -9.9<br>(-13.4 to -6.4)                             |
| Other cardiovascular and circulatory diseases      | 3,865.1<br>(3,302.0 to 4,535.8)                  | --                                             | 199.4<br>(135.2 to 281.5)                   | 8.4<br>(5.2 to 11.7)                              | -9.8<br>(-11.3 to -8.3)                             |
| <b>Chronic respiratory diseases</b>                | <b>11,708.2</b><br><b>(11,470.0 to 11,921.7)</b> | <b>1,384.4†</b><br><b>(1,314.6 to 1,457.7)</b> | <b>611.0</b><br><b>(483.1 to 753.9)</b>     | <b>1.6</b><br><b>(-1.4 to 5.2)</b>                | <b>-4.9</b><br><b>(-7.3 to -2.5)</b>                |
| Chronic obstructive pulmonary disease              | 4,428.6<br>(4,242.8 to 4,612.9)                  | 263.8<br>(251.4 to 276.9)                      | 294.2<br>(256.5 to 326.9)                   | 3.3<br>(-2.7 to 10.9)                             | -10.4<br>(-15.6 to -4.0)                            |
| Pneumoconiosis                                     | 4.2<br>(3.8 to 4.6)                              | 1.2<br>(1.1 to 1.3)                            | 0.7<br>(0.5 to 1.0)                         | 2.3<br>(-0.7 to 5.1)                              | -15.1<br>(-17.4 to -13.0)                           |
| Silicosis                                          | 1.9<br>(1.7 to 2.3)                              | 0.8<br>(0.7 to 0.8)                            | 0.3<br>(0.2 to 0.5)                         | -2.0<br>(-7.0 to 3.0)                             | -17.4<br>(-21.4 to -13.7)                           |

| Cause                                                          | Prevalence in thousands (95% UI)           | Incidence in thousands (95% UI)                     | YLDs in thousands (95% UI)              |                                                   |                                                     |
|----------------------------------------------------------------|--------------------------------------------|-----------------------------------------------------|-----------------------------------------|---------------------------------------------------|-----------------------------------------------------|
|                                                                | 2016 counts                                | 2016 counts                                         | 2016 counts                             | Percentage change in counts between 2006 and 2016 | Percentage change in age-standardised rates between |
| Asbestosis                                                     | 0.8<br>(0.7 to 1.0)                        | 0.1<br>(0.1 to 0.1)                                 | 0.1<br>(0.1 to 0.2)                     | 13.4<br>(9.4 to 17.7)                             | -7.3<br>(-10.1 to -4.7)                             |
| Coal workers pneumoconiosis                                    | 0.4<br>(0.3 to 0.4)                        | < 0.05<br>(< 0.05 to 0.1)                           | 0.1<br>(< 0.05 to 0.1)                  | 8.8<br>(5.7 to 11.7)                              | -5.1<br>(-7.4 to -3.2)                              |
| Other pneumoconiosis                                           | 1.1<br>(0.9 to 1.3)                        | 0.3<br>(0.2 to 0.3)                                 | 0.2<br>(0.1 to 0.3)                     | 0.6<br>(-5.4 to 6.5)                              | -20.0<br>(-24.6 to -15.5)                           |
| Asthma                                                         | 7,635.3<br>(7,220.8 to 8,098.8)            | 1,098.0<br>(1,032.1 to 1,169.3)                     | 293.4<br>(196.6 to 416.1)               | -1.3<br>(-2.8 to 0.1)                             | -2.4<br>(-3.6 to -1.2)                              |
| Interstitial lung disease and pulmonary sarcoidosis            | 151.6<br>(136.6 to 167.6)                  | 21.5<br>(19.9 to 23.3)                              | 16.2<br>(10.9 to 23.0)                  | 21.4<br>(16.7 to 26.2)                            | -0.2<br>(-3.4 to 2.7)                               |
| Other chronic respiratory diseases                             | --                                         | --                                                  | 6.5<br>(5.5 to 7.4)                     | 22.4<br>(15.8 to 29.7)                            | 27.0<br>(19.5 to 35.3)                              |
| <b>Cirrhosis and other chronic liver diseases</b>              | <b>1,408.5<br/>(1,337.6 to 1,474.5)</b>    | <b>30.5<br/>(29.3 to 31.6)</b>                      | <b>29.8<br/>(20.9 to 41.0)</b>          | <b>10.9<br/>(7.8 to 14.0)</b>                     | <b>3.4<br/>(0.4 to 6.5)</b>                         |
| Cirrhosis and other chronic liver diseases due to hepatitis B  | 294.6<br>(273.8 to 315.6)                  | 6.6<br>(6.1 to 7.0)                                 | 6.2<br>(4.3 to 8.6)                     | 14.2<br>(8.9 to 20.1)                             | 4.2<br>(-0.9 to 9.9)                                |
| Cirrhosis and other chronic liver diseases due to hepatitis C  | 683.8<br>(641.6 to 724.0)                  | 14.1<br>(13.4 to 14.8)                              | 13.9<br>(9.7 to 19.1)                   | 10.3<br>(6.4 to 14.6)                             | 3.1<br>(-0.8 to 7.1)                                |
| Cirrhosis and other chronic liver diseases due to alcohol use  | 257.5<br>(239.7 to 276.4)                  | 5.8<br>(5.4 to 6.2)                                 | 5.3<br>(3.7 to 7.2)                     | 13.3<br>(6.7 to 20.0)                             | 2.8<br>(-3.6 to 9.4)                                |
| Cirrhosis and other chronic liver diseases due to other causes | 172.6<br>(154.0 to 194.7)                  | 4.0<br>(3.5 to 4.6)                                 | 4.4<br>(3.0 to 6.2)                     | 5.5<br>(-0.5 to 11.8)                             | 3.8<br>(-3.3 to 11.3)                               |
| <b>Digestive diseases</b>                                      | <b>9,669.5<br/>(9,061.8 to 10,264.9)</b>   | <b>3,918.8<sup>†</sup><br/>(3,661.5 to 4,172.5)</b> | <b>105.8<br/>(75.8 to 142.7)</b>        | <b>14.1<br/>(11.3 to 17.0)</b>                    | <b>3.7<br/>(1.8 to 5.8)</b>                         |
| Peptic ulcer disease                                           | 837.7<br>(770.1 to 916.5)                  | 169.1<br>(152.3 to 187.3)                           | 9.3<br>(6.1 to 14.1)                    | 19.4<br>(14.1 to 25.0)                            | 6.1<br>(2.0 to 10.0)                                |
| Gastritis and duodenitis                                       | 7,797.8<br>(6,769.8 to 8,972.7)            | 1,226.8<br>(1,070.8 to 1,398.9)                     | 34.7<br>(21.7 to 52.7)                  | 18.5<br>(13.5 to 23.5)                            | 2.8<br>(-0.4 to 6.0)                                |
| Appendicitis                                                   | 7.0<br>(6.5 to 7.5)                        | 182.9<br>(171.4 to 195.4)                           | 2.2<br>(1.5 to 3.0)                     | -1.6<br>(-6.8 to 3.8)                             | 1.5<br>(-6.0 to 8.9)                                |
| Paralytic ileus and intestinal obstruction                     | 3.9<br>(3.5 to 4.3)                        | 109.7<br>(99.3 to 120.5)                            | 1.2<br>(0.8 to 1.7)                     | 22.0<br>(17.6 to 26.7)                            | 6.5<br>(4.4 to 8.6)                                 |
| Inguinal, femoral, and abdominal hernia                        | 710.7<br>(630.0 to 799.9)                  | 1,098.0<br>(937.7 to 1,243.7)                       | 33.2<br>(22.8 to 45.7)                  | 12.6<br>(8.0 to 17.4)                             | 5.6<br>(1.9 to 9.3)                                 |
| Inflammatory bowel disease                                     | 62.8<br>(57.6 to 68.5)                     | 29.9<br>(27.7 to 32.1)                              | 9.1<br>(6.1 to 12.3)                    | -2.2<br>(-6.7 to 2.9)                             | -2.9<br>(-7.6 to 2.5)                               |
| Vascular intestinal disorders                                  | 5.0<br>(4.3 to 5.6)                        | 27.6<br>(24.2 to 31.5)                              | 1.5<br>(1.0 to 2.1)                     | 25.4<br>(17.8 to 33.9)                            | 7.1<br>(2.5 to 11.5)                                |
| Gallbladder and biliary diseases                               | 277.0<br>(245.9 to 309.3)                  | 1,040.3<br>(910.0 to 1,178.8)                       | 5.0<br>(3.4 to 7.0)                     | 8.9<br>(1.2 to 16.8)                              | 1.1<br>(-5.6 to 8.0)                                |
| Pancreatitis                                                   | 3.8<br>(3.4 to 4.3)                        | 34.6<br>(30.6 to 38.6)                              | 0.5<br>(0.3 to 0.7)                     | 8.7<br>(5.4 to 12.0)                              | -3.2<br>(-4.9 to -1.6)                              |
| Other digestive diseases                                       | --                                         | --                                                  | 9.0<br>(6.4 to 12.0)                    | 23.1<br>(20.1 to 26.4)                            | 8.4<br>(6.1 to 10.8)                                |
| <b>Neurological disorders</b>                                  | <b>47,491.7<br/>(46,562.8 to 48,479.8)</b> | <b>21,001.9<br/>(18,141.9 to 24,049.9)</b>          | <b>1,534.5<br/>(1,065.1 to 2,026.9)</b> | <b>10.8<br/>(7.4 to 14.7)</b>                     | <b>-0.2<br/>(-2.1 to 1.9)</b>                       |
| Alzheimer's disease and other dementias                        | 3,530.6<br>(2,999.8 to 4,177.4)            | 714.0<br>(589.9 to 865.2)                           | 543.3<br>(375.5 to 727.8)               | 49.5<br>(45.6 to 53.2)                            | 2.0<br>(0.9 to 3.2)                                 |
| Parkinson's disease                                            | 256.5<br>(201.5 to 321.6)                  | 29.5<br>(22.7 to 37.9)                              | 29.7<br>(18.7 to 42.0)                  | 41.9<br>(36.6 to 47.3)                            | 9.4<br>(6.3 to 12.8)                                |
| Epilepsy                                                       | 247.2<br>(196.5 to 306.9)                  | 28.1<br>(22.2 to 34.6)                              | 56.6<br>(35.3 to 83.8)                  | -1.0<br>(-26.0 to 33.5)                           | -2.9<br>(-28.1 to 31.1)                             |
| Multiple sclerosis                                             | 46.2<br>(41.1 to 52.3)                     | 0.8<br>(0.7 to 0.9)                                 | 12.5<br>(8.6 to 16.7)                   | 13.7<br>(9.4 to 18.2)                             | 9.9<br>(6.0 to 14.1)                                |
| Motor neuron disease                                           | 13.9<br>(12.4 to 15.7)                     | 2.3<br>(2.1 to 2.5)                                 | 3.0<br>(2.1 to 3.9)                     | 13.6<br>(10.5 to 16.6)                            | 4.7<br>(3.1 to 6.3)                                 |
| Migraine                                                       | 17,763.4<br>(17,076.3 to 18,452.9)         | 1,535.3<br>(1,472.2 to 1,600.0)                     | 753.1<br>(484.6 to 1,049.6)             | -5.0<br>(-5.8 to -4.0)                            | -1.0<br>(-1.9 to -0.1)                              |
| Tension-type headache                                          | 33,825.3<br>(30,555.8 to 37,158.3)         | 18,690.9<br>(15,877.7 to 21,758.0)                  | 119.7<br>(76.1 to 175.1)                | -1.9<br>(-3.6 to -0.2)                            | -0.2<br>(-1.3 to 1.0)                               |
| Other neurological disorders                                   | 0.5<br>(0.3 to 0.7)                        | 1.0<br>(0.6 to 1.3)                                 | 16.6<br>(11.4 to 22.4)                  | 13.5<br>(-1.7 to 31.4)                            | 15.4<br>(-5.8 to 41.9)                              |
| <b>Mental and substance use disorders</b>                      | <b>16,610.9<br/>(16,417.2 to 16,769.7)</b> | <b>6,635.1<sup>†</sup><br/>(6,220.5 to 7,099.9)</b> | <b>2,466.6<br/>(1,797.6 to 3,190.4)</b> | <b>0.8<br/>(-0.3 to 2.0)</b>                      | <b>3.2<br/>(2.1 to 4.3)</b>                         |
| Schizophrenia                                                  | 417.3<br>(370.3 to 466.4)                  | 17.4<br>(15.5 to 19.7)                              | 265.4<br>(198.1 to 327.2)               | -1.7<br>(-4.0 to 0.6)                             | 0.2<br>(-1.9 to 2.2)                                |
| Alcohol use disorders                                          | 601.1<br>(523.4 to 684.4)                  | 315.5<br>(271.8 to 358.0)                           | 60.2<br>(40.4 to 83.6)                  | -3.8<br>(-6.9 to -0.7)                            | 4.4<br>(1.8 to 7.0)                                 |
| Drug use disorders                                             | 984.0<br>(959.1 to 1,005.6)                | 108.2<br>(98.8 to 118.2)                            | 203.6<br>(146.5 to 263.1)               | -2.8<br>(-5.0 to -0.7)                            | 5.1<br>(2.9 to 7.2)                                 |
| Opioid use disorders                                           | 304.5<br>(263.9 to 349.5)                  | 29.4<br>(25.7 to 34.3)                              | 125.1<br>(87.9 to 163.9)                | -1.2<br>(-4.2 to 1.9)                             | 6.7<br>(3.7 to 9.5)                                 |
| Cocaine use disorders                                          | 176.4<br>(156.4 to 197.2)                  | 7.8<br>(6.7 to 9.0)                                 | 23.7<br>(14.9 to 34.2)                  | -3.5<br>(-7.2 to 0.1)                             | 2.2<br>(-1.7 to 6.3)                                |
| Amphetamine use disorders                                      | 92.5<br>(67.2 to 124.3)                    | 9.2<br>(7.1 to 11.6)                                | 12.3<br>(7.0 to 19.0)                   | -8.6<br>(-13.2 to -3.0)                           | 4.7<br>(-0.9 to 11.0)                               |
| Cannabis use disorders                                         | 352.2<br>(299.4 to 410.3)                  | 48.0<br>(40.6 to 57.2)                              | 10.3<br>(6.5 to 15.1)                   | -10.3<br>(-15.4 to -5.6)                          | 1.5<br>(-4.1 to 7.4)                                |
| Other drug use disorders                                       | 82.5<br>(73.3 to 91.7)                     | 13.8<br>(12.4 to 15.1)                              | 32.3<br>(21.7 to 45.0)                  | -3.7<br>(-7.9 to 1.0)                             | 3.4<br>(-1.4 to 8.8)                                |
| Depressive disorders                                           | 4,767.0<br>(4,640.4 to 4,864.0)            | 5,189.4<br>(4,790.5 to 5,658.9)                     | 808.8<br>(562.1 to 1,101.6)             | 7.3<br>(5.4 to 9.4)                               | 8.2<br>(6.5 to 9.8)                                 |
| Major depressive disorder                                      | 3,251.2<br>(2,997.8 to 3,534.2)            | 4,920.8<br>(4,527.7 to 5,391.7)                     | 657.3<br>(451.6 to 889.4)               | 7.4<br>(5.4 to 9.5)                               | 8.8<br>(7.1 to 10.3)                                |
| Dysthymia                                                      | 1,593.3<br>(1,399.6 to 1,802.0)            | 268.5<br>(236.0 to 305.4)                           | 151.5<br>(102.2 to 217.8)               | 6.8<br>(0.9 to 13.6)                              | 5.7<br>(0.3 to 11.7)                                |
| Bipolar disorder                                               | 874.4<br>(769.3 to 990.3)                  | 60.6<br>(53.8 to 68.5)                              | 176.4<br>(110.4 to 259.1)               | -3.8<br>(-5.7 to -1.7)                            | -1.5<br>(-3.4 to 0.2)                               |
| Anxiety disorders                                              | 4,367.0<br>(4,104.4 to 4,647.4)            | 624.6<br>(585.7 to 667.3)                           | 415.9<br>(291.5 to 558.8)               | 1.3<br>(-3.1 to 6.2)                              | 2.6<br>(-1.8 to 7.6)                                |
| Eating disorders                                               | 252.3<br>(228.3 to 276.9)                  | 85.6<br>(64.7 to 111.8)                             | 52.3<br>(33.9 to 75.4)                  | -10.9<br>(-13.5 to -8.2)                          | 3.1<br>(0.5 to 5.7)                                 |
| Anorexia nervosa                                               | 75.2<br>(56.6 to 97.3)                     | 16.6<br>(12.5 to 21.7)                              | 16.0<br>(9.9 to 23.7)                   | -12.6<br>(-16.3 to -8.6)                          | 2.5<br>(-1.9 to 7.4)                                |
| Bulimia nervosa                                                | 172.6<br>(132.0 to 224.1)                  | 69.0<br>(49.0 to 95.2)                              | 36.3<br>(22.0 to 54.5)                  | -10.1<br>(-13.4 to -6.7)                          | 3.5<br>(0.5 to 6.5)                                 |
| Autistic spectrum disorders                                    | 1,090.7<br>(1,047.3 to 1,132.8)            | 3.5<br>(2.4 to 4.9)                                 | 176.6<br>(119.7 to 249.1)               | -2.5<br>(-3.6 to -1.3)                            | -0.0<br>(-1.2 to 1.2)                               |
| Autism                                                         | 460.0<br>(393.5 to 540.2)                  | 0.4<br>(0.2 to 0.7)                                 | 114.6<br>(73.4 to 167.3)                | -2.2<br>(-3.9 to -0.5)                            | -0.2<br>(-1.9 to 1.5)                               |
| Asperger syndrome and other autistic spectrum disorders        | 627.5<br>(525.6 to 751.8)                  | 3.1<br>(2.0 to 4.5)                                 | 62.0<br>(40.2 to 90.0)                  | -3.0<br>(-4.1 to -1.7)                            | 0.3<br>(-1.1 to 1.6)                                |



| Cause                                                      | Prevalence in thousands (95% UI)                 | Incidence in thousands (95% UI)                      | YLDs in thousands (95% UI)                    |                                                   |                                                     |
|------------------------------------------------------------|--------------------------------------------------|------------------------------------------------------|-----------------------------------------------|---------------------------------------------------|-----------------------------------------------------|
|                                                            | 2016 counts                                      | 2016 counts                                          | 2016 counts                                   | Percentage change in counts between 2006 and 2016 | Percentage change in age-standardised rates between |
| Attention-deficit/hyperactivity disorder                   | 448.7<br>(409.3 to 491.1)                        | 17.9<br>(15.7 to 20.3)                               | 5.4<br>(3.3 to 8.5)                           | -9.9<br>(-12.2 to -7.6)                           | -0.0<br>(-2.6 to 2.7)                               |
| Conduct disorder                                           | 469.5<br>(393.9 to 545.0)                        | 155.7<br>(126.2 to 185.6)                            | 57.2<br>(35.5 to 86.7)                        | -8.4<br>(-10.1 to -6.6)                           | -0.1<br>(-1.9 to 1.9)                               |
| Idiopathic developmental intellectual disability           | 510.6<br>(208.5 to 808.5)                        | --                                                   | 26.1<br>(11.6 to 44.9)                        | -17.6<br>(-23.3 to -14.3)                         | -13.5<br>(-19.1 to -10.4)                           |
| Other mental and substance use disorders                   | 2,983.3<br>(2,637.8 to 3,411.6)                  | 56.8<br>(50.3 to 63.5)                               | 218.7<br>(148.8 to 314.0)                     | 0.8<br>(-0.3 to 2.0)                              | 0.1<br>(-1.0 to 1.2)                                |
| <b>Diabetes, urogenital, blood, and endocrine diseases</b> | <b>41,237.7</b><br><b>(40,946.7 to 41,535.1)</b> | <b>12,397.7†</b><br><b>(11,783.7 to 13,074.9)</b>    | <b>1,506.6</b><br><b>(1,090.8 to 2,016.5)</b> | <b>-0.4</b><br><b>(-3.1 to 2.6)</b>               | <b>-10.6</b><br><b>(-12.7 to -8.4)</b>              |
| Diabetes mellitus                                          | 8,311.1<br>(7,407.0 to 9,232.6)                  | 301.1<br>(262.5 to 345.4)                            | 778.5<br>(532.3 to 1,105.0)                   | -9.6<br>(-13.9 to -4.9)                           | -19.0<br>(-22.4 to -15.6)                           |
| Acute glomerulonephritis                                   | 1.8<br>(1.6 to 2.0)                              | 26.9<br>(23.4 to 30.8)                               | 0.1<br>(0.1 to 0.1)                           | 5.9<br>(2.2 to 9.3)                               | -1.6<br>(-3.4 to -0.1)                              |
| Chronic kidney disease                                     | 9,050.3<br>(8,130.9 to 9,942.9)                  | 739.9<br>(638.5 to 843.6)                            | 318.3<br>(244.6 to 393.0)                     | 18.4<br>(15.5 to 21.3)                            | -0.5<br>(-2.4 to 1.4)                               |
| Chronic kidney disease due to diabetes mellitus            | 5,065.2<br>(4,366.7 to 5,766.3)                  | 419.7<br>(349.2 to 487.6)                            | 181.3<br>(135.8 to 227.2)                     | 17.3<br>(12.8 to 22.2)                            | 0.1<br>(-3.5 to 4.0)                                |
| Chronic kidney disease due to hypertension                 | 886.3<br>(713.2 to 1,065.2)                      | 39.0<br>(29.9 to 50.8)                               | 37.8<br>(26.6 to 49.6)                        | 36.4<br>(24.0 to 50.5)                            | 1.2<br>(-6.6 to 11.5)                               |
| Chronic kidney disease due to glomerulonephritis           | 826.6<br>(667.6 to 993.2)                        | 99.7<br>(76.4 to 127.5)                              | 19.3<br>(13.4 to 26.0)                        | 33.1<br>(20.2 to 48.7)                            | 14.9<br>(5.0 to 26.1)                               |
| Chronic kidney disease due to other causes                 | 2,272.2<br>(1,810.1 to 2,752.5)                  | 181.6<br>(142.3 to 224.8)                            | 79.9<br>(57.2 to 103.8)                       | 10.7<br>(1.9 to 19.4)                             | -5.5<br>(-12.5 to 1.3)                              |
| Urinary diseases and male infertility                      | 4,760.0<br>(4,340.4 to 5,253.4)                  | 7,343.0†<br>(6,790.1 to 7,981.3)                     | 150.2<br>(96.5 to 215.8)                      | 13.2<br>(10.0 to 16.3)                            | 1.2<br>(-0.7 to 2.8)                                |
| Interstitial nephritis and urinary tract infections        | 94.7<br>(84.7 to 105.0)                          | 4,934.6<br>(4,423.2 to 5,486.3)                      | 3.1<br>(1.9 to 4.7)                           | -1.4<br>(-5.9 to 3.1)                             | 0.8<br>(-3.2 to 4.9)                                |
| Urolithiasis                                               | 73.2<br>(64.7 to 82.9)                           | 1,919.7<br>(1,692.2 to 2,176.1)                      | 5.3<br>(3.6 to 7.4)                           | 7.4<br>(1.9 to 13.3)                              | 2.4<br>(-2.1 to 6.5)                                |
| Benign prostatic hyperplasia                               | 4,236.6<br>(3,607.5 to 4,872.9)                  | 488.7<br>(402.0 to 582.6)                            | 137.9<br>(86.8 to 200.5)                      | 14.8<br>(11.5 to 18.2)                            | 2.0<br>(-0.1 to 3.9)                                |
| Male infertility                                           | 201.8<br>(141.1 to 284.8)                        | --                                                   | 1.1<br>(0.4 to 2.4)                           | -9.5<br>(-15.9 to -2.0)                           | -8.5<br>(-14.0 to -3.0)                             |
| Other urinary diseases                                     | --                                               | --                                                   | 2.8<br>(1.8 to 3.8)                           | -15.8<br>(-19.0 to -12.4)                         | -15.2<br>(-17.9 to -12.3)                           |
| Gynecological diseases                                     | 14,234.7<br>(13,948.9 to 14,610.2)               | 3,444.3†<br>(3,262.0 to 3,646.1)                     | 135.1<br>(90.8 to 198.5)                      | -4.4<br>(-6.1 to -2.6)                            | -1.1<br>(-2.1 to -0.0)                              |
| Uterine fibroids                                           | 2,384.3<br>(2,082.5 to 2,711.7)                  | 194.0<br>(163.7 to 230.3)                            | 25.8<br>(14.0 to 45.5)                        | -2.5<br>(-4.7 to -0.5)                            | -3.1<br>(-5.1 to -1.3)                              |
| Polycystic ovarian syndrome                                | 376.4<br>(286.3 to 480.6)                        | 73.2<br>(51.2 to 97.7)                               | 3.3<br>(1.5 to 6.4)                           | -9.0<br>(-11.8 to -5.7)                           | -0.6<br>(-2.5 to 1.3)                               |
| Female infertility                                         | 390.6<br>(220.3 to 619.9)                        | --                                                   | 2.1<br>(0.7 to 4.7)                           | 11.2<br>(-1.5 to 25.1)                            | 6.4<br>(-3.5 to 18.3)                               |
| Endometriosis                                              | 43.4<br>(36.1 to 50.8)                           | 125.9<br>(102.0 to 156.2)                            | 4.1<br>(2.7 to 5.9)                           | -12.2<br>(-18.0 to -5.9)                          | -0.2<br>(-6.8 to 6.9)                               |
| Genital prolapse                                           | 5,806.7<br>(5,025.8 to 6,638.7)                  | 180.7<br>(154.4 to 210.8)                            | 18.0<br>(8.7 to 32.8)                         | 8.9<br>(7.0 to 11.1)                              | -0.7<br>(-2.4 to 1.2)                               |
| Premenstrual syndrome                                      | 5,689.0<br>(5,449.3 to 5,922.8)                  | 1,954.0<br>(1,861.4 to 2,047.7)                      | 47.4<br>(29.7 to 72.5)                        | -6.5<br>(-8.3 to -4.6)                            | -0.8<br>(-2.6 to 1.0)                               |
| Other gynecological diseases                               | 1,084.9<br>(940.9 to 1,243.9)                    | 916.6<br>(759.9 to 1,088.8)                          | 34.5<br>(22.7 to 49.4)                        | -8.0<br>(-11.2 to -4.9)                           | -0.8<br>(-3.1 to 1.4)                               |
| Hemoglobinopathies and hemolytic anaemias                  | 11,839.7<br>(11,768.6 to 11,905.0)               | --                                                   | 39.3<br>(25.7 to 59.6)                        | 10.2<br>(7.4 to 13.3)                             | 1.9<br>(-1.5 to 5.4)                                |
| Thalassemias                                               | 5.7<br>(5.5 to 5.9)                              | --                                                   | 0.3<br>(0.2 to 0.5)                           | -2.8<br>(-5.9 to 0.7)                             | 9.6<br>(5.3 to 14.5)                                |
| Thalassaemias trait                                        | 4,472.9<br>(4,339.5 to 4,622.5)                  | --                                                   | 31.2<br>(20.2 to 47.6)                        | 11.4<br>(8.2 to 14.9)                             | 2.3<br>(-1.4 to 6.4)                                |
| Sickle cell disorders                                      | 0.6<br>(0.5 to 0.6)                              | --                                                   | 0.1<br>(0.1 to 0.1)                           | 17.2<br>(14.6 to 19.9)                            | 25.7<br>(22.7 to 28.3)                              |
| Sickle cell trait                                          | 1,148.1<br>(1,126.6 to 1,171.2)                  | --                                                   | 1.3<br>(0.8 to 2.2)                           | 14.7<br>(8.8 to 20.9)                             | 11.5<br>(3.4 to 19.8)                               |
| G6PD deficiency                                            | 318.2<br>(306.4 to 333.3)                        | --                                                   | < 0.05<br>(< 0.05 to 0.1)                     | 0.1<br>(-3.7 to 3.4)                              | -4.4<br>(-9.3 to 0.4)                               |
| G6PD trait                                                 | 5,947.2<br>(5,834.1 to 6,079.9)                  | --                                                   | < 0.05<br>(< 0.05 to < 0.05)                  | 9.4<br>(6.5 to 12.7)                              | 3.7<br>(1.0 to 6.5)                                 |
| Other hemoglobinopathies and hemolytic anaemias            | 340.6<br>(322.2 to 360.3)                        | --                                                   | 6.3<br>(4.2 to 9.2)                           | 4.7<br>(1.5 to 8.4)                               | -4.2<br>(-7.6 to -0.7)                              |
| Endocrine, metabolic, blood, and immune disorders          | 2,577.1<br>(2,344.6 to 2,847.8)                  | 542.5<br>(485.7 to 605.8)                            | 85.2<br>(57.6 to 117.0)                       | 15.3<br>(11.7 to 19.2)                            | -0.4<br>(-2.5 to 1.9)                               |
| <b>Musculoskeletal disorders</b>                           | <b>37,155.1</b><br><b>(36,501.9 to 37,808.1)</b> | <b>20,529.6</b><br><b>(18,683.1 to 22,636.6)</b>     | <b>4,012.7</b><br><b>(2,922.7 to 5,205.9)</b> | <b>13.4</b><br><b>(11.5 to 15.6)</b>              | <b>9.8</b><br><b>(8.4 to 11.1)</b>                  |
| Rheumatoid arthritis                                       | 604.1<br>(545.2 to 669.8)                        | 24.5<br>(22.0 to 27.3)                               | 140.6<br>(96.7 to 184.6)                      | 15.0<br>(11.5 to 18.3)                            | 6.4<br>(3.4 to 9.2)                                 |
| Osteoarthritis                                             | 10,263.6<br>(9,660.7 to 10,873.8)                | 365.8<br>(340.3 to 392.8)                            | 358.3<br>(234.9 to 514.5)                     | 11.8<br>(10.9 to 12.8)                            | -2.4<br>(-3.1 to -1.7)                              |
| Low back and neck pain                                     | 23,925.4<br>(22,681.8 to 24,978.1)               | 11,067.0<br>(9,738.0 to 12,438.5)                    | 2,843.5<br>(1,992.5 to 3,746.6)               | 15.9<br>(13.3 to 18.7)                            | 12.8<br>(11.1 to 14.4)                              |
| Low back pain                                              | 20,182.3<br>(18,064.4 to 22,476.5)               | 9,828.0<br>(8,508.6 to 11,213.3)                     | 2,277.6<br>(1,588.5 to 3,019.7)               | 18.8<br>(15.4 to 22.2)                            | 16.1<br>(14.1 to 18.0)                              |
| Neck pain                                                  | 5,736.8<br>(4,969.7 to 6,639.1)                  | 1,239.1<br>(1,085.6 to 1,444.6)                      | 565.9<br>(386.9 to 804.2)                     | 5.7<br>(3.1 to 8.4)                               | -0.2<br>(-0.8 to 0.4)                               |
| Gout                                                       | 1,422.9<br>(1,259.9 to 1,599.6)                  | 251.1<br>(217.5 to 286.5)                            | 44.3<br>(30.2 to 61.3)                        | 12.2<br>(8.6 to 15.8)                             | 1.4<br>(-1.5 to 3.9)                                |
| Other musculoskeletal disorders                            | 7,350.0<br>(6,114.1 to 8,747.9)                  | 8,821.1<br>(7,537.0 to 10,428.6)                     | 626.0<br>(423.0 to 884.3)                     | 3.7<br>(-0.8 to 8.8)                              | 3.5<br>(0.5 to 6.5)                                 |
| <b>Other non-communicable diseases</b>                     | <b>94,384.6</b><br><b>(94,029.5 to 94,765.0)</b> | <b>263,608.0†</b><br><b>(251,227.1 to 277,229.2)</b> | <b>3,424.1</b><br><b>(2,371.8 to 4,794.0)</b> | <b>9.8</b><br><b>(8.7 to 11.1)</b>                | <b>-0.1</b><br><b>(-0.7 to 0.6)</b>                 |
| Congenital anomalies                                       | 1,064.5<br>(1,024.9 to 1,101.8)                  | --                                                   | 113.3<br>(80.9 to 150.2)                      | -0.0<br>(-1.8 to 1.8)                             | 2.8<br>(0.9 to 4.7)                                 |
| Neural tube defects                                        | 63.2<br>(57.0 to 70.2)                           | --                                                   | 18.7<br>(13.2 to 24.9)                        | 8.0<br>(2.0 to 14.5)                              | 9.3<br>(2.8 to 16.1)                                |
| Congenital heart anomalies                                 | 457.6<br>(411.0 to 511.0)                        | --                                                   | 24.8<br>(10.3 to 42.8)                        | 0.2<br>(-2.3 to 2.5)                              | 2.6<br>(0.1 to 5.1)                                 |
| Orofacial clefts                                           | 111.1<br>(97.6 to 125.8)                         | --                                                   | 1.1<br>(0.7 to 1.6)                           | -2.0<br>(-11.1 to 8.7)                            | -1.5<br>(-10.7 to 9.1)                              |
| Down's syndrome                                            | 35.1<br>(29.9 to 41.0)                           | --                                                   | 3.1<br>(2.1 to 4.4)                           | -17.1<br>(-19.1 to -15.2)                         | -7.7<br>(-10.0 to -5.5)                             |
| Turner syndrome                                            | 41.5<br>(36.1 to 47.4)                           | --                                                   | 0.7<br>(0.3 to 1.2)                           | -9.8<br>(-16.8 to -2.8)                           | -2.9<br>(-11.5 to 6.6)                              |
| Klinefelter syndrome                                       | 60.2<br>(52.1 to 69.3)                           | --                                                   | 0.4<br>(0.2 to 0.7)                           | -8.9<br>(-13.2 to -4.2)                           | 2.8<br>(-2.3 to 8.3)                                |

| Cause                                         | Prevalence in thousands (95% UI)                 | Incidence in thousands (95% UI)                   | YLDs in thousands (95% UI)                  |                                                   |                                                     |
|-----------------------------------------------|--------------------------------------------------|---------------------------------------------------|---------------------------------------------|---------------------------------------------------|-----------------------------------------------------|
|                                               | 2016 counts                                      | 2016 counts                                       | 2016 counts                                 | Percentage change in counts between 2006 and 2016 | Percentage change in age-standardised rates between |
| Other chromosomal abnormalities               | 62.2<br>(53.5 to 72.3)                           | --                                                | 6.7<br>(4.6 to 9.2)                         | -6.4<br>(-12.2 to -0.6)                           | 3.4<br>(-3.0 to 10.0)                               |
| Congenital musculoskeletal and limb anomalies | 106.9<br>(97.5 to 116.3)                         | --                                                | 15.7<br>(10.7 to 21.7)                      | -1.7<br>(-5.5 to 2.3)                             | -2.1<br>(-5.8 to 1.8)                               |
| Urogenital congenital anomalies               | 61.8<br>(57.0 to 66.6)                           | --                                                | 1.9<br>(1.2 to 3.0)                         | -4.7<br>(-8.8 to -0.5)                            | 3.6<br>(-1.5 to 9.0)                                |
| Digestive congenital anomalies                | 126.5<br>(113.2 to 141.1)                        | --                                                | 5.3<br>(3.5 to 7.6)                         | -8.2<br>(-13.1 to -2.5)                           | -6.8<br>(-11.9 to -0.9)                             |
| Other congenital anomalies                    | 230.7<br>(142.6 to 348.2)                        | --                                                | 34.8<br>(23.7 to 49.3)                      | 1.8<br>(-1.6 to 5.2)                              | 4.9<br>(1.1 to 8.8)                                 |
| Skin and subcutaneous diseases                | 46,697.0<br>(46,262.7 to 47,192.0)               | 111,434.0<br>(103,810.2 to 120,033.8)             | 1,044.8<br>(706.7 to 1,516.5)               | -1.0<br>(-2.1 to 0.2)                             | 0.8<br>(-0.1 to 1.7)                                |
| Dermatitis                                    | 7,635.1<br>(7,301.5 to 7,996.6)                  | 9,763.9<br>(8,978.2 to 10,617.7)                  | 269.5<br>(163.4 to 426.8)                   | -1.2<br>(-3.1 to 1.0)                             | 0.6<br>(-2.3 to 3.3)                                |
| Psoriasis                                     | 1,614.7<br>(1,560.2 to 1,671.2)                  | 156.8<br>(151.4 to 161.8)                         | 138.1<br>(99.9 to 179.9)                    | 3.5<br>(1.9 to 5.2)                               | 2.1<br>(0.2 to 4.0)                                 |
| Cellulitis                                    | 89.2<br>(84.1 to 94.6)                           | 2,134.9<br>(2,013.0 to 2,265.4)                   | 4.9<br>(3.2 to 6.9)                         | 6.1<br>(1.3 to 11.3)                              | 0.5<br>(-4.5 to 5.9)                                |
| Pyoderma                                      | 328.1<br>(318.7 to 338.7)                        | 8,003.3<br>(7,749.9 to 8,262.6)                   | 1.8<br>(0.7 to 3.8)                         | 6.6<br>(4.7 to 8.6)                               | 0.6<br>(-1.4 to 2.7)                                |
| Scabies                                       | 259.1<br>(232.1 to 291.7)                        | 781.2<br>(700.0 to 877.8)                         | 6.6<br>(3.8 to 10.4)                        | -3.8<br>(-6.3 to -1.2)                            | 0.0<br>(-2.1 to 2.1)                                |
| Fungal skin diseases                          | 12,278.8<br>(10,894.6 to 13,905.9)               | 50,127.9<br>(42,824.3 to 58,422.6)                | 67.0<br>(26.7 to 139.1)                     | 14.6<br>(12.1 to 17.0)                            | 0.1<br>(-0.3 to 0.4)                                |
| Viral skin diseases                           | 3,013.7<br>(2,920.5 to 3,105.2)                  | 4,229.7<br>(4,086.3 to 4,373.8)                   | 91.7<br>(56.7 to 136.1)                     | -4.8<br>(-5.7 to -4.0)                            | -0.1<br>(-1.0 to 0.7)                               |
| Acne vulgaris                                 | 10,622.1<br>(9,937.8 to 11,270.9)                | 8,307.7<br>(6,855.9 to 10,275.6)                  | 272.9<br>(183.2 to 396.0)                   | -8.7<br>(-9.9 to -7.6)                            | 0.9<br>(-0.3 to 2.1)                                |
| Alopecia areata                               | 424.2<br>(410.4 to 438.3)                        | 742.7<br>(717.9 to 767.3)                         | 13.8<br>(8.9 to 20.8)                       | -5.2<br>(-6.9 to -3.2)                            | -0.2<br>(-2.2 to 1.8)                               |
| Pruritus                                      | 1,448.4<br>(1,283.1 to 1,647.3)                  | 1,127.7<br>(993.2 to 1,289.0)                     | 15.2<br>(7.1 to 28.2)                       | 4.3<br>(1.9 to 7.3)                               | -0.3<br>(-1.6 to 1.0)                               |
| Urticaria                                     | 892.8<br>(793.9 to 1,001.3)                      | 1,575.1<br>(1,399.2 to 1,774.9)                   | 53.0<br>(34.8 to 75.2)                      | -4.2<br>(-6.3 to -1.9)                            | -0.1<br>(-1.8 to 1.7)                               |
| Decubitus ulcer                               | 76.6<br>(66.5 to 87.1)                           | 283.5<br>(245.1 to 325.2)                         | 11.7<br>(8.2 to 15.8)                       | 30.1<br>(24.1 to 36.0)                            | 1.2<br>(-1.6 to 4.1)                                |
| Other skin and subcutaneous diseases          | 18,259.6<br>(17,768.6 to 18,727.3)               | 24,199.7<br>(23,331.0 to 25,072.8)                | 98.6<br>(47.8 to 178.7)                     | 11.3<br>(10.6 to 12.2)                            | 1.8<br>(1.3 to 2.3)                                 |
| Sense organ diseases                          | 42,453.6<br>(42,085.5 to 42,887.3)               | 15,157.4†<br>(14,357.8 to 16,019.6)               | 1,661.0<br>(1,145.4 to 2,313.5)             | 20.6<br>(18.4 to 23.2)                            | 0.2<br>(-1.0 to 1.6)                                |
| Glaucoma                                      | 247.1<br>(207.2 to 288.6)                        | --                                                | 20.3<br>(13.9 to 27.9)                      | 30.2<br>(25.8 to 34.7)                            | 2.6<br>(-0.3 to 5.6)                                |
| Cataract                                      | 1,533.0<br>(1,278.2 to 1,815.3)                  | --                                                | 88.8<br>(62.1 to 124.1)                     | 31.9<br>(28.8 to 35.6)                            | -2.6<br>(-4.2 to -1.0)                              |
| Macular degeneration                          | 183.1<br>(152.7 to 222.5)                        | --                                                | 13.3<br>(9.2 to 18.2)                       | 35.3<br>(30.4 to 40.7)                            | 2.5<br>(-0.9 to 5.9)                                |
| Refraction and accommodation disorders        | 16,020.2<br>(15,373.4 to 16,681.7)               | --                                                | 309.3<br>(199.1 to 477.6)                   | 9.9<br>(8.4 to 11.5)                              | -1.0<br>(-1.8 to -0.2)                              |
| Age-related and other hearing loss            | 33,798.9<br>(32,564.8 to 35,038.2)               | --                                                | 957.5<br>(660.9 to 1,336.7)                 | 24.7<br>(21.2 to 29.4)                            | 0.8<br>(-1.6 to 3.5)                                |
| Other vision loss                             | 1,105.8<br>(923.7 to 1,301.2)                    | --                                                | 73.4<br>(50.7 to 99.4)                      | 22.1<br>(18.6 to 25.9)                            | 1.6<br>(-0.6 to 3.9)                                |
| Other sense organ diseases                    | 6,355.0<br>(5,866.9 to 6,800.3)                  | 15,157.4<br>(14,357.8 to 16,019.6)                | 198.5<br>(125.2 to 298.0)                   | 12.9<br>(11.8 to 14.2)                            | 0.6<br>(-0.4 to 1.5)                                |
| Oral disorders                                | 57,966.3<br>(56,874.5 to 58,684.7)               | 137,016.7†<br>(127,730.0 to 146,507.0)            | 605.0<br>(383.4 to 884.7)                   | 5.7<br>(4.5 to 7.0)                               | -4.2<br>(-5.2 to -3.1)                              |
| Caries of deciduous teeth                     | 3,919.0<br>(3,182.6 to 4,627.8)                  | 16,833.4<br>(12,236.6 to 22,355.9)                | 1.5<br>(0.7 to 2.9)                         | -7.6<br>(-10.3 to -4.6)                           | 2.8<br>(-0.1 to 6.1)                                |
| Caries of permanent teeth                     | 34,550.7<br>(32,707.7 to 36,487.8)               | 117,479.1<br>(109,287.6 to 125,878.8)             | 33.5<br>(14.8 to 63.4)                      | -2.7<br>(-4.0 to -1.3)                            | -1.1<br>(-1.9 to -0.3)                              |
| Periodontal disease                           | 14,844.5<br>(12,326.3 to 17,539.5)               | 1,730.7<br>(1,365.1 to 2,143.9)                   | 96.3<br>(37.9 to 201.6)                     | 8.0<br>(5.2 to 10.8)                              | 1.8<br>(0.9 to 2.7)                                 |
| Edentulism and severe tooth loss              | 14,509.0<br>(12,710.9 to 16,453.0)               | 973.5<br>(819.6 to 1,158.1)                       | 399.3<br>(259.5 to 562.3)                   | 7.3<br>(5.6 to 9.1)                               | -7.7<br>(-8.5 to -7.0)                              |
| Other oral disorders                          | 2,561.1<br>(2,449.6 to 2,677.4)                  | --                                                | 74.3<br>(45.5 to 111.8)                     | -0.8<br>(-1.9 to 0.2)                             | -0.1<br>(-0.9 to 0.7)                               |
| <b>Injuries</b>                               | <b>45,889.5</b><br><b>(43,202.8 to 49,007.3)</b> | <b>14,580.8†</b><br><b>(13,883.1 to 15,363.1)</b> | <b>1,439.1</b><br><b>(962.4 to 2,046.3)</b> | <b>8.6</b><br><b>(8.0 to 9.4)</b>                 | <b>-0.3</b><br><b>(-1.2 to 0.7)</b>                 |
| <b>Transport injuries</b>                     | <b>6,046.4</b><br><b>(5,641.5 to 6,456.1)</b>    | <b>1,503.0</b><br><b>(1,388.4 to 1,617.2)</b>     | <b>269.8</b><br><b>(176.8 to 392.1)</b>     | <b>0.1</b><br><b>(-0.7 to 1.0)</b>                | <b>-10.3</b><br><b>(-11.1 to -9.5)</b>              |
| Road injuries                                 | 4,744.9<br>(4,434.6 to 5,100.4)                  | 1,328.2<br>(1,217.8 to 1,439.0)                   | 223.0<br>(146.5 to 322.2)                   | -2.2<br>(-3.0 to -1.3)                            | -13.1<br>(-13.9 to -12.2)                           |
| Pedestrian road injuries                      | 830.3<br>(735.5 to 947.0)                        | 166.5<br>(138.3 to 197.1)                         | 42.7<br>(27.9 to 61.9)                      | 11.3<br>(10.4 to 12.3)                            | -1.9<br>(-2.8 to -1.0)                              |
| Cyclist road injuries                         | 1,418.6<br>(1,205.1 to 1,653.1)                  | 528.3<br>(455.6 to 603.8)                         | 62.3<br>(40.8 to 90.8)                      | 3.1<br>(2.1 to 4.2)                               | -9.3<br>(-10.0 to -8.5)                             |
| Motorcyclist road injuries                    | 1,034.6<br>(879.4 to 1,180.1)                    | 165.8<br>(138.4 to 197.1)                         | 49.8<br>(33.0 to 71.3)                      | -10.6<br>(-11.4 to -9.7)                          | -18.6<br>(-19.4 to -17.7)                           |
| Motor vehicle road injuries                   | 1,219.0<br>(1,038.9 to 1,394.5)                  | 391.1<br>(337.1 to 444.2)                         | 59.0<br>(38.9 to 84.9)                      | -9.6<br>(-10.5 to -8.8)                           | -19.1<br>(-19.9 to -18.1)                           |
| Other road injuries                           | 242.3<br>(212.1 to 276.9)                        | 76.6<br>(60.4 to 96.2)                            | 9.3<br>(6.1 to 13.6)                        | 11.5<br>(10.3 to 13.1)                            | -1.4<br>(-2.2 to -0.5)                              |
| Other transport injuries                      | 1,301.4<br>(1,079.0 to 1,512.4)                  | 174.8<br>(153.0 to 199.7)                         | 46.8<br>(30.1 to 67.7)                      | 12.8<br>(12.0 to 13.8)                            | 4.0<br>(3.3 to 4.8)                                 |
| <b>Unintentional injuries</b>                 | <b>37,341.5</b><br><b>(34,713.6 to 40,373.3)</b> | <b>11,950.1</b><br><b>(11,268.0 to 12,702.7)</b>  | <b>1,085.7</b><br><b>(731.4 to 1,549.2)</b> | <b>11.2</b><br><b>(10.4 to 12.1)</b>              | <b>2.0</b><br><b>(1.1 to 2.9)</b>                   |
| Falls                                         | 17,660.6<br>(15,562.0 to 19,961.8)               | 5,997.1<br>(5,372.8 to 6,659.1)                   | 645.0<br>(444.8 to 890.6)                   | 11.2<br>(10.2 to 12.4)                            | 0.9<br>(-0.2 to 1.9)                                |
| Drowning                                      | 309.3<br>(270.6 to 361.7)                        | 84.6<br>(75.5 to 94.7)                            | 13.5<br>(9.0 to 19.6)                       | 2.8<br>(0.9 to 4.5)                               | -17.4<br>(-19.5 to -15.6)                           |
| Fire, heat, and hot substances                | 4,060.1<br>(3,485.9 to 4,802.0)                  | 194.9<br>(164.4 to 222.9)                         | 69.4<br>(39.0 to 116.2)                     | 10.6<br>(9.5 to 12.0)                             | 6.2<br>(4.9 to 7.9)                                 |
| Poisonings                                    | 199.2<br>(167.4 to 240.2)                        | 187.1<br>(152.5 to 226.1)                         | 14.3<br>(9.3 to 20.5)                       | 15.8<br>(13.1 to 18.8)                            | 15.2<br>(12.3 to 18.5)                              |
| Exposure to mechanical forces                 | 6,908.9<br>(5,834.2 to 8,682.7)                  | 1,356.0<br>(1,163.3 to 1,576.0)                   | 125.7<br>(78.9 to 192.7)                    | 12.4<br>(11.7 to 13.3)                            | 6.7<br>(5.9 to 7.5)                                 |
| Unintentional firearm injuries                | 296.5<br>(242.6 to 371.4)                        | 20.8<br>(14.3 to 28.8)                            | 4.4<br>(2.5 to 7.2)                         | 11.1<br>(10.2 to 12.1)                            | 5.7<br>(4.9 to 6.6)                                 |
| Unintentional suffocation                     | 98.6<br>(76.9 to 121.9)                          | 11.0<br>(7.3 to 16.3)                             | 2.3<br>(1.4 to 3.5)                         | 6.2<br>(4.8 to 8.0)                               | -0.2<br>(-1.0 to 0.8)                               |
| Other exposure to mechanical forces           | 6,513.9<br>(5,453.1 to 8,267.0)                  | 1,324.2<br>(1,135.2 to 1,535.5)                   | 119.0<br>(74.9 to 182.2)                    | 12.6<br>(11.8 to 13.5)                            | 6.9<br>(6.1 to 7.7)                                 |



| Cause                                                                               | Prevalence in thousands (95% UI)              | Incidence in thousands (95% UI)                | YLDs in thousands (95% UI)            |                                                   |                                                     |
|-------------------------------------------------------------------------------------|-----------------------------------------------|------------------------------------------------|---------------------------------------|---------------------------------------------------|-----------------------------------------------------|
|                                                                                     | 2016 counts                                   | 2016 counts                                    | 2016 counts                           | Percentage change in counts between 2006 and 2016 | Percentage change in age-standardised rates between |
| Adverse effects of medical treatment                                                | 62.6<br>(49.7 to 77.8)                        | 818.8<br>(717.7 to 922.4)                      | 8.3<br>(5.3 to 12.3)                  | 12.9<br>(9.7 to 16.6)                             | 4.3<br>(3.0 to 5.7)                                 |
| Animal contact                                                                      | 1,167.0<br>(1,028.7 to 1,351.7)               | 520.0<br>(428.1 to 631.3)                      | 21.4<br>(13.5 to 32.2)                | 4.4<br>(2.6 to 5.9)                               | -0.6<br>(-1.9 to 0.8)                               |
| Venomous animal contact                                                             | 166.8<br>(142.6 to 194.5)                     | 157.7<br>(116.8 to 205.9)                      | 8.6<br>(5.5 to 12.6)                  | -0.4<br>(-2.8 to 2.2)                             | -1.3<br>(-3.8 to 1.4)                               |
| Non-venomous animal contact                                                         | 1,000.1<br>(867.1 to 1,181.8)                 | 362.3<br>(293.7 to 442.9)                      | 12.8<br>(7.3 to 20.9)                 | 7.8<br>(7.0 to 8.9)                               | 0.1<br>(-0.6 to 0.9)                                |
| Foreign body                                                                        | 1,589.0<br>(1,363.6 to 1,886.7)               | 1,134.2<br>(1,032.8 to 1,255.9)                | 45.4<br>(29.0 to 67.0)                | 9.5<br>(8.2 to 10.8)                              | -1.1<br>(-1.9 to -0.4)                              |
| Pulmonary aspiration and foreign body in airway                                     | 345.9<br>(287.5 to 407.6)                     | 589.1<br>(533.6 to 656.1)                      | 10.2<br>(6.7 to 15.3)                 | 21.4<br>(19.2 to 24.5)                            | -3.8<br>(-4.7 to -2.8)                              |
| Foreign body in eyes                                                                | 98.2<br>(69.3 to 129.5)                       | 338.7<br>(267.3 to 435.7)                      | 6.8<br>(4.3 to 10.2)                  | 5.9<br>(3.0 to 9.2)                               | 0.5<br>(-0.4 to 1.5)                                |
| Foreign body in other body part                                                     | 1,145.0<br>(948.6 to 1,431.0)                 | 206.5<br>(175.0 to 241.4)                      | 28.4<br>(17.6 to 42.6)                | 6.6<br>(5.7 to 7.7)                               | -0.9<br>(-1.7 to 0.0)                               |
| Environmental heat and cold exposure                                                | 842.4<br>(755.7 to 949.9)                     | 171.5<br>(149.8 to 196.7)                      | 29.8<br>(19.4 to 43.6)                | 16.7<br>(15.2 to 18.2)                            | 3.0<br>(1.7 to 4.2)                                 |
| Other unintentional injuries                                                        | 4,542.4<br>(3,752.5 to 5,397.2)               | 1,486.0<br>(1,256.2 to 1,722.2)                | 112.8<br>(72.6 to 168.5)              | 11.3<br>(10.2 to 12.6)                            | 1.3<br>(0.6 to 2.1)                                 |
| <b>Self-harm and interpersonal violence</b>                                         | <b>3,690.9</b><br><b>(3,369.0 to 4,004.4)</b> | <b>1,123.9†</b><br><b>(1,037.3 to 1,226.1)</b> | <b>74.1</b><br><b>(49.4 to 106.3)</b> | <b>-0.4</b><br><b>(-1.4 to 0.6)</b>               | <b>-1.4</b><br><b>(-2.3 to -0.4)</b>                |
| Self-harm                                                                           | 1,080.8<br>(891.9 to 1,287.7)                 | 904.1<br>(824.9 to 997.2)                      | 36.1<br>(23.1 to 52.5)                | -6.5<br>(-7.9 to -5.1)                            | -9.0<br>(-10.9 to -7.1)                             |
| Self-harm by firearm                                                                | 6.2<br>(5.0 to 7.6)                           | 0.6<br>(0.3 to 1.0)                            | 0.1<br>(0.1 to 0.2)                   | 8.1<br>(6.9 to 9.5)                               | 7.1<br>(5.8 to 8.3)                                 |
| Self-harm by other specified means                                                  | 1,074.6<br>(885.0 to 1,281.9)                 | 903.5<br>(824.1 to 996.1)                      | 36.0<br>(23.0 to 52.3)                | -6.6<br>(-7.9 to -5.2)                            | -9.0<br>(-11.0 to -7.2)                             |
| Interpersonal violence                                                              | 2,610.1<br>(2,384.9 to 2,840.3)               | 219.8‡<br>(184.1 to 262.0)                     | 38.0<br>(25.6 to 53.7)                | 6.3<br>(3.8 to 8.4)                               | 4.6<br>(3.1 to 6.2)                                 |
| Assault by firearm                                                                  | 67.8<br>(56.9 to 80.4)                        | 7.2<br>(5.2 to 9.7)                            | 1.5<br>(1.0 to 2.3)                   | 20.7<br>(19.7 to 21.9)                            | 15.2<br>(14.2 to 16.2)                              |
| Assault by sharp object                                                             | 203.7<br>(166.1 to 242.4)                     | 40.6<br>(30.1 to 54.3)                         | 3.7<br>(2.3 to 5.7)                   | 16.7<br>(15.7 to 17.8)                            | 12.1<br>(11.2 to 13.1)                              |
| Sexual violence                                                                     | 1,625.9<br>(1,442.3 to 1,836.0)               | --                                             | 12.9<br>(8.6 to 18.4)                 | -8.3<br>(-10.2 to -6.4)                           | -2.5<br>(-3.4 to -1.7)                              |
| Assault by other means                                                              | 712.7<br>(595.7 to 859.5)                     | 172.1<br>(143.6 to 206.7)                      | 19.9<br>(12.8 to 29.5)                | 15.2<br>(14.5 to 16.1)                            | 10.9<br>(10.0 to 11.9)                              |
| <b>Forces of nature, conflict and terrorism, and executions and police conflict</b> | <b>436.7</b><br><b>(91.0 to 873.5)</b>        | <b>3.8†</b><br><b>(2.6 to 5.3)</b>             | <b>9.6</b><br><b>(1.4 to 25.2)</b>    | <b>93.3</b><br><b>(76.4 to 105.2)</b>             | <b>87.7</b><br><b>(68.2 to 106.3)</b>               |
| Exposure to forces of nature                                                        | 421.4<br>(74.2 to 848.4)                      | --                                             | 9.2<br>(1.3 to 24.1)                  | 97.4<br>(83.7 to 109.8)                           | 92.4<br>(72.3 to 112.9)                             |
| Conflict and terrorism                                                              | 0.7<br>(0.1 to 1.5)                           | --                                             | < 0.05<br>(< 0.05 to 0.1)             | -8.9<br>(-10.2 to -7.2)                           | -23.7<br>(-24.9 to -22.2)                           |
| Executions and police conflict                                                      | 14.7<br>(8.4 to 23.5)                         | 3.8<br>(2.6 to 5.3)                            | 0.4<br>(0.1 to 1.0)                   | 30.1<br>(19.3 to 33.5)                            | 25.2<br>(16.9 to 28.1)                              |
| <b>Impairments</b>                                                                  | --                                            | --                                             | --                                    | --                                                | --                                                  |
| Anaemia                                                                             | 18,056.6<br>(17,031.4 to 19,120.6)            | --                                             | 358.9<br>(243.2 to 512.0)             | 7.5<br>(4.7 to 10.8)                              | -1.1<br>(-2.9 to 0.8)                               |
| Developmental intellectual disability                                               | 1,691.8<br>(1,366.2 to 1,997.8)               | --                                             | 221.7<br>(166.2 to 287.6)             | -7.0<br>(-8.8 to -5.2)                            | -3.8<br>(-5.5 to -2.0)                              |
| Epilepsy                                                                            | 390.0<br>(320.5 to 462.7)                     | --                                             | 109.4<br>(78.6 to 146.0)              | -6.1<br>(-20.4 to 10.8)                           | -4.9<br>(-19.2 to 11.3)                             |
| Guillain-Barre syndrome                                                             | 1.3<br>(1.0 to 1.7)                           | --                                             | 0.4<br>(0.2 to 0.6)                   | 6.4<br>(1.7 to 11.0)                              | 0.2<br>(0.1 to 0.2)                                 |
| Hearing loss                                                                        | 34,738.3<br>(33,501.4 to 36,004.9)            | --                                             | 1,001.2<br>(695.0 to 1,392.7)         | 23.1<br>(19.8 to 27.4)                            | 0.5<br>(-1.6 to 2.9)                                |
| Heart failure                                                                       | 3,172.9<br>(2,770.9 to 3,642.6)               | --                                             | 349.6<br>(265.1 to 441.4)             | 17.4<br>(14.1 to 21.3)                            | -8.9<br>(-10.9 to -7.0)                             |
| Infertility                                                                         | 832.7<br>(601.4 to 1,133.3)                   | --                                             | 5.6<br>(2.5 to 11.1)                  | -2.6<br>(-8.5 to 3.4)                             | -0.4<br>(-5.0 to 3.9)                               |
| Pelvic inflammatory disease                                                         | 2.9<br>(2.4 to 3.4)                           | --                                             | 0.4<br>(0.3 to 0.6)                   | -13.6<br>(-16.6 to -10.5)                         | -4.8<br>(-6.8 to -2.7)                              |
| Vision loss                                                                         | 19,336.1<br>(18,488.7 to 20,193.6)            | --                                             | 542.6<br>(379.4 to 770.5)             | 14.5<br>(12.7 to 16.3)                            | -1.1<br>(-2.0 to -0.4)                              |

We did not calculate incidence for the nine impairments, certain NTDs, and causes with only birth prevalence. Blank cells mean that no estimate is available.

† Incidence for aggregate causes represents the sum of the incidence of the causes below the aggregate.

‡ Incidence estimates for stroke represent first-ever stroke only.

^ Incidence of HIV/AIDS represents new infections of HIV only and does not include new infections of Tuberculosis in HIV positive cases.

SR Table 14: Prevalence, incidence, and YLDs for 2016, percentage change of YLD counts and percentage change of age-standardised YLD rates between 2006 and 2016 by cause and impairments, for all ages, Jordan.

| Cause                                                                                | Prevalence in thousands (95% UI)       | Incidence in thousands (95% UI)            | YLDs in thousands (95% UI)         |                                                   |                                                     |
|--------------------------------------------------------------------------------------|----------------------------------------|--------------------------------------------|------------------------------------|---------------------------------------------------|-----------------------------------------------------|
|                                                                                      | 2016 counts                            | 2016 counts                                | 2016 counts                        | Percentage change in counts between 2006 and 2016 | Percentage change in age-standardised rates between |
| <b>All causes</b>                                                                    | <b>7,352.5</b><br>(7,311.9 to 7,394.4) | <b>41,447.0†</b><br>(39,079.8 to 43,977.7) | <b>775.0</b><br>(571.5 to 1,011.1) | <b>45.0</b><br>(42.4 to 47.9)                     | <b>-1.4</b><br>(-2.8 to 0.1)                        |
| <b>Communicable, maternal, neonatal, and nutritional disorders</b>                   | <b>4,622.5</b><br>(4,467.3 to 4,773.2) | <b>21,542.8†</b><br>(19,638.5 to 23,473.7) | <b>78.0</b><br>(55.1 to 109.2)     | <b>30.5</b><br>(24.6 to 38.9)                     | <b>-6.0</b><br>(-10.1 to -0.3)                      |
| <b>HIV/AIDS and tuberculosis</b>                                                     | <b>516.9</b><br>(404.2 to 613.4)       | <b>0.5†</b><br>(0.4 to 0.7)                | <b>0.1</b><br>(0.1 to 0.2)         | <b>12.0</b><br>(-1.3 to 25.4)                     | <b>-24.9</b><br>(-35.0 to -13.7)                    |
| Tuberculosis                                                                         | 451.2<br>(352.7 to 567.1)              | 0.5†<br>(0.4 to 0.7)                       | 0.1<br>(0.1 to 0.1)                | 7.5<br>(-6.8 to 22.5)                             | -27.3<br>(-38.6 to -14.5)                           |
| Drug-susceptible tuberculosis                                                        | 0.2<br>(0.2 to 0.3)                    | 0.5<br>(0.3 to 0.6)                        | 0.1<br>(< 0.05 to 0.1)             | 6.3<br>(-14.1 to 25.0)                            | -28.1<br>(-42.9 to -12.8)                           |
| Multidrug-resistant tuberculosis without extensive drug resistance                   | < 0.05<br>(< 0.05 to 0.1)              | < 0.05<br>(< 0.05 to 0.1)                  | < 0.05<br>(< 0.05 to < 0.05)       | 24.2<br>(-82.0 to 406.7)                          | -17.0<br>(-88.1 to 239.7)                           |
| Extensively drug-resistant tuberculosis                                              | < 0.05<br>(< 0.05 to < 0.05)           | < 0.05<br>(< 0.05 to < 0.05)               | < 0.05<br>(< 0.05 to < 0.05)       | 182.0<br>(-59.1 to 1,050.0)                       | 88.5<br>(-73.0 to 671.6)                            |
| Latent tuberculosis infection                                                        | 450.9<br>(352.5 to 566.8)              | --                                         | --                                 | --                                                | --                                                  |
| HIV/AIDS                                                                             | 0.1<br>(0.1 to 0.2)                    | < 0.05^<br>(< 0.05 to < 0.05)              | < 0.05<br>(< 0.05 to < 0.05)       | 40.0<br>(27.3 to 54.4)                            | -9.1<br>(-16.6 to 0.1)                              |
| Drug-susceptible HIV/AIDS - Tuberculosis                                             | < 0.05<br>(< 0.05 to < 0.05)           | < 0.05<br>(< 0.05 to < 0.05)               | < 0.05<br>(< 0.05 to < 0.05)       | 2.8<br>(-21.5 to 20.0)                            | -30.0<br>(-46.6 to -18.2)                           |
| Multidrug-resistant HIV/AIDS - Tuberculosis without extensive drug resistance        | < 0.05<br>(< 0.05 to < 0.05)           | < 0.05<br>(< 0.05 to < 0.05)               | < 0.05<br>(< 0.05 to < 0.05)       | 19.2<br>(-82.3 to 401.7)                          | -18.7<br>(-88.0 to 241.8)                           |
| Extensively drug-resistant HIV/AIDS - Tuberculosis                                   | < 0.05<br>(< 0.05 to < 0.05)           | < 0.05<br>(< 0.05 to < 0.05)               | < 0.05<br>(< 0.05 to < 0.05)       | 170.8<br>(-59.9 to 1,040.3)                       | 84.5<br>(-72.7 to 677.1)                            |
| HIV/AIDS resulting in other diseases                                                 | 0.1<br>(0.1 to 0.2)                    | < 0.05<br>(< 0.05 to < 0.05)               | < 0.05<br>(< 0.05 to < 0.05)       | 41.8<br>(28.5 to 58.3)                            | -8.2<br>(-16.2 to 2.1)                              |
| <b>Diarrhoea, lower respiratory infections, and other common infectious diseases</b> | <b>396.4</b><br>(376.2 to 421.5)       | <b>20,012.7†</b><br>(18,072.6 to 21,973.2) | <b>19.8</b><br>(13.7 to 27.2)      | <b>32.9</b><br>(28.4 to 38.0)                     | <b>-3.0</b><br>(-5.8 to 0.3)                        |
| Diarrhoeal diseases                                                                  | 65.3<br>(60.1 to 71.4)                 | 4,310.4<br>(3,961.2 to 4,712.2)            | 7.5<br>(5.1 to 10.3)               | 27.0<br>(18.2 to 35.7)                            | -4.9<br>(-10.7 to 1.1)                              |
| Intestinal infectious diseases                                                       | 0.2<br>(0.2 to 0.3)                    | 4.4†<br>(3.8 to 5.1)                       | < 0.05<br>(< 0.05 to 0.1)          | 20.6<br>(2.0 to 42.2)                             | -11.7<br>(-23.6 to 1.6)                             |
| Typhoid fever                                                                        | 0.2<br>(0.2 to 0.3)                    | 3.6<br>(3.1 to 4.3)                        | < 0.05<br>(< 0.05 to 0.1)          | 20.7<br>(1.1 to 43.9)                             | -11.6<br>(-24.0 to 2.5)                             |
| Paratyphoid fever                                                                    | < 0.05<br>(< 0.05 to < 0.05)           | 0.8<br>(0.7 to 1.0)                        | < 0.05<br>(< 0.05 to < 0.05)       | 29.2<br>(6.7 to 56.2)                             | -6.8<br>(-20.6 to 9.1)                              |
| Other intestinal infectious diseases                                                 | --                                     | --                                         | < 0.05<br>(< 0.05 to < 0.05)       | -11.6<br>(-31.0 to 12.8)                          | -32.8<br>(-43.2 to -20.6)                           |
| Lower respiratory infections                                                         | 10.2<br>(9.2 to 11.4)                  | 439.6<br>(394.4 to 487.1)                  | 0.6<br>(0.4 to 0.9)                | 44.5<br>(27.4 to 63.7)                            | 2.1<br>(-7.4 to 12.0)                               |
| Upper respiratory infections                                                         | 192.5<br>(168.6 to 218.1)              | 14,369.4<br>(12,516.4 to 16,406.2)         | 4.8<br>(2.8 to 7.6)                | 43.0<br>(34.4 to 52.9)                            | 3.0<br>(-2.7 to 9.3)                                |
| Otitis media                                                                         | 116.0<br>(103.3 to 129.7)              | 681.3<br>(537.3 to 854.5)                  | 3.4<br>(2.1 to 5.0)                | 25.7<br>(15.7 to 35.4)                            | -7.7<br>(-14.4 to -1.3)                             |
| Meningitis                                                                           | 11.3<br>(10.0 to 12.9)                 | 1.8<br>(1.4 to 2.2)                        | 1.4<br>(1.0 to 1.9)                | 40.6<br>(30.5 to 51.3)                            | -0.5<br>(-7.1 to 6.7)                               |
| Pneumococcal meningitis                                                              | 5.1<br>(4.3 to 6.2)                    | 0.4<br>(0.3 to 0.6)                        | 0.6<br>(0.4 to 0.8)                | 42.7<br>(21.1 to 68.5)                            | 0.7<br>(-13.5 to 17.0)                              |
| H influenzae type B meningitis                                                       | 2.2<br>(1.8 to 2.8)                    | 0.4<br>(0.2 to 0.6)                        | 0.3<br>(0.2 to 0.5)                | 37.2<br>(30.9 to 43.5)                            | -1.9<br>(-6.0 to 2.5)                               |
| Meningococcal infection                                                              | 1.8<br>(1.4 to 2.4)                    | 0.5<br>(0.3 to 0.7)                        | 0.2<br>(0.1 to 0.3)                | 36.7<br>(31.1 to 42.0)                            | -3.4<br>(-7.2 to 0.0)                               |
| Other meningitis                                                                     | 2.1<br>(1.7 to 2.8)                    | 0.5<br>(0.3 to 0.7)                        | 0.3<br>(0.2 to 0.4)                | 43.6<br>(35.6 to 52.7)                            | 1.4<br>(-3.5 to 6.7)                                |
| Encephalitis                                                                         | 16.7<br>(11.8 to 23.7)                 | 8.8<br>(7.6 to 10.1)                       | 1.9<br>(1.3 to 2.5)                | 38.9<br>(22.2 to 56.7)                            | -4.2<br>(-14.4 to 6.9)                              |
| Diphtheria                                                                           | < 0.05<br>(< 0.05 to < 0.05)           | < 0.05<br>(< 0.05 to < 0.05)               | < 0.05<br>(< 0.05 to < 0.05)       | 5.9<br>(-42.8 to 106.8)                           | -23.9<br>(-58.2 to 38.5)                            |
| Whooping cough                                                                       | 0.2<br>(0.1 to 0.3)                    | 1.4<br>(1.0 to 1.9)                        | < 0.05<br>(< 0.05 to < 0.05)       | -35.0<br>(-65.4 to 12.3)                          | -49.6<br>(-73.2 to -12.1)                           |
| Tetanus                                                                              | < 0.05<br>(< 0.05 to < 0.05)           | < 0.05<br>(< 0.05 to < 0.05)               | < 0.05<br>(< 0.05 to < 0.05)       | 43.0<br>(31.0 to 58.5)                            | 3.7<br>(-5.4 to 15.8)                               |
| Measles                                                                              | < 0.05<br>(< 0.05 to < 0.05)           | 0.6<br>(0.2 to 1.4)                        | < 0.05<br>(< 0.05 to < 0.05)       | -87.8<br>(-91.8 to -82.5)                         | -90.6<br>(-93.7 to -86.6)                           |
| Varicella and herpes zoster                                                          | 7.1<br>(6.7 to 7.6)                    | 195.1<br>(186.7 to 204.8)                  | 0.2<br>(0.1 to 0.3)                | 46.5<br>(26.0 to 71.9)                            | 0.0<br>(-11.4 to 13.4)                              |
| <b>Neglected tropical diseases and malaria</b>                                       | <b>1,990.2</b><br>(1,741.4 to 2,266.1) | <b>3.7†</b><br>(2.8 to 4.7)                | <b>2.9</b><br>(1.6 to 5.0)         | <b>14.1</b><br>(-20.5 to 67.1)                    | <b>-11.2</b><br>(-40.6 to 34.3)                     |
| Malaria                                                                              | --                                     | --                                         | --                                 | --                                                | --                                                  |
| Chagas disease                                                                       | --                                     | --                                         | --                                 | --                                                | --                                                  |
| Leishmaniasis                                                                        | 0.3<br>(0.1 to 0.7)                    | 0.7<br>(0.2 to 1.4)                        | < 0.05<br>(< 0.05 to < 0.05)       | 19.5<br>(-67.0 to 211.9)                          | -14.3<br>(-75.9 to 125.0)                           |
| Visceral leishmaniasis                                                               | < 0.05<br>(< 0.05 to < 0.05)           | < 0.05<br>(< 0.05 to < 0.05)               | < 0.05<br>(< 0.05 to < 0.05)       | 636.7<br>(-12.3 to 8,290,130.2)                   | 354.8<br>(-50.6 to 4,500,606.4)                     |
| Cutaneous and mucocutaneous leishmaniasis                                            | 0.3<br>(0.1 to 0.7)                    | 0.6<br>(0.2 to 1.4)                        | < 0.05<br>(< 0.05 to < 0.05)       | 19.3<br>(-67.0 to 211.5)                          | -14.5<br>(-75.9 to 124.9)                           |
| African trypanosomiasis                                                              | --                                     | --                                         | --                                 | --                                                | --                                                  |
| Schistosomiasis                                                                      | 8.9<br>(6.8 to 11.6)                   | 2.9<br>(2.3 to 3.7)                        | 0.1<br>(< 0.05 to 0.1)             | 47.6<br>(32.8 to 64.4)                            | -1.4<br>(-10.5 to 8.8)                              |
| Cysticercosis                                                                        | --                                     | --                                         | --                                 | --                                                | --                                                  |
| Cystic echinococcosis                                                                | 0.5<br>(0.1 to 2.3)                    | 0.1<br>(< 0.05 to 0.5)                     | 0.1<br>(< 0.05 to 0.2)             | -35.2<br>(-91.7 to 448.3)                         | -55.5<br>(-94.4 to 226.3)                           |
| Lymphatic filariasis                                                                 | --                                     | --                                         | --                                 | --                                                | --                                                  |
| Onchocerciasis                                                                       | --                                     | --                                         | --                                 | --                                                | --                                                  |
| Trachoma                                                                             | --                                     | --                                         | --                                 | --                                                | --                                                  |
| Dengue                                                                               | --                                     | --                                         | --                                 | --                                                | --                                                  |
| Yellow fever                                                                         | --                                     | --                                         | --                                 | --                                                | --                                                  |
| Rabies                                                                               | < 0.05<br>(< 0.05 to < 0.05)           | < 0.05<br>(< 0.05 to < 0.05)               | < 0.05<br>(< 0.05 to < 0.05)       | 42.8<br>(-22.1 to 174.8)                          | -5.1<br>(-57.5 to 118.0)                            |
| Intestinal nematode infections                                                       | 1,947.7<br>(1,695.6 to 2,230.9)        | --                                         | 1.6<br>(0.7 to 3.1)                | 5.1<br>(-41.6 to 101.7)                           | -13.2<br>(-53.9 to 69.3)                            |
| Ascariasis                                                                           | 1,506.9<br>(1,223.4 to 1,852.7)        | --                                         | 1.3<br>(0.5 to 2.7)                | -0.6<br>(-50.5 to 110.6)                          | -15.8<br>(-60.4 to 85.5)                            |

| Cause                                                                   | Prevalence in thousands (95% UI)              | Incidence in thousands (95% UI)                   | YLDs in thousands (95% UI)              |                                                   |                                                     |
|-------------------------------------------------------------------------|-----------------------------------------------|---------------------------------------------------|-----------------------------------------|---------------------------------------------------|-----------------------------------------------------|
|                                                                         | 2016 counts                                   | 2016 counts                                       | 2016 counts                             | Percentage change in counts between 2006 and 2016 | Percentage change in age-standardised rates between |
| Trichuriasis                                                            | 435.5<br>(355.3 to 533.2)                     | --                                                | < 0.05<br>(< 0.05 to 0.1)               | 41.8<br>(-71.3 to 544.2)                          | -0.3<br>(-82.3 to 389.7)                            |
| Hookworm disease                                                        | 126.1<br>(104.3 to 149.2)                     | --                                                | 0.3<br>(0.1 to 0.5)                     | 40.4<br>(-7.9 to 116.5)                           | 0.9<br>(-36.9 to 65.9)                              |
| Food-borne trematodiasis                                                | --                                            | --                                                | --                                      | --                                                | --                                                  |
| Leprosy                                                                 | --                                            | --                                                | --                                      | --                                                | --                                                  |
| Ebola virus disease                                                     | --                                            | --                                                | --                                      | --                                                | --                                                  |
| Zika virus disease                                                      | --                                            | --                                                | --                                      | --                                                | --                                                  |
| Guinea worm disease                                                     | --                                            | --                                                | --                                      | --                                                | --                                                  |
| Other neglected tropical diseases                                       | 54.0<br>(49.1 to 60.2)                        | --                                                | 1.2<br>(0.7 to 1.9)                     | 31.5<br>(13.9 to 53.5)                            | -1.9<br>(-14.5 to 13.6)                             |
| <b>Maternal disorders</b>                                               | <b>8.5</b><br><b>(6.3 to 11.2)</b>            | <b>116.1†</b><br><b>(99.1 to 136.0)</b>           | <b>0.6</b><br><b>(0.3 to 0.8)</b>       | <b>38.5</b><br><b>(2.3 to 91.0)</b>               | <b>3.5</b><br><b>(-23.7 to 41.6)</b>                |
| Maternal haemorrhage                                                    | 1.7<br>(1.2 to 2.2)                           | 12.4<br>(8.2 to 18.7)                             | 0.1<br>(< 0.05 to 0.1)                  | 21.8<br>(-19.5 to 79.7)                           | -8.6<br>(-38.9 to 34.7)                             |
| Maternal sepsis and other pregnancy related infections                  | 2.4<br>(1.4 to 3.7)                           | 24.3<br>(17.8 to 33.1)                            | 0.1<br>(< 0.05 to 0.2)                  | 21.5<br>(-43.6 to 171.8)                          | -8.5<br>(-57.2 to 103.9)                            |
| Maternal hypertensive disorders                                         | 4.4<br>(2.6 to 6.8)                           | 19.6<br>(13.4 to 27.3)                            | 0.2<br>(0.1 to 0.4)                     | 66.0<br>(-5.2 to 194.0)                           | 23.2<br>(-28.5 to 117.6)                            |
| Maternal obstructed labour and uterine rupture                          | 0.1<br>(0.1 to 0.2)                           | 10.7<br>(7.5 to 14.9)                             | < 0.05<br>(< 0.05 to 0.1)               | 22.5<br>(-50.9 to 254.7)                          | -7.6<br>(-62.2 to 162.1)                            |
| Maternal abortion, miscarriage, and ectopic pregnancy                   | 0.4<br>(0.2 to 0.6)                           | 49.1<br>(36.9 to 65.4)                            | < 0.05<br>(< 0.05 to 0.1)               | 35.9<br>(-34.8 to 180.3)                          | -0.1<br>(-51.8 to 105.8)                            |
| Other maternal disorders                                                | --                                            | --                                                | 0.1<br>(0.1 to 0.1)                     | 31.7<br>(-3.1 to 82.2)                            | -1.3<br>(-27.4 to 35.7)                             |
| <b>Neonatal disorders</b>                                               | <b>73.4</b><br><b>(61.2 to 87.5)</b>          | --                                                | <b>14.5</b><br><b>(9.5 to 22.0)</b>     | <b>39.2</b><br><b>(18.4 to 76.0)</b>              | <b>1.3</b><br><b>(-13.7 to 28.0)</b>                |
| Neonatal preterm birth complications                                    | 61.1<br>(47.0 to 83.3)                        | --                                                | 8.0<br>(4.8 to 13.6)                    | 33.1<br>(-0.4 to 93.4)                            | -3.8<br>(-27.6 to 39.4)                             |
| Neonatal encephalopathy due to birth asphyxia and trauma                | 8.6<br>(4.4 to 15.2)                          | --                                                | 1.3<br>(0.4 to 3.1)                     | 63.6<br>(8.5 to 162.9)                            | 18.9<br>(-20.2 to 91.0)                             |
| Neonatal sepsis and other neonatal infections                           | 8.6<br>(3.9 to 17.9)                          | --                                                | 3.6<br>(1.4 to 8.3)                     | 48.4<br>(22.1 to 113.8)                           | 9.0<br>(-10.0 to 60.6)                              |
| Hemolytic disease and other neonatal jaundice                           | 3.6<br>(3.1 to 4.0)                           | --                                                | 1.0<br>(0.7 to 1.4)                     | 37.8<br>(17.6 to 63.2)                            | -1.1<br>(-14.3 to 14.6)                             |
| Other neonatal disorders                                                | --                                            | --                                                | 0.6<br>(0.4 to 0.9)                     | 27.7<br>(4.0 to 66.0)                             | -2.0<br>(-20.1 to 27.3)                             |
| <b>Nutritional deficiencies</b>                                         | <b>1,745.7</b><br><b>(1,657.7 to 1,833.5)</b> | <b>418.1†</b><br><b>(345.3 to 517.9)</b>          | <b>34.0</b><br><b>(22.3 to 50.1)</b>    | <b>25.7</b><br><b>(18.1 to 33.6)</b>              | <b>-10.7</b><br><b>(-15.6 to -6.0)</b>              |
| Protein-energy malnutrition                                             | 29.9<br>(22.8 to 39.4)                        | 14.1<br>(11.0 to 18.3)                            | 1.2<br>(0.7 to 1.8)                     | -11.7<br>(-36.3 to 20.1)                          | -32.0<br>(-50.7 to -7.4)                            |
| Iodine deficiency                                                       | 320.7<br>(281.1 to 359.9)                     | 9.8<br>(8.6 to 10.9)                              | 7.4<br>(4.7 to 10.8)                    | 41.4<br>(29.7 to 53.8)                            | -1.9<br>(-9.4 to 6.0)                               |
| Vitamin A deficiency                                                    | 444.8<br>(371.2 to 547.2)                     | 394.1<br>(321.3 to 491.6)                         | 1.0<br>(0.5 to 1.6)                     | 34.3<br>(13.0 to 60.1)                            | -0.5<br>(-15.6 to 17.1)                             |
| Iron-deficiency anaemia                                                 | 1,123.8<br>(1,053.9 to 1,205.0)               | --                                                | 24.4<br>(15.7 to 37.1)                  | 23.9<br>(13.6 to 34.7)                            | -12.8<br>(-19.1 to -6.7)                            |
| Other nutritional deficiencies                                          | --                                            | --                                                | < 0.05<br>(< 0.05 to 0.1)               | -13.3<br>(-38.1 to 20.2)                          | -33.4<br>(-52.4 to -7.7)                            |
| <b>Other communicable, maternal, neonatal, and nutritional diseases</b> | <b>1,672.0</b><br><b>(1,561.0 to 1,791.9)</b> | <b>991.8</b><br><b>(866.5 to 1,136.5)</b>         | <b>5.9</b><br><b>(3.7 to 9.4)</b>       | <b>44.6</b><br><b>(35.1 to 54.7)</b>              | <b>0.5</b><br><b>(-5.7 to 6.8)</b>                  |
| Sexually transmitted diseases excluding HIV                             | 1,208.4<br>(1,120.4 to 1,300.5)               | 935.4<br>(812.1 to 1,085.4)                       | 4.8<br>(2.9 to 8.0)                     | 45.5<br>(34.6 to 57.0)                            | 0.3<br>(-6.8 to 7.3)                                |
| Syphilis                                                                | 23.8<br>(17.2 to 31.3)                        | 17.0<br>(11.8 to 23.0)                            | 0.1<br>(< 0.05 to 0.1)                  | 61.8<br>(43.3 to 79.6)                            | 1.8<br>(-10.0 to 13.6)                              |
| Chlamydial infection                                                    | 51.7<br>(41.4 to 63.7)                        | 42.8<br>(34.4 to 52.6)                            | 0.4<br>(0.2 to 0.7)                     | 38.8<br>(17.0 to 61.5)                            | 1.1<br>(-14.7 to 17.6)                              |
| Gonococcal infection                                                    | 190.3<br>(157.3 to 229.1)                     | 691.7<br>(574.1 to 835.6)                         | 2.5<br>(1.5 to 4.3)                     | 45.9<br>(31.4 to 61.6)                            | 0.2<br>(-9.2 to 10.1)                               |
| Trichomoniasis                                                          | 90.1<br>(76.1 to 104.0)                       | 77.2<br>(65.3 to 89.8)                            | 0.1<br>(< 0.05 to 0.2)                  | 54.4<br>(37.2 to 72.6)                            | 6.5<br>(-4.2 to 18.1)                               |
| Genital herpes                                                          | 904.8<br>(777.5 to 1,059.3)                   | 75.3<br>(64.3 to 89.8)                            | 0.2<br>(0.1 to 0.6)                     | 49.1<br>(38.5 to 58.7)                            | 0.5<br>(-4.6 to 5.7)                                |
| Other sexually transmitted diseases                                     | 31.5<br>(28.2 to 34.9)                        | 31.5<br>(24.4 to 39.8)                            | 1.5<br>(1.0 to 2.4)                     | 45.1<br>(34.1 to 57.0)                            | -0.1<br>(-7.6 to 7.7)                               |
| Hepatitis                                                               | 526.1<br>(418.9 to 646.5)                     | 56.4<br>(36.0 to 87.4)                            | < 0.05<br>(< 0.05 to 0.1)               | 14.2<br>(-8.9 to 43.6)                            | -21.2<br>(-35.8 to -3.6)                            |
| Acute hepatitis A                                                       | 1.6<br>(0.2 to 3.8)                           | 20.3<br>(2.5 to 49.5)                             | < 0.05<br>(< 0.05 to < 0.05)            | 5.6<br>(-56.5 to 180.6)                           | -20.6<br>(-65.6 to 86.0)                            |
| Hepatitis B                                                             | 457.9<br>(353.7 to 578.2)                     | 32.5<br>(25.6 to 42.3)                            | < 0.05<br>(< 0.05 to < 0.05)            | 15.5<br>(-6.1 to 39.1)                            | -22.2<br>(-38.6 to -2.5)                            |
| Hepatitis C                                                             | 66.5<br>(59.1 to 74.3)                        | 2.3<br>(2.0 to 2.7)                               | < 0.05<br>(< 0.05 to < 0.05)            | 27.2<br>(25.9 to 28.6)                            | -8.4<br>(-9.4 to -7.2)                              |
| Acute hepatitis E                                                       | 0.1<br>(0.1 to 0.1)                           | 1.2<br>(0.9 to 1.5)                               | < 0.05<br>(< 0.05 to < 0.05)            | 19.7<br>(6.4 to 33.1)                             | -17.1<br>(-27.9 to -3.7)                            |
| Other infectious diseases                                               | 42.0<br>(38.6 to 46.3)                        | < 0.05<br>(< 0.05 to < 0.05)                      | 1.0<br>(0.6 to 1.6)                     | 42.0<br>(25.1 to 62.2)                            | 3.6<br>(-7.8 to 17.5)                               |
| <b>Non-communicable diseases</b>                                        | <b>6,921.6</b><br><b>(6,846.6 to 7,009.3)</b> | <b>19,376.2†</b><br><b>(17,945.1 to 20,839.8)</b> | <b>662.0</b><br><b>(484.3 to 861.2)</b> | <b>46.8</b><br><b>(43.8 to 49.8)</b>              | <b>-1.0</b><br><b>(-2.6 to 0.5)</b>                 |
| <b>Neoplasms</b>                                                        | <b>15.5</b><br><b>(14.6 to 16.5)</b>          | <b>5.9</b><br><b>(5.3 to 6.4)</b>                 | <b>2.0</b><br><b>(1.4 to 2.7)</b>       | <b>63.9</b><br><b>(50.6 to 83.1)</b>              | <b>2.1</b><br><b>(-6.1 to 14.0)</b>                 |
| Lip and oral cavity cancer                                              | 0.4<br>(0.3 to 0.4)                           | 0.1<br>(0.1 to 0.1)                               | < 0.05<br>(< 0.05 to 0.1)               | 68.9<br>(49.4 to 92.0)                            | 3.4<br>(-9.2 to 19.5)                               |
| Nasopharynx cancer                                                      | 0.1<br>(0.1 to 0.2)                           | < 0.05<br>(< 0.05 to < 0.05)                      | < 0.05<br>(< 0.05 to < 0.05)            | 52.1<br>(31.9 to 77.6)                            | -4.3<br>(-15.8 to 10.2)                             |
| Other pharynx cancer                                                    | 0.1<br>(0.1 to 0.1)                           | < 0.05<br>(< 0.05 to < 0.05)                      | < 0.05<br>(< 0.05 to < 0.05)            | 73.8<br>(50.9 to 99.9)                            | 7.6<br>(-7.4 to 24.9)                               |
| Oesophageal cancer                                                      | < 0.05<br>(< 0.05 to < 0.05)                  | < 0.05<br>(< 0.05 to < 0.05)                      | < 0.05<br>(< 0.05 to < 0.05)            | 33.1<br>(20.8 to 46.5)                            | -18.6<br>(-26.5 to -10.1)                           |
| Stomach cancer                                                          | 0.3<br>(0.3 to 0.3)                           | 0.2<br>(0.2 to 0.2)                               | < 0.05<br>(< 0.05 to 0.1)               | 32.9<br>(21.1 to 45.1)                            | -18.4<br>(-26.6 to -8.7)                            |
| Colon and rectum cancer                                                 | 2.2<br>(1.9 to 2.4)                           | 0.7<br>(0.6 to 0.7)                               | 0.2<br>(0.2 to 0.3)                     | 73.0<br>(46.0 to 105.1)                           | 6.3<br>(-11.5 to 27.3)                              |
| Liver cancer                                                            | < 0.05<br>(< 0.05 to 0.1)                     | 0.1<br>(0.1 to 0.1)                               | < 0.05<br>(< 0.05 to < 0.05)            | 58.2<br>(36.1 to 80.4)                            | 0.3<br>(-14.7 to 14.9)                              |
| Liver cancer due to hepatitis B                                         | < 0.05<br>(< 0.05 to < 0.05)                  | < 0.05<br>(< 0.05 to < 0.05)                      | < 0.05<br>(< 0.05 to < 0.05)            | 58.4<br>(34.1 to 82.8)                            | 0.2<br>(-15.5 to 15.7)                              |



| Cause                                              | Prevalence in thousands (95% UI)        | Incidence in thousands (95% UI)          | YLDs in thousands (95% UI)           |                                                   |                                                     |
|----------------------------------------------------|-----------------------------------------|------------------------------------------|--------------------------------------|---------------------------------------------------|-----------------------------------------------------|
|                                                    | 2016 counts                             | 2016 counts                              | 2016 counts                          | Percentage change in counts between 2006 and 2016 | Percentage change in age-standardised rates between |
| Liver cancer due to hepatitis C                    | < 0.05<br>(< 0.05 to < 0.05)            | < 0.05<br>(< 0.05 to < 0.05)             | < 0.05<br>(< 0.05 to < 0.05)         | 59.9<br>(32.3 to 87.6)                            | 0.6<br>(-16.6 to 17.7)                              |
| Liver cancer due to alcohol use                    | < 0.05<br>(< 0.05 to < 0.05)            | < 0.05<br>(< 0.05 to < 0.05)             | < 0.05<br>(< 0.05 to < 0.05)         | 56.0<br>(28.9 to 84.9)                            | -0.5<br>(-17.9 to 18.2)                             |
| Liver cancer due to other causes                   | < 0.05<br>(< 0.05 to < 0.05)            | < 0.05<br>(< 0.05 to < 0.05)             | < 0.05<br>(< 0.05 to < 0.05)         | 56.3<br>(32.1 to 81.9)                            | 0.2<br>(-16.1 to 17.3)                              |
| Gallbladder and biliary tract cancer               | < 0.05<br>(< 0.05 to 0.1)               | 0.1<br>(0.1 to 0.1)                      | < 0.05<br>(< 0.05 to < 0.05)         | 44.6<br>(26.8 to 65.6)                            | -9.8<br>(-21.2 to 3.7)                              |
| Pancreatic cancer                                  | 0.1<br>(0.1 to 0.1)                     | 0.1<br>(0.1 to 0.2)                      | < 0.05<br>(< 0.05 to < 0.05)         | 72.0<br>(56.2 to 88.7)                            | 6.0<br>(-4.2 to 16.8)                               |
| Larynx cancer                                      | 0.1<br>(0.1 to 0.2)                     | < 0.05<br>(< 0.05 to < 0.05)             | < 0.05<br>(< 0.05 to < 0.05)         | 23.5<br>(7.5 to 41.9)                             | -24.9<br>(-34.6 to -13.2)                           |
| Tracheal, bronchus, and lung cancer                | 0.6<br>(0.5 to 0.7)                     | 0.5<br>(0.5 to 0.6)                      | 0.1<br>(0.1 to 0.2)                  | 63.6<br>(31.9 to 103.8)                           | 1.8<br>(-19.1 to 26.7)                              |
| Malignant skin melanoma                            | 0.1<br>(0.1 to 0.1)                     | < 0.05<br>(< 0.05 to < 0.05)             | < 0.05<br>(< 0.05 to < 0.05)         | 85.3<br>(59.4 to 114.5)                           | 14.4<br>(-3.4 to 32.5)                              |
| Non-melanoma skin cancer                           | < 0.05<br>(< 0.05 to 0.1)               | 0.2<br>(0.1 to 0.2)                      | < 0.05<br>(< 0.05 to < 0.05)         | 47.2<br>(32.5 to 62.2)                            | -4.0<br>(-13.7 to 6.6)                              |
| Non-melanoma skin cancer (squamous-cell carcinoma) | < 0.05<br>(< 0.05 to 0.1)               | < 0.05<br>(< 0.05 to 0.1)                | < 0.05<br>(< 0.05 to < 0.05)         | 42.7<br>(27.6 to 59.1)                            | -6.4<br>(-16.5 to 4.9)                              |
| Non-melanoma skin cancer (basal-cell carcinoma)    | < 0.05<br>(< 0.05 to < 0.05)            | 0.1<br>(0.1 to 0.1)                      | < 0.05<br>(< 0.05 to < 0.05)         | 114.5<br>(92.2 to 135.5)                          | 35.6<br>(20.3 to 50.8)                              |
| Breast cancer                                      | 5.7<br>(4.3 to 7.2)                     | 1.2<br>(0.9 to 1.5)                      | 0.5<br>(0.3 to 0.7)                  | 78.9<br>(36.5 to 149.0)                           | 5.7<br>(-19.5 to 46.5)                              |
| Cervical cancer                                    | 0.4<br>(0.2 to 0.5)                     | 0.1<br>(0.1 to 0.1)                      | < 0.05<br>(< 0.05 to 0.1)            | 38.9<br>(9.0 to 80.0)                             | -18.1<br>(-34.1 to 6.9)                             |
| Uterine cancer                                     | 0.6<br>(0.5 to 0.8)                     | 0.1<br>(0.1 to 0.2)                      | < 0.05<br>(< 0.05 to 0.1)            | 72.0<br>(38.2 to 130.0)                           | 3.3<br>(-18.0 to 41.1)                              |
| Ovarian cancer                                     | 0.4<br>(0.3 to 0.5)                     | 0.1<br>(0.1 to 0.1)                      | 0.1<br>(< 0.05 to 0.1)               | 92.1<br>(50.8 to 141.0)                           | 17.5<br>(-12.7 to 55.1)                             |
| Prostate cancer                                    | 1.2<br>(0.8 to 1.4)                     | 0.3<br>(0.2 to 0.4)                      | 0.1<br>(0.1 to 0.2)                  | 82.7<br>(42.0 to 128.9)                           | 14.0<br>(-10.3 to 40.5)                             |
| Testicular cancer                                  | 0.2<br>(0.1 to 0.2)                     | < 0.05<br>(< 0.05 to < 0.05)             | < 0.05<br>(< 0.05 to < 0.05)         | 70.0<br>(22.6 to 125.7)                           | 17.6<br>(-11.4 to 51.5)                             |
| Kidney cancer                                      | 0.5<br>(0.5 to 0.6)                     | 0.1<br>(0.1 to 0.2)                      | < 0.05<br>(< 0.05 to 0.1)            | 79.6<br>(56.1 to 106.0)                           | 11.5<br>(-3.3 to 27.3)                              |
| Bladder cancer                                     | 1.0<br>(0.8 to 1.1)                     | 0.2<br>(0.2 to 0.3)                      | 0.1<br>(0.1 to 0.1)                  | 67.1<br>(39.9 to 99.8)                            | 2.2<br>(-14.8 to 21.9)                              |
| Brain and nervous system cancer                    | 0.5<br>(0.4 to 0.5)                     | 0.2<br>(0.2 to 0.2)                      | 0.1<br>(< 0.05 to 0.1)               | 53.1<br>(38.5 to 69.8)                            | 1.7<br>(-7.4 to 12.0)                               |
| Thyroid cancer                                     | 0.7<br>(0.6 to 0.8)                     | 0.1<br>(0.1 to 0.1)                      | < 0.05<br>(< 0.05 to 0.1)            | 70.5<br>(34.4 to 119.5)                           | 4.2<br>(-16.6 to 32.1)                              |
| Mesothelioma                                       | < 0.05<br>(< 0.05 to < 0.05)            | < 0.05<br>(< 0.05 to < 0.05)             | < 0.05<br>(< 0.05 to < 0.05)         | 29.5<br>(13.2 to 51.1)                            | -20.7<br>(-31.5 to -8.7)                            |
| Hodgkin lymphoma                                   | < 0.05<br>(< 0.05 to < 0.05)            | < 0.05<br>(< 0.05 to < 0.05)             | < 0.05<br>(< 0.05 to < 0.05)         | 31.3<br>(11.2 to 50.0)                            | -16.0<br>(-25.6 to -7.2)                            |
| Non-Hodgkin's lymphoma                             | 0.9<br>(0.7 to 1.0)                     | 0.3<br>(0.3 to 0.3)                      | 0.1<br>(0.1 to 0.1)                  | 53.3<br>(36.9 to 73.0)                            | 2.0<br>(-8.3 to 13.0)                               |
| Multiple myeloma                                   | 0.1<br>(0.1 to 0.1)                     | 0.1<br>(< 0.05 to 0.1)                   | < 0.05<br>(< 0.05 to < 0.05)         | 56.1<br>(38.4 to 78.3)                            | -4.5<br>(-16.6 to 10.1)                             |
| Leukaemia                                          | 1.7<br>(1.4 to 1.9)                     | 0.4<br>(0.3 to 0.4)                      | 0.2<br>(0.1 to 0.3)                  | 34.0<br>(17.2 to 53.4)                            | -9.8<br>(-22.5 to 5.0)                              |
| Acute lymphoid leukaemia                           | < 0.05<br>(< 0.05 to 0.1)               | < 0.05<br>(< 0.05 to < 0.05)             | < 0.05<br>(< 0.05 to < 0.05)         | 52.5<br>(21.4 to 90.6)                            | 8.3<br>(-11.6 to 29.7)                              |
| Chronic lymphoid leukaemia                         | 0.1<br>(< 0.05 to 0.1)                  | < 0.05<br>(< 0.05 to < 0.05)             | < 0.05<br>(< 0.05 to < 0.05)         | 59.1<br>(16.8 to 112.4)                           | 2.0<br>(-25.9 to 37.1)                              |
| Acute myeloid leukaemia                            | < 0.05<br>(< 0.05 to < 0.05)            | < 0.05<br>(< 0.05 to < 0.05)             | < 0.05<br>(< 0.05 to < 0.05)         | 52.8<br>(28.1 to 78.2)                            | 5.5<br>(-9.7 to 20.7)                               |
| Chronic myeloid leukaemia                          | < 0.05<br>(< 0.05 to < 0.05)            | < 0.05<br>(< 0.05 to < 0.05)             | < 0.05<br>(< 0.05 to < 0.05)         | 42.9<br>(14.3 to 80.5)                            | -7.5<br>(-23.9 to 16.1)                             |
| Other leukaemia                                    | 1.5<br>(1.3 to 1.7)                     | 0.3<br>(0.3 to 0.4)                      | 0.2<br>(0.1 to 0.2)                  | 31.8<br>(13.9 to 51.8)                            | -11.0<br>(-23.9 to 4.9)                             |
| Other neoplasms                                    | 0.9<br>(0.7 to 1.0)                     | 0.3<br>(0.3 to 0.3)                      | 0.1<br>(0.1 to 0.1)                  | 63.4<br>(45.8 to 84.8)                            | 9.1<br>(-4.5 to 22.8)                               |
| <b>Cardiovascular diseases</b>                     | <b>380.1</b><br><b>(363.9 to 395.0)</b> | <b>41.5†</b><br><b>(39.1 to 44.0)</b>    | <b>22.4</b><br><b>(16.1 to 29.3)</b> | <b>50.1</b><br><b>(44.8 to 55.7)</b>              | <b>-4.5</b><br><b>(-8.1 to -1.2)</b>                |
| Rheumatic heart disease                            | 0.4<br>(0.3 to 0.4)                     | 0.1<br>(0.1 to 0.1)                      | < 0.05<br>(< 0.05 to < 0.05)         | 53.5<br>(44.0 to 63.1)                            | 0.2<br>(-5.5 to 6.4)                                |
| Ischaemic heart disease                            | 177.5<br>(166.8 to 188.1)               | 22.6<br>(20.6 to 24.8)                   | 6.5<br>(4.5 to 9.0)                  | 55.1<br>(47.9 to 62.6)                            | -2.9<br>(-6.8 to 1.2)                               |
| Cerebrovascular disease                            | 44.0<br>(41.0 to 47.3)                  | 6.3‡<br>(5.7 to 6.9)                     | 6.7<br>(4.8 to 8.6)                  | 47.5<br>(36.2 to 59.2)                            | -9.2<br>(-16.0 to -2.0)                             |
| Ischaemic stroke                                   | 39.6<br>(35.9 to 44.1)                  | 4.9‡<br>(4.4 to 5.5)                     | 5.8<br>(4.1 to 7.5)                  | 46.0<br>(33.3 to 59.7)                            | -10.2<br>(-18.0 to -2.1)                            |
| Hemorrhagic stroke                                 | 6.2<br>(5.7 to 6.9)                     | 1.4‡<br>(1.2 to 1.5)                     | 0.9<br>(0.7 to 1.2)                  | 58.1<br>(41.1 to 78.1)                            | -0.1<br>(-11.3 to 12.4)                             |
| Hypertensive heart disease                         | 19.2<br>(16.6 to 22.2)                  | --                                       | 1.5<br>(1.1 to 2.1)                  | 62.2<br>(48.9 to 76.0)                            | -0.4<br>(-8.0 to 7.4)                               |
| Cardiomyopathy and myocarditis                     | 2.3<br>(2.0 to 2.6)                     | 2.5†<br>(2.1 to 2.9)                     | 0.3<br>(0.2 to 0.4)                  | 35.5<br>(19.9 to 54.5)                            | -2.1<br>(-12.0 to 9.3)                              |
| Myocarditis                                        | 1.8<br>(1.5 to 2.0)                     | 2.5<br>(2.1 to 2.9)                      | 0.1<br>(0.1 to 0.2)                  | 34.4<br>(17.3 to 54.3)                            | -1.7<br>(-13.2 to 10.9)                             |
| Alcoholic cardiomyopathy                           | 0.1<br>(0.1 to 0.1)                     | --                                       | < 0.05<br>(< 0.05 to < 0.05)         | 55.7<br>(43.1 to 69.1)                            | -3.1<br>(-10.3 to 4.4)                              |
| Other cardiomyopathy                               | 1.4<br>(1.2 to 1.7)                     | --                                       | 0.1<br>(0.1 to 0.2)                  | 35.6<br>(12.0 to 67.7)                            | -2.4<br>(-17.4 to 15.8)                             |
| Atrial fibrillation and flutter                    | 19.0<br>(16.6 to 21.8)                  | 1.6<br>(1.4 to 1.9)                      | 1.5<br>(1.0 to 2.1)                  | 63.0<br>(50.8 to 75.6)                            | 0.5<br>(-5.9 to 7.2)                                |
| Peripheral vascular disease                        | 70.6<br>(61.1 to 82.2)                  | 7.2<br>(6.2 to 8.4)                      | 0.3<br>(0.1 to 0.5)                  | 43.7<br>(31.1 to 56.2)                            | -7.3<br>(-14.1 to -0.7)                             |
| Endocarditis                                       | 0.6<br>(0.5 to 0.7)                     | 1.2<br>(1.0 to 1.3)                      | < 0.05<br>(< 0.05 to 0.1)            | 45.7<br>(32.8 to 60.7)                            | -1.9<br>(-14.9 to 12.7)                             |
| Other cardiovascular and circulatory diseases      | 105.8<br>(90.2 to 124.4)                | --                                       | 5.6<br>(3.8 to 7.9)                  | 42.8<br>(33.0 to 54.3)                            | -1.9<br>(-8.0 to 4.8)                               |
| <b>Chronic respiratory diseases</b>                | <b>687.9</b><br><b>(655.5 to 722.5)</b> | <b>123.4†</b><br><b>(114.7 to 132.6)</b> | <b>28.4</b><br><b>(20.2 to 38.7)</b> | <b>49.1</b><br><b>(42.4 to 56.7)</b>              | <b>3.3</b><br><b>(-0.7 to 7.5)</b>                  |
| Chronic obstructive pulmonary disease              | 141.4<br>(135.4 to 148.2)               | 8.9<br>(8.5 to 9.3)                      | 5.5<br>(4.7 to 6.3)                  | 55.6<br>(42.0 to 70.6)                            | -1.4<br>(-9.4 to 7.4)                               |
| Pneumoconiosis                                     | 0.3<br>(0.3 to 0.4)                     | < 0.05<br>(< 0.05 to < 0.05)             | < 0.05<br>(< 0.05 to 0.1)            | 61.9<br>(55.2 to 69.3)                            | 1.7<br>(-2.3 to 6.3)                                |
| Silicosis                                          | 0.1<br>(0.1 to 0.1)                     | < 0.05<br>(< 0.05 to < 0.05)             | < 0.05<br>(< 0.05 to < 0.05)         | 56.7<br>(49.1 to 64.3)                            | 0.1<br>(-4.2 to 4.4)                                |



| Cause                                                          | Prevalence in thousands (95% UI)        | Incidence in thousands (95% UI)         | YLDs in thousands (95% UI)        |                                                   |                                                     |
|----------------------------------------------------------------|-----------------------------------------|-----------------------------------------|-----------------------------------|---------------------------------------------------|-----------------------------------------------------|
|                                                                | 2016 counts                             | 2016 counts                             | 2016 counts                       | Percentage change in counts between 2006 and 2016 | Percentage change in age-standardised rates between |
| Asbestosis                                                     | 0.1<br>(0.1 to 0.1)                     | < 0.05<br>(< 0.05 to < 0.05)            | < 0.05<br>(< 0.05 to < 0.05)      | 58.5<br>(49.1 to 67.2)                            | -1.2<br>(-6.1 to 3.3)                               |
| Coal workers pneumoconiosis                                    | --                                      | --                                      | --                                | --                                                | --                                                  |
| Other pneumoconiosis                                           | 0.2<br>(0.1 to 0.2)                     | < 0.05<br>(< 0.05 to < 0.05)            | < 0.05<br>(< 0.05 to < 0.05)      | 66.6<br>(54.0 to 81.4)                            | 4.0<br>(-4.0 to 13.3)                               |
| Asthma                                                         | 562.1<br>(519.7 to 611.2)               | 114.2<br>(105.4 to 123.3)               | 22.0<br>(14.4 to 32.2)            | 46.7<br>(38.8 to 55.9)                            | 4.7<br>(0.2 to 9.3)                                 |
| Interstitial lung disease and pulmonary sarcoidosis            | 2.0<br>(1.8 to 2.2)                     | 0.2<br>(0.2 to 0.2)                     | 0.2<br>(0.1 to 0.3)               | 56.1<br>(42.2 to 70.6)                            | 0.7<br>(-10.4 to 12.7)                              |
| Other chronic respiratory diseases                             | --                                      | --                                      | 0.6<br>(0.4 to 0.7)               | 86.2<br>(46.9 to 136.1)                           | 32.6<br>(8.9 to 60.6)                               |
| <b>Cirrhosis and other chronic liver diseases</b>              | <b>29.3<br/>(27.8 to 31.1)</b>          | <b>1.1<br/>(1.0 to 1.1)</b>             | <b>1.4<br/>(0.9 to 1.9)</b>       | <b>51.4<br/>(35.0 to 71.0)</b>                    | <b>5.2<br/>(-3.3 to 14.8)</b>                       |
| Cirrhosis and other chronic liver diseases due to hepatitis B  | 8.0<br>(6.6 to 9.4)                     | 0.3<br>(0.2 to 0.4)                     | 0.3<br>(0.2 to 0.4)               | 63.5<br>(35.3 to 100.0)                           | 5.4<br>(-9.7 to 22.5)                               |
| Cirrhosis and other chronic liver diseases due to hepatitis C  | 8.6<br>(7.0 to 10.7)                    | 0.3<br>(0.2 to 0.4)                     | 0.3<br>(0.2 to 0.5)               | 64.6<br>(34.8 to 97.9)                            | 6.0<br>(-9.6 to 24.0)                               |
| Cirrhosis and other chronic liver diseases due to alcohol use  | 1.7<br>(1.5 to 2.0)                     | 0.1<br>(0.1 to 0.1)                     | 0.1<br>(< 0.05 to 0.1)            | 68.4<br>(34.3 to 111.4)                           | 5.5<br>(-17.2 to 36.4)                              |
| Cirrhosis and other chronic liver diseases due to other causes | 11.0<br>(10.0 to 12.2)                  | 0.4<br>(0.4 to 0.4)                     | 0.7<br>(0.5 to 1.0)               | 41.0<br>(17.0 to 71.3)                            | 4.4<br>(-10.5 to 21.9)                              |
| <b>Digestive diseases</b>                                      | <b>222.6<br/>(210.8 to 237.3)</b>       | <b>162.6†<br/>(152.3 to 173.6)</b>      | <b>7.5<br/>(5.2 to 10.1)</b>      | <b>58.7<br/>(47.0 to 70.7)</b>                    | <b>6.0<br/>(-0.2 to 12.7)</b>                       |
| Peptic ulcer disease                                           | 63.4<br>(56.5 to 71.6)                  | 5.9<br>(5.1 to 6.7)                     | 1.5<br>(0.9 to 2.2)               | 93.7<br>(72.8 to 113.9)                           | 22.0<br>(10.7 to 33.1)                              |
| Gastritis and duodenitis                                       | 73.0<br>(64.7 to 82.6)                  | 66.0<br>(58.0 to 75.5)                  | 1.3<br>(0.8 to 1.9)               | 86.0<br>(68.9 to 104.7)                           | 19.4<br>(9.5 to 29.2)                               |
| Appendicitis                                                   | 1.1<br>(1.0 to 1.2)                     | 29.0<br>(26.4 to 31.7)                  | 0.3<br>(0.2 to 0.5)               | 35.4<br>(-4.0 to 93.7)                            | -0.5<br>(-26.3 to 36.2)                             |
| Paralytic ileus and intestinal obstruction                     | 0.1<br>(0.1 to 0.1)                     | 2.4<br>(2.1 to 2.8)                     | < 0.05<br>(< 0.05 to < 0.05)      | 49.0<br>(43.7 to 54.3)                            | -0.3<br>(-5.8 to 4.9)                               |
| Inguinal, femoral, and abdominal hernia                        | 78.3<br>(68.9 to 88.0)                  | 25.1<br>(21.7 to 28.6)                  | 3.2<br>(2.2 to 4.6)               | 40.2<br>(25.2 to 56.4)                            | -5.7<br>(-14.5 to 3.6)                              |
| Inflammatory bowel disease                                     | 2.1<br>(1.6 to 2.6)                     | 4.1<br>(3.0 to 5.4)                     | 0.3<br>(0.2 to 0.5)               | 70.1<br>(34.9 to 115.4)                           | 12.9<br>(-9.5 to 39.6)                              |
| Vascular intestinal disorders                                  | 0.1<br>(< 0.05 to 0.1)                  | 0.3<br>(0.2 to 0.3)                     | < 0.05<br>(< 0.05 to < 0.05)      | 52.6<br>(44.1 to 61.4)                            | 1.4<br>(-2.9 to 6.0)                                |
| Gallbladder and biliary diseases                               | 11.0<br>(9.5 to 12.6)                   | 28.3<br>(24.2 to 32.4)                  | 0.1<br>(0.1 to 0.2)               | 65.2<br>(38.4 to 96.0)                            | 4.3<br>(-14.7 to 25.4)                              |
| Pancreatitis                                                   | 0.2<br>(0.1 to 0.2)                     | 1.5<br>(1.4 to 1.8)                     | < 0.05<br>(< 0.05 to < 0.05)      | 55.1<br>(49.0 to 61.8)                            | -0.0<br>(-3.6 to 3.6)                               |
| Other digestive diseases                                       | --                                      | --                                      | 0.6<br>(0.4 to 0.8)               | 60.1<br>(46.2 to 73.0)                            | 9.5<br>(2.8 to 16.4)                                |
| <b>Neurological disorders</b>                                  | <b>2,912.4<br/>(2,792.3 to 3,053.0)</b> | <b>1,453.9<br/>(1,230.6 to 1,714.9)</b> | <b>81.3<br/>(54.8 to 110.5)</b>   | <b>46.2<br/>(27.6 to 68.8)</b>                    | <b>0.8<br/>(-9.8 to 13.3)</b>                       |
| Alzheimer's disease and other dementias                        | 25.4<br>(21.3 to 30.2)                  | 4.2<br>(3.5 to 5.1)                     | 3.5<br>(2.5 to 4.7)               | 67.4<br>(58.2 to 76.4)                            | -0.2<br>(-4.5 to 4.5)                               |
| Parkinson's disease                                            | 2.6<br>(2.1 to 3.2)                     | 0.3<br>(0.3 to 0.4)                     | 0.3<br>(0.2 to 0.4)               | 82.4<br>(59.8 to 108.2)                           | 10.2<br>(-2.1 to 23.4)                              |
| Epilepsy                                                       | 28.2<br>(10.6 to 40.9)                  | 4.0<br>(1.5 to 5.8)                     | 8.8<br>(2.9 to 17.0)              | 34.3<br>(-61.3 to 358.4)                          | -2.3<br>(-71.9 to 226.8)                            |
| Multiple sclerosis                                             | 3.1<br>(2.8 to 3.6)                     | 0.1<br>(0.1 to 0.2)                     | 0.8<br>(0.6 to 1.1)               | 49.6<br>(23.8 to 77.7)                            | -1.7<br>(-16.9 to 15.6)                             |
| Motor neuron disease                                           | 0.2<br>(0.1 to 0.2)                     | < 0.05<br>(< 0.05 to < 0.05)            | < 0.05<br>(< 0.05 to 0.1)         | 48.8<br>(41.1 to 57.4)                            | 3.3<br>(-0.5 to 7.6)                                |
| Migraine                                                       | 1,203.4<br>(1,125.0 to 1,285.0)         | 142.2<br>(131.2 to 153.3)               | 55.5<br>(35.4 to 77.5)            | 45.8<br>(40.1 to 51.8)                            | 0.7<br>(-2.7 to 4.4)                                |
| Tension-type headache                                          | 2,196.6<br>(1,952.0 to 2,462.2)         | 1,302.9<br>(1,077.9 to 1,558.4)         | 9.9<br>(6.3 to 14.9)              | 48.4<br>(40.7 to 56.5)                            | 1.4<br>(-3.3 to 6.3)                                |
| Other neurological disorders                                   | < 0.05<br>(< 0.05 to < 0.05)            | 0.1<br>(< 0.05 to 0.1)                  | 2.4<br>(0.9 to 4.3)               | 65.8<br>(-40.1 to 353.4)                          | 17.0<br>(-52.2 to 183.7)                            |
| <b>Mental and substance use disorders</b>                      | <b>1,178.7<br/>(1,131.2 to 1,229.7)</b> | <b>438.2†<br/>(400.8 to 479.7)</b>      | <b>164.8<br/>(119.2 to 213.3)</b> | <b>43.3<br/>(39.7 to 46.7)</b>                    | <b>0.2<br/>(-2.1 to 2.4)</b>                        |
| Schizophrenia                                                  | 12.5<br>(10.8 to 14.2)                  | 0.9<br>(0.8 to 1.1)                     | 8.0<br>(5.8 to 10.1)              | 53.1<br>(37.9 to 69.8)                            | 0.9<br>(-8.0 to 10.2)                               |
| Alcohol use disorders                                          | 43.1<br>(36.1 to 50.7)                  | 24.1<br>(19.8 to 27.9)                  | 4.3<br>(2.9 to 6.0)               | 44.7<br>(30.5 to 60.9)                            | 2.3<br>(-7.0 to 12.7)                               |
| Drug use disorders                                             | 72.0<br>(64.4 to 81.0)                  | 8.6<br>(7.6 to 9.7)                     | 24.0<br>(16.4 to 32.2)            | 47.5<br>(33.7 to 63.0)                            | 4.5<br>(-4.5 to 14.2)                               |
| Opioid use disorders                                           | 54.1<br>(45.1 to 65.0)                  | 5.3<br>(4.5 to 6.4)                     | 22.5<br>(15.3 to 30.5)            | 48.0<br>(33.2 to 64.5)                            | 4.7<br>(-4.8 to 15.0)                               |
| Cocaine use disorders                                          | 3.0<br>(2.6 to 3.6)                     | 0.3<br>(0.3 to 0.4)                     | 0.4<br>(0.2 to 0.6)               | 40.4<br>(3.0 to 92.5)                             | 1.5<br>(-22.3 to 32.5)                              |
| Amphetamine use disorders                                      | 0.6<br>(0.4 to 0.8)                     | 0.1<br>(0.1 to 0.1)                     | 0.1<br>(< 0.05 to 0.1)            | 37.6<br>(26.2 to 50.9)                            | 2.1<br>(-5.7 to 10.7)                               |
| Cannabis use disorders                                         | 12.4<br>(10.0 to 15.3)                  | 2.3<br>(1.9 to 2.8)                     | 0.4<br>(0.2 to 0.6)               | 33.8<br>(7.9 to 64.9)                             | -0.6<br>(-17.9 to 20.2)                             |
| Other drug use disorders                                       | 2.8<br>(2.5 to 3.2)                     | 0.6<br>(0.5 to 0.6)                     | 0.6<br>(0.4 to 0.9)               | 45.9<br>(18.9 to 81.9)                            | 3.4<br>(-14.5 to 26.9)                              |
| Depressive disorders                                           | 249.0<br>(232.7 to 268.0)               | 300.1<br>(265.0 to 339.0)               | 44.4<br>(30.6 to 60.3)            | 44.2<br>(37.1 to 51.7)                            | -2.0<br>(-6.3 to 2.5)                               |
| Major depressive disorder                                      | 184.3<br>(162.7 to 208.6)               | 287.3<br>(252.3 to 326.7)               | 37.8<br>(25.8 to 51.9)            | 43.3<br>(35.5 to 52.0)                            | -2.5<br>(-7.7 to 2.9)                               |
| Dysthymia                                                      | 68.7<br>(59.6 to 79.2)                  | 12.8<br>(11.1 to 14.6)                  | 6.6<br>(4.5 to 9.7)               | 49.1<br>(42.2 to 55.9)                            | 0.4<br>(-3.0 to 3.8)                                |
| Bipolar disorder                                               | 60.8<br>(51.9 to 71.3)                  | 5.5<br>(4.7 to 6.5)                     | 12.4<br>(7.6 to 18.6)             | 42.3<br>(34.3 to 50.8)                            | 0.2<br>(-4.9 to 5.5)                                |
| Anxiety disorders                                              | 367.6<br>(323.1 to 416.9)               | 56.2<br>(49.0 to 63.7)                  | 35.6<br>(24.3 to 48.8)            | 42.7<br>(37.6 to 48.2)                            | 0.5<br>(-2.6 to 3.4)                                |
| Eating disorders                                               | 14.1<br>(11.5 to 17.0)                  | 7.4<br>(5.4 to 9.9)                     | 2.8<br>(1.7 to 4.1)               | 52.1<br>(34.6 to 72.9)                            | 13.3<br>(0.5 to 28.2)                               |
| Anorexia nervosa                                               | 2.3<br>(1.6 to 3.1)                     | 1.0<br>(0.7 to 1.4)                     | 0.5<br>(0.3 to 0.7)               | 46.7<br>(12.5 to 95.2)                            | 11.4<br>(-14.3 to 47.4)                             |
| Bulimia nervosa                                                | 10.9<br>(8.2 to 14.5)                   | 6.4<br>(4.4 to 9.0)                     | 2.3<br>(1.4 to 3.4)               | 53.3<br>(33.4 to 76.5)                            | 13.8<br>(-0.5 to 30.5)                              |
| Autistic spectrum disorders                                    | 71.7<br>(64.0 to 80.3)                  | 0.6<br>(0.4 to 0.9)                     | 10.3<br>(7.0 to 14.6)             | 38.4<br>(31.6 to 45.5)                            | -0.4<br>(-4.7 to 4.1)                               |
| Autism                                                         | 20.2<br>(17.2 to 23.7)                  | 0.1<br>(< 0.05 to 0.1)                  | 5.2<br>(3.3 to 7.5)               | 38.9<br>(28.0 to 51.4)                            | -0.3<br>(-7.4 to 7.9)                               |
| Asperger syndrome and other autistic spectrum disorders        | 51.6<br>(43.1 to 61.8)                  | 0.6<br>(0.4 to 0.8)                     | 5.2<br>(3.4 to 7.5)               | 37.8<br>(31.2 to 44.6)                            | -0.5<br>(-5.0 to 4.0)                               |

| Cause                                                      | Prevalence in thousands (95% UI)              | Incidence in thousands (95% UI)                   | YLDs in thousands (95% UI)              |                                                   |                                                     |
|------------------------------------------------------------|-----------------------------------------------|---------------------------------------------------|-----------------------------------------|---------------------------------------------------|-----------------------------------------------------|
|                                                            | 2016 counts                                   | 2016 counts                                       | 2016 counts                             | Percentage change in counts between 2006 and 2016 | Percentage change in age-standardised rates between |
| Attention-deficit/hyperactivity disorder                   | 89.8<br>(72.9 to 110.5)                       | 4.4<br>(3.5 to 5.5)                               | 1.1<br>(0.6 to 1.8)                     | 35.2<br>(25.7 to 45.4)                            | -0.4<br>(-7.0 to 6.9)                               |
| Conduct disorder                                           | 72.9<br>(59.0 to 86.4)                        | 25.2<br>(20.0 to 30.5)                            | 8.8<br>(5.4 to 13.5)                    | 31.2<br>(22.9 to 39.4)                            | -0.3<br>(-6.6 to 6.1)                               |
| Idiopathic developmental intellectual disability           | 114.6<br>(61.9 to 169.3)                      | --                                                | 4.0<br>(1.5 to 7.3)                     | 27.5<br>(17.4 to 37.6)                            | -8.6<br>(-15.9 to -1.8)                             |
| Other mental and substance use disorders                   | 123.5<br>(108.4 to 143.0)                     | 5.2<br>(4.6 to 6.0)                               | 9.2<br>(6.2 to 13.3)                    | 47.8<br>(39.8 to 56.4)                            | -0.1<br>(-4.7 to 4.5)                               |
| <b>Diabetes, urogenital, blood, and endocrine diseases</b> | <b>3,395.1</b><br><b>(3,136.7 to 3,804.0)</b> | <b>836.8†</b><br><b>(782.3 to 891.1)</b>          | <b>75.6</b><br><b>(53.4 to 103.8)</b>   | <b>51.4</b><br><b>(45.0 to 58.5)</b>              | <b>-3.8</b><br><b>(-8.0 to 1.0)</b>                 |
| Diabetes mellitus                                          | 447.2<br>(399.9 to 497.7)                     | 31.1<br>(27.5 to 35.1)                            | 40.6<br>(27.8 to 57.8)                  | 56.3<br>(45.4 to 68.9)                            | -4.2<br>(-11.4 to 3.5)                              |
| Acute glomerulonephritis                                   | 0.1<br>(0.1 to 0.1)                           | 1.0<br>(0.9 to 1.2)                               | < 0.05<br>(< 0.05 to < 0.05)            | 43.4<br>(36.6 to 50.3)                            | 0.5<br>(-3.1 to 4.4)                                |
| Chronic kidney disease                                     | 285.1<br>(258.6 to 313.4)                     | 21.7<br>(19.2 to 24.2)                            | 10.6<br>(8.0 to 13.6)                   | 53.3<br>(43.6 to 63.6)                            | -2.4<br>(-7.7 to 3.7)                               |
| Chronic kidney disease due to diabetes mellitus            | 139.4<br>(122.1 to 158.7)                     | 10.4<br>(8.8 to 12.2)                             | 4.8<br>(3.5 to 6.2)                     | 50.9<br>(34.1 to 67.9)                            | -6.9<br>(-16.7 to 2.8)                              |
| Chronic kidney disease due to hypertension                 | 43.9<br>(37.9 to 49.8)                        | 3.8<br>(3.2 to 4.5)                               | 1.3<br>(0.9 to 1.7)                     | 61.8<br>(37.5 to 88.1)                            | 0.1<br>(-13.8 to 14.4)                              |
| Chronic kidney disease due to glomerulonephritis           | 40.5<br>(34.8 to 46.1)                        | 2.5<br>(2.0 to 3.0)                               | 2.0<br>(1.4 to 2.8)                     | 44.5<br>(21.5 to 70.7)                            | -0.7<br>(-14.9 to 16.5)                             |
| Chronic kidney disease due to other causes                 | 61.3<br>(51.1 to 72.6)                        | 4.9<br>(4.1 to 5.9)                               | 2.5<br>(1.8 to 3.4)                     | 62.2<br>(37.9 to 96.2)                            | 5.7<br>(-8.9 to 27.5)                               |
| Urinary diseases and male infertility                      | 132.5<br>(116.9 to 149.3)                     | 427.9†<br>(384.3 to 474.1)                        | 3.7<br>(2.4 to 5.4)                     | 52.7<br>(32.6 to 69.7)                            | -6.7<br>(-18.8 to 3.7)                              |
| Interstitial nephritis and urinary tract infections        | 6.5<br>(5.7 to 7.4)                           | 341.6<br>(298.5 to 387.6)                         | 0.2<br>(0.1 to 0.3)                     | 42.8<br>(21.6 to 67.6)                            | 2.7<br>(-10.9 to 18.6)                              |
| Urolithiasis                                               | 2.8<br>(2.5 to 3.3)                           | 74.8<br>(65.3 to 86.6)                            | 0.2<br>(0.1 to 0.3)                     | 53.0<br>(27.7 to 81.8)                            | 1.1<br>(-16.1 to 22.2)                              |
| Benign prostatic hyperplasia                               | 90.0<br>(72.9 to 108.9)                       | 11.5<br>(9.2 to 14.2)                             | 3.0<br>(1.8 to 4.4)                     | 58.9<br>(33.4 to 80.3)                            | -6.7<br>(-20.4 to 5.0)                              |
| Male infertility                                           | 28.5<br>(24.3 to 33.4)                        | --                                                | 0.2<br>(0.1 to 0.4)                     | 15.2<br>(3.3 to 27.4)                             | -16.5<br>(-25.3 to -7.5)                            |
| Other urinary diseases                                     | --                                            | --                                                | 0.2<br>(0.1 to 0.2)                     | 21.2<br>(7.6 to 37.9)                             | -14.9<br>(-24.5 to -3.4)                            |
| Gynecological diseases                                     | 808.4<br>(759.8 to 850.1)                     | 341.8†<br>(313.8 to 373.1)                        | 10.3<br>(7.0 to 14.8)                   | 44.9<br>(38.6 to 51.6)                            | -4.0<br>(-7.7 to 0.2)                               |
| Uterine fibroids                                           | 65.7<br>(57.8 to 74.2)                        | 8.2<br>(7.0 to 9.5)                               | 1.1<br>(0.6 to 1.7)                     | 46.2<br>(33.0 to 57.8)                            | -11.3<br>(-18.7 to -5.0)                            |
| Polycystic ovarian syndrome                                | 6.2<br>(4.6 to 8.1)                           | 8.9<br>(6.4 to 12.0)                              | 0.1<br>(< 0.05 to 0.1)                  | 43.7<br>(23.5 to 69.5)                            | 1.9<br>(-12.2 to 19.2)                              |
| Female infertility                                         | 12.0<br>(8.0 to 17.4)                         | --                                                | 0.1<br>(< 0.05 to 0.2)                  | 25.6<br>(-2.1 to 59.4)                            | -0.8<br>(-22.5 to 25.5)                             |
| Endometriosis                                              | 1.7<br>(1.3 to 2.0)                           | 5.1<br>(4.2 to 6.4)                               | 0.2<br>(0.1 to 0.2)                     | 41.0<br>(2.5 to 90.5)                             | 1.1<br>(-25.7 to 33.4)                              |
| Genital prolapse                                           | 266.8<br>(232.0 to 302.8)                     | 22.3<br>(19.1 to 26.1)                            | 0.8<br>(0.4 to 1.5)                     | 45.1<br>(35.5 to 56.3)                            | -9.4<br>(-15.3 to -2.7)                             |
| Premenstrual syndrome                                      | 442.8<br>(402.0 to 482.7)                     | 168.8<br>(151.5 to 185.5)                         | 3.7<br>(2.3 to 5.7)                     | 40.5<br>(27.8 to 52.9)                            | -3.6<br>(-11.8 to 4.7)                              |
| Other gynecological diseases                               | 132.2<br>(113.0 to 154.0)                     | 128.4<br>(105.5 to 155.0)                         | 4.5<br>(3.0 to 6.5)                     | 49.0<br>(38.9 to 59.4)                            | -0.7<br>(-6.7 to 5.7)                               |
| Hemoglobinopathies and hemolytic anaemias                  | 2,452.3<br>(2,154.4 to 2,931.0)               | --                                                | 7.5<br>(4.5 to 12.2)                    | 35.8<br>(24.2 to 48.0)                            | -1.8<br>(-9.3 to 5.5)                               |
| Thalassemias                                               | 0.4<br>(0.3 to 0.4)                           | --                                                | < 0.05<br>(< 0.05 to < 0.05)            | 30.4<br>(-6.8 to 78.7)                            | 0.4<br>(-28.0 to 37.3)                              |
| Thalassaemias trait                                        | 352.1<br>(331.8 to 373.9)                     | --                                                | 4.0<br>(2.6 to 6.0)                     | 39.3<br>(26.9 to 53.2)                            | 0.7<br>(-7.3 to 9.3)                                |
| Sickle cell disorders                                      | 3.5<br>(0.6 to 11.7)                          | --                                                | 0.3<br>(0.1 to 1.0)                     | 38.4<br>(7.6 to 85.5)                             | 6.0<br>(-17.4 to 41.8)                              |
| Sickle cell trait                                          | 888.1<br>(386.5 to 1,886.0)                   | --                                                | 2.2<br>(0.8 to 5.2)                     | 35.1<br>(19.0 to 52.5)                            | -0.6<br>(-11.7 to 11.0)                             |
| G6PD deficiency                                            | 415.4<br>(377.1 to 462.9)                     | --                                                | < 0.05<br>(< 0.05 to < 0.05)            | 10.9<br>(-3.4 to 29.5)                            | -16.9<br>(-25.8 to -5.2)                            |
| G6PD trait                                                 | 1,113.4<br>(1,047.8 to 1,179.1)               | --                                                | < 0.05<br>(< 0.05 to < 0.05)            | 42.5<br>(29.6 to 56.3)                            | 3.6<br>(-4.9 to 12.6)                               |
| Other hemoglobinopathies and hemolytic anaemias            | 51.6<br>(47.4 to 56.1)                        | --                                                | 0.9<br>(0.6 to 1.3)                     | 23.4<br>(8.5 to 38.4)                             | -15.6<br>(-24.1 to -7.3)                            |
| Endocrine, metabolic, blood, and immune disorders          | 100.2<br>(93.9 to 107.2)                      | 13.5<br>(12.1 to 14.9)                            | 2.9<br>(1.9 to 4.0)                     | 44.9<br>(36.4 to 55.1)                            | -1.8<br>(-6.9 to 3.9)                               |
| <b>Musculoskeletal disorders</b>                           | <b>1,187.4</b><br><b>(1,123.8 to 1,244.1)</b> | <b>646.9</b><br><b>(582.1 to 715.9)</b>           | <b>133.4</b><br><b>(96.5 to 173.6)</b>  | <b>52.9</b><br><b>(48.4 to 57.4)</b>              | <b>-0.7</b><br><b>(-2.9 to 1.6)</b>                 |
| Rheumatoid arthritis                                       | 19.7<br>(17.4 to 22.3)                        | 1.3<br>(1.1 to 1.4)                               | 4.6<br>(3.1 to 6.2)                     | 63.9<br>(50.9 to 78.9)                            | 5.7<br>(-1.8 to 13.5)                               |
| Osteoarthritis                                             | 229.3<br>(214.0 to 245.3)                     | 13.6<br>(12.4 to 14.7)                            | 14.1<br>(10.0 to 19.1)                  | 66.8<br>(60.6 to 73.0)                            | 1.1<br>(-2.4 to 4.5)                                |
| Low back and neck pain                                     | 703.7<br>(654.7 to 758.7)                     | 298.9<br>(265.3 to 335.4)                         | 81.7<br>(57.6 to 107.6)                 | 54.2<br>(48.6 to 59.7)                            | -0.0<br>(-2.9 to 2.9)                               |
| Low back pain                                              | 476.8<br>(421.5 to 544.6)                     | 236.8<br>(205.8 to 273.2)                         | 53.6<br>(37.9 to 71.0)                  | 52.4<br>(44.5 to 60.7)                            | -0.3<br>(-4.6 to 4.2)                               |
| Neck pain                                                  | 282.8<br>(243.2 to 326.3)                     | 62.1<br>(53.3 to 72.9)                            | 28.1<br>(18.8 to 39.6)                  | 57.7<br>(53.0 to 62.5)                            | 0.5<br>(-1.2 to 2.3)                                |
| Gout                                                       | 18.2<br>(16.2 to 20.6)                        | 3.8<br>(3.3 to 4.3)                               | 0.6<br>(0.4 to 0.8)                     | 59.9<br>(37.2 to 88.3)                            | -0.9<br>(-14.0 to 14.5)                             |
| Other musculoskeletal disorders                            | 379.6<br>(324.9 to 441.2)                     | 329.3<br>(275.7 to 392.9)                         | 32.5<br>(21.9 to 45.7)                  | 43.1<br>(32.4 to 54.1)                            | -4.2<br>(-10.6 to 2.1)                              |
| <b>Other non-communicable diseases</b>                     | <b>5,303.2</b><br><b>(5,159.7 to 5,423.7)</b> | <b>15,666.1†</b><br><b>(14,275.9 to 17,080.3)</b> | <b>145.3</b><br><b>(101.0 to 202.2)</b> | <b>41.9</b><br><b>(39.8 to 44.1)</b>              | <b>-2.0</b><br><b>(-3.2 to -0.8)</b>                |
| Congenital anomalies                                       | 119.9<br>(109.3 to 132.5)                     | --                                                | 18.1<br>(12.9 to 24.1)                  | 38.1<br>(30.7 to 46.8)                            | 0.7<br>(-4.7 to 6.8)                                |
| Neural tube defects                                        | 19.8<br>(17.5 to 22.3)                        | --                                                | 5.9<br>(4.1 to 8.0)                     | 44.0<br>(29.6 to 60.8)                            | 3.4<br>(-6.6 to 14.7)                               |
| Congenital heart anomalies                                 | 22.0<br>(19.1 to 25.4)                        | --                                                | 1.1<br>(0.5 to 1.8)                     | 38.5<br>(23.2 to 54.9)                            | 3.5<br>(-6.8 to 15.1)                               |
| Orofacial clefts                                           | 4.2<br>(3.7 to 4.8)                           | --                                                | 0.1<br>(< 0.05 to 0.1)                  | 22.4<br>(9.4 to 37.4)                             | -11.6<br>(-20.9 to -0.7)                            |
| Down's syndrome                                            | 3.6<br>(3.0 to 4.2)                           | --                                                | 0.3<br>(0.2 to 0.5)                     | 37.2<br>(27.1 to 47.3)                            | 0.2<br>(-7.0 to 7.3)                                |
| Turner syndrome                                            | 2.3<br>(2.0 to 2.7)                           | --                                                | < 0.05<br>(< 0.05 to 0.1)               | 25.4<br>(-18.9 to 89.2)                           | -8.0<br>(-38.7 to 33.1)                             |
| Klinefelter syndrome                                       | 3.6<br>(3.0 to 4.2)                           | --                                                | < 0.05<br>(< 0.05 to < 0.05)            | 31.2<br>(0.5 to 69.5)                             | -2.5<br>(-25.1 to 24.7)                             |



| Cause                                         | Prevalence in thousands (95% UI)            | Incidence in thousands (95% UI)          | YLDs in thousands (95% UI)           |                                                   |                                                     |
|-----------------------------------------------|---------------------------------------------|------------------------------------------|--------------------------------------|---------------------------------------------------|-----------------------------------------------------|
|                                               | 2016 counts                                 | 2016 counts                              | 2016 counts                          | Percentage change in counts between 2006 and 2016 | Percentage change in age-standardised rates between |
| Other chromosomal abnormalities               | 24.1<br>(19.9 to 28.9)                      | --                                       | 2.3<br>(1.5 to 3.2)                  | 28.6<br>(12.9 to 44.8)                            | -1.7<br>(-13.4 to 10.8)                             |
| Congenital musculoskeletal and limb anomalies | 15.4<br>(14.0 to 17.0)                      | --                                       | 2.3<br>(1.6 to 3.2)                  | 34.0<br>(20.4 to 48.1)                            | -3.3<br>(-12.4 to 6.5)                              |
| Urogenital congenital anomalies               | 9.5<br>(8.1 to 10.9)                        | --                                       | 0.4<br>(0.2 to 0.5)                  | 31.9<br>(16.5 to 49.3)                            | 0.4<br>(-10.9 to 13.1)                              |
| Digestive congenital anomalies                | 10.4<br>(9.1 to 11.7)                       | --                                       | 0.5<br>(0.3 to 0.7)                  | 37.2<br>(16.0 to 60.4)                            | -1.2<br>(-15.1 to 13.4)                             |
| Other congenital anomalies                    | 26.8<br>(15.8 to 42.3)                      | --                                       | 5.3<br>(3.5 to 8.0)                  | 39.0<br>(27.7 to 52.0)                            | 0.3<br>(-7.9 to 9.5)                                |
| Skin and subcutaneous diseases                | 2,173.4<br>(2,111.4 to 2,254.6)             | 4,241.5<br>(4,037.0 to 4,488.5)          | 58.1<br>(39.1 to 84.0)               | 38.6<br>(35.5 to 42.0)                            | 1.5<br>(-0.5 to 3.8)                                |
| Dermatitis                                    | 363.3<br>(334.8 to 395.5)                   | 473.5<br>(433.7 to 516.0)                | 13.9<br>(8.2 to 22.9)                | 36.4<br>(29.6 to 43.7)                            | -0.4<br>(-4.6 to 4.4)                               |
| Psoriasis                                     | 52.8<br>(49.6 to 56.2)                      | 7.8<br>(7.3 to 8.2)                      | 4.6<br>(3.2 to 6.1)                  | 53.5<br>(38.8 to 69.3)                            | 6.2<br>(-2.0 to 15.5)                               |
| Cellulitis                                    | 3.6<br>(3.4 to 3.9)                         | 74.9<br>(70.0 to 80.4)                   | 0.2<br>(0.1 to 0.3)                  | 41.3<br>(12.2 to 80.5)                            | 1.1<br>(-17.2 to 24.4)                              |
| Pyoderma                                      | 16.1<br>(15.5 to 16.7)                      | 360.2<br>(347.0 to 374.2)                | 0.1<br>(< 0.05 to 0.2)               | 44.4<br>(31.6 to 57.6)                            | 0.9<br>(-6.0 to 8.3)                                |
| Scabies                                       | 73.5<br>(62.2 to 88.5)                      | 227.1<br>(191.4 to 272.3)                | 1.9<br>(1.0 to 3.1)                  | 25.9<br>(18.7 to 32.8)                            | -7.2<br>(-11.9 to -2.9)                             |
| Fungal skin diseases                          | 452.9<br>(408.1 to 505.9)                   | 1,547.4<br>(1,385.3 to 1,716.9)          | 2.6<br>(1.0 to 5.3)                  | 41.6<br>(38.8 to 44.6)                            | 0.1<br>(-1.1 to 1.3)                                |
| Viral skin diseases                           | 219.9<br>(208.7 to 232.2)                   | 312.7<br>(295.2 to 331.2)                | 6.8<br>(4.2 to 10.1)                 | 36.7<br>(31.9 to 41.7)                            | 0.5<br>(-2.8 to 3.9)                                |
| Acne vulgaris                                 | 753.0<br>(667.0 to 846.0)                   | 542.6<br>(436.7 to 696.1)                | 19.4<br>(13.0 to 28.0)               | 37.2<br>(31.0 to 43.6)                            | 3.1<br>(-1.3 to 7.7)                                |
| Alopecia areata                               | 14.1<br>(13.2 to 15.0)                      | 25.0<br>(23.4 to 26.7)                   | 0.5<br>(0.3 to 0.7)                  | 41.8<br>(26.1 to 59.8)                            | 0.0<br>(-9.6 to 11.4)                               |
| Pruritus                                      | 59.4<br>(52.2 to 67.0)                      | 47.8<br>(42.5 to 54.2)                   | 0.6<br>(0.3 to 1.2)                  | 46.9<br>(38.1 to 56.1)                            | 1.6<br>(-3.3 to 6.7)                                |
| Urticaria                                     | 83.4<br>(72.2 to 97.3)                      | 149.6<br>(129.1 to 175.0)                | 5.0<br>(3.2 to 7.4)                  | 36.2<br>(28.2 to 45.1)                            | 0.2<br>(-5.0 to 5.8)                                |
| Decubitus ulcer                               | 1.7<br>(1.5 to 1.9)                         | 6.1<br>(5.5 to 6.8)                      | 0.3<br>(0.2 to 0.4)                  | 55.0<br>(41.2 to 70.4)                            | -0.9<br>(-11.5 to 11.9)                             |
| Other skin and subcutaneous diseases          | 413.0<br>(401.3 to 426.2)                   | 467.0<br>(452.7 to 481.9)                | 2.3<br>(1.1 to 4.1)                  | 53.6<br>(49.0 to 58.1)                            | 4.6<br>(2.1 to 7.1)                                 |
| Sense organ diseases                          | 1,355.2<br>(1,308.9 to 1,408.0)             | 702.6†<br>(655.5 to 753.4)               | 53.1<br>(37.1 to 73.8)               | 43.4<br>(39.9 to 47.4)                            | -5.2<br>(-7.1 to -3.5)                              |
| Glaucoma                                      | 6.3<br>(5.0 to 7.8)                         | --                                       | 0.6<br>(0.4 to 0.8)                  | 53.4<br>(38.7 to 70.2)                            | -0.5<br>(-9.2 to 9.7)                               |
| Cataract                                      | 76.9<br>(64.6 to 91.5)                      | --                                       | 5.4<br>(3.7 to 7.6)                  | 54.0<br>(46.3 to 62.7)                            | -5.6<br>(-10.2 to -0.8)                             |
| Macular degeneration                          | 7.0<br>(5.3 to 9.4)                         | --                                       | 0.5<br>(0.3 to 0.7)                  | 57.9<br>(42.6 to 75.4)                            | 1.9<br>(-7.2 to 11.8)                               |
| Refraction and accommodation disorders        | 725.7<br>(662.1 to 796.2)                   | --                                       | 14.9<br>(9.4 to 23.0)                | 33.8<br>(28.3 to 39.9)                            | -9.1<br>(-12.8 to -5.6)                             |
| Age-related and other hearing loss            | 713.0<br>(665.2 to 766.0)                   | --                                       | 24.2<br>(16.8 to 33.6)               | 44.7<br>(38.3 to 51.0)                            | -5.0<br>(-7.9 to -2.2)                              |
| Other vision loss                             | 37.3<br>(31.8 to 43.6)                      | --                                       | 2.8<br>(1.9 to 3.8)                  | 51.0<br>(39.1 to 63.2)                            | -1.3<br>(-7.4 to 5.5)                               |
| Other sense organ diseases                    | 158.9<br>(147.2 to 171.3)                   | 702.6<br>(655.5 to 753.4)                | 4.9<br>(3.0 to 7.3)                  | 52.1<br>(45.0 to 59.2)                            | 1.2<br>(-2.4 to 5.0)                                |
| Oral disorders                                | 3,833.4<br>(3,600.8 to 4,021.7)             | 10,722.0†<br>(9,386.7 to 12,068.0)       | 16.0<br>(9.6 to 24.7)                | 54.7<br>(51.2 to 58.3)                            | 0.6<br>(-1.4 to 2.4)                                |
| Caries of deciduous teeth                     | 618.8<br>(484.4 to 735.0)                   | 2,456.9<br>(1,677.9 to 3,309.2)          | 0.1<br>(0.1 to 0.3)                  | 43.2<br>(11.9 to 71.7)                            | 8.8<br>(-15.0 to 30.3)                              |
| Caries of permanent teeth                     | 2,722.5<br>(2,433.7 to 3,027.2)             | 8,166.6<br>(7,082.8 to 9,265.4)          | 1.6<br>(0.7 to 3.1)                  | 39.3<br>(32.9 to 46.1)                            | -1.9<br>(-5.6 to 1.9)                               |
| Periodontal disease                           | 643.8<br>(531.7 to 779.3)                   | 80.2<br>(64.5 to 98.5)                   | 4.2<br>(1.7 to 8.8)                  | 60.8<br>(54.2 to 67.7)                            | 0.8<br>(-2.6 to 4.6)                                |
| Edentulism and severe tooth loss              | 228.8<br>(196.7 to 263.6)                   | 18.3<br>(15.3 to 21.2)                   | 6.3<br>(4.1 to 8.9)                  | 62.0<br>(55.8 to 68.0)                            | 0.9<br>(-2.3 to 3.9)                                |
| Other oral disorders                          | 125.8<br>(119.9 to 132.0)                   | --                                       | 3.7<br>(2.3 to 5.5)                  | 44.7<br>(39.7 to 50.1)                            | 0.3<br>(-2.6 to 3.5)                                |
| <b>Injuries</b>                               | <b>1,053.8</b><br><b>(980.8 to 1,136.5)</b> | <b>528.0†</b><br><b>(496.0 to 563.0)</b> | <b>35.0</b><br><b>(23.1 to 50.2)</b> | <b>48.4</b><br><b>(44.6 to 52.1)</b>              | <b>0.8</b><br><b>(-1.5 to 3.0)</b>                  |
| <b>Transport injuries</b>                     | <b>144.7</b><br><b>(133.1 to 156.4)</b>     | <b>56.8</b><br><b>(51.2 to 62.7)</b>     | <b>7.0</b><br><b>(4.6 to 10.0)</b>   | <b>46.6</b><br><b>(42.3 to 50.5)</b>              | <b>-2.1</b><br><b>(-4.4 to 0.1)</b>                 |
| Road injuries                                 | 93.8<br>(87.5 to 100.5)                     | 42.1<br>(37.2 to 47.4)                   | 4.6<br>(3.1 to 6.7)                  | 54.5<br>(50.6 to 58.5)                            | 1.8<br>(-0.4 to 3.9)                                |
| Pedestrian road injuries                      | 19.2<br>(16.8 to 21.9)                      | 6.2<br>(5.1 to 7.4)                      | 0.9<br>(0.6 to 1.3)                  | 47.6<br>(43.5 to 51.6)                            | -3.1<br>(-5.4 to -1.0)                              |
| Cyclist road injuries                         | 17.6<br>(14.6 to 20.8)                      | 8.7<br>(6.7 to 10.8)                     | 0.8<br>(0.5 to 1.2)                  | 56.0<br>(51.4 to 60.2)                            | 4.5<br>(2.1 to 6.8)                                 |
| Motorcyclist road injuries                    | 16.0<br>(13.6 to 19.1)                      | 4.7<br>(3.7 to 5.9)                      | 0.7<br>(0.5 to 1.1)                  | 58.1<br>(53.5 to 62.4)                            | 5.1<br>(2.6 to 7.5)                                 |
| Motor vehicle road injuries                   | 31.1<br>(26.8 to 35.6)                      | 16.8<br>(14.4 to 19.4)                   | 1.7<br>(1.2 to 2.4)                  | 55.8<br>(51.8 to 60.1)                            | 1.9<br>(-0.2 to 4.1)                                |
| Other road injuries                           | 9.9<br>(8.5 to 11.7)                        | 5.7<br>(4.5 to 7.4)                      | 0.5<br>(0.3 to 0.7)                  | 56.1<br>(52.0 to 60.1)                            | 2.0<br>(-0.2 to 4.1)                                |
| Other transport injuries                      | 50.9<br>(42.6 to 60.8)                      | 14.7<br>(12.6 to 17.4)                   | 2.3<br>(1.5 to 3.4)                  | 33.0<br>(28.2 to 37.6)                            | -9.7<br>(-12.4 to -6.9)                             |
| <b>Unintentional injuries</b>                 | <b>846.8</b><br><b>(776.5 to 918.0)</b>     | <b>450.9</b><br><b>(419.4 to 485.8)</b>  | <b>25.1</b><br><b>(16.5 to 36.1)</b> | <b>49.3</b><br><b>(45.4 to 52.8)</b>              | <b>1.7</b><br><b>(-0.5 to 3.8)</b>                  |
| Falls                                         | 277.6<br>(235.0 to 320.6)                   | 141.1<br>(118.8 to 170.2)                | 9.7<br>(6.6 to 13.7)                 | 49.2<br>(45.5 to 52.7)                            | 0.9<br>(-1.4 to 3.0)                                |
| Drowning                                      | 2.0<br>(1.7 to 2.4)                         | 0.5<br>(0.4 to 0.6)                      | 0.1<br>(0.1 to 0.1)                  | 39.3<br>(34.3 to 44.4)                            | -4.2<br>(-7.4 to -1.0)                              |
| Fire, heat, and hot substances                | 87.7<br>(73.5 to 106.3)                     | 13.3<br>(10.6 to 16.0)                   | 2.1<br>(1.3 to 3.2)                  | 45.2<br>(37.5 to 52.0)                            | -1.7<br>(-6.2 to 2.1)                               |
| Poisonings                                    | 4.1<br>(3.4 to 4.9)                         | 7.2<br>(5.7 to 9.0)                      | 0.4<br>(0.2 to 0.5)                  | 59.5<br>(47.1 to 73.8)                            | 11.3<br>(3.6 to 19.7)                               |
| Exposure to mechanical forces                 | 133.5<br>(113.0 to 166.2)                   | 64.2<br>(53.0 to 75.0)                   | 2.9<br>(1.9 to 4.3)                  | 53.3<br>(48.9 to 57.6)                            | 3.6<br>(1.0 to 6.1)                                 |
| Unintentional firearm injuries                | 6.2<br>(5.0 to 7.6)                         | 1.9<br>(1.3 to 2.7)                      | 0.2<br>(0.1 to 0.4)                  | 60.4<br>(55.4 to 65.2)                            | 7.0<br>(4.1 to 9.7)                                 |
| Unintentional suffocation                     | 5.4<br>(4.2 to 6.9)                         | 1.4<br>(1.0 to 2.0)                      | 0.2<br>(0.1 to 0.3)                  | 42.0<br>(37.4 to 46.7)                            | -1.1<br>(-3.9 to 1.4)                               |
| Other exposure to mechanical forces           | 121.9<br>(102.1 to 154.3)                   | 60.8<br>(49.9 to 71.3)                   | 2.5<br>(1.6 to 3.7)                  | 53.5<br>(49.0 to 57.8)                            | 3.6<br>(0.9 to 6.2)                                 |

| Cause                                                                               | Prevalence in thousands (95% UI)        | Incidence in thousands (95% UI)       | YLDs in thousands (95% UI)           |                                                   |                                                     |
|-------------------------------------------------------------------------------------|-----------------------------------------|---------------------------------------|--------------------------------------|---------------------------------------------------|-----------------------------------------------------|
|                                                                                     | 2016 counts                             | 2016 counts                           | 2016 counts                          | Percentage change in counts between 2006 and 2016 | Percentage change in age-standardised rates between |
| Adverse effects of medical treatment                                                | 2.0<br>(1.6 to 2.6)                     | 26.8<br>(22.3 to 31.6)                | 0.3<br>(0.2 to 0.4)                  | 48.5<br>(41.8 to 55.6)                            | 6.4<br>(2.5 to 10.4)                                |
| Animal contact                                                                      | 38.3<br>(33.5 to 44.6)                  | 54.9<br>(44.1 to 66.4)                | 1.2<br>(0.8 to 1.7)                  | 40.0<br>(32.2 to 48.1)                            | -3.3<br>(-8.1 to 1.5)                               |
| Venomous animal contact                                                             | 15.7<br>(12.8 to 18.9)                  | 23.2<br>(17.5 to 30.3)                | 0.9<br>(0.6 to 1.2)                  | 43.1<br>(32.5 to 55.2)                            | 0.0<br>(-6.8 to 7.1)                                |
| Non-venomous animal contact                                                         | 22.6<br>(18.6 to 28.1)                  | 31.7<br>(24.7 to 39.0)                | 0.3<br>(0.2 to 0.5)                  | 32.2<br>(26.1 to 37.1)                            | -10.5<br>(-14.1 to -7.7)                            |
| Foreign body                                                                        | 59.1<br>(49.0 to 71.2)                  | 42.9<br>(36.9 to 50.1)                | 1.8<br>(1.1 to 2.6)                  | 39.0<br>(33.2 to 43.9)                            | -3.2<br>(-6.8 to -0.1)                              |
| Pulmonary aspiration and foreign body in airway                                     | 19.1<br>(14.1 to 25.6)                  | 8.2<br>(6.6 to 10.3)                  | 0.7<br>(0.4 to 1.1)                  | 31.6<br>(25.9 to 36.7)                            | -7.4<br>(-10.8 to -4.4)                             |
| Foreign body in eyes                                                                | 3.2<br>(1.7 to 4.8)                     | 17.1<br>(13.0 to 23.1)                | 0.2<br>(0.1 to 0.3)                  | 44.8<br>(39.7 to 51.9)                            | 0.0<br>(-2.7 to 3.1)                                |
| Foreign body in other body part                                                     | 36.9<br>(29.8 to 47.6)                  | 17.6<br>(14.4 to 21.1)                | 0.9<br>(0.6 to 1.3)                  | 44.2<br>(37.4 to 50.4)                            | -0.5<br>(-4.8 to 3.4)                               |
| Environmental heat and cold exposure                                                | 56.3<br>(46.9 to 66.8)                  | 18.4<br>(14.6 to 22.9)                | 1.8<br>(1.2 to 2.7)                  | 41.2<br>(36.7 to 45.6)                            | -3.1<br>(-5.9 to -0.6)                              |
| Other unintentional injuries                                                        | 186.2<br>(147.4 to 231.5)               | 81.6<br>(68.3 to 97.4)                | 5.0<br>(3.2 to 7.3)                  | 58.4<br>(54.4 to 61.9)                            | 8.0<br>(5.8 to 10.0)                                |
| <b>Self-harm and interpersonal violence</b>                                         | <b>193.6</b><br><b>(172.8 to 215.2)</b> | <b>20.1†</b><br><b>(17.3 to 23.4)</b> | <b>2.6</b><br><b>(1.8 to 3.6)</b>    | <b>34.4</b><br><b>(29.8 to 38.8)</b>              | <b>-6.2</b><br><b>(-8.4 to -3.7)</b>                |
| Self-harm                                                                           | 4.7<br>(4.0 to 5.4)                     | 2.1<br>(1.7 to 2.5)                   | 0.2<br>(0.1 to 0.3)                  | 45.6<br>(39.5 to 51.9)                            | -2.9<br>(-6.5 to 0.6)                               |
| Self-harm by firearm                                                                | 0.3<br>(0.3 to 0.4)                     | 0.1<br>( $< 0.05$ to 0.1)             | $< 0.05$<br>( $< 0.05$ to $< 0.05$ ) | 42.7<br>(36.4 to 48.7)                            | -0.8<br>(-4.5 to 2.5)                               |
| Self-harm by other specified means                                                  | 4.3<br>(3.6 to 5.1)                     | 2.0<br>(1.6 to 2.4)                   | 0.2<br>(0.1 to 0.3)                  | 45.8<br>(39.4 to 52.2)                            | -3.0<br>(-6.8 to 0.6)                               |
| Interpersonal violence                                                              | 189.0<br>(168.3 to 210.5)               | 18.0†<br>(15.2 to 21.4)               | 2.4<br>(1.7 to 3.4)                  | 33.5<br>(29.0 to 38.1)                            | -6.4<br>(-8.8 to -3.9)                              |
| Assault by firearm                                                                  | 1.6<br>(1.4 to 1.9)                     | 0.6<br>(0.5 to 0.8)                   | 0.1<br>( $< 0.05$ to 0.1)            | 44.2<br>(38.8 to 49.5)                            | -4.4<br>(-7.3 to -1.6)                              |
| Assault by sharp object                                                             | 10.0<br>(8.2 to 12.0)                   | 4.8<br>(3.6 to 6.1)                   | 0.3<br>(0.2 to 0.4)                  | 43.8<br>(38.8 to 48.6)                            | -3.3<br>(-6.0 to -0.7)                              |
| Sexual violence                                                                     | 158.6<br>(139.0 to 179.9)               | --                                    | 1.4<br>(0.9 to 2.0)                  | 26.0<br>(19.4 to 32.7)                            | -9.0<br>(-12.8 to -4.7)                             |
| Assault by other means                                                              | 18.7<br>(15.8 to 22.5)                  | 12.6<br>(10.5 to 14.9)                | 0.7<br>(0.5 to 1.0)                  | 45.1<br>(41.0 to 48.5)                            | -3.9<br>(-6.1 to -1.9)                              |
| <b>Forces of nature, conflict and terrorism, and executions and police conflict</b> | <b>27.3</b><br><b>(10.3 to 48.0)</b>    | <b>0.2†</b><br><b>(0.1 to 0.3)</b>    | <b>0.3</b><br><b>(0.1 to 0.9)</b>    | <b>352.9</b><br><b>(280.7 to 383.1)</b>           | <b>241.2</b><br><b>(193.1 to 261.3)</b>             |
| Exposure to forces of nature                                                        | --                                      | --                                    | --                                   | --                                                | --                                                  |
| Conflict and terrorism                                                              | 26.8<br>(9.9 to 47.4)                   | --                                    | 0.3<br>(0.1 to 0.9)                  | 396.6<br>(334.0 to 429.1)                         | 275.3<br>(235.6 to 295.8)                           |
| Executions and police conflict                                                      | 0.5<br>(0.3 to 0.9)                     | 0.2<br>(0.1 to 0.3)                   | $< 0.05$<br>( $< 0.05$ to $< 0.05$ ) | 44.6<br>(35.9 to 53.3)                            | 9.2<br>(2.9 to 15.4)                                |
| <b>Impairments</b>                                                                  | --                                      | --                                    | --                                   | --                                                | --                                                  |
| Anaemia                                                                             | 1,863.8<br>(1,723.8 to 2,028.6)         | --                                    | 47.3<br>(31.7 to 69.2)               | 34.6<br>(25.7 to 44.0)                            | -5.4<br>(-10.6 to -0.0)                             |
| Developmental intellectual disability                                               | 214.6<br>(163.3 to 269.8)               | --                                    | 22.8<br>(16.4 to 30.5)               | 35.3<br>(28.5 to 42.6)                            | -2.3<br>(-7.0 to 2.7)                               |
| Epilepsy                                                                            | 40.6<br>(21.9 to 54.7)                  | --                                    | 16.0<br>(9.2 to 25.5)                | 37.0<br>(-23.2 to 155.2)                          | -0.6<br>(-45.0 to 85.7)                             |
| Guillain-Barre syndrome                                                             | 0.1<br>(0.1 to 0.1)                     | --                                    | $< 0.05$<br>( $< 0.05$ to $< 0.05$ ) | 43.6<br>(39.6 to 48.5)                            | -0.1<br>(-0.2 to 0.0)                               |
| Hearing loss                                                                        | 819.7<br>(771.5 to 872.1)               | --                                    | 30.1<br>(21.1 to 40.9)               | 40.6<br>(35.5 to 45.5)                            | -5.4<br>(-8.0 to -3.1)                              |
| Heart failure                                                                       | 44.1<br>(39.0 to 50.3)                  | --                                    | 4.2<br>(3.0 to 5.7)                  | 56.6<br>(47.2 to 66.2)                            | -2.2<br>(-8.2 to 4.0)                               |
| Infertility                                                                         | 92.4<br>(82.7 to 104.3)                 | --                                    | 0.6<br>(0.3 to 1.2)                  | 32.8<br>(22.4 to 43.3)                            | -4.5<br>(-12.2 to 2.8)                              |
| Pelvic inflammatory disease                                                         | 3.2<br>(2.5 to 4.0)                     | --                                    | 0.4<br>(0.3 to 0.6)                  | 40.0<br>(15.3 to 70.8)                            | -3.3<br>(-19.3 to 15.6)                             |
| Vision loss                                                                         | 899.5<br>(826.2 to 982.3)               | --                                    | 30.6<br>(21.4 to 42.6)               | 40.8<br>(36.1 to 46.5)                            | -5.8<br>(-8.7 to -2.7)                              |

We did not calculate incidence for the nine impairments, certain NTDs, and causes with only birth prevalence. Blank cells mean that no estimate is available.

† Incidence for aggregate causes represents the sum of the incidence of the causes below the aggregate.

‡ Incidence estimates for stroke represent first-ever stroke only.

^ Incidence of HIV/AIDS represents new infections of HIV only and does not include new infections of Tuberculosis in HIV positive cases.



SR Table 14: Prevalence, incidence, and YLDs for 2016, percentage change of YLD counts and percentage change of age-standardised YLD rates between 2006 and 2016 by cause and impairments, for all ages, Kazakhstan.

| Cause                                                                                | Prevalence in thousands (95% UI)          | Incidence in thousands (95% UI)            | YLDs in thousands (95% UI)             |                                                   |                                                     |
|--------------------------------------------------------------------------------------|-------------------------------------------|--------------------------------------------|----------------------------------------|---------------------------------------------------|-----------------------------------------------------|
|                                                                                      | 2016 counts                               | 2016 counts                                | 2016 counts                            | Percentage change in counts between 2006 and 2016 | Percentage change in age-standardised rates between |
| <b>All causes</b>                                                                    | <b>17,129.8</b><br>(17,055.2 to 17,220.6) | <b>89,559.6†</b><br>(85,431.1 to 94,093.9) | <b>1,898.3</b><br>(1,404.5 to 2,479.1) | <b>13.3</b><br>(10.8 to 15.7)                     | <b>-1.2</b><br>(-3.2 to 0.8)                        |
| <b>Communicable, maternal, neonatal, and nutritional disorders</b>                   | <b>12,117.0</b><br>(11,648.2 to 12,681.0) | <b>39,334.6†</b><br>(36,062.3 to 42,968.5) | <b>225.9</b><br>(157.8 to 313.4)       | <b>7.7</b><br>(2.8 to 12.8)                       | <b>-7.1</b><br>(-11.3 to -2.9)                      |
| <b>HIV/AIDS and tuberculosis</b>                                                     | <b>3,769.5</b><br>(3,462.9 to 4,024.0)    | <b>16.8†</b><br>(14.7 to 18.9)             | <b>3.6</b><br>(2.1 to 5.9)             | <b>-23.6</b><br>(-37.8 to -3.8)                   | <b>-31.5</b><br>(-43.6 to -14.7)                    |
| Tuberculosis                                                                         | 3,534.8<br>(3,258.1 to 3,856.6)           | 15.2†<br>(13.3 to 17.2)                    | 2.0<br>(1.3 to 2.8)                    | -43.0<br>(-51.8 to -32.7)                         | -47.7<br>(-55.3 to -38.9)                           |
| Drug-susceptible tuberculosis                                                        | 5.0<br>(4.3 to 5.8)                       | 11.5<br>(9.8 to 13.3)                      | 1.5<br>(1.0 to 2.1)                    | -43.3<br>(-56.3 to -26.5)                         | -48.0<br>(-59.5 to -32.4)                           |
| Multidrug-resistant tuberculosis without extensive drug resistance                   | 1.3<br>(1.0 to 1.7)                       | 3.1<br>(2.2 to 4.0)                        | 0.4<br>(0.2 to 0.6)                    | -49.1<br>(-71.7 to -4.4)                          | -53.4<br>(-73.5 to -13.0)                           |
| Extensively drug-resistant tuberculosis                                              | 0.3<br>(0.2 to 0.4)                       | 0.7<br>(0.5 to 0.9)                        | 0.1<br>(0.1 to 0.1)                    | 54.5<br>(-6.3 to 177.2)                           | 41.7<br>(-14.7 to 153.6)                            |
| Latent tuberculosis infection                                                        | 3,528.2<br>(3,251.6 to 3,849.7)           | --                                         | --                                     | --                                                | --                                                  |
| HIV/AIDS                                                                             | 13.0<br>(7.8 to 22.3)                     | 1.6^<br>(0.9 to 2.7)                       | 1.6<br>(0.6 to 3.6)                    | 37.2<br>(5.3 to 76.6)                             | 19.9<br>(-7.9 to 54.2)                              |
| Drug-susceptible HIV/AIDS - Tuberculosis                                             | 0.1<br>(< 0.05 to 0.1)                    | 0.1<br>(0.1 to 0.2)                        | < 0.05<br>(< 0.05 to < 0.05)           | -55.1<br>(-64.0 to -41.2)                         | -60.7<br>(-68.5 to -48.5)                           |
| Multidrug-resistant HIV/AIDS - Tuberculosis without extensive drug resistance        | < 0.05<br>(< 0.05 to < 0.05)              | < 0.05<br>(< 0.05 to 0.1)                  | < 0.05<br>(< 0.05 to < 0.05)           | -61.0<br>(-76.7 to -29.8)                         | -65.8<br>(-79.6 to -38.5)                           |
| Extensively drug-resistant HIV/AIDS - Tuberculosis                                   | < 0.05<br>(< 0.05 to < 0.05)              | < 0.05<br>(< 0.05 to < 0.05)               | < 0.05<br>(< 0.05 to < 0.05)           | 20.2<br>(-28.1 to 116.4)                          | 5.3<br>(-37.0 to 89.5)                              |
| HIV/AIDS resulting in other diseases                                                 | 13.0<br>(7.7 to 22.2)                     | 1.6<br>(0.9 to 2.7)                        | 1.5<br>(0.6 to 3.5)                    | 43.3<br>(9.0 to 94.0)                             | 25.2<br>(-5.1 to 68.8)                              |
| <b>Diarrhoea, lower respiratory infections, and other common infectious diseases</b> | <b>710.0</b><br>(673.9 to 754.1)          | <b>36,530.9†</b><br>(33,241.5 to 40,061.6) | <b>33.5</b><br>(23.0 to 45.8)          | <b>15.0</b><br>(11.3 to 19.0)                     | <b>-1.6</b><br>(-4.5 to 1.4)                        |
| Diarrhoeal diseases                                                                  | 100.5<br>(93.0 to 108.8)                  | 6,536.6<br>(6,050.7 to 7,081.8)            | 11.4<br>(7.7 to 15.8)                  | 26.9<br>(19.0 to 35.0)                            | 4.9<br>(-1.6 to 11.6)                               |
| Intestinal infectious diseases                                                       | < 0.05<br>(< 0.05 to < 0.05)              | 0.1†<br>(< 0.05 to 0.1)                    | < 0.05<br>(< 0.05 to < 0.05)           | 6.2<br>(-9.2 to 25.5)                             | -9.0<br>(-21.8 to 7.5)                              |
| Typhoid fever                                                                        | < 0.05<br>(< 0.05 to < 0.05)              | < 0.05<br>(< 0.05 to 0.1)                  | < 0.05<br>(< 0.05 to < 0.05)           | 4.4<br>(-11.8 to 24.8)                            | -10.3<br>(-23.9 to 7.2)                             |
| Paratyphoid fever                                                                    | < 0.05<br>(< 0.05 to < 0.05)              | < 0.05<br>(< 0.05 to < 0.05)               | < 0.05<br>(< 0.05 to < 0.05)           | 68.3<br>(30.8 to 116.6)                           | 45.1<br>(13.6 to 85.8)                              |
| Other intestinal infectious diseases                                                 | --                                        | --                                         | < 0.05<br>(< 0.05 to < 0.05)           | -20.3<br>(-41.8 to 10.7)                          | -34.9<br>(-50.5 to -13.1)                           |
| Lower respiratory infections                                                         | 21.9<br>(20.3 to 23.5)                    | 964.8<br>(884.5 to 1,048.0)                | 1.3<br>(0.9 to 1.9)                    | 19.2<br>(6.5 to 33.8)                             | 1.7<br>(-8.6 to 14.6)                               |
| Upper respiratory infections                                                         | 368.4<br>(324.7 to 415.5)                 | 27,450.3<br>(24,085.6 to 31,073.9)         | 9.2<br>(5.5 to 14.4)                   | 12.6<br>(5.9 to 19.6)                             | -0.4<br>(-5.4 to 4.9)                               |
| Otitis media                                                                         | 207.6<br>(185.2 to 229.0)                 | 1,176.3<br>(934.5 to 1,473.9)              | 5.9<br>(3.6 to 8.9)                    | 5.8<br>(-2.5 to 14.2)                             | -11.6<br>(-17.9 to -5.1)                            |
| Meningitis                                                                           | 33.3<br>(29.1 to 37.6)                    | 7.0<br>(6.1 to 8.2)                        | 3.8<br>(2.6 to 5.1)                    | 5.7<br>(-1.3 to 13.0)                             | -5.4<br>(-11.6 to 1.0)                              |
| Pneumococcal meningitis                                                              | 12.8<br>(11.0 to 14.9)                    | 0.9<br>(0.7 to 1.1)                        | 1.6<br>(1.1 to 2.1)                    | -1.0<br>(-15.6 to 15.2)                           | -11.4<br>(-24.6 to 3.0)                             |
| H influenzae type B meningitis                                                       | 4.4<br>(3.7 to 5.2)                       | 0.7<br>(0.5 to 1.0)                        | 0.7<br>(0.5 to 0.9)                    | -6.1<br>(-13.5 to -0.1)                           | -15.8<br>(-22.6 to -9.9)                            |
| Meningococcal infection                                                              | 6.1<br>(4.7 to 7.8)                       | 1.9<br>(1.5 to 2.4)                        | 0.7<br>(0.5 to 0.9)                    | 5.9<br>(1.8 to 10.2)                              | -5.1<br>(-8.9 to -1.3)                              |
| Other meningitis                                                                     | 10.0<br>(7.7 to 12.5)                     | 3.5<br>(3.0 to 4.1)                        | 0.9<br>(0.6 to 1.2)                    | 33.8<br>(25.2 to 44.8)                            | 19.2<br>(11.7 to 28.8)                              |
| Encephalitis                                                                         | 9.9<br>(7.3 to 13.5)                      | 5.1<br>(4.5 to 5.6)                        | 1.2<br>(0.9 to 1.7)                    | 6.0<br>(-6.9 to 19.0)                             | -6.2<br>(-17.1 to 4.5)                              |
| Diphtheria                                                                           | < 0.05<br>(< 0.05 to < 0.05)              | < 0.05<br>(< 0.05 to < 0.05)               | < 0.05<br>(< 0.05 to < 0.05)           | -31.0<br>(-61.9 to 25.0)                          | -41.7<br>(-67.2 to 6.8)                             |
| Whooping cough                                                                       | 2.6<br>(2.0 to 3.3)                       | 19.1<br>(14.8 to 24.3)                     | 0.1<br>(0.1 to 0.2)                    | 56.9<br>(23.1 to 102.3)                           | 14.0<br>(-10.9 to 48.2)                             |
| Tetanus                                                                              | < 0.05<br>(< 0.05 to < 0.05)              | < 0.05<br>(< 0.05 to < 0.05)               | < 0.05<br>(< 0.05 to < 0.05)           | -27.5<br>(-48.7 to -9.5)                          | -38.3<br>(-56.8 to -21.9)                           |
| Measles                                                                              | < 0.05<br>(< 0.05 to < 0.05)              | 0.5<br>(0.5 to 0.6)                        | < 0.05<br>(< 0.05 to < 0.05)           | -82.1<br>(-84.2 to -74.1)                         | -87.2<br>(-88.7 to -81.5)                           |
| Varicella and herpes zoster                                                          | 14.6<br>(13.5 to 15.6)                    | 371.1<br>(357.1 to 386.7)                  | 0.5<br>(0.3 to 0.8)                    | 16.7<br>(0.5 to 33.3)                             | -0.2<br>(-12.7 to 13.2)                             |
| <b>Neglected tropical diseases and malaria</b>                                       | <b>4,853.6</b><br>(3,649.0 to 6,179.9)    | <b>251.8†</b><br>(144.4 to 320.3)          | <b>9.5</b><br>(5.7 to 15.4)            | <b>16.6</b><br>(-19.0 to 67.5)                    | <b>-5.2</b><br>(-34.5 to 36.9)                      |
| Malaria                                                                              | --                                        | --                                         | --                                     | --                                                | --                                                  |
| Chagas disease                                                                       | --                                        | --                                         | --                                     | --                                                | --                                                  |
| Leishmaniasis                                                                        | < 0.05<br>(< 0.05 to < 0.05)              | < 0.05<br>(< 0.05 to 0.1)                  | < 0.05<br>(< 0.05 to < 0.05)           | -32.5<br>(-91.5 to 234.9)                         | -42.6<br>(-92.7 to 179.9)                           |
| Visceral leishmaniasis                                                               | < 0.05<br>(< 0.05 to < 0.05)              | < 0.05<br>(< 0.05 to < 0.05)               | < 0.05<br>(< 0.05 to < 0.05)           | -60.7<br>(-95.8 to 66.1)                          | -67.3<br>(-96.6 to 38.6)                            |
| Cutaneous and mucocutaneous leishmaniasis                                            | < 0.05<br>(< 0.05 to < 0.05)              | < 0.05<br>(< 0.05 to 0.1)                  | < 0.05<br>(< 0.05 to < 0.05)           | -30.7<br>(-92.8 to 317.4)                         | -40.6<br>(-94.1 to 247.8)                           |
| African trypanosomiasis                                                              | --                                        | --                                         | --                                     | --                                                | --                                                  |
| Schistosomiasis                                                                      | --                                        | --                                         | --                                     | --                                                | --                                                  |
| Cysticercosis                                                                        | --                                        | --                                         | --                                     | --                                                | --                                                  |
| Cystic echinococcosis                                                                | 1.6<br>(0.3 to 6.4)                       | 0.3<br>(0.1 to 1.2)                        | 0.1<br>(< 0.05 to 0.6)                 | -60.0<br>(-94.8 to 198.1)                         | -65.0<br>(-95.3 to 150.3)                           |
| Lymphatic filariasis                                                                 | --                                        | --                                         | --                                     | --                                                | --                                                  |
| Onchocerciasis                                                                       | --                                        | --                                         | --                                     | --                                                | --                                                  |
| Trachoma                                                                             | --                                        | --                                         | --                                     | --                                                | --                                                  |
| Dengue                                                                               | --                                        | --                                         | --                                     | --                                                | --                                                  |
| Yellow fever                                                                         | --                                        | --                                         | --                                     | --                                                | --                                                  |
| Rabies                                                                               | < 0.05<br>(< 0.05 to < 0.05)              | < 0.05<br>(< 0.05 to < 0.05)               | < 0.05<br>(< 0.05 to < 0.05)           | 42.7<br>(-9.7 to 133.9)                           | 26.4<br>(-19.9 to 106.0)                            |
| Intestinal nematode infections                                                       | 4,773.3<br>(3,530.9 to 6,130.1)           | --                                         | 4.3<br>(1.9 to 8.5)                    | 17.9<br>(-42.0 to 147.5)                          | 1.3<br>(-50.5 to 112.1)                             |
| Ascariasis                                                                           | 4,216.6<br>(3,090.6 to 5,648.2)           | --                                         | 4.2<br>(1.9 to 8.4)                    | 17.9<br>(-43.0 to 149.0)                          | 1.2<br>(-51.1 to 113.7)                             |

| Cause                                                                   | Prevalence in thousands (95% UI)                 | Incidence in thousands (95% UI)                   | YLDs in thousands (95% UI)                    |                                                   |                                                     |
|-------------------------------------------------------------------------|--------------------------------------------------|---------------------------------------------------|-----------------------------------------------|---------------------------------------------------|-----------------------------------------------------|
|                                                                         | 2016 counts                                      | 2016 counts                                       | 2016 counts                                   | Percentage change in counts between 2006 and 2016 | Percentage change in age-standardised rates between |
| Trichuriasis                                                            | 14.7<br>(8.6 to 23.9)                            | --                                                | --                                            | --                                                | --                                                  |
| Hookworm disease                                                        | 14.0<br>(9.5 to 20.2)                            | --                                                | 0.1<br>(< 0.05 to 0.1)                        | 25.1<br>(-22.8 to 99.9)                           | 13.1<br>(-30.8 to 80.9)                             |
| Food-borne trematodiasis                                                | 17.7<br>(11.0 to 22.7)                           | 251.5<br>(144.1 to 320.0)                         | 0.3<br>(0.1 to 0.7)                           | 4.2<br>(-65.4 to 59.0)                            | -13.9<br>(-73.3 to 28.7)                            |
| Leprosy                                                                 | < 0.05<br>(< 0.05 to < 0.05)                     | --                                                | < 0.05<br>(< 0.05 to < 0.05)                  | -25.7<br>(-31.2 to -20.0)                         | -35.4<br>(-40.5 to -30.0)                           |
| Ebola virus disease                                                     | --                                               | --                                                | --                                            | --                                                | --                                                  |
| Zika virus disease                                                      | --                                               | --                                                | --                                            | --                                                | --                                                  |
| Guinea worm disease                                                     | --                                               | --                                                | --                                            | --                                                | --                                                  |
| Other neglected tropical diseases                                       | 184.3<br>(169.6 to 202.0)                        | --                                                | 4.7<br>(3.1 to 7.0)                           | 23.6<br>(9.6 to 41.4)                             | -4.7<br>(-15.5 to 8.5)                              |
| <b>Maternal disorders</b>                                               | <b>17.4</b><br><b>(13.7 to 21.7)</b>             | <b>363.6†</b><br><b>(187.5 to 612.3)</b>          | <b>1.0</b><br><b>(0.6 to 1.6)</b>             | <b>7.3</b><br><b>(-21.1 to 44.4)</b>              | <b>-2.5</b><br><b>(-28.0 to 30.7)</b>               |
| Maternal haemorrhage                                                    | 3.5<br>(2.7 to 4.8)                              | 23.0<br>(16.5 to 30.9)                            | 0.1<br>(0.1 to 0.2)                           | 16.2<br>(-19.5 to 68.3)                           | 7.6<br>(-24.5 to 53.7)                              |
| Maternal sepsis and other pregnancy related infections                  | 8.6<br>(6.2 to 11.9)                             | 59.9<br>(44.7 to 80.7)                            | 0.3<br>(0.1 to 0.5)                           | 13.9<br>(-44.6 to 135.8)                          | 5.6<br>(-47.7 to 120.2)                             |
| Maternal hypertensive disorders                                         | 3.9<br>(2.4 to 5.8)                              | 16.2<br>(12.0 to 21.4)                            | 0.2<br>(0.1 to 0.3)                           | -16.4<br>(-52.5 to 46.3)                          | -25.3<br>(-57.6 to 28.8)                            |
| Maternal obstructed labour and uterine rupture                          | 0.1<br>(0.1 to 0.2)                              | 10.7<br>(7.5 to 15.0)                             | < 0.05<br>(< 0.05 to 0.1)                     | 27.7<br>(-32.8 to 133.9)                          | 13.3<br>(-39.8 to 107.1)                            |
| Maternal abortion, miscarriage, and ectopic pregnancy                   | 2.1<br>(0.6 to 4.4)                              | 253.7<br>(82.6 to 498.3)                          | 0.2<br>(0.1 to 0.5)                           | 21.9<br>(-39.1 to 132.6)                          | 8.8<br>(-44.4 to 104.8)                             |
| Other maternal disorders                                                | --                                               | --                                                | 0.2<br>(0.1 to 0.2)                           | 1.4<br>(-25.7 to 36.1)                            | -7.3<br>(-31.6 to 24.0)                             |
| <b>Neonatal disorders</b>                                               | <b>221.9</b><br><b>(184.8 to 263.1)</b>          | --                                                | <b>37.7</b><br><b>(25.3 to 54.6)</b>          | <b>12.0</b><br><b>(-2.5 to 28.6)</b>              | <b>-1.7</b><br><b>(-14.5 to 12.9)</b>               |
| Neonatal preterm birth complications                                    | 138.7<br>(109.4 to 179.7)                        | --                                                | 12.4<br>(8.0 to 17.8)                         | -0.2<br>(-20.7 to 23.3)                           | -11.5<br>(-29.5 to 9.4)                             |
| Neonatal encephalopathy due to birth asphyxia and trauma                | 82.4<br>(50.6 to 127.8)                          | --                                                | 14.2<br>(6.5 to 26.8)                         | 20.0<br>(-11.7 to 65.6)                           | 6.4<br>(-21.7 to 47.1)                              |
| Neonatal sepsis and other neonatal infections                           | 16.5<br>(7.4 to 35.1)                            | --                                                | 7.1<br>(2.7 to 16.0)                          | 22.3<br>(-5.3 to 167.3)                           | 7.2<br>(-16.6 to 127.5)                             |
| Hemolytic disease and other neonatal jaundice                           | 9.0<br>(7.8 to 10.3)                             | --                                                | 2.6<br>(1.9 to 3.4)                           | 3.3<br>(-11.4 to 20.2)                            | -8.3<br>(-21.2 to 6.1)                              |
| Other neonatal disorders                                                | --                                               | --                                                | 1.4<br>(1.0 to 2.0)                           | 29.6<br>(10.5 to 52.3)                            | -9.4<br>(-23.0 to 6.6)                              |
| <b>Nutritional deficiencies</b>                                         | <b>4,669.2</b><br><b>(4,450.6 to 4,857.6)</b>    | <b>199.8†</b><br><b>(164.5 to 238.0)</b>          | <b>129.6</b><br><b>(85.4 to 185.5)</b>        | <b>5.7</b><br><b>(-0.7 to 12.5)</b>               | <b>-9.0</b><br><b>(-14.3 to -3.2)</b>               |
| Protein-energy malnutrition                                             | 80.6<br>(62.7 to 103.0)                          | 26.8<br>(20.5 to 34.7)                            | 4.0<br>(2.3 to 6.1)                           | 13.9<br>(-23.1 to 69.6)                           | -18.4<br>(-45.4 to 22.3)                            |
| Iodine deficiency                                                       | 317.8<br>(259.4 to 380.4)                        | 6.6<br>(5.4 to 7.8)                               | 8.1<br>(5.2 to 11.8)                          | 6.5<br>(-4.1 to 17.5)                             | -3.4<br>(-12.6 to 6.7)                              |
| Vitamin A deficiency                                                    | 196.9<br>(160.5 to 238.7)                        | 166.4<br>(133.5 to 202.6)                         | --                                            | --                                                | --                                                  |
| Iron-deficiency anaemia                                                 | 4,328.4<br>(4,097.9 to 4,584.7)                  | --                                                | 117.4<br>(77.3 to 170.4)                      | 5.3<br>(-1.6 to 12.8)                             | -9.0<br>(-14.6 to -3.1)                             |
| Other nutritional deficiencies                                          | --                                               | --                                                | 0.1<br>(0.1 to 0.2)                           | 8.5<br>(-31.8 to 68.5)                            | -23.1<br>(-51.6 to 19.5)                            |
| <b>Other communicable, maternal, neonatal, and nutritional diseases</b> | <b>4,617.1</b><br><b>(4,357.6 to 4,898.5)</b>    | <b>1,971.9</b><br><b>(1,765.9 to 2,213.2)</b>     | <b>10.8</b><br><b>(6.9 to 16.3)</b>           | <b>9.7</b><br><b>(3.0 to 16.8)</b>                | <b>-4.7</b><br><b>(-10.0 to 0.9)</b>                |
| Sexually transmitted diseases excluding HIV                             | 2,646.3<br>(2,463.2 to 2,840.6)                  | 1,671.2<br>(1,467.8 to 1,906.1)                   | 6.7<br>(4.2 to 10.5)                          | 7.9<br>(0.8 to 15.9)                              | -2.5<br>(-8.5 to 4.6)                               |
| Syphilis                                                                | 96.3<br>(77.9 to 118.6)                          | 74.4<br>(58.3 to 96.8)                            | 0.7<br>(0.5 to 0.9)                           | 16.5<br>(-2.0 to 39.3)                            | -1.4<br>(-17.3 to 18.0)                             |
| Chlamydial infection                                                    | 318.9<br>(249.5 to 403.8)                        | 255.2<br>(196.0 to 324.4)                         | 1.5<br>(0.9 to 2.5)                           | 11.8<br>(-2.0 to 28.7)                            | -2.4<br>(-14.6 to 11.7)                             |
| Gonococcal infection                                                    | 218.7<br>(173.4 to 279.4)                        | 728.1<br>(553.4 to 947.5)                         | 1.3<br>(0.8 to 2.2)                           | -0.7<br>(-13.9 to 15.2)                           | -2.9<br>(-15.1 to 10.8)                             |
| Trichomoniasis                                                          | 486.0<br>(417.9 to 560.3)                        | 415.2<br>(351.7 to 484.8)                         | 0.6<br>(0.2 to 1.3)                           | 11.4<br>(4.3 to 18.9)                             | -0.8<br>(-6.6 to 5.7)                               |
| Genital herpes                                                          | 1,685.8<br>(1,445.6 to 1,968.2)                  | 101.9<br>(85.5 to 124.3)                          | 0.4<br>(0.1 to 1.0)                           | 15.4<br>(8.8 to 22.4)                             | -0.2<br>(-5.2 to 5.5)                               |
| Other sexually transmitted diseases                                     | 77.1<br>(61.5 to 96.2)                           | 96.3<br>(80.7 to 116.0)                           | 2.1<br>(1.3 to 3.1)                           | 6.0<br>(-4.8 to 17.9)                             | -3.6<br>(-13.2 to 7.0)                              |
| Hepatitis                                                               | 2,284.5<br>(1,984.8 to 2,616.7)                  | 300.6<br>(226.8 to 352.3)                         | 0.2<br>(0.1 to 0.3)                           | -56.2<br>(-64.9 to -45.1)                         | -62.2<br>(-69.7 to -53.0)                           |
| Acute hepatitis A                                                       | 13.4<br>(8.2 to 17.1)                            | 173.9<br>(106.4 to 222.2)                         | 0.1<br>(< 0.05 to 0.1)                        | -62.3<br>(-76.0 to -41.8)                         | -66.6<br>(-78.7 to -49.0)                           |
| Hepatitis B                                                             | 1,234.1<br>(985.8 to 1,543.3)                    | 85.0<br>(65.1 to 112.2)                           | 0.1<br>(< 0.05 to 0.1)                        | -62.9<br>(-70.1 to -53.8)                         | -66.6<br>(-72.8 to -59.0)                           |
| Hepatitis C                                                             | 1,036.8<br>(923.3 to 1,165.6)                    | 38.4<br>(33.2 to 44.5)                            | < 0.05<br>(< 0.05 to 0.1)                     | 26.2<br>(-15.7 to 85.6)                           | -10.6<br>(-39.9 to 32.6)                            |
| Acute hepatitis E                                                       | 0.2<br>(0.2 to 0.3)                              | 3.3<br>(2.8 to 3.8)                               | < 0.05<br>(< 0.05 to < 0.05)                  | -64.4<br>(-67.8 to -60.1)                         | -64.5<br>(-67.6 to -61.0)                           |
| Other infectious diseases                                               | 151.0<br>(139.7 to 163.4)                        | < 0.05<br>(< 0.05 to < 0.05)                      | 3.9<br>(2.5 to 5.9)                           | 21.1<br>(8.3 to 36.1)                             | -2.0<br>(-12.1 to 9.5)                              |
| <b>Non-communicable diseases</b>                                        | <b>15,871.8</b><br><b>(15,740.3 to 16,012.4)</b> | <b>47,962.6†</b><br><b>(45,701.7 to 50,598.0)</b> | <b>1,471.8</b><br><b>(1,086.4 to 1,910.4)</b> | <b>13.4</b><br><b>(10.4 to 16.7)</b>              | <b>-1.0</b><br><b>(-3.5 to 1.6)</b>                 |
| <b>Neoplasms</b>                                                        | <b>75.1</b><br><b>(71.1 to 79.8)</b>             | <b>35.3</b><br><b>(32.6 to 38.2)</b>              | <b>9.7</b><br><b>(7.1 to 12.6)</b>            | <b>0.4</b><br><b>(-7.0 to 9.5)</b>                | <b>-16.0</b><br><b>(-22.0 to -8.8)</b>              |
| Lip and oral cavity cancer                                              | 2.6<br>(2.3 to 2.9)                              | 0.7<br>(0.7 to 0.8)                               | 0.3<br>(0.2 to 0.4)                           | 14.3<br>(-5.2 to 37.5)                            | -5.6<br>(-21.2 to 13.3)                             |
| Nasopharynx cancer                                                      | 0.4<br>(0.3 to 0.4)                              | 0.1<br>(0.1 to 0.1)                               | < 0.05<br>(< 0.05 to 0.1)                     | 3.9<br>(-14.0 to 28.9)                            | -10.4<br>(-24.8 to 8.9)                             |
| Other pharynx cancer                                                    | 0.7<br>(0.6 to 0.8)                              | 0.3<br>(0.2 to 0.3)                               | 0.1<br>(0.1 to 0.1)                           | -0.5<br>(-16.6 to 15.5)                           | -19.4<br>(-31.6 to -7.2)                            |
| Oesophageal cancer                                                      | 1.3<br>(1.2 to 1.4)                              | 1.2<br>(1.1 to 1.3)                               | 0.3<br>(0.2 to 0.4)                           | -12.9<br>(-31.4 to 10.8)                          | -28.2<br>(-43.1 to -8.9)                            |
| Stomach cancer                                                          | 3.7<br>(3.5 to 3.9)                              | 2.4<br>(2.3 to 2.5)                               | 0.6<br>(0.4 to 0.8)                           | -21.8<br>(-33.7 to -6.7)                          | -34.5<br>(-44.0 to -22.0)                           |
| Colon and rectum cancer                                                 | 9.3<br>(8.7 to 10.6)                             | 2.9<br>(2.7 to 3.3)                               | 1.0<br>(0.7 to 1.3)                           | 8.1<br>(-6.7 to 30.9)                             | -9.4<br>(-21.3 to 8.5)                              |
| Liver cancer                                                            | 0.4<br>(0.3 to 0.4)                              | 1.1<br>(1.0 to 1.2)                               | 0.2<br>(0.2 to 0.3)                           | -4.9<br>(-16.9 to 4.7)                            | -21.1<br>(-30.7 to -13.4)                           |
| Liver cancer due to hepatitis B                                         | 0.3<br>(0.2 to 0.3)                              | 0.3<br>(0.2 to 0.4)                               | 0.1<br>(< 0.05 to 0.1)                        | -6.2<br>(-19.7 to 4.7)                            | -22.4<br>(-33.1 to -14.2)                           |

| Cause                                              | Prevalence in thousands (95% UI)              | Incidence in thousands (95% UI)          | YLDs in thousands (95% UI)            |                                                   |                                                     |
|----------------------------------------------------|-----------------------------------------------|------------------------------------------|---------------------------------------|---------------------------------------------------|-----------------------------------------------------|
|                                                    | 2016 counts                                   | 2016 counts                              | 2016 counts                           | Percentage change in counts between 2006 and 2016 | Percentage change in age-standardised rates between |
| Liver cancer due to hepatitis C                    | 0.3<br>(0.3 to 0.4)                           | 0.3<br>(0.3 to 0.4)                      | 0.1<br>(0.1 to 0.1)                   | -3.7<br>(-16.0 to 7.5)                            | -20.4<br>(-30.0 to -11.6)                           |
| Liver cancer due to alcohol use                    | 0.3<br>(0.2 to 0.3)                           | 0.3<br>(0.2 to 0.3)                      | 0.1<br>( $< 0.05$ to 0.1)             | -4.0<br>(-16.9 to 7.1)                            | -19.7<br>(-29.9 to -11.1)                           |
| Liver cancer due to other causes                   | 0.1<br>(0.1 to 0.2)                           | 0.1<br>(0.1 to 0.2)                      | $< 0.05$<br>( $< 0.05$ to $< 0.05$ )  | -7.0<br>(-20.9 to 3.4)                            | -22.9<br>(-32.8 to -14.6)                           |
| Gallbladder and biliary tract cancer               | 0.2<br>(0.2 to 0.2)                           | 0.2<br>(0.2 to 0.3)                      | 0.1<br>( $< 0.05$ to 0.1)             | -28.9<br>(-35.0 to -19.0)                         | -40.5<br>(-45.5 to -33.0)                           |
| Pancreatic cancer                                  | 0.8<br>(0.7 to 0.9)                           | 1.1<br>(1.0 to 1.1)                      | 0.2<br>(0.1 to 0.3)                   | 8.2<br>(-11.6 to 25.9)                            | -10.6<br>(-26.3 to 3.7)                             |
| Larynx cancer                                      | 1.3<br>(1.2 to 1.4)                           | 0.4<br>(0.4 to 0.4)                      | 0.2<br>(0.1 to 0.2)                   | -6.3<br>(-21.3 to 11.3)                           | -24.5<br>(-37.4 to -9.0)                            |
| Tracheal, bronchus, and lung cancer                | 3.7<br>(3.5 to 4.0)                           | 3.3<br>(3.1 to 3.6)                      | 0.8<br>(0.5 to 1.0)                   | -15.9<br>(-31.6 to 3.3)                           | -30.4<br>(-42.6 to -16.0)                           |
| Malignant skin melanoma                            | 1.7<br>(1.4 to 2.5)                           | 0.4<br>(0.3 to 0.6)                      | 0.1<br>(0.1 to 0.2)                   | 7.5<br>(-12.4 to 35.6)                            | -9.3<br>(-25.8 to 13.8)                             |
| Non-melanoma skin cancer                           | 3.6<br>(2.5 to 5.2)                           | 6.4<br>(4.2 to 9.2)                      | 0.1<br>(0.1 to 0.2)                   | 36.7<br>(-14.7 to 149.3)                          | 13.8<br>(-28.4 to 110.8)                            |
| Non-melanoma skin cancer (squamous-cell carcinoma) | 2.9<br>(1.8 to 4.5)                           | 2.4<br>(1.4 to 3.7)                      | 0.1<br>(0.1 to 0.2)                   | 37.1<br>(-15.8 to 163.3)                          | 14.2<br>(-29.0 to 119.4)                            |
| Non-melanoma skin cancer (basal-cell carcinoma)    | 0.6<br>(0.3 to 1.0)                           | 4.0<br>(2.1 to 6.5)                      | $< 0.05$<br>( $< 0.05$ to $< 0.05$ )  | 28.7<br>(-7.4 to 79.0)                            | 5.4<br>(-23.4 to 49.0)                              |
| Breast cancer                                      | 17.9<br>(16.2 to 20.6)                        | 3.8<br>(3.5 to 4.4)                      | 1.6<br>(1.2 to 2.2)                   | 2.8<br>(-14.1 to 24.4)                            | -13.9<br>(-27.2 to 3.7)                             |
| Cervical cancer                                    | 7.1<br>(6.4 to 8.2)                           | 1.8<br>(1.6 to 2.1)                      | 0.7<br>(0.5 to 0.9)                   | -16.8<br>(-33.9 to 5.7)                           | -29.6<br>(-43.5 to -10.7)                           |
| Uterine cancer                                     | 6.1<br>(5.5 to 7.0)                           | 1.3<br>(1.2 to 1.5)                      | 0.5<br>(0.3 to 0.7)                   | 16.1<br>(-9.1 to 50.8)                            | -5.2<br>(-25.4 to 22.9)                             |
| Ovarian cancer                                     | 3.0<br>(2.5 to 3.3)                           | 1.0<br>(0.8 to 1.1)                      | 0.4<br>(0.3 to 0.6)                   | 11.8<br>(-23.8 to 54.9)                           | -5.6<br>(-35.2 to 28.1)                             |
| Prostate cancer                                    | 4.6<br>(3.2 to 5.4)                           | 1.2<br>(0.8 to 1.4)                      | 0.5<br>(0.3 to 0.7)                   | 22.2<br>(-8.3 to 58.9)                            | 3.0<br>(-21.8 to 32.2)                              |
| Testicular cancer                                  | 0.6<br>(0.5 to 0.9)                           | 0.1<br>(0.1 to 0.2)                      | $< 0.05$<br>( $< 0.05$ to 0.1)        | -30.4<br>(-53.2 to 11.9)                          | -38.9<br>(-57.9 to -3.4)                            |
| Kidney cancer                                      | 4.3<br>(3.8 to 4.7)                           | 1.2<br>(1.0 to 1.3)                      | 0.4<br>(0.3 to 0.5)                   | 20.8<br>(-1.8 to 42.9)                            | -0.3<br>(-18.4 to 18.1)                             |
| Bladder cancer                                     | 3.2<br>(2.9 to 3.5)                           | 0.8<br>(0.7 to 0.9)                      | 0.3<br>(0.2 to 0.4)                   | 0.1<br>(-16.2 to 17.9)                            | -17.2<br>(-30.8 to -1.8)                            |
| Brain and nervous system cancer                    | 1.4<br>(1.2 to 1.6)                           | 0.6<br>(0.6 to 0.7)                      | 0.2<br>(0.1 to 0.3)                   | 5.1<br>(-19.8 to 29.8)                            | -12.0<br>(-32.0 to 7.6)                             |
| Thyroid cancer                                     | 2.3<br>(2.1 to 2.7)                           | 0.5<br>(0.4 to 0.5)                      | 0.1<br>(0.1 to 0.2)                   | 37.0<br>(8.4 to 81.5)                             | 14.7<br>(-8.3 to 49.7)                              |
| Mesothelioma                                       | 0.1<br>(0.1 to 0.1)                           | 0.1<br>(0.1 to 0.1)                      | $< 0.05$<br>( $< 0.05$ to $< 0.05$ )  | 14.4<br>(-7.3 to 27.3)                            | -6.0<br>(-22.8 to 4.6)                              |
| Hodgkin lymphoma                                   | 0.6<br>(0.4 to 0.8)                           | 0.1<br>(0.1 to 0.2)                      | 0.1<br>( $< 0.05$ to 0.1)             | 3.1<br>(-25.4 to 37.1)                            | -9.2<br>(-33.2 to 20.0)                             |
| Non-Hodgkin's lymphoma                             | 1.2<br>(1.0 to 1.6)                           | 0.4<br>(0.3 to 0.5)                      | 0.1<br>(0.1 to 0.2)                   | 12.6<br>(-10.1 to 30.6)                           | -3.5<br>(-22.2 to 10.9)                             |
| Multiple myeloma                                   | 0.2<br>(0.2 to 0.3)                           | 0.1<br>(0.1 to 0.2)                      | 0.1<br>( $< 0.05$ to 0.1)             | 19.3<br>(-9.9 to 45.3)                            | -1.6<br>(-23.9 to 18.9)                             |
| Leukaemia                                          | 2.5<br>(2.2 to 2.9)                           | 0.8<br>(0.7 to 0.8)                      | 0.3<br>(0.2 to 0.5)                   | -3.9<br>(-19.6 to 13.7)                           | -18.0<br>(-30.8 to -3.6)                            |
| Acute lymphoid leukaemia                           | 0.6<br>(0.5 to 0.8)                           | 0.2<br>(0.1 to 0.2)                      | 0.1<br>( $< 0.05$ to 0.1)             | 14.1<br>(-14.1 to 46.0)                           | -5.6<br>(-28.1 to 18.7)                             |
| Chronic lymphoid leukaemia                         | 0.8<br>(0.6 to 1.0)                           | 0.2<br>(0.1 to 0.2)                      | 0.1<br>(0.1 to 0.1)                   | -5.2<br>(-25.2 to 23.7)                           | -18.4<br>(-35.2 to 5.5)                             |
| Acute myeloid leukaemia                            | 0.4<br>(0.3 to 0.4)                           | 0.2<br>(0.2 to 0.2)                      | 0.1<br>( $< 0.05$ to 0.1)             | 3.8<br>(-19.8 to 29.2)                            | -11.7<br>(-30.9 to 8.8)                             |
| Chronic myeloid leukaemia                          | 0.2<br>(0.2 to 0.3)                           | 0.1<br>(0.1 to 0.1)                      | $< 0.05$<br>( $< 0.05$ to $< 0.05$ )  | -25.6<br>(-41.3 to -9.1)                          | -36.6<br>(-49.2 to -22.3)                           |
| Other leukaemia                                    | 0.5<br>(0.5 to 0.6)                           | 0.1<br>(0.1 to 0.1)                      | 0.1<br>( $< 0.05$ to 0.1)             | -13.7<br>(-35.2 to 24.2)                          | -23.4<br>(-41.1 to 7.9)                             |
| Other neoplasms                                    | 3.1<br>(2.5 to 3.5)                           | 1.0<br>(0.8 to 1.2)                      | 0.3<br>(0.2 to 0.4)                   | 17.6<br>(-13.8 to 41.2)                           | -0.8<br>(-25.8 to 17.8)                             |
| <b>Cardiovascular diseases</b>                     | <b>1,045.7</b><br><b>(1,007.0 to 1,084.8)</b> | <b>130.5†</b><br><b>(124.6 to 136.9)</b> | <b>90.0</b><br><b>(65.9 to 116.9)</b> | <b>12.7</b><br><b>(8.2 to 17.1)</b>               | <b>-5.2</b><br><b>(-8.9 to -1.5)</b>                |
| Rheumatic heart disease                            | 3.2<br>(2.9 to 3.6)                           | 0.9<br>(0.8 to 0.9)                      | 0.3<br>(0.2 to 0.4)                   | 1.8<br>(-17.3 to 26.4)                            | -14.0<br>(-29.9 to 6.4)                             |
| Ischaemic heart disease                            | 395.2<br>(373.0 to 417.3)                     | 56.8<br>(53.4 to 60.6)                   | 22.8<br>(16.0 to 31.1)                | 25.0<br>(19.5 to 30.8)                            | 4.5<br>(-0.2 to 9.2)                                |
| Cerebrovascular disease                            | 223.2<br>(209.2 to 237.7)                     | 35.8‡<br>(32.9 to 38.8)                  | 43.9<br>(31.1 to 55.7)                | 4.7<br>(-2.8 to 12.2)                             | -11.9<br>(-18.0 to -5.5)                            |
| Ischaemic stroke                                   | 191.3<br>(173.9 to 211.1)                     | 24.8‡<br>(22.1 to 27.6)                  | 36.1<br>(25.5 to 46.1)                | 2.6<br>(-6.5 to 11.2)                             | -13.6<br>(-20.6 to -6.2)                            |
| Hemorrhagic stroke                                 | 41.7<br>(37.8 to 46.0)                        | 11.0‡<br>(9.9 to 12.2)                   | 7.8<br>(5.5 to 10.0)                  | 15.6<br>(3.5 to 28.7)                             | -2.9<br>(-12.6 to 7.2)                              |
| Hypertensive heart disease                         | 49.8<br>(41.9 to 59.4)                        | --                                       | 4.0<br>(2.7 to 5.6)                   | 17.3<br>(5.8 to 29.8)                             | -1.6<br>(-10.9 to 8.1)                              |
| Cardiomyopathy and myocarditis                     | 22.9<br>(20.2 to 25.9)                        | 2.7+<br>(2.4 to 3.1)                     | 2.1<br>(1.4 to 3.0)                   | 16.2<br>(4.2 to 30.2)                             | -0.3<br>(-10.2 to 11.0)                             |
| Myocarditis                                        | 4.0<br>(3.6 to 4.6)                           | 2.7<br>(2.4 to 3.1)                      | 0.3<br>(0.2 to 0.5)                   | 11.9<br>(-4.0 to 32.4)                            | 0.8<br>(-13.0 to 17.3)                              |
| Alcoholic cardiomyopathy                           | 10.2<br>(8.5 to 12.1)                         | --                                       | 0.8<br>(0.6 to 1.2)                   | 18.7<br>(0.9 to 39.5)                             | -1.1<br>(-14.8 to 14.9)                             |
| Other cardiomyopathy                               | 11.3<br>(9.9 to 12.9)                         | --                                       | 0.9<br>(0.6 to 1.4)                   | 15.6<br>(-1.4 to 37.7)                            | 0.0<br>(-13.7 to 17.0)                              |
| Atrial fibrillation and flutter                    | 91.5<br>(79.8 to 105.7)                       | 7.9<br>(6.8 to 9.3)                      | 7.1<br>(4.8 to 10.0)                  | 21.2<br>(12.9 to 30.5)                            | 1.9<br>(-4.5 to 8.9)                                |
| Peripheral vascular disease                        | 257.7<br>(221.8 to 300.6)                     | 24.8<br>(21.2 to 29.0)                   | 1.2<br>(0.6 to 2.3)                   | 15.2<br>(5.2 to 25.7)                             | -4.1<br>(-11.3 to 3.7)                              |
| Endocarditis                                       | 0.3<br>(0.3 to 0.3)                           | 1.6<br>(1.4 to 1.8)                      | $< 0.05$<br>( $< 0.05$ to $< 0.05$ )  | 22.1<br>(16.0 to 28.7)                            | 2.0<br>(-3.0 to 7.5)                                |
| Other cardiovascular and circulatory diseases      | 165.0<br>(141.1 to 193.2)                     | --                                       | 8.6<br>(5.7 to 12.3)                  | 18.5<br>(8.1 to 29.2)                             | 1.0<br>(-7.0 to 9.4)                                |
| <b>Chronic respiratory diseases</b>                | <b>1,250.9</b><br><b>(1,209.7 to 1,294.0)</b> | <b>177.4†</b><br><b>(168.5 to 187.9)</b> | <b>44.9</b><br><b>(33.8 to 58.0)</b>  | <b>20.6</b><br><b>(13.9 to 27.7)</b>              | <b>3.5</b><br><b>(-2.2 to 9.6)</b>                  |
| Chronic obstructive pulmonary disease              | 595.5<br>(564.7 to 627.1)                     | 38.4<br>(36.4 to 40.5)                   | 15.2<br>(11.7 to 18.8)                | 14.3<br>(0.1 to 30.2)                             | -4.2<br>(-16.1 to 8.7)                              |
| Pneumoconiosis                                     | 1.8<br>(1.6 to 1.9)                           | 0.1<br>(0.1 to 0.2)                      | 0.3<br>(0.2 to 0.4)                   | 30.2<br>(7.7 to 55.8)                             | 7.0<br>(-12.2 to 28.3)                              |
| Silicosis                                          | 0.1<br>(0.1 to 0.1)                           | $< 0.05$<br>( $< 0.05$ to $< 0.05$ )     | $< 0.05$<br>( $< 0.05$ to $< 0.05$ )  | 52.1<br>(44.6 to 61.2)                            | 25.3<br>(19.0 to 32.0)                              |



| Cause                                                          | Prevalence in thousands (95% UI)        | Incidence in thousands (95% UI)          | YLDs in thousands (95% UI)        |                                                   |                                                     |
|----------------------------------------------------------------|-----------------------------------------|------------------------------------------|-----------------------------------|---------------------------------------------------|-----------------------------------------------------|
|                                                                | 2016 counts                             | 2016 counts                              | 2016 counts                       | Percentage change in counts between 2006 and 2016 | Percentage change in age-standardised rates between |
| Asbestosis                                                     | 0.3<br>(0.3 to 0.3)                     | < 0.05<br>(< 0.05 to < 0.05)             | < 0.05<br>(< 0.05 to 0.1)         | 13.0<br>(5.9 to 21.9)                             | -7.8<br>(-13.7 to -0.8)                             |
| Coal workers pneumoconiosis                                    | 0.2<br>(0.2 to 0.2)                     | < 0.05<br>(< 0.05 to < 0.05)             | < 0.05<br>(< 0.05 to < 0.05)      | 59.6<br>(47.0 to 74.0)                            | 29.0<br>(19.0 to 40.5)                              |
| Other pneumoconiosis                                           | 1.1<br>(1.0 to 1.3)                     | 0.1<br>(0.1 to 0.1)                      | 0.2<br>(0.1 to 0.2)               | 29.3<br>(-5.3 to 72.9)                            | 6.7<br>(-22.4 to 41.1)                              |
| Asthma                                                         | 684.9<br>(644.6 to 731.5)               | 138.1<br>(129.3 to 148.2)                | 26.5<br>(17.4 to 37.8)            | 23.5<br>(17.7 to 29.5)                            | 7.8<br>(3.1 to 12.6)                                |
| Interstitial lung disease and pulmonary sarcoidosis            | 17.1<br>(15.4 to 18.9)                  | 0.8<br>(0.7 to 0.8)                      | 1.8<br>(1.2 to 2.6)               | 19.6<br>(0.8 to 38.6)                             | 3.8<br>(-11.1 to 18.9)                              |
| Other chronic respiratory diseases                             | --                                      | --                                       | 1.2<br>(0.9 to 1.5)               | 45.1<br>(27.6 to 66.3)                            | 28.5<br>(12.6 to 47.1)                              |
| <b>Cirrhosis and other chronic liver diseases</b>              | <b>155.1<br/>(147.4 to 163.6)</b>       | <b>8.6<br/>(8.2 to 8.9)</b>              | <b>6.0<br/>(4.1 to 8.3)</b>       | <b>33.7<br/>(22.9 to 45.4)</b>                    | <b>16.1<br/>(7.2 to 25.4)</b>                       |
| Cirrhosis and other chronic liver diseases due to hepatitis B  | 48.9<br>(44.9 to 53.1)                  | 2.8<br>(2.6 to 3.0)                      | 1.6<br>(1.1 to 2.3)               | 37.6<br>(18.0 to 59.4)                            | 17.7<br>(3.0 to 34.4)                               |
| Cirrhosis and other chronic liver diseases due to hepatitis C  | 26.1<br>(23.1 to 29.6)                  | 1.5<br>(1.3 to 1.7)                      | 0.8<br>(0.6 to 1.2)               | 36.5<br>(12.3 to 66.3)                            | 16.1<br>(-3.2 to 39.3)                              |
| Cirrhosis and other chronic liver diseases due to alcohol use  | 39.1<br>(35.4 to 43.3)                  | 2.3<br>(2.1 to 2.6)                      | 1.2<br>(0.8 to 1.7)               | 41.2<br>(20.0 to 64.2)                            | 19.2<br>(3.0 to 37.0)                               |
| Cirrhosis and other chronic liver diseases due to other causes | 41.0<br>(37.9 to 44.3)                  | 1.9<br>(1.8 to 2.0)                      | 2.3<br>(1.6 to 3.3)               | 26.7<br>(9.3 to 45.7)                             | 13.3<br>(-1.4 to 30.1)                              |
| <b>Digestive diseases</b>                                      | <b>495.4<br/>(472.4 to 523.0)</b>       | <b>679.8†<br/>(637.0 to 723.3)</b>       | <b>17.9<br/>(12.6 to 24.0)</b>    | <b>20.3<br/>(12.0 to 29.1)</b>                    | <b>0.9<br/>(-6.0 to 8.6)</b>                        |
| Peptic ulcer disease                                           | 136.0<br>(123.7 to 150.6)               | 21.1<br>(18.9 to 23.6)                   | 2.7<br>(1.8 to 3.9)               | 56.7<br>(39.0 to 76.0)                            | 34.8<br>(20.4 to 50.2)                              |
| Gastritis and duodenitis                                       | 200.7<br>(174.6 to 226.1)               | 183.7<br>(163.7 to 205.7)                | 3.4<br>(2.2 to 4.8)               | 43.0<br>(28.1 to 57.9)                            | 21.1<br>(9.1 to 33.8)                               |
| Appendicitis                                                   | 2.6<br>(2.4 to 2.8)                     | 67.9<br>(62.2 to 74.0)                   | 0.8<br>(0.5 to 1.2)               | 0.5<br>(-25.5 to 34.7)                            | -1.9<br>(-26.7 to 29.5)                             |
| Paralytic ileus and intestinal obstruction                     | 0.2<br>(0.2 to 0.2)                     | 5.4<br>(4.8 to 6.0)                      | 0.1<br>(< 0.05 to 0.1)            | 24.5<br>(19.8 to 29.3)                            | 5.5<br>(2.3 to 8.7)                                 |
| Inguinal, femoral, and abdominal hernia                        | 114.1<br>(102.2 to 127.4)               | 225.3<br>(195.8 to 257.0)                | 7.8<br>(5.2 to 10.8)              | 4.9<br>(-6.1 to 17.4)                             | -14.0<br>(-22.5 to -4.2)                            |
| Inflammatory bowel disease                                     | 4.3<br>(4.0 to 4.7)                     | 8.7<br>(8.3 to 9.1)                      | 0.6<br>(0.4 to 0.9)               | 26.4<br>(5.7 to 50.6)                             | 9.4<br>(-8.6 to 31.6)                               |
| Vascular intestinal disorders                                  | 0.2<br>(0.2 to 0.2)                     | 1.1<br>(1.0 to 1.3)                      | 0.1<br>(< 0.05 to 0.1)            | 27.0<br>(21.2 to 33.0)                            | 7.0<br>(2.5 to 11.4)                                |
| Gallbladder and biliary diseases                               | 47.9<br>(42.4 to 54.4)                  | 154.2<br>(133.0 to 177.5)                | 0.8<br>(0.5 to 1.1)               | 19.5<br>(-0.1 to 42.7)                            | 0.1<br>(-15.8 to 20.3)                              |
| Pancreatitis                                                   | 1.4<br>(1.2 to 1.5)                     | 12.4<br>(11.2 to 13.7)                   | 0.2<br>(0.1 to 0.2)               | 27.8<br>(22.0 to 34.7)                            | 7.7<br>(2.6 to 13.1)                                |
| Other digestive diseases                                       | --                                      | --                                       | 1.5<br>(1.1 to 2.0)               | 27.4<br>(17.8 to 37.7)                            | 3.9<br>(-3.6 to 12.1)                               |
| <b>Neurological disorders</b>                                  | <b>6,590.2<br/>(6,321.7 to 6,883.9)</b> | <b>3,049.2<br/>(2,599.8 to 3,544.5)</b>  | <b>173.7<br/>(115.0 to 243.8)</b> | <b>9.6<br/>(-10.8 to 37.5)</b>                    | <b>-1.3<br/>(-19.3 to 23.4)</b>                     |
| Alzheimer's disease and other dementias                        | 56.9<br>(47.5 to 68.0)                  | 9.9<br>(8.2 to 12.1)                     | 8.1<br>(5.6 to 10.9)              | 19.3<br>(12.8 to 26.1)                            | -0.6<br>(-5.8 to 4.4)                               |
| Parkinson's disease                                            | 13.4<br>(10.5 to 16.6)                  | 1.6<br>(1.2 to 2.0)                      | 1.6<br>(1.0 to 2.2)               | 24.1<br>(8.4 to 41.4)                             | 4.3<br>(-8.5 to 18.2)                               |
| Epilepsy                                                       | 61.6<br>(13.3 to 121.2)                 | 6.9<br>(1.5 to 13.6)                     | 20.4<br>(3.7 to 48.0)             | 0.8<br>(-81.7 to 542.8)                           | -10.0<br>(-83.7 to 477.0)                           |
| Multiple sclerosis                                             | 5.4<br>(4.7 to 6.2)                     | 0.2<br>(0.2 to 0.2)                      | 1.4<br>(1.0 to 2.0)               | 38.4<br>(17.9 to 62.7)                            | 19.8<br>(3.2 to 40.9)                               |
| Motor neuron disease                                           | 0.4<br>(0.4 to 0.5)                     | 0.1<br>(0.1 to 0.1)                      | 0.1<br>(0.1 to 0.1)               | 18.6<br>(13.5 to 24.3)                            | 3.5<br>(-0.4 to 8.1)                                |
| Migraine                                                       | 2,766.7<br>(2,596.6 to 2,931.0)         | 285.9<br>(268.0 to 305.9)                | 119.1<br>(75.7 to 165.9)          | 9.5<br>(5.9 to 13.8)                              | -0.5<br>(-3.6 to 3.2)                               |
| Tension-type headache                                          | 4,822.1<br>(4,316.2 to 5,383.9)         | 2,744.5<br>(2,291.1 to 3,257.5)          | 18.5<br>(11.8 to 27.3)            | 10.9<br>(5.5 to 16.8)                             | -0.2<br>(-5.0 to 4.5)                               |
| Other neurological disorders                                   | 0.1<br>(< 0.05 to 0.1)                  | 0.1<br>(0.1 to 0.2)                      | 4.5<br>(1.2 to 10.1)              | 21.2<br>(-68.0 to 438.2)                          | 9.5<br>(-70.5 to 363.4)                             |
| <b>Mental and substance use disorders</b>                      | <b>2,504.2<br/>(2,418.3 to 2,584.8)</b> | <b>1,089.9†<br/>(1,020.8 to 1,175.0)</b> | <b>349.7<br/>(252.5 to 454.1)</b> | <b>10.2<br/>(7.2 to 13.1)</b>                     | <b>-0.7<br/>(-3.2 to 1.7)</b>                       |
| Schizophrenia                                                  | 38.8<br>(33.7 to 44.1)                  | 2.4<br>(2.1 to 2.8)                      | 24.8<br>(17.9 to 31.1)            | 19.1<br>(9.0 to 30.4)                             | 2.4<br>(-6.0 to 12.2)                               |
| Alcohol use disorders                                          | 457.4<br>(407.3 to 512.1)               | 228.4<br>(195.4 to 263.1)                | 45.6<br>(31.3 to 63.1)            | 25.0<br>(12.3 to 37.8)                            | 9.2<br>(-1.6 to 20.2)                               |
| Drug use disorders                                             | 144.0<br>(132.6 to 155.3)               | 18.9<br>(17.4 to 20.5)                   | 34.8<br>(24.8 to 45.4)            | -2.2<br>(-11.0 to 7.0)                            | -13.2<br>(-20.4 to -5.2)                            |
| Opioid use disorders                                           | 61.8<br>(53.6 to 71.3)                  | 8.1<br>(7.0 to 9.3)                      | 25.6<br>(17.5 to 34.0)            | -4.0<br>(-14.2 to 7.3)                            | -16.3<br>(-24.9 to -7.1)                            |
| Cocaine use disorders                                          | 14.3<br>(12.4 to 16.5)                  | 0.9<br>(0.8 to 1.0)                      | 1.9<br>(1.2 to 2.9)               | 1.5<br>(-19.2 to 26.4)                            | -5.6<br>(-23.7 to 16.7)                             |
| Amphetamine use disorders                                      | 14.4<br>(10.2 to 19.9)                  | 1.2<br>(0.9 to 1.5)                      | 1.9<br>(1.1 to 3.1)               | 2.3<br>(-21.9 to 34.9)                            | -1.6<br>(-24.5 to 29.1)                             |
| Cannabis use disorders                                         | 42.1<br>(35.0 to 50.2)                  | 6.4<br>(5.3 to 7.5)                      | 1.2<br>(0.8 to 1.8)               | 1.5<br>(-15.0 to 22.0)                            | 0.5<br>(-14.7 to 20.0)                              |
| Other drug use disorders                                       | 14.2<br>(12.9 to 15.7)                  | 2.4<br>(2.1 to 2.6)                      | 4.1<br>(2.7 to 5.8)               | 4.7<br>(-13.5 to 27.8)                            | -4.1<br>(-20.2 to 16.6)                             |
| Depressive disorders                                           | 627.9<br>(592.8 to 668.2)               | 682.0<br>(621.6 to 754.0)                | 107.2<br>(73.7 to 144.9)          | 10.3<br>(4.4 to 16.3)                             | -1.6<br>(-6.3 to 3.4)                               |
| Major depressive disorder                                      | 427.7<br>(391.3 to 472.5)               | 646.0<br>(586.1 to 719.4)                | 86.9<br>(59.0 to 118.3)           | 9.4<br>(2.1 to 16.7)                              | -1.9<br>(-7.7 to 4.4)                               |
| Dysthymia                                                      | 212.2<br>(186.6 to 244.0)               | 36.0<br>(31.4 to 41.4)                   | 20.3<br>(13.6 to 29.7)            | 14.4<br>(10.2 to 19.0)                            | -0.1<br>(-3.7 to 3.5)                               |
| Bipolar disorder                                               | 106.7<br>(91.4 to 124.4)                | 8.6<br>(7.5 to 9.9)                      | 21.8<br>(13.4 to 32.1)            | 8.3<br>(1.3 to 16.2)                              | 0.1<br>(-6.2 to 7.0)                                |
| Anxiety disorders                                              | 450.2<br>(408.7 to 493.0)               | 77.8<br>(71.5 to 85.0)                   | 43.3<br>(29.9 to 58.9)            | 9.6<br>(2.3 to 17.3)                              | 0.1<br>(-6.1 to 6.7)                                |
| Eating disorders                                               | 23.7<br>(19.1 to 29.1)                  | 11.3<br>(8.5 to 14.7)                    | 4.8<br>(3.0 to 7.1)               | 25.4<br>(9.1 to 44.4)                             | 21.5<br>(5.9 to 40.1)                               |
| Anorexia nervosa                                               | 5.0<br>(3.6 to 6.8)                     | 1.9<br>(1.4 to 2.5)                      | 1.1<br>(0.6 to 1.6)               | 14.9<br>(-9.3 to 52.8)                            | 17.7<br>(-6.4 to 54.9)                              |
| Bulimia nervosa                                                | 17.9<br>(13.6 to 23.7)                  | 9.4<br>(6.6 to 12.8)                     | 3.8<br>(2.3 to 5.8)               | 28.7<br>(9.6 to 51.5)                             | 22.6<br>(5.1 to 44.5)                               |
| Autistic spectrum disorders                                    | 145.6<br>(128.7 to 164.0)               | 1.2<br>(0.8 to 1.7)                      | 21.2<br>(14.3 to 29.7)            | 12.6<br>(7.1 to 18.7)                             | 0.4<br>(-4.4 to 5.6)                                |
| Autism                                                         | 43.0<br>(37.0 to 50.5)                  | 0.1<br>(0.1 to 0.2)                      | 10.9<br>(7.0 to 16.0)             | 12.2<br>(2.9 to 22.8)                             | 0.4<br>(-8.1 to 9.8)                                |
| Asperger syndrome and other autistic spectrum disorders        | 102.5<br>(85.2 to 123.5)                | 1.1<br>(0.7 to 1.6)                      | 10.2<br>(6.6 to 14.9)             | 13.1<br>(7.2 to 18.8)                             | 0.5<br>(-4.5 to 5.5)                                |



| Cause                                                      | Prevalence in thousands (95% UI)                 | Incidence in thousands (95% UI)                   | YLDs in thousands (95% UI)              |                                                   |                                                     |
|------------------------------------------------------------|--------------------------------------------------|---------------------------------------------------|-----------------------------------------|---------------------------------------------------|-----------------------------------------------------|
|                                                            | 2016 counts                                      | 2016 counts                                       | 2016 counts                             | Percentage change in counts between 2006 and 2016 | Percentage change in age-standardised rates between |
| Attention-deficit/hyperactivity disorder                   | 133.9<br>(120.9 to 149.5)                        | 7.3<br>(6.4 to 8.6)                               | 1.6<br>(1.0 to 2.6)                     | 5.0<br>(-3.2 to 14.4)                             | 0.3<br>(-7.8 to 9.1)                                |
| Conduct disorder                                           | 113.7<br>(94.0 to 134.6)                         | 41.7<br>(33.4 to 50.1)                            | 13.9<br>(8.5 to 21.2)                   | -10.4<br>(-16.4 to -3.7)                          | 0.5<br>(-5.7 to 7.3)                                |
| Idiopathic developmental intellectual disability           | 138.5<br>(67.4 to 207.8)                         | --                                                | 6.0<br>(2.6 to 10.5)                    | -5.7<br>(-13.8 to 1.1)                            | -13.3<br>(-20.5 to -6.8)                            |
| Other mental and substance use disorders                   | 334.4<br>(294.5 to 385.7)                        | 10.2<br>(9.1 to 11.6)                             | 24.8<br>(17.1 to 35.4)                  | 14.9<br>(8.8 to 20.7)                             | 0.2<br>(-4.7 to 4.9)                                |
| <b>Diabetes, urogenital, blood, and endocrine diseases</b> | <b>5,484.3</b><br><b>(5,365.7 to 5,589.6)</b>    | <b>2,596.4†</b><br><b>(2,424.9 to 2,780.2)</b>    | <b>126.8</b><br><b>(90.9 to 170.6)</b>  | <b>17.3</b><br><b>(12.9 to 21.9)</b>              | <b>0.6</b><br><b>(-3.2 to 4.6)</b>                  |
| Diabetes mellitus                                          | 445.6<br>(394.9 to 501.5)                        | 24.9<br>(22.1 to 28.1)                            | 37.7<br>(25.9 to 52.0)                  | 24.5<br>(12.3 to 37.5)                            | 3.7<br>(-6.4 to 14.4)                               |
| Acute glomerulonephritis                                   | 0.3<br>(0.3 to 0.4)                              | 4.8<br>(4.2 to 5.5)                               | < 0.05<br>(< 0.05 to < 0.05)            | 14.1<br>(8.3 to 19.6)                             | 0.6<br>(-4.0 to 5.0)                                |
| Chronic kidney disease                                     | 992.4<br>(892.4 to 1,101.6)                      | 78.2<br>(67.7 to 89.5)                            | 27.3<br>(20.1 to 35.4)                  | 18.7<br>(10.6 to 27.3)                            | 1.9<br>(-4.8 to 9.2)                                |
| Chronic kidney disease due to diabetes mellitus            | 440.7<br>(377.3 to 509.8)                        | 35.0<br>(28.7 to 42.0)                            | 11.9<br>(8.6 to 15.7)                   | 22.0<br>(11.6 to 33.4)                            | 3.6<br>(-4.5 to 13.0)                               |
| Chronic kidney disease due to hypertension                 | 155.6<br>(130.8 to 181.0)                        | 17.5<br>(14.1 to 21.3)                            | 1.8<br>(1.2 to 2.5)                     | 22.5<br>(7.4 to 39.4)                             | 3.2<br>(-9.1 to 17.8)                               |
| Chronic kidney disease due to glomerulonephritis           | 134.4<br>(113.3 to 155.5)                        | 5.1<br>(3.9 to 6.5)                               | 6.3<br>(4.5 to 8.5)                     | 14.1<br>(2.9 to 25.0)                             | -0.1<br>(-8.9 to 8.8)                               |
| Chronic kidney disease due to other causes                 | 261.7<br>(213.8 to 313.6)                        | 20.6<br>(16.5 to 25.3)                            | 7.3<br>(5.1 to 9.7)                     | 16.6<br>(6.4 to 27.2)                             | 0.6<br>(-7.4 to 9.1)                                |
| Urinary diseases and male infertility                      | 314.6<br>(280.0 to 348.6)                        | 1,709.2†<br>(1,547.2 to 1,891.8)                  | 9.1<br>(6.0 to 13.1)                    | 16.5<br>(9.7 to 23.5)                             | -3.0<br>(-8.5 to 2.8)                               |
| Interstitial nephritis and urinary tract infections        | 28.2<br>(25.1 to 31.7)                           | 1,458.2<br>(1,297.3 to 1,639.6)                   | 0.9<br>(0.6 to 1.4)                     | 4.7<br>(-7.8 to 18.0)                             | -6.6<br>(-17.0 to 4.7)                              |
| Urolithiasis                                               | 8.4<br>(7.4 to 9.6)                              | 223.5<br>(196.3 to 255.0)                         | 0.6<br>(0.4 to 0.9)                     | 18.6<br>(-0.6 to 42.9)                            | 1.9<br>(-14.6 to 23.5)                              |
| Benign prostatic hyperplasia                               | 204.7<br>(173.4 to 242.5)                        | 27.6<br>(23.1 to 33.0)                            | 6.7<br>(4.2 to 9.8)                     | 21.3<br>(12.6 to 30.7)                            | -1.5<br>(-8.1 to 5.8)                               |
| Male infertility                                           | 61.2<br>(46.9 to 79.9)                           | --                                                | 0.4<br>(0.1 to 0.7)                     | 12.1<br>(3.4 to 22.1)                             | -0.7<br>(-8.1 to 8.1)                               |
| Other urinary diseases                                     | --                                               | --                                                | 0.6<br>(0.4 to 0.8)                     | -8.3<br>(-16.8 to 1.3)                            | -20.5<br>(-27.7 to -12.5)                           |
| Gynecological diseases                                     | 2,135.2<br>(2,026.0 to 2,236.0)                  | 739.6†<br>(687.2 to 798.3)                        | 28.0<br>(19.0 to 39.6)                  | 8.6<br>(4.0 to 12.8)                              | -1.8<br>(-5.5 to 1.8)                               |
| Uterine fibroids                                           | 288.3<br>(253.3 to 325.9)                        | 29.3<br>(25.0 to 34.1)                            | 5.4<br>(3.3 to 8.5)                     | 6.8<br>(-0.3 to 13.5)                             | -6.5<br>(-12.6 to -0.6)                             |
| Polycystic ovarian syndrome                                | 19.1<br>(14.2 to 25.0)                           | 7.0<br>(5.0 to 9.1)                               | 0.2<br>(0.1 to 0.3)                     | 10.4<br>(-4.0 to 27.1)                            | -0.3<br>(-13.1 to 14.4)                             |
| Female infertility                                         | 25.4<br>(10.1 to 50.1)                           | --                                                | 0.1<br>(< 0.05 to 0.4)                  | 21.1<br>(-6.9 to 55.2)                            | 7.4<br>(-14.3 to 36.1)                              |
| Endometriosis                                              | 8.3<br>(6.6 to 10.0)                             | 23.8<br>(18.4 to 30.8)                            | 0.8<br>(0.5 to 1.2)                     | 8.3<br>(-18.1 to 42.9)                            | -1.1<br>(-25.2 to 30.2)                             |
| Genital prolapse                                           | 626.1<br>(539.0 to 718.5)                        | 36.2<br>(30.8 to 43.0)                            | 1.9<br>(0.9 to 3.5)                     | 31.9<br>(20.1 to 44.4)                            | 7.8<br>(-1.4 to 18.3)                               |
| Premenstrual syndrome                                      | 1,148.5<br>(1,080.4 to 1,213.2)                  | 397.9<br>(370.6 to 427.7)                         | 9.6<br>(6.0 to 14.8)                    | 4.6<br>(-2.6 to 11.8)                             | -1.1<br>(-7.7 to 5.9)                               |
| Other gynecological diseases                               | 293.6<br>(254.6 to 336.0)                        | 245.5<br>(202.4 to 294.5)                         | 9.9<br>(6.5 to 14.1)                    | 9.5<br>(2.3 to 17.4)                              | -2.0<br>(-8.4 to 4.6)                               |
| Hemoglobinopathies and hemolytic anaemias                  | 2,430.7<br>(2,340.3 to 2,517.0)                  | --                                                | 14.3<br>(9.4 to 20.9)                   | 16.0<br>(5.5 to 27.0)                             | -1.3<br>(-9.8 to 7.9)                               |
| Thalassemias                                               | 0.3<br>(0.2 to 0.4)                              | --                                                | < 0.05<br>(< 0.05 to 0.1)               | 38.9<br>(12.4 to 66.9)                            | -1.4<br>(-19.2 to 18.5)                             |
| Thalassaemias trait                                        | 491.3<br>(388.8 to 602.7)                        | --                                                | 8.6<br>(5.3 to 13.1)                    | 21.9<br>(8.9 to 35.4)                             | 2.9<br>(-7.4 to 14.3)                               |
| Sickle cell disorders                                      | 0.2<br>(0.2 to 0.2)                              | --                                                | < 0.05<br>(< 0.05 to < 0.05)            | 20.3<br>(10.3 to 31.6)                            | 6.4<br>(-1.5 to 16.1)                               |
| Sickle cell trait                                          | 288.7<br>(275.8 to 303.0)                        | --                                                | 0.8<br>(0.5 to 1.2)                     | 21.8<br>(3.7 to 42.6)                             | 0.2<br>(-14.0 to 17.7)                              |
| G6PD deficiency                                            | 168.6<br>(160.9 to 177.4)                        | --                                                | < 0.05<br>(< 0.05 to < 0.05)            | 45.1<br>(28.8 to 66.9)                            | 22.3<br>(8.7 to 40.5)                               |
| G6PD trait                                                 | 1,363.8<br>(1,329.5 to 1,399.2)                  | --                                                | < 0.05<br>(< 0.05 to < 0.05)            | 19.8<br>(10.4 to 29.7)                            | 4.0<br>(-4.2 to 12.3)                               |
| Other hemoglobinopathies and hemolytic anaemias            | 226.8<br>(212.4 to 242.5)                        | --                                                | 4.8<br>(3.1 to 6.9)                     | 5.6<br>(-5.5 to 18.4)                             | -8.0<br>(-17.0 to 2.4)                              |
| Endocrine, metabolic, blood, and immune disorders          | 352.4<br>(329.9 to 376.1)                        | 39.7<br>(35.3 to 44.5)                            | 10.5<br>(7.2 to 14.6)                   | 16.6<br>(10.1 to 24.0)                            | -2.2<br>(-7.2 to 3.5)                               |
| <b>Musculoskeletal disorders</b>                           | <b>2,676.3</b><br><b>(2,547.2 to 2,822.4)</b>    | <b>1,105.8</b><br><b>(988.6 to 1,236.4)</b>       | <b>303.1</b><br><b>(218.5 to 395.9)</b> | <b>17.4</b><br><b>(13.3 to 21.8)</b>              | <b>-0.5</b><br><b>(-3.9 to 2.7)</b>                 |
| Rheumatoid arthritis                                       | 47.8<br>(42.6 to 54.0)                           | 2.6<br>(2.3 to 3.0)                               | 11.2<br>(7.5 to 14.9)                   | 31.4<br>(20.9 to 43.9)                            | 11.3<br>(3.1 to 21.4)                               |
| Osteoarthritis                                             | 675.5<br>(629.8 to 720.9)                        | 35.4<br>(32.7 to 38.1)                            | 41.4<br>(28.7 to 56.5)                  | 28.6<br>(24.0 to 33.6)                            | 5.7<br>(2.0 to 9.5)                                 |
| Low back and neck pain                                     | 1,994.0<br>(1,864.3 to 2,143.3)                  | 921.9<br>(805.1 to 1,041.6)                       | 234.7<br>(165.6 to 309.9)               | 15.4<br>(10.4 to 21.1)                            | -1.9<br>(-6.0 to 2.0)                               |
| Low back pain                                              | 1,527.9<br>(1,354.8 to 1,735.4)                  | 782.6<br>(670.0 to 907.6)                         | 172.3<br>(121.7 to 226.6)               | 14.9<br>(8.2 to 22.3)                             | -2.6<br>(-7.9 to 2.7)                               |
| Neck pain                                                  | 628.4<br>(535.5 to 731.1)                        | 139.3<br>(120.2 to 165.1)                         | 62.4<br>(42.1 to 88.5)                  | 16.9<br>(13.8 to 20.8)                            | -0.1<br>(-2.1 to 2.1)                               |
| Gout                                                       | 61.3<br>(54.3 to 69.7)                           | 12.3<br>(10.7 to 14.0)                            | 1.9<br>(1.3 to 2.7)                     | 20.8<br>(5.1 to 40.2)                             | 0.5<br>(-12.1 to 15.1)                              |
| Other musculoskeletal disorders                            | 161.7<br>(117.1 to 217.7)                        | 133.6<br>(95.0 to 185.1)                          | 13.9<br>(8.5 to 21.3)                   | 10.3<br>(-5.6 to 28.6)                            | -4.5<br>(-17.3 to 10.3)                             |
| <b>Other non-communicable diseases</b>                     | <b>12,866.3</b><br><b>(12,655.8 to 13,083.9)</b> | <b>39,089.7†</b><br><b>(36,856.9 to 41,662.5)</b> | <b>350.0</b><br><b>(240.6 to 495.8)</b> | <b>12.9</b><br><b>(11.5 to 14.2)</b>              | <b>-1.3</b><br><b>(-2.3 to -0.3)</b>                |
| Congenital anomalies                                       | 199.2<br>(181.5 to 218.7)                        | --                                                | 24.0<br>(17.5 to 31.6)                  | 12.6<br>(6.0 to 19.3)                             | -2.8<br>(-8.3 to 2.6)                               |
| Neural tube defects                                        | 18.2<br>(16.1 to 20.6)                           | --                                                | 5.4<br>(3.8 to 7.4)                     | 2.7<br>(-9.5 to 16.8)                             | -10.0<br>(-20.4 to 2.7)                             |
| Congenital heart anomalies                                 | 52.2<br>(45.6 to 59.6)                           | --                                                | 2.6<br>(1.1 to 4.4)                     | 27.7<br>(15.3 to 42.7)                            | 10.4<br>(-0.6 to 23.0)                              |
| Orofacial clefts                                           | 8.5<br>(7.4 to 9.7)                              | --                                                | 0.1<br>(0.1 to 0.2)                     | 6.4<br>(-6.2 to 20.5)                             | -8.5<br>(-19.3 to 3.5)                              |
| Down's syndrome                                            | 15.8<br>(13.7 to 18.4)                           | --                                                | 1.4<br>(1.0 to 2.0)                     | 19.5<br>(7.4 to 32.9)                             | 4.9<br>(-5.3 to 16.3)                               |
| Turner syndrome                                            | 14.8<br>(12.4 to 17.4)                           | --                                                | 0.3<br>(0.1 to 0.4)                     | 9.0<br>(-15.6 to 39.7)                            | -0.6<br>(-23.1 to 27.4)                             |
| Klinefelter syndrome                                       | 13.0<br>(11.0 to 15.3)                           | --                                                | 0.1<br>(< 0.05 to 0.1)                  | 13.7<br>(-8.6 to 41.7)                            | 1.4<br>(-19.5 to 26.0)                              |

| Cause                                         | Prevalence in thousands (95% UI)              | Incidence in thousands (95% UI)                           | YLDs in thousands (95% UI)              |                                                   |                                                     |
|-----------------------------------------------|-----------------------------------------------|-----------------------------------------------------------|-----------------------------------------|---------------------------------------------------|-----------------------------------------------------|
|                                               | 2016 counts                                   | 2016 counts                                               | 2016 counts                             | Percentage change in counts between 2006 and 2016 | Percentage change in age-standardised rates between |
| Other chromosomal abnormalities               | 9.9<br>(8.4 to 11.6)                          | --                                                        | 1.8<br>(1.2 to 2.6)                     | 33.4<br>(8.9 to 63.8)                             | 3.9<br>(-14.3 to 26.9)                              |
| Congenital musculoskeletal and limb anomalies | 17.9<br>(16.3 to 19.6)                        | --                                                        | 2.6<br>(1.7 to 3.6)                     | 10.7<br>(0.2 to 22.9)                             | -1.8<br>(-10.9 to 8.7)                              |
| Urogenital congenital anomalies               | 20.7<br>(18.0 to 23.9)                        | --                                                        | 0.7<br>(0.5 to 1.2)                     | 20.2<br>(5.7 to 37.3)                             | -0.8<br>(-12.9 to 13.2)                             |
| Digestive congenital anomalies                | 23.7<br>(20.9 to 26.6)                        | --                                                        | 1.1<br>(0.7 to 1.5)                     | 2.5<br>(-11.7 to 17.9)                            | -10.2<br>(-22.4 to 2.9)                             |
| Other congenital anomalies                    | 55.2<br>(35.7 to 80.8)                        | --                                                        | 8.0<br>(5.3 to 11.6)                    | 12.0<br>(1.7 to 23.4)                             | -3.4<br>(-12.2 to 6.7)                              |
| Skin and subcutaneous diseases                | 4,853.2<br>(4,735.3 to 4,980.4)               | 10,451.2<br>(9,890.3 to 11,070.2)                         | 111.5<br>(75.2 to 162.0)                | 8.6<br>(5.9 to 11.5)                              | 1.4<br>(-0.8 to 3.6)                                |
| Dermatitis                                    | 513.5<br>(477.0 to 551.4)                     | 739.9<br>(677.1 to 807.5)                                 | 18.8<br>(11.4 to 29.9)                  | 19.0<br>(13.0 to 25.6)                            | 1.5<br>(-3.1 to 6.3)                                |
| Psoriasis                                     | 164.4<br>(156.8 to 172.7)                     | 22.8<br>(21.7 to 23.9)                                    | 14.3<br>(10.1 to 18.9)                  | 18.3<br>(9.1 to 28.6)                             | 4.0<br>(-3.7 to 12.2)                               |
| Cellulitis                                    | 6.6<br>(6.1 to 7.1)                           | 118.5<br>(110.8 to 126.5)                                 | 0.4<br>(0.2 to 0.5)                     | 16.6<br>(-5.6 to 46.1)                            | 2.1<br>(-16.7 to 25.6)                              |
| Pyoderma                                      | 34.3<br>(33.2 to 35.4)                        | 718.8<br>(693.6 to 745.3)                                 | 0.2<br>(0.1 to 0.4)                     | 20.4<br>(12.1 to 30.0)                            | 1.7<br>(-5.1 to 9.2)                                |
| Scabies                                       | 134.3<br>(117.8 to 154.3)                     | 412.4<br>(359.1 to 474.1)                                 | 3.5<br>(1.9 to 5.5)                     | 10.0<br>(3.3 to 17.4)                             | -1.1<br>(-5.9 to 4.4)                               |
| Fungal skin diseases                          | 1,412.1<br>(1,272.3 to 1,558.3)               | 4,991.8<br>(4,464.1 to 5,599.5)                           | 7.9<br>(3.2 to 16.6)                    | 16.6<br>(14.1 to 19.0)                            | 0.1<br>(-1.0 to 1.1)                                |
| Viral skin diseases                           | 450.2<br>(430.9 to 468.9)                     | 659.3<br>(630.3 to 691.5)                                 | 13.8<br>(8.6 to 20.4)                   | 12.0<br>(7.8 to 16.3)                             | -0.1<br>(-3.4 to 3.2)                               |
| Acne vulgaris                                 | 1,202.8<br>(1,092.6 to 1,329.6)               | 781.3<br>(656.0 to 959.6)                                 | 31.0<br>(20.9 to 45.4)                  | -9.8<br>(-15.0 to -4.5)                           | 0.5<br>(-4.8 to 6.1)                                |
| Alopecia areata                               | 33.9<br>(32.5 to 35.3)                        | 59.8<br>(57.4 to 62.2)                                    | 1.1<br>(0.7 to 1.7)                     | 13.6<br>(1.9 to 25.9)                             | -0.0<br>(-10.2 to 10.8)                             |
| Pruritus                                      | 162.3<br>(142.3 to 183.6)                     | 128.7<br>(114.4 to 145.0)                                 | 1.7<br>(0.8 to 3.1)                     | 19.2<br>(13.0 to 25.5)                            | 2.1<br>(-2.6 to 7.1)                                |
| Urticaria                                     | 188.4<br>(163.9 to 218.2)                     | 338.2<br>(294.1 to 392.0)                                 | 11.4<br>(7.2 to 16.3)                   | 21.1<br>(14.6 to 27.8)                            | -0.1<br>(-4.6 to 4.7)                               |
| Decubitus ulcer                               | 4.2<br>(3.8 to 4.8)                           | 15.2<br>(13.4 to 17.2)                                    | 0.7<br>(0.5 to 0.9)                     | 21.6<br>(7.0 to 37.3)                             | 3.1<br>(-10.5 to 17.9)                              |
| Other skin and subcutaneous diseases          | 1,262.4<br>(1,225.7 to 1,299.5)               | 1,464.6<br>(1,417.8 to 1,514.1)                           | 6.9<br>(3.4 to 12.7)                    | 26.3<br>(23.0 to 29.6)                            | 8.2<br>(5.7 to 10.8)                                |
| Sense organ diseases                          | 4,324.5<br>(4,229.4 to 4,425.2)               | 1,738.1 <sup>†</sup><br>(1,626.3 to 1,860.2)              | 154.7<br>(106.2 to 215.7)               | 14.5<br>(12.6 to 16.4)                            | -3.1<br>(-4.6 to -1.7)                              |
| Glaucoma                                      | 18.3<br>(15.3 to 21.3)                        | --                                                        | 1.9<br>(1.2 to 2.6)                     | 20.9<br>(8.5 to 35.1)                             | -0.1<br>(-10.1 to 11.3)                             |
| Cataract                                      | 212.9<br>(181.6 to 247.3)                     | --                                                        | 11.3<br>(7.8 to 15.8)                   | 16.0<br>(9.8 to 22.4)                             | -3.0<br>(-7.8 to 1.9)                               |
| Macular degeneration                          | 7.4<br>(5.8 to 9.2)                           | --                                                        | 0.4<br>(0.3 to 0.6)                     | 22.9<br>(6.2 to 41.6)                             | 1.7<br>(-11.8 to 16.0)                              |
| Refraction and accommodation disorders        | 2,207.2<br>(2,109.7 to 2,305.2)               | --                                                        | 40.6<br>(25.1 to 63.6)                  | 14.5<br>(11.1 to 18.2)                            | -3.3<br>(-6.3 to -0.5)                              |
| Age-related and other hearing loss            | 2,865.4<br>(2,712.7 to 3,028.0)               | --                                                        | 78.4<br>(54.5 to 109.8)                 | 13.0<br>(9.5 to 16.3)                             | -4.0<br>(-6.5 to -1.6)                              |
| Other vision loss                             | 105.0<br>(91.9 to 120.3)                      | --                                                        | 6.8<br>(4.7 to 9.2)                     | 18.9<br>(10.8 to 27.9)                            | -0.4<br>(-6.5 to 6.5)                               |
| Other sense organ diseases                    | 493.9<br>(455.6 to 532.5)                     | 1,738.1<br>(1,626.3 to 1,860.2)                           | 15.3<br>(9.7 to 23.2)                   | 18.4<br>(13.4 to 22.9)                            | 0.4<br>(-3.3 to 4.0)                                |
| Oral disorders                                | 9,433.3<br>(9,080.1 to 9,779.6)               | 26,900.4 <sup>†</sup><br>(24,711.3 to 29,328.5)           | 59.7<br>(37.4 to 90.0)                  | 17.6<br>(15.0 to 20.4)                            | -0.1<br>(-2.0 to 2.1)                               |
| Caries of deciduous teeth                     | 1,644.9<br>(1,358.0 to 1,931.2)               | 6,597.4<br>(5,106.1 to 8,441.7)                           | 0.6<br>(0.3 to 1.3)                     | 46.9<br>(34.8 to 58.8)                            | -1.2<br>(-9.5 to 7.3)                               |
| Caries of permanent teeth                     | 6,478.2<br>(6,107.5 to 6,854.8)               | 20,013.5<br>(18,460.0 to 21,647.3)                        | 6.3<br>(2.8 to 12.1)                    | 3.2<br>(0.2 to 6.3)                               | -4.8<br>(-7.4 to -2.2)                              |
| Periodontal disease                           | 1,370.0<br>(1,127.7 to 1,626.8)               | 182.0<br>(143.2 to 223.3)                                 | 8.9<br>(3.5 to 18.5)                    | 19.0<br>(14.7 to 23.6)                            | -0.3<br>(-3.9 to 3.0)                               |
| Edentulism and severe tooth loss              | 1,248.3<br>(1,100.6 to 1,398.8)               | 107.6<br>(90.7 to 126.3)                                  | 34.4<br>(22.6 to 48.7)                  | 21.2<br>(17.1 to 25.7)                            | 0.9<br>(-2.2 to 4.2)                                |
| Other oral disorders                          | 321.3<br>(307.2 to 335.5)                     | --                                                        | 9.4<br>(5.8 to 14.1)                    | 12.7<br>(8.8 to 16.6)                             | -0.1<br>(-3.3 to 3.1)                               |
| <b>Injuries</b>                               | <b>5,316.3</b><br><b>(4,986.1 to 5,759.2)</b> | <b>2,262.4<sup>†</sup></b><br><b>(2,136.0 to 2,402.9)</b> | <b>200.6</b><br><b>(137.0 to 279.4)</b> | <b>20.0</b><br><b>(17.8 to 22.2)</b>              | <b>4.5</b><br><b>(2.5 to 6.3)</b>                   |
| <b>Transport injuries</b>                     | <b>666.3</b><br><b>(612.2 to 723.9)</b>       | <b>239.0</b><br><b>(217.4 to 264.1)</b>                   | <b>35.5</b><br><b>(23.6 to 50.6)</b>    | <b>30.1</b><br><b>(27.5 to 32.7)</b>              | <b>12.5</b><br><b>(10.4 to 14.5)</b>                |
| Road injuries                                 | 623.5<br>(568.2 to 678.8)                     | 229.0<br>(207.2 to 254.2)                                 | 33.2<br>(22.1 to 47.4)                  | 35.1<br>(32.4 to 37.6)                            | 16.6<br>(14.5 to 18.6)                              |
| Pedestrian road injuries                      | 144.8<br>(127.4 to 165.0)                     | 37.5<br>(31.9 to 44.0)                                    | 7.5<br>(5.1 to 10.8)                    | 28.6<br>(25.8 to 31.3)                            | 11.7<br>(9.5 to 13.8)                               |
| Cyclist road injuries                         | 89.9<br>(75.0 to 107.0)                       | 34.3<br>(27.4 to 41.8)                                    | 4.4<br>(2.9 to 6.3)                     | 39.4<br>(36.2 to 42.3)                            | 21.6<br>(19.2 to 23.9)                              |
| Motorcyclist road injuries                    | 60.5<br>(51.3 to 74.3)                        | 14.2<br>(11.3 to 17.5)                                    | 3.0<br>(2.0 to 4.4)                     | 40.0<br>(36.8 to 42.8)                            | 20.8<br>(18.4 to 23.1)                              |
| Motor vehicle road injuries                   | 297.0<br>(246.8 to 344.8)                     | 128.7<br>(112.8 to 144.9)                                 | 16.8<br>(11.4 to 23.7)                  | 36.3<br>(33.6 to 39.1)                            | 17.1<br>(14.9 to 19.2)                              |
| Other road injuries                           | 31.3<br>(26.5 to 37.2)                        | 14.3<br>(11.1 to 18.4)                                    | 1.5<br>(1.0 to 2.2)                     | 33.9<br>(31.1 to 36.7)                            | 16.2<br>(14.0 to 18.3)                              |
| Other transport injuries                      | 42.7<br>(36.2 to 50.5)                        | 10.0<br>(8.6 to 11.7)                                     | 2.2<br>(1.5 to 3.2)                     | -15.3<br>(-17.7 to -12.9)                         | -26.6<br>(-28.7 to -24.5)                           |
| <b>Unintentional injuries</b>                 | <b>4,359.4</b><br><b>(4,038.2 to 4,786.5)</b> | <b>1,887.5</b><br><b>(1,766.6 to 2,020.3)</b>             | <b>152.3</b><br><b>(105.3 to 211.5)</b> | <b>19.7</b><br><b>(17.3 to 22.1)</b>              | <b>4.2</b><br><b>(2.2 to 6.2)</b>                   |
| Falls                                         | 2,172.9<br>(1,901.7 to 2,502.5)               | 996.6<br>(888.9 to 1,121.0)                               | 88.7<br>(62.4 to 121.0)                 | 21.6<br>(19.2 to 23.7)                            | 5.8<br>(3.9 to 7.5)                                 |
| Drowning                                      | 13.9<br>(12.1 to 15.9)                        | 2.6<br>(2.4 to 3.0)                                       | 0.7<br>(0.5 to 1.0)                     | -15.4<br>(-18.2 to -12.6)                         | -26.2<br>(-28.5 to -23.7)                           |
| Fire, heat, and hot substances                | 467.2<br>(395.9 to 556.6)                     | 59.1<br>(50.1 to 68.0)                                    | 12.2<br>(8.2 to 17.8)                   | 12.7<br>(8.1 to 16.4)                             | -1.2<br>(-4.8 to 1.8)                               |
| Poisonings                                    | 15.1<br>(12.9 to 17.7)                        | 23.8<br>(20.3 to 27.8)                                    | 1.3<br>(0.8 to 1.8)                     | -43.5<br>(-47.4 to -39.0)                         | -49.7<br>(-53.2 to -46.0)                           |
| Exposure to mechanical forces                 | 827.3<br>(710.5 to 1,007.4)                   | 329.5<br>(289.9 to 368.7)                                 | 20.2<br>(13.3 to 29.3)                  | 34.0<br>(30.4 to 37.6)                            | 16.8<br>(13.8 to 19.6)                              |
| Unintentional firearm injuries                | 19.9<br>(16.3 to 24.4)                        | 5.0<br>(3.6 to 6.6)                                       | 0.8<br>(0.5 to 1.2)                     | 4.1<br>(1.3 to 6.7)                               | -9.3<br>(-11.6 to -7.3)                             |
| Unintentional suffocation                     | 58.6<br>(45.5 to 74.3)                        | 13.5<br>(10.2 to 17.6)                                    | 2.0<br>(1.2 to 3.0)                     | 10.0<br>(7.8 to 12.3)                             | -4.2<br>(-6.2 to -2.4)                              |
| Other exposure to mechanical forces           | 748.8<br>(637.1 to 921.5)                     | 311.0<br>(274.1 to 349.5)                                 | 17.4<br>(11.5 to 25.0)                  | 39.4<br>(35.6 to 43.0)                            | 21.4<br>(18.3 to 24.2)                              |

| Cause                                                                               | Prevalence in thousands (95% UI)        | Incidence in thousands (95% UI)          | YLDs in thousands (95% UI)          |                                                   |                                                     |
|-------------------------------------------------------------------------------------|-----------------------------------------|------------------------------------------|-------------------------------------|---------------------------------------------------|-----------------------------------------------------|
|                                                                                     | 2016 counts                             | 2016 counts                              | 2016 counts                         | Percentage change in counts between 2006 and 2016 | Percentage change in age-standardised rates between |
| Adverse effects of medical treatment                                                | 6.1<br>(4.9 to 7.6)                     | 80.2<br>(71.1 to 90.6)                   | 0.8<br>(0.5 to 1.2)                 | 33.7<br>(27.1 to 40.6)                            | 8.2<br>(3.5 to 13.0)                                |
| Animal contact                                                                      | 61.4<br>(53.7 to 71.3)                  | 71.0<br>(58.6 to 85.3)                   | 2.1<br>(1.4 to 3.0)                 | 4.8<br>(-0.2 to 9.7)                              | -7.9<br>(-12.1 to -3.6)                             |
| Venomous animal contact                                                             | 25.9<br>(21.5 to 31.2)                  | 30.2<br>(23.2 to 38.4)                   | 1.5<br>(1.0 to 2.2)                 | 10.4<br>(3.0 to 18.0)                             | -1.9<br>(-8.3 to 4.8)                               |
| Non-venomous animal contact                                                         | 35.5<br>(29.5 to 45.2)                  | 40.8<br>(32.8 to 50.0)                   | 0.6<br>(0.4 to 0.9)                 | -7.6<br>(-11.4 to -4.1)                           | -20.3<br>(-23.3 to -17.5)                           |
| Foreign body                                                                        | 244.9<br>(203.1 to 285.4)               | 137.0<br>(122.2 to 153.6)                | 9.1<br>(5.9 to 13.3)                | 4.8<br>(1.6 to 8.3)                               | -8.8<br>(-11.5 to -5.8)                             |
| Pulmonary aspiration and foreign body in airway                                     | 127.7<br>(98.7 to 167.8)                | 50.0<br>(43.8 to 57.8)                   | 5.4<br>(3.5 to 8.1)                 | -2.7<br>(-5.5 to 0.2)                             | -15.3<br>(-17.6 to -12.8)                           |
| Foreign body in eyes                                                                | 8.2<br>(4.8 to 12.1)                    | 41.9<br>(32.6 to 55.0)                   | 0.5<br>(0.2 to 0.8)                 | 5.4<br>(1.5 to 9.6)                               | -9.2<br>(-11.5 to -6.6)                             |
| Foreign body in other body part                                                     | 109.0<br>(89.5 to 135.8)                | 45.0<br>(38.0 to 53.2)                   | 3.2<br>(2.1 to 4.7)                 | 20.4<br>(16.1 to 24.8)                            | 4.6<br>(1.0 to 8.2)                                 |
| Environmental heat and cold exposure                                                | 163.0<br>(140.7 to 188.4)               | 46.8<br>(39.8 to 54.9)                   | 6.1<br>(4.0 to 8.8)                 | 11.4<br>(8.7 to 14.0)                             | -4.1<br>(-6.3 to -1.9)                              |
| Other unintentional injuries                                                        | 387.7<br>(311.8 to 474.4)               | 140.8<br>(118.9 to 166.6)                | 11.0<br>(7.2 to 16.2)               | 30.8<br>(28.6 to 32.7)                            | 13.2<br>(11.5 to 14.8)                              |
| <b>Self-harm and interpersonal violence</b>                                         | <b>472.7</b><br><b>(435.9 to 514.7)</b> | <b>135.6†</b><br><b>(118.4 to 153.9)</b> | <b>12.3</b><br><b>(8.3 to 17.6)</b> | <b>0.3</b><br><b>(-1.6 to 2.2)</b>                | <b>-12.1</b><br><b>(-13.6 to -10.6)</b>             |
| Self-harm                                                                           | 53.7<br>(44.5 to 63.2)                  | 23.8<br>(20.9 to 26.9)                   | 2.5<br>(1.6 to 3.6)                 | 4.9<br>(1.9 to 7.9)                               | -9.3<br>(-11.7 to -6.8)                             |
| Self-harm by firearm                                                                | 0.5<br>(0.5 to 0.6)                     | 0.1<br>(0.1 to 0.2)                      | < 0.05<br>(< 0.05 to < 0.05)        | -37.8<br>(-40.7 to -35.2)                         | -47.4<br>(-49.9 to -45.3)                           |
| Self-harm by other specified means                                                  | 53.1<br>(44.0 to 62.7)                  | 23.7<br>(20.8 to 26.7)                   | 2.5<br>(1.6 to 3.6)                 | 5.4<br>(2.3 to 8.5)                               | -8.8<br>(-11.3 to -6.2)                             |
| Interpersonal violence                                                              | 419.0<br>(382.9 to 462.2)               | 111.7†<br>(95.0 to 129.3)                | 9.8<br>(6.7 to 14.0)                | -0.8<br>(-2.7 to 1.2)                             | -12.8<br>(-14.3 to -11.3)                           |
| Assault by firearm                                                                  | 2.4<br>(2.0 to 2.8)                     | 0.7<br>(0.5 to 1.0)                      | 0.1<br>(0.1 to 0.2)                 | 9.0<br>(5.7 to 12.5)                              | -4.4<br>(-7.0 to -1.6)                              |
| Assault by sharp object                                                             | 56.9<br>(46.8 to 67.8)                  | 22.3<br>(17.3 to 28.0)                   | 1.7<br>(1.1 to 2.5)                 | -7.3<br>(-10.2 to -4.5)                           | -19.2<br>(-21.4 to -17.0)                           |
| Sexual violence                                                                     | 199.3<br>(175.0 to 226.1)               | --                                       | 1.6<br>(1.1 to 2.3)                 | 0.3<br>(-3.5 to 4.5)                              | -5.4<br>(-8.4 to -2.0)                              |
| Assault by other means                                                              | 160.4<br>(133.7 to 194.9)               | 88.7<br>(74.9 to 103.1)                  | 6.5<br>(4.3 to 9.4)                 | 0.7<br>(-1.3 to 2.7)                              | -12.9<br>(-14.5 to -11.3)                           |
| <b>Forces of nature, conflict and terrorism, and executions and police conflict</b> | <b>17.4</b><br><b>(8.8 to 27.2)</b>     | <b>0.4†</b><br><b>(0.3 to 0.5)</b>       | <b>0.6</b><br><b>(0.1 to 1.5)</b>   | <b>31.9</b><br><b>(-43.3 to 95.7)</b>             | <b>20.0</b><br><b>(-48.4 to 78.0)</b>               |
| Exposure to forces of nature                                                        | 13.0<br>(5.7 to 21.9)                   | --                                       | 0.4<br>(0.1 to 1.1)                 | 17.2<br>(-52.5 to 85.8)                           | 7.1<br>(-56.5 to 69.4)                              |
| Conflict and terrorism                                                              | 3.3<br>(1.5 to 5.5)                     | --                                       | 0.1<br>(< 0.05 to 0.3)              | 243.0<br>(226.8 to 268.1)                         | 211.9<br>(197.4 to 235.8)                           |
| Executions and police conflict                                                      | 1.1<br>(0.7 to 1.8)                     | 0.4<br>(0.3 to 0.5)                      | < 0.05<br>(< 0.05 to 0.1)           | 20.9<br>(13.6 to 26.5)                            | 10.4<br>(3.6 to 15.3)                               |
| <b>Impairments</b>                                                                  | --                                      | --                                       | --                                  | --                                                | --                                                  |
| Anaemia                                                                             | 6,169.6<br>(5,861.2 to 6,509.1)         | --                                       | 181.1<br>(121.2 to 257.9)           | 10.1<br>(3.1 to 17.5)                             | -5.1<br>(-10.3 to 0.6)                              |
| Developmental intellectual disability                                               | 339.2<br>(269.6 to 412.8)               | --                                       | 39.9<br>(29.1 to 53.2)              | 6.7<br>(0.7 to 14.7)                              | -4.9<br>(-10.0 to 2.1)                              |
| Epilepsy                                                                            | 103.8<br>(53.2 to 165.2)                | --                                       | 36.8<br>(17.7 to 66.0)              | 2.8<br>(-51.9 to 148.2)                           | -8.2<br>(-57.4 to 125.1)                            |
| Guillain-Barre syndrome                                                             | 0.2<br>(0.1 to 0.2)                     | --                                       | 0.1<br>(< 0.05 to 0.1)              | 16.0<br>(11.7 to 20.8)                            | 0.1<br>(0.0 to 0.1)                                 |
| Hearing loss                                                                        | 3,068.4<br>(2,923.9 to 3,228.4)         | --                                       | 88.7<br>(61.7 to 123.8)             | 11.8<br>(8.8 to 14.7)                             | -4.7<br>(-6.8 to -2.6)                              |
| Heart failure                                                                       | 200.6<br>(176.0 to 229.2)               | --                                       | 19.5<br>(14.5 to 25.4)              | 20.6<br>(12.6 to 29.4)                            | 2.2<br>(-4.3 to 9.9)                                |
| Infertility                                                                         | 220.9<br>(174.7 to 279.3)               | --                                       | 1.5<br>(0.7 to 2.8)                 | 12.8<br>(5.5 to 19.9)                             | 0.9<br>(-5.3 to 7.4)                                |
| Pelvic inflammatory disease                                                         | 9.7<br>(8.2 to 11.6)                    | --                                       | 1.3<br>(0.8 to 1.8)                 | 6.2<br>(-11.0 to 25.8)                            | -6.8<br>(-21.8 to 9.4)                              |
| Vision loss                                                                         | 2,596.2<br>(2,477.3 to 2,713.8)         | --                                       | 71.5<br>(49.7 to 102.6)             | 15.8<br>(12.4 to 20.3)                            | -2.1<br>(-4.7 to 1.4)                               |

We did not calculate incidence for the nine impairments, certain NTDs, and causes with only birth prevalence. Blank cells mean that no estimate is available.

† Incidence for aggregate causes represents the sum of the incidence of the causes below the aggregate.

‡ Incidence estimates for stroke represent first-ever stroke only.

^ Incidence of HIV/AIDS represents new infections of HIV only and does not include new infections of Tuberculosis in HIV positive cases.



SR Table 14: Prevalence, incidence, and YLDs for 2016, percentage change of YLD counts and percentage change of age-standardised YLD rates between 2006 and 2016 by cause and impairments, for all ages, Kenya.

| Cause                                                                                | Prevalence in thousands (95% UI)          | Incidence in thousands (95% UI)               | YLDs in thousands (95% UI)             |                                                   |                                                     |
|--------------------------------------------------------------------------------------|-------------------------------------------|-----------------------------------------------|----------------------------------------|---------------------------------------------------|-----------------------------------------------------|
|                                                                                      | 2016 counts                               | 2016 counts                                   | 2016 counts                            | Percentage change in counts between 2006 and 2016 | Percentage change in age-standardised rates between |
| <b>All causes</b>                                                                    | <b>45,409.5</b><br>(45,374.0 to 45,455.3) | <b>344,304.4†</b><br>(324,786.7 to 365,939.7) | <b>4,149.6</b><br>(3,075.4 to 5,426.3) | <b>29.7</b><br>(25.6 to 32.1)                     | <b>-2.6</b><br>(-6.6 to -0.2)                       |
| <b>Communicable, maternal, neonatal, and nutritional disorders</b>                   | <b>37,717.2</b><br>(37,492.2 to 37,942.3) | <b>240,442.7†</b><br>(222,141.5 to 260,253.7) | <b>969.4</b><br>(702.7 to 1,297.8)     | <b>13.6</b><br>(1.0 to 22.2)                      | <b>-16.0</b><br>(-30.3 to -5.6)                     |
| <b>HIV/AIDS and tuberculosis</b>                                                     | <b>14,287.8</b><br>(13,633.5 to 14,664.9) | <b>175.5†</b><br>(157.5 to 197.1)             | <b>185.3</b><br>(129.7 to 253.4)       | <b>-24.4</b><br>(-42.6 to -3.8)                   | <b>-46.3</b><br>(-62.0 to -26.5)                    |
| Tuberculosis                                                                         | 12,908.9<br>(12,155.9 to 13,715.0)        | 77.4†<br>(65.1 to 91.5)                       | 16.9<br>(11.2 to 24.1)                 | 18.6<br>(10.2 to 28.2)                            | -12.0<br>(-17.5 to -6.3)                            |
| Drug-susceptible tuberculosis                                                        | 54.2<br>(44.2 to 65.0)                    | 76.5<br>(64.4 to 90.3)                        | 16.8<br>(11.1 to 23.8)                 | 18.5<br>(9.9 to 28.1)                             | -12.1<br>(-17.6 to -6.4)                            |
| Multidrug-resistant tuberculosis without extensive drug resistance                   | 0.6<br>(0.4 to 0.8)                       | 0.9<br>(0.6 to 1.2)                           | 0.2<br>(0.1 to 0.3)                    | 28.8<br>(0.8 to 67.7)                             | -5.9<br>(-24.8 to 19.9)                             |
| Extensively drug-resistant tuberculosis                                              | < 0.05<br>(< 0.05 to < 0.05)              | < 0.05<br>(< 0.05 to < 0.05)                  | < 0.05<br>(< 0.05 to < 0.05)           | 292.5<br>(207.3 to 411.0)                         | 186.8<br>(129.2 to 265.3)                           |
| Latent tuberculosis infection                                                        | 12,854.1<br>(12,101.9 to 13,660.0)        | --                                            | --                                     | --                                                | --                                                  |
| HIV/AIDS                                                                             | 1,687.2<br>(1,589.9 to 1,786.7)           | 98.2^<br>(86.6 to 115.2)                      | 168.3<br>(116.4 to 232.4)              | -27.1<br>(-45.4 to -5.9)                          | -48.3<br>(-63.9 to -27.6)                           |
| Drug-susceptible HIV/AIDS - Tuberculosis                                             | 23.2<br>(15.8 to 31.6)                    | 32.8<br>(23.3 to 43.8)                        | 8.9<br>(5.2 to 13.9)                   | -33.2<br>(-40.0 to -25.6)                         | -48.2<br>(-53.3 to -42.5)                           |
| Multidrug-resistant HIV/AIDS - Tuberculosis without extensive drug resistance        | 0.3<br>(0.2 to 0.5)                       | 0.4<br>(0.3 to 0.6)                           | 0.1<br>(0.1 to 0.2)                    | -27.0<br>(-44.7 to -2.2)                          | -43.7<br>(-57.2 to -25.3)                           |
| Extensively drug-resistant HIV/AIDS - Tuberculosis                                   | < 0.05<br>(< 0.05 to < 0.05)              | < 0.05<br>(< 0.05 to < 0.05)                  | < 0.05<br>(< 0.05 to < 0.05)           | 122.3<br>(68.4 to 198.0)                          | 71.6<br>(30.4 to 127.6)                             |
| HIV/AIDS resulting in other diseases                                                 | 1,663.7<br>(1,565.0 to 1,765.3)           | 98.2<br>(86.6 to 115.2)                       | 159.3<br>(110.1 to 219.7)              | -26.7<br>(-45.8 to -3.4)                          | -48.3<br>(-64.6 to -26.1)                           |
| <b>Diarrhoea, lower respiratory infections, and other common infectious diseases</b> | <b>3,771.3</b><br>(3,688.9 to 3,853.6)    | <b>205,374.5†</b><br>(186,457.1 to 224,838.1) | <b>214.2</b><br>(150.6 to 289.7)       | <b>19.7</b><br>(18.1 to 21.2)                     | <b>-5.4</b><br>(-6.3 to -4.5)                       |
| Diarrhoeal diseases                                                                  | 868.7<br>(818.3 to 923.1)                 | 58,248.2<br>(54,772.2 to 62,090.4)            | 97.9<br>(67.5 to 135.1)                | 11.5<br>(9.5 to 13.6)                             | -10.7<br>(-11.8 to -9.6)                            |
| Intestinal infectious diseases                                                       | 6.4<br>(5.5 to 7.5)                       | 104.0†<br>(90.8 to 119.2)                     | 1.0<br>(0.6 to 1.4)                    | 25.1<br>(3.5 to 50.3)                             | -1.8<br>(-16.1 to 14.5)                             |
| Typhoid fever                                                                        | 6.2<br>(5.1 to 7.4)                       | 97.8<br>(85.5 to 112.1)                       | 1.0<br>(0.6 to 1.4)                    | 26.8<br>(4.3 to 52.9)                             | -1.0<br>(-15.6 to 16.3)                             |
| Paratyphoid fever                                                                    | 0.3<br>(0.2 to 0.4)                       | 6.2<br>(5.0 to 7.8)                           | < 0.05<br>(< 0.05 to < 0.05)           | 34.7<br>(9.7 to 64.0)                             | 4.9<br>(-11.5 to 24.1)                              |
| Other intestinal infectious diseases                                                 | --                                        | --                                            | < 0.05<br>(< 0.05 to < 0.05)           | -23.7<br>(-46.0 to 9.9)                           | -31.3<br>(-48.6 to -7.6)                            |
| Lower respiratory infections                                                         | 53.2<br>(48.4 to 58.6)                    | 2,271.4<br>(2,046.3 to 2,514.9)               | 3.2<br>(2.1 to 4.7)                    | 18.5<br>(14.9 to 22.1)                            | -4.9<br>(-7.2 to -2.8)                              |
| Upper respiratory infections                                                         | 1,834.9<br>(1,595.6 to 2,088.0)           | 139,054.7<br>(120,207.0 to 158,939.1)         | 45.9<br>(27.1 to 71.9)                 | 27.4<br>(25.2 to 29.6)                            | -0.1<br>(-1.2 to 1.2)                               |
| Otitis media                                                                         | 843.7<br>(750.3 to 943.8)                 | 4,126.9<br>(3,245.9 to 5,206.3)               | 26.4<br>(16.4 to 39.4)                 | 20.7<br>(16.9 to 24.6)                            | -3.7<br>(-6.8 to -0.6)                              |
| Meningitis                                                                           | 250.2<br>(212.9 to 289.7)                 | 48.9<br>(42.5 to 57.7)                        | 25.1<br>(17.8 to 32.9)                 | 29.6<br>(25.3 to 34.5)                            | 2.3<br>(-1.1 to 6.2)                                |
| Pneumococcal meningitis                                                              | 103.7<br>(85.0 to 125.7)                  | 11.9<br>(9.7 to 15.0)                         | 10.1<br>(7.1 to 13.5)                  | -1.9<br>(-7.0 to 3.6)                             | -21.7<br>(-25.8 to -17.2)                           |
| H influenzae type B meningitis                                                       | 55.2<br>(42.0 to 71.0)                    | 12.7<br>(9.7 to 16.6)                         | 5.6<br>(4.0 to 7.5)                    | 29.9<br>(24.7 to 34.9)                            | 3.8<br>(-0.1 to 7.2)                                |
| Meningococcal infection                                                              | 18.5<br>(13.3 to 24.6)                    | 5.7<br>(4.3 to 7.6)                           | 2.0<br>(1.4 to 2.7)                    | 65.5<br>(59.7 to 71.5)                            | 30.8<br>(26.2 to 35.9)                              |
| Other meningitis                                                                     | 72.8<br>(55.6 to 92.0)                    | 18.6<br>(15.4 to 22.5)                        | 7.4<br>(5.2 to 10.0)                   | 108.3<br>(99.7 to 117.5)                          | 60.0<br>(53.5 to 67.2)                              |
| Encephalitis                                                                         | 110.1<br>(72.8 to 161.4)                  | 49.8<br>(43.3 to 56.9)                        | 12.4<br>(8.8 to 16.2)                  | 46.5<br>(40.4 to 52.9)                            | 13.5<br>(9.1 to 18.4)                               |
| Diphtheria                                                                           | < 0.05<br>(< 0.05 to < 0.05)              | < 0.05<br>(< 0.05 to < 0.05)                  | < 0.05<br>(< 0.05 to < 0.05)           | -41.2<br>(-55.6 to -23.2)                         | -48.3<br>(-59.1 to -35.6)                           |
| Whooping cough                                                                       | 9.6<br>(7.5 to 12.2)                      | 70.3<br>(54.7 to 89.3)                        | 0.5<br>(0.3 to 0.8)                    | -33.5<br>(-37.5 to -29.2)                         | -41.2<br>(-44.7 to -37.4)                           |
| Tetanus                                                                              | 1.3<br>(1.2 to 1.7)                       | 6.1<br>(3.4 to 13.3)                          | 0.1<br>(< 0.05 to 0.1)                 | -16.5<br>(-28.2 to -4.2)                          | -34.8<br>(-44.3 to -24.1)                           |
| Measles                                                                              | 4.8<br>(1.8 to 10.7)                      | 176.5<br>(64.5 to 389.0)                      | 0.4<br>(0.1 to 1.0)                    | 189.6<br>(104.2 to 323.7)                         | 151.5<br>(77.5 to 268.3)                            |
| Varicella and herpes zoster                                                          | 41.9<br>(39.3 to 44.8)                    | 1,217.6<br>(1,151.1 to 1,288.0)               | 1.3<br>(0.8 to 1.9)                    | 33.3<br>(28.5 to 38.4)                            | -0.1<br>(-2.9 to 2.5)                               |
| <b>Neglected tropical diseases and malaria</b>                                       | <b>13,768.0</b><br>(13,347.3 to 14,137.6) | <b>6,438.2†</b><br>(5,465.8 to 7,668.0)       | <b>119.0</b><br>(77.3 to 188.1)        | <b>13.8</b><br>(11.0 to 16.7)                     | <b>-11.1</b><br>(-12.8 to -8.9)                     |
| Malaria                                                                              | 1,737.0<br>(1,549.5 to 1,937.7)           | 3,308.1<br>(2,380.3 to 4,515.4)               | 32.6<br>(25.2 to 41.3)                 | -8.5<br>(-13.1 to -3.9)                           | -26.2<br>(-29.6 to -22.8)                           |
| Chagas disease                                                                       | --                                        | --                                            | --                                     | --                                                | --                                                  |
| Leishmaniasis                                                                        | 3.4<br>(3.1 to 3.7)                       | 1.4<br>(1.3 to 1.6)                           | 0.2<br>(0.1 to 0.3)                    | 75.7<br>(57.4 to 98.5)                            | 33.5<br>(19.2 to 51.4)                              |
| Visceral leishmaniasis                                                               | 0.2<br>(0.2 to 0.2)                       | 0.9<br>(0.9 to 0.9)                           | < 0.05<br>(< 0.05 to < 0.05)           | 287.5<br>(256.7 to 325.0)                         | 178.4<br>(111.4 to 282.0)                           |
| Cutaneous and mucocutaneous leishmaniasis                                            | 2.9<br>(2.5 to 3.2)                       | 0.5<br>(0.4 to 0.7)                           | 0.2<br>(0.1 to 0.3)                    | 68.0<br>(50.1 to 90.7)                            | 24.6<br>(11.1 to 42.3)                              |
| African trypanosomiasis                                                              | --                                        | --                                            | --                                     | --                                                | --                                                  |
| Schistosomiasis                                                                      | 7,304.6<br>(6,478.1 to 8,166.0)           | 2,743.9<br>(2,479.4 to 3,033.7)               | 55.6<br>(27.4 to 106.3)                | 19.6<br>(17.1 to 22.4)                            | -10.1<br>(-11.8 to -8.4)                            |
| Cysticercosis                                                                        | 19.0<br>(15.8 to 22.3)                    | --                                            | 3.3<br>(2.2 to 4.6)                    | 17.8<br>(3.8 to 32.0)                             | -13.8<br>(-22.9 to -4.4)                            |
| Cystic echinococcosis                                                                | 2.8<br>(1.1 to 7.2)                       | 0.6<br>(0.2 to 1.6)                           | 0.3<br>(0.1 to 0.7)                    | 29.6<br>(-65.2 to 371.9)                          | -3.4<br>(-73.1 to 225.3)                            |
| Lymphatic filariasis                                                                 | 29.3<br>(24.4 to 35.2)                    | 7.6<br>(6.4 to 9.1)                           | 1.1<br>(0.5 to 1.9)                    | 41.8<br>(35.7 to 48.7)                            | 2.8<br>(-0.9 to 6.9)                                |
| Onchocerciasis                                                                       | --                                        | --                                            | --                                     | --                                                | --                                                  |
| Trachoma                                                                             | 17.1<br>(12.3 to 23.2)                    | --                                            | 1.2<br>(0.8 to 1.7)                    | 53.3<br>(39.9 to 68.0)                            | 10.8<br>(0.8 to 21.4)                               |
| Dengue                                                                               | 22.5<br>(12.0 to 38.2)                    | 375.5<br>(226.9 to 578.2)                     | 3.7<br>(1.6 to 7.0)                    | 180.3<br>(128.4 to 522.2)                         | 115.8<br>(76.2 to 377.1)                            |
| Yellow fever                                                                         | < 0.05<br>(< 0.05 to 0.1)                 | 1.0<br>(0.3 to 2.6)                           | < 0.05<br>(< 0.05 to < 0.05)           | -26.6<br>(-36.6 to -14.0)                         | -43.8<br>(-50.2 to -36.5)                           |
| Rabies                                                                               | < 0.05<br>(< 0.05 to < 0.05)              | 0.1<br>(< 0.05 to 0.2)                        | < 0.05<br>(< 0.05 to < 0.05)           | -13.2<br>(-35.3 to 17.3)                          | -31.4<br>(-46.0 to -11.3)                           |
| Intestinal nematode infections                                                       | 6,224.1<br>(5,849.2 to 6,524.0)           | --                                            | 8.8<br>(5.2 to 14.1)                   | 29.0<br>(11.7 to 48.5)                            | -0.4<br>(-14.3 to 16.4)                             |
| Ascariasis                                                                           | 2,255.6<br>(1,712.1 to 2,951.8)           | --                                            | 0.6<br>(0.3 to 1.1)                    | 26.7<br>(3.6 to 54.1)                             | -1.6<br>(-22.5 to 23.8)                             |



| Cause                                                                   | Prevalence in thousands (95% UI)                 | Incidence in thousands (95% UI)                     | YLDs in thousands (95% UI)                    |                                                   |                                                     |
|-------------------------------------------------------------------------|--------------------------------------------------|-----------------------------------------------------|-----------------------------------------------|---------------------------------------------------|-----------------------------------------------------|
|                                                                         | 2016 counts                                      | 2016 counts                                         | 2016 counts                                   | Percentage change in counts between 2006 and 2016 | Percentage change in age-standardised rates between |
| Trichuriasis                                                            | 1,690.9<br>(1,282.8 to 2,202.8)                  | --                                                  | 0.3<br>(0.2 to 0.6)                           | 28.7<br>(-21.8 to 114.2)                          | -1.1<br>(-45.3 to 82.3)                             |
| Hookworm disease                                                        | 2,561.7<br>(2,032.2 to 3,271.5)                  | --                                                  | 7.8<br>(4.7 to 12.5)                          | 29.2<br>(10.1 to 50.3)                            | -0.3<br>(-15.5 to 17.4)                             |
| Food-borne trematodiasis                                                | --                                               | --                                                  | --                                            | --                                                | --                                                  |
| Leprosy                                                                 | 0.8<br>(0.7 to 0.8)                              | < 0.05<br>(< 0.05 to < 0.05)                        | < 0.05<br>(< 0.05 to 0.1)                     | 3.4<br>(-0.5 to 7.2)                              | -24.1<br>(-27.7 to -20.7)                           |
| Ebola virus disease                                                     | --                                               | --                                                  | --                                            | --                                                | --                                                  |
| Zika virus disease                                                      | --                                               | --                                                  | --                                            | --                                                | --                                                  |
| Guinea worm disease                                                     | --                                               | --                                                  | --                                            | --                                                | --                                                  |
| Other neglected tropical diseases                                       | 422.5<br>(396.2 to 451.0)                        | --                                                  | 12.3<br>(7.9 to 18.1)                         | 27.2<br>(22.8 to 31.5)                            | 6.5<br>(3.1 to 9.9)                                 |
| <b>Maternal disorders</b>                                               | <b>140.2</b><br><b>(133.1 to 146.2)</b>          | <b>2,561.5†</b><br><b>(2,159.2 to 2,920.1)</b>      | <b>23.5</b><br><b>(16.2 to 32.8)</b>          | <b>20.3</b><br><b>(11.4 to 29.9)</b>              | <b>-10.2</b><br><b>(-16.1 to -3.9)</b>              |
| Maternal haemorrhage                                                    | 20.1<br>(15.6 to 25.6)                           | 240.1<br>(185.9 to 314.6)                           | 1.1<br>(0.7 to 1.7)                           | -1.9<br>(-28.9 to 33.1)                           | -22.6<br>(-44.1 to 5.4)                             |
| Maternal sepsis and other pregnancy related infections                  | 19.3<br>(16.2 to 23.5)                           | 71.8<br>(56.1 to 96.5)                              | 0.4<br>(0.2 to 0.6)                           | 8.5<br>(-39.1 to 96.7)                            | -16.9<br>(-51.9 to 44.8)                            |
| Maternal hypertensive disorders                                         | 43.6<br>(27.6 to 61.8)                           | 216.8<br>(177.3 to 258.8)                           | 2.1<br>(1.1 to 3.5)                           | 38.8<br>(-12.7 to 122.7)                          | 7.0<br>(-33.0 to 71.2)                              |
| Maternal obstructed labour and uterine rupture                          | 44.6<br>(37.2 to 52.8)                           | 73.2<br>(56.6 to 95.0)                              | 14.5<br>(9.4 to 20.7)                         | 24.6<br>(18.4 to 31.2)                            | -8.5<br>(-12.5 to -4.4)                             |
| Maternal abortion, miscarriage, and ectopic pregnancy                   | 16.1<br>(10.5 to 22.3)                           | 1,959.6<br>(1,578.9 to 2,305.8)                     | 1.8<br>(1.0 to 2.8)                           | 3.1<br>(-37.1 to 61.7)                            | -21.1<br>(-51.4 to 24.1)                            |
| Other maternal disorders                                                | --                                               | --                                                  | 3.6<br>(2.5 to 5.0)                           | 13.8<br>(5.6 to 23.0)                             | -14.5<br>(-20.1 to -8.5)                            |
| <b>Neonatal disorders</b>                                               | <b>778.3</b><br><b>(719.7 to 844.5)</b>          | --                                                  | <b>149.5</b><br><b>(94.2 to 238.0)</b>        | <b>57.2</b><br><b>(37.7 to 85.3)</b>              | <b>31.2</b><br><b>(14.8 to 54.9)</b>                |
| Neonatal preterm birth complications                                    | 513.0<br>(408.8 to 642.8)                        | --                                                  | 68.0<br>(42.1 to 105.5)                       | 78.3<br>(39.2 to 125.7)                           | 46.7<br>(15.3 to 86.2)                              |
| Neonatal encephalopathy due to birth asphyxia and trauma                | 209.6<br>(121.3 to 356.9)                        | --                                                  | 24.7<br>(5.3 to 66.0)                         | 43.9<br>(16.8 to 69.5)                            | 18.7<br>(-4.9 to 41.2)                              |
| Neonatal sepsis and other neonatal infections                           | 105.5<br>(36.2 to 245.0)                         | --                                                  | 42.2<br>(11.6 to 110.1)                       | 45.4<br>(17.2 to 81.4)                            | 22.0<br>(-4.8 to 56.6)                              |
| Hemolytic disease and other neonatal jaundice                           | 18.1<br>(16.2 to 20.2)                           | --                                                  | 5.8<br>(4.5 to 7.4)                           | 60.0<br>(49.2 to 71.9)                            | 31.5<br>(22.5 to 41.2)                              |
| Other neonatal disorders                                                | --                                               | --                                                  | 8.8<br>(5.6 to 14.1)                          | 22.7<br>(9.7 to 41.4)                             | 8.9<br>(-2.5 to 25.7)                               |
| <b>Nutritional deficiencies</b>                                         | <b>18,682.2</b><br><b>(18,200.4 to 19,071.2)</b> | <b>17,645.9†</b><br><b>(15,222.5 to 20,498.0)</b>   | <b>241.8</b><br><b>(160.4 to 349.0)</b>       | <b>31.8</b><br><b>(28.6 to 34.6)</b>              | <b>8.4</b><br><b>(6.6 to 10.1)</b>                  |
| Protein-energy malnutrition                                             | 358.1<br>(335.8 to 384.2)                        | 324.3<br>(306.9 to 345.0)                           | 14.5<br>(9.4 to 20.7)                         | -8.1<br>(-13.8 to -2.1)                           | -18.8<br>(-23.8 to -13.4)                           |
| Iodine deficiency                                                       | 902.8<br>(800.1 to 1,013.9)                      | 34.0<br>(30.3 to 38.1)                              | 23.2<br>(15.7 to 33.0)                        | 32.4<br>(30.2 to 34.6)                            | -0.2<br>(-1.7 to 1.3)                               |
| Vitamin A deficiency                                                    | 13,363.5<br>(12,026.5 to 14,937.0)               | 17,287.6<br>(14,868.0 to 20,132.7)                  | 1.7<br>(1.1 to 2.6)                           | 16.9<br>(10.9 to 22.9)                            | -5.6<br>(-10.6 to -1.5)                             |
| Iron-deficiency anaemia                                                 | 7,095.6<br>(6,785.5 to 7,437.5)                  | --                                                  | 201.9<br>(132.5 to 294.6)                     | 36.2<br>(32.9 to 39.5)                            | 12.1<br>(10.1 to 13.9)                              |
| Other nutritional deficiencies                                          | --                                               | --                                                  | 0.5<br>(0.3 to 0.7)                           | -8.7<br>(-14.6 to -2.4)                           | -19.4<br>(-24.6 to -13.8)                           |
| <b>Other communicable, maternal, neonatal, and nutritional diseases</b> | <b>14,318.8</b><br><b>(14,046.9 to 14,565.4)</b> | <b>8,247.0</b><br><b>(7,337.8 to 9,320.0)</b>       | <b>36.2</b><br><b>(22.9 to 56.3)</b>          | <b>38.0</b><br><b>(34.4 to 41.1)</b>              | <b>3.8</b><br><b>(1.5 to 6.0)</b>                   |
| Sexually transmitted diseases excluding HIV                             | 11,744.1<br>(11,373.6 to 12,070.2)               | 6,596.9<br>(5,981.0 to 7,280.9)                     | 24.6<br>(15.3 to 40.2)                        | 40.9<br>(37.7 to 44.4)                            | 3.7<br>(1.8 to 5.8)                                 |
| Syphilis                                                                | 542.1<br>(409.0 to 691.9)                        | 390.3<br>(274.3 to 522.3)                           | 1.4<br>(1.0 to 1.9)                           | 42.0<br>(36.5 to 47.9)                            | 0.1<br>(-3.7 to 4.4)                                |
| Chlamydial infection                                                    | 850.6<br>(670.0 to 1,048.3)                      | 706.8<br>(575.4 to 858.9)                           | 5.2<br>(3.2 to 8.3)                           | 41.6<br>(35.3 to 48.9)                            | 6.6<br>(2.9 to 11.1)                                |
| Gonococcal infection                                                    | 513.6<br>(422.6 to 629.9)                        | 1,775.5<br>(1,408.1 to 2,253.0)                     | 4.2<br>(2.5 to 6.8)                           | 35.9<br>(30.6 to 41.4)                            | 1.1<br>(-2.0 to 4.3)                                |
| Trichomoniasis                                                          | 2,351.1<br>(2,001.9 to 2,691.0)                  | 2,267.3<br>(1,899.5 to 2,666.9)                     | 3.4<br>(1.3 to 7.1)                           | 30.2<br>(27.4 to 33.2)                            | -1.6<br>(-2.7 to -0.5)                              |
| Genital herpes                                                          | 9,261.6<br>(8,034.8 to 10,686.6)                 | 1,024.2<br>(863.0 to 1,226.9)                       | 2.5<br>(0.8 to 5.7)                           | 36.1<br>(29.9 to 42.3)                            | -0.2<br>(-3.7 to 3.9)                               |
| Other sexually transmitted diseases                                     | 338.2<br>(264.0 to 431.5)                        | 432.8<br>(363.0 to 518.1)                           | 7.9<br>(5.2 to 11.9)                          | 50.1<br>(43.6 to 58.3)                            | 9.1<br>(5.0 to 14.0)                                |
| Hepatitis                                                               | 3,406.0<br>(2,857.8 to 4,049.7)                  | 1,650.0<br>(1,112.8 to 2,568.2)                     | 1.8<br>(1.1 to 2.9)                           | 1.2<br>(-19.7 to 27.9)                            | -17.6<br>(-30.6 to -1.8)                            |
| Acute hepatitis A                                                       | 34.3<br>(4.4 to 101.0)                           | 445.7<br>(56.6 to 1,313.2)                          | 0.3<br>(0.1 to 0.6)                           | -3.5<br>(-73.9 to 314.2)                          | -17.8<br>(-69.2 to 148.2)                           |
| Hepatitis B                                                             | 2,508.8<br>(2,006.2 to 3,143.6)                  | 1,069.2<br>(817.5 to 1,414.8)                       | 1.4<br>(0.8 to 2.2)                           | 1.6<br>(-16.5 to 21.2)                            | -18.2<br>(-31.3 to -3.9)                            |
| Hepatitis C                                                             | 857.4<br>(762.2 to 953.1)                        | 64.6<br>(58.7 to 70.8)                              | 0.1<br>(< 0.05 to 0.1)                        | 26.3<br>(20.6 to 32.8)                            | -0.6<br>(-3.8 to 2.7)                               |
| Acute hepatitis E                                                       | 5.4<br>(4.8 to 6.2)                              | 70.5<br>(62.1 to 80.2)                              | 0.1<br>(0.1 to 0.2)                           | -1.2<br>(-11.0 to 9.5)                            | -16.1<br>(-22.2 to -9.7)                            |
| Other infectious diseases                                               | 309.6<br>(291.8 to 328.3)                        | < 0.05<br>(< 0.05 to 0.1)                           | 9.7<br>(6.2 to 14.3)                          | 40.2<br>(36.1 to 44.3)                            | 13.9<br>(11.2 to 16.8)                              |
| <b>Non-communicable diseases</b>                                        | <b>41,763.6</b><br><b>(41,637.5 to 41,869.4)</b> | <b>100,288.1†</b><br><b>(93,851.8 to 108,060.4)</b> | <b>2,938.5</b><br><b>(2,161.6 to 3,829.1)</b> | <b>34.7</b><br><b>(33.7 to 35.7)</b>              | <b>0.5</b><br><b>(-0.0 to 1.1)</b>                  |
| <b>Neoplasms</b>                                                        | <b>46.2</b><br><b>(44.9 to 48.2)</b>             | <b>22.6</b><br><b>(18.5 to 26.7)</b>                | <b>7.0</b><br><b>(4.6 to 10.1)</b>            | <b>38.0</b><br><b>(32.2 to 45.7)</b>              | <b>-2.4</b><br><b>(-6.3 to 2.4)</b>                 |
| Lip and oral cavity cancer                                              | 2.0<br>(1.5 to 2.1)                              | 0.6<br>(0.5 to 0.6)                                 | 0.2<br>(0.1 to 0.3)                           | 43.6<br>(33.3 to 52.5)                            | -0.3<br>(-7.3 to 5.2)                               |
| Nasopharynx cancer                                                      | 1.1<br>(1.0 to 1.3)                              | 0.3<br>(0.3 to 0.4)                                 | 0.1<br>(0.1 to 0.2)                           | 33.5<br>(22.2 to 48.8)                            | -7.7<br>(-15.0 to 3.1)                              |
| Other pharynx cancer                                                    | 0.4<br>(0.4 to 0.5)                              | 0.2<br>(0.1 to 0.2)                                 | 0.1<br>(< 0.05 to 0.1)                        | 43.9<br>(30.5 to 56.6)                            | -0.4<br>(-9.6 to 8.3)                               |
| Oesophageal cancer                                                      | 0.8<br>(0.8 to 0.9)                              | 0.8<br>(0.8 to 0.8)                                 | 0.2<br>(0.1 to 0.3)                           | 33.9<br>(26.6 to 42.9)                            | -5.3<br>(-10.3 to 0.7)                              |
| Stomach cancer                                                          | 2.6<br>(2.4 to 2.8)                              | 1.8<br>(1.6 to 1.9)                                 | 0.4<br>(0.3 to 0.6)                           | 21.3<br>(15.7 to 27.9)                            | -15.2<br>(-19.1 to -10.5)                           |
| Colon and rectum cancer                                                 | 3.1<br>(2.7 to 3.8)                              | 1.1<br>(1.0 to 1.4)                                 | 0.4<br>(0.3 to 0.6)                           | 43.9<br>(29.1 to 54.9)                            | 2.3<br>(-7.5 to 9.6)                                |
| Liver cancer                                                            | 0.4<br>(0.3 to 0.5)                              | 0.9<br>(0.7 to 1.1)                                 | 0.2<br>(0.1 to 0.3)                           | 47.7<br>(36.8 to 56.6)                            | 1.8<br>(-5.7 to 7.9)                                |
| Liver cancer due to hepatitis B                                         | 0.3<br>(0.2 to 0.3)                              | 0.3<br>(0.2 to 0.3)                                 | 0.1<br>(< 0.05 to 0.1)                        | 49.9<br>(38.5 to 59.6)                            | 2.5<br>(-5.0 to 9.5)                                |

| Cause                                              | Prevalence in thousands (95% UI)              | Incidence in thousands (95% UI)          | YLDs in thousands (95% UI)             |                                                   |                                                     |
|----------------------------------------------------|-----------------------------------------------|------------------------------------------|----------------------------------------|---------------------------------------------------|-----------------------------------------------------|
|                                                    | 2016 counts                                   | 2016 counts                              | 2016 counts                            | Percentage change in counts between 2006 and 2016 | Percentage change in age-standardised rates between |
| Liver cancer due to hepatitis C                    | 0.3<br>(0.2 to 0.4)                           | 0.3<br>(0.2 to 0.4)                      | 0.1<br>( $< 0.05$ to 0.1)              | 48.2<br>(35.5 to 57.5)                            | 2.2<br>(-6.3 to 8.8)                                |
| Liver cancer due to alcohol use                    | 0.1<br>(0.1 to 0.1)                           | 0.1<br>(0.1 to 0.1)                      | $< 0.05$<br>( $< 0.05$ to $< 0.05$ )   | 52.1<br>(37.3 to 62.8)                            | 4.5<br>(-5.4 to 11.7)                               |
| Liver cancer due to other causes                   | 0.2<br>(0.2 to 0.2)                           | 0.2<br>(0.2 to 0.2)                      | $< 0.05$<br>( $< 0.05$ to 0.1)         | 42.3<br>(32.2 to 51.0)                            | -1.6<br>(-8.3 to 4.4)                               |
| Gallbladder and biliary tract cancer               | 0.1<br>(0.1 to 0.2)                           | 0.2<br>(0.2 to 0.2)                      | $< 0.05$<br>( $< 0.05$ to 0.1)         | 32.1<br>(22.3 to 43.1)                            | -8.7<br>(-15.2 to -1.5)                             |
| Pancreatic cancer                                  | 0.5<br>(0.4 to 0.6)                           | 0.7<br>(0.6 to 0.7)                      | 0.1<br>(0.1 to 0.2)                    | 48.4<br>(44.4 to 52.2)                            | 4.3<br>(1.4 to 7.0)                                 |
| Larynx cancer                                      | 1.1<br>(1.0 to 1.2)                           | 0.4<br>(0.3 to 0.4)                      | 0.1<br>(0.1 to 0.2)                    | 40.9<br>(31.4 to 53.6)                            | -3.5<br>(-10.0 to 4.9)                              |
| Tracheal, bronchus, and lung cancer                | 0.8<br>(0.7 to 0.9)                           | 0.7<br>(0.6 to 0.8)                      | 0.2<br>(0.1 to 0.2)                    | 45.0<br>(36.6 to 52.2)                            | 2.7<br>(-3.1 to 7.9)                                |
| Malignant skin melanoma                            | 0.5<br>(0.4 to 0.6)                           | 0.1<br>(0.1 to 0.2)                      | $< 0.05$<br>( $< 0.05$ to 0.1)         | 61.3<br>(36.9 to 77.5)                            | 12.7<br>(-3.1 to 23.6)                              |
| Non-melanoma skin cancer                           | 0.2<br>(0.1 to 0.4)                           | 2.3<br>(1.4 to 3.5)                      | $< 0.05$<br>( $< 0.05$ to $< 0.05$ )   | 90.1<br>(70.3 to 111.3)                           | 29.0<br>(15.8 to 44.4)                              |
| Non-melanoma skin cancer (squamous-cell carcinoma) | 0.1<br>(0.1 to 0.1)                           | 0.2<br>(0.2 to 0.3)                      | $< 0.05$<br>( $< 0.05$ to $< 0.05$ )   | 71.5<br>(53.5 to 95.7)                            | 20.2<br>(7.1 to 38.4)                               |
| Non-melanoma skin cancer (basal-cell carcinoma)    | 0.2<br>(0.1 to 0.4)                           | 2.0<br>(1.2 to 3.2)                      | $< 0.05$<br>( $< 0.05$ to $< 0.05$ )   | 145.3<br>(123.2 to 181.9)                         | 62.3<br>(48.9 to 81.5)                              |
| Breast cancer                                      | 7.6<br>(5.5 to 10.1)                          | 1.7<br>(1.3 to 2.3)                      | 0.8<br>(0.5 to 1.2)                    | 53.9<br>(29.1 to 78.1)                            | 6.8<br>(-9.5 to 22.1)                               |
| Cervical cancer                                    | 11.8<br>(5.4 to 18.6)                         | 3.3<br>(1.6 to 5.2)                      | 1.2<br>(0.5 to 2.1)                    | 22.9<br>(10.7 to 43.4)                            | -15.3<br>(-23.4 to -1.9)                            |
| Uterine cancer                                     | 0.8<br>(0.7 to 1.2)                           | 0.2<br>(0.2 to 0.3)                      | 0.1<br>( $< 0.05$ to 0.1)              | 52.1<br>(40.2 to 67.0)                            | 4.5<br>(-3.5 to 14.4)                               |
| Ovarian cancer                                     | 1.8<br>(1.1 to 2.0)                           | 0.6<br>(0.4 to 0.7)                      | 0.3<br>(0.1 to 0.4)                    | 52.4<br>(35.1 to 66.2)                            | 6.5<br>(-5.0 to 16.6)                               |
| Prostate cancer                                    | 4.2<br>(2.3 to 4.8)                           | 1.2<br>(0.7 to 1.3)                      | 0.5<br>(0.3 to 0.7)                    | 55.9<br>(35.8 to 70.0)                            | 8.1<br>(-5.2 to 17.4)                               |
| Testicular cancer                                  | 0.3<br>(0.3 to 0.4)                           | 0.1<br>(0.1 to 0.1)                      | $< 0.05$<br>( $< 0.05$ to $< 0.05$ )   | 30.2<br>(16.8 to 50.4)                            | -10.3<br>(-18.7 to 0.7)                             |
| Kidney cancer                                      | 1.2<br>(0.8 to 1.6)                           | 0.3<br>(0.2 to 0.4)                      | 0.1<br>(0.1 to 0.2)                    | 48.2<br>(30.5 to 57.9)                            | 13.2<br>(4.7 to 18.3)                               |
| Bladder cancer                                     | 1.2<br>(1.0 to 1.4)                           | 0.3<br>(0.3 to 0.4)                      | 0.1<br>(0.1 to 0.2)                    | 51.4<br>(37.9 to 61.5)                            | 5.9<br>(-3.1 to 12.4)                               |
| Brain and nervous system cancer                    | 1.1<br>(0.6 to 1.4)                           | 0.5<br>(0.3 to 0.6)                      | 0.2<br>(0.1 to 0.2)                    | 39.1<br>(31.4 to 63.8)                            | 3.2<br>(-3.2 to 23.5)                               |
| Thyroid cancer                                     | 0.8<br>(0.5 to 1.0)                           | 0.2<br>(0.1 to 0.2)                      | 0.1<br>( $< 0.05$ to 0.1)              | 58.6<br>(42.7 to 78.0)                            | 8.3<br>(-1.4 to 19.6)                               |
| Mesothelioma                                       | 0.1<br>(0.1 to 0.1)                           | 0.1<br>( $< 0.05$ to 0.1)                | $< 0.05$<br>( $< 0.05$ to $< 0.05$ )   | 35.5<br>(21.9 to 45.4)                            | -3.5<br>(-13.2 to 3.2)                              |
| Hodgkin lymphoma                                   | 0.5<br>(0.2 to 0.6)                           | 0.2<br>(0.1 to 0.2)                      | 0.1<br>( $< 0.05$ to 0.1)              | 19.4<br>(10.4 to 32.0)                            | -13.5<br>(-18.7 to -6.5)                            |
| Non-Hodgkin's lymphoma                             | 2.3<br>(1.7 to 2.7)                           | 0.8<br>(0.6 to 0.9)                      | 0.2<br>(0.1 to 0.4)                    | 41.5<br>(33.0 to 47.4)                            | 2.3<br>(-2.1 to 6.1)                                |
| Multiple myeloma                                   | 0.4<br>(0.2 to 0.6)                           | 0.3<br>(0.1 to 0.4)                      | 0.1<br>(0.1 to 0.2)                    | 50.8<br>(39.5 to 64.1)                            | 3.3<br>(-4.6 to 12.9)                               |
| Leukaemia                                          | 2.5<br>(1.6 to 3.2)                           | 0.8<br>(0.5 to 1.0)                      | 0.3<br>(0.2 to 0.5)                    | 23.2<br>(14.1 to 31.9)                            | -6.6<br>(-11.9 to -1.6)                             |
| Acute lymphoid leukaemia                           | 0.8<br>(0.5 to 1.0)                           | 0.2<br>(0.1 to 0.3)                      | 0.1<br>(0.1 to 0.1)                    | 22.9<br>(9.0 to 31.9)                             | -4.3<br>(-12.4 to 1.6)                              |
| Chronic lymphoid leukaemia                         | 0.4<br>(0.3 to 0.5)                           | 0.1<br>(0.1 to 0.1)                      | 0.1<br>( $< 0.05$ to 0.1)              | 39.5<br>(28.9 to 50.2)                            | -0.7<br>(-7.7 to 6.0)                               |
| Acute myeloid leukaemia                            | 0.3<br>(0.2 to 0.4)                           | 0.2<br>(0.1 to 0.2)                      | 0.1<br>( $< 0.05$ to 0.1)              | 34.1<br>(25.1 to 43.6)                            | 2.8<br>(-2.8 to 9.8)                                |
| Chronic myeloid leukaemia                          | 0.3<br>(0.2 to 0.4)                           | 0.1<br>(0.1 to 0.1)                      | $< 0.05$<br>( $< 0.05$ to 0.1)         | 23.4<br>(11.5 to 39.6)                            | -10.3<br>(-18.3 to 0.0)                             |
| Other leukaemia                                    | 0.7<br>(0.4 to 1.0)                           | 0.1<br>(0.1 to 0.2)                      | 0.1<br>( $< 0.05$ to 0.1)              | 8.6<br>(-6.9 to 23.6)                             | -15.1<br>(-23.6 to -7.4)                            |
| Other neoplasms                                    | 6.0<br>(5.3 to 6.6)                           | 2.1<br>(1.8 to 2.3)                      | 0.6<br>(0.4 to 0.8)                    | 34.6<br>(28.0 to 41.5)                            | -2.6<br>(-7.1 to 2.6)                               |
| <b>Cardiovascular diseases</b>                     | <b>1,811.2</b><br><b>(1,756.9 to 1,857.2)</b> | <b>146.4†</b><br><b>(140.2 to 152.7)</b> | <b>99.7</b><br><b>(71.8 to 132.9)</b>  | <b>40.4</b><br><b>(38.0 to 42.7)</b>              | <b>2.8</b><br><b>(1.4 to 4.1)</b>                   |
| Rheumatic heart disease                            | 388.2<br>(342.9 to 433.9)                     | 16.7<br>(14.7 to 18.7)                   | 18.4<br>(11.6 to 27.2)                 | 53.0<br>(47.4 to 62.0)                            | 12.9<br>(8.9 to 18.7)                               |
| Ischaemic heart disease                            | 419.8<br>(398.3 to 441.4)                     | 54.9<br>(51.7 to 58.4)                   | 21.2<br>(14.4 to 29.2)                 | 38.5<br>(36.8 to 40.3)                            | -2.5<br>(-3.4 to -1.5)                              |
| Cerebrovascular disease                            | 111.6<br>(106.9 to 116.9)                     | 21.1‡<br>(19.2 to 23.1)                  | 16.1<br>(11.7 to 20.4)                 | 45.8<br>(38.7 to 53.0)                            | 3.1<br>(-2.1 to 8.6)                                |
| Ischaemic stroke                                   | 99.9<br>(90.1 to 110.5)                       | 14.1‡<br>(12.3 to 15.9)                  | 13.6<br>(9.8 to 17.4)                  | 47.0<br>(38.8 to 55.8)                            | 4.1<br>(-2.1 to 10.4)                               |
| Hemorrhagic stroke                                 | 17.7<br>(16.0 to 19.7)                        | 7.0‡<br>(6.2 to 7.8)                     | 2.5<br>(1.8 to 3.1)                    | 39.6<br>(32.4 to 47.1)                            | -2.6<br>(-8.1 to 3.5)                               |
| Hypertensive heart disease                         | 40.9<br>(33.5 to 49.1)                        | --                                       | 3.3<br>(2.2 to 4.7)                    | 45.7<br>(40.5 to 50.7)                            | 4.2<br>(1.0 to 7.6)                                 |
| Cardiomyopathy and myocarditis                     | 14.8<br>(13.2 to 16.5)                        | 10.5†<br>(9.2 to 12.0)                   | 1.6<br>(1.0 to 2.2)                    | 41.7<br>(37.3 to 46.1)                            | 6.6<br>(3.4 to 9.7)                                 |
| Myocarditis                                        | 5.2<br>(4.7 to 6.0)                           | 10.5<br>(9.2 to 12.0)                    | 0.4<br>(0.2 to 0.5)                    | 35.1<br>(32.8 to 37.5)                            | 3.3<br>(1.4 to 5.2)                                 |
| Alcoholic cardiomyopathy                           | 1.4<br>(1.0 to 1.8)                           | --                                       | 0.1<br>(0.1 to 0.2)                    | 53.2<br>(45.1 to 61.6)                            | 7.5<br>(2.3 to 12.8)                                |
| Other cardiomyopathy                               | 12.5<br>(10.2 to 15.0)                        | --                                       | 1.1<br>(0.7 to 1.5)                    | 43.0<br>(37.5 to 48.5)                            | 7.3<br>(3.5 to 11.0)                                |
| Atrial fibrillation and flutter                    | 79.9<br>(70.0 to 91.0)                        | 6.9<br>(5.9 to 8.0)                      | 6.3<br>(4.2 to 8.9)                    | 40.8<br>(38.2 to 43.4)                            | 0.1<br>(-1.2 to 1.2)                                |
| Peripheral vascular disease                        | 302.2<br>(263.1 to 350.0)                     | 30.2<br>(26.2 to 35.1)                   | 1.4<br>(0.7 to 2.6)                    | 39.2<br>(36.7 to 41.8)                            | -1.0<br>(-2.3 to 0.2)                               |
| Endocarditis                                       | 2.1<br>(1.8 to 2.4)                           | 6.1<br>(5.3 to 6.9)                      | 0.2<br>(0.1 to 0.2)                    | 32.2<br>(28.3 to 36.6)                            | 5.1<br>(2.2 to 8.1)                                 |
| Other cardiovascular and circulatory diseases      | 582.2<br>(472.8 to 696.1)                     | --                                       | 31.3<br>(20.2 to 45.3)                 | 32.2<br>(28.6 to 35.8)                            | 5.8<br>(3.5 to 8.0)                                 |
| <b>Chronic respiratory diseases</b>                | <b>2,684.8</b><br><b>(2,561.2 to 2,835.7)</b> | <b>566.5†</b><br><b>(522.8 to 613.5)</b> | <b>124.9</b><br><b>(91.2 to 166.5)</b> | <b>38.6</b><br><b>(36.6 to 41.0)</b>              | <b>3.9</b><br><b>(1.5 to 6.2)</b>                   |
| Chronic obstructive pulmonary disease              | 379.1<br>(363.1 to 396.0)                     | 26.9<br>(25.8 to 28.0)                   | 29.7<br>(25.7 to 32.6)                 | 40.8<br>(34.0 to 47.4)                            | 0.4<br>(-4.5 to 5.4)                                |
| Pneumoconiosis                                     | 0.5<br>(0.4 to 0.5)                           | 0.1<br>(0.1 to 0.1)                      | 0.1<br>(0.1 to 0.1)                    | 39.1<br>(36.4 to 41.6)                            | -2.2<br>(-4.1 to -0.5)                              |
| Silicosis                                          | $< 0.05$<br>( $< 0.05$ to $< 0.05$ )          | $< 0.05$<br>( $< 0.05$ to $< 0.05$ )     | $< 0.05$<br>( $< 0.05$ to $< 0.05$ )   | 45.1<br>(41.7 to 48.2)                            | 1.6<br>(0.2 to 2.9)                                 |



| Cause                                                          | Prevalence in thousands (95% UI)           | Incidence in thousands (95% UI)          | YLDs in thousands (95% UI)        |                                                   |                                                     |
|----------------------------------------------------------------|--------------------------------------------|------------------------------------------|-----------------------------------|---------------------------------------------------|-----------------------------------------------------|
|                                                                | 2016 counts                                | 2016 counts                              | 2016 counts                       | Percentage change in counts between 2006 and 2016 | Percentage change in age-standardised rates between |
| Asbestosis                                                     | 0.2<br>(0.2 to 0.2)                        | < 0.05<br>(< 0.05 to < 0.05)             | < 0.05<br>(< 0.05 to < 0.05)      | 43.3<br>(40.8 to 45.9)                            | 1.2<br>(0.1 to 2.3)                                 |
| Coal workers pneumoconiosis                                    | --                                         | --                                       | --                                | --                                                | --                                                  |
| Other pneumoconiosis                                           | 0.2<br>(0.2 to 0.3)                        | < 0.05<br>(< 0.05 to < 0.05)             | < 0.05<br>(< 0.05 to 0.1)         | 35.3<br>(31.0 to 39.5)                            | -4.8<br>(-7.9 to -2.0)                              |
| Asthma                                                         | 2,300.4<br>(2,115.5 to 2,512.3)            | 539.2<br>(495.4 to 585.7)                | 91.0<br>(59.0 to 131.2)           | 36.6<br>(34.6 to 38.6)                            | 5.5<br>(4.2 to 7.0)                                 |
| Interstitial lung disease and pulmonary sarcoidosis            | 3.5<br>(3.0 to 3.9)                        | 0.3<br>(0.3 to 0.3)                      | 0.4<br>(0.3 to 0.6)               | 38.5<br>(36.8 to 40.3)                            | 1.3<br>(0.1 to 2.4)                                 |
| Other chronic respiratory diseases                             | --                                         | --                                       | 3.8<br>(3.1 to 4.3)               | 80.7<br>(68.7 to 93.9)                            | 35.8<br>(28.2 to 43.9)                              |
| <b>Cirrhosis and other chronic liver diseases</b>              | <b>85.7<br/>(81.0 to 90.4)</b>             | <b>6.5<br/>(6.2 to 6.9)</b>              | <b>6.8<br/>(4.7 to 9.3)</b>       | <b>38.3<br/>(34.5 to 42.0)</b>                    | <b>4.0<br/>(1.8 to 6.2)</b>                         |
| Cirrhosis and other chronic liver diseases due to hepatitis B  | 20.6<br>(18.2 to 23.0)                     | 1.7<br>(1.5 to 1.9)                      | 1.2<br>(0.8 to 1.7)               | 44.1<br>(37.1 to 51.1)                            | 2.5<br>(-1.1 to 6.3)                                |
| Cirrhosis and other chronic liver diseases due to hepatitis C  | 5.8<br>(5.0 to 6.8)                        | 0.5<br>(0.4 to 0.5)                      | 0.4<br>(0.2 to 0.5)               | 42.0<br>(36.4 to 47.8)                            | 0.8<br>(-4.0 to 5.7)                                |
| Cirrhosis and other chronic liver diseases due to alcohol use  | 22.6<br>(20.7 to 24.7)                     | 2.0<br>(1.9 to 2.2)                      | 1.3<br>(0.9 to 1.8)               | 50.6<br>(43.7 to 57.3)                            | 5.4<br>(1.6 to 8.8)                                 |
| Cirrhosis and other chronic liver diseases due to other causes | 36.7<br>(33.9 to 40.0)                     | 2.3<br>(2.1 to 2.5)                      | 3.9<br>(2.6 to 5.5)               | 32.8<br>(27.5 to 38.2)                            | 4.7<br>(0.8 to 8.5)                                 |
| <b>Digestive diseases</b>                                      | <b>523.6<br/>(500.1 to 545.1)</b>          | <b>655.9†<br/>(624.6 to 690.9)</b>       | <b>19.4<br/>(13.7 to 26.1)</b>    | <b>42.3<br/>(38.8 to 45.7)</b>                    | <b>6.2<br/>(4.3 to 8.1)</b>                         |
| Peptic ulcer disease                                           | 86.8<br>(79.2 to 95.2)                     | 44.8<br>(39.6 to 51.1)                   | 1.7<br>(1.2 to 2.5)               | 75.1<br>(69.0 to 81.6)                            | 20.2<br>(16.8 to 23.3)                              |
| Gastritis and duodenitis                                       | 141.4<br>(124.9 to 157.2)                  | 211.3<br>(189.5 to 236.5)                | 2.1<br>(1.4 to 3.0)               | 60.3<br>(55.4 to 65.3)                            | 16.0<br>(13.6 to 18.7)                              |
| Appendicitis                                                   | 5.7<br>(5.2 to 6.2)                        | 149.7<br>(137.7 to 162.8)                | 1.8<br>(1.2 to 2.4)               | 44.1<br>(34.8 to 53.8)                            | 10.7<br>(5.4 to 16.1)                               |
| Paralytic ileus and intestinal obstruction                     | 1.0<br>(0.9 to 1.1)                        | 28.2<br>(25.3 to 31.3)                   | 0.3<br>(0.2 to 0.4)               | 42.6<br>(39.8 to 45.1)                            | 4.6<br>(1.8 to 7.5)                                 |
| Inguinal, femoral, and abdominal hernia                        | 275.9<br>(233.8 to 325.1)                  | 78.5<br>(69.9 to 88.3)                   | 10.5<br>(7.1 to 14.7)             | 35.5<br>(31.2 to 39.9)                            | 1.2<br>(-1.2 to 3.8)                                |
| Inflammatory bowel disease                                     | 3.7<br>(3.4 to 4.0)                        | 15.9<br>(14.5 to 17.4)                   | 0.6<br>(0.4 to 0.8)               | 32.1<br>(29.9 to 34.5)                            | -2.7<br>(-4.9 to -0.6)                              |
| Vascular intestinal disorders                                  | 0.2<br>(0.2 to 0.3)                        | 1.6<br>(1.4 to 1.9)                      | 0.1<br>(0.1 to 0.1)               | 34.6<br>(31.5 to 38.6)                            | 4.4<br>(3.0 to 6.0)                                 |
| Gallbladder and biliary diseases                               | 25.6<br>(22.5 to 28.8)                     | 120.2<br>(103.5 to 137.5)                | 0.6<br>(0.4 to 0.9)               | 41.5<br>(36.9 to 46.2)                            | 0.9<br>(-2.5 to 4.4)                                |
| Pancreatitis                                                   | 0.6<br>(0.5 to 0.7)                        | 5.7<br>(5.0 to 6.5)                      | 0.1<br>(0.1 to 0.1)               | 40.9<br>(37.9 to 44.4)                            | 3.7<br>(2.4 to 5.0)                                 |
| Other digestive diseases                                       | --                                         | --                                       | 1.7<br>(1.2 to 2.3)               | 42.3<br>(37.9 to 46.5)                            | 9.8<br>(7.8 to 11.8)                                |
| <b>Neurological disorders</b>                                  | <b>13,300.2<br/>(12,900.9 to 13,747.3)</b> | <b>6,392.1<br/>(5,446.2 to 7,465.7)</b>  | <b>325.8<br/>(219.1 to 437.8)</b> | <b>34.2<br/>(26.9 to 42.7)</b>                    | <b>0.4<br/>(-3.9 to 5.5)</b>                        |
| Alzheimer's disease and other dementias                        | 61.1<br>(51.6 to 72.3)                     | 10.7<br>(9.0 to 12.8)                    | 8.8<br>(6.0 to 11.6)              | 36.1<br>(33.9 to 38.4)                            | -0.7<br>(-1.5 to 0.2)                               |
| Parkinson's disease                                            | 6.6<br>(5.2 to 8.1)                        | 0.8<br>(0.7 to 1.1)                      | 0.8<br>(0.5 to 1.1)               | 50.5<br>(45.9 to 55.5)                            | 7.9<br>(5.2 to 10.7)                                |
| Epilepsy                                                       | 200.8<br>(161.0 to 244.9)                  | 30.2<br>(23.9 to 37.1)                   | 72.3<br>(47.3 to 101.6)           | 29.2<br>(4.7 to 61.4)                             | -0.5<br>(-19.2 to 23.5)                             |
| Multiple sclerosis                                             | 1.6<br>(1.4 to 1.8)                        | 0.1<br>(0.1 to 0.1)                      | 0.5<br>(0.3 to 0.6)               | 53.0<br>(50.9 to 55.0)                            | 9.1<br>(8.1 to 10.0)                                |
| Motor neuron disease                                           | 0.5<br>(0.4 to 0.6)                        | 0.1<br>(0.1 to 0.1)                      | 0.1<br>(0.1 to 0.1)               | 36.6<br>(34.3 to 39.3)                            | 4.2<br>(3.2 to 5.0)                                 |
| Migraine                                                       | 4,461.2<br>(4,252.4 to 4,661.1)            | 588.2<br>(563.0 to 616.4)                | 192.8<br>(123.6 to 270.3)         | 34.2<br>(32.8 to 35.8)                            | -0.2<br>(-1.0 to 0.7)                               |
| Tension-type headache                                          | 10,067.6<br>(8,908.7 to 11,433.4)          | 5,761.7<br>(4,821.5 to 6,840.9)          | 33.2<br>(21.0 to 49.1)            | 33.5<br>(30.6 to 36.6)                            | -1.0<br>(-2.5 to 0.7)                               |
| Other neurological disorders                                   | 0.1<br>(0.1 to 0.2)                        | 0.2<br>(0.1 to 0.3)                      | 17.4<br>(11.4 to 24.6)            | 58.3<br>(28.9 to 96.0)                            | 21.3<br>(-0.7 to 48.7)                              |
| <b>Mental and substance use disorders</b>                      | <b>6,302.5<br/>(6,186.3 to 6,458.0)</b>    | <b>2,270.7†<br/>(2,112.9 to 2,456.6)</b> | <b>757.7<br/>(551.4 to 991.6)</b> | <b>30.5<br/>(29.1 to 32.0)</b>                    | <b>-2.3<br/>(-3.2 to -1.3)</b>                      |
| Schizophrenia                                                  | 65.6<br>(57.2 to 74.6)                     | 5.9<br>(5.2 to 6.7)                      | 42.3<br>(30.6 to 53.0)            | 42.4<br>(39.0 to 45.7)                            | 1.1<br>(-0.7 to 2.9)                                |
| Alcohol use disorders                                          | 442.8<br>(373.6 to 515.0)                  | 245.9<br>(206.2 to 286.0)                | 44.3<br>(30.1 to 62.1)            | 35.2<br>(31.6 to 39.2)                            | 0.8<br>(-1.1 to 2.7)                                |
| Drug use disorders                                             | 171.2<br>(163.8 to 179.9)                  | 30.7<br>(27.4 to 34.4)                   | 39.6<br>(28.0 to 52.6)            | 43.1<br>(39.2 to 46.8)                            | 4.9<br>(2.8 to 7.0)                                 |
| Opioid use disorders                                           | 81.3<br>(68.0 to 97.9)                     | 11.0<br>(9.4 to 13.0)                    | 33.9<br>(23.2 to 45.5)            | 44.9<br>(40.3 to 49.3)                            | 5.3<br>(2.9 to 7.7)                                 |
| Cocaine use disorders                                          | 5.5<br>(4.5 to 6.7)                        | 0.8<br>(0.6 to 1.0)                      | 0.8<br>(0.5 to 1.2)               | 36.1<br>(33.3 to 39.0)                            | 3.1<br>(2.0 to 4.3)                                 |
| Amphetamine use disorders                                      | 3.1<br>(2.1 to 4.3)                        | 0.6<br>(0.4 to 0.8)                      | 0.4<br>(0.2 to 0.7)               | 32.8<br>(28.3 to 38.1)                            | 4.2<br>(1.3 to 6.9)                                 |
| Cannabis use disorders                                         | 76.6<br>(63.2 to 93.7)                     | 15.7<br>(12.8 to 19.2)                   | 2.2<br>(1.4 to 3.4)               | 26.7<br>(20.8 to 33.4)                            | 0.1<br>(-3.8 to 4.2)                                |
| Other drug use disorders                                       | 12.7<br>(11.1 to 14.4)                     | 2.7<br>(2.4 to 3.1)                      | 2.2<br>(1.5 to 3.1)               | 40.4<br>(35.0 to 45.2)                            | 3.7<br>(0.5 to 7.0)                                 |
| Depressive disorders                                           | 1,302.2<br>(1,255.4 to 1,346.7)            | 1,423.4<br>(1,273.8 to 1,590.5)          | 221.5<br>(152.6 to 303.2)         | 27.5<br>(25.6 to 29.4)                            | -5.8<br>(-6.8 to -4.8)                              |
| Major depressive disorder                                      | 859.4<br>(762.8 to 970.4)                  | 1,338.1<br>(1,187.5 to 1,509.5)          | 176.6<br>(119.5 to 242.0)         | 25.3<br>(23.2 to 27.5)                            | -7.2<br>(-8.4 to -6.0)                              |
| Dysthymia                                                      | 463.7<br>(401.1 to 535.3)                  | 85.3<br>(74.1 to 97.9)                   | 44.9<br>(29.9 to 65.3)            | 36.8<br>(34.9 to 38.7)                            | -0.0<br>(-0.8 to 0.7)                               |
| Bipolar disorder                                               | 251.6<br>(213.5 to 295.9)                  | 27.9<br>(23.9 to 33.0)                   | 51.8<br>(32.1 to 76.4)            | 32.4<br>(29.9 to 35.2)                            | 0.1<br>(-1.2 to 1.5)                                |
| Anxiety disorders                                              | 1,389.4<br>(1,283.3 to 1,506.2)            | 249.4<br>(231.7 to 271.1)                | 135.4<br>(95.3 to 184.4)          | 32.2<br>(25.9 to 38.6)                            | -0.0<br>(-4.6 to 4.2)                               |
| Eating disorders                                               | 42.7<br>(37.8 to 48.1)                     | 35.7<br>(26.0 to 47.7)                   | 8.7<br>(5.5 to 12.7)              | 40.3<br>(34.9 to 46.3)                            | 8.4<br>(5.0 to 11.8)                                |
| Anorexia nervosa                                               | 11.4<br>(8.2 to 15.4)                      | 5.3<br>(3.8 to 7.1)                      | 2.4<br>(1.4 to 3.7)               | 33.4<br>(25.4 to 42.3)                            | 6.8<br>(0.7 to 13.3)                                |
| Bulimia nervosa                                                | 29.8<br>(22.2 to 40.0)                     | 30.4<br>(20.9 to 42.8)                   | 6.3<br>(3.7 to 9.6)               | 43.2<br>(36.3 to 51.3)                            | 9.0<br>(4.7 to 13.2)                                |
| Autistic spectrum disorders                                    | 406.1<br>(385.5 to 421.8)                  | 5.0<br>(3.4 to 6.9)                      | 58.6<br>(39.5 to 82.5)            | 28.9<br>(27.4 to 30.3)                            | 0.1<br>(-0.9 to 1.1)                                |
| Autism                                                         | 114.0<br>(98.5 to 132.2)                   | 0.6<br>(0.3 to 1.0)                      | 29.3<br>(18.8 to 42.3)            | 28.7<br>(26.2 to 31.2)                            | 0.1<br>(-1.7 to 2.0)                                |
| Asperger syndrome and other autistic spectrum disorders        | 291.2<br>(239.0 to 348.9)                  | 4.4<br>(2.8 to 6.2)                      | 29.3<br>(19.0 to 42.7)            | 29.1<br>(27.7 to 30.5)                            | 0.1<br>(-0.8 to 0.9)                                |

| Cause                                                      | Prevalence in thousands (95% UI)                 | Incidence in thousands (95% UI)                   | YLDs in thousands (95% UI)                |                                                   |                                                     |
|------------------------------------------------------------|--------------------------------------------------|---------------------------------------------------|-------------------------------------------|---------------------------------------------------|-----------------------------------------------------|
|                                                            | 2016 counts                                      | 2016 counts                                       | 2016 counts                               | Percentage change in counts between 2006 and 2016 | Percentage change in age-standardised rates between |
| Attention-deficit/hyperactivity disorder                   | 630.0<br>(577.9 to 689.4)                        | 38.1<br>(34.0 to 43.0)                            | 7.6<br>(4.5 to 11.9)                      | 28.6<br>(26.7 to 30.5)                            | 0.1<br>(-1.4 to 1.4)                                |
| Conduct disorder                                           | 485.6<br>(407.8 to 564.0)                        | 177.8<br>(143.1 to 210.7)                         | 58.8<br>(36.4 to 89.5)                    | 25.4<br>(23.5 to 27.1)                            | -0.1<br>(-1.2 to 1.1)                               |
| Idiopathic developmental intellectual disability           | 1,014.0<br>(625.4 to 1,409.6)                    | --                                                | 42.5<br>(20.6 to 72.1)                    | 15.4<br>(9.4 to 19.0)                             | -12.0<br>(-17.0 to -9.0)                            |
| Other mental and substance use disorders                   | 622.2<br>(535.6 to 726.4)                        | 30.9<br>(26.6 to 35.7)                            | 46.6<br>(31.4 to 66.8)                    | 38.0<br>(36.0 to 39.9)                            | 0.1<br>(-1.0 to 1.1)                                |
| <b>Diabetes, urogenital, blood, and endocrine diseases</b> | <b>21,948.6</b><br><b>(21,878.7 to 22,014.2)</b> | <b>4,359.1†</b><br><b>(4,081.7 to 4,646.5)</b>    | <b>229.1</b><br><b>(161.7 to 314.9)</b>   | <b>43.1</b><br><b>(41.3 to 45.1)</b>              | <b>4.2</b><br><b>(3.1 to 5.3)</b>                   |
| Diabetes mellitus                                          | 754.9<br>(669.0 to 844.0)                        | 51.8<br>(46.1 to 58.2)                            | 70.7<br>(48.1 to 100.2)                   | 49.2<br>(46.0 to 52.2)                            | 4.6<br>(2.2 to 6.9)                                 |
| Acute glomerulonephritis                                   | 0.4<br>(0.4 to 0.5)                              | 6.3<br>(5.3 to 7.3)                               | < 0.05<br>(< 0.05 to < 0.05)              | 32.4<br>(29.5 to 35.7)                            | 0.5<br>(-0.7 to 2.1)                                |
| Chronic kidney disease                                     | 1,360.9<br>(1,219.7 to 1,507.2)                  | 103.7<br>(92.1 to 115.8)                          | 32.9<br>(23.6 to 43.0)                    | 52.8<br>(49.6 to 56.0)                            | 7.4<br>(5.5 to 9.3)                                 |
| Chronic kidney disease due to diabetes mellitus            | 401.6<br>(339.8 to 468.0)                        | 28.7<br>(23.9 to 34.6)                            | 9.2<br>(6.5 to 12.1)                      | 55.6<br>(49.8 to 61.8)                            | 7.9<br>(4.0 to 12.1)                                |
| Chronic kidney disease due to hypertension                 | 290.5<br>(250.2 to 332.2)                        | 27.6<br>(23.2 to 32.5)                            | 5.2<br>(3.6 to 7.1)                       | 50.8<br>(39.0 to 62.8)                            | 6.0<br>(-2.9 to 14.3)                               |
| Chronic kidney disease due to glomerulonephritis           | 280.1<br>(242.0 to 319.9)                        | 16.1<br>(13.0 to 19.5)                            | 9.0<br>(6.4 to 12.2)                      | 52.5<br>(47.2 to 58.0)                            | 8.2<br>(5.0 to 11.4)                                |
| Chronic kidney disease due to other causes                 | 388.7<br>(327.5 to 453.1)                        | 31.3<br>(26.6 to 36.3)                            | 9.5<br>(6.8 to 12.7)                      | 51.5<br>(46.4 to 56.8)                            | 7.2<br>(3.9 to 10.7)                                |
| Urinary diseases and male infertility                      | 591.5<br>(540.0 to 645.4)                        | 2,320.9†<br>(2,080.8 to 2,592.4)                  | 15.9<br>(10.5 to 22.9)                    | 37.8<br>(35.0 to 40.9)                            | -2.6<br>(-4.0 to -1.0)                              |
| Interstitial nephritis and urinary tract infections        | 38.6<br>(34.0 to 43.5)                           | 2,023.3<br>(1,781.2 to 2,291.3)                   | 1.3<br>(0.8 to 2.0)                       | 32.3<br>(27.4 to 37.4)                            | 2.2<br>(-1.0 to 5.7)                                |
| Urolithiasis                                               | 9.4<br>(8.3 to 10.8)                             | 249.3<br>(219.2 to 285.7)                         | 0.7<br>(0.5 to 1.0)                       | 41.9<br>(38.8 to 45.3)                            | 2.5<br>(0.6 to 4.4)                                 |
| Benign prostatic hyperplasia                               | 377.0<br>(320.1 to 435.6)                        | 48.3<br>(40.9 to 56.4)                            | 12.4<br>(7.8 to 18.1)                     | 37.2<br>(34.3 to 40.0)                            | -3.4<br>(-4.9 to -2.0)                              |
| Male infertility                                           | 145.3<br>(110.3 to 193.4)                        | --                                                | 0.8<br>(0.3 to 1.7)                       | 108.2<br>(93.7 to 127.0)                          | 45.8<br>(35.6 to 58.3)                              |
| Other urinary diseases                                     | --                                               | --                                                | 0.8<br>(0.5 to 1.1)                       | 11.6<br>(8.3 to 15.2)                             | -14.7<br>(-16.5 to -12.8)                           |
| Gynecological diseases                                     | 4,739.8<br>(4,632.9 to 4,863.2)                  | 1,845.6†<br>(1,729.7 to 1,978.8)                  | 52.9<br>(35.5 to 75.6)                    | 43.3<br>(38.9 to 48.7)                            | 3.3<br>(0.5 to 6.9)                                 |
| Uterine fibroids                                           | 332.3<br>(292.4 to 374.6)                        | 42.8<br>(37.2 to 48.9)                            | 5.5<br>(3.3 to 8.8)                       | 58.9<br>(54.6 to 64.3)                            | 9.8<br>(7.0 to 13.3)                                |
| Polycystic ovarian syndrome                                | 44.4<br>(32.8 to 57.9)                           | 114.3<br>(80.6 to 151.4)                          | 0.4<br>(0.2 to 0.7)                       | 50.1<br>(43.9 to 56.7)                            | 4.8<br>(0.9 to 8.8)                                 |
| Female infertility                                         | 42.7<br>(21.8 to 109.2)                          | --                                                | 0.2<br>(0.1 to 0.7)                       | 229.8<br>(102.7 to 539.7)                         | 110.7<br>(36.3 to 301.5)                            |
| Endometriosis                                              | 9.1<br>(7.7 to 10.8)                             | 36.8<br>(30.3 to 45.7)                            | 0.9<br>(0.6 to 1.2)                       | 34.2<br>(25.4 to 44.5)                            | 0.8<br>(-4.7 to 6.6)                                |
| Genital prolapse                                           | 1,957.5<br>(1,731.4 to 2,178.8)                  | 177.0<br>(150.8 to 206.0)                         | 6.2<br>(3.0 to 11.2)                      | 28.3<br>(26.4 to 30.2)                            | -8.5<br>(-9.9 to -7.2)                              |
| Premenstrual syndrome                                      | 2,440.8<br>(2,260.0 to 2,612.6)                  | 944.9<br>(874.4 to 1,010.9)                       | 20.4<br>(12.7 to 31.9)                    | 30.9<br>(27.2 to 34.6)                            | -2.3<br>(-4.6 to -0.1)                              |
| Other gynecological diseases                               | 553.1<br>(468.1 to 641.8)                        | 529.8<br>(431.2 to 634.4)                         | 19.4<br>(12.6 to 27.8)                    | 60.1<br>(48.8 to 76.2)                            | 15.3<br>(7.6 to 26.4)                               |
| Hemoglobinopathies and hemolytic anaemias                  | 18,032.6<br>(17,960.9 to 18,104.1)               | --                                                | 44.5<br>(29.8 to 64.2)                    | 32.2<br>(29.4 to 35.0)                            | 5.4<br>(3.6 to 7.2)                                 |
| Thalassemias                                               | < 0.05<br>(< 0.05 to < 0.05)                     | --                                                | < 0.05<br>(< 0.05 to < 0.05)              | 13.0<br>(0.5 to 20.0)                             | -2.7<br>(-13.2 to 3.1)                              |
| Thalassaemias trait                                        | 204.8<br>(168.6 to 249.0)                        | --                                                | 2.7<br>(1.7 to 4.2)                       | 35.7<br>(24.8 to 42.7)                            | 5.6<br>(-2.9 to 10.2)                               |
| Sickle cell disorders                                      | 89.2<br>(84.5 to 94.2)                           | --                                                | 7.0<br>(4.9 to 9.7)                       | 27.4<br>(23.6 to 31.6)                            | 4.0<br>(1.2 to 6.9)                                 |
| Sickle cell trait                                          | 8,168.6<br>(8,020.6 to 8,329.5)                  | --                                                | 26.6<br>(17.5 to 39.0)                    | 31.3<br>(28.1 to 34.5)                            | 4.6<br>(2.8 to 6.6)                                 |
| G6PD deficiency                                            | 4,235.5<br>(4,101.5 to 4,398.4)                  | --                                                | 0.2<br>(0.1 to 0.3)                       | 15.0<br>(8.7 to 22.2)                             | -5.0<br>(-8.8 to -0.8)                              |
| G6PD trait                                                 | 7,793.2<br>(7,697.7 to 7,901.7)                  | --                                                | < 0.05<br>(< 0.05 to < 0.05)              | 18.7<br>(15.3 to 21.9)                            | -7.9<br>(-9.7 to -6.0)                              |
| Other hemoglobinopathies and hemolytic anaemias            | 321.2<br>(308.1 to 334.7)                        | --                                                | 8.0<br>(5.3 to 11.6)                      | 39.3<br>(34.0 to 46.1)                            | 9.3<br>(6.4 to 13.1)                                |
| Endocrine, metabolic, blood, and immune disorders          | 411.0<br>(391.4 to 431.0)                        | 30.8<br>(27.3 to 34.6)                            | 12.1<br>(8.1 to 17.2)                     | 34.6<br>(31.6 to 37.8)                            | 4.4<br>(2.6 to 6.1)                                 |
| <b>Musculoskeletal disorders</b>                           | <b>4,249.0</b><br><b>(4,149.6 to 4,346.2)</b>    | <b>2,048.2</b><br><b>(1,842.6 to 2,268.2)</b>     | <b>469.0</b><br><b>(335.8 to 614.2)</b>   | <b>40.8</b><br><b>(39.3 to 42.3)</b>              | <b>0.2</b><br><b>(-0.5 to 0.9)</b>                  |
| Rheumatoid arthritis                                       | 54.3<br>(47.7 to 61.5)                           | 3.7<br>(3.3 to 4.1)                               | 13.0<br>(8.9 to 17.5)                     | 41.4<br>(37.8 to 44.7)                            | 0.9<br>(-1.3 to 2.9)                                |
| Osteoarthritis                                             | 728.3<br>(683.5 to 774.5)                        | 42.7<br>(39.8 to 45.8)                            | 45.0<br>(31.8 to 61.0)                    | 50.9<br>(49.8 to 52.0)                            | 4.7<br>(4.1 to 5.4)                                 |
| Low back and neck pain                                     | 2,958.4<br>(2,822.4 to 3,095.5)                  | 1,373.9<br>(1,224.6 to 1,529.9)                   | 342.2<br>(239.4 to 450.9)                 | 40.4<br>(38.6 to 42.2)                            | -0.2<br>(-1.0 to 0.7)                               |
| Low back pain                                              | 2,297.2<br>(2,043.6 to 2,609.4)                  | 1,157.1<br>(1,013.1 to 1,314.8)                   | 260.5<br>(183.6 to 345.6)                 | 40.1<br>(37.9 to 42.4)                            | -0.2<br>(-1.2 to 0.8)                               |
| Neck pain                                                  | 814.0<br>(698.8 to 939.6)                        | 216.8<br>(186.6 to 253.4)                         | 81.7<br>(54.7 to 117.5)                   | 41.3<br>(39.0 to 43.5)                            | -0.0<br>(-0.6 to 0.5)                               |
| Gout                                                       | 94.5<br>(83.8 to 106.2)                          | 20.0<br>(17.5 to 22.5)                            | 3.0<br>(2.1 to 4.1)                       | 43.7<br>(39.0 to 48.3)                            | -0.2<br>(-2.9 to 2.3)                               |
| Other musculoskeletal disorders                            | 758.8<br>(594.2 to 933.0)                        | 608.0<br>(464.4 to 773.8)                         | 65.8<br>(42.5 to 96.2)                    | 36.2<br>(31.0 to 41.1)                            | -2.9<br>(-5.5 to -0.3)                              |
| <b>Other non-communicable diseases</b>                     | <b>32,090.0</b><br><b>(31,814.1 to 32,335.6)</b> | <b>83,820.2†</b><br><b>(77,614.1 to 91,435.5)</b> | <b>899.2</b><br><b>(607.3 to 1,267.1)</b> | <b>32.1</b><br><b>(31.1 to 32.9)</b>              | <b>0.9</b><br><b>(0.5 to 1.3)</b>                   |
| Congenital anomalies                                       | 563.8<br>(509.1 to 604.0)                        | --                                                | 74.1<br>(50.1 to 103.9)                   | 31.6<br>(26.2 to 36.1)                            | 2.3<br>(-1.9 to 5.9)                                |
| Neural tube defects                                        | 36.4<br>(32.4 to 41.0)                           | --                                                | 10.9<br>(7.8 to 14.7)                     | 27.8<br>(23.3 to 32.5)                            | -0.9<br>(-4.3 to 2.7)                               |
| Congenital heart anomalies                                 | 45.1<br>(38.0 to 53.0)                           | --                                                | 2.2<br>(1.1 to 3.6)                       | 28.6<br>(24.2 to 33.3)                            | 5.2<br>(1.9 to 8.6)                                 |
| Orofacial clefts                                           | 10.6<br>(9.2 to 12.0)                            | --                                                | 0.2<br>(0.1 to 0.3)                       | 22.5<br>(11.6 to 34.0)                            | -4.5<br>(-13.1 to 4.5)                              |
| Down's syndrome                                            | 11.2<br>(9.5 to 13.3)                            | --                                                | 1.0<br>(0.7 to 1.4)                       | 22.6<br>(20.5 to 25.2)                            | -2.9<br>(-4.6 to -0.8)                              |
| Turner syndrome                                            | 24.3<br>(21.0 to 27.8)                           | --                                                | 0.4<br>(0.2 to 0.7)                       | 22.9<br>(15.7 to 31.6)                            | -2.1<br>(-7.6 to 4.3)                               |
| Klinefelter syndrome                                       | 27.6<br>(23.6 to 31.8)                           | --                                                | 0.1<br>(0.1 to 0.2)                       | 26.1<br>(19.7 to 33.0)                            | -0.8<br>(-5.9 to 4.5)                               |



| Cause                                         | Prevalence in thousands (95% UI)              | Incidence in thousands (95% UI)                | YLDs in thousands (95% UI)              |                                                   |                                                     |
|-----------------------------------------------|-----------------------------------------------|------------------------------------------------|-----------------------------------------|---------------------------------------------------|-----------------------------------------------------|
|                                               | 2016 counts                                   | 2016 counts                                    | 2016 counts                             | Percentage change in counts between 2006 and 2016 | Percentage change in age-standardised rates between |
| Other chromosomal abnormalities               | 7.2<br>(6.1 to 8.5)                           | --                                             | 1.4<br>(1.0 to 2.0)                     | 26.4<br>(17.7 to 35.5)                            | 8.1<br>(0.9 to 15.7)                                |
| Congenital musculoskeletal and limb anomalies | 61.9<br>(54.4 to 69.7)                        | --                                             | 9.2<br>(6.1 to 12.7)                    | 31.2<br>(27.7 to 35.0)                            | 1.2<br>(-1.2 to 4.0)                                |
| Urogenital congenital anomalies               | 45.1<br>(40.1 to 50.6)                        | --                                             | 1.2<br>(0.7 to 1.9)                     | 22.3<br>(20.5 to 24.4)                            | -0.5<br>(-1.9 to 1.1)                               |
| Digestive congenital anomalies                | 21.2<br>(18.7 to 23.8)                        | --                                             | 1.0<br>(0.6 to 1.4)                     | 29.4<br>(22.3 to 36.6)                            | 0.5<br>(-4.3 to 5.4)                                |
| Other congenital anomalies                    | 361.6<br>(259.7 to 504.0)                     | --                                             | 46.5<br>(29.0 to 70.4)                  | 33.5<br>(25.2 to 40.3)                            | 3.4<br>(-3.2 to 8.7)                                |
| Skin and subcutaneous diseases                | 16,376.6<br>(16,197.4 to 16,552.1)            | 38,387.2<br>(36,217.1 to 40,891.7)             | 425.4<br>(281.2 to 613.8)               | 28.3<br>(27.0 to 29.5)                            | 1.3<br>(0.5 to 2.1)                                 |
| Dermatitis                                    | 2,616.6<br>(2,469.9 to 2,772.2)               | 2,055.6<br>(1,878.3 to 2,250.2)                | 106.9<br>(61.8 to 178.9)                | 25.1<br>(21.3 to 28.8)                            | -0.9<br>(-3.4 to 1.5)                               |
| Psoriasis                                     | 282.8<br>(272.3 to 293.7)                     | 42.0<br>(40.5 to 43.4)                         | 24.9<br>(17.9 to 32.8)                  | 44.0<br>(41.1 to 47.2)                            | 7.6<br>(5.8 to 9.5)                                 |
| Cellulitis                                    | 17.2<br>(15.9 to 18.6)                        | 308.2<br>(286.2 to 331.3)                      | 1.0<br>(0.6 to 1.4)                     | 29.3<br>(22.9 to 36.0)                            | 1.2<br>(-3.4 to 5.9)                                |
| Pyoderma                                      | 301.9<br>(290.5 to 313.5)                     | 5,851.8<br>(5,644.5 to 6,071.9)                | 1.7<br>(0.7 to 3.6)                     | 29.4<br>(28.0 to 30.8)                            | 2.3<br>(1.3 to 3.2)                                 |
| Scabies                                       | 1,192.6<br>(1,039.4 to 1,375.8)               | 3,706.9<br>(3,206.2 to 4,296.5)                | 30.9<br>(17.3 to 49.2)                  | 16.8<br>(15.1 to 18.3)                            | -7.6<br>(-8.3 to -6.9)                              |
| Fungal skin diseases                          | 5,486.0<br>(4,874.4 to 6,224.4)               | 16,583.4<br>(14,732.6 to 18,588.9)             | 31.1<br>(12.1 to 64.7)                  | 31.4<br>(28.4 to 34.9)                            | 0.7<br>(-0.6 to 2.3)                                |
| Viral skin diseases                           | 1,541.7<br>(1,424.5 to 1,667.8)               | 2,097.3<br>(1,920.6 to 2,303.7)                | 47.5<br>(29.5 to 70.1)                  | 28.2<br>(26.9 to 29.5)                            | -0.0<br>(-0.6 to 0.6)                               |
| Acne vulgaris                                 | 5,174.8<br>(4,646.8 to 5,719.4)               | 4,024.7<br>(3,212.0 to 5,190.7)                | 133.4<br>(89.2 to 193.1)                | 30.5<br>(28.8 to 32.5)                            | 5.0<br>(3.9 to 6.2)                                 |
| Alopecia areata                               | 78.1<br>(74.8 to 81.4)                        | 139.3<br>(133.3 to 145.3)                      | 2.6<br>(1.6 to 3.9)                     | 34.2<br>(30.9 to 37.6)                            | 0.0<br>(-2.1 to 2.2)                                |
| Pruritus                                      | 353.1<br>(308.8 to 399.2)                     | 283.9<br>(252.1 to 320.8)                      | 3.8<br>(1.7 to 6.9)                     | 33.4<br>(31.1 to 35.8)                            | 0.6<br>(-0.3 to 1.6)                                |
| Urticaria                                     | 480.4<br>(409.7 to 563.7)                     | 861.0<br>(737.0 to 1,009.6)                    | 29.1<br>(18.6 to 42.5)                  | 25.0<br>(22.9 to 27.2)                            | 0.0<br>(-1.0 to 1.1)                                |
| Decubitus ulcer                               | 4.2<br>(3.8 to 4.6)                           | 15.2<br>(13.6 to 16.8)                         | 0.7<br>(0.5 to 1.0)                     | 41.1<br>(38.3 to 44.0)                            | 3.5<br>(0.8 to 6.2)                                 |
| Other skin and subcutaneous diseases          | 2,145.1<br>(2,088.0 to 2,206.6)               | 2,418.0<br>(2,351.9 to 2,488.7)                | 11.9<br>(5.7 to 21.7)                   | 35.7<br>(34.9 to 36.7)                            | 2.2<br>(1.7 to 2.6)                                 |
| Sense organ diseases                          | 8,424.5<br>(8,344.6 to 8,506.5)               | 4,183.6†<br>(3,903.9 to 4,481.3)               | 318.6<br>(222.3 to 445.1)               | 35.7<br>(34.4 to 37.0)                            | 0.6<br>(-0.2 to 1.2)                                |
| Glaucoma                                      | 12.4<br>(10.4 to 14.7)                        | --                                             | 1.2<br>(0.8 to 1.7)                     | 38.9<br>(34.1 to 44.8)                            | -2.7<br>(-5.8 to 1.1)                               |
| Cataract                                      | 275.4<br>(243.2 to 310.4)                     | --                                             | 20.2<br>(14.4 to 27.6)                  | 48.9<br>(45.8 to 52.5)                            | 8.3<br>(6.5 to 10.4)                                |
| Macular degeneration                          | 51.6<br>(41.7 to 63.4)                        | --                                             | 3.2<br>(2.2 to 4.4)                     | 63.9<br>(58.4 to 70.1)                            | 13.9<br>(10.5 to 17.9)                              |
| Refraction and accommodation disorders        | 3,973.0<br>(3,841.7 to 4,110.0)               | --                                             | 60.8<br>(35.8 to 99.6)                  | 30.6<br>(28.6 to 32.2)                            | -0.3<br>(-1.2 to 0.6)                               |
| Age-related and other hearing loss            | 5,198.5<br>(4,920.4 to 5,495.0)               | --                                             | 198.2<br>(138.5 to 274.8)               | 35.5<br>(33.5 to 37.5)                            | -0.7<br>(-1.8 to 0.2)                               |
| Other vision loss                             | 129.4<br>(111.1 to 150.8)                     | --                                             | 9.2<br>(6.3 to 12.7)                    | 34.0<br>(29.9 to 38.0)                            | -0.5<br>(-3.1 to 2.4)                               |
| Other sense organ diseases                    | 841.4<br>(784.7 to 894.8)                     | 4,183.6<br>(3,903.9 to 4,481.3)                | 25.7<br>(16.3 to 38.8)                  | 37.7<br>(36.2 to 39.2)                            | 1.0<br>(0.3 to 1.7)                                 |
| Oral disorders                                | 19,661.6<br>(18,890.5 to 20,245.7)            | 41,249.4†<br>(35,348.6 to 48,082.2)            | 81.2<br>(41.7 to 144.2)                 | 39.2<br>(38.0 to 40.4)                            | 0.5<br>(0.0 to 1.2)                                 |
| Caries of deciduous teeth                     | 5,407.3<br>(4,506.1 to 6,274.6)               | 21,438.5<br>(15,884.1 to 28,162.7)             | 1.3<br>(0.6 to 2.5)                     | 22.0<br>(18.2 to 24.9)                            | -1.0<br>(-3.4 to 1.4)                               |
| Caries of permanent teeth                     | 8,592.5<br>(7,881.2 to 9,362.5)               | 18,999.1<br>(17,322.8 to 21,202.4)             | 5.1<br>(2.2 to 9.7)                     | 28.5<br>(26.2 to 30.8)                            | -2.4<br>(-3.5 to -1.4)                              |
| Periodontal disease                           | 6,690.5<br>(5,768.2 to 7,685.6)               | 788.0<br>(651.3 to 931.4)                      | 44.1<br>(17.9 to 91.6)                  | 41.4<br>(39.7 to 42.9)                            | -0.1<br>(-0.6 to 0.4)                               |
| Edentulism and severe tooth loss              | 342.4<br>(294.3 to 392.5)                     | 23.9<br>(20.6 to 27.2)                         | 9.6<br>(6.3 to 13.6)                    | 50.5<br>(47.6 to 53.6)                            | 4.3<br>(2.9 to 5.9)                                 |
| Other oral disorders                          | 719.0<br>(684.3 to 756.1)                     | --                                             | 21.2<br>(13.0 to 31.8)                  | 34.3<br>(33.1 to 35.7)                            | -0.0<br>(-0.7 to 0.6)                               |
| <b>Injuries</b>                               | <b>5,890.1</b><br><b>(5,515.3 to 6,298.0)</b> | <b>3,573.7†</b><br><b>(3,363.7 to 3,803.1)</b> | <b>241.7</b><br><b>(163.5 to 342.5)</b> | <b>46.0</b><br><b>(44.8 to 47.2)</b>              | <b>8.9</b><br><b>(8.3 to 9.6)</b>                   |
| <b>Transport injuries</b>                     | <b>625.0</b><br><b>(582.9 to 670.8)</b>       | <b>299.5</b><br><b>(264.3 to 340.7)</b>        | <b>36.1</b><br><b>(23.9 to 51.8)</b>    | <b>50.9</b><br><b>(49.7 to 52.4)</b>              | <b>8.8</b><br><b>(8.0 to 9.7)</b>                   |
| Road injuries                                 | 512.3<br>(480.3 to 549.7)                     | 263.0<br>(229.1 to 301.9)                      | 29.4<br>(19.6 to 42.2)                  | 49.1<br>(47.9 to 50.5)                            | 7.3<br>(6.5 to 8.2)                                 |
| Pedestrian road injuries                      | 144.7<br>(127.7 to 164.8)                     | 54.2<br>(43.6 to 66.7)                         | 8.3<br>(5.6 to 12.0)                    | 45.7<br>(44.4 to 47.1)                            | 4.3<br>(3.5 to 5.2)                                 |
| Cyclist road injuries                         | 118.6<br>(99.9 to 140.6)                      | 68.2<br>(53.6 to 84.1)                         | 6.4<br>(4.2 to 9.3)                     | 45.4<br>(44.0 to 46.9)                            | 5.7<br>(4.9 to 6.7)                                 |
| Motorcyclist road injuries                    | 56.9<br>(48.6 to 67.1)                        | 19.8<br>(15.6 to 25.3)                         | 3.1<br>(2.1 to 4.5)                     | 57.7<br>(56.2 to 59.4)                            | 12.9<br>(12.0 to 13.9)                              |
| Motor vehicle road injuries                   | 140.6<br>(120.1 to 160.1)                     | 86.9<br>(71.8 to 104.1)                        | 8.8<br>(5.9 to 12.6)                    | 51.1<br>(49.7 to 52.5)                            | 7.7<br>(6.9 to 8.6)                                 |
| Other road injuries                           | 51.5<br>(43.8 to 60.8)                        | 34.0<br>(25.4 to 44.5)                         | 2.7<br>(1.8 to 4.0)                     | 53.4<br>(51.7 to 55.0)                            | 13.6<br>(12.7 to 14.5)                              |
| Other transport injuries                      | 112.8<br>(93.9 to 136.4)                      | 36.5<br>(29.9 to 45.2)                         | 6.7<br>(4.4 to 9.6)                     | 59.6<br>(57.8 to 61.4)                            | 18.2<br>(17.1 to 19.2)                              |
| <b>Unintentional injuries</b>                 | <b>4,843.8</b><br><b>(4,467.7 to 5,249.2)</b> | <b>3,008.2</b><br><b>(2,809.6 to 3,226.0)</b>  | <b>174.4</b><br><b>(117.1 to 246.8)</b> | <b>48.2</b><br><b>(46.8 to 49.5)</b>              | <b>10.6</b><br><b>(9.8 to 11.4)</b>                 |
| Falls                                         | 1,741.0<br>(1,494.8 to 1,977.0)               | 1,075.8<br>(925.7 to 1,256.8)                  | 74.1<br>(51.8 to 102.0)                 | 58.1<br>(56.5 to 59.7)                            | 15.4<br>(14.5 to 16.4)                              |
| Drowning                                      | 14.1<br>(12.2 to 16.4)                        | 3.9<br>(3.4 to 4.6)                            | 0.8<br>(0.5 to 1.2)                     | 39.5<br>(37.9 to 41.2)                            | 3.6<br>(2.6 to 4.6)                                 |
| Fire, heat, and hot substances                | 563.0<br>(469.2 to 690.2)                     | 103.8<br>(82.6 to 127.7)                       | 16.5<br>(11.2 to 23.8)                  | 37.9<br>(35.9 to 40.0)                            | 4.8<br>(3.2 to 6.7)                                 |
| Poisonings                                    | 13.6<br>(10.9 to 16.6)                        | 24.0<br>(18.6 to 30.4)                         | 1.4<br>(0.9 to 2.1)                     | 39.8<br>(36.6 to 43.2)                            | 6.3<br>(4.2 to 8.4)                                 |
| Exposure to mechanical forces                 | 791.9<br>(677.0 to 965.9)                     | 427.7<br>(356.0 to 501.0)                      | 20.8<br>(13.5 to 30.6)                  | 42.4<br>(41.1 to 43.6)                            | 4.0<br>(3.2 to 4.7)                                 |
| Unintentional firearm injuries                | 41.9<br>(34.3 to 51.7)                        | 15.4<br>(11.0 to 21.0)                         | 1.9<br>(1.2 to 2.8)                     | 42.8<br>(41.3 to 44.4)                            | 3.0<br>(2.2 to 3.8)                                 |
| Unintentional suffocation                     | 72.5<br>(51.7 to 97.1)                        | 23.1<br>(15.7 to 33.2)                         | 2.4<br>(1.4 to 3.7)                     | 43.6<br>(42.0 to 45.1)                            | 9.8<br>(8.9 to 10.7)                                |
| Other exposure to mechanical forces           | 677.5<br>(565.8 to 845.0)                     | 389.1<br>(323.5 to 456.0)                      | 16.5<br>(10.8 to 24.0)                  | 42.2<br>(40.8 to 43.5)                            | 3.5<br>(2.7 to 4.2)                                 |

| Cause                                                                               | Prevalence in thousands (95% UI)              | Incidence in thousands (95% UI)          | YLDs in thousands (95% UI)           |                                                   |                                                     |
|-------------------------------------------------------------------------------------|-----------------------------------------------|------------------------------------------|--------------------------------------|---------------------------------------------------|-----------------------------------------------------|
|                                                                                     | 2016 counts                                   | 2016 counts                              | 2016 counts                          | Percentage change in counts between 2006 and 2016 | Percentage change in age-standardised rates between |
| Adverse effects of medical treatment                                                | 15.4<br>(12.0 to 19.4)                        | 201.7<br>(169.7 to 236.1)                | 2.1<br>(1.2 to 3.1)                  | 32.2<br>(29.2 to 35.3)                            | 5.2<br>(3.5 to 7.2)                                 |
| Animal contact                                                                      | 248.4<br>(217.8 to 288.3)                     | 405.1<br>(339.6 to 474.6)                | 8.7<br>(5.7 to 12.2)                 | 40.7<br>(38.5 to 42.9)                            | 3.7<br>(2.4 to 4.9)                                 |
| Venomous animal contact                                                             | 95.4<br>(79.0 to 115.2)                       | 167.4<br>(132.0 to 210.3)                | 5.9<br>(3.9 to 8.5)                  | 40.4<br>(37.6 to 43.3)                            | 4.2<br>(2.5 to 6.0)                                 |
| Non-venomous animal contact                                                         | 153.0<br>(127.5 to 190.1)                     | 237.7<br>(192.6 to 284.3)                | 2.8<br>(1.8 to 4.1)                  | 41.4<br>(39.2 to 43.5)                            | 2.9<br>(1.4 to 4.2)                                 |
| Foreign body                                                                        | 360.7<br>(290.3 to 432.4)                     | 288.2<br>(248.8 to 335.5)                | 15.1<br>(9.8 to 22.2)                | 43.7<br>(42.0 to 45.4)                            | 9.8<br>(8.8 to 10.7)                                |
| Pulmonary aspiration and foreign body in airway                                     | 185.1<br>(135.1 to 253.1)                     | 90.0<br>(72.9 to 112.3)                  | 8.9<br>(5.6 to 13.3)                 | 41.6<br>(39.8 to 43.3)                            | 8.5<br>(7.5 to 9.5)                                 |
| Foreign body in eyes                                                                | 20.6<br>(10.8 to 31.7)                        | 116.0<br>(87.8 to 155.6)                 | 1.2<br>(0.5 to 2.1)                  | 33.6<br>(30.9 to 36.8)                            | 0.3<br>(-0.5 to 1.1)                                |
| Foreign body in other body part                                                     | 155.0<br>(122.2 to 205.2)                     | 82.2<br>(65.6 to 100.4)                  | 5.0<br>(3.3 to 7.4)                  | 50.0<br>(47.9 to 52.2)                            | 14.4<br>(13.1 to 15.6)                              |
| Environmental heat and cold exposure                                                | 308.1<br>(251.4 to 387.1)                     | 114.6<br>(90.5 to 144.8)                 | 12.3<br>(8.0 to 18.1)                | 44.2<br>(42.6 to 45.9)                            | 9.6<br>(8.6 to 10.4)                                |
| Other unintentional injuries                                                        | 787.5<br>(595.7 to 1,050.2)                   | 363.4<br>(292.5 to 454.4)                | 22.6<br>(14.5 to 33.7)               | 42.5<br>(41.1 to 43.9)                            | 7.7<br>(6.9 to 8.4)                                 |
| <b>Self-harm and interpersonal violence</b>                                         | <b>1,929.1</b><br><b>(1,717.0 to 2,154.7)</b> | <b>259.5†</b><br><b>(222.0 to 300.6)</b> | <b>29.9</b><br><b>(20.8 to 41.4)</b> | <b>30.5</b><br><b>(26.8 to 33.9)</b>              | <b>-0.3</b><br><b>(-2.1 to 1.4)</b>                 |
| Self-harm                                                                           | 27.1<br>(23.6 to 30.6)                        | 16.5<br>(13.9 to 19.3)                   | 1.4<br>(0.9 to 2.1)                  | 44.6<br>(43.1 to 46.2)                            | 4.2<br>(3.3 to 5.1)                                 |
| Self-harm by firearm                                                                | 1.9<br>(1.7 to 2.2)                           | 0.8<br>(0.6 to 1.2)                      | 0.1<br>(< 0.05 to 0.1)               | 39.5<br>(37.7 to 41.7)                            | -1.5<br>(-2.8 to -0.1)                              |
| Self-harm by other specified means                                                  | 25.2<br>(21.7 to 28.7)                        | 15.7<br>(13.2 to 18.4)                   | 1.4<br>(0.9 to 2.0)                  | 44.9<br>(43.4 to 46.6)                            | 4.6<br>(3.7 to 5.5)                                 |
| Interpersonal violence                                                              | 1,902.0<br>(1,690.8 to 2,128.0)               | 243.0†<br>(206.6 to 283.8)               | 28.4<br>(19.8 to 39.2)               | 29.9<br>(26.1 to 33.4)                            | -0.7<br>(-2.5 to 1.2)                               |
| Assault by firearm                                                                  | 12.6<br>(10.9 to 14.7)                        | 5.5<br>(4.0 to 7.3)                      | 0.6<br>(0.4 to 0.9)                  | 51.9<br>(49.9 to 54.0)                            | 10.1<br>(9.1 to 11.1)                               |
| Assault by sharp object                                                             | 87.5<br>(71.5 to 104.6)                       | 47.0<br>(35.5 to 61.2)                   | 2.9<br>(1.9 to 4.2)                  | 42.8<br>(40.8 to 44.6)                            | 5.2<br>(4.3 to 6.0)                                 |
| Sexual violence                                                                     | 1,551.9<br>(1,349.0 to 1,769.4)               | --                                       | 14.2<br>(9.6 to 20.2)                | 14.7<br>(10.9 to 18.3)                            | -12.4<br>(-14.2 to -10.7)                           |
| Assault by other means                                                              | 250.0<br>(213.3 to 299.8)                     | 190.5<br>(160.4 to 223.9)                | 10.8<br>(7.2 to 15.5)                | 51.5<br>(50.0 to 53.3)                            | 10.1<br>(9.2 to 11.2)                               |
| <b>Forces of nature, conflict and terrorism, and executions and police conflict</b> | <b>44.1</b><br><b>(25.9 to 68.7)</b>          | <b>6.5†</b><br><b>(3.1 to 11.1)</b>      | <b>1.4</b><br><b>(0.3 to 4.2)</b>    | <b>24.6</b><br><b>(12.6 to 29.0)</b>              | <b>2.7</b><br><b>(-5.9 to 5.7)</b>                  |
| Exposure to forces of nature                                                        | 3.1<br>(1.7 to 4.7)                           | 2.3<br>(1.3 to 3.4)                      | 0.1<br>(0.1 to 0.3)                  | 41.8<br>(-14.1 to 103.3)                          | 20.1<br>(-28.0 to 66.7)                             |
| Conflict and terrorism                                                              | 29.9<br>(16.4 to 48.1)                        | --                                       | 0.9<br>(0.2 to 2.6)                  | 20.5<br>(17.7 to 24.5)                            | 0.4<br>(-1.8 to 3.8)                                |
| Executions and police conflict                                                      | 11.1<br>(2.3 to 25.7)                         | 4.2<br>(0.9 to 8.7)                      | 0.3<br>(0.1 to 1.4)                  | 29.3<br>(3.8 to 47.2)                             | 2.5<br>(-15.7 to 11.2)                              |
| <b>Impairments</b>                                                                  | --                                            | --                                       | --                                   | --                                                | --                                                  |
| Anaemia                                                                             | 13,362.5<br>(12,891.9 to 13,889.6)            | --                                       | 505.7<br>(349.0 to 703.5)            | 4.5<br>(-14.0 to 19.4)                            | -24.3<br>(-42.6 to -7.9)                            |
| Developmental intellectual disability                                               | 1,658.7<br>(1,256.1 to 2,068.2)               | --                                       | 179.9<br>(128.5 to 255.9)            | 31.7<br>(25.9 to 38.5)                            | 3.6<br>(-1.2 to 10.0)                               |
| Epilepsy                                                                            | 457.4<br>(371.4 to 596.0)                     | --                                       | 171.7<br>(123.9 to 245.1)            | 37.3<br>(22.6 to 53.1)                            | 8.1<br>(-4.2 to 21.1)                               |
| Guillain-Barre syndrome                                                             | 0.3<br>(0.2 to 0.4)                           | --                                       | 0.1<br>(0.1 to 0.1)                  | 32.5<br>(25.6 to 40.3)                            | 2.0<br>(-2.1 to 6.2)                                |
| Hearing loss                                                                        | 6,225.0<br>(5,942.7 to 6,542.2)               | --                                       | 265.8<br>(186.1 to 360.4)            | 33.4<br>(31.9 to 34.9)                            | -0.7<br>(-1.4 to 0.0)                               |
| Heart failure                                                                       | 113.8<br>(102.1 to 127.5)                     | --                                       | 12.9<br>(9.4 to 16.6)                | 39.6<br>(36.9 to 42.3)                            | 1.7<br>(-0.5 to 3.8)                                |
| Infertility                                                                         | 731.9<br>(560.2 to 965.9)                     | --                                       | 4.3<br>(1.8 to 8.6)                  | 97.9<br>(84.0 to 112.8)                           | 38.4<br>(29.9 to 47.7)                              |
| Pelvic inflammatory disease                                                         | 43.2<br>(36.3 to 51.6)                        | --                                       | 5.6<br>(3.8 to 8.0)                  | 44.9<br>(39.0 to 50.4)                            | 4.8<br>(1.3 to 8.1)                                 |
| Vision loss                                                                         | 4,681.3<br>(4,507.9 to 4,866.0)               | --                                       | 147.5<br>(101.1 to 215.3)            | 38.6<br>(32.8 to 45.3)                            | 5.7<br>(3.2 to 10.0)                                |

We did not calculate incidence for the nine impairments, certain NTDs, and causes with only birth prevalence. Blank cells mean that no estimate is available.

† Incidence for aggregate causes represents the sum of the incidence of the causes below the aggregate.

‡ Incidence estimates for stroke represent first-ever stroke only.

^ Incidence of HIV/AIDS represents new infections of HIV only and does not include new infections of Tuberculosis in HIV positive cases.

SR Table 14: Prevalence, incidence, and YLDs for 2016, percentage change of YLD counts and percentage change of age-standardised YLD rates between 2006 and 2016 by cause and impairments, for all ages, Kiribati.

| Cause                                                                                | Prevalence in thousands (95% UI) | Incidence in thousands (95% UI)   | YLDs in thousands (95% UI)   |                                                   |                                                     |
|--------------------------------------------------------------------------------------|----------------------------------|-----------------------------------|------------------------------|---------------------------------------------------|-----------------------------------------------------|
|                                                                                      | 2016 counts                      | 2016 counts                       | 2016 counts                  | Percentage change in counts between 2006 and 2016 | Percentage change in age-standardised rates between |
| <b>All causes</b>                                                                    | <b>109.1</b><br>(108.6 to 109.5) | <b>720.6†</b><br>(681.9 to 761.4) | <b>11.4</b><br>(8.5 to 15.0) | <b>21.7</b><br>(18.9 to 24.4)                     | <b>-0.4</b><br>(-2.1 to 1.3)                        |
| <b>Communicable, maternal, neonatal, and nutritional disorders</b>                   | <b>81.8</b><br>(80.1 to 83.5)    | <b>429.5†</b><br>(396.1 to 465.4) | <b>1.8</b><br>(1.2 to 2.5)   | <b>9.8</b><br>(2.4 to 17.3)                       | <b>-4.7</b><br>(-9.8 to 0.8)                        |
| <b>HIV/AIDS and tuberculosis</b>                                                     | <b>36.0</b><br>(33.1 to 38.2)    | <b>0.3†</b><br>(0.3 to 0.3)       | <b>0.1</b><br>(0.1 to 0.1)   | <b>13.6</b><br>(4.9 to 24.5)                      | <b>-9.0</b><br>(-15.3 to -1.9)                      |
| Tuberculosis                                                                         | 34.1<br>(31.7 to 36.6)           | 0.3†<br>(0.3 to 0.3)              | 0.1<br>(0.1 to 0.1)          | 14.1<br>(5.2 to 25.2)                             | -8.6<br>(-15.0 to -1.4)                             |
| Drug-susceptible tuberculosis                                                        | 0.3<br>(0.2 to 0.3)              | 0.3<br>(0.2 to 0.3)               | 0.1<br>(0.1 to 0.1)          | 14.4<br>(1.7 to 30.1)                             | -8.4<br>(-17.1 to 2.3)                              |
| Multidrug-resistant tuberculosis without extensive drug resistance                   | < 0.05<br>(< 0.05 to < 0.05)     | < 0.05<br>(< 0.05 to < 0.05)      | < 0.05<br>(< 0.05 to < 0.05) | -7.6<br>(-98.2 to 3,740.4)                        | -25.1<br>(-98.5 to 3,077.8)                         |
| Extensively drug-resistant tuberculosis                                              | < 0.05<br>(< 0.05 to < 0.05)     | < 0.05<br>(< 0.05 to < 0.05)      | < 0.05<br>(< 0.05 to < 0.05) | 200.2<br>(-93.6 to 11,772.2)                      | 140.1<br>(-94.9 to 9,427.7)                         |
| Latent tuberculosis infection                                                        | 33.9<br>(31.4 to 36.4)           | --                                | --                           | --                                                | --                                                  |
| HIV/AIDS                                                                             | < 0.05<br>(< 0.05 to < 0.05)     | < 0.05^<br>(< 0.05 to < 0.05)     | < 0.05<br>(< 0.05 to < 0.05) | -9.6<br>(-21.4 to 11.8)                           | -28.8<br>(-37.9 to -10.7)                           |
| Drug-susceptible HIV/AIDS - Tuberculosis                                             | < 0.05<br>(< 0.05 to < 0.05)     | < 0.05<br>(< 0.05 to < 0.05)      | < 0.05<br>(< 0.05 to < 0.05) | -16.3<br>(-25.5 to -4.5)                          | -34.0<br>(-41.3 to -24.7)                           |
| Multidrug-resistant HIV/AIDS - Tuberculosis without extensive drug resistance        | < 0.05<br>(< 0.05 to < 0.05)     | < 0.05<br>(< 0.05 to < 0.05)      | < 0.05<br>(< 0.05 to < 0.05) | -30.8<br>(-98.6 to 2,545.5)                       | -45.4<br>(-98.9 to 1,986.9)                         |
| Extensively drug-resistant HIV/AIDS - Tuberculosis                                   | < 0.05<br>(< 0.05 to < 0.05)     | < 0.05<br>(< 0.05 to < 0.05)      | < 0.05<br>(< 0.05 to < 0.05) | 127.9<br>(-95.4 to 8,606.9)                       | 79.7<br>(-96.4 to 6,768.9)                          |
| HIV/AIDS resulting in other diseases                                                 | < 0.05<br>(< 0.05 to < 0.05)     | < 0.05<br>(< 0.05 to < 0.05)      | < 0.05<br>(< 0.05 to < 0.05) | 1.4<br>(-29.9 to 49.8)                            | -20.4<br>(-44.4 to 23.2)                            |
| <b>Diarrhoea, lower respiratory infections, and other common infectious diseases</b> | <b>8.0</b><br>(7.6 to 8.4)       | <b>407.4†</b><br>(373.4 to 444.2) | <b>0.5</b><br>(0.3 to 0.6)   | <b>10.1</b><br>(6.7 to 13.6)                      | <b>-3.8</b><br>(-6.6 to -1.0)                       |
| Diarrhoeal diseases                                                                  | 1.9<br>(1.7 to 2.0)              | 124.7<br>(116.5 to 133.8)         | 0.2<br>(0.1 to 0.3)          | 8.3<br>(2.5 to 14.3)                              | -5.5<br>(-9.8 to -0.7)                              |
| Intestinal infectious diseases                                                       | < 0.05<br>(< 0.05 to < 0.05)     | 0.2†<br>(0.2 to 0.2)              | < 0.05<br>(< 0.05 to < 0.05) | -18.6<br>(-35.1 to 2.6)                           | -27.4<br>(-39.7 to -11.9)                           |
| Typhoid fever                                                                        | < 0.05<br>(< 0.05 to < 0.05)     | 0.1<br>(0.1 to 0.2)               | < 0.05<br>(< 0.05 to < 0.05) | -18.4<br>(-36.4 to 5.0)                           | -27.2<br>(-41.0 to -10.0)                           |
| Paratyphoid fever                                                                    | < 0.05<br>(< 0.05 to < 0.05)     | < 0.05<br>(< 0.05 to 0.1)         | < 0.05<br>(< 0.05 to < 0.05) | -14.6<br>(-29.8 to 2.3)                           | -24.9<br>(-36.4 to -12.3)                           |
| Other intestinal infectious diseases                                                 | --                               | --                                | < 0.05<br>(< 0.05 to < 0.05) | -45.6<br>(-57.0 to -29.6)                         | -46.1<br>(-55.0 to -35.4)                           |
| Lower respiratory infections                                                         | 0.2<br>(0.2 to 0.2)              | 8.6<br>(7.7 to 9.5)               | < 0.05<br>(< 0.05 to < 0.05) | 26.5<br>(13.3 to 41.8)                            | 10.0<br>(0.4 to 20.9)                               |
| Upper respiratory infections                                                         | 3.5<br>(3.1 to 4.0)              | 265.0<br>(232.3 to 302.2)         | 0.1<br>(0.1 to 0.1)          | 13.6<br>(7.2 to 20.0)                             | -0.1<br>(-5.1 to 5.0)                               |
| Otitis media                                                                         | 1.9<br>(1.7 to 2.1)              | 5.2<br>(4.1 to 6.7)               | 0.1<br>(< 0.05 to 0.1)       | 11.8<br>(3.9 to 20.6)                             | 0.0<br>(-6.4 to 6.5)                                |
| Meningitis                                                                           | 0.4<br>(0.4 to 0.5)              | 0.1<br>(0.1 to 0.1)               | < 0.05<br>(< 0.05 to 0.1)    | 3.1<br>(-5.2 to 12.2)                             | -11.0<br>(-17.7 to -3.8)                            |
| Pneumococcal meningitis                                                              | 0.2<br>(0.2 to 0.2)              | < 0.05<br>(< 0.05 to < 0.05)      | < 0.05<br>(< 0.05 to < 0.05) | -8.4<br>(-20.4 to 6.5)                            | -21.5<br>(-30.8 to -10.3)                           |
| H influenzae type B meningitis                                                       | < 0.05<br>(< 0.05 to 0.1)        | < 0.05<br>(< 0.05 to < 0.05)      | < 0.05<br>(< 0.05 to < 0.05) | -8.5<br>(-16.4 to 0.7)                            | -21.2<br>(-28.6 to -12.8)                           |
| Meningococcal infection                                                              | < 0.05<br>(< 0.05 to 0.1)        | < 0.05<br>(< 0.05 to < 0.05)      | < 0.05<br>(< 0.05 to < 0.05) | 12.3<br>(6.9 to 18.3)                             | -3.6<br>(-8.4 to 1.7)                               |
| Other meningitis                                                                     | 0.1<br>(0.1 to 0.2)              | < 0.05<br>(< 0.05 to < 0.05)      | < 0.05<br>(< 0.05 to < 0.05) | 61.4<br>(38.0 to 84.3)                            | 42.6<br>(22.0 to 62.9)                              |
| Encephalitis                                                                         | 0.4<br>(0.3 to 0.6)              | 0.1<br>(0.1 to 0.2)               | < 0.05<br>(< 0.05 to 0.1)    | 18.1<br>(4.7 to 32.0)                             | -0.2<br>(-10.9 to 10.3)                             |
| Diphtheria                                                                           | < 0.05<br>(< 0.05 to < 0.05)     | < 0.05<br>(< 0.05 to < 0.05)      | < 0.05<br>(< 0.05 to < 0.05) | -19.7<br>(-59.2 to 57.9)                          | -25.7<br>(-60.3 to 34.2)                            |
| Whooping cough                                                                       | < 0.05<br>(< 0.05 to < 0.05)     | 0.2<br>(0.1 to 0.2)               | < 0.05<br>(< 0.05 to < 0.05) | -26.7<br>(-42.1 to -9.4)                          | -25.6<br>(-41.3 to -7.9)                            |
| Tetanus                                                                              | < 0.05<br>(< 0.05 to < 0.05)     | < 0.05<br>(< 0.05 to < 0.05)      | < 0.05<br>(< 0.05 to < 0.05) | 16.0<br>(3.5 to 29.2)                             | 0.1<br>(-10.8 to 11.9)                              |
| Measles                                                                              | < 0.05<br>(< 0.05 to < 0.05)     | 0.5<br>(0.2 to 1.1)               | < 0.05<br>(< 0.05 to < 0.05) | -43.9<br>(-61.5 to -16.5)                         | -43.8<br>(-61.4 to -16.3)                           |
| Varicella and herpes zoster                                                          | 0.1<br>(0.1 to 0.1)              | 2.9<br>(2.8 to 3.0)               | < 0.05<br>(< 0.05 to < 0.05) | 23.1<br>(7.2 to 39.1)                             | -0.1<br>(-10.5 to 10.4)                             |
| <b>Neglected tropical diseases and malaria</b>                                       | <b>16.1</b><br>(14.1 to 18.6)    | <b>1.2†</b><br>(0.8 to 1.7)       | <b>0.1</b><br>(0.1 to 0.1)   | <b>9.4</b><br>(-11.1 to 38.5)                     | <b>-3.1</b><br>(-21.8 to 24.5)                      |
| Malaria                                                                              | --                               | --                                | --                           | --                                                | --                                                  |
| Chagas disease                                                                       | --                               | --                                | --                           | --                                                | --                                                  |
| Leishmaniasis                                                                        | --                               | --                                | --                           | --                                                | --                                                  |
| Visceral leishmaniasis                                                               | --                               | --                                | --                           | --                                                | --                                                  |
| Cutaneous and mucocutaneous leishmaniasis                                            | --                               | --                                | --                           | --                                                | --                                                  |
| African trypanosomiasis                                                              | --                               | --                                | --                           | --                                                | --                                                  |
| Schistosomiasis                                                                      | --                               | --                                | --                           | --                                                | --                                                  |
| Cysticercosis                                                                        | --                               | --                                | --                           | --                                                | --                                                  |
| Cystic echinococcosis                                                                | --                               | --                                | --                           | --                                                | --                                                  |
| Lymphatic filariasis                                                                 | --                               | --                                | --                           | --                                                | --                                                  |
| Onchocerciasis                                                                       | --                               | --                                | --                           | --                                                | --                                                  |
| Trachoma                                                                             | 0.1<br>(0.1 to 0.2)              | --                                | < 0.05<br>(< 0.05 to < 0.05) | 23.5<br>(-14.5 to 78.4)                           | -6.4<br>(-37.7 to 40.1)                             |
| Dengue                                                                               | 0.1<br>(< 0.05 to 0.1)           | 1.2<br>(0.8 to 1.7)               | < 0.05<br>(< 0.05 to < 0.05) | -6.1<br>(-32.3 to 175.6)                          | -18.8<br>(-40.7 to 135.9)                           |
| Yellow fever                                                                         | --                               | --                                | --                           | --                                                | --                                                  |
| Rabies                                                                               | < 0.05<br>(< 0.05 to < 0.05)     | < 0.05<br>(< 0.05 to < 0.05)      | < 0.05<br>(< 0.05 to < 0.05) | 32.5<br>(-26.9 to 137.9)                          | 3.8<br>(-43.1 to 85.9)                              |
| Intestinal nematode infections                                                       | 14.8<br>(12.7 to 17.2)           | --                                | < 0.05<br>(< 0.05 to 0.1)    | 20.8<br>(-23.8 to 100.1)                          | 4.7<br>(-37.9 to 83.8)                              |
| Ascariasis                                                                           | 0.1<br>(< 0.05 to 0.1)           | --                                | --                           | --                                                | --                                                  |



| Cause                                                                   | Prevalence in thousands (95% UI)       | Incidence in thousands (95% UI)          | YLDs in thousands (95% UI)                          |                                                   |                                                     |
|-------------------------------------------------------------------------|----------------------------------------|------------------------------------------|-----------------------------------------------------|---------------------------------------------------|-----------------------------------------------------|
|                                                                         | 2016 counts                            | 2016 counts                              | 2016 counts                                         | Percentage change in counts between 2006 and 2016 | Percentage change in age-standardised rates between |
| Trichuriasis                                                            | 6.2<br>(5.3 to 7.2)                    | --                                       | < 0.05<br>(< 0.05 to < 0.05)                        | 51.1<br>(19.7 to 88.5)                            | 28.9<br>(-0.5 to 63.8)                              |
| Hookworm disease                                                        | 9.2<br>(7.0 to 12.0)                   | --                                       | < 0.05<br>(< 0.05 to 0.1)                           | 18.5<br>(-27.2 to 106.0)                          | 2.8<br>(-41.5 to 90.1)                              |
| Food-borne trematodiasis                                                | --                                     | --                                       | --                                                  | --                                                | --                                                  |
| Leprosy                                                                 | < 0.05<br>(< 0.05 to < 0.05)           | < 0.05<br>(< 0.05 to < 0.05)             | < 0.05<br>(< 0.05 to < 0.05)                        | 131.6<br>(26.2 to 418.6)                          | 72.8<br>(-6.2 to 296.6)                             |
| Ebola virus disease                                                     | --                                     | --                                       | --                                                  | --                                                | --                                                  |
| Zika virus disease                                                      | --                                     | --                                       | --                                                  | --                                                | --                                                  |
| Guinea worm disease                                                     | --                                     | --                                       | --                                                  | --                                                | --                                                  |
| Other neglected tropical diseases                                       | 1.4<br>(1.2 to 1.5)                    | --                                       | < 0.05<br>(< 0.05 to 0.1)                           | 2.5<br>(-15.8 to 23.9)                            | -5.0<br>(-20.5 to 13.5)                             |
| <b>Maternal disorders</b>                                               | <b>0.1</b><br><b>(0.1 to 0.1)</b>      | <b>1.8†</b><br><b>(1.5 to 2.1)</b>       | <b>&lt; 0.05</b><br><b>(&lt; 0.05 to &lt; 0.05)</b> | <b>4.1</b><br><b>(-21.3 to 38.6)</b>              | <b>-17.2</b><br><b>(-37.3 to 9.9)</b>               |
| Maternal haemorrhage                                                    | < 0.05<br>(< 0.05 to < 0.05)           | 0.3<br>(0.2 to 0.4)                      | < 0.05<br>(< 0.05 to < 0.05)                        | -6.0<br>(-40.8 to 46.8)                           | -26.4<br>(-53.1 to 16.3)                            |
| Maternal sepsis and other pregnancy related infections                  | < 0.05<br>(< 0.05 to < 0.05)           | 0.1<br>(0.1 to 0.2)                      | < 0.05<br>(< 0.05 to < 0.05)                        | -8.1<br>(-61.1 to 109.2)                          | -26.0<br>(-68.8 to 69.9)                            |
| Maternal hypertensive disorders                                         | < 0.05<br>(< 0.05 to 0.1)              | 0.2<br>(0.1 to 0.2)                      | < 0.05<br>(< 0.05 to < 0.05)                        | 37.4<br>(-18.8 to 137.9)                          | 9.9<br>(-35.3 to 90.3)                              |
| Maternal obstructed labour and uterine rupture                          | < 0.05<br>(< 0.05 to < 0.05)           | 0.2<br>(0.1 to 0.3)                      | < 0.05<br>(< 0.05 to < 0.05)                        | -0.1<br>(-60.2 to 169.2)                          | -21.2<br>(-68.5 to 109.3)                           |
| Maternal abortion, miscarriage, and ectopic pregnancy                   | < 0.05<br>(< 0.05 to < 0.05)           | 1.0<br>(0.8 to 1.3)                      | < 0.05<br>(< 0.05 to < 0.05)                        | -9.2<br>(-50.9 to 57.8)                           | -26.9<br>(-60.9 to 28.2)                            |
| Other maternal disorders                                                | --                                     | --                                       | < 0.05<br>(< 0.05 to < 0.05)                        | -1.6<br>(-25.5 to 30.6)                           | -21.5<br>(-40.6 to 3.9)                             |
| <b>Neonatal disorders</b>                                               | <b>1.9</b><br><b>(1.5 to 2.6)</b>      | <b>0.2</b><br><b>--</b>                  | <b>0.2</b><br><b>(0.1 to 0.2)</b>                   | <b>16.9</b><br><b>(-3.2 to 39.0)</b>              | <b>5.3</b><br><b>(-13.2 to 25.3)</b>                |
| Neonatal preterm birth complications                                    | 1.7<br>(1.3 to 2.5)                    | --                                       | 0.1<br>(0.1 to 0.2)                                 | 19.3<br>(-6.6 to 47.3)                            | 6.6<br>(-17.1 to 32.3)                              |
| Neonatal encephalopathy due to birth asphyxia and trauma                | 0.1<br>(< 0.05 to 0.1)                 | --                                       | < 0.05<br>(< 0.05 to < 0.05)                        | 21.8<br>(-42.9 to 121.2)                          | 9.2<br>(-48.1 to 99.6)                              |
| Neonatal sepsis and other neonatal infections                           | < 0.05<br>(< 0.05 to 0.1)              | --                                       | < 0.05<br>(< 0.05 to < 0.05)                        | 12.2<br>(-37.0 to 60.2)                           | 1.9<br>(-39.9 to 46.4)                              |
| Hemolytic disease and other neonatal jaundice                           | < 0.05<br>(< 0.05 to < 0.05)           | --                                       | < 0.05<br>(< 0.05 to < 0.05)                        | 9.8<br>(-4.5 to 24.7)                             | -3.0<br>(-13.8 to 7.8)                              |
| Other neonatal disorders                                                | --                                     | --                                       | < 0.05<br>(< 0.05 to < 0.05)                        | -2.8<br>(-21.6 to 18.8)                           | -0.6<br>(-19.9 to 21.5)                             |
| <b>Nutritional deficiencies</b>                                         | <b>34.6</b><br><b>(32.0 to 36.8)</b>   | <b>5.1†</b><br><b>(3.7 to 7.3)</b>       | <b>0.9</b><br><b>(0.6 to 1.3)</b>                   | <b>8.0</b><br><b>(-4.8 to 21.5)</b>               | <b>-6.2</b><br><b>(-15.4 to 3.9)</b>                |
| Protein-energy malnutrition                                             | 1.3<br>(1.0 to 1.8)                    | 0.6<br>(0.4 to 0.8)                      | 0.1<br>(< 0.05 to 0.1)                              | 11.8<br>(-30.2 to 79.8)                           | 14.3<br>(-28.7 to 84.0)                             |
| Iodine deficiency                                                       | < 0.05<br>(< 0.05 to 0.1)              | < 0.05<br>(< 0.05 to < 0.05)             | < 0.05<br>(< 0.05 to < 0.05)                        | 17.9<br>(5.8 to 31.4)                             | -6.5<br>(-15.8 to 3.2)                              |
| Vitamin A deficiency                                                    | 5.5<br>(3.8 to 7.8)                    | 4.5<br>(3.1 to 6.7)                      | < 0.05<br>(< 0.05 to < 0.05)                        | 6.8<br>(-13.0 to 31.4)                            | -3.2<br>(-19.2 to 16.1)                             |
| Iron-deficiency anaemia                                                 | 29.8<br>(26.8 to 32.9)                 | --                                       | 0.8<br>(0.5 to 1.2)                                 | 7.7<br>(-5.6 to 21.2)                             | -7.1<br>(-16.6 to 2.9)                              |
| Other nutritional deficiencies                                          | --                                     | --                                       | < 0.05<br>(< 0.05 to < 0.05)                        | 11.7<br>(-32.4 to 83.5)                           | 14.1<br>(-30.9 to 87.5)                             |
| <b>Other communicable, maternal, neonatal, and nutritional diseases</b> | <b>33.8</b><br><b>(31.5 to 35.9)</b>   | <b>13.6</b><br><b>(12.3 to 15.0)</b>     | <b>0.1</b><br><b>(&lt; 0.05 to 0.1)</b>             | <b>14.8</b><br><b>(5.6 to 24.0)</b>               | <b>-2.1</b><br><b>(-8.4 to 3.9)</b>                 |
| Sexually transmitted diseases excluding HIV                             | 21.8<br>(20.3 to 23.3)                 | 9.0<br>(8.1 to 9.9)                      | < 0.05<br>(< 0.05 to 0.1)                           | 18.9<br>(11.8 to 26.1)                            | -2.8<br>(-8.4 to 2.6)                               |
| Syphilis                                                                | 2.6<br>(2.1 to 3.1)                    | 1.6<br>(1.2 to 1.9)                      | < 0.05<br>(< 0.05 to < 0.05)                        | 27.6<br>(13.8 to 43.5)                            | -1.5<br>(-11.9 to 10.6)                             |
| Chlamydial infection                                                    | 2.3<br>(1.6 to 3.0)                    | 1.9<br>(1.4 to 2.4)                      | < 0.05<br>(< 0.05 to < 0.05)                        | 18.1<br>(4.5 to 33.8)                             | -3.8<br>(-14.6 to 8.2)                              |
| Gonococcal infection                                                    | 0.2<br>(0.2 to 0.3)                    | 0.5<br>(0.4 to 0.7)                      | < 0.05<br>(< 0.05 to < 0.05)                        | 17.6<br>(-4.5 to 45.8)                            | -2.8<br>(-20.3 to 19.6)                             |
| Trichomoniasis                                                          | 3.1<br>(2.5 to 3.7)                    | 2.7<br>(2.2 to 3.3)                      | < 0.05<br>(< 0.05 to < 0.05)                        | 23.7<br>(15.7 to 33.5)                            | -1.0<br>(-7.1 to 5.8)                               |
| Genital herpes                                                          | 15.5<br>(13.3 to 18.0)                 | 1.3<br>(1.1 to 1.6)                      | < 0.05<br>(< 0.05 to < 0.05)                        | 25.7<br>(14.2 to 37.2)                            | -0.2<br>(-8.0 to 7.9)                               |
| Other sexually transmitted diseases                                     | 1.0<br>(0.8 to 1.1)                    | 1.1<br>(0.9 to 1.3)                      | < 0.05<br>(< 0.05 to < 0.05)                        | 15.7<br>(4.7 to 27.9)                             | -3.8<br>(-13.0 to 6.4)                              |
| Hepatitis                                                               | 14.4<br>(11.9 to 17.3)                 | 4.7<br>(3.6 to 5.6)                      | < 0.05<br>(< 0.05 to < 0.05)                        | 18.6<br>(-6.3 to 46.9)                            | -1.8<br>(-21.5 to 21.1)                             |
| Acute hepatitis A                                                       | 0.1<br>(0.1 to 0.2)                    | 2.0<br>(1.1 to 2.5)                      | < 0.05<br>(< 0.05 to < 0.05)                        | 18.4<br>(-22.8 to 77.0)                           | 1.1<br>(-30.4 to 42.0)                              |
| Hepatitis B                                                             | 11.8<br>(9.3 to 14.7)                  | 2.4<br>(1.8 to 3.1)                      | < 0.05<br>(< 0.05 to < 0.05)                        | 19.3<br>(-11.4 to 57.9)                           | -3.1<br>(-27.3 to 27.4)                             |
| Hepatitis C                                                             | 2.4<br>(2.1 to 2.8)                    | 0.1<br>(0.1 to 0.2)                      | < 0.05<br>(< 0.05 to < 0.05)                        | 11.5<br>(-5.8 to 32.4)                            | 2.8<br>(-9.3 to 16.7)                               |
| Acute hepatitis E                                                       | < 0.05<br>(< 0.05 to < 0.05)           | 0.1<br>(0.1 to 0.2)                      | < 0.05<br>(< 0.05 to < 0.05)                        | 13.6<br>(-23.9 to 68.1)                           | -2.8<br>(-29.9 to 35.8)                             |
| Other infectious diseases                                               | 1.1<br>(0.9 to 1.2)                    | < 0.05<br>(< 0.05 to < 0.05)             | < 0.05<br>(< 0.05 to < 0.05)                        | 9.4<br>(-8.3 to 28.6)                             | -1.2<br>(-15.1 to 13.9)                             |
| <b>Non-communicable diseases</b>                                        | <b>100.6</b><br><b>(99.7 to 101.4)</b> | <b>284.6†</b><br><b>(267.2 to 302.8)</b> | <b>9.1</b><br><b>(6.7 to 11.9)</b>                  | <b>23.6</b><br><b>(20.8 to 26.6)</b>              | <b>-0.3</b><br><b>(-2.1 to 1.6)</b>                 |
| <b>Neoplasms</b>                                                        | <b>0.1</b><br><b>(0.1 to 0.1)</b>      | <b>0.1</b><br><b>(0.1 to 0.1)</b>        | <b>&lt; 0.05</b><br><b>(&lt; 0.05 to &lt; 0.05)</b> | <b>32.8</b><br><b>(25.5 to 40.5)</b>              | <b>2.0</b><br><b>(-3.2 to 7.4)</b>                  |
| Lip and oral cavity cancer                                              | < 0.05<br>(< 0.05 to < 0.05)           | < 0.05<br>(< 0.05 to < 0.05)             | < 0.05<br>(< 0.05 to < 0.05)                        | 40.2<br>(21.8 to 61.4)                            | 6.0<br>(-7.8 to 22.4)                               |
| Nasopharynx cancer                                                      | < 0.05<br>(< 0.05 to < 0.05)           | < 0.05<br>(< 0.05 to < 0.05)             | < 0.05<br>(< 0.05 to < 0.05)                        | 30.1<br>(6.3 to 60.4)                             | 1.4<br>(-16.4 to 22.0)                              |
| Other pharynx cancer                                                    | < 0.05<br>(< 0.05 to < 0.05)           | < 0.05<br>(< 0.05 to < 0.05)             | < 0.05<br>(< 0.05 to < 0.05)                        | 32.0<br>(20.0 to 46.1)                            | -0.6<br>(-9.3 to 9.3)                               |
| Oesophageal cancer                                                      | < 0.05<br>(< 0.05 to < 0.05)           | < 0.05<br>(< 0.05 to < 0.05)             | < 0.05<br>(< 0.05 to < 0.05)                        | 28.5<br>(17.2 to 41.6)                            | -4.2<br>(-14.1 to 6.9)                              |
| Stomach cancer                                                          | < 0.05<br>(< 0.05 to < 0.05)           | < 0.05<br>(< 0.05 to < 0.05)             | < 0.05<br>(< 0.05 to < 0.05)                        | 24.3<br>(7.5 to 43.2)                             | -6.5<br>(-20.5 to 9.5)                              |
| Colon and rectum cancer                                                 | < 0.05<br>(< 0.05 to < 0.05)           | < 0.05<br>(< 0.05 to < 0.05)             | < 0.05<br>(< 0.05 to < 0.05)                        | 40.9<br>(19.3 to 67.1)                            | 4.7<br>(-12.5 to 25.5)                              |
| Liver cancer                                                            | < 0.05<br>(< 0.05 to < 0.05)           | < 0.05<br>(< 0.05 to < 0.05)             | < 0.05<br>(< 0.05 to < 0.05)                        | 29.7<br>(13.8 to 46.0)                            | -2.4<br>(-13.2 to 9.1)                              |
| Liver cancer due to hepatitis B                                         | < 0.05<br>(< 0.05 to < 0.05)           | < 0.05<br>(< 0.05 to < 0.05)             | < 0.05<br>(< 0.05 to < 0.05)                        | 29.2<br>(13.5 to 45.5)                            | -2.5<br>(-14.0 to 9.3)                              |



| Cause                                              | Prevalence in thousands (95% UI)     | Incidence in thousands (95% UI)    | YLDs in thousands (95% UI)        |                                                   |                                                     |
|----------------------------------------------------|--------------------------------------|------------------------------------|-----------------------------------|---------------------------------------------------|-----------------------------------------------------|
|                                                    | 2016 counts                          | 2016 counts                        | 2016 counts                       | Percentage change in counts between 2006 and 2016 | Percentage change in age-standardised rates between |
| Liver cancer due to hepatitis C                    | < 0.05<br>(< 0.05 to < 0.05)         | < 0.05<br>(< 0.05 to < 0.05)       | < 0.05<br>(< 0.05 to < 0.05)      | 33.8<br>(17.4 to 51.3)                            | -1.5<br>(-13.6 to 12.5)                             |
| Liver cancer due to alcohol use                    | < 0.05<br>(< 0.05 to < 0.05)         | < 0.05<br>(< 0.05 to < 0.05)       | < 0.05<br>(< 0.05 to < 0.05)      | 28.2<br>(11.0 to 46.7)                            | -4.8<br>(-17.3 to 8.4)                              |
| Liver cancer due to other causes                   | < 0.05<br>(< 0.05 to < 0.05)         | < 0.05<br>(< 0.05 to < 0.05)       | < 0.05<br>(< 0.05 to < 0.05)      | 28.7<br>(11.9 to 48.4)                            | -2.3<br>(-14.5 to 11.5)                             |
| Gallbladder and biliary tract cancer               | < 0.05<br>(< 0.05 to < 0.05)         | < 0.05<br>(< 0.05 to < 0.05)       | < 0.05<br>(< 0.05 to < 0.05)      | 27.7<br>(15.7 to 39.5)                            | -4.9<br>(-13.8 to 3.9)                              |
| Pancreatic cancer                                  | < 0.05<br>(< 0.05 to < 0.05)         | < 0.05<br>(< 0.05 to < 0.05)       | < 0.05<br>(< 0.05 to < 0.05)      | 39.4<br>(26.5 to 53.5)                            | 2.8<br>(-6.7 to 13.2)                               |
| Larynx cancer                                      | < 0.05<br>(< 0.05 to < 0.05)         | < 0.05<br>(< 0.05 to < 0.05)       | < 0.05<br>(< 0.05 to < 0.05)      | 30.9<br>(15.8 to 47.6)                            | -2.9<br>(-15.3 to 10.7)                             |
| Tracheal, bronchus, and lung cancer                | < 0.05<br>(< 0.05 to < 0.05)         | < 0.05<br>(< 0.05 to < 0.05)       | < 0.05<br>(< 0.05 to < 0.05)      | 28.6<br>(5.1 to 56.8)                             | -5.0<br>(-22.0 to 15.2)                             |
| Malignant skin melanoma                            | < 0.05<br>(< 0.05 to < 0.05)         | < 0.05<br>(< 0.05 to < 0.05)       | < 0.05<br>(< 0.05 to < 0.05)      | 41.7<br>(20.3 to 67.7)                            | 3.8<br>(-10.3 to 21.9)                              |
| Non-melanoma skin cancer                           | < 0.05<br>(< 0.05 to < 0.05)         | < 0.05<br>(< 0.05 to < 0.05)       | < 0.05<br>(< 0.05 to < 0.05)      | -16.4<br>(-65.7 to 63.1)                          | -39.4<br>(-76.2 to 21.9)                            |
| Non-melanoma skin cancer (squamous-cell carcinoma) | < 0.05<br>(< 0.05 to < 0.05)         | < 0.05<br>(< 0.05 to < 0.05)       | < 0.05<br>(< 0.05 to < 0.05)      | -16.7<br>(-66.0 to 63.4)                          | -39.5<br>(-76.3 to 22.0)                            |
| Non-melanoma skin cancer (basal-cell carcinoma)    | < 0.05<br>(< 0.05 to < 0.05)         | < 0.05<br>(< 0.05 to < 0.05)       | < 0.05<br>(< 0.05 to < 0.05)      | 27.3<br>(10.3 to 43.1)                            | -1.3<br>(-13.0 to 9.2)                              |
| Breast cancer                                      | < 0.05<br>(< 0.05 to < 0.05)         | < 0.05<br>(< 0.05 to < 0.05)       | < 0.05<br>(< 0.05 to < 0.05)      | 47.2<br>(14.6 to 89.8)                            | 12.1<br>(-10.7 to 41.6)                             |
| Cervical cancer                                    | < 0.05<br>(< 0.05 to < 0.05)         | < 0.05<br>(< 0.05 to < 0.05)       | < 0.05<br>(< 0.05 to < 0.05)      | 14.6<br>(-13.1 to 47.2)                           | -7.3<br>(-27.6 to 18.3)                             |
| Uterine cancer                                     | < 0.05<br>(< 0.05 to < 0.05)         | < 0.05<br>(< 0.05 to < 0.05)       | < 0.05<br>(< 0.05 to < 0.05)      | 38.5<br>(8.7 to 73.8)                             | 1.3<br>(-18.9 to 26.5)                              |
| Ovarian cancer                                     | < 0.05<br>(< 0.05 to < 0.05)         | < 0.05<br>(< 0.05 to < 0.05)       | < 0.05<br>(< 0.05 to < 0.05)      | 41.4<br>(20.9 to 62.0)                            | 6.2<br>(-8.6 to 21.3)                               |
| Prostate cancer                                    | < 0.05<br>(< 0.05 to < 0.05)         | < 0.05<br>(< 0.05 to < 0.05)       | < 0.05<br>(< 0.05 to < 0.05)      | 47.4<br>(15.9 to 89.7)                            | 6.4<br>(-15.1 to 34.0)                              |
| Testicular cancer                                  | < 0.05<br>(< 0.05 to < 0.05)         | < 0.05<br>(< 0.05 to < 0.05)       | < 0.05<br>(< 0.05 to < 0.05)      | 44.7<br>(2.0 to 100.1)                            | 11.0<br>(-16.8 to 48.6)                             |
| Kidney cancer                                      | < 0.05<br>(< 0.05 to < 0.05)         | < 0.05<br>(< 0.05 to < 0.05)       | < 0.05<br>(< 0.05 to < 0.05)      | 34.6<br>(8.2 to 64.5)                             | 9.0<br>(-8.3 to 29.4)                               |
| Bladder cancer                                     | < 0.05<br>(< 0.05 to < 0.05)         | < 0.05<br>(< 0.05 to < 0.05)       | < 0.05<br>(< 0.05 to < 0.05)      | 45.5<br>(32.6 to 59.3)                            | 6.8<br>(-3.0 to 18.1)                               |
| Brain and nervous system cancer                    | < 0.05<br>(< 0.05 to < 0.05)         | < 0.05<br>(< 0.05 to < 0.05)       | < 0.05<br>(< 0.05 to < 0.05)      | 29.3<br>(14.6 to 47.0)                            | 6.4<br>(-6.6 to 20.8)                               |
| Thyroid cancer                                     | < 0.05<br>(< 0.05 to < 0.05)         | < 0.05<br>(< 0.05 to < 0.05)       | < 0.05<br>(< 0.05 to < 0.05)      | 37.9<br>(23.4 to 53.9)                            | 0.7<br>(-9.6 to 13.6)                               |
| Mesothelioma                                       | < 0.05<br>(< 0.05 to < 0.05)         | < 0.05<br>(< 0.05 to < 0.05)       | < 0.05<br>(< 0.05 to < 0.05)      | 36.5<br>(22.7 to 53.1)                            | 2.1<br>(-8.8 to 14.7)                               |
| Hodgkin lymphoma                                   | < 0.05<br>(< 0.05 to < 0.05)         | < 0.05<br>(< 0.05 to < 0.05)       | < 0.05<br>(< 0.05 to < 0.05)      | 17.7<br>(3.6 to 36.4)                             | -6.3<br>(-16.3 to 5.5)                              |
| Non-Hodgkin's lymphoma                             | < 0.05<br>(< 0.05 to < 0.05)         | < 0.05<br>(< 0.05 to < 0.05)       | < 0.05<br>(< 0.05 to < 0.05)      | 29.8<br>(13.2 to 47.5)                            | 3.8<br>(-7.6 to 16.1)                               |
| Multiple myeloma                                   | < 0.05<br>(< 0.05 to < 0.05)         | < 0.05<br>(< 0.05 to < 0.05)       | < 0.05<br>(< 0.05 to < 0.05)      | 39.4<br>(24.0 to 57.6)                            | 2.4<br>(-9.0 to 17.1)                               |
| Leukaemia                                          | < 0.05<br>(< 0.05 to < 0.05)         | < 0.05<br>(< 0.05 to < 0.05)       | < 0.05<br>(< 0.05 to < 0.05)      | 13.6<br>(2.5 to 26.8)                             | -3.6<br>(-11.4 to 5.1)                              |
| Acute lymphoid leukaemia                           | < 0.05<br>(< 0.05 to < 0.05)         | < 0.05<br>(< 0.05 to < 0.05)       | < 0.05<br>(< 0.05 to < 0.05)      | 5.9<br>(-15.9 to 39.2)                            | -3.6<br>(-19.2 to 19.8)                             |
| Chronic lymphoid leukaemia                         | < 0.05<br>(< 0.05 to < 0.05)         | < 0.05<br>(< 0.05 to < 0.05)       | < 0.05<br>(< 0.05 to < 0.05)      | 39.9<br>(17.4 to 69.4)                            | -0.2<br>(-15.1 to 19.7)                             |
| Acute myeloid leukaemia                            | < 0.05<br>(< 0.05 to < 0.05)         | < 0.05<br>(< 0.05 to < 0.05)       | < 0.05<br>(< 0.05 to < 0.05)      | 18.3<br>(1.1 to 39.5)                             | 2.1<br>(-9.1 to 16.4)                               |
| Chronic myeloid leukaemia                          | < 0.05<br>(< 0.05 to < 0.05)         | < 0.05<br>(< 0.05 to < 0.05)       | < 0.05<br>(< 0.05 to < 0.05)      | 28.4<br>(7.4 to 51.3)                             | -3.6<br>(-17.4 to 11.9)                             |
| Other leukaemia                                    | < 0.05<br>(< 0.05 to < 0.05)         | < 0.05<br>(< 0.05 to < 0.05)       | < 0.05<br>(< 0.05 to < 0.05)      | 7.5<br>(-7.7 to 25.1)                             | -6.4<br>(-17.8 to 6.7)                              |
| Other neoplasms                                    | < 0.05<br>(< 0.05 to < 0.05)         | < 0.05<br>(< 0.05 to < 0.05)       | < 0.05<br>(< 0.05 to < 0.05)      | 22.9<br>(5.5 to 42.8)                             | 1.9<br>(-10.3 to 16.0)                              |
| <b>Cardiovascular diseases</b>                     | <b>5.9</b><br><b>(5.7 to 6.2)</b>    | <b>0.6†</b><br><b>(0.5 to 0.6)</b> | <b>0.4</b><br><b>(0.3 to 0.5)</b> | <b>22.9</b><br><b>(18.3 to 27.6)</b>              | <b>-3.9</b><br><b>(-7.3 to -0.4)</b>                |
| Rheumatic heart disease                            | 2.1<br>(1.9 to 2.4)                  | 0.1<br>(0.1 to 0.1)                | 0.1<br>(0.1 to 0.1)               | 11.8<br>(2.8 to 20.7)                             | -8.2<br>(-15.0 to -1.0)                             |
| Ischaemic heart disease                            | 1.2<br>(1.1 to 1.2)                  | 0.2<br>(0.1 to 0.2)                | 0.1<br>(< 0.05 to 0.1)            | 35.7<br>(28.4 to 43.1)                            | 2.1<br>(-2.4 to 6.8)                                |
| Cerebrovascular disease                            | 0.8<br>(0.8 to 0.9)                  | 0.1‡<br>(0.1 to 0.1)               | 0.2<br>(0.1 to 0.2)               | 23.8<br>(16.1 to 32.9)                            | -6.3<br>(-11.8 to 0.3)                              |
| Ischaemic stroke                                   | 0.7<br>(0.6 to 0.7)                  | 0.1‡<br>(0.1 to 0.1)               | 0.1<br>(0.1 to 0.2)               | 26.4<br>(17.1 to 37.9)                            | -5.0<br>(-11.9 to 3.0)                              |
| Hemorrhagic stroke                                 | 0.2<br>(0.2 to 0.2)                  | 0.1‡<br>(< 0.05 to 0.1)            | < 0.05<br>(< 0.05 to < 0.05)      | 14.8<br>(3.1 to 28.5)                             | -11.3<br>(-19.7 to -1.8)                            |
| Hypertensive heart disease                         | 0.1<br>(0.1 to 0.1)                  | --                                 | < 0.05<br>(< 0.05 to < 0.05)      | 35.4<br>(21.7 to 52.2)                            | 1.4<br>(-8.2 to 11.6)                               |
| Cardiomyopathy and myocarditis                     | < 0.05<br>(< 0.05 to < 0.05)         | < 0.05†<br>(< 0.05 to < 0.05)      | < 0.05<br>(< 0.05 to < 0.05)      | 29.6<br>(15.8 to 46.4)                            | 3.1<br>(-7.4 to 15.5)                               |
| Myocarditis                                        | < 0.05<br>(< 0.05 to < 0.05)         | < 0.05<br>(< 0.05 to < 0.05)       | < 0.05<br>(< 0.05 to < 0.05)      | 27.9<br>(11.9 to 47.1)                            | 2.9<br>(-10.4 to 18.6)                              |
| Alcoholic cardiomyopathy                           | < 0.05<br>(< 0.05 to < 0.05)         | --                                 | < 0.05<br>(< 0.05 to < 0.05)      | 42.4<br>(27.6 to 58.1)                            | 3.4<br>(-10.0 to 19.4)                              |
| Other cardiomyopathy                               | < 0.05<br>(< 0.05 to < 0.05)         | --                                 | < 0.05<br>(< 0.05 to < 0.05)      | 31.5<br>(11.6 to 55.0)                            | 3.3<br>(-10.7 to 19.9)                              |
| Atrial fibrillation and flutter                    | 0.3<br>(0.3 to 0.4)                  | < 0.05<br>(< 0.05 to < 0.05)       | < 0.05<br>(< 0.05 to < 0.05)      | 34.1<br>(24.2 to 45.2)                            | 0.1<br>(-5.9 to 6.3)                                |
| Peripheral vascular disease                        | 1.0<br>(0.9 to 1.2)                  | 0.1<br>(0.1 to 0.1)                | < 0.05<br>(< 0.05 to < 0.05)      | 32.7<br>(22.5 to 44.2)                            | -2.9<br>(-10.2 to 5.0)                              |
| Endocarditis                                       | < 0.05<br>(< 0.05 to < 0.05)         | < 0.05<br>(< 0.05 to < 0.05)       | < 0.05<br>(< 0.05 to < 0.05)      | 29.8<br>(18.6 to 41.8)                            | 0.6<br>(-11.6 to 15.4)                              |
| Other cardiovascular and circulatory diseases      | 0.8<br>(0.7 to 1.0)                  | --                                 | < 0.05<br>(< 0.05 to 0.1)         | 23.9<br>(13.3 to 35.7)                            | 0.5<br>(-7.4 to 8.5)                                |
| <b>Chronic respiratory diseases</b>                | <b>12.9</b><br><b>(12.3 to 13.5)</b> | <b>2.9†</b><br><b>(2.7 to 3.1)</b> | <b>0.7</b><br><b>(0.5 to 0.8)</b> | <b>37.9</b><br><b>(32.5 to 43.4)</b>              | <b>13.1</b><br><b>(8.3 to 17.9)</b>                 |
| Chronic obstructive pulmonary disease              | 3.1<br>(2.9 to 3.2)                  | 0.2<br>(0.2 to 0.2)                | 0.2<br>(0.2 to 0.3)               | 32.9<br>(24.5 to 41.8)                            | 2.2<br>(-3.8 to 8.6)                                |
| Pneumoconiosis                                     | < 0.05<br>(< 0.05 to < 0.05)         | < 0.05<br>(< 0.05 to < 0.05)       | < 0.05<br>(< 0.05 to < 0.05)      | 28.8<br>(9.1 to 55.1)                             | -6.1<br>(-20.7 to 13.6)                             |
| Silicosis                                          | < 0.05<br>(< 0.05 to < 0.05)         | < 0.05<br>(< 0.05 to < 0.05)       | < 0.05<br>(< 0.05 to < 0.05)      | 30.2<br>(-2.5 to 77.4)                            | -4.9<br>(-29.8 to 29.6)                             |

| Cause                                                          | Prevalence in thousands (95% UI)     | Incidence in thousands (95% UI)                     | YLDs in thousands (95% UI)                          |                                                   |                                                     |
|----------------------------------------------------------------|--------------------------------------|-----------------------------------------------------|-----------------------------------------------------|---------------------------------------------------|-----------------------------------------------------|
|                                                                | 2016 counts                          | 2016 counts                                         | 2016 counts                                         | Percentage change in counts between 2006 and 2016 | Percentage change in age-standardised rates between |
| Asbestosis                                                     | < 0.05<br>(< 0.05 to < 0.05)         | < 0.05<br>(< 0.05 to < 0.05)                        | < 0.05<br>(< 0.05 to < 0.05)                        | 30.8<br>(16.0 to 45.2)                            | -4.3<br>(-16.0 to 7.4)                              |
| Coal workers pneumoconiosis                                    | --                                   | --                                                  | --                                                  | --                                                | --                                                  |
| Other pneumoconiosis                                           | < 0.05<br>(< 0.05 to < 0.05)         | < 0.05<br>(< 0.05 to < 0.05)                        | < 0.05<br>(< 0.05 to < 0.05)                        | 23.9<br>(-2.1 to 59.5)                            | -10.3<br>(-32.0 to 19.1)                            |
| Asthma                                                         | 10.3<br>(9.6 to 11.1)                | 2.6<br>(2.4 to 2.8)                                 | 0.4<br>(0.3 to 0.6)                                 | 40.4<br>(33.4 to 47.4)                            | 23.5<br>(17.9 to 29.2)                              |
| Interstitial lung disease and pulmonary sarcoidosis            | 0.1<br>(0.1 to 0.1)                  | < 0.05<br>(< 0.05 to < 0.05)                        | < 0.05<br>(< 0.05 to < 0.05)                        | 30.3<br>(16.5 to 45.6)                            | 0.8<br>(-9.4 to 11.6)                               |
| Other chronic respiratory diseases                             | --                                   | --                                                  | < 0.05<br>(< 0.05 to < 0.05)                        | 50.4<br>(27.4 to 77.8)                            | 33.2<br>(16.1 to 52.0)                              |
| <b>Cirrhosis and other chronic liver diseases</b>              | <b>0.5</b><br><b>(0.5 to 0.5)</b>    | <b>&lt; 0.05</b><br><b>(&lt; 0.05 to &lt; 0.05)</b> | <b>&lt; 0.05</b><br><b>(&lt; 0.05 to &lt; 0.05)</b> | <b>18.4</b><br><b>(6.1 to 33.1)</b>               | <b>0.2</b><br><b>(-8.8 to 10.3)</b>                 |
| Cirrhosis and other chronic liver diseases due to hepatitis B  | 0.2<br>(0.2 to 0.2)                  | < 0.05<br>(< 0.05 to < 0.05)                        | < 0.05<br>(< 0.05 to < 0.05)                        | 30.1<br>(9.4 to 55.7)                             | 1.0<br>(-13.2 to 17.4)                              |
| Cirrhosis and other chronic liver diseases due to hepatitis C  | 0.1<br>(0.1 to 0.1)                  | < 0.05<br>(< 0.05 to < 0.05)                        | < 0.05<br>(< 0.05 to < 0.05)                        | 30.7<br>(3.3 to 67.7)                             | 1.2<br>(-19.2 to 27.9)                              |
| Cirrhosis and other chronic liver diseases due to alcohol use  | 0.1<br>(0.1 to 0.1)                  | < 0.05<br>(< 0.05 to < 0.05)                        | < 0.05<br>(< 0.05 to < 0.05)                        | 31.8<br>(1.5 to 70.1)                             | 0.4<br>(-19.9 to 26.2)                              |
| Cirrhosis and other chronic liver diseases due to other causes | 0.2<br>(0.2 to 0.2)                  | < 0.05<br>(< 0.05 to < 0.05)                        | < 0.05<br>(< 0.05 to < 0.05)                        | 11.2<br>(-5.4 to 32.0)                            | -0.5<br>(-13.3 to 15.9)                             |
| <b>Digestive diseases</b>                                      | <b>1.9</b><br><b>(1.8 to 2.0)</b>    | <b>2.5†</b><br><b>(2.4 to 2.7)</b>                  | <b>0.1</b><br><b>(&lt; 0.05 to 0.1)</b>             | <b>31.9</b><br><b>(21.5 to 43.4)</b>              | <b>5.7</b><br><b>(-1.3 to 13.4)</b>                 |
| Peptic ulcer disease                                           | 0.6<br>(0.5 to 0.6)                  | 0.2<br>(0.2 to 0.3)                                 | < 0.05<br>(< 0.05 to < 0.05)                        | 40.0<br>(23.0 to 59.5)                            | 8.3<br>(-4.6 to 22.2)                               |
| Gastritis and duodenitis                                       | 0.9<br>(0.8 to 1.0)                  | 1.1<br>(1.0 to 1.2)                                 | < 0.05<br>(< 0.05 to < 0.05)                        | 38.5<br>(21.1 to 56.8)                            | 9.0<br>(-2.9 to 22.5)                               |
| Appendicitis                                                   | < 0.05<br>(< 0.05 to < 0.05)         | 0.5<br>(0.4 to 0.5)                                 | < 0.05<br>(< 0.05 to < 0.05)                        | 12.7<br>(-16.7 to 54.5)                           | -3.8<br>(-24.8 to 24.6)                             |
| Paralytic ileus and intestinal obstruction                     | < 0.05<br>(< 0.05 to < 0.05)         | < 0.05<br>(< 0.05 to < 0.05)                        | < 0.05<br>(< 0.05 to < 0.05)                        | 13.5<br>(9.2 to 17.9)                             | -4.6<br>(-9.5 to 0.0)                               |
| Inguinal, femoral, and abdominal hernia                        | 0.3<br>(0.3 to 0.4)                  | 0.1<br>(0.1 to 0.1)                                 | < 0.05<br>(< 0.05 to < 0.05)                        | 32.3<br>(16.4 to 53.3)                            | 6.4<br>(-3.8 to 18.5)                               |
| Inflammatory bowel disease                                     | < 0.05<br>(< 0.05 to < 0.05)         | 0.1<br>(0.1 to 0.1)                                 | < 0.05<br>(< 0.05 to < 0.05)                        | 10.8<br>(2.0 to 20.4)                             | -13.0<br>(-21.6 to -3.7)                            |
| Vascular intestinal disorders                                  | < 0.05<br>(< 0.05 to < 0.05)         | < 0.05<br>(< 0.05 to < 0.05)                        | < 0.05<br>(< 0.05 to < 0.05)                        | 22.8<br>(16.3 to 29.5)                            | 6.2<br>(2.0 to 10.3)                                |
| Gallbladder and biliary diseases                               | 0.2<br>(0.1 to 0.2)                  | 0.5<br>(0.4 to 0.6)                                 | < 0.05<br>(< 0.05 to < 0.05)                        | 22.3<br>(-1.9 to 54.2)                            | -3.1<br>(-21.0 to 20.9)                             |
| Pancreatitis                                                   | < 0.05<br>(< 0.05 to < 0.05)         | < 0.05<br>(< 0.05 to < 0.05)                        | < 0.05<br>(< 0.05 to < 0.05)                        | 17.6<br>(12.6 to 22.4)                            | -5.4<br>(-8.7 to -2.0)                              |
| Other digestive diseases                                       | --                                   | --                                                  | < 0.05<br>(< 0.05 to < 0.05)                        | 34.6<br>(22.8 to 47.5)                            | 9.8<br>(2.8 to 17.4)                                |
| <b>Neurological disorders</b>                                  | <b>34.1</b><br><b>(32.5 to 36.1)</b> | <b>16.0</b><br><b>(13.6 to 18.8)</b>                | <b>0.8</b><br><b>(0.5 to 1.1)</b>                   | <b>21.4</b><br><b>(-4.7 to 55.7)</b>              | <b>-0.2</b><br><b>(-17.7 to 21.6)</b>               |
| Alzheimer's disease and other dementias                        | 0.3<br>(0.2 to 0.4)                  | 0.1<br>(< 0.05 to 0.1)                              | < 0.05<br>(< 0.05 to 0.1)                           | 34.6<br>(28.0 to 41.5)                            | -0.6<br>(-4.9 to 3.9)                               |
| Parkinson's disease                                            | < 0.05<br>(< 0.05 to < 0.05)         | < 0.05<br>(< 0.05 to < 0.05)                        | < 0.05<br>(< 0.05 to < 0.05)                        | 42.8<br>(22.2 to 65.8)                            | 5.8<br>(-6.9 to 21.7)                               |
| Epilepsy                                                       | 0.3<br>(0.1 to 0.6)                  | < 0.05<br>(< 0.05 to 0.1)                           | 0.1<br>(< 0.05 to 0.3)                              | 15.1<br>(-72.9 to 391.5)                          | -1.6<br>(-76.8 to 323.8)                            |
| Multiple sclerosis                                             | < 0.05<br>(< 0.05 to < 0.05)         | < 0.05<br>(< 0.05 to < 0.05)                        | < 0.05<br>(< 0.05 to < 0.05)                        | 38.2<br>(33.3 to 43.6)                            | 10.9<br>(7.0 to 15.0)                               |
| Motor neuron disease                                           | < 0.05<br>(< 0.05 to < 0.05)         | < 0.05<br>(< 0.05 to < 0.05)                        | < 0.05<br>(< 0.05 to < 0.05)                        | 23.0<br>(18.1 to 27.7)                            | 2.6<br>(-0.6 to 5.8)                                |
| Migraine                                                       | 12.0<br>(11.3 to 12.7)               | 1.4<br>(1.3 to 1.5)                                 | 0.5<br>(0.3 to 0.7)                                 | 21.3<br>(16.0 to 26.7)                            | -0.6<br>(-4.5 to 3.5)                               |
| Tension-type headache                                          | 25.8<br>(22.9 to 29.3)               | 14.5<br>(12.1 to 17.3)                              | 0.1<br>(< 0.05 to 0.1)                              | 20.8<br>(14.2 to 28.2)                            | -0.9<br>(-5.4 to 4.6)                               |
| Other neurological disorders                                   | < 0.05<br>(< 0.05 to < 0.05)         | < 0.05<br>(< 0.05 to < 0.05)                        | < 0.05<br>(< 0.05 to 0.1)                           | 37.0<br>(-64.2 to 401.7)                          | 17.8<br>(-64.8 to 275.5)                            |
| <b>Mental and substance use disorders</b>                      | <b>14.2</b><br><b>(13.7 to 14.8)</b> | <b>4.7†</b><br><b>(4.4 to 5.1)</b>                  | <b>1.8</b><br><b>(1.3 to 2.4)</b>                   | <b>20.4</b><br><b>(17.6 to 23.3)</b>              | <b>-0.6</b><br><b>(-2.8 to 1.4)</b>                 |
| Schizophrenia                                                  | 0.3<br>(0.2 to 0.3)                  | < 0.05<br>(< 0.05 to < 0.05)                        | 0.2<br>(0.1 to 0.2)                                 | 25.1<br>(15.4 to 35.5)                            | -1.2<br>(-8.7 to 6.3)                               |
| Alcohol use disorders                                          | 0.8<br>(0.7 to 1.0)                  | 0.5<br>(0.4 to 0.6)                                 | 0.1<br>(0.1 to 0.1)                                 | 26.7<br>(15.5 to 38.5)                            | 1.5<br>(-6.9 to 10.5)                               |
| Drug use disorders                                             | 1.0<br>(0.8 to 1.1)                  | 0.1<br>(0.1 to 0.2)                                 | 0.2<br>(0.1 to 0.2)                                 | 23.9<br>(12.1 to 37.2)                            | -1.7<br>(-10.1 to 7.7)                              |
| Opioid use disorders                                           | 0.3<br>(0.3 to 0.4)                  | < 0.05<br>(< 0.05 to < 0.05)                        | 0.1<br>(0.1 to 0.2)                                 | 23.7<br>(9.9 to 39.9)                             | -3.0<br>(-12.9 to 8.4)                              |
| Cocaine use disorders                                          | < 0.05<br>(< 0.05 to < 0.05)         | < 0.05<br>(< 0.05 to < 0.05)                        | < 0.05<br>(< 0.05 to < 0.05)                        | 28.4<br>(20.8 to 37.1)                            | 3.1<br>(-2.7 to 9.4)                                |
| Amphetamine use disorders                                      | 0.1<br>(< 0.05 to 0.1)               | < 0.05<br>(< 0.05 to < 0.05)                        | < 0.05<br>(< 0.05 to < 0.05)                        | 28.6<br>(-6.9 to 74.0)                            | 7.5<br>(-21.8 to 43.6)                              |
| Cannabis use disorders                                         | 0.5<br>(0.4 to 0.6)                  | 0.1<br>(0.1 to 0.1)                                 | < 0.05<br>(< 0.05 to < 0.05)                        | 18.0<br>(1.9 to 36.9)                             | 0.1<br>(-12.9 to 14.8)                              |
| Other drug use disorders                                       | < 0.05<br>(< 0.05 to < 0.05)         | < 0.05<br>(< 0.05 to < 0.05)                        | < 0.05<br>(< 0.05 to < 0.05)                        | 28.8<br>(0.5 to 65.9)                             | 5.2<br>(-15.9 to 32.0)                              |
| Depressive disorders                                           | 3.2<br>(3.0 to 3.4)                  | 2.9<br>(2.6 to 3.2)                                 | 0.5<br>(0.3 to 0.7)                                 | 21.6<br>(15.9 to 27.0)                            | -1.5<br>(-5.4 to 2.4)                               |
| Major depressive disorder                                      | 1.7<br>(1.6 to 2.0)                  | 2.6<br>(2.3 to 3.0)                                 | 0.4<br>(0.2 to 0.5)                                 | 19.4<br>(12.0 to 26.6)                            | -2.1<br>(-7.3 to 3.4)                               |
| Dysthymia                                                      | 1.5<br>(1.3 to 1.7)                  | 0.2<br>(0.2 to 0.3)                                 | 0.1<br>(0.1 to 0.2)                                 | 27.4<br>(22.9 to 31.9)                            | -0.2<br>(-3.1 to 2.8)                               |
| Bipolar disorder                                               | 0.4<br>(0.4 to 0.5)                  | < 0.05<br>(< 0.05 to 0.1)                           | 0.1<br>(0.1 to 0.1)                                 | 22.2<br>(12.6 to 32.2)                            | -0.1<br>(-7.2 to 7.1)                               |
| Anxiety disorders                                              | 3.6<br>(3.2 to 4.0)                  | 0.6<br>(0.6 to 0.7)                                 | 0.3<br>(0.2 to 0.5)                                 | 19.6<br>(12.5 to 27.1)                            | -0.0<br>(-5.8 to 6.1)                               |
| Eating disorders                                               | 0.1<br>(0.1 to 0.1)                  | 0.1<br>(< 0.05 to 0.1)                              | < 0.05<br>(< 0.05 to < 0.05)                        | 16.7<br>(-1.3 to 37.7)                            | -0.9<br>(-16.1 to 16.3)                             |
| Anorexia nervosa                                               | < 0.05<br>(< 0.05 to < 0.05)         | < 0.05<br>(< 0.05 to < 0.05)                        | < 0.05<br>(< 0.05 to < 0.05)                        | 15.5<br>(-14.3 to 59.5)                           | 0.7<br>(-25.0 to 36.4)                              |
| Bulimia nervosa                                                | < 0.05<br>(< 0.05 to 0.1)            | < 0.05<br>(< 0.05 to 0.1)                           | < 0.05<br>(< 0.05 to < 0.05)                        | 17.4<br>(-5.1 to 44.6)                            | -1.7<br>(-20.6 to 20.5)                             |
| Autistic spectrum disorders                                    | 0.9<br>(0.8 to 1.0)                  | < 0.05<br>(< 0.05 to < 0.05)                        | 0.1<br>(0.1 to 0.2)                                 | 15.6<br>(9.4 to 22.1)                             | 0.5<br>(-4.4 to 5.8)                                |
| Autism                                                         | 0.2<br>(0.2 to 0.3)                  | < 0.05<br>(< 0.05 to < 0.05)                        | 0.1<br>(< 0.05 to 0.1)                              | 15.5<br>(4.4 to 27.3)                             | 0.6<br>(-8.3 to 10.4)                               |
| Asperger syndrome and other autistic spectrum disorders        | 0.7<br>(0.6 to 0.8)                  | < 0.05<br>(< 0.05 to < 0.05)                        | 0.1<br>(< 0.05 to 0.1)                              | 15.6<br>(9.5 to 22.2)                             | 0.4<br>(-4.6 to 5.2)                                |

| Cause                                                      | Prevalence in thousands (95% UI)     | Incidence in thousands (95% UI)          | YLDs in thousands (95% UI)           |                                                   |                                                     |
|------------------------------------------------------------|--------------------------------------|------------------------------------------|--------------------------------------|---------------------------------------------------|-----------------------------------------------------|
|                                                            | 2016 counts                          | 2016 counts                              | 2016 counts                          | Percentage change in counts between 2006 and 2016 | Percentage change in age-standardised rates between |
| Attention-deficit/hyperactivity disorder                   | 1.0<br>(0.9 to 1.1)                  | 0.1<br>( $< 0.05$ to 0.1)                | $< 0.05$<br>( $< 0.05$ to $< 0.05$ ) | 13.1<br>(3.5 to 23.5)                             | 0.1<br>(-8.2 to 9.0)                                |
| Conduct disorder                                           | 1.0<br>(0.8 to 1.2)                  | 0.3<br>(0.3 to 0.4)                      | 0.1<br>(0.1 to 0.2)                  | 5.6<br>(-1.3 to 13.4)                             | 0.2<br>(-6.2 to 7.7)                                |
| Idiopathic developmental intellectual disability           | 1.3<br>(0.7 to 2.0)                  | --                                       | 0.1<br>( $< 0.05$ to 0.1)            | 16.0<br>(6.0 to 27.4)                             | -0.6<br>(-8.9 to 9.0)                               |
| Other mental and substance use disorders                   | 1.8<br>(1.6 to 2.1)                  | 0.1<br>(0.1 to 0.1)                      | 0.1<br>(0.1 to 0.2)                  | 26.5<br>(19.9 to 33.7)                            | 0.2<br>(-4.4 to 5.3)                                |
| <b>Diabetes, urogenital, blood, and endocrine diseases</b> | <b>46.5</b><br><b>(45.3 to 47.8)</b> | <b>12.2†</b><br><b>(11.5 to 13.0)</b>    | <b>1.7</b><br><b>(1.2 to 2.3)</b>    | <b>28.2</b><br><b>(22.9 to 33.4)</b>              | <b>-1.5</b><br><b>(-5.2 to 2.0)</b>                 |
| Diabetes mellitus                                          | 17.6<br>(16.1 to 19.2)               | 1.6<br>(1.4 to 1.8)                      | 1.2<br>(0.8 to 1.6)                  | 29.6<br>(22.8 to 36.4)                            | -2.4<br>(-6.8 to 2.1)                               |
| Acute glomerulonephritis                                   | $< 0.05$<br>( $< 0.05$ to $< 0.05$ ) | $< 0.05$<br>( $< 0.05$ to $< 0.05$ )     | $< 0.05$<br>( $< 0.05$ to $< 0.05$ ) | 19.7<br>(13.2 to 26.6)                            | 0.4<br>(-4.6 to 4.8)                                |
| Chronic kidney disease                                     | 3.1<br>(2.8 to 3.4)                  | 0.2<br>(0.2 to 0.3)                      | 0.1<br>(0.1 to 0.2)                  | 38.1<br>(28.8 to 48.6)                            | 6.3<br>(-0.4 to 13.5)                               |
| Chronic kidney disease due to diabetes mellitus            | 1.8<br>(1.6 to 2.0)                  | 0.1<br>(0.1 to 0.2)                      | 0.1<br>(0.1 to 0.1)                  | 40.8<br>(28.6 to 54.7)                            | 7.5<br>(-1.2 to 17.1)                               |
| Chronic kidney disease due to hypertension                 | 0.5<br>(0.4 to 0.6)                  | $< 0.05$<br>( $< 0.05$ to $< 0.05$ )     | $< 0.05$<br>( $< 0.05$ to $< 0.05$ ) | 38.0<br>(22.4 to 57.8)                            | 3.5<br>(-6.7 to 16.4)                               |
| Chronic kidney disease due to glomerulonephritis           | 0.5<br>(0.4 to 0.6)                  | 0.1<br>( $< 0.05$ to 0.1)                | $< 0.05$<br>( $< 0.05$ to $< 0.05$ ) | 30.4<br>(15.5 to 48.4)                            | 6.5<br>(-3.9 to 19.5)                               |
| Chronic kidney disease due to other causes                 | 0.3<br>(0.2 to 0.4)                  | $< 0.05$<br>( $< 0.05$ to $< 0.05$ )     | $< 0.05$<br>( $< 0.05$ to $< 0.05$ ) | 32.5<br>(19.7 to 47.2)                            | 6.6<br>(-3.6 to 17.3)                               |
| Urinary diseases and male infertility                      | 1.3<br>(1.1 to 1.4)                  | 5.6†<br>(5.0 to 6.3)                     | $< 0.05$<br>( $< 0.05$ to $< 0.05$ ) | 29.0<br>(21.6 to 37.1)                            | -1.4<br>(-7.2 to 4.3)                               |
| Interstitial nephritis and urinary tract infections        | 0.1<br>(0.1 to 0.1)                  | 5.0<br>(4.4 to 5.7)                      | $< 0.05$<br>( $< 0.05$ to $< 0.05$ ) | 17.2<br>(-1.3 to 38.4)                            | -1.1<br>(-15.5 to 14.5)                             |
| Urolithiasis                                               | $< 0.05$<br>( $< 0.05$ to $< 0.05$ ) | 0.6<br>(0.5 to 0.7)                      | $< 0.05$<br>( $< 0.05$ to $< 0.05$ ) | 23.1<br>(10.4 to 38.3)                            | -3.8<br>(-15.5 to 10.4)                             |
| Benign prostatic hyperplasia                               | 0.5<br>(0.4 to 0.6)                  | 0.1<br>(0.1 to 0.1)                      | $< 0.05$<br>( $< 0.05$ to $< 0.05$ ) | 39.3<br>(27.7 to 51.1)                            | -0.3<br>(-7.4 to 7.1)                               |
| Male infertility                                           | 0.6<br>(0.4 to 0.7)                  | --                                       | $< 0.05$<br>( $< 0.05$ to $< 0.05$ ) | 20.7<br>(12.0 to 29.3)                            | 1.1<br>(-5.4 to 7.6)                                |
| Other urinary diseases                                     | --                                   | --                                       | $< 0.05$<br>( $< 0.05$ to $< 0.05$ ) | -3.1<br>(-14.5 to 10.3)                           | -18.6<br>(-27.5 to -9.0)                            |
| Gynecological diseases                                     | 11.8<br>(11.2 to 12.3)               | 4.4†<br>(4.1 to 4.8)                     | 0.2<br>(0.1 to 0.2)                  | 19.3<br>(13.7 to 25.5)                            | -3.2<br>(-7.5 to 1.4)                               |
| Uterine fibroids                                           | 1.4<br>(1.2 to 1.5)                  | 0.1<br>(0.1 to 0.2)                      | $< 0.05$<br>( $< 0.05$ to $< 0.05$ ) | 20.0<br>(6.6 to 35.9)                             | -2.1<br>(-12.6 to 10.0)                             |
| Polycystic ovarian syndrome                                | 0.1<br>(0.1 to 0.1)                  | 0.1<br>( $< 0.05$ to 0.1)                | $< 0.05$<br>( $< 0.05$ to $< 0.05$ ) | 16.1<br>(-0.8 to 34.6)                            | -0.5<br>(-14.5 to 15.2)                             |
| Female infertility                                         | 0.6<br>(0.3 to 1.1)                  | --                                       | $< 0.05$<br>( $< 0.05$ to $< 0.05$ ) | 11.2<br>(-10.7 to 34.9)                           | -9.7<br>(-27.9 to 9.9)                              |
| Endometriosis                                              | $< 0.05$<br>( $< 0.05$ to $< 0.05$ ) | 0.1<br>(0.1 to 0.2)                      | $< 0.05$<br>( $< 0.05$ to $< 0.05$ ) | 20.1<br>(-11.3 to 61.0)                           | -0.8<br>(-26.1 to 31.1)                             |
| Genital prolapse                                           | 2.6<br>(2.2 to 3.0)                  | 0.2<br>(0.2 to 0.2)                      | $< 0.05$<br>( $< 0.05$ to $< 0.05$ ) | 9.7<br>(0.4 to 19.2)                              | -19.4<br>(-26.2 to -12.2)                           |
| Premenstrual syndrome                                      | 7.0<br>(6.5 to 7.5)                  | 2.6<br>(2.4 to 2.8)                      | 0.1<br>( $< 0.05$ to 0.1)            | 19.7<br>(10.6 to 29.3)                            | -0.7<br>(-8.3 to 7.0)                               |
| Other gynecological diseases                               | 1.7<br>(1.5 to 1.9)                  | 1.3<br>(1.1 to 1.6)                      | 0.1<br>( $< 0.05$ to 0.1)            | 20.7<br>(11.7 to 30.8)                            | -2.0<br>(-8.7 to 5.8)                               |
| Hemoglobinopathies and hemolytic anaemias                  | 24.7<br>(23.4 to 26.3)               | --                                       | 0.1<br>( $< 0.05$ to 0.1)            | 13.7<br>(-2.1 to 30.8)                            | 0.7<br>(-10.9 to 12.6)                              |
| Thalassemias                                               | $< 0.05$<br>( $< 0.05$ to $< 0.05$ ) | --                                       | $< 0.05$<br>( $< 0.05$ to $< 0.05$ ) | 7.5<br>(-13.3 to 32.9)                            | 5.6<br>(-15.0 to 30.0)                              |
| Thalassaemias trait                                        | 1.8<br>(0.8 to 3.6)                  | --                                       | $< 0.05$<br>( $< 0.05$ to $< 0.05$ ) | 22.7<br>(2.9 to 49.0)                             | 10.4<br>(-4.8 to 32.5)                              |
| Sickle cell disorders                                      | $< 0.05$<br>( $< 0.05$ to $< 0.05$ ) | --                                       | $< 0.05$<br>( $< 0.05$ to $< 0.05$ ) | 3.4<br>(-17.7 to 16.6)                            | -2.3<br>(-22.3 to 9.3)                              |
| Sickle cell trait                                          | 0.1<br>(0.1 to 0.2)                  | --                                       | $< 0.05$<br>( $< 0.05$ to $< 0.05$ ) | 41.6<br>(16.6 to 71.3)                            | 22.5<br>(5.1 to 41.5)                               |
| G6PD deficiency                                            | 5.7<br>(5.0 to 6.5)                  | --                                       | $< 0.05$<br>( $< 0.05$ to $< 0.05$ ) | 17.9<br>(-0.7 to 40.3)                            | 3.0<br>(-10.5 to 18.2)                              |
| G6PD trait                                                 | 16.6<br>(16.1 to 17.2)               | --                                       | $< 0.05$<br>( $< 0.05$ to $< 0.05$ ) | 19.6<br>(-0.1 to 43.4)                            | 5.4<br>(-10.3 to 22.8)                              |
| Other hemoglobinopathies and hemolytic anaemias            | 1.4<br>(1.3 to 1.6)                  | --                                       | $< 0.05$<br>( $< 0.05$ to $< 0.05$ ) | 7.4<br>(-8.4 to 25.1)                             | -5.6<br>(-16.4 to 7.2)                              |
| Endocrine, metabolic, blood, and immune disorders          | 2.6<br>(2.4 to 2.8)                  | 0.3<br>(0.3 to 0.3)                      | 0.1<br>(0.1 to 0.1)                  | 19.0<br>(10.4 to 27.6)                            | -2.7<br>(-8.0 to 2.3)                               |
| <b>Musculoskeletal disorders</b>                           | <b>15.3</b><br><b>(14.6 to 16.0)</b> | <b>7.5</b><br><b>(6.8 to 8.3)</b>        | <b>1.6</b><br><b>(1.2 to 2.1)</b>    | <b>26.3</b><br><b>(22.7 to 29.8)</b>              | <b>-1.2</b><br><b>(-3.5 to 1.2)</b>                 |
| Rheumatoid arthritis                                       | 0.1<br>(0.1 to 0.2)                  | $< 0.05$<br>( $< 0.05$ to $< 0.05$ )     | $< 0.05$<br>( $< 0.05$ to $< 0.05$ ) | 32.3<br>(18.3 to 47.0)                            | 3.5<br>(-5.8 to 13.8)                               |
| Osteoarthritis                                             | 3.7<br>(3.5 to 4.0)                  | 0.2<br>(0.2 to 0.2)                      | 0.2<br>(0.2 to 0.3)                  | 33.4<br>(28.1 to 39.2)                            | -0.5<br>(-4.2 to 3.4)                               |
| Low back and neck pain                                     | 8.8<br>(8.1 to 9.4)                  | 3.6<br>(3.2 to 4.1)                      | 1.0<br>(0.7 to 1.3)                  | 25.8<br>(21.5 to 30.5)                            | -0.9<br>(-3.9 to 2.3)                               |
| Low back pain                                              | 6.0<br>(5.3 to 6.8)                  | 2.9<br>(2.5 to 3.3)                      | 0.7<br>(0.5 to 0.9)                  | 24.9<br>(18.9 to 31.7)                            | -1.3<br>(-5.7 to 3.4)                               |
| Neck pain                                                  | 3.3<br>(2.9 to 3.8)                  | 0.8<br>(0.7 to 0.9)                      | 0.3<br>(0.2 to 0.5)                  | 27.7<br>(23.9 to 32.1)                            | 0.0<br>(-2.0 to 2.2)                                |
| Gout                                                       | 0.3<br>(0.3 to 0.4)                  | 0.1<br>(0.1 to 0.1)                      | $< 0.05$<br>( $< 0.05$ to $< 0.05$ ) | 32.5<br>(13.5 to 54.0)                            | 0.4<br>(-11.7 to 14.2)                              |
| Other musculoskeletal disorders                            | 4.2<br>(3.5 to 4.9)                  | 3.6<br>(3.0 to 4.3)                      | 0.4<br>(0.2 to 0.5)                  | 22.6<br>(13.5 to 32.1)                            | -3.1<br>(-9.6 to 3.9)                               |
| <b>Other non-communicable diseases</b>                     | <b>81.6</b><br><b>(79.9 to 83.1)</b> | <b>238.1†</b><br><b>(220.5 to 256.2)</b> | <b>2.1</b><br><b>(1.4 to 2.9)</b>    | <b>17.9</b><br><b>(16.2 to 19.5)</b>              | <b>-1.3</b><br><b>(-2.3 to -0.3)</b>                |
| Congenital anomalies                                       | 1.4<br>(1.2 to 1.6)                  | --                                       | 0.1<br>(0.1 to 0.2)                  | 14.0<br>(5.9 to 22.8)                             | -0.2<br>(-7.1 to 7.3)                               |
| Neural tube defects                                        | 0.1<br>( $< 0.05$ to 0.1)            | --                                       | $< 0.05$<br>( $< 0.05$ to $< 0.05$ ) | 20.9<br>(3.4 to 39.3)                             | 4.3<br>(-9.8 to 19.1)                               |
| Congenital heart anomalies                                 | 0.4<br>(0.3 to 0.4)                  | --                                       | $< 0.05$<br>( $< 0.05$ to $< 0.05$ ) | 18.1<br>(4.8 to 34.9)                             | 8.8<br>(-2.6 to 23.9)                               |
| Orofacial clefts                                           | 0.1<br>(0.1 to 0.1)                  | --                                       | $< 0.05$<br>( $< 0.05$ to $< 0.05$ ) | 16.0<br>(3.6 to 30.2)                             | 1.0<br>(-9.6 to 13.2)                               |
| Down's syndrome                                            | $< 0.05$<br>( $< 0.05$ to $< 0.05$ ) | --                                       | $< 0.05$<br>( $< 0.05$ to $< 0.05$ ) | 13.0<br>(4.9 to 21.8)                             | 0.1<br>(-7.3 to 8.0)                                |
| Turner syndrome                                            | $< 0.05$<br>( $< 0.05$ to $< 0.05$ ) | --                                       | $< 0.05$<br>( $< 0.05$ to $< 0.05$ ) | 22.0<br>(-19.7 to 87.5)                           | 7.9<br>(-26.0 to 62.6)                              |
| Klinefelter syndrome                                       | $< 0.05$<br>( $< 0.05$ to $< 0.05$ ) | --                                       | $< 0.05$<br>( $< 0.05$ to $< 0.05$ ) | 19.0<br>(-13.2 to 64.4)                           | 1.9<br>(-25.1 to 38.4)                              |



| Cause                                         | Prevalence in thousands (95% UI)     | Incidence in thousands (95% UI)    | YLDs in thousands (95% UI)        |                                                   |                                                     |
|-----------------------------------------------|--------------------------------------|------------------------------------|-----------------------------------|---------------------------------------------------|-----------------------------------------------------|
|                                               | 2016 counts                          | 2016 counts                        | 2016 counts                       | Percentage change in counts between 2006 and 2016 | Percentage change in age-standardised rates between |
| Other chromosomal abnormalities               | < 0.05<br>(< 0.05 to < 0.05)         | --                                 | < 0.05<br>(< 0.05 to < 0.05)      | 3.5<br>(-18.4 to 30.9)                            | 0.4<br>(-20.6 to 26.6)                              |
| Congenital musculoskeletal and limb anomalies | 0.1<br>(0.1 to 0.1)                  | --                                 | < 0.05<br>(< 0.05 to < 0.05)      | 27.1<br>(13.5 to 43.0)                            | 10.4<br>(-0.3 to 23.1)                              |
| Urogenital congenital anomalies               | 0.1<br>(0.1 to 0.1)                  | --                                 | < 0.05<br>(< 0.05 to < 0.05)      | 7.7<br>(-1.9 to 17.4)                             | -0.0<br>(-8.7 to 8.5)                               |
| Digestive congenital anomalies                | 0.2<br>(0.2 to 0.2)                  | --                                 | < 0.05<br>(< 0.05 to < 0.05)      | 16.6<br>(-0.2 to 35.9)                            | 1.3<br>(-11.7 to 17.4)                              |
| Other congenital anomalies                    | 0.6<br>(0.4 to 0.8)                  | --                                 | 0.1<br>(0.1 to 0.1)               | 10.4<br>(-1.7 to 23.7)                            | -4.3<br>(-15.1 to 7.0)                              |
| Skin and subcutaneous diseases                | 34.4<br>(33.5 to 35.4)               | 75.0<br>(71.2 to 79.4)             | 0.9<br>(0.6 to 1.3)               | 13.0<br>(10.8 to 15.3)                            | -0.1<br>(-1.8 to 1.7)                               |
| Dermatitis                                    | 5.2<br>(4.8 to 5.7)                  | 6.0<br>(5.6 to 6.5)                | 0.2<br>(0.1 to 0.3)               | 11.0<br>(6.8 to 15.7)                             | 0.0<br>(-3.5 to 4.0)                                |
| Psoriasis                                     | 0.5<br>(0.5 to 0.5)                  | 0.1<br>(0.1 to 0.1)                | < 0.05<br>(< 0.05 to 0.1)         | 28.1<br>(13.9 to 44.7)                            | 6.3<br>(-4.5 to 18.0)                               |
| Cellulitis                                    | < 0.05<br>(< 0.05 to < 0.05)         | 0.6<br>(0.5 to 0.6)                | < 0.05<br>(< 0.05 to < 0.05)      | 18.1<br>(3.7 to 34.5)                             | 0.6<br>(-11.7 to 14.6)                              |
| Pyoderma                                      | 0.1<br>(0.1 to 0.1)                  | 3.0<br>(2.9 to 3.1)                | < 0.05<br>(< 0.05 to < 0.05)      | 21.2<br>(9.6 to 34.1)                             | -0.6<br>(-8.1 to 7.1)                               |
| Scabies                                       | 5.4<br>(4.7 to 6.2)                  | 17.0<br>(14.7 to 19.7)             | 0.1<br>(0.1 to 0.2)               | 12.2<br>(8.0 to 16.5)                             | -3.0<br>(-6.0 to 0.1)                               |
| Fungal skin diseases                          | 8.4<br>(7.6 to 9.4)                  | 28.2<br>(25.4 to 31.6)             | < 0.05<br>(< 0.05 to 0.1)         | 17.2<br>(15.2 to 19.4)                            | 0.0<br>(-1.0 to 1.1)                                |
| Viral skin diseases                           | 3.3<br>(3.1 to 3.5)                  | 4.7<br>(4.4 to 5.0)                | 0.1<br>(0.1 to 0.1)               | 13.1<br>(9.0 to 17.2)                             | -0.1<br>(-3.4 to 3.1)                               |
| Acne vulgaris                                 | 10.1<br>(8.9 to 11.4)                | 7.0<br>(5.7 to 8.9)                | 0.3<br>(0.2 to 0.4)               | 11.5<br>(6.2 to 16.9)                             | 0.6<br>(-3.9 to 5.3)                                |
| Alopecia areata                               | 0.2<br>(0.2 to 0.2)                  | 0.4<br>(0.4 to 0.4)                | < 0.05<br>(< 0.05 to < 0.05)      | 22.1<br>(8.4 to 38.1)                             | 0.1<br>(-10.0 to 11.8)                              |
| Pruritus                                      | 0.8<br>(0.7 to 0.9)                  | 0.7<br>(0.6 to 0.8)                | < 0.05<br>(< 0.05 to < 0.05)      | 20.0<br>(13.0 to 27.8)                            | -0.3<br>(-5.5 to 5.4)                               |
| Urticaria                                     | 1.1<br>(0.9 to 1.2)                  | 1.9<br>(1.7 to 2.2)                | 0.1<br>(< 0.05 to 0.1)            | 10.4<br>(3.6 to 17.9)                             | -0.1<br>(-5.7 to 5.9)                               |
| Decubitus ulcer                               | < 0.05<br>(< 0.05 to < 0.05)         | 0.1<br>(< 0.05 to 0.1)             | < 0.05<br>(< 0.05 to < 0.05)      | 26.0<br>(13.7 to 39.2)                            | -3.1<br>(-14.3 to 10.7)                             |
| Other skin and subcutaneous diseases          | 4.9<br>(4.7 to 5.0)                  | 5.4<br>(5.3 to 5.6)                | < 0.05<br>(< 0.05 to < 0.05)      | 20.6<br>(16.4 to 24.5)                            | -1.4<br>(-4.1 to 1.2)                               |
| Sense organ diseases                          | 22.6<br>(22.1 to 23.2)               | 10.1†<br>(9.4 to 10.8)             | 0.9<br>(0.6 to 1.2)               | 22.7<br>(19.5 to 25.8)                            | -2.4<br>(-4.1 to -0.7)                              |
| Glaucoma                                      | < 0.05<br>(< 0.05 to < 0.05)         | --                                 | < 0.05<br>(< 0.05 to < 0.05)      | 39.6<br>(20.6 to 63.7)                            | 1.2<br>(-11.6 to 16.7)                              |
| Cataract                                      | 0.5<br>(0.5 to 0.6)                  | --                                 | < 0.05<br>(< 0.05 to < 0.05)      | 28.0<br>(19.7 to 36.7)                            | -3.7<br>(-9.9 to 3.1)                               |
| Macular degeneration                          | < 0.05<br>(< 0.05 to < 0.05)         | --                                 | < 0.05<br>(< 0.05 to < 0.05)      | 42.2<br>(22.4 to 64.8)                            | 4.0<br>(-9.3 to 18.8)                               |
| Refraction and accommodation disorders        | 12.8<br>(12.3 to 13.4)               | --                                 | 0.2<br>(0.1 to 0.4)               | 20.4<br>(16.8 to 24.1)                            | -3.2<br>(-5.8 to -0.6)                              |
| Age-related and other hearing loss            | 13.0<br>(12.2 to 13.8)               | --                                 | 0.5<br>(0.4 to 0.7)               | 22.4<br>(17.7 to 27.2)                            | -2.5<br>(-4.8 to -0.1)                              |
| Other vision loss                             | 0.3<br>(0.3 to 0.3)                  | --                                 | < 0.05<br>(< 0.05 to < 0.05)      | 29.9<br>(18.7 to 41.8)                            | 0.5<br>(-6.5 to 8.6)                                |
| Other sense organ diseases                    | 2.3<br>(2.2 to 2.5)                  | 10.1<br>(9.4 to 10.8)              | 0.1<br>(< 0.05 to 0.1)            | 27.4<br>(21.4 to 33.9)                            | 0.9<br>(-2.7 to 4.9)                                |
| Oral disorders                                | 59.5<br>(56.7 to 61.7)               | 153.0†<br>(137.0 to 170.8)         | 0.1<br>(0.1 to 0.2)               | 26.0<br>(23.2 to 29.2)                            | 0.3<br>(-1.7 to 2.3)                                |
| Caries of deciduous teeth                     | 7.3<br>(5.2 to 9.2)                  | 33.2<br>(20.9 to 45.8)             | < 0.05<br>(< 0.05 to < 0.05)      | 7.5<br>(-6.3 to 21.7)                             | 0.1<br>(-12.6 to 13.3)                              |
| Caries of permanent teeth                     | 50.4<br>(47.3 to 53.3)               | 119.5<br>(109.1 to 130.4)          | < 0.05<br>(< 0.05 to 0.1)         | 21.8<br>(17.9 to 25.9)                            | 2.9<br>(-0.1 to 5.8)                                |
| Periodontal disease                           | 1.3<br>(1.0 to 1.5)                  | 0.1<br>(0.1 to 0.2)                | < 0.05<br>(< 0.05 to < 0.05)      | 32.4<br>(26.0 to 38.5)                            | 0.7<br>(-3.2 to 4.7)                                |
| Edentulism and severe tooth loss              | 1.8<br>(1.5 to 2.0)                  | 0.1<br>(0.1 to 0.2)                | < 0.05<br>(< 0.05 to 0.1)         | 33.4<br>(27.9 to 39.4)                            | -0.3<br>(-3.7 to 3.4)                               |
| Other oral disorders                          | 1.9<br>(1.8 to 2.0)                  | --                                 | 0.1<br>(< 0.05 to 0.1)            | 22.0<br>(17.3 to 26.6)                            | -0.1<br>(-3.5 to 3.1)                               |
| <b>Injuries</b>                               | <b>11.4</b><br><b>(10.8 to 12.0)</b> | <b>6.5†</b><br><b>(6.2 to 6.9)</b> | <b>0.5</b><br><b>(0.3 to 0.7)</b> | <b>36.5</b><br><b>(33.7 to 39.3)</b>              | <b>11.6</b><br><b>(9.6 to 13.6)</b>                 |
| <b>Transport injuries</b>                     | <b>1.9</b><br><b>(1.8 to 2.1)</b>    | <b>0.7</b><br><b>(0.7 to 0.8)</b>  | <b>0.1</b><br><b>(0.1 to 0.2)</b> | <b>44.9</b><br><b>(40.9 to 48.8)</b>              | <b>18.0</b><br><b>(15.3 to 20.6)</b>                |
| Road injuries                                 | 1.1<br>(1.0 to 1.2)                  | 0.5<br>(0.4 to 0.6)                | 0.1<br>(< 0.05 to 0.1)            | 69.0<br>(64.9 to 73.2)                            | 34.6<br>(31.7 to 37.3)                              |
| Pedestrian road injuries                      | 0.1<br>(0.1 to 0.1)                  | < 0.05<br>(< 0.05 to 0.1)          | < 0.05<br>(< 0.05 to < 0.05)      | 103.2<br>(97.4 to 109.1)                          | 60.6<br>(56.5 to 64.7)                              |
| Cyclist road injuries                         | 0.2<br>(0.1 to 0.2)                  | 0.1<br>(0.1 to 0.1)                | < 0.05<br>(< 0.05 to < 0.05)      | 71.0<br>(66.5 to 75.5)                            | 36.6<br>(33.5 to 39.6)                              |
| Motorcyclist road injuries                    | 0.4<br>(0.3 to 0.5)                  | 0.1<br>(0.1 to 0.1)                | < 0.05<br>(< 0.05 to < 0.05)      | 65.1<br>(60.9 to 69.3)                            | 30.9<br>(28.0 to 33.6)                              |
| Motor vehicle road injuries                   | 0.3<br>(0.2 to 0.3)                  | 0.1<br>(0.1 to 0.2)                | < 0.05<br>(< 0.05 to < 0.05)      | 59.9<br>(55.8 to 64.2)                            | 27.8<br>(24.9 to 30.6)                              |
| Other road injuries                           | 0.2<br>(0.1 to 0.2)                  | 0.1<br>(0.1 to 0.1)                | < 0.05<br>(< 0.05 to < 0.05)      | 71.2<br>(66.9 to 75.2)                            | 36.6<br>(33.6 to 39.5)                              |
| Other transport injuries                      | 0.8<br>(0.7 to 1.0)                  | 0.2<br>(0.2 to 0.3)                | 0.1<br>(< 0.05 to 0.1)            | 22.5<br>(18.8 to 26.5)                            | 0.9<br>(-1.9 to 3.6)                                |
| <b>Unintentional injuries</b>                 | <b>7.5</b><br><b>(7.0 to 8.1)</b>    | <b>4.7</b><br><b>(4.4 to 5.0)</b>  | <b>0.3</b><br><b>(0.2 to 0.4)</b> | <b>38.2</b><br><b>(35.2 to 41.4)</b>              | <b>12.8</b><br><b>(10.7 to 15.0)</b>                |
| Falls                                         | 1.8<br>(1.5 to 2.0)                  | 0.9<br>(0.7 to 1.1)                | 0.1<br>(< 0.05 to 0.1)            | 63.9<br>(59.7 to 68.3)                            | 32.0<br>(29.2 to 35.0)                              |
| Drowning                                      | < 0.05<br>(< 0.05 to < 0.05)         | < 0.05<br>(< 0.05 to < 0.05)       | < 0.05<br>(< 0.05 to < 0.05)      | 36.5<br>(31.8 to 41.1)                            | 9.3<br>(6.0 to 12.4)                                |
| Fire, heat, and hot substances                | 0.8<br>(0.7 to 1.0)                  | 0.1<br>(0.1 to 0.1)                | < 0.05<br>(< 0.05 to < 0.05)      | 43.0<br>(34.8 to 50.6)                            | 15.8<br>(10.1 to 21.2)                              |
| Poisonings                                    | < 0.05<br>(< 0.05 to < 0.05)         | < 0.05<br>(< 0.05 to 0.1)          | < 0.05<br>(< 0.05 to < 0.05)      | 67.2<br>(54.0 to 81.9)                            | 36.1<br>(26.9 to 45.9)                              |
| Exposure to mechanical forces                 | 1.2<br>(1.0 to 1.4)                  | 0.6<br>(0.5 to 0.7)                | < 0.05<br>(< 0.05 to < 0.05)      | 56.1<br>(52.0 to 60.2)                            | 25.6<br>(22.7 to 28.2)                              |
| Unintentional firearm injuries                | 0.1<br>(< 0.05 to 0.1)               | < 0.05<br>(< 0.05 to < 0.05)       | < 0.05<br>(< 0.05 to < 0.05)      | 42.4<br>(38.4 to 46.5)                            | 14.3<br>(11.5 to 17.2)                              |
| Unintentional suffocation                     | 0.1<br>(0.1 to 0.1)                  | < 0.05<br>(< 0.05 to < 0.05)       | < 0.05<br>(< 0.05 to < 0.05)      | 32.0<br>(28.1 to 35.9)                            | 8.7<br>(5.9 to 11.3)                                |
| Other exposure to mechanical forces           | 1.0<br>(0.8 to 1.3)                  | 0.5<br>(0.4 to 0.6)                | < 0.05<br>(< 0.05 to < 0.05)      | 61.2<br>(56.8 to 65.6)                            | 29.1<br>(26.0 to 31.9)                              |



| Cause                                                                               | Prevalence in thousands (95% UI)  | Incidence in thousands (95% UI)                      | YLDs in thousands (95% UI)                          |                                                   |                                                     |
|-------------------------------------------------------------------------------------|-----------------------------------|------------------------------------------------------|-----------------------------------------------------|---------------------------------------------------|-----------------------------------------------------|
|                                                                                     | 2016 counts                       | 2016 counts                                          | 2016 counts                                         | Percentage change in counts between 2006 and 2016 | Percentage change in age-standardised rates between |
| Adverse effects of medical treatment                                                | 0.1<br>(0.1 to 0.1)               | 1.0<br>(0.9 to 1.1)                                  | < 0.05<br>(< 0.05 to < 0.05)                        | 4.0<br>(-0.7 to 9.4)                              | -7.2<br>(-10.5 to -3.2)                             |
| Animal contact                                                                      | 0.6<br>(0.5 to 0.7)               | 0.8<br>(0.7 to 1.0)                                  | < 0.05<br>(< 0.05 to < 0.05)                        | 34.1<br>(26.6 to 42.2)                            | 11.0<br>(5.8 to 16.3)                               |
| Venomous animal contact                                                             | 0.2<br>(0.2 to 0.2)               | 0.3<br>(0.2 to 0.4)                                  | < 0.05<br>(< 0.05 to < 0.05)                        | 38.1<br>(26.4 to 50.5)                            | 15.4<br>(7.3 to 24.1)                               |
| Non-venomous animal contact                                                         | 0.4<br>(0.3 to 0.5)               | 0.5<br>(0.4 to 0.6)                                  | < 0.05<br>(< 0.05 to < 0.05)                        | 27.0<br>(21.9 to 32.1)                            | 3.9<br>(0.2 to 7.2)                                 |
| Foreign body                                                                        | 0.5<br>(0.4 to 0.6)               | 0.3<br>(0.3 to 0.4)                                  | < 0.05<br>(< 0.05 to < 0.05)                        | 20.0<br>(15.9 to 24.3)                            | 0.3<br>(-2.3 to 3.1)                                |
| Pulmonary aspiration and foreign body in airway                                     | 0.3<br>(0.2 to 0.4)               | 0.1<br>(0.1 to 0.2)                                  | < 0.05<br>(< 0.05 to < 0.05)                        | 21.1<br>(16.9 to 25.4)                            | 1.5<br>(-1.2 to 4.4)                                |
| Foreign body in eyes                                                                | < 0.05<br>(< 0.05 to < 0.05)      | 0.1<br>(0.1 to 0.1)                                  | < 0.05<br>(< 0.05 to < 0.05)                        | 25.1<br>(20.5 to 30.2)                            | 3.1<br>(-0.2 to 6.6)                                |
| Foreign body in other body part                                                     | 0.2<br>(0.2 to 0.2)               | 0.1<br>(0.1 to 0.1)                                  | < 0.05<br>(< 0.05 to < 0.05)                        | 17.2<br>(12.3 to 22.1)                            | -2.6<br>(-5.7 to 0.7)                               |
| Environmental heat and cold exposure                                                | 1.2<br>(1.0 to 1.4)               | 0.4<br>(0.3 to 0.5)                                  | < 0.05<br>(< 0.05 to 0.1)                           | 20.6<br>(17.7 to 23.6)                            | -2.2<br>(-4.4 to -0.3)                              |
| Other unintentional injuries                                                        | 1.4<br>(1.1 to 1.7)               | 0.6<br>(0.5 to 0.7)                                  | < 0.05<br>(< 0.05 to 0.1)                           | 33.1<br>(30.4 to 36.0)                            | 8.2<br>(6.3 to 10.2)                                |
| <b>Self-harm and interpersonal violence</b>                                         | <b>5.2</b><br><b>(4.7 to 5.8)</b> | <b>1.1†</b><br><b>(0.9 to 1.3)</b>                   | <b>0.1</b><br><b>(0.1 to 0.1)</b>                   | <b>28.6</b><br><b>(25.4 to 31.8)</b>              | <b>4.7</b><br><b>(2.7 to 6.7)</b>                   |
| Self-harm                                                                           | 0.1<br>(0.1 to 0.2)               | 0.1<br>(0.1 to 0.1)                                  | < 0.05<br>(< 0.05 to < 0.05)                        | 21.9<br>(17.7 to 26.2)                            | -3.8<br>(-6.7 to -1.1)                              |
| Self-harm by firearm                                                                | < 0.05<br>(< 0.05 to < 0.05)      | < 0.05<br>(< 0.05 to < 0.05)                         | < 0.05<br>(< 0.05 to < 0.05)                        | 39.1<br>(32.7 to 45.3)                            | 12.9<br>(8.6 to 17.1)                               |
| Self-harm by other specified means                                                  | 0.1<br>(0.1 to 0.2)               | 0.1<br>(0.1 to 0.1)                                  | < 0.05<br>(< 0.05 to < 0.05)                        | 21.5<br>(17.3 to 25.7)                            | -4.2<br>(-7.1 to -1.4)                              |
| Interpersonal violence                                                              | 5.1<br>(4.6 to 5.6)               | 1.0†<br>(0.8 to 1.2)                                 | 0.1<br>(0.1 to 0.1)                                 | 29.1<br>(25.9 to 32.5)                            | 5.5<br>(3.4 to 7.7)                                 |
| Assault by firearm                                                                  | < 0.05<br>(< 0.05 to < 0.05)      | < 0.05<br>(< 0.05 to < 0.05)                         | < 0.05<br>(< 0.05 to < 0.05)                        | 40.9<br>(36.5 to 45.4)                            | 11.8<br>(8.9 to 14.8)                               |
| Assault by sharp object                                                             | 0.5<br>(0.4 to 0.6)               | 0.2<br>(0.2 to 0.3)                                  | < 0.05<br>(< 0.05 to < 0.05)                        | 21.1<br>(17.3 to 24.8)                            | -4.7<br>(-7.4 to -2.1)                              |
| Sexual violence                                                                     | 3.5<br>(3.0 to 4.0)               | --                                                   | < 0.05<br>(< 0.05 to < 0.05)                        | 8.8<br>(4.5 to 13.7)                              | -8.0<br>(-11.3 to -4.4)                             |
| Assault by other means                                                              | 1.1<br>(0.9 to 1.4)               | 0.8<br>(0.6 to 0.9)                                  | < 0.05<br>(< 0.05 to 0.1)                           | 50.5<br>(46.8 to 54.1)                            | 18.1<br>(15.5 to 20.5)                              |
| <b>Forces of nature, conflict and terrorism, and executions and police conflict</b> | <b>0.2</b><br><b>(0.1 to 0.3)</b> | <b>&lt; 0.05†</b><br><b>(&lt; 0.05 to &lt; 0.05)</b> | <b>&lt; 0.05</b><br><b>(&lt; 0.05 to &lt; 0.05)</b> | <b>-18.0</b><br><b>(-22.1 to -14.6)</b>           | <b>-24.9</b><br><b>(-28.3 to -22.2)</b>             |
| Exposure to forces of nature                                                        | --                                | --                                                   | --                                                  | --                                                | --                                                  |
| Conflict and terrorism                                                              | 0.2<br>(0.1 to 0.3)               | --                                                   | < 0.05<br>(< 0.05 to < 0.05)                        | -19.6<br>(-23.8 to -16.0)                         | -26.1<br>(-29.6 to -23.3)                           |
| Executions and police conflict                                                      | < 0.05<br>(< 0.05 to < 0.05)      | < 0.05<br>(< 0.05 to < 0.05)                         | < 0.05<br>(< 0.05 to < 0.05)                        | 36.0<br>(27.7 to 42.2)                            | 15.2<br>(9.9 to 19.7)                               |
| <b>Impairments</b>                                                                  | --                                | --                                                   | --                                                  | --                                                | --                                                  |
| Anaemia                                                                             | 39.3<br>(35.5 to 43.4)            | --                                                   | 1.2<br>(0.8 to 1.7)                                 | 11.5<br>(-0.8 to 24.6)                            | -3.6<br>(-12.3 to 5.7)                              |
| Developmental intellectual disability                                               | 2.7<br>(2.1 to 3.4)               | --                                                   | 0.3<br>(0.2 to 0.3)                                 | 16.2<br>(10.2 to 22.4)                            | 1.0<br>(-3.9 to 6.3)                                |
| Epilepsy                                                                            | 0.6<br>(0.3 to 0.8)               | --                                                   | 0.2<br>(0.1 to 0.4)                                 | 16.3<br>(-43.4 to 148.1)                          | 0.7<br>(-53.0 to 121.3)                             |
| Guillain-Barre syndrome                                                             | < 0.05<br>(< 0.05 to < 0.05)      | --                                                   | < 0.05<br>(< 0.05 to < 0.05)                        | 18.5<br>(15.1 to 22.5)                            | 0.0<br>(-0.0 to 0.1)                                |
| Hearing loss                                                                        | 15.2<br>(14.5 to 16.1)            | --                                                   | 0.7<br>(0.5 to 0.9)                                 | 19.4<br>(15.8 to 22.5)                            | -2.9<br>(-4.7 to -1.1)                              |
| Heart failure                                                                       | 0.3<br>(0.3 to 0.4)               | --                                                   | < 0.05<br>(< 0.05 to < 0.05)                        | 35.9<br>(26.1 to 46.4)                            | 2.4<br>(-5.1 to 10.0)                               |
| Infertility                                                                         | 2.4<br>(1.9 to 3.1)               | --                                                   | < 0.05<br>(< 0.05 to < 0.05)                        | 15.3<br>(8.2 to 22.5)                             | -2.1<br>(-7.4 to 3.3)                               |
| Pelvic inflammatory disease                                                         | 0.1<br>(0.1 to 0.1)               | --                                                   | < 0.05<br>(< 0.05 to < 0.05)                        | 15.4<br>(0.2 to 33.8)                             | -5.7<br>(-17.3 to 8.3)                              |
| Vision loss                                                                         | 14.2<br>(13.7 to 14.9)            | --                                                   | 0.3<br>(0.2 to 0.5)                                 | 21.4<br>(18.2 to 25.0)                            | -2.6<br>(-4.7 to -0.4)                              |

We did not calculate incidence for the nine impairments, certain NTDs, and causes with only birth prevalence. Blank cells mean that no estimate is available.

† Incidence for aggregate causes represents the sum of the incidence of the causes below the aggregate.

‡ Incidence estimates for stroke represent first-ever stroke only.

^ Incidence of HIV/AIDS represents new infections of HIV only and does not include new infections of Tuberculosis in HIV positive cases.

SR Table 14: Prevalence, incidence, and YLDs for 2016, percentage change of YLD counts and percentage change of age-standardised YLD rates between 2006 and 2016 by cause and impairments, for all ages, Kuwait.

| Cause                                                                                | Prevalence in thousands (95% UI)       | Incidence in thousands (95% UI)            | YLDs in thousands (95% UI)          |                                                   |                                                     |
|--------------------------------------------------------------------------------------|----------------------------------------|--------------------------------------------|-------------------------------------|---------------------------------------------------|-----------------------------------------------------|
|                                                                                      | 2016 counts                            | 2016 counts                                | 2016 counts                         | Percentage change in counts between 2006 and 2016 | Percentage change in age-standardised rates between |
| <b>All causes</b>                                                                    | <b>3,738.1</b><br>(3,714.4 to 3,760.3) | <b>23,193.5†</b><br>(21,814.9 to 24,832.5) | <b>419.0</b><br>(308.5 to 544.6)    | <b>74.2</b><br>(71.3 to 77.2)                     | <b>-1.0</b><br>(-2.5 to 0.5)                        |
| <b>Communicable, maternal, neonatal, and nutritional disorders</b>                   | <b>2,318.7</b><br>(2,126.7 to 2,533.0) | <b>13,163.3†</b><br>(11,938.8 to 14,586.0) | <b>34.0</b><br>(24.2 to 46.8)       | <b>51.3</b><br>(44.8 to 60.5)                     | <b>-6.0</b><br>(-10.1 to -0.2)                      |
| <b>HIV/AIDS and tuberculosis</b>                                                     | <b>1,500.2</b><br>(1,077.3 to 1,926.5) | <b>1.0†</b><br>(0.6 to 1.5)                | <b>0.1</b><br>(0.1 to 0.3)          | <b>12.9</b><br>(-21.6 to 58.1)                    | <b>-34.1</b><br>(-49.3 to -14.0)                    |
| Tuberculosis                                                                         | 1,278.5<br>(846.4 to 1,741.8)          | 1.0†<br>(0.6 to 1.4)                       | 0.1<br>(0.1 to 0.2)                 | 10.0<br>(-26.3 to 58.1)                           | -35.0<br>(-51.0 to -13.8)                           |
| Drug-susceptible tuberculosis                                                        | 0.5<br>(0.3 to 0.7)                    | 1.0<br>(0.6 to 1.4)                        | 0.1<br>(0.1 to 0.2)                 | 9.9<br>(-27.0 to 59.0)                            | -35.0<br>(-51.5 to -13.2)                           |
| Multidrug-resistant tuberculosis without extensive drug resistance                   | < 0.05<br>(< 0.05 to < 0.05)           | < 0.05<br>(< 0.05 to < 0.05)               | < 0.05<br>(< 0.05 to < 0.05)        | 12.9<br>(-70.5 to 336.9)                          | -33.5<br>(-82.5 to 161.9)                           |
| Extensively drug-resistant tuberculosis                                              | < 0.05<br>(< 0.05 to < 0.05)           | < 0.05<br>(< 0.05 to < 0.05)               | < 0.05<br>(< 0.05 to < 0.05)        | 156.4<br>(-33.1 to 892.2)                         | 51.0<br>(-60.2 to 494.3)                            |
| Latent tuberculosis infection                                                        | 1,278.0<br>(846.1 to 1,741.3)          | --                                         | --                                  | --                                                | --                                                  |
| HIV/AIDS                                                                             | 0.1<br>(< 0.05 to 0.1)                 | < 0.05^<br>(< 0.05 to < 0.05)              | < 0.05<br>(< 0.05 to < 0.05)        | 57.3<br>(40.0 to 80.5)                            | -22.7<br>(-30.9 to -4.1)                            |
| Drug-susceptible HIV/AIDS - Tuberculosis                                             | < 0.05<br>(< 0.05 to < 0.05)           | < 0.05<br>(< 0.05 to < 0.05)               | < 0.05<br>(< 0.05 to < 0.05)        | -29.2<br>(-39.2 to -18.2)                         | -63.3<br>(-68.4 to -57.5)                           |
| Multidrug-resistant HIV/AIDS - Tuberculosis without extensive drug resistance        | < 0.05<br>(< 0.05 to < 0.05)           | < 0.05<br>(< 0.05 to < 0.05)               | < 0.05<br>(< 0.05 to < 0.05)        | -28.9<br>(-81.7 to 177.3)                         | -63.0<br>(-90.5 to 44.1)                            |
| Extensively drug-resistant HIV/AIDS - Tuberculosis                                   | < 0.05<br>(< 0.05 to < 0.05)           | < 0.05<br>(< 0.05 to < 0.05)               | < 0.05<br>(< 0.05 to < 0.05)        | 61.5<br>(-58.4 to 530.2)                          | -16.0<br>(-78.4 to 227.5)                           |
| HIV/AIDS resulting in other diseases                                                 | 0.1<br>(< 0.05 to 0.1)                 | < 0.05<br>(< 0.05 to < 0.05)               | < 0.05<br>(< 0.05 to < 0.05)        | 67.6<br>(45.9 to 121.5)                           | -18.4<br>(-28.8 to 21.9)                            |
| <b>Diarrhoea, lower respiratory infections, and other common infectious diseases</b> | <b>208.0</b><br>(193.8 to 222.5)       | <b>12,338.1†</b><br>(11,125.0 to 13,788.2) | <b>10.2</b><br>(7.1 to 14.1)        | <b>65.8</b><br>(59.9 to 72.2)                     | <b>5.3</b><br>(1.9 to 9.0)                          |
| Diarrhoeal diseases                                                                  | 34.8<br>(32.2 to 37.6)                 | 2,317.3<br>(2,148.4 to 2,516.3)            | 4.0<br>(2.8 to 5.4)                 | 69.0<br>(58.6 to 81.6)                            | 11.4<br>(4.8 to 18.8)                               |
| Intestinal infectious diseases                                                       | 0.1<br>(0.1 to 0.1)                    | 1.5†<br>(1.3 to 1.7)                       | < 0.05<br>(< 0.05 to < 0.05)        | 17.9<br>(1.8 to 37.1)                             | -23.9<br>(-33.8 to -12.2)                           |
| Typhoid fever                                                                        | 0.1<br>(0.1 to 0.1)                    | 1.2<br>(1.0 to 1.4)                        | < 0.05<br>(< 0.05 to < 0.05)        | 17.9<br>(0.6 to 37.8)                             | -23.9<br>(-34.4 to -11.4)                           |
| Paratyphoid fever                                                                    | < 0.05<br>(< 0.05 to < 0.05)           | 0.3<br>(0.2 to 0.3)                        | < 0.05<br>(< 0.05 to < 0.05)        | 27.7<br>(7.5 to 51.7)                             | -19.7<br>(-31.9 to -5.6)                            |
| Other intestinal infectious diseases                                                 | --                                     | --                                         | < 0.05<br>(< 0.05 to < 0.05)        | -20.7<br>(-36.3 to -1.6)                          | -42.0<br>(-51.1 to -31.2)                           |
| Lower respiratory infections                                                         | 4.1<br>(3.7 to 4.5)                    | 177.6<br>(160.8 to 196.2)                  | 0.2<br>(0.2 to 0.4)                 | 78.0<br>(57.2 to 100.7)                           | 14.1<br>(3.8 to 25.0)                               |
| Upper respiratory infections                                                         | 126.6<br>(110.8 to 145.0)              | 9,522.0<br>(8,293.4 to 10,955.8)           | 3.2<br>(1.8 to 5.0)                 | 60.1<br>(51.3 to 69.1)                            | 0.1<br>(-4.7 to 4.9)                                |
| Otitis media                                                                         | 37.1<br>(33.1 to 41.2)                 | 242.7<br>(194.5 to 303.0)                  | 1.0<br>(0.6 to 1.5)                 | 48.3<br>(36.9 to 60.2)                            | -1.6<br>(-8.3 to 5.5)                               |
| Meningitis                                                                           | 5.6<br>(5.0 to 6.3)                    | 1.0<br>(0.8 to 1.1)                        | 0.8<br>(0.5 to 1.0)                 | 66.9<br>(56.7 to 77.1)                            | -1.4<br>(-7.0 to 4.3)                               |
| Pneumococcal meningitis                                                              | 2.1<br>(1.8 to 2.5)                    | 0.1<br>(0.1 to 0.1)                        | 0.3<br>(0.2 to 0.4)                 | 56.6<br>(35.4 to 78.5)                            | -8.7<br>(-20.2 to 3.4)                              |
| H influenzae type B meningitis                                                       | 1.1<br>(0.9 to 1.3)                    | 0.1<br>(0.1 to 0.2)                        | 0.2<br>(0.1 to 0.2)                 | 72.9<br>(65.1 to 80.9)                            | 2.6<br>(-1.5 to 7.0)                                |
| Meningococcal infection                                                              | 0.9<br>(0.7 to 1.2)                    | 0.2<br>(0.2 to 0.3)                        | 0.1<br>(0.1 to 0.2)                 | 66.8<br>(58.7 to 74.9)                            | -2.1<br>(-6.7 to 2.4)                               |
| Other meningitis                                                                     | 1.5<br>(1.2 to 1.9)                    | 0.5<br>(0.4 to 0.6)                        | 0.2<br>(0.1 to 0.2)                 | 81.6<br>(70.3 to 94.1)                            | 9.8<br>(2.7 to 18.6)                                |
| Encephalitis                                                                         | 7.6<br>(5.7 to 10.1)                   | 4.3<br>(3.8 to 4.9)                        | 1.0<br>(0.7 to 1.4)                 | 92.8<br>(65.4 to 123.6)                           | 9.0<br>(-3.8 to 23.4)                               |
| Diphtheria                                                                           | < 0.05<br>(< 0.05 to < 0.05)           | < 0.05<br>(< 0.05 to < 0.05)               | < 0.05<br>(< 0.05 to < 0.05)        | 13.4<br>(-40.6 to 109.5)                          | -28.2<br>(-62.8 to 33.0)                            |
| Whooping cough                                                                       | < 0.05<br>(< 0.05 to 0.1)              | 0.3<br>(0.2 to 0.5)                        | < 0.05<br>(< 0.05 to < 0.05)        | -44.3<br>(-69.3 to -6.3)                          | -54.5<br>(-74.9 to -23.3)                           |
| Tetanus                                                                              | < 0.05<br>(< 0.05 to < 0.05)           | < 0.05<br>(< 0.05 to < 0.05)               | < 0.05<br>(< 0.05 to < 0.05)        | 61.1<br>(44.7 to 75.9)                            | 0.4<br>(-9.1 to 10.0)                               |
| Measles                                                                              | < 0.05<br>(< 0.05 to 0.1)              | 1.4<br>(0.5 to 3.2)                        | < 0.05<br>(< 0.05 to < 0.05)        | -44.4<br>(-64.4 to 6.3)                           | -56.2<br>(-72.0 to -16.4)                           |
| Varicella and herpes zoster                                                          | 3.2<br>(2.9 to 3.5)                    | 70.0<br>(67.8 to 72.3)                     | 0.1<br>(0.1 to 0.2)                 | 74.7<br>(49.1 to 101.7)                           | 0.2<br>(-9.3 to 11.5)                               |
| <b>Neglected tropical diseases and malaria</b>                                       | <b>0.1</b><br>(0.1 to 0.6)             | <b>&lt; 0.05†</b><br>(< 0.05 to 0.1)       | <b>&lt; 0.05</b><br>(< 0.05 to 0.1) | <b>31.2</b><br>(-79.3 to 724.5)                   | <b>-22.6</b><br>(-85.4 to 315.8)                    |
| Malaria                                                                              | --                                     | --                                         | --                                  | --                                                | --                                                  |
| Chagas disease                                                                       | --                                     | --                                         | --                                  | --                                                | --                                                  |
| Leishmaniasis                                                                        | 0.1<br>(< 0.05 to 0.1)                 | < 0.05<br>(< 0.05 to < 0.05)               | < 0.05<br>(< 0.05 to < 0.05)        | 304.4<br>(75.1 to 1,544.9)                        | 126.0<br>(-2.5 to 832.2)                            |
| Visceral leishmaniasis                                                               | --                                     | --                                         | --                                  | --                                                | --                                                  |
| Cutaneous and mucocutaneous leishmaniasis                                            | 0.1<br>(< 0.05 to 0.1)                 | < 0.05<br>(< 0.05 to < 0.05)               | < 0.05<br>(< 0.05 to < 0.05)        | 304.4<br>(75.1 to 1,544.9)                        | 126.0<br>(-2.5 to 832.2)                            |
| African trypanosomiasis                                                              | --                                     | --                                         | --                                  | --                                                | --                                                  |
| Schistosomiasis                                                                      | --                                     | --                                         | --                                  | --                                                | --                                                  |
| Cysticercosis                                                                        | --                                     | --                                         | --                                  | --                                                | --                                                  |
| Cystic echinococcosis                                                                | 0.1<br>(< 0.05 to 0.5)                 | < 0.05<br>(< 0.05 to 0.1)                  | < 0.05<br>(< 0.05 to 0.1)           | -2.4<br>(-92.5 to 1,041.7)                        | -44.1<br>(-94.0 to 437.1)                           |
| Lymphatic filariasis                                                                 | --                                     | --                                         | --                                  | --                                                | --                                                  |
| Onchocerciasis                                                                       | --                                     | --                                         | --                                  | --                                                | --                                                  |
| Trachoma                                                                             | --                                     | --                                         | --                                  | --                                                | --                                                  |
| Dengue                                                                               | --                                     | --                                         | --                                  | --                                                | --                                                  |
| Yellow fever                                                                         | --                                     | --                                         | --                                  | --                                                | --                                                  |
| Rabies                                                                               | < 0.05<br>(< 0.05 to < 0.05)           | < 0.05<br>(< 0.05 to < 0.05)               | < 0.05<br>(< 0.05 to < 0.05)        | -74.8<br>(-84.2 to -55.4)                         | -87.6<br>(-92.9 to -74.8)                           |
| Intestinal nematode infections                                                       | --                                     | --                                         | --                                  | --                                                | --                                                  |
| Ascariasis                                                                           | --                                     | --                                         | --                                  | --                                                | --                                                  |

| Cause                                                                   | Prevalence in thousands (95% UI)              | Incidence in thousands (95% UI)                 | YLDs in thousands (95% UI)              |                                                   |                                                     |
|-------------------------------------------------------------------------|-----------------------------------------------|-------------------------------------------------|-----------------------------------------|---------------------------------------------------|-----------------------------------------------------|
|                                                                         | 2016 counts                                   | 2016 counts                                     | 2016 counts                             | Percentage change in counts between 2006 and 2016 | Percentage change in age-standardised rates between |
| Trichuriasis                                                            | --                                            | --                                              | --                                      | --                                                | --                                                  |
| Hookworm disease                                                        | --                                            | --                                              | --                                      | --                                                | --                                                  |
| Food-borne trematodiasis                                                | --                                            | --                                              | --                                      | --                                                | --                                                  |
| Leprosy                                                                 | < 0.05<br>(< 0.05 to < 0.05)                  | < 0.05<br>(< 0.05 to < 0.05)                    | < 0.05<br>(< 0.05 to < 0.05)            | 241.6<br>(108.8 to 544.4)                         | 58.5<br>(1.9 to 201.8)                              |
| Ebola virus disease                                                     | --                                            | --                                              | --                                      | --                                                | --                                                  |
| Zika virus disease                                                      | --                                            | --                                              | --                                      | --                                                | --                                                  |
| Guinea worm disease                                                     | --                                            | --                                              | --                                      | --                                                | --                                                  |
| Other neglected tropical diseases                                       | --                                            | --                                              | < 0.05<br>(< 0.05 to < 0.05)            | --                                                | --                                                  |
| <b>Maternal disorders</b>                                               | <b>4.2</b><br><b>(3.3 to 5.4)</b>             | <b>37.3†</b><br><b>(32.9 to 42.6)</b>           | <b>0.2</b><br><b>(0.1 to 0.4)</b>       | <b>74.9</b><br><b>(20.5 to 146.5)</b>             | <b>4.4</b><br><b>(-27.4 to 46.4)</b>                |
| Maternal haemorrhage                                                    | 0.5<br>(0.4 to 0.7)                           | 3.3<br>(2.1 to 5.1)                             | < 0.05<br>(< 0.05 to < 0.05)            | 14.4<br>(-22.7 to 66.9)                           | -31.9<br>(-53.5 to 0.5)                             |
| Maternal sepsis and other pregnancy related infections                  | 0.7<br>(0.5 to 1.1)                           | 6.5<br>(4.7 to 9.0)                             | < 0.05<br>(< 0.05 to 0.1)               | 7.5<br>(-52.5 to 138.9)                           | -35.1<br>(-71.4 to 41.8)                            |
| Maternal hypertensive disorders                                         | 3.0<br>(1.9 to 4.2)                           | 12.3<br>(10.2 to 14.5)                          | 0.1<br>(0.1 to 0.2)                     | 152.1<br>(40.9 to 332.1)                          | 50.0<br>(-15.5 to 157.3)                            |
| Maternal obstructed labour and uterine rupture                          | < 0.05<br>(< 0.05 to 0.1)                     | 2.9<br>(2.0 to 4.1)                             | < 0.05<br>(< 0.05 to < 0.05)            | 9.2<br>(-47.3 to 143.8)                           | -34.0<br>(-67.4 to 41.3)                            |
| Maternal abortion, miscarriage, and ectopic pregnancy                   | 0.1<br>(0.1 to 0.1)                           | 12.2<br>(9.2 to 16.3)                           | < 0.05<br>(< 0.05 to < 0.05)            | 8.1<br>(-57.5 to 142.3)                           | -36.9<br>(-73.4 to 41.3)                            |
| Other maternal disorders                                                | --                                            | --                                              | < 0.05<br>(< 0.05 to 0.1)               | 65.8<br>(14.4 to 134.2)                           | -0.6<br>(-30.8 to 39.6)                             |
| <b>Neonatal disorders</b>                                               | <b>30.9</b><br><b>(25.8 to 37.1)</b>          | --                                              | <b>6.2</b><br><b>(4.1 to 9.8)</b>       | <b>63.4</b><br><b>(37.1 to 107.2)</b>             | <b>1.0</b><br><b>(-15.2 to 27.6)</b>                |
| Neonatal preterm birth complications                                    | 25.5<br>(19.4 to 34.6)                        | --                                              | 3.6<br>(2.2 to 6.0)                     | 69.0<br>(25.9 to 143.9)                           | 3.3<br>(-22.9 to 49.2)                              |
| Neonatal encephalopathy due to birth asphyxia and trauma                | 6.3<br>(3.8 to 9.3)                           | --                                              | 1.1<br>(0.6 to 2.0)                     | 62.5<br>(16.6 to 128.2)                           | -0.7<br>(-28.7 to 38.3)                             |
| Neonatal sepsis and other neonatal infections                           | 2.6<br>(0.9 to 7.3)                           | --                                              | 1.1<br>(0.3 to 3.5)                     | 54.3<br>(24.5 to 97.9)                            | -3.2<br>(-21.5 to 25.1)                             |
| Hemolytic disease and other neonatal jaundice                           | 1.0<br>(0.9 to 1.2)                           | --                                              | 0.3<br>(0.2 to 0.4)                     | 62.2<br>(41.1 to 87.2)                            | -2.0<br>(-16.3 to 16.4)                             |
| Other neonatal disorders                                                | --                                            | --                                              | 0.1<br>(0.1 to 0.2)                     | 21.8<br>(-5.7 to 59.9)                            | -2.2<br>(-24.2 to 28.7)                             |
| <b>Nutritional deficiencies</b>                                         | <b>659.6</b><br><b>(617.7 to 701.8)</b>       | <b>55.7†</b><br><b>(35.9 to 84.5)</b>           | <b>12.7</b><br><b>(8.4 to 18.8)</b>     | <b>33.1</b><br><b>(24.0 to 42.5)</b>              | <b>-16.2</b><br><b>(-22.3 to -9.3)</b>              |
| Protein-energy malnutrition                                             | 5.2<br>(4.1 to 6.7)                           | 2.5<br>(1.9 to 3.1)                             | 0.3<br>(0.1 to 0.4)                     | 11.2<br>(-22.1 to 56.6)                           | -10.9<br>(-37.2 to 25.2)                            |
| Iodine deficiency                                                       | 113.7<br>(89.7 to 143.8)                      | 2.0<br>(1.6 to 2.5)                             | 2.9<br>(1.9 to 4.3)                     | 32.7<br>(19.8 to 45.7)                            | -22.0<br>(-29.3 to -14.6)                           |
| Vitamin A deficiency                                                    | 63.0<br>(39.8 to 99.5)                        | 51.2<br>(31.4 to 80.2)                          | 0.4<br>(0.2 to 0.6)                     | 50.3<br>(27.5 to 81.4)                            | -1.3<br>(-15.1 to 16.5)                             |
| Iron-deficiency anaemia                                                 | 510.2<br>(467.2 to 552.3)                     | --                                              | 9.2<br>(5.9 to 13.8)                    | 33.3<br>(21.7 to 45.7)                            | -15.0<br>(-23.1 to -5.6)                            |
| Other nutritional deficiencies                                          | --                                            | --                                              | < 0.05<br>(< 0.05 to < 0.05)            | 11.6<br>(-22.6 to 59.3)                           | -11.1<br>(-38.1 to 26.6)                            |
| <b>Other communicable, maternal, neonatal, and nutritional diseases</b> | <b>895.0</b><br><b>(841.4 to 945.5)</b>       | <b>731.2</b><br><b>(614.5 to 857.8)</b>         | <b>4.3</b><br><b>(2.7 to 7.1)</b>       | <b>66.5</b><br><b>(54.7 to 79.4)</b>              | <b>-4.7</b><br><b>(-10.8 to 1.8)</b>                |
| Sexually transmitted diseases excluding HIV                             | 712.5<br>(664.1 to 762.9)                     | 717.0<br>(600.4 to 843.5)                       | 3.9<br>(2.4 to 6.4)                     | 69.4<br>(56.1 to 83.5)                            | -4.2<br>(-11.0 to 2.9)                              |
| Syphilis                                                                | 23.7<br>(12.7 to 42.5)                        | 18.5<br>(9.4 to 32.0)                           | < 0.05<br>(< 0.05 to 0.1)               | 82.9<br>(59.4 to 107.4)                           | -2.3<br>(-14.9 to 10.2)                             |
| Chlamydial infection                                                    | 64.3<br>(50.9 to 79.3)                        | 44.7<br>(36.1 to 55.9)                          | 0.4<br>(0.2 to 0.7)                     | 54.8<br>(33.7 to 80.7)                            | -6.2<br>(-18.1 to 8.9)                              |
| Gonococcal infection                                                    | 154.5<br>(126.8 to 188.0)                     | 552.1<br>(438.0 to 679.6)                       | 2.0<br>(1.2 to 3.4)                     | 69.3<br>(52.7 to 88.1)                            | -5.4<br>(-14.2 to 4.0)                              |
| Trichomoniasis                                                          | 60.6<br>(51.2 to 71.3)                        | 50.6<br>(42.2 to 60.0)                          | < 0.05<br>(< 0.05 to 0.1)               | 106.7<br>(82.1 to 138.0)                          | 17.8<br>(6.1 to 33.3)                               |
| Genital herpes                                                          | 444.9<br>(377.6 to 520.5)                     | 28.2<br>(23.7 to 34.4)                          | 0.1<br>(< 0.05 to 0.3)                  | 85.5<br>(70.3 to 97.8)                            | 3.0<br>(-3.3 to 8.8)                                |
| Other sexually transmitted diseases                                     | 25.1<br>(20.2 to 29.4)                        | 22.8<br>(17.4 to 29.4)                          | 1.2<br>(0.8 to 2.0)                     | 72.3<br>(58.8 to 86.8)                            | -3.3<br>(-10.5 to 4.2)                              |
| Hepatitis                                                               | 212.8<br>(178.0 to 255.8)                     | 14.2<br>(10.2 to 19.0)                          | < 0.05<br>(< 0.05 to < 0.05)            | -26.4<br>(-42.6 to -5.3)                          | -55.1<br>(-64.9 to -42.3)                           |
| Acute hepatitis A                                                       | 0.3<br>(0.1 to 0.6)                           | 3.4<br>(0.7 to 7.4)                             | < 0.05<br>(< 0.05 to < 0.05)            | -29.8<br>(-72.5 to 94.4)                          | -53.6<br>(-80.8 to 17.9)                            |
| Hepatitis B                                                             | 164.4<br>(131.1 to 206.7)                     | 9.6<br>(7.4 to 12.4)                            | < 0.05<br>(< 0.05 to < 0.05)            | -28.1<br>(-42.6 to -9.8)                          | -57.6<br>(-67.5 to -44.7)                           |
| Hepatitis C                                                             | 48.1<br>(42.7 to 54.4)                        | 0.9<br>(0.8 to 1.1)                             | < 0.05<br>(< 0.05 to < 0.05)            | 12.8<br>(9.5 to 14.7)                             | -19.7<br>(-22.9 to -16.8)                           |
| Acute hepatitis E                                                       | < 0.05<br>(< 0.05 to < 0.05)                  | 0.3<br>(0.2 to 0.4)                             | < 0.05<br>(< 0.05 to < 0.05)            | -26.8<br>(-34.8 to -17.6)                         | -54.8<br>(-58.2 to -51.1)                           |
| Other infectious diseases                                               | 18.3<br>(16.4 to 20.3)                        | < 0.05<br>(< 0.05 to < 0.05)                    | 0.4<br>(0.2 to 0.6)                     | 47.2<br>(28.6 to 70.0)                            | -3.7<br>(-16.2 to 12.1)                             |
| <b>Non-communicable diseases</b>                                        | <b>3,540.6</b><br><b>(3,513.8 to 3,563.8)</b> | <b>9,714.6†</b><br><b>(8,994.6 to 10,461.7)</b> | <b>358.4</b><br><b>(264.1 to 466.3)</b> | <b>76.5</b><br><b>(73.2 to 79.9)</b>              | <b>-0.6</b><br><b>(-2.2 to 1.1)</b>                 |
| <b>Neoplasms</b>                                                        | <b>7.2</b><br><b>(6.7 to 7.8)</b>             | <b>2.6</b><br><b>(2.5 to 2.8)</b>               | <b>0.9</b><br><b>(0.7 to 1.2)</b>       | <b>121.5</b><br><b>(108.8 to 135.1)</b>           | <b>18.3</b><br><b>(12.0 to 25.1)</b>                |
| Lip and oral cavity cancer                                              | 0.1<br>(0.1 to 0.1)                           | < 0.05<br>(< 0.05 to < 0.05)                    | < 0.05<br>(< 0.05 to < 0.05)            | 83.8<br>(65.6 to 105.5)                           | -3.0<br>(-13.4 to 9.6)                              |
| Nasopharynx cancer                                                      | < 0.05<br>(< 0.05 to < 0.05)                  | < 0.05<br>(< 0.05 to < 0.05)                    | < 0.05<br>(< 0.05 to < 0.05)            | 31.1<br>(13.5 to 54.6)                            | -28.9<br>(-36.8 to -19.0)                           |
| Other pharynx cancer                                                    | < 0.05<br>(< 0.05 to < 0.05)                  | < 0.05<br>(< 0.05 to < 0.05)                    | < 0.05<br>(< 0.05 to < 0.05)            | 153.5<br>(128.2 to 179.5)                         | 34.8<br>(22.1 to 48.8)                              |
| Oesophageal cancer                                                      | < 0.05<br>(< 0.05 to < 0.05)                  | < 0.05<br>(< 0.05 to < 0.05)                    | < 0.05<br>(< 0.05 to < 0.05)            | 66.5<br>(47.8 to 86.9)                            | -9.2<br>(-19.3 to 2.6)                              |
| Stomach cancer                                                          | 0.1<br>(0.1 to 0.1)                           | 0.1<br>(< 0.05 to 0.1)                          | < 0.05<br>(< 0.05 to < 0.05)            | 59.4<br>(45.1 to 75.0)                            | -9.6<br>(-21.3 to 4.2)                              |
| Colon and rectum cancer                                                 | 0.9<br>(0.8 to 1.0)                           | 0.3<br>(0.2 to 0.3)                             | 0.1<br>(0.1 to 0.1)                     | 132.2<br>(97.2 to 172.0)                          | 26.0<br>(5.9 to 48.0)                               |
| Liver cancer                                                            | < 0.05<br>(< 0.05 to < 0.05)                  | 0.1<br>(0.1 to 0.1)                             | < 0.05<br>(< 0.05 to < 0.05)            | 56.6<br>(37.7 to 77.0)                            | -15.4<br>(-24.9 to -4.2)                            |
| Liver cancer due to hepatitis B                                         | < 0.05<br>(< 0.05 to < 0.05)                  | < 0.05<br>(< 0.05 to < 0.05)                    | < 0.05<br>(< 0.05 to < 0.05)            | 60.1<br>(38.8 to 82.8)                            | -15.6<br>(-25.9 to -3.9)                            |



| Cause                                              | Prevalence in thousands (95% UI)        | Incidence in thousands (95% UI)       | YLDs in thousands (95% UI)          |                                                   |                                                     |
|----------------------------------------------------|-----------------------------------------|---------------------------------------|-------------------------------------|---------------------------------------------------|-----------------------------------------------------|
|                                                    | 2016 counts                             | 2016 counts                           | 2016 counts                         | Percentage change in counts between 2006 and 2016 | Percentage change in age-standardised rates between |
| Liver cancer due to hepatitis C                    | < 0.05<br>(< 0.05 to < 0.05)            | < 0.05<br>(< 0.05 to < 0.05)          | < 0.05<br>(< 0.05 to < 0.05)        | 58.2<br>(38.2 to 81.4)                            | -12.5<br>(-23.2 to -0.3)                            |
| Liver cancer due to alcohol use                    | < 0.05<br>(< 0.05 to < 0.05)            | < 0.05<br>(< 0.05 to < 0.05)          | < 0.05<br>(< 0.05 to < 0.05)        | 53.1<br>(29.4 to 81.2)                            | -17.6<br>(-30.3 to -1.8)                            |
| Liver cancer due to other causes                   | < 0.05<br>(< 0.05 to < 0.05)            | < 0.05<br>(< 0.05 to < 0.05)          | < 0.05<br>(< 0.05 to < 0.05)        | 50.8<br>(27.2 to 76.0)                            | -18.7<br>(-29.9 to -4.3)                            |
| Gallbladder and biliary tract cancer               | < 0.05<br>(< 0.05 to < 0.05)            | < 0.05<br>(< 0.05 to < 0.05)          | < 0.05<br>(< 0.05 to < 0.05)        | 67.3<br>(54.2 to 85.4)                            | -5.4<br>(-12.4 to 4.0)                              |
| Pancreatic cancer                                  | < 0.05<br>(< 0.05 to < 0.05)            | 0.1<br>(0.1 to 0.1)                   | < 0.05<br>(< 0.05 to < 0.05)        | 78.3<br>(63.9 to 93.7)                            | -3.3<br>(-14.1 to 9.4)                              |
| Larynx cancer                                      | 0.1<br>(0.1 to 0.1)                     | < 0.05<br>(< 0.05 to < 0.05)          | < 0.05<br>(< 0.05 to < 0.05)        | 92.9<br>(74.5 to 113.5)                           | 4.7<br>(-7.6 to 19.5)                               |
| Tracheal, bronchus, and lung cancer                | 0.1<br>(0.1 to 0.2)                     | 0.1<br>(0.1 to 0.1)                   | < 0.05<br>(< 0.05 to < 0.05)        | 46.4<br>(21.7 to 74.4)                            | -16.8<br>(-32.9 to 2.1)                             |
| Malignant skin melanoma                            | 0.1<br>(0.1 to 0.1)                     | < 0.05<br>(< 0.05 to < 0.05)          | < 0.05<br>(< 0.05 to < 0.05)        | 185.1<br>(133.9 to 247.5)                         | 48.6<br>(21.0 to 81.7)                              |
| Non-melanoma skin cancer                           | < 0.05<br>(< 0.05 to < 0.05)            | 0.1<br>(< 0.05 to 0.1)                | < 0.05<br>(< 0.05 to < 0.05)        | 181.2<br>(100.3 to 262.1)                         | 29.8<br>(-6.3 to 78.2)                              |
| Non-melanoma skin cancer (squamous-cell carcinoma) | < 0.05<br>(< 0.05 to < 0.05)            | < 0.05<br>(< 0.05 to < 0.05)          | < 0.05<br>(< 0.05 to < 0.05)        | 181.7<br>(98.5 to 265.3)                          | 29.6<br>(-7.3 to 78.4)                              |
| Non-melanoma skin cancer (basal-cell carcinoma)    | < 0.05<br>(< 0.05 to < 0.05)            | < 0.05<br>(< 0.05 to 0.1)             | < 0.05<br>(< 0.05 to < 0.05)        | 172.7<br>(71.9 to 377.6)                          | 35.5<br>(-6.4 to 97.7)                              |
| Breast cancer                                      | 3.0<br>(2.6 to 3.4)                     | 0.6<br>(0.5 to 0.7)                   | 0.2<br>(0.2 to 0.3)                 | 147.2<br>(101.0 to 199.7)                         | 33.9<br>(10.5 to 59.0)                              |
| Cervical cancer                                    | 0.2<br>(0.1 to 0.2)                     | < 0.05<br>(< 0.05 to < 0.05)          | < 0.05<br>(< 0.05 to < 0.05)        | 44.8<br>(17.2 to 77.6)                            | -26.5<br>(-37.8 to -12.2)                           |
| Uterine cancer                                     | 0.6<br>(0.6 to 0.7)                     | 0.1<br>(0.1 to 0.1)                   | < 0.05<br>(< 0.05 to 0.1)           | 228.8<br>(164.3 to 314.6)                         | 71.0<br>(33.8 to 116.2)                             |
| Ovarian cancer                                     | 0.2<br>(0.1 to 0.2)                     | 0.1<br>(0.1 to 0.1)                   | < 0.05<br>(< 0.05 to < 0.05)        | 98.4<br>(66.0 to 137.5)                           | 7.4<br>(-17.1 to 38.3)                              |
| Prostate cancer                                    | 0.7<br>(0.6 to 1.0)                     | 0.2<br>(0.1 to 0.2)                   | 0.1<br>(< 0.05 to 0.1)              | 136.3<br>(99.5 to 186.0)                          | 28.2<br>(8.8 to 53.7)                               |
| Testicular cancer                                  | 0.1<br>(0.1 to 0.1)                     | < 0.05<br>(< 0.05 to < 0.05)          | < 0.05<br>(< 0.05 to < 0.05)        | 138.3<br>(93.1 to 203.2)                          | 29.7<br>(8.7 to 59.6)                               |
| Kidney cancer                                      | 0.3<br>(0.2 to 0.3)                     | 0.1<br>(0.1 to 0.1)                   | < 0.05<br>(< 0.05 to < 0.05)        | 96.0<br>(69.5 to 123.7)                           | 5.9<br>(-7.2 to 20.0)                               |
| Bladder cancer                                     | 0.5<br>(0.4 to 0.5)                     | 0.1<br>(0.1 to 0.1)                   | < 0.05<br>(< 0.05 to 0.1)           | 101.1<br>(76.3 to 128.9)                          | 7.4<br>(-7.3 to 24.5)                               |
| Brain and nervous system cancer                    | 0.2<br>(0.1 to 0.2)                     | 0.1<br>(0.1 to 0.1)                   | < 0.05<br>(< 0.05 to < 0.05)        | 112.6<br>(67.8 to 145.6)                          | 17.8<br>(-4.4 to 34.3)                              |
| Thyroid cancer                                     | 0.5<br>(0.5 to 0.6)                     | 0.1<br>(0.1 to 0.1)                   | < 0.05<br>(< 0.05 to < 0.05)        | 180.0<br>(121.4 to 259.1)                         | 41.9<br>(18.1 to 70.9)                              |
| Mesothelioma                                       | < 0.05<br>(< 0.05 to < 0.05)            | < 0.05<br>(< 0.05 to < 0.05)          | < 0.05<br>(< 0.05 to < 0.05)        | 144.5<br>(110.8 to 170.4)                         | 37.7<br>(19.7 to 51.6)                              |
| Hodgkin lymphoma                                   | 0.1<br>(0.1 to 0.1)                     | < 0.05<br>(< 0.05 to < 0.05)          | < 0.05<br>(< 0.05 to < 0.05)        | 140.3<br>(112.4 to 176.9)                         | 22.1<br>(8.0 to 44.6)                               |
| Non-Hodgkin's lymphoma                             | 0.5<br>(0.5 to 0.7)                     | 0.1<br>(0.1 to 0.2)                   | < 0.05<br>(< 0.05 to 0.1)           | 197.3<br>(163.5 to 237.0)                         | 57.2<br>(40.1 to 76.7)                              |
| Multiple myeloma                                   | 0.1<br>(< 0.05 to 0.1)                  | < 0.05<br>(< 0.05 to < 0.05)          | < 0.05<br>(< 0.05 to < 0.05)        | 149.0<br>(110.4 to 201.7)                         | 26.9<br>(6.1 to 51.8)                               |
| Leukaemia                                          | 0.5<br>(0.5 to 0.6)                     | 0.1<br>(0.1 to 0.1)                   | 0.1<br>(< 0.05 to 0.1)              | 74.2<br>(53.6 to 101.1)                           | -1.1<br>(-13.0 to 12.5)                             |
| Acute lymphoid leukaemia                           | 0.1<br>(0.1 to 0.2)                     | < 0.05<br>(< 0.05 to < 0.05)          | < 0.05<br>(< 0.05 to < 0.05)        | 192.9<br>(116.1 to 299.4)                         | 90.5<br>(41.8 to 158.5)                             |
| Chronic lymphoid leukaemia                         | 0.1<br>(0.1 to 0.1)                     | < 0.05<br>(< 0.05 to < 0.05)          | < 0.05<br>(< 0.05 to < 0.05)        | 104.2<br>(63.3 to 152.1)                          | 10.1<br>(-12.8 to 36.5)                             |
| Acute myeloid leukaemia                            | < 0.05<br>(< 0.05 to 0.1)               | < 0.05<br>(< 0.05 to < 0.05)          | < 0.05<br>(< 0.05 to < 0.05)        | 83.5<br>(56.1 to 116.8)                           | 8.3<br>(-6.5 to 25.2)                               |
| Chronic myeloid leukaemia                          | < 0.05<br>(< 0.05 to < 0.05)            | < 0.05<br>(< 0.05 to < 0.05)          | < 0.05<br>(< 0.05 to < 0.05)        | 54.0<br>(20.0 to 89.1)                            | -12.4<br>(-29.2 to 3.9)                             |
| Other leukaemia                                    | 0.3<br>(0.2 to 0.3)                     | 0.1<br>(0.1 to 0.1)                   | < 0.05<br>(< 0.05 to < 0.05)        | 40.7<br>(19.8 to 63.4)                            | -15.8<br>(-28.4 to -2.3)                            |
| Other neoplasms                                    | 0.5<br>(0.4 to 0.5)                     | 0.1<br>(0.1 to 0.1)                   | < 0.05<br>(< 0.05 to 0.1)           | 146.8<br>(120.6 to 177.2)                         | 33.3<br>(18.8 to 50.1)                              |
| <b>Cardiovascular diseases</b>                     | <b>179.0</b><br><b>(171.9 to 186.8)</b> | <b>18.9†</b><br><b>(17.7 to 20.3)</b> | <b>10.6</b><br><b>(7.5 to 14.1)</b> | <b>76.6</b><br><b>(69.4 to 83.9)</b>              | <b>-4.0</b><br><b>(-7.2 to -0.7)</b>                |
| Rheumatic heart disease                            | 0.2<br>(0.2 to 0.2)                     | < 0.05<br>(< 0.05 to < 0.05)          | < 0.05<br>(< 0.05 to < 0.05)        | 82.7<br>(69.3 to 95.9)                            | -0.2<br>(-9.6 to 9.4)                               |
| Ischaemic heart disease                            | 85.5<br>(80.0 to 91.1)                  | 10.7<br>(9.6 to 11.8)                 | 3.5<br>(2.4 to 4.9)                 | 84.5<br>(75.1 to 95.5)                            | -2.6<br>(-6.3 to 1.7)                               |
| Cerebrovascular disease                            | 20.2<br>(18.8 to 21.6)                  | 2.6‡<br>(2.4 to 3.0)                  | 3.0<br>(2.1 to 3.8)                 | 73.7<br>(60.0 to 87.4)                            | -7.8<br>(-14.5 to -1.1)                             |
| Ischaemic stroke                                   | 17.5<br>(15.7 to 19.4)                  | 2.0‡<br>(1.8 to 2.3)                  | 2.5<br>(1.8 to 3.1)                 | 68.0<br>(52.4 to 83.2)                            | -10.8<br>(-18.1 to -3.2)                            |
| Hemorrhagic stroke                                 | 3.6<br>(3.2 to 4.1)                     | 0.6‡<br>(0.5 to 0.7)                  | 0.5<br>(0.4 to 0.7)                 | 107.9<br>(84.4 to 132.9)                          | 20.6<br>(7.1 to 34.9)                               |
| Hypertensive heart disease                         | 8.9<br>(7.7 to 10.3)                    | --                                    | 0.7<br>(0.5 to 1.0)                 | 92.1<br>(75.2 to 112.9)                           | 0.3<br>(-7.2 to 8.5)                                |
| Cardiomyopathy and myocarditis                     | 2.1<br>(1.8 to 2.4)                     | 1.3†<br>(1.1 to 1.5)                  | 0.2<br>(0.1 to 0.3)                 | 63.7<br>(39.2 to 94.5)                            | -1.7<br>(-12.4 to 11.1)                             |
| Myocarditis                                        | 1.4<br>(1.2 to 1.6)                     | 1.3<br>(1.1 to 1.5)                   | 0.1<br>(0.1 to 0.2)                 | 62.4<br>(30.8 to 102.6)                           | -0.2<br>(-16.6 to 19.0)                             |
| Alcoholic cardiomyopathy                           | 0.1<br>(0.1 to 0.1)                     | --                                    | < 0.05<br>(< 0.05 to < 0.05)        | 83.7<br>(67.6 to 100.9)                           | -3.9<br>(-13.7 to 7.1)                              |
| Other cardiomyopathy                               | 1.2<br>(1.0 to 1.4)                     | --                                    | 0.1<br>(0.1 to 0.1)                 | 63.8<br>(28.1 to 112.6)                           | -2.6<br>(-17.1 to 16.2)                             |
| Atrial fibrillation and flutter                    | 7.7<br>(6.6 to 8.7)                     | 0.7<br>(0.6 to 0.8)                   | 0.6<br>(0.4 to 0.8)                 | 85.5<br>(65.4 to 106.5)                           | -0.0<br>(-6.2 to 6.6)                               |
| Peripheral vascular disease                        | 28.1<br>(23.9 to 33.0)                  | 3.1<br>(2.6 to 3.6)                   | 0.1<br>(< 0.05 to 0.1)              | 63.9<br>(48.8 to 82.1)                            | -8.8<br>(-14.9 to -1.4)                             |
| Endocarditis                                       | 0.2<br>(0.2 to 0.2)                     | 0.5<br>(0.5 to 0.6)                   | < 0.05<br>(< 0.05 to < 0.05)        | 67.1<br>(53.6 to 81.0)                            | 0.9<br>(-14.1 to 17.2)                              |
| Other cardiovascular and circulatory diseases      | 45.7<br>(38.6 to 54.1)                  | --                                    | 2.4<br>(1.6 to 3.5)                 | 65.4<br>(51.6 to 81.0)                            | -2.2<br>(-9.2 to 4.3)                               |
| <b>Chronic respiratory diseases</b>                | <b>327.2</b><br><b>(313.1 to 342.8)</b> | <b>55.3†</b><br><b>(51.8 to 59.4)</b> | <b>13.6</b><br><b>(9.7 to 18.2)</b> | <b>77.8</b><br><b>(70.3 to 86.5)</b>              | <b>2.7</b><br><b>(-1.0 to 7.0)</b>                  |
| Chronic obstructive pulmonary disease              | 82.7<br>(78.7 to 87.0)                  | 5.2<br>(5.0 to 5.5)                   | 3.2<br>(2.7 to 3.8)                 | 84.2<br>(66.2 to 103.3)                           | -3.0<br>(-10.7 to 5.3)                              |
| Pneumoconiosis                                     | 0.2<br>(0.2 to 0.2)                     | < 0.05<br>(< 0.05 to < 0.05)          | < 0.05<br>(< 0.05 to < 0.05)        | 86.0<br>(77.7 to 94.5)                            | -4.8<br>(-8.8 to 0.1)                               |
| Silicosis                                          | 0.1<br>(< 0.05 to 0.1)                  | < 0.05<br>(< 0.05 to < 0.05)          | < 0.05<br>(< 0.05 to < 0.05)        | 81.4<br>(71.1 to 93.3)                            | -5.3<br>(-9.8 to -0.2)                              |



| Cause                                                          | Prevalence in thousands (95% UI)              | Incidence in thousands (95% UI)          | YLDs in thousands (95% UI)            |                                                   |                                                     |
|----------------------------------------------------------------|-----------------------------------------------|------------------------------------------|---------------------------------------|---------------------------------------------------|-----------------------------------------------------|
|                                                                | 2016 counts                                   | 2016 counts                              | 2016 counts                           | Percentage change in counts between 2006 and 2016 | Percentage change in age-standardised rates between |
| Asbestosis                                                     | 0.1<br>(< 0.05 to 0.1)                        | < 0.05<br>(< 0.05 to < 0.05)             | < 0.05<br>(< 0.05 to < 0.05)          | 81.1<br>(70.2 to 91.4)                            | -5.8<br>(-10.3 to -1.1)                             |
| Coal workers pneumoconiosis                                    | --                                            | --                                       | --                                    | --                                                | --                                                  |
| Other pneumoconiosis                                           | 0.1<br>(0.1 to 0.1)                           | < 0.05<br>(< 0.05 to < 0.05)             | < 0.05<br>(< 0.05 to < 0.05)          | 91.9<br>(75.6 to 109.4)                           | -4.0<br>(-12.3 to 6.2)                              |
| Asthma                                                         | 252.4<br>(233.1 to 273.2)                     | 49.9<br>(46.5 to 54.0)                   | 9.9<br>(6.5 to 14.3)                  | 74.7<br>(66.4 to 84.5)                            | 4.9<br>(0.4 to 9.8)                                 |
| Interstitial lung disease and pulmonary sarcoidosis            | 1.0<br>(0.8 to 1.1)                           | 0.1<br>(0.1 to 0.1)                      | 0.1<br>(0.1 to 0.1)                   | 91.7<br>(79.6 to 105.8)                           | 4.6<br>(-5.9 to 16.5)                               |
| Other chronic respiratory diseases                             | --                                            | --                                       | 0.3<br>(0.2 to 0.3)                   | 119.6<br>(87.9 to 154.7)                          | 32.0<br>(13.0 to 55.1)                              |
| <b>Cirrhosis and other chronic liver diseases</b>              | <b>17.3</b><br><b>(16.3 to 18.4)</b>          | <b>0.4</b><br><b>(0.4 to 0.5)</b>        | <b>0.7</b><br><b>(0.5 to 1.0)</b>     | <b>83.3</b><br><b>(62.0 to 107.5)</b>             | <b>8.7</b><br><b>(-0.8 to 19.1)</b>                 |
| Cirrhosis and other chronic liver diseases due to hepatitis B  | 5.2<br>(4.3 to 6.3)                           | 0.1<br>(0.1 to 0.1)                      | 0.2<br>(0.1 to 0.3)                   | 99.0<br>(51.3 to 160.1)                           | 8.5<br>(-9.7 to 30.2)                               |
| Cirrhosis and other chronic liver diseases due to hepatitis C  | 5.9<br>(4.7 to 7.2)                           | 0.1<br>(0.1 to 0.2)                      | 0.2<br>(0.1 to 0.3)                   | 100.1<br>(56.4 to 153.3)                          | 9.2<br>(-8.1 to 28.7)                               |
| Cirrhosis and other chronic liver diseases due to alcohol use  | 1.0<br>(0.8 to 1.2)                           | < 0.05<br>(< 0.05 to < 0.05)             | < 0.05<br>(< 0.05 to 0.1)             | 107.2<br>(64.0 to 168.3)                          | 11.0<br>(-15.2 to 46.2)                             |
| Cirrhosis and other chronic liver diseases due to other causes | 5.2<br>(4.5 to 5.8)                           | 0.1<br>(0.1 to 0.1)                      | 0.3<br>(0.2 to 0.4)                   | 62.5<br>(36.2 to 96.1)                            | 8.1<br>(-7.6 to 29.0)                               |
| <b>Digestive diseases</b>                                      | <b>130.9</b><br><b>(121.6 to 141.8)</b>       | <b>105.6†</b><br><b>(98.1 to 114.1)</b>  | <b>3.9</b><br><b>(2.7 to 5.4)</b>     | <b>121.5</b><br><b>(102.0 to 142.2)</b>           | <b>18.4</b><br><b>(10.5 to 26.6)</b>                |
| Peptic ulcer disease                                           | 49.5<br>(43.2 to 56.6)                        | 3.8<br>(3.2 to 4.4)                      | 1.1<br>(0.7 to 1.6)                   | 171.2<br>(141.2 to 209.3)                         | 33.5<br>(22.0 to 46.6)                              |
| Gastritis and duodenitis                                       | 47.2<br>(40.8 to 54.1)                        | 39.9<br>(34.6 to 46.7)                   | 0.9<br>(0.6 to 1.3)                   | 168.3<br>(139.8 to 200.3)                         | 34.7<br>(24.2 to 46.4)                              |
| Appendicitis                                                   | 0.6<br>(0.5 to 0.6)                           | 14.5<br>(13.3 to 15.8)                   | 0.2<br>(0.1 to 0.2)                   | 55.6<br>(12.9 to 117.8)                           | -2.2<br>(-25.1 to 27.7)                             |
| Paralytic ileus and intestinal obstruction                     | < 0.05<br>(< 0.05 to 0.1)                     | 1.2<br>(1.0 to 1.4)                      | < 0.05<br>(< 0.05 to < 0.05)          | 79.8<br>(73.2 to 86.5)                            | 5.7<br>(2.8 to 9.0)                                 |
| Inguinal, femoral, and abdominal hernia                        | 28.9<br>(25.1 to 33.4)                        | 25.2<br>(21.7 to 29.5)                   | 1.2<br>(0.8 to 1.7)                   | 84.2<br>(61.5 to 108.2)                           | 2.1<br>(-7.9 to 12.7)                               |
| Inflammatory bowel disease                                     | 1.4<br>(1.2 to 1.5)                           | 1.7<br>(1.6 to 1.8)                      | 0.2<br>(0.1 to 0.3)                   | 93.2<br>(53.1 to 146.1)                           | 7.0<br>(-12.5 to 29.0)                              |
| Vascular intestinal disorders                                  | < 0.05<br>(< 0.05 to < 0.05)                  | 0.1<br>(0.1 to 0.1)                      | < 0.05<br>(< 0.05 to < 0.05)          | 81.9<br>(70.1 to 92.6)                            | 5.8<br>(0.6 to 10.9)                                |
| Gallbladder and biliary diseases                               | 7.3<br>(6.2 to 8.5)                           | 18.3<br>(15.5 to 21.4)                   | 0.1<br>(0.1 to 0.1)                   | 98.6<br>(58.4 to 141.4)                           | 4.4<br>(-16.6 to 28.1)                              |
| Pancreatitis                                                   | 0.1<br>(0.1 to 0.1)                           | 1.0<br>(0.9 to 1.2)                      | < 0.05<br>(< 0.05 to < 0.05)          | 90.3<br>(83.1 to 98.1)                            | 4.9<br>(1.3 to 8.8)                                 |
| Other digestive diseases                                       | --                                            | --                                       | 0.3<br>(0.2 to 0.4)                   | 125.8<br>(106.7 to 146.8)                         | 22.1<br>(14.2 to 30.7)                              |
| <b>Neurological disorders</b>                                  | <b>1,664.3</b><br><b>(1,587.3 to 1,740.7)</b> | <b>800.1</b><br><b>(663.9 to 949.7)</b>  | <b>46.6</b><br><b>(30.8 to 64.4)</b>  | <b>75.1</b><br><b>(53.6 to 99.3)</b>              | <b>0.8</b><br><b>(-11.4 to 15.0)</b>                |
| Alzheimer's disease and other dementias                        | 7.1<br>(6.1 to 8.4)                           | 1.2<br>(1.1 to 1.5)                      | 1.0<br>(0.7 to 1.3)                   | 72.8<br>(63.1 to 83.2)                            | 0.4<br>(-3.6 to 4.6)                                |
| Parkinson's disease                                            | 1.3<br>(1.0 to 1.6)                           | 0.2<br>(0.1 to 0.2)                      | 0.1<br>(0.1 to 0.2)                   | 108.2<br>(76.5 to 145.5)                          | 11.3<br>(-0.7 to 24.3)                              |
| Epilepsy                                                       | 13.4<br>(4.7 to 20.4)                         | 1.5<br>(0.5 to 2.3)                      | 3.8<br>(1.0 to 7.7)                   | 39.6<br>(-63.9 to 385.3)                          | -12.2<br>(-77.6 to 208.7)                           |
| Multiple sclerosis                                             | 2.0<br>(1.7 to 2.5)                           | 0.1<br>(0.1 to 0.1)                      | 0.5<br>(0.4 to 0.8)                   | 104.0<br>(61.1 to 170.3)                          | 10.0<br>(-10.9 to 42.6)                             |
| Motor neuron disease                                           | 0.1<br>(0.1 to 0.1)                           | < 0.05<br>(< 0.05 to < 0.05)             | < 0.05<br>(< 0.05 to < 0.05)          | 65.9<br>(57.1 to 74.2)                            | -3.9<br>(-7.8 to -0.2)                              |
| Migraine                                                       | 712.2<br>(664.5 to 759.9)                     | 76.8<br>(70.3 to 83.7)                   | 33.9<br>(21.8 to 48.1)                | 78.7<br>(71.6 to 86.4)                            | 2.2<br>(-1.2 to 5.9)                                |
| Tension-type headache                                          | 1,250.4<br>(1,101.2 to 1,414.5)               | 720.2<br>(582.1 to 868.9)                | 6.3<br>(3.9 to 9.6)                   | 81.7<br>(71.0 to 93.1)                            | 2.5<br>(-2.7 to 7.6)                                |
| Other neurological disorders                                   | < 0.05<br>(< 0.05 to < 0.05)                  | < 0.05<br>(< 0.05 to < 0.05)             | 1.0<br>(0.3 to 1.8)                   | 71.7<br>(-40.7 to 386.0)                          | 8.6<br>(-59.5 to 175.0)                             |
| <b>Mental and substance use disorders</b>                      | <b>659.3</b><br><b>(634.2 to 685.0)</b>       | <b>251.1†</b><br><b>(226.6 to 277.7)</b> | <b>97.7</b><br><b>(70.5 to 126.6)</b> | <b>73.6</b><br><b>(69.2 to 78.1)</b>              | <b>1.2</b><br><b>(-1.0 to 3.2)</b>                  |
| Schizophrenia                                                  | 9.7<br>(8.4 to 11.3)                          | 0.6<br>(0.5 to 0.7)                      | 6.2<br>(4.5 to 8.0)                   | 85.2<br>(65.8 to 104.6)                           | 0.1<br>(-8.7 to 9.3)                                |
| Alcohol use disorders                                          | 29.7<br>(24.8 to 34.8)                        | 16.3<br>(13.6 to 19.2)                   | 3.0<br>(2.0 to 4.2)                   | 74.4<br>(56.9 to 94.8)                            | 0.6<br>(-8.9 to 11.1)                               |
| Drug use disorders                                             | 42.5<br>(37.1 to 49.4)                        | 4.3<br>(3.8 to 4.9)                      | 14.0<br>(9.5 to 19.4)                 | 80.2<br>(63.8 to 98.3)                            | 3.9<br>(-4.4 to 12.8)                               |
| Opioid use disorders                                           | 31.2<br>(24.7 to 39.4)                        | 2.6<br>(2.1 to 3.2)                      | 13.0<br>(8.7 to 18.2)                 | 81.6<br>(63.1 to 101.4)                           | 4.4<br>(-4.9 to 14.5)                               |
| Cocaine use disorders                                          | 1.9<br>(1.6 to 2.3)                           | 0.1<br>(0.1 to 0.2)                      | 0.3<br>(0.1 to 0.4)                   | 62.3<br>(14.3 to 126.5)                           | -2.3<br>(-27.9 to 29.2)                             |
| Amphetamine use disorders                                      | 0.5<br>(0.3 to 0.6)                           | 0.1<br>(< 0.05 to 0.1)                   | 0.1<br>(< 0.05 to 0.1)                | 57.8<br>(4.4 to 136.6)                            | -3.8<br>(-32.0 to 34.0)                             |
| Cannabis use disorders                                         | 7.3<br>(6.0 to 8.8)                           | 1.1<br>(0.9 to 1.3)                      | 0.2<br>(0.1 to 0.3)                   | 56.1<br>(25.7 to 96.0)                            | -1.9<br>(-20.2 to 21.1)                             |
| Other drug use disorders                                       | 2.1<br>(1.9 to 2.5)                           | 0.4<br>(0.3 to 0.4)                      | 0.5<br>(0.3 to 0.6)                   | 70.8<br>(39.6 to 113.2)                           | -0.4<br>(-17.3 to 21.3)                             |
| Depressive disorders                                           | 151.1<br>(139.6 to 162.6)                     | 181.4<br>(158.3 to 207.0)                | 27.1<br>(18.7 to 37.3)                | 76.8<br>(67.2 to 87.0)                            | 1.1<br>(-3.5 to 5.7)                                |
| Major depressive disorder                                      | 112.2<br>(97.4 to 128.2)                      | 173.9<br>(151.2 to 199.8)                | 23.1<br>(15.5 to 31.9)                | 75.9<br>(64.7 to 88.4)                            | 1.0<br>(-4.4 to 6.5)                                |
| Dysthymia                                                      | 42.0<br>(36.0 to 49.0)                        | 7.5<br>(6.4 to 8.7)                      | 4.0<br>(2.7 to 6.0)                   | 82.3<br>(72.9 to 92.6)                            | 1.7<br>(-2.1 to 5.6)                                |
| Bipolar disorder                                               | 37.8<br>(32.3 to 44.2)                        | 2.4<br>(2.1 to 2.8)                      | 7.8<br>(4.8 to 11.6)                  | 71.9<br>(61.6 to 83.3)                            | 1.0<br>(-4.0 to 6.7)                                |
| Anxiety disorders                                              | 206.7<br>(181.1 to 235.4)                     | 29.8<br>(25.9 to 34.3)                   | 20.0<br>(13.6 to 27.6)                | 73.1<br>(67.1 to 79.6)                            | 2.0<br>(-0.9 to 5.3)                                |
| Eating disorders                                               | 14.0<br>(11.3 to 16.9)                        | 4.3<br>(3.3 to 5.5)                      | 2.8<br>(1.7 to 4.0)                   | 70.5<br>(53.6 to 88.7)                            | 5.2<br>(-4.6 to 15.6)                               |
| Anorexia nervosa                                               | 1.7<br>(1.2 to 2.3)                           | 0.6<br>(0.4 to 0.7)                      | 0.4<br>(0.2 to 0.6)                   | 59.0<br>(27.2 to 97.0)                            | 4.4<br>(-16.0 to 28.2)                              |
| Bulimia nervosa                                                | 11.5<br>(8.4 to 15.0)                         | 3.7<br>(2.7 to 5.0)                      | 2.4<br>(1.4 to 3.6)                   | 72.4<br>(53.2 to 92.8)                            | 5.3<br>(-5.1 to 17.1)                               |
| Autistic spectrum disorders                                    | 38.9<br>(34.3 to 43.9)                        | 0.2<br>(0.1 to 0.3)                      | 5.6<br>(3.8 to 7.9)                   | 60.2<br>(52.6 to 68.5)                            | -2.4<br>(-6.5 to 2.0)                               |
| Autism                                                         | 11.3<br>(9.6 to 13.3)                         | < 0.05<br>(< 0.05 to < 0.05)             | 2.9<br>(1.9 to 4.2)                   | 61.3<br>(48.7 to 76.5)                            | -2.4<br>(-9.6 to 6.1)                               |
| Asperger syndrome and other autistic spectrum disorders        | 27.5<br>(23.1 to 33.0)                        | 0.2<br>(0.1 to 0.3)                      | 2.8<br>(1.8 to 4.0)                   | 59.1<br>(51.1 to 67.3)                            | -2.5<br>(-6.6 to 1.9)                               |

| Cause                                                      | Prevalence in thousands (95% UI)              | Incidence in thousands (95% UI)                | YLDs in thousands (95% UI)            |                                                   |                                                     |
|------------------------------------------------------------|-----------------------------------------------|------------------------------------------------|---------------------------------------|---------------------------------------------------|-----------------------------------------------------|
|                                                            | 2016 counts                                   | 2016 counts                                    | 2016 counts                           | Percentage change in counts between 2006 and 2016 | Percentage change in age-standardised rates between |
| Attention-deficit/hyperactivity disorder                   | 44.8<br>(36.3 to 55.3)                        | 1.4<br>(1.2 to 1.8)                            | 0.5<br>(0.3 to 0.9)                   | 56.1<br>(44.2 to 68.1)                            | -1.1<br>(-7.9 to 5.7)                               |
| Conduct disorder                                           | 22.8<br>(18.5 to 26.9)                        | 7.9<br>(6.3 to 9.6)                            | 2.8<br>(1.7 to 4.2)                   | 35.7<br>(26.9 to 44.3)                            | 0.5<br>(-6.1 to 7.0)                                |
| Idiopathic developmental intellectual disability           | 41.7<br>(21.7 to 63.0)                        | --                                             | 1.6<br>(0.7 to 2.9)                   | 64.8<br>(51.3 to 79.9)                            | -2.0<br>(-9.8 to 5.5)                               |
| Other mental and substance use disorders                   | 84.5<br>(74.2 to 97.5)                        | 2.4<br>(2.1 to 2.8)                            | 6.3<br>(4.3 to 9.0)                   | 77.7<br>(67.7 to 89.2)                            | -1.2<br>(-5.7 to 4.2)                               |
| <b>Diabetes, urogenital, blood, and endocrine diseases</b> | <b>1,356.4</b><br><b>(1,319.0 to 1,391.1)</b> | <b>485.1†</b><br><b>(451.7 to 520.3)</b>       | <b>36.5</b><br><b>(25.8 to 49.8)</b>  | <b>78.2</b><br><b>(69.7 to 87.0)</b>              | <b>-7.7</b><br><b>(-12.2 to -2.9)</b>               |
| Diabetes mellitus                                          | 254.7<br>(223.5 to 285.6)                     | 17.8<br>(15.5 to 20.2)                         | 20.2<br>(13.6 to 28.7)                | 73.6<br>(59.7 to 89.2)                            | -11.4<br>(-18.4 to -3.4)                            |
| Acute glomerulonephritis                                   | < 0.05<br>(< 0.05 to < 0.05)                  | 0.6<br>(0.5 to 0.7)                            | < 0.05<br>(< 0.05 to < 0.05)          | 67.9<br>(58.5 to 77.6)                            | -0.8<br>(-5.0 to 3.2)                               |
| Chronic kidney disease                                     | 124.2<br>(111.2 to 139.1)                     | 9.2<br>(8.1 to 10.5)                           | 5.2<br>(3.8 to 6.7)                   | 83.0<br>(67.6 to 100.0)                           | -3.0<br>(-10.0 to 4.7)                              |
| Chronic kidney disease due to diabetes mellitus            | 55.0<br>(47.4 to 64.7)                        | 4.1<br>(3.4 to 5.0)                            | 2.2<br>(1.6 to 2.9)                   | 92.5<br>(69.5 to 116.9)                           | -1.8<br>(-11.2 to 8.4)                              |
| Chronic kidney disease due to hypertension                 | 17.6<br>(14.7 to 20.6)                        | 1.5<br>(1.2 to 1.8)                            | 0.6<br>(0.4 to 0.8)                   | 79.4<br>(52.5 to 111.1)                           | -6.0<br>(-17.4 to 6.1)                              |
| Chronic kidney disease due to glomerulonephritis           | 16.2<br>(13.5 to 19.2)                        | 1.0<br>(0.8 to 1.2)                            | 0.9<br>(0.6 to 1.3)                   | 73.7<br>(48.8 to 103.1)                           | -2.0<br>(-12.4 to 9.7)                              |
| Chronic kidney disease due to other causes                 | 35.4<br>(29.2 to 42.0)                        | 2.7<br>(2.2 to 3.2)                            | 1.5<br>(1.1 to 2.1)                   | 77.5<br>(56.7 to 104.0)                           | -3.6<br>(-12.3 to 6.5)                              |
| Urinary diseases and male infertility                      | 89.7<br>(76.9 to 102.7)                       | 243.6†<br>(216.9 to 273.4)                     | 2.2<br>(1.4 to 3.3)                   | 79.7<br>(55.3 to 101.6)                           | -10.8<br>(-22.1 to -1.4)                            |
| Interstitial nephritis and urinary tract infections        | 3.6<br>(3.1 to 4.2)                           | 187.0<br>(161.2 to 215.7)                      | 0.1<br>(0.1 to 0.2)                   | 72.2<br>(44.1 to 104.7)                           | 4.7<br>(-10.8 to 20.8)                              |
| Urolithiasis                                               | 1.9<br>(1.6 to 2.2)                           | 49.2<br>(42.1 to 58.0)                         | 0.1<br>(0.1 to 0.2)                   | 83.6<br>(52.2 to 120.5)                           | 0.0<br>(-16.3 to 19.8)                              |
| Benign prostatic hyperplasia                               | 51.9<br>(41.2 to 63.7)                        | 7.4<br>(5.7 to 9.3)                            | 1.7<br>(1.0 to 2.6)                   | 84.8<br>(53.1 to 111.2)                           | -11.6<br>(-24.4 to -1.2)                            |
| Male infertility                                           | 28.1<br>(21.8 to 36.4)                        | --                                             | 0.2<br>(0.1 to 0.3)                   | 57.3<br>(46.1 to 69.9)                            | -8.7<br>(-14.8 to -2.2)                             |
| Other urinary diseases                                     | --                                            | --                                             | 0.1<br>(0.1 to 0.1)                   | 49.5<br>(31.4 to 69.0)                            | -14.8<br>(-24.8 to -4.0)                            |
| Gynecological diseases                                     | 436.8<br>(417.3 to 456.9)                     | 207.0†<br>(190.1 to 226.1)                     | 6.2<br>(4.2 to 8.9)                   | 90.0<br>(81.4 to 98.9)                            | 5.0<br>(0.7 to 9.7)                                 |
| Uterine fibroids                                           | 40.8<br>(35.8 to 46.2)                        | 5.4<br>(4.6 to 6.3)                            | 0.6<br>(0.4 to 1.0)                   | 89.8<br>(72.4 to 105.5)                           | -2.2<br>(-10.8 to 5.1)                              |
| Polycystic ovarian syndrome                                | 4.0<br>(3.0 to 5.2)                           | 6.0<br>(4.0 to 8.4)                            | < 0.05<br>(< 0.05 to 0.1)             | 94.1<br>(67.0 to 124.7)                           | 9.9<br>(-5.7 to 26.3)                               |
| Female infertility                                         | 10.5<br>(5.4 to 20.4)                         | --                                             | 0.1<br>(< 0.05 to 0.2)                | 78.5<br>(47.4 to 129.5)                           | 16.5<br>(0.7 to 39.2)                               |
| Endometriosis                                              | 0.9<br>(0.8 to 1.1)                           | 2.4<br>(1.9 to 2.9)                            | 0.1<br>(0.1 to 0.1)                   | 83.3<br>(35.2 to 150.6)                           | 9.7<br>(-18.2 to 47.4)                              |
| Genital prolapse                                           | 70.4<br>(61.0 to 80.5)                        | 6.6<br>(5.7 to 7.8)                            | 0.2<br>(0.1 to 0.4)                   | 44.9<br>(32.0 to 57.5)                            | -24.6<br>(-31.0 to -18.0)                           |
| Premenstrual syndrome                                      | 290.0<br>(271.2 to 309.4)                     | 104.5<br>(96.8 to 113.3)                       | 2.4<br>(1.5 to 3.7)                   | 88.3<br>(74.9 to 103.2)                           | 8.9<br>(1.2 to 17.2)                                |
| Other gynecological diseases                               | 82.7<br>(69.8 to 97.3)                        | 82.1<br>(67.1 to 99.8)                         | 2.8<br>(1.8 to 4.2)                   | 96.8<br>(84.5 to 110.0)                           | 9.2<br>(3.2 to 15.9)                                |
| Hemoglobinopathies and hemolytic anaemias                  | 698.4<br>(656.1 to 734.1)                     | --                                             | 1.2<br>(0.8 to 1.9)                   | 84.4<br>(68.3 to 101.7)                           | 7.7<br>(-1.9 to 17.3)                               |
| Thalassemias                                               | < 0.05<br>(< 0.05 to < 0.05)                  | --                                             | < 0.05<br>(< 0.05 to < 0.05)          | 32.4<br>(1.7 to 58.2)                             | 1.8<br>(-22.5 to 21.9)                              |
| Thalassaemias trait                                        | 37.9<br>(33.8 to 41.8)                        | --                                             | 0.5<br>(0.3 to 0.7)                   | 121.8<br>(95.4 to 151.1)                          | 24.4<br>(11.0 to 39.4)                              |
| Sickle cell disorders                                      | 0.4<br>(0.3 to 0.4)                           | --                                             | 0.1<br>(< 0.05 to 0.1)                | 112.2<br>(92.4 to 132.9)                          | 26.8<br>(14.5 to 40.3)                              |
| Sickle cell trait                                          | 154.8<br>(133.2 to 183.7)                     | --                                             | 0.3<br>(0.2 to 0.6)                   | 103.5<br>(80.0 to 130.0)                          | 27.3<br>(13.1 to 43.2)                              |
| G6PD deficiency                                            | 146.4<br>(131.8 to 164.8)                     | --                                             | < 0.05<br>(< 0.05 to < 0.05)          | 18.7<br>(0.4 to 39.1)                             | -28.8<br>(-38.3 to -18.3)                           |
| G6PD trait                                                 | 368.8<br>(340.2 to 396.2)                     | --                                             | < 0.05<br>(< 0.05 to < 0.05)          | 114.4<br>(91.8 to 140.2)                          | 27.9<br>(14.7 to 43.4)                              |
| Other hemoglobinopathies and hemolytic anaemias            | 26.3<br>(23.0 to 29.5)                        | --                                             | 0.3<br>(0.2 to 0.5)                   | 35.9<br>(18.7 to 54.4)                            | -18.3<br>(-27.2 to -9.0)                            |
| Endocrine, metabolic, blood, and immune disorders          | 49.1<br>(44.8 to 53.7)                        | 6.9<br>(6.1 to 7.9)                            | 1.4<br>(0.9 to 1.9)                   | 71.6<br>(57.9 to 86.0)                            | 0.2<br>(-5.6 to 7.0)                                |
| <b>Musculoskeletal disorders</b>                           | <b>709.5</b><br><b>(667.9 to 747.9)</b>       | <b>375.6</b><br><b>(330.3 to 422.3)</b>        | <b>79.7</b><br><b>(57.4 to 105.1)</b> | <b>87.0</b><br><b>(80.9 to 92.7)</b>              | <b>0.6</b><br><b>(-1.7 to 2.9)</b>                  |
| Rheumatoid arthritis                                       | 13.2<br>(11.5 to 15.2)                        | 0.9<br>(0.8 to 1.0)                            | 3.1<br>(2.1 to 4.2)                   | 72.3<br>(53.2 to 92.2)                            | -10.2<br>(-19.0 to -0.7)                            |
| Osteoarthritis                                             | 136.4<br>(127.3 to 145.8)                     | 9.7<br>(8.8 to 10.5)                           | 8.5<br>(6.0 to 11.6)                  | 102.3<br>(94.2 to 111.0)                          | 2.0<br>(-1.6 to 6.2)                                |
| Low back and neck pain                                     | 433.1<br>(396.5 to 472.7)                     | 182.8<br>(159.5 to 208.2)                      | 50.7<br>(35.6 to 67.5)                | 89.1<br>(82.1 to 95.9)                            | 2.0<br>(-1.0 to 4.9)                                |
| Low back pain                                              | 288.4<br>(250.3 to 334.6)                     | 142.7<br>(121.2 to 167.9)                      | 32.9<br>(23.0 to 44.2)                | 86.8<br>(76.0 to 97.2)                            | 1.6<br>(-2.8 to 5.8)                                |
| Neck pain                                                  | 177.4<br>(149.6 to 207.2)                     | 40.1<br>(33.8 to 48.0)                         | 17.8<br>(11.8 to 25.4)                | 93.5<br>(87.8 to 99.4)                            | 2.9<br>(0.8 to 4.8)                                 |
| Gout                                                       | 11.6<br>(10.1 to 13.3)                        | 2.4<br>(2.1 to 2.8)                            | 0.4<br>(0.2 to 0.5)                   | 86.8<br>(51.9 to 128.1)                           | -3.4<br>(-16.2 to 11.6)                             |
| Other musculoskeletal disorders                            | 198.1<br>(159.1 to 241.3)                     | 179.8<br>(141.4 to 223.3)                      | 17.1<br>(11.3 to 25.0)                | 77.2<br>(62.5 to 92.7)                            | -1.9<br>(-9.2 to 5.1)                               |
| <b>Other non-communicable diseases</b>                     | <b>2,671.0</b><br><b>(2,602.8 to 2,732.5)</b> | <b>7,619.8†</b><br><b>(6,890.4 to 8,313.1)</b> | <b>68.3</b><br><b>(46.6 to 96.9)</b>  | <b>67.0</b><br><b>(64.1 to 69.5)</b>              | <b>-1.1</b><br><b>(-2.4 to 0.4)</b>                 |
| Congenital anomalies                                       | 47.2<br>(43.0 to 52.6)                        | --                                             | 6.6<br>(4.8 to 8.7)                   | 60.1<br>(51.5 to 70.0)                            | 1.2<br>(-4.2 to 7.1)                                |
| Neural tube defects                                        | 6.4<br>(5.7 to 7.3)                           | --                                             | 1.9<br>(1.3 to 2.6)                   | 69.9<br>(50.8 to 90.9)                            | 4.0<br>(-7.0 to 16.5)                               |
| Congenital heart anomalies                                 | 8.4<br>(7.3 to 9.5)                           | --                                             | 0.4<br>(0.2 to 0.7)                   | 72.7<br>(54.4 to 92.2)                            | 6.7<br>(-3.6 to 18.7)                               |
| Orofacial clefts                                           | 1.5<br>(1.3 to 1.7)                           | --                                             | < 0.05<br>(< 0.05 to < 0.05)          | 50.2<br>(33.2 to 69.3)                            | -7.3<br>(-18.0 to 4.4)                              |
| Down's syndrome                                            | 1.6<br>(1.3 to 1.8)                           | --                                             | 0.1<br>(0.1 to 0.2)                   | 67.2<br>(56.5 to 79.5)                            | 3.6<br>(-2.9 to 11.2)                               |
| Turner syndrome                                            | 0.8<br>(0.7 to 1.0)                           | --                                             | < 0.05<br>(< 0.05 to < 0.05)          | 57.8<br>(1.6 to 147.0)                            | -2.3<br>(-34.6 to 50.4)                             |
| Klinefelter syndrome                                       | 1.6<br>(1.4 to 1.9)                           | --                                             | < 0.05<br>(< 0.05 to < 0.05)          | 55.8<br>(18.7 to 107.7)                           | -4.8<br>(-26.0 to 24.9)                             |



| Cause                                         | Prevalence in thousands (95% UI)        | Incidence in thousands (95% UI)          | YLDs in thousands (95% UI)           |                                                   |                                                     |
|-----------------------------------------------|-----------------------------------------|------------------------------------------|--------------------------------------|---------------------------------------------------|-----------------------------------------------------|
|                                               | 2016 counts                             | 2016 counts                              | 2016 counts                          | Percentage change in counts between 2006 and 2016 | Percentage change in age-standardised rates between |
| Other chromosomal abnormalities               | 8.7<br>(7.4 to 10.1)                    | --                                       | 0.8<br>(0.6 to 1.1)                  | 36.4<br>(21.8 to 52.6)                            | 1.8<br>(-9.0 to 13.8)                               |
| Congenital musculoskeletal and limb anomalies | 7.8<br>(7.1 to 8.6)                     | --                                       | 1.2<br>(0.8 to 1.6)                  | 60.9<br>(44.9 to 78.8)                            | -2.1<br>(-11.2 to 8.4)                              |
| Urogenital congenital anomalies               | 3.2<br>(2.8 to 3.7)                     | --                                       | 0.1<br>(0.1 to 0.2)                  | 38.8<br>(23.0 to 57.3)                            | -1.0<br>(-12.2 to 12.1)                             |
| Digestive congenital anomalies                | 5.6<br>(5.0 to 6.3)                     | --                                       | 0.2<br>(0.1 to 0.4)                  | 57.1<br>(34.0 to 83.8)                            | -3.7<br>(-15.8 to 11.4)                             |
| Other congenital anomalies                    | 11.6<br>(6.9 to 18.7)                   | --                                       | 1.8<br>(1.1 to 2.7)                  | 60.9<br>(45.6 to 78.0)                            | -0.3<br>(-9.2 to 9.8)                               |
| Skin and subcutaneous diseases                | 1,096.5<br>(1,069.1 to 1,123.4)         | 2,156.4<br>(2,056.7 to 2,259.8)          | 27.9<br>(18.9 to 40.1)               | 60.4<br>(56.7 to 64.3)                            | 2.2<br>(0.2 to 4.3)                                 |
| Dermatitis                                    | 177.6<br>(165.2 to 191.3)               | 281.9<br>(254.6 to 309.7)                | 6.6<br>(3.9 to 10.8)                 | 57.4<br>(49.7 to 65.8)                            | -0.3<br>(-4.9 to 4.6)                               |
| Psoriasis                                     | 35.7<br>(33.3 to 38.3)                  | 4.8<br>(4.5 to 5.1)                      | 3.1<br>(2.2 to 4.2)                  | 90.0<br>(73.2 to 107.6)                           | 9.4<br>(1.7 to 17.6)                                |
| Cellulitis                                    | 1.9<br>(1.7 to 2.0)                     | 39.5<br>(36.6 to 42.5)                   | 0.1<br>(0.1 to 0.2)                  | 66.6<br>(30.3 to 115.3)                           | 0.9<br>(-16.7 to 25.1)                              |
| Pyoderma                                      | 8.4<br>(8.1 to 8.8)                     | 192.1<br>(183.8 to 200.2)                | < 0.05<br>(< 0.05 to 0.1)            | 69.0<br>(55.0 to 85.0)                            | 0.5<br>(-6.1 to 7.7)                                |
| Scabies                                       | 36.5<br>(30.6 to 43.6)                  | 111.0<br>(93.1 to 132.0)                 | 0.9<br>(0.5 to 1.5)                  | 48.6<br>(40.5 to 57.8)                            | -4.4<br>(-8.7 to 0.2)                               |
| Fungal skin diseases                          | 217.3<br>(193.1 to 244.3)               | 746.9<br>(663.4 to 837.0)                | 1.2<br>(0.5 to 2.6)                  | 65.2<br>(61.4 to 69.2)                            | -0.0<br>(-1.2 to 1.2)                               |
| Viral skin diseases                           | 97.3<br>(92.3 to 103.0)                 | 141.1<br>(132.7 to 150.0)                | 3.0<br>(1.9 to 4.4)                  | 58.7<br>(53.7 to 64.7)                            | 1.3<br>(-1.4 to 4.5)                                |
| Acne vulgaris                                 | 325.6<br>(295.8 to 359.3)               | 206.9<br>(173.8 to 251.6)                | 8.4<br>(5.6 to 12.1)                 | 52.6<br>(45.9 to 59.7)                            | 4.1<br>(-0.4 to 8.4)                                |
| Alopecia areata                               | 8.9<br>(8.2 to 9.6)                     | 15.6<br>(14.5 to 16.9)                   | 0.3<br>(0.2 to 0.4)                  | 73.0<br>(53.3 to 95.1)                            | 0.4<br>(-9.5 to 11.0)                               |
| Pruritus                                      | 34.4<br>(29.5 to 39.5)                  | 27.1<br>(23.6 to 31.4)                   | 0.4<br>(0.2 to 0.7)                  | 73.9<br>(63.3 to 86.3)                            | 0.9<br>(-4.1 to 6.2)                                |
| Urticaria                                     | 36.4<br>(31.6 to 41.8)                  | 64.7<br>(56.4 to 74.4)                   | 2.2<br>(1.4 to 3.1)                  | 55.1<br>(46.0 to 65.8)                            | 0.6<br>(-4.4 to 6.0)                                |
| Decubitus ulcer                               | 0.7<br>(0.6 to 0.8)                     | 2.6<br>(2.2 to 2.9)                      | 0.1<br>(0.1 to 0.2)                  | 82.2<br>(67.8 to 97.5)                            | 4.3<br>(-8.2 to 19.6)                               |
| Other skin and subcutaneous diseases          | 282.0<br>(272.7 to 291.9)               | 322.3<br>(310.9 to 334.5)                | 1.6<br>(0.7 to 2.9)                  | 76.1<br>(71.0 to 81.5)                            | 1.0<br>(-1.4 to 3.4)                                |
| Sense organ diseases                          | 704.1<br>(678.3 to 733.3)               | 338.0†<br>(316.2 to 361.4)               | 23.7<br>(16.4 to 33.3)               | 69.9<br>(64.6 to 75.3)                            | -4.3<br>(-6.5 to -1.7)                              |
| Glaucoma                                      | 2.4<br>(1.9 to 3.0)                     | --                                       | 0.2<br>(0.1 to 0.3)                  | 84.9<br>(64.4 to 107.8)                           | -1.4<br>(-10.6 to 9.1)                              |
| Cataract                                      | 32.2<br>(26.8 to 38.3)                  | --                                       | 2.3<br>(1.6 to 3.3)                  | 80.6<br>(69.3 to 92.6)                            | -3.9<br>(-8.8 to 1.4)                               |
| Macular degeneration                          | 2.6<br>(1.9 to 3.5)                     | --                                       | 0.2<br>(0.1 to 0.3)                  | 88.1<br>(68.4 to 110.4)                           | 2.0<br>(-7.0 to 11.9)                               |
| Refraction and accommodation disorders        | 315.6<br>(287.2 to 349.0)               | --                                       | 7.0<br>(4.3 to 10.7)                 | 55.3<br>(48.9 to 63.0)                            | -11.0<br>(-14.1 to -7.7)                            |
| Age-related and other hearing loss            | 379.9<br>(346.5 to 414.3)               | --                                       | 9.7<br>(6.4 to 14.2)                 | 73.4<br>(62.6 to 83.1)                            | -2.5<br>(-7.1 to 1.8)                               |
| Other vision loss                             | 20.9<br>(17.4 to 25.1)                  | --                                       | 1.6<br>(1.1 to 2.3)                  | 79.9<br>(63.3 to 96.2)                            | -1.6<br>(-8.0 to 4.8)                               |
| Other sense organ diseases                    | 86.9<br>(79.7 to 94.3)                  | 338.0<br>(316.2 to 361.4)                | 2.7<br>(1.7 to 4.1)                  | 83.1<br>(73.4 to 93.9)                            | 2.0<br>(-1.8 to 5.9)                                |
| Oral disorders                                | 1,860.2<br>(1,752.0 to 1,961.9)         | 5,125.3†<br>(4,404.6 to 5,816.8)         | 10.1<br>(5.9 to 15.9)                | 85.6<br>(81.0 to 90.4)                            | 0.6<br>(-1.2 to 2.5)                                |
| Caries of deciduous teeth                     | 192.7<br>(151.3 to 231.2)               | 833.4<br>(566.4 to 1,124.5)              | 0.1<br>(< 0.05 to 0.1)               | 57.0<br>(24.8 to 86.4)                            | 10.0<br>(-13.1 to 30.7)                             |
| Caries of permanent teeth                     | 1,306.1<br>(1,147.4 to 1,460.7)         | 4,227.3<br>(3,561.8 to 4,825.4)          | 1.3<br>(0.6 to 2.5)                  | 73.0<br>(64.3 to 81.0)                            | 1.7<br>(-2.2 to 5.6)                                |
| Periodontal disease                           | 438.6<br>(354.4 to 537.8)               | 53.7<br>(41.5 to 68.7)                   | 2.9<br>(1.1 to 6.1)                  | 91.4<br>(82.5 to 100.4)                           | -0.2<br>(-3.9 to 3.5)                               |
| Edentulism and severe tooth loss              | 130.8<br>(110.7 to 152.6)               | 10.9<br>(9.1 to 12.8)                    | 3.7<br>(2.4 to 5.3)                  | 93.2<br>(84.4 to 101.6)                           | 0.5<br>(-2.8 to 3.9)                                |
| Other oral disorders                          | 73.8<br>(70.0 to 77.6)                  | --                                       | 2.2<br>(1.4 to 3.2)                  | 75.5<br>(68.8 to 82.5)                            | 0.9<br>(-2.0 to 4.0)                                |
| <b>Injuries</b>                               | <b>803.6</b><br><b>(750.6 to 863.9)</b> | <b>315.7†</b><br><b>(297.0 to 336.6)</b> | <b>26.6</b><br><b>(17.6 to 38.5)</b> | <b>77.2</b><br><b>(74.0 to 80.2)</b>              | <b>-0.9</b><br><b>(-2.1 to 0.4)</b>                 |
| <b>Transport injuries</b>                     | <b>127.9</b><br><b>(118.1 to 138.1)</b> | <b>45.7</b><br><b>(41.3 to 50.6)</b>     | <b>6.3</b><br><b>(4.1 to 8.9)</b>    | <b>65.8</b><br><b>(62.2 to 69.4)</b>              | <b>-9.5</b><br><b>(-11.1 to -7.9)</b>               |
| Road injuries                                 | 98.3<br>(90.6 to 106.0)                 | 39.4<br>(34.9 to 44.4)                   | 4.9<br>(3.2 to 7.0)                  | 64.8<br>(61.0 to 68.5)                            | -11.0<br>(-12.6 to -9.4)                            |
| Pedestrian road injuries                      | 18.9<br>(16.4 to 21.8)                  | 5.4<br>(4.4 to 6.4)                      | 0.9<br>(0.6 to 1.3)                  | 52.9<br>(49.4 to 56.2)                            | -17.4<br>(-18.8 to -15.9)                           |
| Cyclist road injuries                         | 15.1<br>(12.5 to 17.9)                  | 6.0<br>(4.7 to 7.6)                      | 0.7<br>(0.5 to 1.0)                  | 75.2<br>(71.1 to 79.2)                            | -5.0<br>(-6.7 to -3.3)                              |
| Motorcyclist road injuries                    | 15.3<br>(12.9 to 18.8)                  | 3.8<br>(3.0 to 4.9)                      | 0.7<br>(0.5 to 1.0)                  | 87.7<br>(83.4 to 91.9)                            | 4.0<br>(2.2 to 5.8)                                 |
| Motor vehicle road injuries                   | 40.2<br>(34.2 to 46.3)                  | 19.8<br>(17.1 to 22.8)                   | 2.2<br>(1.5 to 3.1)                  | 57.5<br>(53.4 to 61.5)                            | -15.2<br>(-17.0 to -13.6)                           |
| Other road injuries                           | 8.8<br>(7.3 to 10.4)                    | 4.4<br>(3.4 to 5.7)                      | 0.4<br>(0.3 to 0.6)                  | 86.8<br>(82.4 to 91.2)                            | 1.2<br>(-0.5 to 2.9)                                |
| Other transport injuries                      | 29.6<br>(24.5 to 35.8)                  | 6.3<br>(5.4 to 7.4)                      | 1.4<br>(0.9 to 1.9)                  | 69.4<br>(65.3 to 73.3)                            | -3.2<br>(-5.1 to -1.5)                              |
| <b>Unintentional injuries</b>                 | <b>628.2</b><br><b>(578.1 to 681.7)</b> | <b>259.6</b><br><b>(242.5 to 281.4)</b>  | <b>18.4</b><br><b>(12.1 to 26.7)</b> | <b>84.7</b><br><b>(81.7 to 87.8)</b>              | <b>3.7</b><br><b>(2.4 to 5.0)</b>                   |
| Falls                                         | 214.7<br>(184.2 to 249.5)               | 88.7<br>(77.3 to 102.5)                  | 7.5<br>(5.1 to 10.7)                 | 77.6<br>(74.4 to 81.0)                            | -1.8<br>(-3.2 to -0.4)                              |
| Drowning                                      | 2.0<br>(1.7 to 2.4)                     | 0.4<br>(0.3 to 0.4)                      | 0.1<br>(0.1 to 0.1)                  | 96.4<br>(90.8 to 102.2)                           | 10.9<br>(8.1 to 13.7)                               |
| Fire, heat, and hot substances                | 65.4<br>(54.2 to 79.6)                  | 7.7<br>(6.2 to 9.1)                      | 1.6<br>(1.0 to 2.4)                  | 100.6<br>(93.9 to 107.9)                          | 12.2<br>(9.1 to 15.3)                               |
| Poisonings                                    | 2.9<br>(2.5 to 3.4)                     | 4.1<br>(3.2 to 5.2)                      | 0.2<br>(0.2 to 0.4)                  | 86.2<br>(71.6 to 101.3)                           | 9.2<br>(2.1 to 16.5)                                |
| Exposure to mechanical forces                 | 112.6<br>(95.1 to 140.5)                | 45.9<br>(37.9 to 54.6)                   | 2.4<br>(1.6 to 3.6)                  | 102.0<br>(98.3 to 105.8)                          | 10.5<br>(9.1 to 12.1)                               |
| Unintentional firearm injuries                | 5.1<br>(4.1 to 6.3)                     | 1.4<br>(0.9 to 2.0)                      | 0.2<br>(0.1 to 0.3)                  | 109.5<br>(104.4 to 114.3)                         | 14.4<br>(12.3 to 16.6)                              |
| Unintentional suffocation                     | 3.5<br>(2.7 to 4.5)                     | 0.6<br>(0.4 to 0.9)                      | 0.1<br>(0.1 to 0.2)                  | 84.2<br>(79.4 to 89.4)                            | 7.7<br>(5.5 to 9.8)                                 |
| Other exposure to mechanical forces           | 103.9<br>(86.2 to 131.6)                | 43.8<br>(36.4 to 52.0)                   | 2.1<br>(1.4 to 3.1)                  | 102.4<br>(98.6 to 106.2)                          | 10.3<br>(8.8 to 12.0)                               |

| Cause                                                                               | Prevalence in thousands (95% UI)     | Incidence in thousands (95% UI)      | YLDs in thousands (95% UI)           |                                                   |                                                     |
|-------------------------------------------------------------------------------------|--------------------------------------|--------------------------------------|--------------------------------------|---------------------------------------------------|-----------------------------------------------------|
|                                                                                     | 2016 counts                          | 2016 counts                          | 2016 counts                          | Percentage change in counts between 2006 and 2016 | Percentage change in age-standardised rates between |
| Adverse effects of medical treatment                                                | 1.1<br>(0.9 to 1.4)                  | 14.5<br>(12.3 to 16.9)               | 0.1<br>(0.1 to 0.2)                  | 61.4<br>(53.9 to 70.5)                            | 4.7<br>(0.1 to 9.3)                                 |
| Animal contact                                                                      | 16.7<br>(14.6 to 19.4)               | 19.7<br>(15.8 to 24.4)               | 0.5<br>(0.4 to 0.8)                  | 78.6<br>(67.3 to 89.5)                            | 4.2<br>(-0.5 to 9.5)                                |
| Venomous animal contact                                                             | 8.2<br>(6.7 to 9.8)                  | 9.3<br>(7.0 to 12.1)                 | 0.4<br>(0.3 to 0.6)                  | 77.5<br>(64.0 to 91.5)                            | 4.4<br>(-1.9 to 11.2)                               |
| Non-venomous animal contact                                                         | 8.5<br>(7.0 to 10.8)                 | 10.4<br>(7.9 to 13.3)                | 0.1<br>(0.1 to 0.2)                  | 82.6<br>(77.6 to 87.5)                            | 3.7<br>(1.8 to 5.6)                                 |
| Foreign body                                                                        | 38.4<br>(31.7 to 45.9)               | 22.7<br>(19.2 to 27.1)               | 1.1<br>(0.7 to 1.7)                  | 79.2<br>(74.9 to 83.0)                            | 4.5<br>(2.7 to 6.3)                                 |
| Pulmonary aspiration and foreign body in airway                                     | 12.5<br>(9.1 to 17.0)                | 3.5<br>(2.8 to 4.3)                  | 0.5<br>(0.3 to 0.7)                  | 67.3<br>(62.1 to 72.0)                            | -0.4<br>(-2.8 to 1.9)                               |
| Foreign body in eyes                                                                | 2.0<br>(1.1 to 3.0)                  | 10.5<br>(7.9 to 14.4)                | 0.1<br>(0.1 to 0.2)                  | 84.7<br>(75.8 to 94.4)                            | 6.6<br>(3.1 to 10.0)                                |
| Foreign body in other body part                                                     | 23.9<br>(19.3 to 30.7)               | 8.7<br>(7.1 to 10.5)                 | 0.6<br>(0.4 to 0.8)                  | 88.8<br>(84.6 to 93.2)                            | 8.4<br>(6.7 to 10.3)                                |
| Environmental heat and cold exposure                                                | 35.0<br>(29.3 to 41.4)               | 9.0<br>(7.3 to 11.1)                 | 1.1<br>(0.7 to 1.6)                  | 81.5<br>(78.2 to 84.9)                            | 3.5<br>(2.1 to 4.9)                                 |
| Other unintentional injuries                                                        | 139.4<br>(110.9 to 172.3)            | 47.1<br>(38.1 to 56.8)               | 3.6<br>(2.4 to 5.4)                  | 87.7<br>(84.3 to 91.2)                            | 8.0<br>(6.6 to 9.6)                                 |
| <b>Self-harm and interpersonal violence</b>                                         | <b>87.1</b><br><b>(76.9 to 98.1)</b> | <b>10.3†</b><br><b>(8.8 to 12.0)</b> | <b>1.3</b><br><b>(0.9 to 1.8)</b>    | <b>59.2</b><br><b>(55.1 to 63.2)</b>              | <b>-8.2</b><br><b>(-9.7 to -6.6)</b>                |
| Self-harm                                                                           | 4.4<br>(3.7 to 5.1)                  | 1.9<br>(1.5 to 2.2)                  | 0.2<br>(0.1 to 0.3)                  | 75.8<br>(70.0 to 81.2)                            | -3.2<br>(-5.6 to -0.9)                              |
| Self-harm by firearm                                                                | 0.3<br>(0.2 to 0.3)                  | 0.1<br>( $< 0.05$ to 0.1)            | $< 0.05$<br>( $< 0.05$ to $< 0.05$ ) | 82.6<br>(76.6 to 88.8)                            | 4.2<br>(1.7 to 6.9)                                 |
| Self-harm by other specified means                                                  | 4.1<br>(3.4 to 4.8)                  | 1.8<br>(1.5 to 2.2)                  | 0.2<br>(0.1 to 0.2)                  | 75.4<br>(69.4 to 81.1)                            | -3.6<br>(-6.0 to -1.3)                              |
| Interpersonal violence                                                              | 82.8<br>(72.7 to 93.7)               | 8.5†<br>(7.0 to 10.1)                | 1.1<br>(0.8 to 1.6)                  | 56.9<br>(52.4 to 61.2)                            | -8.9<br>(-10.6 to -7.2)                             |
| Assault by firearm                                                                  | 1.0<br>(0.9 to 1.2)                  | 0.3<br>(0.2 to 0.5)                  | $< 0.05$<br>( $< 0.05$ to 0.1)       | 72.0<br>(65.9 to 77.4)                            | -6.5<br>(-9.0 to -4.1)                              |
| Assault by sharp object                                                             | 5.4<br>(4.3 to 6.5)                  | 2.1<br>(1.5 to 2.8)                  | 0.1<br>(0.1 to 0.2)                  | 60.4<br>(56.2 to 64.4)                            | -11.1<br>(-12.7 to -9.4)                            |
| Sexual violence                                                                     | 66.0<br>(56.0 to 76.7)               | --                                   | 0.5<br>(0.4 to 0.8)                  | 47.0<br>(40.6 to 53.5)                            | -10.1<br>(-13.0 to -6.9)                            |
| Assault by other means                                                              | 10.3<br>(8.7 to 12.4)                | 6.0<br>(4.9 to 7.2)                  | 0.4<br>(0.3 to 0.6)                  | 69.6<br>(65.6 to 73.5)                            | -7.1<br>(-8.8 to -5.4)                              |
| <b>Forces of nature, conflict and terrorism, and executions and police conflict</b> | <b>26.2</b><br><b>(11.5 to 49.5)</b> | <b>0.1†</b><br><b>(0.1 to 0.1)</b>   | <b>0.6</b><br><b>(0.1 to 1.6)</b>    | <b>33.3</b><br><b>(26.9 to 38.9)</b>              | <b>-20.7</b><br><b>(-23.4 to -18.4)</b>             |
| Exposure to forces of nature                                                        | $< 0.05$<br>( $< 0.05$ to 0.1)       | --                                   | $< 0.05$<br>( $< 0.05$ to $< 0.05$ ) | 4.5<br>(-0.7 to 7.5)                              | -31.7<br>(-33.0 to -30.4)                           |
| Conflict and terrorism                                                              | 25.8<br>(11.1 to 48.9)               | --                                   | 0.6<br>(0.1 to 1.6)                  | 33.1<br>(26.6 to 38.8)                            | -20.9<br>(-23.7 to -18.6)                           |
| Executions and police conflict                                                      | 0.4<br>(0.2 to 0.6)                  | 0.1<br>(0.1 to 0.1)                  | $< 0.05$<br>( $< 0.05$ to $< 0.05$ ) | 60.2<br>(55.1 to 65.5)                            | -0.2<br>(-2.6 to 2.3)                               |
| <b>Impairments</b>                                                                  | --                                   | --                                   | --                                   | --                                                | --                                                  |
| Anaemia                                                                             | 773.4<br>(712.4 to 834.1)            | --                                   | 17.4<br>(11.6 to 25.2)               | 57.5<br>(45.3 to 69.9)                            | -5.6<br>(-12.1 to 1.2)                              |
| Developmental intellectual disability                                               | 86.0<br>(65.5 to 107.6)              | --                                   | 9.2<br>(6.7 to 12.4)                 | 62.1<br>(54.5 to 70.6)                            | -1.2<br>(-5.3 to 3.5)                               |
| Epilepsy                                                                            | 21.3<br>(12.1 to 29.2)               | --                                   | 6.7<br>(3.4 to 11.0)                 | 48.6<br>(-28.7 to 193.6)                          | -8.8<br>(-58.4 to 87.8)                             |
| Guillain-Barre syndrome                                                             | $< 0.05$<br>( $< 0.05$ to $< 0.05$ ) | --                                   | $< 0.05$<br>( $< 0.05$ to $< 0.05$ ) | 70.6<br>(63.6 to 77.3)                            | -0.5<br>(-0.8 to -0.1)                              |
| Hearing loss                                                                        | 415.8<br>(383.0 to 449.5)            | --                                   | 11.5<br>(7.8 to 16.4)                | 68.9<br>(59.9 to 76.8)                            | -3.0<br>(-6.9 to 0.9)                               |
| Heart failure                                                                       | 22.2<br>(19.6 to 25.1)               | --                                   | 2.0<br>(1.4 to 2.7)                  | 81.2<br>(68.6 to 94.9)                            | -2.4<br>(-8.6 to 4.3)                               |
| Infertility                                                                         | 78.6<br>(61.7 to 100.8)              | --                                   | 0.5<br>(0.2 to 1.0)                  | 79.6<br>(69.4 to 90.7)                            | 3.5<br>(-1.5 to 8.8)                                |
| Pelvic inflammatory disease                                                         | 2.3<br>(1.7 to 2.9)                  | --                                   | 0.3<br>(0.2 to 0.5)                  | 80.9<br>(51.4 to 116.3)                           | 1.7<br>(-13.2 to 18.8)                              |
| Vision loss                                                                         | 394.4<br>(358.3 to 434.8)            | --                                   | 13.9<br>(9.6 to 19.1)                | 62.8<br>(57.1 to 69.2)                            | -6.9<br>(-9.4 to -4.2)                              |

We did not calculate incidence for the nine impairments, certain NTDs, and causes with only birth prevalence. Blank cells mean that no estimate is available.

† Incidence for aggregate causes represents the sum of the incidence of the causes below the aggregate.

‡ Incidence estimates for stroke represent first-ever stroke only.

^ Incidence of HIV/AIDS represents new infections of HIV only and does not include new infections of Tuberculosis in HIV positive cases.



SR Table 14: Prevalence, incidence, and YLDs for 2016, percentage change of YLD counts and percentage change of age-standardised YLD rates between 2006 and 2016 by cause and impairments, for all ages, Kyrgyzstan.

| Cause                                                                                | Prevalence in thousands (95% UI)       | Incidence in thousands (95% UI)            | YLDs in thousands (95% UI)       |                                                   |                                                     |
|--------------------------------------------------------------------------------------|----------------------------------------|--------------------------------------------|----------------------------------|---------------------------------------------------|-----------------------------------------------------|
|                                                                                      | 2016 counts                            | 2016 counts                                | 2016 counts                      | Percentage change in counts between 2006 and 2016 | Percentage change in age-standardised rates between |
| <b>All causes</b>                                                                    | <b>5,763.8</b><br>(5,740.6 to 5,785.4) | <b>28,809.4†</b><br>(27,703.2 to 30,121.8) | <b>566.8</b><br>(419.0 to 741.0) | <b>15.6</b><br>(12.8 to 18.4)                     | <b>-1.0</b><br>(-3.0 to 1.1)                        |
| <b>Communicable, maternal, neonatal, and nutritional disorders</b>                   | <b>4,113.2</b><br>(3,952.3 to 4,267.7) | <b>10,841.6†</b><br>(10,018.9 to 11,700.9) | <b>78.7</b><br>(55.4 to 110.0)   | <b>13.6</b><br>(8.2 to 19.5)                      | <b>-3.1</b><br>(-7.6 to 1.5)                        |
| <b>HIV/AIDS and tuberculosis</b>                                                     | <b>1,047.9</b><br>(959.9 to 1,113.2)   | <b>7.2†</b><br>(6.3 to 8.1)                | <b>1.5</b><br>(0.9 to 2.4)       | <b>11.6</b><br>(-5.7 to 31.8)                     | <b>-3.3</b><br>(-18.3 to 13.3)                      |
| Tuberculosis                                                                         | 982.9<br>(905.7 to 1,066.9)            | 6.5†<br>(5.7 to 7.4)                       | 0.8<br>(0.6 to 1.2)              | -4.4<br>(-18.7 to 13.8)                           | -16.6<br>(-28.4 to -2.9)                            |
| Drug-susceptible tuberculosis                                                        | 1.9<br>(1.2 to 2.4)                    | 4.5<br>(2.9 to 5.9)                        | 0.6<br>(0.3 to 0.9)              | -7.3<br>(-48.8 to 66.7)                           | -19.2<br>(-54.9 to 44.0)                            |
| Multidrug-resistant tuberculosis without extensive drug resistance                   | 0.7<br>(0.3 to 1.2)                    | 1.7<br>(0.7 to 2.9)                        | 0.2<br>(0.1 to 0.4)              | -10.4<br>(-73.9 to 262.5)                         | -21.8<br>(-76.6 to 205.6)                           |
| Extensively drug-resistant tuberculosis                                              | 0.1<br>(0.1 to 0.3)                    | 0.4<br>(0.2 to 0.6)                        | 0.1<br>(< 0.05 to 0.1)           | 177.2<br>(-12.3 to 922.4)                         | 141.6<br>(-23.4 to 783.8)                           |
| Latent tuberculosis infection                                                        | 980.1<br>(903.2 to 1,064.3)            | --                                         | --                               | --                                                | --                                                  |
| HIV/AIDS                                                                             | 5.5<br>(3.4 to 8.6)                    | 0.7^<br>(0.4 to 1.1)                       | 0.6<br>(0.3 to 1.4)              | 44.2<br>(6.7 to 98.4)                             | 24.5<br>(-8.1 to 71.1)                              |
| Drug-susceptible HIV/AIDS - Tuberculosis                                             | < 0.05<br>(< 0.05 to 0.1)              | 0.1<br>(< 0.05 to 0.2)                     | < 0.05<br>(< 0.05 to < 0.05)     | -9.1<br>(-61.5 to 94.9)                           | -19.1<br>(-65.7 to 73.5)                            |
| Multidrug-resistant HIV/AIDS - Tuberculosis without extensive drug resistance        | < 0.05<br>(< 0.05 to < 0.05)           | < 0.05<br>(< 0.05 to 0.1)                  | < 0.05<br>(< 0.05 to < 0.05)     | -11.8<br>(-72.3 to 228.6)                         | -21.5<br>(-75.4 to 192.4)                           |
| Extensively drug-resistant HIV/AIDS - Tuberculosis                                   | < 0.05<br>(< 0.05 to < 0.05)           | < 0.05<br>(< 0.05 to < 0.05)               | < 0.05<br>(< 0.05 to < 0.05)     | 171.9<br>(-14.6 to 913.5)                         | 142.0<br>(-24.0 to 801.8)                           |
| HIV/AIDS resulting in other diseases                                                 | 5.5<br>(3.4 to 8.5)                    | 0.7<br>(0.4 to 1.1)                        | 0.6<br>(0.2 to 1.4)              | 47.6<br>(7.4 to 113.5)                            | 27.1<br>(-7.5 to 83.7)                              |
| <b>Diarrhoea, lower respiratory infections, and other common infectious diseases</b> | <b>246.6</b><br>(236.1 to 258.7)       | <b>9,611.1†</b><br>(8,788.0 to 10,478.4)   | <b>13.0</b><br>(9.0 to 17.8)     | <b>15.1</b><br>(11.2 to 18.9)                     | <b>-2.6</b><br>(-5.6 to 0.3)                        |
| Diarrhoeal diseases                                                                  | 39.0<br>(36.1 to 42.2)                 | 2,475.4<br>(2,301.0 to 2,682.5)            | 4.5<br>(3.1 to 6.2)              | 24.8<br>(16.7 to 33.5)                            | 2.4<br>(-3.9 to 9.1)                                |
| Intestinal infectious diseases                                                       | < 0.05<br>(< 0.05 to < 0.05)           | < 0.05†<br>(< 0.05 to < 0.05)              | < 0.05<br>(< 0.05 to < 0.05)     | 13.1<br>(-3.6 to 32.9)                            | -4.7<br>(-18.4 to 12.3)                             |
| Typhoid fever                                                                        | < 0.05<br>(< 0.05 to < 0.05)           | < 0.05<br>(< 0.05 to < 0.05)               | < 0.05<br>(< 0.05 to < 0.05)     | 11.2<br>(-6.8 to 31.9)                            | -6.3<br>(-21.0 to 11.2)                             |
| Paratyphoid fever                                                                    | < 0.05<br>(< 0.05 to < 0.05)           | < 0.05<br>(< 0.05 to < 0.05)               | < 0.05<br>(< 0.05 to < 0.05)     | 78.0<br>(41.8 to 130.6)                           | 53.3<br>(22.1 to 98.0)                              |
| Other intestinal infectious diseases                                                 | --                                     | --                                         | < 0.05<br>(< 0.05 to < 0.05)     | -12.5<br>(-37.8 to 23.2)                          | -31.8<br>(-48.6 to -9.9)                            |
| Lower respiratory infections                                                         | 9.1<br>(8.4 to 9.9)                    | 385.6<br>(351.9 to 422.4)                  | 0.6<br>(0.4 to 0.8)              | 4.9<br>(-6.8 to 17.8)                             | -11.5<br>(-20.3 to -1.7)                            |
| Upper respiratory infections                                                         | 82.9<br>(72.6 to 94.1)                 | 6,137.1<br>(5,369.7 to 6,983.1)            | 2.1<br>(1.2 to 3.2)              | 10.9<br>(3.7 to 18.4)                             | -2.4<br>(-8.1 to 3.4)                               |
| Otitis media                                                                         | 99.1<br>(88.4 to 109.7)                | 436.7<br>(344.2 to 550.5)                  | 3.1<br>(2.0 to 4.7)              | 10.4<br>(2.6 to 19.2)                             | -6.5<br>(-12.4 to 0.2)                              |
| Meningitis                                                                           | 25.0<br>(21.0 to 29.3)                 | 4.8<br>(4.1 to 5.6)                        | 1.9<br>(1.4 to 2.6)              | 8.6<br>(1.2 to 15.9)                              | -4.1<br>(-10.4 to 1.9)                              |
| Pneumococcal meningitis                                                              | 10.7<br>(8.5 to 13.3)                  | 1.1<br>(0.9 to 1.4)                        | 0.8<br>(0.6 to 1.1)              | 7.4<br>(-5.5 to 22.8)                             | -5.3<br>(-16.0 to 6.5)                              |
| H influenzae type B meningitis                                                       | 3.3<br>(2.5 to 4.4)                    | 0.7<br>(0.5 to 0.9)                        | 0.3<br>(0.2 to 0.4)              | -12.0<br>(-23.8 to -1.7)                          | -22.7<br>(-32.9 to -13.6)                           |
| Meningococcal infection                                                              | 5.4<br>(3.8 to 7.2)                    | 1.6<br>(1.2 to 1.9)                        | 0.4<br>(0.3 to 0.5)              | 13.8<br>(7.6 to 21.1)                             | 0.8<br>(-4.7 to 7.4)                                |
| Other meningitis                                                                     | 5.6<br>(4.1 to 7.2)                    | 1.4<br>(1.2 to 1.7)                        | 0.4<br>(0.3 to 0.6)              | 29.5<br>(19.2 to 40.2)                            | 13.6<br>(4.6 to 22.7)                               |
| Encephalitis                                                                         | 4.4<br>(3.0 to 6.3)                    | 1.8<br>(1.6 to 2.0)                        | 0.5<br>(0.3 to 0.6)              | 7.0<br>(-4.6 to 19.1)                             | -7.7<br>(-17.8 to 3.2)                              |
| Diphtheria                                                                           | < 0.05<br>(< 0.05 to < 0.05)           | < 0.05<br>(< 0.05 to < 0.05)               | < 0.05<br>(< 0.05 to < 0.05)     | -21.7<br>(-55.7 to 46.5)                          | -38.2<br>(-64.6 to 13.1)                            |
| Whooping cough                                                                       | 2.3<br>(1.8 to 2.9)                    | 17.0<br>(13.3 to 21.4)                     | 0.1<br>(0.1 to 0.2)              | 36.8<br>(18.9 to 58.0)                            | -3.9<br>(-16.3 to 11.1)                             |
| Tetanus                                                                              | < 0.05<br>(< 0.05 to < 0.05)           | < 0.05<br>(< 0.05 to < 0.05)               | < 0.05<br>(< 0.05 to < 0.05)     | -0.5<br>(-19.9 to 12.8)                           | -19.1<br>(-37.5 to -6.2)                            |
| Measles                                                                              | 0.5<br>(0.5 to 0.5)                    | 18.0<br>(17.7 to 18.2)                     | < 0.05<br>(< 0.05 to 0.1)        | 128,190.8<br>(41,448.4 to 2.8e+23)                | 90,330.7<br>(29,458.6 to 2.0e+23)                   |
| Varicella and herpes zoster                                                          | 4.8<br>(4.5 to 5.1)                    | 134.7<br>(128.3 to 141.2)                  | 0.1<br>(0.1 to 0.2)              | 18.3<br>(1.2 to 38.7)                             | -0.2<br>(-12.5 to 14.1)                             |
| <b>Neglected tropical diseases and malaria</b>                                       | <b>1,667.9</b><br>(1,300.7 to 2,080.1) | <b>0.8†</b><br>(0.2 to 2.5)                | <b>3.8</b><br>(2.3 to 6.3)       | <b>7.4</b><br>(-28.0 to 49.6)                     | <b>-12.1</b><br>(-44.2 to 25.5)                     |
| Malaria                                                                              | --                                     | --                                         | --                               | --                                                | --                                                  |
| Chagas disease                                                                       | --                                     | --                                         | --                               | --                                                | --                                                  |
| Leishmaniasis                                                                        | < 0.05<br>(< 0.05 to < 0.05)           | < 0.05<br>(< 0.05 to < 0.05)               | < 0.05<br>(< 0.05 to < 0.05)     | -1.8<br>(-87.5 to 790.5)                          | -13.3<br>(-88.7 to 752.0)                           |
| Visceral leishmaniasis                                                               | < 0.05<br>(< 0.05 to < 0.05)           | < 0.05<br>(< 0.05 to < 0.05)               | < 0.05<br>(< 0.05 to < 0.05)     | 9.7<br>(-79.9 to 674.5)                           | -6.9<br>(-85.4 to 676.8)                            |
| Cutaneous and mucocutaneous leishmaniasis                                            | < 0.05<br>(< 0.05 to < 0.05)           | < 0.05<br>(0.0 to < 0.05)                  | < 0.05<br>(< 0.05 to < 0.05)     | -32.4<br>(-100.0 to 2.2e+18)                      | -41.3<br>(-100.0 to 1.8e+18)                        |
| African trypanosomiasis                                                              | --                                     | --                                         | --                               | --                                                | --                                                  |
| Schistosomiasis                                                                      | --                                     | --                                         | --                               | --                                                | --                                                  |
| Cysticercosis                                                                        | --                                     | --                                         | --                               | --                                                | --                                                  |
| Cystic echinococcosis                                                                | 3.9<br>(0.9 to 11.9)                   | 0.8<br>(0.2 to 2.5)                        | 0.4<br>(0.1 to 1.2)              | -47.4<br>(-92.7 to 175.8)                         | -55.2<br>(-93.7 to 128.9)                           |
| Lymphatic filariasis                                                                 | --                                     | --                                         | --                               | --                                                | --                                                  |
| Onchocerciasis                                                                       | --                                     | --                                         | --                               | --                                                | --                                                  |
| Trachoma                                                                             | --                                     | --                                         | --                               | --                                                | --                                                  |
| Dengue                                                                               | --                                     | --                                         | --                               | --                                                | --                                                  |
| Yellow fever                                                                         | --                                     | --                                         | --                               | --                                                | --                                                  |
| Rabies                                                                               | < 0.05<br>(< 0.05 to < 0.05)           | < 0.05<br>(< 0.05 to < 0.05)               | < 0.05<br>(< 0.05 to < 0.05)     | -83.8<br>(-90.4 to -71.7)                         | -85.4<br>(-91.1 to -74.7)                           |
| Intestinal nematode infections                                                       | 1,637.6<br>(1,259.7 to 2,053.5)        | --                                         | 1.7<br>(0.9 to 2.9)              | 15.9<br>(-16.9 to 66.3)                           | 0.4<br>(-29.7 to 48.2)                              |
| Ascariasis                                                                           | 1,462.3<br>(1,104.7 to 1,877.2)        | --                                         | 1.7<br>(0.9 to 2.9)              | 15.8<br>(-17.2 to 66.8)                           | 0.3<br>(-30.0 to 48.9)                              |

| Cause                                                                   | Prevalence in thousands (95% UI)              | Incidence in thousands (95% UI)                   | YLDs in thousands (95% UI)              |                                                   |                                                     |
|-------------------------------------------------------------------------|-----------------------------------------------|---------------------------------------------------|-----------------------------------------|---------------------------------------------------|-----------------------------------------------------|
|                                                                         | 2016 counts                                   | 2016 counts                                       | 2016 counts                             | Percentage change in counts between 2006 and 2016 | Percentage change in age-standardised rates between |
| Trichuriasis                                                            | 4.6<br>(2.8 to 7.1)                           | --                                                | --                                      | --                                                | --                                                  |
| Hookworm disease                                                        | 4.5<br>(3.0 to 6.6)                           | --                                                | < 0.05<br>(< 0.05 to < 0.05)            | 22.4<br>(-25.4 to 105.4)                          | 6.6<br>(-35.4 to 80.5)                              |
| Food-borne trematodiasis                                                | --                                            | --                                                | --                                      | --                                                | --                                                  |
| Leprosy                                                                 | --                                            | --                                                | --                                      | --                                                | --                                                  |
| Ebola virus disease                                                     | --                                            | --                                                | --                                      | --                                                | --                                                  |
| Zika virus disease                                                      | --                                            | --                                                | --                                      | --                                                | --                                                  |
| Guinea worm disease                                                     | --                                            | --                                                | --                                      | --                                                | --                                                  |
| Other neglected tropical diseases                                       | 71.4<br>(65.7 to 77.8)                        | --                                                | 1.7<br>(1.1 to 2.6)                     | 26.5<br>(11.3 to 45.8)                            | 0.0<br>(-11.8 to 14.0)                              |
| <b>Maternal disorders</b>                                               | <b>5.6</b><br><b>(4.4 to 7.2)</b>             | <b>52.8†</b><br><b>(44.7 to 62.0)</b>             | <b>0.3</b><br><b>(0.2 to 0.5)</b>       | <b>22.8</b><br><b>(-14.3 to 72.8)</b>             | <b>7.0</b><br><b>(-25.0 to 49.9)</b>                |
| Maternal haemorrhage                                                    | 1.5<br>(1.1 to 1.9)                           | 9.3<br>(6.8 to 12.4)                              | 0.1<br>(< 0.05 to 0.1)                  | 29.8<br>(-8.3 to 87.2)                            | 13.4<br>(-19.0 to 62.4)                             |
| Maternal sepsis and other pregnancy related infections                  | 3.2<br>(2.2 to 4.6)                           | 25.0<br>(18.3 to 33.6)                            | 0.1<br>(< 0.05 to 0.2)                  | 29.8<br>(-38.3 to 175.0)                          | 14.0<br>(-45.5 to 140.2)                            |
| Maternal hypertensive disorders                                         | 1.1<br>(0.7 to 1.6)                           | 4.4<br>(3.1 to 5.7)                               | 0.1<br>(< 0.05 to 0.1)                  | 3.7<br>(-42.1 to 92.5)                            | -10.1<br>(-49.5 to 67.9)                            |
| Maternal obstructed labour and uterine rupture                          | 0.1<br>(< 0.05 to 0.1)                        | 4.1<br>(2.9 to 5.7)                               | < 0.05<br>(< 0.05 to < 0.05)            | 35.3<br>(-25.9 to 155.1)                          | 15.6<br>(-36.2 to 117.1)                            |
| Maternal abortion, miscarriage, and ectopic pregnancy                   | 0.1<br>(0.1 to 0.1)                           | 10.1<br>(7.5 to 13.4)                             | < 0.05<br>(< 0.05 to < 0.05)            | 37.1<br>(-9.4 to 103.6)                           | 15.3<br>(-23.7 to 71.3)                             |
| Other maternal disorders                                                | --                                            | --                                                | < 0.05<br>(< 0.05 to 0.1)               | 16.6<br>(-18.9 to 64.4)                           | 2.1<br>(-28.7 to 43.2)                              |
| <b>Neonatal disorders</b>                                               | <b>82.9</b><br><b>(67.3 to 102.6)</b>         | --                                                | <b>12.5</b><br><b>(8.0 to 18.9)</b>     | <b>20.0</b><br><b>(1.8 to 40.2)</b>               | <b>4.0</b><br><b>(-11.6 to 21.6)</b>                |
| Neonatal preterm birth complications                                    | 60.5<br>(47.0 to 83.6)                        | --                                                | 5.4<br>(3.6 to 8.0)                     | 9.1<br>(-15.4 to 38.7)                            | -4.2<br>(-25.4 to 21.6)                             |
| Neonatal encephalopathy due to birth asphyxia and trauma                | 23.1<br>(11.1 to 40.8)                        | --                                                | 3.4<br>(0.6 to 8.1)                     | 30.9<br>(-16.0 to 137.3)                          | 14.2<br>(-26.5 to 103.2)                            |
| Neonatal sepsis and other neonatal infections                           | 4.7<br>(1.9 to 10.1)                          | --                                                | 1.9<br>(0.7 to 4.5)                     | 39.4<br>(10.9 to 103.0)                           | 21.0<br>(-4.2 to 74.8)                              |
| Hemolytic disease and other neonatal jaundice                           | 3.8<br>(3.3 to 4.4)                           | --                                                | 1.2<br>(0.9 to 1.5)                     | 10.0<br>(-5.8 to 27.3)                            | -3.9<br>(-16.8 to 11.0)                             |
| Other neonatal disorders                                                | --                                            | --                                                | 0.5<br>(0.3 to 0.8)                     | 45.7<br>(21.3 to 71.7)                            | -1.0<br>(-17.6 to 17.0)                             |
| <b>Nutritional deficiencies</b>                                         | <b>1,774.2</b><br><b>(1,696.5 to 1,855.3)</b> | <b>201.0†</b><br><b>(157.1 to 264.3)</b>          | <b>43.4</b><br><b>(28.4 to 63.1)</b>    | <b>12.4</b><br><b>(5.5 to 20.4)</b>               | <b>-3.9</b><br><b>(-9.0 to 1.7)</b>                 |
| Protein-energy malnutrition                                             | 19.3<br>(15.1 to 24.4)                        | 6.8<br>(5.3 to 8.7)                               | 0.9<br>(0.5 to 1.5)                     | 51.4<br>(-2.2 to 134.4)                           | 4.7<br>(-32.4 to 63.6)                              |
| Iodine deficiency                                                       | 97.4<br>(80.3 to 116.6)                       | 2.5<br>(2.1 to 3.0)                               | 2.4<br>(1.5 to 3.6)                     | 5.5<br>(-4.6 to 18.2)                             | -6.9<br>(-15.5 to 3.2)                              |
| Vitamin A deficiency                                                    | 222.5<br>(176.0 to 287.9)                     | 191.7<br>(147.9 to 254.2)                         | 0.3<br>(0.2 to 0.6)                     | 16.9<br>(0.7 to 34.4)                             | -2.9<br>(-15.0 to 11.2)                             |
| Iron-deficiency anaemia                                                 | 1,578.9<br>(1,488.0 to 1,671.6)               | --                                                | 39.7<br>(25.9 to 58.2)                  | 12.2<br>(4.9 to 20.6)                             | -3.8<br>(-9.3 to 2.3)                               |
| Other nutritional deficiencies                                          | --                                            | --                                                | < 0.05<br>(< 0.05 to < 0.05)            | 48.2<br>(-8.9 to 142.3)                           | 1.8<br>(-37.8 to 66.6)                              |
| <b>Other communicable, maternal, neonatal, and nutritional diseases</b> | <b>1,553.1</b><br><b>(1,462.8 to 1,654.5)</b> | <b>968.8</b><br><b>(835.7 to 1,090.7)</b>         | <b>3.8</b><br><b>(2.4 to 5.8)</b>       | <b>13.5</b><br><b>(6.9 to 20.6)</b>               | <b>-3.7</b><br><b>(-8.9 to 1.9)</b>                 |
| Sexually transmitted diseases excluding HIV                             | 815.0<br>(757.6 to 876.2)                     | 583.2<br>(507.3 to 675.7)                         | 2.2<br>(1.4 to 3.6)                     | 10.2<br>(2.2 to 18.3)                             | -4.1<br>(-10.4 to 2.3)                              |
| Syphilis                                                                | 27.2<br>(22.0 to 34.1)                        | 21.7<br>(16.6 to 27.5)                            | 0.2<br>(0.1 to 0.2)                     | 18.0<br>(2.1 to 37.7)                             | -2.1<br>(-15.4 to 15.6)                             |
| Chlamydial infection                                                    | 109.0<br>(84.4 to 136.6)                      | 88.1<br>(67.3 to 111.8)                           | 0.5<br>(0.3 to 0.8)                     | 14.6<br>(-0.1 to 30.6)                            | -3.9<br>(-15.8 to 9.3)                              |
| Gonococcal infection                                                    | 80.2<br>(62.3 to 102.5)                       | 269.6<br>(202.8 to 358.3)                         | 0.5<br>(0.3 to 0.8)                     | 3.7<br>(-10.9 to 20.4)                            | -4.7<br>(-17.1 to 10.3)                             |
| Trichomoniasis                                                          | 155.7<br>(133.2 to 178.6)                     | 134.9<br>(113.6 to 156.6)                         | 0.2<br>(0.1 to 0.4)                     | 16.5<br>(8.9 to 24.6)                             | -0.3<br>(-6.1 to 6.0)                               |
| Genital herpes                                                          | 491.6<br>(420.7 to 573.5)                     | 37.0<br>(31.0 to 44.5)                            | 0.1<br>(< 0.05 to 0.3)                  | 19.2<br>(11.7 to 26.9)                            | -0.1<br>(-5.5 to 6.0)                               |
| Other sexually transmitted diseases                                     | 27.2<br>(24.9 to 29.7)                        | 31.9<br>(26.6 to 38.5)                            | 0.7<br>(0.5 to 1.1)                     | 7.1<br>(-3.7 to 18.9)                             | -6.3<br>(-15.8 to 3.4)                              |
| Hepatitis                                                               | 835.5<br>(722.6 to 963.9)                     | 385.5<br>(264.6 to 467.7)                         | 0.2<br>(0.1 to 0.3)                     | -20.4<br>(-38.3 to 2.3)                           | -32.5<br>(-46.5 to -14.5)                           |
| Acute hepatitis A                                                       | 21.9<br>(12.7 to 28.2)                        | 284.8<br>(165.0 to 366.0)                         | 0.1<br>(0.1 to 0.2)                     | -20.1<br>(-50.9 to 26.2)                          | -31.7<br>(-57.2 to 6.3)                             |
| Hepatitis B                                                             | 486.1<br>(384.7 to 610.6)                     | 80.0<br>(58.7 to 109.0)                           | 0.1<br>(< 0.05 to 0.1)                  | -25.8<br>(-42.9 to -4.2)                          | -36.3<br>(-49.9 to -19.3)                           |
| Hepatitis C                                                             | 327.1<br>(289.4 to 368.1)                     | 16.0<br>(14.0 to 18.2)                            | < 0.05<br>(< 0.05 to < 0.05)            | 31.0<br>(-22.8 to 109.6)                          | -7.8<br>(-44.9 to 46.8)                             |
| Acute hepatitis E                                                       | 0.4<br>(0.3 to 0.4)                           | 4.7<br>(4.1 to 5.5)                               | < 0.05<br>(< 0.05 to < 0.05)            | -29.3<br>(-36.7 to -20.6)                         | -31.2<br>(-37.5 to -23.2)                           |
| Other infectious diseases                                               | 58.0<br>(53.6 to 62.6)                        | < 0.05<br>(< 0.05 to < 0.05)                      | 1.4<br>(0.9 to 2.1)                     | 27.0<br>(14.0 to 44.8)                            | 3.3<br>(-6.5 to 16.4)                               |
| <b>Non-communicable diseases</b>                                        | <b>5,351.7</b><br><b>(5,311.2 to 5,397.8)</b> | <b>17,358.3†</b><br><b>(16,499.6 to 18,327.3)</b> | <b>438.8</b><br><b>(322.6 to 572.0)</b> | <b>15.1</b><br><b>(11.6 to 18.4)</b>              | <b>-1.3</b><br><b>(-3.8 to 1.1)</b>                 |
| <b>Neoplasms</b>                                                        | <b>10.2</b><br><b>(9.2 to 11.5)</b>           | <b>6.5</b><br><b>(5.8 to 7.6)</b>                 | <b>1.6</b><br><b>(1.2 to 2.1)</b>       | <b>10.2</b><br><b>(1.0 to 20.1)</b>               | <b>-10.8</b><br><b>(-17.6 to -3.1)</b>              |
| Lip and oral cavity cancer                                              | 0.4<br>(0.4 to 0.5)                           | 0.1<br>(0.1 to 0.1)                               | < 0.05<br>(< 0.05 to 0.1)               | 20.6<br>(3.6 to 40.2)                             | -5.5<br>(-18.4 to 9.2)                              |
| Nasopharynx cancer                                                      | 0.1<br>(0.1 to 0.1)                           | < 0.05<br>(< 0.05 to < 0.05)                      | < 0.05<br>(< 0.05 to < 0.05)            | -3.3<br>(-20.2 to 19.5)                           | -18.6<br>(-30.3 to -1.7)                            |
| Other pharynx cancer                                                    | 0.1<br>(0.1 to 0.1)                           | < 0.05<br>(< 0.05 to < 0.05)                      | < 0.05<br>(< 0.05 to < 0.05)            | 21.8<br>(5.5 to 38.9)                             | -4.8<br>(-18.6 to 9.4)                              |
| Oesophageal cancer                                                      | 0.1<br>(0.1 to 0.2)                           | 0.1<br>(0.1 to 0.2)                               | < 0.05<br>(< 0.05 to < 0.05)            | -7.9<br>(-25.1 to 15.2)                           | -23.7<br>(-38.8 to -3.0)                            |
| Stomach cancer                                                          | 1.0<br>(0.9 to 1.0)                           | 0.6<br>(0.6 to 0.7)                               | 0.2<br>(0.1 to 0.2)                     | -4.2<br>(-18.0 to 12.3)                           | -21.8<br>(-33.5 to -8.2)                            |
| Colon and rectum cancer                                                 | 0.9<br>(0.8 to 1.0)                           | 0.3<br>(0.3 to 0.3)                               | 0.1<br>(0.1 to 0.1)                     | 5.4<br>(-10.4 to 28.2)                            | -13.5<br>(-27.0 to 5.9)                             |
| Liver cancer                                                            | 0.1<br>(0.1 to 0.1)                           | 0.3<br>(0.3 to 0.3)                               | 0.1<br>(< 0.05 to 0.1)                  | 28.2<br>(12.5 to 44.9)                            | 5.0<br>(-8.4 to 18.7)                               |
| Liver cancer due to hepatitis B                                         | 0.1<br>(0.1 to 0.1)                           | 0.1<br>(0.1 to 0.1)                               | < 0.05<br>(< 0.05 to < 0.05)            | 29.3<br>(11.6 to 48.4)                            | 4.2<br>(-9.6 to 18.9)                               |

| Cause                                              | Prevalence in thousands (95% UI)        | Incidence in thousands (95% UI)       | YLDs in thousands (95% UI)           |                                                   |                                                     |
|----------------------------------------------------|-----------------------------------------|---------------------------------------|--------------------------------------|---------------------------------------------------|-----------------------------------------------------|
|                                                    | 2016 counts                             | 2016 counts                           | 2016 counts                          | Percentage change in counts between 2006 and 2016 | Percentage change in age-standardised rates between |
| Liver cancer due to hepatitis C                    | 0.1<br>(0.1 to 0.1)                     | 0.1<br>(0.1 to 0.1)                   | < 0.05<br>(< 0.05 to < 0.05)         | 30.8<br>(12.9 to 49.3)                            | 7.5<br>(-6.9 to 23.3)                               |
| Liver cancer due to alcohol use                    | 0.1<br>(< 0.05 to 0.1)                  | 0.1<br>(0.1 to 0.1)                   | < 0.05<br>(< 0.05 to < 0.05)         | 23.1<br>(6.9 to 41.0)                             | 2.2<br>(-10.9 to 17.2)                              |
| Liver cancer due to other causes                   | < 0.05<br>(< 0.05 to 0.1)               | 0.1<br>(< 0.05 to 0.1)                | < 0.05<br>(< 0.05 to < 0.05)         | 27.7<br>(9.5 to 46.0)                             | 5.0<br>(-10.1 to 19.4)                              |
| Gallbladder and biliary tract cancer               | < 0.05<br>(< 0.05 to < 0.05)            | < 0.05<br>(< 0.05 to < 0.05)          | < 0.05<br>(< 0.05 to < 0.05)         | 1.6<br>(-7.0 to 15.9)                             | -14.4<br>(-21.2 to -3.1)                            |
| Pancreatic cancer                                  | 0.1<br>(0.1 to 0.1)                     | 0.2<br>(0.1 to 0.2)                   | < 0.05<br>(< 0.05 to < 0.05)         | 31.3<br>(11.8 to 46.1)                            | 5.1<br>(-9.8 to 16.7)                               |
| Larynx cancer                                      | 0.1<br>(0.1 to 0.1)                     | < 0.05<br>(< 0.05 to < 0.05)          | < 0.05<br>(< 0.05 to < 0.05)         | -0.2<br>(-11.2 to 10.8)                           | -24.4<br>(-33.0 to -15.4)                           |
| Tracheal, bronchus, and lung cancer                | 0.5<br>(0.5 to 0.6)                     | 0.5<br>(0.4 to 0.5)                   | 0.1<br>(0.1 to 0.1)                  | 1.9<br>(-19.2 to 27.3)                            | -18.5<br>(-34.7 to 1.0)                             |
| Malignant skin melanoma                            | 0.1<br>(0.1 to 0.2)                     | < 0.05<br>(< 0.05 to < 0.05)          | < 0.05<br>(< 0.05 to < 0.05)         | 22.0<br>(-2.0 to 39.5)                            | -1.1<br>(-19.5 to 14.0)                             |
| Non-melanoma skin cancer                           | 1.2<br>(0.7 to 2.3)                     | 1.7<br>(1.1 to 2.8)                   | < 0.05<br>(< 0.05 to 0.1)            | 2.1<br>(-37.7 to 89.6)                            | -13.4<br>(-46.5 to 63.3)                            |
| Non-melanoma skin cancer (squamous-cell carcinoma) | 0.9<br>(0.5 to 2.1)                     | 0.8<br>(0.5 to 1.8)                   | < 0.05<br>(< 0.05 to 0.1)            | 1.4<br>(-39.0 to 92.2)                            | -13.8<br>(-47.4 to 65.7)                            |
| Non-melanoma skin cancer (basal-cell carcinoma)    | 0.1<br>(0.1 to 0.2)                     | 0.9<br>(0.5 to 1.5)                   | < 0.05<br>(< 0.05 to < 0.05)         | 31.9<br>(-5.4 to 78.5)                            | 5.2<br>(-24.0 to 48.1)                              |
| Breast cancer                                      | 2.2<br>(2.0 to 2.5)                     | 0.5<br>(0.5 to 0.6)                   | 0.2<br>(0.2 to 0.3)                  | 11.4<br>(-9.6 to 40.3)                            | -10.7<br>(-26.5 to 11.2)                            |
| Cervical cancer                                    | 1.8<br>(1.6 to 2.0)                     | 0.5<br>(0.4 to 0.5)                   | 0.2<br>(0.1 to 0.2)                  | 2.9<br>(-22.4 to 35.3)                            | -14.6<br>(-35.3 to 12.2)                            |
| Uterine cancer                                     | 0.6<br>(0.5 to 0.7)                     | 0.1<br>(0.1 to 0.1)                   | < 0.05<br>(< 0.05 to 0.1)            | 17.9<br>(-5.5 to 52.1)                            | -10.6<br>(-27.1 to 14.2)                            |
| Ovarian cancer                                     | 0.5<br>(0.4 to 0.6)                     | 0.2<br>(0.1 to 0.2)                   | 0.1<br>(< 0.05 to 0.1)               | 26.5<br>(-12.7 to 81.3)                           | 0.6<br>(-31.1 to 45.5)                              |
| Prostate cancer                                    | 0.4<br>(0.3 to 0.5)                     | 0.1<br>(0.1 to 0.1)                   | 0.1<br>(< 0.05 to 0.1)               | 15.1<br>(-13.1 to 52.4)                           | -0.8<br>(-24.2 to 30.2)                             |
| Testicular cancer                                  | 0.1<br>(0.1 to 0.1)                     | < 0.05<br>(< 0.05 to < 0.05)          | < 0.05<br>(< 0.05 to < 0.05)         | 32.6<br>(-2.0 to 84.5)                            | 11.9<br>(-16.9 to 52.1)                             |
| Kidney cancer                                      | 0.7<br>(0.6 to 0.8)                     | 0.2<br>(0.2 to 0.2)                   | 0.1<br>(< 0.05 to 0.1)               | 27.4<br>(4.5 to 50.2)                             | -0.2<br>(-16.8 to 16.4)                             |
| Bladder cancer                                     | 0.4<br>(0.3 to 0.4)                     | 0.1<br>(0.1 to 0.1)                   | < 0.05<br>(< 0.05 to 0.1)            | 13.2<br>(-4.8 to 31.8)                            | -9.6<br>(-24.2 to 6.1)                              |
| Brain and nervous system cancer                    | 0.3<br>(0.2 to 0.4)                     | 0.1<br>(0.1 to 0.2)                   | < 0.05<br>(< 0.05 to 0.1)            | 39.3<br>(-2.9 to 62.5)                            | 11.2<br>(-21.9 to 29.6)                             |
| Thyroid cancer                                     | 0.2<br>(0.2 to 0.2)                     | < 0.05<br>(< 0.05 to 0.1)             | < 0.05<br>(< 0.05 to < 0.05)         | 17.6<br>(-5.3 to 48.5)                            | -5.6<br>(-23.8 to 20.6)                             |
| Mesothelioma                                       | < 0.05<br>(< 0.05 to < 0.05)            | < 0.05<br>(< 0.05 to < 0.05)          | < 0.05<br>(< 0.05 to < 0.05)         | 45.5<br>(27.3 to 59.8)                            | 14.7<br>(0.6 to 26.3)                               |
| Hodgkin lymphoma                                   | < 0.05<br>(< 0.05 to 0.1)               | < 0.05<br>(< 0.05 to < 0.05)          | < 0.05<br>(< 0.05 to < 0.05)         | -17.8<br>(-26.7 to -5.5)                          | -32.2<br>(-38.9 to -23.1)                           |
| Non-Hodgkin's lymphoma                             | 0.2<br>(0.2 to 0.2)                     | 0.1<br>(0.1 to 0.1)                   | < 0.05<br>(< 0.05 to < 0.05)         | 16.6<br>(-2.6 to 32.7)                            | -3.1<br>(-19.1 to 10.9)                             |
| Multiple myeloma                                   | < 0.05<br>(< 0.05 to < 0.05)            | < 0.05<br>(< 0.05 to < 0.05)          | < 0.05<br>(< 0.05 to < 0.05)         | 19.2<br>(-3.6 to 36.6)                            | -5.3<br>(-22.3 to 7.9)                              |
| Leukaemia                                          | 0.6<br>(0.5 to 0.6)                     | 0.2<br>(0.1 to 0.2)                   | 0.1<br>(0.1 to 0.1)                  | 8.0<br>(-4.3 to 21.5)                             | -10.1<br>(-20.0 to 0.8)                             |
| Acute lymphoid leukaemia                           | 0.1<br>(0.1 to 0.2)                     | < 0.05<br>(< 0.05 to < 0.05)          | < 0.05<br>(< 0.05 to < 0.05)         | 31.8<br>(12.8 to 51.5)                            | 14.9<br>(-2.4 to 31.3)                              |
| Chronic lymphoid leukaemia                         | 0.1<br>(0.1 to 0.1)                     | < 0.05<br>(< 0.05 to < 0.05)          | < 0.05<br>(< 0.05 to < 0.05)         | -5.9<br>(-25.2 to 18.2)                           | -23.2<br>(-37.9 to -4.9)                            |
| Acute myeloid leukaemia                            | 0.1<br>(0.1 to 0.1)                     | < 0.05<br>(< 0.05 to 0.1)             | < 0.05<br>(< 0.05 to < 0.05)         | 47.8<br>(11.8 to 75.1)                            | 23.1<br>(-7.2 to 45.3)                              |
| Chronic myeloid leukaemia                          | < 0.05<br>(< 0.05 to < 0.05)            | < 0.05<br>(< 0.05 to < 0.05)          | < 0.05<br>(< 0.05 to < 0.05)         | -29.9<br>(-43.7 to -16.6)                         | -44.4<br>(-54.7 to -34.6)                           |
| Other leukaemia                                    | 0.2<br>(0.2 to 0.2)                     | < 0.05<br>(< 0.05 to 0.1)             | < 0.05<br>(< 0.05 to < 0.05)         | -3.4<br>(-16.8 to 13.3)                           | -15.5<br>(-27.3 to -1.1)                            |
| Other neoplasms                                    | 0.8<br>(0.7 to 0.9)                     | 0.3<br>(0.2 to 0.3)                   | 0.1<br>(0.1 to 0.1)                  | 15.8<br>(-2.8 to 32.3)                            | -5.2<br>(-20.2 to 7.0)                              |
| <b>Cardiovascular diseases</b>                     | <b>226.4</b><br><b>(216.4 to 235.6)</b> | <b>29.3†</b><br><b>(28.0 to 30.7)</b> | <b>18.5</b><br><b>(13.5 to 24.0)</b> | <b>12.8</b><br><b>(8.2 to 17.2)</b>               | <b>-5.3</b><br><b>(-9.2 to -1.5)</b>                |
| Rheumatic heart disease                            | 0.8<br>(0.7 to 0.8)                     | 0.2<br>(0.2 to 0.2)                   | 0.1<br>(< 0.05 to 0.1)               | 3.2<br>(-18.5 to 30.5)                            | -15.7<br>(-33.5 to 6.6)                             |
| Ischaemic heart disease                            | 82.9<br>(78.2 to 87.7)                  | 11.9<br>(11.2 to 12.7)                | 5.1<br>(3.6 to 6.9)                  | 22.5<br>(16.8 to 29.0)                            | 3.5<br>(-0.9 to 8.4)                                |
| Cerebrovascular disease                            | 44.0<br>(41.4 to 46.8)                  | 8.1‡<br>(7.5 to 8.8)                  | 8.6<br>(6.2 to 11.0)                 | 4.8<br>(-2.3 to 12.2)                             | -12.6<br>(-18.8 to -5.9)                            |
| Ischaemic stroke                                   | 36.7<br>(33.3 to 40.4)                  | 5.2‡<br>(4.7 to 5.8)                  | 6.9<br>(4.9 to 8.8)                  | 5.0<br>(-3.2 to 13.6)                             | -11.8<br>(-19.2 to -4.0)                            |
| Hemorrhagic stroke                                 | 9.2<br>(8.3 to 10.2)                    | 2.9‡<br>(2.6 to 3.2)                  | 1.7<br>(1.2 to 2.2)                  | 4.2<br>(-7.5 to 16.3)                             | -15.9<br>(-24.7 to -6.0)                            |
| Hypertensive heart disease                         | 9.0<br>(7.7 to 10.8)                    | --                                    | 0.7<br>(0.5 to 1.0)                  | 21.0<br>(8.4 to 35.6)                             | 1.5<br>(-8.3 to 11.9)                               |
| Cardiomyopathy and myocarditis                     | 5.0<br>(4.4 to 5.6)                     | 0.8†<br>(0.7 to 0.8)                  | 0.5<br>(0.3 to 0.7)                  | 22.7<br>(6.4 to 40.6)                             | 0.9<br>(-11.5 to 15.0)                              |
| Myocarditis                                        | 1.6<br>(1.4 to 1.9)                     | 0.8<br>(0.7 to 0.8)                   | 0.1<br>(0.1 to 0.2)                  | 16.1<br>(-10.6 to 48.7)                           | 1.4<br>(-20.2 to 27.7)                              |
| Alcoholic cardiomyopathy                           | 2.9<br>(2.4 to 3.6)                     | --                                    | 0.2<br>(0.2 to 0.4)                  | 29.0<br>(6.1 to 59.2)                             | 0.2<br>(-15.4 to 20.6)                              |
| Other cardiomyopathy                               | 0.9<br>(0.7 to 1.0)                     | --                                    | 0.1<br>(< 0.05 to 0.1)               | 16.5<br>(-10.4 to 51.5)                           | 2.7<br>(-18.1 to 27.5)                              |
| Atrial fibrillation and flutter                    | 20.7<br>(18.0 to 23.5)                  | 1.8<br>(1.5 to 2.1)                   | 1.6<br>(1.1 to 2.3)                  | 15.8<br>(7.3 to 24.7)                             | 1.2<br>(-5.0 to 7.8)                                |
| Peripheral vascular disease                        | 58.1<br>(50.1 to 67.4)                  | 6.1<br>(5.2 to 7.1)                   | 0.3<br>(0.1 to 0.5)                  | 12.6<br>(2.1 to 25.6)                             | -3.6<br>(-10.3 to 3.9)                              |
| Endocarditis                                       | 0.1<br>(0.1 to 0.1)                     | 0.4<br>(0.4 to 0.5)                   | < 0.05<br>(< 0.05 to < 0.05)         | 24.0<br>(16.8 to 31.1)                            | 3.2<br>(-2.6 to 8.8)                                |
| Other cardiovascular and circulatory diseases      | 32.5<br>(27.6 to 38.2)                  | --                                    | 1.7<br>(1.1 to 2.5)                  | 21.0<br>(9.3 to 34.1)                             | 2.2<br>(-6.4 to 12.1)                               |
| <b>Chronic respiratory diseases</b>                | <b>408.3</b><br><b>(391.2 to 428.2)</b> | <b>63.4†</b><br><b>(59.3 to 67.9)</b> | <b>15.5</b><br><b>(11.1 to 20.9)</b> | <b>23.3</b><br><b>(17.6 to 29.2)</b>              | <b>4.8</b><br><b>(-0.6 to 10.2)</b>                 |
| Chronic obstructive pulmonary disease              | 121.5<br>(115.6 to 127.4)               | 8.9<br>(8.4 to 9.3)                   | 3.1<br>(2.5 to 3.8)                  | 4.6<br>(-7.4 to 17.8)                             | -15.6<br>(-25.7 to -4.6)                            |
| Pneumoconiosis                                     | 0.3<br>(0.3 to 0.4)                     | < 0.05<br>(< 0.05 to < 0.05)          | < 0.05<br>(< 0.05 to 0.1)            | 54.9<br>(31.8 to 79.7)                            | 23.5<br>(4.5 to 44.5)                               |
| Silicosis                                          | < 0.05<br>(< 0.05 to < 0.05)            | < 0.05<br>(< 0.05 to < 0.05)          | < 0.05<br>(< 0.05 to < 0.05)         | 61.8<br>(51.3 to 73.4)                            | 28.9<br>(21.9 to 35.8)                              |



| Cause                                                          | Prevalence in thousands (95% UI)        | Incidence in thousands (95% UI)       | YLDs in thousands (95% UI)       |                                                   |                                                     |
|----------------------------------------------------------------|-----------------------------------------|---------------------------------------|----------------------------------|---------------------------------------------------|-----------------------------------------------------|
|                                                                | 2016 counts                             | 2016 counts                           | 2016 counts                      | Percentage change in counts between 2006 and 2016 | Percentage change in age-standardised rates between |
| Asbestosis                                                     | 0.1<br>(0.1 to 0.1)                     | < 0.05<br>(< 0.05 to < 0.05)          | < 0.05<br>(< 0.05 to < 0.05)     | 26.4<br>(18.2 to 35.9)                            | -0.9<br>(-7.1 to 6.0)                               |
| Coal workers pneumoconiosis                                    | < 0.05<br>(< 0.05 to 0.1)               | < 0.05<br>(< 0.05 to < 0.05)          | < 0.05<br>(< 0.05 to < 0.05)     | 85.3<br>(70.2 to 102.2)                           | 39.9<br>(29.4 to 51.0)                              |
| Other pneumoconiosis                                           | 0.2<br>(0.2 to 0.2)                     | < 0.05<br>(< 0.05 to < 0.05)          | < 0.05<br>(< 0.05 to < 0.05)     | 59.8<br>(19.5 to 110.9)                           | 29.4<br>(-3.4 to 70.3)                              |
| Asthma                                                         | 291.8<br>(271.4 to 314.4)               | 54.3<br>(50.3 to 58.7)                | 11.4<br>(7.5 to 16.5)            | 29.3<br>(22.8 to 35.7)                            | 14.4<br>(9.2 to 19.7)                               |
| Interstitial lung disease and pulmonary sarcoidosis            | 4.5<br>(4.1 to 5.1)                     | 0.2<br>(0.2 to 0.2)                   | 0.5<br>(0.3 to 0.7)              | 17.3<br>(1.0 to 36.4)                             | -0.3<br>(-13.5 to 14.9)                             |
| Other chronic respiratory diseases                             | --                                      | --                                    | 0.3<br>(0.3 to 0.4)              | 40.2<br>(25.8 to 55.5)                            | 25.0<br>(13.4 to 37.7)                              |
| <b>Cirrhosis and other chronic liver diseases</b>              | <b>51.6<br/>(49.3 to 54.2)</b>          | <b>2.6<br/>(2.5 to 2.7)</b>           | <b>2.0<br/>(1.4 to 2.8)</b>      | <b>24.6<br/>(14.3 to 35.7)</b>                    | <b>5.0<br/>(-3.0 to 12.8)</b>                       |
| Cirrhosis and other chronic liver diseases due to hepatitis B  | 16.4<br>(15.2 to 17.9)                  | 0.8<br>(0.8 to 0.9)                   | 0.5<br>(0.4 to 0.8)              | 30.2<br>(13.4 to 49.7)                            | 5.7<br>(-6.7 to 20.4)                               |
| Cirrhosis and other chronic liver diseases due to hepatitis C  | 9.3<br>(8.2 to 10.5)                    | 0.5<br>(0.4 to 0.5)                   | 0.3<br>(0.2 to 0.4)              | 32.0<br>(10.4 to 61.3)                            | 6.0<br>(-10.1 to 25.9)                              |
| Cirrhosis and other chronic liver diseases due to alcohol use  | 11.7<br>(10.5 to 12.8)                  | 0.6<br>(0.6 to 0.7)                   | 0.4<br>(0.2 to 0.5)              | 31.9<br>(11.1 to 53.9)                            | 5.0<br>(-9.7 to 19.5)                               |
| Cirrhosis and other chronic liver diseases due to other causes | 14.3<br>(13.2 to 15.4)                  | 0.6<br>(0.6 to 0.7)                   | 0.9<br>(0.6 to 1.2)              | 16.7<br>(0.8 to 35.7)                             | 3.9<br>(-9.8 to 19.3)                               |
| <b>Digestive diseases</b>                                      | <b>179.2<br/>(168.6 to 189.4)</b>       | <b>174.4†<br/>(163.5 to 187.0)</b>    | <b>8.8<br/>(6.1 to 12.2)</b>     | <b>22.2<br/>(14.1 to 30.9)</b>                    | <b>0.5<br/>(-5.0 to 6.7)</b>                        |
| Peptic ulcer disease                                           | 29.8<br>(27.1 to 32.9)                  | 5.9<br>(5.2 to 6.6)                   | 0.5<br>(0.4 to 0.8)              | 45.4<br>(29.2 to 64.5)                            | 21.2<br>(7.8 to 36.0)                               |
| Gastritis and duodenitis                                       | 63.4<br>(54.3 to 72.4)                  | 58.8<br>(51.6 to 66.5)                | 0.8<br>(0.5 to 1.2)              | 37.2<br>(24.3 to 51.2)                            | 18.5<br>(8.4 to 30.8)                               |
| Appendicitis                                                   | 0.9<br>(0.8 to 1.0)                     | 23.5<br>(21.3 to 25.8)                | 0.3<br>(0.2 to 0.4)              | 7.6<br>(-22.5 to 51.4)                            | 3.0<br>(-23.6 to 40.4)                              |
| Paralytic ileus and intestinal obstruction                     | 0.1<br>(0.1 to 0.1)                     | 1.5<br>(1.3 to 1.7)                   | < 0.05<br>(< 0.05 to < 0.05)     | 26.0<br>(21.0 to 30.9)                            | 4.8<br>(1.4 to 8.0)                                 |
| Inguinal, femoral, and abdominal hernia                        | 77.5<br>(68.8 to 86.7)                  | 40.7<br>(35.1 to 47.6)                | 6.0<br>(4.0 to 8.4)              | 18.6<br>(8.6 to 29.5)                             | -3.7<br>(-10.5 to 3.2)                              |
| Inflammatory bowel disease                                     | 1.0<br>(0.9 to 1.1)                     | 2.8<br>(2.7 to 2.9)                   | 0.1<br>(0.1 to 0.2)              | 7.5<br>(-8.2 to 25.4)                             | -9.9<br>(-23.8 to 5.7)                              |
| Vascular intestinal disorders                                  | < 0.05<br>(< 0.05 to 0.1)               | 0.3<br>(0.2 to 0.3)                   | < 0.05<br>(< 0.05 to < 0.05)     | 27.7<br>(20.6 to 35.8)                            | 5.2<br>(0.6 to 10.1)                                |
| Gallbladder and biliary diseases                               | 12.0<br>(10.5 to 13.5)                  | 38.6<br>(33.3 to 44.6)                | 0.2<br>(0.1 to 0.3)              | 32.9<br>(7.3 to 63.7)                             | 7.5<br>(-12.4 to 31.5)                              |
| Pancreatitis                                                   | 0.3<br>(0.2 to 0.3)                     | 2.4<br>(2.1 to 2.6)                   | < 0.05<br>(< 0.05 to < 0.05)     | 52.7<br>(46.3 to 60.0)                            | 22.3<br>(17.4 to 27.2)                              |
| Other digestive diseases                                       | --                                      | --                                    | 0.8<br>(0.6 to 1.2)              | 27.8<br>(18.1 to 38.8)                            | 2.2<br>(-4.4 to 9.6)                                |
| <b>Neurological disorders</b>                                  | <b>2,202.2<br/>(2,110.0 to 2,301.2)</b> | <b>1,058.9<br/>(897.5 to 1,246.9)</b> | <b>54.8<br/>(36.0 to 76.0)</b>   | <b>11.2<br/>(-10.8 to 39.4)</b>                   | <b>-1.7<br/>(-19.6 to 20.2)</b>                     |
| Alzheimer's disease and other dementias                        | 13.1<br>(11.0 to 15.6)                  | 2.3<br>(1.9 to 2.8)                   | 1.9<br>(1.3 to 2.5)              | 12.6<br>(5.9 to 19.6)                             | -0.1<br>(-5.1 to 4.7)                               |
| Parkinson's disease                                            | 2.8<br>(2.2 to 3.5)                     | 0.3<br>(0.3 to 0.4)                   | 0.3<br>(0.2 to 0.5)              | 15.0<br>(2.1 to 31.1)                             | 2.5<br>(-8.5 to 14.3)                               |
| Epilepsy                                                       | 19.0<br>(4.0 to 38.8)                   | 2.3<br>(0.5 to 4.7)                   | 6.4<br>(1.2 to 14.9)             | -3.1<br>(-82.8 to 499.4)                          | -13.9<br>(-84.8 to 430.5)                           |
| Multiple sclerosis                                             | 1.0<br>(0.9 to 1.2)                     | < 0.05<br>(< 0.05 to 0.1)             | 0.3<br>(0.2 to 0.4)              | 36.8<br>(15.8 to 59.9)                            | 15.3<br>(-1.0 to 33.8)                              |
| Motor neuron disease                                           | 0.1<br>(0.1 to 0.1)                     | < 0.05<br>(< 0.05 to < 0.05)          | < 0.05<br>(< 0.05 to < 0.05)     | 19.9<br>(14.5 to 25.5)                            | 3.8<br>(0.3 to 7.2)                                 |
| Migraine                                                       | 901.6<br>(846.1 to 954.7)               | 98.1<br>(92.2 to 105.0)               | 38.5<br>(24.4 to 54.4)           | 13.0<br>(9.2 to 17.1)                             | -0.3<br>(-3.4 to 3.1)                               |
| Tension-type headache                                          | 1,645.5<br>(1,470.9 to 1,835.8)         | 955.8<br>(796.0 to 1,145.6)           | 5.9<br>(3.7 to 8.8)              | 14.5<br>(8.6 to 20.8)                             | -0.1<br>(-4.7 to 4.8)                               |
| Other neurological disorders                                   | < 0.05<br>(< 0.05 to < 0.05)            | < 0.05<br>(< 0.05 to 0.1)             | 1.5<br>(0.4 to 3.3)              | 17.5<br>(-74.6 to 475.4)                          | 4.8<br>(-75.4 to 357.0)                             |
| <b>Mental and substance use disorders</b>                      | <b>808.2<br/>(779.7 to 839.1)</b>       | <b>313.9†<br/>(294.2 to 335.5)</b>    | <b>106.4<br/>(77.7 to 138.1)</b> | <b>11.3<br/>(8.3 to 14.3)</b>                     | <b>-2.7<br/>(-5.2 to -0.2)</b>                      |
| Schizophrenia                                                  | 10.9<br>(9.5 to 12.4)                   | 0.8<br>(0.7 to 0.9)                   | 7.0<br>(5.2 to 8.9)              | 21.6<br>(10.7 to 34.1)                            | 0.7<br>(-7.9 to 10.4)                               |
| Alcohol use disorders                                          | 145.9<br>(130.4 to 164.8)               | 74.3<br>(64.2 to 85.2)                | 14.6<br>(10.1 to 20.0)           | 11.9<br>(0.0 to 24.3)                             | -7.4<br>(-17.1 to 2.6)                              |
| Drug use disorders                                             | 43.7<br>(40.4 to 47.5)                  | 6.4<br>(5.8 to 7.0)                   | 10.0<br>(7.1 to 13.1)            | 9.3<br>(-0.6 to 20.2)                             | -8.1<br>(-15.7 to 0.0)                              |
| Opioid use disorders                                           | 17.5<br>(15.1 to 20.5)                  | 2.5<br>(2.2 to 2.9)                   | 7.3<br>(5.0 to 9.7)              | 7.5<br>(-5.5 to 20.9)                             | -11.1<br>(-20.7 to -1.4)                            |
| Cocaine use disorders                                          | 4.2<br>(3.6 to 4.9)                     | 0.3<br>(0.3 to 0.4)                   | 0.6<br>(0.4 to 0.9)              | 14.7<br>(-10.6 to 46.8)                           | 1.5<br>(-18.3 to 25.7)                              |
| Amphetamine use disorders                                      | 4.5<br>(3.1 to 6.4)                     | 0.4<br>(0.3 to 0.6)                   | 0.6<br>(0.3 to 1.0)              | 18.4<br>(-10.8 to 55.5)                           | 6.2<br>(-18.6 to 37.8)                              |
| Cannabis use disorders                                         | 15.2<br>(12.4 to 18.5)                  | 2.5<br>(2.0 to 3.0)                   | 0.5<br>(0.3 to 0.7)              | 7.8<br>(-8.7 to 29.5)                             | -0.2<br>(-14.5 to 18.4)                             |
| Other drug use disorders                                       | 3.3<br>(2.9 to 3.6)                     | 0.6<br>(0.6 to 0.7)                   | 1.1<br>(0.7 to 1.7)              | 15.5<br>(-7.1 to 44.9)                            | 0.3<br>(-18.9 to 24.7)                              |
| Depressive disorders                                           | 169.3<br>(158.0 to 181.9)               | 176.6<br>(159.5 to 196.2)             | 28.3<br>(19.6 to 38.6)           | 11.9<br>(6.5 to 17.8)                             | -3.0<br>(-7.6 to 1.6)                               |
| Major depressive disorder                                      | 108.7<br>(97.8 to 120.9)                | 165.5<br>(148.2 to 184.8)             | 22.3<br>(15.3 to 30.4)           | 10.3<br>(3.9 to 17.6)                             | -3.7<br>(-9.3 to 2.0)                               |
| Dysthymia                                                      | 63.1<br>(55.0 to 72.6)                  | 11.1<br>(9.7 to 12.8)                 | 6.1<br>(4.1 to 8.9)              | 18.4<br>(13.1 to 23.4)                            | 0.1<br>(-3.4 to 3.9)                                |
| Bipolar disorder                                               | 35.1<br>(30.0 to 40.9)                  | 3.0<br>(2.6 to 3.5)                   | 7.2<br>(4.5 to 10.8)             | 12.7<br>(5.1 to 21.0)                             | -0.1<br>(-5.9 to 6.6)                               |
| Anxiety disorders                                              | 144.7<br>(130.7 to 159.1)               | 26.0<br>(23.8 to 28.4)                | 14.0<br>(9.8 to 19.1)            | 11.9<br>(4.5 to 21.3)                             | 0.2<br>(-6.1 to 7.4)                                |
| Eating disorders                                               | 4.7<br>(3.8 to 5.7)                     | 3.2<br>(2.4 to 4.3)                   | 1.0<br>(0.6 to 1.4)              | 18.5<br>(1.3 to 40.3)                             | 10.6<br>(-5.0 to 29.4)                              |
| Anorexia nervosa                                               | 1.1<br>(0.8 to 1.5)                     | 0.5<br>(0.4 to 0.7)                   | 0.2<br>(0.1 to 0.4)              | 10.6<br>(-20.4 to 51.2)                           | 7.9<br>(-21.4 to 45.9)                              |
| Bulimia nervosa                                                | 3.4<br>(2.5 to 4.6)                     | 2.7<br>(1.9 to 3.7)                   | 0.7<br>(0.4 to 1.1)              | 21.4<br>(-0.1 to 48.7)                            | 11.5<br>(-7.6 to 35.5)                              |
| Autistic spectrum disorders                                    | 50.2<br>(44.9 to 56.0)                  | 0.5<br>(0.3 to 0.7)                   | 7.4<br>(5.0 to 10.4)             | 13.9<br>(8.0 to 19.7)                             | 0.2<br>(-4.5 to 4.9)                                |
| Autism                                                         | 14.8<br>(12.7 to 17.3)                  | 0.1<br>(< 0.05 to 0.1)                | 3.8<br>(2.4 to 5.5)              | 13.6<br>(3.9 to 23.7)                             | 0.2<br>(-7.4 to 8.1)                                |
| Asperger syndrome and other autistic spectrum disorders        | 35.4<br>(29.4 to 42.7)                  | 0.4<br>(0.3 to 0.6)                   | 3.6<br>(2.3 to 5.2)              | 14.3<br>(8.6 to 20.3)                             | 0.2<br>(-4.5 to 5.1)                                |



| Cause                                                      | Prevalence in thousands (95% UI)              | Incidence in thousands (95% UI)                   | YLDs in thousands (95% UI)             |                                                   |                                                     |
|------------------------------------------------------------|-----------------------------------------------|---------------------------------------------------|----------------------------------------|---------------------------------------------------|-----------------------------------------------------|
|                                                            | 2016 counts                                   | 2016 counts                                       | 2016 counts                            | Percentage change in counts between 2006 and 2016 | Percentage change in age-standardised rates between |
| Attention-deficit/hyperactivity disorder                   | 49.5<br>(44.5 to 55.3)                        | 2.7<br>(2.4 to 3.2)                               | 0.6<br>(0.4 to 1.0)                    | 5.5<br>(-3.3 to 15.4)                             | 0.2<br>(-7.9 to 8.9)                                |
| Conduct disorder                                           | 46.9<br>(38.8 to 55.6)                        | 16.5<br>(13.2 to 19.8)                            | 5.7<br>(3.6 to 8.8)                    | -8.6<br>(-14.5 to -2.5)                           | 0.2<br>(-6.0 to 6.8)                                |
| Idiopathic developmental intellectual disability           | 72.1<br>(37.3 to 106.3)                       | --                                                | 2.8<br>(1.2 to 5.1)                    | 1.9<br>(-7.6 to 9.8)                              | -7.8<br>(-16.1 to -0.6)                             |
| Other mental and substance use disorders                   | 102.4<br>(89.8 to 118.5)                      | 3.9<br>(3.5 to 4.5)                               | 7.7<br>(5.1 to 11.1)                   | 18.9<br>(12.7 to 25.7)                            | -0.0<br>(-4.6 to 4.9)                               |
| <b>Diabetes, urogenital, blood, and endocrine diseases</b> | <b>1,784.0</b><br><b>(1,745.4 to 1,817.7)</b> | <b>980.3†</b><br><b>(907.0 to 1,064.6)</b>        | <b>35.2</b><br><b>(25.0 to 47.6)</b>   | <b>19.6</b><br><b>(15.8 to 23.4)</b>              | <b>0.6</b><br><b>(-2.3 to 3.6)</b>                  |
| Diabetes mellitus                                          | 96.7<br>(85.9 to 107.2)                       | 5.8<br>(5.2 to 6.4)                               | 8.1<br>(5.5 to 11.3)                   | 27.7<br>(17.7 to 38.6)                            | 2.5<br>(-5.3 to 11.1)                               |
| Acute glomerulonephritis                                   | 0.1<br>(0.1 to 0.1)                           | 1.6<br>(1.4 to 1.8)                               | < 0.05<br>(< 0.05 to < 0.05)           | 8.8<br>(2.2 to 16.5)                              | -5.6<br>(-10.8 to -0.1)                             |
| Chronic kidney disease                                     | 251.2<br>(228.5 to 276.4)                     | 18.4<br>(16.2 to 20.8)                            | 7.1<br>(5.2 to 9.1)                    | 16.5<br>(9.5 to 24.0)                             | -0.2<br>(-5.9 to 5.7)                               |
| Chronic kidney disease due to diabetes mellitus            | 104.8<br>(90.9 to 122.3)                      | 7.5<br>(6.1 to 9.0)                               | 2.8<br>(2.0 to 3.8)                    | 20.4<br>(10.0 to 31.1)                            | 1.1<br>(-6.6 to 9.0)                                |
| Chronic kidney disease due to hypertension                 | 42.7<br>(36.5 to 49.6)                        | 4.7<br>(3.9 to 5.6)                               | 0.4<br>(0.3 to 0.6)                    | 16.6<br>(3.6 to 32.0)                             | -0.5<br>(-10.9 to 11.8)                             |
| Chronic kidney disease due to glomerulonephritis           | 34.4<br>(29.6 to 39.4)                        | 1.1<br>(0.8 to 1.3)                               | 1.8<br>(1.3 to 2.5)                    | 14.2<br>(3.0 to 26.6)                             | -0.7<br>(-9.2 to 7.9)                               |
| Chronic kidney disease due to other causes                 | 69.2<br>(57.9 to 81.3)                        | 5.2<br>(4.3 to 6.2)                               | 2.0<br>(1.4 to 2.7)                    | 13.4<br>(3.7 to 24.2)                             | -1.8<br>(-8.9 to 6.1)                               |
| Urinary diseases and male infertility                      | 97.5<br>(89.0 to 106.4)                       | 676.5†<br>(606.7 to 758.1)                        | 2.7<br>(1.8 to 3.9)                    | 16.8<br>(7.7 to 24.8)                             | -5.3<br>(-12.6 to 0.3)                              |
| Interstitial nephritis and urinary tract infections        | 11.5<br>(10.2 to 13.1)                        | 596.7<br>(526.6 to 678.1)                         | 0.4<br>(0.2 to 0.6)                    | 9.4<br>(-3.6 to 23.8)                             | -5.6<br>(-15.2 to 5.8)                              |
| Urolithiasis                                               | 2.7<br>(2.4 to 3.1)                           | 72.4<br>(64.0 to 82.8)                            | 0.2<br>(0.1 to 0.3)                    | 21.3<br>(4.4 to 41.8)                             | 1.4<br>(-13.5 to 18.9)                              |
| Benign prostatic hyperplasia                               | 54.2<br>(45.7 to 64.4)                        | 7.4<br>(6.2 to 8.9)                               | 1.8<br>(1.1 to 2.6)                    | 22.1<br>(8.4 to 34.5)                             | -4.4<br>(-14.3 to 3.0)                              |
| Male infertility                                           | 26.9<br>(23.4 to 30.8)                        | --                                                | 0.1<br>(0.1 to 0.3)                    | 11.6<br>(-7.4 to 34.9)                            | -6.3<br>(-22.6 to 14.0)                             |
| Other urinary diseases                                     | --                                            | --                                                | 0.2<br>(0.1 to 0.3)                    | -5.3<br>(-14.2 to 4.6)                            | -19.7<br>(-26.9 to -11.8)                           |
| Gynecological diseases                                     | 711.9<br>(680.6 to 737.9)                     | 267.1†<br>(247.0 to 288.5)                        | 9.6<br>(6.5 to 13.7)                   | 15.5<br>(10.3 to 20.2)                            | 0.5<br>(-3.6 to 4.1)                                |
| Uterine fibroids                                           | 80.8<br>(71.2 to 91.6)                        | 8.8<br>(7.5 to 10.2)                              | 1.6<br>(1.0 to 2.5)                    | 19.8<br>(11.8 to 27.9)                            | 1.2<br>(-5.4 to 8.1)                                |
| Polycystic ovarian syndrome                                | 6.4<br>(4.7 to 8.5)                           | 2.1<br>(1.6 to 2.7)                               | 0.1<br>(< 0.05 to 0.1)                 | 12.4<br>(-1.7 to 28.7)                            | -0.9<br>(-13.2 to 13.7)                             |
| Female infertility                                         | 18.7<br>(13.2 to 25.0)                        | --                                                | 0.1<br>(< 0.05 to 0.2)                 | 40.3<br>(-9.9 to 141.1)                           | 13.1<br>(-29.1 to 101.9)                            |
| Endometriosis                                              | 2.8<br>(2.2 to 3.4)                           | 8.9<br>(6.8 to 11.2)                              | 0.3<br>(0.2 to 0.4)                    | 15.9<br>(-12.0 to 51.3)                           | 0.4<br>(-22.5 to 29.6)                              |
| Genital prolapse                                           | 223.5<br>(193.8 to 253.3)                     | 15.6<br>(13.3 to 18.3)                            | 0.7<br>(0.3 to 1.3)                    | 41.8<br>(29.4 to 54.1)                            | 10.6<br>(0.5 to 21.2)                               |
| Premenstrual syndrome                                      | 375.6<br>(350.8 to 399.6)                     | 134.8<br>(124.7 to 145.2)                         | 3.1<br>(2.0 to 4.8)                    | 8.6<br>(0.1 to 17.3)                              | -1.6<br>(-9.2 to 6.3)                               |
| Other gynecological diseases                               | 110.3<br>(95.9 to 126.0)                      | 96.8<br>(80.0 to 115.4)                           | 3.8<br>(2.5 to 5.3)                    | 15.3<br>(7.6 to 23.2)                             | -0.7<br>(-7.4 to 5.8)                               |
| Hemoglobinopathies and hemolytic anaemias                  | 864.6<br>(832.1 to 894.3)                     | --                                                | 4.6<br>(3.0 to 6.8)                    | 20.1<br>(10.4 to 31.0)                            | 2.7<br>(-4.7 to 10.8)                               |
| Thalassemias                                               | 0.1<br>(0.1 to 0.2)                           | --                                                | < 0.05<br>(< 0.05 to < 0.05)           | 49.3<br>(13.3 to 102.4)                           | 6.5<br>(-18.9 to 44.3)                              |
| Thalassaemias trait                                        | 178.9<br>(142.7 to 216.4)                     | --                                                | 2.7<br>(1.7 to 4.0)                    | 23.0<br>(10.4 to 36.6)                            | 4.6<br>(-5.2 to 15.1)                               |
| Sickle cell disorders                                      | 0.1<br>(0.1 to 0.1)                           | --                                                | < 0.05<br>(< 0.05 to < 0.05)           | 16.2<br>(6.3 to 26.8)                             | 0.3<br>(-8.4 to 9.5)                                |
| Sickle cell trait                                          | 115.1<br>(110.1 to 120.8)                     | --                                                | 0.3<br>(0.2 to 0.5)                    | 27.8<br>(9.8 to 48.1)                             | 7.9<br>(-6.2 to 23.6)                               |
| G6PD deficiency                                            | 62.4<br>(59.6 to 65.6)                        | --                                                | < 0.05<br>(< 0.05 to < 0.05)           | 47.4<br>(29.0 to 69.6)                            | 23.3<br>(9.8 to 38.0)                               |
| G6PD trait                                                 | 465.4<br>(453.6 to 477.2)                     | --                                                | < 0.05<br>(< 0.05 to < 0.05)           | 19.9<br>(10.9 to 30.5)                            | 2.3<br>(-5.2 to 10.5)                               |
| Other hemoglobinopathies and hemolytic anaemias            | 82.5<br>(76.5 to 89.1)                        | --                                                | 1.5<br>(1.0 to 2.3)                    | 13.6<br>(1.3 to 29.2)                             | -1.3<br>(-10.5 to 10.1)                             |
| Endocrine, metabolic, blood, and immune disorders          | 110.9<br>(104.4 to 118.1)                     | 11.0<br>(9.8 to 12.2)                             | 3.1<br>(2.1 to 4.4)                    | 22.2<br>(14.3 to 30.5)                            | 1.5<br>(-4.2 to 7.4)                                |
| <b>Musculoskeletal disorders</b>                           | <b>758.6</b><br><b>(715.8 to 802.9)</b>       | <b>329.6</b><br><b>(296.5 to 366.0)</b>           | <b>86.7</b><br><b>(62.3 to 113.7)</b>  | <b>19.2</b><br><b>(15.3 to 23.2)</b>              | <b>-1.3</b><br><b>(-3.7 to 1.1)</b>                 |
| Rheumatoid arthritis                                       | 17.4<br>(15.4 to 19.6)                        | 1.1<br>(1.0 to 1.3)                               | 4.1<br>(2.8 to 5.5)                    | 34.8<br>(23.8 to 46.7)                            | 10.3<br>(1.8 to 19.0)                               |
| Osteoarthritis                                             | 163.3<br>(152.0 to 174.5)                     | 9.2<br>(8.4 to 9.9)                               | 10.1<br>(7.1 to 13.7)                  | 30.4<br>(25.6 to 35.3)                            | 4.0<br>(0.5 to 7.7)                                 |
| Low back and neck pain                                     | 557.3<br>(516.8 to 601.3)                     | 257.0<br>(226.3 to 289.5)                         | 65.7<br>(45.8 to 86.5)                 | 17.7<br>(12.9 to 22.3)                            | -2.4<br>(-5.3 to 0.6)                               |
| Low back pain                                              | 422.8<br>(374.1 to 482.3)                     | 216.3<br>(187.7 to 249.7)                         | 48.0<br>(33.5 to 63.2)                 | 16.5<br>(10.4 to 22.8)                            | -3.2<br>(-7.1 to 0.7)                               |
| Neck pain                                                  | 177.0<br>(150.3 to 205.2)                     | 40.7<br>(35.0 to 48.0)                            | 17.7<br>(11.9 to 25.5)                 | 21.1<br>(16.6 to 26.1)                            | 0.1<br>(-2.1 to 2.4)                                |
| Gout                                                       | 16.5<br>(14.6 to 18.6)                        | 3.4<br>(2.9 to 3.8)                               | 0.5<br>(0.4 to 0.7)                    | 23.4<br>(5.9 to 43.6)                             | -0.4<br>(-13.1 to 14.2)                             |
| Other musculoskeletal disorders                            | 72.9<br>(53.7 to 95.6)                        | 59.0<br>(43.0 to 78.3)                            | 6.3<br>(3.8 to 9.8)                    | 10.4<br>(-3.6 to 25.0)                            | -7.6<br>(-18.3 to 4.2)                              |
| <b>Other non-communicable diseases</b>                     | <b>4,478.8</b><br><b>(4,404.8 to 4,558.2)</b> | <b>14,399.4†</b><br><b>(13,548.6 to 15,334.6)</b> | <b>109.3</b><br><b>(75.2 to 153.7)</b> | <b>14.9</b><br><b>(13.2 to 16.5)</b>              | <b>-0.4</b><br><b>(-1.4 to 0.6)</b>                 |
| Congenital anomalies                                       | 78.8<br>(71.4 to 86.5)                        | --                                                | 9.5<br>(7.0 to 12.4)                   | 19.4<br>(12.3 to 26.4)                            | 1.3<br>(-4.3 to 7.0)                                |
| Neural tube defects                                        | 6.9<br>(6.1 to 7.8)                           | --                                                | 2.0<br>(1.4 to 2.8)                    | 13.1<br>(-0.2 to 27.9)                            | -2.2<br>(-13.1 to 10.4)                             |
| Congenital heart anomalies                                 | 24.4<br>(20.9 to 28.5)                        | --                                                | 1.2<br>(0.5 to 2.0)                    | 32.4<br>(18.6 to 48.7)                            | 11.5<br>(0.1 to 24.8)                               |
| Orofacial clefts                                           | 2.9<br>(2.5 to 3.2)                           | --                                                | < 0.05<br>(< 0.05 to 0.1)              | 8.3<br>(-5.3 to 23.9)                             | -8.4<br>(-19.4 to 4.0)                              |
| Down's syndrome                                            | 5.9<br>(5.1 to 6.8)                           | --                                                | 0.5<br>(0.4 to 0.7)                    | 21.3<br>(8.4 to 35.9)                             | 4.9<br>(-5.8 to 16.8)                               |
| Turner syndrome                                            | 5.6<br>(4.7 to 6.6)                           | --                                                | 0.1<br>(< 0.05 to 0.2)                 | 18.3<br>(-7.6 to 54.0)                            | 5.4<br>(-17.2 to 35.5)                              |
| Klinefelter syndrome                                       | 4.8<br>(4.0 to 5.7)                           | --                                                | < 0.05<br>(< 0.05 to 0.1)              | 17.4<br>(-5.8 to 45.9)                            | 1.7<br>(-17.9 to 25.9)                              |

| Cause                                         | Prevalence in thousands (95% UI)              | Incidence in thousands (95% UI)          | YLDs in thousands (95% UI)           |                                                   |                                                     |
|-----------------------------------------------|-----------------------------------------------|------------------------------------------|--------------------------------------|---------------------------------------------------|-----------------------------------------------------|
|                                               | 2016 counts                                   | 2016 counts                              | 2016 counts                          | Percentage change in counts between 2006 and 2016 | Percentage change in age-standardised rates between |
| Other chromosomal abnormalities               | 3.7<br>(3.1 to 4.3)                           | --                                       | 0.7<br>(0.5 to 1.0)                  | 33.3<br>(9.4 to 61.7)                             | 3.7<br>(-15.0 to 25.7)                              |
| Congenital musculoskeletal and limb anomalies | 5.9<br>(5.3 to 6.4)                           | --                                       | 0.8<br>(0.6 to 1.2)                  | 16.0<br>(3.9 to 29.7)                             | 1.4<br>(-9.0 to 12.4)                               |
| Urogenital congenital anomalies               | 7.3<br>(6.4 to 8.4)                           | --                                       | 0.2<br>(0.1 to 0.4)                  | 13.3<br>(0.1 to 28.1)                             | -2.1<br>(-13.5 to 10.8)                             |
| Digestive congenital anomalies                | 8.0<br>(7.1 to 8.9)                           | --                                       | 0.4<br>(0.2 to 0.5)                  | 11.7<br>(-5.5 to 30.8)                            | -3.5<br>(-17.7 to 12.2)                             |
| Other congenital anomalies                    | 21.0<br>(13.8 to 30.9)                        | --                                       | 3.4<br>(2.3 to 4.9)                  | 19.0<br>(8.1 to 31.0)                             | 0.6<br>(-7.9 to 10.0)                               |
| Skin and subcutaneous diseases                | 1,550.9<br>(1,509.2 to 1,595.3)               | 3,256.7<br>(3,084.4 to 3,443.8)          | 38.0<br>(25.7 to 55.0)               | 10.2<br>(7.2 to 13.3)                             | 0.9<br>(-1.2 to 3.1)                                |
| Dermatitis                                    | 184.9<br>(171.0 to 200.9)                     | 237.2<br>(217.1 to 259.6)                | 7.0<br>(4.2 to 11.2)                 | 18.8<br>(11.9 to 25.7)                            | 1.4<br>(-3.9 to 6.6)                                |
| Psoriasis                                     | 44.5<br>(42.4 to 46.5)                        | 6.6<br>(6.3 to 6.9)                      | 3.9<br>(2.8 to 5.2)                  | 18.3<br>(8.8 to 30.7)                             | 2.1<br>(-5.4 to 11.1)                               |
| Cellulitis                                    | 2.2<br>(2.0 to 2.4)                           | 38.1<br>(35.4 to 40.9)                   | 0.1<br>(0.1 to 0.2)                  | 18.3<br>(-5.9 to 47.1)                            | 2.1<br>(-17.0 to 24.8)                              |
| Pyoderma                                      | 10.4<br>(10.1 to 10.8)                        | 217.3<br>(210.1 to 225.3)                | 0.1<br>(< 0.05 to 0.1)               | 21.5<br>(11.3 to 33.5)                            | 1.2<br>(-6.4 to 9.1)                                |
| Scabies                                       | 58.3<br>(50.5 to 67.3)                        | 176.9<br>(151.8 to 203.8)                | 1.5<br>(0.8 to 2.4)                  | 6.3<br>(0.7 to 12.4)                              | -5.8<br>(-9.9 to -1.4)                              |
| Fungal skin diseases                          | 445.6<br>(401.1 to 493.8)                     | 1,545.3<br>(1,389.3 to 1,723.2)          | 2.5<br>(1.0 to 5.3)                  | 16.3<br>(13.6 to 19.0)                            | 0.0<br>(-1.1 to 1.1)                                |
| Viral skin diseases                           | 158.4<br>(151.2 to 165.4)                     | 229.9<br>(219.2 to 241.7)                | 4.9<br>(3.1 to 7.3)                  | 11.8<br>(7.7 to 15.7)                             | 0.0<br>(-3.3 to 3.2)                                |
| Acne vulgaris                                 | 442.5<br>(395.6 to 493.4)                     | 295.7<br>(246.1 to 364.4)                | 11.4<br>(7.5 to 16.5)                | -3.0<br>(-8.0 to 2.6)                             | 1.3<br>(-3.7 to 6.8)                                |
| Alopecia areata                               | 11.0<br>(10.6 to 11.5)                        | 19.6<br>(18.8 to 20.4)                   | 0.4<br>(0.2 to 0.6)                  | 17.3<br>(4.1 to 31.5)                             | 0.3<br>(-10.2 to 12.3)                              |
| Pruritus                                      | 46.9<br>(41.3 to 52.9)                        | 38.0<br>(33.9 to 42.9)                   | 0.5<br>(0.2 to 0.9)                  | 19.8<br>(12.1 to 27.4)                            | 1.1<br>(-4.1 to 6.2)                                |
| Urticaria                                     | 66.3<br>(57.1 to 77.1)                        | 119.2<br>(102.9 to 138.4)                | 4.0<br>(2.6 to 5.8)                  | 21.7<br>(14.6 to 29.5)                            | -0.0<br>(-5.2 to 5.5)                               |
| Decubitus ulcer                               | 1.1<br>(1.0 to 1.3)                           | 4.1<br>(3.6 to 4.6)                      | 0.2<br>(0.1 to 0.3)                  | 20.0<br>(8.0 to 33.7)                             | 3.1<br>(-10.4 to 19.1)                              |
| Other skin and subcutaneous diseases          | 293.1<br>(284.4 to 301.5)                     | 328.9<br>(318.6 to 339.1)                | 1.6<br>(0.8 to 2.9)                  | 24.0<br>(20.7 to 27.7)                            | 4.4<br>(1.8 to 7.0)                                 |
| Sense organ diseases                          | 1,289.7<br>(1,261.5 to 1,320.9)               | 551.9†<br>(514.7 to 592.1)               | 46.5<br>(31.9 to 65.0)               | 16.3<br>(13.9 to 18.6)                            | -1.7<br>(-3.1 to -0.3)                              |
| Glaucoma                                      | 4.1<br>(3.4 to 4.8)                           | --                                       | 0.4<br>(0.3 to 0.6)                  | 18.3<br>(5.7 to 32.4)                             | 0.1<br>(-9.1 to 10.1)                               |
| Cataract                                      | 52.4<br>(45.0 to 60.4)                        | --                                       | 2.9<br>(2.0 to 4.0)                  | 12.3<br>(6.4 to 19.3)                             | -2.9<br>(-7.3 to 2.3)                               |
| Macular degeneration                          | 1.6<br>(1.3 to 1.9)                           | --                                       | 0.1<br>(0.1 to 0.1)                  | 19.0<br>(3.2 to 38.3)                             | 1.0<br>(-11.8 to 16.1)                              |
| Refraction and accommodation disorders        | 743.2<br>(712.7 to 777.4)                     | --                                       | 13.0<br>(7.9 to 20.6)                | 16.7<br>(13.4 to 20.2)                            | -2.9<br>(-5.3 to -0.3)                              |
| Age-related and other hearing loss            | 761.8<br>(717.4 to 809.5)                     | --                                       | 24.1<br>(17.0 to 33.8)               | 15.7<br>(11.8 to 19.9)                            | -1.3<br>(-3.4 to 0.8)                               |
| Other vision loss                             | 26.9<br>(23.6 to 30.8)                        | --                                       | 1.7<br>(1.2 to 2.3)                  | 19.2<br>(10.7 to 28.2)                            | -0.9<br>(-6.8 to 5.5)                               |
| Other sense organ diseases                    | 137.0<br>(126.1 to 147.6)                     | 551.9<br>(514.7 to 592.1)                | 4.2<br>(2.6 to 6.4)                  | 19.9<br>(14.4 to 25.2)                            | 0.3<br>(-3.6 to 3.9)                                |
| Oral disorders                                | 3,556.6<br>(3,430.7 to 3,679.6)               | 10,590.7†<br>(9,789.5 to 11,460.0)       | 15.4<br>(9.6 to 23.3)                | 20.3<br>(17.9 to 23.0)                            | 0.5<br>(-1.2 to 2.4)                                |
| Caries of deciduous teeth                     | 636.4<br>(530.5 to 746.1)                     | 2,496.4<br>(1,913.2 to 3,192.7)          | 0.1<br>(0.1 to 0.3)                  | 36.6<br>(23.2 to 51.9)                            | -0.1<br>(-9.4 to 11.2)                              |
| Caries of permanent teeth                     | 2,671.3<br>(2,543.1 to 2,794.2)               | 8,017.4<br>(7,485.8 to 8,550.5)          | 1.6<br>(0.7 to 3.1)                  | 7.3<br>(4.0 to 10.7)                              | -2.4<br>(-5.1 to 0.2)                               |
| Periodontal disease                           | 388.8<br>(318.9 to 465.6)                     | 51.3<br>(40.5 to 63.4)                   | 2.5<br>(1.0 to 5.3)                  | 23.9<br>(18.8 to 29.2)                            | -0.3<br>(-3.8 to 2.9)                               |
| Edentulism and severe tooth loss              | 291.5<br>(255.5 to 328.6)                     | 25.6<br>(21.6 to 29.7)                   | 8.1<br>(5.4 to 11.5)                 | 23.8<br>(19.5 to 28.2)                            | 1.3<br>(-1.4 to 4.1)                                |
| Other oral disorders                          | 101.6<br>(96.9 to 106.4)                      | --                                       | 3.0<br>(1.8 to 4.5)                  | 15.3<br>(11.2 to 19.6)                            | 0.0<br>(-3.1 to 3.0)                                |
| <b>Injuries</b>                               | <b>1,305.7</b><br><b>(1,219.2 to 1,420.1)</b> | <b>609.5†</b><br><b>(570.3 to 652.0)</b> | <b>49.2</b><br><b>(33.3 to 69.7)</b> | <b>24.2</b><br><b>(21.7 to 26.8)</b>              | <b>5.6</b><br><b>(3.5 to 7.7)</b>                   |
| <b>Transport injuries</b>                     | <b>137.7</b><br><b>(127.3 to 148.9)</b>       | <b>56.6</b><br><b>(50.3 to 63.0)</b>     | <b>7.5</b><br><b>(5.0 to 10.7)</b>   | <b>40.9</b><br><b>(38.0 to 43.7)</b>              | <b>18.0</b><br><b>(15.8 to 19.9)</b>                |
| Road injuries                                 | 126.8<br>(116.2 to 137.2)                     | 53.8<br>(47.5 to 60.2)                   | 6.9<br>(4.6 to 9.9)                  | 43.1<br>(40.2 to 45.9)                            | 19.5<br>(17.3 to 21.5)                              |
| Pedestrian road injuries                      | 27.8<br>(24.6 to 31.5)                        | 8.4<br>(7.0 to 10.0)                     | 1.5<br>(1.0 to 2.1)                  | 39.4<br>(36.4 to 42.3)                            | 17.4<br>(15.3 to 19.4)                              |
| Cyclist road injuries                         | 21.5<br>(18.0 to 25.6)                        | 9.6<br>(7.6 to 11.8)                     | 1.1<br>(0.7 to 1.6)                  | 49.2<br>(45.9 to 52.4)                            | 26.7<br>(24.3 to 28.9)                              |
| Motorcyclist road injuries                    | 16.6<br>(14.3 to 20.3)                        | 4.7<br>(3.8 to 5.8)                      | 0.8<br>(0.6 to 1.2)                  | 42.8<br>(39.7 to 45.8)                            | 18.8<br>(16.4 to 20.8)                              |
| Motor vehicle road injuries                   | 52.3<br>(43.8 to 60.6)                        | 26.4<br>(22.9 to 30.2)                   | 3.0<br>(2.0 to 4.4)                  | 43.6<br>(40.6 to 46.5)                            | 18.8<br>(16.6 to 20.9)                              |
| Other road injuries                           | 8.6<br>(7.3 to 10.2)                          | 4.6<br>(3.6 to 5.8)                      | 0.4<br>(0.3 to 0.6)                  | 39.3<br>(36.1 to 42.2)                            | 17.3<br>(15.0 to 19.3)                              |
| Other transport injuries                      | 10.9<br>(9.2 to 13.1)                         | 2.8<br>(2.4 to 3.4)                      | 0.6<br>(0.4 to 0.8)                  | 18.9<br>(15.4 to 22.5)                            | 1.2<br>(-1.4 to 3.8)                                |
| <b>Unintentional injuries</b>                 | <b>1,090.7</b><br><b>(1,002.7 to 1,200.5)</b> | <b>518.9</b><br><b>(480.9 to 562.4)</b>  | <b>38.1</b><br><b>(25.9 to 53.5)</b> | <b>21.5</b><br><b>(19.1 to 24.0)</b>              | <b>3.4</b><br><b>(1.4 to 5.3)</b>                   |
| Falls                                         | 520.2<br>(451.3 to 600.8)                     | 258.4<br>(224.0 to 296.8)                | 20.9<br>(14.7 to 28.5)               | 18.2<br>(15.8 to 20.5)                            | 0.6<br>(-1.2 to 2.4)                                |
| Drowning                                      | 4.2<br>(3.6 to 4.8)                           | 0.9<br>(0.8 to 1.0)                      | 0.2<br>(0.1 to 0.3)                  | -8.3<br>(-11.0 to -5.5)                           | -21.3<br>(-23.6 to -19.0)                           |
| Fire, heat, and hot substances                | 131.8<br>(111.7 to 159.1)                     | 18.7<br>(15.5 to 21.7)                   | 3.6<br>(2.4 to 5.2)                  | 25.5<br>(19.9 to 30.4)                            | 8.3<br>(4.1 to 12.0)                                |
| Poisonings                                    | 3.6<br>(3.1 to 4.4)                           | 6.1<br>(4.9 to 7.5)                      | 0.3<br>(0.2 to 0.5)                  | 44.7<br>(34.0 to 54.6)                            | 27.5<br>(19.1 to 35.2)                              |
| Exposure to mechanical forces                 | 180.1<br>(152.7 to 225.0)                     | 80.2<br>(68.5 to 92.6)                   | 4.5<br>(2.9 to 6.5)                  | 37.7<br>(34.3 to 40.7)                            | 16.8<br>(14.1 to 19.1)                              |
| Unintentional firearm injuries                | 4.6<br>(3.7 to 5.6)                           | 1.3<br>(0.9 to 1.8)                      | 0.2<br>(0.1 to 0.3)                  | 37.1<br>(33.5 to 40.5)                            | 15.8<br>(13.2 to 18.2)                              |
| Unintentional suffocation                     | 13.0<br>(10.1 to 16.4)                        | 3.4<br>(2.5 to 4.5)                      | 0.4<br>(0.3 to 0.7)                  | 25.4<br>(22.1 to 28.4)                            | 6.9<br>(4.6 to 9.2)                                 |
| Other exposure to mechanical forces           | 162.6<br>(136.0 to 207.6)                     | 75.6<br>(64.5 to 87.6)                   | 3.8<br>(2.5 to 5.6)                  | 39.3<br>(35.7 to 42.5)                            | 18.0<br>(15.2 to 20.4)                              |

| Cause                                                                               | Prevalence in thousands (95% UI)        | Incidence in thousands (95% UI)       | YLDs in thousands (95% UI)           |                                                   |                                                     |
|-------------------------------------------------------------------------------------|-----------------------------------------|---------------------------------------|--------------------------------------|---------------------------------------------------|-----------------------------------------------------|
|                                                                                     | 2016 counts                             | 2016 counts                           | 2016 counts                          | Percentage change in counts between 2006 and 2016 | Percentage change in age-standardised rates between |
| Adverse effects of medical treatment                                                | 1.4<br>(1.1 to 1.8)                     | 18.3<br>(15.7 to 21.0)                | 0.2<br>(0.1 to 0.3)                  | 37.8<br>(30.3 to 44.9)                            | 7.8<br>(3.0 to 12.3)                                |
| Animal contact                                                                      | 28.8<br>(24.9 to 33.8)                  | 37.0<br>(30.0 to 44.8)                | 1.0<br>(0.6 to 1.4)                  | 12.6<br>(6.7 to 18.2)                             | -2.7<br>(-7.2 to 1.4)                               |
| Venomous animal contact                                                             | 10.3<br>(8.3 to 12.6)                   | 14.3<br>(10.8 to 18.4)                | 0.7<br>(0.4 to 1.0)                  | 15.7<br>(7.3 to 24.1)                             | 1.2<br>(-5.7 to 7.5)                                |
| Non-venomous animal contact                                                         | 18.5<br>(15.1 to 23.6)                  | 22.7<br>(18.1 to 27.9)                | 0.3<br>(0.2 to 0.5)                  | 6.4<br>(2.6 to 9.8)                               | -9.7<br>(-12.6 to -7.0)                             |
| Foreign body                                                                        | 70.5<br>(57.2 to 82.8)                  | 42.1<br>(37.3 to 47.9)                | 2.6<br>(1.7 to 3.9)                  | 12.9<br>(9.2 to 16.4)                             | -2.8<br>(-5.6 to 0.1)                               |
| Pulmonary aspiration and foreign body in airway                                     | 36.3<br>(27.2 to 49.3)                  | 15.1<br>(12.7 to 18.2)                | 1.6<br>(1.0 to 2.4)                  | 4.5<br>(1.1 to 7.7)                               | -9.9<br>(-12.5 to -7.4)                             |
| Foreign body in eyes                                                                | 2.3<br>(1.3 to 3.5)                     | 12.3<br>(9.4 to 16.4)                 | 0.1<br>(0.1 to 0.2)                  | 21.3<br>(16.7 to 26.3)                            | 2.6<br>(0.1 to 5.6)                                 |
| Foreign body in other body part                                                     | 31.9<br>(26.2 to 40.2)                  | 14.7<br>(12.4 to 17.4)                | 1.0<br>(0.6 to 1.4)                  | 28.5<br>(24.0 to 32.9)                            | 9.7<br>(6.1 to 12.9)                                |
| Environmental heat and cold exposure                                                | 53.6<br>(46.4 to 61.8)                  | 17.7<br>(15.0 to 20.8)                | 2.1<br>(1.4 to 3.0)                  | 18.3<br>(15.6 to 20.8)                            | -2.4<br>(-4.5 to -0.4)                              |
| Other unintentional injuries                                                        | 96.6<br>(77.1 to 118.4)                 | 39.4<br>(32.6 to 47.6)                | 2.8<br>(1.8 to 4.1)                  | 35.4<br>(32.5 to 38.0)                            | 14.3<br>(12.0 to 16.5)                              |
| <b>Self-harm and interpersonal violence</b>                                         | <b>151.0</b><br><b>(137.6 to 165.3)</b> | <b>33.8†</b><br><b>(29.4 to 38.8)</b> | <b>3.1</b><br><b>(2.2 to 4.4)</b>    | <b>15.2</b><br><b>(12.5 to 18.0)</b>              | <b>-0.9</b><br><b>(-2.8 to 1.0)</b>                 |
| Self-harm                                                                           | 8.6<br>(7.2 to 10.1)                    | 4.2<br>(3.6 to 4.8)                   | 0.4<br>(0.3 to 0.6)                  | 16.9<br>(13.1 to 20.5)                            | -2.5<br>(-5.2 to 0.2)                               |
| Self-harm by firearm                                                                | 0.2<br>(0.1 to 0.2)                     | 0.1<br>( $< 0.05$ to 0.1)             | $< 0.05$<br>( $< 0.05$ to $< 0.05$ ) | -18.5<br>(-21.8 to -15.5)                         | -35.1<br>(-37.5 to -32.9)                           |
| Self-harm by other specified means                                                  | 8.5<br>(7.1 to 9.9)                     | 4.1<br>(3.5 to 4.7)                   | 0.4<br>(0.3 to 0.6)                  | 17.7<br>(13.9 to 21.3)                            | -1.7<br>(-4.6 to 1.0)                               |
| Interpersonal violence                                                              | 142.4<br>(128.8 to 156.4)               | 29.7†<br>(25.2 to 34.7)               | 2.7<br>(1.9 to 3.8)                  | 15.0<br>(12.1 to 17.9)                            | -0.6<br>(-2.7 to 1.4)                               |
| Assault by firearm                                                                  | 0.6<br>(0.5 to 0.7)                     | 0.2<br>(0.1 to 0.3)                   | $< 0.05$<br>( $< 0.05$ to $< 0.05$ ) | 8.8<br>(5.3 to 12.3)                              | -8.1<br>(-10.5 to -5.6)                             |
| Assault by sharp object                                                             | 13.7<br>(11.2 to 16.3)                  | 6.1<br>(4.7 to 7.8)                   | 0.4<br>(0.3 to 0.6)                  | 12.7<br>(9.4 to 16.2)                             | -4.7<br>(-7.2 to -2.3)                              |
| Sexual violence                                                                     | 90.8<br>(79.3 to 103.5)                 | --                                    | 0.8<br>(0.5 to 1.1)                  | 5.2<br>(-0.2 to 11.3)                             | -3.1<br>(-7.4 to 1.4)                               |
| Assault by other means                                                              | 37.4<br>(30.9 to 45.3)                  | 23.4<br>(19.8 to 27.6)                | 1.5<br>(1.0 to 2.2)                  | 21.3<br>(18.6 to 24.1)                            | 1.8<br>(-0.1 to 3.8)                                |
| <b>Forces of nature, conflict and terrorism, and executions and police conflict</b> | <b>17.2</b><br><b>(7.2 to 28.4)</b>     | <b>0.1†</b><br><b>(0.1 to 0.2)</b>    | <b>0.5</b><br><b>(0.1 to 1.5)</b>    | <b>99.2</b><br><b>(35.5 to 128.2)</b>             | <b>77.2</b><br><b>(23.6 to 100.0)</b>               |
| Exposure to forces of nature                                                        | 8.8<br>(4.0 to 14.7)                    | --                                    | 0.3<br>(0.1 to 0.8)                  | 20.1<br>(-10.5 to 33.0)                           | 10.8<br>(-16.0 to 21.8)                             |
| Conflict and terrorism                                                              | 8.0<br>(2.8 to 14.9)                    | --                                    | 0.2<br>( $< 0.05$ to 0.7)            | 1,749.2<br>(1,653.5 to 1,868.8)                   | 1,556.5<br>(1,477.9 to 1,654.1)                     |
| Executions and police conflict                                                      | 0.4<br>(0.2 to 0.6)                     | 0.1<br>(0.1 to 0.2)                   | $< 0.05$<br>( $< 0.05$ to $< 0.05$ ) | 24.9<br>(18.4 to 30.4)                            | 16.8<br>(10.7 to 21.4)                              |
| <b>Impairments</b>                                                                  | --                                      | --                                    | --                                   | --                                                | --                                                  |
| Anaemia                                                                             | 2,163.0<br>(2,042.3 to 2,286.1)         | --                                    | 58.3<br>(38.7 to 84.1)               | 15.1<br>(8.2 to 23.1)                             | -1.4<br>(-6.7 to 4.3)                               |
| Developmental intellectual disability                                               | 158.6<br>(125.2 to 193.0)               | --                                    | 16.4<br>(12.1 to 21.6)               | 12.7<br>(7.0 to 18.9)                             | -0.7<br>(-5.3 to 4.6)                               |
| Epilepsy                                                                            | 34.1<br>(17.4 to 54.4)                  | --                                    | 12.1<br>(5.8 to 21.1)                | 5.5<br>(-54.6 to 134.5)                           | -6.7<br>(-60.5 to 112.7)                            |
| Guillain-Barre syndrome                                                             | 0.1<br>( $< 0.05$ to 0.1)               | --                                    | $< 0.05$<br>( $< 0.05$ to $< 0.05$ ) | 16.7<br>(12.0 to 22.5)                            | -0.0<br>(-0.1 to 0.1)                               |
| Hearing loss                                                                        | 862.8<br>(820.7 to 910.3)               | --                                    | 29.4<br>(20.6 to 40.5)               | 14.5<br>(11.2 to 17.6)                            | -1.9<br>(-3.8 to -0.1)                              |
| Heart failure                                                                       | 43.3<br>(38.1 to 49.2)                  | --                                    | 4.4<br>(3.3 to 5.6)                  | 18.1<br>(10.4 to 26.6)                            | 0.1<br>(-6.2 to 6.7)                                |
| Infertility                                                                         | 93.4<br>(83.6 to 104.2)                 | --                                    | 0.6<br>(0.3 to 1.2)                  | 14.7<br>(-2.1 to 34.7)                            | -2.4<br>(-17.0 to 15.1)                             |
| Pelvic inflammatory disease                                                         | 3.2<br>(2.7 to 3.9)                     | --                                    | 0.4<br>(0.3 to 0.6)                  | 6.9<br>(-10.2 to 26.9)                            | -8.9<br>(-23.6 to 7.7)                              |
| Vision loss                                                                         | 854.1<br>(817.4 to 893.1)               | --                                    | 21.6<br>(14.8 to 31.6)               | 17.6<br>(14.2 to 21.4)                            | -1.4<br>(-3.7 to 1.2)                               |

We did not calculate incidence for the nine impairments, certain NTDs, and causes with only birth prevalence. Blank cells mean that no estimate is available.

† Incidence for aggregate causes represents the sum of the incidence of the causes below the aggregate.

‡ Incidence estimates for stroke represent first-ever stroke only.

^ Incidence of HIV/AIDS represents new infections of HIV only and does not include new infections of Tuberculosis in HIV positive cases.



SR Table 14: Prevalence, incidence, and YLDs for 2016, percentage change of YLD counts and percentage change of age-standardised YLD rates between 2006 and 2016 by cause and impairments, for all ages, Laos.

| Cause                                                                                | Prevalence in thousands (95% UI)       | Incidence in thousands (95% UI)            | YLDs in thousands (95% UI)       |                                                   |                                                     |
|--------------------------------------------------------------------------------------|----------------------------------------|--------------------------------------------|----------------------------------|---------------------------------------------------|-----------------------------------------------------|
|                                                                                      | 2016 counts                            | 2016 counts                                | 2016 counts                      | Percentage change in counts between 2006 and 2016 | Percentage change in age-standardised rates between |
| <b>All causes</b>                                                                    | <b>6,934.0</b><br>(6,905.8 to 6,961.5) | <b>44,271.8†</b><br>(41,609.5 to 47,219.0) | <b>619.5</b><br>(457.7 to 800.9) | <b>19.6</b><br>(16.7 to 23.0)                     | <b>-3.5</b><br>(-5.8 to -1.2)                       |
| <b>Communicable, maternal, neonatal, and nutritional disorders</b>                   | <b>5,374.8</b><br>(5,235.4 to 5,517.0) | <b>26,585.9†</b><br>(24,218.7 to 29,059.9) | <b>103.5</b><br>(72.8 to 144.4)  | <b>-3.1</b><br>(-9.6 to 4.2)                      | <b>-22.5</b><br>(-29.8 to -15.7)                    |
| <b>HIV/AIDS and tuberculosis</b>                                                     | <b>1,676.0</b><br>(1,455.0 to 1,851.5) | <b>8.7†</b><br>(6.9 to 11.5)               | <b>5.2</b><br>(3.1 to 11.4)      | <b>-1.6</b><br>(-16.8 to 44.1)                    | <b>-24.5</b><br>(-35.4 to 10.8)                     |
| Tuberculosis                                                                         | 1,532.7<br>(1,349.7 to 1,747.6)        | 8.1†<br>(6.7 to 9.8)                       | 3.5<br>(2.2 to 5.0)              | -14.3<br>(-22.4 to -5.5)                          | -33.9<br>(-39.3 to -28.1)                           |
| Drug-susceptible tuberculosis                                                        | 11.4<br>(9.2 to 14.0)                  | 8.0<br>(6.6 to 9.7)                        | 3.5<br>(2.2 to 5.0)              | -13.8<br>(-22.2 to -3.8)                          | -33.5<br>(-39.4 to -26.7)                           |
| Multidrug-resistant tuberculosis without extensive drug resistance                   | 0.1<br>(< 0.05 to 0.2)                 | < 0.05<br>(< 0.05 to 0.2)                  | < 0.05<br>(< 0.05 to 0.1)        | -59.1<br>(-94.9 to 211.8)                         | -68.0<br>(-96.0 to 157.3)                           |
| Extensively drug-resistant tuberculosis                                              | < 0.05<br>(< 0.05 to < 0.05)           | < 0.05<br>(< 0.05 to < 0.05)               | < 0.05<br>(< 0.05 to < 0.05)     | 31.1<br>(-83.6 to 891.7)                          | 1.0<br>(-87.4 to 667.9)                             |
| Latent tuberculosis infection                                                        | 1,521.2<br>(1,336.7 to 1,736.6)        | --                                         | --                               | --                                                | --                                                  |
| HIV/AIDS                                                                             | 8.7<br>(2.1 to 43.0)                   | 0.6 <sup>a</sup><br>(< 0.05 to 3.4)        | 1.7<br>(0.6 to 7.6)              | 40.2<br>(-5.5 to 138.7)                           | 14.1<br>(-23.9 to 94.9)                             |
| Drug-susceptible HIV/AIDS - Tuberculosis                                             | 2.5<br>(1.6 to 3.8)                    | 1.8<br>(1.1 to 2.7)                        | 1.0<br>(0.5 to 1.6)              | 13.2<br>(-5.5 to 37.0)                            | -10.1<br>(-24.1 to 7.1)                             |
| Multidrug-resistant HIV/AIDS - Tuberculosis without extensive drug resistance        | < 0.05<br>(< 0.05 to 0.1)              | < 0.05<br>(< 0.05 to < 0.05)               | < 0.05<br>(< 0.05 to < 0.05)     | -47.1<br>(-93.4 to 296.5)                         | -57.8<br>(-94.7 to 216.2)                           |
| Extensively drug-resistant HIV/AIDS - Tuberculosis                                   | < 0.05<br>(< 0.05 to < 0.05)           | < 0.05<br>(< 0.05 to < 0.05)               | < 0.05<br>(< 0.05 to < 0.05)     | 74.0<br>(-78.3 to 1,204.7)                        | 38.9<br>(-82.7 to 940.5)                            |
| HIV/AIDS resulting in other diseases                                                 | 6.1<br>(0.1 to 40.6)                   | 0.6<br>(< 0.05 to 3.4)                     | 0.8<br>(< 0.05 to 6.6)           | 105.9<br>(-66.7 to 281.7)                         | 71.6<br>(-77.7 to 209.8)                            |
| <b>Diarrhoea, lower respiratory infections, and other common infectious diseases</b> | <b>433.9</b><br>(408.2 to 461.9)       | <b>23,799.0†</b><br>(21,533.3 to 26,209.0) | <b>23.2</b><br>(16.1 to 31.4)    | <b>12.5</b><br>(8.4 to 16.7)                      | <b>-7.7</b><br>(-10.7 to -4.8)                      |
| Diarrhoeal diseases                                                                  | 84.8<br>(78.9 to 90.8)                 | 5,586.9<br>(5,185.6 to 5,983.7)            | 9.7<br>(6.7 to 13.3)             | 18.4<br>(10.6 to 26.0)                            | -5.8<br>(-11.1 to -0.6)                             |
| Intestinal infectious diseases                                                       | 1.6<br>(1.2 to 2.0)                    | 28.9†<br>(22.6 to 37.3)                    | 0.2<br>(0.1 to 0.4)              | -26.7<br>(-44.2 to -5.4)                          | -35.4<br>(-48.7 to -21.3)                           |
| Typhoid fever                                                                        | 1.5<br>(1.1 to 1.9)                    | 23.1<br>(18.0 to 30.0)                     | 0.2<br>(0.1 to 0.3)              | -26.8<br>(-45.1 to -3.5)                          | -35.4<br>(-49.5 to -19.4)                           |
| Paratyphoid fever                                                                    | 0.2<br>(0.2 to 0.3)                    | 5.8<br>(4.5 to 7.3)                        | < 0.05<br>(< 0.05 to < 0.05)     | -21.7<br>(-35.9 to -5.6)                          | -32.3<br>(-43.1 to -20.2)                           |
| Other intestinal infectious diseases                                                 | --                                     | --                                         | < 0.05<br>(< 0.05 to < 0.05)     | -40.1<br>(-54.9 to -20.9)                         | -51.8<br>(-61.2 to -41.4)                           |
| Lower respiratory infections                                                         | 6.6<br>(5.8 to 7.4)                    | 285.9<br>(250.2 to 322.9)                  | 0.4<br>(0.3 to 0.6)              | 5.8<br>(-8.8 to 21.6)                             | -12.1<br>(-21.4 to -1.9)                            |
| Upper respiratory infections                                                         | 229.6<br>(200.7 to 260.1)              | 17,254.5<br>(15,063.2 to 19,663.9)         | 5.8<br>(3.4 to 9.1)              | 19.6<br>(13.1 to 26.4)                            | -0.9<br>(-5.8 to 4.2)                               |
| Otitis media                                                                         | 94.3<br>(84.0 to 105.1)                | 411.5<br>(320.2 to 530.0)                  | 3.0<br>(1.8 to 4.5)              | 3.4<br>(-4.9 to 12.6)                             | -13.5<br>(-19.8 to -6.9)                            |
| Meningitis                                                                           | 14.6<br>(12.4 to 17.0)                 | 3.5<br>(3.0 to 4.2)                        | 1.7<br>(1.2 to 2.3)              | 4.5<br>(-0.9 to 10.9)                             | -13.3<br>(-18.0 to -7.6)                            |
| Pneumococcal meningitis                                                              | 5.3<br>(4.5 to 6.3)                    | 0.5<br>(0.4 to 0.7)                        | 0.7<br>(0.5 to 1.0)              | -5.5<br>(-14.3 to 5.3)                            | -21.8<br>(-29.4 to -12.4)                           |
| H influenzae type B meningitis                                                       | 2.4<br>(2.0 to 3.0)                    | 0.5<br>(0.4 to 0.7)                        | 0.4<br>(0.2 to 0.5)              | -10.3<br>(-19.9 to 1.1)                           | -24.9<br>(-33.3 to -14.6)                           |
| Meningococcal infection                                                              | 0.6<br>(0.5 to 0.8)                    | 0.2<br>(0.2 to 0.3)                        | 0.1<br>(0.1 to 0.1)              | 7.2<br>(0.4 to 13.8)                              | -11.0<br>(-16.7 to -5.5)                            |
| Other meningitis                                                                     | 6.3<br>(4.7 to 8.1)                    | 2.3<br>(1.9 to 2.8)                        | 0.6<br>(0.4 to 0.8)              | 35.2<br>(24.8 to 46.5)                            | 11.9<br>(3.7 to 20.3)                               |
| Encephalitis                                                                         | 15.8<br>(10.5 to 23.2)                 | 7.8<br>(6.7 to 9.1)                        | 1.9<br>(1.4 to 2.6)              | 12.3<br>(-3.3 to 29.5)                            | -7.4<br>(-19.7 to 5.5)                              |
| Diphtheria                                                                           | < 0.05<br>(< 0.05 to < 0.05)           | < 0.05<br>(< 0.05 to < 0.05)               | < 0.05<br>(< 0.05 to < 0.05)     | -86.6<br>(-94.4 to -66.8)                         | -89.0<br>(-94.7 to -76.3)                           |
| Whooping cough                                                                       | 3.6<br>(2.8 to 4.6)                    | 26.5<br>(20.7 to 33.3)                     | 0.2<br>(0.1 to 0.3)              | -39.2<br>(-47.9 to -28.4)                         | -53.0<br>(-59.8 to -44.5)                           |
| Tetanus                                                                              | 0.1<br>(0.1 to 0.1)                    | 0.2<br>(0.1 to 0.3)                        | < 0.05<br>(< 0.05 to < 0.05)     | -69.5<br>(-83.1 to -43.0)                         | -75.9<br>(-87.1 to -54.7)                           |
| Measles                                                                              | 0.3<br>(0.1 to 0.6)                    | 9.4<br>(3.1 to 23.0)                       | < 0.05<br>(< 0.05 to 0.1)        | -82.8<br>(-90.2 to -71.5)                         | -86.5<br>(-92.3 to -77.7)                           |
| Varicella and herpes zoster                                                          | 7.7<br>(7.1 to 8.3)                    | 183.8<br>(173.9 to 194.2)                  | 0.3<br>(0.2 to 0.4)              | 25.2<br>(10.4 to 42.5)                            | 0.4<br>(-8.8 to 10.7)                               |
| <b>Neglected tropical diseases and malaria</b>                                       | <b>2,660.8</b><br>(2,343.5 to 2,986.2) | <b>1,258.3†</b><br>(875.2 to 1,595.5)      | <b>15.7</b><br>(9.5 to 24.2)     | <b>-28.7</b><br>(-41.5 to -9.2)                   | <b>-38.2</b><br>(-54.0 to -17.4)                    |
| Malaria                                                                              | 12.2<br>(10.3 to 14.4)                 | 80.0<br>(35.2 to 115.8)                    | 0.3<br>(0.2 to 0.4)              | 11.3<br>(-13.2 to 37.0)                           | -3.9<br>(-24.2 to 17.5)                             |
| Chagas disease                                                                       | --                                     | --                                         | --                               | --                                                | --                                                  |
| Leishmaniasis                                                                        | --                                     | --                                         | --                               | --                                                | --                                                  |
| Visceral leishmaniasis                                                               | --                                     | --                                         | --                               | --                                                | --                                                  |
| Cutaneous and mucocutaneous leishmaniasis                                            | --                                     | --                                         | --                               | --                                                | --                                                  |
| African trypanosomiasis                                                              | --                                     | --                                         | --                               | --                                                | --                                                  |
| Schistosomiasis                                                                      | 88.5<br>(84.3 to 92.6)                 | 46.2<br>(42.7 to 50.2)                     | 0.8<br>(0.4 to 1.4)              | -72.6<br>(-76.2 to -66.3)                         | -79.5<br>(-82.2 to -74.9)                           |
| Cysticercosis                                                                        | 2.4<br>(1.8 to 3.0)                    | --                                         | 0.5<br>(0.3 to 0.7)              | -10.1<br>(-33.7 to 14.7)                          | -31.1<br>(-47.8 to -13.1)                           |
| Cystic echinococcosis                                                                | 0.1<br>(< 0.05 to 0.2)                 | < 0.05<br>(< 0.05 to 0.1)                  | < 0.05<br>(< 0.05 to < 0.05)     | -55.5<br>(-95.3 to 386.4)                         | -64.4<br>(-96.3 to 278.8)                           |
| Lymphatic filariasis                                                                 | 3.2<br>(2.1 to 4.7)                    | 1.2<br>(0.8 to 1.6)                        | 0.2<br>(0.1 to 0.4)              | 335.3<br>(116.9 to 567.9)                         | 252.7<br>(89.2 to 437.4)                            |
| Onchocerciasis                                                                       | --                                     | --                                         | --                               | --                                                | --                                                  |
| Trachoma                                                                             | 0.4<br>(0.2 to 0.7)                    | --                                         | < 0.05<br>(< 0.05 to 0.1)        | -22.4<br>(-52.3 to 27.0)                          | -37.7<br>(-62.7 to 4.4)                             |
| Dengue                                                                               | 4.0<br>(2.4 to 6.4)                    | 67.5<br>(46.6 to 92.9)                     | 0.7<br>(0.3 to 1.2)              | 84.5<br>(33.4 to 339.2)                           | 54.9<br>(14.4 to 251.7)                             |
| Yellow fever                                                                         | --                                     | --                                         | --                               | --                                                | --                                                  |
| Rabies                                                                               | < 0.05<br>(< 0.05 to < 0.05)           | < 0.05<br>(< 0.05 to < 0.05)               | < 0.05<br>(< 0.05 to < 0.05)     | -74.8<br>(-86.4 to -50.8)                         | -79.1<br>(-87.7 to -62.6)                           |
| Intestinal nematode infections                                                       | 2,425.8<br>(2,087.4 to 2,797.6)        | --                                         | 6.5<br>(3.7 to 10.8)             | -40.8<br>(-49.0 to -30.0)                         | -48.9<br>(-57.1 to -38.8)                           |
| Ascariasis                                                                           | 1,089.1<br>(817.2 to 1,381.1)          | --                                         | 2.0<br>(1.1 to 3.4)              | -48.9<br>(-59.6 to -35.0)                         | -55.7<br>(-66.2 to -41.9)                           |



| Cause                                                                   | Prevalence in thousands (95% UI)        | Incidence in thousands (95% UI)             | YLDs in thousands (95% UI)        |                                                   |                                                     |
|-------------------------------------------------------------------------|-----------------------------------------|---------------------------------------------|-----------------------------------|---------------------------------------------------|-----------------------------------------------------|
|                                                                         | 2016 counts                             | 2016 counts                                 | 2016 counts                       | Percentage change in counts between 2006 and 2016 | Percentage change in age-standardised rates between |
| Trichuriasis                                                            | 990.1<br>(751.6 to 1,327.9)             | --                                          | 1.7<br>(0.8 to 3.0)               | -47.8<br>(-65.5 to -19.4)                         | -53.8<br>(-70.8 to -25.1)                           |
| Hookworm disease                                                        | 776.6<br>(599.1 to 984.6)               | --                                          | 2.9<br>(1.7 to 4.6)               | -26.8<br>(-39.0 to -12.5)                         | -38.8<br>(-50.0 to -25.5)                           |
| Food-borne trematodiasis                                                | 198.2<br>(130.6 to 269.3)               | 1,063.4<br>(685.3 to 1,398.4)               | 4.6<br>(1.2 to 10.6)              | -5.2<br>(-50.8 to 43.0)                           | -24.1<br>(-60.2 to 9.3)                             |
| Leprosy                                                                 | 0.8<br>(0.7 to 0.9)                     | < 0.05<br>(< 0.05 to < 0.05)                | < 0.05<br>(< 0.05 to 0.1)         | -11.1<br>(-25.8 to 9.4)                           | -29.2<br>(-39.7 to -15.6)                           |
| Ebola virus disease                                                     | --                                      | --                                          | --                                | --                                                | --                                                  |
| Zika virus disease                                                      | --                                      | --                                          | --                                | --                                                | --                                                  |
| Guinea worm disease                                                     | --                                      | --                                          | --                                | --                                                | --                                                  |
| Other neglected tropical diseases                                       | 85.7<br>(78.3 to 93.8)                  | --                                          | 2.0<br>(1.2 to 3.1)               | 4.8<br>(-9.5 to 22.6)                             | -12.1<br>(-23.2 to 0.8)                             |
| <b>Maternal disorders</b>                                               | <b>10.4<br/>(7.7 to 14.7)</b>           | <b>212.0†<br/>(179.1 to 255.2)</b>          | <b>0.8<br/>(0.5 to 1.2)</b>       | <b>25.1<br/>(-6.3 to 67.0)</b>                    | <b>-8.2<br/>(-31.0 to 21.9)</b>                     |
| Maternal haemorrhage                                                    | 2.5<br>(1.9 to 3.3)                     | 23.0<br>(17.2 to 31.0)                      | 0.1<br>(0.1 to 0.2)               | 22.0<br>(-23.3 to 87.0)                           | -11.1<br>(-43.3 to 33.6)                            |
| Maternal sepsis and other pregnancy related infections                  | 2.3<br>(1.2 to 3.9)                     | 28.0<br>(20.0 to 38.9)                      | 0.1<br>(< 0.05 to 0.2)            | 25.3<br>(-42.7 to 175.7)                          | -6.1<br>(-56.6 to 104.9)                            |
| Maternal hypertensive disorders                                         | 4.9<br>(2.4 to 8.4)                     | 24.6<br>(15.8 to 35.6)                      | 0.2<br>(0.1 to 0.5)               | 32.7<br>(-19.6 to 127.1)                          | -3.2<br>(-41.5 to 64.8)                             |
| Maternal obstructed labour and uterine rupture                          | 0.2<br>(0.1 to 0.4)                     | 18.3<br>(13.4 to 24.4)                      | 0.1<br>(< 0.05 to 0.1)            | 26.4<br>(-45.8 to 206.3)                          | -6.6<br>(-58.6 to 131.5)                            |
| Maternal abortion, miscarriage, and ectopic pregnancy                   | 1.0<br>(0.6 to 1.4)                     | 118.1<br>(89.0 to 160.5)                    | 0.1<br>(0.1 to 0.2)               | 18.3<br>(-34.1 to 108.4)                          | -13.6<br>(-51.5 to 51.6)                            |
| Other maternal disorders                                                | --                                      | --                                          | 0.1<br>(0.1 to 0.2)               | 19.4<br>(-10.2 to 59.4)                           | -12.0<br>(-33.9 to 17.1)                            |
| <b>Neonatal disorders</b>                                               | <b>99.0<br/>(81.7 to 129.8)</b>         | --                                          | <b>9.6<br/>(6.7 to 13.5)</b>      | <b>36.0<br/>(10.5 to 65.8)</b>                    | <b>14.9<br/>(-7.3 to 40.0)</b>                      |
| Neonatal preterm birth complications                                    | 91.3<br>(69.7 to 120.8)                 | --                                          | 6.8<br>(4.5 to 9.6)               | 35.8<br>(4.5 to 71.0)                             | 15.2<br>(-12.1 to 46.1)                             |
| Neonatal encephalopathy due to birth asphyxia and trauma                | 4.7<br>(1.9 to 9.3)                     | --                                          | 0.4<br>(0.1 to 1.6)               | -9.4<br>(-53.1 to 71.1)                           | -23.6<br>(-61.8 to 47.6)                            |
| Neonatal sepsis and other neonatal infections                           | 2.8<br>(0.8 to 7.0)                     | --                                          | 1.2<br>(0.2 to 3.3)               | 102.5<br>(39.3 to 265.9)                          | 76.0<br>(22.7 to 231.8)                             |
| Hemolytic disease and other neonatal jaundice                           | 1.9<br>(1.7 to 2.2)                     | --                                          | 0.7<br>(0.5 to 0.9)               | 12.6<br>(-0.4 to 27.9)                            | -4.9<br>(-14.6 to 6.3)                              |
| Other neonatal disorders                                                | --                                      | --                                          | 0.6<br>(0.4 to 0.8)               | 31.1<br>(5.7 to 58.3)                             | 0.3<br>(-19.4 to 21.3)                              |
| <b>Nutritional deficiencies</b>                                         | <b>2,191.1<br/>(2,095.0 to 2,288.8)</b> | <b>597.6†<br/>(490.3 to 726.0)</b>          | <b>44.3<br/>(28.9 to 65.2)</b>    | <b>-5.1<br/>(-13.3 to 3.5)</b>                    | <b>-23.1<br/>(-28.1 to -17.9)</b>                   |
| Protein-energy malnutrition                                             | 75.4<br>(55.0 to 103.9)                 | 35.6<br>(26.6 to 46.5)                      | 2.8<br>(1.2 to 5.3)               | 0.1<br>(-49.9 to 95.0)                            | -23.6<br>(-62.1 to 49.9)                            |
| Iodine deficiency                                                       | 58.2<br>(50.6 to 67.3)                  | 2.1<br>(1.8 to 2.4)                         | 1.5<br>(1.0 to 2.1)               | -59.3<br>(-64.2 to -53.9)                         | -64.8<br>(-68.5 to -60.4)                           |
| Vitamin A deficiency                                                    | 609.5<br>(501.9 to 729.4)               | 560.0<br>(451.9 to 688.4)                   | 0.1<br>(0.1 to 0.2)               | 10.3<br>(-11.6 to 37.9)                           | -7.6<br>(-24.4 to 12.7)                             |
| Iron-deficiency anaemia                                                 | 1,720.6<br>(1,620.4 to 1,832.6)         | --                                          | 39.8<br>(26.0 to 59.3)            | -0.5<br>(-8.7 to 8.7)                             | -18.5<br>(-23.8 to -13.0)                           |
| Other nutritional deficiencies                                          | --                                      | --                                          | 0.1<br>(< 0.05 to 0.2)            | -1.0<br>(-52.4 to 97.8)                           | -24.4<br>(-63.7 to 52.1)                            |
| <b>Other communicable, maternal, neonatal, and nutritional diseases</b> | <b>1,653.2<br/>(1,545.7 to 1,765.0)</b> | <b>710.2<br/>(541.2 to 838.5)</b>           | <b>3.9<br/>(2.6 to 5.9)</b>       | <b>16.1<br/>(8.1 to 24.7)</b>                     | <b>-8.5<br/>(-13.7 to -3.2)</b>                     |
| Sexually transmitted diseases excluding HIV                             | 909.1<br>(836.8 to 987.1)               | 372.0<br>(331.2 to 417.1)                   | 2.1<br>(1.4 to 3.3)               | 27.3<br>(17.4 to 36.3)                            | -4.4<br>(-11.5 to 2.3)                              |
| Syphilis                                                                | 20.7<br>(11.5 to 37.0)                  | 14.4<br>(7.9 to 25.2)                       | 0.1<br>(0.1 to 0.1)               | 29.3<br>(15.3 to 44.9)                            | -2.8<br>(-14.4 to 10.0)                             |
| Chlamydial infection                                                    | 115.5<br>(86.5 to 150.3)                | 98.5<br>(76.1 to 128.0)                     | 0.7<br>(0.4 to 1.1)               | 31.2<br>(14.7 to 48.2)                            | -2.1<br>(-13.8 to 10.3)                             |
| Gonococcal infection                                                    | 12.5<br>(7.9 to 18.9)                   | 35.1<br>(18.8 to 60.0)                      | 0.1<br>(< 0.05 to 0.1)            | 23.5<br>(-0.8 to 51.6)                            | -6.7<br>(-25.4 to 15.3)                             |
| Trichomoniasis                                                          | 110.8<br>(91.8 to 131.7)                | 95.7<br>(78.9 to 115.2)                     | 0.1<br>(< 0.05 to 0.2)            | 28.9<br>(17.6 to 40.4)                            | -2.4<br>(-10.1 to 5.5)                              |
| Genital herpes                                                          | 667.6<br>(564.8 to 775.8)               | 61.2<br>(51.7 to 72.1)                      | 0.2<br>(0.1 to 0.4)               | 31.7<br>(19.8 to 44.1)                            | 0.1<br>(-7.2 to 7.5)                                |
| Other sexually transmitted diseases                                     | 45.0<br>(36.9 to 54.2)                  | 67.1<br>(56.6 to 79.0)                      | 1.0<br>(0.6 to 1.4)               | 24.0<br>(10.6 to 37.6)                            | -6.9<br>(-16.7 to 3.8)                              |
| Hepatitis                                                               | 812.9<br>(694.8 to 951.7)               | 338.2<br>(166.6 to 453.9)                   | 0.2<br>(0.1 to 0.2)               | -17.7<br>(-33.5 to 1.5)                           | -30.1<br>(-42.3 to -16.1)                           |
| Acute hepatitis A                                                       | 18.7<br>(6.0 to 27.4)                   | 243.1<br>(77.4 to 356.7)                    | 0.1<br>(< 0.05 to 0.1)            | -19.0<br>(-49.1 to 31.2)                          | -27.8<br>(-50.6 to 8.0)                             |
| Hepatitis B                                                             | 594.7<br>(476.4 to 729.8)               | 78.0<br>(57.9 to 104.2)                     | 0.1<br>(0.1 to 0.1)               | -19.6<br>(-36.7 to 2.4)                           | -32.8<br>(-46.8 to -16.1)                           |
| Hepatitis C                                                             | 199.0<br>(176.0 to 224.9)               | 11.7<br>(10.3 to 13.4)                      | < 0.05<br>(< 0.05 to < 0.05)      | 25.9<br>(-39.8 to 147.3)                          | -4.6<br>(-46.6 to 66.5)                             |
| Acute hepatitis E                                                       | 0.4<br>(0.4 to 0.5)                     | 5.3<br>(4.5 to 6.4)                         | < 0.05<br>(< 0.05 to < 0.05)      | -22.8<br>(-31.5 to -14.1)                         | -26.9<br>(-34.4 to -18.8)                           |
| Other infectious diseases                                               | 66.8<br>(61.5 to 72.4)                  | < 0.05<br>(< 0.05 to < 0.05)                | 1.6<br>(1.0 to 2.4)               | 8.1<br>(-5.0 to 23.9)                             | -11.5<br>(-20.7 to -1.7)                            |
| <b>Non-communicable diseases</b>                                        | <b>6,257.4<br/>(6,193.4 to 6,316.3)</b> | <b>17,323.8†<br/>(15,972.1 to 18,788.5)</b> | <b>486.6<br/>(357.3 to 626.1)</b> | <b>25.2<br/>(21.8 to 28.7)</b>                    | <b>0.2<br/>(-1.9 to 2.3)</b>                        |
| <b>Neoplasms</b>                                                        | <b>9.3<br/>(8.6 to 10.0)</b>            | <b>5.2<br/>(4.8 to 5.5)</b>                 | <b>1.7<br/>(1.2 to 2.2)</b>       | <b>18.8<br/>(9.8 to 32.8)</b>                     | <b>-6.9<br/>(-12.9 to 1.6)</b>                      |
| Lip and oral cavity cancer                                              | 0.6<br>(0.6 to 0.7)                     | 0.2<br>(0.2 to 0.2)                         | 0.1<br>(< 0.05 to 0.1)            | 30.0<br>(9.5 to 51.0)                             | -1.4<br>(-16.9 to 14.7)                             |
| Nasopharynx cancer                                                      | 0.3<br>(0.2 to 0.4)                     | 0.1<br>(0.1 to 0.1)                         | < 0.05<br>(< 0.05 to 0.1)         | 11.5<br>(-7.2 to 37.3)                            | -14.8<br>(-27.8 to 3.7)                             |
| Other pharynx cancer                                                    | 0.1<br>(0.1 to 0.1)                     | < 0.05<br>(< 0.05 to 0.1)                   | < 0.05<br>(< 0.05 to < 0.05)      | 24.5<br>(3.2 to 49.8)                             | -5.3<br>(-21.1 to 12.9)                             |
| Oesophageal cancer                                                      | 0.1<br>(0.1 to 0.1)                     | 0.1<br>(0.1 to 0.1)                         | < 0.05<br>(< 0.05 to < 0.05)      | 5.7<br>(-3.8 to 16.5)                             | -18.6<br>(-25.9 to -10.4)                           |
| Stomach cancer                                                          | 0.5<br>(0.4 to 0.5)                     | 0.3<br>(0.3 to 0.4)                         | 0.1<br>(0.1 to 0.1)               | 0.4<br>(-12.1 to 16.2)                            | -21.8<br>(-32.8 to -7.9)                            |
| Colon and rectum cancer                                                 | 1.0<br>(0.9 to 1.2)                     | 0.4<br>(0.3 to 0.4)                         | 0.1<br>(0.1 to 0.2)               | 27.3<br>(6.2 to 53.2)                             | -2.5<br>(-19.0 to 16.9)                             |
| Liver cancer                                                            | 0.1<br>(0.1 to 0.2)                     | 0.3<br>(0.2 to 0.4)                         | 0.1<br>(< 0.05 to 0.1)            | 28.0<br>(10.4 to 45.9)                            | -2.1<br>(-14.7 to 10.9)                             |
| Liver cancer due to hepatitis B                                         | 0.1<br>(0.1 to 0.2)                     | 0.1<br>(0.1 to 0.2)                         | < 0.05<br>(< 0.05 to < 0.05)      | 27.9<br>(8.9 to 47.6)                             | -2.6<br>(-15.7 to 11.5)                             |

| Cause                                              | Prevalence in thousands (95% UI)        | Incidence in thousands (95% UI)          | YLDs in thousands (95% UI)           |                                                   |                                                     |
|----------------------------------------------------|-----------------------------------------|------------------------------------------|--------------------------------------|---------------------------------------------------|-----------------------------------------------------|
|                                                    | 2016 counts                             | 2016 counts                              | 2016 counts                          | Percentage change in counts between 2006 and 2016 | Percentage change in age-standardised rates between |
| Liver cancer due to hepatitis C                    | 0.1<br>( $< 0.05$ to 0.1)               | 0.1<br>( $< 0.05$ to 0.1)                | $< 0.05$<br>( $< 0.05$ to $< 0.05$ ) | 27.2<br>(8.6 to 47.9)                             | -2.3<br>(-16.2 to 12.4)                             |
| Liver cancer due to alcohol use                    | $< 0.05$<br>( $< 0.05$ to 0.1)          | $< 0.05$<br>( $< 0.05$ to 0.1)           | $< 0.05$<br>( $< 0.05$ to $< 0.05$ ) | 30.5<br>(10.7 to 52.2)                            | -0.4<br>(-15.1 to 15.5)                             |
| Liver cancer due to other causes                   | 0.1<br>( $< 0.05$ to 0.1)               | 0.1<br>( $< 0.05$ to 0.1)                | $< 0.05$<br>( $< 0.05$ to $< 0.05$ ) | 26.9<br>(6.5 to 50.3)                             | -2.2<br>(-17.4 to 14.9)                             |
| Gallbladder and biliary tract cancer               | $< 0.05$<br>( $< 0.05$ to 0.1)          | 0.1<br>(0.1 to 0.1)                      | $< 0.05$<br>( $< 0.05$ to $< 0.05$ ) | 17.2<br>(0.5 to 33.5)                             | -9.9<br>(-22.4 to 1.3)                              |
| Pancreatic cancer                                  | 0.1<br>(0.1 to 0.1)                     | 0.1<br>(0.1 to 0.1)                      | $< 0.05$<br>( $< 0.05$ to $< 0.05$ ) | 35.3<br>(24.3 to 47.1)                            | 3.4<br>(-4.8 to 12.8)                               |
| Larynx cancer                                      | 0.2<br>(0.2 to 0.2)                     | 0.1<br>(0.1 to 0.1)                      | $< 0.05$<br>( $< 0.05$ to $< 0.05$ ) | 16.4<br>(1.6 to 34.3)                             | -10.7<br>(-22.8 to 3.4)                             |
| Tracheal, bronchus, and lung cancer                | 0.8<br>(0.7 to 1.0)                     | 0.7<br>(0.6 to 0.9)                      | 0.2<br>(0.1 to 0.2)                  | 27.5<br>(4.3 to 54.7)                             | -1.6<br>(-19.1 to 18.6)                             |
| Malignant skin melanoma                            | 0.1<br>( $< 0.05$ to 0.1)               | $< 0.05$<br>( $< 0.05$ to $< 0.05$ )     | $< 0.05$<br>( $< 0.05$ to $< 0.05$ ) | 35.6<br>(9.1 to 56.5)                             | 2.8<br>(-15.2 to 17.6)                              |
| Non-melanoma skin cancer                           | $< 0.05$<br>( $< 0.05$ to $< 0.05$ )    | 0.1<br>(0.1 to 0.2)                      | $< 0.05$<br>( $< 0.05$ to $< 0.05$ ) | 65.8<br>(26.1 to 121.5)                           | 25.9<br>(-6.9 to 71.8)                              |
| Non-melanoma skin cancer (squamous-cell carcinoma) | $< 0.05$<br>( $< 0.05$ to $< 0.05$ )    | $< 0.05$<br>( $< 0.05$ to 0.1)           | $< 0.05$<br>( $< 0.05$ to $< 0.05$ ) | 73.2<br>(26.3 to 141.5)                           | 30.6<br>(-7.0 to 84.1)                              |
| Non-melanoma skin cancer (basal-cell carcinoma)    | $< 0.05$<br>( $< 0.05$ to $< 0.05$ )    | 0.1<br>( $< 0.05$ to 0.1)                | $< 0.05$<br>( $< 0.05$ to $< 0.05$ ) | 29.5<br>(17.5 to 42.5)                            | -2.5<br>(-12.2 to 6.6)                              |
| Breast cancer                                      | 2.4<br>(1.5 to 3.3)                     | 0.6<br>(0.4 to 0.8)                      | 0.2<br>(0.2 to 0.4)                  | 28.9<br>(0.2 to 72.7)                             | -2.8<br>(-23.6 to 28.2)                             |
| Cervical cancer                                    | 2.1<br>(1.4 to 2.5)                     | 0.6<br>(0.4 to 0.7)                      | 0.2<br>(0.1 to 0.3)                  | 5.4<br>(-25.0 to 49.8)                            | -19.9<br>(-43.5 to 11.5)                            |
| Uterine cancer                                     | 0.4<br>(0.3 to 0.4)                     | 0.1<br>(0.1 to 0.1)                      | $< 0.05$<br>( $< 0.05$ to $< 0.05$ ) | 21.0<br>(-4.1 to 55.9)                            | -8.6<br>(-26.2 to 16.1)                             |
| Ovarian cancer                                     | 0.4<br>(0.4 to 0.5)                     | 0.1<br>(0.1 to 0.2)                      | 0.1<br>( $< 0.05$ to 0.1)            | 42.9<br>(5.1 to 102.7)                            | 7.6<br>(-22.5 to 53.4)                              |
| Prostate cancer                                    | 0.6<br>(0.4 to 0.7)                     | 0.2<br>(0.1 to 0.2)                      | 0.1<br>( $< 0.05$ to 0.1)            | 41.6<br>(11.6 to 79.0)                            | 6.8<br>(-13.3 to 31.1)                              |
| Testicular cancer                                  | $< 0.05$<br>( $< 0.05$ to 0.1)          | $< 0.05$<br>( $< 0.05$ to $< 0.05$ )     | $< 0.05$<br>( $< 0.05$ to $< 0.05$ ) | 16.9<br>(-5.3 to 46.5)                            | -13.2<br>(-27.7 to 5.4)                             |
| Kidney cancer                                      | 0.4<br>(0.4 to 0.5)                     | 0.1<br>(0.1 to 0.1)                      | $< 0.05$<br>( $< 0.05$ to 0.1)       | 33.4<br>(1.1 to 67.8)                             | 7.4<br>(-9.3 to 25.4)                               |
| Bladder cancer                                     | 0.3<br>(0.3 to 0.4)                     | 0.1<br>(0.1 to 0.1)                      | $< 0.05$<br>( $< 0.05$ to $< 0.05$ ) | 36.7<br>(17.4 to 58.3)                            | 4.0<br>(-10.8 to 21.0)                              |
| Brain and nervous system cancer                    | 0.3<br>(0.2 to 0.3)                     | 0.1<br>(0.1 to 0.1)                      | $< 0.05$<br>( $< 0.05$ to 0.1)       | 20.9<br>(4.3 to 36.5)                             | -0.4<br>(-8.9 to 7.5)                               |
| Thyroid cancer                                     | 0.2<br>(0.2 to 0.3)                     | 0.1<br>( $< 0.05$ to 0.1)                | $< 0.05$<br>( $< 0.05$ to $< 0.05$ ) | 27.0<br>(3.5 to 61.6)                             | -6.6<br>(-23.2 to 17.4)                             |
| Mesothelioma                                       | $< 0.05$<br>( $< 0.05$ to $< 0.05$ )    | $< 0.05$<br>( $< 0.05$ to $< 0.05$ )     | $< 0.05$<br>( $< 0.05$ to $< 0.05$ ) | 9.4<br>(-7.9 to 30.0)                             | -17.1<br>(-30.3 to -4.8)                            |
| Hodgkin lymphoma                                   | 0.1<br>(0.1 to 0.1)                     | $< 0.05$<br>( $< 0.05$ to $< 0.05$ )     | $< 0.05$<br>( $< 0.05$ to $< 0.05$ ) | -19.2<br>(-27.1 to -10.6)                         | -35.5<br>(-42.2 to -28.5)                           |
| Non-Hodgkin's lymphoma                             | 0.4<br>(0.3 to 0.4)                     | 0.1<br>(0.1 to 0.2)                      | $< 0.05$<br>( $< 0.05$ to 0.1)       | 26.3<br>(6.9 to 43.0)                             | 0.3<br>(-11.1 to 12.3)                              |
| Multiple myeloma                                   | $< 0.05$<br>( $< 0.05$ to 0.1)          | $< 0.05$<br>( $< 0.05$ to $< 0.05$ )     | $< 0.05$<br>( $< 0.05$ to $< 0.05$ ) | 34.6<br>(20.3 to 49.9)                            | 2.8<br>(-7.3 to 13.1)                               |
| Leukaemia                                          | 1.1<br>(0.9 to 1.5)                     | 0.3<br>(0.2 to 0.4)                      | 0.1<br>(0.1 to 0.2)                  | -9.8<br>(-27.3 to 19.7)                           | -22.0<br>(-33.5 to -4.4)                            |
| Acute lymphoid leukaemia                           | 0.2<br>(0.2 to 0.4)                     | 0.1<br>( $< 0.05$ to 0.1)                | $< 0.05$<br>( $< 0.05$ to $< 0.05$ ) | 3.0<br>(-30.8 to 51.7)                            | -9.1<br>(-34.2 to 25.6)                             |
| Chronic lymphoid leukaemia                         | 0.1<br>( $< 0.05$ to 0.1)               | $< 0.05$<br>( $< 0.05$ to $< 0.05$ )     | $< 0.05$<br>( $< 0.05$ to $< 0.05$ ) | 15.9<br>(-9.0 to 64.8)                            | -10.1<br>(-27.3 to 24.9)                            |
| Acute myeloid leukaemia                            | 0.1<br>(0.1 to 0.1)                     | $< 0.05$<br>( $< 0.05$ to 0.1)           | $< 0.05$<br>( $< 0.05$ to $< 0.05$ ) | 19.7<br>(-13.8 to 64.5)                           | 0.2<br>(-22.0 to 31.2)                              |
| Chronic myeloid leukaemia                          | 0.1<br>( $< 0.05$ to 0.1)               | $< 0.05$<br>( $< 0.05$ to $< 0.05$ )     | $< 0.05$<br>( $< 0.05$ to $< 0.05$ ) | -2.6<br>(-23.9 to 30.2)                           | -23.9<br>(-38.2 to -0.4)                            |
| Other leukaemia                                    | 0.7<br>(0.5 to 0.9)                     | 0.1<br>(0.1 to 0.2)                      | 0.1<br>( $< 0.05$ to 0.1)            | -18.5<br>(-35.4 to 12.3)                          | -28.4<br>(-40.0 to -10.5)                           |
| Other neoplasms                                    | 0.8<br>(0.7 to 0.8)                     | 0.3<br>(0.2 to 0.3)                      | 0.1<br>(0.1 to 0.1)                  | 15.7<br>(-6.3 to 36.7)                            | -7.1<br>(-19.3 to 6.5)                              |
| <b>Cardiovascular diseases</b>                     | <b>331.1</b><br><b>(317.1 to 344.6)</b> | <b>30.1†</b><br><b>(28.8 to 31.4)</b>    | <b>21.5</b><br><b>(15.7 to 27.9)</b> | <b>27.9</b><br><b>(23.3 to 32.9)</b>              | <b>0.1</b><br><b>(-3.3 to 3.6)</b>                  |
| Rheumatic heart disease                            | 130.4<br>(116.8 to 146.0)               | 4.9<br>(4.4 to 5.5)                      | 6.2<br>(3.9 to 9.2)                  | 20.8<br>(9.3 to 31.3)                             | -3.5<br>(-12.5 to 4.4)                              |
| Ischaemic heart disease                            | 73.2<br>(69.1 to 77.1)                  | 10.4<br>(9.6 to 11.3)                    | 3.4<br>(2.3 to 4.7)                  | 38.2<br>(31.0 to 45.1)                            | 5.5<br>(0.6 to 10.2)                                |
| Cerebrovascular disease                            | 35.6<br>(33.4 to 37.8)                  | 6.2†<br>(5.8 to 6.7)                     | 7.3<br>(5.1 to 9.4)                  | 27.4<br>(19.0 to 36.0)                            | -1.4<br>(-7.7 to 5.4)                               |
| Ischaemic stroke                                   | 28.2<br>(25.4 to 31.1)                  | 3.7†<br>(3.3 to 4.2)                     | 5.5<br>(3.9 to 7.1)                  | 30.5<br>(20.1 to 41.7)                            | 0.8<br>(-6.9 to 9.4)                                |
| Hemorrhagic stroke                                 | 9.3<br>(8.4 to 10.3)                    | 2.5†<br>(2.3 to 2.8)                     | 1.8<br>(1.3 to 2.4)                  | 18.7<br>(7.1 to 31.5)                             | -7.9<br>(-16.5 to 1.0)                              |
| Hypertensive heart disease                         | 7.2<br>(6.2 to 8.3)                     | --                                       | 0.6<br>(0.4 to 0.8)                  | 37.9<br>(23.6 to 53.8)                            | 4.4<br>(-4.9 to 14.8)                               |
| Cardiomyopathy and myocarditis                     | 1.7<br>(1.5 to 2.0)                     | 1.0†<br>(0.8 to 1.1)                     | 0.2<br>(0.1 to 0.3)                  | 35.7<br>(22.7 to 51.8)                            | 6.1<br>(-3.7 to 17.7)                               |
| Myocarditis                                        | 1.0<br>(0.8 to 1.1)                     | 1.0<br>(0.8 to 1.1)                      | 0.1<br>(0.1 to 0.1)                  | 29.1<br>(19.3 to 40.9)                            | 4.6<br>(-4.0 to 14.6)                               |
| Alcoholic cardiomyopathy                           | 0.4<br>(0.3 to 0.4)                     | --                                       | $< 0.05$<br>( $< 0.05$ to $< 0.05$ ) | 41.5<br>(25.2 to 59.1)                            | 6.6<br>(-6.8 to 21.4)                               |
| Other cardiomyopathy                               | 1.3<br>(1.1 to 1.5)                     | --                                       | 0.1<br>(0.1 to 0.2)                  | 39.1<br>(16.9 to 65.6)                            | 6.8<br>(-8.4 to 24.9)                               |
| Atrial fibrillation and flutter                    | 18.5<br>(16.2 to 21.4)                  | 1.6<br>(1.4 to 1.9)                      | 1.4<br>(1.0 to 2.0)                  | 30.9<br>(21.6 to 40.6)                            | 0.6<br>(-5.7 to 7.4)                                |
| Peripheral vascular disease                        | 51.4<br>(44.4 to 59.7)                  | 5.0<br>(4.3 to 5.8)                      | 0.3<br>(0.1 to 0.5)                  | 22.5<br>(11.9 to 33.9)                            | -5.9<br>(-13.6 to 3.1)                              |
| Endocarditis                                       | 0.2<br>(0.2 to 0.3)                     | 1.0<br>(0.9 to 1.1)                      | $< 0.05$<br>( $< 0.05$ to $< 0.05$ ) | 34.8<br>(27.7 to 43.3)                            | 3.2<br>(-5.1 to 11.9)                               |
| Other cardiovascular and circulatory diseases      | 39.0<br>(32.3 to 46.4)                  | --                                       | 2.1<br>(1.4 to 3.0)                  | 32.4<br>(19.5 to 47.2)                            | 4.2<br>(-4.2 to 13.1)                               |
| <b>Chronic respiratory diseases</b>                | <b>519.1</b><br><b>(497.3 to 540.1)</b> | <b>128.6†</b><br><b>(119.5 to 138.2)</b> | <b>31.7</b><br><b>(25.4 to 39.2)</b> | <b>31.3</b><br><b>(26.2 to 36.9)</b>              | <b>7.8</b><br><b>(4.1 to 11.7)</b>                  |
| Chronic obstructive pulmonary disease              | 145.4<br>(139.4 to 152.0)               | 11.6<br>(11.0 to 12.1)                   | 14.9<br>(13.0 to 16.3)               | 40.8<br>(32.9 to 48.7)                            | 8.9<br>(3.3 to 14.7)                                |
| Pneumoconiosis                                     | 0.7<br>(0.6 to 0.7)                     | 0.1<br>(0.1 to 0.1)                      | 0.1<br>(0.1 to 0.1)                  | 36.9<br>(10.6 to 66.3)                            | 3.4<br>(-16.4 to 25.3)                              |
| Silicosis                                          | 0.3<br>(0.2 to 0.3)                     | $< 0.05$<br>( $< 0.05$ to $< 0.05$ )     | $< 0.05$<br>( $< 0.05$ to 0.1)       | 37.3<br>(-0.6 to 90.4)                            | 4.0<br>(-24.1 to 45.8)                              |



| Cause                                                          | Prevalence in thousands (95% UI)              | Incidence in thousands (95% UI)             | YLDs in thousands (95% UI)             |                                                   |                                                     |
|----------------------------------------------------------------|-----------------------------------------------|---------------------------------------------|----------------------------------------|---------------------------------------------------|-----------------------------------------------------|
|                                                                | 2016 counts                                   | 2016 counts                                 | 2016 counts                            | Percentage change in counts between 2006 and 2016 | Percentage change in age-standardised rates between |
| Asbestosis                                                     | 0.1<br>( $< 0.05$ to 0.1)                     | $< 0.05$<br>( $< 0.05$ to $< 0.05$ )        | $< 0.05$<br>( $< 0.05$ to $< 0.05$ )   | 32.7<br>(25.0 to 40.5)                            | 0.4<br>(-5.0 to 6.1)                                |
| Coal workers pneumoconiosis                                    | 0.3<br>(0.2 to 0.3)                           | $< 0.05$<br>( $< 0.05$ to $< 0.05$ )        | $< 0.05$<br>( $< 0.05$ to 0.1)         | 37.5<br>(-0.3 to 94.4)                            | 3.2<br>(-25.2 to 47.5)                              |
| Other pneumoconiosis                                           | $< 0.05$<br>( $< 0.05$ to $< 0.05$ )          | $< 0.05$<br>( $< 0.05$ to $< 0.05$ )        | $< 0.05$<br>( $< 0.05$ to $< 0.05$ )   | 34.3<br>(21.0 to 49.7)                            | 5.0<br>(-6.3 to 17.3)                               |
| Asthma                                                         | 386.5<br>(357.8 to 415.2)                     | 116.7<br>(107.6 to 126.2)                   | 15.2<br>(10.0 to 22.1)                 | 21.7<br>(15.7 to 28.1)                            | 4.6<br>(0.3 to 9.1)                                 |
| Interstitial lung disease and pulmonary sarcoidosis            | 3.0<br>(2.7 to 3.4)                           | 0.3<br>(0.2 to 0.3)                         | 0.3<br>(0.2 to 0.4)                    | 31.2<br>(16.5 to 46.4)                            | 2.7<br>(-8.7 to 14.3)                               |
| Other chronic respiratory diseases                             | --                                            | --                                          | 1.2<br>(1.0 to 1.4)                    | 59.2<br>(32.6 to 91.8)                            | 39.3<br>(21.9 to 60.1)                              |
| <b>Cirrhosis and other chronic liver diseases</b>              | <b>20.3</b><br><b>(19.1 to 21.5)</b>          | <b>1.3</b><br><b>(1.2 to 1.4)</b>           | <b>0.8</b><br><b>(0.6 to 1.1)</b>      | <b>23.8</b><br><b>(8.4 to 42.6)</b>               | <b>0.5</b><br><b>(-9.4 to 11.8)</b>                 |
| Cirrhosis and other chronic liver diseases due to hepatitis B  | 7.0<br>(6.1 to 7.9)                           | 0.5<br>(0.4 to 0.5)                         | 0.2<br>(0.1 to 0.3)                    | 33.3<br>(9.8 to 60.8)                             | 1.2<br>(-14.9 to 19.4)                              |
| Cirrhosis and other chronic liver diseases due to hepatitis C  | 3.1<br>(2.6 to 3.9)                           | 0.2<br>(0.2 to 0.2)                         | 0.1<br>(0.1 to 0.1)                    | 34.8<br>(6.7 to 70.7)                             | 2.2<br>(-19.7 to 29.4)                              |
| Cirrhosis and other chronic liver diseases due to alcohol use  | 3.1<br>(2.5 to 3.7)                           | 0.2<br>(0.2 to 0.3)                         | 0.1<br>(0.1 to 0.1)                    | 32.9<br>(2.7 to 71.5)                             | 0.4<br>(-21.6 to 27.5)                              |
| Cirrhosis and other chronic liver diseases due to other causes | 7.2<br>(6.5 to 7.8)                           | 0.4<br>(0.4 to 0.5)                         | 0.4<br>(0.3 to 0.6)                    | 16.2<br>(-6.7 to 48.0)                            | -0.7<br>(-17.5 to 21.3)                             |
| <b>Digestive diseases</b>                                      | <b>60.8</b><br><b>(57.4 to 64.4)</b>          | <b>81.9†</b><br><b>(77.8 to 86.5)</b>       | <b>1.9</b><br><b>(1.3 to 2.6)</b>      | <b>21.8</b><br><b>(12.5 to 32.0)</b>              | <b>-2.2</b><br><b>(-7.7 to 3.4)</b>                 |
| Peptic ulcer disease                                           | 21.6<br>(20.1 to 23.4)                        | 13.0<br>(11.8 to 14.3)                      | 0.5<br>(0.3 to 0.7)                    | 21.7<br>(10.9 to 34.2)                            | -4.1<br>(-11.4 to 4.5)                              |
| Gastritis and duodenitis                                       | 28.6<br>(25.3 to 31.8)                        | 30.0<br>(26.7 to 33.6)                      | 0.5<br>(0.3 to 0.7)                    | 32.4<br>(18.9 to 46.5)                            | 5.5<br>(-3.1 to 15.6)                               |
| Appendicitis                                                   | 0.5<br>(0.5 to 0.6)                           | 13.6<br>(12.6 to 14.7)                      | 0.2<br>(0.1 to 0.2)                    | 10.0<br>(-20.8 to 54.7)                           | -6.4<br>(-25.9 to 18.7)                             |
| Paralytic ileus and intestinal obstruction                     | 0.1<br>(0.1 to 0.1)                           | 1.6<br>(1.4 to 1.8)                         | $< 0.05$<br>( $< 0.05$ to $< 0.05$ )   | 29.9<br>(25.5 to 34.6)                            | 4.6<br>(0.2 to 9.6)                                 |
| Inguinal, femoral, and abdominal hernia                        | 9.2<br>(7.9 to 10.7)                          | 7.6<br>(6.6 to 8.6)                         | 0.5<br>(0.3 to 0.7)                    | 11.9<br>(-7.5 to 35.5)                            | -10.5<br>(-23.0 to 3.6)                             |
| Inflammatory bowel disease                                     | 0.5<br>(0.3 to 0.6)                           | 3.3<br>(2.5 to 4.3)                         | 0.1<br>( $< 0.05$ to 0.1)              | 28.6<br>(20.2 to 38.5)                            | 2.0<br>(-5.0 to 9.9)                                |
| Vascular intestinal disorders                                  | $< 0.05$<br>( $< 0.05$ to $< 0.05$ )          | 0.2<br>(0.2 to 0.3)                         | $< 0.05$<br>( $< 0.05$ to $< 0.05$ )   | 35.6<br>(29.1 to 42.6)                            | 11.8<br>(7.8 to 16.2)                               |
| Gallbladder and biliary diseases                               | 3.5<br>(3.0 to 3.9)                           | 10.9<br>(9.5 to 12.6)                       | 0.1<br>( $< 0.05$ to 0.1)              | 34.7<br>(22.0 to 49.3)                            | 3.6<br>(-7.5 to 16.8)                               |
| Pancreatitis                                                   | 0.2<br>(0.2 to 0.2)                           | 1.6<br>(1.5 to 1.8)                         | $< 0.05$<br>( $< 0.05$ to $< 0.05$ )   | 37.9<br>(33.0 to 43.2)                            | 7.6<br>(4.1 to 11.0)                                |
| Other digestive diseases                                       | --                                            | --                                          | 0.2<br>(0.1 to 0.2)                    | 25.7<br>(12.8 to 39.1)                            | 1.9<br>(-4.4 to 8.3)                                |
| <b>Neurological disorders</b>                                  | <b>2,327.5</b><br><b>(2,218.8 to 2,448.8)</b> | <b>1,142.3</b><br><b>(962.3 to 1,342.5)</b> | <b>51.5</b><br><b>(33.6 to 73.6)</b>   | <b>26.2</b><br><b>(-0.6 to 61.8)</b>              | <b>0.6</b><br><b>(-16.6 to 20.9)</b>                |
| Alzheimer's disease and other dementias                        | 20.7<br>(17.5 to 24.4)                        | 3.5<br>(2.9 to 4.2)                         | 2.9<br>(2.0 to 3.9)                    | 29.9<br>(23.3 to 36.7)                            | -0.2<br>(-4.8 to 4.3)                               |
| Parkinson's disease                                            | 2.3<br>(1.9 to 2.8)                           | 0.3<br>(0.2 to 0.3)                         | 0.3<br>(0.2 to 0.4)                    | 42.8<br>(24.8 to 63.7)                            | 9.7<br>(-3.1 to 24.1)                               |
| Epilepsy                                                       | 19.5<br>(4.7 to 34.8)                         | 3.2<br>(0.8 to 5.8)                         | 8.0<br>(1.8 to 16.0)                   | 22.6<br>(-76.8 to 508.6)                          | 3.2<br>(-79.7 to 425.7)                             |
| Multiple sclerosis                                             | 0.2<br>(0.2 to 0.2)                           | $< 0.05$<br>( $< 0.05$ to $< 0.05$ )        | 0.1<br>( $< 0.05$ to 0.1)              | 49.7<br>(44.1 to 54.8)                            | 15.4<br>(11.2 to 19.5)                              |
| Motor neuron disease                                           | 0.1<br>(0.1 to 0.2)                           | $< 0.05$<br>( $< 0.05$ to $< 0.05$ )        | $< 0.05$<br>( $< 0.05$ to $< 0.05$ )   | 30.0<br>(24.0 to 35.7)                            | 6.1<br>(2.4 to 9.8)                                 |
| Migraine                                                       | 819.1<br>(768.6 to 871.9)                     | 95.1<br>(89.0 to 101.7)                     | 33.3<br>(20.9 to 47.6)                 | 25.7<br>(20.4 to 31.9)                            | -0.5<br>(-4.0 to 3.7)                               |
| Tension-type headache                                          | 1,803.4<br>(1,602.5 to 2,042.7)               | 1,040.3<br>(860.4 to 1,242.2)               | 5.0<br>(3.1 to 7.7)                    | 25.2<br>(18.2 to 32.4)                            | -0.9<br>(-6.0 to 4.0)                               |
| Other neurological disorders                                   | $< 0.05$<br>( $< 0.05$ to $< 0.05$ )          | $< 0.05$<br>( $< 0.05$ to $< 0.05$ )        | 2.0<br>(0.5 to 3.8)                    | 46.9<br>(-65.9 to 500.7)                          | 21.5<br>(-65.1 to 285.8)                            |
| <b>Mental and substance use disorders</b>                      | <b>876.2</b><br><b>(837.9 to 914.7)</b>       | <b>259.8†</b><br><b>(242.1 to 279.8)</b>    | <b>112.0</b><br><b>(81.5 to 145.3)</b> | <b>24.4</b><br><b>(21.0 to 27.8)</b>              | <b>0.3</b><br><b>(-2.1 to 2.7)</b>                  |
| Schizophrenia                                                  | 15.1<br>(13.1 to 17.4)                        | 1.2<br>(1.0 to 1.4)                         | 9.8<br>(7.0 to 12.6)                   | 37.8<br>(26.0 to 50.6)                            | 2.8<br>(-5.4 to 11.3)                               |
| Alcohol use disorders                                          | 52.0<br>(45.1 to 60.0)                        | 28.4<br>(24.3 to 32.9)                      | 5.2<br>(3.5 to 7.3)                    | 32.3<br>(18.9 to 45.0)                            | 0.1<br>(-8.9 to 8.7)                                |
| Drug use disorders                                             | 59.8<br>(53.0 to 67.7)                        | 8.6<br>(7.4 to 10.1)                        | 9.9<br>(7.0 to 13.6)                   | 32.1<br>(17.7 to 47.8)                            | 2.9<br>(-6.9 to 13.7)                               |
| Opioid use disorders                                           | 12.5<br>(10.1 to 15.7)                        | 1.7<br>(1.4 to 2.1)                         | 5.2<br>(3.5 to 7.4)                    | 42.2<br>(25.5 to 62.5)                            | 5.8<br>(-5.2 to 19.0)                               |
| Cocaine use disorders                                          | 1.0<br>(0.8 to 1.2)                           | 0.1<br>(0.1 to 0.2)                         | 0.1<br>(0.1 to 0.2)                    | 37.1<br>(29.7 to 45.6)                            | 5.7<br>(0.4 to 11.6)                                |
| Amphetamine use disorders                                      | 14.9<br>(10.0 to 21.4)                        | 1.5<br>(0.9 to 2.2)                         | 2.0<br>(1.1 to 3.3)                    | 19.7<br>(-4.1 to 52.3)                            | -2.9<br>(-22.0 to 22.2)                             |
| Cannabis use disorders                                         | 31.1<br>(24.6 to 39.0)                        | 4.8<br>(3.7 to 6.0)                         | 0.9<br>(0.6 to 1.4)                    | 23.9<br>(8.5 to 42.8)                             | 0.4<br>(-11.8 to 14.9)                              |
| Other drug use disorders                                       | 2.4<br>(2.1 to 2.7)                           | 0.5<br>(0.4 to 0.6)                         | 1.6<br>(0.9 to 2.6)                    | 23.7<br>(-8.3 to 71.1)                            | -0.3<br>(-24.5 to 35.5)                             |
| Depressive disorders                                           | 167.5<br>(155.8 to 181.0)                     | 141.8<br>(125.8 to 159.1)                   | 25.7<br>(17.6 to 35.0)                 | 28.9<br>(22.9 to 35.5)                            | 0.8<br>(-2.9 to 4.8)                                |
| Major depressive disorder                                      | 84.3<br>(74.5 to 95.6)                        | 127.8<br>(111.8 to 144.8)                   | 17.5<br>(11.9 to 23.9)                 | 28.0<br>(19.5 to 37.4)                            | 1.2<br>(-4.5 to 7.5)                                |
| Dysthymia                                                      | 85.3<br>(74.3 to 97.7)                        | 14.1<br>(12.4 to 16.1)                      | 8.2<br>(5.5 to 11.9)                   | 30.8<br>(26.0 to 35.4)                            | 0.2<br>(-2.9 to 3.0)                                |
| Bipolar disorder                                               | 33.5<br>(28.5 to 39.4)                        | 3.5<br>(3.0 to 4.1)                         | 6.9<br>(4.3 to 10.3)                   | 26.7<br>(17.7 to 37.1)                            | 0.3<br>(-5.9 to 7.0)                                |
| Anxiety disorders                                              | 251.0<br>(226.2 to 277.1)                     | 41.4<br>(38.0 to 45.4)                      | 24.4<br>(17.0 to 33.5)                 | 24.1<br>(15.9 to 33.0)                            | 1.2<br>(-4.9 to 7.9)                                |
| Eating disorders                                               | 6.7<br>(5.5 to 8.4)                           | 4.9<br>(3.6 to 6.6)                         | 1.4<br>(0.9 to 2.0)                    | 48.3<br>(25.3 to 76.1)                            | 21.1<br>(3.8 to 43.2)                               |
| Anorexia nervosa                                               | 2.2<br>(1.6 to 3.0)                           | 1.0<br>(0.7 to 1.4)                         | 0.5<br>(0.3 to 0.7)                    | 39.1<br>(7.9 to 85.5)                             | 18.1<br>(-8.1 to 55.1)                              |
| Bulimia nervosa                                                | 4.3<br>(3.2 to 5.8)                           | 3.9<br>(2.7 to 5.5)                         | 0.9<br>(0.6 to 1.4)                    | 53.5<br>(26.6 to 88.2)                            | 22.5<br>(1.2 to 50.2)                               |
| Autistic spectrum disorders                                    | 59.0<br>(52.6 to 66.9)                        | 0.7<br>(0.5 to 1.0)                         | 8.5<br>(5.7 to 11.8)                   | 20.6<br>(14.1 to 27.2)                            | 0.9<br>(-4.2 to 6.2)                                |
| Autism                                                         | 16.3<br>(14.0 to 19.1)                        | 0.1<br>( $< 0.05$ to 0.1)                   | 4.2<br>(2.7 to 6.2)                    | 20.2<br>(9.6 to 32.4)                             | 1.0<br>(-7.1 to 10.4)                               |
| Asperger syndrome and other autistic spectrum disorders        | 42.3<br>(34.9 to 51.3)                        | 0.6<br>(0.4 to 0.9)                         | 4.3<br>(2.8 to 6.2)                    | 21.0<br>(14.6 to 27.8)                            | 0.9<br>(-4.0 to 5.6)                                |

| Cause                                                      | Prevalence in thousands (95% UI)              | Incidence in thousands (95% UI)                   | YLDs in thousands (95% UI)             |                                                   |                                                     |
|------------------------------------------------------------|-----------------------------------------------|---------------------------------------------------|----------------------------------------|---------------------------------------------------|-----------------------------------------------------|
|                                                            | 2016 counts                                   | 2016 counts                                       | 2016 counts                            | Percentage change in counts between 2006 and 2016 | Percentage change in age-standardised rates between |
| Attention-deficit/hyperactivity disorder                   | 40.6<br>(31.9 to 51.0)                        | 2.4<br>(1.8 to 3.2)                               | 0.5<br>(0.3 to 0.8)                    | 12.3<br>(0.7 to 26.1)                             | 0.1<br>(-9.9 to 11.3)                               |
| Conduct disorder                                           | 63.2<br>(51.4 to 74.8)                        | 21.6<br>(17.1 to 26.3)                            | 7.7<br>(4.7 to 11.7)                   | 1.1<br>(-5.5 to 8.1)                              | 0.5<br>(-6.2 to 7.4)                                |
| Idiopathic developmental intellectual disability           | 87.3<br>(42.9 to 138.9)                       | --                                                | 3.9<br>(1.7 to 6.8)                    | -10.3<br>(-20.9 to 0.6)                           | -24.4<br>(-33.3 to -15.4)                           |
| Other mental and substance use disorders                   | 108.1<br>(94.6 to 125.3)                      | 5.1<br>(4.5 to 5.9)                               | 8.1<br>(5.5 to 11.7)                   | 33.0<br>(25.7 to 41.3)                            | 0.4<br>(-4.1 to 5.5)                                |
| <b>Diabetes, urogenital, blood, and endocrine diseases</b> | <b>2,767.2</b><br><b>(2,717.0 to 2,823.7)</b> | <b>553.8†</b><br><b>(520.8 to 588.5)</b>          | <b>43.7</b><br><b>(30.2 to 60.4)</b>   | <b>29.0</b><br><b>(24.2 to 33.6)</b>              | <b>1.3</b><br><b>(-2.3 to 4.7)</b>                  |
| Diabetes mellitus                                          | 300.5<br>(269.8 to 330.9)                     | 19.0<br>(17.0 to 20.9)                            | 21.2<br>(14.3 to 29.7)                 | 41.7<br>(33.6 to 49.7)                            | 7.8<br>(1.9 to 13.8)                                |
| Acute glomerulonephritis                                   | 0.1<br>(0.1 to 0.1)                           | 1.2<br>(1.1 to 1.5)                               | < 0.05<br>(< 0.05 to < 0.05)           | 18.6<br>(12.2 to 25.1)                            | 0.7<br>(-3.9 to 4.7)                                |
| Chronic kidney disease                                     | 116.5<br>(106.1 to 128.1)                     | 8.4<br>(7.6 to 9.2)                               | 4.6<br>(3.3 to 5.9)                    | 21.3<br>(13.2 to 30.1)                            | -5.3<br>(-11.1 to 0.8)                              |
| Chronic kidney disease due to diabetes mellitus            | 68.0<br>(60.6 to 76.1)                        | 4.7<br>(4.0 to 5.3)                               | 2.6<br>(1.9 to 3.4)                    | 23.6<br>(11.6 to 37.1)                            | -5.3<br>(-13.3 to 4.1)                              |
| Chronic kidney disease due to hypertension                 | 19.0<br>(16.4 to 21.7)                        | 1.0<br>(0.8 to 1.2)                               | 1.1<br>(0.8 to 1.4)                    | 25.8<br>(12.7 to 40.4)                            | -3.4<br>(-12.9 to 7.4)                              |
| Chronic kidney disease due to glomerulonephritis           | 20.8<br>(17.9 to 24.1)                        | 1.9<br>(1.6 to 2.3)                               | 0.5<br>(0.3 to 0.7)                    | 9.7<br>(0.8 to 19.8)                              | -9.4<br>(-15.4 to -2.2)                             |
| Chronic kidney disease due to other causes                 | 8.7<br>(7.2 to 10.4)                          | 0.8<br>(0.7 to 1.0)                               | 0.4<br>(0.3 to 0.6)                    | 11.3<br>(2.9 to 19.9)                             | -8.2<br>(-13.9 to -2.2)                             |
| Urinary diseases and male infertility                      | 55.3<br>(48.6 to 62.0)                        | 301.2†<br>(270.0 to 335.7)                        | 1.3<br>(0.8 to 1.9)                    | 27.9<br>(20.2 to 36.6)                            | -2.2<br>(-7.7 to 4.0)                               |
| Interstitial nephritis and urinary tract infections        | 5.4<br>(4.8 to 6.0)                           | 279.9<br>(248.5 to 314.4)                         | 0.2<br>(0.1 to 0.3)                    | 29.7<br>(9.8 to 53.6)                             | 3.5<br>(-10.8 to 20.8)                              |
| Urolithiasis                                               | 0.7<br>(0.6 to 0.8)                           | 18.0<br>(15.9 to 20.6)                            | 0.1<br>(< 0.05 to 0.1)                 | 32.4<br>(24.1 to 40.5)                            | 1.2<br>(-7.2 to 10.1)                               |
| Benign prostatic hyperplasia                               | 25.5<br>(21.6 to 30.3)                        | 3.4<br>(2.8 to 4.0)                               | 0.8<br>(0.5 to 1.2)                    | 28.6<br>(18.9 to 39.3)                            | -2.4<br>(-9.3 to 5.0)                               |
| Male infertility                                           | 21.0<br>(16.4 to 27.1)                        | --                                                | 0.1<br>(0.1 to 0.3)                    | 37.0<br>(25.4 to 49.2)                            | 2.4<br>(-6.0 to 11.0)                               |
| Other urinary diseases                                     | --                                            | --                                                | 0.1<br>(0.1 to 0.1)                    | 6.4<br>(-7.6 to 22.6)                             | -14.8<br>(-24.0 to -4.3)                            |
| Gynecological diseases                                     | 641.7<br>(608.3 to 670.7)                     | 213.4†<br>(200.6 to 226.7)                        | 7.2<br>(4.8 to 10.5)                   | 22.1<br>(16.0 to 28.2)                            | -6.4<br>(-10.6 to -2.0)                             |
| Uterine fibroids                                           | 72.8<br>(63.7 to 82.8)                        | 8.8<br>(7.6 to 10.3)                              | 1.4<br>(0.9 to 2.3)                    | 21.0<br>(11.9 to 30.5)                            | -8.6<br>(-15.5 to -1.9)                             |
| Polycystic ovarian syndrome                                | 5.0<br>(3.7 to 6.5)                           | 3.8<br>(2.9 to 4.9)                               | < 0.05<br>(< 0.05 to 0.1)              | 29.2<br>(10.9 to 51.0)                            | -2.6<br>(-16.4 to 13.2)                             |
| Female infertility                                         | 11.9<br>(4.0 to 26.4)                         | --                                                | 0.1<br>(< 0.05 to 0.2)                 | 5.8<br>(-25.8 to 40.2)                            | -23.2<br>(-45.9 to 2.5)                             |
| Endometriosis                                              | 0.7<br>(0.5 to 0.8)                           | 5.2<br>(4.3 to 6.3)                               | 0.1<br>(< 0.05 to 0.1)                 | 28.8<br>(-6.0 to 79.8)                            | -0.7<br>(-27.4 to 34.8)                             |
| Genital prolapse                                           | 161.3<br>(138.7 to 183.6)                     | 12.0<br>(10.2 to 14.0)                            | 0.5<br>(0.2 to 0.9)                    | 22.5<br>(11.7 to 34.3)                            | -8.0<br>(-16.7 to 1.2)                              |
| Premenstrual syndrome                                      | 402.4<br>(373.6 to 430.9)                     | 150.8<br>(139.6 to 162.4)                         | 3.4<br>(2.1 to 5.2)                    | 23.6<br>(13.2 to 34.3)                            | -3.7<br>(-11.2 to 3.9)                              |
| Other gynecological diseases                               | 53.1<br>(48.0 to 58.5)                        | 32.8<br>(27.4 to 38.4)                            | 1.7<br>(1.1 to 2.4)                    | 20.3<br>(9.3 to 32.6)                             | -7.6<br>(-16.0 to 1.4)                              |
| Hemoglobinopathies and hemolytic anaemias                  | 2,019.5<br>(1,970.7 to 2,071.6)               | --                                                | 6.5<br>(4.2 to 9.7)                    | 13.6<br>(3.8 to 24.4)                             | -6.6<br>(-12.8 to -0.0)                             |
| Thalassemias                                               | 4.2<br>(3.7 to 4.9)                           | --                                                | 0.2<br>(0.1 to 0.4)                    | 40.2<br>(15.9 to 68.3)                            | 10.4<br>(-8.4 to 33.0)                              |
| Thalassaemias trait                                        | 750.1<br>(709.2 to 797.5)                     | --                                                | 4.6<br>(3.0 to 6.8)                    | 17.8<br>(7.0 to 29.1)                             | -2.3<br>(-9.3 to 4.9)                               |
| Sickle cell disorders                                      | < 0.05<br>(< 0.05 to < 0.05)                  | --                                                | < 0.05<br>(< 0.05 to < 0.05)           | 33.0<br>(10.0 to 60.8)                            | 7.3<br>(-9.2 to 27.1)                               |
| Sickle cell trait                                          | 33.5<br>(30.1 to 36.5)                        | --                                                | 0.1<br>(< 0.05 to 0.1)                 | 13.6<br>(-12.3 to 50.8)                           | -7.4<br>(-26.3 to 18.1)                             |
| G6PD deficiency                                            | 413.7<br>(373.4 to 459.9)                     | --                                                | < 0.05<br>(< 0.05 to 0.1)              | 2.5<br>(-13.0 to 21.8)                            | -15.9<br>(-25.9 to -4.0)                            |
| G6PD trait                                                 | 937.5<br>(923.7 to 953.9)                     | --                                                | < 0.05<br>(< 0.05 to < 0.05)           | 16.4<br>(3.0 to 33.5)                             | -5.0<br>(-13.3 to 4.3)                              |
| Other hemoglobinopathies and hemolytic anaemias            | 88.6<br>(82.7 to 94.3)                        | --                                                | 1.5<br>(1.0 to 2.3)                    | 0.1<br>(-10.4 to 11.9)                            | -17.1<br>(-23.3 to -10.4)                           |
| Endocrine, metabolic, blood, and immune disorders          | 113.5<br>(106.4 to 120.3)                     | 10.5<br>(9.4 to 11.7)                             | 3.0<br>(2.0 to 4.2)                    | 17.0<br>(8.7 to 25.5)                             | -3.6<br>(-8.8 to 1.5)                               |
| <b>Musculoskeletal disorders</b>                           | <b>858.5</b><br><b>(815.6 to 904.0)</b>       | <b>466.8</b><br><b>(423.6 to 514.1)</b>           | <b>94.7</b><br><b>(68.0 to 124.8)</b>  | <b>31.7</b><br><b>(25.8 to 38.2)</b>              | <b>0.9</b><br><b>(-3.1 to 5.2)</b>                  |
| Rheumatoid arthritis                                       | 5.8<br>(5.2 to 6.6)                           | 0.4<br>(0.3 to 0.4)                               | 1.4<br>(0.9 to 1.9)                    | 37.4<br>(22.8 to 54.2)                            | 5.7<br>(-3.9 to 17.3)                               |
| Osteoarthritis                                             | 124.6<br>(116.6 to 133.0)                     | 6.8<br>(6.3 to 7.3)                               | 7.7<br>(5.4 to 10.5)                   | 36.3<br>(31.1 to 41.6)                            | 2.7<br>(-1.2 to 6.5)                                |
| Low back and neck pain                                     | 539.2<br>(503.2 to 578.4)                     | 236.1<br>(211.3 to 264.8)                         | 62.6<br>(43.9 to 82.9)                 | 32.7<br>(24.4 to 42.0)                            | 1.8<br>(-3.9 to 7.9)                                |
| Low back pain                                              | 413.3<br>(364.4 to 470.6)                     | 198.1<br>(174.0 to 226.6)                         | 47.0<br>(32.9 to 62.6)                 | 32.9<br>(21.8 to 45.0)                            | 2.3<br>(-5.4 to 10.7)                               |
| Neck pain                                                  | 155.1<br>(134.0 to 178.8)                     | 38.0<br>(32.9 to 44.6)                            | 15.6<br>(10.5 to 22.3)                 | 32.2<br>(28.3 to 35.9)                            | 0.3<br>(-2.0 to 2.8)                                |
| Gout                                                       | 18.3<br>(16.2 to 20.7)                        | 3.8<br>(3.3 to 4.2)                               | 0.6<br>(0.4 to 0.8)                    | 32.8<br>(15.1 to 53.7)                            | -0.2<br>(-12.6 to 13.9)                             |
| Other musculoskeletal disorders                            | 259.4<br>(219.1 to 302.0)                     | 219.8<br>(184.6 to 260.2)                         | 22.5<br>(15.4 to 31.7)                 | 27.1<br>(17.9 to 36.7)                            | -2.8<br>(-9.4 to 4.1)                               |
| <b>Other non-communicable diseases</b>                     | <b>4,714.2</b><br><b>(4,568.2 to 4,851.4)</b> | <b>14,654.0†</b><br><b>(13,294.1 to 16,017.9)</b> | <b>127.1</b><br><b>(87.0 to 179.0)</b> | <b>18.2</b><br><b>(16.2 to 19.9)</b>              | <b>-3.0</b><br><b>(-4.4 to -1.8)</b>                |
| Congenital anomalies                                       | 73.2<br>(63.7 to 85.5)                        | --                                                | 8.8<br>(6.0 to 12.3)                   | 14.5<br>(6.6 to 22.9)                             | -5.2<br>(-11.4 to 1.7)                              |
| Neural tube defects                                        | 5.0<br>(4.5 to 5.7)                           | --                                                | 1.5<br>(1.0 to 2.0)                    | 18.1<br>(2.5 to 36.6)                             | -2.5<br>(-14.1 to 11.2)                             |
| Congenital heart anomalies                                 | 21.5<br>(18.2 to 24.8)                        | --                                                | 0.9<br>(0.4 to 1.5)                    | 18.3<br>(3.8 to 34.1)                             | 1.2<br>(-11.0 to 13.3)                              |
| Orofacial clefts                                           | 4.2<br>(3.7 to 4.8)                           | --                                                | 0.1<br>(< 0.05 to 0.1)                 | 24.2<br>(10.1 to 41.2)                            | 2.2<br>(-9.1 to 15.7)                               |
| Down's syndrome                                            | 2.3<br>(2.0 to 2.7)                           | --                                                | 0.2<br>(0.1 to 0.3)                    | 22.9<br>(14.1 to 34.1)                            | 2.7<br>(-4.4 to 11.9)                               |
| Turner syndrome                                            | 2.4<br>(2.1 to 2.8)                           | --                                                | < 0.05<br>(< 0.05 to 0.1)              | 17.9<br>(-23.7 to 78.8)                           | 0.4<br>(-32.2 to 47.4)                              |
| Klinefelter syndrome                                       | 2.2<br>(1.8 to 2.6)                           | --                                                | < 0.05<br>(< 0.05 to < 0.05)           | 25.9<br>(-8.5 to 75.9)                            | 0.6<br>(-25.9 to 37.0)                              |



| Cause                                         | Prevalence in thousands (95% UI)        | Incidence in thousands (95% UI)          | YLDs in thousands (95% UI)           |                                                   |                                                     |
|-----------------------------------------------|-----------------------------------------|------------------------------------------|--------------------------------------|---------------------------------------------------|-----------------------------------------------------|
|                                               | 2016 counts                             | 2016 counts                              | 2016 counts                          | Percentage change in counts between 2006 and 2016 | Percentage change in age-standardised rates between |
| Other chromosomal abnormalities               | 2.3<br>(1.9 to 2.7)                     | --                                       | 0.3<br>(0.2 to 0.4)                  | 18.1<br>(-6.9 to 50.7)                            | 0.7<br>(-20.1 to 26.5)                              |
| Congenital musculoskeletal and limb anomalies | 6.8<br>(6.1 to 7.5)                     | --                                       | 1.0<br>(0.7 to 1.4)                  | 29.1<br>(13.7 to 47.1)                            | 7.6<br>(-3.5 to 20.2)                               |
| Urogenital congenital anomalies               | 6.9<br>(6.0 to 7.9)                     | --                                       | 0.1<br>(0.1 to 0.2)                  | 14.1<br>(3.3 to 26.6)                             | -2.0<br>(-10.6 to 8.2)                              |
| Digestive congenital anomalies                | 8.4<br>(7.5 to 9.4)                     | --                                       | 0.4<br>(0.2 to 0.6)                  | 29.0<br>(8.2 to 53.1)                             | 7.0<br>(-9.0 to 24.5)                               |
| Other congenital anomalies                    | 28.4<br>(17.3 to 44.1)                  | --                                       | 4.3<br>(2.5 to 6.9)                  | 7.9<br>(-3.5 to 20.2)                             | -11.2<br>(-19.9 to -1.6)                            |
| Skin and subcutaneous diseases                | 2,433.4<br>(2,348.5 to 2,525.3)         | 5,361.8<br>(4,997.3 to 5,854.5)          | 63.9<br>(41.5 to 93.9)               | 17.8<br>(14.9 to 20.5)                            | 1.1<br>(-1.0 to 3.0)                                |
| Dermatitis                                    | 360.4<br>(319.1 to 403.7)               | 375.8<br>(347.5 to 405.6)                | 14.2<br>(8.1 to 23.7)                | 18.3<br>(13.8 to 23.5)                            | 0.2<br>(-2.9 to 3.5)                                |
| Psoriasis                                     | 36.9<br>(35.1 to 38.8)                  | 5.7<br>(5.5 to 6.0)                      | 3.2<br>(2.3 to 4.4)                  | 35.5<br>(20.0 to 50.0)                            | 9.8<br>(0.3 to 19.4)                                |
| Cellulitis                                    | 2.9<br>(2.7 to 3.2)                     | 60.3<br>(55.9 to 64.8)                   | 0.2<br>(0.1 to 0.2)                  | 23.1<br>(-3.1 to 55.8)                            | 2.4<br>(-16.7 to 25.8)                              |
| Pyoderma                                      | 5.9<br>(5.7 to 6.1)                     | 114.5<br>(110.7 to 118.6)                | < 0.05<br>(< 0.05 to 0.1)            | 26.6<br>(12.9 to 43.4)                            | 1.8<br>(-7.2 to 11.4)                               |
| Scabies                                       | 357.7<br>(285.1 to 471.8)               | 1,148.2<br>(893.6 to 1,553.5)            | 9.3<br>(5.0 to 15.7)                 | 13.4<br>(4.7 to 21.5)                             | -5.2<br>(-12.5 to 0.2)                              |
| Fungal skin diseases                          | 694.0<br>(620.4 to 776.0)               | 2,226.6<br>(1,981.0 to 2,488.0)          | 3.9<br>(1.6 to 8.4)                  | 21.9<br>(19.5 to 24.4)                            | 0.2<br>(-0.8 to 1.2)                                |
| Viral skin diseases                           | 220.2<br>(197.3 to 243.4)               | 306.3<br>(272.5 to 342.1)                | 6.8<br>(4.3 to 10.0)                 | 15.8<br>(11.3 to 20.3)                            | -0.0<br>(-2.9 to 2.8)                               |
| Acne vulgaris                                 | 734.9<br>(648.0 to 828.7)               | 537.6<br>(425.6 to 703.8)                | 19.0<br>(12.6 to 27.6)               | 13.7<br>(8.6 to 19.5)                             | 3.0<br>(-0.9 to 7.5)                                |
| Alopecia areata                               | 12.5<br>(12.0 to 13.0)                  | 22.3<br>(21.5 to 23.1)                   | 0.4<br>(0.3 to 0.6)                  | 28.6<br>(14.2 to 45.0)                            | 0.3<br>(-9.8 to 12.1)                               |
| Pruritus                                      | 53.2<br>(46.7 to 60.2)                  | 43.4<br>(38.5 to 49.0)                   | 0.6<br>(0.3 to 1.0)                  | 27.9<br>(19.9 to 35.7)                            | 2.3<br>(-2.7 to 7.6)                                |
| Urticaria                                     | 70.3<br>(60.2 to 82.1)                  | 127.2<br>(109.7 to 148.8)                | 4.3<br>(2.7 to 6.2)                  | 21.9<br>(14.0 to 30.2)                            | 0.3<br>(-5.4 to 6.3)                                |
| Decubitus ulcer                               | 0.4<br>(0.4 to 0.5)                     | 1.6<br>(1.4 to 1.7)                      | 0.1<br>(< 0.05 to 0.1)               | 36.6<br>(20.2 to 56.6)                            | 7.6<br>(-7.8 to 26.7)                               |
| Other skin and subcutaneous diseases          | 348.1<br>(337.2 to 359.2)               | 392.4<br>(379.5 to 405.2)                | 1.9<br>(0.9 to 3.5)                  | 37.1<br>(33.0 to 41.3)                            | 8.7<br>(6.0 to 11.3)                                |
| Sense organ diseases                          | 991.6<br>(962.3 to 1,025.1)             | 649.6†<br>(604.1 to 697.5)               | 46.6<br>(32.8 to 63.9)               | 18.1<br>(14.5 to 21.9)                            | -6.1<br>(-8.0 to -4.2)                              |
| Glaucoma                                      | 1.5<br>(1.2 to 1.9)                     | --                                       | 0.2<br>(0.1 to 0.3)                  | 33.9<br>(16.0 to 53.8)                            | 2.2<br>(-11.0 to 17.1)                              |
| Cataract                                      | 43.9<br>(35.0 to 52.9)                  | --                                       | 3.4<br>(2.4 to 4.8)                  | 24.3<br>(17.3 to 32.2)                            | -3.9<br>(-9.5 to 1.8)                               |
| Macular degeneration                          | 0.6<br>(0.4 to 0.8)                     | --                                       | 0.1<br>(< 0.05 to 0.1)               | 36.4<br>(12.4 to 65.4)                            | 4.0<br>(-13.9 to 23.4)                              |
| Refraction and accommodation disorders        | 373.2<br>(354.7 to 392.1)               | --                                       | 7.5<br>(4.8 to 11.7)                 | 11.2<br>(6.9 to 15.9)                             | -11.7<br>(-14.7 to -8.4)                            |
| Age-related and other hearing loss            | 639.0<br>(597.6 to 687.3)               | --                                       | 29.6<br>(20.8 to 40.2)               | 17.2<br>(11.8 to 23.2)                            | -6.4<br>(-9.4 to -3.6)                              |
| Other vision loss                             | 16.1<br>(13.9 to 18.4)                  | --                                       | 1.5<br>(1.0 to 2.0)                  | 27.8<br>(17.2 to 40.6)                            | -0.6<br>(-8.0 to 7.5)                               |
| Other sense organ diseases                    | 140.9<br>(130.2 to 151.3)               | 649.6<br>(604.1 to 697.5)                | 4.3<br>(2.7 to 6.6)                  | 29.7<br>(23.3 to 36.9)                            | 1.4<br>(-2.6 to 5.6)                                |
| Oral disorders                                | 3,073.5<br>(2,800.1 to 3,297.1)         | 8,642.7†<br>(7,345.1 to 9,967.4)         | 7.8<br>(4.7 to 11.9)                 | 26.5<br>(23.2 to 30.2)                            | 0.7<br>(-1.4 to 3.1)                                |
| Caries of deciduous teeth                     | 564.5<br>(425.6 to 676.9)               | 2,183.3<br>(1,363.7 to 3,057.7)          | 0.1<br>(0.1 to 0.3)                  | 4.4<br>(-19.2 to 24.3)                            | -9.8<br>(-28.9 to 6.6)                              |
| Caries of permanent teeth                     | 2,247.4<br>(1,954.5 to 2,555.2)         | 6,437.2<br>(5,375.3 to 7,524.2)          | 1.3<br>(0.6 to 2.6)                  | 14.3<br>(8.3 to 20.8)                             | -5.1<br>(-9.1 to -0.8)                              |
| Periodontal disease                           | 132.4<br>(108.2 to 159.8)               | 15.7<br>(12.6 to 19.2)                   | 0.9<br>(0.3 to 1.8)                  | 32.1<br>(26.6 to 37.9)                            | -1.0<br>(-4.8 to 3.0)                               |
| Edentulism and severe tooth loss              | 78.8<br>(68.9 to 88.9)                  | 6.5<br>(5.6 to 7.4)                      | 2.2<br>(1.4 to 3.1)                  | 37.9<br>(31.5 to 44.4)                            | 4.3<br>(0.2 to 8.5)                                 |
| Other oral disorders                          | 112.9<br>(107.7 to 118.4)               | --                                       | 3.3<br>(2.0 to 5.0)                  | 24.8<br>(20.0 to 29.7)                            | 0.1<br>(-3.1 to 3.5)                                |
| <b>Injuries</b>                               | <b>662.0</b><br><b>(624.8 to 699.2)</b> | <b>362.2†</b><br><b>(343.3 to 381.1)</b> | <b>29.3</b><br><b>(19.8 to 41.8)</b> | <b>32.4</b><br><b>(28.8 to 35.7)</b>              | <b>6.3</b><br><b>(3.9 to 8.6)</b>                   |
| <b>Transport injuries</b>                     | <b>139.8</b><br><b>(128.6 to 151.7)</b> | <b>59.9</b><br><b>(53.3 to 66.8)</b>     | <b>8.4</b><br><b>(5.7 to 12.1)</b>   | <b>51.6</b><br><b>(46.7 to 56.4)</b>              | <b>20.4</b><br><b>(17.2 to 23.7)</b>                |
| Road injuries                                 | 98.3<br>(91.4 to 105.9)                 | 46.7<br>(41.0 to 53.2)                   | 5.8<br>(3.9 to 8.4)                  | 69.1<br>(64.2 to 73.8)                            | 31.3<br>(28.1 to 34.7)                              |
| Pedestrian road injuries                      | 14.3<br>(12.6 to 16.4)                  | 5.0<br>(4.1 to 6.1)                      | 0.9<br>(0.6 to 1.2)                  | 63.3<br>(58.4 to 68.2)                            | 28.3<br>(24.9 to 31.7)                              |
| Cyclist road injuries                         | 15.5<br>(13.0 to 18.2)                  | 8.3<br>(6.4 to 10.3)                     | 0.9<br>(0.6 to 1.2)                  | 90.5<br>(84.8 to 96.0)                            | 48.8<br>(44.9 to 52.5)                              |
| Motorcyclist road injuries                    | 31.1<br>(26.6 to 37.7)                  | 10.6<br>(8.8 to 12.8)                    | 1.8<br>(1.2 to 2.6)                  | 60.1<br>(55.0 to 64.8)                            | 23.0<br>(19.7 to 26.3)                              |
| Motor vehicle road injuries                   | 23.9<br>(20.6 to 27.3)                  | 14.2<br>(12.0 to 16.9)                   | 1.6<br>(1.1 to 2.2)                  | 69.6<br>(64.6 to 74.4)                            | 32.2<br>(28.8 to 35.6)                              |
| Other road injuries                           | 13.5<br>(11.6 to 15.9)                  | 8.6<br>(6.7 to 10.6)                     | 0.7<br>(0.5 to 1.1)                  | 76.3<br>(71.3 to 81.2)                            | 36.3<br>(32.8 to 39.7)                              |
| Other transport injuries                      | 41.5<br>(33.8 to 51.4)                  | 13.2<br>(10.8 to 16.5)                   | 2.6<br>(1.8 to 3.7)                  | 23.0<br>(18.2 to 28.2)                            | -1.7<br>(-5.2 to 1.7)                               |
| <b>Unintentional injuries</b>                 | <b>479.3</b><br><b>(445.7 to 512.3)</b> | <b>280.0</b><br><b>(262.8 to 297.8)</b>  | <b>18.0</b><br><b>(12.2 to 25.4)</b> | <b>26.0</b><br><b>(22.3 to 29.5)</b>              | <b>1.0</b><br><b>(-1.5 to 3.2)</b>                  |
| Falls                                         | 147.7<br>(129.6 to 167.0)               | 84.7<br>(74.3 to 98.6)                   | 6.4<br>(4.5 to 8.9)                  | 44.3<br>(40.4 to 48.2)                            | 13.8<br>(11.1 to 16.5)                              |
| Drowning                                      | 4.4<br>(3.8 to 5.1)                     | 1.2<br>(1.0 to 1.3)                      | 0.3<br>(0.2 to 0.4)                  | -4.2<br>(-8.2 to -0.2)                            | -23.6<br>(-26.2 to -20.8)                           |
| Fire, heat, and hot substances                | 56.5<br>(48.2 to 67.2)                  | 9.4<br>(7.9 to 11.1)                     | 1.7<br>(1.2 to 2.4)                  | 0.0<br>(-6.7 to 6.5)                              | -21.4<br>(-26.2 to -17.2)                           |
| Poisonings                                    | 1.2<br>(1.0 to 1.4)                     | 2.7<br>(2.2 to 3.4)                      | 0.1<br>(0.1 to 0.2)                  | 40.4<br>(28.0 to 53.2)                            | 10.7<br>(2.8 to 18.8)                               |
| Exposure to mechanical forces                 | 73.8<br>(63.3 to 90.1)                  | 38.6<br>(32.3 to 45.2)                   | 2.1<br>(1.4 to 3.0)                  | 50.5<br>(45.1 to 55.8)                            | 18.6<br>(15.0 to 22.2)                              |
| Unintentional firearm injuries                | 2.9<br>(2.4 to 3.6)                     | 1.0<br>(0.7 to 1.4)                      | 0.1<br>(0.1 to 0.2)                  | 29.5<br>(25.1 to 34.0)                            | 0.7<br>(-2.4 to 3.8)                                |
| Unintentional suffocation                     | 5.2<br>(4.0 to 6.7)                     | 1.6<br>(1.2 to 2.3)                      | 0.2<br>(0.1 to 0.3)                  | 23.2<br>(18.7 to 27.6)                            | 0.7<br>(-2.3 to 3.7)                                |
| Other exposure to mechanical forces           | 65.7<br>(55.3 to 81.9)                  | 36.0<br>(29.9 to 42.2)                   | 1.8<br>(1.2 to 2.5)                  | 56.3<br>(50.6 to 61.9)                            | 22.3<br>(18.4 to 26.0)                              |

| Cause                                                                               | Prevalence in thousands (95% UI)        | Incidence in thousands (95% UI)       | YLDs in thousands (95% UI)        |                                                   |                                                     |
|-------------------------------------------------------------------------------------|-----------------------------------------|---------------------------------------|-----------------------------------|---------------------------------------------------|-----------------------------------------------------|
|                                                                                     | 2016 counts                             | 2016 counts                           | 2016 counts                       | Percentage change in counts between 2006 and 2016 | Percentage change in age-standardised rates between |
| Adverse effects of medical treatment                                                | 2.2<br>(1.7 to 2.8)                     | 29.3<br>(25.0 to 33.9)                | 0.3<br>(0.2 to 0.5)               | 3.1<br>(-3.3 to 11.5)                             | -19.2<br>(-22.8 to -15.0)                           |
| Animal contact                                                                      | 18.3<br>(15.7 to 21.9)                  | 27.7<br>(22.6 to 33.4)                | 0.6<br>(0.4 to 0.8)               | 13.8<br>(7.3 to 20.8)                             | -9.8<br>(-14.1 to -5.4)                             |
| Venomous animal contact                                                             | 4.8<br>(4.0 to 5.7)                     | 9.5<br>(7.1 to 12.3)                  | 0.3<br>(0.2 to 0.5)               | 24.6<br>(13.0 to 37.8)                            | 0.1<br>(-8.1 to 8.8)                                |
| Non-venomous animal contact                                                         | 13.4<br>(11.1 to 17.1)                  | 18.2<br>(14.7 to 22.1)                | 0.2<br>(0.2 to 0.4)               | 2.5<br>(-2.8 to 7.6)                              | -19.1<br>(-23.1 to -15.7)                           |
| Foreign body                                                                        | 38.8<br>(31.0 to 47.1)                  | 26.0<br>(22.8 to 29.9)                | 1.8<br>(1.2 to 2.7)               | 6.5<br>(1.8 to 11.1)                              | -13.0<br>(-16.2 to -9.9)                            |
| Pulmonary aspiration and foreign body in airway                                     | 27.1<br>(20.2 to 36.3)                  | 13.9<br>(11.3 to 17.4)                | 1.4<br>(0.9 to 2.0)               | 6.0<br>(1.1 to 10.8)                              | -12.7<br>(-16.1 to -9.5)                            |
| Foreign body in eyes                                                                | 1.1<br>(0.6 to 1.7)                     | 6.2<br>(4.6 to 8.3)                   | 0.1<br>(< 0.05 to 0.1)            | 27.8<br>(22.7 to 33.8)                            | 1.2<br>(-1.9 to 4.6)                                |
| Foreign body in other body part                                                     | 10.6<br>(8.4 to 13.2)                   | 5.9<br>(4.9 to 7.1)                   | 0.4<br>(0.2 to 0.6)               | 5.4<br>(0.0 to 10.6)                              | -15.7<br>(-19.2 to -12.2)                           |
| Environmental heat and cold exposure                                                | 40.0<br>(33.1 to 47.7)                  | 14.2<br>(11.3 to 17.8)                | 1.7<br>(1.1 to 2.5)               | 23.0<br>(18.6 to 27.3)                            | -2.1<br>(-5.1 to 0.8)                               |
| Other unintentional injuries                                                        | 96.4<br>(78.0 to 116.8)                 | 46.2<br>(38.8 to 54.4)                | 2.9<br>(1.9 to 4.2)               | 20.9<br>(17.4 to 23.9)                            | -3.5<br>(-5.8 to -1.5)                              |
| <b>Self-harm and interpersonal violence</b>                                         | <b>167.2</b><br><b>(148.6 to 188.3)</b> | <b>22.1†</b><br><b>(18.4 to 25.7)</b> | <b>2.7</b><br><b>(1.8 to 3.7)</b> | <b>29.3</b><br><b>(24.7 to 34.1)</b>              | <b>5.6</b><br><b>(2.7 to 8.7)</b>                   |
| Self-harm                                                                           | 4.7<br>(4.0 to 5.5)                     | 2.6<br>(2.2 to 3.1)                   | 0.3<br>(0.2 to 0.4)               | 16.8<br>(11.8 to 21.9)                            | -12.2<br>(-15.5 to -8.9)                            |
| Self-harm by firearm                                                                | 0.1<br>(0.1 to 0.2)                     | < 0.05<br>(< 0.05 to 0.1)             | < 0.05<br>(< 0.05 to < 0.05)      | 1.6<br>(-3.6 to 6.6)                              | -23.7<br>(-27.1 to -20.5)                           |
| Self-harm by other specified means                                                  | 4.5<br>(3.8 to 5.3)                     | 2.6<br>(2.1 to 3.1)                   | 0.3<br>(0.2 to 0.4)               | 17.2<br>(12.2 to 22.5)                            | -11.9<br>(-15.2 to -8.6)                            |
| Interpersonal violence                                                              | 162.5<br>(143.8 to 183.7)               | 19.4†<br>(15.9 to 23.2)               | 2.4<br>(1.7 to 3.3)               | 30.9<br>(25.5 to 36.4)                            | 8.5<br>(5.1 to 11.9)                                |
| Assault by firearm                                                                  | 0.5<br>(0.5 to 0.6)                     | 0.2<br>(0.1 to 0.3)                   | < 0.05<br>(< 0.05 to < 0.05)      | 62.9<br>(56.9 to 68.5)                            | 27.8<br>(23.9 to 31.4)                              |
| Assault by sharp object                                                             | 7.7<br>(6.2 to 9.2)                     | 3.9<br>(2.8 to 5.2)                   | 0.3<br>(0.2 to 0.4)               | 48.6<br>(42.8 to 54.1)                            | 16.3<br>(12.4 to 20.0)                              |
| Sexual violence                                                                     | 132.7<br>(114.4 to 154.5)               | --                                    | 1.1<br>(0.8 to 1.6)               | 8.2<br>(3.6 to 13.4)                              | -10.2<br>(-13.2 to -7.0)                            |
| Assault by other means                                                              | 21.6<br>(18.2 to 25.9)                  | 15.3<br>(12.5 to 18.4)                | 1.0<br>(0.7 to 1.4)               | 64.8<br>(60.1 to 69.4)                            | 27.2<br>(24.0 to 30.3)                              |
| <b>Forces of nature, conflict and terrorism, and executions and police conflict</b> | <b>8.5</b><br><b>(4.5 to 13.8)</b>      | <b>0.3†</b><br><b>(0.1 to 0.4)</b>    | <b>0.3</b><br><b>(0.1 to 0.8)</b> | <b>-5.7</b><br><b>(-9.7 to 0.9)</b>               | <b>-18.6</b><br><b>(-21.9 to -13.6)</b>             |
| Exposure to forces of nature                                                        | 0.8<br>(0.4 to 1.2)                     | --                                    | < 0.05<br>(< 0.05 to 0.1)         | 46.8<br>(39.5 to 58.0)                            | 21.7<br>(15.7 to 31.7)                              |
| Conflict and terrorism                                                              | 6.9<br>(3.2 to 11.9)                    | --                                    | 0.2<br>(< 0.05 to 0.6)            | -11.9<br>(-15.9 to -6.7)                          | -22.4<br>(-25.7 to -18.2)                           |
| Executions and police conflict                                                      | 0.8<br>(0.4 to 1.4)                     | 0.3<br>(0.1 to 0.4)                   | < 0.05<br>(< 0.05 to 0.1)         | 5.7<br>(-1.8 to 16.4)                             | -14.9<br>(-20.8 to -5.4)                            |
| <b>Impairments</b>                                                                  | --                                      | --                                    | --                                | --                                                | --                                                  |
| Anaemia                                                                             | 2,404.3<br>(2,268.1 to 2,566.2)         | --                                    | 60.0<br>(40.0 to 88.1)            | 2.5<br>(-5.7 to 11.6)                             | -15.8<br>(-21.1 to -8.5)                            |
| Developmental intellectual disability                                               | 162.8<br>(118.5 to 212.7)               | --                                    | 15.7<br>(11.3 to 20.9)            | 11.1<br>(4.3 to 19.6)                             | -6.9<br>(-12.3 to 0.2)                              |
| Epilepsy                                                                            | 34.0<br>(19.0 to 50.1)                  | --                                    | 13.4<br>(6.7 to 21.9)             | 24.3<br>(-44.5 to 173.8)                          | 3.6<br>(-53.9 to 136.1)                             |
| Guillain-Barre syndrome                                                             | < 0.05<br>(< 0.05 to 0.1)               | --                                    | < 0.05<br>(< 0.05 to < 0.05)      | 21.9<br>(17.7 to 26.2)                            | 0.1<br>(0.0 to 0.1)                                 |
| Hearing loss                                                                        | 741.3<br>(699.1 to 787.7)               | --                                    | 35.8<br>(25.2 to 48.3)            | 14.2<br>(10.0 to 18.5)                            | -7.5<br>(-10.1 to -5.0)                             |
| Heart failure                                                                       | 21.2<br>(18.8 to 24.2)                  | --                                    | 2.4<br>(1.7 to 3.3)               | 40.9<br>(30.8 to 52.1)                            | 7.8<br>(0.3 to 15.8)                                |
| Infertility                                                                         | 94.1<br>(73.3 to 120.5)                 | --                                    | 0.6<br>(0.2 to 1.2)               | 24.1<br>(15.4 to 33.0)                            | -7.2<br>(-13.4 to -0.4)                             |
| Pelvic inflammatory disease                                                         | 5.9<br>(5.0 to 6.9)                     | --                                    | 0.8<br>(0.5 to 1.1)               | 20.9<br>(4.4 to 38.8)                             | -8.5<br>(-20.5 to 4.7)                              |
| Vision loss                                                                         | 455.9<br>(434.6 to 476.7)               | --                                    | 15.4<br>(11.0 to 21.5)            | 20.6<br>(16.0 to 26.9)                            | -5.4<br>(-8.4 to -1.8)                              |

We did not calculate incidence for the nine impairments, certain NTDs, and causes with only birth prevalence. Blank cells mean that no estimate is available.

† Incidence for aggregate causes represents the sum of the incidence of the causes below the aggregate.

‡ Incidence estimates for stroke represent first-ever stroke only.

^ Incidence of HIV/AIDS represents new infections of HIV only and does not include new infections of Tuberculosis in HIV positive cases.

SR Table 14: Prevalence, incidence, and YLDs for 2016, percentage change of YLD counts and percentage change of age-standardised YLD rates between 2006 and 2016 by cause and impairments, for all ages, Latvia.

| Cause                                                                                | Prevalence in thousands (95% UI)       | Incidence in thousands (95% UI)            | YLDs in thousands (95% UI)       |                                                   |                                                     |
|--------------------------------------------------------------------------------------|----------------------------------------|--------------------------------------------|----------------------------------|---------------------------------------------------|-----------------------------------------------------|
|                                                                                      | 2016 counts                            | 2016 counts                                | 2016 counts                      | Percentage change in counts between 2006 and 2016 | Percentage change in age-standardised rates between |
| <b>All causes</b>                                                                    | <b>1,896.9</b><br>(1,890.6 to 1,903.4) | <b>13,471.3†</b><br>(12,518.5 to 14,579.1) | <b>279.8</b><br>(208.9 to 360.1) | <b>-6.2</b><br>(-7.6 to -5.0)                     | <b>-1.3</b><br>(-2.8 to 0.1)                        |
| <b>Communicable, maternal, neonatal, and nutritional disorders</b>                   | <b>1,025.8</b><br>(993.0 to 1,063.7)   | <b>7,159.3†</b><br>(6,297.8 to 8,205.3)    | <b>11.2</b><br>(8.1 to 14.9)     | <b>-16.9</b><br>(-20.8 to -12.0)                  | <b>-7.8</b><br>(-12.5 to -2.0)                      |
| <b>HIV/AIDS and tuberculosis</b>                                                     | <b>518.4</b><br>(476.7 to 552.0)       | <b>0.8†</b><br>(0.7 to 0.9)                | <b>0.4</b><br>(0.2 to 0.6)       | <b>-6.7</b><br>(-19.6 to 7.6)                     | <b>5.2</b><br>(-9.6 to 20.9)                        |
| Tuberculosis                                                                         | 488.1<br>(451.3 to 530.7)              | 0.6†<br>(0.6 to 0.7)                       | 0.1<br>(0.1 to 0.1)              | -37.5<br>(-50.5 to -21.8)                         | -32.0<br>(-45.7 to -15.5)                           |
| Drug-susceptible tuberculosis                                                        | 0.3<br>(0.3 to 0.3)                    | 0.6<br>(0.5 to 0.7)                        | 0.1<br>(0.1 to 0.1)              | -36.2<br>(-51.2 to -17.4)                         | -30.5<br>(-46.3 to -11.0)                           |
| Multidrug-resistant tuberculosis without extensive drug resistance                   | < 0.05<br>(< 0.05 to < 0.05)           | < 0.05<br>(< 0.05 to 0.1)                  | < 0.05<br>(< 0.05 to < 0.05)     | -53.3<br>(-66.0 to -38.1)                         | -49.5<br>(-63.3 to -32.8)                           |
| Extensively drug-resistant tuberculosis                                              | < 0.05<br>(< 0.05 to < 0.05)           | < 0.05<br>(< 0.05 to < 0.05)               | < 0.05<br>(< 0.05 to < 0.05)     | 44.1<br>(4.7 to 90.8)                             | 55.8<br>(13.1 to 107.2)                             |
| Latent tuberculosis infection                                                        | 487.8<br>(450.9 to 530.5)              | --                                         | --                               | --                                                | --                                                  |
| HIV/AIDS                                                                             | 2.0<br>(1.4 to 3.0)                    | 0.2^<br>(0.1 to 0.2)                       | 0.3<br>(0.1 to 0.5)              | 15.1<br>(-4.3 to 51.2)                            | 30.1<br>(8.6 to 68.9)                               |
| Drug-susceptible HIV/AIDS - Tuberculosis                                             | < 0.05<br>(< 0.05 to < 0.05)           | 0.1<br>(< 0.05 to 0.1)                     | < 0.05<br>(< 0.05 to < 0.05)     | -12.5<br>(-19.9 to -3.0)                          | -1.8<br>(-10.1 to 8.9)                              |
| Multidrug-resistant HIV/AIDS - Tuberculosis without extensive drug resistance        | < 0.05<br>(< 0.05 to < 0.05)           | < 0.05<br>(< 0.05 to < 0.05)               | < 0.05<br>(< 0.05 to < 0.05)     | -36.2<br>(-53.2 to -14.3)                         | -28.5<br>(-47.5 to -3.8)                            |
| Extensively drug-resistant HIV/AIDS - Tuberculosis                                   | < 0.05<br>(< 0.05 to < 0.05)           | < 0.05<br>(< 0.05 to < 0.05)               | < 0.05<br>(< 0.05 to < 0.05)     | 96.5<br>(44.2 to 164.6)                           | 120.5<br>(61.9 to 197.0)                            |
| HIV/AIDS resulting in other diseases                                                 | 1.9<br>(1.4 to 3.0)                    | 0.2<br>(0.1 to 0.2)                        | 0.2<br>(0.1 to 0.5)              | 17.3<br>(-3.9 to 61.0)                            | 32.8<br>(9.1 to 79.8)                               |
| <b>Diarrhoea, lower respiratory infections, and other common infectious diseases</b> | <b>115.9</b><br>(106.1 to 125.1)       | <b>6,968.4†</b><br>(6,108.4 to 8,029.0)    | <b>5.1</b><br>(3.5 to 7.1)       | <b>-13.4</b><br>(-16.3 to -10.3)                  | <b>-6.0</b><br>(-9.4 to -2.7)                       |
| Diarrhoeal diseases                                                                  | 17.1<br>(15.9 to 18.4)                 | 1,111.4<br>(1,033.2 to 1,198.9)            | 1.9<br>(1.3 to 2.6)              | -15.7<br>(-20.2 to -11.0)                         | -12.1<br>(-17.1 to -6.9)                            |
| Intestinal infectious diseases                                                       | < 0.05<br>(< 0.05 to < 0.05)           | < 0.05†<br>(< 0.05 to < 0.05)              | < 0.05<br>(< 0.05 to < 0.05)     | -9.5<br>(-23.0 to 6.8)                            | -7.6<br>(-21.5 to 8.7)                              |
| Typhoid fever                                                                        | < 0.05<br>(< 0.05 to < 0.05)           | < 0.05<br>(< 0.05 to < 0.05)               | < 0.05<br>(< 0.05 to < 0.05)     | -18.6<br>(-33.7 to -2.2)                          | -12.3<br>(-29.7 to 6.7)                             |
| Paratyphoid fever                                                                    | < 0.05<br>(< 0.05 to < 0.05)           | < 0.05<br>(< 0.05 to < 0.05)               | < 0.05<br>(< 0.05 to < 0.05)     | -0.2<br>(-16.2 to 23.3)                           | 1.3<br>(-15.1 to 21.6)                              |
| Other intestinal infectious diseases                                                 | --                                     | --                                         | < 0.05<br>(< 0.05 to < 0.05)     | -27.7<br>(-45.6 to -3.4)                          | -33.6<br>(-53.6 to -5.2)                            |
| Lower respiratory infections                                                         | 3.3<br>(3.1 to 3.5)                    | 150.7<br>(138.6 to 163.4)                  | 0.2<br>(0.1 to 0.3)              | 2.4<br>(-7.4 to 13.7)                             | 1.8<br>(-9.1 to 13.8)                               |
| Upper respiratory infections                                                         | 73.7<br>(62.7 to 87.0)                 | 5,592.9<br>(4,736.2 to 6,654.2)            | 1.8<br>(1.1 to 2.9)              | -12.3<br>(-18.0 to -6.5)                          | 0.5<br>(-5.2 to 6.0)                                |
| Otitis media                                                                         | 19.1<br>(17.2 to 21.0)                 | 81.1<br>(67.7 to 98.6)                     | 0.5<br>(0.3 to 0.8)              | -19.4<br>(-25.2 to -13.2)                         | -8.3<br>(-14.7 to -1.5)                             |
| Meningitis                                                                           | 1.9<br>(1.6 to 2.1)                    | 0.3<br>(0.2 to 0.3)                        | 0.2<br>(0.2 to 0.3)              | -17.1<br>(-19.4 to -15.1)                         | -4.1<br>(-6.8 to -1.6)                              |
| Pneumococcal meningitis                                                              | 0.7<br>(0.6 to 0.7)                    | < 0.05<br>(< 0.05 to < 0.05)               | 0.1<br>(0.1 to 0.1)              | -21.2<br>(-25.3 to -17.1)                         | -8.5<br>(-13.3 to -3.8)                             |
| H influenzae type B meningitis                                                       | 0.2<br>(0.2 to 0.2)                    | < 0.05<br>(< 0.05 to < 0.05)               | < 0.05<br>(< 0.05 to 0.1)        | -16.7<br>(-20.0 to -13.4)                         | -2.0<br>(-6.0 to 2.0)                               |
| Meningococcal infection                                                              | 0.3<br>(0.2 to 0.4)                    | 0.1<br>(0.1 to 0.1)                        | < 0.05<br>(< 0.05 to 0.1)        | -18.5<br>(-22.2 to -15.1)                         | -6.2<br>(-10.7 to -2.0)                             |
| Other meningitis                                                                     | 0.7<br>(0.5 to 0.8)                    | 0.2<br>(0.2 to 0.2)                        | 0.1<br>(< 0.05 to 0.1)           | -9.9<br>(-13.7 to -5.6)                           | 3.1<br>(-1.1 to 7.5)                                |
| Encephalitis                                                                         | 3.6<br>(2.4 to 5.3)                    | 2.5<br>(2.4 to 2.5)                        | 0.3<br>(0.2 to 0.5)              | -1.8<br>(-13.8 to 12.0)                           | 6.9<br>(-7.2 to 22.3)                               |
| Diphtheria                                                                           | < 0.05<br>(< 0.05 to < 0.05)           | < 0.05<br>(< 0.05 to < 0.05)               | < 0.05<br>(< 0.05 to < 0.05)     | -36.8<br>(-68.7 to 28.2)                          | -32.0<br>(-64.3 to 30.2)                            |
| Whooping cough                                                                       | 0.1<br>(0.1 to 0.1)                    | 0.8<br>(0.6 to 1.0)                        | < 0.05<br>(< 0.05 to < 0.05)     | -0.4<br>(-25.6 to 34.2)                           | -1.3<br>(-26.8 to 33.7)                             |
| Tetanus                                                                              | < 0.05<br>(< 0.05 to < 0.05)           | < 0.05<br>(< 0.05 to < 0.05)               | < 0.05<br>(< 0.05 to < 0.05)     | -35.0<br>(-48.8 to -23.1)                         | -24.3<br>(-39.6 to -11.8)                           |
| Measles                                                                              | < 0.05<br>(0.0 to < 0.05)              | < 0.05<br>(0.0 to < 0.05)                  | < 0.05<br>(0.0 to < 0.05)        | --                                                | --                                                  |
| Varicella and herpes zoster                                                          | 1.8<br>(1.6 to 1.9)                    | 28.9<br>(27.9 to 29.9)                     | 0.1<br>(< 0.05 to 0.1)           | -3.6<br>(-16.8 to 11.2)                           | 0.0<br>(-13.9 to 15.7)                              |
| <b>Neglected tropical diseases and malaria</b>                                       | <b>0.6</b><br>(0.2 to 1.1)             | <b>&lt; 0.05†</b><br>(< 0.05 to < 0.05)    | <b>0.1</b><br>(< 0.05 to 0.2)    | <b>-22.3</b><br>(-97.8 to 1,201.1)                | <b>-18.5</b><br>(-96.9 to 1,136.5)                  |
| Malaria                                                                              | --                                     | --                                         | --                               | --                                                | --                                                  |
| Chagas disease                                                                       | --                                     | --                                         | --                               | --                                                | --                                                  |
| Leishmaniasis                                                                        | --                                     | --                                         | --                               | --                                                | --                                                  |
| Visceral leishmaniasis                                                               | --                                     | --                                         | --                               | --                                                | --                                                  |
| Cutaneous and mucocutaneous leishmaniasis                                            | --                                     | --                                         | --                               | --                                                | --                                                  |
| African trypanosomiasis                                                              | --                                     | --                                         | --                               | --                                                | --                                                  |
| Schistosomiasis                                                                      | --                                     | --                                         | --                               | --                                                | --                                                  |
| Cysticercosis                                                                        | 0.5<br>(< 0.05 to 1.1)                 | --                                         | 0.1<br>(< 0.05 to 0.2)           | --                                                | --                                                  |
| Cystic echinococcosis                                                                | < 0.05<br>(< 0.05 to 0.2)              | < 0.05<br>(< 0.05 to < 0.05)               | < 0.05<br>(< 0.05 to < 0.05)     | -62.6<br>(-96.2 to 220.1)                         | -59.0<br>(-95.9 to 203.7)                           |
| Lymphatic filariasis                                                                 | --                                     | --                                         | --                               | --                                                | --                                                  |
| Onchocerciasis                                                                       | --                                     | --                                         | --                               | --                                                | --                                                  |
| Trachoma                                                                             | --                                     | --                                         | --                               | --                                                | --                                                  |
| Dengue                                                                               | --                                     | --                                         | --                               | --                                                | --                                                  |
| Yellow fever                                                                         | --                                     | --                                         | --                               | --                                                | --                                                  |
| Rabies                                                                               | < 0.05<br>(< 0.05 to < 0.05)           | < 0.05<br>(< 0.05 to < 0.05)               | < 0.05<br>(< 0.05 to < 0.05)     | -43.2<br>(-59.0 to -18.8)                         | -44.6<br>(-60.6 to -21.0)                           |
| Intestinal nematode infections                                                       | --                                     | --                                         | --                               | --                                                | --                                                  |
| Ascariasis                                                                           | --                                     | --                                         | --                               | --                                                | --                                                  |



| Cause                                                                   | Prevalence in thousands (95% UI)              | Incidence in thousands (95% UI)                | YLDs in thousands (95% UI)              |                                                   |                                                     |
|-------------------------------------------------------------------------|-----------------------------------------------|------------------------------------------------|-----------------------------------------|---------------------------------------------------|-----------------------------------------------------|
|                                                                         | 2016 counts                                   | 2016 counts                                    | 2016 counts                             | Percentage change in counts between 2006 and 2016 | Percentage change in age-standardised rates between |
| Trichuriasis                                                            | --                                            | --                                             | --                                      | --                                                | --                                                  |
| Hookworm disease                                                        | --                                            | --                                             | --                                      | --                                                | --                                                  |
| Food-borne trematodiasis                                                | --                                            | --                                             | --                                      | --                                                | --                                                  |
| Leprosy                                                                 | --                                            | --                                             | --                                      | --                                                | --                                                  |
| Ebola virus disease                                                     | --                                            | --                                             | --                                      | --                                                | --                                                  |
| Zika virus disease                                                      | --                                            | --                                             | --                                      | --                                                | --                                                  |
| Guinea worm disease                                                     | --                                            | --                                             | --                                      | --                                                | --                                                  |
| Other neglected tropical diseases                                       | --                                            | --                                             | < 0.05<br>(< 0.05 to < 0.05)            | --                                                | --                                                  |
| <b>Maternal disorders</b>                                               | <b>2.1</b><br><b>(1.8 to 2.6)</b>             | <b>34.5†</b><br><b>(32.2 to 37.6)</b>          | <b>0.1</b><br><b>(0.1 to 0.1)</b>       | <b>-18.2</b><br><b>(-35.8 to 5.2)</b>             | <b>-2.0</b><br><b>(-23.0 to 25.6)</b>               |
| Maternal haemorrhage                                                    | 0.9<br>(0.7 to 1.2)                           | 5.0<br>(4.4 to 5.7)                            | < 0.05<br>(< 0.05 to < 0.05)            | -15.1<br>(-45.3 to 31.7)                          | 3.4<br>(-32.2 to 59.0)                              |
| Maternal sepsis and other pregnancy related infections                  | 0.7<br>(0.6 to 0.9)                           | 2.5<br>(2.2 to 2.9)                            | < 0.05<br>(< 0.05 to < 0.05)            | -21.9<br>(-58.0 to 45.4)                          | -5.0<br>(-49.6 to 79.9)                             |
| Maternal hypertensive disorders                                         | 0.4<br>(0.2 to 0.5)                           | 1.4<br>(1.2 to 1.6)                            | < 0.05<br>(< 0.05 to < 0.05)            | -39.6<br>(-65.0 to 9.2)                           | -29.2<br>(-58.7 to 28.6)                            |
| Maternal obstructed labour and uterine rupture                          | < 0.05<br>(< 0.05 to < 0.05)                  | 1.6<br>(1.4 to 1.8)                            | < 0.05<br>(< 0.05 to < 0.05)            | 24.6<br>(-43.4 to 150.0)                          | 47.3<br>(-31.1 to 193.2)                            |
| Maternal abortion, miscarriage, and ectopic pregnancy                   | 0.2<br>(0.1 to 0.3)                           | 24.0<br>(21.9 to 27.0)                         | < 0.05<br>(< 0.05 to < 0.05)            | 1.5<br>(-43.5 to 77.2)                            | 19.4<br>(-33.9 to 107.9)                            |
| Other maternal disorders                                                | --                                            | --                                             | < 0.05<br>(< 0.05 to < 0.05)            | -23.7<br>(-40.4 to -2.2)                          | -8.0<br>(-27.9 to 17.7)                             |
| <b>Neonatal disorders</b>                                               | <b>16.9</b><br><b>(14.4 to 19.6)</b>          | --                                             | <b>2.9</b><br><b>(2.0 to 4.1)</b>       | <b>-15.9</b><br><b>(-28.1 to 4.5)</b>             | <b>-3.1</b><br><b>(-17.2 to 19.4)</b>               |
| Neonatal preterm birth complications                                    | 10.0<br>(7.7 to 13.1)                         | --                                             | 0.9<br>(0.6 to 1.3)                     | -28.2<br>(-43.6 to -9.6)                          | -15.1<br>(-33.7 to 7.3)                             |
| Neonatal encephalopathy due to birth asphyxia and trauma                | 7.3<br>(5.0 to 10.4)                          | --                                             | 1.3<br>(0.7 to 2.0)                     | -4.7<br>(-29.7 to 84.9)                           | 8.8<br>(-19.9 to 107.5)                             |
| Neonatal sepsis and other neonatal infections                           | 1.2<br>(0.6 to 2.7)                           | --                                             | 0.5<br>(0.2 to 1.2)                     | -15.8<br>(-30.6 to 7.3)                           | -3.7<br>(-20.4 to 20.6)                             |
| Hemolytic disease and other neonatal jaundice                           | 0.6<br>(0.5 to 0.7)                           | --                                             | 0.2<br>(0.1 to 0.2)                     | -16.8<br>(-30.2 to -1.6)                          | -2.4<br>(-19.1 to 17.5)                             |
| Other neonatal disorders                                                | --                                            | --                                             | 0.1<br>(< 0.05 to 0.1)                  | -7.9<br>(-24.2 to 16.5)                           | -9.3<br>(-25.4 to 14.8)                             |
| <b>Nutritional deficiencies</b>                                         | <b>157.1</b><br><b>(136.2 to 178.1)</b>       | <b>3.6†</b><br><b>(2.9 to 4.5)</b>             | <b>2.0</b><br><b>(1.2 to 3.1)</b>       | <b>-27.8</b><br><b>(-35.9 to -18.4)</b>           | <b>-20.1</b><br><b>(-31.1 to -7.8)</b>              |
| Protein-energy malnutrition                                             | 2.6<br>(2.1 to 3.3)                           | 1.1<br>(0.9 to 1.4)                            | 0.1<br>(0.1 to 0.2)                     | -14.1<br>(-42.6 to 31.6)                          | -15.3<br>(-43.5 to 29.6)                            |
| Iodine deficiency                                                       | 26.3<br>(22.8 to 30.4)                        | 0.3<br>(0.3 to 0.4)                            | 0.6<br>(0.4 to 0.8)                     | -6.0<br>(-16.2 to 7.7)                            | 2.3<br>(-8.9 to 16.2)                               |
| Vitamin A deficiency                                                    | 2.5<br>(1.7 to 3.6)                           | 2.1<br>(1.4 to 3.0)                            | --                                      | --                                                | --                                                  |
| Iron-deficiency anaemia                                                 | 116.3<br>(95.7 to 139.1)                      | --                                             | 1.3<br>(0.7 to 2.1)                     | -35.8<br>(-46.0 to -23.7)                         | -26.0<br>(-39.0 to -11.3)                           |
| Other nutritional deficiencies                                          | --                                            | --                                             | < 0.05<br>(< 0.05 to < 0.05)            | -14.5<br>(-43.4 to 31.7)                          | -15.8<br>(-44.3 to 29.8)                            |
| <b>Other communicable, maternal, neonatal, and nutritional diseases</b> | <b>521.5</b><br><b>(484.0 to 564.9)</b>       | <b>152.0</b><br><b>(128.4 to 177.2)</b>        | <b>0.7</b><br><b>(0.5 to 1.1)</b>       | <b>-12.9</b><br><b>(-18.1 to -7.5)</b>            | <b>-1.6</b><br><b>(-7.0 to 3.6)</b>                 |
| Sexually transmitted diseases excluding HIV                             | 418.1<br>(385.0 to 462.8)                     | 116.2<br>(97.6 to 140.4)                       | 0.6<br>(0.4 to 1.0)                     | -13.9<br>(-19.9 to -7.8)                          | -2.2<br>(-8.3 to 3.4)                               |
| Syphilis                                                                | 5.9<br>(4.6 to 7.4)                           | 4.1<br>(2.9 to 5.5)                            | 0.1<br>(0.1 to 0.2)                     | 5.7<br>(-11.6 to 30.8)                            | 4.6<br>(-11.2 to 26.1)                              |
| Chlamydial infection                                                    | 26.0<br>(20.6 to 32.4)                        | 20.1<br>(16.0 to 25.3)                         | 0.1<br>(0.1 to 0.2)                     | -17.5<br>(-26.5 to -8.0)                          | -3.2<br>(-13.6 to 8.3)                              |
| Gonococcal infection                                                    | 12.7<br>(8.0 to 18.4)                         | 41.4<br>(23.8 to 64.3)                         | 0.1<br>(< 0.05 to 0.1)                  | -25.4<br>(-37.3 to -11.8)                         | -3.8<br>(-18.1 to 11.8)                             |
| Trichomoniasis                                                          | 34.8<br>(30.3 to 39.9)                        | 28.7<br>(24.7 to 33.0)                         | < 0.05<br>(< 0.05 to 0.1)               | -14.0<br>(-21.1 to -6.9)                          | -1.4<br>(-9.5 to 6.8)                               |
| Genital herpes                                                          | 348.4<br>(301.4 to 407.2)                     | 12.5<br>(10.6 to 15.3)                         | 0.1<br>(< 0.05 to 0.2)                  | -8.0<br>(-15.7 to -0.4)                           | -0.7<br>(-8.9 to 8.3)                               |
| Other sexually transmitted diseases                                     | 8.8<br>(7.2 to 10.5)                          | 9.5<br>(8.0 to 11.3)                           | 0.2<br>(0.1 to 0.3)                     | -19.8<br>(-27.8 to -10.7)                         | -4.4<br>(-13.6 to 6.0)                              |
| Hepatitis                                                               | 137.9<br>(120.5 to 159.6)                     | 35.7<br>(23.4 to 43.1)                         | < 0.05<br>(< 0.05 to < 0.05)            | -4.2<br>(-20.4 to 13.6)                           | 2.4<br>(-18.4 to 26.2)                              |
| Acute hepatitis A                                                       | 2.0<br>(1.1 to 2.6)                           | 26.3<br>(14.1 to 33.6)                         | < 0.05<br>(< 0.05 to < 0.05)            | -8.8<br>(-35.8 to 31.1)                           | 0.5<br>(-33.8 to 53.6)                              |
| Hepatitis B                                                             | 82.5<br>(67.4 to 102.3)                       | 7.9<br>(6.2 to 10.0)                           | < 0.05<br>(< 0.05 to < 0.05)            | -1.1<br>(-18.9 to 19.4)                           | 3.5<br>(-14.1 to 23.8)                              |
| Hepatitis C                                                             | 53.4<br>(47.9 to 59.1)                        | 0.9<br>(0.8 to 1.0)                            | < 0.05<br>(< 0.05 to < 0.05)            | 4.6<br>(-17.5 to 31.8)                            | 2.9<br>(-22.9 to 36.7)                              |
| Acute hepatitis E                                                       | < 0.05<br>(< 0.05 to 0.1)                     | 0.6<br>(0.5 to 0.8)                            | < 0.05<br>(< 0.05 to < 0.05)            | 1.7<br>(-10.3 to 15.1)                            | 11.1<br>(1.7 to 21.2)                               |
| Other infectious diseases                                               | 4.2<br>(3.3 to 5.2)                           | < 0.05<br>(< 0.05 to < 0.05)                   | 0.1<br>(0.1 to 0.1)                     | -8.2<br>(-19.4 to 4.5)                            | 0.7<br>(-13.7 to 18.0)                              |
| <b>Non-communicable diseases</b>                                        | <b>1,834.2</b><br><b>(1,825.9 to 1,842.4)</b> | <b>5,994.6†</b><br><b>(5,704.8 to 6,303.1)</b> | <b>234.8</b><br><b>(175.1 to 302.2)</b> | <b>-5.3</b><br><b>(-6.8 to -3.8)</b>              | <b>-0.5</b><br><b>(-2.1 to 1.2)</b>                 |
| <b>Neoplasms</b>                                                        | <b>32.8</b><br><b>(31.2 to 34.2)</b>          | <b>11.0</b><br><b>(9.9 to 11.9)</b>            | <b>3.4</b><br><b>(2.5 to 4.4)</b>       | <b>2.9</b><br><b>(-5.4 to 13.2)</b>               | <b>0.7</b><br><b>(-7.5 to 11.2)</b>                 |
| Lip and oral cavity cancer                                              | 0.6<br>(0.5 to 0.6)                           | 0.2<br>(0.1 to 0.2)                            | 0.1<br>(< 0.05 to 0.1)                  | 7.7<br>(-14.0 to 32.8)                            | 5.2<br>(-16.1 to 30.0)                              |
| Nasopharynx cancer                                                      | < 0.05<br>(< 0.05 to < 0.05)                  | < 0.05<br>(< 0.05 to < 0.05)                   | < 0.05<br>(< 0.05 to < 0.05)            | -29.5<br>(-40.1 to -14.1)                         | -26.0<br>(-37.6 to -9.0)                            |
| Other pharynx cancer                                                    | 0.3<br>(0.3 to 0.4)                           | 0.1<br>(0.1 to 0.1)                            | < 0.05<br>(< 0.05 to < 0.05)            | 40.5<br>(12.5 to 72.6)                            | 42.4<br>(13.6 to 75.2)                              |
| Oesophageal cancer                                                      | 0.1<br>(0.1 to 0.2)                           | 0.1<br>(0.1 to 0.1)                            | < 0.05<br>(< 0.05 to < 0.05)            | -0.1<br>(-28.4 to 43.9)                           | -1.6<br>(-30.7 to 44.0)                             |
| Stomach cancer                                                          | 1.2<br>(1.1 to 1.4)                           | 0.6<br>(0.6 to 0.7)                            | 0.2<br>(0.1 to 0.2)                     | -13.6<br>(-27.8 to 2.8)                           | -18.0<br>(-31.1 to -4.0)                            |
| Colon and rectum cancer                                                 | 3.9<br>(3.6 to 4.4)                           | 1.1<br>(1.0 to 1.3)                            | 0.4<br>(0.3 to 0.5)                     | 1.6<br>(-12.6 to 20.1)                            | -4.1<br>(-17.9 to 13.7)                             |
| Liver cancer                                                            | 0.1<br>(0.1 to 0.1)                           | 0.2<br>(0.1 to 0.2)                            | < 0.05<br>(< 0.05 to 0.1)               | 24.7<br>(5.7 to 46.6)                             | 19.1<br>(1.5 to 38.8)                               |
| Liver cancer due to hepatitis B                                         | 0.1<br>(0.1 to 0.1)                           | 0.1<br>(< 0.05 to 0.1)                         | < 0.05<br>(< 0.05 to < 0.05)            | 21.6<br>(3.2 to 41.3)                             | 17.4<br>(-0.6 to 35.9)                              |



| Cause                                              | Prevalence in thousands (95% UI)        | Incidence in thousands (95% UI)       | YLDs in thousands (95% UI)           |                                                   |                                                     |
|----------------------------------------------------|-----------------------------------------|---------------------------------------|--------------------------------------|---------------------------------------------------|-----------------------------------------------------|
|                                                    | 2016 counts                             | 2016 counts                           | 2016 counts                          | Percentage change in counts between 2006 and 2016 | Percentage change in age-standardised rates between |
| Liver cancer due to hepatitis C                    | < 0.05<br>(< 0.05 to < 0.05)            | < 0.05<br>(< 0.05 to < 0.05)          | < 0.05<br>(< 0.05 to < 0.05)         | 29.6<br>(6.1 to 59.0)                             | 18.8<br>(-2.2 to 45.0)                              |
| Liver cancer due to alcohol use                    | 0.1<br>(0.1 to 0.1)                     | 0.1<br>(0.1 to 0.1)                   | < 0.05<br>(< 0.05 to < 0.05)         | 30.6<br>(9.0 to 57.0)                             | 25.3<br>(5.2 to 49.4)                               |
| Liver cancer due to other causes                   | < 0.05<br>(< 0.05 to < 0.05)            | < 0.05<br>(< 0.05 to < 0.05)          | < 0.05<br>(< 0.05 to < 0.05)         | 14.4<br>(-2.6 to 31.4)                            | 9.7<br>(-7.4 to 24.7)                               |
| Gallbladder and biliary tract cancer               | < 0.05<br>(< 0.05 to < 0.05)            | 0.1<br>(< 0.05 to 0.1)                | < 0.05<br>(< 0.05 to < 0.05)         | -17.3<br>(-24.3 to -5.5)                          | -23.5<br>(-29.9 to -12.2)                           |
| Pancreatic cancer                                  | 0.3<br>(0.3 to 0.4)                     | 0.4<br>(0.3 to 0.4)                   | 0.1<br>(0.1 to 0.1)                  | 5.6<br>(-17.7 to 30.9)                            | -0.6<br>(-21.6 to 20.7)                             |
| Larynx cancer                                      | 0.5<br>(0.5 to 0.6)                     | 0.1<br>(0.1 to 0.2)                   | 0.1<br>(< 0.05 to 0.1)               | -6.0<br>(-26.1 to 20.1)                           | -6.4<br>(-26.6 to 17.8)                             |
| Tracheal, bronchus, and lung cancer                | 1.7<br>(1.4 to 1.9)                     | 1.1<br>(1.0 to 1.3)                   | 0.3<br>(0.2 to 0.4)                  | -12.0<br>(-26.5 to 4.8)                           | -13.8<br>(-28.4 to 3.6)                             |
| Malignant skin melanoma                            | 1.4<br>(1.0 to 1.6)                     | 0.3<br>(0.2 to 0.4)                   | 0.1<br>(0.1 to 0.1)                  | 17.7<br>(-7.1 to 42.6)                            | 17.1<br>(-7.0 to 40.8)                              |
| Non-melanoma skin cancer                           | 0.4<br>(0.2 to 0.8)                     | 1.0<br>(0.6 to 1.5)                   | < 0.05<br>(< 0.05 to < 0.05)         | 146.4<br>(26.8 to 445.3)                          | 113.0<br>(12.5 to 367.2)                            |
| Non-melanoma skin cancer (squamous-cell carcinoma) | 0.3<br>(0.1 to 0.7)                     | 0.3<br>(0.2 to 0.6)                   | < 0.05<br>(< 0.05 to < 0.05)         | 149.3<br>(21.9 to 472.8)                          | 113.0<br>(6.6 to 387.4)                             |
| Non-melanoma skin cancer (basal-cell carcinoma)    | 0.1<br>(< 0.05 to 0.2)                  | 0.7<br>(0.3 to 1.2)                   | < 0.05<br>(< 0.05 to < 0.05)         | 111.7<br>(4.8 to 280.2)                           | 112.7<br>(8.6 to 263.6)                             |
| Breast cancer                                      | 4.5<br>(4.0 to 5.4)                     | 1.0<br>(0.8 to 1.1)                   | 0.4<br>(0.3 to 0.6)                  | -8.7<br>(-22.0 to 7.8)                            | -9.8<br>(-22.6 to 6.6)                              |
| Cervical cancer                                    | 0.6<br>(0.5 to 0.7)                     | 0.2<br>(0.1 to 0.2)                   | 0.1<br>(< 0.05 to 0.1)               | -31.8<br>(-44.0 to -13.1)                         | -31.3<br>(-43.6 to -12.9)                           |
| Uterine cancer                                     | 3.5<br>(2.9 to 4.4)                     | 0.8<br>(0.6 to 0.9)                   | 0.3<br>(0.2 to 0.4)                  | 22.2<br>(-4.8 to 62.5)                            | 20.6<br>(-6.3 to 61.2)                              |
| Ovarian cancer                                     | 0.8<br>(0.6 to 1.0)                     | 0.3<br>(0.2 to 0.3)                   | 0.1<br>(0.1 to 0.2)                  | -9.4<br>(-40.2 to 25.2)                           | -9.7<br>(-41.0 to 25.6)                             |
| Prostate cancer                                    | 4.3<br>(2.2 to 5.2)                     | 1.1<br>(0.6 to 1.2)                   | 0.4<br>(0.2 to 0.6)                  | 11.3<br>(-10.7 to 35.3)                           | 7.5<br>(-13.2 to 31.8)                              |
| Testicular cancer                                  | 0.2<br>(0.2 to 0.3)                     | < 0.05<br>(< 0.05 to 0.1)             | < 0.05<br>(< 0.05 to < 0.05)         | -18.5<br>(-42.3 to 16.3)                          | -7.9<br>(-36.1 to 35.1)                             |
| Kidney cancer                                      | 2.6<br>(2.2 to 3.0)                     | 0.7<br>(0.6 to 0.7)                   | 0.2<br>(0.1 to 0.3)                  | 6.9<br>(-15.0 to 29.5)                            | 6.7<br>(-15.5 to 28.6)                              |
| Bladder cancer                                     | 1.6<br>(1.4 to 1.7)                     | 0.4<br>(0.4 to 0.5)                   | 0.1<br>(0.1 to 0.2)                  | 11.0<br>(-5.2 to 27.8)                            | 4.3<br>(-10.3 to 20.2)                              |
| Brain and nervous system cancer                    | 0.5<br>(0.3 to 0.6)                     | 0.2<br>(0.1 to 0.2)                   | 0.1<br>(< 0.05 to 0.1)               | 3.9<br>(-20.5 to 23.2)                            | 6.1<br>(-18.7 to 25.3)                              |
| Thyroid cancer                                     | 0.9<br>(0.8 to 1.0)                     | 0.2<br>(0.1 to 0.2)                   | 0.1<br>(< 0.05 to 0.1)               | 6.5<br>(-13.8 to 37.3)                            | 8.3<br>(-12.3 to 39.6)                              |
| Mesothelioma                                       | < 0.05<br>(< 0.05 to < 0.05)            | < 0.05<br>(< 0.05 to < 0.05)          | < 0.05<br>(< 0.05 to < 0.05)         | -8.8<br>(-20.7 to -0.7)                           | -9.7<br>(-22.1 to -1.0)                             |
| Hodgkin lymphoma                                   | 0.2<br>(0.2 to 0.3)                     | 0.1<br>(< 0.05 to 0.1)                | < 0.05<br>(< 0.05 to < 0.05)         | -5.0<br>(-27.0 to 16.5)                           | 10.2<br>(-16.0 to 37.4)                             |
| Non-Hodgkin's lymphoma                             | 1.0<br>(0.8 to 1.2)                     | 0.3<br>(0.2 to 0.3)                   | 0.1<br>(0.1 to 0.1)                  | 30.9<br>(4.2 to 57.6)                             | 29.9<br>(2.9 to 54.8)                               |
| Multiple myeloma                                   | 0.4<br>(0.2 to 0.4)                     | 0.1<br>(0.1 to 0.1)                   | 0.1<br>(< 0.05 to 0.1)               | 27.2<br>(-14.8 to 77.5)                           | 25.1<br>(-15.4 to 71.6)                             |
| Leukaemia                                          | 1.2<br>(1.1 to 1.4)                     | 0.3<br>(0.3 to 0.4)                   | 0.1<br>(0.1 to 0.2)                  | 29.3<br>(5.7 to 58.2)                             | 29.1<br>(5.5 to 59.4)                               |
| Acute lymphoid leukaemia                           | 0.1<br>(0.1 to 0.2)                     | < 0.05<br>(< 0.05 to < 0.05)          | < 0.05<br>(< 0.05 to < 0.05)         | 58.3<br>(14.3 to 115.2)                           | 78.6<br>(19.6 to 162.0)                             |
| Chronic lymphoid leukaemia                         | 0.8<br>(0.6 to 0.9)                     | 0.2<br>(0.1 to 0.2)                   | 0.1<br>(0.1 to 0.1)                  | 29.1<br>(-1.5 to 68.5)                            | 23.2<br>(-4.4 to 60.5)                              |
| Acute myeloid leukaemia                            | 0.1<br>(0.1 to 0.1)                     | 0.1<br>(< 0.05 to 0.1)                | < 0.05<br>(< 0.05 to < 0.05)         | 51.8<br>(18.0 to 89.7)                            | 47.6<br>(10.6 to 92.6)                              |
| Chronic myeloid leukaemia                          | 0.1<br>(0.1 to 0.1)                     | < 0.05<br>(< 0.05 to < 0.05)          | < 0.05<br>(< 0.05 to < 0.05)         | 1.3<br>(-17.6 to 25.3)                            | -1.6<br>(-19.6 to 20.5)                             |
| Other leukaemia                                    | 0.2<br>(0.1 to 0.2)                     | < 0.05<br>(< 0.05 to 0.1)             | < 0.05<br>(< 0.05 to < 0.05)         | 16.2<br>(-7.5 to 49.1)                            | 8.6<br>(-13.1 to 39.6)                              |
| Other neoplasms                                    | 0.6<br>(0.5 to 0.7)                     | 0.2<br>(0.2 to 0.2)                   | 0.1<br>(< 0.05 to 0.1)               | -0.6<br>(-21.8 to 19.0)                           | -4.4<br>(-24.6 to 12.2)                             |
| <b>Cardiovascular diseases</b>                     | <b>241.1</b><br><b>(231.9 to 250.1)</b> | <b>36.6†</b><br><b>(34.7 to 38.5)</b> | <b>22.8</b><br><b>(16.5 to 28.8)</b> | <b>8.1</b><br><b>(1.2 to 15.9)</b>                | <b>0.6</b><br><b>(-5.4 to 6.8)</b>                  |
| Rheumatic heart disease                            | 0.5<br>(0.5 to 0.6)                     | 0.1<br>(0.1 to 0.1)                   | < 0.05<br>(< 0.05 to 0.1)            | -12.7<br>(-30.5 to 8.2)                           | -9.5<br>(-26.3 to 10.0)                             |
| Ischaemic heart disease                            | 108.6<br>(100.7 to 117.5)               | 14.9<br>(13.7 to 16.1)                | 5.3<br>(3.7 to 7.1)                  | 11.5<br>(7.1 to 16.0)                             | 4.5<br>(0.6 to 8.7)                                 |
| Cerebrovascular disease                            | 68.5<br>(62.4 to 74.3)                  | 12.2‡<br>(10.8 to 13.5)               | 13.8<br>(9.6 to 17.6)                | 5.8<br>(-5.0 to 18.7)                             | -2.1<br>(-11.3 to 8.4)                              |
| Ischaemic stroke                                   | 63.1<br>(55.2 to 71.1)                  | 10.1‡<br>(8.8 to 11.4)                | 12.4<br>(8.6 to 15.9)                | 7.0<br>(-5.0 to 21.4)                             | -1.5<br>(-11.7 to 10.2)                             |
| Hemorrhagic stroke                                 | 7.3<br>(6.4 to 8.3)                     | 2.1‡<br>(1.9 to 2.4)                  | 1.4<br>(1.0 to 1.9)                  | -3.6<br>(-15.2 to 8.3)                            | -6.2<br>(-17.2 to 4.9)                              |
| Hypertensive heart disease                         | 4.1<br>(3.4 to 5.0)                     | --                                    | 0.3<br>(0.2 to 0.5)                  | 29.1<br>(13.4 to 47.1)                            | 14.2<br>(0.7 to 29.0)                               |
| Cardiomyopathy and myocarditis                     | 4.8<br>(4.3 to 5.5)                     | 1.0†<br>(0.8 to 1.1)                  | 0.4<br>(0.3 to 0.6)                  | 9.3<br>(-1.7 to 23.0)                             | 13.4<br>(2.1 to 27.8)                               |
| Myocarditis                                        | 0.3<br>(0.2 to 0.3)                     | 1.0<br>(0.8 to 1.1)                   | < 0.05<br>(< 0.05 to < 0.05)         | -6.9<br>(-22.0 to 11.1)                           | 1.4<br>(-10.2 to 14.6)                              |
| Alcoholic cardiomyopathy                           | 1.2<br>(1.0 to 1.4)                     | --                                    | 0.1<br>(0.1 to 0.1)                  | 12.5<br>(-7.4 to 37.0)                            | 17.7<br>(-4.0 to 44.5)                              |
| Other cardiomyopathy                               | 3.4<br>(3.0 to 4.0)                     | --                                    | 0.3<br>(0.2 to 0.4)                  | 9.2<br>(-4.0 to 24.7)                             | 13.0<br>(-0.9 to 29.1)                              |
| Atrial fibrillation and flutter                    | 27.6<br>(23.8 to 32.4)                  | 2.1<br>(1.8 to 2.5)                   | 2.1<br>(1.4 to 3.0)                  | 11.0<br>(4.1 to 19.0)                             | 0.8<br>(-5.7 to 7.3)                                |
| Peripheral vascular disease                        | 68.3<br>(59.2 to 79.2)                  | 6.0<br>(5.2 to 7.1)                   | 0.3<br>(0.1 to 0.6)                  | 3.7<br>(-5.6 to 14.1)                             | -5.8<br>(-12.7 to 1.9)                              |
| Endocarditis                                       | 0.1<br>(0.1 to 0.1)                     | 0.4<br>(0.4 to 0.4)                   | < 0.05<br>(< 0.05 to < 0.05)         | 14.9<br>(7.2 to 23.6)                             | 8.8<br>(2.8 to 15.1)                                |
| Other cardiovascular and circulatory diseases      | 11.6<br>(9.5 to 13.9)                   | --                                    | 0.6<br>(0.4 to 0.8)                  | 18.4<br>(4.9 to 32.9)                             | 15.7<br>(3.1 to 29.1)                               |
| <b>Chronic respiratory diseases</b>                | <b>189.3</b><br><b>(181.5 to 197.1)</b> | <b>23.6†</b><br><b>(22.3 to 24.9)</b> | <b>6.2</b><br><b>(4.6 to 8.1)</b>    | <b>-2.6</b><br><b>(-7.2 to 2.7)</b>               | <b>4.6</b><br><b>(-0.0 to 9.3)</b>                  |
| Chronic obstructive pulmonary disease              | 79.9<br>(74.9 to 86.9)                  | 4.2<br>(3.9 to 4.5)                   | 1.5<br>(1.2 to 1.9)                  | 3.6<br>(-11.9 to 20.9)                            | 3.6<br>(-11.0 to 21.1)                              |
| Pneumoconiosis                                     | 0.3<br>(0.2 to 0.3)                     | < 0.05<br>(< 0.05 to < 0.05)          | < 0.05<br>(< 0.05 to 0.1)            | 0.7<br>(-15.2 to 19.5)                            | -0.2<br>(-15.5 to 18.0)                             |
| Silicosis                                          | < 0.05<br>(< 0.05 to 0.1)               | < 0.05<br>(< 0.05 to < 0.05)          | < 0.05<br>(< 0.05 to < 0.05)         | -10.7<br>(-16.4 to -4.5)                          | -9.9<br>(-15.2 to -4.1)                             |

| Cause                                                          | Prevalence in thousands (95% UI)        | Incidence in thousands (95% UI)          | YLDs in thousands (95% UI)           |                                                   |                                                     |
|----------------------------------------------------------------|-----------------------------------------|------------------------------------------|--------------------------------------|---------------------------------------------------|-----------------------------------------------------|
|                                                                | 2016 counts                             | 2016 counts                              | 2016 counts                          | Percentage change in counts between 2006 and 2016 | Percentage change in age-standardised rates between |
| Asbestosis                                                     | 0.1<br>(0.1 to 0.1)                     | < 0.05<br>(< 0.05 to < 0.05)             | < 0.05<br>(< 0.05 to < 0.05)         | -0.4<br>(-6.6 to 5.9)                             | 0.8<br>(-5.9 to 7.1)                                |
| Coal workers pneumoconiosis                                    | --                                      | --                                       | --                                   | --                                                | --                                                  |
| Other pneumoconiosis                                           | 0.1<br>(0.1 to 0.2)                     | < 0.05<br>(< 0.05 to < 0.05)             | < 0.05<br>(< 0.05 to < 0.05)         | 5.9<br>(-22.2 to 45.2)                            | 3.2<br>(-23.7 to 41.1)                              |
| Asthma                                                         | 114.3<br>(107.2 to 122.0)               | 19.3<br>(18.1 to 20.7)                   | 4.4<br>(2.9 to 6.2)                  | -4.5<br>(-8.6 to -0.1)                            | 4.7<br>(0.2 to 9.1)                                 |
| Interstitial lung disease and pulmonary sarcoidosis            | 2.3<br>(2.1 to 2.5)                     | 0.1<br>(0.1 to 0.1)                      | 0.2<br>(0.1 to 0.3)                  | -8.0<br>(-20.5 to 7.0)                            | -4.5<br>(-17.0 to 10.5)                             |
| Other chronic respiratory diseases                             | --                                      | --                                       | 0.1<br>(0.1 to 0.1)                  | 19.1<br>(8.6 to 32.3)                             | 36.5<br>(25.5 to 50.0)                              |
| <b>Cirrhosis and other chronic liver diseases</b>              | <b>19.6</b><br><b>(18.6 to 20.6)</b>    | <b>0.5</b><br><b>(0.5 to 0.6)</b>        | <b>0.5</b><br><b>(0.4 to 0.8)</b>    | <b>0.7</b><br><b>(-8.5 to 10.5)</b>               | <b>8.6</b><br><b>(-1.7 to 19.4)</b>                 |
| Cirrhosis and other chronic liver diseases due to hepatitis B  | 3.6<br>(3.2 to 4.0)                     | 0.1<br>(0.1 to 0.1)                      | 0.1<br>(0.1 to 0.1)                  | 2.6<br>(-18.1 to 27.3)                            | 8.7<br>(-13.6 to 35.6)                              |
| Cirrhosis and other chronic liver diseases due to hepatitis C  | 4.4<br>(4.0 to 4.8)                     | 0.1<br>(0.1 to 0.1)                      | 0.1<br>(0.1 to 0.2)                  | 1.7<br>(-16.8 to 24.0)                            | 7.9<br>(-11.8 to 31.7)                              |
| Cirrhosis and other chronic liver diseases due to alcohol use  | 6.8<br>(6.2 to 7.4)                     | 0.2<br>(0.2 to 0.2)                      | 0.2<br>(0.1 to 0.2)                  | 7.5<br>(-7.7 to 27.8)                             | 12.2<br>(-4.2 to 35.1)                              |
| Cirrhosis and other chronic liver diseases due to other causes | 4.9<br>(4.5 to 5.3)                     | 0.1<br>(0.1 to 0.1)                      | 0.2<br>(0.1 to 0.2)                  | -6.8<br>(-20.5 to 8.7)                            | 6.6<br>(-10.0 to 25.0)                              |
| <b>Digestive diseases</b>                                      | <b>117.9</b><br><b>(110.3 to 125.5)</b> | <b>118.6†</b><br><b>(113.4 to 124.2)</b> | <b>3.3</b><br><b>(2.3 to 4.5)</b>    | <b>-2.9</b><br><b>(-10.4 to 5.6)</b>              | <b>4.4</b><br><b>(-4.2 to 14.3)</b>                 |
| Peptic ulcer disease                                           | 38.8<br>(34.9 to 43.3)                  | 3.2<br>(2.9 to 3.5)                      | 0.6<br>(0.4 to 1.0)                  | 21.1<br>(-0.5 to 48.2)                            | 33.5<br>(8.2 to 66.0)                               |
| Gastritis and duodenitis                                       | 54.9<br>(48.3 to 61.7)                  | 39.3<br>(35.5 to 43.3)                   | 0.7<br>(0.5 to 1.1)                  | 6.4<br>(-9.7 to 25.1)                             | 19.8<br>(-0.0 to 42.9)                              |
| Appendicitis                                                   | 0.1<br>(0.1 to 0.1)                     | 3.6<br>(3.4 to 3.9)                      | < 0.05<br>(< 0.05 to 0.1)            | -18.9<br>(-37.9 to 10.9)                          | 1.5<br>(-27.1 to 45.6)                              |
| Paralytic ileus and intestinal obstruction                     | < 0.05<br>(< 0.05 to < 0.05)            | 0.8<br>(0.8 to 0.9)                      | < 0.05<br>(< 0.05 to < 0.05)         | 1.1<br>(-3.4 to 5.6)                              | 2.5<br>(-1.7 to 6.9)                                |
| Inguinal, femoral, and abdominal hernia                        | 12.7<br>(11.9 to 13.7)                  | 29.1<br>(26.0 to 32.6)                   | 0.9<br>(0.6 to 1.2)                  | -19.2<br>(-26.9 to -11.5)                         | -15.2<br>(-23.1 to -7.3)                            |
| Inflammatory bowel disease                                     | 3.7<br>(3.4 to 4.0)                     | 1.6<br>(1.5 to 1.6)                      | 0.5<br>(0.3 to 0.7)                  | -8.2<br>(-17.6 to 2.2)                            | -3.2<br>(-13.0 to 8.3)                              |
| Vascular intestinal disorders                                  | 0.1<br>(0.1 to 0.1)                     | 0.4<br>(0.4 to 0.5)                      | < 0.05<br>(< 0.05 to < 0.05)         | 2.8<br>(-24.5 to 41.2)                            | -1.3<br>(-21.6 to 24.3)                             |
| Gallbladder and biliary diseases                               | 9.8<br>(8.8 to 10.8)                    | 36.4<br>(35.0 to 37.9)                   | 0.1<br>(0.1 to 0.2)                  | -1.8<br>(-18.3 to 17.5)                           | 1.2<br>(-15.4 to 20.9)                              |
| Pancreatitis                                                   | 0.5<br>(0.4 to 0.5)                     | 4.1<br>(3.7 to 4.5)                      | 0.1<br>(< 0.05 to 0.1)               | 0.5<br>(-20.8 to 23.6)                            | 4.3<br>(-13.9 to 23.2)                              |
| Other digestive diseases                                       | --                                      | --                                       | 0.3<br>(0.2 to 0.4)                  | 4.6<br>(-2.8 to 13.2)                             | 8.8<br>(0.0 to 19.1)                                |
| <b>Neurological disorders</b>                                  | <b>808.7</b><br><b>(778.8 to 843.3)</b> | <b>348.2</b><br><b>(301.0 to 404.4)</b>  | <b>24.5</b><br><b>(16.4 to 33.6)</b> | <b>-9.5</b><br><b>(-18.7 to 0.2)</b>              | <b>-1.3</b><br><b>(-12.8 to 10.1)</b>               |
| Alzheimer's disease and other dementias                        | 20.7<br>(17.2 to 24.9)                  | 3.6<br>(2.9 to 4.4)                      | 3.1<br>(2.1 to 4.1)                  | 24.9<br>(16.9 to 33.4)                            | -0.8<br>(-6.1 to 4.9)                               |
| Parkinson's disease                                            | 4.6<br>(3.6 to 5.8)                     | 0.5<br>(0.4 to 0.6)                      | 0.5<br>(0.3 to 0.7)                  | 13.5<br>(2.0 to 27.6)                             | 3.7<br>(-6.5 to 16.2)                               |
| Epilepsy                                                       | 4.8<br>(0.9 to 9.7)                     | 0.4<br>(0.1 to 0.8)                      | 1.2<br>(0.2 to 3.1)                  | -23.3<br>(-88.3 to 380.5)                         | -14.3<br>(-86.8 to 437.6)                           |
| Multiple sclerosis                                             | 1.3<br>(1.2 to 1.4)                     | < 0.05<br>(< 0.05 to < 0.05)             | 0.3<br>(0.2 to 0.4)                  | 4.3<br>(-12.2 to 23.4)                            | 11.6<br>(-6.0 to 31.7)                              |
| Motor neuron disease                                           | 0.1<br>(0.1 to 0.1)                     | < 0.05<br>(< 0.05 to < 0.05)             | < 0.05<br>(< 0.05 to < 0.05)         | -1.6<br>(-5.1 to 2.2)                             | 5.3<br>(1.6 to 9.5)                                 |
| Migraine                                                       | 342.8<br>(321.1 to 365.1)               | 32.6<br>(29.4 to 36.3)                   | 16.0<br>(10.4 to 22.6)               | -13.3<br>(-16.6 to -9.8)                          | -0.8<br>(-4.4 to 3.1)                               |
| Tension-type headache                                          | 583.3<br>(522.9 to 646.7)               | 311.0<br>(263.6 to 367.2)                | 3.0<br>(1.8 to 4.5)                  | -11.5<br>(-17.2 to -6.0)                          | -0.4<br>(-5.9 to 5.2)                               |
| Other neurological disorders                                   | < 0.05<br>(< 0.05 to < 0.05)            | < 0.05<br>(< 0.05 to < 0.05)             | 0.3<br>(0.1 to 0.6)                  | -8.4<br>(-65.8 to 154.4)                          | 5.8<br>(-66.9 to 245.6)                             |
| <b>Mental and substance use disorders</b>                      | <b>328.9</b><br><b>(319.0 to 339.0)</b> | <b>145.8†</b><br><b>(136.7 to 155.3)</b> | <b>45.4</b><br><b>(33.1 to 58.7)</b> | <b>-12.4</b><br><b>(-14.6 to -10.0)</b>           | <b>-0.7</b><br><b>(-3.0 to 1.9)</b>                 |
| Schizophrenia                                                  | 4.7<br>(4.1 to 5.3)                     | 0.2<br>(0.2 to 0.3)                      | 3.0<br>(2.2 to 3.7)                  | -8.1<br>(-16.0 to 0.3)                            | 1.7<br>(-7.2 to 11.2)                               |
| Alcohol use disorders                                          | 75.7<br>(68.3 to 83.5)                  | 37.1<br>(32.6 to 41.9)                   | 7.5<br>(5.2 to 10.1)                 | -15.0<br>(-22.1 to -7.7)                          | -3.3<br>(-11.3 to 4.9)                              |
| Drug use disorders                                             | 18.2<br>(17.0 to 19.8)                  | 2.0<br>(1.9 to 2.2)                      | 4.5<br>(3.2 to 5.8)                  | -10.0<br>(-18.7 to 2.1)                           | 6.8<br>(-4.1 to 21.9)                               |
| Opioid use disorders                                           | 8.0<br>(7.1 to 9.1)                     | 0.9<br>(0.8 to 1.1)                      | 3.3<br>(2.3 to 4.2)                  | -2.1<br>(-13.5 to 15.1)                           | 12.9<br>(-1.4 to 35.5)                              |
| Cocaine use disorders                                          | 1.1<br>(0.9 to 1.2)                     | 0.1<br>(0.1 to 0.1)                      | 0.1<br>(0.1 to 0.2)                  | -18.8<br>(-35.7 to 3.5)                           | -1.1<br>(-23.4 to 26.6)                             |
| Amphetamine use disorders                                      | 3.3<br>(2.7 to 4.0)                     | 0.2<br>(0.1 to 0.2)                      | 0.4<br>(0.3 to 0.7)                  | -28.0<br>(-39.9 to -11.9)                         | -4.5<br>(-20.4 to 16.6)                             |
| Cannabis use disorders                                         | 4.7<br>(4.2 to 5.3)                     | 0.6<br>(0.5 to 0.7)                      | 0.1<br>(0.1 to 0.2)                  | -32.5<br>(-43.1 to -21.1)                         | -9.0<br>(-24.1 to 8.2)                              |
| Other drug use disorders                                       | 1.7<br>(1.5 to 1.8)                     | 0.3<br>(0.2 to 0.3)                      | 0.6<br>(0.4 to 0.8)                  | -22.6<br>(-37.2 to -3.5)                          | -3.9<br>(-22.2 to 20.5)                             |
| Depressive disorders                                           | 91.9<br>(87.0 to 97.5)                  | 91.2<br>(83.2 to 99.3)                   | 14.6<br>(10.2 to 19.7)               | -10.0<br>(-14.4 to -5.9)                          | -3.3<br>(-7.8 to 0.7)                               |
| Major depressive disorder                                      | 55.6<br>(50.9 to 60.4)                  | 85.7<br>(77.8 to 93.7)                   | 11.0<br>(7.6 to 14.7)                | -10.8<br>(-16.6 to -5.3)                          | -4.3<br>(-10.0 to 1.0)                              |
| Dysthymia                                                      | 38.7<br>(33.8 to 44.2)                  | 5.5<br>(4.8 to 6.2)                      | 3.6<br>(2.5 to 5.3)                  | -7.7<br>(-10.7 to -4.5)                           | -0.4<br>(-3.5 to 2.9)                               |
| Bipolar disorder                                               | 13.0<br>(11.3 to 15.0)                  | 0.9<br>(0.8 to 1.0)                      | 2.6<br>(1.6 to 3.9)                  | -15.0<br>(-20.0 to -10.0)                         | -0.2<br>(-6.0 to 5.9)                               |
| Anxiety disorders                                              | 59.7<br>(54.4 to 65.1)                  | 9.1<br>(8.4 to 9.8)                      | 5.6<br>(3.9 to 7.6)                  | -12.7<br>(-16.8 to -8.5)                          | -0.1<br>(-4.9 to 5.0)                               |
| Eating disorders                                               | 2.1<br>(1.7 to 2.5)                     | 0.9<br>(0.7 to 1.2)                      | 0.4<br>(0.3 to 0.6)                  | -13.2<br>(-24.7 to -1.3)                          | 13.7<br>(-0.5 to 29.3)                              |
| Anorexia nervosa                                               | 0.4<br>(0.3 to 0.6)                     | 0.1<br>(0.1 to 0.2)                      | 0.1<br>(0.1 to 0.1)                  | -20.3<br>(-39.1 to 3.0)                           | 11.4<br>(-13.6 to 42.2)                             |
| Bulimia nervosa                                                | 1.6<br>(1.2 to 2.1)                     | 0.7<br>(0.5 to 1.0)                      | 0.3<br>(0.2 to 0.5)                  | -11.2<br>(-24.2 to 3.7)                           | 14.4<br>(-1.5 to 32.7)                              |
| Autistic spectrum disorders                                    | 15.3<br>(13.7 to 17.2)                  | 0.1<br>(< 0.05 to 0.1)                   | 2.2<br>(1.5 to 3.1)                  | -13.0<br>(-17.0 to -8.8)                          | 0.7<br>(-4.3 to 5.9)                                |
| Autism                                                         | 4.7<br>(4.1 to 5.5)                     | < 0.05<br>(< 0.05 to < 0.05)             | 1.2<br>(0.8 to 1.7)                  | -13.3<br>(-19.9 to -6.3)                          | 0.5<br>(-7.2 to 8.8)                                |
| Asperger syndrome and other autistic spectrum disorders        | 10.5<br>(8.7 to 12.6)                   | 0.1<br>(< 0.05 to 0.1)                   | 1.0<br>(0.7 to 1.5)                  | -12.7<br>(-16.6 to -8.3)                          | 0.9<br>(-3.8 to 6.3)                                |

| Cause                                                      | Prevalence in thousands (95% UI)        | Incidence in thousands (95% UI)          | YLDs in thousands (95% UI)     |                                                   |                                                     |
|------------------------------------------------------------|-----------------------------------------|------------------------------------------|--------------------------------|---------------------------------------------------|-----------------------------------------------------|
|                                                            | 2016 counts                             | 2016 counts                              | 2016 counts                    | Percentage change in counts between 2006 and 2016 | Percentage change in age-standardised rates between |
| Attention-deficit/hyperactivity disorder                   | 11.4<br>(10.3 to 12.6)                  | 0.4<br>(0.4 to 0.5)                      | 0.1<br>(0.1 to 0.2)            | -21.4<br>(-27.7 to -14.4)                         | 0.1<br>(-7.6 to 8.5)                                |
| Conduct disorder                                           | 8.1<br>(6.7 to 9.6)                     | 2.9<br>(2.3 to 3.5)                      | 1.0<br>(0.6 to 1.5)            | -35.1<br>(-40.2 to -29.7)                         | 0.1<br>(-6.3 to 6.6)                                |
| Idiopathic developmental intellectual disability           | 13.6<br>(6.3 to 21.1)                   | --                                       | 0.5<br>(0.2 to 1.0)            | -24.2<br>(-30.6 to -19.1)                         | -9.9<br>(-17.2 to -4.0)                             |
| Other mental and substance use disorders                   | 44.6<br>(39.6 to 51.0)                  | 0.9<br>(0.8 to 1.1)                      | 3.2<br>(2.2 to 4.6)            | -8.4<br>(-12.5 to -4.0)                           | 0.5<br>(-4.3 to 5.2)                                |
| <b>Diabetes, urogenital, blood, and endocrine diseases</b> | <b>725.7<br/>(712.4 to 740.1)</b>       | <b>396.6†<br/>(375.9 to 417.8)</b>       | <b>21.8<br/>(15.3 to 29.3)</b> | <b>3.0<br/>(-1.6 to 7.8)</b>                      | <b>5.5<br/>(0.7 to 10.2)</b>                        |
| Diabetes mellitus                                          | 111.9<br>(100.4 to 125.8)               | 4.7<br>(4.2 to 5.4)                      | 9.7<br>(6.7 to 13.3)           | 11.1<br>(1.9 to 21.8)                             | 11.0<br>(1.9 to 21.6)                               |
| Acute glomerulonephritis                                   | < 0.05<br>(< 0.05 to 0.1)               | 0.6<br>(0.6 to 0.7)                      | < 0.05<br>(< 0.05 to < 0.05)   | -8.4<br>(-13.0 to -3.9)                           | 0.1<br>(-4.2 to 4.4)                                |
| Chronic kidney disease                                     | 182.0<br>(161.3 to 202.0)               | 12.9<br>(10.8 to 14.9)                   | 3.5<br>(2.6 to 4.6)            | 17.7<br>(7.2 to 30.7)                             | 12.2<br>(3.0 to 22.9)                               |
| Chronic kidney disease due to diabetes mellitus            | 39.8<br>(35.2 to 45.1)                  | 3.0<br>(2.5 to 3.6)                      | 0.7<br>(0.5 to 1.0)            | 8.1<br>(-4.8 to 24.7)                             | 7.0<br>(-5.1 to 21.8)                               |
| Chronic kidney disease due to hypertension                 | 41.5<br>(35.9 to 47.4)                  | 4.4<br>(3.7 to 5.2)                      | 0.4<br>(0.3 to 0.5)            | 51.6<br>(29.4 to 79.0)                            | 26.2<br>(9.0 to 46.8)                               |
| Chronic kidney disease due to glomerulonephritis           | 38.5<br>(33.5 to 43.9)                  | 1.1<br>(0.9 to 1.3)                      | 1.2<br>(0.9 to 1.6)            | 0.5<br>(-10.8 to 13.8)                            | -1.1<br>(-10.9 to 10.6)                             |
| Chronic kidney disease due to other causes                 | 62.2<br>(54.6 to 69.8)                  | 4.4<br>(3.6 to 5.1)                      | 1.2<br>(0.9 to 1.6)            | 39.5<br>(21.2 to 61.6)                            | 31.2<br>(15.8 to 50.4)                              |
| Urinary diseases and male infertility                      | 78.0<br>(70.3 to 85.6)                  | 264.1†<br>(245.6 to 283.0)               | 2.4<br>(1.6 to 3.5)            | -0.6<br>(-5.1 to 4.8)                             | -1.0<br>(-5.4 to 4.0)                               |
| Interstitial nephritis and urinary tract infections        | 3.8<br>(3.5 to 4.2)                     | 199.7<br>(181.4 to 218.3)                | 0.1<br>(0.1 to 0.2)            | -21.7<br>(-29.9 to -12.6)                         | -7.8<br>(-17.2 to 2.1)                              |
| Urolithiasis                                               | 2.1<br>(2.0 to 2.3)                     | 56.6<br>(53.8 to 60.6)                   | 0.1<br>(0.1 to 0.2)            | -4.0<br>(-19.3 to 14.0)                           | -1.5<br>(-16.5 to 16.7)                             |
| Benign prostatic hyperplasia                               | 62.9<br>(54.5 to 71.7)                  | 7.9<br>(6.6 to 9.2)                      | 2.0<br>(1.3 to 2.9)            | 3.9<br>(-1.9 to 10.5)                             | 1.9<br>(-3.8 to 8.5)                                |
| Male infertility                                           | 7.5<br>(5.8 to 9.6)                     | --                                       | < 0.05<br>(< 0.05 to 0.1)      | -22.4<br>(-28.5 to -16.0)                         | -7.5<br>(-14.7 to 0.1)                              |
| Other urinary diseases                                     | --                                      | --                                       | 0.1<br>(0.1 to 0.1)            | -28.7<br>(-35.5 to -20.9)                         | -21.2<br>(-28.2 to -13.2)                           |
| Gynecological diseases                                     | 267.5<br>(256.0 to 281.9)               | 105.2†<br>(96.0 to 113.4)                | 3.6<br>(2.5 to 5.2)            | -17.3<br>(-22.8 to -11.0)                         | -2.7<br>(-9.7 to 7.5)                               |
| Uterine fibroids                                           | 56.7<br>(51.2 to 62.1)                  | 4.6<br>(3.9 to 5.3)                      | 0.5<br>(0.2 to 0.9)            | -14.5<br>(-19.9 to -10.5)                         | -7.3<br>(-13.9 to -2.6)                             |
| Polycystic ovarian syndrome                                | 1.8<br>(1.4 to 2.4)                     | 0.7<br>(0.5 to 1.0)                      | < 0.05<br>(< 0.05 to < 0.05)   | -17.8<br>(-27.8 to -6.9)                          | -1.0<br>(-12.8 to 12.2)                             |
| Female infertility                                         | 3.7<br>(1.5 to 7.0)                     | --                                       | < 0.05<br>(< 0.05 to 0.1)      | 0.3<br>(-19.4 to 32.4)                            | 17.7<br>(-2.9 to 55.6)                              |
| Endometriosis                                              | 1.4<br>(1.2 to 1.7)                     | 3.8<br>(2.9 to 5.0)                      | 0.1<br>(0.1 to 0.2)            | -20.4<br>(-35.1 to -3.9)                          | -1.6<br>(-19.3 to 18.6)                             |
| Genital prolapse                                           | 79.6<br>(70.5 to 89.9)                  | 2.8<br>(2.4 to 3.2)                      | 0.2<br>(0.1 to 0.4)            | 20.7<br>(8.9 to 34.2)                             | 19.9<br>(8.2 to 33.0)                               |
| Premenstrual syndrome                                      | 114.0<br>(107.9 to 120.4)               | 37.7<br>(35.1 to 40.3)                   | 1.0<br>(0.6 to 1.5)            | -21.4<br>(-27.2 to -15.8)                         | -2.3<br>(-9.5 to 4.6)                               |
| Other gynecological diseases                               | 50.6<br>(43.3 to 56.2)                  | 55.6<br>(46.7 to 62.7)                   | 1.8<br>(1.2 to 2.5)            | -19.2<br>(-28.4 to -6.4)                          | -3.8<br>(-15.5 to 16.2)                             |
| Hemoglobinopathies and hemolytic anaemias                  | 233.7<br>(227.7 to 239.9)               | --                                       | 0.6<br>(0.4 to 1.0)            | 1.5<br>(-13.8 to 18.3)                            | 14.1<br>(-5.0 to 37.1)                              |
| Thalassemias                                               | < 0.05<br>(< 0.05 to < 0.05)            | --                                       | < 0.05<br>(< 0.05 to < 0.05)   | 17.7<br>(-4.2 to 47.2)                            | 18.1<br>(-4.1 to 49.4)                              |
| Thalassaemias trait                                        | 33.5<br>(30.7 to 36.7)                  | --                                       | 0.5<br>(0.3 to 0.7)            | 3.1<br>(-14.3 to 24.2)                            | 16.5<br>(-4.9 to 42.1)                              |
| Sickle cell disorders                                      | < 0.05<br>(< 0.05 to < 0.05)            | --                                       | < 0.05<br>(< 0.05 to < 0.05)   | -19.0<br>(-24.9 to -12.3)                         | 3.5<br>(-4.0 to 12.2)                               |
| Sickle cell trait                                          | 28.2<br>(27.0 to 29.4)                  | --                                       | 0.1<br>(< 0.05 to 0.1)         | 5.9<br>(-15.2 to 30.8)                            | 18.3<br>(-8.2 to 49.8)                              |
| G6PD deficiency                                            | 21.4<br>(20.3 to 22.8)                  | --                                       | < 0.05<br>(< 0.05 to < 0.05)   | 16.7<br>(-4.9 to 44.7)                            | 29.0<br>(4.8 to 59.5)                               |
| G6PD trait                                                 | 149.9<br>(146.0 to 154.1)               | --                                       | < 0.05<br>(< 0.05 to < 0.05)   | 10.9<br>(-8.2 to 34.8)                            | 31.4<br>(7.2 to 61.5)                               |
| Other hemoglobinopathies and hemolytic anaemias            | 7.8<br>(6.2 to 9.7)                     | --                                       | 0.1<br>(0.1 to 0.1)            | -9.1<br>(-25.2 to 10.8)                           | -0.6<br>(-19.4 to 22.2)                             |
| Endocrine, metabolic, blood, and immune disorders          | 57.4<br>(52.1 to 62.8)                  | 8.9<br>(7.9 to 10.0)                     | 1.9<br>(1.3 to 2.6)            | -4.7<br>(-9.7 to 0.2)                             | 0.0<br>(-5.1 to 5.1)                                |
| <b>Musculoskeletal disorders</b>                           | <b>474.6<br/>(454.1 to 497.8)</b>       | <b>200.2<br/>(177.6 to 225.8)</b>        | <b>55.0<br/>(39.7 to 71.3)</b> | <b>-6.2<br/>(-9.2 to -3.2)</b>                    | <b>-3.3<br/>(-6.4 to -0.2)</b>                      |
| Rheumatoid arthritis                                       | 9.5<br>(8.4 to 10.7)                    | 0.4<br>(0.4 to 0.5)                      | 2.2<br>(1.5 to 2.9)            | -3.8<br>(-12.7 to 5.3)                            | -2.0<br>(-10.7 to 7.1)                              |
| Osteoarthritis                                             | 143.5<br>(134.7 to 152.7)               | 5.7<br>(5.3 to 6.2)                      | 8.7<br>(6.2 to 11.7)           | 5.3<br>(1.8 to 9.1)                               | 3.4<br>(-0.1 to 7.2)                                |
| Low back and neck pain                                     | 352.9<br>(332.0 to 378.1)               | 172.1<br>(150.2 to 195.8)                | 41.8<br>(29.9 to 54.7)         | -8.3<br>(-12.1 to -4.7)                           | -4.4<br>(-8.4 to -0.7)                              |
| Low back pain                                              | 290.1<br>(257.8 to 326.7)               | 151.8<br>(130.2 to 176.0)                | 32.2<br>(22.6 to 42.3)         | -9.2<br>(-13.8 to -4.6)                           | -5.7<br>(-10.7 to -0.9)                             |
| Neck pain                                                  | 98.6<br>(84.9 to 114.2)                 | 20.3<br>(17.6 to 23.8)                   | 9.6<br>(6.6 to 13.6)           | -4.9<br>(-7.4 to -2.3)                            | -0.1<br>(-2.1 to 2.2)                               |
| Gout                                                       | 11.2<br>(9.8 to 12.7)                   | 2.1<br>(1.9 to 2.5)                      | 0.3<br>(0.2 to 0.5)            | 0.7<br>(-13.2 to 16.4)                            | 1.4<br>(-12.7 to 17.6)                              |
| Other musculoskeletal disorders                            | 23.6<br>(18.2 to 30.6)                  | 19.8<br>(15.0 to 26.8)                   | 2.0<br>(1.3 to 3.0)            | -10.4<br>(-22.1 to 2.4)                           | -3.0<br>(-15.7 to 11.5)                             |
| <b>Other non-communicable diseases</b>                     | <b>1,510.3<br/>(1,487.3 to 1,532.9)</b> | <b>4,713.5†<br/>(4,430.9 to 5,012.5)</b> | <b>51.9<br/>(36.0 to 72.6)</b> | <b>-4.8<br/>(-5.9 to -3.6)</b>                    | <b>-0.5<br/>(-1.7 to 0.5)</b>                       |
| Congenital anomalies                                       | 37.2<br>(34.7 to 39.4)                  | --                                       | 4.4<br>(3.2 to 5.7)            | -11.8<br>(-16.1 to -7.0)                          | -0.1<br>(-5.0 to 5.0)                               |
| Neural tube defects                                        | 3.9<br>(3.5 to 4.4)                     | --                                       | 1.2<br>(0.8 to 1.6)            | -13.6<br>(-22.0 to -2.5)                          | -2.6<br>(-12.5 to 9.3)                              |
| Congenital heart anomalies                                 | 5.9<br>(5.3 to 6.5)                     | --                                       | 0.3<br>(0.1 to 0.5)            | -5.3<br>(-14.7 to 4.6)                            | 5.5<br>(-4.7 to 16.4)                               |
| Orofacial clefts                                           | 2.2<br>(1.9 to 2.5)                     | --                                       | < 0.05<br>(< 0.05 to < 0.05)   | -16.0<br>(-25.9 to -5.3)                          | -5.9<br>(-18.5 to 7.0)                              |
| Down's syndrome                                            | 1.1<br>(1.0 to 1.3)                     | --                                       | 0.1<br>(0.1 to 0.1)            | -15.6<br>(-23.9 to -6.8)                          | -1.2<br>(-11.5 to 9.8)                              |
| Turner syndrome                                            | 1.5<br>(1.3 to 1.7)                     | --                                       | < 0.05<br>(< 0.05 to < 0.05)   | -16.0<br>(-34.1 to 6.6)                           | 1.1<br>(-19.7 to 27.1)                              |
| Klinefelter syndrome                                       | 1.6<br>(1.4 to 1.8)                     | --                                       | < 0.05<br>(< 0.05 to < 0.05)   | -14.7<br>(-29.2 to 1.7)                           | 3.0<br>(-14.2 to 22.8)                              |



| Cause                                         | Prevalence in thousands (95% UI)          | Incidence in thousands (95% UI)          | YLDs in thousands (95% UI)           |                                                   |                                                     |
|-----------------------------------------------|-------------------------------------------|------------------------------------------|--------------------------------------|---------------------------------------------------|-----------------------------------------------------|
|                                               | 2016 counts                               | 2016 counts                              | 2016 counts                          | Percentage change in counts between 2006 and 2016 | Percentage change in age-standardised rates between |
| Other chromosomal abnormalities               | 2.3<br>(2.0 to 2.7)                       | --                                       | 0.3<br>(0.2 to 0.4)                  | -13.6<br>(-24.1 to -1.1)                          | 2.3<br>(-10.1 to 17.2)                              |
| Congenital musculoskeletal and limb anomalies | 7.5<br>(6.8 to 8.2)                       | --                                       | 1.1<br>(0.7 to 1.5)                  | -11.9<br>(-19.3 to -4.2)                          | -1.1<br>(-9.5 to 7.5)                               |
| Urogenital congenital anomalies               | 5.0<br>(4.4 to 5.5)                       | --                                       | 0.1<br>(0.1 to 0.2)                  | -13.3<br>(-21.1 to -5.1)                          | -1.8<br>(-11.0 to 7.8)                              |
| Digestive congenital anomalies                | 5.5<br>(4.9 to 6.2)                       | --                                       | 0.3<br>(0.2 to 0.4)                  | -10.9<br>(-20.3 to 0.1)                           | 0.3<br>(-10.8 to 13.0)                              |
| Other congenital anomalies                    | 6.3<br>(3.9 to 9.5)                       | --                                       | 1.0<br>(0.7 to 1.4)                  | -10.3<br>(-17.8 to -1.9)                          | 1.1<br>(-7.4 to 10.1)                               |
| Skin and subcutaneous diseases                | 614.9<br>(599.1 to 629.8)                 | 1,721.4<br>(1,614.4 to 1,835.4)          | 13.0<br>(8.8 to 19.0)                | -14.3<br>(-16.4 to -12.4)                         | 1.3<br>(-0.8 to 3.2)                                |
| Dermatitis                                    | 70.4<br>(66.5 to 74.5)                    | 94.7<br>(86.6 to 103.7)                  | 2.6<br>(1.6 to 4.1)                  | -9.9<br>(-13.5 to -6.0)                           | 0.3<br>(-3.8 to 4.7)                                |
| Psoriasis                                     | 24.0<br>(22.9 to 25.4)                    | 3.0<br>(2.9 to 3.1)                      | 2.0<br>(1.4 to 2.7)                  | -6.4<br>(-12.1 to -0.1)                           | 3.2<br>(-3.4 to 10.7)                               |
| Cellulitis                                    | 1.4<br>(1.3 to 1.5)                       | 31.7<br>(29.8 to 33.5)                   | 0.1<br>(< 0.05 to 0.1)               | -7.9<br>(-23.0 to 10.8)                           | 0.4<br>(-16.5 to 20.1)                              |
| Pyoderma                                      | 11.6<br>(11.1 to 12.0)                    | 316.6<br>(303.8 to 329.4)                | 0.1<br>(< 0.05 to 0.1)               | -2.2<br>(-7.1 to 2.6)                             | -0.5<br>(-5.3 to 4.4)                               |
| Scabies                                       | 13.4<br>(11.9 to 15.2)                    | 40.8<br>(36.2 to 46.0)                   | 0.3<br>(0.2 to 0.5)                  | -17.5<br>(-22.3 to -12.8)                         | -2.7<br>(-7.3 to 2.0)                               |
| Fungal skin diseases                          | 209.2<br>(186.8 to 232.6)                 | 805.8<br>(698.2 to 919.0)                | 1.1<br>(0.5 to 2.4)                  | -1.8<br>(-3.7 to 0.2)                             | 0.1<br>(-0.9 to 1.2)                                |
| Viral skin diseases                           | 43.9<br>(42.1 to 45.6)                    | 66.3<br>(63.5 to 69.4)                   | 1.3<br>(0.8 to 2.0)                  | -14.5<br>(-17.3 to -11.5)                         | -0.4<br>(-3.6 to 2.9)                               |
| Acne vulgaris                                 | 108.6<br>(99.6 to 118.3)                  | 68.7<br>(58.0 to 83.0)                   | 2.8<br>(1.9 to 4.1)                  | -31.9<br>(-35.2 to -28.0)                         | 2.2<br>(-2.3 to 6.6)                                |
| Alopecia areata                               | 3.8<br>(3.6 to 3.9)                       | 6.6<br>(6.4 to 6.9)                      | 0.1<br>(0.1 to 0.2)                  | -12.6<br>(-21.2 to -3.1)                          | 0.0<br>(-10.2 to 11.0)                              |
| Pruritus                                      | 22.4<br>(19.7 to 25.4)                    | 17.5<br>(15.4 to 19.9)                   | 0.2<br>(0.1 to 0.4)                  | -4.7<br>(-9.6 to 0.8)                             | 1.4<br>(-3.8 to 6.7)                                |
| Urticaria                                     | 17.1<br>(15.2 to 19.4)                    | 30.4<br>(26.9 to 34.3)                   | 1.0<br>(0.7 to 1.4)                  | -9.7<br>(-14.6 to -4.2)                           | -0.0<br>(-4.8 to 5.7)                               |
| Decubitus ulcer                               | 1.6<br>(1.4 to 1.7)                       | 5.7<br>(5.0 to 6.4)                      | 0.2<br>(0.2 to 0.3)                  | 4.5<br>(-10.8 to 24.0)                            | -0.6<br>(-14.0 to 15.8)                             |
| Other skin and subcutaneous diseases          | 194.8<br>(188.7 to 200.5)                 | 233.7<br>(225.2 to 241.8)                | 1.1<br>(0.5 to 1.9)                  | 0.6<br>(-1.8 to 3.0)                              | 5.5<br>(3.1 to 7.9)                                 |
| Sense organ diseases                          | 702.4<br>(691.2 to 715.9)                 | 226.7†<br>(214.1 to 240.6)               | 26.2<br>(18.3 to 36.5)               | 0.8<br>(-0.8 to 2.6)                              | -2.5<br>(-4.2 to -1.0)                              |
| Glaucoma                                      | 2.3<br>(1.9 to 2.7)                       | --                                       | 0.2<br>(0.1 to 0.3)                  | 7.6<br>(-7.4 to 23.2)                             | -1.0<br>(-14.3 to 13.4)                             |
| Cataract                                      | 33.0<br>(27.7 to 38.6)                    | --                                       | 1.6<br>(1.1 to 2.3)                  | 8.0<br>(1.1 to 15.4)                              | -4.5<br>(-10.3 to 1.7)                              |
| Macular degeneration                          | 1.2<br>(0.9 to 1.5)                       | --                                       | 0.1<br>(< 0.05 to 0.1)               | 10.9<br>(-6.7 to 32.0)                            | 0.2<br>(-15.3 to 18.0)                              |
| Refraction and accommodation disorders        | 326.4<br>(311.2 to 342.1)                 | --                                       | 5.0<br>(2.9 to 8.0)                  | -5.0<br>(-7.9 to -2.0)                            | -3.8<br>(-6.5 to -1.0)                              |
| Age-related and other hearing loss            | 556.7<br>(534.6 to 579.0)                 | --                                       | 15.9<br>(11.2 to 22.1)               | 2.2<br>(-0.3 to 4.6)                              | -2.5<br>(-4.9 to -0.3)                              |
| Other vision loss                             | 11.9<br>(10.2 to 13.8)                    | --                                       | 0.7<br>(0.5 to 1.0)                  | 3.0<br>(-4.7 to 11.9)                             | -1.0<br>(-7.9 to 6.7)                               |
| Other sense organ diseases                    | 88.5<br>(81.7 to 95.8)                    | 226.7<br>(214.1 to 240.6)                | 2.7<br>(1.7 to 4.1)                  | -1.0<br>(-5.0 to 3.0)                             | 0.3<br>(-3.8 to 4.4)                                |
| Oral disorders                                | 1,040.3<br>(997.3 to 1,082.5)             | 2,765.4†<br>(2,495.0 to 3,032.4)         | 8.3<br>(5.2 to 12.5)                 | -0.8<br>(-3.4 to 2.2)                             | 0.6<br>(-1.5 to 2.7)                                |
| Caries of deciduous teeth                     | 88.0<br>(73.4 to 102.2)                   | 359.7<br>(267.8 to 472.1)                | < 0.05<br>(< 0.05 to 0.1)            | 7.4<br>(-2.2 to 18.1)                             | -1.4<br>(-10.1 to 8.1)                              |
| Caries of permanent teeth                     | 723.1<br>(668.7 to 781.1)                 | 2,363.5<br>(2,112.6 to 2,605.6)          | 0.7<br>(0.3 to 1.3)                  | -17.6<br>(-20.8 to -14.3)                         | -6.2<br>(-9.7 to -2.7)                              |
| Periodontal disease                           | 236.2<br>(193.9 to 281.7)                 | 29.0<br>(22.8 to 35.5)                   | 1.5<br>(0.6 to 3.1)                  | -3.6<br>(-7.0 to 0.5)                             | 0.0<br>(-3.4 to 3.8)                                |
| Edentulism and severe tooth loss              | 181.7<br>(158.1 to 206.8)                 | 13.2<br>(11.1 to 15.6)                   | 4.9<br>(3.3 to 7.0)                  | 5.9<br>(1.8 to 10.1)                              | 2.9<br>(-0.8 to 6.8)                                |
| Other oral disorders                          | 40.1<br>(38.5 to 41.9)                    | --                                       | 1.2<br>(0.7 to 1.7)                  | -10.8<br>(-13.7 to -7.8)                          | -0.1<br>(-3.4 to 3.2)                               |
| <b>Injuries</b>                               | <b>981.3</b><br><b>(918.4 to 1,060.4)</b> | <b>317.4†</b><br><b>(298.7 to 335.9)</b> | <b>33.8</b><br><b>(23.0 to 47.4)</b> | <b>-8.9</b><br><b>(-10.4 to -7.4)</b>             | <b>-4.2</b><br><b>(-5.9 to -2.5)</b>                |
| <b>Transport injuries</b>                     | <b>99.4</b><br><b>(92.2 to 107.2)</b>     | <b>24.2</b><br><b>(22.2 to 26.6)</b>     | <b>4.7</b><br><b>(3.1 to 6.7)</b>    | <b>-19.6</b><br><b>(-21.0 to -18.3)</b>           | <b>-15.0</b><br><b>(-16.7 to -13.5)</b>             |
| Road injuries                                 | 92.5<br>(85.7 to 99.9)                    | 23.1<br>(21.1 to 25.5)                   | 4.4<br>(2.9 to 6.3)                  | -19.9<br>(-21.3 to -18.6)                         | -15.5<br>(-17.2 to -14.0)                           |
| Pedestrian road injuries                      | 21.1<br>(18.6 to 24.1)                    | 3.9<br>(3.4 to 4.6)                      | 1.0<br>(0.6 to 1.4)                  | -25.0<br>(-26.4 to -23.7)                         | -21.3<br>(-22.8 to -19.9)                           |
| Cyclist road injuries                         | 20.1<br>(16.9 to 23.7)                    | 5.6<br>(4.7 to 6.5)                      | 0.9<br>(0.6 to 1.3)                  | -11.2<br>(-12.9 to -9.8)                          | -5.9<br>(-7.7 to -4.3)                              |
| Motorcyclist road injuries                    | 9.8<br>(8.2 to 11.7)                      | 1.5<br>(1.2 to 1.9)                      | 0.4<br>(0.3 to 0.6)                  | -10.0<br>(-11.6 to -8.4)                          | -4.8<br>(-6.5 to -3.1)                              |
| Motor vehicle road injuries                   | 36.2<br>(30.3 to 41.7)                    | 10.4<br>(9.1 to 11.7)                    | 1.8<br>(1.2 to 2.6)                  | -24.7<br>(-26.1 to -23.4)                         | -20.7<br>(-22.3 to -19.2)                           |
| Other road injuries                           | 5.4<br>(4.6 to 6.3)                       | 1.7<br>(1.4 to 2.1)                      | 0.2<br>(0.1 to 0.3)                  | 0.8<br>(-1.1 to 2.5)                              | 6.0<br>(4.0 to 8.0)                                 |
| Other transport injuries                      | 7.0<br>(6.0 to 8.1)                       | 1.1<br>(1.0 to 1.2)                      | 0.3<br>(0.2 to 0.4)                  | -14.8<br>(-16.7 to -13.1)                         | -7.9<br>(-10.1 to -5.9)                             |
| <b>Unintentional injuries</b>                 | <b>843.0</b><br><b>(781.5 to 918.0)</b>   | <b>279.7</b><br><b>(261.4 to 297.5)</b>  | <b>27.6</b><br><b>(18.7 to 38.7)</b> | <b>-6.5</b><br><b>(-8.1 to -5.0)</b>              | <b>-1.9</b><br><b>(-3.8 to -0.1)</b>                |
| Falls                                         | 460.8<br>(410.7 to 524.1)                 | 172.7<br>(156.0 to 189.1)                | 17.8<br>(12.5 to 24.5)               | -8.7<br>(-10.3 to -7.2)                           | -5.5<br>(-7.2 to -3.7)                              |
| Drowning                                      | 2.4<br>(2.1 to 2.7)                       | 0.3<br>(0.3 to 0.4)                      | 0.1<br>(0.1 to 0.1)                  | -24.4<br>(-27.3 to -22.0)                         | -20.3<br>(-23.1 to -18.0)                           |
| Fire, heat, and hot substances                | 77.0<br>(67.2 to 90.3)                    | 7.4<br>(6.4 to 8.1)                      | 1.7<br>(1.1 to 2.6)                  | -12.1<br>(-14.9 to -9.9)                          | -5.9<br>(-9.1 to -3.4)                              |
| Poisonings                                    | 2.1<br>(1.7 to 2.6)                       | 1.8<br>(1.5 to 2.2)                      | 0.2<br>(0.1 to 0.3)                  | 17.8<br>(10.2 to 26.4)                            | 33.4<br>(24.4 to 43.2)                              |
| Exposure to mechanical forces                 | 139.6<br>(119.9 to 171.8)                 | 38.4<br>(34.0 to 43.1)                   | 3.0<br>(2.0 to 4.4)                  | 4.2<br>(2.0 to 6.1)                               | 11.4<br>(9.2 to 13.4)                               |
| Unintentional firearm injuries                | 1.9<br>(1.6 to 2.3)                       | 0.3<br>(0.2 to 0.4)                      | 0.1<br>(< 0.05 to 0.1)               | 5.5<br>(3.2 to 7.9)                               | 13.5<br>(11.0 to 15.8)                              |
| Unintentional suffocation                     | 4.5<br>(3.6 to 5.5)                       | 0.6<br>(0.5 to 0.8)                      | 0.1<br>(0.1 to 0.2)                  | -2.0<br>(-4.0 to -0.2)                            | 5.0<br>(2.7 to 6.9)                                 |
| Other exposure to mechanical forces           | 133.2<br>(113.4 to 165.3)                 | 37.5<br>(33.2 to 42.1)                   | 2.8<br>(1.8 to 4.1)                  | 4.5<br>(2.3 to 6.4)                               | 11.7<br>(9.5 to 13.8)                               |



| Cause                                                                               | Prevalence in thousands (95% UI)     | Incidence in thousands (95% UI)                      | YLDs in thousands (95% UI)                          |                                                   |                                                     |
|-------------------------------------------------------------------------------------|--------------------------------------|------------------------------------------------------|-----------------------------------------------------|---------------------------------------------------|-----------------------------------------------------|
|                                                                                     | 2016 counts                          | 2016 counts                                          | 2016 counts                                         | Percentage change in counts between 2006 and 2016 | Percentage change in age-standardised rates between |
| Adverse effects of medical treatment                                                | 0.6<br>(0.5 to 0.7)                  | 7.4<br>(6.6 to 8.3)                                  | 0.1<br>(< 0.05 to 0.1)                              | 6.9<br>(1.7 to 12.3)                              | 7.9<br>(3.2 to 12.5)                                |
| Animal contact                                                                      | 13.3<br>(11.7 to 15.2)               | 10.7<br>(8.9 to 12.8)                                | 0.4<br>(0.2 to 0.5)                                 | -14.6<br>(-18.7 to -10.3)                         | -5.5<br>(-9.9 to -0.5)                              |
| Venomous animal contact                                                             | 5.4<br>(4.5 to 6.5)                  | 4.5<br>(3.4 to 5.7)                                  | 0.3<br>(0.2 to 0.4)                                 | -12.3<br>(-18.2 to -6.0)                          | -1.7<br>(-8.1 to 5.5)                               |
| Non-venomous animal contact                                                         | 7.8<br>(6.6 to 9.5)                  | 6.2<br>(5.1 to 7.6)                                  | 0.1<br>(0.1 to 0.2)                                 | -19.7<br>(-22.2 to -17.6)                         | -14.8<br>(-17.3 to -12.3)                           |
| Foreign body                                                                        | 29.2<br>(25.1 to 33.3)               | 12.4<br>(11.0 to 13.9)                               | 0.9<br>(0.6 to 1.3)                                 | -9.8<br>(-12.1 to -7.8)                           | -2.9<br>(-5.6 to -0.6)                              |
| Pulmonary aspiration and foreign body in airway                                     | 17.1<br>(13.9 to 21.0)               | 4.8<br>(4.2 to 5.4)                                  | 0.6<br>(0.4 to 0.9)                                 | -15.2<br>(-17.2 to -13.3)                         | -8.9<br>(-11.2 to -6.8)                             |
| Foreign body in eyes                                                                | 1.1<br>(0.7 to 1.5)                  | 4.7<br>(3.7 to 6.1)                                  | 0.1<br>(< 0.05 to 0.1)                              | -2.5<br>(-5.8 to 1.4)                             | 4.3<br>(1.5 to 7.0)                                 |
| Foreign body in other body part                                                     | 11.0<br>(9.0 to 13.6)                | 2.9<br>(2.4 to 3.4)                                  | 0.2<br>(0.2 to 0.4)                                 | 3.6<br>(0.5 to 6.4)                               | 11.8<br>(8.2 to 14.8)                               |
| Environmental heat and cold exposure                                                | 52.5<br>(46.8 to 59.7)               | 12.4<br>(11.0 to 13.9)                               | 1.7<br>(1.2 to 2.5)                                 | -10.7<br>(-12.5 to -9.1)                          | -6.8<br>(-8.7 to -5.1)                              |
| Other unintentional injuries                                                        | 65.6<br>(53.2 to 79.1)               | 16.2<br>(13.8 to 18.9)                               | 1.8<br>(1.2 to 2.6)                                 | 17.4<br>(15.8 to 19.1)                            | 25.1<br>(23.0 to 27.0)                              |
| <b>Self-harm and interpersonal violence</b>                                         | <b>62.6</b><br><b>(57.7 to 67.9)</b> | <b>13.5†</b><br><b>(11.9 to 15.2)</b>                | <b>1.5</b><br><b>(1.0 to 2.1)</b>                   | <b>-14.0</b><br><b>(-15.4 to -12.7)</b>           | <b>-6.2</b><br><b>(-7.6 to -4.8)</b>                |
| Self-harm                                                                           | 7.0<br>(5.9 to 8.2)                  | 2.6<br>(2.2 to 3.0)                                  | 0.2<br>(0.2 to 0.4)                                 | -15.3<br>(-17.5 to -13.1)                         | -10.3<br>(-12.6 to -8.1)                            |
| Self-harm by firearm                                                                | 0.1<br>(0.1 to 0.2)                  | < 0.05<br>(< 0.05 to 0.1)                            | < 0.05<br>(< 0.05 to < 0.05)                        | -44.0<br>(-46.6 to -41.8)                         | -36.9<br>(-40.0 to -34.4)                           |
| Self-harm by other specified means                                                  | 6.9<br>(5.8 to 8.0)                  | 2.5<br>(2.2 to 2.9)                                  | 0.2<br>(0.2 to 0.4)                                 | -14.6<br>(-16.8 to -12.4)                         | -9.6<br>(-12.0 to -7.4)                             |
| Interpersonal violence                                                              | 55.5<br>(50.9 to 61.1)               | 10.9†<br>(9.5 to 12.6)                               | 1.2<br>(0.8 to 1.8)                                 | -13.7<br>(-15.2 to -12.5)                         | -5.4<br>(-6.8 to -4.0)                              |
| Assault by firearm                                                                  | 0.4<br>(0.3 to 0.4)                  | 0.1<br>(0.1 to 0.1)                                  | < 0.05<br>(< 0.05 to < 0.05)                        | -14.2<br>(-16.4 to -12.2)                         | -6.6<br>(-9.1 to -4.3)                              |
| Assault by sharp object                                                             | 6.9<br>(5.7 to 8.1)                  | 1.8<br>(1.4 to 2.2)                                  | 0.2<br>(0.1 to 0.2)                                 | -17.1<br>(-19.1 to -15.1)                         | -10.3<br>(-12.5 to -8.1)                            |
| Sexual violence                                                                     | 23.8<br>(21.0 to 26.8)               | --                                                   | 0.2<br>(0.1 to 0.3)                                 | -20.6<br>(-23.6 to -17.2)                         | -4.1<br>(-7.2 to -0.7)                              |
| Assault by other means                                                              | 24.4<br>(20.6 to 29.4)               | 9.1<br>(7.8 to 10.5)                                 | 0.8<br>(0.6 to 1.2)                                 | -11.3<br>(-12.9 to -10.0)                         | -4.7<br>(-6.6 to -3.3)                              |
| <b>Forces of nature, conflict and terrorism, and executions and police conflict</b> | <b>0.1</b><br><b>(0.1 to 0.2)</b>    | <b>&lt; 0.05†</b><br><b>(&lt; 0.05 to &lt; 0.05)</b> | <b>&lt; 0.05</b><br><b>(&lt; 0.05 to &lt; 0.05)</b> | <b>-3.7</b><br><b>(-7.2 to -0.5)</b>              | <b>7.9</b><br><b>(4.5 to 11.4)</b>                  |
| Exposure to forces of nature                                                        | < 0.05<br>(< 0.05 to < 0.05)         | --                                                   | < 0.05<br>(< 0.05 to < 0.05)                        | -29.2<br>(-31.2 to -26.8)                         | -27.2<br>(-29.4 to -24.7)                           |
| Conflict and terrorism                                                              | --                                   | --                                                   | --                                                  | --                                                | --                                                  |
| Executions and police conflict                                                      | 0.1<br>(0.1 to 0.2)                  | < 0.05<br>(< 0.05 to < 0.05)                         | < 0.05<br>(< 0.05 to < 0.05)                        | 5.0<br>(-1.7 to 8.6)                              | 18.3<br>(11.9 to 22.4)                              |
| <b>Impairments</b>                                                                  | --                                   | --                                                   | --                                                  | --                                                | --                                                  |
| Anaemia                                                                             | 308.3<br>(264.7 to 354.6)            | --                                                   | 6.7<br>(4.5 to 9.6)                                 | -1.8<br>(-12.9 to 10.7)                           | -0.2<br>(-11.6 to 12.3)                             |
| Developmental intellectual disability                                               | 35.9<br>(28.6 to 43.2)               | --                                                   | 4.1<br>(3.0 to 5.3)                                 | -16.4<br>(-19.9 to -12.0)                         | -3.4<br>(-7.4 to 1.4)                               |
| Epilepsy                                                                            | 8.9<br>(4.9 to 13.7)                 | --                                                   | 2.6<br>(1.4 to 4.5)                                 | -20.7<br>(-63.8 to 67.7)                          | -10.2<br>(-56.8 to 86.2)                            |
| Guillain-Barre syndrome                                                             | < 0.05<br>(< 0.05 to < 0.05)         | --                                                   | < 0.05<br>(< 0.05 to < 0.05)                        | -6.0<br>(-9.3 to -2.9)                            | 0.1<br>(0.1 to 0.2)                                 |
| Hearing loss                                                                        | 577.9<br>(555.9 to 600.5)            | --                                                   | 16.9<br>(12.0 to 23.5)                              | 0.6<br>(-1.6 to 2.8)                              | -3.0<br>(-5.1 to -1.2)                              |
| Heart failure                                                                       | 32.9<br>(28.6 to 37.9)               | --                                                   | 2.9<br>(2.0 to 3.9)                                 | 28.9<br>(18.6 to 39.7)                            | 14.2<br>(6.2 to 23.1)                               |
| Infertility                                                                         | 27.4<br>(22.0 to 34.2)               | --                                                   | 0.2<br>(0.1 to 0.4)                                 | -15.8<br>(-20.9 to -11.1)                         | 0.4<br>(-5.3 to 6.1)                                |
| Pelvic inflammatory disease                                                         | 1.0<br>(0.8 to 1.1)                  | --                                                   | 0.1<br>(0.1 to 0.2)                                 | -21.6<br>(-32.2 to -7.7)                          | -9.0<br>(-21.8 to 6.5)                              |
| Vision loss                                                                         | 378.8<br>(360.9 to 397.2)            | --                                                   | 8.4<br>(5.7 to 12.3)                                | -2.5<br>(-5.4 to 0.4)                             | -3.4<br>(-6.0 to -0.3)                              |

We did not calculate incidence for the nine impairments, certain NTDs, and causes with only birth prevalence. Blank cells mean that no estimate is available.

† Incidence for aggregate causes represents the sum of the incidence of the causes below the aggregate.

‡ Incidence estimates for stroke represent first-ever stroke only.

^ Incidence of HIV/AIDS represents new infections of HIV only and does not include new infections of Tuberculosis in HIV positive cases.

SR Table 14: Prevalence, incidence, and YLDs for 2016, percentage change of YLD counts and percentage change of age-standardised YLD rates between 2006 and 2016 by cause and impairments, for all ages, Lebanon.

| Cause                                                                                | Prevalence in thousands (95% UI)       | Incidence in thousands (95% UI)            | YLDs in thousands (95% UI)       |                                                   |                                                     |
|--------------------------------------------------------------------------------------|----------------------------------------|--------------------------------------------|----------------------------------|---------------------------------------------------|-----------------------------------------------------|
|                                                                                      | 2016 counts                            | 2016 counts                                | 2016 counts                      | Percentage change in counts between 2006 and 2016 | Percentage change in age-standardised rates between |
| <b>All causes</b>                                                                    | <b>5,571.1</b><br>(5,551.2 to 5,592.9) | <b>34,834.6†</b><br>(32,853.8 to 36,979.3) | <b>697.4</b><br>(521.4 to 899.8) | <b>51.0</b><br>(48.4 to 53.6)                     | <b>-1.2</b><br>(-2.7 to 0.4)                        |
| <b>Communicable, maternal, neonatal, and nutritional disorders</b>                   | <b>2,848.9</b><br>(2,760.5 to 2,934.7) | <b>18,957.5†</b><br>(17,339.5 to 20,822.2) | <b>49.6</b><br>(35.2 to 68.0)    | <b>28.9</b><br>(21.7 to 38.1)                     | <b>-9.8</b><br>(-14.9 to -3.6)                      |
| <b>HIV/AIDS and tuberculosis</b>                                                     | <b>1,011.7</b><br>(883.9 to 1,114.4)   | <b>1.0†</b><br>(0.8 to 1.3)                | <b>0.3</b><br>(0.1 to 0.6)       | <b>27.2</b><br>(-12.7 to 85.3)                    | <b>-18.0</b><br>(-43.3 to 19.1)                     |
| Tuberculosis                                                                         | 920.3<br>(802.9 to 1,047.1)            | 0.8†<br>(0.7 to 1.0)                       | 0.1<br>(0.1 to 0.2)              | 14.1<br>(-11.2 to 48.9)                           | -25.8<br>(-41.4 to -5.0)                            |
| Drug-susceptible tuberculosis                                                        | 0.4<br>(0.3 to 0.5)                    | 0.8<br>(0.7 to 1.0)                        | 0.1<br>(0.1 to 0.2)              | 13.5<br>(-14.0 to 47.8)                           | -26.2<br>(-42.7 to -5.5)                            |
| Multidrug-resistant tuberculosis without extensive drug resistance                   | < 0.05<br>(< 0.05 to < 0.05)           | < 0.05<br>(< 0.05 to 0.1)                  | < 0.05<br>(< 0.05 to < 0.05)     | 42.6<br>(-79.9 to 592.2)                          | -7.8<br>(-87.0 to 355.8)                            |
| Extensively drug-resistant tuberculosis                                              | < 0.05<br>(< 0.05 to < 0.05)           | < 0.05<br>(< 0.05 to < 0.05)               | < 0.05<br>(< 0.05 to < 0.05)     | 223.9<br>(-54.4 to 1,471.2)                       | 109.3<br>(-70.4 to 934.7)                           |
| Latent tuberculosis infection                                                        | 919.8<br>(802.5 to 1,046.6)            | --                                         | --                               | --                                                | --                                                  |
| HIV/AIDS                                                                             | 1.2<br>(0.2 to 3.5)                    | 0.1 <sup>a</sup><br>(< 0.05 to 0.4)        | 0.1<br>(< 0.05 to 0.5)           | 43.6<br>(-28.1 to 196.1)                          | -8.2<br>(-53.7 to 95.3)                             |
| Drug-susceptible HIV/AIDS - Tuberculosis                                             | < 0.05<br>(< 0.05 to < 0.05)           | < 0.05<br>(< 0.05 to < 0.05)               | < 0.05<br>(< 0.05 to < 0.05)     | -14.7<br>(-23.0 to -7.0)                          | -45.0<br>(-50.4 to -40.1)                           |
| Multidrug-resistant HIV/AIDS - Tuberculosis without extensive drug resistance        | < 0.05<br>(< 0.05 to < 0.05)           | < 0.05<br>(< 0.05 to < 0.05)               | < 0.05<br>(< 0.05 to < 0.05)     | 10.0<br>(-84.2 to 436.7)                          | -29.1<br>(-89.8 to 245.8)                           |
| Extensively drug-resistant HIV/AIDS - Tuberculosis                                   | < 0.05<br>(< 0.05 to < 0.05)           | < 0.05<br>(< 0.05 to < 0.05)               | < 0.05<br>(< 0.05 to < 0.05)     | 149.9<br>(-64.1 to 1,118.4)                       | 61.0<br>(-76.9 to 685.1)                            |
| HIV/AIDS resulting in other diseases                                                 | 1.2<br>(0.2 to 3.5)                    | 0.1<br>(< 0.05 to 0.4)                     | 0.1<br>(< 0.05 to 0.5)           | 46.8<br>(-28.5 to 235.2)                          | -6.2<br>(-54.1 to 121.2)                            |
| <b>Diarrhoea, lower respiratory infections, and other common infectious diseases</b> | <b>323.4</b><br>(304.8 to 343.4)       | <b>18,052.0†</b><br>(16,458.0 to 19,895.1) | <b>16.0</b><br>(11.2 to 22.0)    | <b>43.6</b><br>(39.0 to 48.4)                     | <b>1.4</b><br>(-1.8 to 4.5)                         |
| Diarrhoeal diseases                                                                  | 54.5<br>(50.9 to 58.4)                 | 3,610.8<br>(3,371.4 to 3,867.5)            | 6.1<br>(4.2 to 8.5)              | 49.3<br>(40.3 to 57.9)                            | 7.0<br>(0.9 to 13.1)                                |
| Intestinal infectious diseases                                                       | 0.2<br>(0.2 to 0.2)                    | 4.0†<br>(3.5 to 4.5)                       | < 0.05<br>(< 0.05 to < 0.05)     | -6.6<br>(-19.3 to 8.6)                            | -32.4<br>(-41.3 to -22.2)                           |
| Typhoid fever                                                                        | 0.2<br>(0.2 to 0.2)                    | 3.2<br>(2.8 to 3.7)                        | < 0.05<br>(< 0.05 to < 0.05)     | -6.7<br>(-20.4 to 9.2)                            | -32.3<br>(-41.7 to -21.7)                           |
| Paratyphoid fever                                                                    | < 0.05<br>(< 0.05 to < 0.05)           | 0.7<br>(0.6 to 0.8)                        | < 0.05<br>(< 0.05 to < 0.05)     | -0.3<br>(-15.9 to 17.6)                           | -28.6<br>(-39.1 to -16.7)                           |
| Other intestinal infectious diseases                                                 | --                                     | --                                         | < 0.05<br>(< 0.05 to < 0.05)     | -22.4<br>(-33.9 to -9.9)                          | -48.3<br>(-56.3 to -39.2)                           |
| Lower respiratory infections                                                         | 8.2<br>(7.4 to 9.1)                    | 358.7<br>(322.4 to 399.1)                  | 0.5<br>(0.3 to 0.7)              | 56.4<br>(39.5 to 73.5)                            | 6.2<br>(-5.2 to 17.3)                               |
| Upper respiratory infections                                                         | 181.6<br>(161.0 to 204.7)              | 13,649.7<br>(12,034.5 to 15,475.0)         | 4.5<br>(2.7 to 7.1)              | 42.4<br>(35.3 to 50.4)                            | 0.0<br>(-4.4 to 5.1)                                |
| Otitis media                                                                         | 68.1<br>(61.0 to 75.8)                 | 323.8<br>(265.7 to 394.0)                  | 1.9<br>(1.2 to 2.9)              | 28.9<br>(19.2 to 39.6)                            | -5.0<br>(-11.6 to 2.0)                              |
| Meningitis                                                                           | 9.7<br>(8.4 to 11.1)                   | 1.3<br>(1.1 to 1.6)                        | 1.1<br>(0.8 to 1.5)              | 40.8<br>(32.4 to 49.4)                            | -4.2<br>(-9.7 to 1.5)                               |
| Pneumococcal meningitis                                                              | 3.3<br>(2.8 to 3.9)                    | 0.1<br>(0.1 to 0.2)                        | 0.4<br>(0.3 to 0.6)              | 25.3<br>(8.2 to 45.0)                             | -15.5<br>(-26.4 to -2.9)                            |
| H influenzae type B meningitis                                                       | 1.9<br>(1.5 to 2.4)                    | 0.2<br>(0.1 to 0.3)                        | 0.3<br>(0.2 to 0.4)              | 40.7<br>(34.0 to 47.6)                            | -3.9<br>(-8.5 to 0.9)                               |
| Meningococcal infection                                                              | 1.7<br>(1.2 to 2.2)                    | 0.4<br>(0.3 to 0.5)                        | 0.2<br>(0.1 to 0.2)              | 39.9<br>(33.0 to 46.5)                            | -5.3<br>(-9.9 to -0.9)                              |
| Other meningitis                                                                     | 2.9<br>(2.2 to 3.8)                    | 0.6<br>(0.5 to 0.8)                        | 0.3<br>(0.2 to 0.4)              | 77.3<br>(65.9 to 90.6)                            | 21.6<br>(13.1 to 31.3)                              |
| Encephalitis                                                                         | 14.0<br>(9.8 to 19.9)                  | 6.6<br>(5.8 to 7.5)                        | 1.6<br>(1.1 to 2.1)              | 51.0<br>(33.4 to 69.3)                            | -0.4<br>(-11.3 to 11.2)                             |
| Diphtheria                                                                           | < 0.05<br>(< 0.05 to < 0.05)           | < 0.05<br>(< 0.05 to < 0.05)               | < 0.05<br>(< 0.05 to < 0.05)     | -39.8<br>(-66.0 to 9.1)                           | -57.8<br>(-76.6 to -20.4)                           |
| Whooping cough                                                                       | 0.2<br>(0.1 to 0.2)                    | 1.2<br>(0.9 to 1.5)                        | < 0.05<br>(< 0.05 to < 0.05)     | -72.2<br>(-81.6 to -61.0)                         | -77.6<br>(-85.6 to -68.3)                           |
| Tetanus                                                                              | < 0.05<br>(< 0.05 to < 0.05)           | < 0.05<br>(< 0.05 to < 0.05)               | < 0.05<br>(< 0.05 to < 0.05)     | 48.1<br>(34.8 to 62.5)                            | 2.1<br>(-6.5 to 11.8)                               |
| Measles                                                                              | < 0.05<br>(< 0.05 to < 0.05)           | 0.1<br>(< 0.05 to 0.4)                     | < 0.05<br>(< 0.05 to < 0.05)     | -97.8<br>(-98.9 to -95.2)                         | -98.2<br>(-99.1 to -96.1)                           |
| Varicella and herpes zoster                                                          | 5.2<br>(4.7 to 5.7)                    | 95.8<br>(91.3 to 100.2)                    | 0.2<br>(0.1 to 0.3)              | 52.5<br>(34.9 to 73.1)                            | 0.1<br>(-10.5 to 12.7)                              |
| <b>Neglected tropical diseases and malaria</b>                                       | <b>47.2</b><br>(42.6 to 52.8)          | <b>0.1†</b><br>(< 0.05 to 0.6)             | <b>0.6</b><br>(0.3 to 0.9)       | <b>5.8</b><br>(-28.3 to 56.2)                     | <b>-19.0</b><br>(-44.1 to 14.2)                     |
| Malaria                                                                              | --                                     | --                                         | --                               | --                                                | --                                                  |
| Chagas disease                                                                       | --                                     | --                                         | --                               | --                                                | --                                                  |
| Leishmaniasis                                                                        | < 0.05<br>(< 0.05 to < 0.05)           | < 0.05<br>(< 0.05 to < 0.05)               | < 0.05<br>(< 0.05 to < 0.05)     | 139.0<br>(-93.8 to 72,547,320.6)                  | 53.6<br>(-95.6 to 45,835,829.8)                     |
| Visceral leishmaniasis                                                               | < 0.05<br>(< 0.05 to < 0.05)           | < 0.05<br>(< 0.05 to < 0.05)               | < 0.05<br>(< 0.05 to < 0.05)     | 332.0<br>(-96.0 to 2.1e+76)                       | 174.1<br>(-97.8 to 2.0e+76)                         |
| Cutaneous and mucocutaneous leishmaniasis                                            | < 0.05<br>(< 0.05 to < 0.05)           | < 0.05<br>(< 0.05 to < 0.05)               | < 0.05<br>(< 0.05 to < 0.05)     | 130.6<br>(-98.1 to 150,644,680.9)                 | 47.6<br>(-98.8 to 100,445,381.4)                    |
| African trypanosomiasis                                                              | --                                     | --                                         | --                               | --                                                | --                                                  |
| Schistosomiasis                                                                      | --                                     | --                                         | --                               | --                                                | --                                                  |
| Cysticercosis                                                                        | --                                     | --                                         | --                               | --                                                | --                                                  |
| Cystic echinococcosis                                                                | 0.7<br>(0.1 to 3.0)                    | 0.1<br>(< 0.05 to 0.6)                     | 0.1<br>(< 0.05 to 0.3)           | -20.2<br>(-89.7 to 568.7)                         | -47.1<br>(-92.4 to 283.2)                           |
| Lymphatic filariasis                                                                 | --                                     | --                                         | --                               | --                                                | --                                                  |
| Onchocerciasis                                                                       | --                                     | --                                         | --                               | --                                                | --                                                  |
| Trachoma                                                                             | --                                     | --                                         | --                               | --                                                | --                                                  |
| Dengue                                                                               | --                                     | --                                         | --                               | --                                                | --                                                  |
| Yellow fever                                                                         | --                                     | --                                         | --                               | --                                                | --                                                  |
| Rabies                                                                               | < 0.05<br>(< 0.05 to < 0.05)           | < 0.05<br>(< 0.05 to < 0.05)               | < 0.05<br>(< 0.05 to < 0.05)     | 15.4<br>(-53.8 to 219.4)                          | -32.5<br>(-74.4 to 94.4)                            |
| Intestinal nematode infections                                                       | 13.6<br>(11.6 to 15.8)                 | --                                         | < 0.05<br>(< 0.05 to < 0.05)     | 68.2<br>(25.1 to 130.9)                           | 9.1<br>(-19.2 to 49.8)                              |
| Ascariasis                                                                           | 4.8<br>(3.6 to 6.2)                    | --                                         | --                               | --                                                | --                                                  |

| Cause                                                                   | Prevalence in thousands (95% UI)              | Incidence in thousands (95% UI)                   | YLDs in thousands (95% UI)              |                                                   |                                                     |
|-------------------------------------------------------------------------|-----------------------------------------------|---------------------------------------------------|-----------------------------------------|---------------------------------------------------|-----------------------------------------------------|
|                                                                         | 2016 counts                                   | 2016 counts                                       | 2016 counts                             | Percentage change in counts between 2006 and 2016 | Percentage change in age-standardised rates between |
| Trichuriasis                                                            | 4.7<br>(3.6 to 6.1)                           | --                                                | --                                      | --                                                | --                                                  |
| Hookworm disease                                                        | 4.7<br>(3.8 to 5.8)                           | --                                                | < 0.05<br>(< 0.05 to < 0.05)            | 68.2<br>(25.1 to 130.9)                           | 9.1<br>(-19.2 to 49.8)                              |
| Food-borne trematodiasis                                                | --                                            | --                                                | --                                      | --                                                | --                                                  |
| Leprosy                                                                 | < 0.05<br>(< 0.05 to < 0.05)                  | < 0.05<br>(< 0.05 to < 0.05)                      | < 0.05<br>(< 0.05 to < 0.05)            | 228.9<br>(99.3 to 584.0)                          | 99.3<br>(20.9 to 317.0)                             |
| Ebola virus disease                                                     | --                                            | --                                                | --                                      | --                                                | --                                                  |
| Zika virus disease                                                      | --                                            | --                                                | --                                      | --                                                | --                                                  |
| Guinea worm disease                                                     | --                                            | --                                                | --                                      | --                                                | --                                                  |
| Other neglected tropical diseases                                       | 31.2<br>(27.4 to 35.8)                        | --                                                | 0.5<br>(0.3 to 0.8)                     | 8.7<br>(-12.0 to 39.0)                            | -15.1<br>(-31.9 to 8.7)                             |
| <b>Maternal disorders</b>                                               | <b>3.3</b><br><b>(2.5 to 4.4)</b>             | <b>39.5†</b><br><b>(33.9 to 45.4)</b>             | <b>0.2</b><br><b>(0.1 to 0.3)</b>       | <b>60.7</b><br><b>(16.8 to 121.4)</b>             | <b>0.1</b><br><b>(-27.2 to 38.6)</b>                |
| Maternal haemorrhage                                                    | 0.6<br>(0.4 to 0.8)                           | 4.2<br>(2.6 to 6.4)                               | < 0.05<br>(< 0.05 to < 0.05)            | 26.9<br>(-17.7 to 86.2)                           | -20.2<br>(-47.9 to 16.4)                            |
| Maternal sepsis and other pregnancy related infections                  | 1.0<br>(0.6 to 1.4)                           | 8.5<br>(6.2 to 11.8)                              | < 0.05<br>(< 0.05 to 0.1)               | 29.9<br>(-42.7 to 181.1)                          | -18.9<br>(-63.5 to 78.6)                            |
| Maternal hypertensive disorders                                         | 1.9<br>(1.2 to 2.8)                           | 9.5<br>(7.4 to 12.1)                              | 0.1<br>(< 0.05 to 0.2)                  | 116.0<br>(23.7 to 284.6)                          | 34.3<br>(-23.4 to 140.9)                            |
| Maternal obstructed labour and uterine rupture                          | 0.1<br>(< 0.05 to 0.1)                        | 3.8<br>(2.6 to 5.2)                               | < 0.05<br>(< 0.05 to < 0.05)            | 27.1<br>(-30.7 to 130.2)                          | -21.4<br>(-56.9 to 43.3)                            |
| Maternal abortion, miscarriage, and ectopic pregnancy                   | 0.1<br>(0.1 to 0.2)                           | 13.5<br>(10.0 to 18.0)                            | < 0.05<br>(< 0.05 to < 0.05)            | 25.6<br>(-46.4 to 161.3)                          | -22.2<br>(-66.3 to 63.7)                            |
| Other maternal disorders                                                | --                                            | --                                                | < 0.05<br>(< 0.05 to < 0.05)            | 52.4<br>(11.1 to 109.5)                           | -4.7<br>(-30.9 to 32.0)                             |
| <b>Neonatal disorders</b>                                               | <b>50.3</b><br><b>(40.2 to 71.2)</b>          | <b>11.5</b><br><b>--</b>                          | <b>11.5</b><br><b>(6.7 to 21.1)</b>     | <b>28.0</b><br><b>(9.1 to 61.2)</b>               | <b>-10.3</b><br><b>(-23.4 to 13.1)</b>              |
| Neonatal preterm birth complications                                    | 39.1<br>(29.3 to 53.8)                        | --                                                | 5.3<br>(3.1 to 9.0)                     | 41.9<br>(5.4 to 106.9)                            | -1.4<br>(-26.5 to 43.5)                             |
| Neonatal encephalopathy due to birth asphyxia and trauma                | 5.7<br>(2.9 to 9.7)                           | --                                                | 1.0<br>(0.3 to 2.0)                     | 46.0<br>(6.5 to 95.0)                             | 0.9<br>(-26.9 to 34.0)                              |
| Neonatal sepsis and other neonatal infections                           | 11.3<br>(4.0 to 32.4)                         | --                                                | 4.7<br>(1.5 to 14.4)                    | 13.0<br>(-4.0 to 31.7)                            | -20.2<br>(-32.0 to -6.9)                            |
| Hemolytic disease and other neonatal jaundice                           | 1.2<br>(1.0 to 1.4)                           | --                                                | 0.4<br>(0.3 to 0.5)                     | 44.3<br>(30.9 to 58.9)                            | -0.5<br>(-11.2 to 10.9)                             |
| Other neonatal disorders                                                | --                                            | --                                                | 0.2<br>(0.1 to 0.4)                     | 4.6<br>(-13.8 to 36.5)                            | -14.3<br>(-29.4 to 11.8)                            |
| <b>Nutritional deficiencies</b>                                         | <b>1,031.7</b><br><b>(958.1 to 1,114.9)</b>   | <b>73.2†</b><br><b>(47.1 to 117.3)</b>            | <b>16.5</b><br><b>(10.7 to 24.7)</b>    | <b>14.5</b><br><b>(5.2 to 25.5)</b>               | <b>-19.2</b><br><b>(-25.9 to -11.2)</b>             |
| Protein-energy malnutrition                                             | 14.2<br>(10.8 to 18.6)                        | 6.7<br>(5.2 to 8.7)                               | 0.6<br>(0.4 to 0.9)                     | -5.2<br>(-31.5 to 30.9)                           | -22.3<br>(-44.0 to 7.4)                             |
| Iodine deficiency                                                       | 186.7<br>(164.8 to 211.2)                     | 3.5<br>(3.1 to 3.9)                               | 4.7<br>(3.2 to 6.7)                     | 14.7<br>(6.1 to 24.4)                             | -23.7<br>(-29.4 to -17.4)                           |
| Vitamin A deficiency                                                    | 77.3<br>(46.9 to 127.6)                       | 63.0<br>(37.5 to 107.8)                           | --                                      | --                                                | --                                                  |
| Iron-deficiency anaemia                                                 | 778.0<br>(707.3 to 860.3)                     | --                                                | 11.2<br>(6.8 to 17.1)                   | 15.7<br>(2.9 to 32.9)                             | -16.9<br>(-26.4 to -4.4)                            |
| Other nutritional deficiencies                                          | --                                            | --                                                | < 0.05<br>(< 0.05 to < 0.05)            | -5.8<br>(-32.6 to 31.7)                           | -22.6<br>(-44.6 to 8.3)                             |
| <b>Other communicable, maternal, neonatal, and nutritional diseases</b> | <b>1,237.9</b><br><b>(1,157.1 to 1,312.8)</b> | <b>791.8</b><br><b>(656.9 to 941.6)</b>           | <b>4.5</b><br><b>(2.8 to 7.2)</b>       | <b>49.4</b><br><b>(38.3 to 60.5)</b>              | <b>-2.4</b><br><b>(-9.6 to 4.5)</b>                 |
| Sexually transmitted diseases excluding HIV                             | 960.0<br>(888.2 to 1,031.3)                   | 768.5<br>(632.1 to 919.2)                         | 4.0<br>(2.4 to 6.4)                     | 53.7<br>(41.8 to 67.0)                            | -1.3<br>(-8.9 to 6.9)                               |
| Syphilis                                                                | 29.7<br>(20.2 to 42.7)                        | 21.0<br>(13.8 to 30.8)                            | 0.1<br>(0.1 to 0.1)                     | 64.7<br>(45.5 to 85.9)                            | 1.3<br>(-11.2 to 14.6)                              |
| Chlamydial infection                                                    | 56.7<br>(44.7 to 71.2)                        | 42.9<br>(33.7 to 53.5)                            | 0.4<br>(0.2 to 0.7)                     | 57.8<br>(36.4 to 81.5)                            | 0.5<br>(-13.0 to 15.2)                              |
| Gonococcal infection                                                    | 158.9<br>(125.9 to 199.4)                     | 567.7<br>(434.4 to 719.2)                         | 2.0<br>(1.2 to 3.4)                     | 51.2<br>(35.8 to 68.6)                            | -2.7<br>(-12.3 to 8.4)                              |
| Trichomoniasis                                                          | 76.6<br>(65.8 to 88.2)                        | 64.9<br>(55.7 to 75.1)                            | 0.1<br>(< 0.05 to 0.1)                  | 74.9<br>(57.6 to 96.0)                            | 12.3<br>(1.7 to 24.9)                               |
| Genital herpes                                                          | 665.8<br>(564.0 to 780.6)                     | 45.4<br>(38.3 to 54.3)                            | 0.2<br>(0.1 to 0.4)                     | 58.3<br>(48.0 to 68.1)                            | 1.0<br>(-4.9 to 7.1)                                |
| Other sexually transmitted diseases                                     | 33.8<br>(28.9 to 37.5)                        | 26.7<br>(20.7 to 34.1)                            | 1.3<br>(0.8 to 2.0)                     | 54.3<br>(41.2 to 67.5)                            | -0.7<br>(-9.1 to 7.8)                               |
| Hepatitis                                                               | 321.1<br>(272.1 to 386.5)                     | 23.3<br>(18.2 to 29.3)                            | < 0.05<br>(< 0.05 to < 0.05)            | 16.6<br>(-8.1 to 51.1)                            | -21.7<br>(-37.3 to -1.2)                            |
| Acute hepatitis A                                                       | 0.4<br>(0.1 to 0.7)                           | 4.7<br>(1.4 to 9.1)                               | < 0.05<br>(< 0.05 to < 0.05)            | 8.8<br>(-59.8 to 197.3)                           | -22.8<br>(-69.6 to 100.0)                           |
| Hepatitis B                                                             | 244.4<br>(197.5 to 306.0)                     | 16.8<br>(13.2 to 21.6)                            | < 0.05<br>(< 0.05 to < 0.05)            | 18.6<br>(-2.1 to 42.6)                            | -22.9<br>(-36.4 to -8.1)                            |
| Hepatitis C                                                             | 76.4<br>(68.2 to 85.4)                        | 1.2<br>(1.1 to 1.4)                               | < 0.05<br>(< 0.05 to < 0.05)            | 23.5<br>(22.3 to 24.8)                            | -4.5<br>(-5.5 to -3.5)                              |
| Acute hepatitis E                                                       | < 0.05<br>(< 0.05 to 0.1)                     | 0.6<br>(0.5 to 0.7)                               | < 0.05<br>(< 0.05 to < 0.05)            | 22.6<br>(10.2 to 35.7)                            | -19.6<br>(-26.3 to -12.5)                           |
| Other infectious diseases                                               | 26.7<br>(23.3 to 30.6)                        | < 0.05<br>(< 0.05 to < 0.05)                      | 0.5<br>(0.3 to 0.8)                     | 22.5<br>(5.5 to 44.8)                             | -8.2<br>(-21.8 to 9.2)                              |
| <b>Non-communicable diseases</b>                                        | <b>5,374.6</b><br><b>(5,343.4 to 5,404.1)</b> | <b>15,474.3†</b><br><b>(14,427.5 to 16,534.8)</b> | <b>578.4</b><br><b>(422.3 to 750.8)</b> | <b>55.4</b><br><b>(53.0 to 58.2)</b>              | <b>0.8</b><br><b>(-0.7 to 2.6)</b>                  |
| <b>Neoplasms</b>                                                        | <b>51.9</b><br><b>(49.2 to 54.2)</b>          | <b>15.5</b><br><b>(13.9 to 17.0)</b>              | <b>5.0</b><br><b>(3.6 to 6.7)</b>       | <b>78.6</b><br><b>(67.7 to 93.1)</b>              | <b>10.0</b><br><b>(3.4 to 18.5)</b>                 |
| Lip and oral cavity cancer                                              | 0.5<br>(0.5 to 0.6)                           | 0.1<br>(0.1 to 0.1)                               | 0.1<br>(< 0.05 to 0.1)                  | 61.6<br>(42.5 to 85.5)                            | -0.8<br>(-12.6 to 13.6)                             |
| Nasopharynx cancer                                                      | 0.1<br>(0.1 to 0.1)                           | < 0.05<br>(< 0.05 to < 0.05)                      | < 0.05<br>(< 0.05 to < 0.05)            | 30.9<br>(8.5 to 58.3)                             | -14.8<br>(-29.2 to 2.4)                             |
| Other pharynx cancer                                                    | 0.1<br>(0.1 to 0.1)                           | < 0.05<br>(< 0.05 to < 0.05)                      | < 0.05<br>(< 0.05 to < 0.05)            | 73.2<br>(48.9 to 102.0)                           | 6.8<br>(-8.2 to 24.8)                               |
| Oesophageal cancer                                                      | 0.1<br>(0.1 to 0.1)                           | 0.1<br>(0.1 to 0.1)                               | < 0.05<br>(< 0.05 to < 0.05)            | 46.7<br>(32.3 to 62.7)                            | -11.4<br>(-19.9 to -1.9)                            |
| Stomach cancer                                                          | 0.7<br>(0.6 to 0.7)                           | 0.4<br>(0.4 to 0.4)                               | 0.1<br>(0.1 to 0.1)                     | 45.6<br>(26.0 to 67.9)                            | -11.2<br>(-22.8 to 2.0)                             |
| Colon and rectum cancer                                                 | 5.2<br>(4.5 to 5.9)                           | 1.4<br>(1.2 to 1.6)                               | 0.5<br>(0.3 to 0.6)                     | 82.2<br>(54.8 to 111.3)                           | 10.1<br>(-6.4 to 27.2)                              |
| Liver cancer                                                            | 0.1<br>(0.1 to 0.1)                           | 0.2<br>(0.2 to 0.2)                               | < 0.05<br>(< 0.05 to 0.1)               | 64.7<br>(42.8 to 88.4)                            | 0.2<br>(-13.0 to 14.6)                              |
| Liver cancer due to hepatitis B                                         | 0.1<br>(0.1 to 0.1)                           | 0.1<br>(0.1 to 0.1)                               | < 0.05<br>(< 0.05 to < 0.05)            | 62.6<br>(40.9 to 87.8)                            | 0.5<br>(-13.0 to 15.8)                              |



| Cause                                              | Prevalence in thousands (95% UI)        | Incidence in thousands (95% UI)        | YLDs in thousands (95% UI)           |                                                   |                                                     |
|----------------------------------------------------|-----------------------------------------|----------------------------------------|--------------------------------------|---------------------------------------------------|-----------------------------------------------------|
|                                                    | 2016 counts                             | 2016 counts                            | 2016 counts                          | Percentage change in counts between 2006 and 2016 | Percentage change in age-standardised rates between |
| Liver cancer due to hepatitis C                    | < 0.05<br>(< 0.05 to 0.1)               | < 0.05<br>(< 0.05 to 0.1)              | < 0.05<br>(< 0.05 to < 0.05)         | 66.3<br>(40.9 to 92.0)                            | -1.9<br>(-16.5 to 12.6)                             |
| Liver cancer due to alcohol use                    | < 0.05<br>(< 0.05 to < 0.05)            | < 0.05<br>(< 0.05 to < 0.05)           | < 0.05<br>(< 0.05 to < 0.05)         | 65.0<br>(39.8 to 95.8)                            | 1.6<br>(-13.3 to 20.3)                              |
| Liver cancer due to other causes                   | < 0.05<br>(< 0.05 to < 0.05)            | < 0.05<br>(< 0.05 to < 0.05)           | < 0.05<br>(< 0.05 to < 0.05)         | 67.2<br>(41.7 to 96.7)                            | 1.5<br>(-14.2 to 19.5)                              |
| Gallbladder and biliary tract cancer               | 0.1<br>(0.1 to 0.1)                     | 0.1<br>(0.1 to 0.1)                    | < 0.05<br>(< 0.05 to < 0.05)         | 50.6<br>(36.8 to 68.7)                            | -11.0<br>(-19.6 to -0.3)                            |
| Pancreatic cancer                                  | 0.2<br>(0.2 to 0.2)                     | 0.2<br>(0.2 to 0.3)                    | 0.1<br>(< 0.05 to 0.1)               | 55.4<br>(40.5 to 70.4)                            | -3.7<br>(-13.1 to 5.7)                              |
| Larynx cancer                                      | 1.0<br>(0.9 to 1.1)                     | 0.3<br>(0.2 to 0.3)                    | 0.1<br>(0.1 to 0.1)                  | 70.3<br>(40.4 to 107.6)                           | 5.3<br>(-13.6 to 28.6)                              |
| Tracheal, bronchus, and lung cancer                | 1.7<br>(1.5 to 1.9)                     | 1.5<br>(1.3 to 1.6)                    | 0.3<br>(0.2 to 0.4)                  | 59.0<br>(33.5 to 89.5)                            | -2.4<br>(-17.6 to 15.8)                             |
| Malignant skin melanoma                            | 0.5<br>(0.5 to 0.6)                     | 0.1<br>(0.1 to 0.1)                    | < 0.05<br>(< 0.05 to 0.1)            | 118.0<br>(80.3 to 162.8)                          | 31.7<br>(8.6 to 57.7)                               |
| Non-melanoma skin cancer                           | 0.2<br>(0.2 to 0.3)                     | 0.7<br>(0.6 to 0.7)                    | < 0.05<br>(< 0.05 to < 0.05)         | 71.7<br>(52.3 to 94.2)                            | 0.9<br>(-10.7 to 14.3)                              |
| Non-melanoma skin cancer (squamous-cell carcinoma) | 0.2<br>(0.2 to 0.2)                     | 0.2<br>(0.2 to 0.2)                    | < 0.05<br>(< 0.05 to < 0.05)         | 71.7<br>(51.2 to 95.5)                            | 0.7<br>(-11.9 to 14.8)                              |
| Non-melanoma skin cancer (basal-cell carcinoma)    | 0.1<br>(< 0.05 to 0.1)                  | 0.5<br>(0.4 to 0.5)                    | < 0.05<br>(< 0.05 to < 0.05)         | 71.6<br>(43.8 to 108.9)                           | 3.8<br>(-14.8 to 27.7)                              |
| Breast cancer                                      | 11.9<br>(8.9 to 15.8)                   | 2.5<br>(1.9 to 3.3)                    | 0.9<br>(0.6 to 1.4)                  | 67.1<br>(34.1 to 109.4)                           | 5.0<br>(-15.1 to 31.5)                              |
| Cervical cancer                                    | 0.5<br>(0.3 to 0.7)                     | 0.1<br>(0.1 to 0.2)                    | < 0.05<br>(< 0.05 to 0.1)            | 29.1<br>(5.9 to 64.8)                             | -17.9<br>(-32.4 to 5.1)                             |
| Uterine cancer                                     | 1.4<br>(1.2 to 1.8)                     | 0.3<br>(0.2 to 0.4)                    | 0.1<br>(0.1 to 0.2)                  | 77.9<br>(38.5 to 133.6)                           | 10.5<br>(-14.1 to 46.1)                             |
| Ovarian cancer                                     | 0.9<br>(0.7 to 1.0)                     | 0.3<br>(0.2 to 0.3)                    | 0.1<br>(0.1 to 0.2)                  | 62.8<br>(20.0 to 117.6)                           | 1.6<br>(-25.6 to 37.5)                              |
| Prostate cancer                                    | 8.0<br>(4.9 to 9.8)                     | 1.8<br>(1.1 to 2.2)                    | 0.7<br>(0.4 to 1.0)                  | 111.3<br>(79.1 to 148.7)                          | 23.8<br>(5.7 to 44.1)                               |
| Testicular cancer                                  | 0.6<br>(0.5 to 0.8)                     | 0.1<br>(0.1 to 0.2)                    | < 0.05<br>(< 0.05 to 0.1)            | 107.4<br>(39.1 to 210.3)                          | 29.7<br>(-12.5 to 93.9)                             |
| Kidney cancer                                      | 0.8<br>(0.7 to 0.9)                     | 0.2<br>(0.2 to 0.3)                    | 0.1<br>(0.1 to 0.1)                  | 66.6<br>(42.9 to 90.8)                            | 5.6<br>(-9.0 to 21.2)                               |
| Bladder cancer                                     | 6.5<br>(5.7 to 7.2)                     | 1.6<br>(1.4 to 1.8)                    | 0.5<br>(0.4 to 0.7)                  | 85.9<br>(61.0 to 115.1)                           | 10.7<br>(-3.9 to 27.6)                              |
| Brain and nervous system cancer                    | 0.7<br>(0.5 to 0.8)                     | 0.3<br>(0.3 to 0.3)                    | 0.1<br>(0.1 to 0.1)                  | 74.7<br>(57.1 to 94.6)                            | 13.8<br>(3.0 to 26.3)                               |
| Thyroid cancer                                     | 2.2<br>(1.9 to 2.6)                     | 0.4<br>(0.4 to 0.5)                    | 0.1<br>(0.1 to 0.2)                  | 116.8<br>(77.6 to 167.9)                          | 36.5<br>(12.5 to 67.9)                              |
| Mesothelioma                                       | < 0.05<br>(< 0.05 to < 0.05)            | < 0.05<br>(< 0.05 to < 0.05)           | < 0.05<br>(< 0.05 to < 0.05)         | 56.7<br>(37.9 to 73.7)                            | -4.3<br>(-15.8 to 6.0)                              |
| Hodgkin lymphoma                                   | 1.1<br>(0.7 to 1.4)                     | 0.3<br>(0.2 to 0.3)                    | 0.1<br>(0.1 to 0.1)                  | 90.2<br>(59.6 to 124.4)                           | 21.1<br>(3.1 to 42.6)                               |
| Non-Hodgkin's lymphoma                             | 3.7<br>(2.5 to 4.2)                     | 1.1<br>(0.7 to 1.2)                    | 0.3<br>(0.2 to 0.5)                  | 99.2<br>(72.7 to 127.8)                           | 24.4<br>(7.6 to 41.6)                               |
| Multiple myeloma                                   | 0.5<br>(0.4 to 0.6)                     | 0.2<br>(0.2 to 0.2)                    | 0.1<br>(0.1 to 0.1)                  | 85.4<br>(48.6 to 129.3)                           | 14.0<br>(-8.3 to 40.1)                              |
| Leukaemia                                          | 1.8<br>(1.6 to 2.1)                     | 0.5<br>(0.4 to 0.6)                    | 0.2<br>(0.2 to 0.3)                  | 60.4<br>(43.9 to 78.6)                            | 4.0<br>(-7.1 to 15.8)                               |
| Acute lymphoid leukaemia                           | 0.2<br>(0.2 to 0.4)                     | 0.1<br>(< 0.05 to 0.1)                 | < 0.05<br>(< 0.05 to < 0.05)         | 87.0<br>(46.9 to 139.7)                           | 42.1<br>(7.9 to 88.3)                               |
| Chronic lymphoid leukaemia                         | 0.3<br>(0.2 to 0.3)                     | 0.1<br>(< 0.05 to 0.1)                 | < 0.05<br>(< 0.05 to < 0.05)         | 70.8<br>(43.8 to 104.4)                           | 5.8<br>(-11.3 to 27.2)                              |
| Acute myeloid leukaemia                            | 0.1<br>(0.1 to 0.2)                     | 0.1<br>(0.1 to 0.1)                    | < 0.05<br>(< 0.05 to < 0.05)         | 70.7<br>(49.6 to 94.4)                            | 13.4<br>(-1.7 to 33.0)                              |
| Chronic myeloid leukaemia                          | 0.2<br>(0.1 to 0.3)                     | 0.1<br>(< 0.05 to 0.1)                 | < 0.05<br>(< 0.05 to < 0.05)         | 47.5<br>(22.9 to 75.0)                            | -7.7<br>(-22.8 to 9.4)                              |
| Other leukaemia                                    | 1.0<br>(0.8 to 1.2)                     | 0.2<br>(0.2 to 0.3)                    | 0.1<br>(0.1 to 0.2)                  | 52.2<br>(28.9 to 77.8)                            | -3.5<br>(-18.2 to 12.7)                             |
| Other neoplasms                                    | 2.4<br>(2.1 to 2.6)                     | 0.7<br>(0.7 to 0.8)                    | 0.2<br>(0.1 to 0.3)                  | 86.9<br>(63.0 to 113.4)                           | 18.6<br>(3.8 to 34.6)                               |
| <b>Cardiovascular diseases</b>                     | <b>437.4</b><br><b>(420.1 to 454.0)</b> | <b>48.2†</b><br><b>(45.4 to 51.4)</b>  | <b>25.5</b><br><b>(18.5 to 33.4)</b> | <b>64.7</b><br><b>(58.7 to 70.7)</b>              | <b>0.8</b><br><b>(-2.9 to 4.4)</b>                  |
| Rheumatic heart disease                            | 0.4<br>(0.3 to 0.5)                     | 0.1<br>(0.1 to 0.1)                    | < 0.05<br>(< 0.05 to < 0.05)         | 59.4<br>(46.0 to 73.4)                            | 2.4<br>(-6.5 to 11.7)                               |
| Ischaemic heart disease                            | 212.1<br>(199.8 to 225.0)               | 25.8<br>(23.5 to 28.6)                 | 8.5<br>(6.0 to 11.6)                 | 66.9<br>(60.1 to 73.9)                            | 2.2<br>(-1.9 to 6.2)                                |
| Cerebrovascular disease                            | 44.5<br>(41.5 to 47.9)                  | 6.8‡<br>(6.1 to 7.5)                   | 7.1<br>(5.1 to 9.1)                  | 65.3<br>(52.4 to 78.2)                            | -0.5<br>(-8.2 to 7.2)                               |
| Ischaemic stroke                                   | 39.5<br>(35.4 to 44.3)                  | 5.2‡<br>(4.6 to 6.0)                   | 6.1<br>(4.3 to 7.8)                  | 65.5<br>(50.9 to 80.2)                            | -0.8<br>(-9.5 to 7.9)                               |
| Hemorrhagic stroke                                 | 6.8<br>(6.1 to 7.5)                     | 1.5‡<br>(1.3 to 1.7)                   | 1.0<br>(0.7 to 1.3)                  | 64.1<br>(45.1 to 84.7)                            | 1.5<br>(-10.7 to 14.4)                              |
| Hypertensive heart disease                         | 10.9<br>(9.3 to 12.8)                   | --                                     | 0.9<br>(0.6 to 1.2)                  | 66.5<br>(49.8 to 85.9)                            | 1.2<br>(-8.8 to 11.8)                               |
| Cardiomyopathy and myocarditis                     | 5.0<br>(4.4 to 5.6)                     | 2.4†<br>(2.1 to 2.8)                   | 0.5<br>(0.3 to 0.7)                  | 62.4<br>(46.1 to 82.2)                            | 3.5<br>(-6.6 to 15.1)                               |
| Myocarditis                                        | 1.4<br>(1.3 to 1.6)                     | 2.4<br>(2.1 to 2.8)                    | 0.1<br>(0.1 to 0.1)                  | 54.5<br>(36.8 to 77.0)                            | 3.8<br>(-7.1 to 17.4)                               |
| Alcoholic cardiomyopathy                           | 0.5<br>(0.4 to 0.6)                     | --                                     | < 0.05<br>(< 0.05 to 0.1)            | 67.6<br>(38.4 to 104.9)                           | 3.6<br>(-14.8 to 25.9)                              |
| Other cardiomyopathy                               | 4.1<br>(3.6 to 4.7)                     | --                                     | 0.3<br>(0.2 to 0.5)                  | 64.3<br>(41.5 to 91.9)                            | 3.4<br>(-10.0 to 18.9)                              |
| Atrial fibrillation and flutter                    | 30.3<br>(26.4 to 35.0)                  | 2.5<br>(2.1 to 3.0)                    | 2.3<br>(1.6 to 3.2)                  | 69.5<br>(58.2 to 82.2)                            | -0.0<br>(-6.2 to 7.2)                               |
| Peripheral vascular disease                        | 102.6<br>(89.2 to 119.5)                | 9.6<br>(8.3 to 11.4)                   | 0.4<br>(0.2 to 0.8)                  | 58.5<br>(46.4 to 73.0)                            | -5.5<br>(-11.5 to 1.9)                              |
| Endocarditis                                       | 0.7<br>(0.6 to 0.8)                     | 1.0<br>(0.9 to 1.1)                    | 0.1<br>(< 0.05 to 0.1)               | 71.2<br>(44.4 to 100.2)                           | 2.1<br>(-14.0 to 19.4)                              |
| Other cardiovascular and circulatory diseases      | 111.7<br>(97.2 to 129.7)                | --                                     | 5.8<br>(3.9 to 8.1)                  | 59.2<br>(48.4 to 71.8)                            | 1.0<br>(-5.8 to 8.4)                                |
| <b>Chronic respiratory diseases</b>                | <b>626.0</b><br><b>(600.6 to 651.0)</b> | <b>96.5†</b><br><b>(91.0 to 102.5)</b> | <b>26.2</b><br><b>(19.2 to 34.9)</b> | <b>53.6</b><br><b>(47.6 to 59.3)</b>              | <b>3.7</b><br><b>(-0.0 to 7.4)</b>                  |
| Chronic obstructive pulmonary disease              | 179.1<br>(171.3 to 186.9)               | 10.3<br>(9.8 to 10.8)                  | 7.1<br>(6.0 to 8.2)                  | 61.0<br>(48.6 to 75.4)                            | 0.7<br>(-6.9 to 9.7)                                |
| Pneumoconiosis                                     | 0.4<br>(0.3 to 0.4)                     | < 0.05<br>(< 0.05 to < 0.05)           | 0.1<br>(< 0.05 to 0.1)               | 60.1<br>(52.4 to 67.2)                            | 1.1<br>(-3.7 to 5.6)                                |
| Silicosis                                          | 0.1<br>(0.1 to 0.1)                     | < 0.05<br>(< 0.05 to < 0.05)           | < 0.05<br>(< 0.05 to < 0.05)         | 53.4<br>(45.0 to 61.6)                            | -1.4<br>(-6.7 to 3.6)                               |



| Cause                                                          | Prevalence in thousands (95% UI)        | Incidence in thousands (95% UI)       | YLDs in thousands (95% UI)        |                                                   |                                                     |
|----------------------------------------------------------------|-----------------------------------------|---------------------------------------|-----------------------------------|---------------------------------------------------|-----------------------------------------------------|
|                                                                | 2016 counts                             | 2016 counts                           | 2016 counts                       | Percentage change in counts between 2006 and 2016 | Percentage change in age-standardised rates between |
| Asbestosis                                                     | 0.1<br>(0.1 to 0.1)                     | < 0.05<br>(< 0.05 to < 0.05)          | < 0.05<br>(< 0.05 to < 0.05)      | 59.5<br>(52.5 to 67.3)                            | -0.8<br>(-5.2 to 4.0)                               |
| Coal workers pneumoconiosis                                    | --                                      | --                                    | --                                | --                                                | --                                                  |
| Other pneumoconiosis                                           | 0.2<br>(0.2 to 0.2)                     | < 0.05<br>(< 0.05 to < 0.05)          | < 0.05<br>(< 0.05 to < 0.05)      | 63.5<br>(49.3 to 76.4)                            | 3.4<br>(-5.7 to 12.2)                               |
| Asthma                                                         | 474.2<br>(443.8 to 507.0)               | 85.9<br>(80.4 to 92.2)                | 18.3<br>(12.1 to 26.4)            | 50.0<br>(44.1 to 56.0)                            | 4.5<br>(0.7 to 8.4)                                 |
| Interstitial lung disease and pulmonary sarcoidosis            | 2.5<br>(2.2 to 2.7)                     | 0.3<br>(0.2 to 0.3)                   | 0.3<br>(0.2 to 0.4)               | 63.0<br>(47.7 to 80.2)                            | -1.0<br>(-10.2 to 9.4)                              |
| Other chronic respiratory diseases                             | --                                      | --                                    | 0.5<br>(0.4 to 0.6)               | 87.8<br>(60.5 to 122.5)                           | 33.7<br>(14.4 to 56.9)                              |
| <b>Cirrhosis and other chronic liver diseases</b>              | <b>30.2<br/>(28.4 to 32.0)</b>          | <b>1.3<br/>(1.2 to 1.4)</b>           | <b>1.3<br/>(0.9 to 1.8)</b>       | <b>60.7<br/>(46.0 to 76.4)</b>                    | <b>5.8<br/>(-2.8 to 15.4)</b>                       |
| Cirrhosis and other chronic liver diseases due to hepatitis B  | 10.0<br>(8.4 to 11.7)                   | 0.5<br>(0.4 to 0.6)                   | 0.4<br>(0.2 to 0.5)               | 69.7<br>(44.1 to 96.3)                            | 6.1<br>(-8.4 to 21.1)                               |
| Cirrhosis and other chronic liver diseases due to hepatitis C  | 9.0<br>(7.1 to 11.0)                    | 0.4<br>(0.3 to 0.5)                   | 0.3<br>(0.2 to 0.5)               | 69.9<br>(42.7 to 101.4)                           | 6.6<br>(-9.0 to 24.2)                               |
| Cirrhosis and other chronic liver diseases due to alcohol use  | 1.9<br>(1.6 to 2.1)                     | 0.1<br>(0.1 to 0.1)                   | 0.1<br>(< 0.05 to 0.1)            | 70.4<br>(31.9 to 123.2)                           | 5.9<br>(-18.2 to 38.7)                              |
| Cirrhosis and other chronic liver diseases due to other causes | 9.3<br>(8.4 to 10.3)                    | 0.3<br>(0.3 to 0.4)                   | 0.5<br>(0.3 to 0.7)               | 48.7<br>(25.4 to 74.2)                            | 5.1<br>(-10.6 to 21.5)                              |
| <b>Digestive diseases</b>                                      | <b>204.9<br/>(191.9 to 219.0)</b>       | <b>154.5†<br/>(144.9 to 164.9)</b>    | <b>5.7<br/>(4.1 to 7.7)</b>       | <b>63.2<br/>(51.9 to 75.1)</b>                    | <b>6.1<br/>(-0.9 to 14.0)</b>                       |
| Peptic ulcer disease                                           | 62.0<br>(55.6 to 69.8)                  | 5.9<br>(5.2 to 6.8)                   | 1.1<br>(0.7 to 1.6)               | 90.8<br>(70.1 to 113.7)                           | 20.6<br>(7.5 to 35.1)                               |
| Gastritis and duodenitis                                       | 72.5<br>(64.1 to 82.0)                  | 65.1<br>(57.5 to 73.8)                | 1.0<br>(0.7 to 1.5)               | 84.5<br>(66.3 to 106.0)                           | 17.1<br>(5.6 to 30.5)                               |
| Appendicitis                                                   | 0.8<br>(0.7 to 0.8)                     | 20.3<br>(18.6 to 22.2)                | 0.2<br>(0.1 to 0.4)               | 48.7<br>(6.1 to 106.4)                            | 2.2<br>(-25.0 to 38.9)                              |
| Paralytic ileus and intestinal obstruction                     | 0.1<br>(0.1 to 0.1)                     | 2.1<br>(1.8 to 2.3)                   | < 0.05<br>(< 0.05 to < 0.05)      | 61.0<br>(55.7 to 66.7)                            | 3.9<br>(1.1 to 7.2)                                 |
| Inguinal, femoral, and abdominal hernia                        | 63.5<br>(56.2 to 71.0)                  | 28.5<br>(24.5 to 32.6)                | 2.5<br>(1.7 to 3.6)               | 48.0<br>(33.5 to 65.2)                            | -2.6<br>(-11.8 to 8.0)                              |
| Inflammatory bowel disease                                     | 1.2<br>(1.1 to 1.3)                     | 2.1<br>(2.0 to 2.2)                   | 0.2<br>(0.1 to 0.3)               | 61.1<br>(33.5 to 92.0)                            | 4.7<br>(-13.6 to 25.8)                              |
| Vascular intestinal disorders                                  | < 0.05<br>(< 0.05 to 0.1)               | 0.3<br>(0.2 to 0.3)                   | < 0.05<br>(< 0.05 to < 0.05)      | 58.0<br>(49.9 to 65.7)                            | 0.5<br>(-4.2 to 5.0)                                |
| Gallbladder and biliary diseases                               | 10.8<br>(9.3 to 12.2)                   | 28.7<br>(24.8 to 32.8)                | 0.1<br>(0.1 to 0.2)               | 63.8<br>(34.8 to 100.8)                           | 4.7<br>(-14.8 to 29.0)                              |
| Pancreatitis                                                   | 0.2<br>(0.2 to 0.2)                     | 1.6<br>(1.4 to 1.8)                   | < 0.05<br>(< 0.05 to < 0.05)      | 67.2<br>(61.8 to 73.0)                            | 6.1<br>(2.9 to 9.7)                                 |
| Other digestive diseases                                       | --                                      | --                                    | 0.4<br>(0.3 to 0.6)               | 69.2<br>(57.7 to 82.6)                            | 10.0<br>(2.7 to 18.1)                               |
| <b>Neurological disorders</b>                                  | <b>2,425.3<br/>(2,325.0 to 2,537.8)</b> | <b>1,153.3<br/>(970.9 to 1,355.7)</b> | <b>71.5<br/>(48.4 to 97.4)</b>    | <b>55.4<br/>(39.1 to 76.1)</b>                    | <b>1.0<br/>(-9.8 to 14.9)</b>                       |
| Alzheimer's disease and other dementias                        | 45.7<br>(38.0 to 54.8)                  | 7.5<br>(6.2 to 9.1)                   | 6.5<br>(4.5 to 8.7)               | 82.9<br>(74.5 to 91.9)                            | -0.9<br>(-4.8 to 3.1)                               |
| Parkinson's disease                                            | 5.1<br>(4.0 to 6.4)                     | 0.6<br>(0.5 to 0.8)                   | 0.6<br>(0.4 to 0.8)               | 88.2<br>(66.7 to 110.9)                           | 8.8<br>(-3.0 to 21.0)                               |
| Epilepsy                                                       | 18.8<br>(6.0 to 29.9)                   | 2.0<br>(0.7 to 3.2)                   | 5.4<br>(1.5 to 11.4)              | 36.3<br>(-64.1 to 454.4)                          | -3.9<br>(-74.3 to 296.1)                            |
| Multiple sclerosis                                             | 3.4<br>(3.0 to 3.9)                     | 0.1<br>(0.1 to 0.1)                   | 0.9<br>(0.6 to 1.2)               | 64.3<br>(41.0 to 91.7)                            | 5.0<br>(-9.4 to 22.1)                               |
| Motor neuron disease                                           | 0.2<br>(0.1 to 0.2)                     | < 0.05<br>(< 0.05 to < 0.05)          | < 0.05<br>(< 0.05 to < 0.05)      | 52.9<br>(46.9 to 59.4)                            | 2.4<br>(-1.2 to 6.4)                                |
| Migraine                                                       | 1,017.5<br>(954.3 to 1,084.1)           | 110.4<br>(101.9 to 119.5)             | 47.8<br>(30.9 to 66.6)            | 53.9<br>(48.8 to 59.9)                            | 1.2<br>(-2.0 to 4.8)                                |
| Tension-type headache                                          | 1,795.2<br>(1,607.6 to 2,009.9)         | 1,032.6<br>(856.7 to 1,235.5)         | 8.9<br>(5.6 to 13.3)              | 55.7<br>(48.6 to 64.0)                            | 1.7<br>(-2.8 to 6.9)                                |
| Other neurological disorders                                   | < 0.05<br>(< 0.05 to < 0.05)            | < 0.05<br>(< 0.05 to 0.1)             | 1.4<br>(0.6 to 2.6)               | 61.8<br>(-37.7 to 345.8)                          | 16.2<br>(-54.7 to 208.9)                            |
| <b>Mental and substance use disorders</b>                      | <b>1,025.9<br/>(991.4 to 1,059.2)</b>   | <b>385.8†<br/>(356.5 to 419.5)</b>    | <b>143.6<br/>(103.8 to 185.2)</b> | <b>50.8<br/>(47.0 to 55.1)</b>                    | <b>-0.6<br/>(-2.9 to 2.1)</b>                       |
| Schizophrenia                                                  | 11.7<br>(10.2 to 13.4)                  | 0.8<br>(0.7 to 0.9)                   | 7.4<br>(5.3 to 9.2)               | 57.7<br>(43.2 to 73.2)                            | 0.7<br>(-8.2 to 10.0)                               |
| Alcohol use disorders                                          | 43.8<br>(36.6 to 51.8)                  | 23.3<br>(19.6 to 27.2)                | 4.4<br>(2.9 to 6.1)               | 64.5<br>(49.9 to 81.7)                            | 5.4<br>(-3.6 to 15.6)                               |
| Drug use disorders                                             | 55.8<br>(49.7 to 62.4)                  | 6.7<br>(5.9 to 7.5)                   | 18.1<br>(12.5 to 24.4)            | 67.2<br>(53.8 to 82.2)                            | 5.6<br>(-2.5 to 14.7)                               |
| Opioid use disorders                                           | 40.9<br>(34.0 to 49.8)                  | 4.1<br>(3.4 to 4.9)                   | 16.9<br>(11.5 to 23.1)            | 67.8<br>(53.1 to 84.5)                            | 5.8<br>(-3.1 to 15.6)                               |
| Cocaine use disorders                                          | 2.6<br>(2.2 to 3.0)                     | 0.2<br>(0.2 to 0.3)                   | 0.4<br>(0.2 to 0.5)               | 57.1<br>(14.3 to 117.8)                           | 2.5<br>(-23.5 to 40.3)                              |
| Amphetamine use disorders                                      | 0.2<br>(0.2 to 0.4)                     | < 0.05<br>(< 0.05 to 0.1)             | < 0.05<br>(< 0.05 to 0.1)         | 63.8<br>(47.3 to 84.0)                            | 4.4<br>(-5.6 to 16.3)                               |
| Cannabis use disorders                                         | 10.3<br>(8.5 to 12.3)                   | 1.8<br>(1.5 to 2.1)                   | 0.3<br>(0.2 to 0.5)               | 56.0<br>(24.3 to 93.6)                            | 2.2<br>(-16.7 to 25.2)                              |
| Other drug use disorders                                       | 2.6<br>(2.2 to 2.9)                     | 0.5<br>(0.4 to 0.6)                   | 0.5<br>(0.4 to 0.8)               | 61.9<br>(31.1 to 98.1)                            | 4.0<br>(-15.0 to 25.4)                              |
| Depressive disorders                                           | 230.5<br>(216.6 to 245.4)               | 279.2<br>(250.0 to 311.4)             | 40.9<br>(28.1 to 55.5)            | 45.8<br>(38.0 to 54.1)                            | -4.9<br>(-9.7 to 0.3)                               |
| Major depressive disorder                                      | 172.9<br>(154.8 to 192.9)               | 268.1<br>(239.1 to 300.9)             | 35.0<br>(23.7 to 47.6)            | 44.0<br>(35.6 to 53.3)                            | -5.9<br>(-11.3 to 0.1)                              |
| Dysthymia                                                      | 61.9<br>(54.1 to 71.1)                  | 11.2<br>(9.8 to 12.7)                 | 5.9<br>(4.0 to 8.6)               | 57.9<br>(47.5 to 68.9)                            | 1.5<br>(-5.0 to 8.4)                                |
| Bipolar disorder                                               | 61.8<br>(53.9 to 70.7)                  | 4.7<br>(4.1 to 5.4)                   | 12.6<br>(7.8 to 18.7)             | 52.8<br>(44.8 to 60.9)                            | 0.5<br>(-4.3 to 5.4)                                |
| Anxiety disorders                                              | 340.3<br>(309.5 to 372.5)               | 45.3<br>(41.4 to 49.4)                | 32.6<br>(22.8 to 44.4)            | 50.5<br>(39.6 to 61.4)                            | 0.3<br>(-6.4 to 7.1)                                |
| Eating disorders                                               | 12.6<br>(10.3 to 15.0)                  | 5.7<br>(4.2 to 7.7)                   | 2.5<br>(1.6 to 3.6)               | 67.5<br>(49.0 to 88.6)                            | 10.9<br>(-1.2 to 24.7)                              |
| Anorexia nervosa                                               | 1.9<br>(1.4 to 2.5)                     | 0.8<br>(0.6 to 1.0)                   | 0.4<br>(0.2 to 0.6)               | 57.1<br>(20.8 to 104.3)                           | 8.5<br>(-16.3 to 40.5)                              |
| Bulimia nervosa                                                | 9.9<br>(7.3 to 13.4)                    | 5.0<br>(3.5 to 6.9)                   | 2.1<br>(1.3 to 3.0)               | 69.7<br>(48.1 to 94.8)                            | 11.4<br>(-2.6 to 27.9)                              |
| Autistic spectrum disorders                                    | 52.9<br>(47.6 to 59.8)                  | 0.2<br>(0.2 to 0.4)                   | 7.6<br>(5.2 to 10.7)              | 43.5<br>(37.1 to 50.4)                            | -0.7<br>(-5.0 to 3.9)                               |
| Autism                                                         | 15.4<br>(13.1 to 18.0)                  | < 0.05<br>(< 0.05 to < 0.05)          | 3.9<br>(2.6 to 5.6)               | 44.3<br>(33.8 to 56.1)                            | -0.5<br>(-8.2 to 7.3)                               |
| Asperger syndrome and other autistic spectrum disorders        | 37.5<br>(31.5 to 44.9)                  | 0.2<br>(0.1 to 0.3)                   | 3.7<br>(2.4 to 5.4)               | 42.7<br>(36.0 to 50.0)                            | -0.9<br>(-5.5 to 4.0)                               |

| Cause                                                      | Prevalence in thousands (95% UI)              | Incidence in thousands (95% UI)                   | YLDs in thousands (95% UI)             |                                                   |                                                     |
|------------------------------------------------------------|-----------------------------------------------|---------------------------------------------------|----------------------------------------|---------------------------------------------------|-----------------------------------------------------|
|                                                            | 2016 counts                                   | 2016 counts                                       | 2016 counts                            | Percentage change in counts between 2006 and 2016 | Percentage change in age-standardised rates between |
| Attention-deficit/hyperactivity disorder                   | 80.0<br>(71.2 to 90.3)                        | 2.4<br>(2.0 to 2.7)                               | 1.0<br>(0.6 to 1.6)                    | 40.3<br>(32.5 to 49.3)                            | -0.3<br>(-5.7 to 6.0)                               |
| Conduct disorder                                           | 42.1<br>(34.0 to 49.8)                        | 13.3<br>(10.3 to 16.0)                            | 5.1<br>(3.1 to 7.9)                    | 25.9<br>(19.0 to 33.0)                            | 0.3<br>(-5.4 to 5.7)                                |
| Idiopathic developmental intellectual disability           | 82.9<br>(45.7 to 122.9)                       | --                                                | 3.1<br>(1.4 to 5.6)                    | 38.6<br>(28.2 to 50.4)                            | -6.0<br>(-13.4 to 1.6)                              |
| Other mental and substance use disorders                   | 115.0<br>(101.2 to 132.7)                     | 4.1<br>(3.6 to 4.7)                               | 8.4<br>(5.9 to 12.1)                   | 56.5<br>(49.6 to 64.4)                            | -0.3<br>(-4.6 to 4.3)                               |
| <b>Diabetes, urogenital, blood, and endocrine diseases</b> | <b>2,332.4</b><br><b>(2,298.7 to 2,365.2)</b> | <b>706.1†</b><br><b>(663.4 to 749.8)</b>          | <b>58.8</b><br><b>(42.0 to 79.7)</b>   | <b>56.1</b><br><b>(49.2 to 62.7)</b>              | <b>-1.2</b><br><b>(-5.7 to 2.9)</b>                 |
| Diabetes mellitus                                          | 354.0<br>(316.5 to 394.8)                     | 19.8<br>(17.6 to 22.4)                            | 30.5<br>(20.7 to 43.0)                 | 58.1<br>(45.5 to 69.2)                            | -0.5<br>(-8.6 to 6.7)                               |
| Acute glomerulonephritis                                   | 0.1<br>(0.1 to 0.1)                           | 0.9<br>(0.8 to 1.0)                               | < 0.05<br>(< 0.05 to < 0.05)           | 50.4<br>(42.7 to 57.3)                            | 0.5<br>(-4.1 to 4.7)                                |
| Chronic kidney disease                                     | 284.6<br>(259.0 to 312.7)                     | 18.6<br>(16.4 to 20.9)                            | 8.8<br>(6.6 to 11.3)                   | 58.4<br>(47.1 to 72.3)                            | -1.7<br>(-8.6 to 7.0)                               |
| Chronic kidney disease due to diabetes mellitus            | 123.8<br>(106.9 to 142.2)                     | 8.1<br>(6.7 to 9.6)                               | 3.6<br>(2.6 to 4.7)                    | 54.2<br>(39.9 to 72.5)                            | -3.0<br>(-11.9 to 8.3)                              |
| Chronic kidney disease due to hypertension                 | 45.0<br>(38.1 to 51.9)                        | 2.6<br>(2.1 to 3.2)                               | 1.4<br>(1.0 to 1.9)                    | 70.3<br>(49.3 to 94.3)                            | -0.7<br>(-12.0 to 13.0)                             |
| Chronic kidney disease due to glomerulonephritis           | 40.9<br>(34.8 to 47.6)                        | 2.8<br>(2.2 to 3.5)                               | 1.3<br>(1.0 to 1.8)                    | 59.4<br>(40.4 to 80.8)                            | 0.5<br>(-10.6 to 13.6)                              |
| Chronic kidney disease due to other causes                 | 75.0<br>(62.2 to 88.1)                        | 5.1<br>(4.2 to 6.0)                               | 2.4<br>(1.7 to 3.3)                    | 57.8<br>(42.8 to 76.1)                            | -1.4<br>(-10.6 to 9.4)                              |
| Urinary diseases and male infertility                      | 174.9<br>(154.2 to 197.5)                     | 357.9†<br>(323.2 to 395.1)                        | 4.9<br>(3.1 to 7.1)                    | 50.5<br>(33.4 to 70.4)                            | -7.0<br>(-17.5 to 4.8)                              |
| Interstitial nephritis and urinary tract infections        | 5.2<br>(4.5 to 5.9)                           | 271.9<br>(237.6 to 309.0)                         | 0.2<br>(0.1 to 0.3)                    | 51.7<br>(30.1 to 79.2)                            | 0.8<br>(-13.8 to 17.9)                              |
| Urolithiasis                                               | 2.7<br>(2.4 to 3.1)                           | 71.5<br>(62.7 to 82.1)                            | 0.2<br>(0.1 to 0.3)                    | 56.7<br>(29.8 to 88.9)                            | 0.5<br>(-17.1 to 21.3)                              |
| Benign prostatic hyperplasia                               | 128.5<br>(107.0 to 154.5)                     | 14.6<br>(12.1 to 17.6)                            | 4.2<br>(2.6 to 6.2)                    | 51.6<br>(32.0 to 75.5)                            | -7.2<br>(-18.9 to 6.5)                              |
| Male infertility                                           | 31.7<br>(24.9 to 40.8)                        | --                                                | 0.2<br>(0.1 to 0.4)                    | 38.3<br>(20.4 to 59.4)                            | -9.6<br>(-21.4 to 4.4)                              |
| Other urinary diseases                                     | --                                            | --                                                | 0.1<br>(0.1 to 0.2)                    | 28.9<br>(13.4 to 46.8)                            | -15.7<br>(-25.8 to -4.3)                            |
| Gynecological diseases                                     | 678.1<br>(648.1 to 708.5)                     | 295.2†<br>(273.0 to 319.2)                        | 8.8<br>(6.0 to 12.6)                   | 59.5<br>(52.6 to 66.9)                            | 2.1<br>(-1.8 to 6.8)                                |
| Uterine fibroids                                           | 60.0<br>(52.8 to 67.6)                        | 6.8<br>(5.9 to 7.9)                               | 0.8<br>(0.5 to 1.3)                    | 51.9<br>(40.0 to 65.4)                            | -2.0<br>(-9.3 to 6.5)                               |
| Polycystic ovarian syndrome                                | 5.4<br>(4.0 to 7.1)                           | 7.6<br>(5.4 to 10.1)                              | < 0.05<br>(< 0.05 to 0.1)              | 65.5<br>(43.5 to 92.7)                            | 8.3<br>(-5.4 to 26.9)                               |
| Female infertility                                         | 27.6<br>(14.2 to 48.8)                        | --                                                | 0.2<br>(0.1 to 0.4)                    | 108.2<br>(48.4 to 215.2)                          | 39.4<br>(-3.5 to 116.8)                             |
| Endometriosis                                              | 1.4<br>(1.1 to 1.7)                           | 4.2<br>(3.4 to 5.1)                               | 0.1<br>(0.1 to 0.2)                    | 60.1<br>(18.7 to 116.1)                           | 4.1<br>(-21.1 to 38.7)                              |
| Genital prolapse                                           | 137.9<br>(119.9 to 156.5)                     | 8.8<br>(7.6 to 10.2)                              | 0.4<br>(0.2 to 0.8)                    | 27.3<br>(17.2 to 39.3)                            | -20.4<br>(-26.8 to -12.7)                           |
| Premenstrual syndrome                                      | 421.7<br>(396.4 to 449.5)                     | 157.2<br>(146.7 to 168.8)                         | 3.5<br>(2.1 to 5.3)                    | 59.2<br>(47.4 to 71.2)                            | 4.1<br>(-3.1 to 12.0)                               |
| Other gynecological diseases                               | 110.3<br>(94.0 to 129.6)                      | 110.6<br>(90.9 to 133.3)                          | 3.7<br>(2.4 to 5.4)                    | 64.4<br>(53.6 to 76.6)                            | 4.0<br>(-2.5 to 11.2)                               |
| Hemoglobinopathies and hemolytic anaemias                  | 1,352.7<br>(1,326.3 to 1,377.4)               | --                                                | 3.2<br>(2.0 to 4.8)                    | 38.9<br>(25.2 to 56.8)                            | -3.9<br>(-13.2 to 8.0)                              |
| Thalassemias                                               | 0.2<br>(0.1 to 0.2)                           | --                                                | < 0.05<br>(< 0.05 to < 0.05)           | 16.3<br>(-16.1 to 59.4)                           | -4.5<br>(-33.8 to 36.8)                             |
| Thalassaemia trait                                         | 288.7<br>(264.5 to 313.1)                     | --                                                | 2.2<br>(1.4 to 3.5)                    | 41.6<br>(26.4 to 60.1)                            | -1.7<br>(-12.3 to 11.0)                             |
| Sickle cell disorders                                      | 0.4<br>(0.4 to 0.5)                           | --                                                | 0.1<br>(< 0.05 to 0.1)                 | 61.2<br>(46.0 to 78.2)                            | 11.8<br>(0.6 to 23.9)                               |
| Sickle cell trait                                          | 200.7<br>(186.8 to 215.1)                     | --                                                | 0.3<br>(0.2 to 0.5)                    | 38.1<br>(19.1 to 61.5)                            | -1.9<br>(-15.0 to 14.0)                             |
| G6PD deficiency                                            | 148.2<br>(140.4 to 157.1)                     | --                                                | < 0.05<br>(< 0.05 to < 0.05)           | 55.9<br>(36.8 to 79.7)                            | 6.7<br>(-6.3 to 23.1)                               |
| G6PD trait                                                 | 786.1<br>(775.3 to 799.2)                     | --                                                | < 0.05<br>(< 0.05 to < 0.05)           | 59.3<br>(42.4 to 77.3)                            | 8.0<br>(-3.4 to 19.9)                               |
| Other hemoglobinopathies and hemolytic anaemias            | 46.5<br>(40.3 to 53.4)                        | --                                                | 0.6<br>(0.4 to 0.9)                    | 28.2<br>(11.6 to 51.1)                            | -13.4<br>(-24.1 to -0.1)                            |
| Endocrine, metabolic, blood, and immune disorders          | 91.3<br>(84.2 to 99.0)                        | 13.7<br>(12.3 to 15.2)                            | 2.6<br>(1.7 to 3.5)                    | 50.0<br>(40.3 to 60.6)                            | -2.4<br>(-8.2 to 4.2)                               |
| <b>Musculoskeletal disorders</b>                           | <b>1,009.3</b><br><b>(959.0 to 1,065.8)</b>   | <b>594.6</b><br><b>(536.9 to 660.0)</b>           | <b>112.1</b><br><b>(79.2 to 148.4)</b> | <b>66.8</b><br><b>(61.9 to 72.2)</b>              | <b>5.4</b><br><b>(2.7 to 8.4)</b>                   |
| Rheumatoid arthritis                                       | 24.7<br>(21.9 to 27.5)                        | 1.4<br>(1.2 to 1.5)                               | 5.7<br>(3.9 to 7.6)                    | 64.1<br>(53.3 to 76.7)                            | 4.1<br>(-2.5 to 11.7)                               |
| Osteoarthritis                                             | 223.5<br>(208.8 to 238.3)                     | 10.9<br>(10.1 to 11.7)                            | 13.6<br>(9.6 to 18.4)                  | 63.1<br>(57.1 to 69.3)                            | 1.6<br>(-2.1 to 5.5)                                |
| Low back and neck pain                                     | 657.2<br>(609.4 to 710.4)                     | 272.4<br>(243.8 to 303.0)                         | 75.7<br>(53.7 to 99.8)                 | 64.0<br>(58.7 to 69.2)                            | 4.4<br>(1.4 to 7.6)                                 |
| Low back pain                                              | 426.1<br>(376.5 to 480.2)                     | 213.2<br>(185.5 to 243.2)                         | 47.5<br>(33.6 to 62.8)                 | 68.2<br>(60.0 to 76.4)                            | 7.1<br>(2.4 to 12.1)                                |
| Neck pain                                                  | 287.0<br>(249.4 to 328.8)                     | 59.2<br>(51.6 to 70.0)                            | 28.2<br>(19.1 to 39.2)                 | 57.4<br>(54.1 to 60.8)                            | 0.3<br>(-1.5 to 2.0)                                |
| Gout                                                       | 21.6<br>(19.2 to 24.3)                        | 4.4<br>(3.8 to 5.0)                               | 0.7<br>(0.5 to 0.9)                    | 59.5<br>(37.1 to 85.8)                            | -0.0<br>(-13.6 to 15.3)                             |
| Other musculoskeletal disorders                            | 192.8<br>(135.0 to 265.2)                     | 305.6<br>(255.4 to 361.9)                         | 16.5<br>(9.4 to 26.3)                  | 86.5<br>(61.9 to 129.0)                           | 15.5<br>(1.5 to 37.5)                               |
| <b>Other non-communicable diseases</b>                     | <b>4,248.1</b><br><b>(4,158.8 to 4,338.6)</b> | <b>12,318.4†</b><br><b>(11,282.5 to 13,373.7)</b> | <b>128.6</b><br><b>(90.1 to 178.7)</b> | <b>48.9</b><br><b>(47.0 to 50.6)</b>              | <b>-1.6</b><br><b>(-2.7 to -0.6)</b>                |
| Congenital anomalies                                       | 76.6<br>(69.8 to 84.9)                        | --                                                | 12.5<br>(9.1 to 16.5)                  | 43.7<br>(36.1 to 52.1)                            | 1.6<br>(-3.6 to 7.2)                                |
| Neural tube defects                                        | 15.8<br>(13.9 to 17.9)                        | --                                                | 4.7<br>(3.3 to 6.4)                    | 47.7<br>(33.6 to 62.7)                            | 1.9<br>(-7.8 to 12.1)                               |
| Congenital heart anomalies                                 | 13.0<br>(11.4 to 14.9)                        | --                                                | 0.7<br>(0.3 to 1.1)                    | 46.7<br>(31.7 to 63.4)                            | 5.0<br>(-5.9 to 17.0)                               |
| Orofacial clefts                                           | 2.2<br>(1.9 to 2.5)                           | --                                                | < 0.05<br>(< 0.05 to < 0.05)           | 24.8<br>(11.7 to 39.8)                            | -13.5<br>(-22.5 to -3.0)                            |
| Down's syndrome                                            | 2.2<br>(1.9 to 2.6)                           | --                                                | 0.2<br>(0.1 to 0.3)                    | 45.1<br>(33.9 to 55.7)                            | 1.9<br>(-5.8 to 9.6)                                |
| Turner syndrome                                            | 1.5<br>(1.3 to 1.8)                           | --                                                | < 0.05<br>(< 0.05 to < 0.05)           | 38.2<br>(-10.5 to 109.3)                          | -4.6<br>(-36.7 to 40.7)                             |
| Klinefelter syndrome                                       | 2.2<br>(1.8 to 2.5)                           | --                                                | < 0.05<br>(< 0.05 to < 0.05)           | 43.6<br>(9.1 to 85.5)                             | -3.6<br>(-25.9 to 22.8)                             |



| Cause                                         | Prevalence in thousands (95% UI)              | Incidence in thousands (95% UI)          | YLDs in thousands (95% UI)            |                                                   |                                                     |
|-----------------------------------------------|-----------------------------------------------|------------------------------------------|---------------------------------------|---------------------------------------------------|-----------------------------------------------------|
|                                               | 2016 counts                                   | 2016 counts                              | 2016 counts                           | Percentage change in counts between 2006 and 2016 | Percentage change in age-standardised rates between |
| Other chromosomal abnormalities               | 14.0<br>(11.6 to 16.8)                        | --                                       | 1.3<br>(0.9 to 1.8)                   | 26.8<br>(12.7 to 41.2)                            | 1.2<br>(-10.3 to 13.1)                              |
| Congenital musculoskeletal and limb anomalies | 10.9<br>(9.9 to 12.0)                         | --                                       | 1.6<br>(1.1 to 2.2)                   | 44.5<br>(30.8 to 59.3)                            | 0.0<br>(-9.6 to 9.9)                                |
| Urogenital congenital anomalies               | 5.9<br>(5.1 to 6.8)                           | --                                       | 0.2<br>(0.1 to 0.3)                   | 28.0<br>(11.9 to 47.8)                            | -0.7<br>(-13.6 to 13.8)                             |
| Digestive congenital anomalies                | 7.1<br>(6.2 to 8.0)                           | --                                       | 0.3<br>(0.2 to 0.4)                   | 42.8<br>(22.8 to 65.2)                            | -1.3<br>(-15.2 to 13.3)                             |
| Other congenital anomalies                    | 17.4<br>(10.2 to 27.7)                        | --                                       | 3.5<br>(2.3 to 5.1)                   | 45.8<br>(33.3 to 58.0)                            | 2.1<br>(-6.2 to 10.4)                               |
| Skin and subcutaneous diseases                | 1,774.7<br>(1,731.0 to 1,822.0)               | 3,570.7<br>(3,404.0 to 3,764.3)          | 46.3<br>(31.1 to 66.2)                | 43.8<br>(40.7 to 47.1)                            | 1.2<br>(-0.7 to 3.3)                                |
| Dermatitis                                    | 306.6<br>(287.8 to 326.9)                     | 393.2<br>(360.9 to 427.7)                | 11.6<br>(6.9 to 18.8)                 | 37.8<br>(31.3 to 44.2)                            | -1.6<br>(-6.0 to 2.8)                               |
| Psoriasis                                     | 53.1<br>(49.8 to 56.5)                        | 7.1<br>(6.7 to 7.5)                      | 4.6<br>(3.2 to 6.0)                   | 58.3<br>(46.5 to 72.5)                            | 5.0<br>(-2.2 to 13.9)                               |
| Cellulitis                                    | 2.9<br>(2.7 to 3.1)                           | 62.6<br>(58.6 to 66.8)                   | 0.2<br>(0.1 to 0.2)                   | 48.9<br>(18.7 to 85.9)                            | 1.1<br>(-17.5 to 23.4)                              |
| Pyoderma                                      | 13.6<br>(13.1 to 14.0)                        | 314.5<br>(303.3 to 326.2)                | 0.1<br>(< 0.05 to 0.2)                | 50.8<br>(40.3 to 62.8)                            | 0.5<br>(-6.1 to 7.7)                                |
| Scabies                                       | 63.8<br>(54.2 to 76.0)                        | 193.6<br>(163.8 to 231.0)                | 1.6<br>(0.9 to 2.7)                   | 29.9<br>(23.3 to 36.9)                            | -8.2<br>(-12.2 to -4.2)                             |
| Fungal skin diseases                          | 377.1<br>(341.3 to 417.7)                     | 1,352.0<br>(1,208.1 to 1,512.1)          | 2.1<br>(0.8 to 4.3)                   | 48.7<br>(45.7 to 51.5)                            | 0.0<br>(-1.1 to 1.2)                                |
| Viral skin diseases                           | 154.3<br>(146.4 to 163.3)                     | 225.7<br>(213.0 to 239.1)                | 4.7<br>(2.9 to 7.0)                   | 40.1<br>(35.5 to 45.0)                            | 0.5<br>(-2.7 to 3.7)                                |
| Acne vulgaris                                 | 578.9<br>(520.2 to 640.8)                     | 391.9<br>(320.7 to 486.1)                | 14.9<br>(9.9 to 21.4)                 | 45.1<br>(38.7 to 51.4)                            | 4.3<br>(-0.1 to 8.5)                                |
| Alopecia areata                               | 11.7<br>(11.0 to 12.5)                        | 20.8<br>(19.4 to 22.1)                   | 0.4<br>(0.2 to 0.6)                   | 53.4<br>(37.6 to 70.5)                            | 0.3<br>(-9.9 to 11.3)                               |
| Pruritus                                      | 52.1<br>(45.8 to 58.8)                        | 41.2<br>(36.8 to 46.5)                   | 0.6<br>(0.3 to 1.0)                   | 52.8<br>(44.5 to 61.6)                            | 1.4<br>(-3.9 to 6.6)                                |
| Urticaria                                     | 52.0<br>(45.7 to 59.3)                        | 92.1<br>(81.2 to 105.1)                  | 3.1<br>(2.0 to 4.5)                   | 39.0<br>(31.4 to 48.4)                            | 0.3<br>(-4.8 to 6.1)                                |
| Decubitus ulcer                               | 2.0<br>(1.8 to 2.2)                           | 7.3<br>(6.4 to 8.2)                      | 0.3<br>(0.2 to 0.4)                   | 67.5<br>(47.5 to 88.8)                            | 0.1<br>(-11.7 to 12.7)                              |
| Other skin and subcutaneous diseases          | 405.1<br>(393.2 to 417.2)                     | 468.8<br>(453.4 to 484.3)                | 2.2<br>(1.1 to 4.0)                   | 57.5<br>(53.6 to 61.6)                            | 3.1<br>(0.7 to 5.6)                                 |
| Sense organ diseases                          | 1,294.0<br>(1,264.1 to 1,328.8)               | 551.5†<br>(518.8 to 588.9)               | 52.9<br>(37.1 to 73.1)                | 52.3<br>(49.4 to 55.4)                            | -4.9<br>(-6.4 to -3.1)                              |
| Glaucoma                                      | 8.6<br>(7.0 to 10.5)                          | --                                       | 0.8<br>(0.5 to 1.2)                   | 60.0<br>(44.1 to 77.0)                            | -2.1<br>(-11.4 to 8.0)                              |
| Cataract                                      | 95.3<br>(83.4 to 108.4)                       | --                                       | 6.3<br>(4.5 to 8.7)                   | 58.3<br>(50.5 to 65.9)                            | -7.1<br>(-11.6 to -2.9)                             |
| Macular degeneration                          | 9.3<br>(7.1 to 12.0)                          | --                                       | 0.6<br>(0.4 to 0.8)                   | 63.7<br>(49.1 to 80.9)                            | -0.9<br>(-9.5 to 8.9)                               |
| Refraction and accommodation disorders        | 570.9<br>(544.3 to 594.8)                     | --                                       | 10.8<br>(6.8 to 16.9)                 | 38.9<br>(34.7 to 43.1)                            | -9.1<br>(-11.6 to -6.4)                             |
| Age-related and other hearing loss            | 856.1<br>(810.1 to 907.4)                     | --                                       | 27.0<br>(19.0 to 37.8)                | 55.2<br>(49.8 to 59.9)                            | -3.9<br>(-6.9 to -1.4)                              |
| Other vision loss                             | 32.2<br>(28.2 to 36.5)                        | --                                       | 2.3<br>(1.6 to 3.2)                   | 54.1<br>(44.3 to 64.8)                            | -2.6<br>(-8.4 to 3.6)                               |
| Other sense organ diseases                    | 167.6<br>(154.4 to 181.1)                     | 551.5<br>(518.8 to 588.9)                | 5.2<br>(3.2 to 7.8)                   | 57.7<br>(51.3 to 64.0)                            | 0.9<br>(-2.9 to 4.7)                                |
| Oral disorders                                | 3,086.9<br>(2,916.7 to 3,243.4)               | 8,196.2†<br>(7,156.9 to 9,232.4)         | 16.9<br>(10.3 to 26.2)                | 57.1<br>(54.4 to 60.1)                            | 0.1<br>(-1.6 to 2.0)                                |
| Caries of deciduous teeth                     | 310.7<br>(238.4 to 389.6)                     | 1,284.8<br>(892.7 to 1,767.4)            | 0.1<br>(< 0.05 to 0.1)                | 19.5<br>(6.2 to 34.4)                             | 0.8<br>(-10.0 to 12.5)                              |
| Caries of permanent teeth                     | 2,230.0<br>(2,018.5 to 2,467.1)               | 6,807.5<br>(5,928.8 to 7,708.8)          | 1.3<br>(0.6 to 2.5)                   | 45.1<br>(39.0 to 51.7)                            | -2.6<br>(-6.0 to 1.3)                               |
| Periodontal disease                           | 670.8<br>(562.1 to 793.8)                     | 81.7<br>(66.8 to 99.7)                   | 4.3<br>(1.7 to 9.0)                   | 57.1<br>(52.1 to 62.8)                            | -0.3<br>(-3.5 to 3.2)                               |
| Edentulism and severe tooth loss              | 291.9<br>(251.2 to 331.3)                     | 22.1<br>(18.5 to 26.0)                   | 8.0<br>(5.2 to 11.3)                  | 62.1<br>(57.3 to 67.3)                            | 0.6<br>(-2.4 to 3.8)                                |
| Other oral disorders                          | 109.2<br>(104.3 to 114.2)                     | --                                       | 3.2<br>(2.0 to 4.8)                   | 51.7<br>(46.7 to 56.9)                            | 0.4<br>(-2.6 to 3.7)                                |
| <b>Injuries</b>                               | <b>2,490.4</b><br><b>(1,931.5 to 3,133.3)</b> | <b>402.9†</b><br><b>(378.0 to 431.6)</b> | <b>69.4</b><br><b>(38.8 to 111.5)</b> | <b>35.6</b><br><b>(29.3 to 43.4)</b>              | <b>-9.7</b><br><b>(-13.6 to -4.9)</b>               |
| <b>Transport injuries</b>                     | <b>133.2</b><br><b>(123.1 to 143.5)</b>       | <b>40.0</b><br><b>(35.6 to 44.8)</b>     | <b>6.7</b><br><b>(3.6 to 11.3)</b>    | <b>51.1</b><br><b>(39.9 to 65.2)</b>              | <b>-2.6</b><br><b>(-8.9 to 5.6)</b>                 |
| Road injuries                                 | 92.9<br>(86.8 to 99.5)                        | 32.1<br>(28.2 to 36.8)                   | 4.8<br>(2.6 to 8.0)                   | 49.4<br>(38.6 to 63.0)                            | -4.4<br>(-10.3 to 3.6)                              |
| Pedestrian road injuries                      | 16.2<br>(14.3 to 18.6)                        | 4.0<br>(3.1 to 4.9)                      | 0.8<br>(0.4 to 1.4)                   | 52.2<br>(40.9 to 67.2)                            | -3.0<br>(-9.3 to 5.6)                               |
| Cyclist road injuries                         | 17.6<br>(14.7 to 20.8)                        | 6.5<br>(5.0 to 8.1)                      | 0.8<br>(0.5 to 1.4)                   | 57.8<br>(45.5 to 73.0)                            | 1.7<br>(-5.4 to 10.8)                               |
| Motorcyclist road injuries                    | 18.5<br>(15.8 to 22.0)                        | 4.3<br>(3.3 to 5.4)                      | 0.9<br>(0.5 to 1.6)                   | 65.2<br>(52.6 to 82.1)                            | 6.1<br>(-0.8 to 15.9)                               |
| Motor vehicle road injuries                   | 29.7<br>(25.6 to 33.8)                        | 12.5<br>(10.5 to 14.6)                   | 1.7<br>(0.9 to 2.8)                   | 34.9<br>(25.6 to 46.5)                            | -13.8<br>(-19.1 to -7.0)                            |
| Other road injuries                           | 10.9<br>(9.3 to 12.7)                         | 4.9<br>(3.8 to 6.2)                      | 0.5<br>(0.3 to 0.9)                   | 60.3<br>(49.2 to 73.9)                            | 2.4<br>(-3.6 to 10.3)                               |
| Other transport injuries                      | 40.3<br>(33.7 to 48.0)                        | 7.8<br>(6.6 to 9.3)                      | 1.9<br>(1.1 to 3.3)                   | 55.3<br>(43.7 to 70.4)                            | 2.1<br>(-5.0 to 11.1)                               |
| <b>Unintentional injuries</b>                 | <b>920.3</b><br><b>(844.9 to 998.2)</b>       | <b>349.7</b><br><b>(324.7 to 378.7)</b>  | <b>28.4</b><br><b>(16.2 to 46.3)</b>  | <b>68.6</b><br><b>(56.8 to 83.2)</b>              | <b>10.0</b><br><b>(2.7 to 18.7)</b>                 |
| Falls                                         | 313.0<br>(266.9 to 361.4)                     | 113.7<br>(96.5 to 135.6)                 | 11.5<br>(6.7 to 18.2)                 | 65.7<br>(52.2 to 83.3)                            | 7.5<br>(-0.4 to 17.6)                               |
| Drowning                                      | 3.1<br>(2.6 to 3.5)                           | 0.5<br>(0.4 to 0.6)                      | 0.1<br>(0.1 to 0.3)                   | 73.7<br>(60.0 to 89.9)                            | 12.9<br>(5.0 to 22.2)                               |
| Fire, heat, and hot substances                | 92.2<br>(77.0 to 113.3)                       | 10.2<br>(8.2 to 12.3)                    | 2.2<br>(1.1 to 3.8)                   | 73.9<br>(54.6 to 100.5)                           | 13.2<br>(1.8 to 29.2)                               |
| Poisonings                                    | 4.4<br>(3.7 to 5.2)                           | 5.6<br>(4.4 to 6.9)                      | 0.4<br>(0.2 to 0.7)                   | 72.1<br>(59.2 to 90.4)                            | 15.1<br>(7.9 to 25.2)                               |
| Exposure to mechanical forces                 | 152.6<br>(129.8 to 188.7)                     | 54.9<br>(45.3 to 65.0)                   | 3.5<br>(1.9 to 6.0)                   | 84.5<br>(73.2 to 97.9)                            | 19.7<br>(13.0 to 27.5)                              |
| Unintentional firearm injuries                | 7.0<br>(5.8 to 8.6)                           | 1.7<br>(1.1 to 2.4)                      | 0.3<br>(0.1 to 0.5)                   | 80.4<br>(69.4 to 94.5)                            | 16.5<br>(9.8 to 24.6)                               |
| Unintentional suffocation                     | 4.9<br>(3.8 to 6.1)                           | 0.8<br>(0.6 to 1.1)                      | 0.2<br>(0.1 to 0.3)                   | 60.7<br>(47.9 to 78.2)                            | 6.8<br>(-1.3 to 17.6)                               |
| Other exposure to mechanical forces           | 140.7<br>(118.2 to 176.5)                     | 52.4<br>(43.4 to 62.5)                   | 3.1<br>(1.7 to 5.2)                   | 86.4<br>(75.2 to 99.2)                            | 20.8<br>(14.2 to 28.5)                              |

| Cause                                                                               | Prevalence in thousands (95% UI)            | Incidence in thousands (95% UI)       | YLDs in thousands (95% UI)           |                                                   |                                                     |
|-------------------------------------------------------------------------------------|---------------------------------------------|---------------------------------------|--------------------------------------|---------------------------------------------------|-----------------------------------------------------|
|                                                                                     | 2016 counts                                 | 2016 counts                           | 2016 counts                          | Percentage change in counts between 2006 and 2016 | Percentage change in age-standardised rates between |
| Adverse effects of medical treatment                                                | 1.5<br>(1.2 to 1.8)                         | 19.1<br>(16.6 to 21.8)                | 0.2<br>(0.1 to 0.3)                  | 51.8<br>(45.1 to 58.7)                            | 3.0<br>(-1.5 to 7.7)                                |
| Animal contact                                                                      | 34.3<br>(30.2 to 40.0)                      | 37.1<br>(29.7 to 45.2)                | 1.0<br>(0.6 to 1.7)                  | 52.5<br>(43.4 to 63.9)                            | 1.3<br>(-3.5 to 7.4)                                |
| Venomous animal contact                                                             | 14.5<br>(12.0 to 17.3)                      | 16.0<br>(12.3 to 20.8)                | 0.8<br>(0.5 to 1.2)                  | 53.9<br>(42.6 to 69.2)                            | 2.9<br>(-3.1 to 11.3)                               |
| Non-venomous animal contact                                                         | 19.8<br>(16.5 to 24.4)                      | 21.1<br>(16.6 to 26.1)                | 0.3<br>(0.2 to 0.5)                  | 49.1<br>(42.4 to 55.2)                            | -2.5<br>(-6.6 to 1.3)                               |
| Foreign body                                                                        | 53.1<br>(44.6 to 64.1)                      | 29.8<br>(25.6 to 34.8)                | 1.6<br>(0.9 to 2.9)                  | 58.1<br>(48.6 to 68.3)                            | 4.5<br>(-1.3 to 10.7)                               |
| Pulmonary aspiration and foreign body in airway                                     | 14.6<br>(11.1 to 19.4)                      | 4.0<br>(3.3 to 5.0)                   | 0.6<br>(0.3 to 1.0)                  | 53.7<br>(43.7 to 65.5)                            | 2.2<br>(-3.8 to 9.2)                                |
| Foreign body in eyes                                                                | 2.9<br>(1.7 to 4.2)                         | 14.0<br>(10.7 to 18.4)                | 0.2<br>(0.1 to 0.3)                  | 54.0<br>(48.8 to 60.9)                            | 1.7<br>(-2.0 to 5.6)                                |
| Foreign body in other body part                                                     | 35.6<br>(29.2 to 45.6)                      | 11.8<br>(9.7 to 14.0)                 | 0.9<br>(0.5 to 1.6)                  | 61.8<br>(51.4 to 73.6)                            | 6.5<br>(0.1 to 13.6)                                |
| Environmental heat and cold exposure                                                | 52.0<br>(43.8 to 61.1)                      | 12.0<br>(9.8 to 14.7)                 | 1.8<br>(0.9 to 3.0)                  | 55.0<br>(44.2 to 68.5)                            | 1.7<br>(-4.7 to 9.7)                                |
| Other unintentional injuries                                                        | 214.2<br>(170.5 to 264.2)                   | 66.8<br>(55.4 to 80.6)                | 6.0<br>(3.4 to 9.7)                  | 74.5<br>(62.8 to 89.0)                            | 14.5<br>(7.4 to 23.2)                               |
| <b>Self-harm and interpersonal violence</b>                                         | <b>127.1</b><br><b>(114.0 to 142.0)</b>     | <b>13.1†</b><br><b>(11.2 to 15.2)</b> | <b>1.9</b><br><b>(1.3 to 2.9)</b>    | <b>37.5</b><br><b>(30.4 to 43.8)</b>              | <b>-9.7</b><br><b>(-14.5 to -5.5)</b>               |
| Self-harm                                                                           | 5.2<br>(4.5 to 6.1)                         | 2.0<br>(1.6 to 2.4)                   | 0.2<br>(0.1 to 0.4)                  | 49.0<br>(37.8 to 63.5)                            | -4.1<br>(-10.4 to 3.3)                              |
| Self-harm by firearm                                                                | 0.4<br>(0.3 to 0.4)                         | 0.1<br>( $< 0.05$ to 0.1)             | $< 0.05$<br>( $< 0.05$ to $< 0.05$ ) | 60.2<br>(44.8 to 79.4)                            | 5.2<br>(-4.4 to 17.2)                               |
| Self-harm by other specified means                                                  | 4.9<br>(4.1 to 5.7)                         | 1.9<br>(1.6 to 2.3)                   | 0.2<br>(0.1 to 0.4)                  | 48.4<br>(37.3 to 62.7)                            | -4.6<br>(-10.7 to 2.7)                              |
| Interpersonal violence                                                              | 121.9<br>(108.8 to 136.7)                   | 11.2†                                 | 1.7<br>(1.1 to 2.5)                  | 36.1<br>(29.2 to 42.4)                            | -10.4<br>(-15.2 to -6.2)                            |
| Assault by firearm                                                                  | 1.2<br>(1.0 to 1.4)                         | 0.3<br>(0.2 to 0.5)                   | 0.1<br>( $< 0.05$ to 0.1)            | 31.1<br>(20.2 to 45.5)                            | -15.1<br>(-21.4 to -6.4)                            |
| Assault by sharp object                                                             | 8.1<br>(6.5 to 9.8)                         | 2.9<br>(2.1 to 3.7)                   | 0.2<br>(0.1 to 0.4)                  | 26.5<br>(17.3 to 37.5)                            | -17.9<br>(-23.5 to -11.0)                           |
| Sexual violence                                                                     | 96.8<br>(83.9 to 111.7)                     | --                                    | 0.8<br>(0.5 to 1.1)                  | 35.7<br>(30.6 to 41.7)                            | -8.6<br>(-12.0 to -5.1)                             |
| Assault by other means                                                              | 15.8<br>(13.5 to 18.8)                      | 8.0<br>(6.6 to 9.6)                   | 0.6<br>(0.3 to 1.1)                  | 40.8<br>(30.4 to 53.9)                            | -9.2<br>(-15.3 to -1.4)                             |
| <b>Forces of nature, conflict and terrorism, and executions and police conflict</b> | <b>1,406.6</b><br><b>(828.9 to 2,059.3)</b> | <b>0.1†</b><br><b>(0.1 to 0.2)</b>    | <b>32.4</b><br><b>(17.6 to 51.4)</b> | <b>13.7</b><br><b>(4.4 to 21.9)</b>               | <b>-22.8</b><br><b>(-28.7 to -17.7)</b>             |
| Exposure to forces of nature                                                        | 0.3<br>(0.1 to 0.6)                         | --                                    | $< 0.05$<br>( $< 0.05$ to $< 0.05$ ) | 6.5<br>(3.2 to 11.4)                              | -27.7<br>(-30.0 to -24.3)                           |
| Conflict and terrorism                                                              | 1,405.9<br>(828.4 to 2,058.6)               | --                                    | 32.4<br>(17.6 to 51.3)               | 13.7<br>(4.4 to 21.8)                             | -22.8<br>(-28.7 to -17.8)                           |
| Executions and police conflict                                                      | 0.4<br>(0.2 to 0.7)                         | 0.1<br>(0.1 to 0.2)                   | $< 0.05$<br>( $< 0.05$ to $< 0.05$ ) | 75.5<br>(64.1 to 84.5)                            | 19.5<br>(13.4 to 25.6)                              |
| <b>Impairments</b>                                                                  | --                                          | --                                    | --                                   | --                                                | --                                                  |
| Anaemia                                                                             | 1,300.0<br>(1,192.0 to 1,434.1)             | --                                    | 24.7<br>(16.1 to 35.9)               | 32.2<br>(20.9 to 46.7)                            | -9.5<br>(-17.1 to 0.1)                              |
| Developmental intellectual disability                                               | 159.9<br>(121.6 to 202.3)                   | --                                    | 17.9<br>(12.6 to 27.5)               | 32.6<br>(22.4 to 41.0)                            | -7.8<br>(-14.6 to -2.3)                             |
| Epilepsy                                                                            | 36.6<br>(20.1 to 57.6)                      | --                                    | 12.5<br>(6.2 to 23.1)                | 27.5<br>(-23.9 to 130.2)                          | -10.9<br>(-47.7 to 61.9)                            |
| Guillain-Barre syndrome                                                             | 0.1<br>( $< 0.05$ to 0.1)                   | --                                    | $< 0.05$<br>( $< 0.05$ to $< 0.05$ ) | 49.4<br>(45.2 to 53.8)                            | -0.1<br>(-0.3 to 0.1)                               |
| Hearing loss                                                                        | 925.1<br>(879.2 to 973.9)                   | --                                    | 30.4<br>(21.5 to 42.1)               | 52.1<br>(47.6 to 56.3)                            | -4.2<br>(-6.8 to -2.0)                              |
| Heart failure                                                                       | 62.5<br>(55.0 to 71.2)                      | --                                    | 6.2<br>(4.5 to 8.1)                  | 70.7<br>(59.8 to 82.8)                            | 2.1<br>(-4.0 to 9.4)                                |
| Infertility                                                                         | 113.8<br>(89.6 to 144.5)                    | --                                    | 0.7<br>(0.3 to 1.4)                  | 63.9<br>(43.8 to 89.8)                            | 7.9<br>(-6.0 to 25.2)                               |
| Pelvic inflammatory disease                                                         | 2.7<br>(2.1 to 3.4)                         | --                                    | 0.4<br>(0.2 to 0.5)                  | 58.7<br>(29.5 to 91.3)                            | 0.6<br>(-17.2 to 20.8)                              |
| Vision loss                                                                         | 742.9<br>(705.1 to 778.2)                   | --                                    | 26.4<br>(18.7 to 37.9)               | 41.3<br>(30.5 to 48.6)                            | -8.8<br>(-13.6 to -5.3)                             |

We did not calculate incidence for the nine impairments, certain NTDs, and causes with only birth prevalence. Blank cells mean that no estimate is available.

† Incidence for aggregate causes represents the sum of the incidence of the causes below the aggregate.

‡ Incidence estimates for stroke represent first-ever stroke only.

^ Incidence of HIV/AIDS represents new infections of HIV only and does not include new infections of Tuberculosis in HIV positive cases.



SR Table 14: Prevalence, incidence, and YLDs for 2016, percentage change of YLD counts and percentage change of age-standardised YLD rates between 2006 and 2016 by cause and impairments, for all ages, Lesotho.

| Cause                                                                                | Prevalence in thousands (95% UI)       | Incidence in thousands (95% UI)            | YLDs in thousands (95% UI)       |                                                   |                                                     |
|--------------------------------------------------------------------------------------|----------------------------------------|--------------------------------------------|----------------------------------|---------------------------------------------------|-----------------------------------------------------|
|                                                                                      | 2016 counts                            | 2016 counts                                | 2016 counts                      | Percentage change in counts between 2006 and 2016 | Percentage change in age-standardised rates between |
| <b>All causes</b>                                                                    | <b>2,108.1</b><br>(2,103.9 to 2,112.1) | <b>14,588.3†</b><br>(13,781.9 to 15,479.6) | <b>240.7</b><br>(177.6 to 313.3) | <b>8.5</b><br>(3.5 to 12.8)                       | <b>-3.8</b><br>(-9.2 to 0.5)                        |
| <b>Communicable, maternal, neonatal, and nutritional disorders</b>                   | <b>1,967.7</b><br>(1,939.5 to 1,997.3) | <b>8,965.4†</b><br>(8,262.2 to 9,774.6)    | <b>68.3</b><br>(49.6 to 89.6)    | <b>-1.2</b><br>(-13.9 to 9.5)                     | <b>-16.2</b><br>(-30.9 to -3.6)                     |
| <b>HIV/AIDS and tuberculosis</b>                                                     | <b>813.4</b><br>(743.8 to 887.9)       | <b>38.1†</b><br>(30.5 to 47.5)             | <b>35.3</b><br>(24.9 to 47.3)    | <b>-0.9</b><br>(-22.0 to 23.3)                    | <b>-18.9</b><br>(-39.3 to 5.3)                      |
| Tuberculosis                                                                         | 619.2<br>(519.5 to 732.5)              | 19.2†<br>(13.6 to 26.5)                    | 2.1<br>(1.3 to 3.3)              | 31.3<br>(2.0 to 61.2)                             | 2.4<br>(-18.6 to 25.9)                              |
| Drug-susceptible tuberculosis                                                        | 6.7<br>(4.7 to 9.3)                    | 18.6<br>(13.1 to 25.7)                     | 2.1<br>(1.2 to 3.1)              | 31.1<br>(1.8 to 63.4)                             | 2.2<br>(-19.0 to 26.7)                              |
| Multidrug-resistant tuberculosis without extensive drug resistance                   | 0.2<br>(0.1 to 0.4)                    | 0.6<br>(0.3 to 1.1)                        | 0.1<br>(< 0.05 to 0.1)           | 37.4<br>(-56.1 to 382.1)                          | 7.8<br>(-63.8 to 267.1)                             |
| Extensively drug-resistant tuberculosis                                              | < 0.05<br>(< 0.05 to < 0.05)           | < 0.05<br>(< 0.05 to < 0.05)               | < 0.05<br>(< 0.05 to < 0.05)     | 324.7<br>(46.1 to 1,314.0)                        | 228.7<br>(11.3 to 1,023.2)                          |
| Latent tuberculosis infection                                                        | 612.4<br>(511.7 to 725.8)              | --                                         | --                               | --                                                | --                                                  |
| HIV/AIDS                                                                             | 312.4<br>(286.8 to 341.7)              | 18.9^<br>(14.8 to 24.3)                    | 33.2<br>(23.6 to 44.5)           | -2.4<br>(-23.9 to 22.2)                           | -19.6<br>(-40.4 to 5.3)                             |
| Drug-susceptible HIV/AIDS - Tuberculosis                                             | 9.8<br>(7.5 to 12.6)                   | 26.9<br>(20.3 to 34.6)                     | 3.7<br>(2.3 to 5.3)              | -6.0<br>(-18.1 to 8.1)                            | -19.9<br>(-30.2 to -7.8)                            |
| Multidrug-resistant HIV/AIDS - Tuberculosis without extensive drug resistance        | 0.4<br>(0.2 to 0.7)                    | 1.1<br>(0.6 to 1.8)                        | 0.1<br>(0.1 to 0.3)              | 1.5<br>(-63.8 to 236.8)                           | -13.8<br>(-70.0 to 183.1)                           |
| Extensively drug-resistant HIV/AIDS - Tuberculosis                                   | < 0.05<br>(< 0.05 to < 0.05)           | < 0.05<br>(< 0.05 to < 0.05)               | < 0.05<br>(< 0.05 to < 0.05)     | 208.0<br>(9.1 to 866.9)                           | 161.9<br>(-6.5 to 743.5)                            |
| HIV/AIDS resulting in other diseases                                                 | 302.2<br>(276.1 to 331.7)              | 18.9<br>(14.8 to 24.3)                     | 29.4<br>(20.8 to 39.5)           | -2.0<br>(-25.7 to 28.1)                           | -19.6<br>(-42.4 to 9.4)                             |
| <b>Diarrhoea, lower respiratory infections, and other common infectious diseases</b> | <b>148.2</b><br>(141.4 to 157.8)       | <b>7,573.9†</b><br>(6,894.2 to 8,363.2)    | <b>7.8</b><br>(5.4 to 10.6)      | <b>4.2</b><br>(1.1 to 7.6)                        | <b>-4.8</b><br>(-7.3 to -2.2)                       |
| Diarrhoeal diseases                                                                  | 30.9<br>(28.8 to 33.0)                 | 2,041.8<br>(1,904.6 to 2,180.2)            | 3.5<br>(2.4 to 4.8)              | 3.6<br>(-1.9 to 9.3)                              | -5.9<br>(-10.3 to -1.2)                             |
| Intestinal infectious diseases                                                       | < 0.05<br>(< 0.05 to < 0.05)           | 0.1†<br>(0.1 to 0.1)                       | < 0.05<br>(< 0.05 to < 0.05)     | -3.3<br>(-18.8 to 15.0)                           | -9.8<br>(-22.4 to 4.6)                              |
| Typhoid fever                                                                        | < 0.05<br>(< 0.05 to < 0.05)           | 0.1<br>(0.1 to 0.1)                        | < 0.05<br>(< 0.05 to < 0.05)     | -1.4<br>(-17.6 to 18.1)                           | -8.2<br>(-21.7 to 7.2)                              |
| Paratyphoid fever                                                                    | < 0.05<br>(< 0.05 to < 0.05)           | < 0.05<br>(< 0.05 to < 0.05)               | < 0.05<br>(< 0.05 to < 0.05)     | 0.7<br>(-16.9 to 23.0)                            | -7.5<br>(-21.3 to 9.8)                              |
| Other intestinal infectious diseases                                                 | --                                     | --                                         | < 0.05<br>(< 0.05 to < 0.05)     | -33.9<br>(-55.6 to -0.5)                          | -37.7<br>(-56.9 to -9.1)                            |
| Lower respiratory infections                                                         | 3.5<br>(3.2 to 3.8)                    | 147.9<br>(134.2 to 161.9)                  | 0.2<br>(0.1 to 0.3)              | -4.3<br>(-14.6 to 8.0)                            | -9.7<br>(-18.2 to -0.0)                             |
| Upper respiratory infections                                                         | 68.7<br>(60.4 to 78.8)                 | 5,161.6<br>(4,523.6 to 5,959.2)            | 1.7<br>(1.0 to 2.7)              | 10.8<br>(4.4 to 18.1)                             | 0.6<br>(-4.5 to 6.1)                                |
| Otitis media                                                                         | 41.6<br>(37.0 to 46.4)                 | 160.1<br>(126.5 to 202.4)                  | 1.3<br>(0.8 to 1.9)              | -1.6<br>(-8.3 to 5.8)                             | -7.1<br>(-12.9 to -0.9)                             |
| Meningitis                                                                           | 6.2<br>(5.2 to 7.2)                    | 1.2<br>(1.1 to 1.4)                        | 0.6<br>(0.4 to 0.8)              | 4.5<br>(-2.8 to 12.1)                             | -5.8<br>(-12.1 to 0.2)                              |
| Pneumococcal meningitis                                                              | 2.5<br>(2.1 to 3.1)                    | 0.3<br>(0.2 to 0.3)                        | 0.3<br>(0.2 to 0.4)              | -10.0<br>(-22.7 to 4.7)                           | -19.7<br>(-29.0 to -8.8)                            |
| H influenzae type B meningitis                                                       | 0.8<br>(0.6 to 1.0)                    | 0.1<br>(0.1 to 0.2)                        | 0.1<br>(0.1 to 0.1)              | -9.7<br>(-18.1 to -0.6)                           | -19.3<br>(-27.2 to -10.8)                           |
| Meningococcal infection                                                              | 0.5<br>(0.4 to 0.7)                    | 0.2<br>(0.1 to 0.2)                        | 0.1<br>(< 0.05 to 0.1)           | 7.3<br>(1.3 to 13.7)                              | -3.5<br>(-9.1 to 2.1)                               |
| Other meningitis                                                                     | 2.4<br>(1.8 to 3.1)                    | 0.7<br>(0.6 to 0.8)                        | 0.2<br>(0.1 to 0.3)              | 48.9<br>(35.4 to 63.8)                            | 36.0<br>(24.2 to 49.1)                              |
| Encephalitis                                                                         | 4.0<br>(2.5 to 6.2)                    | 2.0<br>(1.7 to 2.3)                        | 0.4<br>(0.3 to 0.5)              | 7.7<br>(-7.4 to 24.4)                             | -4.2<br>(-15.3 to 8.0)                              |
| Diphtheria                                                                           | < 0.05<br>(< 0.05 to < 0.05)           | < 0.05<br>(< 0.05 to < 0.05)               | < 0.05<br>(< 0.05 to < 0.05)     | -11.9<br>(-51.4 to 57.8)                          | -15.9<br>(-52.5 to 50.1)                            |
| Whooping cough                                                                       | 0.7<br>(0.6 to 0.9)                    | 5.4<br>(4.2 to 6.8)                        | < 0.05<br>(< 0.05 to 0.1)        | -5.8<br>(-22.5 to 12.4)                           | -11.6<br>(-27.3 to 5.5)                             |
| Tetanus                                                                              | < 0.05<br>(< 0.05 to < 0.05)           | < 0.05<br>(< 0.05 to < 0.05)               | < 0.05<br>(< 0.05 to < 0.05)     | -31.6<br>(-54.3 to -2.2)                          | -39.2<br>(-58.4 to -12.1)                           |
| Measles                                                                              | 0.1<br>(< 0.05 to 0.2)                 | 3.3<br>(1.2 to 7.4)                        | < 0.05<br>(< 0.05 to < 0.05)     | 59.2<br>(-16.1 to 189.9)                          | 50.1<br>(-20.8 to 173.6)                            |
| Varicella and herpes zoster                                                          | 1.9<br>(1.8 to 2.0)                    | 50.5<br>(48.2 to 52.6)                     | 0.1<br>(< 0.05 to 0.1)           | 9.3<br>(-6.7 to 26.4)                             | 0.0<br>(-11.1 to 13.0)                              |
| <b>Neglected tropical diseases and malaria</b>                                       | <b>1,325.0</b><br>(1,195.5 to 1,479.5) | <b>0.1†</b><br>(< 0.05 to 0.4)             | <b>5.7</b><br>(3.8 to 8.5)       | <b>5.3</b><br>(-3.2 to 13.4)                      | <b>-4.7</b><br>(-12.8 to 3.1)                       |
| Malaria                                                                              | --                                     | --                                         | --                               | --                                                | --                                                  |
| Chagas disease                                                                       | --                                     | --                                         | --                               | --                                                | --                                                  |
| Leishmaniasis                                                                        | --                                     | --                                         | --                               | --                                                | --                                                  |
| Visceral leishmaniasis                                                               | --                                     | --                                         | --                               | --                                                | --                                                  |
| Cutaneous and mucocutaneous leishmaniasis                                            | --                                     | --                                         | --                               | --                                                | --                                                  |
| African trypanosomiasis                                                              | --                                     | --                                         | --                               | --                                                | --                                                  |
| Schistosomiasis                                                                      | --                                     | --                                         | --                               | --                                                | --                                                  |
| Cysticercosis                                                                        | 5.7<br>(4.4 to 6.9)                    | --                                         | 1.1<br>(0.7 to 1.7)              | 1.1<br>(-18.7 to 18.3)                            | -11.9<br>(-27.3 to 1.3)                             |
| Cystic echinococcosis                                                                | 0.5<br>(0.1 to 1.9)                    | 0.1<br>(< 0.05 to 0.4)                     | < 0.05<br>(< 0.05 to 0.2)        | -36.8<br>(-92.4 to 326.7)                         | -43.8<br>(-92.3 to 272.5)                           |
| Lymphatic filariasis                                                                 | --                                     | --                                         | --                               | --                                                | --                                                  |
| Onchocerciasis                                                                       | --                                     | --                                         | --                               | --                                                | --                                                  |
| Trachoma                                                                             | --                                     | --                                         | --                               | --                                                | --                                                  |
| Dengue                                                                               | --                                     | --                                         | --                               | --                                                | --                                                  |
| Yellow fever                                                                         | --                                     | --                                         | --                               | --                                                | --                                                  |
| Rabies                                                                               | < 0.05<br>(< 0.05 to < 0.05)           | < 0.05<br>(< 0.05 to < 0.05)               | < 0.05<br>(< 0.05 to < 0.05)     | -48.5<br>(-79.2 to 31.4)                          | -48.6<br>(-75.7 to 13.0)                            |
| Intestinal nematode infections                                                       | 1,315.9<br>(1,186.3 to 1,473.4)        | --                                         | 4.0<br>(2.3 to 6.5)              | 9.6<br>(1.8 to 18.9)                              | 0.3<br>(-7.8 to 9.6)                                |
| Ascariasis                                                                           | 377.3<br>(276.4 to 511.1)              | --                                         | 0.2<br>(0.1 to 0.3)              | 7.1<br>(-4.1 to 19.2)                             | -0.5<br>(-11.4 to 11.3)                             |

| Cause                                                                   | Prevalence in thousands (95% UI)              | Incidence in thousands (95% UI)                | YLDs in thousands (95% UI)              |                                                                    |                                                                      |
|-------------------------------------------------------------------------|-----------------------------------------------|------------------------------------------------|-----------------------------------------|--------------------------------------------------------------------|----------------------------------------------------------------------|
|                                                                         | 2016 counts<br>(747.4 to 1,153.9)             | 2016 counts                                    | 2016 counts<br>(1.2 to 3.6)             | Percentage change in counts between 2006 and 2016<br>(0.4 to 14.3) | Percentage change in age-standardised rates between<br>(-7.5 to 6.9) |
| Trichuriasis                                                            | 927.7<br>(747.4 to 1,153.9)                   | --                                             | 2.1<br>(1.2 to 3.6)                     | 6.9<br>(0.4 to 14.3)                                               | -0.8<br>(-7.5 to 6.9)                                                |
| Hookworm disease                                                        | 433.3<br>(336.8 to 564.7)                     | --                                             | 1.7<br>(1.0 to 2.6)                     | 13.5<br>(-2.9 to 33.9)                                             | 1.8<br>(-13.7 to 20.6)                                               |
| Food-borne trematodiasis                                                | --                                            | --                                             | --                                      | --                                                                 | --                                                                   |
| Leprosy                                                                 | < 0.05<br>(< 0.05 to < 0.05)                  | < 0.05<br>(< 0.05 to < 0.05)                   | < 0.05<br>(< 0.05 to < 0.05)            | 5.9<br>(-16.3 to 39.6)                                             | -4.9<br>(-23.9 to 26.7)                                              |
| Ebola virus disease                                                     | --                                            | --                                             | --                                      | --                                                                 | --                                                                   |
| Zika virus disease                                                      | --                                            | --                                             | --                                      | --                                                                 | --                                                                   |
| Guinea worm disease                                                     | --                                            | --                                             | --                                      | --                                                                 | --                                                                   |
| Other neglected tropical diseases                                       | 17.9<br>(17.0 to 18.9)                        | --                                             | 0.6<br>(0.4 to 0.8)                     | -7.5<br>(-16.2 to 1.7)                                             | -10.3<br>(-18.6 to -1.8)                                             |
| <b>Maternal disorders</b>                                               | <b>5.2</b><br><b>(4.2 to 6.6)</b>             | <b>33.5†</b><br><b>(29.4 to 37.6)</b>          | <b>0.6</b><br><b>(0.4 to 0.8)</b>       | <b>-7.9</b><br><b>(-23.4 to 11.1)</b>                              | <b>-29.9</b><br><b>(-41.6 to -16.1)</b>                              |
| Maternal haemorrhage                                                    | 0.7<br>(0.5 to 0.9)                           | 4.1<br>(3.0 to 5.6)                            | < 0.05<br>(< 0.05 to < 0.05)            | 0.2<br>(-31.2 to 43.6)                                             | -19.2<br>(-43.9 to 16.0)                                             |
| Maternal sepsis and other pregnancy related infections                  | 0.6<br>(0.5 to 0.8)                           | 3.1<br>(2.3 to 4.3)                            | < 0.05<br>(< 0.05 to < 0.05)            | 5.8<br>(-52.7 to 114.0)                                            | -13.8<br>(-57.9 to 63.4)                                             |
| Maternal hypertensive disorders                                         | 3.0<br>(1.9 to 4.2)                           | 14.2<br>(11.6 to 16.4)                         | 0.1<br>(0.1 to 0.2)                     | 15.5<br>(-29.7 to 91.5)                                            | -8.9<br>(-44.6 to 52.0)                                              |
| Maternal obstructed labour and uterine rupture                          | 1.0<br>(0.8 to 1.2)                           | 1.9<br>(1.4 to 2.6)                            | 0.3<br>(0.2 to 0.4)                     | -15.8<br>(-29.9 to 1.8)                                            | -35.7<br>(-46.7 to -21.9)                                            |
| Maternal abortion, miscarriage, and ectopic pregnancy                   | 0.1<br>(0.1 to 0.1)                           | 10.2<br>(7.8 to 13.2)                          | < 0.05<br>(< 0.05 to < 0.05)            | 0.6<br>(-55.0 to 128.8)                                            | -21.6<br>(-63.0 to 71.8)                                             |
| Other maternal disorders                                                | --                                            | --                                             | 0.1<br>(0.1 to 0.1)                     | -12.6<br>(-27.3 to 5.5)                                            | -32.9<br>(-44.0 to -19.7)                                            |
| <b>Neonatal disorders</b>                                               | <b>26.0</b><br><b>(20.2 to 33.0)</b>          | --                                             | <b>3.2</b><br><b>(2.1 to 4.8)</b>       | <b>26.1</b><br><b>(3.5 to 51.9)</b>                                | <b>17.2</b><br><b>(-4.6 to 41.5)</b>                                 |
| Neonatal preterm birth complications                                    | 22.0<br>(15.7 to 31.1)                        | --                                             | 1.8<br>(1.2 to 2.6)                     | 17.7<br>(-7.9 to 45.6)                                             | 9.4<br>(-14.7 to 35.2)                                               |
| Neonatal encephalopathy due to birth asphyxia and trauma                | 3.6<br>(1.8 to 6.0)                           | --                                             | 0.4<br>(0.1 to 1.0)                     | 49.3<br>(-36.5 to 152.4)                                           | 38.3<br>(-39.2 to 127.7)                                             |
| Neonatal sepsis and other neonatal infections                           | 1.6<br>(0.5 to 3.7)                           | --                                             | 0.6<br>(0.1 to 1.7)                     | 63.8<br>(-27.7 to 251.4)                                           | 55.4<br>(-32.1 to 233.3)                                             |
| Hemolytic disease and other neonatal jaundice                           | 0.7<br>(0.6 to 0.8)                           | --                                             | 0.2<br>(0.2 to 0.3)                     | 1.8<br>(-12.8 to 18.2)                                             | -5.4<br>(-18.0 to 8.4)                                               |
| Other neonatal disorders                                                | --                                            | --                                             | 0.2<br>(0.1 to 0.3)                     | 16.2<br>(-6.0 to 39.3)                                             | 8.4<br>(-12.4 to 30.0)                                               |
| <b>Nutritional deficiencies</b>                                         | <b>977.3</b><br><b>(917.7 to 1,037.9)</b>     | <b>910.2†</b><br><b>(745.8 to 1,103.5)</b>     | <b>13.8</b><br><b>(9.3 to 19.7)</b>     | <b>-12.8</b><br><b>(-16.8 to -8.6)</b>                             | <b>-23.5</b><br><b>(-26.6 to -20.1)</b>                              |
| Protein-energy malnutrition                                             | 9.9<br>(7.3 to 13.3)                          | 4.9<br>(3.6 to 6.5)                            | 0.4<br>(0.2 to 0.7)                     | -31.7<br>(-58.8 to 12.0)                                           | -36.3<br>(-61.6 to 4.3)                                              |
| Iodine deficiency                                                       | 150.6<br>(133.5 to 170.8)                     | 4.6<br>(4.1 to 5.2)                            | 4.0<br>(2.7 to 5.7)                     | -7.9<br>(-13.7 to -0.7)                                            | -18.8<br>(-23.6 to -12.7)                                            |
| Vitamin A deficiency                                                    | 688.6<br>(601.9 to 781.1)                     | 900.7<br>(735.9 to 1,091.6)                    | 0.1<br>(0.1 to 0.1)                     | 3.1<br>(-16.4 to 25.5)                                             | -4.7<br>(-22.3 to 15.0)                                              |
| Iron-deficiency anaemia                                                 | 302.4<br>(288.9 to 314.5)                     | --                                             | 9.3<br>(6.1 to 13.7)                    | -13.8<br>(-18.6 to -8.8)                                           | -25.5<br>(-29.2 to -21.6)                                            |
| Other nutritional deficiencies                                          | --                                            | --                                             | < 0.05<br>(< 0.05 to < 0.05)            | -32.2<br>(-60.4 to 13.3)                                           | -36.8<br>(-63.2 to 5.9)                                              |
| <b>Other communicable, maternal, neonatal, and nutritional diseases</b> | <b>756.7</b><br><b>(715.9 to 800.0)</b>       | <b>409.6</b><br><b>(368.1 to 459.8)</b>        | <b>1.9</b><br><b>(1.2 to 2.9)</b>       | <b>18.6</b><br><b>(11.7 to 25.0)</b>                               | <b>0.9</b><br><b>(-4.7 to 5.9)</b>                                   |
| Sexually transmitted diseases excluding HIV                             | 584.1<br>(546.7 to 622.6)                     | 383.0<br>(341.6 to 433.4)                      | 1.4<br>(0.9 to 2.2)                     | 27.1<br>(18.6 to 34.9)                                             | 2.9<br>(-3.8 to 9.0)                                                 |
| Syphilis                                                                | 68.4<br>(53.8 to 85.2)                        | 48.9<br>(37.2 to 63.8)                         | 0.1<br>(0.1 to 0.1)                     | 8.8<br>(-4.0 to 24.6)                                              | -4.2<br>(-15.9 to 10.8)                                              |
| Chlamydial infection                                                    | 41.1<br>(30.8 to 54.3)                        | 34.6<br>(26.3 to 45.8)                         | 0.2<br>(0.1 to 0.3)                     | 34.5<br>(14.3 to 55.1)                                             | 5.0<br>(-9.8 to 20.2)                                                |
| Gonococcal infection                                                    | 42.6<br>(33.7 to 53.9)                        | 142.6<br>(109.1 to 185.1)                      | 0.4<br>(0.2 to 0.7)                     | 28.3<br>(14.1 to 45.1)                                             | 6.1<br>(-5.4 to 17.9)                                                |
| Trichomoniasis                                                          | 89.2<br>(74.4 to 104.9)                       | 83.3<br>(68.4 to 100.7)                        | 0.1<br>(< 0.05 to 0.3)                  | 18.1<br>(10.7 to 25.9)                                             | -3.8<br>(-8.6 to 1.7)                                                |
| Genital herpes                                                          | 435.3<br>(376.4 to 508.2)                     | 49.8<br>(41.5 to 61.1)                         | 0.1<br>(< 0.05 to 0.3)                  | 17.3<br>(6.5 to 29.3)                                              | -0.7<br>(-8.1 to 7.7)                                                |
| Other sexually transmitted diseases                                     | 19.1<br>(15.4 to 23.2)                        | 23.8<br>(19.7 to 28.8)                         | 0.5<br>(0.3 to 0.7)                     | 32.2<br>(18.9 to 46.0)                                             | 4.6<br>(-6.4 to 15.4)                                                |
| Hepatitis                                                               | 238.4<br>(194.2 to 287.1)                     | 26.7<br>(19.5 to 35.7)                         | < 0.05<br>(< 0.05 to < 0.05)            | -1.4<br>(-22.0 to 24.4)                                            | -11.0<br>(-28.9 to 10.5)                                             |
| Acute hepatitis A                                                       | 0.4<br>(0.1 to 0.9)                           | 4.8<br>(0.7 to 12.0)                           | < 0.05<br>(< 0.05 to < 0.05)            | -3.8<br>(-70.5 to 242.0)                                           | -9.4<br>(-63.7 to 154.4)                                             |
| Hepatitis B                                                             | 185.1<br>(142.1 to 234.3)                     | 18.5<br>(13.7 to 24.5)                         | < 0.05<br>(< 0.05 to < 0.05)            | -0.7<br>(-22.8 to 24.7)                                            | -11.5<br>(-31.5 to 12.6)                                             |
| Hepatitis C                                                             | 52.9<br>(46.6 to 59.4)                        | 2.3<br>(2.0 to 2.6)                            | < 0.05<br>(< 0.05 to < 0.05)            | 5.8<br>(-40.3 to 84.3)                                             | -1.8<br>(-37.2 to 53.5)                                              |
| Acute hepatitis E                                                       | 0.1<br>(0.1 to 0.1)                           | 1.0<br>(0.9 to 1.2)                            | < 0.05<br>(< 0.05 to < 0.05)            | -11.1<br>(-19.0 to -3.1)                                           | -13.5<br>(-20.8 to -5.8)                                             |
| Other infectious diseases                                               | 12.8<br>(12.2 to 13.5)                        | < 0.05<br>(< 0.05 to < 0.05)                   | 0.4<br>(0.3 to 0.6)                     | -1.4<br>(-10.4 to 8.2)                                             | -5.7<br>(-13.8 to 2.9)                                               |
| <b>Non-communicable diseases</b>                                        | <b>1,896.9</b><br><b>(1,877.9 to 1,915.2)</b> | <b>5,465.1†</b><br><b>(5,023.6 to 5,896.6)</b> | <b>161.1</b><br><b>(119.5 to 209.2)</b> | <b>12.4</b><br><b>(8.9 to 16.0)</b>                                | <b>0.7</b><br><b>(-1.8 to 3.3)</b>                                   |
| <b>Neoplasms</b>                                                        | <b>3.7</b><br><b>(3.3 to 4.3)</b>             | <b>2.3</b><br><b>(1.9 to 2.6)</b>              | <b>0.7</b><br><b>(0.5 to 0.9)</b>       | <b>8.3</b><br><b>(1.9 to 14.8)</b>                                 | <b>2.5</b><br><b>(-3.1 to 8.5)</b>                                   |
| Lip and oral cavity cancer                                              | 0.2<br>(0.2 to 0.2)                           | 0.1<br>(0.1 to 0.1)                            | < 0.05<br>(< 0.05 to < 0.05)            | 8.0<br>(-10.8 to 30.1)                                             | 3.4<br>(-15.2 to 24.8)                                               |
| Nasopharynx cancer                                                      | < 0.05<br>(< 0.05 to < 0.05)                  | < 0.05<br>(< 0.05 to < 0.05)                   | < 0.05<br>(< 0.05 to < 0.05)            | 6.1<br>(-8.5 to 22.2)                                              | -2.7<br>(-16.2 to 12.2)                                              |
| Other pharynx cancer                                                    | < 0.05<br>(< 0.05 to < 0.05)                  | < 0.05<br>(< 0.05 to < 0.05)                   | < 0.05<br>(< 0.05 to < 0.05)            | 7.2<br>(-9.0 to 24.9)                                              | 4.6<br>(-11.4 to 22.2)                                               |
| Oesophageal cancer                                                      | 0.1<br>(0.1 to 0.2)                           | 0.1<br>(0.1 to 0.2)                            | < 0.05<br>(< 0.05 to < 0.05)            | -3.6<br>(-21.3 to 18.1)                                            | -5.4<br>(-22.2 to 15.9)                                              |
| Stomach cancer                                                          | 0.1<br>(0.1 to 0.2)                           | 0.1<br>(0.1 to 0.1)                            | < 0.05<br>(< 0.05 to < 0.05)            | -9.2<br>(-23.1 to 6.8)                                             | -12.3<br>(-26.2 to 3.6)                                              |
| Colon and rectum cancer                                                 | 0.3<br>(0.2 to 0.4)                           | 0.1<br>(0.1 to 0.1)                            | < 0.05<br>(< 0.05 to 0.1)               | 15.6<br>(-2.1 to 36.4)                                             | 10.8<br>(-7.0 to 31.8)                                               |
| Liver cancer                                                            | < 0.05<br>(< 0.05 to < 0.05)                  | 0.1<br>(0.1 to 0.1)                            | < 0.05<br>(< 0.05 to < 0.05)            | 5.4<br>(-6.9 to 19.9)                                              | -1.8<br>(-13.4 to 12.0)                                              |
| Liver cancer due to hepatitis B                                         | < 0.05<br>(< 0.05 to < 0.05)                  | < 0.05<br>(< 0.05 to < 0.05)                   | < 0.05<br>(< 0.05 to < 0.05)            | 7.1<br>(-5.7 to 22.2)                                              | -1.9<br>(-13.2 to 12.2)                                              |

| Cause                                              | Prevalence in thousands (95% UI)        | Incidence in thousands (95% UI)       | YLDs in thousands (95% UI)         |                                                   |                                                     |
|----------------------------------------------------|-----------------------------------------|---------------------------------------|------------------------------------|---------------------------------------------------|-----------------------------------------------------|
|                                                    | 2016 counts                             | 2016 counts                           | 2016 counts                        | Percentage change in counts between 2006 and 2016 | Percentage change in age-standardised rates between |
| Liver cancer due to hepatitis C                    | < 0.05<br>(< 0.05 to < 0.05)            | < 0.05<br>(< 0.05 to < 0.05)          | < 0.05<br>(< 0.05 to < 0.05)       | 2.2<br>(-11.5 to 18.0)                            | -1.6<br>(-14.2 to 13.6)                             |
| Liver cancer due to alcohol use                    | < 0.05<br>(< 0.05 to < 0.05)            | < 0.05<br>(< 0.05 to < 0.05)          | < 0.05<br>(< 0.05 to < 0.05)       | 3.4<br>(-10.1 to 19.4)                            | -1.1<br>(-14.3 to 14.5)                             |
| Liver cancer due to other causes                   | < 0.05<br>(< 0.05 to < 0.05)            | < 0.05<br>(< 0.05 to < 0.05)          | < 0.05<br>(< 0.05 to < 0.05)       | 5.5<br>(-6.9 to 20.3)                             | -2.6<br>(-14.9 to 11.3)                             |
| Gallbladder and biliary tract cancer               | < 0.05<br>(< 0.05 to < 0.05)            | < 0.05<br>(< 0.05 to < 0.05)          | < 0.05<br>(< 0.05 to < 0.05)       | -1.6<br>(-10.6 to 8.8)                            | -4.9<br>(-13.7 to 5.2)                              |
| Pancreatic cancer                                  | < 0.05<br>(< 0.05 to < 0.05)            | < 0.05<br>(< 0.05 to 0.1)             | < 0.05<br>(< 0.05 to < 0.05)       | 10.3<br>(0.1 to 21.2)                             | 6.9<br>(-3.5 to 18.4)                               |
| Larynx cancer                                      | 0.1<br>(0.1 to 0.1)                     | < 0.05<br>(< 0.05 to < 0.05)          | < 0.05<br>(< 0.05 to < 0.05)       | 0.4<br>(-20.5 to 26.2)                            | -1.2<br>(-21.3 to 24.0)                             |
| Tracheal, bronchus, and lung cancer                | 0.3<br>(0.2 to 0.4)                     | 0.2<br>(0.2 to 0.3)                   | 0.1<br>(< 0.05 to 0.1)             | 3.3<br>(-15.0 to 27.2)                            | 1.4<br>(-16.7 to 24.8)                              |
| Malignant skin melanoma                            | < 0.05<br>(< 0.05 to 0.1)               | < 0.05<br>(< 0.05 to < 0.05)          | < 0.05<br>(< 0.05 to < 0.05)       | 24.1<br>(8.0 to 46.8)                             | 14.1<br>(-1.3 to 34.8)                              |
| Non-melanoma skin cancer                           | < 0.05<br>(< 0.05 to 0.1)               | 0.2<br>(0.1 to 0.3)                   | < 0.05<br>(< 0.05 to < 0.05)       | 17.9<br>(-11.8 to 58.9)                           | 13.1<br>(-15.9 to 54.4)                             |
| Non-melanoma skin cancer (squamous-cell carcinoma) | < 0.05<br>(< 0.05 to 0.1)               | 0.1<br>(0.1 to 0.1)                   | < 0.05<br>(< 0.05 to < 0.05)       | 19.2<br>(-13.1 to 63.8)                           | 14.3<br>(-17.4 to 61.4)                             |
| Non-melanoma skin cancer (basal-cell carcinoma)    | < 0.05<br>(< 0.05 to < 0.05)            | 0.1<br>(0.1 to 0.2)                   | < 0.05<br>(< 0.05 to < 0.05)       | 6.2<br>(-7.8 to 23.6)                             | 0.6<br>(-13.8 to 18.3)                              |
| Breast cancer                                      | 0.9<br>(0.6 to 1.2)                     | 0.2<br>(0.1 to 0.3)                   | 0.1<br>(0.1 to 0.1)                | 17.4<br>(-4.2 to 47.2)                            | 11.7<br>(-8.6 to 39.5)                              |
| Cervical cancer                                    | 1.4<br>(0.8 to 1.8)                     | 0.4<br>(0.2 to 0.5)                   | 0.1<br>(0.1 to 0.2)                | 4.1<br>(-14.6 to 25.8)                            | -5.5<br>(-21.9 to 12.8)                             |
| Uterine cancer                                     | 0.1<br>(0.1 to 0.1)                     | < 0.05<br>(< 0.05 to < 0.05)          | < 0.05<br>(< 0.05 to < 0.05)       | 19.1<br>(-6.1 to 50.5)                            | 15.2<br>(-9.5 to 46.1)                              |
| Ovarian cancer                                     | 0.1<br>(0.1 to 0.1)                     | < 0.05<br>(< 0.05 to < 0.05)          | < 0.05<br>(< 0.05 to < 0.05)       | 21.0<br>(-3.2 to 49.7)                            | 11.1<br>(-14.3 to 43.7)                             |
| Prostate cancer                                    | 0.5<br>(0.2 to 0.8)                     | 0.2<br>(0.1 to 0.2)                   | 0.1<br>(< 0.05 to 0.1)             | 14.8<br>(-1.7 to 40.0)                            | 10.0<br>(-4.9 to 31.9)                              |
| Testicular cancer                                  | < 0.05<br>(< 0.05 to < 0.05)            | < 0.05<br>(< 0.05 to < 0.05)          | < 0.05<br>(< 0.05 to < 0.05)       | 26.2<br>(5.4 to 51.9)                             | 4.8<br>(-11.3 to 24.9)                              |
| Kidney cancer                                      | 0.1<br>(0.1 to 0.1)                     | < 0.05<br>(< 0.05 to < 0.05)          | < 0.05<br>(< 0.05 to < 0.05)       | 19.4<br>(-1.1 to 44.7)                            | 15.6<br>(-0.8 to 36.3)                              |
| Bladder cancer                                     | 0.1<br>(0.1 to 0.2)                     | < 0.05<br>(< 0.05 to 0.1)             | < 0.05<br>(< 0.05 to < 0.05)       | 14.6<br>(0.3 to 30.4)                             | 9.0<br>(-5.3 to 25.0)                               |
| Brain and nervous system cancer                    | 0.1<br>(< 0.05 to 0.1)                  | < 0.05<br>(< 0.05 to < 0.05)          | < 0.05<br>(< 0.05 to < 0.05)       | 14.2<br>(1.0 to 30.4)                             | 9.3<br>(-5.5 to 28.6)                               |
| Thyroid cancer                                     | < 0.05<br>(< 0.05 to 0.1)               | < 0.05<br>(< 0.05 to < 0.05)          | < 0.05<br>(< 0.05 to < 0.05)       | 24.0<br>(3.9 to 48.2)                             | 12.6<br>(-6.0 to 36.3)                              |
| Mesothelioma                                       | < 0.05<br>(< 0.05 to < 0.05)            | < 0.05<br>(< 0.05 to < 0.05)          | < 0.05<br>(< 0.05 to < 0.05)       | -2.5<br>(-16.2 to 13.9)                           | -4.9<br>(-18.7 to 11.8)                             |
| Hodgkin lymphoma                                   | < 0.05<br>(< 0.05 to < 0.05)            | < 0.05<br>(< 0.05 to < 0.05)          | < 0.05<br>(< 0.05 to < 0.05)       | 2.3<br>(-7.2 to 14.0)                             | -8.8<br>(-16.1 to -0.0)                             |
| Non-Hodgkin's lymphoma                             | 0.1<br>(0.1 to 0.1)                     | < 0.05<br>(< 0.05 to < 0.05)          | < 0.05<br>(< 0.05 to < 0.05)       | 11.2<br>(-0.5 to 23.8)                            | 4.0<br>(-8.6 to 18.6)                               |
| Multiple myeloma                                   | < 0.05<br>(< 0.05 to < 0.05)            | < 0.05<br>(< 0.05 to < 0.05)          | < 0.05<br>(< 0.05 to < 0.05)       | 12.4<br>(-4.3 to 31.2)                            | 9.2<br>(-8.2 to 28.8)                               |
| Leukaemia                                          | 0.2<br>(0.2 to 0.3)                     | 0.1<br>(0.1 to 0.1)                   | < 0.05<br>(< 0.05 to < 0.05)       | -0.5<br>(-10.7 to 10.7)                           | -5.3<br>(-16.4 to 7.0)                              |
| Acute lymphoid leukaemia                           | < 0.05<br>(< 0.05 to < 0.05)            | < 0.05<br>(< 0.05 to < 0.05)          | < 0.05<br>(< 0.05 to < 0.05)       | 0.9<br>(-18.6 to 27.7)                            | -2.2<br>(-17.5 to 16.9)                             |
| Chronic lymphoid leukaemia                         | < 0.05<br>(< 0.05 to < 0.05)            | < 0.05<br>(< 0.05 to < 0.05)          | < 0.05<br>(< 0.05 to < 0.05)       | 9.2<br>(-6.0 to 27.5)                             | 4.3<br>(-9.9 to 21.9)                               |
| Acute myeloid leukaemia                            | < 0.05<br>(< 0.05 to < 0.05)            | < 0.05<br>(< 0.05 to < 0.05)          | < 0.05<br>(< 0.05 to < 0.05)       | 12.6<br>(-3.0 to 28.5)                            | 7.0<br>(-6.2 to 18.2)                               |
| Chronic myeloid leukaemia                          | < 0.05<br>(< 0.05 to < 0.05)            | < 0.05<br>(< 0.05 to < 0.05)          | < 0.05<br>(< 0.05 to < 0.05)       | 12.7<br>(-3.1 to 31.3)                            | -1.3<br>(-14.7 to 14.5)                             |
| Other leukaemia                                    | 0.1<br>(0.1 to 0.2)                     | < 0.05<br>(< 0.05 to < 0.05)          | < 0.05<br>(< 0.05 to < 0.05)       | -5.8<br>(-18.7 to 10.5)                           | -9.0<br>(-23.3 to 8.7)                              |
| Other neoplasms                                    | 0.4<br>(0.3 to 0.4)                     | 0.1<br>(0.1 to 0.1)                   | < 0.05<br>(< 0.05 to 0.1)          | 13.9<br>(-0.8 to 31.8)                            | 0.0<br>(-12.8 to 15.1)                              |
| <b>Cardiovascular diseases</b>                     | <b>87.2</b><br><b>(83.2 to 91.2)</b>    | <b>8.8†</b><br><b>(8.4 to 9.3)</b>    | <b>4.8</b><br><b>(3.5 to 6.2)</b>  | <b>8.3</b><br><b>(4.7 to 12.8)</b>                | <b>-0.2</b><br><b>(-3.3 to 3.3)</b>                 |
| Rheumatic heart disease                            | 26.1<br>(23.1 to 29.0)                  | 1.0<br>(0.9 to 1.1)                   | 1.3<br>(0.8 to 1.9)                | 11.6<br>(2.8 to 21.6)                             | -3.5<br>(-10.6 to 4.1)                              |
| Ischaemic heart disease                            | 19.7<br>(18.4 to 21.0)                  | 3.0<br>(2.8 to 3.2)                   | 0.9<br>(0.6 to 1.2)                | 6.9<br>(1.0 to 12.8)                              | 0.1<br>(-4.5 to 4.8)                                |
| Cerebrovascular disease                            | 8.0<br>(7.5 to 8.6)                     | 1.6†<br>(1.5 to 1.8)                  | 1.2<br>(0.9 to 1.5)                | 6.4<br>(-1.6 to 14.7)                             | 1.4<br>(-6.3 to 9.7)                                |
| Ischaemic stroke                                   | 6.8<br>(6.2 to 7.6)                     | 1.0†<br>(0.9 to 1.1)                  | 1.0<br>(0.7 to 1.2)                | 9.8<br>(0.4 to 19.7)                              | 5.0<br>(-4.1 to 14.9)                               |
| Hemorrhagic stroke                                 | 1.6<br>(1.4 to 1.8)                     | 0.6†<br>(0.5 to 0.7)                  | 0.2<br>(0.2 to 0.3)                | -5.7<br>(-15.5 to 4.2)                            | -11.6<br>(-20.5 to -1.9)                            |
| Hypertensive heart disease                         | 1.0<br>(0.8 to 1.2)                     | --                                    | 0.1<br>(< 0.05 to 0.1)             | -2.9<br>(-14.9 to 10.6)                           | -6.4<br>(-16.7 to 5.4)                              |
| Cardiomyopathy and myocarditis                     | 1.5<br>(1.3 to 1.7)                     | 0.5†<br>(0.4 to 0.6)                  | 0.1<br>(0.1 to 0.2)                | 5.5<br>(-5.1 to 18.2)                             | -1.2<br>(-11.7 to 10.7)                             |
| Myocarditis                                        | 0.3<br>(0.3 to 0.3)                     | 0.5<br>(0.4 to 0.6)                   | < 0.05<br>(< 0.05 to < 0.05)       | 12.8<br>(5.9 to 21.1)                             | 1.6<br>(-6.1 to 10.6)                               |
| Alcoholic cardiomyopathy                           | 0.1<br>(0.1 to 0.2)                     | --                                    | < 0.05<br>(< 0.05 to < 0.05)       | 0.2<br>(-20.4 to 27.8)                            | -1.8<br>(-21.6 to 25.9)                             |
| Other cardiomyopathy                               | 1.3<br>(1.1 to 1.5)                     | --                                    | 0.1<br>(0.1 to 0.1)                | 4.7<br>(-7.8 to 18.9)                             | -1.4<br>(-13.0 to 12.2)                             |
| Atrial fibrillation and flutter                    | 5.0<br>(4.3 to 5.7)                     | 0.4<br>(0.4 to 0.5)                   | 0.4<br>(0.3 to 0.5)                | 3.8<br>(-3.0 to 11.8)                             | -0.5<br>(-6.4 to 5.8)                               |
| Peripheral vascular disease                        | 20.7<br>(18.0 to 23.9)                  | 2.0<br>(1.7 to 2.4)                   | 0.1<br>(0.1 to 0.2)                | 5.4<br>(-2.5 to 14.3)                             | 1.9<br>(-5.4 to 10.1)                               |
| Endocarditis                                       | 0.1<br>(0.1 to 0.1)                     | 0.2<br>(0.2 to 0.3)                   | < 0.05<br>(< 0.05 to < 0.05)       | 14.7<br>(4.2 to 27.0)                             | -0.5<br>(-13.1 to 15.7)                             |
| Other cardiovascular and circulatory diseases      | 14.0<br>(11.0 to 17.6)                  | --                                    | 0.7<br>(0.5 to 1.1)                | 12.9<br>(2.2 to 26.0)                             | 0.9<br>(-7.2 to 9.8)                                |
| <b>Chronic respiratory diseases</b>                | <b>184.7</b><br><b>(174.9 to 194.2)</b> | <b>32.7†</b><br><b>(30.4 to 35.3)</b> | <b>9.3</b><br><b>(7.0 to 12.0)</b> | <b>12.9</b><br><b>(8.4 to 17.6)</b>               | <b>4.7</b><br><b>(1.1 to 8.4)</b>                   |
| Chronic obstructive pulmonary disease              | 40.0<br>(38.2 to 41.7)                  | 3.1<br>(3.0 to 3.2)                   | 3.2<br>(2.8 to 3.5)                | 7.8<br>(1.7 to 14.3)                              | 2.4<br>(-3.2 to 8.2)                                |
| Pneumoconiosis                                     | < 0.05<br>(< 0.05 to 0.1)               | < 0.05<br>(< 0.05 to < 0.05)          | < 0.05<br>(< 0.05 to < 0.05)       | 2.7<br>(-3.8 to 8.9)                              | -3.6<br>(-10.0 to 2.5)                              |
| Silicosis                                          | < 0.05<br>(< 0.05 to < 0.05)            | < 0.05<br>(< 0.05 to < 0.05)          | < 0.05<br>(< 0.05 to < 0.05)       | 14.5<br>(8.1 to 21.9)                             | 3.9<br>(-0.9 to 9.1)                                |



| Cause                                                          | Prevalence in thousands (95% UI)  | Incidence in thousands (95% UI)    | YLDs in thousands (95% UI)        |                                                                    |                                                                      |
|----------------------------------------------------------------|-----------------------------------|------------------------------------|-----------------------------------|--------------------------------------------------------------------|----------------------------------------------------------------------|
|                                                                | 2016 counts<br>(< 0.05 to < 0.05) | 2016 counts<br>(< 0.05 to < 0.05)  | 2016 counts<br>(< 0.05 to < 0.05) | Percentage change in counts between 2006 and 2016<br>(-2.3 to 9.2) | Percentage change in age-standardised rates between<br>(-9.1 to 1.3) |
| Asbestosis                                                     | < 0.05<br>(< 0.05 to < 0.05)      | < 0.05<br>(< 0.05 to < 0.05)       | < 0.05<br>(< 0.05 to < 0.05)      | 3.8<br>(-2.3 to 9.2)                                               | -3.9<br>(-9.1 to 1.3)                                                |
| Coal workers pneumoconiosis                                    | --                                | --                                 | --                                | --                                                                 | --                                                                   |
| Other pneumoconiosis                                           | < 0.05<br>(< 0.05 to < 0.05)      | < 0.05<br>(< 0.05 to < 0.05)       | < 0.05<br>(< 0.05 to < 0.05)      | 0.2<br>(-11.3 to 12.5)                                             | -4.1<br>(-16.0 to 7.5)                                               |
| Asthma                                                         | 148.7<br>(137.9 to 160.9)         | 29.6<br>(27.2 to 32.1)             | 5.8<br>(3.8 to 8.4)               | 14.8<br>(9.3 to 20.8)                                              | 6.1<br>(2.0 to 10.5)                                                 |
| Interstitial lung disease and pulmonary sarcoidosis            | 0.3<br>(0.3 to 0.3)               | < 0.05<br>(< 0.05 to < 0.05)       | < 0.05<br>(< 0.05 to < 0.05)      | 8.5<br>(-1.1 to 19.0)                                              | 1.2<br>(-10.3 to 13.5)                                               |
| Other chronic respiratory diseases                             | --                                | --                                 | 0.2<br>(0.2 to 0.3)               | 47.3<br>(18.8 to 82.6)                                             | 37.8<br>(18.2 to 59.6)                                               |
| <b>Cirrhosis and other chronic liver diseases</b>              | <b>2.6<br/>(2.4 to 2.7)</b>       | <b>0.3<br/>(0.2 to 0.3)</b>        | <b>0.2<br/>(0.2 to 0.3)</b>       | <b>11.8<br/>(-3.6 to 29.4)</b>                                     | <b>2.9<br/>(-7.8 to 15.2)</b>                                        |
| Cirrhosis and other chronic liver diseases due to hepatitis B  | 0.6<br>(0.5 to 0.7)               | 0.1<br>(0.1 to 0.1)                | < 0.05<br>(< 0.05 to 0.1)         | 17.1<br>(-8.8 to 50.0)                                             | 3.1<br>(-16.0 to 28.5)                                               |
| Cirrhosis and other chronic liver diseases due to hepatitis C  | 0.3<br>(0.3 to 0.3)               | < 0.05<br>(< 0.05 to < 0.05)       | < 0.05<br>(< 0.05 to < 0.05)      | 17.3<br>(-2.7 to 40.4)                                             | 4.2<br>(-17.9 to 31.5)                                               |
| Cirrhosis and other chronic liver diseases due to alcohol use  | 0.6<br>(0.5 to 0.6)               | 0.1<br>(0.1 to 0.1)                | < 0.05<br>(< 0.05 to 0.1)         | 11.4<br>(-9.8 to 36.6)                                             | 0.8<br>(-16.8 to 22.1)                                               |
| Cirrhosis and other chronic liver diseases due to other causes | 1.1<br>(1.0 to 1.2)               | 0.1<br>(0.1 to 0.1)                | 0.1<br>(0.1 to 0.2)               | 9.3<br>(-13.9 to 39.5)                                             | 3.7<br>(-15.9 to 27.9)                                               |
| <b>Digestive diseases</b>                                      | <b>32.1<br/>(29.9 to 34.4)</b>    | <b>34.6†<br/>(32.7 to 36.7)</b>    | <b>1.0<br/>(0.7 to 1.3)</b>       | <b>16.0<br/>(7.4 to 26.3)</b>                                      | <b>4.2<br/>(-2.3 to 10.9)</b>                                        |
| Peptic ulcer disease                                           | 6.0<br>(5.5 to 6.5)               | 2.1<br>(1.9 to 2.4)                | 0.1<br>(0.1 to 0.2)               | 33.5<br>(20.5 to 47.8)                                             | 13.6<br>(4.5 to 23.0)                                                |
| Gastritis and duodenitis                                       | 10.4<br>(9.1 to 11.7)             | 14.4<br>(12.8 to 16.1)             | 0.2<br>(0.1 to 0.2)               | 40.5<br>(26.7 to 55.2)                                             | 22.4<br>(12.3 to 33.1)                                               |
| Appendicitis                                                   | 0.2<br>(0.2 to 0.3)               | 6.4<br>(5.9 to 7.0)                | 0.1<br>(< 0.05 to 0.1)            | 10.7<br>(-21.8 to 58.6)                                            | 0.2<br>(-23.2 to 31.9)                                               |
| Paralytic ileus and intestinal obstruction                     | < 0.05<br>(< 0.05 to < 0.05)      | 0.8<br>(0.7 to 0.9)                | < 0.05<br>(< 0.05 to < 0.05)      | 13.4<br>(8.9 to 18.2)                                              | 3.5<br>(-2.7 to 9.7)                                                 |
| Inguinal, femoral, and abdominal hernia                        | 15.0<br>(12.6 to 17.9)            | 3.3<br>(3.0 to 3.8)                | 0.5<br>(0.3 to 0.6)               | 5.5<br>(-7.2 to 19.9)                                              | -4.4<br>(-13.5 to 5.9)                                               |
| Inflammatory bowel disease                                     | 0.1<br>(0.1 to 0.1)               | 0.8<br>(0.8 to 0.9)                | < 0.05<br>(< 0.05 to < 0.05)      | 11.5<br>(8.8 to 14.1)                                              | -3.3<br>(-5.5 to -1.2)                                               |
| Vascular intestinal disorders                                  | < 0.05<br>(< 0.05 to < 0.05)      | 0.1<br>(0.1 to 0.1)                | < 0.05<br>(< 0.05 to < 0.05)      | 14.8<br>(9.1 to 21.2)                                              | 8.2<br>(4.0 to 12.4)                                                 |
| Gallbladder and biliary diseases                               | 1.4<br>(1.2 to 1.6)               | 6.3<br>(5.5 to 7.2)                | < 0.05<br>(< 0.05 to 0.1)         | 17.9<br>(0.6 to 39.8)                                              | 3.9<br>(-14.9 to 27.7)                                               |
| Pancreatitis                                                   | < 0.05<br>(< 0.05 to < 0.05)      | 0.3<br>(0.2 to 0.3)                | < 0.05<br>(< 0.05 to < 0.05)      | 21.0<br>(16.1 to 25.8)                                             | 8.4<br>(4.8 to 11.9)                                                 |
| Other digestive diseases                                       | --                                | --                                 | 0.1<br>(0.1 to 0.1)               | 16.4<br>(6.0 to 28.7)                                              | 6.8<br>(0.1 to 14.2)                                                 |
| <b>Neurological disorders</b>                                  | <b>663.6<br/>(631.5 to 698.1)</b> | <b>322.7<br/>(273.3 to 382.3)</b>  | <b>16.0<br/>(9.8 to 22.7)</b>     | <b>17.2<br/>(-15.7 to 58.5)</b>                                    | <b>2.0<br/>(-23.5 to 33.2)</b>                                       |
| Alzheimer's disease and other dementias                        | 4.4<br>(3.6 to 5.2)               | 0.8<br>(0.6 to 0.9)                | 0.6<br>(0.4 to 0.8)               | 3.4<br>(-2.3 to 9.3)                                               | 0.0<br>(-4.9 to 5.0)                                                 |
| Parkinson's disease                                            | 0.4<br>(0.3 to 0.5)               | 0.1<br>(< 0.05 to 0.1)             | < 0.05<br>(< 0.05 to 0.1)         | 10.4<br>(-3.1 to 28.7)                                             | 6.6<br>(-6.6 to 22.9)                                                |
| Epilepsy                                                       | 7.5<br>(1.5 to 14.8)              | 0.7<br>(0.1 to 1.5)                | 3.1<br>(0.5 to 6.7)               | 23.8<br>(-80.0 to 692.5)                                           | 11.6<br>(-82.0 to 619.3)                                             |
| Multiple sclerosis                                             | 0.2<br>(0.2 to 0.2)               | < 0.05<br>(< 0.05 to < 0.05)       | 0.1<br>(< 0.05 to 0.1)            | 28.6<br>(20.3 to 37.1)                                             | 11.0<br>(2.3 to 19.9)                                                |
| Motor neuron disease                                           | < 0.05<br>(< 0.05 to < 0.05)      | < 0.05<br>(< 0.05 to < 0.05)       | < 0.05<br>(< 0.05 to < 0.05)      | 14.5<br>(9.2 to 19.9)                                              | 4.2<br>(0.4 to 7.8)                                                  |
| Migraine                                                       | 235.9<br>(221.7 to 250.1)         | 29.4<br>(27.7 to 31.3)             | 9.9<br>(6.3 to 13.9)              | 15.1<br>(10.4 to 20.4)                                             | -1.1<br>(-4.6 to 2.8)                                                |
| Tension-type headache                                          | 503.8<br>(444.5 to 572.9)         | 291.8<br>(242.1 to 351.6)          | 1.7<br>(1.0 to 2.5)               | 15.4<br>(8.9 to 22.2)                                              | -1.1<br>(-6.1 to 4.3)                                                |
| Other neurological disorders                                   | < 0.05<br>(< 0.05 to < 0.05)      | < 0.05<br>(< 0.05 to < 0.05)       | 0.7<br>(0.1 to 1.4)               | 45.7<br>(-73.7 to 640.9)                                           | 31.8<br>(-73.5 to 483.9)                                             |
| <b>Mental and substance use disorders</b>                      | <b>352.0<br/>(336.9 to 368.0)</b> | <b>171.0†<br/>(156.5 to 188.7)</b> | <b>47.0<br/>(34.1 to 60.9)</b>    | <b>15.4<br/>(12.5 to 18.6)</b>                                     | <b>0.8<br/>(-1.6 to 3.3)</b>                                         |
| Schizophrenia                                                  | 3.0<br>(2.6 to 3.4)               | 0.3<br>(0.2 to 0.3)                | 1.9<br>(1.3 to 2.3)               | 22.7<br>(9.3 to 35.7)                                              | 1.9<br>(-7.3 to 11.6)                                                |
| Alcohol use disorders                                          | 31.7<br>(26.4 to 37.3)            | 16.4<br>(13.7 to 19.2)             | 3.1<br>(2.1 to 4.4)               | 23.1<br>(13.4 to 34.4)                                             | 2.2<br>(-4.8 to 10.2)                                                |
| Drug use disorders                                             | 14.8<br>(13.3 to 16.7)            | 2.2<br>(1.9 to 2.5)                | 4.0<br>(2.8 to 5.5)               | 29.9<br>(14.8 to 44.9)                                             | 3.2<br>(-7.3 to 13.5)                                                |
| Opioid use disorders                                           | 9.0<br>(7.4 to 10.9)              | 1.1<br>(0.9 to 1.3)                | 3.7<br>(2.5 to 5.1)               | 30.6<br>(14.1 to 47.0)                                             | 3.3<br>(-8.2 to 14.4)                                                |
| Cocaine use disorders                                          | 0.4<br>(0.3 to 0.4)               | < 0.05<br>(< 0.05 to 0.1)          | 0.1<br>(< 0.05 to 0.1)            | 23.2<br>(16.2 to 29.7)                                             | 3.1<br>(-1.9 to 7.7)                                                 |
| Amphetamine use disorders                                      | 0.3<br>(0.2 to 0.4)               | < 0.05<br>(< 0.05 to 0.1)          | < 0.05<br>(< 0.05 to 0.1)         | 22.1<br>(-26.6 to 98.4)                                            | 2.0<br>(-34.5 to 55.8)                                               |
| Cannabis use disorders                                         | 5.0<br>(4.2 to 6.1)               | 0.9<br>(0.7 to 1.1)                | 0.1<br>(0.1 to 0.2)               | 22.2<br>(0.3 to 49.6)                                              | 1.5<br>(-15.3 to 21.2)                                               |
| Other drug use disorders                                       | 0.7<br>(0.6 to 0.8)               | 0.1<br>(0.1 to 0.2)                | 0.1<br>(0.1 to 0.2)               | 25.2<br>(3.7 to 50.9)                                              | 3.4<br>(-12.5 to 22.2)                                               |
| Depressive disorders                                           | 100.3<br>(93.8 to 108.3)          | 126.1<br>(111.8 to 144.1)          | 18.3<br>(12.5 to 24.7)            | 15.9<br>(10.5 to 21.8)                                             | 1.4<br>(-2.9 to 6.3)                                                 |
| Major depressive disorder                                      | 79.7<br>(70.9 to 91.0)            | 122.0<br>(107.8 to 140.0)          | 16.1<br>(10.9 to 21.9)            | 16.0<br>(9.9 to 22.5)                                              | 1.6<br>(-3.2 to 7.2)                                                 |
| Dysthymia                                                      | 22.9<br>(19.6 to 26.6)            | 4.1<br>(3.6 to 4.7)                | 2.2<br>(1.5 to 3.1)               | 15.3<br>(10.9 to 20.6)                                             | -0.3<br>(-3.3 to 3.2)                                                |
| Bipolar disorder                                               | 11.8<br>(10.0 to 14.0)            | 1.4<br>(1.2 to 1.6)                | 2.4<br>(1.5 to 3.6)               | 16.0<br>(7.8 to 25.6)                                              | 0.1<br>(-5.9 to 6.8)                                                 |
| Anxiety disorders                                              | 71.7<br>(64.1 to 80.1)            | 12.6<br>(11.4 to 13.9)             | 6.9<br>(4.7 to 9.4)               | 12.1<br>(4.9 to 20.2)                                              | -0.5<br>(-6.5 to 5.8)                                                |
| Eating disorders                                               | 2.2<br>(1.8 to 2.6)               | 1.6<br>(1.2 to 2.1)                | 0.4<br>(0.3 to 0.6)               | 32.1<br>(12.2 to 56.6)                                             | 9.1<br>(-6.3 to 27.9)                                                |
| Anorexia nervosa                                               | 0.6<br>(0.4 to 0.8)               | 0.3<br>(0.2 to 0.4)                | 0.1<br>(0.1 to 0.2)               | 23.5<br>(-9.6 to 64.8)                                             | 8.4<br>(-18.5 to 41.8)                                               |
| Bulimia nervosa                                                | 1.5<br>(1.1 to 2.0)               | 1.4<br>(0.9 to 1.9)                | 0.3<br>(0.2 to 0.5)               | 35.8<br>(11.5 to 64.9)                                             | 9.4<br>(-8.8 to 32.6)                                                |
| Autistic spectrum disorders                                    | 18.2<br>(16.4 to 20.7)            | 0.2<br>(0.1 to 0.2)                | 2.6<br>(1.8 to 3.8)               | 10.6<br>(4.1 to 17.4)                                              | 1.0<br>(-4.3 to 6.4)                                                 |
| Autism                                                         | 5.3<br>(4.6 to 6.2)               | < 0.05<br>(< 0.05 to < 0.05)       | 1.4<br>(0.9 to 2.0)               | 10.0<br>(-0.5 to 21.6)                                             | 1.0<br>(-8.1 to 11.1)                                                |
| Asperger syndrome and other autistic spectrum disorders        | 12.9<br>(10.8 to 15.6)            | 0.1<br>(0.1 to 0.2)                | 1.3<br>(0.8 to 1.9)               | 11.2<br>(5.1 to 17.4)                                              | 1.0<br>(-4.0 to 6.0)                                                 |



| Cause                                                      | Prevalence in thousands (95% UI)              | Incidence in thousands (95% UI)                | YLDs in thousands (95% UI)           |                                                   |                                                     |
|------------------------------------------------------------|-----------------------------------------------|------------------------------------------------|--------------------------------------|---------------------------------------------------|-----------------------------------------------------|
|                                                            | 2016 counts                                   | 2016 counts                                    | 2016 counts                          | Percentage change in counts between 2006 and 2016 | Percentage change in age-standardised rates between |
| Attention-deficit/hyperactivity disorder                   | 28.8<br>(25.8 to 32.5)                        | 1.5<br>(1.3 to 1.7)                            | 0.4<br>(0.2 to 0.6)                  | 8.3<br>(0.8 to 16.9)                              | 0.3<br>(-6.1 to 7.6)                                |
| Conduct disorder                                           | 21.3<br>(17.5 to 25.1)                        | 7.2<br>(5.8 to 8.7)                            | 2.6<br>(1.6 to 4.0)                  | 0.1<br>(-5.9 to 7.0)                              | -0.1<br>(-6.3 to 6.8)                               |
| Idiopathic developmental intellectual disability           | 51.0<br>(32.6 to 70.1)                        | --                                             | 2.0<br>(1.0 to 3.5)                  | 1.4<br>(-4.6 to 7.2)                              | -8.8<br>(-14.0 to -3.8)                             |
| Other mental and substance use disorders                   | 32.4<br>(28.3 to 37.6)                        | 1.7<br>(1.5 to 1.9)                            | 2.4<br>(1.6 to 3.5)                  | 20.6<br>(13.5 to 27.7)                            | 0.5<br>(-4.3 to 5.4)                                |
| <b>Diabetes, urogenital, blood, and endocrine diseases</b> | <b>803.8</b><br><b>(782.5 to 835.4)</b>       | <b>215.3†</b><br><b>(200.2 to 231.2)</b>       | <b>15.3</b><br><b>(11.0 to 20.5)</b> | <b>15.1</b><br><b>(12.1 to 18.8)</b>              | <b>5.0</b><br><b>(1.8 to 8.6)</b>                   |
| Diabetes mellitus                                          | 91.7<br>(82.9 to 100.8)                       | 6.8<br>(6.2 to 7.5)                            | 7.2<br>(5.0 to 9.8)                  | 18.8<br>(12.9 to 25.3)                            | 10.7<br>(5.0 to 17.4)                               |
| Acute glomerulonephritis                                   | < 0.05<br>(< 0.05 to < 0.05)                  | 0.3<br>(0.2 to 0.3)                            | < 0.05<br>(< 0.05 to < 0.05)         | 8.6<br>(2.4 to 15.1)                              | -1.7<br>(-6.5 to 2.8)                               |
| Chronic kidney disease                                     | 112.3<br>(101.4 to 123.8)                     | 8.8<br>(7.8 to 9.8)                            | 3.3<br>(2.4 to 4.2)                  | 20.7<br>(13.6 to 28.7)                            | 6.7<br>(1.6 to 12.4)                                |
| Chronic kidney disease due to diabetes mellitus            | 35.5<br>(30.0 to 41.4)                        | 2.6<br>(2.2 to 3.1)                            | 1.0<br>(0.7 to 1.3)                  | 18.6<br>(9.3 to 30.1)                             | 7.4<br>(0.1 to 15.8)                                |
| Chronic kidney disease due to hypertension                 | 22.6<br>(19.6 to 25.6)                        | 2.2<br>(1.9 to 2.6)                            | 0.5<br>(0.4 to 0.7)                  | 10.7<br>(1.3 to 20.6)                             | 3.6<br>(-4.6 to 12.0)                               |
| Chronic kidney disease due to glomerulonephritis           | 23.8<br>(20.5 to 27.0)                        | 1.4<br>(1.1 to 1.7)                            | 0.9<br>(0.6 to 1.2)                  | 29.4<br>(16.9 to 42.6)                            | 10.6<br>(1.9 to 19.8)                               |
| Chronic kidney disease due to other causes                 | 30.4<br>(25.5 to 35.4)                        | 2.5<br>(2.1 to 3.0)                            | 0.9<br>(0.7 to 1.2)                  | 21.4<br>(11.0 to 34.7)                            | 4.8<br>(-2.7 to 13.6)                               |
| Urinary diseases and male infertility                      | 25.8<br>(23.1 to 28.6)                        | 107.4†<br>(95.3 to 121.9)                      | 0.7<br>(0.4 to 1.0)                  | 0.5<br>(-6.2 to 8.2)                              | -4.8<br>(-11.5 to 2.3)                              |
| Interstitial nephritis and urinary tract infections        | 1.8<br>(1.6 to 2.1)                           | 94.1<br>(82.2 to 109.2)                        | 0.1<br>(< 0.05 to 0.1)               | 18.3<br>(-0.2 to 44.0)                            | 1.9<br>(-12.0 to 19.3)                              |
| Urolithiasis                                               | 0.4<br>(0.4 to 0.5)                           | 11.4<br>(9.9 to 13.1)                          | < 0.05<br>(< 0.05 to < 0.05)         | 17.9<br>(9.2 to 27.0)                             | 1.9<br>(-5.7 to 10.2)                               |
| Benign prostatic hyperplasia                               | 15.4<br>(13.0 to 17.7)                        | 1.9<br>(1.6 to 2.3)                            | 0.5<br>(0.3 to 0.7)                  | -6.0<br>(-13.6 to 2.2)                            | -6.5<br>(-13.7 to 1.3)                              |
| Male infertility                                           | 7.2<br>(5.5 to 9.5)                           | --                                             | < 0.05<br>(< 0.05 to 0.1)            | 105.9<br>(64.1 to 157.5)                          | 68.1<br>(34.6 to 111.5)                             |
| Other urinary diseases                                     | --                                            | --                                             | < 0.05<br>(< 0.05 to 0.1)            | -1.4<br>(-12.2 to 11.7)                           | -15.1<br>(-22.4 to -6.9)                            |
| Gynecological diseases                                     | 233.5<br>(221.1 to 245.7)                     | 89.0†<br>(81.7 to 96.4)                        | 2.6<br>(1.8 to 3.7)                  | 10.4<br>(4.8 to 15.8)                             | -9.9<br>(-13.6 to -6.4)                             |
| Uterine fibroids                                           | 15.1<br>(13.3 to 16.9)                        | 1.9<br>(1.6 to 2.2)                            | 0.2<br>(0.1 to 0.3)                  | -12.3<br>(-21.3 to -4.6)                          | -26.4<br>(-34.7 to -19.9)                           |
| Polycystic ovarian syndrome                                | 2.1<br>(1.5 to 2.7)                           | 2.9<br>(2.1 to 3.9)                            | < 0.05<br>(< 0.05 to < 0.05)         | 31.0<br>(13.8 to 51.4)                            | -2.3<br>(-14.5 to 12.6)                             |
| Female infertility                                         | 3.1<br>(1.3 to 8.8)                           | --                                             | < 0.05<br>(< 0.05 to 0.1)            | 201.1<br>(36.5 to 712.4)                          | 120.4<br>(9.7 to 499.2)                             |
| Endometriosis                                              | 0.5<br>(0.4 to 0.6)                           | 1.9<br>(1.5 to 2.4)                            | < 0.05<br>(< 0.05 to 0.1)            | 18.3<br>(-13.2 to 63.9)                           | -5.1<br>(-28.3 to 24.2)                             |
| Genital prolapse                                           | 92.6<br>(81.3 to 104.9)                       | 6.7<br>(5.7 to 7.8)                            | 0.3<br>(0.1 to 0.5)                  | -3.5<br>(-9.7 to 4.9)                             | -7.4<br>(-13.7 to 1.2)                              |
| Premenstrual syndrome                                      | 116.9<br>(108.2 to 125.6)                     | 44.5<br>(41.1 to 48.1)                         | 1.0<br>(0.6 to 1.5)                  | 13.4<br>(3.9 to 24.0)                             | -8.0<br>(-14.8 to -0.5)                             |
| Other gynecological diseases                               | 31.2<br>(26.2 to 36.6)                        | 31.1<br>(25.2 to 37.6)                         | 1.1<br>(0.7 to 1.6)                  | 15.9<br>(6.5 to 24.4)                             | -8.7<br>(-14.5 to -2.6)                             |
| Hemoglobinopathies and hemolytic anaemias                  | 523.4<br>(499.6 to 556.7)                     | --                                             | 0.7<br>(0.5 to 1.1)                  | 2.2<br>(-5.6 to 10.7)                             | -5.4<br>(-11.8 to 1.3)                              |
| Thalassemias                                               | < 0.05<br>(< 0.05 to < 0.05)                  | --                                             | < 0.05<br>(< 0.05 to < 0.05)         | 6.0<br>(-4.7 to 16.8)                             | 0.8<br>(-9.5 to 11.1)                               |
| Thalassaemias trait                                        | 9.8<br>(9.0 to 10.5)                          | --                                             | 0.1<br>(0.1 to 0.2)                  | 21.5<br>(7.4 to 36.6)                             | 10.6<br>(-1.1 to 22.4)                              |
| Sickle cell disorders                                      | 0.1<br>(< 0.05 to 0.1)                        | --                                             | < 0.05<br>(< 0.05 to < 0.05)         | 2.6<br>(-16.1 to 21.2)                            | -0.7<br>(-18.9 to 17.0)                             |
| Sickle cell trait                                          | 73.0<br>(41.4 to 124.9)                       | --                                             | 0.2<br>(0.1 to 0.5)                  | 15.3<br>(2.5 to 31.5)                             | 6.0<br>(-4.9 to 20.4)                               |
| G6PD deficiency                                            | 138.5<br>(130.6 to 147.4)                     | --                                             | < 0.05<br>(< 0.05 to < 0.05)         | 4.7<br>(-3.5 to 14.4)                             | 0.8<br>(-5.6 to 8.8)                                |
| G6PD trait                                                 | 324.1<br>(316.8 to 332.8)                     | --                                             | < 0.05<br>(< 0.05 to < 0.05)         | 19.9<br>(12.7 to 27.4)                            | 7.8<br>(2.0 to 13.8)                                |
| Other hemoglobinopathies and hemolytic anaemias            | 11.9<br>(11.3 to 12.4)                        | --                                             | 0.3<br>(0.2 to 0.5)                  | -11.7<br>(-20.6 to -0.4)                          | -18.6<br>(-25.7 to -9.6)                            |
| Endocrine, metabolic, blood, and immune disorders          | 24.7<br>(23.2 to 26.2)                        | 3.0<br>(2.6 to 3.4)                            | 0.8<br>(0.6 to 1.1)                  | 4.2<br>(-2.7 to 11.4)                             | -2.7<br>(-8.1 to 3.4)                               |
| <b>Musculoskeletal disorders</b>                           | <b>230.8</b><br><b>(218.4 to 243.2)</b>       | <b>114.2</b><br><b>(103.0 to 126.2)</b>        | <b>25.2</b><br><b>(18.3 to 32.8)</b> | <b>12.2</b><br><b>(8.3 to 16.0)</b>               | <b>-0.2</b><br><b>(-2.9 to 2.5)</b>                 |
| Rheumatoid arthritis                                       | 4.4<br>(4.0 to 4.9)                           | 0.3<br>(0.3 to 0.3)                            | 1.0<br>(0.7 to 1.4)                  | 14.7<br>(6.1 to 24.7)                             | 5.7<br>(-2.2 to 14.0)                               |
| Osteoarthritis                                             | 41.1<br>(38.7 to 43.9)                        | 2.2<br>(2.0 to 2.3)                            | 2.5<br>(1.8 to 3.3)                  | 7.2<br>(2.9 to 11.1)                              | 1.8<br>(-2.0 to 5.7)                                |
| Low back and neck pain                                     | 152.1<br>(142.0 to 164.3)                     | 69.1<br>(61.9 to 77.0)                         | 17.2<br>(12.1 to 22.5)               | 10.7<br>(6.2 to 15.5)                             | -1.4<br>(-4.8 to 2.1)                               |
| Low back pain                                              | 119.1<br>(105.8 to 135.5)                     | 58.8<br>(52.0 to 66.5)                         | 13.2<br>(9.3 to 17.5)                | 10.4<br>(4.8 to 16.1)                             | -1.8<br>(-6.0 to 2.7)                               |
| Neck pain                                                  | 40.8<br>(35.3 to 47.0)                        | 10.2<br>(8.9 to 12.0)                          | 4.0<br>(2.7 to 5.6)                  | 11.9<br>(7.5 to 16.6)                             | -0.2<br>(-2.6 to 2.2)                               |
| Gout                                                       | 4.7<br>(4.2 to 5.3)                           | 1.0<br>(0.9 to 1.1)                            | 0.1<br>(0.1 to 0.2)                  | 9.2<br>(-4.9 to 26.5)                             | -1.0<br>(-13.0 to 14.0)                             |
| Other musculoskeletal disorders                            | 52.1<br>(42.8 to 62.3)                        | 41.6<br>(33.7 to 50.8)                         | 4.4<br>(2.9 to 6.3)                  | 20.9<br>(10.3 to 31.6)                            | 2.0<br>(-5.5 to 10.0)                               |
| <b>Other non-communicable diseases</b>                     | <b>1,506.1</b><br><b>(1,462.5 to 1,547.5)</b> | <b>4,563.4†</b><br><b>(4,114.7 to 4,991.4)</b> | <b>41.5</b><br><b>(28.4 to 58.1)</b> | <b>7.1</b><br><b>(5.5 to 8.7)</b>                 | <b>-2.0</b><br><b>(-3.2 to -0.8)</b>                |
| Congenital anomalies                                       | 24.1<br>(20.0 to 29.6)                        | --                                             | 3.6<br>(2.4 to 5.3)                  | 3.2<br>(-3.9 to 11.5)                             | -5.9<br>(-12.2 to 1.4)                              |
| Neural tube defects                                        | 2.5<br>(2.2 to 2.8)                           | --                                             | 0.8<br>(0.5 to 1.0)                  | 8.6<br>(-3.9 to 23.2)                             | -1.6<br>(-11.5 to 10.3)                             |
| Congenital heart anomalies                                 | 3.1<br>(2.6 to 3.7)                           | --                                             | 0.1<br>(0.1 to 0.3)                  | 1.9<br>(-13.3 to 17.9)                            | -2.6<br>(-16.4 to 12.0)                             |
| Orofacial clefts                                           | 0.7<br>(0.6 to 0.8)                           | --                                             | < 0.05<br>(< 0.05 to < 0.05)         | 7.0<br>(-4.2 to 21.1)                             | -2.6<br>(-13.0 to 10.0)                             |
| Down's syndrome                                            | 0.5<br>(0.4 to 0.6)                           | --                                             | < 0.05<br>(< 0.05 to 0.1)            | 11.1<br>(3.7 to 19.3)                             | 0.7<br>(-5.8 to 8.0)                                |
| Turner syndrome                                            | 1.6<br>(1.3 to 1.8)                           | --                                             | < 0.05<br>(< 0.05 to < 0.05)         | 6.7<br>(-21.5 to 46.7)                            | -3.8<br>(-27.7 to 30.7)                             |
| Klinefelter syndrome                                       | 1.4<br>(1.2 to 1.7)                           | --                                             | < 0.05<br>(< 0.05 to < 0.05)         | 16.1<br>(-10.1 to 49.4)                           | 0.9<br>(-21.4 to 29.0)                              |

| Cause                                         | Prevalence in thousands (95% UI)        | Incidence in thousands (95% UI)          | YLDs in thousands (95% UI)          |                                                   |                                                     |
|-----------------------------------------------|-----------------------------------------|------------------------------------------|-------------------------------------|---------------------------------------------------|-----------------------------------------------------|
|                                               | 2016 counts                             | 2016 counts                              | 2016 counts                         | Percentage change in counts between 2006 and 2016 | Percentage change in age-standardised rates between |
| Other chromosomal abnormalities               | 0.4<br>(0.3 to 0.5)                     | --                                       | 0.1<br>( $< 0.05$ to 0.1)           | 5.9<br>(-20.3 to 43.8)                            | 1.3<br>(-24.5 to 38.3)                              |
| Congenital musculoskeletal and limb anomalies | 2.9<br>(2.5 to 3.2)                     | --                                       | 0.4<br>(0.3 to 0.6)                 | 11.2<br>(-3.0 to 27.5)                            | 1.5<br>(-10.2 to 13.7)                              |
| Urogenital congenital anomalies               | 1.8<br>(1.6 to 2.0)                     | --                                       | $< 0.05$<br>( $< 0.05$ to 0.1)      | 4.8<br>(-3.9 to 14.4)                             | -0.5<br>(-8.5 to 8.1)                               |
| Digestive congenital anomalies                | 1.8<br>(1.6 to 2.0)                     | --                                       | 0.1<br>(0.1 to 0.1)                 | 13.5<br>(-7.5 to 39.3)                            | 3.1<br>(-13.3 to 23.5)                              |
| Other congenital anomalies                    | 12.0<br>(6.6 to 19.6)                   | --                                       | 2.0<br>(1.0 to 3.4)                 | -0.8<br>(-10.9 to 10.7)                           | -9.7<br>(-18.1 to 0.5)                              |
| Skin and subcutaneous diseases                | 735.0<br>(712.1 to 759.3)               | 1,607.9<br>(1,515.8 to 1,718.2)          | 18.7<br>(12.3 to 27.2)              | 9.5<br>(7.3 to 12.0)                              | 1.6<br>(-0.1 to 3.5)                                |
| Dermatitis                                    | 132.4<br>(120.4 to 144.8)               | 99.0<br>(90.6 to 108.5)                  | 5.4<br>(3.1 to 8.9)                 | 6.1<br>(2.5 to 9.9)                               | 0.1<br>(-2.9 to 3.1)                                |
| Psoriasis                                     | 13.9<br>(13.2 to 14.6)                  | 2.0<br>(1.9 to 2.2)                      | 1.2<br>(0.8 to 1.6)                 | 22.4<br>(11.0 to 35.5)                            | 8.6<br>(0.3 to 17.9)                                |
| Cellulitis                                    | 0.8<br>(0.8 to 0.9)                     | 14.2<br>(13.2 to 15.3)                   | $< 0.05$<br>( $< 0.05$ to 0.1)      | 11.8<br>(-11.8 to 41.4)                           | 2.4<br>(-16.9 to 25.0)                              |
| Pyoderma                                      | 10.7<br>(10.2 to 11.1)                  | 213.5<br>(204.7 to 222.5)                | 0.1<br>( $< 0.05$ to 0.1)           | 7.2<br>(0.4 to 14.2)                              | 1.4<br>(-4.0 to 7.4)                                |
| Scabies                                       | 35.6<br>(30.7 to 41.6)                  | 108.7<br>(92.7 to 126.7)                 | 0.9<br>(0.5 to 1.5)                 | 3.5<br>(-1.4 to 8.9)                              | -5.1<br>(-8.9 to -1.2)                              |
| Fungal skin diseases                          | 259.6<br>(231.4 to 294.2)               | 748.3<br>(666.4 to 840.2)                | 1.5<br>(0.6 to 3.0)                 | 7.0<br>(5.3 to 9.0)                               | -0.0<br>(-0.9 to 0.9)                               |
| Viral skin diseases                           | 61.0<br>(56.5 to 65.5)                  | 86.5<br>(80.0 to 93.8)                   | 1.9<br>(1.2 to 2.8)                 | 7.5<br>(3.7 to 11.8)                              | -0.2<br>(-3.4 to 3.2)                               |
| Acne vulgaris                                 | 223.0<br>(196.9 to 251.2)               | 162.6<br>(127.7 to 212.0)                | 5.7<br>(3.8 to 8.4)                 | 12.4<br>(6.8 to 18.2)                             | 3.8<br>(-1.1 to 8.7)                                |
| Alopecia areata                               | 3.8<br>(3.6 to 3.9)                     | 6.7<br>(6.4 to 7.0)                      | 0.1<br>(0.1 to 0.2)                 | 19.4<br>(6.1 to 37.2)                             | 0.1<br>(-10.1 to 12.2)                              |
| Pruritus                                      | 15.3<br>(13.5 to 17.3)                  | 12.4<br>(11.0 to 14.0)                   | 0.2<br>(0.1 to 0.3)                 | 12.1<br>(5.1 to 19.4)                             | 0.7<br>(-4.5 to 5.7)                                |
| Urticaria                                     | 19.5<br>(16.8 to 22.8)                  | 34.9<br>(30.1 to 40.7)                   | 1.2<br>(0.8 to 1.7)                 | 8.2<br>(1.3 to 15.7)                              | -0.0<br>(-6.1 to 6.1)                               |
| Decubitus ulcer                               | 0.3<br>(0.3 to 0.3)                     | 1.1<br>(1.0 to 1.3)                      | $< 0.05$<br>( $< 0.05$ to 0.1)      | 9.0<br>(-2.1 to 21.4)                             | 2.8<br>(-9.7 to 17.2)                               |
| Other skin and subcutaneous diseases          | 103.3<br>(100.1 to 106.5)               | 118.0<br>(114.1 to 121.8)                | 0.6<br>(0.3 to 1.0)                 | 14.1<br>(10.8 to 17.7)                            | 3.9<br>(1.5 to 6.6)                                 |
| Sense organ diseases                          | 425.2<br>(413.5 to 438.5)               | 190.4†<br>(176.9 to 205.5)               | 15.1<br>(10.5 to 21.0)              | 3.5<br>(0.3 to 6.9)                               | -4.2<br>(-6.2 to -2.2)                              |
| Glaucoma                                      | 1.1<br>(0.9 to 1.4)                     | --                                       | 0.1<br>(0.1 to 0.1)                 | 4.2<br>(-7.6 to 18.0)                             | 0.6<br>(-10.3 to 13.2)                              |
| Cataract                                      | 7.0<br>(5.8 to 8.4)                     | --                                       | 0.7<br>(0.5 to 1.0)                 | 0.9<br>(-7.6 to 9.6)                              | -4.0<br>(-12.2 to 4.8)                              |
| Macular degeneration                          | 0.6<br>(0.5 to 0.8)                     | --                                       | $< 0.05$<br>( $< 0.05$ to 0.1)      | 7.2<br>(-6.7 to 22.5)                             | 3.8<br>(-9.2 to 18.0)                               |
| Refraction and accommodation disorders        | 255.5<br>(242.6 to 268.6)               | --                                       | 3.7<br>(2.2 to 6.1)                 | 1.0<br>(-2.4 to 4.4)                              | -7.2<br>(-10.0 to -4.4)                             |
| Age-related and other hearing loss            | 230.7<br>(214.8 to 247.7)               | --                                       | 8.7<br>(6.0 to 12.1)                | 3.6<br>(-1.6 to 9.2)                              | -4.1<br>(-7.1 to -1.1)                              |
| Other vision loss                             | 7.7<br>(6.8 to 8.7)                     | --                                       | 0.6<br>(0.4 to 0.8)                 | 5.7<br>(-2.2 to 13.7)                             | 0.0<br>(-6.7 to 7.1)                                |
| Other sense organ diseases                    | 41.9<br>(38.7 to 44.9)                  | 190.4<br>(176.9 to 205.5)                | 1.3<br>(0.8 to 1.9)                 | 11.2<br>(6.1 to 16.8)                             | 1.2<br>(-2.7 to 5.4)                                |
| Oral disorders                                | 997.3<br>(907.6 to 1,074.8)             | 2,765.1†<br>(2,347.9 to 3,179.0)         | 4.1<br>(2.6 to 6.0)                 | 14.1<br>(10.4 to 17.7)                            | -0.1<br>(-3.0 to 2.7)                               |
| Caries of deciduous teeth                     | 184.4<br>(142.6 to 230.8)               | 715.2<br>(486.8 to 1,005.7)              | $< 0.05$<br>( $< 0.05$ to 0.1)      | 1.1<br>(-10.1 to 13.8)                            | -0.5<br>(-11.5 to 12.1)                             |
| Caries of permanent teeth                     | 707.9<br>(612.7 to 811.5)               | 2,040.8<br>(1,696.8 to 2,385.1)          | 0.4<br>(0.2 to 0.8)                 | 11.4<br>(5.4 to 17.4)                             | -1.8<br>(-6.4 to 2.7)                               |
| Periodontal disease                           | 36.6<br>(30.5 to 43.9)                  | 4.3<br>(3.5 to 5.2)                      | 0.2<br>(0.1 to 0.5)                 | 14.0<br>(9.1 to 19.8)                             | 0.5<br>(-2.8 to 4.2)                                |
| Edentulism and severe tooth loss              | 87.1<br>(74.7 to 100.0)                 | 4.7<br>(4.0 to 5.6)                      | 2.4<br>(1.6 to 3.5)                 | 15.0<br>(9.0 to 20.9)                             | 0.1<br>(-3.9 to 4.2)                                |
| Other oral disorders                          | 34.3<br>(32.6 to 36.1)                  | --                                       | 1.0<br>(0.6 to 1.5)                 | 13.7<br>(9.4 to 18.3)                             | -0.3<br>(-3.2 to 2.9)                               |
| <b>Injuries</b>                               | <b>269.8</b><br><b>(255.1 to 288.0)</b> | <b>157.8†</b><br><b>(149.3 to 167.0)</b> | <b>11.3</b><br><b>(7.6 to 16.0)</b> | <b>19.3</b><br><b>(17.0 to 21.6)</b>              | <b>7.0</b><br><b>(5.4 to 8.7)</b>                   |
| <b>Transport injuries</b>                     | <b>42.9</b><br><b>(39.3 to 46.5)</b>    | <b>21.0</b><br><b>(18.5 to 23.9)</b>     | <b>2.5</b><br><b>(1.7 to 3.6)</b>   | <b>24.9</b><br><b>(22.0 to 27.6)</b>              | <b>12.1</b><br><b>(9.9 to 14.2)</b>                 |
| Road injuries                                 | 36.5<br>(33.4 to 39.8)                  | 19.0<br>(16.6 to 21.9)                   | 2.1<br>(1.4 to 3.0)                 | 26.5<br>(23.5 to 29.2)                            | 13.1<br>(10.9 to 15.2)                              |
| Pedestrian road injuries                      | 9.2<br>(7.7 to 11.0)                    | 3.3<br>(2.7 to 4.0)                      | 0.5<br>(0.4 to 0.8)                 | 19.8<br>(16.8 to 22.8)                            | 10.4<br>(8.2 to 12.6)                               |
| Cyclist road injuries                         | 4.0<br>(3.3 to 4.8)                     | 2.2<br>(1.7 to 2.9)                      | 0.2<br>(0.1 to 0.3)                 | 27.2<br>(24.0 to 30.5)                            | 14.2<br>(11.8 to 16.5)                              |
| Motorcyclist road injuries                    | 3.3<br>(2.7 to 4.0)                     | 1.2<br>(0.9 to 1.5)                      | 0.2<br>(0.1 to 0.3)                 | 30.7<br>(27.3 to 34.2)                            | 13.9<br>(11.5 to 16.3)                              |
| Motor vehicle road injuries                   | 17.5<br>(14.9 to 20.2)                  | 10.9<br>(9.2 to 12.6)                    | 1.1<br>(0.7 to 1.5)                 | 29.9<br>(26.7 to 33.0)                            | 14.7<br>(12.4 to 16.9)                              |
| Other road injuries                           | 2.4<br>(2.0 to 2.8)                     | 1.5<br>(1.1 to 2.0)                      | 0.1<br>(0.1 to 0.2)                 | 21.2<br>(18.3 to 24.1)                            | 8.3<br>(6.2 to 10.4)                                |
| Other transport injuries                      | 6.4<br>(5.4 to 7.7)                     | 2.0<br>(1.7 to 2.4)                      | 0.4<br>(0.3 to 0.6)                 | 17.7<br>(13.9 to 21.3)                            | 7.1<br>(4.2 to 9.6)                                 |
| <b>Unintentional injuries</b>                 | <b>200.1</b><br><b>(185.7 to 218.3)</b> | <b>118.6</b><br><b>(111.0 to 126.2)</b>  | <b>7.1</b><br><b>(4.8 to 10.1)</b>  | <b>18.9</b><br><b>(16.2 to 21.6)</b>              | <b>6.6</b><br><b>(4.8 to 8.5)</b>                   |
| Falls                                         | 45.6<br>(39.1 to 52.5)                  | 26.3<br>(22.0 to 31.9)                   | 2.0<br>(1.4 to 2.8)                 | 20.3<br>(17.9 to 22.8)                            | 8.5<br>(6.6 to 10.2)                                |
| Drowning                                      | 0.9<br>(0.8 to 1.0)                     | 0.2<br>(0.2 to 0.3)                      | 0.1<br>( $< 0.05$ to 0.1)           | 15.4<br>(11.6 to 19.2)                            | 4.0<br>(1.1 to 6.7)                                 |
| Fire, heat, and hot substances                | 34.4<br>(29.1 to 41.7)                  | 6.1<br>(5.2 to 7.0)                      | 1.0<br>(0.7 to 1.4)                 | 22.6<br>(16.3 to 28.7)                            | 9.6<br>(5.1 to 13.8)                                |
| Poisonings                                    | 0.8<br>(0.7 to 1.0)                     | 1.4<br>(1.1 to 1.7)                      | 0.1<br>(0.1 to 0.1)                 | 16.4<br>(5.9 to 27.8)                             | 4.0<br>(-3.3 to 12.2)                               |
| Exposure to mechanical forces                 | 44.4<br>(37.3 to 54.0)                  | 22.5<br>(18.8 to 26.2)                   | 1.2<br>(0.8 to 1.8)                 | 22.7<br>(19.3 to 26.0)                            | 8.6<br>(6.3 to 11.0)                                |
| Unintentional firearm injuries                | 1.4<br>(1.1 to 1.7)                     | 0.5<br>(0.4 to 0.7)                      | 0.1<br>( $< 0.05$ to 0.1)           | 25.7<br>(21.9 to 29.6)                            | 9.9<br>(7.3 to 12.5)                                |
| Unintentional suffocation                     | 3.4<br>(2.6 to 4.3)                     | 1.0<br>(0.7 to 1.3)                      | 0.1<br>(0.1 to 0.2)                 | 24.7<br>(20.9 to 28.6)                            | 10.6<br>(8.1 to 13.4)                               |
| Other exposure to mechanical forces           | 39.6<br>(32.8 to 49.1)                  | 21.0<br>(17.7 to 24.4)                   | 1.0<br>(0.7 to 1.5)                 | 22.2<br>(18.7 to 25.7)                            | 8.3<br>(5.9 to 10.8)                                |

| Cause                                                                               | Prevalence in thousands (95% UI)     | Incidence in thousands (95% UI)                | YLDs in thousands (95% UI)                    |                                                   |                                                     |
|-------------------------------------------------------------------------------------|--------------------------------------|------------------------------------------------|-----------------------------------------------|---------------------------------------------------|-----------------------------------------------------|
|                                                                                     | 2016 counts                          | 2016 counts                                    | 2016 counts                                   | Percentage change in counts between 2006 and 2016 | Percentage change in age-standardised rates between |
| Adverse effects of medical treatment                                                | 0.7<br>(0.6 to 0.9)                  | 9.4<br>(8.2 to 10.8)                           | 0.1<br>(0.1 to 0.1)                           | 9.1<br>(4.1 to 15.7)                              | 0.6<br>(-3.2 to 5.0)                                |
| Animal contact                                                                      | 16.5<br>(14.2 to 19.4)               | 25.3<br>(21.4 to 29.3)                         | 0.6<br>(0.4 to 0.8)                           | 11.9<br>(6.5 to 17.5)                             | -0.9<br>(-4.4 to 3.1)                               |
| Venomous animal contact                                                             | 4.3<br>(3.5 to 5.3)                  | 8.4<br>(6.7 to 10.7)                           | 0.3<br>(0.2 to 0.4)                           | 14.4<br>(5.1 to 24.2)                             | 1.7<br>(-4.9 to 9.0)                                |
| Non-venomous animal contact                                                         | 12.1<br>(10.0 to 15.0)               | 16.8<br>(13.9 to 19.9)                         | 0.2<br>(0.2 to 0.4)                           | 9.0<br>(5.2 to 13.0)                              | -3.4<br>(-6.2 to -0.5)                              |
| Foreign body                                                                        | 15.1<br>(12.2 to 18.1)               | 10.5<br>(9.1 to 12.1)                          | 0.7<br>(0.5 to 1.0)                           | 18.3<br>(14.2 to 22.8)                            | 6.4<br>(3.5 to 9.4)                                 |
| Pulmonary aspiration and foreign body in airway                                     | 7.5<br>(5.6 to 10.1)                 | 3.4<br>(2.8 to 4.1)                            | 0.4<br>(0.2 to 0.6)                           | 19.6<br>(15.2 to 24.1)                            | 7.9<br>(5.0 to 11.0)                                |
| Foreign body in eyes                                                                | 0.7<br>(0.4 to 1.1)                  | 3.8<br>(2.9 to 5.1)                            | < 0.05<br>(< 0.05 to 0.1)                     | 15.1<br>(9.7 to 19.6)                             | 2.6<br>(-0.3 to 5.2)                                |
| Foreign body in other body part                                                     | 6.9<br>(5.3 to 9.1)                  | 3.3<br>(2.6 to 4.0)                            | 0.3<br>(0.2 to 0.4)                           | 16.9<br>(11.8 to 22.3)                            | 4.9<br>(1.3 to 8.4)                                 |
| Environmental heat and cold exposure                                                | 15.6<br>(13.0 to 19.0)               | 5.4<br>(4.5 to 6.5)                            | 0.7<br>(0.4 to 1.0)                           | 12.9<br>(10.1 to 15.7)                            | 0.8<br>(-1.0 to 2.7)                                |
| Other unintentional injuries                                                        | 26.1<br>(20.6 to 33.4)               | 11.5<br>(9.6 to 13.9)                          | 0.8<br>(0.5 to 1.1)                           | 18.1<br>(15.5 to 20.7)                            | 6.9<br>(5.2 to 8.7)                                 |
| <b>Self-harm and interpersonal violence</b>                                         | <b>86.8</b><br><b>(77.3 to 97.2)</b> | <b>18.1†</b><br><b>(15.3 to 21.2)</b>          | <b>1.6</b><br><b>(1.1 to 2.3)</b>             | <b>14.3</b><br><b>(11.3 to 17.1)</b>              | <b>0.8</b><br><b>(-1.2 to 2.9)</b>                  |
| Self-harm                                                                           | 2.1<br>(1.8 to 2.4)                  | 1.4<br>(1.2 to 1.6)                            | 0.1<br>(0.1 to 0.2)                           | 28.7<br>(25.0 to 32.3)                            | 12.8<br>(10.3 to 15.6)                              |
| Self-harm by firearm                                                                | 0.2<br>(0.1 to 0.2)                  | 0.1<br>(0.1 to 0.1)                            | < 0.05<br>(< 0.05 to < 0.05)                  | 9.8<br>(5.9 to 14.6)                              | -2.8<br>(-5.8 to 0.7)                               |
| Self-harm by other specified means                                                  | 1.9<br>(1.6 to 2.3)                  | 1.3<br>(1.1 to 1.6)                            | 0.1<br>(0.1 to 0.2)                           | 30.2<br>(26.3 to 34.0)                            | 14.2<br>(11.5 to 17.1)                              |
| Interpersonal violence                                                              | 84.7<br>(75.1 to 95.0)               | 16.7†<br>(14.0 to 19.8)                        | 1.5<br>(1.0 to 2.1)                           | 13.3<br>(10.2 to 16.1)                            | -0.3<br>(-2.3 to 1.8)                               |
| Assault by firearm                                                                  | 0.5<br>(0.4 to 0.6)                  | 0.2<br>(0.2 to 0.3)                            | < 0.05<br>(< 0.05 to < 0.05)                  | 16.3<br>(12.2 to 20.9)                            | -0.2<br>(-2.8 to 2.6)                               |
| Assault by sharp object                                                             | 9.9<br>(8.0 to 11.9)                 | 6.2<br>(4.8 to 7.8)                            | 0.4<br>(0.2 to 0.5)                           | 22.6<br>(18.8 to 26.4)                            | 5.9<br>(3.4 to 8.4)                                 |
| Sexual violence                                                                     | 61.1<br>(52.3 to 71.2)               | --                                             | 0.5<br>(0.4 to 0.8)                           | 2.4<br>(-2.3 to 6.8)                              | -11.7<br>(-14.8 to -8.4)                            |
| Assault by other means                                                              | 13.3<br>(11.2 to 16.0)               | 10.3<br>(8.5 to 12.3)                          | 0.6<br>(0.4 to 0.8)                           | 19.4<br>(16.3 to 22.5)                            | 4.8<br>(2.8 to 7.2)                                 |
| <b>Forces of nature, conflict and terrorism, and executions and police conflict</b> | <b>1.0</b><br><b>(0.5 to 1.7)</b>    | <b>&lt; 0.05†</b><br><b>(&lt; 0.05 to 0.1)</b> | <b>&lt; 0.05</b><br><b>(&lt; 0.05 to 0.1)</b> | <b>-20.1</b><br><b>(-23.9 to -16.6)</b>           | <b>-16.8</b><br><b>(-19.9 to -13.3)</b>             |
| Exposure to forces of nature                                                        | 0.1<br>(< 0.05 to 0.2)               | --                                             | < 0.05<br>(< 0.05 to < 0.05)                  | 53.6<br>(46.2 to 59.2)                            | 32.6<br>(27.7 to 38.0)                              |
| Conflict and terrorism                                                              | 0.8<br>(0.4 to 1.5)                  | --                                             | < 0.05<br>(< 0.05 to 0.1)                     | -28.1<br>(-32.0 to -25.0)                         | -23.5<br>(-26.8 to -20.3)                           |
| Executions and police conflict                                                      | 0.1<br>(0.1 to 0.1)                  | < 0.05<br>(< 0.05 to 0.1)                      | < 0.05<br>(< 0.05 to < 0.05)                  | 7.7<br>(-1.0 to 13.3)                             | 0.5<br>(-6.5 to 5.8)                                |
| <b>Impairments</b>                                                                  | --                                   | --                                             | --                                            | --                                                | --                                                  |
| Anaemia                                                                             | 782.1<br>(748.6 to 817.8)            | --                                             | 48.3<br>(34.4 to 64.1)                        | -3.6<br>(-19.5 to 10.7)                           | -18.1<br>(-35.0 to -1.6)                            |
| Developmental intellectual disability                                               | 76.7<br>(58.1 to 95.6)               | --                                             | 6.7<br>(4.8 to 9.1)                           | 9.2<br>(3.2 to 18.0)                              | -1.2<br>(-6.2 to 6.3)                               |
| Epilepsy                                                                            | 17.2<br>(10.5 to 24.8)               | --                                             | 5.9<br>(3.0 to 9.5)                           | 20.7<br>(-43.5 to 147.5)                          | 6.6<br>(-49.5 to 119.8)                             |
| Guillain-Barre syndrome                                                             | < 0.05<br>(< 0.05 to < 0.05)         | --                                             | < 0.05<br>(< 0.05 to < 0.05)                  | 8.7<br>(5.4 to 13.4)                              | 0.2<br>(-0.2 to 0.5)                                |
| Hearing loss                                                                        | 276.7<br>(261.4 to 293.9)            | --                                             | 11.6<br>(8.1 to 15.8)                         | 1.9<br>(-1.9 to 5.7)                              | -5.3<br>(-7.9 to -2.9)                              |
| Heart failure                                                                       | 6.7<br>(6.0 to 7.6)                  | --                                             | 0.8<br>(0.6 to 1.0)                           | -2.6<br>(-10.3 to 6.0)                            | -6.0<br>(-13.0 to 2.4)                              |
| Infertility                                                                         | 40.8<br>(31.5 to 53.5)               | --                                             | 0.2<br>(0.1 to 0.5)                           | 76.2<br>(44.4 to 114.4)                           | 39.1<br>(12.5 to 74.9)                              |
| Pelvic inflammatory disease                                                         | 2.4<br>(2.0 to 2.8)                  | --                                             | 0.3<br>(0.2 to 0.4)                           | 20.0<br>(4.0 to 39.4)                             | -7.1<br>(-18.6 to 6.5)                              |
| Vision loss                                                                         | 280.6<br>(266.6 to 294.1)            | --                                             | 6.2<br>(4.2 to 9.1)                           | 5.9<br>(1.2 to 13.3)                              | -3.3<br>(-6.6 to 1.2)                               |

We did not calculate incidence for the nine impairments, certain NTDs, and causes with only birth prevalence. Blank cells mean that no estimate is available.

† Incidence for aggregate causes represents the sum of the incidence of the causes below the aggregate.

‡ Incidence estimates for stroke represent first-ever stroke only.

^ Incidence of HIV/AIDS represents new infections of HIV only and does not include new infections of Tuberculosis in HIV positive cases.



SR Table 14: Prevalence, incidence, and YLDs for 2016, percentage change of YLD counts and percentage change of age-standardised YLD rates between 2006 and 2016 by cause and impairments, for all ages, Liberia.

| Cause                                                                                | Prevalence in thousands (95% UI)       | Incidence in thousands (95% UI)            | YLDs in thousands (95% UI)       |                                                   |                                                     |
|--------------------------------------------------------------------------------------|----------------------------------------|--------------------------------------------|----------------------------------|---------------------------------------------------|-----------------------------------------------------|
|                                                                                      | 2016 counts                            | 2016 counts                                | 2016 counts                      | Percentage change in counts between 2006 and 2016 | Percentage change in age-standardised rates between |
| <b>All causes</b>                                                                    | <b>4,577.3</b><br>(4,571.7 to 4,582.7) | <b>34,304.7†</b><br>(32,614.4 to 36,235.4) | <b>484.3</b><br>(355.2 to 634.1) | <b>28.4</b><br>(24.2 to 32.9)                     | <b>-6.6</b><br>(-9.2 to -3.9)                       |
| <b>Communicable, maternal, neonatal, and nutritional disorders</b>                   | <b>4,353.1</b><br>(4,316.7 to 4,391.9) | <b>22,892.4†</b><br>(21,398.1 to 24,538.5) | <b>160.5</b><br>(106.2 to 225.7) | <b>11.1</b><br>(2.8 to 20.4)                      | <b>-20.6</b><br>(-27.4 to -12.7)                    |
| <b>HIV/AIDS and tuberculosis</b>                                                     | <b>1,252.5</b><br>(1,084.4 to 1,392.6) | <b>9.7†</b><br>(8.0 to 11.6)               | <b>6.1</b><br>(4.0 to 8.8)       | <b>-11.4</b><br>(-29.1 to 11.2)                   | <b>-37.2</b><br>(-49.8 to -19.9)                    |
| Tuberculosis                                                                         | 1,127.5<br>(974.4 to 1,305.6)          | 7.3†<br>(6.0 to 8.8)                       | 1.3<br>(0.8 to 1.8)              | 9.5<br>(-4.0 to 24.7)                             | -20.0<br>(-28.5 to -11.0)                           |
| Drug-susceptible tuberculosis                                                        | 4.1<br>(3.4 to 5.0)                    | 7.2<br>(5.9 to 8.6)                        | 1.2<br>(0.8 to 1.8)              | 9.7<br>(-4.2 to 25.4)                             | -19.9<br>(-28.6 to -10.2)                           |
| Multidrug-resistant tuberculosis without extensive drug resistance                   | 0.1<br>(< 0.05 to 0.2)                 | 0.1<br>(< 0.05 to 0.3)                     | < 0.05<br>(< 0.05 to 0.1)        | -1.4<br>(-68.1 to 209.2)                          | -28.1<br>(-76.8 to 124.8)                           |
| Extensively drug-resistant tuberculosis                                              | < 0.05<br>(< 0.05 to < 0.05)           | < 0.05<br>(< 0.05 to < 0.05)               | < 0.05<br>(< 0.05 to < 0.05)     | 200.2<br>(-3.0 to 840.8)                          | 118.3<br>(-29.4 to 579.4)                           |
| Latent tuberculosis infection                                                        | 1,123.3<br>(970.5 to 1,301.6)          | --                                         | --                               | --                                                | --                                                  |
| HIV/AIDS                                                                             | 35.4<br>(29.2 to 42.6)                 | 2.4 <sup>A</sup><br>(1.4 to 3.8)           | 4.8<br>(3.0 to 7.4)              | -15.6<br>(-34.5 to 11.5)                          | -40.9<br>(-54.8 to -20.0)                           |
| Drug-susceptible HIV/AIDS - Tuberculosis                                             | 0.3<br>(0.2 to 0.5)                    | 0.5<br>(0.3 to 0.8)                        | 0.1<br>(0.1 to 0.2)              | -25.6<br>(-43.1 to -1.9)                          | -44.4<br>(-57.7 to -26.3)                           |
| Multidrug-resistant HIV/AIDS - Tuberculosis without extensive drug resistance        | < 0.05<br>(< 0.05 to < 0.05)           | < 0.05<br>(< 0.05 to < 0.05)               | < 0.05<br>(< 0.05 to < 0.05)     | -34.9<br>(-78.9 to 103.0)                         | -51.4<br>(-84.3 to 51.6)                            |
| Extensively drug-resistant HIV/AIDS - Tuberculosis                                   | < 0.05<br>(< 0.05 to < 0.05)           | < 0.05<br>(< 0.05 to < 0.05)               | < 0.05<br>(< 0.05 to < 0.05)     | 98.3<br>(-35.8 to 518.8)                          | 48.0<br>(-52.1 to 361.9)                            |
| HIV/AIDS resulting in other diseases                                                 | 35.1<br>(28.9 to 42.4)                 | 2.4<br>(1.4 to 3.8)                        | 4.7<br>(3.0 to 7.2)              | -15.3<br>(-34.9 to 13.2)                          | -40.8<br>(-54.7 to -19.0)                           |
| <b>Diarrhoea, lower respiratory infections, and other common infectious diseases</b> | <b>369.6</b><br>(354.1 to 389.2)       | <b>17,328.1†</b><br>(15,927.2 to 18,714.0) | <b>21.7</b><br>(15.2 to 29.4)    | <b>23.8</b><br>(20.0 to 28.1)                     | <b>-6.8</b><br>(-9.3 to -4.1)                       |
| Diarrhoeal diseases                                                                  | 86.5<br>(79.9 to 92.7)                 | 5,779.2<br>(5,324.3 to 6,219.0)            | 9.7<br>(6.7 to 13.4)             | 17.3<br>(10.5 to 24.3)                            | -9.7<br>(-13.8 to -5.4)                             |
| Intestinal infectious diseases                                                       | 0.5<br>(0.3 to 0.7)                    | 9.7†<br>(6.2 to 14.5)                      | 0.1<br>(< 0.05 to 0.1)           | 6.5<br>(-17.0 to 38.2)                            | -22.6<br>(-35.7 to -4.8)                            |
| Typhoid fever                                                                        | 0.5<br>(0.3 to 0.7)                    | 7.4<br>(4.7 to 11.1)                       | 0.1<br>(< 0.05 to 0.1)           | 6.6<br>(-19.1 to 40.5)                            | -22.7<br>(-36.9 to -3.1)                            |
| Paratyphoid fever                                                                    | 0.1<br>(0.1 to 0.2)                    | 2.3<br>(1.3 to 4.0)                        | < 0.05<br>(< 0.05 to < 0.05)     | 14.7<br>(-11.1 to 46.6)                           | -17.0<br>(-33.3 to 2.2)                             |
| Other intestinal infectious diseases                                                 | --                                     | --                                         | < 0.05<br>(< 0.05 to < 0.05)     | -31.8<br>(-48.1 to -10.6)                         | -44.6<br>(-53.9 to -33.7)                           |
| Lower respiratory infections                                                         | 6.3<br>(5.8 to 6.8)                    | 272.6<br>(247.9 to 300.9)                  | 0.4<br>(0.2 to 0.5)              | 18.2<br>(4.9 to 33.6)                             | -7.5<br>(-15.7 to 1.4)                              |
| Upper respiratory infections                                                         | 142.1<br>(125.1 to 159.6)              | 10,673.6<br>(9,332.5 to 12,042.9)          | 3.5<br>(2.1 to 5.5)              | 32.1<br>(24.0 to 40.8)                            | -1.9<br>(-7.0 to 3.7)                               |
| Otitis media                                                                         | 119.4<br>(106.7 to 133.2)              | 404.5<br>(314.2 to 517.4)                  | 4.1<br>(2.6 to 6.1)              | 26.6<br>(18.3 to 35.0)                            | -5.9<br>(-11.7 to -0.1)                             |
| Meningitis                                                                           | 21.2<br>(17.7 to 25.0)                 | 4.5<br>(3.9 to 5.5)                        | 2.1<br>(1.5 to 2.8)              | 31.5<br>(22.9 to 40.5)                            | -4.4<br>(-10.7 to 2.3)                              |
| Pneumococcal meningitis                                                              | 5.9<br>(4.9 to 7.2)                    | 0.5<br>(0.4 to 0.7)                        | 0.7<br>(0.5 to 1.0)              | 22.9<br>(5.1 to 43.9)                             | -12.2<br>(-24.2 to 2.4)                             |
| H influenzae type B meningitis                                                       | 3.0<br>(2.1 to 4.3)                    | 0.6<br>(0.3 to 0.9)                        | 0.4<br>(0.2 to 0.5)              | 9.0<br>(-5.4 to 24.8)                             | -21.1<br>(-31.4 to -10.4)                           |
| Meningococcal infection                                                              | 4.8<br>(3.4 to 6.6)                    | 1.3<br>(0.9 to 1.8)                        | 0.5<br>(0.4 to 0.7)              | 29.0<br>(18.5 to 39.7)                            | -6.7<br>(-14.1 to 1.1)                              |
| Other meningitis                                                                     | 7.5<br>(5.0 to 10.4)                   | 2.2<br>(1.7 to 2.8)                        | 0.5<br>(0.3 to 0.7)              | 79.1<br>(59.0 to 103.1)                           | 33.5<br>(19.0 to 50.4)                              |
| Encephalitis                                                                         | 12.6<br>(7.9 to 19.2)                  | 4.8<br>(4.1 to 5.5)                        | 1.3<br>(0.9 to 1.8)              | 35.8<br>(20.2 to 53.5)                            | -2.3<br>(-11.9 to 9.2)                              |
| Diphtheria                                                                           | < 0.05<br>(< 0.05 to < 0.05)           | < 0.05<br>(< 0.05 to < 0.05)               | < 0.05<br>(< 0.05 to < 0.05)     | -59.3<br>(-81.7 to -3.1)                          | -65.3<br>(-82.3 to -30.1)                           |
| Whooping cough                                                                       | 3.1<br>(2.4 to 3.9)                    | 22.8<br>(17.7 to 28.8)                     | 0.1<br>(0.1 to 0.2)              | -10.8<br>(-22.1 to 4.6)                           | -27.4<br>(-37.0 to -14.8)                           |
| Tetanus                                                                              | 0.1<br>(0.1 to 0.1)                    | < 0.05<br>(< 0.05 to 0.1)                  | < 0.05<br>(< 0.05 to < 0.05)     | 4.2<br>(-20.1 to 22.8)                            | -21.8<br>(-37.1 to -10.9)                           |
| Measles                                                                              | 1.0<br>(0.3 to 2.2)                    | 34.8<br>(12.2 to 79.0)                     | 0.1<br>(< 0.05 to 0.2)           | 199.5<br>(94.0 to 413.7)                          | 141.4<br>(58.3 to 312.5)                            |
| Varicella and herpes zoster                                                          | 4.2<br>(3.9 to 4.5)                    | 121.6<br>(114.0 to 129.8)                  | 0.1<br>(0.1 to 0.2)              | 38.9<br>(19.4 to 60.8)                            | 0.4<br>(-11.0 to 12.9)                              |
| <b>Neglected tropical diseases and malaria</b>                                       | <b>3,375.1</b><br>(3,217.9 to 3,532.6) | <b>2,041.4†</b><br>(1,601.7 to 2,605.3)    | <b>84.6</b><br>(49.6 to 133.2)   | <b>0.6</b><br>(-13.6 to 16.9)                     | <b>-26.8</b><br>(-38.2 to -14.9)                    |
| Malaria                                                                              | 692.9<br>(593.7 to 808.5)              | 1,097.7<br>(722.1 to 1,673.6)              | 8.7<br>(6.4 to 11.6)             | -13.4<br>(-21.9 to -3.4)                          | -34.0<br>(-40.0 to -26.9)                           |
| Chagas disease                                                                       | --                                     | --                                         | --                               | --                                                | --                                                  |
| Leishmaniasis                                                                        | --                                     | --                                         | --                               | --                                                | --                                                  |
| Visceral leishmaniasis                                                               | --                                     | --                                         | --                               | --                                                | --                                                  |
| Cutaneous and mucocutaneous leishmaniasis                                            | --                                     | --                                         | --                               | --                                                | --                                                  |
| African trypanosomiasis                                                              | --                                     | --                                         | --                               | --                                                | --                                                  |
| Schistosomiasis                                                                      | 1,385.9<br>(1,055.7 to 1,626.2)        | 583.8<br>(474.2 to 671.6)                  | 10.5<br>(5.0 to 20.3)            | 16.9<br>(8.3 to 25.2)                             | -15.8<br>(-21.8 to -10.1)                           |
| Cysticercosis                                                                        | 9.2<br>(7.2 to 11.3)                   | --                                         | 1.7<br>(1.0 to 2.6)              | 43.3<br>(18.1 to 70.9)                            | 2.0<br>(-14.0 to 19.4)                              |
| Cystic echinococcosis                                                                | 2.8<br>(0.7 to 9.2)                    | 0.6<br>(0.1 to 2.0)                        | 0.3<br>(0.1 to 0.9)              | -27.3<br>(-88.2 to 316.9)                         | -47.7<br>(-92.1 to 179.5)                           |
| Lymphatic filariasis                                                                 | 217.8<br>(175.3 to 267.3)              | 110.4<br>(91.9 to 131.7)                   | 8.6<br>(4.1 to 14.8)             | -16.1<br>(-38.8 to -1.4)                          | -40.1<br>(-56.3 to -29.5)                           |
| Onchocerciasis                                                                       | 743.0<br>(395.5 to 1,342.6)            | 194.3<br>(86.6 to 365.5)                   | 46.6<br>(17.9 to 89.9)           | -1.7<br>(-32.2 to 22.3)                           | -28.4<br>(-51.2 to -10.1)                           |
| Trachoma                                                                             | --                                     | --                                         | --                               | --                                                | --                                                  |
| Dengue                                                                               | 3.2<br>(1.9 to 5.2)                    | 53.3<br>(35.3 to 75.6)                     | 0.5<br>(0.2 to 1.0)              | 199.2<br>(118.2 to 612.2)                         | 118.8<br>(63.8 to 408.7)                            |
| Yellow fever                                                                         | < 0.05<br>(< 0.05 to 0.1)              | 1.1<br>(0.3 to 2.8)                        | < 0.05<br>(< 0.05 to < 0.05)     | -32.1<br>(-48.6 to -8.3)                          | -50.4<br>(-61.2 to -37.2)                           |
| Rabies                                                                               | < 0.05<br>(< 0.05 to < 0.05)           | < 0.05<br>(< 0.05 to < 0.05)               | < 0.05<br>(< 0.05 to < 0.05)     | -25.5<br>(-60.7 to 41.8)                          | -43.8<br>(-66.3 to -4.5)                            |
| Intestinal nematode infections                                                       | 2,238.9<br>(1,980.3 to 2,519.3)        | --                                         | 5.9<br>(3.5 to 9.5)              | 34.5<br>(18.9 to 52.0)                            | -1.4<br>(-14.3 to 12.8)                             |
| Ascariasis                                                                           | 714.3<br>(533.5 to 939.5)              | --                                         | 0.3<br>(0.2 to 0.6)              | 35.5<br>(13.0 to 60.2)                            | 0.3<br>(-18.0 to 21.7)                              |



| Cause                                                                   | Prevalence in thousands (95% UI)              | Incidence in thousands (95% UI)                   | YLDs in thousands (95% UI)              |                                                   |                                                     |
|-------------------------------------------------------------------------|-----------------------------------------------|---------------------------------------------------|-----------------------------------------|---------------------------------------------------|-----------------------------------------------------|
|                                                                         | 2016 counts                                   | 2016 counts                                       | 2016 counts                             | Percentage change in counts between 2006 and 2016 | Percentage change in age-standardised rates between |
| Trichuriasis                                                            | 797.8<br>(577.9 to 1,103.2)                   | --                                                | 0.3<br>(0.1 to 0.5)                     | 37.3<br>(9.7 to 71.8)                             | 0.4<br>(-22.7 to 28.1)                              |
| Hookworm disease                                                        | 1,303.1<br>(1,027.6 to 1,623.6)               | --                                                | 5.3<br>(3.1 to 8.4)                     | 34.2<br>(17.0 to 53.6)                            | -1.5<br>(-15.7 to 14.2)                             |
| Food-borne trematodiasis                                                | --                                            | --                                                | --                                      | --                                                | --                                                  |
| Leprosy                                                                 | 0.3<br>(0.3 to 0.4)                           | 0.1<br>(0.1 to 0.1)                               | < 0.05<br>(< 0.05 to < 0.05)            | -1.6<br>(-23.6 to 27.7)                           | -27.8<br>(-42.2 to -8.7)                            |
| Ebola virus disease                                                     | < 0.05<br>(< 0.05 to 0.1)                     | --                                                | < 0.05<br>(0.0 to < 0.05)               | --                                                | --                                                  |
| Zika virus disease                                                      | --                                            | --                                                | --                                      | --                                                | --                                                  |
| Guinea worm disease                                                     | --                                            | --                                                | --                                      | --                                                | --                                                  |
| Other neglected tropical diseases                                       | 60.9<br>(57.0 to 64.7)                        | --                                                | 2.0<br>(1.3 to 2.9)                     | 37.8<br>(24.1 to 53.9)                            | 5.1<br>(-5.0 to 16.5)                               |
| <b>Maternal disorders</b>                                               | <b>13.3</b><br><b>(10.7 to 17.2)</b>          | <b>104.9†</b><br><b>(90.4 to 121.5)</b>           | <b>1.1</b><br><b>(0.7 to 1.5)</b>       | <b>3.7</b><br><b>(-18.9 to 31.0)</b>              | <b>-26.8</b><br><b>(-42.0 to -7.7)</b>              |
| Maternal haemorrhage                                                    | 1.5<br>(1.1 to 1.9)                           | 12.0<br>(8.0 to 17.2)                             | 0.1<br>(< 0.05 to 0.1)                  | 19.6<br>(-19.6 to 81.5)                           | -12.2<br>(-40.5 to 31.8)                            |
| Maternal sepsis and other pregnancy related infections                  | 2.1<br>(1.6 to 2.7)                           | 11.4<br>(8.7 to 15.1)                             | 0.1<br>(< 0.05 to 0.1)                  | 19.0<br>(-38.6 to 136.4)                          | -13.8<br>(-54.2 to 66.4)                            |
| Maternal hypertensive disorders                                         | 8.7<br>(5.5 to 12.1)                          | 38.0<br>(31.0 to 44.6)                            | 0.4<br>(0.2 to 0.7)                     | 23.5<br>(-25.8 to 100.5)                          | -10.5<br>(-46.0 to 45.4)                            |
| Maternal obstructed labour and uterine rupture                          | 1.1<br>(0.8 to 1.5)                           | 6.4<br>(4.5 to 9.0)                               | 0.3<br>(0.2 to 0.5)                     | -15.3<br>(-34.0 to 9.2)                           | -40.3<br>(-53.2 to -23.3)                           |
| Maternal abortion, miscarriage, and ectopic pregnancy                   | 0.3<br>(0.2 to 0.5)                           | 37.1<br>(26.5 to 50.5)                            | < 0.05<br>(< 0.05 to 0.1)               | 14.6<br>(-43.9 to 114.5)                          | -17.8<br>(-58.5 to 52.0)                            |
| Other maternal disorders                                                | --                                            | --                                                | 0.2<br>(0.1 to 0.2)                     | -1.3<br>(-22.9 to 25.0)                           | -30.2<br>(-44.9 to -12.1)                           |
| <b>Neonatal disorders</b>                                               | <b>60.6</b><br><b>(47.7 to 75.6)</b>          | --                                                | <b>6.7</b><br><b>(3.6 to 12.2)</b>      | <b>69.0</b><br><b>(18.3 to 134.8)</b>             | <b>32.1</b><br><b>(-9.1 to 85.9)</b>                |
| Neonatal preterm birth complications                                    | 39.4<br>(28.8 to 56.4)                        | --                                                | 1.9<br>(1.3 to 2.8)                     | 21.8<br>(-6.5 to 54.6)                            | -6.3<br>(-28.3 to 21.1)                             |
| Neonatal encephalopathy due to birth asphyxia and trauma                | 19.1<br>(9.8 to 33.5)                         | --                                                | 1.8<br>(0.3 to 5.9)                     | 107.4<br>(-17.4 to 429.9)                         | 61.6<br>(-36.6 to 318.4)                            |
| Neonatal sepsis and other neonatal infections                           | 6.0<br>(1.8 to 13.7)                          | --                                                | 2.2<br>(0.5 to 5.9)                     | 134.7<br>(16.1 to 334.1)                          | 90.1<br>(-12.2 to 287.6)                            |
| Hemolytic disease and other neonatal jaundice                           | 0.9<br>(0.8 to 1.1)                           | --                                                | 0.3<br>(0.2 to 0.4)                     | 30.4<br>(13.4 to 47.7)                            | -1.7<br>(-12.6 to 10.1)                             |
| Other neonatal disorders                                                | --                                            | --                                                | 0.6<br>(0.3 to 0.9)                     | 36.7<br>(5.1 to 76.5)                             | 12.3<br>(-14.0 to 45.6)                             |
| <b>Nutritional deficiencies</b>                                         | <b>2,434.2</b><br><b>(2,309.9 to 2,578.0)</b> | <b>2,608.7†</b><br><b>(2,202.7 to 3,092.5)</b>    | <b>36.6</b><br><b>(24.5 to 52.1)</b>    | <b>29.2</b><br><b>(21.5 to 37.0)</b>              | <b>-6.1</b><br><b>(-10.5 to -1.7)</b>               |
| Protein-energy malnutrition                                             | 47.0<br>(37.9 to 58.0)                        | 33.3<br>(27.6 to 40.3)                            | 2.0<br>(1.2 to 3.1)                     | 6.2<br>(-23.0 to 43.0)                            | -13.1<br>(-37.1 to 17.2)                            |
| Iodine deficiency                                                       | 67.6<br>(50.6 to 86.9)                        | 2.6<br>(1.9 to 3.3)                               | 2.1<br>(1.3 to 3.1)                     | 15.7<br>(2.2 to 29.9)                             | -16.6<br>(-25.3 to -6.7)                            |
| Vitamin A deficiency                                                    | 1,803.9<br>(1,634.1 to 1,991.9)               | 2,572.8<br>(2,169.8 to 3,059.1)                   | 0.4<br>(0.2 to 0.6)                     | 28.1<br>(-1.2 to 69.1)                            | -4.2<br>(-23.4 to 22.8)                             |
| Iron-deficiency anaemia                                                 | 1,028.2<br>(983.2 to 1,075.8)                 | --                                                | 32.1<br>(21.3 to 46.4)                  | 32.0<br>(24.2 to 40.2)                            | -4.7<br>(-9.7 to -0.1)                              |
| Other nutritional deficiencies                                          | --                                            | --                                                | 0.1<br>(< 0.05 to 0.1)                  | 5.8<br>(-24.4 to 44.2)                            | -13.4<br>(-38.2 to 18.0)                            |
| <b>Other communicable, maternal, neonatal, and nutritional diseases</b> | <b>1,627.4</b><br><b>(1,493.1 to 1,768.7)</b> | <b>799.7</b><br><b>(682.5 to 948.3)</b>           | <b>3.7</b><br><b>(2.4 to 5.6)</b>       | <b>38.2</b><br><b>(30.9 to 45.7)</b>              | <b>-0.1</b><br><b>(-4.6 to 4.8)</b>                 |
| Sexually transmitted diseases excluding HIV                             | 878.9<br>(828.6 to 932.4)                     | 562.0<br>(483.4 to 653.1)                         | 2.0<br>(1.2 to 3.2)                     | 39.6<br>(30.8 to 48.5)                            | -0.4<br>(-6.3 to 5.5)                               |
| Syphilis                                                                | 159.9<br>(132.5 to 192.4)                     | 115.6<br>(92.1 to 146.8)                          | 0.1<br>(0.1 to 0.2)                     | 42.9<br>(23.6 to 65.2)                            | 2.1<br>(-10.9 to 17.3)                              |
| Chlamydial infection                                                    | 51.8<br>(36.9 to 72.3)                        | 43.6<br>(31.5 to 61.1)                            | 0.4<br>(0.2 to 0.6)                     | 38.8<br>(21.7 to 58.8)                            | -1.0<br>(-13.0 to 12.5)                             |
| Gonococcal infection                                                    | 47.1<br>(31.8 to 67.4)                        | 154.0<br>(92.4 to 237.3)                          | 0.4<br>(0.2 to 0.7)                     | 41.5<br>(23.4 to 59.2)                            | 1.4<br>(-10.9 to 13.8)                              |
| Trichomoniasis                                                          | 159.7<br>(131.3 to 191.3)                     | 146.8<br>(118.5 to 179.7)                         | 0.2<br>(0.1 to 0.5)                     | 38.3<br>(30.1 to 47.5)                            | -0.4<br>(-5.8 to 5.7)                               |
| Genital herpes                                                          | 581.0<br>(504.6 to 673.4)                     | 57.7<br>(49.0 to 69.0)                            | 0.1<br>(< 0.05 to 0.4)                  | 40.3<br>(27.9 to 54.5)                            | -0.0<br>(-7.5 to 8.7)                               |
| Other sexually transmitted diseases                                     | 41.0<br>(37.4 to 45.3)                        | 44.4<br>(36.8 to 53.6)                            | 0.8<br>(0.5 to 1.1)                     | 38.8<br>(25.4 to 53.4)                            | -1.8<br>(-11.0 to 7.8)                              |
| Hepatitis                                                               | 882.3<br>(700.3 to 1,103.6)                   | 237.7<br>(160.8 to 345.4)                         | 0.3<br>(0.1 to 0.4)                     | 11.3<br>(-12.8 to 42.5)                           | -14.5<br>(-30.5 to 5.7)                             |
| Acute hepatitis A                                                       | 3.4<br>(0.3 to 10.3)                          | 44.6<br>(3.9 to 133.5)                            | < 0.05<br>(< 0.05 to 0.1)               | 11.9<br>(-78.1 to 568.8)                          | -13.3<br>(-78.0 to 285.9)                           |
| Hepatitis B                                                             | 713.5<br>(535.1 to 937.0)                     | 164.8<br>(115.1 to 231.9)                         | 0.2<br>(0.1 to 0.3)                     | 10.2<br>(-11.2 to 37.1)                           | -15.0<br>(-30.7 to 5.4)                             |
| Hepatitis C                                                             | 164.2<br>(144.6 to 185.3)                     | 12.6<br>(11.3 to 14.0)                            | < 0.05<br>(< 0.05 to < 0.05)            | 23.7<br>(-21.6 to 93.2)                           | -2.7<br>(-28.3 to 31.2)                             |
| Acute hepatitis E                                                       | 1.2<br>(1.0 to 1.6)                           | 15.7<br>(12.4 to 20.1)                            | < 0.05<br>(< 0.05 to < 0.05)            | 13.1<br>(-18.5 to 56.2)                           | -14.8<br>(-35.3 to 10.4)                            |
| Other infectious diseases                                               | 44.0<br>(41.4 to 46.6)                        | < 0.05<br>(< 0.05 to < 0.05)                      | 1.5<br>(1.0 to 2.1)                     | 42.2<br>(27.7 to 57.2)                            | 5.8<br>(-4.0 to 16.1)                               |
| <b>Non-communicable diseases</b>                                        | <b>4,163.4</b><br><b>(4,128.3 to 4,197.7)</b> | <b>11,118.9†</b><br><b>(10,155.3 to 12,088.3)</b> | <b>299.8</b><br><b>(219.3 to 389.9)</b> | <b>40.1</b><br><b>(34.1 to 46.6)</b>              | <b>0.6</b><br><b>(-2.6 to 4.0)</b>                  |
| <b>Neoplasms</b>                                                        | <b>3.6</b><br><b>(3.2 to 4.0)</b>             | <b>2.5</b><br><b>(2.3 to 2.7)</b>                 | <b>0.8</b><br><b>(0.6 to 1.1)</b>       | <b>41.8</b><br><b>(33.5 to 50.6)</b>              | <b>3.2</b><br><b>(-2.3 to 9.2)</b>                  |
| Lip and oral cavity cancer                                              | 0.1<br>(0.1 to 0.1)                           | < 0.05<br>(< 0.05 to < 0.05)                      | < 0.05<br>(< 0.05 to < 0.05)            | 55.6<br>(37.0 to 75.4)                            | 9.8<br>(-3.1 to 24.6)                               |
| Nasopharynx cancer                                                      | < 0.05<br>(< 0.05 to < 0.05)                  | < 0.05<br>(< 0.05 to < 0.05)                      | < 0.05<br>(< 0.05 to < 0.05)            | 49.0<br>(28.8 to 72.6)                            | 3.7<br>(-8.5 to 17.8)                               |
| Other pharynx cancer                                                    | < 0.05<br>(< 0.05 to < 0.05)                  | < 0.05<br>(< 0.05 to < 0.05)                      | < 0.05<br>(< 0.05 to < 0.05)            | 41.6<br>(27.9 to 58.0)                            | 3.1<br>(-7.5 to 14.3)                               |
| Oesophageal cancer                                                      | 0.1<br>(0.1 to 0.1)                           | 0.1<br>(0.1 to 0.1)                               | < 0.05<br>(< 0.05 to < 0.05)            | 64.5<br>(44.1 to 86.9)                            | 17.8<br>(1.1 to 35.8)                               |
| Stomach cancer                                                          | 0.3<br>(0.2 to 0.3)                           | 0.2<br>(0.2 to 0.2)                               | < 0.05<br>(< 0.05 to 0.1)               | 36.4<br>(17.8 to 56.5)                            | -0.5<br>(-15.7 to 16.0)                             |
| Colon and rectum cancer                                                 | 0.3<br>(0.3 to 0.4)                           | 0.1<br>(0.1 to 0.1)                               | < 0.05<br>(< 0.05 to 0.1)               | 51.0<br>(32.4 to 72.2)                            | 8.2<br>(-7.0 to 26.2)                               |
| Liver cancer                                                            | 0.2<br>(0.2 to 0.3)                           | 0.4<br>(0.3 to 0.5)                               | 0.1<br>(0.1 to 0.1)                     | 27.0<br>(11.9 to 44.5)                            | -8.6<br>(-18.9 to 3.8)                              |
| Liver cancer due to hepatitis B                                         | 0.2<br>(0.2 to 0.3)                           | 0.2<br>(0.2 to 0.3)                               | < 0.05<br>(< 0.05 to 0.1)               | 27.8<br>(11.5 to 46.2)                            | -8.1<br>(-19.6 to 5.8)                              |

| Cause                                              | Prevalence in thousands (95% UI)        | Incidence in thousands (95% UI)       | YLDs in thousands (95% UI)          |                                                   |                                                     |
|----------------------------------------------------|-----------------------------------------|---------------------------------------|-------------------------------------|---------------------------------------------------|-----------------------------------------------------|
|                                                    | 2016 counts                             | 2016 counts                           | 2016 counts                         | Percentage change in counts between 2006 and 2016 | Percentage change in age-standardised rates between |
| Liver cancer due to hepatitis C                    | < 0.05<br>(< 0.05 to < 0.05)            | < 0.05<br>(< 0.05 to < 0.05)          | < 0.05<br>(< 0.05 to < 0.05)        | 30.5<br>(13.7 to 49.5)                            | -5.7<br>(-17.7 to 8.2)                              |
| Liver cancer due to alcohol use                    | 0.1<br>(< 0.05 to 0.1)                  | 0.1<br>(< 0.05 to 0.1)                | < 0.05<br>(< 0.05 to < 0.05)        | 19.4<br>(3.9 to 36.7)                             | -14.2<br>(-24.9 to -1.6)                            |
| Liver cancer due to other causes                   | 0.1<br>(0.1 to 0.1)                     | 0.1<br>(0.1 to 0.1)                   | < 0.05<br>(< 0.05 to < 0.05)        | 29.0<br>(12.8 to 48.0)                            | -7.0<br>(-17.8 to 6.6)                              |
| Gallbladder and biliary tract cancer               | < 0.05<br>(< 0.05 to < 0.05)            | < 0.05<br>(< 0.05 to < 0.05)          | < 0.05<br>(< 0.05 to < 0.05)        | 28.4<br>(15.7 to 41.6)                            | -7.6<br>(-16.2 to 1.5)                              |
| Pancreatic cancer                                  | 0.1<br>(0.1 to 0.1)                     | 0.1<br>(0.1 to 0.1)                   | < 0.05<br>(< 0.05 to < 0.05)        | 52.9<br>(38.9 to 69.2)                            | 9.5<br>(-0.8 to 21.1)                               |
| Larynx cancer                                      | < 0.05<br>(< 0.05 to 0.1)               | < 0.05<br>(< 0.05 to < 0.05)          | < 0.05<br>(< 0.05 to < 0.05)        | 44.2<br>(25.1 to 65.8)                            | 3.2<br>(-10.1 to 17.7)                              |
| Tracheal, bronchus, and lung cancer                | 0.1<br>(0.1 to 0.1)                     | 0.1<br>(0.1 to 0.1)                   | < 0.05<br>(< 0.05 to < 0.05)        | 59.4<br>(34.2 to 89.1)                            | 15.0<br>(-4.3 to 39.9)                              |
| Malignant skin melanoma                            | < 0.05<br>(< 0.05 to < 0.05)            | < 0.05<br>(< 0.05 to < 0.05)          | < 0.05<br>(< 0.05 to < 0.05)        | 37.3<br>(23.3 to 57.2)                            | -1.8<br>(-11.9 to 11.0)                             |
| Non-melanoma skin cancer                           | < 0.05<br>(< 0.05 to < 0.05)            | 0.1<br>(0.1 to 0.2)                   | < 0.05<br>(< 0.05 to < 0.05)        | 41.4<br>(4.5 to 90.9)                             | -2.5<br>(-30.4 to 44.7)                             |
| Non-melanoma skin cancer (squamous-cell carcinoma) | < 0.05<br>(< 0.05 to < 0.05)            | < 0.05<br>(< 0.05 to < 0.05)          | < 0.05<br>(< 0.05 to < 0.05)        | 40.3<br>(-1.9 to 105.7)                           | -3.2<br>(-33.6 to 51.2)                             |
| Non-melanoma skin cancer (basal-cell carcinoma)    | < 0.05<br>(< 0.05 to < 0.05)            | 0.1<br>(0.1 to 0.2)                   | < 0.05<br>(< 0.05 to < 0.05)        | 48.2<br>(35.3 to 64.5)                            | 4.3<br>(-4.3 to 15.3)                               |
| Breast cancer                                      | 1.0<br>(0.8 to 1.3)                     | 0.2<br>(0.2 to 0.3)                   | 0.1<br>(0.1 to 0.2)                 | 54.4<br>(20.7 to 95.5)                            | 9.8<br>(-12.6 to 37.9)                              |
| Cervical cancer                                    | 1.3<br>(0.8 to 1.7)                     | 0.4<br>(0.2 to 0.5)                   | 0.1<br>(0.1 to 0.2)                 | 32.5<br>(3.6 to 68.1)                             | -5.7<br>(-25.6 to 17.2)                             |
| Uterine cancer                                     | 0.1<br>(0.1 to 0.2)                     | < 0.05<br>(< 0.05 to < 0.05)          | < 0.05<br>(< 0.05 to < 0.05)        | 45.6<br>(14.3 to 81.5)                            | 5.9<br>(-15.7 to 31.9)                              |
| Ovarian cancer                                     | 0.1<br>(0.1 to 0.2)                     | < 0.05<br>(< 0.05 to 0.1)             | < 0.05<br>(< 0.05 to < 0.05)        | 50.2<br>(29.4 to 75.4)                            | 6.0<br>(-10.1 to 25.6)                              |
| Prostate cancer                                    | 0.5<br>(0.3 to 0.6)                     | 0.1<br>(0.1 to 0.2)                   | 0.1<br>(< 0.05 to 0.1)              | 61.5<br>(23.8 to 103.2)                           | 14.7<br>(-9.9 to 41.1)                              |
| Testicular cancer                                  | < 0.05<br>(< 0.05 to < 0.05)            | < 0.05<br>(< 0.05 to < 0.05)          | < 0.05<br>(< 0.05 to < 0.05)        | 28.7<br>(4.4 to 64.7)                             | -6.2<br>(-23.9 to 19.2)                             |
| Kidney cancer                                      | 0.2<br>(0.1 to 0.3)                     | 0.1<br>(< 0.05 to 0.1)                | < 0.05<br>(< 0.05 to < 0.05)        | 50.5<br>(17.5 to 91.0)                            | 12.9<br>(-4.0 to 32.5)                              |
| Bladder cancer                                     | 0.1<br>(0.1 to 0.1)                     | < 0.05<br>(< 0.05 to < 0.05)          | < 0.05<br>(< 0.05 to < 0.05)        | 40.5<br>(26.5 to 57.6)                            | 0.3<br>(-10.3 to 12.7)                              |
| Brain and nervous system cancer                    | 0.1<br>(0.1 to 0.1)                     | 0.1<br>(< 0.05 to 0.1)                | < 0.05<br>(< 0.05 to < 0.05)        | 47.4<br>(37.1 to 63.6)                            | 8.0<br>(-1.0 to 20.3)                               |
| Thyroid cancer                                     | < 0.05<br>(< 0.05 to < 0.05)            | < 0.05<br>(< 0.05 to < 0.05)          | < 0.05<br>(< 0.05 to < 0.05)        | 27.6<br>(11.2 to 44.1)                            | -9.7<br>(-20.2 to 1.0)                              |
| Mesothelioma                                       | < 0.05<br>(< 0.05 to < 0.05)            | < 0.05<br>(< 0.05 to < 0.05)          | < 0.05<br>(< 0.05 to < 0.05)        | 30.2<br>(16.0 to 48.1)                            | -6.9<br>(-16.7 to 5.2)                              |
| Hodgkin lymphoma                                   | < 0.05<br>(< 0.05 to < 0.05)            | < 0.05<br>(< 0.05 to < 0.05)          | < 0.05<br>(< 0.05 to < 0.05)        | 11.2<br>(-1.5 to 27.6)                            | -15.2<br>(-21.8 to -5.5)                            |
| Non-Hodgkin's lymphoma                             | 0.2<br>(0.2 to 0.3)                     | 0.1<br>(0.1 to 0.1)                   | < 0.05<br>(< 0.05 to < 0.05)        | 35.7<br>(20.1 to 51.8)                            | -0.4<br>(-10.7 to 10.4)                             |
| Multiple myeloma                                   | < 0.05<br>(< 0.05 to < 0.05)            | < 0.05<br>(< 0.05 to < 0.05)          | < 0.05<br>(< 0.05 to < 0.05)        | 42.9<br>(25.5 to 60.4)                            | 3.1<br>(-10.2 to 16.8)                              |
| Leukaemia                                          | 0.3<br>(0.2 to 0.3)                     | 0.1<br>(0.1 to 0.1)                   | < 0.05<br>(< 0.05 to 0.1)           | 30.5<br>(15.4 to 46.6)                            | -2.9<br>(-10.4 to 5.5)                              |
| Acute lymphoid leukaemia                           | 0.1<br>(< 0.05 to 0.1)                  | < 0.05<br>(< 0.05 to < 0.05)          | < 0.05<br>(< 0.05 to < 0.05)        | 22.6<br>(-6.3 to 56.0)                            | -7.4<br>(-22.7 to 9.9)                              |
| Chronic lymphoid leukaemia                         | < 0.05<br>(< 0.05 to < 0.05)            | < 0.05<br>(< 0.05 to < 0.05)          | < 0.05<br>(< 0.05 to < 0.05)        | 43.3<br>(21.6 to 70.5)                            | 2.5<br>(-13.6 to 22.3)                              |
| Acute myeloid leukaemia                            | 0.1<br>(< 0.05 to 0.1)                  | < 0.05<br>(< 0.05 to < 0.05)          | < 0.05<br>(< 0.05 to < 0.05)        | 35.4<br>(10.4 to 65.8)                            | 2.9<br>(-8.5 to 17.3)                               |
| Chronic myeloid leukaemia                          | < 0.05<br>(< 0.05 to < 0.05)            | < 0.05<br>(< 0.05 to < 0.05)          | < 0.05<br>(< 0.05 to < 0.05)        | 27.3<br>(7.9 to 52.2)                             | -8.8<br>(-21.3 to 7.3)                              |
| Other leukaemia                                    | 0.1<br>(0.1 to 0.1)                     | < 0.05<br>(< 0.05 to < 0.05)          | < 0.05<br>(< 0.05 to < 0.05)        | 27.7<br>(10.9 to 48.3)                            | -5.2<br>(-16.1 to 6.6)                              |
| Other neoplasms                                    | 0.4<br>(0.4 to 0.5)                     | 0.1<br>(0.1 to 0.1)                   | < 0.05<br>(< 0.05 to 0.1)           | 31.1<br>(9.0 to 58.8)                             | -0.4<br>(-12.3 to 13.5)                             |
| <b>Cardiovascular diseases</b>                     | <b>211.0</b><br><b>(200.2 to 223.8)</b> | <b>16.7†</b><br><b>(15.9 to 17.5)</b> | <b>11.8</b><br><b>(8.5 to 15.7)</b> | <b>45.5</b><br><b>(39.8 to 51.3)</b>              | <b>3.3</b><br><b>(-0.6 to 7.2)</b>                  |
| Rheumatic heart disease                            | 36.0<br>(31.9 to 40.4)                  | 1.6<br>(1.4 to 1.8)                   | 1.8<br>(1.1 to 2.6)                 | 44.5<br>(32.4 to 56.4)                            | 2.8<br>(-5.5 to 10.7)                               |
| Ischaemic heart disease                            | 47.9<br>(44.4 to 51.5)                  | 6.7<br>(6.2 to 7.2)                   | 2.0<br>(1.4 to 2.8)                 | 42.2<br>(34.6 to 51.6)                            | 0.7<br>(-3.7 to 6.3)                                |
| Cerebrovascular disease                            | 14.7<br>(13.8 to 15.8)                  | 2.6‡<br>(2.4 to 2.9)                  | 2.1<br>(1.5 to 2.7)                 | 48.3<br>(36.6 to 60.1)                            | 6.5<br>(-2.1 to 15.0)                               |
| Ischaemic stroke                                   | 12.4<br>(11.1 to 13.7)                  | 1.7‡<br>(1.5 to 1.9)                  | 1.7<br>(1.2 to 2.1)                 | 50.4<br>(36.9 to 64.3)                            | 7.6<br>(-1.8 to 17.4)                               |
| Hemorrhagic stroke                                 | 3.1<br>(2.8 to 3.5)                     | 1.0‡<br>(0.9 to 1.0)                  | 0.4<br>(0.3 to 0.6)                 | 40.8<br>(23.6 to 59.7)                            | 1.8<br>(-9.8 to 15.0)                               |
| Hypertensive heart disease                         | 3.6<br>(2.9 to 4.4)                     | --                                    | 0.3<br>(0.2 to 0.4)                 | 37.3<br>(22.6 to 54.1)                            | -4.5<br>(-13.9 to 5.2)                              |
| Cardiomyopathy and myocarditis                     | 2.2<br>(1.9 to 2.5)                     | 1.0†<br>(0.9 to 1.2)                  | 0.2<br>(0.1 to 0.3)                 | 43.4<br>(25.9 to 61.1)                            | 0.9<br>(-11.8 to 13.6)                              |
| Myocarditis                                        | 0.6<br>(0.5 to 0.7)                     | 1.0<br>(0.9 to 1.2)                   | < 0.05<br>(< 0.05 to 0.1)           | 42.1<br>(29.7 to 57.1)                            | 1.7<br>(-9.9 to 16.3)                               |
| Alcoholic cardiomyopathy                           | 0.3<br>(0.3 to 0.4)                     | --                                    | < 0.05<br>(< 0.05 to < 0.05)        | 46.2<br>(9.0 to 98.6)                             | 1.7<br>(-22.6 to 35.8)                              |
| Other cardiomyopathy                               | 1.6<br>(1.3 to 1.9)                     | --                                    | 0.1<br>(0.1 to 0.2)                 | 43.2<br>(22.3 to 67.0)                            | 0.5<br>(-14.1 to 17.1)                              |
| Atrial fibrillation and flutter                    | 8.8<br>(7.6 to 10.1)                    | 0.8<br>(0.7 to 0.9)                   | 0.7<br>(0.5 to 1.0)                 | 42.8<br>(31.7 to 54.8)                            | 1.2<br>(-5.0 to 7.8)                                |
| Peripheral vascular disease                        | 32.1<br>(27.8 to 37.6)                  | 3.3<br>(2.8 to 3.9)                   | 0.1<br>(0.1 to 0.3)                 | 38.8<br>(28.3 to 51.5)                            | -0.4<br>(-7.5 to 8.5)                               |
| Endocarditis                                       | 0.3<br>(0.2 to 0.3)                     | 0.7<br>(0.6 to 0.8)                   | < 0.05<br>(< 0.05 to < 0.05)        | 45.9<br>(27.8 to 66.8)                            | 3.8<br>(-11.9 to 20.9)                              |
| Other cardiovascular and circulatory diseases      | 88.2<br>(71.8 to 105.9)                 | --                                    | 4.6<br>(3.1 to 6.5)                 | 47.4<br>(35.6 to 60.1)                            | 4.6<br>(-3.4 to 13.9)                               |
| <b>Chronic respiratory diseases</b>                | <b>246.3</b><br><b>(232.2 to 261.8)</b> | <b>51.3†</b><br><b>(47.1 to 56.0)</b> | <b>11.0</b><br><b>(8.1 to 14.8)</b> | <b>45.9</b><br><b>(39.0 to 53.1)</b>              | <b>5.7</b><br><b>(1.3 to 9.8)</b>                   |
| Chronic obstructive pulmonary disease              | 37.8<br>(36.1 to 39.6)                  | 2.7<br>(2.6 to 2.8)                   | 2.5<br>(2.2 to 2.8)                 | 47.2<br>(34.5 to 59.9)                            | 4.6<br>(-3.6 to 12.8)                               |
| Pneumoconiosis                                     | < 0.05<br>(< 0.05 to < 0.05)            | < 0.05<br>(< 0.05 to < 0.05)          | < 0.05<br>(< 0.05 to < 0.05)        | 45.5<br>(37.0 to 53.6)                            | 3.0<br>(-2.6 to 8.2)                                |
| Silicosis                                          | < 0.05<br>(< 0.05 to < 0.05)            | < 0.05<br>(< 0.05 to < 0.05)          | < 0.05<br>(< 0.05 to < 0.05)        | 44.8<br>(33.4 to 58.7)                            | 1.5<br>(-5.3 to 10.0)                               |

| Cause                                                          | Prevalence in thousands (95% UI)        | Incidence in thousands (95% UI)    | YLDs in thousands (95% UI)        |                                                                     |                                                                      |
|----------------------------------------------------------------|-----------------------------------------|------------------------------------|-----------------------------------|---------------------------------------------------------------------|----------------------------------------------------------------------|
|                                                                | 2016 counts<br>(< 0.05 to < 0.05)       | 2016 counts<br>(< 0.05 to < 0.05)  | 2016 counts<br>(< 0.05 to < 0.05) | Percentage change in counts between 2006 and 2016<br>(33.4 to 55.7) | Percentage change in age-standardised rates between<br>(-4.2 to 8.8) |
| Asbestosis                                                     | < 0.05<br>(< 0.05 to < 0.05)            | < 0.05<br>(< 0.05 to < 0.05)       | < 0.05<br>(< 0.05 to < 0.05)      | 44.1<br>(33.4 to 55.7)                                              | 1.8<br>(-4.2 to 8.8)                                                 |
| Coal workers pneumoconiosis                                    | --                                      | --                                 | --                                | --                                                                  | --                                                                   |
| Other pneumoconiosis                                           | < 0.05<br>(< 0.05 to < 0.05)            | < 0.05<br>(< 0.05 to < 0.05)       | < 0.05<br>(< 0.05 to < 0.05)      | 47.0<br>(33.2 to 60.4)                                              | 4.3<br>(-6.2 to 14.2)                                                |
| Asthma                                                         | 207.8<br>(189.7 to 228.9)               | 48.6<br>(44.4 to 53.2)             | 8.1<br>(5.3 to 11.8)              | 44.2<br>(36.7 to 52.4)                                              | 5.5<br>(0.9 to 10.5)                                                 |
| Interstitial lung disease and pulmonary sarcoidosis            | 0.3<br>(0.3 to 0.4)                     | < 0.05<br>(< 0.05 to < 0.05)       | < 0.05<br>(< 0.05 to 0.1)         | 41.4<br>(38.0 to 45.0)                                              | 0.3<br>(-2.9 to 3.5)                                                 |
| Other chronic respiratory diseases                             | --                                      | --                                 | 0.3<br>(0.2 to 0.4)               | 93.6<br>(43.6 to 157.6)                                             | 38.9<br>(11.4 to 71.9)                                               |
| <b>Cirrhosis and other chronic liver diseases</b>              | <b>11.6<br/>(11.0 to 12.2)</b>          | <b>1.2<br/>(1.1 to 1.2)</b>        | <b>1.0<br/>(0.7 to 1.5)</b>       | <b>37.0<br/>(23.5 to 51.9)</b>                                      | <b>-0.6<br/>(-7.5 to 7.4)</b>                                        |
| Cirrhosis and other chronic liver diseases due to hepatitis B  | 4.2<br>(3.6 to 4.8)                     | 0.4<br>(0.4 to 0.5)                | 0.3<br>(0.2 to 0.4)               | 40.5<br>(20.8 to 64.0)                                              | -0.0<br>(-11.7 to 13.0)                                              |
| Cirrhosis and other chronic liver diseases due to hepatitis C  | 1.6<br>(1.1 to 2.3)                     | 0.2<br>(0.1 to 0.2)                | 0.1<br>(0.1 to 0.2)               | 42.7<br>(13.9 to 77.1)                                              | 0.9<br>(-17.4 to 22.8)                                               |
| Cirrhosis and other chronic liver diseases due to alcohol use  | 2.0<br>(1.7 to 2.3)                     | 0.2<br>(0.2 to 0.3)                | 0.1<br>(0.1 to 0.2)               | 39.5<br>(15.9 to 68.6)                                              | -1.9<br>(-15.7 to 14.4)                                              |
| Cirrhosis and other chronic liver diseases due to other causes | 3.8<br>(3.5 to 4.2)                     | 0.3<br>(0.3 to 0.3)                | 0.5<br>(0.3 to 0.7)               | 33.0<br>(9.8 to 60.9)                                               | -1.2<br>(-17.8 to 17.0)                                              |
| <b>Digestive diseases</b>                                      | <b>75.3<br/>(68.7 to 82.8)</b>          | <b>68.4†<br/>(65.2 to 72.0)</b>    | <b>2.4<br/>(1.7 to 3.3)</b>       | <b>38.1<br/>(26.6 to 50.4)</b>                                      | <b>1.5<br/>(-4.4 to 8.2)</b>                                         |
| Peptic ulcer disease                                           | 10.0<br>(9.1 to 11.0)                   | 5.2<br>(4.7 to 5.9)                | 0.2<br>(0.1 to 0.3)               | 48.1<br>(31.3 to 66.2)                                              | 6.1<br>(-3.6 to 16.2)                                                |
| Gastritis and duodenitis                                       | 20.9<br>(18.4 to 23.7)                  | 21.3<br>(18.9 to 23.8)             | 0.3<br>(0.2 to 0.4)               | 50.1<br>(33.2 to 70.1)                                              | 11.7<br>(1.4 to 22.7)                                                |
| Appendicitis                                                   | 0.8<br>(0.8 to 0.9)                     | 22.2<br>(20.4 to 24.1)             | 0.2<br>(0.2 to 0.4)               | 41.8<br>(5.5 to 92.5)                                               | 3.1<br>(-16.4 to 28.1)                                               |
| Paralytic ileus and intestinal obstruction                     | 0.1<br>(0.1 to 0.1)                     | 2.2<br>(2.0 to 2.5)                | < 0.05<br>(< 0.05 to < 0.05)      | 40.2<br>(35.9 to 45.2)                                              | 1.5<br>(-4.7 to 8.4)                                                 |
| Inguinal, femoral, and abdominal hernia                        | 42.5<br>(34.5 to 52.1)                  | 5.0<br>(4.4 to 5.7)                | 1.4<br>(0.9 to 1.9)               | 33.7<br>(18.9 to 49.5)                                              | -2.1<br>(-9.9 to 6.9)                                                |
| Inflammatory bowel disease                                     | 0.2<br>(0.2 to 0.2)                     | 1.6<br>(1.5 to 1.6)                | < 0.05<br>(< 0.05 to 0.1)         | 40.3<br>(36.3 to 43.9)                                              | 0.2<br>(-2.8 to 2.9)                                                 |
| Vascular intestinal disorders                                  | < 0.05<br>(< 0.05 to < 0.05)            | 0.1<br>(0.1 to 0.2)                | < 0.05<br>(< 0.05 to < 0.05)      | 38.4<br>(31.6 to 45.9)                                              | 5.0<br>(0.9 to 9.4)                                                  |
| Gallbladder and biliary diseases                               | 2.1<br>(1.8 to 2.4)                     | 9.9<br>(8.5 to 11.2)               | 0.1<br>(< 0.05 to 0.1)            | 44.9<br>(30.9 to 59.4)                                              | 3.9<br>(-7.1 to 16.1)                                                |
| Pancreatitis                                                   | 0.1<br>(0.1 to 0.1)                     | 0.8<br>(0.7 to 0.9)                | < 0.05<br>(< 0.05 to < 0.05)      | 48.5<br>(43.5 to 54.1)                                              | 5.8<br>(2.2 to 9.7)                                                  |
| Other digestive diseases                                       | --                                      | --                                 | 0.2<br>(0.2 to 0.3)               | 38.5<br>(23.7 to 55.2)                                              | 5.0<br>(-1.8 to 12.4)                                                |
| <b>Neurological disorders</b>                                  | <b>1,475.5<br/>(1,405.4 to 1,551.3)</b> | <b>756.5<br/>(638.8 to 887.3)</b>  | <b>35.1<br/>(21.4 to 51.4)</b>    | <b>42.3<br/>(-0.8 to 106.1)</b>                                     | <b>1.5<br/>(-24.7 to 38.6)</b>                                       |
| Alzheimer's disease and other dementias                        | 4.6<br>(3.9 to 5.5)                     | 0.8<br>(0.7 to 1.0)                | 0.6<br>(0.4 to 0.8)               | 41.6<br>(32.7 to 50.6)                                              | -0.6<br>(-5.7 to 4.8)                                                |
| Parkinson's disease                                            | 0.5<br>(0.4 to 0.7)                     | 0.1<br>(0.1 to 0.1)                | 0.1<br>(< 0.05 to 0.1)            | 51.9<br>(28.9 to 81.4)                                              | 7.3<br>(-7.5 to 25.9)                                                |
| Epilepsy                                                       | 20.4<br>(4.7 to 41.1)                   | 2.8<br>(0.6 to 5.6)                | 7.7<br>(1.6 to 17.4)              | 40.8<br>(-72.4 to 740.6)                                            | 2.9<br>(-80.1 to 500.0)                                              |
| Multiple sclerosis                                             | 0.1<br>(0.1 to 0.1)                     | < 0.05<br>(< 0.05 to < 0.05)       | < 0.05<br>(< 0.05 to 0.1)         | 55.0<br>(50.1 to 60.2)                                              | 9.5<br>(6.3 to 13.0)                                                 |
| Motor neuron disease                                           | < 0.05<br>(< 0.05 to 0.1)               | < 0.05<br>(< 0.05 to < 0.05)       | < 0.05<br>(< 0.05 to < 0.05)      | 41.5<br>(35.2 to 47.4)                                              | 2.9<br>(-0.6 to 6.4)                                                 |
| Migraine                                                       | 523.1<br>(490.3 to 554.8)               | 65.4<br>(61.2 to 69.8)             | 21.4<br>(13.6 to 30.3)            | 40.8<br>(34.9 to 46.8)                                              | 0.2<br>(-3.5 to 3.9)                                                 |
| Tension-type headache                                          | 1,141.8<br>(1,021.1 to 1,280.3)         | 687.4<br>(569.7 to 821.9)          | 3.4<br>(2.1 to 5.1)               | 41.0<br>(34.1 to 48.1)                                              | 0.5<br>(-3.6 to 5.0)                                                 |
| Other neurological disorders                                   | < 0.05<br>(< 0.05 to < 0.05)            | < 0.05<br>(< 0.05 to < 0.05)       | 1.9<br>(0.4 to 4.1)               | 73.5<br>(-63.9 to 877.2)                                            | 24.1<br>(-72.2 to 515.5)                                             |
| <b>Mental and substance use disorders</b>                      | <b>653.2<br/>(619.2 to 685.0)</b>       | <b>250.1†<br/>(232.5 to 268.5)</b> | <b>77.5<br/>(56.2 to 101.1)</b>   | <b>40.5<br/>(37.3 to 43.5)</b>                                      | <b>0.8<br/>(-1.5 to 2.8)</b>                                         |
| Schizophrenia                                                  | 6.2<br>(5.4 to 7.0)                     | 0.6<br>(0.5 to 0.6)                | 3.9<br>(2.9 to 4.9)               | 43.5<br>(29.6 to 59.6)                                              | 1.6<br>(-6.8 to 11.3)                                                |
| Alcohol use disorders                                          | 44.5<br>(37.7 to 52.0)                  | 24.6<br>(20.8 to 28.6)             | 4.4<br>(3.0 to 6.2)               | 42.6<br>(31.2 to 54.8)                                              | 2.8<br>(-4.6 to 11.0)                                                |
| Drug use disorders                                             | 18.5<br>(16.6 to 20.8)                  | 3.1<br>(2.8 to 3.5)                | 4.7<br>(3.2 to 6.4)               | 51.0<br>(35.9 to 67.3)                                              | 9.2<br>(-1.1 to 20.1)                                                |
| Opioid use disorders                                           | 10.2<br>(8.5 to 12.4)                   | 1.3<br>(1.1 to 1.6)                | 4.2<br>(2.8 to 5.7)               | 52.8<br>(35.9 to 71.9)                                              | 10.3<br>(-1.0 to 22.9)                                               |
| Cocaine use disorders                                          | 0.5<br>(0.5 to 0.7)                     | 0.1<br>(0.1 to 0.1)                | 0.1<br>(< 0.05 to 0.1)            | 42.1<br>(34.4 to 51.1)                                              | 3.2<br>(-2.3 to 9.0)                                                 |
| Amphetamine use disorders                                      | 0.3<br>(0.2 to 0.4)                     | 0.1<br>(< 0.05 to 0.1)             | < 0.05<br>(< 0.05 to 0.1)         | 38.5<br>(26.1 to 53.7)                                              | 2.6<br>(-6.3 to 12.7)                                                |
| Cannabis use disorders                                         | 7.1<br>(5.9 to 8.6)                     | 1.4<br>(1.2 to 1.7)                | 0.2<br>(0.1 to 0.3)               | 33.0<br>(6.5 to 66.5)                                               | -2.6<br>(-20.8 to 19.9)                                              |
| Other drug use disorders                                       | 1.3<br>(1.1 to 1.5)                     | 0.3<br>(0.2 to 0.3)                | 0.2<br>(0.1 to 0.3)               | 42.4<br>(20.0 to 70.4)                                              | 2.7<br>(-12.6 to 21.5)                                               |
| Depressive disorders                                           | 144.6<br>(135.8 to 155.0)               | 168.4<br>(152.6 to 185.0)          | 25.1<br>(17.2 to 33.8)            | 40.8<br>(34.5 to 46.9)                                              | 0.4<br>(-3.9 to 4.7)                                                 |
| Major depressive disorder                                      | 102.8<br>(93.4 to 112.6)                | 160.2<br>(144.2 to 177.1)          | 20.8<br>(14.2 to 27.9)            | 40.7<br>(33.5 to 48.2)                                              | 0.4<br>(-4.8 to 5.6)                                                 |
| Dysthymia                                                      | 45.4<br>(39.2 to 52.6)                  | 8.2<br>(7.2 to 9.4)                | 4.3<br>(2.9 to 6.3)               | 41.1<br>(35.4 to 47.2)                                              | 0.5<br>(-2.9 to 3.9)                                                 |
| Bipolar disorder                                               | 24.3<br>(20.5 to 28.7)                  | 2.7<br>(2.3 to 3.3)                | 4.9<br>(3.0 to 7.4)               | 41.2<br>(31.4 to 52.1)                                              | 1.0<br>(-5.2 to 7.0)                                                 |
| Anxiety disorders                                              | 124.0<br>(112.2 to 137.6)               | 23.4<br>(21.4 to 25.7)             | 11.9<br>(8.3 to 16.2)             | 40.4<br>(31.1 to 50.1)                                              | 0.5<br>(-5.5 to 6.5)                                                 |
| Eating disorders                                               | 2.9<br>(2.3 to 3.5)                     | 2.6<br>(1.9 to 3.5)                | 0.6<br>(0.4 to 0.9)               | 49.5<br>(25.9 to 75.0)                                              | 7.9<br>(-8.0 to 26.5)                                                |
| Anorexia nervosa                                               | 0.8<br>(0.6 to 1.1)                     | 0.4<br>(0.3 to 0.6)                | 0.2<br>(0.1 to 0.3)               | 46.5<br>(7.0 to 105.1)                                              | 6.0<br>(-21.6 to 44.5)                                               |
| Bulimia nervosa                                                | 1.9<br>(1.4 to 2.6)                     | 2.1<br>(1.5 to 3.0)                | 0.4<br>(0.2 to 0.6)               | 50.9<br>(24.2 to 86.2)                                              | 8.7<br>(-10.5 to 32.8)                                               |
| Autistic spectrum disorders                                    | 38.4<br>(34.1 to 43.8)                  | 0.5<br>(0.3 to 0.7)                | 5.4<br>(3.6 to 7.5)               | 37.8<br>(30.3 to 45.6)                                              | 0.9<br>(-3.7 to 6.1)                                                 |
| Autism                                                         | 10.2<br>(8.8 to 11.9)                   | 0.1<br>(< 0.05 to 0.1)             | 2.6<br>(1.7 to 3.8)               | 38.2<br>(25.2 to 52.3)                                              | 1.0<br>(-7.9 to 10.2)                                                |
| Asperger syndrome and other autistic spectrum disorders        | 28.1<br>(23.2 to 34.1)                  | 0.4<br>(0.3 to 0.6)                | 2.8<br>(1.8 to 4.1)               | 37.5<br>(30.0 to 45.0)                                              | 0.8<br>(-3.9 to 5.7)                                                 |



| Cause                                                      | Prevalence in thousands (95% UI)              | Incidence in thousands (95% UI)                 | YLDs in thousands (95% UI)            |                                                   |                                                     |
|------------------------------------------------------------|-----------------------------------------------|-------------------------------------------------|---------------------------------------|---------------------------------------------------|-----------------------------------------------------|
|                                                            | 2016 counts                                   | 2016 counts                                     | 2016 counts                           | Percentage change in counts between 2006 and 2016 | Percentage change in age-standardised rates between |
| Attention-deficit/hyperactivity disorder                   | 63.2<br>(56.6 to 70.6)                        | 4.0<br>(3.5 to 4.7)                             | 0.8<br>(0.5 to 1.2)                   | 39.4<br>(29.0 to 49.5)                            | 0.6<br>(-6.6 to 7.2)                                |
| Conduct disorder                                           | 47.1<br>(38.5 to 56.1)                        | 17.0<br>(13.6 to 20.5)                          | 5.7<br>(3.5 to 8.7)                   | 41.9<br>(32.4 to 51.6)                            | 0.9<br>(-5.8 to 7.9)                                |
| Idiopathic developmental intellectual disability           | 131.6<br>(83.3 to 180.3)                      | --                                              | 5.4<br>(2.7 to 9.2)                   | 27.0<br>(18.1 to 35.6)                            | -7.9<br>(-14.5 to -2.1)                             |
| Other mental and substance use disorders                   | 63.6<br>(55.6 to 73.7)                        | 3.1<br>(2.7 to 3.6)                             | 4.7<br>(3.2 to 6.7)                   | 41.3<br>(33.5 to 49.2)                            | 0.7<br>(-4.0 to 5.6)                                |
| <b>Diabetes, urogenital, blood, and endocrine diseases</b> | <b>2,244.6</b><br><b>(2,205.6 to 2,281.3)</b> | <b>486.0†</b><br><b>(453.4 to 519.5)</b>        | <b>29.4</b><br><b>(20.9 to 39.9)</b>  | <b>40.3</b><br><b>(36.4 to 44.5)</b>              | <b>2.0</b><br><b>(-0.7 to 4.8)</b>                  |
| Diabetes mellitus                                          | 97.5<br>(87.6 to 108.1)                       | 6.5<br>(5.9 to 7.2)                             | 6.8<br>(4.6 to 9.3)                   | 53.5<br>(45.0 to 62.9)                            | 8.9<br>(2.9 to 15.4)                                |
| Acute glomerulonephritis                                   | < 0.05<br>(< 0.05 to < 0.05)                  | 0.6<br>(0.5 to 0.7)                             | < 0.05<br>(< 0.05 to < 0.05)          | 38.6<br>(33.1 to 44.2)                            | 0.4<br>(-3.4 to 4.1)                                |
| Chronic kidney disease                                     | 231.5<br>(208.6 to 257.4)                     | 17.7<br>(15.7 to 19.9)                          | 5.7<br>(4.1 to 7.4)                   | 48.0<br>(39.7 to 56.9)                            | 3.8<br>(-1.2 to 9.3)                                |
| Chronic kidney disease due to diabetes mellitus            | 71.6<br>(60.4 to 85.1)                        | 5.1<br>(4.2 to 6.2)                             | 1.6<br>(1.2 to 2.2)                   | 50.9<br>(37.8 to 65.4)                            | 4.7<br>(-3.3 to 12.8)                               |
| Chronic kidney disease due to hypertension                 | 49.9<br>(42.9 to 57.0)                        | 4.6<br>(3.9 to 5.4)                             | 1.0<br>(0.7 to 1.3)                   | 48.2<br>(33.3 to 66.2)                            | 3.5<br>(-6.1 to 13.9)                               |
| Chronic kidney disease due to glomerulonephritis           | 47.0<br>(40.3 to 53.7)                        | 2.8<br>(2.2 to 3.5)                             | 1.5<br>(1.0 to 2.0)                   | 48.6<br>(34.7 to 64.7)                            | 5.2<br>(-2.9 to 14.6)                               |
| Chronic kidney disease due to other causes                 | 63.0<br>(52.5 to 74.4)                        | 5.2<br>(4.3 to 6.1)                             | 1.6<br>(1.1 to 2.1)                   | 44.3<br>(31.0 to 58.7)                            | 2.0<br>(-5.6 to 10.4)                               |
| Urinary diseases and male infertility                      | 85.2<br>(78.0 to 92.7)                        | 282.4†<br>(253.9 to 314.0)                      | 1.8<br>(1.1 to 2.6)                   | 38.7<br>(29.6 to 48.3)                            | -1.0<br>(-7.1 to 6.2)                               |
| Interstitial nephritis and urinary tract infections        | 4.9<br>(4.3 to 5.5)                           | 254.7<br>(225.4 to 286.0)                       | 0.2<br>(0.1 to 0.2)                   | 34.5<br>(16.3 to 56.8)                            | -0.8<br>(-12.7 to 12.7)                             |
| Urolithiasis                                               | 0.8<br>(0.8 to 1.0)                           | 22.7<br>(20.0 to 26.0)                          | 0.1<br>(< 0.05 to 0.1)                | 43.0<br>(34.3 to 53.7)                            | 2.0<br>(-5.0 to 10.3)                               |
| Benign prostatic hyperplasia                               | 38.4<br>(32.1 to 44.6)                        | 5.0<br>(4.2 to 5.9)                             | 1.2<br>(0.8 to 1.8)                   | 40.6<br>(28.6 to 54.0)                            | -0.6<br>(-8.0 to 7.6)                               |
| Male infertility                                           | 38.8<br>(34.5 to 43.7)                        | --                                              | 0.2<br>(0.1 to 0.4)                   | 44.0<br>(31.8 to 56.5)                            | 0.9<br>(-7.4 to 9.7)                                |
| Other urinary diseases                                     | --                                            | --                                              | 0.1<br>(0.1 to 0.1)                   | 10.8<br>(-1.2 to 24.7)                            | -17.0<br>(-24.5 to -9.2)                            |
| Gynecological diseases                                     | 467.0<br>(442.8 to 492.8)                     | 175.6†<br>(161.3 to 191.1)                      | 5.4<br>(3.6 to 7.7)                   | 34.0<br>(27.7 to 40.3)                            | -5.0<br>(-8.9 to -1.2)                              |
| Uterine fibroids                                           | 33.7<br>(29.7 to 38.0)                        | 4.1<br>(3.6 to 4.8)                             | 0.6<br>(0.4 to 1.0)                   | 33.6<br>(22.7 to 43.4)                            | -7.1<br>(-14.5 to -0.5)                             |
| Polycystic ovarian syndrome                                | 4.1<br>(3.1 to 5.3)                           | 10.1<br>(7.1 to 13.4)                           | < 0.05<br>(< 0.05 to 0.1)             | 41.5<br>(23.2 to 61.5)                            | -0.0<br>(-12.2 to 13.7)                             |
| Female infertility                                         | 5.4<br>(3.3 to 8.3)                           | --                                              | < 0.05<br>(< 0.05 to 0.1)             | 119.3<br>(44.8 to 214.1)                          | 42.6<br>(-0.7 to 100.9)                             |
| Endometriosis                                              | 0.9<br>(0.7 to 1.1)                           | 3.6<br>(2.9 to 4.5)                             | 0.1<br>(0.1 to 0.1)                   | 38.2<br>(1.6 to 88.0)                             | -0.5<br>(-24.4 to 31.6)                             |
| Genital prolapse                                           | 227.7<br>(200.2 to 254.8)                     | 21.1<br>(17.6 to 25.1)                          | 0.7<br>(0.4 to 1.3)                   | 30.3<br>(21.9 to 39.8)                            | -7.5<br>(-13.8 to -0.3)                             |
| Premenstrual syndrome                                      | 198.0<br>(178.3 to 216.3)                     | 74.9<br>(67.0 to 82.6)                          | 1.6<br>(1.0 to 2.6)                   | 29.9<br>(16.9 to 43.8)                            | -6.9<br>(-15.2 to 2.2)                              |
| Other gynecological diseases                               | 66.7<br>(57.2 to 77.2)                        | 61.8<br>(50.7 to 74.6)                          | 2.3<br>(1.5 to 3.2)                   | 37.7<br>(28.2 to 47.4)                            | -2.0<br>(-8.5 to 4.6)                               |
| Hemoglobinopathies and hemolytic anaemias                  | 1,798.6<br>(1,758.9 to 1,836.5)               | --                                              | 8.2<br>(5.4 to 11.8)                  | 31.6<br>(23.4 to 40.6)                            | -2.6<br>(-8.3 to 2.8)                               |
| Thalassemias                                               | 0.6<br>(0.6 to 0.7)                           | --                                              | < 0.05<br>(< 0.05 to 0.1)             | 24.8<br>(-7.8 to 68.0)                            | -0.4<br>(-26.1 to 33.2)                             |
| Thalassaemias trait                                        | 355.9<br>(332.9 to 379.8)                     | --                                              | 4.9<br>(3.2 to 7.0)                   | 30.4<br>(21.4 to 40.7)                            | -2.0<br>(-8.3 to 4.7)                               |
| Sickle cell disorders                                      | 4.0<br>(2.5 to 9.3)                           | --                                              | 0.3<br>(0.2 to 0.7)                   | 44.2<br>(21.6 to 69.8)                            | 10.4<br>(-5.8 to 28.5)                              |
| Sickle cell trait                                          | 561.4<br>(527.2 to 601.4)                     | --                                              | 1.8<br>(1.2 to 2.6)                   | 38.2<br>(26.6 to 49.7)                            | 3.3<br>(-4.2 to 10.8)                               |
| G6PD deficiency                                            | 401.3<br>(370.0 to 439.7)                     | --                                              | < 0.05<br>(< 0.05 to < 0.05)          | 24.2<br>(8.9 to 41.8)                             | -11.4<br>(-19.9 to -1.3)                            |
| G6PD trait                                                 | 753.5<br>(743.9 to 765.2)                     | --                                              | < 0.05<br>(< 0.05 to < 0.05)          | 43.4<br>(31.1 to 56.5)                            | 7.1<br>(-0.8 to 15.0)                               |
| Other hemoglobinopathies and hemolytic anaemias            | 43.3<br>(41.3 to 45.4)                        | --                                              | 1.1<br>(0.7 to 1.6)                   | 24.0<br>(12.2 to 37.6)                            | -15.1<br>(-21.5 to -8.5)                            |
| Endocrine, metabolic, blood, and immune disorders          | 53.3<br>(51.1 to 55.7)                        | 3.2<br>(2.9 to 3.5)                             | 1.6<br>(1.1 to 2.3)                   | 36.3<br>(25.8 to 47.3)                            | 0.4<br>(-5.4 to 6.6)                                |
| <b>Musculoskeletal disorders</b>                           | <b>462.7</b><br><b>(437.8 to 487.5)</b>       | <b>225.6</b><br><b>(203.4 to 248.8)</b>         | <b>50.1</b><br><b>(35.6 to 65.8)</b>  | <b>42.2</b><br><b>(38.1 to 46.7)</b>              | <b>0.2</b><br><b>(-2.2 to 3.0)</b>                  |
| Rheumatoid arthritis                                       | 4.5<br>(3.9 to 5.1)                           | 0.3<br>(0.3 to 0.3)                             | 1.1<br>(0.7 to 1.4)                   | 47.2<br>(32.1 to 64.0)                            | 4.7<br>(-4.2 to 14.7)                               |
| Osteoarthritis                                             | 85.6<br>(80.1 to 91.8)                        | 5.0<br>(4.7 to 5.4)                             | 5.2<br>(3.7 to 7.0)                   | 46.9<br>(41.1 to 52.2)                            | 3.4<br>(-0.2 to 6.9)                                |
| Low back and neck pain                                     | 327.5<br>(305.0 to 353.4)                     | 146.9<br>(130.7 to 164.4)                       | 37.2<br>(26.2 to 49.0)                | 39.8<br>(35.1 to 45.2)                            | -1.2<br>(-4.3 to 2.1)                               |
| Low back pain                                              | 249.6<br>(220.9 to 284.9)                     | 124.2<br>(108.3 to 142.2)                       | 27.8<br>(19.5 to 37.0)                | 38.7<br>(32.8 to 45.7)                            | -1.8<br>(-5.7 to 2.7)                               |
| Neck pain                                                  | 94.7<br>(81.6 to 109.2)                       | 22.8<br>(19.6 to 26.7)                          | 9.4<br>(6.3 to 13.2)                  | 43.2<br>(39.4 to 47.1)                            | 0.6<br>(-1.7 to 2.8)                                |
| Gout                                                       | 9.9<br>(8.7 to 11.1)                          | 2.0<br>(1.8 to 2.3)                             | 0.3<br>(0.2 to 0.4)                   | 43.3<br>(23.1 to 68.7)                            | 0.8<br>(-12.0 to 15.7)                              |
| Other musculoskeletal disorders                            | 73.7<br>(54.6 to 93.1)                        | 71.2<br>(57.0 to 87.2)                          | 6.3<br>(3.8 to 9.5)                   | 52.8<br>(37.7 to 74.1)                            | 4.8<br>(-4.2 to 17.2)                               |
| <b>Other non-communicable diseases</b>                     | <b>3,259.7</b><br><b>(3,168.3 to 3,346.7)</b> | <b>9,260.7†</b><br><b>(8,320.5 to 10,226.9)</b> | <b>80.7</b><br><b>(54.6 to 113.8)</b> | <b>36.2</b><br><b>(34.0 to 38.3)</b>              | <b>-1.5</b><br><b>(-2.8 to -0.2)</b>                |
| Congenital anomalies                                       | 51.9<br>(45.3 to 60.6)                        | --                                              | 7.4<br>(5.3 to 10.0)                  | 29.1<br>(20.7 to 37.6)                            | -4.2<br>(-10.1 to 2.0)                              |
| Neural tube defects                                        | 6.5<br>(5.8 to 7.3)                           | --                                              | 1.9<br>(1.4 to 2.6)                   | 31.8<br>(16.5 to 48.4)                            | -2.7<br>(-13.1 to 9.2)                              |
| Congenital heart anomalies                                 | 13.6<br>(11.2 to 16.1)                        | --                                              | 0.7<br>(0.3 to 1.1)                   | 28.5<br>(13.0 to 46.1)                            | 0.6<br>(-10.6 to 13.9)                              |
| Orofacial clefts                                           | 1.2<br>(1.1 to 1.4)                           | --                                              | < 0.05<br>(< 0.05 to < 0.05)          | 30.8<br>(16.8 to 45.9)                            | -2.9<br>(-13.2 to 8.4)                              |
| Down's syndrome                                            | 0.7<br>(0.6 to 0.9)                           | --                                              | 0.1<br>(< 0.05 to 0.1)                | 35.4<br>(26.0 to 47.3)                            | 0.6<br>(-6.3 to 9.3)                                |
| Turner syndrome                                            | 2.6<br>(2.2 to 3.1)                           | --                                              | < 0.05<br>(< 0.05 to 0.1)             | 27.3<br>(-7.5 to 77.3)                            | -4.7<br>(-29.4 to 31.0)                             |
| Klinefelter syndrome                                       | 2.6<br>(2.2 to 3.1)                           | --                                              | < 0.05<br>(< 0.05 to < 0.05)          | 34.4<br>(3.0 to 73.2)                             | 0.1<br>(-21.7 to 29.2)                              |



| Cause                                         | Prevalence in thousands (95% UI)        | Incidence in thousands (95% UI)          | YLDs in thousands (95% UI)           |                                                   |                                                     |
|-----------------------------------------------|-----------------------------------------|------------------------------------------|--------------------------------------|---------------------------------------------------|-----------------------------------------------------|
|                                               | 2016 counts                             | 2016 counts                              | 2016 counts                          | Percentage change in counts between 2006 and 2016 | Percentage change in age-standardised rates between |
| Other chromosomal abnormalities               | 0.8<br>(0.7 to 1.0)                     | --                                       | 0.2<br>(0.1 to 0.2)                  | 25.8<br>(-13.7 to 82.0)                           | -0.1<br>(-29.9 to 42.6)                             |
| Congenital musculoskeletal and limb anomalies | 4.5<br>(3.9 to 5.1)                     | --                                       | 0.7<br>(0.4 to 0.9)                  | 37.5<br>(19.2 to 57.6)                            | 0.1<br>(-11.6 to 12.9)                              |
| Urogenital congenital anomalies               | 3.5<br>(3.0 to 4.0)                     | --                                       | 0.1<br>(< 0.05 to 0.1)               | 29.9<br>(17.2 to 44.5)                            | -1.5<br>(-9.9 to 8.4)                               |
| Digestive congenital anomalies                | 4.6<br>(4.0 to 5.1)                     | --                                       | 0.2<br>(0.1 to 0.3)                  | 36.2<br>(12.0 to 63.0)                            | 0.7<br>(-14.6 to 18.4)                              |
| Other congenital anomalies                    | 21.4<br>(14.2 to 32.0)                  | --                                       | 3.6<br>(2.3 to 5.4)                  | 26.1<br>(15.0 to 37.8)                            | -6.9<br>(-14.8 to 1.5)                              |
| Skin and subcutaneous diseases                | 1,529.1<br>(1,468.2 to 1,599.6)         | 3,630.0<br>(3,321.8 to 3,973.9)          | 35.6<br>(23.2 to 52.3)               | 39.2<br>(36.1 to 42.1)                            | 2.0<br>(0.1 to 3.8)                                 |
| Dermatitis                                    | 213.6<br>(177.5 to 254.5)               | 200.8<br>(175.5 to 232.5)                | 8.4<br>(4.8 to 14.1)                 | 34.8<br>(28.9 to 40.2)                            | 0.3<br>(-3.4 to 3.8)                                |
| Psoriasis                                     | 22.6<br>(21.2 to 24.1)                  | 3.6<br>(3.4 to 3.8)                      | 2.0<br>(1.4 to 2.6)                  | 50.5<br>(33.9 to 68.2)                            | 8.2<br>(-1.0 to 18.2)                               |
| Cellulitis                                    | 1.6<br>(1.5 to 1.8)                     | 28.1<br>(26.1 to 30.3)                   | 0.1<br>(0.1 to 0.1)                  | 38.4<br>(13.2 to 68.1)                            | 2.0<br>(-16.3 to 24.2)                              |
| Pyoderma                                      | 24.6<br>(23.4 to 25.9)                  | 486.7<br>(462.5 to 511.2)                | 0.1<br>(0.1 to 0.3)                  | 36.3<br>(27.8 to 45.1)                            | 1.7<br>(-3.5 to 7.0)                                |
| Scabies                                       | 81.8<br>(65.2 to 104.0)                 | 253.0<br>(202.5 to 321.4)                | 2.1<br>(1.1 to 3.5)                  | 31.7<br>(24.5 to 39.7)                            | -2.6<br>(-7.5 to 2.4)                               |
| Fungal skin diseases                          | 654.6<br>(551.5 to 771.9)               | 1,846.7<br>(1,555.5 to 2,170.2)          | 3.7<br>(1.4 to 8.0)                  | 36.4<br>(34.5 to 38.2)                            | 0.4<br>(-0.5 to 1.3)                                |
| Viral skin diseases                           | 134.3<br>(127.2 to 142.0)               | 186.2<br>(176.0 to 198.6)                | 4.1<br>(2.6 to 6.1)                  | 36.3<br>(31.4 to 41.4)                            | 0.2<br>(-3.0 to 3.5)                                |
| Acne vulgaris                                 | 416.2<br>(358.4 to 482.4)               | 301.6<br>(232.1 to 406.1)                | 10.6<br>(6.9 to 15.4)                | 46.6<br>(38.8 to 54.3)                            | 4.5<br>(-0.9 to 9.6)                                |
| Alopecia areata                               | 7.6<br>(7.2 to 8.1)                     | 13.6<br>(12.8 to 14.5)                   | 0.2<br>(0.2 to 0.4)                  | 38.6<br>(22.6 to 57.1)                            | -0.0<br>(-9.9 to 12.3)                              |
| Pruritus                                      | 31.2<br>(27.3 to 35.2)                  | 25.5<br>(22.7 to 28.7)                   | 0.3<br>(0.1 to 0.6)                  | 38.8<br>(30.4 to 47.9)                            | 1.0<br>(-4.2 to 6.6)                                |
| Urticaria                                     | 45.6<br>(38.8 to 53.6)                  | 82.0<br>(69.5 to 96.3)                   | 2.7<br>(1.7 to 4.0)                  | 32.6<br>(23.1 to 41.5)                            | 0.5<br>(-5.6 to 6.6)                                |
| Decubitus ulcer                               | 0.3<br>(0.3 to 0.4)                     | 1.2<br>(1.1 to 1.4)                      | 0.1<br>(< 0.05 to 0.1)               | 43.1<br>(32.9 to 56.2)                            | 5.0<br>(-7.7 to 21.1)                               |
| Other skin and subcutaneous diseases          | 179.8<br>(174.2 to 185.3)               | 200.9<br>(194.7 to 207.2)                | 1.0<br>(0.5 to 1.8)                  | 42.3<br>(37.6 to 47.0)                            | 3.4<br>(0.7 to 6.0)                                 |
| Sense organ diseases                          | 835.5<br>(801.6 to 870.5)               | 406.1†<br>(375.3 to 437.0)               | 29.8<br>(20.7 to 41.6)               | 33.4<br>(29.8 to 37.5)                            | -3.4<br>(-5.6 to -1.2)                              |
| Glaucoma                                      | 1.3<br>(1.0 to 1.6)                     | --                                       | 0.1<br>(0.1 to 0.2)                  | 41.9<br>(23.2 to 63.5)                            | 2.0<br>(-10.2 to 16.1)                              |
| Cataract                                      | 33.1<br>(28.1 to 38.4)                  | --                                       | 3.0<br>(2.0 to 4.3)                  | 41.3<br>(32.8 to 51.2)                            | -0.2<br>(-6.2 to 5.9)                               |
| Macular degeneration                          | 1.5<br>(1.1 to 2.1)                     | --                                       | 0.1<br>(0.1 to 0.2)                  | 44.1<br>(24.3 to 66.9)                            | 4.0<br>(-8.3 to 18.8)                               |
| Refraction and accommodation disorders        | 458.3<br>(415.7 to 510.6)               | --                                       | 7.7<br>(4.6 to 12.4)                 | 27.4<br>(20.7 to 35.3)                            | -8.1<br>(-12.9 to -2.8)                             |
| Age-related and other hearing loss            | 457.0<br>(426.2 to 491.7)               | --                                       | 15.1<br>(10.5 to 21.2)               | 33.2<br>(27.6 to 39.5)                            | -3.5<br>(-5.9 to -0.8)                              |
| Other vision loss                             | 13.0<br>(11.2 to 15.0)                  | --                                       | 1.3<br>(0.8 to 1.8)                  | 41.3<br>(29.2 to 55.6)                            | 1.3<br>(-6.1 to 9.3)                                |
| Other sense organ diseases                    | 81.8<br>(75.7 to 88.0)                  | 406.1<br>(375.3 to 437.0)                | 2.5<br>(1.6 to 3.8)                  | 41.5<br>(34.6 to 49.0)                            | 1.7<br>(-2.2 to 5.9)                                |
| Oral disorders                                | 2,268.3<br>(2,091.3 to 2,412.3)         | 5,224.6†<br>(4,383.9 to 6,102.8)         | 7.9<br>(4.4 to 13.7)                 | 40.9<br>(37.6 to 43.8)                            | 0.2<br>(-1.9 to 2.2)                                |
| Caries of deciduous teeth                     | 521.6<br>(405.0 to 634.5)               | 1,695.7<br>(1,137.7 to 2,358.6)          | 0.1<br>(0.1 to 0.2)                  | 26.3<br>(12.9 to 42.3)                            | -1.4<br>(-11.7 to 11.1)                             |
| Caries of permanent teeth                     | 1,367.1<br>(1,185.0 to 1,554.9)         | 3,468.5<br>(2,840.0 to 4,115.7)          | 0.8<br>(0.4 to 1.5)                  | 36.5<br>(30.2 to 43.5)                            | -2.4<br>(-6.3 to 1.9)                               |
| Periodontal disease                           | 479.2<br>(352.2 to 603.3)               | 56.3<br>(41.2 to 72.2)                   | 3.1<br>(1.2 to 6.7)                  | 41.9<br>(35.8 to 47.7)                            | -0.1<br>(-3.8 to 3.6)                               |
| Edentulism and severe tooth loss              | 65.8<br>(55.1 to 77.1)                  | 4.1<br>(3.4 to 4.8)                      | 1.8<br>(1.2 to 2.6)                  | 43.2<br>(36.3 to 50.8)                            | 1.2<br>(-2.7 to 5.4)                                |
| Other oral disorders                          | 69.7<br>(66.6 to 73.2)                  | --                                       | 2.0<br>(1.2 to 3.1)                  | 40.1<br>(34.7 to 44.9)                            | 0.4<br>(-2.8 to 3.3)                                |
| <b>Injuries</b>                               | <b>610.1</b><br><b>(537.0 to 707.2)</b> | <b>293.4†</b><br><b>(276.5 to 311.8)</b> | <b>24.0</b><br><b>(14.7 to 36.0)</b> | <b>28.2</b><br><b>(20.8 to 36.1)</b>              | <b>-3.2</b><br><b>(-6.6 to 0.2)</b>                 |
| <b>Transport injuries</b>                     | <b>46.6</b><br><b>(43.3 to 50.3)</b>    | <b>21.6</b><br><b>(19.2 to 24.2)</b>     | <b>2.8</b><br><b>(1.8 to 4.3)</b>    | <b>44.3</b><br><b>(37.8 to 50.6)</b>              | <b>3.8</b><br><b>(1.1 to 6.5)</b>                   |
| Road injuries                                 | 34.6<br>(32.5 to 37.0)                  | 17.6<br>(15.4 to 20.2)                   | 2.1<br>(1.3 to 3.1)                  | 45.3<br>(39.8 to 50.5)                            | 4.2<br>(1.6 to 6.6)                                 |
| Pedestrian road injuries                      | 7.9<br>(7.0 to 9.0)                     | 2.9<br>(2.3 to 3.5)                      | 0.5<br>(0.3 to 0.7)                  | 42.3<br>(36.6 to 47.9)                            | 2.3<br>(-0.2 to 4.7)                                |
| Cyclist road injuries                         | 6.6<br>(5.5 to 7.8)                     | 3.7<br>(2.9 to 4.7)                      | 0.4<br>(0.2 to 0.6)                  | 49.1<br>(42.5 to 55.7)                            | 7.5<br>(4.4 to 10.7)                                |
| Motorcyclist road injuries                    | 5.6<br>(4.8 to 6.7)                     | 1.9<br>(1.5 to 2.4)                      | 0.3<br>(0.2 to 0.5)                  | 39.9<br>(34.2 to 45.6)                            | -0.1<br>(-2.8 to 2.4)                               |
| Motor vehicle road injuries                   | 9.9<br>(8.5 to 11.2)                    | 6.0<br>(5.0 to 7.1)                      | 0.6<br>(0.4 to 1.0)                  | 46.1<br>(41.0 to 51.1)                            | 4.8<br>(2.5 to 7.2)                                 |
| Other road injuries                           | 4.7<br>(4.0 to 5.4)                     | 3.0<br>(2.4 to 3.9)                      | 0.3<br>(0.2 to 0.4)                  | 50.8<br>(45.3 to 56.3)                            | 7.8<br>(5.1 to 10.6)                                |
| Other transport injuries                      | 12.0<br>(10.0 to 14.7)                  | 4.1<br>(3.3 to 5.1)                      | 0.8<br>(0.5 to 1.2)                  | 41.6<br>(31.8 to 52.6)                            | 2.6<br>(-1.8 to 7.1)                                |
| <b>Unintentional injuries</b>                 | <b>391.9</b><br><b>(362.9 to 422.6)</b> | <b>262.4</b><br><b>(245.4 to 280.3)</b>  | <b>14.9</b><br><b>(9.8 to 21.1)</b>  | <b>43.4</b><br><b>(35.4 to 51.6)</b>              | <b>3.3</b><br><b>(-0.0 to 6.5)</b>                  |
| Falls                                         | 140.3<br>(122.3 to 159.2)               | 87.7<br>(75.4 to 102.9)                  | 6.2<br>(4.2 to 8.7)                  | 46.4<br>(37.7 to 55.8)                            | 4.5<br>(1.1 to 7.7)                                 |
| Drowning                                      | 1.6<br>(1.4 to 1.9)                     | 0.5<br>(0.4 to 0.6)                      | 0.1<br>(0.1 to 0.2)                  | 35.6<br>(25.9 to 45.8)                            | -1.5<br>(-5.8 to 2.8)                               |
| Fire, heat, and hot substances                | 40.4<br>(33.9 to 49.3)                  | 7.6<br>(6.0 to 9.3)                      | 1.2<br>(0.8 to 1.8)                  | 41.5<br>(28.4 to 57.3)                            | 2.5<br>(-3.6 to 9.7)                                |
| Poisonings                                    | 1.4<br>(1.1 to 1.6)                     | 2.4<br>(1.8 to 3.1)                      | 0.1<br>(0.1 to 0.2)                  | 49.4<br>(36.0 to 64.1)                            | 8.1<br>(0.6 to 16.0)                                |
| Exposure to mechanical forces                 | 64.1<br>(55.1 to 77.6)                  | 34.5<br>(29.0 to 40.2)                   | 1.8<br>(1.1 to 2.7)                  | 43.0<br>(36.4 to 50.1)                            | 2.6<br>(-0.4 to 5.7)                                |
| Unintentional firearm injuries                | 3.6<br>(3.0 to 4.4)                     | 1.3<br>(1.0 to 1.8)                      | 0.2<br>(0.1 to 0.3)                  | 44.9<br>(37.8 to 51.8)                            | 3.0<br>(-0.2 to 6.3)                                |
| Unintentional suffocation                     | 5.8<br>(4.1 to 7.7)                     | 1.9<br>(1.3 to 2.6)                      | 0.2<br>(0.1 to 0.3)                  | 40.0<br>(27.7 to 54.0)                            | 2.1<br>(-3.7 to 8.9)                                |
| Other exposure to mechanical forces           | 54.7<br>(46.0 to 67.4)                  | 31.4<br>(26.2 to 36.6)                   | 1.4<br>(0.9 to 2.1)                  | 43.2<br>(37.0 to 49.9)                            | 2.6<br>(-0.1 to 5.6)                                |

| Cause                                                                               | Prevalence in thousands (95% UI)        | Incidence in thousands (95% UI)                       | YLDs in thousands (95% UI)           |                                                   |                                                     |
|-------------------------------------------------------------------------------------|-----------------------------------------|-------------------------------------------------------|--------------------------------------|---------------------------------------------------|-----------------------------------------------------|
|                                                                                     | 2016 counts                             | 2016 counts                                           | 2016 counts                          | Percentage change in counts between 2006 and 2016 | Percentage change in age-standardised rates between |
| Adverse effects of medical treatment                                                | 1.5<br>(1.2 to 1.8)                     | 19.2<br>(16.6 to 22.1)                                | 0.2<br>(0.1 to 0.3)                  | 24.7<br>(18.0 to 32.2)                            | -4.1<br>(-7.9 to -0.1)                              |
| Animal contact                                                                      | 28.7<br>(25.1 to 33.5)                  | 47.1<br>(39.2 to 55.5)                                | 1.0<br>(0.7 to 1.4)                  | 43.8<br>(36.6 to 51.3)                            | 1.8<br>(-2.2 to 5.7)                                |
| Venomous animal contact                                                             | 10.2<br>(8.4 to 12.3)                   | 18.7<br>(14.6 to 23.7)                                | 0.6<br>(0.4 to 0.9)                  | 46.1<br>(35.5 to 57.3)                            | 3.8<br>(-2.0 to 9.8)                                |
| Non-venomous animal contact                                                         | 18.5<br>(15.4 to 22.6)                  | 28.4<br>(23.1 to 34.1)                                | 0.4<br>(0.2 to 0.5)                  | 39.8<br>(34.6 to 45.3)                            | -1.2<br>(-4.2 to 1.8)                               |
| Foreign body                                                                        | 31.9<br>(25.7 to 38.5)                  | 25.5<br>(22.0 to 29.6)                                | 1.4<br>(0.9 to 2.2)                  | 36.0<br>(26.3 to 46.2)                            | -0.3<br>(-4.8 to 4.3)                               |
| Pulmonary aspiration and foreign body in airway                                     | 18.7<br>(13.8 to 25.3)                  | 9.9<br>(8.0 to 12.4)                                  | 0.9<br>(0.6 to 1.4)                  | 31.9<br>(22.1 to 42.7)                            | -2.7<br>(-7.2 to 2.1)                               |
| Foreign body in eyes                                                                | 1.7<br>(0.9 to 2.6)                     | 9.3<br>(7.0 to 12.5)                                  | 0.1<br>( $< 0.05$ to 0.2)            | 44.6<br>(39.4 to 50.1)                            | 4.7<br>(1.8 to 7.9)                                 |
| Foreign body in other body part                                                     | 11.5<br>(9.1 to 15.1)                   | 6.4<br>(5.1 to 7.7)                                   | 0.4<br>(0.2 to 0.6)                  | 44.5<br>(33.6 to 56.7)                            | 4.6<br>(-0.8 to 10.1)                               |
| Environmental heat and cold exposure                                                | 27.6<br>(23.3 to 32.5)                  | 10.8<br>(8.8 to 13.1)                                 | 1.2<br>(0.7 to 1.8)                  | 39.5<br>(31.1 to 47.9)                            | 0.0<br>(-3.6 to 3.4)                                |
| Other unintentional injuries                                                        | 54.4<br>(42.8 to 69.9)                  | 27.0<br>(22.3 to 32.4)                                | 1.6<br>(1.0 to 2.4)                  | 46.4<br>(37.5 to 55.4)                            | 6.7<br>(2.9 to 10.2)                                |
| <b>Self-harm and interpersonal violence</b>                                         | <b>143.8</b><br><b>(125.8 to 163.5)</b> | <b>9.4†</b><br><b>(8.0 to 11.0)</b>                   | <b>1.8</b><br><b>(1.2 to 2.4)</b>    | <b>28.1</b><br><b>(22.5 to 33.4)</b>              | <b>-7.0</b><br><b>(-10.5 to -3.7)</b>               |
| Self-harm                                                                           | 2.3<br>(2.0 to 2.6)                     | 1.4<br>(1.2 to 1.7)                                   | 0.1<br>(0.1 to 0.2)                  | 51.3<br>(46.3 to 56.8)                            | 6.7<br>(4.1 to 9.2)                                 |
| Self-harm by firearm                                                                | 0.2<br>(0.2 to 0.2)                     | 0.1<br>(0.1 to 0.1)                                   | $< 0.05$<br>( $< 0.05$ to $< 0.05$ ) | 36.2<br>(30.5 to 43.5)                            | -5.1<br>(-8.0 to -1.5)                              |
| Self-harm by other specified means                                                  | 2.1<br>(1.8 to 2.4)                     | 1.3<br>(1.1 to 1.6)                                   | 0.1<br>(0.1 to 0.2)                  | 52.4<br>(47.4 to 58.1)                            | 7.7<br>(5.0 to 10.4)                                |
| Interpersonal violence                                                              | 141.5<br>(123.5 to 161.3)               | 8.0†<br>(6.6 to 9.5)                                  | 1.6<br>(1.1 to 2.2)                  | 26.5<br>(20.8 to 32.1)                            | -8.4<br>(-12.1 to -4.9)                             |
| Assault by firearm                                                                  | 0.6<br>(0.5 to 0.7)                     | 0.2<br>(0.2 to 0.3)                                   | $< 0.05$<br>( $< 0.05$ to $< 0.05$ ) | 39.9<br>(32.6 to 47.9)                            | -0.8<br>(-4.4 to 3.1)                               |
| Assault by sharp object                                                             | 4.8<br>(3.9 to 5.7)                     | 2.7<br>(2.0 to 3.4)                                   | 0.2<br>(0.1 to 0.3)                  | 44.4<br>(37.3 to 51.5)                            | 3.0<br>(-0.6 to 6.5)                                |
| Sexual violence                                                                     | 129.5<br>(112.2 to 149.1)               | --                                                    | 1.1<br>(0.8 to 1.6)                  | 19.2<br>(11.3 to 26.6)                            | -14.7<br>(-19.9 to -9.6)                            |
| Assault by other means                                                              | 6.7<br>(5.7 to 8.0)                     | 5.0<br>(4.0 to 6.2)                                   | 0.3<br>(0.2 to 0.5)                  | 49.2<br>(42.1 to 56.3)                            | 5.5<br>(1.9 to 8.9)                                 |
| <b>Forces of nature, conflict and terrorism, and executions and police conflict</b> | <b>157.3</b><br><b>(90.8 to 251.1)</b>  | <b>0.1†</b><br><b>(<math>&lt; 0.05</math> to 0.1)</b> | <b>4.5</b><br><b>(1.7 to 8.4)</b>    | <b>-10.1</b><br><b>(-20.8 to -1.0)</b>            | <b>-22.1</b><br><b>(-29.8 to -16.3)</b>             |
| Exposure to forces of nature                                                        | 0.1<br>( $< 0.05$ to 0.3)               | --                                                    | $< 0.05$<br>( $< 0.05$ to $< 0.05$ ) | -22.6<br>(-25.3 to -19.0)                         | -34.5<br>(-36.6 to -31.5)                           |
| Conflict and terrorism                                                              | 157.0<br>(90.7 to 250.7)                | --                                                    | 4.5<br>(1.7 to 8.4)                  | -10.1<br>(-20.9 to -1.0)                          | -22.1<br>(-29.9 to -16.3)                           |
| Executions and police conflict                                                      | 0.2<br>(0.1 to 0.4)                     | 0.1<br>( $< 0.05$ to 0.1)                             | $< 0.05$<br>( $< 0.05$ to $< 0.05$ ) | 38.5<br>(20.0 to 61.5)                            | 4.9<br>(-15.0 to 24.3)                              |
| <b>Impairments</b>                                                                  | --                                      | --                                                    | --                                   | --                                                | --                                                  |
| Anaemia                                                                             | 1,921.4<br>(1,837.9 to 2,009.4)         | --                                                    | 64.3<br>(43.6 to 90.8)               | 19.7<br>(12.0 to 26.8)                            | -12.8<br>(-19.0 to -7.6)                            |
| Developmental intellectual disability                                               | 201.2<br>(152.2 to 249.6)               | --                                                    | 17.6<br>(12.6 to 23.7)               | 38.3<br>(28.7 to 51.7)                            | 0.7<br>(-5.8 to 10.1)                               |
| Epilepsy                                                                            | 44.6<br>(26.4 to 66.5)                  | --                                                    | 15.3<br>(7.9 to 25.6)                | 48.6<br>(-27.1 to 213.8)                          | 8.0<br>(-46.1 to 129.8)                             |
| Guillain-Barre syndrome                                                             | $< 0.05$<br>( $< 0.05$ to $< 0.05$ )    | --                                                    | $< 0.05$<br>( $< 0.05$ to $< 0.05$ ) | 37.3<br>(35.6 to 38.9)                            | 0.1<br>(0.0 to 0.1)                                 |
| Hearing loss                                                                        | 579.1<br>(547.4 to 613.9)               | --                                                    | 21.7<br>(15.1 to 29.5)               | 30.1<br>(26.2 to 34.2)                            | -4.5<br>(-6.7 to -2.4)                              |
| Heart failure                                                                       | 11.7<br>(10.3 to 13.1)                  | --                                                    | 1.2<br>(0.9 to 1.6)                  | 37.7<br>(27.4 to 48.6)                            | -1.8<br>(-9.3 to 6.2)                               |
| Infertility                                                                         | 109.2<br>(99.5 to 120.0)                | --                                                    | 0.6<br>(0.2 to 1.2)                  | 45.0<br>(34.6 to 55.8)                            | 0.9<br>(-6.1 to 8.4)                                |
| Pelvic inflammatory disease                                                         | 4.5<br>(3.7 to 5.4)                     | --                                                    | 0.6<br>(0.4 to 0.8)                  | 35.3<br>(16.3 to 58.0)                            | -3.6<br>(-16.6 to 11.2)                             |
| Vision loss                                                                         | 536.1<br>(493.2 to 591.1)               | --                                                    | 16.4<br>(11.4 to 22.8)               | 36.4<br>(28.3 to 48.1)                            | -3.6<br>(-7.8 to 1.5)                               |

We did not calculate incidence for the nine impairments, certain NTDs, and causes with only birth prevalence. Blank cells mean that no estimate is available.

† Incidence for aggregate causes represents the sum of the incidence of the causes below the aggregate.

‡ Incidence estimates for stroke represent first-ever stroke only.

^ Incidence of HIV/AIDS represents new infections of HIV only and does not include new infections of Tuberculosis in HIV positive cases.

SR Table 14: Prevalence, incidence, and YLDs for 2016, percentage change of YLD counts and percentage change of age-standardised YLD rates between 2006 and 2016 by cause and impairments, for all ages, Libya.

| Cause                                                                                | Prevalence in thousands (95% UI)       | Incidence in thousands (95% UI)            | YLDs in thousands (95% UI)       |                                                   |                                                     |
|--------------------------------------------------------------------------------------|----------------------------------------|--------------------------------------------|----------------------------------|---------------------------------------------------|-----------------------------------------------------|
|                                                                                      | 2016 counts                            | 2016 counts                                | 2016 counts                      | Percentage change in counts between 2006 and 2016 | Percentage change in age-standardised rates between |
| <b>All causes</b>                                                                    | <b>5,913.9</b><br>(5,881.5 to 5,943.9) | <b>39,300.6†</b><br>(36,973.4 to 41,854.6) | <b>689.9</b><br>(509.7 to 893.5) | <b>13.0</b><br>(10.4 to 15.8)                     | <b>1.2</b><br>(-0.7 to 3.3)                         |
| <b>Communicable, maternal, neonatal, and nutritional disorders</b>                   | <b>3,808.0</b><br>(3,566.6 to 4,048.2) | <b>22,243.9†</b><br>(20,359.3 to 24,336.9) | <b>64.6</b><br>(45.2 to 91.4)    | <b>-1.0</b><br>(-8.3 to 8.1)                      | <b>0.6</b><br>(-6.5 to 9.5)                         |
| <b>HIV/AIDS and tuberculosis</b>                                                     | <b>2,213.4</b><br>(1,612.0 to 2,713.8) | <b>2.0†</b><br>(1.3 to 2.8)                | <b>0.4</b><br>(0.2 to 0.8)       | <b>16.8</b><br>(-15.6 to 70.1)                    | <b>7.7</b><br>(-19.1 to 49.6)                       |
| Tuberculosis                                                                         | 1,874.0<br>(1,278.3 to 2,482.3)        | 1.9†<br>(1.2 to 2.6)                       | 0.3<br>(0.2 to 0.5)              | 0.2<br>(-27.5 to 36.8)                            | -5.8<br>(-28.6 to 21.5)                             |
| Drug-susceptible tuberculosis                                                        | 0.9<br>(0.6 to 1.3)                    | 1.8<br>(1.2 to 2.6)                        | 0.3<br>(0.1 to 0.5)              | -0.5<br>(-29.2 to 35.4)                           | -6.5<br>(-30.0 to 20.2)                             |
| Multidrug-resistant tuberculosis without extensive drug resistance                   | < 0.05<br>(< 0.05 to 0.1)              | < 0.05<br>(< 0.05 to 0.1)                  | < 0.05<br>(< 0.05 to < 0.05)     | 54.9<br>(-77.8 to 1,039.6)                        | 44.2<br>(-79.0 to 934.6)                            |
| Extensively drug-resistant tuberculosis                                              | < 0.05<br>(< 0.05 to < 0.05)           | < 0.05<br>(< 0.05 to < 0.05)               | < 0.05<br>(< 0.05 to < 0.05)     | 251.7<br>(-49.6 to 2,486.2)                       | 227.6<br>(-52.4 to 2,248.9)                         |
| Latent tuberculosis infection                                                        | 1,873.1<br>(1,277.5 to 2,481.3)        | --                                         | --                               | --                                                | --                                                  |
| HIV/AIDS                                                                             | 0.9<br>(0.1 to 3.1)                    | 0.1 <sup>a</sup><br>(< 0.05 to 0.4)        | 0.1<br>(< 0.05 to 0.5)           | 70.9<br>(-4.7 to 188.9)                           | 55.4<br>(-13.8 to 176.0)                            |
| Drug-susceptible HIV/AIDS - Tuberculosis                                             | 0.1<br>(< 0.05 to 0.2)                 | 0.2<br>(0.1 to 0.3)                        | < 0.05<br>(< 0.05 to 0.1)        | 25.6<br>(7.3 to 48.6)                             | 19.2<br>(1.9 to 40.6)                               |
| Multidrug-resistant HIV/AIDS - Tuberculosis without extensive drug resistance        | < 0.05<br>(< 0.05 to < 0.05)           | < 0.05<br>(< 0.05 to < 0.05)               | < 0.05<br>(< 0.05 to < 0.05)     | 99.9<br>(-72.7 to 1,327.6)                        | 89.7<br>(-74.0 to 1,253.1)                          |
| Extensively drug-resistant HIV/AIDS - Tuberculosis                                   | < 0.05<br>(< 0.05 to < 0.05)           | < 0.05<br>(< 0.05 to < 0.05)               | < 0.05<br>(< 0.05 to < 0.05)     | 354.0<br>(-38.0 to 3,138.4)                       | 330.7<br>(-41.1 to 2,969.3)                         |
| HIV/AIDS resulting in other diseases                                                 | 0.8<br>(0.1 to 3.0)                    | 0.1<br>(< 0.05 to 0.4)                     | 0.1<br>(< 0.05 to 0.4)           | 96.4<br>(-43.4 to 303.5)                          | 74.0<br>(-52.1 to 300.0)                            |
| <b>Diarrhoea, lower respiratory infections, and other common infectious diseases</b> | <b>372.4</b><br>(351.7 to 395.1)       | <b>20,931.7†</b><br>(19,024.8 to 23,041.0) | <b>19.6</b><br>(13.7 to 26.8)    | <b>4.9</b><br>(1.3 to 8.9)                        | <b>6.7</b><br>(3.2 to 10.4)                         |
| Diarrhoeal diseases                                                                  | 77.2<br>(71.0 to 84.2)                 | 5,073.4<br>(4,654.8 to 5,531.1)            | 8.7<br>(5.9 to 12.0)             | 5.6<br>(-0.6 to 12.6)                             | 11.7<br>(5.4 to 18.7)                               |
| Intestinal infectious diseases                                                       | 0.1<br>(0.1 to 0.2)                    | 2.6†<br>(2.3 to 3.0)                       | < 0.05<br>(< 0.05 to < 0.05)     | -20.8<br>(-31.9 to -7.7)                          | -22.9<br>(-32.5 to -11.2)                           |
| Typhoid fever                                                                        | 0.1<br>(0.1 to 0.2)                    | 2.1<br>(1.9 to 2.5)                        | < 0.05<br>(< 0.05 to < 0.05)     | -20.7<br>(-32.5 to -6.8)                          | -22.9<br>(-33.2 to -10.3)                           |
| Paratyphoid fever                                                                    | < 0.05<br>(< 0.05 to < 0.05)           | 0.5<br>(0.4 to 0.6)                        | < 0.05<br>(< 0.05 to < 0.05)     | -14.9<br>(-29.2 to 0.8)                           | -18.6<br>(-30.8 to -4.8)                            |
| Other intestinal infectious diseases                                                 | --                                     | --                                         | < 0.05<br>(< 0.05 to < 0.05)     | -50.9<br>(-60.4 to -39.2)                         | -41.3<br>(-50.4 to -30.3)                           |
| Lower respiratory infections                                                         | 10.0<br>(9.1 to 11.1)                  | 416.7<br>(373.7 to 463.0)                  | 0.6<br>(0.4 to 0.9)              | 7.5<br>(-4.0 to 20.3)                             | 3.3<br>(-6.2 to 13.8)                               |
| Upper respiratory infections                                                         | 198.0<br>(173.9 to 225.0)              | 14,886.7<br>(13,004.2 to 17,024.5)         | 4.9<br>(2.9 to 7.7)              | -0.8<br>(-6.7 to 6.4)                             | -0.4<br>(-5.5 to 5.5)                               |
| Otitis media                                                                         | 78.6<br>(70.3 to 87.4)                 | 419.2<br>(336.7 to 522.5)                  | 2.2<br>(1.4 to 3.4)              | 1.9<br>(-5.5 to 10.4)                             | 4.7<br>(-2.5 to 12.5)                               |
| Meningitis                                                                           | 10.4<br>(9.1 to 11.7)                  | 1.6<br>(1.3 to 1.9)                        | 1.2<br>(0.8 to 1.6)              | 7.4<br>(-0.6 to 15.6)                             | 2.4<br>(-4.7 to 9.7)                                |
| Pneumococcal meningitis                                                              | 3.4<br>(2.9 to 4.0)                    | 0.2<br>(0.1 to 0.2)                        | 0.5<br>(0.3 to 0.6)              | -5.0<br>(-20.2 to 12.8)                           | -10.4<br>(-23.7 to 5.4)                             |
| H influenzae type B meningitis                                                       | 2.0<br>(1.6 to 2.6)                    | 0.2<br>(0.1 to 0.4)                        | 0.3<br>(0.2 to 0.4)              | -0.4<br>(-6.1 to 5.2)                             | -4.6<br>(-10.1 to 0.4)                              |
| Meningococcal infection                                                              | 1.8<br>(1.3 to 2.4)                    | 0.4<br>(0.3 to 0.6)                        | 0.2<br>(0.1 to 0.3)              | 11.1<br>(5.5 to 17.9)                             | 5.2<br>(-0.1 to 11.6)                               |
| Other meningitis                                                                     | 3.2<br>(2.4 to 4.1)                    | 0.7<br>(0.6 to 0.9)                        | 0.3<br>(0.2 to 0.4)              | 43.1<br>(29.4 to 61.1)                            | 38.7<br>(25.4 to 57.0)                              |
| Encephalitis                                                                         | 14.7<br>(10.3 to 21.0)                 | 6.9<br>(6.1 to 7.9)                        | 1.7<br>(1.2 to 2.2)              | 23.8<br>(9.1 to 40.2)                             | 11.7<br>(-0.3 to 24.9)                              |
| Diphtheria                                                                           | < 0.05<br>(< 0.05 to < 0.05)           | < 0.05<br>(< 0.05 to < 0.05)               | < 0.05<br>(< 0.05 to < 0.05)     | -24.6<br>(-58.2 to 36.5)                          | -25.8<br>(-57.2 to 30.9)                            |
| Whooping cough                                                                       | 0.3<br>(0.2 to 0.4)                    | 2.1<br>(1.6 to 2.8)                        | < 0.05<br>(< 0.05 to < 0.05)     | -39.7<br>(-59.2 to -12.8)                         | -11.9<br>(-40.1 to 25.7)                            |
| Tetanus                                                                              | < 0.05<br>(< 0.05 to < 0.05)           | < 0.05<br>(< 0.05 to < 0.05)               | < 0.05<br>(< 0.05 to < 0.05)     | 2.8<br>(-6.1 to 12.3)                             | 1.6<br>(-7.0 to 10.7)                               |
| Measles                                                                              | 0.1<br>(< 0.05 to 0.2)                 | 3.4<br>(1.2 to 7.7)                        | < 0.05<br>(< 0.05 to < 0.05)     | -24.5<br>(-36.7 to -9.7)                          | 2.9<br>(-14.3 to 24.0)                              |
| Varicella and herpes zoster                                                          | 5.4<br>(5.0 to 5.8)                    | 119.0<br>(113.2 to 124.2)                  | 0.2<br>(0.1 to 0.3)              | 13.2<br>(-1.4 to 31.9)                            | 0.2<br>(-10.7 to 12.4)                              |
| <b>Neglected tropical diseases and malaria</b>                                       | <b>1,023.1</b><br>(911.1 to 1,150.3)   | <b>266.5†</b><br>(223.2 to 315.2)          | <b>8.1</b><br>(4.1 to 14.8)      | <b>2.8</b><br>(-13.9 to 20.8)                     | <b>-8.0</b><br>(-21.7 to 7.7)                       |
| Malaria                                                                              | --                                     | --                                         | --                               | --                                                | --                                                  |
| Chagas disease                                                                       | --                                     | --                                         | --                               | --                                                | --                                                  |
| Leishmaniasis                                                                        | 3.9<br>(1.8 to 7.0)                    | 6.3<br>(1.7 to 13.9)                       | 0.2<br>(< 0.05 to 0.5)           | -39.1<br>(-86.3 to 75.7)                          | -42.4<br>(-87.5 to 68.3)                            |
| Visceral leishmaniasis                                                               | < 0.05<br>(< 0.05 to < 0.05)           | < 0.05<br>(< 0.05 to < 0.05)               | < 0.05<br>(< 0.05 to < 0.05)     | 46.1<br>(-38.9 to 238.2)                          | 19.0<br>(-52.7 to 197.8)                            |
| Cutaneous and mucocutaneous leishmaniasis                                            | 3.1<br>(0.8 to 6.9)                    | 6.3<br>(1.6 to 13.9)                       | 0.2<br>(< 0.05 to 0.5)           | -39.1<br>(-86.4 to 75.8)                          | -42.4<br>(-87.5 to 68.4)                            |
| African trypanosomiasis                                                              | --                                     | --                                         | --                               | --                                                | --                                                  |
| Schistosomiasis                                                                      | 906.8<br>(744.3 to 1,087.6)            | 260.0<br>(218.3 to 309.2)                  | 6.7<br>(3.0 to 12.6)             | 7.8<br>(-9.9 to 28.8)                             | -5.2<br>(-20.2 to 12.8)                             |
| Cysticercosis                                                                        | --                                     | --                                         | --                               | --                                                | --                                                  |
| Cystic echinococcosis                                                                | 1.1<br>(0.2 to 4.8)                    | 0.2<br>(< 0.05 to 0.9)                     | 0.1<br>(< 0.05 to 0.4)           | 3.1<br>(-88.9 to 919.4)                           | -6.9<br>(-88.1 to 707.2)                            |
| Lymphatic filariasis                                                                 | --                                     | --                                         | --                               | --                                                | --                                                  |
| Onchocerciasis                                                                       | --                                     | --                                         | --                               | --                                                | --                                                  |
| Trachoma                                                                             | 4.5<br>(3.1 to 6.3)                    | --                                         | 0.4<br>(0.2 to 0.6)              | -0.5<br>(-29.1 to 39.6)                           | -22.0<br>(-47.7 to 15.2)                            |
| Dengue                                                                               | --                                     | --                                         | --                               | --                                                | --                                                  |
| Yellow fever                                                                         | --                                     | --                                         | --                               | --                                                | --                                                  |
| Rabies                                                                               | < 0.05<br>(< 0.05 to < 0.05)           | < 0.05<br>(< 0.05 to < 0.05)               | < 0.05<br>(< 0.05 to < 0.05)     | -0.4<br>(-56.4 to 96.7)                           | -10.5<br>(-66.8 to 106.1)                           |
| Intestinal nematode infections                                                       | 96.1<br>(76.7 to 122.5)                | --                                         | < 0.05<br>(< 0.05 to 0.1)        | -0.7<br>(-42.3 to 65.9)                           | -8.4<br>(-46.7 to 53.9)                             |
| Ascariasis                                                                           | 56.2<br>(38.4 to 82.2)                 | --                                         | < 0.05<br>(< 0.05 to < 0.05)     | -5.1<br>(-61.6 to 136.5)                          | -8.5<br>(-63.8 to 135.4)                            |



| Cause                                                                   | Prevalence in thousands (95% UI)              | Incidence in thousands (95% UI)                   | YLDs in thousands (95% UI)              |                                                   |                                                     |
|-------------------------------------------------------------------------|-----------------------------------------------|---------------------------------------------------|-----------------------------------------|---------------------------------------------------|-----------------------------------------------------|
|                                                                         | 2016 counts                                   | 2016 counts                                       | 2016 counts                             | Percentage change in counts between 2006 and 2016 | Percentage change in age-standardised rates between |
| Trichuriasis                                                            | 37.9<br>(26.4 to 54.0)                        | --                                                | < 0.05<br>(< 0.05 to < 0.05)            | -6.5<br>(-73.0 to 208.6)                          | -11.4<br>(-75.2 to 200.2)                           |
| Hookworm disease                                                        | 4.3<br>(3.0 to 6.1)                           | --                                                | < 0.05<br>(< 0.05 to < 0.05)            | 5.8<br>(-41.6 to 86.8)                            | -7.4<br>(-46.7 to 57.5)                             |
| Food-borne trematodiasis                                                | --                                            | --                                                | --                                      | --                                                | --                                                  |
| Leprosy                                                                 | < 0.05<br>(< 0.05 to < 0.05)                  | < 0.05<br>(< 0.05 to < 0.05)                      | < 0.05<br>(< 0.05 to < 0.05)            | -10.8<br>(-27.8 to 37.8)                          | -27.9<br>(-40.7 to 11.7)                            |
| Ebola virus disease                                                     | --                                            | --                                                | --                                      | --                                                | --                                                  |
| Zika virus disease                                                      | --                                            | --                                                | --                                      | --                                                | --                                                  |
| Guinea worm disease                                                     | --                                            | --                                                | --                                      | --                                                | --                                                  |
| Other neglected tropical diseases                                       | 29.5<br>(22.4 to 38.2)                        | --                                                | 0.7<br>(0.4 to 1.1)                     | -16.4<br>(-41.3 to 13.3)                          | -1.9<br>(-29.2 to 32.4)                             |
| <b>Maternal disorders</b>                                               | <b>6.0</b><br><b>(4.4 to 7.7)</b>             | <b>54.1†</b><br><b>(47.5 to 61.3)</b>             | <b>0.4</b><br><b>(0.2 to 0.5)</b>       | <b>-14.4</b><br><b>(-41.3 to 23.7)</b>            | <b>-14.2</b><br><b>(-40.8 to 24.6)</b>              |
| Maternal haemorrhage                                                    | 0.8<br>(0.5 to 1.3)                           | 5.0<br>(3.2 to 7.3)                               | < 0.05<br>(< 0.05 to < 0.05)            | -43.9<br>(-62.9 to -13.8)                         | -43.2<br>(-62.5 to -12.4)                           |
| Maternal sepsis and other pregnancy related infections                  | 1.1<br>(0.7 to 1.6)                           | 9.3<br>(6.8 to 12.8)                              | < 0.05<br>(< 0.05 to 0.1)               | -41.1<br>(-73.1 to 28.7)                          | -40.0<br>(-72.5 to 30.7)                            |
| Maternal hypertensive disorders                                         | 4.1<br>(2.5 to 5.9)                           | 18.5<br>(14.7 to 22.1)                            | 0.2<br>(0.1 to 0.3)                     | 15.7<br>(-36.9 to 109.3)                          | 15.0<br>(-36.8 to 108.9)                            |
| Maternal obstructed labour and uterine rupture                          | 0.1<br>(< 0.05 to 0.1)                        | 4.1<br>(2.8 to 5.7)                               | < 0.05<br>(< 0.05 to < 0.05)            | -40.8<br>(-72.2 to 53.0)                          | -38.9<br>(-70.6 to 49.8)                            |
| Maternal abortion, miscarriage, and ectopic pregnancy                   | 0.1<br>(0.1 to 0.2)                           | 17.2<br>(12.9 to 22.1)                            | < 0.05<br>(< 0.05 to < 0.05)            | -41.2<br>(-72.1 to 27.3)                          | -43.4<br>(-73.0 to 24.3)                            |
| Other maternal disorders                                                | --                                            | --                                                | 0.1<br>(< 0.05 to 0.1)                  | -18.4<br>(-44.0 to 17.7)                          | -18.0<br>(-43.3 to 18.7)                            |
| <b>Neonatal disorders</b>                                               | <b>56.0</b><br><b>(44.9 to 80.4)</b>          | --                                                | <b>12.5</b><br><b>(7.5 to 24.2)</b>     | <b>-3.3</b><br><b>(-18.0 to 21.4)</b>             | <b>-2.1</b><br><b>(-16.8 to 22.8)</b>               |
| Neonatal preterm birth complications                                    | 41.3<br>(31.9 to 54.5)                        | --                                                | 5.4<br>(3.2 to 9.0)                     | 3.1<br>(-22.2 to 47.7)                            | 2.6<br>(-22.1 to 46.7)                              |
| Neonatal encephalopathy due to birth asphyxia and trauma                | 6.6<br>(3.4 to 11.4)                          | --                                                | 1.0<br>(0.3 to 2.2)                     | 45.5<br>(-2.3 to 290.1)                           | 44.5<br>(-1.2 to 280.2)                             |
| Neonatal sepsis and other neonatal infections                           | 11.2<br>(4.1 to 34.3)                         | --                                                | 4.8<br>(1.5 to 16.2)                    | -13.4<br>(-27.4 to 19.1)                          | -12.6<br>(-26.8 to 25.3)                            |
| Hemolytic disease and other neonatal jaundice                           | 3.5<br>(3.0 to 3.9)                           | --                                                | 1.0<br>(0.7 to 1.3)                     | 2.1<br>(-12.6 to 19.2)                            | 0.3<br>(-13.8 to 16.6)                              |
| Other neonatal disorders                                                | --                                            | --                                                | 0.3<br>(0.2 to 0.6)                     | -35.3<br>(-47.6 to -16.4)                         | -5.2<br>(-23.2 to 22.4)                             |
| <b>Nutritional deficiencies</b>                                         | <b>927.0</b><br><b>(797.1 to 1,048.0)</b>     | <b>138.1†</b><br><b>(87.0 to 205.2)</b>           | <b>18.5</b><br><b>(11.6 to 27.9)</b>    | <b>-7.0</b><br><b>(-23.8 to 11.8)</b>             | <b>1.6</b><br><b>(-15.6 to 21.5)</b>                |
| Protein-energy malnutrition                                             | 23.3<br>(17.1 to 31.0)                        | 10.8<br>(8.1 to 14.3)                             | 1.1<br>(0.7 to 1.7)                     | -36.4<br>(-55.8 to -10.9)                         | -7.1<br>(-35.1 to 30.2)                             |
| Iodine deficiency                                                       | 148.6<br>(115.8 to 185.3)                     | 3.6<br>(2.9 to 4.5)                               | 3.3<br>(2.0 to 5.1)                     | 49.6<br>(14.9 to 116.5)                           | 29.7<br>(2.8 to 76.7)                               |
| Vitamin A deficiency                                                    | 153.5<br>(90.5 to 231.9)                      | 123.6<br>(72.1 to 189.5)                          | 0.9<br>(0.6 to 1.4)                     | -7.8<br>(-21.9 to 8.5)                            | -2.6<br>(-16.5 to 13.2)                             |
| Iron-deficiency anaemia                                                 | 618.7<br>(484.5 to 771.3)                     | --                                                | 13.2<br>(7.3 to 21.1)                   | -11.8<br>(-31.9 to 13.9)                          | -2.6<br>(-24.0 to 25.3)                             |
| Other nutritional deficiencies                                          | --                                            | --                                                | < 0.05<br>(< 0.05 to 0.1)               | -36.2<br>(-56.3 to -9.4)                          | -7.5<br>(-36.3 to 30.4)                             |
| <b>Other communicable, maternal, neonatal, and nutritional diseases</b> | <b>1,237.5</b><br><b>(1,157.2 to 1,317.5)</b> | <b>851.6</b><br><b>(705.2 to 1,010.4)</b>         | <b>5.0</b><br><b>(3.1 to 7.9)</b>       | <b>3.1</b><br><b>(-4.8 to 11.7)</b>               | <b>-1.1</b><br><b>(-7.7 to 6.6)</b>                 |
| Sexually transmitted diseases excluding HIV                             | 964.2<br>(891.2 to 1,037.5)                   | 820.8<br>(675.1 to 977.9)                         | 4.3<br>(2.6 to 6.9)                     | 4.5<br>(-4.5 to 13.7)                             | -1.9<br>(-9.3 to 5.8)                               |
| Syphilis                                                                | 27.9<br>(15.5 to 47.4)                        | 22.0<br>(11.4 to 37.7)                            | 0.1<br>(< 0.05 to 0.1)                  | 26.0<br>(11.6 to 40.9)                            | -0.3<br>(-11.2 to 11.4)                             |
| Chlamydial infection                                                    | 62.5<br>(43.7 to 87.1)                        | 47.6<br>(33.6 to 66.7)                            | 0.4<br>(0.2 to 0.7)                     | -4.2<br>(-18.5 to 11.7)                           | -1.8<br>(-16.0 to 12.9)                             |
| Gonococcal infection                                                    | 171.3<br>(135.5 to 213.4)                     | 613.8<br>(470.7 to 779.2)                         | 2.2<br>(1.3 to 3.7)                     | 4.4<br>(-7.2 to 17.4)                             | -2.9<br>(-12.5 to 8.1)                              |
| Trichomoniasis                                                          | 75.6<br>(64.7 to 87.5)                        | 64.1<br>(54.5 to 74.5)                            | 0.1<br>(< 0.05 to 0.2)                  | 10.5<br>(0.3 to 22.0)                             | 5.9<br>(-2.7 to 15.1)                               |
| Genital herpes                                                          | 661.6<br>(562.3 to 774.0)                     | 43.1<br>(36.7 to 51.5)                            | 0.2<br>(0.1 to 0.4)                     | 13.8<br>(4.9 to 21.7)                             | 1.4<br>(-3.8 to 7.6)                                |
| Other sexually transmitted diseases                                     | 33.2<br>(26.4 to 40.2)                        | 30.3<br>(23.5 to 38.2)                            | 1.4<br>(0.9 to 2.2)                     | 5.3<br>(-3.9 to 15.2)                             | -1.6<br>(-9.5 to 6.8)                               |
| Hepatitis                                                               | 314.4<br>(263.0 to 379.7)                     | 30.7<br>(24.1 to 38.4)                            | < 0.05<br>(< 0.05 to 0.1)               | -2.2<br>(-21.9 to 23.5)                           | -8.5<br>(-25.6 to 12.7)                             |
| Acute hepatitis A                                                       | 0.5<br>(0.2 to 0.9)                           | 6.4<br>(2.4 to 11.5)                              | < 0.05<br>(< 0.05 to < 0.05)            | -12.9<br>(-59.9 to 117.2)                         | -10.2<br>(-56.1 to 96.7)                            |
| Hepatitis B                                                             | 254.6<br>(203.5 to 317.1)                     | 21.9<br>(17.2 to 27.9)                            | < 0.05<br>(< 0.05 to < 0.05)            | 1.9<br>(-18.8 to 25.0)                            | -9.1<br>(-28.3 to 12.9)                             |
| Hepatitis C                                                             | 59.2<br>(52.8 to 65.8)                        | 1.4<br>(1.2 to 1.6)                               | < 0.05<br>(< 0.05 to < 0.05)            | -17.6<br>(-20.3 to -14.7)                         | 1.9<br>(1.2 to 2.6)                                 |
| Acute hepatitis E                                                       | 0.1<br>(0.1 to 0.1)                           | 1.1<br>(0.8 to 1.4)                               | < 0.05<br>(< 0.05 to < 0.05)            | 5.4<br>(-9.1 to 20.3)                             | -0.3<br>(-10.8 to 9.1)                              |
| Other infectious diseases                                               | 23.1<br>(17.7 to 29.5)                        | < 0.05<br>(< 0.05 to < 0.05)                      | 0.6<br>(0.4 to 1.0)                     | -5.4<br>(-26.7 to 19.7)                           | 5.4<br>(-17.6 to 34.4)                              |
| <b>Non-communicable diseases</b>                                        | <b>5,644.5</b><br><b>(5,603.1 to 5,683.6)</b> | <b>16,633.3†</b><br><b>(15,513.2 to 17,765.9)</b> | <b>578.6</b><br><b>(424.7 to 748.0)</b> | <b>12.8</b><br><b>(10.4 to 15.0)</b>              | <b>-0.2</b><br><b>(-1.8 to 1.4)</b>                 |
| <b>Neoplasms</b>                                                        | <b>20.0</b><br><b>(18.8 to 21.2)</b>          | <b>7.8</b><br><b>(7.3 to 8.2)</b>                 | <b>2.6</b><br><b>(1.9 to 3.4)</b>       | <b>66.4</b><br><b>(54.1 to 79.9)</b>              | <b>26.4</b><br><b>(17.0 to 37.3)</b>                |
| Lip and oral cavity cancer                                              | 0.3<br>(0.3 to 0.4)                           | 0.1<br>(0.1 to 0.1)                               | < 0.05<br>(< 0.05 to < 0.05)            | 42.6<br>(22.8 to 72.6)                            | 7.5<br>(-7.7 to 30.1)                               |
| Nasopharynx cancer                                                      | 0.3<br>(0.2 to 0.3)                           | 0.1<br>(0.1 to 0.1)                               | < 0.05<br>(< 0.05 to < 0.05)            | 24.8<br>(1.5 to 49.8)                             | -4.5<br>(-23.2 to 14.0)                             |
| Other pharynx cancer                                                    | 0.1<br>(0.1 to 0.1)                           | < 0.05<br>(< 0.05 to < 0.05)                      | < 0.05<br>(< 0.05 to < 0.05)            | 58.0<br>(38.9 to 79.4)                            | 17.1<br>(2.0 to 34.2)                               |
| Oesophageal cancer                                                      | < 0.05<br>(< 0.05 to 0.1)                     | < 0.05<br>(< 0.05 to 0.1)                         | < 0.05<br>(< 0.05 to < 0.05)            | 36.0<br>(17.1 to 56.0)                            | 3.4<br>(-13.3 to 21.2)                              |
| Stomach cancer                                                          | 0.3<br>(0.3 to 0.4)                           | 0.2<br>(0.2 to 0.2)                               | 0.1<br>(< 0.05 to 0.1)                  | 42.1<br>(24.9 to 60.6)                            | 8.7<br>(-6.0 to 24.4)                               |
| Colon and rectum cancer                                                 | 3.5<br>(3.0 to 4.0)                           | 1.0<br>(0.8 to 1.1)                               | 0.3<br>(0.2 to 0.4)                     | 79.9<br>(47.6 to 116.7)                           | 36.2<br>(12.4 to 63.4)                              |
| Liver cancer                                                            | 0.1<br>(0.1 to 0.1)                           | 0.2<br>(0.2 to 0.2)                               | < 0.05<br>(< 0.05 to 0.1)               | 32.5<br>(15.0 to 54.6)                            | 0.6<br>(-12.0 to 16.5)                              |
| Liver cancer due to hepatitis B                                         | 0.1<br>(< 0.05 to 0.1)                        | 0.1<br>(< 0.05 to 0.1)                            | < 0.05<br>(< 0.05 to < 0.05)            | 34.6<br>(15.5 to 56.7)                            | 1.3<br>(-12.4 to 19.2)                              |



| Cause                                              | Prevalence in thousands (95% UI)        | Incidence in thousands (95% UI)       | YLDs in thousands (95% UI)           |                                                   |                                                     |
|----------------------------------------------------|-----------------------------------------|---------------------------------------|--------------------------------------|---------------------------------------------------|-----------------------------------------------------|
|                                                    | 2016 counts                             | 2016 counts                           | 2016 counts                          | Percentage change in counts between 2006 and 2016 | Percentage change in age-standardised rates between |
| Liver cancer due to hepatitis C                    | 0.1<br>( $< 0.05$ to 0.1)               | 0.1<br>(0.1 to 0.1)                   | $< 0.05$<br>( $< 0.05$ to $< 0.05$ ) | 32.7<br>(14.8 to 54.5)                            | 1.2<br>(-12.0 to 17.7)                              |
| Liver cancer due to alcohol use                    | $< 0.05$<br>( $< 0.05$ to $< 0.05$ )    | $< 0.05$<br>( $< 0.05$ to $< 0.05$ )  | $< 0.05$<br>( $< 0.05$ to $< 0.05$ ) | 31.9<br>(9.2 to 60.9)                             | 0.8<br>(-16.0 to 23.1)                              |
| Liver cancer due to other causes                   | $< 0.05$<br>( $< 0.05$ to $< 0.05$ )    | $< 0.05$<br>( $< 0.05$ to 0.1)        | $< 0.05$<br>( $< 0.05$ to $< 0.05$ ) | 29.6<br>(9.5 to 57.4)                             | -1.2<br>(-16.6 to 20.5)                             |
| Gallbladder and biliary tract cancer               | 0.1<br>(0.1 to 0.1)                     | 0.1<br>(0.1 to 0.1)                   | $< 0.05$<br>( $< 0.05$ to $< 0.05$ ) | 30.3<br>(14.7 to 47.5)                            | -3.3<br>(-17.4 to 12.2)                             |
| Pancreatic cancer                                  | 0.2<br>(0.1 to 0.2)                     | 0.2<br>(0.2 to 0.2)                   | $< 0.05$<br>( $< 0.05$ to 0.1)       | 41.2<br>(21.2 to 66.0)                            | 5.1<br>(-12.2 to 25.4)                              |
| Larynx cancer                                      | 0.6<br>(0.5 to 0.7)                     | 0.2<br>(0.1 to 0.2)                   | 0.1<br>( $< 0.05$ to 0.1)            | 68.8<br>(31.1 to 109.6)                           | 26.1<br>(-3.0 to 58.1)                              |
| Tracheal, bronchus, and lung cancer                | 0.9<br>(0.8 to 1.0)                     | 0.8<br>(0.7 to 1.0)                   | 0.2<br>(0.1 to 0.2)                  | 45.7<br>(14.3 to 81.8)                            | 10.3<br>(-13.2 to 39.2)                             |
| Malignant skin melanoma                            | 0.2<br>(0.2 to 0.2)                     | $< 0.05$<br>( $< 0.05$ to 0.1)        | $< 0.05$<br>( $< 0.05$ to $< 0.05$ ) | 90.3<br>(59.0 to 129.5)                           | 47.0<br>(21.2 to 79.1)                              |
| Non-melanoma skin cancer                           | 0.1<br>( $< 0.05$ to 0.1)               | 0.1<br>(0.1 to 0.2)                   | $< 0.05$<br>( $< 0.05$ to $< 0.05$ ) | 41.0<br>(0.7 to 79.3)                             | 3.3<br>(-24.3 to 34.9)                              |
| Non-melanoma skin cancer (squamous-cell carcinoma) | 0.1<br>( $< 0.05$ to 0.1)               | 0.1<br>( $< 0.05$ to 0.1)             | $< 0.05$<br>( $< 0.05$ to $< 0.05$ ) | 41.6<br>(-1.0 to 83.2)                            | 3.4<br>(-25.7 to 37.0)                              |
| Non-melanoma skin cancer (basal-cell carcinoma)    | $< 0.05$<br>( $< 0.05$ to $< 0.05$ )    | 0.1<br>(0.1 to 0.1)                   | $< 0.05$<br>( $< 0.05$ to $< 0.05$ ) | 31.0<br>(17.3 to 44.4)                            | 1.4<br>(-8.0 to 10.8)                               |
| Breast cancer                                      | 5.5<br>(4.2 to 7.1)                     | 1.1<br>(0.9 to 1.4)                   | 0.5<br>(0.3 to 0.6)                  | 91.8<br>(49.6 to 146.8)                           | 40.0<br>(11.3 to 77.8)                              |
| Cervical cancer                                    | 0.6<br>(0.5 to 0.8)                     | 0.2<br>(0.1 to 0.2)                   | 0.1<br>( $< 0.05$ to 0.1)            | 32.1<br>(2.8 to 65.5)                             | -2.8<br>(-23.2 to 20.0)                             |
| Uterine cancer                                     | 0.6<br>(0.5 to 0.8)                     | 0.1<br>(0.1 to 0.2)                   | $< 0.05$<br>( $< 0.05$ to 0.1)       | 103.0<br>(56.1 to 155.2)                          | 48.2<br>(14.1 to 87.2)                              |
| Ovarian cancer                                     | 0.5<br>(0.4 to 0.6)                     | 0.2<br>(0.1 to 0.2)                   | 0.1<br>(0.1 to 0.1)                  | 49.7<br>(20.0 to 84.5)                            | 16.4<br>(-11.1 to 50.5)                             |
| Prostate cancer                                    | 2.1<br>(1.4 to 2.5)                     | 0.5<br>(0.3 to 0.6)                   | 0.2<br>(0.1 to 0.3)                  | 78.1<br>(47.9 to 111.5)                           | 32.7<br>(11.2 to 57.7)                              |
| Testicular cancer                                  | 0.2<br>(0.2 to 0.2)                     | $< 0.05$<br>( $< 0.05$ to $< 0.05$ )  | $< 0.05$<br>( $< 0.05$ to $< 0.05$ ) | 93.6<br>(32.9 to 167.2)                           | 69.0<br>(18.9 to 129.3)                             |
| Kidney cancer                                      | 0.7<br>(0.6 to 0.8)                     | 0.2<br>(0.2 to 0.2)                   | 0.1<br>( $< 0.05$ to 0.1)            | 52.2<br>(29.7 to 82.2)                            | 18.7<br>(-1.2 to 43.2)                              |
| Bladder cancer                                     | 2.1<br>(1.8 to 2.4)                     | 0.5<br>(0.5 to 0.6)                   | 0.2<br>(0.1 to 0.2)                  | 66.8<br>(39.0 to 103.4)                           | 25.5<br>(4.6 to 53.8)                               |
| Brain and nervous system cancer                    | 0.5<br>(0.4 to 0.7)                     | 0.2<br>(0.2 to 0.3)                   | 0.1<br>( $< 0.05$ to 0.1)            | 45.7<br>(23.5 to 79.8)                            | 21.4<br>(1.3 to 53.3)                               |
| Thyroid cancer                                     | 1.4<br>(1.2 to 1.7)                     | 0.3<br>(0.2 to 0.3)                   | 0.1<br>(0.1 to 0.1)                  | 131.1<br>(84.8 to 186.6)                          | 73.5<br>(43.1 to 107.0)                             |
| Mesothelioma                                       | $< 0.05$<br>( $< 0.05$ to $< 0.05$ )    | $< 0.05$<br>( $< 0.05$ to $< 0.05$ )  | $< 0.05$<br>( $< 0.05$ to $< 0.05$ ) | 46.5<br>(25.6 to 70.5)                            | 12.6<br>(-2.8 to 31.5)                              |
| Hodgkin lymphoma                                   | 0.7<br>(0.3 to 0.9)                     | 0.2<br>(0.1 to 0.2)                   | 0.1<br>( $< 0.05$ to 0.1)            | 91.8<br>(60.8 to 126.5)                           | 76.2<br>(46.4 to 106.7)                             |
| Non-Hodgkin's lymphoma                             | 1.3<br>(1.1 to 1.5)                     | 0.4<br>(0.3 to 0.4)                   | 0.1<br>(0.1 to 0.2)                  | 80.3<br>(56.1 to 111.6)                           | 42.7<br>(21.3 to 70.6)                              |
| Multiple myeloma                                   | 0.2<br>(0.1 to 0.2)                     | 0.1<br>(0.1 to 0.1)                   | $< 0.05$<br>( $< 0.05$ to 0.1)       | 78.2<br>(42.1 to 123.3)                           | 32.7<br>(3.3 to 69.1)                               |
| Leukaemia                                          | 1.1<br>(1.0 to 1.3)                     | 0.3<br>(0.3 to 0.4)                   | 0.1<br>(0.1 to 0.2)                  | 36.2<br>(21.6 to 53.2)                            | 16.6<br>(2.0 to 33.6)                               |
| Acute lymphoid leukaemia                           | 0.2<br>(0.2 to 0.3)                     | 0.1<br>( $< 0.05$ to 0.1)             | $< 0.05$<br>( $< 0.05$ to $< 0.05$ ) | 47.9<br>(18.3 to 88.1)                            | 46.9<br>(19.0 to 86.6)                              |
| Chronic lymphoid leukaemia                         | 0.2<br>(0.1 to 0.2)                     | $< 0.05$<br>( $< 0.05$ to 0.1)        | $< 0.05$<br>( $< 0.05$ to $< 0.05$ ) | 50.9<br>(24.7 to 80.7)                            | 18.8<br>(-3.1 to 42.6)                              |
| Acute myeloid leukaemia                            | 0.1<br>(0.1 to 0.2)                     | 0.1<br>(0.1 to 0.1)                   | $< 0.05$<br>( $< 0.05$ to $< 0.05$ ) | 28.9<br>(10.6 to 46.8)                            | 19.2<br>(3.6 to 35.6)                               |
| Chronic myeloid leukaemia                          | 0.1<br>(0.1 to 0.1)                     | $< 0.05$<br>( $< 0.05$ to $< 0.05$ )  | $< 0.05$<br>( $< 0.05$ to $< 0.05$ ) | 40.5<br>(18.6 to 67.7)                            | 13.8<br>(-4.4 to 35.6)                              |
| Other leukaemia                                    | 0.5<br>(0.3 to 0.6)                     | 0.1<br>(0.1 to 0.1)                   | 0.1<br>( $< 0.05$ to 0.1)            | 27.8<br>(5.3 to 56.5)                             | 8.6<br>(-13.0 to 37.9)                              |
| Other neoplasms                                    | 1.2<br>(1.1 to 1.4)                     | 0.4<br>(0.3 to 0.4)                   | 0.1<br>(0.1 to 0.1)                  | 61.0<br>(39.0 to 90.4)                            | 34.6<br>(16.7 to 60.3)                              |
| <b>Cardiovascular diseases</b>                     | <b>361.9</b><br><b>(349.5 to 375.8)</b> | <b>39.7†</b><br><b>(37.4 to 42.1)</b> | <b>21.5</b><br><b>(15.7 to 28.2)</b> | <b>28.2</b><br><b>(23.8 to 32.8)</b>              | <b>2.7</b><br><b>(-0.7 to 6.2)</b>                  |
| Rheumatic heart disease                            | 31.7<br>(28.1 to 35.6)                  | 0.9<br>(0.8 to 1.0)                   | 1.5<br>(0.9 to 2.2)                  | 17.3<br>(6.9 to 28.2)                             | 6.7<br>(-2.1 to 16.5)                               |
| Ischaemic heart disease                            | 157.7<br>(148.6 to 166.8)               | 20.2<br>(18.4 to 22.4)                | 6.3<br>(4.3 to 8.7)                  | 36.1<br>(29.7 to 42.2)                            | 5.3<br>(0.9 to 9.8)                                 |
| Cerebrovascular disease                            | 45.2<br>(42.6 to 47.8)                  | 6.5†<br>(5.9 to 7.1)                  | 6.9<br>(5.0 to 8.8)                  | 28.1<br>(19.2 to 37.5)                            | -0.4<br>(-7.1 to 7.1)                               |
| Ischaemic stroke                                   | 39.2<br>(35.2 to 43.4)                  | 4.9†<br>(4.3 to 5.5)                  | 5.8<br>(4.1 to 7.4)                  | 28.4<br>(17.8 to 39.4)                            | -1.0<br>(-9.1 to 7.7)                               |
| Hemorrhagic stroke                                 | 8.0<br>(7.2 to 8.8)                     | 1.7†<br>(1.5 to 1.8)                  | 1.2<br>(0.8 to 1.5)                  | 26.3<br>(14.5 to 40.2)                            | 3.5<br>(-6.7 to 14.1)                               |
| Hypertensive heart disease                         | 6.6<br>(5.6 to 7.6)                     | --                                    | 0.5<br>(0.4 to 0.7)                  | 43.6<br>(27.9 to 62.7)                            | 7.3<br>(-3.2 to 19.4)                               |
| Cardiomyopathy and myocarditis                     | 3.7<br>(3.3 to 4.1)                     | 2.1†<br>(1.9 to 2.5)                  | 0.4<br>(0.3 to 0.6)                  | 17.0<br>(1.6 to 34.1)                             | 8.4<br>(-3.7 to 20.9)                               |
| Myocarditis                                        | 1.3<br>(1.2 to 1.5)                     | 2.1<br>(1.9 to 2.5)                   | 0.1<br>(0.1 to 0.1)                  | 11.0<br>(-3.0 to 25.8)                            | 7.2<br>(-4.5 to 19.9)                               |
| Alcoholic cardiomyopathy                           | 0.4<br>(0.3 to 0.4)                     | --                                    | $< 0.05$<br>( $< 0.05$ to $< 0.05$ ) | 43.1<br>(19.8 to 71.0)                            | 8.6<br>(-12.5 to 35.7)                              |
| Other cardiomyopathy                               | 3.1<br>(2.7 to 3.5)                     | --                                    | 0.3<br>(0.2 to 0.4)                  | 16.8<br>(-4.5 to 40.9)                            | 8.8<br>(-6.3 to 25.6)                               |
| Atrial fibrillation and flutter                    | 20.1<br>(17.5 to 22.9)                  | 1.7<br>(1.5 to 2.0)                   | 1.6<br>(1.0 to 2.2)                  | 30.4<br>(21.5 to 40.7)                            | -0.4<br>(-6.3 to 6.4)                               |
| Peripheral vascular disease                        | 70.7<br>(61.1 to 82.0)                  | 7.1<br>(6.2 to 8.3)                   | 0.3<br>(0.1 to 0.5)                  | 27.2<br>(17.9 to 37.8)                            | -1.4<br>(-8.5 to 5.9)                               |
| Endocarditis                                       | 0.4<br>(0.3 to 0.4)                     | 1.0<br>(0.9 to 1.1)                   | $< 0.05$<br>( $< 0.05$ to $< 0.05$ ) | 18.2<br>(5.0 to 34.3)                             | 5.3<br>(-11.2 to 25.0)                              |
| Other cardiovascular and circulatory diseases      | 78.0<br>(67.6 to 90.2)                  | --                                    | 4.1<br>(2.8 to 5.7)                  | 20.4<br>(10.4 to 30.7)                            | 5.0<br>(-2.4 to 12.5)                               |
| <b>Chronic respiratory diseases</b>                | <b>512.8</b><br><b>(491.7 to 534.7)</b> | <b>86.7†</b><br><b>(81.0 to 92.6)</b> | <b>21.5</b><br><b>(15.7 to 28.5)</b> | <b>18.5</b><br><b>(13.7 to 23.7)</b>              | <b>4.4</b><br><b>(0.1 to 8.2)</b>                   |
| Chronic obstructive pulmonary disease              | 147.3<br>(141.0 to 153.8)               | 9.4<br>(9.0 to 9.8)                   | 6.0<br>(4.9 to 7.0)                  | 24.7<br>(14.1 to 35.9)                            | -1.9<br>(-10.0 to 6.2)                              |
| Pneumoconiosis                                     | 0.3<br>(0.3 to 0.4)                     | $< 0.05$<br>( $< 0.05$ to $< 0.05$ )  | 0.1<br>( $< 0.05$ to 0.1)            | 28.0<br>(22.2 to 34.0)                            | -0.4<br>(-4.8 to 4.9)                               |
| Silicosis                                          | 0.1<br>(0.1 to 0.1)                     | $< 0.05$<br>( $< 0.05$ to $< 0.05$ )  | $< 0.05$<br>( $< 0.05$ to $< 0.05$ ) | 20.7<br>(15.3 to 27.4)                            | -1.8<br>(-5.7 to 2.8)                               |

| Cause                                                          | Prevalence in thousands (95% UI)        | Incidence in thousands (95% UI)               | YLDs in thousands (95% UI)        |                                                   |                                                     |
|----------------------------------------------------------------|-----------------------------------------|-----------------------------------------------|-----------------------------------|---------------------------------------------------|-----------------------------------------------------|
|                                                                | 2016 counts                             | 2016 counts                                   | 2016 counts                       | Percentage change in counts between 2006 and 2016 | Percentage change in age-standardised rates between |
| Asbestosis                                                     | 0.1<br>(0.1 to 0.1)                     | < 0.05<br>(< 0.05 to < 0.05)                  | < 0.05<br>(< 0.05 to < 0.05)      | 26.0<br>(19.4 to 33.3)                            | -2.4<br>(-7.2 to 2.0)                               |
| Coal workers pneumoconiosis                                    | --                                      | --                                            | --                                | --                                                | --                                                  |
| Other pneumoconiosis                                           | 0.2<br>(0.1 to 0.2)                     | < 0.05<br>(< 0.05 to < 0.05)                  | < 0.05<br>(< 0.05 to < 0.05)      | 32.8<br>(22.2 to 44.2)                            | 1.4<br>(-6.5 to 10.7)                               |
| Asthma                                                         | 379.7<br>(351.3 to 407.7)               | 77.0<br>(71.4 to 83.2)                        | 14.8<br>(9.8 to 21.1)             | 15.4<br>(10.5 to 20.6)                            | 7.3<br>(3.1 to 11.5)                                |
| Interstitial lung disease and pulmonary sarcoidosis            | 2.0<br>(1.8 to 2.2)                     | 0.2<br>(0.2 to 0.2)                           | 0.2<br>(0.1 to 0.3)               | 27.9<br>(16.7 to 40.8)                            | 2.3<br>(-8.8 to 15.5)                               |
| Other chronic respiratory diseases                             | --                                      | --                                            | 0.5<br>(0.4 to 0.6)               | 44.6<br>(19.9 to 75.1)                            | 32.4<br>(11.4 to 57.8)                              |
| <b>Cirrhosis and other chronic liver diseases</b>              | <b>28.4<br/>(26.9 to 30.2)</b>          | <b>1.1<br/>(1.1 to 1.2)</b>                   | <b>1.2<br/>(0.8 to 1.7)</b>       | <b>17.7<br/>(4.9 to 30.8)</b>                     | <b>5.6<br/>(-3.8 to 15.2)</b>                       |
| Cirrhosis and other chronic liver diseases due to hepatitis B  | 8.3<br>(6.9 to 9.8)                     | 0.4<br>(0.3 to 0.4)                           | 0.3<br>(0.2 to 0.4)               | 30.0<br>(7.8 to 57.0)                             | 5.6<br>(-8.8 to 22.7)                               |
| Cirrhosis and other chronic liver diseases due to hepatitis C  | 9.5<br>(7.7 to 11.4)                    | 0.4<br>(0.3 to 0.5)                           | 0.4<br>(0.2 to 0.5)               | 30.3<br>(7.9 to 55.9)                             | 6.3<br>(-8.4 to 22.8)                               |
| Cirrhosis and other chronic liver diseases due to alcohol use  | 1.6<br>(1.4 to 1.8)                     | 0.1<br>(0.1 to 0.1)                           | 0.1<br>(< 0.05 to 0.1)            | 36.6<br>(7.4 to 74.6)                             | 7.2<br>(-17.0 to 39.0)                              |
| Cirrhosis and other chronic liver diseases due to other causes | 9.0<br>(8.1 to 10.0)                    | 0.3<br>(0.3 to 0.4)                           | 0.5<br>(0.4 to 0.8)               | 3.9<br>(-14.0 to 24.2)                            | 4.8<br>(-10.9 to 22.2)                              |
| <b>Digestive diseases</b>                                      | <b>225.1<br/>(199.4 to 256.3)</b>       | <b>149.1<sup>†</sup><br/>(139.7 to 159.9)</b> | <b>7.0<br/>(4.6 to 10.1)</b>      | <b>24.5<br/>(5.9 to 48.4)</b>                     | <b>2.5<br/>(-10.6 to 18.9)</b>                      |
| Peptic ulcer disease                                           | 75.2<br>(58.3 to 98.2)                  | 5.8<br>(5.0 to 6.6)                           | 1.8<br>(0.9 to 3.1)               | 27.4<br>(-9.3 to 80.9)                            | -2.8<br>(-26.9 to 32.3)                             |
| Gastritis and duodenitis                                       | 77.7<br>(63.6 to 96.2)                  | 61.9<br>(54.4 to 70.9)                        | 1.5<br>(0.8 to 2.6)               | 22.4<br>(-11.3 to 65.9)                           | -4.3<br>(-25.6 to 25.1)                             |
| Appendicitis                                                   | 0.8<br>(0.7 to 0.9)                     | 21.1<br>(19.4 to 22.9)                        | 0.2<br>(0.2 to 0.4)               | -3.8<br>(-28.4 to 32.4)                           | -2.5<br>(-26.0 to 29.7)                             |
| Paralytic ileus and intestinal obstruction                     | 0.1<br>(0.1 to 0.1)                     | 2.0<br>(1.7 to 2.3)                           | < 0.05<br>(< 0.05 to < 0.05)      | 14.3<br>(8.8 to 20.1)                             | 1.7<br>(-1.8 to 5.4)                                |
| Inguinal, femoral, and abdominal hernia                        | 64.3<br>(56.8 to 72.8)                  | 26.2<br>(22.6 to 30.0)                        | 2.6<br>(1.7 to 3.7)               | 28.0<br>(14.0 to 44.1)                            | 11.5<br>(1.1 to 23.3)                               |
| Inflammatory bowel disease                                     | 0.9<br>(0.8 to 0.9)                     | 2.1<br>(2.0 to 2.2)                           | 0.1<br>(0.1 to 0.2)               | 6.4<br>(-2.7 to 17.3)                             | -6.4<br>(-16.4 to 5.3)                              |
| Vascular intestinal disorders                                  | < 0.05<br>(< 0.05 to 0.1)               | 0.2<br>(0.2 to 0.3)                           | < 0.05<br>(< 0.05 to < 0.05)      | 18.7<br>(11.2 to 26.4)                            | 3.6<br>(-1.2 to 8.3)                                |
| Gallbladder and biliary diseases                               | 10.6<br>(9.2 to 12.1)                   | 28.3<br>(24.3 to 32.6)                        | 0.1<br>(0.1 to 0.2)               | 28.1<br>(3.7 to 55.4)                             | 1.6<br>(-18.2 to 25.7)                              |
| Pancreatitis                                                   | 0.2<br>(0.1 to 0.2)                     | 1.5<br>(1.3 to 1.7)                           | < 0.05<br>(< 0.05 to < 0.05)      | 22.5<br>(17.2 to 28.0)                            | 1.5<br>(-1.8 to 4.9)                                |
| Other digestive diseases                                       | --                                      | --                                            | 0.5<br>(0.4 to 0.7)               | 26.9<br>(10.0 to 50.1)                            | 6.4<br>(-5.7 to 21.9)                               |
| <b>Neurological disorders</b>                                  | <b>2,469.6<br/>(2,366.7 to 2,580.6)</b> | <b>1,189.4<br/>(1,002.8 to 1,389.7)</b>       | <b>70.2<br/>(46.7 to 95.4)</b>    | <b>10.2<br/>(-1.7 to 23.4)</b>                    | <b>1.2<br/>(-8.8 to 12.0)</b>                       |
| Alzheimer's disease and other dementias                        | 25.6<br>(21.6 to 30.4)                  | 4.3<br>(3.6 to 5.2)                           | 3.6<br>(2.5 to 4.7)               | 30.5<br>(24.3 to 36.6)                            | -0.6<br>(-5.2 to 3.8)                               |
| Parkinson's disease                                            | 3.1<br>(2.5 to 3.9)                     | 0.4<br>(0.3 to 0.5)                           | 0.4<br>(0.2 to 0.5)               | 46.5<br>(29.5 to 65.6)                            | 10.6<br>(-0.5 to 23.3)                              |
| Epilepsy                                                       | 17.0<br>(6.2 to 25.2)                   | 2.2<br>(0.8 to 3.2)                           | 5.6<br>(1.8 to 10.7)              | -1.4<br>(-71.5 to 274.4)                          | -3.9<br>(-72.1 to 265.9)                            |
| Multiple sclerosis                                             | 2.8<br>(2.5 to 3.2)                     | 0.1<br>(0.1 to 0.1)                           | 0.7<br>(0.5 to 1.0)               | 27.5<br>(5.6 to 54.7)                             | 8.2<br>(-9.1 to 29.0)                               |
| Motor neuron disease                                           | 0.1<br>(0.1 to 0.2)                     | < 0.05<br>(< 0.05 to < 0.05)                  | < 0.05<br>(< 0.05 to < 0.05)      | 10.6<br>(5.2 to 16.7)                             | -0.7<br>(-4.2 to 3.1)                               |
| Migraine                                                       | 1,054.8<br>(988.5 to 1,121.9)           | 117.6<br>(108.9 to 127.1)                     | 49.5<br>(32.1 to 69.7)            | 9.4<br>(5.2 to 13.7)                              | 1.4<br>(-2.0 to 4.8)                                |
| Tension-type headache                                          | 1,837.4<br>(1,632.5 to 2,055.3)         | 1,064.7<br>(876.9 to 1,268.2)                 | 9.1<br>(5.7 to 13.6)              | 11.8<br>(5.7 to 18.6)                             | 1.7<br>(-3.2 to 7.0)                                |
| Other neurological disorders                                   | < 0.05<br>(< 0.05 to < 0.05)            | < 0.05<br>(< 0.05 to 0.1)                     | 1.5<br>(0.6 to 2.6)               | 22.0<br>(-53.7 to 242.2)                          | 17.0<br>(-51.6 to 189.7)                            |
| <b>Mental and substance use disorders</b>                      | <b>1,008.2<br/>(971.0 to 1,052.9)</b>   | <b>397.1<sup>†</sup><br/>(361.7 to 435.3)</b> | <b>143.6<br/>(104.0 to 185.3)</b> | <b>6.8<br/>(4.1 to 9.8)</b>                       | <b>0.9<br/>(-1.4 to 3.4)</b>                        |
| Schizophrenia                                                  | 12.1<br>(10.5 to 13.9)                  | 0.8<br>(0.7 to 0.9)                           | 7.7<br>(5.6 to 9.7)               | 14.0<br>(3.5 to 26.9)                             | -1.5<br>(-9.7 to 7.8)                               |
| Alcohol use disorders                                          | 37.9<br>(32.3 to 44.2)                  | 20.9<br>(17.7 to 24.2)                        | 3.8<br>(2.5 to 5.3)               | 3.8<br>(-6.5 to 16.1)                             | 1.1<br>(-7.7 to 11.1)                               |
| Drug use disorders                                             | 58.4<br>(52.3 to 64.8)                  | 6.6<br>(5.9 to 7.3)                           | 19.4<br>(13.3 to 25.9)            | 6.5<br>(-2.6 to 18.1)                             | 4.3<br>(-3.5 to 14.1)                               |
| Opioid use disorders                                           | 44.0<br>(36.7 to 52.4)                  | 4.0<br>(3.5 to 4.7)                           | 18.1<br>(12.4 to 24.5)            | 7.1<br>(-2.4 to 19.3)                             | 4.5<br>(-3.6 to 14.9)                               |
| Cocaine use disorders                                          | 2.5<br>(2.1 to 3.0)                     | 0.2<br>(0.2 to 0.3)                           | 0.4<br>(0.2 to 0.5)               | -1.5<br>(-27.9 to 36.9)                           | 0.8<br>(-24.0 to 36.4)                              |
| Amphetamine use disorders                                      | 0.5<br>(0.3 to 0.6)                     | 0.1<br>(0.1 to 0.1)                           | 0.1<br>(< 0.05 to 0.1)            | -5.3<br>(-13.9 to 4.6)                            | 1.1<br>(-6.0 to 9.5)                                |
| Cannabis use disorders                                         | 9.8<br>(8.1 to 12.0)                    | 1.7<br>(1.4 to 2.1)                           | 0.3<br>(0.2 to 0.4)               | -9.1<br>(-25.9 to 11.4)                           | -1.3<br>(-19.9 to 18.8)                             |
| Other drug use disorders                                       | 2.6<br>(2.3 to 3.0)                     | 0.5<br>(0.4 to 0.6)                           | 0.6<br>(0.4 to 0.8)               | 4.4<br>(-15.6 to 29.5)                            | 1.9<br>(-16.6 to 24.2)                              |
| Depressive disorders                                           | 237.9<br>(223.7 to 255.4)               | 287.8<br>(253.9 to 325.6)                     | 42.4<br>(29.2 to 58.2)            | 11.0<br>(5.2 to 16.9)                             | 1.2<br>(-3.2 to 5.5)                                |
| Major depressive disorder                                      | 178.1<br>(157.3 to 202.1)               | 276.3<br>(242.9 to 314.4)                     | 36.3<br>(24.3 to 49.9)            | 10.6<br>(4.1 to 17.7)                             | 1.2<br>(-3.8 to 6.6)                                |
| Dysthymia                                                      | 64.0<br>(55.5 to 74.2)                  | 11.5<br>(10.0 to 13.2)                        | 6.1<br>(4.2 to 8.9)               | 13.3<br>(7.3 to 19.7)                             | 0.7<br>(-3.0 to 4.6)                                |
| Bipolar disorder                                               | 53.1<br>(45.6 to 62.2)                  | 4.3<br>(3.7 to 5.0)                           | 10.8<br>(6.7 to 16.1)             | 3.7<br>(-2.4 to 10.8)                             | 0.4<br>(-4.5 to 5.7)                                |
| Anxiety disorders                                              | 318.0<br>(280.7 to 360.5)               | 46.0<br>(40.5 to 51.9)                        | 30.6<br>(20.8 to 42.0)            | 6.4<br>(-0.6 to 14.1)                             | 1.0<br>(-5.0 to 7.4)                                |
| Eating disorders                                               | 12.6<br>(10.2 to 15.2)                  | 5.6<br>(4.1 to 7.6)                           | 2.5<br>(1.6 to 3.6)               | -12.6<br>(-22.5 to -2.3)                          | -6.1<br>(-15.8 to 5.0)                              |
| Anorexia nervosa                                               | 1.8<br>(1.4 to 2.5)                     | 0.8<br>(0.6 to 1.0)                           | 0.4<br>(0.2 to 0.6)               | -14.5<br>(-32.9 to 10.8)                          | -5.4<br>(-25.5 to 21.8)                             |
| Bulimia nervosa                                                | 10.0<br>(7.5 to 13.2)                   | 4.9<br>(3.4 to 6.8)                           | 2.1<br>(1.2 to 3.1)               | -12.3<br>(-22.9 to -0.5)                          | -6.2<br>(-17.5 to 6.0)                              |
| Autistic spectrum disorders                                    | 56.2<br>(50.3 to 63.5)                  | 0.4<br>(0.2 to 0.5)                           | 8.1<br>(5.5 to 11.4)              | 0.8<br>(-4.0 to 6.3)                              | -1.7<br>(-6.0 to 3.2)                               |
| Autism                                                         | 16.1<br>(13.8 to 18.8)                  | < 0.05<br>(< 0.05 to 0.1)                     | 4.1<br>(2.6 to 6.0)               | 1.9<br>(-6.0 to 11.3)                             | -1.3<br>(-8.6 to 7.0)                               |
| Asperger syndrome and other autistic spectrum disorders        | 40.2<br>(33.7 to 48.3)                  | 0.3<br>(0.2 to 0.5)                           | 4.0<br>(2.6 to 5.8)               | -0.3<br>(-5.0 to 5.1)                             | -2.0<br>(-6.4 to 2.6)                               |



| Cause                                                      | Prevalence in thousands (95% UI)              | Incidence in thousands (95% UI)                   | YLDs in thousands (95% UI)             |                                                   |                                                     |
|------------------------------------------------------------|-----------------------------------------------|---------------------------------------------------|----------------------------------------|---------------------------------------------------|-----------------------------------------------------|
|                                                            | 2016 counts                                   | 2016 counts                                       | 2016 counts                            | Percentage change in counts between 2006 and 2016 | Percentage change in age-standardised rates between |
| Attention-deficit/hyperactivity disorder                   | 69.5<br>(56.5 to 85.5)                        | 2.9<br>(2.3 to 3.6)                               | 0.8<br>(0.5 to 1.4)                    | -0.7<br>(-7.8 to 7.1)                             | -1.1<br>(-7.9 to 6.6)                               |
| Conduct disorder                                           | 51.0<br>(41.2 to 60.4)                        | 17.9<br>(14.2 to 21.7)                            | 6.2<br>(3.8 to 9.5)                    | -2.2<br>(-8.9 to 4.4)                             | -0.2<br>(-6.6 to 6.5)                               |
| Idiopathic developmental intellectual disability           | 85.7<br>(47.5 to 126.7)                       | --                                                | 3.0<br>(1.2 to 5.5)                    | 6.8<br>(-1.0 to 16.6)                             | 3.4<br>(-4.4 to 12.9)                               |
| Other mental and substance use disorders                   | 113.7<br>(100.0 to 131.4)                     | 3.9<br>(3.4 to 4.4)                               | 8.4<br>(5.8 to 12.2)                   | 10.1<br>(4.2 to 16.2)                             | -0.9<br>(-5.5 to 3.8)                               |
| <b>Diabetes, urogenital, blood, and endocrine diseases</b> | <b>2,658.2</b><br><b>(2,598.0 to 2,720.4)</b> | <b>738.2†</b><br><b>(691.6 to 787.6)</b>          | <b>65.5</b><br><b>(46.1 to 89.4)</b>   | <b>21.3</b><br><b>(15.3 to 27.9)</b>              | <b>-1.2</b><br><b>(-5.5 to 3.5)</b>                 |
| Diabetes mellitus                                          | 365.8<br>(325.5 to 408.4)                     | 23.6<br>(20.9 to 26.8)                            | 35.4<br>(23.8 to 50.9)                 | 33.5<br>(25.0 to 42.6)                            | 2.6<br>(-3.5 to 9.3)                                |
| Acute glomerulonephritis                                   | 0.1<br>(< 0.05 to 0.1)                        | 0.9<br>(0.7 to 1.0)                               | < 0.05<br>(< 0.05 to < 0.05)           | 8.3<br>(2.4 to 13.9)                              | 0.2<br>(-4.0 to 4.0)                                |
| Chronic kidney disease                                     | 280.7<br>(253.9 to 309.5)                     | 20.6<br>(18.2 to 23.1)                            | 9.3<br>(6.9 to 12.1)                   | 21.2<br>(11.5 to 32.3)                            | -3.8<br>(-10.7 to 4.0)                              |
| Chronic kidney disease due to diabetes mellitus            | 127.8<br>(111.2 to 147.3)                     | 9.4<br>(7.9 to 11.2)                              | 4.0<br>(2.9 to 5.3)                    | 30.8<br>(17.2 to 44.8)                            | -1.6<br>(-10.3 to 8.0)                              |
| Chronic kidney disease due to hypertension                 | 39.4<br>(33.4 to 45.7)                        | 2.9<br>(2.4 to 3.6)                               | 1.2<br>(0.9 to 1.7)                    | 23.2<br>(7.5 to 44.7)                             | -6.4<br>(-17.7 to 7.3)                              |
| Chronic kidney disease due to glomerulonephritis           | 38.9<br>(32.9 to 45.4)                        | 2.6<br>(2.1 to 3.2)                               | 1.5<br>(1.0 to 2.0)                    | 8.1<br>(-6.4 to 26.2)                             | -4.9<br>(-15.8 to 7.2)                              |
| Chronic kidney disease due to other causes                 | 74.6<br>(62.3 to 88.0)                        | 5.7<br>(4.7 to 6.8)                               | 2.6<br>(1.8 to 3.5)                    | 15.1<br>(2.4 to 29.8)                             | -5.1<br>(-13.8 to 5.2)                              |
| Urinary diseases and male infertility                      | 136.5<br>(116.8 to 154.4)                     | 371.8†<br>(336.5 to 413.3)                        | 3.8<br>(2.5 to 5.5)                    | 20.9<br>(4.5 to 35.9)                             | -9.2<br>(-20.9 to 1.7)                              |
| Interstitial nephritis and urinary tract infections        | 5.5<br>(4.9 to 6.3)                           | 289.3<br>(254.8 to 328.4)                         | 0.2<br>(0.1 to 0.3)                    | 3.0<br>(-11.5 to 21.0)                            | 1.2<br>(-11.9 to 16.9)                              |
| Urolithiasis                                               | 2.7<br>(2.3 to 3.1)                           | 70.3<br>(61.3 to 81.6)                            | 0.2<br>(0.1 to 0.3)                    | 16.7<br>(-3.9 to 44.2)                            | 0.4<br>(-16.5 to 22.3)                              |
| Benign prostatic hyperplasia                               | 96.1<br>(78.3 to 116.4)                       | 12.2<br>(9.7 to 15.2)                             | 3.1<br>(2.0 to 4.6)                    | 26.5<br>(5.6 to 45.2)                             | -9.8<br>(-23.1 to 2.4)                              |
| Male infertility                                           | 26.2<br>(20.5 to 33.8)                        | --                                                | 0.2<br>(0.1 to 0.3)                    | -8.7<br>(-15.9 to -0.1)                           | -7.8<br>(-14.5 to -0.6)                             |
| Other urinary diseases                                     | --                                            | --                                                | 0.1<br>(0.1 to 0.2)                    | -9.9<br>(-20.6 to 2.8)                            | -15.6<br>(-25.2 to -4.8)                            |
| Gynecological diseases                                     | 679.9<br>(646.8 to 718.4)                     | 308.5†<br>(283.4 to 336.1)                        | 9.2<br>(6.2 to 13.0)                   | 11.2<br>(5.6 to 16.9)                             | 0.4<br>(-4.2 to 5.4)                                |
| Uterine fibroids                                           | 69.1<br>(60.5 to 78.4)                        | 8.3<br>(7.1 to 9.6)                               | 0.8<br>(0.4 to 1.3)                    | 30.5<br>(8.1 to 51.1)                             | 3.4<br>(-12.4 to 18.6)                              |
| Polycystic ovarian syndrome                                | 5.8<br>(4.3 to 7.5)                           | 8.1<br>(5.6 to 10.9)                              | 0.1<br>(< 0.05 to 0.1)                 | 8.1<br>(-7.4 to 25.3)                             | 4.7<br>(-10.3 to 20.8)                              |
| Female infertility                                         | 12.2<br>(6.8 to 21.9)                         | --                                                | 0.1<br>(< 0.05 to 0.2)                 | -4.5<br>(-18.1 to 22.6)                           | 12.1<br>(-2.8 to 33.6)                              |
| Endometriosis                                              | 1.4<br>(1.2 to 1.7)                           | 4.1<br>(3.4 to 5.1)                               | 0.1<br>(0.1 to 0.2)                    | 1.7<br>(-25.3 to 39.4)                            | 3.9<br>(-21.9 to 39.0)                              |
| Genital prolapse                                           | 143.3<br>(124.0 to 163.3)                     | 11.1<br>(9.5 to 12.9)                             | 0.5<br>(0.2 to 0.8)                    | -13.0<br>(-20.0 to -5.0)                          | -31.8<br>(-37.1 to -25.6)                           |
| Premenstrual syndrome                                      | 418.6<br>(387.9 to 449.4)                     | 154.2<br>(140.4 to 168.3)                         | 3.5<br>(2.1 to 5.4)                    | 6.0<br>(-2.6 to 14.5)                             | 1.3<br>(-6.4 to 9.6)                                |
| Other gynecological diseases                               | 120.2<br>(101.0 to 141.2)                     | 122.8<br>(100.3 to 148.4)                         | 4.2<br>(2.7 to 6.0)                    | 16.9<br>(8.2 to 26.8)                             | 6.2<br>(-0.3 to 14.2)                               |
| Hemoglobinopathies and hemolytic anaemias                  | 1,801.2<br>(1,726.2 to 1,872.6)               | --                                                | 5.3<br>(3.2 to 8.3)                    | -14.7<br>(-34.3 to 9.8)                           | -18.3<br>(-35.3 to 3.6)                             |
| Thalassemias                                               | 0.2<br>(0.1 to 0.2)                           | --                                                | < 0.05<br>(< 0.05 to < 0.05)           | -26.4<br>(-48.1 to 5.0)                           | -5.0<br>(-33.6 to 35.4)                             |
| Thalassaemias trait                                        | 276.0<br>(231.7 to 317.5)                     | --                                                | 3.4<br>(2.0 to 5.4)                    | -12.3<br>(-34.3 to 15.7)                          | -17.4<br>(-36.1 to 7.1)                             |
| Sickle cell disorders                                      | 1.8<br>(1.5 to 2.3)                           | --                                                | 0.2<br>(0.1 to 0.3)                    | 15.5<br>(-1.5 to 34.4)                            | 14.5<br>(-1.4 to 32.9)                              |
| Sickle cell trait                                          | 441.3<br>(412.5 to 472.4)                     | --                                                | 1.1<br>(0.6 to 1.9)                    | -26.9<br>(-47.6 to 1.0)                           | -28.3<br>(-47.1 to -1.6)                            |
| G6PD deficiency                                            | 276.8<br>(236.0 to 323.7)                     | --                                                | < 0.05<br>(< 0.05 to < 0.05)           | -20.7<br>(-42.8 to 13.5)                          | -20.7<br>(-40.7 to 7.7)                             |
| G6PD trait                                                 | 982.7<br>(938.4 to 1,030.9)                   | --                                                | < 0.05<br>(< 0.05 to < 0.05)           | -11.0<br>(-39.6 to 32.8)                          | -15.9<br>(-40.1 to 18.0)                            |
| Other hemoglobinopathies and hemolytic anaemias            | 29.6<br>(22.8 to 37.3)                        | --                                                | 0.5<br>(0.3 to 0.8)                    | -8.2<br>(-29.3 to 19.1)                           | -9.0<br>(-26.5 to 12.3)                             |
| Endocrine, metabolic, blood, and immune disorders          | 80.1<br>(72.2 to 89.0)                        | 12.9<br>(11.5 to 14.3)                            | 2.5<br>(1.6 to 3.4)                    | 14.7<br>(5.1 to 25.0)                             | 1.2<br>(-5.2 to 8.1)                                |
| <b>Musculoskeletal disorders</b>                           | <b>1,099.0</b><br><b>(1,041.0 to 1,148.2)</b> | <b>618.0</b><br><b>(555.0 to 682.5)</b>           | <b>125.3</b><br><b>(89.0 to 164.0)</b> | <b>17.8</b><br><b>(12.3 to 22.4)</b>              | <b>-1.4</b><br><b>(-5.0 to 1.5)</b>                 |
| Rheumatoid arthritis                                       | 19.7<br>(17.4 to 22.3)                        | 1.2<br>(1.1 to 1.4)                               | 4.6<br>(3.1 to 6.2)                    | 30.2<br>(20.1 to 41.6)                            | 5.5<br>(-1.4 to 13.5)                               |
| Osteoarthritis                                             | 215.4<br>(201.3 to 230.7)                     | 12.6<br>(11.6 to 13.7)                            | 13.2<br>(9.4 to 17.9)                  | 38.8<br>(34.0 to 44.0)                            | 2.8<br>(-0.5 to 6.3)                                |
| Low back and neck pain                                     | 700.6<br>(651.1 to 756.5)                     | 297.0<br>(261.9 to 336.7)                         | 82.0<br>(57.9 to 107.9)                | 20.4<br>(15.7 to 25.4)                            | 0.5<br>(-2.4 to 3.7)                                |
| Low back pain                                              | 482.5<br>(425.9 to 550.9)                     | 237.4<br>(202.9 to 275.5)                         | 54.3<br>(38.0 to 72.3)                 | 18.6<br>(11.8 to 25.8)                            | 0.1<br>(-4.1 to 4.8)                                |
| Neck pain                                                  | 280.0<br>(240.6 to 323.8)                     | 59.6<br>(51.2 to 70.8)                            | 27.8<br>(18.5 to 39.0)                 | 24.3<br>(19.5 to 28.7)                            | 1.2<br>(-0.7 to 2.9)                                |
| Gout                                                       | 18.4<br>(16.4 to 20.9)                        | 3.8<br>(3.3 to 4.3)                               | 0.6<br>(0.4 to 0.8)                    | 26.7<br>(7.8 to 50.4)                             | -2.0<br>(-15.3 to 12.7)                             |
| Other musculoskeletal disorders                            | 293.4<br>(228.4 to 356.6)                     | 303.4<br>(254.0 to 358.1)                         | 24.9<br>(15.6 to 36.7)                 | 0.6<br>(-16.0 to 14.2)                            | -10.7<br>(-23.4 to -0.6)                            |
| <b>Other non-communicable diseases</b>                     | <b>4,412.3</b><br><b>(4,307.1 to 4,508.7)</b> | <b>13,406.3†</b><br><b>(12,295.3 to 14,492.7)</b> | <b>120.0</b><br><b>(82.9 to 167.3)</b> | <b>7.9</b><br><b>(6.1 to 9.4)</b>                 | <b>-2.2</b><br><b>(-3.5 to -1.1)</b>                |
| Congenital anomalies                                       | 70.5<br>(63.4 to 78.6)                        | --                                                | 9.8<br>(7.0 to 13.0)                   | -0.8<br>(-6.3 to 4.8)                             | -0.1<br>(-5.4 to 5.3)                               |
| Neural tube defects                                        | 9.1<br>(8.0 to 10.3)                          | --                                                | 2.7<br>(1.9 to 3.7)                    | 2.5<br>(-8.6 to 14.6)                             | 0.1<br>(-10.5 to 11.6)                              |
| Congenital heart anomalies                                 | 12.5<br>(10.9 to 14.3)                        | --                                                | 0.6<br>(0.3 to 1.0)                    | 3.9<br>(-7.3 to 17.5)                             | 6.0<br>(-5.3 to 19.0)                               |
| Orofacial clefts                                           | 1.6<br>(1.3 to 1.8)                           | --                                                | < 0.05<br>(< 0.05 to < 0.05)           | -12.5<br>(-21.4 to -2.3)                          | -13.7<br>(-22.6 to -3.7)                            |
| Down's syndrome                                            | 2.1<br>(1.8 to 2.5)                           | --                                                | 0.2<br>(0.1 to 0.3)                    | 1.6<br>(-5.2 to 8.5)                              | 3.1<br>(-3.9 to 9.9)                                |
| Turner syndrome                                            | 1.9<br>(1.6 to 2.2)                           | --                                                | < 0.05<br>(< 0.05 to 0.1)              | -1.6<br>(-33.5 to 50.2)                           | 0.3<br>(-30.9 to 48.8)                              |
| Klinefelter syndrome                                       | 2.6<br>(2.2 to 3.1)                           | --                                                | < 0.05<br>(< 0.05 to < 0.05)           | -7.0<br>(-29.4 to 21.4)                           | -1.7<br>(-24.2 to 27.8)                             |

| Cause                                         | Prevalence in thousands (95% UI)              | Incidence in thousands (95% UI)          | YLDs in thousands (95% UI)           |                                                   |                                                     |
|-----------------------------------------------|-----------------------------------------------|------------------------------------------|--------------------------------------|---------------------------------------------------|-----------------------------------------------------|
|                                               | 2016 counts                                   | 2016 counts                              | 2016 counts                          | Percentage change in counts between 2006 and 2016 | Percentage change in age-standardised rates between |
| Other chromosomal abnormalities               | 18.2<br>(15.2 to 21.8)                        | --                                       | 1.7<br>(1.2 to 2.4)                  | -8.5<br>(-18.9 to 3.3)                            | 2.4<br>(-8.6 to 15.4)                               |
| Congenital musculoskeletal and limb anomalies | 7.2<br>(6.5 to 7.9)                           | --                                       | 1.1<br>(0.7 to 1.5)                  | -1.9<br>(-13.4 to 10.2)                           | -4.9<br>(-15.5 to 6.0)                              |
| Urogenital congenital anomalies               | 4.7<br>(4.1 to 5.4)                           | --                                       | 0.2<br>(0.1 to 0.2)                  | -8.2<br>(-19.0 to 6.6)                            | -0.3<br>(-12.3 to 14.8)                             |
| Digestive congenital anomalies                | 7.5<br>(6.6 to 8.5)                           | --                                       | 0.3<br>(0.2 to 0.5)                  | -0.6<br>(-16.8 to 17.6)                           | -2.4<br>(-17.1 to 14.5)                             |
| Other congenital anomalies                    | 18.6<br>(11.0 to 29.7)                        | --                                       | 3.0<br>(1.9 to 4.5)                  | 1.1<br>(-7.6 to 10.6)                             | -0.7<br>(-9.1 to 8.1)                               |
| Skin and subcutaneous diseases                | 1,765.7<br>(1,718.4 to 1,816.0)               | 3,520.9<br>(3,361.5 to 3,711.1)          | 46.3<br>(31.3 to 66.9)               | 0.5<br>(-1.8 to 2.7)                              | 1.6<br>(-0.3 to 3.6)                                |
| Dermatitis                                    | 293.4<br>(254.2 to 335.1)                     | 408.1<br>(373.3 to 444.8)                | 11.1<br>(6.4 to 17.8)                | 0.1<br>(-4.0 to 4.4)                              | 0.0<br>(-3.5 to 3.4)                                |
| Psoriasis                                     | 52.9<br>(49.9 to 56.4)                        | 7.2<br>(6.8 to 7.6)                      | 4.6<br>(3.2 to 6.0)                  | 18.2<br>(7.9 to 29.5)                             | 7.6<br>(-0.8 to 16.0)                               |
| Cellulitis                                    | 3.0<br>(2.8 to 3.2)                           | 63.0<br>(58.8 to 67.5)                   | 0.2<br>(0.1 to 0.2)                  | 4.2<br>(-16.6 to 32.5)                            | -0.0<br>(-17.6 to 21.8)                             |
| Pyoderma                                      | 13.4<br>(13.0 to 13.9)                        | 306.0<br>(295.0 to 318.4)                | 0.1<br>(< 0.05 to 0.2)               | 7.0<br>(-1.8 to 16.7)                             | -0.1<br>(-7.2 to 7.5)                               |
| Scabies                                       | 66.4<br>(56.4 to 78.9)                        | 202.0<br>(170.6 to 240.4)                | 1.7<br>(0.9 to 2.8)                  | -5.1<br>(-10.5 to 0.4)                            | -2.2<br>(-6.6 to 2.5)                               |
| Fungal skin diseases                          | 370.4<br>(334.3 to 412.2)                     | 1,284.3<br>(1,149.7 to 1,425.1)          | 2.1<br>(0.8 to 4.3)                  | 6.9<br>(4.1 to 9.8)                               | -0.1<br>(-1.3 to 1.1)                               |
| Viral skin diseases                           | 168.6<br>(160.2 to 178.3)                     | 242.8<br>(228.7 to 257.1)                | 5.2<br>(3.2 to 7.7)                  | 1.2<br>(-2.3 to 4.9)                              | 0.7<br>(-2.5 to 4.0)                                |
| Acne vulgaris                                 | 567.4<br>(509.2 to 633.5)                     | 399.8<br>(324.6 to 506.5)                | 14.6<br>(9.7 to 21.2)                | -4.5<br>(-8.9 to 0.0)                             | 3.7<br>(-0.8 to 8.3)                                |
| Alopecia areata                               | 12.1<br>(11.4 to 13.0)                        | 21.5<br>(20.1 to 22.9)                   | 0.4<br>(0.2 to 0.6)                  | 3.8<br>(-6.8 to 15.9)                             | -0.2<br>(-9.8 to 10.4)                              |
| Pruritus                                      | 51.9<br>(45.3 to 58.5)                        | 41.2<br>(36.5 to 46.7)                   | 0.6<br>(0.2 to 1.0)                  | 8.6<br>(1.3 to 15.8)                              | -0.7<br>(-5.7 to 4.0)                               |
| Urticaria                                     | 59.5<br>(51.7 to 68.7)                        | 104.8<br>(91.5 to 121.6)                 | 3.6<br>(2.3 to 5.1)                  | -4.6<br>(-10.2 to 1.5)                            | 0.2<br>(-5.2 to 5.8)                                |
| Decubitus ulcer                               | 1.6<br>(1.4 to 1.7)                           | 5.7<br>(5.1 to 6.4)                      | 0.2<br>(0.2 to 0.3)                  | 19.9<br>(8.6 to 33.7)                             | -2.3<br>(-13.4 to 10.8)                             |
| Other skin and subcutaneous diseases          | 381.8<br>(370.6 to 393.1)                     | 434.7<br>(420.7 to 449.1)                | 2.1<br>(1.0 to 3.8)                  | 8.1<br>(5.0 to 11.1)                              | -3.4<br>(-5.7 to -1.2)                              |
| Sense organ diseases                          | 1,178.0<br>(1,141.7 to 1,217.6)               | 568.9†<br>(532.7 to 608.0)               | 48.5<br>(34.2 to 66.9)               | 13.7<br>(10.9 to 16.6)                            | -5.4<br>(-7.7 to -3.4)                              |
| Glaucoma                                      | 8.1<br>(6.8 to 9.7)                           | --                                       | 0.8<br>(0.6 to 1.1)                  | 22.1<br>(10.8 to 33.5)                            | -5.4<br>(-13.7 to 3.1)                              |
| Cataract                                      | 77.7<br>(68.9 to 87.2)                        | --                                       | 6.6<br>(4.7 to 9.0)                  | 15.2<br>(7.5 to 22.6)                             | -12.4<br>(-18.2 to -6.8)                            |
| Macular degeneration                          | 8.3<br>(6.9 to 10.1)                          | --                                       | 0.7<br>(0.5 to 0.9)                  | 21.6<br>(8.4 to 34.6)                             | -5.3<br>(-14.7 to 4.5)                              |
| Refraction and accommodation disorders        | 538.7<br>(497.9 to 578.1)                     | --                                       | 11.3<br>(7.4 to 17.3)                | 3.2<br>(-0.8 to 7.4)                              | -9.3<br>(-12.9 to -5.7)                             |
| Age-related and other hearing loss            | 694.4<br>(648.0 to 746.3)                     | --                                       | 21.5<br>(14.9 to 30.1)               | 17.8<br>(12.7 to 22.4)                            | -1.8<br>(-4.5 to 0.8)                               |
| Other vision loss                             | 31.7<br>(28.3 to 35.3)                        | --                                       | 3.0<br>(2.0 to 4.1)                  | 14.2<br>(5.2 to 23.2)                             | -6.0<br>(-12.1 to 0.7)                              |
| Other sense organ diseases                    | 149.4<br>(137.8 to 161.5)                     | 568.9<br>(532.7 to 608.0)                | 4.6<br>(2.9 to 6.9)                  | 18.9<br>(13.4 to 24.9)                            | 1.3<br>(-2.8 to 5.0)                                |
| Oral disorders                                | 3,276.9<br>(3,103.0 to 3,433.1)               | 9,316.6†<br>(8,250.0 to 10,370.3)        | 15.4<br>(9.3 to 24.2)                | 21.7<br>(18.8 to 24.9)                            | 0.2<br>(-1.7 to 2.2)                                |
| Caries of deciduous teeth                     | 458.1<br>(346.5 to 589.8)                     | 1,889.4<br>(1,333.3 to 2,576.8)          | 0.1<br>(< 0.05 to 0.2)               | -6.2<br>(-17.3 to 7.2)                            | -0.5<br>(-10.7 to 10.7)                             |
| Caries of permanent teeth                     | 2,335.6<br>(2,106.4 to 2,585.2)               | 7,331.0<br>(6,422.4 to 8,208.0)          | 1.4<br>(0.6 to 2.7)                  | 11.1<br>(5.0 to 17.2)                             | 3.9<br>(-0.4 to 8.2)                                |
| Periodontal disease                           | 636.4<br>(524.9 to 765.1)                     | 77.5<br>(62.6 to 96.6)                   | 4.2<br>(1.6 to 8.8)                  | 25.4<br>(19.6 to 31.5)                            | -0.2<br>(-3.4 to 3.4)                               |
| Edentulism and severe tooth loss              | 236.0<br>(201.5 to 270.3)                     | 18.6<br>(15.5 to 21.7)                   | 6.5<br>(4.2 to 9.3)                  | 29.5<br>(24.9 to 34.8)                            | -0.1<br>(-3.1 to 3.2)                               |
| Other oral disorders                          | 111.2<br>(106.1 to 116.5)                     | --                                       | 3.2<br>(2.0 to 4.9)                  | 9.7<br>(5.8 to 14.2)                              | 0.3<br>(-2.9 to 3.7)                                |
| <b>Injuries</b>                               | <b>1,477.5</b><br><b>(1,218.0 to 1,789.9)</b> | <b>423.5†</b><br><b>(398.0 to 452.1)</b> | <b>46.8</b><br><b>(26.6 to 73.9)</b> | <b>45.8</b><br><b>(15.1 to 80.7)</b>              | <b>24.9</b><br><b>(-0.8 to 53.6)</b>                |
| <b>Transport injuries</b>                     | <b>151.8</b><br><b>(140.5 to 163.7)</b>       | <b>54.0</b><br><b>(48.2 to 60.1)</b>     | <b>7.9</b><br><b>(4.9 to 11.7)</b>   | <b>11.9</b><br><b>(-3.5 to 31.5)</b>              | <b>-5.0</b><br><b>(-17.7 to 9.9)</b>                |
| Road injuries                                 | 113.9<br>(105.3 to 122.5)                     | 45.4<br>(39.8 to 51.3)                   | 5.9<br>(3.7 to 8.8)                  | 11.7<br>(-3.2 to 29.5)                            | -6.6<br>(-18.5 to 7.2)                              |
| Pedestrian road injuries                      | 22.0<br>(19.4 to 25.2)                        | 6.2<br>(5.1 to 7.5)                      | 1.1<br>(0.7 to 1.7)                  | 11.1<br>(-4.5 to 30.0)                            | -7.5<br>(-19.8 to 7.1)                              |
| Cyclist road injuries                         | 17.8<br>(14.9 to 21.2)                        | 7.5<br>(5.8 to 9.3)                      | 0.9<br>(0.5 to 1.3)                  | 14.5<br>(-0.6 to 32.7)                            | -1.9<br>(-13.8 to 12.6)                             |
| Motorcyclist road injuries                    | 17.6<br>(14.9 to 21.4)                        | 4.4<br>(3.5 to 5.5)                      | 0.9<br>(0.5 to 1.3)                  | 19.9<br>(2.4 to 41.0)                             | 1.9<br>(-12.1 to 18.1)                              |
| Motor vehicle road injuries                   | 46.2<br>(39.1 to 52.9)                        | 22.1<br>(18.8 to 25.5)                   | 2.6<br>(1.7 to 3.8)                  | 7.6<br>(-6.9 to 25.2)                             | -10.9<br>(-21.9 to 2.8)                             |
| Other road injuries                           | 10.3<br>(8.7 to 12.2)                         | 5.2<br>(3.9 to 6.7)                      | 0.5<br>(0.3 to 0.8)                  | 18.1<br>(4.5 to 35.5)                             | -1.0<br>(-11.4 to 12.6)                             |
| Other transport injuries                      | 37.9<br>(31.6 to 45.4)                        | 8.6<br>(7.3 to 10.3)                     | 1.9<br>(1.1 to 2.9)                  | 12.6<br>(-5.4 to 35.8)                            | 0.5<br>(-14.9 to 19.8)                              |
| <b>Unintentional injuries</b>                 | <b>806.2</b><br><b>(740.2 to 871.5)</b>       | <b>354.2</b><br><b>(329.4 to 382.0)</b>  | <b>25.4</b><br><b>(15.5 to 37.5)</b> | <b>17.5</b><br><b>(-0.6 to 39.3)</b>              | <b>3.6</b><br><b>(-11.6 to 21.5)</b>                |
| Falls                                         | 271.3<br>(230.8 to 309.2)                     | 115.7<br>(99.1 to 137.6)                 | 10.2<br>(6.4 to 14.8)                | 14.5<br>(-4.7 to 38.2)                            | 0.1<br>(-15.5 to 18.9)                              |
| Drowning                                      | 2.0<br>(1.8 to 2.4)                           | 0.4<br>(0.3 to 0.5)                      | 0.1<br>(0.1 to 0.2)                  | 12.7<br>(-10.4 to 46.5)                           | -0.4<br>(-19.6 to 28.1)                             |
| Fire, heat, and hot substances                | 84.0<br>(70.4 to 102.2)                       | 10.5<br>(8.4 to 12.6)                    | 2.1<br>(1.2 to 3.2)                  | 24.3<br>(1.7 to 53.5)                             | 9.2<br>(-9.8 to 34.0)                               |
| Poisonings                                    | 4.0<br>(3.4 to 4.8)                           | 5.8<br>(4.5 to 7.2)                      | 0.4<br>(0.2 to 0.5)                  | 16.2<br>(0.4 to 38.5)                             | 8.2<br>(-5.9 to 26.6)                               |
| Exposure to mechanical forces                 | 126.5<br>(107.0 to 156.2)                     | 52.2<br>(43.4 to 61.0)                   | 3.0<br>(1.8 to 4.7)                  | 20.9<br>(3.4 to 41.1)                             | 3.1<br>(-11.2 to 19.5)                              |
| Unintentional firearm injuries                | 5.9<br>(4.8 to 7.2)                           | 1.6<br>(1.1 to 2.2)                      | 0.2<br>(0.1 to 0.4)                  | 29.0<br>(10.0 to 51.9)                            | 9.3<br>(-6.3 to 27.7)                               |
| Unintentional suffocation                     | 4.6<br>(3.6 to 5.8)                           | 0.9<br>(0.6 to 1.3)                      | 0.2<br>(0.1 to 0.3)                  | 20.2<br>(-7.7 to 56.0)                            | 9.1<br>(-15.8 to 39.1)                              |
| Other exposure to mechanical forces           | 115.9<br>(96.9 to 145.3)                      | 49.7<br>(41.4 to 58.1)                   | 2.6<br>(1.5 to 4.0)                  | 20.3<br>(3.5 to 39.1)                             | 2.2<br>(-11.4 to 17.6)                              |



| Cause                                                                               | Prevalence in thousands (95% UI)        | Incidence in thousands (95% UI)       | YLDs in thousands (95% UI)           |                                                   |                                                     |
|-------------------------------------------------------------------------------------|-----------------------------------------|---------------------------------------|--------------------------------------|---------------------------------------------------|-----------------------------------------------------|
|                                                                                     | 2016 counts                             | 2016 counts                           | 2016 counts                          | Percentage change in counts between 2006 and 2016 | Percentage change in age-standardised rates between |
| Adverse effects of medical treatment                                                | 1.5<br>(1.2 to 1.9)                     | 20.2<br>(17.3 to 23.4)                | 0.2<br>(0.1 to 0.3)                  | 0.9<br>(-4.3 to 6.7)                              | 1.5<br>(-2.6 to 6.1)                                |
| Animal contact                                                                      | 32.7<br>(28.7 to 38.2)                  | 39.7<br>(32.1 to 47.9)                | 1.0<br>(0.7 to 1.5)                  | 19.8<br>(6.7 to 35.9)                             | 10.0<br>(-1.3 to 23.9)                              |
| Venomous animal contact                                                             | 13.8<br>(11.3 to 16.5)                  | 17.0<br>(12.9 to 22.0)                | 0.7<br>(0.5 to 1.1)                  | 17.7<br>(3.0 to 37.6)                             | 9.6<br>(-3.3 to 26.6)                               |
| Non-venomous animal contact                                                         | 18.9<br>(15.6 to 23.5)                  | 22.7<br>(17.8 to 27.9)                | 0.3<br>(0.2 to 0.4)                  | 25.7<br>(15.7 to 38.2)                            | 10.9<br>(2.5 to 20.7)                               |
| Foreign body                                                                        | 49.5<br>(41.7 to 59.7)                  | 30.9<br>(26.3 to 36.1)                | 1.6<br>(0.9 to 2.6)                  | 15.3<br>(-5.5 to 43.0)                            | 4.4<br>(-13.4 to 27.7)                              |
| Pulmonary aspiration and foreign body in airway                                     | 13.5<br>(10.1 to 17.9)                  | 4.4<br>(3.5 to 5.4)                   | 0.5<br>(0.3 to 0.9)                  | 10.9<br>(-10.4 to 37.5)                           | 2.3<br>(-15.7 to 24.8)                              |
| Foreign body in eyes                                                                | 2.6<br>(1.5 to 3.9)                     | 13.6<br>(10.4 to 18.3)                | 0.1<br>(0.1 to 0.3)                  | 8.8<br>(-0.1 to 24.5)                             | -1.0<br>(-8.3 to 10.6)                              |
| Foreign body in other body part                                                     | 33.5<br>(27.3 to 42.8)                  | 12.9<br>(10.6 to 15.3)                | 0.9<br>(0.5 to 1.5)                  | 19.3<br>(-4.2 to 50.6)                            | 6.8<br>(-13.5 to 32.7)                              |
| Environmental heat and cold exposure                                                | 50.9<br>(42.7 to 60.2)                  | 13.7<br>(11.1 to 17.1)                | 1.8<br>(1.1 to 2.7)                  | 15.9<br>(-2.7 to 38.8)                            | 2.8<br>(-13.0 to 21.1)                              |
| Other unintentional injuries                                                        | 183.7<br>(144.1 to 228.0)               | 65.1<br>(53.1 to 78.5)                | 5.1<br>(3.1 to 7.7)                  | 21.0<br>(3.1 to 43.4)                             | 8.0<br>(-6.7 to 26.6)                               |
| <b>Self-harm and interpersonal violence</b>                                         | <b>131.5</b><br><b>(117.0 to 146.4)</b> | <b>15.1†</b><br><b>(12.9 to 17.5)</b> | <b>2.0</b><br><b>(1.4 to 2.9)</b>    | <b>4.0</b><br><b>(-4.9 to 16.5)</b>               | <b>-4.0</b><br><b>(-11.8 to 6.4)</b>                |
| Self-harm                                                                           | 6.0<br>(5.1 to 7.0)                     | 2.5<br>(2.1 to 3.0)                   | 0.3<br>(0.2 to 0.4)                  | 16.4<br>(0.2 to 35.6)                             | 0.7<br>(-13.0 to 16.2)                              |
| Self-harm by firearm                                                                | 0.3<br>(0.3 to 0.4)                     | 0.1<br>( $< 0.05$ to 0.1)             | $< 0.05$<br>( $< 0.05$ to $< 0.05$ ) | 14.2<br>(-5.6 to 37.8)                            | 5.2<br>(-12.5 to 26.3)                              |
| Self-harm by other specified means                                                  | 5.7<br>(4.8 to 6.7)                     | 2.5<br>(2.0 to 2.9)                   | 0.2<br>(0.1 to 0.4)                  | 16.5<br>(0.4 to 36.2)                             | 0.5<br>(-13.0 to 15.9)                              |
| Interpersonal violence                                                              | 125.5<br>(111.0 to 140.6)               | 12.6†<br>(10.5 to 14.9)               | 1.8<br>(1.2 to 2.4)                  | 2.4<br>(-5.8 to 13.2)                             | -4.7<br>(-11.9 to 4.8)                              |
| Assault by firearm                                                                  | 1.2<br>(1.0 to 1.4)                     | 0.4<br>(0.3 to 0.5)                   | 0.1<br>( $< 0.05$ to 0.1)            | 11.1<br>(-7.0 to 35.5)                            | -4.2<br>(-18.6 to 14.7)                             |
| Assault by sharp object                                                             | 8.4<br>(6.7 to 10.1)                    | 3.4<br>(2.5 to 4.4)                   | 0.2<br>(0.1 to 0.4)                  | 12.0<br>(-5.7 to 33.8)                            | -2.5<br>(-16.7 to 14.8)                             |
| Sexual violence                                                                     | 100.3<br>(87.3 to 115.4)                | --                                    | 0.8<br>(0.6 to 1.2)                  | -9.4<br>(-13.8 to -4.9)                           | -9.8<br>(-13.2 to -6.6)                             |
| Assault by other means                                                              | 15.6<br>(13.2 to 18.8)                  | 8.8<br>(7.2 to 10.6)                  | 0.6<br>(0.4 to 1.0)                  | 18.2<br>(2.6 to 36.7)                             | 1.1<br>(-11.4 to 16.2)                              |
| <b>Forces of nature, conflict and terrorism, and executions and police conflict</b> | <b>488.2</b><br><b>(247.3 to 779.2)</b> | <b>0.2†</b><br><b>(0.1 to 0.2)</b>    | <b>11.5</b><br><b>(4.2 to 21.9)</b>  | <b>659.5</b><br><b>(365.4 to 1,651.6)</b>         | <b>590.1</b><br><b>(336.2 to 1,469.2)</b>           |
| Exposure to forces of nature                                                        | 0.1<br>( $< 0.05$ to 0.1)               | --                                    | $< 0.05$<br>( $< 0.05$ to $< 0.05$ ) | --                                                | --                                                  |
| Conflict and terrorism                                                              | 487.8<br>(247.0 to 778.8)               | --                                    | 11.5<br>(4.2 to 21.9)                | 662.9<br>(366.9 to 1,665.5)                       | 593.0<br>(337.8 to 1,482.0)                         |
| Executions and police conflict                                                      | 0.4<br>(0.3 to 0.7)                     | 0.2<br>(0.1 to 0.2)                   | $< 0.05$<br>( $< 0.05$ to $< 0.05$ ) | 26.1<br>(7.5 to 47.2)                             | 23.5<br>(6.1 to 43.4)                               |
| <b>Impairments</b>                                                                  | --                                      | --                                    | --                                   | --                                                | --                                                  |
| Anaemia                                                                             | 1,334.1<br>(1,079.2 to 1,642.4)         | --                                    | 32.4<br>(20.4 to 48.5)               | -3.1<br>(-22.3 to 19.7)                           | -6.5<br>(-22.6 to 12.9)                             |
| Developmental intellectual disability                                               | 168.9<br>(128.8 to 213.7)               | --                                    | 18.7<br>(13.0 to 30.2)               | 4.9<br>(-4.6 to 15.9)                             | 3.5<br>(-5.3 to 13.7)                               |
| Epilepsy                                                                            | 35.0<br>(20.4 to 58.3)                  | --                                    | 12.9<br>(7.2 to 23.9)                | -4.3<br>(-42.5 to 68.0)                           | -5.5<br>(-44.3 to 69.5)                             |
| Guillain-Barre syndrome                                                             | 0.1<br>( $< 0.05$ to 0.1)               | --                                    | $< 0.05$<br>( $< 0.05$ to $< 0.05$ ) | 9.3<br>(4.0 to 15.1)                              | -0.3<br>(-0.5 to -0.1)                              |
| Hearing loss                                                                        | 769.6<br>(723.1 to 819.9)               | --                                    | 25.3<br>(17.6 to 35.0)               | 14.6<br>(10.6 to 18.7)                            | -1.7<br>(-4.1 to 0.7)                               |
| Heart failure                                                                       | 38.4<br>(34.0 to 43.3)                  | --                                    | 3.9<br>(2.8 to 5.0)                  | 38.7<br>(29.8 to 48.5)                            | 7.5<br>(0.7 to 15.3)                                |
| Infertility                                                                         | 91.6<br>(72.5 to 115.8)                 | --                                    | 0.6<br>(0.2 to 1.1)                  | 4.1<br>(-3.1 to 12.2)                             | 2.4<br>(-2.7 to 7.8)                                |
| Pelvic inflammatory disease                                                         | 3.0<br>(2.4 to 3.8)                     | --                                    | 0.4<br>(0.2 to 0.6)                  | 4.4<br>(-14.5 to 27.5)                            | -1.1<br>(-18.2 to 19.2)                             |
| Vision loss                                                                         | 707.4<br>(660.0 to 752.9)               | --                                    | 29.6<br>(21.0 to 42.0)               | 4.9<br>(-1.4 to 10.4)                             | -9.8<br>(-13.4 to -6.1)                             |

We did not calculate incidence for the nine impairments, certain NTDs, and causes with only birth prevalence. Blank cells mean that no estimate is available.

† Incidence for aggregate causes represents the sum of the incidence of the causes below the aggregate.

‡ Incidence estimates for stroke represent first-ever stroke only.

^ Incidence of HIV/AIDS represents new infections of HIV only and does not include new infections of Tuberculosis in HIV positive cases.

SR Table 14: Prevalence, incidence, and YLDs for 2016, percentage change of YLD counts and percentage change of age-standardised YLD rates between 2006 and 2016 by cause and impairments, for all ages, Lithuania.

| Cause                                                                                | Prevalence in thousands (95% UI)       | Incidence in thousands (95% UI)            | YLDs in thousands (95% UI)       |                                                   |                                                     |
|--------------------------------------------------------------------------------------|----------------------------------------|--------------------------------------------|----------------------------------|---------------------------------------------------|-----------------------------------------------------|
|                                                                                      | 2016 counts                            | 2016 counts                                | 2016 counts                      | Percentage change in counts between 2006 and 2016 | Percentage change in age-standardised rates between |
| <b>All causes</b>                                                                    | <b>2,778.7</b><br>(2,770.2 to 2,787.2) | <b>20,072.8†</b><br>(18,704.9 to 21,646.4) | <b>409.9</b><br>(306.0 to 529.0) | <b>-6.0</b><br>(-7.4 to -4.6)                     | <b>-1.2</b><br>(-2.9 to 0.2)                        |
| <b>Communicable, maternal, neonatal, and nutritional disorders</b>                   | <b>1,520.4</b><br>(1,467.0 to 1,580.8) | <b>10,702.1†</b><br>(9,421.3 to 12,236.0)  | <b>17.0</b><br>(12.3 to 22.9)    | <b>-17.1</b><br>(-21.1 to -12.5)                  | <b>-5.5</b><br>(-10.1 to 0.1)                       |
| <b>HIV/AIDS and tuberculosis</b>                                                     | <b>811.9</b><br>(745.1 to 865.3)       | <b>1.4†</b><br>(1.2 to 1.6)                | <b>0.4</b><br>(0.2 to 0.7)       | <b>-21.0</b><br>(-36.7 to -3.5)                   | <b>-12.5</b><br>(-30.3 to 7.5)                      |
| Tuberculosis                                                                         | 764.8<br>(709.7 to 825.2)              | 1.4†<br>(1.2 to 1.6)                       | 0.2<br>(0.1 to 0.3)              | -32.5<br>(-45.1 to -19.3)                         | -27.1<br>(-40.4 to -12.9)                           |
| Drug-susceptible tuberculosis                                                        | 0.6<br>(0.6 to 0.7)                    | 1.2<br>(1.0 to 1.3)                        | 0.2<br>(0.1 to 0.3)              | -34.5<br>(-48.4 to -19.1)                         | -29.1<br>(-43.6 to -12.6)                           |
| Multidrug-resistant tuberculosis without extensive drug resistance                   | 0.1<br>(0.1 to 0.1)                    | 0.2<br>(0.1 to 0.2)                        | < 0.05<br>(< 0.05 to < 0.05)     | -29.7<br>(-43.2 to -13.6)                         | -24.7<br>(-39.1 to -7.4)                            |
| Extensively drug-resistant tuberculosis                                              | < 0.05<br>(< 0.05 to < 0.05)           | < 0.05<br>(< 0.05 to < 0.05)               | < 0.05<br>(< 0.05 to < 0.05)     | 114.6<br>(76.1 to 159.6)                          | 130.1<br>(89.8 to 177.7)                            |
| Latent tuberculosis infection                                                        | 764.1<br>(708.9 to 824.5)              | --                                         | --                               | --                                                | --                                                  |
| HIV/AIDS                                                                             | 0.9<br>(0.6 to 1.6)                    | 0.1 <sup>a</sup><br>(< 0.05 to 0.1)        | 0.2<br>(0.1 to 0.4)              | 0.7<br>(-32.9 to 37.4)                            | 14.3<br>(-22.9 to 54.6)                             |
| Drug-susceptible HIV/AIDS - Tuberculosis                                             | < 0.05<br>(< 0.05 to < 0.05)           | < 0.05<br>(< 0.05 to < 0.05)               | < 0.05<br>(< 0.05 to < 0.05)     | -33.1<br>(-38.1 to -22.5)                         | -21.7<br>(-27.6 to -10.2)                           |
| Multidrug-resistant HIV/AIDS - Tuberculosis without extensive drug resistance        | < 0.05<br>(< 0.05 to < 0.05)           | < 0.05<br>(< 0.05 to < 0.05)               | < 0.05<br>(< 0.05 to < 0.05)     | -28.8<br>(-42.0 to -11.6)                         | -16.7<br>(-32.1 to 3.2)                             |
| Extensively drug-resistant HIV/AIDS - Tuberculosis                                   | < 0.05<br>(< 0.05 to < 0.05)           | < 0.05<br>(< 0.05 to < 0.05)               | < 0.05<br>(< 0.05 to < 0.05)     | 119.5<br>(79.0 to 172.2)                          | 156.8<br>(109.3 to 218.2)                           |
| HIV/AIDS resulting in other diseases                                                 | 0.9<br>(0.5 to 1.6)                    | 0.1<br>(< 0.05 to 0.1)                     | 0.2<br>(0.1 to 0.4)              | 2.1<br>(-33.0 to 41.5)                            | 15.9<br>(-23.2 to 60.3)                             |
| <b>Diarrhoea, lower respiratory infections, and other common infectious diseases</b> | <b>173.6</b><br>(159.5 to 188.0)       | <b>10,462.5†</b><br>(9,181.6 to 11,996.0)  | <b>7.9</b><br>(5.4 to 10.9)      | <b>-15.2</b><br>(-17.9 to -12.3)                  | <b>-4.8</b><br>(-8.1 to -1.3)                       |
| Diarrhoeal diseases                                                                  | 29.1<br>(27.2 to 31.1)                 | 1,895.0<br>(1,773.9 to 2,034.4)            | 3.3<br>(2.3 to 4.5)              | -14.2<br>(-18.8 to -8.8)                          | -6.6<br>(-12.3 to -0.5)                             |
| Intestinal infectious diseases                                                       | < 0.05<br>(< 0.05 to < 0.05)           | < 0.05†<br>(< 0.05 to < 0.05)              | < 0.05<br>(< 0.05 to < 0.05)     | -7.4<br>(-19.9 to 6.4)                            | -1.5<br>(-14.8 to 13.4)                             |
| Typhoid fever                                                                        | < 0.05<br>(< 0.05 to < 0.05)           | < 0.05<br>(< 0.05 to < 0.05)               | < 0.05<br>(< 0.05 to < 0.05)     | 2.6<br>(-15.8 to 22.7)                            | 14.9<br>(-5.5 to 37.5)                              |
| Paratyphoid fever                                                                    | < 0.05<br>(< 0.05 to < 0.05)           | < 0.05<br>(< 0.05 to < 0.05)               | < 0.05<br>(< 0.05 to < 0.05)     | -15.9<br>(-29.1 to 0.9)                           | -12.7<br>(-25.7 to 3.5)                             |
| Other intestinal infectious diseases                                                 | --                                     | --                                         | < 0.05<br>(< 0.05 to < 0.05)     | -34.1<br>(-53.1 to -7.6)                          | -40.5<br>(-60.2 to -10.7)                           |
| Lower respiratory infections                                                         | 5.8<br>(5.4 to 6.2)                    | 256.1<br>(236.7 to 278.0)                  | 0.3<br>(0.2 to 0.5)              | -1.9<br>(-10.2 to 7.6)                            | -0.4<br>(-10.0 to 9.9)                              |
| Upper respiratory infections                                                         | 107.4<br>(91.2 to 126.6)               | 8,149.5<br>(6,866.8 to 9,680.1)            | 2.6<br>(1.6 to 4.2)              | -14.5<br>(-19.7 to -8.8)                          | 0.3<br>(-5.2 to 6.1)                                |
| Otitis media                                                                         | 27.2<br>(24.5 to 29.9)                 | 115.1<br>(96.1 to 139.1)                   | 0.7<br>(0.5 to 1.1)              | -23.4<br>(-28.8 to -17.6)                         | -9.5<br>(-15.6 to -3.2)                             |
| Meningitis                                                                           | 2.7<br>(2.4 to 3.1)                    | 0.4<br>(0.4 to 0.5)                        | 0.3<br>(0.2 to 0.4)              | -19.2<br>(-21.9 to -16.9)                         | -5.7<br>(-8.8 to -2.9)                              |
| Pneumococcal meningitis                                                              | 1.0<br>(0.9 to 1.1)                    | < 0.05<br>(< 0.05 to 0.1)                  | 0.1<br>(0.1 to 0.2)              | -24.5<br>(-29.4 to -20.2)                         | -11.8<br>(-17.7 to -6.6)                            |
| H influenzae type B meningitis                                                       | 0.3<br>(0.3 to 0.4)                    | < 0.05<br>(< 0.05 to < 0.05)               | 0.1<br>(< 0.05 to 0.1)           | -22.2<br>(-26.2 to -18.0)                         | -8.2<br>(-13.3 to -2.7)                             |
| Meningococcal infection                                                              | 0.4<br>(0.4 to 0.5)                    | 0.1<br>(0.1 to 0.1)                        | 0.1<br>(< 0.05 to 0.1)           | -20.5<br>(-24.2 to -16.5)                         | -7.5<br>(-12.1 to -2.8)                             |
| Other meningitis                                                                     | 1.0<br>(0.8 to 1.2)                    | 0.3<br>(0.2 to 0.3)                        | 0.1<br>(0.1 to 0.1)              | -6.7<br>(-10.5 to -1.7)                           | 8.4<br>(3.9 to 13.5)                                |
| Encephalitis                                                                         | 5.5<br>(3.6 to 8.2)                    | 4.0<br>(3.9 to 4.1)                        | 0.5<br>(0.3 to 0.7)              | -18.7<br>(-28.3 to -8.8)                          | -10.8<br>(-21.6 to 0.6)                             |
| Diphtheria                                                                           | < 0.05<br>(< 0.05 to < 0.05)           | < 0.05<br>(< 0.05 to < 0.05)               | < 0.05<br>(< 0.05 to < 0.05)     | -35.8<br>(-67.8 to 24.6)                          | -29.6<br>(-61.0 to 25.5)                            |
| Whooping cough                                                                       | 0.2<br>(0.1 to 0.2)                    | 1.3<br>(1.0 to 1.6)                        | < 0.05<br>(< 0.05 to < 0.05)     | -10.1<br>(-31.8 to 19.4)                          | -8.6<br>(-30.8 to 21.9)                             |
| Tetanus                                                                              | < 0.05<br>(< 0.05 to < 0.05)           | < 0.05<br>(< 0.05 to < 0.05)               | < 0.05<br>(< 0.05 to < 0.05)     | -57.8<br>(-68.1 to -44.3)                         | -49.8<br>(-62.8 to -33.1)                           |
| Measles                                                                              | < 0.05<br>(< 0.05 to < 0.05)           | < 0.05<br>(< 0.05 to 0.1)                  | < 0.05<br>(< 0.05 to < 0.05)     | --                                                | --                                                  |
| Varicella and herpes zoster                                                          | 2.6<br>(2.3 to 2.8)                    | 41.1<br>(39.6 to 42.6)                     | 0.1<br>(0.1 to 0.2)              | -3.5<br>(-15.3 to 9.6)                            | -0.3<br>(-13.2 to 13.8)                             |
| <b>Neglected tropical diseases and malaria</b>                                       | <b>0.9</b><br>(0.2 to 1.7)             | <b>&lt; 0.05†</b><br>(< 0.05 to < 0.05)    | <b>0.1</b><br>(< 0.05 to 0.3)    | <b>-17.7</b><br>(-98.1 to 1,369.1)                | <b>-13.7</b><br>(-97.7 to 1,324.9)                  |
| Malaria                                                                              | --                                     | --                                         | --                               | --                                                | --                                                  |
| Chagas disease                                                                       | --                                     | --                                         | --                               | --                                                | --                                                  |
| Leishmaniasis                                                                        | --                                     | --                                         | --                               | --                                                | --                                                  |
| Visceral leishmaniasis                                                               | --                                     | --                                         | --                               | --                                                | --                                                  |
| Cutaneous and mucocutaneous leishmaniasis                                            | --                                     | --                                         | --                               | --                                                | --                                                  |
| African trypanosomiasis                                                              | --                                     | --                                         | --                               | --                                                | --                                                  |
| Schistosomiasis                                                                      | --                                     | --                                         | --                               | --                                                | --                                                  |
| Cysticercosis                                                                        | 0.7<br>(< 0.05 to 1.5)                 | --                                         | 0.1<br>(< 0.05 to 0.2)           | --                                                | --                                                  |
| Cystic echinococcosis                                                                | 0.1<br>(< 0.05 to 0.2)                 | < 0.05<br>(< 0.05 to < 0.05)               | < 0.05<br>(< 0.05 to < 0.05)     | -61.1<br>(-96.4 to 228.1)                         | -57.3<br>(-96.1 to 281.5)                           |
| Lymphatic filariasis                                                                 | --                                     | --                                         | --                               | --                                                | --                                                  |
| Onchocerciasis                                                                       | --                                     | --                                         | --                               | --                                                | --                                                  |
| Trachoma                                                                             | --                                     | --                                         | --                               | --                                                | --                                                  |
| Dengue                                                                               | --                                     | --                                         | --                               | --                                                | --                                                  |
| Yellow fever                                                                         | --                                     | --                                         | --                               | --                                                | --                                                  |
| Rabies                                                                               | < 0.05<br>(< 0.05 to < 0.05)           | < 0.05<br>(< 0.05 to < 0.05)               | < 0.05<br>(< 0.05 to < 0.05)     | -83.2<br>(-89.3 to -74.5)                         | -85.0<br>(-90.7 to -76.7)                           |
| Intestinal nematode infections                                                       | --                                     | --                                         | --                               | --                                                | --                                                  |
| Ascariasis                                                                           | --                                     | --                                         | --                               | --                                                | --                                                  |

| Cause                                                                   | Prevalence in thousands (95% UI)              | Incidence in thousands (95% UI)                | YLDs in thousands (95% UI)              |                                                   |                                                     |
|-------------------------------------------------------------------------|-----------------------------------------------|------------------------------------------------|-----------------------------------------|---------------------------------------------------|-----------------------------------------------------|
|                                                                         | 2016 counts                                   | 2016 counts                                    | 2016 counts                             | Percentage change in counts between 2006 and 2016 | Percentage change in age-standardised rates between |
| Trichuriasis                                                            | --                                            | --                                             | --                                      | --                                                | --                                                  |
| Hookworm disease                                                        | --                                            | --                                             | --                                      | --                                                | --                                                  |
| Food-borne trematodiasis                                                | --                                            | --                                             | --                                      | --                                                | --                                                  |
| Leprosy                                                                 | --                                            | --                                             | --                                      | --                                                | --                                                  |
| Ebola virus disease                                                     | --                                            | --                                             | --                                      | --                                                | --                                                  |
| Zika virus disease                                                      | --                                            | --                                             | --                                      | --                                                | --                                                  |
| Guinea worm disease                                                     | --                                            | --                                             | --                                      | --                                                | --                                                  |
| Other neglected tropical diseases                                       | --                                            | --                                             | < 0.05<br>(< 0.05 to < 0.05)            | --                                                | --                                                  |
| <b>Maternal disorders</b>                                               | <b>3.4</b><br><b>(2.8 to 4.4)</b>             | <b>39.1†</b><br><b>(35.5 to 44.7)</b>          | <b>0.1</b><br><b>(0.1 to 0.2)</b>       | <b>-22.9</b><br><b>(-40.7 to -2.2)</b>            | <b>-8.1</b><br><b>(-29.4 to 16.6)</b>               |
| Maternal haemorrhage                                                    | 1.6<br>(1.1 to 2.4)                           | 7.7<br>(6.8 to 9.3)                            | 0.1<br>(< 0.05 to 0.1)                  | -23.9<br>(-49.8 to 13.5)                          | -9.3<br>(-40.4 to 35.5)                             |
| Maternal sepsis and other pregnancy related infections                  | 0.9<br>(0.8 to 1.1)                           | 3.2<br>(2.9 to 3.6)                            | < 0.05<br>(< 0.05 to < 0.05)            | -14.6<br>(-55.2 to 59.2)                          | 0.3<br>(-48.5 to 89.5)                              |
| Maternal hypertensive disorders                                         | 0.7<br>(0.4 to 0.9)                           | 2.7<br>(2.4 to 3.1)                            | < 0.05<br>(< 0.05 to 0.1)               | -30.7<br>(-58.8 to 21.9)                          | -17.4<br>(-50.9 to 45.4)                            |
| Maternal obstructed labour and uterine rupture                          | < 0.05<br>(< 0.05 to < 0.05)                  | 2.2<br>(1.9 to 2.5)                            | < 0.05<br>(< 0.05 to < 0.05)            | 4.1<br>(-66.6 to 132.4)                           | 23.5<br>(-61.4 to 174.4)                            |
| Maternal abortion, miscarriage, and ectopic pregnancy                   | 0.2<br>(0.1 to 0.3)                           | 23.2<br>(19.9 to 28.6)                         | < 0.05<br>(< 0.05 to < 0.05)            | -16.2<br>(-56.9 to 62.4)                          | 2.0<br>(-47.9 to 95.0)                              |
| Other maternal disorders                                                | --                                            | --                                             | < 0.05<br>(< 0.05 to < 0.05)            | -27.5<br>(-44.2 to -8.4)                          | -13.7<br>(-33.8 to 9.5)                             |
| <b>Neonatal disorders</b>                                               | <b>23.6</b><br><b>(19.9 to 28.0)</b>          | <b>4.3</b><br><b>--</b>                        | <b>3.1</b><br><b>(3.0 to 6.0)</b>       | <b>-20.7</b><br><b>(-30.6 to -2.6)</b>            | <b>-6.6</b><br><b>(-18.3 to 14.7)</b>               |
| Neonatal preterm birth complications                                    | 12.6<br>(10.0 to 16.1)                        | --                                             | 1.2<br>(0.8 to 1.7)                     | -30.8<br>(-45.4 to -12.9)                         | -16.6<br>(-34.9 to 5.0)                             |
| Neonatal encephalopathy due to birth asphyxia and trauma                | 11.7<br>(8.1 to 16.5)                         | --                                             | 2.1<br>(1.3 to 3.2)                     | -13.6<br>(-30.7 to 51.5)                          | 1.6<br>(-19.8 to 75.8)                              |
| Neonatal sepsis and other neonatal infections                           | 2.2<br>(1.1 to 4.6)                           | --                                             | 0.9<br>(0.4 to 2.0)                     | -21.9<br>(-33.5 to -5.9)                          | -8.4<br>(-22.3 to 10.1)                             |
| Hemolytic disease and other neonatal jaundice                           | 0.2<br>(0.2 to 0.3)                           | --                                             | 0.1<br>(< 0.05 to 0.1)                  | -17.1<br>(-23.6 to -10.5)                         | -1.2<br>(-8.8 to 6.6)                               |
| Other neonatal disorders                                                | --                                            | --                                             | 0.1<br>(0.1 to 0.1)                     | -11.2<br>(-26.7 to 12.0)                          | -12.2<br>(-27.5 to 10.7)                            |
| <b>Nutritional deficiencies</b>                                         | <b>225.8</b><br><b>(195.3 to 257.6)</b>       | <b>5.2†</b><br><b>(4.1 to 6.7)</b>             | <b>3.1</b><br><b>(1.9 to 4.6)</b>       | <b>-16.8</b><br><b>(-26.4 to -4.0)</b>            | <b>-5.4</b><br><b>(-18.1 to 10.9)</b>               |
| Protein-energy malnutrition                                             | 3.6<br>(2.9 to 4.5)                           | 1.7<br>(1.4 to 2.2)                            | 0.2<br>(0.1 to 0.3)                     | -15.3<br>(-43.5 to 27.1)                          | -16.3<br>(-44.1 to 25.5)                            |
| Iodine deficiency                                                       | 39.6<br>(34.0 to 45.9)                        | 0.5<br>(0.4 to 0.5)                            | 0.9<br>(0.6 to 1.3)                     | -4.4<br>(-14.5 to 6.9)                            | 4.3<br>(-7.2 to 16.9)                               |
| Vitamin A deficiency                                                    | 3.5<br>(2.4 to 5.1)                           | 3.0<br>(2.0 to 4.4)                            | --                                      | --                                                | --                                                  |
| Iron-deficiency anaemia                                                 | 166.5<br>(136.8 to 202.6)                     | --                                             | 1.9<br>(1.2 to 3.1)                     | -21.6<br>(-34.5 to -3.7)                          | -6.5<br>(-23.1 to 16.3)                             |
| Other nutritional deficiencies                                          | --                                            | --                                             | < 0.05<br>(< 0.05 to < 0.05)            | -15.7<br>(-45.2 to 28.7)                          | -16.7<br>(-45.8 to 27.0)                            |
| <b>Other communicable, maternal, neonatal, and nutritional diseases</b> | <b>745.6</b><br><b>(688.2 to 809.5)</b>       | <b>193.9</b><br><b>(164.0 to 233.0)</b>        | <b>1.0</b><br><b>(0.7 to 1.7)</b>       | <b>-13.9</b><br><b>(-18.8 to -8.2)</b>            | <b>-1.5</b><br><b>(-7.5 to 4.8)</b>                 |
| Sexually transmitted diseases excluding HIV                             | 605.8<br>(555.1 to 669.9)                     | 172.6<br>(144.3 to 211.1)                      | 0.9<br>(0.6 to 1.4)                     | -13.9<br>(-19.2 to -7.5)                          | -1.6<br>(-7.9 to 5.0)                               |
| Syphilis                                                                | 5.1<br>(4.3 to 6.2)                           | 3.3<br>(2.5 to 4.2)                            | 0.2<br>(0.1 to 0.3)                     | 4.7<br>(-13.0 to 25.0)                            | 3.0<br>(-14.1 to 22.0)                              |
| Chlamydial infection                                                    | 36.8<br>(29.4 to 45.4)                        | 29.1<br>(23.2 to 36.1)                         | 0.1<br>(0.1 to 0.3)                     | -19.1<br>(-28.2 to -8.5)                          | -2.6<br>(-14.0 to 9.4)                              |
| Gonococcal infection                                                    | 19.7<br>(12.3 to 29.2)                        | 64.8<br>(36.3 to 102.4)                        | 0.1<br>(0.1 to 0.2)                     | -21.1<br>(-33.0 to -7.7)                          | -2.1<br>(-17.2 to 14.5)                             |
| Trichomoniasis                                                          | 51.2<br>(44.7 to 58.6)                        | 42.4<br>(36.7 to 48.7)                         | < 0.05<br>(< 0.05 to 0.1)               | -12.8<br>(-18.6 to -6.0)                          | -1.2<br>(-7.6 to 6.2)                               |
| Genital herpes                                                          | 505.5<br>(437.1 to 591.0)                     | 19.2<br>(16.3 to 23.0)                         | 0.1<br>(< 0.05 to 0.3)                  | -7.3<br>(-15.0 to -0.0)                           | -0.4<br>(-8.8 to 8.1)                               |
| Other sexually transmitted diseases                                     | 12.9<br>(10.5 to 15.4)                        | 13.8<br>(11.8 to 16.4)                         | 0.2<br>(0.2 to 0.4)                     | -20.7<br>(-29.2 to -11.7)                         | -3.2<br>(-13.7 to 8.0)                              |
| Hepatitis                                                               | 186.3<br>(162.4 to 216.2)                     | 21.3<br>(16.5 to 25.1)                         | < 0.05<br>(< 0.05 to < 0.05)            | -44.5<br>(-53.0 to -34.7)                         | -41.5<br>(-51.1 to -30.4)                           |
| Acute hepatitis A                                                       | 0.9<br>(0.5 to 1.1)                           | 11.2<br>(6.1 to 13.9)                          | < 0.05<br>(< 0.05 to < 0.05)            | -46.3<br>(-61.7 to -24.5)                         | -43.0<br>(-59.5 to -18.5)                           |
| Hepatitis B                                                             | 117.1<br>(94.2 to 144.7)                      | 8.6<br>(6.6 to 10.8)                           | < 0.05<br>(< 0.05 to < 0.05)            | -44.9<br>(-55.2 to -32.1)                         | -42.9<br>(-53.2 to -30.1)                           |
| Hepatitis C                                                             | 68.3<br>(61.1 to 75.5)                        | 1.0<br>(0.9 to 1.1)                            | < 0.05<br>(< 0.05 to < 0.05)            | -21.3<br>(-34.6 to -5.3)                          | -13.1<br>(-32.5 to 12.3)                            |
| Acute hepatitis E                                                       | < 0.05<br>(< 0.05 to 0.1)                     | 0.6<br>(0.4 to 0.8)                            | < 0.05<br>(< 0.05 to < 0.05)            | -41.0<br>(-47.2 to -34.2)                         | -39.4<br>(-43.4 to -35.0)                           |
| Other infectious diseases                                               | 5.9<br>(4.6 to 7.5)                           | < 0.05<br>(< 0.05 to < 0.05)                   | 0.1<br>(0.1 to 0.2)                     | -6.1<br>(-18.4 to 8.6)                            | 7.1<br>(-9.2 to 26.5)                               |
| <b>Non-communicable diseases</b>                                        | <b>2,690.5</b><br><b>(2,680.0 to 2,701.1)</b> | <b>8,842.0†</b><br><b>(8,506.1 to 9,207.9)</b> | <b>337.4</b><br><b>(251.4 to 434.2)</b> | <b>-5.8</b><br><b>(-7.5 to -4.1)</b>              | <b>-1.2</b><br><b>(-3.1 to 0.6)</b>                 |
| <b>Neoplasms</b>                                                        | <b>56.3</b><br><b>(53.7 to 59.2)</b>          | <b>17.4</b><br><b>(15.3 to 18.7)</b>           | <b>5.5</b><br><b>(4.0 to 7.3)</b>       | <b>7.5</b><br><b>(-0.3 to 16.7)</b>               | <b>5.3</b><br><b>(-2.4 to 14.7)</b>                 |
| Lip and oral cavity cancer                                              | 0.7<br>(0.7 to 0.8)                           | 0.2<br>(0.2 to 0.2)                            | 0.1<br>(0.1 to 0.1)                     | 0.0<br>(-18.7 to 22.0)                            | -4.2<br>(-22.9 to 17.6)                             |
| Nasopharynx cancer                                                      | < 0.05<br>(< 0.05 to 0.1)                     | < 0.05<br>(< 0.05 to < 0.05)                   | < 0.05<br>(< 0.05 to < 0.05)            | -25.4<br>(-36.7 to -9.5)                          | -21.8<br>(-34.0 to -4.6)                            |
| Other pharynx cancer                                                    | 0.6<br>(0.5 to 0.7)                           | 0.2<br>(0.1 to 0.2)                            | 0.1<br>(< 0.05 to 0.1)                  | 33.9<br>(4.4 to 68.8)                             | 30.3<br>(0.6 to 64.6)                               |
| Oesophageal cancer                                                      | 0.2<br>(0.2 to 0.3)                           | 0.2<br>(0.2 to 0.2)                            | 0.1<br>(< 0.05 to 0.1)                  | 4.4<br>(-24.9 to 39.3)                            | -0.2<br>(-29.2 to 35.2)                             |
| Stomach cancer                                                          | 1.8<br>(1.6 to 2.0)                           | 0.9<br>(0.9 to 1.0)                            | 0.2<br>(0.2 to 0.3)                     | -8.3<br>(-22.0 to 7.0)                            | -13.8<br>(-26.3 to 0.3)                             |
| Colon and rectum cancer                                                 | 5.8<br>(5.3 to 6.5)                           | 1.6<br>(1.5 to 1.8)                            | 0.6<br>(0.4 to 0.7)                     | 4.0<br>(-9.1 to 20.6)                             | -1.7<br>(-14.7 to 15.0)                             |
| Liver cancer                                                            | 0.3<br>(0.2 to 0.4)                           | 0.3<br>(0.2 to 0.3)                            | 0.1<br>(< 0.05 to 0.1)                  | 55.6<br>(30.7 to 85.9)                            | 50.7<br>(27.2 to 77.8)                              |
| Liver cancer due to hepatitis B                                         | 0.2<br>(0.1 to 0.2)                           | 0.1<br>(0.1 to 0.1)                            | < 0.05<br>(< 0.05 to < 0.05)            | 55.0<br>(29.0 to 85.3)                            | 51.2<br>(25.9 to 79.3)                              |



| Cause                                              | Prevalence in thousands (95% UI)        | Incidence in thousands (95% UI)       | YLDs in thousands (95% UI)           |                                                   |                                                     |
|----------------------------------------------------|-----------------------------------------|---------------------------------------|--------------------------------------|---------------------------------------------------|-----------------------------------------------------|
|                                                    | 2016 counts                             | 2016 counts                           | 2016 counts                          | Percentage change in counts between 2006 and 2016 | Percentage change in age-standardised rates between |
| Liver cancer due to hepatitis C                    | 0.1<br>( $< 0.05$ to 0.1)               | $< 0.05$<br>( $< 0.05$ to $< 0.05$ )  | $< 0.05$<br>( $< 0.05$ to $< 0.05$ ) | 55.9<br>(27.9 to 89.3)                            | 44.5<br>(20.0 to 74.5)                              |
| Liver cancer due to alcohol use                    | 0.2<br>(0.1 to 0.2)                     | 0.1<br>(0.1 to 0.1)                   | $< 0.05$<br>( $< 0.05$ to $< 0.05$ ) | 58.0<br>(29.8 to 90.5)                            | 53.5<br>(26.1 to 85.4)                              |
| Liver cancer due to other causes                   | 0.1<br>(0.1 to 0.1)                     | $< 0.05$<br>( $< 0.05$ to $< 0.05$ )  | $< 0.05$<br>( $< 0.05$ to $< 0.05$ ) | 50.7<br>(25.4 to 80.1)                            | 47.1<br>(22.1 to 75.4)                              |
| Gallbladder and biliary tract cancer               | 0.1<br>(0.1 to 0.1)                     | 0.1<br>(0.1 to 0.1)                   | $< 0.05$<br>( $< 0.05$ to $< 0.05$ ) | -8.3<br>(-15.7 to 1.5)                            | -15.4<br>(-22.0 to -6.3)                            |
| Pancreatic cancer                                  | 0.5<br>(0.4 to 0.5)                     | 0.5<br>(0.5 to 0.5)                   | 0.1<br>(0.1 to 0.1)                  | 7.7<br>(-13.7 to 30.8)                            | 0.1<br>(-18.9 to 20.2)                              |
| Larynx cancer                                      | 0.9<br>(0.8 to 1.0)                     | 0.3<br>(0.2 to 0.3)                   | 0.1<br>(0.1 to 0.1)                  | 1.9<br>(-19.1 to 28.2)                            | -0.5<br>(-20.9 to 25.8)                             |
| Tracheal, bronchus, and lung cancer                | 2.1<br>(1.9 to 2.3)                     | 1.5<br>(1.4 to 1.6)                   | 0.3<br>(0.2 to 0.4)                  | -8.3<br>(-22.6 to 9.2)                            | -12.0<br>(-25.7 to 4.8)                             |
| Malignant skin melanoma                            | 1.8<br>(1.3 to 2.1)                     | 0.4<br>(0.3 to 0.4)                   | 0.1<br>(0.1 to 0.2)                  | 28.1<br>(2.7 to 50.5)                             | 28.6<br>(3.3 to 51.6)                               |
| Non-melanoma skin cancer                           | 0.6<br>(0.2 to 1.4)                     | 1.1<br>(0.6 to 1.8)                   | $< 0.05$<br>( $< 0.05$ to 0.1)       | 68.1<br>(-43.6 to 427.3)                          | 49.3<br>(-47.5 to 350.7)                            |
| Non-melanoma skin cancer (squamous-cell carcinoma) | 0.4<br>(0.1 to 1.3)                     | 0.3<br>(0.1 to 0.9)                   | $< 0.05$<br>( $< 0.05$ to 0.1)       | 70.3<br>(-49.2 to 454.6)                          | 50.4<br>(-53.7 to 374.5)                            |
| Non-melanoma skin cancer (basal-cell carcinoma)    | 0.1<br>(0.1 to 0.2)                     | 0.8<br>(0.4 to 1.3)                   | $< 0.05$<br>( $< 0.05$ to $< 0.05$ ) | 42.0<br>(-24.0 to 114.1)                          | 36.7<br>(-21.9 to 99.4)                             |
| Breast cancer                                      | 6.7<br>(6.1 to 7.5)                     | 1.4<br>(1.3 to 1.6)                   | 0.6<br>(0.4 to 0.8)                  | -4.7<br>(-16.9 to 11.3)                           | -5.5<br>(-17.7 to 10.6)                             |
| Cervical cancer                                    | 1.0<br>(0.9 to 1.2)                     | 0.3<br>(0.2 to 0.3)                   | 0.1<br>(0.1 to 0.1)                  | -28.2<br>(-40.3 to -10.0)                         | -26.7<br>(-39.3 to -8.3)                            |
| Uterine cancer                                     | 5.0<br>(4.2 to 5.9)                     | 1.1<br>(0.9 to 1.2)                   | 0.4<br>(0.2 to 0.5)                  | 20.2<br>(-2.9 to 54.5)                            | 16.8<br>(-5.9 to 52.0)                              |
| Ovarian cancer                                     | 1.2<br>(1.0 to 1.4)                     | 0.4<br>(0.3 to 0.4)                   | 0.2<br>(0.1 to 0.2)                  | -5.1<br>(-31.9 to 27.5)                           | -5.6<br>(-32.7 to 26.7)                             |
| Prostate cancer                                    | 13.9<br>(7.2 to 16.8)                   | 3.0<br>(1.6 to 3.6)                   | 1.2<br>(0.6 to 1.6)                  | 13.3<br>(-6.2 to 36.8)                            | 11.0<br>(-8.6 to 34.5)                              |
| Testicular cancer                                  | 0.3<br>(0.2 to 0.4)                     | 0.1<br>( $< 0.05$ to 0.1)             | $< 0.05$<br>( $< 0.05$ to $< 0.05$ ) | 12.5<br>(-29.6 to 72.7)                           | 30.0<br>(-20.0 to 101.4)                            |
| Kidney cancer                                      | 2.6<br>(2.2 to 2.9)                     | 0.7<br>(0.6 to 0.8)                   | 0.2<br>(0.1 to 0.3)                  | -1.6<br>(-19.2 to 17.6)                           | -3.5<br>(-21.2 to 15.1)                             |
| Bladder cancer                                     | 1.7<br>(1.6 to 1.9)                     | 0.5<br>(0.4 to 0.5)                   | 0.2<br>(0.1 to 0.2)                  | 2.6<br>(-12.3 to 19.0)                            | -4.0<br>(-17.9 to 11.3)                             |
| Brain and nervous system cancer                    | 0.8<br>(0.5 to 1.0)                     | 0.3<br>(0.2 to 0.4)                   | 0.1<br>(0.1 to 0.1)                  | 16.1<br>(-9.3 to 36.1)                            | 19.4<br>(-6.5 to 40.2)                              |
| Thyroid cancer                                     | 1.6<br>(1.4 to 1.9)                     | 0.3<br>(0.3 to 0.4)                   | 0.1<br>(0.1 to 0.1)                  | 4.0<br>(-13.8 to 27.6)                            | 5.6<br>(-11.9 to 30.5)                              |
| Mesothelioma                                       | $< 0.05$<br>( $< 0.05$ to $< 0.05$ )    | $< 0.05$<br>( $< 0.05$ to $< 0.05$ )  | $< 0.05$<br>( $< 0.05$ to $< 0.05$ ) | -19.3<br>(-27.3 to -8.0)                          | -20.4<br>(-28.4 to -9.9)                            |
| Hodgkin lymphoma                                   | 0.4<br>(0.3 to 0.5)                     | 0.1<br>(0.1 to 0.1)                   | $< 0.05$<br>( $< 0.05$ to $< 0.05$ ) | -19.3<br>(-32.9 to -1.4)                          | -8.0<br>(-24.6 to 14.4)                             |
| Non-Hodgkin's lymphoma                             | 1.8<br>(1.3 to 2.0)                     | 0.4<br>(0.3 to 0.5)                   | 0.1<br>(0.1 to 0.2)                  | 36.4<br>(11.6 to 61.1)                            | 35.2<br>(10.0 to 58.6)                              |
| Multiple myeloma                                   | 0.6<br>(0.4 to 0.7)                     | 0.2<br>(0.1 to 0.2)                   | 0.1<br>(0.1 to 0.1)                  | 18.8<br>(-12.2 to 62.2)                           | 15.7<br>(-15.3 to 59.7)                             |
| Leukaemia                                          | 2.4<br>(2.2 to 2.7)                     | 0.7<br>(0.6 to 0.8)                   | 0.3<br>(0.2 to 0.4)                  | 49.9<br>(26.4 to 77.6)                            | 48.7<br>(24.4 to 77.1)                              |
| Acute lymphoid leukaemia                           | 0.3<br>(0.2 to 0.4)                     | 0.1<br>(0.1 to 0.1)                   | $< 0.05$<br>( $< 0.05$ to $< 0.05$ ) | 56.1<br>(13.3 to 108.8)                           | 77.9<br>(16.4 to 164.3)                             |
| Chronic lymphoid leukaemia                         | 1.5<br>(1.3 to 1.7)                     | 0.3<br>(0.3 to 0.4)                   | 0.2<br>(0.1 to 0.2)                  | 45.8<br>(15.5 to 82.5)                            | 40.1<br>(11.8 to 73.9)                              |
| Acute myeloid leukaemia                            | 0.2<br>(0.2 to 0.2)                     | 0.1<br>(0.1 to 0.2)                   | $< 0.05$<br>( $< 0.05$ to 0.1)       | 81.4<br>(38.7 to 122.0)                           | 70.3<br>(26.6 to 113.1)                             |
| Chronic myeloid leukaemia                          | 0.1<br>(0.1 to 0.2)                     | $< 0.05$<br>( $< 0.05$ to 0.1)        | $< 0.05$<br>( $< 0.05$ to $< 0.05$ ) | -1.1<br>(-16.9 to 17.4)                           | -3.9<br>(-19.0 to 13.9)                             |
| Other leukaemia                                    | 0.3<br>(0.2 to 0.4)                     | 0.1<br>(0.1 to 0.1)                   | $< 0.05$<br>( $< 0.05$ to 0.1)       | 76.7<br>(33.2 to 130.2)                           | 62.3<br>(22.0 to 110.5)                             |
| Other neoplasms                                    | 2.8<br>(2.2 to 3.3)                     | 0.7<br>(0.6 to 0.8)                   | 0.2<br>(0.1 to 0.3)                  | 29.2<br>(-0.1 to 60.8)                            | 31.1<br>(1.8 to 62.3)                               |
| <b>Cardiovascular diseases</b>                     | <b>368.0</b><br><b>(354.3 to 380.4)</b> | <b>52.7†</b><br><b>(50.0 to 55.2)</b> | <b>33.4</b><br><b>(24.5 to 42.9)</b> | <b>1.0</b><br><b>(-5.7 to 8.4)</b>                | <b>-5.6</b><br><b>(-11.3 to 1.1)</b>                |
| Rheumatic heart disease                            | 0.7<br>(0.7 to 0.8)                     | 0.1<br>(0.1 to 0.1)                   | 0.1<br>( $< 0.05$ to 0.1)            | -23.3<br>(-40.2 to -4.8)                          | -22.6<br>(-39.0 to -3.7)                            |
| Ischaemic heart disease                            | 163.1<br>(153.5 to 173.4)               | 23.8<br>(22.1 to 25.6)                | 9.3<br>(6.6 to 12.7)                 | 4.7<br>(0.5 to 9.6)                               | -2.7<br>(-6.5 to 1.4)                               |
| Cerebrovascular disease                            | 82.4<br>(75.6 to 91.6)                  | 15.0‡<br>(13.7 to 16.3)               | 16.5<br>(11.5 to 21.4)               | -2.8<br>(-14.6 to 11.2)                           | -9.8<br>(-20.1 to 2.6)                              |
| Ischaemic stroke                                   | 76.0<br>(67.2 to 88.4)                  | 12.5‡<br>(11.2 to 13.8)               | 14.9<br>(10.3 to 19.4)               | -4.3<br>(-16.8 to 11.0)                           | -11.7<br>(-22.9 to 1.9)                             |
| Hemorrhagic stroke                                 | 8.6<br>(7.6 to 9.8)                     | 2.5‡<br>(2.2 to 2.8)                  | 1.7<br>(1.2 to 2.1)                  | 13.6<br>(-0.6 to 26.9)                            | 8.6<br>(-4.3 to 20.9)                               |
| Hypertensive heart disease                         | 9.2<br>(7.6 to 11.2)                    | --                                    | 0.7<br>(0.5 to 1.0)                  | 6.5<br>(-5.7 to 20.8)                             | -0.2<br>(-11.8 to 12.4)                             |
| Cardiomyopathy and myocarditis                     | 7.9<br>(7.1 to 8.9)                     | 1.7+<br>(1.5 to 1.9)                  | 0.7<br>(0.4 to 0.9)                  | 2.9<br>(-8.3 to 15.3)                             | 7.0<br>(-4.3 to 19.8)                               |
| Myocarditis                                        | 0.6<br>(0.5 to 0.6)                     | 1.7<br>(1.5 to 1.9)                   | $< 0.05$<br>( $< 0.05$ to $< 0.05$ ) | -9.9<br>(-22.1 to 4.0)                            | 1.3<br>(-9.8 to 13.9)                               |
| Alcoholic cardiomyopathy                           | 4.0<br>(3.4 to 4.8)                     | --                                    | 0.3<br>(0.2 to 0.5)                  | 7.5<br>(-7.7 to 26.6)                             | 9.9<br>(-6.0 to 29.6)                               |
| Other cardiomyopathy                               | 3.6<br>(3.1 to 4.1)                     | --                                    | 0.3<br>(0.2 to 0.4)                  | -0.4<br>(-14.1 to 14.3)                           | 4.9<br>(-9.0 to 20.7)                               |
| Atrial fibrillation and flutter                    | 39.6<br>(34.2 to 46.1)                  | 3.0<br>(2.5 to 3.5)                   | 3.0<br>(2.1 to 4.2)                  | 11.1<br>(4.4 to 18.6)                             | 0.9<br>(-4.9 to 7.4)                                |
| Peripheral vascular disease                        | 97.1<br>(84.4 to 112.0)                 | 8.6<br>(7.4 to 10.1)                  | 0.4<br>(0.2 to 0.8)                  | 3.3<br>(-5.7 to 13.7)                             | -6.4<br>(-13.6 to 1.0)                              |
| Endocarditis                                       | 0.2<br>(0.2 to 0.2)                     | 0.5<br>(0.5 to 0.5)                   | $< 0.05$<br>( $< 0.05$ to $< 0.05$ ) | 4.8<br>(-4.8 to 16.5)                             | 1.7<br>(-6.3 to 10.7)                               |
| Other cardiovascular and circulatory diseases      | 52.1<br>(43.8 to 61.9)                  | --                                    | 2.6<br>(1.8 to 3.8)                  | 0.4<br>(-8.9 to 11.0)                             | 1.1<br>(-7.5 to 11.3)                               |
| <b>Chronic respiratory diseases</b>                | <b>269.4</b><br><b>(257.5 to 281.1)</b> | <b>33.3†</b><br><b>(31.5 to 35.2)</b> | <b>8.6</b><br><b>(6.4 to 11.2)</b>   | <b>-3.6</b><br><b>(-8.2 to 1.6)</b>               | <b>4.9</b><br><b>(0.3 to 9.6)</b>                   |
| Chronic obstructive pulmonary disease              | 126.0<br>(117.8 to 136.7)               | 7.0<br>(6.6 to 7.6)                   | 2.4<br>(1.9 to 3.0)                  | -1.0<br>(-14.6 to 16.6)                           | -2.2<br>(-16.1 to 14.7)                             |
| Pneumoconiosis                                     | 0.3<br>(0.3 to 0.3)                     | $< 0.05$<br>( $< 0.05$ to $< 0.05$ )  | $< 0.05$<br>( $< 0.05$ to 0.1)       | -3.3<br>(-17.2 to 12.1)                           | -5.8<br>(-18.1 to 7.7)                              |
| Silicosis                                          | $< 0.05$<br>( $< 0.05$ to $< 0.05$ )    | $< 0.05$<br>( $< 0.05$ to $< 0.05$ )  | $< 0.05$<br>( $< 0.05$ to $< 0.05$ ) | -1.8<br>(-6.8 to 3.1)                             | -1.9<br>(-6.8 to 3.1)                               |



| Cause                                                          | Prevalence in thousands (95% UI)              | Incidence in thousands (95% UI)          | YLDs in thousands (95% UI)           |                                                   |                                                     |
|----------------------------------------------------------------|-----------------------------------------------|------------------------------------------|--------------------------------------|---------------------------------------------------|-----------------------------------------------------|
|                                                                | 2016 counts                                   | 2016 counts                              | 2016 counts                          | Percentage change in counts between 2006 and 2016 | Percentage change in age-standardised rates between |
| Asbestosis                                                     | 0.1<br>(0.1 to 0.1)                           | < 0.05<br>(< 0.05 to < 0.05)             | < 0.05<br>(< 0.05 to < 0.05)         | -7.5<br>(-14.3 to -1.0)                           | -8.0<br>(-14.8 to -1.4)                             |
| Coal workers pneumoconiosis                                    | --                                            | --                                       | --                                   | --                                                | --                                                  |
| Other pneumoconiosis                                           | 0.2<br>(0.1 to 0.2)                           | < 0.05<br>(< 0.05 to < 0.05)             | < 0.05<br>(< 0.05 to < 0.05)         | -0.8<br>(-27.0 to 32.2)                           | -5.2<br>(-28.4 to 22.1)                             |
| Asthma                                                         | 150.3<br>(140.8 to 161.2)                     | 26.2<br>(24.5 to 28.0)                   | 5.8<br>(3.8 to 8.2)                  | -5.0<br>(-9.1 to -0.5)                            | 6.7<br>(1.9 to 11.5)                                |
| Interstitial lung disease and pulmonary sarcoidosis            | 3.1<br>(2.8 to 3.4)                           | 0.1<br>(0.1 to 0.1)                      | 0.3<br>(0.2 to 0.5)                  | -1.2<br>(-15.4 to 13.4)                           | 2.5<br>(-10.7 to 16.7)                              |
| Other chronic respiratory diseases                             | --                                            | --                                       | 0.1<br>(0.1 to 0.1)                  | 9.9<br>(-0.5 to 22.3)                             | 36.5<br>(24.7 to 50.1)                              |
| <b>Cirrhosis and other chronic liver diseases</b>              | <b>37.0</b><br><b>(35.3 to 38.8)</b>          | <b>1.0</b><br><b>(1.0 to 1.1)</b>        | <b>0.9</b><br><b>(0.6 to 1.3)</b>    | <b>2.6</b><br><b>(-5.5 to 12.0)</b>               | <b>10.1</b><br><b>(0.7 to 20.6)</b>                 |
| Cirrhosis and other chronic liver diseases due to hepatitis B  | 6.7<br>(6.0 to 7.5)                           | 0.2<br>(0.2 to 0.2)                      | 0.2<br>(0.1 to 0.2)                  | 3.9<br>(-14.1 to 25.4)                            | 10.3<br>(-9.4 to 35.1)                              |
| Cirrhosis and other chronic liver diseases due to hepatitis C  | 7.8<br>(7.1 to 8.7)                           | 0.2<br>(0.2 to 0.3)                      | 0.2<br>(0.1 to 0.3)                  | 2.7<br>(-14.6 to 25.0)                            | 8.4<br>(-10.2 to 32.4)                              |
| Cirrhosis and other chronic liver diseases due to alcohol use  | 13.4<br>(12.3 to 14.6)                        | 0.4<br>(0.4 to 0.4)                      | 0.3<br>(0.2 to 0.4)                  | 9.6<br>(-6.6 to 26.4)                             | 14.1<br>(-3.2 to 31.9)                              |
| Cirrhosis and other chronic liver diseases due to other causes | 9.1<br>(8.4 to 9.9)                           | 0.2<br>(0.2 to 0.2)                      | 0.3<br>(0.2 to 0.4)                  | -5.3<br>(-18.9 to 11.3)                           | 7.8<br>(-8.4 to 27.5)                               |
| <b>Digestive diseases</b>                                      | <b>161.8</b><br><b>(151.0 to 173.0)</b>       | <b>191.9†</b><br><b>(181.8 to 202.1)</b> | <b>5.5</b><br><b>(3.9 to 7.3)</b>    | <b>-6.1</b><br><b>(-13.2 to 1.7)</b>              | <b>-2.9</b><br><b>(-10.2 to 4.8)</b>                |
| Peptic ulcer disease                                           | 62.9<br>(56.6 to 70.0)                        | 5.5<br>(5.0 to 6.0)                      | 1.0<br>(0.6 to 1.4)                  | -0.2<br>(-19.8 to 22.5)                           | 3.8<br>(-16.0 to 27.8)                              |
| Gastritis and duodenitis                                       | 55.3<br>(48.3 to 62.7)                        | 42.0<br>(37.9 to 46.3)                   | 0.9<br>(0.6 to 1.3)                  | -5.6<br>(-20.7 to 12.5)                           | -3.0<br>(-20.4 to 18.3)                             |
| Appendicitis                                                   | 0.2<br>(0.2 to 0.3)                           | 6.3<br>(5.9 to 6.9)                      | 0.1<br>(< 0.05 to 0.1)               | -18.4<br>(-38.0 to 8.0)                           | 1.5<br>(-26.4 to 40.9)                              |
| Paralytic ileus and intestinal obstruction                     | 0.1<br>(0.1 to 0.1)                           | 1.8<br>(1.6 to 1.9)                      | < 0.05<br>(< 0.05 to < 0.05)         | -3.3<br>(-9.3 to 1.3)                             | -2.0<br>(-8.1 to 2.4)                               |
| Inguinal, femoral, and abdominal hernia                        | 27.0<br>(25.0 to 29.0)                        | 61.4<br>(53.9 to 69.5)                   | 1.9<br>(1.3 to 2.7)                  | -10.7<br>(-18.1 to -2.7)                          | -7.3<br>(-15.3 to 0.7)                              |
| Inflammatory bowel disease                                     | 5.5<br>(5.1 to 5.9)                           | 2.1<br>(2.0 to 2.2)                      | 0.8<br>(0.5 to 1.0)                  | -7.1<br>(-15.6 to 2.6)                            | -3.4<br>(-12.6 to 7.2)                              |
| Vascular intestinal disorders                                  | 0.1<br>(0.1 to 0.1)                           | 0.6<br>(0.6 to 0.7)                      | < 0.05<br>(< 0.05 to < 0.05)         | 13.2<br>(-15.7 to 51.1)                           | 7.9<br>(-13.0 to 34.0)                              |
| Gallbladder and biliary diseases                               | 15.0<br>(13.6 to 16.6)                        | 65.1<br>(60.8 to 70.0)                   | 0.3<br>(0.2 to 0.4)                  | 1.7<br>(-14.8 to 20.4)                            | 3.2<br>(-12.8 to 22.2)                              |
| Pancreatitis                                                   | 0.8<br>(0.7 to 0.9)                           | 7.2<br>(6.5 to 7.9)                      | 0.1<br>(0.1 to 0.1)                  | 7.4<br>(-14.5 to 34.4)                            | 10.1<br>(-8.5 to 33.0)                              |
| Other digestive diseases                                       | --                                            | --                                       | 0.5<br>(0.3 to 0.6)                  | -1.1<br>(-8.4 to 6.4)                             | -1.0<br>(-8.9 to 7.1)                               |
| <b>Neurological disorders</b>                                  | <b>1,233.4</b><br><b>(1,185.5 to 1,286.1)</b> | <b>535.9</b><br><b>(461.9 to 626.0)</b>  | <b>34.3</b><br><b>(23.5 to 46.6)</b> | <b>-8.2</b><br><b>(-18.9 to 3.7)</b>              | <b>-0.3</b><br><b>(-13.4 to 14.4)</b>               |
| Alzheimer's disease and other dementias                        | 30.2<br>(25.1 to 36.4)                        | 5.2<br>(4.3 to 6.3)                      | 4.5<br>(3.1 to 6.0)                  | 25.4<br>(17.5 to 33.6)                            | -0.2<br>(-5.5 to 5.4)                               |
| Parkinson's disease                                            | 6.8<br>(5.2 to 8.6)                           | 0.7<br>(0.5 to 0.9)                      | 0.8<br>(0.5 to 1.1)                  | 13.8<br>(2.6 to 29.2)                             | 4.1<br>(-5.9 to 17.1)                               |
| Epilepsy                                                       | 7.9<br>(1.8 to 15.0)                          | 0.7<br>(0.1 to 1.3)                      | 2.1<br>(0.4 to 5.3)                  | -15.3<br>(-86.8 to 459.2)                         | -4.7<br>(-85.0 to 506.3)                            |
| Multiple sclerosis                                             | 1.9<br>(1.7 to 2.1)                           | 0.1<br>(< 0.05 to 0.1)                   | 0.5<br>(0.3 to 0.6)                  | 6.1<br>(-10.5 to 23.6)                            | 14.5<br>(-3.3 to 33.4)                              |
| Motor neuron disease                                           | 0.1<br>(0.1 to 0.1)                           | < 0.05<br>(< 0.05 to < 0.05)             | < 0.05<br>(< 0.05 to < 0.05)         | 2.6<br>(-1.2 to 6.4)                              | 8.1<br>(4.5 to 11.8)                                |
| Migraine                                                       | 510.4<br>(487.7 to 532.0)                     | 44.3<br>(41.8 to 46.8)                   | 22.2<br>(14.5 to 31.1)               | -12.8<br>(-15.5 to -10.0)                         | -0.5<br>(-3.7 to 2.6)                               |
| Tension-type headache                                          | 903.7<br>(812.4 to 1,000.7)                   | 484.9<br>(410.3 to 576.1)                | 3.7<br>(2.4 to 5.3)                  | -10.9<br>(-15.0 to -6.4)                          | 0.1<br>(-4.4 to 4.8)                                |
| Other neurological disorders                                   | < 0.05<br>(< 0.05 to < 0.05)                  | < 0.05<br>(< 0.05 to < 0.05)             | 0.5<br>(0.2 to 1.0)                  | -1.9<br>(-65.6 to 178.9)                          | 14.7<br>(-66.1 to 271.4)                            |
| <b>Mental and substance use disorders</b>                      | <b>498.6</b><br><b>(482.4 to 515.8)</b>       | <b>247.1†</b><br><b>(230.5 to 267.4)</b> | <b>70.2</b><br><b>(51.0 to 91.5)</b> | <b>-10.6</b><br><b>(-13.0 to -8.2)</b>            | <b>0.4</b><br><b>(-2.1 to 3.1)</b>                  |
| Schizophrenia                                                  | 6.9<br>(6.0 to 7.7)                           | 0.3<br>(0.3 to 0.4)                      | 4.3<br>(3.2 to 5.4)                  | -8.5<br>(-15.7 to -0.1)                           | 1.8<br>(-6.3 to 11.3)                               |
| Alcohol use disorders                                          | 110.4<br>(99.0 to 123.4)                      | 54.9<br>(47.9 to 62.5)                   | 10.9<br>(7.5 to 14.9)                | -15.2<br>(-22.4 to -6.8)                          | -3.3<br>(-11.6 to 6.1)                              |
| Drug use disorders                                             | 22.4<br>(21.0 to 23.8)                        | 2.9<br>(2.7 to 3.1)                      | 5.6<br>(4.0 to 7.2)                  | 20.8<br>(8.4 to 35.1)                             | 37.3<br>(22.2 to 54.2)                              |
| Opioid use disorders                                           | 10.0<br>(8.9 to 11.2)                         | 1.3<br>(1.1 to 1.5)                      | 4.1<br>(2.9 to 5.4)                  | 38.8<br>(20.8 to 59.6)                            | 56.1<br>(33.5 to 81.4)                              |
| Cocaine use disorders                                          | 2.5<br>(2.2 to 2.9)                           | 0.1<br>(0.1 to 0.2)                      | 0.3<br>(0.2 to 0.5)                  | -8.2<br>(-25.5 to 14.1)                           | 7.4<br>(-13.9 to 34.0)                              |
| Amphetamine use disorders                                      | 2.0<br>(1.6 to 2.6)                           | 0.2<br>(0.1 to 0.2)                      | 0.3<br>(0.1 to 0.4)                  | -13.3<br>(-32.9 to 9.6)                           | 4.8<br>(-20.1 to 33.5)                              |
| Cannabis use disorders                                         | 5.5<br>(4.8 to 6.4)                           | 0.8<br>(0.7 to 1.0)                      | 0.2<br>(0.1 to 0.2)                  | -23.4<br>(-35.8 to -9.2)                          | -6.3<br>(-22.7 to 12.6)                             |
| Other drug use disorders                                       | 3.0<br>(2.7 to 3.2)                           | 0.5<br>(0.4 to 0.5)                      | 0.7<br>(0.5 to 1.0)                  | -8.2<br>(-23.5 to 11.3)                           | 6.2<br>(-12.1 to 30.9)                              |
| Depressive disorders                                           | 156.4<br>(147.0 to 167.4)                     | 166.6<br>(151.2 to 183.9)                | 25.9<br>(18.0 to 35.4)               | -10.6<br>(-15.2 to -5.7)                          | -4.7<br>(-9.3 to -0.1)                              |
| Major depressive disorder                                      | 104.1<br>(95.1 to 113.9)                      | 158.6<br>(143.3 to 175.6)                | 20.6<br>(14.2 to 28.2)               | -11.6<br>(-17.1 to -5.7)                          | -5.8<br>(-11.3 to 0.1)                              |
| Dysthymia                                                      | 56.3<br>(49.2 to 64.4)                        | 8.0<br>(7.1 to 9.2)                      | 5.3<br>(3.6 to 7.6)                  | -6.4<br>(-9.3 to -3.5)                            | -0.1<br>(-3.0 to 3.1)                               |
| Bipolar disorder                                               | 19.5<br>(17.0 to 22.3)                        | 1.4<br>(1.2 to 1.6)                      | 3.9<br>(2.5 to 5.8)                  | -12.5<br>(-17.7 to -7.1)                          | -0.1<br>(-5.9 to 6.3)                               |
| Anxiety disorders                                              | 87.9<br>(80.2 to 95.9)                        | 13.3<br>(12.3 to 14.3)                   | 8.3<br>(5.7 to 11.1)                 | -12.1<br>(-16.1 to -8.0)                          | 0.1<br>(-4.4 to 4.9)                                |
| Eating disorders                                               | 3.2<br>(2.6 to 3.9)                           | 1.5<br>(1.1 to 1.9)                      | 0.7<br>(0.4 to 1.0)                  | -9.3<br>(-20.2 to 3.5)                            | 16.3<br>(2.9 to 32.1)                               |
| Anorexia nervosa                                               | 0.7<br>(0.5 to 0.9)                           | 0.2<br>(0.2 to 0.3)                      | 0.1<br>(0.1 to 0.2)                  | -12.8<br>(-32.9 to 10.8)                          | 13.9<br>(-11.7 to 44.6)                             |
| Bulimia nervosa                                                | 2.4<br>(1.8 to 3.3)                           | 1.2<br>(0.9 to 1.7)                      | 0.5<br>(0.3 to 0.8)                  | -8.3<br>(-22.0 to 7.5)                            | 17.0<br>(0.7 to 36.8)                               |
| Autistic spectrum disorders                                    | 22.4<br>(20.3 to 25.2)                        | 0.1<br>(0.1 to 0.1)                      | 3.3<br>(2.2 to 4.6)                  | -14.3<br>(-18.1 to -10.1)                         | 0.5<br>(-4.3 to 5.5)                                |
| Autism                                                         | 7.0<br>(6.0 to 8.3)                           | < 0.05<br>(< 0.05 to < 0.05)             | 1.8<br>(1.1 to 2.6)                  | -14.3<br>(-20.6 to -7.2)                          | 0.5<br>(-7.0 to 8.9)                                |
| Asperger syndrome and other autistic spectrum disorders        | 15.4<br>(12.8 to 18.5)                        | 0.1<br>(0.1 to 0.1)                      | 1.5<br>(1.0 to 2.2)                  | -14.3<br>(-18.2 to -10.1)                         | 0.5<br>(-4.1 to 5.6)                                |

| Cause                                                      | Prevalence in thousands (95% UI)              | Incidence in thousands (95% UI)                | YLDs in thousands (95% UI)            |                                                   |                                                     |
|------------------------------------------------------------|-----------------------------------------------|------------------------------------------------|---------------------------------------|---------------------------------------------------|-----------------------------------------------------|
|                                                            | 2016 counts                                   | 2016 counts                                    | 2016 counts                           | Percentage change in counts between 2006 and 2016 | Percentage change in age-standardised rates between |
| Attention-deficit/hyperactivity disorder                   | 17.0<br>(15.3 to 18.9)                        | 0.6<br>(0.5 to 0.7)                            | 0.2<br>(0.1 to 0.3)                   | -23.2<br>(-29.8 to -15.9)                         | 0.3<br>(-8.1 to 9.3)                                |
| Conduct disorder                                           | 12.9<br>(10.6 to 15.1)                        | 4.1<br>(3.2 to 4.9)                            | 1.6<br>(1.0 to 2.4)                   | -35.6<br>(-39.4 to -31.5)                         | 0.1<br>(-6.0 to 6.2)                                |
| Idiopathic developmental intellectual disability           | 20.5<br>(9.9 to 31.2)                         | --                                             | 0.8<br>(0.3 to 1.4)                   | -23.8<br>(-30.1 to -18.2)                         | -9.1<br>(-16.4 to -2.2)                             |
| Other mental and substance use disorders                   | 64.9<br>(57.7 to 74.3)                        | 1.5<br>(1.4 to 1.7)                            | 4.7<br>(3.3 to 6.7)                   | -8.1<br>(-12.4 to -3.6)                           | 0.3<br>(-4.7 to 5.5)                                |
| <b>Diabetes, urogenital, blood, and endocrine diseases</b> | <b>1,033.5</b><br><b>(1,013.3 to 1,055.4)</b> | <b>548.0†</b><br><b>(522.6 to 576.6)</b>       | <b>27.0</b><br><b>(19.3 to 36.0)</b>  | <b>-3.3</b><br><b>(-7.2 to 0.7)</b>               | <b>-1.7</b><br><b>(-5.3 to 2.0)</b>                 |
| Diabetes mellitus                                          | 115.3<br>(103.1 to 130.3)                     | 4.9<br>(4.3 to 5.5)                            | 10.0<br>(6.9 to 13.5)                 | 0.2<br>(-7.1 to 9.8)                              | -1.4<br>(-8.7 to 8.0)                               |
| Acute glomerulonephritis                                   | 0.1<br>(0.1 to 0.1)                           | 1.0<br>(0.8 to 1.1)                            | < 0.05<br>(< 0.05 to < 0.05)          | -9.5<br>(-14.0 to -4.3)                           | -0.6<br>(-5.1 to 4.3)                               |
| Chronic kidney disease                                     | 243.8<br>(218.8 to 269.0)                     | 16.8<br>(14.2 to 19.2)                         | 4.7<br>(3.5 to 6.2)                   | 8.0<br>(-3.7 to 21.9)                             | 2.2<br>(-8.3 to 14.4)                               |
| Chronic kidney disease due to diabetes mellitus            | 64.7<br>(52.1 to 79.1)                        | 4.7<br>(3.6 to 5.9)                            | 1.2<br>(0.8 to 1.6)                   | 7.7<br>(-7.5 to 25.5)                             | 4.8<br>(-9.9 to 21.1)                               |
| Chronic kidney disease due to hypertension                 | 61.6<br>(50.4 to 74.2)                        | 6.8<br>(5.4 to 8.3)                            | 0.4<br>(0.3 to 0.6)                   | 19.3<br>(-1.7 to 42.6)                            | -0.1<br>(-15.1 to 18.0)                             |
| Chronic kidney disease due to glomerulonephritis           | 57.5<br>(47.7 to 67.9)                        | 1.2<br>(0.9 to 1.6)                            | 1.9<br>(1.4 to 2.6)                   | 5.0<br>(-7.3 to 18.6)                             | 0.7<br>(-10.2 to 13.3)                              |
| Chronic kidney disease due to other causes                 | 60.0<br>(47.7 to 73.6)                        | 4.0<br>(3.2 to 5.1)                            | 1.2<br>(0.8 to 1.6)                   | 9.7<br>(-4.9 to 26.1)                             | 2.9<br>(-9.5 to 16.3)                               |
| Urinary diseases and male infertility                      | 112.3<br>(101.0 to 123.2)                     | 359.7†<br>(335.3 to 387.1)                     | 3.5<br>(2.3 to 5.0)                   | -0.3<br>(-5.4 to 5.5)                             | -2.4<br>(-7.3 to 3.2)                               |
| Interstitial nephritis and urinary tract infections        | 5.0<br>(4.6 to 5.5)                           | 261.2<br>(237.2 to 287.5)                      | 0.2<br>(0.1 to 0.2)                   | 0.2<br>(-22.2 to -4.4)                            | -0.6<br>(-11.1 to 10.2)                             |
| Urolithiasis                                               | 3.3<br>(3.1 to 3.5)                           | 87.2<br>(82.9 to 92.0)                         | 0.2<br>(0.1 to 0.3)                   | -12.2<br>(-24.9 to 1.7)                           | -10.5<br>(-23.0 to 3.4)                             |
| Benign prostatic hyperplasia                               | 90.5<br>(77.7 to 103.4)                       | 11.4<br>(9.5 to 13.4)                          | 2.9<br>(1.9 to 4.2)                   | 4.2<br>(-2.1 to 10.7)                             | 0.1<br>(-5.9 to 6.5)                                |
| Male infertility                                           | 10.9<br>(8.4 to 13.8)                         | --                                             | 0.1<br>(< 0.05 to 0.1)                | -25.0<br>(-31.0 to -18.4)                         | -7.5<br>(-14.5 to -0.2)                             |
| Other urinary diseases                                     | --                                            | --                                             | 0.1<br>(0.1 to 0.2)                   | -28.7<br>(-35.2 to -21.7)                         | -21.3<br>(-28.3 to -14.1)                           |
| Gynecological diseases                                     | 412.0<br>(395.9 to 428.9)                     | 153.0†<br>(144.6 to 162.1)                     | 5.2<br>(3.5 to 7.3)                   | -16.4<br>(-20.9 to -11.7)                         | -4.2<br>(-9.1 to 0.6)                               |
| Uterine fibroids                                           | 50.3<br>(46.2 to 54.6)                        | 4.3<br>(3.8 to 4.9)                            | 0.4<br>(0.2 to 0.8)                   | -9.7<br>(-16.4 to -3.3)                           | -0.5<br>(-8.6 to 7.7)                               |
| Polycystic ovarian syndrome                                | 2.6<br>(2.0 to 3.5)                           | 1.1<br>(0.8 to 1.4)                            | < 0.05<br>(< 0.05 to < 0.05)          | -21.3<br>(-30.1 to -10.9)                         | -1.1<br>(-12.1 to 11.5)                             |
| Female infertility                                         | 5.7<br>(2.3 to 10.8)                          | --                                             | < 0.05<br>(< 0.05 to 0.1)             | -0.2<br>(-21.5 to 27.5)                           | 16.1<br>(-8.6 to 49.8)                              |
| Endometriosis                                              | 2.5<br>(2.1 to 2.9)                           | 6.9<br>(5.2 to 9.2)                            | 0.2<br>(0.1 to 0.3)                   | -19.2<br>(-32.1 to -2.6)                          | -4.3<br>(-19.7 to 15.7)                             |
| Genital prolapse                                           | 162.9<br>(144.5 to 180.4)                     | 6.2<br>(5.5 to 7.1)                            | 0.5<br>(0.2 to 0.9)                   | 21.7<br>(12.4 to 31.8)                            | 18.5<br>(10.1 to 28.0)                              |
| Premenstrual syndrome                                      | 172.1<br>(162.7 to 181.7)                     | 57.3<br>(53.5 to 61.3)                         | 1.4<br>(0.9 to 2.2)                   | -19.7<br>(-25.1 to -14.1)                         | -2.1<br>(-8.5 to 4.5)                               |
| Other gynecological diseases                               | 70.3<br>(64.4 to 76.2)                        | 77.2<br>(69.7 to 85.0)                         | 2.5<br>(1.7 to 3.5)                   | -20.4<br>(-27.2 to -13.4)                         | -8.6<br>(-16.4 to -0.7)                             |
| Hemoglobinopathies and hemolytic anaemias                  | 340.7<br>(333.7 to 348.3)                     | --                                             | 0.8<br>(0.5 to 1.3)                   | -9.7<br>(-24.0 to 7.7)                            | -1.1<br>(-18.3 to 20.1)                             |
| Thalassemias                                               | < 0.05<br>(< 0.05 to < 0.05)                  | --                                             | < 0.05<br>(< 0.05 to < 0.05)          | 5.6<br>(-22.4 to 35.5)                            | 18.5<br>(-11.9 to 54.2)                             |
| Thalassaemias trait                                        | 47.4<br>(43.2 to 51.8)                        | --                                             | 0.6<br>(0.4 to 0.9)                   | -13.1<br>(-27.9 to 5.1)                           | -4.1<br>(-21.9 to 18.2)                             |
| Sickle cell disorders                                      | < 0.05<br>(< 0.05 to < 0.05)                  | --                                             | < 0.05<br>(< 0.05 to < 0.05)          | -15.2<br>(-21.1 to -9.0)                          | 7.1<br>(-1.2 to 16.1)                               |
| Sickle cell trait                                          | 40.4<br>(38.7 to 42.4)                        | --                                             | 0.1<br>(0.1 to 0.2)                   | -21.2<br>(-37.6 to -1.1)                          | -10.0<br>(-31.6 to 17.1)                            |
| G6PD deficiency                                            | 32.0<br>(30.4 to 34.1)                        | --                                             | < 0.05<br>(< 0.05 to < 0.05)          | 63.3<br>(27.6 to 112.2)                           | 84.5<br>(42.0 to 142.7)                             |
| G6PD trait                                                 | 220.6<br>(215.3 to 226.7)                     | --                                             | < 0.05<br>(< 0.05 to < 0.05)          | -10.1<br>(-26.6 to 10.4)                          | 0.8<br>(-18.9 to 26.1)                              |
| Other hemoglobinopathies and hemolytic anaemias            | 11.0<br>(8.8 to 13.6)                         | --                                             | 0.1<br>(0.1 to 0.2)                   | 18.0<br>(-3.7 to 46.3)                            | 22.7<br>(-0.8 to 55.6)                              |
| Endocrine, metabolic, blood, and immune disorders          | 84.3<br>(77.2 to 91.0)                        | 12.8<br>(11.5 to 14.3)                         | 2.8<br>(1.9 to 3.9)                   | -6.1<br>(-12.8 to 0.2)                            | -1.1<br>(-7.4 to 5.1)                               |
| <b>Musculoskeletal disorders</b>                           | <b>686.6</b><br><b>(659.2 to 717.6)</b>       | <b>287.7</b><br><b>(254.8 to 322.9)</b>        | <b>79.6</b><br><b>(57.6 to 103.5)</b> | <b>-5.8</b><br><b>(-9.0 to -2.5)</b>              | <b>-3.1</b><br><b>(-6.2 to 0.1)</b>                 |
| Rheumatoid arthritis                                       | 14.4<br>(12.9 to 16.2)                        | 0.6<br>(0.6 to 0.7)                            | 3.3<br>(2.3 to 4.4)                   | -2.6<br>(-10.5 to 6.9)                            | -2.3<br>(-10.5 to 6.9)                              |
| Osteoarthritis                                             | 204.3<br>(191.8 to 217.4)                     | 8.3<br>(7.7 to 8.9)                            | 12.3<br>(8.8 to 16.6)                 | 4.4<br>(0.6 to 8.2)                               | 1.4<br>(-2.2 to 5.1)                                |
| Low back and neck pain                                     | 514.1<br>(482.4 to 548.2)                     | 250.7<br>(218.5 to 284.2)                      | 60.9<br>(43.2 to 80.3)                | -7.7<br>(-11.5 to -3.5)                           | -4.0<br>(-7.7 to -0.0)                              |
| Low back pain                                              | 423.0<br>(375.8 to 477.3)                     | 221.0<br>(189.9 to 254.6)                      | 46.8<br>(33.2 to 61.5)                | -8.7<br>(-13.7 to -3.5)                           | -5.1<br>(-9.9 to 0.1)                               |
| Neck pain                                                  | 143.7<br>(123.8 to 166.2)                     | 29.6<br>(25.7 to 34.8)                         | 14.0<br>(9.7 to 19.9)                 | -4.2<br>(-6.9 to -1.3)                            | 0.0<br>(-2.0 to 2.2)                                |
| Gout                                                       | 16.2<br>(14.2 to 18.5)                        | 3.1<br>(2.7 to 3.6)                            | 0.5<br>(0.3 to 0.7)                   | 0.7<br>(-12.7 to 15.3)                            | 0.4<br>(-13.0 to 15.2)                              |
| Other musculoskeletal disorders                            | 31.4<br>(25.2 to 40.4)                        | 25.0<br>(20.1 to 32.1)                         | 2.6<br>(1.7 to 3.9)                   | -8.6<br>(-19.5 to 5.4)                            | -0.8<br>(-12.5 to 13.4)                             |
| <b>Other non-communicable diseases</b>                     | <b>2,222.7</b><br><b>(2,195.6 to 2,247.6)</b> | <b>6,926.9†</b><br><b>(6,595.1 to 7,280.0)</b> | <b>72.4</b><br><b>(50.5 to 101.7)</b> | <b>-4.7</b><br><b>(-5.8 to -3.6)</b>              | <b>-0.8</b><br><b>(-2.1 to 0.2)</b>                 |
| Congenital anomalies                                       | 41.2<br>(38.2 to 44.5)                        | --                                             | 5.0<br>(3.7 to 6.6)                   | -14.2<br>(-18.3 to -9.7)                          | -2.2<br>(-7.0 to 2.9)                               |
| Neural tube defects                                        | 4.3<br>(3.9 to 4.8)                           | --                                             | 1.3<br>(0.9 to 1.7)                   | -13.7<br>(-22.9 to -2.7)                          | -1.7<br>(-12.2 to 11.0)                             |
| Congenital heart anomalies                                 | 6.8<br>(6.1 to 7.6)                           | --                                             | 0.4<br>(0.1 to 0.6)                   | -8.8<br>(-17.8 to 1.5)                            | 3.7<br>(-6.4 to 15.3)                               |
| Orofacial clefts                                           | 1.8<br>(1.6 to 2.0)                           | --                                             | < 0.05<br>(< 0.05 to < 0.05)          | -12.0<br>(-22.3 to -0.9)                          | -0.7<br>(-12.7 to 12.2)                             |
| Down's syndrome                                            | 1.3<br>(1.1 to 1.5)                           | --                                             | 0.1<br>(0.1 to 0.2)                   | -15.9<br>(-23.1 to -8.7)                          | -0.2<br>(-8.7 to 9.3)                               |
| Turner syndrome                                            | 1.5<br>(1.3 to 1.7)                           | --                                             | < 0.05<br>(< 0.05 to < 0.05)          | -11.1<br>(-32.5 to 14.6)                          | 7.9<br>(-18.6 to 41.3)                              |
| Klinefelter syndrome                                       | 1.1<br>(1.0 to 1.3)                           | --                                             | < 0.05<br>(< 0.05 to < 0.05)          | -19.1<br>(-37.4 to 2.4)                           | -1.7<br>(-24.2 to 25.0)                             |



| Cause                                         | Prevalence in thousands (95% UI)              | Incidence in thousands (95% UI)          | YLDs in thousands (95% UI)           |                                                   |                                                     |
|-----------------------------------------------|-----------------------------------------------|------------------------------------------|--------------------------------------|---------------------------------------------------|-----------------------------------------------------|
|                                               | 2016 counts                                   | 2016 counts                              | 2016 counts                          | Percentage change in counts between 2006 and 2016 | Percentage change in age-standardised rates between |
| Other chromosomal abnormalities               | 2.1<br>(1.8 to 2.4)                           | --                                       | 0.4<br>(0.2 to 0.5)                  | -22.6<br>(-33.4 to -10.7)                         | -8.0<br>(-21.0 to 6.1)                              |
| Congenital musculoskeletal and limb anomalies | 8.7<br>(7.9 to 9.5)                           | --                                       | 1.2<br>(0.8 to 1.7)                  | -14.1<br>(-21.2 to -6.1)                          | -3.0<br>(-11.3 to 6.4)                              |
| Urogenital congenital anomalies               | 7.2<br>(6.4 to 8.0)                           | --                                       | 0.1<br>(0.1 to 0.2)                  | -19.9<br>(-26.0 to -13.6)                         | -4.8<br>(-12.3 to 3.1)                              |
| Digestive congenital anomalies                | 5.3<br>(4.7 to 6.0)                           | --                                       | 0.2<br>(0.2 to 0.4)                  | -15.7<br>(-25.5 to -4.7)                          | -3.9<br>(-15.1 to 8.6)                              |
| Other congenital anomalies                    | 9.1<br>(5.6 to 13.7)                          | --                                       | 1.3<br>(0.9 to 1.9)                  | -12.5<br>(-20.5 to -4.4)                          | -0.8<br>(-9.2 to 8.2)                               |
| Skin and subcutaneous diseases                | 890.6<br>(864.6 to 913.7)                     | 2,442.4<br>(2,284.5 to 2,607.5)          | 18.0<br>(12.2 to 26.5)               | -13.6<br>(-15.6 to -11.8)                         | 1.9<br>(-0.1 to 4.0)                                |
| Dermatitis                                    | 71.6<br>(67.2 to 76.6)                        | 135.1<br>(123.3 to 148.3)                | 2.4<br>(1.5 to 3.7)                  | -11.0<br>(-15.3 to -6.8)                          | 1.9<br>(-3.7 to 7.2)                                |
| Psoriasis                                     | 36.0<br>(34.3 to 37.8)                        | 4.4<br>(4.2 to 4.6)                      | 3.1<br>(2.2 to 4.0)                  | -5.8<br>(-11.6 to 0.1)                            | 4.2<br>(-2.7 to 10.9)                               |
| Cellulitis                                    | 1.8<br>(1.7 to 1.9)                           | 39.7<br>(37.2 to 42.2)                   | 0.1<br>(0.1 to 0.1)                  | -6.1<br>(-21.9 to 13.9)                           | 2.5<br>(-15.1 to 24.4)                              |
| Pyoderma                                      | 15.1<br>(14.5 to 15.7)                        | 390.6<br>(373.1 to 407.4)                | 0.1<br>(< 0.05 to 0.2)               | -1.8<br>(-7.0 to 3.9)                             | 0.3<br>(-5.1 to 6.1)                                |
| Scabies                                       | 20.5<br>(18.2 to 23.1)                        | 62.2<br>(54.9 to 70.5)                   | 0.5<br>(0.3 to 0.8)                  | -18.6<br>(-22.4 to -13.9)                         | -3.6<br>(-8.4 to 1.8)                               |
| Fungal skin diseases                          | 304.2<br>(271.8 to 337.4)                     | 1,173.7<br>(1,017.5 to 1,337.5)          | 1.7<br>(0.7 to 3.5)                  | -3.1<br>(-4.9 to -1.2)                            | 0.1<br>(-1.0 to 1.2)                                |
| Viral skin diseases                           | 64.2<br>(61.6 to 66.8)                        | 97.3<br>(93.2 to 101.8)                  | 1.9<br>(1.2 to 2.9)                  | -16.8<br>(-19.4 to -14.1)                         | -0.2<br>(-3.2 to 3.0)                               |
| Acne vulgaris                                 | 177.8<br>(161.7 to 194.5)                     | 110.6<br>(94.0 to 131.3)                 | 4.6<br>(3.1 to 6.6)                  | -25.6<br>(-29.3 to -21.7)                         | 2.5<br>(-2.4 to 7.4)                                |
| Alopecia areata                               | 5.5<br>(5.3 to 5.7)                           | 9.6<br>(9.2 to 10.0)                     | 0.2<br>(0.1 to 0.3)                  | -13.0<br>(-22.2 to -3.6)                          | -0.0<br>(-11.1 to 11.6)                             |
| Pruritus                                      | 32.5<br>(28.7 to 37.2)                        | 25.4<br>(22.4 to 29.1)                   | 0.3<br>(0.2 to 0.6)                  | -5.1<br>(-10.7 to 0.4)                            | 1.6<br>(-3.6 to 7.1)                                |
| Urticaria                                     | 24.7<br>(21.9 to 27.9)                        | 43.9<br>(38.8 to 49.4)                   | 1.5<br>(1.0 to 2.1)                  | -12.9<br>(-17.5 to -7.8)                          | -0.1<br>(-5.0 to 5.4)                               |
| Decubitus ulcer                               | 1.1<br>(1.0 to 1.3)                           | 4.0<br>(3.6 to 4.6)                      | 0.2<br>(0.1 to 0.2)                  | 15.2<br>(-3.8 to 35.9)                            | 8.4<br>(-5.2 to 23.6)                               |
| Other skin and subcutaneous diseases          | 287.9<br>(279.3 to 296.9)                     | 345.9<br>(333.3 to 358.7)                | 1.6<br>(0.8 to 2.8)                  | 1.7<br>(-0.4 to 4.1)                              | 6.3<br>(4.0 to 8.8)                                 |
| Sense organ diseases                          | 970.6<br>(951.9 to 992.5)                     | 329.5†<br>(310.9 to 348.4)               | 36.4<br>(25.4 to 50.8)               | 0.8<br>(-0.9 to 2.6)                              | -3.0<br>(-4.6 to -1.4)                              |
| Glaucoma                                      | 3.3<br>(2.7 to 3.8)                           | --                                       | 0.3<br>(0.2 to 0.4)                  | 8.2<br>(-5.4 to 24.3)                             | -0.8<br>(-13.4 to 13.7)                             |
| Cataract                                      | 47.2<br>(39.5 to 55.4)                        | --                                       | 2.4<br>(1.6 to 3.3)                  | 8.7<br>(1.5 to 16.5)                              | -4.0<br>(-9.8 to 2.0)                               |
| Macular degeneration                          | 1.7<br>(1.3 to 2.1)                           | --                                       | 0.1<br>(0.1 to 0.1)                  | 12.1<br>(-5.3 to 34.6)                            | 1.0<br>(-14.8 to 20.2)                              |
| Refraction and accommodation disorders        | 365.8<br>(338.0 to 394.8)                     | --                                       | 6.1<br>(3.7 to 9.8)                  | -5.8<br>(-9.5 to -1.5)                            | -4.5<br>(-8.0 to -0.8)                              |
| Age-related and other hearing loss            | 802.2<br>(769.3 to 835.6)                     | --                                       | 22.6<br>(15.9 to 31.3)               | 1.8<br>(-0.6 to 4.3)                              | -3.2<br>(-5.6 to -1.1)                              |
| Other vision loss                             | 17.2<br>(14.9 to 19.9)                        | --                                       | 1.1<br>(0.7 to 1.4)                  | 4.4<br>(-3.4 to 12.6)                             | -0.3<br>(-7.3 to 7.1)                               |
| Other sense organ diseases                    | 128.3<br>(118.0 to 139.1)                     | 329.5<br>(310.9 to 348.4)                | 4.0<br>(2.5 to 5.9)                  | -0.4<br>(-4.0 to 3.3)                             | 0.5<br>(-3.2 to 4.2)                                |
| Oral disorders                                | 1,596.6<br>(1,548.5 to 1,643.0)               | 4,155.0†<br>(3,872.1 to 4,462.7)         | 13.0<br>(8.2 to 19.3)                | -1.4<br>(-3.9 to 1.1)                             | -0.2<br>(-1.9 to 1.7)                               |
| Caries of deciduous teeth                     | 124.4<br>(105.4 to 142.9)                     | 483.0<br>(369.2 to 621.2)                | < 0.05<br>(< 0.05 to 0.1)            | -14.3<br>(-27.3 to -2.5)                          | 0.6<br>(-15.2 to 14.2)                              |
| Caries of permanent teeth                     | 1,151.4<br>(1,093.6 to 1,210.1)               | 3,608.9<br>(3,358.7 to 3,875.7)          | 1.1<br>(0.5 to 2.1)                  | -18.4<br>(-21.0 to -16.0)                         | -7.1<br>(-10.9 to -3.8)                             |
| Periodontal disease                           | 336.5<br>(279.1 to 400.5)                     | 41.9<br>(33.3 to 51.7)                   | 2.2<br>(0.9 to 4.5)                  | -3.1<br>(-7.0 to 0.8)                             | -0.1<br>(-3.4 to 3.5)                               |
| Edentulism and severe tooth loss              | 292.8<br>(254.8 to 332.2)                     | 21.2<br>(18.0 to 24.6)                   | 7.9<br>(5.2 to 11.2)                 | 4.6<br>(0.8 to 7.9)                               | 1.5<br>(-1.8 to 4.5)                                |
| Other oral disorders                          | 58.6<br>(56.3 to 61.1)                        | --                                       | 1.7<br>(1.1 to 2.6)                  | -10.7<br>(-13.3 to -8.1)                          | -0.1<br>(-3.2 to 2.8)                               |
| <b>Injuries</b>                               | <b>1,589.8</b><br><b>(1,489.2 to 1,716.9)</b> | <b>528.6†</b><br><b>(498.7 to 558.1)</b> | <b>55.5</b><br><b>(37.9 to 77.5)</b> | <b>-3.1</b><br><b>(-4.8 to -1.6)</b>              | <b>0.4</b><br><b>(-1.3 to 2.1)</b>                  |
| <b>Transport injuries</b>                     | <b>160.3</b><br><b>(148.7 to 173.0)</b>       | <b>40.9</b><br><b>(37.1 to 44.7)</b>     | <b>7.5</b><br><b>(5.0 to 10.8)</b>   | <b>-11.6</b><br><b>(-13.1 to -10.2)</b>           | <b>-7.8</b><br><b>(-9.3 to -6.2)</b>                |
| Road injuries                                 | 150.3<br>(139.1 to 162.2)                     | 39.4<br>(35.5 to 43.2)                   | 7.1<br>(4.7 to 10.2)                 | -11.9<br>(-13.3 to -10.4)                         | -8.2<br>(-9.8 to -6.7)                              |
| Pedestrian road injuries                      | 34.2<br>(30.2 to 39.1)                        | 6.7<br>(5.7 to 7.8)                      | 1.6<br>(1.0 to 2.3)                  | -11.2<br>(-12.9 to -9.7)                          | -8.4<br>(-10.1 to -6.8)                             |
| Cyclist road injuries                         | 33.3<br>(28.2 to 39.1)                        | 9.8<br>(8.3 to 11.4)                     | 1.5<br>(1.0 to 2.1)                  | -15.9<br>(-17.3 to -14.5)                         | -12.8<br>(-14.3 to -11.2)                           |
| Motorcyclist road injuries                    | 15.5<br>(13.0 to 18.5)                        | 2.5<br>(2.0 to 3.1)                      | 0.7<br>(0.4 to 1.0)                  | 3.5<br>(1.7 to 5.5)                               | 9.0<br>(7.1 to 11.0)                                |
| Motor vehicle road injuries                   | 59.5<br>(49.7 to 68.6)                        | 17.9<br>(15.6 to 20.3)                   | 3.0<br>(2.0 to 4.3)                  | -13.7<br>(-15.2 to -12.3)                         | -9.9<br>(-11.4 to -8.3)                             |
| Other road injuries                           | 7.9<br>(6.7 to 9.2)                           | 2.6<br>(2.0 to 3.3)                      | 0.3<br>(0.2 to 0.5)                  | -4.7<br>(-6.3 to -3.1)                            | -0.7<br>(-2.4 to 0.9)                               |
| Other transport injuries                      | 9.9<br>(8.5 to 11.6)                          | 1.5<br>(1.3 to 1.7)                      | 0.4<br>(0.3 to 0.6)                  | -7.4<br>(-9.5 to -5.3)                            | -0.4<br>(-2.7 to 1.9)                               |
| <b>Unintentional injuries</b>                 | <b>1,365.8</b><br><b>(1,267.5 to 1,489.5)</b> | <b>465.3</b><br><b>(434.5 to 494.7)</b>  | <b>45.6</b><br><b>(31.0 to 63.6)</b> | <b>-1.1</b><br><b>(-2.8 to 0.5)</b>               | <b>2.2</b><br><b>(0.4 to 3.9)</b>                   |
| Falls                                         | 775.5<br>(694.7 to 871.2)                     | 298.1<br>(267.1 to 326.5)                | 30.2<br>(21.2 to 41.5)               | -1.6<br>(-3.3 to -0.0)                            | 0.1<br>(-1.7 to 1.6)                                |
| Drowning                                      | 3.7<br>(3.3 to 4.2)                           | 0.5<br>(0.5 to 0.6)                      | 0.1<br>(0.1 to 0.2)                  | -22.2<br>(-24.9 to -19.7)                         | -18.8<br>(-21.5 to -16.2)                           |
| Fire, heat, and hot substances                | 102.4<br>(87.7 to 122.5)                      | 8.8<br>(7.6 to 9.9)                      | 2.2<br>(1.4 to 3.4)                  | 0.5<br>(-2.8 to 3.3)                              | 8.7<br>(5.2 to 11.6)                                |
| Poisonings                                    | 3.2<br>(2.7 to 4.0)                           | 2.7<br>(2.2 to 3.4)                      | 0.3<br>(0.2 to 0.4)                  | 19.0<br>(12.4 to 26.4)                            | 34.2<br>(26.2 to 43.3)                              |
| Exposure to mechanical forces                 | 212.8<br>(182.2 to 261.2)                     | 58.2<br>(51.1 to 65.5)                   | 4.5<br>(3.0 to 6.7)                  | 7.0<br>(4.7 to 9.1)                               | 14.0<br>(11.6 to 16.2)                              |
| Unintentional firearm injuries                | 3.1<br>(2.5 to 3.7)                           | 0.5<br>(0.4 to 0.6)                      | 0.1<br>(0.1 to 0.2)                  | 2.6<br>(0.3 to 5.0)                               | 9.9<br>(7.6 to 12.2)                                |
| Unintentional suffocation                     | 7.4<br>(6.0 to 9.3)                           | 1.0<br>(0.7 to 1.3)                      | 0.2<br>(0.1 to 0.3)                  | -2.2<br>(-4.0 to -0.4)                            | 6.1<br>(4.0 to 8.1)                                 |
| Other exposure to mechanical forces           | 202.3<br>(171.7 to 250.4)                     | 56.7<br>(50.0 to 63.8)                   | 4.2<br>(2.8 to 6.2)                  | 7.7<br>(5.3 to 9.8)                               | 14.6<br>(12.2 to 16.8)                              |

| Cause                                                                               | Prevalence in thousands (95% UI) | Incidence in thousands (95% UI)          | YLDs in thousands (95% UI)                    |                                                   |                                                     |
|-------------------------------------------------------------------------------------|----------------------------------|------------------------------------------|-----------------------------------------------|---------------------------------------------------|-----------------------------------------------------|
|                                                                                     | 2016 counts                      | 2016 counts                              | 2016 counts                                   | Percentage change in counts between 2006 and 2016 | Percentage change in age-standardised rates between |
| Adverse effects of medical treatment                                                | 0.8<br>(0.6 to 1.0)              | 10.5<br>(9.2 to 11.8)                    | 0.1<br>(0.1 to 0.2)                           | 11.1<br>(6.3 to 16.0)                             | 11.6<br>(7.6 to 15.9)                               |
| Animal contact                                                                      | 19.7<br>(17.4 to 22.5)           | 15.9<br>(13.4 to 18.8)                   | 0.6<br>(0.4 to 0.8)                           | -16.9<br>(-20.3 to -13.4)                         | -7.8<br>(-11.9 to -3.5)                             |
| Venomous animal contact                                                             | 8.2<br>(6.9 to 9.8)              | 6.7<br>(5.2 to 8.4)                      | 0.4<br>(0.3 to 0.6)                           | -14.1<br>(-18.9 to -9.1)                          | -3.5<br>(-9.3 to 2.5)                               |
| Non-venomous animal contact                                                         | 11.4<br>(9.7 to 14.0)            | 9.2<br>(7.5 to 11.2)                     | 0.2<br>(0.1 to 0.2)                           | -23.2<br>(-26.0 to -21.0)                         | -18.3<br>(-21.1 to -15.9)                           |
| Foreign body                                                                        | 54.2<br>(46.6 to 61.7)           | 22.7<br>(20.6 to 25.5)                   | 1.7<br>(1.1 to 2.5)                           | -10.4<br>(-12.7 to -8.3)                          | -4.4<br>(-7.1 to -2.0)                              |
| Pulmonary aspiration and foreign body in airway                                     | 35.6<br>(29.1 to 42.9)           | 10.8<br>(9.8 to 12.0)                    | 1.2<br>(0.8 to 1.8)                           | -14.1<br>(-16.2 to -12.2)                         | -9.0<br>(-11.4 to -7.0)                             |
| Foreign body in eyes                                                                | 1.8<br>(1.1 to 2.4)              | 7.6<br>(5.9 to 9.7)                      | 0.1<br>(0.1 to 0.2)                           | -2.9<br>(-6.6 to 1.0)                             | 4.5<br>(1.6 to 7.3)                                 |
| Foreign body in other body part                                                     | 16.9<br>(13.9 to 21.0)           | 4.4<br>(3.7 to 5.2)                      | 0.4<br>(0.2 to 0.6)                           | 1.5<br>(-1.8 to 4.5)                              | 9.7<br>(5.8 to 13.1)                                |
| Environmental heat and cold exposure                                                | 86.1<br>(76.6 to 98.1)           | 21.4<br>(18.9 to 24.1)                   | 2.9<br>(1.9 to 4.2)                           | -6.0<br>(-8.0 to -4.1)                            | -3.9<br>(-6.0 to -2.2)                              |
| Other unintentional injuries                                                        | 107.4<br>(87.6 to 129.6)         | 26.4<br>(22.8 to 30.2)                   | 2.9<br>(1.9 to 4.3)                           | 6.0<br>(4.5 to 7.4)                               | 12.8<br>(11.2 to 14.2)                              |
| <b>Self-harm and interpersonal violence</b>                                         | <b>99.4<br/>(91.2 to 108.1)</b>  | <b>22.4†<br/>(20.0 to 25.0)</b>          | <b>2.4<br/>(1.6 to 3.4)</b>                   | <b>-11.0<br/>(-12.7 to -9.4)</b>                  | <b>-4.0<br/>(-5.6 to -2.4)</b>                      |
| Self-harm                                                                           | 15.2<br>(12.7 to 17.9)           | 5.6<br>(4.8 to 6.4)                      | 0.5<br>(0.4 to 0.8)                           | -12.8<br>(-15.2 to -10.5)                         | -9.0<br>(-11.5 to -6.8)                             |
| Self-harm by firearm                                                                | 0.2<br>(0.2 to 0.2)              | < 0.05<br>(< 0.05 to 0.1)                | < 0.05<br>(< 0.05 to < 0.05)                  | -45.3<br>(-48.0 to -43.1)                         | -39.2<br>(-42.2 to -36.8)                           |
| Self-harm by other specified means                                                  | 15.0<br>(12.5 to 17.6)           | 5.6<br>(4.8 to 6.3)                      | 0.5<br>(0.3 to 0.8)                           | -12.2<br>(-14.7 to -9.8)                          | -8.4<br>(-10.9 to -6.2)                             |
| Interpersonal violence                                                              | 84.2<br>(77.0 to 93.1)           | 16.8†<br>(14.6 to 19.4)                  | 1.9<br>(1.3 to 2.6)                           | -10.4<br>(-12.1 to -8.9)                          | -2.6<br>(-4.3 to -1.0)                              |
| Assault by firearm                                                                  | 0.6<br>(0.5 to 0.7)              | 0.1<br>(0.1 to 0.2)                      | < 0.05<br>(< 0.05 to < 0.05)                  | -8.6<br>(-10.8 to -6.2)                           | -0.9<br>(-3.3 to 1.5)                               |
| Assault by sharp object                                                             | 9.5<br>(7.8 to 11.3)             | 2.3<br>(1.8 to 3.0)                      | 0.2<br>(0.1 to 0.3)                           | -15.0<br>(-17.4 to -12.9)                         | -8.5<br>(-10.8 to -6.2)                             |
| Sexual violence                                                                     | 36.1<br>(31.8 to 40.9)           | --                                       | 0.3<br>(0.2 to 0.4)                           | -21.4<br>(-24.4 to -18.3)                         | -5.5<br>(-8.6 to -1.9)                              |
| Assault by other means                                                              | 38.0<br>(31.9 to 45.5)           | 14.3<br>(12.4 to 16.5)                   | 1.3<br>(0.9 to 1.9)                           | -6.8<br>(-8.6 to -5.2)                            | -0.6<br>(-2.6 to 1.1)                               |
| <b>Forces of nature, conflict and terrorism, and executions and police conflict</b> | <b>0.5<br/>(0.3 to 0.7)</b>      | <b>&lt; 0.05†<br/>(&lt; 0.05 to 0.1)</b> | <b>&lt; 0.05<br/>(&lt; 0.05 to &lt; 0.05)</b> | <b>-23.2<br/>(-25.5 to -20.1)</b>                 | <b>-17.0<br/>(-19.7 to -12.4)</b>                   |
| Exposure to forces of nature                                                        | 0.2<br>(0.1 to 0.4)              | --                                       | < 0.05<br>(< 0.05 to < 0.05)                  | -31.7<br>(-33.9 to -29.2)                         | -29.0<br>(-31.3 to -26.2)                           |
| Conflict and terrorism                                                              | 0.1<br>(< 0.05 to 0.1)           | --                                       | < 0.05<br>(< 0.05 to < 0.05)                  | -27.0<br>(-29.6 to -24.0)                         | -26.5<br>(-29.1 to -23.7)                           |
| Executions and police conflict                                                      | 0.2<br>(0.1 to 0.3)              | < 0.05<br>(< 0.05 to 0.1)                | < 0.05<br>(< 0.05 to < 0.05)                  | 2.6<br>(-4.7 to 6.8)                              | 16.6<br>(10.6 to 21.1)                              |
| <b>Impairments</b>                                                                  | --                               | --                                       | --                                            | --                                                | --                                                  |
| Anaemia                                                                             | 430.5<br>(369.5 to 499.3)        | --                                       | 8.9<br>(6.0 to 12.6)                          | -5.3<br>(-17.8 to 9.8)                            | -1.9<br>(-14.3 to 14.1)                             |
| Developmental intellectual disability                                               | 49.8<br>(39.3 to 60.3)           | --                                       | 5.9<br>(4.3 to 7.8)                           | -19.9<br>(-23.6 to -16.0)                         | -5.8<br>(-10.3 to -1.3)                             |
| Epilepsy                                                                            | 14.2<br>(7.8 to 21.8)            | --                                       | 4.2<br>(2.1 to 7.6)                           | -18.6<br>(-62.3 to 73.2)                          | -6.8<br>(-55.1 to 89.9)                             |
| Guillain-Barre syndrome                                                             | < 0.05<br>(< 0.05 to < 0.05)     | --                                       | < 0.05<br>(< 0.05 to < 0.05)                  | -6.9<br>(-10.3 to -3.3)                           | 0.1<br>(0.0 to 0.1)                                 |
| Hearing loss                                                                        | 832.5<br>(800.3 to 866.4)        | --                                       | 24.0<br>(17.0 to 33.4)                        | 0.0<br>(-2.2 to 2.2)                              | -3.9<br>(-6.0 to -2.0)                              |
| Heart failure                                                                       | 77.6<br>(67.8 to 89.8)           | --                                       | 7.0<br>(5.1 to 9.1)                           | 5.8<br>(-1.4 to 13.8)                             | -3.7<br>(-9.9 to 3.4)                               |
| Infertility                                                                         | 39.2<br>(30.8 to 49.4)           | --                                       | 0.2<br>(0.1 to 0.5)                           | -18.4<br>(-23.4 to -13.0)                         | 0.4<br>(-5.6 to 6.7)                                |
| Pelvic inflammatory disease                                                         | 1.4<br>(1.2 to 1.6)              | --                                       | 0.2<br>(0.1 to 0.3)                           | -21.9<br>(-33.1 to -8.7)                          | -7.2<br>(-21.1 to 9.1)                              |
| Vision loss                                                                         | 441.5<br>(410.1 to 475.2)        | --                                       | 11.1<br>(7.7 to 16.1)                         | -3.6<br>(-7.1 to 0.0)                             | -4.4<br>(-7.9 to -1.1)                              |

We did not calculate incidence for the nine impairments, certain NTDs, and causes with only birth prevalence. Blank cells mean that no estimate is available.

† Incidence for aggregate causes represents the sum of the incidence of the causes below the aggregate.

‡ Incidence estimates for stroke represent first-ever stroke only.

^ Incidence of HIV/AIDS represents new infections of HIV only and does not include new infections of Tuberculosis in HIV positive cases.



SR Table 14: Prevalence, incidence, and YLDs for 2016, percentage change of YLD counts and percentage change of age-standardised YLD rates between 2006 and 2016 by cause and impairments, for all ages, Luxembourg.

| Cause                                                                                | Prevalence in thousands (95% UI)       | Incidence in thousands (95% UI)         | YLDs in thousands (95% UI)             |                                                   |                                                     |
|--------------------------------------------------------------------------------------|----------------------------------------|-----------------------------------------|----------------------------------------|---------------------------------------------------|-----------------------------------------------------|
|                                                                                      | 2016 counts                            | 2016 counts                             | 2016 counts                            | Percentage change in counts between 2006 and 2016 | Percentage change in age-standardised rates between |
| <b>All causes</b>                                                                    | <b>548.3</b><br>(545.2 to 551.5)       | <b>3,883.8†</b><br>(3,640.6 to 4,148.2) | <b>73.5</b><br>(54.6 to 95.1)          | <b>23.6</b><br>(22.0 to 25.1)                     | <b>-1.9</b><br>(-3.2 to -0.5)                       |
| <b>Communicable, maternal, neonatal, and nutritional disorders</b>                   | <b>178.2</b><br>(169.6 to 188.0)       | <b>2,203.2†</b><br>(1,979.1 to 2,451.7) | <b>2.4</b><br>(1.7 to 3.2)             | <b>18.3</b><br>(13.1 to 23.9)                     | <b>-3.5</b><br>(-7.7 to 1.2)                        |
| <b>HIV/AIDS and tuberculosis</b>                                                     | <b>59.2</b><br>(49.1 to 68.9)          | <b>0.1†</b><br>(0.1 to 0.2)             | <b>0.1</b><br>(0.1 to 0.2)             | <b>54.2</b><br>(30.3 to 77.3)                     | <b>19.3</b><br>(-0.0 to 37.5)                       |
| Tuberculosis                                                                         | 52.1<br>(41.8 to 64.0)                 | < 0.05†<br>(< 0.05 to 0.1)              | < 0.05<br>(< 0.05 to < 0.05)           | 0.9<br>(-12.9 to 15.4)                            | -19.1<br>(-30.9 to -6.9)                            |
| Drug-susceptible tuberculosis                                                        | < 0.05<br>(< 0.05 to < 0.05)           | < 0.05<br>(< 0.05 to 0.1)               | < 0.05<br>(< 0.05 to < 0.05)           | 0.7<br>(-13.2 to 15.1)                            | -19.3<br>(-31.1 to -7.1)                            |
| Multidrug-resistant tuberculosis without extensive drug resistance                   | < 0.05<br>(< 0.05 to < 0.05)           | < 0.05<br>(< 0.05 to < 0.05)            | < 0.05<br>(< 0.05 to < 0.05)           | 144.9<br>(55.5 to 296.8)                          | 96.1<br>(24.1 to 218.2)                             |
| Extensively drug-resistant tuberculosis                                              | < 0.05<br>(< 0.05 to < 0.05)           | < 0.05<br>(< 0.05 to < 0.05)            | < 0.05<br>(< 0.05 to < 0.05)           | 426.7<br>(234.3 to 753.3)                         | 321.7<br>(167.1 to 584.8)                           |
| Latent tuberculosis infection                                                        | 52.1<br>(41.8 to 64.0)                 | --                                      | --                                     | --                                                | --                                                  |
| HIV/AIDS                                                                             | 1.4<br>(0.6 to 2.3)                    | 0.1 <sup>a</sup><br>(< 0.05 to 0.1)     | 0.1<br>(0.1 to 0.2)                    | 61.3<br>(35.7 to 87.0)                            | 24.7<br>(3.6 to 45.5)                               |
| Drug-susceptible HIV/AIDS - Tuberculosis                                             | < 0.05<br>(< 0.05 to < 0.05)           | < 0.05<br>(< 0.05 to < 0.05)            | < 0.05<br>(< 0.05 to < 0.05)           | -24.5<br>(-32.7 to -16.7)                         | -41.8<br>(-48.1 to -35.8)                           |
| Multidrug-resistant HIV/AIDS - Tuberculosis without extensive drug resistance        | < 0.05<br>(< 0.05 to < 0.05)           | < 0.05<br>(< 0.05 to < 0.05)            | < 0.05<br>(< 0.05 to < 0.05)           | 84.9<br>(15.8 to 199.2)                           | 42.5<br>(-10.7 to 130.2)                            |
| Extensively drug-resistant HIV/AIDS - Tuberculosis                                   | < 0.05<br>(< 0.05 to < 0.05)           | < 0.05<br>(< 0.05 to < 0.05)            | < 0.05<br>(< 0.05 to < 0.05)           | 297.6<br>(149.1 to 544.3)                         | 206.4<br>(92.0 to 395.3)                            |
| HIV/AIDS resulting in other diseases                                                 | 1.4<br>(0.6 to 2.3)                    | 0.1<br>(< 0.05 to 0.1)                  | 0.1<br>(< 0.05 to 0.2)                 | 62.1<br>(36.5 to 88.1)                            | 25.4<br>(4.1 to 46.2)                               |
| <b>Diarrhoea, lower respiratory infections, and other common infectious diseases</b> | <b>33.8</b><br>(31.3 to 36.1)          | <b>2,181.3†</b><br>(1,958.6 to 2,430.7) | <b>1.0</b><br>(0.7 to 1.5)             | <b>17.1</b><br>(13.2 to 21.3)                     | <b>-3.7</b><br>(-6.9 to -0.4)                       |
| Diarrhoeal diseases                                                                  | 1.5<br>(1.4 to 1.6)                    | 98.5<br>(91.9 to 105.4)                 | 0.2<br>(0.1 to 0.2)                    | 2.5<br>(-5.2 to 10.7)                             | -16.6<br>(-23.1 to -9.2)                            |
| Intestinal infectious diseases                                                       | < 0.05<br>(< 0.05 to < 0.05)           | < 0.05†<br>(< 0.05 to < 0.05)           | < 0.05<br>(< 0.05 to < 0.05)           | 18.5<br>(2.5 to 35.3)                             | -5.5<br>(-17.5 to 7.9)                              |
| Typhoid fever                                                                        | < 0.05<br>(< 0.05 to < 0.05)           | < 0.05<br>(< 0.05 to < 0.05)            | < 0.05<br>(< 0.05 to < 0.05)           | 22.6<br>(2.3 to 44.9)                             | -0.7<br>(-16.3 to 16.6)                             |
| Paratyphoid fever                                                                    | < 0.05<br>(< 0.05 to < 0.05)           | < 0.05<br>(< 0.05 to < 0.05)            | < 0.05<br>(< 0.05 to < 0.05)           | 16.9<br>(-4.0 to 41.6)                            | -6.8<br>(-23.0 to 12.2)                             |
| Other intestinal infectious diseases                                                 | --                                     | --                                      | < 0.05<br>(< 0.05 to < 0.05)           | -15.7<br>(-36.3 to 9.5)                           | -34.2<br>(-53.8 to -8.4)                            |
| Lower respiratory infections                                                         | 0.2<br>(0.2 to 0.2)                    | 8.9<br>(8.1 to 9.7)                     | < 0.05<br>(< 0.05 to < 0.05)           | 35.0<br>(18.2 to 55.5)                            | 4.5<br>(-8.4 to 19.5)                               |
| Upper respiratory infections                                                         | 26.5<br>(23.7 to 29.6)                 | 2,029.4<br>(1,803.3 to 2,283.5)         | 0.7<br>(0.4 to 1.0)                    | 20.9<br>(15.8 to 26.4)                            | 0.2<br>(-3.9 to 4.5)                                |
| Otitis media                                                                         | 5.3<br>(4.5 to 6.4)                    | 35.6<br>(24.5 to 56.3)                  | 0.1<br>(0.1 to 0.2)                    | 15.8<br>(8.0 to 24.1)                             | -2.6<br>(-8.9 to 4.1)                               |
| Meningitis                                                                           | 0.1<br>(0.1 to 0.1)                    | < 0.05<br>(< 0.05 to < 0.05)            | < 0.05<br>(< 0.05 to < 0.05)           | 18.3<br>(13.6 to 27.2)                            | -4.9<br>(-8.5 to 0.3)                               |
| Pneumococcal meningitis                                                              | < 0.05<br>(< 0.05 to < 0.05)           | < 0.05<br>(< 0.05 to < 0.05)            | < 0.05<br>(< 0.05 to < 0.05)           | 12.8<br>(6.0 to 18.9)                             | -9.8<br>(-15.4 to -4.6)                             |
| H influenzae type B meningitis                                                       | < 0.05<br>(< 0.05 to < 0.05)           | < 0.05<br>(< 0.05 to < 0.05)            | < 0.05<br>(< 0.05 to < 0.05)           | 20.1<br>(14.1 to 26.3)                            | -3.2<br>(-8.0 to 2.0)                               |
| Meningococcal infection                                                              | < 0.05<br>(< 0.05 to < 0.05)           | < 0.05<br>(< 0.05 to < 0.05)            | < 0.05<br>(< 0.05 to < 0.05)           | 22.9<br>(11.3 to 71.6)                            | -3.1<br>(-11.2 to 24.0)                             |
| Other meningitis                                                                     | 0.1<br>(< 0.05 to 0.1)                 | < 0.05<br>(< 0.05 to < 0.05)            | < 0.05<br>(< 0.05 to < 0.05)           | 18.9<br>(13.9 to 24.5)                            | -3.6<br>(-7.8 to 0.8)                               |
| Encephalitis                                                                         | 0.2<br>(0.1 to 0.3)                    | 0.1<br>(0.1 to 0.1)                     | < 0.05<br>(< 0.05 to < 0.05)           | 21.5<br>(17.4 to 25.3)                            | -2.7<br>(-5.9 to 0.3)                               |
| Diphtheria                                                                           | < 0.05<br>(< 0.05 to < 0.05)           | < 0.05<br>(< 0.05 to < 0.05)            | < 0.05<br>(< 0.05 to < 0.05)           | -3.9<br>(-49.3 to 76.2)                           | -25.3<br>(-57.5 to 29.9)                            |
| Whooping cough                                                                       | < 0.05<br>(< 0.05 to < 0.05)           | < 0.05<br>(< 0.05 to < 0.05)            | < 0.05<br>(< 0.05 to < 0.05)           | -35.4<br>(-60.1 to 1.4)                           | -43.3<br>(-65.0 to -11.1)                           |
| Tetanus                                                                              | < 0.05<br>(< 0.05 to < 0.05)           | < 0.05<br>(< 0.05 to < 0.05)            | < 0.05<br>(< 0.05 to < 0.05)           | -26.9<br>(-48.3 to -2.8)                          | -43.0<br>(-58.7 to -25.5)                           |
| Measles                                                                              | < 0.05<br>(0.0 to < 0.05)              | < 0.05<br>(0.0 to < 0.05)               | < 0.05<br>(0.0 to < 0.05)              | --                                                | --                                                  |
| Varicella and herpes zoster                                                          | 0.6<br>(0.5 to 0.6)                    | 8.7<br>(8.3 to 9.0)                     | < 0.05<br>(< 0.05 to < 0.05)           | 25.9<br>(12.3 to 41.9)                            | -0.1<br>(-11.5 to 13.2)                             |
| <b>Neglected tropical diseases and malaria</b>                                       | <b>&lt; 0.05</b><br>(< 0.05 to < 0.05) | <b>&lt; 0.05†</b><br>(< 0.05 to < 0.05) | <b>&lt; 0.05</b><br>(< 0.05 to < 0.05) | <b>54.7</b><br>(-54.9 to 324.9)                   | <b>20.1</b><br>(-66.9 to 244.7)                     |
| Malaria                                                                              | --                                     | --                                      | --                                     | --                                                | --                                                  |
| Chagas disease                                                                       | < 0.05<br>(< 0.05 to < 0.05)           | --                                      | < 0.05<br>(< 0.05 to < 0.05)           | 101.9<br>(-2.8 to 320.3)                          | 59.5<br>(-21.3 to 236.3)                            |
| Leishmaniasis                                                                        | --                                     | --                                      | --                                     | --                                                | --                                                  |
| Visceral leishmaniasis                                                               | --                                     | --                                      | --                                     | --                                                | --                                                  |
| Cutaneous and mucocutaneous leishmaniasis                                            | --                                     | --                                      | --                                     | --                                                | --                                                  |
| African trypanosomiasis                                                              | --                                     | --                                      | --                                     | --                                                | --                                                  |
| Schistosomiasis                                                                      | --                                     | --                                      | --                                     | --                                                | --                                                  |
| Cysticercosis                                                                        | --                                     | --                                      | --                                     | --                                                | --                                                  |
| Cystic echinococcosis                                                                | < 0.05<br>(< 0.05 to < 0.05)           | < 0.05<br>(< 0.05 to < 0.05)            | < 0.05<br>(< 0.05 to < 0.05)           | -25.3<br>(-96.6 to 1,299.6)                       | -40.3<br>(-97.4 to 1,023.9)                         |
| Lymphatic filariasis                                                                 | --                                     | --                                      | --                                     | --                                                | --                                                  |
| Onchocerciasis                                                                       | --                                     | --                                      | --                                     | --                                                | --                                                  |
| Trachoma                                                                             | --                                     | --                                      | --                                     | --                                                | --                                                  |
| Dengue                                                                               | --                                     | --                                      | --                                     | --                                                | --                                                  |
| Yellow fever                                                                         | --                                     | --                                      | --                                     | --                                                | --                                                  |
| Rabies                                                                               | < 0.05<br>(< 0.05 to < 0.05)           | < 0.05<br>(< 0.05 to < 0.05)            | < 0.05<br>(< 0.05 to < 0.05)           | -7.5<br>(-33.0 to 29.3)                           | -31.9<br>(-49.2 to -9.9)                            |
| Intestinal nematode infections                                                       | --                                     | --                                      | --                                     | --                                                | --                                                  |
| Ascariasis                                                                           | --                                     | --                                      | --                                     | --                                                | --                                                  |

| Cause                                                                   | Prevalence in thousands (95% UI)        | Incidence in thousands (95% UI)                | YLDs in thousands (95% UI)                          |                                                   |                                                     |
|-------------------------------------------------------------------------|-----------------------------------------|------------------------------------------------|-----------------------------------------------------|---------------------------------------------------|-----------------------------------------------------|
|                                                                         | 2016 counts                             | 2016 counts                                    | 2016 counts                                         | Percentage change in counts between 2006 and 2016 | Percentage change in age-standardised rates between |
| Trichuriasis                                                            | --                                      | --                                             | --                                                  | --                                                | --                                                  |
| Hookworm disease                                                        | --                                      | --                                             | --                                                  | --                                                | --                                                  |
| Food-borne trematodiasis                                                | --                                      | --                                             | --                                                  | --                                                | --                                                  |
| Leprosy                                                                 | --                                      | --                                             | --                                                  | --                                                | --                                                  |
| Ebola virus disease                                                     | --                                      | --                                             | --                                                  | --                                                | --                                                  |
| Zika virus disease                                                      | --                                      | --                                             | --                                                  | --                                                | --                                                  |
| Guinea worm disease                                                     | --                                      | --                                             | --                                                  | --                                                | --                                                  |
| Other neglected tropical diseases                                       | --                                      | --                                             | < 0.05<br>(< 0.05 to < 0.05)                        | --                                                | --                                                  |
| <b>Maternal disorders</b>                                               | <b>0.3</b><br><b>(0.2 to 0.4)</b>       | <b>3.1†</b><br><b>(2.7 to 3.5)</b>             | <b>&lt; 0.05</b><br><b>(&lt; 0.05 to &lt; 0.05)</b> | <b>51.3</b><br><b>(6.6 to 114.4)</b>              | <b>16.9</b><br><b>(-17.3 to 64.9)</b>               |
| Maternal haemorrhage                                                    | < 0.05<br>(< 0.05 to 0.1)               | 0.2<br>(0.2 to 0.3)                            | < 0.05<br>(< 0.05 to < 0.05)                        | 68.2<br>(6.7 to 172.8)                            | 29.2<br>(-17.4 to 106.4)                            |
| Maternal sepsis and other pregnancy related infections                  | 0.1<br>(0.1 to 0.1)                     | 0.4<br>(0.3 to 0.5)                            | < 0.05<br>(< 0.05 to < 0.05)                        | 18.2<br>(-42.0 to 156.0)                          | -10.2<br>(-57.6 to 96.5)                            |
| Maternal hypertensive disorders                                         | 0.2<br>(0.1 to 0.2)                     | 0.6<br>(0.5 to 0.8)                            | < 0.05<br>(< 0.05 to < 0.05)                        | 84.3<br>(4.2 to 234.1)                            | 42.8<br>(-18.2 to 158.4)                            |
| Maternal obstructed labour and uterine rupture                          | < 0.05<br>(< 0.05 to < 0.05)            | 0.1<br>(0.1 to 0.1)                            | < 0.05<br>(< 0.05 to < 0.05)                        | 10.3<br>(-41.9 to 101.0)                          | -14.9<br>(-55.0 to 55.3)                            |
| Maternal abortion, miscarriage, and ectopic pregnancy                   | < 0.05<br>(< 0.05 to < 0.05)            | 1.8<br>(1.5 to 2.1)                            | < 0.05<br>(< 0.05 to < 0.05)                        | 7.8<br>(-53.6 to 141.5)                           | -15.3<br>(-62.3 to 87.0)                            |
| Other maternal disorders                                                | --                                      | --                                             | < 0.05<br>(< 0.05 to < 0.05)                        | 43.3<br>(1.0 to 102.4)                            | 10.6<br>(-21.8 to 55.9)                             |
| <b>Neonatal disorders</b>                                               | <b>4.6</b><br><b>(3.8 to 5.7)</b>       | --                                             | <b>0.8</b><br><b>(0.6 to 1.1)</b>                   | <b>17.5</b><br><b>(4.4 to 32.4)</b>               | <b>-3.7</b><br><b>(-14.2 to 8.5)</b>                |
| Neonatal preterm birth complications                                    | 3.0<br>(2.3 to 4.1)                     | --                                             | 0.3<br>(0.2 to 0.4)                                 | 22.7<br>(-5.4 to 57.1)                            | 0.9<br>(-22.4 to 29.6)                              |
| Neonatal encephalopathy due to birth asphyxia and trauma                | 2.0<br>(1.4 to 2.8)                     | --                                             | 0.4<br>(0.2 to 0.6)                                 | 12.2<br>(-2.8 to 30.4)                            | -8.7<br>(-20.8 to 6.3)                              |
| Neonatal sepsis and other neonatal infections                           | 0.2<br>(0.1 to 0.5)                     | --                                             | 0.1<br>(< 0.05 to 0.2)                              | 25.0<br>(4.1 to 48.8)                             | 2.4<br>(-15.6 to 22.0)                              |
| Hemolytic disease and other neonatal jaundice                           | < 0.05<br>(< 0.05 to < 0.05)            | --                                             | < 0.05<br>(< 0.05 to < 0.05)                        | 20.9<br>(11.9 to 29.1)                            | -0.9<br>(-8.4 to 5.9)                               |
| Other neonatal disorders                                                | --                                      | --                                             | < 0.05<br>(< 0.05 to < 0.05)                        | 5.9<br>(-12.6 to 28.6)                            | -6.1<br>(-22.5 to 14.1)                             |
| <b>Nutritional deficiencies</b>                                         | <b>25.2</b><br><b>(21.7 to 29.2)</b>    | <b>2.5†</b><br><b>(1.9 to 3.1)</b>             | <b>0.4</b><br><b>(0.2 to 0.6)</b>                   | <b>14.0</b><br><b>(0.8 to 28.5)</b>               | <b>-6.8</b><br><b>(-18.6 to 5.8)</b>                |
| Protein-energy malnutrition                                             | 0.3<br>(0.3 to 0.3)                     | 0.2<br>(0.2 to 0.2)                            | < 0.05<br>(< 0.05 to < 0.05)                        | 11.9<br>(-2.3 to 27.7)                            | -0.8<br>(-13.5 to 13.2)                             |
| Iodine deficiency                                                       | 9.5<br>(7.2 to 12.3)                    | 0.1<br>(0.1 to 0.2)                            | 0.2<br>(0.1 to 0.4)                                 | 23.9<br>(10.8 to 38.1)                            | -0.7<br>(-11.2 to 11.1)                             |
| Vitamin A deficiency                                                    | 2.7<br>(2.0 to 3.4)                     | 2.2<br>(1.6 to 2.8)                            | --                                                  | --                                                | --                                                  |
| Iron-deficiency anaemia                                                 | 12.1<br>(9.0 to 16.4)                   | --                                             | 0.1<br>(0.1 to 0.2)                                 | -2.3<br>(-30.6 to 36.6)                           | -17.3<br>(-42.3 to 15.1)                            |
| Other nutritional deficiencies                                          | --                                      | --                                             | < 0.05<br>(< 0.05 to < 0.05)                        | 11.3<br>(-3.6 to 27.7)                            | -1.1<br>(-14.4 to 13.5)                             |
| <b>Other communicable, maternal, neonatal, and nutritional diseases</b> | <b>87.0</b><br><b>(80.6 to 93.9)</b>    | <b>16.2</b><br><b>(14.1 to 19.6)</b>           | <b>0.1</b><br><b>(&lt; 0.05 to 0.1)</b>             | <b>14.4</b><br><b>(7.0 to 20.5)</b>               | <b>-7.2</b><br><b>(-13.5 to -1.8)</b>               |
| Sexually transmitted diseases excluding HIV                             | 74.4<br>(68.4 to 81.3)                  | 15.1<br>(12.9 to 18.5)                         | 0.1<br>(< 0.05 to 0.1)                              | 13.9<br>(4.2 to 21.7)                             | -8.9<br>(-17.0 to -2.5)                             |
| Syphilis                                                                | 0.4<br>(0.3 to 0.6)                     | 0.4<br>(0.2 to 0.6)                            | < 0.05<br>(< 0.05 to < 0.05)                        | 23.2<br>(7.4 to 42.8)                             | -4.1<br>(-16.5 to 11.4)                             |
| Chlamydial infection                                                    | 1.9<br>(1.3 to 2.6)                     | 1.4<br>(1.0 to 2.0)                            | < 0.05<br>(< 0.05 to < 0.05)                        | 11.1<br>(-9.9 to 33.9)                            | -10.1<br>(-27.3 to 8.4)                             |
| Gonococcal infection                                                    | 0.6<br>(0.3 to 1.5)                     | 1.7<br>(0.5 to 4.9)                            | < 0.05<br>(< 0.05 to < 0.05)                        | 1.2<br>(-17.9 to 23.1)                            | -17.5<br>(-33.3 to 1.8)                             |
| Trichomoniasis                                                          | 10.3<br>(8.7 to 12.1)                   | 8.5<br>(7.2 to 10.1)                           | < 0.05<br>(< 0.05 to < 0.05)                        | 24.4<br>(13.2 to 36.2)                            | -0.6<br>(-9.1 to 9.1)                               |
| Genital herpes                                                          | 62.5<br>(53.5 to 73.2)                  | 2.5<br>(2.1 to 3.0)                            | < 0.05<br>(< 0.05 to < 0.05)                        | 25.6<br>(17.8 to 33.4)                            | -0.4<br>(-6.7 to 5.9)                               |
| Other sexually transmitted diseases                                     | 0.7<br>(0.6 to 0.8)                     | 0.6<br>(0.5 to 0.8)                            | < 0.05<br>(< 0.05 to < 0.05)                        | -1.4<br>(-19.0 to 16.5)                           | -19.3<br>(-33.5 to -4.9)                            |
| Hepatitis                                                               | 15.2<br>(13.5 to 17.2)                  | 1.1<br>(1.0 to 1.3)                            | < 0.05<br>(< 0.05 to < 0.05)                        | -25.4<br>(-36.1 to -13.0)                         | -39.4<br>(-49.0 to -28.5)                           |
| Acute hepatitis A                                                       | < 0.05<br>(< 0.05 to < 0.05)            | 0.4<br>(0.4 to 0.5)                            | < 0.05<br>(< 0.05 to < 0.05)                        | -24.4<br>(-42.2 to -0.5)                          | -38.8<br>(-53.9 to -19.2)                           |
| Hepatitis B                                                             | 6.6<br>(5.3 to 8.4)                     | 0.5<br>(0.4 to 0.7)                            | < 0.05<br>(< 0.05 to < 0.05)                        | -29.6<br>(-40.9 to -16.4)                         | -45.0<br>(-53.6 to -35.5)                           |
| Hepatitis C                                                             | 8.5<br>(7.7 to 9.5)                     | 0.1<br>(0.1 to 0.1)                            | < 0.05<br>(< 0.05 to < 0.05)                        | -3.9<br>(-6.2 to -1.7)                            | -12.6<br>(-14.8 to -10.5)                           |
| Acute hepatitis E                                                       | < 0.05<br>(< 0.05 to < 0.05)            | < 0.05<br>(< 0.05 to 0.1)                      | < 0.05<br>(< 0.05 to < 0.05)                        | -21.0<br>(-27.3 to -13.0)                         | -40.1<br>(-43.6 to -36.0)                           |
| Other infectious diseases                                               | 0.4<br>(0.3 to 0.5)                     | < 0.05<br>(< 0.05 to < 0.05)                   | < 0.05<br>(< 0.05 to < 0.05)                        | 23.1<br>(13.2 to 32.7)                            | 2.4<br>(-8.2 to 13.1)                               |
| <b>Non-communicable diseases</b>                                        | <b>538.4</b><br><b>(534.4 to 542.4)</b> | <b>1,619.0†</b><br><b>(1,514.6 to 1,718.9)</b> | <b>65.5</b><br><b>(48.5 to 84.5)</b>                | <b>24.0</b><br><b>(22.3 to 25.8)</b>              | <b>-1.5</b><br><b>(-3.0 to -0.0)</b>                |
| <b>Neoplasms</b>                                                        | <b>11.8</b><br><b>(11.3 to 12.5)</b>    | <b>3.6</b><br><b>(3.4 to 4.0)</b>              | <b>1.2</b><br><b>(0.8 to 1.5)</b>                   | <b>29.7</b><br><b>(24.6 to 35.7)</b>              | <b>-0.2</b><br><b>(-4.2 to 4.5)</b>                 |
| Lip and oral cavity cancer                                              | 0.1<br>(0.1 to 0.2)                     | < 0.05<br>(< 0.05 to < 0.05)                   | < 0.05<br>(< 0.05 to < 0.05)                        | 20.1<br>(2.8 to 40.1)                             | -8.5<br>(-21.7 to 7.5)                              |
| Nasopharynx cancer                                                      | < 0.05<br>(< 0.05 to < 0.05)            | < 0.05<br>(< 0.05 to < 0.05)                   | < 0.05<br>(< 0.05 to < 0.05)                        | 3.0<br>(-13.8 to 24.8)                            | -19.6<br>(-32.9 to -2.9)                            |
| Other pharynx cancer                                                    | 0.1<br>(0.1 to 0.1)                     | < 0.05<br>(< 0.05 to < 0.05)                   | < 0.05<br>(< 0.05 to < 0.05)                        | 38.2<br>(17.9 to 61.5)                            | 5.2<br>(-9.9 to 23.0)                               |
| Oesophageal cancer                                                      | 0.1<br>(< 0.05 to 0.1)                  | < 0.05<br>(< 0.05 to < 0.05)                   | < 0.05<br>(< 0.05 to < 0.05)                        | 32.3<br>(6.6 to 63.2)                             | 0.5<br>(-19.1 to 23.7)                              |
| Stomach cancer                                                          | 0.2<br>(0.2 to 0.2)                     | 0.1<br>(0.1 to 0.1)                            | < 0.05<br>(< 0.05 to < 0.05)                        | 15.5<br>(-3.4 to 38.0)                            | -12.2<br>(-25.8 to 4.5)                             |
| Colon and rectum cancer                                                 | 1.6<br>(1.5 to 1.8)                     | 0.4<br>(0.4 to 0.5)                            | 0.1<br>(0.1 to 0.2)                                 | 20.5<br>(8.3 to 34.5)                             | -8.0<br>(-17.5 to 2.8)                              |
| Liver cancer                                                            | 0.1<br>(0.1 to 0.1)                     | 0.1<br>(0.1 to 0.1)                            | < 0.05<br>(< 0.05 to < 0.05)                        | 45.8<br>(22.8 to 73.0)                            | 12.1<br>(-5.2 to 33.6)                              |
| Liver cancer due to hepatitis B                                         | < 0.05<br>(< 0.05 to < 0.05)            | < 0.05<br>(< 0.05 to < 0.05)                   | < 0.05<br>(< 0.05 to < 0.05)                        | 42.2<br>(19.0 to 69.8)                            | 9.2<br>(-8.6 to 31.3)                               |

| Cause                                              | Prevalence in thousands (95% UI)     | Incidence in thousands (95% UI)    | YLDs in thousands (95% UI)        |                                                   |                                                     |
|----------------------------------------------------|--------------------------------------|------------------------------------|-----------------------------------|---------------------------------------------------|-----------------------------------------------------|
|                                                    | 2016 counts                          | 2016 counts                        | 2016 counts                       | Percentage change in counts between 2006 and 2016 | Percentage change in age-standardised rates between |
| Liver cancer due to hepatitis C                    | < 0.05<br>(< 0.05 to < 0.05)         | < 0.05<br>(< 0.05 to < 0.05)       | < 0.05<br>(< 0.05 to < 0.05)      | 47.7<br>(20.8 to 81.2)                            | 11.9<br>(-7.5 to 35.4)                              |
| Liver cancer due to alcohol use                    | 0.1<br>(< 0.05 to 0.1)               | < 0.05<br>(< 0.05 to < 0.05)       | < 0.05<br>(< 0.05 to < 0.05)      | 45.9<br>(19.6 to 78.0)                            | 13.2<br>(-7.6 to 38.1)                              |
| Liver cancer due to other causes                   | < 0.05<br>(< 0.05 to < 0.05)         | < 0.05<br>(< 0.05 to < 0.05)       | < 0.05<br>(< 0.05 to < 0.05)      | 45.6<br>(17.6 to 80.1)                            | 12.2<br>(-9.1 to 38.8)                              |
| Gallbladder and biliary tract cancer               | < 0.05<br>(< 0.05 to < 0.05)         | < 0.05<br>(< 0.05 to < 0.05)       | < 0.05<br>(< 0.05 to < 0.05)      | 12.1<br>(-16.4 to 52.7)                           | -15.1<br>(-36.9 to 11.7)                            |
| Pancreatic cancer                                  | 0.1<br>(0.1 to 0.1)                  | 0.1<br>(0.1 to 0.1)                | < 0.05<br>(< 0.05 to < 0.05)      | 40.2<br>(15.6 to 72.1)                            | 5.9<br>(-11.6 to 27.6)                              |
| Larynx cancer                                      | 0.1<br>(0.1 to 0.2)                  | < 0.05<br>(< 0.05 to < 0.05)       | < 0.05<br>(< 0.05 to < 0.05)      | 14.5<br>(-7.2 to 40.0)                            | -12.4<br>(-30.6 to 7.7)                             |
| Tracheal, bronchus, and lung cancer                | 0.6<br>(0.5 to 0.7)                  | 0.3<br>(0.3 to 0.4)                | 0.1<br>(0.1 to 0.1)               | 21.8<br>(2.8 to 43.5)                             | -6.0<br>(-20.8 to 10.6)                             |
| Malignant skin melanoma                            | 0.9<br>(0.7 to 1.0)                  | 0.2<br>(0.1 to 0.2)                | 0.1<br>(< 0.05 to 0.1)            | 44.8<br>(27.2 to 63.5)                            | 12.9<br>(-1.2 to 27.8)                              |
| Non-melanoma skin cancer                           | 0.1<br>(0.1 to 0.2)                  | 0.3<br>(0.2 to 0.5)                | < 0.05<br>(< 0.05 to < 0.05)      | 6.0<br>(-29.8 to 63.2)                            | -20.3<br>(-47.0 to 20.8)                            |
| Non-melanoma skin cancer (squamous-cell carcinoma) | 0.1<br>(0.1 to 0.2)                  | 0.1<br>(0.1 to 0.2)                | < 0.05<br>(< 0.05 to < 0.05)      | 5.0<br>(-31.0 to 67.6)                            | -21.1<br>(-48.0 to 23.8)                            |
| Non-melanoma skin cancer (basal-cell carcinoma)    | < 0.05<br>(< 0.05 to < 0.05)         | 0.2<br>(0.1 to 0.3)                | < 0.05<br>(< 0.05 to < 0.05)      | 28.5<br>(-4.6 to 75.4)                            | -1.4<br>(-26.4 to 34.2)                             |
| Breast cancer                                      | 2.4<br>(2.2 to 2.7)                  | 0.5<br>(0.5 to 0.6)                | 0.2<br>(0.1 to 0.3)               | 31.8<br>(18.1 to 49.4)                            | 1.2<br>(-9.5 to 14.5)                               |
| Cervical cancer                                    | 0.1<br>(0.1 to 0.1)                  | < 0.05<br>(< 0.05 to < 0.05)       | < 0.05<br>(< 0.05 to < 0.05)      | 12.6<br>(-8.1 to 36.4)                            | -11.7<br>(-28.7 to 7.9)                             |
| Uterine cancer                                     | 0.5<br>(0.4 to 0.6)                  | 0.1<br>(0.1 to 0.1)                | < 0.05<br>(< 0.05 to 0.1)         | 53.4<br>(27.3 to 85.9)                            | 16.3<br>(-3.1 to 42.0)                              |
| Ovarian cancer                                     | 0.2<br>(0.1 to 0.2)                  | 0.1<br>(< 0.05 to 0.1)             | < 0.05<br>(< 0.05 to < 0.05)      | 39.6<br>(5.9 to 81.1)                             | 7.0<br>(-18.5 to 39.1)                              |
| Prostate cancer                                    | 1.7<br>(1.3 to 3.1)                  | 0.4<br>(0.3 to 0.7)                | 0.1<br>(0.1 to 0.2)               | 30.5<br>(10.4 to 56.7)                            | 1.1<br>(-14.2 to 21.3)                              |
| Testicular cancer                                  | 0.2<br>(0.1 to 0.2)                  | < 0.05<br>(< 0.05 to < 0.05)       | < 0.05<br>(< 0.05 to < 0.05)      | 18.2<br>(-10.8 to 53.6)                           | -6.5<br>(-29.6 to 22.0)                             |
| Kidney cancer                                      | 0.1<br>(0.1 to 0.2)                  | < 0.05<br>(< 0.05 to < 0.05)       | < 0.05<br>(< 0.05 to < 0.05)      | 27.9<br>(12.0 to 46.1)                            | -0.6<br>(-13.2 to 13.4)                             |
| Bladder cancer                                     | 0.6<br>(0.5 to 0.6)                  | 0.1<br>(0.1 to 0.1)                | < 0.05<br>(< 0.05 to 0.1)         | 30.0<br>(15.6 to 48.1)                            | -0.8<br>(-12.3 to 13.7)                             |
| Brain and nervous system cancer                    | 0.3<br>(0.2 to 0.4)                  | 0.1<br>(0.1 to 0.1)                | < 0.05<br>(< 0.05 to 0.1)         | 38.3<br>(9.7 to 72.7)                             | 9.0<br>(-12.6 to 34.5)                              |
| Thyroid cancer                                     | 0.5<br>(0.4 to 0.5)                  | 0.1<br>(0.1 to 0.1)                | < 0.05<br>(< 0.05 to < 0.05)      | 33.0<br>(14.0 to 55.8)                            | 3.7<br>(-10.9 to 21.5)                              |
| Mesothelioma                                       | < 0.05<br>(< 0.05 to < 0.05)         | < 0.05<br>(< 0.05 to < 0.05)       | < 0.05<br>(< 0.05 to < 0.05)      | 35.1<br>(17.4 to 52.7)                            | 5.2<br>(-9.1 to 19.1)                               |
| Hodgkin lymphoma                                   | 0.1<br>(0.1 to 0.1)                  | < 0.05<br>(< 0.05 to < 0.05)       | < 0.05<br>(< 0.05 to < 0.05)      | 9.3<br>(-8.1 to 31.2)                             | -13.4<br>(-27.7 to 4.8)                             |
| Non-Hodgkin's lymphoma                             | 0.6<br>(0.5 to 0.8)                  | 0.1<br>(0.1 to 0.2)                | < 0.05<br>(< 0.05 to 0.1)         | 39.6<br>(20.5 to 61.0)                            | 8.2<br>(-6.5 to 24.7)                               |
| Multiple myeloma                                   | 0.1<br>(0.1 to 0.2)                  | < 0.05<br>(< 0.05 to 0.1)          | < 0.05<br>(< 0.05 to < 0.05)      | 42.0<br>(11.6 to 80.7)                            | 9.5<br>(-14.4 to 41.0)                              |
| Leukaemia                                          | 0.5<br>(0.5 to 0.5)                  | 0.1<br>(0.1 to 0.1)                | 0.1<br>(< 0.05 to 0.1)            | 23.0<br>(7.7 to 38.2)                             | -6.4<br>(-17.9 to 5.7)                              |
| Acute lymphoid leukaemia                           | < 0.05<br>(< 0.05 to 0.1)            | < 0.05<br>(< 0.05 to < 0.05)       | < 0.05<br>(< 0.05 to < 0.05)      | 0.4<br>(-25.1 to 35.4)                            | -15.9<br>(-41.7 to 20.9)                            |
| Chronic lymphoid leukaemia                         | 0.2<br>(0.1 to 0.2)                  | < 0.05<br>(< 0.05 to < 0.05)       | < 0.05<br>(< 0.05 to < 0.05)      | 26.9<br>(1.7 to 59.5)                             | -3.2<br>(-22.8 to 22.4)                             |
| Acute myeloid leukaemia                            | < 0.05<br>(< 0.05 to 0.1)            | < 0.05<br>(< 0.05 to < 0.05)       | < 0.05<br>(< 0.05 to < 0.05)      | 33.4<br>(8.9 to 60.2)                             | 3.1<br>(-14.6 to 22.4)                              |
| Chronic myeloid leukaemia                          | < 0.05<br>(< 0.05 to < 0.05)         | < 0.05<br>(< 0.05 to < 0.05)       | < 0.05<br>(< 0.05 to < 0.05)      | 0.0<br>(-15.2 to 16.7)                            | -23.5<br>(-34.9 to -10.4)                           |
| Other leukaemia                                    | 0.2<br>(0.2 to 0.2)                  | < 0.05<br>(< 0.05 to 0.1)          | < 0.05<br>(< 0.05 to < 0.05)      | 27.1<br>(3.4 to 53.7)                             | -4.6<br>(-22.6 to 15.6)                             |
| Other neoplasms                                    | 0.7<br>(0.6 to 0.7)                  | 0.2<br>(0.1 to 0.2)                | < 0.05<br>(< 0.05 to 0.1)         | 38.0<br>(19.8 to 58.3)                            | 6.3<br>(-7.5 to 20.8)                               |
| <b>Cardiovascular diseases</b>                     | <b>74.8</b><br><b>(71.5 to 78.5)</b> | <b>5.7†</b><br><b>(5.4 to 6.1)</b> | <b>4.9</b><br><b>(3.6 to 6.4)</b> | <b>17.6</b><br><b>(13.1 to 22.5)</b>              | <b>-8.9</b><br><b>(-12.4 to -5.1)</b>               |
| Rheumatic heart disease                            | 0.1<br>(0.1 to 0.1)                  | < 0.05<br>(< 0.05 to < 0.05)       | < 0.05<br>(< 0.05 to < 0.05)      | 11.8<br>(-5.9 to 32.4)                            | -11.2<br>(-24.6 to 3.7)                             |
| Ischaemic heart disease                            | 15.6<br>(14.7 to 16.6)               | 1.7<br>(1.6 to 1.8)                | 0.9<br>(0.6 to 1.2)               | 15.6<br>(9.7 to 21.0)                             | -10.4<br>(-14.8 to -6.2)                            |
| Cerebrovascular disease                            | 8.2<br>(7.7 to 8.8)                  | 1.1†<br>(1.0 to 1.1)               | 1.3<br>(0.9 to 1.7)               | 32.2<br>(22.2 to 41.9)                            | 0.9<br>(-6.2 to 8.1)                                |
| Ischaemic stroke                                   | 6.5<br>(5.9 to 7.2)                  | 0.7†<br>(0.7 to 0.8)               | 1.0<br>(0.7 to 1.3)               | 35.6<br>(23.2 to 47.9)                            | 3.4<br>(-5.4 to 12.7)                               |
| Hemorrhagic stroke                                 | 2.0<br>(1.9 to 2.3)                  | 0.4†<br>(0.3 to 0.4)               | 0.3<br>(0.2 to 0.4)               | 22.2<br>(10.0 to 36.2)                            | -6.1<br>(-15.1 to 4.5)                              |
| Hypertensive heart disease                         | 1.5<br>(1.2 to 1.7)                  | --                                 | 0.1<br>(0.1 to 0.2)               | 8.9<br>(-2.7 to 21.0)                             | -16.8<br>(-25.7 to -7.8)                            |
| Cardiomyopathy and myocarditis                     | 1.3<br>(1.1 to 1.4)                  | 0.3†<br>(0.3 to 0.4)               | 0.1<br>(0.1 to 0.1)               | 11.6<br>(0.5 to 22.6)                             | -14.1<br>(-22.8 to -6.0)                            |
| Myocarditis                                        | 0.3<br>(0.3 to 0.4)                  | 0.3<br>(0.3 to 0.4)                | < 0.05<br>(< 0.05 to < 0.05)      | 8.2<br>(-8.3 to 28.6)                             | -11.7<br>(-25.7 to 4.9)                             |
| Alcoholic cardiomyopathy                           | 0.2<br>(0.2 to 0.2)                  | --                                 | < 0.05<br>(< 0.05 to < 0.05)      | 8.2<br>(-13.4 to 31.9)                            | -16.7<br>(-33.5 to 1.3)                             |
| Other cardiomyopathy                               | 0.8<br>(0.7 to 0.9)                  | --                                 | 0.1<br>(< 0.05 to 0.1)            | 14.1<br>(1.4 to 27.1)                             | -14.5<br>(-24.0 to -4.6)                            |
| Atrial fibrillation and flutter                    | 7.4<br>(6.5 to 8.5)                  | 0.6<br>(0.5 to 0.7)                | 0.6<br>(0.4 to 0.8)               | 27.5<br>(20.3 to 35.6)                            | -2.0<br>(-7.8 to 4.1)                               |
| Peripheral vascular disease                        | 23.9<br>(20.9 to 27.1)               | 1.9<br>(1.6 to 2.2)                | 0.1<br>(< 0.05 to 0.2)            | 19.1<br>(11.8 to 27.7)                            | -8.3<br>(-14.3 to -1.9)                             |
| Endocarditis                                       | 0.1<br>(0.1 to 0.2)                  | 0.1<br>(0.1 to 0.2)                | < 0.05<br>(< 0.05 to < 0.05)      | 7.2<br>(-9.4 to 27.4)                             | -16.4<br>(-29.4 to -1.5)                            |
| Other cardiovascular and circulatory diseases      | 35.3<br>(30.6 to 39.6)               | --                                 | 1.8<br>(1.2 to 2.6)               | 8.3<br>(0.6 to 15.8)                              | -14.4<br>(-20.3 to -8.8)                            |
| <b>Chronic respiratory diseases</b>                | <b>79.5</b><br><b>(76.8 to 82.0)</b> | <b>6.0†</b><br><b>(5.7 to 6.3)</b> | <b>3.0</b><br><b>(2.2 to 3.9)</b> | <b>17.6</b><br><b>(11.4 to 23.8)</b>              | <b>-4.8</b><br><b>(-9.2 to -0.4)</b>                |
| Chronic obstructive pulmonary disease              | 29.9<br>(28.5 to 31.4)               | 1.8<br>(1.7 to 1.9)                | 0.8<br>(0.7 to 1.0)               | 18.0<br>(0.1 to 35.3)                             | -8.4<br>(-22.0 to 5.1)                              |
| Pneumoconiosis                                     | < 0.05<br>(< 0.05 to < 0.05)         | < 0.05<br>(< 0.05 to < 0.05)       | < 0.05<br>(< 0.05 to < 0.05)      | 16.1<br>(9.7 to 22.5)                             | -8.1<br>(-13.3 to -2.8)                             |
| Silicosis                                          | < 0.05<br>(< 0.05 to < 0.05)         | < 0.05<br>(< 0.05 to < 0.05)       | < 0.05<br>(< 0.05 to < 0.05)      | 18.7<br>(9.1 to 28.3)                             | -3.5<br>(-11.5 to 4.4)                              |



| Cause                                                          | Prevalence in thousands (95% UI)        | Incidence in thousands (95% UI)       | YLDs in thousands (95% UI)           |                                                   |                                                     |
|----------------------------------------------------------------|-----------------------------------------|---------------------------------------|--------------------------------------|---------------------------------------------------|-----------------------------------------------------|
|                                                                | 2016 counts                             | 2016 counts                           | 2016 counts                          | Percentage change in counts between 2006 and 2016 | Percentage change in age-standardised rates between |
| Asbestosis                                                     | < 0.05<br>(< 0.05 to < 0.05)            | < 0.05<br>(< 0.05 to < 0.05)          | < 0.05<br>(< 0.05 to < 0.05)         | 4.3<br>(-7.4 to 15.2)                             | -18.7<br>(-27.8 to -10.1)                           |
| Coal workers pneumoconiosis                                    | --                                      | --                                    | --                                   | --                                                | --                                                  |
| Other pneumoconiosis                                           | < 0.05<br>(< 0.05 to < 0.05)            | < 0.05<br>(< 0.05 to < 0.05)          | < 0.05<br>(< 0.05 to < 0.05)         | 23.4<br>(13.5 to 35.4)                            | -6.8<br>(-14.1 to 1.7)                              |
| Asthma                                                         | 53.8<br>(50.5 to 57.4)                  | 4.1<br>(3.8 to 4.4)                   | 2.1<br>(1.4 to 3.0)                  | 16.9<br>(12.9 to 21.0)                            | -4.0<br>(-7.5 to -0.4)                              |
| Interstitial lung disease and pulmonary sarcoidosis            | 0.3<br>(0.2 to 0.3)                     | < 0.05<br>(< 0.05 to < 0.05)          | < 0.05<br>(< 0.05 to < 0.05)         | 32.6<br>(17.5 to 49.1)                            | 2.1<br>(-8.8 to 14.3)                               |
| Other chronic respiratory diseases                             | --                                      | --                                    | < 0.05<br>(< 0.05 to < 0.05)         | 49.1<br>(27.8 to 73.5)                            | 24.1<br>(4.0 to 46.4)                               |
| <b>Cirrhosis and other chronic liver diseases</b>              | <b>7.8</b><br><b>(7.4 to 8.1)</b>       | <b>0.1</b><br><b>(0.1 to 0.1)</b>     | <b>0.2</b><br><b>(0.1 to 0.2)</b>    | <b>23.7</b><br><b>(13.3 to 34.4)</b>              | <b>-1.5</b><br><b>(-9.7 to 7.2)</b>                 |
| Cirrhosis and other chronic liver diseases due to hepatitis B  | 1.0<br>(0.8 to 1.2)                     | < 0.05<br>(< 0.05 to < 0.05)          | < 0.05<br>(< 0.05 to < 0.05)         | 24.3<br>(-0.8 to 54.3)                            | -2.2<br>(-21.9 to 21.8)                             |
| Cirrhosis and other chronic liver diseases due to hepatitis C  | 2.0<br>(1.5 to 2.6)                     | < 0.05<br>(< 0.05 to < 0.05)          | < 0.05<br>(< 0.05 to 0.1)            | 21.6<br>(2.7 to 43.9)                             | -4.6<br>(-20.1 to 13.0)                             |
| Cirrhosis and other chronic liver diseases due to alcohol use  | 4.1<br>(3.5 to 4.6)                     | 0.1<br>(0.1 to 0.1)                   | 0.1<br>(0.1 to 0.1)                  | 26.0<br>(11.4 to 43.1)                            | -1.8<br>(-13.4 to 11.7)                             |
| Cirrhosis and other chronic liver diseases due to other causes | 0.7<br>(0.5 to 0.9)                     | < 0.05<br>(< 0.05 to < 0.05)          | < 0.05<br>(< 0.05 to < 0.05)         | 19.8<br>(-0.3 to 44.9)                            | 2.0<br>(-15.5 to 24.2)                              |
| <b>Digestive diseases</b>                                      | <b>13.8</b><br><b>(12.9 to 14.7)</b>    | <b>22.2†</b><br><b>(20.7 to 23.8)</b> | <b>0.6</b><br><b>(0.4 to 0.8)</b>    | <b>19.6</b><br><b>(12.6 to 27.5)</b>              | <b>-5.1</b><br><b>(-10.7 to 1.2)</b>                |
| Peptic ulcer disease                                           | 2.8<br>(2.5 to 3.3)                     | 0.7<br>(0.6 to 0.7)                   | < 0.05<br>(< 0.05 to < 0.05)         | 40.8<br>(1.9 to 93.4)                             | 16.3<br>(-16.8 to 61.8)                             |
| Gastritis and duodenitis                                       | 4.6<br>(4.0 to 5.4)                     | 4.9<br>(4.3 to 5.5)                   | < 0.05<br>(< 0.05 to < 0.05)         | 38.3<br>(8.2 to 74.0)                             | 12.0<br>(-11.8 to 41.5)                             |
| Appendicitis                                                   | < 0.05<br>(< 0.05 to < 0.05)            | 0.7<br>(0.6 to 0.8)                   | < 0.05<br>(< 0.05 to < 0.05)         | 18.7<br>(-3.6 to 47.0)                            | -3.2<br>(-25.7 to 27.3)                             |
| Paralytic ileus and intestinal obstruction                     | < 0.05<br>(< 0.05 to < 0.05)            | 0.3<br>(0.3 to 0.3)                   | < 0.05<br>(< 0.05 to < 0.05)         | 28.5<br>(21.2 to 37.0)                            | 1.4<br>(-3.3 to 6.6)                                |
| Inguinal, femoral, and abdominal hernia                        | 4.5<br>(4.0 to 4.9)                     | 9.5<br>(8.2 to 10.7)                  | 0.3<br>(0.2 to 0.4)                  | 25.9<br>(15.8 to 37.8)                            | -0.7<br>(-8.7 to 8.9)                               |
| Inflammatory bowel disease                                     | 0.9<br>(0.8 to 1.0)                     | 0.2<br>(0.2 to 0.2)                   | 0.1<br>(0.1 to 0.2)                  | -0.7<br>(-10.5 to 10.5)                           | -20.5<br>(-28.9 to -11.4)                           |
| Vascular intestinal disorders                                  | < 0.05<br>(< 0.05 to < 0.05)            | 0.1<br>(0.1 to 0.1)                   | < 0.05<br>(< 0.05 to < 0.05)         | 29.7<br>(-0.7 to 69.0)                            | 0.2<br>(-22.8 to 28.7)                              |
| Gallbladder and biliary diseases                               | 1.2<br>(1.1 to 1.4)                     | 5.5<br>(4.9 to 6.2)                   | < 0.05<br>(< 0.05 to < 0.05)         | 20.7<br>(-1.2 to 44.5)                            | -5.3<br>(-22.1 to 13.6)                             |
| Pancreatitis                                                   | < 0.05<br>(< 0.05 to 0.1)               | 0.4<br>(0.4 to 0.5)                   | < 0.05<br>(< 0.05 to < 0.05)         | 14.9<br>(9.3 to 19.9)                             | -9.4<br>(-13.6 to -5.4)                             |
| Other digestive diseases                                       | --                                      | --                                    | < 0.05<br>(< 0.05 to 0.1)            | 25.1<br>(17.8 to 33.3)                            | -0.9<br>(-7.0 to 5.9)                               |
| <b>Neurological disorders</b>                                  | <b>239.8</b><br><b>(232.5 to 249.3)</b> | <b>91.7</b><br><b>(79.8 to 105.1)</b> | <b>7.5</b><br><b>(5.1 to 10.2)</b>   | <b>24.7</b><br><b>(12.6 to 38.2)</b>              | <b>-0.9</b><br><b>(-11.2 to 10.6)</b>               |
| Alzheimer's disease and other dementias                        | 5.0<br>(4.3 to 5.9)                     | 1.0<br>(0.8 to 1.2)                   | 0.8<br>(0.5 to 1.0)                  | 38.3<br>(31.5 to 45.4)                            | -2.0<br>(-6.4 to 2.5)                               |
| Parkinson's disease                                            | 0.9<br>(0.7 to 1.1)                     | 0.1<br>(0.1 to 0.1)                   | 0.1<br>(0.1 to 0.1)                  | 36.4<br>(22.8 to 52.0)                            | 4.8<br>(-6.0 to 16.2)                               |
| Epilepsy                                                       | 1.8<br>(0.5 to 3.2)                     | 0.2<br>(< 0.05 to 0.3)                | 0.4<br>(0.1 to 1.0)                  | 11.0<br>(-80.5 to 495.4)                          | -10.6<br>(-84.0 to 387.3)                           |
| Multiple sclerosis                                             | 0.8<br>(0.8 to 0.9)                     | < 0.05<br>(< 0.05 to < 0.05)          | 0.2<br>(0.1 to 0.3)                  | 33.5<br>(18.6 to 51.0)                            | 6.0<br>(-5.6 to 19.5)                               |
| Motor neuron disease                                           | 0.1<br>(0.1 to 0.1)                     | < 0.05<br>(< 0.05 to < 0.05)          | < 0.05<br>(< 0.05 to < 0.05)         | 31.6<br>(26.5 to 36.9)                            | 4.6<br>(0.5 to 8.9)                                 |
| Migraine                                                       | 122.7<br>(117.7 to 127.6)               | 10.2<br>(9.7 to 10.8)                 | 5.2<br>(3.3 to 7.3)                  | 23.4<br>(19.7 to 27.3)                            | -0.6<br>(-3.6 to 2.5)                               |
| Tension-type headache                                          | 157.3<br>(141.2 to 174.9)               | 80.1<br>(68.1 to 93.5)                | 0.7<br>(0.5 to 1.0)                  | 24.3<br>(18.2 to 29.9)                            | -0.1<br>(-4.8 to 4.5)                               |
| Other neurological disorders                                   | < 0.05<br>(< 0.05 to < 0.05)            | < 0.05<br>(< 0.05 to < 0.05)          | 0.1<br>(0.1 to 0.2)                  | 34.2<br>(-41.7 to 216.5)                          | 9.8<br>(-57.2 to 190.8)                             |
| <b>Mental and substance use disorders</b>                      | <b>97.0</b><br><b>(93.4 to 100.6)</b>   | <b>32.4†</b><br><b>(30.3 to 34.9)</b> | <b>13.8</b><br><b>(10.0 to 17.9)</b> | <b>20.5</b><br><b>(17.9 to 22.9)</b>              | <b>-3.2</b><br><b>(-5.3 to -1.3)</b>                |
| Schizophrenia                                                  | 1.8<br>(1.4 to 2.1)                     | 0.1<br>(0.1 to 0.1)                   | 1.1<br>(0.8 to 1.4)                  | 26.4<br>(16.7 to 37.9)                            | 0.6<br>(-7.2 to 9.7)                                |
| Alcohol use disorders                                          | 7.8<br>(6.9 to 8.9)                     | 3.2<br>(2.7 to 3.6)                   | 0.8<br>(0.6 to 1.1)                  | 21.3<br>(9.9 to 33.1)                             | -3.2<br>(-12.2 to 6.0)                              |
| Drug use disorders                                             | 5.2<br>(4.8 to 5.5)                     | 0.7<br>(0.6 to 0.8)                   | 1.0<br>(0.7 to 1.4)                  | -5.6<br>(-16.3 to 6.6)                            | -24.9<br>(-33.5 to -14.6)                           |
| Opioid use disorders                                           | 1.8<br>(1.5 to 2.1)                     | 0.2<br>(0.2 to 0.3)                   | 0.7<br>(0.5 to 1.0)                  | -13.4<br>(-26.4 to 1.0)                           | -31.8<br>(-42.6 to -19.1)                           |
| Cocaine use disorders                                          | 0.2<br>(0.2 to 0.2)                     | < 0.05<br>(< 0.05 to < 0.05)          | < 0.05<br>(< 0.05 to < 0.05)         | 23.4<br>(-4.2 to 60.6)                            | -1.8<br>(-26.7 to 33.1)                             |
| Amphetamine use disorders                                      | 0.6<br>(0.4 to 0.7)                     | < 0.05<br>(< 0.05 to 0.1)             | 0.1<br>(< 0.05 to 0.1)               | 15.0<br>(-8.7 to 45.4)                            | -8.5<br>(-28.0 to 16.5)                             |
| Cannabis use disorders                                         | 2.1<br>(1.8 to 2.6)                     | 0.3<br>(0.2 to 0.4)                   | 0.1<br>(< 0.05 to 0.1)               | 24.3<br>(6.9 to 45.2)                             | -0.3<br>(-15.1 to 17.0)                             |
| Other drug use disorders                                       | 0.7<br>(0.6 to 0.8)                     | 0.1<br>(0.1 to 0.1)                   | 0.1<br>(0.1 to 0.2)                  | 23.0<br>(2.9 to 43.5)                             | -2.5<br>(-19.2 to 15.7)                             |
| Depressive disorders                                           | 23.5<br>(22.2 to 25.1)                  | 22.2<br>(20.1 to 24.6)                | 3.7<br>(2.6 to 5.1)                  | 21.5<br>(15.5 to 27.5)                            | -3.2<br>(-7.6 to 1.6)                               |
| Major depressive disorder                                      | 13.7<br>(12.4 to 15.1)                  | 20.8<br>(18.8 to 23.2)                | 2.8<br>(1.9 to 3.8)                  | 20.1<br>(12.5 to 28.4)                            | -4.1<br>(-9.9 to 2.3)                               |
| Dysthymia                                                      | 10.2<br>(9.0 to 11.8)                   | 1.4<br>(1.2 to 1.6)                   | 1.0<br>(0.7 to 1.4)                  | 25.4<br>(21.7 to 29.5)                            | -0.4<br>(-3.4 to 3.0)                               |
| Bipolar disorder                                               | 6.7<br>(4.4 to 9.8)                     | 0.4<br>(0.3 to 0.6)                   | 1.4<br>(0.7 to 2.2)                  | 25.3<br>(19.0 to 31.7)                            | -0.1<br>(-5.2 to 4.6)                               |
| Anxiety disorders                                              | 30.5<br>(27.0 to 34.5)                  | 3.9<br>(3.4 to 4.4)                   | 2.9<br>(2.0 to 4.0)                  | 23.4<br>(19.9 to 27.1)                            | -0.3<br>(-3.2 to 2.8)                               |
| Eating disorders                                               | 2.7<br>(2.2 to 3.3)                     | 0.6<br>(0.5 to 0.8)                   | 0.6<br>(0.4 to 0.8)                  | 29.0<br>(18.5 to 39.9)                            | 5.4<br>(-3.3 to 14.2)                               |
| Anorexia nervosa                                               | 0.7<br>(0.5 to 0.9)                     | 0.1<br>(0.1 to 0.1)                   | 0.1<br>(0.1 to 0.2)                  | 29.6<br>(10.3 to 51.5)                            | 5.2<br>(-10.5 to 22.8)                              |
| Bulimia nervosa                                                | 2.0<br>(1.5 to 2.6)                     | 0.5<br>(0.3 to 0.6)                   | 0.4<br>(0.2 to 0.6)                  | 28.8<br>(15.6 to 42.3)                            | 5.5<br>(-5.4 to 16.7)                               |
| Autistic spectrum disorders                                    | 4.4<br>(3.9 to 4.9)                     | < 0.05<br>(< 0.05 to < 0.05)          | 0.7<br>(0.5 to 1.0)                  | 23.5<br>(18.0 to 29.5)                            | 0.8<br>(-4.0 to 5.9)                                |
| Autism                                                         | 1.7<br>(1.5 to 2.0)                     | < 0.05<br>(< 0.05 to < 0.05)          | 0.4<br>(0.3 to 0.6)                  | 23.7<br>(15.2 to 33.2)                            | 0.8<br>(-6.2 to 8.5)                                |
| Asperger syndrome and other autistic spectrum disorders        | 2.6<br>(2.2 to 3.2)                     | < 0.05<br>(< 0.05 to < 0.05)          | 0.3<br>(0.2 to 0.4)                  | 23.0<br>(17.2 to 29.4)                            | 0.7<br>(-4.3 to 6.0)                                |



| Cause                                                      | Prevalence in thousands (95% UI)        | Incidence in thousands (95% UI)                | YLDs in thousands (95% UI)           |                                                   |                                                     |
|------------------------------------------------------------|-----------------------------------------|------------------------------------------------|--------------------------------------|---------------------------------------------------|-----------------------------------------------------|
|                                                            | 2016 counts                             | 2016 counts                                    | 2016 counts                          | Percentage change in counts between 2006 and 2016 | Percentage change in age-standardised rates between |
| Attention-deficit/hyperactivity disorder                   | 3.9<br>(2.9 to 5.2)                     | 0.2<br>(0.1 to 0.2)                            | < 0.05<br>(< 0.05 to 0.1)            | 17.9<br>(9.0 to 28.0)                             | -0.1<br>(-7.6 to 8.8)                               |
| Conduct disorder                                           | 2.9<br>(2.2 to 3.7)                     | 0.9<br>(0.7 to 1.2)                            | 0.4<br>(0.2 to 0.6)                  | 12.3<br>(5.4 to 20.3)                             | 0.0<br>(-6.2 to 6.8)                                |
| Idiopathic developmental intellectual disability           | 2.7<br>(1.0 to 4.6)                     | --                                             | 0.1<br>(< 0.05 to 0.2)               | 20.2<br>(9.6 to 32.4)                             | -2.7<br>(-11.9 to 6.7)                              |
| Other mental and substance use disorders                   | 13.8<br>(12.0 to 16.0)                  | 0.3<br>(0.3 to 0.4)                            | 1.0<br>(0.7 to 1.5)                  | 26.6<br>(21.1 to 32.6)                            | 0.5<br>(-4.1 to 5.2)                                |
| <b>Diabetes, urogenital, blood, and endocrine diseases</b> | <b>206.8</b><br><b>(187.2 to 231.5)</b> | <b>59.5†</b><br><b>(55.9 to 63.3)</b>          | <b>4.7</b><br><b>(3.3 to 6.3)</b>    | <b>27.0</b><br><b>(21.3 to 33.2)</b>              | <b>-0.8</b><br><b>(-5.2 to 4.2)</b>                 |
| Diabetes mellitus                                          | 26.6<br>(23.6 to 29.9)                  | 1.5<br>(1.3 to 1.7)                            | 2.2<br>(1.5 to 3.1)                  | 26.9<br>(17.5 to 39.1)                            | -1.6<br>(-8.9 to 7.9)                               |
| Acute glomerulonephritis                                   | < 0.05<br>(< 0.05 to < 0.05)            | 0.1<br>(0.1 to 0.1)                            | < 0.05<br>(< 0.05 to < 0.05)         | 24.6<br>(19.6 to 29.3)                            | 0.7<br>(-3.5 to 4.3)                                |
| Chronic kidney disease                                     | 19.3<br>(17.2 to 21.3)                  | 1.6<br>(1.4 to 1.9)                            | 0.5<br>(0.4 to 0.6)                  | 28.1<br>(18.2 to 38.5)                            | -1.2<br>(-8.3 to 6.7)                               |
| Chronic kidney disease due to diabetes mellitus            | 6.7<br>(5.5 to 7.9)                     | 0.6<br>(0.5 to 0.7)                            | 0.2<br>(0.1 to 0.2)                  | 30.0<br>(15.5 to 45.9)                            | 1.0<br>(-10.3 to 13.4)                              |
| Chronic kidney disease due to hypertension                 | 3.6<br>(3.0 to 4.3)                     | 0.3<br>(0.3 to 0.4)                            | 0.1<br>(< 0.05 to 0.1)               | 32.6<br>(13.5 to 54.6)                            | -3.3<br>(-16.2 to 11.7)                             |
| Chronic kidney disease due to glomerulonephritis           | 3.2<br>(2.6 to 3.7)                     | 0.2<br>(0.2 to 0.3)                            | 0.1<br>(0.1 to 0.1)                  | 25.5<br>(12.2 to 41.2)                            | -1.6<br>(-11.6 to 9.7)                              |
| Chronic kidney disease due to other causes                 | 5.8<br>(4.7 to 7.1)                     | 0.5<br>(0.4 to 0.6)                            | 0.1<br>(0.1 to 0.2)                  | 26.0<br>(12.0 to 40.6)                            | -2.5<br>(-12.2 to 8.6)                              |
| Urinary diseases and male infertility                      | 19.2<br>(16.9 to 21.6)                  | 32.3†<br>(29.0 to 35.9)                        | 0.6<br>(0.4 to 0.9)                  | 33.5<br>(24.1 to 43.6)                            | 3.2<br>(-4.0 to 10.8)                               |
| Interstitial nephritis and urinary tract infections        | 0.5<br>(0.4 to 0.5)                     | 24.0<br>(20.7 to 27.6)                         | < 0.05<br>(< 0.05 to < 0.05)         | 26.6<br>(7.2 to 48.4)                             | 1.5<br>(-14.2 to 19.1)                              |
| Urolithiasis                                               | 0.2<br>(0.2 to 0.3)                     | 6.5<br>(5.8 to 7.4)                            | < 0.05<br>(< 0.05 to < 0.05)         | 28.5<br>(7.9 to 54.1)                             | 1.6<br>(-13.5 to 19.9)                              |
| Benign prostatic hyperplasia                               | 16.4<br>(13.9 to 19.3)                  | 1.8<br>(1.5 to 2.1)                            | 0.5<br>(0.4 to 0.8)                  | 35.1<br>(24.5 to 46.5)                            | 4.1<br>(-3.8 to 12.8)                               |
| Male infertility                                           | 1.5<br>(1.1 to 2.1)                     | --                                             | < 0.05<br>(< 0.05 to < 0.05)         | 14.6<br>(4.7 to 25.7)                             | -2.5<br>(-10.3 to 6.3)                              |
| Other urinary diseases                                     | --                                      | --                                             | < 0.05<br>(< 0.05 to < 0.05)         | 7.5<br>(-4.6 to 21.4)                             | -14.7<br>(-24.0 to -4.6)                            |
| Gynecological diseases                                     | 67.8<br>(64.5 to 71.5)                  | 21.2†<br>(19.8 to 22.7)                        | 0.7<br>(0.5 to 1.0)                  | 14.3<br>(7.6 to 21.3)                             | -8.5<br>(-14.1 to -2.7)                             |
| Uterine fibroids                                           | 7.2<br>(6.5 to 8.1)                     | 0.7<br>(0.6 to 0.8)                            | 0.1<br>(< 0.05 to 0.1)               | 22.5<br>(12.5 to 31.0)                            | -3.1<br>(-10.6 to 4.0)                              |
| Polycystic ovarian syndrome                                | 0.2<br>(0.1 to 0.2)                     | 0.6<br>(0.4 to 0.8)                            | < 0.05<br>(< 0.05 to < 0.05)         | 18.2<br>(-5.2 to 47.2)                            | -0.8<br>(-20.8 to 23.7)                             |
| Female infertility                                         | 2.5<br>(1.6 to 3.9)                     | --                                             | < 0.05<br>(< 0.05 to < 0.05)         | 19.9<br>(8.9 to 33.4)                             | 3.1<br>(-5.8 to 14.1)                               |
| Endometriosis                                              | 0.4<br>(0.3 to 0.5)                     | 0.9<br>(0.7 to 1.2)                            | < 0.05<br>(< 0.05 to 0.1)            | 13.4<br>(-7.7 to 38.9)                            | -9.3<br>(-26.9 to 12.2)                             |
| Genital prolapse                                           | 26.4<br>(23.8 to 29.4)                  | 1.3<br>(1.2 to 1.5)                            | 0.1<br>(< 0.05 to 0.1)               | 19.8<br>(10.2 to 30.7)                            | -7.7<br>(-14.9 to 0.4)                              |
| Premenstrual syndrome                                      | 31.4<br>(29.1 to 33.5)                  | 10.5<br>(9.6 to 11.4)                          | 0.3<br>(0.2 to 0.4)                  | 22.0<br>(12.4 to 33.0)                            | -1.2<br>(-9.1 to 7.5)                               |
| Other gynecological diseases                               | 7.0<br>(6.0 to 8.1)                     | 7.2<br>(6.0 to 8.4)                            | 0.2<br>(0.2 to 0.4)                  | 4.0<br>(-8.1 to 17.5)                             | -16.8<br>(-26.6 to -6.0)                            |
| Hemoglobinopathies and hemolytic anaemias                  | 108.7<br>(83.0 to 141.1)                | --                                             | 0.2<br>(0.1 to 0.6)                  | 33.6<br>(-5.0 to 89.2)                            | 11.2<br>(-21.1 to 56.2)                             |
| Thalassemias                                               | 0.1<br>(< 0.05 to 0.2)                  | --                                             | < 0.05<br>(< 0.05 to < 0.05)         | 19.3<br>(-25.5 to 81.4)                           | 5.4<br>(-36.1 to 63.0)                              |
| Thalassaemias trait                                        | 42.9<br>(13.1 to 93.6)                  | --                                             | 0.2<br>(0.1 to 0.5)                  | 35.6<br>(-6.3 to 95.6)                            | 13.0<br>(-21.4 to 61.3)                             |
| Sickle cell disorders                                      | < 0.05<br>(< 0.05 to < 0.05)            | --                                             | < 0.05<br>(< 0.05 to < 0.05)         | 19.9<br>(-5.4 to 48.0)                            | -0.5<br>(-20.0 to 21.4)                             |
| Sickle cell trait                                          | 7.8<br>(4.7 to 12.0)                    | --                                             | < 0.05<br>(< 0.05 to < 0.05)         | 35.5<br>(-11.3 to 95.0)                           | 13.9<br>(-25.5 to 61.4)                             |
| G6PD deficiency                                            | 10.2<br>(8.5 to 12.1)                   | --                                             | < 0.05<br>(< 0.05 to < 0.05)         | 55.6<br>(13.1 to 116.4)                           | 26.6<br>(-8.3 to 74.9)                              |
| G6PD trait                                                 | 52.4<br>(48.3 to 56.6)                  | --                                             | < 0.05<br>(< 0.05 to < 0.05)         | 78.7<br>(10.6 to 182.6)                           | 43.9<br>(-9.1 to 121.7)                             |
| Other hemoglobinopathies and hemolytic anaemias            | 0.6<br>(0.5 to 0.7)                     | --                                             | < 0.05<br>(< 0.05 to < 0.05)         | 5.9<br>(-8.2 to 20.6)                             | -18.1<br>(-30.8 to -3.5)                            |
| Endocrine, metabolic, blood, and immune disorders          | 13.6<br>(12.5 to 14.9)                  | 2.8<br>(2.5 to 3.1)                            | 0.5<br>(0.3 to 0.7)                  | 37.4<br>(29.9 to 45.8)                            | 6.2<br>(0.4 to 12.7)                                |
| <b>Musculoskeletal disorders</b>                           | <b>148.3</b><br><b>(141.2 to 155.7)</b> | <b>71.9</b><br><b>(65.2 to 79.5)</b>           | <b>16.0</b><br><b>(11.7 to 20.7)</b> | <b>28.5</b><br><b>(24.9 to 32.2)</b>              | <b>1.4</b><br><b>(-1.2 to 4.2)</b>                  |
| Rheumatoid arthritis                                       | 2.6<br>(2.3 to 2.9)                     | 0.1<br>(0.1 to 0.1)                            | 0.6<br>(0.4 to 0.8)                  | 26.3<br>(17.4 to 37.5)                            | -0.9<br>(-8.1 to 7.2)                               |
| Osteoarthritis                                             | 40.1<br>(36.5 to 44.3)                  | 1.9<br>(1.7 to 2.1)                            | 1.4<br>(0.9 to 2.0)                  | 29.8<br>(25.8 to 34.0)                            | 0.6<br>(-2.6 to 3.8)                                |
| Low back and neck pain                                     | 100.1<br>(93.9 to 107.4)                | 42.5<br>(37.4 to 47.7)                         | 12.0<br>(8.5 to 15.6)                | 27.4<br>(23.5 to 31.6)                            | 0.8<br>(-2.2 to 4.1)                                |
| Low back pain                                              | 73.4<br>(65.5 to 82.5)                  | 35.9<br>(30.9 to 41.3)                         | 8.3<br>(5.8 to 10.9)                 | 27.9<br>(22.1 to 33.9)                            | 1.2<br>(-3.1 to 6.0)                                |
| Neck pain                                                  | 37.2<br>(32.2 to 42.8)                  | 6.6<br>(5.7 to 7.7)                            | 3.7<br>(2.5 to 5.2)                  | 26.4<br>(23.9 to 29.2)                            | -0.2<br>(-2.0 to 1.6)                               |
| Gout                                                       | 6.0<br>(5.3 to 6.8)                     | 1.0<br>(0.8 to 1.1)                            | 0.2<br>(0.1 to 0.3)                  | 30.4<br>(15.4 to 46.4)                            | 1.7<br>(-10.2 to 14.1)                              |
| Other musculoskeletal disorders                            | 21.2<br>(16.6 to 26.9)                  | 26.4<br>(21.9 to 31.9)                         | 1.8<br>(1.2 to 2.6)                  | 35.9<br>(22.6 to 51.0)                            | 7.0<br>(-2.9 to 18.1)                               |
| <b>Other non-communicable diseases</b>                     | <b>442.9</b><br><b>(432.6 to 452.4)</b> | <b>1,325.8†</b><br><b>(1,220.2 to 1,423.1)</b> | <b>13.7</b><br><b>(9.4 to 19.4)</b>  | <b>25.1</b><br><b>(23.5 to 26.6)</b>              | <b>0.0</b><br><b>(-1.1 to 1.2)</b>                  |
| Congenital anomalies                                       | 8.1<br>(7.7 to 8.5)                     | --                                             | 0.9<br>(0.7 to 1.2)                  | 18.9<br>(13.8 to 24.6)                            | -2.7<br>(-6.8 to 1.9)                               |
| Neural tube defects                                        | 0.6<br>(0.5 to 0.7)                     | --                                             | 0.2<br>(0.1 to 0.2)                  | 15.8<br>(3.2 to 29.8)                             | -5.6<br>(-16.5 to 6.1)                              |
| Congenital heart anomalies                                 | 1.4<br>(1.2 to 1.6)                     | --                                             | 0.1<br>(< 0.05 to 0.1)               | 21.8<br>(10.1 to 34.9)                            | -0.4<br>(-10.1 to 10.6)                             |
| Orofacial clefts                                           | 0.4<br>(0.3 to 0.4)                     | --                                             | < 0.05<br>(< 0.05 to < 0.05)         | 18.2<br>(4.8 to 33.9)                             | -3.6<br>(-14.5 to 9.5)                              |
| Down's syndrome                                            | 0.5<br>(0.4 to 0.5)                     | --                                             | < 0.05<br>(< 0.05 to 0.1)            | 24.3<br>(11.1 to 38.2)                            | 2.9<br>(-8.3 to 15.2)                               |
| Turner syndrome                                            | 0.4<br>(0.3 to 0.5)                     | --                                             | < 0.05<br>(< 0.05 to < 0.05)         | 18.0<br>(-7.1 to 53.1)                            | -2.6<br>(-23.8 to 26.1)                             |
| Klinefelter syndrome                                       | 0.5<br>(0.4 to 0.6)                     | --                                             | < 0.05<br>(< 0.05 to < 0.05)         | 24.4<br>(2.2 to 50.1)                             | 2.1<br>(-15.8 to 23.8)                              |

| Cause                                         | Prevalence in thousands (95% UI)        | Incidence in thousands (95% UI)       | YLDs in thousands (95% UI)        |                                                   |                                                     |
|-----------------------------------------------|-----------------------------------------|---------------------------------------|-----------------------------------|---------------------------------------------------|-----------------------------------------------------|
|                                               | 2016 counts                             | 2016 counts                           | 2016 counts                       | Percentage change in counts between 2006 and 2016 | Percentage change in age-standardised rates between |
| Other chromosomal abnormalities               | 0.8<br>(0.7 to 0.9)                     | --                                    | 0.1<br>(0.1 to 0.1)               | -0.4<br>(-12.5 to 12.2)                           | -11.2<br>(-21.8 to 0.1)                             |
| Congenital musculoskeletal and limb anomalies | 2.3<br>(2.1 to 2.5)                     | --                                    | 0.3<br>(0.2 to 0.5)               | 21.3<br>(12.4 to 31.1)                            | -1.5<br>(-8.9 to 7.2)                               |
| Urogenital congenital anomalies               | 1.0<br>(0.9 to 1.1)                     | --                                    | < 0.05<br>(< 0.05 to < 0.05)      | 12.0<br>(2.1 to 22.0)                             | -3.8<br>(-12.5 to 6.3)                              |
| Digestive congenital anomalies                | 1.0<br>(0.9 to 1.1)                     | --                                    | < 0.05<br>(< 0.05 to 0.1)         | 24.6<br>(9.9 to 41.2)                             | 1.7<br>(-10.9 to 15.5)                              |
| Other congenital anomalies                    | 0.8<br>(0.3 to 1.3)                     | --                                    | 0.2<br>(0.1 to 0.3)               | 25.4<br>(15.2 to 37.4)                            | 1.3<br>(-6.5 to 10.6)                               |
| Skin and subcutaneous diseases                | 206.7<br>(201.7 to 211.6)               | 456.3<br>(432.9 to 482.6)             | 5.4<br>(3.7 to 7.7)               | 23.2<br>(20.9 to 25.4)                            | 1.1<br>(-0.7 to 2.9)                                |
| Dermatitis                                    | 36.2<br>(31.7 to 41.4)                  | 42.3<br>(36.5 to 49.5)                | 1.4<br>(0.8 to 2.2)               | 19.2<br>(15.8 to 22.7)                            | 0.0<br>(-2.9 to 3.0)                                |
| Psoriasis                                     | 12.5<br>(11.7 to 13.3)                  | 1.1<br>(1.0 to 1.2)                   | 1.1<br>(0.8 to 1.4)               | 28.1<br>(21.3 to 34.8)                            | 2.4<br>(-2.9 to 7.8)                                |
| Cellulitis                                    | 0.2<br>(0.2 to 0.2)                     | 3.3<br>(3.1 to 3.5)                   | < 0.05<br>(< 0.05 to < 0.05)      | 26.6<br>(7.6 to 49.9)                             | 1.0<br>(-16.0 to 20.5)                              |
| Pyoderma                                      | 2.6<br>(2.5 to 2.7)                     | 72.7<br>(70.4 to 75.0)                | < 0.05<br>(< 0.05 to < 0.05)      | 26.8<br>(20.4 to 33.0)                            | 0.7<br>(-4.3 to 6.1)                                |
| Scabies                                       | 0.5<br>(0.4 to 0.7)                     | 1.6<br>(1.1 to 2.2)                   | < 0.05<br>(< 0.05 to < 0.05)      | 20.7<br>(8.1 to 34.3)                             | -0.1<br>(-10.5 to 12.2)                             |
| Fungal skin diseases                          | 41.5<br>(37.0 to 46.3)                  | 161.2<br>(140.6 to 183.6)             | 0.2<br>(0.1 to 0.5)               | 27.2<br>(25.3 to 29.1)                            | 0.2<br>(-1.1 to 1.4)                                |
| Viral skin diseases                           | 16.3<br>(13.9 to 18.8)                  | 21.7<br>(18.5 to 25.1)                | 0.5<br>(0.3 to 0.7)               | 19.4<br>(15.7 to 23.0)                            | -0.2<br>(-2.8 to 2.8)                               |
| Acne vulgaris                                 | 55.0<br>(50.6 to 59.9)                  | 41.1<br>(33.9 to 51.9)                | 1.4<br>(0.9 to 2.0)               | 22.1<br>(17.8 to 26.8)                            | 1.8<br>(-1.7 to 6.0)                                |
| Alopecia areata                               | 1.8<br>(1.8 to 1.9)                     | 3.2<br>(3.1 to 3.3)                   | 0.1<br>(< 0.05 to 0.1)            | 24.0<br>(14.8 to 34.3)                            | -0.2<br>(-7.9 to 8.5)                               |
| Pruritus                                      | 5.5<br>(4.9 to 6.3)                     | 4.3<br>(3.8 to 4.9)                   | 0.1<br>(< 0.05 to 0.1)            | 24.9<br>(18.8 to 31.5)                            | -0.1<br>(-5.1 to 5.2)                               |
| Urticaria                                     | 3.6<br>(3.2 to 4.1)                     | 6.4<br>(5.7 to 7.3)                   | 0.2<br>(0.1 to 0.3)               | 21.7<br>(14.0 to 30.1)                            | -0.1<br>(-6.4 to 6.7)                               |
| Decubitus ulcer                               | 0.3<br>(0.3 to 0.4)                     | 1.1<br>(1.0 to 1.3)                   | < 0.05<br>(< 0.05 to 0.1)         | 34.0<br>(18.0 to 51.8)                            | 0.6<br>(-10.2 to 11.8)                              |
| Other skin and subcutaneous diseases          | 74.2<br>(72.4 to 76.3)                  | 96.2<br>(93.1 to 99.7)                | 0.4<br>(0.2 to 0.7)               | 30.1<br>(27.4 to 32.7)                            | 3.0<br>(0.9 to 5.0)                                 |
| Sense organ diseases                          | 158.8<br>(149.4 to 168.0)               | 60.2†<br>(56.9 to 63.8)               | 4.6<br>(3.2 to 6.7)               | 27.8<br>(24.5 to 31.2)                            | -0.7<br>(-3.0 to 1.7)                               |
| Glaucoma                                      | 0.3<br>(0.2 to 0.4)                     | --                                    | < 0.05<br>(< 0.05 to < 0.05)      | 29.0<br>(10.8 to 51.4)                            | -1.1<br>(-15.8 to 16.5)                             |
| Cataract                                      | 2.4<br>(1.8 to 3.3)                     | --                                    | 0.2<br>(0.1 to 0.3)               | 29.3<br>(18.4 to 41.6)                            | -3.9<br>(-12.4 to 5.2)                              |
| Macular degeneration                          | 0.6<br>(0.4 to 0.8)                     | --                                    | 0.1<br>(< 0.05 to 0.1)            | 33.2<br>(16.7 to 53.3)                            | -0.6<br>(-12.8 to 14.0)                             |
| Refraction and accommodation disorders        | 51.0<br>(47.2 to 55.4)                  | --                                    | 0.9<br>(0.5 to 1.4)               | 22.6<br>(18.1 to 27.2)                            | -2.8<br>(-6.4 to 1.2)                               |
| Age-related and other hearing loss            | 122.6<br>(106.3 to 139.4)               | --                                    | 2.7<br>(1.8 to 4.0)               | 29.3<br>(23.9 to 34.6)                            | -0.0<br>(-3.9 to 3.9)                               |
| Other vision loss                             | 1.6<br>(1.2 to 2.0)                     | --                                    | 0.1<br>(0.1 to 0.2)               | 27.8<br>(16.1 to 40.6)                            | -0.4<br>(-9.6 to 9.9)                               |
| Other sense organ diseases                    | 21.9<br>(20.2 to 23.6)                  | 60.2<br>(56.9 to 63.8)                | 0.7<br>(0.4 to 1.0)               | 27.7<br>(23.2 to 32.6)                            | 0.6<br>(-3.0 to 4.7)                                |
| Oral disorders                                | 317.4<br>(299.7 to 333.4)               | 809.3†<br>(706.7 to 905.6)            | 2.8<br>(1.7 to 4.2)               | 26.6<br>(24.0 to 29.2)                            | -0.4<br>(-2.5 to 1.7)                               |
| Caries of deciduous teeth                     | 20.7<br>(14.0 to 28.2)                  | 81.5<br>(48.4 to 119.0)               | < 0.05<br>(< 0.05 to < 0.05)      | 7.6<br>(-3.3 to 19.8)                             | -0.5<br>(-10.4 to 10.6)                             |
| Caries of permanent teeth                     | 215.1<br>(195.4 to 236.6)               | 712.5<br>(613.2 to 798.6)             | 0.2<br>(0.1 to 0.4)               | 22.5<br>(17.9 to 27.5)                            | -1.6<br>(-5.3 to 2.4)                               |
| Periodontal disease                           | 90.1<br>(63.0 to 117.8)                 | 10.7<br>(7.8 to 13.6)                 | 0.6<br>(0.2 to 1.3)               | 26.5<br>(20.7 to 32.8)                            | -0.5<br>(-4.9 to 4.4)                               |
| Edentulism and severe tooth loss              | 59.1<br>(52.1 to 66.1)                  | 4.6<br>(3.8 to 5.4)                   | 1.6<br>(1.1 to 2.3)               | 27.7<br>(23.9 to 31.8)                            | -0.2<br>(-3.4 to 2.9)                               |
| Other oral disorders                          | 11.5<br>(11.0 to 12.1)                  | --                                    | 0.3<br>(0.2 to 0.5)               | 24.5<br>(20.8 to 28.6)                            | -0.0<br>(-3.1 to 3.3)                               |
| <b>Injuries</b>                               | <b>177.6</b><br><b>(165.6 to 191.7)</b> | <b>61.5†</b><br><b>(58.0 to 65.3)</b> | <b>5.6</b><br><b>(3.8 to 8.0)</b> | <b>20.7</b><br><b>(19.3 to 22.2)</b>              | <b>-5.3</b><br><b>(-6.4 to -4.2)</b>                |
| <b>Transport injuries</b>                     | <b>26.0</b><br><b>(24.1 to 28.0)</b>    | <b>6.3</b><br><b>(5.7 to 6.9)</b>     | <b>1.2</b><br><b>(0.8 to 1.7)</b> | <b>9.9</b><br><b>(8.1 to 11.8)</b>                | <b>-13.0</b><br><b>(-14.5 to -11.4)</b>             |
| Road injuries                                 | 23.7<br>(21.9 to 25.6)                  | 5.9<br>(5.3 to 6.6)                   | 1.1<br>(0.7 to 1.6)               | 9.0<br>(7.2 to 11.0)                              | -13.7<br>(-15.2 to -12.0)                           |
| Pedestrian road injuries                      | 3.7<br>(3.2 to 4.3)                     | 0.6<br>(0.5 to 0.7)                   | 0.2<br>(0.1 to 0.3)               | 17.2<br>(15.2 to 19.3)                            | -6.9<br>(-8.7 to -5.1)                              |
| Cyclist road injuries                         | 6.5<br>(5.4 to 7.8)                     | 2.0<br>(1.7 to 2.3)                   | 0.3<br>(0.2 to 0.4)               | 21.6<br>(19.7 to 23.5)                            | -4.0<br>(-5.5 to -2.4)                              |
| Motorcyclist road injuries                    | 4.5<br>(3.8 to 5.3)                     | 0.7<br>(0.6 to 0.8)                   | 0.2<br>(0.1 to 0.3)               | 11.6<br>(9.7 to 13.9)                             | -11.8<br>(-13.5 to -9.9)                            |
| Motor vehicle road injuries                   | 7.2<br>(6.0 to 8.3)                     | 2.2<br>(1.9 to 2.5)                   | 0.4<br>(0.2 to 0.5)               | -2.5<br>(-4.2 to -0.6)                            | -22.7<br>(-24.2 to -21.2)                           |
| Other road injuries                           | 1.8<br>(1.5 to 2.2)                     | 0.5<br>(0.4 to 0.6)                   | 0.1<br>(< 0.05 to 0.1)            | 1.4<br>(-0.7 to 3.4)                              | -19.6<br>(-21.4 to -17.9)                           |
| Other transport injuries                      | 2.3<br>(1.9 to 2.7)                     | 0.3<br>(0.3 to 0.4)                   | 0.1<br>(0.1 to 0.1)               | 22.8<br>(21.2 to 24.4)                            | -3.1<br>(-4.4 to -1.7)                              |
| <b>Unintentional injuries</b>                 | <b>144.5</b><br><b>(133.2 to 157.6)</b> | <b>52.4</b><br><b>(49.0 to 56.4)</b>  | <b>4.2</b><br><b>(2.8 to 6.0)</b> | <b>24.0</b><br><b>(22.6 to 25.7)</b>              | <b>-3.1</b><br><b>(-4.2 to -1.9)</b>                |
| Falls                                         | 76.5<br>(67.0 to 86.3)                  | 28.6<br>(25.8 to 31.6)                | 2.7<br>(1.9 to 3.8)               | 25.2<br>(23.4 to 27.2)                            | -2.8<br>(-4.0 to -1.3)                              |
| Drowning                                      | 0.2<br>(0.2 to 0.2)                     | < 0.05<br>(< 0.05 to < 0.05)          | < 0.05<br>(< 0.05 to < 0.05)      | 29.4<br>(22.5 to 36.7)                            | 2.9<br>(-2.8 to 8.9)                                |
| Fire, heat, and hot substances                | 12.6<br>(10.6 to 14.9)                  | 0.7<br>(0.6 to 0.8)                   | 0.2<br>(0.1 to 0.4)               | 29.1<br>(26.0 to 32.1)                            | 2.7<br>(0.2 to 5.1)                                 |
| Poisonings                                    | 0.5<br>(0.4 to 0.7)                     | 0.5<br>(0.4 to 0.6)                   | < 0.05<br>(< 0.05 to 0.1)         | 26.0<br>(15.2 to 37.1)                            | 2.1<br>(-7.2 to 11.8)                               |
| Exposure to mechanical forces                 | 28.5<br>(23.9 to 36.6)                  | 7.2<br>(6.1 to 8.5)                   | 0.5<br>(0.3 to 0.8)               | 23.5<br>(21.9 to 25.0)                            | -2.3<br>(-3.6 to -1.0)                              |
| Unintentional firearm injuries                | 0.9<br>(0.8 to 1.2)                     | 0.1<br>(0.1 to 0.1)                   | < 0.05<br>(< 0.05 to < 0.05)      | 25.6<br>(23.2 to 27.9)                            | -0.7<br>(-2.5 to 1.3)                               |
| Unintentional suffocation                     | 0.4<br>(0.3 to 0.5)                     | 0.1<br>(< 0.05 to 0.1)                | < 0.05<br>(< 0.05 to < 0.05)      | 32.0<br>(30.2 to 34.1)                            | 3.8<br>(2.2 to 5.5)                                 |
| Other exposure to mechanical forces           | 27.2<br>(22.6 to 35.1)                  | 7.1<br>(5.9 to 8.3)                   | 0.5<br>(0.3 to 0.8)               | 23.3<br>(21.7 to 24.9)                            | -2.4<br>(-3.8 to -1.2)                              |

| Cause                                                                               | Prevalence in thousands (95% UI) | Incidence in thousands (95% UI)                | YLDs in thousands (95% UI)                    |                                                   |                                                     |
|-------------------------------------------------------------------------------------|----------------------------------|------------------------------------------------|-----------------------------------------------|---------------------------------------------------|-----------------------------------------------------|
|                                                                                     | 2016 counts                      | 2016 counts                                    | 2016 counts                                   | Percentage change in counts between 2006 and 2016 | Percentage change in age-standardised rates between |
| Adverse effects of medical treatment                                                | 0.2<br>(0.2 to 0.3)              | 3.1<br>(2.8 to 3.5)                            | < 0.05<br>(< 0.05 to < 0.05)                  | 25.8<br>(19.9 to 31.5)                            | -2.7<br>(-6.9 to 1.1)                               |
| Animal contact                                                                      | 1.8<br>(1.6 to 2.1)              | 1.1<br>(0.8 to 1.3)                            | < 0.05<br>(< 0.05 to 0.1)                     | 18.2<br>(13.9 to 22.0)                            | -6.2<br>(-9.7 to -2.9)                              |
| Venomous animal contact                                                             | 0.3<br>(0.3 to 0.4)              | 0.3<br>(0.2 to 0.5)                            | < 0.05<br>(< 0.05 to < 0.05)                  | 18.5<br>(9.6 to 27.7)                             | -5.0<br>(-12.3 to 2.7)                              |
| Non-venomous animal contact                                                         | 1.5<br>(1.3 to 1.8)              | 0.7<br>(0.6 to 0.9)                            | < 0.05<br>(< 0.05 to < 0.05)                  | 17.9<br>(16.0 to 19.9)                            | -7.2<br>(-8.7 to -5.6)                              |
| Foreign body                                                                        | 3.3<br>(2.8 to 3.9)              | 2.5<br>(2.2 to 3.0)                            | 0.1<br>(0.1 to 0.1)                           | 27.5<br>(25.8 to 29.4)                            | 0.6<br>(-0.8 to 2.0)                                |
| Pulmonary aspiration and foreign body in airway                                     | 0.7<br>(0.5 to 0.8)              | 0.8<br>(0.8 to 0.9)                            | < 0.05<br>(< 0.05 to < 0.05)                  | 22.6<br>(20.5 to 25.3)                            | -6.1<br>(-7.8 to -4.5)                              |
| Foreign body in eyes                                                                | 0.3<br>(0.2 to 0.4)              | 1.2<br>(0.9 to 1.6)                            | < 0.05<br>(< 0.05 to < 0.05)                  | 25.9<br>(22.1 to 30.3)                            | 1.1<br>(-1.8 to 4.2)                                |
| Foreign body in other body part                                                     | 2.3<br>(1.9 to 2.9)              | 0.5<br>(0.4 to 0.6)                            | 0.1<br>(< 0.05 to 0.1)                        | 29.6<br>(27.7 to 31.6)                            | 2.5<br>(1.0 to 4.2)                                 |
| Environmental heat and cold exposure                                                | 1.6<br>(1.4 to 1.8)              | 0.4<br>(0.3 to 0.4)                            | 0.1<br>(< 0.05 to 0.1)                        | 35.2<br>(30.3 to 40.4)                            | 5.2<br>(1.4 to 9.4)                                 |
| Other unintentional injuries                                                        | 19.2<br>(16.2 to 22.6)           | 8.3<br>(7.1 to 9.6)                            | 0.5<br>(0.3 to 0.7)                           | 14.3<br>(12.8 to 15.7)                            | -10.1<br>(-11.3 to -8.8)                            |
| <b>Self-harm and interpersonal violence</b>                                         | <b>13.5<br/>(12.3 to 14.7)</b>   | <b>2.9†<br/>(2.5 to 3.2)</b>                   | <b>0.2<br/>(0.2 to 0.4)</b>                   | <b>22.2<br/>(19.9 to 24.3)</b>                    | <b>-2.5<br/>(-4.3 to -0.7)</b>                      |
| Self-harm                                                                           | 1.6<br>(1.3 to 1.9)              | 1.3<br>(1.2 to 1.5)                            | 0.1<br>(< 0.05 to 0.1)                        | 18.3<br>(12.6 to 24.2)                            | -6.5<br>(-11.3 to -1.4)                             |
| Self-harm by firearm                                                                | < 0.05<br>(< 0.05 to < 0.05)     | < 0.05<br>(< 0.05 to < 0.05)                   | < 0.05<br>(< 0.05 to < 0.05)                  | 24.4<br>(21.8 to 26.9)                            | -0.6<br>(-2.7 to 1.6)                               |
| Self-harm by other specified means                                                  | 1.6<br>(1.3 to 1.9)              | 1.3<br>(1.2 to 1.5)                            | 0.1<br>(< 0.05 to 0.1)                        | 18.2<br>(12.6 to 24.2)                            | -6.5<br>(-11.3 to -1.4)                             |
| Interpersonal violence                                                              | 11.9<br>(10.8 to 13.1)           | 1.5†<br>(1.2 to 1.8)                           | 0.2<br>(0.1 to 0.3)                           | 23.5<br>(21.5 to 25.5)                            | -1.2<br>(-3.1 to 0.4)                               |
| Assault by firearm                                                                  | 0.4<br>(0.3 to 0.4)              | < 0.05<br>(< 0.05 to 0.1)                      | < 0.05<br>(< 0.05 to < 0.05)                  | 34.4<br>(32.0 to 36.8)                            | 6.5<br>(4.5 to 8.5)                                 |
| Assault by sharp object                                                             | 1.0<br>(0.8 to 1.2)              | 0.3<br>(0.2 to 0.4)                            | < 0.05<br>(< 0.05 to < 0.05)                  | 23.4<br>(21.3 to 25.7)                            | -2.3<br>(-4.1 to -0.5)                              |
| Sexual violence                                                                     | 6.7<br>(5.9 to 7.6)              | --                                             | 0.1<br>(< 0.05 to 0.1)                        | 18.0<br>(13.7 to 22.4)                            | -3.3<br>(-6.9 to 0.6)                               |
| Assault by other means                                                              | 3.9<br>(3.2 to 4.8)              | 1.2<br>(1.0 to 1.4)                            | 0.1<br>(0.1 to 0.2)                           | 25.7<br>(23.8 to 27.7)                            | -0.2<br>(-1.8 to 1.4)                               |
| <b>Forces of nature, conflict and terrorism, and executions and police conflict</b> | <b>0.2<br/>(0.1 to 0.4)</b>      | <b>&lt; 0.05†<br/>(&lt; 0.05 to &lt; 0.05)</b> | <b>&lt; 0.05<br/>(&lt; 0.05 to &lt; 0.05)</b> | <b>21.1<br/>(18.8 to 25.6)</b>                    | <b>-9.7<br/>(-11.8 to -4.7)</b>                     |
| Exposure to forces of nature                                                        | 0.1<br>(< 0.05 to 0.1)           | --                                             | < 0.05<br>(< 0.05 to < 0.05)                  | 6.0<br>(3.6 to 9.1)                               | -22.5<br>(-24.5 to -20.0)                           |
| Conflict and terrorism                                                              | 0.1<br>(< 0.05 to 0.2)           | --                                             | < 0.05<br>(< 0.05 to < 0.05)                  | 10.9<br>(8.2 to 14.1)                             | -20.1<br>(-22.1 to -17.6)                           |
| Executions and police conflict                                                      | 0.1<br>(< 0.05 to 0.1)           | < 0.05<br>(< 0.05 to < 0.05)                   | < 0.05<br>(< 0.05 to < 0.05)                  | 62.4<br>(49.9 to 67.2)                            | 25.1<br>(16.9 to 28.5)                              |
| <b>Impairments</b>                                                                  | --                               | --                                             | --                                            | --                                                | --                                                  |
| Anaemia                                                                             | 41.7<br>(28.6 to 64.0)           | --                                             | 0.8<br>(0.5 to 1.3)                           | 29.7<br>(6.0 to 57.6)                             | 3.5<br>(-15.9 to 28.1)                              |
| Developmental intellectual disability                                               | 8.2<br>(6.3 to 10.4)             | --                                             | 1.0<br>(0.8 to 1.4)                           | 19.4<br>(14.3 to 24.6)                            | -2.5<br>(-6.7 to 1.8)                               |
| Epilepsy                                                                            | 2.7<br>(1.3 to 4.2)              | --                                             | 0.7<br>(0.4 to 1.3)                           | 14.3<br>(-49.7 to 163.6)                          | -7.5<br>(-59.0 to 111.8)                            |
| Guillain-Barre syndrome                                                             | < 0.05<br>(< 0.05 to < 0.05)     | --                                             | < 0.05<br>(< 0.05 to < 0.05)                  | 24.8<br>(22.5 to 27.3)                            | 0.2<br>(0.1 to 0.4)                                 |
| Hearing loss                                                                        | 126.6<br>(110.4 to 143.5)        | --                                             | 2.9<br>(1.9 to 4.3)                           | 28.5<br>(23.5 to 33.3)                            | -0.3<br>(-3.8 to 3.2)                               |
| Heart failure                                                                       | 10.8<br>(9.4 to 12.2)            | --                                             | 1.2<br>(0.9 to 1.4)                           | 12.5<br>(4.6 to 20.0)                             | -13.6<br>(-19.8 to -7.8)                            |
| Infertility                                                                         | 5.9<br>(4.5 to 7.8)              | --                                             | < 0.05<br>(< 0.05 to 0.1)                     | 17.6<br>(10.5 to 25.7)                            | -1.2<br>(-7.5 to 5.1)                               |
| Pelvic inflammatory disease                                                         | 0.1<br>(0.1 to 0.1)              | --                                             | < 0.05<br>(< 0.05 to < 0.05)                  | -17.3<br>(-34.8 to 4.2)                           | -32.8<br>(-47.1 to -15.2)                           |
| Vision loss                                                                         | 56.9<br>(52.3 to 62.0)           | --                                             | 1.4<br>(1.0 to 2.1)                           | 24.4<br>(20.3 to 28.9)                            | -2.2<br>(-5.4 to 1.1)                               |

We did not calculate incidence for the nine impairments, certain NTDs, and causes with only birth prevalence. Blank cells mean that no estimate is available.

† Incidence for aggregate causes represents the sum of the incidence of the causes below the aggregate.

‡ Incidence estimates for stroke represent first-ever stroke only.

^ Incidence of HIV/AIDS represents new infections of HIV only and does not include new infections of Tuberculosis in HIV positive cases.



SR Table 14: Prevalence, incidence, and YLDs for 2016, percentage change of YLD counts and percentage change of age-standardised YLD rates between 2006 and 2016 by cause and impairments, for all ages, Macedonia.

| Cause                                                                                | Prevalence in thousands (95% UI)       | Incidence in thousands (95% UI)           | YLDs in thousands (95% UI)          |                                                   |                                                     |
|--------------------------------------------------------------------------------------|----------------------------------------|-------------------------------------------|-------------------------------------|---------------------------------------------------|-----------------------------------------------------|
|                                                                                      | 2016 counts                            | 2016 counts                               | 2016 counts                         | Percentage change in counts between 2006 and 2016 | Percentage change in age-standardised rates between |
| <b>All causes</b>                                                                    | <b>1,979.6</b><br>(1,971.5 to 1,987.6) | <b>10,195.5†</b><br>(9,732.2 to 10,712.4) | <b>249.5</b><br>(185.8 to 323.5)    | <b>9.4</b><br>(7.7 to 11.0)                       | <b>0.1</b><br>(-1.6 to 1.6)                         |
| <b>Communicable, maternal, neonatal, and nutritional disorders</b>                   | <b>962.8</b><br>(935.1 to 992.1)       | <b>3,932.2†</b><br>(3,584.7 to 4,312.3)   | <b>13.3</b><br>(9.4 to 18.4)        | <b>-10.9</b><br>(-14.8 to -6.5)                   | <b>-8.8</b><br>(-13.0 to -4.2)                      |
| <b>HIV/AIDS and tuberculosis</b>                                                     | <b>477.9</b><br>(438.5 to 508.4)       | <b>0.5†</b><br>(0.4 to 0.5)               | <b>0.1</b><br>(0.1 to 0.1)          | <b>-25.1</b><br>(-40.7 to -5.6)                   | <b>-29.7</b><br>(-44.5 to -12.1)                    |
| Tuberculosis                                                                         | 449.2<br>(416.2 to 487.4)              | 0.5†<br>(0.4 to 0.5)                      | 0.1<br>(0.1 to 0.1)                 | -27.7<br>(-44.0 to -7.8)                          | -32.3<br>(-47.1 to -13.8)                           |
| Drug-susceptible tuberculosis                                                        | 0.3<br>(0.2 to 0.3)                    | 0.5<br>(0.4 to 0.5)                       | 0.1<br>(0.1 to 0.1)                 | -28.2<br>(-44.6 to -7.5)                          | -32.7<br>(-47.5 to -14.3)                           |
| Multidrug-resistant tuberculosis without extensive drug resistance                   | < 0.05<br>(< 0.05 to < 0.05)           | < 0.05<br>(< 0.05 to < 0.05)              | < 0.05<br>(< 0.05 to < 0.05)        | 16.1<br>(-75.5 to 573.8)                          | 8.0<br>(-77.3 to 521.6)                             |
| Extensively drug-resistant tuberculosis                                              | < 0.05<br>(< 0.05 to < 0.05)           | < 0.05<br>(< 0.05 to < 0.05)              | < 0.05<br>(< 0.05 to < 0.05)        | 257.9<br>(-24.6 to 1,976.8)                       | 233.0<br>(-29.9 to 1,816.2)                         |
| Latent tuberculosis infection                                                        | 449.0<br>(416.0 to 487.1)              | --                                        | --                                  | --                                                | --                                                  |
| HIV/AIDS                                                                             | < 0.05<br>(< 0.05 to 0.1)              | < 0.05^<br>(< 0.05 to < 0.05)             | < 0.05<br>(< 0.05 to < 0.05)        | 34.0<br>(16.9 to 48.9)                            | 30.4<br>(13.3 to 45.7)                              |
| Drug-susceptible HIV/AIDS - Tuberculosis                                             | < 0.05<br>(< 0.05 to < 0.05)           | < 0.05<br>(< 0.05 to < 0.05)              | < 0.05<br>(< 0.05 to < 0.05)        | -24.7<br>(-29.5 to -19.2)                         | -26.2<br>(-30.9 to -20.8)                           |
| Multidrug-resistant HIV/AIDS - Tuberculosis without extensive drug resistance        | < 0.05<br>(< 0.05 to < 0.05)           | < 0.05<br>(< 0.05 to < 0.05)              | < 0.05<br>(< 0.05 to < 0.05)        | 21.0<br>(-75.1 to 595.2)                          | 18.6<br>(-75.6 to 581.4)                            |
| Extensively drug-resistant HIV/AIDS - Tuberculosis                                   | < 0.05<br>(< 0.05 to < 0.05)           | < 0.05<br>(< 0.05 to < 0.05)              | < 0.05<br>(< 0.05 to < 0.05)        | 272.9<br>(-23.3 to 2,043.2)                       | 265.7<br>(-24.8 to 2,000.6)                         |
| HIV/AIDS resulting in other diseases                                                 | < 0.05<br>(< 0.05 to 0.1)              | < 0.05<br>(< 0.05 to < 0.05)              | < 0.05<br>(< 0.05 to < 0.05)        | 47.9<br>(27.1 to 84.6)                            | 44.0<br>(23.4 to 78.5)                              |
| <b>Diarrhoea, lower respiratory infections, and other common infectious diseases</b> | <b>73.4</b><br>(69.7 to 77.8)          | <b>3,727.8†</b><br>(3,380.8 to 4,104.6)   | <b>3.3</b><br>(2.3 to 4.6)          | <b>-1.0</b><br>(-3.9 to 2.3)                      | <b>-0.1</b><br>(-3.3 to 3.5)                        |
| Diarrhoeal diseases                                                                  | 9.8<br>(9.2 to 10.6)                   | 638.9<br>(596.4 to 690.1)                 | 1.1<br>(0.8 to 1.5)                 | 1.2<br>(-4.9 to 8.3)                              | 1.9<br>(-4.7 to 9.0)                                |
| Intestinal infectious diseases                                                       | < 0.05<br>(< 0.05 to < 0.05)           | < 0.05†<br>(< 0.05 to < 0.05)             | < 0.05<br>(< 0.05 to < 0.05)        | 39.5<br>(14.8 to 69.5)                            | 27.8<br>(7.3 to 55.1)                               |
| Typhoid fever                                                                        | < 0.05<br>(< 0.05 to < 0.05)           | < 0.05<br>(< 0.05 to < 0.05)              | < 0.05<br>(< 0.05 to < 0.05)        | 49.9<br>(19.6 to 88.2)                            | 39.6<br>(12.1 to 73.8)                              |
| Paratyphoid fever                                                                    | < 0.05<br>(< 0.05 to < 0.05)           | < 0.05<br>(< 0.05 to < 0.05)              | < 0.05<br>(< 0.05 to < 0.05)        | 34.0<br>(7.4 to 65.3)                             | 22.6<br>(0.2 to 51.0)                               |
| Other intestinal infectious diseases                                                 | --                                     | --                                        | < 0.05<br>(< 0.05 to < 0.05)        | -4.1<br>(-31.9 to 31.7)                           | -12.6<br>(-40.5 to 26.3)                            |
| Lower respiratory infections                                                         | 2.4<br>(2.2 to 2.6)                    | 103.0<br>(93.2 to 113.9)                  | 0.1<br>(0.1 to 0.2)                 | 30.6<br>(16.4 to 46.3)                            | 27.5<br>(12.4 to 43.0)                              |
| Upper respiratory infections                                                         | 38.6<br>(34.2 to 43.7)                 | 2,866.1<br>(2,529.0 to 3,243.6)           | 1.0<br>(0.6 to 1.5)                 | -1.7<br>(-7.0 to 4.0)                             | -0.6<br>(-5.8 to 5.2)                               |
| Otitis media                                                                         | 21.8<br>(19.5 to 24.1)                 | 88.7<br>(73.1 to 108.0)                   | 0.6<br>(0.4 to 0.9)                 | -10.7<br>(-17.2 to -3.6)                          | -6.7<br>(-13.8 to 0.4)                              |
| Meningitis                                                                           | 1.7<br>(1.5 to 2.0)                    | 0.2<br>(0.2 to 0.2)                       | 0.2<br>(0.1 to 0.3)                 | 0.0<br>(-2.4 to 2.5)                              | -1.8<br>(-4.3 to 0.5)                               |
| Pneumococcal meningitis                                                              | 0.8<br>(0.7 to 1.0)                    | 0.1<br>(< 0.05 to 0.1)                    | 0.1<br>(0.1 to 0.1)                 | -0.3<br>(-3.5 to 3.0)                             | -2.4<br>(-5.7 to 1.2)                               |
| H influenzae type B meningitis                                                       | 0.1<br>(0.1 to 0.2)                    | < 0.05<br>(< 0.05 to < 0.05)              | < 0.05<br>(< 0.05 to < 0.05)        | -6.4<br>(-11.7 to -1.6)                           | -7.6<br>(-13.1 to -2.7)                             |
| Meningococcal infection                                                              | 0.3<br>(0.2 to 0.4)                    | 0.1<br>(< 0.05 to 0.1)                    | < 0.05<br>(< 0.05 to < 0.05)        | -1.2<br>(-5.4 to 2.7)                             | -3.2<br>(-7.4 to 0.7)                               |
| Other meningitis                                                                     | 0.5<br>(0.4 to 0.6)                    | 0.1<br>(0.1 to 0.1)                       | 0.1<br>(< 0.05 to 0.1)              | 5.8<br>(1.9 to 10.2)                              | 4.0<br>(0.2 to 8.2)                                 |
| Encephalitis                                                                         | 1.6<br>(1.1 to 2.2)                    | 0.7<br>(0.6 to 0.8)                       | 0.2<br>(0.1 to 0.2)                 | 3.5<br>(-8.3 to 16.2)                             | -1.2<br>(-11.5 to 10.2)                             |
| Diphtheria                                                                           | < 0.05<br>(< 0.05 to < 0.05)           | < 0.05<br>(< 0.05 to < 0.05)              | < 0.05<br>(< 0.05 to < 0.05)        | -17.9<br>(-56.2 to 52.2)                          | -18.8<br>(-54.6 to 44.1)                            |
| Whooping cough                                                                       | 0.2<br>(0.1 to 0.2)                    | 1.2<br>(0.9 to 1.5)                       | < 0.05<br>(< 0.05 to < 0.05)        | -17.6<br>(-35.9 to 5.2)                           | -13.3<br>(-32.6 to 11.1)                            |
| Tetanus                                                                              | < 0.05<br>(< 0.05 to < 0.05)           | < 0.05<br>(< 0.05 to < 0.05)              | < 0.05<br>(< 0.05 to < 0.05)        | -5.1<br>(-13.0 to 3.3)                            | -3.8<br>(-12.7 to 7.2)                              |
| Measles                                                                              | < 0.05<br>(0.0 to < 0.05)              | < 0.05<br>(0.0 to < 0.05)                 | < 0.05<br>(0.0 to < 0.05)           | -90.2<br>(-100.0 to -35.4)                        | -89.5<br>(-100.0 to -31.1)                          |
| Varicella and herpes zoster                                                          | 1.6<br>(1.4 to 1.7)                    | 29.0<br>(28.0 to 30.1)                    | 0.1<br>(< 0.05 to 0.1)              | 10.2<br>(-4.5 to 27.7)                            | -0.1<br>(-13.9 to 15.3)                             |
| <b>Neglected tropical diseases and malaria</b>                                       | <b>0.5</b><br>(0.2 to 1.3)             | <b>0.1†</b><br>(< 0.05 to 0.2)            | <b>&lt; 0.05</b><br>(< 0.05 to 0.1) | <b>-41.2</b><br>(-82.5 to 65.0)                   | <b>-45.9</b><br>(-83.6 to 56.1)                     |
| Malaria                                                                              | --                                     | --                                        | --                                  | --                                                | --                                                  |
| Chagas disease                                                                       | --                                     | --                                        | --                                  | --                                                | --                                                  |
| Leishmaniasis                                                                        | < 0.05<br>(< 0.05 to < 0.05)           | < 0.05<br>(< 0.05 to < 0.05)              | < 0.05<br>(< 0.05 to < 0.05)        | -8.5<br>(-51.6 to 60.4)                           | -24.9<br>(-59.1 to 31.8)                            |
| Visceral leishmaniasis                                                               | < 0.05<br>(< 0.05 to < 0.05)           | < 0.05<br>(< 0.05 to < 0.05)              | < 0.05<br>(< 0.05 to < 0.05)        | -8.5<br>(-51.6 to 60.4)                           | -24.9<br>(-59.1 to 31.8)                            |
| Cutaneous and mucocutaneous leishmaniasis                                            | --                                     | --                                        | --                                  | --                                                | --                                                  |
| African trypanosomiasis                                                              | --                                     | --                                        | --                                  | --                                                | --                                                  |
| Schistosomiasis                                                                      | --                                     | --                                        | --                                  | --                                                | --                                                  |
| Cysticercosis                                                                        | 0.2<br>(0.1 to 0.4)                    | --                                        | < 0.05<br>(< 0.05 to 0.1)           | -39.4<br>(-81.5 to 16.5)                          | -45.3<br>(-82.7 to 5.2)                             |
| Cystic echinococcosis                                                                | 0.2<br>(< 0.05 to 0.8)                 | < 0.05<br>(< 0.05 to 0.2)                 | < 0.05<br>(< 0.05 to 0.1)           | -43.9<br>(-93.1 to 385.6)                         | -46.9<br>(-93.3 to 346.1)                           |
| Lymphatic filariasis                                                                 | --                                     | --                                        | --                                  | --                                                | --                                                  |
| Onchocerciasis                                                                       | --                                     | --                                        | --                                  | --                                                | --                                                  |
| Trachoma                                                                             | --                                     | --                                        | --                                  | --                                                | --                                                  |
| Dengue                                                                               | --                                     | --                                        | --                                  | --                                                | --                                                  |
| Yellow fever                                                                         | --                                     | --                                        | --                                  | --                                                | --                                                  |
| Rabies                                                                               | < 0.05<br>(< 0.05 to < 0.05)           | < 0.05<br>(< 0.05 to < 0.05)              | < 0.05<br>(< 0.05 to < 0.05)        | -28.8<br>(-49.3 to 3.1)                           | -43.2<br>(-59.3 to -16.1)                           |
| Intestinal nematode infections                                                       | --                                     | --                                        | --                                  | --                                                | --                                                  |
| Ascariasis                                                                           | --                                     | --                                        | --                                  | --                                                | --                                                  |



| Cause                                                                   | Prevalence in thousands (95% UI)              | Incidence in thousands (95% UI)                | YLDs in thousands (95% UI)              |                                                   |                                                     |
|-------------------------------------------------------------------------|-----------------------------------------------|------------------------------------------------|-----------------------------------------|---------------------------------------------------|-----------------------------------------------------|
|                                                                         | 2016 counts                                   | 2016 counts                                    | 2016 counts                             | Percentage change in counts between 2006 and 2016 | Percentage change in age-standardised rates between |
| Trichuriasis                                                            | --                                            | --                                             | --                                      | --                                                | --                                                  |
| Hookworm disease                                                        | --                                            | --                                             | --                                      | --                                                | --                                                  |
| Food-borne trematodiasis                                                | --                                            | --                                             | --                                      | --                                                | --                                                  |
| Leprosy                                                                 | --                                            | --                                             | --                                      | --                                                | --                                                  |
| Ebola virus disease                                                     | --                                            | --                                             | --                                      | --                                                | --                                                  |
| Zika virus disease                                                      | --                                            | --                                             | --                                      | --                                                | --                                                  |
| Guinea worm disease                                                     | --                                            | --                                             | --                                      | --                                                | --                                                  |
| Other neglected tropical diseases                                       | --                                            | --                                             | < 0.05<br>(< 0.05 to < 0.05)            | --                                                | --                                                  |
| <b>Maternal disorders</b>                                               | <b>1.6</b><br><b>(1.3 to 2.0)</b>             | <b>27.3†</b><br><b>(22.3 to 34.1)</b>          | <b>0.1</b><br><b>(0.1 to 0.1)</b>       | <b>-4.4</b><br><b>(-27.1 to 23.2)</b>             | <b>-2.8</b><br><b>(-26.1 to 25.2)</b>               |
| Maternal haemorrhage                                                    | 0.7<br>(0.5 to 0.9)                           | 3.9<br>(2.9 to 5.2)                            | < 0.05<br>(< 0.05 to < 0.05)            | 1.7<br>(-30.8 to 47.0)                            | 3.4<br>(-29.6 to 50.1)                              |
| Maternal sepsis and other pregnancy related infections                  | 0.4<br>(0.2 to 0.5)                           | 2.4<br>(1.8 to 3.3)                            | < 0.05<br>(< 0.05 to < 0.05)            | -17.2<br>(-61.6 to 82.0)                          | -14.2<br>(-60.6 to 86.8)                            |
| Maternal hypertensive disorders                                         | 0.5<br>(0.3 to 0.7)                           | 1.9<br>(1.4 to 2.6)                            | < 0.05<br>(< 0.05 to < 0.05)            | -0.3<br>(-41.3 to 78.2)                           | 1.1<br>(-40.2 to 80.4)                              |
| Maternal obstructed labour and uterine rupture                          | < 0.05<br>(< 0.05 to < 0.05)                  | 0.7<br>(0.4 to 1.1)                            | < 0.05<br>(< 0.05 to < 0.05)            | -3.9<br>(-50.1 to 82.2)                           | -3.0<br>(-49.5 to 82.7)                             |
| Maternal abortion, miscarriage, and ectopic pregnancy                   | 0.1<br>(0.1 to 0.2)                           | 18.3<br>(13.7 to 24.8)                         | < 0.05<br>(< 0.05 to < 0.05)            | -3.9<br>(-50.5 to 89.2)                           | -3.5<br>(-50.2 to 89.2)                             |
| Other maternal disorders                                                | --                                            | --                                             | < 0.05<br>(< 0.05 to < 0.05)            | -10.3<br>(-31.7 to 15.5)                          | -8.4<br>(-30.1 to 17.9)                             |
| <b>Neonatal disorders</b>                                               | <b>14.1</b><br><b>(10.9 to 18.3)</b>          | <b>2.9</b><br><b>--</b>                        | <b>2.9</b><br><b>(1.8 to 4.5)</b>       | <b>-14.4</b><br><b>(-27.0 to -1.7)</b>            | <b>-13.0</b><br><b>(-25.9 to 0.4)</b>               |
| Neonatal preterm birth complications                                    | 8.2<br>(6.1 to 11.8)                          | --                                             | 0.9<br>(0.6 to 1.3)                     | -20.0<br>(-40.2 to 7.7)                           | -18.5<br>(-39.1 to 10.2)                            |
| Neonatal encephalopathy due to birth asphyxia and trauma                | 6.4<br>(2.8 to 11.5)                          | --                                             | 1.1<br>(0.3 to 2.4)                     | -20.0<br>(-48.6 to 10.3)                          | -19.0<br>(-47.7 to 11.6)                            |
| Neonatal sepsis and other neonatal infections                           | 1.5<br>(0.7 to 3.1)                           | --                                             | 0.6<br>(0.2 to 1.3)                     | 2.8<br>(-12.7 to 22.3)                            | 4.9<br>(-11.1 to 25.5)                              |
| Hemolytic disease and other neonatal jaundice                           | 1.1<br>(1.0 to 1.3)                           | --                                             | 0.3<br>(0.2 to 0.5)                     | -3.2<br>(-16.0 to 10.8)                           | -2.5<br>(-16.1 to 13.0)                             |
| Other neonatal disorders                                                | --                                            | --                                             | 0.1<br>(< 0.05 to 0.1)                  | -16.2<br>(-32.5 to 3.6)                           | -12.5<br>(-29.5 to 7.8)                             |
| <b>Nutritional deficiencies</b>                                         | <b>298.8</b><br><b>(283.7 to 310.4)</b>       | <b>6.0†</b><br><b>(4.7 to 7.5)</b>             | <b>6.0</b><br><b>(3.9 to 8.8)</b>       | <b>-14.4</b><br><b>(-19.6 to -8.7)</b>            | <b>-11.2</b><br><b>(-17.1 to -4.9)</b>              |
| Protein-energy malnutrition                                             | 4.5<br>(2.9 to 6.8)                           | 2.0<br>(1.3 to 3.0)                            | 0.2<br>(0.1 to 0.3)                     | -13.1<br>(-48.8 to 46.9)                          | -9.4<br>(-46.5 to 53.0)                             |
| Iodine deficiency                                                       | 21.8<br>(15.8 to 29.9)                        | 0.3<br>(0.2 to 0.4)                            | 0.6<br>(0.3 to 0.9)                     | 3.6<br>(-7.8 to 14.4)                             | -0.6<br>(-11.0 to 9.9)                              |
| Vitamin A deficiency                                                    | 4.4<br>(3.2 to 5.8)                           | 3.7<br>(2.7 to 4.9)                            | --                                      | --                                                | --                                                  |
| Iron-deficiency anaemia                                                 | 271.5<br>(257.8 to 286.0)                     | --                                             | 5.3<br>(3.4 to 7.8)                     | -16.0<br>(-21.6 to -9.7)                          | -12.1<br>(-18.3 to -5.1)                            |
| Other nutritional deficiencies                                          | --                                            | --                                             | < 0.05<br>(< 0.05 to < 0.05)            | -12.7<br>(-49.2 to 51.3)                          | -9.1<br>(-46.9 to 57.3)                             |
| <b>Other communicable, maternal, neonatal, and nutritional diseases</b> | <b>355.5</b><br><b>(332.4 to 380.1)</b>       | <b>170.6</b><br><b>(147.2 to 199.6)</b>        | <b>0.8</b><br><b>(0.5 to 1.2)</b>       | <b>-1.2</b><br><b>(-6.5 to 4.3)</b>               | <b>-1.1</b><br><b>(-6.7 to 5.0)</b>                 |
| Sexually transmitted diseases excluding HIV                             | 272.7<br>(253.4 to 297.0)                     | 158.7<br>(134.9 to 187.7)                      | 0.6<br>(0.3 to 0.9)                     | 0.0<br>(-6.4 to 6.1)                              | -2.5<br>(-9.1 to 3.4)                               |
| Syphilis                                                                | 2.0<br>(1.3 to 3.1)                           | 1.3<br>(0.7 to 2.2)                            | 0.1<br>(0.1 to 0.1)                     | 15.8<br>(-1.7 to 35.6)                            | -0.6<br>(-15.4 to 16.2)                             |
| Chlamydial infection                                                    | 24.4<br>(16.2 to 36.3)                        | 18.8<br>(12.9 to 28.4)                         | 0.1<br>(0.1 to 0.2)                     | -3.2<br>(-15.8 to 10.5)                           | -3.4<br>(-16.4 to 10.7)                             |
| Gonococcal infection                                                    | 23.6<br>(17.8 to 31.0)                        | 81.1<br>(59.5 to 109.4)                        | 0.1<br>(< 0.05 to 0.2)                  | -4.5<br>(-17.0 to 9.2)                            | -1.0<br>(-14.1 to 13.5)                             |
| Trichomoniasis                                                          | 47.6<br>(41.1 to 54.7)                        | 39.9<br>(34.2 to 45.9)                         | 0.1<br>(< 0.05 to 0.1)                  | 2.1<br>(-4.1 to 10.0)                             | -0.8<br>(-6.7 to 6.9)                               |
| Genital herpes                                                          | 181.8<br>(155.2 to 216.0)                     | 8.5<br>(7.1 to 10.3)                           | < 0.05<br>(< 0.05 to 0.1)               | 8.6<br>(0.4 to 16.3)                              | -0.2<br>(-7.6 to 7.0)                               |
| Other sexually transmitted diseases                                     | 8.5<br>(6.7 to 10.7)                          | 9.1<br>(7.7 to 10.8)                           | 0.2<br>(0.1 to 0.3)                     | -3.8<br>(-14.5 to 6.9)                            | -4.3<br>(-15.1 to 6.5)                              |
| Hepatitis                                                               | 89.5<br>(77.2 to 103.4)                       | 11.8<br>(9.0 to 13.8)                          | < 0.05<br>(< 0.05 to < 0.05)            | -31.8<br>(-47.0 to -12.6)                         | -30.9<br>(-47.7 to -9.4)                            |
| Acute hepatitis A                                                       | 0.5<br>(0.3 to 0.7)                           | 7.1<br>(4.2 to 8.7)                            | < 0.05<br>(< 0.05 to < 0.05)            | -33.5<br>(-56.5 to 6.2)                           | -30.1<br>(-55.8 to 14.1)                            |
| Hepatitis B                                                             | 55.0<br>(44.0 to 68.0)                        | 4.0<br>(3.1 to 5.1)                            | < 0.05<br>(< 0.05 to < 0.05)            | -30.5<br>(-41.8 to -18.2)                         | -34.5<br>(-44.5 to -23.1)                           |
| Hepatitis C                                                             | 33.9<br>(30.4 to 37.6)                        | 0.5<br>(0.4 to 0.5)                            | < 0.05<br>(< 0.05 to < 0.05)            | -12.4<br>(-14.0 to -11.1)                         | -8.5<br>(-10.2 to -7.2)                             |
| Acute hepatitis E                                                       | < 0.05<br>(< 0.05 to < 0.05)                  | 0.3<br>(0.2 to 0.4)                            | < 0.05<br>(< 0.05 to < 0.05)            | -32.9<br>(-38.5 to -26.9)                         | -32.9<br>(-38.2 to -27.1)                           |
| Other infectious diseases                                               | 9.6<br>(9.1 to 10.3)                          | < 0.05<br>(< 0.05 to < 0.05)                   | 0.2<br>(0.1 to 0.3)                     | -2.2<br>(-11.8 to 9.4)                            | 3.8<br>(-6.9 to 17.5)                               |
| <b>Non-communicable diseases</b>                                        | <b>1,911.9</b><br><b>(1,900.2 to 1,923.5)</b> | <b>5,963.9†</b><br><b>(5,621.7 to 6,273.4)</b> | <b>206.7</b><br><b>(153.6 to 267.6)</b> | <b>9.9</b><br><b>(7.9 to 11.7)</b>                | <b>-0.0</b><br><b>(-1.9 to 1.8)</b>                 |
| <b>Neoplasms</b>                                                        | <b>18.1</b><br><b>(17.2 to 18.9)</b>          | <b>7.4</b><br><b>(6.9 to 7.9)</b>              | <b>2.2</b><br><b>(1.6 to 2.8)</b>       | <b>23.2</b><br><b>(16.4 to 31.0)</b>              | <b>3.8</b><br><b>(-2.0 to 10.3)</b>                 |
| Lip and oral cavity cancer                                              | 0.2<br>(0.2 to 0.3)                           | 0.1<br>(0.1 to 0.1)                            | < 0.05<br>(< 0.05 to < 0.05)            | 7.3<br>(-8.2 to 24.5)                             | -11.6<br>(-23.9 to 2.3)                             |
| Nasopharynx cancer                                                      | < 0.05<br>(< 0.05 to < 0.05)                  | < 0.05<br>(< 0.05 to < 0.05)                   | < 0.05<br>(< 0.05 to < 0.05)            | 0.6<br>(-10.6 to 14.4)                            | -12.0<br>(-21.9 to 0.0)                             |
| Other pharynx cancer                                                    | 0.1<br>(0.1 to 0.1)                           | < 0.05<br>(< 0.05 to < 0.05)                   | < 0.05<br>(< 0.05 to < 0.05)            | 30.6<br>(6.1 to 57.9)                             | 12.0<br>(-8.5 to 34.8)                              |
| Oesophageal cancer                                                      | < 0.05<br>(< 0.05 to 0.1)                     | < 0.05<br>(< 0.05 to < 0.05)                   | < 0.05<br>(< 0.05 to < 0.05)            | 15.1<br>(2.6 to 29.4)                             | -4.8<br>(-14.5 to 6.2)                              |
| Stomach cancer                                                          | 0.7<br>(0.6 to 0.8)                           | 0.4<br>(0.4 to 0.5)                            | 0.1<br>(0.1 to 0.1)                     | 3.8<br>(-13.8 to 23.8)                            | -14.2<br>(-28.0 to 1.4)                             |
| Colon and rectum cancer                                                 | 2.7<br>(2.5 to 2.9)                           | 0.8<br>(0.8 to 0.9)                            | 0.3<br>(0.2 to 0.4)                     | 31.1<br>(12.7 to 51.0)                            | 8.1<br>(-6.2 to 23.4)                               |
| Liver cancer                                                            | 0.1<br>(0.1 to 0.1)                           | 0.2<br>(0.2 to 0.2)                            | < 0.05<br>(< 0.05 to 0.1)               | 23.9<br>(10.1 to 35.9)                            | 2.0<br>(-8.8 to 11.8)                               |
| Liver cancer due to hepatitis B                                         | 0.1<br>(< 0.05 to 0.1)                        | 0.1<br>(0.1 to 0.1)                            | < 0.05<br>(< 0.05 to < 0.05)            | 23.6<br>(9.4 to 36.9)                             | 2.7<br>(-8.9 to 13.9)                               |

| Cause                                              | Prevalence in thousands (95% UI)        | Incidence in thousands (95% UI)       | YLDs in thousands (95% UI)           |                                                   |                                                     |
|----------------------------------------------------|-----------------------------------------|---------------------------------------|--------------------------------------|---------------------------------------------------|-----------------------------------------------------|
|                                                    | 2016 counts                             | 2016 counts                           | 2016 counts                          | Percentage change in counts between 2006 and 2016 | Percentage change in age-standardised rates between |
| Liver cancer due to hepatitis C                    | 0.1<br>( $< 0.05$ to 0.1)               | 0.1<br>( $< 0.05$ to 0.1)             | $< 0.05$<br>( $< 0.05$ to $< 0.05$ ) | 25.8<br>(10.8 to 40.2)                            | 2.1<br>(-9.9 to 14.0)                               |
| Liver cancer due to alcohol use                    | $< 0.05$<br>( $< 0.05$ to 0.1)          | 0.1<br>( $< 0.05$ to 0.1)             | $< 0.05$<br>( $< 0.05$ to $< 0.05$ ) | 22.8<br>(8.2 to 37.4)                             | 1.2<br>(-10.6 to 13.2)                              |
| Liver cancer due to other causes                   | $< 0.05$<br>( $< 0.05$ to 0.1)          | $< 0.05$<br>( $< 0.05$ to 0.1)        | $< 0.05$<br>( $< 0.05$ to $< 0.05$ ) | 23.2<br>(9.5 to 38.2)                             | 1.7<br>(-9.5 to 13.6)                               |
| Gallbladder and biliary tract cancer               | $< 0.05$<br>( $< 0.05$ to 0.1)          | 0.1<br>(0.1 to 0.1)                   | $< 0.05$<br>( $< 0.05$ to $< 0.05$ ) | -4.9<br>(-16.9 to 8.8)                            | -22.7<br>(-32.4 to -12.5)                           |
| Pancreatic cancer                                  | 0.2<br>(0.2 to 0.2)                     | 0.2<br>(0.2 to 0.3)                   | $< 0.05$<br>( $< 0.05$ to 0.1)       | 27.6<br>(8.0 to 50.3)                             | 4.6<br>(-11.4 to 22.8)                              |
| Larynx cancer                                      | 0.5<br>(0.5 to 0.6)                     | 0.1<br>(0.1 to 0.2)                   | 0.1<br>( $< 0.05$ to 0.1)            | 15.3<br>(-10.4 to 46.1)                           | -3.2<br>(-24.4 to 21.9)                             |
| Tracheal, bronchus, and lung cancer                | 1.1<br>(1.0 to 1.2)                     | 1.0<br>(0.9 to 1.0)                   | 0.2<br>(0.1 to 0.3)                  | 12.2<br>(-7.9 to 34.5)                            | -6.2<br>(-22.2 to 11.7)                             |
| Malignant skin melanoma                            | 0.9<br>(0.7 to 1.1)                     | 0.2<br>(0.2 to 0.2)                   | 0.1<br>( $< 0.05$ to 0.1)            | 34.5<br>(15.0 to 56.8)                            | 13.8<br>(-2.5 to 32.3)                              |
| Non-melanoma skin cancer                           | 0.3<br>(0.2 to 0.4)                     | 0.8<br>(0.5 to 1.2)                   | $< 0.05$<br>( $< 0.05$ to $< 0.05$ ) | 8.3<br>(-28.5 to 75.1)                            | -14.9<br>(-45.0 to 37.2)                            |
| Non-melanoma skin cancer (squamous-cell carcinoma) | 0.2<br>(0.1 to 0.4)                     | 0.2<br>(0.1 to 0.3)                   | $< 0.05$<br>( $< 0.05$ to $< 0.05$ ) | 6.0<br>(-31.2 to 79.7)                            | -17.0<br>(-46.8 to 39.8)                            |
| Non-melanoma skin cancer (basal-cell carcinoma)    | 0.1<br>( $< 0.05$ to 0.2)               | 0.6<br>(0.3 to 1.0)                   | $< 0.05$<br>( $< 0.05$ to $< 0.05$ ) | 37.8<br>(0.1 to 93.2)                             | 13.2<br>(-14.4 to 56.2)                             |
| Breast cancer                                      | 4.2<br>(3.6 to 4.9)                     | 0.9<br>(0.8 to 1.0)                   | 0.4<br>(0.3 to 0.5)                  | 22.1<br>(2.4 to 46.2)                             | 4.8<br>(-12.0 to 24.6)                              |
| Cervical cancer                                    | 0.7<br>(0.5 to 0.8)                     | 0.2<br>(0.1 to 0.2)                   | 0.1<br>( $< 0.05$ to 0.1)            | -0.8<br>(-18.0 to 20.6)                           | -11.4<br>(-26.3 to 7.5)                             |
| Uterine cancer                                     | 1.6<br>(1.4 to 1.8)                     | 0.3<br>(0.3 to 0.4)                   | 0.1<br>(0.1 to 0.2)                  | 46.0<br>(17.9 to 78.2)                            | 24.1<br>(0.5 to 51.5)                               |
| Ovarian cancer                                     | 0.4<br>(0.4 to 0.5)                     | 0.1<br>(0.1 to 0.2)                   | 0.1<br>( $< 0.05$ to 0.1)            | 16.2<br>(-10.3 to 53.1)                           | 1.1<br>(-21.3 to 32.1)                              |
| Prostate cancer                                    | 2.0<br>(1.6 to 2.8)                     | 0.5<br>(0.4 to 0.7)                   | 0.2<br>(0.1 to 0.3)                  | 47.2<br>(17.7 to 88.6)                            | 16.2<br>(-6.7 to 47.3)                              |
| Testicular cancer                                  | 0.3<br>(0.2 to 0.3)                     | 0.1<br>( $< 0.05$ to 0.1)             | $< 0.05$<br>( $< 0.05$ to $< 0.05$ ) | 33.4<br>(-3.4 to 85.5)                            | 29.3<br>(-7.6 to 80.4)                              |
| Kidney cancer                                      | 0.5<br>(0.4 to 0.5)                     | 0.1<br>(0.1 to 0.1)                   | $< 0.05$<br>( $< 0.05$ to 0.1)       | 29.6<br>(13.0 to 49.7)                            | 12.0<br>(-2.0 to 29.3)                              |
| Bladder cancer                                     | 1.2<br>(1.1 to 1.3)                     | 0.3<br>(0.3 to 0.3)                   | 0.1<br>(0.1 to 0.1)                  | 29.7<br>(11.8 to 51.8)                            | 6.7<br>(-7.7 to 23.6)                               |
| Brain and nervous system cancer                    | 0.4<br>(0.3 to 0.4)                     | 0.2<br>(0.1 to 0.2)                   | 0.1<br>( $< 0.05$ to 0.1)            | 19.3<br>(3.6 to 37.2)                             | 4.7<br>(-8.6 to 19.4)                               |
| Thyroid cancer                                     | 0.4<br>(0.3 to 0.4)                     | 0.1<br>(0.1 to 0.1)                   | $< 0.05$<br>( $< 0.05$ to $< 0.05$ ) | 22.8<br>(-3.0 to 56.9)                            | 8.3<br>(-13.8 to 37.0)                              |
| Mesothelioma                                       | $< 0.05$<br>( $< 0.05$ to $< 0.05$ )    | $< 0.05$<br>( $< 0.05$ to $< 0.05$ )  | $< 0.05$<br>( $< 0.05$ to $< 0.05$ ) | -2.9<br>(-14.9 to 14.8)                           | -16.4<br>(-26.3 to -2.5)                            |
| Hodgkin lymphoma                                   | 0.1<br>(0.1 to 0.2)                     | $< 0.05$<br>( $< 0.05$ to $< 0.05$ )  | $< 0.05$<br>( $< 0.05$ to $< 0.05$ ) | 8.5<br>(-7.3 to 29.0)                             | 3.8<br>(-12.3 to 26.4)                              |
| Non-Hodgkin's lymphoma                             | 0.3<br>(0.2 to 0.3)                     | 0.1<br>(0.1 to 0.1)                   | $< 0.05$<br>( $< 0.05$ to $< 0.05$ ) | 38.5<br>(20.5 to 58.4)                            | 19.4<br>(5.1 to 35.4)                               |
| Multiple myeloma                                   | 0.1<br>( $< 0.05$ to 0.1)               | $< 0.05$<br>( $< 0.05$ to $< 0.05$ )  | $< 0.05$<br>( $< 0.05$ to $< 0.05$ ) | 36.5<br>(20.9 to 54.1)                            | 13.0<br>(0.0 to 27.9)                               |
| Leukaemia                                          | 0.5<br>(0.4 to 0.5)                     | 0.1<br>(0.1 to 0.1)                   | 0.1<br>( $< 0.05$ to 0.1)            | 16.8<br>(3.8 to 32.0)                             | 2.4<br>(-9.3 to 15.8)                               |
| Acute lymphoid leukaemia                           | 0.1<br>( $< 0.05$ to 0.1)               | $< 0.05$<br>( $< 0.05$ to $< 0.05$ )  | $< 0.05$<br>( $< 0.05$ to $< 0.05$ ) | 15.1<br>(-2.9 to 37.5)                            | 19.9<br>(-3.7 to 52.5)                              |
| Chronic lymphoid leukaemia                         | 0.2<br>(0.2 to 0.3)                     | 0.1<br>(0.1 to 0.1)                   | $< 0.05$<br>( $< 0.05$ to $< 0.05$ ) | 25.1<br>(0.4 to 53.8)                             | 2.7<br>(-17.1 to 26.7)                              |
| Acute myeloid leukaemia                            | $< 0.05$<br>( $< 0.05$ to 0.1)          | $< 0.05$<br>( $< 0.05$ to $< 0.05$ )  | $< 0.05$<br>( $< 0.05$ to $< 0.05$ ) | 19.8<br>(7.9 to 33.6)                             | 8.6<br>(-3.5 to 23.0)                               |
| Chronic myeloid leukaemia                          | $< 0.05$<br>( $< 0.05$ to $< 0.05$ )    | $< 0.05$<br>( $< 0.05$ to $< 0.05$ )  | $< 0.05$<br>( $< 0.05$ to $< 0.05$ ) | 1.9<br>(-13.2 to 19.6)                            | -11.4<br>(-23.8 to 3.7)                             |
| Other leukaemia                                    | 0.1<br>(0.1 to 0.1)                     | $< 0.05$<br>( $< 0.05$ to $< 0.05$ )  | $< 0.05$<br>( $< 0.05$ to $< 0.05$ ) | 3.8<br>(-9.4 to 19.8)                             | -6.5<br>(-17.6 to 7.8)                              |
| Other neoplasms                                    | 0.7<br>(0.6 to 0.7)                     | 0.2<br>(0.2 to 0.2)                   | 0.1<br>( $< 0.05$ to 0.1)            | 14.1<br>(-2.5 to 34.4)                            | -2.2<br>(-15.9 to 15.4)                             |
| <b>Cardiovascular diseases</b>                     | <b>203.9</b><br><b>(196.5 to 211.7)</b> | <b>24.1†</b><br><b>(22.9 to 25.4)</b> | <b>17.6</b><br><b>(13.0 to 22.6)</b> | <b>16.9</b><br><b>(12.2 to 21.4)</b>              | <b>-3.9</b><br><b>(-7.6 to -0.2)</b>                |
| Rheumatic heart disease                            | 0.2<br>(0.2 to 0.2)                     | $< 0.05$<br>( $< 0.05$ to 0.1)        | $< 0.05$<br>( $< 0.05$ to $< 0.05$ ) | 4.3<br>(-11.0 to 23.4)                            | -10.6<br>(-23.1 to 5.2)                             |
| Ischaemic heart disease                            | 75.9<br>(70.7 to 81.2)                  | 8.3<br>(7.7 to 9.0)                   | 3.9<br>(2.6 to 5.3)                  | 11.8<br>(7.2 to 16.3)                             | -6.1<br>(-9.9 to -2.4)                              |
| Cerebrovascular disease                            | 43.1<br>(40.6 to 45.6)                  | 8.2‡<br>(7.4 to 8.9)                  | 8.6<br>(6.1 to 11.0)                 | 17.6<br>(9.9 to 26.1)                             | -4.1<br>(-10.4 to 2.7)                              |
| Ischaemic stroke                                   | 37.4<br>(33.8 to 41.6)                  | 6.0‡<br>(5.3 to 6.7)                  | 7.1<br>(5.0 to 9.2)                  | 19.4<br>(10.2 to 29.3)                            | -3.4<br>(-10.7 to 4.4)                              |
| Hemorrhagic stroke                                 | 7.8<br>(7.0 to 8.7)                     | 2.1‡<br>(1.9 to 2.4)                  | 1.5<br>(1.1 to 1.9)                  | 9.6<br>(-1.9 to 22.4)                             | -7.4<br>(-16.7 to 2.9)                              |
| Hypertensive heart disease                         | 7.6<br>(6.3 to 9.2)                     | --                                    | 0.6<br>(0.4 to 0.8)                  | 22.3<br>(10.2 to 34.9)                            | -2.4<br>(-11.6 to 7.7)                              |
| Cardiomyopathy and myocarditis                     | 16.4<br>(14.5 to 18.2)                  | 0.8†<br>(0.7 to 1.0)                  | 1.3<br>(0.9 to 1.8)                  | 19.1<br>(9.3 to 29.6)                             | -3.1<br>(-10.6 to 5.2)                              |
| Myocarditis                                        | 0.7<br>(0.6 to 0.8)                     | 0.8<br>(0.7 to 1.0)                   | 0.1<br>( $< 0.05$ to 0.1)            | 4.2<br>(-8.4 to 18.9)                             | -2.6<br>(-13.0 to 9.5)                              |
| Alcoholic cardiomyopathy                           | 2.3<br>(2.0 to 2.8)                     | --                                    | 0.2<br>(0.1 to 0.3)                  | 16.9<br>(1.5 to 34.6)                             | -3.0<br>(-15.7 to 11.3)                             |
| Other cardiomyopathy                               | 13.4<br>(11.3 to 15.7)                  | --                                    | 1.1<br>(0.7 to 1.5)                  | 20.3<br>(10.1 to 31.3)                            | -3.1<br>(-10.7 to 5.1)                              |
| Atrial fibrillation and flutter                    | 18.9<br>(16.4 to 21.9)                  | 1.6<br>(1.4 to 1.9)                   | 1.5<br>(1.0 to 2.0)                  | 25.6<br>(17.1 to 34.2)                            | 0.3<br>(-6.2 to 6.6)                                |
| Peripheral vascular disease                        | 52.2<br>(45.3 to 60.8)                  | 4.9<br>(4.2 to 5.8)                   | 0.2<br>(0.1 to 0.4)                  | 19.8<br>(10.9 to 29.7)                            | -6.2<br>(-12.3 to 0.8)                              |
| Endocarditis                                       | $< 0.05$<br>( $< 0.05$ to $< 0.05$ )    | 0.2<br>(0.2 to 0.3)                   | $< 0.05$<br>( $< 0.05$ to $< 0.05$ ) | 14.2<br>(8.1 to 21.1)                             | -0.2<br>(-5.2 to 5.1)                               |
| Other cardiovascular and circulatory diseases      | 30.8<br>(25.9 to 36.9)                  | --                                    | 1.6<br>(1.1 to 2.3)                  | 14.5<br>(4.8 to 25.2)                             | -1.5<br>(-9.3 to 7.1)                               |
| <b>Chronic respiratory diseases</b>                | <b>153.0</b><br><b>(148.2 to 157.8)</b> | <b>20.6†</b><br><b>(19.6 to 21.7)</b> | <b>5.7</b><br><b>(4.4 to 7.3)</b>    | <b>6.5</b><br><b>(1.0 to 12.4)</b>                | <b>-1.3</b><br><b>(-6.0 to 3.7)</b>                 |
| Chronic obstructive pulmonary disease              | 72.1<br>(68.2 to 76.0)                  | 4.4<br>(4.2 to 4.7)                   | 2.1<br>(1.7 to 2.5)                  | 14.2<br>(2.1 to 26.9)                             | -3.4<br>(-13.2 to 7.1)                              |
| Pneumoconiosis                                     | 0.3<br>(0.3 to 0.3)                     | $< 0.05$<br>( $< 0.05$ to $< 0.05$ )  | $< 0.05$<br>( $< 0.05$ to 0.1)       | 27.6<br>(6.2 to 54.2)                             | 5.3<br>(-11.9 to 26.1)                              |
| Silicosis                                          | 0.1<br>(0.1 to 0.1)                     | $< 0.05$<br>( $< 0.05$ to $< 0.05$ )  | $< 0.05$<br>( $< 0.05$ to $< 0.05$ ) | 28.1<br>(-12.9 to 89.9)                           | 5.3<br>(-28.2 to 54.6)                              |

| Cause                                                          | Prevalence in thousands (95% UI)        | Incidence in thousands (95% UI)          | YLDs in thousands (95% UI)           |                                                   |                                                     |
|----------------------------------------------------------------|-----------------------------------------|------------------------------------------|--------------------------------------|---------------------------------------------------|-----------------------------------------------------|
|                                                                | 2016 counts                             | 2016 counts                              | 2016 counts                          | Percentage change in counts between 2006 and 2016 | Percentage change in age-standardised rates between |
| Asbestosis                                                     | 0.1<br>(0.1 to 0.1)                     | < 0.05<br>(< 0.05 to < 0.05)             | < 0.05<br>(< 0.05 to < 0.05)         | 19.8<br>(11.9 to 27.6)                            | 0.7<br>(-5.7 to 7.5)                                |
| Coal workers pneumoconiosis                                    | --                                      | --                                       | --                                   | --                                                | --                                                  |
| Other pneumoconiosis                                           | 0.1<br>(0.1 to 0.1)                     | < 0.05<br>(< 0.05 to < 0.05)             | < 0.05<br>(< 0.05 to < 0.05)         | 33.0<br>(-0.2 to 80.7)                            | 8.8<br>(-17.6 to 47.5)                              |
| Asthma                                                         | 84.4<br>(79.4 to 90.2)                  | 16.1<br>(15.2 to 17.2)                   | 3.3<br>(2.2 to 4.7)                  | 0.9<br>(-4.1 to 6.0)                              | -1.1<br>(-6.4 to 4.3)                               |
| Interstitial lung disease and pulmonary sarcoidosis            | 1.8<br>(1.6 to 2.0)                     | 0.1<br>(0.1 to 0.1)                      | 0.2<br>(0.1 to 0.3)                  | 12.5<br>(-2.6 to 32.0)                            | 1.8<br>(-10.2 to 17.0)                              |
| Other chronic respiratory diseases                             | --                                      | --                                       | 0.1<br>(0.1 to 0.1)                  | 28.6<br>(17.8 to 39.8)                            | 32.1<br>(21.7 to 42.9)                              |
| <b>Cirrhosis and other chronic liver diseases</b>              | <b>16.8</b><br><b>(16.0 to 17.7)</b>    | <b>0.4</b><br><b>(0.4 to 0.4)</b>        | <b>0.4</b><br><b>(0.3 to 0.6)</b>    | <b>21.3</b><br><b>(10.0 to 35.5)</b>              | <b>11.5</b><br><b>(0.7 to 24.8)</b>                 |
| Cirrhosis and other chronic liver diseases due to hepatitis B  | 2.9<br>(2.4 to 3.4)                     | 0.1<br>(0.1 to 0.1)                      | 0.1<br>(< 0.05 to 0.1)               | 27.9<br>(-0.6 to 64.2)                            | 13.8<br>(-10.9 to 44.9)                             |
| Cirrhosis and other chronic liver diseases due to hepatitis C  | 4.3<br>(3.3 to 5.5)                     | 0.1<br>(0.1 to 0.1)                      | 0.1<br>(0.1 to 0.1)                  | 29.9<br>(4.3 to 61.5)                             | 15.1<br>(-7.5 to 42.8)                              |
| Cirrhosis and other chronic liver diseases due to alcohol use  | 5.2<br>(4.2 to 6.2)                     | 0.1<br>(0.1 to 0.2)                      | 0.1<br>(0.1 to 0.2)                  | 29.3<br>(5.6 to 60.1)                             | 13.3<br>(-7.5 to 40.5)                              |
| Cirrhosis and other chronic liver diseases due to other causes | 4.5<br>(4.0 to 5.0)                     | 0.1<br>(0.1 to 0.1)                      | 0.1<br>(0.1 to 0.2)                  | 7.4<br>(-11.1 to 30.6)                            | 7.7<br>(-10.8 to 31.2)                              |
| <b>Digestive diseases</b>                                      | <b>94.7</b><br><b>(89.5 to 99.5)</b>    | <b>113.3†</b><br><b>(105.0 to 122.1)</b> | <b>4.1</b><br><b>(2.9 to 5.5)</b>    | <b>25.4</b><br><b>(17.4 to 34.0)</b>              | <b>12.1</b><br><b>(5.4 to 19.5)</b>                 |
| Peptic ulcer disease                                           | 33.6<br>(30.4 to 37.2)                  | 2.6<br>(2.4 to 3.0)                      | 0.8<br>(0.5 to 1.3)                  | 59.1<br>(38.6 to 81.7)                            | 40.4<br>(21.9 to 59.6)                              |
| Gastritis and duodenitis                                       | 33.7<br>(29.9 to 37.4)                  | 23.3<br>(20.7 to 26.3)                   | 0.8<br>(0.5 to 1.1)                  | 41.4<br>(26.1 to 57.6)                            | 23.5<br>(11.1 to 37.2)                              |
| Appendicitis                                                   | 0.1<br>(0.1 to 0.1)                     | 2.9<br>(2.7 to 3.2)                      | < 0.05<br>(< 0.05 to 0.1)            | -6.4<br>(-28.6 to 22.0)                           | -0.8<br>(-27.1 to 33.2)                             |
| Paralytic ileus and intestinal obstruction                     | < 0.05<br>(< 0.05 to < 0.05)            | 1.1<br>(1.0 to 1.2)                      | < 0.05<br>(< 0.05 to < 0.05)         | 19.2<br>(8.8 to 32.8)                             | 3.1<br>(-5.1 to 14.4)                               |
| Inguinal, femoral, and abdominal hernia                        | 20.1<br>(18.2 to 22.4)                  | 44.8<br>(38.3 to 51.2)                   | 1.4<br>(1.0 to 2.0)                  | 11.7<br>(2.8 to 21.4)                             | 1.6<br>(-6.8 to 10.3)                               |
| Inflammatory bowel disease                                     | 3.1<br>(2.5 to 3.9)                     | 2.1<br>(1.6 to 2.6)                      | 0.4<br>(0.3 to 0.6)                  | 4.4<br>(-8.1 to 18.4)                             | -4.3<br>(-15.5 to 8.0)                              |
| Vascular intestinal disorders                                  | < 0.05<br>(< 0.05 to < 0.05)            | 0.2<br>(0.2 to 0.2)                      | < 0.05<br>(< 0.05 to < 0.05)         | 12.7<br>(7.0 to 18.9)                             | -0.7<br>(-5.2 to 4.2)                               |
| Gallbladder and biliary diseases                               | 6.9<br>(6.0 to 7.8)                     | 34.0<br>(29.5 to 38.8)                   | 0.1<br>(0.1 to 0.2)                  | 24.2<br>(3.0 to 52.3)                             | 9.7<br>(-8.5 to 32.3)                               |
| Pancreatitis                                                   | 0.3<br>(0.2 to 0.3)                     | 2.4<br>(2.2 to 2.7)                      | < 0.05<br>(< 0.05 to < 0.05)         | 31.7<br>(19.8 to 44.1)                            | 16.5<br>(6.5 to 26.7)                               |
| Other digestive diseases                                       | --                                      | --                                       | 0.3<br>(0.2 to 0.4)                  | 29.2<br>(20.7 to 37.9)                            | 14.0<br>(6.3 to 21.9)                               |
| <b>Neurological disorders</b>                                  | <b>776.6</b><br><b>(747.3 to 811.5)</b> | <b>328.7</b><br><b>(282.7 to 380.6)</b>  | <b>23.6</b><br><b>(16.0 to 32.2)</b> | <b>5.3</b><br><b>(-8.1 to 20.7)</b>               | <b>-0.2</b><br><b>(-13.8 to 15.8)</b>               |
| Alzheimer's disease and other dementias                        | 12.8<br>(10.6 to 15.3)                  | 2.2<br>(1.8 to 2.7)                      | 1.8<br>(1.3 to 2.5)                  | 35.4<br>(27.9 to 43.4)                            | -0.5<br>(-5.0 to 4.5)                               |
| Parkinson's disease                                            | 3.0<br>(2.3 to 3.8)                     | 0.4<br>(0.3 to 0.5)                      | 0.4<br>(0.2 to 0.5)                  | 30.3<br>(17.2 to 44.3)                            | 3.4<br>(-6.5 to 13.4)                               |
| Epilepsy                                                       | 6.4<br>(1.5 to 11.7)                    | 0.7<br>(0.2 to 1.3)                      | 1.7<br>(0.3 to 4.0)                  | 0.7<br>(-83.2 to 500.6)                           | -0.5<br>(-83.4 to 494.0)                            |
| Multiple sclerosis                                             | 0.9<br>(0.8 to 1.1)                     | < 0.05<br>(< 0.05 to < 0.05)             | 0.2<br>(0.2 to 0.3)                  | 22.5<br>(3.5 to 46.2)                             | 13.0<br>(-4.5 to 34.0)                              |
| Motor neuron disease                                           | 0.1<br>(0.1 to 0.1)                     | < 0.05<br>(< 0.05 to < 0.05)             | < 0.05<br>(< 0.05 to < 0.05)         | 5.8<br>(0.8 to 10.7)                              | -1.1<br>(-5.6 to 3.3)                               |
| Migraine                                                       | 346.0<br>(326.1 to 366.8)               | 35.2<br>(32.7 to 38.0)                   | 16.2<br>(10.5 to 22.7)               | 2.6<br>(-0.7 to 6.2)                              | -0.7<br>(-4.0 to 2.7)                               |
| Tension-type headache                                          | 539.5<br>(484.9 to 602.5)               | 290.2<br>(244.6 to 342.2)                | 2.8<br>(1.8 to 4.2)                  | 3.9<br>(-1.4 to 9.3)                              | -1.1<br>(-6.0 to 4.0)                               |
| Other neurological disorders                                   | < 0.05<br>(< 0.05 to < 0.05)            | < 0.05<br>(< 0.05 to < 0.05)             | 0.4<br>(0.1 to 0.8)                  | 16.4<br>(-64.8 to 285.6)                          | 19.6<br>(-67.0 to 318.6)                            |
| <b>Mental and substance use disorders</b>                      | <b>290.3</b><br><b>(280.2 to 300.6)</b> | <b>100.2†</b><br><b>(93.8 to 107.1)</b>  | <b>37.8</b><br><b>(27.7 to 49.0)</b> | <b>3.7</b><br><b>(1.3 to 5.8)</b>                 | <b>0.3</b><br><b>(-1.9 to 2.4)</b>                  |
| Schizophrenia                                                  | 5.3<br>(4.5 to 6.4)                     | 0.3<br>(0.2 to 0.3)                      | 3.4<br>(2.4 to 4.4)                  | 7.4<br>(-1.2 to 17.0)                             | 0.9<br>(-7.6 to 9.6)                                |
| Alcohol use disorders                                          | 36.7<br>(32.0 to 41.6)                  | 20.0<br>(17.3 to 22.8)                   | 3.7<br>(2.5 to 5.1)                  | 8.0<br>(0.4 to 15.9)                              | 5.3<br>(-1.9 to 12.7)                               |
| Drug use disorders                                             | 11.2<br>(10.3 to 12.1)                  | 1.6<br>(1.5 to 1.8)                      | 2.3<br>(1.6 to 3.0)                  | 5.8<br>(-3.8 to 16.2)                             | 4.0<br>(-5.8 to 14.3)                               |
| Opioid use disorders                                           | 3.5<br>(2.9 to 4.2)                     | 0.5<br>(0.4 to 0.6)                      | 1.4<br>(1.0 to 2.0)                  | 7.9<br>(-3.8 to 22.4)                             | 4.0<br>(-7.7 to 18.2)                               |
| Cocaine use disorders                                          | 1.2<br>(1.0 to 1.4)                     | 0.1<br>(0.1 to 0.1)                      | 0.2<br>(0.1 to 0.2)                  | 2.8<br>(-21.6 to 35.8)                            | 1.9<br>(-22.5 to 36.7)                              |
| Amphetamine use disorders                                      | 1.3<br>(0.9 to 1.9)                     | 0.1<br>(0.1 to 0.2)                      | 0.2<br>(0.1 to 0.3)                  | -2.0<br>(-24.8 to 24.4)                           | 3.5<br>(-21.9 to 31.5)                              |
| Cannabis use disorders                                         | 4.2<br>(3.6 to 5.0)                     | 0.7<br>(0.6 to 0.8)                      | 0.1<br>(0.1 to 0.2)                  | 2.2<br>(-16.2 to 22.7)                            | 7.5<br>(-13.0 to 31.2)                              |
| Other drug use disorders                                       | 1.3<br>(1.1 to 1.4)                     | 0.2<br>(0.2 to 0.2)                      | 0.4<br>(0.2 to 0.5)                  | 4.0<br>(-15.1 to 29.6)                            | 4.0<br>(-15.8 to 30.3)                              |
| Depressive disorders                                           | 58.9<br>(55.4 to 62.5)                  | 59.8<br>(54.4 to 66.1)                   | 9.5<br>(6.7 to 13.0)                 | 5.9<br>(0.1 to 11.5)                              | -1.9<br>(-6.8 to 2.9)                               |
| Major depressive disorder                                      | 36.5<br>(33.0 to 40.2)                  | 55.7<br>(50.4 to 62.0)                   | 7.3<br>(5.0 to 10.0)                 | 5.2<br>(-1.6 to 12.3)                             | -2.5<br>(-8.2 to 3.6)                               |
| Dysthymia                                                      | 23.3<br>(20.4 to 26.7)                  | 4.1<br>(3.6 to 4.7)                      | 2.2<br>(1.5 to 3.2)                  | 8.3<br>(4.0 to 12.9)                              | -0.1<br>(-4.1 to 4.1)                               |
| Bipolar disorder                                               | 14.5<br>(12.6 to 16.7)                  | 1.0<br>(0.9 to 1.2)                      | 3.0<br>(1.8 to 4.4)                  | 2.7<br>(-3.5 to 9.7)                              | -0.1<br>(-5.9 to 7.1)                               |
| Anxiety disorders                                              | 74.6<br>(67.8 to 81.8)                  | 11.0<br>(10.2 to 12.0)                   | 7.1<br>(5.0 to 9.7)                  | 2.8<br>(-3.6 to 9.4)                              | -0.1<br>(-6.2 to 6.1)                               |
| Eating disorders                                               | 2.2<br>(1.8 to 2.7)                     | 1.1<br>(0.8 to 1.4)                      | 0.5<br>(0.3 to 0.7)                  | 6.2<br>(-7.2 to 20.6)                             | 11.2<br>(-2.7 to 26.0)                              |
| Anorexia nervosa                                               | 0.5<br>(0.3 to 0.6)                     | 0.2<br>(0.1 to 0.2)                      | 0.1<br>(0.1 to 0.1)                  | 0.0<br>(-23.2 to 30.1)                            | 9.0<br>(-16.2 to 41.9)                              |
| Bulimia nervosa                                                | 1.7<br>(1.2 to 2.2)                     | 0.9<br>(0.6 to 1.2)                      | 0.4<br>(0.2 to 0.5)                  | 8.0<br>(-7.6 to 26.5)                             | 11.8<br>(-4.3 to 30.3)                              |
| Autistic spectrum disorders                                    | 17.5<br>(15.9 to 19.5)                  | 0.1<br>(0.1 to 0.1)                      | 2.6<br>(1.8 to 3.7)                  | 0.0<br>(-4.6 to 4.9)                              | 0.2<br>(-4.5 to 5.1)                                |
| Autism                                                         | 5.7<br>(4.9 to 6.6)                     | < 0.05<br>(< 0.05 to < 0.05)             | 1.4<br>(0.9 to 2.1)                  | 0.4<br>(-7.1 to 8.8)                              | 0.2<br>(-7.4 to 8.9)                                |
| Asperger syndrome and other autistic spectrum disorders        | 11.8<br>(9.8 to 14.2)                   | 0.1<br>(< 0.05 to 0.1)                   | 1.2<br>(0.8 to 1.7)                  | -0.4<br>(-4.9 to 4.4)                             | 0.2<br>(-4.4 to 5.2)                                |



| Cause                                                      | Prevalence in thousands (95% UI)        | Incidence in thousands (95% UI)          | YLDs in thousands (95% UI)     |                                                   |                                                     |
|------------------------------------------------------------|-----------------------------------------|------------------------------------------|--------------------------------|---------------------------------------------------|-----------------------------------------------------|
|                                                            | 2016 counts                             | 2016 counts                              | 2016 counts                    | Percentage change in counts between 2006 and 2016 | Percentage change in age-standardised rates between |
| Attention-deficit/hyperactivity disorder                   | 13.9<br>(12.6 to 15.5)                  | 0.5<br>(0.4 to 0.6)                      | 0.2<br>(0.1 to 0.3)            | -8.2<br>(-16.1 to -0.2)                           | 0.0<br>(-8.7 to 8.8)                                |
| Conduct disorder                                           | 11.3<br>(9.4 to 13.5)                   | 3.6<br>(2.9 to 4.4)                      | 1.4<br>(0.9 to 2.1)            | -16.7<br>(-21.8 to -10.8)                         | -0.1<br>(-6.3 to 6.7)                               |
| Idiopathic developmental intellectual disability           | 20.7<br>(11.3 to 29.9)                  | --                                       | 0.8<br>(0.4 to 1.4)            | -6.1<br>(-12.0 to 0.4)                            | -6.1<br>(-12.2 to 0.2)                              |
| Other mental and substance use disorders                   | 45.5<br>(40.3 to 52.3)                  | 1.2<br>(1.0 to 1.3)                      | 3.4<br>(2.3 to 4.8)            | 7.0<br>(1.7 to 12.2)                              | 0.0<br>(-4.9 to 4.9)                                |
| <b>Diabetes, urogenital, blood, and endocrine diseases</b> | <b>680.0<br/>(663.4 to 699.0)</b>       | <b>270.5†<br/>(254.7 to 287.4)</b>       | <b>21.2<br/>(15.0 to 28.4)</b> | <b>16.5<br/>(11.9 to 22.0)</b>                    | <b>2.1<br/>(-1.9 to 6.8)</b>                        |
| Diabetes mellitus                                          | 122.5<br>(109.1 to 136.8)               | 7.0<br>(6.3 to 7.9)                      | 10.7<br>(7.4 to 14.8)          | 21.7<br>(12.5 to 32.8)                            | 3.0<br>(-4.7 to 12.3)                               |
| Acute glomerulonephritis                                   | < 0.05<br>(< 0.05 to < 0.05)            | 0.6<br>(0.5 to 0.6)                      | < 0.05<br>(< 0.05 to < 0.05)   | 2.2<br>(-2.0 to 6.6)                              | 0.4<br>(-3.4 to 4.1)                                |
| Chronic kidney disease                                     | 67.8<br>(60.7 to 74.9)                  | 4.9<br>(4.2 to 5.5)                      | 2.8<br>(2.0 to 3.5)            | 32.3<br>(19.9 to 46.3)                            | 10.0<br>(0.4 to 20.4)                               |
| Chronic kidney disease due to diabetes mellitus            | 19.1<br>(15.5 to 23.1)                  | 1.4<br>(1.1 to 1.7)                      | 0.8<br>(0.6 to 1.0)            | 40.1<br>(16.6 to 66.0)                            | 17.4<br>(-1.7 to 38.2)                              |
| Chronic kidney disease due to hypertension                 | 12.3<br>(10.4 to 14.5)                  | 1.3<br>(1.0 to 1.5)                      | 0.4<br>(0.3 to 0.5)            | 25.0<br>(4.0 to 50.2)                             | -4.0<br>(-19.0 to 14.8)                             |
| Chronic kidney disease due to glomerulonephritis           | 14.6<br>(12.2 to 17.3)                  | 0.6<br>(0.5 to 0.8)                      | 0.7<br>(0.5 to 1.0)            | 30.0<br>(5.9 to 53.5)                             | 11.8<br>(-6.7 to 31.4)                              |
| Chronic kidney disease due to other causes                 | 21.7<br>(17.9 to 25.9)                  | 1.6<br>(1.3 to 1.9)                      | 0.9<br>(0.6 to 1.2)            | 31.0<br>(8.8 to 56.2)                             | 9.8<br>(-8.1 to 29.8)                               |
| Urinary diseases and male infertility                      | 58.1<br>(52.5 to 64.3)                  | 155.2†<br>(141.8 to 170.5)               | 1.8<br>(1.2 to 2.5)            | 16.1<br>(10.4 to 22.8)                            | -1.7<br>(-6.5 to 3.7)                               |
| Interstitial nephritis and urinary tract infections        | 2.2<br>(1.9 to 2.4)                     | 112.1<br>(99.0 to 126.0)                 | 0.1<br>(< 0.05 to 0.1)         | 0.8<br>(-11.6 to 14.8)                            | 0.7<br>(-11.9 to 14.4)                              |
| Urolithiasis                                               | 1.4<br>(1.2 to 1.6)                     | 37.2<br>(32.8 to 42.4)                   | 0.1<br>(0.1 to 0.1)            | 12.0<br>(-4.2 to 32.2)                            | 1.0<br>(-12.8 to 17.3)                              |
| Benign prostatic hyperplasia                               | 46.0<br>(39.1 to 53.4)                  | 5.9<br>(4.8 to 7.1)                      | 1.5<br>(1.0 to 2.2)            | 19.7<br>(12.5 to 27.7)                            | -1.0<br>(-6.8 to 5.5)                               |
| Male infertility                                           | 6.6<br>(5.0 to 8.8)                     | --                                       | < 0.05<br>(< 0.05 to 0.1)      | -7.7<br>(-15.3 to 0.1)                            | -7.8<br>(-15.7 to 0.3)                              |
| Other urinary diseases                                     | --                                      | --                                       | 0.1<br>(< 0.05 to 0.1)         | -12.3<br>(-20.9 to -2.5)                          | -17.1<br>(-24.8 to -8.4)                            |
| Gynecological diseases                                     | 243.8<br>(233.4 to 255.6)               | 94.2†<br>(87.0 to 102.3)                 | 3.1<br>(2.1 to 4.3)            | -1.4<br>(-5.4 to 2.4)                             | -2.3<br>(-6.2 to 1.6)                               |
| Uterine fibroids                                           | 25.2<br>(22.2 to 28.9)                  | 2.5<br>(2.1 to 2.9)                      | 0.3<br>(0.2 to 0.5)            | -7.1<br>(-16.1 to 1.1)                            | -11.8<br>(-20.2 to -3.9)                            |
| Polycystic ovarian syndrome                                | 2.1<br>(1.6 to 2.8)                     | 1.0<br>(0.7 to 1.3)                      | < 0.05<br>(< 0.05 to < 0.05)   | 0.2<br>(-11.1 to 12.2)                            | 0.2<br>(-11.0 to 12.5)                              |
| Female infertility                                         | 2.0<br>(0.7 to 4.8)                     | --                                       | < 0.05<br>(< 0.05 to < 0.05)   | 15.7<br>(-14.0 to 69.2)                           | 18.0<br>(-13.1 to 69.0)                             |
| Endometriosis                                              | 0.9<br>(0.8 to 1.1)                     | 3.6<br>(2.8 to 4.7)                      | 0.1<br>(0.1 to 0.1)            | -3.2<br>(-25.1 to 25.3)                           | 0.4<br>(-22.1 to 30.7)                              |
| Genital prolapse                                           | 68.2<br>(58.0 to 79.6)                  | 3.2<br>(2.7 to 3.9)                      | 0.2<br>(0.1 to 0.4)            | 15.6<br>(3.1 to 28.9)                             | -1.8<br>(-12.1 to 9.5)                              |
| Premenstrual syndrome                                      | 135.0<br>(128.0 to 142.6)               | 46.6<br>(43.3 to 49.9)                   | 1.1<br>(0.7 to 1.8)            | -1.5<br>(-8.1 to 5.1)                             | -0.3<br>(-7.2 to 6.3)                               |
| Other gynecological diseases                               | 36.9<br>(31.5 to 43.1)                  | 37.2<br>(30.9 to 44.7)                   | 1.3<br>(0.8 to 1.9)            | -2.3<br>(-8.5 to 3.9)                             | -2.2<br>(-8.4 to 4.2)                               |
| Hemoglobinopathies and hemolytic anaemias                  | 274.2<br>(255.5 to 292.9)               | --                                       | 1.1<br>(0.7 to 1.6)            | 6.0<br>(-4.5 to 16.8)                             | -0.5<br>(-9.9 to 9.6)                               |
| Thalassemias                                               | < 0.05<br>(< 0.05 to < 0.05)            | --                                       | < 0.05<br>(< 0.05 to < 0.05)   | 2.6<br>(-15.9 to 22.7)                            | 10.9<br>(-9.7 to 33.6)                              |
| Thalassaemias trait                                        | 26.1<br>(18.1 to 34.7)                  | --                                       | 0.6<br>(0.3 to 0.9)            | 22.5<br>(6.9 to 39.2)                             | 12.7<br>(-1.5 to 28.2)                              |
| Sickle cell disorders                                      | < 0.05<br>(< 0.05 to < 0.05)            | --                                       | < 0.05<br>(< 0.05 to < 0.05)   | -1.0<br>(-6.5 to 5.8)                             | 7.6<br>(0.1 to 15.7)                                |
| Sickle cell trait                                          | 34.6<br>(33.8 to 35.8)                  | --                                       | 0.1<br>(0.1 to 0.2)            | -9.7<br>(-21.6 to 4.4)                            | -17.1<br>(-28.9 to -3.3)                            |
| G6PD deficiency                                            | 41.1<br>(35.6 to 47.5)                  | --                                       | < 0.05<br>(< 0.05 to < 0.05)   | -5.5<br>(-23.2 to 15.6)                           | -14.2<br>(-32.5 to 10.0)                            |
| G6PD trait                                                 | 161.5<br>(147.4 to 178.4)               | --                                       | < 0.05<br>(< 0.05 to < 0.05)   | 36.6<br>(18.0 to 57.4)                            | 29.4<br>(12.2 to 49.2)                              |
| Other hemoglobinopathies and hemolytic anaemias            | 18.1<br>(17.1 to 19.1)                  | --                                       | 0.3<br>(0.2 to 0.5)            | -9.2<br>(-17.3 to -0.2)                           | -10.0<br>(-18.3 to -0.5)                            |
| Endocrine, metabolic, blood, and immune disorders          | 57.8<br>(52.6 to 63.8)                  | 8.7<br>(7.8 to 9.9)                      | 1.9<br>(1.2 to 2.6)            | 9.2<br>(3.6 to 15.1)                              | 0.3<br>(-4.3 to 5.5)                                |
| <b>Musculoskeletal disorders</b>                           | <b>418.9<br/>(399.7 to 439.9)</b>       | <b>175.7<br/>(156.2 to 197.6)</b>        | <b>48.0<br/>(34.3 to 62.9)</b> | <b>12.2<br/>(9.2 to 15.3)</b>                     | <b>0.0<br/>(-2.6 to 2.5)</b>                        |
| Rheumatoid arthritis                                       | 7.4<br>(6.5 to 8.4)                     | 0.4<br>(0.3 to 0.4)                      | 1.7<br>(1.2 to 2.3)            | 19.2<br>(10.0 to 28.1)                            | 4.0<br>(-3.7 to 11.5)                               |
| Osteoarthritis                                             | 114.6<br>(107.2 to 122.2)               | 5.4<br>(5.0 to 5.8)                      | 7.0<br>(4.9 to 9.5)            | 21.1<br>(16.6 to 25.5)                            | 1.8<br>(-1.9 to 5.4)                                |
| Low back and neck pain                                     | 314.2<br>(293.5 to 336.7)               | 149.8<br>(130.4 to 170.4)                | 37.3<br>(26.3 to 49.4)         | 10.9<br>(7.1 to 14.6)                             | -0.2<br>(-3.4 to 2.8)                               |
| Low back pain                                              | 250.1<br>(221.7 to 283.1)               | 130.0<br>(111.5 to 150.8)                | 28.2<br>(19.8 to 37.5)         | 11.0<br>(6.1 to 15.7)                             | -0.2<br>(-4.4 to 3.6)                               |
| Neck pain                                                  | 92.3<br>(79.6 to 107.2)                 | 19.8<br>(17.1 to 23.4)                   | 9.1<br>(6.2 to 13.0)           | 10.7<br>(7.8 to 13.6)                             | -0.1<br>(-2.2 to 1.9)                               |
| Gout                                                       | 9.7<br>(8.5 to 11.0)                    | 1.9<br>(1.7 to 2.2)                      | 0.3<br>(0.2 to 0.4)            | 17.6<br>(2.5 to 36.0)                             | 0.7<br>(-12.2 to 15.9)                              |
| Other musculoskeletal disorders                            | 20.3<br>(15.4 to 26.7)                  | 18.1<br>(13.0 to 26.4)                   | 1.7<br>(1.1 to 2.6)            | 2.5<br>(-11.2 to 17.9)                            | -4.6<br>(-17.4 to 9.5)                              |
| <b>Other non-communicable diseases</b>                     | <b>1,599.9<br/>(1,571.1 to 1,632.4)</b> | <b>4,923.0†<br/>(4,576.4 to 5,231.7)</b> | <b>46.1<br/>(31.8 to 65.3)</b> | <b>8.5<br/>(7.0 to 10.0)</b>                      | <b>-0.8<br/>(-2.0 to 0.5)</b>                       |
| Congenital anomalies                                       | 23.5<br>(21.5 to 25.7)                  | --                                       | 2.8<br>(2.0 to 3.7)            | -1.0<br>(-6.1 to 4.4)                             | -0.7<br>(-6.0 to 4.2)                               |
| Neural tube defects                                        | 1.9<br>(1.6 to 2.1)                     | --                                       | 0.6<br>(0.4 to 0.8)            | -4.7<br>(-16.8 to 7.4)                            | -6.0<br>(-18.2 to 6.4)                              |
| Congenital heart anomalies                                 | 5.6<br>(5.0 to 6.4)                     | --                                       | 0.3<br>(0.1 to 0.5)            | 4.8<br>(-5.5 to 15.7)                             | 6.3<br>(-4.3 to 17.4)                               |
| Orofacial clefts                                           | 1.0<br>(0.9 to 1.1)                     | --                                       | < 0.05<br>(< 0.05 to < 0.05)   | -18.1<br>(-27.5 to -7.8)                          | -19.0<br>(-28.3 to -8.6)                            |
| Down's syndrome                                            | 1.0<br>(0.9 to 1.2)                     | --                                       | 0.1<br>(0.1 to 0.1)            | 0.2<br>(-8.3 to 10.2)                             | 0.9<br>(-8.1 to 11.3)                               |
| Turner syndrome                                            | 1.1<br>(0.9 to 1.3)                     | --                                       | < 0.05<br>(< 0.05 to < 0.05)   | -2.3<br>(-26.6 to 28.7)                           | 0.8<br>(-24.6 to 32.8)                              |
| Klinefelter syndrome                                       | 1.0<br>(0.8 to 1.1)                     | --                                       | < 0.05<br>(< 0.05 to < 0.05)   | -1.9<br>(-23.1 to 25.3)                           | 1.9<br>(-20.2 to 31.1)                              |



| Cause                                         | Prevalence in thousands (95% UI)        | Incidence in thousands (95% UI)          | YLDs in thousands (95% UI)           |                                                   |                                                     |
|-----------------------------------------------|-----------------------------------------|------------------------------------------|--------------------------------------|---------------------------------------------------|-----------------------------------------------------|
|                                               | 2016 counts                             | 2016 counts                              | 2016 counts                          | Percentage change in counts between 2006 and 2016 | Percentage change in age-standardised rates between |
| Other chromosomal abnormalities               | 1.6<br>(1.3 to 1.9)                     | --                                       | 0.2<br>(0.1 to 0.2)                  | -7.8<br>(-20.6 to 9.1)                            | 4.8<br>(-10.4 to 24.8)                              |
| Congenital musculoskeletal and limb anomalies | 4.6<br>(4.2 to 5.0)                     | --                                       | 0.6<br>(0.4 to 0.9)                  | 1.7<br>(-7.8 to 11.8)                             | -0.7<br>(-9.9 to 9.3)                               |
| Urogenital congenital anomalies               | 2.5<br>(2.2 to 2.8)                     | --                                       | 0.1<br>(< 0.05 to 0.1)               | -7.3<br>(-16.7 to 2.8)                            | 0.4<br>(-10.5 to 13.0)                              |
| Digestive congenital anomalies                | 2.8<br>(2.5 to 3.2)                     | --                                       | 0.1<br>(0.1 to 0.2)                  | -0.5<br>(-13.1 to 13.4)                           | -1.4<br>(-14.5 to 12.9)                             |
| Other congenital anomalies                    | 5.9<br>(3.7 to 8.9)                     | --                                       | 0.8<br>(0.6 to 1.2)                  | 0.0<br>(-8.8 to 10.4)                             | -1.2<br>(-9.8 to 8.7)                               |
| Skin and subcutaneous diseases                | 599.0<br>(583.9 to 614.1)               | 1,497.9<br>(1,411.7 to 1,591.4)          | 13.2<br>(9.0 to 19.0)                | 0.1<br>(-2.1 to 2.4)                              | 1.6<br>(-0.6 to 4.0)                                |
| Dermatitis                                    | 62.8<br>(58.9 to 67.7)                  | 95.5<br>(87.5 to 104.4)                  | 2.2<br>(1.4 to 3.6)                  | 0.7<br>(-4.4 to 5.9)                              | 2.1<br>(-3.4 to 8.2)                                |
| Psoriasis                                     | 22.4<br>(21.3 to 23.6)                  | 2.9<br>(2.8 to 3.1)                      | 1.9<br>(1.4 to 2.6)                  | 9.6<br>(2.6 to 17.9)                              | 4.0<br>(-2.8 to 11.6)                               |
| Cellulitis                                    | 0.9<br>(0.8 to 0.9)                     | 16.6<br>(15.5 to 17.7)                   | < 0.05<br>(< 0.05 to 0.1)            | 3.2<br>(-17.6 to 28.8)                            | 0.1<br>(-20.2 to 26.4)                              |
| Pyoderma                                      | 9.2<br>(8.8 to 9.5)                     | 242.8<br>(234.0 to 252.3)                | 0.1<br>(< 0.05 to 0.1)               | 13.0<br>(6.9 to 19.4)                             | 0.6<br>(-4.6 to 6.3)                                |
| Scabies                                       | 14.3<br>(12.6 to 16.2)                  | 43.3<br>(38.1 to 48.9)                   | 0.4<br>(0.2 to 0.6)                  | -2.6<br>(-7.6 to 2.5)                             | 0.6<br>(-4.3 to 5.6)                                |
| Fungal skin diseases                          | 185.2<br>(165.6 to 205.4)               | 681.5<br>(603.3 to 769.4)                | 1.0<br>(0.4 to 2.1)                  | 7.7<br>(5.8 to 9.7)                               | -0.0<br>(-1.2 to 1.0)                               |
| Viral skin diseases                           | 47.4<br>(45.5 to 49.5)                  | 71.2<br>(68.1 to 74.4)                   | 1.4<br>(0.9 to 2.1)                  | -3.5<br>(-6.6 to -0.4)                            | -0.0<br>(-3.1 to 3.4)                               |
| Acne vulgaris                                 | 139.0<br>(125.3 to 154.0)               | 88.8<br>(74.3 to 107.4)                  | 3.6<br>(2.4 to 5.2)                  | -8.1<br>(-12.2 to -3.6)                           | 1.7<br>(-3.1 to 6.5)                                |
| Alopecia areata                               | 4.1<br>(4.0 to 4.3)                     | 7.2<br>(7.0 to 7.5)                      | 0.1<br>(0.1 to 0.2)                  | 3.0<br>(-8.1 to 14.3)                             | 0.4<br>(-10.4 to 12.3)                              |
| Pruritus                                      | 20.8<br>(18.4 to 23.7)                  | 16.5<br>(14.7 to 18.8)                   | 0.2<br>(0.1 to 0.4)                  | 8.4<br>(2.9 to 14.3)                              | 1.1<br>(-3.6 to 6.3)                                |
| Urticaria                                     | 18.5<br>(16.4 to 20.8)                  | 32.8<br>(29.0 to 37.3)                   | 1.1<br>(0.7 to 1.6)                  | -2.3<br>(-7.1 to 3.6)                             | 0.0<br>(-4.9 to 5.6)                                |
| Decubitus ulcer                               | 0.7<br>(0.6 to 0.8)                     | 2.7<br>(2.3 to 3.1)                      | 0.1<br>(0.1 to 0.2)                  | 21.1<br>(2.9 to 40.9)                             | 2.8<br>(-11.8 to 17.8)                              |
| Other skin and subcutaneous diseases          | 167.4<br>(162.5 to 172.4)               | 196.2<br>(189.6 to 203.1)                | 0.9<br>(0.4 to 1.7)                  | 14.3<br>(11.5 to 16.9)                            | 3.8<br>(1.3 to 6.2)                                 |
| Sense organ diseases                          | 633.0<br>(611.3 to 655.9)               | 212.1†<br>(200.3 to 225.6)               | 22.4<br>(15.4 to 31.5)               | 13.2<br>(10.6 to 15.8)                            | -2.9<br>(-5.0 to -0.8)                              |
| Glaucoma                                      | 1.7<br>(1.4 to 2.1)                     | --                                       | 0.1<br>(0.1 to 0.2)                  | 26.4<br>(9.3 to 46.0)                             | 0.1<br>(-13.0 to 14.5)                              |
| Cataract                                      | 30.3<br>(25.3 to 35.4)                  | --                                       | 1.4<br>(1.0 to 2.0)                  | 22.1<br>(15.4 to 29.7)                            | -3.6<br>(-8.4 to 2.0)                               |
| Macular degeneration                          | 1.0<br>(0.8 to 1.3)                     | --                                       | 0.1<br>(< 0.05 to 0.1)               | 29.3<br>(9.6 to 50.2)                             | 1.8<br>(-12.8 to 17.0)                              |
| Refraction and accommodation disorders        | 281.1<br>(235.5 to 330.1)               | --                                       | 4.8<br>(2.9 to 7.8)                  | 6.2<br>(-2.3 to 14.1)                             | -4.9<br>(-12.1 to 1.7)                              |
| Age-related and other hearing loss            | 469.6<br>(448.5 to 492.1)               | --                                       | 13.0<br>(9.0 to 18.3)                | 14.5<br>(11.9 to 17.0)                            | -2.7<br>(-4.9 to -0.8)                              |
| Other vision loss                             | 11.8<br>(10.2 to 13.7)                  | --                                       | 0.6<br>(0.4 to 0.9)                  | 19.4<br>(10.6 to 29.0)                            | 0.5<br>(-6.8 to 8.0)                                |
| Other sense organ diseases                    | 75.1<br>(69.0 to 81.3)                  | 212.1<br>(200.3 to 225.6)                | 2.3<br>(1.5 to 3.5)                  | 14.5<br>(10.2 to 18.9)                            | 0.5<br>(-3.1 to 4.3)                                |
| Oral disorders                                | 1,204.8<br>(1,152.0 to 1,253.5)         | 3,213.0†<br>(2,877.4 to 3,517.7)         | 7.8<br>(4.9 to 11.7)                 | 14.8<br>(12.7 to 17.4)                            | 0.3<br>(-1.3 to 2.1)                                |
| Caries of deciduous teeth                     | 108.4<br>(92.2 to 126.7)                | 441.6<br>(347.8 to 559.4)                | < 0.05<br>(< 0.05 to 0.1)            | -11.9<br>(-20.9 to -2.5)                          | -0.7<br>(-10.6 to 9.8)                              |
| Caries of permanent teeth                     | 898.1<br>(826.0 to 982.0)               | 2,729.7<br>(2,418.4 to 2,999.6)          | 0.5<br>(0.2 to 1.0)                  | -0.7<br>(-4.5 to 2.9)                             | -3.2<br>(-6.8 to 0.2)                               |
| Periodontal disease                           | 226.1<br>(186.5 to 271.4)               | 28.2<br>(21.9 to 35.0)                   | 1.5<br>(0.6 to 3.1)                  | 12.9<br>(8.9 to 17.1)                             | 0.2<br>(-2.9 to 3.9)                                |
| Edentulism and severe tooth loss              | 166.3<br>(144.4 to 188.5)               | 13.4<br>(11.2 to 15.7)                   | 4.6<br>(3.0 to 6.5)                  | 21.2<br>(17.7 to 24.8)                            | 0.9<br>(-1.6 to 3.8)                                |
| Other oral disorders                          | 41.2<br>(39.5 to 43.0)                  | --                                       | 1.2<br>(0.7 to 1.8)                  | 4.2<br>(1.2 to 7.2)                               | -0.1<br>(-3.0 to 2.9)                               |
| <b>Injuries</b>                               | <b>857.7</b><br><b>(793.9 to 942.1)</b> | <b>299.4†</b><br><b>(277.3 to 321.5)</b> | <b>29.5</b><br><b>(20.0 to 41.3)</b> | <b>17.8</b><br><b>(15.8 to 19.7)</b>              | <b>6.6</b><br><b>(4.8 to 8.2)</b>                   |
| <b>Transport injuries</b>                     | <b>100.4</b><br><b>(92.5 to 108.6)</b>  | <b>27.4</b><br><b>(24.4 to 30.5)</b>     | <b>4.8</b><br><b>(3.1 to 6.9)</b>    | <b>27.9</b><br><b>(25.6 to 30.3)</b>              | <b>16.8</b><br><b>(14.7 to 18.8)</b>                |
| Road injuries                                 | 95.8<br>(88.0 to 103.7)                 | 26.6<br>(23.6 to 29.8)                   | 4.6<br>(3.0 to 6.6)                  | 28.8<br>(26.4 to 31.1)                            | 17.5<br>(15.4 to 19.5)                              |
| Pedestrian road injuries                      | 18.3<br>(15.7 to 21.4)                  | 3.5<br>(2.9 to 4.1)                      | 0.8<br>(0.6 to 1.2)                  | 25.1<br>(22.4 to 27.5)                            | 14.7<br>(12.2 to 17.0)                              |
| Cyclist road injuries                         | 26.4<br>(22.0 to 31.3)                  | 7.9<br>(6.6 to 9.3)                      | 1.2<br>(0.8 to 1.7)                  | 23.4<br>(21.0 to 25.8)                            | 12.9<br>(10.7 to 14.9)                              |
| Motorcyclist road injuries                    | 10.4<br>(8.7 to 12.8)                   | 1.8<br>(1.4 to 2.3)                      | 0.5<br>(0.3 to 0.7)                  | 25.8<br>(23.2 to 28.4)                            | 14.9<br>(12.6 to 17.1)                              |
| Motor vehicle road injuries                   | 37.2<br>(31.2 to 43.3)                  | 12.2<br>(10.4 to 13.9)                   | 1.9<br>(1.3 to 2.8)                  | 36.1<br>(33.5 to 38.7)                            | 23.8<br>(21.5 to 26.1)                              |
| Other road injuries                           | 3.4<br>(2.9 to 4.0)                     | 1.2<br>(0.9 to 1.5)                      | 0.1<br>(0.1 to 0.2)                  | 14.9<br>(12.5 to 17.1)                            | 4.7<br>(2.7 to 6.5)                                 |
| Other transport injuries                      | 4.6<br>(3.9 to 5.4)                     | 0.8<br>(0.7 to 0.9)                      | 0.2<br>(0.1 to 0.3)                  | 11.9<br>(9.2 to 14.7)                             | 3.5<br>(1.0 to 5.9)                                 |
| <b>Unintentional injuries</b>                 | <b>726.9</b><br><b>(665.1 to 808.7)</b> | <b>262.0</b><br><b>(240.8 to 284.9)</b>  | <b>23.4</b><br><b>(16.0 to 33.1)</b> | <b>16.8</b><br><b>(14.7 to 18.7)</b>              | <b>5.4</b><br><b>(3.4 to 7.0)</b>                   |
| Falls                                         | 432.3<br>(379.8 to 500.2)               | 167.0<br>(147.8 to 187.1)                | 16.3<br>(11.3 to 22.4)               | 20.8<br>(18.6 to 22.8)                            | 7.8<br>(5.8 to 9.5)                                 |
| Drowning                                      | 0.8<br>(0.7 to 0.9)                     | 0.1<br>(0.1 to 0.1)                      | < 0.05<br>(< 0.05 to < 0.05)         | 12.3<br>(8.2 to 15.7)                             | 3.5<br>(0.1 to 6.4)                                 |
| Fire, heat, and hot substances                | 35.7<br>(30.8 to 42.5)                  | 3.4<br>(2.8 to 4.0)                      | 0.8<br>(0.5 to 1.2)                  | 17.6<br>(12.2 to 21.8)                            | 9.4<br>(4.8 to 12.9)                                |
| Poisonings                                    | 1.8<br>(1.5 to 2.1)                     | 1.9<br>(1.5 to 2.3)                      | 0.1<br>(0.1 to 0.2)                  | 38.1<br>(29.0 to 48.3)                            | 33.1<br>(24.3 to 43.6)                              |
| Exposure to mechanical forces                 | 159.7<br>(135.7 to 200.0)               | 48.6<br>(41.7 to 55.7)                   | 3.4<br>(2.2 to 5.0)                  | 23.2<br>(20.3 to 25.9)                            | 12.7<br>(10.3 to 14.9)                              |
| Unintentional firearm injuries                | 1.6<br>(1.3 to 1.9)                     | 0.3<br>(0.2 to 0.4)                      | 0.1<br>(< 0.05 to 0.1)               | 12.3<br>(9.7 to 14.9)                             | 2.8<br>(0.6 to 4.9)                                 |
| Unintentional suffocation                     | 1.6<br>(1.3 to 2.0)                     | 0.2<br>(0.2 to 0.3)                      | 0.1<br>(< 0.05 to 0.1)               | 8.9<br>(6.4 to 11.3)                              | 2.7<br>(0.5 to 5.0)                                 |
| Other exposure to mechanical forces           | 156.5<br>(132.2 to 196.8)               | 48.1<br>(41.2 to 55.1)                   | 3.3<br>(2.2 to 4.8)                  | 23.6<br>(20.7 to 26.4)                            | 13.1<br>(10.7 to 15.3)                              |

| Cause                                                                               | Prevalence in thousands (95% UI)     | Incidence in thousands (95% UI)                      | YLDs in thousands (95% UI)              |                                                   |                                                     |
|-------------------------------------------------------------------------------------|--------------------------------------|------------------------------------------------------|-----------------------------------------|---------------------------------------------------|-----------------------------------------------------|
|                                                                                     | 2016 counts                          | 2016 counts                                          | 2016 counts                             | Percentage change in counts between 2006 and 2016 | Percentage change in age-standardised rates between |
| Adverse effects of medical treatment                                                | 0.4<br>(0.3 to 0.5)                  | 4.9<br>(4.2 to 5.6)                                  | < 0.05<br>(< 0.05 to 0.1)               | 20.0<br>(14.9 to 25.8)                            | 6.6<br>(2.7 to 11.4)                                |
| Animal contact                                                                      | 8.7<br>(7.7 to 10.2)                 | 7.9<br>(6.5 to 9.6)                                  | 0.2<br>(0.2 to 0.4)                     | -4.7<br>(-9.4 to 0.0)                             | -8.9<br>(-13.3 to -4.1)                             |
| Venomous animal contact                                                             | 3.2<br>(2.6 to 3.8)                  | 3.1<br>(2.3 to 4.0)                                  | 0.2<br>(0.1 to 0.2)                     | -2.9<br>(-9.3 to 4.2)                             | -5.8<br>(-12.2 to 1.7)                              |
| Non-venomous animal contact                                                         | 5.6<br>(4.7 to 6.8)                  | 4.8<br>(3.9 to 5.9)                                  | 0.1<br>(< 0.05 to 0.1)                  | -8.4<br>(-11.5 to -5.9)                           | -15.4<br>(-18.1 to -13.3)                           |
| Foreign body                                                                        | 15.1<br>(12.9 to 17.2)               | 10.3<br>(8.8 to 12.3)                                | 0.5<br>(0.3 to 0.7)                     | 9.6<br>(6.8 to 12.3)                              | 2.4<br>(-0.2 to 4.7)                                |
| Pulmonary aspiration and foreign body in airway                                     | 7.5<br>(6.0 to 9.3)                  | 2.1<br>(1.8 to 2.6)                                  | 0.3<br>(0.2 to 0.4)                     | 11.4<br>(8.2 to 14.4)                             | 4.1<br>(1.1 to 6.9)                                 |
| Foreign body in eyes                                                                | 1.4<br>(0.9 to 1.9)                  | 6.3<br>(4.9 to 8.2)                                  | 0.1<br>(< 0.05 to 0.1)                  | 8.7<br>(4.9 to 13.2)                              | 1.9<br>(-0.8 to 5.0)                                |
| Foreign body in other body part                                                     | 6.2<br>(5.2 to 7.6)                  | 1.8<br>(1.5 to 2.2)                                  | 0.1<br>(0.1 to 0.2)                     | 6.9<br>(2.9 to 10.6)                              | -0.5<br>(-4.2 to 2.7)                               |
| Environmental heat and cold exposure                                                | 17.0<br>(14.5 to 20.3)               | 3.3<br>(2.7 to 3.9)                                  | 0.5<br>(0.4 to 0.8)                     | 14.6<br>(11.7 to 17.2)                            | 6.3<br>(3.8 to 8.6)                                 |
| Other unintentional injuries                                                        | 55.4<br>(45.2 to 66.7)               | 14.7<br>(12.4 to 17.2)                               | 1.5<br>(1.0 to 2.2)                     | -19.1<br>(-21.9 to -16.3)                         | -24.4<br>(-27.3 to -21.5)                           |
| <b>Self-harm and interpersonal violence</b>                                         | <b>56.0</b><br><b>(51.0 to 61.0)</b> | <b>10.0†</b><br><b>(8.7 to 11.4)</b>                 | <b>1.2</b><br><b>(0.8 to 1.7)</b>       | <b>4.3</b><br><b>(2.2 to 6.5)</b>                 | <b>-1.7</b><br><b>(-3.4 to -0.0)</b>                |
| Self-harm                                                                           | 4.1<br>(3.4 to 4.8)                  | 1.4<br>(1.2 to 1.7)                                  | 0.2<br>(0.1 to 0.2)                     | 13.0<br>(8.8 to 17.1)                             | 3.3<br>(-0.3 to 6.6)                                |
| Self-harm by firearm                                                                | 0.1<br>(0.1 to 0.1)                  | < 0.05<br>(< 0.05 to < 0.05)                         | < 0.05<br>(< 0.05 to < 0.05)            | -16.0<br>(-19.0 to -13.1)                         | -22.9<br>(-25.8 to -20.4)                           |
| Self-harm by other specified means                                                  | 4.0<br>(3.3 to 4.6)                  | 1.4<br>(1.2 to 1.7)                                  | 0.2<br>(0.1 to 0.2)                     | 13.9<br>(9.7 to 18.1)                             | 4.2<br>(0.4 to 7.5)                                 |
| Interpersonal violence                                                              | 51.9<br>(46.9 to 56.9)               | 8.6†<br>(7.3 to 10.0)                                | 1.0<br>(0.7 to 1.4)                     | 3.0<br>(1.0 to 5.0)                               | -2.4<br>(-4.1 to -0.8)                              |
| Assault by firearm                                                                  | 0.5<br>(0.5 to 0.6)                  | 0.1<br>(0.1 to 0.2)                                  | < 0.05<br>(< 0.05 to < 0.05)            | 10.2<br>(7.2 to 13.2)                             | 1.9<br>(-0.7 to 4.5)                                |
| Assault by sharp object                                                             | 3.7<br>(3.0 to 4.5)                  | 1.0<br>(0.7 to 1.3)                                  | 0.1<br>(0.1 to 0.1)                     | 24.1<br>(20.2 to 27.6)                            | 15.5<br>(12.4 to 18.4)                              |
| Sexual violence                                                                     | 28.9<br>(25.3 to 32.9)               | --                                                   | 0.2<br>(0.1 to 0.3)                     | -6.7<br>(-9.8 to -3.7)                            | -5.0<br>(-8.0 to -1.7)                              |
| Assault by other means                                                              | 18.8<br>(15.4 to 22.8)               | 7.5<br>(6.3 to 8.7)                                  | 0.7<br>(0.4 to 1.0)                     | 4.2<br>(2.1 to 6.2)                               | -3.6<br>(-5.5 to -1.8)                              |
| <b>Forces of nature, conflict and terrorism, and executions and police conflict</b> | <b>3.3</b><br><b>(1.7 to 5.5)</b>    | <b>&lt; 0.05†</b><br><b>(&lt; 0.05 to &lt; 0.05)</b> | <b>0.1</b><br><b>(&lt; 0.05 to 0.2)</b> | <b>-10.0</b><br><b>(-25.8 to -3.9)</b>            | <b>-18.4</b><br><b>(-33.2 to -12.5)</b>             |
| Exposure to forces of nature                                                        | 0.6<br>(0.4 to 1.0)                  | --                                                   | < 0.05<br>(< 0.05 to < 0.05)            | -18.4<br>(-50.5 to 2.4)                           | -26.7<br>(-56.9 to -6.4)                            |
| Conflict and terrorism                                                              | 2.5<br>(1.1 to 4.5)                  | --                                                   | 0.1<br>(< 0.05 to 0.2)                  | -8.2<br>(-12.1 to -3.8)                           | -16.9<br>(-20.6 to -12.7)                           |
| Executions and police conflict                                                      | 0.1<br>(0.1 to 0.2)                  | < 0.05<br>(< 0.05 to < 0.05)                         | < 0.05<br>(< 0.05 to < 0.05)            | 19.4<br>(10.7 to 24.8)                            | 16.9<br>(10.5 to 21.7)                              |
| <b>Impairments</b>                                                                  | --                                   | --                                                   | --                                      | --                                                | --                                                  |
| Anaemia                                                                             | 446.9<br>(422.5 to 471.0)            | --                                                   | 10.7<br>(7.2 to 15.3)                   | 1.3<br>(-5.1 to 8.4)                              | -2.7<br>(-8.7 to 4.0)                               |
| Developmental intellectual disability                                               | 41.0<br>(32.0 to 50.2)               | --                                                   | 4.4<br>(3.2 to 5.9)                     | -4.2<br>(-8.3 to -0.0)                            | -3.4<br>(-7.6 to 1.1)                               |
| Epilepsy                                                                            | 10.7<br>(5.5 to 16.3)                | --                                                   | 3.3<br>(1.6 to 5.8)                     | -5.7<br>(-58.0 to 92.4)                           | -5.9<br>(-58.3 to 94.9)                             |
| Guillain-Barre syndrome                                                             | < 0.05<br>(< 0.05 to < 0.05)         | --                                                   | < 0.05<br>(< 0.05 to < 0.05)            | 6.5<br>(3.0 to 10.5)                              | 0.0<br>(-0.0 to 0.1)                                |
| Hearing loss                                                                        | 492.7<br>(471.2 to 515.6)            | --                                                   | 14.1<br>(9.9 to 19.6)                   | 12.3<br>(9.9 to 14.5)                             | -3.2<br>(-5.1 to -1.4)                              |
| Heart failure                                                                       | 36.1<br>(31.2 to 41.6)               | --                                                   | 3.2<br>(2.3 to 4.4)                     | 17.7<br>(8.7 to 26.5)                             | -4.8<br>(-11.8 to 2.0)                              |
| Infertility                                                                         | 23.2<br>(18.0 to 30.2)               | --                                                   | 0.1<br>(0.1 to 0.3)                     | 0.4<br>(-5.9 to 7.1)                              | 0.2<br>(-5.8 to 6.8)                                |
| Pelvic inflammatory disease                                                         | 0.9<br>(0.8 to 1.1)                  | --                                                   | 0.1<br>(0.1 to 0.2)                     | -8.4<br>(-22.9 to 7.1)                            | -10.1<br>(-24.2 to 5.9)                             |
| Vision loss                                                                         | 329.8<br>(283.2 to 380.1)            | --                                                   | 7.9<br>(5.2 to 11.6)                    | 8.8<br>(2.7 to 14.5)                              | -4.1<br>(-9.0 to 0.6)                               |

We did not calculate incidence for the nine impairments, certain NTDs, and causes with only birth prevalence. Blank cells mean that no estimate is available.

† Incidence for aggregate causes represents the sum of the incidence of the causes below the aggregate.

‡ Incidence estimates for stroke represent first-ever stroke only.

^ Incidence of HIV/AIDS represents new infections of HIV only and does not include new infections of Tuberculosis in HIV positive cases.

SR Table 14: Prevalence, incidence, and YLDs for 2016, percentage change of YLD counts and percentage change of age-standardised YLD rates between 2006 and 2016 by cause and impairments, for all ages, Madagascar.

| Cause                                                                                | Prevalence in thousands (95% UI)          | Incidence in thousands (95% UI)               | YLDs in thousands (95% UI)             |                                                   |                                                     |
|--------------------------------------------------------------------------------------|-------------------------------------------|-----------------------------------------------|----------------------------------------|---------------------------------------------------|-----------------------------------------------------|
|                                                                                      | 2016 counts                               | 2016 counts                                   | 2016 counts                            | Percentage change in counts between 2006 and 2016 | Percentage change in age-standardised rates between |
| <b>All causes</b>                                                                    | <b>24,608.0</b><br>(24,563.6 to 24,648.4) | <b>186,455.6†</b><br>(177,424.3 to 196,357.1) | <b>2,236.5</b><br>(1,649.1 to 2,941.2) | <b>28.4</b><br>(25.2 to 32.3)                     | <b>-3.9</b><br>(-5.7 to -1.8)                       |
| <b>Communicable, maternal, neonatal, and nutritional disorders</b>                   | <b>21,884.5</b><br>(21,531.6 to 22,212.1) | <b>107,439.3†</b><br>(99,235.9 to 116,229.9)  | <b>521.9</b><br>(365.0 to 727.5)       | <b>8.0</b><br>(3.4 to 14.0)                       | <b>-18.1</b><br>(-21.5 to -14.0)                    |
| <b>HIV/AIDS and tuberculosis</b>                                                     | <b>7,108.2</b><br>(5,834.8 to 8,326.1)    | <b>36.3†</b><br>(28.8 to 47.0)                | <b>14.1</b><br>(8.2 to 24.3)           | <b>19.6</b><br>(-3.0 to 49.2)                     | <b>-12.0</b><br>(-28.4 to 9.2)                      |
| Tuberculosis                                                                         | 6,236.5<br>(5,016.4 to 7,659.3)           | 33.1†<br>(26.2 to 42.5)                       | 8.2<br>(4.9 to 12.2)                   | 16.2<br>(-0.8 to 38.6)                            | -14.3<br>(-25.1 to -1.8)                            |
| Drug-susceptible tuberculosis                                                        | 26.4<br>(20.7 to 33.9)                    | 32.8<br>(26.0 to 42.2)                        | 8.2<br>(4.9 to 12.1)                   | 16.1<br>(-0.8 to 38.4)                            | -14.4<br>(-25.3 to -1.6)                            |
| Multidrug-resistant tuberculosis without extensive drug resistance                   | 0.2<br>(0.1 to 0.6)                       | 0.3<br>(0.1 to 0.7)                           | 0.1<br>(< 0.05 to 0.2)                 | 30.2<br>(-57.2 to 247.4)                          | -4.0<br>(-68.5 to 159.3)                            |
| Extensively drug-resistant tuberculosis                                              | < 0.05<br>(< 0.05 to < 0.05)              | < 0.05<br>(< 0.05 to < 0.05)                  | < 0.05<br>(< 0.05 to < 0.05)           | 296.9<br>(30.5 to 958.2)                          | 192.6<br>(-4.2 to 689.8)                            |
| Latent tuberculosis infection                                                        | 6,209.9<br>(4,994.1 to 7,632.4)           | --                                            | --                                     | --                                                | --                                                  |
| HIV/AIDS                                                                             | 37.9<br>(15.0 to 86.8)                    | 3.2^<br>(1.0 to 9.2)                          | 5.8<br>(1.8 to 14.4)                   | 24.7<br>(-15.5 to 93.8)                           | -8.7<br>(-39.4 to 43.9)                             |
| Drug-susceptible HIV/AIDS - Tuberculosis                                             | 0.1<br>(0.1 to 0.2)                       | 0.2<br>(0.1 to 0.3)                           | 0.1<br>(< 0.05 to 0.1)                 | 4.9<br>(-7.8 to 19.9)                             | -21.7<br>(-31.2 to -10.5)                           |
| Multidrug-resistant HIV/AIDS - Tuberculosis without extensive drug resistance        | < 0.05<br>(< 0.05 to < 0.05)              | < 0.05<br>(< 0.05 to < 0.05)                  | < 0.05<br>(< 0.05 to < 0.05)           | 17.5<br>(-61.6 to 214.2)                          | -12.2<br>(-71.4 to 134.7)                           |
| Extensively drug-resistant HIV/AIDS - Tuberculosis                                   | < 0.05<br>(< 0.05 to < 0.05)              | < 0.05<br>(< 0.05 to < 0.05)                  | < 0.05<br>(< 0.05 to < 0.05)           | 258.1<br>(16.9 to 857.8)                          | 167.4<br>(-12.7 to 615.2)                           |
| HIV/AIDS resulting in other diseases                                                 | 37.8<br>(14.9 to 86.7)                    | 3.2<br>(1.0 to 9.2)                           | 5.8<br>(1.8 to 14.3)                   | 24.9<br>(-15.8 to 95.3)                           | -8.6<br>(-39.5 to 44.8)                             |
| <b>Diarrhoea, lower respiratory infections, and other common infectious diseases</b> | <b>1,840.5</b><br>(1,759.6 to 1,949.7)    | <b>90,546.9†</b><br>(82,254.5 to 99,227.3)    | <b>108.0</b><br>(76.2 to 145.3)        | <b>30.6</b><br>(25.8 to 35.8)                     | <b>-1.5</b><br>(-4.6 to 1.5)                        |
| Diarrhoeal diseases                                                                  | 418.8<br>(386.1 to 452.4)                 | 27,945.9<br>(25,744.5 to 30,197.8)            | 47.4<br>(32.9 to 66.0)                 | 28.6<br>(20.4 to 37.6)                            | -3.4<br>(-8.3 to 1.8)                               |
| Intestinal infectious diseases                                                       | 1.7<br>(1.3 to 2.2)                       | 28.9†<br>(22.4 to 36.6)                       | 0.3<br>(0.2 to 0.4)                    | 2.5<br>(-17.0 to 26.7)                            | -20.3<br>(-32.3 to -5.6)                            |
| Typhoid fever                                                                        | 1.7<br>(1.3 to 2.2)                       | 26.5<br>(20.6 to 34.1)                        | 0.3<br>(0.2 to 0.4)                    | 3.2<br>(-16.8 to 29.6)                            | -20.0<br>(-32.4 to -4.3)                            |
| Paratyphoid fever                                                                    | 0.1<br>(0.1 to 0.1)                       | 2.4<br>(1.6 to 3.3)                           | < 0.05<br>(< 0.05 to < 0.05)           | 20.3<br>(-10.5 to 57.6)                           | -7.3<br>(-27.5 to 16.3)                             |
| Other intestinal infectious diseases                                                 | --                                        | --                                            | < 0.05<br>(< 0.05 to < 0.05)           | -31.2<br>(-50.6 to -1.8)                          | -42.5<br>(-55.4 to -24.6)                           |
| Lower respiratory infections                                                         | 41.7<br>(37.8 to 45.8)                    | 1,781.0<br>(1,603.2 to 1,978.0)               | 2.5<br>(1.6 to 3.7)                    | 27.4<br>(12.5 to 44.6)                            | -5.3<br>(-14.2 to 5.5)                              |
| Upper respiratory infections                                                         | 768.3<br>(668.1 to 878.3)                 | 57,655.5<br>(49,963.6 to 66,280.4)            | 19.2<br>(11.3 to 30.1)                 | 39.4<br>(29.8 to 50.3)                            | 4.2<br>(-1.8 to 11.3)                               |
| Otitis media                                                                         | 495.5<br>(438.8 to 552.9)                 | 2,185.4<br>(1,696.4 to 2,798.0)               | 16.2<br>(10.0 to 24.4)                 | 25.8<br>(16.4 to 35.5)                            | -1.2<br>(-8.0 to 5.7)                               |
| Meningitis                                                                           | 134.3<br>(112.0 to 160.2)                 | 27.7<br>(23.8 to 32.8)                        | 13.7<br>(9.7 to 18.0)                  | 32.1<br>(22.0 to 43.7)                            | -1.3<br>(-7.8 to 6.1)                               |
| Pneumococcal meningitis                                                              | 47.0<br>(38.9 to 56.7)                    | 4.8<br>(3.7 to 6.1)                           | 5.3<br>(3.7 to 7.2)                    | 15.6<br>(-2.2 to 36.4)                            | -15.5<br>(-27.2 to -3.0)                            |
| H influenzae type B meningitis                                                       | 21.2<br>(16.7 to 27.2)                    | 3.7<br>(2.7 to 5.2)                           | 2.8<br>(1.9 to 3.8)                    | 14.7<br>(-1.5 to 32.2)                            | -13.9<br>(-24.7 to -2.3)                            |
| Meningococcal infection                                                              | 10.1<br>(7.2 to 14.1)                     | 3.1<br>(2.3 to 4.2)                           | 1.0<br>(0.7 to 1.4)                    | 36.3<br>(28.4 to 45.4)                            | 2.7<br>(-3.5 to 10.0)                               |
| Other meningitis                                                                     | 56.0<br>(40.4 to 74.1)                    | 16.1<br>(13.2 to 19.5)                        | 4.6<br>(3.1 to 6.2)                    | 76.3<br>(52.3 to 101.9)                           | 34.0<br>(17.7 to 52.7)                              |
| Encephalitis                                                                         | 65.7<br>(42.6 to 99.5)                    | 27.0<br>(23.3 to 30.7)                        | 7.1<br>(5.0 to 9.4)                    | 35.9<br>(19.9 to 53.9)                            | 0.1<br>(-10.3 to 11.3)                              |
| Diphtheria                                                                           | < 0.05<br>(< 0.05 to < 0.05)              | < 0.05<br>(< 0.05 to < 0.05)                  | < 0.05<br>(< 0.05 to < 0.05)           | -25.3<br>(-66.9 to 74.1)                          | -39.7<br>(-68.7 to 17.4)                            |
| Whooping cough                                                                       | 10.6<br>(8.3 to 13.4)                     | 77.6<br>(60.5 to 97.6)                        | 0.5<br>(0.3 to 0.8)                    | -12.8<br>(-27.7 to 6.2)                           | -27.2<br>(-39.7 to -10.8)                           |
| Tetanus                                                                              | 0.3<br>(0.3 to 0.4)                       | 0.5<br>(0.2 to 0.9)                           | < 0.05<br>(< 0.05 to < 0.05)           | 15.3<br>(-12.9 to 51.4)                           | -12.1<br>(-27.3 to 5.2)                             |
| Measles                                                                              | 3.7<br>(1.3 to 8.1)                       | 135.0<br>(48.0 to 294.2)                      | 0.3<br>(0.1 to 0.8)                    | 72.1<br>(-1.9 to 209.8)                           | 43.3<br>(-18.1 to 156.5)                            |
| Varicella and herpes zoster                                                          | 23.1<br>(21.6 to 24.8)                    | 682.5<br>(640.7 to 725.0)                     | 0.7<br>(0.4 to 1.1)                    | 35.4<br>(16.9 to 57.8)                            | 0.4<br>(-10.3 to 12.4)                              |
| <b>Neglected tropical diseases and malaria</b>                                       | <b>13,518.1</b><br>(12,668.1 to 14,421.5) | <b>3,431.9†</b><br>(2,832.1 to 4,081.0)       | <b>105.0</b><br>(68.7 to 157.1)        | <b>-23.3</b><br>(-28.8 to -16.6)                  | <b>-40.9</b><br>(-45.5 to -35.5)                    |
| Malaria                                                                              | 1,224.2<br>(1,058.1 to 1,431.4)           | 1,986.1<br>(1,473.7 to 2,671.4)               | 17.3<br>(12.9 to 22.1)                 | -16.0<br>(-27.4 to -1.2)                          | -31.9<br>(-39.5 to -22.6)                           |
| Chagas disease                                                                       | --                                        | --                                            | --                                     | --                                                | --                                                  |
| Leishmaniasis                                                                        | --                                        | --                                            | --                                     | --                                                | --                                                  |
| Visceral leishmaniasis                                                               | --                                        | --                                            | --                                     | --                                                | --                                                  |
| Cutaneous and mucocutaneous leishmaniasis                                            | --                                        | --                                            | --                                     | --                                                | --                                                  |
| African trypanosomiasis                                                              | --                                        | --                                            | --                                     | --                                                | --                                                  |
| Schistosomiasis                                                                      | 3,024.9<br>(2,401.2 to 3,664.6)           | 1,091.1<br>(901.2 to 1,295.6)                 | 22.8<br>(10.5 to 43.7)                 | -11.8<br>(-14.7 to -8.6)                          | -35.5<br>(-37.5 to -33.0)                           |
| Cysticercosis                                                                        | 14.1<br>(11.7 to 16.4)                    | --                                            | 2.6<br>(1.5 to 3.9)                    | 33.7<br>(11.1 to 61.0)                            | -3.8<br>(-18.1 to 12.8)                             |
| Cystic echinococcosis                                                                | 8.8<br>(2.0 to 34.5)                      | 1.9<br>(0.4 to 7.4)                           | 0.8<br>(0.2 to 3.2)                    | -6.3<br>(-86.9 to 529.2)                          | -30.9<br>(-89.4 to 329.0)                           |
| Lymphatic filariasis                                                                 | 544.7<br>(450.9 to 655.8)                 | 208.3<br>(179.9 to 238.8)                     | 23.4<br>(11.8 to 38.4)                 | -5.8<br>(-28.4 to 13.1)                           | -30.6<br>(-47.1 to -16.8)                           |
| Onchocerciasis                                                                       | --                                        | --                                            | --                                     | --                                                | --                                                  |
| Trachoma                                                                             | --                                        | --                                            | --                                     | --                                                | --                                                  |
| Dengue                                                                               | 8.6<br>(4.0 to 15.5)                      | 143.8<br>(75.2 to 242.2)                      | 1.4<br>(0.5 to 2.9)                    | 185.8<br>(93.5 to 583.2)                          | 117.1<br>(54.1 to 420.0)                            |
| Yellow fever                                                                         | --                                        | --                                            | --                                     | --                                                | --                                                  |
| Rabies                                                                               | < 0.05<br>(< 0.05 to < 0.05)              | 0.2<br>(0.1 to 0.3)                           | < 0.05<br>(< 0.05 to < 0.05)           | 41.0<br>(-26.5 to 175.3)                          | 8.4<br>(-38.7 to 81.3)                              |
| Intestinal nematode infections                                                       | 10,914.9<br>(9,890.2 to 12,030.9)         | --                                            | 28.0<br>(16.0 to 46.2)                 | -48.3<br>(-51.1 to -45.4)                         | -60.9<br>(-63.4 to -58.4)                           |
| Ascariasis                                                                           | 5,899.2<br>(4,939.8 to 7,001.3)           | --                                            | 12.6<br>(7.1 to 21.1)                  | -47.4<br>(-51.5 to -43.5)                         | -60.0<br>(-63.8 to -56.5)                           |



| Cause                                                                   | Prevalence in thousands (95% UI)                 | Incidence in thousands (95% UI)                   | YLDs in thousands (95% UI)                    |                                                   |                                                     |
|-------------------------------------------------------------------------|--------------------------------------------------|---------------------------------------------------|-----------------------------------------------|---------------------------------------------------|-----------------------------------------------------|
|                                                                         | 2016 counts                                      | 2016 counts                                       | 2016 counts                                   | Percentage change in counts between 2006 and 2016 | Percentage change in age-standardised rates between |
| Trichuriasis                                                            | 5,444.0<br>(4,496.4 to 6,539.5)                  | --                                                | 9.1<br>(5.2 to 15.1)                          | -49.3<br>(-53.6 to -45.1)                         | -61.5<br>(-65.4 to -57.8)                           |
| Hookworm disease                                                        | 1,855.5<br>(1,497.0 to 2,332.4)                  | --                                                | 6.3<br>(3.7 to 10.0)                          | -48.5<br>(-54.5 to -41.7)                         | -61.7<br>(-66.6 to -56.0)                           |
| Food-borne trematodiasis                                                | --                                               | --                                                | --                                            | --                                                | --                                                  |
| Leprosy                                                                 | 10.9<br>(10.3 to 11.5)                           | 0.6<br>(0.5 to 0.6)                               | 0.7<br>(0.5 to 1.0)                           | -1.0<br>(-11.7 to 10.5)                           | -26.1<br>(-32.2 to -19.6)                           |
| Ebola virus disease                                                     | --                                               | --                                                | --                                            | --                                                | --                                                  |
| Zika virus disease                                                      | --                                               | --                                                | --                                            | --                                                | --                                                  |
| Guinea worm disease                                                     | --                                               | --                                                | --                                            | --                                                | --                                                  |
| Other neglected tropical diseases                                       | 296.9<br>(283.0 to 311.0)                        | --                                                | 8.1<br>(5.2 to 11.9)                          | 7.4<br>(-1.9 to 17.0)                             | -13.5<br>(-20.9 to -6.2)                            |
| <b>Maternal disorders</b>                                               | <b>89.7</b><br><b>(70.7 to 107.8)</b>            | <b>950.3†</b><br><b>(700.3 to 1,323.2)</b>        | <b>13.2</b><br><b>(8.7 to 18.6)</b>           | <b>16.2</b><br><b>(-0.8 to 36.2)</b>              | <b>-16.5</b><br><b>(-28.3 to -2.2)</b>              |
| Maternal haemorrhage                                                    | 7.8<br>(6.0 to 10.1)                             | 79.8<br>(52.1 to 117.0)                           | 0.4<br>(0.2 to 0.7)                           | 21.3<br>(-22.8 to 85.8)                           | -13.3<br>(-44.1 to 31.4)                            |
| Maternal sepsis and other pregnancy related infections                  | 11.4<br>(9.4 to 13.9)                            | 42.6<br>(31.9 to 60.1)                            | 0.2<br>(0.1 to 0.4)                           | 22.5<br>(-37.7 to 134.3)                          | -12.0<br>(-52.8 to 60.5)                            |
| Maternal hypertensive disorders                                         | 43.9<br>(28.0 to 61.8)                           | 188.8<br>(148.9 to 228.0)                         | 2.1<br>(1.1 to 3.5)                           | 27.1<br>(-21.5 to 111.9)                          | -8.8<br>(-43.9 to 52.8)                             |
| Maternal obstructed labour and uterine rupture                          | 24.3<br>(17.5 to 32.4)                           | 67.6<br>(47.6 to 93.9)                            | 7.9<br>(4.7 to 12.2)                          | 14.3<br>(-2.9 to 36.9)                            | -17.4<br>(-29.4 to -1.4)                            |
| Maternal abortion, miscarriage, and ectopic pregnancy                   | 4.7<br>(2.4 to 8.3)                              | 571.5<br>(323.8 to 956.0)                         | 0.5<br>(0.2 to 1.0)                           | 20.3<br>(-27.6 to 111.0)                          | -14.1<br>(-48.3 to 48.2)                            |
| Other maternal disorders                                                | --                                               | --                                                | 2.0<br>(1.3 to 2.9)                           | 11.2<br>(-4.9 to 30.3)                            | -20.3<br>(-31.4 to -6.7)                            |
| <b>Neonatal disorders</b>                                               | <b>332.8</b><br><b>(267.7 to 425.9)</b>          | --                                                | <b>46.7</b><br><b>(24.5 to 85.8)</b>          | <b>20.9</b><br><b>(0.4 to 47.5)</b>               | <b>-5.2</b><br><b>(-21.6 to 16.9)</b>               |
| Neonatal preterm birth complications                                    | 198.7<br>(147.0 to 277.9)                        | --                                                | 13.2<br>(8.4 to 20.4)                         | 15.0<br>(-10.8 to 47.4)                           | -10.2<br>(-29.6 to 14.5)                            |
| Neonatal encephalopathy due to birth asphyxia and trauma                | 123.0<br>(64.0 to 221.8)                         | --                                                | 11.0<br>(2.2 to 35.4)                         | 46.6<br>(-8.5 to 228.8)                           | 13.5<br>(-31.6 to 158.5)                            |
| Neonatal sepsis and other neonatal infections                           | 43.8<br>(14.0 to 102.2)                          | --                                                | 16.6<br>(3.7 to 45.1)                         | 13.0<br>(-22.2 to 53.8)                           | -12.1<br>(-42.1 to 21.9)                            |
| Hemolytic disease and other neonatal jaundice                           | 5.9<br>(5.0 to 6.9)                              | --                                                | 2.0<br>(1.5 to 2.6)                           | 31.4<br>(14.5 to 50.9)                            | 0.8<br>(-10.0 to 13.1)                              |
| Other neonatal disorders                                                | --                                               | --                                                | 3.9<br>(2.2 to 6.7)                           | 14.0<br>(-4.3 to 37.4)                            | -4.8<br>(-20.2 to 15.0)                             |
| <b>Nutritional deficiencies</b>                                         | <b>10,319.7</b><br><b>(9,756.8 to 10,989.7)</b>  | <b>7,126.6†</b><br><b>(5,861.9 to 8,923.9)</b>    | <b>209.4</b><br><b>(140.2 to 301.0)</b>       | <b>14.6</b><br><b>(6.1 to 24.0)</b>               | <b>-10.0</b><br><b>(-15.1 to -4.3)</b>              |
| Protein-energy malnutrition                                             | 942.5<br>(713.4 to 1,231.5)                      | 758.9<br>(588.6 to 971.2)                         | 48.9<br>(28.9 to 74.2)                        | 16.6<br>(-12.8 to 54.1)                           | -2.5<br>(-27.2 to 29.6)                             |
| Iodine deficiency                                                       | 714.4<br>(628.7 to 815.0)                        | 26.3<br>(23.2 to 30.0)                            | 20.7<br>(14.0 to 29.2)                        | 50.7<br>(36.8 to 65.5)                            | 10.5<br>(1.2 to 20.2)                               |
| Vitamin A deficiency                                                    | 5,650.1<br>(4,844.1 to 6,657.4)                  | 6,341.4<br>(5,103.9 to 8,178.9)                   | 1.0<br>(0.5 to 1.6)                           | 20.9<br>(0.6 to 44.5)                             | -5.9<br>(-19.7 to 9.7)                              |
| Iron-deficiency anaemia                                                 | 5,168.6<br>(4,957.7 to 5,395.4)                  | --                                                | 137.2<br>(90.8 to 201.6)                      | 9.9<br>(3.6 to 15.8)                              | -14.8<br>(-19.0 to -10.8)                           |
| Other nutritional deficiencies                                          | --                                               | --                                                | 1.7<br>(1.0 to 2.5)                           | 16.2<br>(-14.3 to 56.8)                           | -2.7<br>(-28.5 to 32.0)                             |
| <b>Other communicable, maternal, neonatal, and nutritional diseases</b> | <b>8,076.9</b><br><b>(7,611.7 to 8,555.6)</b>    | <b>5,347.4</b><br><b>(4,405.5 to 6,606.9)</b>     | <b>25.6</b><br><b>(15.6 to 41.1)</b>          | <b>33.0</b><br><b>(26.1 to 40.6)</b>              | <b>-0.5</b><br><b>(-6.0 to 5.3)</b>                 |
| Sexually transmitted diseases excluding HIV                             | 6,487.4<br>(6,024.2 to 6,920.1)                  | 4,497.1<br>(3,552.3 to 5,736.2)                   | 18.1<br>(10.5 to 30.8)                        | 41.7<br>(31.4 to 52.6)                            | 2.5<br>(-4.7 to 10.1)                               |
| Syphilis                                                                | 649.6<br>(551.4 to 756.9)                        | 453.8<br>(370.5 to 548.9)                         | 1.0<br>(0.7 to 1.3)                           | 43.1<br>(21.7 to 67.8)                            | 1.2<br>(-14.7 to 19.5)                              |
| Chlamydial infection                                                    | 339.6<br>(256.4 to 437.2)                        | 299.7<br>(234.6 to 383.1)                         | 2.2<br>(1.3 to 3.7)                           | 45.9<br>(27.0 to 67.1)                            | 6.5<br>(-7.4 to 21.5)                               |
| Gonococcal infection                                                    | 538.7<br>(299.0 to 864.2)                        | 1,887.2<br>(997.7 to 3,108.1)                     | 6.2<br>(2.6 to 12.8)                          | 38.8<br>(23.4 to 58.8)                            | 0.6<br>(-10.6 to 15.0)                              |
| Trichomoniasis                                                          | 1,121.0<br>(915.9 to 1,356.2)                    | 1,064.6<br>(850.3 to 1,333.1)                     | 1.6<br>(0.6 to 3.3)                           | 39.5<br>(30.9 to 49.0)                            | 0.2<br>(-5.4 to 6.4)                                |
| Genital herpes                                                          | 4,895.6<br>(4,182.9 to 5,716.9)                  | 539.7<br>(440.9 to 663.7)                         | 1.3<br>(0.4 to 3.0)                           | 39.9<br>(28.6 to 53.1)                            | 0.4<br>(-6.2 to 8.6)                                |
| Other sexually transmitted diseases                                     | 185.9<br>(149.3 to 233.3)                        | 252.1<br>(209.4 to 304.7)                         | 5.8<br>(3.5 to 9.5)                           | 44.0<br>(31.1 to 59.0)                            | 4.8<br>(-4.5 to 15.7)                               |
| Hepatitis                                                               | 2,074.4<br>(1,672.2 to 2,533.1)                  | 850.3<br>(607.2 to 1,138.2)                       | 1.1<br>(0.6 to 1.7)                           | 29.8<br>(-2.0 to 71.3)                            | -3.7<br>(-22.6 to 18.7)                             |
| Acute hepatitis A                                                       | 14.5<br>(3.1 to 30.8)                            | 188.0<br>(41.0 to 399.8)                          | 0.2<br>(0.1 to 0.4)                           | 31.6<br>(-65.4 to 416.5)                          | -0.5<br>(-65.0 to 199.2)                            |
| Hepatitis B                                                             | 1,737.4<br>(1,350.4 to 2,191.2)                  | 591.6<br>(433.4 to 805.9)                         | 0.8<br>(0.4 to 1.2)                           | 28.9<br>(0.9 to 62.1)                             | -4.6<br>(-23.7 to 16.4)                             |
| Hepatitis C                                                             | 319.1<br>(281.4 to 357.2)                        | 27.3<br>(24.9 to 29.9)                            | < 0.05<br>(< 0.05 to < 0.05)                  | 33.0<br>(31.7 to 34.3)                            | 2.3<br>(1.9 to 2.7)                                 |
| Acute hepatitis E                                                       | 3.3<br>(2.6 to 4.6)                              | 43.4<br>(33.9 to 59.6)                            | 0.1<br>(< 0.05 to 0.1)                        | 33.3<br>(-5.3 to 86.4)                            | -1.3<br>(-23.5 to 26.6)                             |
| Other infectious diseases                                               | 219.4<br>(209.9 to 229.5)                        | < 0.05<br>(< 0.05 to < 0.05)                      | 6.4<br>(4.2 to 9.4)                           | 13.8<br>(4.0 to 24.2)                             | -12.0<br>(-18.8 to -5.1)                            |
| <b>Non-communicable diseases</b>                                        | <b>22,766.2</b><br><b>(22,592.6 to 22,914.1)</b> | <b>77,262.6†</b><br><b>(73,415.9 to 81,224.0)</b> | <b>1,592.9</b><br><b>(1,160.7 to 2,070.9)</b> | <b>36.0</b><br><b>(31.5 to 40.7)</b>              | <b>-0.5</b><br><b>(-2.9 to 2.0)</b>                 |
| <b>Neoplasms</b>                                                        | <b>35.6</b><br><b>(32.7 to 41.3)</b>             | <b>16.0</b><br><b>(13.2 to 17.7)</b>              | <b>5.4</b><br><b>(3.7 to 7.3)</b>             | <b>40.5</b><br><b>(32.2 to 50.2)</b>              | <b>0.5</b><br><b>(-5.1 to 6.4)</b>                  |
| Lip and oral cavity cancer                                              | 1.2<br>(1.1 to 1.3)                              | 0.3<br>(0.3 to 0.4)                               | 0.1<br>(0.1 to 0.2)                           | 47.5<br>(31.1 to 65.0)                            | 3.3<br>(-8.5 to 16.7)                               |
| Nasopharynx cancer                                                      | 0.6<br>(0.5 to 0.8)                              | 0.2<br>(0.1 to 0.2)                               | 0.1<br>(0.1 to 0.1)                           | 43.3<br>(21.9 to 68.0)                            | -0.2<br>(-14.9 to 16.0)                             |
| Other pharynx cancer                                                    | 0.2<br>(0.2 to 0.3)                              | 0.1<br>(0.1 to 0.1)                               | < 0.05<br>(< 0.05 to 0.1)                     | 39.0<br>(26.0 to 53.7)                            | -2.6<br>(-12.0 to 8.3)                              |
| Oesophageal cancer                                                      | 0.7<br>(0.6 to 0.8)                              | 0.6<br>(0.6 to 0.7)                               | 0.2<br>(0.1 to 0.2)                           | 32.0<br>(9.1 to 58.9)                             | -6.9<br>(-24.3 to 12.4)                             |
| Stomach cancer                                                          | 0.9<br>(0.8 to 1.0)                              | 0.6<br>(0.5 to 0.7)                               | 0.2<br>(0.1 to 0.2)                           | 25.6<br>(12.2 to 41.1)                            | -11.4<br>(-22.5 to 1.9)                             |
| Colon and rectum cancer                                                 | 2.4<br>(2.0 to 2.8)                              | 0.9<br>(0.8 to 1.1)                               | 0.3<br>(0.2 to 0.4)                           | 46.6<br>(24.5 to 68.9)                            | 4.0<br>(-11.8 to 20.9)                              |
| Liver cancer                                                            | 0.3<br>(0.2 to 0.4)                              | 0.7<br>(0.6 to 0.9)                               | 0.2<br>(0.1 to 0.2)                           | 39.6<br>(24.3 to 57.7)                            | -1.4<br>(-12.1 to 11.1)                             |
| Liver cancer due to hepatitis B                                         | 0.2<br>(0.2 to 0.3)                              | 0.2<br>(0.2 to 0.3)                               | 0.1<br>(< 0.05 to 0.1)                        | 39.2<br>(22.0 to 59.1)                            | -1.8<br>(-13.3 to 11.7)                             |



| Cause                                              | Prevalence in thousands (95% UI)              | Incidence in thousands (95% UI)          | YLDs in thousands (95% UI)            |                                                   |                                                     |
|----------------------------------------------------|-----------------------------------------------|------------------------------------------|---------------------------------------|---------------------------------------------------|-----------------------------------------------------|
|                                                    | 2016 counts                                   | 2016 counts                              | 2016 counts                           | Percentage change in counts between 2006 and 2016 | Percentage change in age-standardised rates between |
| Liver cancer due to hepatitis C                    | 0.2<br>(0.1 to 0.3)                           | 0.2<br>(0.1 to 0.3)                      | < 0.05<br>(< 0.05 to 0.1)             | 40.9<br>(23.5 to 61.3)                            | -0.9<br>(-12.6 to 13.6)                             |
| Liver cancer due to alcohol use                    | 0.1<br>(0.1 to 0.1)                           | 0.1<br>(0.1 to 0.1)                      | < 0.05<br>(< 0.05 to < 0.05)          | 45.2<br>(28.0 to 66.6)                            | 2.6<br>(-10.6 to 17.9)                              |
| Liver cancer due to other causes                   | 0.2<br>(0.1 to 0.2)                           | 0.2<br>(0.1 to 0.2)                      | < 0.05<br>(< 0.05 to 0.1)             | 36.7<br>(20.3 to 55.1)                            | -3.3<br>(-14.2 to 8.9)                              |
| Gallbladder and biliary tract cancer               | 0.1<br>(0.1 to 0.1)                           | 0.1<br>(0.1 to 0.1)                      | < 0.05<br>(< 0.05 to < 0.05)          | 34.2<br>(22.4 to 47.6)                            | -5.8<br>(-13.7 to 2.9)                              |
| Pancreatic cancer                                  | 0.2<br>(0.2 to 0.3)                           | 0.3<br>(0.3 to 0.4)                      | 0.1<br>(< 0.05 to 0.1)                | 42.8<br>(32.1 to 54.7)                            | 0.9<br>(-7.2 to 9.3)                                |
| Larynx cancer                                      | 0.3<br>(0.3 to 0.4)                           | 0.1<br>(0.1 to 0.1)                      | < 0.05<br>(< 0.05 to 0.1)             | 39.3<br>(22.6 to 56.7)                            | -3.4<br>(-14.1 to 8.0)                              |
| Tracheal, bronchus, and lung cancer                | 0.5<br>(0.4 to 0.5)                           | 0.4<br>(0.4 to 0.5)                      | 0.1<br>(0.1 to 0.1)                   | 45.3<br>(21.8 to 73.3)                            | 3.0<br>(-16.4 to 25.3)                              |
| Malignant skin melanoma                            | 0.5<br>(0.4 to 0.6)                           | 0.1<br>(0.1 to 0.2)                      | < 0.05<br>(< 0.05 to 0.1)             | 50.0<br>(26.9 to 78.3)                            | 5.2<br>(-10.9 to 24.8)                              |
| Non-melanoma skin cancer                           | 0.1<br>(0.1 to 0.1)                           | 0.7<br>(0.4 to 1.0)                      | < 0.05<br>(< 0.05 to < 0.05)          | 50.8<br>(22.0 to 86.6)                            | 4.4<br>(-15.6 to 30.9)                              |
| Non-melanoma skin cancer (squamous-cell carcinoma) | 0.1<br>(< 0.05 to 0.1)                        | 0.2<br>(0.1 to 0.2)                      | < 0.05<br>(< 0.05 to < 0.05)          | 51.2<br>(16.9 to 94.9)                            | 4.4<br>(-19.2 to 36.8)                              |
| Non-melanoma skin cancer (basal-cell carcinoma)    | 0.1<br>(< 0.05 to 0.1)                        | 0.5<br>(0.3 to 0.8)                      | < 0.05<br>(< 0.05 to < 0.05)          | 48.9<br>(30.8 to 65.4)                            | 4.7<br>(-5.8 to 16.1)                               |
| Breast cancer                                      | 5.1<br>(3.9 to 6.1)                           | 1.2<br>(1.0 to 1.5)                      | 0.6<br>(0.4 to 0.8)                   | 49.6<br>(16.4 to 90.2)                            | 5.9<br>(-16.1 to 31.2)                              |
| Cervical cancer                                    | 10.6<br>(6.7 to 13.8)                         | 3.0<br>(1.9 to 3.8)                      | 1.1<br>(0.6 to 1.6)                   | 36.2<br>(8.7 to 68.0)                             | -3.9<br>(-22.7 to 18.0)                             |
| Uterine cancer                                     | 1.0<br>(0.8 to 1.2)                           | 0.2<br>(0.2 to 0.3)                      | 0.1<br>(0.1 to 0.1)                   | 43.6<br>(16.0 to 79.9)                            | 1.1<br>(-17.8 to 26.3)                              |
| Ovarian cancer                                     | 1.4<br>(0.9 to 1.6)                           | 0.5<br>(0.3 to 0.6)                      | 0.2<br>(0.1 to 0.3)                   | 51.7<br>(17.6 to 101.8)                           | 7.1<br>(-19.8 to 45.0)                              |
| Prostate cancer                                    | 4.5<br>(1.6 to 6.2)                           | 1.4<br>(0.6 to 1.9)                      | 0.7<br>(0.2 to 1.1)                   | 47.0<br>(17.9 to 79.1)                            | 3.6<br>(-14.0 to 23.4)                              |
| Testicular cancer                                  | 0.1<br>(0.1 to 0.1)                           | < 0.05<br>(< 0.05 to < 0.05)             | < 0.05<br>(< 0.05 to < 0.05)          | 33.9<br>(8.0 to 66.8)                             | -4.8<br>(-23.7 to 18.5)                             |
| Kidney cancer                                      | 1.1<br>(0.8 to 1.4)                           | 0.3<br>(0.2 to 0.3)                      | 0.1<br>(0.1 to 0.1)                   | 40.6<br>(-4.2 to 104.5)                           | 8.2<br>(-10.1 to 29.5)                              |
| Bladder cancer                                     | 0.8<br>(0.7 to 0.8)                           | 0.2<br>(0.2 to 0.3)                      | 0.1<br>(0.1 to 0.1)                   | 42.3<br>(27.8 to 59.2)                            | 0.5<br>(-10.2 to 13.4)                              |
| Brain and nervous system cancer                    | 0.7<br>(0.6 to 0.8)                           | 0.3<br>(0.3 to 0.4)                      | 0.1<br>(0.1 to 0.1)                   | 42.4<br>(27.4 to 60.0)                            | 6.2<br>(-4.4 to 21.6)                               |
| Thyroid cancer                                     | 1.0<br>(0.5 to 1.2)                           | 0.2<br>(0.1 to 0.3)                      | 0.1<br>(< 0.05 to 0.1)                | 44.1<br>(14.6 to 77.7)                            | -0.2<br>(-19.6 to 21.0)                             |
| Mesothelioma                                       | < 0.05<br>(< 0.05 to < 0.05)                  | < 0.05<br>(< 0.05 to < 0.05)             | < 0.05<br>(< 0.05 to < 0.05)          | 36.2<br>(22.6 to 53.1)                            | -4.1<br>(-14.3 to 7.8)                              |
| Hodgkin lymphoma                                   | 0.4<br>(0.2 to 0.6)                           | 0.1<br>(0.1 to 0.2)                      | 0.1<br>(< 0.05 to 0.1)                | 25.6<br>(11.5 to 45.3)                            | -6.1<br>(-13.5 to 4.9)                              |
| Non-Hodgkin's lymphoma                             | 3.1<br>(2.0 to 3.9)                           | 1.0<br>(0.7 to 1.2)                      | 0.3<br>(0.2 to 0.5)                   | 34.6<br>(10.5 to 61.5)                            | 2.5<br>(-9.2 to 16.1)                               |
| Multiple myeloma                                   | 0.3<br>(0.2 to 0.3)                           | 0.2<br>(0.1 to 0.2)                      | 0.1<br>(< 0.05 to 0.1)                | 49.0<br>(34.7 to 65.2)                            | 4.7<br>(-5.1 to 15.8)                               |
| Leukaemia                                          | 1.3<br>(1.1 to 1.5)                           | 0.4<br>(0.3 to 0.4)                      | 0.2<br>(0.1 to 0.2)                   | 31.8<br>(18.8 to 45.6)                            | -2.0<br>(-11.5 to 7.2)                              |
| Acute lymphoid leukaemia                           | 0.4<br>(0.3 to 0.4)                           | 0.1<br>(0.1 to 0.1)                      | < 0.05<br>(< 0.05 to 0.1)             | 28.5<br>(9.1 to 51.2)                             | -1.2<br>(-13.4 to 12.1)                             |
| Chronic lymphoid leukaemia                         | 0.1<br>(0.1 to 0.2)                           | < 0.05<br>(< 0.05 to < 0.05)             | < 0.05<br>(< 0.05 to < 0.05)          | 40.0<br>(19.1 to 65.5)                            | 1.5<br>(-14.7 to 20.4)                              |
| Acute myeloid leukaemia                            | 0.1<br>(0.1 to 0.1)                           | 0.1<br>(0.1 to 0.1)                      | < 0.05<br>(< 0.05 to < 0.05)          | 37.4<br>(17.9 to 57.6)                            | 2.9<br>(-9.0 to 14.9)                               |
| Chronic myeloid leukaemia                          | 0.1<br>(0.1 to 0.2)                           | < 0.05<br>(< 0.05 to 0.1)                | < 0.05<br>(< 0.05 to < 0.05)          | 31.5<br>(11.5 to 55.8)                            | -5.5<br>(-18.8 to 10.1)                             |
| Other leukaemia                                    | 0.5<br>(0.4 to 0.6)                           | 0.1<br>(0.1 to 0.1)                      | 0.1<br>(< 0.05 to 0.1)                | 29.9<br>(10.7 to 52.5)                            | -4.2<br>(-17.1 to 10.0)                             |
| Other neoplasms                                    | 4.5<br>(4.0 to 5.0)                           | 1.5<br>(1.4 to 1.7)                      | 0.5<br>(0.3 to 0.6)                   | 34.6<br>(17.9 to 54.5)                            | -2.2<br>(-13.4 to 12.0)                             |
| <b>Cardiovascular diseases</b>                     | <b>1,138.6</b><br><b>(1,047.3 to 1,212.9)</b> | <b>92.1†</b><br><b>(88.2 to 96.0)</b>    | <b>63.8</b><br><b>(45.2 to 87.1)</b>  | <b>38.3</b><br><b>(32.2 to 44.6)</b>              | <b>-1.6</b><br><b>(-5.3 to 2.4)</b>                 |
| Rheumatic heart disease                            | 311.9<br>(276.0 to 349.2)                     | 13.3<br>(11.8 to 14.9)                   | 14.8<br>(9.3 to 21.8)                 | 44.1<br>(31.7 to 57.0)                            | 4.7<br>(-4.0 to 13.6)                               |
| Ischaemic heart disease                            | 235.5<br>(218.8 to 252.5)                     | 32.6<br>(30.4 to 35.1)                   | 11.0<br>(7.4 to 15.3)                 | 39.4<br>(31.1 to 47.1)                            | -1.2<br>(-5.6 to 3.3)                               |
| Cerebrovascular disease                            | 79.1<br>(74.0 to 84.7)                        | 16.0‡<br>(14.7 to 17.3)                  | 11.4<br>(8.2 to 14.4)                 | 30.0<br>(19.7 to 41.1)                            | -7.6<br>(-14.8 to -0.2)                             |
| Ischaemic stroke                                   | 67.2<br>(60.4 to 74.2)                        | 9.7‡<br>(8.5 to 10.8)                    | 9.2<br>(6.6 to 11.7)                  | 34.7<br>(22.1 to 48.3)                            | -5.3<br>(-13.9 to 3.6)                              |
| Hemorrhagic stroke                                 | 16.2<br>(14.6 to 18.0)                        | 6.3‡<br>(5.7 to 7.0)                     | 2.2<br>(1.6 to 2.9)                   | 13.9<br>(0.7 to 28.3)                             | -16.9<br>(-26.2 to -6.2)                            |
| Hypertensive heart disease                         | 17.2<br>(13.6 to 21.4)                        | --                                       | 1.4<br>(0.9 to 2.0)                   | 37.5<br>(23.3 to 54.9)                            | -2.2<br>(-11.2 to 8.9)                              |
| Cardiomyopathy and myocarditis                     | 12.4<br>(9.6 to 15.2)                         | 5.5†<br>(4.8 to 6.2)                     | 1.2<br>(0.7 to 1.8)                   | 37.9<br>(22.7 to 54.6)                            | -1.2<br>(-13.3 to 11.6)                             |
| Myocarditis                                        | 3.1<br>(2.6 to 3.7)                           | 5.5<br>(4.8 to 6.2)                      | 0.2<br>(0.1 to 0.3)                   | 34.8<br>(27.0 to 43.5)                            | -0.7<br>(-8.7 to 7.9)                               |
| Alcoholic cardiomyopathy                           | 1.1<br>(0.7 to 1.5)                           | --                                       | 0.1<br>(< 0.05 to 0.1)                | 43.2<br>(9.2 to 84.9)                             | -0.4<br>(-24.2 to 28.5)                             |
| Other cardiomyopathy                               | 10.1<br>(7.2 to 13.4)                         | --                                       | 0.8<br>(0.5 to 1.3)                   | 38.1<br>(18.8 to 59.9)                            | -1.4<br>(-16.0 to 14.8)                             |
| Atrial fibrillation and flutter                    | 41.8<br>(36.5 to 47.8)                        | 3.7<br>(3.2 to 4.3)                      | 3.3<br>(2.2 to 4.7)                   | 38.5<br>(27.7 to 50.0)                            | -0.9<br>(-7.2 to 5.5)                               |
| Peripheral vascular disease                        | 162.1<br>(139.6 to 187.8)                     | 16.3<br>(14.0 to 19.0)                   | 0.8<br>(0.4 to 1.5)                   | 36.6<br>(24.8 to 48.9)                            | -2.3<br>(-9.5 to 5.5)                               |
| Endocarditis                                       | 1.2<br>(0.9 to 1.5)                           | 4.7<br>(4.2 to 5.2)                      | 0.1<br>(0.1 to 0.1)                   | 36.8<br>(24.5 to 50.2)                            | -1.5<br>(-15.3 to 12.9)                             |
| Other cardiovascular and circulatory diseases      | 370.3<br>(254.5 to 503.4)                     | --                                       | 19.8<br>(11.6 to 30.7)                | 38.6<br>(24.1 to 56.2)                            | 0.4<br>(-11.9 to 13.5)                              |
| <b>Chronic respiratory diseases</b>                | <b>1,967.0</b><br><b>(1,851.5 to 2,075.2)</b> | <b>376.7†</b><br><b>(346.6 to 409.4)</b> | <b>92.0</b><br><b>(66.7 to 123.3)</b> | <b>30.4</b><br><b>(24.6 to 36.4)</b>              | <b>-2.4</b><br><b>(-6.0 to 1.4)</b>                 |
| Chronic obstructive pulmonary disease              | 277.0<br>(265.6 to 289.1)                     | 20.8<br>(19.9 to 21.7)                   | 21.7<br>(18.9 to 24.0)                | 35.2<br>(26.5 to 45.1)                            | -3.6<br>(-9.1 to 3.0)                               |
| Pneumoconiosis                                     | 0.3<br>(0.2 to 0.3)                           | < 0.05<br>(< 0.05 to < 0.05)             | < 0.05<br>(< 0.05 to 0.1)             | 39.6<br>(31.6 to 48.4)                            | -2.1<br>(-7.4 to 4.0)                               |
| Silicosis                                          | < 0.05<br>(< 0.05 to < 0.05)                  | < 0.05<br>(< 0.05 to < 0.05)             | < 0.05<br>(< 0.05 to < 0.05)          | 38.7<br>(27.7 to 52.4)                            | -1.7<br>(-8.2 to 6.0)                               |

| Cause                                                          | Prevalence in thousands (95% UI)        | Incidence in thousands (95% UI)          | YLDs in thousands (95% UI)        |                                                   |                                                     |
|----------------------------------------------------------------|-----------------------------------------|------------------------------------------|-----------------------------------|---------------------------------------------------|-----------------------------------------------------|
|                                                                | 2016 counts                             | 2016 counts                              | 2016 counts                       | Percentage change in counts between 2006 and 2016 | Percentage change in age-standardised rates between |
| Asbestosis                                                     | 0.1<br>(0.1 to 0.1)                     | < 0.05<br>(< 0.05 to < 0.05)             | < 0.05<br>(< 0.05 to < 0.05)      | 39.4<br>(27.0 to 50.9)                            | -1.4<br>(-7.9 to 4.8)                               |
| Coal workers pneumoconiosis                                    | --                                      | --                                       | --                                | --                                                | --                                                  |
| Other pneumoconiosis                                           | 0.1<br>(0.1 to 0.2)                     | < 0.05<br>(< 0.05 to < 0.05)             | < 0.05<br>(< 0.05 to < 0.05)      | 39.8<br>(27.9 to 54.0)                            | -2.6<br>(-10.8 to 7.3)                              |
| Asthma                                                         | 1,704.1<br>(1,564.3 to 1,852.7)         | 355.7<br>(325.8 to 388.4)                | 67.3<br>(44.0 to 96.7)            | 27.8<br>(21.2 to 34.7)                            | -2.5<br>(-6.7 to 1.6)                               |
| Interstitial lung disease and pulmonary sarcoidosis            | 1.9<br>(1.7 to 2.2)                     | 0.2<br>(0.2 to 0.2)                      | 0.2<br>(0.1 to 0.3)               | 35.5<br>(31.0 to 40.1)                            | -2.8<br>(-8.0 to 2.5)                               |
| Other chronic respiratory diseases                             | --                                      | --                                       | 2.7<br>(2.2 to 3.3)               | 63.9<br>(30.1 to 109.9)                           | 26.4<br>(6.0 to 50.8)                               |
| <b>Cirrhosis and other chronic liver diseases</b>              | <b>53.1<br/>(50.3 to 56.1)</b>          | <b>4.7<br/>(4.5 to 5.0)</b>              | <b>4.3<br/>(2.9 to 6.0)</b>       | <b>33.1<br/>(18.6 to 49.8)</b>                    | <b>-1.4<br/>(-9.5 to 7.2)</b>                       |
| Cirrhosis and other chronic liver diseases due to hepatitis B  | 13.8<br>(11.3 to 16.5)                  | 1.3<br>(1.1 to 1.5)                      | 0.9<br>(0.6 to 1.3)               | 37.2<br>(13.8 to 65.5)                            | -2.6<br>(-16.3 to 13.0)                             |
| Cirrhosis and other chronic liver diseases due to hepatitis C  | 9.5<br>(6.4 to 13.6)                    | 0.9<br>(0.6 to 1.3)                      | 0.6<br>(0.4 to 1.0)               | 37.5<br>(9.8 to 69.2)                             | -2.5<br>(-19.3 to 16.3)                             |
| Cirrhosis and other chronic liver diseases due to alcohol use  | 10.2<br>(8.5 to 11.9)                   | 1.1<br>(0.9 to 1.2)                      | 0.6<br>(0.4 to 0.9)               | 41.6<br>(14.8 to 74.8)                            | -0.3<br>(-16.0 to 18.1)                             |
| Cirrhosis and other chronic liver diseases due to other causes | 19.6<br>(17.8 to 21.3)                  | 1.4<br>(1.3 to 1.5)                      | 2.2<br>(1.4 to 3.1)               | 28.2<br>(3.6 to 59.7)                             | -0.6<br>(-16.4 to 19.1)                             |
| <b>Digestive diseases</b>                                      | <b>364.7<br/>(341.0 to 390.6)</b>       | <b>357.8†<br/>(340.8 to 376.2)</b>       | <b>12.3<br/>(8.5 to 16.7)</b>     | <b>37.4<br/>(25.6 to 51.3)</b>                    | <b>3.0<br/>(-3.2 to 9.9)</b>                        |
| Peptic ulcer disease                                           | 50.0<br>(46.0 to 54.6)                  | 27.6<br>(24.7 to 30.6)                   | 1.0<br>(0.7 to 1.4)               | 46.1<br>(30.4 to 62.8)                            | 3.8<br>(-5.1 to 12.7)                               |
| Gastritis and duodenitis                                       | 128.5<br>(113.4 to 144.8)               | 114.9<br>(103.9 to 127.9)                | 1.5<br>(0.9 to 2.1)               | 50.6<br>(33.9 to 68.5)                            | 12.1<br>(3.1 to 22.2)                               |
| Appendicitis                                                   | 3.6<br>(3.3 to 3.9)                     | 94.6<br>(87.1 to 102.7)                  | 1.1<br>(0.7 to 1.6)               | 29.5<br>(-11.2 to 81.8)                           | -3.1<br>(-27.0 to 25.6)                             |
| Paralytic ileus and intestinal obstruction                     | 0.6<br>(0.5 to 0.6)                     | 16.6<br>(15.1 to 18.3)                   | 0.2<br>(0.1 to 0.3)               | 36.9<br>(29.9 to 45.0)                            | 0.4<br>(-9.7 to 11.9)                               |
| Inguinal, femoral, and abdominal hernia                        | 177.1<br>(148.5 to 211.1)               | 31.1<br>(27.5 to 35.3)                   | 6.8<br>(4.4 to 9.6)               | 35.1<br>(19.4 to 54.8)                            | 1.3<br>(-7.7 to 11.6)                               |
| Inflammatory bowel disease                                     | 1.2<br>(1.2 to 1.3)                     | 8.6<br>(8.2 to 8.9)                      | 0.2<br>(0.1 to 0.3)               | 29.7<br>(25.8 to 33.7)                            | -7.8<br>(-10.5 to -4.8)                             |
| Vascular intestinal disorders                                  | 0.1<br>(0.1 to 0.1)                     | 0.8<br>(0.7 to 0.9)                      | < 0.05<br>(< 0.05 to 0.1)         | 34.4<br>(27.3 to 41.6)                            | 3.3<br>(-0.7 to 7.9)                                |
| Gallbladder and biliary diseases                               | 13.5<br>(11.8 to 15.2)                  | 60.7<br>(53.2 to 69.6)                   | 0.4<br>(0.2 to 0.5)               | 40.6<br>(23.0 to 61.2)                            | 1.4<br>(-13.9 to 18.8)                              |
| Pancreatitis                                                   | 0.3<br>(0.3 to 0.4)                     | 2.9<br>(2.6 to 3.3)                      | < 0.05<br>(< 0.05 to 0.1)         | 41.4<br>(36.8 to 46.3)                            | 2.7<br>(-0.3 to 5.6)                                |
| Other digestive diseases                                       | --                                      | --                                       | 1.1<br>(0.8 to 1.5)               | 37.8<br>(22.3 to 56.1)                            | 6.8<br>(-0.3 to 14.6)                               |
| <b>Neurological disorders</b>                                  | <b>6,994.8<br/>(6,662.3 to 7,365.0)</b> | <b>3,265.3<br/>(2,785.7 to 3,799.7)</b>  | <b>163.3<br/>(101.6 to 238.3)</b> | <b>38.6<br/>(2.3 to 92.7)</b>                     | <b>1.2<br/>(-19.8 to 30.8)</b>                      |
| Alzheimer's disease and other dementias                        | 31.9<br>(26.7 to 37.9)                  | 5.6<br>(4.6 to 6.7)                      | 4.5<br>(3.2 to 6.1)               | 39.0<br>(31.8 to 47.0)                            | 0.3<br>(-4.3 to 5.2)                                |
| Parkinson's disease                                            | 2.9<br>(2.3 to 3.7)                     | 0.4<br>(0.3 to 0.5)                      | 0.4<br>(0.2 to 0.5)               | 47.1<br>(25.3 to 72.1)                            | 5.7<br>(-8.5 to 21.3)                               |
| Epilepsy                                                       | 79.7<br>(17.7 to 151.0)                 | 11.9<br>(2.6 to 22.9)                    | 31.0<br>(6.7 to 69.0)             | 35.1<br>(-71.8 to 632.7)                          | 1.8<br>(-78.9 to 442.2)                             |
| Multiple sclerosis                                             | 1.3<br>(1.1 to 1.4)                     | 0.1<br>(0.1 to 0.1)                      | 0.4<br>(0.2 to 0.5)               | 50.2<br>(44.7 to 55.6)                            | 7.7<br>(4.0 to 11.2)                                |
| Motor neuron disease                                           | 0.3<br>(0.2 to 0.3)                     | 0.1<br>(0.1 to 0.1)                      | 0.1<br>(< 0.05 to 0.1)            | 36.6<br>(30.8 to 42.1)                            | 1.8<br>(-1.2 to 5.0)                                |
| Migraine                                                       | 2,374.8<br>(2,222.2 to 2,536.8)         | 307.9<br>(288.5 to 328.8)                | 102.2<br>(65.5 to 144.6)          | 38.1<br>(32.3 to 44.3)                            | 0.4<br>(-3.3 to 4.1)                                |
| Tension-type headache                                          | 5,283.9<br>(4,671.8 to 6,016.5)         | 2,939.3<br>(2,445.9 to 3,471.0)          | 17.3<br>(10.9 to 25.7)            | 37.4<br>(29.9 to 45.2)                            | -0.3<br>(-5.2 to 4.9)                               |
| Other neurological disorders                                   | 0.1<br>(< 0.05 to 0.1)                  | 0.1<br>(0.1 to 0.2)                      | 7.5<br>(1.7 to 16.4)              | 65.7<br>(-61.8 to 677.7)                          | 22.7<br>(-68.6 to 397.0)                            |
| <b>Mental and substance use disorders</b>                      | <b>3,580.1<br/>(3,421.6 to 3,737.9)</b> | <b>1,324.9†<br/>(1,229.0 to 1,436.0)</b> | <b>424.2<br/>(305.6 to 556.1)</b> | <b>37.0<br/>(34.0 to 40.3)</b>                    | <b>0.2<br/>(-2.0 to 2.5)</b>                        |
| Schizophrenia                                                  | 33.4<br>(29.2 to 38.1)                  | 3.0<br>(2.6 to 3.4)                      | 21.6<br>(15.8 to 27.3)            | 40.2<br>(26.7 to 55.3)                            | 0.4<br>(-8.4 to 10.1)                               |
| Alcohol use disorders                                          | 309.4<br>(260.9 to 363.3)               | 164.6<br>(138.2 to 191.2)                | 31.1<br>(21.1 to 43.2)            | 42.4<br>(30.6 to 54.8)                            | 2.2<br>(-5.3 to 10.5)                               |
| Drug use disorders                                             | 104.1<br>(93.2 to 116.2)                | 18.7<br>(15.9 to 21.6)                   | 21.3<br>(14.6 to 29.3)            | 43.9<br>(29.7 to 60.0)                            | 3.7<br>(-5.3 to 14.0)                               |
| Opioid use disorders                                           | 42.8<br>(34.3 to 54.7)                  | 6.0<br>(4.9 to 7.4)                      | 17.9<br>(11.9 to 25.6)            | 44.3<br>(28.1 to 64.3)                            | 4.1<br>(-6.4 to 16.2)                               |
| Cocaine use disorders                                          | 2.9<br>(2.4 to 3.6)                     | 0.4<br>(0.3 to 0.5)                      | 0.4<br>(0.2 to 0.6)               | 42.9<br>(35.4 to 51.7)                            | 2.6<br>(-2.7 to 8.3)                                |
| Amphetamine use disorders                                      | 1.6<br>(1.1 to 2.2)                     | 0.3<br>(0.2 to 0.4)                      | 0.2<br>(0.1 to 0.4)               | 42.2<br>(28.9 to 55.0)                            | 2.0<br>(-7.4 to 10.9)                               |
| Cannabis use disorders                                         | 53.6<br>(42.6 to 67.1)                  | 10.5<br>(8.2 to 13.2)                    | 1.6<br>(0.9 to 2.4)               | 40.0<br>(13.3 to 68.2)                            | -0.0<br>(-16.5 to 18.4)                             |
| Other drug use disorders                                       | 6.8<br>(5.9 to 7.7)                     | 1.5<br>(1.3 to 1.7)                      | 1.2<br>(0.8 to 1.7)               | 43.2<br>(20.8 to 70.2)                            | 3.0<br>(-11.9 to 21.5)                              |
| Depressive disorders                                           | 749.3<br>(699.8 to 801.6)               | 846.8<br>(753.1 to 950.7)                | 129.7<br>(88.6 to 178.2)          | 38.3<br>(32.0 to 45.2)                            | -0.4<br>(-4.8 to 4.4)                               |
| Major depressive disorder                                      | 514.0<br>(455.8 to 577.3)               | 802.2<br>(708.8 to 904.8)                | 105.9<br>(71.7 to 146.3)          | 37.9<br>(30.3 to 46.3)                            | -0.5<br>(-6.0 to 5.2)                               |
| Dysthymia                                                      | 246.2<br>(213.0 to 284.1)               | 44.6<br>(39.0 to 51.5)                   | 23.8<br>(16.1 to 34.3)            | 40.0<br>(34.1 to 46.4)                            | 0.4<br>(-2.9 to 3.8)                                |
| Bipolar disorder                                               | 132.5<br>(112.2 to 156.2)               | 14.8<br>(12.6 to 17.6)                   | 27.3<br>(16.8 to 40.9)            | 39.5<br>(29.6 to 50.1)                            | 0.3<br>(-6.1 to 6.9)                                |
| Anxiety disorders                                              | 740.0<br>(657.3 to 830.9)               | 131.3<br>(117.5 to 146.8)                | 72.1<br>(49.2 to 99.8)            | 36.6<br>(26.8 to 46.6)                            | 0.4<br>(-6.2 to 7.2)                                |
| Eating disorders                                               | 18.3<br>(14.8 to 22.7)                  | 15.2<br>(11.0 to 20.7)                   | 3.7<br>(2.4 to 5.5)               | 40.3<br>(18.2 to 65.0)                            | 2.8<br>(-12.8 to 22.0)                              |
| Anorexia nervosa                                               | 5.1<br>(3.7 to 6.8)                     | 2.5<br>(1.8 to 3.4)                      | 1.1<br>(0.6 to 1.7)               | 38.5<br>(0.2 to 89.8)                             | 1.8<br>(-25.4 to 36.5)                              |
| Bulimia nervosa                                                | 12.4<br>(9.3 to 16.8)                   | 12.8<br>(8.5 to 18.1)                    | 2.6<br>(1.6 to 4.0)               | 41.1<br>(14.2 to 74.3)                            | 3.2<br>(-16.6 to 26.4)                              |
| Autistic spectrum disorders                                    | 207.8<br>(185.7 to 235.7)               | 2.5<br>(1.8 to 3.6)                      | 29.8<br>(20.1 to 42.3)            | 32.4<br>(24.7 to 40.3)                            | 0.5<br>(-4.3 to 5.4)                                |
| Autism                                                         | 57.0<br>(49.2 to 66.2)                  | 0.3<br>(0.2 to 0.6)                      | 14.6<br>(9.3 to 21.4)             | 32.6<br>(19.5 to 46.8)                            | 0.6<br>(-8.3 to 9.4)                                |
| Asperger syndrome and other autistic spectrum disorders        | 150.8<br>(124.6 to 182.8)               | 2.2<br>(1.4 to 3.2)                      | 15.2<br>(9.8 to 22.3)             | 32.3<br>(24.9 to 39.9)                            | 0.4<br>(-4.4 to 5.2)                                |



| Cause                                                      | Prevalence in thousands (95% UI)                 | Incidence in thousands (95% UI)                   | YLDs in thousands (95% UI)              |                                                   |                                                     |
|------------------------------------------------------------|--------------------------------------------------|---------------------------------------------------|-----------------------------------------|---------------------------------------------------|-----------------------------------------------------|
|                                                            | 2016 counts                                      | 2016 counts                                       | 2016 counts                             | Percentage change in counts between 2006 and 2016 | Percentage change in age-standardised rates between |
| Attention-deficit/hyperactivity disorder                   | 330.4<br>(295.5 to 371.3)                        | 20.4<br>(17.7 to 23.9)                            | 4.0<br>(2.4 to 6.4)                     | 32.0<br>(22.2 to 42.1)                            | 0.3<br>(-6.5 to 7.3)                                |
| Conduct disorder                                           | 252.4<br>(205.0 to 298.5)                        | 90.1<br>(70.3 to 110.1)                           | 30.6<br>(19.1 to 46.9)                  | 30.4<br>(22.4 to 39.3)                            | 0.6<br>(-5.6 to 7.2)                                |
| Idiopathic developmental intellectual disability           | 677.5<br>(421.8 to 931.4)                        | --                                                | 27.3<br>(13.1 to 46.8)                  | 27.3<br>(19.4 to 35.2)                            | -4.1<br>(-10.0 to 1.6)                              |
| Other mental and substance use disorders                   | 342.7<br>(299.8 to 397.3)                        | 17.3<br>(15.2 to 20.1)                            | 25.7<br>(17.7 to 37.2)                  | 40.1<br>(32.1 to 47.7)                            | 0.5<br>(-4.2 to 5.0)                                |
| <b>Diabetes, urogenital, blood, and endocrine diseases</b> | <b>9,698.4</b><br><b>(9,538.1 to 9,858.1)</b>    | <b>2,263.0†</b><br><b>(2,115.4 to 2,415.0)</b>    | <b>121.2</b><br><b>(86.5 to 165.9)</b>  | <b>38.8</b><br><b>(34.5 to 43.0)</b>              | <b>0.8</b><br><b>(-2.2 to 3.9)</b>                  |
| Diabetes mellitus                                          | 435.6<br>(390.3 to 487.8)                        | 30.4<br>(27.4 to 33.7)                            | 40.9<br>(28.3 to 56.8)                  | 47.3<br>(38.3 to 56.5)                            | 3.9<br>(-2.5 to 10.2)                               |
| Acute glomerulonephritis                                   | 0.2<br>(0.2 to 0.2)                              | 3.1<br>(2.7 to 3.7)                               | < 0.05<br>(< 0.05 to < 0.05)            | 33.6<br>(27.9 to 40.0)                            | -0.1<br>(-3.6 to 4.0)                               |
| Chronic kidney disease                                     | 800.1<br>(722.3 to 885.3)                        | 60.6<br>(53.7 to 67.8)                            | 19.9<br>(14.3 to 26.1)                  | 48.9<br>(39.8 to 59.2)                            | 4.2<br>(-1.6 to 10.7)                               |
| Chronic kidney disease due to diabetes mellitus            | 246.9<br>(207.1 to 290.2)                        | 17.5<br>(14.3 to 21.2)                            | 5.8<br>(4.0 to 7.8)                     | 50.0<br>(36.5 to 64.5)                            | 4.0<br>(-4.4 to 12.7)                               |
| Chronic kidney disease due to hypertension                 | 171.5<br>(147.7 to 195.3)                        | 15.8<br>(13.4 to 18.7)                            | 3.2<br>(2.2 to 4.4)                     | 45.9<br>(32.0 to 63.1)                            | 1.5<br>(-7.9 to 12.8)                               |
| Chronic kidney disease due to glomerulonephritis           | 159.2<br>(136.7 to 182.0)                        | 9.3<br>(7.5 to 11.4)                              | 5.2<br>(3.6 to 7.2)                     | 48.8<br>(32.3 to 66.6)                            | 6.6<br>(-2.5 to 16.5)                               |
| Chronic kidney disease due to other causes                 | 222.6<br>(185.8 to 260.7)                        | 17.9<br>(15.0 to 20.9)                            | 5.6<br>(3.9 to 7.6)                     | 49.5<br>(34.4 to 65.9)                            | 4.8<br>(-3.8 to 13.9)                               |
| Urinary diseases and male infertility                      | 351.3<br>(309.3 to 396.0)                        | 1,163.8†<br>(1,037.4 to 1,306.9)                  | 9.3<br>(6.1 to 13.6)                    | 42.6<br>(33.4 to 53.6)                            | -1.4<br>(-7.5 to 5.6)                               |
| Interstitial nephritis and urinary tract infections        | 19.2<br>(16.8 to 21.9)                           | 1,008.9<br>(885.8 to 1,150.1)                     | 0.6<br>(0.4 to 1.0)                     | 35.8<br>(13.9 to 60.3)                            | 1.1<br>(-13.2 to 17.3)                              |
| Urolithiasis                                               | 4.7<br>(4.2 to 5.4)                              | 125.7<br>(110.8 to 144.5)                         | 0.4<br>(0.2 to 0.5)                     | 41.1<br>(29.6 to 52.4)                            | 1.8<br>(-6.8 to 11.5)                               |
| Benign prostatic hyperplasia                               | 226.4<br>(190.0 to 262.9)                        | 29.2<br>(24.5 to 34.3)                            | 7.5<br>(4.6 to 10.9)                    | 43.1<br>(32.1 to 57.2)                            | -2.0<br>(-8.6 to 5.7)                               |
| Male infertility                                           | 86.6<br>(64.9 to 118.9)                          | --                                                | 0.5<br>(0.2 to 1.1)                     | 82.7<br>(47.7 to 127.0)                           | 33.3<br>(6.8 to 67.1)                               |
| Other urinary diseases                                     | --                                               | --                                                | 0.4<br>(0.2 to 0.6)                     | 11.8<br>(-1.1 to 25.9)                            | -15.4<br>(-23.2 to -6.4)                            |
| Gynecological diseases                                     | 2,663.9<br>(2,538.6 to 2,802.7)                  | 988.6†<br>(919.2 to 1,058.0)                      | 29.6<br>(19.8 to 42.6)                  | 33.8<br>(28.1 to 39.8)                            | -4.2<br>(-7.8 to -0.5)                              |
| Uterine fibroids                                           | 181.6<br>(159.9 to 204.8)                        | 22.3<br>(19.3 to 25.8)                            | 3.6<br>(2.2 to 5.6)                     | 25.0<br>(14.5 to 34.7)                            | -12.1<br>(-19.4 to -5.5)                            |
| Polycystic ovarian syndrome                                | 21.9<br>(16.3 to 28.5)                           | 56.3<br>(40.4 to 77.7)                            | 0.2<br>(0.1 to 0.4)                     | 42.5<br>(23.7 to 62.9)                            | 3.1<br>(-10.6 to 17.5)                              |
| Female infertility                                         | 27.0<br>(12.6 to 57.6)                           | --                                                | 0.2<br>(< 0.05 to 0.4)                  | 193.6<br>(48.2 to 487.1)                          | 95.1<br>(9.2 to 274.3)                              |
| Endometriosis                                              | 4.9<br>(4.1 to 5.8)                              | 20.1<br>(16.2 to 25.5)                            | 0.5<br>(0.3 to 0.7)                     | 40.2<br>(0.1 to 89.8)                             | 0.7<br>(-25.3 to 34.9)                              |
| Genital prolapse                                           | 1,212.4<br>(1,066.0 to 1,357.5)                  | 114.6<br>(95.9 to 135.9)                          | 3.8<br>(1.9 to 7.0)                     | 36.1<br>(28.0 to 45.2)                            | -4.0<br>(-10.0 to 2.7)                              |
| Premenstrual syndrome                                      | 1,304.1<br>(1,201.6 to 1,408.1)                  | 503.0<br>(459.7 to 548.4)                         | 10.9<br>(6.9 to 16.8)                   | 34.8<br>(22.6 to 47.8)                            | -3.3<br>(-11.5 to 5.4)                              |
| Other gynecological diseases                               | 306.3<br>(265.7 to 351.9)                        | 272.3<br>(224.7 to 324.8)                         | 10.5<br>(6.8 to 14.8)                   | 33.7<br>(24.8 to 43.0)                            | -2.5<br>(-8.8 to 4.2)                               |
| Hemoglobinopathies and hemolytic anaemias                  | 7,104.8<br>(6,939.1 to 7,260.6)                  | --                                                | 14.0<br>(9.2 to 20.5)                   | 24.9<br>(15.5 to 34.4)                            | -3.4<br>(-9.9 to 3.3)                               |
| Thalassemias                                               | < 0.05<br>(< 0.05 to < 0.05)                     | --                                                | < 0.05<br>(< 0.05 to < 0.05)            | 18.5<br>(-15.1 to 63.7)                           | -1.2<br>(-29.1 to 35.6)                             |
| Thalassaemias trait                                        | 115.9<br>(39.4 to 206.5)                         | --                                                | 1.5<br>(0.4 to 3.0)                     | 30.6<br>(4.9 to 66.7)                             | 2.3<br>(-17.9 to 33.0)                              |
| Sickle cell disorders                                      | 9.1<br>(7.6 to 10.6)                             | --                                                | 0.7<br>(0.5 to 1.1)                     | 37.3<br>(13.4 to 65.6)                            | 11.7<br>(-6.4 to 32.9)                              |
| Sickle cell trait                                          | 2,150.5<br>(1,972.0 to 2,326.8)                  | --                                                | 6.4<br>(4.2 to 9.4)                     | 29.5<br>(17.4 to 42.2)                            | 2.0<br>(-6.7 to 10.7)                               |
| G6PD deficiency                                            | 1,492.3<br>(1,443.7 to 1,552.8)                  | --                                                | 0.1<br>(0.1 to 0.2)                     | 30.4<br>(-0.2 to 77.4)                            | 2.8<br>(-16.9 to 28.8)                              |
| G6PD trait                                                 | 3,809.0<br>(3,755.3 to 3,871.9)                  | --                                                | < 0.05<br>(< 0.05 to < 0.05)            | 22.4<br>(11.9 to 32.9)                            | -4.9<br>(-12.1 to 3.0)                              |
| Other hemoglobinopathies and hemolytic anaemias            | 234.8<br>(224.0 to 247.0)                        | --                                                | 5.3<br>(3.5 to 7.8)                     | 16.8<br>(5.2 to 30.0)                             | -12.1<br>(-19.4 to -4.7)                            |
| Endocrine, metabolic, blood, and immune disorders          | 273.5<br>(262.1 to 285.3)                        | 16.5<br>(14.6 to 18.5)                            | 7.5<br>(5.1 to 10.7)                    | 18.0<br>(9.9 to 26.7)                             | -7.2<br>(-12.5 to -1.5)                             |
| <b>Musculoskeletal disorders</b>                           | <b>2,271.8</b><br><b>(2,146.0 to 2,401.7)</b>    | <b>1,102.4</b><br><b>(988.5 to 1,213.6)</b>       | <b>252.0</b><br><b>(180.7 to 329.1)</b> | <b>41.1</b><br><b>(36.9 to 45.7)</b>              | <b>0.5</b><br><b>(-2.0 to 3.3)</b>                  |
| Rheumatoid arthritis                                       | 28.6<br>(25.0 to 32.1)                           | 1.9<br>(1.7 to 2.1)                               | 6.9<br>(4.7 to 9.2)                     | 40.8<br>(26.4 to 55.5)                            | 0.3<br>(-8.2 to 9.3)                                |
| Osteoarthritis                                             | 352.6<br>(329.6 to 376.6)                        | 20.6<br>(19.1 to 22.2)                            | 21.8<br>(15.3 to 29.6)                  | 43.2<br>(37.9 to 49.3)                            | 0.7<br>(-2.7 to 4.5)                                |
| Low back and neck pain                                     | 1,597.4<br>(1,481.5 to 1,715.7)                  | 733.8<br>(652.0 to 822.8)                         | 185.0<br>(130.1 to 243.6)               | 41.2<br>(36.4 to 46.6)                            | 0.6<br>(-2.6 to 3.9)                                |
| Low back pain                                              | 1,259.4<br>(1,119.6 to 1,419.5)                  | 627.3<br>(547.7 to 716.0)                         | 142.9<br>(100.4 to 189.0)               | 41.2<br>(35.0 to 48.0)                            | 0.6<br>(-3.4 to 5.0)                                |
| Neck pain                                                  | 418.6<br>(360.1 to 486.5)                        | 106.5<br>(92.0 to 124.7)                          | 42.1<br>(28.4 to 59.7)                  | 41.1<br>(36.9 to 45.6)                            | 0.4<br>(-2.1 to 2.9)                                |
| Gout                                                       | 51.4<br>(44.9 to 58.0)                           | 10.7<br>(9.3 to 12.1)                             | 1.6<br>(1.1 to 2.3)                     | 41.5<br>(22.0 to 63.3)                            | -0.5<br>(-12.4 to 13.1)                             |
| Other musculoskeletal disorders                            | 422.7<br>(335.8 to 517.1)                        | 335.4<br>(257.3 to 424.7)                         | 36.7<br>(23.9 to 53.2)                  | 39.7<br>(28.0 to 53.3)                            | 0.3<br>(-8.3 to 9.9)                                |
| <b>Other non-communicable diseases</b>                     | <b>19,335.0</b><br><b>(18,958.8 to 19,645.9)</b> | <b>68,459.6†</b><br><b>(64,585.2 to 72,404.6)</b> | <b>454.5</b><br><b>(309.4 to 641.4)</b> | <b>31.5</b><br><b>(29.5 to 33.6)</b>              | <b>-2.3</b><br><b>(-3.5 to -1.1)</b>                |
| Congenital anomalies                                       | 320.6<br>(262.4 to 394.1)                        | --                                                | 44.2<br>(29.9 to 62.5)                  | 24.6<br>(16.2 to 33.5)                            | -5.0<br>(-10.9 to 1.2)                              |
| Neural tube defects                                        | 29.9<br>(26.4 to 33.4)                           | --                                                | 8.9<br>(6.2 to 12.1)                    | 30.9<br>(14.6 to 48.7)                            | -0.5<br>(-11.1 to 11.1)                             |
| Congenital heart anomalies                                 | 26.2<br>(21.7 to 31.5)                           | --                                                | 1.3<br>(0.6 to 2.2)                     | 27.6<br>(8.6 to 51.4)                             | 2.9<br>(-11.2 to 20.5)                              |
| Orofacial clefts                                           | 6.1<br>(5.3 to 7.0)                              | --                                                | 0.1<br>(0.1 to 0.1)                     | 22.8<br>(9.2 to 37.6)                             | -5.5<br>(-16.0 to 6.2)                              |
| Down's syndrome                                            | 4.3<br>(3.6 to 5.1)                              | --                                                | 0.4<br>(0.2 to 0.5)                     | 30.2<br>(20.2 to 40.7)                            | 0.6<br>(-7.2 to 8.5)                                |
| Turner syndrome                                            | 14.4<br>(12.2 to 16.8)                           | --                                                | 0.2<br>(0.1 to 0.4)                     | 29.8<br>(-7.9 to 83.2)                            | -0.2<br>(-26.6 to 37.0)                             |
| Klinefelter syndrome                                       | 14.0<br>(11.6 to 16.6)                           | --                                                | 0.1<br>(< 0.05 to 0.1)                  | 31.9<br>(-1.3 to 68.6)                            | -0.9<br>(-24.7 to 26.5)                             |

| Cause                                         | Prevalence in thousands (95% UI)              | Incidence in thousands (95% UI)                | YLDs in thousands (95% UI)             |                                                   |                                                     |
|-----------------------------------------------|-----------------------------------------------|------------------------------------------------|----------------------------------------|---------------------------------------------------|-----------------------------------------------------|
|                                               | 2016 counts                                   | 2016 counts                                    | 2016 counts                            | Percentage change in counts between 2006 and 2016 | Percentage change in age-standardised rates between |
| Other chromosomal abnormalities               | 4.2<br>(3.5 to 4.9)                           | --                                             | 0.8<br>(0.5 to 1.2)                    | 20.1<br>(-16.6 to 73.6)                           | -1.2<br>(-30.3 to 40.3)                             |
| Congenital musculoskeletal and limb anomalies | 29.3<br>(25.9 to 33.0)                        | --                                             | 4.3<br>(2.8 to 6.0)                    | 30.6<br>(14.2 to 49.5)                            | -1.2<br>(-11.7 to 11.3)                             |
| Urogenital congenital anomalies               | 25.7<br>(22.3 to 29.4)                        | --                                             | 0.7<br>(0.4 to 1.1)                    | 26.4<br>(17.0 to 36.9)                            | -0.1<br>(-7.2 to 7.4)                               |
| Digestive congenital anomalies                | 13.5<br>(12.0 to 15.2)                        | --                                             | 0.6<br>(0.4 to 0.9)                    | 30.9<br>(1.2 to 69.6)                             | -0.1<br>(-20.2 to 24.0)                             |
| Other congenital anomalies                    | 198.1<br>(141.4 to 287.7)                     | --                                             | 26.9<br>(16.6 to 41.6)                 | 21.5<br>(11.0 to 34.1)                            | -7.6<br>(-15.6 to 1.5)                              |
| Skin and subcutaneous diseases                | 8,305.0<br>(7,925.0 to 8,707.3)               | 19,795.1<br>(18,339.3 to 21,542.0)             | 210.0<br>(136.7 to 307.8)              | 32.9<br>(29.9 to 36.2)                            | 1.4<br>(-0.4 to 3.4)                                |
| Dermatitis                                    | 1,399.4<br>(1,090.4 to 1,731.3)               | 1,087.8<br>(950.8 to 1,255.4)                  | 57.1<br>(31.5 to 97.6)                 | 28.0<br>(22.9 to 33.3)                            | 0.2<br>(-3.2 to 3.5)                                |
| Psoriasis                                     | 125.1<br>(118.9 to 131.3)                     | 19.8<br>(18.8 to 20.7)                         | 11.0<br>(7.8 to 14.5)                  | 42.5<br>(27.8 to 59.4)                            | 5.3<br>(-3.8 to 15.7)                               |
| Cellulitis                                    | 9.1<br>(8.3 to 9.8)                           | 157.4<br>(145.8 to 169.1)                      | 0.5<br>(0.3 to 0.8)                    | 33.8<br>(7.0 to 69.1)                             | 1.6<br>(-17.0 to 24.1)                              |
| Pyoderma                                      | 163.3<br>(155.5 to 171.7)                     | 3,142.6<br>(2,990.2 to 3,295.9)                | 0.9<br>(0.4 to 2.0)                    | 28.9<br>(21.7 to 37.0)                            | 1.3<br>(-3.6 to 6.3)                                |
| Scabies                                       | 514.9<br>(443.9 to 602.1)                     | 1,594.5<br>(1,356.8 to 1,868.8)                | 13.3<br>(7.4 to 21.6)                  | 27.0<br>(21.7 to 32.3)                            | -2.5<br>(-6.3 to 1.2)                               |
| Fungal skin diseases                          | 2,994.2<br>(2,548.3 to 3,518.4)               | 9,063.6<br>(7,596.6 to 10,697.5)               | 17.0<br>(6.6 to 35.9)                  | 30.6<br>(28.4 to 32.7)                            | 0.1<br>(-0.9 to 1.0)                                |
| Viral skin diseases                           | 833.4<br>(726.3 to 961.9)                     | 1,106.9<br>(945.6 to 1,270.8)                  | 25.6<br>(16.0 to 38.3)                 | 30.6<br>(25.9 to 35.1)                            | 0.3<br>(-2.7 to 3.2)                                |
| Acne vulgaris                                 | 2,344.6<br>(2,013.2 to 2,702.2)               | 1,778.9<br>(1,342.8 to 2,356.9)                | 60.4<br>(39.5 to 89.0)                 | 40.7<br>(33.9 to 48.1)                            | 4.0<br>(-0.7 to 8.9)                                |
| Alopecia areata                               | 40.4<br>(37.6 to 42.9)                        | 72.1<br>(67.1 to 76.8)                         | 1.3<br>(0.8 to 2.0)                    | 36.1<br>(20.4 to 54.2)                            | 0.1<br>(-10.0 to 11.5)                              |
| Pruritus                                      | 170.8<br>(150.0 to 194.0)                     | 139.1<br>(123.6 to 157.4)                      | 1.8<br>(0.8 to 3.3)                    | 34.4<br>(25.7 to 42.9)                            | 0.5<br>(-4.6 to 5.8)                                |
| Urticaria                                     | 244.2<br>(207.8 to 288.1)                     | 440.6<br>(374.4 to 515.5)                      | 14.8<br>(9.3 to 21.6)                  | 27.0<br>(19.0 to 36.2)                            | 0.2<br>(-5.6 to 6.4)                                |
| Decubitus ulcer                               | 2.2<br>(2.0 to 2.4)                           | 8.0<br>(7.1 to 8.8)                            | 0.4<br>(0.2 to 0.5)                    | 36.5<br>(24.5 to 49.0)                            | -0.7<br>(-13.5 to 14.0)                             |
| Other skin and subcutaneous diseases          | 1,052.3<br>(1,020.6 to 1,088.5)               | 1,183.9<br>(1,148.9 to 1,224.8)                | 5.8<br>(2.8 to 10.7)                   | 35.7<br>(31.6 to 40.0)                            | 0.5<br>(-1.8 to 3.0)                                |
| Sense organ diseases                          | 4,421.8<br>(4,258.9 to 4,601.8)               | 2,196.6†<br>(2,041.2 to 2,364.1)               | 171.0<br>(119.8 to 240.3)              | 30.8<br>(27.0 to 35.1)                            | -4.4<br>(-6.3 to -2.4)                              |
| Glaucoma                                      | 8.7<br>(7.3 to 10.1)                          | --                                             | 0.9<br>(0.6 to 1.3)                    | 35.7<br>(20.6 to 51.6)                            | -4.0<br>(-13.3 to 6.3)                              |
| Cataract                                      | 82.5<br>(72.9 to 92.5)                        | --                                             | 7.3<br>(5.1 to 10.0)                   | 28.2<br>(20.9 to 35.9)                            | -7.9<br>(-12.5 to -3.0)                             |
| Macular degeneration                          | 23.2<br>(19.1 to 27.9)                        | --                                             | 1.4<br>(1.0 to 2.0)                    | 36.6<br>(23.6 to 51.9)                            | -2.7<br>(-11.2 to 6.8)                              |
| Refraction and accommodation disorders        | 2,057.6<br>(1,860.9 to 2,308.7)               | --                                             | 31.7<br>(18.2 to 51.1)                 | 26.4<br>(19.4 to 34.0)                            | -7.7<br>(-12.9 to -1.7)                             |
| Age-related and other hearing loss            | 2,813.2<br>(2,649.2 to 2,990.4)               | --                                             | 112.0<br>(78.4 to 155.5)               | 31.1<br>(25.9 to 37.0)                            | -3.8<br>(-6.3 to -1.4)                              |
| Other vision loss                             | 54.6<br>(48.9 to 60.8)                        | --                                             | 4.2<br>(2.9 to 5.7)                    | 34.9<br>(25.0 to 46.3)                            | -4.6<br>(-10.4 to 2.0)                              |
| Other sense organ diseases                    | 441.0<br>(407.7 to 475.0)                     | 2,196.6<br>(2,041.2 to 2,364.1)                | 13.5<br>(8.4 to 20.6)                  | 38.7<br>(32.1 to 46.3)                            | 1.3<br>(-2.5 to 5.3)                                |
| Oral disorders                                | 15,274.5<br>(14,702.8 to 15,765.0)            | 46,467.9†<br>(43,024.2 to 50,165.8)            | 29.3<br>(17.2 to 45.5)                 | 37.4<br>(34.6 to 40.2)                            | 0.2<br>(-1.7 to 2.0)                                |
| Caries of deciduous teeth                     | 3,782.2<br>(3,220.2 to 4,329.6)               | 12,057.0<br>(9,077.9 to 15,601.2)              | 0.9<br>(0.4 to 1.8)                    | 20.1<br>(8.8 to 32.1)                             | 0.2<br>(-9.5 to 10.4)                               |
| Caries of permanent teeth                     | 11,506.7<br>(10,862.0 to 12,072.9)            | 34,336.8<br>(32,878.8 to 35,685.7)             | 6.8<br>(3.1 to 13.2)                   | 35.0<br>(31.0 to 38.9)                            | -0.3<br>(-2.7 to 2.3)                               |
| Periodontal disease                           | 538.1<br>(446.9 to 646.2)                     | 57.3<br>(46.9 to 69.2)                         | 3.5<br>(1.4 to 7.3)                    | 40.8<br>(35.7 to 46.3)                            | -0.0<br>(-3.4 to 3.7)                               |
| Edentulism and severe tooth loss              | 249.6<br>(214.8 to 288.6)                     | 16.8<br>(14.2 to 19.3)                         | 7.0<br>(4.5 to 10.0)                   | 41.6<br>(34.0 to 49.2)                            | 0.5<br>(-3.9 to 4.7)                                |
| Other oral disorders                          | 376.7<br>(359.6 to 395.8)                     | --                                             | 11.1<br>(6.8 to 16.7)                  | 36.8<br>(31.9 to 42.2)                            | 0.3<br>(-2.9 to 3.4)                                |
| <b>Injuries</b>                               | <b>2,802.2</b><br><b>(2,618.3 to 3,029.6)</b> | <b>1,753.8†</b><br><b>(1,648.6 to 1,864.0)</b> | <b>121.7</b><br><b>(83.0 to 171.5)</b> | <b>40.4</b><br><b>(37.7 to 43.1)</b>              | <b>2.1</b><br><b>(0.5 to 3.6)</b>                   |
| <b>Transport injuries</b>                     | <b>307.9</b><br><b>(287.4 to 330.2)</b>       | <b>148.1</b><br><b>(130.9 to 167.4)</b>        | <b>18.6</b><br><b>(12.2 to 26.7)</b>   | <b>40.6</b><br><b>(37.4 to 43.5)</b>              | <b>0.7</b><br><b>(-1.1 to 2.3)</b>                  |
| Road injuries                                 | 256.7<br>(239.8 to 275.9)                     | 131.0<br>(114.3 to 150.0)                      | 15.3<br>(10.2 to 22.0)                 | 40.9<br>(37.9 to 43.8)                            | 0.4<br>(-1.3 to 2.1)                                |
| Pedestrian road injuries                      | 85.2<br>(75.0 to 96.9)                        | 32.5<br>(26.8 to 39.1)                         | 5.1<br>(3.4 to 7.3)                    | 37.5<br>(34.4 to 40.6)                            | -2.1<br>(-4.0 to -0.4)                              |
| Cyclist road injuries                         | 52.6<br>(44.3 to 62.0)                        | 30.8<br>(24.1 to 38.4)                         | 2.9<br>(1.9 to 4.2)                    | 45.4<br>(42.1 to 48.6)                            | 4.0<br>(2.2 to 5.8)                                 |
| Motorcyclist road injuries                    | 26.7<br>(22.9 to 31.7)                        | 9.4<br>(7.5 to 11.9)                           | 1.5<br>(1.0 to 2.2)                    | 37.9<br>(35.0 to 40.9)                            | -1.7<br>(-3.5 to 0.0)                               |
| Motor vehicle road injuries                   | 68.5<br>(59.0 to 77.8)                        | 42.5<br>(35.2 to 50.2)                         | 4.4<br>(3.0 to 6.3)                    | 42.1<br>(38.9 to 45.3)                            | 1.1<br>(-0.8 to 3.0)                                |
| Other road injuries                           | 23.7<br>(20.2 to 28.1)                        | 15.8<br>(11.8 to 20.5)                         | 1.3<br>(0.8 to 1.9)                    | 44.4<br>(41.1 to 47.8)                            | 3.7<br>(1.8 to 5.6)                                 |
| Other transport injuries                      | 51.3<br>(42.9 to 61.8)                        | 17.1<br>(14.0 to 21.4)                         | 3.2<br>(2.1 to 4.7)                    | 39.0<br>(34.4 to 43.6)                            | 1.9<br>(-0.4 to 4.2)                                |
| <b>Unintentional injuries</b>                 | <b>2,358.6</b><br><b>(2,180.1 to 2,586.5)</b> | <b>1,529.9</b><br><b>(1,428.1 to 1,636.1)</b>  | <b>89.4</b><br><b>(60.6 to 126.4)</b>  | <b>41.4</b><br><b>(38.5 to 44.3)</b>              | <b>2.8</b><br><b>(1.3 to 4.4)</b>                   |
| Falls                                         | 871.7<br>(753.9 to 998.7)                     | 544.4<br>(464.9 to 633.8)                      | 38.7<br>(27.1 to 53.2)                 | 42.6<br>(39.8 to 45.5)                            | 2.8<br>(1.1 to 4.4)                                 |
| Drowning                                      | 8.6<br>(7.4 to 9.9)                           | 2.4<br>(2.1 to 2.9)                            | 0.5<br>(0.4 to 0.8)                    | 37.1<br>(32.9 to 41.4)                            | -0.8<br>(-3.0 to 1.3)                               |
| Fire, heat, and hot substances                | 329.5<br>(270.9 to 407.0)                     | 62.8<br>(50.3 to 76.5)                         | 10.2<br>(7.0 to 14.4)                  | 41.0<br>(33.0 to 48.9)                            | 3.1<br>(-1.3 to 7.3)                                |
| Poisonings                                    | 7.9<br>(6.3 to 9.7)                           | 14.2<br>(11.0 to 17.9)                         | 0.8<br>(0.5 to 1.3)                    | 41.9<br>(28.3 to 56.1)                            | 5.7<br>(-1.6 to 13.3)                               |
| Exposure to mechanical forces                 | 357.3<br>(303.9 to 435.1)                     | 196.1<br>(164.2 to 229.3)                      | 9.9<br>(6.5 to 14.7)                   | 39.8<br>(36.4 to 43.0)                            | 0.4<br>(-1.5 to 2.2)                                |
| Unintentional firearm injuries                | 17.6<br>(14.5 to 21.6)                        | 6.4<br>(4.5 to 8.7)                            | 0.8<br>(0.5 to 1.2)                    | 39.5<br>(36.0 to 43.1)                            | -0.1<br>(-2.1 to 1.9)                               |
| Unintentional suffocation                     | 28.0<br>(20.2 to 37.3)                        | 9.5<br>(6.4 to 13.9)                           | 1.0<br>(0.6 to 1.5)                    | 40.1<br>(35.3 to 45.1)                            | 4.4<br>(2.0 to 6.9)                                 |
| Other exposure to mechanical forces           | 311.7<br>(261.0 to 388.8)                     | 180.3<br>(150.4 to 211.4)                      | 8.1<br>(5.4 to 11.9)                   | 39.8<br>(36.1 to 43.2)                            | 0.1<br>(-1.8 to 2.0)                                |



| Cause                                                                               | Prevalence in thousands (95% UI)          | Incidence in thousands (95% UI)       | YLDs in thousands (95% UI)          |                                                   |                                                     |
|-------------------------------------------------------------------------------------|-------------------------------------------|---------------------------------------|-------------------------------------|---------------------------------------------------|-----------------------------------------------------|
|                                                                                     | 2016 counts                               | 2016 counts                           | 2016 counts                         | Percentage change in counts between 2006 and 2016 | Percentage change in age-standardised rates between |
| Adverse effects of medical treatment                                                | 8.5<br>(6.6 to 10.6)                      | 111.7<br>(94.4 to 129.9)              | 1.1<br>(0.7 to 1.7)                 | 30.4<br>(22.8 to 37.8)                            | 3.1<br>(-1.1 to 7.3)                                |
| Animal contact                                                                      | 152.9<br>(134.8 to 177.8)                 | 252.9<br>(212.5 to 296.0)             | 5.4<br>(3.5 to 7.7)                 | 43.2<br>(35.6 to 51.1)                            | 3.5<br>(-0.3 to 7.2)                                |
| Venomous animal contact                                                             | 54.5<br>(45.5 to 66.4)                    | 100.5<br>(78.9 to 125.9)              | 3.5<br>(2.3 to 5.0)                 | 44.2<br>(33.5 to 56.1)                            | 4.5<br>(-0.8 to 10.6)                               |
| Non-venomous animal contact                                                         | 98.4<br>(83.0 to 119.6)                   | 152.4<br>(124.4 to 181.4)             | 1.9<br>(1.2 to 2.8)                 | 41.3<br>(36.9 to 45.9)                            | 1.8<br>(-0.9 to 4.5)                                |
| Foreign body                                                                        | 168.2<br>(136.1 to 201.1)                 | 136.9<br>(118.6 to 159.2)             | 7.5<br>(4.9 to 11.0)                | 39.2<br>(34.3 to 44.4)                            | 3.8<br>(1.2 to 6.3)                                 |
| Pulmonary aspiration and foreign body in airway                                     | 86.7<br>(63.4 to 119.0)                   | 45.9<br>(37.4 to 57.8)                | 4.4<br>(2.8 to 6.6)                 | 37.6<br>(32.1 to 43.3)                            | 3.1<br>(0.3 to 5.9)                                 |
| Foreign body in eyes                                                                | 9.1<br>(4.8 to 13.9)                      | 50.8<br>(38.6 to 68.3)                | 0.5<br>(0.2 to 0.9)                 | 34.9<br>(30.2 to 40.5)                            | 0.4<br>(-2.1 to 3.4)                                |
| Foreign body in other body part                                                     | 72.4<br>(57.6 to 95.6)                    | 40.1<br>(32.4 to 49.2)                | 2.6<br>(1.7 to 3.8)                 | 43.0<br>(37.2 to 49.1)                            | 5.4<br>(2.2 to 8.5)                                 |
| Environmental heat and cold exposure                                                | 137.1<br>(112.7 to 168.4)                 | 52.6<br>(42.5 to 65.1)                | 5.8<br>(3.8 to 8.5)                 | 40.4<br>(36.8 to 43.8)                            | 3.1<br>(1.3 to 4.8)                                 |
| Other unintentional injuries                                                        | 316.9<br>(245.2 to 416.1)                 | 155.8<br>(127.3 to 191.3)             | 9.4<br>(6.1 to 13.8)                | 42.1<br>(38.7 to 45.6)                            | 4.2<br>(2.4 to 5.9)                                 |
| <b>Self-harm and interpersonal violence</b>                                         | <b>989.6</b><br><b>(872.4 to 1,111.2)</b> | <b>74.9†</b><br><b>(62.8 to 88.8)</b> | <b>12.9</b><br><b>(8.9 to 17.8)</b> | <b>31.4</b><br><b>(27.5 to 35.4)</b>              | <b>-2.8</b><br><b>(-5.2 to -0.5)</b>                |
| Self-harm                                                                           | 13.4<br>(11.7 to 15.2)                    | 8.3<br>(7.1 to 9.7)                   | 0.8<br>(0.5 to 1.1)                 | 40.7<br>(36.9 to 44.3)                            | -0.4<br>(-2.5 to 1.5)                               |
| Self-harm by firearm                                                                | 1.2<br>(1.1 to 1.4)                       | 0.6<br>(0.4 to 0.8)                   | 0.1<br>(< 0.05 to 0.1)              | 39.3<br>(34.9 to 43.8)                            | -2.5<br>(-5.0 to 0.5)                               |
| Self-harm by other specified means                                                  | 12.2<br>(10.4 to 14.0)                    | 7.8<br>(6.6 to 9.1)                   | 0.7<br>(0.5 to 1.0)                 | 40.8<br>(36.9 to 44.7)                            | -0.2<br>(-2.3 to 1.8)                               |
| Interpersonal violence                                                              | 976.2<br>(858.9 to 1,097.2)               | 66.5†<br>(54.7 to 79.7)               | 12.2<br>(8.3 to 16.9)               | 30.9<br>(26.9 to 35.1)                            | -3.1<br>(-5.6 to -0.5)                              |
| Assault by firearm                                                                  | 2.9<br>(2.6 to 3.4)                       | 1.3<br>(0.9 to 1.8)                   | 0.1<br>(0.1 to 0.2)                 | 45.2<br>(40.0 to 49.9)                            | 5.5<br>(2.6 to 8.2)                                 |
| Assault by sharp object                                                             | 30.5<br>(24.7 to 36.8)                    | 16.2<br>(11.8 to 21.8)                | 1.1<br>(0.7 to 1.6)                 | 48.5<br>(44.5 to 52.6)                            | 7.8<br>(5.5 to 10.1)                                |
| Sexual violence                                                                     | 876.4<br>(762.4 to 998.7)                 | --                                    | 8.0<br>(5.3 to 11.4)                | 23.7<br>(18.9 to 29.1)                            | -8.9<br>(-12.3 to -5.5)                             |
| Assault by other means                                                              | 66.4<br>(55.5 to 79.7)                    | 49.0<br>(39.5 to 59.5)                | 3.0<br>(2.0 to 4.3)                 | 47.1<br>(43.6 to 50.5)                            | 6.0<br>(4.0 to 8.0)                                 |
| <b>Forces of nature, conflict and terrorism, and executions and police conflict</b> | <b>22.5</b><br><b>(12.5 to 34.8)</b>      | <b>0.9†</b><br><b>(0.5 to 1.8)</b>    | <b>0.8</b><br><b>(0.2 to 2.2)</b>   | <b>102.8</b><br><b>(83.9 to 112.1)</b>            | <b>46.2</b><br><b>(34.5 to 51.7)</b>                |
| Exposure to forces of nature                                                        | 8.2<br>(4.0 to 13.6)                      | --                                    | 0.3<br>(0.1 to 0.8)                 | 24.0<br>(20.4 to 28.1)                            | 0.1<br>(-2.4 to 2.9)                                |
| Conflict and terrorism                                                              | 11.3<br>(5.6 to 19.1)                     | --                                    | 0.4<br>(0.1 to 1.0)                 | 747.5<br>(713.3 to 792.3)                         | 475.0<br>(455.7 to 498.6)                           |
| Executions and police conflict                                                      | 2.9<br>(1.4 to 5.8)                       | 0.9<br>(0.5 to 1.8)                   | 0.1<br>(< 0.05 to 0.3)              | 23.1<br>(1.8 to 47.6)                             | -0.1<br>(-13.3 to 13.3)                             |
| <b>Impairments</b>                                                                  | --                                        | --                                    | --                                  | --                                                | --                                                  |
| Anaemia                                                                             | 7,579.5<br>(7,276.1 to 7,903.2)           | --                                    | 213.9<br>(143.0 to 307.3)           | 9.1<br>(3.4 to 14.8)                              | -14.1<br>(-18.0 to -10.1)                           |
| Developmental intellectual disability                                               | 1,027.2<br>(779.0 to 1,280.0)             | --                                    | 95.8<br>(67.6 to 133.9)             | 26.6<br>(19.2 to 33.8)                            | -3.6<br>(-8.6 to 1.1)                               |
| Epilepsy                                                                            | 176.3<br>(101.7 to 265.5)                 | --                                    | 67.3<br>(35.1 to 114.5)             | 26.4<br>(-31.4 to 143.7)                          | -3.1<br>(-49.4 to 96.7)                             |
| Guillain-Barre syndrome                                                             | 0.2<br>(0.1 to 0.2)                       | --                                    | < 0.05<br>(< 0.05 to 0.1)           | 31.8<br>(29.4 to 34.6)                            | 0.1<br>(0.1 to 0.2)                                 |
| Hearing loss                                                                        | 3,412.8<br>(3,263.5 to 3,569.5)           | --                                    | 150.9<br>(105.5 to 205.8)           | 28.4<br>(24.6 to 32.4)                            | -4.4<br>(-6.4 to -2.4)                              |
| Heart failure                                                                       | 61.6<br>(54.2 to 69.5)                    | --                                    | 6.8<br>(4.8 to 9.0)                 | 35.8<br>(26.3 to 47.1)                            | -1.4<br>(-8.7 to 6.8)                               |
| Infertility                                                                         | 410.7<br>(327.1 to 530.1)                 | --                                    | 2.5<br>(1.1 to 5.0)                 | 75.1<br>(46.6 to 112.9)                           | 28.0<br>(5.2 to 57.3)                               |
| Pelvic inflammatory disease                                                         | 25.1<br>(21.3 to 29.9)                    | --                                    | 3.3<br>(2.2 to 4.7)                 | 41.2<br>(22.8 to 61.8)                            | 2.6<br>(-10.3 to 17.4)                              |
| Vision loss                                                                         | 2,334.9<br>(2,134.8 to 2,593.4)           | --                                    | 65.0<br>(43.7 to 96.4)              | 24.9<br>(16.2 to 32.3)                            | -7.2<br>(-11.2 to -3.2)                             |

We did not calculate incidence for the nine impairments, certain NTDs, and causes with only birth prevalence. Blank cells mean that no estimate is available.

† Incidence for aggregate causes represents the sum of the incidence of the causes below the aggregate.

‡ Incidence estimates for stroke represent first-ever stroke only.

^ Incidence of HIV/AIDS represents new infections of HIV only and does not include new infections of Tuberculosis in HIV positive cases.

SR Table 14: Prevalence, incidence, and YLDs for 2016, percentage change of YLD counts and percentage change of age-standardised YLD rates between 2006 and 2016 by cause and impairments, for all ages, Malawi.

| Cause                                                                                | Prevalence in thousands (95% UI)          | Incidence in thousands (95% UI)               | YLDs in thousands (95% UI)             |                                                   |                                                     |
|--------------------------------------------------------------------------------------|-------------------------------------------|-----------------------------------------------|----------------------------------------|---------------------------------------------------|-----------------------------------------------------|
|                                                                                      | 2016 counts                               | 2016 counts                                   | 2016 counts                            | Percentage change in counts between 2006 and 2016 | Percentage change in age-standardised rates between |
| <b>All causes</b>                                                                    | <b>17,517.8</b><br>(17,465.0 to 17,567.4) | <b>139,189.3†</b><br>(131,507.0 to 148,276.4) | <b>1,629.4</b><br>(1,201.0 to 2,126.8) | <b>24.4</b><br>(18.7 to 28.7)                     | <b>-9.5</b><br>(-15.1 to -5.8)                      |
| <b>Communicable, maternal, neonatal, and nutritional disorders</b>                   | <b>15,182.5</b><br>(14,958.8 to 15,401.5) | <b>90,028.2†</b><br>(82,983.6 to 97,685.8)    | <b>501.0</b><br>(358.0 to 669.4)       | <b>1.8</b><br>(-8.3 to 9.1)                       | <b>-30.2</b><br>(-41.4 to -21.9)                    |
| <b>HIV/AIDS and tuberculosis</b>                                                     | <b>3,973.5</b><br>(3,825.9 to 4,143.8)    | <b>104.5†</b><br>(92.1 to 121.0)              | <b>128.1</b><br>(90.1 to 173.5)        | <b>-15.7</b><br>(-35.9 to 6.4)                    | <b>-41.9</b><br>(-59.1 to -19.8)                    |
| Tuberculosis                                                                         | 3,045.6<br>(2,854.5 to 3,261.9)           | 35.1†<br>(28.8 to 42.8)                       | 5.9<br>(3.7 to 8.7)                    | 11.8<br>(-6.9 to 32.7)                            | -23.4<br>(-35.0 to -10.7)                           |
| Drug-susceptible tuberculosis                                                        | 18.8<br>(14.9 to 23.4)                    | 34.8<br>(28.5 to 42.4)                        | 5.8<br>(3.6 to 8.6)                    | 11.7<br>(-6.8 to 32.8)                            | -23.4<br>(-35.2 to -10.4)                           |
| Multidrug-resistant tuberculosis without extensive drug resistance                   | 0.2<br>(0.1 to 0.4)                       | 0.3<br>(0.1 to 0.6)                           | 0.1<br>(< 0.05 to 0.1)                 | 15.9<br>(-63.4 to 249.5)                          | -22.3<br>(-75.6 to 134.6)                           |
| Extensively drug-resistant tuberculosis                                              | < 0.05<br>(< 0.05 to < 0.05)              | < 0.05<br>(< 0.05 to < 0.05)                  | < 0.05<br>(< 0.05 to < 0.05)           | 253.1<br>(11.7 to 964.7)                          | 136.8<br>(-25.6 to 614.7)                           |
| Latent tuberculosis infection                                                        | 3,026.6<br>(2,836.9 to 3,242.7)           | --                                            | --                                     | --                                                | --                                                  |
| HIV/AIDS                                                                             | 1,241.2<br>(1,163.0 to 1,326.8)           | 69.4^<br>(58.8 to 83.9)                       | 122.2<br>(85.9 to 165.4)               | -16.6<br>(-37.3 to 5.9)                           | -42.4<br>(-59.9 to -19.7)                           |
| Drug-susceptible HIV/AIDS - Tuberculosis                                             | 16.6<br>(12.6 to 20.8)                    | 27.0<br>(21.3 to 33.0)                        | 6.3<br>(3.9 to 9.1)                    | -24.9<br>(-36.3 to -12.7)                         | -42.2<br>(-49.9 to -34.2)                           |
| Multidrug-resistant HIV/AIDS - Tuberculosis without extensive drug resistance        | 0.2<br>(0.1 to 0.4)                       | 0.3<br>(0.1 to 0.6)                           | 0.1<br>(< 0.05 to 0.2)                 | -21.3<br>(-75.9 to 148.8)                         | -39.9<br>(-81.6 to 88.1)                            |
| Extensively drug-resistant HIV/AIDS - Tuberculosis                                   | < 0.05<br>(< 0.05 to < 0.05)              | < 0.05<br>(< 0.05 to < 0.05)                  | < 0.05<br>(< 0.05 to < 0.05)           | 139.9<br>(-26.7 to 657.9)                         | 83.3<br>(-44.1 to 472.8)                            |
| HIV/AIDS resulting in other diseases                                                 | 1,224.4<br>(1,146.6 to 1,310.6)           | 69.4<br>(58.8 to 83.9)                        | 115.8<br>(80.1 to 159.4)               | -16.1<br>(-37.9 to 8.1)                           | -42.4<br>(-60.5 to -18.0)                           |
| <b>Diarrhoea, lower respiratory infections, and other common infectious diseases</b> | <b>1,419.4</b><br>(1,354.2 to 1,505.3)    | <b>72,446.3†</b><br>(65,417.6 to 79,743.5)    | <b>79.9</b><br>(56.1 to 108.4)         | <b>24.6</b><br>(19.8 to 29.7)                     | <b>-7.5</b><br>(-10.4 to -4.6)                      |
| Diarrhoeal diseases                                                                  | 307.0<br>(281.8 to 334.0)                 | 20,511.2<br>(18,845.3 to 22,271.0)            | 34.7<br>(24.1 to 48.7)                 | 15.3<br>(8.2 to 23.0)                             | -13.4<br>(-17.6 to -9.3)                            |
| Intestinal infectious diseases                                                       | 1.0<br>(0.7 to 1.4)                       | 17.6†<br>(12.4 to 24.7)                       | 0.2<br>(0.1 to 0.3)                    | 10.9<br>(-12.6 to 37.5)                           | -18.2<br>(-32.2 to -1.4)                            |
| Typhoid fever                                                                        | 1.0<br>(0.7 to 1.4)                       | 16.1<br>(11.4 to 22.8)                        | 0.2<br>(0.1 to 0.2)                    | 12.3<br>(-12.1 to 40.6)                           | -17.5<br>(-31.9 to -0.5)                            |
| Paratyphoid fever                                                                    | 0.1<br>(< 0.05 to 0.1)                    | 1.4<br>(0.9 to 2.2)                           | < 0.05<br>(< 0.05 to < 0.05)           | 23.6<br>(-10.1 to 69.8)                           | -9.4<br>(-30.6 to 19.7)                             |
| Other intestinal infectious diseases                                                 | --                                        | --                                            | < 0.05<br>(< 0.05 to < 0.05)           | -37.6<br>(-55.9 to -10.2)                         | -50.0<br>(-61.6 to -34.7)                           |
| Lower respiratory infections                                                         | 27.2<br>(24.6 to 30.2)                    | 1,179.1<br>(1,054.5 to 1,316.4)               | 1.7<br>(1.1 to 2.4)                    | 14.4<br>(-0.9 to 30.2)                            | -10.1<br>(-18.8 to -1.3)                            |
| Upper respiratory infections                                                         | 641.1<br>(553.2 to 734.7)                 | 48,354.8<br>(41,532.4 to 55,880.7)            | 16.0<br>(9.4 to 25.2)                  | 36.6<br>(25.2 to 48.9)                            | 0.0<br>(-6.5 to 7.4)                                |
| Otitis media                                                                         | 373.4<br>(332.2 to 417.5)                 | 1,727.2<br>(1,336.0 to 2,216.1)               | 12.3<br>(7.7 to 18.6)                  | 30.6<br>(20.9 to 40.3)                            | -3.5<br>(-10.1 to 3.6)                              |
| Meningitis                                                                           | 95.6<br>(78.5 to 115.3)                   | 22.8<br>(19.5 to 27.1)                        | 9.5<br>(6.8 to 12.6)                   | 33.0<br>(22.4 to 44.7)                            | -3.0<br>(-9.6 to 4.3)                               |
| Pneumococcal meningitis                                                              | 29.6<br>(24.7 to 35.4)                    | 3.3<br>(2.5 to 4.3)                           | 3.4<br>(2.4 to 4.7)                    | 19.6<br>(2.1 to 40.0)                             | -13.6<br>(-24.4 to -0.3)                            |
| H influenzae type B meningitis                                                       | 12.0<br>(9.9 to 14.8)                     | 1.9<br>(1.4 to 2.7)                           | 1.8<br>(1.2 to 2.5)                    | 36.3<br>(20.4 to 54.6)                            | 0.7<br>(-9.2 to 10.9)                               |
| Meningococcal infection                                                              | 5.9<br>(4.2 to 8.2)                       | 1.8<br>(1.2 to 2.6)                           | 0.7<br>(0.5 to 0.9)                    | 39.9<br>(31.4 to 48.6)                            | 1.9<br>(-5.0 to 8.7)                                |
| Other meningitis                                                                     | 48.1<br>(34.1 to 63.4)                    | 15.8<br>(13.4 to 18.9)                        | 3.6<br>(2.4 to 4.9)                    | 45.6<br>(28.9 to 62.9)                            | 6.9<br>(-3.1 to 17.4)                               |
| Encephalitis                                                                         | 45.4<br>(28.7 to 68.8)                    | 19.7<br>(17.0 to 22.5)                        | 4.7<br>(3.3 to 6.2)                    | 40.5<br>(21.2 to 61.6)                            | 2.6<br>(-9.1 to 16.3)                               |
| Diphtheria                                                                           | < 0.05<br>(< 0.05 to < 0.05)              | < 0.05<br>(< 0.05 to < 0.05)                  | < 0.05<br>(< 0.05 to < 0.05)           | -41.5<br>(-77.9 to 55.9)                          | -53.7<br>(-79.5 to -0.9)                            |
| Whooping cough                                                                       | 4.4<br>(3.4 to 5.5)                       | 31.7<br>(24.7 to 40.4)                        | 0.2<br>(0.1 to 0.4)                    | -26.2<br>(-42.5 to -6.5)                          | -45.0<br>(-57.1 to -29.7)                           |
| Tetanus                                                                              | 0.2<br>(0.2 to 0.3)                       | 0.3<br>(0.1 to 0.6)                           | < 0.05<br>(< 0.05 to < 0.05)           | -14.1<br>(-40.0 to 14.7)                          | -35.4<br>(-51.5 to -17.8)                           |
| Measles                                                                              | 1.4<br>(0.5 to 3.2)                       | 52.9<br>(18.6 to 116.8)                       | 0.1<br>(< 0.05 to 0.3)                 | 17.7<br>(-40.6 to 111.8)                          | -12.8<br>(-55.3 to 56.6)                            |
| Varicella and herpes zoster                                                          | 17.0<br>(15.8 to 18.2)                    | 529.0<br>(491.5 to 570.8)                     | 0.5<br>(0.3 to 0.7)                    | 36.1<br>(15.8 to 57.2)                            | 0.0<br>(-10.8 to 11.8)                              |
| <b>Neglected tropical diseases and malaria</b>                                       | <b>5,667.9</b><br>(5,334.9 to 6,012.2)    | <b>5,553.7†</b><br>(4,279.8 to 7,048.0)       | <b>82.4</b><br>(55.8 to 119.1)         | <b>-20.8</b><br>(-31.1 to -11.8)                  | <b>-44.8</b><br>(-53.2 to -37.6)                    |
| Malaria                                                                              | 2,894.8<br>(2,520.1 to 3,349.6)           | 4,648.3<br>(3,391.7 to 6,123.7)               | 31.4<br>(22.4 to 43.1)                 | 9.6<br>(0.3 to 19.6)                              | -15.0<br>(-22.4 to -7.4)                            |
| Chagas disease                                                                       | --                                        | --                                            | --                                     | --                                                | --                                                  |
| Leishmaniasis                                                                        | < 0.05<br>(< 0.05 to < 0.05)              | < 0.05<br>(< 0.05 to < 0.05)                  | < 0.05<br>(< 0.05 to < 0.05)           | 5.5<br>(-21.0 to 39.5)                            | -28.1<br>(-58.5 to 26.7)                            |
| Visceral leishmaniasis                                                               | < 0.05<br>(< 0.05 to < 0.05)              | < 0.05<br>(< 0.05 to < 0.05)                  | < 0.05<br>(< 0.05 to < 0.05)           | 5.5<br>(-21.0 to 39.5)                            | -28.1<br>(-58.5 to 26.7)                            |
| Cutaneous and mucocutaneous leishmaniasis                                            | --                                        | --                                            | --                                     | --                                                | --                                                  |
| African trypanosomiasis                                                              | < 0.05<br>(< 0.05 to 0.2)                 | 0.1<br>(< 0.05 to 0.3)                        | < 0.05<br>(< 0.05 to 0.1)              | -17.8<br>(-88.3 to 437.1)                         | -40.7<br>(-91.3 to 301.5)                           |
| Schistosomiasis                                                                      | 1,299.3<br>(1,138.0 to 1,461.2)           | 594.5<br>(527.3 to 668.6)                     | 11.3<br>(5.8 to 21.0)                  | -55.6<br>(-58.1 to -51.9)                         | -68.1<br>(-69.9 to -65.4)                           |
| Cysticercosis                                                                        | 7.5<br>(5.9 to 9.0)                       | --                                            | 1.4<br>(0.8 to 2.2)                    | 14.5<br>(-9.7 to 39.5)                            | -18.6<br>(-33.9 to -3.7)                            |
| Cystic echinococcosis                                                                | 8.2<br>(2.2 to 26.1)                      | 1.7<br>(0.4 to 5.5)                           | 0.8<br>(0.2 to 2.4)                    | -20.3<br>(-86.9 to 356.8)                         | -42.1<br>(-89.7 to 235.0)                           |
| Lymphatic filariasis                                                                 | 389.9<br>(303.6 to 500.7)                 | 185.5<br>(166.7 to 204.8)                     | 20.3<br>(9.5 to 35.7)                  | -22.2<br>(-54.6 to 3.0)                           | -41.6<br>(-64.9 to -23.0)                           |
| Onchocerciasis                                                                       | 57.3<br>(27.7 to 98.2)                    | 9.7<br>(3.4 to 23.5)                          | 4.1<br>(1.3 to 8.6)                    | -49.7<br>(-73.1 to -20.4)                         | -58.1<br>(-77.8 to -30.7)                           |
| Trachoma                                                                             | 10.6<br>(7.7 to 14.2)                     | --                                            | 0.9<br>(0.6 to 1.3)                    | -36.9<br>(-49.9 to -21.3)                         | -55.2<br>(-65.5 to -41.4)                           |
| Dengue                                                                               | 6.8<br>(3.4 to 12.0)                      | 113.6<br>(62.2 to 185.1)                      | 1.1<br>(0.5 to 2.2)                    | 196.5<br>(106.4 to 623.8)                         | 117.8<br>(58.0 to 424.9)                            |
| Yellow fever                                                                         | --                                        | --                                            | --                                     | --                                                | --                                                  |
| Rabies                                                                               | < 0.05<br>(< 0.05 to < 0.05)              | 0.1<br>(< 0.05 to 0.1)                        | < 0.05<br>(< 0.05 to < 0.05)           | -14.5<br>(-68.3 to 87.7)                          | -34.9<br>(-72.5 to 29.3)                            |
| Intestinal nematode infections                                                       | 1,592.6<br>(1,354.2 to 1,864.0)           | --                                            | 1.9<br>(1.1 to 3.0)                    | -51.0<br>(-59.6 to -41.7)                         | -64.8<br>(-71.7 to -56.6)                           |
| Ascariasis                                                                           | 471.5<br>(356.5 to 629.9)                 | --                                            | < 0.05<br>(< 0.05 to 0.1)              | -52.1<br>(-65.5 to -34.0)                         | -64.5<br>(-75.0 to -50.3)                           |

| Cause                                                                   | Prevalence in thousands (95% UI)                 | Incidence in thousands (95% UI)                   | YLDs in thousands (95% UI)                  |                                                   |                                                     |
|-------------------------------------------------------------------------|--------------------------------------------------|---------------------------------------------------|---------------------------------------------|---------------------------------------------------|-----------------------------------------------------|
|                                                                         | 2016 counts                                      | 2016 counts                                       | 2016 counts                                 | Percentage change in counts between 2006 and 2016 | Percentage change in age-standardised rates between |
| Trichuriasis                                                            | 509.7<br>(373.9 to 689.4)                        | --                                                | < 0.05<br>(< 0.05 to < 0.05)                | -54.3<br>(-68.0 to -35.7)                         | -66.3<br>(-77.4 to -49.2)                           |
| Hookworm disease                                                        | 655.8<br>(517.8 to 850.6)                        | --                                                | 1.9<br>(1.1 to 3.0)                         | -50.9<br>(-59.7 to -41.4)                         | -64.8<br>(-71.8 to -56.3)                           |
| Food-borne trematodiasis                                                | --                                               | --                                                | --                                          | --                                                | --                                                  |
| Leprosy                                                                 | 2.1<br>(2.0 to 2.3)                              | 0.2<br>(0.2 to 0.2)                               | 0.1<br>(0.1 to 0.2)                         | 19.2<br>(-1.0 to 43.0)                            | -13.8<br>(-26.7 to 2.4)                             |
| Ebola virus disease                                                     | --                                               | --                                                | --                                          | --                                                | --                                                  |
| Zika virus disease                                                      | --                                               | --                                                | --                                          | --                                                | --                                                  |
| Guinea worm disease                                                     | --                                               | --                                                | --                                          | --                                                | --                                                  |
| Other neglected tropical diseases                                       | 280.6<br>(269.6 to 293.9)                        | --                                                | 9.0<br>(5.9 to 13.2)                        | 18.2<br>(9.9 to 27.9)                             | -11.0<br>(-17.0 to -4.2)                            |
| <b>Maternal disorders</b>                                               | <b>52.6</b><br><b>(41.5 to 66.6)</b>             | <b>522.0†</b><br><b>(454.0 to 602.4)</b>          | <b>5.5</b><br><b>(3.7 to 7.7)</b>           | <b>4.9</b><br><b>(-13.2 to 26.4)</b>              | <b>-28.5</b><br><b>(-39.7 to -14.6)</b>             |
| Maternal haemorrhage                                                    | 6.0<br>(4.6 to 7.8)                              | 30.2<br>(21.9 to 40.6)                            | 0.2<br>(0.1 to 0.3)                         | 29.2<br>(-10.5 to 81.5)                           | -7.0<br>(-34.5 to 27.9)                             |
| Maternal sepsis and other pregnancy related infections                  | 7.5<br>(5.8 to 9.7)                              | 38.6<br>(28.7 to 51.1)                            | 0.2<br>(0.1 to 0.3)                         | 40.1<br>(-30.6 to 190.5)                          | -1.3<br>(-49.3 to 96.1)                             |
| Maternal hypertensive disorders                                         | 30.0<br>(18.7 to 42.9)                           | 124.4<br>(96.9 to 153.7)                          | 1.4<br>(0.7 to 2.4)                         | 29.0<br>(-21.2 to 115.0)                          | -8.7<br>(-44.2 to 51.8)                             |
| Maternal obstructed labour and uterine rupture                          | 7.9<br>(6.6 to 9.3)                              | 52.9<br>(37.4 to 72.9)                            | 2.6<br>(1.6 to 3.6)                         | -8.2<br>(-24.2 to 12.0)                           | -37.4<br>(-47.7 to -24.8)                           |
| Maternal abortion, miscarriage, and ectopic pregnancy                   | 2.3<br>(1.5 to 3.2)                              | 275.8<br>(218.5 to 348.6)                         | 0.2<br>(0.1 to 0.4)                         | 34.3<br>(-22.7 to 133.5)                          | -6.2<br>(-45.2 to 62.1)                             |
| Other maternal disorders                                                | --                                               | --                                                | 0.8<br>(0.6 to 1.2)                         | -0.1<br>(-17.5 to 20.4)                           | -31.9<br>(-42.5 to -18.5)                           |
| <b>Neonatal disorders</b>                                               | <b>233.6</b><br><b>(186.2 to 297.5)</b>          | --                                                | <b>30.6</b><br><b>(16.8 to 54.8)</b>        | <b>68.1</b><br><b>(25.5 to 116.2)</b>             | <b>31.2</b><br><b>(-5.2 to 72.9)</b>                |
| Neonatal preterm birth complications                                    | 156.4<br>(116.0 to 215.9)                        | --                                                | 8.2<br>(5.5 to 12.0)                        | 32.8<br>(4.4 to 64.9)                             | -0.8<br>(-22.7 to 25.5)                             |
| Neonatal encephalopathy due to birth asphyxia and trauma                | 61.5<br>(30.9 to 110.2)                          | --                                                | 5.2<br>(1.1 to 18.4)                        | 63.6<br>(-28.3 to 241.0)                          | 30.4<br>(-46.7 to 175.7)                            |
| Neonatal sepsis and other neonatal infections                           | 33.1<br>(11.2 to 74.0)                           | --                                                | 12.7<br>(3.2 to 32.9)                       | 128.0<br>(42.7 to 300.9)                          | 93.0<br>(15.6 to 270.2)                             |
| Hemolytic disease and other neonatal jaundice                           | 4.9<br>(4.1 to 5.6)                              | --                                                | 1.7<br>(1.2 to 2.1)                         | 22.1<br>(6.4 to 40.6)                             | -6.9<br>(-16.4 to 3.8)                              |
| Other neonatal disorders                                                | --                                               | --                                                | 2.9<br>(1.7 to 4.8)                         | 46.7<br>(13.9 to 82.3)                            | 9.6<br>(-15.2 to 36.7)                              |
| <b>Nutritional deficiencies</b>                                         | <b>9,024.8</b><br><b>(8,566.7 to 9,564.4)</b>    | <b>7,688.2†</b><br><b>(6,134.8 to 9,559.1)</b>    | <b>159.4</b><br><b>(106.1 to 230.9)</b>     | <b>16.2</b><br><b>(10.6 to 21.9)</b>              | <b>-13.2</b><br><b>(-16.7 to -9.9)</b>              |
| Protein-energy malnutrition                                             | 109.0<br>(90.0 to 131.8)                         | 77.3<br>(64.7 to 92.4)                            | 4.5<br>(2.7 to 6.8)                         | -25.0<br>(-44.1 to 1.4)                           | -44.4<br>(-58.8 to -24.4)                           |
| Iodine deficiency                                                       | 403.0<br>(354.0 to 459.0)                        | 16.6<br>(14.7 to 18.9)                            | 12.1<br>(8.2 to 16.9)                       | 13.0<br>(3.3 to 23.7)                             | -17.9<br>(-24.6 to -11.2)                           |
| Vitamin A deficiency                                                    | 5,827.1<br>(5,036.3 to 6,714.0)                  | 7,594.3<br>(6,025.1 to 9,473.0)                   | 0.9<br>(0.5 to 1.6)                         | 25.2<br>(-3.4 to 57.9)                            | -7.6<br>(-27.8 to 13.2)                             |
| Iron-deficiency anaemia                                                 | 4,624.0<br>(4,477.2 to 4,797.5)                  | --                                                | 141.7<br>(94.0 to 206.9)                    | 18.5<br>(12.4 to 24.9)                            | -11.6<br>(-15.6 to -7.8)                            |
| Other nutritional deficiencies                                          | --                                               | --                                                | 0.1<br>(0.1 to 0.2)                         | -26.5<br>(-46.1 to 0.8)                           | -45.5<br>(-60.2 to -24.9)                           |
| <b>Other communicable, maternal, neonatal, and nutritional diseases</b> | <b>6,365.4</b><br><b>(5,972.7 to 6,717.7)</b>    | <b>3,713.5</b><br><b>(3,090.8 to 4,620.4)</b>     | <b>15.3</b><br><b>(9.9 to 23.1)</b>         | <b>30.9</b><br><b>(22.5 to 39.8)</b>              | <b>-3.6</b><br><b>(-9.5 to 2.6)</b>                 |
| Sexually transmitted diseases excluding HIV                             | 4,692.0<br>(4,379.2 to 5,003.4)                  | 2,377.1<br>(2,150.8 to 2,647.0)                   | 7.4<br>(4.6 to 12.0)                        | 46.5<br>(33.7 to 61.8)                            | 2.8<br>(-5.4 to 11.8)                               |
| Syphilis                                                                | 465.1<br>(378.8 to 559.9)                        | 336.3<br>(261.1 to 426.2)                         | 0.6<br>(0.4 to 0.8)                         | 42.9<br>(22.2 to 66.9)                            | 1.1<br>(-14.8 to 19.4)                              |
| Chlamydial infection                                                    | 156.3<br>(124.0 to 193.1)                        | 149.4<br>(123.5 to 179.3)                         | 1.2<br>(0.8 to 1.9)                         | 53.5<br>(32.0 to 78.4)                            | 7.7<br>(-7.4 to 24.6)                               |
| Gonococcal infection                                                    | 214.8<br>(170.5 to 268.6)                        | 699.9<br>(535.7 to 902.2)                         | 1.3<br>(0.7 to 2.1)                         | 47.6<br>(12.6 to 96.1)                            | 4.9<br>(-18.9 to 37.2)                              |
| Trichomoniasis                                                          | 579.9<br>(488.6 to 678.5)                        | 535.4<br>(444.4 to 634.1)                         | 0.7<br>(0.3 to 1.5)                         | 47.0<br>(36.9 to 57.3)                            | 3.6<br>(-2.8 to 10.0)                               |
| Genital herpes                                                          | 3,905.8<br>(3,351.9 to 4,506.2)                  | 497.5<br>(406.4 to 606.1)                         | 1.1<br>(0.4 to 2.5)                         | 21.9<br>(5.7 to 38.7)                             | -12.3<br>(-22.4 to -1.4)                            |
| Other sexually transmitted diseases                                     | 118.1<br>(92.2 to 150.9)                         | 158.6<br>(130.6 to 193.0)                         | 2.5<br>(1.6 to 3.7)                         | 56.7<br>(36.0 to 79.8)                            | 9.4<br>(-4.7 to 25.1)                               |
| Hepatitis                                                               | 2,197.7<br>(1,792.0 to 2,686.0)                  | 1,336.4<br>(793.7 to 2,227.3)                     | 1.2<br>(0.7 to 1.9)                         | -4.7<br>(-26.7 to 25.5)                           | -23.4<br>(-37.0 to -6.8)                            |
| Acute hepatitis A                                                       | 39.5<br>(3.8 to 105.6)                           | 512.9<br>(49.7 to 1,372.6)                        | 0.2<br>(0.1 to 0.5)                         | -10.8<br>(-76.1 to 292.0)                         | -26.0<br>(-72.5 to 125.0)                           |
| Hepatitis B                                                             | 1,707.6<br>(1,301.7 to 2,199.3)                  | 732.3<br>(529.6 to 987.5)                         | 0.9<br>(0.5 to 1.5)                         | -4.1<br>(-21.9 to 18.2)                           | -23.5<br>(-37.2 to -6.5)                            |
| Hepatitis C                                                             | 447.1<br>(391.8 to 507.6)                        | 45.9<br>(41.5 to 50.5)                            | < 0.05<br>(< 0.05 to 0.1)                   | 22.3<br>(-23.1 to 95.1)                           | -9.2<br>(-33.2 to 23.3)                             |
| Acute hepatitis E                                                       | 3.5<br>(2.8 to 4.5)                              | 45.3<br>(36.6 to 58.3)                            | 0.1<br>(< 0.05 to 0.1)                      | -4.0<br>(-28.0 to 31.9)                           | -20.7<br>(-35.3 to -1.8)                            |
| Other infectious diseases                                               | 206.0<br>(198.3 to 214.7)                        | < 0.05<br>(< 0.05 to < 0.05)                      | 6.7<br>(4.4 to 9.9)                         | 24.9<br>(15.6 to 35.0)                            | -7.0<br>(-13.4 to -0.2)                             |
| <b>Non-communicable diseases</b>                                        | <b>15,680.7</b><br><b>(15,491.8 to 15,897.7)</b> | <b>47,988.8†</b><br><b>(43,754.8 to 52,234.4)</b> | <b>1,054.7</b><br><b>(770.4 to 1,373.0)</b> | <b>38.1</b><br><b>(32.7 to 43.4)</b>              | <b>0.2</b><br><b>(-2.5 to 2.9)</b>                  |
| <b>Neoplasms</b>                                                        | <b>44.1</b><br><b>(40.8 to 48.1)</b>             | <b>16.4</b><br><b>(11.5 to 18.5)</b>              | <b>5.2</b><br><b>(3.2 to 7.1)</b>           | <b>23.6</b><br><b>(12.9 to 34.7)</b>              | <b>-9.5</b><br><b>(-15.9 to -2.6)</b>               |
| Lip and oral cavity cancer                                              | 0.8<br>(0.7 to 0.8)                              | 0.2<br>(0.2 to 0.2)                               | 0.1<br>(0.1 to 0.1)                         | 30.8<br>(14.6 to 51.0)                            | -2.5<br>(-14.9 to 12.6)                             |
| Nasopharynx cancer                                                      | 0.1<br>(0.1 to 0.1)                              | < 0.05<br>(< 0.05 to < 0.05)                      | < 0.05<br>(< 0.05 to < 0.05)                | 25.6<br>(6.4 to 52.6)                             | -9.8<br>(-23.4 to 8.3)                              |
| Other pharynx cancer                                                    | 0.1<br>(0.1 to 0.1)                              | < 0.05<br>(< 0.05 to 0.1)                         | < 0.05<br>(< 0.05 to < 0.05)                | 20.2<br>(6.0 to 36.8)                             | -9.6<br>(-19.8 to 1.6)                              |
| Oesophageal cancer                                                      | 2.0<br>(1.8 to 2.2)                              | 1.8<br>(1.6 to 1.9)                               | 0.4<br>(0.3 to 0.6)                         | 16.9<br>(-2.8 to 42.0)                            | -12.3<br>(-27.2 to 5.9)                             |
| Stomach cancer                                                          | 0.4<br>(0.3 to 0.4)                              | 0.2<br>(0.2 to 0.3)                               | 0.1<br>(< 0.05 to 0.1)                      | 12.3<br>(1.9 to 23.8)                             | -16.2<br>(-25.0 to -6.8)                            |
| Colon and rectum cancer                                                 | 1.0<br>(0.8 to 1.1)                              | 0.4<br>(0.3 to 0.4)                               | 0.1<br>(0.1 to 0.2)                         | 31.1<br>(10.8 to 53.3)                            | -3.1<br>(-18.3 to 12.5)                             |
| Liver cancer                                                            | 0.2<br>(0.2 to 0.3)                              | 0.5<br>(0.4 to 0.6)                               | 0.1<br>(0.1 to 0.1)                         | 31.9<br>(15.6 to 48.5)                            | -2.5<br>(-14.2 to 9.7)                              |
| Liver cancer due to hepatitis B                                         | 0.2<br>(0.1 to 0.2)                              | 0.2<br>(0.1 to 0.2)                               | < 0.05<br>(< 0.05 to 0.1)                   | 32.6<br>(13.1 to 51.9)                            | -2.7<br>(-15.7 to 10.8)                             |



| Cause                                              | Prevalence in thousands (95% UI)              | Incidence in thousands (95% UI)          | YLDs in thousands (95% UI)           |                                                   |                                                     |
|----------------------------------------------------|-----------------------------------------------|------------------------------------------|--------------------------------------|---------------------------------------------------|-----------------------------------------------------|
|                                                    | 2016 counts                                   | 2016 counts                              | 2016 counts                          | Percentage change in counts between 2006 and 2016 | Percentage change in age-standardised rates between |
| Liver cancer due to hepatitis C                    | 0.1<br>(0.1 to 0.2)                           | 0.1<br>(0.1 to 0.2)                      | < 0.05<br>(< 0.05 to < 0.05)         | 30.4<br>(12.5 to 48.2)                            | -2.5<br>(-14.7 to 10.6)                             |
| Liver cancer due to alcohol use                    | < 0.05<br>(< 0.05 to 0.1)                     | < 0.05<br>(< 0.05 to 0.1)                | < 0.05<br>(< 0.05 to < 0.05)         | 37.4<br>(18.5 to 57.5)                            | 1.4<br>(-11.9 to 15.2)                              |
| Liver cancer due to other causes                   | 0.2<br>(0.1 to 0.2)                           | 0.1<br>(0.1 to 0.2)                      | < 0.05<br>(< 0.05 to < 0.05)         | 31.0<br>(13.3 to 49.7)                            | -3.7<br>(-15.8 to 9.3)                              |
| Gallbladder and biliary tract cancer               | < 0.05<br>(< 0.05 to < 0.05)                  | 0.1<br>(< 0.05 to 0.1)                   | < 0.05<br>(< 0.05 to < 0.05)         | 19.7<br>(7.8 to 32.2)                             | -9.8<br>(-17.9 to -1.1)                             |
| Pancreatic cancer                                  | 0.1<br>(0.1 to 0.1)                           | 0.2<br>(0.2 to 0.2)                      | < 0.05<br>(< 0.05 to 0.1)            | 41.9<br>(30.9 to 53.2)                            | 3.3<br>(-4.8 to 12.1)                               |
| Larynx cancer                                      | 0.1<br>(0.1 to 0.1)                           | < 0.05<br>(< 0.05 to 0.1)                | < 0.05<br>(< 0.05 to < 0.05)         | 19.8<br>(6.3 to 35.4)                             | -9.6<br>(-19.8 to 2.5)                              |
| Tracheal, bronchus, and lung cancer                | 0.3<br>(0.3 to 0.4)                           | 0.3<br>(0.3 to 0.3)                      | 0.1<br>(< 0.05 to 0.1)               | 38.4<br>(13.0 to 72.3)                            | 1.7<br>(-17.5 to 26.8)                              |
| Malignant skin melanoma                            | 0.6<br>(0.4 to 0.7)                           | 0.2<br>(0.1 to 0.2)                      | 0.1<br>(< 0.05 to 0.1)               | 34.2<br>(9.2 to 57.3)                             | -0.5<br>(-18.1 to 16.1)                             |
| Non-melanoma skin cancer                           | < 0.05<br>(< 0.05 to 0.1)                     | 0.4<br>(0.3 to 0.5)                      | < 0.05<br>(< 0.05 to < 0.05)         | 32.6<br>(7.1 to 65.6)                             | -4.0<br>(-23.9 to 22.1)                             |
| Non-melanoma skin cancer (squamous-cell carcinoma) | < 0.05<br>(< 0.05 to 0.1)                     | 0.1<br>(0.1 to 0.1)                      | < 0.05<br>(< 0.05 to < 0.05)         | 28.0<br>(0.1 to 64.8)                             | -6.8<br>(-27.8 to 21.4)                             |
| Non-melanoma skin cancer (basal-cell carcinoma)    | < 0.05<br>(< 0.05 to 0.1)                     | 0.2<br>(0.2 to 0.4)                      | < 0.05<br>(< 0.05 to < 0.05)         | 61.4<br>(39.5 to 87.9)                            | 17.9<br>(2.0 to 35.5)                               |
| Breast cancer                                      | 2.7<br>(2.0 to 3.4)                           | 0.7<br>(0.5 to 0.8)                      | 0.3<br>(0.2 to 0.4)                  | 29.2<br>(-2.4 to 69.1)                            | -4.7<br>(-27.5 to 24.6)                             |
| Cervical cancer                                    | 8.3<br>(3.8 to 11.4)                          | 2.3<br>(1.1 to 3.1)                      | 0.8<br>(0.4 to 1.2)                  | 9.7<br>(-13.3 to 40.2)                            | -20.0<br>(-35.6 to 1.1)                             |
| Uterine cancer                                     | 0.3<br>(0.3 to 0.4)                           | 0.1<br>(0.1 to 0.1)                      | < 0.05<br>(< 0.05 to < 0.05)         | 19.3<br>(-5.7 to 50.4)                            | -9.2<br>(-27.5 to 16.1)                             |
| Ovarian cancer                                     | 0.7<br>(0.5 to 0.8)                           | 0.2<br>(0.2 to 0.3)                      | 0.1<br>(0.1 to 0.1)                  | 41.2<br>(18.5 to 66.7)                            | 2.3<br>(-15.0 to 22.9)                              |
| Prostate cancer                                    | 1.8<br>(1.1 to 2.1)                           | 0.6<br>(0.4 to 0.7)                      | 0.3<br>(0.2 to 0.4)                  | 36.2<br>(6.9 to 73.3)                             | -2.9<br>(-21.5 to 19.8)                             |
| Testicular cancer                                  | 0.1<br>(0.1 to 0.1)                           | < 0.05<br>(< 0.05 to < 0.05)             | < 0.05<br>(< 0.05 to < 0.05)         | 22.5<br>(-3.0 to 55.3)                            | -15.4<br>(-36.0 to 10.9)                            |
| Kidney cancer                                      | 1.7<br>(1.0 to 2.6)                           | 0.4<br>(0.2 to 0.5)                      | 0.1<br>(0.1 to 0.2)                  | 29.5<br>(-27.9 to 110.0)                          | 0.9<br>(-26.4 to 34.2)                              |
| Bladder cancer                                     | 2.5<br>(2.2 to 2.9)                           | 0.8<br>(0.7 to 0.9)                      | 0.3<br>(0.2 to 0.4)                  | 29.7<br>(7.9 to 52.7)                             | -4.0<br>(-19.5 to 11.5)                             |
| Brain and nervous system cancer                    | 0.4<br>(0.3 to 0.4)                           | 0.2<br>(0.1 to 0.2)                      | 0.1<br>(< 0.05 to 0.1)               | 35.5<br>(24.4 to 48.3)                            | 2.8<br>(-6.0 to 14.0)                               |
| Thyroid cancer                                     | 0.4<br>(0.3 to 0.5)                           | 0.1<br>(0.1 to 0.1)                      | < 0.05<br>(< 0.05 to < 0.05)         | 18.6<br>(-4.7 to 48.7)                            | -11.2<br>(-29.2 to 12.3)                            |
| Mesothelioma                                       | < 0.05<br>(< 0.05 to < 0.05)                  | < 0.05<br>(< 0.05 to < 0.05)             | < 0.05<br>(< 0.05 to < 0.05)         | 24.5<br>(10.0 to 40.1)                            | -7.4<br>(-18.4 to 4.1)                              |
| Hodgkin lymphoma                                   | 0.1<br>(0.1 to 0.2)                           | < 0.05<br>(< 0.05 to 0.1)                | < 0.05<br>(< 0.05 to < 0.05)         | -0.2<br>(-14.8 to 17.7)                           | -26.0<br>(-33.8 to -17.3)                           |
| Non-Hodgkin's lymphoma                             | 5.1<br>(2.1 to 7.0)                           | 1.4<br>(0.7 to 1.9)                      | 0.5<br>(0.2 to 0.7)                  | 21.2<br>(-6.0 to 52.4)                            | -8.3<br>(-20.9 to 5.9)                              |
| Multiple myeloma                                   | 0.1<br>(0.1 to 0.1)                           | 0.1<br>(0.1 to 0.1)                      | < 0.05<br>(< 0.05 to < 0.05)         | 35.9<br>(22.0 to 49.1)                            | 1.0<br>(-9.1 to 9.5)                                |
| Leukaemia                                          | 0.8<br>(0.6 to 0.9)                           | 0.2<br>(0.2 to 0.3)                      | 0.1<br>(0.1 to 0.1)                  | 23.6<br>(8.6 to 40.5)                             | -8.7<br>(-16.3 to -0.0)                             |
| Acute lymphoid leukaemia                           | 0.2<br>(0.2 to 0.3)                           | 0.1<br>(< 0.05 to 0.1)                   | < 0.05<br>(< 0.05 to < 0.05)         | 28.6<br>(2.4 to 58.3)                             | -1.7<br>(-15.0 to 13.4)                             |
| Chronic lymphoid leukaemia                         | 0.1<br>(0.1 to 0.1)                           | < 0.05<br>(< 0.05 to < 0.05)             | < 0.05<br>(< 0.05 to < 0.05)         | 36.3<br>(16.9 to 62.1)                            | -3.7<br>(-17.3 to 14.4)                             |
| Acute myeloid leukaemia                            | 0.1<br>(0.1 to 0.1)                           | < 0.05<br>(< 0.05 to 0.1)                | < 0.05<br>(< 0.05 to < 0.05)         | 38.5<br>(20.3 to 60.7)                            | 3.8<br>(-6.5 to 15.6)                               |
| Chronic myeloid leukaemia                          | 0.1<br>(0.1 to 0.1)                           | < 0.05<br>(< 0.05 to < 0.05)             | < 0.05<br>(< 0.05 to < 0.05)         | 19.2<br>(2.3 to 41.0)                             | -14.0<br>(-25.4 to 0.2)                             |
| Other leukaemia                                    | 0.3<br>(0.2 to 0.4)                           | 0.1<br>(0.1 to 0.1)                      | < 0.05<br>(< 0.05 to 0.1)            | 13.8<br>(-5.6 to 36.8)                            | -15.5<br>(-26.6 to -3.0)                            |
| Other neoplasms                                    | 16.0<br>(6.9 to 18.7)                         | 5.1<br>(2.5 to 5.9)                      | 1.5<br>(0.7 to 2.1)                  | 26.9<br>(6.1 to 50.4)                             | -10.4<br>(-23.4 to 5.2)                             |
| <b>Cardiovascular diseases</b>                     | <b>777.1</b><br><b>(722.0 to 831.9)</b>       | <b>65.2†</b><br><b>(62.4 to 68.2)</b>    | <b>42.7</b><br><b>(30.3 to 58.1)</b> | <b>42.7</b><br><b>(36.5 to 49.1)</b>              | <b>1.1</b><br><b>(-3.0 to 4.9)</b>                  |
| Rheumatic heart disease                            | 213.7<br>(188.8 to 238.7)                     | 10.2<br>(9.0 to 11.4)                    | 10.2<br>(6.2 to 15.2)                | 56.9<br>(41.7 to 74.5)                            | 11.5<br>(1.4 to 22.4)                               |
| Ischaemic heart disease                            | 175.4<br>(165.3 to 185.3)                     | 25.4<br>(23.9 to 27.1)                   | 8.3<br>(5.7 to 11.4)                 | 34.9<br>(27.9 to 42.0)                            | -2.4<br>(-6.4 to 1.9)                               |
| Cerebrovascular disease                            | 42.8<br>(39.9 to 45.8)                        | 8.7‡<br>(7.9 to 9.5)                     | 6.2<br>(4.5 to 7.9)                  | 41.0<br>(29.6 to 53.4)                            | 1.6<br>(-6.6 to 10.7)                               |
| Ischaemic stroke                                   | 38.5<br>(34.7 to 42.7)                        | 6.0‡<br>(5.2 to 6.7)                     | 5.3<br>(3.8 to 6.8)                  | 41.7<br>(28.6 to 56.1)                            | 1.9<br>(-7.5 to 12.3)                               |
| Hemorrhagic stroke                                 | 6.4<br>(5.7 to 7.2)                           | 2.8‡<br>(2.5 to 3.1)                     | 0.9<br>(0.6 to 1.2)                  | 37.2<br>(19.8 to 56.6)                            | 0.0<br>(-13.3 to 15.4)                              |
| Hypertensive heart disease                         | 11.4<br>(8.9 to 14.3)                         | --                                       | 0.9<br>(0.6 to 1.4)                  | 37.2<br>(23.4 to 53.3)                            | -2.4<br>(-11.2 to 8.2)                              |
| Cardiomyopathy and myocarditis                     | 8.1<br>(6.3 to 9.9)                           | 4.0†<br>(3.5 to 4.5)                     | 0.8<br>(0.5 to 1.1)                  | 31.9<br>(17.4 to 48.1)                            | -2.9<br>(-15.5 to 11.9)                             |
| Myocarditis                                        | 2.1<br>(1.8 to 2.5)                           | 4.0<br>(3.5 to 4.5)                      | 0.1<br>(0.1 to 0.2)                  | 33.2<br>(25.0 to 42.2)                            | -2.2<br>(-10.3 to 7.0)                              |
| Alcoholic cardiomyopathy                           | 0.7<br>(0.4 to 1.0)                           | --                                       | 0.1<br>(< 0.05 to 0.1)               | 28.7<br>(1.2 to 64.9)                             | -2.3<br>(-22.9 to 26.2)                             |
| Other cardiomyopathy                               | 6.5<br>(4.6 to 8.8)                           | --                                       | 0.5<br>(0.3 to 0.9)                  | 31.9<br>(14.5 to 51.5)                            | -3.1<br>(-17.3 to 13.7)                             |
| Atrial fibrillation and flutter                    | 31.7<br>(27.5 to 36.5)                        | 2.7<br>(2.3 to 3.2)                      | 2.5<br>(1.7 to 3.4)                  | 42.6<br>(32.0 to 53.9)                            | 0.2<br>(-6.3 to 7.0)                                |
| Peripheral vascular disease                        | 117.5<br>(102.4 to 135.8)                     | 11.8<br>(10.2 to 13.9)                   | 0.6<br>(0.3 to 1.2)                  | 33.5<br>(22.0 to 45.9)                            | -5.0<br>(-12.0 to 2.3)                              |
| Endocarditis                                       | 0.7<br>(0.6 to 0.9)                           | 2.4<br>(2.1 to 2.7)                      | 0.1<br>(< 0.05 to 0.1)               | 41.6<br>(28.6 to 56.5)                            | -1.1<br>(-15.7 to 16.4)                             |
| Other cardiovascular and circulatory diseases      | 249.3<br>(179.8 to 328.9)                     | --                                       | 13.2<br>(7.9 to 20.1)                | 40.3<br>(26.3 to 56.4)                            | 0.3<br>(-10.4 to 11.8)                              |
| <b>Chronic respiratory diseases</b>                | <b>1,135.2</b><br><b>(1,061.2 to 1,215.2)</b> | <b>240.6†</b><br><b>(218.5 to 265.0)</b> | <b>51.9</b><br><b>(37.4 to 70.0)</b> | <b>39.6</b><br><b>(33.0 to 46.8)</b>              | <b>2.9</b><br><b>(-1.1 to 7.2)</b>                  |
| Chronic obstructive pulmonary disease              | 145.3<br>(139.1 to 151.6)                     | 10.5<br>(10.1 to 10.9)                   | 11.3<br>(9.8 to 12.6)                | 36.6<br>(26.3 to 47.3)                            | 0.8<br>(-5.7 to 8.1)                                |
| Pneumoconiosis                                     | 0.2<br>(0.1 to 0.2)                           | < 0.05<br>(< 0.05 to < 0.05)             | < 0.05<br>(< 0.05 to < 0.05)         | 38.4<br>(30.9 to 45.3)                            | 1.8<br>(-3.6 to 7.1)                                |
| Silicosis                                          | < 0.05<br>(< 0.05 to < 0.05)                  | < 0.05<br>(< 0.05 to < 0.05)             | < 0.05<br>(< 0.05 to < 0.05)         | 42.1<br>(29.0 to 56.0)                            | 0.5<br>(-6.3 to 7.4)                                |



| Cause                                                          | Prevalence in thousands (95% UI)        | Incidence in thousands (95% UI)         | YLDs in thousands (95% UI)        |                                                   |                                                     |
|----------------------------------------------------------------|-----------------------------------------|-----------------------------------------|-----------------------------------|---------------------------------------------------|-----------------------------------------------------|
|                                                                | 2016 counts                             | 2016 counts                             | 2016 counts                       | Percentage change in counts between 2006 and 2016 | Percentage change in age-standardised rates between |
| Asbestosis                                                     | 0.1<br>(0.1 to 0.1)                     | < 0.05<br>(< 0.05 to < 0.05)            | < 0.05<br>(< 0.05 to < 0.05)      | 39.0<br>(28.8 to 49.4)                            | 0.7<br>(-4.8 to 6.5)                                |
| Coal workers pneumoconiosis                                    | --                                      | --                                      | --                                | --                                                | --                                                  |
| Other pneumoconiosis                                           | 0.1<br>(0.1 to 0.1)                     | < 0.05<br>(< 0.05 to < 0.05)            | < 0.05<br>(< 0.05 to < 0.05)      | 37.5<br>(26.1 to 49.1)                            | 2.8<br>(-6.1 to 12.0)                               |
| Asthma                                                         | 984.6<br>(891.0 to 1,088.9)             | 230.0<br>(207.9 to 254.3)               | 38.8<br>(25.2 to 56.3)            | 39.1<br>(31.3 to 47.4)                            | 3.4<br>(-1.0 to 8.2)                                |
| Interstitial lung disease and pulmonary sarcoidosis            | 1.2<br>(1.0 to 1.3)                     | 0.1<br>(0.1 to 0.1)                     | 0.1<br>(0.1 to 0.2)               | 38.4<br>(33.9 to 42.9)                            | -1.0<br>(-5.7 to 4.2)                               |
| Other chronic respiratory diseases                             | --                                      | --                                      | 1.6<br>(1.2 to 2.0)               | 81.6<br>(37.8 to 136.6)                           | 34.1<br>(10.0 to 61.8)                              |
| <b>Cirrhosis and other chronic liver diseases</b>              | <b>33.9<br/>(32.0 to 35.6)</b>          | <b>3.4<br/>(3.3 to 3.6)</b>             | <b>2.8<br/>(1.9 to 4.0)</b>       | <b>34.5<br/>(16.8 to 55.1)</b>                    | <b>-0.8<br/>(-9.8 to 9.2)</b>                       |
| Cirrhosis and other chronic liver diseases due to hepatitis B  | 8.2<br>(6.7 to 9.8)                     | 0.9<br>(0.8 to 1.1)                     | 0.5<br>(0.3 to 0.8)               | 37.5<br>(12.9 to 68.1)                            | -0.6<br>(-15.6 to 17.8)                             |
| Cirrhosis and other chronic liver diseases due to hepatitis C  | 6.0<br>(4.1 to 8.3)                     | 0.7<br>(0.5 to 1.0)                     | 0.4<br>(0.2 to 0.6)               | 35.8<br>(11.0 to 70.4)                            | -0.8<br>(-17.2 to 19.2)                             |
| Cirrhosis and other chronic liver diseases due to alcohol use  | 6.0<br>(5.1 to 6.9)                     | 0.8<br>(0.6 to 0.9)                     | 0.4<br>(0.2 to 0.5)               | 37.1<br>(11.3 to 69.5)                            | -0.6<br>(-16.7 to 18.9)                             |
| Cirrhosis and other chronic liver diseases due to other causes | 13.6<br>(12.4 to 14.8)                  | 1.1<br>(1.0 to 1.2)                     | 1.6<br>(1.0 to 2.3)               | 32.7<br>(5.2 to 64.5)                             | -1.1<br>(-18.8 to 18.7)                             |
| <b>Digestive diseases</b>                                      | <b>256.6<br/>(235.6 to 277.7)</b>       | <b>219.0†<br/>(208.8 to 230.7)</b>      | <b>8.7<br/>(6.0 to 11.8)</b>      | <b>35.7<br/>(23.8 to 48.9)</b>                    | <b>-1.4<br/>(-7.7 to 4.7)</b>                       |
| Peptic ulcer disease                                           | 31.3<br>(28.6 to 34.2)                  | 17.3<br>(15.4 to 19.3)                  | 0.6<br>(0.4 to 0.9)               | 39.1<br>(24.8 to 54.6)                            | -4.2<br>(-12.4 to 4.0)                              |
| Gastritis and duodenitis                                       | 89.0<br>(77.9 to 100.2)                 | 75.6<br>(67.9 to 84.0)                  | 1.0<br>(0.7 to 1.5)               | 49.7<br>(33.5 to 67.6)                            | 8.1<br>(-0.7 to 17.9)                               |
| Appendicitis                                                   | 1.8<br>(1.7 to 2.0)                     | 48.7<br>(44.6 to 52.9)                  | 0.6<br>(0.4 to 0.8)               | 32.5<br>(-7.2 to 83.6)                            | -3.8<br>(-25.7 to 23.1)                             |
| Paralytic ileus and intestinal obstruction                     | 0.4<br>(0.3 to 0.4)                     | 10.6<br>(9.6 to 11.6)                   | 0.1<br>(0.1 to 0.2)               | 36.0<br>(24.3 to 48.5)                            | -1.6<br>(-15.8 to 14.5)                             |
| Inguinal, femoral, and abdominal hernia                        | 131.4<br>(108.6 to 158.0)               | 20.1<br>(17.8 to 22.8)                  | 5.1<br>(3.4 to 7.2)               | 32.4<br>(16.9 to 49.7)                            | -3.8<br>(-12.5 to 5.4)                              |
| Inflammatory bowel disease                                     | 0.8<br>(0.7 to 0.8)                     | 5.8<br>(5.6 to 6.1)                     | 0.1<br>(0.1 to 0.2)               | 46.5<br>(42.0 to 51.2)                            | 11.2<br>(8.1 to 14.6)                               |
| Vascular intestinal disorders                                  | 0.1<br>(0.1 to 0.1)                     | 0.5<br>(0.5 to 0.6)                     | < 0.05<br>(< 0.05 to < 0.05)      | 41.6<br>(33.8 to 50.1)                            | 3.1<br>(-1.1 to 7.6)                                |
| Gallbladder and biliary diseases                               | 8.8<br>(7.8 to 9.8)                     | 38.5<br>(33.4 to 44.2)                  | 0.2<br>(0.1 to 0.3)               | 37.7<br>(19.1 to 58.6)                            | -1.3<br>(-17.6 to 18.7)                             |
| Pancreatitis                                                   | 0.2<br>(0.2 to 0.2)                     | 1.9<br>(1.7 to 2.2)                     | < 0.05<br>(< 0.05 to < 0.05)      | 41.2<br>(36.1 to 46.9)                            | 1.8<br>(-1.3 to 4.9)                                |
| Other digestive diseases                                       | --                                      | --                                      | 0.8<br>(0.6 to 1.1)               | 38.4<br>(23.1 to 55.2)                            | 2.1<br>(-5.0 to 9.2)                                |
| <b>Neurological disorders</b>                                  | <b>4,793.3<br/>(4,540.2 to 5,061.8)</b> | <b>2,272.5<br/>(1,931.5 to 2,644.9)</b> | <b>110.2<br/>(67.4 to 159.2)</b>  | <b>40.4<br/>(-1.1 to 99.1)</b>                    | <b>0.5<br/>(-22.4 to 29.9)</b>                      |
| Alzheimer's disease and other dementias                        | 24.4<br>(20.3 to 29.2)                  | 4.2<br>(3.5 to 5.2)                     | 3.5<br>(2.4 to 4.6)               | 49.4<br>(41.4 to 57.6)                            | -0.3<br>(-4.8 to 4.5)                               |
| Parkinson's disease                                            | 2.1<br>(1.7 to 2.7)                     | 0.3<br>(0.2 to 0.4)                     | 0.2<br>(0.1 to 0.4)               | 55.7<br>(32.2 to 81.2)                            | 7.7<br>(-7.2 to 23.6)                               |
| Epilepsy                                                       | 55.7<br>(11.2 to 114.9)                 | 8.5<br>(1.7 to 17.8)                    | 21.2<br>(3.6 to 47.2)             | 36.7<br>(-77.7 to 710.2)                          | -1.0<br>(-84.0 to 463.2)                            |
| Multiple sclerosis                                             | 0.6<br>(0.5 to 0.7)                     | < 0.05<br>(< 0.05 to < 0.05)            | 0.2<br>(0.1 to 0.2)               | 52.4<br>(47.0 to 58.0)                            | 9.3<br>(5.6 to 13.1)                                |
| Motor neuron disease                                           | 0.2<br>(0.1 to 0.2)                     | < 0.05<br>(< 0.05 to 0.1)               | < 0.05<br>(< 0.05 to < 0.05)      | 40.0<br>(33.7 to 46.8)                            | 2.7<br>(-0.4 to 6.1)                                |
| Migraine                                                       | 1,606.8<br>(1,502.9 to 1,712.6)         | 216.2<br>(202.9 to 231.0)               | 68.4<br>(43.5 to 97.7)            | 39.6<br>(32.9 to 46.8)                            | 0.3<br>(-3.7 to 4.6)                                |
| Tension-type headache                                          | 3,628.3<br>(3,197.2 to 4,114.3)         | 2,043.1<br>(1,702.0 to 2,419.4)         | 11.6<br>(7.3 to 17.3)             | 38.3<br>(30.9 to 46.4)                            | -0.7<br>(-5.4 to 4.6)                               |
| Other neurological disorders                                   | < 0.05<br>(< 0.05 to 0.1)               | 0.1<br>(0.1 to 0.1)                     | 5.2<br>(1.0 to 11.4)              | 68.2<br>(-70.0 to 762.7)                          | 19.7<br>(-74.5 to 435.3)                            |
| <b>Mental and substance use disorders</b>                      | <b>2,453.3<br/>(2,321.0 to 2,589.6)</b> | <b>840.4†<br/>(781.2 to 909.6)</b>      | <b>279.1<br/>(202.6 to 363.5)</b> | <b>39.2<br/>(35.6 to 42.9)</b>                    | <b>0.8<br/>(-1.5 to 3.2)</b>                        |
| Schizophrenia                                                  | 19.9<br>(17.3 to 22.7)                  | 2.0<br>(1.7 to 2.3)                     | 12.8<br>(9.2 to 16.1)             | 44.2<br>(29.4 to 60.1)                            | 1.8<br>(-7.0 to 11.9)                               |
| Alcohol use disorders                                          | 217.7<br>(181.7 to 257.4)               | 115.6<br>(96.2 to 136.1)                | 21.8<br>(14.9 to 30.7)            | 45.6<br>(33.3 to 58.6)                            | 2.7<br>(-5.2 to 10.8)                               |
| Drug use disorders                                             | 72.7<br>(63.9 to 81.5)                  | 13.1<br>(11.1 to 15.2)                  | 14.8<br>(10.2 to 20.3)            | 50.1<br>(34.8 to 68.2)                            | 4.9<br>(-4.9 to 16.0)                               |
| Opioid use disorders                                           | 30.0<br>(23.7 to 38.6)                  | 4.2<br>(3.4 to 5.2)                     | 12.5<br>(8.2 to 17.7)             | 51.4<br>(33.0 to 72.5)                            | 5.4<br>(-5.9 to 18.0)                               |
| Cocaine use disorders                                          | 2.0<br>(1.6 to 2.4)                     | 0.3<br>(0.2 to 0.4)                     | 0.3<br>(0.2 to 0.4)               | 44.4<br>(35.9 to 53.4)                            | 2.9<br>(-2.4 to 9.0)                                |
| Amphetamine use disorders                                      | 1.1<br>(0.8 to 1.5)                     | 0.2<br>(0.1 to 0.3)                     | 0.2<br>(0.1 to 0.3)               | 43.9<br>(30.8 to 58.1)                            | 2.6<br>(-6.6 to 12.8)                               |
| Cannabis use disorders                                         | 37.8<br>(29.8 to 47.5)                  | 7.4<br>(5.8 to 9.4)                     | 1.1<br>(0.6 to 1.7)               | 41.0<br>(15.5 to 69.8)                            | 0.7<br>(-15.9 to 19.0)                              |
| Other drug use disorders                                       | 4.4<br>(3.8 to 5.1)                     | 1.0<br>(0.9 to 1.2)                     | 0.8<br>(0.5 to 1.1)               | 45.9<br>(22.8 to 72.7)                            | 2.5<br>(-12.4 to 19.8)                              |
| Depressive disorders                                           | 452.7<br>(422.9 to 488.7)               | 496.4<br>(440.8 to 558.8)               | 76.5<br>(52.5 to 103.7)           | 40.1<br>(32.4 to 48.9)                            | 0.7<br>(-4.6 to 6.5)                                |
| Major depressive disorder                                      | 297.3<br>(264.1 to 336.5)               | 466.6<br>(412.0 to 527.5)               | 60.9<br>(41.1 to 83.0)            | 40.2<br>(30.5 to 51.3)                            | 0.8<br>(-6.0 to 7.9)                                |
| Dysthymia                                                      | 162.1<br>(140.1 to 187.4)               | 29.9<br>(26.0 to 34.6)                  | 15.6<br>(10.4 to 22.7)            | 39.7<br>(33.8 to 46.0)                            | 0.4<br>(-3.0 to 4.1)                                |
| Bipolar disorder                                               | 86.0<br>(72.4 to 102.0)                 | 10.7<br>(9.0 to 12.7)                   | 17.7<br>(11.0 to 26.7)            | 39.9<br>(29.4 to 51.7)                            | 0.9<br>(-5.4 to 7.8)                                |
| Anxiety disorders                                              | 508.5<br>(448.9 to 569.5)               | 92.9<br>(83.4 to 104.5)                 | 49.5<br>(34.0 to 67.2)            | 38.4<br>(28.3 to 48.7)                            | 0.5<br>(-5.8 to 7.4)                                |
| Eating disorders                                               | 12.3<br>(9.9 to 15.0)                   | 10.7<br>(7.7 to 14.4)                   | 2.5<br>(1.6 to 3.7)               | 48.5<br>(25.1 to 77.5)                            | 6.5<br>(-9.5 to 27.3)                               |
| Anorexia nervosa                                               | 3.5<br>(2.5 to 4.6)                     | 1.7<br>(1.2 to 2.3)                     | 0.7<br>(0.4 to 1.2)               | 43.2<br>(3.4 to 98.0)                             | 5.2<br>(-22.0 to 44.2)                              |
| Bulimia nervosa                                                | 8.3<br>(6.1 to 11.3)                    | 9.0<br>(6.1 to 12.7)                    | 1.7<br>(1.0 to 2.7)               | 50.8<br>(21.5 to 85.7)                            | 7.0<br>(-11.8 to 32.0)                              |
| Autistic spectrum disorders                                    | 150.9<br>(135.2 to 169.3)               | 2.1<br>(1.4 to 2.9)                     | 21.6<br>(14.4 to 30.7)            | 37.0<br>(29.4 to 45.2)                            | 0.7<br>(-4.3 to 5.8)                                |
| Autism                                                         | 41.7<br>(36.0 to 48.6)                  | 0.3<br>(0.2 to 0.5)                     | 10.7<br>(6.9 to 15.6)             | 36.7<br>(22.9 to 51.5)                            | 0.7<br>(-8.5 to 10.4)                               |
| Asperger syndrome and other autistic spectrum disorders        | 108.9<br>(89.5 to 132.3)                | 1.8<br>(1.1 to 2.6)                     | 10.9<br>(7.0 to 16.1)             | 37.4<br>(30.0 to 44.8)                            | 0.7<br>(-4.2 to 5.3)                                |

| Cause                                                      | Prevalence in thousands (95% UI)                 | Incidence in thousands (95% UI)                   | YLDs in thousands (95% UI)              |                                                   |                                                     |
|------------------------------------------------------------|--------------------------------------------------|---------------------------------------------------|-----------------------------------------|---------------------------------------------------|-----------------------------------------------------|
|                                                            | 2016 counts                                      | 2016 counts                                       | 2016 counts                             | Percentage change in counts between 2006 and 2016 | Percentage change in age-standardised rates between |
| Attention-deficit/hyperactivity disorder                   | 240.1<br>(214.3 to 270.4)                        | 16.3<br>(14.1 to 19.1)                            | 2.9<br>(1.7 to 4.7)                     | 36.1<br>(25.8 to 47.1)                            | 0.5<br>(-6.2 to 7.7)                                |
| Conduct disorder                                           | 186.5<br>(151.4 to 220.8)                        | 68.2<br>(53.1 to 83.4)                            | 22.5<br>(13.8 to 34.2)                  | 32.0<br>(23.3 to 40.6)                            | 0.4<br>(-6.2 to 6.8)                                |
| Idiopathic developmental intellectual disability           | 487.8<br>(302.2 to 668.4)                        | --                                                | 19.6<br>(9.6 to 33.6)                   | 28.9<br>(20.1 to 37.4)                            | -6.0<br>(-12.2 to -0.5)                             |
| Other mental and substance use disorders                   | 226.4<br>(197.7 to 262.8)                        | 12.4<br>(10.9 to 14.3)                            | 16.9<br>(11.5 to 24.2)                  | 42.5<br>(33.9 to 51.3)                            | 0.8<br>(-4.0 to 6.0)                                |
| <b>Diabetes, urogenital, blood, and endocrine diseases</b> | <b>6,552.3</b><br><b>(6,338.7 to 6,767.8)</b>    | <b>1,535.0†</b><br><b>(1,431.1 to 1,646.8)</b>    | <b>83.3</b><br><b>(58.9 to 113.3)</b>   | <b>36.1</b><br><b>(32.5 to 39.8)</b>              | <b>-0.2</b><br><b>(-3.1 to 2.8)</b>                 |
| Diabetes mellitus                                          | 296.6<br>(267.3 to 329.4)                        | 20.8<br>(18.8 to 22.9)                            | 27.4<br>(19.0 to 37.6)                  | 38.9<br>(32.1 to 46.7)                            | 2.0<br>(-3.1 to 8.1)                                |
| Acute glomerulonephritis                                   | 0.1<br>(0.1 to 0.2)                              | 2.2<br>(1.9 to 2.6)                               | < 0.05<br>(< 0.05 to < 0.05)            | 37.1<br>(31.5 to 42.6)                            | 0.0<br>(-3.2 to 3.3)                                |
| Chronic kidney disease                                     | 533.5<br>(480.9 to 589.4)                        | 40.9<br>(36.5 to 45.8)                            | 14.1<br>(10.2 to 18.6)                  | 43.1<br>(35.4 to 51.5)                            | 1.4<br>(-3.9 to 6.9)                                |
| Chronic kidney disease due to diabetes mellitus            | 154.8<br>(129.9 to 182.6)                        | 11.0<br>(9.2 to 13.4)                             | 3.9<br>(2.8 to 5.4)                     | 42.2<br>(29.5 to 54.8)                            | 1.8<br>(-6.2 to 10.4)                               |
| Chronic kidney disease due to hypertension                 | 117.8<br>(101.5 to 133.9)                        | 10.8<br>(9.2 to 12.6)                             | 2.5<br>(1.7 to 3.3)                     | 42.7<br>(26.9 to 58.8)                            | 0.3<br>(-10.1 to 11.2)                              |
| Chronic kidney disease due to glomerulonephritis           | 110.7<br>(95.1 to 126.2)                         | 6.7<br>(5.3 to 8.3)                               | 3.7<br>(2.6 to 5.0)                     | 46.3<br>(32.8 to 61.0)                            | 3.6<br>(-4.5 to 12.3)                               |
| Chronic kidney disease due to other causes                 | 150.2<br>(126.2 to 174.8)                        | 12.3<br>(10.4 to 14.2)                            | 4.0<br>(2.8 to 5.4)                     | 41.5<br>(27.3 to 55.5)                            | 0.0<br>(-8.2 to 8.2)                                |
| Urinary diseases and male infertility                      | 206.8<br>(182.1 to 232.8)                        | 835.1†<br>(749.0 to 940.3)                        | 5.5<br>(3.5 to 8.0)                     | 31.5<br>(22.7 to 41.5)                            | -0.1<br>(-6.7 to 7.3)                               |
| Interstitial nephritis and urinary tract infections        | 14.1<br>(12.4 to 16.1)                           | 736.8<br>(649.4 to 839.4)                         | 0.5<br>(0.3 to 0.7)                     | 40.2<br>(18.3 to 68.3)                            | 1.8<br>(-11.5 to 18.1)                              |
| Urolithiasis                                               | 3.1<br>(2.7 to 3.5)                              | 81.9<br>(72.1 to 94.2)                            | 0.2<br>(0.1 to 0.3)                     | 42.2<br>(31.6 to 53.6)                            | 2.0<br>(-6.8 to 11.8)                               |
| Benign prostatic hyperplasia                               | 129.9<br>(109.4 to 150.1)                        | 16.5<br>(13.8 to 19.5)                            | 4.2<br>(2.7 to 6.2)                     | 28.0<br>(17.3 to 39.8)                            | -0.7<br>(-8.2 to 7.8)                               |
| Male infertility                                           | 50.4<br>(36.3 to 71.1)                           | --                                                | 0.3<br>(0.1 to 0.6)                     | 116.8<br>(68.1 to 182.6)                          | 51.9<br>(16.0 to 101.3)                             |
| Other urinary diseases                                     | --                                               | --                                                | 0.3<br>(0.2 to 0.4)                     | 15.2<br>(2.0 to 31.4)                             | -15.1<br>(-22.8 to -6.5)                            |
| Gynecological diseases                                     | 1,704.4<br>(1,601.2 to 1,809.5)                  | 624.4†<br>(573.3 to 676.3)                        | 18.9<br>(12.7 to 27.2)                  | 36.4<br>(28.9 to 43.5)                            | -4.4<br>(-8.7 to -0.5)                              |
| Uterine fibroids                                           | 104.2<br>(91.8 to 117.1)                         | 13.8<br>(11.9 to 15.8)                            | 2.3<br>(1.4 to 3.6)                     | 35.8<br>(25.7 to 45.8)                            | -5.9<br>(-12.8 to 0.9)                              |
| Polycystic ovarian syndrome                                | 14.6<br>(10.8 to 19.0)                           | 37.8<br>(26.7 to 51.7)                            | 0.1<br>(0.1 to 0.2)                     | 56.9<br>(35.3 to 83.8)                            | 5.2<br>(-8.3 to 21.7)                               |
| Female infertility                                         | 13.4<br>(7.3 to 32.2)                            | --                                                | 0.1<br>(< 0.05 to 0.2)                  | 204.2<br>(60.9 to 603.2)                          | 95.2<br>(10.7 to 328.8)                             |
| Endometriosis                                              | 3.3<br>(2.8 to 4.0)                              | 14.0<br>(11.3 to 17.5)                            | 0.3<br>(0.2 to 0.5)                     | 45.4<br>(2.8 to 101.2)                            | 1.5<br>(-24.9 to 33.6)                              |
| Genital prolapse                                           | 812.8<br>(721.6 to 903.5)                        | 71.8<br>(60.9 to 84.7)                            | 2.5<br>(1.2 to 4.6)                     | 28.9<br>(21.6 to 37.4)                            | -3.2<br>(-9.2 to 3.1)                               |
| Premenstrual syndrome                                      | 779.5<br>(687.3 to 868.8)                        | 308.6<br>(271.8 to 343.4)                         | 6.5<br>(4.0 to 10.0)                    | 31.2<br>(14.6 to 47.1)                            | -8.2<br>(-18.0 to 1.3)                              |
| Other gynecological diseases                               | 204.8<br>(176.3 to 235.8)                        | 178.6<br>(146.1 to 215.0)                         | 7.0<br>(4.6 to 10.1)                    | 43.3<br>(33.1 to 53.7)                            | -1.8<br>(-8.1 to 4.8)                               |
| Hemoglobinopathies and hemolytic anaemias                  | 4,826.5<br>(4,593.7 to 5,062.9)                  | --                                                | 10.4<br>(6.9 to 15.1)                   | 30.4<br>(20.8 to 40.1)                            | -3.6<br>(-9.8 to 2.3)                               |
| Thalassemias                                               | < 0.05<br>(< 0.05 to 0.1)                        | --                                                | < 0.05<br>(< 0.05 to < 0.05)            | 39.4<br>(18.6 to 67.3)                            | 3.4<br>(-12.4 to 23.8)                              |
| Thalassaemias trait                                        | 100.3<br>(35.1 to 186.3)                         | --                                                | 1.4<br>(0.4 to 2.9)                     | 41.7<br>(18.4 to 66.5)                            | 5.9<br>(-11.5 to 20.4)                              |
| Sickle cell disorders                                      | 1.8<br>(1.4 to 2.1)                              | --                                                | 0.1<br>(0.1 to 0.2)                     | 38.8<br>(1.3 to 91.7)                             | 4.4<br>(-20.6 to 38.5)                              |
| Sickle cell trait                                          | 860.1<br>(771.2 to 929.7)                        | --                                                | 2.9<br>(1.9 to 4.4)                     | 41.4<br>(28.2 to 55.7)                            | 6.8<br>(-1.7 to 16.6)                               |
| G6PD deficiency                                            | 1,184.8<br>(1,016.5 to 1,366.5)                  | --                                                | 0.1<br>(0.1 to 0.2)                     | 10.6<br>(-1.9 to 25.5)                            | -15.4<br>(-23.0 to -6.2)                            |
| G6PD trait                                                 | 2,838.4<br>(2,706.0 to 2,983.1)                  | --                                                | < 0.05<br>(< 0.05 to < 0.05)            | 32.9<br>(22.1 to 44.6)                            | -1.9<br>(-8.9 to 5.3)                               |
| Other hemoglobinopathies and hemolytic anaemias            | 217.2<br>(207.6 to 226.9)                        | --                                                | 5.8<br>(3.8 to 8.3)                     | 23.3<br>(12.4 to 34.5)                            | -10.4<br>(-16.7 to -3.9)                            |
| Endocrine, metabolic, blood, and immune disorders          | 236.6<br>(228.5 to 246.0)                        | 11.6<br>(10.3 to 13.0)                            | 7.1<br>(4.7 to 10.2)                    | 24.9<br>(17.0 to 33.8)                            | -4.3<br>(-9.2 to 1.0)                               |
| <b>Musculoskeletal disorders</b>                           | <b>1,486.4</b><br><b>(1,401.0 to 1,572.6)</b>    | <b>727.7</b><br><b>(657.4 to 803.2)</b>           | <b>163.2</b><br><b>(116.5 to 213.2)</b> | <b>38.8</b><br><b>(31.8 to 45.3)</b>              | <b>0.9</b><br><b>(-3.6 to 5.4)</b>                  |
| Rheumatoid arthritis                                       | 19.3<br>(17.1 to 21.9)                           | 1.3<br>(1.2 to 1.5)                               | 4.6<br>(3.1 to 6.1)                     | 36.8<br>(22.7 to 51.1)                            | -0.9<br>(-8.9 to 7.8)                               |
| Osteoarthritis                                             | 241.4<br>(224.6 to 257.5)                        | 13.1<br>(12.1 to 14.1)                            | 14.8<br>(10.4 to 20.1)                  | 39.4<br>(34.0 to 44.8)                            | 2.9<br>(-1.0 to 6.6)                                |
| Low back and neck pain                                     | 1,025.8<br>(950.6 to 1,103.1)                    | 472.7<br>(422.5 to 528.6)                         | 117.4<br>(82.7 to 154.6)                | 38.5<br>(29.7 to 47.1)                            | 0.9<br>(-5.4 to 6.9)                                |
| Low back pain                                              | 812.6<br>(722.4 to 924.1)                        | 404.9<br>(356.1 to 460.8)                         | 91.4<br>(64.8 to 121.0)                 | 38.1<br>(26.6 to 48.9)                            | 1.0<br>(-7.1 to 8.8)                                |
| Neck pain                                                  | 261.0<br>(225.9 to 300.9)                        | 67.8<br>(58.6 to 78.7)                            | 26.1<br>(17.6 to 37.0)                  | 40.3<br>(35.1 to 45.4)                            | 0.5<br>(-2.0 to 3.1)                                |
| Gout                                                       | 32.5<br>(28.9 to 36.6)                           | 6.8<br>(5.9 to 7.7)                               | 1.0<br>(0.7 to 1.4)                     | 38.5<br>(19.7 to 60.4)                            | 0.2<br>(-12.2 to 14.2)                              |
| Other musculoskeletal disorders                            | 293.8<br>(235.0 to 356.0)                        | 233.9<br>(184.3 to 290.9)                         | 25.4<br>(16.6 to 36.6)                  | 40.3<br>(27.1 to 53.1)                            | -0.4<br>(-8.7 to 7.6)                               |
| <b>Other non-communicable diseases</b>                     | <b>12,421.4</b><br><b>(12,014.4 to 12,843.8)</b> | <b>42,068.4†</b><br><b>(37,772.8 to 46,212.6)</b> | <b>307.6</b><br><b>(209.9 to 436.3)</b> | <b>35.9</b><br><b>(33.9 to 38.1)</b>              | <b>-1.0</b><br><b>(-2.2 to 0.2)</b>                 |
| Congenital anomalies                                       | 196.9<br>(159.9 to 248.3)                        | --                                                | 26.5<br>(17.6 to 38.6)                  | 32.5<br>(23.8 to 42.9)                            | -2.9<br>(-9.0 to 4.3)                               |
| Neural tube defects                                        | 19.8<br>(17.5 to 22.3)                           | --                                                | 5.9<br>(4.1 to 8.0)                     | 34.7<br>(18.6 to 54.0)                            | -1.3<br>(-11.7 to 10.5)                             |
| Congenital heart anomalies                                 | 26.3<br>(21.5 to 31.7)                           | --                                                | 1.3<br>(0.6 to 2.2)                     | 37.2<br>(17.7 to 59.9)                            | 2.5<br>(-11.6 to 18.7)                              |
| Orofacial clefts                                           | 4.3<br>(3.8 to 5.0)                              | --                                                | 0.1<br>(0.1 to 0.1)                     | 29.4<br>(15.8 to 46.0)                            | -5.1<br>(-14.9 to 7.2)                              |
| Down's syndrome                                            | 3.5<br>(2.9 to 4.1)                              | --                                                | 0.3<br>(0.2 to 0.4)                     | 39.6<br>(28.0 to 50.6)                            | 2.4<br>(-5.9 to 10.4)                               |
| Turner syndrome                                            | 11.7<br>(9.9 to 13.9)                            | --                                                | 0.2<br>(0.1 to 0.3)                     | 25.0<br>(-13.2 to 80.2)                           | -6.7<br>(-31.6 to 28.4)                             |
| Klinefelter syndrome                                       | 12.4<br>(10.4 to 14.7)                           | --                                                | 0.1<br>(< 0.05 to 0.1)                  | 39.7<br>(6.9 to 85.6)                             | 0.6<br>(-22.4 to 31.7)                              |



| Cause                                         | Prevalence in thousands (95% UI)              | Incidence in thousands (95% UI)                           | YLDs in thousands (95% UI)            |                                                   |                                                     |
|-----------------------------------------------|-----------------------------------------------|-----------------------------------------------------------|---------------------------------------|---------------------------------------------------|-----------------------------------------------------|
|                                               | 2016 counts                                   | 2016 counts                                               | 2016 counts                           | Percentage change in counts between 2006 and 2016 | Percentage change in age-standardised rates between |
| Other chromosomal abnormalities               | 3.4<br>(2.8 to 4.0)                           | --                                                        | 0.7<br>(0.4 to 1.0)                   | 36.4<br>(-5.2 to 97.7)                            | 1.8<br>(-28.3 to 44.1)                              |
| Congenital musculoskeletal and limb anomalies | 21.6<br>(19.0 to 24.3)                        | --                                                        | 3.1<br>(2.0 to 4.4)                   | 37.0<br>(20.0 to 57.5)                            | 0.3<br>(-10.5 to 12.7)                              |
| Urogenital congenital anomalies               | 22.2<br>(19.4 to 25.4)                        | --                                                        | 0.6<br>(0.3 to 0.9)                   | 34.3<br>(23.4 to 46.2)                            | -0.3<br>(-7.5 to 8.0)                               |
| Digestive congenital anomalies                | 9.3<br>(8.2 to 10.5)                          | --                                                        | 0.4<br>(0.2 to 0.6)                   | 36.7<br>(6.2 to 78.6)                             | 0.1<br>(-18.6 to 24.7)                              |
| Other congenital anomalies                    | 98.7<br>(55.5 to 170.7)                       | --                                                        | 14.0<br>(7.7 to 24.1)                 | 29.9<br>(16.8 to 44.7)                            | -4.9<br>(-14.0 to 5.6)                              |
| Skin and subcutaneous diseases                | 6,235.5<br>(5,937.4 to 6,597.5)               | 15,126.9<br>(13,858.4 to 16,771.8)                        | 155.1<br>(100.0 to 227.6)             | 37.2<br>(34.2 to 40.6)                            | 1.5<br>(-0.4 to 3.6)                                |
| Dermatitis                                    | 1,041.7<br>(801.8 to 1,301.4)                 | 759.9<br>(665.4 to 876.7)                                 | 42.7<br>(23.5 to 73.5)                | 35.7<br>(30.3 to 41.4)                            | 0.3<br>(-3.1 to 4.0)                                |
| Psoriasis                                     | 84.5<br>(80.5 to 88.9)                        | 13.7<br>(13.0 to 14.4)                                    | 7.4<br>(5.2 to 9.8)                   | 47.8<br>(31.0 to 67.1)                            | 7.4<br>(-2.5 to 18.8)                               |
| Cellulitis                                    | 6.5<br>(6.0 to 7.1)                           | 112.0<br>(103.5 to 121.5)                                 | 0.4<br>(0.2 to 0.6)                   | 36.7<br>(6.0 to 80.9)                             | 1.0<br>(-19.0 to 26.0)                              |
| Pyoderma                                      | 121.4<br>(115.3 to 128.2)                     | 2,329.0<br>(2,212.3 to 2,454.7)                           | 0.7<br>(0.3 to 1.4)                   | 37.2<br>(29.2 to 46.2)                            | 1.6<br>(-3.3 to 6.9)                                |
| Scabies                                       | 408.5<br>(348.2 to 480.4)                     | 1,264.0<br>(1,080.0 to 1,481.6)                           | 10.6<br>(5.9 to 16.9)                 | 28.9<br>(23.0 to 34.6)                            | -5.1<br>(-8.7 to -1.8)                              |
| Fungal skin diseases                          | 2,528.8<br>(2,064.3 to 3,089.9)               | 7,278.7<br>(6,043.2 to 8,759.2)                           | 14.3<br>(5.7 to 30.4)                 | 36.5<br>(34.8 to 38.4)                            | 0.3<br>(-0.6 to 1.2)                                |
| Viral skin diseases                           | 611.1<br>(532.0 to 701.7)                     | 806.4<br>(692.4 to 928.6)                                 | 18.8<br>(11.7 to 27.9)                | 36.0<br>(31.5 to 40.8)                            | 0.2<br>(-2.7 to 3.3)                                |
| Acne vulgaris                                 | 1,657.0<br>(1,410.1 to 1,912.8)               | 1,271.6<br>(952.8 to 1,694.1)                             | 42.7<br>(28.2 to 61.8)                | 40.0<br>(32.0 to 48.9)                            | 4.4<br>(-1.2 to 10.6)                               |
| Alopecia areata                               | 27.9<br>(25.9 to 29.7)                        | 49.9<br>(46.3 to 53.1)                                    | 0.9<br>(0.6 to 1.4)                   | 40.7<br>(22.6 to 60.2)                            | 0.3<br>(-10.9 to 11.5)                              |
| Pruritus                                      | 119.1<br>(104.0 to 135.4)                     | 97.6<br>(86.4 to 110.5)                                   | 1.3<br>(0.6 to 2.3)                   | 39.3<br>(30.5 to 48.6)                            | 1.1<br>(-4.2 to 6.4)                                |
| Urticaria                                     | 184.6<br>(156.3 to 218.6)                     | 333.9<br>(281.9 to 393.7)                                 | 11.2<br>(7.0 to 16.3)                 | 36.5<br>(27.8 to 45.8)                            | 0.4<br>(-5.2 to 6.8)                                |
| Decubitus ulcer                               | 1.6<br>(1.4 to 1.7)                           | 5.7<br>(5.1 to 6.3)                                       | 0.3<br>(0.2 to 0.4)                   | 39.7<br>(24.1 to 57.2)                            | 1.3<br>(-13.3 to 18.0)                              |
| Other skin and subcutaneous diseases          | 714.7<br>(692.4 to 738.8)                     | 804.7<br>(778.1 to 831.9)                                 | 3.9<br>(1.9 to 7.3)                   | 39.9<br>(35.6 to 44.5)                            | 2.1<br>(-0.4 to 4.6)                                |
| Sense organ diseases                          | 2,405.4<br>(2,323.8 to 2,505.7)               | 1,603.5 <sup>†</sup><br>(1,488.9 to 1,734.1)              | 101.8<br>(70.9 to 143.1)              | 34.3<br>(30.6 to 38.5)                            | -2.6<br>(-4.5 to -0.8)                              |
| Glaucoma                                      | 8.7<br>(7.4 to 10.3)                          | --                                                        | 1.0<br>(0.7 to 1.4)                   | 40.1<br>(25.4 to 56.8)                            | 2.7<br>(-7.5 to 13.4)                               |
| Cataract                                      | 70.9<br>(61.4 to 81.0)                        | --                                                        | 6.2<br>(4.4 to 8.5)                   | 36.5<br>(27.2 to 45.8)                            | -4.5<br>(-10.6 to 1.8)                              |
| Macular degeneration                          | 12.9<br>(10.1 to 16.2)                        | --                                                        | 1.0<br>(0.6 to 1.4)                   | 40.4<br>(24.9 to 57.5)                            | 2.8<br>(-7.6 to 14.1)                               |
| Refraction and accommodation disorders        | 797.8<br>(760.5 to 838.9)                     | --                                                        | 16.4<br>(10.5 to 25.2)                | 25.2<br>(19.3 to 30.6)                            | -9.0<br>(-12.5 to -5.3)                             |
| Age-related and other hearing loss            | 1,680.8<br>(1,560.2 to 1,811.1)               | --                                                        | 63.6<br>(43.1 to 90.1)                | 35.6<br>(30.1 to 41.8)                            | -1.9<br>(-4.4 to 0.6)                               |
| Other vision loss                             | 50.8<br>(45.7 to 56.4)                        | --                                                        | 4.5<br>(3.1 to 6.0)                   | 37.1<br>(27.1 to 48.5)                            | 0.4<br>(-6.1 to 7.1)                                |
| Other sense organ diseases                    | 302.2<br>(280.2 to 325.2)                     | 1,603.5<br>(1,488.9 to 1,734.1)                           | 9.1<br>(5.8 to 13.7)                  | 39.6<br>(32.3 to 47.0)                            | 1.5<br>(-2.5 to 5.4)                                |
| Oral disorders                                | 8,758.6<br>(8,026.5 to 9,423.8)               | 25,338.1 <sup>†</sup><br>(21,163.0 to 29,458.4)           | 24.2<br>(13.8 to 40.5)                | 38.1<br>(34.1 to 41.6)                            | 0.1<br>(-2.8 to 2.7)                                |
| Caries of deciduous teeth                     | 2,355.0<br>(1,863.7 to 2,887.5)               | 8,891.8<br>(6,355.1 to 12,041.2)                          | 0.6<br>(0.2 to 1.1)                   | 33.1<br>(18.8 to 48.5)                            | -1.4<br>(-12.0 to 10.2)                             |
| Caries of permanent teeth                     | 5,430.9<br>(4,619.4 to 6,259.7)               | 16,296.7<br>(13,224.3 to 19,091.7)                        | 3.2<br>(1.4 to 6.3)                   | 36.5<br>(29.0 to 44.7)                            | -0.7<br>(-5.4 to 4.4)                               |
| Periodontal disease                           | 1,089.4<br>(675.3 to 1,581.5)                 | 135.8<br>(85.2 to 202.1)                                  | 7.1<br>(2.6 to 16.2)                  | 38.9<br>(29.9 to 47.0)                            | 0.0<br>(-6.3 to 6.0)                                |
| Edentulism and severe tooth loss              | 205.3<br>(179.8 to 232.0)                     | 13.8<br>(11.9 to 15.7)                                    | 5.7<br>(3.8 to 8.1)                   | 37.4<br>(30.8 to 45.5)                            | 0.2<br>(-3.7 to 4.2)                                |
| Other oral disorders                          | 256.6<br>(244.1 to 270.4)                     | --                                                        | 7.5<br>(4.6 to 11.4)                  | 38.9<br>(33.1 to 44.8)                            | 0.4<br>(-2.9 to 3.6)                                |
| <b>Injuries</b>                               | <b>1,700.0</b><br><b>(1,584.8 to 1,837.9)</b> | <b>1,172.3<sup>†</sup></b><br><b>(1,098.4 to 1,250.5)</b> | <b>73.6</b><br><b>(50.0 to 103.6)</b> | <b>37.7</b><br><b>(34.5 to 40.6)</b>              | <b>0.5</b><br><b>(-1.3 to 2.3)</b>                  |
| <b>Transport injuries</b>                     | <b>163.3</b><br><b>(151.7 to 175.0)</b>       | <b>83.7</b><br><b>(73.8 to 94.3)</b>                      | <b>9.5</b><br><b>(6.3 to 13.7)</b>    | <b>39.2</b><br><b>(35.7 to 42.7)</b>              | <b>1.8</b><br><b>(-0.3 to 4.0)</b>                  |
| Road injuries                                 | 130.2<br>(121.9 to 139.6)                     | 71.5<br>(62.0 to 81.9)                                    | 7.5<br>(5.0 to 10.8)                  | 37.6<br>(34.0 to 41.1)                            | 0.8<br>(-1.3 to 3.0)                                |
| Pedestrian road injuries                      | 39.8<br>(34.9 to 45.5)                        | 16.1<br>(13.0 to 19.8)                                    | 2.3<br>(1.5 to 3.3)                   | 28.3<br>(25.0 to 31.7)                            | -5.9<br>(-8.0 to -3.8)                              |
| Cyclist road injuries                         | 29.8<br>(25.0 to 35.3)                        | 18.7<br>(14.6 to 23.2)                                    | 1.6<br>(1.1 to 2.3)                   | 47.3<br>(43.3 to 51.8)                            | 8.7<br>(6.4 to 11.5)                                |
| Motorcyclist road injuries                    | 14.1<br>(12.0 to 16.6)                        | 5.3<br>(4.2 to 6.7)                                       | 0.8<br>(0.5 to 1.1)                   | 42.1<br>(38.5 to 45.8)                            | 2.7<br>(0.6 to 5.0)                                 |
| Motor vehicle road injuries                   | 33.4<br>(28.8 to 37.8)                        | 22.0<br>(18.2 to 26.1)                                    | 2.1<br>(1.4 to 3.0)                   | 38.1<br>(34.2 to 42.0)                            | 1.3<br>(-0.9 to 3.5)                                |
| Other road injuries                           | 13.2<br>(11.3 to 15.7)                        | 9.4<br>(7.0 to 12.5)                                      | 0.7<br>(0.5 to 1.0)                   | 43.4<br>(39.5 to 47.4)                            | 5.7<br>(3.3 to 8.3)                                 |
| Other transport injuries                      | 33.0<br>(27.5 to 40.0)                        | 12.2<br>(9.9 to 15.2)                                     | 2.0<br>(1.3 to 2.9)                   | 45.6<br>(39.8 to 51.1)                            | 6.9<br>(3.9 to 10.0)                                |
| <b>Unintentional injuries</b>                 | <b>1,465.9</b><br><b>(1,355.0 to 1,603.5)</b> | <b>1,039.9</b><br><b>(969.0 to 1,116.2)</b>               | <b>54.6</b><br><b>(36.8 to 77.0)</b>  | <b>38.9</b><br><b>(35.6 to 42.0)</b>              | <b>0.9</b><br><b>(-0.9 to 2.6)</b>                  |
| Falls                                         | 544.7<br>(467.9 to 621.8)                     | 365.9<br>(314.2 to 431.0)                                 | 23.5<br>(16.4 to 32.4)                | 36.4<br>(33.3 to 39.6)                            | -1.0<br>(-2.9 to 0.9)                               |
| Drowning                                      | 4.7<br>(4.0 to 5.4)                           | 1.5<br>(1.3 to 1.7)                                       | 0.3<br>(0.2 to 0.4)                   | 25.3<br>(21.3 to 29.4)                            | -8.2<br>(-10.8 to -5.9)                             |
| Fire, heat, and hot substances                | 202.4<br>(164.3 to 254.6)                     | 43.0<br>(33.8 to 53.1)                                    | 6.0<br>(4.1 to 8.5)                   | 40.2<br>(32.2 to 48.8)                            | 4.6<br>(0.3 to 9.8)                                 |
| Poisonings                                    | 4.6<br>(3.6 to 5.7)                           | 9.1<br>(6.9 to 11.8)                                      | 0.5<br>(0.3 to 0.8)                   | 50.0<br>(35.4 to 65.9)                            | 9.2<br>(0.8 to 18.1)                                |
| Exposure to mechanical forces                 | 199.8<br>(169.4 to 247.5)                     | 119.2<br>(98.5 to 141.4)                                  | 5.4<br>(3.5 to 7.9)                   | 40.3<br>(36.3 to 44.1)                            | 2.2<br>(-0.2 to 4.3)                                |
| Unintentional firearm injuries                | 9.0<br>(7.3 to 11.0)                          | 3.6<br>(2.4 to 5.0)                                       | 0.4<br>(0.3 to 0.6)                   | 46.5<br>(42.3 to 51.4)                            | 7.0<br>(4.2 to 9.8)                                 |
| Unintentional suffocation                     | 18.7<br>(13.4 to 25.0)                        | 7.2<br>(4.9 to 10.3)                                      | 0.6<br>(0.4 to 1.0)                   | 43.3<br>(38.1 to 48.2)                            | 5.0<br>(2.3 to 7.5)                                 |
| Other exposure to mechanical forces           | 172.1<br>(143.2 to 218.5)                     | 108.5<br>(89.5 to 129.0)                                  | 4.3<br>(2.8 to 6.3)                   | 39.3<br>(35.0 to 43.2)                            | 1.4<br>(-1.0 to 3.7)                                |

| Cause                                                                               | Prevalence in thousands (95% UI)        | Incidence in thousands (95% UI)       | YLDs in thousands (95% UI)              |                                                   |                                                     |
|-------------------------------------------------------------------------------------|-----------------------------------------|---------------------------------------|-----------------------------------------|---------------------------------------------------|-----------------------------------------------------|
|                                                                                     | 2016 counts                             | 2016 counts                           | 2016 counts                             | Percentage change in counts between 2006 and 2016 | Percentage change in age-standardised rates between |
| Adverse effects of medical treatment                                                | 6.3<br>(4.9 to 8.0)                     | 82.0<br>(69.2 to 98.0)                | 0.8<br>(0.5 to 1.3)                     | 32.4<br>(24.3 to 41.6)                            | -2.0<br>(-6.3 to 2.4)                               |
| Animal contact                                                                      | 95.5<br>(83.9 to 112.2)                 | 168.2<br>(140.1 to 197.8)             | 3.4<br>(2.2 to 4.8)                     | 33.4<br>(26.0 to 40.9)                            | -4.0<br>(-8.0 to -0.2)                              |
| Venomous animal contact                                                             | 33.8<br>(28.0 to 41.3)                  | 66.3<br>(51.6 to 82.7)                | 2.2<br>(1.4 to 3.2)                     | 34.2<br>(23.5 to 45.4)                            | -3.6<br>(-9.8 to 2.4)                               |
| Non-venomous animal contact                                                         | 61.8<br>(51.9 to 76.3)                  | 102.0<br>(83.0 to 123.2)              | 1.2<br>(0.8 to 1.7)                     | 31.8<br>(26.4 to 36.5)                            | -4.6<br>(-8.1 to -1.8)                              |
| Foreign body                                                                        | 117.5<br>(94.1 to 142.3)                | 102.9<br>(88.8 to 119.3)              | 5.1<br>(3.3 to 7.6)                     | 36.4<br>(31.4 to 41.7)                            | 0.9<br>(-2.0 to 3.7)                                |
| Pulmonary aspiration and foreign body in airway                                     | 64.0<br>(46.1 to 88.9)                  | 38.0<br>(30.3 to 47.8)                | 3.2<br>(2.0 to 4.7)                     | 31.5<br>(26.1 to 37.5)                            | -2.5<br>(-5.3 to 0.5)                               |
| Foreign body in eyes                                                                | 6.2<br>(3.2 to 9.8)                     | 35.8<br>(26.8 to 48.2)                | 0.4<br>(0.2 to 0.6)                     | 41.7<br>(36.4 to 47.6)                            | 2.4<br>(-0.6 to 5.8)                                |
| Foreign body in other body part                                                     | 47.3<br>(37.6 to 62.9)                  | 29.1<br>(22.9 to 35.5)                | 1.6<br>(1.1 to 2.4)                     | 45.8<br>(39.7 to 52.3)                            | 7.2<br>(3.4 to 10.7)                                |
| Environmental heat and cold exposure                                                | 87.2<br>(71.1 to 106.7)                 | 37.1<br>(29.3 to 46.8)                | 3.6<br>(2.3 to 5.3)                     | 47.6<br>(43.4 to 51.7)                            | 6.5<br>(4.2 to 8.6)                                 |
| Other unintentional injuries                                                        | 203.3<br>(157.6 to 266.4)               | 111.0<br>(89.9 to 137.7)              | 6.0<br>(3.9 to 8.9)                     | 48.0<br>(44.0 to 51.6)                            | 6.3<br>(4.4 to 8.2)                                 |
| <b>Self-harm and interpersonal violence</b>                                         | <b>766.0</b><br><b>(673.5 to 866.8)</b> | <b>48.1†</b><br><b>(39.9 to 57.5)</b> | <b>9.3</b><br><b>(6.4 to 12.8)</b>      | <b>30.2</b><br><b>(22.0 to 38.8)</b>              | <b>-3.6</b><br><b>(-8.5 to 1.5)</b>                 |
| Self-harm                                                                           | 7.0<br>(6.1 to 7.9)                     | 4.6<br>(3.9 to 5.4)                   | 0.4<br>(0.2 to 0.6)                     | 33.6<br>(29.3 to 37.9)                            | -4.5<br>(-7.2 to -2.1)                              |
| Self-harm by firearm                                                                | 0.6<br>(0.6 to 0.8)                     | 0.3<br>(0.2 to 0.5)                   | < 0.05<br>(< 0.05 to < 0.05)            | 37.1<br>(32.1 to 42.4)                            | -2.5<br>(-5.9 to 1.1)                               |
| Self-harm by other specified means                                                  | 6.4<br>(5.5 to 7.3)                     | 4.3<br>(3.6 to 5.0)                   | 0.4<br>(0.2 to 0.5)                     | 33.4<br>(28.9 to 37.9)                            | -4.8<br>(-7.5 to -2.2)                              |
| Interpersonal violence                                                              | 759.0<br>(666.9 to 860.1)               | 43.5†<br>(35.3 to 52.6)               | 9.0<br>(6.1 to 12.4)                    | 30.0<br>(21.6 to 39.0)                            | -3.6<br>(-8.8 to 1.9)                               |
| Assault by firearm                                                                  | 1.6<br>(1.4 to 1.8)                     | 0.8<br>(0.5 to 1.1)                   | 0.1<br>(0.1 to 0.1)                     | 53.3<br>(47.2 to 59.4)                            | 13.2<br>(9.8 to 17.0)                               |
| Assault by sharp object                                                             | 18.0<br>(14.6 to 21.8)                  | 10.5<br>(7.6 to 14.6)                 | 0.6<br>(0.4 to 0.9)                     | 51.0<br>(46.4 to 55.7)                            | 10.8<br>(8.0 to 13.6)                               |
| Sexual violence                                                                     | 699.6<br>(607.9 to 797.3)               | --                                    | 6.5<br>(4.3 to 9.3)                     | 22.5<br>(12.3 to 34.2)                            | -11.1<br>(-18.0 to -3.3)                            |
| Assault by other means                                                              | 39.8<br>(33.7 to 47.4)                  | 32.3<br>(26.2 to 39.5)                | 1.7<br>(1.2 to 2.5)                     | 57.6<br>(53.6 to 62.0)                            | 15.2<br>(12.7 to 18.1)                              |
| <b>Forces of nature, conflict and terrorism, and executions and police conflict</b> | <b>4.4</b><br><b>(2.5 to 8.0)</b>       | <b>0.6†</b><br><b>(0.3 to 1.4)</b>    | <b>0.1</b><br><b>(&lt; 0.05 to 0.5)</b> | <b>18.1</b><br><b>(5.8 to 31.4)</b>               | <b>-5.5</b><br><b>(-11.7 to 2.0)</b>                |
| Exposure to forces of nature                                                        | 1.5<br>(0.8 to 2.5)                     | --                                    | 0.1<br>(< 0.05 to 0.1)                  | 39.9<br>(34.0 to 45.4)                            | 4.4<br>(0.4 to 8.7)                                 |
| Conflict and terrorism                                                              | 0.7<br>(0.3 to 1.2)                     | --                                    | < 0.05<br>(< 0.05 to 0.1)               | -4.2<br>(-8.7 to 0.6)                             | -16.5<br>(-19.9 to -12.5)                           |
| Executions and police conflict                                                      | 2.2<br>(1.0 to 5.4)                     | 0.6<br>(0.3 to 1.4)                   | 0.1<br>(< 0.05 to 0.2)                  | 10.7<br>(-11.2 to 36.0)                           | -9.4<br>(-26.1 to 3.5)                              |
| <b>Impairments</b>                                                                  | --                                      | --                                    | --                                      | --                                                | --                                                  |
| Anaemia                                                                             | 7,978.2<br>(7,721.3 to 8,283.1)         | --                                    | 336.5<br>(235.5 to 466.1)               | 1.8<br>(-14.2 to 13.9)                            | -29.6<br>(-45.0 to -15.1)                           |
| Developmental intellectual disability                                               | 736.4<br>(551.6 to 910.4)               | --                                    | 68.1<br>(48.3 to 95.2)                  | 42.3<br>(31.8 to 60.4)                            | 4.3<br>(-3.2 to 17.0)                               |
| Epilepsy                                                                            | 121.2<br>(66.2 to 187.5)                | --                                    | 46.1<br>(23.2 to 80.6)                  | 51.1<br>(-30.7 to 207.2)                          | 9.8<br>(-51.5 to 139.0)                             |
| Guillain-Barre syndrome                                                             | 0.1<br>(0.1 to 0.2)                     | --                                    | < 0.05<br>(< 0.05 to 0.1)               | 36.4<br>(34.5 to 38.5)                            | 0.1<br>(0.0 to 0.2)                                 |
| Hearing loss                                                                        | 2,075.6<br>(1,958.0 to 2,205.6)         | --                                    | 86.8<br>(59.6 to 119.2)                 | 33.3<br>(28.9 to 38.0)                            | -2.6<br>(-4.7 to -0.4)                              |
| Heart failure                                                                       | 44.7<br>(39.0 to 50.9)                  | --                                    | 5.0<br>(3.6 to 6.6)                     | 40.3<br>(30.5 to 50.3)                            | -2.5<br>(-9.0 to 4.5)                               |
| Infertility                                                                         | 254.0<br>(195.3 to 336.2)               | --                                    | 1.5<br>(0.6 to 3.0)                     | 103.4<br>(62.4 to 154.4)                          | 43.2<br>(12.8 to 84.6)                              |
| Pelvic inflammatory disease                                                         | 15.8<br>(13.2 to 19.0)                  | --                                    | 2.1<br>(1.4 to 2.9)                     | 45.4<br>(26.1 to 68.1)                            | 0.4<br>(-12.0 to 14.9)                              |
| Vision loss                                                                         | 1,045.5<br>(994.7 to 1,100.8)           | --                                    | 45.9<br>(31.8 to 65.5)                  | 39.3<br>(27.8 to 60.4)                            | -4.8<br>(-9.6 to 3.6)                               |

We did not calculate incidence for the nine impairments, certain NTDs, and causes with only birth prevalence. Blank cells mean that no estimate is available.

† Incidence for aggregate causes represents the sum of the incidence of the causes below the aggregate.

‡ Incidence estimates for stroke represent first-ever stroke only.

^ Incidence of HIV/AIDS represents new infections of HIV only and does not include new infections of Tuberculosis in HIV positive cases.



SR Table 14: Prevalence, incidence, and YLDs for 2016, percentage change of YLD counts and percentage change of age-standardised YLD rates between 2006 and 2016 by cause and impairments, for all ages, Malaysia.

| Cause                                                                                | Prevalence in thousands (95% UI)          | Incidence in thousands (95% UI)               | YLDs in thousands (95% UI)             |                                                   |                                                     |
|--------------------------------------------------------------------------------------|-------------------------------------------|-----------------------------------------------|----------------------------------------|---------------------------------------------------|-----------------------------------------------------|
|                                                                                      | 2016 counts                               | 2016 counts                                   | 2016 counts                            | Percentage change in counts between 2006 and 2016 | Percentage change in age-standardised rates between |
| <b>All causes</b>                                                                    | <b>29,804.5</b><br>(29,680.0 to 29,915.1) | <b>159,587.1†</b><br>(150,626.6 to 169,939.8) | <b>2,944.1</b><br>(2,194.6 to 3,829.4) | <b>26.1</b><br>(23.3 to 29.2)                     | <b>0.0</b><br>(-2.0 to 2.1)                         |
| <b>Communicable, maternal, neonatal, and nutritional disorders</b>                   | <b>24,956.6</b><br>(24,074.2 to 25,764.8) | <b>97,573.7†</b><br>(89,296.1 to 106,754.7)   | <b>348.5</b><br>(242.4 to 491.8)       | <b>14.6</b><br>(4.8 to 25.5)                      | <b>-1.9</b><br>(-10.1 to 6.7)                       |
| <b>HIV/AIDS and tuberculosis</b>                                                     | <b>9,337.3</b><br>(7,798.3 to 10,785.3)   | <b>18.5†</b><br>(14.8 to 23.2)                | <b>13.9</b><br>(8.6 to 21.2)           | <b>6.4</b><br>(-5.2 to 19.8)                      | <b>-18.0</b><br>(-26.3 to -8.7)                     |
| Tuberculosis                                                                         | 8,306.0<br>(6,769.2 to 10,011.4)          | 16.6†<br>(13.0 to 21.4)                       | 9.0<br>(5.6 to 13.1)                   | 10.6<br>(-3.2 to 26.5)                            | -17.0<br>(-26.1 to -6.3)                            |
| Drug-susceptible tuberculosis                                                        | 29.3<br>(22.8 to 38.0)                    | 16.5<br>(12.9 to 21.2)                        | 8.9<br>(5.5 to 12.9)                   | 11.0<br>(-3.4 to 27.3)                            | -16.7<br>(-26.0 to -6.0)                            |
| Multidrug-resistant tuberculosis without extensive drug resistance                   | 0.2<br>(0.1 to 0.5)                       | 0.1<br>(0.1 to 0.2)                           | 0.1<br>(< 0.05 to 0.1)                 | -26.5<br>(-84.3 to 418.5)                         | -45.2<br>(-88.3 to 295.4)                           |
| Extensively drug-resistant tuberculosis                                              | < 0.05<br>(< 0.05 to < 0.05)              | < 0.05<br>(< 0.05 to < 0.05)                  | < 0.05<br>(< 0.05 to < 0.05)           | 141.9<br>(-48.3 to 1,607.0)                       | 80.5<br>(-61.5 to 1,200.7)                          |
| Latent tuberculosis infection                                                        | 8,276.4<br>(6,740.8 to 9,985.8)           | --                                            | --                                     | --                                                | --                                                  |
| HIV/AIDS                                                                             | 39.3<br>(28.8 to 57.2)                    | 1.8^<br>(1.5 to 2.4)                          | 4.9<br>(2.5 to 9.8)                    | -0.5<br>(-17.3 to 24.1)                           | -20.1<br>(-33.8 to 0.1)                             |
| Drug-susceptible HIV/AIDS - Tuberculosis                                             | 2.2<br>(1.2 to 3.6)                       | 1.2<br>(0.7 to 2.0)                           | 0.9<br>(0.4 to 1.5)                    | -24.0<br>(-47.7 to 6.5)                           | -37.7<br>(-56.4 to -13.8)                           |
| Multidrug-resistant HIV/AIDS - Tuberculosis without extensive drug resistance        | < 0.05<br>(< 0.05 to < 0.05)              | < 0.05<br>(< 0.05 to < 0.05)                  | < 0.05<br>(< 0.05 to < 0.05)           | -50.8<br>(-89.2 to 276.1)                         | -59.8<br>(-91.1 to 207.9)                           |
| Extensively drug-resistant HIV/AIDS - Tuberculosis                                   | < 0.05<br>(< 0.05 to < 0.05)              | < 0.05<br>(< 0.05 to < 0.05)                  | < 0.05<br>(< 0.05 to < 0.05)           | 61.9<br>(-64.2 to 1,138.3)                        | 32.4<br>(-70.8 to 913.8)                            |
| HIV/AIDS resulting in other diseases                                                 | 37.1<br>(26.3 to 54.9)                    | 1.8<br>(1.5 to 2.4)                           | 4.0<br>(1.8 to 8.9)                    | 6.8<br>(-14.9 to 51.7)                            | -14.8<br>(-32.1 to 21.3)                            |
| <b>Diarrhoea, lower respiratory infections, and other common infectious diseases</b> | <b>1,618.1</b><br>(1,522.4 to 1,715.3)    | <b>93,620.1†</b><br>(85,354.6 to 102,637.8)   | <b>86.7</b><br>(60.5 to 119.2)         | <b>22.9</b><br>(18.2 to 27.6)                     | <b>6.1</b><br>(2.3 to 9.7)                          |
| Diarrhoeal diseases                                                                  | 330.9<br>(302.7 to 361.0)                 | 22,320.9<br>(20,399.8 to 24,368.4)            | 37.5<br>(26.0 to 52.2)                 | 38.6<br>(28.8 to 48.3)                            | 19.5<br>(12.0 to 27.2)                              |
| Intestinal infectious diseases                                                       | 2.6<br>(2.0 to 3.3)                       | 49.9†<br>(40.7 to 62.0)                       | 0.4<br>(0.3 to 0.6)                    | -15.6<br>(-31.9 to 5.9)                           | -21.7<br>(-36.0 to -3.5)                            |
| Typhoid fever                                                                        | 2.5<br>(2.0 to 3.2)                       | 39.6<br>(31.9 to 49.4)                        | 0.4<br>(0.2 to 0.6)                    | -15.8<br>(-33.2 to 6.9)                           | -21.7<br>(-37.0 to -2.2)                            |
| Paratyphoid fever                                                                    | 0.5<br>(0.4 to 0.6)                       | 10.4<br>(8.4 to 12.8)                         | < 0.05<br>(< 0.05 to < 0.05)           | -8.6<br>(-24.4 to 9.0)                            | -17.0<br>(-30.5 to -1.7)                            |
| Other intestinal infectious diseases                                                 | --                                        | --                                            | < 0.05<br>(< 0.05 to < 0.05)           | -35.0<br>(-47.9 to -20.0)                         | -42.2<br>(-52.2 to -30.6)                           |
| Lower respiratory infections                                                         | 37.7<br>(34.8 to 40.8)                    | 1,548.3<br>(1,416.9 to 1,684.8)               | 2.3<br>(1.5 to 3.3)                    | 26.3<br>(13.4 to 39.9)                            | -1.3<br>(-10.2 to 8.5)                              |
| Upper respiratory infections                                                         | 904.3<br>(801.9 to 1,021.6)               | 67,822.9<br>(59,789.2 to 77,024.5)            | 22.6<br>(13.3 to 35.2)                 | 14.2<br>(8.2 to 20.7)                             | -0.2<br>(-5.1 to 5.5)                               |
| Otitis media                                                                         | 261.0<br>(232.5 to 288.8)                 | 1,166.8<br>(942.9 to 1,447.4)                 | 7.2<br>(4.5 to 10.8)                   | 1.7<br>(-6.7 to 10.5)                             | -7.4<br>(-14.4 to 0.2)                              |
| Meningitis                                                                           | 62.2<br>(53.9 to 71.6)                    | 10.4<br>(8.6 to 12.5)                         | 6.7<br>(4.7 to 8.8)                    | 12.9<br>(4.0 to 22.6)                             | -4.1<br>(-11.3 to 3.8)                              |
| Pneumococcal meningitis                                                              | 33.8<br>(28.1 to 40.9)                    | 3.1<br>(2.5 to 4.0)                           | 3.3<br>(2.2 to 4.5)                    | 14.1<br>(-3.5 to 33.3)                            | -3.6<br>(-17.3 to 11.8)                             |
| H influenzae type B meningitis                                                       | 7.9<br>(6.7 to 9.5)                       | 1.1<br>(0.8 to 1.4)                           | 1.3<br>(0.8 to 1.7)                    | 7.5<br>(2.0 to 13.1)                              | -7.2<br>(-11.8 to -2.5)                             |
| Meningococcal infection                                                              | 2.2<br>(1.7 to 3.0)                       | 0.7<br>(0.5 to 0.9)                           | 0.3<br>(0.2 to 0.4)                    | 13.6<br>(8.1 to 18.6)                             | -4.4<br>(-8.7 to -0.2)                              |
| Other meningitis                                                                     | 18.2<br>(14.1 to 23.4)                    | 5.5<br>(4.5 to 6.8)                           | 1.9<br>(1.3 to 2.6)                    | 14.6<br>(10.0 to 19.7)                            | -2.7<br>(-6.7 to 1.5)                               |
| Encephalitis                                                                         | 70.0<br>(50.1 to 97.6)                    | 35.8<br>(31.6 to 40.8)                        | 8.4<br>(5.9 to 11.2)                   | 19.4<br>(4.0 to 34.8)                             | -1.5<br>(-13.2 to 10.6)                             |
| Diphtheria                                                                           | < 0.05<br>(< 0.05 to < 0.05)              | < 0.05<br>(< 0.05 to < 0.05)                  | < 0.05<br>(< 0.05 to < 0.05)           | -11.8<br>(-48.7 to 51.6)                          | -25.4<br>(-57.0 to 29.8)                            |
| Whooping cough                                                                       | 1.3<br>(1.0 to 1.7)                       | 9.3<br>(7.0 to 12.3)                          | 0.1<br>(< 0.05 to 0.1)                 | -46.7<br>(-65.0 to -22.6)                         | -49.0<br>(-66.5 to -26.1)                           |
| Tetanus                                                                              | 0.1<br>(0.1 to 0.1)                       | < 0.05<br>(< 0.05 to 0.1)                     | < 0.05<br>(< 0.05 to < 0.05)           | 11.6<br>(1.5 to 21.2)                             | -9.2<br>(-18.2 to -0.9)                             |
| Measles                                                                              | 0.6<br>(0.2 to 1.4)                       | 22.5<br>(8.0 to 51.7)                         | 0.1<br>(< 0.05 to 0.1)                 | 35.4<br>(-6.1 to 93.5)                            | 30.5<br>(-9.9 to 86.6)                              |
| Varicella and herpes zoster                                                          | 34.7<br>(31.6 to 37.9)                    | 633.1<br>(611.0 to 655.6)                     | 1.4<br>(0.9 to 2.2)                    | 28.5<br>(13.3 to 44.8)                            | 0.0<br>(-10.6 to 10.9)                              |
| <b>Neglected tropical diseases and malaria</b>                                       | <b>18,629.7</b><br>(16,895.8 to 20,376.8) | <b>1,126.7†</b><br>(692.0 to 1,691.7)         | <b>81.7</b><br>(48.5 to 128.1)         | <b>22.9</b><br>(1.8 to 47.9)                      | <b>4.2</b><br>(-13.9 to 25.2)                       |
| Malaria                                                                              | 0.5<br>(0.4 to 0.7)                       | 0.2<br>(0.2 to 0.2)                           | 0.1<br>(0.1 to 0.2)                    | 6.7<br>(-3.5 to 17.2)                             | -9.2<br>(-17.7 to -0.4)                             |
| Chagas disease                                                                       | --                                        | --                                            | --                                     | --                                                | --                                                  |
| Leishmaniasis                                                                        | --                                        | --                                            | --                                     | --                                                | --                                                  |
| Visceral leishmaniasis                                                               | --                                        | --                                            | --                                     | --                                                | --                                                  |
| Cutaneous and mucocutaneous leishmaniasis                                            | --                                        | --                                            | --                                     | --                                                | --                                                  |
| African trypanosomiasis                                                              | --                                        | --                                            | --                                     | --                                                | --                                                  |
| Schistosomiasis                                                                      | --                                        | --                                            | --                                     | --                                                | --                                                  |
| Cysticercosis                                                                        | 0.1<br>(0.1 to 0.2)                       | --                                            | < 0.05<br>(< 0.05 to 0.1)              | 19.0<br>(-45.5 to 105.9)                          | -11.5<br>(-59.3 to 53.1)                            |
| Cystic echinococcosis                                                                | --                                        | --                                            | --                                     | --                                                | --                                                  |
| Lymphatic filariasis                                                                 | 1.2<br>(0.8 to 2.0)                       | 0.4<br>(0.4 to 0.5)                           | 0.1<br>(< 0.05 to 0.2)                 | -36.0<br>(-74.1 to 4.7)                           | -48.7<br>(-79.1 to -15.8)                           |
| Onchocerciasis                                                                       | --                                        | --                                            | --                                     | --                                                | --                                                  |
| Trachoma                                                                             | --                                        | --                                            | --                                     | --                                                | --                                                  |
| Dengue                                                                               | 67.3<br>(36.6 to 112.8)                   | 1,125.5<br>(691.0 to 1,690.6)                 | 11.0<br>(5.0 to 20.4)                  | 113.4<br>(67.8 to 394.3)                          | 84.6<br>(45.2 to 327.6)                             |
| Yellow fever                                                                         | --                                        | --                                            | --                                     | --                                                | --                                                  |
| Rabies                                                                               | < 0.05<br>(< 0.05 to < 0.05)              | < 0.05<br>(< 0.05 to < 0.05)                  | < 0.05<br>(< 0.05 to < 0.05)           | -5.4<br>(-39.1 to 41.9)                           | -27.1<br>(-51.3 to 3.1)                             |
| Intestinal nematode infections                                                       | 18,523.4<br>(16,798.8 to 20,279.5)        | --                                            | 66.6<br>(37.2 to 113.3)                | 16.2<br>(-6.7 to 44.9)                            | -2.4<br>(-21.8 to 21.2)                             |
| Ascariasis                                                                           | 13,163.2<br>(10,857.8 to 15,990.7)        | --                                            | 33.3<br>(17.0 to 58.7)                 | 17.2<br>(-16.7 to 65.7)                           | -1.3<br>(-30.2 to 40.0)                             |

| Cause                                                                   | Prevalence in thousands (95% UI)                 | Incidence in thousands (95% UI)                   | YLDs in thousands (95% UI)                    |                                                   |                                                     |
|-------------------------------------------------------------------------|--------------------------------------------------|---------------------------------------------------|-----------------------------------------------|---------------------------------------------------|-----------------------------------------------------|
|                                                                         | 2016 counts                                      | 2016 counts                                       | 2016 counts                                   | Percentage change in counts between 2006 and 2016 | Percentage change in age-standardised rates between |
| Trichuriasis                                                            | 4,591.8<br>(4,059.5 to 5,175.6)                  | --                                                | 4.2<br>(2.1 to 8.1)                           | -22.0<br>(-32.8 to -9.4)                          | -34.7<br>(-43.8 to -24.3)                           |
| Hookworm disease                                                        | 6,633.4<br>(5,588.7 to 7,879.2)                  | --                                                | 29.1<br>(16.3 to 47.5)                        | 23.8<br>(-5.7 to 67.2)                            | 3.5<br>(-21.2 to 39.4)                              |
| Food-borne trematodiasis                                                | --                                               | --                                                | --                                            | --                                                | --                                                  |
| Leprosy                                                                 | 0.3<br>(0.2 to 0.3)                              | 0.1<br>( $< 0.05$ to 0.1)                         | $< 0.05$<br>( $< 0.05$ to $< 0.05$ )          | 13.7<br>(1.1 to 31.0)                             | -16.8<br>(-27.3 to -1.4)                            |
| Ebola virus disease                                                     | --                                               | --                                                | --                                            | --                                                | --                                                  |
| Zika virus disease                                                      | $< 0.05$<br>( $< 0.05$ to $< 0.05$ )             | 0.5<br>(0.1 to 1.5)                               | $< 0.05$<br>( $< 0.05$ to $< 0.05$ )          | --                                                | --                                                  |
| Guinea worm disease                                                     | --                                               | --                                                | --                                            | --                                                | --                                                  |
| Other neglected tropical diseases                                       | 179.8<br>(141.0 to 223.1)                        | --                                                | 3.8<br>(2.0 to 6.4)                           | 3.3<br>(-23.9 to 45.3)                            | -1.2<br>(-27.1 to 36.2)                             |
| <b>Maternal disorders</b>                                               | <b>37.1</b><br><b>(27.3 to 46.9)</b>             | <b>480.1†</b><br><b>(412.2 to 561.4)</b>          | <b>2.3</b><br><b>(1.4 to 3.5)</b>             | <b>11.4</b><br><b>(-18.9 to 54.3)</b>             | <b>-11.7</b><br><b>(-35.5 to 22.2)</b>              |
| Maternal haemorrhage                                                    | 10.5<br>(6.6 to 16.1)                            | 48.9<br>(36.4 to 66.2)                            | 0.3<br>(0.2 to 0.5)                           | 26.2<br>(-17.6 to 90.0)                           | -2.0<br>(-34.8 to 46.5)                             |
| Maternal sepsis and other pregnancy related infections                  | 4.2<br>(2.1 to 7.0)                              | 49.7<br>(36.7 to 68.0)                            | 0.2<br>(0.1 to 0.4)                           | 0.9<br>(-57.3 to 128.0)                           | -18.9<br>(-65.5 to 77.2)                            |
| Maternal hypertensive disorders                                         | 22.0<br>(12.9 to 32.3)                           | 113.9<br>(86.2 to 139.4)                          | 1.1<br>(0.5 to 1.8)                           | 15.5<br>(-30.1 to 99.5)                           | -8.4<br>(-44.1 to 59.0)                             |
| Maternal obstructed labour and uterine rupture                          | 0.5<br>(0.3 to 0.8)                              | 34.7<br>(24.6 to 47.8)                            | 0.1<br>( $< 0.05$ to 0.3)                     | 3.8<br>(-66.1 to 174.3)                           | -17.2<br>(-72.0 to 115.7)                           |
| Maternal abortion, miscarriage, and ectopic pregnancy                   | 1.9<br>(1.2 to 2.8)                              | 232.9<br>(173.4 to 307.2)                         | 0.2<br>(0.1 to 0.4)                           | -1.6<br>(-46.8 to 91.4)                           | -21.8<br>(-57.7 to 51.4)                            |
| Other maternal disorders                                                | --                                               | --                                                | 0.4<br>(0.2 to 0.5)                           | 6.2<br>(-22.7 to 47.5)                            | -15.5<br>(-38.4 to 16.9)                            |
| <b>Neonatal disorders</b>                                               | <b>376.0</b><br><b>(314.4 to 453.9)</b>          | --                                                | <b>56.3</b><br><b>(37.7 to 80.6)</b>          | <b>12.9</b><br><b>(-7.2 to 37.7)</b>              | <b>-0.5</b><br><b>(-18.3 to 21.6)</b>               |
| Neonatal preterm birth complications                                    | 348.2<br>(269.3 to 447.8)                        | --                                                | 42.9<br>(27.7 to 63.3)                        | 15.0<br>(-11.1 to 48.4)                           | 1.3<br>(-21.6 to 30.1)                              |
| Neonatal encephalopathy due to birth asphyxia and trauma                | 28.0<br>(16.9 to 41.9)                           | --                                                | 5.2<br>(2.5 to 9.3)                           | 16.3<br>(-7.4 to 92.9)                            | 1.8<br>(-18.9 to 69.2)                              |
| Neonatal sepsis and other neonatal infections                           | 13.8<br>(6.0 to 31.7)                            | --                                                | 6.0<br>(2.3 to 15.1)                          | -0.8<br>(-19.0 to 21.9)                           | -12.6<br>(-28.4 to 7.2)                             |
| Hemolytic disease and other neonatal jaundice                           | 2.1<br>(1.8 to 2.5)                              | --                                                | 0.6<br>(0.5 to 0.8)                           | 12.1<br>(2.4 to 22.1)                             | -2.6<br>(-11.2 to 6.1)                              |
| Other neonatal disorders                                                | --                                               | --                                                | 1.5<br>(1.0 to 2.2)                           | 5.0<br>(-18.4 to 35.3)                            | -0.9<br>(-23.0 to 27.7)                             |
| <b>Nutritional deficiencies</b>                                         | <b>5,168.7</b><br><b>(4,429.6 to 5,767.7)</b>    | <b>358.0†</b><br><b>(310.1 to 413.2)</b>          | <b>92.8</b><br><b>(57.9 to 143.8)</b>         | <b>3.5</b><br><b>(-15.0 to 27.8)</b>              | <b>-10.2</b><br><b>(-25.6 to 8.7)</b>               |
| Protein-energy malnutrition                                             | 265.3<br>(229.0 to 306.1)                        | 128.2<br>(112.6 to 146.0)                         | 5.4<br>(2.4 to 10.6)                          | 0.2<br>(-56.9 to 132.9)                           | -5.3<br>(-59.0 to 118.7)                            |
| Iodine deficiency                                                       | 89.0<br>(76.6 to 102.3)                          | 2.8<br>(2.4 to 3.2)                               | 2.3<br>(1.5 to 3.3)                           | 3.1<br>(-12.8 to 21.8)                            | -18.1<br>(-29.5 to -4.7)                            |
| Vitamin A deficiency                                                    | 266.9<br>(215.9 to 320.8)                        | 227.1<br>(180.7 to 277.3)                         | --                                            | --                                                | --                                                  |
| Iron-deficiency anaemia                                                 | 4,310.8<br>(3,626.2 to 5,051.2)                  | --                                                | 84.9<br>(52.0 to 132.8)                       | 3.8<br>(-15.4 to 30.5)                            | -10.2<br>(-26.0 to 10.2)                            |
| Other nutritional deficiencies                                          | --                                               | --                                                | 0.2<br>(0.1 to 0.4)                           | -0.4<br>(-58.9 to 142.2)                          | -6.0<br>(-61.2 to 127.3)                            |
| <b>Other communicable, maternal, neonatal, and nutritional diseases</b> | <b>6,129.1</b><br><b>(5,721.7 to 6,572.5)</b>    | <b>1,970.3</b><br><b>(1,781.0 to 2,164.2)</b>     | <b>14.7</b><br><b>(9.2 to 22.6)</b>           | <b>18.5</b><br><b>(9.4 to 28.6)</b>               | <b>-2.7</b><br><b>(-10.1 to 5.2)</b>                |
| Sexually transmitted diseases excluding HIV                             | 4,893.1<br>(4,503.2 to 5,350.8)                  | 1,622.0<br>(1,446.8 to 1,806.8)                   | 10.2<br>(6.4 to 16.0)                         | 22.4<br>(13.0 to 31.6)                            | -2.5<br>(-9.8 to 4.4)                               |
| Syphilis                                                                | 53.1<br>(41.7 to 66.2)                           | 30.9<br>(23.8 to 40.6)                            | 0.7<br>(0.4 to 0.9)                           | 40.7<br>(22.9 to 57.9)                            | 1.3<br>(-10.6 to 14.7)                              |
| Chlamydial infection                                                    | 532.8<br>(402.2 to 680.7)                        | 424.0<br>(330.1 to 546.9)                         | 3.2<br>(1.9 to 5.0)                           | 21.3<br>(6.7 to 37.7)                             | -1.7<br>(-13.3 to 10.8)                             |
| Gonococcal infection                                                    | 60.1<br>(40.9 to 86.0)                           | 154.0<br>(83.1 to 253.4)                          | 0.4<br>(0.2 to 0.6)                           | 20.9<br>(-1.8 to 47.4)                            | -2.4<br>(-20.7 to 18.9)                             |
| Trichomoniasis                                                          | 558.5<br>(468.1 to 657.2)                        | 473.3<br>(392.1 to 561.7)                         | 0.5<br>(0.2 to 1.2)                           | 26.7<br>(15.6 to 38.2)                            | 1.0<br>(-7.2 to 9.5)                                |
| Genital herpes                                                          | 3,738.4<br>(3,212.2 to 4,358.0)                  | 259.4<br>(218.4 to 308.6)                         | 1.0<br>(0.3 to 2.2)                           | 30.0<br>(19.9 to 40.9)                            | 0.4<br>(-6.5 to 8.5)                                |
| Other sexually transmitted diseases                                     | 255.0<br>(208.7 to 301.3)                        | 280.3<br>(235.9 to 332.1)                         | 4.5<br>(2.9 to 6.7)                           | 19.1<br>(5.7 to 32.6)                             | -4.8<br>(-15.3 to 5.9)                              |
| Hepatitis                                                               | 1,417.2<br>(1,260.7 to 1,592.9)                  | 348.3<br>(290.6 to 414.7)                         | 0.7<br>(0.4 to 1.1)                           | 15.3<br>(-7.6 to 44.9)                            | -13.7<br>(-30.0 to 6.8)                             |
| Acute hepatitis A                                                       | 8.2<br>(6.0 to 10.1)                             | 107.1<br>(78.1 to 130.8)                          | 0.2<br>(0.1 to 0.4)                           | 12.5<br>(-28.0 to 72.4)                           | -13.8<br>(-42.2 to 27.8)                            |
| Hepatitis B                                                             | 611.1<br>(487.9 to 760.2)                        | 189.0<br>(139.0 to 250.6)                         | 0.4<br>(0.2 to 0.6)                           | 17.1<br>(-12.5 to 61.7)                           | -14.2<br>(-35.1 to 16.1)                            |
| Hepatitis C                                                             | 796.5<br>(703.4 to 894.8)                        | 34.1<br>(30.6 to 38.0)                            | $< 0.05$<br>( $< 0.05$ to 0.1)                | 12.8<br>(-4.2 to 30.9)                            | -6.2<br>(-19.5 to 7.5)                              |
| Acute hepatitis E                                                       | 1.4<br>(0.9 to 2.0)                              | 18.1<br>(12.2 to 25.4)                            | $< 0.05$<br>( $< 0.05$ to 0.1)                | 16.8<br>(1.4 to 36.1)                             | -13.6<br>(-27.9 to 4.0)                             |
| Other infectious diseases                                               | 146.1<br>(117.5 to 178.1)                        | $< 0.05$<br>( $< 0.05$ to $< 0.05$ )              | 3.8<br>(2.2 to 6.2)                           | 9.6<br>(-11.8 to 39.4)                            | -0.8<br>(-20.4 to 25.3)                             |
| <b>Non-communicable diseases</b>                                        | <b>26,685.0</b><br><b>(26,496.2 to 26,859.5)</b> | <b>60,236.2†</b><br><b>(57,149.0 to 63,719.4)</b> | <b>2,427.6</b><br><b>(1,809.8 to 3,136.3)</b> | <b>27.0</b><br><b>(24.1 to 30.2)</b>              | <b>-0.3</b><br><b>(-2.4 to 1.9)</b>                 |
| <b>Neoplasms</b>                                                        | <b>111.9</b><br><b>(105.7 to 117.7)</b>          | <b>42.6</b><br><b>(40.5 to 44.7)</b>              | <b>14.3</b><br><b>(10.4 to 18.6)</b>          | <b>62.6</b><br><b>(51.8 to 72.9)</b>              | <b>13.2</b><br><b>(6.0 to 20.1)</b>                 |
| Lip and oral cavity cancer                                              | 3.6<br>(3.3 to 4.0)                              | 1.0<br>(0.9 to 1.1)                               | 0.4<br>(0.3 to 0.5)                           | 47.6<br>(28.9 to 68.5)                            | 0.8<br>(-12.5 to 15.5)                              |
| Nasopharynx cancer                                                      | 4.7<br>(4.0 to 5.5)                              | 1.4<br>(1.2 to 1.6)                               | 0.6<br>(0.4 to 0.8)                           | 30.9<br>(8.2 to 56.7)                             | -3.4<br>(-19.2 to 14.5)                             |
| Other pharynx cancer                                                    | 0.8<br>(0.7 to 0.9)                              | 0.3<br>(0.2 to 0.3)                               | 0.1<br>(0.1 to 0.1)                           | 68.8<br>(45.3 to 92.8)                            | 13.2<br>(-3.1 to 29.6)                              |
| Oesophageal cancer                                                      | 0.5<br>(0.5 to 0.6)                              | 0.5<br>(0.4 to 0.5)                               | 0.1<br>(0.1 to 0.2)                           | 41.4<br>(27.0 to 56.6)                            | -6.0<br>(-17.0 to 6.4)                              |
| Stomach cancer                                                          | 2.1<br>(2.0 to 2.3)                              | 1.4<br>(1.3 to 1.5)                               | 0.4<br>(0.2 to 0.5)                           | 42.2<br>(18.6 to 71.4)                            | -6.0<br>(-21.7 to 13.8)                             |
| Colon and rectum cancer                                                 | 18.7<br>(16.5 to 20.6)                           | 5.5<br>(4.8 to 6.0)                               | 1.9<br>(1.4 to 2.5)                           | 83.1<br>(56.5 to 109.5)                           | 20.9<br>(2.8 to 37.8)                               |
| Liver cancer                                                            | 1.0<br>(0.9 to 1.2)                              | 1.9<br>(1.7 to 2.1)                               | 0.4<br>(0.3 to 0.5)                           | 47.7<br>(30.4 to 67.8)                            | -0.2<br>(-11.4 to 13.3)                             |
| Liver cancer due to hepatitis B                                         | 1.0<br>(0.9 to 1.2)                              | 1.2<br>(1.0 to 1.4)                               | 0.2<br>(0.2 to 0.3)                           | 47.0<br>(28.8 to 68.8)                            | -0.1<br>(-12.5 to 14.7)                             |

| Cause                                              | Prevalence in thousands (95% UI)              | Incidence in thousands (95% UI)          | YLDs in thousands (95% UI)              |                                                   |                                                     |
|----------------------------------------------------|-----------------------------------------------|------------------------------------------|-----------------------------------------|---------------------------------------------------|-----------------------------------------------------|
|                                                    | 2016 counts                                   | 2016 counts                              | 2016 counts                             | Percentage change in counts between 2006 and 2016 | Percentage change in age-standardised rates between |
| Liver cancer due to hepatitis C                    | 0.2<br>(0.1 to 0.3)                           | 0.2<br>(0.2 to 0.3)                      | 0.1<br>( $< 0.05$ to 0.1)               | 50.4<br>(31.9 to 71.9)                            | -1.4<br>(-14.1 to 13.4)                             |
| Liver cancer due to alcohol use                    | 0.1<br>(0.1 to 0.1)                           | 0.1<br>(0.1 to 0.2)                      | $< 0.05$<br>( $< 0.05$ to $< 0.05$ )    | 57.2<br>(35.8 to 82.6)                            | 5.4<br>(-9.0 to 22.4)                               |
| Liver cancer due to other causes                   | 0.3<br>(0.2 to 0.4)                           | 0.4<br>(0.3 to 0.5)                      | 0.1<br>( $< 0.05$ to 0.1)               | 45.1<br>(25.9 to 69.3)                            | -1.5<br>(-14.5 to 14.8)                             |
| Gallbladder and biliary tract cancer               | 0.2<br>(0.2 to 0.2)                           | 0.2<br>(0.2 to 0.3)                      | 0.1<br>( $< 0.05$ to 0.1)               | 41.6<br>(30.2 to 54.3)                            | -6.5<br>(-14.6 to 2.6)                              |
| Pancreatic cancer                                  | 0.6<br>(0.6 to 0.7)                           | 0.9<br>(0.8 to 0.9)                      | 0.2<br>(0.1 to 0.2)                     | 58.3<br>(46.0 to 70.5)                            | 5.2<br>(-4.0 to 15.8)                               |
| Larynx cancer                                      | 1.3<br>(1.2 to 1.5)                           | 0.4<br>(0.4 to 0.4)                      | 0.2<br>(0.1 to 0.2)                     | 68.5<br>(44.9 to 94.6)                            | 11.5<br>(-4.0 to 29.4)                              |
| Tracheal, bronchus, and lung cancer                | 5.3<br>(4.9 to 5.8)                           | 4.9<br>(4.5 to 5.3)                      | 1.1<br>(0.8 to 1.5)                     | 45.4<br>(18.6 to 76.6)                            | -2.9<br>(-20.1 to 16.9)                             |
| Malignant skin melanoma                            | 0.6<br>(0.5 to 0.7)                           | 0.1<br>(0.1 to 0.2)                      | $< 0.05$<br>( $< 0.05$ to 0.1)          | 69.0<br>(47.7 to 93.1)                            | 18.5<br>(2.6 to 36.9)                               |
| Non-melanoma skin cancer                           | 0.2<br>(0.1 to 0.3)                           | 0.8<br>(0.7 to 1.1)                      | $< 0.05$<br>( $< 0.05$ to $< 0.05$ )    | 42.7<br>(7.6 to 83.2)                             | -6.4<br>(-31.0 to 22.4)                             |
| Non-melanoma skin cancer (squamous-cell carcinoma) | 0.2<br>(0.1 to 0.3)                           | 0.3<br>(0.3 to 0.4)                      | $< 0.05$<br>( $< 0.05$ to $< 0.05$ )    | 43.8<br>(6.1 to 89.7)                             | -5.0<br>(-31.4 to 26.0)                             |
| Non-melanoma skin cancer (basal-cell carcinoma)    | 0.1<br>( $< 0.05$ to 0.1)                     | 0.5<br>(0.3 to 0.7)                      | $< 0.05$<br>( $< 0.05$ to $< 0.05$ )    | 31.6<br>(-2.5 to 78.8)                            | -21.4<br>(-42.9 to 7.0)                             |
| Breast cancer                                      | 34.2<br>(27.8 to 40.8)                        | 7.2<br>(5.9 to 8.5)                      | 2.9<br>(2.0 to 4.1)                     | 62.8<br>(30.3 to 99.2)                            | 17.2<br>(-6.0 to 41.2)                              |
| Cervical cancer                                    | 6.7<br>(5.4 to 8.6)                           | 1.8<br>(1.4 to 2.2)                      | 0.6<br>(0.4 to 0.9)                     | 25.8<br>(1.6 to 59.0)                             | -9.9<br>(-27.0 to 13.9)                             |
| Uterine cancer                                     | 3.9<br>(3.3 to 4.7)                           | 0.8<br>(0.7 to 1.0)                      | 0.3<br>(0.2 to 0.4)                     | 89.0<br>(49.0 to 140.2)                           | 28.8<br>(3.4 to 61.8)                               |
| Ovarian cancer                                     | 4.4<br>(3.7 to 5.2)                           | 1.4<br>(1.2 to 1.6)                      | 0.6<br>(0.4 to 0.9)                     | 54.9<br>(13.6 to 110.6)                           | 12.6<br>(-17.1 to 51.2)                             |
| Prostate cancer                                    | 8.6<br>(6.8 to 10.7)                          | 2.1<br>(1.7 to 2.6)                      | 0.8<br>(0.6 to 1.2)                     | 99.3<br>(60.7 to 148.9)                           | 28.2<br>(4.6 to 58.1)                               |
| Testicular cancer                                  | 1.0<br>(0.8 to 1.4)                           | 0.2<br>(0.2 to 0.3)                      | 0.1<br>( $< 0.05$ to 0.1)               | 104.5<br>(50.3 to 175.2)                          | 57.9<br>(18.5 to 107.4)                             |
| Kidney cancer                                      | 3.3<br>(2.9 to 3.7)                           | 0.9<br>(0.8 to 1.0)                      | 0.3<br>(0.2 to 0.4)                     | 61.7<br>(38.8 to 85.5)                            | 15.7<br>(-0.4 to 32.1)                              |
| Bladder cancer                                     | 4.0<br>(3.6 to 4.4)                           | 1.0<br>(0.9 to 1.1)                      | 0.4<br>(0.3 to 0.5)                     | 74.0<br>(48.4 to 102.9)                           | 14.5<br>(-3.3 to 33.8)                              |
| Brain and nervous system cancer                    | 1.4<br>(1.2 to 1.7)                           | 0.6<br>(0.5 to 0.8)                      | 0.2<br>(0.1 to 0.3)                     | 59.0<br>(39.3 to 86.6)                            | 21.7<br>(7.7 to 39.6)                               |
| Thyroid cancer                                     | 6.9<br>(5.9 to 8.2)                           | 1.3<br>(1.2 to 1.6)                      | 0.5<br>(0.3 to 0.7)                     | 121.2<br>(79.4 to 176.2)                          | 50.2<br>(22.7 to 83.7)                              |
| Mesothelioma                                       | 0.1<br>(0.1 to 0.1)                           | 0.1<br>( $< 0.05$ to 0.1)                | $< 0.05$<br>( $< 0.05$ to $< 0.05$ )    | 45.6<br>(27.4 to 64.9)                            | 1.7<br>(-11.2 to 14.8)                              |
| Hodgkin lymphoma                                   | 0.9<br>(0.6 to 1.4)                           | 0.2<br>(0.2 to 0.3)                      | 0.1<br>(0.1 to 0.1)                     | 104.2<br>(56.0 to 171.5)                          | 50.8<br>(17.9 to 97.3)                              |
| Non-Hodgkin's lymphoma                             | 4.5<br>(4.0 to 5.2)                           | 1.4<br>(1.3 to 1.6)                      | 0.5<br>(0.3 to 0.6)                     | 78.0<br>(58.4 to 103.8)                           | 26.4<br>(12.4 to 44.7)                              |
| Multiple myeloma                                   | 0.6<br>(0.5 to 0.7)                           | 0.3<br>(0.2 to 0.3)                      | 0.1<br>(0.1 to 0.2)                     | 87.3<br>(66.5 to 110.6)                           | 25.5<br>(11.9 to 41.1)                              |
| Leukaemia                                          | 6.9<br>(5.9 to 8.7)                           | 2.0<br>(1.7 to 2.5)                      | 0.9<br>(0.6 to 1.2)                     | 51.4<br>(32.6 to 75.7)                            | 14.7<br>(0.6 to 33.7)                               |
| Acute lymphoid leukaemia                           | 2.3<br>(1.8 to 3.1)                           | 0.6<br>(0.5 to 0.8)                      | 0.3<br>(0.2 to 0.4)                     | 60.1<br>(32.0 to 100.6)                           | 25.2<br>(4.3 to 55.4)                               |
| Chronic lymphoid leukaemia                         | 0.7<br>(0.6 to 0.9)                           | 0.2<br>(0.1 to 0.2)                      | 0.1<br>(0.1 to 0.1)                     | 61.0<br>(35.8 to 89.4)                            | 15.1<br>(-2.4 to 35.8)                              |
| Acute myeloid leukaemia                            | 0.8<br>(0.6 to 1.2)                           | 0.5<br>(0.4 to 0.6)                      | 0.1<br>(0.1 to 0.2)                     | 55.6<br>(32.1 to 86.0)                            | 23.2<br>(5.2 to 45.4)                               |
| Chronic myeloid leukaemia                          | 0.4<br>(0.4 to 0.6)                           | 0.1<br>(0.1 to 0.2)                      | 0.1<br>( $< 0.05$ to 0.1)               | 41.5<br>(16.5 to 69.7)                            | 3.0<br>(-14.8 to 24.0)                              |
| Other leukaemia                                    | 2.6<br>(2.1 to 3.5)                           | 0.6<br>(0.5 to 0.8)                      | 0.3<br>(0.2 to 0.5)                     | 42.0<br>(19.7 to 71.1)                            | 6.3<br>(-11.6 to 29.5)                              |
| Other neoplasms                                    | 7.1<br>(6.5 to 7.8)                           | 2.1<br>(2.0 to 2.3)                      | 0.6<br>(0.5 to 0.8)                     | 81.4<br>(59.5 to 105.5)                           | 31.1<br>(16.4 to 47.3)                              |
| <b>Cardiovascular diseases</b>                     | <b>1,640.5</b><br><b>(1,572.4 to 1,713.1)</b> | <b>171.4†</b><br><b>(163.6 to 179.2)</b> | <b>116.4</b><br><b>(84.3 to 152.8)</b>  | <b>41.0</b><br><b>(35.6 to 46.5)</b>              | <b>-0.1</b><br><b>(-3.8 to 3.2)</b>                 |
| Rheumatic heart disease                            | 2.0<br>(1.8 to 2.3)                           | 0.5<br>(0.5 to 0.6)                      | 0.2<br>(0.1 to 0.2)                     | 31.1<br>(15.6 to 48.7)                            | -2.4<br>(-15.9 to 12.7)                             |
| Ischaemic heart disease                            | 696.7<br>(661.3 to 732.7)                     | 83.5<br>(78.1 to 89.8)                   | 33.3<br>(22.7 to 46.1)                  | 49.6<br>(42.6 to 56.5)                            | 6.2<br>(2.0 to 10.6)                                |
| Cerebrovascular disease                            | 218.2<br>(201.7 to 236.0)                     | 33.6‡<br>(30.7 to 36.5)                  | 45.0<br>(32.0 to 58.0)                  | 42.4<br>(32.5 to 52.8)                            | -2.4<br>(-9.2 to 4.4)                               |
| Ischaemic stroke                                   | 173.8<br>(152.9 to 193.2)                     | 21.3‡<br>(18.6 to 24.0)                  | 34.2<br>(23.9 to 44.1)                  | 45.3<br>(31.9 to 58.4)                            | -1.5<br>(-10.5 to 6.8)                              |
| Hemorrhagic stroke                                 | 55.4<br>(50.2 to 61.2)                        | 12.4‡<br>(11.2 to 13.6)                  | 10.8<br>(7.7 to 14.1)                   | 34.2<br>(20.8 to 49.2)                            | -5.3<br>(-14.1 to 4.2)                              |
| Hypertensive heart disease                         | 22.2<br>(18.8 to 25.9)                        | --                                       | 1.8<br>(1.2 to 2.6)                     | 39.0<br>(18.7 to 61.0)                            | 0.9<br>(-11.5 to 13.8)                              |
| Cardiomyopathy and myocarditis                     | 18.2<br>(16.3 to 20.2)                        | 5.5†<br>(4.8 to 6.3)                     | 1.9<br>(1.2 to 2.6)                     | 36.0<br>(18.6 to 56.0)                            | 8.0<br>(-5.0 to 22.6)                               |
| Myocarditis                                        | 4.7<br>(4.2 to 5.3)                           | 5.5<br>(4.8 to 6.3)                      | 0.4<br>(0.2 to 0.5)                     | 25.0<br>(14.6 to 35.8)                            | 6.7<br>(-2.2 to 15.8)                               |
| Alcoholic cardiomyopathy                           | 1.7<br>(1.4 to 2.0)                           | --                                       | 0.1<br>(0.1 to 0.2)                     | 48.2<br>(33.8 to 66.2)                            | 8.1<br>(-1.6 to 20.1)                               |
| Other cardiomyopathy                               | 15.7<br>(13.5 to 18.1)                        | --                                       | 1.3<br>(0.9 to 1.9)                     | 38.1<br>(15.0 to 66.7)                            | 8.3<br>(-8.1 to 27.9)                               |
| Atrial fibrillation and flutter                    | 123.9<br>(108.1 to 142.0)                     | 10.9<br>(9.3 to 12.8)                    | 9.8<br>(6.5 to 13.8)                    | 53.3<br>(42.9 to 65.2)                            | 2.4<br>(-4.3 to 9.1)                                |
| Peripheral vascular disease                        | 325.0<br>(280.9 to 378.7)                     | 29.7<br>(25.7 to 34.5)                   | 1.5<br>(0.7 to 2.8)                     | 53.5<br>(41.5 to 65.3)                            | -1.5<br>(-8.5 to 5.7)                               |
| Endocarditis                                       | 3.9<br>(3.5 to 4.5)                           | 7.6<br>(7.0 to 8.3)                      | 0.3<br>(0.2 to 0.5)                     | 27.8<br>(16.6 to 40.2)                            | -4.7<br>(-15.2 to 6.7)                              |
| Other cardiovascular and circulatory diseases      | 430.4<br>(372.0 to 498.1)                     | --                                       | 22.7<br>(15.1 to 32.3)                  | 23.8<br>(14.1 to 34.9)                            | -5.9<br>(-12.9 to 2.1)                              |
| <b>Chronic respiratory diseases</b>                | <b>2,545.3</b><br><b>(2,445.5 to 2,645.3)</b> | <b>552.4†</b><br><b>(521.6 to 586.3)</b> | <b>160.5</b><br><b>(128.2 to 195.1)</b> | <b>38.1</b><br><b>(32.6 to 44.5)</b>              | <b>6.2</b><br><b>(2.3 to 10.3)</b>                  |
| Chronic obstructive pulmonary disease              | 867.6<br>(830.9 to 903.0)                     | 67.4<br>(64.2 to 70.8)                   | 84.5<br>(74.1 to 93.3)                  | 46.4<br>(39.7 to 53.9)                            | 2.8<br>(-1.9 to 7.7)                                |
| Pneumoconiosis                                     | 2.8<br>(2.5 to 3.1)                           | 0.2<br>(0.2 to 0.3)                      | 0.4<br>(0.3 to 0.6)                     | 46.1<br>(14.4 to 89.5)                            | -0.4<br>(-21.7 to 29.1)                             |
| Silicosis                                          | 2.2<br>(1.9 to 2.6)                           | 0.2<br>(0.2 to 0.2)                      | 0.3<br>(0.2 to 0.5)                     | 46.6<br>(7.7 to 104.4)                            | 0.0<br>(-26.5 to 38.9)                              |



| Cause                                                          | Prevalence in thousands (95% UI)           | Incidence in thousands (95% UI)                     | YLDs in thousands (95% UI)        |                                                   |                                                     |
|----------------------------------------------------------------|--------------------------------------------|-----------------------------------------------------|-----------------------------------|---------------------------------------------------|-----------------------------------------------------|
|                                                                | 2016 counts                                | 2016 counts                                         | 2016 counts                       | Percentage change in counts between 2006 and 2016 | Percentage change in age-standardised rates between |
| Asbestosis                                                     | 0.4<br>(0.3 to 0.4)                        | < 0.05<br>(< 0.05 to < 0.05)                        | 0.1<br>(< 0.05 to 0.1)            | 43.5<br>(35.6 to 51.7)                            | -1.6<br>(-7.2 to 3.9)                               |
| Coal workers pneumoconiosis                                    | --                                         | --                                                  | --                                | --                                                | --                                                  |
| Other pneumoconiosis                                           | 0.1<br>(0.1 to 0.2)                        | < 0.05<br>(< 0.05 to < 0.05)                        | < 0.05<br>(< 0.05 to < 0.05)      | 45.9<br>(30.9 to 62.3)                            | -2.4<br>(-13.4 to 9.1)                              |
| Asthma                                                         | 1,756.1<br>(1,636.9 to 1,878.5)            | 482.8<br>(452.0 to 516.7)                           | 69.0<br>(45.3 to 98.5)            | 27.9<br>(20.3 to 37.3)                            | 10.7<br>(4.7 to 18.0)                               |
| Interstitial lung disease and pulmonary sarcoidosis            | 22.4<br>(20.0 to 25.0)                     | 2.0<br>(1.7 to 2.2)                                 | 2.3<br>(1.5 to 3.3)               | 47.1<br>(30.4 to 65.1)                            | 1.5<br>(-9.4 to 12.8)                               |
| Other chronic respiratory diseases                             | --                                         | --                                                  | 4.3<br>(3.6 to 4.9)               | 60.8<br>(40.2 to 83.6)                            | 38.8<br>(21.9 to 56.6)                              |
| <b>Cirrhosis and other chronic liver diseases</b>              | <b>121.7<br/>(115.0 to 128.8)</b>          | <b>5.0<br/>(4.8 to 5.3)</b>                         | <b>4.1<br/>(2.8 to 5.7)</b>       | <b>32.6<br/>(17.0 to 50.5)</b>                    | <b>4.4<br/>(-6.3 to 16.2)</b>                       |
| Cirrhosis and other chronic liver diseases due to hepatitis B  | 47.8<br>(41.7 to 54.4)                     | 2.1<br>(1.8 to 2.4)                                 | 1.3<br>(0.9 to 1.9)               | 45.8<br>(19.5 to 75.3)                            | 5.2<br>(-11.5 to 25.2)                              |
| Cirrhosis and other chronic liver diseases due to hepatitis C  | 16.4<br>(13.6 to 20.0)                     | 0.7<br>(0.6 to 0.8)                                 | 0.5<br>(0.3 to 0.7)               | 40.5<br>(8.4 to 82.3)                             | 2.2<br>(-21.5 to 31.4)                              |
| Cirrhosis and other chronic liver diseases due to alcohol use  | 17.0<br>(14.4 to 20.1)                     | 0.8<br>(0.7 to 0.9)                                 | 0.5<br>(0.3 to 0.7)               | 48.0<br>(11.8 to 94.4)                            | 5.8<br>(-18.8 to 38.9)                              |
| Cirrhosis and other chronic liver diseases due to other causes | 40.5<br>(36.2 to 45.0)                     | 1.5<br>(1.4 to 1.7)                                 | 1.9<br>(1.2 to 2.7)               | 20.3<br>(-1.4 to 48.1)                            | 3.9<br>(-14.1 to 25.2)                              |
| <b>Digestive diseases</b>                                      | <b>351.1<br/>(323.3 to 385.7)</b>          | <b>437.4<sup>†</sup><br/>(412.2 to 464.5)</b>       | <b>10.6<br/>(7.2 to 14.8)</b>     | <b>37.5<br/>(20.6 to 57.0)</b>                    | <b>1.2<br/>(-10.5 to 14.3)</b>                      |
| Peptic ulcer disease                                           | 124.7<br>(107.6 to 146.5)                  | 56.6<br>(50.7 to 63.1)                              | 3.0<br>(1.8 to 4.6)               | 43.1<br>(14.1 to 78.4)                            | 0.5<br>(-17.3 to 22.2)                              |
| Gastritis and duodenitis                                       | 178.3<br>(151.3 to 205.2)                  | 161.3<br>(141.8 to 183.7)                           | 3.1<br>(1.9 to 4.9)               | 40.1<br>(12.0 to 73.5)                            | 1.4<br>(-17.8 to 23.1)                              |
| Appendicitis                                                   | 2.2<br>(2.0 to 2.4)                        | 58.1<br>(53.9 to 62.6)                              | 0.7<br>(0.5 to 1.0)               | 20.3<br>(6.7 to 36.6)                             | 1.4<br>(-10.9 to 16.0)                              |
| Paralytic ileus and intestinal obstruction                     | 0.3<br>(0.3 to 0.3)                        | 8.3<br>(7.5 to 9.3)                                 | 0.1<br>(0.1 to 0.1)               | 28.2<br>(22.2 to 34.9)                            | -1.9<br>(-9.4 to 6.6)                               |
| Inguinal, femoral, and abdominal hernia                        | 36.6<br>(31.6 to 42.1)                     | 59.0<br>(52.0 to 66.5)                              | 1.6<br>(1.0 to 2.2)               | 32.2<br>(13.1 to 53.5)                            | 0.4<br>(-13.9 to 16.4)                              |
| Inflammatory bowel disease                                     | 3.9<br>(3.6 to 4.2)                        | 10.0<br>(9.6 to 10.4)                               | 0.6<br>(0.4 to 0.9)               | 30.6<br>(19.7 to 41.5)                            | 2.5<br>(-6.6 to 11.8)                               |
| Vascular intestinal disorders                                  | 0.2<br>(0.2 to 0.2)                        | 1.3<br>(1.2 to 1.5)                                 | 0.1<br>(< 0.05 to 0.1)            | 32.4<br>(25.7 to 39.2)                            | 2.2<br>(-2.3 to 6.6)                                |
| Gallbladder and biliary diseases                               | 22.1<br>(19.5 to 24.9)                     | 71.9<br>(62.0 to 82.7)                              | 0.5<br>(0.3 to 0.7)               | 39.0<br>(18.9 to 61.3)                            | 1.4<br>(-15.5 to 20.1)                              |
| Pancreatitis                                                   | 1.2<br>(1.1 to 1.3)                        | 10.8<br>(9.7 to 12.1)                               | 0.1<br>(0.1 to 0.2)               | 38.3<br>(33.5 to 43.6)                            | 0.6<br>(-3.2 to 4.4)                                |
| Other digestive diseases                                       | --                                         | --                                                  | 0.8<br>(0.6 to 1.1)               | 41.6<br>(25.1 to 60.4)                            | 4.1<br>(-7.8 to 17.7)                               |
| <b>Neurological disorders</b>                                  | <b>10,680.4<br/>(10,193.0 to 11,190.9)</b> | <b>4,944.2<br/>(4,172.5 to 5,795.4)</b>             | <b>263.7<br/>(176.8 to 362.1)</b> | <b>25.0<br/>(3.2 to 52.4)</b>                     | <b>-0.1<br/>(-16.3 to 20.2)</b>                     |
| Alzheimer's disease and other dementias                        | 159.5<br>(135.9 to 189.5)                  | 26.6<br>(22.4 to 31.9)                              | 22.4<br>(15.5 to 29.8)            | 47.1<br>(39.1 to 54.6)                            | -5.4<br>(-10.0 to -1.0)                             |
| Parkinson's disease                                            | 19.6<br>(15.7 to 23.9)                     | 2.1<br>(1.7 to 2.7)                                 | 2.3<br>(1.5 to 3.2)               | 60.0<br>(40.8 to 81.7)                            | 8.0<br>(-3.9 to 20.4)                               |
| Epilepsy                                                       | 127.8<br>(50.5 to 188.1)                   | 16.4<br>(6.2 to 24.2)                               | 42.6<br>(14.1 to 82.1)            | 17.3<br>(-61.1 to 255.8)                          | 0.6<br>(-67.2 to 204.8)                             |
| Multiple sclerosis                                             | 0.9<br>(0.8 to 1.0)                        | < 0.05<br>(< 0.05 to 0.1)                           | 0.2<br>(0.2 to 0.3)               | 47.9<br>(43.9 to 53.1)                            | 14.0<br>(10.9 to 18.1)                              |
| Motor neuron disease                                           | 0.8<br>(0.7 to 0.9)                        | 0.1<br>(0.1 to 0.1)                                 | 0.2<br>(0.1 to 0.2)               | 27.6<br>(22.5 to 32.4)                            | 3.3<br>(0.1 to 6.8)                                 |
| Migraine                                                       | 3,912.0<br>(3,686.6 to 4,142.4)            | 414.4<br>(389.6 to 441.6)                           | 162.0<br>(103.0 to 228.3)         | 23.8<br>(18.9 to 28.9)                            | 0.1<br>(-3.6 to 3.7)                                |
| Tension-type headache                                          | 7,989.5<br>(7,067.9 to 9,022.9)            | 4,484.3<br>(3,702.7 to 5,348.3)                     | 24.4<br>(15.2 to 36.8)            | 23.8<br>(17.1 to 31.5)                            | -0.3<br>(-5.4 to 5.2)                               |
| Other neurological disorders                                   | 0.1<br>(< 0.05 to 0.1)                     | 0.1<br>(0.1 to 0.2)                                 | 9.6<br>(3.6 to 17.6)              | 35.9<br>(-46.7 to 263.5)                          | 19.0<br>(-51.5 to 195.5)                            |
| <b>Mental and substance use disorders</b>                      | <b>4,143.4<br/>(3,997.4 to 4,290.2)</b>    | <b>1,449.1<sup>†</sup><br/>(1,341.6 to 1,558.9)</b> | <b>587.5<br/>(423.1 to 759.1)</b> | <b>22.2<br/>(19.4 to 25.4)</b>                    | <b>-0.6<br/>(-2.8 to 1.9)</b>                       |
| Schizophrenia                                                  | 93.5<br>(80.9 to 107.1)                    | 5.7<br>(4.9 to 6.5)                                 | 60.9<br>(43.6 to 76.7)            | 30.4<br>(19.7 to 42.3)                            | 1.5<br>(-6.9 to 9.9)                                |
| Alcohol use disorders                                          | 187.6<br>(170.2 to 209.9)                  | 104.4<br>(92.2 to 117.3)                            | 18.8<br>(12.8 to 25.6)            | 23.2<br>(12.1 to 36.0)                            | -2.5<br>(-10.7 to 6.9)                              |
| Drug use disorders                                             | 274.9<br>(252.8 to 300.2)                  | 36.4<br>(32.0 to 41.2)                              | 53.2<br>(38.1 to 70.7)            | 25.4<br>(14.1 to 36.9)                            | -0.7<br>(-9.1 to 7.9)                               |
| Opioid use disorders                                           | 88.7<br>(74.7 to 104.7)                    | 10.2<br>(8.7 to 12.1)                               | 37.0<br>(25.5 to 49.8)            | 27.0<br>(13.0 to 41.5)                            | -2.5<br>(-12.5 to 7.9)                              |
| Cocaine use disorders                                          | 4.9<br>(4.1 to 5.8)                        | 0.6<br>(0.5 to 0.7)                                 | 0.7<br>(0.4 to 1.1)               | 29.7<br>(23.0 to 37.7)                            | 3.8<br>(-1.1 to 9.5)                                |
| Amphetamine use disorders                                      | 43.4<br>(28.3 to 62.3)                     | 4.2<br>(2.7 to 6.1)                                 | 5.8<br>(3.1 to 9.6)               | 22.6<br>(-2.2 to 55.7)                            | 6.6<br>(-15.0 to 35.1)                              |
| Cannabis use disorders                                         | 132.7<br>(107.1 to 164.0)                  | 18.8<br>(14.9 to 23.1)                              | 3.9<br>(2.3 to 5.9)               | 15.6<br>(1.1 to 32.8)                             | -1.0<br>(-13.1 to 13.0)                             |
| Other drug use disorders                                       | 14.6<br>(12.9 to 16.3)                     | 2.7<br>(2.4 to 3.1)                                 | 5.8<br>(3.5 to 9.0)               | 24.8<br>(-2.1 to 59.4)                            | 4.8<br>(-17.1 to 31.2)                              |
| Depressive disorders                                           | 1,082.7<br>(1,016.8 to 1,163.3)            | 982.6<br>(877.7 to 1,089.5)                         | 173.0<br>(118.8 to 235.6)         | 30.8<br>(24.7 to 37.1)                            | 3.7<br>(-1.0 to 8.5)                                |
| Major depressive disorder                                      | 610.9<br>(545.6 to 679.9)                  | 907.0<br>(805.9 to 1,014.9)                         | 126.1<br>(85.0 to 170.6)          | 30.1<br>(21.7 to 38.7)                            | 5.0<br>(-1.4 to 11.5)                               |
| Dysthymia                                                      | 487.0<br>(422.8 to 558.0)                  | 75.5<br>(66.0 to 86.4)                              | 46.9<br>(31.3 to 67.3)            | 32.5<br>(28.0 to 37.2)                            | 0.5<br>(-2.5 to 3.6)                                |
| Bipolar disorder                                               | 176.5<br>(152.0 to 206.3)                  | 14.6<br>(12.7 to 16.8)                              | 36.4<br>(22.9 to 54.1)            | 24.3<br>(16.1 to 33.7)                            | 0.1<br>(-6.0 to 6.7)                                |
| Anxiety disorders                                              | 1,202.4<br>(1,088.4 to 1,319.8)            | 184.1<br>(169.6 to 199.5)                           | 116.7<br>(81.2 to 157.9)          | 13.8<br>(5.6 to 21.4)                             | -6.6<br>(-13.1 to -0.5)                             |
| Eating disorders                                               | 47.6<br>(39.2 to 57.5)                     | 24.9<br>(18.8 to 32.4)                              | 9.9<br>(6.3 to 14.4)              | 32.9<br>(17.6 to 53.8)                            | 13.0<br>(0.1 to 29.5)                               |
| Anorexia nervosa                                               | 14.2<br>(10.2 to 19.3)                     | 5.3<br>(3.8 to 7.2)                                 | 3.1<br>(1.8 to 4.7)               | 27.4<br>(2.3 to 60.0)                             | 12.7<br>(-9.1 to 41.4)                              |
| Bulimia nervosa                                                | 32.3<br>(24.4 to 43.6)                     | 19.6<br>(13.6 to 27.0)                              | 6.9<br>(4.1 to 10.2)              | 35.6<br>(16.0 to 59.1)                            | 13.1<br>(-2.4 to 32.0)                              |
| Autistic spectrum disorders                                    | 253.6<br>(227.0 to 283.9)                  | 1.7<br>(1.1 to 2.4)                                 | 37.3<br>(25.1 to 53.3)            | 14.6<br>(9.0 to 20.4)                             | -1.1<br>(-5.9 to 3.8)                               |
| Autism                                                         | 76.5<br>(65.3 to 89.2)                     | 0.2<br>(0.1 to 0.3)                                 | 19.6<br>(12.5 to 28.9)            | 14.9<br>(5.2 to 25.8)                             | -1.1<br>(-9.2 to 8.1)                               |
| Asperger syndrome and other autistic spectrum disorders        | 176.7<br>(146.4 to 212.7)                  | 1.5<br>(1.0 to 2.1)                                 | 17.7<br>(11.6 to 26.1)            | 14.2<br>(8.7 to 20.3)                             | -1.2<br>(-5.5 to 3.6)                               |



| Cause                                                      | Prevalence in thousands (95% UI)                 | Incidence in thousands (95% UI)                   | YLDs in thousands (95% UI)              |                                                   |                                                     |
|------------------------------------------------------------|--------------------------------------------------|---------------------------------------------------|-----------------------------------------|---------------------------------------------------|-----------------------------------------------------|
|                                                            | 2016 counts                                      | 2016 counts                                       | 2016 counts                             | Percentage change in counts between 2006 and 2016 | Percentage change in age-standardised rates between |
| Attention-deficit/hyperactivity disorder                   | 110.0<br>(96.8 to 125.2)                         | 4.9<br>(4.2 to 5.7)                               | 1.3<br>(0.8 to 2.1)                     | 7.1<br>(-5.6 to 22.5)                             | -0.2<br>(-11.3 to 13.8)                             |
| Conduct disorder                                           | 213.4<br>(178.0 to 247.1)                        | 69.2<br>(55.0 to 82.8)                            | 26.0<br>(16.1 to 39.3)                  | -2.1<br>(-8.6 to 4.3)                             | -0.9<br>(-7.3 to 5.6)                               |
| Idiopathic developmental intellectual disability           | 219.5<br>(87.1 to 371.9)                         | --                                                | 9.9<br>(4.0 to 18.4)                    | -1.1<br>(-11.2 to 7.6)                            | -14.8<br>(-23.4 to -7.7)                            |
| Other mental and substance use disorders                   | 587.2<br>(516.5 to 678.3)                        | 20.8<br>(18.5 to 23.6)                            | 44.1<br>(30.4 to 63.2)                  | 28.3<br>(21.6 to 34.6)                            | -0.3<br>(-5.2 to 4.1)                               |
| <b>Diabetes, urogenital, blood, and endocrine diseases</b> | <b>9,816.7</b><br><b>(9,602.7 to 10,060.9)</b>   | <b>2,835.8†</b><br><b>(2,650.3 to 3,027.4)</b>    | <b>249.8</b><br><b>(172.6 to 343.4)</b> | <b>34.5</b><br><b>(27.9 to 41.3)</b>              | <b>-0.2</b><br><b>(-5.3 to 4.9)</b>                 |
| Diabetes mellitus                                          | 1,949.6<br>(1,748.0 to 2,167.5)                  | 109.6<br>(98.0 to 122.4)                          | 163.3<br>(111.3 to 230.3)               | 38.1<br>(28.5 to 47.9)                            | 0.7<br>(-6.5 to 7.8)                                |
| Acute glomerulonephritis                                   | 0.4<br>(0.3 to 0.4)                              | 5.6<br>(4.9 to 6.4)                               | < 0.05<br>(< 0.05 to < 0.05)            | 19.4<br>(13.8 to 25.2)                            | 0.7<br>(-2.8 to 4.6)                                |
| Chronic kidney disease                                     | 637.1<br>(579.6 to 701.8)                        | 44.5<br>(40.0 to 49.7)                            | 23.1<br>(16.9 to 30.0)                  | 38.2<br>(26.1 to 51.4)                            | -1.9<br>(-10.5 to 7.2)                              |
| Chronic kidney disease due to diabetes mellitus            | 395.3<br>(351.1 to 442.2)                        | 27.4<br>(24.0 to 31.1)                            | 14.0<br>(10.3 to 18.2)                  | 38.5<br>(23.4 to 55.3)                            | -2.1<br>(-12.8 to 9.1)                              |
| Chronic kidney disease due to hypertension                 | 94.4<br>(79.4 to 110.6)                          | 3.4<br>(2.7 to 4.0)                               | 5.5<br>(3.9 to 7.4)                     | 42.2<br>(23.7 to 61.9)                            | -3.6<br>(-15.3 to 9.4)                              |
| Chronic kidney disease due to glomerulonephritis           | 108.8<br>(91.4 to 128.1)                         | 10.6<br>(8.9 to 12.5)                             | 1.9<br>(1.3 to 2.5)                     | 30.7<br>(19.4 to 42.4)                            | 4.7<br>(-4.2 to 13.4)                               |
| Chronic kidney disease due to other causes                 | 38.6<br>(31.7 to 46.1)                           | 3.1<br>(2.6 to 3.7)                               | 1.7<br>(1.1 to 2.3)                     | 32.6<br>(21.3 to 45.2)                            | 1.7<br>(-7.3 to 10.9)                               |
| Urinary diseases and male infertility                      | 324.8<br>(288.0 to 365.9)                        | 1,587.2†<br>(1,415.2 to 1,762.6)                  | 8.0<br>(5.2 to 11.6)                    | 33.0<br>(24.9 to 41.8)                            | -4.7<br>(-10.3 to 1.1)                              |
| Interstitial nephritis and urinary tract infections        | 27.8<br>(24.5 to 31.3)                           | 1,455.0<br>(1,282.6 to 1,630.7)                   | 0.9<br>(0.6 to 1.4)                     | 24.2<br>(6.3 to 44.7)                             | 0.2<br>(-13.6 to 14.6)                              |
| Urolithiasis                                               | 4.1<br>(3.6 to 4.7)                              | 109.3<br>(95.9 to 124.9)                          | 0.3<br>(0.2 to 0.4)                     | 36.6<br>(27.0 to 47.8)                            | 0.8<br>(-9.1 to 12.6)                               |
| Benign prostatic hyperplasia                               | 175.6<br>(149.5 to 207.1)                        | 22.9<br>(19.1 to 27.5)                            | 5.8<br>(3.7 to 8.5)                     | 40.0<br>(28.6 to 51.2)                            | -4.3<br>(-10.9 to 2.5)                              |
| Male infertility                                           | 101.3<br>(76.6 to 132.5)                         | --                                                | 0.6<br>(0.2 to 1.2)                     | 11.7<br>(0.1 to 24.7)                             | -10.0<br>(-19.4 to 0.4)                             |
| Other urinary diseases                                     | --                                               | --                                                | 0.5<br>(0.3 to 0.7)                     | 4.5<br>(-7.7 to 18.8)                             | -16.5<br>(-25.2 to -6.3)                            |
| Gynecological diseases                                     | 3,079.8<br>(2,920.8 to 3,245.0)                  | 1,025.3†<br>(969.1 to 1,084.9)                    | 33.1<br>(22.2 to 48.6)                  | 23.3<br>(16.0 to 30.6)                            | -1.3<br>(-6.9 to 4.6)                               |
| Uterine fibroids                                           | 434.6<br>(380.8 to 495.2)                        | 48.6<br>(41.7 to 56.9)                            | 6.2<br>(3.6 to 10.6)                    | 26.4<br>(8.2 to 46.6)                             | -1.6<br>(-15.9 to 13.4)                             |
| Polycystic ovarian syndrome                                | 25.9<br>(19.2 to 33.2)                           | 21.7<br>(16.0 to 27.8)                            | 0.2<br>(0.1 to 0.4)                     | 23.8<br>(6.5 to 44.1)                             | 0.4<br>(-13.2 to 16.5)                              |
| Female infertility                                         | 97.0<br>(32.3 to 215.0)                          | --                                                | 0.5<br>(0.1 to 1.5)                     | 40.8<br>(7.0 to 94.0)                             | 12.5<br>(-12.4 to 54.5)                             |
| Endometriosis                                              | 3.2<br>(2.6 to 3.8)                              | 24.9<br>(20.3 to 30.5)                            | 0.3<br>(0.2 to 0.5)                     | 24.4<br>(-9.6 to 70.7)                            | 2.3<br>(-24.8 to 39.9)                              |
| Genital prolapse                                           | 611.5<br>(530.4 to 700.1)                        | 40.6<br>(34.9 to 47.8)                            | 1.9<br>(0.9 to 3.6)                     | 20.0<br>(9.6 to 30.9)                             | -14.5<br>(-22.1 to -6.3)                            |
| Premenstrual syndrome                                      | 1,979.1<br>(1,858.4 to 2,099.9)                  | 717.2<br>(668.3 to 766.2)                         | 16.6<br>(10.3 to 25.9)                  | 21.9<br>(12.1 to 32.2)                            | 0.4<br>(-7.3 to 8.6)                                |
| Other gynecological diseases                               | 230.9<br>(199.4 to 264.3)                        | 172.2<br>(142.9 to 201.9)                         | 7.3<br>(4.7 to 10.5)                    | 23.3<br>(9.1 to 39.7)                             | -0.7<br>(-11.8 to 12.1)                             |
| Hemoglobinopathies and hemolytic anaemias                  | 5,304.2<br>(5,082.8 to 5,543.3)                  | --                                                | 9.2<br>(5.6 to 14.3)                    | 19.6<br>(-3.8 to 48.7)                            | -0.6<br>(-18.7 to 21.2)                             |
| Thalassemias                                               | 0.7<br>(0.6 to 0.8)                              | --                                                | 0.1<br>(< 0.05 to 0.1)                  | 2.3<br>(-19.0 to 28.2)                            | 2.0<br>(-19.5 to 27.7)                              |
| Thalassaemias trait                                        | 520.2<br>(485.9 to 559.4)                        | --                                                | 5.1<br>(3.1 to 8.2)                     | 24.5<br>(-3.1 to 59.3)                            | 4.1<br>(-18.2 to 31.8)                              |
| Sickle cell disorders                                      | < 0.05<br>(< 0.05 to < 0.05)                     | --                                                | < 0.05<br>(< 0.05 to < 0.05)            | 12.4<br>(-4.1 to 35.8)                            | 2.0<br>(-14.2 to 24.4)                              |
| Sickle cell trait                                          | 86.7<br>(77.6 to 95.3)                           | --                                                | 0.2<br>(0.1 to 0.4)                     | 6.3<br>(-31.1 to 68.3)                            | -2.3<br>(-36.1 to 53.7)                             |
| G6PD deficiency                                            | 1,005.5<br>(925.0 to 1,102.8)                    | --                                                | 0.1<br>(0.1 to 0.2)                     | 16.8<br>(-14.0 to 63.7)                           | -0.7<br>(-24.0 to 34.8)                             |
| G6PD trait                                                 | 3,634.4<br>(3,437.1 to 3,841.9)                  | --                                                | < 0.05<br>(< 0.05 to < 0.05)            | 41.0<br>(3.2 to 93.5)                             | 15.0<br>(-15.1 to 56.0)                             |
| Other hemoglobinopathies and hemolytic anaemias            | 233.2<br>(192.4 to 277.4)                        | --                                                | 3.7<br>(2.2 to 5.8)                     | 14.6<br>(-6.4 to 43.3)                            | -5.4<br>(-21.1 to 15.0)                             |
| Endocrine, metabolic, blood, and immune disorders          | 452.1<br>(408.7 to 500.0)                        | 63.5<br>(56.3 to 71.5)                            | 13.1<br>(8.8 to 18.3)                   | 29.2<br>(18.7 to 40.7)                            | -1.5<br>(-8.1 to 5.8)                               |
| <b>Musculoskeletal disorders</b>                           | <b>4,501.2</b><br><b>(4,260.6 to 4,720.5)</b>    | <b>2,316.0</b><br><b>(2,095.0 to 2,546.4)</b>     | <b>485.0</b><br><b>(351.0 to 638.7)</b> | <b>31.6</b><br><b>(26.9 to 37.6)</b>              | <b>-0.2</b><br><b>(-3.5 to 4.0)</b>                 |
| Rheumatoid arthritis                                       | 32.7<br>(28.7 to 37.0)                           | 1.9<br>(1.7 to 2.2)                               | 7.8<br>(5.2 to 10.6)                    | 42.8<br>(26.3 to 60.7)                            | 6.6<br>(-4.5 to 18.9)                               |
| Osteoarthritis                                             | 962.8<br>(897.5 to 1,030.7)                      | 51.0<br>(47.2 to 55.0)                            | 59.8<br>(42.0 to 81.4)                  | 45.1<br>(39.5 to 50.8)                            | 2.1<br>(-1.7 to 5.9)                                |
| Low back and neck pain                                     | 2,677.2<br>(2,477.7 to 2,890.4)                  | 1,152.0<br>(1,030.3 to 1,284.7)                   | 310.2<br>(219.0 to 412.4)               | 33.5<br>(27.4 to 41.4)                            | 2.1<br>(-2.3 to 8.1)                                |
| Low back pain                                              | 1,905.4<br>(1,690.6 to 2,170.4)                  | 934.4<br>(817.2 to 1,066.3)                       | 217.3<br>(152.5 to 290.3)               | 34.0<br>(25.1 to 45.2)                            | 3.0<br>(-3.3 to 10.9)                               |
| Neck pain                                                  | 922.7<br>(794.5 to 1,066.4)                      | 217.6<br>(187.4 to 256.8)                         | 92.8<br>(62.5 to 132.7)                 | 32.3<br>(28.7 to 36.4)                            | 0.2<br>(-2.1 to 2.9)                                |
| Gout                                                       | 120.0<br>(105.9 to 135.9)                        | 24.0<br>(21.1 to 27.3)                            | 3.8<br>(2.6 to 5.3)                     | 37.7<br>(19.8 to 61.2)                            | -1.1<br>(-12.9 to 13.4)                             |
| Other musculoskeletal disorders                            | 1,196.2<br>(1,009.7 to 1,411.3)                  | 1,087.1<br>(903.6 to 1,291.7)                     | 103.5<br>(69.7 to 146.6)                | 19.0<br>(9.8 to 29.0)                             | -8.6<br>(-15.4 to -1.4)                             |
| <b>Other non-communicable diseases</b>                     | <b>19,798.0</b><br><b>(19,376.2 to 20,238.7)</b> | <b>47,482.3†</b><br><b>(44,552.5 to 50,660.2)</b> | <b>535.8</b><br><b>(363.8 to 762.3)</b> | <b>19.9</b><br><b>(17.9 to 21.8)</b>              | <b>-2.8</b><br><b>(-4.2 to -1.5)</b>                |
| Congenital anomalies                                       | 166.3<br>(147.7 to 187.2)                        | --                                                | 22.4<br>(16.5 to 29.2)                  | 17.7<br>(10.7 to 25.9)                            | 2.1<br>(-3.9 to 8.9)                                |
| Neural tube defects                                        | 19.8<br>(17.4 to 22.5)                           | --                                                | 5.9<br>(4.1 to 8.0)                     | 19.6<br>(3.6 to 39.7)                             | 2.2<br>(-10.8 to 18.5)                              |
| Congenital heart anomalies                                 | 57.7<br>(50.5 to 65.3)                           | --                                                | 2.8<br>(1.2 to 4.8)                     | 20.6<br>(6.7 to 36.7)                             | 5.1<br>(-6.7 to 18.1)                               |
| Orofacial clefts                                           | 14.5<br>(12.7 to 16.4)                           | --                                                | 0.1<br>(0.1 to 0.2)                     | 30.3<br>(16.2 to 45.9)                            | 12.0<br>(-0.1 to 25.6)                              |
| Down's syndrome                                            | 6.5<br>(5.5 to 7.6)                              | --                                                | 0.6<br>(0.4 to 0.8)                     | 17.6<br>(8.5 to 28.9)                             | 3.2<br>(-4.7 to 13.2)                               |
| Turner syndrome                                            | 5.1<br>(4.3 to 6.0)                              | --                                                | 0.1<br>(< 0.05 to 0.1)                  | 24.9<br>(7.5 to 45.7)                             | 9.0<br>(-6.0 to 26.5)                               |
| Klinefelter syndrome                                       | 6.9<br>(5.8 to 8.1)                              | --                                                | < 0.05<br>(< 0.05 to 0.1)               | 16.0<br>(-15.1 to 63.9)                           | -0.6<br>(-26.6 to 38.6)                             |

| Cause                                         | Prevalence in thousands (95% UI)              | Incidence in thousands (95% UI)                | YLDs in thousands (95% UI)              |                                                   |                                                     |
|-----------------------------------------------|-----------------------------------------------|------------------------------------------------|-----------------------------------------|---------------------------------------------------|-----------------------------------------------------|
|                                               | 2016 counts                                   | 2016 counts                                    | 2016 counts                             | Percentage change in counts between 2006 and 2016 | Percentage change in age-standardised rates between |
| Other chromosomal abnormalities               | 8.9<br>(7.2 to 10.6)                          | --                                             | 1.0<br>(0.7 to 1.4)                     | 0.8<br>(-19.1 to 24.3)                            | 0.8<br>(-19.0 to 25.0)                              |
| Congenital musculoskeletal and limb anomalies | 29.7<br>(27.0 to 32.5)                        | --                                             | 4.3<br>(2.9 to 6.1)                     | 22.9<br>(9.3 to 38.3)                             | 5.2<br>(-5.7 to 17.3)                               |
| Urogenital congenital anomalies               | 19.1<br>(16.9 to 21.3)                        | --                                             | 0.4<br>(0.2 to 0.7)                     | 6.9<br>(-1.6 to 15.5)                             | 0.7<br>(-7.0 to 8.9)                                |
| Digestive congenital anomalies                | 31.9<br>(28.3 to 35.9)                        | --                                             | 1.5<br>(1.0 to 2.2)                     | 27.4<br>(6.8 to 51.9)                             | 9.0<br>(-7.8 to 28.4)                               |
| Other congenital anomalies                    | 39.9<br>(21.5 to 67.6)                        | --                                             | 5.6<br>(3.8 to 8.0)                     | 12.4<br>(2.1 to 23.2)                             | -3.3<br>(-11.9 to 5.8)                              |
| Skin and subcutaneous diseases                | 10,839.4<br>(10,508.0 to 11,178.9)            | 23,270.0<br>(21,862.7 to 25,030.6)             | 272.2<br>(181.7 to 397.0)               | 13.3<br>(10.7 to 15.9)                            | 0.3<br>(-1.9 to 2.3)                                |
| Dermatitis                                    | 1,513.1<br>(1,429.4 to 1,601.7)               | 1,795.5<br>(1,663.0 to 1,934.8)                | 58.2<br>(34.4 to 95.8)                  | 10.9<br>(5.9 to 15.9)                             | 0.1<br>(-4.2 to 4.4)                                |
| Psoriasis                                     | 246.8<br>(234.9 to 259.2)                     | 32.5<br>(31.0 to 33.9)                         | 21.6<br>(15.3 to 28.7)                  | 33.4<br>(23.1 to 44.2)                            | 8.6<br>(0.7 to 16.9)                                |
| Cellulitis                                    | 14.1<br>(13.1 to 15.1)                        | 288.3<br>(268.9 to 307.9)                      | 0.8<br>(0.5 to 1.2)                     | 21.1<br>(-3.2 to 51.3)                            | 0.8<br>(-17.3 to 22.9)                              |
| Pyoderma                                      | 30.0<br>(29.0 to 31.1)                        | 582.3<br>(562.1 to 605.6)                      | 0.2<br>(0.1 to 0.4)                     | 27.9<br>(15.6 to 42.1)                            | 0.2<br>(-8.0 to 9.7)                                |
| Scabies                                       | 1,038.9<br>(826.7 to 1,379.0)                 | 3,271.1<br>(2,564.8 to 4,414.9)                | 26.9<br>(14.5 to 45.9)                  | 7.8<br>(0.8 to 13.7)                              | -5.4<br>(-10.5 to -0.9)                             |
| Fungal skin diseases                          | 3,171.5<br>(2,818.2 to 3,526.8)               | 10,384.3<br>(9,178.5 to 11,653.4)              | 17.9<br>(7.1 to 38.9)                   | 21.4<br>(18.9 to 23.8)                            | -0.0<br>(-1.0 to 0.9)                               |
| Viral skin diseases                           | 870.9<br>(783.0 to 962.5)                     | 1,240.4<br>(1,105.3 to 1,378.2)                | 26.8<br>(16.7 to 39.3)                  | 11.9<br>(8.2 to 15.9)                             | 0.6<br>(-2.3 to 3.5)                                |
| Acne vulgaris                                 | 3,373.4<br>(3,088.7 to 3,690.4)               | 2,354.6<br>(2,001.2 to 2,823.8)                | 87.3<br>(58.2 to 125.9)                 | 8.8<br>(3.1 to 14.3)                              | -0.4<br>(-5.9 to 4.3)                               |
| Alopecia areata                               | 60.7<br>(58.4 to 63.0)                        | 107.5<br>(103.6 to 111.5)                      | 2.0<br>(1.3 to 3.0)                     | 23.4<br>(10.6 to 37.9)                            | 0.1<br>(-9.8 to 11.5)                               |
| Pruritus                                      | 270.3<br>(237.2 to 307.3)                     | 213.2<br>(189.6 to 241.3)                      | 2.9<br>(1.3 to 5.2)                     | 25.5<br>(18.7 to 32.8)                            | 1.2<br>(-3.7 to 6.7)                                |
| Urticaria                                     | 250.6<br>(219.3 to 287.3)                     | 445.7<br>(393.4 to 509.4)                      | 15.1<br>(9.7 to 21.9)                   | 11.7<br>(4.6 to 19.3)                             | 0.1<br>(-6.0 to 6.0)                                |
| Decubitus ulcer                               | 3.6<br>(3.2 to 4.1)                           | 13.2<br>(11.7 to 14.9)                         | 0.6<br>(0.4 to 0.8)                     | 42.3<br>(19.5 to 68.1)                            | -2.7<br>(-19.0 to 15.5)                             |
| Other skin and subcutaneous diseases          | 2,182.9<br>(2,117.2 to 2,244.7)               | 2,541.4<br>(2,457.0 to 2,622.0)                | 12.0<br>(5.8 to 21.9)                   | 33.0<br>(29.6 to 36.5)                            | 3.9<br>(1.5 to 6.4)                                 |
| Sense organ diseases                          | 4,969.3<br>(4,822.0 to 5,137.5)               | 2,853.3†<br>(2,673.8 to 3,045.8)               | 179.7<br>(125.6 to 249.2)               | 27.8<br>(24.9 to 30.6)                            | -6.7<br>(-8.6 to -4.9)                              |
| Glaucoma                                      | 14.7<br>(12.3 to 17.4)                        | --                                             | 1.6<br>(1.1 to 2.2)                     | 51.8<br>(33.1 to 72.5)                            | -1.1<br>(-12.0 to 10.2)                             |
| Cataract                                      | 236.5<br>(203.5 to 273.0)                     | --                                             | 16.4<br>(11.5 to 22.7)                  | 38.9<br>(31.7 to 47.0)                            | -8.1<br>(-12.6 to -3.2)                             |
| Macular degeneration                          | 7.3<br>(5.9 to 8.8)                           | --                                             | 0.6<br>(0.4 to 0.9)                     | 55.8<br>(30.7 to 83.1)                            | 1.4<br>(-13.7 to 16.9)                              |
| Refraction and accommodation disorders        | 1,590.9<br>(1,507.3 to 1,677.6)               | --                                             | 38.4<br>(25.4 to 57.5)                  | 16.8<br>(12.5 to 21.8)                            | -10.7<br>(-13.7 to -7.4)                            |
| Age-related and other hearing loss            | 3,304.3<br>(3,089.5 to 3,540.5)               | --                                             | 85.1<br>(58.5 to 121.6)                 | 27.5<br>(21.8 to 32.9)                            | -7.4<br>(-11.0 to -4.0)                             |
| Other vision loss                             | 153.8<br>(136.8 to 171.9)                     | --                                             | 12.6<br>(8.8 to 16.9)                   | 36.7<br>(28.2 to 46.4)                            | -2.5<br>(-8.0 to 3.4)                               |
| Other sense organ diseases                    | 800.4<br>(738.9 to 863.3)                     | 2,853.3<br>(2,673.8 to 3,045.8)                | 25.0<br>(15.6 to 37.4)                  | 34.5<br>(28.7 to 40.8)                            | 1.2<br>(-2.7 to 5.5)                                |
| Oral disorders                                | 11,323.4<br>(10,602.5 to 12,036.2)            | 21,359.0†<br>(18,845.3 to 24,200.3)            | 61.3<br>(37.0 to 97.7)                  | 30.9<br>(27.5 to 34.6)                            | -2.2<br>(-4.6 to 0.2)                               |
| Caries of deciduous teeth                     | 1,449.5<br>(1,090.8 to 1,742.7)               | 5,939.9<br>(3,908.1 to 8,119.4)                | 0.3<br>(0.1 to 0.7)                     | -6.6<br>(-17.7 to 6.3)                            | -1.0<br>(-12.6 to 12.5)                             |
| Caries of permanent teeth                     | 7,094.4<br>(6,490.4 to 7,729.0)               | 15,048.4<br>(13,543.2 to 16,759.7)             | 4.2<br>(1.9 to 8.0)                     | 11.3<br>(5.8 to 16.9)                             | -7.2<br>(-11.5 to -2.6)                             |
| Periodontal disease                           | 2,382.7<br>(1,630.3 to 3,358.6)               | 301.1<br>(207.0 to 423.6)                      | 15.6<br>(5.6 to 34.8)                   | 38.4<br>(29.9 to 47.4)                            | 0.8<br>(-4.7 to 6.5)                                |
| Edentulism and severe tooth loss              | 883.6<br>(772.0 to 995.4)                     | 69.6<br>(59.0 to 80.5)                         | 24.6<br>(16.1 to 35.0)                  | 36.8<br>(30.6 to 42.6)                            | -4.3<br>(-8.1 to -0.6)                              |
| Other oral disorders                          | 562.5<br>(536.8 to 589.0)                     | --                                             | 16.6<br>(10.2 to 24.8)                  | 23.3<br>(19.1 to 27.9)                            | 0.2<br>(-2.9 to 3.5)                                |
| <b>Injuries</b>                               | <b>4,344.9</b><br><b>(4,113.7 to 4,581.9)</b> | <b>1,777.2†</b><br><b>(1,687.0 to 1,864.8)</b> | <b>168.0</b><br><b>(111.0 to 240.9)</b> | <b>40.9</b><br><b>(37.9 to 43.6)</b>              | <b>9.9</b><br><b>(7.8 to 11.8)</b>                  |
| <b>Transport injuries</b>                     | <b>1,195.4</b><br><b>(1,107.3 to 1,286.6)</b> | <b>417.2</b><br><b>(373.6 to 463.6)</b>        | <b>61.6</b><br><b>(41.2 to 88.0)</b>    | <b>55.0</b><br><b>(51.2 to 58.7)</b>              | <b>18.8</b><br><b>(16.2 to 21.3)</b>                |
| Road injuries                                 | 919.2<br>(850.5 to 992.2)                     | 353.8<br>(312.4 to 398.3)                      | 47.8<br>(31.8 to 68.3)                  | 69.0<br>(65.1 to 72.6)                            | 27.9<br>(25.3 to 30.3)                              |
| Pedestrian road injuries                      | 125.9<br>(112.3 to 142.3)                     | 36.1<br>(30.2 to 43.3)                         | 6.5<br>(4.3 to 9.3)                     | 68.0<br>(63.9 to 71.8)                            | 24.6<br>(21.9 to 27.1)                              |
| Cyclist road injuries                         | 130.8<br>(110.3 to 154.4)                     | 57.0<br>(45.1 to 70.3)                         | 6.5<br>(4.2 to 9.3)                     | 79.0<br>(74.9 to 82.9)                            | 34.8<br>(32.0 to 37.3)                              |
| Motorcyclist road injuries                    | 272.1<br>(232.4 to 336.2)                     | 70.8<br>(58.0 to 86.3)                         | 13.4<br>(8.9 to 19.2)                   | 69.6<br>(65.5 to 73.7)                            | 30.0<br>(27.2 to 32.7)                              |
| Motor vehicle road injuries                   | 284.2<br>(238.1 to 327.8)                     | 136.0<br>(114.7 to 157.9)                      | 16.3<br>(11.0 to 23.0)                  | 63.6<br>(59.8 to 67.4)                            | 23.6<br>(21.1 to 26.2)                              |
| Other road injuries                           | 106.2<br>(89.9 to 125.5)                      | 53.9<br>(42.3 to 67.6)                         | 5.1<br>(3.4 to 7.5)                     | 74.9<br>(70.9 to 78.7)                            | 33.0<br>(30.3 to 35.5)                              |
| Other transport injuries                      | 276.2<br>(233.0 to 328.4)                     | 63.5<br>(55.7 to 73.7)                         | 13.8<br>(9.3 to 19.7)                   | 20.5<br>(16.8 to 24.1)                            | -5.0<br>(-7.5 to -2.4)                              |
| <b>Unintentional injuries</b>                 | <b>2,782.2</b><br><b>(2,598.4 to 2,974.9)</b> | <b>1,165.1</b><br><b>(1,094.5 to 1,242.7)</b>  | <b>88.8</b><br><b>(58.9 to 127.6)</b>   | <b>35.0</b><br><b>(31.7 to 37.8)</b>              | <b>6.2</b><br><b>(3.9 to 8.1)</b>                   |
| Falls                                         | 749.0<br>(654.1 to 840.8)                     | 316.3<br>(273.6 to 369.8)                      | 28.8<br>(19.5 to 40.9)                  | 56.2<br>(52.7 to 59.7)                            | 20.4<br>(17.8 to 22.7)                              |
| Drowning                                      | 22.7<br>(19.6 to 26.4)                        | 4.1<br>(3.5 to 4.7)                            | 1.1<br>(0.7 to 1.6)                     | 27.1<br>(23.0 to 30.9)                            | -1.0<br>(-3.8 to 1.9)                               |
| Fire, heat, and hot substances                | 292.7<br>(249.3 to 352.1)                     | 35.1<br>(28.7 to 41.6)                         | 7.5<br>(4.9 to 11.3)                    | 25.8<br>(19.1 to 31.6)                            | -1.3<br>(-5.8 to 2.6)                               |
| Poisonings                                    | 9.7<br>(8.3 to 11.1)                          | 16.9<br>(13.6 to 20.6)                         | 0.7<br>(0.5 to 1.1)                     | 37.4<br>(26.3 to 49.2)                            | 10.4<br>(2.4 to 18.8)                               |
| Exposure to mechanical forces                 | 460.5<br>(395.9 to 561.1)                     | 183.4<br>(153.8 to 215.3)                      | 10.9<br>(7.1 to 16.1)                   | 49.6<br>(45.4 to 53.3)                            | 15.8<br>(12.9 to 18.3)                              |
| Unintentional firearm injuries                | 19.9<br>(16.5 to 24.1)                        | 5.0<br>(3.5 to 7.0)                            | 0.8<br>(0.5 to 1.2)                     | 22.8<br>(19.5 to 25.8)                            | -6.0<br>(-8.3 to -4.0)                              |
| Unintentional suffocation                     | 32.9<br>(25.2 to 42.1)                        | 6.5<br>(4.8 to 9.0)                            | 1.0<br>(0.6 to 1.6)                     | 19.8<br>(16.4 to 22.8)                            | -3.0<br>(-5.5 to -0.8)                              |
| Other exposure to mechanical forces           | 407.8<br>(344.0 to 502.9)                     | 171.9<br>(143.8 to 202.7)                      | 9.1<br>(5.9 to 13.4)                    | 57.0<br>(52.7 to 60.8)                            | 20.9<br>(17.8 to 23.5)                              |

| Cause                                                                               | Prevalence in thousands (95% UI)        | Incidence in thousands (95% UI)          | YLDs in thousands (95% UI)           |                                                   |                                                     |
|-------------------------------------------------------------------------------------|-----------------------------------------|------------------------------------------|--------------------------------------|---------------------------------------------------|-----------------------------------------------------|
|                                                                                     | 2016 counts                             | 2016 counts                              | 2016 counts                          | Percentage change in counts between 2006 and 2016 | Percentage change in age-standardised rates between |
| Adverse effects of medical treatment                                                | 8.9<br>(7.0 to 11.0)                    | 115.9<br>(101.7 to 131.5)                | 1.2<br>(0.7 to 1.8)                  | 17.5<br>(12.3 to 23.1)                            | -3.7<br>(-7.9 to 0.9)                               |
| Animal contact                                                                      | 77.4<br>(67.3 to 91.7)                  | 89.7<br>(72.7 to 108.7)                  | 2.3<br>(1.5 to 3.3)                  | 20.7<br>(13.1 to 28.5)                            | -2.1<br>(-7.6 to 3.6)                               |
| Venomous animal contact                                                             | 26.3<br>(22.1 to 31.2)                  | 35.4<br>(26.7 to 46.3)                   | 1.5<br>(1.0 to 2.2)                  | 25.1<br>(13.2 to 37.6)                            | 2.7<br>(-6.0 to 11.8)                               |
| Non-venomous animal contact                                                         | 51.1<br>(42.3 to 65.0)                  | 54.3<br>(42.9 to 67.3)                   | 0.8<br>(0.5 to 1.2)                  | 13.1<br>(8.8 to 16.9)                             | -9.8<br>(-12.7 to -7.2)                             |
| Foreign body                                                                        | 216.0<br>(174.5 to 258.8)               | 104.2<br>(92.5 to 118.3)                 | 8.0<br>(5.0 to 11.9)                 | 17.6<br>(13.6 to 21.5)                            | -4.8<br>(-7.7 to -2.1)                              |
| Pulmonary aspiration and foreign body in airway                                     | 149.0<br>(113.5 to 197.4)               | 49.6<br>(42.2 to 58.2)                   | 6.0<br>(3.8 to 9.0)                  | 17.4<br>(13.1 to 21.3)                            | -4.0<br>(-7.1 to -1.1)                              |
| Foreign body in eyes                                                                | 5.7<br>(3.3 to 8.4)                     | 28.8<br>(21.8 to 39.1)                   | 0.3<br>(0.2 to 0.5)                  | 21.8<br>(17.6 to 27.0)                            | -2.8<br>(-5.4 to 0.2)                               |
| Foreign body in other body part                                                     | 61.3<br>(50.2 to 75.3)                  | 25.9<br>(22.1 to 30.8)                   | 1.7<br>(1.1 to 2.5)                  | 17.6<br>(13.1 to 21.6)                            | -8.0<br>(-11.2 to -5.3)                             |
| Environmental heat and cold exposure                                                | 306.5<br>(256.1 to 362.0)               | 78.3<br>(63.7 to 96.2)                   | 10.7<br>(7.0 to 15.5)                | 25.3<br>(21.6 to 28.5)                            | 0.1<br>(-2.5 to 2.3)                                |
| Other unintentional injuries                                                        | 638.8<br>(514.6 to 778.7)               | 221.1<br>(188.3 to 259.4)                | 17.7<br>(11.5 to 25.9)               | 21.8<br>(19.2 to 24.2)                            | -3.7<br>(-5.6 to -2.0)                              |
| <b>Self-harm and interpersonal violence</b>                                         | <b>814.1</b><br><b>(740.5 to 896.1)</b> | <b>193.7†</b><br><b>(165.5 to 222.4)</b> | <b>17.4</b><br><b>(11.9 to 24.3)</b> | <b>28.7</b><br><b>(25.3 to 32.0)</b>              | <b>0.8</b><br><b>(-1.2 to 2.7)</b>                  |
| Self-harm                                                                           | 34.3<br>(29.5 to 39.2)                  | 16.5<br>(14.1 to 19.2)                   | 1.5<br>(1.0 to 2.2)                  | 25.8<br>(21.2 to 30.2)                            | -5.9<br>(-8.8 to -3.1)                              |
| Self-harm by firearm                                                                | 1.4<br>(1.2 to 1.7)                     | 0.3<br>(0.2 to 0.5)                      | < 0.05<br>(< 0.05 to 0.1)            | 27.3<br>(22.5 to 31.6)                            | 0.6<br>(-2.7 to 3.6)                                |
| Self-harm by other specified means                                                  | 32.9<br>(28.1 to 37.7)                  | 16.2<br>(13.9 to 18.9)                   | 1.5<br>(0.9 to 2.2)                  | 25.8<br>(21.2 to 30.2)                            | -6.1<br>(-9.0 to -3.2)                              |
| Interpersonal violence                                                              | 779.7<br>(706.6 to 863.5)               | 177.2†<br>(149.8 to 205.7)               | 15.8<br>(10.9 to 22.1)               | 28.9<br>(25.4 to 32.4)                            | 1.6<br>(-0.6 to 3.6)                                |
| Assault by firearm                                                                  | 6.3<br>(5.5 to 7.2)                     | 2.0<br>(1.4 to 2.6)                      | 0.3<br>(0.2 to 0.4)                  | 34.6<br>(30.3 to 38.8)                            | 3.8<br>(1.0 to 6.6)                                 |
| Assault by sharp object                                                             | 69.1<br>(56.5 to 82.8)                  | 27.2<br>(20.5 to 34.9)                   | 1.9<br>(1.3 to 2.8)                  | 31.7<br>(27.2 to 35.8)                            | 2.2<br>(-0.7 to 4.9)                                |
| Sexual violence                                                                     | 455.6<br>(391.7 to 525.4)               | --                                       | 3.8<br>(2.5 to 5.4)                  | 5.8<br>(1.4 to 10.4)                              | -9.2<br>(-12.5 to -5.5)                             |
| Assault by other means                                                              | 248.8<br>(208.5 to 300.9)               | 148.0<br>(124.6 to 172.4)                | 9.8<br>(6.6 to 14.2)                 | 39.9<br>(36.4 to 42.9)                            | 5.6<br>(3.3 to 7.5)                                 |
| <b>Forces of nature, conflict and terrorism, and executions and police conflict</b> | <b>8.8</b><br><b>(5.2 to 12.6)</b>      | <b>1.1†</b><br><b>(0.6 to 1.6)</b>       | <b>0.2</b><br><b>(0.1 to 0.7)</b>    | <b>10.4</b><br><b>(-12.0 to 18.4)</b>             | <b>-9.4</b><br><b>(-25.8 to -3.6)</b>               |
| Exposure to forces of nature                                                        | 3.4<br>(1.5 to 5.8)                     | --                                       | 0.1<br>(< 0.05 to 0.3)               | -17.5<br>(-43.1 to -7.4)                          | -31.0<br>(-51.5 to -23.3)                           |
| Conflict and terrorism                                                              | 2.6<br>(1.2 to 4.7)                     | --                                       | 0.1<br>(< 0.05 to 0.2)               | 45.0<br>(31.4 to 170.5)                           | 10.9<br>(1.5 to 98.3)                               |
| Executions and police conflict                                                      | 2.8<br>(1.5 to 4.3)                     | 1.1<br>(0.6 to 1.6)                      | 0.1<br>(< 0.05 to 0.2)               | 55.2<br>(29.8 to 67.7)                            | 28.7<br>(9.0 to 37.9)                               |
| <b>Impairments</b>                                                                  | --                                      | --                                       | --                                   | --                                                | --                                                  |
| Anaemia                                                                             | 6,580.7<br>(5,529.0 to 7,736.8)         | --                                       | 146.9<br>(93.9 to 224.4)             | 11.0<br>(-8.2 to 33.8)                            | -7.2<br>(-22.1 to 10.2)                             |
| Developmental intellectual disability                                               | 503.9<br>(367.8 to 663.1)               | --                                       | 57.6<br>(40.8 to 77.0)               | 5.9<br>(0.2 to 11.4)                              | -8.6<br>(-13.3 to -4.0)                             |
| Epilepsy                                                                            | 193.0<br>(110.6 to 257.8)               | --                                       | 66.6<br>(35.3 to 107.2)              | 11.9<br>(-41.3 to 112.0)                          | -3.1<br>(-49.8 to 89.5)                             |
| Guillain-Barre syndrome                                                             | 0.2<br>(0.1 to 0.3)                     | --                                       | 0.1<br>(< 0.05 to 0.1)               | 21.1<br>(16.4 to 26.0)                            | -0.1<br>(-0.2 to 0.0)                               |
| Hearing loss                                                                        | 3,547.7<br>(3,320.7 to 3,785.2)         | --                                       | 94.5<br>(65.2 to 135.1)              | 24.2<br>(19.2 to 29.1)                            | -7.7<br>(-11.1 to -4.5)                             |
| Heart failure                                                                       | 163.7<br>(143.5 to 184.5)               | --                                       | 18.8<br>(13.5 to 25.5)               | 41.6<br>(31.9 to 52.6)                            | -4.7<br>(-11.3 to 2.6)                              |
| Infertility                                                                         | 544.6<br>(412.3 to 724.6)               | --                                       | 3.1<br>(1.2 to 6.5)                  | 24.9<br>(16.2 to 33.5)                            | 0.7<br>(-5.9 to 7.6)                                |
| Pelvic inflammatory disease                                                         | 25.3<br>(21.5 to 29.8)                  | --                                       | 3.3<br>(2.2 to 4.7)                  | 14.9<br>(-0.5 to 33.8)                            | -8.6<br>(-20.6 to 5.9)                              |
| Vision loss                                                                         | 2,078.1<br>(1,969.5 to 2,193.0)         | --                                       | 82.4<br>(59.3 to 111.9)              | 22.7<br>(18.6 to 27.1)                            | -8.0<br>(-10.3 to -5.5)                             |

We did not calculate incidence for the nine impairments, certain NTDs, and causes with only birth prevalence. Blank cells mean that no estimate is available.

† Incidence for aggregate causes represents the sum of the incidence of the causes below the aggregate.

‡ Incidence estimates for stroke represent first-ever stroke only.

^ Incidence of HIV/AIDS represents new infections of HIV only and does not include new infections of Tuberculosis in HIV positive cases.



SR Table 14: Prevalence, incidence, and YLDs for 2016, percentage change of YLD counts and percentage change of age-standardised YLD rates between 2006 and 2016 by cause and impairments, for all ages, Maldives.

| Cause                                                                                | Prevalence in thousands (95% UI) | Incidence in thousands (95% UI)         | YLDs in thousands (95% UI)    |                                                   |                                                     |
|--------------------------------------------------------------------------------------|----------------------------------|-----------------------------------------|-------------------------------|---------------------------------------------------|-----------------------------------------------------|
|                                                                                      | 2016 counts                      | 2016 counts                             | 2016 counts                   | Percentage change in counts between 2006 and 2016 | Percentage change in age-standardised rates between |
| <b>All causes</b>                                                                    | <b>348.7</b><br>(347.4 to 350.1) | <b>2,021.4†</b><br>(1,898.9 to 2,163.7) | <b>34.0</b><br>(25.3 to 44.4) | <b>22.1</b><br>(19.6 to 24.8)                     | <b>-2.9</b><br>(-4.6 to -1.2)                       |
| <b>Communicable, maternal, neonatal, and nutritional disorders</b>                   | <b>228.2</b><br>(220.9 to 236.4) | <b>1,111.8†</b><br>(1,008.9 to 1,225.7) | <b>4.8</b><br>(3.3 to 6.7)    | <b>2.6</b><br>(-1.8 to 7.6)                       | <b>-13.0</b><br>(-16.5 to -9.1)                     |
| <b>HIV/AIDS and tuberculosis</b>                                                     | <b>105.7</b><br>(88.1 to 121.9)  | <b>0.2†</b><br>(0.1 to 0.2)             | <b>0.1</b><br>(0.1 to 0.1)    | <b>12.8</b><br>(-2.6 to 30.4)                     | <b>-20.4</b><br>(-29.7 to -9.8)                     |
| Tuberculosis                                                                         | 94.1<br>(77.4 to 114.2)          | 0.2†<br>(0.1 to 0.2)                    | 0.1<br>(0.1 to 0.1)           | 11.7<br>(-4.0 to 29.6)                            | -21.1<br>(-30.7 to -10.4)                           |
| Drug-susceptible tuberculosis                                                        | 0.3<br>(0.2 to 0.4)              | 0.2<br>(0.1 to 0.2)                     | 0.1<br>(0.1 to 0.1)           | 12.5<br>(-3.6 to 31.1)                            | -20.5<br>(-30.5 to -9.2)                            |
| Multidrug-resistant tuberculosis without extensive drug resistance                   | < 0.05<br>(< 0.05 to < 0.05)     | < 0.05<br>(< 0.05 to < 0.05)            | < 0.05<br>(< 0.05 to < 0.05)  | -52.8<br>(-92.6 to 258.4)                         | -66.7<br>(-94.8 to 147.7)                           |
| Extensively drug-resistant tuberculosis                                              | < 0.05<br>(< 0.05 to < 0.05)     | < 0.05<br>(< 0.05 to < 0.05)            | < 0.05<br>(< 0.05 to < 0.05)  | 55.5<br>(-75.6 to 1,079.8)                        | 9.7<br>(-82.8 to 715.3)                             |
| Latent tuberculosis infection                                                        | 93.9<br>(77.1 to 113.9)          | --                                      | --                            | --                                                | --                                                  |
| HIV/AIDS                                                                             | < 0.05<br>(< 0.05 to < 0.05)     | < 0.05^<br>(< 0.05 to < 0.05)           | < 0.05<br>(< 0.05 to < 0.05)  | 63.2<br>(25.1 to 112.7)                           | 21.2<br>(-6.5 to 57.7)                              |
| Drug-susceptible HIV/AIDS - Tuberculosis                                             | < 0.05<br>(< 0.05 to < 0.05)     | < 0.05<br>(< 0.05 to < 0.05)            | < 0.05<br>(< 0.05 to < 0.05)  | 19.8<br>(8.6 to 32.3)                             | -12.5<br>(-20.7 to -3.4)                            |
| Multidrug-resistant HIV/AIDS - Tuberculosis without extensive drug resistance        | < 0.05<br>(< 0.05 to < 0.05)     | < 0.05<br>(< 0.05 to < 0.05)            | < 0.05<br>(< 0.05 to < 0.05)  | -50.2<br>(-92.1 to 279.4)                         | -63.6<br>(-94.2 to 177.2)                           |
| Extensively drug-resistant HIV/AIDS - Tuberculosis                                   | < 0.05<br>(< 0.05 to < 0.05)     | < 0.05<br>(< 0.05 to < 0.05)            | < 0.05<br>(< 0.05 to < 0.05)  | 63.9<br>(-74.0 to 1,147.8)                        | 19.7<br>(-81.0 to 811.5)                            |
| HIV/AIDS resulting in other diseases                                                 | < 0.05<br>(< 0.05 to < 0.05)     | < 0.05<br>(< 0.05 to < 0.05)            | < 0.05<br>(< 0.05 to < 0.05)  | 104.0<br>(37.1 to 196.7)                          | 51.7<br>(4.2 to 132.5)                              |
| <b>Diarrhoea, lower respiratory infections, and other common infectious diseases</b> | <b>18.8</b><br>(17.7 to 20.2)    | <b>1,066.9†</b><br>(963.3 to 1,180.4)   | <b>0.9</b><br>(0.6 to 1.3)    | <b>17.7</b><br>(13.5 to 22.1)                     | <b>1.3</b><br>(-1.9 to 4.5)                         |
| Diarrhoeal diseases                                                                  | 2.8<br>(2.6 to 3.0)              | 190.5<br>(177.1 to 204.8)               | 0.3<br>(0.2 to 0.4)           | 29.1<br>(20.1 to 39.0)                            | 11.0<br>(4.3 to 18.2)                               |
| Intestinal infectious diseases                                                       | < 0.05<br>(< 0.05 to < 0.05)     | 0.2†<br>(0.1 to 0.2)                    | < 0.05<br>(< 0.05 to < 0.05)  | -22.9<br>(-34.9 to -7.6)                          | -27.0<br>(-37.4 to -14.5)                           |
| Typhoid fever                                                                        | < 0.05<br>(< 0.05 to < 0.05)     | 0.1<br>(0.1 to 0.2)                     | < 0.05<br>(< 0.05 to < 0.05)  | -23.2<br>(-35.9 to -7.0)                          | -26.9<br>(-38.0 to -13.1)                           |
| Paratyphoid fever                                                                    | < 0.05<br>(< 0.05 to < 0.05)     | < 0.05<br>(< 0.05 to < 0.05)            | < 0.05<br>(< 0.05 to < 0.05)  | -15.4<br>(-30.2 to 1.9)                           | -22.8<br>(-35.2 to -9.2)                            |
| Other intestinal infectious diseases                                                 | --                               | --                                      | < 0.05<br>(< 0.05 to < 0.05)  | -39.2<br>(-52.0 to -24.0)                         | -46.4<br>(-56.0 to -35.3)                           |
| Lower respiratory infections                                                         | 0.3<br>(0.3 to 0.4)              | 14.1<br>(12.5 to 15.8)                  | < 0.05<br>(< 0.05 to < 0.05)  | 44.4<br>(26.4 to 64.9)                            | 18.1<br>(4.6 to 33.0)                               |
| Upper respiratory infections                                                         | 11.2<br>(9.8 to 12.6)            | 838.9<br>(734.4 to 953.6)               | 0.3<br>(0.2 to 0.4)           | 13.8<br>(6.6 to 20.9)                             | -1.3<br>(-6.6 to 4.2)                               |
| Otitis media                                                                         | 3.6<br>(3.2 to 4.0)              | 14.7<br>(11.8 to 18.4)                  | 0.1<br>(0.1 to 0.2)           | 0.9<br>(-8.3 to 10.2)                             | -8.9<br>(-16.1 to -1.7)                             |
| Meningitis                                                                           | 0.7<br>(0.6 to 0.8)              | 0.1<br>(0.1 to 0.1)                     | 0.1<br>(0.1 to 0.1)           | 13.0<br>(5.1 to 21.8)                             | -5.2<br>(-11.2 to 1.0)                              |
| Pneumococcal meningitis                                                              | 0.4<br>(0.3 to 0.5)              | < 0.05<br>(< 0.05 to < 0.05)            | < 0.05<br>(< 0.05 to 0.1)     | 15.5<br>(0.0 to 33.2)                             | -3.9<br>(-16.2 to 8.5)                              |
| H influenzae type B meningitis                                                       | 0.1<br>(0.1 to 0.1)              | < 0.05<br>(< 0.05 to < 0.05)            | < 0.05<br>(< 0.05 to < 0.05)  | -9.4<br>(-17.9 to 0.1)                            | -23.0<br>(-30.5 to -15.1)                           |
| Meningococcal infection                                                              | < 0.05<br>(< 0.05 to < 0.05)     | < 0.05<br>(< 0.05 to < 0.05)            | < 0.05<br>(< 0.05 to < 0.05)  | 14.9<br>(8.9 to 21.7)                             | -4.6<br>(-9.0 to 0.4)                               |
| Other meningitis                                                                     | 0.2<br>(0.2 to 0.3)              | 0.1<br>(< 0.05 to 0.1)                  | < 0.05<br>(< 0.05 to < 0.05)  | 30.5<br>(24.0 to 37.5)                            | 9.2<br>(3.8 to 15.1)                                |
| Encephalitis                                                                         | 0.8<br>(0.6 to 1.2)              | 0.4<br>(0.3 to 0.4)                     | 0.1<br>(0.1 to 0.1)           | 16.5<br>(1.1 to 34.2)                             | -4.5<br>(-16.0 to 9.2)                              |
| Diphtheria                                                                           | < 0.05<br>(< 0.05 to < 0.05)     | < 0.05<br>(< 0.05 to < 0.05)            | < 0.05<br>(< 0.05 to < 0.05)  | -29.6<br>(-62.3 to 30.7)                          | -41.2<br>(-67.4 to 7.4)                             |
| Whooping cough                                                                       | < 0.05<br>(< 0.05 to 0.1)        | 0.3<br>(0.2 to 0.4)                     | < 0.05<br>(< 0.05 to < 0.05)  | 15.1<br>(-10.5 to 49.5)                           | 6.1<br>(-17.8 to 38.6)                              |
| Tetanus                                                                              | < 0.05<br>(< 0.05 to < 0.05)     | < 0.05<br>(< 0.05 to < 0.05)            | < 0.05<br>(< 0.05 to < 0.05)  | 17.9<br>(11.5 to 25.1)                            | 0.0<br>(-5.4 to 6.4)                                |
| Measles                                                                              | < 0.05<br>(< 0.05 to < 0.05)     | 0.2<br>(0.1 to 0.4)                     | < 0.05<br>(< 0.05 to < 0.05)  | -61.7<br>(-76.7 to -29.4)                         | -65.5<br>(-79.3 to -35.1)                           |
| Varicella and herpes zoster                                                          | 0.4<br>(0.4 to 0.4)              | 7.5<br>(7.3 to 7.8)                     | < 0.05<br>(< 0.05 to < 0.05)  | 28.6<br>(13.8 to 45.6)                            | 0.1<br>(-9.8 to 11.2)                               |
| <b>Neglected tropical diseases and malaria</b>                                       | <b>6.4</b><br>(6.0 to 7.0)       | <b>8.9†</b><br>(5.5 to 13.2)            | <b>0.3</b><br>(0.2 to 0.4)    | <b>40.1</b><br>(14.7 to 86.2)                     | <b>24.0</b><br>(1.2 to 65.5)                        |
| Malaria                                                                              | --                               | --                                      | --                            | --                                                | --                                                  |
| Chagas disease                                                                       | --                               | --                                      | --                            | --                                                | --                                                  |
| Leishmaniasis                                                                        | --                               | --                                      | --                            | --                                                | --                                                  |
| Visceral leishmaniasis                                                               | --                               | --                                      | --                            | --                                                | --                                                  |
| Cutaneous and mucocutaneous leishmaniasis                                            | --                               | --                                      | --                            | --                                                | --                                                  |
| African trypanosomiasis                                                              | --                               | --                                      | --                            | --                                                | --                                                  |
| Schistosomiasis                                                                      | --                               | --                                      | --                            | --                                                | --                                                  |
| Cysticercosis                                                                        | --                               | --                                      | --                            | --                                                | --                                                  |
| Cystic echinococcosis                                                                | --                               | --                                      | --                            | --                                                | --                                                  |
| Lymphatic filariasis                                                                 | 0.6<br>(0.3 to 1.1)              | 0.2<br>(0.1 to 0.3)                     | 0.1<br>(< 0.05 to 0.1)        | --                                                | --                                                  |
| Onchocerciasis                                                                       | --                               | --                                      | --                            | --                                                | --                                                  |
| Trachoma                                                                             | --                               | --                                      | --                            | --                                                | --                                                  |
| Dengue                                                                               | 0.5<br>(0.3 to 0.9)              | 8.6<br>(5.2 to 12.9)                    | 0.1<br>(< 0.05 to 0.2)        | 14.1<br>(-9.7 to 135.1)                           | -0.8<br>(-21.1 to 104.6)                            |
| Yellow fever                                                                         | --                               | --                                      | --                            | --                                                | --                                                  |
| Rabies                                                                               | < 0.05<br>(< 0.05 to < 0.05)     | < 0.05<br>(< 0.05 to < 0.05)            | < 0.05<br>(< 0.05 to < 0.05)  | -36.0<br>(-65.5 to 17.8)                          | -49.5<br>(-72.0 to -11.4)                           |
| Intestinal nematode infections                                                       | 0.8<br>(0.7 to 0.9)              | --                                      | < 0.05<br>(< 0.05 to < 0.05)  | 30.4<br>(-5.3 to 78.1)                            | 1.8<br>(-25.2 to 38.3)                              |
| Ascariasis                                                                           | 0.3<br>(0.2 to 0.4)              | --                                      | --                            | --                                                | --                                                  |



| Cause                                                                   | Prevalence in thousands (95% UI)        | Incidence in thousands (95% UI)          | YLDs in thousands (95% UI)                          |                                                   |                                                     |
|-------------------------------------------------------------------------|-----------------------------------------|------------------------------------------|-----------------------------------------------------|---------------------------------------------------|-----------------------------------------------------|
|                                                                         | 2016 counts                             | 2016 counts                              | 2016 counts                                         | Percentage change in counts between 2006 and 2016 | Percentage change in age-standardised rates between |
| Trichuriasis                                                            | 0.3<br>(0.2 to 0.4)                     | --                                       | --                                                  | --                                                | --                                                  |
| Hookworm disease                                                        | 0.3<br>(0.2 to 0.3)                     | --                                       | < 0.05<br>(< 0.05 to < 0.05)                        | 30.4<br>(-5.3 to 78.1)                            | 1.8<br>(-25.2 to 38.3)                              |
| Food-borne trematodiasis                                                | --                                      | --                                       | --                                                  | --                                                | --                                                  |
| Leprosy                                                                 | < 0.05<br>(< 0.05 to 0.1)               | < 0.05<br>(< 0.05 to < 0.05)             | < 0.05<br>(< 0.05 to < 0.05)                        | -8.4<br>(-28.4 to 41.5)                           | -34.2<br>(-47.4 to -0.1)                            |
| Ebola virus disease                                                     | --                                      | --                                       | --                                                  | --                                                | --                                                  |
| Zika virus disease                                                      | < 0.05<br>(< 0.05 to < 0.05)            | 0.1<br>(< 0.05 to 0.3)                   | < 0.05<br>(< 0.05 to < 0.05)                        | --                                                | --                                                  |
| Guinea worm disease                                                     | --                                      | --                                       | --                                                  | --                                                | --                                                  |
| Other neglected tropical diseases                                       | 4.5<br>(4.3 to 4.8)                     | --                                       | 0.1<br>(0.1 to 0.2)                                 | -3.8<br>(-12.4 to 6.0)                            | -14.3<br>(-21.8 to -5.7)                            |
| <b>Maternal disorders</b>                                               | <b>0.4</b><br><b>(0.3 to 0.5)</b>       | <b>5.3†</b><br><b>(4.6 to 6.3)</b>       | <b>&lt; 0.05</b><br><b>(&lt; 0.05 to &lt; 0.05)</b> | <b>2.7</b><br><b>(-26.2 to 42.6)</b>              | <b>-24.8</b><br><b>(-46.1 to 4.1)</b>               |
| Maternal haemorrhage                                                    | 0.1<br>(< 0.05 to 0.1)                  | 0.5<br>(0.4 to 0.7)                      | < 0.05<br>(< 0.05 to < 0.05)                        | 2.0<br>(-36.6 to 56.6)                            | -26.4<br>(-53.3 to 12.5)                            |
| Maternal sepsis and other pregnancy related infections                  | < 0.05<br>(< 0.05 to 0.1)               | 0.6<br>(0.4 to 0.8)                      | < 0.05<br>(< 0.05 to < 0.05)                        | -7.7<br>(-62.9 to 110.5)                          | -29.9<br>(-71.5 to 60.8)                            |
| Maternal hypertensive disorders                                         | 0.3<br>(0.1 to 0.4)                     | 1.4<br>(1.1 to 1.7)                      | < 0.05<br>(< 0.05 to < 0.05)                        | 11.1<br>(-35.1 to 93.7)                           | -19.1<br>(-53.7 to 40.0)                            |
| Maternal obstructed labour and uterine rupture                          | < 0.05<br>(< 0.05 to < 0.05)            | 0.4<br>(0.3 to 0.6)                      | < 0.05<br>(< 0.05 to < 0.05)                        | -4.4<br>(-61.5 to 182.2)                          | -29.3<br>(-71.0 to 93.7)                            |
| Maternal abortion, miscarriage, and ectopic pregnancy                   | < 0.05<br>(< 0.05 to < 0.05)            | 2.4<br>(1.8 to 3.3)                      | < 0.05<br>(< 0.05 to < 0.05)                        | -11.2<br>(-59.2 to 76.8)                          | -36.1<br>(-69.4 to 27.1)                            |
| Other maternal disorders                                                | --                                      | --                                       | < 0.05<br>(< 0.05 to < 0.05)                        | -2.8<br>(-30.1 to 34.9)                           | -28.1<br>(-48.4 to -0.1)                            |
| <b>Neonatal disorders</b>                                               | <b>3.4</b><br><b>(2.9 to 4.3)</b>       | <b>--</b>                                | <b>0.5</b><br><b>(0.3 to 0.7)</b>                   | <b>0.4</b><br><b>(-14.6 to 18.1)</b>              | <b>-12.8</b><br><b>(-25.6 to 2.6)</b>               |
| Neonatal preterm birth complications                                    | 3.2<br>(2.6 to 4.1)                     | --                                       | 0.4<br>(0.2 to 0.5)                                 | -6.0<br>(-23.2 to 14.8)                           | -18.4<br>(-33.4 to -0.7)                            |
| Neonatal encephalopathy due to birth asphyxia and trauma                | 0.2<br>(0.1 to 0.3)                     | --                                       | < 0.05<br>(< 0.05 to 0.1)                           | 68.9<br>(5.4 to 552.8)                            | 45.7<br>(-9.2 to 460.2)                             |
| Neonatal sepsis and other neonatal infections                           | 0.1<br>(< 0.05 to 0.3)                  | --                                       | 0.1<br>(< 0.05 to 0.1)                              | 18.1<br>(-4.0 to 55.0)                            | 2.4<br>(-16.3 to 33.4)                              |
| Hemolytic disease and other neonatal jaundice                           | 0.1<br>(0.1 to 0.1)                     | --                                       | < 0.05<br>(< 0.05 to < 0.05)                        | 16.3<br>(7.5 to 25.5)                             | 0.0<br>(-7.5 to 8.1)                                |
| Other neonatal disorders                                                | --                                      | --                                       | < 0.05<br>(< 0.05 to < 0.05)                        | -1.3<br>(-19.9 to 20.6)                           | -13.8<br>(-30.0 to 5.2)                             |
| <b>Nutritional deficiencies</b>                                         | <b>115.1</b><br><b>(111.6 to 118.4)</b> | <b>7.8†</b><br><b>(6.5 to 9.3)</b>       | <b>2.8</b><br><b>(1.8 to 4.0)</b>                   | <b>-4.7</b><br><b>(-10.6 to 1.9)</b>              | <b>-18.8</b><br><b>(-23.4 to -13.5)</b>             |
| Protein-energy malnutrition                                             | 3.3<br>(2.3 to 4.5)                     | 1.6<br>(1.2 to 2.1)                      | 0.1<br>(< 0.05 to 0.2)                              | -17.8<br>(-62.0 to 74.1)                          | -28.0<br>(-66.7 to 52.1)                            |
| Iodine deficiency                                                       | 1.5<br>(1.4 to 1.7)                     | < 0.05<br>(< 0.05 to 0.1)                | < 0.05<br>(< 0.05 to 0.1)                           | 26.3<br>(9.6 to 46.2)                             | -1.9<br>(-13.4 to 10.5)                             |
| Vitamin A deficiency                                                    | 7.2<br>(5.8 to 8.8)                     | 6.1<br>(4.8 to 7.6)                      | < 0.05<br>(< 0.05 to < 0.05)                        | 5.4<br>(-18.4 to 30.9)                            | -6.5<br>(-26.9 to 14.4)                             |
| Iron-deficiency anaemia                                                 | 109.8<br>(105.9 to 113.9)               | --                                       | 2.6<br>(1.7 to 3.8)                                 | -4.4<br>(-9.6 to 1.4)                             | -18.6<br>(-22.7 to -14.4)                           |
| Other nutritional deficiencies                                          | --                                      | --                                       | < 0.05<br>(< 0.05 to < 0.05)                        | -18.2<br>(-63.2 to 75.6)                          | -28.9<br>(-68.0 to 51.2)                            |
| <b>Other communicable, maternal, neonatal, and nutritional diseases</b> | <b>82.0</b><br><b>(76.8 to 87.5)</b>    | <b>22.7</b><br><b>(20.4 to 25.3)</b>     | <b>0.2</b><br><b>(0.1 to 0.3)</b>                   | <b>17.8</b><br><b>(10.7 to 24.8)</b>              | <b>-6.6</b><br><b>(-11.9 to -1.7)</b>               |
| Sexually transmitted diseases excluding HIV                             | 56.8<br>(52.2 to 61.5)                  | 20.1<br>(18.0 to 22.6)                   | 0.1<br>(0.1 to 0.2)                                 | 35.8<br>(25.2 to 45.9)                            | -0.7<br>(-8.1 to 6.3)                               |
| Syphilis                                                                | 0.7<br>(0.5 to 0.9)                     | 0.4<br>(0.3 to 0.5)                      | < 0.05<br>(< 0.05 to < 0.05)                        | 34.4<br>(15.4 to 52.8)                            | -10.8<br>(-23.5 to 2.6)                             |
| Chlamydial infection                                                    | 7.0<br>(5.4 to 9.1)                     | 5.4<br>(4.2 to 7.1)                      | < 0.05<br>(< 0.05 to 0.1)                           | 33.8<br>(16.8 to 51.1)                            | 1.2<br>(-11.0 to 13.2)                              |
| Gonococcal infection                                                    | 0.8<br>(0.6 to 1.2)                     | 1.9<br>(1.1 to 3.2)                      | < 0.05<br>(< 0.05 to < 0.05)                        | 33.6<br>(7.1 to 61.2)                             | 0.2<br>(-19.6 to 20.9)                              |
| Trichomoniasis                                                          | 6.7<br>(5.5 to 7.9)                     | 5.7<br>(4.6 to 6.8)                      | < 0.05<br>(< 0.05 to < 0.05)                        | 33.7<br>(20.3 to 46.8)                            | -0.1<br>(-8.0 to 7.8)                               |
| Genital herpes                                                          | 42.0<br>(36.3 to 49.1)                  | 3.2<br>(2.8 to 3.9)                      | < 0.05<br>(< 0.05 to < 0.05)                        | 38.1<br>(25.2 to 51.5)                            | 0.4<br>(-6.6 to 8.3)                                |
| Other sexually transmitted diseases                                     | 3.7<br>(3.3 to 4.1)                     | 3.4<br>(2.9 to 4.1)                      | 0.1<br>(< 0.05 to 0.1)                              | 37.3<br>(21.9 to 53.0)                            | -0.2<br>(-11.2 to 10.9)                             |
| Hepatitis                                                               | 27.5<br>(23.7 to 32.4)                  | 2.6<br>(2.2 to 3.1)                      | < 0.05<br>(< 0.05 to < 0.05)                        | -11.8<br>(-26.9 to 5.6)                           | -27.1<br>(-38.2 to -15.6)                           |
| Acute hepatitis A                                                       | 0.1<br>(0.1 to 0.1)                     | 0.9<br>(0.7 to 1.1)                      | < 0.05<br>(< 0.05 to < 0.05)                        | -23.7<br>(-46.1 to 9.5)                           | -30.5<br>(-47.7 to -7.3)                            |
| Hepatitis B                                                             | 17.7<br>(14.2 to 22.5)                  | 1.4<br>(1.1 to 1.8)                      | < 0.05<br>(< 0.05 to < 0.05)                        | -3.9<br>(-20.2 to 14.6)                           | -27.9<br>(-41.2 to -12.0)                           |
| Hepatitis C                                                             | 9.7<br>(8.5 to 11.0)                    | 0.3<br>(0.2 to 0.3)                      | < 0.05<br>(< 0.05 to < 0.05)                        | 12.2<br>(-52.4 to 173.7)                          | -3.4<br>(-57.3 to 123.6)                            |
| Acute hepatitis E                                                       | < 0.05<br>(< 0.05 to < 0.05)            | 0.1<br>(0.1 to 0.1)                      | < 0.05<br>(< 0.05 to < 0.05)                        | -14.6<br>(-25.6 to -3.9)                          | -23.9<br>(-31.3 to -16.6)                           |
| Other infectious diseases                                               | 3.8<br>(3.6 to 3.9)                     | < 0.05<br>(< 0.05 to < 0.05)             | 0.1<br>(0.1 to 0.1)                                 | -0.3<br>(-9.3 to 9.2)                             | -12.5<br>(-19.8 to -4.5)                            |
| <b>Non-communicable diseases</b>                                        | <b>328.5</b><br><b>(326.1 to 330.9)</b> | <b>893.2†</b><br><b>(823.1 to 970.1)</b> | <b>28.0</b><br><b>(20.6 to 36.1)</b>                | <b>25.6</b><br><b>(22.5 to 28.7)</b>              | <b>-1.5</b><br><b>(-3.5 to 0.5)</b>                 |
| <b>Neoplasms</b>                                                        | <b>0.5</b><br><b>(0.5 to 0.5)</b>       | <b>0.2</b><br><b>(0.2 to 0.2)</b>        | <b>0.1</b><br><b>(0.1 to 0.1)</b>                   | <b>48.7</b><br><b>(37.6 to 63.2)</b>              | <b>3.6</b><br><b>(-4.0 to 13.7)</b>                 |
| Lip and oral cavity cancer                                              | 0.1<br>(0.1 to 0.1)                     | < 0.05<br>(< 0.05 to < 0.05)             | < 0.05<br>(< 0.05 to < 0.05)                        | 49.3<br>(24.5 to 77.5)                            | 3.5<br>(-13.7 to 22.8)                              |
| Nasopharynx cancer                                                      | < 0.05<br>(< 0.05 to < 0.05)            | < 0.05<br>(< 0.05 to < 0.05)             | < 0.05<br>(< 0.05 to < 0.05)                        | 27.1<br>(5.8 to 53.1)                             | -10.8<br>(-26.1 to 7.7)                             |
| Other pharynx cancer                                                    | < 0.05<br>(< 0.05 to < 0.05)            | < 0.05<br>(< 0.05 to < 0.05)             | < 0.05<br>(< 0.05 to < 0.05)                        | 38.7<br>(15.7 to 69.4)                            | -0.2<br>(-17.2 to 23.7)                             |
| Oesophageal cancer                                                      | < 0.05<br>(< 0.05 to < 0.05)            | < 0.05<br>(< 0.05 to < 0.05)             | < 0.05<br>(< 0.05 to < 0.05)                        | 19.7<br>(9.1 to 31.9)                             | -17.0<br>(-24.5 to -8.1)                            |
| Stomach cancer                                                          | < 0.05<br>(< 0.05 to < 0.05)            | < 0.05<br>(< 0.05 to < 0.05)             | < 0.05<br>(< 0.05 to < 0.05)                        | 14.6<br>(1.5 to 29.3)                             | -21.9<br>(-32.2 to -10.4)                           |
| Colon and rectum cancer                                                 | 0.1<br>(< 0.05 to 0.1)                  | < 0.05<br>(< 0.05 to < 0.05)             | < 0.05<br>(< 0.05 to < 0.05)                        | 64.5<br>(35.4 to 99.0)                            | 12.3<br>(-8.2 to 38.1)                              |
| Liver cancer                                                            | < 0.05<br>(< 0.05 to < 0.05)            | < 0.05<br>(< 0.05 to < 0.05)             | < 0.05<br>(< 0.05 to < 0.05)                        | 38.5<br>(18.1 to 61.4)                            | -3.9<br>(-18.5 to 11.9)                             |
| Liver cancer due to hepatitis B                                         | < 0.05<br>(< 0.05 to < 0.05)            | < 0.05<br>(< 0.05 to < 0.05)             | < 0.05<br>(< 0.05 to < 0.05)                        | 40.5<br>(17.8 to 63.7)                            | -2.9<br>(-18.0 to 13.5)                             |

| Cause                                              | Prevalence in thousands (95% UI)     | Incidence in thousands (95% UI)    | YLDs in thousands (95% UI)        |                                                   |                                                     |
|----------------------------------------------------|--------------------------------------|------------------------------------|-----------------------------------|---------------------------------------------------|-----------------------------------------------------|
|                                                    | 2016 counts                          | 2016 counts                        | 2016 counts                       | Percentage change in counts between 2006 and 2016 | Percentage change in age-standardised rates between |
| Liver cancer due to hepatitis C                    | < 0.05<br>(< 0.05 to < 0.05)         | < 0.05<br>(< 0.05 to < 0.05)       | < 0.05<br>(< 0.05 to < 0.05)      | 40.3<br>(17.2 to 67.0)                            | -3.6<br>(-19.1 to 14.3)                             |
| Liver cancer due to alcohol use                    | < 0.05<br>(< 0.05 to < 0.05)         | < 0.05<br>(< 0.05 to < 0.05)       | < 0.05<br>(< 0.05 to < 0.05)      | 29.4<br>(6.7 to 56.9)                             | -7.0<br>(-22.9 to 12.6)                             |
| Liver cancer due to other causes                   | < 0.05<br>(< 0.05 to < 0.05)         | < 0.05<br>(< 0.05 to < 0.05)       | < 0.05<br>(< 0.05 to < 0.05)      | 38.6<br>(15.7 to 66.5)                            | -4.1<br>(-19.9 to 14.8)                             |
| Gallbladder and biliary tract cancer               | < 0.05<br>(< 0.05 to < 0.05)         | < 0.05<br>(< 0.05 to < 0.05)       | < 0.05<br>(< 0.05 to < 0.05)      | 34.1<br>(17.0 to 56.1)                            | -6.8<br>(-18.2 to 8.5)                              |
| Pancreatic cancer                                  | < 0.05<br>(< 0.05 to < 0.05)         | < 0.05<br>(< 0.05 to < 0.05)       | < 0.05<br>(< 0.05 to < 0.05)      | 52.2<br>(37.5 to 67.5)                            | 4.8<br>(-5.4 to 15.3)                               |
| Larynx cancer                                      | < 0.05<br>(< 0.05 to < 0.05)         | < 0.05<br>(< 0.05 to < 0.05)       | < 0.05<br>(< 0.05 to < 0.05)      | 35.5<br>(13.7 to 60.0)                            | -5.8<br>(-20.1 to 11.7)                             |
| Tracheal, bronchus, and lung cancer                | < 0.05<br>(< 0.05 to < 0.05)         | < 0.05<br>(< 0.05 to < 0.05)       | < 0.05<br>(< 0.05 to < 0.05)      | 45.3<br>(11.9 to 87.1)                            | 4.1<br>(-21.9 to 34.8)                              |
| Malignant skin melanoma                            | < 0.05<br>(< 0.05 to < 0.05)         | < 0.05<br>(< 0.05 to < 0.05)       | < 0.05<br>(< 0.05 to < 0.05)      | 60.1<br>(30.5 to 95.5)                            | 7.4<br>(-14.2 to 34.0)                              |
| Non-melanoma skin cancer                           | < 0.05<br>(< 0.05 to < 0.05)         | < 0.05<br>(< 0.05 to < 0.05)       | < 0.05<br>(< 0.05 to < 0.05)      | 19.6<br>(-58.1 to 153.1)                          | -23.2<br>(-75.0 to 80.8)                            |
| Non-melanoma skin cancer (squamous-cell carcinoma) | < 0.05<br>(< 0.05 to < 0.05)         | < 0.05<br>(< 0.05 to < 0.05)       | < 0.05<br>(< 0.05 to < 0.05)      | 16.6<br>(-62.5 to 180.7)                          | -25.2<br>(-77.9 to 99.4)                            |
| Non-melanoma skin cancer (basal-cell carcinoma)    | < 0.05<br>(< 0.05 to < 0.05)         | < 0.05<br>(< 0.05 to < 0.05)       | < 0.05<br>(< 0.05 to < 0.05)      | 44.1<br>(27.0 to 69.0)                            | -1.9<br>(-13.0 to 13.1)                             |
| Breast cancer                                      | 0.1<br>(0.1 to 0.2)                  | < 0.05<br>(< 0.05 to < 0.05)       | < 0.05<br>(< 0.05 to < 0.05)      | 62.7<br>(27.8 to 113.6)                           | 10.5<br>(-13.7 to 45.0)                             |
| Cervical cancer                                    | < 0.05<br>(< 0.05 to 0.1)            | < 0.05<br>(< 0.05 to < 0.05)       | < 0.05<br>(< 0.05 to < 0.05)      | 24.8<br>(-2.3 to 71.7)                            | -14.3<br>(-33.7 to 19.1)                            |
| Uterine cancer                                     | < 0.05<br>(< 0.05 to < 0.05)         | < 0.05<br>(< 0.05 to < 0.05)       | < 0.05<br>(< 0.05 to < 0.05)      | 71.8<br>(29.5 to 137.6)                           | 13.5<br>(-13.9 to 57.9)                             |
| Ovarian cancer                                     | < 0.05<br>(< 0.05 to < 0.05)         | < 0.05<br>(< 0.05 to < 0.05)       | < 0.05<br>(< 0.05 to < 0.05)      | 60.8<br>(11.7 to 130.3)                           | 8.0<br>(-26.4 to 58.4)                              |
| Prostate cancer                                    | < 0.05<br>(< 0.05 to 0.1)            | < 0.05<br>(< 0.05 to < 0.05)       | < 0.05<br>(< 0.05 to < 0.05)      | 70.2<br>(28.8 to 125.3)                           | 11.8<br>(-14.2 to 42.3)                             |
| Testicular cancer                                  | < 0.05<br>(< 0.05 to < 0.05)         | < 0.05<br>(< 0.05 to < 0.05)       | < 0.05<br>(< 0.05 to < 0.05)      | 115.0<br>(71.8 to 169.9)                          | 48.2<br>(21.0 to 80.6)                              |
| Kidney cancer                                      | < 0.05<br>(< 0.05 to < 0.05)         | < 0.05<br>(< 0.05 to < 0.05)       | < 0.05<br>(< 0.05 to < 0.05)      | 62.1<br>(39.4 to 84.4)                            | 17.0<br>(-0.1 to 33.9)                              |
| Bladder cancer                                     | < 0.05<br>(< 0.05 to < 0.05)         | < 0.05<br>(< 0.05 to < 0.05)       | < 0.05<br>(< 0.05 to < 0.05)      | 64.4<br>(35.3 to 95.7)                            | 9.4<br>(-10.1 to 30.3)                              |
| Brain and nervous system cancer                    | < 0.05<br>(< 0.05 to < 0.05)         | < 0.05<br>(< 0.05 to < 0.05)       | < 0.05<br>(< 0.05 to < 0.05)      | 40.6<br>(26.6 to 57.5)                            | 5.4<br>(-6.8 to 20.3)                               |
| Thyroid cancer                                     | < 0.05<br>(< 0.05 to < 0.05)         | < 0.05<br>(< 0.05 to < 0.05)       | < 0.05<br>(< 0.05 to < 0.05)      | 103.9<br>(65.9 to 151.7)                          | 32.3<br>(7.5 to 61.1)                               |
| Mesothelioma                                       | < 0.05<br>(< 0.05 to < 0.05)         | < 0.05<br>(< 0.05 to < 0.05)       | < 0.05<br>(< 0.05 to < 0.05)      | 40.7<br>(17.9 to 63.5)                            | -7.2<br>(-22.5 to 8.1)                              |
| Hodgkin lymphoma                                   | < 0.05<br>(< 0.05 to < 0.05)         | < 0.05<br>(< 0.05 to < 0.05)       | < 0.05<br>(< 0.05 to < 0.05)      | 32.4<br>(13.8 to 60.8)                            | -3.5<br>(-15.8 to 17.0)                             |
| Non-Hodgkin's lymphoma                             | < 0.05<br>(< 0.05 to < 0.05)         | < 0.05<br>(< 0.05 to < 0.05)       | < 0.05<br>(< 0.05 to < 0.05)      | 41.4<br>(25.0 to 58.9)                            | 3.2<br>(-9.3 to 17.0)                               |
| Multiple myeloma                                   | < 0.05<br>(< 0.05 to < 0.05)         | < 0.05<br>(< 0.05 to < 0.05)       | < 0.05<br>(< 0.05 to < 0.05)      | 60.8<br>(42.8 to 80.8)                            | 12.1<br>(-0.6 to 25.9)                              |
| Leukaemia                                          | < 0.05<br>(< 0.05 to < 0.05)         | < 0.05<br>(< 0.05 to < 0.05)       | < 0.05<br>(< 0.05 to < 0.05)      | 13.8<br>(-1.4 to 33.7)                            | -10.0<br>(-22.4 to 5.9)                             |
| Acute lymphoid leukaemia                           | < 0.05<br>(< 0.05 to < 0.05)         | < 0.05<br>(< 0.05 to < 0.05)       | < 0.05<br>(< 0.05 to < 0.05)      | 18.7<br>(-1.2 to 40.6)                            | -3.9<br>(-18.7 to 12.1)                             |
| Chronic lymphoid leukaemia                         | < 0.05<br>(< 0.05 to < 0.05)         | < 0.05<br>(< 0.05 to < 0.05)       | < 0.05<br>(< 0.05 to < 0.05)      | 47.6<br>(21.0 to 76.8)                            | 8.4<br>(-11.1 to 28.2)                              |
| Acute myeloid leukaemia                            | < 0.05<br>(< 0.05 to < 0.05)         | < 0.05<br>(< 0.05 to < 0.05)       | < 0.05<br>(< 0.05 to < 0.05)      | 31.4<br>(13.9 to 50.8)                            | 5.6<br>(-7.7 to 20.1)                               |
| Chronic myeloid leukaemia                          | < 0.05<br>(< 0.05 to < 0.05)         | < 0.05<br>(< 0.05 to < 0.05)       | < 0.05<br>(< 0.05 to < 0.05)      | 15.5<br>(-8.6 to 49.3)                            | -17.4<br>(-34.5 to 7.7)                             |
| Other leukaemia                                    | < 0.05<br>(< 0.05 to < 0.05)         | < 0.05<br>(< 0.05 to < 0.05)       | < 0.05<br>(< 0.05 to < 0.05)      | 2.1<br>(-19.6 to 33.3)                            | -18.0<br>(-36.6 to 6.4)                             |
| Other neoplasms                                    | < 0.05<br>(< 0.05 to < 0.05)         | < 0.05<br>(< 0.05 to < 0.05)       | < 0.05<br>(< 0.05 to < 0.05)      | 42.4<br>(25.8 to 63.0)                            | 2.5<br>(-11.7 to 19.4)                              |
| <b>Cardiovascular diseases</b>                     | <b>16.8</b><br><b>(16.1 to 17.5)</b> | <b>1.5†</b><br><b>(1.4 to 1.6)</b> | <b>1.1</b><br><b>(0.8 to 1.4)</b> | <b>37.5</b><br><b>(32.4 to 42.9)</b>              | <b>-0.9</b><br><b>(-4.5 to 2.5)</b>                 |
| Rheumatic heart disease                            | 3.4<br>(3.0 to 3.7)                  | 0.1<br>(0.1 to 0.1)                | 0.2<br>(0.1 to 0.2)               | 24.3<br>(15.0 to 34.7)                            | -2.5<br>(-9.5 to 5.3)                               |
| Ischaemic heart disease                            | 5.2<br>(4.9 to 5.6)                  | 0.6<br>(0.6 to 0.7)                | 0.2<br>(0.2 to 0.4)               | 47.5<br>(40.8 to 55.1)                            | 1.8<br>(-2.4 to 6.4)                                |
| Cerebrovascular disease                            | 1.7<br>(1.6 to 1.9)                  | 0.3‡<br>(0.3 to 0.3)               | 0.4<br>(0.2 to 0.5)               | 39.4<br>(28.4 to 50.2)                            | -3.7<br>(-11.1 to 3.5)                              |
| Ischaemic stroke                                   | 1.4<br>(1.2 to 1.6)                  | 0.2‡<br>(0.2 to 0.2)               | 0.3<br>(0.2 to 0.4)               | 40.6<br>(27.8 to 53.9)                            | -3.3<br>(-12.5 to 5.9)                              |
| Hemorrhagic stroke                                 | 0.4<br>(0.4 to 0.5)                  | 0.1‡<br>(0.1 to 0.1)               | 0.1<br>(0.1 to 0.1)               | 35.4<br>(21.6 to 51.1)                            | -5.0<br>(-14.9 to 6.2)                              |
| Hypertensive heart disease                         | 0.4<br>(0.3 to 0.4)                  | --                                 | < 0.05<br>(< 0.05 to < 0.05)      | 55.5<br>(36.4 to 76.3)                            | 3.7<br>(-7.3 to 16.0)                               |
| Cardiomyopathy and myocarditis                     | 0.1<br>(0.1 to 0.1)                  | 0.1†<br>(0.1 to 0.1)               | < 0.05<br>(< 0.05 to < 0.05)      | 37.0<br>(21.7 to 54.7)                            | 4.1<br>(-5.9 to 16.4)                               |
| Myocarditis                                        | 0.1<br>(< 0.05 to 0.1)               | 0.1<br>(0.1 to 0.1)                | < 0.05<br>(< 0.05 to < 0.05)      | 28.2<br>(17.3 to 39.6)                            | 2.7<br>(-4.7 to 10.8)                               |
| Alcoholic cardiomyopathy                           | < 0.05<br>(< 0.05 to < 0.05)         | --                                 | < 0.05<br>(< 0.05 to < 0.05)      | 58.7<br>(45.7 to 73.6)                            | 6.4<br>(-2.0 to 15.7)                               |
| Other cardiomyopathy                               | 0.1<br>(0.1 to 0.1)                  | --                                 | < 0.05<br>(< 0.05 to < 0.05)      | 42.6<br>(16.3 to 76.5)                            | 4.8<br>(-12.0 to 25.9)                              |
| Atrial fibrillation and flutter                    | 1.3<br>(1.1 to 1.4)                  | 0.1<br>(0.1 to 0.1)                | 0.1<br>(0.1 to 0.1)               | 48.1<br>(37.4 to 59.5)                            | 0.5<br>(-5.9 to 6.9)                                |
| Peripheral vascular disease                        | 3.1<br>(2.7 to 3.5)                  | 0.3<br>(0.2 to 0.3)                | < 0.05<br>(< 0.05 to < 0.05)      | 35.2<br>(21.7 to 49.4)                            | -5.5<br>(-11.7 to 1.7)                              |
| Endocarditis                                       | < 0.05<br>(< 0.05 to < 0.05)         | < 0.05<br>(< 0.05 to 0.1)          | < 0.05<br>(< 0.05 to < 0.05)      | 37.4<br>(22.9 to 53.7)                            | 1.3<br>(-7.2 to 11.2)                               |
| Other cardiovascular and circulatory diseases      | 3.3<br>(2.8 to 3.9)                  | --                                 | 0.2<br>(0.1 to 0.3)               | 26.4<br>(15.7 to 38.9)                            | 1.4<br>(-6.0 to 9.6)                                |
| <b>Chronic respiratory diseases</b>                | <b>26.1</b><br><b>(25.0 to 27.2)</b> | <b>5.9†</b><br><b>(5.6 to 6.3)</b> | <b>1.7</b><br><b>(1.4 to 2.0)</b> | <b>30.1</b><br><b>(25.4 to 35.7)</b>              | <b>1.4</b><br><b>(-2.3 to 4.7)</b>                  |
| Chronic obstructive pulmonary disease              | 8.2<br>(7.8 to 8.6)                  | 0.7<br>(0.6 to 0.7)                | 0.9<br>(0.8 to 0.9)               | 39.2<br>(31.7 to 47.1)                            | -1.5<br>(-6.7 to 3.6)                               |
| Pneumoconiosis                                     | < 0.05<br>(< 0.05 to < 0.05)         | < 0.05<br>(< 0.05 to < 0.05)       | < 0.05<br>(< 0.05 to < 0.05)      | 35.6<br>(6.2 to 73.1)                             | -5.3<br>(-26.9 to 21.7)                             |
| Silicosis                                          | < 0.05<br>(< 0.05 to < 0.05)         | < 0.05<br>(< 0.05 to < 0.05)       | < 0.05<br>(< 0.05 to < 0.05)      | 37.2<br>(-0.2 to 89.2)                            | -4.3<br>(-31.6 to 32.5)                             |

| Cause                                                          | Prevalence in thousands (95% UI)  | Incidence in thousands (95% UI)               | YLDs in thousands (95% UI)              |                                                                             |                                                                               |
|----------------------------------------------------------------|-----------------------------------|-----------------------------------------------|-----------------------------------------|-----------------------------------------------------------------------------|-------------------------------------------------------------------------------|
|                                                                | 2016 counts<br>(< 0.05 to < 0.05) | 2016 counts<br>(< 0.05 to < 0.05)             | 2016 counts<br>(< 0.05 to < 0.05)       | Percentage change in counts between 2006 and 2016<br>35.8<br>(27.3 to 45.8) | Percentage change in age-standardised rates between<br>-5.0<br>(-10.3 to 1.3) |
| Asbestosis                                                     | < 0.05<br>(< 0.05 to < 0.05)      | < 0.05<br>(< 0.05 to < 0.05)                  | < 0.05<br>(< 0.05 to < 0.05)            | 35.8<br>(27.3 to 45.8)                                                      | -5.0<br>(-10.3 to 1.3)                                                        |
| Coal workers pneumoconiosis                                    | --                                | --                                            | --                                      | --                                                                          | --                                                                            |
| Other pneumoconiosis                                           | < 0.05<br>(< 0.05 to < 0.05)      | < 0.05<br>(< 0.05 to < 0.05)                  | < 0.05<br>(< 0.05 to < 0.05)            | 20.3<br>(5.4 to 36.5)                                                       | -14.5<br>(-25.2 to -2.7)                                                      |
| Asthma                                                         | 18.3<br>(17.1 to 19.7)            | 5.2<br>(4.9 to 5.6)                           | 0.7<br>(0.5 to 1.0)                     | 19.7<br>(13.6 to 25.8)                                                      | 5.8<br>(1.3 to 10.2)                                                          |
| Interstitial lung disease and pulmonary sarcoidosis            | 0.4<br>(0.4 to 0.5)               | < 0.05<br>(< 0.05 to < 0.05)                  | < 0.05<br>(< 0.05 to 0.1)               | 34.1<br>(22.2 to 46.6)                                                      | -3.4<br>(-11.7 to 4.6)                                                        |
| Other chronic respiratory diseases                             | --                                | --                                            | 0.1<br>(< 0.05 to 0.1)                  | 43.5<br>(23.0 to 67.8)                                                      | 25.9<br>(10.3 to 43.8)                                                        |
| <b>Cirrhosis and other chronic liver diseases</b>              | <b>1.3<br/>(1.2 to 1.4)</b>       | <b>&lt; 0.05<br/>(&lt; 0.05 to &lt; 0.05)</b> | <b>&lt; 0.05<br/>(&lt; 0.05 to 0.1)</b> | <b>29.8<br/>(13.8 to 47.7)</b>                                              | <b>2.9<br/>(-7.7 to 14.4)</b>                                                 |
| Cirrhosis and other chronic liver diseases due to hepatitis B  | 0.4<br>(0.4 to 0.5)               | < 0.05<br>(< 0.05 to < 0.05)                  | < 0.05<br>(< 0.05 to < 0.05)            | 46.8<br>(16.5 to 79.9)                                                      | 3.0<br>(-16.5 to 23.7)                                                        |
| Cirrhosis and other chronic liver diseases due to hepatitis C  | 0.2<br>(0.2 to 0.3)               | < 0.05<br>(< 0.05 to < 0.05)                  | < 0.05<br>(< 0.05 to < 0.05)            | 48.3<br>(16.6 to 86.9)                                                      | 3.6<br>(-19.1 to 30.6)                                                        |
| Cirrhosis and other chronic liver diseases due to alcohol use  | 0.2<br>(0.2 to 0.2)               | < 0.05<br>(< 0.05 to < 0.05)                  | < 0.05<br>(< 0.05 to < 0.05)            | 45.0<br>(14.7 to 84.9)                                                      | 0.4<br>(-20.1 to 27.8)                                                        |
| Cirrhosis and other chronic liver diseases due to other causes | 0.4<br>(0.4 to 0.5)               | < 0.05<br>(< 0.05 to < 0.05)                  | < 0.05<br>(< 0.05 to < 0.05)            | 15.1<br>(-7.4 to 42.5)                                                      | 3.4<br>(-14.1 to 25.2)                                                        |
| <b>Digestive diseases</b>                                      | <b>3.4<br/>(3.2 to 3.6)</b>       | <b>4.4†<br/>(4.1 to 4.7)</b>                  | <b>0.1<br/>(0.1 to 0.1)</b>             | <b>41.2<br/>(32.6 to 49.6)</b>                                              | <b>5.7<br/>(-0.2 to 11.5)</b>                                                 |
| Peptic ulcer disease                                           | 1.0<br>(0.9 to 1.1)               | 0.5<br>(0.4 to 0.6)                           | < 0.05<br>(< 0.05 to < 0.05)            | 47.4<br>(29.5 to 65.6)                                                      | 5.5<br>(-4.9 to 16.6)                                                         |
| Gastritis and duodenitis                                       | 1.8<br>(1.6 to 2.0)               | 1.8<br>(1.6 to 2.0)                           | < 0.05<br>(< 0.05 to < 0.05)            | 47.1<br>(32.4 to 63.3)                                                      | 8.1<br>(-0.8 to 17.7)                                                         |
| Appendicitis                                                   | < 0.05<br>(< 0.05 to < 0.05)      | 0.6<br>(0.6 to 0.7)                           | < 0.05<br>(< 0.05 to < 0.05)            | 13.3<br>(8.4 to 18.7)                                                       | -1.3<br>(-7.2 to 4.8)                                                         |
| Paralytic ileus and intestinal obstruction                     | < 0.05<br>(< 0.05 to < 0.05)      | 0.1<br>(0.1 to 0.1)                           | < 0.05<br>(< 0.05 to < 0.05)            | 34.2<br>(28.3 to 40.1)                                                      | 1.9<br>(-1.8 to 5.8)                                                          |
| Inguinal, femoral, and abdominal hernia                        | 0.4<br>(0.4 to 0.5)               | 0.6<br>(0.5 to 0.6)                           | < 0.05<br>(< 0.05 to < 0.05)            | 31.8<br>(13.9 to 52.9)                                                      | 1.2<br>(-12.6 to 19.6)                                                        |
| Inflammatory bowel disease                                     | 0.1<br>(0.1 to 0.1)               | 0.1<br>(0.1 to 0.1)                           | < 0.05<br>(< 0.05 to < 0.05)            | 45.0<br>(19.3 to 77.1)                                                      | 7.2<br>(-10.5 to 28.1)                                                        |
| Vascular intestinal disorders                                  | < 0.05<br>(< 0.05 to < 0.05)      | < 0.05<br>(< 0.05 to < 0.05)                  | < 0.05<br>(< 0.05 to < 0.05)            | 35.1<br>(26.7 to 43.9)                                                      | 4.2<br>(-0.7 to 8.9)                                                          |
| Gallbladder and biliary diseases                               | 0.2<br>(0.2 to 0.2)               | 0.6<br>(0.6 to 0.7)                           | < 0.05<br>(< 0.05 to < 0.05)            | 55.9<br>(43.1 to 70.9)                                                      | 10.2<br>(0.6 to 20.4)                                                         |
| Pancreatitis                                                   | < 0.05<br>(< 0.05 to < 0.05)      | 0.1<br>(0.1 to 0.1)                           | < 0.05<br>(< 0.05 to < 0.05)            | 51.9<br>(45.7 to 59.0)                                                      | 11.4<br>(8.0 to 14.9)                                                         |
| Other digestive diseases                                       | --                                | --                                            | < 0.05<br>(< 0.05 to < 0.05)            | 46.9<br>(36.9 to 56.4)                                                      | 9.9<br>(3.6 to 16.2)                                                          |
| <b>Neurological disorders</b>                                  | <b>128.9<br/>(123.0 to 135.1)</b> | <b>61.2<br/>(51.5 to 72.0)</b>                | <b>3.1<br/>(2.0 to 4.3)</b>             | <b>25.9<br/>(3.3 to 56.9)</b>                                               | <b>-0.6<br/>(-17.2 to 21.6)</b>                                               |
| Alzheimer's disease and other dementias                        | 1.5<br>(1.2 to 1.7)               | 0.2<br>(0.2 to 0.3)                           | 0.2<br>(0.1 to 0.3)                     | 64.9<br>(54.6 to 75.5)                                                      | 1.1<br>(-2.8 to 5.7)                                                          |
| Parkinson's disease                                            | 0.2<br>(0.1 to 0.2)               | < 0.05<br>(< 0.05 to < 0.05)                  | < 0.05<br>(< 0.05 to < 0.05)            | 58.8<br>(40.0 to 82.5)                                                      | 8.2<br>(-3.1 to 21.2)                                                         |
| Epilepsy                                                       | 1.6<br>(0.6 to 2.3)               | 0.2<br>(0.1 to 0.3)                           | 0.5<br>(0.1 to 0.9)                     | 9.1<br>(-65.8 to 249.6)                                                     | -6.5<br>(-70.5 to 193.5)                                                      |
| Multiple sclerosis                                             | < 0.05<br>(< 0.05 to < 0.05)      | < 0.05<br>(< 0.05 to < 0.05)                  | < 0.05<br>(< 0.05 to < 0.05)            | 63.0<br>(57.1 to 69.1)                                                      | 16.7<br>(12.7 to 20.7)                                                        |
| Motor neuron disease                                           | < 0.05<br>(< 0.05 to < 0.05)      | < 0.05<br>(< 0.05 to < 0.05)                  | < 0.05<br>(< 0.05 to < 0.05)            | 31.5<br>(25.7 to 36.5)                                                      | 4.4<br>(0.9 to 8.0)                                                           |
| Migraine                                                       | 47.3<br>(44.2 to 50.1)            | 5.1<br>(4.8 to 5.5)                           | 1.9<br>(1.2 to 2.7)                     | 27.2<br>(21.9 to 33.0)                                                      | -0.2<br>(-3.9 to 3.6)                                                         |
| Tension-type headache                                          | 97.4<br>(85.8 to 109.7)           | 55.6<br>(45.7 to 66.4)                        | 0.3<br>(0.2 to 0.4)                     | 26.4<br>(19.0 to 35.1)                                                      | -0.7<br>(-5.3 to 4.5)                                                         |
| Other neurological disorders                                   | < 0.05<br>(< 0.05 to < 0.05)      | < 0.05<br>(< 0.05 to < 0.05)                  | 0.1<br>(< 0.05 to 0.2)                  | 26.2<br>(-54.5 to 261.9)                                                    | 12.8<br>(-56.9 to 195.3)                                                      |
| <b>Mental and substance use disorders</b>                      | <b>47.1<br/>(45.2 to 48.9)</b>    | <b>15.3†<br/>(14.2 to 16.5)</b>               | <b>6.4<br/>(4.6 to 8.2)</b>             | <b>22.0<br/>(18.7 to 25.1)</b>                                              | <b>-1.2<br/>(-3.5 to 0.9)</b>                                                 |
| Schizophrenia                                                  | 1.1<br>(0.9 to 1.2)               | 0.1<br>(0.1 to 0.1)                           | 0.7<br>(0.5 to 0.9)                     | 44.4<br>(32.0 to 57.4)                                                      | 1.7<br>(-6.2 to 10.0)                                                         |
| Alcohol use disorders                                          | 2.8<br>(2.3 to 3.2)               | 1.5<br>(1.3 to 1.8)                           | 0.3<br>(0.2 to 0.4)                     | 39.5<br>(27.2 to 54.7)                                                      | 4.7<br>(-3.4 to 14.2)                                                         |
| Drug use disorders                                             | 3.1<br>(2.8 to 3.4)               | 0.4<br>(0.4 to 0.5)                           | 0.5<br>(0.4 to 0.7)                     | 32.0<br>(18.6 to 46.4)                                                      | 4.7<br>(-4.0 to 14.4)                                                         |
| Opioid use disorders                                           | 0.8<br>(0.6 to 1.0)               | 0.1<br>(0.1 to 0.1)                           | 0.3<br>(0.2 to 0.5)                     | 44.2<br>(27.0 to 62.3)                                                      | 4.5<br>(-7.1 to 16.0)                                                         |
| Cocaine use disorders                                          | 0.1<br>(0.1 to 0.1)               | < 0.05<br>(< 0.05 to < 0.05)                  | < 0.05<br>(< 0.05 to < 0.05)            | 31.6<br>(23.0 to 39.6)                                                      | 1.8<br>(-3.3 to 6.9)                                                          |
| Amphetamine use disorders                                      | 0.6<br>(0.4 to 0.8)               | < 0.05<br>(< 0.05 to 0.1)                     | 0.1<br>(< 0.05 to 0.1)                  | 13.8<br>(-10.5 to 46.2)                                                     | 7.7<br>(-14.8 to 37.1)                                                        |
| Cannabis use disorders                                         | 1.6<br>(1.3 to 2.0)               | 0.2<br>(0.2 to 0.3)                           | < 0.05<br>(< 0.05 to 0.1)               | 10.3<br>(-5.3 to 29.0)                                                      | 0.8<br>(-11.6 to 15.3)                                                        |
| Other drug use disorders                                       | 0.2<br>(0.1 to 0.2)               | < 0.05<br>(< 0.05 to < 0.05)                  | 0.1<br>(< 0.05 to 0.1)                  | 21.3<br>(-6.8 to 58.6)                                                      | 6.2<br>(-16.3 to 34.5)                                                        |
| Depressive disorders                                           | 10.9<br>(10.2 to 11.7)            | 9.6<br>(8.6 to 10.7)                          | 1.7<br>(1.2 to 2.3)                     | 18.9<br>(12.3 to 25.3)                                                      | -5.9<br>(-10.1 to -1.8)                                                       |
| Major depressive disorder                                      | 5.8<br>(5.2 to 6.5)               | 8.7<br>(7.7 to 9.8)                           | 1.2<br>(0.8 to 1.6)                     | 12.3<br>(4.4 to 20.7)                                                       | -8.7<br>(-14.3 to -3.1)                                                       |
| Dysthymia                                                      | 5.2<br>(4.6 to 6.0)               | 0.8<br>(0.7 to 1.0)                           | 0.5<br>(0.3 to 0.7)                     | 38.2<br>(32.5 to 43.5)                                                      | 1.0<br>(-1.9 to 4.0)                                                          |
| Bipolar disorder                                               | 2.0<br>(1.7 to 2.4)               | 0.2<br>(0.1 to 0.2)                           | 0.4<br>(0.2 to 0.6)                     | 24.9<br>(15.4 to 34.8)                                                      | 0.2<br>(-6.2 to 7.1)                                                          |
| Anxiety disorders                                              | 12.4<br>(10.9 to 14.0)            | 2.0<br>(1.8 to 2.3)                           | 1.2<br>(0.8 to 1.7)                     | 22.9<br>(14.4 to 32.0)                                                      | 0.9<br>(-5.1 to 7.3)                                                          |
| Eating disorders                                               | 0.5<br>(0.4 to 0.6)               | 0.3<br>(0.2 to 0.4)                           | 0.1<br>(0.1 to 0.1)                     | 30.4<br>(12.2 to 50.9)                                                      | 12.9<br>(-2.1 to 28.7)                                                        |
| Anorexia nervosa                                               | 0.1<br>(0.1 to 0.2)               | 0.1<br>(< 0.05 to 0.1)                        | < 0.05<br>(< 0.05 to 0.1)               | 15.4<br>(-10.0 to 47.4)                                                     | 9.8<br>(-14.2 to 40.4)                                                        |
| Bulimia nervosa                                                | 0.3<br>(0.2 to 0.5)               | 0.2<br>(0.1 to 0.3)                           | 0.1<br>(< 0.05 to 0.1)                  | 38.7<br>(14.5 to 65.9)                                                      | 14.4<br>(-3.0 to 34.3)                                                        |
| Autistic spectrum disorders                                    | 3.0<br>(2.7 to 3.4)               | < 0.05<br>(< 0.05 to < 0.05)                  | 0.4<br>(0.3 to 0.6)                     | 15.9<br>(10.4 to 22.0)                                                      | -0.3<br>(-4.9 to 4.5)                                                         |
| Autism                                                         | 0.9<br>(0.8 to 1.1)               | < 0.05<br>(< 0.05 to < 0.05)                  | 0.2<br>(0.1 to 0.3)                     | 15.9<br>(5.8 to 27.2)                                                       | -0.5<br>(-8.6 to 8.0)                                                         |
| Asperger syndrome and other autistic spectrum disorders        | 2.1<br>(1.8 to 2.6)               | < 0.05<br>(< 0.05 to < 0.05)                  | 0.2<br>(0.1 to 0.3)                     | 15.9<br>(10.4 to 22.1)                                                      | -0.1<br>(-4.4 to 4.9)                                                         |



| Cause                                                      | Prevalence in thousands (95% UI)        | Incidence in thousands (95% UI)          | YLDs in thousands (95% UI)         |                                                   |                                                     |
|------------------------------------------------------------|-----------------------------------------|------------------------------------------|------------------------------------|---------------------------------------------------|-----------------------------------------------------|
|                                                            | 2016 counts                             | 2016 counts                              | 2016 counts                        | Percentage change in counts between 2006 and 2016 | Percentage change in age-standardised rates between |
| Attention-deficit/hyperactivity disorder                   | 2.0<br>(1.6 to 2.5)                     | 0.1<br>(0.1 to 0.1)                      | < 0.05<br>(< 0.05 to < 0.05)       | 3.3<br>(-6.7 to 16.2)                             | 0.1<br>(-9.5 to 11.6)                               |
| Conduct disorder                                           | 2.6<br>(2.1 to 3.1)                     | 0.9<br>(0.7 to 1.1)                      | 0.3<br>(0.2 to 0.5)                | -17.2<br>(-22.6 to -10.7)                         | 0.3<br>(-6.2 to 8.0)                                |
| Idiopathic developmental intellectual disability           | 3.4<br>(1.6 to 5.5)                     | --                                       | 0.1<br>(0.1 to 0.3)                | -5.5<br>(-15.8 to 3.7)                            | -17.6<br>(-26.2 to -9.8)                            |
| Other mental and substance use disorders                   | 6.7<br>(5.9 to 7.8)                     | 0.3<br>(0.2 to 0.3)                      | 0.5<br>(0.4 to 0.7)                | 38.2<br>(30.8 to 46.2)                            | 0.1<br>(-4.3 to 4.8)                                |
| <b>Diabetes, urogenital, blood, and endocrine diseases</b> | <b>164.4</b><br><b>(160.1 to 169.1)</b> | <b>31.2†</b><br><b>(29.2 to 33.3)</b>    | <b>2.9</b><br><b>(2.0 to 4.1)</b>  | <b>27.6</b><br><b>(23.4 to 32.3)</b>              | <b>-3.2</b><br><b>(-6.4 to -0.2)</b>                |
| Diabetes mellitus                                          | 15.3<br>(13.6 to 17.1)                  | 0.9<br>(0.8 to 1.0)                      | 1.1<br>(0.7 to 1.6)                | 49.7<br>(41.4 to 59.1)                            | 3.9<br>(-2.0 to 10.4)                               |
| Acute glomerulonephritis                                   | < 0.05<br>(< 0.05 to < 0.05)            | 0.1<br>(0.1 to 0.1)                      | < 0.05<br>(< 0.05 to < 0.05)       | 17.4<br>(10.5 to 24.5)                            | 0.3<br>(-3.3 to 4.9)                                |
| Chronic kidney disease                                     | 7.0<br>(6.3 to 7.6)                     | 0.5<br>(0.4 to 0.5)                      | 0.2<br>(0.2 to 0.3)                | 25.8<br>(17.7 to 34.1)                            | -8.8<br>(-14.4 to -3.4)                             |
| Chronic kidney disease due to diabetes mellitus            | 4.0<br>(3.6 to 4.5)                     | 0.3<br>(0.2 to 0.3)                      | 0.1<br>(0.1 to 0.2)                | 28.4<br>(16.8 to 41.6)                            | -9.2<br>(-16.9 to -0.9)                             |
| Chronic kidney disease due to hypertension                 | 1.1<br>(1.0 to 1.3)                     | < 0.05<br>(< 0.05 to 0.1)                | 0.1<br>(< 0.05 to 0.1)             | 37.8<br>(24.3 to 52.4)                            | -6.2<br>(-15.0 to 3.3)                              |
| Chronic kidney disease due to glomerulonephritis           | 1.3<br>(1.1 to 1.5)                     | 0.1<br>(0.1 to 0.1)                      | < 0.05<br>(< 0.05 to < 0.05)       | -0.1<br>(-9.4 to 9.9)                             | -14.1<br>(-20.2 to -7.6)                            |
| Chronic kidney disease due to other causes                 | 0.5<br>(0.4 to 0.6)                     | < 0.05<br>(< 0.05 to < 0.05)             | < 0.05<br>(< 0.05 to < 0.05)       | 9.7<br>(-1.2 to 20.6)                             | -11.0<br>(-16.8 to -4.7)                            |
| Urinary diseases and male infertility                      | 4.8<br>(4.1 to 5.5)                     | 16.1†<br>(14.3 to 18.0)                  | 0.1<br>(0.1 to 0.1)                | 30.4<br>(21.8 to 39.5)                            | -8.2<br>(-14.0 to -2.5)                             |
| Interstitial nephritis and urinary tract infections        | 0.3<br>(0.2 to 0.3)                     | 14.7<br>(12.9 to 16.6)                   | < 0.05<br>(< 0.05 to < 0.05)       | 26.4<br>(5.9 to 50.3)                             | -0.1<br>(-14.6 to 16.4)                             |
| Urolithiasis                                               | < 0.05<br>(< 0.05 to 0.1)               | 1.2<br>(1.0 to 1.3)                      | < 0.05<br>(< 0.05 to < 0.05)       | 41.2<br>(28.9 to 54.9)                            | 0.1<br>(-9.7 to 12.5)                               |
| Benign prostatic hyperplasia                               | 1.7<br>(1.5 to 2.0)                     | 0.2<br>(0.2 to 0.3)                      | 0.1<br>(< 0.05 to 0.1)             | 31.1<br>(20.9 to 42.3)                            | -10.3<br>(-16.9 to -3.4)                            |
| Male infertility                                           | 2.5<br>(1.9 to 3.2)                     | --                                       | < 0.05<br>(< 0.05 to < 0.05)       | 37.3<br>(10.5 to 67.6)                            | 6.6<br>(-13.2 to 28.8)                              |
| Other urinary diseases                                     | --                                      | --                                       | < 0.05<br>(< 0.05 to < 0.05)       | 8.0<br>(-6.4 to 23.7)                             | -17.1<br>(-26.7 to -7.2)                            |
| Gynecological diseases                                     | 39.0<br>(36.7 to 41.6)                  | 12.9†<br>(12.2 to 13.7)                  | 0.5<br>(0.3 to 0.7)                | 28.0<br>(21.5 to 35.1)                            | -5.2<br>(-9.7 to -0.8)                              |
| Uterine fibroids                                           | 4.7<br>(4.1 to 5.4)                     | 0.6<br>(0.5 to 0.7)                      | 0.1<br>(0.1 to 0.2)                | 38.0<br>(27.6 to 47.1)                            | -8.0<br>(-15.0 to -1.6)                             |
| Polycystic ovarian syndrome                                | 0.3<br>(0.2 to 0.4)                     | 0.3<br>(0.2 to 0.4)                      | < 0.05<br>(< 0.05 to < 0.05)       | 37.0<br>(17.2 to 61.3)                            | 1.0<br>(-13.4 to 17.1)                              |
| Female infertility                                         | 3.8<br>(1.8 to 6.4)                     | --                                       | < 0.05<br>(< 0.05 to < 0.05)       | 40.7<br>(-21.9 to 128.0)                          | 10.5<br>(-41.0 to 84.3)                             |
| Endometriosis                                              | < 0.05<br>(< 0.05 to < 0.05)            | 0.3<br>(0.2 to 0.4)                      | < 0.05<br>(< 0.05 to < 0.05)       | 26.5<br>(-11.0 to 75.5)                           | -0.6<br>(-28.3 to 35.7)                             |
| Genital prolapse                                           | 5.3<br>(4.6 to 6.1)                     | 0.4<br>(0.3 to 0.5)                      | < 0.05<br>(< 0.05 to < 0.05)       | 16.4<br>(6.5 to 27.6)                             | -19.4<br>(-26.5 to -11.7)                           |
| Premenstrual syndrome                                      | 25.5<br>(24.1 to 26.9)                  | 9.2<br>(8.6 to 9.9)                      | 0.2<br>(0.1 to 0.3)                | 25.5<br>(16.2 to 35.4)                            | -1.2<br>(-7.9 to 6.2)                               |
| Other gynecological diseases                               | 3.8<br>(3.4 to 4.1)                     | 2.1<br>(1.8 to 2.5)                      | 0.1<br>(0.1 to 0.2)                | 24.2<br>(12.6 to 36.2)                            | -7.4<br>(-14.9 to 0.9)                              |
| Hemoglobinopathies and hemolytic anaemias                  | 122.9<br>(117.9 to 128.2)               | --                                       | 0.8<br>(0.5 to 1.2)                | 8.7<br>(1.2 to 16.7)                              | -8.2<br>(-13.8 to -2.0)                             |
| Thalassemias                                               | 0.2<br>(0.1 to 0.2)                     | --                                       | < 0.05<br>(< 0.05 to < 0.05)       | 6.0<br>(-12.5 to 26.0)                            | -1.8<br>(-18.7 to 16.7)                             |
| Thalassaemias trait                                        | 60.7<br>(56.9 to 64.2)                  | --                                       | 0.7<br>(0.4 to 1.0)                | 11.0<br>(2.5 to 19.9)                             | -6.3<br>(-12.8 to 0.9)                              |
| Sickle cell disorders                                      | < 0.05<br>(< 0.05 to < 0.05)            | --                                       | < 0.05<br>(< 0.05 to < 0.05)       | 16.8<br>(1.7 to 36.7)                             | 5.4<br>(-8.8 to 24.4)                               |
| Sickle cell trait                                          | 1.2<br>(1.1 to 1.3)                     | --                                       | < 0.05<br>(< 0.05 to < 0.05)       | 10.2<br>(-8.8 to 34.7)                            | -2.1<br>(-17.7 to 17.4)                             |
| G6PD deficiency                                            | 21.6<br>(18.1 to 25.5)                  | --                                       | < 0.05<br>(< 0.05 to < 0.05)       | 8.8<br>(-6.4 to 27.5)                             | -9.7<br>(-20.7 to 3.1)                              |
| G6PD trait                                                 | 51.4<br>(47.6 to 55.4)                  | --                                       | < 0.05<br>(< 0.05 to < 0.05)       | 12.4<br>(-3.4 to 30.9)                            | -5.6<br>(-17.1 to 7.1)                              |
| Other hemoglobinopathies and hemolytic anaemias            | 5.9<br>(5.7 to 6.2)                     | --                                       | 0.1<br>(0.1 to 0.2)                | -3.3<br>(-10.0 to 4.5)                            | -17.5<br>(-22.5 to -12.1)                           |
| Endocrine, metabolic, blood, and immune disorders          | 7.8<br>(7.4 to 8.2)                     | 0.8<br>(0.7 to 0.8)                      | 0.2<br>(0.1 to 0.3)                | 17.1<br>(10.2 to 24.3)                            | -6.7<br>(-11.1 to -2.1)                             |
| <b>Musculoskeletal disorders</b>                           | <b>51.3</b><br><b>(48.7 to 53.8)</b>    | <b>27.2</b><br><b>(24.5 to 30.0)</b>     | <b>5.6</b><br><b>(4.0 to 7.3)</b>  | <b>37.7</b><br><b>(33.7 to 42.2)</b>              | <b>0.0</b><br><b>(-2.5 to 2.6)</b>                  |
| Rheumatoid arthritis                                       | 0.4<br>(0.4 to 0.5)                     | < 0.05<br>(< 0.05 to < 0.05)             | 0.1<br>(0.1 to 0.1)                | 46.2<br>(30.0 to 64.2)                            | 5.2<br>(-5.3 to 17.1)                               |
| Osteoarthritis                                             | 9.8<br>(9.2 to 10.5)                    | 0.5<br>(0.5 to 0.6)                      | 0.6<br>(0.4 to 0.8)                | 58.5<br>(52.2 to 65.2)                            | 7.8<br>(3.8 to 12.0)                                |
| Low back and neck pain                                     | 30.1<br>(27.8 to 32.5)                  | 13.0<br>(11.6 to 14.6)                   | 3.5<br>(2.5 to 4.6)                | 37.0<br>(31.7 to 42.2)                            | -1.0<br>(-4.2 to 2.1)                               |
| Low back pain                                              | 21.8<br>(19.3 to 24.7)                  | 10.6<br>(9.2 to 12.2)                    | 2.5<br>(1.8 to 3.3)                | 34.4<br>(27.5 to 41.4)                            | -1.5<br>(-5.9 to 2.7)                               |
| Neck pain                                                  | 9.9<br>(8.5 to 11.5)                    | 2.4<br>(2.1 to 2.9)                      | 1.0<br>(0.7 to 1.4)                | 43.6<br>(38.4 to 48.5)                            | 0.5<br>(-2.0 to 3.0)                                |
| Gout                                                       | 1.2<br>(1.1 to 1.4)                     | 0.2<br>(0.2 to 0.3)                      | < 0.05<br>(< 0.05 to 0.1)          | 43.1<br>(24.3 to 66.2)                            | -2.4<br>(-14.1 to 11.7)                             |
| Other musculoskeletal disorders                            | 15.4<br>(12.8 to 17.8)                  | 13.4<br>(11.1 to 15.9)                   | 1.3<br>(0.9 to 1.9)                | 31.1<br>(20.5 to 42.0)                            | -2.0<br>(-8.5 to 4.9)                               |
| <b>Other non-communicable diseases</b>                     | <b>249.6</b><br><b>(241.9 to 256.7)</b> | <b>746.2†</b><br><b>(676.0 to 818.4)</b> | <b>7.0</b><br><b>(4.8 to 10.0)</b> | <b>16.8</b><br><b>(14.7 to 19.0)</b>              | <b>-3.5</b><br><b>(-4.9 to -2.2)</b>                |
| Congenital anomalies                                       | 2.7<br>(2.3 to 3.2)                     | --                                       | 0.3<br>(0.2 to 0.5)                | 10.1<br>(2.4 to 18.1)                             | -4.9<br>(-11.3 to 1.8)                              |
| Neural tube defects                                        | 0.2<br>(0.2 to 0.2)                     | --                                       | 0.1<br>(< 0.05 to 0.1)             | 18.5<br>(1.7 to 37.3)                             | 0.8<br>(-11.5 to 16.2)                              |
| Congenital heart anomalies                                 | 0.7<br>(0.6 to 0.8)                     | --                                       | < 0.05<br>(< 0.05 to 0.1)          | 18.6<br>(4.9 to 34.8)                             | 5.5<br>(-5.8 to 18.9)                               |
| Orofacial clefts                                           | 0.2<br>(0.1 to 0.2)                     | --                                       | < 0.05<br>(< 0.05 to < 0.05)       | 11.2<br>(-0.5 to 25.5)                            | -5.0<br>(-15.0 to 7.3)                              |
| Down's syndrome                                            | 0.1<br>(0.1 to 0.1)                     | --                                       | < 0.05<br>(< 0.05 to < 0.05)       | 12.2<br>(4.0 to 20.9)                             | -2.7<br>(-9.6 to 4.7)                               |
| Turner syndrome                                            | 0.1<br>(< 0.05 to 0.1)                  | --                                       | < 0.05<br>(< 0.05 to < 0.05)       | 12.6<br>(-2.6 to 33.2)                            | -1.8<br>(-14.1 to 14.4)                             |
| Klinefelter syndrome                                       | 0.1<br>(0.1 to 0.1)                     | --                                       | < 0.05<br>(< 0.05 to < 0.05)       | 23.6<br>(-10.8 to 70.7)                           | 1.4<br>(-25.2 to 38.6)                              |



| Cause                                         | Prevalence in thousands (95% UI)     | Incidence in thousands (95% UI)       | YLDs in thousands (95% UI)        |                                                   |                                                     |
|-----------------------------------------------|--------------------------------------|---------------------------------------|-----------------------------------|---------------------------------------------------|-----------------------------------------------------|
|                                               | 2016 counts                          | 2016 counts                           | 2016 counts                       | Percentage change in counts between 2006 and 2016 | Percentage change in age-standardised rates between |
| Other chromosomal abnormalities               | 0.1<br>(0.1 to 0.1)                  | --                                    | < 0.05<br>(< 0.05 to < 0.05)      | -4.7<br>(-23.8 to 15.1)                           | -2.5<br>(-22.7 to 18.9)                             |
| Congenital musculoskeletal and limb anomalies | 0.3<br>(0.3 to 0.4)                  | --                                    | < 0.05<br>(< 0.05 to 0.1)         | 26.9<br>(11.6 to 43.5)                            | 8.3<br>(-3.7 to 21.0)                               |
| Urogenital congenital anomalies               | 0.2<br>(0.2 to 0.3)                  | --                                    | < 0.05<br>(< 0.05 to < 0.05)      | 3.0<br>(-5.4 to 11.9)                             | -0.6<br>(-8.2 to 7.8)                               |
| Digestive congenital anomalies                | 0.4<br>(0.3 to 0.4)                  | --                                    | < 0.05<br>(< 0.05 to < 0.05)      | 20.4<br>(1.1 to 41.3)                             | 2.5<br>(-12.7 to 18.1)                              |
| Other congenital anomalies                    | 1.1<br>(0.7 to 1.8)                  | --                                    | 0.1<br>(0.1 to 0.2)               | 1.6<br>(-9.8 to 14.3)                             | -13.2<br>(-22.5 to -3.1)                            |
| Skin and subcutaneous diseases                | 127.8<br>(123.5 to 132.5)            | 290.2<br>(269.3 to 316.1)             | 3.3<br>(2.1 to 4.8)               | 9.3<br>(6.2 to 12.3)                              | 1.1<br>(-1.0 to 3.2)                                |
| Dermatitis                                    | 16.6<br>(15.0 to 18.4)               | 21.0<br>(19.4 to 22.7)                | 0.6<br>(0.4 to 1.0)               | 12.6<br>(8.0 to 17.8)                             | 0.3<br>(-3.1 to 3.9)                                |
| Psoriasis                                     | 2.5<br>(2.4 to 2.7)                  | 0.4<br>(0.3 to 0.4)                   | 0.2<br>(0.2 to 0.3)               | 39.4<br>(26.9 to 53.1)                            | 12.0<br>(3.0 to 21.3)                               |
| Cellulitis                                    | 0.1<br>(0.1 to 0.2)                  | 3.2<br>(3.0 to 3.4)                   | < 0.05<br>(< 0.05 to < 0.05)      | 18.3<br>(-7.5 to 54.6)                            | 1.3<br>(-17.8 to 25.7)                              |
| Pyoderma                                      | 0.3<br>(0.3 to 0.3)                  | 6.2<br>(6.0 to 6.4)                   | < 0.05<br>(< 0.05 to < 0.05)      | 28.4<br>(14.6 to 42.9)                            | 0.8<br>(-7.7 to 10.3)                               |
| Scabies                                       | 20.4<br>(15.9 to 26.3)               | 65.1<br>(50.2 to 85.6)                | 0.5<br>(0.3 to 0.9)               | 6.2<br>(-4.7 to 16.5)                             | -6.1<br>(-13.7 to 0.6)                              |
| Fungal skin diseases                          | 36.6<br>(32.5 to 40.8)               | 119.1<br>(105.5 to 133.3)             | 0.2<br>(0.1 to 0.4)               | 21.8<br>(17.7 to 25.6)                            | 0.1<br>(-0.9 to 1.0)                                |
| Viral skin diseases                           | 10.5<br>(9.4 to 11.7)                | 14.9<br>(13.2 to 16.6)                | 0.3<br>(0.2 to 0.5)               | 9.3<br>(4.7 to 14.3)                              | 0.3<br>(-2.7 to 3.4)                                |
| Acne vulgaris                                 | 37.4<br>(33.6 to 41.5)               | 26.1<br>(21.3 to 32.8)                | 1.0<br>(0.6 to 1.4)               | -2.5<br>(-7.7 to 3.0)                             | 3.8<br>(-0.8 to 8.5)                                |
| Alopecia areata                               | 0.7<br>(0.7 to 0.8)                  | 1.3<br>(1.2 to 1.3)                   | < 0.05<br>(< 0.05 to < 0.05)      | 29.9<br>(15.2 to 46.0)                            | 0.0<br>(-10.1 to 11.3)                              |
| Pruritus                                      | 3.0<br>(2.6 to 3.4)                  | 2.4<br>(2.1 to 2.7)                   | < 0.05<br>(< 0.05 to 0.1)         | 29.1<br>(21.1 to 38.1)                            | 1.7<br>(-3.5 to 6.6)                                |
| Urticaria                                     | 3.0<br>(2.6 to 3.5)                  | 5.4<br>(4.7 to 6.2)                   | 0.2<br>(0.1 to 0.3)               | 14.6<br>(7.5 to 22.6)                             | 0.1<br>(-5.3 to 6.0)                                |
| Decubitus ulcer                               | < 0.05<br>(< 0.05 to < 0.05)         | 0.1<br>(0.1 to 0.1)                   | < 0.05<br>(< 0.05 to < 0.05)      | 48.0<br>(23.6 to 77.1)                            | -0.4<br>(-16.8 to 20.2)                             |
| Other skin and subcutaneous diseases          | 22.1<br>(21.5 to 22.8)               | 25.2<br>(24.4 to 26.0)                | 0.1<br>(0.1 to 0.2)               | 35.5<br>(31.8 to 39.2)                            | 5.5<br>(3.1 to 7.9)                                 |
| Sense organ diseases                          | 65.6<br>(62.9 to 68.4)               | 32.7†<br>(30.7 to 35.0)               | 2.8<br>(2.0 to 3.9)               | 23.7<br>(19.5 to 27.8)                            | -7.6<br>(-9.8 to -5.4)                              |
| Glaucoma                                      | 0.1<br>(0.1 to 0.1)                  | --                                    | < 0.05<br>(< 0.05 to < 0.05)      | 40.7<br>(20.7 to 62.9)                            | 1.3<br>(-11.7 to 15.2)                              |
| Cataract                                      | 3.4<br>(2.7 to 4.2)                  | --                                    | 0.2<br>(0.2 to 0.4)               | 39.3<br>(29.3 to 50.4)                            | -6.7<br>(-12.5 to -0.6)                             |
| Macular degeneration                          | 0.1<br>(< 0.05 to 0.1)               | --                                    | < 0.05<br>(< 0.05 to < 0.05)      | 48.0<br>(22.2 to 81.9)                            | 3.7<br>(-13.3 to 24.6)                              |
| Refraction and accommodation disorders        | 30.2<br>(26.4 to 34.5)               | --                                    | 0.6<br>(0.4 to 0.9)               | 11.9<br>(5.2 to 19.7)                             | -12.8<br>(-17.6 to -7.3)                            |
| Age-related and other hearing loss            | 39.1<br>(36.6 to 41.9)               | --                                    | 1.6<br>(1.1 to 2.1)               | 23.4<br>(16.9 to 29.9)                            | -7.8<br>(-11.0 to -4.8)                             |
| Other vision loss                             | 1.3<br>(1.1 to 1.5)                  | --                                    | 0.1<br>(0.1 to 0.1)               | 41.8<br>(30.8 to 53.7)                            | 0.8<br>(-5.9 to 8.0)                                |
| Other sense organ diseases                    | 8.5<br>(7.8 to 9.1)                  | 32.7<br>(30.7 to 35.0)                | 0.3<br>(0.2 to 0.4)               | 35.9<br>(29.9 to 42.2)                            | 1.9<br>(-1.9 to 5.8)                                |
| Oral disorders                                | 160.6<br>(148.0 to 171.5)            | 423.3†<br>(357.7 to 492.8)            | 0.6<br>(0.4 to 1.0)               | 35.9<br>(32.2 to 39.8)                            | 0.4<br>(-1.8 to 2.6)                                |
| Caries of deciduous teeth                     | 22.1<br>(16.7 to 28.0)               | 91.0<br>(61.2 to 126.4)               | < 0.05<br>(< 0.05 to < 0.05)      | 9.1<br>(-3.1 to 23.0)                             | -1.0<br>(-11.6 to 11.3)                             |
| Caries of permanent teeth                     | 111.4<br>(96.9 to 127.0)             | 328.6<br>(271.1 to 388.1)             | 0.1<br>(< 0.05 to 0.1)            | 13.6<br>(6.6 to 21.2)                             | -4.1<br>(-8.5 to 0.2)                               |
| Periodontal disease                           | 24.7<br>(16.8 to 36.1)               | 3.2<br>(2.2 to 4.6)                   | 0.2<br>(0.1 to 0.4)               | 47.7<br>(40.3 to 54.9)                            | 0.0<br>(-5.3 to 4.5)                                |
| Edentulism and severe tooth loss              | 7.4<br>(6.1 to 8.7)                  | 0.6<br>(0.5 to 0.7)                   | 0.2<br>(0.1 to 0.3)               | 47.2<br>(40.3 to 54.3)                            | 1.8<br>(-1.9 to 5.7)                                |
| Other oral disorders                          | 6.5<br>(6.2 to 6.8)                  | --                                    | 0.2<br>(0.1 to 0.3)               | 26.3<br>(21.4 to 31.1)                            | 0.3<br>(-2.9 to 3.2)                                |
| <b>Injuries</b>                               | <b>37.6</b><br><b>(35.5 to 39.9)</b> | <b>16.4†</b><br><b>(15.5 to 17.4)</b> | <b>1.3</b><br><b>(0.9 to 1.9)</b> | <b>35.6</b><br><b>(31.3 to 39.4)</b>              | <b>4.3</b><br><b>(1.4 to 6.7)</b>                   |
| <b>Transport injuries</b>                     | <b>6.3</b><br><b>(5.8 to 6.9)</b>    | <b>2.1</b><br><b>(1.9 to 2.4)</b>     | <b>0.3</b><br><b>(0.2 to 0.4)</b> | <b>50.8</b><br><b>(45.2 to 55.8)</b>              | <b>13.1</b><br><b>(9.3 to 16.2)</b>                 |
| Road injuries                                 | 3.9<br>(3.6 to 4.2)                  | 1.6<br>(1.4 to 1.8)                   | 0.2<br>(0.1 to 0.3)               | 76.6<br>(71.3 to 81.8)                            | 27.5<br>(24.0 to 30.6)                              |
| Pedestrian road injuries                      | 0.6<br>(0.5 to 0.6)                  | 0.2<br>(0.1 to 0.2)                   | < 0.05<br>(< 0.05 to < 0.05)      | 102.5<br>(95.5 to 109.0)                          | 46.1<br>(41.7 to 50.3)                              |
| Cyclist road injuries                         | 0.7<br>(0.6 to 0.8)                  | 0.3<br>(0.2 to 0.4)                   | < 0.05<br>(< 0.05 to < 0.05)      | 77.2<br>(71.5 to 82.6)                            | 27.8<br>(24.3 to 30.9)                              |
| Motorcyclist road injuries                    | 1.2<br>(1.1 to 1.5)                  | 0.4<br>(0.3 to 0.4)                   | 0.1<br>(< 0.05 to 0.1)            | 68.2<br>(62.7 to 73.2)                            | 20.7<br>(17.2 to 23.9)                              |
| Motor vehicle road injuries                   | 0.8<br>(0.7 to 0.9)                  | 0.4<br>(0.3 to 0.5)                   | < 0.05<br>(< 0.05 to 0.1)         | 72.5<br>(67.2 to 78.2)                            | 25.2<br>(21.9 to 28.3)                              |
| Other road injuries                           | 0.6<br>(0.5 to 0.8)                  | 0.4<br>(0.3 to 0.5)                   | < 0.05<br>(< 0.05 to < 0.05)      | 79.5<br>(74.1 to 85.1)                            | 29.8<br>(26.6 to 33.0)                              |
| Other transport injuries                      | 2.4<br>(2.0 to 2.9)                  | 0.6<br>(0.5 to 0.7)                   | 0.1<br>(0.1 to 0.2)               | 20.2<br>(14.6 to 24.9)                            | -6.5<br>(-10.3 to -3.2)                             |
| <b>Unintentional injuries</b>                 | <b>27.8</b><br><b>(25.8 to 29.8)</b> | <b>12.5</b><br><b>(11.7 to 13.4)</b>  | <b>0.8</b><br><b>(0.6 to 1.2)</b> | <b>33.6</b><br><b>(29.0 to 37.7)</b>              | <b>3.1</b><br><b>(0.1 to 5.5)</b>                   |
| Falls                                         | 7.8<br>(6.8 to 8.8)                  | 3.5<br>(3.1 to 4.2)                   | 0.3<br>(0.2 to 0.4)               | 51.3<br>(46.6 to 55.8)                            | 14.2<br>(11.1 to 17.2)                              |
| Drowning                                      | 0.2<br>(0.2 to 0.3)                  | < 0.05<br>(< 0.05 to 0.1)             | < 0.05<br>(< 0.05 to < 0.05)      | -2.7<br>(-7.0 to 1.4)                             | -26.1<br>(-29.1 to -23.1)                           |
| Fire, heat, and hot substances                | 2.9<br>(2.5 to 3.6)                  | 0.4<br>(0.3 to 0.5)                   | 0.1<br>(< 0.05 to 0.1)            | 15.0<br>(6.6 to 21.1)                             | -12.7<br>(-18.5 to -8.3)                            |
| Poisonings                                    | 0.1<br>(0.1 to 0.1)                  | 0.2<br>(0.1 to 0.2)                   | < 0.05<br>(< 0.05 to < 0.05)      | 64.6<br>(49.0 to 81.6)                            | 28.7<br>(18.3 to 39.5)                              |
| Exposure to mechanical forces                 | 5.1<br>(4.4 to 6.2)                  | 2.2<br>(1.8 to 2.6)                   | 0.1<br>(0.1 to 0.2)               | 29.2<br>(24.1 to 33.8)                            | -2.4<br>(-6.0 to 0.4)                               |
| Unintentional firearm injuries                | 0.2<br>(0.2 to 0.2)                  | 0.1<br>(< 0.05 to 0.1)                | < 0.05<br>(< 0.05 to < 0.05)      | 26.8<br>(21.2 to 31.8)                            | -4.5<br>(-7.9 to -1.5)                              |
| Unintentional suffocation                     | 0.4<br>(0.3 to 0.5)                  | 0.1<br>(0.1 to 0.1)                   | < 0.05<br>(< 0.05 to < 0.05)      | -6.3<br>(-9.7 to -3.1)                            | -23.7<br>(-26.0 to -21.6)                           |
| Other exposure to mechanical forces           | 4.5<br>(3.8 to 5.6)                  | 2.0<br>(1.7 to 2.4)                   | 0.1<br>(0.1 to 0.1)               | 35.7<br>(30.2 to 40.5)                            | 1.0<br>(-2.8 to 4.0)                                |

| Cause                                                                               | Prevalence in thousands (95% UI)   | Incidence in thousands (95% UI)                      | YLDs in thousands (95% UI)                          |                                                   |                                                     |
|-------------------------------------------------------------------------------------|------------------------------------|------------------------------------------------------|-----------------------------------------------------|---------------------------------------------------|-----------------------------------------------------|
|                                                                                     | 2016 counts                        | 2016 counts                                          | 2016 counts                                         | Percentage change in counts between 2006 and 2016 | Percentage change in age-standardised rates between |
| Adverse effects of medical treatment                                                | 0.1<br>(0.1 to 0.1)                | 1.1<br>(0.9 to 1.2)                                  | < 0.05<br>(< 0.05 to < 0.05)                        | 23.6<br>(17.0 to 31.1)                            | -1.1<br>(-5.8 to 3.8)                               |
| Animal contact                                                                      | 0.9<br>(0.8 to 1.1)                | 1.2<br>(0.9 to 1.4)                                  | < 0.05<br>(< 0.05 to < 0.05)                        | 18.7<br>(10.3 to 27.4)                            | -5.5<br>(-11.3 to 0.1)                              |
| Venomous animal contact                                                             | 0.3<br>(0.2 to 0.3)                | 0.4<br>(0.3 to 0.6)                                  | < 0.05<br>(< 0.05 to < 0.05)                        | 27.2<br>(13.5 to 43.0)                            | 3.5<br>(-6.4 to 13.7)                               |
| Non-venomous animal contact                                                         | 0.7<br>(0.5 to 0.8)                | 0.7<br>(0.6 to 0.9)                                  | < 0.05<br>(< 0.05 to < 0.05)                        | 5.9<br>(-0.4 to 11.1)                             | -17.3<br>(-21.6 to -14.1)                           |
| Foreign body                                                                        | 2.0<br>(1.6 to 2.4)                | 1.0<br>(0.9 to 1.2)                                  | 0.1<br>(< 0.05 to 0.1)                              | 14.1<br>(8.6 to 19.3)                             | -7.8<br>(-11.8 to -4.1)                             |
| Pulmonary aspiration and foreign body in airway                                     | 1.4<br>(1.0 to 1.8)                | 0.5<br>(0.4 to 0.5)                                  | < 0.05<br>(< 0.05 to 0.1)                           | 11.4<br>(5.7 to 16.6)                             | -9.0<br>(-12.9 to -5.1)                             |
| Foreign body in eyes                                                                | 0.1<br>(< 0.05 to 0.1)             | 0.3<br>(0.2 to 0.4)                                  | < 0.05<br>(< 0.05 to < 0.05)                        | 31.0<br>(23.4 to 38.7)                            | -0.1<br>(-3.2 to 2.9)                               |
| Foreign body in other body part                                                     | 0.6<br>(0.5 to 0.8)                | 0.2<br>(0.2 to 0.3)                                  | < 0.05<br>(< 0.05 to < 0.05)                        | 20.2<br>(12.9 to 26.6)                            | -5.6<br>(-10.6 to -1.1)                             |
| Environmental heat and cold exposure                                                | 2.1<br>(1.8 to 2.5)                | 0.6<br>(0.5 to 0.7)                                  | 0.1<br>(< 0.05 to 0.1)                              | 20.3<br>(15.1 to 24.9)                            | -5.2<br>(-8.8 to -2.2)                              |
| Other unintentional injuries                                                        | 6.5<br>(5.2 to 8.0)                | 2.3<br>(1.9 to 2.8)                                  | 0.2<br>(0.1 to 0.2)                                 | 40.1<br>(36.1 to 43.7)                            | 8.7<br>(5.9 to 11.0)                                |
| <b>Self-harm and interpersonal violence</b>                                         | <b>9.0</b><br><b>(8.1 to 10.0)</b> | <b>1.8†</b><br><b>(1.5 to 2.1)</b>                   | <b>0.2</b><br><b>(0.1 to 0.2)</b>                   | <b>26.5</b><br><b>(21.1 to 31.6)</b>              | <b>-1.9</b><br><b>(-4.5 to 0.6)</b>                 |
| Self-harm                                                                           | 0.3<br>(0.2 to 0.3)                | 0.1<br>(0.1 to 0.1)                                  | < 0.05<br>(< 0.05 to < 0.05)                        | 23.0<br>(17.1 to 28.8)                            | -10.7<br>(-14.3 to -7.2)                            |
| Self-harm by firearm                                                                | < 0.05<br>(< 0.05 to < 0.05)       | < 0.05<br>(< 0.05 to < 0.05)                         | < 0.05<br>(< 0.05 to < 0.05)                        | 7.2<br>(2.1 to 12.5)                              | -20.5<br>(-23.8 to -17.4)                           |
| Self-harm by other specified means                                                  | 0.2<br>(0.2 to 0.3)                | 0.1<br>(0.1 to 0.1)                                  | < 0.05<br>(< 0.05 to < 0.05)                        | 23.9<br>(17.7 to 29.8)                            | -10.2<br>(-13.9 to -6.7)                            |
| Interpersonal violence                                                              | 8.8<br>(7.9 to 9.8)                | 1.6†<br>(1.4 to 1.9)                                 | 0.1<br>(0.1 to 0.2)                                 | 26.8<br>(21.2 to 32.1)                            | -1.1<br>(-3.8 to 1.5)                               |
| Assault by firearm                                                                  | 0.1<br>(0.1 to 0.1)                | < 0.05<br>(< 0.05 to < 0.05)                         | < 0.05<br>(< 0.05 to < 0.05)                        | 58.5<br>(51.4 to 65.0)                            | 14.2<br>(10.0 to 18.0)                              |
| Assault by sharp object                                                             | 0.7<br>(0.6 to 0.8)                | 0.3<br>(0.2 to 0.4)                                  | < 0.05<br>(< 0.05 to < 0.05)                        | 33.2<br>(26.5 to 38.9)                            | -2.6<br>(-6.3 to 0.8)                               |
| Sexual violence                                                                     | 6.0<br>(5.2 to 6.9)                | --                                                   | 0.1<br>(< 0.05 to 0.1)                              | 1.7<br>(-4.1 to 7.2)                              | -11.4<br>(-14.9 to -8.1)                            |
| Assault by other means                                                              | 2.0<br>(1.7 to 2.5)                | 1.3<br>(1.1 to 1.6)                                  | 0.1<br>(0.1 to 0.1)                                 | 47.9<br>(43.1 to 52.5)                            | 5.1<br>(2.2 to 7.8)                                 |
| <b>Forces of nature, conflict and terrorism, and executions and police conflict</b> | <b>0.5</b><br><b>(0.2 to 0.8)</b>  | <b>&lt; 0.05†</b><br><b>(&lt; 0.05 to &lt; 0.05)</b> | <b>&lt; 0.05</b><br><b>(&lt; 0.05 to &lt; 0.05)</b> | <b>-11.2</b><br><b>(-15.8 to -6.5)</b>            | <b>-25.8</b><br><b>(-29.6 to -22.1)</b>             |
| Exposure to forces of nature                                                        | 0.4<br>(0.2 to 0.7)                | --                                                   | < 0.05<br>(< 0.05 to < 0.05)                        | -12.6<br>(-17.2 to -8.0)                          | -26.7<br>(-30.3 to -22.9)                           |
| Conflict and terrorism                                                              | --                                 | --                                                   | --                                                  | --                                                | --                                                  |
| Executions and police conflict                                                      | < 0.05<br>(< 0.05 to 0.1)          | < 0.05<br>(< 0.05 to < 0.05)                         | < 0.05<br>(< 0.05 to < 0.05)                        | 23.7<br>(13.3 to 34.5)                            | -8.8<br>(-19.1 to 3.1)                              |
| <b>Impairments</b>                                                                  | --                                 | --                                                   | --                                                  | --                                                | --                                                  |
| Anaemia                                                                             | 163.2<br>(157.0 to 169.3)          | --                                                   | 4.1<br>(2.7 to 5.9)                                 | 0.5<br>(-5.0 to 6.6)                              | -15.3<br>(-19.4 to -11.0)                           |
| Developmental intellectual disability                                               | 6.7<br>(4.8 to 8.8)                | --                                                   | 0.7<br>(0.5 to 0.9)                                 | 4.1<br>(-2.1 to 10.2)                             | -10.0<br>(-15.0 to -5.2)                            |
| Epilepsy                                                                            | 2.2<br>(1.2 to 3.0)                | --                                                   | 0.7<br>(0.4 to 1.2)                                 | 4.6<br>(-47.8 to 109.9)                           | -9.6<br>(-56.4 to 83.5)                             |
| Guillain-Barre syndrome                                                             | < 0.05<br>(< 0.05 to < 0.05)       | --                                                   | < 0.05<br>(< 0.05 to < 0.05)                        | 22.4<br>(14.4 to 30.9)                            | 0.2<br>(-0.2 to 1.0)                                |
| Hearing loss                                                                        | 43.1<br>(40.5 to 45.8)             | --                                                   | 1.8<br>(1.3 to 2.4)                                 | 19.6<br>(14.3 to 25.1)                            | -8.5<br>(-11.4 to -5.8)                             |
| Heart failure                                                                       | 1.5<br>(1.3 to 1.7)                | --                                                   | 0.2<br>(0.1 to 0.3)                                 | 55.1<br>(43.5 to 67.4)                            | 3.0<br>(-3.9 to 10.8)                               |
| Infertility                                                                         | 11.3<br>(8.6 to 14.6)              | --                                                   | 0.1<br>(< 0.05 to 0.1)                              | 45.7<br>(16.9 to 80.5)                            | 11.1<br>(-10.7 to 37.0)                             |
| Pelvic inflammatory disease                                                         | 0.3<br>(0.3 to 0.4)                | --                                                   | < 0.05<br>(< 0.05 to 0.1)                           | 28.1<br>(11.2 to 49.4)                            | -8.4<br>(-20.1 to 7.0)                              |
| Vision loss                                                                         | 36.0<br>(32.1 to 40.4)             | --                                                   | 1.1<br>(0.8 to 1.6)                                 | 19.9<br>(14.6 to 25.5)                            | -8.9<br>(-12.2 to -5.5)                             |

We did not calculate incidence for the nine impairments, certain NTDs, and causes with only birth prevalence. Blank cells mean that no estimate is available.

† Incidence for aggregate causes represents the sum of the incidence of the causes below the aggregate.

‡ Incidence estimates for stroke represent first-ever stroke only.

^ Incidence of HIV/AIDS represents new infections of HIV only and does not include new infections of Tuberculosis in HIV positive cases.

SR Table 14: Prevalence, incidence, and YLDs for 2016, percentage change of YLD counts and percentage change of age-standardised YLD rates between 2006 and 2016 by cause and impairments, for all ages, Mali.

| Cause                                                                                | Prevalence in thousands (95% UI)          | Incidence in thousands (95% UI)               | YLDs in thousands (95% UI)             |                                                   |                                                     |
|--------------------------------------------------------------------------------------|-------------------------------------------|-----------------------------------------------|----------------------------------------|---------------------------------------------------|-----------------------------------------------------|
|                                                                                      | 2016 counts                               | 2016 counts                                   | 2016 counts                            | Percentage change in counts between 2006 and 2016 | Percentage change in age-standardised rates between |
| <b>All causes</b>                                                                    | <b>17,596.1</b><br>(17,550.1 to 17,639.9) | <b>112,463.1†</b><br>(106,045.2 to 119,575.0) | <b>1,696.8</b><br>(1,236.5 to 2,251.0) | <b>27.0</b><br>(23.9 to 30.4)                     | <b>-5.4</b><br>(-7.6 to -3.3)                       |
| <b>Communicable, maternal, neonatal, and nutritional disorders</b>                   | <b>15,428.6</b><br>(15,196.9 to 15,657.7) | <b>69,224.2†</b><br>(63,955.1 to 74,675.0)    | <b>580.4</b><br>(403.3 to 803.3)       | <b>13.2</b><br>(8.3 to 18.0)                      | <b>-20.5</b><br>(-25.1 to -16.6)                    |
| <b>HIV/AIDS and tuberculosis</b>                                                     | <b>4,106.2</b><br>(3,557.3 to 4,593.9)    | <b>16.3†</b><br>(13.8 to 19.4)                | <b>16.4</b><br>(10.8 to 23.8)          | <b>3.5</b><br>(-9.9 to 18.9)                      | <b>-22.9</b><br>(-34.1 to -9.6)                     |
| Tuberculosis                                                                         | 3,702.9<br>(3,217.1 to 4,265.1)           | 7.9†<br>(6.4 to 9.6)                          | 1.9<br>(1.2 to 2.7)                    | 4.4<br>(-12.0 to 22.9)                            | -21.8<br>(-31.7 to -10.7)                           |
| Drug-susceptible tuberculosis                                                        | 6.0<br>(4.9 to 7.5)                       | 7.8<br>(6.3 to 9.4)                           | 1.9<br>(1.2 to 2.7)                    | 4.6<br>(-12.4 to 23.1)                            | -21.6<br>(-31.8 to -10.5)                           |
| Multidrug-resistant tuberculosis without extensive drug resistance                   | 0.1<br>(< 0.05 to 0.2)                    | 0.1<br>(< 0.05 to 0.3)                        | < 0.05<br>(< 0.05 to 0.1)              | -6.4<br>(-69.2 to 171.1)                          | -30.0<br>(-77.0 to 104.3)                           |
| Extensively drug-resistant tuberculosis                                              | < 0.05<br>(< 0.05 to < 0.05)              | < 0.05<br>(< 0.05 to < 0.05)                  | < 0.05<br>(< 0.05 to < 0.05)           | 185.4<br>(-6.3 to 726.6)                          | 113.4<br>(-30.0 to 522.7)                           |
| Latent tuberculosis infection                                                        | 3,696.8<br>(3,210.7 to 4,258.7)           | --                                            | --                                     | --                                                | --                                                  |
| HIV/AIDS                                                                             | 121.2<br>(105.4 to 138.9)                 | 8.4 <sup>a</sup><br>(6.5 to 10.9)             | 14.5<br>(9.5 to 21.6)                  | 3.4<br>(-11.3 to 20.8)                            | -23.1<br>(-35.3 to -7.7)                            |
| Drug-susceptible HIV/AIDS - Tuberculosis                                             | 1.0<br>(0.6 to 1.6)                       | 1.3<br>(0.8 to 2.1)                           | 0.4<br>(0.2 to 0.7)                    | -16.4<br>(-37.7 to 10.6)                          | -34.2<br>(-49.6 to -14.1)                           |
| Multidrug-resistant HIV/AIDS - Tuberculosis without extensive drug resistance        | < 0.05<br>(< 0.05 to 0.1)                 | < 0.05<br>(< 0.05 to 0.1)                     | < 0.05<br>(< 0.05 to < 0.05)           | -24.8<br>(-75.5 to 116.2)                         | -41.1<br>(-80.9 to 69.2)                            |
| Extensively drug-resistant HIV/AIDS - Tuberculosis                                   | < 0.05<br>(< 0.05 to < 0.05)              | < 0.05<br>(< 0.05 to < 0.05)                  | < 0.05<br>(< 0.05 to < 0.05)           | 129.2<br>(-25.4 to 558.8)                         | 79.4<br>(-41.6 to 415.6)                            |
| HIV/AIDS resulting in other diseases                                                 | 120.2<br>(104.2 to 138.0)                 | 8.4<br>(6.5 to 10.9)                          | 14.1<br>(9.2 to 21.0)                  | 4.1<br>(-11.2 to 22.2)                            | -22.7<br>(-35.3 to -6.3)                            |
| <b>Diarrhoea, lower respiratory infections, and other common infectious diseases</b> | <b>1,263.1</b><br>(1,209.1 to 1,329.4)    | <b>54,534.5†</b><br>(49,518.8 to 59,650.3)    | <b>73.5</b><br>(51.6 to 99.2)          | <b>21.9</b><br>(17.8 to 26.2)                     | <b>-8.2</b><br>(-10.9 to -5.5)                      |
| Diarrhoeal diseases                                                                  | 275.1<br>(255.8 to 297.2)                 | 18,223.7<br>(16,857.9 to 19,694.2)            | 30.9<br>(21.3 to 42.7)                 | 12.9<br>(6.9 to 19.5)                             | -11.9<br>(-15.9 to -7.8)                            |
| Intestinal infectious diseases                                                       | 2.1<br>(1.3 to 3.1)                       | 41.1†<br>(26.0 to 62.2)                       | 0.3<br>(0.2 to 0.6)                    | -7.0<br>(-29.4 to 20.5)                           | -33.4<br>(-45.8 to -18.6)                           |
| Typhoid fever                                                                        | 2.0<br>(1.2 to 3.1)                       | 31.3<br>(19.8 to 47.4)                        | 0.3<br>(0.2 to 0.5)                    | -7.0<br>(-30.7 to 24.0)                           | -33.5<br>(-46.7 to -16.8)                           |
| Paratyphoid fever                                                                    | 0.4<br>(0.2 to 0.8)                       | 9.8<br>(5.5 to 16.9)                          | < 0.05<br>(< 0.05 to 0.1)              | 0.5<br>(-23.2 to 30.7)                            | -28.5<br>(-43.0 to -11.9)                           |
| Other intestinal infectious diseases                                                 | --                                        | --                                            | < 0.05<br>(< 0.05 to < 0.05)           | -38.0<br>(-53.0 to -17.3)                         | -51.2<br>(-60.0 to -40.6)                           |
| Lower respiratory infections                                                         | 15.2<br>(13.6 to 16.8)                    | 684.2<br>(609.7 to 763.5)                     | 0.9<br>(0.6 to 1.3)                    | 17.3<br>(0.3 to 37.0)                             | -5.9<br>(-15.5 to 5.6)                              |
| Upper respiratory infections                                                         | 443.8<br>(382.9 to 508.2)                 | 33,135.3<br>(28,444.4 to 38,153.6)            | 11.1<br>(6.5 to 17.4)                  | 40.3<br>(30.8 to 50.3)                            | 1.8<br>(-4.0 to 8.0)                                |
| Otitis media                                                                         | 429.0<br>(382.4 to 477.0)                 | 1,736.6<br>(1,343.6 to 2,229.1)               | 14.3<br>(8.9 to 21.1)                  | 27.9<br>(19.0 to 36.8)                            | -6.5<br>(-12.5 to -0.8)                             |
| Meningitis                                                                           | 125.8<br>(101.6 to 152.2)                 | 40.8<br>(35.1 to 49.5)                        | 10.3<br>(7.2 to 13.6)                  | 24.2<br>(15.7 to 32.9)                            | -9.1<br>(-15.0 to -2.9)                             |
| Pneumococcal meningitis                                                              | 41.9<br>(32.6 to 53.9)                    | 6.6<br>(4.7 to 9.2)                           | 3.6<br>(2.5 to 4.9)                    | 5.5<br>(-8.4 to 21.2)                             | -23.3<br>(-32.6 to -12.5)                           |
| H influenzae type B meningitis                                                       | 9.1<br>(7.1 to 11.9)                      | 2.0<br>(1.3 to 3.1)                           | 1.3<br>(0.9 to 1.7)                    | 35.9<br>(28.4 to 43.6)                            | -0.8<br>(-5.5 to 4.0)                               |
| Meningococcal infection                                                              | 52.4<br>(34.8 to 72.0)                    | 24.5<br>(19.3 to 30.6)                        | 3.6<br>(2.4 to 4.9)                    | 25.2<br>(12.6 to 40.4)                            | -7.3<br>(-16.9 to 3.7)                              |
| Other meningitis                                                                     | 22.4<br>(15.7 to 31.6)                    | 7.7<br>(5.2 to 11.1)                          | 1.9<br>(1.2 to 2.6)                    | 70.0<br>(50.4 to 91.5)                            | 27.2<br>(14.5 to 42.2)                              |
| Encephalitis                                                                         | 38.5<br>(25.3 to 56.8)                    | 19.0<br>(16.2 to 22.0)                        | 4.3<br>(3.0 to 5.7)                    | 32.8<br>(16.9 to 50.2)                            | -2.3<br>(-12.2 to 8.7)                              |
| Diphtheria                                                                           | < 0.05<br>(< 0.05 to < 0.05)              | < 0.05<br>(< 0.05 to 0.1)                     | < 0.05<br>(< 0.05 to < 0.05)           | -22.1<br>(-72.3 to 111.3)                         | -38.7<br>(-74.8 to 42.9)                            |
| Whooping cough                                                                       | 15.0<br>(11.6 to 19.0)                    | 109.5<br>(84.6 to 138.4)                      | 0.7<br>(0.4 to 1.2)                    | 17.4<br>(2.5 to 34.9)                             | -8.6<br>(-20.9 to 5.6)                              |
| Tetanus                                                                              | 0.3<br>(0.2 to 0.3)                       | 0.3<br>(0.1 to 0.8)                           | < 0.05<br>(< 0.05 to < 0.05)           | -1.4<br>(-30.3 to 26.5)                           | -28.5<br>(-46.9 to -10.2)                           |
| Measles                                                                              | 0.9<br>(0.3 to 2.1)                       | 31.4<br>(10.2 to 78.5)                        | 0.1<br>(< 0.05 to 0.2)                 | -26.3<br>(-72.2 to 63.9)                          | -43.4<br>(-78.4 to 25.3)                            |
| Varicella and herpes zoster                                                          | 16.5<br>(15.4 to 17.8)                    | 512.5<br>(474.6 to 552.4)                     | 0.5<br>(0.3 to 0.7)                    | 35.3<br>(16.0 to 57.8)                            | 0.6<br>(-10.8 to 13.1)                              |
| <b>Neglected tropical diseases and malaria</b>                                       | <b>7,684.6</b><br>(7,113.8 to 8,279.4)    | <b>8,577.0†</b><br>(6,945.3 to 10,531.8)      | <b>133.8</b><br>(91.7 to 189.6)        | <b>-16.2</b><br>(-27.3 to -5.8)                   | <b>-44.9</b><br>(-53.9 to -36.8)                    |
| Malaria                                                                              | 5,516.1<br>(4,651.0 to 6,486.1)           | 7,718.8<br>(6,100.1 to 9,679.8)               | 65.7<br>(46.9 to 91.8)                 | 28.3<br>(16.1 to 42.0)                            | -8.1<br>(-15.8 to 0.9)                              |
| Chagas disease                                                                       | --                                        | --                                            | --                                     | --                                                | --                                                  |
| Leishmaniasis                                                                        | 4.2<br>(3.5 to 4.9)                       | 0.2<br>(0.1 to 0.5)                           | 0.2<br>(0.1 to 0.4)                    | 3.0<br>(-15.1 to 29.6)                            | -19.0<br>(-31.4 to 0.7)                             |
| Visceral leishmaniasis                                                               | --                                        | --                                            | --                                     | --                                                | --                                                  |
| Cutaneous and mucocutaneous leishmaniasis                                            | 3.7<br>(2.9 to 4.7)                       | 0.2<br>(0.1 to 0.5)                           | 0.2<br>(0.1 to 0.4)                    | 3.0<br>(-15.1 to 29.6)                            | -19.0<br>(-31.4 to 0.7)                             |
| African trypanosomiasis                                                              | --                                        | --                                            | --                                     | --                                                | --                                                  |
| Schistosomiasis                                                                      | 1,001.2<br>(940.1 to 1,061.5)             | 507.6<br>(472.5 to 548.1)                     | 10.3<br>(5.5 to 18.4)                  | -74.2<br>(-76.2 to -71.4)                         | -81.0<br>(-82.4 to -78.8)                           |
| Cysticercosis                                                                        | 0.8<br>(0.6 to 1.1)                       | --                                            | 0.1<br>(0.1 to 0.2)                    | 7.6<br>(-22.4 to 47.0)                            | -19.1<br>(-43.2 to 13.6)                            |
| Cystic echinococcosis                                                                | 10.6<br>(2.6 to 37.7)                     | 2.2<br>(0.5 to 8.0)                           | 1.0<br>(0.2 to 3.6)                    | -26.7<br>(-87.9 to 329.7)                         | -46.5<br>(-91.0 to 205.1)                           |
| Lymphatic filariasis                                                                 | 649.5<br>(523.4 to 803.2)                 | 264.1<br>(233.3 to 299.1)                     | 33.1<br>(16.4 to 55.0)                 | -23.4<br>(-53.1 to -1.4)                          | -41.2<br>(-63.4 to -25.1)                           |
| Onchocerciasis                                                                       | --                                        | --                                            | --                                     | --                                                | --                                                  |
| Trachoma                                                                             | 14.9<br>(10.4 to 20.6)                    | --                                            | 1.3<br>(0.8 to 1.9)                    | -44.8<br>(-56.0 to -32.3)                         | -54.5<br>(-65.5 to -41.4)                           |
| Dengue                                                                               | 4.9<br>(2.2 to 9.2)                       | 82.7<br>(38.4 to 149.3)                       | 0.8<br>(0.3 to 1.8)                    | 189.5<br>(94.6 to 612.5)                          | 109.0<br>(52.3 to 393.3)                            |
| Yellow fever                                                                         | < 0.05<br>(< 0.05 to 0.1)                 | 1.0<br>(0.3 to 2.8)                           | < 0.05<br>(< 0.05 to < 0.05)           | -37.1<br>(-57.4 to -10.2)                         | -54.1<br>(-67.0 to -37.2)                           |
| Rabies                                                                               | < 0.05<br>(< 0.05 to < 0.05)              | 0.3<br>(0.1 to 0.6)                           | < 0.05<br>(< 0.05 to < 0.05)           | 0.6<br>(-44.6 to 109.8)                           | -25.6<br>(-51.5 to 33.4)                            |
| Intestinal nematode infections                                                       | 1,456.7<br>(1,225.0 to 1,730.2)           | --                                            | 4.1<br>(2.5 to 6.4)                    | -46.1<br>(-54.6 to -36.8)                         | -61.3<br>(-68.2 to -53.7)                           |
| Ascariasis                                                                           | 63.5<br>(47.7 to 82.2)                    | --                                            | < 0.05<br>(< 0.05 to < 0.05)           | -37.0<br>(-59.4 to -4.4)                          | -55.3<br>(-72.5 to -25.6)                           |



| Cause                                                                   | Prevalence in thousands (95% UI)                 | Incidence in thousands (95% UI)                   | YLDs in thousands (95% UI)                  |                                                   |                                                     |
|-------------------------------------------------------------------------|--------------------------------------------------|---------------------------------------------------|---------------------------------------------|---------------------------------------------------|-----------------------------------------------------|
|                                                                         | 2016 counts                                      | 2016 counts                                       | 2016 counts                                 | Percentage change in counts between 2006 and 2016 | Percentage change in age-standardised rates between |
| Trichuriasis                                                            | 160.6<br>(121.7 to 216.6)                        | --                                                | < 0.05<br>(< 0.05 to < 0.05)                | -40.6<br>(-58.2 to -11.0)                         | -58.5<br>(-73.1 to -34.6)                           |
| Hookworm disease                                                        | 1,183.2<br>(957.5 to 1,485.3)                    | --                                                | 4.1<br>(2.5 to 6.4)                         | -46.1<br>(-54.6 to -36.8)                         | -61.3<br>(-68.2 to -53.7)                           |
| Food-borne trematodiasis                                                | --                                               | --                                                | --                                          | --                                                | --                                                  |
| Leprosy                                                                 | 1.1<br>(1.0 to 1.3)                              | 0.1<br>(0.1 to 0.1)                               | 0.1<br>(< 0.05 to 0.1)                      | -21.7<br>(-36.5 to -4.3)                          | -35.4<br>(-45.7 to -22.8)                           |
| Ebola virus disease                                                     | --                                               | --                                                | --                                          | --                                                | --                                                  |
| Zika virus disease                                                      | --                                               | --                                                | --                                          | --                                                | --                                                  |
| Guinea worm disease                                                     | --                                               | --                                                | --                                          | --                                                | --                                                  |
| Other neglected tropical diseases                                       | 417.0<br>(408.2 to 427.1)                        | --                                                | 16.9<br>(11.4 to 24.2)                      | 29.8<br>(22.4 to 37.4)                            | -4.0<br>(-9.0 to 1.2)                               |
| <b>Maternal disorders</b>                                               | <b>56.5</b><br><b>(43.2 to 72.5)</b>             | <b>418.3†</b><br><b>(362.0 to 478.2)</b>          | <b>4.7</b><br><b>(3.0 to 6.6)</b>           | <b>9.6</b><br><b>(-13.7 to 39.2)</b>              | <b>-20.5</b><br><b>(-37.0 to -0.1)</b>              |
| Maternal haemorrhage                                                    | 6.3<br>(4.9 to 8.2)                              | 58.2<br>(38.8 to 84.5)                            | 0.3<br>(0.2 to 0.5)                         | 22.1<br>(-19.7 to 90.4)                           | -9.7<br>(-40.3 to 38.6)                             |
| Maternal sepsis and other pregnancy related infections                  | 7.9<br>(6.0 to 10.5)                             | 46.2<br>(35.5 to 61.0)                            | 0.2<br>(0.1 to 0.4)                         | 21.0<br>(-42.2 to 144.4)                          | -10.7<br>(-55.9 to 77.2)                            |
| Maternal hypertensive disorders                                         | 37.3<br>(23.1 to 52.3)                           | 161.1<br>(126.6 to 192.9)                         | 1.8<br>(0.9 to 2.9)                         | 25.1<br>(-20.8 to 108.9)                          | -7.3<br>(-41.4 to 52.8)                             |
| Maternal obstructed labour and uterine rupture                          | 4.7<br>(3.9 to 5.6)                              | 30.2<br>(21.2 to 41.3)                            | 1.5<br>(1.0 to 2.2)                         | -5.7<br>(-24.6 to 17.6)                           | -31.8<br>(-44.7 to -16.8)                           |
| Maternal abortion, miscarriage, and ectopic pregnancy                   | 1.0<br>(0.6 to 1.5)                              | 122.6<br>(91.8 to 163.6)                          | 0.1<br>(0.1 to 0.2)                         | 21.9<br>(-34.2 to 144.1)                          | -10.4<br>(-49.9 to 75.1)                            |
| Other maternal disorders                                                | --                                               | --                                                | 0.7<br>(0.5 to 1.0)                         | 4.6<br>(-17.4 to 32.8)                            | -24.1<br>(-39.9 to -5.1)                            |
| <b>Neonatal disorders</b>                                               | <b>226.9</b><br><b>(183.7 to 291.1)</b>          | --                                                | <b>22.7</b><br><b>(13.3 to 39.0)</b>        | <b>67.0</b><br><b>(29.7 to 110.0)</b>             | <b>29.9</b><br><b>(-2.0 to 67.2)</b>                |
| Neonatal preterm birth complications                                    | 146.4<br>(103.8 to 214.6)                        | --                                                | 6.8<br>(4.4 to 9.9)                         | 32.0<br>(-0.6 to 73.9)                            | 1.4<br>(-26.0 to 38.2)                              |
| Neonatal encephalopathy due to birth asphyxia and trauma                | 73.7<br>(37.8 to 135.2)                          | --                                                | 4.0<br>(1.2 to 14.5)                        | 64.1<br>(-23.1 to 207.2)                          | 27.5<br>(-45.6 to 152.4)                            |
| Neonatal sepsis and other neonatal infections                           | 23.2<br>(9.5 to 53.1)                            | --                                                | 8.4<br>(2.4 to 22.4)                        | 140.1<br>(49.5 to 324.9)                          | 98.5<br>(18.3 to 300.9)                             |
| Hemolytic disease and other neonatal jaundice                           | 3.7<br>(3.1 to 4.3)                              | --                                                | 1.2<br>(0.9 to 1.6)                         | 33.4<br>(17.3 to 51.0)                            | -0.5<br>(-10.6 to 10.7)                             |
| Other neonatal disorders                                                | --                                               | --                                                | 2.3<br>(1.4 to 3.8)                         | 43.9<br>(16.1 to 78.2)                            | 13.7<br>(-8.4 to 41.9)                              |
| <b>Nutritional deficiencies</b>                                         | <b>8,424.9</b><br><b>(8,054.0 to 8,914.5)</b>    | <b>2,645.8†</b><br><b>(1,846.1 to 4,083.7)</b>    | <b>308.8</b><br><b>(207.5 to 438.6)</b>     | <b>26.6</b><br><b>(22.3 to 30.7)</b>              | <b>-5.8</b><br><b>(-8.6 to -3.1)</b>                |
| Protein-energy malnutrition                                             | 349.7<br>(285.3 to 425.2)                        | 291.1<br>(245.3 to 345.2)                         | 12.1<br>(7.2 to 18.9)                       | -10.3<br>(-34.7 to 27.1)                          | -30.1<br>(-49.4 to -0.7)                            |
| Iodine deficiency                                                       | 444.5<br>(341.2 to 565.4)                        | 19.2<br>(14.8 to 24.4)                            | 12.9<br>(8.5 to 18.8)                       | 6.5<br>(-4.2 to 16.6)                             | -21.5<br>(-28.5 to -15.2)                           |
| Vitamin A deficiency                                                    | 2,465.3<br>(1,726.2 to 3,727.7)                  | 2,335.4<br>(1,546.8 to 3,768.5)                   | 1.4<br>(0.8 to 2.2)                         | 25.7<br>(-2.3 to 57.8)                            | -6.0<br>(-24.1 to 15.1)                             |
| Iron-deficiency anaemia                                                 | 7,227.8<br>(7,086.3 to 7,377.8)                  | --                                                | 282.0<br>(187.7 to 403.5)                   | 30.1<br>(26.1 to 34.2)                            | -3.6<br>(-6.5 to -1.0)                              |
| Other nutritional deficiencies                                          | --                                               | --                                                | 0.4<br>(0.2 to 0.6)                         | -11.5<br>(-37.3 to 26.5)                          | -31.0<br>(-51.3 to -0.8)                            |
| <b>Other communicable, maternal, neonatal, and nutritional diseases</b> | <b>6,397.2</b><br><b>(5,809.2 to 7,056.6)</b>    | <b>3,032.3</b><br><b>(2,541.8 to 3,766.0)</b>     | <b>20.7</b><br><b>(13.8 to 30.2)</b>        | <b>38.2</b><br><b>(32.3 to 44.6)</b>              | <b>-0.0</b><br><b>(-4.2 to 4.3)</b>                 |
| Sexually transmitted diseases excluding HIV                             | 3,134.2<br>(2,943.8 to 3,347.6)                  | 1,925.8<br>(1,754.0 to 2,115.6)                   | 7.4<br>(4.7 to 11.8)                        | 36.7<br>(27.2 to 46.3)                            | 0.2<br>(-6.3 to 6.8)                                |
| Syphilis                                                                | 447.3<br>(385.0 to 521.6)                        | 318.5<br>(265.4 to 383.0)                         | 0.4<br>(0.3 to 0.6)                         | 46.7<br>(28.6 to 68.5)                            | 6.3<br>(-7.3 to 23.2)                               |
| Chlamydial infection                                                    | 232.2<br>(181.6 to 290.3)                        | 196.9<br>(159.3 to 239.2)                         | 1.5<br>(0.9 to 2.4)                         | 35.9<br>(18.8 to 54.6)                            | -0.2<br>(-12.3 to 12.1)                             |
| Gonococcal infection                                                    | 137.6<br>(112.5 to 170.3)                        | 455.9<br>(360.0 to 590.2)                         | 1.3<br>(0.8 to 2.1)                         | 37.5<br>(19.3 to 57.5)                            | 1.6<br>(-11.4 to 15.0)                              |
| Trichomoniasis                                                          | 586.9<br>(492.7 to 687.9)                        | 543.3<br>(450.8 to 649.7)                         | 0.8<br>(0.3 to 1.6)                         | 31.9<br>(23.7 to 40.2)                            | -2.4<br>(-7.7 to 2.7)                               |
| Genital herpes                                                          | 2,127.2<br>(1,843.6 to 2,469.6)                  | 235.8<br>(199.5 to 280.6)                         | 0.6<br>(0.2 to 1.3)                         | 34.8<br>(21.6 to 48.8)                            | -0.2<br>(-8.1 to 7.9)                               |
| Other sexually transmitted diseases                                     | 151.0<br>(117.6 to 182.2)                        | 175.4<br>(146.7 to 213.2)                         | 2.9<br>(1.8 to 4.2)                         | 37.4<br>(22.1 to 53.3)                            | -0.6<br>(-11.4 to 10.6)                             |
| Hepatitis                                                               | 3,670.7<br>(2,875.0 to 4,709.1)                  | 1,106.6<br>(670.0 to 1,794.7)                     | 0.9<br>(0.5 to 1.5)                         | -7.9<br>(-28.8 to 20.4)                           | -26.9<br>(-40.5 to -8.8)                            |
| Acute hepatitis A                                                       | 28.0<br>(2.1 to 81.8)                            | 363.6<br>(27.8 to 1,063.8)                        | 0.1<br>(< 0.05 to 0.3)                      | -9.6<br>(-82.6 to 357.6)                          | -28.0<br>(-80.2 to 186.5)                           |
| Hepatitis B                                                             | 3,047.1<br>(2,245.3 to 4,093.2)                  | 626.1<br>(442.7 to 872.8)                         | 0.7<br>(0.4 to 1.1)                         | -8.5<br>(-26.8 to 13.8)                           | -26.9<br>(-41.1 to -10.5)                           |
| Hepatitis C                                                             | 590.4<br>(520.3 to 670.5)                        | 49.1<br>(43.8 to 55.1)                            | < 0.05<br>(< 0.05 to 0.1)                   | 18.8<br>(-30.2 to 89.5)                           | -11.6<br>(-37.2 to 20.1)                            |
| Acute hepatitis E                                                       | 5.2<br>(4.4 to 6.3)                              | 67.8<br>(57.0 to 81.7)                            | 0.1<br>(0.1 to 0.2)                         | -10.5<br>(-37.5 to 25.9)                          | -30.1<br>(-47.7 to -7.7)                            |
| Other infectious diseases                                               | 311.3<br>(304.6 to 318.4)                        | < 0.05<br>(< 0.05 to < 0.05)                      | 12.3<br>(8.3 to 17.7)                       | 44.6<br>(36.5 to 53.6)                            | 4.5<br>(-0.8 to 10.5)                               |
| <b>Non-communicable diseases</b>                                        | <b>15,585.0</b><br><b>(15,402.8 to 15,745.2)</b> | <b>41,989.3†</b><br><b>(38,187.1 to 45,933.9)</b> | <b>1,035.5</b><br><b>(765.8 to 1,349.8)</b> | <b>36.1</b><br><b>(31.6 to 40.5)</b>              | <b>1.0</b><br><b>(-1.3 to 3.3)</b>                  |
| <b>Neoplasms</b>                                                        | <b>15.1</b><br><b>(13.0 to 17.3)</b>             | <b>9.3</b><br><b>(8.4 to 10.5)</b>                | <b>2.8</b><br><b>(2.0 to 3.7)</b>           | <b>29.7</b><br><b>(21.3 to 38.9)</b>              | <b>-1.0</b><br><b>(-7.1 to 5.2)</b>                 |
| Lip and oral cavity cancer                                              | 0.3<br>(0.2 to 0.3)                              | 0.1<br>(0.1 to 0.1)                               | < 0.05<br>(< 0.05 to < 0.05)                | 34.7<br>(19.6 to 51.2)                            | 3.6<br>(-8.1 to 17.3)                               |
| Nasopharynx cancer                                                      | < 0.05<br>(< 0.05 to 0.1)                        | < 0.05<br>(< 0.05 to < 0.05)                      | < 0.05<br>(< 0.05 to < 0.05)                | 34.8<br>(15.1 to 55.3)                            | -1.5<br>(-14.5 to 12.2)                             |
| Other pharynx cancer                                                    | < 0.05<br>(< 0.05 to 0.1)                        | < 0.05<br>(< 0.05 to < 0.05)                      | < 0.05<br>(< 0.05 to < 0.05)                | 32.5<br>(12.0 to 51.8)                            | 2.2<br>(-13.4 to 17.5)                              |
| Oesophageal cancer                                                      | 0.1<br>(0.1 to 0.2)                              | 0.1<br>(0.1 to 0.1)                               | < 0.05<br>(< 0.05 to < 0.05)                | 35.3<br>(20.4 to 51.0)                            | 3.9<br>(-7.6 to 16.0)                               |
| Stomach cancer                                                          | 1.3<br>(1.2 to 1.4)                              | 0.9<br>(0.8 to 0.9)                               | 0.2<br>(0.1 to 0.3)                         | 16.7<br>(0.1 to 35.9)                             | -9.0<br>(-22.6 to 7.4)                              |
| Colon and rectum cancer                                                 | 1.1<br>(0.9 to 1.4)                              | 0.4<br>(0.3 to 0.5)                               | 0.1<br>(0.1 to 0.2)                         | 34.0<br>(15.9 to 51.0)                            | 3.4<br>(-10.5 to 17.6)                              |
| Liver cancer                                                            | 1.5<br>(1.3 to 1.8)                              | 2.3<br>(1.9 to 2.7)                               | 0.5<br>(0.3 to 0.7)                         | 38.0<br>(18.7 to 59.2)                            | 3.7<br>(-10.8 to 19.4)                              |
| Liver cancer due to hepatitis B                                         | 1.4<br>(1.1 to 1.7)                              | 1.3<br>(1.0 to 1.6)                               | 0.3<br>(0.2 to 0.4)                         | 38.9<br>(15.6 to 64.0)                            | 3.8<br>(-14.1 to 22.7)                              |



| Cause                                              | Prevalence in thousands (95% UI)        | Incidence in thousands (95% UI)          | YLDs in thousands (95% UI)           |                                                   |                                                     |
|----------------------------------------------------|-----------------------------------------|------------------------------------------|--------------------------------------|---------------------------------------------------|-----------------------------------------------------|
|                                                    | 2016 counts                             | 2016 counts                              | 2016 counts                          | Percentage change in counts between 2006 and 2016 | Percentage change in age-standardised rates between |
| Liver cancer due to hepatitis C                    | 0.2<br>(0.2 to 0.3)                     | 0.2<br>(0.2 to 0.3)                      | 0.1<br>( $< 0.05$ to 0.1)            | 35.2<br>(16.7 to 54.3)                            | 4.8<br>(-9.4 to 19.4)                               |
| Liver cancer due to alcohol use                    | 0.2<br>(0.2 to 0.3)                     | 0.2<br>(0.1 to 0.2)                      | $< 0.05$<br>( $< 0.05$ to 0.1)       | 36.0<br>(15.1 to 56.3)                            | 2.4<br>(-12.9 to 17.3)                              |
| Liver cancer due to other causes                   | 0.6<br>(0.5 to 0.8)                     | 0.6<br>(0.5 to 0.7)                      | 0.1<br>(0.1 to 0.2)                  | 37.9<br>(18.1 to 57.8)                            | 3.6<br>(-11.1 to 18.5)                              |
| Gallbladder and biliary tract cancer               | 0.1<br>(0.1 to 0.1)                     | 0.1<br>(0.1 to 0.1)                      | $< 0.05$<br>( $< 0.05$ to $< 0.05$ ) | 18.3<br>(4.0 to 33.5)                             | -5.0<br>(-16.2 to 6.7)                              |
| Pancreatic cancer                                  | 0.2<br>(0.1 to 0.2)                     | 0.2<br>(0.2 to 0.2)                      | $< 0.05$<br>( $< 0.05$ to 0.1)       | 34.3<br>(23.4 to 45.2)                            | 7.1<br>(-1.5 to 15.6)                               |
| Larynx cancer                                      | 0.1<br>(0.1 to 0.1)                     | $< 0.05$<br>( $< 0.05$ to $< 0.05$ )     | $< 0.05$<br>( $< 0.05$ to $< 0.05$ ) | 23.6<br>(7.2 to 42.6)                             | -1.9<br>(-14.1 to 12.8)                             |
| Tracheal, bronchus, and lung cancer                | 0.3<br>(0.3 to 0.4)                     | 0.3<br>(0.2 to 0.3)                      | 0.1<br>( $< 0.05$ to 0.1)            | 32.2<br>(10.4 to 58.7)                            | 4.9<br>(-14.0 to 29.5)                              |
| Malignant skin melanoma                            | 0.1<br>(0.1 to 0.2)                     | $< 0.05$<br>( $< 0.05$ to $< 0.05$ )     | $< 0.05$<br>( $< 0.05$ to $< 0.05$ ) | 33.4<br>(12.3 to 54.7)                            | 2.5<br>(-14.2 to 19.5)                              |
| Non-melanoma skin cancer                           | 0.1<br>(0.1 to 0.1)                     | 0.4<br>(0.3 to 0.7)                      | $< 0.05$<br>( $< 0.05$ to $< 0.05$ ) | 38.6<br>(0.9 to 85.8)                             | 7.3<br>(-25.6 to 52.1)                              |
| Non-melanoma skin cancer (squamous-cell carcinoma) | 0.1<br>( $< 0.05$ to 0.1)               | 0.1<br>(0.1 to 0.1)                      | $< 0.05$<br>( $< 0.05$ to $< 0.05$ ) | 33.7<br>(-8.2 to 86.8)                            | 5.4<br>(-30.6 to 54.1)                              |
| Non-melanoma skin cancer (basal-cell carcinoma)    | $< 0.05$<br>( $< 0.05$ to 0.1)          | 0.3<br>(0.2 to 0.6)                      | $< 0.05$<br>( $< 0.05$ to $< 0.05$ ) | 76.3<br>(51.3 to 107.9)                           | 29.3<br>(11.0 to 47.5)                              |
| Breast cancer                                      | 3.1<br>(2.3 to 4.2)                     | 0.8<br>(0.6 to 1.0)                      | 0.4<br>(0.2 to 0.5)                  | 34.2<br>(4.1 to 69.8)                             | 1.1<br>(-20.9 to 26.1)                              |
| Cervical cancer                                    | 4.0<br>(2.8 to 5.9)                     | 1.1<br>(0.8 to 1.7)                      | 0.4<br>(0.2 to 0.6)                  | 19.5<br>(-7.5 to 54.3)                            | -11.7<br>(-31.0 to 13.2)                            |
| Uterine cancer                                     | 0.3<br>(0.2 to 0.3)                     | 0.1<br>(0.1 to 0.1)                      | $< 0.05$<br>( $< 0.05$ to $< 0.05$ ) | 21.5<br>(-6.5 to 56.6)                            | -6.0<br>(-27.1 to 19.9)                             |
| Ovarian cancer                                     | 0.4<br>(0.3 to 0.4)                     | 0.1<br>(0.1 to 0.1)                      | 0.1<br>( $< 0.05$ to 0.1)            | 37.5<br>(19.4 to 57.5)                            | 2.8<br>(-10.9 to 17.6)                              |
| Prostate cancer                                    | 0.8<br>(0.5 to 1.0)                     | 0.2<br>(0.2 to 0.3)                      | 0.1<br>(0.1 to 0.2)                  | 23.5<br>(-5.2 to 57.7)                            | 0.2<br>(-20.4 to 25.1)                              |
| Testicular cancer                                  | 0.1<br>( $< 0.05$ to 0.1)               | $< 0.05$<br>( $< 0.05$ to $< 0.05$ )     | $< 0.05$<br>( $< 0.05$ to $< 0.05$ ) | 25.8<br>(1.2 to 59.5)                             | -6.6<br>(-25.1 to 17.1)                             |
| Kidney cancer                                      | 0.9<br>(0.7 to 1.1)                     | 0.2<br>(0.2 to 0.3)                      | 0.1<br>( $< 0.05$ to 0.1)            | 48.1<br>(14.3 to 90.5)                            | 15.4<br>(-3.0 to 38.2)                              |
| Bladder cancer                                     | 1.7<br>(1.4 to 2.0)                     | 0.5<br>(0.4 to 0.6)                      | 0.2<br>(0.1 to 0.3)                  | 34.4<br>(12.8 to 57.8)                            | 2.7<br>(-14.1 to 20.9)                              |
| Brain and nervous system cancer                    | 0.4<br>(0.3 to 0.5)                     | 0.2<br>(0.1 to 0.2)                      | 0.1<br>( $< 0.05$ to 0.1)            | 37.2<br>(23.4 to 51.9)                            | 4.4<br>(-6.8 to 18.2)                               |
| Thyroid cancer                                     | 0.2<br>(0.1 to 0.2)                     | $< 0.05$<br>( $< 0.05$ to 0.1)           | $< 0.05$<br>( $< 0.05$ to $< 0.05$ ) | 25.7<br>(6.6 to 51.2)                             | -6.3<br>(-21.8 to 14.2)                             |
| Mesothelioma                                       | $< 0.05$<br>( $< 0.05$ to $< 0.05$ )    | $< 0.05$<br>( $< 0.05$ to $< 0.05$ )     | $< 0.05$<br>( $< 0.05$ to $< 0.05$ ) | 20.6<br>(6.3 to 35.7)                             | -8.8<br>(-18.5 to 1.9)                              |
| Hodgkin lymphoma                                   | 0.2<br>(0.1 to 0.2)                     | 0.1<br>( $< 0.05$ to 0.1)                | $< 0.05$<br>( $< 0.05$ to $< 0.05$ ) | 11.8<br>(-6.2 to 36.4)                            | -15.5<br>(-26.3 to -2.4)                            |
| Non-Hodgkin's lymphoma                             | 0.6<br>(0.5 to 0.7)                     | 0.2<br>(0.2 to 0.3)                      | 0.1<br>( $< 0.05$ to 0.1)            | 33.9<br>(20.2 to 49.8)                            | 0.4<br>(-9.3 to 10.9)                               |
| Multiple myeloma                                   | 0.1<br>(0.1 to 0.1)                     | 0.1<br>( $< 0.05$ to 0.1)                | $< 0.05$<br>( $< 0.05$ to $< 0.05$ ) | 27.4<br>(13.0 to 40.3)                            | 0.5<br>(-10.8 to 11.2)                              |
| Leukaemia                                          | 0.9<br>(0.7 to 1.1)                     | 0.3<br>(0.2 to 0.3)                      | 0.1<br>(0.1 to 0.2)                  | 26.0<br>(13.8 to 40.1)                            | -3.9<br>(-12.0 to 4.8)                              |
| Acute lymphoid leukaemia                           | 0.2<br>(0.1 to 0.2)                     | $< 0.05$<br>( $< 0.05$ to 0.1)           | $< 0.05$<br>( $< 0.05$ to $< 0.05$ ) | 25.2<br>(2.6 to 53.0)                             | -6.2<br>(-19.2 to 9.0)                              |
| Chronic lymphoid leukaemia                         | 0.1<br>(0.1 to 0.2)                     | $< 0.05$<br>( $< 0.05$ to $< 0.05$ )     | $< 0.05$<br>( $< 0.05$ to $< 0.05$ ) | 25.1<br>(5.0 to 50.2)                             | -0.0<br>(-16.9 to 19.9)                             |
| Acute myeloid leukaemia                            | 0.2<br>(0.1 to 0.2)                     | 0.1<br>(0.1 to 0.1)                      | $< 0.05$<br>( $< 0.05$ to $< 0.05$ ) | 36.0<br>(14.0 to 60.3)                            | 3.6<br>(-8.1 to 17.0)                               |
| Chronic myeloid leukaemia                          | 0.1<br>(0.1 to 0.1)                     | $< 0.05$<br>( $< 0.05$ to $< 0.05$ )     | $< 0.05$<br>( $< 0.05$ to $< 0.05$ ) | 23.1<br>(2.0 to 47.7)                             | -7.6<br>(-21.9 to 8.7)                              |
| Other leukaemia                                    | 0.3<br>(0.2 to 0.4)                     | 0.1<br>(0.1 to 0.1)                      | $< 0.05$<br>( $< 0.05$ to 0.1)       | 21.9<br>(6.9 to 38.8)                             | -6.8<br>(-16.2 to 4.5)                              |
| Other neoplasms                                    | 1.7<br>(1.4 to 2.0)                     | 0.5<br>(0.5 to 0.6)                      | 0.2<br>(0.1 to 0.2)                  | 29.3<br>(5.7 to 54.1)                             | -0.8<br>(-12.8 to 12.2)                             |
| <b>Cardiovascular diseases</b>                     | <b>732.8</b><br><b>(689.1 to 775.6)</b> | <b>52.4†</b><br><b>(50.2 to 54.8)</b>    | <b>41.5</b><br><b>(29.7 to 55.3)</b> | <b>34.5</b><br><b>(28.6 to 40.0)</b>              | <b>2.3</b><br><b>(-1.6 to 6.4)</b>                  |
| Rheumatic heart disease                            | 178.7<br>(159.6 to 200.2)               | 8.6<br>(7.7 to 9.6)                      | 8.6<br>(5.4 to 12.5)                 | 40.2<br>(28.2 to 52.4)                            | 3.2<br>(-5.1 to 11.6)                               |
| Ischaemic heart disease                            | 116.0<br>(109.8 to 122.3)               | 17.3<br>(16.2 to 18.6)                   | 4.8<br>(3.2 to 6.7)                  | 33.2<br>(24.7 to 41.9)                            | 2.2<br>(-3.0 to 7.7)                                |
| Cerebrovascular disease                            | 48.4<br>(45.0 to 51.9)                  | 8.3‡<br>(7.6 to 9.1)                     | 7.1<br>(5.1 to 8.9)                  | 25.6<br>(15.3 to 36.0)                            | 0.4<br>(-8.1 to 8.8)                                |
| Ischaemic stroke                                   | 40.9<br>(37.1 to 45.5)                  | 5.3‡<br>(4.7 to 6.0)                     | 5.6<br>(4.1 to 7.2)                  | 27.6<br>(15.3 to 40.4)                            | 1.8<br>(-8.0 to 12.0)                               |
| Hemorrhagic stroke                                 | 10.4<br>(9.4 to 11.6)                   | 3.0‡<br>(2.7 to 3.4)                     | 1.4<br>(1.0 to 1.9)                  | 18.5<br>(5.3 to 32.9)                             | -5.3<br>(-16.1 to 6.5)                              |
| Hypertensive heart disease                         | 11.4<br>(9.3 to 13.8)                   | --                                       | 0.9<br>(0.6 to 1.3)                  | 23.2<br>(9.6 to 38.9)                             | -4.2<br>(-13.4 to 6.2)                              |
| Cardiomyopathy and myocarditis                     | 6.2<br>(5.5 to 7.2)                     | 3.5†<br>(3.1 to 4.0)                     | 0.6<br>(0.4 to 0.9)                  | 35.0<br>(19.9 to 51.2)                            | 1.3<br>(-11.0 to 14.8)                              |
| Myocarditis                                        | 2.1<br>(1.8 to 2.4)                     | 3.5<br>(3.1 to 4.0)                      | 0.1<br>(0.1 to 0.2)                  | 40.3<br>(28.1 to 54.2)                            | 2.7<br>(-9.1 to 16.5)                               |
| Alcoholic cardiomyopathy                           | 0.7<br>(0.6 to 0.9)                     | --                                       | 0.1<br>( $< 0.05$ to 0.1)            | 38.5<br>(4.8 to 82.2)                             | 1.9<br>(-22.2 to 33.9)                              |
| Other cardiomyopathy                               | 4.7<br>(3.8 to 5.8)                     | --                                       | 0.4<br>(0.2 to 0.6)                  | 32.4<br>(13.1 to 54.2)                            | 0.9<br>(-13.4 to 18.5)                              |
| Atrial fibrillation and flutter                    | 26.7<br>(23.3 to 30.6)                  | 2.4<br>(2.0 to 2.8)                      | 2.1<br>(1.4 to 2.9)                  | 25.8<br>(16.6 to 37.1)                            | 1.0<br>(-5.4 to 7.9)                                |
| Peripheral vascular disease                        | 96.0<br>(82.6 to 111.7)                 | 9.6<br>(8.3 to 11.2)                     | 0.5<br>(0.2 to 0.9)                  | 20.8<br>(11.4 to 31.1)                            | 0.2<br>(-6.8 to 8.1)                                |
| Endocarditis                                       | 1.0<br>(0.8 to 1.2)                     | 2.7<br>(2.4 to 3.0)                      | 0.1<br>(0.1 to 0.1)                  | 31.2<br>(15.8 to 46.8)                            | 3.7<br>(-11.2 to 20.4)                              |
| Other cardiovascular and circulatory diseases      | 318.4<br>(262.6 to 385.7)               | --                                       | 16.8<br>(10.9 to 23.9)               | 38.4<br>(26.7 to 51.0)                            | 4.5<br>(-4.3 to 13.3)                               |
| <b>Chronic respiratory diseases</b>                | <b>818.0</b><br><b>(766.2 to 874.0)</b> | <b>177.4†</b><br><b>(162.2 to 194.6)</b> | <b>38.3</b><br><b>(28.3 to 50.3)</b> | <b>37.4</b><br><b>(30.6 to 44.0)</b>              | <b>0.7</b><br><b>(-3.7 to 5.4)</b>                  |
| Chronic obstructive pulmonary disease              | 164.7<br>(157.7 to 172.1)               | 12.0<br>(11.5 to 12.5)                   | 11.1<br>(9.5 to 12.5)                | 28.4<br>(18.4 to 38.9)                            | -1.4<br>(-8.3 to 6.1)                               |
| Pneumoconiosis                                     | 0.1<br>(0.1 to 0.1)                     | $< 0.05$<br>( $< 0.05$ to $< 0.05$ )     | $< 0.05$<br>( $< 0.05$ to $< 0.05$ ) | 35.0<br>(27.7 to 41.8)                            | 1.9<br>(-3.3 to 6.9)                                |
| Silicosis                                          | $< 0.05$<br>( $< 0.05$ to $< 0.05$ )    | $< 0.05$<br>( $< 0.05$ to $< 0.05$ )     | $< 0.05$<br>( $< 0.05$ to $< 0.05$ ) | 40.4<br>(28.6 to 53.5)                            | 2.0<br>(-5.1 to 9.7)                                |

| Cause                                                          | Prevalence in thousands (95% UI)        | Incidence in thousands (95% UI)         | YLDs in thousands (95% UI)        |                                                   |                                                     |
|----------------------------------------------------------------|-----------------------------------------|-----------------------------------------|-----------------------------------|---------------------------------------------------|-----------------------------------------------------|
|                                                                | 2016 counts                             | 2016 counts                             | 2016 counts                       | Percentage change in counts between 2006 and 2016 | Percentage change in age-standardised rates between |
| Asbestosis                                                     | 0.1<br>(0.1 to 0.1)                     | < 0.05<br>(< 0.05 to < 0.05)            | < 0.05<br>(< 0.05 to < 0.05)      | 34.0<br>(23.6 to 45.7)                            | 1.4<br>(-4.7 to 8.0)                                |
| Coal workers pneumoconiosis                                    | --                                      | --                                      | --                                | --                                                | --                                                  |
| Other pneumoconiosis                                           | 0.1<br>(0.1 to 0.1)                     | < 0.05<br>(< 0.05 to < 0.05)            | < 0.05<br>(< 0.05 to < 0.05)      | 35.1<br>(23.1 to 46.1)                            | 2.4<br>(-6.6 to 11.1)                               |
| Asthma                                                         | 653.3<br>(596.3 to 717.0)               | 165.2<br>(150.0 to 182.2)               | 25.6<br>(16.7 to 37.2)            | 39.7<br>(32.2 to 48.1)                            | 1.7<br>(-2.9 to 6.9)                                |
| Interstitial lung disease and pulmonary sarcoidosis            | 1.1<br>(1.0 to 1.3)                     | 0.1<br>(0.1 to 0.1)                     | 0.1<br>(0.1 to 0.2)               | 32.3<br>(28.6 to 36.1)                            | -1.5<br>(-6.3 to 3.0)                               |
| Other chronic respiratory diseases                             | --                                      | --                                      | 1.4<br>(1.1 to 1.8)               | 82.7<br>(39.6 to 139.5)                           | 30.0<br>(8.5 to 57.5)                               |
| <b>Cirrhosis and other chronic liver diseases</b>              | <b>37.5<br/>(35.5 to 39.4)</b>          | <b>3.5<br/>(3.3 to 3.6)</b>             | <b>3.6<br/>(2.5 to 5.0)</b>       | <b>31.1<br/>(16.3 to 48.1)</b>                    | <b>-2.8<br/>(-10.3 to 6.2)</b>                      |
| Cirrhosis and other chronic liver diseases due to hepatitis B  | 11.0<br>(9.1 to 12.9)                   | 1.0<br>(0.9 to 1.2)                     | 0.8<br>(0.5 to 1.2)               | 29.0<br>(7.8 to 54.1)                             | -3.3<br>(-15.2 to 10.2)                             |
| Cirrhosis and other chronic liver diseases due to hepatitis C  | 6.9<br>(5.4 to 8.8)                     | 0.7<br>(0.5 to 0.8)                     | 0.5<br>(0.3 to 0.8)               | 33.9<br>(9.7 to 66.8)                             | 0.0<br>(-15.3 to 20.0)                              |
| Cirrhosis and other chronic liver diseases due to alcohol use  | 5.6<br>(4.8 to 6.5)                     | 0.6<br>(0.5 to 0.7)                     | 0.4<br>(0.3 to 0.6)               | 29.7<br>(5.1 to 63.2)                             | -3.0<br>(-18.2 to 16.4)                             |
| Cirrhosis and other chronic liver diseases due to other causes | 13.9<br>(12.8 to 15.2)                  | 1.2<br>(1.1 to 1.3)                     | 1.9<br>(1.2 to 2.7)               | 31.5<br>(8.0 to 62.5)                             | -3.8<br>(-19.3 to 14.4)                             |
| <b>Digestive diseases</b>                                      | <b>247.1<br/>(224.0 to 275.2)</b>       | <b>233.9†<br/>(222.1 to 247.0)</b>      | <b>8.0<br/>(5.6 to 10.9)</b>      | <b>28.7<br/>(17.3 to 41.0)</b>                    | <b>-3.6<br/>(-9.6 to 2.4)</b>                       |
| Peptic ulcer disease                                           | 36.2<br>(32.8 to 40.0)                  | 20.1<br>(17.9 to 22.7)                  | 0.7<br>(0.5 to 1.1)               | 25.0<br>(10.7 to 39.9)                            | -4.8<br>(-13.3 to 4.4)                              |
| Gastritis and duodenitis                                       | 77.7<br>(67.9 to 88.3)                  | 73.2<br>(64.9 to 82.8)                  | 1.1<br>(0.7 to 1.6)               | 37.0<br>(21.2 to 52.9)                            | 2.6<br>(-5.7 to 12.1)                               |
| Appendicitis                                                   | 2.5<br>(2.3 to 2.7)                     | 66.3<br>(61.1 to 71.9)                  | 0.8<br>(0.5 to 1.1)               | 30.1<br>(-6.9 to 82.7)                            | -4.0<br>(-24.3 to 20.3)                             |
| Paralytic ileus and intestinal obstruction                     | 0.3<br>(0.3 to 0.3)                     | 8.3<br>(7.4 to 9.2)                     | 0.1<br>(0.1 to 0.1)               | 30.3<br>(25.0 to 35.8)                            | -3.0<br>(-11.2 to 5.9)                              |
| Inguinal, femoral, and abdominal hernia                        | 129.3<br>(102.8 to 160.9)               | 22.7<br>(20.0 to 25.8)                  | 4.2<br>(2.8 to 5.9)               | 26.2<br>(10.0 to 45.1)                            | -5.7<br>(-14.7 to 3.9)                              |
| Inflammatory bowel disease                                     | 0.9<br>(0.8 to 1.0)                     | 5.8<br>(5.5 to 6.0)                     | 0.1<br>(0.1 to 0.2)               | 27.8<br>(23.9 to 32.3)                            | -6.2<br>(-9.2 to -3.0)                              |
| Vascular intestinal disorders                                  | 0.1<br>(0.1 to 0.1)                     | 0.6<br>(0.5 to 0.7)                     | < 0.05<br>(< 0.05 to < 0.05)      | 34.9<br>(27.7 to 43.6)                            | 3.0<br>(-0.9 to 7.4)                                |
| Gallbladder and biliary diseases                               | 7.4<br>(6.5 to 8.4)                     | 34.3<br>(29.4 to 39.4)                  | 0.2<br>(0.1 to 0.3)               | 35.7<br>(22.3 to 50.8)                            | 0.4<br>(-11.8 to 14.3)                              |
| Pancreatitis                                                   | 0.3<br>(0.3 to 0.3)                     | 2.8<br>(2.5 to 3.1)                     | < 0.05<br>(< 0.05 to 0.1)         | 39.4<br>(34.3 to 45.4)                            | 3.0<br>(-0.6 to 7.1)                                |
| Other digestive diseases                                       | --                                      | --                                      | 0.8<br>(0.5 to 1.1)               | 31.0<br>(17.1 to 48.4)                            | -0.1<br>(-6.5 to 7.3)                               |
| <b>Neurological disorders</b>                                  | <b>5,474.6<br/>(5,209.9 to 5,757.2)</b> | <b>2,861.7<br/>(2,421.4 to 3,338.7)</b> | <b>113.3<br/>(71.4 to 163.3)</b>  | <b>37.5<br/>(4.0 to 83.3)</b>                     | <b>0.7<br/>(-18.4 to 24.8)</b>                      |
| Alzheimer's disease and other dementias                        | 15.7<br>(13.2 to 18.7)                  | 2.7<br>(2.3 to 3.2)                     | 2.2<br>(1.5 to 2.9)               | 17.1<br>(10.3 to 24.1)                            | -1.0<br>(-5.7 to 4.4)                               |
| Parkinson's disease                                            | 1.6<br>(1.2 to 2.0)                     | 0.2<br>(0.2 to 0.3)                     | 0.2<br>(0.1 to 0.3)               | 29.3<br>(10.3 to 52.0)                            | 5.8<br>(-8.4 to 22.0)                               |
| Epilepsy                                                       | 41.3<br>(5.3 to 98.3)                   | 6.6<br>(0.9 to 15.9)                    | 15.7<br>(1.7 to 40.1)             | 37.9<br>(-85.4 to 821.8)                          | 2.4<br>(-89.0 to 588.4)                             |
| Multiple sclerosis                                             | 0.7<br>(0.6 to 0.8)                     | < 0.05<br>(< 0.05 to < 0.05)            | 0.2<br>(0.1 to 0.2)               | 47.0<br>(42.3 to 51.8)                            | 7.9<br>(4.5 to 11.8)                                |
| Motor neuron disease                                           | 0.2<br>(0.1 to 0.2)                     | < 0.05<br>(< 0.05 to 0.1)               | < 0.05<br>(< 0.05 to 0.1)         | 38.9<br>(33.3 to 44.9)                            | 3.4<br>(-0.0 to 6.5)                                |
| Migraine                                                       | 1,915.5<br>(1,799.5 to 2,026.2)         | 251.2<br>(236.0 to 267.4)               | 78.7<br>(50.6 to 111.3)           | 36.8<br>(31.1 to 43.3)                            | 0.0<br>(-3.4 to 3.8)                                |
| Tension-type headache                                          | 4,270.8<br>(3,825.6 to 4,776.3)         | 2,600.8<br>(2,154.7 to 3,094.7)         | 12.4<br>(7.7 to 18.9)             | 37.1<br>(30.2 to 44.4)                            | 0.5<br>(-3.9 to 5.1)                                |
| Other neurological disorders                                   | < 0.05<br>(< 0.05 to 0.1)               | 0.1<br>(0.1 to 0.1)                     | 3.9<br>(0.5 to 9.9)               | 70.9<br>(-78.1 to 854.1)                          | 21.2<br>(-79.3 to 466.0)                            |
| <b>Mental and substance use disorders</b>                      | <b>2,269.7<br/>(2,152.9 to 2,397.1)</b> | <b>729.6†<br/>(679.0 to 790.4)</b>      | <b>257.9<br/>(187.5 to 336.8)</b> | <b>37.6<br/>(34.5 to 40.9)</b>                    | <b>1.4<br/>(-0.8 to 3.7)</b>                        |
| Schizophrenia                                                  | 22.0<br>(19.0 to 25.1)                  | 2.0<br>(1.8 to 2.3)                     | 14.1<br>(10.2 to 17.8)            | 38.8<br>(24.4 to 54.1)                            | 1.8<br>(-7.3 to 11.4)                               |
| Alcohol use disorders                                          | 158.0<br>(132.1 to 185.1)               | 88.3<br>(73.4 to 103.3)                 | 15.8<br>(10.7 to 22.3)            | 38.7<br>(28.2 to 50.9)                            | 3.4<br>(-3.6 to 11.6)                               |
| Drug use disorders                                             | 61.4<br>(54.4 to 68.1)                  | 10.9<br>(9.6 to 12.3)                   | 16.0<br>(10.9 to 21.9)            | 43.0<br>(27.4 to 59.4)                            | 7.0<br>(-3.5 to 17.8)                               |
| Opioid use disorders                                           | 33.8<br>(27.6 to 42.0)                  | 4.5<br>(3.8 to 5.5)                     | 14.1<br>(9.3 to 19.6)             | 44.0<br>(26.6 to 62.8)                            | 7.7<br>(-4.0 to 19.8)                               |
| Cocaine use disorders                                          | 1.9<br>(1.6 to 2.3)                     | 0.3<br>(0.2 to 0.4)                     | 0.3<br>(0.2 to 0.4)               | 36.6<br>(29.3 to 44.6)                            | 2.9<br>(-2.0 to 8.3)                                |
| Amphetamine use disorders                                      | 1.0<br>(0.7 to 1.4)                     | 0.2<br>(0.1 to 0.3)                     | 0.1<br>(0.1 to 0.2)               | 34.2<br>(20.5 to 46.7)                            | 2.6<br>(-7.5 to 11.5)                               |
| Cannabis use disorders                                         | 22.8<br>(19.0 to 27.4)                  | 4.9<br>(4.0 to 6.0)                     | 0.7<br>(0.4 to 1.0)               | 34.5<br>(5.4 to 72.1)                             | 0.9<br>(-19.1 to 24.3)                              |
| Other drug use disorders                                       | 4.6<br>(4.0 to 5.3)                     | 1.0<br>(0.9 to 1.1)                     | 0.8<br>(0.5 to 1.1)               | 37.1<br>(15.3 to 63.4)                            | 2.2<br>(-12.8 to 20.7)                              |
| Depressive disorders                                           | 397.3<br>(369.1 to 429.4)               | 412.5<br>(366.4 to 463.8)               | 65.0<br>(45.3 to 89.1)            | 38.7<br>(32.2 to 45.4)                            | 2.7<br>(-1.8 to 7.5)                                |
| Major depressive disorder                                      | 243.3<br>(215.0 to 275.7)               | 383.1<br>(338.0 to 436.1)               | 49.7<br>(33.5 to 67.8)            | 39.6<br>(31.6 to 48.6)                            | 3.5<br>(-2.3 to 9.7)                                |
| Dysthymia                                                      | 158.8<br>(137.0 to 184.4)               | 29.4<br>(25.6 to 33.9)                  | 15.3<br>(10.1 to 22.4)            | 35.6<br>(29.8 to 41.8)                            | 0.5<br>(-2.8 to 4.1)                                |
| Bipolar disorder                                               | 87.0<br>(73.3 to 102.8)                 | 10.4<br>(8.7 to 12.4)                   | 17.9<br>(11.0 to 26.5)            | 36.5<br>(26.2 to 46.9)                            | 0.7<br>(-5.4 to 7.1)                                |
| Anxiety disorders                                              | 462.0<br>(416.1 to 513.7)               | 90.3<br>(81.5 to 100.0)                 | 44.9<br>(31.1 to 61.8)            | 37.4<br>(27.7 to 48.8)                            | 0.3<br>(-5.8 to 7.2)                                |
| Eating disorders                                               | 13.7<br>(11.2 to 16.4)                  | 11.4<br>(8.3 to 15.4)                   | 2.8<br>(1.8 to 4.1)               | 48.3<br>(26.3 to 73.6)                            | 9.7<br>(-6.9 to 28.3)                               |
| Anorexia nervosa                                               | 3.9<br>(2.7 to 5.2)                     | 1.9<br>(1.3 to 2.5)                     | 0.8<br>(0.5 to 1.3)               | 46.0<br>(7.1 to 95.7)                             | 7.5<br>(-20.0 to 43.1)                              |
| Bulimia nervosa                                                | 9.3<br>(7.0 to 12.7)                    | 9.6<br>(6.4 to 13.5)                    | 2.0<br>(1.2 to 3.1)               | 49.4<br>(23.3 to 83.4)                            | 10.5<br>(-8.6 to 34.5)                              |
| Autistic spectrum disorders                                    | 149.3<br>(132.7 to 168.5)               | 2.1<br>(1.5 to 2.9)                     | 21.1<br>(14.3 to 29.3)            | 37.8<br>(30.1 to 46.2)                            | 1.0<br>(-3.9 to 5.9)                                |
| Autism                                                         | 39.5<br>(33.9 to 46.5)                  | 0.3<br>(0.2 to 0.5)                     | 10.1<br>(6.4 to 14.6)             | 38.1<br>(23.7 to 53.5)                            | 1.1<br>(-7.9 to 10.4)                               |
| Asperger syndrome and other autistic spectrum disorders        | 110.0<br>(90.4 to 133.7)                | 1.8<br>(1.2 to 2.6)                     | 11.0<br>(7.1 to 16.1)             | 37.4<br>(29.5 to 45.7)                            | 0.9<br>(-4.0 to 6.2)                                |



| Cause                                                      | Prevalence in thousands (95% UI)                 | Incidence in thousands (95% UI)                   | YLDs in thousands (95% UI)              |                                                   |                                                     |
|------------------------------------------------------------|--------------------------------------------------|---------------------------------------------------|-----------------------------------------|---------------------------------------------------|-----------------------------------------------------|
|                                                            | 2016 counts                                      | 2016 counts                                       | 2016 counts                             | Percentage change in counts between 2006 and 2016 | Percentage change in age-standardised rates between |
| Attention-deficit/hyperactivity disorder                   | 251.2<br>(224.5 to 281.2)                        | 17.7<br>(15.4 to 20.6)                            | 3.0<br>(1.8 to 4.7)                     | 39.2<br>(29.5 to 49.9)                            | 0.6<br>(-5.9 to 7.6)                                |
| Conduct disorder                                           | 193.2<br>(158.2 to 231.0)                        | 71.9<br>(57.2 to 87.0)                            | 23.2<br>(14.1 to 35.7)                  | 41.3<br>(32.6 to 50.5)                            | 0.5<br>(-5.5 to 7.2)                                |
| Idiopathic developmental intellectual disability           | 430.3<br>(266.7 to 597.5)                        | --                                                | 17.6<br>(8.5 to 30.4)                   | 25.2<br>(17.0 to 32.7)                            | -8.7<br>(-14.5 to -3.3)                             |
| Other mental and substance use disorders                   | 222.0<br>(193.9 to 257.6)                        | 12.0<br>(10.5 to 13.9)                            | 16.6<br>(11.4 to 23.9)                  | 35.9<br>(28.2 to 43.5)                            | 0.8<br>(-4.0 to 5.5)                                |
| <b>Diabetes, urogenital, blood, and endocrine diseases</b> | <b>7,038.3</b><br><b>(6,899.7 to 7,177.0)</b>    | <b>1,750.1†</b><br><b>(1,627.9 to 1,874.4)</b>    | <b>104.7</b><br><b>(73.8 to 142.7)</b>  | <b>32.8</b><br><b>(29.6 to 35.9)</b>              | <b>-0.1</b><br><b>(-2.4 to 2.2)</b>                 |
| Diabetes mellitus                                          | 305.5<br>(273.6 to 341.5)                        | 20.7<br>(18.7 to 22.8)                            | 21.1<br>(14.3 to 29.7)                  | 40.4<br>(32.4 to 47.8)                            | 6.6<br>(0.2 to 12.4)                                |
| Acute glomerulonephritis                                   | 0.1<br>(0.1 to 0.2)                              | 2.1<br>(1.8 to 2.5)                               | < 0.05<br>(< 0.05 to < 0.05)            | 36.6<br>(30.7 to 43.7)                            | 0.4<br>(-3.4 to 4.9)                                |
| Chronic kidney disease                                     | 719.4<br>(650.0 to 794.9)                        | 55.8<br>(49.5 to 62.3)                            | 20.0<br>(14.5 to 26.1)                  | 31.8<br>(24.4 to 39.2)                            | 0.1<br>(-4.9 to 5.0)                                |
| Chronic kidney disease due to diabetes mellitus            | 218.5<br>(185.1 to 255.5)                        | 15.5<br>(12.8 to 18.8)                            | 5.9<br>(4.2 to 7.9)                     | 33.0<br>(23.0 to 43.7)                            | 1.4<br>(-5.6 to 8.9)                                |
| Chronic kidney disease due to hypertension                 | 156.4<br>(134.2 to 178.3)                        | 15.0<br>(12.6 to 17.6)                            | 3.3<br>(2.3 to 4.5)                     | 25.4<br>(13.5 to 37.9)                            | -0.7<br>(-10.2 to 8.6)                              |
| Chronic kidney disease due to glomerulonephritis           | 145.1<br>(125.4 to 164.5)                        | 8.6<br>(6.9 to 10.5)                              | 5.2<br>(3.6 to 7.1)                     | 33.9<br>(21.7 to 47.3)                            | -0.3<br>(-7.9 to 7.6)                               |
| Chronic kidney disease due to other causes                 | 199.3<br>(166.8 to 233.2)                        | 16.7<br>(14.0 to 19.6)                            | 5.6<br>(3.9 to 7.6)                     | 32.5<br>(20.7 to 45.2)                            | -0.3<br>(-7.5 to 7.3)                               |
| Urinary diseases and male infertility                      | 312.2<br>(268.0 to 359.4)                        | 1,036.3†<br>(926.4 to 1,156.2)                    | 5.9<br>(3.8 to 8.6)                     | 29.9<br>(21.1 to 39.7)                            | -0.2<br>(-6.5 to 6.6)                               |
| Interstitial nephritis and urinary tract infections        | 18.1<br>(15.9 to 20.3)                           | 942.2<br>(831.3 to 1,061.4)                       | 0.6<br>(0.4 to 0.9)                     | 33.5<br>(13.8 to 56.8)                            | -0.4<br>(-12.3 to 14.8)                             |
| Urolithiasis                                               | 3.0<br>(2.6 to 3.4)                              | 78.5<br>(69.0 to 89.6)                            | 0.2<br>(0.1 to 0.3)                     | 37.9<br>(29.2 to 46.9)                            | 2.1<br>(-5.0 to 10.3)                               |
| Benign prostatic hyperplasia                               | 117.8<br>(99.2 to 137.5)                         | 15.6<br>(13.1 to 18.4)                            | 3.9<br>(2.4 to 5.7)                     | 25.5<br>(15.9 to 36.6)                            | -1.1<br>(-7.7 to 6.4)                               |
| Male infertility                                           | 156.3<br>(121.5 to 202.2)                        | --                                                | 0.9<br>(0.4 to 1.8)                     | 59.4<br>(27.7 to 100.5)                           | 17.9<br>(-6.5 to 49.8)                              |
| Other urinary diseases                                     | --                                               | --                                                | 0.3<br>(0.2 to 0.5)                     | 9.1<br>(-4.3 to 24.7)                             | -16.6<br>(-24.5 to -7.8)                            |
| Gynecological diseases                                     | 1,687.2<br>(1,571.9 to 1,779.9)                  | 624.0†<br>(569.4 to 679.5)                        | 21.7<br>(14.8 to 31.1)                  | 29.7<br>(24.1 to 35.2)                            | -5.5<br>(-8.9 to -2.0)                              |
| Uterine fibroids                                           | 112.3<br>(98.9 to 126.7)                         | 14.3<br>(12.3 to 16.5)                            | 3.4<br>(2.2 to 5.1)                     | 31.3<br>(23.7 to 38.8)                            | -7.2<br>(-12.1 to -2.2)                             |
| Polycystic ovarian syndrome                                | 14.7<br>(10.8 to 19.1)                           | 35.9<br>(25.8 to 48.2)                            | 0.1<br>(0.1 to 0.2)                     | 38.5<br>(20.1 to 58.7)                            | -0.8<br>(-12.9 to 12.9)                             |
| Female infertility                                         | 24.5<br>(10.4 to 67.0)                           | --                                                | 0.1<br>(< 0.05 to 0.4)                  | 97.5<br>(-10.7 to 454.5)                          | 45.5<br>(-31.2 to 341.4)                            |
| Endometriosis                                              | 3.2<br>(2.6 to 3.8)                              | 13.2<br>(10.8 to 16.7)                            | 0.3<br>(0.2 to 0.4)                     | 34.7<br>(-1.8 to 87.7)                            | -1.1<br>(-25.2 to 33.5)                             |
| Genital prolapse                                           | 845.7<br>(753.1 to 943.5)                        | 83.8<br>(70.7 to 99.6)                            | 2.6<br>(1.3 to 4.8)                     | 23.3<br>(15.6 to 31.2)                            | -5.5<br>(-11.5 to 0.6)                              |
| Premenstrual syndrome                                      | 675.5<br>(591.8 to 751.4)                        | 260.4<br>(228.0 to 291.5)                         | 5.6<br>(3.5 to 8.8)                     | 26.2<br>(9.9 to 42.1)                             | -8.2<br>(-18.2 to 1.7)                              |
| Other gynecological diseases                               | 267.9<br>(234.4 to 304.6)                        | 216.3<br>(176.6 to 260.8)                         | 9.5<br>(6.3 to 13.4)                    | 32.3<br>(24.6 to 40.7)                            | -3.8<br>(-9.1 to 2.0)                               |
| Hemoglobinopathies and hemolytic anaemias                  | 5,124.0<br>(4,972.4 to 5,266.3)                  | --                                                | 23.7<br>(15.9 to 33.7)                  | 31.9<br>(25.7 to 38.0)                            | -4.0<br>(-7.8 to -0.2)                              |
| Thalassemias                                               | < 0.05<br>(< 0.05 to < 0.05)                     | --                                                | < 0.05<br>(< 0.05 to < 0.05)            | 28.3<br>(15.4 to 40.5)                            | -1.3<br>(-11.1 to 8.1)                              |
| Thalassaemias trait                                        | 160.3<br>(138.1 to 184.6)                        | --                                                | 2.5<br>(1.7 to 3.7)                     | 28.3<br>(15.5 to 41.2)                            | -2.1<br>(-10.1 to 6.4)                              |
| Sickle cell disorders                                      | 16.3<br>(14.8 to 18.4)                           | --                                                | 1.3<br>(0.9 to 1.9)                     | 45.9<br>(28.4 to 65.6)                            | 8.8<br>(-3.5 to 23.2)                               |
| Sickle cell trait                                          | 2,027.2<br>(1,911.5 to 2,183.2)                  | --                                                | 8.7<br>(5.8 to 12.7)                    | 35.9<br>(26.4 to 45.1)                            | -3.6<br>(-9.5 to 2.2)                               |
| G6PD deficiency                                            | 769.4<br>(697.3 to 856.9)                        | --                                                | 0.1<br>(0.1 to 0.1)                     | 31.9<br>(20.4 to 43.6)                            | -1.1<br>(-9.1 to 6.9)                               |
| G6PD trait                                                 | 2,380.8<br>(2,290.1 to 2,482.5)                  | --                                                | < 0.05<br>(< 0.05 to < 0.05)            | 40.2<br>(30.6 to 50.4)                            | 3.4<br>(-3.0 to 9.9)                                |
| Other hemoglobinopathies and hemolytic anaemias            | 342.7<br>(334.5 to 350.6)                        | --                                                | 11.0<br>(7.5 to 15.7)                   | 28.3<br>(19.9 to 36.9)                            | -5.6<br>(-10.3 to -0.8)                             |
| Endocrine, metabolic, blood, and immune disorders          | 336.8<br>(329.7 to 344.0)                        | 11.1<br>(9.9 to 12.4)                             | 12.2<br>(8.3 to 17.2)                   | 30.7<br>(23.5 to 37.8)                            | -2.4<br>(-6.7 to 1.9)                               |
| <b>Musculoskeletal disorders</b>                           | <b>1,529.5</b><br><b>(1,441.6 to 1,609.8)</b>    | <b>738.8</b><br><b>(664.8 to 816.6)</b>           | <b>165.8</b><br><b>(118.2 to 216.7)</b> | <b>41.7</b><br><b>(36.6 to 47.5)</b>              | <b>4.7</b><br><b>(1.4 to 8.4)</b>                   |
| Rheumatoid arthritis                                       | 15.2<br>(13.4 to 17.2)                           | 1.1<br>(0.9 to 1.2)                               | 3.6<br>(2.4 to 4.9)                     | 40.6<br>(24.7 to 57.7)                            | 5.5<br>(-4.8 to 16.2)                               |
| Osteoarthritis                                             | 266.3<br>(249.1 to 284.1)                        | 15.8<br>(14.6 to 17.0)                            | 16.4<br>(11.5 to 22.1)                  | 40.2<br>(34.8 to 46.0)                            | 7.3<br>(3.8 to 11.3)                                |
| Low back and neck pain                                     | 1,052.2<br>(975.3 to 1,138.1)                    | 474.1<br>(422.6 to 533.1)                         | 120.0<br>(85.1 to 158.4)                | 42.8<br>(35.9 to 50.6)                            | 4.9<br>(0.8 to 9.9)                                 |
| Low back pain                                              | 784.7<br>(687.4 to 897.2)                        | 396.1<br>(347.1 to 452.8)                         | 88.3<br>(61.9 to 117.5)                 | 45.2<br>(36.1 to 55.7)                            | 6.8<br>(0.9 to 13.4)                                |
| Neck pain                                                  | 317.7<br>(275.1 to 365.4)                        | 78.0<br>(67.1 to 91.0)                            | 31.7<br>(21.3 to 44.9)                  | 36.4<br>(32.4 to 40.8)                            | 0.3<br>(-1.9 to 2.7)                                |
| Gout                                                       | 31.9<br>(28.4 to 36.2)                           | 6.6<br>(5.8 to 7.5)                               | 1.0<br>(0.7 to 1.4)                     | 33.8<br>(15.2 to 54.6)                            | 0.9<br>(-11.4 to 15.0)                              |
| Other musculoskeletal disorders                            | 287.4<br>(225.2 to 352.0)                        | 241.2<br>(189.2 to 297.1)                         | 24.8<br>(15.9 to 36.3)                  | 38.2<br>(25.6 to 53.3)                            | 1.0<br>(-8.0 to 11.3)                               |
| <b>Other non-communicable diseases</b>                     | <b>12,154.4</b><br><b>(11,778.6 to 12,507.5)</b> | <b>35,432.6†</b><br><b>(31,693.8 to 39,271.4)</b> | <b>299.6</b><br><b>(205.3 to 422.1)</b> | <b>32.9</b><br><b>(30.6 to 34.9)</b>              | <b>-1.2</b><br><b>(-2.6 to -0.0)</b>                |
| Congenital anomalies                                       | 208.4<br>(181.1 to 244.4)                        | --                                                | 30.5<br>(21.6 to 41.5)                  | 30.7<br>(21.9 to 40.6)                            | -3.7<br>(-9.5 to 2.8)                               |
| Neural tube defects                                        | 26.8<br>(23.7 to 30.3)                           | --                                                | 8.0<br>(5.6 to 10.8)                    | 33.7<br>(17.7 to 51.6)                            | -1.4<br>(-11.6 to 10.1)                             |
| Congenital heart anomalies                                 | 49.7<br>(40.8 to 59.7)                           | --                                                | 2.5<br>(1.2 to 4.0)                     | 31.0<br>(15.0 to 50.8)                            | -0.6<br>(-13.0 to 13.5)                             |
| Orofacial clefts                                           | 4.9<br>(4.2 to 5.6)                              | --                                                | 0.1<br>(0.1 to 0.1)                     | 33.9<br>(19.2 to 50.2)                            | -1.0<br>(-11.7 to 11.0)                             |
| Down's syndrome                                            | 3.0<br>(2.6 to 3.6)                              | --                                                | 0.3<br>(0.2 to 0.4)                     | 40.5<br>(31.2 to 52.3)                            | 3.3<br>(-3.5 to 11.8)                               |
| Turner syndrome                                            | 10.2<br>(8.7 to 12.1)                            | --                                                | 0.2<br>(0.1 to 0.3)                     | 29.7<br>(-9.5 to 84.2)                            | -3.5<br>(-30.4 to 32.7)                             |
| Klinefelter syndrome                                       | 10.6<br>(8.9 to 12.5)                            | --                                                | < 0.05<br>(< 0.05 to 0.1)               | 35.0<br>(1.0 to 75.8)                             | 0.8<br>(-23.6 to 30.8)                              |

| Cause                                         | Prevalence in thousands (95% UI)              | Incidence in thousands (95% UI)                | YLDs in thousands (95% UI)            |                                                   |                                                     |
|-----------------------------------------------|-----------------------------------------------|------------------------------------------------|---------------------------------------|---------------------------------------------------|-----------------------------------------------------|
|                                               | 2016 counts                                   | 2016 counts                                    | 2016 counts                           | Percentage change in counts between 2006 and 2016 | Percentage change in age-standardised rates between |
| Other chromosomal abnormalities               | 3.7<br>(3.1 to 4.4)                           | --                                             | 0.7<br>(0.5 to 1.1)                   | 31.9<br>(-7.4 to 85.6)                            | 0.5<br>(-28.2 to 39.3)                              |
| Congenital musculoskeletal and limb anomalies | 17.8<br>(15.5 to 20.3)                        | --                                             | 2.6<br>(1.7 to 3.7)                   | 37.3<br>(19.0 to 58.8)                            | 0.5<br>(-10.8 to 13.5)                              |
| Urogenital congenital anomalies               | 14.2<br>(12.5 to 16.2)                        | --                                             | 0.3<br>(0.2 to 0.5)                   | 33.5<br>(20.9 to 46.9)                            | -1.5<br>(-9.7 to 7.1)                               |
| Digestive congenital anomalies                | 17.8<br>(15.8 to 20.1)                        | --                                             | 0.8<br>(0.5 to 1.2)                   | 39.2<br>(13.9 to 69.7)                            | 2.4<br>(-13.6 to 22.0)                              |
| Other congenital anomalies                    | 90.4<br>(60.6 to 134.5)                       | --                                             | 15.0<br>(9.7 to 22.6)                 | 27.3<br>(16.2 to 41.2)                            | -6.4<br>(-14.2 to 3.1)                              |
| Skin and subcutaneous diseases                | 5,907.7<br>(5,672.3 to 6,189.9)               | 14,137.1<br>(12,926.5 to 15,496.8)             | 134.9<br>(89.1 to 199.0)              | 38.8<br>(35.7 to 41.9)                            | 1.8<br>(-0.1 to 3.6)                                |
| Dermatitis                                    | 776.5<br>(696.8 to 862.0)                     | 732.9<br>(643.7 to 846.9)                      | 30.8<br>(17.8 to 50.9)                | 37.4<br>(31.7 to 43.5)                            | 0.5<br>(-3.0 to 4.3)                                |
| Psoriasis                                     | 79.8<br>(75.6 to 84.1)                        | 13.0<br>(12.3 to 13.7)                         | 7.0<br>(4.9 to 9.4)                   | 46.2<br>(27.9 to 64.8)                            | 7.4<br>(-2.4 to 17.3)                               |
| Cellulitis                                    | 6.2<br>(5.7 to 6.8)                           | 107.3<br>(98.6 to 116.7)                       | 0.4<br>(0.2 to 0.5)                   | 36.6<br>(10.6 to 68.2)                            | 0.9<br>(-17.2 to 23.1)                              |
| Pyoderma                                      | 101.0<br>(95.7 to 106.5)                      | 1,978.4<br>(1,881.9 to 2,075.3)                | 0.6<br>(0.2 to 1.2)                   | 38.2<br>(29.7 to 47.6)                            | 1.6<br>(-3.5 to 7.0)                                |
| Scabies                                       | 306.8<br>(260.5 to 358.9)                     | 948.6<br>(803.5 to 1,121.3)                    | 7.9<br>(4.4 to 12.7)                  | 32.8<br>(26.7 to 39.4)                            | -2.4<br>(-6.1 to 1.7)                               |
| Fungal skin diseases                          | 2,577.5<br>(2,146.0 to 3,055.4)               | 7,174.8<br>(6,035.2 to 8,499.8)                | 14.6<br>(5.8 to 31.3)                 | 36.7<br>(34.9 to 38.4)                            | 0.4<br>(-0.5 to 1.2)                                |
| Viral skin diseases                           | 540.2<br>(511.2 to 569.3)                     | 738.4<br>(696.9 to 787.2)                      | 16.6<br>(10.3 to 24.6)                | 38.0<br>(32.9 to 43.1)                            | 0.2<br>(-3.0 to 3.4)                                |
| Acne vulgaris                                 | 1,535.3<br>(1,318.7 to 1,795.8)               | 1,127.5<br>(875.0 to 1,523.6)                  | 39.4<br>(26.1 to 57.3)                | 42.4<br>(35.1 to 50.6)                            | 3.6<br>(-1.2 to 9.1)                                |
| Alopecia areata                               | 28.1<br>(26.3 to 29.9)                        | 50.2<br>(47.0 to 53.4)                         | 0.9<br>(0.6 to 1.4)                   | 36.5<br>(20.3 to 54.2)                            | 0.6<br>(-9.3 to 11.9)                               |
| Pruritus                                      | 120.1<br>(105.0 to 136.6)                     | 98.0<br>(86.5 to 111.0)                        | 1.3<br>(0.6 to 2.3)                   | 37.2<br>(28.5 to 45.6)                            | 1.4<br>(-3.8 to 6.5)                                |
| Urticaria                                     | 186.5<br>(157.5 to 221.0)                     | 337.3<br>(283.2 to 397.6)                      | 11.2<br>(7.0 to 16.4)                 | 35.4<br>(26.5 to 44.6)                            | 0.4<br>(-5.4 to 6.3)                                |
| Decubitus ulcer                               | 1.2<br>(1.1 to 1.4)                           | 4.4<br>(3.9 to 4.9)                            | 0.2<br>(0.1 to 0.3)                   | 34.4<br>(23.9 to 44.8)                            | 5.0<br>(-8.3 to 19.9)                               |
| Other skin and subcutaneous diseases          | 735.5<br>(713.2 to 758.4)                     | 826.3<br>(801.3 to 851.9)                      | 4.1<br>(1.9 to 7.4)                   | 38.8<br>(34.6 to 42.9)                            | 3.9<br>(1.2 to 6.4)                                 |
| Sense organ diseases                          | 2,650.1<br>(2,567.8 to 2,741.3)               | 1,579.0†<br>(1,464.4 to 1,701.0)               | 107.6<br>(75.4 to 148.8)              | 26.0<br>(22.4 to 29.5)                            | -2.8<br>(-4.7 to -0.9)                              |
| Glaucoma                                      | 4.6<br>(3.8 to 5.5)                           | --                                             | 0.5<br>(0.3 to 0.6)                   | 27.9<br>(12.8 to 44.6)                            | 4.9<br>(-6.6 to 17.2)                               |
| Cataract                                      | 141.1<br>(125.6 to 156.9)                     | --                                             | 13.2<br>(9.3 to 17.9)                 | 24.6<br>(17.6 to 31.6)                            | 0.0<br>(-5.7 to 5.5)                                |
| Macular degeneration                          | 3.7<br>(2.9 to 4.6)                           | --                                             | 0.3<br>(0.2 to 0.4)                   | 28.5<br>(11.0 to 47.5)                            | 5.8<br>(-7.3 to 20.1)                               |
| Refraction and accommodation disorders        | 1,183.2<br>(1,124.5 to 1,250.8)               | --                                             | 25.4<br>(16.4 to 38.8)                | 23.4<br>(18.2 to 29.1)                            | -7.4<br>(-10.9 to -3.7)                             |
| Age-related and other hearing loss            | 1,592.9<br>(1,479.0 to 1,713.9)               | --                                             | 55.0<br>(37.6 to 76.7)                | 25.8<br>(19.8 to 31.4)                            | -3.3<br>(-6.3 to -0.7)                              |
| Other vision loss                             | 50.2<br>(44.5 to 56.7)                        | --                                             | 4.6<br>(3.1 to 6.3)                   | 30.5<br>(19.0 to 43.0)                            | 1.4<br>(-6.2 to 8.7)                                |
| Other sense organ diseases                    | 288.6<br>(268.0 to 310.5)                     | 1,579.0<br>(1,464.4 to 1,701.0)                | 8.7<br>(5.5 to 13.1)                  | 34.9<br>(28.0 to 42.1)                            | 1.5<br>(-2.3 to 5.6)                                |
| Oral disorders                                | 8,299.4<br>(7,583.4 to 8,925.5)               | 19,716.5†<br>(16,376.5 to 23,223.5)            | 26.6<br>(14.8 to 45.5)                | 35.8<br>(32.4 to 39.5)                            | 0.6<br>(-1.6 to 3.0)                                |
| Caries of deciduous teeth                     | 2,236.2<br>(1,744.7 to 2,749.1)               | 7,240.6<br>(4,823.7 to 10,149.8)               | 0.5<br>(0.2 to 1.0)                   | 36.0<br>(21.5 to 53.8)                            | -1.1<br>(-11.4 to 11.3)                             |
| Caries of permanent teeth                     | 4,678.9<br>(4,006.7 to 5,386.2)               | 12,270.3<br>(9,892.0 to 14,830.2)              | 2.8<br>(1.2 to 5.4)                   | 33.6<br>(26.5 to 41.2)                            | -1.9<br>(-6.0 to 2.9)                               |
| Periodontal disease                           | 1,621.4<br>(1,187.5 to 2,067.6)               | 193.8<br>(140.3 to 254.7)                      | 10.7<br>(4.0 to 23.4)                 | 35.9<br>(28.8 to 42.8)                            | 0.2<br>(-4.2 to 4.5)                                |
| Edentulism and severe tooth loss              | 186.1<br>(161.8 to 212.6)                     | 11.8<br>(10.2 to 13.4)                         | 5.2<br>(3.4 to 7.3)                   | 34.6<br>(27.2 to 42.8)                            | 2.4<br>(-2.0 to 6.9)                                |
| Other oral disorders                          | 255.5<br>(243.2 to 269.1)                     | --                                             | 7.5<br>(4.6 to 11.2)                  | 37.1<br>(31.6 to 42.7)                            | 0.4<br>(-2.7 to 3.7)                                |
| <b>Injuries</b>                               | <b>1,946.5</b><br><b>(1,798.7 to 2,112.4)</b> | <b>1,249.7†</b><br><b>(1,177.9 to 1,325.9)</b> | <b>80.9</b><br><b>(54.1 to 116.3)</b> | <b>30.3</b><br><b>(26.3 to 34.0)</b>              | <b>-0.9</b><br><b>(-2.7 to 0.7)</b>                 |
| <b>Transport injuries</b>                     | <b>184.3</b><br><b>(171.5 to 198.2)</b>       | <b>94.8</b><br><b>(83.7 to 106.4)</b>          | <b>11.1</b><br><b>(7.4 to 16.0)</b>   | <b>37.5</b><br><b>(33.6 to 40.9)</b>              | <b>3.0</b><br><b>(1.1 to 4.9)</b>                   |
| Road injuries                                 | 141.9<br>(133.1 to 151.8)                     | 78.7<br>(68.5 to 89.8)                         | 8.4<br>(5.6 to 12.1)                  | 37.2<br>(33.6 to 40.5)                            | 3.1<br>(1.2 to 5.1)                                 |
| Pedestrian road injuries                      | 34.0<br>(30.0 to 38.8)                        | 13.8<br>(11.2 to 16.9)                         | 2.0<br>(1.4 to 2.9)                   | 33.7<br>(30.3 to 36.9)                            | 1.0<br>(-1.0 to 2.8)                                |
| Cyclist road injuries                         | 25.6<br>(21.3 to 30.1)                        | 16.2<br>(12.4 to 20.4)                         | 1.4<br>(0.9 to 2.1)                   | 45.6<br>(41.4 to 49.6)                            | 9.4<br>(7.1 to 11.6)                                |
| Motorcyclist road injuries                    | 22.9<br>(19.6 to 27.2)                        | 8.6<br>(6.9 to 10.8)                           | 1.3<br>(0.9 to 1.9)                   | 32.1<br>(28.7 to 35.4)                            | -1.0<br>(-2.9 to 0.9)                               |
| Motor vehicle road injuries                   | 41.8<br>(36.1 to 47.2)                        | 27.5<br>(23.1 to 32.4)                         | 2.7<br>(1.8 to 3.8)                   | 36.8<br>(33.3 to 40.2)                            | 3.1<br>(1.0 to 5.2)                                 |
| Other road injuries                           | 17.6<br>(15.2 to 20.6)                        | 12.5<br>(9.7 to 16.1)                          | 1.0<br>(0.6 to 1.4)                   | 41.5<br>(38.0 to 44.9)                            | 5.8<br>(3.8 to 7.7)                                 |
| Other transport injuries                      | 42.4<br>(34.9 to 52.1)                        | 16.1<br>(13.0 to 20.3)                         | 2.6<br>(1.7 to 3.9)                   | 38.2<br>(32.4 to 44.0)                            | 2.7<br>(0.0 to 5.3)                                 |
| <b>Unintentional injuries</b>                 | <b>1,578.8</b><br><b>(1,459.1 to 1,703.2)</b> | <b>1,119.0</b><br><b>(1,050.1 to 1,193.8)</b>  | <b>58.8</b><br><b>(40.0 to 82.7)</b>  | <b>31.9</b><br><b>(28.2 to 35.1)</b>              | <b>-0.8</b><br><b>(-2.5 to 0.8)</b>                 |
| Falls                                         | 511.4<br>(436.7 to 581.9)                     | 349.4<br>(300.7 to 413.3)                      | 22.2<br>(15.3 to 30.6)                | 35.1<br>(31.2 to 38.6)                            | 1.5<br>(-0.3 to 3.2)                                |
| Drowning                                      | 5.8<br>(4.8 to 6.8)                           | 1.9<br>(1.6 to 2.2)                            | 0.4<br>(0.2 to 0.5)                   | 22.6<br>(17.1 to 27.8)                            | -7.0<br>(-9.8 to -4.5)                              |
| Fire, heat, and hot substances                | 166.8<br>(138.1 to 207.3)                     | 35.9<br>(29.1 to 43.6)                         | 5.1<br>(3.5 to 7.2)                   | 28.7<br>(21.6 to 36.4)                            | -4.0<br>(-7.7 to 0.1)                               |
| Poisonings                                    | 5.2<br>(4.1 to 6.4)                           | 10.5<br>(8.2 to 13.1)                          | 0.6<br>(0.4 to 0.8)                   | 39.1<br>(25.1 to 52.1)                            | 2.2<br>(-5.5 to 9.4)                                |
| Exposure to mechanical forces                 | 283.9<br>(242.1 to 342.4)                     | 168.8<br>(141.5 to 197.7)                      | 7.7<br>(5.0 to 11.2)                  | 33.0<br>(28.9 to 36.6)                            | -1.0<br>(-3.0 to 0.8)                               |
| Unintentional firearm injuries                | 15.9<br>(13.1 to 19.4)                        | 6.4<br>(4.7 to 8.4)                            | 0.8<br>(0.5 to 1.1)                   | 37.6<br>(33.3 to 41.7)                            | 1.9<br>(-0.4 to 4.1)                                |
| Unintentional suffocation                     | 24.8<br>(17.6 to 33.6)                        | 9.1<br>(6.2 to 13.0)                           | 0.8<br>(0.5 to 1.4)                   | 37.2<br>(29.9 to 44.7)                            | 1.3<br>(-2.2 to 4.7)                                |
| Other exposure to mechanical forces           | 243.2<br>(202.8 to 299.0)                     | 153.3<br>(128.2 to 179.6)                      | 6.0<br>(4.0 to 8.7)                   | 31.8<br>(27.7 to 35.4)                            | -1.6<br>(-3.7 to 0.3)                               |



| Cause                                                                               | Prevalence in thousands (95% UI)        | Incidence in thousands (95% UI)       | YLDs in thousands (95% UI)         |                                                   |                                                     |
|-------------------------------------------------------------------------------------|-----------------------------------------|---------------------------------------|------------------------------------|---------------------------------------------------|-----------------------------------------------------|
|                                                                                     | 2016 counts                             | 2016 counts                           | 2016 counts                        | Percentage change in counts between 2006 and 2016 | Percentage change in age-standardised rates between |
| Adverse effects of medical treatment                                                | 6.9<br>(5.4 to 8.7)                     | 90.5<br>(77.5 to 105.8)               | 0.9<br>(0.6 to 1.4)                | 20.8<br>(14.5 to 28.4)                            | -6.4<br>(-10.2 to -2.5)                             |
| Animal contact                                                                      | 91.7<br>(80.4 to 106.8)                 | 162.8<br>(136.1 to 192.1)             | 3.3<br>(2.2 to 4.7)                | 26.0<br>(19.0 to 32.8)                            | -7.0<br>(-10.8 to -3.5)                             |
| Venomous animal contact                                                             | 36.2<br>(29.9 to 44.0)                  | 68.1<br>(53.5 to 85.2)                | 2.3<br>(1.5 to 3.3)                | 25.8<br>(16.2 to 35.0)                            | -7.4<br>(-12.9 to -2.4)                             |
| Non-venomous animal contact                                                         | 55.4<br>(46.0 to 68.8)                  | 94.7<br>(76.9 to 114.5)               | 1.0<br>(0.7 to 1.5)                | 26.7<br>(22.1 to 31.0)                            | -6.3<br>(-9.2 to -3.6)                              |
| Foreign body                                                                        | 124.4<br>(99.5 to 149.7)                | 105.2<br>(91.0 to 120.9)              | 5.5<br>(3.6 to 8.3)                | 30.2<br>(24.5 to 35.9)                            | -2.7<br>(-5.5 to -0.1)                              |
| Pulmonary aspiration and foreign body in airway                                     | 74.2<br>(53.8 to 101.9)                 | 44.6<br>(36.5 to 55.3)                | 3.7<br>(2.4 to 5.6)                | 28.1<br>(22.1 to 33.9)                            | -4.0<br>(-6.9 to -1.4)                              |
| Foreign body in eyes                                                                | 5.7<br>(2.9 to 9.0)                     | 33.1<br>(24.9 to 44.4)                | 0.3<br>(0.1 to 0.6)                | 38.2<br>(33.5 to 44.1)                            | 1.8<br>(-1.0 to 5.0)                                |
| Foreign body in other body part                                                     | 44.4<br>(34.7 to 57.6)                  | 27.5<br>(22.0 to 34.0)                | 1.6<br>(1.0 to 2.3)                | 33.9<br>(27.7 to 40.7)                            | -0.5<br>(-3.7 to 2.7)                               |
| Environmental heat and cold exposure                                                | 141.7<br>(118.6 to 167.1)               | 61.5<br>(50.9 to 75.1)                | 6.0<br>(4.0 to 8.7)                | 34.8<br>(30.5 to 38.7)                            | 0.5<br>(-1.6 to 2.2)                                |
| Other unintentional injuries                                                        | 241.1<br>(189.8 to 310.2)               | 132.6<br>(110.6 to 160.8)             | 7.1<br>(4.6 to 10.3)               | 26.7<br>(22.7 to 30.3)                            | -3.2<br>(-5.0 to -1.4)                              |
| <b>Self-harm and interpersonal violence</b>                                         | <b>601.6</b><br><b>(529.3 to 685.0)</b> | <b>35.6†</b><br><b>(30.1 to 41.7)</b> | <b>7.1</b><br><b>(4.9 to 9.8)</b>  | <b>31.3</b><br><b>(25.8 to 37.7)</b>              | <b>-2.2</b><br><b>(-5.6 to 1.8)</b>                 |
| Self-harm                                                                           | 6.7<br>(5.8 to 7.5)                     | 4.2<br>(3.5 to 5.0)                   | 0.4<br>(0.2 to 0.6)                | 42.7<br>(38.7 to 46.7)                            | 6.6<br>(4.4 to 8.9)                                 |
| Self-harm by firearm                                                                | 0.5<br>(0.5 to 0.6)                     | 0.3<br>(0.2 to 0.4)                   | < 0.05<br>(< 0.05 to < 0.05)       | 25.9<br>(21.6 to 30.3)                            | -6.5<br>(-9.2 to -3.6)                              |
| Self-harm by other specified means                                                  | 6.1<br>(5.2 to 7.0)                     | 3.9<br>(3.3 to 4.7)                   | 0.4<br>(0.2 to 0.5)                | 44.0<br>(39.9 to 48.2)                            | 7.8<br>(5.4 to 10.1)                                |
| Interpersonal violence                                                              | 594.9<br>(522.5 to 678.3)               | 31.4†<br>(26.0 to 37.6)               | 6.7<br>(4.6 to 9.3)                | 30.8<br>(25.2 to 37.5)                            | -3.0<br>(-6.5 to 1.3)                               |
| Assault by firearm                                                                  | 2.2<br>(1.9 to 2.6)                     | 1.1<br>(0.8 to 1.5)                   | 0.1<br>(0.1 to 0.2)                | 37.8<br>(32.7 to 42.8)                            | 2.0<br>(-1.1 to 4.9)                                |
| Assault by sharp object                                                             | 17.2<br>(14.1 to 20.5)                  | 10.7<br>(8.1 to 13.9)                 | 0.6<br>(0.4 to 0.9)                | 40.0<br>(35.6 to 44.3)                            | 4.0<br>(1.6 to 6.4)                                 |
| Sexual violence                                                                     | 552.1<br>(479.4 to 636.0)               | --                                    | 4.9<br>(3.3 to 7.1)                | 27.4<br>(20.0 to 36.1)                            | -6.5<br>(-11.4 to -0.3)                             |
| Assault by other means                                                              | 23.5<br>(20.2 to 28.0)                  | 19.6<br>(15.7 to 23.9)                | 1.1<br>(0.7 to 1.6)                | 42.0<br>(38.2 to 45.6)                            | 4.7<br>(2.6 to 6.9)                                 |
| <b>Forces of nature, conflict and terrorism, and executions and police conflict</b> | <b>133.8</b><br><b>(58.1 to 239.4)</b>  | <b>0.3†</b><br><b>(0.2 to 0.5)</b>    | <b>3.9</b><br><b>(0.9 to 10.3)</b> | <b>-3.0</b><br><b>(-10.2 to 2.9)</b>              | <b>-11.5</b><br><b>(-16.3 to -7.5)</b>              |
| Exposure to forces of nature                                                        | 0.2<br>(0.1 to 0.4)                     | --                                    | < 0.05<br>(< 0.05 to < 0.05)       | 192.3<br>(180.7 to 207.1)                         | 109.2<br>(103.1 to 118.0)                           |
| Conflict and terrorism                                                              | 132.9<br>(57.3 to 238.5)                | --                                    | 3.9<br>(0.9 to 10.2)               | -3.2<br>(-10.5 to 2.6)                            | -11.7<br>(-16.5 to -7.6)                            |
| Executions and police conflict                                                      | 0.8<br>(0.3 to 1.7)                     | 0.3<br>(0.2 to 0.5)                   | < 0.05<br>(< 0.05 to 0.1)          | 26.8<br>(6.4 to 54.5)                             | 2.5<br>(-19.5 to 25.5)                              |
| <b>Impairments</b>                                                                  | --                                      | --                                    | --                                 | --                                                | --                                                  |
| Anaemia                                                                             | 10,724.1<br>(10,444.4 to 11,010.7)      | --                                    | 437.3<br>(293.7 to 620.5)          | 25.4<br>(21.1 to 29.4)                            | -8.8<br>(-12.0 to -6.1)                             |
| Developmental intellectual disability                                               | 703.5<br>(536.2 to 872.6)               | --                                    | 63.1<br>(45.2 to 85.2)             | 37.8<br>(29.4 to 50.3)                            | 0.3<br>(-5.2 to 8.7)                                |
| Epilepsy                                                                            | 94.6<br>(53.1 to 153.9)                 | --                                    | 36.5<br>(19.2 to 64.0)             | 51.0<br>(-31.7 to 209.2)                          | 10.6<br>(-53.0 to 141.8)                            |
| Guillain-Barre syndrome                                                             | 0.1<br>(0.1 to 0.2)                     | --                                    | < 0.05<br>(< 0.05 to 0.1)          | 36.3<br>(34.5 to 37.9)                            | 0.1<br>(0.0 to 0.2)                                 |
| Hearing loss                                                                        | 2,041.0<br>(1,926.0 to 2,171.3)         | --                                    | 80.2<br>(55.8 to 109.3)            | 25.2<br>(20.6 to 29.1)                            | -4.4<br>(-6.9 to -2.3)                              |
| Heart failure                                                                       | 35.7<br>(31.7 to 39.9)                  | --                                    | 3.8<br>(2.7 to 5.0)                | 23.7<br>(14.8 to 33.4)                            | -0.8<br>(-8.4 to 7.5)                               |
| Infertility                                                                         | 419.0<br>(320.4 to 552.6)               | --                                    | 2.4<br>(1.0 to 4.9)                | 52.9<br>(21.7 to 92.5)                            | 9.3<br>(-14.1 to 39.5)                              |
| Pelvic inflammatory disease                                                         | 17.4<br>(14.7 to 20.9)                  | --                                    | 2.3<br>(1.5 to 3.2)                | 32.6<br>(15.3 to 52.4)                            | -3.2<br>(-15.1 to 9.4)                              |
| Vision loss                                                                         | 1,489.3<br>(1,417.2 to 1,568.5)         | --                                    | 59.0<br>(42.6 to 80.4)             | 28.5<br>(21.9 to 39.4)                            | -5.2<br>(-8.9 to -1.1)                              |

We did not calculate incidence for the nine impairments, certain NTDs, and causes with only birth prevalence. Blank cells mean that no estimate is available.

† Incidence for aggregate causes represents the sum of the incidence of the causes below the aggregate.

‡ Incidence estimates for stroke represent first-ever stroke only.

^ Incidence of HIV/AIDS represents new infections of HIV only and does not include new infections of Tuberculosis in HIV positive cases.

SR Table 14: Prevalence, incidence, and YLDs for 2016, percentage change of YLD counts and percentage change of age-standardised YLD rates between 2006 and 2016 by cause and impairments, for all ages, Malta.

| Cause                                                                                | Prevalence in thousands (95% UI)                          | Incidence in thousands (95% UI)                                       | YLDs in thousands (95% UI)                                |                                                   |                                                     |
|--------------------------------------------------------------------------------------|-----------------------------------------------------------|-----------------------------------------------------------------------|-----------------------------------------------------------|---------------------------------------------------|-----------------------------------------------------|
|                                                                                      | 2016 counts                                               | 2016 counts                                                           | 2016 counts                                               | Percentage change in counts between 2006 and 2016 | Percentage change in age-standardised rates between |
| <b>All causes</b>                                                                    | <b>398.6</b><br>(395.9 to 400.6)                          | <b>2,713.9†</b><br>(2,543.4 to 2,896.8)                               | <b>53.5</b><br>(39.9 to 69.0)                             | <b>11.3</b><br>(9.8 to 12.7)                      | <b>-0.7</b><br>(-2.0 to 0.6)                        |
| <b>Communicable, maternal, neonatal, and nutritional disorders</b>                   | <b>129.6</b><br>(122.7 to 137.2)                          | <b>1,519.3†</b><br>(1,364.6 to 1,688.0)                               | <b>1.8</b><br>(1.3 to 2.4)                                | <b>-1.4</b><br>(-6.9 to 4.4)                      | <b>-3.9</b><br>(-9.6 to 1.9)                        |
| <b>HIV/AIDS and tuberculosis</b>                                                     | <b>39.3</b><br>(32.5 to 45.5)                             | <b>0.1†</b><br>( $< 0.05$ to 0.1)                                     | <b>0.1</b><br>( $< 0.05$ to 0.1)                          | <b>45.5</b><br>(19.5 to 67.5)                     | <b>34.0</b><br>(8.6 to 54.8)                        |
| Tuberculosis                                                                         | 34.6<br>(27.9 to 42.6)                                    | $< 0.05$ <sup>†</sup><br>( $< 0.05$ to $< 0.05$ )                     | $< 0.05$<br>( $< 0.05$ to $< 0.05$ )                      | -7.2<br>(-25.3 to 16.7)                           | -11.5<br>(-30.7 to 15.0)                            |
| Drug-susceptible tuberculosis                                                        | $< 0.05$<br>( $< 0.05$ to $< 0.05$ )                      | $< 0.05$<br>( $< 0.05$ to $< 0.05$ )                                  | $< 0.05$<br>( $< 0.05$ to $< 0.05$ )                      | -7.2<br>(-25.3 to 16.7)                           | -11.5<br>(-30.7 to 15.0)                            |
| Multidrug-resistant tuberculosis without extensive drug resistance                   | $< 0.05$<br>( $< 0.05$ to $< 0.05$ )                      | $< 0.05$<br>( $< 0.05$ to $< 0.05$ )                                  | $< 0.05$<br>( $< 0.05$ to $< 0.05$ )                      | -56.1<br>(-72.8 to -27.7)                         | -58.1<br>(-73.7 to -30.9)                           |
| Extensively drug-resistant tuberculosis                                              | $< 0.05$<br>( $< 0.05$ to $< 0.05$ )                      | $< 0.05$<br>( $< 0.05$ to $< 0.05$ )                                  | $< 0.05$<br>( $< 0.05$ to $< 0.05$ )                      | -5.6<br>(-41.6 to 55.6)                           | -9.9<br>(-43.5 to 48.9)                             |
| Latent tuberculosis infection                                                        | 34.6<br>(27.9 to 42.6)                                    | --                                                                    | --                                                        | --                                                | --                                                  |
| HIV/AIDS                                                                             | 0.8<br>(0.4 to 1.4)                                       | 0.1 <sup>†</sup><br>( $< 0.05$ to 0.1)                                | 0.1<br>( $< 0.05$ to 0.1)                                 | 52.9<br>(25.7 to 78.0)                            | 40.6<br>(12.6 to 64.9)                              |
| Drug-susceptible HIV/AIDS - Tuberculosis                                             | $< 0.05$<br>( $< 0.05$ to $< 0.05$ )                      | $< 0.05$<br>( $< 0.05$ to $< 0.05$ )                                  | $< 0.05$<br>( $< 0.05$ to $< 0.05$ )                      | -24.3<br>(-31.4 to -16.6)                         | -30.4<br>(-36.9 to -23.2)                           |
| Multidrug-resistant HIV/AIDS - Tuberculosis without extensive drug resistance        | $< 0.05$<br>( $< 0.05$ to $< 0.05$ )                      | $< 0.05$<br>( $< 0.05$ to $< 0.05$ )                                  | $< 0.05$<br>( $< 0.05$ to $< 0.05$ )                      | -64.0<br>(-77.9 to -41.1)                         | -66.9<br>(-79.7 to -45.7)                           |
| Extensively drug-resistant HIV/AIDS - Tuberculosis                                   | $< 0.05$<br>( $< 0.05$ to $< 0.05$ )                      | $< 0.05$<br>( $< 0.05$ to $< 0.05$ )                                  | $< 0.05$<br>( $< 0.05$ to $< 0.05$ )                      | -22.6<br>(-52.4 to 26.8)                          | -28.8<br>(-56.2 to 16.7)                            |
| HIV/AIDS resulting in other diseases                                                 | 0.8<br>(0.4 to 1.4)                                       | 0.1<br>( $< 0.05$ to 0.1)                                             | 0.1<br>( $< 0.05$ to 0.1)                                 | 53.5<br>(26.3 to 79.6)                            | 41.2<br>(13.3 to 65.9)                              |
| <b>Diarrhoea, lower respiratory infections, and other common infectious diseases</b> | <b>24.1</b><br>(22.4 to 25.7)                             | <b>1,504.1†</b><br>(1,348.6 to 1,674.0)                               | <b>0.7</b><br>(0.5 to 1.0)                                | <b>1.7</b><br>(-1.7 to 5.4)                       | <b>-0.5</b><br>(-3.7 to 2.6)                        |
| Diarrhoeal diseases                                                                  | 0.4<br>(0.4 to 0.4)                                       | 27.7<br>(25.7 to 29.9)                                                | $< 0.05$<br>( $< 0.05$ to 0.1)                            | 11.2<br>(0.1 to 23.8)                             | 6.4<br>(-4.3 to 18.6)                               |
| Intestinal infectious diseases                                                       | $< 0.05$<br>( $< 0.05$ to $< 0.05$ )                      | $< 0.05$ <sup>†</sup><br>( $< 0.05$ to $< 0.05$ )                     | $< 0.05$<br>( $< 0.05$ to $< 0.05$ )                      | 5.2<br>(-9.7 to 22.4)                             | -3.0<br>(-16.2 to 10.7)                             |
| Typhoid fever                                                                        | $< 0.05$<br>( $< 0.05$ to $< 0.05$ )                      | $< 0.05$<br>( $< 0.05$ to $< 0.05$ )                                  | $< 0.05$<br>( $< 0.05$ to $< 0.05$ )                      | 25.6<br>(2.0 to 53.6)                             | 18.1<br>(-4.3 to 43.0)                              |
| Paratyphoid fever                                                                    | $< 0.05$<br>( $< 0.05$ to $< 0.05$ )                      | $< 0.05$<br>( $< 0.05$ to $< 0.05$ )                                  | $< 0.05$<br>( $< 0.05$ to $< 0.05$ )                      | -6.4<br>(-21.2 to 13.1)                           | -12.6<br>(-26.7 to 3.9)                             |
| Other intestinal infectious diseases                                                 | --                                                        | --                                                                    | $< 0.05$<br>( $< 0.05$ to $< 0.05$ )                      | -18.0<br>(-39.1 to 8.8)                           | -28.6<br>(-50.0 to 2.2)                             |
| Lower respiratory infections                                                         | 0.2<br>(0.2 to 0.2)                                       | 9.2<br>(8.5 to 9.9)                                                   | $< 0.05$<br>( $< 0.05$ to $< 0.05$ )                      | 17.4<br>(2.5 to 34.6)                             | -3.3<br>(-15.2 to 9.8)                              |
| Upper respiratory infections                                                         | 18.8<br>(16.9 to 20.9)                                    | 1,437.6<br>(1,281.8 to 1,606.2)                                       | 0.5<br>(0.3 to 0.7)                                       | 1.9<br>(-3.0 to 7.0)                              | 0.2<br>(-3.9 to 4.7)                                |
| Otitis media                                                                         | 4.4<br>(3.8 to 5.1)                                       | 23.6<br>(16.5 to 36.5)                                                | 0.1<br>(0.1 to 0.2)                                       | -5.4<br>(-11.9 to 1.6)                            | -3.9<br>(-9.8 to 2.3)                               |
| Meningitis                                                                           | 0.1<br>(0.1 to 0.1)                                       | $< 0.05$<br>( $< 0.05$ to $< 0.05$ )                                  | $< 0.05$<br>( $< 0.05$ to $< 0.05$ )                      | -1.0<br>(-4.5 to 5.0)                             | -6.1<br>(-9.2 to -2.0)                              |
| Pneumococcal meningitis                                                              | $< 0.05$<br>( $< 0.05$ to $< 0.05$ )                      | $< 0.05$<br>( $< 0.05$ to $< 0.05$ )                                  | $< 0.05$<br>( $< 0.05$ to $< 0.05$ )                      | -0.8<br>(-5.4 to 4.0)                             | -6.1<br>(-10.5 to -1.7)                             |
| H influenzae type B meningitis                                                       | $< 0.05$<br>( $< 0.05$ to $< 0.05$ )                      | $< 0.05$<br>( $< 0.05$ to $< 0.05$ )                                  | $< 0.05$<br>( $< 0.05$ to $< 0.05$ )                      | -1.9<br>(-7.1 to 3.2)                             | -6.8<br>(-12.2 to -1.9)                             |
| Meningococcal infection                                                              | $< 0.05$<br>( $< 0.05$ to $< 0.05$ )                      | $< 0.05$<br>( $< 0.05$ to $< 0.05$ )                                  | $< 0.05$<br>( $< 0.05$ to $< 0.05$ )                      | 2.9<br>(-4.8 to 32.0)                             | -4.9<br>(-11.7 to 11.0)                             |
| Other meningitis                                                                     | $< 0.05$<br>( $< 0.05$ to $< 0.05$ )                      | $< 0.05$<br>( $< 0.05$ to $< 0.05$ )                                  | $< 0.05$<br>( $< 0.05$ to $< 0.05$ )                      | -2.3<br>(-6.5 to 2.4)                             | -6.3<br>(-10.4 to -1.5)                             |
| Encephalitis                                                                         | 0.1<br>(0.1 to 0.2)                                       | 0.1<br>(0.1 to 0.1)                                                   | $< 0.05$<br>( $< 0.05$ to $< 0.05$ )                      | 5.5<br>(1.9 to 9.0)                               | -1.4<br>(-4.7 to 1.7)                               |
| Diphtheria                                                                           | $< 0.05$<br>( $< 0.05$ to $< 0.05$ )                      | $< 0.05$<br>( $< 0.05$ to $< 0.05$ )                                  | $< 0.05$<br>( $< 0.05$ to $< 0.05$ )                      | -47.6<br>(-70.6 to -1.7)                          | -46.7<br>(-68.6 to -5.9)                            |
| Whooping cough                                                                       | $< 0.05$<br>( $< 0.05$ to $< 0.05$ )                      | 0.1<br>(0.1 to 0.1)                                                   | $< 0.05$<br>( $< 0.05$ to $< 0.05$ )                      | -60.3<br>(-69.7 to -48.3)                         | -61.1<br>(-70.3 to -49.4)                           |
| Tetanus                                                                              | $< 0.05$<br>( $< 0.05$ to $< 0.05$ )                      | $< 0.05$<br>( $< 0.05$ to $< 0.05$ )                                  | $< 0.05$<br>( $< 0.05$ to $< 0.05$ )                      | -40.2<br>(-56.9 to -20.6)                         | -51.5<br>(-63.7 to -35.7)                           |
| Measles                                                                              | $< 0.05$<br>(0.0 to $< 0.05$ )                            | $< 0.05$<br>(0.0 to $< 0.05$ )                                        | $< 0.05$<br>(0.0 to $< 0.05$ )                            | 8.2<br>(-100.0 to 1.2e+21)                        | 8.3<br>(-100.0 to 1.2e+21)                          |
| Varicella and herpes zoster                                                          | 0.4<br>(0.4 to 0.5)                                       | 5.9<br>(5.7 to 6.2)                                                   | $< 0.05$<br>( $< 0.05$ to $< 0.05$ )                      | 14.1<br>(0.4 to 29.1)                             | -0.1<br>(-12.2 to 13.2)                             |
| <b>Neglected tropical diseases and malaria</b>                                       | <b><math>&lt; 0.05</math></b><br>( $< 0.05$ to $< 0.05$ ) | <b><math>&lt; 0.05</math><sup>†</sup></b><br>( $< 0.05$ to $< 0.05$ ) | <b><math>&lt; 0.05</math></b><br>( $< 0.05$ to $< 0.05$ ) | <b>-84.5</b><br>(-100.0 to 143.9)                 | <b>-86.2</b><br>(-100.0 to 140.4)                   |
| Malaria                                                                              | --                                                        | --                                                                    | --                                                        | --                                                | --                                                  |
| Chagas disease                                                                       | --                                                        | --                                                                    | --                                                        | --                                                | --                                                  |
| Leishmaniasis                                                                        | $< 0.05$<br>( $< 0.05$ to $< 0.05$ )                      | $< 0.05$<br>( $< 0.05$ to $< 0.05$ )                                  | $< 0.05$<br>( $< 0.05$ to $< 0.05$ )                      | -84.8<br>(-100.0 to 143.7)                        | -86.4<br>(-100.0 to 145.0)                          |
| Visceral leishmaniasis                                                               | $< 0.05$<br>( $< 0.05$ to $< 0.05$ )                      | $< 0.05$<br>( $< 0.05$ to $< 0.05$ )                                  | $< 0.05$<br>( $< 0.05$ to $< 0.05$ )                      | -77.9<br>(-100.0 to 105.8)                        | -81.1<br>(-100.0 to 81.1)                           |
| Cutaneous and mucocutaneous leishmaniasis                                            | $< 0.05$<br>( $< 0.05$ to $< 0.05$ )                      | $< 0.05$<br>(0.0 to $< 0.05$ )                                        | $< 0.05$<br>( $< 0.05$ to $< 0.05$ )                      | -87.3<br>(-100.0 to 413.8)                        | -87.9<br>(-100.0 to 410.5)                          |
| African trypanosomiasis                                                              | --                                                        | --                                                                    | --                                                        | --                                                | --                                                  |
| Schistosomiasis                                                                      | --                                                        | --                                                                    | --                                                        | --                                                | --                                                  |
| Cysticercosis                                                                        | --                                                        | --                                                                    | --                                                        | --                                                | --                                                  |
| Cystic echinococcosis                                                                | --                                                        | --                                                                    | --                                                        | --                                                | --                                                  |
| Lymphatic filariasis                                                                 | --                                                        | --                                                                    | --                                                        | --                                                | --                                                  |
| Onchocerciasis                                                                       | --                                                        | --                                                                    | --                                                        | --                                                | --                                                  |
| Trachoma                                                                             | --                                                        | --                                                                    | --                                                        | --                                                | --                                                  |
| Dengue                                                                               | --                                                        | --                                                                    | --                                                        | --                                                | --                                                  |
| Yellow fever                                                                         | --                                                        | --                                                                    | --                                                        | --                                                | --                                                  |
| Rabies                                                                               | $< 0.05$<br>( $< 0.05$ to $< 0.05$ )                      | $< 0.05$<br>( $< 0.05$ to $< 0.05$ )                                  | $< 0.05$<br>( $< 0.05$ to $< 0.05$ )                      | -20.5<br>(-42.3 to 9.2)                           | -33.3<br>(-55.0 to -1.9)                            |
| Intestinal nematode infections                                                       | --                                                        | --                                                                    | --                                                        | --                                                | --                                                  |
| Ascariasis                                                                           | --                                                        | --                                                                    | --                                                        | --                                                | --                                                  |

| Cause                                                                   | Prevalence in thousands (95% UI)        | Incidence in thousands (95% UI)                | YLDs in thousands (95% UI)                          |                                                   |                                                     |
|-------------------------------------------------------------------------|-----------------------------------------|------------------------------------------------|-----------------------------------------------------|---------------------------------------------------|-----------------------------------------------------|
|                                                                         | 2016 counts                             | 2016 counts                                    | 2016 counts                                         | Percentage change in counts between 2006 and 2016 | Percentage change in age-standardised rates between |
| Trichuriasis                                                            | --                                      | --                                             | --                                                  | --                                                | --                                                  |
| Hookworm disease                                                        | --                                      | --                                             | --                                                  | --                                                | --                                                  |
| Food-borne trematodiasis                                                | --                                      | --                                             | --                                                  | --                                                | --                                                  |
| Leprosy                                                                 | --                                      | --                                             | --                                                  | --                                                | --                                                  |
| Ebola virus disease                                                     | --                                      | --                                             | --                                                  | --                                                | --                                                  |
| Zika virus disease                                                      | --                                      | --                                             | --                                                  | --                                                | --                                                  |
| Guinea worm disease                                                     | --                                      | --                                             | --                                                  | --                                                | --                                                  |
| Other neglected tropical diseases                                       | --                                      | --                                             | < 0.05<br>(< 0.05 to < 0.05)                        | --                                                | --                                                  |
| <b>Maternal disorders</b>                                               | <b>0.2</b><br><b>(0.2 to 0.3)</b>       | <b>2.8†</b><br><b>(2.4 to 3.1)</b>             | <b>&lt; 0.05</b><br><b>(&lt; 0.05 to &lt; 0.05)</b> | <b>-1.7</b><br><b>(-29.2 to 40.3)</b>             | <b>-4.8</b><br><b>(-31.0 to 35.7)</b>               |
| Maternal haemorrhage                                                    | < 0.05<br>(< 0.05 to < 0.05)            | 0.2<br>(0.2 to 0.3)                            | < 0.05<br>(< 0.05 to < 0.05)                        | 19.1<br>(-28.4 to 101.8)                          | 14.5<br>(-30.4 to 90.9)                             |
| Maternal sepsis and other pregnancy related infections                  | 0.1<br>(< 0.05 to 0.1)                  | 0.4<br>(0.3 to 0.5)                            | < 0.05<br>(< 0.05 to < 0.05)                        | -3.6<br>(-56.1 to 98.4)                           | -4.6<br>(-57.0 to 100.3)                            |
| Maternal hypertensive disorders                                         | 0.1<br>(0.1 to 0.2)                     | 0.5<br>(0.4 to 0.6)                            | < 0.05<br>(< 0.05 to < 0.05)                        | -2.6<br>(-42.3 to 66.7)                           | -5.9<br>(-43.6 to 60.0)                             |
| Maternal obstructed labour and uterine rupture                          | < 0.05<br>(< 0.05 to < 0.05)            | 0.1<br>(< 0.05 to 0.1)                         | < 0.05<br>(< 0.05 to < 0.05)                        | 33.2<br>(-28.4 to 165.2)                          | 30.4<br>(-29.9 to 162.3)                            |
| Maternal abortion, miscarriage, and ectopic pregnancy                   | < 0.05<br>(< 0.05 to < 0.05)            | 1.6<br>(1.3 to 1.9)                            | < 0.05<br>(< 0.05 to < 0.05)                        | -8.8<br>(-56.4 to 94.1)                           | -12.6<br>(-57.7 to 87.0)                            |
| Other maternal disorders                                                | --                                      | --                                             | < 0.05<br>(< 0.05 to < 0.05)                        | -6.8<br>(-32.7 to 33.4)                           | -9.6<br>(-34.7 to 29.5)                             |
| <b>Neonatal disorders</b>                                               | <b>4.0</b><br><b>(3.4 to 4.7)</b>       | --                                             | <b>0.7</b><br><b>(0.5 to 0.9)</b>                   | <b>-5.1</b><br><b>(-16.7 to 9.5)</b>              | <b>-6.6</b><br><b>(-18.2 to 7.8)</b>                |
| Neonatal preterm birth complications                                    | 2.9<br>(2.4 to 3.8)                     | --                                             | 0.3<br>(0.2 to 0.5)                                 | 1.2<br>(-17.9 to 21.9)                            | -0.1<br>(-19.8 to 20.6)                             |
| Neonatal encephalopathy due to birth asphyxia and trauma                | 1.3<br>(0.8 to 1.9)                     | --                                             | 0.2<br>(0.1 to 0.4)                                 | -13.5<br>(-35.5 to 18.1)                          | -15.1<br>(-36.8 to 17.6)                            |
| Neonatal sepsis and other neonatal infections                           | 0.2<br>(0.1 to 0.4)                     | --                                             | 0.1<br>(< 0.05 to 0.2)                              | -2.8<br>(-21.7 to 15.8)                           | -4.4<br>(-22.3 to 14.3)                             |
| Hemolytic disease and other neonatal jaundice                           | < 0.05<br>(< 0.05 to < 0.05)            | --                                             | < 0.05<br>(< 0.05 to < 0.05)                        | 2.4<br>(-5.2 to 12.3)                             | -0.1<br>(-7.2 to 9.8)                               |
| Other neonatal disorders                                                | --                                      | --                                             | < 0.05<br>(< 0.05 to < 0.05)                        | -5.7<br>(-20.2 to 11.0)                           | -9.4<br>(-23.2 to 6.6)                              |
| <b>Nutritional deficiencies</b>                                         | <b>19.8</b><br><b>(17.0 to 22.9)</b>    | <b>1.0†</b><br><b>(0.8 to 1.3)</b>             | <b>0.3</b><br><b>(0.2 to 0.5)</b>                   | <b>-7.2</b><br><b>(-20.4 to 7.5)</b>              | <b>-10.1</b><br><b>(-23.5 to 5.3)</b>               |
| Protein-energy malnutrition                                             | 0.2<br>(0.2 to 0.2)                     | 0.1<br>(0.1 to 0.1)                            | < 0.05<br>(< 0.05 to < 0.05)                        | 2.4<br>(-6.9 to 12.5)                             | -1.7<br>(-10.6 to 7.9)                              |
| Iodine deficiency                                                       | 6.3<br>(4.9 to 8.2)                     | 0.1<br>(0.1 to 0.1)                            | 0.2<br>(0.1 to 0.2)                                 | 1.2<br>(-8.3 to 12.3)                             | -5.8<br>(-14.7 to 5.0)                              |
| Vitamin A deficiency                                                    | 1.0<br>(0.7 to 1.3)                     | 0.8<br>(0.6 to 1.1)                            | --                                                  | --                                                | --                                                  |
| Iron-deficiency anaemia                                                 | 11.5<br>(8.8 to 14.3)                   | --                                             | 0.1<br>(0.1 to 0.2)                                 | -17.5<br>(-40.7 to 13.1)                          | -15.6<br>(-40.5 to 14.5)                            |
| Other nutritional deficiencies                                          | --                                      | --                                             | < 0.05<br>(< 0.05 to < 0.05)                        | 2.1<br>(-7.3 to 12.7)                             | -2.0<br>(-11.0 to 8.2)                              |
| <b>Other communicable, maternal, neonatal, and nutritional diseases</b> | <b>65.1</b><br><b>(60.0 to 70.5)</b>    | <b>11.3</b><br><b>(9.6 to 13.8)</b>            | <b>0.1</b><br><b>(&lt; 0.05 to 0.1)</b>             | <b>-0.6</b><br><b>(-8.0 to 6.2)</b>               | <b>-5.3</b><br><b>(-12.9 to 2.0)</b>                |
| Sexually transmitted diseases excluding HIV                             | 55.2<br>(50.5 to 60.9)                  | 10.5<br>(8.8 to 13.0)                          | < 0.05<br>(< 0.05 to 0.1)                           | -0.3<br>(-9.6 to 8.5)                             | -7.3<br>(-17.1 to 1.2)                              |
| Syphilis                                                                | 0.2<br>(0.2 to 0.3)                     | 0.2<br>(0.1 to 0.3)                            | < 0.05<br>(< 0.05 to < 0.05)                        | 24.5<br>(8.2 to 42.9)                             | 3.3<br>(-9.9 to 18.4)                               |
| Chlamydial infection                                                    | 1.9<br>(0.9 to 3.8)                     | 1.4<br>(0.6 to 2.7)                            | < 0.05<br>(< 0.05 to < 0.05)                        | -2.7<br>(-24.6 to 23.8)                           | -5.1<br>(-25.7 to 19.9)                             |
| Gonococcal infection                                                    | 0.4<br>(0.2 to 1.0)                     | 1.0<br>(0.2 to 3.1)                            | < 0.05<br>(< 0.05 to < 0.05)                        | -21.2<br>(-36.2 to -7.8)                          | -23.0<br>(-38.2 to -9.8)                            |
| Trichomoniasis                                                          | 7.2<br>(6.1 to 8.3)                     | 5.9<br>(5.0 to 6.9)                            | < 0.05<br>(< 0.05 to < 0.05)                        | 3.4<br>(-5.2 to 13.0)                             | -1.4<br>(-9.8 to 7.8)                               |
| Genital herpes                                                          | 46.5<br>(39.8 to 54.5)                  | 1.8<br>(1.5 to 2.1)                            | < 0.05<br>(< 0.05 to < 0.05)                        | 10.1<br>(3.4 to 16.6)                             | -0.4<br>(-6.7 to 5.8)                               |
| Other sexually transmitted diseases                                     | 0.4<br>(0.3 to 0.4)                     | 0.2<br>(0.1 to 0.2)                            | < 0.05<br>(< 0.05 to < 0.05)                        | -16.5<br>(-33.5 to -0.4)                          | -19.3<br>(-35.8 to -3.8)                            |
| Hepatitis                                                               | 12.0<br>(10.6 to 13.4)                  | 0.8<br>(0.7 to 1.0)                            | < 0.05<br>(< 0.05 to < 0.05)                        | -33.8<br>(-45.1 to -21.2)                         | -40.4<br>(-51.6 to -28.5)                           |
| Acute hepatitis A                                                       | < 0.05<br>(< 0.05 to < 0.05)            | 0.3<br>(0.3 to 0.4)                            | < 0.05<br>(< 0.05 to < 0.05)                        | -35.7<br>(-53.1 to -12.1)                         | -41.0<br>(-57.8 to -16.0)                           |
| Hepatitis B                                                             | 5.3<br>(4.2 to 6.5)                     | 0.4<br>(0.3 to 0.5)                            | < 0.05<br>(< 0.05 to < 0.05)                        | -33.3<br>(-44.6 to -20.6)                         | -44.0<br>(-53.1 to -34.0)                           |
| Hepatitis C                                                             | 6.7<br>(6.0 to 7.4)                     | 0.1<br>(0.1 to 0.1)                            | < 0.05<br>(< 0.05 to < 0.05)                        | -14.9<br>(-17.3 to -12.5)                         | -12.6<br>(-14.8 to -10.5)                           |
| Acute hepatitis E                                                       | < 0.05<br>(< 0.05 to < 0.05)            | < 0.05<br>(< 0.05 to < 0.05)                   | < 0.05<br>(< 0.05 to < 0.05)                        | -31.5<br>(-36.2 to -26.8)                         | -43.4<br>(-46.8 to -39.5)                           |
| Other infectious diseases                                               | 0.4<br>(0.3 to 0.5)                     | < 0.05<br>(< 0.05 to < 0.05)                   | < 0.05<br>(< 0.05 to < 0.05)                        | 3.7<br>(-6.2 to 14.0)                             | 4.1<br>(-10.0 to 18.7)                              |
| <b>Non-communicable diseases</b>                                        | <b>391.3</b><br><b>(388.1 to 393.8)</b> | <b>1,151.7†</b><br><b>(1,072.8 to 1,222.9)</b> | <b>47.4</b><br><b>(35.2 to 61.1)</b>                | <b>11.9</b><br><b>(10.3 to 13.6)</b>              | <b>-0.3</b><br><b>(-1.8 to 1.2)</b>                 |
| <b>Neoplasms</b>                                                        | <b>6.8</b><br><b>(6.5 to 7.2)</b>       | <b>2.2</b><br><b>(2.1 to 2.4)</b>              | <b>0.7</b><br><b>(0.5 to 0.9)</b>                   | <b>27.8</b><br><b>(21.2 to 37.1)</b>              | <b>0.7</b><br><b>(-4.4 to 7.5)</b>                  |
| Lip and oral cavity cancer                                              | 0.1<br>(0.1 to 0.1)                     | < 0.05<br>(< 0.05 to < 0.05)                   | < 0.05<br>(< 0.05 to < 0.05)                        | 24.3<br>(7.2 to 43.4)                             | 0.0<br>(-13.2 to 15.2)                              |
| Nasopharynx cancer                                                      | < 0.05<br>(< 0.05 to < 0.05)            | < 0.05<br>(< 0.05 to < 0.05)                   | < 0.05<br>(< 0.05 to < 0.05)                        | 5.9<br>(-9.9 to 24.3)                             | -10.1<br>(-23.6 to 6.1)                             |
| Other pharynx cancer                                                    | < 0.05<br>(< 0.05 to < 0.05)            | < 0.05<br>(< 0.05 to < 0.05)                   | < 0.05<br>(< 0.05 to < 0.05)                        | 31.1<br>(10.7 to 56.1)                            | 9.8<br>(-7.3 to 29.1)                               |
| Oesophageal cancer                                                      | < 0.05<br>(< 0.05 to < 0.05)            | < 0.05<br>(< 0.05 to < 0.05)                   | < 0.05<br>(< 0.05 to < 0.05)                        | 25.8<br>(7.7 to 46.6)                             | -1.8<br>(-15.6 to 13.8)                             |
| Stomach cancer                                                          | 0.1<br>(0.1 to 0.1)                     | 0.1<br>(0.1 to 0.1)                            | < 0.05<br>(< 0.05 to < 0.05)                        | 16.6<br>(-3.1 to 40.9)                            | -11.2<br>(-25.1 to 6.6)                             |
| Colon and rectum cancer                                                 | 1.1<br>(1.0 to 1.3)                     | 0.3<br>(0.2 to 0.3)                            | 0.1<br>(0.1 to 0.1)                                 | 33.5<br>(16.7 to 57.4)                            | 1.3<br>(-11.4 to 18.9)                              |
| Liver cancer                                                            | < 0.05<br>(< 0.05 to < 0.05)            | < 0.05<br>(< 0.05 to < 0.05)                   | < 0.05<br>(< 0.05 to < 0.05)                        | 48.9<br>(27.3 to 75.3)                            | 14.0<br>(-2.2 to 33.9)                              |
| Liver cancer due to hepatitis B                                         | < 0.05<br>(< 0.05 to < 0.05)            | < 0.05<br>(< 0.05 to < 0.05)                   | < 0.05<br>(< 0.05 to < 0.05)                        | 45.4<br>(20.8 to 72.5)                            | 15.8<br>(-2.6 to 37.3)                              |



| Cause                                              | Prevalence in thousands (95% UI)     | Incidence in thousands (95% UI)    | YLDs in thousands (95% UI)        |                                                   |                                                     |
|----------------------------------------------------|--------------------------------------|------------------------------------|-----------------------------------|---------------------------------------------------|-----------------------------------------------------|
|                                                    | 2016 counts                          | 2016 counts                        | 2016 counts                       | Percentage change in counts between 2006 and 2016 | Percentage change in age-standardised rates between |
| Liver cancer due to hepatitis C                    | < 0.05<br>(< 0.05 to < 0.05)         | < 0.05<br>(< 0.05 to < 0.05)       | < 0.05<br>(< 0.05 to < 0.05)      | 45.6<br>(23.8 to 74.9)                            | 10.3<br>(-5.9 to 31.6)                              |
| Liver cancer due to alcohol use                    | < 0.05<br>(< 0.05 to < 0.05)         | < 0.05<br>(< 0.05 to < 0.05)       | < 0.05<br>(< 0.05 to < 0.05)      | 55.6<br>(30.8 to 86.0)                            | 18.2<br>(-0.6 to 40.9)                              |
| Liver cancer due to other causes                   | < 0.05<br>(< 0.05 to < 0.05)         | < 0.05<br>(< 0.05 to < 0.05)       | < 0.05<br>(< 0.05 to < 0.05)      | 47.8<br>(23.8 to 76.5)                            | 13.2<br>(-4.6 to 35.1)                              |
| Gallbladder and biliary tract cancer               | < 0.05<br>(< 0.05 to < 0.05)         | < 0.05<br>(< 0.05 to < 0.05)       | < 0.05<br>(< 0.05 to < 0.05)      | 8.2<br>(-16.1 to 35.1)                            | -18.6<br>(-36.7 to 1.6)                             |
| Pancreatic cancer                                  | 0.1<br>(< 0.05 to 0.1)               | 0.1<br>(0.1 to 0.1)                | < 0.05<br>(< 0.05 to < 0.05)      | 33.0<br>(6.9 to 61.0)                             | 1.3<br>(-17.6 to 21.0)                              |
| Larynx cancer                                      | 0.1<br>(0.1 to 0.1)                  | < 0.05<br>(< 0.05 to < 0.05)       | < 0.05<br>(< 0.05 to < 0.05)      | 22.1<br>(0.2 to 50.2)                             | -2.3<br>(-20.1 to 18.7)                             |
| Tracheal, bronchus, and lung cancer                | 0.3<br>(0.3 to 0.4)                  | 0.2<br>(0.2 to 0.2)                | < 0.05<br>(< 0.05 to 0.1)         | 36.9<br>(11.6 to 67.0)                            | 4.6<br>(-13.9 to 26.9)                              |
| Malignant skin melanoma                            | 0.2<br>(0.2 to 0.3)                  | < 0.05<br>(< 0.05 to 0.1)          | < 0.05<br>(< 0.05 to < 0.05)      | 41.8<br>(19.0 to 66.5)                            | 19.3<br>(0.4 to 39.8)                               |
| Non-melanoma skin cancer                           | 0.1<br>(0.1 to 0.1)                  | 0.2<br>(0.2 to 0.3)                | < 0.05<br>(< 0.05 to < 0.05)      | 39.6<br>(11.5 to 77.2)                            | 5.7<br>(-15.6 to 32.9)                              |
| Non-melanoma skin cancer (squamous-cell carcinoma) | 0.1<br>(0.1 to 0.1)                  | 0.1<br>(0.1 to 0.1)                | < 0.05<br>(< 0.05 to < 0.05)      | 39.7<br>(9.5 to 80.4)                             | 5.6<br>(-16.8 to 35.2)                              |
| Non-melanoma skin cancer (basal-cell carcinoma)    | < 0.05<br>(< 0.05 to < 0.05)         | 0.2<br>(0.1 to 0.2)                | < 0.05<br>(< 0.05 to < 0.05)      | 37.8<br>(-3.0 to 88.3)                            | 7.6<br>(-22.2 to 43.7)                              |
| Breast cancer                                      | 1.4<br>(1.3 to 1.6)                  | 0.3<br>(0.3 to 0.3)                | 0.1<br>(0.1 to 0.2)               | 5.7<br>(-5.4 to 21.1)                             | -13.4<br>(-22.7 to -0.8)                            |
| Cervical cancer                                    | 0.1<br>(0.1 to 0.1)                  | < 0.05<br>(< 0.05 to < 0.05)       | < 0.05<br>(< 0.05 to < 0.05)      | -25.4<br>(-38.8 to -8.0)                          | -34.2<br>(-46.8 to -18.6)                           |
| Uterine cancer                                     | 0.3<br>(0.3 to 0.4)                  | 0.1<br>(0.1 to 0.1)                | < 0.05<br>(< 0.05 to < 0.05)      | 30.8<br>(2.9 to 68.9)                             | 5.3<br>(-16.6 to 34.6)                              |
| Ovarian cancer                                     | 0.1<br>(0.1 to 0.2)                  | < 0.05<br>(< 0.05 to 0.1)          | < 0.05<br>(< 0.05 to < 0.05)      | 13.6<br>(-19.1 to 55.9)                           | -6.0<br>(-32.7 to 28.0)                             |
| Prostate cancer                                    | 1.2<br>(1.0 to 1.6)                  | 0.3<br>(0.3 to 0.4)                | 0.1<br>(0.1 to 0.1)               | 53.7<br>(30.4 to 81.9)                            | 12.4<br>(-4.2 to 32.7)                              |
| Testicular cancer                                  | 0.1<br>(0.1 to 0.1)                  | < 0.05<br>(< 0.05 to < 0.05)       | < 0.05<br>(< 0.05 to < 0.05)      | 31.0<br>(-4.4 to 78.7)                            | 27.1<br>(-8.9 to 76.2)                              |
| Kidney cancer                                      | 0.2<br>(0.1 to 0.2)                  | 0.1<br>(< 0.05 to 0.1)             | < 0.05<br>(< 0.05 to < 0.05)      | 32.1<br>(12.0 to 55.8)                            | 5.3<br>(-10.3 to 23.0)                              |
| Bladder cancer                                     | 0.4<br>(0.4 to 0.5)                  | 0.1<br>(0.1 to 0.1)                | < 0.05<br>(< 0.05 to < 0.05)      | 36.2<br>(15.3 to 59.5)                            | 2.9<br>(-12.0 to 19.5)                              |
| Brain and nervous system cancer                    | 0.1<br>(0.1 to 0.1)                  | < 0.05<br>(< 0.05 to < 0.05)       | < 0.05<br>(< 0.05 to < 0.05)      | 33.9<br>(4.5 to 67.6)                             | 14.9<br>(-9.9 to 41.1)                              |
| Thyroid cancer                                     | 0.1<br>(0.1 to 0.2)                  | < 0.05<br>(< 0.05 to < 0.05)       | < 0.05<br>(< 0.05 to < 0.05)      | 15.0<br>(-2.6 to 39.3)                            | -0.9<br>(-17.0 to 19.5)                             |
| Mesothelioma                                       | < 0.05<br>(< 0.05 to < 0.05)         | < 0.05<br>(< 0.05 to < 0.05)       | < 0.05<br>(< 0.05 to < 0.05)      | 45.7<br>(18.4 to 76.9)                            | 10.1<br>(-9.1 to 30.9)                              |
| Hodgkin lymphoma                                   | 0.1<br>(< 0.05 to 0.1)               | < 0.05<br>(< 0.05 to < 0.05)       | < 0.05<br>(< 0.05 to < 0.05)      | 16.9<br>(-4.1 to 41.3)                            | 8.8<br>(-12.5 to 34.4)                              |
| Non-Hodgkin's lymphoma                             | 0.3<br>(0.2 to 0.3)                  | 0.1<br>(0.1 to 0.1)                | < 0.05<br>(< 0.05 to < 0.05)      | 43.7<br>(21.8 to 67.2)                            | 15.8<br>(-0.9 to 33.7)                              |
| Multiple myeloma                                   | 0.1<br>(< 0.05 to 0.1)               | < 0.05<br>(< 0.05 to < 0.05)       | < 0.05<br>(< 0.05 to < 0.05)      | 38.2<br>(6.0 to 79.7)                             | 6.0<br>(-17.4 to 36.0)                              |
| Leukaemia                                          | 0.1<br>(0.1 to 0.2)                  | < 0.05<br>(< 0.05 to 0.1)          | < 0.05<br>(< 0.05 to < 0.05)      | 29.7<br>(12.7 to 49.8)                            | 4.0<br>(-9.7 to 19.4)                               |
| Acute lymphoid leukaemia                           | < 0.05<br>(< 0.05 to < 0.05)         | < 0.05<br>(< 0.05 to < 0.05)       | < 0.05<br>(< 0.05 to < 0.05)      | 35.0<br>(11.0 to 66.1)                            | 34.6<br>(2.7 to 83.2)                               |
| Chronic lymphoid leukaemia                         | 0.1<br>(< 0.05 to 0.1)               | < 0.05<br>(< 0.05 to < 0.05)       | < 0.05<br>(< 0.05 to < 0.05)      | 32.9<br>(2.4 to 71.3)                             | -1.2<br>(-23.4 to 26.3)                             |
| Acute myeloid leukaemia                            | < 0.05<br>(< 0.05 to < 0.05)         | < 0.05<br>(< 0.05 to < 0.05)       | < 0.05<br>(< 0.05 to < 0.05)      | 38.4<br>(17.4 to 61.6)                            | 7.4<br>(-8.4 to 24.6)                               |
| Chronic myeloid leukaemia                          | < 0.05<br>(< 0.05 to < 0.05)         | < 0.05<br>(< 0.05 to < 0.05)       | < 0.05<br>(< 0.05 to < 0.05)      | 3.7<br>(-11.4 to 21.8)                            | -19.8<br>(-30.8 to -7.1)                            |
| Other leukaemia                                    | < 0.05<br>(< 0.05 to < 0.05)         | < 0.05<br>(< 0.05 to < 0.05)       | < 0.05<br>(< 0.05 to < 0.05)      | 24.8<br>(2.7 to 53.7)                             | -5.8<br>(-21.5 to 14.5)                             |
| Other neoplasms                                    | 0.3<br>(0.3 to 0.4)                  | 0.1<br>(0.1 to 0.1)                | < 0.05<br>(< 0.05 to < 0.05)      | 43.4<br>(18.9 to 76.6)                            | 17.4<br>(-1.4 to 41.1)                              |
| <b>Cardiovascular diseases</b>                     | <b>53.4</b><br><b>(51.5 to 55.5)</b> | <b>5.5†</b><br><b>(5.1 to 5.9)</b> | <b>3.4</b><br><b>(2.5 to 4.5)</b> | <b>27.9</b><br><b>(23.4 to 32.6)</b>              | <b>-1.4</b><br><b>(-4.9 to 2.0)</b>                 |
| Rheumatic heart disease                            | < 0.05<br>(< 0.05 to < 0.05)         | < 0.05<br>(< 0.05 to < 0.05)       | < 0.05<br>(< 0.05 to < 0.05)      | 13.3<br>(-1.5 to 29.9)                            | -9.3<br>(-20.2 to 2.5)                              |
| Ischaemic heart disease                            | 16.3<br>(15.3 to 17.3)               | 1.9<br>(1.7 to 2.1)                | 0.9<br>(0.6 to 1.2)               | 24.9<br>(19.4 to 30.7)                            | -3.5<br>(-7.7 to 0.8)                               |
| Cerebrovascular disease                            | 6.6<br>(6.3 to 7.0)                  | 0.9‡<br>(0.8 to 1.0)               | 1.0<br>(0.7 to 1.3)               | 30.3<br>(21.6 to 40.3)                            | 1.5<br>(-5.1 to 8.7)                                |
| Ischaemic stroke                                   | 5.1<br>(4.7 to 5.7)                  | 0.6‡<br>(0.5 to 0.6)               | 0.8<br>(0.5 to 1.0)               | 29.0<br>(18.8 to 41.2)                            | -0.2<br>(-7.7 to 9.0)                               |
| Hemorrhagic stroke                                 | 1.8<br>(1.6 to 2.0)                  | 0.3‡<br>(0.3 to 0.4)               | 0.3<br>(0.2 to 0.3)               | 34.2<br>(21.1 to 49.0)                            | 6.3<br>(-3.4 to 17.8)                               |
| Hypertensive heart disease                         | 1.4<br>(1.1 to 1.6)                  | --                                 | 0.1<br>(0.1 to 0.1)               | 23.7<br>(11.3 to 36.9)                            | -6.5<br>(-15.8 to 3.1)                              |
| Cardiomyopathy and myocarditis                     | 1.2<br>(1.1 to 1.4)                  | 0.2†<br>(0.1 to 0.2)               | 0.1<br>(0.1 to 0.1)               | 15.8<br>(5.5 to 26.8)                             | -5.8<br>(-14.2 to 2.9)                              |
| Myocarditis                                        | 0.3<br>(0.3 to 0.4)                  | 0.2<br>(0.1 to 0.2)                | < 0.05<br>(< 0.05 to < 0.05)      | 5.0<br>(-9.5 to 22.7)                             | -6.5<br>(-19.7 to 8.8)                              |
| Alcoholic cardiomyopathy                           | 0.1<br>(0.1 to 0.1)                  | --                                 | < 0.05<br>(< 0.05 to < 0.05)      | 13.0<br>(-14.5 to 46.4)                           | -0.3<br>(-23.7 to 29.0)                             |
| Other cardiomyopathy                               | 0.8<br>(0.7 to 1.0)                  | --                                 | 0.1<br>(< 0.05 to 0.1)            | 20.8<br>(7.7 to 34.8)                             | -6.2<br>(-16.0 to 4.6)                              |
| Atrial fibrillation and flutter                    | 7.5<br>(6.7 to 8.3)                  | 0.6<br>(0.6 to 0.7)                | 0.6<br>(0.4 to 0.8)               | 40.6<br>(30.9 to 49.5)                            | 5.3<br>(-2.0 to 11.9)                               |
| Peripheral vascular disease                        | 20.8<br>(18.2 to 23.6)               | 1.7<br>(1.5 to 2.1)                | 0.1<br>(< 0.05 to 0.1)            | 25.0<br>(16.1 to 34.4)                            | -8.1<br>(-14.3 to -1.7)                             |
| Endocarditis                                       | 0.1<br>(0.1 to 0.1)                  | 0.1<br>(0.1 to 0.1)                | < 0.05<br>(< 0.05 to < 0.05)      | 20.3<br>(-0.0 to 45.3)                            | -8.1<br>(-22.3 to 8.7)                              |
| Other cardiovascular and circulatory diseases      | 12.0<br>(10.1 to 14.1)               | --                                 | 0.6<br>(0.4 to 0.9)               | 21.1<br>(11.3 to 31.6)                            | -5.7<br>(-12.8 to 1.8)                              |
| <b>Chronic respiratory diseases</b>                | <b>50.5</b><br><b>(48.6 to 52.2)</b> | <b>3.9†</b><br><b>(3.7 to 4.1)</b> | <b>1.9</b><br><b>(1.4 to 2.5)</b> | <b>7.9</b><br><b>(2.1 to 14.0)</b>                | <b>-0.9</b><br><b>(-5.8 to 4.0)</b>                 |
| Chronic obstructive pulmonary disease              | 19.8<br>(18.8 to 20.8)               | 1.2<br>(1.1 to 1.2)                | 0.5<br>(0.4 to 0.7)               | 16.8<br>(-0.5 to 35.6)                            | -5.2<br>(-18.9 to 10.5)                             |
| Pneumoconiosis                                     | < 0.05<br>(< 0.05 to < 0.05)         | < 0.05<br>(< 0.05 to < 0.05)       | < 0.05<br>(< 0.05 to < 0.05)      | 45.8<br>(36.9 to 54.1)                            | 5.5<br>(-0.4 to 11.1)                               |
| Silicosis                                          | < 0.05<br>(< 0.05 to < 0.05)         | < 0.05<br>(< 0.05 to < 0.05)       | < 0.05<br>(< 0.05 to < 0.05)      | 59.9<br>(48.6 to 69.8)                            | 14.0<br>(6.2 to 21.1)                               |



| Cause                                                          | Prevalence in thousands (95% UI)  | Incidence in thousands (95% UI)   | YLDs in thousands (95% UI)        |                                                                     |                                                                        |
|----------------------------------------------------------------|-----------------------------------|-----------------------------------|-----------------------------------|---------------------------------------------------------------------|------------------------------------------------------------------------|
|                                                                | 2016 counts<br>(< 0.05 to < 0.05) | 2016 counts<br>(< 0.05 to < 0.05) | 2016 counts<br>(< 0.05 to < 0.05) | Percentage change in counts between 2006 and 2016<br>(-6.4 to 20.8) | Percentage change in age-standardised rates between<br>(-27.8 to -6.3) |
| Asbestosis                                                     | < 0.05<br>(< 0.05 to < 0.05)      | < 0.05<br>(< 0.05 to < 0.05)      | < 0.05<br>(< 0.05 to < 0.05)      | 6.7<br>(-6.4 to 20.8)                                               | -17.4<br>(-27.8 to -6.3)                                               |
| Coal workers pneumoconiosis                                    | --                                | --                                | --                                | --                                                                  | --                                                                     |
| Other pneumoconiosis                                           | < 0.05<br>(< 0.05 to < 0.05)      | < 0.05<br>(< 0.05 to < 0.05)      | < 0.05<br>(< 0.05 to < 0.05)      | 22.1<br>(10.8 to 32.8)                                              | -8.7<br>(-16.9 to -1.2)                                                |
| Asthma                                                         | 32.8<br>(30.9 to 35.1)            | 2.7<br>(2.5 to 2.9)               | 1.3<br>(0.8 to 1.8)               | 3.7<br>(-0.5 to 8.6)                                                | -0.0<br>(-4.5 to 5.4)                                                  |
| Interstitial lung disease and pulmonary sarcoidosis            | 0.3<br>(0.3 to 0.4)               | < 0.05<br>(< 0.05 to < 0.05)      | < 0.05<br>(< 0.05 to < 0.05)      | 30.6<br>(13.1 to 49.8)                                              | 1.7<br>(-10.7 to 15.4)                                                 |
| Other chronic respiratory diseases                             | --                                | --                                | < 0.05<br>(< 0.05 to < 0.05)      | 29.5<br>(10.1 to 50.6)                                              | 28.9<br>(7.6 to 51.6)                                                  |
| <b>Cirrhosis and other chronic liver diseases</b>              | <b>3.0<br/>(2.9 to 3.2)</b>       | <b>0.1<br/>(0.1 to 0.1)</b>       | <b>0.1<br/>(0.1 to 0.1)</b>       | <b>18.6<br/>(7.4 to 31.5)</b>                                       | <b>7.0<br/>(-3.3 to 19.0)</b>                                          |
| Cirrhosis and other chronic liver diseases due to hepatitis B  | 0.4<br>(0.3 to 0.5)               | < 0.05<br>(< 0.05 to < 0.05)      | < 0.05<br>(< 0.05 to < 0.05)      | 23.1<br>(-5.8 to 59.3)                                              | 8.0<br>(-17.7 to 39.0)                                                 |
| Cirrhosis and other chronic liver diseases due to hepatitis C  | 1.0<br>(0.8 to 1.2)               | < 0.05<br>(< 0.05 to < 0.05)      | < 0.05<br>(< 0.05 to < 0.05)      | 18.6<br>(-1.8 to 43.2)                                              | 5.5<br>(-12.7 to 27.6)                                                 |
| Cirrhosis and other chronic liver diseases due to alcohol use  | 1.4<br>(1.2 to 1.6)               | < 0.05<br>(< 0.05 to < 0.05)      | < 0.05<br>(< 0.05 to 0.1)         | 23.9<br>(6.6 to 45.5)                                               | 8.2<br>(-6.8 to 28.0)                                                  |
| Cirrhosis and other chronic liver diseases due to other causes | 0.3<br>(0.2 to 0.4)               | < 0.05<br>(< 0.05 to < 0.05)      | < 0.05<br>(< 0.05 to < 0.05)      | 3.6<br>(-16.1 to 30.7)                                              | 6.7<br>(-14.0 to 35.5)                                                 |
| <b>Digestive diseases</b>                                      | <b>11.9<br/>(11.1 to 12.7)</b>    | <b>13.6†<br/>(12.7 to 14.6)</b>   | <b>0.4<br/>(0.2 to 0.5)</b>       | <b>11.0<br/>(3.1 to 19.1)</b>                                       | <b>-3.9<br/>(-10.5 to 3.4)</b>                                         |
| Peptic ulcer disease                                           | 1.9<br>(1.6 to 2.1)               | 0.5<br>(0.5 to 0.6)               | < 0.05<br>(< 0.05 to < 0.05)      | 31.9<br>(-5.6 to 77.9)                                              | 18.0<br>(-17.1 to 64.5)                                                |
| Gastritis and duodenitis                                       | 5.8<br>(5.0 to 6.6)               | 4.5<br>(4.0 to 5.1)               | < 0.05<br>(< 0.05 to < 0.05)      | 41.9<br>(12.3 to 77.4)                                              | 19.2<br>(-7.2 to 50.5)                                                 |
| Appendicitis                                                   | < 0.05<br>(< 0.05 to < 0.05)      | 0.4<br>(0.4 to 0.4)               | < 0.05<br>(< 0.05 to < 0.05)      | 2.7<br>(-6.6 to 16.5)                                               | 4.1<br>(-6.8 to 20.7)                                                  |
| Paralytic ileus and intestinal obstruction                     | < 0.05<br>(< 0.05 to < 0.05)      | 0.2<br>(0.2 to 0.2)               | < 0.05<br>(< 0.05 to < 0.05)      | 31.2<br>(25.5 to 37.6)                                              | 8.3<br>(4.4 to 12.7)                                                   |
| Inguinal, femoral, and abdominal hernia                        | 3.4<br>(3.1 to 3.7)               | 5.5<br>(4.7 to 6.2)               | 0.2<br>(0.1 to 0.3)               | 6.0<br>(-3.4 to 15.5)                                               | -8.5<br>(-16.2 to -0.5)                                                |
| Inflammatory bowel disease                                     | 0.3<br>(0.3 to 0.3)               | 0.1<br>(0.1 to 0.1)               | < 0.05<br>(< 0.05 to 0.1)         | 3.7<br>(-11.4 to 20.2)                                              | -5.6<br>(-19.8 to 10.0)                                                |
| Vascular intestinal disorders                                  | < 0.05<br>(< 0.05 to < 0.05)      | 0.1<br>(0.1 to 0.1)               | < 0.05<br>(< 0.05 to < 0.05)      | 35.2<br>(1.6 to 75.9)                                               | 7.6<br>(-14.9 to 34.8)                                                 |
| Gallbladder and biliary diseases                               | 0.8<br>(0.8 to 1.0)               | 2.1<br>(1.9 to 2.4)               | < 0.05<br>(< 0.05 to < 0.05)      | 16.0<br>(-5.4 to 45.6)                                              | -1.9<br>(-18.2 to 19.2)                                                |
| Pancreatitis                                                   | < 0.05<br>(< 0.05 to < 0.05)      | 0.2<br>(0.2 to 0.2)               | < 0.05<br>(< 0.05 to < 0.05)      | 20.2<br>(15.3 to 25.8)                                              | 0.7<br>(-3.0 to 4.6)                                                   |
| Other digestive diseases                                       | --                                | --                                | < 0.05<br>(< 0.05 to < 0.05)      | 16.2<br>(8.3 to 24.7)                                               | -2.1<br>(-9.1 to 5.0)                                                  |
| <b>Neurological disorders</b>                                  | <b>164.8<br/>(159.1 to 172.2)</b> | <b>63.4<br/>(55.2 to 72.6)</b>    | <b>5.2<br/>(3.6 to 7.1)</b>       | <b>8.7<br/>(0.0 to 19.8)</b>                                        | <b>-0.2<br/>(-8.9 to 11.0)</b>                                         |
| Alzheimer's disease and other dementias                        | 5.2<br>(4.3 to 6.1)               | 1.0<br>(0.8 to 1.2)               | 0.8<br>(0.5 to 1.0)               | 33.4<br>(27.5 to 39.7)                                              | -1.6<br>(-5.6 to 3.2)                                                  |
| Parkinson's disease                                            | 0.7<br>(0.6 to 0.9)               | 0.1<br>(0.1 to 0.1)               | 0.1<br>(0.1 to 0.1)               | 41.2<br>(27.5 to 56.6)                                              | 5.1<br>(-5.4 to 17.2)                                                  |
| Epilepsy                                                       | 1.1<br>(0.3 to 2.0)               | 0.1<br>(< 0.05 to 0.2)            | 0.3<br>(0.1 to 0.6)               | 8.6<br>(-80.9 to 470.1)                                             | 1.5<br>(-82.4 to 466.5)                                                |
| Multiple sclerosis                                             | 0.2<br>(0.2 to 0.3)               | < 0.05<br>(< 0.05 to < 0.05)      | 0.1<br>(< 0.05 to 0.1)            | 23.7<br>(3.8 to 50.9)                                               | 12.1<br>(-6.5 to 35.8)                                                 |
| Motor neuron disease                                           | 0.1<br>(0.1 to 0.1)               | < 0.05<br>(< 0.05 to < 0.05)      | < 0.05<br>(< 0.05 to < 0.05)      | 22.6<br>(17.4 to 28.3)                                              | 6.0<br>(2.1 to 10.4)                                                   |
| Migraine                                                       | 80.2<br>(75.9 to 84.9)            | 6.9<br>(6.4 to 7.5)               | 3.5<br>(2.3 to 4.9)               | 3.7<br>(0.1 to 7.5)                                                 | -0.8<br>(-4.1 to 2.6)                                                  |
| Tension-type headache                                          | 108.6<br>(97.6 to 121.0)          | 55.2<br>(47.0 to 64.5)            | 0.5<br>(0.3 to 0.8)               | 6.8<br>(1.0 to 13.1)                                                | -0.0<br>(-5.0 to 5.4)                                                  |
| Other neurological disorders                                   | < 0.05<br>(< 0.05 to < 0.05)      | < 0.05<br>(< 0.05 to < 0.05)      | 0.1<br>(< 0.05 to 0.1)            | 20.9<br>(-50.5 to 217.1)                                            | 20.0<br>(-59.1 to 267.0)                                               |
| <b>Mental and substance use disorders</b>                      | <b>67.7<br/>(65.0 to 71.0)</b>    | <b>21.2†<br/>(19.7 to 22.8)</b>   | <b>9.6<br/>(7.0 to 12.3)</b>      | <b>3.8<br/>(1.9 to 5.7)</b>                                         | <b>-1.4<br/>(-3.4 to 0.3)</b>                                          |
| Schizophrenia                                                  | 1.2<br>(1.0 to 1.5)               | 0.1<br>(< 0.05 to 0.1)            | 0.8<br>(0.6 to 1.0)               | 8.4<br>(0.1 to 17.5)                                                | 0.7<br>(-7.0 to 9.1)                                                   |
| Alcohol use disorders                                          | 4.3<br>(3.6 to 5.0)               | 1.9<br>(1.7 to 2.2)               | 0.4<br>(0.3 to 0.6)               | 8.1<br>(-1.0 to 17.5)                                               | 4.6<br>(-4.4 to 14.2)                                                  |
| Drug use disorders                                             | 3.2<br>(3.0 to 3.4)               | 0.4<br>(0.4 to 0.5)               | 0.8<br>(0.6 to 1.0)               | -12.8<br>(-19.9 to -4.4)                                            | -16.5<br>(-23.8 to -8.2)                                               |
| Opioid use disorders                                           | 1.6<br>(1.4 to 1.7)               | 0.2<br>(0.2 to 0.2)               | 0.7<br>(0.5 to 0.8)               | -16.0<br>(-24.1 to -6.7)                                            | -20.1<br>(-28.1 to -10.6)                                              |
| Cocaine use disorders                                          | 0.1<br>(0.1 to 0.1)               | < 0.05<br>(< 0.05 to < 0.05)      | < 0.05<br>(< 0.05 to < 0.05)      | 11.4<br>(-12.5 to 41.4)                                             | 5.3<br>(-21.0 to 39.6)                                                 |
| Amphetamine use disorders                                      | 0.3<br>(0.2 to 0.4)               | < 0.05<br>(< 0.05 to < 0.05)      | < 0.05<br>(< 0.05 to 0.1)         | -3.0<br>(-24.0 to 24.4)                                             | -3.1<br>(-25.1 to 24.7)                                                |
| Cannabis use disorders                                         | 1.0<br>(0.8 to 1.2)               | 0.2<br>(0.1 to 0.2)               | < 0.05<br>(< 0.05 to < 0.05)      | 2.5<br>(-14.3 to 21.3)                                              | 2.9<br>(-14.6 to 23.4)                                                 |
| Other drug use disorders                                       | 0.4<br>(0.3 to 0.4)               | 0.1<br>(< 0.05 to 0.1)            | 0.1<br>(< 0.05 to 0.1)            | 5.4<br>(-11.6 to 25.7)                                              | 1.8<br>(-16.0 to 23.7)                                                 |
| Depressive disorders                                           | 16.2<br>(15.2 to 17.5)            | 14.4<br>(13.0 to 16.0)            | 2.5<br>(1.7 to 3.4)               | 7.5<br>(3.5 to 11.8)                                                | -0.3<br>(-4.1 to 3.7)                                                  |
| Major depressive disorder                                      | 8.8<br>(7.9 to 9.7)               | 13.4<br>(12.0 to 14.9)            | 1.8<br>(1.2 to 2.4)               | 6.8<br>(1.4 to 12.7)                                                | -0.2<br>(-5.4 to 5.2)                                                  |
| Dysthymia                                                      | 7.6<br>(6.7 to 8.8)               | 1.0<br>(0.9 to 1.2)               | 0.7<br>(0.5 to 1.1)               | 9.4<br>(5.9 to 13.2)                                                | -0.4<br>(-3.6 to 2.7)                                                  |
| Bipolar disorder                                               | 4.9<br>(3.3 to 7.0)               | 0.3<br>(0.2 to 0.4)               | 1.0<br>(0.6 to 1.6)               | 5.8<br>(0.7 to 11.3)                                                | -0.5<br>(-5.4 to 4.1)                                                  |
| Anxiety disorders                                              | 22.2<br>(19.6 to 25.0)            | 2.8<br>(2.4 to 3.1)               | 2.1<br>(1.5 to 2.9)               | 4.3<br>(1.3 to 7.7)                                                 | -0.1<br>(-3.3 to 3.0)                                                  |
| Eating disorders                                               | 1.3<br>(1.1 to 1.6)               | 0.4<br>(0.3 to 0.5)               | 0.3<br>(0.2 to 0.4)               | 7.2<br>(-1.9 to 17.1)                                               | 8.3<br>(-1.1 to 18.1)                                                  |
| Anorexia nervosa                                               | 0.4<br>(0.3 to 0.5)               | 0.1<br>(< 0.05 to 0.1)            | 0.1<br>(< 0.05 to 0.1)            | 5.0<br>(-11.6 to 22.8)                                              | 8.0<br>(-8.9 to 26.1)                                                  |
| Bulimia nervosa                                                | 1.0<br>(0.7 to 1.3)               | 0.3<br>(0.2 to 0.4)               | 0.2<br>(0.1 to 0.3)               | 8.1<br>(-3.4 to 19.8)                                               | 8.4<br>(-3.1 to 20.0)                                                  |
| Autistic spectrum disorders                                    | 3.1<br>(2.8 to 3.5)               | < 0.05<br>(< 0.05 to < 0.05)      | 0.5<br>(0.3 to 0.7)               | 3.8<br>(-1.2 to 8.9)                                                | 0.2<br>(-4.5 to 5.2)                                                   |
| Autism                                                         | 1.3<br>(1.1 to 1.5)               | < 0.05<br>(< 0.05 to < 0.05)      | 0.3<br>(0.2 to 0.5)               | 4.2<br>(-3.2 to 12.5)                                               | 0.3<br>(-6.8 to 8.2)                                                   |
| Asperger syndrome and other autistic spectrum disorders        | 1.9<br>(1.6 to 2.3)               | < 0.05<br>(< 0.05 to < 0.05)      | 0.2<br>(0.1 to 0.3)               | 2.9<br>(-2.2 to 8.2)                                                | 0.1<br>(-5.1 to 5.2)                                                   |

| Cause                                                      | Prevalence in thousands (95% UI)        | Incidence in thousands (95% UI)            | YLDs in thousands (95% UI)          |                                                   |                                                     |
|------------------------------------------------------------|-----------------------------------------|--------------------------------------------|-------------------------------------|---------------------------------------------------|-----------------------------------------------------|
|                                                            | 2016 counts                             | 2016 counts                                | 2016 counts                         | Percentage change in counts between 2006 and 2016 | Percentage change in age-standardised rates between |
| Attention-deficit/hyperactivity disorder                   | 2.7<br>(2.0 to 3.6)                     | 0.1<br>(0.1 to 0.1)                        | < 0.05<br>(< 0.05 to 0.1)           | -7.9<br>(-14.8 to -0.5)                           | -1.1<br>(-8.4 to 6.5)                               |
| Conduct disorder                                           | 2.0<br>(1.6 to 2.6)                     | 0.6<br>(0.5 to 0.8)                        | 0.2<br>(0.1 to 0.4)                 | -15.3<br>(-20.6 to -9.5)                          | -1.4<br>(-7.6 to 4.6)                               |
| Idiopathic developmental intellectual disability           | 2.4<br>(0.9 to 4.1)                     | --                                         | 0.1<br>(< 0.05 to 0.2)              | -0.7<br>(-9.5 to 9.9)                             | -4.1<br>(-13.1 to 5.5)                              |
| Other mental and substance use disorders                   | 10.1<br>(8.8 to 11.7)                   | 0.2<br>(0.2 to 0.3)                        | 0.8<br>(0.5 to 1.1)                 | 9.8<br>(4.9 to 14.4)                              | 0.6<br>(-4.0 to 5.0)                                |
| <b>Diabetes, urogenital, blood, and endocrine diseases</b> | <b>155.2</b><br><b>(141.7 to 171.3)</b> | <b>39.8†</b><br><b>(37.4 to 42.7)</b>      | <b>3.5</b><br><b>(2.5 to 4.8)</b>   | <b>16.4</b><br><b>(11.1 to 22.2)</b>              | <b>-1.4</b><br><b>(-6.0 to 3.9)</b>                 |
| Diabetes mellitus                                          | 22.4<br>(20.0 to 24.9)                  | 1.2<br>(1.1 to 1.4)                        | 1.7<br>(1.2 to 2.4)                 | 16.5<br>(7.5 to 25.8)                             | -4.7<br>(-12.0 to 2.8)                              |
| Acute glomerulonephritis                                   | < 0.05<br>(< 0.05 to < 0.05)            | 0.1<br>(0.1 to 0.1)                        | < 0.05<br>(< 0.05 to < 0.05)        | 11.5<br>(5.9 to 17.9)                             | 0.8<br>(-3.6 to 5.8)                                |
| Chronic kidney disease                                     | 18.3<br>(16.3 to 20.7)                  | 1.6<br>(1.4 to 1.9)                        | 0.5<br>(0.4 to 0.6)                 | 25.5<br>(15.6 to 36.1)                            | 1.4<br>(-6.3 to 9.8)                                |
| Chronic kidney disease due to diabetes mellitus            | 7.0<br>(5.7 to 8.3)                     | 0.6<br>(0.5 to 0.8)                        | 0.2<br>(0.1 to 0.2)                 | 29.7<br>(14.8 to 46.3)                            | 3.7<br>(-8.0 to 16.7)                               |
| Chronic kidney disease due to hypertension                 | 3.2<br>(2.6 to 3.8)                     | 0.3<br>(0.2 to 0.4)                        | 0.1<br>(< 0.05 to 0.1)              | 30.4<br>(12.6 to 52.4)                            | -1.3<br>(-14.1 to 14.2)                             |
| Chronic kidney disease due to glomerulonephritis           | 2.8<br>(2.3 to 3.3)                     | 0.2<br>(0.1 to 0.2)                        | 0.1<br>(0.1 to 0.1)                 | 20.0<br>(5.0 to 36.6)                             | 1.4<br>(-10.1 to 14.9)                              |
| Chronic kidney disease due to other causes                 | 5.3<br>(4.2 to 6.6)                     | 0.5<br>(0.4 to 0.6)                        | 0.1<br>(0.1 to 0.2)                 | 22.7<br>(9.0 to 38.1)                             | -0.2<br>(-10.5 to 11.6)                             |
| Urinary diseases and male infertility                      | 10.1<br>(9.2 to 11.0)                   | 20.7†<br>(18.9 to 22.9)                    | 0.3<br>(0.2 to 0.5)                 | 27.5<br>(20.0 to 35.2)                            | 4.3<br>(-1.5 to 10.4)                               |
| Interstitial nephritis and urinary tract infections        | 0.3<br>(0.2 to 0.3)                     | 13.8<br>(12.1 to 15.8)                     | < 0.05<br>(< 0.05 to < 0.05)        | 6.8<br>(-10.0 to 25.6)                            | 3.7<br>(-12.8 to 21.4)                              |
| Urolithiasis                                               | 0.2<br>(0.2 to 0.2)                     | 5.9<br>(5.3 to 6.7)                        | < 0.05<br>(< 0.05 to < 0.05)        | 10.6<br>(-9.8 to 34.1)                            | -2.5<br>(-18.9 to 16.6)                             |
| Benign prostatic hyperplasia                               | 8.4<br>(7.4 to 9.4)                     | 1.0<br>(0.9 to 1.2)                        | 0.3<br>(0.2 to 0.4)                 | 32.1<br>(23.5 to 41.0)                            | 6.5<br>(-0.3 to 13.6)                               |
| Male infertility                                           | 0.9<br>(0.6 to 1.3)                     | --                                         | < 0.05<br>(< 0.05 to < 0.05)        | -2.9<br>(-13.0 to 7.8)                            | -5.3<br>(-15.0 to 4.8)                              |
| Other urinary diseases                                     | --                                      | --                                         | < 0.05<br>(< 0.05 to < 0.05)        | -10.3<br>(-22.1 to 2.3)                           | -16.3<br>(-26.6 to -4.9)                            |
| Gynecological diseases                                     | 47.6<br>(44.9 to 50.4)                  | 13.9†<br>(12.5 to 15.6)                    | 0.5<br>(0.3 to 0.7)                 | 1.1<br>(-4.9 to 8.0)                              | -1.6<br>(-7.4 to 5.8)                               |
| Uterine fibroids                                           | 2.9<br>(2.6 to 3.3)                     | 0.3<br>(0.2 to 0.3)                        | < 0.05<br>(< 0.05 to < 0.05)        | -4.1<br>(-16.2 to 6.5)                            | -9.7<br>(-21.7 to 1.1)                              |
| Polycystic ovarian syndrome                                | 0.1<br>(0.1 to 0.2)                     | 0.4<br>(0.3 to 0.5)                        | < 0.05<br>(< 0.05 to < 0.05)        | 3.6<br>(-17.1 to 29.9)                            | -1.7<br>(-21.2 to 23.3)                             |
| Female infertility                                         | 1.7<br>(1.0 to 2.6)                     | --                                         | < 0.05<br>(< 0.05 to < 0.05)        | 10.6<br>(-1.4 to 23.1)                            | 4.5<br>(-5.8 to 16.0)                               |
| Endometriosis                                              | 0.2<br>(0.2 to 0.2)                     | 0.6<br>(0.4 to 0.7)                        | < 0.05<br>(< 0.05 to < 0.05)        | 2.7<br>(-18.7 to 30.4)                            | 3.2<br>(-18.7 to 31.0)                              |
| Genital prolapse                                           | 21.3<br>(18.7 to 24.4)                  | 0.9<br>(0.8 to 1.0)                        | 0.1<br>(< 0.05 to 0.1)              | 18.9<br>(9.0 to 31.4)                             | 0.1<br>(-8.3 to 10.6)                               |
| Premenstrual syndrome                                      | 20.6<br>(19.2 to 22.1)                  | 7.0<br>(6.4 to 7.6)                        | 0.2<br>(0.1 to 0.3)                 | -1.1<br>(-9.4 to 7.7)                             | -0.7<br>(-9.3 to 8.1)                               |
| Other gynecological diseases                               | 4.7<br>(3.6 to 6.0)                     | 4.8<br>(3.6 to 6.3)                        | 0.2<br>(0.1 to 0.3)                 | -2.5<br>(-13.3 to 13.1)                           | -2.7<br>(-14.0 to 13.2)                             |
| Hemoglobinopathies and hemolytic anaemias                  | 83.6<br>(65.6 to 104.9)                 | --                                         | 0.2<br>(0.1 to 0.4)                 | 23.8<br>(-12.6 to 70.2)                           | 17.0<br>(-15.2 to 62.7)                             |
| Thalassemias                                               | < 0.05<br>(< 0.05 to 0.1)               | --                                         | < 0.05<br>(< 0.05 to < 0.05)        | 17.4<br>(-21.1 to 70.3)                           | 20.0<br>(-20.6 to 80.5)                             |
| Thalassaemias trait                                        | 31.2<br>(10.1 to 66.9)                  | --                                         | 0.1<br>(< 0.05 to 0.4)              | 25.5<br>(-13.1 to 77.1)                           | 19.3<br>(-15.2 to 69.8)                             |
| Sickle cell disorders                                      | < 0.05<br>(< 0.05 to < 0.05)            | --                                         | < 0.05<br>(< 0.05 to < 0.05)        | 3.2<br>(-18.3 to 29.8)                            | 4.9<br>(-14.8 to 30.4)                              |
| Sickle cell trait                                          | 5.9<br>(3.5 to 9.3)                     | --                                         | < 0.05<br>(< 0.05 to < 0.05)        | 22.4<br>(-15.4 to 78.0)                           | 16.6<br>(-19.3 to 66.5)                             |
| G6PD deficiency                                            | 8.6<br>(7.2 to 10.2)                    | --                                         | < 0.05<br>(< 0.05 to < 0.05)        | 56.5<br>(17.7 to 107.6)                           | 41.5<br>(5.7 to 88.4)                               |
| G6PD trait                                                 | 41.2<br>(37.9 to 44.6)                  | --                                         | < 0.05<br>(< 0.05 to < 0.05)        | 84.2<br>(9.7 to 196.7)                            | 70.0<br>(5.2 to 165.8)                              |
| Other hemoglobinopathies and hemolytic anaemias            | 0.6<br>(0.5 to 0.7)                     | --                                         | < 0.05<br>(< 0.05 to < 0.05)        | 6.0<br>(-11.3 to 27.4)                            | -11.0<br>(-27.5 to 9.3)                             |
| Endocrine, metabolic, blood, and immune disorders          | 11.1<br>(10.0 to 12.3)                  | 2.3<br>(2.0 to 2.6)                        | 0.4<br>(0.3 to 0.5)                 | 14.6<br>(8.4 to 22.2)                             | -4.0<br>(-9.1 to 1.9)                               |
| <b>Musculoskeletal disorders</b>                           | <b>115.5</b><br><b>(110.4 to 120.5)</b> | <b>56.2</b><br><b>(51.0 to 62.2)</b>       | <b>12.4</b><br><b>(9.0 to 16.1)</b> | <b>13.8</b><br><b>(10.5 to 17.4)</b>              | <b>1.0</b><br><b>(-1.9 to 3.7)</b>                  |
| Rheumatoid arthritis                                       | 2.0<br>(1.8 to 2.2)                     | 0.1<br>(0.1 to 0.1)                        | 0.5<br>(0.3 to 0.6)                 | 16.7<br>(8.3 to 26.5)                             | -0.3<br>(-7.3 to 7.8)                               |
| Osteoarthritis                                             | 35.3<br>(32.0 to 39.1)                  | 1.5<br>(1.4 to 1.7)                        | 1.2<br>(0.8 to 1.8)                 | 22.9<br>(18.7 to 27.3)                            | -0.9<br>(-4.2 to 2.6)                               |
| Low back and neck pain                                     | 76.2<br>(71.0 to 81.3)                  | 32.4<br>(28.6 to 36.4)                     | 9.2<br>(6.5 to 12.1)                | 12.1<br>(8.3 to 16.3)                             | 0.6<br>(-2.7 to 4.0)                                |
| Low back pain                                              | 56.2<br>(49.8 to 63.3)                  | 27.6<br>(23.8 to 31.7)                     | 6.4<br>(4.4 to 8.4)                 | 12.1<br>(6.9 to 17.9)                             | 1.0<br>(-3.6 to 5.7)                                |
| Neck pain                                                  | 28.2<br>(24.4 to 32.4)                  | 4.8<br>(4.2 to 5.7)                        | 2.8<br>(1.9 to 3.9)                 | 12.0<br>(9.1 to 14.9)                             | -0.3<br>(-2.1 to 1.6)                               |
| Gout                                                       | 4.9<br>(4.3 to 5.6)                     | 0.8<br>(0.7 to 0.9)                        | 0.1<br>(0.1 to 0.2)                 | 22.7<br>(8.3 to 37.2)                             | 2.9<br>(-8.3 to 15.2)                               |
| Other musculoskeletal disorders                            | 16.0<br>(12.6 to 20.1)                  | 21.3<br>(17.8 to 25.8)                     | 1.4<br>(0.9 to 2.0)                 | 15.4<br>(3.2 to 28.8)                             | 4.9<br>(-5.4 to 16.0)                               |
| <b>Other non-communicable diseases</b>                     | <b>325.1</b><br><b>(318.2 to 331.7)</b> | <b>945.8†</b><br><b>(867.7 to 1,016.3)</b> | <b>10.3</b><br><b>(7.1 to 14.6)</b> | <b>13.4</b><br><b>(11.9 to 15.1)</b>              | <b>-0.0</b><br><b>(-1.2 to 1.2)</b>                 |
| Congenital anomalies                                       | 5.7<br>(5.4 to 6.0)                     | --                                         | 0.7<br>(0.5 to 0.9)                 | 2.2<br>(-2.6 to 7.0)                              | -1.2<br>(-5.6 to 3.3)                               |
| Neural tube defects                                        | 0.4<br>(0.4 to 0.5)                     | --                                         | 0.1<br>(0.1 to 0.2)                 | 2.7<br>(-9.7 to 15.1)                             | -2.0<br>(-13.7 to 9.7)                              |
| Congenital heart anomalies                                 | 1.3<br>(1.2 to 1.5)                     | --                                         | 0.1<br>(< 0.05 to 0.1)              | 1.6<br>(-8.3 to 12.9)                             | -3.0<br>(-12.2 to 7.7)                              |
| Orofacial clefts                                           | 0.2<br>(0.2 to 0.3)                     | --                                         | < 0.05<br>(< 0.05 to < 0.05)        | 2.5<br>(-9.3 to 16.4)                             | -2.7<br>(-14.2 to 11.2)                             |
| Down's syndrome                                            | 0.4<br>(0.3 to 0.4)                     | --                                         | < 0.05<br>(< 0.05 to < 0.05)        | -6.8<br>(-17.4 to 5.5)                            | -5.1<br>(-16.2 to 7.3)                              |
| Turner syndrome                                            | 0.2<br>(0.1 to 0.2)                     | --                                         | < 0.05<br>(< 0.05 to < 0.05)        | -4.6<br>(-30.4 to 28.9)                           | -4.3<br>(-30.1 to 27.8)                             |
| Klinefelter syndrome                                       | 0.4<br>(0.3 to 0.5)                     | --                                         | < 0.05<br>(< 0.05 to < 0.05)        | -4.9<br>(-20.7 to 12.8)                           | -4.3<br>(-20.0 to 13.4)                             |

| Cause                                         | Prevalence in thousands (95% UI)        | Incidence in thousands (95% UI)       | YLDs in thousands (95% UI)        |                                                   |                                                     |
|-----------------------------------------------|-----------------------------------------|---------------------------------------|-----------------------------------|---------------------------------------------------|-----------------------------------------------------|
|                                               | 2016 counts                             | 2016 counts                           | 2016 counts                       | Percentage change in counts between 2006 and 2016 | Percentage change in age-standardised rates between |
| Other chromosomal abnormalities               | 0.5<br>(0.4 to 0.6)                     | --                                    | < 0.05<br>(< 0.05 to 0.1)         | -10.8<br>(-20.0 to 0.0)                           | -1.2<br>(-11.1 to 9.8)                              |
| Congenital musculoskeletal and limb anomalies | 1.3<br>(1.2 to 1.4)                     | --                                    | 0.2<br>(0.1 to 0.2)               | 7.6<br>(-1.2 to 17.1)                             | 1.5<br>(-7.1 to 10.5)                               |
| Urogenital congenital anomalies               | 0.5<br>(0.5 to 0.6)                     | --                                    | < 0.05<br>(< 0.05 to < 0.05)      | -10.9<br>(-21.2 to -1.5)                          | -10.1<br>(-20.4 to -0.4)                            |
| Digestive congenital anomalies                | 1.1<br>(0.9 to 1.2)                     | --                                    | < 0.05<br>(< 0.05 to 0.1)         | 1.2<br>(-9.9 to 13.8)                             | -3.0<br>(-13.6 to 9.1)                              |
| Other congenital anomalies                    | 0.6<br>(0.2 to 1.1)                     | --                                    | 0.1<br>(0.1 to 0.2)               | 5.1<br>(-3.4 to 15.2)                             | 0.8<br>(-7.4 to 10.1)                               |
| Skin and subcutaneous diseases                | 145.6<br>(142.1 to 148.8)               | 336.9<br>(318.3 to 358.9)             | 3.6<br>(2.5 to 5.1)               | 4.7<br>(2.6 to 6.9)                               | 1.2<br>(-0.7 to 3.1)                                |
| Dermatitis                                    | 18.7<br>(17.5 to 20.1)                  | 29.2<br>(25.2 to 34.0)                | 0.6<br>(0.4 to 1.0)               | 3.0<br>(-0.7 to 6.9)                              | 0.8<br>(-3.2 to 4.7)                                |
| Psoriasis                                     | 8.6<br>(8.1 to 9.2)                     | 0.8<br>(0.7 to 0.8)                   | 0.7<br>(0.5 to 1.0)               | 13.2<br>(7.2 to 19.2)                             | 3.3<br>(-2.3 to 9.1)                                |
| Cellulitis                                    | 0.3<br>(0.3 to 0.3)                     | 6.7<br>(6.3 to 7.1)                   | < 0.05<br>(< 0.05 to < 0.05)      | 10.3<br>(-7.2 to 30.2)                            | 0.1<br>(-16.8 to 18.9)                              |
| Pyoderma                                      | 1.8<br>(1.7 to 1.8)                     | 47.8<br>(46.2 to 49.5)                | < 0.05<br>(< 0.05 to < 0.05)      | 15.4<br>(9.2 to 21.9)                             | 1.1<br>(-4.4 to 7.0)                                |
| Scabies                                       | 0.4<br>(0.3 to 0.5)                     | 1.1<br>(0.8 to 1.5)                   | < 0.05<br>(< 0.05 to < 0.05)      | -0.4<br>(-11.5 to 13.1)                           | 0.5<br>(-11.0 to 14.1)                              |
| Fungal skin diseases                          | 32.4<br>(28.6 to 36.4)                  | 126.1<br>(109.0 to 145.3)             | 0.2<br>(0.1 to 0.4)               | 16.5<br>(13.8 to 19.0)                            | 0.1<br>(-1.1 to 1.4)                                |
| Viral skin diseases                           | 11.6<br>(10.0 to 13.6)                  | 15.6<br>(13.4 to 18.2)                | 0.4<br>(0.2 to 0.5)               | -0.2<br>(-3.7 to 3.5)                             | 0.2<br>(-2.4 to 3.0)                                |
| Acne vulgaris                                 | 39.8<br>(36.6 to 43.1)                  | 29.6<br>(24.2 to 37.3)                | 1.0<br>(0.7 to 1.5)               | -3.9<br>(-7.6 to -0.3)                            | 1.2<br>(-2.7 to 4.8)                                |
| Alopecia areata                               | 1.3<br>(1.2 to 1.3)                     | 2.3<br>(2.2 to 2.4)                   | < 0.05<br>(< 0.05 to 0.1)         | 4.4<br>(-4.2 to 13.4)                             | -0.5<br>(-8.9 to 8.1)                               |
| Pruritus                                      | 4.0<br>(3.6 to 4.6)                     | 3.2<br>(2.8 to 3.6)                   | < 0.05<br>(< 0.05 to 0.1)         | 11.5<br>(5.7 to 18.3)                             | 0.1<br>(-5.1 to 5.8)                                |
| Urticaria                                     | 2.6<br>(2.3 to 2.9)                     | 4.6<br>(4.0 to 5.1)                   | 0.1<br>(0.1 to 0.2)               | 3.8<br>(-2.5 to 10.7)                             | -0.3<br>(-6.2 to 5.9)                               |
| Decubitus ulcer                               | 0.5<br>(0.5 to 0.6)                     | 1.9<br>(1.7 to 2.1)                   | 0.1<br>(0.1 to 0.1)               | 17.0<br>(4.6 to 31.3)                             | -8.5<br>(-17.1 to 1.3)                              |
| Other skin and subcutaneous diseases          | 52.7<br>(51.2 to 54.1)                  | 68.1<br>(65.6 to 70.7)                | 0.3<br>(0.1 to 0.5)               | 20.0<br>(17.6 to 22.6)                            | 3.3<br>(1.2 to 5.4)                                 |
| Sense organ diseases                          | 125.6<br>(118.7 to 131.8)               | 45.5+<br>(43.0 to 48.2)               | 4.0<br>(2.8 to 5.7)               | 21.8<br>(18.4 to 25.2)                            | -1.2<br>(-3.6 to 1.3)                               |
| Glaucoma                                      | 0.3<br>(0.2 to 0.4)                     | --                                    | < 0.05<br>(< 0.05 to < 0.05)      | 33.1<br>(11.1 to 58.8)                            | -0.5<br>(-16.8 to 18.8)                             |
| Cataract                                      | 2.0<br>(1.4 to 2.7)                     | --                                    | 0.2<br>(0.1 to 0.2)               | 25.6<br>(15.2 to 37.6)                            | -3.5<br>(-11.3 to 5.5)                              |
| Macular degeneration                          | 0.5<br>(0.4 to 0.7)                     | --                                    | < 0.05<br>(< 0.05 to 0.1)         | 35.2<br>(18.2 to 54.9)                            | 0.9<br>(-12.3 to 15.2)                              |
| Refraction and accommodation disorders        | 33.5<br>(30.2 to 37.3)                  | --                                    | 0.6<br>(0.4 to 1.0)               | 9.7<br>(3.5 to 15.8)                              | -3.6<br>(-8.2 to 0.8)                               |
| Age-related and other hearing loss            | 103.9<br>(92.2 to 115.4)                | --                                    | 2.5<br>(1.7 to 3.6)               | 25.0<br>(20.2 to 30.1)                            | -0.8<br>(-4.3 to 2.8)                               |
| Other vision loss                             | 1.2<br>(1.0 to 1.6)                     | --                                    | 0.1<br>(0.1 to 0.1)               | 19.6<br>(8.2 to 32.0)                             | 0.1<br>(-9.0 to 10.0)                               |
| Other sense organ diseases                    | 17.7<br>(16.3 to 19.2)                  | 45.5<br>(43.0 to 48.2)                | 0.6<br>(0.4 to 0.8)               | 20.3<br>(15.6 to 24.9)                            | 0.4<br>(-3.4 to 4.4)                                |
| Oral disorders                                | 236.7<br>(223.7 to 248.5)               | 563.4+<br>(488.1 to 632.0)            | 2.1<br>(1.3 to 3.2)               | 18.9<br>(15.3 to 22.7)                            | -0.4<br>(-2.2 to 1.6)                               |
| Caries of deciduous teeth                     | 13.5<br>(9.4 to 17.7)                   | 53.2<br>(32.6 to 75.4)                | < 0.05<br>(< 0.05 to < 0.05)      | -11.9<br>(-21.6 to -2.0)                          | -0.3<br>(-10.3 to 9.7)                              |
| Caries of permanent teeth                     | 162.1<br>(145.7 to 179.7)               | 498.7<br>(430.5 to 561.0)             | 0.2<br>(0.1 to 0.3)               | 4.0<br>(-0.2 to 8.5)                              | -2.2<br>(-6.1 to 1.9)                               |
| Periodontal disease                           | 69.6<br>(51.1 to 88.8)                  | 8.1<br>(5.9 to 10.3)                  | 0.5<br>(0.2 to 1.0)               | 11.3<br>(5.0 to 18.4)                             | -0.2<br>(-5.0 to 5.4)                               |
| Edentulism and severe tooth loss              | 44.0<br>(37.6 to 50.5)                  | 3.4<br>(2.8 to 4.2)                   | 1.2<br>(0.8 to 1.7)               | 27.7<br>(23.6 to 32.6)                            | -0.3<br>(-3.2 to 2.7)                               |
| Other oral disorders                          | 8.5<br>(8.1 to 8.8)                     | --                                    | 0.2<br>(0.1 to 0.4)               | 6.7<br>(3.6 to 9.7)                               | -0.2<br>(-3.1 to 2.8)                               |
| <b>Injuries</b>                               | <b>141.2</b><br><b>(131.3 to 152.3)</b> | <b>43.0+</b><br><b>(40.5 to 45.8)</b> | <b>4.3</b><br><b>(2.9 to 6.2)</b> | <b>10.0</b><br><b>(8.7 to 11.3)</b>               | <b>-3.2</b><br><b>(-4.3 to -2.1)</b>                |
| <b>Transport injuries</b>                     | <b>17.7</b><br><b>(16.3 to 19.1)</b>    | <b>3.7</b><br><b>(3.3 to 4.1)</b>     | <b>0.8</b><br><b>(0.5 to 1.1)</b> | <b>9.2</b><br><b>(7.5 to 11.0)</b>                | <b>-3.0</b><br><b>(-4.7 to -1.3)</b>                |
| Road injuries                                 | 15.3<br>(14.2 to 16.6)                  | 3.4<br>(3.0 to 3.8)                   | 0.7<br>(0.5 to 1.0)               | 10.2<br>(8.3 to 12.0)                             | -2.2<br>(-4.0 to -0.4)                              |
| Pedestrian road injuries                      | 2.5<br>(2.1 to 2.9)                     | 0.3<br>(0.3 to 0.4)                   | 0.1<br>(0.1 to 0.2)               | 19.7<br>(17.7 to 21.6)                            | 6.4<br>(4.4 to 8.3)                                 |
| Cyclist road injuries                         | 4.5<br>(3.7 to 5.4)                     | 1.3<br>(1.0 to 1.5)                   | 0.2<br>(0.1 to 0.3)               | 12.5<br>(10.7 to 14.2)                            | -0.5<br>(-2.3 to 1.1)                               |
| Motorcyclist road injuries                    | 3.2<br>(2.7 to 3.8)                     | 0.5<br>(0.4 to 0.6)                   | 0.1<br>(0.1 to 0.2)               | 4.5<br>(2.4 to 6.7)                               | -6.5<br>(-8.5 to -4.4)                              |
| Motor vehicle road injuries                   | 4.1<br>(3.4 to 4.7)                     | 1.1<br>(0.9 to 1.3)                   | 0.2<br>(0.1 to 0.3)               | 9.8<br>(7.8 to 12.0)                              | -2.9<br>(-4.8 to -1.0)                              |
| Other road injuries                           | 1.1<br>(0.9 to 1.3)                     | 0.2<br>(0.2 to 0.3)                   | < 0.05<br>(< 0.05 to 0.1)         | -1.5<br>(-3.6 to 0.6)                             | -11.7<br>(-13.7 to -9.6)                            |
| Other transport injuries                      | 2.3<br>(1.9 to 2.8)                     | 0.3<br>(0.3 to 0.3)                   | 0.1<br>(0.1 to 0.1)               | 2.2<br>(0.8 to 3.6)                               | -9.3<br>(-10.5 to -8.1)                             |
| <b>Unintentional injuries</b>                 | <b>118.3</b><br><b>(108.9 to 128.7)</b> | <b>37.6</b><br><b>(35.1 to 40.5)</b>  | <b>3.4</b><br><b>(2.2 to 4.8)</b> | <b>10.3</b><br><b>(9.0 to 11.8)</b>               | <b>-3.4</b><br><b>(-4.5 to -2.3)</b>                |
| Falls                                         | 60.7<br>(53.2 to 68.5)                  | 19.8<br>(17.7 to 22.0)                | 2.1<br>(1.4 to 3.0)               | 11.2<br>(9.6 to 12.8)                             | -3.5<br>(-4.8 to -2.1)                              |
| Drowning                                      | 0.3<br>(0.2 to 0.3)                     | < 0.05<br>(< 0.05 to < 0.05)          | < 0.05<br>(< 0.05 to < 0.05)      | 19.4<br>(13.7 to 25.3)                            | 7.4<br>(1.7 to 13.0)                                |
| Fire, heat, and hot substances                | 10.0<br>(8.5 to 11.9)                   | 0.5<br>(0.4 to 0.6)                   | 0.2<br>(0.1 to 0.3)               | 13.1<br>(10.0 to 16.1)                            | 2.0<br>(-0.7 to 4.8)                                |
| Poisonings                                    | 0.4<br>(0.3 to 0.5)                     | 0.3<br>(0.3 to 0.4)                   | < 0.05<br>(< 0.05 to < 0.05)      | 15.4<br>(6.1 to 25.2)                             | 9.0<br>(-0.1 to 18.8)                               |
| Exposure to mechanical forces                 | 24.7<br>(20.7 to 31.3)                  | 5.6<br>(4.8 to 6.5)                   | 0.4<br>(0.3 to 0.7)               | 6.5<br>(5.2 to 7.9)                               | -5.1<br>(-6.3 to -3.9)                              |
| Unintentional firearm injuries                | 0.8<br>(0.6 to 1.0)                     | 0.1<br>(< 0.05 to 0.1)                | < 0.05<br>(< 0.05 to < 0.05)      | 15.7<br>(13.8 to 17.6)                            | 2.7<br>(1.1 to 4.4)                                 |
| Unintentional suffocation                     | 0.3<br>(0.2 to 0.3)                     | < 0.05<br>(< 0.05 to 0.1)             | < 0.05<br>(< 0.05 to < 0.05)      | 19.7<br>(18.0 to 21.4)                            | 6.2<br>(4.5 to 7.9)                                 |
| Other exposure to mechanical forces           | 23.6<br>(19.6 to 30.1)                  | 5.5<br>(4.7 to 6.3)                   | 0.4<br>(0.3 to 0.7)               | 6.1<br>(4.8 to 7.4)                               | -5.5<br>(-6.7 to -4.3)                              |



| Cause                                                                               | Prevalence in thousands (95% UI) | Incidence in thousands (95% UI)                | YLDs in thousands (95% UI)                    |                                                   |                                                     |
|-------------------------------------------------------------------------------------|----------------------------------|------------------------------------------------|-----------------------------------------------|---------------------------------------------------|-----------------------------------------------------|
|                                                                                     | 2016 counts                      | 2016 counts                                    | 2016 counts                                   | Percentage change in counts between 2006 and 2016 | Percentage change in age-standardised rates between |
| Adverse effects of medical treatment                                                | 0.1<br>(0.1 to 0.2)              | 2.0<br>(1.7 to 2.2)                            | < 0.05<br>(< 0.05 to < 0.05)                  | 14.7<br>(9.9 to 20.2)                             | 1.1<br>(-2.6 to 4.9)                                |
| Animal contact                                                                      | 1.8<br>(1.6 to 2.1)              | 0.9<br>(0.8 to 1.2)                            | < 0.05<br>(< 0.05 to 0.1)                     | 9.4<br>(5.6 to 13.1)                              | -1.9<br>(-5.7 to 1.8)                               |
| Venomous animal contact                                                             | 0.3<br>(0.2 to 0.3)              | 0.3<br>(0.2 to 0.4)                            | < 0.05<br>(< 0.05 to < 0.05)                  | 6.4<br>(-2.0 to 15.1)                             | -1.0<br>(-9.1 to 7.3)                               |
| Non-venomous animal contact                                                         | 1.5<br>(1.3 to 1.8)              | 0.7<br>(0.5 to 0.8)                            | < 0.05<br>(< 0.05 to < 0.05)                  | 11.5<br>(9.8 to 13.2)                             | -2.6<br>(-4.2 to -1.1)                              |
| Foreign body                                                                        | 2.8<br>(2.4 to 3.3)              | 1.9<br>(1.7 to 2.3)                            | 0.1<br>(0.1 to 0.1)                           | 15.1<br>(13.2 to 17.0)                            | 3.0<br>(1.4 to 4.5)                                 |
| Pulmonary aspiration and foreign body in airway                                     | 0.4<br>(0.4 to 0.6)              | 0.4<br>(0.4 to 0.5)                            | < 0.05<br>(< 0.05 to < 0.05)                  | 21.0<br>(18.9 to 23.3)                            | 6.7<br>(4.7 to 8.7)                                 |
| Foreign body in eyes                                                                | 0.3<br>(0.2 to 0.4)              | 1.1<br>(0.9 to 1.5)                            | < 0.05<br>(< 0.05 to < 0.05)                  | 11.3<br>(7.4 to 16.0)                             | 1.9<br>(-1.3 to 5.0)                                |
| Foreign body in other body part                                                     | 2.0<br>(1.7 to 2.5)              | 0.4<br>(0.3 to 0.5)                            | 0.1<br>(< 0.05 to 0.1)                        | 15.3<br>(13.7 to 17.1)                            | 2.6<br>(1.0 to 4.2)                                 |
| Environmental heat and cold exposure                                                | 1.3<br>(1.2 to 1.5)              | 0.3<br>(0.2 to 0.3)                            | < 0.05<br>(< 0.05 to 0.1)                     | 23.9<br>(19.7 to 28.4)                            | 5.9<br>(2.3 to 9.7)                                 |
| Other unintentional injuries                                                        | 16.1<br>(13.6 to 19.0)           | 6.2<br>(5.3 to 7.2)                            | 0.4<br>(0.3 to 0.6)                           | 6.1<br>(4.8 to 7.5)                               | -7.5<br>(-8.8 to -6.4)                              |
| <b>Self-harm and interpersonal violence</b>                                         | <b>10.2<br/>(9.3 to 11.2)</b>    | <b>1.7†<br/>(1.5 to 1.9)</b>                   | <b>0.2<br/>(0.1 to 0.3)</b>                   | <b>7.4<br/>(5.2 to 9.4)</b>                       | <b>-1.0<br/>(-3.1 to 1.0)</b>                       |
| Self-harm                                                                           | 0.8<br>(0.7 to 1.0)              | 0.6<br>(0.5 to 0.7)                            | < 0.05<br>(< 0.05 to 0.1)                     | 15.3<br>(9.4 to 21.5)                             | 3.6<br>(-2.2 to 9.5)                                |
| Self-harm by firearm                                                                | < 0.05<br>(< 0.05 to < 0.05)     | < 0.05<br>(< 0.05 to < 0.05)                   | < 0.05<br>(< 0.05 to < 0.05)                  | 22.2<br>(19.7 to 24.8)                            | 11.3<br>(8.9 to 13.8)                               |
| Self-harm by other specified means                                                  | 0.8<br>(0.7 to 1.0)              | 0.6<br>(0.5 to 0.7)                            | < 0.05<br>(< 0.05 to < 0.05)                  | 15.3<br>(9.3 to 21.5)                             | 3.6<br>(-2.2 to 9.5)                                |
| Interpersonal violence                                                              | 9.4<br>(8.5 to 10.4)             | 1.1†<br>(0.9 to 1.3)                           | 0.1<br>(0.1 to 0.2)                           | 5.8<br>(3.7 to 7.8)                               | -1.9<br>(-3.9 to 0.1)                               |
| Assault by firearm                                                                  | 0.3<br>(0.2 to 0.4)              | < 0.05<br>(< 0.05 to < 0.05)                   | < 0.05<br>(< 0.05 to < 0.05)                  | 8.6<br>(6.6 to 10.5)                              | -2.3<br>(-4.0 to -0.6)                              |
| Assault by sharp object                                                             | 0.8<br>(0.7 to 1.0)              | 0.2<br>(0.1 to 0.3)                            | < 0.05<br>(< 0.05 to < 0.05)                  | 9.9<br>(8.0 to 11.8)                              | -1.0<br>(-2.7 to 0.7)                               |
| Sexual violence                                                                     | 5.2<br>(4.6 to 6.0)              | --                                             | < 0.05<br>(< 0.05 to 0.1)                     | -3.0<br>(-7.1 to 1.6)                             | -3.1<br>(-7.7 to 1.7)                               |
| Assault by other means                                                              | 3.1<br>(2.5 to 3.8)              | 0.9<br>(0.7 to 1.0)                            | 0.1<br>(0.1 to 0.1)                           | 9.8<br>(8.2 to 11.5)                              | -1.1<br>(-2.7 to 0.5)                               |
| <b>Forces of nature, conflict and terrorism, and executions and police conflict</b> | <b>0.2<br/>(0.1 to 0.4)</b>      | <b>&lt; 0.05†<br/>(&lt; 0.05 to &lt; 0.05)</b> | <b>&lt; 0.05<br/>(&lt; 0.05 to &lt; 0.05)</b> | <b>18.2<br/>(15.0 to 23.9)</b>                    | <b>5.0<br/>(1.7 to 13.0)</b>                        |
| Exposure to forces of nature                                                        | < 0.05<br>(< 0.05 to 0.1)        | --                                             | < 0.05<br>(< 0.05 to < 0.05)                  | 82.4<br>(79.1 to 87.4)                            | 68.1<br>(64.7 to 73.1)                              |
| Conflict and terrorism                                                              | 0.1<br>(< 0.05 to 0.2)           | --                                             | < 0.05<br>(< 0.05 to < 0.05)                  | -5.9<br>(-8.3 to -3.5)                            | -22.5<br>(-24.6 to -20.4)                           |
| Executions and police conflict                                                      | 0.1<br>(0.1 to 0.2)              | < 0.05<br>(< 0.05 to < 0.05)                   | < 0.05<br>(< 0.05 to < 0.05)                  | 28.9<br>(23.6 to 37.5)                            | 17.7<br>(12.4 to 28.9)                              |
| <b>Impairments</b>                                                                  | --                               | --                                             | --                                            | --                                                | --                                                  |
| Anaemia                                                                             | 35.8<br>(25.7 to 51.0)           | --                                             | 0.7<br>(0.5 to 1.1)                           | 18.0<br>(-6.0 to 41.9)                            | 4.4<br>(-15.6 to 27.5)                              |
| Developmental intellectual disability                                               | 6.9<br>(5.3 to 8.8)              | --                                             | 0.8<br>(0.6 to 1.1)                           | 0.0<br>(-4.2 to 4.5)                              | -2.8<br>(-7.0 to 1.2)                               |
| Epilepsy                                                                            | 1.9<br>(1.0 to 2.8)              | --                                             | 0.5<br>(0.3 to 0.9)                           | 2.2<br>(-49.6 to 105.8)                           | -2.7<br>(-51.3 to 94.6)                             |
| Guillain-Barre syndrome                                                             | < 0.05<br>(< 0.05 to < 0.05)     | --                                             | < 0.05<br>(< 0.05 to < 0.05)                  | 13.4<br>(8.3 to 18.8)                             | 0.4<br>(0.1 to 0.7)                                 |
| Hearing loss                                                                        | 107.5<br>(96.0 to 119.0)         | --                                             | 2.7<br>(1.8 to 3.9)                           | 22.8<br>(18.3 to 27.2)                            | -1.2<br>(-4.3 to 1.7)                               |
| Heart failure                                                                       | 9.3<br>(8.1 to 10.6)             | --                                             | 0.9<br>(0.7 to 1.2)                           | 27.6<br>(18.3 to 36.4)                            | -4.4<br>(-11.2 to 1.9)                              |
| Infertility                                                                         | 3.7<br>(2.8 to 5.0)              | --                                             | < 0.05<br>(< 0.05 to < 0.05)                  | 2.5<br>(-4.2 to 10.0)                             | -0.9<br>(-6.9 to 5.7)                               |
| Pelvic inflammatory disease                                                         | < 0.05<br>(< 0.05 to < 0.05)     | --                                             | < 0.05<br>(< 0.05 to < 0.05)                  | -46.7<br>(-59.8 to -29.8)                         | -48.0<br>(-60.3 to -31.4)                           |
| Vision loss                                                                         | 38.3<br>(34.5 to 42.7)           | --                                             | 1.1<br>(0.8 to 1.6)                           | 12.5<br>(7.5 to 17.5)                             | -3.0<br>(-6.8 to 0.8)                               |

We did not calculate incidence for the nine impairments, certain NTDs, and causes with only birth prevalence. Blank cells mean that no estimate is available.

† Incidence for aggregate causes represents the sum of the incidence of the causes below the aggregate.

‡ Incidence estimates for stroke represent first-ever stroke only.

^ Incidence of HIV/AIDS represents new infections of HIV only and does not include new infections of Tuberculosis in HIV positive cases.



SR Table 14: Prevalence, incidence, and YLDs for 2016, percentage change of YLD counts and percentage change of age-standardised YLD rates between 2006 and 2016 by cause and impairments, for all ages, Marshall Islands.

| Cause                                                                                | Prevalence in thousands (95% UI)            | Incidence in thousands (95% UI)              | YLDs in thousands (95% UI)                      |                                                   |                                                     |
|--------------------------------------------------------------------------------------|---------------------------------------------|----------------------------------------------|-------------------------------------------------|---------------------------------------------------|-----------------------------------------------------|
|                                                                                      | 2016 counts                                 | 2016 counts                                  | 2016 counts                                     | Percentage change in counts between 2006 and 2016 | Percentage change in age-standardised rates between |
| <b>All causes</b>                                                                    | <b>72.1</b><br>(71.9 to 72.4)               | <b>474.9†</b><br>(449.3 to 502.6)            | <b>7.4</b><br>(5.5 to 9.7)                      | <b>30.8</b><br>(28.2 to 33.5)                     | <b>0.2</b><br>(-1.4 to 1.8)                         |
| <b>Communicable, maternal, neonatal, and nutritional disorders</b>                   | <b>59.2</b><br>(58.1 to 60.6)               | <b>282.1†</b><br>(259.0 to 307.6)            | <b>1.2</b><br>(0.8 to 1.6)                      | <b>19.4</b><br>(11.4 to 27.3)                     | <b>-2.7</b><br>(-8.7 to 3.4)                        |
| <b>HIV/AIDS and tuberculosis</b>                                                     | <b>21.5</b><br>(19.9 to 22.8)               | <b>0.1†</b><br>(0.1 to 0.2)                  | <b>&lt; 0.05</b><br>( <b>&lt; 0.05 to 0.1</b> ) | <b>15.0</b><br>(-3.3 to 53.5)                     | <b>-12.5</b><br>(-24.8 to 14.2)                     |
| Tuberculosis                                                                         | 20.4<br>(19.0 to 21.9)                      | 0.1†<br>(0.1 to 0.2)                         | < 0.05<br>( <b>&lt; 0.05 to &lt; 0.05</b> )     | 4.4<br>(-6.3 to 16.8)                             | -19.8<br>(-26.8 to -11.7)                           |
| Drug-susceptible tuberculosis                                                        | 0.1<br>(0.1 to 0.1)                         | 0.1<br>(0.1 to 0.2)                          | < 0.05<br>( <b>&lt; 0.05 to &lt; 0.05</b> )     | 5.7<br>(-9.0 to 24.1)                             | -18.8<br>(-29.0 to -5.8)                            |
| Multidrug-resistant tuberculosis without extensive drug resistance                   | < 0.05<br>( <b>&lt; 0.05 to &lt; 0.05</b> ) | < 0.05<br>( <b>&lt; 0.05 to &lt; 0.05</b> )  | < 0.05<br>( <b>&lt; 0.05 to &lt; 0.05</b> )     | -37.4<br>(-96.7 to 1,446.0)                       | -51.1<br>(-97.5 to 1,097.8)                         |
| Extensively drug-resistant tuberculosis                                              | < 0.05<br>( <b>&lt; 0.05 to &lt; 0.05</b> ) | < 0.05<br>( <b>&lt; 0.05 to &lt; 0.05</b> )  | < 0.05<br>( <b>&lt; 0.05 to &lt; 0.05</b> )     | 101.6<br>(-88.7 to 4,857.5)                       | 54.5<br>(-91.5 to 3,692.5)                          |
| Latent tuberculosis infection                                                        | 20.3<br>(18.9 to 21.8)                      | --                                           | --                                              | --                                                | --                                                  |
| HIV/AIDS                                                                             | < 0.05<br>( <b>&lt; 0.05 to 0.2</b> )       | < 0.05^<br>( <b>&lt; 0.05 to &lt; 0.05</b> ) | < 0.05<br>( <b>&lt; 0.05 to &lt; 0.05</b> )     | 115.3<br>(0.6 to 563.9)                           | 61.0<br>(-26.0 to 411.4)                            |
| Drug-susceptible HIV/AIDS - Tuberculosis                                             | < 0.05<br>( <b>&lt; 0.05 to &lt; 0.05</b> ) | < 0.05<br>( <b>&lt; 0.05 to &lt; 0.05</b> )  | < 0.05<br>( <b>&lt; 0.05 to &lt; 0.05</b> )     | 39.1<br>(22.3 to 67.2)                            | 5.8<br>(-7.0 to 27.1)                               |
| Multidrug-resistant HIV/AIDS - Tuberculosis without extensive drug resistance        | < 0.05<br>( <b>&lt; 0.05 to &lt; 0.05</b> ) | < 0.05<br>( <b>&lt; 0.05 to &lt; 0.05</b> )  | < 0.05<br>( <b>&lt; 0.05 to &lt; 0.05</b> )     | -18.6<br>(-95.4 to 1,878.1)                       | -38.1<br>(-96.5 to 1,403.0)                         |
| Extensively drug-resistant HIV/AIDS - Tuberculosis                                   | < 0.05<br>( <b>&lt; 0.05 to &lt; 0.05</b> ) | < 0.05<br>( <b>&lt; 0.05 to &lt; 0.05</b> )  | < 0.05<br>( <b>&lt; 0.05 to &lt; 0.05</b> )     | 168.0<br>(-84.8 to 6,414.4)                       | 103.7<br>(-88.5 to 4,849.0)                         |
| HIV/AIDS resulting in other diseases                                                 | < 0.05<br>( <b>&lt; 0.05 to 0.2</b> )       | < 0.05<br>( <b>&lt; 0.05 to &lt; 0.05</b> )  | < 0.05<br>( <b>&lt; 0.05 to &lt; 0.05</b> )     | 128.1<br>(-8.8 to 1,101.0)                        | 69.6<br>(-33.4 to 845.1)                            |
| <b>Diarrhoea, lower respiratory infections, and other common infectious diseases</b> | <b>4.9</b><br>(4.7 to 5.2)                  | <b>256.5†</b><br>(232.6 to 281.1)            | <b>0.3</b><br>(0.2 to 0.4)                      | <b>24.6</b><br>(20.4 to 28.8)                     | <b>1.3</b><br>(-1.7 to 4.4)                         |
| Diarrhoeal diseases                                                                  | 1.0<br>(1.0 to 1.1)                         | 69.3<br>(64.3 to 74.7)                       | 0.1<br>(0.1 to 0.2)                             | 29.4<br>(22.4 to 37.4)                            | 4.6<br>(-0.6 to 10.4)                               |
| Intestinal infectious diseases                                                       | < 0.05<br>( <b>&lt; 0.05 to &lt; 0.05</b> ) | 0.1†<br>(0.1 to 0.1)                         | < 0.05<br>( <b>&lt; 0.05 to &lt; 0.05</b> )     | -7.1<br>(-23.8 to 14.4)                           | -24.2<br>(-35.7 to -9.9)                            |
| Typhoid fever                                                                        | < 0.05<br>( <b>&lt; 0.05 to &lt; 0.05</b> ) | 0.1<br>(0.1 to 0.1)                          | < 0.05<br>( <b>&lt; 0.05 to &lt; 0.05</b> )     | -6.8<br>(-25.1 to 17.0)                           | -24.1<br>(-36.8 to -8.5)                            |
| Paratyphoid fever                                                                    | < 0.05<br>( <b>&lt; 0.05 to &lt; 0.05</b> ) | < 0.05<br>( <b>&lt; 0.05 to &lt; 0.05</b> )  | < 0.05<br>( <b>&lt; 0.05 to &lt; 0.05</b> )     | -3.2<br>(-20.4 to 16.6)                           | -21.7<br>(-33.4 to -8.8)                            |
| Other intestinal infectious diseases                                                 | --                                          | --                                           | < 0.05<br>( <b>&lt; 0.05 to &lt; 0.05</b> )     | -39.3<br>(-53.7 to -22.0)                         | -43.9<br>(-53.8 to -33.1)                           |
| Lower respiratory infections                                                         | 0.1<br>(0.1 to 0.1)                         | 5.7<br>(5.1 to 6.4)                          | < 0.05<br>( <b>&lt; 0.05 to &lt; 0.05</b> )     | 36.1<br>(22.0 to 53.8)                            | 12.6<br>(3.0 to 23.7)                               |
| Upper respiratory infections                                                         | 2.3<br>(2.0 to 2.6)                         | 174.6<br>(152.2 to 200.1)                    | 0.1<br>( <b>&lt; 0.05 to 0.1</b> )              | 22.6<br>(15.9 to 29.6)                            | 0.2<br>(-4.7 to 5.8)                                |
| Otitis media                                                                         | 1.1<br>(1.0 to 1.2)                         | 3.6<br>(2.8 to 4.6)                          | < 0.05<br>( <b>&lt; 0.05 to 0.1</b> )           | 16.7<br>(7.9 to 26.2)                             | -3.4<br>(-10.0 to 3.6)                              |
| Meningitis                                                                           | 0.2<br>(0.2 to 0.3)                         | < 0.05<br>( <b>&lt; 0.05 to &lt; 0.05</b> )  | < 0.05<br>( <b>&lt; 0.05 to &lt; 0.05</b> )     | 18.4<br>(9.3 to 28.5)                             | -5.5<br>(-12.4 to 1.9)                              |
| Pneumococcal meningitis                                                              | 0.1<br>(0.1 to 0.2)                         | < 0.05<br>( <b>&lt; 0.05 to &lt; 0.05</b> )  | < 0.05<br>( <b>&lt; 0.05 to &lt; 0.05</b> )     | 12.5<br>(-1.0 to 28.3)                            | -10.4<br>(-20.2 to 0.9)                             |
| H influenzae type B meningitis                                                       | < 0.05<br>( <b>&lt; 0.05 to &lt; 0.05</b> ) | < 0.05<br>( <b>&lt; 0.05 to &lt; 0.05</b> )  | < 0.05<br>( <b>&lt; 0.05 to &lt; 0.05</b> )     | 19.9<br>(14.7 to 25.1)                            | -3.7<br>(-7.7 to 0.4)                               |
| Meningococcal infection                                                              | < 0.05<br>( <b>&lt; 0.05 to &lt; 0.05</b> ) | < 0.05<br>( <b>&lt; 0.05 to &lt; 0.05</b> )  | < 0.05<br>( <b>&lt; 0.05 to &lt; 0.05</b> )     | 22.1<br>(16.6 to 27.5)                            | -2.7<br>(-7.2 to 1.7)                               |
| Other meningitis                                                                     | < 0.05<br>( <b>&lt; 0.05 to 0.1</b> )       | < 0.05<br>( <b>&lt; 0.05 to &lt; 0.05</b> )  | < 0.05<br>( <b>&lt; 0.05 to &lt; 0.05</b> )     | 40.6<br>(30.7 to 50.3)                            | 12.7<br>(6.2 to 19.4)                               |
| Encephalitis                                                                         | 0.2<br>(0.2 to 0.4)                         | 0.1<br>(0.1 to 0.1)                          | < 0.05<br>( <b>&lt; 0.05 to &lt; 0.05</b> )     | 26.0<br>(11.7 to 41.2)                            | -0.9<br>(-11.3 to 10.0)                             |
| Diphtheria                                                                           | < 0.05<br>( <b>&lt; 0.05 to &lt; 0.05</b> ) | < 0.05<br>( <b>&lt; 0.05 to &lt; 0.05</b> )  | < 0.05<br>( <b>&lt; 0.05 to &lt; 0.05</b> )     | -35.9<br>(-64.2 to 18.2)                          | -44.9<br>(-67.7 to -3.9)                            |
| Whooping cough                                                                       | 0.1<br>( <b>&lt; 0.05 to 0.1</b> )          | 0.4<br>(0.3 to 0.5)                          | < 0.05<br>( <b>&lt; 0.05 to &lt; 0.05</b> )     | -5.7<br>(-17.3 to 7.5)                            | -11.8<br>(-22.6 to 0.6)                             |
| Tetanus                                                                              | < 0.05<br>( <b>&lt; 0.05 to &lt; 0.05</b> ) | < 0.05<br>( <b>&lt; 0.05 to &lt; 0.05</b> )  | < 0.05<br>( <b>&lt; 0.05 to &lt; 0.05</b> )     | 5.2<br>(-16.4 to 23.7)                            | -19.3<br>(-36.6 to -2.8)                            |
| Measles                                                                              | < 0.05<br>( <b>&lt; 0.05 to &lt; 0.05</b> ) | 0.7<br>(0.3 to 1.6)                          | < 0.05<br>( <b>&lt; 0.05 to &lt; 0.05</b> )     | 59.9<br>(13.7 to 128.2)                           | 48.0<br>(5.5 to 110.6)                              |
| Varicella and herpes zoster                                                          | 0.1<br>(0.1 to 0.1)                         | 2.0<br>(1.9 to 2.1)                          | < 0.05<br>( <b>&lt; 0.05 to &lt; 0.05</b> )     | 31.3<br>(14.4 to 50.3)                            | 0.1<br>(-10.1 to 11.2)                              |
| <b>Neglected tropical diseases and malaria</b>                                       | <b>23.9</b><br>(21.2 to 27.1)               | <b>1.9†</b><br>(1.2 to 2.7)                  | <b>0.1</b><br>(0.1 to 0.2)                      | <b>37.8</b><br>(-0.8 to 83.1)                     | <b>13.2</b><br>(-24.3 to 57.8)                      |
| Malaria                                                                              | --                                          | --                                           | --                                              | --                                                | --                                                  |
| Chagas disease                                                                       | --                                          | --                                           | --                                              | --                                                | --                                                  |
| Leishmaniasis                                                                        | --                                          | --                                           | --                                              | --                                                | --                                                  |
| Visceral leishmaniasis                                                               | --                                          | --                                           | --                                              | --                                                | --                                                  |
| Cutaneous and mucocutaneous leishmaniasis                                            | --                                          | --                                           | --                                              | --                                                | --                                                  |
| African trypanosomiasis                                                              | --                                          | --                                           | --                                              | --                                                | --                                                  |
| Schistosomiasis                                                                      | --                                          | --                                           | --                                              | --                                                | --                                                  |
| Cysticercosis                                                                        | --                                          | --                                           | --                                              | --                                                | --                                                  |
| Cystic echinococcosis                                                                | --                                          | --                                           | --                                              | --                                                | --                                                  |
| Lymphatic filariasis                                                                 | < 0.05<br>( <b>&lt; 0.05 to 0.1</b> )       | < 0.05<br>( <b>&lt; 0.05 to &lt; 0.05</b> )  | < 0.05<br>( <b>&lt; 0.05 to &lt; 0.05</b> )     | --                                                | --                                                  |
| Onchocerciasis                                                                       | --                                          | --                                           | --                                              | --                                                | --                                                  |
| Trachoma                                                                             | --                                          | --                                           | --                                              | --                                                | --                                                  |
| Dengue                                                                               | 0.1<br>(0.1 to 0.2)                         | 1.8<br>(1.2 to 2.6)                          | < 0.05<br>( <b>&lt; 0.05 to &lt; 0.05</b> )     | 247.6<br>(165.2 to 699.2)                         | 179.1<br>(115.9 to 539.5)                           |
| Yellow fever                                                                         | --                                          | --                                           | --                                              | --                                                | --                                                  |
| Rabies                                                                               | < 0.05<br>( <b>&lt; 0.05 to &lt; 0.05</b> ) | < 0.05<br>( <b>&lt; 0.05 to &lt; 0.05</b> )  | < 0.05<br>( <b>&lt; 0.05 to &lt; 0.05</b> )     | -17.2<br>(-49.6 to 47.5)                          | -40.6<br>(-63.0 to 6.0)                             |
| Intestinal nematode infections                                                       | 23.2<br>(20.4 to 26.5)                      | --                                           | 0.1<br>( <b>&lt; 0.05 to 0.1</b> )              | 26.2<br>(-19.3 to 93.3)                           | 1.0<br>(-39.1 to 63.9)                              |
| Ascariasis                                                                           | 3.5<br>(2.6 to 4.7)                         | --                                           | < 0.05<br>( <b>&lt; 0.05 to &lt; 0.05</b> )     | 23.9<br>(-53.3 to 234.8)                          | 2.2<br>(-65.5 to 207.9)                             |

| Cause                                                                   | Prevalence in thousands (95% UI)        | Incidence in thousands (95% UI)          | YLDs in thousands (95% UI)                          |                                                   |                                                     |
|-------------------------------------------------------------------------|-----------------------------------------|------------------------------------------|-----------------------------------------------------|---------------------------------------------------|-----------------------------------------------------|
|                                                                         | 2016 counts                             | 2016 counts                              | 2016 counts                                         | Percentage change in counts between 2006 and 2016 | Percentage change in age-standardised rates between |
| Trichuriasis                                                            | 4.0<br>(3.5 to 4.7)                     | --                                       | < 0.05<br>(< 0.05 to < 0.05)                        | 63.5<br>(28.4 to 107.1)                           | 29.9<br>(0.4 to 66.9)                               |
| Hookworm disease                                                        | 18.1<br>(14.7 to 21.8)                  | --                                       | 0.1<br>(< 0.05 to 0.1)                              | 25.7<br>(-20.3 to 94.2)                           | 0.5<br>(-39.9 to 63.7)                              |
| Food-borne trematodiasis                                                | --                                      | --                                       | --                                                  | --                                                | --                                                  |
| Leprosy                                                                 | < 0.05<br>(< 0.05 to < 0.05)            | < 0.05<br>(< 0.05 to < 0.05)             | < 0.05<br>(< 0.05 to < 0.05)                        | 43.5<br>(-5.7 to 187.6)                           | 5.0<br>(-28.4 to 113.2)                             |
| Ebola virus disease                                                     | --                                      | --                                       | --                                                  | --                                                | --                                                  |
| Zika virus disease                                                      | < 0.05<br>(0.0 to < 0.05)               | < 0.05<br>(< 0.05 to 0.1)                | < 0.05<br>(0.0 to < 0.05)                           | --                                                | --                                                  |
| Guinea worm disease                                                     | --                                      | --                                       | --                                                  | --                                                | --                                                  |
| Other neglected tropical diseases                                       | 1.0<br>(0.8 to 1.1)                     | --                                       | < 0.05<br>(< 0.05 to < 0.05)                        | 11.8<br>(-6.8 to 29.2)                            | -2.6<br>(-17.0 to 11.0)                             |
| <b>Maternal disorders</b>                                               | <b>0.1</b><br><b>(&lt; 0.05 to 0.1)</b> | <b>1.2†</b><br><b>(1.0 to 1.4)</b>       | <b>&lt; 0.05</b><br><b>(&lt; 0.05 to &lt; 0.05)</b> | <b>8.5</b><br><b>(-19.4 to 44.4)</b>              | <b>-12.3</b><br><b>(-34.5 to 16.0)</b>              |
| Maternal haemorrhage                                                    | < 0.05<br>(< 0.05 to < 0.05)            | 0.2<br>(0.2 to 0.3)                      | < 0.05<br>(< 0.05 to < 0.05)                        | 1.0<br>(-33.4 to 57.7)                            | -18.2<br>(-45.1 to 26.9)                            |
| Maternal sepsis and other pregnancy related infections                  | < 0.05<br>(< 0.05 to < 0.05)            | 0.1<br>(0.1 to 0.1)                      | < 0.05<br>(< 0.05 to < 0.05)                        | 5.3<br>(-52.4 to 135.8)                           | -15.3<br>(-61.6 to 89.9)                            |
| Maternal hypertensive disorders                                         | < 0.05<br>(< 0.05 to < 0.05)            | 0.1<br>(0.1 to 0.1)                      | < 0.05<br>(< 0.05 to < 0.05)                        | 29.0<br>(-22.8 to 121.7)                          | 4.1<br>(-37.6 to 78.4)                              |
| Maternal obstructed labour and uterine rupture                          | < 0.05<br>(< 0.05 to < 0.05)            | 0.1<br>(0.1 to 0.2)                      | < 0.05<br>(< 0.05 to < 0.05)                        | 6.2<br>(-59.2 to 165.8)                           | -14.0<br>(-67.3 to 108.1)                           |
| Maternal abortion, miscarriage, and ectopic pregnancy                   | < 0.05<br>(< 0.05 to < 0.05)            | 0.7<br>(0.5 to 0.8)                      | < 0.05<br>(< 0.05 to < 0.05)                        | 2.5<br>(-45.2 to 87.0)                            | -17.7<br>(-55.3 to 49.8)                            |
| Other maternal disorders                                                | --                                      | --                                       | < 0.05<br>(< 0.05 to < 0.05)                        | 2.6<br>(-23.9 to 37.0)                            | -17.1<br>(-38.4 to 10.0)                            |
| <b>Neonatal disorders</b>                                               | <b>1.2</b><br><b>(1.0 to 1.6)</b>       | <b>--</b>                                | <b>0.1</b><br><b>(0.1 to 0.2)</b>                   | <b>22.2</b><br><b>(2.4 to 45.1)</b>               | <b>1.4</b><br><b>(-14.9 to 20.5)</b>                |
| Neonatal preterm birth complications                                    | 1.1<br>(0.9 to 1.6)                     | --                                       | 0.1<br>(0.1 to 0.1)                                 | 21.5<br>(-1.9 to 48.9)                            | -0.0<br>(-19.2 to 22.1)                             |
| Neonatal encephalopathy due to birth asphyxia and trauma                | 0.1<br>(< 0.05 to 0.1)                  | --                                       | < 0.05<br>(< 0.05 to < 0.05)                        | 33.4<br>(-20.2 to 139.8)                          | 9.4<br>(-34.6 to 95.2)                              |
| Neonatal sepsis and other neonatal infections                           | < 0.05<br>(< 0.05 to 0.1)               | --                                       | < 0.05<br>(< 0.05 to < 0.05)                        | 32.2<br>(4.4 to 89.6)                             | 10.8<br>(-11.8 to 66.5)                             |
| Hemolytic disease and other neonatal jaundice                           | < 0.05<br>(< 0.05 to < 0.05)            | --                                       | < 0.05<br>(< 0.05 to < 0.05)                        | 19.9<br>(6.4 to 36.0)                             | -2.4<br>(-11.2 to 8.8)                              |
| Other neonatal disorders                                                | --                                      | --                                       | < 0.05<br>(< 0.05 to < 0.05)                        | 3.5<br>(-16.2 to 28.3)                            | -2.9<br>(-21.4 to 20.4)                             |
| <b>Nutritional deficiencies</b>                                         | <b>29.2</b><br><b>(27.5 to 31.2)</b>    | <b>15.8†</b><br><b>(12.5 to 19.8)</b>    | <b>0.5</b><br><b>(0.3 to 0.8)</b>                   | <b>13.0</b><br><b>(1.2 to 24.3)</b>               | <b>-7.7</b><br><b>(-15.7 to -0.1)</b>               |
| Protein-energy malnutrition                                             | 0.7<br>(0.5 to 1.0)                     | 0.3<br>(0.2 to 0.3)                      | < 0.05<br>(< 0.05 to 0.1)                           | 21.4<br>(-25.5 to 100.9)                          | 14.0<br>(-30.1 to 88.5)                             |
| Iodine deficiency                                                       | < 0.05<br>(< 0.05 to < 0.05)            | < 0.05<br>(< 0.05 to < 0.05)             | < 0.05<br>(< 0.05 to < 0.05)                        | 19.4<br>(8.3 to 30.9)                             | -10.0<br>(-18.2 to -1.0)                            |
| Vitamin A deficiency                                                    | 14.3<br>(12.1 to 17.1)                  | 15.6<br>(12.3 to 19.5)                   | < 0.05<br>(< 0.05 to < 0.05)                        | 12.0<br>(-8.6 to 34.7)                            | -6.3<br>(-21.9 to 10.3)                             |
| Iron-deficiency anaemia                                                 | 18.9<br>(17.3 to 20.5)                  | --                                       | 0.5<br>(0.3 to 0.7)                                 | 12.4<br>(0.4 to 23.7)                             | -8.6<br>(-16.6 to -1.4)                             |
| Other nutritional deficiencies                                          | --                                      | --                                       | < 0.05<br>(< 0.05 to < 0.05)                        | 21.1<br>(-26.9 to 103.5)                          | 13.7<br>(-31.4 to 90.9)                             |
| <b>Other communicable, maternal, neonatal, and nutritional diseases</b> | <b>19.4</b><br><b>(18.2 to 20.7)</b>    | <b>6.5</b><br><b>(5.9 to 7.2)</b>        | <b>&lt; 0.05</b><br><b>(&lt; 0.05 to 0.1)</b>       | <b>23.0</b><br><b>(13.7 to 32.6)</b>              | <b>-1.7</b><br><b>(-7.8 to 4.4)</b>                 |
| Sexually transmitted diseases excluding HIV                             | 12.5<br>(11.6 to 13.5)                  | 4.5<br>(4.0 to 4.9)                      | < 0.05<br>(< 0.05 to < 0.05)                        | 28.0<br>(19.3 to 37.1)                            | -2.0<br>(-8.2 to 4.3)                               |
| Syphilis                                                                | 0.7<br>(0.6 to 0.9)                     | 0.4<br>(0.4 to 0.5)                      | < 0.05<br>(< 0.05 to < 0.05)                        | 39.9<br>(23.7 to 58.5)                            | -0.2<br>(-12.6 to 14.2)                             |
| Chlamydial infection                                                    | 0.6<br>(0.5 to 0.7)                     | 0.5<br>(0.4 to 0.6)                      | < 0.05<br>(< 0.05 to < 0.05)                        | 27.0<br>(9.5 to 46.2)                             | -1.6<br>(-14.6 to 13.5)                             |
| Gonococcal infection                                                    | 0.1<br>(0.1 to 0.1)                     | 0.3<br>(0.2 to 0.3)                      | < 0.05<br>(< 0.05 to < 0.05)                        | 18.2<br>(-4.7 to 49.4)                            | -7.1<br>(-23.8 to 15.7)                             |
| Trichomoniasis                                                          | 1.9<br>(1.6 to 2.3)                     | 1.7<br>(1.4 to 2.1)                      | < 0.05<br>(< 0.05 to < 0.05)                        | 28.9<br>(19.9 to 38.5)                            | -0.0<br>(-6.9 to 7.0)                               |
| Genital herpes                                                          | 9.7<br>(8.3 to 11.3)                    | 0.8<br>(0.7 to 1.0)                      | < 0.05<br>(< 0.05 to < 0.05)                        | 31.5<br>(20.1 to 43.6)                            | -0.2<br>(-7.4 to 7.7)                               |
| Other sexually transmitted diseases                                     | 0.7<br>(0.6 to 0.7)                     | 0.7<br>(0.6 to 0.9)                      | < 0.05<br>(< 0.05 to < 0.05)                        | 27.1<br>(13.6 to 40.5)                            | -2.9<br>(-12.6 to 7.5)                              |
| Hepatitis                                                               | 8.0<br>(6.7 to 9.6)                     | 2.1<br>(1.7 to 2.5)                      | < 0.05<br>(< 0.05 to < 0.05)                        | 3.5<br>(-17.7 to 32.7)                            | -16.9<br>(-32.4 to 3.3)                             |
| Acute hepatitis A                                                       | 0.1<br>(< 0.05 to 0.1)                  | 0.7<br>(0.4 to 1.0)                      | < 0.05<br>(< 0.05 to < 0.05)                        | 3.1<br>(-42.5 to 83.1)                            | -15.6<br>(-48.5 to 39.6)                            |
| Hepatitis B                                                             | 6.4<br>(5.0 to 8.0)                     | 1.2<br>(0.9 to 1.6)                      | < 0.05<br>(< 0.05 to < 0.05)                        | 3.7<br>(-20.6 to 35.8)                            | -17.9<br>(-36.8 to 5.3)                             |
| Hepatitis C                                                             | 1.6<br>(1.4 to 1.8)                     | 0.1<br>(0.1 to 0.1)                      | < 0.05<br>(< 0.05 to < 0.05)                        | 7.4<br>(-11.7 to 31.2)                            | -5.8<br>(-19.4 to 10.8)                             |
| Acute hepatitis E                                                       | < 0.05<br>(< 0.05 to < 0.05)            | 0.1<br>(0.1 to 0.1)                      | < 0.05<br>(< 0.05 to < 0.05)                        | 2.2<br>(-28.3 to 50.1)                            | -17.0<br>(-37.9 to 12.3)                            |
| Other infectious diseases                                               | 0.8<br>(0.7 to 0.8)                     | < 0.05<br>(< 0.05 to < 0.05)             | < 0.05<br>(< 0.05 to < 0.05)                        | 20.8<br>(3.4 to 38.6)                             | 1.5<br>(-11.8 to 14.7)                              |
| <b>Non-communicable diseases</b>                                        | <b>65.0</b><br><b>(64.3 to 65.6)</b>    | <b>188.5†</b><br><b>(177.1 to 200.5)</b> | <b>6.0</b><br><b>(4.4 to 7.8)</b>                   | <b>32.8</b><br><b>(30.1 to 35.6)</b>              | <b>0.3</b><br><b>(-1.4 to 2.0)</b>                  |
| <b>Neoplasms</b>                                                        | <b>0.1</b><br><b>(0.1 to 0.1)</b>       | <b>0.1</b><br><b>(&lt; 0.05 to 0.1)</b>  | <b>&lt; 0.05</b><br><b>(&lt; 0.05 to &lt; 0.05)</b> | <b>40.9</b><br><b>(32.4 to 50.0)</b>              | <b>1.8</b><br><b>(-3.6 to 7.4)</b>                  |
| Lip and oral cavity cancer                                              | < 0.05<br>(< 0.05 to < 0.05)            | < 0.05<br>(< 0.05 to < 0.05)             | < 0.05<br>(< 0.05 to < 0.05)                        | 44.4<br>(26.9 to 64.2)                            | 3.6<br>(-9.2 to 17.9)                               |
| Nasopharynx cancer                                                      | < 0.05<br>(< 0.05 to < 0.05)            | < 0.05<br>(< 0.05 to < 0.05)             | < 0.05<br>(< 0.05 to < 0.05)                        | 36.0<br>(10.0 to 65.8)                            | -2.4<br>(-18.9 to 16.1)                             |
| Other pharynx cancer                                                    | < 0.05<br>(< 0.05 to < 0.05)            | < 0.05<br>(< 0.05 to < 0.05)             | < 0.05<br>(< 0.05 to < 0.05)                        | 42.1<br>(25.2 to 65.8)                            | 1.2<br>(-10.6 to 16.7)                              |
| Oesophageal cancer                                                      | < 0.05<br>(< 0.05 to < 0.05)            | < 0.05<br>(< 0.05 to < 0.05)             | < 0.05<br>(< 0.05 to < 0.05)                        | 31.6<br>(18.2 to 46.9)                            | -7.3<br>(-16.5 to 3.8)                              |
| Stomach cancer                                                          | < 0.05<br>(< 0.05 to < 0.05)            | < 0.05<br>(< 0.05 to < 0.05)             | < 0.05<br>(< 0.05 to < 0.05)                        | 25.6<br>(10.9 to 41.5)                            | -10.2<br>(-22.8 to 4.3)                             |
| Colon and rectum cancer                                                 | < 0.05<br>(< 0.05 to < 0.05)            | < 0.05<br>(< 0.05 to < 0.05)             | < 0.05<br>(< 0.05 to < 0.05)                        | 52.2<br>(31.3 to 75.3)                            | 7.3<br>(-8.3 to 24.7)                               |
| Liver cancer                                                            | < 0.05<br>(< 0.05 to < 0.05)            | < 0.05<br>(< 0.05 to < 0.05)             | < 0.05<br>(< 0.05 to < 0.05)                        | 39.1<br>(22.0 to 58.5)                            | -1.0<br>(-12.9 to 11.9)                             |
| Liver cancer due to hepatitis B                                         | < 0.05<br>(< 0.05 to < 0.05)            | < 0.05<br>(< 0.05 to < 0.05)             | < 0.05<br>(< 0.05 to < 0.05)                        | 38.3<br>(21.2 to 59.1)                            | -1.1<br>(-12.8 to 12.1)                             |

| Cause                                              | Prevalence in thousands (95% UI)  | Incidence in thousands (95% UI)    | YLDs in thousands (95% UI)        |                                                   |                                                     |
|----------------------------------------------------|-----------------------------------|------------------------------------|-----------------------------------|---------------------------------------------------|-----------------------------------------------------|
|                                                    | 2016 counts                       | 2016 counts                        | 2016 counts                       | Percentage change in counts between 2006 and 2016 | Percentage change in age-standardised rates between |
| Liver cancer due to hepatitis C                    | < 0.05<br>(< 0.05 to < 0.05)      | < 0.05<br>(< 0.05 to < 0.05)       | < 0.05<br>(< 0.05 to < 0.05)      | 42.5<br>(23.1 to 64.1)                            | -0.5<br>(-13.6 to 13.8)                             |
| Liver cancer due to alcohol use                    | < 0.05<br>(< 0.05 to < 0.05)      | < 0.05<br>(< 0.05 to < 0.05)       | < 0.05<br>(< 0.05 to < 0.05)      | 42.0<br>(21.3 to 63.1)                            | -0.8<br>(-14.5 to 13.3)                             |
| Liver cancer due to other causes                   | < 0.05<br>(< 0.05 to < 0.05)      | < 0.05<br>(< 0.05 to < 0.05)       | < 0.05<br>(< 0.05 to < 0.05)      | 38.0<br>(19.6 to 59.8)                            | -1.5<br>(-14.1 to 13.4)                             |
| Gallbladder and biliary tract cancer               | < 0.05<br>(< 0.05 to < 0.05)      | < 0.05<br>(< 0.05 to < 0.05)       | < 0.05<br>(< 0.05 to < 0.05)      | 38.5<br>(27.0 to 54.4)                            | -3.5<br>(-11.1 to 6.6)                              |
| Pancreatic cancer                                  | < 0.05<br>(< 0.05 to < 0.05)      | < 0.05<br>(< 0.05 to < 0.05)       | < 0.05<br>(< 0.05 to < 0.05)      | 48.4<br>(37.6 to 59.6)                            | 3.2<br>(-4.7 to 11.6)                               |
| Larynx cancer                                      | < 0.05<br>(< 0.05 to < 0.05)      | < 0.05<br>(< 0.05 to < 0.05)       | < 0.05<br>(< 0.05 to < 0.05)      | 46.1<br>(30.0 to 64.3)                            | 1.6<br>(-10.8 to 15.2)                              |
| Tracheal, bronchus, and lung cancer                | < 0.05<br>(< 0.05 to < 0.05)      | < 0.05<br>(< 0.05 to < 0.05)       | < 0.05<br>(< 0.05 to < 0.05)      | 37.2<br>(13.0 to 70.2)                            | -4.5<br>(-22.5 to 18.0)                             |
| Malignant skin melanoma                            | < 0.05<br>(< 0.05 to < 0.05)      | < 0.05<br>(< 0.05 to < 0.05)       | < 0.05<br>(< 0.05 to < 0.05)      | 46.6<br>(23.8 to 76.4)                            | 3.6<br>(-12.0 to 23.6)                              |
| Non-melanoma skin cancer                           | < 0.05<br>(< 0.05 to < 0.05)      | < 0.05<br>(< 0.05 to < 0.05)       | < 0.05<br>(< 0.05 to < 0.05)      | 12.2<br>(-48.7 to 78.8)                           | -27.8<br>(-68.1 to 20.4)                            |
| Non-melanoma skin cancer (squamous-cell carcinoma) | < 0.05<br>(< 0.05 to < 0.05)      | < 0.05<br>(< 0.05 to < 0.05)       | < 0.05<br>(< 0.05 to < 0.05)      | 12.0<br>(-49.2 to 79.7)                           | -27.9<br>(-68.2 to 20.5)                            |
| Non-melanoma skin cancer (basal-cell carcinoma)    | < 0.05<br>(< 0.05 to < 0.05)      | < 0.05<br>(< 0.05 to < 0.05)       | < 0.05<br>(< 0.05 to < 0.05)      | 34.4<br>(22.7 to 49.9)                            | 1.1<br>(-6.9 to 10.0)                               |
| Breast cancer                                      | < 0.05<br>(< 0.05 to 0.1)         | < 0.05<br>(< 0.05 to < 0.05)       | < 0.05<br>(< 0.05 to < 0.05)      | 53.2<br>(25.7 to 91.5)                            | 9.6<br>(-8.2 to 33.0)                               |
| Cervical cancer                                    | < 0.05<br>(< 0.05 to < 0.05)      | < 0.05<br>(< 0.05 to < 0.05)       | < 0.05<br>(< 0.05 to < 0.05)      | 24.7<br>(-5.6 to 66.6)                            | -9.7<br>(-30.0 to 17.1)                             |
| Uterine cancer                                     | < 0.05<br>(< 0.05 to < 0.05)      | < 0.05<br>(< 0.05 to < 0.05)       | < 0.05<br>(< 0.05 to < 0.05)      | 51.3<br>(21.5 to 89.9)                            | 6.2<br>(-15.3 to 33.7)                              |
| Ovarian cancer                                     | < 0.05<br>(< 0.05 to < 0.05)      | < 0.05<br>(< 0.05 to < 0.05)       | < 0.05<br>(< 0.05 to < 0.05)      | 49.8<br>(21.5 to 94.4)                            | 7.0<br>(-18.4 to 47.0)                              |
| Prostate cancer                                    | < 0.05<br>(< 0.05 to < 0.05)      | < 0.05<br>(< 0.05 to < 0.05)       | < 0.05<br>(< 0.05 to < 0.05)      | 62.4<br>(31.0 to 104.0)                           | 9.8<br>(-8.8 to 34.1)                               |
| Testicular cancer                                  | < 0.05<br>(< 0.05 to < 0.05)      | < 0.05<br>(< 0.05 to < 0.05)       | < 0.05<br>(< 0.05 to < 0.05)      | 42.1<br>(13.5 to 77.8)                            | 8.6<br>(-10.7 to 32.1)                              |
| Kidney cancer                                      | < 0.05<br>(< 0.05 to < 0.05)      | < 0.05<br>(< 0.05 to < 0.05)       | < 0.05<br>(< 0.05 to < 0.05)      | 43.4<br>(20.1 to 73.8)                            | 7.0<br>(-9.0 to 27.3)                               |
| Bladder cancer                                     | < 0.05<br>(< 0.05 to < 0.05)      | < 0.05<br>(< 0.05 to < 0.05)       | < 0.05<br>(< 0.05 to < 0.05)      | 63.3<br>(44.2 to 84.4)                            | 11.3<br>(-0.7 to 24.4)                              |
| Brain and nervous system cancer                    | < 0.05<br>(< 0.05 to < 0.05)      | < 0.05<br>(< 0.05 to < 0.05)       | < 0.05<br>(< 0.05 to < 0.05)      | 33.0<br>(19.3 to 44.8)                            | 3.0<br>(-6.6 to 13.7)                               |
| Thyroid cancer                                     | < 0.05<br>(< 0.05 to < 0.05)      | < 0.05<br>(< 0.05 to < 0.05)       | < 0.05<br>(< 0.05 to < 0.05)      | 66.9<br>(38.0 to 108.1)                           | 12.2<br>(-6.7 to 36.6)                              |
| Mesothelioma                                       | < 0.05<br>(< 0.05 to < 0.05)      | < 0.05<br>(< 0.05 to < 0.05)       | < 0.05<br>(< 0.05 to < 0.05)      | 42.1<br>(26.4 to 61.3)                            | 0.3<br>(-10.7 to 14.0)                              |
| Hodgkin lymphoma                                   | < 0.05<br>(< 0.05 to < 0.05)      | < 0.05<br>(< 0.05 to < 0.05)       | < 0.05<br>(< 0.05 to < 0.05)      | 14.4<br>(0.1 to 30.6)                             | -13.4<br>(-24.4 to -2.6)                            |
| Non-Hodgkin's lymphoma                             | < 0.05<br>(< 0.05 to < 0.05)      | < 0.05<br>(< 0.05 to < 0.05)       | < 0.05<br>(< 0.05 to < 0.05)      | 39.4<br>(26.4 to 54.8)                            | 4.5<br>(-4.7 to 15.6)                               |
| Multiple myeloma                                   | < 0.05<br>(< 0.05 to < 0.05)      | < 0.05<br>(< 0.05 to < 0.05)       | < 0.05<br>(< 0.05 to < 0.05)      | 52.1<br>(37.2 to 70.9)                            | 6.9<br>(-4.2 to 19.6)                               |
| Leukaemia                                          | < 0.05<br>(< 0.05 to < 0.05)      | < 0.05<br>(< 0.05 to < 0.05)       | < 0.05<br>(< 0.05 to < 0.05)      | 18.9<br>(7.6 to 36.2)                             | -5.3<br>(-13.6 to 5.2)                              |
| Acute lymphoid leukaemia                           | < 0.05<br>(< 0.05 to < 0.05)      | < 0.05<br>(< 0.05 to < 0.05)       | < 0.05<br>(< 0.05 to < 0.05)      | 12.1<br>(-9.4 to 42.9)                            | -4.6<br>(-19.2 to 15.2)                             |
| Chronic lymphoid leukaemia                         | < 0.05<br>(< 0.05 to < 0.05)      | < 0.05<br>(< 0.05 to < 0.05)       | < 0.05<br>(< 0.05 to < 0.05)      | 44.8<br>(21.9 to 76.6)                            | 0.1<br>(-18.5 to 25.2)                              |
| Acute myeloid leukaemia                            | < 0.05<br>(< 0.05 to < 0.05)      | < 0.05<br>(< 0.05 to < 0.05)       | < 0.05<br>(< 0.05 to < 0.05)      | 26.6<br>(9.1 to 46.9)                             | 2.5<br>(-9.2 to 14.2)                               |
| Chronic myeloid leukaemia                          | < 0.05<br>(< 0.05 to < 0.05)      | < 0.05<br>(< 0.05 to < 0.05)       | < 0.05<br>(< 0.05 to < 0.05)      | 20.3<br>(2.7 to 43.2)                             | -9.8<br>(-21.9 to 6.0)                              |
| Other leukaemia                                    | < 0.05<br>(< 0.05 to < 0.05)      | < 0.05<br>(< 0.05 to < 0.05)       | < 0.05<br>(< 0.05 to < 0.05)      | 13.5<br>(-2.3 to 38.0)                            | -8.5<br>(-20.1 to 7.5)                              |
| Other neoplasms                                    | < 0.05<br>(< 0.05 to < 0.05)      | < 0.05<br>(< 0.05 to < 0.05)       | < 0.05<br>(< 0.05 to < 0.05)      | 33.3<br>(16.9 to 53.2)                            | 1.5<br>(-10.3 to 15.0)                              |
| <b>Cardiovascular diseases</b>                     | <b>3.5</b><br><b>(3.4 to 3.7)</b> | <b>0.3†</b><br><b>(0.3 to 0.3)</b> | <b>0.2</b><br><b>(0.2 to 0.3)</b> | <b>33.8</b><br><b>(28.8 to 38.6)</b>              | <b>-1.7</b><br><b>(-5.2 to 1.7)</b>                 |
| Rheumatic heart disease                            | 1.3<br>(1.1 to 1.4)               | < 0.05<br>(< 0.05 to 0.1)          | 0.1<br>(< 0.05 to 0.1)            | 22.9<br>(12.6 to 32.0)                            | -5.4<br>(-13.2 to 1.5)                              |
| Ischaemic heart disease                            | 0.7<br>(0.7 to 0.8)               | 0.1<br>(0.1 to 0.1)                | < 0.05<br>(< 0.05 to < 0.05)      | 44.4<br>(37.1 to 51.9)                            | 2.8<br>(-1.3 to 6.9)                                |
| Cerebrovascular disease                            | 0.4<br>(0.4 to 0.5)               | 0.1‡<br>(0.1 to 0.1)               | 0.1<br>(0.1 to 0.1)               | 35.3<br>(25.5 to 45.0)                            | -3.5<br>(-9.8 to 3.2)                               |
| Ischaemic stroke                                   | 0.4<br>(0.3 to 0.4)               | < 0.05‡<br>(< 0.05 to < 0.05)      | 0.1<br>(< 0.05 to 0.1)            | 37.2<br>(26.0 to 48.8)                            | -3.1<br>(-10.9 to 4.8)                              |
| Hemorrhagic stroke                                 | 0.1<br>(0.1 to 0.1)               | < 0.05‡<br>(< 0.05 to < 0.05)      | < 0.05<br>(< 0.05 to < 0.05)      | 28.9<br>(16.2 to 42.7)                            | -4.8<br>(-14.4 to 5.0)                              |
| Hypertensive heart disease                         | 0.1<br>(0.1 to 0.1)               | --                                 | < 0.05<br>(< 0.05 to < 0.05)      | 45.5<br>(28.8 to 63.1)                            | 1.9<br>(-7.4 to 11.8)                               |
| Cardiomyopathy and myocarditis                     | < 0.05<br>(< 0.05 to < 0.05)      | < 0.05†<br>(< 0.05 to < 0.05)      | < 0.05<br>(< 0.05 to < 0.05)      | 35.1<br>(20.3 to 52.1)                            | 4.1<br>(-6.7 to 16.6)                               |
| Myocarditis                                        | < 0.05<br>(< 0.05 to < 0.05)      | < 0.05<br>(< 0.05 to < 0.05)       | < 0.05<br>(< 0.05 to < 0.05)      | 34.7<br>(22.6 to 48.1)                            | 3.9<br>(-7.6 to 16.8)                               |
| Alcoholic cardiomyopathy                           | < 0.05<br>(< 0.05 to < 0.05)      | --                                 | < 0.05<br>(< 0.05 to < 0.05)      | 49.5<br>(35.4 to 65.1)                            | 5.5<br>(-6.9 to 19.6)                               |
| Other cardiomyopathy                               | < 0.05<br>(< 0.05 to < 0.05)      | --                                 | < 0.05<br>(< 0.05 to < 0.05)      | 34.3<br>(13.0 to 60.4)                            | 4.0<br>(-11.8 to 21.9)                              |
| Atrial fibrillation and flutter                    | 0.2<br>(0.1 to 0.2)               | < 0.05<br>(< 0.05 to < 0.05)       | < 0.05<br>(< 0.05 to < 0.05)      | 44.5<br>(33.4 to 56.6)                            | 0.1<br>(-6.4 to 6.9)                                |
| Peripheral vascular disease                        | 0.6<br>(0.5 to 0.7)               | 0.1<br>(0.1 to 0.1)                | < 0.05<br>(< 0.05 to < 0.05)      | 42.4<br>(30.7 to 56.8)                            | -3.4<br>(-10.4 to 6.0)                              |
| Endocarditis                                       | < 0.05<br>(< 0.05 to < 0.05)      | < 0.05<br>(< 0.05 to < 0.05)       | < 0.05<br>(< 0.05 to < 0.05)      | 36.1<br>(25.3 to 47.4)                            | 3.0<br>(-10.9 to 19.2)                              |
| Other cardiovascular and circulatory diseases      | 0.5<br>(0.4 to 0.6)               | --                                 | < 0.05<br>(< 0.05 to < 0.05)      | 34.6<br>(20.4 to 48.7)                            | 2.2<br>(-6.0 to 10.7)                               |
| <b>Chronic respiratory diseases</b>                | <b>7.5</b><br><b>(7.1 to 7.8)</b> | <b>1.7†</b><br><b>(1.6 to 1.8)</b> | <b>0.4</b><br><b>(0.3 to 0.5)</b> | <b>53.7</b><br><b>(47.5 to 59.9)</b>              | <b>17.0</b><br><b>(12.4 to 22.1)</b>                |
| Chronic obstructive pulmonary disease              | 1.8<br>(1.7 to 1.8)               | 0.1<br>(0.1 to 0.1)                | 0.1<br>(0.1 to 0.1)               | 38.2<br>(29.7 to 47.4)                            | 0.9<br>(-4.8 to 7.2)                                |
| Pneumoconiosis                                     | < 0.05<br>(< 0.05 to < 0.05)      | < 0.05<br>(< 0.05 to < 0.05)       | < 0.05<br>(< 0.05 to < 0.05)      | 40.4<br>(17.7 to 68.9)                            | -3.2<br>(-19.1 to 16.3)                             |
| Silicosis                                          | < 0.05<br>(< 0.05 to < 0.05)      | < 0.05<br>(< 0.05 to < 0.05)       | < 0.05<br>(< 0.05 to < 0.05)      | 40.4<br>(3.9 to 92.5)                             | -3.3<br>(-28.7 to 33.9)                             |



| Cause                                                          | Prevalence in thousands (95% UI)     | Incidence in thousands (95% UI)                     | YLDs in thousands (95% UI)                          |                                                   |                                                     |
|----------------------------------------------------------------|--------------------------------------|-----------------------------------------------------|-----------------------------------------------------|---------------------------------------------------|-----------------------------------------------------|
|                                                                | 2016 counts                          | 2016 counts                                         | 2016 counts                                         | Percentage change in counts between 2006 and 2016 | Percentage change in age-standardised rates between |
| Asbestosis                                                     | < 0.05<br>(< 0.05 to < 0.05)         | < 0.05<br>(< 0.05 to < 0.05)                        | < 0.05<br>(< 0.05 to < 0.05)                        | 40.1<br>(31.6 to 49.6)                            | -2.9<br>(-9.4 to 4.0)                               |
| Coal workers pneumoconiosis                                    | --                                   | --                                                  | --                                                  | --                                                | --                                                  |
| Other pneumoconiosis                                           | < 0.05<br>(< 0.05 to < 0.05)         | < 0.05<br>(< 0.05 to < 0.05)                        | < 0.05<br>(< 0.05 to < 0.05)                        | 40.8<br>(22.1 to 59.9)                            | -3.4<br>(-18.0 to 11.8)                             |
| Asthma                                                         | 6.0<br>(5.6 to 6.4)                  | 1.6<br>(1.5 to 1.7)                                 | 0.2<br>(0.1 to 0.3)                                 | 63.7<br>(56.1 to 72.4)                            | 34.9<br>(29.3 to 41.1)                              |
| Interstitial lung disease and pulmonary sarcoidosis            | < 0.05<br>(< 0.05 to < 0.05)         | < 0.05<br>(< 0.05 to < 0.05)                        | < 0.05<br>(< 0.05 to < 0.05)                        | 38.2<br>(24.0 to 55.0)                            | -0.8<br>(-10.6 to 10.5)                             |
| Other chronic respiratory diseases                             | --                                   | --                                                  | < 0.05<br>(< 0.05 to < 0.05)                        | 63.8<br>(38.3 to 94.2)                            | 31.2<br>(14.8 to 50.7)                              |
| <b>Cirrhosis and other chronic liver diseases</b>              | <b>0.3</b><br><b>(0.3 to 0.3)</b>    | <b>&lt; 0.05</b><br><b>(&lt; 0.05 to &lt; 0.05)</b> | <b>&lt; 0.05</b><br><b>(&lt; 0.05 to &lt; 0.05)</b> | <b>29.7</b><br><b>(14.1 to 46.5)</b>              | <b>1.7</b><br><b>(-8.0 to 12.1)</b>                 |
| Cirrhosis and other chronic liver diseases due to hepatitis B  | 0.1<br>(0.1 to 0.1)                  | < 0.05<br>(< 0.05 to < 0.05)                        | < 0.05<br>(< 0.05 to < 0.05)                        | 38.6<br>(16.5 to 69.0)                            | 1.7<br>(-12.2 to 19.3)                              |
| Cirrhosis and other chronic liver diseases due to hepatitis C  | < 0.05<br>(< 0.05 to < 0.05)         | < 0.05<br>(< 0.05 to < 0.05)                        | < 0.05<br>(< 0.05 to < 0.05)                        | 39.8<br>(10.4 to 77.5)                            | 2.5<br>(-18.2 to 28.4)                              |
| Cirrhosis and other chronic liver diseases due to alcohol use  | < 0.05<br>(< 0.05 to < 0.05)         | < 0.05<br>(< 0.05 to < 0.05)                        | < 0.05<br>(< 0.05 to < 0.05)                        | 42.7<br>(10.6 to 84.7)                            | 2.7<br>(-19.1 to 29.5)                              |
| Cirrhosis and other chronic liver diseases due to other causes | 0.1<br>(0.1 to 0.1)                  | < 0.05<br>(< 0.05 to < 0.05)                        | < 0.05<br>(< 0.05 to < 0.05)                        | 23.7<br>(3.0 to 48.1)                             | 1.3<br>(-14.2 to 18.2)                              |
| <b>Digestive diseases</b>                                      | <b>1.0</b><br><b>(0.9 to 1.0)</b>    | <b>1.2†</b><br><b>(1.2 to 1.3)</b>                  | <b>&lt; 0.05</b><br><b>(&lt; 0.05 to &lt; 0.05)</b> | <b>35.9</b><br><b>(25.6 to 47.0)</b>              | <b>1.7</b><br><b>(-4.5 to 8.0)</b>                  |
| Peptic ulcer disease                                           | 0.3<br>(0.3 to 0.3)                  | 0.1<br>(0.1 to 0.1)                                 | < 0.05<br>(< 0.05 to < 0.05)                        | 36.6<br>(22.5 to 51.8)                            | -1.3<br>(-10.9 to 9.0)                              |
| Gastritis and duodenitis                                       | 0.5<br>(0.4 to 0.5)                  | 0.4<br>(0.4 to 0.5)                                 | < 0.05<br>(< 0.05 to < 0.05)                        | 42.8<br>(26.6 to 58.1)                            | 5.0<br>(-5.9 to 14.8)                               |
| Appendicitis                                                   | < 0.05<br>(< 0.05 to < 0.05)         | 0.3<br>(0.2 to 0.3)                                 | < 0.05<br>(< 0.05 to < 0.05)                        | 26.3<br>(-7.4 to 74.3)                            | -1.7<br>(-25.1 to 27.8)                             |
| Paralytic ileus and intestinal obstruction                     | < 0.05<br>(< 0.05 to < 0.05)         | < 0.05<br>(< 0.05 to < 0.05)                        | < 0.05<br>(< 0.05 to < 0.05)                        | 25.9<br>(21.7 to 30.3)                            | -1.2<br>(-4.7 to 2.0)                               |
| Inguinal, femoral, and abdominal hernia                        | 0.2<br>(0.1 to 0.2)                  | 0.1<br>(0.1 to 0.1)                                 | < 0.05<br>(< 0.05 to < 0.05)                        | 35.5<br>(16.0 to 57.5)                            | 2.9<br>(-8.6 to 15.6)                               |
| Inflammatory bowel disease                                     | < 0.05<br>(< 0.05 to < 0.05)         | < 0.05<br>(< 0.05 to < 0.05)                        | < 0.05<br>(< 0.05 to < 0.05)                        | 23.5<br>(11.0 to 36.7)                            | -8.5<br>(-20.2 to 4.8)                              |
| Vascular intestinal disorders                                  | < 0.05<br>(< 0.05 to < 0.05)         | < 0.05<br>(< 0.05 to < 0.05)                        | < 0.05<br>(< 0.05 to < 0.05)                        | 32.0<br>(25.3 to 39.7)                            | 5.2<br>(1.3 to 9.8)                                 |
| Gallbladder and biliary diseases                               | 0.1<br>(0.1 to 0.1)                  | 0.3<br>(0.2 to 0.3)                                 | < 0.05<br>(< 0.05 to < 0.05)                        | 32.5<br>(8.2 to 62.7)                             | -1.7<br>(-18.7 to 19.8)                             |
| Pancreatitis                                                   | < 0.05<br>(< 0.05 to < 0.05)         | < 0.05<br>(< 0.05 to < 0.05)                        | < 0.05<br>(< 0.05 to < 0.05)                        | 33.5<br>(28.8 to 38.0)                            | -0.4<br>(-3.9 to 2.9)                               |
| Other digestive diseases                                       | --                                   | --                                                  | < 0.05<br>(< 0.05 to < 0.05)                        | 39.1<br>(25.1 to 54.1)                            | 6.0<br>(-1.0 to 13.3)                               |
| <b>Neurological disorders</b>                                  | <b>21.0</b><br><b>(20.1 to 22.1)</b> | <b>9.7</b><br><b>(8.3 to 11.4)</b>                  | <b>0.5</b><br><b>(0.3 to 0.7)</b>                   | <b>28.5</b><br><b>(6.5 to 58.7)</b>               | <b>-0.8</b><br><b>(-14.8 to 16.9)</b>               |
| Alzheimer's disease and other dementias                        | 0.2<br>(0.1 to 0.2)                  | < 0.05<br>(< 0.05 to < 0.05)                        | < 0.05<br>(< 0.05 to < 0.05)                        | 45.1<br>(37.1 to 52.6)                            | -0.6<br>(-5.3 to 3.9)                               |
| Parkinson's disease                                            | < 0.05<br>(< 0.05 to < 0.05)         | < 0.05<br>(< 0.05 to < 0.05)                        | < 0.05<br>(< 0.05 to < 0.05)                        | 53.2<br>(31.1 to 78.8)                            | 5.6<br>(-6.6 to 19.5)                               |
| Epilepsy                                                       | 0.2<br>(0.1 to 0.3)                  | < 0.05<br>(< 0.05 to < 0.05)                        | 0.1<br>(< 0.05 to 0.1)                              | 18.8<br>(-63.1 to 282.9)                          | -5.3<br>(-70.3 to 199.0)                            |
| Multiple sclerosis                                             | < 0.05<br>(< 0.05 to < 0.05)         | < 0.05<br>(< 0.05 to < 0.05)                        | < 0.05<br>(< 0.05 to < 0.05)                        | 48.3<br>(43.0 to 53.6)                            | 12.6<br>(8.5 to 16.5)                               |
| Motor neuron disease                                           | < 0.05<br>(< 0.05 to < 0.05)         | < 0.05<br>(< 0.05 to < 0.05)                        | < 0.05<br>(< 0.05 to < 0.05)                        | 31.5<br>(26.1 to 37.1)                            | 2.8<br>(-0.6 to 6.0)                                |
| Migraine                                                       | 7.5<br>(7.1 to 8.0)                  | 0.9<br>(0.8 to 1.0)                                 | 0.3<br>(0.2 to 0.4)                                 | 29.1<br>(23.7 to 34.9)                            | -0.6<br>(-4.3 to 3.3)                               |
| Tension-type headache                                          | 15.7<br>(13.8 to 17.8)               | 8.8<br>(7.3 to 10.4)                                | < 0.05<br>(< 0.05 to 0.1)                           | 29.1<br>(21.9 to 37.1)                            | -0.9<br>(-5.8 to 4.5)                               |
| Other neurological disorders                                   | < 0.05<br>(< 0.05 to < 0.05)         | < 0.05<br>(< 0.05 to < 0.05)                        | < 0.05<br>(< 0.05 to < 0.05)                        | 44.6<br>(-51.3 to 318.0)                          | 14.0<br>(-57.3 to 195.9)                            |
| <b>Mental and substance use disorders</b>                      | <b>9.0</b><br><b>(8.7 to 9.3)</b>    | <b>3.0†</b><br><b>(2.8 to 3.3)</b>                  | <b>1.1</b><br><b>(0.8 to 1.5)</b>                   | <b>28.9</b><br><b>(26.1 to 31.7)</b>              | <b>-0.3</b><br><b>(-2.3 to 1.7)</b>                 |
| Schizophrenia                                                  | 0.2<br>(0.2 to 0.2)                  | < 0.05<br>(< 0.05 to < 0.05)                        | 0.1<br>(0.1 to 0.1)                                 | 30.4<br>(20.6 to 41.3)                            | -0.4<br>(-7.6 to 7.6)                               |
| Alcohol use disorders                                          | 0.6<br>(0.5 to 0.7)                  | 0.3<br>(0.3 to 0.4)                                 | 0.1<br>(< 0.05 to 0.1)                              | 30.6<br>(19.6 to 41.6)                            | 0.8<br>(-7.2 to 9.5)                                |
| Drug use disorders                                             | 0.5<br>(0.5 to 0.6)                  | 0.1<br>(0.1 to 0.1)                                 | 0.1<br>(0.1 to 0.1)                                 | 31.2<br>(19.4 to 44.2)                            | 3.0<br>(-5.8 to 12.2)                               |
| Opioid use disorders                                           | 0.1<br>(0.1 to 0.1)                  | < 0.05<br>(< 0.05 to < 0.05)                        | 0.1<br>(< 0.05 to 0.1)                              | 31.2<br>(16.6 to 49.0)                            | 2.8<br>(-7.6 to 15.4)                               |
| Cocaine use disorders                                          | < 0.05<br>(< 0.05 to < 0.05)         | < 0.05<br>(< 0.05 to < 0.05)                        | < 0.05<br>(< 0.05 to < 0.05)                        | 32.7<br>(24.7 to 41.5)                            | 2.7<br>(-2.9 to 8.5)                                |
| Amphetamine use disorders                                      | 0.1<br>(< 0.05 to 0.1)               | < 0.05<br>(< 0.05 to < 0.05)                        | < 0.05<br>(< 0.05 to < 0.05)                        | 33.1<br>(0.5 to 77.4)                             | 6.0<br>(-19.3 to 39.4)                              |
| Cannabis use disorders                                         | 0.3<br>(0.3 to 0.4)                  | 0.1<br>(< 0.05 to 0.1)                              | < 0.05<br>(< 0.05 to < 0.05)                        | 27.2<br>(10.5 to 46.3)                            | -0.0<br>(-12.8 to 14.2)                             |
| Other drug use disorders                                       | < 0.05<br>(< 0.05 to < 0.05)         | < 0.05<br>(< 0.05 to < 0.05)                        | < 0.05<br>(< 0.05 to < 0.05)                        | 34.5<br>(5.9 to 72.5)                             | 5.5<br>(-14.8 to 32.1)                              |
| Depressive disorders                                           | 2.0<br>(1.8 to 2.1)                  | 1.8<br>(1.6 to 2.0)                                 | 0.3<br>(0.2 to 0.4)                                 | 29.6<br>(24.1 to 35.3)                            | -1.3<br>(-5.0 to 2.5)                               |
| Major depressive disorder                                      | 1.1<br>(1.0 to 1.2)                  | 1.6<br>(1.4 to 1.9)                                 | 0.2<br>(0.1 to 0.3)                                 | 27.7<br>(20.6 to 35.0)                            | -1.9<br>(-6.9 to 3.3)                               |
| Dysthymia                                                      | 0.9<br>(0.8 to 1.1)                  | 0.1<br>(0.1 to 0.2)                                 | 0.1<br>(0.1 to 0.1)                                 | 34.6<br>(29.8 to 39.3)                            | 0.0<br>(-2.9 to 3.0)                                |
| Bipolar disorder                                               | 0.3<br>(0.2 to 0.3)                  | < 0.05<br>(< 0.05 to < 0.05)                        | 0.1<br>(< 0.05 to 0.1)                              | 30.8<br>(20.8 to 42.5)                            | 0.1<br>(-6.8 to 8.0)                                |
| Anxiety disorders                                              | 2.3<br>(2.1 to 2.5)                  | 0.4<br>(0.4 to 0.4)                                 | 0.2<br>(0.1 to 0.3)                                 | 29.4<br>(21.4 to 38.9)                            | 0.0<br>(-5.8 to 6.5)                                |
| Eating disorders                                               | 0.1<br>(< 0.05 to 0.1)               | < 0.05<br>(< 0.05 to 0.1)                           | < 0.05<br>(< 0.05 to < 0.05)                        | 30.9<br>(11.7 to 53.6)                            | 3.9<br>(-11.2 to 21.8)                              |
| Anorexia nervosa                                               | < 0.05<br>(< 0.05 to < 0.05)         | < 0.05<br>(< 0.05 to < 0.05)                        | < 0.05<br>(< 0.05 to < 0.05)                        | 30.6<br>(0.0 to 74.0)                             | 3.9<br>(-20.2 to 36.8)                              |
| Bulimia nervosa                                                | < 0.05<br>(< 0.05 to 0.1)            | < 0.05<br>(< 0.05 to 0.1)                           | < 0.05<br>(< 0.05 to < 0.05)                        | 31.1<br>(8.0 to 58.9)                             | 4.0<br>(-14.2 to 24.9)                              |
| Autistic spectrum disorders                                    | 0.6<br>(0.6 to 0.7)                  | < 0.05<br>(< 0.05 to < 0.05)                        | 0.1<br>(0.1 to 0.1)                                 | 24.3<br>(17.3 to 31.1)                            | -0.1<br>(-5.0 to 5.2)                               |
| Autism                                                         | 0.2<br>(0.1 to 0.2)                  | < 0.05<br>(< 0.05 to < 0.05)                        | < 0.05<br>(< 0.05 to 0.1)                           | 24.4<br>(12.7 to 37.1)                            | -0.1<br>(-8.6 to 9.1)                               |
| Asperger syndrome and other autistic spectrum disorders        | 0.4<br>(0.4 to 0.5)                  | < 0.05<br>(< 0.05 to < 0.05)                        | < 0.05<br>(< 0.05 to 0.1)                           | 24.3<br>(18.1 to 30.8)                            | -0.1<br>(-4.6 to 4.7)                               |



| Cause                                                      | Prevalence in thousands (95% UI)     | Incidence in thousands (95% UI)          | YLDs in thousands (95% UI)        |                                                   |                                                     |
|------------------------------------------------------------|--------------------------------------|------------------------------------------|-----------------------------------|---------------------------------------------------|-----------------------------------------------------|
|                                                            | 2016 counts                          | 2016 counts                              | 2016 counts                       | Percentage change in counts between 2006 and 2016 | Percentage change in age-standardised rates between |
| Attention-deficit/hyperactivity disorder                   | 0.7<br>(0.6 to 0.7)                  | < 0.05<br>(< 0.05 to < 0.05)             | < 0.05<br>(< 0.05 to < 0.05)      | 24.6<br>(13.8 to 35.8)                            | 0.2<br>(-7.9 to 8.6)                                |
| Conduct disorder                                           | 0.7<br>(0.5 to 0.8)                  | 0.2<br>(0.2 to 0.3)                      | 0.1<br>(< 0.05 to 0.1)            | 25.1<br>(16.8 to 33.9)                            | 0.3<br>(-6.2 to 7.3)                                |
| Idiopathic developmental intellectual disability           | 0.7<br>(0.3 to 1.1)                  | --                                       | < 0.05<br>(< 0.05 to 0.1)         | 20.8<br>(11.0 to 31.6)                            | -4.4<br>(-12.6 to 4.0)                              |
| Other mental and substance use disorders                   | 1.2<br>(1.0 to 1.3)                  | 0.1<br>(< 0.05 to 0.1)                   | 0.1<br>(0.1 to 0.1)               | 31.4<br>(24.5 to 39.1)                            | 0.0<br>(-4.7 to 5.2)                                |
| <b>Diabetes, urogenital, blood, and endocrine diseases</b> | <b>31.3</b><br><b>(30.5 to 32.2)</b> | <b>8.7†</b><br><b>(8.1 to 9.4)</b>       | <b>1.4</b><br><b>(0.9 to 1.8)</b> | <b>38.6</b><br><b>(31.3 to 46.6)</b>              | <b>0.6</b><br><b>(-3.7 to 5.6)</b>                  |
| Diabetes mellitus                                          | 15.5<br>(14.1 to 16.8)               | 1.8<br>(1.6 to 2.0)                      | 1.0<br>(0.7 to 1.4)               | 40.9<br>(31.4 to 52.1)                            | 1.1<br>(-4.4 to 7.5)                                |
| Acute glomerulonephritis                                   | < 0.05<br>(< 0.05 to < 0.05)         | < 0.05<br>(< 0.05 to < 0.05)             | < 0.05<br>(< 0.05 to < 0.05)      | 28.5<br>(22.5 to 34.7)                            | -0.6<br>(-4.8 to 3.7)                               |
| Chronic kidney disease                                     | 2.3<br>(2.1 to 2.5)                  | 0.2<br>(0.2 to 0.2)                      | 0.1<br>(0.1 to 0.2)               | 41.9<br>(34.0 to 51.0)                            | 2.2<br>(-3.0 to 8.1)                                |
| Chronic kidney disease due to diabetes mellitus            | 1.4<br>(1.2 to 1.5)                  | 0.1<br>(0.1 to 0.1)                      | 0.1<br>(0.1 to 0.1)               | 43.2<br>(32.1 to 55.6)                            | 2.9<br>(-3.9 to 10.7)                               |
| Chronic kidney disease due to hypertension                 | 0.3<br>(0.3 to 0.4)                  | < 0.05<br>(< 0.05 to < 0.05)             | < 0.05<br>(< 0.05 to < 0.05)      | 43.1<br>(27.6 to 61.3)                            | -0.4<br>(-10.3 to 11.1)                             |
| Chronic kidney disease due to glomerulonephritis           | 0.4<br>(0.3 to 0.5)                  | < 0.05<br>(< 0.05 to 0.1)                | < 0.05<br>(< 0.05 to < 0.05)      | 35.1<br>(17.0 to 54.9)                            | 4.1<br>(-7.6 to 16.5)                               |
| Chronic kidney disease due to other causes                 | 0.2<br>(0.2 to 0.3)                  | < 0.05<br>(< 0.05 to < 0.05)             | < 0.05<br>(< 0.05 to < 0.05)      | 39.8<br>(23.9 to 57.1)                            | 4.1<br>(-6.0 to 15.1)                               |
| Urinary diseases and male infertility                      | 0.8<br>(0.7 to 1.0)                  | 3.7†<br>(3.3 to 4.4)                     | < 0.05<br>(< 0.05 to < 0.05)      | 33.5<br>(25.4 to 42.2)                            | -3.0<br>(-8.8 to 3.0)                               |
| Interstitial nephritis and urinary tract infections        | 0.1<br>(0.1 to 0.1)                  | 3.4<br>(2.9 to 4.1)                      | < 0.05<br>(< 0.05 to < 0.05)      | 20.9<br>(3.8 to 41.6)                             | -3.7<br>(-16.5 to 10.2)                             |
| Urolithiasis                                               | < 0.05<br>(< 0.05 to < 0.05)         | 0.3<br>(0.3 to 0.4)                      | < 0.05<br>(< 0.05 to < 0.05)      | 35.1<br>(24.4 to 46.0)                            | -0.9<br>(-11.1 to 10.2)                             |
| Benign prostatic hyperplasia                               | 0.3<br>(0.3 to 0.4)                  | < 0.05<br>(< 0.05 to 0.1)                | < 0.05<br>(< 0.05 to < 0.05)      | 42.5<br>(31.3 to 54.8)                            | -2.4<br>(-9.5 to 5.4)                               |
| Male infertility                                           | 0.4<br>(0.3 to 0.5)                  | --                                       | < 0.05<br>(< 0.05 to < 0.05)      | 28.8<br>(20.9 to 37.8)                            | 0.6<br>(-5.3 to 7.2)                                |
| Other urinary diseases                                     | --                                   | --                                       | < 0.05<br>(< 0.05 to < 0.05)      | 0.8<br>(-10.6 to 15.0)                            | -19.1<br>(-26.9 to -10.2)                           |
| Gynecological diseases                                     | 7.1<br>(6.8 to 7.5)                  | 2.8†<br>(2.6 to 3.0)                     | 0.1<br>(0.1 to 0.1)               | 26.2<br>(20.9 to 32.2)                            | -4.2<br>(-8.1 to 0.1)                               |
| Uterine fibroids                                           | 0.8<br>(0.7 to 0.9)                  | 0.1<br>(0.1 to 0.1)                      | < 0.05<br>(< 0.05 to < 0.05)      | 25.8<br>(14.1 to 37.7)                            | -8.0<br>(-16.5 to 0.7)                              |
| Polycystic ovarian syndrome                                | 0.1<br>(< 0.05 to 0.1)               | < 0.05<br>(< 0.05 to < 0.05)             | < 0.05<br>(< 0.05 to < 0.05)      | 29.6<br>(11.8 to 48.6)                            | 0.2<br>(-12.7 to 14.3)                              |
| Female infertility                                         | 0.4<br>(0.2 to 0.7)                  | --                                       | < 0.05<br>(< 0.05 to < 0.05)      | 8.2<br>(-16.5 to 30.4)                            | -14.6<br>(-34.6 to 4.1)                             |
| Endometriosis                                              | < 0.05<br>(< 0.05 to < 0.05)         | 0.1<br>(0.1 to 0.1)                      | < 0.05<br>(< 0.05 to < 0.05)      | 29.2<br>(-1.4 to 69.1)                            | -0.3<br>(-23.3 to 29.4)                             |
| Genital prolapse                                           | 1.6<br>(1.4 to 1.8)                  | 0.1<br>(0.1 to 0.1)                      | < 0.05<br>(< 0.05 to < 0.05)      | 22.6<br>(12.0 to 33.2)                            | -12.4<br>(-20.1 to -4.5)                            |
| Premenstrual syndrome                                      | 4.2<br>(3.9 to 4.5)                  | 1.6<br>(1.5 to 1.7)                      | < 0.05<br>(< 0.05 to 0.1)         | 28.3<br>(18.8 to 38.5)                            | -0.7<br>(-7.7 to 7.0)                               |
| Other gynecological diseases                               | 1.0<br>(0.8 to 1.1)                  | 0.8<br>(0.7 to 1.0)                      | < 0.05<br>(< 0.05 to < 0.05)      | 25.7<br>(16.6 to 35.6)                            | -3.0<br>(-9.7 to 4.1)                               |
| Hemoglobinopathies and hemolytic anaemias                  | 15.4<br>(14.6 to 16.4)               | --                                       | < 0.05<br>(< 0.05 to 0.1)         | 16.4<br>(0.1 to 33.3)                             | -5.2<br>(-17.1 to 5.9)                              |
| Thalassemias                                               | < 0.05<br>(< 0.05 to < 0.05)         | --                                       | < 0.05<br>(< 0.05 to < 0.05)      | 20.8<br>(0.1 to 46.0)                             | 8.9<br>(-9.6 to 30.4)                               |
| Thalassaemias trait                                        | 1.1<br>(0.5 to 2.1)                  | --                                       | < 0.05<br>(< 0.05 to < 0.05)      | 12.9<br>(-33.5 to 40.1)                           | -8.2<br>(-46.6 to 12.1)                             |
| Sickle cell disorders                                      | < 0.05<br>(< 0.05 to < 0.05)         | --                                       | < 0.05<br>(< 0.05 to < 0.05)      | 16.0<br>(-2.8 to 26.3)                            | -0.3<br>(-16.8 to 7.8)                              |
| Sickle cell trait                                          | 0.1<br>(0.1 to 0.1)                  | --                                       | < 0.05<br>(< 0.05 to < 0.05)      | 26.6<br>(9.0 to 44.7)                             | 7.8<br>(-5.4 to 20.6)                               |
| G6PD deficiency                                            | 3.5<br>(3.1 to 4.0)                  | --                                       | < 0.05<br>(< 0.05 to < 0.05)      | 38.5<br>(17.5 to 60.3)                            | 13.0<br>(-1.6 to 28.3)                              |
| G6PD trait                                                 | 10.3<br>(9.9 to 10.7)                | --                                       | < 0.05<br>(< 0.05 to < 0.05)      | 31.0<br>(11.9 to 52.5)                            | 6.6<br>(-6.7 to 21.0)                               |
| Other hemoglobinopathies and hemolytic anaemias            | 1.0<br>(0.9 to 1.1)                  | --                                       | < 0.05<br>(< 0.05 to < 0.05)      | 17.6<br>(0.9 to 34.0)                             | -4.4<br>(-14.9 to 6.1)                              |
| Endocrine, metabolic, blood, and immune disorders          | 1.6<br>(1.5 to 1.7)                  | 0.2<br>(0.2 to 0.2)                      | < 0.05<br>(< 0.05 to 0.1)         | 25.9<br>(17.2 to 34.3)                            | -3.0<br>(-8.1 to 2.1)                               |
| <b>Musculoskeletal disorders</b>                           | <b>9.8</b><br><b>(9.4 to 10.3)</b>   | <b>5.0</b><br><b>(4.5 to 5.4)</b>        | <b>1.0</b><br><b>(0.8 to 1.4)</b> | <b>32.2</b><br><b>(28.4 to 36.0)</b>              | <b>-1.8</b><br><b>(-4.2 to 0.5)</b>                 |
| Rheumatoid arthritis                                       | 0.1<br>(0.1 to 0.1)                  | < 0.05<br>(< 0.05 to < 0.05)             | < 0.05<br>(< 0.05 to < 0.05)      | 39.2<br>(24.7 to 55.2)                            | 2.8<br>(-6.5 to 13.3)                               |
| Osteoarthritis                                             | 2.2<br>(2.0 to 2.3)                  | 0.1<br>(0.1 to 0.1)                      | 0.1<br>(0.1 to 0.2)               | 41.4<br>(36.2 to 46.9)                            | -0.2<br>(-3.5 to 3.3)                               |
| Low back and neck pain                                     | 5.5<br>(5.1 to 5.9)                  | 2.3<br>(2.0 to 2.6)                      | 0.6<br>(0.4 to 0.8)               | 33.6<br>(29.1 to 38.2)                            | -0.8<br>(-4.0 to 2.2)                               |
| Low back pain                                              | 3.7<br>(3.3 to 4.2)                  | 1.8<br>(1.6 to 2.1)                      | 0.4<br>(0.3 to 0.6)               | 32.4<br>(26.1 to 39.1)                            | -1.3<br>(-5.5 to 3.1)                               |
| Neck pain                                                  | 2.1<br>(1.8 to 2.4)                  | 0.5<br>(0.4 to 0.6)                      | 0.2<br>(0.1 to 0.3)               | 36.0<br>(32.5 to 39.7)                            | 0.0<br>(-2.0 to 2.2)                                |
| Gout                                                       | 0.2<br>(0.2 to 0.2)                  | < 0.05<br>(< 0.05 to < 0.05)             | < 0.05<br>(< 0.05 to < 0.05)      | 39.3<br>(19.6 to 61.9)                            | -0.3<br>(-13.2 to 13.4)                             |
| Other musculoskeletal disorders                            | 3.1<br>(2.6 to 3.5)                  | 2.5<br>(2.1 to 2.9)                      | 0.3<br>(0.2 to 0.4)               | 24.3<br>(15.1 to 33.4)                            | -5.8<br>(-11.7 to 0.6)                              |
| <b>Other non-communicable diseases</b>                     | <b>52.3</b><br><b>(51.2 to 53.4)</b> | <b>158.7†</b><br><b>(147.6 to 170.7)</b> | <b>1.3</b><br><b>(0.9 to 1.8)</b> | <b>26.9</b><br><b>(25.0 to 28.8)</b>              | <b>-1.4</b><br><b>(-2.5 to -0.5)</b>                |
| Congenital anomalies                                       | 0.8<br>(0.7 to 0.9)                  | --                                       | 0.1<br>(0.1 to 0.1)               | 22.4<br>(14.5 to 31.0)                            | -0.5<br>(-6.8 to 6.0)                               |
| Neural tube defects                                        | < 0.05<br>(< 0.05 to < 0.05)         | --                                       | < 0.05<br>(< 0.05 to < 0.05)      | 23.5<br>(6.7 to 44.6)                             | -0.5<br>(-13.6 to 13.9)                             |
| Congenital heart anomalies                                 | 0.2<br>(0.2 to 0.3)                  | --                                       | < 0.05<br>(< 0.05 to < 0.05)      | 27.8<br>(12.3 to 44.4)                            | 7.6<br>(-4.8 to 20.8)                               |
| Orofacial clefts                                           | < 0.05<br>(< 0.05 to < 0.05)         | --                                       | < 0.05<br>(< 0.05 to < 0.05)      | 23.8<br>(10.3 to 38.8)                            | 0.2<br>(-10.7 to 12.3)                              |
| Down's syndrome                                            | < 0.05<br>(< 0.05 to < 0.05)         | --                                       | < 0.05<br>(< 0.05 to < 0.05)      | 25.5<br>(16.5 to 34.5)                            | 2.8<br>(-4.7 to 10.3)                               |
| Turner syndrome                                            | < 0.05<br>(< 0.05 to < 0.05)         | --                                       | < 0.05<br>(< 0.05 to < 0.05)      | 25.6<br>(-17.2 to 94.2)                           | 3.5<br>(-29.2 to 53.7)                              |
| Klinefelter syndrome                                       | < 0.05<br>(< 0.05 to < 0.05)         | --                                       | < 0.05<br>(< 0.05 to < 0.05)      | 24.8<br>(-10.7 to 74.5)                           | 2.3<br>(-26.1 to 41.2)                              |

| Cause                                         | Prevalence in thousands (95% UI)  | Incidence in thousands (95% UI)    | YLDs in thousands (95% UI)        |                                                   |                                                     |
|-----------------------------------------------|-----------------------------------|------------------------------------|-----------------------------------|---------------------------------------------------|-----------------------------------------------------|
|                                               | 2016 counts                       | 2016 counts                        | 2016 counts                       | Percentage change in counts between 2006 and 2016 | Percentage change in age-standardised rates between |
| Other chromosomal abnormalities               | < 0.05<br>(< 0.05 to < 0.05)      | --                                 | < 0.05<br>(< 0.05 to < 0.05)      | 16.9<br>(-7.1 to 45.3)                            | 2.0<br>(-17.9 to 25.8)                              |
| Congenital musculoskeletal and limb anomalies | 0.1<br>(0.1 to 0.1)               | --                                 | < 0.05<br>(< 0.05 to < 0.05)      | 33.6<br>(18.7 to 51.7)                            | 8.1<br>(-2.4 to 20.5)                               |
| Urogenital congenital anomalies               | 0.1<br>(0.1 to 0.1)               | --                                 | < 0.05<br>(< 0.05 to < 0.05)      | 17.6<br>(7.0 to 27.8)                             | -0.5<br>(-9.0 to 7.8)                               |
| Digestive congenital anomalies                | 0.1<br>(0.1 to 0.1)               | --                                 | < 0.05<br>(< 0.05 to < 0.05)      | 26.7<br>(10.1 to 46.2)                            | 2.3<br>(-10.2 to 16.7)                              |
| Other congenital anomalies                    | 0.3<br>(0.2 to 0.5)               | --                                 | < 0.05<br>(< 0.05 to 0.1)         | 19.0<br>(6.8 to 32.3)                             | -4.0<br>(-13.9 to 6.2)                              |
| Skin and subcutaneous diseases                | 22.5<br>(21.9 to 23.2)            | 48.1<br>(45.7 to 51.0)             | 0.6<br>(0.4 to 0.9)               | 24.1<br>(21.5 to 26.8)                            | 0.1<br>(-1.6 to 2.1)                                |
| Dermatitis                                    | 3.5<br>(3.2 to 3.8)               | 3.9<br>(3.6 to 4.2)                | 0.1<br>(0.1 to 0.2)               | 19.8<br>(15.3 to 24.9)                            | -0.0<br>(-3.4 to 3.6)                               |
| Psoriasis                                     | 0.4<br>(0.4 to 0.4)               | 0.1<br>(0.1 to 0.1)                | < 0.05<br>(< 0.05 to < 0.05)      | 37.3<br>(21.9 to 53.6)                            | 6.4<br>(-3.1 to 17.3)                               |
| Cellulitis                                    | < 0.05<br>(< 0.05 to < 0.05)      | 0.4<br>(0.3 to 0.4)                | < 0.05<br>(< 0.05 to < 0.05)      | 26.8<br>(11.5 to 45.7)                            | 0.2<br>(-12.7 to 15.6)                              |
| Pyoderma                                      | 0.1<br>(0.1 to 0.1)               | 1.9<br>(1.8 to 1.9)                | < 0.05<br>(< 0.05 to < 0.05)      | 30.1<br>(17.4 to 44.2)                            | -0.5<br>(-8.0 to 7.6)                               |
| Scabies                                       | 3.2<br>(2.8 to 3.7)               | 10.2<br>(8.8 to 11.9)              | 0.1<br>(< 0.05 to 0.1)            | 15.9<br>(11.7 to 20.3)                            | -6.3<br>(-9.3 to -3.0)                              |
| Fungal skin diseases                          | 5.5<br>(4.9 to 6.1)               | 18.2<br>(16.4 to 20.4)             | < 0.05<br>(< 0.05 to 0.1)         | 25.9<br>(23.8 to 28.1)                            | -0.0<br>(-1.1 to 1.1)                               |
| Viral skin diseases                           | 2.2<br>(2.0 to 2.3)               | 3.1<br>(2.9 to 3.3)                | 0.1<br>(< 0.05 to 0.1)            | 23.2<br>(18.9 to 27.3)                            | -0.0<br>(-3.2 to 3.1)                               |
| Acne vulgaris                                 | 6.7<br>(5.9 to 7.4)               | 4.7<br>(3.8 to 5.7)                | 0.2<br>(0.1 to 0.2)               | 30.4<br>(23.9 to 37.9)                            | 2.7<br>(-2.0 to 8.4)                                |
| Alopecia areata                               | 0.1<br>(0.1 to 0.1)               | 0.2<br>(0.2 to 0.2)                | < 0.05<br>(< 0.05 to < 0.05)      | 26.9<br>(13.5 to 42.1)                            | -0.4<br>(-10.2 to 10.5)                             |
| Pruritus                                      | 0.6<br>(0.5 to 0.6)               | 0.4<br>(0.4 to 0.5)                | < 0.05<br>(< 0.05 to < 0.05)      | 28.9<br>(21.6 to 36.4)                            | 0.7<br>(-4.3 to 5.5)                                |
| Urticaria                                     | 0.7<br>(0.6 to 0.8)               | 1.3<br>(1.1 to 1.5)                | < 0.05<br>(< 0.05 to 0.1)         | 18.6<br>(11.5 to 26.4)                            | -0.0<br>(-5.6 to 6.0)                               |
| Decubitus ulcer                               | < 0.05<br>(< 0.05 to < 0.05)      | < 0.05<br>(< 0.05 to < 0.05)       | < 0.05<br>(< 0.05 to < 0.05)      | 37.5<br>(25.4 to 50.7)                            | -1.0<br>(-13.7 to 13.2)                             |
| Other skin and subcutaneous diseases          | 3.4<br>(3.3 to 3.5)               | 3.8<br>(3.7 to 4.0)                | < 0.05<br>(< 0.05 to < 0.05)      | 31.1<br>(27.2 to 34.7)                            | 0.7<br>(-1.9 to 2.9)                                |
| Sense organ diseases                          | 13.1<br>(12.8 to 13.5)            | 6.7†<br>(6.2 to 7.2)               | 0.5<br>(0.3 to 0.7)               | 30.3<br>(27.4 to 33.0)                            | -2.8<br>(-4.3 to -1.4)                              |
| Glaucoma                                      | < 0.05<br>(< 0.05 to < 0.05)      | --                                 | < 0.05<br>(< 0.05 to < 0.05)      | 45.9<br>(24.3 to 68.1)                            | -0.2<br>(-13.7 to 13.2)                             |
| Cataract                                      | 0.3<br>(0.2 to 0.4)               | --                                 | < 0.05<br>(< 0.05 to < 0.05)      | 39.6<br>(31.2 to 48.8)                            | -3.6<br>(-8.8 to 2.0)                               |
| Macular degeneration                          | < 0.05<br>(< 0.05 to < 0.05)      | --                                 | < 0.05<br>(< 0.05 to < 0.05)      | 50.8<br>(29.4 to 76.6)                            | 2.4<br>(-10.5 to 17.9)                              |
| Refraction and accommodation disorders        | 6.6<br>(6.4 to 7.0)               | --                                 | 0.1<br>(0.1 to 0.2)               | 27.8<br>(24.1 to 32.0)                            | -3.8<br>(-6.3 to -1.1)                              |
| Age-related and other hearing loss            | 7.9<br>(7.4 to 8.4)               | --                                 | 0.3<br>(0.2 to 0.4)               | 29.9<br>(25.4 to 34.0)                            | -3.0<br>(-5.2 to -1.1)                              |
| Other vision loss                             | 0.2<br>(0.2 to 0.2)               | --                                 | < 0.05<br>(< 0.05 to < 0.05)      | 36.7<br>(25.1 to 47.0)                            | -0.7<br>(-7.8 to 5.9)                               |
| Other sense organ diseases                    | 1.5<br>(1.4 to 1.6)               | 6.7<br>(6.2 to 7.2)                | < 0.05<br>(< 0.05 to 0.1)         | 34.7<br>(28.3 to 42.0)                            | 0.9<br>(-3.1 to 5.3)                                |
| Oral disorders                                | 38.2<br>(36.3 to 39.7)            | 103.9†<br>(93.2 to 115.1)          | 0.1<br>(0.1 to 0.1)               | 33.2<br>(30.4 to 36.5)                            | -0.0<br>(-1.9 to 2.0)                               |
| Caries of deciduous teeth                     | 4.6<br>(3.1 to 5.8)               | 19.9<br>(11.5 to 28.1)             | < 0.05<br>(< 0.05 to < 0.05)      | 12.3<br>(-2.2 to 28.7)                            | -0.6<br>(-13.4 to 13.7)                             |
| Caries of permanent teeth                     | 32.3<br>(30.2 to 34.2)            | 83.8<br>(76.8 to 90.9)             | < 0.05<br>(< 0.05 to < 0.05)      | 27.9<br>(23.6 to 32.5)                            | -0.6<br>(-3.4 to 2.5)                               |
| Periodontal disease                           | 0.8<br>(0.6 to 1.0)               | 0.1<br>(0.1 to 0.1)                | < 0.05<br>(< 0.05 to < 0.05)      | 40.5<br>(34.4 to 47.2)                            | 1.2<br>(-2.9 to 5.7)                                |
| Edentulism and severe tooth loss              | 1.1<br>(0.9 to 1.2)               | 0.1<br>(0.1 to 0.1)                | < 0.05<br>(< 0.05 to < 0.05)      | 41.5<br>(35.8 to 47.1)                            | 0.0<br>(-3.4 to 3.4)                                |
| Other oral disorders                          | 1.2<br>(1.1 to 1.2)               | --                                 | < 0.05<br>(< 0.05 to 0.1)         | 29.6<br>(24.5 to 34.4)                            | -0.0<br>(-3.3 to 3.3)                               |
| <b>Injuries</b>                               | <b>7.8</b><br><b>(7.4 to 8.2)</b> | <b>4.4†</b><br><b>(4.1 to 4.6)</b> | <b>0.3</b><br><b>(0.2 to 0.5)</b> | <b>40.4</b><br><b>(37.1 to 43.5)</b>              | <b>7.9</b><br><b>(5.8 to 10.0)</b>                  |
| <b>Transport injuries</b>                     | <b>1.5</b><br><b>(1.4 to 1.6)</b> | <b>0.6</b><br><b>(0.5 to 0.7)</b>  | <b>0.1</b><br><b>(0.1 to 0.1)</b> | <b>50.4</b><br><b>(46.2 to 54.6)</b>              | <b>15.7</b><br><b>(12.7 to 18.4)</b>                |
| Road injuries                                 | 0.9<br>(0.8 to 1.0)               | 0.4<br>(0.4 to 0.5)                | 0.1<br>(< 0.05 to 0.1)            | 72.7<br>(68.7 to 76.8)                            | 30.1<br>(27.4 to 32.9)                              |
| Pedestrian road injuries                      | 0.1<br>(0.1 to 0.2)               | < 0.05<br>(< 0.05 to 0.1)          | < 0.05<br>(< 0.05 to < 0.05)      | 73.2<br>(69.1 to 77.5)                            | 29.7<br>(26.9 to 32.5)                              |
| Cyclist road injuries                         | 0.1<br>(0.1 to 0.1)               | 0.1<br>(< 0.05 to 0.1)             | < 0.05<br>(< 0.05 to < 0.05)      | 81.0<br>(76.5 to 85.5)                            | 36.4<br>(33.6 to 39.4)                              |
| Motorcyclist road injuries                    | 0.2<br>(0.2 to 0.3)               | 0.1<br>(< 0.05 to 0.1)             | < 0.05<br>(< 0.05 to < 0.05)      | 83.7<br>(79.1 to 88.2)                            | 38.5<br>(35.4 to 41.5)                              |
| Motor vehicle road injuries                   | 0.3<br>(0.3 to 0.4)               | 0.2<br>(0.1 to 0.2)                | < 0.05<br>(< 0.05 to < 0.05)      | 63.5<br>(59.5 to 67.6)                            | 23.6<br>(21.0 to 26.3)                              |
| Other road injuries                           | 0.1<br>(0.1 to 0.1)               | 0.1<br>(0.1 to 0.1)                | < 0.05<br>(< 0.05 to < 0.05)      | 77.1<br>(72.7 to 81.5)                            | 33.5<br>(30.7 to 36.4)                              |
| Other transport injuries                      | 0.6<br>(0.5 to 0.7)               | 0.2<br>(0.1 to 0.2)                | < 0.05<br>(< 0.05 to < 0.05)      | 25.2<br>(20.7 to 29.4)                            | -3.0<br>(-6.0 to -0.4)                              |
| <b>Unintentional injuries</b>                 | <b>5.6</b><br><b>(5.2 to 6.0)</b> | <b>3.3</b><br><b>(3.1 to 3.5)</b>  | <b>0.2</b><br><b>(0.1 to 0.3)</b> | <b>39.1</b><br><b>(35.4 to 42.4)</b>              | <b>6.7</b><br><b>(4.4 to 8.8)</b>                   |
| Falls                                         | 1.3<br>(1.2 to 1.5)               | 0.7<br>(0.6 to 0.8)                | 0.1<br>(< 0.05 to 0.1)            | 59.6<br>(55.4 to 63.5)                            | 21.5<br>(18.9 to 24.0)                              |
| Drowning                                      | 0.1<br>(< 0.05 to 0.1)            | < 0.05<br>(< 0.05 to < 0.05)       | < 0.05<br>(< 0.05 to < 0.05)      | 22.2<br>(17.9 to 26.2)                            | -7.8<br>(-10.9 to -4.9)                             |
| Fire, heat, and hot substances                | 0.6<br>(0.5 to 0.7)               | 0.1<br>(0.1 to 0.1)                | < 0.05<br>(< 0.05 to < 0.05)      | 33.3<br>(25.7 to 40.1)                            | 1.4<br>(-3.6 to 5.8)                                |
| Poisonings                                    | < 0.05<br>(< 0.05 to < 0.05)      | < 0.05<br>(< 0.05 to < 0.05)       | < 0.05<br>(< 0.05 to < 0.05)      | 49.9<br>(37.5 to 63.1)                            | 15.9<br>(7.7 to 23.9)                               |
| Exposure to mechanical forces                 | 1.0<br>(0.9 to 1.2)               | 0.5<br>(0.4 to 0.6)                | < 0.05<br>(< 0.05 to < 0.05)      | 54.1<br>(49.7 to 58.1)                            | 16.3<br>(13.4 to 19.0)                              |
| Unintentional firearm injuries                | < 0.05<br>(< 0.05 to 0.1)         | < 0.05<br>(< 0.05 to < 0.05)       | < 0.05<br>(< 0.05 to < 0.05)      | 40.6<br>(36.2 to 44.8)                            | 6.3<br>(3.5 to 9.0)                                 |
| Unintentional suffocation                     | 0.1<br>(0.1 to 0.1)               | < 0.05<br>(< 0.05 to < 0.05)       | < 0.05<br>(< 0.05 to < 0.05)      | 33.6<br>(29.6 to 37.3)                            | 3.5<br>(0.9 to 5.9)                                 |
| Other exposure to mechanical forces           | 0.9<br>(0.8 to 1.1)               | 0.5<br>(0.4 to 0.5)                | < 0.05<br>(< 0.05 to < 0.05)      | 58.1<br>(53.4 to 62.4)                            | 18.7<br>(15.7 to 21.5)                              |

| Cause                                                                               | Prevalence in thousands (95% UI)                    | Incidence in thousands (95% UI)                      | YLDs in thousands (95% UI)                          |                                                   |                                                     |
|-------------------------------------------------------------------------------------|-----------------------------------------------------|------------------------------------------------------|-----------------------------------------------------|---------------------------------------------------|-----------------------------------------------------|
|                                                                                     | 2016 counts                                         | 2016 counts                                          | 2016 counts                                         | Percentage change in counts between 2006 and 2016 | Percentage change in age-standardised rates between |
| Adverse effects of medical treatment                                                | < 0.05<br>(< 0.05 to < 0.05)                        | 0.5<br>(0.4 to 0.5)                                  | < 0.05<br>(< 0.05 to < 0.05)                        | 15.5<br>(9.5 to 22.7)                             | -5.2<br>(-8.9 to -0.7)                              |
| Animal contact                                                                      | 0.4<br>(0.3 to 0.4)                                 | 0.5<br>(0.4 to 0.7)                                  | < 0.05<br>(< 0.05 to < 0.05)                        | 31.5<br>(23.5 to 39.1)                            | 2.0<br>(-2.8 to 6.6)                                |
| Venomous animal contact                                                             | 0.1<br>(0.1 to 0.2)                                 | 0.2<br>(0.2 to 0.3)                                  | < 0.05<br>(< 0.05 to < 0.05)                        | 35.7<br>(24.5 to 47.2)                            | 5.9<br>(-1.2 to 12.8)                               |
| Non-venomous animal contact                                                         | 0.2<br>(0.2 to 0.3)                                 | 0.3<br>(0.2 to 0.4)                                  | < 0.05<br>(< 0.05 to < 0.05)                        | 22.9<br>(17.6 to 27.6)                            | -5.2<br>(-8.8 to -2.0)                              |
| Foreign body                                                                        | 0.4<br>(0.3 to 0.5)                                 | 0.2<br>(0.2 to 0.3)                                  | < 0.05<br>(< 0.05 to < 0.05)                        | 19.1<br>(14.5 to 23.5)                            | -6.6<br>(-9.4 to -3.9)                              |
| Pulmonary aspiration and foreign body in airway                                     | 0.2<br>(0.2 to 0.3)                                 | 0.1<br>(0.1 to 0.1)                                  | < 0.05<br>(< 0.05 to < 0.05)                        | 17.8<br>(13.1 to 22.1)                            | -7.3<br>(-10.2 to -4.7)                             |
| Foreign body in eyes                                                                | < 0.05<br>(< 0.05 to < 0.05)                        | 0.1<br>(< 0.05 to 0.1)                               | < 0.05<br>(< 0.05 to < 0.05)                        | 29.5<br>(24.9 to 34.9)                            | 0.4<br>(-2.5 to 3.4)                                |
| Foreign body in other body part                                                     | 0.1<br>(0.1 to 0.1)                                 | 0.1<br>(< 0.05 to 0.1)                               | < 0.05<br>(< 0.05 to < 0.05)                        | 21.8<br>(16.4 to 27.4)                            | -5.2<br>(-8.7 to -1.9)                              |
| Environmental heat and cold exposure                                                | 0.7<br>(0.6 to 0.8)                                 | 0.2<br>(0.2 to 0.3)                                  | < 0.05<br>(< 0.05 to < 0.05)                        | 27.2<br>(23.6 to 30.5)                            | -3.5<br>(-5.8 to -1.3)                              |
| Other unintentional injuries                                                        | 1.1<br>(0.9 to 1.3)                                 | 0.5<br>(0.4 to 0.6)                                  | < 0.05<br>(< 0.05 to < 0.05)                        | 33.8<br>(30.8 to 36.7)                            | 2.1<br>(0.2 to 3.9)                                 |
| <b>Self-harm and interpersonal violence</b>                                         | <b>2.6</b><br><b>(2.3 to 2.9)</b>                   | <b>0.4†</b><br><b>(0.4 to 0.5)</b>                   | <b>&lt; 0.05</b><br><b>(&lt; 0.05 to 0.1)</b>       | <b>29.5</b><br><b>(26.5 to 32.6)</b>              | <b>-0.6</b><br><b>(-2.6 to 1.3)</b>                 |
| Self-harm                                                                           | 0.1<br>(0.1 to 0.1)                                 | < 0.05<br>(< 0.05 to < 0.05)                         | < 0.05<br>(< 0.05 to < 0.05)                        | 24.4<br>(19.8 to 28.8)                            | -7.2<br>(-10.2 to -4.4)                             |
| Self-harm by firearm                                                                | < 0.05<br>(< 0.05 to < 0.05)                        | < 0.05<br>(< 0.05 to < 0.05)                         | < 0.05<br>(< 0.05 to < 0.05)                        | 27.8<br>(22.5 to 33.2)                            | -4.7<br>(-8.1 to -1.3)                              |
| Self-harm by other specified means                                                  | 0.1<br>(0.1 to 0.1)                                 | < 0.05<br>(< 0.05 to < 0.05)                         | < 0.05<br>(< 0.05 to < 0.05)                        | 24.3<br>(19.6 to 28.8)                            | -7.3<br>(-10.3 to -4.4)                             |
| Interpersonal violence                                                              | 2.5<br>(2.2 to 2.8)                                 | 0.4†<br>(0.3 to 0.5)                                 | < 0.05<br>(< 0.05 to 0.1)                           | 30.0<br>(26.8 to 33.4)                            | 0.1<br>(-1.9 to 2.2)                                |
| Assault by firearm                                                                  | < 0.05<br>(< 0.05 to < 0.05)                        | < 0.05<br>(< 0.05 to < 0.05)                         | < 0.05<br>(< 0.05 to < 0.05)                        | 25.8<br>(21.6 to 30.3)                            | -5.5<br>(-8.2 to -2.6)                              |
| Assault by sharp object                                                             | 0.1<br>(0.1 to 0.1)                                 | 0.1<br>(< 0.05 to 0.1)                               | < 0.05<br>(< 0.05 to < 0.05)                        | 26.4<br>(22.0 to 30.6)                            | -5.2<br>(-8.0 to -2.5)                              |
| Sexual violence                                                                     | 1.9<br>(1.6 to 2.1)                                 | --                                                   | < 0.05<br>(< 0.05 to < 0.05)                        | 18.4<br>(13.7 to 23.3)                            | -6.6<br>(-9.8 to -3.2)                              |
| Assault by other means                                                              | 0.5<br>(0.4 to 0.6)                                 | 0.3<br>(0.3 to 0.4)                                  | < 0.05<br>(< 0.05 to < 0.05)                        | 41.8<br>(38.2 to 45.3)                            | 5.7<br>(3.4 to 7.9)                                 |
| <b>Forces of nature, conflict and terrorism, and executions and police conflict</b> | <b>&lt; 0.05</b><br><b>(&lt; 0.05 to &lt; 0.05)</b> | <b>&lt; 0.05†</b><br><b>(&lt; 0.05 to &lt; 0.05)</b> | <b>&lt; 0.05</b><br><b>(&lt; 0.05 to &lt; 0.05)</b> | <b>41.0</b><br><b>(33.4 to 47.0)</b>              | <b>14.2</b><br><b>(8.8 to 18.4)</b>                 |
| Exposure to forces of nature                                                        | --                                                  | --                                                   | --                                                  | --                                                | --                                                  |
| Conflict and terrorism                                                              | --                                                  | --                                                   | --                                                  | --                                                | --                                                  |
| Executions and police conflict                                                      | < 0.05<br>(< 0.05 to < 0.05)                        | < 0.05<br>(< 0.05 to < 0.05)                         | < 0.05<br>(< 0.05 to < 0.05)                        | 41.0<br>(33.4 to 47.0)                            | 14.2<br>(8.8 to 18.4)                               |
| <b>Impairments</b>                                                                  | --                                                  | --                                                   | --                                                  | --                                                | --                                                  |
| Anaemia                                                                             | 25.6<br>(23.5 to 27.8)                              | --                                                   | 0.7<br>(0.5 to 1.1)                                 | 17.1<br>(5.7 to 28.2)                             | -5.2<br>(-12.3 to 1.6)                              |
| Developmental intellectual disability                                               | 1.6<br>(1.2 to 2.0)                                 | --                                                   | 0.2<br>(0.1 to 0.2)                                 | 25.9<br>(18.3 to 41.7)                            | 0.5<br>(-5.2 to 10.0)                               |
| Epilepsy                                                                            | 0.4<br>(0.2 to 0.5)                                 | --                                                   | 0.1<br>(0.1 to 0.2)                                 | 21.2<br>(-29.6 to 114.2)                          | -2.7<br>(-45.2 to 79.5)                             |
| Guillain-Barre syndrome                                                             | < 0.05<br>(< 0.05 to < 0.05)                        | --                                                   | < 0.05<br>(< 0.05 to < 0.05)                        | 27.6<br>(24.9 to 30.6)                            | 0.3<br>(-0.0 to 1.2)                                |
| Hearing loss                                                                        | 9.1<br>(8.6 to 9.6)                                 | --                                                   | 0.4<br>(0.2 to 0.5)                                 | 26.9<br>(23.2 to 30.2)                            | -3.4<br>(-5.3 to -1.6)                              |
| Heart failure                                                                       | 0.2<br>(0.2 to 0.2)                                 | --                                                   | < 0.05<br>(< 0.05 to < 0.05)                        | 49.1<br>(35.8 to 67.7)                            | 3.3<br>(-4.4 to 11.8)                               |
| Infertility                                                                         | 1.6<br>(1.3 to 2.1)                                 | --                                                   | < 0.05<br>(< 0.05 to < 0.05)                        | 24.0<br>(17.2 to 31.1)                            | -4.0<br>(-9.2 to 1.7)                               |
| Pelvic inflammatory disease                                                         | 0.1<br>(0.1 to 0.1)                                 | --                                                   | < 0.05<br>(< 0.05 to < 0.05)                        | 26.1<br>(9.1 to 45.6)                             | -3.7<br>(-16.5 to 10.1)                             |
| Vision loss                                                                         | 7.5<br>(7.1 to 7.8)                                 | --                                                   | 0.2<br>(0.1 to 0.3)                                 | 29.3<br>(25.6 to 33.3)                            | -2.7<br>(-4.8 to -0.4)                              |

We did not calculate incidence for the nine impairments, certain NTDs, and causes with only birth prevalence. Blank cells mean that no estimate is available.

† Incidence for aggregate causes represents the sum of the incidence of the causes below the aggregate.

‡ Incidence estimates for stroke represent first-ever stroke only.

^ Incidence of HIV/AIDS represents new infections of HIV only and does not include new infections of Tuberculosis in HIV positive cases.



SR Table 14: Prevalence, incidence, and YLDs for 2016, percentage change of YLD counts and percentage change of age-standardised YLD rates between 2006 and 2016 by cause and impairments, for all ages, Mauritania.

| Cause                                                                                | Prevalence in thousands (95% UI)       | Incidence in thousands (95% UI)            | YLDs in thousands (95% UI)       |                                                   |                                                     |
|--------------------------------------------------------------------------------------|----------------------------------------|--------------------------------------------|----------------------------------|---------------------------------------------------|-----------------------------------------------------|
|                                                                                      | 2016 counts                            | 2016 counts                                | 2016 counts                      | Percentage change in counts between 2006 and 2016 | Percentage change in age-standardised rates between |
| <b>All causes</b>                                                                    | <b>3,977.5</b><br>(3,961.5 to 3,991.3) | <b>24,666.0†</b><br>(23,229.3 to 26,242.5) | <b>384.6</b><br>(282.3 to 507.4) | <b>27.4</b><br>(23.3 to 32.2)                     | <b>-2.7</b><br>(-5.3 to -0.1)                       |
| <b>Communicable, maternal, neonatal, and nutritional disorders</b>                   | <b>3,330.7</b><br>(3,217.4 to 3,430.7) | <b>15,242.0†</b><br>(14,091.8 to 16,625.0) | <b>84.4</b><br>(58.3 to 118.1)   | <b>14.1</b><br>(6.8 to 21.7)                      | <b>-11.6</b><br>(-16.8 to -6.4)                     |
| <b>HIV/AIDS and tuberculosis</b>                                                     | <b>974.6</b><br>(836.3 to 1,086.9)     | <b>3.6†</b><br>(2.7 to 5.4)                | <b>1.9</b><br>(0.6 to 5.2)       | <b>-6.9</b><br>(-50.1 to 60.4)                    | <b>-29.8</b><br>(-62.4 to 20.8)                     |
| Tuberculosis                                                                         | 880.2<br>(759.7 to 1,021.6)            | 3.0†<br>(2.4 to 3.6)                       | 0.5<br>(0.4 to 0.8)              | 3.3<br>(-12.4 to 21.9)                            | -21.8<br>(-31.8 to -10.4)                           |
| Drug-susceptible tuberculosis                                                        | 1.7<br>(1.4 to 2.1)                    | 3.0<br>(2.4 to 3.6)                        | 0.5<br>(0.3 to 0.8)              | 3.5<br>(-12.6 to 22.9)                            | -21.7<br>(-31.8 to -10.1)                           |
| Multidrug-resistant tuberculosis without extensive drug resistance                   | < 0.05<br>(< 0.05 to 0.1)              | < 0.05<br>(< 0.05 to 0.1)                  | < 0.05<br>(< 0.05 to < 0.05)     | -7.0<br>(-67.8 to 168.4)                          | -30.0<br>(-75.8 to 102.6)                           |
| Extensively drug-resistant tuberculosis                                              | < 0.05<br>(< 0.05 to < 0.05)           | < 0.05<br>(< 0.05 to < 0.05)               | < 0.05<br>(< 0.05 to < 0.05)     | 183.4<br>(-1.9 to 717.9)                          | 113.4<br>(-26.2 to 517.2)                           |
| Latent tuberculosis infection                                                        | 878.5<br>(757.9 to 1,019.7)            | --                                         | --                               | --                                                | --                                                  |
| HIV/AIDS                                                                             | 9.3<br>(1.6 to 29.4)                   | 0.6^<br>(< 0.05 to 2.4)                    | 1.3<br>(0.2 to 4.6)              | -10.6<br>(-59.2 to 101.6)                         | -33.1<br>(-70.5 to 62.1)                            |
| Drug-susceptible HIV/AIDS - Tuberculosis                                             | 0.2<br>(0.1 to 0.3)                    | 0.3<br>(0.2 to 0.5)                        | 0.1<br>(< 0.05 to 0.1)           | -21.3<br>(-39.9 to 4.0)                           | -38.1<br>(-51.9 to -19.3)                           |
| Multidrug-resistant HIV/AIDS - Tuberculosis without extensive drug resistance        | < 0.05<br>(< 0.05 to < 0.05)           | < 0.05<br>(< 0.05 to < 0.05)               | < 0.05<br>(< 0.05 to < 0.05)     | -29.1<br>(-75.2 to 104.0)                         | -44.5<br>(-80.6 to 59.5)                            |
| Extensively drug-resistant HIV/AIDS - Tuberculosis                                   | < 0.05<br>(< 0.05 to < 0.05)           | < 0.05<br>(< 0.05 to < 0.05)               | < 0.05<br>(< 0.05 to < 0.05)     | 116.0<br>(-24.3 to 521.7)                         | 69.0<br>(-40.8 to 386.0)                            |
| HIV/AIDS resulting in other diseases                                                 | 9.1<br>(1.4 to 29.1)                   | 0.6<br>(< 0.05 to 2.4)                     | 1.2<br>(0.1 to 4.5)              | -9.7<br>(-61.9 to 163.2)                          | -32.7<br>(-71.7 to 117.0)                           |
| <b>Diarrhoea, lower respiratory infections, and other common infectious diseases</b> | <b>267.2</b><br>(255.3 to 282.1)       | <b>12,671.8†</b><br>(11,570.9 to 13,872.9) | <b>15.3</b><br>(10.8 to 20.7)    | <b>15.7</b><br>(12.1 to 19.1)                     | <b>-8.9</b><br>(-11.5 to -6.4)                      |
| Diarrhoeal diseases                                                                  | 58.1<br>(54.5 to 61.9)                 | 3,907.6<br>(3,651.1 to 4,159.5)            | 6.5<br>(4.5 to 8.9)              | 8.0<br>(2.9 to 13.7)                              | -13.8<br>(-17.5 to -9.8)                            |
| Intestinal infectious diseases                                                       | 0.6<br>(0.4 to 0.8)                    | 10.8†<br>(7.1 to 16.1)                     | 0.1<br>(< 0.05 to 0.1)           | 5.0<br>(-18.8 to 35.9)                            | -18.0<br>(-33.2 to 0.1)                             |
| Typhoid fever                                                                        | 0.5<br>(0.3 to 0.8)                    | 8.3<br>(5.3 to 12.5)                       | 0.1<br>(< 0.05 to 0.1)           | 4.8<br>(-21.7 to 39.9)                            | -18.1<br>(-35.1 to 2.4)                             |
| Paratyphoid fever                                                                    | 0.1<br>(0.1 to 0.2)                    | 2.6<br>(1.5 to 4.4)                        | < 0.05<br>(< 0.05 to < 0.05)     | 13.5<br>(-13.0 to 45.6)                           | -11.7<br>(-29.6 to 10.0)                            |
| Other intestinal infectious diseases                                                 | --                                     | --                                         | < 0.05<br>(< 0.05 to < 0.05)     | -30.6<br>(-45.4 to -11.2)                         | -41.3<br>(-51.0 to -29.8)                           |
| Lower respiratory infections                                                         | 4.6<br>(4.2 to 5.0)                    | 203.5<br>(185.6 to 222.3)                  | 0.3<br>(0.2 to 0.4)              | 8.1<br>(-6.2 to 22.9)                             | -12.6<br>(-21.2 to -4.0)                            |
| Upper respiratory infections                                                         | 108.3<br>(94.4 to 123.7)               | 8,106.1<br>(7,039.9 to 9,327.8)            | 2.7<br>(1.6 to 4.3)              | 27.1<br>(20.3 to 34.2)                            | -0.4<br>(-5.3 to 4.9)                               |
| Otitis media                                                                         | 81.9<br>(72.9 to 91.3)                 | 319.6<br>(251.5 to 405.5)                  | 2.6<br>(1.6 to 3.8)              | 17.9<br>(9.7 to 26.8)                             | -6.8<br>(-13.2 to -0.2)                             |
| Meningitis                                                                           | 17.6<br>(15.0 to 20.5)                 | 4.0<br>(3.5 to 4.8)                        | 1.9<br>(1.3 to 2.5)              | 24.7<br>(16.0 to 33.6)                            | -4.4<br>(-10.2 to 1.9)                              |
| Pneumococcal meningitis                                                              | 5.6<br>(4.7 to 6.7)                    | 0.5<br>(0.4 to 0.7)                        | 0.7<br>(0.5 to 0.9)              | 14.9<br>(-0.7 to 34.0)                            | -13.2<br>(-23.8 to -0.4)                            |
| H influenzae type B meningitis                                                       | 2.5<br>(1.8 to 3.5)                    | 0.5<br>(0.3 to 0.8)                        | 0.3<br>(0.2 to 0.4)              | 6.5<br>(-5.0 to 18.4)                             | -18.1<br>(-26.6 to -9.1)                            |
| Meningococcal infection                                                              | 4.3<br>(3.1 to 5.8)                    | 1.3<br>(1.0 to 1.8)                        | 0.5<br>(0.3 to 0.6)              | 24.5<br>(9.3 to 41.1)                             | -4.8<br>(-15.6 to 6.9)                              |
| Other meningitis                                                                     | 5.2<br>(3.6 to 7.0)                    | 1.7<br>(1.3 to 2.2)                        | 0.4<br>(0.3 to 0.6)              | 71.9<br>(54.5 to 92.8)                            | 34.5<br>(21.1 to 51.1)                              |
| Encephalitis                                                                         | 9.4<br>(6.3 to 13.7)                   | 4.4<br>(3.9 to 5.1)                        | 1.1<br>(0.8 to 1.4)              | 29.2<br>(13.9 to 46.3)                            | -2.0<br>(-12.2 to 9.4)                              |
| Diphtheria                                                                           | < 0.05<br>(< 0.05 to < 0.05)           | < 0.05<br>(< 0.05 to < 0.05)               | < 0.05<br>(< 0.05 to < 0.05)     | -64.5<br>(-85.3 to -16.9)                         | -69.8<br>(-86.2 to -36.0)                           |
| Whooping cough                                                                       | 2.3<br>(1.8 to 2.9)                    | 16.9<br>(13.1 to 21.3)                     | 0.1<br>(0.1 to 0.2)              | -12.3<br>(-23.5 to 1.5)                           | -25.5<br>(-35.0 to -13.8)                           |
| Tetanus                                                                              | 0.1<br>(0.1 to 0.1)                    | < 0.05<br>(< 0.05 to 0.1)                  | < 0.05<br>(< 0.05 to < 0.05)     | -16.8<br>(-45.4 to 11.2)                          | -31.5<br>(-52.7 to -13.2)                           |
| Measles                                                                              | 0.1<br>(< 0.05 to 0.1)                 | 2.3<br>(0.8 to 5.5)                        | < 0.05<br>(< 0.05 to < 0.05)     | -68.8<br>(-82.9 to -38.2)                         | -73.8<br>(-85.7 to -48.2)                           |
| Varicella and herpes zoster                                                          | 3.6<br>(3.3 to 3.8)                    | 96.5<br>(91.1 to 101.6)                    | 0.1<br>(0.1 to 0.2)              | 32.9<br>(13.8 to 54.4)                            | 0.4<br>(-11.0 to 13.2)                              |
| <b>Neglected tropical diseases and malaria</b>                                       | <b>1,079.7</b><br>(886.2 to 1,274.7)   | <b>456.9†</b><br>(339.4 to 586.5)          | <b>11.4</b><br>(7.1 to 18.3)     | <b>10.0</b><br>(2.3 to 17.7)                      | <b>-16.0</b><br>(-21.6 to -10.4)                    |
| Malaria                                                                              | 60.0<br>(49.2 to 72.1)                 | 145.2<br>(85.8 to 224.6)                   | 2.7<br>(2.0 to 3.4)              | 11.1<br>(-2.9 to 25.9)                            | -12.0<br>(-22.1 to -1.2)                            |
| Chagas disease                                                                       | --                                     | --                                         | --                               | --                                                | --                                                  |
| Leishmaniasis                                                                        | 0.2<br>(0.1 to 0.3)                    | < 0.05<br>(< 0.05 to < 0.05)               | < 0.05<br>(< 0.05 to < 0.05)     | -4.1<br>(-26.3 to 30.7)                           | -26.7<br>(-44.0 to 1.9)                             |
| Visceral leishmaniasis                                                               | --                                     | --                                         | --                               | --                                                | --                                                  |
| Cutaneous and mucocutaneous leishmaniasis                                            | 0.2<br>(0.1 to 0.3)                    | < 0.05<br>(< 0.05 to < 0.05)               | < 0.05<br>(< 0.05 to < 0.05)     | -4.1<br>(-26.3 to 30.7)                           | -26.7<br>(-44.0 to 1.9)                             |
| African trypanosomiasis                                                              | --                                     | --                                         | --                               | --                                                | --                                                  |
| Schistosomiasis                                                                      | 752.6<br>(469.1 to 1,056.0)            | 296.4<br>(203.1 to 397.7)                  | 5.6<br>(2.2 to 11.6)             | 7.0<br>(-1.8 to 16.0)                             | -17.9<br>(-24.1 to -11.2)                           |
| Cysticercosis                                                                        | --                                     | --                                         | --                               | --                                                | --                                                  |
| Cystic echinococcosis                                                                | 0.8<br>(0.1 to 2.7)                    | 0.2<br>(< 0.05 to 0.6)                     | 0.1<br>(< 0.05 to 0.2)           | -29.5<br>(-91.6 to 437.6)                         | -46.7<br>(-93.4 to 312.2)                           |
| Lymphatic filariasis                                                                 | 0.9<br>(0.3 to 1.8)                    | --                                         | 0.1<br>(< 0.05 to 0.2)           | 37.4<br>(7.2 to 77.1)                             | 2.9<br>(-17.2 to 28.0)                              |
| Onchocerciasis                                                                       | --                                     | --                                         | --                               | --                                                | --                                                  |
| Trachoma                                                                             | 3.4<br>(2.3 to 4.7)                    | --                                         | 0.3<br>(0.2 to 0.5)              | -8.7<br>(-28.6 to 15.0)                           | -33.2<br>(-50.4 to -9.6)                            |
| Dengue                                                                               | 0.9<br>(0.3 to 1.8)                    | 14.8<br>(6.0 to 29.4)                      | 0.1<br>(< 0.05 to 0.3)           | 172.3<br>(96.6 to 525.6)                          | 109.1<br>(56.0 to 383.2)                            |
| Yellow fever                                                                         | < 0.05<br>(< 0.05 to < 0.05)           | 0.3<br>(0.1 to 0.7)                        | < 0.05<br>(< 0.05 to < 0.05)     | -32.9<br>(-60.3 to 14.6)                          | -47.8<br>(-66.2 to -18.0)                           |
| Rabies                                                                               | < 0.05<br>(< 0.05 to < 0.05)           | < 0.05<br>(< 0.05 to 0.1)                  | < 0.05<br>(< 0.05 to < 0.05)     | -38.6<br>(-66.1 to 15.8)                          | -51.5<br>(-68.7 to -17.8)                           |
| Intestinal nematode infections                                                       | 259.8<br>(218.6 to 318.4)              | --                                         | 0.3<br>(0.2 to 0.5)              | 33.4<br>(7.4 to 64.3)                             | 3.5<br>(-17.7 to 29.3)                              |
| Ascariasis                                                                           | 26.8<br>(20.7 to 34.6)                 | --                                         | < 0.05<br>(< 0.05 to < 0.05)     | 23.8<br>(-27.7 to 118.2)                          | -2.8<br>(-48.1 to 86.2)                             |



| Cause                                                                   | Prevalence in thousands (95% UI)              | Incidence in thousands (95% UI)                | YLDs in thousands (95% UI)              |                                                   |                                                     |
|-------------------------------------------------------------------------|-----------------------------------------------|------------------------------------------------|-----------------------------------------|---------------------------------------------------|-----------------------------------------------------|
|                                                                         | 2016 counts                                   | 2016 counts                                    | 2016 counts                             | Percentage change in counts between 2006 and 2016 | Percentage change in age-standardised rates between |
| Trichuriasis                                                            | 110.4<br>(84.4 to 144.7)                      | --                                             | < 0.05<br>(< 0.05 to < 0.05)            | 27.1<br>(-27.6 to 117.0)                          | -0.9<br>(-49.0 to 85.0)                             |
| Hookworm disease                                                        | 127.3<br>(101.1 to 160.5)                     | --                                             | 0.3<br>(0.2 to 0.5)                     | 33.5<br>(7.4 to 65.3)                             | 3.6<br>(-18.0 to 30.0)                              |
| Food-borne trematodiasis                                                | --                                            | --                                             | --                                      | --                                                | --                                                  |
| Leprosy                                                                 | 0.3<br>(0.2 to 0.4)                           | < 0.05<br>(< 0.05 to < 0.05)                   | < 0.05<br>(< 0.05 to < 0.05)            | -6.6<br>(-27.0 to 19.8)                           | -28.1<br>(-42.1 to -10.5)                           |
| Ebola virus disease                                                     | --                                            | --                                             | --                                      | --                                                | --                                                  |
| Zika virus disease                                                      | --                                            | --                                             | --                                      | --                                                | --                                                  |
| Guinea worm disease                                                     | --                                            | --                                             | --                                      | --                                                | --                                                  |
| Other neglected tropical diseases                                       | 63.7<br>(57.3 to 70.3)                        | --                                             | 2.1<br>(1.3 to 3.2)                     | 14.1<br>(-1.4 to 30.9)                            | -7.4<br>(-19.3 to 5.5)                              |
| <b>Maternal disorders</b>                                               | <b>10.1</b><br><b>(8.0 to 12.6)</b>           | <b>67.8†</b><br><b>(60.8 to 75.4)</b>          | <b>0.9</b><br><b>(0.6 to 1.3)</b>       | <b>-3.1</b><br><b>(-21.9 to 20.7)</b>             | <b>-26.7</b><br><b>(-40.8 to -9.1)</b>              |
| Maternal haemorrhage                                                    | 1.1<br>(0.8 to 1.4)                           | 8.1<br>(5.3 to 11.8)                           | < 0.05<br>(< 0.05 to 0.1)               | 14.9<br>(-22.1 to 70.1)                           | -10.9<br>(-40.2 to 30.4)                            |
| Maternal sepsis and other pregnancy related infections                  | 1.6<br>(1.3 to 2.0)                           | 7.8<br>(6.0 to 10.2)                           | < 0.05<br>(< 0.05 to 0.1)               | 15.1<br>(-41.1 to 127.2)                          | -11.4<br>(-53.6 to 71.0)                            |
| Maternal hypertensive disorders                                         | 6.4<br>(4.1 to 8.8)                           | 31.6<br>(27.3 to 35.5)                         | 0.3<br>(0.2 to 0.5)                     | 15.8<br>(-27.1 to 86.1)                           | -10.3<br>(-43.6 to 44.0)                            |
| Maternal obstructed labour and uterine rupture                          | 1.2<br>(0.8 to 1.6)                           | 4.7<br>(3.2 to 6.3)                            | 0.4<br>(0.2 to 0.6)                     | -16.1<br>(-34.8 to 5.2)                           | -36.6<br>(-50.5 to -21.2)                           |
| Maternal abortion, miscarriage, and ectopic pregnancy                   | 0.1<br>(0.1 to 0.2)                           | 15.6<br>(11.7 to 20.4)                         | < 0.05<br>(< 0.05 to < 0.05)            | 12.7<br>(-42.8 to 132.0)                          | -13.2<br>(-56.0 to 78.0)                            |
| Other maternal disorders                                                | --                                            | --                                             | 0.1<br>(0.1 to 0.2)                     | -7.5<br>(-25.5 to 15.7)                           | -30.0<br>(-43.4 to -13.2)                           |
| <b>Neonatal disorders</b>                                               | <b>57.8</b><br><b>(44.6 to 73.2)</b>          | --                                             | <b>9.8</b><br><b>(5.4 to 17.2)</b>      | <b>40.9</b><br><b>(14.9 to 79.4)</b>              | <b>13.0</b><br><b>(-8.0 to 44.7)</b>                |
| Neonatal preterm birth complications                                    | 36.1<br>(26.9 to 50.0)                        | --                                             | 3.0<br>(1.9 to 4.5)                     | 3.4<br>(-21.2 to 33.4)                            | -17.8<br>(-37.4 to 6.2)                             |
| Neonatal encephalopathy due to birth asphyxia and trauma                | 14.8<br>(7.4 to 27.6)                         | --                                             | 1.6<br>(0.2 to 4.9)                     | 55.7<br>(-25.1 to 190.5)                          | 24.4<br>(-40.1 to 140.0)                            |
| Neonatal sepsis and other neonatal infections                           | 11.0<br>(3.7 to 24.3)                         | --                                             | 4.4<br>(1.2 to 10.9)                    | 85.9<br>(36.2 to 405.7)                           | 49.6<br>(9.0 to 354.9)                              |
| Hemolytic disease and other neonatal jaundice                           | 0.8<br>(0.7 to 0.9)                           | --                                             | 0.2<br>(0.2 to 0.3)                     | 25.3<br>(9.5 to 43.6)                             | -1.9<br>(-12.8 to 10.5)                             |
| Other neonatal disorders                                                | --                                            | --                                             | 0.6<br>(0.4 to 1.0)                     | 20.9<br>(-0.7 to 58.1)                            | 2.7<br>(-15.8 to 35.1)                              |
| <b>Nutritional deficiencies</b>                                         | <b>1,984.4</b><br><b>(1,792.3 to 2,207.6)</b> | <b>1,421.0†</b><br><b>(926.8 to 2,106.5)</b>   | <b>41.3</b><br><b>(27.3 to 60.1)</b>    | <b>10.4</b><br><b>(0.0 to 21.1)</b>               | <b>-14.3</b><br><b>(-21.0 to -7.4)</b>              |
| Protein-energy malnutrition                                             | 63.9<br>(54.8 to 73.2)                        | 47.5<br>(41.6 to 53.6)                         | 1.8<br>(1.1 to 2.6)                     | -0.3<br>(-22.5 to 28.9)                           | -15.3<br>(-34.3 to 9.5)                             |
| Iodine deficiency                                                       | 69.5<br>(61.3 to 79.5)                        | 2.4<br>(2.1 to 2.8)                            | 1.9<br>(1.2 to 2.7)                     | -9.3<br>(-18.0 to -0.4)                           | -30.6<br>(-36.6 to -24.5)                           |
| Vitamin A deficiency                                                    | 1,140.6<br>(844.8 to 1,492.4)                 | 1,371.1<br>(871.5 to 2,058.2)                  | 0.3<br>(0.2 to 0.5)                     | 24.5<br>(-1.6 to 55.3)                            | -2.2<br>(-21.5 to 19.7)                             |
| Iron-deficiency anaemia                                                 | 1,184.1<br>(1,085.3 to 1,282.3)               | --                                             | 37.3<br>(24.3 to 55.3)                  | 12.1<br>(0.5 to 24.1)                             | -13.0<br>(-20.4 to -5.1)                            |
| Other nutritional deficiencies                                          | --                                            | --                                             | 0.1<br>(< 0.05 to 0.1)                  | -3.7<br>(-26.6 to 26.5)                           | -18.2<br>(-37.8 to 7.8)                             |
| <b>Other communicable, maternal, neonatal, and nutritional diseases</b> | <b>1,313.3</b><br><b>(1,223.0 to 1,407.0)</b> | <b>621.0</b><br><b>(531.2 to 735.8)</b>        | <b>3.6</b><br><b>(2.3 to 5.5)</b>       | <b>24.3</b><br><b>(15.6 to 32.7)</b>              | <b>-3.2</b><br><b>(-9.0 to 2.0)</b>                 |
| Sexually transmitted diseases excluding HIV                             | 784.9<br>(732.6 to 842.7)                     | 473.7<br>(402.7 to 561.0)                      | 1.9<br>(1.2 to 3.1)                     | 29.8<br>(20.9 to 38.4)                            | -1.3<br>(-7.7 to 4.9)                               |
| Syphilis                                                                | 73.9<br>(54.0 to 98.3)                        | 51.6<br>(36.4 to 71.6)                         | 0.1<br>(0.1 to 0.1)                     | 39.5<br>(21.6 to 59.3)                            | 2.0<br>(-12.4 to 17.3)                              |
| Chlamydial infection                                                    | 48.2<br>(33.6 to 66.0)                        | 41.9<br>(30.7 to 57.9)                         | 0.4<br>(0.2 to 0.6)                     | 28.0<br>(11.9 to 44.6)                            | -1.9<br>(-15.1 to 10.9)                             |
| Gonococcal infection                                                    | 44.2<br>(29.7 to 63.5)                        | 145.2<br>(88.7 to 221.1)                       | 0.4<br>(0.2 to 0.6)                     | 31.0<br>(15.4 to 48.8)                            | -0.1<br>(-11.8 to 12.5)                             |
| Trichomoniasis                                                          | 150.3<br>(123.8 to 179.2)                     | 137.8<br>(110.9 to 169.2)                      | 0.2<br>(0.1 to 0.4)                     | 30.5<br>(22.5 to 39.5)                            | -0.8<br>(-6.9 to 5.9)                               |
| Genital herpes                                                          | 550.1<br>(478.2 to 641.6)                     | 52.4<br>(44.5 to 63.0)                         | 0.1<br>(< 0.05 to 0.3)                  | 33.5<br>(21.1 to 46.2)                            | -0.2<br>(-8.0 to 7.7)                               |
| Other sexually transmitted diseases                                     | 38.0<br>(30.0 to 46.6)                        | 44.8<br>(37.1 to 54.4)                         | 0.7<br>(0.5 to 1.1)                     | 27.9<br>(14.6 to 42.4)                            | -2.6<br>(-12.5 to 8.6)                              |
| Hepatitis                                                               | 624.8<br>(508.3 to 764.1)                     | 147.3<br>(99.9 to 215.8)                       | 0.1<br>(0.1 to 0.2)                     | -7.2<br>(-29.2 to 19.6)                           | -24.2<br>(-40.0 to -5.4)                            |
| Acute hepatitis A                                                       | 2.8<br>(0.3 to 7.8)                           | 35.9<br>(4.1 to 101.5)                         | < 0.05<br>(< 0.05 to < 0.05)            | -9.8<br>(-79.1 to 331.9)                          | -25.3<br>(-76.6 to 176.1)                           |
| Hepatitis B                                                             | 483.7<br>(368.4 to 626.9)                     | 94.4<br>(68.6 to 127.5)                        | 0.1<br>(0.1 to 0.2)                     | -7.1<br>(-27.7 to 17.4)                           | -24.3<br>(-40.1 to -5.2)                            |
| Hepatitis C                                                             | 137.7<br>(121.4 to 154.9)                     | 8.1<br>(7.3 to 9.1)                            | < 0.05<br>(< 0.05 to < 0.05)            | 15.0<br>(-30.9 to 85.0)                           | -7.5<br>(-37.1 to 32.1)                             |
| Acute hepatitis E                                                       | 0.7<br>(0.6 to 0.9)                           | 8.8<br>(7.2 to 11.2)                           | < 0.05<br>(< 0.05 to < 0.05)            | -12.8<br>(-40.3 to 25.9)                          | -27.8<br>(-47.7 to -2.9)                            |
| Other infectious diseases                                               | 47.7<br>(43.2 to 52.6)                        | < 0.05<br>(< 0.05 to < 0.05)                   | 1.6<br>(1.0 to 2.3)                     | 21.9<br>(6.1 to 38.4)                             | -3.0<br>(-14.3 to 9.1)                              |
| <b>Non-communicable diseases</b>                                        | <b>3,627.1</b><br><b>(3,593.9 to 3,659.3)</b> | <b>9,130.5†</b><br><b>(8,382.0 to 9,947.8)</b> | <b>279.4</b><br><b>(205.1 to 361.7)</b> | <b>31.9</b><br><b>(26.7 to 37.5)</b>              | <b>-0.6</b><br><b>(-3.6 to 2.6)</b>                 |
| <b>Neoplasms</b>                                                        | <b>3.9</b><br><b>(3.5 to 4.2)</b>             | <b>2.3</b><br><b>(2.0 to 2.4)</b>              | <b>0.7</b><br><b>(0.5 to 1.0)</b>       | <b>40.3</b><br><b>(30.6 to 49.8)</b>              | <b>3.2</b><br><b>(-3.1 to 9.5)</b>                  |
| Lip and oral cavity cancer                                              | 0.1<br>(0.1 to 0.2)                           | < 0.05<br>(< 0.05 to < 0.05)                   | < 0.05<br>(< 0.05 to < 0.05)            | 49.5<br>(29.6 to 72.2)                            | 7.5<br>(-6.2 to 23.2)                               |
| Nasopharynx cancer                                                      | < 0.05<br>(< 0.05 to < 0.05)                  | < 0.05<br>(< 0.05 to < 0.05)                   | < 0.05<br>(< 0.05 to < 0.05)            | 43.9<br>(25.3 to 66.7)                            | 3.3<br>(-9.2 to 17.1)                               |
| Other pharynx cancer                                                    | < 0.05<br>(< 0.05 to < 0.05)                  | < 0.05<br>(< 0.05 to < 0.05)                   | < 0.05<br>(< 0.05 to < 0.05)            | 42.7<br>(29.2 to 57.6)                            | 4.6<br>(-5.1 to 15.1)                               |
| Oesophageal cancer                                                      | 0.1<br>(< 0.05 to 0.1)                        | 0.1<br>(< 0.05 to 0.1)                         | < 0.05<br>(< 0.05 to < 0.05)            | 65.1<br>(46.7 to 84.0)                            | 17.6<br>(3.5 to 32.5)                               |
| Stomach cancer                                                          | 0.2<br>(0.1 to 0.2)                           | 0.1<br>(0.1 to 0.1)                            | < 0.05<br>(< 0.05 to < 0.05)            | 29.1<br>(15.5 to 43.6)                            | -5.3<br>(-16.4 to 7.7)                              |
| Colon and rectum cancer                                                 | 0.3<br>(0.2 to 0.4)                           | 0.1<br>(0.1 to 0.1)                            | < 0.05<br>(< 0.05 to 0.1)               | 46.8<br>(26.0 to 69.6)                            | 6.7<br>(-9.9 to 24.5)                               |
| Liver cancer                                                            | 0.2<br>(0.1 to 0.2)                           | 0.3<br>(0.2 to 0.4)                            | 0.1<br>(< 0.05 to 0.1)                  | 24.3<br>(9.2 to 41.5)                             | -8.5<br>(-18.6 to 3.6)                              |
| Liver cancer due to hepatitis B                                         | 0.2<br>(0.1 to 0.2)                           | 0.2<br>(0.1 to 0.2)                            | < 0.05<br>(< 0.05 to 0.1)               | 24.1<br>(8.7 to 42.1)                             | -8.7<br>(-19.6 to 4.0)                              |

| Cause                                              | Prevalence in thousands (95% UI)        | Incidence in thousands (95% UI)       | YLDs in thousands (95% UI)          |                                                   |                                                     |
|----------------------------------------------------|-----------------------------------------|---------------------------------------|-------------------------------------|---------------------------------------------------|-----------------------------------------------------|
|                                                    | 2016 counts                             | 2016 counts                           | 2016 counts                         | Percentage change in counts between 2006 and 2016 | Percentage change in age-standardised rates between |
| Liver cancer due to hepatitis C                    | < 0.05<br>(< 0.05 to < 0.05)            | < 0.05<br>(< 0.05 to < 0.05)          | < 0.05<br>(< 0.05 to < 0.05)        | 25.9<br>(10.2 to 44.3)                            | -7.7<br>(-18.8 to 4.5)                              |
| Liver cancer due to alcohol use                    | < 0.05<br>(< 0.05 to < 0.05)            | < 0.05<br>(< 0.05 to < 0.05)          | < 0.05<br>(< 0.05 to < 0.05)        | 24.8<br>(9.1 to 43.5)                             | -9.2<br>(-20.4 to 3.5)                              |
| Liver cancer due to other causes                   | 0.1<br>(0.1 to 0.1)                     | 0.1<br>(0.1 to 0.1)                   | < 0.05<br>(< 0.05 to < 0.05)        | 24.2<br>(8.7 to 41.4)                             | -8.2<br>(-18.7 to 3.6)                              |
| Gallbladder and biliary tract cancer               | < 0.05<br>(< 0.05 to < 0.05)            | < 0.05<br>(< 0.05 to < 0.05)          | < 0.05<br>(< 0.05 to < 0.05)        | 21.5<br>(9.6 to 34.2)                             | -11.6<br>(-19.9 to -2.6)                            |
| Pancreatic cancer                                  | 0.1<br>(0.1 to 0.1)                     | 0.1<br>(0.1 to 0.1)                   | < 0.05<br>(< 0.05 to < 0.05)        | 49.9<br>(38.2 to 63.0)                            | 8.4<br>(-1.0 to 18.5)                               |
| Larynx cancer                                      | < 0.05<br>(< 0.05 to < 0.05)            | < 0.05<br>(< 0.05 to < 0.05)          | < 0.05<br>(< 0.05 to < 0.05)        | 46.7<br>(28.2 to 68.6)                            | 4.8<br>(-7.8 to 19.7)                               |
| Tracheal, bronchus, and lung cancer                | 0.1<br>(0.1 to 0.2)                     | 0.1<br>(0.1 to 0.1)                   | < 0.05<br>(< 0.05 to < 0.05)        | 53.9<br>(28.2 to 82.7)                            | 12.2<br>(-7.7 to 34.7)                              |
| Malignant skin melanoma                            | < 0.05<br>(< 0.05 to < 0.05)            | < 0.05<br>(< 0.05 to < 0.05)          | < 0.05<br>(< 0.05 to < 0.05)        | 44.9<br>(27.9 to 65.0)                            | 4.8<br>(-8.1 to 19.2)                               |
| Non-melanoma skin cancer                           | < 0.05<br>(< 0.05 to < 0.05)            | 0.1<br>(0.1 to 0.2)                   | < 0.05<br>(< 0.05 to < 0.05)        | 38.7<br>(-11.4 to 86.5)                           | -1.0<br>(-46.5 to 44.9)                             |
| Non-melanoma skin cancer (squamous-cell carcinoma) | < 0.05<br>(< 0.05 to < 0.05)            | < 0.05<br>(< 0.05 to < 0.05)          | < 0.05<br>(< 0.05 to < 0.05)        | 38.3<br>(-17.8 to 92.0)                           | -1.3<br>(-49.5 to 49.1)                             |
| Non-melanoma skin cancer (basal-cell carcinoma)    | < 0.05<br>(< 0.05 to < 0.05)            | 0.1<br>(< 0.05 to 0.1)                | < 0.05<br>(< 0.05 to < 0.05)        | 42.0<br>(31.7 to 54.0)                            | 2.5<br>(-5.9 to 11.7)                               |
| Breast cancer                                      | 1.1<br>(0.8 to 1.4)                     | 0.2<br>(0.2 to 0.3)                   | 0.1<br>(0.1 to 0.2)                 | 55.4<br>(19.7 to 106.2)                           | 10.4<br>(-13.6 to 42.8)                             |
| Cervical cancer                                    | 1.1<br>(0.8 to 1.4)                     | 0.3<br>(0.2 to 0.4)                   | 0.1<br>(0.1 to 0.2)                 | 24.9<br>(-2.5 to 57.5)                            | -10.2<br>(-29.2 to 13.7)                            |
| Uterine cancer                                     | 0.1<br>(0.1 to 0.2)                     | < 0.05<br>(< 0.05 to < 0.05)          | < 0.05<br>(< 0.05 to < 0.05)        | 45.2<br>(15.5 to 82.6)                            | 5.6<br>(-14.8 to 29.8)                              |
| Ovarian cancer                                     | 0.2<br>(0.1 to 0.2)                     | 0.1<br>(< 0.05 to 0.1)                | < 0.05<br>(< 0.05 to < 0.05)        | 52.4<br>(28.8 to 80.0)                            | 8.6<br>(-9.1 to 28.7)                               |
| Prostate cancer                                    | 0.5<br>(0.3 to 0.7)                     | 0.2<br>(0.1 to 0.2)                   | 0.1<br>(< 0.05 to 0.1)              | 66.2<br>(27.7 to 106.0)                           | 18.4<br>(-7.1 to 45.0)                              |
| Testicular cancer                                  | < 0.05<br>(< 0.05 to < 0.05)            | < 0.05<br>(< 0.05 to < 0.05)          | < 0.05<br>(< 0.05 to < 0.05)        | 30.2<br>(6.7 to 63.0)                             | -2.3<br>(-20.1 to 22.4)                             |
| Kidney cancer                                      | 0.2<br>(0.2 to 0.3)                     | 0.1<br>(< 0.05 to 0.1)                | < 0.05<br>(< 0.05 to < 0.05)        | 51.5<br>(23.8 to 85.8)                            | 13.5<br>(-3.1 to 34.5)                              |
| Bladder cancer                                     | 0.1<br>(0.1 to 0.2)                     | < 0.05<br>(< 0.05 to 0.1)             | < 0.05<br>(< 0.05 to < 0.05)        | 43.9<br>(28.5 to 60.6)                            | 3.5<br>(-8.5 to 16.7)                               |
| Brain and nervous system cancer                    | 0.1<br>(0.1 to 0.1)                     | 0.1<br>(< 0.05 to 0.1)                | < 0.05<br>(< 0.05 to < 0.05)        | 46.1<br>(32.4 to 64.6)                            | 9.7<br>(-1.9 to 25.6)                               |
| Thyroid cancer                                     | < 0.05<br>(< 0.05 to 0.1)               | < 0.05<br>(< 0.05 to < 0.05)          | < 0.05<br>(< 0.05 to < 0.05)        | 40.1<br>(23.0 to 60.4)                            | -1.7<br>(-12.7 to 10.9)                             |
| Mesothelioma                                       | < 0.05<br>(< 0.05 to < 0.05)            | < 0.05<br>(< 0.05 to < 0.05)          | < 0.05<br>(< 0.05 to < 0.05)        | 22.7<br>(7.0 to 39.1)                             | -10.6<br>(-20.8 to 0.5)                             |
| Hodgkin lymphoma                                   | < 0.05<br>(< 0.05 to < 0.05)            | < 0.05<br>(< 0.05 to < 0.05)          | < 0.05<br>(< 0.05 to < 0.05)        | 4.6<br>(-6.3 to 17.1)                             | -17.9<br>(-24.9 to -8.8)                            |
| Non-Hodgkin's lymphoma                             | 0.2<br>(0.2 to 0.2)                     | 0.1<br>(0.1 to 0.1)                   | < 0.05<br>(< 0.05 to < 0.05)        | 32.0<br>(18.0 to 47.1)                            | 0.6<br>(-9.5 to 10.9)                               |
| Multiple myeloma                                   | < 0.05<br>(< 0.05 to < 0.05)            | < 0.05<br>(< 0.05 to < 0.05)          | < 0.05<br>(< 0.05 to < 0.05)        | 37.0<br>(18.8 to 53.3)                            | -1.1<br>(-14.1 to 10.5)                             |
| Leukaemia                                          | 0.2<br>(0.1 to 0.3)                     | 0.1<br>(< 0.05 to 0.1)                | < 0.05<br>(< 0.05 to < 0.05)        | 25.3<br>(12.6 to 38.9)                            | -4.3<br>(-12.0 to 3.8)                              |
| Acute lymphoid leukaemia                           | < 0.05<br>(< 0.05 to 0.1)               | < 0.05<br>(< 0.05 to < 0.05)          | < 0.05<br>(< 0.05 to < 0.05)        | 17.4<br>(-5.6 to 44.5)                            | -7.2<br>(-21.4 to 8.9)                              |
| Chronic lymphoid leukaemia                         | < 0.05<br>(< 0.05 to < 0.05)            | < 0.05<br>(< 0.05 to < 0.05)          | < 0.05<br>(< 0.05 to < 0.05)        | 34.6<br>(12.6 to 61.0)                            | -2.0<br>(-18.0 to 18.2)                             |
| Acute myeloid leukaemia                            | < 0.05<br>(< 0.05 to 0.1)               | < 0.05<br>(< 0.05 to < 0.05)          | < 0.05<br>(< 0.05 to < 0.05)        | 30.0<br>(9.8 to 51.9)                             | 2.6<br>(-8.5 to 14.8)                               |
| Chronic myeloid leukaemia                          | < 0.05<br>(< 0.05 to < 0.05)            | < 0.05<br>(< 0.05 to < 0.05)          | < 0.05<br>(< 0.05 to < 0.05)        | 24.3<br>(4.4 to 49.5)                             | -7.6<br>(-21.9 to 9.3)                              |
| Other leukaemia                                    | 0.1<br>(< 0.05 to 0.1)                  | < 0.05<br>(< 0.05 to < 0.05)          | < 0.05<br>(< 0.05 to < 0.05)        | 21.9<br>(6.9 to 38.1)                             | -7.7<br>(-18.3 to 3.8)                              |
| Other neoplasms                                    | 0.4<br>(0.3 to 0.4)                     | 0.1<br>(0.1 to 0.1)                   | < 0.05<br>(< 0.05 to < 0.05)        | 27.4<br>(8.8 to 48.4)                             | -1.8<br>(-12.8 to 10.3)                             |
| <b>Cardiovascular diseases</b>                     | <b>208.2</b><br><b>(197.2 to 220.3)</b> | <b>14.6†</b><br><b>(14.0 to 15.3)</b> | <b>12.0</b><br><b>(8.7 to 15.9)</b> | <b>38.5</b><br><b>(32.9 to 44.8)</b>              | <b>2.2</b><br><b>(-1.7 to 6.5)</b>                  |
| Rheumatic heart disease                            | 31.2<br>(27.7 to 35.2)                  | 1.2<br>(1.1 to 1.4)                   | 1.5<br>(1.0 to 2.2)                 | 38.3<br>(25.7 to 51.1)                            | 4.4<br>(-4.4 to 13.5)                               |
| Ischaemic heart disease                            | 44.3<br>(41.7 to 47.0)                  | 5.6<br>(5.2 to 6.0)                   | 1.9<br>(1.3 to 2.6)                 | 40.7<br>(33.0 to 49.1)                            | 1.9<br>(-2.9 to 7.0)                                |
| Cerebrovascular disease                            | 16.2<br>(15.1 to 17.4)                  | 2.4‡<br>(2.2 to 2.7)                  | 2.4<br>(1.7 to 3.0)                 | 39.0<br>(28.4 to 50.2)                            | 1.3<br>(-6.5 to 9.5)                                |
| Ischaemic stroke                                   | 14.1<br>(12.7 to 15.6)                  | 1.7‡<br>(1.5 to 1.9)                  | 1.9<br>(1.4 to 2.5)                 | 39.4<br>(27.2 to 52.3)                            | 1.2<br>(-7.5 to 10.3)                               |
| Hemorrhagic stroke                                 | 2.9<br>(2.6 to 3.3)                     | 0.7‡<br>(0.7 to 0.8)                  | 0.4<br>(0.3 to 0.5)                 | 37.3<br>(20.0 to 56.8)                            | 1.8<br>(-11.1 to 15.3)                              |
| Hypertensive heart disease                         | 3.8<br>(3.1 to 4.6)                     | --                                    | 0.3<br>(0.2 to 0.4)                 | 34.1<br>(19.3 to 50.9)                            | -4.4<br>(-13.2 to 6.2)                              |
| Cardiomyopathy and myocarditis                     | 2.2<br>(1.9 to 2.5)                     | 0.9†<br>(0.8 to 1.1)                  | 0.2<br>(0.1 to 0.3)                 | 41.1<br>(24.3 to 59.1)                            | 1.1<br>(-11.3 to 14.5)                              |
| Myocarditis                                        | 0.6<br>(0.5 to 0.7)                     | 0.9<br>(0.8 to 1.1)                   | < 0.05<br>(< 0.05 to 0.1)           | 36.4<br>(22.7 to 51.8)                            | 2.2<br>(-10.1 to 16.4)                              |
| Alcoholic cardiomyopathy                           | 0.3<br>(0.2 to 0.4)                     | --                                    | < 0.05<br>(< 0.05 to < 0.05)        | 46.1<br>(5.8 to 100.7)                            | 2.2<br>(-24.2 to 37.1)                              |
| Other cardiomyopathy                               | 1.7<br>(1.3 to 2.0)                     | --                                    | 0.1<br>(0.1 to 0.2)                 | 41.8<br>(20.8 to 65.9)                            | 0.6<br>(-13.9 to 17.0)                              |
| Atrial fibrillation and flutter                    | 8.3<br>(7.2 to 9.5)                     | 0.7<br>(0.6 to 0.9)                   | 0.7<br>(0.4 to 0.9)                 | 38.8<br>(27.6 to 50.4)                            | 0.8<br>(-6.0 to 7.5)                                |
| Peripheral vascular disease                        | 31.2<br>(27.1 to 36.4)                  | 3.0<br>(2.6 to 3.6)                   | 0.1<br>(0.1 to 0.3)                 | 33.0<br>(22.6 to 45.0)                            | -2.9<br>(-10.2 to 5.4)                              |
| Endocarditis                                       | 0.3<br>(0.3 to 0.4)                     | 0.6<br>(0.5 to 0.7)                   | < 0.05<br>(< 0.05 to < 0.05)        | 38.8<br>(22.2 to 56.1)                            | 4.4<br>(-10.7 to 22.3)                              |
| Other cardiovascular and circulatory diseases      | 93.5<br>(77.3 to 112.5)                 | --                                    | 4.9<br>(3.2 to 7.0)                 | 37.8<br>(26.7 to 50.2)                            | 4.0<br>(-4.6 to 12.8)                               |
| <b>Chronic respiratory diseases</b>                | <b>278.2</b><br><b>(260.6 to 295.1)</b> | <b>52.3†</b><br><b>(48.1 to 57.0)</b> | <b>12.5</b><br><b>(9.1 to 16.8)</b> | <b>34.3</b><br><b>(28.4 to 40.2)</b>              | <b>2.1</b><br><b>(-1.7 to 6.1)</b>                  |
| Chronic obstructive pulmonary disease              | 42.0<br>(40.1 to 43.9)                  | 2.9<br>(2.8 to 3.0)                   | 2.8<br>(2.5 to 3.2)                 | 40.1<br>(28.6 to 52.5)                            | 1.4<br>(-6.2 to 9.6)                                |
| Pneumoconiosis                                     | < 0.05<br>(< 0.05 to < 0.05)            | < 0.05<br>(< 0.05 to < 0.05)          | < 0.05<br>(< 0.05 to < 0.05)        | 43.1<br>(35.3 to 51.9)                            | 3.5<br>(-2.2 to 9.9)                                |
| Silicosis                                          | < 0.05<br>(< 0.05 to < 0.05)            | < 0.05<br>(< 0.05 to < 0.05)          | < 0.05<br>(< 0.05 to < 0.05)        | 41.0<br>(28.7 to 54.7)                            | 2.4<br>(-5.3 to 10.5)                               |

| Cause                                                          | Prevalence in thousands (95% UI)              | Incidence in thousands (95% UI)          | YLDs in thousands (95% UI)           |                                                   |                                                     |
|----------------------------------------------------------------|-----------------------------------------------|------------------------------------------|--------------------------------------|---------------------------------------------------|-----------------------------------------------------|
|                                                                | 2016 counts                                   | 2016 counts                              | 2016 counts                          | Percentage change in counts between 2006 and 2016 | Percentage change in age-standardised rates between |
| Asbestosis                                                     | < 0.05<br>(< 0.05 to < 0.05)                  | < 0.05<br>(< 0.05 to < 0.05)             | < 0.05<br>(< 0.05 to < 0.05)         | 41.2<br>(32.5 to 50.9)                            | 2.4<br>(-2.5 to 8.6)                                |
| Coal workers pneumoconiosis                                    | --                                            | --                                       | --                                   | --                                                | --                                                  |
| Other pneumoconiosis                                           | < 0.05<br>(< 0.05 to < 0.05)                  | < 0.05<br>(< 0.05 to < 0.05)             | < 0.05<br>(< 0.05 to < 0.05)         | 45.5<br>(32.4 to 60.9)                            | 4.7<br>(-5.5 to 17.1)                               |
| Asthma                                                         | 237.0<br>(217.3 to 259.9)                     | 49.4<br>(45.1 to 54.0)                   | 9.3<br>(6.1 to 13.5)                 | 31.6<br>(25.4 to 38.4)                            | 1.8<br>(-2.5 to 6.4)                                |
| Interstitial lung disease and pulmonary sarcoidosis            | 0.3<br>(0.3 to 0.4)                           | < 0.05<br>(< 0.05 to < 0.05)             | < 0.05<br>(< 0.05 to 0.1)            | 34.7<br>(30.7 to 38.9)                            | -0.7<br>(-5.4 to 4.2)                               |
| Other chronic respiratory diseases                             | --                                            | --                                       | 0.3<br>(0.2 to 0.4)                  | 76.7<br>(33.0 to 132.2)                           | 35.8<br>(10.7 to 66.3)                              |
| <b>Cirrhosis and other chronic liver diseases</b>              | <b>10.7</b><br><b>(10.1 to 11.3)</b>          | <b>0.9</b><br><b>(0.8 to 1.0)</b>        | <b>0.9</b><br><b>(0.6 to 1.3)</b>    | <b>32.6</b><br><b>(18.9 to 47.0)</b>              | <b>0.7</b><br><b>(-7.1 to 9.3)</b>                  |
| Cirrhosis and other chronic liver diseases due to hepatitis B  | 4.0<br>(3.5 to 4.6)                           | 0.3<br>(0.3 to 0.4)                      | 0.3<br>(0.2 to 0.4)                  | 36.6<br>(16.0 to 62.4)                            | 1.2<br>(-10.9 to 15.4)                              |
| Cirrhosis and other chronic liver diseases due to hepatitis C  | 1.7<br>(1.2 to 2.4)                           | 0.2<br>(0.1 to 0.2)                      | 0.1<br>(0.1 to 0.2)                  | 36.6<br>(11.0 to 66.3)                            | -0.5<br>(-17.6 to 19.3)                             |
| Cirrhosis and other chronic liver diseases due to alcohol use  | 1.7<br>(1.5 to 2.0)                           | 0.2<br>(0.1 to 0.2)                      | 0.1<br>(0.1 to 0.2)                  | 41.6<br>(15.3 to 74.0)                            | 1.8<br>(-13.9 to 21.1)                              |
| Cirrhosis and other chronic liver diseases due to other causes | 3.2<br>(3.0 to 3.5)                           | 0.2<br>(0.2 to 0.2)                      | 0.4<br>(0.3 to 0.6)                  | 26.4<br>(3.1 to 53.9)                             | -0.0<br>(-16.1 to 18.8)                             |
| <b>Digestive diseases</b>                                      | <b>57.4</b><br><b>(53.4 to 61.7)</b>          | <b>61.2†</b><br><b>(58.2 to 64.6)</b>    | <b>1.8</b><br><b>(1.2 to 2.5)</b>    | <b>31.2</b><br><b>(20.3 to 43.7)</b>              | <b>0.0</b><br><b>(-6.2 to 7.0)</b>                  |
| Peptic ulcer disease                                           | 9.9<br>(8.9 to 11.0)                          | 4.5<br>(3.9 to 5.1)                      | 0.2<br>(0.1 to 0.3)                  | 37.2<br>(20.0 to 57.1)                            | 2.9<br>(-7.7 to 14.6)                               |
| Gastritis and duodenitis                                       | 20.3<br>(17.8 to 22.8)                        | 18.9<br>(16.7 to 21.5)                   | 0.3<br>(0.2 to 0.4)                  | 47.6<br>(29.2 to 66.9)                            | 14.7<br>(2.2 to 28.7)                               |
| Appendicitis                                                   | 0.6<br>(0.6 to 0.7)                           | 17.0<br>(15.7 to 18.4)                   | 0.2<br>(0.1 to 0.3)                  | 23.6<br>(-10.4 to 71.7)                           | -4.4<br>(-24.9 to 20.8)                             |
| Paralytic ileus and intestinal obstruction                     | 0.1<br>(0.1 to 0.1)                           | 2.2<br>(2.0 to 2.5)                      | < 0.05<br>(< 0.05 to < 0.05)         | 27.4<br>(22.3 to 33.0)                            | -4.1<br>(-12.1 to 4.6)                              |
| Inguinal, femoral, and abdominal hernia                        | 26.0<br>(21.4 to 31.3)                        | 7.0<br>(6.1 to 7.9)                      | 0.8<br>(0.5 to 1.1)                  | 25.3<br>(9.2 to 44.1)                             | -5.4<br>(-15.3 to 5.4)                              |
| Inflammatory bowel disease                                     | 0.5<br>(0.4 to 0.5)                           | 1.4<br>(1.3 to 1.5)                      | 0.1<br>(< 0.05 to 0.1)               | 45.9<br>(34.6 to 58.7)                            | 9.0<br>(-3.0 to 22.5)                               |
| Vascular intestinal disorders                                  | < 0.05<br>(< 0.05 to < 0.05)                  | 0.1<br>(0.1 to 0.2)                      | < 0.05<br>(< 0.05 to < 0.05)         | 31.2<br>(24.3 to 38.3)                            | 2.5<br>(-1.9 to 6.9)                                |
| Gallbladder and biliary diseases                               | 2.0<br>(1.7 to 2.2)                           | 9.4<br>(8.1 to 10.8)                     | 0.1<br>(< 0.05 to 0.1)               | 34.8<br>(20.2 to 51.4)                            | -0.1<br>(-12.7 to 15.8)                             |
| Pancreatitis                                                   | 0.1<br>(0.1 to 0.1)                           | 0.8<br>(0.7 to 0.8)                      | < 0.05<br>(< 0.05 to < 0.05)         | 36.8<br>(31.4 to 42.0)                            | 0.2<br>(-4.1 to 4.1)                                |
| Other digestive diseases                                       | --                                            | --                                       | 0.2<br>(0.1 to 0.2)                  | 32.5<br>(18.5 to 48.4)                            | 3.2<br>(-3.9 to 11.4)                               |
| <b>Neurological disorders</b>                                  | <b>1,312.6</b><br><b>(1,255.8 to 1,378.9)</b> | <b>657.9</b><br><b>(558.5 to 772.7)</b>  | <b>34.1</b><br><b>(21.5 to 50.2)</b> | <b>32.1</b><br><b>(-6.3 to 84.6)</b>              | <b>0.7</b><br><b>(-24.7 to 33.5)</b>                |
| Alzheimer's disease and other dementias                        | 4.8<br>(4.0 to 5.7)                           | 0.8<br>(0.7 to 1.0)                      | 0.7<br>(0.5 to 0.9)                  | 35.2<br>(27.7 to 43.1)                            | -1.0<br>(-5.9 to 3.8)                               |
| Parkinson's disease                                            | 0.6<br>(0.4 to 0.7)                           | 0.1<br>(0.1 to 0.1)                      | 0.1<br>(< 0.05 to 0.1)               | 46.3<br>(21.9 to 73.2)                            | 6.6<br>(-8.6 to 23.2)                               |
| Epilepsy                                                       | 22.9<br>(6.6 to 37.4)                         | 2.9<br>(0.8 to 4.9)                      | 8.3<br>(2.1 to 16.8)                 | 28.1<br>(-71.2 to 388.8)                          | 0.4<br>(-77.4 to 284.9)                             |
| Multiple sclerosis                                             | 0.3<br>(0.2 to 0.3)                           | < 0.05<br>(< 0.05 to < 0.05)             | 0.1<br>(< 0.05 to 0.1)               | 49.0<br>(43.7 to 53.7)                            | 9.9<br>(6.1 to 13.3)                                |
| Motor neuron disease                                           | 0.1<br>(< 0.05 to 0.1)                        | < 0.05<br>(< 0.05 to < 0.05)             | < 0.05<br>(< 0.05 to < 0.05)         | 34.6<br>(29.1 to 40.3)                            | 3.0<br>(-0.3 to 6.6)                                |
| Migraine                                                       | 476.0<br>(446.5 to 504.2)                     | 58.6<br>(55.1 to 62.5)                   | 19.9<br>(12.7 to 28.0)               | 31.7<br>(26.1 to 37.4)                            | -0.3<br>(-3.9 to 3.6)                               |
| Tension-type headache                                          | 996.8<br>(888.2 to 1,118.7)                   | 595.5<br>(496.0 to 710.5)                | 3.1<br>(2.0 to 4.7)                  | 32.4<br>(25.4 to 40.0)                            | -0.0<br>(-4.7 to 4.9)                               |
| Other neurological disorders                                   | < 0.05<br>(< 0.05 to < 0.05)                  | < 0.05<br>(< 0.05 to < 0.05)             | 1.9<br>(0.5 to 3.9)                  | 55.9<br>(-63.0 to 469.8)                          | 20.0<br>(-69.5 to 316.2)                            |
| <b>Mental and substance use disorders</b>                      | <b>540.5</b><br><b>(513.8 to 566.4)</b>       | <b>184.7†</b><br><b>(171.7 to 199.1)</b> | <b>65.3</b><br><b>(47.6 to 85.2)</b> | <b>32.9</b><br><b>(30.0 to 36.1)</b>              | <b>1.2</b><br><b>(-0.9 to 3.6)</b>                  |
| Schizophrenia                                                  | 6.4<br>(5.6 to 7.3)                           | 0.5<br>(0.5 to 0.6)                      | 4.2<br>(3.0 to 5.2)                  | 36.7<br>(24.2 to 49.7)                            | 1.5<br>(-7.0 to 10.2)                               |
| Alcohol use disorders                                          | 41.2<br>(34.4 to 48.2)                        | 22.8<br>(19.0 to 26.5)                   | 4.1<br>(2.8 to 5.9)                  | 35.1<br>(24.5 to 45.5)                            | 3.1<br>(-4.7 to 10.5)                               |
| Drug use disorders                                             | 16.9<br>(15.1 to 18.8)                        | 2.8<br>(2.5 to 3.1)                      | 4.6<br>(3.1 to 6.2)                  | 42.4<br>(28.2 to 57.9)                            | 8.8<br>(-1.2 to 19.7)                               |
| Opioid use disorders                                           | 9.9<br>(8.1 to 12.2)                          | 1.2<br>(1.0 to 1.5)                      | 4.1<br>(2.8 to 5.7)                  | 43.7<br>(27.6 to 61.9)                            | 9.7<br>(-1.8 to 21.6)                               |
| Cocaine use disorders                                          | 0.5<br>(0.4 to 0.6)                           | 0.1<br>(0.1 to 0.1)                      | 0.1<br>(< 0.05 to 0.1)               | 34.5<br>(27.4 to 41.1)                            | 3.0<br>(-2.0 to 7.5)                                |
| Amphetamine use disorders                                      | 0.3<br>(0.2 to 0.4)                           | < 0.05<br>(< 0.05 to 0.1)                | < 0.05<br>(< 0.05 to 0.1)            | 30.4<br>(18.5 to 42.7)                            | 2.2<br>(-6.6 to 11.5)                               |
| Cannabis use disorders                                         | 5.7<br>(4.8 to 6.9)                           | 1.2<br>(1.0 to 1.4)                      | 0.2<br>(0.1 to 0.2)                  | 29.1<br>(2.4 to 62.2)                             | -0.1<br>(-18.9 to 23.0)                             |
| Other drug use disorders                                       | 1.2<br>(1.1 to 1.4)                           | 0.3<br>(0.2 to 0.3)                      | 0.2<br>(0.1 to 0.3)                  | 35.3<br>(15.3 to 59.0)                            | 2.9<br>(-11.4 to 19.7)                              |
| Depressive disorders                                           | 107.2<br>(99.5 to 115.5)                      | 111.1<br>(99.0 to 125.0)                 | 17.7<br>(12.1 to 24.3)               | 36.4<br>(30.3 to 42.6)                            | 1.9<br>(-2.5 to 6.3)                                |
| Major depressive disorder                                      | 66.1<br>(58.7 to 74.8)                        | 103.5<br>(91.0 to 117.4)                 | 13.5<br>(9.2 to 18.5)                | 37.0<br>(29.2 to 45.3)                            | 2.5<br>(-3.0 to 8.1)                                |
| Dysthymia                                                      | 42.8<br>(37.0 to 49.6)                        | 7.6<br>(6.7 to 8.8)                      | 4.1<br>(2.7 to 6.0)                  | 34.3<br>(29.2 to 39.8)                            | 0.1<br>(-3.1 to 3.4)                                |
| Bipolar disorder                                               | 23.2<br>(19.6 to 27.4)                        | 2.4<br>(2.0 to 2.9)                      | 4.8<br>(2.9 to 7.1)                  | 32.3<br>(23.4 to 41.3)                            | 0.3<br>(-5.9 to 6.6)                                |
| Anxiety disorders                                              | 113.4<br>(102.2 to 125.8)                     | 21.1<br>(19.2 to 23.4)                   | 11.0<br>(7.6 to 15.1)                | 30.9<br>(21.8 to 40.4)                            | 0.1<br>(-6.2 to 6.6)                                |
| Eating disorders                                               | 4.1<br>(3.3 to 5.0)                           | 2.9<br>(2.1 to 3.9)                      | 0.8<br>(0.5 to 1.2)                  | 40.5<br>(20.3 to 61.4)                            | 9.6<br>(-5.7 to 25.6)                               |
| Anorexia nervosa                                               | 1.1<br>(0.8 to 1.5)                           | 0.5<br>(0.3 to 0.7)                      | 0.2<br>(0.1 to 0.4)                  | 37.8<br>(3.1 to 85.0)                             | 8.0<br>(-17.9 to 43.6)                              |
| Bulimia nervosa                                                | 2.8<br>(2.1 to 3.8)                           | 2.4<br>(1.7 to 3.5)                      | 0.6<br>(0.4 to 0.9)                  | 41.5<br>(17.7 to 66.2)                            | 10.2<br>(-8.4 to 28.9)                              |
| Autistic spectrum disorders                                    | 34.2<br>(30.9 to 38.9)                        | 0.4<br>(0.2 to 0.5)                      | 4.9<br>(3.3 to 6.9)                  | 28.7<br>(21.8 to 35.7)                            | 0.4<br>(-4.5 to 5.2)                                |
| Autism                                                         | 9.4<br>(8.1 to 11.0)                          | < 0.05<br>(< 0.05 to 0.1)                | 2.4<br>(1.5 to 3.5)                  | 28.6<br>(17.0 to 41.8)                            | 0.2<br>(-7.9 to 9.1)                                |
| Asperger syndrome and other autistic spectrum disorders        | 24.8<br>(20.6 to 29.9)                        | 0.3<br>(0.2 to 0.5)                      | 2.5<br>(1.6 to 3.6)                  | 28.8<br>(22.3 to 36.2)                            | 0.5<br>(-4.0 to 5.6)                                |



| Cause                                                      | Prevalence in thousands (95% UI)              | Incidence in thousands (95% UI)                | YLDs in thousands (95% UI)            |                                                   |                                                     |
|------------------------------------------------------------|-----------------------------------------------|------------------------------------------------|---------------------------------------|---------------------------------------------------|-----------------------------------------------------|
|                                                            | 2016 counts                                   | 2016 counts                                    | 2016 counts                           | Percentage change in counts between 2006 and 2016 | Percentage change in age-standardised rates between |
| Attention-deficit/hyperactivity disorder                   | 56.0<br>(50.2 to 62.6)                        | 3.2<br>(2.8 to 3.8)                            | 0.7<br>(0.4 to 1.1)                   | 27.9<br>(19.0 to 37.7)                            | 0.1<br>(-6.7 to 7.3)                                |
| Conduct disorder                                           | 40.7<br>(33.4 to 48.5)                        | 14.6<br>(11.6 to 17.6)                         | 4.9<br>(3.0 to 7.6)                   | 27.0<br>(18.7 to 35.3)                            | 0.3<br>(-6.3 to 6.8)                                |
| Idiopathic developmental intellectual disability           | 80.2<br>(46.8 to 114.6)                       | --                                             | 3.1<br>(1.4 to 5.5)                   | 16.7<br>(7.3 to 24.9)                             | -9.7<br>(-17.0 to -3.6)                             |
| Other mental and substance use disorders                   | 60.1<br>(52.6 to 69.7)                        | 2.8<br>(2.5 to 3.3)                            | 4.5<br>(3.1 to 6.5)                   | 34.0<br>(27.4 to 40.9)                            | 0.4<br>(-4.0 to 4.9)                                |
| <b>Diabetes, urogenital, blood, and endocrine diseases</b> | <b>1,705.3</b><br><b>(1,644.7 to 1,763.0)</b> | <b>456.4†</b><br><b>(427.5 to 488.4)</b>       | <b>24.9</b><br><b>(17.5 to 33.9)</b>  | <b>31.3</b><br><b>(26.9 to 35.9)</b>              | <b>-1.4</b><br><b>(-4.3 to 1.7)</b>                 |
| Diabetes mellitus                                          | 95.5<br>(85.4 to 106.6)                       | 6.1<br>(5.5 to 6.8)                            | 6.7<br>(4.5 to 9.4)                   | 36.6<br>(28.8 to 44.5)                            | 0.5<br>(-4.9 to 6.4)                                |
| Acute glomerulonephritis                                   | < 0.05<br>(< 0.05 to < 0.05)                  | 0.5<br>(0.4 to 0.6)                            | < 0.05<br>(< 0.05 to < 0.05)          | 30.7<br>(24.8 to 36.8)                            | 0.2<br>(-3.8 to 4.4)                                |
| Chronic kidney disease                                     | 217.2<br>(195.2 to 241.1)                     | 16.4<br>(14.4 to 18.4)                         | 5.6<br>(4.1 to 7.4)                   | 38.0<br>(28.3 to 47.5)                            | 0.4<br>(-5.7 to 6.7)                                |
| Chronic kidney disease due to diabetes mellitus            | 65.6<br>(55.2 to 77.3)                        | 4.6<br>(3.8 to 5.6)                            | 1.6<br>(1.1 to 2.2)                   | 40.2<br>(27.9 to 54.0)                            | 0.2<br>(-8.1 to 8.9)                                |
| Chronic kidney disease due to hypertension                 | 46.7<br>(40.1 to 53.9)                        | 4.2<br>(3.5 to 5.0)                            | 1.0<br>(0.7 to 1.3)                   | 39.5<br>(25.1 to 56.9)                            | -0.3<br>(-9.7 to 11.4)                              |
| Chronic kidney disease due to glomerulonephritis           | 45.1<br>(39.0 to 51.7)                        | 2.7<br>(2.1 to 3.3)                            | 1.4<br>(1.0 to 2.0)                   | 36.6<br>(22.7 to 51.2)                            | 1.5<br>(-7.0 to 11.0)                               |
| Chronic kidney disease due to other causes                 | 59.8<br>(49.9 to 70.6)                        | 4.8<br>(4.0 to 5.7)                            | 1.6<br>(1.1 to 2.1)                   | 36.3<br>(23.3 to 50.0)                            | 0.4<br>(-7.4 to 8.7)                                |
| Urinary diseases and male infertility                      | 85.6<br>(74.6 to 99.3)                        | 265.2†<br>(240.0 to 296.8)                     | 1.7<br>(1.1 to 2.6)                   | 38.4<br>(28.7 to 48.6)                            | 0.5<br>(-6.6 to 7.7)                                |
| Interstitial nephritis and urinary tract infections        | 4.6<br>(4.1 to 5.2)                           | 238.9<br>(213.2 to 269.7)                      | 0.1<br>(0.1 to 0.2)                   | 23.2<br>(7.0 to 41.1)                             | -4.8<br>(-15.6 to 7.3)                              |
| Urolithiasis                                               | 0.8<br>(0.7 to 0.9)                           | 21.4<br>(18.8 to 24.8)                         | 0.1<br>(< 0.05 to 0.1)                | 36.4<br>(26.1 to 46.5)                            | 1.6<br>(-6.4 to 9.8)                                |
| Benign prostatic hyperplasia                               | 36.7<br>(30.6 to 42.6)                        | 4.8<br>(4.0 to 5.7)                            | 1.2<br>(0.8 to 1.8)                   | 45.2<br>(31.7 to 59.0)                            | 1.4<br>(-7.0 to 9.6)                                |
| Male infertility                                           | 39.2<br>(30.6 to 51.0)                        | --                                             | 0.2<br>(0.1 to 0.5)                   | 32.7<br>(7.5 to 64.4)                             | 3.4<br>(-16.2 to 28.8)                              |
| Other urinary diseases                                     | --                                            | --                                             | 0.1<br>(0.1 to 0.1)                   | 3.2<br>(-7.9 to 14.4)                             | -19.2<br>(-26.2 to -12.0)                           |
| Gynecological diseases                                     | 433.3<br>(411.5 to 456.9)                     | 165.1†<br>(152.0 to 178.2)                     | 5.4<br>(3.7 to 7.7)                   | 28.4<br>(23.0 to 34.0)                            | -4.3<br>(-7.9 to -0.3)                              |
| Uterine fibroids                                           | 32.3<br>(28.4 to 36.5)                        | 3.9<br>(3.4 to 4.5)                            | 0.8<br>(0.5 to 1.2)                   | 33.8<br>(22.1 to 46.0)                            | -4.4<br>(-12.8 to 4.9)                              |
| Polycystic ovarian syndrome                                | 3.8<br>(2.8 to 4.9)                           | 9.8<br>(7.0 to 13.1)                           | < 0.05<br>(< 0.05 to 0.1)             | 31.1<br>(13.8 to 49.6)                            | 0.0<br>(-12.9 to 14.0)                              |
| Female infertility                                         | 5.3<br>(2.5 to 12.7)                          | --                                             | < 0.05<br>(< 0.05 to 0.1)             | 18.9<br>(-43.7 to 192.5)                          | -4.9<br>(-51.4 to 150.9)                            |
| Endometriosis                                              | 0.8<br>(0.7 to 1.0)                           | 3.2<br>(2.6 to 4.0)                            | 0.1<br>(< 0.05 to 0.1)                | 29.1<br>(-5.7 to 76.7)                            | -0.8<br>(-25.1 to 31.6)                             |
| Genital prolapse                                           | 194.8<br>(171.1 to 219.2)                     | 17.2<br>(14.5 to 20.3)                         | 0.6<br>(0.3 to 1.1)                   | 26.4<br>(18.0 to 35.6)                            | -9.4<br>(-15.5 to -2.0)                             |
| Premenstrual syndrome                                      | 193.6<br>(179.0 to 208.5)                     | 72.9<br>(66.8 to 78.7)                         | 1.6<br>(1.0 to 2.5)                   | 27.1<br>(15.5 to 38.9)                            | -3.0<br>(-11.2 to 5.7)                              |
| Other gynecological diseases                               | 66.8<br>(57.8 to 76.5)                        | 58.0<br>(47.6 to 70.0)                         | 2.3<br>(1.5 to 3.3)                   | 28.2<br>(20.1 to 37.2)                            | -2.9<br>(-8.6 to 3.8)                               |
| Hemoglobinopathies and hemolytic anaemias                  | 1,211.2<br>(1,142.8 to 1,278.9)               | --                                             | 3.6<br>(2.2 to 5.6)                   | 22.1<br>(9.2 to 35.6)                             | -4.3<br>(-12.5 to 4.7)                              |
| Thalassemias                                               | < 0.05<br>(< 0.05 to 0.1)                     | --                                             | < 0.05<br>(< 0.05 to < 0.05)          | 21.9<br>(-4.5 to 56.3)                            | 1.9<br>(-20.5 to 31.1)                              |
| Thalassaemias trait                                        | 70.8<br>(30.8 to 129.9)                       | --                                             | 1.1<br>(0.4 to 2.2)                   | 31.0<br>(14.3 to 52.0)                            | 4.8<br>(-7.0 to 21.6)                               |
| Sickle cell disorders                                      | 1.1<br>(0.9 to 1.3)                           | --                                             | 0.1<br>(0.1 to 0.1)                   | 35.4<br>(12.0 to 63.1)                            | 10.0<br>(-7.5 to 31.3)                              |
| Sickle cell trait                                          | 297.1<br>(267.4 to 333.8)                     | --                                             | 1.0<br>(0.7 to 1.5)                   | 28.7<br>(14.0 to 46.9)                            | 2.7<br>(-7.7 to 15.1)                               |
| G6PD deficiency                                            | 284.7<br>(239.6 to 331.7)                     | --                                             | < 0.05<br>(< 0.05 to < 0.05)          | 29.2<br>(6.4 to 53.9)                             | -1.0<br>(-14.3 to 13.2)                             |
| G6PD trait                                                 | 622.2<br>(582.0 to 660.6)                     | --                                             | < 0.05<br>(< 0.05 to < 0.05)          | 45.4<br>(24.5 to 71.3)                            | 13.7<br>(-0.5 to 30.0)                              |
| Other hemoglobinopathies and hemolytic anaemias            | 53.7<br>(48.9 to 58.7)                        | --                                             | 1.4<br>(0.9 to 2.0)                   | 10.6<br>(-3.9 to 26.8)                            | -15.5<br>(-23.8 to -6.5)                            |
| Endocrine, metabolic, blood, and immune disorders          | 59.1<br>(55.0 to 63.3)                        | 3.1<br>(2.8 to 3.5)                            | 1.8<br>(1.2 to 2.6)                   | 17.1<br>(5.3 to 28.9)                             | -8.0<br>(-14.6 to -1.3)                             |
| <b>Musculoskeletal disorders</b>                           | <b>457.8</b><br><b>(432.3 to 482.1)</b>       | <b>215.3</b><br><b>(194.3 to 238.4)</b>        | <b>50.6</b><br><b>(36.4 to 65.9)</b>  | <b>33.6</b><br><b>(27.2 to 40.5)</b>              | <b>-1.5</b><br><b>(-5.7 to 3.0)</b>                 |
| Rheumatoid arthritis                                       | 4.4<br>(3.9 to 5.0)                           | 0.3<br>(0.2 to 0.3)                            | 1.1<br>(0.7 to 1.4)                   | 40.5<br>(26.3 to 56.5)                            | 3.2<br>(-6.0 to 13.3)                               |
| Osteoarthritis                                             | 85.0<br>(79.4 to 90.9)                        | 5.0<br>(4.6 to 5.4)                            | 5.2<br>(3.7 to 7.1)                   | 44.7<br>(38.8 to 50.1)                            | 3.0<br>(-1.0 to 6.5)                                |
| Low back and neck pain                                     | 323.2<br>(300.5 to 348.2)                     | 145.0<br>(128.7 to 162.6)                      | 37.4<br>(26.2 to 49.1)                | 32.3<br>(23.6 to 40.6)                            | -2.5<br>(-8.1 to 3.1)                               |
| Low back pain                                              | 250.1<br>(220.5 to 283.5)                     | 123.2<br>(107.0 to 140.8)                      | 28.3<br>(19.7 to 37.6)                | 30.7<br>(19.7 to 41.1)                            | -3.2<br>(-10.8 to 4.0)                              |
| Neck pain                                                  | 90.8<br>(78.2 to 104.9)                       | 21.7<br>(18.7 to 25.4)                         | 9.1<br>(6.1 to 12.7)                  | 37.7<br>(33.7 to 41.4)                            | -0.0<br>(-2.2 to 2.3)                               |
| Gout                                                       | 9.5<br>(8.4 to 10.8)                          | 2.0<br>(1.7 to 2.2)                            | 0.3<br>(0.2 to 0.4)                   | 39.7<br>(19.8 to 63.0)                            | 0.7<br>(-12.7 to 14.3)                              |
| Other musculoskeletal disorders                            | 77.1<br>(61.4 to 94.6)                        | 63.1<br>(49.7 to 78.3)                         | 6.7<br>(4.3 to 9.7)                   | 31.7<br>(19.9 to 45.2)                            | -1.5<br>(-10.1 to 7.8)                              |
| <b>Other non-communicable diseases</b>                     | <b>2,849.8</b><br><b>(2,770.7 to 2,920.2)</b> | <b>7,484.8†</b><br><b>(6,737.8 to 8,309.2)</b> | <b>76.5</b><br><b>(51.4 to 108.9)</b> | <b>28.6</b><br><b>(27.0 to 30.3)</b>              | <b>-2.6</b><br><b>(-3.7 to -1.4)</b>                |
| Congenital anomalies                                       | 36.5<br>(31.4 to 42.6)                        | --                                             | 5.8<br>(4.1 to 7.8)                   | 23.0<br>(15.3 to 31.6)                            | -3.7<br>(-9.7 to 2.7)                               |
| Neural tube defects                                        | 6.1<br>(5.4 to 6.9)                           | --                                             | 1.8<br>(1.3 to 2.5)                   | 25.2<br>(11.3 to 41.6)                            | -2.5<br>(-12.8 to 8.9)                              |
| Congenital heart anomalies                                 | 7.2<br>(6.1 to 8.5)                           | --                                             | 0.4<br>(0.2 to 0.6)                   | 24.8<br>(9.5 to 43.4)                             | 1.8<br>(-9.8 to 15.4)                               |
| Orofacial clefts                                           | 1.0<br>(0.9 to 1.2)                           | --                                             | < 0.05<br>(< 0.05 to < 0.05)          | 21.2<br>(6.9 to 37.2)                             | -5.0<br>(-16.2 to 7.6)                              |
| Down's syndrome                                            | 0.7<br>(0.6 to 0.8)                           | --                                             | 0.1<br>(< 0.05 to 0.1)                | 29.7<br>(20.6 to 39.0)                            | 2.7<br>(-4.4 to 9.7)                                |
| Turner syndrome                                            | 1.7<br>(1.5 to 2.0)                           | --                                             | < 0.05<br>(< 0.05 to 0.1)             | 17.0<br>(-19.2 to 71.7)                           | -6.9<br>(-33.9 to 30.4)                             |
| Klinefelter syndrome                                       | 2.0<br>(1.7 to 2.4)                           | --                                             | < 0.05<br>(< 0.05 to < 0.05)          | 26.6<br>(-3.7 to 66.9)                            | -0.2<br>(-23.4 to 29.9)                             |



| Cause                                         | Prevalence in thousands (95% UI)        | Incidence in thousands (95% UI)          | YLDs in thousands (95% UI)           |                                                   |                                                     |
|-----------------------------------------------|-----------------------------------------|------------------------------------------|--------------------------------------|---------------------------------------------------|-----------------------------------------------------|
|                                               | 2016 counts                             | 2016 counts                              | 2016 counts                          | Percentage change in counts between 2006 and 2016 | Percentage change in age-standardised rates between |
| Other chromosomal abnormalities               | 0.8<br>(0.7 to 0.9)                     | --                                       | 0.1<br>(0.1 to 0.2)                  | 22.6<br>(-11.0 to 65.8)                           | 1.6<br>(-26.5 to 37.1)                              |
| Congenital musculoskeletal and limb anomalies | 4.0<br>(3.5 to 4.5)                     | --                                       | 0.6<br>(0.4 to 0.8)                  | 28.8<br>(12.2 to 48.2)                            | 0.3<br>(-11.0 to 13.0)                              |
| Urogenital congenital anomalies               | 2.5<br>(2.2 to 2.8)                     | --                                       | 0.1<br>(< 0.05 to 0.1)               | 22.8<br>(12.9 to 33.5)                            | -1.5<br>(-9.2 to 6.7)                               |
| Digestive congenital anomalies                | 4.1<br>(3.6 to 4.6)                     | --                                       | 0.2<br>(0.1 to 0.3)                  | 31.3<br>(9.7 to 57.6)                             | 2.6<br>(-12.7 to 21.2)                              |
| Other congenital anomalies                    | 15.8<br>(10.1 to 23.9)                  | --                                       | 2.5<br>(1.6 to 3.8)                  | 19.5<br>(9.0 to 31.3)                             | -6.8<br>(-14.8 to 1.8)                              |
| Skin and subcutaneous diseases                | 1,406.6<br>(1,348.6 to 1,468.2)         | 3,281.8<br>(3,018.6 to 3,588.2)          | 32.9<br>(21.6 to 48.5)               | 30.2<br>(27.7 to 33.2)                            | 1.9<br>(0.2 to 3.9)                                 |
| Dermatitis                                    | 183.9<br>(153.3 to 217.7)               | 182.4<br>(158.8 to 211.2)                | 7.3<br>(4.0 to 12.1)                 | 26.9<br>(22.1 to 32.2)                            | 0.2<br>(-3.2 to 4.0)                                |
| Psoriasis                                     | 24.8<br>(23.3 to 26.4)                  | 3.6<br>(3.4 to 3.9)                      | 2.2<br>(1.6 to 2.9)                  | 42.6<br>(28.7 to 57.9)                            | 8.3<br>(-0.4 to 17.7)                               |
| Cellulitis                                    | 1.4<br>(1.3 to 1.6)                     | 25.2<br>(23.4 to 27.2)                   | 0.1<br>(0.1 to 0.1)                  | 30.8<br>(4.0 to 62.7)                             | 1.6<br>(-16.6 to 24.0)                              |
| Pyoderma                                      | 21.8<br>(20.8 to 22.8)                  | 429.4<br>(409.7 to 448.4)                | 0.1<br>(< 0.05 to 0.3)               | 28.6<br>(21.0 to 37.1)                            | 0.9<br>(-4.0 to 6.4)                                |
| Scabies                                       | 70.8<br>(56.7 to 90.1)                  | 218.3<br>(174.5 to 277.8)                | 1.8<br>(1.0 to 3.1)                  | 23.6<br>(17.0 to 30.7)                            | -2.7<br>(-7.5 to 2.4)                               |
| Fungal skin diseases                          | 573.8<br>(484.0 to 675.8)               | 1,629.3<br>(1,376.5 to 1,916.5)          | 3.2<br>(1.3 to 7.0)                  | 28.6<br>(27.1 to 30.3)                            | 0.1<br>(-0.7 to 0.9)                                |
| Viral skin diseases                           | 117.0<br>(110.8 to 123.5)               | 163.3<br>(154.4 to 174.1)                | 3.6<br>(2.2 to 5.3)                  | 27.4<br>(22.8 to 32.3)                            | -0.0<br>(-3.4 to 3.4)                               |
| Acne vulgaris                                 | 412.8<br>(360.8 to 471.4)               | 299.4<br>(232.1 to 395.2)                | 10.6<br>(6.9 to 15.4)                | 33.2<br>(26.8 to 39.6)                            | 4.0<br>(-0.6 to 8.8)                                |
| Alopecia areata                               | 7.0<br>(6.6 to 7.5)                     | 12.5<br>(11.7 to 13.3)                   | 0.2<br>(0.1 to 0.4)                  | 30.6<br>(14.7 to 47.2)                            | -0.1<br>(-11.1 to 11.9)                             |
| Pruritus                                      | 29.6<br>(26.0 to 33.5)                  | 23.7<br>(21.2 to 26.8)                   | 0.3<br>(0.1 to 0.6)                  | 32.2<br>(24.7 to 40.3)                            | 0.9<br>(-4.0 to 6.3)                                |
| Urticaria                                     | 38.0<br>(32.6 to 44.5)                  | 68.0<br>(58.2 to 79.5)                   | 2.3<br>(1.4 to 3.3)                  | 25.7<br>(17.5 to 35.2)                            | 0.1<br>(-5.8 to 6.4)                                |
| Decubitus ulcer                               | 0.3<br>(0.3 to 0.4)                     | 1.2<br>(1.1 to 1.4)                      | 0.1<br>(< 0.05 to 0.1)               | 37.8<br>(27.6 to 48.3)                            | 4.3<br>(-8.0 to 17.5)                               |
| Other skin and subcutaneous diseases          | 199.1<br>(192.9 to 205.3)               | 225.5<br>(218.4 to 233.0)                | 1.1<br>(0.5 to 2.0)                  | 36.9<br>(33.0 to 40.9)                            | 3.5<br>(1.0 to 6.0)                                 |
| Sense organ diseases                          | 878.9<br>(857.2 to 900.9)               | 361.8†<br>(336.9 to 389.5)               | 29.8<br>(20.7 to 42.0)               | 26.6<br>(23.9 to 29.4)                            | -5.3<br>(-7.0 to -3.5)                              |
| Glaucoma                                      | 1.4<br>(1.1 to 1.7)                     | --                                       | 0.1<br>(0.1 to 0.2)                  | 39.4<br>(22.4 to 57.1)                            | 0.9<br>(-10.1 to 12.1)                              |
| Cataract                                      | 41.1<br>(36.1 to 46.2)                  | --                                       | 3.8<br>(2.6 to 5.2)                  | 31.0<br>(23.9 to 37.6)                            | -4.9<br>(-9.9 to 0.0)                               |
| Macular degeneration                          | 1.8<br>(1.3 to 2.3)                     | --                                       | 0.2<br>(0.1 to 0.2)                  | 40.0<br>(21.9 to 59.6)                            | 1.5<br>(-10.2 to 14.0)                              |
| Refraction and accommodation disorders        | 556.2<br>(534.8 to 577.7)               | --                                       | 8.8<br>(5.2 to 14.4)                 | 20.0<br>(16.6 to 23.9)                            | -9.8<br>(-12.2 to -7.1)                             |
| Age-related and other hearing loss            | 442.2<br>(413.0 to 473.2)               | --                                       | 13.1<br>(9.1 to 18.4)                | 27.4<br>(22.0 to 32.5)                            | -4.4<br>(-7.2 to -2.1)                              |
| Other vision loss                             | 14.2<br>(12.5 to 16.1)                  | --                                       | 1.4<br>(1.0 to 2.0)                  | 34.2<br>(23.7 to 45.1)                            | -1.7<br>(-8.5 to 5.3)                               |
| Other sense organ diseases                    | 77.8<br>(71.8 to 83.7)                  | 361.8<br>(336.9 to 389.5)                | 2.4<br>(1.5 to 3.6)                  | 35.9<br>(29.0 to 42.8)                            | 1.4<br>(-2.3 to 5.5)                                |
| Oral disorders                                | 1,798.9<br>(1,657.4 to 1,933.6)         | 3,841.1†<br>(3,156.4 to 4,597.7)         | 8.0<br>(4.6 to 13.2)                 | 34.5<br>(31.2 to 37.8)                            | -0.4<br>(-2.6 to 1.7)                               |
| Caries of deciduous teeth                     | 399.6<br>(308.1 to 498.9)               | 1,367.2<br>(920.1 to 1,952.5)            | 0.1<br>(< 0.05 to 0.2)               | 21.3<br>(6.7 to 38.6)                             | -0.8<br>(-12.5 to 13.1)                             |
| Caries of permanent teeth                     | 972.8<br>(827.7 to 1,120.7)             | 2,415.2<br>(1,946.9 to 2,918.0)          | 0.6<br>(0.2 to 1.1)                  | 27.0<br>(20.4 to 34.2)                            | -2.8<br>(-7.2 to 1.9)                               |
| Periodontal disease                           | 454.2<br>(336.2 to 570.5)               | 53.7<br>(39.9 to 69.1)                   | 3.0<br>(1.1 to 6.5)                  | 37.4<br>(31.4 to 43.4)                            | 0.4<br>(-3.6 to 4.2)                                |
| Edentulism and severe tooth loss              | 87.1<br>(75.6 to 98.1)                  | 5.1<br>(4.4 to 5.8)                      | 2.5<br>(1.6 to 3.5)                  | 35.6<br>(28.9 to 42.1)                            | -0.9<br>(-5.0 to 3.1)                               |
| Other oral disorders                          | 64.5<br>(61.6 to 67.7)                  | --                                       | 1.9<br>(1.2 to 2.8)                  | 31.8<br>(26.8 to 36.7)                            | -0.0<br>(-3.3 to 3.2)                               |
| <b>Injuries</b>                               | <b>513.3</b><br><b>(481.9 to 548.5)</b> | <b>293.5†</b><br><b>(277.1 to 310.6)</b> | <b>20.8</b><br><b>(14.1 to 29.4)</b> | <b>30.2</b><br><b>(27.7 to 32.7)</b>              | <b>-1.8</b><br><b>(-3.4 to -0.2)</b>                |
| <b>Transport injuries</b>                     | <b>59.3</b><br><b>(55.2 to 63.6)</b>    | <b>26.6</b><br><b>(23.6 to 30.0)</b>     | <b>3.5</b><br><b>(2.3 to 5.0)</b>    | <b>31.4</b><br><b>(28.6 to 34.3)</b>              | <b>-2.0</b><br><b>(-3.9 to -0.1)</b>                |
| Road injuries                                 | 47.3<br>(44.2 to 50.4)                  | 23.0<br>(20.0 to 26.3)                   | 2.7<br>(1.8 to 4.0)                  | 31.6<br>(28.8 to 34.4)                            | -2.4<br>(-4.2 to -0.5)                              |
| Pedestrian road injuries                      | 11.5<br>(10.2 to 13.0)                  | 4.0<br>(3.3 to 4.9)                      | 0.7<br>(0.4 to 1.0)                  | 28.5<br>(25.4 to 31.4)                            | -4.5<br>(-6.6 to -2.6)                              |
| Cyclist road injuries                         | 7.9<br>(6.6 to 9.2)                     | 4.3<br>(3.3 to 5.3)                      | 0.4<br>(0.3 to 0.6)                  | 36.9<br>(33.8 to 40.1)                            | 2.0<br>(0.1 to 4.0)                                 |
| Motorcyclist road injuries                    | 7.2<br>(6.2 to 8.6)                     | 2.4<br>(1.9 to 3.0)                      | 0.4<br>(0.3 to 0.6)                  | 27.2<br>(24.1 to 30.0)                            | -5.9<br>(-7.8 to -4.0)                              |
| Motor vehicle road injuries                   | 15.2<br>(13.1 to 17.3)                  | 8.8<br>(7.4 to 10.4)                     | 1.0<br>(0.6 to 1.4)                  | 31.2<br>(28.2 to 34.3)                            | -2.6<br>(-4.5 to -0.7)                              |
| Other road injuries                           | 5.5<br>(4.8 to 6.5)                     | 3.5<br>(2.7 to 4.4)                      | 0.3<br>(0.2 to 0.4)                  | 39.2<br>(36.1 to 42.3)                            | 3.0<br>(1.0 to 5.0)                                 |
| Other transport injuries                      | 12.0<br>(10.0 to 14.8)                  | 3.6<br>(2.9 to 4.5)                      | 0.7<br>(0.5 to 1.0)                  | 31.0<br>(27.1 to 35.6)                            | -0.6<br>(-3.0 to 1.9)                               |
| <b>Unintentional injuries</b>                 | <b>433.3</b><br><b>(401.1 to 467.5)</b> | <b>256.4</b><br><b>(240.8 to 273.0)</b>  | <b>15.7</b><br><b>(10.6 to 22.3)</b> | <b>30.9</b><br><b>(28.2 to 33.5)</b>              | <b>-1.4</b><br><b>(-3.1 to 0.2)</b>                 |
| Falls                                         | 148.7<br>(129.3 to 168.2)               | 87.2<br>(76.0 to 101.2)                  | 6.4<br>(4.5 to 8.8)                  | 33.3<br>(30.5 to 35.9)                            | -0.3<br>(-1.9 to 1.4)                               |
| Drowning                                      | 1.9<br>(1.7 to 2.3)                     | 0.5<br>(0.4 to 0.6)                      | 0.1<br>(0.1 to 0.2)                  | 25.3<br>(21.5 to 29.2)                            | -5.2<br>(-7.6 to -2.8)                              |
| Fire, heat, and hot substances                | 46.4<br>(39.1 to 56.2)                  | 8.0<br>(6.5 to 9.8)                      | 1.4<br>(0.9 to 1.9)                  | 25.1<br>(18.8 to 31.6)                            | -5.2<br>(-9.2 to -1.3)                              |
| Poisonings                                    | 1.5<br>(1.2 to 1.9)                     | 2.5<br>(1.9 to 3.1)                      | 0.2<br>(0.1 to 0.2)                  | 35.2<br>(23.1 to 47.6)                            | 3.5<br>(-3.7 to 11.0)                               |
| Exposure to mechanical forces                 | 79.2<br>(67.4 to 95.5)                  | 39.1<br>(33.3 to 45.3)                   | 2.1<br>(1.3 to 3.0)                  | 30.2<br>(26.6 to 33.4)                            | -2.4<br>(-4.5 to -0.4)                              |
| Unintentional firearm injuries                | 4.5<br>(3.7 to 5.5)                     | 1.5<br>(1.1 to 2.0)                      | 0.2<br>(0.1 to 0.3)                  | 33.0<br>(29.4 to 36.4)                            | -1.2<br>(-3.5 to 1.0)                               |
| Unintentional suffocation                     | 6.5<br>(4.7 to 8.7)                     | 1.8<br>(1.2 to 2.5)                      | 0.2<br>(0.1 to 0.3)                  | 34.1<br>(29.7 to 38.3)                            | 2.9<br>(0.1 to 5.3)                                 |
| Other exposure to mechanical forces           | 68.2<br>(57.0 to 83.6)                  | 35.8<br>(30.6 to 41.8)                   | 1.6<br>(1.1 to 2.4)                  | 29.4<br>(25.7 to 32.6)                            | -3.0<br>(-5.3 to -1.0)                              |

| Cause                                                                               | Prevalence in thousands (95% UI) | Incidence in thousands (95% UI)    | YLDs in thousands (95% UI)        |                                                   |                                                     |
|-------------------------------------------------------------------------------------|----------------------------------|------------------------------------|-----------------------------------|---------------------------------------------------|-----------------------------------------------------|
|                                                                                     | 2016 counts                      | 2016 counts                        | 2016 counts                       | Percentage change in counts between 2006 and 2016 | Percentage change in age-standardised rates between |
| Adverse effects of medical treatment                                                | 1.6<br>(1.2 to 1.9)              | 20.3<br>(17.6 to 23.3)             | 0.2<br>(0.1 to 0.3)               | 21.4<br>(14.8 to 28.4)                            | -4.7<br>(-8.9 to -0.2)                              |
| Animal contact                                                                      | 23.0<br>(20.3 to 26.6)           | 35.6<br>(29.6 to 41.7)             | 0.8<br>(0.5 to 1.1)               | 26.0<br>(19.3 to 32.4)                            | -5.9<br>(-9.4 to -2.3)                              |
| Venomous animal contact                                                             | 9.7<br>(8.1 to 11.7)             | 15.6<br>(12.3 to 19.5)             | 0.6<br>(0.4 to 0.8)               | 27.1<br>(17.9 to 36.6)                            | -4.7<br>(-9.8 to 1.0)                               |
| Non-venomous animal contact                                                         | 13.2<br>(11.1 to 16.2)           | 20.0<br>(16.0 to 24.3)             | 0.2<br>(0.1 to 0.4)               | 23.5<br>(18.9 to 27.6)                            | -8.3<br>(-11.3 to -5.6)                             |
| Foreign body                                                                        | 33.0<br>(26.6 to 39.9)           | 22.5<br>(19.6 to 25.8)             | 1.4<br>(0.9 to 2.1)               | 28.2<br>(24.0 to 32.3)                            | -1.9<br>(-4.5 to 0.4)                               |
| Pulmonary aspiration and foreign body in airway                                     | 19.9<br>(14.8 to 27.1)           | 9.1<br>(7.5 to 11.0)               | 0.9<br>(0.6 to 1.4)               | 27.2<br>(22.4 to 31.5)                            | -2.6<br>(-5.3 to -0.2)                              |
| Foreign body in eyes                                                                | 1.4<br>(0.7 to 2.1)              | 7.7<br>(5.8 to 10.4)               | 0.1<br>(< 0.05 to 0.1)            | 35.2<br>(30.5 to 39.8)                            | 3.2<br>(0.2 to 5.9)                                 |
| Foreign body in other body part                                                     | 11.7<br>(9.2 to 15.2)            | 5.7<br>(4.7 to 7.0)                | 0.4<br>(0.2 to 0.6)               | 29.5<br>(24.4 to 34.3)                            | -1.3<br>(-4.3 to 1.6)                               |
| Environmental heat and cold exposure                                                | 34.4<br>(29.0 to 40.6)           | 12.3<br>(10.1 to 14.9)             | 1.4<br>(0.9 to 2.0)               | 30.3<br>(27.2 to 33.4)                            | -2.3<br>(-4.4 to -0.4)                              |
| Other unintentional injuries                                                        | 63.7<br>(49.9 to 81.0)           | 28.4<br>(24.1 to 34.2)             | 1.9<br>(1.2 to 2.7)               | 34.5<br>(31.6 to 37.2)                            | 2.0<br>(0.2 to 3.7)                                 |
| <b>Self-harm and interpersonal violence</b>                                         | <b>108.4<br/>(95.5 to 122.6)</b> | <b>10.5†<br/>(8.9 to 12.3)</b>     | <b>1.5<br/>(1.0 to 2.1)</b>       | <b>23.8<br/>(20.2 to 27.5)</b>                    | <b>-4.9<br/>(-7.1 to -2.8)</b>                      |
| Self-harm                                                                           | 2.8<br>(2.4 to 3.1)              | 1.6<br>(1.4 to 1.9)                | 0.1<br>(0.1 to 0.2)               | 39.1<br>(35.4 to 43.1)                            | 2.3<br>(-0.2 to 4.8)                                |
| Self-harm by firearm                                                                | 0.2<br>(0.2 to 0.2)              | 0.1<br>(0.1 to 0.1)                | < 0.05<br>(< 0.05 to < 0.05)      | 29.1<br>(25.0 to 33.3)                            | -6.2<br>(-8.9 to -3.5)                              |
| Self-harm by other specified means                                                  | 2.5<br>(2.2 to 2.9)              | 1.6<br>(1.3 to 1.8)                | 0.1<br>(0.1 to 0.2)               | 39.9<br>(36.0 to 44.1)                            | 3.0<br>(0.5 to 5.6)                                 |
| Interpersonal violence                                                              | 105.7<br>(92.9 to 119.8)         | 8.8†<br>(7.3 to 10.6)              | 1.4<br>(0.9 to 1.9)               | 22.3<br>(18.6 to 26.0)                            | -6.0<br>(-8.2 to -3.7)                              |
| Assault by firearm                                                                  | 0.9<br>(0.8 to 1.1)              | 0.4<br>(0.3 to 0.5)                | < 0.05<br>(< 0.05 to 0.1)         | 31.9<br>(27.2 to 36.5)                            | -2.0<br>(-4.9 to 1.0)                               |
| Assault by sharp object                                                             | 5.7<br>(4.7 to 6.8)              | 3.1<br>(2.4 to 4.0)                | 0.2<br>(0.1 to 0.3)               | 34.3<br>(30.6 to 38.1)                            | 0.7<br>(-1.7 to 3.1)                                |
| Sexual violence                                                                     | 91.7<br>(79.2 to 105.7)          | --                                 | 0.8<br>(0.5 to 1.1)               | 14.9<br>(9.8 to 20.2)                             | -11.2<br>(-14.7 to -7.8)                            |
| Assault by other means                                                              | 7.4<br>(6.3 to 8.8)              | 5.3<br>(4.3 to 6.4)                | 0.3<br>(0.2 to 0.5)               | 34.6<br>(31.3 to 37.6)                            | 0.0<br>(-1.9 to 2.0)                                |
| <b>Forces of nature, conflict and terrorism, and executions and police conflict</b> | <b>4.0<br/>(1.7 to 7.7)</b>      | <b>0.1†<br/>(&lt; 0.05 to 0.1)</b> | <b>0.1<br/>(&lt; 0.05 to 0.4)</b> | <b>-1.6<br/>(-5.3 to 3.5)</b>                     | <b>-15.4<br/>(-18.1 to -11.7)</b>                   |
| Exposure to forces of nature                                                        | 0.1<br>(< 0.05 to 0.1)           | --                                 | < 0.05<br>(< 0.05 to < 0.05)      | -18.5<br>(-21.2 to -15.2)                         | -28.4<br>(-30.6 to -25.5)                           |
| Conflict and terrorism                                                              | 3.8<br>(1.5 to 7.5)              | --                                 | 0.1<br>(< 0.05 to 0.3)            | -2.3<br>(-6.1 to 2.4)                             | -15.7<br>(-18.4 to -12.0)                           |
| Executions and police conflict                                                      | 0.1<br>(0.1 to 0.3)              | 0.1<br>(< 0.05 to 0.1)             | < 0.05<br>(< 0.05 to < 0.05)      | 33.1<br>(16.9 to 50.9)                            | 3.7<br>(-12.7 to 19.8)                              |
| <b>Impairments</b>                                                                  | --                               | --                                 | --                                | --                                                | --                                                  |
| Anaemia                                                                             | 1,682.4<br>(1,550.5 to 1,817.9)  | --                                 | 55.2<br>(36.2 to 80.6)            | 14.3<br>(3.1 to 25.9)                             | -10.7<br>(-18.9 to -3.2)                            |
| Developmental intellectual disability                                               | 139.9<br>(106.4 to 174.0)        | --                                 | 15.6<br>(10.7 to 22.4)            | 32.3<br>(21.7 to 49.2)                            | 2.9<br>(-5.1 to 14.9)                               |
| Epilepsy                                                                            | 41.1<br>(22.4 to 59.8)           | --                                 | 15.8<br>(8.2 to 25.4)             | 36.9<br>(-29.5 to 164.5)                          | 7.0<br>(-47.3 to 116.9)                             |
| Guillain-Barre syndrome                                                             | < 0.05<br>(< 0.05 to < 0.05)     | --                                 | < 0.05<br>(< 0.05 to < 0.05)      | 30.0<br>(28.4 to 32.0)                            | 0.0<br>(-0.0 to 0.1)                                |
| Hearing loss                                                                        | 525.0<br>(495.8 to 557.3)        | --                                 | 17.3<br>(12.0 to 23.8)            | 24.1<br>(19.6 to 28.1)                            | -5.3<br>(-7.8 to -3.2)                              |
| Heart failure                                                                       | 11.7<br>(10.4 to 13.2)           | --                                 | 1.2<br>(0.8 to 1.6)               | 33.0<br>(22.6 to 43.9)                            | -2.8<br>(-9.9 to 4.8)                               |
| Infertility                                                                         | 104.0<br>(80.8 to 134.3)         | --                                 | 0.6<br>(0.2 to 1.2)               | 29.1<br>(6.0 to 59.2)                             | -0.4<br>(-19.4 to 24.8)                             |
| Pelvic inflammatory disease                                                         | 4.5<br>(3.8 to 5.3)              | --                                 | 0.6<br>(0.4 to 0.8)               | 25.8<br>(9.0 to 44.6)                             | -4.4<br>(-16.4 to 8.9)                              |
| Vision loss                                                                         | 640.0<br>(615.1 to 665.0)        | --                                 | 19.6<br>(13.5 to 27.7)            | 31.0<br>(23.9 to 43.0)                            | -4.4<br>(-8.2 to 1.1)                               |

We did not calculate incidence for the nine impairments, certain NTDs, and causes with only birth prevalence. Blank cells mean that no estimate is available.

† Incidence for aggregate causes represents the sum of the incidence of the causes below the aggregate.

‡ Incidence estimates for stroke represent first-ever stroke only.

^ Incidence of HIV/AIDS represents new infections of HIV only and does not include new infections of Tuberculosis in HIV positive cases.

SR Table 14: Prevalence, incidence, and YLDs for 2016, percentage change of YLD counts and percentage change of age-standardised YLD rates between 2006 and 2016 by cause and impairments, for all ages, Mauritius.

| Cause                                                                                | Prevalence in thousands (95% UI)       | Incidence in thousands (95% UI)         | YLDs in thousands (95% UI)       |                                                   |                                                     |
|--------------------------------------------------------------------------------------|----------------------------------------|-----------------------------------------|----------------------------------|---------------------------------------------------|-----------------------------------------------------|
|                                                                                      | 2016 counts                            | 2016 counts                             | 2016 counts                      | Percentage change in counts between 2006 and 2016 | Percentage change in age-standardised rates between |
| <b>All causes</b>                                                                    | <b>1,232.3</b><br>(1,228.2 to 1,237.3) | <b>7,028.5†</b><br>(6,629.2 to 7,464.5) | <b>151.1</b><br>(112.5 to 196.4) | <b>14.6</b><br>(12.2 to 17.2)                     | <b>-0.1</b><br>(-2.2 to 1.9)                        |
| <b>Communicable, maternal, neonatal, and nutritional disorders</b>                   | <b>892.7</b><br>(858.6 to 926.6)       | <b>3,788.3†</b><br>(3,482.0 to 4,145.7) | <b>17.0</b><br>(11.9 to 23.8)    | <b>-4.2</b><br>(-8.5 to 0.2)                      | <b>-6.1</b><br>(-10.6 to -1.5)                      |
| <b>HIV/AIDS and tuberculosis</b>                                                     | <b>554.4</b><br>(464.2 to 632.5)       | <b>0.3†</b><br>(0.3 to 0.4)             | <b>0.4</b><br>(0.2 to 0.5)       | <b>22.1</b><br>(-3.0 to 50.5)                     | <b>9.5</b><br>(-11.2 to 33.2)                       |
| Tuberculosis                                                                         | 495.4<br>(404.2 to 582.9)              | 0.3†<br>(0.2 to 0.3)                    | 0.2<br>(0.1 to 0.3)              | 14.1<br>(-5.4 to 37.4)                            | -0.8<br>(-16.8 to 17.2)                             |
| Drug-susceptible tuberculosis                                                        | 0.7<br>(0.6 to 1.0)                    | 0.3<br>(0.2 to 0.3)                     | 0.2<br>(0.1 to 0.3)              | 14.2<br>(-5.5 to 38.6)                            | -0.7<br>(-16.5 to 17.2)                             |
| Multidrug-resistant tuberculosis without extensive drug resistance                   | < 0.05<br>(< 0.05 to < 0.05)           | < 0.05<br>(< 0.05 to < 0.05)            | < 0.05<br>(< 0.05 to < 0.05)     | -8.6<br>(-85.0 to 427.0)                          | -21.3<br>(-87.4 to 352.2)                           |
| Extensively drug-resistant tuberculosis                                              | < 0.05<br>(< 0.05 to < 0.05)           | < 0.05<br>(< 0.05 to < 0.05)            | < 0.05<br>(< 0.05 to < 0.05)     | 201.0<br>(-50.6 to 1,634.5)                       | 159.1<br>(-58.4 to 1,387.4)                         |
| Latent tuberculosis infection                                                        | 494.7<br>(403.4 to 582.2)              | --                                      | --                               | --                                                | --                                                  |
| HIV/AIDS                                                                             | 1.6<br>(1.2 to 2.2)                    | 0.1 <sup>a</sup><br>(< 0.05 to 0.1)     | 0.1<br>(0.1 to 0.2)              | 36.2<br>(-18.1 to 130.0)                          | 30.0<br>(-20.9 to 116.9)                            |
| Drug-susceptible HIV/AIDS - Tuberculosis                                             | 0.1<br>(< 0.05 to 0.1)                 | < 0.05<br>(< 0.05 to < 0.05)            | < 0.05<br>(< 0.05 to < 0.05)     | 92.5<br>(43.8 to 153.9)                           | 82.8<br>(36.4 to 141.9)                             |
| Multidrug-resistant HIV/AIDS - Tuberculosis without extensive drug resistance        | < 0.05<br>(< 0.05 to < 0.05)           | < 0.05<br>(< 0.05 to < 0.05)            | < 0.05<br>(< 0.05 to < 0.05)     | 55.3<br>(-74.3 to 782.8)                          | 47.5<br>(-75.6 to 738.0)                            |
| Extensively drug-resistant HIV/AIDS - Tuberculosis                                   | < 0.05<br>(< 0.05 to < 0.05)           | < 0.05<br>(< 0.05 to < 0.05)            | < 0.05<br>(< 0.05 to < 0.05)     | 411.3<br>(-15.5 to 2,807.2)                       | 385.4<br>(-19.8 to 2,660.0)                         |
| HIV/AIDS resulting in other diseases                                                 | 1.5<br>(1.1 to 2.1)                    | 0.1<br>(< 0.05 to 0.1)                  | 0.1<br>(0.1 to 0.2)              | 28.8<br>(-24.2 to 138.1)                          | 23.0<br>(-26.7 to 123.9)                            |
| <b>Diarrhoea, lower respiratory infections, and other common infectious diseases</b> | <b>63.5</b><br>(60.0 to 66.8)          | <b>3,629.4†</b><br>(3,325.3 to 3,982.9) | <b>3.4</b><br>(2.4 to 4.6)       | <b>4.2</b><br>(0.7 to 8.0)                        | <b>3.0</b><br>(-0.3 to 6.5)                         |
| Diarrhoeal diseases                                                                  | 12.6<br>(11.7 to 13.7)                 | 848.4<br>(784.2 to 922.1)               | 1.4<br>(1.0 to 1.9)              | 11.0<br>(4.2 to 18.4)                             | 10.4<br>(3.7 to 17.4)                               |
| Intestinal infectious diseases                                                       | < 0.05<br>(< 0.05 to < 0.05)           | 0.2†<br>(0.2 to 0.3)                    | < 0.05<br>(< 0.05 to < 0.05)     | -23.1<br>(-33.7 to -11.3)                         | -20.9<br>(-32.1 to -8.1)                            |
| Typhoid fever                                                                        | < 0.05<br>(< 0.05 to < 0.05)           | 0.2<br>(0.2 to 0.2)                     | < 0.05<br>(< 0.05 to < 0.05)     | -23.1<br>(-34.7 to -9.9)                          | -20.8<br>(-32.7 to -6.4)                            |
| Paratyphoid fever                                                                    | < 0.05<br>(< 0.05 to < 0.05)           | 0.1<br>(< 0.05 to 0.1)                  | < 0.05<br>(< 0.05 to < 0.05)     | -17.8<br>(-30.5 to -3.4)                          | -16.4<br>(-29.9 to -1.7)                            |
| Other intestinal infectious diseases                                                 | --                                     | --                                      | < 0.05<br>(< 0.05 to < 0.05)     | -42.8<br>(-53.0 to -30.5)                         | -42.4<br>(-52.8 to -29.0)                           |
| Lower respiratory infections                                                         | 1.1<br>(1.0 to 1.2)                    | 49.0<br>(44.9 to 53.4)                  | 0.1<br>(< 0.05 to 0.1)           | 4.6<br>(-6.8 to 19.7)                             | -5.0<br>(-15.0 to 7.7)                              |
| Upper respiratory infections                                                         | 35.6<br>(31.6 to 40.2)                 | 2,668.1<br>(2,350.2 to 3,023.3)         | 0.9<br>(0.5 to 1.4)              | -0.0<br>(-5.1 to 6.1)                             | -0.3<br>(-5.2 to 5.1)                               |
| Otitis media                                                                         | 10.7<br>(9.6 to 11.9)                  | 37.3<br>(30.8 to 45.7)                  | 0.3<br>(0.2 to 0.5)              | -10.1<br>(-17.4 to -1.9)                          | -6.6<br>(-13.4 to 1.3)                              |
| Meningitis                                                                           | 2.4<br>(2.0 to 2.7)                    | 0.3<br>(0.3 to 0.4)                     | 0.3<br>(0.2 to 0.4)              | -4.2<br>(-11.3 to 3.5)                            | -6.2<br>(-13.2 to 1.2)                              |
| Pneumococcal meningitis                                                              | 1.0<br>(0.9 to 1.2)                    | 0.1<br>(< 0.05 to 0.1)                  | 0.1<br>(0.1 to 0.2)              | -10.8<br>(-23.2 to 4.7)                           | -13.4<br>(-25.9 to 1.2)                             |
| H influenzae type B meningitis                                                       | 0.3<br>(0.3 to 0.4)                    | < 0.05<br>(< 0.05 to < 0.05)            | 0.1<br>(< 0.05 to 0.1)           | -14.4<br>(-20.7 to -8.1)                          | -15.5<br>(-22.1 to -9.1)                            |
| Meningococcal infection                                                              | 0.1<br>(0.1 to 0.1)                    | < 0.05<br>(< 0.05 to < 0.05)            | < 0.05<br>(< 0.05 to < 0.05)     | -1.3<br>(-5.9 to 3.1)                             | -4.9<br>(-9.2 to -0.8)                              |
| Other meningitis                                                                     | 0.9<br>(0.7 to 1.1)                    | 0.2<br>(0.2 to 0.2)                     | 0.1<br>(0.1 to 0.1)              | 16.1<br>(9.5 to 24.5)                             | 14.3<br>(7.6 to 22.0)                               |
| Encephalitis                                                                         | 3.0<br>(2.1 to 4.2)                    | 1.2<br>(1.1 to 1.4)                     | 0.4<br>(0.2 to 0.5)              | 9.5<br>(-3.0 to 25.2)                             | 3.9<br>(-7.8 to 18.7)                               |
| Diphtheria                                                                           | < 0.05<br>(< 0.05 to < 0.05)           | < 0.05<br>(< 0.05 to < 0.05)            | < 0.05<br>(< 0.05 to < 0.05)     | -23.4<br>(-57.6 to 42.6)                          | -23.7<br>(-56.2 to 32.7)                            |
| Whooping cough                                                                       | < 0.05<br>(< 0.05 to < 0.05)           | 0.2<br>(0.2 to 0.3)                     | < 0.05<br>(< 0.05 to < 0.05)     | -59.3<br>(-71.6 to -43.7)                         | -47.6<br>(-63.6 to -27.6)                           |
| Tetanus                                                                              | < 0.05<br>(< 0.05 to < 0.05)           | < 0.05<br>(< 0.05 to < 0.05)            | < 0.05<br>(< 0.05 to < 0.05)     | 3.1<br>(-5.2 to 12.1)                             | -0.7<br>(-8.2 to 7.6)                               |
| Measles                                                                              | < 0.05<br>(< 0.05 to < 0.05)           | 0.4<br>(0.1 to 0.9)                     | < 0.05<br>(< 0.05 to < 0.05)     | -43.6<br>(-58.0 to -23.7)                         | -26.7<br>(-45.9 to -1.0)                            |
| Varicella and herpes zoster                                                          | 1.6<br>(1.4 to 1.8)                    | 24.2<br>(23.1 to 25.3)                  | 0.1<br>(< 0.05 to 0.1)           | 19.1<br>(6.8 to 33.1)                             | -0.4<br>(-9.9 to 10.5)                              |
| <b>Neglected tropical diseases and malaria</b>                                       | <b>110.8</b><br>(90.7 to 135.5)        | <b>39.9†</b><br>(30.3 to 52.2)          | <b>1.7</b><br>(1.0 to 2.6)       | <b>18.2</b><br>(9.6 to 27.2)                      | <b>10.0</b><br>(1.9 to 18.7)                        |
| Malaria                                                                              | --                                     | --                                      | --                               | --                                                | --                                                  |
| Chagas disease                                                                       | --                                     | --                                      | --                               | --                                                | --                                                  |
| Leishmaniasis                                                                        | --                                     | --                                      | --                               | --                                                | --                                                  |
| Visceral leishmaniasis                                                               | --                                     | --                                      | --                               | --                                                | --                                                  |
| Cutaneous and mucocutaneous leishmaniasis                                            | --                                     | --                                      | --                               | --                                                | --                                                  |
| African trypanosomiasis                                                              | --                                     | --                                      | --                               | --                                                | --                                                  |
| Schistosomiasis                                                                      | 92.4<br>(63.6 to 128.8)                | 18.0<br>(11.7 to 28.3)                  | 1.2<br>(0.6 to 2.0)              | 24.2<br>(15.1 to 34.1)                            | 10.7<br>(2.5 to 19.6)                               |
| Cysticercosis                                                                        | 0.1<br>(0.1 to 0.2)                    | --                                      | < 0.05<br>(< 0.05 to < 0.05)     | -16.4<br>(-64.6 to 89.6)                          | -30.4<br>(-70.1 to 57.0)                            |
| Cystic echinococcosis                                                                | --                                     | --                                      | --                               | --                                                | --                                                  |
| Lymphatic filariasis                                                                 | --                                     | --                                      | --                               | --                                                | --                                                  |
| Onchocerciasis                                                                       | --                                     | --                                      | --                               | --                                                | --                                                  |
| Trachoma                                                                             | --                                     | --                                      | --                               | --                                                | --                                                  |
| Dengue                                                                               | 1.3<br>(0.8 to 2.1)                    | 21.9<br>(14.9 to 30.6)                  | 0.2<br>(0.1 to 0.4)              | 97.1<br>(53.9 to 337.9)                           | 89.9<br>(48.5 to 318.6)                             |
| Yellow fever                                                                         | --                                     | --                                      | --                               | --                                                | --                                                  |
| Rabies                                                                               | < 0.05<br>(< 0.05 to < 0.05)           | < 0.05<br>(< 0.05 to < 0.05)            | < 0.05<br>(< 0.05 to < 0.05)     | -56.2<br>(-66.3 to -43.0)                         | -73.2<br>(-79.7 to -65.3)                           |
| Intestinal nematode infections                                                       | 3.1<br>(2.7 to 3.6)                    | --                                      | < 0.05<br>(< 0.05 to < 0.05)     | 19.5<br>(-12.4 to 61.4)                           | 6.5<br>(-21.3 to 42.6)                              |
| Ascariasis                                                                           | 1.1<br>(0.8 to 1.4)                    | --                                      | --                               | --                                                | --                                                  |



| Cause                                                                   | Prevalence in thousands (95% UI)              | Incidence in thousands (95% UI)                | YLDs in thousands (95% UI)              |                                                   |                                                     |
|-------------------------------------------------------------------------|-----------------------------------------------|------------------------------------------------|-----------------------------------------|---------------------------------------------------|-----------------------------------------------------|
|                                                                         | 2016 counts                                   | 2016 counts                                    | 2016 counts                             | Percentage change in counts between 2006 and 2016 | Percentage change in age-standardised rates between |
| Trichuriasis                                                            | 1.1<br>(0.8 to 1.4)                           | --                                             | --                                      | --                                                | --                                                  |
| Hookworm disease                                                        | 1.1<br>(0.8 to 1.3)                           | --                                             | < 0.05<br>(< 0.05 to < 0.05)            | 19.5<br>(-12.4 to 61.4)                           | 6.5<br>(-21.3 to 42.6)                              |
| Food-borne trematodiasis                                                | --                                            | --                                             | --                                      | --                                                | --                                                  |
| Leprosy                                                                 | 0.3<br>(0.1 to 0.7)                           | < 0.05<br>(< 0.05 to < 0.05)                   | < 0.05<br>(< 0.05 to < 0.05)            | -24.2<br>(-37.7 to 0.7)                           | -41.2<br>(-51.1 to -21.2)                           |
| Ebola virus disease                                                     | --                                            | --                                             | --                                      | --                                                | --                                                  |
| Zika virus disease                                                      | --                                            | --                                             | --                                      | --                                                | --                                                  |
| Guinea worm disease                                                     | --                                            | --                                             | --                                      | --                                                | --                                                  |
| Other neglected tropical diseases                                       | 12.2<br>(11.4 to 13.0)                        | --                                             | 0.3<br>(0.2 to 0.4)                     | -20.2<br>(-28.4 to -11.6)                         | -9.3<br>(-18.9 to 1.4)                              |
| <b>Maternal disorders</b>                                               | <b>0.8</b><br><b>(0.6 to 1.1)</b>             | <b>11.5†</b><br><b>(10.0 to 13.0)</b>          | <b>0.1</b><br><b>(&lt; 0.05 to 0.1)</b> | <b>-17.2</b><br><b>(-38.7 to 15.0)</b>            | <b>-16.9</b><br><b>(-38.4 to 16.0)</b>              |
| Maternal haemorrhage                                                    | 0.1<br>(0.1 to 0.2)                           | 1.2<br>(0.9 to 1.6)                            | < 0.05<br>(< 0.05 to < 0.05)            | -16.6<br>(-44.7 to 28.6)                          | -15.4<br>(-44.2 to 31.8)                            |
| Maternal sepsis and other pregnancy related infections                  | 0.1<br>(0.1 to 0.2)                           | 1.4<br>(1.0 to 1.9)                            | < 0.05<br>(< 0.05 to < 0.05)            | -18.7<br>(-65.2 to 80.6)                          | -18.8<br>(-65.2 to 82.6)                            |
| Maternal hypertensive disorders                                         | 0.6<br>(0.4 to 0.9)                           | 3.4<br>(2.7 to 4.0)                            | < 0.05<br>(< 0.05 to 0.1)               | -15.2<br>(-47.9 to 39.0)                          | -14.9<br>(-47.4 to 40.7)                            |
| Maternal obstructed labour and uterine rupture                          | < 0.05<br>(< 0.05 to < 0.05)                  | 0.9<br>(0.7 to 1.2)                            | < 0.05<br>(< 0.05 to < 0.05)            | -17.8<br>(-54.9 to 47.4)                          | -17.6<br>(-55.0 to 49.3)                            |
| Maternal abortion, miscarriage, and ectopic pregnancy                   | < 0.05<br>(< 0.05 to 0.1)                     | 4.5<br>(3.5 to 5.9)                            | < 0.05<br>(< 0.05 to < 0.05)            | -20.7<br>(-62.4 to 64.9)                          | -20.6<br>(-62.6 to 66.9)                            |
| Other maternal disorders                                                | --                                            | --                                             | < 0.05<br>(< 0.05 to < 0.05)            | -21.2<br>(-41.6 to 9.5)                           | -21.1<br>(-41.5 to 9.9)                             |
| <b>Neonatal disorders</b>                                               | <b>12.7</b><br><b>(10.6 to 16.2)</b>          | <b>2.1</b><br><b>--</b>                        | <b>2.1</b><br><b>(1.4 to 3.0)</b>       | <b>-1.0</b><br><b>(-17.4 to 21.1)</b>             | <b>1.1</b><br><b>(-15.7 to 23.4)</b>                |
| Neonatal preterm birth complications                                    | 12.0<br>(9.4 to 15.4)                         | --                                             | 1.6<br>(1.0 to 2.3)                     | -1.1<br>(-22.8 to 27.2)                           | 0.6<br>(-20.8 to 29.9)                              |
| Neonatal encephalopathy due to birth asphyxia and trauma                | 0.4<br>(0.2 to 0.7)                           | --                                             | 0.1<br>(< 0.05 to 0.2)                  | -18.1<br>(-52.7 to 13.9)                          | -17.9<br>(-51.8 to 13.8)                            |
| Neonatal sepsis and other neonatal infections                           | 0.9<br>(0.4 to 2.1)                           | --                                             | 0.4<br>(0.1 to 1.0)                     | 7.4<br>(-10.1 to 26.9)                            | 8.7<br>(-8.6 to 29.2)                               |
| Hemolytic disease and other neonatal jaundice                           | 0.2<br>(0.1 to 0.2)                           | --                                             | < 0.05<br>(< 0.05 to 0.1)               | -3.9<br>(-11.6 to 4.0)                            | -3.5<br>(-11.3 to 4.5)                              |
| Other neonatal disorders                                                | --                                            | --                                             | < 0.05<br>(< 0.05 to 0.1)               | -24.5<br>(-40.4 to -3.5)                          | 0.9<br>(-20.3 to 29.1)                              |
| <b>Nutritional deficiencies</b>                                         | <b>355.1</b><br><b>(341.9 to 366.5)</b>       | <b>30.9†</b><br><b>(26.0 to 36.3)</b>          | <b>8.8</b><br><b>(5.8 to 12.6)</b>      | <b>-11.8</b><br><b>(-17.0 to -6.0)</b>            | <b>-13.3</b><br><b>(-19.2 to -7.2)</b>              |
| Protein-energy malnutrition                                             | 7.8<br>(5.4 to 11.2)                          | 4.6<br>(3.3 to 6.2)                            | 0.2<br>(0.1 to 0.5)                     | -30.0<br>(-69.0 to 63.7)                          | -6.8<br>(-58.0 to 116.6)                            |
| Iodine deficiency                                                       | 6.0<br>(5.3 to 6.8)                           | 0.1<br>(0.1 to 0.2)                            | 0.1<br>(0.1 to 0.2)                     | 13.7<br>(0.8 to 29.6)                             | -0.8<br>(-11.7 to 13.0)                             |
| Vitamin A deficiency                                                    | 29.8<br>(25.2 to 35.6)                        | 26.1<br>(21.8 to 31.3)                         | < 0.05<br>(< 0.05 to < 0.05)            | -8.2<br>(-25.7 to 13.1)                           | -4.4<br>(-22.2 to 18.1)                             |
| Iron-deficiency anaemia                                                 | 331.6<br>(317.1 to 347.4)                     | --                                             | 8.3<br>(5.5 to 12.1)                    | -11.4<br>(-16.3 to -6.3)                          | -13.7<br>(-18.8 to -8.3)                            |
| Other nutritional deficiencies                                          | --                                            | --                                             | < 0.05<br>(< 0.05 to < 0.05)            | -30.5<br>(-70.7 to 69.5)                          | -7.2<br>(-60.4 to 124.2)                            |
| <b>Other communicable, maternal, neonatal, and nutritional diseases</b> | <b>309.4</b><br><b>(287.6 to 329.4)</b>       | <b>76.4</b><br><b>(69.6 to 83.2)</b>           | <b>0.7</b><br><b>(0.4 to 1.0)</b>       | <b>-2.3</b><br><b>(-7.4 to 3.1)</b>               | <b>-2.3</b><br><b>(-7.5 to 3.3)</b>                 |
| Sexually transmitted diseases excluding HIV                             | 224.5<br>(204.8 to 244.1)                     | 65.2<br>(58.9 to 71.8)                         | 0.4<br>(0.3 to 0.6)                     | 2.7<br>(-4.1 to 9.7)                              | -1.9<br>(-8.1 to 4.6)                               |
| Syphilis                                                                | 7.2<br>(6.2 to 8.5)                           | 4.2<br>(3.5 to 5.0)                            | < 0.05<br>(< 0.05 to 0.1)               | 31.3<br>(15.4 to 49.1)                            | 2.9<br>(-9.8 to 18.3)                               |
| Chlamydial infection                                                    | 18.7<br>(14.3 to 23.6)                        | 15.3<br>(12.0 to 19.4)                         | 0.1<br>(0.1 to 0.2)                     | -0.8<br>(-13.0 to 12.8)                           | -1.1<br>(-13.5 to 12.4)                             |
| Gonococcal infection                                                    | 2.2<br>(1.5 to 3.1)                           | 5.6<br>(3.1 to 9.1)                            | < 0.05<br>(< 0.05 to < 0.05)            | -1.8<br>(-19.7 to 20.3)                           | -2.9<br>(-20.5 to 18.2)                             |
| Trichomoniasis                                                          | 23.4<br>(19.9 to 27.4)                        | 19.6<br>(16.7 to 23.0)                         | < 0.05<br>(< 0.05 to < 0.05)            | 6.0<br>(-2.9 to 15.3)                             | -0.3<br>(-8.3 to 7.9)                               |
| Genital herpes                                                          | 177.3<br>(152.1 to 206.2)                     | 9.2<br>(7.8 to 10.8)                           | < 0.05<br>(< 0.05 to 0.1)               | 13.2<br>(5.0 to 22.4)                             | 0.1<br>(-7.1 to 8.2)                                |
| Other sexually transmitted diseases                                     | 9.1<br>(7.2 to 11.1)                          | 11.3<br>(9.7 to 13.3)                          | 0.2<br>(0.1 to 0.2)                     | -1.9<br>(-11.6 to 9.1)                            | -3.9<br>(-13.4 to 6.5)                              |
| Hepatitis                                                               | 98.3<br>(85.2 to 113.4)                       | 11.2<br>(9.1 to 13.5)                          | < 0.05<br>(< 0.05 to < 0.05)            | 110.8<br>(70.2 to 157.1)                          | 98.0<br>(59.5 to 140.0)                             |
| Acute hepatitis A                                                       | 0.3<br>(0.2 to 0.4)                           | 3.6<br>(2.1 to 4.7)                            | < 0.05<br>(< 0.05 to < 0.05)            | 121.8<br>(44.4 to 231.4)                          | 118.2<br>(40.2 to 225.7)                            |
| Hepatitis B                                                             | 60.7<br>(49.4 to 74.5)                        | 6.5<br>(5.0 to 8.5)                            | < 0.05<br>(< 0.05 to < 0.05)            | 119.8<br>(71.5 to 181.0)                          | 100.0<br>(58.4 to 150.6)                            |
| Hepatitis C                                                             | 37.3<br>(33.1 to 41.6)                        | 0.7<br>(0.6 to 0.8)                            | < 0.05<br>(< 0.05 to < 0.05)            | -0.6<br>(-39.7 to 82.5)                           | 14.1<br>(-34.7 to 117.4)                            |
| Acute hepatitis E                                                       | < 0.05<br>(< 0.05 to < 0.05)                  | 0.4<br>(0.3 to 0.5)                            | < 0.05<br>(< 0.05 to < 0.05)            | 141.2<br>(121.5 to 164.6)                         | 127.5<br>(109.4 to 150.1)                           |
| Other infectious diseases                                               | 10.6<br>(10.0 to 11.2)                        | < 0.05<br>(< 0.05 to < 0.05)                   | 0.2<br>(0.1 to 0.3)                     | -13.0<br>(-20.5 to -4.9)                          | -5.4<br>(-14.1 to 4.0)                              |
| <b>Non-communicable diseases</b>                                        | <b>1,162.9</b><br><b>(1,153.7 to 1,172.0)</b> | <b>3,173.4†</b><br><b>(2,952.2 to 3,403.8)</b> | <b>126.8</b><br><b>(94.4 to 164.2)</b>  | <b>17.0</b><br><b>(14.1 to 20.2)</b>              | <b>0.2</b><br><b>(-2.2 to 2.8)</b>                  |
| <b>Neoplasms</b>                                                        | <b>6.1</b><br><b>(5.8 to 6.5)</b>             | <b>2.2</b><br><b>(2.1 to 2.3)</b>              | <b>0.8</b><br><b>(0.6 to 1.0)</b>       | <b>41.1</b><br><b>(33.4 to 49.2)</b>              | <b>6.1</b><br><b>(0.6 to 11.9)</b>                  |
| Lip and oral cavity cancer                                              | 0.3<br>(0.3 to 0.4)                           | 0.1<br>(0.1 to 0.1)                            | < 0.05<br>(< 0.05 to < 0.05)            | 37.6<br>(18.0 to 60.6)                            | 1.9<br>(-13.2 to 18.8)                              |
| Nasopharynx cancer                                                      | 0.1<br>(< 0.05 to 0.1)                        | < 0.05<br>(< 0.05 to < 0.05)                   | < 0.05<br>(< 0.05 to < 0.05)            | 7.7<br>(-6.2 to 22.6)                             | -13.5<br>(-24.0 to -1.7)                            |
| Other pharynx cancer                                                    | < 0.05<br>(< 0.05 to 0.1)                     | < 0.05<br>(< 0.05 to < 0.05)                   | < 0.05<br>(< 0.05 to < 0.05)            | 77.8<br>(56.8 to 101.7)                           | 28.7<br>(14.1 to 45.1)                              |
| Oesophageal cancer                                                      | < 0.05<br>(< 0.05 to < 0.05)                  | < 0.05<br>(< 0.05 to < 0.05)                   | < 0.05<br>(< 0.05 to < 0.05)            | 35.7<br>(21.8 to 52.2)                            | -4.5<br>(-15.3 to 6.9)                              |
| Stomach cancer                                                          | 0.2<br>(0.2 to 0.2)                           | 0.1<br>(0.1 to 0.1)                            | < 0.05<br>(< 0.05 to < 0.05)            | 16.4<br>(-0.6 to 35.6)                            | -17.8<br>(-30.4 to -4.7)                            |
| Colon and rectum cancer                                                 | 0.9<br>(0.8 to 1.0)                           | 0.3<br>(0.2 to 0.3)                            | 0.1<br>(0.1 to 0.1)                     | 58.8<br>(37.7 to 83.8)                            | 13.1<br>(-1.9 to 31.0)                              |
| Liver cancer                                                            | < 0.05<br>(< 0.05 to < 0.05)                  | 0.1<br>(0.1 to 0.1)                            | < 0.05<br>(< 0.05 to < 0.05)            | 26.8<br>(14.8 to 39.3)                            | -9.9<br>(-18.3 to -1.1)                             |
| Liver cancer due to hepatitis B                                         | < 0.05<br>(< 0.05 to < 0.05)                  | < 0.05<br>(< 0.05 to < 0.05)                   | < 0.05<br>(< 0.05 to < 0.05)            | 24.6<br>(11.1 to 38.1)                            | -9.7<br>(-19.1 to -0.2)                             |



| Cause                                              | Prevalence in thousands (95% UI)        | Incidence in thousands (95% UI)       | YLDs in thousands (95% UI)        |                                                   |                                                     |
|----------------------------------------------------|-----------------------------------------|---------------------------------------|-----------------------------------|---------------------------------------------------|-----------------------------------------------------|
|                                                    | 2016 counts                             | 2016 counts                           | 2016 counts                       | Percentage change in counts between 2006 and 2016 | Percentage change in age-standardised rates between |
| Liver cancer due to hepatitis C                    | < 0.05<br>(< 0.05 to < 0.05)            | < 0.05<br>(< 0.05 to < 0.05)          | < 0.05<br>(< 0.05 to < 0.05)      | 29.3<br>(16.2 to 44.9)                            | -10.8<br>(-19.3 to -0.8)                            |
| Liver cancer due to alcohol use                    | < 0.05<br>(< 0.05 to < 0.05)            | < 0.05<br>(< 0.05 to < 0.05)          | < 0.05<br>(< 0.05 to < 0.05)      | 26.9<br>(11.9 to 44.2)                            | -11.5<br>(-21.9 to 0.8)                             |
| Liver cancer due to other causes                   | < 0.05<br>(< 0.05 to < 0.05)            | < 0.05<br>(< 0.05 to < 0.05)          | < 0.05<br>(< 0.05 to < 0.05)      | 28.2<br>(11.6 to 46.8)                            | -8.0<br>(-19.3 to 5.0)                              |
| Gallbladder and biliary tract cancer               | < 0.05<br>(< 0.05 to < 0.05)            | < 0.05<br>(< 0.05 to < 0.05)          | < 0.05<br>(< 0.05 to < 0.05)      | 15.4<br>(7.2 to 24.9)                             | -19.9<br>(-25.3 to -13.3)                           |
| Pancreatic cancer                                  | < 0.05<br>(< 0.05 to 0.1)               | 0.1<br>(0.1 to 0.1)                   | < 0.05<br>(< 0.05 to < 0.05)      | 54.5<br>(41.1 to 66.8)                            | 9.2<br>(-0.4 to 18.1)                               |
| Larynx cancer                                      | 0.1<br>(0.1 to 0.1)                     | < 0.05<br>(< 0.05 to < 0.05)          | < 0.05<br>(< 0.05 to < 0.05)      | 19.0<br>(3.0 to 35.5)                             | -15.8<br>(-26.2 to -4.2)                            |
| Tracheal, bronchus, and lung cancer                | 0.2<br>(0.2 to 0.2)                     | 0.2<br>(0.1 to 0.2)                   | < 0.05<br>(< 0.05 to 0.1)         | 28.8<br>(5.0 to 58.4)                             | -9.1<br>(-25.8 to 10.7)                             |
| Malignant skin melanoma                            | < 0.05<br>(< 0.05 to < 0.05)            | < 0.05<br>(< 0.05 to < 0.05)          | < 0.05<br>(< 0.05 to < 0.05)      | 50.1<br>(34.5 to 66.8)                            | 15.0<br>(3.0 to 27.5)                               |
| Non-melanoma skin cancer                           | < 0.05<br>(< 0.05 to < 0.05)            | < 0.05<br>(< 0.05 to 0.1)             | < 0.05<br>(< 0.05 to < 0.05)      | -56.7<br>(-84.4 to 84.4)                          | -72.3<br>(-90.1 to 29.6)                            |
| Non-melanoma skin cancer (squamous-cell carcinoma) | < 0.05<br>(< 0.05 to < 0.05)            | < 0.05<br>(< 0.05 to < 0.05)          | < 0.05<br>(< 0.05 to < 0.05)      | -60.0<br>(-86.2 to 93.5)                          | -74.4<br>(-90.8 to 32.1)                            |
| Non-melanoma skin cancer (basal-cell carcinoma)    | < 0.05<br>(< 0.05 to < 0.05)            | < 0.05<br>(< 0.05 to < 0.05)          | < 0.05<br>(< 0.05 to < 0.05)      | 32.4<br>(18.0 to 54.6)                            | -0.6<br>(-10.5 to 11.3)                             |
| Breast cancer                                      | 2.0<br>(1.8 to 2.2)                     | 0.4<br>(0.4 to 0.5)                   | 0.2<br>(0.1 to 0.2)               | 44.5<br>(22.2 to 72.1)                            | 14.7<br>(-2.6 to 34.9)                              |
| Cervical cancer                                    | 0.4<br>(0.3 to 0.4)                     | 0.1<br>(0.1 to 0.1)                   | < 0.05<br>(< 0.05 to < 0.05)      | 5.7<br>(-14.3 to 32.1)                            | -15.8<br>(-31.6 to 6.5)                             |
| Uterine cancer                                     | 0.4<br>(0.4 to 0.4)                     | 0.1<br>(0.1 to 0.1)                   | < 0.05<br>(< 0.05 to < 0.05)      | 44.8<br>(18.9 to 78.3)                            | 6.0<br>(-12.6 to 28.5)                              |
| Ovarian cancer                                     | 0.2<br>(0.2 to 0.2)                     | 0.1<br>(0.1 to 0.1)                   | < 0.05<br>(< 0.05 to < 0.05)      | 42.2<br>(0.6 to 97.8)                             | 14.4<br>(-17.4 to 55.0)                             |
| Prostate cancer                                    | 0.9<br>(0.6 to 1.0)                     | 0.2<br>(0.1 to 0.2)                   | 0.1<br>(0.1 to 0.1)               | 78.4<br>(49.2 to 114.0)                           | 19.7<br>(0.4 to 43.2)                               |
| Testicular cancer                                  | < 0.05<br>(< 0.05 to < 0.05)            | < 0.05<br>(< 0.05 to < 0.05)          | < 0.05<br>(< 0.05 to < 0.05)      | 7.8<br>(-23.2 to 45.9)                            | 0.7<br>(-27.9 to 36.5)                              |
| Kidney cancer                                      | 0.2<br>(0.2 to 0.2)                     | < 0.05<br>(< 0.05 to 0.1)             | < 0.05<br>(< 0.05 to < 0.05)      | 26.4<br>(8.9 to 46.5)                             | -0.7<br>(-13.3 to 13.2)                             |
| Bladder cancer                                     | 0.3<br>(0.2 to 0.3)                     | 0.1<br>(0.1 to 0.1)                   | < 0.05<br>(< 0.05 to < 0.05)      | 44.4<br>(26.6 to 66.5)                            | 2.6<br>(-10.0 to 18.2)                              |
| Brain and nervous system cancer                    | 0.1<br>(< 0.05 to 0.1)                  | < 0.05<br>(< 0.05 to < 0.05)          | < 0.05<br>(< 0.05 to < 0.05)      | 22.9<br>(9.4 to 35.3)                             | 3.4<br>(-8.9 to 13.8)                               |
| Thyroid cancer                                     | 0.1<br>(0.1 to 0.2)                     | < 0.05<br>(< 0.05 to < 0.05)          | < 0.05<br>(< 0.05 to < 0.05)      | 47.2<br>(14.3 to 90.7)                            | 17.4<br>(-6.6 to 49.4)                              |
| Mesothelioma                                       | < 0.05<br>(< 0.05 to < 0.05)            | < 0.05<br>(< 0.05 to < 0.05)          | < 0.05<br>(< 0.05 to < 0.05)      | 33.8<br>(18.7 to 47.6)                            | 0.5<br>(-10.5 to 10.3)                              |
| Hodgkin lymphoma                                   | < 0.05<br>(< 0.05 to 0.1)               | < 0.05<br>(< 0.05 to < 0.05)          | < 0.05<br>(< 0.05 to < 0.05)      | 60.1<br>(29.4 to 98.7)                            | 37.0<br>(8.3 to 73.1)                               |
| Non-Hodgkin's lymphoma                             | 0.1<br>(0.1 to 0.1)                     | < 0.05<br>(< 0.05 to < 0.05)          | < 0.05<br>(< 0.05 to < 0.05)      | 41.3<br>(27.1 to 58.7)                            | 11.0<br>(0.2 to 23.9)                               |
| Multiple myeloma                                   | < 0.05<br>(< 0.05 to < 0.05)            | < 0.05<br>(< 0.05 to < 0.05)          | < 0.05<br>(< 0.05 to < 0.05)      | 88.5<br>(52.1 to 115.4)                           | 32.5<br>(7.8 to 50.8)                               |
| Leukaemia                                          | 0.2<br>(0.2 to 0.2)                     | 0.1<br>(0.1 to 0.1)                   | < 0.05<br>(< 0.05 to < 0.05)      | 16.3<br>(5.0 to 29.5)                             | -2.0<br>(-12.6 to 10.1)                             |
| Acute lymphoid leukaemia                           | < 0.05<br>(< 0.05 to 0.1)               | < 0.05<br>(< 0.05 to < 0.05)          | < 0.05<br>(< 0.05 to < 0.05)      | 23.2<br>(8.5 to 41.9)                             | 7.5<br>(-7.6 to 29.1)                               |
| Chronic lymphoid leukaemia                         | < 0.05<br>(< 0.05 to < 0.05)            | < 0.05<br>(< 0.05 to < 0.05)          | < 0.05<br>(< 0.05 to < 0.05)      | 24.1<br>(-10.6 to 57.8)                           | -6.8<br>(-33.8 to 19.4)                             |
| Acute myeloid leukaemia                            | < 0.05<br>(< 0.05 to < 0.05)            | < 0.05<br>(< 0.05 to < 0.05)          | < 0.05<br>(< 0.05 to < 0.05)      | 74.0<br>(41.3 to 105.7)                           | 60.9<br>(27.2 to 99.2)                              |
| Chronic myeloid leukaemia                          | < 0.05<br>(< 0.05 to < 0.05)            | < 0.05<br>(< 0.05 to < 0.05)          | < 0.05<br>(< 0.05 to < 0.05)      | 15.4<br>(-3.8 to 38.1)                            | -10.5<br>(-24.7 to 6.7)                             |
| Other leukaemia                                    | 0.1<br>(0.1 to 0.1)                     | < 0.05<br>(< 0.05 to < 0.05)          | < 0.05<br>(< 0.05 to < 0.05)      | 7.2<br>(-6.5 to 22.5)                             | -10.2<br>(-22.5 to 4.4)                             |
| Other neoplasms                                    | 0.4<br>(0.4 to 0.4)                     | 0.1<br>(0.1 to 0.1)                   | < 0.05<br>(< 0.05 to < 0.05)      | 47.8<br>(31.8 to 66.2)                            | 21.5<br>(7.2 to 37.2)                               |
| <b>Cardiovascular diseases</b>                     | <b>97.6</b><br><b>(94.0 to 101.2)</b>   | <b>9.5†</b><br><b>(9.0 to 10.0)</b>   | <b>6.5</b><br><b>(4.7 to 8.4)</b> | <b>23.8</b><br><b>(19.4 to 28.4)</b>              | <b>-6.2</b><br><b>(-9.3 to -3.1)</b>                |
| Rheumatic heart disease                            | 12.1<br>(10.8 to 13.5)                  | 0.3<br>(0.2 to 0.3)                   | 0.6<br>(0.4 to 0.8)               | 13.6<br>(5.0 to 24.6)                             | 5.3<br>(-2.8 to 15.5)                               |
| Ischaemic heart disease                            | 35.1<br>(33.2 to 37.1)                  | 4.0<br>(3.7 to 4.4)                   | 1.7<br>(1.1 to 2.3)               | 29.1<br>(23.4 to 35.4)                            | -3.2<br>(-6.9 to 1.1)                               |
| Cerebrovascular disease                            | 11.8<br>(10.9 to 12.6)                  | 1.8‡<br>(1.7 to 2.0)                  | 2.4<br>(1.7 to 3.1)               | 20.4<br>(11.7 to 29.6)                            | -13.2<br>(-19.1 to -6.7)                            |
| Ischaemic stroke                                   | 9.4<br>(8.2 to 10.4)                    | 1.2‡<br>(1.0 to 1.3)                  | 1.8<br>(1.3 to 2.4)               | 23.9<br>(13.1 to 34.9)                            | -11.7<br>(-19.3 to -3.8)                            |
| Hemorrhagic stroke                                 | 2.9<br>(2.7 to 3.3)                     | 0.7‡<br>(0.6 to 0.8)                  | 0.6<br>(0.4 to 0.7)               | 10.4<br>(-1.7 to 23.9)                            | -17.6<br>(-26.1 to -8.5)                            |
| Hypertensive heart disease                         | 4.2<br>(3.6 to 4.8)                     | --                                    | 0.3<br>(0.2 to 0.5)               | 32.7<br>(20.4 to 46.6)                            | -2.6<br>(-10.7 to 6.3)                              |
| Cardiomyopathy and myocarditis                     | 0.6<br>(0.6 to 0.7)                     | 0.3†<br>(0.2 to 0.3)                  | 0.1<br>(< 0.05 to 0.1)            | 8.4<br>(-5.5 to 23.0)                             | -2.5<br>(-14.1 to 9.7)                              |
| Myocarditis                                        | 0.2<br>(0.2 to 0.2)                     | 0.3<br>(0.2 to 0.3)                   | < 0.05<br>(< 0.05 to < 0.05)      | 1.1<br>(-14.1 to 18.1)                            | -2.3<br>(-16.1 to 12.6)                             |
| Alcoholic cardiomyopathy                           | 0.1<br>(0.1 to 0.1)                     | --                                    | < 0.05<br>(< 0.05 to < 0.05)      | 12.9<br>(-0.8 to 28.7)                            | -2.5<br>(-13.6 to 9.5)                              |
| Other cardiomyopathy                               | 0.5<br>(0.5 to 0.6)                     | --                                    | < 0.05<br>(< 0.05 to 0.1)         | 10.2<br>(-10.1 to 33.4)                           | -2.6<br>(-18.9 to 16.3)                             |
| Atrial fibrillation and flutter                    | 7.9<br>(6.9 to 9.1)                     | 0.7<br>(0.6 to 0.8)                   | 0.6<br>(0.4 to 0.9)               | 42.7<br>(33.3 to 53.3)                            | -0.1<br>(-6.3 to 6.4)                               |
| Peripheral vascular disease                        | 24.3<br>(21.2 to 28.3)                  | 2.2<br>(1.9 to 2.6)                   | 0.1<br>(0.1 to 0.2)               | 49.9<br>(37.6 to 64.2)                            | -1.3<br>(-9.0 to 7.1)                               |
| Endocarditis                                       | 0.1<br>(0.1 to 0.1)                     | 0.2<br>(0.2 to 0.2)                   | < 0.05<br>(< 0.05 to < 0.05)      | 12.3<br>(5.1 to 20.1)                             | -3.0<br>(-9.5 to 4.4)                               |
| Other cardiovascular and circulatory diseases      | 13.1<br>(11.2 to 15.2)                  | --                                    | 0.7<br>(0.5 to 1.0)               | 13.0<br>(3.4 to 23.2)                             | -3.1<br>(-10.3 to 4.9)                              |
| <b>Chronic respiratory diseases</b>                | <b>114.1</b><br><b>(110.4 to 117.8)</b> | <b>23.8†</b><br><b>(22.6 to 25.0)</b> | <b>7.7</b><br><b>(6.3 to 9.1)</b> | <b>24.9</b><br><b>(19.9 to 30.9)</b>              | <b>2.8</b><br><b>(-0.7 to 6.6)</b>                  |
| Chronic obstructive pulmonary disease              | 43.9<br>(41.9 to 46.0)                  | 3.3<br>(3.1 to 3.4)                   | 4.4<br>(3.9 to 4.8)               | 37.3<br>(30.1 to 45.8)                            | 2.8<br>(-2.2 to 8.5)                                |
| Pneumoconiosis                                     | 0.1<br>(0.1 to 0.2)                     | < 0.05<br>(< 0.05 to < 0.05)          | < 0.05<br>(< 0.05 to < 0.05)      | 42.8<br>(10.1 to 87.4)                            | 1.1<br>(-20.9 to 31.0)                              |
| Silicosis                                          | 0.1<br>(0.1 to 0.1)                     | < 0.05<br>(< 0.05 to < 0.05)          | < 0.05<br>(< 0.05 to < 0.05)      | 43.6<br>(2.5 to 101.9)                            | 1.7<br>(-26.3 to 41.6)                              |

| Cause                                                          | Prevalence in thousands (95% UI)  | Incidence in thousands (95% UI)   | YLDs in thousands (95% UI)        |                                                                     |                                                                      |
|----------------------------------------------------------------|-----------------------------------|-----------------------------------|-----------------------------------|---------------------------------------------------------------------|----------------------------------------------------------------------|
|                                                                | 2016 counts<br>(< 0.05 to < 0.05) | 2016 counts<br>(< 0.05 to < 0.05) | 2016 counts<br>(< 0.05 to < 0.05) | Percentage change in counts between 2006 and 2016<br>(33.2 to 50.6) | Percentage change in age-standardised rates between<br>(-4.8 to 7.5) |
| Asbestosis                                                     | < 0.05<br>(< 0.05 to < 0.05)      | < 0.05<br>(< 0.05 to < 0.05)      | < 0.05<br>(< 0.05 to < 0.05)      | 41.4<br>(33.2 to 50.6)                                              | 1.1<br>(-4.8 to 7.5)                                                 |
| Coal workers pneumoconiosis                                    | --                                | --                                | --                                | --                                                                  | --                                                                   |
| Other pneumoconiosis                                           | < 0.05<br>(< 0.05 to < 0.05)      | < 0.05<br>(< 0.05 to < 0.05)      | < 0.05<br>(< 0.05 to < 0.05)      | 36.8<br>(19.9 to 55.6)                                              | -4.8<br>(-16.2 to 9.4)                                               |
| Asthma                                                         | 73.8<br>(69.7 to 78.4)            | 20.3<br>(19.1 to 21.5)            | 2.9<br>(1.9 to 4.1)               | 7.8<br>(3.1 to 12.7)                                                | 1.3<br>(-2.9 to 5.9)                                                 |
| Interstitial lung disease and pulmonary sarcoidosis            | 2.2<br>(1.9 to 2.5)               | 0.2<br>(0.2 to 0.2)               | 0.2<br>(0.1 to 0.3)               | 46.4<br>(31.5 to 62.0)                                              | 2.5<br>(-6.8 to 12.8)                                                |
| Other chronic respiratory diseases                             | --                                | --                                | 0.2<br>(0.1 to 0.2)               | 42.0<br>(25.4 to 60.4)                                              | 37.8<br>(20.3 to 57.6)                                               |
| <b>Cirrhosis and other chronic liver diseases</b>              | <b>7.4<br/>(7.0 to 7.8)</b>       | <b>0.4<br/>(0.4 to 0.4)</b>       | <b>0.2<br/>(0.1 to 0.3)</b>       | <b>8.6<br/>(-2.8 to 21.6)</b>                                       | <b>-7.2<br/>(-16.6 to 3.6)</b>                                       |
| Cirrhosis and other chronic liver diseases due to hepatitis B  | 2.5<br>(2.1 to 2.8)               | 0.1<br>(0.1 to 0.1)               | 0.1<br>(< 0.05 to 0.1)            | 13.3<br>(-6.1 to 37.2)                                              | -8.6<br>(-23.0 to 9.9)                                               |
| Cirrhosis and other chronic liver diseases due to hepatitis C  | 1.5<br>(1.2 to 1.8)               | 0.1<br>(0.1 to 0.1)               | < 0.05<br>(< 0.05 to 0.1)         | 13.4<br>(-11.8 to 45.2)                                             | -7.9<br>(-26.6 to 16.1)                                              |
| Cirrhosis and other chronic liver diseases due to alcohol use  | 1.4<br>(1.1 to 1.6)               | 0.1<br>(0.1 to 0.1)               | < 0.05<br>(< 0.05 to 0.1)         | 12.8<br>(-13.3 to 45.9)                                             | -10.6<br>(-29.7 to 13.3)                                             |
| Cirrhosis and other chronic liver diseases due to other causes | 2.1<br>(1.9 to 2.3)               | 0.1<br>(0.1 to 0.1)               | 0.1<br>(0.1 to 0.1)               | 1.5<br>(-15.9 to 24.5)                                              | -4.6<br>(-19.9 to 16.7)                                              |
| <b>Digestive diseases</b>                                      | <b>16.5<br/>(15.4 to 17.5)</b>    | <b>20.7†<br/>(19.5 to 22.1)</b>   | <b>0.5<br/>(0.3 to 0.7)</b>       | <b>26.5<br/>(18.8 to 34.8)</b>                                      | <b>3.9<br/>(-1.9 to 10.1)</b>                                        |
| Peptic ulcer disease                                           | 4.9<br>(4.5 to 5.3)               | 2.3<br>(2.0 to 2.5)               | 0.1<br>(0.1 to 0.2)               | 32.3<br>(19.7 to 46.5)                                              | 7.6<br>(-2.3 to 18.5)                                                |
| Gastritis and duodenitis                                       | 9.0<br>(7.8 to 10.2)              | 8.5<br>(7.5 to 9.7)               | 0.1<br>(0.1 to 0.2)               | 35.4<br>(22.8 to 50.3)                                              | 7.4<br>(-1.8 to 17.9)                                                |
| Appendicitis                                                   | 0.1<br>(0.1 to 0.1)               | 2.3<br>(2.1 to 2.4)               | < 0.05<br>(< 0.05 to < 0.05)      | 3.0<br>(-2.9 to 9.3)                                                | -4.6<br>(-10.9 to 2.4)                                               |
| Paralytic ileus and intestinal obstruction                     | < 0.05<br>(< 0.05 to < 0.05)      | 0.3<br>(0.3 to 0.4)               | < 0.05<br>(< 0.05 to < 0.05)      | 19.8<br>(14.9 to 25.6)                                              | 3.1<br>(0.1 to 6.2)                                                  |
| Inguinal, femoral, and abdominal hernia                        | 1.9<br>(1.6 to 2.2)               | 2.9<br>(2.5 to 3.3)               | 0.1<br>(0.1 to 0.1)               | 29.0<br>(9.8 to 52.0)                                               | 5.3<br>(-8.8 to 22.2)                                                |
| Inflammatory bowel disease                                     | 0.4<br>(0.3 to 0.6)               | 0.6<br>(0.4 to 0.7)               | 0.1<br>(< 0.05 to 0.1)            | 8.9<br>(-9.3 to 32.2)                                               | -7.9<br>(-22.3 to 9.8)                                               |
| Vascular intestinal disorders                                  | < 0.05<br>(< 0.05 to < 0.05)      | 0.1<br>(0.1 to 0.1)               | < 0.05<br>(< 0.05 to < 0.05)      | 23.1<br>(16.6 to 31.0)                                              | 5.7<br>(1.5 to 10.1)                                                 |
| Gallbladder and biliary diseases                               | 1.0<br>(0.8 to 1.1)               | 3.3<br>(2.8 to 3.8)               | < 0.05<br>(< 0.05 to < 0.05)      | 31.0<br>(17.7 to 45.9)                                              | 7.2<br>(-2.5 to 17.5)                                                |
| Pancreatitis                                                   | 0.1<br>(0.1 to 0.1)               | 0.6<br>(0.5 to 0.6)               | < 0.05<br>(< 0.05 to < 0.05)      | 14.0<br>(8.4 to 19.9)                                               | -3.8<br>(-7.9 to 0.7)                                                |
| Other digestive diseases                                       | --                                | --                                | < 0.05<br>(< 0.05 to 0.1)         | 32.9<br>(24.9 to 41.5)                                              | 7.7<br>(1.6 to 14.3)                                                 |
| <b>Neurological disorders</b>                                  | <b>461.2<br/>(442.8 to 487.6)</b> | <b>203.9<br/>(175.1 to 237.4)</b> | <b>12.3<br/>(8.1 to 17.1)</b>     | <b>10.2<br/>(-10.6 to 37.4)</b>                                     | <b>-0.5<br/>(-19.8 to 24.6)</b>                                      |
| Alzheimer's disease and other dementias                        | 9.9<br>(8.4 to 11.7)              | 1.7<br>(1.4 to 2.0)               | 1.4<br>(1.0 to 1.9)               | 48.0<br>(40.8 to 54.9)                                              | -0.3<br>(-4.8 to 4.0)                                                |
| Parkinson's disease                                            | 1.2<br>(1.0 to 1.5)               | 0.1<br>(0.1 to 0.2)               | 0.1<br>(0.1 to 0.2)               | 49.4<br>(31.9 to 71.3)                                              | 5.9<br>(-5.5 to 19.7)                                                |
| Epilepsy                                                       | 6.7<br>(1.9 to 9.6)               | 0.7<br>(0.2 to 1.0)               | 2.2<br>(0.6 to 4.2)               | 1.5<br>(-74.0 to 224.6)                                             | -4.1<br>(-75.1 to 207.7)                                             |
| Multiple sclerosis                                             | 0.1<br>(0.1 to 0.1)               | < 0.05<br>(< 0.05 to < 0.05)      | < 0.05<br>(< 0.05 to < 0.05)      | 25.9<br>(21.2 to 31.1)                                              | 10.8<br>(7.1 to 15.3)                                                |
| Motor neuron disease                                           | < 0.05<br>(< 0.05 to < 0.05)      | < 0.05<br>(< 0.05 to < 0.05)      | < 0.05<br>(< 0.05 to < 0.05)      | 16.6<br>(12.0 to 21.6)                                              | 3.6<br>(0.4 to 6.9)                                                  |
| Migraine                                                       | 171.3<br>(160.9 to 182.1)         | 16.9<br>(15.8 to 18.0)            | 7.0<br>(4.5 to 10.0)              | 7.0<br>(3.4 to 10.8)                                                | -0.3<br>(-3.9 to 3.0)                                                |
| Tension-type headache                                          | 339.2<br>(304.0 to 380.5)         | 184.5<br>(155.5 to 218.0)         | 1.1<br>(0.7 to 1.6)               | 8.5<br>(3.0 to 15.0)                                                | -0.3<br>(-5.2 to 5.4)                                                |
| Other neurological disorders                                   | < 0.05<br>(< 0.05 to < 0.05)      | < 0.05<br>(< 0.05 to < 0.05)      | 0.5<br>(0.1 to 0.8)               | 15.4<br>(-59.9 to 218.9)                                            | 15.4<br>(-61.8 to 217.0)                                             |
| <b>Mental and substance use disorders</b>                      | <b>183.1<br/>(176.6 to 190.2)</b> | <b>65.0†<br/>(60.9 to 70.0)</b>   | <b>25.1<br/>(18.2 to 32.4)</b>    | <b>7.2<br/>(4.5 to 9.8)</b>                                         | <b>-1.5<br/>(-3.7 to 0.9)</b>                                        |
| Schizophrenia                                                  | 4.1<br>(3.6 to 4.6)               | 0.2<br>(0.2 to 0.2)               | 2.6<br>(1.9 to 3.3)               | 10.4<br>(1.7 to 19.6)                                               | 1.4<br>(-6.6 to 9.6)                                                 |
| Alcohol use disorders                                          | 14.4<br>(13.0 to 16.1)            | 7.1<br>(6.2 to 8.0)               | 1.4<br>(1.0 to 2.0)               | 7.2<br>(-2.9 to 18.1)                                               | -0.9<br>(-10.0 to 8.6)                                               |
| Drug use disorders                                             | 9.8<br>(8.9 to 10.7)              | 1.3<br>(1.2 to 1.5)               | 1.8<br>(1.2 to 2.4)               | 13.9<br>(3.8 to 24.3)                                               | 7.0<br>(-2.4 to 16.6)                                                |
| Opioid use disorders                                           | 2.8<br>(2.3 to 3.4)               | 0.3<br>(0.3 to 0.4)               | 1.2<br>(0.8 to 1.6)               | 17.1<br>(4.2 to 30.9)                                               | 8.0<br>(-3.4 to 20.0)                                                |
| Cocaine use disorders                                          | 0.2<br>(0.2 to 0.2)               | < 0.05<br>(< 0.05 to < 0.05)      | < 0.05<br>(< 0.05 to < 0.05)      | 14.0<br>(7.6 to 20.8)                                               | 5.3<br>(-0.4 to 11.0)                                                |
| Amphetamine use disorders                                      | 1.6<br>(1.0 to 2.2)               | 0.1<br>(0.1 to 0.2)               | 0.2<br>(0.1 to 0.3)               | 9.3<br>(-12.6 to 38.8)                                              | 7.4<br>(-13.9 to 36.4)                                               |
| Cannabis use disorders                                         | 5.0<br>(4.0 to 6.1)               | 0.7<br>(0.6 to 0.8)               | 0.1<br>(0.1 to 0.2)               | 2.0<br>(-10.8 to 15.4)                                              | -0.2<br>(-12.6 to 13.3)                                              |
| Other drug use disorders                                       | 0.6<br>(0.6 to 0.7)               | 0.1<br>(0.1 to 0.1)               | 0.2<br>(0.1 to 0.4)               | 10.8<br>(-12.2 to 38.5)                                             | 6.8<br>(-15.9 to 34.0)                                               |
| Depressive disorders                                           | 51.1<br>(47.9 to 54.6)            | 44.3<br>(40.3 to 49.3)            | 7.9<br>(5.5 to 10.8)              | 6.8<br>(1.9 to 11.8)                                                | -5.9<br>(-10.2 to -1.8)                                              |
| Major depressive disorder                                      | 27.5<br>(24.9 to 30.8)            | 40.7<br>(36.8 to 45.7)            | 5.6<br>(3.8 to 7.6)               | 2.3<br>(-3.9 to 8.7)                                                | -8.0<br>(-13.5 to -2.8)                                              |
| Dysthymia                                                      | 24.6<br>(21.4 to 28.3)            | 3.6<br>(3.1 to 4.1)               | 2.3<br>(1.6 to 3.4)               | 19.1<br>(14.6 to 23.9)                                              | -0.2<br>(-3.1 to 2.8)                                                |
| Bipolar disorder                                               | 7.7<br>(6.7 to 8.9)               | 0.6<br>(0.5 to 0.7)               | 1.6<br>(1.0 to 2.3)               | 9.5<br>(2.6 to 17.2)                                                | 0.1<br>(-6.0 to 6.8)                                                 |
| Anxiety disorders                                              | 48.0<br>(42.4 to 53.6)            | 7.2<br>(6.4 to 8.1)               | 4.6<br>(3.2 to 6.3)               | 9.2<br>(1.9 to 16.8)                                                | 0.2<br>(-6.2 to 6.8)                                                 |
| Eating disorders                                               | 1.6<br>(1.3 to 1.9)               | 0.8<br>(0.6 to 1.1)               | 0.3<br>(0.2 to 0.5)               | 9.7<br>(-4.2 to 25.6)                                               | 11.0<br>(-3.2 to 27.3)                                               |
| Anorexia nervosa                                               | 0.5<br>(0.3 to 0.6)               | 0.2<br>(0.1 to 0.2)               | 0.1<br>(0.1 to 0.1)               | 8.4<br>(-13.9 to 37.2)                                              | 10.3<br>(-11.8 to 39.3)                                              |
| Bulimia nervosa                                                | 1.1<br>(0.8 to 1.4)               | 0.7<br>(0.5 to 0.9)               | 0.2<br>(0.1 to 0.3)               | 10.3<br>(-6.3 to 30.8)                                              | 11.3<br>(-5.4 to 31.4)                                               |
| Autistic spectrum disorders                                    | 10.2<br>(9.1 to 11.6)             | < 0.05<br>(< 0.05 to 0.1)         | 1.5<br>(1.0 to 2.1)               | 2.1<br>(-2.6 to 7.1)                                                | 0.1<br>(-4.7 to 4.9)                                                 |
| Autism                                                         | 3.1<br>(2.6 to 3.6)               | < 0.05<br>(< 0.05 to < 0.05)      | 0.8<br>(0.5 to 1.1)               | 2.3<br>(-5.9 to 10.6)                                               | -0.1<br>(-8.2 to 8.0)                                                |
| Asperger syndrome and other autistic spectrum disorders        | 7.2<br>(6.0 to 8.6)               | < 0.05<br>(< 0.05 to 0.1)         | 0.7<br>(0.5 to 1.0)               | 1.9<br>(-3.1 to 7.1)                                                | 0.2<br>(-4.6 to 5.1)                                                 |

| Cause                                                      | Prevalence in thousands (95% UI)        | Incidence in thousands (95% UI)                | YLDs in thousands (95% UI)           |                                                   |                                                     |
|------------------------------------------------------------|-----------------------------------------|------------------------------------------------|--------------------------------------|---------------------------------------------------|-----------------------------------------------------|
|                                                            | 2016 counts                             | 2016 counts                                    | 2016 counts                          | Percentage change in counts between 2006 and 2016 | Percentage change in age-standardised rates between |
| Attention-deficit/hyperactivity disorder                   | 5.9<br>(4.7 to 7.3)                     | 0.2<br>(0.1 to 0.3)                            | 0.1<br>( $< 0.05$ to 0.1)            | -4.3<br>(-14.7 to 5.9)                            | 0.2<br>(-10.1 to 10.8)                              |
| Conduct disorder                                           | 7.8<br>(6.3 to 9.2)                     | 2.5<br>(2.0 to 3.0)                            | 1.0<br>(0.6 to 1.4)                  | -8.6<br>(-14.5 to -2.0)                           | 0.2<br>(-6.3 to 7.0)                                |
| Idiopathic developmental intellectual disability           | 9.9<br>(4.3 to 16.4)                    | --                                             | 0.4<br>(0.2 to 0.8)                  | -12.1<br>(-20.8 to -3.8)                          | -13.8<br>(-22.4 to -5.8)                            |
| Other mental and substance use disorders                   | 26.8<br>(23.7 to 30.9)                  | 0.8<br>(0.7 to 0.9)                            | 2.0<br>(1.4 to 2.8)                  | 11.6<br>(6.0 to 17.6)                             | -0.0<br>(-4.8 to 5.1)                               |
| <b>Diabetes, urogenital, blood, and endocrine diseases</b> | <b>577.7</b><br><b>(551.6 to 603.5)</b> | <b>124.1†</b><br><b>(117.5 to 131.3)</b>       | <b>18.6</b><br><b>(13.1 to 25.5)</b> | <b>37.9</b><br><b>(30.7 to 45.4)</b>              | <b>12.7</b><br><b>(7.1 to 18.2)</b>                 |
| Diabetes mellitus                                          | 205.3<br>(187.4 to 226.6)               | 13.9<br>(12.8 to 15.2)                         | 11.7<br>(7.9 to 16.4)                | 53.9<br>(42.1 to 66.5)                            | 22.0<br>(13.0 to 31.5)                              |
| Acute glomerulonephritis                                   | $< 0.05$<br>( $< 0.05$ to $< 0.05$ )    | 0.2<br>(0.2 to 0.3)                            | $< 0.05$<br>( $< 0.05$ to $< 0.05$ ) | 9.9<br>(4.0 to 16.6)                              | 0.7<br>(-3.9 to 5.7)                                |
| Chronic kidney disease                                     | 63.4<br>(57.5 to 70.6)                  | 4.7<br>(4.2 to 5.2)                            | 2.6<br>(1.9 to 3.3)                  | 38.0<br>(25.8 to 51.2)                            | 7.3<br>(-2.0 to 16.6)                               |
| Chronic kidney disease due to diabetes mellitus            | 39.6<br>(35.0 to 44.8)                  | 3.0<br>(2.6 to 3.4)                            | 1.6<br>(1.2 to 2.1)                  | 38.3<br>(24.2 to 53.7)                            | 7.8<br>(-3.2 to 19.1)                               |
| Chronic kidney disease due to hypertension                 | 9.2<br>(7.9 to 10.7)                    | 0.3<br>(0.2 to 0.3)                            | 0.7<br>(0.5 to 0.9)                  | 45.7<br>(26.6 to 66.6)                            | 6.7<br>(-6.6 to 19.9)                               |
| Chronic kidney disease due to glomerulonephritis           | 11.2<br>(9.5 to 13.2)                   | 1.2<br>(1.0 to 1.4)                            | 0.2<br>(0.1 to 0.2)                  | 20.9<br>(10.9 to 31.2)                            | 7.8<br>(-0.5 to 16.7)                               |
| Chronic kidney disease due to other causes                 | 3.4<br>(2.8 to 4.1)                     | 0.3<br>(0.2 to 0.3)                            | 0.2<br>(0.1 to 0.2)                  | 25.1<br>(14.6 to 37.0)                            | 4.8<br>(-3.5 to 13.0)                               |
| Urinary diseases and male infertility                      | 16.2<br>(14.4 to 18.0)                  | 60.8†<br>(54.7 to 67.4)                        | 0.4<br>(0.3 to 0.6)                  | 27.8<br>(18.7 to 37.0)                            | -2.4<br>(-8.3 to 3.4)                               |
| Interstitial nephritis and urinary tract infections        | 1.0<br>(0.9 to 1.2)                     | 53.6<br>(47.5 to 60.0)                         | $< 0.05$<br>( $< 0.05$ to 0.1)       | 9.7<br>(-6.3 to 28.1)                             | 2.8<br>(-11.9 to 20.6)                              |
| Urolithiasis                                               | 0.2<br>(0.2 to 0.3)                     | 5.9<br>(5.1 to 6.8)                            | $< 0.05$<br>( $< 0.05$ to $< 0.05$ ) | 26.7<br>(15.9 to 39.4)                            | 1.5<br>(-8.1 to 12.1)                               |
| Benign prostatic hyperplasia                               | 10.2<br>(8.6 to 12.0)                   | 1.3<br>(1.1 to 1.6)                            | 0.3<br>(0.2 to 0.5)                  | 37.5<br>(26.3 to 48.8)                            | -1.5<br>(-8.8 to 6.1)                               |
| Male infertility                                           | 4.1<br>(3.1 to 5.3)                     | --                                             | $< 0.05$<br>( $< 0.05$ to $< 0.05$ ) | -12.3<br>(-19.6 to -4.1)                          | -11.2<br>(-18.5 to -2.8)                            |
| Other urinary diseases                                     | --                                      | --                                             | $< 0.05$<br>( $< 0.05$ to $< 0.05$ ) | -7.0<br>(-17.9 to 4.8)                            | -14.9<br>(-24.5 to -4.0)                            |
| Gynecological diseases                                     | 133.2<br>(128.1 to 138.3)               | 40.8†<br>(38.5 to 43.2)                        | 1.6<br>(1.1 to 2.3)                  | -0.2<br>(-4.5 to 4.0)                             | -4.2<br>(-8.2 to -0.0)                              |
| Uterine fibroids                                           | 21.8<br>(19.2 to 24.9)                  | 2.1<br>(1.8 to 2.5)                            | 0.4<br>(0.3 to 0.7)                  | 1.4<br>(-7.2 to 9.6)                              | -6.4<br>(-13.8 to 1.0)                              |
| Polycystic ovarian syndrome                                | 1.0<br>(0.7 to 1.3)                     | 0.9<br>(0.6 to 1.1)                            | $< 0.05$<br>( $< 0.05$ to $< 0.05$ ) | 0.5<br>(-14.2 to 16.2)                            | 0.7<br>(-14.2 to 16.6)                              |
| Female infertility                                         | 2.1<br>(0.8 to 4.8)                     | --                                             | $< 0.05$<br>( $< 0.05$ to $< 0.05$ ) | 16.4<br>(-11.0 to 67.5)                           | 17.2<br>(-10.2 to 68.3)                             |
| Endometriosis                                              | 0.1<br>(0.1 to 0.1)                     | 1.0<br>(0.8 to 1.2)                            | $< 0.05$<br>( $< 0.05$ to $< 0.05$ ) | 2.4<br>(-24.1 to 41.0)                            | 0.5<br>(-25.4 to 38.8)                              |
| Genital prolapse                                           | 29.2<br>(25.0 to 33.6)                  | 1.5<br>(1.3 to 1.8)                            | 0.1<br>( $< 0.05$ to 0.2)            | 9.7<br>(-1.2 to 21.5)                             | -17.1<br>(-25.2 to -8.1)                            |
| Premenstrual syndrome                                      | 80.8<br>(76.5 to 85.1)                  | 28.2<br>(26.3 to 30.1)                         | 0.7<br>(0.4 to 1.1)                  | -0.2<br>(-6.7 to 7.3)                             | -0.5<br>(-7.0 to 7.2)                               |
| Other gynecological diseases                               | 11.7<br>(10.6 to 12.9)                  | 7.1<br>(5.9 to 8.4)                            | 0.4<br>(0.2 to 0.5)                  | -4.5<br>(-12.1 to 4.2)                            | -5.8<br>(-13.3 to 2.8)                              |
| Hemoglobinopathies and hemolytic anaemias                  | 304.0<br>(271.8 to 337.7)               | --                                             | 1.4<br>(0.7 to 2.5)                  | 6.4<br>(-2.6 to 17.4)                             | -0.5<br>(-8.8 to 9.1)                               |
| Thalassemias                                               | 0.1<br>(0.1 to 0.3)                     | --                                             | $< 0.05$<br>( $< 0.05$ to $< 0.05$ ) | -14.6<br>(-32.5 to 11.5)                          | 9.4<br>(-14.1 to 45.3)                              |
| Thalassaemias trait                                        | 89.6<br>(46.5 to 151.3)                 | --                                             | 1.0<br>(0.3 to 2.0)                  | 8.8<br>(-2.0 to 23.4)                             | 3.6<br>(-6.8 to 17.6)                               |
| Sickle cell disorders                                      | $< 0.05$<br>( $< 0.05$ to $< 0.05$ )    | --                                             | $< 0.05$<br>( $< 0.05$ to $< 0.05$ ) | -3.0<br>(-14.0 to 8.8)                            | 5.8<br>(-7.5 to 20.6)                               |
| Sickle cell trait                                          | 3.5<br>(3.1 to 3.8)                     | --                                             | $< 0.05$<br>( $< 0.05$ to $< 0.05$ ) | -2.4<br>(-20.0 to 15.9)                           | -0.8<br>(-19.3 to 19.8)                             |
| G6PD deficiency                                            | 46.6<br>(42.1 to 51.9)                  | --                                             | $< 0.05$<br>( $< 0.05$ to $< 0.05$ ) | -1.3<br>(-10.6 to 9.1)                            | -6.9<br>(-15.9 to 3.0)                              |
| G6PD trait                                                 | 165.7<br>(163.2 to 168.4)               | --                                             | $< 0.05$<br>( $< 0.05$ to $< 0.05$ ) | 1.7<br>(-8.7 to 12.7)                             | -2.9<br>(-12.7 to 7.5)                              |
| Other hemoglobinopathies and hemolytic anaemias            | 20.3<br>(19.4 to 21.3)                  | --                                             | 0.4<br>(0.2 to 0.5)                  | 1.2<br>(-6.7 to 9.1)                              | -10.1<br>(-16.5 to -3.3)                            |
| Endocrine, metabolic, blood, and immune disorders          | 30.4<br>(28.4 to 32.5)                  | 3.6<br>(3.2 to 4.1)                            | 0.9<br>(0.6 to 1.2)                  | 15.1<br>(8.5 to 22.0)                             | -4.1<br>(-9.2 to 1.1)                               |
| <b>Musculoskeletal disorders</b>                           | <b>245.0</b><br><b>(234.1 to 256.3)</b> | <b>127.4</b><br><b>(115.2 to 140.6)</b>        | <b>26.4</b><br><b>(19.3 to 34.5)</b> | <b>19.0</b><br><b>(14.6 to 23.4)</b>              | <b>-0.5</b><br><b>(-3.9 to 2.9)</b>                 |
| Rheumatoid arthritis                                       | 2.1<br>(1.9 to 2.4)                     | 0.1<br>(0.1 to 0.1)                            | 0.5<br>(0.3 to 0.7)                  | 31.6<br>(18.2 to 48.1)                            | 5.7<br>(-3.9 to 17.6)                               |
| Osteoarthritis                                             | 59.4<br>(55.4 to 63.5)                  | 2.9<br>(2.6 to 3.1)                            | 3.6<br>(2.6 to 4.9)                  | 35.0<br>(29.7 to 40.7)                            | 1.3<br>(-2.4 to 5.2)                                |
| Low back and neck pain                                     | 140.3<br>(130.3 to 152.3)               | 60.4<br>(53.4 to 68.1)                         | 16.2<br>(11.3 to 21.4)               | 17.3<br>(11.3 to 23.3)                            | -0.3<br>(-5.0 to 4.3)                               |
| Low back pain                                              | 102.7<br>(90.9 to 116.7)                | 49.9<br>(43.0 to 57.4)                         | 11.6<br>(8.2 to 15.3)                | 17.4<br>(9.4 to 25.6)                             | -0.4<br>(-6.7 to 6.0)                               |
| Neck pain                                                  | 47.1<br>(40.5 to 54.7)                  | 10.6<br>(9.1 to 12.5)                          | 4.7<br>(3.1 to 6.7)                  | 17.1<br>(12.9 to 21.5)                            | -0.1<br>(-2.4 to 2.4)                               |
| Gout                                                       | 6.8<br>(6.0 to 7.8)                     | 1.3<br>(1.2 to 1.5)                            | 0.2<br>(0.1 to 0.3)                  | 28.9<br>(11.8 to 47.6)                            | 0.2<br>(-11.9 to 13.6)                              |
| Other musculoskeletal disorders                            | 69.4<br>(59.7 to 80.5)                  | 62.6<br>(53.1 to 74.5)                         | 5.9<br>(4.0 to 8.4)                  | 14.0<br>(5.7 to 22.9)                             | -2.6<br>(-8.9 to 4.1)                               |
| <b>Other non-communicable diseases</b>                     | <b>908.7</b><br><b>(883.5 to 930.7)</b> | <b>2,596.4†</b><br><b>(2,362.0 to 2,827.0)</b> | <b>28.8</b><br><b>(20.0 to 40.3)</b> | <b>12.4</b><br><b>(10.6 to 14.3)</b>              | <b>-3.1</b><br><b>(-4.3 to -1.8)</b>                |
| Congenital anomalies                                       | 8.9<br>(7.7 to 10.5)                    | --                                             | 1.2<br>(0.8 to 1.6)                  | 2.8<br>(-3.3 to 9.9)                              | -0.0<br>(-5.8 to 6.7)                               |
| Neural tube defects                                        | 0.8<br>(0.7 to 0.9)                     | --                                             | 0.2<br>(0.2 to 0.3)                  | 6.7<br>(-7.3 to 22.2)                             | 2.3<br>(-10.7 to 16.7)                              |
| Congenital heart anomalies                                 | 2.2<br>(2.0 to 2.5)                     | --                                             | 0.1<br>( $< 0.05$ to 0.2)            | 6.6<br>(-4.5 to 19.4)                             | 4.8<br>(-5.6 to 17.1)                               |
| Orofacial clefts                                           | 0.6<br>(0.5 to 0.6)                     | --                                             | $< 0.05$<br>( $< 0.05$ to $< 0.05$ ) | 7.6<br>(-4.8 to 21.4)                             | 4.0<br>(-7.8 to 17.3)                               |
| Down's syndrome                                            | 0.3<br>(0.3 to 0.4)                     | --                                             | $< 0.05$<br>( $< 0.05$ to $< 0.05$ ) | 1.0<br>(-7.4 to 9.2)                              | 2.9<br>(-5.5 to 11.2)                               |
| Turner syndrome                                            | 0.2<br>(0.2 to 0.2)                     | --                                             | $< 0.05$<br>( $< 0.05$ to $< 0.05$ ) | 4.6<br>(-8.8 to 21.1)                             | 6.4<br>(-6.8 to 22.4)                               |
| Klinefelter syndrome                                       | 0.3<br>(0.2 to 0.3)                     | --                                             | $< 0.05$<br>( $< 0.05$ to $< 0.05$ ) | -1.3<br>(-28.5 to 35.5)                           | 1.7<br>(-25.8 to 39.7)                              |



| Cause                                         | Prevalence in thousands (95% UI)        | Incidence in thousands (95% UI)       | YLDs in thousands (95% UI)         |                                                   |                                                     |
|-----------------------------------------------|-----------------------------------------|---------------------------------------|------------------------------------|---------------------------------------------------|-----------------------------------------------------|
|                                               | 2016 counts                             | 2016 counts                           | 2016 counts                        | Percentage change in counts between 2006 and 2016 | Percentage change in age-standardised rates between |
| Other chromosomal abnormalities               | 0.3<br>(0.2 to 0.3)                     | --                                    | < 0.05<br>(< 0.05 to < 0.05)       | -14.6<br>(-26.6 to 0.3)                           | 1.1<br>(-12.7 to 17.1)                              |
| Congenital musculoskeletal and limb anomalies | 1.1<br>(1.0 to 1.2)                     | --                                    | 0.2<br>(0.1 to 0.2)                | 10.0<br>(-2.0 to 23.3)                            | 5.6<br>(-5.8 to 17.9)                               |
| Urogenital congenital anomalies               | 0.7<br>(0.6 to 0.8)                     | --                                    | < 0.05<br>(< 0.05 to < 0.05)       | -7.2<br>(-14.1 to 0.4)                            | -0.4<br>(-7.7 to 8.0)                               |
| Digestive congenital anomalies                | 1.6<br>(1.4 to 1.8)                     | --                                    | 0.1<br>(0.1 to 0.1)                | 10.4<br>(-4.6 to 27.6)                            | 6.2<br>(-7.7 to 22.7)                               |
| Other congenital anomalies                    | 3.6<br>(2.1 to 5.7)                     | --                                    | 0.5<br>(0.3 to 0.8)                | -1.4<br>(-10.3 to 10.2)                           | -5.2<br>(-13.6 to 5.6)                              |
| Skin and subcutaneous diseases                | 442.1<br>(427.8 to 456.5)               | 1,016.6<br>(948.0 to 1,096.3)         | 10.2<br>(6.8 to 15.0)              | 2.0<br>(-0.1 to 4.1)                              | 0.5<br>(-1.4 to 2.3)                                |
| Dermatitis                                    | 54.7<br>(50.2 to 59.6)                  | 75.9<br>(70.5 to 81.7)                | 2.0<br>(1.2 to 3.2)                | -2.3<br>(-6.0 to 1.9)                             | -0.0<br>(-3.3 to 3.5)                               |
| Psoriasis                                     | 10.9<br>(10.4 to 11.5)                  | 1.4<br>(1.3 to 1.5)                   | 0.9<br>(0.7 to 1.2)                | 16.5<br>(7.6 to 26.1)                             | 5.5<br>(-2.1 to 14.0)                               |
| Cellulitis                                    | 0.6<br>(0.5 to 0.6)                     | 12.1<br>(11.3 to 13.0)                | < 0.05<br>(< 0.05 to < 0.05)       | 9.6<br>(-10.7 to 35.5)                            | 2.7<br>(-16.1 to 26.6)                              |
| Pyoderma                                      | 1.5<br>(1.4 to 1.6)                     | 29.6<br>(28.4 to 30.7)                | < 0.05<br>(< 0.05 to < 0.05)       | 21.1<br>(9.4 to 34.0)                             | 1.0<br>(-8.1 to 10.6)                               |
| Scabies                                       | 39.6<br>(31.8 to 51.9)                  | 124.3<br>(98.1 to 163.8)              | 1.0<br>(0.5 to 1.7)                | -4.3<br>(-10.0 to 1.2)                            | -4.5<br>(-9.3 to -0.1)                              |
| Fungal skin diseases                          | 145.9<br>(129.9 to 162.7)               | 494.2<br>(434.9 to 559.6)             | 0.8<br>(0.3 to 1.7)                | 11.6<br>(8.8 to 14.6)                             | -0.0<br>(-0.9 to 0.9)                               |
| Viral skin diseases                           | 34.0<br>(30.5 to 37.5)                  | 48.9<br>(43.9 to 53.9)                | 1.0<br>(0.7 to 1.5)                | -0.4<br>(-3.6 to 2.9)                             | -0.1<br>(-3.1 to 3.0)                               |
| Acne vulgaris                                 | 115.0<br>(103.7 to 127.2)               | 79.9<br>(65.3 to 101.3)               | 3.0<br>(2.0 to 4.3)                | -0.9<br>(-5.2 to 3.6)                             | 1.1<br>(-3.3 to 5.5)                                |
| Alopecia areata                               | 2.5<br>(2.4 to 2.6)                     | 4.4<br>(4.3 to 4.6)                   | 0.1<br>(0.1 to 0.1)                | 5.0<br>(-5.4 to 16.0)                             | -0.3<br>(-10.2 to 10.1)                             |
| Pruritus                                      | 12.3<br>(10.8 to 14.0)                  | 9.7<br>(8.6 to 11.0)                  | 0.1<br>(0.1 to 0.2)                | 12.6<br>(6.4 to 19.1)                             | 0.7<br>(-4.5 to 5.8)                                |
| Urticaria                                     | 9.4<br>(8.3 to 10.6)                    | 16.6<br>(14.7 to 18.8)                | 0.6<br>(0.4 to 0.8)                | -3.9<br>(-9.4 to 2.0)                             | -0.1<br>(-5.6 to 5.4)                               |
| Decubitus ulcer                               | 0.2<br>(0.2 to 0.2)                     | 0.8<br>(0.7 to 0.9)                   | < 0.05<br>(< 0.05 to < 0.05)       | 50.3<br>(28.9 to 75.9)                            | 8.1<br>(-7.9 to 27.8)                               |
| Other skin and subcutaneous diseases          | 101.4<br>(98.2 to 104.3)                | 118.8<br>(114.8 to 123.0)             | 0.6<br>(0.3 to 1.0)                | 21.9<br>(18.7 to 24.9)                            | 3.8<br>(1.2 to 6.2)                                 |
| Sense organ diseases                          | 311.6<br>(303.9 to 319.2)               | 124.6†<br>(117.4 to 132.5)            | 13.7<br>(9.8 to 18.9)              | 20.3<br>(17.5 to 23.3)                            | -6.1<br>(-8.0 to -4.1)                              |
| Glaucoma                                      | 0.8<br>(0.6 to 0.9)                     | --                                    | 0.1<br>(0.1 to 0.1)                | 44.3<br>(24.4 to 67.7)                            | -4.5<br>(-17.2 to 10.2)                             |
| Cataract                                      | 21.8<br>(16.8 to 27.0)                  | --                                    | 1.5<br>(1.0 to 2.1)                | 32.8<br>(24.7 to 40.8)                            | -7.6<br>(-12.9 to -1.8)                             |
| Macular degeneration                          | 0.4<br>(0.3 to 0.5)                     | --                                    | < 0.05<br>(< 0.05 to < 0.05)       | 47.8<br>(25.1 to 73.1)                            | -1.8<br>(-16.8 to 14.5)                             |
| Refraction and accommodation disorders        | 130.3<br>(123.1 to 137.9)               | --                                    | 2.7<br>(1.7 to 4.1)                | 10.2<br>(5.8 to 15.2)                             | -9.9<br>(-13.2 to -6.5)                             |
| Age-related and other hearing loss            | 214.9<br>(202.6 to 229.1)               | --                                    | 7.6<br>(5.4 to 10.4)               | 20.8<br>(15.7 to 25.6)                            | -5.6<br>(-8.6 to -2.5)                              |
| Other vision loss                             | 6.4<br>(5.4 to 7.6)                     | --                                    | 0.5<br>(0.4 to 0.7)                | 24.3<br>(15.1 to 34.5)                            | -4.9<br>(-11.2 to 2.1)                              |
| Other sense organ diseases                    | 41.7<br>(38.4 to 45.1)                  | 124.6<br>(117.4 to 132.5)             | 1.3<br>(0.8 to 1.9)                | 24.5<br>(19.4 to 29.4)                            | 0.5<br>(-3.2 to 4.1)                                |
| Oral disorders                                | 589.5<br>(544.6 to 629.8)               | 1,455.3†<br>(1,240.8 to 1,664.8)      | 3.8<br>(2.3 to 5.8)                | 20.2<br>(16.8 to 23.8)                            | -2.6<br>(-5.0 to -0.3)                              |
| Caries of deciduous teeth                     | 49.6<br>(37.2 to 63.0)                  | 204.8<br>(136.3 to 288.7)             | < 0.05<br>(< 0.05 to < 0.05)       | -22.9<br>(-30.2 to -14.1)                         | -1.5<br>(-10.7 to 9.1)                              |
| Caries of permanent teeth                     | 405.5<br>(356.9 to 457.3)               | 1,229.5<br>(1,028.0 to 1,421.7)       | 0.4<br>(0.2 to 0.8)                | 6.9<br>(1.4 to 12.7)                              | -0.8<br>(-5.4 to 3.6)                               |
| Periodontal disease                           | 128.4<br>(91.5 to 176.9)                | 16.0<br>(11.1 to 21.4)                | 0.8<br>(0.3 to 1.8)                | 26.2<br>(15.8 to 35.9)                            | 0.9<br>(-4.5 to 6.6)                                |
| Edentulism and severe tooth loss              | 64.6<br>(56.2 to 73.0)                  | 4.9<br>(4.1 to 5.8)                   | 1.8<br>(1.2 to 2.5)                | 26.9<br>(21.3 to 32.6)                            | -5.5<br>(-8.9 to -1.6)                              |
| Other oral disorders                          | 24.9<br>(23.9 to 26.0)                  | --                                    | 0.7<br>(0.5 to 1.1)                | 9.2<br>(5.7 to 13.3)                              | -0.0<br>(-3.1 to 3.5)                               |
| <b>Injuries</b>                               | <b>195.9</b><br><b>(185.5 to 206.3)</b> | <b>66.8†</b><br><b>(63.9 to 70.1)</b> | <b>7.3</b><br><b>(4.9 to 10.3)</b> | <b>28.1</b><br><b>(25.3 to 30.6)</b>              | <b>11.6</b><br><b>(9.3 to 13.5)</b>                 |
| <b>Transport injuries</b>                     | <b>42.9</b><br><b>(39.8 to 46.3)</b>    | <b>11.9</b><br><b>(10.8 to 13.0)</b>  | <b>2.2</b><br><b>(1.5 to 3.1)</b>  | <b>41.4</b><br><b>(37.8 to 44.7)</b>              | <b>21.1</b><br><b>(18.2 to 23.5)</b>                |
| Road injuries                                 | 32.3<br>(30.1 to 34.9)                  | 10.1<br>(9.0 to 11.1)                 | 1.7<br>(1.1 to 2.4)                | 53.7<br>(50.0 to 57.2)                            | 29.8<br>(26.9 to 32.4)                              |
| Pedestrian road injuries                      | 4.2<br>(3.7 to 4.8)                     | 1.0<br>(0.8 to 1.2)                   | 0.2<br>(0.1 to 0.3)                | 49.6<br>(45.9 to 53.3)                            | 24.1<br>(21.2 to 26.7)                              |
| Cyclist road injuries                         | 5.0<br>(4.2 to 5.9)                     | 1.8<br>(1.4 to 2.2)                   | 0.2<br>(0.2 to 0.4)                | 63.8<br>(59.9 to 67.8)                            | 37.1<br>(34.1 to 40.0)                              |
| Motorcyclist road injuries                    | 10.3<br>(8.8 to 12.6)                   | 2.2<br>(1.8 to 2.6)                   | 0.5<br>(0.3 to 0.7)                | 59.4<br>(55.5 to 63.3)                            | 36.6<br>(33.4 to 39.4)                              |
| Motor vehicle road injuries                   | 8.6<br>(7.3 to 9.9)                     | 3.3<br>(2.8 to 3.8)                   | 0.5<br>(0.3 to 0.7)                | 42.2<br>(38.7 to 45.6)                            | 20.2<br>(17.3 to 22.7)                              |
| Other road injuries                           | 4.3<br>(3.6 to 5.1)                     | 1.8<br>(1.4 to 2.2)                   | 0.2<br>(0.1 to 0.3)                | 62.9<br>(59.0 to 66.9)                            | 37.0<br>(33.8 to 39.9)                              |
| Other transport injuries                      | 10.6<br>(8.9 to 12.7)                   | 1.9<br>(1.6 to 2.2)                   | 0.5<br>(0.4 to 0.8)                | 12.9<br>(9.5 to 16.4)                             | 1.1<br>(-1.8 to 4.0)                                |
| <b>Unintentional injuries</b>                 | <b>136.2</b><br><b>(127.4 to 144.9)</b> | <b>47.7</b><br><b>(45.1 to 50.7)</b>  | <b>4.3</b><br><b>(2.9 to 6.2)</b>  | <b>24.4</b><br><b>(21.6 to 27.1)</b>              | <b>9.0</b><br><b>(6.8 to 11.0)</b>                  |
| Falls                                         | 42.1<br>(37.1 to 47.1)                  | 14.8<br>(13.0 to 16.7)                | 1.6<br>(1.1 to 2.2)                | 45.8<br>(42.4 to 49.0)                            | 25.2<br>(22.5 to 27.6)                              |
| Drowning                                      | 1.4<br>(1.2 to 1.6)                     | 0.2<br>(0.2 to 0.2)                   | 0.1<br>(< 0.05 to 0.1)             | 18.5<br>(14.6 to 22.2)                            | 3.2<br>(0.0 to 6.2)                                 |
| Fire, heat, and hot substances                | 19.9<br>(17.1 to 23.6)                  | 1.9<br>(1.6 to 2.1)                   | 0.5<br>(0.3 to 0.7)                | -4.0<br>(-9.0 to 0.2)                             | -14.9<br>(-18.9 to -11.6)                           |
| Poisonings                                    | 0.4<br>(0.4 to 0.5)                     | 0.6<br>(0.5 to 0.8)                   | < 0.05<br>(< 0.05 to < 0.05)       | 34.8<br>(25.1 to 45.6)                            | 21.9<br>(13.1 to 31.0)                              |
| Exposure to mechanical forces                 | 21.0<br>(18.1 to 25.7)                  | 6.7<br>(5.6 to 8.0)                   | 0.5<br>(0.3 to 0.7)                | 49.0<br>(44.8 to 52.9)                            | 29.1<br>(26.0 to 31.9)                              |
| Unintentional firearm injuries                | 0.9<br>(0.7 to 1.1)                     | 0.2<br>(0.1 to 0.2)                   | < 0.05<br>(< 0.05 to 0.1)          | 26.2<br>(22.7 to 29.6)                            | 10.9<br>(8.0 to 13.6)                               |
| Unintentional suffocation                     | 1.4<br>(1.1 to 1.8)                     | 0.2<br>(0.1 to 0.3)                   | < 0.05<br>(< 0.05 to 0.1)          | 19.2<br>(16.0 to 22.5)                            | 8.4<br>(5.6 to 11.0)                                |
| Other exposure to mechanical forces           | 18.8<br>(15.7 to 23.2)                  | 6.3<br>(5.2 to 7.5)                   | 0.4<br>(0.3 to 0.6)                | 55.3<br>(51.1 to 59.1)                            | 33.7<br>(30.4 to 36.6)                              |



| Cause                                                                               | Prevalence in thousands (95% UI)     | Incidence in thousands (95% UI)                      | YLDs in thousands (95% UI)                          |                                                   |                                                     |
|-------------------------------------------------------------------------------------|--------------------------------------|------------------------------------------------------|-----------------------------------------------------|---------------------------------------------------|-----------------------------------------------------|
|                                                                                     | 2016 counts                          | 2016 counts                                          | 2016 counts                                         | Percentage change in counts between 2006 and 2016 | Percentage change in age-standardised rates between |
| Adverse effects of medical treatment                                                | 0.5<br>(0.4 to 0.6)                  | 6.2<br>(5.6 to 6.8)                                  | 0.1<br>(< 0.05 to 0.1)                              | 13.8<br>(8.5 to 19.4)                             | 3.1<br>(-1.7 to 8.2)                                |
| Animal contact                                                                      | 3.9<br>(3.5 to 4.6)                  | 3.9<br>(3.2 to 4.8)                                  | 0.1<br>(0.1 to 0.2)                                 | 9.7<br>(3.9 to 15.6)                              | -0.9<br>(-6.0 to 4.5)                               |
| Venomous animal contact                                                             | 1.3<br>(1.1 to 1.5)                  | 1.6<br>(1.2 to 2.0)                                  | 0.1<br>(< 0.05 to 0.1)                              | 13.6<br>(4.6 to 23.5)                             | 4.3<br>(-3.9 to 13.1)                               |
| Non-venomous animal contact                                                         | 2.6<br>(2.2 to 3.3)                  | 2.4<br>(1.9 to 2.9)                                  | < 0.05<br>(< 0.05 to 0.1)                           | 3.6<br>(-0.5 to 7.2)                              | -8.8<br>(-12.2 to -6.1)                             |
| Foreign body                                                                        | 10.3<br>(8.3 to 12.4)                | 3.8<br>(3.4 to 4.4)                                  | 0.4<br>(0.2 to 0.6)                                 | 2.4<br>(-1.3 to 5.9)                              | -6.0<br>(-9.3 to -3.1)                              |
| Pulmonary aspiration and foreign body in airway                                     | 7.3<br>(5.6 to 9.6)                  | 1.7<br>(1.5 to 2.0)                                  | 0.3<br>(0.2 to 0.4)                                 | -0.6<br>(-4.5 to 2.9)                             | -7.6<br>(-11.1 to -4.6)                             |
| Foreign body in eyes                                                                | 0.2<br>(0.1 to 0.4)                  | 1.2<br>(0.9 to 1.6)                                  | < 0.05<br>(< 0.05 to < 0.05)                        | 12.2<br>(7.0 to 18.4)                             | 0.3<br>(-2.7 to 3.4)                                |
| Foreign body in other body part                                                     | 2.7<br>(2.2 to 3.4)                  | 1.0<br>(0.8 to 1.1)                                  | 0.1<br>(< 0.05 to 0.1)                              | 13.8<br>(9.4 to 18.0)                             | -0.5<br>(-4.1 to 2.7)                               |
| Environmental heat and cold exposure                                                | 9.0<br>(7.6 to 10.6)                 | 1.9<br>(1.5 to 2.3)                                  | 0.3<br>(0.2 to 0.5)                                 | 12.8<br>(9.6 to 15.7)                             | -0.6<br>(-3.2 to 1.5)                               |
| Other unintentional injuries                                                        | 27.5<br>(22.4 to 33.2)               | 7.8<br>(6.5 to 9.2)                                  | 0.8<br>(0.5 to 1.1)                                 | 18.3<br>(15.7 to 20.8)                            | 3.9<br>(2.0 to 5.8)                                 |
| <b>Self-harm and interpersonal violence</b>                                         | <b>35.4</b><br><b>(32.4 to 38.9)</b> | <b>7.1†</b><br><b>(6.2 to 8.1)</b>                   | <b>0.8</b><br><b>(0.5 to 1.1)</b>                   | <b>16.6</b><br><b>(13.7 to 19.6)</b>              | <b>3.1</b><br><b>(1.0 to 5.1)</b>                   |
| Self-harm                                                                           | 2.1<br>(1.8 to 2.4)                  | 0.8<br>(0.7 to 0.9)                                  | 0.1<br>(0.1 to 0.1)                                 | 3.7<br>(-0.4 to 7.2)                              | -10.6<br>(-13.9 to -7.9)                            |
| Self-harm by firearm                                                                | 0.1<br>(0.1 to 0.1)                  | < 0.05<br>(< 0.05 to < 0.05)                         | < 0.05<br>(< 0.05 to < 0.05)                        | 15.6<br>(11.5 to 19.6)                            | 4.4<br>(0.6 to 8.0)                                 |
| Self-harm by other specified means                                                  | 2.0<br>(1.7 to 2.3)                  | 0.8<br>(0.7 to 0.9)                                  | 0.1<br>(0.1 to 0.1)                                 | 3.4<br>(-0.7 to 7.0)                              | -10.9<br>(-14.2 to -8.2)                            |
| Interpersonal violence                                                              | 33.3<br>(30.3 to 36.9)               | 6.4‡<br>(5.5 to 7.4)                                 | 0.7<br>(0.5 to 1.0)                                 | 18.5<br>(15.3 to 21.7)                            | 5.2<br>(2.9 to 7.4)                                 |
| Assault by firearm                                                                  | 0.3<br>(0.3 to 0.4)                  | 0.1<br>(0.1 to 0.1)                                  | < 0.05<br>(< 0.05 to < 0.05)                        | 40.1<br>(35.3 to 44.7)                            | 21.1<br>(17.4 to 24.6)                              |
| Assault by sharp object                                                             | 3.7<br>(3.0 to 4.4)                  | 1.2<br>(0.9 to 1.5)                                  | 0.1<br>(0.1 to 0.1)                                 | 33.0<br>(28.4 to 37.2)                            | 17.4<br>(13.9 to 20.7)                              |
| Sexual violence                                                                     | 18.7<br>(16.5 to 21.3)               | --                                                   | 0.1<br>(0.1 to 0.2)                                 | -5.5<br>(-8.9 to -2.0)                            | -7.2<br>(-10.3 to -3.8)                             |
| Assault by other means                                                              | 10.6<br>(8.9 to 12.8)                | 5.1<br>(4.3 to 5.9)                                  | 0.4<br>(0.3 to 0.6)                                 | 26.2<br>(23.2 to 29.0)                            | 7.8<br>(5.5 to 10.0)                                |
| <b>Forces of nature, conflict and terrorism, and executions and police conflict</b> | <b>0.2</b><br><b>(0.1 to 0.2)</b>    | <b>&lt; 0.05†</b><br><b>(&lt; 0.05 to &lt; 0.05)</b> | <b>&lt; 0.05</b><br><b>(&lt; 0.05 to &lt; 0.05)</b> | <b>70.8</b><br><b>(51.7 to 78.1)</b>              | <b>57.8</b><br><b>(42.2 to 64.2)</b>                |
| Exposure to forces of nature                                                        | < 0.05<br>(< 0.05 to 0.1)            | --                                                   | < 0.05<br>(< 0.05 to < 0.05)                        | 323.7<br>(311.9 to 338.3)                         | 302.1<br>(289.2 to 317.4)                           |
| Conflict and terrorism                                                              | --                                   | --                                                   | --                                                  | --                                                | --                                                  |
| Executions and police conflict                                                      | 0.1<br>(0.1 to 0.2)                  | < 0.05<br>(< 0.05 to < 0.05)                         | < 0.05<br>(< 0.05 to < 0.05)                        | 25.9<br>(17.3 to 31.4)                            | 14.7<br>(9.0 to 18.9)                               |
| <b>Impairments</b>                                                                  | --                                   | --                                                   | --                                                  | --                                                | --                                                  |
| Anaemia                                                                             | 506.1<br>(470.4 to 544.3)            | --                                                   | 14.2<br>(9.7 to 19.9)                               | -1.7<br>(-6.9 to 3.7)                             | -7.7<br>(-12.6 to -2.4)                             |
| Developmental intellectual disability                                               | 21.4<br>(15.6 to 28.1)               | --                                                   | 2.5<br>(1.8 to 3.3)                                 | -3.7<br>(-8.8 to 1.7)                             | -5.1<br>(-10.4 to 0.2)                              |
| Epilepsy                                                                            | 9.5<br>(4.8 to 12.7)                 | --                                                   | 3.3<br>(1.5 to 5.2)                                 | -0.4<br>(-52.7 to 104.5)                          | -4.1<br>(-54.3 to 96.0)                             |
| Guillain-Barre syndrome                                                             | < 0.05<br>(< 0.05 to < 0.05)         | --                                                   | < 0.05<br>(< 0.05 to < 0.05)                        | 10.9<br>(5.5 to 17.0)                             | 0.1<br>(0.0 to 0.1)                                 |
| Hearing loss                                                                        | 227.4<br>(214.9 to 241.6)            | --                                                   | 8.3<br>(5.9 to 11.3)                                | 17.9<br>(13.3 to 22.3)                            | -5.9<br>(-8.7 to -3.2)                              |
| Heart failure                                                                       | 10.8<br>(9.5 to 12.3)                | --                                                   | 1.1<br>(0.8 to 1.5)                                 | 33.6<br>(24.2 to 43.5)                            | -3.5<br>(-9.8 to 3.4)                               |
| Infertility                                                                         | 18.3<br>(14.0 to 24.3)               | --                                                   | 0.1<br>(< 0.05 to 0.2)                              | -0.6<br>(-6.4 to 6.0)                             | 0.7<br>(-5.1 to 7.5)                                |
| Pelvic inflammatory disease                                                         | 1.0<br>(0.9 to 1.2)                  | --                                                   | 0.1<br>(0.1 to 0.2)                                 | -4.5<br>(-16.7 to 10.1)                           | -8.3<br>(-20.0 to 5.9)                              |
| Vision loss                                                                         | 164.4<br>(154.7 to 175.0)            | --                                                   | 5.6<br>(3.9 to 7.7)                                 | 17.8<br>(14.0 to 21.9)                            | -6.4<br>(-9.2 to -3.3)                              |

We did not calculate incidence for the nine impairments, certain NTDs, and causes with only birth prevalence. Blank cells mean that no estimate is available.

† Incidence for aggregate causes represents the sum of the incidence of the causes below the aggregate.

‡ Incidence estimates for stroke represent first-ever stroke only.

^ Incidence of HIV/AIDS represents new infections of HIV only and does not include new infections of Tuberculosis in HIV positive cases.

SR Table 14: Prevalence, incidence, and YLDs for 2016, percentage change of YLD counts and percentage change of age-standardised YLD rates between 2006 and 2016 by cause and impairments, for all ages, Mexico.

| Cause                                                                                | Prevalence in thousands (95% UI)             | Incidence in thousands (95% UI)               | YLDs in thousands (95% UI)               |                                                   |                                                     |
|--------------------------------------------------------------------------------------|----------------------------------------------|-----------------------------------------------|------------------------------------------|---------------------------------------------------|-----------------------------------------------------|
|                                                                                      | 2016 counts                                  | 2016 counts                                   | 2016 counts                              | Percentage change in counts between 2006 and 2016 | Percentage change in age-standardised rates between |
| <b>All causes</b>                                                                    | <b>122,211.2</b><br>(121,998.6 to 122,406.4) | <b>704,733.4†</b><br>(662,463.2 to 752,508.9) | <b>11,905.0</b><br>(8,774.0 to 15,474.6) | <b>25.4</b><br>(24.3 to 26.6)                     | <b>0.8</b><br>(0.0 to 1.7)                          |
| <b>Communicable, maternal, neonatal, and nutritional disorders</b>                   | <b>81,760.7</b><br>(81,005.5 to 82,489.8)    | <b>410,787.8†</b><br>(372,125.4 to 454,552.1) | <b>790.9</b><br>(558.4 to 1,085.4)       | <b>9.2</b><br>(5.9 to 13.0)                       | <b>-0.4</b><br>(-3.5 to 2.9)                        |
| <b>HIV/AIDS and tuberculosis</b>                                                     | <b>36,136.5</b><br>(33,123.6 to 38,135.5)    | <b>39.5†</b><br>(33.2 to 46.7)                | <b>21.9</b><br>(12.3 to 37.6)            | <b>34.8</b><br>(12.1 to 59.3)                     | <b>8.0</b><br>(-11.6 to 29.2)                       |
| Tuberculosis                                                                         | 33,902.5<br>(31,469.1 to 36,498.3)           | 22.7†<br>(19.2 to 26.6)                       | 2.9<br>(1.9 to 4.0)                      | 5.9<br>(0.2 to 12.2)                              | -16.7<br>(-21.4 to -11.8)                           |
| Drug-susceptible tuberculosis                                                        | 8.9<br>(7.6 to 10.3)                         | 22.2<br>(18.8 to 26.0)                        | 2.8<br>(1.8 to 3.9)                      | 6.0<br>(0.1 to 12.7)                              | -16.6<br>(-21.4 to -11.6)                           |
| Multidrug-resistant tuberculosis without extensive drug resistance                   | 0.2<br>(0.2 to 0.2)                          | 0.5<br>(0.4 to 0.6)                           | 0.1<br>(< 0.05 to 0.1)                   | -3.9<br>(-18.3 to 12.6)                           | -25.0<br>(-36.2 to -12.8)                           |
| Extensively drug-resistant tuberculosis                                              | < 0.05<br>(< 0.05 to < 0.05)                 | < 0.05<br>(< 0.05 to < 0.05)                  | < 0.05<br>(< 0.05 to < 0.05)             | 155.8<br>(117.6 to 199.8)                         | 99.6<br>(70.0 to 132.3)                             |
| Latent tuberculosis infection                                                        | 33,893.4<br>(31,460.0 to 36,489.1)           | --                                            | --                                       | --                                                | --                                                  |
| HIV/AIDS                                                                             | 194.7<br>(137.6 to 278.0)                    | 16.8^<br>(11.8 to 22.9)                       | 19.0<br>(10.0 to 34.1)                   | 40.7<br>(12.7 to 75.9)                            | 13.5<br>(-10.7 to 44.7)                             |
| Drug-susceptible HIV/AIDS - Tuberculosis                                             | 1.1<br>(0.7 to 1.7)                          | 2.7<br>(1.7 to 4.2)                           | 0.4<br>(0.2 to 0.7)                      | -6.0<br>(-9.0 to -3.0)                            | -21.7<br>(-24.1 to -19.1)                           |
| Multidrug-resistant HIV/AIDS - Tuberculosis without extensive drug resistance        | < 0.05<br>(< 0.05 to < 0.05)                 | 0.1<br>(< 0.05 to 0.1)                        | < 0.05<br>(< 0.05 to < 0.05)             | -14.3<br>(-28.2 to 1.7)                           | -28.6<br>(-40.1 to -15.4)                           |
| Extensively drug-resistant HIV/AIDS - Tuberculosis                                   | < 0.05<br>(< 0.05 to < 0.05)                 | < 0.05<br>(< 0.05 to < 0.05)                  | < 0.05<br>(< 0.05 to < 0.05)             | 128.2<br>(91.0 to 170.8)                          | 90.0<br>(59.4 to 125.3)                             |
| HIV/AIDS resulting in other diseases                                                 | 193.6<br>(136.6 to 276.8)                    | 16.8<br>(11.8 to 22.9)                        | 18.5<br>(9.5 to 33.6)                    | 42.4<br>(13.0 to 79.5)                            | 14.8<br>(-10.5 to 48.1)                             |
| <b>Diarrhoea, lower respiratory infections, and other common infectious diseases</b> | <b>6,808.4</b><br>(6,524.0 to 7,012.0)       | <b>387,672.1†</b><br>(349,089.7 to 431,362.2) | <b>248.4</b><br>(167.7 to 353.7)         | <b>5.4</b><br>(3.9 to 6.9)                        | <b>-3.4</b><br>(-4.5 to -2.4)                       |
| Diarrhoeal diseases                                                                  | 583.7<br>(540.8 to 634.2)                    | 39,244.2<br>(36,354.1 to 42,665.4)            | 66.3<br>(45.9 to 91.7)                   | -1.7<br>(-4.2 to 1.7)                             | -7.4<br>(-9.7 to -4.6)                              |
| Intestinal infectious diseases                                                       | 0.9<br>(0.8 to 1.0)                          | 14.0†<br>(13.2 to 14.9)                       | 0.1<br>(0.1 to 0.2)                      | 12.8<br>(-0.4 to 28.0)                            | -6.4<br>(-18.2 to 6.8)                              |
| Typhoid fever                                                                        | 0.9<br>(0.8 to 1.0)                          | 13.6<br>(12.8 to 14.4)                        | 0.1<br>(0.1 to 0.2)                      | 21.0<br>(7.5 to 36.9)                             | -3.1<br>(-15.2 to 11.4)                             |
| Paratyphoid fever                                                                    | < 0.05<br>(< 0.05 to < 0.05)                 | 0.4<br>(0.4 to 0.5)                           | < 0.05<br>(< 0.05 to < 0.05)             | 5.7<br>(-8.1 to 22.8)                             | -16.2<br>(-27.9 to -0.9)                            |
| Other intestinal infectious diseases                                                 | --                                           | --                                            | < 0.05<br>(< 0.05 to < 0.05)             | -35.6<br>(-56.3 to -1.5)                          | -33.4<br>(-53.3 to -3.6)                            |
| Lower respiratory infections                                                         | 39.5<br>(36.8 to 42.3)                       | 1,740.8<br>(1,614.5 to 1,876.6)               | 2.4<br>(1.6 to 3.4)                      | 11.4<br>(6.5 to 16.7)                             | -4.1<br>(-8.0 to -0.2)                              |
| Upper respiratory infections                                                         | 4,444.3<br>(3,955.9 to 5,000.0)              | 335,558.7<br>(296,910.9 to 379,145.8)         | 111.3<br>(65.4 to 172.5)                 | 10.4<br>(8.4 to 12.6)                             | -0.4<br>(-1.4 to 0.8)                               |
| Otitis media                                                                         | 1,722.2<br>(1,544.3 to 1,903.3)              | 8,240.7<br>(6,623.3 to 10,218.7)              | 48.6<br>(30.0 to 73.0)                   | 2.1<br>(-0.8 to 5.1)                              | -3.3<br>(-5.9 to -0.7)                              |
| Meningitis                                                                           | 48.9<br>(42.3 to 56.2)                       | 7.6<br>(5.6 to 9.6)                           | 6.8<br>(4.7 to 9.2)                      | 16.3<br>(13.1 to 21.6)                            | -2.1<br>(-4.8 to 3.6)                               |
| Pneumococcal meningitis                                                              | 22.1<br>(19.0 to 25.7)                       | 1.4<br>(1.1 to 1.9)                           | 3.1<br>(2.1 to 4.2)                      | 2.1<br>(-2.3 to 6.2)                              | -14.1<br>(-17.6 to -10.9)                           |
| H influenzae type B meningitis                                                       | 5.7<br>(4.7 to 6.9)                          | 0.7<br>(0.5 to 1.0)                           | 0.9<br>(0.6 to 1.3)                      | 33.4<br>(29.6 to 37.1)                            | 13.8<br>(11.0 to 16.4)                              |
| Meningococcal infection                                                              | 3.7<br>(2.8 to 5.5)                          | 0.8<br>(0.6 to 1.1)                           | 0.6<br>(0.4 to 0.9)                      | 34.2<br>(24.6 to 101.4)                           | 13.3<br>(3.5 to 94.3)                               |
| Other meningitis                                                                     | 17.5<br>(13.8 to 21.5)                       | 4.6<br>(3.4 to 5.9)                           | 2.2<br>(1.5 to 3.1)                      | 29.7<br>(26.2 to 33.0)                            | 8.7<br>(5.7 to 11.3)                                |
| Encephalitis                                                                         | 55.1<br>(39.7 to 77.0)                       | 25.9<br>(23.1 to 28.7)                        | 6.8<br>(4.8 to 9.1)                      | 4.2<br>(1.5 to 6.6)                               | -12.1<br>(-14.3 to -10.2)                           |
| Diphtheria                                                                           | < 0.05<br>(< 0.05 to < 0.05)                 | < 0.05<br>(< 0.05 to < 0.05)                  | < 0.05<br>(< 0.05 to < 0.05)             | 0.9<br>(-12.9 to 18.0)                            | -8.4<br>(-21.0 to 6.8)                              |
| Whooping cough                                                                       | 30.6<br>(23.8 to 38.5)                       | 223.5<br>(174.0 to 281.1)                     | 1.5<br>(0.9 to 2.4)                      | -1.0<br>(-5.3 to 3.3)                             | 7.1<br>(2.6 to 11.8)                                |
| Tetanus                                                                              | < 0.05<br>(< 0.05 to < 0.05)                 | < 0.05<br>(< 0.05 to < 0.05)                  | < 0.05<br>(< 0.05 to < 0.05)             | -28.4<br>(-43.2 to -10.4)                         | -42.0<br>(-54.1 to -26.8)                           |
| Measles                                                                              | < 0.05<br>(0.0 to < 0.05)                    | < 0.05<br>(0.0 to < 0.05)                     | < 0.05<br>(0.0 to < 0.05)                | -85.7<br>(-100.0 to 6.2e+19)                      | -84.5<br>(-100.0 to 6.7e+19)                        |
| Varicella and herpes zoster                                                          | 118.3<br>(109.2 to 127.7)                    | 2,616.6<br>(2,551.1 to 2,693.8)               | 4.4<br>(2.7 to 6.8)                      | 24.5<br>(20.2 to 29.1)                            | 0.0<br>(-2.7 to 2.7)                                |
| <b>Neglected tropical diseases and malaria</b>                                       | <b>32,086.6</b><br>(31,009.1 to 32,903.5)    | <b>1,542.9†</b><br>(1,038.5 to 2,219.3)       | <b>78.7</b><br>(53.6 to 116.4)           | <b>23.2</b><br>(3.5 to 47.1)                      | <b>3.9</b><br>(-12.1 to 23.6)                       |
| Malaria                                                                              | 0.1<br>(< 0.05 to 0.1)                       | 0.7<br>(0.7 to 0.7)                           | < 0.05<br>(< 0.05 to < 0.05)             | -26.1<br>(-51.6 to -4.4)                          | -35.2<br>(-57.4 to -16.5)                           |
| Chagas disease                                                                       | 965.8<br>(782.4 to 1,181.2)                  | 29.0<br>(23.6 to 35.2)                        | 8.3<br>(5.3 to 12.2)                     | 38.3<br>(32.4 to 44.5)                            | 3.9<br>(0.2 to 7.9)                                 |
| Leishmaniasis                                                                        | 2.5<br>(2.0 to 3.1)                          | 1.8<br>(1.5 to 2.1)                           | 0.1<br>(0.1 to 0.2)                      | 36.1<br>(-40.6 to 508.1)                          | 21.6<br>(-48.1 to 427.2)                            |
| Visceral leishmaniasis                                                               | < 0.05<br>(< 0.05 to < 0.05)                 | < 0.05<br>(< 0.05 to < 0.05)                  | < 0.05<br>(< 0.05 to < 0.05)             | -56.4<br>(-84.2 to 5.0)                           | -67.3<br>(-88.9 to -15.5)                           |
| Cutaneous and mucocutaneous leishmaniasis                                            | 2.0<br>(1.4 to 2.7)                          | 1.8<br>(1.5 to 2.1)                           | 0.1<br>(0.1 to 0.2)                      | 36.3<br>(-40.5 to 515.7)                          | 21.9<br>(-48.1 to 434.2)                            |
| African trypanosomiasis                                                              | --                                           | --                                            | --                                       | --                                                | --                                                  |
| Schistosomiasis                                                                      | --                                           | --                                            | --                                       | --                                                | --                                                  |
| Cysticercosis                                                                        | 83.0<br>(60.1 to 112.1)                      | --                                            | 11.7<br>(7.0 to 17.7)                    | -7.4<br>(-28.1 to 17.4)                           | -28.7<br>(-44.3 to -10.5)                           |
| Cystic echinococcosis                                                                | 0.3<br>(0.1 to 0.6)                          | 0.1<br>(< 0.05 to 0.1)                        | < 0.05<br>(< 0.05 to 0.1)                | -23.6<br>(-71.0 to 102.1)                         | -37.3<br>(-75.5 to 58.1)                            |
| Lymphatic filariasis                                                                 | --                                           | --                                            | --                                       | --                                                | --                                                  |
| Onchocerciasis                                                                       | --                                           | --                                            | --                                       | --                                                | --                                                  |
| Trachoma                                                                             | 63.8<br>(46.4 to 83.7)                       | --                                            | 5.1<br>(3.4 to 7.3)                      | 38.1<br>(24.2 to 54.6)                            | -2.9<br>(-13.4 to 9.0)                              |
| Dengue                                                                               | 79.1<br>(44.0 to 131.2)                      | 1,322.8<br>(836.9 to 1,957.5)                 | 13.0<br>(5.8 to 24.1)                    | 201.7<br>(151.8 to 490.6)                         | 165.4<br>(122.0 to 418.0)                           |
| Yellow fever                                                                         | --                                           | --                                            | --                                       | --                                                | --                                                  |
| Rabies                                                                               | < 0.05<br>(< 0.05 to < 0.05)                 | < 0.05<br>(< 0.05 to < 0.05)                  | < 0.05<br>(< 0.05 to < 0.05)             | -77.2<br>(-79.9 to -74.7)                         | -80.2<br>(-82.4 to -78.2)                           |
| Intestinal nematode infections                                                       | 30,943.0<br>(29,849.0 to 31,763.5)           | --                                            | 31.0<br>(16.3 to 55.5)                   | 11.5<br>(-21.8 to 55.4)                           | -1.2<br>(-31.6 to 40.7)                             |
| Ascariasis                                                                           | 15,318.6<br>(13,626.9 to 17,315.7)           | --                                            | 11.1<br>(5.3 to 21.0)                    | 9.5<br>(-32.7 to 75.8)                            | -1.5<br>(-41.0 to 58.0)                             |

| Cause                                                                   | Prevalence in thousands (95% UI)              | Incidence in thousands (95% UI)                | YLDs in thousands (95% UI)                |                                                   |                                                     |
|-------------------------------------------------------------------------|-----------------------------------------------|------------------------------------------------|-------------------------------------------|---------------------------------------------------|-----------------------------------------------------|
|                                                                         | 2016 counts<br>(15,715.1 to 19,738.4)         | 2016 counts                                    | 2016 counts                               | Percentage change in counts between 2006 and 2016 | Percentage change in age-standardised rates between |
| Trichuriasis                                                            | 17,655.2<br>(15,715.1 to 19,738.4)            | --                                             | 19.7<br>(10.1 to 35.8)                    | 12.6<br>(-27.7 to 79.7)                           | -1.0<br>(-37.5 to 61.5)                             |
| Hookworm disease                                                        | 26.9<br>(23.5 to 30.7)                        | --                                             | 0.2<br>(0.1 to 0.2)                       | 16.5<br>(-3.2 to 42.7)                            | -3.1<br>(-19.5 to 18.8)                             |
| Food-borne trematodiasis                                                | --                                            | --                                             | --                                        | --                                                | --                                                  |
| Leprosy                                                                 | 0.7<br>(0.6 to 0.8)                           | 0.1<br>(< 0.05 to 0.1)                         | < 0.05<br>(< 0.05 to 0.1)                 | -2.7<br>(-4.3 to -1.2)                            | -27.8<br>(-29.2 to -26.5)                           |
| Ebola virus disease                                                     | --                                            | --                                             | --                                        | --                                                | --                                                  |
| Zika virus disease                                                      | 3.1<br>(2.0 to 5.2)                           | 188.4<br>(123.2 to 314.5)                      | 0.1<br>(< 0.05 to 0.1)                    | --                                                | --                                                  |
| Guinea worm disease                                                     | --                                            | --                                             | --                                        | --                                                | --                                                  |
| Other neglected tropical diseases                                       | 450.1<br>(412.0 to 497.3)                     | --                                             | 9.4<br>(5.8 to 14.7)                      | 2.0<br>(-7.6 to 10.8)                             | 5.2<br>(-4.1 to 14.2)                               |
| <b>Maternal disorders</b>                                               | <b>194.7<br/>(178.3 to 209.1)</b>             | <b>3,539.4†<br/>(3,232.3 to 3,947.3)</b>       | <b>12.1<br/>(7.6 to 17.7)</b>             | <b>8.6<br/>(-17.2 to 41.3)</b>                    | <b>-3.5<br/>(-26.5 to 25.5)</b>                     |
| Maternal haemorrhage                                                    | 32.0<br>(28.1 to 36.5)                        | 124.0<br>(103.4 to 147.3)                      | 0.9<br>(0.6 to 1.3)                       | -5.4<br>(-24.1 to 20.2)                           | -15.8<br>(-32.4 to 6.9)                             |
| Maternal sepsis and other pregnancy related infections                  | 39.1<br>(28.9 to 52.6)                        | 275.7<br>(241.8 to 315.8)                      | 1.2<br>(0.6 to 2.1)                       | 6.4<br>(-44.7 to 111.1)                           | -5.8<br>(-50.8 to 87.0)                             |
| Maternal hypertensive disorders                                         | 109.2<br>(73.2 to 147.0)                      | 526.7<br>(483.5 to 567.2)                      | 5.4<br>(3.0 to 8.6)                       | 30.5<br>(-16.5 to 106.5)                          | 15.8<br>(-25.8 to 83.3)                             |
| Maternal obstructed labour and uterine rupture                          | 1.2<br>(0.7 to 1.8)                           | 86.4<br>(74.5 to 99.8)                         | 0.4<br>(0.2 to 0.6)                       | -8.1<br>(-50.8 to 65.5)                           | -18.1<br>(-56.1 to 47.3)                            |
| Maternal abortion, miscarriage, and ectopic pregnancy                   | 20.7<br>(13.9 to 29.0)                        | 2,526.6<br>(2,216.2 to 2,952.1)                | 2.3<br>(1.3 to 3.6)                       | -13.5<br>(-47.6 to 39.1)                          | -23.2<br>(-53.6 to 23.2)                            |
| Other maternal disorders                                                | --                                            | --                                             | 1.9<br>(1.2 to 2.7)                       | 3.7<br>(-21.1 to 35.0)                            | -7.9<br>(-29.8 to 19.9)                             |
| <b>Neonatal disorders</b>                                               | <b>825.9<br/>(762.4 to 885.2)</b>             | <b>--</b>                                      | <b>153.7<br/>(105.8 to 219.7)</b>         | <b>24.3<br/>(11.9 to 38.2)</b>                    | <b>12.3<br/>(1.0 to 24.6)</b>                       |
| Neonatal preterm birth complications                                    | 657.1<br>(549.4 to 783.8)                     | --                                             | 77.5<br>(51.8 to 112.5)                   | 21.0<br>(-0.0 to 46.4)                            | 8.4<br>(-10.4 to 30.7)                              |
| Neonatal encephalopathy due to birth asphyxia and trauma                | 193.7<br>(111.5 to 327.3)                     | --                                             | 26.6<br>(6.7 to 64.3)                     | 56.1<br>(21.0 to 130.5)                           | 39.6<br>(8.7 to 105.3)                              |
| Neonatal sepsis and other neonatal infections                           | 62.9<br>(27.4 to 136.8)                       | --                                             | 27.4<br>(11.0 to 64.1)                    | 18.0<br>(7.0 to 38.0)                             | 7.5<br>(-2.9 to 28.0)                               |
| Hemolytic disease and other neonatal jaundice                           | 63.1<br>(56.2 to 70.8)                        | --                                             | 17.6<br>(13.1 to 22.3)                    | 19.8<br>(13.9 to 25.3)                            | 6.2<br>(1.2 to 11.1)                                |
| Other neonatal disorders                                                | --                                            | --                                             | 4.5<br>(3.0 to 6.7)                       | -0.7<br>(-11.1 to 11.4)                           | 8.2<br>(-3.0 to 21.5)                               |
| <b>Nutritional deficiencies</b>                                         | <b>18,124.2<br/>(17,629.7 to 18,499.5)</b>    | <b>8,064.6†<br/>(7,000.1 to 9,708.8)</b>       | <b>237.3<br/>(158.0 to 341.1)</b>         | <b>-0.3<br/>(-4.8 to 3.3)</b>                     | <b>-5.1<br/>(-8.7 to -2.1)</b>                      |
| Protein-energy malnutrition                                             | 410.0<br>(388.0 to 434.7)                     | 245.5<br>(232.8 to 259.6)                      | 28.4<br>(18.2 to 40.7)                    | -19.4<br>(-27.8 to -10.5)                         | -12.2<br>(-21.2 to -2.6)                            |
| Iodine deficiency                                                       | 2,015.8<br>(1,784.3 to 2,276.4)               | 46.1<br>(40.9 to 51.7)                         | 51.9<br>(34.7 to 73.5)                    | 16.3<br>(13.7 to 19.0)                            | -3.4<br>(-5.6 to -1.2)                              |
| Vitamin A deficiency                                                    | 8,453.6<br>(7,327.8 to 10,147.2)              | 7,773.0<br>(6,713.7 to 9,409.9)                | 5.0<br>(3.2 to 7.4)                       | 10.0<br>(4.1 to 17.1)                             | 2.5<br>(-2.1 to 7.6)                                |
| Iron-deficiency anaemia                                                 | 8,310.2<br>(7,821.5 to 8,860.7)               | --                                             | 151.2<br>(95.7 to 230.9)                  | -0.8<br>(-7.0 to 4.1)                             | -4.4<br>(-9.6 to 0.2)                               |
| Other nutritional deficiencies                                          | --                                            | --                                             | 1.0<br>(0.6 to 1.4)                       | -20.1<br>(-28.7 to -10.8)                         | -12.9<br>(-22.2 to -2.9)                            |
| <b>Other communicable, maternal, neonatal, and nutritional diseases</b> | <b>24,260.4<br/>(23,549.3 to 24,982.5)</b>    | <b>9,929.4<br/>(8,756.6 to 11,330.5)</b>       | <b>36.5<br/>(21.7 to 62.4)</b>            | <b>12.0<br/>(7.2 to 16.1)</b>                     | <b>-3.5<br/>(-7.0 to -0.1)</b>                      |
| Sexually transmitted diseases excluding HIV                             | 21,851.6<br>(20,906.9 to 22,652.0)            | 8,505.4<br>(7,626.0 to 9,451.4)                | 25.7<br>(14.2 to 45.2)                    | 19.7<br>(17.0 to 22.6)                            | -0.3<br>(-2.3 to 1.9)                               |
| Syphilis                                                                | 228.0<br>(171.5 to 302.0)                     | 175.0<br>(121.9 to 238.5)                      | 2.0<br>(1.4 to 2.8)                       | 45.3<br>(39.5 to 51.7)                            | 6.0<br>(1.9 to 10.8)                                |
| Chlamydial infection                                                    | 2,593.6<br>(1,976.0 to 3,275.3)               | 2,038.4<br>(1,550.5 to 2,659.7)                | 6.2<br>(3.3 to 10.8)                      | 13.8<br>(8.9 to 18.8)                             | -0.7<br>(-4.9 to 3.7)                               |
| Gonococcal infection                                                    | 390.2<br>(317.6 to 483.8)                     | 1,367.7<br>(1,079.8 to 1,714.6)                | 3.1<br>(1.7 to 4.9)                       | 17.1<br>(10.6 to 24.9)                            | -0.4<br>(-5.9 to 6.1)                               |
| Trichomoniasis                                                          | 4,213.0<br>(3,636.2 to 4,813.3)               | 3,701.8<br>(3,137.2 to 4,281.2)                | 5.4<br>(2.1 to 11.6)                      | 20.8<br>(17.7 to 23.8)                            | -0.2<br>(-2.4 to 1.6)                               |
| Genital herpes                                                          | 16,216.2<br>(13,942.9 to 18,817.9)            | 1,125.2<br>(954.8 to 1,336.3)                  | 4.2<br>(1.4 to 9.5)                       | 24.6<br>(17.0 to 32.6)                            | -1.2<br>(-6.4 to 4.8)                               |
| Other sexually transmitted diseases                                     | 123.9<br>(111.0 to 138.8)                     | 97.3<br>(85.6 to 111.4)                        | 4.8<br>(2.8 to 7.9)                       | 15.1<br>(11.7 to 18.9)                            | -2.4<br>(-5.5 to 0.8)                               |
| Hepatitis                                                               | 2,759.8<br>(2,395.3 to 3,146.5)               | 1,423.8<br>(716.5 to 2,354.5)                  | 1.5<br>(0.9 to 2.4)                       | -43.9<br>(-64.0 to -12.2)                         | -53.3<br>(-67.9 to -31.1)                           |
| Acute hepatitis A                                                       | 69.6<br>(16.1 to 140.7)                       | 904.9<br>(209.5 to 1,828.4)                    | 0.7<br>(0.3 to 1.4)                       | -51.3<br>(-79.5 to 16.1)                          | -57.9<br>(-81.5 to -6.7)                            |
| Hepatitis B                                                             | 976.4<br>(737.9 to 1,295.7)                   | 362.6<br>(276.9 to 474.9)                      | 0.6<br>(0.3 to 0.9)                       | -28.4<br>(-39.1 to -16.7)                         | -43.7<br>(-52.4 to -34.6)                           |
| Hepatitis C                                                             | 1,707.9<br>(1,511.1 to 1,923.1)               | 80.4<br>(72.5 to 88.3)                         | 0.1<br>(< 0.05 to 0.1)                    | -36.4<br>(-39.0 to -33.4)                         | -50.7<br>(-53.8 to -47.3)                           |
| Acute hepatitis E                                                       | 5.8<br>(5.4 to 6.4)                           | 76.0<br>(69.6 to 83.1)                         | 0.1<br>(0.1 to 0.2)                       | -50.7<br>(-54.0 to -47.1)                         | -61.1<br>(-63.7 to -58.1)                           |
| Other infectious diseases                                               | 350.5<br>(324.7 to 381.6)                     | 0.2<br>(0.1 to 0.3)                            | 9.3<br>(6.0 to 14.6)                      | 10.2<br>(3.5 to 16.4)                             | 7.0<br>(1.3 to 12.7)                                |
| <b>Non-communicable diseases</b>                                        | <b>113,494.0<br/>(113,135.2 to 113,853.9)</b> | <b>286,860.1†<br/>(272,446.0 to 303,470.4)</b> | <b>10,540.5<br/>(7,778.4 to 13,673.6)</b> | <b>27.4<br/>(26.2 to 28.7)</b>                    | <b>1.5<br/>(0.7 to 2.4)</b>                         |
| <b>Neoplasms</b>                                                        | <b>562.0<br/>(550.9 to 573.3)</b>             | <b>258.2<br/>(231.2 to 292.2)</b>              | <b>63.2<br/>(46.6 to 82.0)</b>            | <b>51.4<br/>(47.1 to 56.8)</b>                    | <b>9.5<br/>(6.0 to 13.6)</b>                        |
| Lip and oral cavity cancer                                              | 7.6<br>(7.4 to 7.8)                           | 2.1<br>(2.0 to 2.1)                            | 0.8<br>(0.6 to 1.1)                       | 38.9<br>(33.8 to 44.4)                            | -0.8<br>(-4.5 to 3.1)                               |
| Nasopharynx cancer                                                      | 1.2<br>(1.2 to 1.3)                           | 0.4<br>(0.4 to 0.4)                            | 0.1<br>(0.1 to 0.2)                       | 24.5<br>(19.7 to 29.0)                            | -5.0<br>(-8.4 to -1.8)                              |
| Other pharynx cancer                                                    | 1.2<br>(1.2 to 1.3)                           | 0.4<br>(0.4 to 0.5)                            | 0.2<br>(0.1 to 0.2)                       | 42.1<br>(37.1 to 49.2)                            | -0.6<br>(-4.1 to 4.4)                               |
| Oesophageal cancer                                                      | 1.4<br>(1.3 to 1.4)                           | 1.3<br>(1.2 to 1.3)                            | 0.3<br>(0.2 to 0.4)                       | 34.3<br>(30.7 to 38.0)                            | -5.8<br>(-8.4 to -3.1)                              |
| Stomach cancer                                                          | 22.1<br>(21.7 to 22.5)                        | 11.2<br>(11.0 to 11.4)                         | 3.0<br>(2.2 to 3.9)                       | 53.3<br>(47.8 to 59.3)                            | 8.2<br>(4.0 to 12.8)                                |
| Colon and rectum cancer                                                 | 60.0<br>(57.7 to 62.8)                        | 16.1<br>(15.5 to 16.9)                         | 5.6<br>(4.1 to 7.3)                       | 79.2<br>(70.5 to 88.5)                            | 26.6<br>(20.3 to 33.3)                              |
| Liver cancer                                                            | 2.4<br>(2.2 to 2.6)                           | 6.5<br>(6.3 to 6.8)                            | 1.4<br>(1.0 to 1.8)                       | 37.1<br>(30.8 to 44.8)                            | -3.0<br>(-7.4 to 2.4)                               |
| Liver cancer due to hepatitis B                                         | 0.9<br>(0.7 to 1.2)                           | 1.1<br>(0.8 to 1.5)                            | 0.2<br>(0.1 to 0.4)                       | 37.6<br>(29.6 to 47.8)                            | -1.7<br>(-7.5 to 5.5)                               |



| Cause                                              | Prevalence in thousands (95% UI)              | Incidence in thousands (95% UI)                | YLDs in thousands (95% UI)              |                                                   |                                                     |
|----------------------------------------------------|-----------------------------------------------|------------------------------------------------|-----------------------------------------|---------------------------------------------------|-----------------------------------------------------|
|                                                    | 2016 counts                                   | 2016 counts                                    | 2016 counts                             | Percentage change in counts between 2006 and 2016 | Percentage change in age-standardised rates between |
| Liver cancer due to hepatitis C                    | 2.0<br>(1.8 to 2.2)                           | 2.4<br>(2.1 to 2.6)                            | 0.5<br>(0.4 to 0.7)                     | 38.2<br>(31.7 to 45.8)                            | -2.8<br>(-7.4 to 2.6)                               |
| Liver cancer due to alcohol use                    | 1.5<br>(1.3 to 1.6)                           | 1.8<br>(1.6 to 1.9)                            | 0.4<br>(0.3 to 0.5)                     | 32.5<br>(26.3 to 38.6)                            | -7.2<br>(-11.6 to -3.0)                             |
| Liver cancer due to other causes                   | 1.1<br>(1.0 to 1.2)                           | 1.3<br>(1.2 to 1.4)                            | 0.3<br>(0.2 to 0.4)                     | 41.1<br>(32.3 to 53.5)                            | 2.0<br>(-4.4 to 11.1)                               |
| Gallbladder and biliary tract cancer               | 1.8<br>(1.8 to 1.9)                           | 2.4<br>(2.3 to 2.6)                            | 0.5<br>(0.4 to 0.7)                     | 19.5<br>(15.9 to 26.4)                            | -16.3<br>(-18.9 to -11.4)                           |
| Pancreatic cancer                                  | 3.6<br>(3.5 to 3.7)                           | 4.7<br>(4.6 to 4.9)                            | 1.0<br>(0.7 to 1.3)                     | 38.2<br>(33.6 to 44.4)                            | -3.1<br>(-6.5 to 1.4)                               |
| Larynx cancer                                      | 5.0<br>(4.8 to 5.2)                           | 1.5<br>(1.5 to 1.6)                            | 0.6<br>(0.4 to 0.8)                     | 25.3<br>(19.3 to 33.4)                            | -12.1<br>(-16.5 to -6.4)                            |
| Tracheal, bronchus, and lung cancer                | 9.7<br>(9.3 to 10.0)                          | 8.5<br>(8.2 to 8.8)                            | 2.0<br>(1.4 to 2.5)                     | 21.4<br>(15.4 to 27.9)                            | -14.5<br>(-18.9 to -9.7)                            |
| Malignant skin melanoma                            | 8.3<br>(7.0 to 10.1)                          | 1.9<br>(1.6 to 2.3)                            | 0.6<br>(0.4 to 0.8)                     | 83.6<br>(69.9 to 96.7)                            | 34.4<br>(24.2 to 43.9)                              |
| Non-melanoma skin cancer                           | 57.5<br>(44.1 to 73.6)                        | 79.4<br>(52.7 to 113.2)                        | 2.0<br>(1.1 to 3.5)                     | -20.6<br>(-36.4 to -1.7)                          | -45.5<br>(-56.3 to -32.6)                           |
| Non-melanoma skin cancer (squamous-cell carcinoma) | 45.9<br>(27.7 to 69.9)                        | 38.0<br>(21.1 to 59.4)                         | 1.9<br>(1.0 to 3.4)                     | -21.6<br>(-37.2 to -2.3)                          | -46.1<br>(-56.9 to -33.0)                           |
| Non-melanoma skin cancer (basal-cell carcinoma)    | 5.8<br>(3.2 to 10.1)                          | 41.4<br>(22.8 to 64.8)                         | 0.1<br>(< 0.05 to 0.1)                  | 39.7<br>(28.8 to 50.6)                            | -1.0<br>(-8.0 to 6.6)                               |
| Breast cancer                                      | 110.6<br>(103.9 to 116.3)                     | 23.1<br>(21.7 to 24.3)                         | 9.1<br>(6.6 to 11.9)                    | 59.5<br>(49.2 to 70.0)                            | 14.9<br>(7.4 to 22.5)                               |
| Cervical cancer                                    | 39.5<br>(37.7 to 42.3)                        | 10.5<br>(10.0 to 11.1)                         | 3.8<br>(2.7 to 4.9)                     | 12.3<br>(5.2 to 19.6)                             | -18.0<br>(-23.3 to -13.0)                           |
| Uterine cancer                                     | 24.7<br>(23.9 to 25.7)                        | 5.2<br>(5.0 to 5.4)                            | 1.9<br>(1.4 to 2.6)                     | 115.4<br>(102.7 to 129.3)                         | 49.7<br>(40.8 to 59.0)                              |
| Ovarian cancer                                     | 14.4<br>(13.7 to 15.1)                        | 4.6<br>(4.4 to 4.8)                            | 2.1<br>(1.5 to 2.8)                     | 52.2<br>(39.4 to 65.7)                            | 11.5<br>(1.8 to 21.7)                               |
| Prostate cancer                                    | 109.9<br>(103.2 to 139.1)                     | 25.2<br>(23.7 to 31.5)                         | 9.8<br>(7.1 to 13.2)                    | 77.4<br>(67.4 to 96.4)                            | 23.9<br>(16.8 to 37.2)                              |
| Testicular cancer                                  | 19.5<br>(18.3 to 20.8)                        | 3.9<br>(3.6 to 4.1)                            | 1.4<br>(0.9 to 1.9)                     | 111.8<br>(88.5 to 136.4)                          | 79.3<br>(60.3 to 99.5)                              |
| Kidney cancer                                      | 25.2<br>(24.5 to 25.8)                        | 6.8<br>(6.6 to 7.0)                            | 2.3<br>(1.7 to 3.0)                     | 50.3<br>(44.9 to 57.6)                            | 12.1<br>(8.0 to 17.3)                               |
| Bladder cancer                                     | 11.6<br>(11.3 to 11.9)                        | 2.9<br>(2.9 to 3.0)                            | 1.1<br>(0.8 to 1.5)                     | 57.8<br>(52.5 to 63.5)                            | 10.9<br>(7.1 to 15.0)                               |
| Brain and nervous system cancer                    | 6.7<br>(5.3 to 7.2)                           | 3.0<br>(2.4 to 3.3)                            | 1.0<br>(0.6 to 1.3)                     | 29.9<br>(21.0 to 49.3)                            | 3.7<br>(-3.3 to 16.7)                               |
| Thyroid cancer                                     | 19.0<br>(18.2 to 19.9)                        | 3.7<br>(3.5 to 3.9)                            | 1.2<br>(0.9 to 1.7)                     | 100.4<br>(88.7 to 113.2)                          | 43.6<br>(35.5 to 52.7)                              |
| Mesothelioma                                       | 0.7<br>(0.6 to 0.7)                           | 0.5<br>(0.4 to 0.5)                            | 0.1<br>(0.1 to 0.2)                     | 46.4<br>(40.5 to 52.1)                            | 5.4<br>(1.1 to 9.5)                                 |
| Hodgkin lymphoma                                   | 3.8<br>(3.6 to 4.1)                           | 1.1<br>(1.0 to 1.2)                            | 0.4<br>(0.3 to 0.6)                     | 47.8<br>(37.2 to 56.4)                            | 13.7<br>(5.8 to 20.2)                               |
| Non-Hodgkin's lymphoma                             | 13.4<br>(12.2 to 14.0)                        | 4.2<br>(3.9 to 4.5)                            | 1.4<br>(1.0 to 1.8)                     | 52.5<br>(46.1 to 66.0)                            | 15.2<br>(10.4 to 24.4)                              |
| Multiple myeloma                                   | 3.1<br>(2.3 to 3.7)                           | 1.5<br>(1.2 to 1.9)                            | 0.7<br>(0.5 to 1.0)                     | 66.7<br>(57.7 to 80.5)                            | 16.8<br>(10.5 to 26.3)                              |
| Leukaemia                                          | 23.2<br>(22.4 to 24.3)                        | 6.7<br>(6.6 to 7.0)                            | 3.0<br>(2.1 to 4.0)                     | 14.9<br>(11.2 to 18.8)                            | -2.1<br>(-4.9 to 0.9)                               |
| Acute lymphoid leukaemia                           | 10.7<br>(9.3 to 11.4)                         | 2.8<br>(2.5 to 3.0)                            | 1.3<br>(0.9 to 1.8)                     | 11.7<br>(4.7 to 18.7)                             | 2.8<br>(-3.2 to 8.8)                                |
| Chronic lymphoid leukaemia                         | 4.0<br>(3.8 to 4.6)                           | 0.9<br>(0.8 to 1.0)                            | 0.5<br>(0.4 to 0.7)                     | 45.1<br>(38.6 to 52.5)                            | 5.1<br>(0.5 to 10.6)                                |
| Acute myeloid leukaemia                            | 2.3<br>(2.1 to 2.5)                           | 1.4<br>(1.3 to 1.6)                            | 0.4<br>(0.3 to 0.5)                     | 18.0<br>(11.9 to 26.6)                            | 1.5<br>(-3.3 to 8.3)                                |
| Chronic myeloid leukaemia                          | 1.5<br>(1.4 to 1.7)                           | 0.5<br>(0.5 to 0.6)                            | 0.2<br>(0.1 to 0.3)                     | 13.1<br>(6.7 to 20.2)                             | -14.4<br>(-19.0 to -9.1)                            |
| Other leukaemia                                    | 4.7<br>(4.4 to 5.3)                           | 1.0<br>(1.0 to 1.2)                            | 0.6<br>(0.4 to 0.8)                     | 1.2<br>(-4.5 to 7.2)                              | -14.5<br>(-19.3 to -9.7)                            |
| Other neoplasms                                    | 73.7<br>(70.6 to 76.7)                        | 18.9<br>(18.2 to 19.7)                         | 5.7<br>(4.1 to 7.5)                     | 88.9<br>(78.9 to 99.0)                            | 46.1<br>(38.6 to 53.7)                              |
| <b>Cardiovascular diseases</b>                     | <b>5,817.8</b><br><b>(5,691.3 to 5,919.8)</b> | <b>545.4†</b><br><b>(518.0 to 578.3)</b>       | <b>323.5</b><br><b>(231.8 to 425.7)</b> | <b>34.8</b><br><b>(32.7 to 37.0)</b>              | <b>-2.3</b><br><b>(-3.9 to -0.8)</b>                |
| Rheumatic heart disease                            | 7.2<br>(6.4 to 8.0)                           | 1.7<br>(1.6 to 1.9)                            | 0.6<br>(0.4 to 0.8)                     | 15.9<br>(9.7 to 22.5)                             | -13.8<br>(-18.7 to -8.8)                            |
| Ischaemic heart disease                            | 1,636.8<br>(1,546.3 to 1,726.7)               | 167.9<br>(159.0 to 177.2)                      | 96.5<br>(66.6 to 131.5)                 | 34.5<br>(33.0 to 36.0)                            | -3.1<br>(-4.1 to -2.1)                              |
| Cerebrovascular disease                            | 685.7<br>(661.0 to 709.7)                     | 104.9‡<br>(95.9 to 113.5)                      | 68.9<br>(49.5 to 87.8)                  | 32.8<br>(25.2 to 40.5)                            | -5.8<br>(-11.6 to 0.4)                              |
| Ischaemic stroke                                   | 566.9<br>(504.8 to 632.4)                     | 71.0‡<br>(62.7 to 79.6)                        | 54.2<br>(38.5 to 70.0)                  | 32.1<br>(22.7 to 41.9)                            | -6.8<br>(-14.1 to 0.6)                              |
| Hemorrhagic stroke                                 | 153.7<br>(140.6 to 168.6)                     | 33.9‡<br>(30.8 to 37.2)                        | 14.7<br>(10.7 to 18.8)                  | 35.3<br>(28.0 to 42.4)                            | -1.5<br>(-6.9 to 4.1)                               |
| Hypertensive heart disease                         | 238.7<br>(206.1 to 275.6)                     | --                                             | 19.1<br>(13.2 to 26.2)                  | 45.7<br>(42.1 to 49.5)                            | 1.6<br>(-1.0 to 4.0)                                |
| Cardiomyopathy and myocarditis                     | 39.2<br>(35.6 to 43.2)                        | 27.7†<br>(24.4 to 31.4)                        | 4.7<br>(3.1 to 6.7)                     | 23.5<br>(19.5 to 27.4)                            | 1.1<br>(-1.4 to 3.7)                                |
| Myocarditis                                        | 18.5<br>(16.2 to 20.9)                        | 27.7<br>(24.4 to 31.4)                         | 1.4<br>(0.9 to 2.0)                     | 17.6<br>(14.5 to 20.6)                            | 0.7<br>(-1.5 to 2.9)                                |
| Alcoholic cardiomyopathy                           | 5.2<br>(4.2 to 6.3)                           | --                                             | 0.5<br>(0.3 to 0.7)                     | 39.4<br>(34.7 to 44.1)                            | 1.5<br>(-1.6 to 4.6)                                |
| Other cardiomyopathy                               | 33.3<br>(28.4 to 38.4)                        | --                                             | 2.9<br>(1.9 to 4.1)                     | 24.2<br>(19.1 to 29.6)                            | 1.3<br>(-2.5 to 5.0)                                |
| Atrial fibrillation and flutter                    | 678.2<br>(594.7 to 771.1)                     | 53.5<br>(46.2 to 62.0)                         | 53.3<br>(35.7 to 74.4)                  | 41.4<br>(39.1 to 43.6)                            | -0.5<br>(-1.9 to 1.0)                               |
| Peripheral vascular disease                        | 1,852.3<br>(1,620.4 to 2,137.9)               | 179.9<br>(155.7 to 209.6)                      | 8.7<br>(4.1 to 15.9)                    | 38.6<br>(35.8 to 41.3)                            | -4.4<br>(-6.0 to -2.5)                              |
| Endocarditis                                       | 4.9<br>(4.3 to 5.6)                           | 9.7<br>(8.8 to 10.6)                           | 0.4<br>(0.3 to 0.6)                     | 28.8<br>(25.5 to 31.9)                            | 0.9<br>(-0.8 to 2.7)                                |
| Other cardiovascular and circulatory diseases      | 1,353.2<br>(1,157.8 to 1,589.5)               | --                                             | 71.3<br>(47.6 to 101.3)                 | 30.5<br>(26.7 to 34.1)                            | 0.4<br>(-1.5 to 2.4)                                |
| <b>Chronic respiratory diseases</b>                | <b>8,888.5</b><br><b>(8,599.9 to 9,149.6)</b> | <b>1,534.0†</b><br><b>(1,442.8 to 1,628.1)</b> | <b>302.4</b><br><b>(226.3 to 398.8)</b> | <b>19.8</b><br><b>(15.5 to 24.9)</b>              | <b>0.4</b><br><b>(-4.1 to 4.8)</b>                  |
| Chronic obstructive pulmonary disease              | 3,904.2<br>(3,668.5 to 4,211.9)               | 279.4<br>(262.4 to 300.3)                      | 86.3<br>(69.2 to 106.0)                 | 34.1<br>(18.6 to 50.0)                            | -1.9<br>(-13.6 to 10.6)                             |
| Pneumoconiosis                                     | 16.2<br>(14.5 to 18.1)                        | 1.4<br>(1.2 to 1.5)                            | 2.4<br>(1.7 to 3.3)                     | 24.9<br>(19.8 to 29.6)                            | -11.2<br>(-14.5 to -7.7)                            |
| Silicosis                                          | 3.4<br>(3.0 to 4.0)                           | 0.4<br>(0.3 to 0.4)                            | 0.5<br>(0.4 to 0.8)                     | 14.6<br>(7.7 to 20.7)                             | -19.4<br>(-24.7 to -14.7)                           |



| Cause                                                          | Prevalence in thousands (95% UI)           | Incidence in thousands (95% UI)                     | YLDs in thousands (95% UI)              |                                                   |                                                     |
|----------------------------------------------------------------|--------------------------------------------|-----------------------------------------------------|-----------------------------------------|---------------------------------------------------|-----------------------------------------------------|
|                                                                | 2016 counts                                | 2016 counts                                         | 2016 counts                             | Percentage change in counts between 2006 and 2016 | Percentage change in age-standardised rates between |
| Asbestosis                                                     | 3.3<br>(2.8 to 3.9)                        | 0.2<br>(0.2 to 0.3)                                 | 0.5<br>(0.3 to 0.7)                     | 33.0<br>(17.9 to 46.3)                            | -1.7<br>(-9.7 to 5.8)                               |
| Coal workers pneumoconiosis                                    | 1.7<br>(1.4 to 2.0)                        | 0.1<br>(0.1 to 0.1)                                 | 0.3<br>(0.2 to 0.4)                     | 41.2<br>(35.4 to 45.4)                            | 1.1<br>(-3.4 to 4.0)                                |
| Other pneumoconiosis                                           | 7.8<br>(6.3 to 9.5)                        | 0.7<br>(0.5 to 0.8)                                 | 1.1<br>(0.7 to 1.6)                     | 23.4<br>(15.4 to 31.9)                            | -12.8<br>(-18.8 to -6.7)                            |
| Asthma                                                         | 5,072.2<br>(4,695.4 to 5,486.8)            | 1,246.0<br>(1,156.5 to 1,340.5)                     | 200.8<br>(131.0 to 289.9)               | 13.4<br>(11.7 to 15.4)                            | 1.0<br>(-0.7 to 2.9)                                |
| Interstitial lung disease and pulmonary sarcoidosis            | 56.2<br>(51.2 to 61.5)                     | 7.3<br>(6.7 to 8.0)                                 | 6.0<br>(4.0 to 8.5)                     | 36.7<br>(32.5 to 41.2)                            | 2.2<br>(-0.8 to 5.2)                                |
| Other chronic respiratory diseases                             | --                                         | --                                                  | 7.0<br>(5.8 to 8.3)                     | 47.6<br>(35.3 to 62.3)                            | 33.8<br>(22.9 to 45.7)                              |
| <b>Cirrhosis and other chronic liver diseases</b>              | <b>1,286.4<br/>(1,229.9 to 1,346.2)</b>    | <b>51.2<br/>(49.6 to 52.8)</b>                      | <b>29.1<br/>(20.3 to 40.1)</b>          | <b>26.3<br/>(23.1 to 29.6)</b>                    | <b>-4.2<br/>(-6.5 to -2.0)</b>                      |
| Cirrhosis and other chronic liver diseases due to hepatitis B  | 37.2<br>(34.3 to 40.6)                     | 1.5<br>(1.4 to 1.7)                                 | 0.8<br>(0.5 to 1.1)                     | 33.9<br>(25.0 to 42.5)                            | -2.2<br>(-8.9 to 4.5)                               |
| Cirrhosis and other chronic liver diseases due to hepatitis C  | 523.7<br>(491.7 to 556.3)                  | 21.8<br>(20.8 to 22.9)                              | 10.6<br>(7.3 to 14.8)                   | 32.3<br>(27.0 to 37.4)                            | -3.1<br>(-6.7 to 0.2)                               |
| Cirrhosis and other chronic liver diseases due to alcohol use  | 465.2<br>(436.3 to 498.0)                  | 18.6<br>(17.6 to 19.6)                              | 9.5<br>(6.6 to 13.1)                    | 30.8<br>(25.6 to 36.0)                            | -6.3<br>(-9.7 to -2.7)                              |
| Cirrhosis and other chronic liver diseases due to other causes | 260.3<br>(231.5 to 293.7)                  | 9.3<br>(8.3 to 10.5)                                | 8.2<br>(5.6 to 11.5)                    | 14.4<br>(9.5 to 19.9)                             | -3.3<br>(-7.1 to 0.6)                               |
| <b>Digestive diseases</b>                                      | <b>3,611.3<br/>(3,522.5 to 3,699.5)</b>    | <b>2,863.0<sup>†</sup><br/>(2,688.1 to 3,024.2)</b> | <b>161.5<br/>(114.0 to 218.7)</b>       | <b>28.9<br/>(25.1 to 32.8)</b>                    | <b>1.3<br/>(-1.4 to 4.0)</b>                        |
| Peptic ulcer disease                                           | 1,740.9<br>(1,597.6 to 1,917.8)            | 52.7<br>(47.6 to 58.3)                              | 43.4<br>(28.1 to 63.1)                  | 42.6<br>(36.6 to 48.6)                            | 8.5<br>(4.2 to 12.8)                                |
| Gastritis and duodenitis                                       | 881.1<br>(795.4 to 984.8)                  | 239.3<br>(218.2 to 264.4)                           | 26.6<br>(17.3 to 38.7)                  | 42.2<br>(36.9 to 47.7)                            | 8.5<br>(4.9 to 12.2)                                |
| Appendicitis                                                   | 7.9<br>(7.2 to 8.7)                        | 208.1<br>(190.1 to 229.1)                           | 2.5<br>(1.7 to 3.4)                     | 8.1<br>(-1.2 to 18.6)                             | -2.0<br>(-9.3 to 6.4)                               |
| Paralytic ileus and intestinal obstruction                     | 1.2<br>(1.1 to 1.4)                        | 34.8<br>(31.9 to 38.2)                              | 0.4<br>(0.3 to 0.6)                     | 18.2<br>(14.8 to 21.5)                            | 0.5<br>(-1.9 to 3.0)                                |
| Inguinal, femoral, and abdominal hernia                        | 926.8<br>(862.0 to 992.0)                  | 963.6<br>(855.0 to 1,077.4)                         | 64.1<br>(44.0 to 88.8)                  | 16.6<br>(11.7 to 21.2)                            | -5.7<br>(-9.4 to -2.1)                              |
| Inflammatory bowel disease                                     | 30.3<br>(27.4 to 33.6)                     | 33.2<br>(30.7 to 35.9)                              | 4.4<br>(3.0 to 6.1)                     | 23.0<br>(17.8 to 28.4)                            | -8.1<br>(-11.7 to -4.3)                             |
| Vascular intestinal disorders                                  | 1.4<br>(1.2 to 1.6)                        | 7.8<br>(6.9 to 9.2)                                 | 0.4<br>(0.3 to 0.6)                     | 35.0<br>(29.0 to 41.3)                            | 6.5<br>(2.2 to 11.0)                                |
| Gallbladder and biliary diseases                               | 135.3<br>(124.6 to 147.0)                  | 1,254.5<br>(1,135.6 to 1,378.1)                     | 5.9<br>(4.0 to 8.3)                     | 45.1<br>(36.9 to 53.3)                            | 8.8<br>(2.9 to 14.8)                                |
| Pancreatitis                                                   | 7.7<br>(7.0 to 8.4)                        | 68.8<br>(62.9 to 75.2)                              | 1.0<br>(0.7 to 1.4)                     | 42.9<br>(39.4 to 46.2)                            | 11.3<br>(8.9 to 13.7)                               |
| Other digestive diseases                                       | --                                         | --                                                  | 12.7<br>(9.0 to 17.1)                   | 30.1<br>(25.9 to 34.4)                            | 5.3<br>(2.5 to 8.0)                                 |
| <b>Neurological disorders</b>                                  | <b>48,644.3<br/>(47,515.1 to 49,773.3)</b> | <b>23,758.3<br/>(20,441.4 to 27,239.7)</b>          | <b>1,366.4<br/>(940.0 to 1,824.8)</b>   | <b>21.8<br/>(14.8 to 29.6)</b>                    | <b>-0.2<br/>(-5.5 to 5.5)</b>                       |
| Alzheimer's disease and other dementias                        | 679.6<br>(571.9 to 806.9)                  | 120.3<br>(100.4 to 145.4)                           | 100.2<br>(69.9 to 133.4)                | 46.3<br>(44.1 to 48.7)                            | -0.7<br>(-1.6 to 0.5)                               |
| Parkinson's disease                                            | 68.7<br>(54.7 to 83.9)                     | 7.9<br>(6.2 to 9.8)                                 | 8.1<br>(5.2 to 11.2)                    | 50.3<br>(45.9 to 55.2)                            | 5.3<br>(2.1 to 8.7)                                 |
| Epilepsy                                                       | 727.0<br>(559.0 to 909.1)                  | 81.6<br>(62.7 to 102.2)                             | 213.2<br>(132.3 to 313.2)               | 9.1<br>(-20.1 to 49.7)                            | -4.6<br>(-30.2 to 30.9)                             |
| Multiple sclerosis                                             | 13.3<br>(11.8 to 15.2)                     | 0.6<br>(0.6 to 0.7)                                 | 3.8<br>(2.6 to 5.1)                     | 42.1<br>(39.4 to 45.1)                            | 10.3<br>(8.3 to 12.3)                               |
| Motor neuron disease                                           | 4.2<br>(3.6 to 5.0)                        | 0.6<br>(0.5 to 0.7)                                 | 0.9<br>(0.6 to 1.2)                     | 23.5<br>(20.4 to 26.9)                            | 3.8<br>(2.5 to 5.1)                                 |
| Migraine                                                       | 17,294.3<br>(16,557.0 to 18,007.2)         | 1,982.8<br>(1,896.0 to 2,074.2)                     | 829.4<br>(540.6 to 1,149.2)             | 21.8<br>(20.6 to 23.0)                            | -0.0<br>(-0.7 to 0.8)                               |
| Tension-type headache                                          | 37,432.2<br>(33,861.9 to 41,615.5)         | 21,563.5<br>(18,185.4 to 25,074.9)                  | 164.1<br>(105.5 to 238.9)               | 24.3<br>(22.2 to 26.3)                            | 0.8<br>(-0.3 to 2.0)                                |
| Other neurological disorders                                   | 0.5<br>(0.3 to 0.7)                        | 1.0<br>(0.6 to 1.5)                                 | 46.7<br>(29.4 to 67.8)                  | 29.3<br>(-3.8 to 73.8)                            | 14.9<br>(-13.6 to 52.6)                             |
| <b>Mental and substance use disorders</b>                      | <b>16,332.2<br/>(16,126.7 to 16,569.8)</b> | <b>6,287.1<sup>†</sup><br/>(5,894.6 to 6,724.2)</b> | <b>2,295.6<br/>(1,654.3 to 2,982.3)</b> | <b>20.3<br/>(19.0 to 21.6)</b>                    | <b>-0.4<br/>(-1.3 to 0.6)</b>                       |
| Schizophrenia                                                  | 261.1<br>(227.8 to 297.1)                  | 17.6<br>(15.4 to 19.9)                              | 169.1<br>(124.0 to 211.2)               | 27.1<br>(24.1 to 30.2)                            | 0.5<br>(-1.5 to 2.6)                                |
| Alcohol use disorders                                          | 1,997.2<br>(1,792.9 to 2,226.5)            | 1,053.8<br>(932.8 to 1,185.3)                       | 202.0<br>(139.7 to 278.2)               | 21.2<br>(17.0 to 25.1)                            | -0.1<br>(-3.4 to 3.3)                               |
| Drug use disorders                                             | 733.8<br>(713.4 to 752.5)                  | 92.2<br>(85.0 to 100.0)                             | 188.7<br>(133.7 to 245.8)               | 21.4<br>(18.7 to 24.2)                            | 1.8<br>(-0.5 to 4.0)                                |
| Opioid use disorders                                           | 294.2<br>(251.8 to 346.8)                  | 36.4<br>(31.3 to 42.8)                              | 123.7<br>(86.0 to 164.5)                | 21.6<br>(18.2 to 25.4)                            | 1.8<br>(-0.9 to 4.7)                                |
| Cocaine use disorders                                          | 189.4<br>(165.3 to 217.5)                  | 11.6<br>(9.8 to 13.7)                               | 26.0<br>(16.3 to 38.9)                  | 21.9<br>(17.2 to 26.8)                            | 1.7<br>(-2.2 to 5.5)                                |
| Amphetamine use disorders                                      | 52.5<br>(41.9 to 66.5)                     | 6.7<br>(5.2 to 8.3)                                 | 7.0<br>(4.2 to 11.0)                    | 17.2<br>(8.4 to 27.0)                             | 2.0<br>(-5.2 to 9.4)                                |
| Cannabis use disorders                                         | 164.8<br>(144.4 to 190.4)                  | 27.5<br>(23.8 to 31.6)                              | 4.9<br>(3.1 to 7.0)                     | 18.0<br>(12.2 to 24.1)                            | 0.5<br>(-4.3 to 5.4)                                |
| Other drug use disorders                                       | 52.1<br>(46.1 to 58.1)                     | 10.1<br>(9.0 to 11.3)                               | 27.1<br>(17.9 to 38.2)                  | 22.3<br>(15.7 to 29.0)                            | 2.0<br>(-3.3 to 7.3)                                |
| Depressive disorders                                           | 3,554.6<br>(3,448.7 to 3,659.7)            | 3,830.0<br>(3,473.2 to 4,251.1)                     | 606.1<br>(417.8 to 823.6)               | 25.9<br>(23.8 to 27.9)                            | -1.0<br>(-2.6 to 0.6)                               |
| Major depressive disorder                                      | 2,352.6<br>(2,117.4 to 2,613.5)            | 3,600.8<br>(3,234.5 to 4,019.6)                     | 484.3<br>(329.8 to 660.3)               | 26.0<br>(24.1 to 28.0)                            | -1.0<br>(-2.6 to 0.6)                               |
| Dysthymia                                                      | 1,259.1<br>(1,105.8 to 1,435.9)            | 229.2<br>(200.9 to 261.4)                           | 121.7<br>(81.5 to 176.1)                | 25.2<br>(19.0 to 32.1)                            | -1.0<br>(-5.7 to 4.0)                               |
| Bipolar disorder                                               | 1,029.5<br>(883.8 to 1,200.7)              | 86.5<br>(74.6 to 101.0)                             | 213.1<br>(132.3 to 318.6)               | 19.8<br>(17.7 to 21.8)                            | -0.2<br>(-1.6 to 1.1)                               |
| Anxiety disorders                                              | 3,766.4<br>(3,519.5 to 4,051.9)            | 620.5<br>(580.5 to 661.3)                           | 366.9<br>(256.1 to 497.3)               | 16.8<br>(11.2 to 22.4)                            | -2.1<br>(-6.5 to 2.3)                               |
| Eating disorders                                               | 209.6<br>(185.0 to 237.3)                  | 117.6<br>(86.7 to 157.3)                            | 42.9<br>(27.6 to 62.7)                  | 15.2<br>(11.8 to 18.6)                            | 2.3<br>(-0.5 to 5.3)                                |
| Anorexia nervosa                                               | 50.2<br>(36.8 to 67.4)                     | 20.2<br>(14.9 to 26.9)                              | 10.8<br>(6.6 to 16.3)                   | 14.5<br>(8.4 to 21.0)                             | 4.0<br>(-1.2 to 9.6)                                |
| Bulimia nervosa                                                | 151.3<br>(113.8 to 200.3)                  | 97.4<br>(68.1 to 135.6)                             | 32.1<br>(19.4 to 49.0)                  | 15.5<br>(11.5 to 19.7)                            | 1.8<br>(-1.6 to 5.3)                                |
| Autistic spectrum disorders                                    | 1,169.2<br>(1,111.9 to 1,213.3)            | 8.7<br>(5.9 to 12.4)                                | 173.1<br>(116.8 to 243.7)               | 13.7<br>(12.3 to 15.1)                            | 0.3<br>(-0.9 to 1.5)                                |
| Autism                                                         | 358.8<br>(308.4 to 418.0)                  | 0.9<br>(0.5 to 1.6)                                 | 91.9<br>(58.8 to 133.6)                 | 14.2<br>(12.0 to 16.6)                            | 0.3<br>(-1.6 to 2.3)                                |
| Asperger syndrome and other autistic spectrum disorders        | 807.1<br>(664.9 to 966.8)                  | 7.7<br>(4.9 to 11.3)                                | 81.2<br>(52.9 to 118.0)                 | 13.1<br>(11.7 to 14.6)                            | 0.2<br>(-0.8 to 1.3)                                |

| Cause                                                      | Prevalence in thousands (95% UI)           | Incidence in thousands (95% UI)                | YLDs in thousands (95% UI)              |                                                   |                                                     |
|------------------------------------------------------------|--------------------------------------------|------------------------------------------------|-----------------------------------------|---------------------------------------------------|-----------------------------------------------------|
|                                                            | 2016 counts                                | 2016 counts                                    | 2016 counts                             | Percentage change in counts between 2006 and 2016 | Percentage change in age-standardised rates between |
| Attention-deficit/hyperactivity disorder                   | 746.6<br>(682.8 to 817.8)                  | 35.5<br>(31.6 to 40.3)                         | 9.1<br>(5.4 to 14.3)                    | 9.3<br>(1.6 to 17.4)                              | 1.0<br>(-6.0 to 8.1)                                |
| Conduct disorder                                           | 1,019.0<br>(860.6 to 1,175.9)              | 342.8<br>(277.0 to 408.8)                      | 124.7<br>(77.3 to 188.9)                | 4.4<br>(-0.6 to 9.6)                              | 0.9<br>(-4.1 to 5.8)                                |
| Idiopathic developmental intellectual disability           | 801.6<br>(403.8 to 1,195.6)                | --                                             | 32.7<br>(13.6 to 58.1)                  | 13.7<br>(10.8 to 17.0)                            | -1.5<br>(-4.2 to 0.8)                               |
| Other mental and substance use disorders                   | 2,236.3<br>(1,935.7 to 2,598.2)            | 82.0<br>(71.3 to 94.0)                         | 167.4<br>(113.1 to 240.0)               | 25.6<br>(24.0 to 27.3)                            | -0.0<br>(-1.1 to 1.1)                               |
| <b>Diabetes, urogenital, blood, and endocrine diseases</b> | <b>39,005.4<br/>(38,656.2 to 39,322.5)</b> | <b>9,869.6†<br/>(9,393.2 to 10,358.9)</b>      | <b>1,560.1<br/>(1,106.5 to 2,133.6)</b> | <b>39.3<br/>(35.1 to 43.4)</b>                    | <b>4.0<br/>(1.1 to 7.1)</b>                         |
| Diabetes mellitus                                          | 11,477.8<br>(10,510.1 to 12,656.9)         | 688.4<br>(626.9 to 761.9)                      | 1,043.3<br>(708.6 to 1,468.7)           | 40.7<br>(34.6 to 46.9)                            | 3.2<br>(-1.2 to 7.9)                                |
| Acute glomerulonephritis                                   | 1.7<br>(1.4 to 2.1)                        | 25.4<br>(20.2 to 31.8)                         | 0.1<br>(0.1 to 0.1)                     | 31.1<br>(26.1 to 35.8)                            | 4.6<br>(0.6 to 7.7)                                 |
| Chronic kidney disease                                     | 8,085.3<br>(7,423.3 to 8,800.9)            | 718.8<br>(638.3 to 807.3)                      | 262.8<br>(198.4 to 328.7)               | 53.6<br>(49.1 to 58.0)                            | 12.5<br>(9.2 to 15.7)                               |
| Chronic kidney disease due to diabetes mellitus            | 3,139.2<br>(2,692.9 to 3,641.9)            | 290.6<br>(240.2 to 348.5)                      | 94.5<br>(69.8 to 121.1)                 | 61.4<br>(55.1 to 67.9)                            | 14.9<br>(10.5 to 19.5)                              |
| Chronic kidney disease due to hypertension                 | 1,535.8<br>(1,311.2 to 1,765.1)            | 193.4<br>(158.3 to 231.2)                      | 33.1<br>(23.9 to 43.0)                  | 60.1<br>(51.6 to 68.8)                            | 11.3<br>(5.4 to 17.4)                               |
| Chronic kidney disease due to glomerulonephritis           | 1,767.0<br>(1,533.2 to 1,987.2)            | 89.1<br>(69.0 to 108.9)                        | 78.3<br>(57.6 to 101.3)                 | 45.6<br>(40.4 to 51.3)                            | 10.8<br>(7.4 to 14.7)                               |
| Chronic kidney disease due to other causes                 | 1,643.3<br>(1,351.5 to 1,957.5)            | 145.7<br>(117.2 to 177.3)                      | 56.9<br>(41.6 to 75.2)                  | 49.3<br>(43.5 to 55.2)                            | 11.3<br>(7.7 to 15.0)                               |
| Urinary diseases and male infertility                      | 1,846.2<br>(1,702.7 to 1,993.2)            | 4,260.4†<br>(3,849.3 to 4,710.8)               | 46.8<br>(30.9 to 66.2)                  | 34.7<br>(31.8 to 37.1)                            | -2.6<br>(-4.3 to -1.0)                              |
| Interstitial nephritis and urinary tract infections        | 72.1<br>(64.2 to 80.5)                     | 3,784.1<br>(3,377.3 to 4,229.4)                | 2.4<br>(1.5 to 3.6)                     | 29.9<br>(23.8 to 36.7)                            | 8.7<br>(4.1 to 14.2)                                |
| Urolithiasis                                               | 11.7<br>(10.4 to 13.3)                     | 310.4<br>(274.4 to 350.5)                      | 0.9<br>(0.6 to 1.3)                     | 31.7<br>(27.6 to 35.7)                            | 2.7<br>(0.3 to 5.0)                                 |
| Benign prostatic hyperplasia                               | 1,223.9<br>(1,092.1 to 1,371.6)            | 165.9<br>(145.2 to 192.1)                      | 39.8<br>(26.1 to 57.1)                  | 38.3<br>(35.8 to 40.8)                            | -2.7<br>(-4.6 to -0.9)                              |
| Male infertility                                           | 459.6<br>(344.7 to 615.3)                  | --                                             | 2.5<br>(1.0 to 5.2)                     | 8.5<br>(3.2 to 14.8)                              | -8.6<br>(-13.5 to -3.4)                             |
| Other urinary diseases                                     | --                                         | --                                             | 1.2<br>(0.8 to 1.7)                     | 5.4<br>(1.1 to 10.1)                              | -11.6<br>(-14.6 to -8.4)                            |
| Gynecological diseases                                     | 12,540.2<br>(12,305.1 to 12,749.9)         | 3,960.0†<br>(3,769.5 to 4,145.5)               | 115.5<br>(76.7 to 171.9)                | 17.5<br>(14.8 to 19.8)                            | -5.2<br>(-7.0 to -3.4)                              |
| Uterine fibroids                                           | 1,055.2<br>(956.9 to 1,161.5)              | 121.8<br>(107.5 to 138.4)                      | 10.3<br>(5.5 to 18.4)                   | 29.1<br>(25.8 to 31.9)                            | -3.0<br>(-4.8 to -1.4)                              |
| Polycystic ovarian syndrome                                | 20.5<br>(16.9 to 24.3)                     | 92.5<br>(70.0 to 117.3)                        | 0.2<br>(0.1 to 0.3)                     | 19.5<br>(11.5 to 28.6)                            | -0.4<br>(-6.9 to 7.1)                               |
| Female infertility                                         | 1,284.4<br>(921.5 to 1,804.2)              | --                                             | 6.9<br>(2.6 to 14.8)                    | 26.7<br>(19.0 to 35.7)                            | 6.2<br>(-0.2 to 13.6)                               |
| Endometriosis                                              | 5.3<br>(4.6 to 6.1)                        | 24.5<br>(21.1 to 28.4)                         | 0.5<br>(0.4 to 0.7)                     | 17.4<br>(11.7 to 23.2)                            | -3.2<br>(-7.9 to 1.7)                               |
| Genital prolapse                                           | 2,436.8<br>(2,201.9 to 2,682.2)            | 156.1<br>(139.2 to 174.5)                      | 7.6<br>(3.7 to 13.6)                    | 20.8<br>(17.8 to 24.0)                            | -14.9<br>(-17.0 to -12.6)                           |
| Premenstrual syndrome                                      | 8,282.4<br>(7,891.4 to 8,678.0)            | 3,021.6<br>(2,858.5 to 3,187.7)                | 69.7<br>(42.9 to 108.1)                 | 16.3<br>(14.1 to 18.5)                            | -3.0<br>(-4.8 to -1.1)                              |
| Other gynecological diseases                               | 615.6<br>(540.2 to 700.3)                  | 543.6<br>(462.8 to 636.4)                      | 20.3<br>(13.5 to 28.9)                  | 12.1<br>(4.1 to 19.5)                             | -11.3<br>(-17.7 to -5.7)                            |
| Hemoglobinopathies and hemolytic anaemias                  | 14,003.2<br>(13,919.5 to 14,095.3)         | --                                             | 53.7<br>(35.4 to 77.6)                  | 14.4<br>(9.3 to 18.8)                             | 3.0<br>(-0.5 to 6.5)                                |
| Thalassemias                                               | 1.2<br>(1.1 to 1.2)                        | --                                             | 0.1<br>(0.1 to 0.2)                     | 1.3<br>(-6.8 to 13.2)                             | 8.2<br>(-0.5 to 20.6)                               |
| Thalassaemias trait                                        | 1,841.6<br>(1,681.7 to 1,992.7)            | --                                             | 38.1<br>(25.2 to 55.3)                  | 14.9<br>(9.8 to 19.5)                             | 2.7<br>(-0.9 to 6.4)                                |
| Sickle cell disorders                                      | 1.1<br>(1.1 to 1.2)                        | --                                             | 0.2<br>(0.1 to 0.2)                     | 18.9<br>(15.0 to 22.4)                            | 11.5<br>(8.4 to 14.2)                               |
| Sickle cell trait                                          | 1,517.5<br>(1,483.4 to 1,555.1)            | --                                             | 7.7<br>(5.0 to 11.6)                    | 11.2<br>(5.3 to 17.0)                             | 3.6<br>(-1.2 to 8.5)                                |
| G6PD deficiency                                            | 1,103.1<br>(1,068.3 to 1,141.5)            | --                                             | 0.2<br>(0.1 to 0.3)                     | -2.1<br>(-8.4 to 2.4)                             | -14.0<br>(-17.8 to -10.8)                           |
| G6PD trait                                                 | 9,520.7<br>(9,367.4 to 9,710.3)            | --                                             | < 0.05<br>(< 0.05 to < 0.05)            | 0.0<br>(-4.0 to 3.8)                              | -12.2<br>(-15.2 to -8.8)                            |
| Other hemoglobinopathies and hemolytic anaemias            | 433.9<br>(411.0 to 459.9)                  | --                                             | 7.4<br>(4.8 to 11.1)                    | 15.7<br>(9.4 to 22.3)                             | 4.2<br>(-0.7 to 9.1)                                |
| Endocrine, metabolic, blood, and immune disorders          | 1,219.7<br>(1,139.9 to 1,305.1)            | 216.6<br>(195.1 to 238.7)                      | 37.8<br>(25.5 to 51.6)                  | 36.7<br>(31.8 to 41.8)                            | 7.5<br>(4.7 to 10.7)                                |
| <b>Musculoskeletal disorders</b>                           | <b>17,578.9<br/>(17,264.9 to 17,934.9)</b> | <b>8,516.3<br/>(7,742.9 to 9,388.6)</b>        | <b>1,868.8<br/>(1,349.6 to 2,451.8)</b> | <b>39.8<br/>(38.2 to 41.6)</b>                    | <b>6.3<br/>(5.4 to 7.4)</b>                         |
| Rheumatoid arthritis                                       | 286.1<br>(258.6 to 318.0)                  | 18.4<br>(16.8 to 20.2)                         | 67.7<br>(47.0 to 89.7)                  | 40.0<br>(36.3 to 44.2)                            | 4.2<br>(1.8 to 7.0)                                 |
| Osteoarthritis                                             | 4,093.1<br>(3,848.6 to 4,350.1)            | 214.9<br>(199.7 to 229.9)                      | 252.6<br>(179.2 to 341.8)               | 44.3<br>(43.1 to 45.5)                            | 2.2<br>(1.4 to 3.1)                                 |
| Low back and neck pain                                     | 9,576.0<br>(9,213.9 to 9,882.2)            | 3,714.4<br>(3,340.6 to 4,112.1)                | 1,085.2<br>(762.3 to 1,433.9)           | 41.8<br>(39.9 to 44.1)                            | 8.4<br>(7.1 to 9.9)                                 |
| Low back pain                                              | 5,672.5<br>(4,968.7 to 6,446.9)            | 2,654.7<br>(2,318.3 to 3,033.6)                | 646.0<br>(454.3 to 862.0)               | 49.0<br>(46.0 to 52.1)                            | 15.2<br>(13.5 to 17.1)                              |
| Neck pain                                                  | 4,375.5<br>(3,759.7 to 5,077.9)            | 1,059.7<br>(915.6 to 1,245.9)                  | 439.2<br>(293.7 to 623.6)               | 32.5<br>(30.6 to 34.5)                            | -0.1<br>(-0.6 to 0.4)                               |
| Gout                                                       | 239.9<br>(207.0 to 278.5)                  | 49.9<br>(42.9 to 57.3)                         | 7.8<br>(5.3 to 10.7)                    | 42.0<br>(35.2 to 49.2)                            | 5.9<br>(0.9 to 10.3)                                |
| Other musculoskeletal disorders                            | 5,261.5<br>(4,569.0 to 6,045.1)            | 4,518.8<br>(3,807.1 to 5,306.3)                | 455.4<br>(309.0 to 639.8)               | 32.8<br>(29.2 to 36.9)                            | 4.5<br>(2.2 to 6.9)                                 |
| <b>Other non-communicable diseases</b>                     | <b>93,228.6<br/>(92,671.0 to 93,912.1)</b> | <b>233,177.0†<br/>(218,884.6 to 248,929.1)</b> | <b>2,569.9<br/>(1,768.6 to 3,630.2)</b> | <b>22.1<br/>(21.3 to 22.9)</b>                    | <b>-0.4<br/>(-0.8 to -0.1)</b>                      |
| Congenital anomalies                                       | 1,597.7<br>(1,517.8 to 1,667.6)            | --                                             | 188.0<br>(134.1 to 247.7)               | 10.3<br>(8.4 to 12.1)                             | -1.9<br>(-3.5 to -0.3)                              |
| Neural tube defects                                        | 146.3<br>(135.1 to 158.3)                  | --                                             | 43.4<br>(30.7 to 57.7)                  | 13.8<br>(10.1 to 17.6)                            | -0.4<br>(-3.8 to 2.7)                               |
| Congenital heart anomalies                                 | 139.2<br>(122.5 to 158.0)                  | --                                             | 7.1<br>(3.3 to 11.9)                    | 6.5<br>(2.4 to 10.8)                              | -1.8<br>(-5.5 to 2.3)                               |
| Orofacial clefts                                           | 145.1<br>(130.8 to 159.7)                  | --                                             | 1.7<br>(1.1 to 2.5)                     | 1.2<br>(-4.0 to 5.7)                              | -10.7<br>(-15.2 to -6.8)                            |
| Down's syndrome                                            | 70.8<br>(61.4 to 82.7)                     | --                                             | 6.4<br>(4.3 to 8.9)                     | -10.2<br>(-15.4 to -5.7)                          | -20.0<br>(-24.6 to -15.9)                           |
| Turner syndrome                                            | 34.7<br>(30.6 to 39.4)                     | --                                             | 0.6<br>(0.3 to 1.0)                     | 14.2<br>(6.5 to 22.1)                             | 3.2<br>(-3.5 to 10.0)                               |
| Klinefelter syndrome                                       | 69.4<br>(61.2 to 78.5)                     | --                                             | 0.4<br>(0.2 to 0.7)                     | 15.6<br>(9.4 to 22.4)                             | 4.7<br>(-0.9 to 10.6)                               |



| Cause                                         | Prevalence in thousands (95% UI)                 | Incidence in thousands (95% UI)                | YLDs in thousands (95% UI)              |                                                   |                                                     |
|-----------------------------------------------|--------------------------------------------------|------------------------------------------------|-----------------------------------------|---------------------------------------------------|-----------------------------------------------------|
|                                               | 2016 counts                                      | 2016 counts                                    | 2016 counts                             | Percentage change in counts between 2006 and 2016 | Percentage change in age-standardised rates between |
| Other chromosomal abnormalities               | 111.7<br>(96.6 to 129.9)                         | --                                             | 12.8<br>(9.0 to 17.4)                   | 1.7<br>(-4.0 to 6.8)                              | 4.2<br>(-1.4 to 9.5)                                |
| Congenital musculoskeletal and limb anomalies | 299.5<br>(276.7 to 322.1)                        | --                                             | 38.1<br>(25.9 to 52.2)                  | 18.3<br>(15.0 to 21.5)                            | 2.1<br>(-0.7 to 4.8)                                |
| Urogenital congenital anomalies               | 207.9<br>(191.3 to 226.2)                        | --                                             | 5.1<br>(3.0 to 8.0)                     | 2.5<br>(0.3 to 4.6)                               | -0.6<br>(-2.5 to 1.5)                               |
| Digestive congenital anomalies                | 249.6<br>(226.8 to 273.3)                        | --                                             | 11.0<br>(7.2 to 15.8)                   | 16.9<br>(12.9 to 21.3)                            | 2.7<br>(-0.9 to 6.6)                                |
| Other congenital anomalies                    | 484.5<br>(320.6 to 708.8)                        | --                                             | 61.4<br>(41.2 to 87.6)                  | 8.1<br>(4.8 to 11.5)                              | -4.7<br>(-7.5 to -1.6)                              |
| Skin and subcutaneous diseases                | 36,633.1<br>(36,300.3 to 36,936.1)               | 75,296.0<br>(72,012.3 to 79,070.5)             | 911.5<br>(612.5 to 1,320.1)             | 13.5<br>(12.6 to 14.4)                            | 1.4<br>(0.8 to 2.0)                                 |
| Dermatitis                                    | 4,541.1<br>(4,331.7 to 4,767.2)                  | 6,623.3<br>(6,139.3 to 7,115.7)                | 169.6<br>(102.0 to 275.0)               | 10.8<br>(8.7 to 13.2)                             | 1.3<br>(-0.5 to 3.2)                                |
| Psoriasis                                     | 1,104.9<br>(1,067.8 to 1,144.7)                  | 154.3<br>(149.4 to 159.3)                      | 97.0<br>(70.2 to 127.2)                 | 28.3<br>(25.7 to 30.9)                            | 6.0<br>(4.1 to 7.9)                                 |
| Cellulitis                                    | 44.2<br>(41.0 to 47.5)                           | 790.4<br>(739.5 to 844.6)                      | 2.5<br>(1.7 to 3.7)                     | 16.4<br>(10.2 to 22.6)                            | 3.3<br>(-1.4 to 8.1)                                |
| Pyoderma                                      | 268.3<br>(261.5 to 275.2)                        | 5,716.5<br>(5,528.9 to 5,922.0)                | 1.5<br>(0.6 to 3.1)                     | 26.3<br>(23.9 to 28.9)                            | 2.4<br>(0.7 to 4.4)                                 |
| Scabies                                       | 1,791.5<br>(1,576.6 to 2,056.7)                  | 5,479.0<br>(4,747.4 to 6,272.1)                | 46.5<br>(25.8 to 74.2)                  | 7.2<br>(5.3 to 8.9)                               | -2.0<br>(-2.9 to -1.1)                              |
| Fungal skin diseases                          | 8,309.4<br>(7,534.8 to 9,182.7)                  | 29,311.9<br>(26,404.1 to 32,623.2)             | 46.7<br>(18.8 to 97.3)                  | 17.0<br>(15.1 to 18.9)                            | 0.0<br>(-0.3 to 0.3)                                |
| Viral skin diseases                           | 3,545.3<br>(3,421.1 to 3,667.1)                  | 5,347.3<br>(5,144.5 to 5,545.9)                | 109.2<br>(66.8 to 162.7)                | 10.2<br>(9.2 to 11.1)                             | -0.2<br>(-0.9 to 0.6)                               |
| Acne vulgaris                                 | 11,012.8<br>(10,065.1 to 12,022.3)               | 7,536.0<br>(6,401.7 to 8,933.5)                | 285.6<br>(192.3 to 412.5)               | 11.6<br>(10.3 to 13.1)                            | 1.8<br>(0.7 to 3.0)                                 |
| Alopecia areata                               | 224.8<br>(215.7 to 233.6)                        | 398.2<br>(382.5 to 413.8)                      | 7.4<br>(4.7 to 11.3)                    | 18.6<br>(15.5 to 21.8)                            | -0.0<br>(-2.5 to 2.5)                               |
| Pruritus                                      | 1,189.7<br>(1,050.0 to 1,337.8)                  | 941.6<br>(844.2 to 1,061.4)                    | 12.7<br>(5.9 to 23.1)                   | 21.3<br>(18.6 to 24.1)                            | 0.4<br>(-0.8 to 1.6)                                |
| Urticaria                                     | 1,255.5<br>(1,100.8 to 1,446.1)                  | 2,236.5<br>(1,962.4 to 2,564.1)                | 76.2<br>(48.4 to 110.0)                 | 6.7<br>(4.4 to 9.2)                               | -0.0<br>(-1.2 to 1.3)                               |
| Decubitus ulcer                               | 42.0<br>(38.1 to 46.4)                           | 153.6<br>(138.5 to 170.5)                      | 6.6<br>(4.7 to 8.9)                     | 30.8<br>(26.6 to 35.4)                            | -0.7<br>(-4.1 to 2.8)                               |
| Other skin and subcutaneous diseases          | 9,072.0<br>(8,840.3 to 9,297.0)                  | 10,607.5<br>(10,307.5 to 10,903.4)             | 50.0<br>(24.1 to 91.8)                  | 26.4<br>(25.5 to 27.3)                            | 1.2<br>(0.7 to 1.8)                                 |
| Sense organ diseases                          | 29,313.6<br>(29,027.5 to 29,611.9)               | 12,178.0†<br>(11,446.1 to 12,988.6)            | 1,072.6<br>(751.8 to 1,487.0)           | 28.8<br>(27.7 to 29.9)                            | -2.2<br>(-2.9 to -1.7)                              |
| Glaucoma                                      | 92.0<br>(77.1 to 107.4)                          | --                                             | 9.9<br>(6.6 to 13.5)                    | 46.0<br>(42.3 to 49.7)                            | 1.3<br>(-1.2 to 3.9)                                |
| Cataract                                      | 1,339.5<br>(1,195.6 to 1,485.4)                  | --                                             | 112.6<br>(80.8 to 155.0)                | 39.0<br>(37.0 to 41.1)                            | -2.9<br>(-4.2 to -1.5)                              |
| Macular degeneration                          | 45.2<br>(37.1 to 55.0)                           | --                                             | 3.8<br>(2.5 to 5.2)                     | 52.1<br>(46.9 to 57.6)                            | 5.3<br>(1.8 to 8.9)                                 |
| Refraction and accommodation disorders        | 14,057.4<br>(13,536.7 to 14,622.3)               | --                                             | 261.5<br>(163.8 to 411.3)               | 21.0<br>(19.2 to 22.9)                            | -2.5<br>(-3.3 to -1.7)                              |
| Age-related and other hearing loss            | 18,995.9<br>(18,031.0 to 20,048.1)               | --                                             | 539.0<br>(377.8 to 752.7)               | 30.0<br>(27.7 to 32.0)                            | -2.8<br>(-3.8 to -1.8)                              |
| Other vision loss                             | 460.4<br>(400.3 to 528.2)                        | --                                             | 42.1<br>(29.0 to 56.9)                  | 31.3<br>(27.9 to 34.7)                            | -0.4<br>(-2.5 to 1.7)                               |
| Other sense organ diseases                    | 3,335.9<br>(3,101.3 to 3,553.8)                  | 12,178.0<br>(11,446.1 to 12,988.6)             | 103.9<br>(65.6 to 157.4)                | 30.5<br>(29.1 to 31.9)                            | 0.7<br>(-0.2 to 1.6)                                |
| Oral disorders                                | 68,798.3<br>(66,967.2 to 70,300.6)               | 145,703.0†<br>(131,522.9 to 161,112.6)         | 397.8<br>(238.5 to 623.6)               | 33.5<br>(31.3 to 35.9)                            | 2.2<br>(1.4 to 3.1)                                 |
| Caries of deciduous teeth                     | 8,100.7<br>(6,430.2 to 9,571.5)                  | 30,047.0<br>(19,930.4 to 41,143.3)             | 3.1<br>(1.3 to 6.0)                     | -5.6<br>(-8.0 to -3.4)                            | 0.3<br>(-2.3 to 2.8)                                |
| Caries of permanent teeth                     | 49,041.0<br>(46,000.2 to 51,890.4)               | 113,216.3<br>(103,545.9 to 123,748.5)          | 48.3<br>(21.2 to 91.7)                  | 17.4<br>(16.0 to 18.9)                            | -0.4<br>(-1.3 to 0.4)                               |
| Periodontal disease                           | 15,359.3<br>(12,951.8 to 18,140.7)               | 1,899.9<br>(1,553.5 to 2,308.7)                | 101.0<br>(39.9 to 207.3)                | 34.0<br>(31.8 to 35.8)                            | 0.3<br>(-0.5 to 1.3)                                |
| Edentulism and severe tooth loss              | 6,395.6<br>(5,580.4 to 7,168.3)                  | 539.8<br>(455.8 to 627.8)                      | 177.6<br>(116.4 to 252.4)               | 45.3<br>(42.8 to 47.8)                            | 4.4<br>(3.2 to 5.5)                                 |
| Other oral disorders                          | 2,298.0<br>(2,196.4 to 2,404.5)                  | --                                             | 67.7<br>(41.7 to 102.3)                 | 21.0<br>(19.8 to 22.1)                            | -0.1<br>(-0.8 to 0.6)                               |
| <b>Injuries</b>                               | <b>13,942.7</b><br><b>(13,006.2 to 15,129.6)</b> | <b>7,085.5†</b><br><b>(6,634.0 to 7,577.1)</b> | <b>573.6</b><br><b>(391.7 to 810.0)</b> | <b>15.6</b><br><b>(14.1 to 17.1)</b>              | <b>-8.8</b><br><b>(-9.9 to -7.7)</b>                |
| <b>Transport injuries</b>                     | <b>2,248.6</b><br><b>(2,088.7 to 2,407.9)</b>    | <b>862.0</b><br><b>(784.4 to 941.5)</b>        | <b>119.5</b><br><b>(79.2 to 171.2)</b>  | <b>18.2</b><br><b>(16.6 to 19.7)</b>              | <b>-8.0</b><br><b>(-9.1 to -6.9)</b>                |
| Road injuries                                 | 2,152.4<br>(2,000.3 to 2,311.0)                  | 839.0<br>(761.4 to 918.8)                      | 114.5<br>(76.0 to 163.6)                | 17.4<br>(15.8 to 18.9)                            | -8.7<br>(-9.8 to -7.6)                              |
| Pedestrian road injuries                      | 419.2<br>(369.3 to 475.3)                        | 115.5<br>(100.0 to 135.1)                      | 21.8<br>(14.4 to 31.5)                  | -1.5<br>(-3.0 to -0.1)                            | -23.4<br>(-24.6 to -22.4)                           |
| Cyclist road injuries                         | 283.3<br>(231.6 to 334.8)                        | 117.7<br>(93.7 to 145.1)                       | 13.9<br>(9.2 to 20.4)                   | 2.7<br>(1.1 to 4.2)                               | -17.3<br>(-18.4 to -16.3)                           |
| Motorcyclist road injuries                    | 308.4<br>(260.6 to 368.6)                        | 76.9<br>(63.2 to 93.8)                         | 15.4<br>(10.0 to 22.3)                  | 46.7<br>(44.6 to 48.7)                            | 14.2<br>(12.6 to 15.7)                              |
| Motor vehicle road injuries                   | 897.7<br>(772.2 to 1,022.5)                      | 408.8<br>(357.9 to 455.7)                      | 51.5<br>(34.9 to 72.3)                  | 23.3<br>(21.7 to 24.9)                            | -4.8<br>(-5.8 to -3.7)                              |
| Other road injuries                           | 243.9<br>(211.4 to 284.8)                        | 120.1<br>(96.5 to 149.4)                       | 11.8<br>(7.7 to 17.4)                   | 23.5<br>(21.7 to 25.2)                            | -4.0<br>(-5.4 to -2.7)                              |
| Other transport injuries                      | 96.1<br>(81.6 to 113.7)                          | 23.0<br>(19.1 to 29.3)                         | 5.0<br>(3.3 to 7.3)                     | 40.3<br>(37.9 to 43.0)                            | 11.2<br>(9.2 to 13.3)                               |
| <b>Unintentional injuries</b>                 | <b>10,670.4</b><br><b>(9,726.6 to 11,820.3)</b>  | <b>5,734.5</b><br><b>(5,298.5 to 6,215.3)</b>  | <b>397.8</b><br><b>(277.6 to 549.1)</b> | <b>14.9</b><br><b>(13.3 to 16.6)</b>              | <b>-9.2</b><br><b>(-10.2 to -8.2)</b>               |
| Falls                                         | 6,052.3<br>(5,293.4 to 6,862.4)                  | 3,095.2<br>(2,834.3 to 3,381.3)                | 256.9<br>(182.7 to 352.4)               | 17.8<br>(16.3 to 19.3)                            | -8.3<br>(-9.4 to -7.4)                              |
| Drowning                                      | 49.4<br>(43.9 to 55.4)                           | 12.2<br>(11.1 to 13.5)                         | 2.6<br>(1.7 to 3.7)                     | 35.9<br>(33.3 to 38.8)                            | 4.0<br>(2.1 to 6.0)                                 |
| Fire, heat, and hot substances                | 750.5<br>(613.1 to 960.4)                        | 97.6<br>(77.8 to 119.7)                        | 20.0<br>(13.2 to 29.6)                  | -7.7<br>(-10.7 to -4.7)                           | -23.0<br>(-25.2 to -21.1)                           |
| Poisonings                                    | 24.4<br>(20.0 to 29.6)                           | 35.5<br>(27.4 to 45.3)                         | 2.2<br>(1.4 to 3.4)                     | 8.5<br>(4.4 to 12.3)                              | -9.0<br>(-12.2 to -5.6)                             |
| Exposure to mechanical forces                 | 1,882.2<br>(1,621.1 to 2,246.7)                  | 766.2<br>(657.3 to 874.3)                      | 45.0<br>(29.1 to 65.5)                  | 9.8<br>(8.0 to 11.7)                              | -13.4<br>(-14.6 to -12.1)                           |
| Unintentional firearm injuries                | 100.8<br>(82.4 to 122.5)                         | 27.7<br>(20.5 to 36.3)                         | 4.1<br>(2.7 to 6.1)                     | 1.4<br>(-0.3 to 3.3)                              | -20.7<br>(-21.8 to -19.7)                           |
| Unintentional suffocation                     | 90.5<br>(70.2 to 114.2)                          | 18.6<br>(11.8 to 27.4)                         | 3.0<br>(1.8 to 4.6)                     | 42.5<br>(39.7 to 45.7)                            | 19.1<br>(17.3 to 21.1)                              |
| Other exposure to mechanical forces           | 1,690.9<br>(1,437.5 to 2,054.5)                  | 720.0<br>(617.2 to 823.2)                      | 37.9<br>(24.7 to 55.0)                  | 8.9<br>(7.0 to 10.7)                              | -14.2<br>(-15.6 to -12.9)                           |

| Cause                                                                               | Prevalence in thousands (95% UI)              | Incidence in thousands (95% UI)          | YLDs in thousands (95% UI)           |                                                   |                                                     |
|-------------------------------------------------------------------------------------|-----------------------------------------------|------------------------------------------|--------------------------------------|---------------------------------------------------|-----------------------------------------------------|
|                                                                                     | 2016 counts                                   | 2016 counts                              | 2016 counts                          | Percentage change in counts between 2006 and 2016 | Percentage change in age-standardised rates between |
| Adverse effects of medical treatment                                                | 14.9<br>(11.9 to 18.4)                        | 194.9<br>(172.6 to 219.3)                | 2.0<br>(1.2 to 3.0)                  | 41.7<br>(37.5 to 46.5)                            | 14.0<br>(10.3 to 18.1)                              |
| Animal contact                                                                      | 257.3<br>(227.6 to 299.8)                     | 320.7<br>(274.7 to 378.4)                | 9.1<br>(6.0 to 13.1)                 | -6.6<br>(-9.0 to -4.0)                            | -22.3<br>(-23.9 to -20.4)                           |
| Venomous animal contact                                                             | 133.2<br>(112.3 to 159.7)                     | 155.8<br>(125.4 to 191.3)                | 7.1<br>(4.7 to 10.3)                 | -6.9<br>(-9.6 to -3.7)                            | -21.7<br>(-23.8 to -19.2)                           |
| Non-venomous animal contact                                                         | 124.1<br>(105.4 to 152.8)                     | 164.9<br>(135.1 to 200.0)                | 2.0<br>(1.2 to 3.0)                  | -5.6<br>(-8.0 to -3.3)                            | -24.3<br>(-25.9 to -22.8)                           |
| Foreign body                                                                        | 836.3<br>(683.5 to 1,002.7)                   | 922.7<br>(650.3 to 1,257.8)              | 35.4<br>(22.3 to 52.4)               | 18.9<br>(15.0 to 24.6)                            | -2.1<br>(-5.1 to 1.8)                               |
| Pulmonary aspiration and foreign body in airway                                     | 602.4<br>(476.4 to 750.2)                     | 222.5<br>(195.1 to 256.8)                | 25.1<br>(16.0 to 36.8)               | 10.9<br>(8.3 to 13.8)                             | -8.0<br>(-9.7 to -6.1)                              |
| Foreign body in eyes                                                                | 127.7<br>(70.6 to 208.2)                      | 649.5<br>(376.2 to 992.5)                | 7.2<br>(3.6 to 13.4)                 | 64.0<br>(54.1 to 72.2)                            | 28.8<br>(23.5 to 32.9)                              |
| Foreign body in other body part                                                     | 106.2<br>(87.1 to 135.9)                      | 50.7<br>(41.5 to 62.1)                   | 3.1<br>(2.0 to 4.7)                  | 12.6<br>(9.8 to 15.5)                             | -8.3<br>(-10.3 to -6.4)                             |
| Environmental heat and cold exposure                                                | 174.0<br>(149.5 to 205.3)                     | 50.9<br>(40.5 to 64.9)                   | 6.5<br>(4.2 to 9.7)                  | 18.0<br>(15.6 to 20.6)                            | -4.9<br>(-6.5 to -3.3)                              |
| Other unintentional injuries                                                        | 629.0<br>(520.7 to 748.8)                     | 238.6<br>(199.2 to 288.4)                | 18.2<br>(11.8 to 26.6)               | 20.1<br>(18.4 to 21.9)                            | -4.1<br>(-5.3 to -2.9)                              |
| <b>Self-harm and interpersonal violence</b>                                         | <b>3,011.3</b><br><b>(2,712.9 to 3,340.1)</b> | <b>483.6†</b><br><b>(421.8 to 552.6)</b> | <b>53.0</b><br><b>(36.3 to 74.9)</b> | <b>12.2</b><br><b>(10.6 to 13.8)</b>              | <b>-9.9</b><br><b>(-10.6 to -9.1)</b>               |
| Self-harm                                                                           | 70.7<br>(61.7 to 80.0)                        | 32.5<br>(28.4 to 36.9)                   | 3.3<br>(2.1 to 4.9)                  | 42.6<br>(39.5 to 46.3)                            | 9.9<br>(7.9 to 12.3)                                |
| Self-harm by firearm                                                                | 8.2<br>(7.0 to 9.3)                           | 2.5<br>(1.5 to 3.7)                      | 0.3<br>(0.2 to 0.4)                  | 63.0<br>(58.6 to 67.1)                            | 26.2<br>(23.3 to 28.9)                              |
| Self-harm by other specified means                                                  | 62.6<br>(53.3 to 71.6)                        | 30.1<br>(26.2 to 34.4)                   | 3.0<br>(1.9 to 4.4)                  | 40.8<br>(37.7 to 44.6)                            | 8.5<br>(6.5 to 10.9)                                |
| Interpersonal violence                                                              | 2,940.6<br>(2,647.3 to 3,267.0)               | 451.1†<br>(389.8 to 519.5)               | 49.7<br>(34.2 to 69.9)               | 10.6<br>(9.2 to 12.2)                             | -11.0<br>(-11.7 to -10.2)                           |
| Assault by firearm                                                                  | 77.8<br>(66.0 to 91.6)                        | 27.2<br>(21.4 to 34.6)                   | 3.6<br>(2.4 to 5.4)                  | 31.8<br>(29.5 to 34.1)                            | 2.5<br>(1.0 to 3.7)                                 |
| Assault by sharp object                                                             | 357.4<br>(294.1 to 423.7)                     | 168.1<br>(135.8 to 202.4)                | 11.0<br>(7.3 to 16.1)                | 8.2<br>(6.1 to 10.2)                              | -16.1<br>(-17.5 to -14.8)                           |
| Sexual violence                                                                     | 2,099.5<br>(1,830.0 to 2,401.1)               | --                                       | 17.7<br>(11.9 to 25.2)               | 5.0<br>(3.5 to 6.7)                               | -9.2<br>(-10.0 to -8.3)                             |
| Assault by other means                                                              | 406.0<br>(344.2 to 487.7)                     | 255.8<br>(216.3 to 298.0)                | 17.3<br>(11.5 to 25.1)               | 14.7<br>(13.1 to 16.2)                            | -11.6<br>(-12.7 to -10.5)                           |
| <b>Forces of nature, conflict and terrorism, and executions and police conflict</b> | <b>112.0</b><br><b>(68.9 to 163.4)</b>        | <b>5.4†</b><br><b>(3.9 to 6.8)</b>       | <b>3.4</b><br><b>(0.9 to 9.1)</b>    | <b>90.7</b><br><b>(64.8 to 106.2)</b>             | <b>57.2</b><br><b>(37.4 to 69.0)</b>                |
| Exposure to forces of nature                                                        | 47.6<br>(26.3 to 73.5)                        | 3.3<br>(2.2 to 4.5)                      | 1.6<br>(0.5 to 3.9)                  | -5.1<br>(-8.3 to -2.6)                            | -20.1<br>(-22.1 to -18.0)                           |
| Conflict and terrorism                                                              | 61.3<br>(35.7 to 96.5)                        | --                                       | 1.7<br>(0.4 to 5.0)                  | 1,939.3<br>(1,857.8 to 2,055.2)                   | 1,660.2<br>(1,591.7 to 1,760.4)                     |
| Executions and police conflict                                                      | 3.1<br>(1.7 to 4.9)                           | 2.1<br>(0.7 to 2.9)                      | 0.1<br>(< 0.05 to 0.2)               | 121.7<br>(92.8 to 137.7)                          | 92.2<br>(69.2 to 106.2)                             |
| <b>Impairments</b>                                                                  | --                                            | --                                       | --                                   | --                                                | --                                                  |
| Anaemia                                                                             | 17,837.1<br>(16,897.1 to 18,823.5)            | --                                       | 493.8<br>(340.2 to 681.2)            | 21.3<br>(16.4 to 26.0)                            | 3.1<br>(0.0 to 5.8)                                 |
| Developmental intellectual disability                                               | 1,756.9<br>(1,372.4 to 2,153.3)               | --                                       | 218.2<br>(157.9 to 286.6)            | 14.0<br>(12.0 to 16.5)                            | 1.1<br>(-0.7 to 3.3)                                |
| Epilepsy                                                                            | 979.4<br>(796.8 to 1,171.2)                   | --                                       | 290.4<br>(198.8 to 405.8)            | 11.2<br>(-11.1 to 39.9)                           | -3.4<br>(-22.6 to 22.5)                             |
| Guillain-Barre syndrome                                                             | 1.4<br>(1.0 to 1.8)                           | --                                       | 0.4<br>(0.2 to 0.6)                  | 9.9<br>(-2.4 to 19.2)                             | -5.1<br>(-14.5 to 2.2)                              |
| Hearing loss                                                                        | 20,760.8<br>(19,815.2 to 21,794.7)            | --                                       | 626.1<br>(439.1 to 868.0)            | 25.4<br>(23.2 to 27.4)                            | -3.2<br>(-4.2 to -2.4)                              |
| Heart failure                                                                       | 756.3<br>(674.3 to 852.8)                     | --                                       | 87.7<br>(66.6 to 109.7)              | 42.1<br>(38.5 to 46.1)                            | 0.8<br>(-1.9 to 4.0)                                |
| Infertility                                                                         | 2,023.8<br>(1,548.8 to 2,702.9)               | --                                       | 11.6<br>(4.6 to 23.5)                | 20.2<br>(14.8 to 26.5)                            | 1.0<br>(-3.8 to 6.3)                                |
| Pelvic inflammatory disease                                                         | 9.6<br>(8.4 to 10.9)                          | --                                       | 1.3<br>(0.9 to 1.8)                  | 14.8<br>(8.7 to 21.2)                             | -7.8<br>(-12.5 to -2.9)                             |
| Vision loss                                                                         | 16,489.7<br>(15,843.0 to 17,127.7)            | --                                       | 497.3<br>(351.3 to 696.6)            | 26.5<br>(25.1 to 28.1)                            | -1.5<br>(-2.2 to -0.7)                              |

We did not calculate incidence for the nine impairments, certain NTDs, and causes with only birth prevalence. Blank cells mean that no estimate is available.

† Incidence for aggregate causes represents the sum of the incidence of the causes below the aggregate.

‡ Incidence estimates for stroke represent first-ever stroke only.

^ Incidence of HIV/AIDS represents new infections of HIV only and does not include new infections of Tuberculosis in HIV positive cases.



SR Table 14: Prevalence, incidence, and YLDs for 2016, percentage change of YLD counts and percentage change of age-standardised YLD rates between 2006 and 2016 by cause and impairments, for all ages, Moldova.

| Cause                                                                                | Prevalence in thousands (95% UI)       | Incidence in thousands (95% UI)            | YLDs in thousands (95% UI)       |                                                   |                                                     |
|--------------------------------------------------------------------------------------|----------------------------------------|--------------------------------------------|----------------------------------|---------------------------------------------------|-----------------------------------------------------|
|                                                                                      | 2016 counts                            | 2016 counts                                | 2016 counts                      | Percentage change in counts between 2006 and 2016 | Percentage change in age-standardised rates between |
| <b>All causes</b>                                                                    | <b>3,912.1</b><br>(3,898.9 to 3,926.4) | <b>20,729.9†</b><br>(19,885.1 to 21,678.0) | <b>494.4</b><br>(367.4 to 640.7) | <b>2.6</b><br>(1.2 to 3.9)                        | <b>-1.1</b><br>(-2.4 to 0.2)                        |
| <b>Communicable, maternal, neonatal, and nutritional disorders</b>                   | <b>2,277.8</b><br>(2,208.5 to 2,348.2) | <b>7,771.6†</b><br>(7,067.5 to 8,483.9)    | <b>32.3</b><br>(23.1 to 44.1)    | <b>-13.5</b><br>(-18.0 to -9.0)                   | <b>-10.5</b><br>(-15.2 to -5.2)                     |
| <b>HIV/AIDS and tuberculosis</b>                                                     | <b>989.8</b><br>(909.1 to 1,057.3)     | <b>3.3†</b><br>(2.9 to 3.7)                | <b>0.9</b><br>(0.6 to 1.6)       | <b>-14.9</b><br>(-27.7 to 1.9)                    | <b>-18.2</b><br>(-30.4 to -3.5)                     |
| Tuberculosis                                                                         | 928.0<br>(853.3 to 1,007.3)            | 3.0†<br>(2.6 to 3.4)                       | 0.4<br>(0.2 to 0.5)              | -31.0<br>(-42.7 to -17.7)                         | -32.3<br>(-43.7 to -19.2)                           |
| Drug-susceptible tuberculosis                                                        | 0.8<br>(0.7 to 1.0)                    | 2.0<br>(1.7 to 2.4)                        | 0.2<br>(0.2 to 0.4)              | -38.4<br>(-53.5 to -19.0)                         | -39.6<br>(-54.2 to -21.4)                           |
| Multidrug-resistant tuberculosis without extensive drug resistance                   | 0.3<br>(0.2 to 0.4)                    | 0.8<br>(0.6 to 1.1)                        | 0.1<br>(0.1 to 0.2)              | -21.3<br>(-52.5 to 27.8)                          | -22.7<br>(-53.5 to 22.8)                            |
| Extensively drug-resistant tuberculosis                                              | 0.1<br>(0.1 to 0.1)                    | 0.2<br>(0.1 to 0.2)                        | < 0.05<br>(< 0.05 to < 0.05)     | 143.5<br>(63.9 to 255.6)                          | 138.1<br>(61.7 to 245.7)                            |
| Latent tuberculosis infection                                                        | 926.8<br>(852.0 to 1,006.0)            | --                                         | --                               | --                                                | --                                                  |
| HIV/AIDS                                                                             | 5.4<br>(3.6 to 8.1)                    | 0.3^<br>(0.2 to 0.5)                       | 0.6<br>(0.3 to 1.2)              | 1.9<br>(-21.3 to 37.7)                            | -3.8<br>(-25.2 to 30.0)                             |
| Drug-susceptible HIV/AIDS - Tuberculosis                                             | < 0.05<br>(< 0.05 to < 0.05)           | 0.1<br>(< 0.05 to 0.1)                     | < 0.05<br>(< 0.05 to < 0.05)     | -47.4<br>(-58.4 to -34.5)                         | -50.8<br>(-61.2 to -38.8)                           |
| Multidrug-resistant HIV/AIDS - Tuberculosis without extensive drug resistance        | < 0.05<br>(< 0.05 to < 0.05)           | < 0.05<br>(< 0.05 to 0.1)                  | < 0.05<br>(< 0.05 to < 0.05)     | -29.7<br>(-52.6 to 2.5)                           | -34.2<br>(-55.6 to -4.1)                            |
| Extensively drug-resistant HIV/AIDS - Tuberculosis                                   | < 0.05<br>(< 0.05 to < 0.05)           | < 0.05<br>(< 0.05 to < 0.05)               | < 0.05<br>(< 0.05 to < 0.05)     | 116.8<br>(46.3 to 216.4)                          | 102.7<br>(36.8 to 195.8)                            |
| HIV/AIDS resulting in other diseases                                                 | 5.4<br>(3.5 to 8.1)                    | 0.3<br>(0.2 to 0.5)                        | 0.5<br>(0.2 to 1.2)              | 4.0<br>(-20.5 to 44.6)                            | -1.7<br>(-24.4 to 36.2)                             |
| <b>Diarrhoea, lower respiratory infections, and other common infectious diseases</b> | <b>163.2</b><br>(155.3 to 172.1)       | <b>7,336.1†</b><br>(6,642.8 to 8,056.5)    | <b>7.3</b><br>(5.0 to 10.0)      | <b>-7.3</b><br>(-10.1 to -4.1)                    | <b>-3.4</b><br>(-6.2 to -0.2)                       |
| Diarrhoeal diseases                                                                  | 16.0<br>(14.8 to 17.3)                 | 1,031.7<br>(958.3 to 1,117.0)              | 1.8<br>(1.2 to 2.5)              | -3.7<br>(-9.6 to 2.8)                             | -0.4<br>(-6.4 to 6.4)                               |
| Intestinal infectious diseases                                                       | < 0.05<br>(< 0.05 to < 0.05)           | < 0.05†<br>(< 0.05 to < 0.05)              | < 0.05<br>(< 0.05 to < 0.05)     | 25.6<br>(5.5 to 47.7)                             | 22.5<br>(4.1 to 43.1)                               |
| Typhoid fever                                                                        | < 0.05<br>(< 0.05 to < 0.05)           | < 0.05<br>(< 0.05 to < 0.05)               | < 0.05<br>(< 0.05 to < 0.05)     | 2.3<br>(-18.1 to 27.3)                            | 9.5<br>(-13.2 to 38.9)                              |
| Paratyphoid fever                                                                    | < 0.05<br>(< 0.05 to < 0.05)           | < 0.05<br>(< 0.05 to < 0.05)               | < 0.05<br>(< 0.05 to < 0.05)     | 49.9<br>(23.6 to 83.1)                            | 43.2<br>(19.3 to 73.8)                              |
| Other intestinal infectious diseases                                                 | --                                     | --                                         | < 0.05<br>(< 0.05 to < 0.05)     | -16.4<br>(-41.2 to 17.8)                          | -19.0<br>(-44.9 to 17.2)                            |
| Lower respiratory infections                                                         | 7.8<br>(7.2 to 8.4)                    | 330.7<br>(303.2 to 362.2)                  | 0.5<br>(0.3 to 0.7)              | 10.5<br>(0.0 to 22.2)                             | 5.8<br>(-4.4 to 16.9)                               |
| Upper respiratory infections                                                         | 77.2<br>(68.0 to 86.8)                 | 5,731.6<br>(5,037.1 to 6,453.4)            | 1.9<br>(1.1 to 3.0)              | -4.5<br>(-9.8 to 1.3)                             | 1.2<br>(-3.8 to 6.5)                                |
| Otitis media                                                                         | 54.4<br>(48.8 to 60.1)                 | 175.4<br>(145.9 to 212.9)                  | 1.6<br>(1.0 to 2.4)              | -17.5<br>(-23.6 to -10.7)                         | -9.9<br>(-16.0 to -3.7)                             |
| Meningitis                                                                           | 5.2<br>(4.4 to 5.9)                    | 0.7<br>(0.6 to 0.7)                        | 0.6<br>(0.4 to 0.8)              | -9.5<br>(-12.5 to -6.5)                           | -7.2<br>(-10.3 to -4.0)                             |
| Pneumococcal meningitis                                                              | 1.6<br>(1.4 to 1.9)                    | 0.1<br>(0.1 to 0.1)                        | 0.2<br>(0.1 to 0.3)              | -17.3<br>(-22.7 to -12.2)                         | -15.9<br>(-21.5 to -10.5)                           |
| H influenzae type B meningitis                                                       | 0.6<br>(0.5 to 0.7)                    | < 0.05<br>(< 0.05 to < 0.05)               | 0.1<br>(0.1 to 0.1)              | -22.2<br>(-29.1 to -15.4)                         | -19.7<br>(-27.1 to -12.6)                           |
| Meningococcal infection                                                              | 0.9<br>(0.7 to 1.1)                    | 0.1<br>(0.1 to 0.2)                        | 0.1<br>(0.1 to 0.1)              | -12.7<br>(-16.9 to -8.5)                          | -10.8<br>(-15.1 to -6.5)                            |
| Other meningitis                                                                     | 2.0<br>(1.5 to 2.6)                    | 0.4<br>(0.3 to 0.5)                        | 0.2<br>(0.1 to 0.2)              | 18.5<br>(10.1 to 29.7)                            | 22.1<br>(13.6 to 32.8)                              |
| Encephalitis                                                                         | 8.5<br>(5.3 to 12.7)                   | 3.9<br>(3.5 to 4.3)                        | 0.8<br>(0.6 to 1.0)              | -7.7<br>(-18.2 to 4.3)                            | -10.3<br>(-20.2 to 0.9)                             |
| Diphtheria                                                                           | < 0.05<br>(< 0.05 to < 0.05)           | < 0.05<br>(< 0.05 to < 0.05)               | < 0.05<br>(< 0.05 to < 0.05)     | -27.3<br>(-61.1 to 38.6)                          | -26.0<br>(-57.5 to 35.1)                            |
| Whooping cough                                                                       | 0.3<br>(0.2 to 0.4)                    | 2.2<br>(1.8 to 2.9)                        | < 0.05<br>(< 0.05 to < 0.05)     | -4.4<br>(-24.9 to 21.6)                           | -5.4<br>(-26.0 to 21.1)                             |
| Tetanus                                                                              | < 0.05<br>(< 0.05 to < 0.05)           | < 0.05<br>(< 0.05 to < 0.05)               | < 0.05<br>(< 0.05 to < 0.05)     | -41.6<br>(-58.0 to -26.1)                         | -40.1<br>(-57.0 to -24.6)                           |
| Measles                                                                              | < 0.05<br>(0.0 to < 0.05)              | < 0.05<br>(0.0 to < 0.05)                  | < 0.05<br>(0.0 to < 0.05)        | -43.9<br>(-100.0 to 4.5e+20)                      | -44.1<br>(-100.0 to 4.7e+20)                        |
| Varicella and herpes zoster                                                          | 3.2<br>(2.9 to 3.5)                    | 59.9<br>(57.8 to 62.2)                     | 0.1<br>(0.1 to 0.2)              | 5.2<br>(-8.3 to 20.8)                             | -0.1<br>(-12.4 to 13.9)                             |
| <b>Neglected tropical diseases and malaria</b>                                       | <b>3.7</b><br>(2.0 to 8.2)             | <b>0.2†</b><br>(0.1 to 0.9)                | <b>0.4</b><br>(0.1 to 0.8)       | <b>-39.1</b><br>(-78.7 to 48.2)                   | <b>-42.5</b><br>(-79.4 to 32.8)                     |
| Malaria                                                                              | --                                     | --                                         | --                               | --                                                | --                                                  |
| Chagas disease                                                                       | --                                     | --                                         | --                               | --                                                | --                                                  |
| Leishmaniasis                                                                        | --                                     | --                                         | --                               | --                                                | --                                                  |
| Visceral leishmaniasis                                                               | --                                     | --                                         | --                               | --                                                | --                                                  |
| Cutaneous and mucocutaneous leishmaniasis                                            | --                                     | --                                         | --                               | --                                                | --                                                  |
| African trypanosomiasis                                                              | --                                     | --                                         | --                               | --                                                | --                                                  |
| Schistosomiasis                                                                      | --                                     | --                                         | --                               | --                                                | --                                                  |
| Cysticercosis                                                                        | 1.9<br>(0.7 to 3.1)                    | --                                         | 0.2<br>(0.1 to 0.5)              | -28.2<br>(-74.9 to 43.2)                          | -33.0<br>(-76.4 to 32.1)                            |
| Cystic echinococcosis                                                                | 1.2<br>(0.3 to 4.4)                    | 0.2<br>(0.1 to 0.9)                        | 0.1<br>(< 0.05 to 0.4)           | -54.8<br>(-93.8 to 208.4)                         | -55.6<br>(-93.6 to 193.9)                           |
| Lymphatic filariasis                                                                 | --                                     | --                                         | --                               | --                                                | --                                                  |
| Onchocerciasis                                                                       | --                                     | --                                         | --                               | --                                                | --                                                  |
| Trachoma                                                                             | --                                     | --                                         | --                               | --                                                | --                                                  |
| Dengue                                                                               | --                                     | --                                         | --                               | --                                                | --                                                  |
| Yellow fever                                                                         | --                                     | --                                         | --                               | --                                                | --                                                  |
| Rabies                                                                               | < 0.05<br>(< 0.05 to < 0.05)           | < 0.05<br>(< 0.05 to < 0.05)               | < 0.05<br>(< 0.05 to < 0.05)     | -73.8<br>(-81.5 to -65.8)                         | -72.1<br>(-81.7 to -63.4)                           |
| Intestinal nematode infections                                                       | --                                     | --                                         | --                               | --                                                | --                                                  |
| Ascariasis                                                                           | --                                     | --                                         | --                               | --                                                | --                                                  |

| Cause                                                                   | Prevalence in thousands (95% UI)              | Incidence in thousands (95% UI)                   | YLDs in thousands (95% UI)              |                                                   |                                                     |
|-------------------------------------------------------------------------|-----------------------------------------------|---------------------------------------------------|-----------------------------------------|---------------------------------------------------|-----------------------------------------------------|
|                                                                         | 2016 counts                                   | 2016 counts                                       | 2016 counts                             | Percentage change in counts between 2006 and 2016 | Percentage change in age-standardised rates between |
| Trichuriasis                                                            | --                                            | --                                                | --                                      | --                                                | --                                                  |
| Hookworm disease                                                        | --                                            | --                                                | --                                      | --                                                | --                                                  |
| Food-borne trematodiasis                                                | --                                            | --                                                | --                                      | --                                                | --                                                  |
| Leprosy                                                                 | --                                            | --                                                | --                                      | --                                                | --                                                  |
| Ebola virus disease                                                     | --                                            | --                                                | --                                      | --                                                | --                                                  |
| Zika virus disease                                                      | --                                            | --                                                | --                                      | --                                                | --                                                  |
| Guinea worm disease                                                     | --                                            | --                                                | --                                      | --                                                | --                                                  |
| Other neglected tropical diseases                                       | --                                            | --                                                | < 0.05<br>(< 0.05 to < 0.05)            | --                                                | --                                                  |
| <b>Maternal disorders</b>                                               | <b>5.3</b><br><b>(4.3 to 6.3)</b>             | <b>68.0†</b><br><b>(57.3 to 82.9)</b>             | <b>0.3</b><br><b>(0.2 to 0.4)</b>       | <b>-6.3</b><br><b>(-29.1 to 21.2)</b>             | <b>-3.5</b><br><b>(-26.9 to 25.2)</b>               |
| Maternal haemorrhage                                                    | 1.4<br>(1.0 to 1.9)                           | 10.0<br>(7.5 to 13.0)                             | 0.1<br>(< 0.05 to 0.1)                  | -1.1<br>(-34.7 to 54.5)                           | 2.0<br>(-32.0 to 57.8)                              |
| Maternal sepsis and other pregnancy related infections                  | 1.8<br>(1.4 to 2.3)                           | 8.3<br>(6.2 to 10.6)                              | < 0.05<br>(< 0.05 to 0.1)               | -13.0<br>(-55.5 to 65.7)                          | -5.9<br>(-51.4 to 77.9)                             |
| Maternal hypertensive disorders                                         | 1.9<br>(1.2 to 2.8)                           | 7.8<br>(5.9 to 9.6)                               | 0.1<br>(< 0.05 to 0.2)                  | -4.9<br>(-44.0 to 65.1)                           | -3.4<br>(-43.7 to 67.9)                             |
| Maternal obstructed labour and uterine rupture                          | < 0.05<br>(< 0.05 to 0.1)                     | 3.0<br>(2.1 to 4.1)                               | < 0.05<br>(< 0.05 to < 0.05)            | -3.8<br>(-50.0 to 75.4)                           | -1.6<br>(-48.0 to 78.2)                             |
| Maternal abortion, miscarriage, and ectopic pregnancy                   | 0.3<br>(0.2 to 0.5)                           | 39.0<br>(29.0 to 53.7)                            | < 0.05<br>(< 0.05 to 0.1)               | -2.9<br>(-50.6 to 91.2)                           | -3.2<br>(-49.6 to 84.4)                             |
| Other maternal disorders                                                | --                                            | --                                                | < 0.05<br>(< 0.05 to 0.1)               | -12.4<br>(-33.7 to 13.3)                          | -8.7<br>(-31.3 to 18.6)                             |
| <b>Neonatal disorders</b>                                               | <b>44.6</b><br><b>(35.6 to 55.5)</b>          | --                                                | <b>8.9</b><br><b>(5.5 to 13.7)</b>      | <b>-14.5</b><br><b>(-28.1 to -4.5)</b>            | <b>-10.2</b><br><b>(-24.3 to -0.0)</b>              |
| Neonatal preterm birth complications                                    | 24.8<br>(19.3 to 32.6)                        | --                                                | 2.5<br>(1.7 to 3.7)                     | -22.1<br>(-38.8 to -3.9)                          | -16.9<br>(-34.7 to 2.5)                             |
| Neonatal encephalopathy due to birth asphyxia and trauma                | 17.1<br>(8.7 to 28.4)                         | --                                                | 2.7<br>(0.7 to 5.8)                     | -13.4<br>(-58.1 to 16.1)                          | -9.8<br>(-56.2 to 20.7)                             |
| Neonatal sepsis and other neonatal infections                           | 6.8<br>(3.1 to 14.6)                          | --                                                | 2.8<br>(1.0 to 6.7)                     | -9.2<br>(-22.7 to 25.6)                           | -4.7<br>(-18.6 to 27.2)                             |
| Hemolytic disease and other neonatal jaundice                           | 2.3<br>(2.0 to 2.6)                           | --                                                | 0.7<br>(0.5 to 0.8)                     | -8.4<br>(-20.7 to 4.4)                            | -3.9<br>(-16.7 to 10.0)                             |
| Other neonatal disorders                                                | --                                            | --                                                | 0.2<br>(0.1 to 0.3)                     | -10.8<br>(-26.9 to 3.3)                           | -14.0<br>(-29.5 to -0.3)                            |
| <b>Nutritional deficiencies</b>                                         | <b>773.1</b><br><b>(715.0 to 815.7)</b>       | <b>10.4†</b><br><b>(8.2 to 13.0)</b>              | <b>12.8</b><br><b>(8.2 to 18.8)</b>     | <b>-16.4</b><br><b>(-23.0 to -9.1)</b>            | <b>-13.7</b><br><b>(-21.4 to -3.8)</b>              |
| Protein-energy malnutrition                                             | 6.6<br>(5.3 to 8.1)                           | 3.1<br>(2.5 to 3.8)                               | 0.3<br>(0.2 to 0.5)                     | -27.2<br>(-48.9 to 6.5)                           | -29.7<br>(-50.6 to 3.0)                             |
| Iodine deficiency                                                       | 56.1<br>(49.1 to 63.9)                        | 0.8<br>(0.7 to 0.8)                               | 1.4<br>(0.8 to 2.0)                     | -1.2<br>(-11.6 to 10.4)                           | -2.2<br>(-12.0 to 7.8)                              |
| Vitamin A deficiency                                                    | 7.7<br>(5.4 to 10.6)                          | 6.5<br>(4.6 to 9.2)                               | --                                      | --                                                | --                                                  |
| Iron-deficiency anaemia                                                 | 692.9<br>(641.1 to 744.1)                     | --                                                | 11.1<br>(7.1 to 16.7)                   | -17.6<br>(-24.7 to -9.1)                          | -13.9<br>(-22.1 to -2.8)                            |
| Other nutritional deficiencies                                          | --                                            | --                                                | < 0.05<br>(< 0.05 to < 0.05)            | -27.3<br>(-49.6 to 8.3)                           | -29.9<br>(-51.5 to 4.5)                             |
| <b>Other communicable, maternal, neonatal, and nutritional diseases</b> | <b>1,101.6</b><br><b>(1,029.3 to 1,178.5)</b> | <b>353.6</b><br><b>(302.8 to 421.4)</b>           | <b>1.8</b><br><b>(1.1 to 2.8)</b>       | <b>0.6</b><br><b>(-5.7 to 7.5)</b>                | <b>-1.4</b><br><b>(-7.7 to 6.0)</b>                 |
| Sexually transmitted diseases excluding HIV                             | 862.5<br>(798.6 to 935.8)                     | 328.4<br>(278.3 to 394.9)                         | 1.4<br>(0.9 to 2.2)                     | 1.9<br>(-5.0 to 9.2)                              | -1.7<br>(-8.1 to 4.7)                               |
| Syphilis                                                                | 54.2<br>(43.6 to 67.6)                        | 43.3<br>(32.7 to 56.7)                            | 0.2<br>(0.1 to 0.3)                     | 12.2<br>(-4.5 to 33.3)                            | 2.2<br>(-12.6 to 19.7)                              |
| Chlamydial infection                                                    | 69.4<br>(54.6 to 87.4)                        | 53.7<br>(42.0 to 68.2)                            | 0.3<br>(0.2 to 0.5)                     | 3.1<br>(-10.0 to 17.7)                            | -2.5<br>(-14.8 to 11.1)                             |
| Gonococcal infection                                                    | 33.1<br>(21.0 to 48.6)                        | 108.5<br>(62.9 to 168.3)                          | 0.2<br>(0.1 to 0.4)                     | -8.5<br>(-23.3 to 8.7)                            | -2.6<br>(-15.9 to 12.5)                             |
| Trichomoniasis                                                          | 78.4<br>(67.7 to 89.5)                        | 65.2<br>(55.7 to 75.6)                            | 0.1<br>(< 0.05 to 0.2)                  | 0.0<br>(-7.1 to 8.5)                              | -1.6<br>(-8.5 to 6.9)                               |
| Genital herpes                                                          | 661.5<br>(571.3 to 771.6)                     | 33.9<br>(28.5 to 41.5)                            | 0.2<br>(0.1 to 0.4)                     | 5.5<br>(-3.4 to 14.6)                             | -0.4<br>(-8.2 to 8.7)                               |
| Other sexually transmitted diseases                                     | 22.8<br>(18.9 to 26.6)                        | 23.9<br>(20.1 to 28.8)                            | 0.4<br>(0.3 to 0.7)                     | 0.7<br>(-11.6 to 13.3)                            | -3.2<br>(-15.0 to 8.8)                              |
| Hepatitis                                                               | 299.9<br>(258.4 to 354.9)                     | 25.2<br>(19.4 to 30.2)                            | < 0.05<br>(< 0.05 to < 0.05)            | -40.5<br>(-53.5 to -25.0)                         | -30.1<br>(-44.8 to -12.6)                           |
| Acute hepatitis A                                                       | 0.9<br>(0.5 to 1.1)                           | 11.8<br>(6.4 to 14.9)                             | < 0.05<br>(< 0.05 to < 0.05)            | -43.8<br>(-66.6 to -5.6)                          | -30.0<br>(-57.2 to 12.7)                            |
| Hepatitis B                                                             | 202.8<br>(164.0 to 256.3)                     | 11.2<br>(8.5 to 15.1)                             | < 0.05<br>(< 0.05 to < 0.05)            | -38.1<br>(-49.6 to -25.4)                         | -33.9<br>(-45.1 to -21.0)                           |
| Hepatitis C                                                             | 96.2<br>(85.8 to 106.6)                       | 1.2<br>(1.0 to 1.4)                               | < 0.05<br>(< 0.05 to < 0.05)            | -4.2<br>(-27.9 to 27.9)                           | -3.3<br>(-29.0 to 33.2)                             |
| Acute hepatitis E                                                       | 0.1<br>(0.1 to 0.1)                           | 0.9<br>(0.7 to 1.2)                               | < 0.05<br>(< 0.05 to < 0.05)            | -47.6<br>(-53.4 to -42.1)                         | -32.0<br>(-38.8 to -24.3)                           |
| Other infectious diseases                                               | 22.3<br>(19.9 to 24.7)                        | < 0.05<br>(< 0.05 to < 0.05)                      | 0.4<br>(0.2 to 0.6)                     | -0.7<br>(-12.9 to 16.6)                           | 1.4<br>(-12.9 to 24.0)                              |
| <b>Non-communicable diseases</b>                                        | <b>3,768.1</b><br><b>(3,748.8 to 3,787.1)</b> | <b>12,433.7†</b><br><b>(11,892.2 to 13,026.6)</b> | <b>410.9</b><br><b>(305.3 to 533.5)</b> | <b>3.4</b><br><b>(1.9 to 5.0)</b>                 | <b>-0.6</b><br><b>(-2.0 to 0.9)</b>                 |
| <b>Neoplasms</b>                                                        | <b>20.0</b><br><b>(19.0 to 21.2)</b>          | <b>9.6</b><br><b>(9.1 to 10.3)</b>                | <b>2.9</b><br><b>(2.1 to 3.7)</b>       | <b>11.8</b><br><b>(6.2 to 18.2)</b>               | <b>-0.4</b><br><b>(-5.3 to 5.1)</b>                 |
| Lip and oral cavity cancer                                              | 0.8<br>(0.7 to 0.8)                           | 0.2<br>(0.2 to 0.2)                               | 0.1<br>(0.1 to 0.1)                     | 9.2<br>(-11.7 to 36.5)                            | -3.5<br>(-21.2 to 19.4)                             |
| Nasopharynx cancer                                                      | 0.2<br>(0.2 to 0.2)                           | 0.1<br>(< 0.05 to 0.1)                            | < 0.05<br>(< 0.05 to < 0.05)            | -9.6<br>(-24.7 to 7.3)                            | -14.0<br>(-27.1 to 1.2)                             |
| Other pharynx cancer                                                    | 0.5<br>(0.4 to 0.6)                           | 0.2<br>(0.2 to 0.2)                               | 0.1<br>(< 0.05 to 0.1)                  | 44.1<br>(7.2 to 91.0)                             | 23.9<br>(-6.7 to 62.4)                              |
| Oesophageal cancer                                                      | 0.1<br>(0.1 to 0.1)                           | 0.1<br>(0.1 to 0.1)                               | < 0.05<br>(< 0.05 to < 0.05)            | 1.9<br>(-9.2 to 13.3)                             | -11.3<br>(-20.5 to -1.9)                            |
| Stomach cancer                                                          | 0.8<br>(0.8 to 0.9)                           | 0.5<br>(0.5 to 0.6)                               | 0.1<br>(0.1 to 0.2)                     | -11.4<br>(-25.2 to 5.3)                           | -21.3<br>(-33.2 to -7.4)                            |
| Colon and rectum cancer                                                 | 3.7<br>(3.4 to 4.0)                           | 1.2<br>(1.1 to 1.3)                               | 0.4<br>(0.3 to 0.5)                     | 22.2<br>(4.9 to 42.6)                             | 8.0<br>(-6.8 to 25.2)                               |
| Liver cancer                                                            | 0.2<br>(0.2 to 0.2)                           | 0.5<br>(0.5 to 0.5)                               | 0.1<br>(0.1 to 0.1)                     | 32.2<br>(21.5 to 44.2)                            | 17.3<br>(8.1 to 27.5)                               |
| Liver cancer due to hepatitis B                                         | 0.2<br>(0.1 to 0.2)                           | 0.2<br>(0.2 to 0.2)                               | < 0.05<br>(< 0.05 to 0.1)               | 31.3<br>(18.1 to 44.4)                            | 16.2<br>(5.2 to 27.9)                               |

| Cause                                              | Prevalence in thousands (95% UI)        | Incidence in thousands (95% UI)       | YLDs in thousands (95% UI)           |                                                   |                                                     |
|----------------------------------------------------|-----------------------------------------|---------------------------------------|--------------------------------------|---------------------------------------------------|-----------------------------------------------------|
|                                                    | 2016 counts                             | 2016 counts                           | 2016 counts                          | Percentage change in counts between 2006 and 2016 | Percentage change in age-standardised rates between |
| Liver cancer due to hepatitis C                    | 0.1<br>( $< 0.05$ to 0.1)               | 0.1<br>( $< 0.05$ to 0.1)             | $< 0.05$<br>( $< 0.05$ to $< 0.05$ ) | 34.1<br>(21.3 to 48.2)                            | 18.1<br>(7.3 to 30.5)                               |
| Liver cancer due to alcohol use                    | 0.1<br>(0.1 to 0.1)                     | 0.1<br>(0.1 to 0.1)                   | $< 0.05$<br>( $< 0.05$ to $< 0.05$ ) | 34.4<br>(21.9 to 47.5)                            | 20.0<br>(9.7 to 31.6)                               |
| Liver cancer due to other causes                   | 0.1<br>(0.1 to 0.1)                     | 0.1<br>(0.1 to 0.1)                   | $< 0.05$<br>( $< 0.05$ to $< 0.05$ ) | 29.7<br>(17.5 to 43.8)                            | 15.3<br>(5.3 to 26.6)                               |
| Gallbladder and biliary tract cancer               | $< 0.05$<br>( $< 0.05$ to $< 0.05$ )    | $< 0.05$<br>( $< 0.05$ to 0.1)        | $< 0.05$<br>( $< 0.05$ to $< 0.05$ ) | -8.2<br>(-14.1 to -0.0)                           | -20.2<br>(-25.4 to -13.1)                           |
| Pancreatic cancer                                  | 0.3<br>(0.3 to 0.3)                     | 0.4<br>(0.4 to 0.4)                   | 0.1<br>(0.1 to 0.1)                  | 19.2<br>(7.6 to 31.6)                             | 4.1<br>(-6.4 to 15.6)                               |
| Larynx cancer                                      | 0.7<br>(0.7 to 0.8)                     | 0.2<br>(0.2 to 0.2)                   | 0.1<br>(0.1 to 0.1)                  | 16.8<br>(-8.9 to 52.3)                            | 1.4<br>(-20.4 to 32.5)                              |
| Tracheal, bronchus, and lung cancer                | 1.1<br>(1.0 to 1.2)                     | 1.0<br>(0.9 to 1.1)                   | 0.2<br>(0.2 to 0.3)                  | -0.0<br>(-18.7 to 23.2)                           | -12.9<br>(-28.2 to 6.2)                             |
| Malignant skin melanoma                            | 0.5<br>(0.5 to 0.6)                     | 0.1<br>(0.1 to 0.1)                   | $< 0.05$<br>( $< 0.05$ to 0.1)       | 35.2<br>(11.4 to 62.9)                            | 22.0<br>(1.2 to 45.8)                               |
| Non-melanoma skin cancer                           | 0.3<br>(0.2 to 0.5)                     | 1.2<br>(0.7 to 1.8)                   | $< 0.05$<br>( $< 0.05$ to $< 0.05$ ) | -43.9<br>(-68.6 to 29.0)                          | -51.4<br>(-72.7 to 12.7)                            |
| Non-melanoma skin cancer (squamous-cell carcinoma) | 0.2<br>(0.1 to 0.4)                     | 0.2<br>(0.1 to 0.4)                   | $< 0.05$<br>( $< 0.05$ to $< 0.05$ ) | -48.7<br>(-70.4 to 28.2)                          | -55.4<br>(-74.2 to 10.9)                            |
| Non-melanoma skin cancer (basal-cell carcinoma)    | 0.1<br>(0.1 to 0.2)                     | 1.0<br>(0.5 to 1.6)                   | $< 0.05$<br>( $< 0.05$ to $< 0.05$ ) | 31.2<br>(-4.2 to 67.4)                            | 14.9<br>(-16.1 to 52.8)                             |
| Breast cancer                                      | 4.7<br>(4.2 to 5.2)                     | 1.0<br>(0.9 to 1.1)                   | 0.5<br>(0.3 to 0.6)                  | 9.3<br>(-7.3 to 29.0)                             | -1.9<br>(-16.0 to 14.8)                             |
| Cervical cancer                                    | 1.4<br>(1.1 to 1.7)                     | 0.4<br>(0.3 to 0.4)                   | 0.1<br>(0.1 to 0.2)                  | -15.4<br>(-32.8 to 6.9)                           | -22.2<br>(-38.0 to -2.2)                            |
| Uterine cancer                                     | 1.4<br>(1.2 to 1.6)                     | 0.3<br>(0.3 to 0.4)                   | 0.1<br>(0.1 to 0.2)                  | 25.1<br>(1.1 to 59.0)                             | 8.7<br>(-12.0 to 36.6)                              |
| Ovarian cancer                                     | 0.6<br>(0.5 to 0.6)                     | 0.2<br>(0.2 to 0.2)                   | 0.1<br>(0.1 to 0.1)                  | 3.4<br>(-29.2 to 50.1)                            | -5.8<br>(-34.0 to 32.4)                             |
| Prostate cancer                                    | 1.7<br>(1.4 to 2.0)                     | 0.5<br>(0.4 to 0.6)                   | 0.2<br>(0.1 to 0.3)                  | 48.6<br>(14.2 to 82.6)                            | 27.6<br>(-1.2 to 57.2)                              |
| Testicular cancer                                  | 0.1<br>(0.1 to 0.1)                     | $< 0.05$<br>( $< 0.05$ to $< 0.05$ )  | $< 0.05$<br>( $< 0.05$ to $< 0.05$ ) | -0.1<br>(-24.6 to 29.7)                           | -6.6<br>(-29.4 to 21.1)                             |
| Kidney cancer                                      | 1.2<br>(1.1 to 1.4)                     | 0.3<br>(0.3 to 0.4)                   | 0.1<br>(0.1 to 0.1)                  | 22.9<br>(4.1 to 44.2)                             | 10.3<br>(-5.5 to 27.6)                              |
| Bladder cancer                                     | 1.0<br>(0.9 to 1.0)                     | 0.3<br>(0.2 to 0.3)                   | 0.1<br>(0.1 to 0.1)                  | 11.9<br>(-4.7 to 31.5)                            | -1.5<br>(-15.6 to 15.7)                             |
| Brain and nervous system cancer                    | 0.4<br>(0.3 to 0.4)                     | 0.2<br>(0.2 to 0.2)                   | 0.1<br>( $< 0.05$ to 0.1)            | 18.9<br>(-3.1 to 34.0)                            | 9.4<br>(-11.8 to 23.1)                              |
| Thyroid cancer                                     | 0.5<br>(0.5 to 0.6)                     | 0.1<br>(0.1 to 0.1)                   | $< 0.05$<br>( $< 0.05$ to $< 0.05$ ) | 43.8<br>(12.5 to 85.2)                            | 27.6<br>(-0.0 to 62.9)                              |
| Mesothelioma                                       | $< 0.05$<br>( $< 0.05$ to $< 0.05$ )    | $< 0.05$<br>( $< 0.05$ to $< 0.05$ )  | $< 0.05$<br>( $< 0.05$ to $< 0.05$ ) | -4.7<br>(-13.2 to 8.8)                            | -12.7<br>(-19.8 to -2.9)                            |
| Hodgkin lymphoma                                   | 0.1<br>(0.1 to 0.2)                     | $< 0.05$<br>( $< 0.05$ to 0.1)        | $< 0.05$<br>( $< 0.05$ to $< 0.05$ ) | -11.7<br>(-20.6 to -3.3)                          | -14.8<br>(-23.2 to -6.4)                            |
| Non-Hodgkin's lymphoma                             | 0.5<br>(0.4 to 0.5)                     | 0.2<br>(0.1 to 0.2)                   | 0.1<br>( $< 0.05$ to 0.1)            | 20.6<br>(7.1 to 35.6)                             | 9.7<br>(-2.5 to 23.3)                               |
| Multiple myeloma                                   | 0.1<br>(0.1 to 0.1)                     | 0.1<br>( $< 0.05$ to 0.1)             | $< 0.05$<br>( $< 0.05$ to $< 0.05$ ) | 30.4<br>(16.0 to 45.2)                            | 13.9<br>(1.7 to 26.4)                               |
| Leukaemia                                          | 0.6<br>(0.5 to 0.6)                     | 0.2<br>(0.2 to 0.2)                   | 0.1<br>(0.1 to 0.1)                  | -4.9<br>(-12.4 to 3.9)                            | -10.8<br>(-17.6 to -2.2)                            |
| Acute lymphoid leukaemia                           | 0.1<br>(0.1 to 0.1)                     | $< 0.05$<br>( $< 0.05$ to $< 0.05$ )  | $< 0.05$<br>( $< 0.05$ to $< 0.05$ ) | -22.0<br>(-31.0 to -10.8)                         | -23.7<br>(-32.8 to -12.0)                           |
| Chronic lymphoid leukaemia                         | 0.1<br>(0.1 to 0.2)                     | $< 0.05$<br>( $< 0.05$ to $< 0.05$ )  | $< 0.05$<br>( $< 0.05$ to $< 0.05$ ) | 2.2<br>(-13.7 to 21.1)                            | -6.0<br>(-20.1 to 12.0)                             |
| Acute myeloid leukaemia                            | 0.1<br>( $< 0.05$ to 0.1)               | $< 0.05$<br>( $< 0.05$ to $< 0.05$ )  | $< 0.05$<br>( $< 0.05$ to $< 0.05$ ) | 1.2<br>(-10.2 to 14.1)                            | -4.8<br>(-15.2 to 6.9)                              |
| Chronic myeloid leukaemia                          | $< 0.05$<br>( $< 0.05$ to $< 0.05$ )    | $< 0.05$<br>( $< 0.05$ to $< 0.05$ )  | $< 0.05$<br>( $< 0.05$ to $< 0.05$ ) | -24.6<br>(-37.9 to -9.2)                          | -32.5<br>(-44.0 to -19.3)                           |
| Other leukaemia                                    | 0.2<br>(0.2 to 0.3)                     | 0.1<br>( $< 0.05$ to 0.1)             | $< 0.05$<br>( $< 0.05$ to $< 0.05$ ) | 0.8<br>(-12.6 to 15.0)                            | -5.3<br>(-18.5 to 8.0)                              |
| Other neoplasms                                    | 0.8<br>(0.8 to 0.9)                     | 0.3<br>(0.3 to 0.3)                   | 0.1<br>(0.1 to 0.1)                  | 5.9<br>(-5.6 to 18.7)                             | -1.9<br>(-12.2 to 9.4)                              |
| <b>Cardiovascular diseases</b>                     | <b>319.4</b><br><b>(303.7 to 334.4)</b> | <b>51.1†</b><br><b>(48.5 to 53.9)</b> | <b>26.6</b><br><b>(19.5 to 34.6)</b> | <b>10.1</b><br><b>(4.8 to 15.0)</b>               | <b>-2.0</b><br><b>(-6.5 to 2.3)</b>                 |
| Rheumatic heart disease                            | 0.8<br>(0.7 to 0.9)                     | 0.2<br>(0.2 to 0.2)                   | 0.1<br>( $< 0.05$ to 0.1)            | -4.2<br>(-24.9 to 22.4)                           | -13.4<br>(-30.1 to 8.4)                             |
| Ischaemic heart disease                            | 143.7<br>(130.0 to 160.2)               | 24.5<br>(22.5 to 26.9)                | 7.6<br>(5.3 to 10.3)                 | 14.2<br>(8.8 to 20.0)                             | 1.6<br>(-2.8 to 6.4)                                |
| Cerebrovascular disease                            | 68.5<br>(63.9 to 72.9)                  | 12.9‡<br>(11.8 to 14.0)               | 13.5<br>(9.4 to 17.2)                | 7.7<br>(-0.7 to 16.7)                             | -4.6<br>(-12.2 to 3.1)                              |
| Ischaemic stroke                                   | 60.6<br>(54.2 to 67.1)                  | 9.7‡<br>(8.6 to 10.7)                 | 11.5<br>(8.1 to 14.9)                | 8.5<br>(-1.1 to 18.9)                             | -4.1<br>(-12.8 to 4.7)                              |
| Hemorrhagic stroke                                 | 10.3<br>(9.2 to 11.6)                   | 3.2‡<br>(2.9 to 3.6)                  | 1.9<br>(1.4 to 2.5)                  | 3.2<br>(-8.8 to 15.2)                             | -7.6<br>(-17.6 to 2.6)                              |
| Hypertensive heart disease                         | 9.6<br>(8.1 to 11.6)                    | --                                    | 0.8<br>(0.5 to 1.1)                  | 13.3<br>(1.8 to 26.5)                             | 0.1<br>(-9.5 to 11.2)                               |
| Cardiomyopathy and myocarditis                     | 5.6<br>(5.0 to 6.3)                     | 1.7+<br>(1.5 to 2.0)                  | 0.5<br>(0.3 to 0.7)                  | 5.3<br>(-5.4 to 19.5)                             | 1.3<br>(-8.4 to 13.8)                               |
| Myocarditis                                        | 0.8<br>(0.7 to 0.9)                     | 1.7<br>(1.5 to 2.0)                   | 0.1<br>( $< 0.05$ to 0.1)            | -4.1<br>(-18.0 to 12.5)                           | 1.2<br>(-12.3 to 17.1)                              |
| Alcoholic cardiomyopathy                           | 1.5<br>(1.2 to 1.8)                     | --                                    | 0.1<br>(0.1 to 0.2)                  | 10.0<br>(-12.6 to 41.2)                           | 1.7<br>(-19.2 to 27.9)                              |
| Other cardiomyopathy                               | 3.8<br>(3.3 to 4.5)                     | --                                    | 0.3<br>(0.2 to 0.5)                  | 5.2<br>(-9.6 to 21.5)                             | 1.1<br>(-12.4 to 16.1)                              |
| Atrial fibrillation and flutter                    | 32.4<br>(28.3 to 37.4)                  | 2.8<br>(2.4 to 3.2)                   | 2.5<br>(1.7 to 3.5)                  | 14.1<br>(6.9 to 22.5)                             | 1.0<br>(-5.2 to 8.2)                                |
| Peripheral vascular disease                        | 85.5<br>(73.9 to 99.3)                  | 8.4<br>(7.3 to 9.8)                   | 0.4<br>(0.2 to 0.7)                  | 7.3<br>(-1.4 to 17.0)                             | -8.2<br>(-14.2 to -1.0)                             |
| Endocarditis                                       | 0.1<br>(0.1 to 0.1)                     | 0.6<br>(0.5 to 0.6)                   | $< 0.05$<br>( $< 0.05$ to $< 0.05$ ) | 10.7<br>(4.8 to 18.0)                             | 2.2<br>(-3.1 to 8.1)                                |
| Other cardiovascular and circulatory diseases      | 25.4<br>(21.5 to 30.0)                  | --                                    | 1.3<br>(0.9 to 1.9)                  | 6.2<br>(-4.2 to 18.6)                             | 0.2<br>(-8.6 to 9.8)                                |
| <b>Chronic respiratory diseases</b>                | <b>319.2</b><br><b>(306.0 to 332.1)</b> | <b>43.1†</b><br><b>(40.7 to 45.7)</b> | <b>10.9</b><br><b>(7.9 to 14.4)</b>  | <b>2.0</b><br><b>(-2.5 to 7.0)</b>                | <b>1.6</b><br><b>(-2.6 to 5.8)</b>                  |
| Chronic obstructive pulmonary disease              | 120.7<br>(112.7 to 130.4)               | 7.5<br>(7.1 to 8.2)                   | 2.4<br>(1.9 to 3.0)                  | 2.2<br>(-11.5 to 19.1)                            | -7.5<br>(-19.4 to 7.2)                              |
| Pneumoconiosis                                     | 0.4<br>(0.3 to 0.4)                     | $< 0.05$<br>( $< 0.05$ to $< 0.05$ )  | 0.1<br>( $< 0.05$ to 0.1)            | 20.8<br>(1.2 to 45.8)                             | 6.3<br>(-10.2 to 27.0)                              |
| Silicosis                                          | 0.1<br>( $< 0.05$ to 0.1)               | $< 0.05$<br>( $< 0.05$ to $< 0.05$ )  | $< 0.05$<br>( $< 0.05$ to $< 0.05$ ) | 18.9<br>(12.7 to 25.3)                            | 4.5<br>(-0.6 to 9.8)                                |



| Cause                                                          | Prevalence in thousands (95% UI)              | Incidence in thousands (95% UI)          | YLDs in thousands (95% UI)            |                                                   |                                                     |
|----------------------------------------------------------------|-----------------------------------------------|------------------------------------------|---------------------------------------|---------------------------------------------------|-----------------------------------------------------|
|                                                                | 2016 counts                                   | 2016 counts                              | 2016 counts                           | Percentage change in counts between 2006 and 2016 | Percentage change in age-standardised rates between |
| Asbestosis                                                     | 0.1<br>(0.1 to 0.1)                           | < 0.05<br>(< 0.05 to < 0.05)             | < 0.05<br>(< 0.05 to < 0.05)          | 10.0<br>(2.0 to 18.2)                             | -1.3<br>(-8.4 to 6.1)                               |
| Coal workers pneumoconiosis                                    | --                                            | --                                       | --                                    | --                                                | --                                                  |
| Other pneumoconiosis                                           | 0.2<br>(0.2 to 0.2)                           | < 0.05<br>(< 0.05 to < 0.05)             | < 0.05<br>(< 0.05 to < 0.05)          | 28.1<br>(-8.1 to 78.5)                            | 11.4<br>(-18.6 to 54.1)                             |
| Asthma                                                         | 204.8<br>(191.6 to 219.3)                     | 35.4<br>(33.0 to 38.0)                   | 7.9<br>(5.2 to 11.3)                  | 1.2<br>(-3.1 to 5.5)                              | 3.5<br>(-0.6 to 7.8)                                |
| Interstitial lung disease and pulmonary sarcoidosis            | 3.4<br>(3.1 to 3.8)                           | 0.1<br>(0.1 to 0.1)                      | 0.4<br>(0.2 to 0.5)                   | 7.2<br>(-8.6 to 25.8)                             | 2.9<br>(-11.3 to 18.8)                              |
| Other chronic respiratory diseases                             | --                                            | --                                       | 0.1<br>(0.1 to 0.2)                   | 22.1<br>(10.6 to 35.3)                            | 34.0<br>(23.6 to 46.7)                              |
| <b>Cirrhosis and other chronic liver diseases</b>              | <b>92.8</b><br><b>(88.1 to 97.5)</b>          | <b>3.0</b><br><b>(2.9 to 3.1)</b>        | <b>1.9</b><br><b>(1.3 to 2.7)</b>     | <b>2.4</b><br><b>(-4.8 to 9.6)</b>                | <b>-4.2</b><br><b>(-10.9 to 2.2)</b>                |
| Cirrhosis and other chronic liver diseases due to hepatitis B  | 17.1<br>(15.2 to 19.2)                        | 0.6<br>(0.5 to 0.6)                      | 0.4<br>(0.2 to 0.5)                   | 5.9<br>(-9.5 to 24.2)                             | -3.7<br>(-16.5 to 12.2)                             |
| Cirrhosis and other chronic liver diseases due to hepatitis C  | 23.3<br>(20.8 to 26.0)                        | 0.8<br>(0.7 to 0.8)                      | 0.5<br>(0.3 to 0.6)                   | 7.0<br>(-6.6 to 22.4)                             | -2.9<br>(-14.6 to 11.0)                             |
| Cirrhosis and other chronic liver diseases due to alcohol use  | 30.3<br>(27.3 to 33.3)                        | 1.0<br>(0.9 to 1.1)                      | 0.6<br>(0.4 to 0.8)                   | 4.1<br>(-7.8 to 17.2)                             | -6.2<br>(-16.2 to 5.0)                              |
| Cirrhosis and other chronic liver diseases due to other causes | 22.1<br>(20.0 to 24.4)                        | 0.7<br>(0.6 to 0.7)                      | 0.5<br>(0.4 to 0.8)                   | -5.0<br>(-16.8 to 8.2)                            | -3.6<br>(-15.3 to 9.4)                              |
| <b>Digestive diseases</b>                                      | <b>179.2</b><br><b>(170.9 to 187.9)</b>       | <b>188.4†</b><br><b>(175.9 to 202.2)</b> | <b>6.3</b><br><b>(4.5 to 8.6)</b>     | <b>9.8</b><br><b>(3.3 to 16.0)</b>                | <b>3.6</b><br><b>(-2.2 to 9.3)</b>                  |
| Peptic ulcer disease                                           | 50.5<br>(46.1 to 55.6)                        | 5.5<br>(5.0 to 6.1)                      | 0.7<br>(0.5 to 1.1)                   | 31.4<br>(16.8 to 48.8)                            | 23.8<br>(10.6 to 39.8)                              |
| Gastritis and duodenitis                                       | 69.5<br>(61.1 to 78.3)                        | 60.5<br>(53.6 to 67.8)                   | 0.8<br>(0.5 to 1.2)                   | 16.4<br>(5.2 to 28.6)                             | 14.1<br>(2.6 to 26.0)                               |
| Appendicitis                                                   | 0.3<br>(0.3 to 0.4)                           | 8.4<br>(7.8 to 9.2)                      | 0.1<br>(0.1 to 0.1)                   | -11.2<br>(-32.7 to 16.2)                          | 2.5<br>(-24.4 to 36.8)                              |
| Paralytic ileus and intestinal obstruction                     | 0.1<br>(0.1 to 0.1)                           | 1.6<br>(1.4 to 1.8)                      | < 0.05<br>(< 0.05 to < 0.05)          | 7.6<br>(3.5 to 12.3)                              | 4.0<br>(0.7 to 7.2)                                 |
| Inguinal, femoral, and abdominal hernia                        | 44.2<br>(39.8 to 48.8)                        | 39.1<br>(33.2 to 45.6)                   | 3.2<br>(2.2 to 4.5)                   | 4.9<br>(-4.6 to 14.2)                             | -2.2<br>(-10.4 to 5.8)                              |
| Inflammatory bowel disease                                     | 4.1<br>(3.8 to 4.5)                           | 3.4<br>(3.3 to 3.5)                      | 0.6<br>(0.4 to 0.8)                   | 4.5<br>(-9.2 to 19.2)                             | -1.3<br>(-13.8 to 11.6)                             |
| Vascular intestinal disorders                                  | 0.1<br>(0.1 to 0.1)                           | 0.5<br>(0.4 to 0.5)                      | < 0.05<br>(< 0.05 to < 0.05)          | 23.9<br>(18.0 to 29.9)                            | 14.1<br>(9.3 to 19.1)                               |
| Gallbladder and biliary diseases                               | 14.2<br>(12.5 to 16.0)                        | 61.8<br>(53.6 to 71.3)                   | 0.2<br>(0.2 to 0.4)                   | 16.8<br>(-6.4 to 42.2)                            | 6.8<br>(-13.0 to 28.7)                              |
| Pancreatitis                                                   | 0.8<br>(0.8 to 0.9)                           | 7.7<br>(7.0 to 8.4)                      | 0.1<br>(0.1 to 0.1)                   | 10.8<br>(-7.4 to 34.0)                            | 3.4<br>(-12.8 to 23.1)                              |
| Other digestive diseases                                       | --                                            | --                                       | 0.5<br>(0.4 to 0.7)                   | 15.5<br>(8.4 to 22.3)                             | 7.4<br>(0.8 to 14.3)                                |
| <b>Neurological disorders</b>                                  | <b>1,777.4</b><br><b>(1,707.6 to 1,855.5)</b> | <b>819.5</b><br><b>(700.6 to 970.6)</b>  | <b>46.9</b><br><b>(31.0 to 63.8)</b>  | <b>0.3</b><br><b>(-10.1 to 10.1)</b>              | <b>-1.2</b><br><b>(-11.3 to 9.2)</b>                |
| Alzheimer's disease and other dementias                        | 20.8<br>(17.4 to 24.8)                        | 3.6<br>(3.0 to 4.4)                      | 3.0<br>(2.1 to 4.1)                   | 18.7<br>(12.5 to 25.5)                            | -0.5<br>(-4.9 to 4.1)                               |
| Parkinson's disease                                            | 4.8<br>(3.8 to 6.0)                           | 0.6<br>(0.4 to 0.7)                      | 0.6<br>(0.4 to 0.8)                   | 18.6<br>(5.7 to 31.5)                             | 5.4<br>(-5.2 to 15.7)                               |
| Epilepsy                                                       | 7.9<br>(2.0 to 15.1)                          | 0.8<br>(0.2 to 1.5)                      | 2.2<br>(0.4 to 5.2)                   | -18.5<br>(-85.8 to 352.2)                         | -15.6<br>(-85.5 to 369.8)                           |
| Multiple sclerosis                                             | 1.3<br>(1.2 to 1.5)                           | < 0.05<br>(< 0.05 to < 0.1)              | 0.4<br>(0.2 to 0.5)                   | 29.3<br>(11.8 to 51.2)                            | 21.6<br>(4.9 to 41.7)                               |
| Motor neuron disease                                           | 0.1<br>(0.1 to 0.1)                           | < 0.05<br>(< 0.05 to < 0.05)             | < 0.05<br>(< 0.05 to < 0.05)          | 6.2<br>(1.2 to 11.0)                              | 4.8<br>(0.7 to 9.3)                                 |
| Migraine                                                       | 745.4<br>(698.2 to 792.6)                     | 72.7<br>(65.6 to 80.9)                   | 34.1<br>(22.2 to 47.3)                | -0.4<br>(-4.4 to 3.8)                             | -0.6<br>(-4.2 to 2.8)                               |
| Tension-type headache                                          | 1,337.1<br>(1,191.9 to 1,488.1)               | 741.8<br>(622.5 to 886.9)                | 6.1<br>(3.7 to 9.2)                   | 2.0<br>(-5.1 to 9.5)                              | -0.2<br>(-5.5 to 5.5)                               |
| Other neurological disorders                                   | < 0.05<br>(< 0.05 to < 0.05)                  | < 0.05<br>(< 0.05 to < 0.05)             | 0.5<br>(0.2 to 1.1)                   | -3.1<br>(-68.0 to 197.5)                          | 4.4<br>(-68.3 to 233.1)                             |
| <b>Mental and substance use disorders</b>                      | <b>680.5</b><br><b>(658.0 to 704.6)</b>       | <b>284.6†</b><br><b>(266.2 to 306.4)</b> | <b>91.5</b><br><b>(66.9 to 118.6)</b> | <b>1.4</b><br><b>(-1.1 to 4.1)</b>                | <b>1.0</b><br><b>(-1.4 to 3.3)</b>                  |
| Schizophrenia                                                  | 9.3<br>(8.1 to 10.6)                          | 0.6<br>(0.5 to 0.6)                      | 6.0<br>(4.4 to 7.5)                   | 8.6<br>(-0.9 to 18.8)                             | 1.8<br>(-7.2 to 11.3)                               |
| Alcohol use disorders                                          | 157.7<br>(141.9 to 176.1)                     | 80.6<br>(70.4 to 91.9)                   | 15.7<br>(10.8 to 21.6)                | 9.0<br>(0.1 to 19.1)                              | 5.3<br>(-3.0 to 14.2)                               |
| Drug use disorders                                             | 37.1<br>(34.4 to 39.6)                        | 4.6<br>(4.2 to 5.0)                      | 8.8<br>(6.4 to 11.6)                  | 14.7<br>(5.4 to 24.8)                             | 11.9<br>(3.3 to 21.5)                               |
| Opioid use disorders                                           | 15.2<br>(13.2 to 17.5)                        | 2.0<br>(1.8 to 2.3)                      | 6.2<br>(4.4 to 8.2)                   | 21.1<br>(8.8 to 35.0)                             | 13.5<br>(2.5 to 25.9)                               |
| Cocaine use disorders                                          | 4.2<br>(3.6 to 4.8)                           | 0.2<br>(0.2 to 0.3)                      | 0.6<br>(0.4 to 0.8)                   | 7.2<br>(-13.3 to 32.7)                            | 11.7<br>(-9.9 to 38.0)                              |
| Amphetamine use disorders                                      | 4.5<br>(3.2 to 6.1)                           | 0.3<br>(0.2 to 0.4)                      | 0.6<br>(0.3 to 1.0)                   | -2.5<br>(-21.5 to 26.6)                           | 6.9<br>(-14.5 to 37.3)                              |
| Cannabis use disorders                                         | 11.1<br>(9.2 to 13.2)                         | 1.5<br>(1.2 to 1.8)                      | 0.3<br>(0.2 to 0.5)                   | -12.4<br>(-25.5 to 3.9)                           | 0.6<br>(-14.1 to 19.0)                              |
| Other drug use disorders                                       | 3.3<br>(3.0 to 3.7)                           | 0.6<br>(0.5 to 0.6)                      | 1.1<br>(0.7 to 1.6)                   | 7.2<br>(-14.0 to 34.3)                            | 10.9<br>(-11.5 to 39.1)                             |
| Depressive disorders                                           | 170.3<br>(160.1 to 181.8)                     | 165.8<br>(149.3 to 182.4)                | 27.2<br>(18.9 to 37.0)                | 0.7<br>(-4.4 to 6.3)                              | -2.9<br>(-7.3 to 1.8)                               |
| Major depressive disorder                                      | 100.7<br>(91.3 to 111.0)                      | 154.9<br>(138.8 to 171.5)                | 20.2<br>(14.0 to 27.9)                | -0.7<br>(-7.2 to 6.6)                             | -3.8<br>(-9.5 to 2.5)                               |
| Dysthymia                                                      | 72.6<br>(63.2 to 83.0)                        | 10.9<br>(9.6 to 12.5)                    | 6.9<br>(4.7 to 10.1)                  | 5.3<br>(1.4 to 8.9)                               | -0.2<br>(-3.4 to 2.8)                               |
| Bipolar disorder                                               | 27.9<br>(24.3 to 32.2)                        | 2.0<br>(1.7 to 2.3)                      | 5.7<br>(3.6 to 8.4)                   | -2.0<br>(-7.8 to 5.2)                             | -0.1<br>(-5.6 to 6.6)                               |
| Anxiety disorders                                              | 121.5<br>(110.4 to 132.8)                     | 19.4<br>(17.8 to 21.0)                   | 11.6<br>(8.1 to 15.7)                 | -2.5<br>(-7.4 to 2.5)                             | -0.0<br>(-4.8 to 4.6)                               |
| Eating disorders                                               | 3.4<br>(2.7 to 4.2)                           | 1.9<br>(1.4 to 2.4)                      | 0.7<br>(0.4 to 1.0)                   | 7.6<br>(-9.0 to 26.2)                             | 15.7<br>(-1.7 to 33.9)                              |
| Anorexia nervosa                                               | 0.7<br>(0.5 to 1.0)                           | 0.3<br>(0.2 to 0.4)                      | 0.1<br>(0.1 to 0.2)                   | -6.4<br>(-30.2 to 29.9)                           | 11.9<br>(-14.7 to 52.2)                             |
| Bulimia nervosa                                                | 2.5<br>(1.9 to 3.4)                           | 1.6<br>(1.1 to 2.1)                      | 0.5<br>(0.3 to 0.8)                   | 12.4<br>(-8.1 to 37.1)                            | 17.0<br>(-4.2 to 40.1)                              |
| Autistic spectrum disorders                                    | 33.0<br>(29.6 to 37.3)                        | 0.1<br>(0.1 to 0.2)                      | 4.8<br>(3.2 to 6.8)                   | -4.1<br>(-8.5 to 0.5)                             | 0.5<br>(-4.1 to 5.2)                                |
| Autism                                                         | 10.1<br>(8.7 to 11.8)                         | < 0.05<br>(< 0.05 to < 0.05)             | 2.6<br>(1.6 to 3.8)                   | -4.2<br>(-11.7 to 3.3)                            | 0.5<br>(-7.1 to 8.9)                                |
| Asperger syndrome and other autistic spectrum disorders        | 22.8<br>(19.0 to 27.4)                        | 0.1<br>(0.1 to 0.2)                      | 2.3<br>(1.5 to 3.3)                   | -4.0<br>(-8.0 to 0.3)                             | 0.6<br>(-3.5 to 4.9)                                |



| Cause                                                      | Prevalence in thousands (95% UI)              | Incidence in thousands (95% UI)                 | YLDs in thousands (95% UI)            |                                                   |                                                     |
|------------------------------------------------------------|-----------------------------------------------|-------------------------------------------------|---------------------------------------|---------------------------------------------------|-----------------------------------------------------|
|                                                            | 2016 counts                                   | 2016 counts                                     | 2016 counts                           | Percentage change in counts between 2006 and 2016 | Percentage change in age-standardised rates between |
| Attention-deficit/hyperactivity disorder                   | 27.5<br>(24.9 to 30.6)                        | 0.9<br>(0.8 to 1.1)                             | 0.3<br>(0.2 to 0.5)                   | -14.1<br>(-21.2 to -6.3)                          | 0.4<br>(-7.9 to 9.2)                                |
| Conduct disorder                                           | 19.8<br>(16.4 to 23.3)                        | 6.4<br>(5.1 to 7.7)                             | 2.4<br>(1.5 to 3.7)                   | -34.1<br>(-38.5 to -29.5)                         | 0.2<br>(-6.2 to 7.1)                                |
| Idiopathic developmental intellectual disability           | 46.3<br>(25.2 to 68.0)                        | --                                              | 1.7<br>(0.7 to 3.1)                   | -15.0<br>(-20.9 to -8.6)                          | -10.4<br>(-16.5 to -4.0)                            |
| Other mental and substance use disorders                   | 89.8<br>(79.4 to 103.5)                       | 2.3<br>(2.1 to 2.6)                             | 6.6<br>(4.6 to 9.6)                   | 5.6<br>(0.3 to 11.3)                              | 0.3<br>(-4.5 to 5.4)                                |
| <b>Diabetes, urogenital, blood, and endocrine diseases</b> | <b>1,391.0</b><br><b>(1,366.3 to 1,417.2)</b> | <b>824.5†</b><br><b>(773.7 to 879.8)</b>        | <b>36.9</b><br><b>(26.2 to 50.2)</b>  | <b>8.4</b><br><b>(4.1 to 13.0)</b>                | <b>1.7</b><br><b>(-2.1 to 5.8)</b>                  |
| Diabetes mellitus                                          | 174.2<br>(156.1 to 196.2)                     | 8.8<br>(7.8 to 9.8)                             | 15.0<br>(10.3 to 20.7)                | 16.7<br>(6.4 to 28.2)                             | 5.5<br>(-3.2 to 16.1)                               |
| Acute glomerulonephritis                                   | 0.1<br>(0.1 to 0.1)                           | 1.2<br>(1.1 to 1.4)                             | < 0.05<br>(< 0.05 to < 0.05)          | 0.7<br>(-4.9 to 6.5)                              | 0.4<br>(-3.9 to 4.4)                                |
| Chronic kidney disease                                     | 219.1<br>(195.9 to 243.9)                     | 16.5<br>(14.3 to 18.9)                          | 4.6<br>(3.4 to 6.1)                   | 12.0<br>(3.9 to 21.4)                             | 0.9<br>(-6.6 to 8.6)                                |
| Chronic kidney disease due to diabetes mellitus            | 58.8<br>(47.5 to 71.8)                        | 4.6<br>(3.5 to 5.8)                             | 1.2<br>(0.8 to 1.6)                   | 14.8<br>(2.8 to 28.1)                             | 3.1<br>(-6.6 to 14.5)                               |
| Chronic kidney disease due to hypertension                 | 62.0<br>(52.2 to 72.5)                        | 6.9<br>(5.7 to 8.3)                             | 0.4<br>(0.2 to 0.5)                   | 8.2<br>(-5.5 to 25.9)                             | -7.6<br>(-19.0 to 6.3)                              |
| Chronic kidney disease due to glomerulonephritis           | 45.7<br>(39.2 to 53.0)                        | 1.1<br>(0.8 to 1.4)                             | 2.0<br>(1.4 to 2.7)                   | 11.2<br>(1.3 to 22.5)                             | 1.8<br>(-6.8 to 11.6)                               |
| Chronic kidney disease due to other causes                 | 52.7<br>(42.3 to 64.1)                        | 3.9<br>(3.1 to 4.9)                             | 1.1<br>(0.8 to 1.5)                   | 11.8<br>(1.2 to 23.9)                             | 0.4<br>(-8.7 to 9.1)                                |
| Urinary diseases and male infertility                      | 133.8<br>(120.2 to 148.8)                     | 538.6†<br>(491.5 to 589.3)                      | 4.0<br>(2.6 to 5.7)                   | 9.8<br>(3.9 to 16.4)                              | -1.3<br>(-6.7 to 4.5)                               |
| Interstitial nephritis and urinary tract infections        | 8.2<br>(7.3 to 9.1)                           | 424.2<br>(378.6 to 472.6)                       | 0.3<br>(0.2 to 0.4)                   | -7.1<br>(-17.2 to 3.9)                            | -3.9<br>(-13.6 to 7.1)                              |
| Urolithiasis                                               | 3.9<br>(3.4 to 4.4)                           | 102.2<br>(90.1 to 116.0)                        | 0.3<br>(0.2 to 0.4)                   | 13.2<br>(-4.4 to 36.4)                            | 4.3<br>(-10.5 to 24.3)                              |
| Benign prostatic hyperplasia                               | 95.5<br>(81.5 to 111.5)                       | 12.3<br>(10.1 to 14.5)                          | 3.1<br>(2.0 to 4.5)                   | 12.8<br>(5.5 to 21.6)                             | -0.8<br>(-7.4 to 6.5)                               |
| Male infertility                                           | 21.9<br>(16.9 to 27.9)                        | --                                              | 0.1<br>(0.1 to 0.3)                   | 20.1<br>(-1.5 to 45.2)                            | 14.2<br>(-5.6 to 35.5)                              |
| Other urinary diseases                                     | --                                            | --                                              | 0.2<br>(0.1 to 0.3)                   | -14.6<br>(-22.6 to -4.9)                          | -17.6<br>(-25.2 to -8.9)                            |
| Gynecological diseases                                     | 543.1<br>(523.2 to 569.4)                     | 243.5†<br>(221.4 to 268.3)                      | 8.3<br>(5.7 to 11.9)                  | -5.0<br>(-8.7 to -1.4)                            | -2.7<br>(-5.9 to 0.9)                               |
| Uterine fibroids                                           | 72.3<br>(63.0 to 82.9)                        | 6.7<br>(5.7 to 7.8)                             | 1.0<br>(0.6 to 1.6)                   | -7.4<br>(-14.7 to -0.9)                           | -8.2<br>(-15.2 to -1.7)                             |
| Polycystic ovarian syndrome                                | 4.7<br>(3.5 to 6.2)                           | 1.8<br>(1.2 to 2.4)                             | < 0.05<br>(< 0.05 to 0.1)             | 4.1<br>(-10.4 to 20.7)                            | -0.9<br>(-14.5 to 14.6)                             |
| Female infertility                                         | 12.3<br>(5.4 to 22.2)                         | --                                              | 0.1<br>(< 0.05 to 0.2)                | 81.9<br>(-0.1 to 198.1)                           | 77.5<br>(4.2 to 185.2)                              |
| Endometriosis                                              | 3.6<br>(3.0 to 4.4)                           | 9.4<br>(7.2 to 12.3)                            | 0.3<br>(0.2 to 0.5)                   | -4.1<br>(-22.8 to 15.4)                           | -1.2<br>(-20.6 to 19.4)                             |
| Genital prolapse                                           | 129.3<br>(111.6 to 149.1)                     | 6.1<br>(5.2 to 7.1)                             | 0.4<br>(0.2 to 0.7)                   | 16.4<br>(5.9 to 27.4)                             | 3.7<br>(-5.7 to 13.3)                               |
| Premenstrual syndrome                                      | 279.9<br>(264.1 to 296.1)                     | 95.0<br>(88.9 to 101.6)                         | 2.3<br>(1.4 to 3.6)                   | -8.6<br>(-14.6 to -1.9)                           | -2.6<br>(-8.9 to 4.4)                               |
| Other gynecological diseases                               | 120.1<br>(104.1 to 139.0)                     | 124.6<br>(104.2 to 148.6)                       | 4.2<br>(2.8 to 6.0)                   | -5.0<br>(-10.0 to 0.3)                            | -2.8<br>(-7.4 to 2.4)                               |
| Hemoglobinopathies and hemolytic anaemias                  | 529.4<br>(517.4 to 539.1)                     | --                                              | 1.4<br>(0.9 to 2.1)                   | 4.6<br>(-4.9 to 15.5)                             | 2.9<br>(-7.2 to 15.4)                               |
| Thalassemias                                               | < 0.05<br>(< 0.05 to < 0.05)                  | --                                              | < 0.05<br>(< 0.05 to < 0.05)          | -1.5<br>(-21.1 to 16.8)                           | -0.2<br>(-20.1 to 18.9)                             |
| Thalassaemias trait                                        | 76.4<br>(70.4 to 82.7)                        | --                                              | 0.8<br>(0.5 to 1.2)                   | 7.7<br>(-3.6 to 20.6)                             | 6.2<br>(-4.9 to 20.0)                               |
| Sickle cell disorders                                      | < 0.05<br>(< 0.05 to < 0.05)                  | --                                              | < 0.05<br>(< 0.05 to < 0.05)          | -12.5<br>(-19.4 to -5.1)                          | -2.8<br>(-11.7 to 6.8)                              |
| Sickle cell trait                                          | 65.8<br>(63.1 to 68.9)                        | --                                              | 0.1<br>(0.1 to 0.2)                   | -0.8<br>(-16.7 to 16.2)                           | -0.2<br>(-17.0 to 18.8)                             |
| G6PD deficiency                                            | 51.5<br>(48.8 to 54.7)                        | --                                              | < 0.05<br>(< 0.05 to < 0.05)          | 2.5<br>(-12.1 to 20.0)                            | 2.2<br>(-14.4 to 21.6)                              |
| G6PD trait                                                 | 313.8<br>(305.6 to 321.9)                     | --                                              | < 0.05<br>(< 0.05 to < 0.05)          | 7.6<br>(-1.5 to 18.2)                             | 7.9<br>(-1.2 to 19.4)                               |
| Other hemoglobinopathies and hemolytic anaemias            | 41.9<br>(37.8 to 46.0)                        | --                                              | 0.5<br>(0.3 to 0.8)                   | 1.5<br>(-10.5 to 15.4)                            | -1.1<br>(-12.7 to 13.2)                             |
| Endocrine, metabolic, blood, and immune disorders          | 119.0<br>(108.4 to 130.2)                     | 15.8<br>(13.8 to 17.9)                          | 3.6<br>(2.4 to 5.1)                   | 7.6<br>(1.6 to 14.2)                              | 1.4<br>(-4.4 to 7.1)                                |
| <b>Musculoskeletal disorders</b>                           | <b>845.2</b><br><b>(803.8 to 894.2)</b>       | <b>364.1</b><br><b>(325.2 to 409.1)</b>         | <b>97.6</b><br><b>(70.1 to 127.4)</b> | <b>5.7</b><br><b>(2.4 to 9.2)</b>                 | <b>-2.0</b><br><b>(-4.5 to 0.6)</b>                 |
| Rheumatoid arthritis                                       | 12.5<br>(11.2 to 14.0)                        | 0.6<br>(0.6 to 0.7)                             | 2.9<br>(2.0 to 3.9)                   | 16.5<br>(6.8 to 27.4)                             | 6.7<br>(-2.1 to 16.4)                               |
| Osteoarthritis                                             | 225.6<br>(210.0 to 240.7)                     | 10.9<br>(10.1 to 11.8)                          | 13.8<br>(9.8 to 18.8)                 | 19.2<br>(14.5 to 23.9)                            | 5.5<br>(1.4 to 9.6)                                 |
| Low back and neck pain                                     | 638.4<br>(594.3 to 689.1)                     | 305.7<br>(266.6 to 347.2)                       | 76.0<br>(53.3 to 100.0)               | 3.8<br>(-0.2 to 8.0)                              | -3.1<br>(-6.0 to 0.1)                               |
| Low back pain                                              | 519.5<br>(461.5 to 586.3)                     | 267.9<br>(230.1 to 310.2)                       | 58.5<br>(41.5 to 77.0)                | 3.1<br>(-1.9 to 8.4)                              | -4.0<br>(-7.7 to 0.1)                               |
| Neck pain                                                  | 176.3<br>(150.6 to 205.0)                     | 37.8<br>(32.7 to 44.8)                          | 17.4<br>(11.9 to 24.8)                | 6.3<br>(2.5 to 10.1)                              | -0.1<br>(-2.1 to 2.1)                               |
| Gout                                                       | 18.1<br>(15.9 to 20.5)                        | 3.6<br>(3.1 to 4.1)                             | 0.6<br>(0.4 to 0.8)                   | 11.8<br>(-3.8 to 29.1)                            | 0.2<br>(-12.7 to 15.0)                              |
| Other musculoskeletal disorders                            | 50.4<br>(36.1 to 69.1)                        | 43.2<br>(31.0 to 61.6)                          | 4.3<br>(2.6 to 6.7)                   | -4.0<br>(-17.5 to 11.4)                           | -9.6<br>(-21.5 to 3.6)                              |
| <b>Other non-communicable diseases</b>                     | <b>3,085.2</b><br><b>(3,031.7 to 3,140.0)</b> | <b>9,845.8†</b><br><b>(9,321.5 to 10,407.2)</b> | <b>89.3</b><br><b>(61.5 to 125.6)</b> | <b>0.6</b><br><b>(-0.6 to 1.8)</b>                | <b>-1.2</b><br><b>(-2.2 to -0.1)</b>                |
| Congenital anomalies                                       | 61.6<br>(56.4 to 67.1)                        | --                                              | 7.0<br>(5.1 to 9.2)                   | -4.7<br>(-9.5 to 0.1)                             | -0.6<br>(-5.3 to 4.3)                               |
| Neural tube defects                                        | 4.2<br>(3.7 to 4.7)                           | --                                              | 1.2<br>(0.9 to 1.7)                   | -3.1<br>(-14.6 to 8.3)                            | -0.9<br>(-12.5 to 10.9)                             |
| Congenital heart anomalies                                 | 9.5<br>(8.2 to 10.8)                          | --                                              | 0.5<br>(0.2 to 0.8)                   | 1.6<br>(-8.5 to 13.0)                             | 7.7<br>(-2.8 to 19.7)                               |
| Orofacial clefts                                           | 2.3<br>(2.0 to 2.6)                           | --                                              | < 0.05<br>(< 0.05 to < 0.05)          | -13.5<br>(-23.8 to -2.1)                          | -11.2<br>(-21.8 to 0.5)                             |
| Down's syndrome                                            | 3.0<br>(2.5 to 3.4)                           | --                                              | 0.3<br>(0.2 to 0.4)                   | 0.4<br>(-8.9 to 10.9)                             | 5.2<br>(-5.2 to 16.8)                               |
| Turner syndrome                                            | 3.1<br>(2.6 to 3.6)                           | --                                              | 0.1<br>(< 0.05 to 0.1)                | -11.1<br>(-31.2 to 15.1)                          | -4.8<br>(-26.9 to 23.8)                             |
| Klinefelter syndrome                                       | 2.8<br>(2.4 to 3.3)                           | --                                              | < 0.05<br>(< 0.05 to < 0.05)          | -0.8<br>(-19.4 to 23.5)                           | 2.8<br>(-16.6 to 26.1)                              |

| Cause                                         | Prevalence in thousands (95% UI)              | Incidence in thousands (95% UI)                     | YLDs in thousands (95% UI)           |                                                   |                                                     |
|-----------------------------------------------|-----------------------------------------------|-----------------------------------------------------|--------------------------------------|---------------------------------------------------|-----------------------------------------------------|
|                                               | 2016 counts                                   | 2016 counts                                         | 2016 counts                          | Percentage change in counts between 2006 and 2016 | Percentage change in age-standardised rates between |
| Other chromosomal abnormalities               | 3.6<br>(3.0 to 4.2)                           | --                                                  | 0.5<br>(0.3 to 0.7)                  | -10.9<br>(-22.4 to 3.0)                           | 4.2<br>(-9.6 to 20.6)                               |
| Congenital musculoskeletal and limb anomalies | 12.5<br>(11.4 to 13.7)                        | --                                                  | 1.8<br>(1.2 to 2.4)                  | -2.6<br>(-10.2 to 6.1)                            | 0.0<br>(-8.0 to 9.3)                                |
| Urogenital congenital anomalies               | 7.1<br>(6.3 to 7.9)                           | --                                                  | 0.2<br>(0.1 to 0.3)                  | -11.4<br>(-19.2 to -3.4)                          | 0.1<br>(-8.8 to 9.8)                                |
| Digestive congenital anomalies                | 9.1<br>(8.0 to 10.2)                          | --                                                  | 0.4<br>(0.3 to 0.6)                  | -4.9<br>(-14.6 to 6.0)                            | -2.3<br>(-12.0 to 8.5)                              |
| Other congenital anomalies                    | 15.1<br>(9.8 to 22.5)                         | --                                                  | 2.1<br>(1.4 to 3.1)                  | -7.0<br>(-16.7 to 2.7)                            | -4.6<br>(-14.7 to 5.3)                              |
| Skin and subcutaneous diseases                | 1,134.7<br>(1,102.6 to 1,164.5)               | 2,843.2<br>(2,687.6 to 3,010.9)                     | 26.0<br>(17.6 to 37.6)               | -8.0<br>(-10.0 to -5.9)                           | 1.2<br>(-0.5 to 3.0)                                |
| Dermatitis                                    | 146.2<br>(130.7 to 163.2)                     | 190.7<br>(174.0 to 208.4)                           | 5.4<br>(3.2 to 8.6)                  | -5.2<br>(-9.0 to -1.2)                            | 0.0<br>(-3.5 to 3.4)                                |
| Psoriasis                                     | 39.2<br>(37.4 to 41.2)                        | 5.4<br>(5.1 to 5.7)                                 | 3.4<br>(2.4 to 4.5)                  | 8.1<br>(0.3 to 16.4)                              | 6.2<br>(-1.3 to 14.2)                               |
| Cellulitis                                    | 2.5<br>(2.3 to 2.7)                           | 54.5<br>(50.8 to 57.9)                              | 0.1<br>(0.1 to 0.2)                  | 3.2<br>(-14.4 to 26.7)                            | 3.0<br>(-14.2 to 24.6)                              |
| Pyoderma                                      | 17.2<br>(16.6 to 17.8)                        | 452.9<br>(435.3 to 470.6)                           | 0.1<br>( $< 0.05$ to 0.2)            | 6.4<br>(1.1 to 12.5)                              | 0.7<br>(-4.2 to 6.2)                                |
| Scabies                                       | 39.9<br>(35.1 to 45.9)                        | 118.9<br>(103.7 to 135.5)                           | 1.0<br>(0.6 to 1.6)                  | -19.6<br>(-24.7 to -14.6)                         | -11.6<br>(-16.0 to -7.6)                            |
| Fungal skin diseases                          | 350.5<br>(314.7 to 388.5)                     | 1,285.6<br>(1,141.2 to 1,449.9)                     | 1.9<br>(0.8 to 4.1)                  | 2.0<br>(-0.6 to 4.6)                              | 0.0<br>(-1.0 to 1.1)                                |
| Viral skin diseases                           | 93.6<br>(89.7 to 97.4)                        | 141.2<br>(135.0 to 148.2)                           | 2.9<br>(1.8 to 4.2)                  | -8.3<br>(-11.3 to -5.1)                           | -0.2<br>(-3.2 to 3.0)                               |
| Acne vulgaris                                 | 256.2<br>(232.0 to 280.6)                     | 161.1<br>(136.3 to 196.5)                           | 6.6<br>(4.4 to 9.6)                  | -22.0<br>(-25.9 to -17.9)                         | 3.0<br>(-1.6 to 7.9)                                |
| Alopecia areata                               | 8.4<br>(8.1 to 8.8)                           | 14.8<br>(14.2 to 15.4)                              | 0.3<br>(0.2 to 0.4)                  | 2.4<br>(-7.8 to 13.8)                             | 0.1<br>(-9.8 to 11.2)                               |
| Pruritus                                      | 38.8<br>(34.1 to 44.1)                        | 31.0<br>(27.3 to 35.2)                              | 0.4<br>(0.2 to 0.8)                  | 5.0<br>(-1.0 to 11.6)                             | 1.5<br>(-3.2 to 6.6)                                |
| Urticaria                                     | 36.0<br>(31.9 to 40.9)                        | 64.0<br>(56.5 to 72.5)                              | 2.1<br>(1.4 to 3.1)                  | -3.5<br>(-8.8 to 2.5)                             | -0.2<br>(-5.2 to 5.0)                               |
| Decubitus ulcer                               | 1.4<br>(1.2 to 1.6)                           | 5.0<br>(4.4 to 5.7)                                 | 0.2<br>(0.1 to 0.3)                  | 10.5<br>(-5.1 to 28.4)                            | 3.3<br>(-10.1 to 18.2)                              |
| Other skin and subcutaneous diseases          | 277.0<br>(268.7 to 285.9)                     | 318.3<br>(307.5 to 330.3)                           | 1.5<br>(0.7 to 2.7)                  | 11.4<br>(8.7 to 14.4)                             | 6.2<br>(3.6 to 8.8)                                 |
| Sense organ diseases                          | 1,166.8<br>(1,136.3 to 1,198.5)               | 401.2 <sup>†</sup><br>(378.3 to 426.4)              | 41.6<br>(28.7 to 58.2)               | 5.4<br>(3.3 to 7.3)                               | -3.4<br>(-5.0 to -1.8)                              |
| Glaucoma                                      | 2.9<br>(2.4 to 3.4)                           | --                                                  | 0.2<br>(0.2 to 0.4)                  | 16.2<br>(0.9 to 32.5)                             | -0.2<br>(-12.7 to 12.5)                             |
| Cataract                                      | 39.8<br>(33.2 to 46.7)                        | --                                                  | 2.0<br>(1.4 to 2.8)                  | 9.7<br>(2.9 to 17.5)                              | -4.5<br>(-9.7 to 1.4)                               |
| Macular degeneration                          | 1.4<br>(1.1 to 1.8)                           | --                                                  | 0.1<br>(0.1 to 0.1)                  | 19.6<br>(2.0 to 41.8)                             | 1.9<br>(-12.3 to 20.3)                              |
| Refraction and accommodation disorders        | 526.9<br>(484.2 to 572.6)                     | --                                                  | 8.4<br>(5.0 to 13.4)                 | -0.4<br>(-4.4 to 4.0)                             | -6.4<br>(-10.0 to -2.6)                             |
| Age-related and other hearing loss            | 864.5<br>(822.2 to 907.7)                     | --                                                  | 25.6<br>(18.0 to 35.6)               | 6.0<br>(3.0 to 8.7)                               | -3.1<br>(-5.4 to -0.9)                              |
| Other vision loss                             | 17.5<br>(15.1 to 20.3)                        | --                                                  | 1.1<br>(0.7 to 1.4)                  | 11.9<br>(3.4 to 21.7)                             | 0.2<br>(-6.9 to 7.7)                                |
| Other sense organ diseases                    | 138.8<br>(127.2 to 150.2)                     | 401.2<br>(378.3 to 426.4)                           | 4.3<br>(2.7 to 6.6)                  | 8.9<br>(4.7 to 13.3)                              | 0.7<br>(-2.9 to 4.5)                                |
| Oral disorders                                | 2,311.4<br>(2,212.1 to 2,400.9)               | 6,601.4 <sup>†</sup><br>(6,110.4 to 7,149.0)        | 14.6<br>(9.1 to 22.4)                | 7.6<br>(5.1 to 10.4)                              | -0.2<br>(-1.9 to 1.8)                               |
| Caries of deciduous teeth                     | 196.3<br>(160.2 to 230.9)                     | 752.2<br>(561.5 to 976.4)                           | 0.1<br>( $< 0.05$ to 0.1)            | -3.3<br>(-12.2 to 5.7)                            | -2.2<br>(-10.7 to 7.0)                              |
| Caries of permanent teeth                     | 1,799.4<br>(1,678.2 to 1,930.4)               | 5,775.6<br>(5,302.7 to 6,228.8)                     | 1.8<br>(0.8 to 3.4)                  | -7.4<br>(-10.5 to -4.0)                           | -4.8<br>(-7.6 to -1.6)                              |
| Periodontal disease                           | 405.2<br>(335.8 to 488.2)                     | 50.3<br>(39.5 to 62.0)                              | 2.6<br>(1.1 to 5.4)                  | 8.8<br>(4.7 to 14.1)                              | -0.3<br>(-3.6 to 3.2)                               |
| Edentulism and severe tooth loss              | 283.1<br>(246.7 to 319.8)                     | 23.3<br>(19.6 to 27.2)                              | 7.8<br>(5.1 to 11.0)                 | 13.7<br>(10.2 to 17.8)                            | 1.1<br>(-1.8 to 4.2)                                |
| Other oral disorders                          | 81.6<br>(77.9 to 85.2)                        | --                                                  | 2.4<br>(1.5 to 3.6)                  | 1.0<br>(-2.3 to 4.4)                              | -0.1<br>(-3.1 to 3.0)                               |
| <b>Injuries</b>                               | <b>1,511.0</b><br><b>(1,409.6 to 1,647.7)</b> | <b>524.6<sup>†</sup></b><br><b>(494.1 to 557.4)</b> | <b>51.2</b><br><b>(34.4 to 72.4)</b> | <b>8.6</b><br><b>(5.3 to 11.6)</b>                | <b>3.1</b><br><b>(0.0 to 5.8)</b>                   |
| <b>Transport injuries</b>                     | <b>142.6</b><br><b>(132.1 to 153.8)</b>       | <b>41.9</b><br><b>(37.8 to 45.9)</b>                | <b>6.8</b><br><b>(4.5 to 9.9)</b>    | <b>12.7</b><br><b>(9.8 to 15.7)</b>               | <b>6.1</b><br><b>(3.4 to 8.7)</b>                   |
| Road injuries                                 | 130.5<br>(120.7 to 140.6)                     | 39.8<br>(35.8 to 43.8)                              | 6.3<br>(4.2 to 9.1)                  | 14.1<br>(11.3 to 17.0)                            | 7.2<br>(4.6 to 9.7)                                 |
| Pedestrian road injuries                      | 29.3<br>(25.6 to 33.6)                        | 6.2<br>(5.3 to 7.4)                                 | 1.4<br>(0.9 to 2.0)                  | -0.0<br>(-3.1 to 3.0)                             | -5.8<br>(-8.6 to -3.3)                              |
| Cyclist road injuries                         | 28.4<br>(23.7 to 33.7)                        | 9.1<br>(7.5 to 10.9)                                | 1.3<br>(0.8 to 1.9)                  | 21.7<br>(18.4 to 25.1)                            | 15.4<br>(12.4 to 18.3)                              |
| Motorcyclist road injuries                    | 15.4<br>(12.9 to 18.6)                        | 3.0<br>(2.4 to 3.7)                                 | 0.7<br>(0.5 to 1.0)                  | 18.2<br>(14.7 to 21.6)                            | 11.2<br>(8.1 to 14.1)                               |
| Motor vehicle road injuries                   | 48.5<br>(40.6 to 55.9)                        | 17.9<br>(15.4 to 20.4)                              | 2.6<br>(1.7 to 3.6)                  | 18.5<br>(15.7 to 21.4)                            | 10.7<br>(8.2 to 13.3)                               |
| Other road injuries                           | 8.9<br>(7.6 to 10.4)                          | 3.6<br>(2.8 to 4.4)                                 | 0.4<br>(0.3 to 0.6)                  | 12.2<br>(9.3 to 15.1)                             | 4.9<br>(2.3 to 7.3)                                 |
| Other transport injuries                      | 12.2<br>(10.3 to 14.3)                        | 2.1<br>(1.8 to 2.4)                                 | 0.5<br>(0.4 to 0.8)                  | -1.1<br>(-5.2 to 3.0)                             | -4.3<br>(-8.2 to -0.6)                              |
| <b>Unintentional injuries</b>                 | <b>1,290.6</b><br><b>(1,192.6 to 1,420.2)</b> | <b>456.6</b><br><b>(425.8 to 491.1)</b>             | <b>41.3</b><br><b>(28.0 to 58.3)</b> | <b>9.1</b><br><b>(5.7 to 12.0)</b>                | <b>3.6</b><br><b>(0.2 to 6.3)</b>                   |
| Falls                                         | 658.1<br>(578.4 to 765.1)                     | 251.1<br>(224.4 to 281.7)                           | 24.6<br>(16.9 to 34.1)               | 11.4<br>(8.3 to 14.1)                             | 5.1<br>(2.0 to 7.7)                                 |
| Drowning                                      | 3.3<br>(2.9 to 3.8)                           | 0.5<br>(0.5 to 0.6)                                 | 0.1<br>(0.1 to 0.2)                  | -20.0<br>(-24.4 to -15.9)                         | -24.1<br>(-28.1 to -20.4)                           |
| Fire, heat, and hot substances                | 116.3<br>(98.9 to 140.7)                      | 11.5<br>(9.9 to 13.0)                               | 2.6<br>(1.7 to 4.0)                  | 11.4<br>(4.5 to 16.9)                             | 7.2<br>(0.9 to 12.2)                                |
| Poisonings                                    | 3.1<br>(2.6 to 3.7)                           | 3.1<br>(2.5 to 3.8)                                 | 0.3<br>(0.2 to 0.4)                  | -13.6<br>(-19.3 to -8.0)                          | -13.3<br>(-18.8 to -7.6)                            |
| Exposure to mechanical forces                 | 208.2<br>(176.5 to 261.8)                     | 64.7<br>(55.3 to 75.4)                              | 4.5<br>(2.9 to 6.6)                  | 17.0<br>(12.3 to 21.2)                            | 11.8<br>(7.5 to 15.4)                               |
| Unintentional firearm injuries                | 3.1<br>(2.6 to 3.8)                           | 0.6<br>(0.4 to 0.8)                                 | 0.1<br>(0.1 to 0.2)                  | 5.3<br>(1.5 to 8.7)                               | 0.6<br>(-2.8 to 3.5)                                |
| Unintentional suffocation                     | 7.8<br>(6.2 to 9.8)                           | 1.2<br>(0.9 to 1.6)                                 | 0.2<br>(0.1 to 0.4)                  | -5.1<br>(-7.8 to -2.3)                            | -7.5<br>(-10.0 to -5.1)                             |
| Other exposure to mechanical forces           | 197.3<br>(166.5 to 250.4)                     | 63.0<br>(53.9 to 73.5)                              | 4.1<br>(2.7 to 6.1)                  | 19.0<br>(14.2 to 23.2)                            | 13.7<br>(9.3 to 17.3)                               |

| Cause                                                                               | Prevalence in thousands (95% UI)        | Incidence in thousands (95% UI)       | YLDs in thousands (95% UI)           |                                                   |                                                     |
|-------------------------------------------------------------------------------------|-----------------------------------------|---------------------------------------|--------------------------------------|---------------------------------------------------|-----------------------------------------------------|
|                                                                                     | 2016 counts                             | 2016 counts                           | 2016 counts                          | Percentage change in counts between 2006 and 2016 | Percentage change in age-standardised rates between |
| Adverse effects of medical treatment                                                | 0.8<br>(0.6 to 1.0)                     | 10.7<br>(9.3 to 12.0)                 | 0.1<br>(0.1 to 0.2)                  | 18.5<br>(12.3 to 24.6)                            | 11.5<br>(7.1 to 16.5)                               |
| Animal contact                                                                      | 33.4<br>(29.3 to 38.9)                  | 30.2<br>(25.2 to 35.7)                | 1.0<br>(0.6 to 1.4)                  | -9.0<br>(-13.0 to -5.0)                           | -9.4<br>(-13.3 to -5.5)                             |
| Venomous animal contact                                                             | 12.0<br>(9.8 to 14.5)                   | 11.7<br>(9.0 to 14.9)                 | 0.7<br>(0.4 to 1.0)                  | -4.2<br>(-10.2 to 1.9)                            | -3.2<br>(-9.1 to 2.9)                               |
| Non-venomous animal contact                                                         | 21.5<br>(17.8 to 26.6)                  | 18.5<br>(15.1 to 22.5)                | 0.3<br>(0.2 to 0.5)                  | -18.0<br>(-22.7 to -14.4)                         | -21.0<br>(-25.3 to -17.6)                           |
| Foreign body                                                                        | 70.5<br>(59.5 to 80.6)                  | 32.4<br>(29.3 to 36.1)                | 2.3<br>(1.4 to 3.4)                  | -7.5<br>(-11.8 to -3.5)                           | -10.8<br>(-14.9 to -7.1)                            |
| Pulmonary aspiration and foreign body in airway                                     | 46.8<br>(38.3 to 57.1)                  | 15.6<br>(14.3 to 17.2)                | 1.7<br>(1.0 to 2.5)                  | -12.1<br>(-15.8 to -8.5)                          | -15.6<br>(-19.1 to -12.4)                           |
| Foreign body in eyes                                                                | 2.2<br>(1.4 to 3.2)                     | 10.6<br>(8.2 to 13.9)                 | 0.1<br>(0.1 to 0.2)                  | 12.2<br>(7.3 to 17.1)                             | 8.2<br>(5.2 to 11.1)                                |
| Foreign body in other body part                                                     | 21.4<br>(17.5 to 26.9)                  | 6.1<br>(5.2 to 7.4)                   | 0.5<br>(0.3 to 0.8)                  | 5.9<br>(-0.7 to 11.9)                             | 3.8<br>(-2.8 to 9.6)                                |
| Environmental heat and cold exposure                                                | 84.2<br>(74.3 to 96.1)                  | 21.8<br>(19.2 to 24.7)                | 2.8<br>(1.9 to 4.1)                  | 4.7<br>(0.4 to 8.4)                               | -2.0<br>(-5.9 to 1.4)                               |
| Other unintentional injuries                                                        | 112.7<br>(91.4 to 136.6)                | 30.6<br>(26.1 to 35.7)                | 3.0<br>(2.0 to 4.5)                  | 7.2<br>(4.5 to 9.3)                               | 4.0<br>(1.2 to 6.2)                                 |
| <b>Self-harm and interpersonal violence</b>                                         | <b>127.0</b><br><b>(116.4 to 138.5)</b> | <b>26.0†</b><br><b>(22.6 to 29.8)</b> | <b>2.7</b><br><b>(1.8 to 3.8)</b>    | <b>-1.7</b><br><b>(-4.6 to 1.0)</b>               | <b>-4.3</b><br><b>(-6.7 to -2.1)</b>                |
| Self-harm                                                                           | 8.8<br>(7.5 to 10.2)                    | 3.6<br>(3.1 to 4.2)                   | 0.3<br>(0.2 to 0.5)                  | 0.7<br>(-3.8 to 4.9)                              | -5.2<br>(-9.3 to -1.6)                              |
| Self-harm by firearm                                                                | 0.2<br>(0.2 to 0.3)                     | 0.1<br>( $< 0.05$ to 0.1)             | $< 0.05$<br>( $< 0.05$ to $< 0.05$ ) | -29.9<br>(-33.6 to -26.5)                         | -33.4<br>(-36.6 to -30.5)                           |
| Self-harm by other specified means                                                  | 8.6<br>(7.3 to 10.0)                    | 3.6<br>(3.1 to 4.1)                   | 0.3<br>(0.2 to 0.5)                  | 1.7<br>(-2.8 to 6.0)                              | -4.2<br>(-8.4 to -0.6)                              |
| Interpersonal violence                                                              | 118.2<br>(107.7 to 129.6)               | 22.4†<br>(19.1 to 26.0)               | 2.3<br>(1.6 to 3.3)                  | -2.1<br>(-4.8 to 0.8)                             | -4.2<br>(-6.5 to -2.0)                              |
| Assault by firearm                                                                  | 0.6<br>(0.5 to 0.6)                     | 0.1<br>(0.1 to 0.2)                   | $< 0.05$<br>( $< 0.05$ to $< 0.05$ ) | -0.3<br>(-4.0 to 2.9)                             | -3.1<br>(-6.2 to -0.2)                              |
| Assault by sharp object                                                             | 10.6<br>(8.5 to 12.7)                   | 3.0<br>(2.3 to 3.9)                   | 0.3<br>(0.2 to 0.4)                  | 5.8<br>(1.0 to 9.9)                               | 2.1<br>(-2.3 to 5.6)                                |
| Sexual violence                                                                     | 64.1<br>(55.9 to 72.7)                  | --                                    | 0.5<br>(0.3 to 0.8)                  | -14.9<br>(-19.4 to -9.7)                          | -8.4<br>(-13.1 to -4.0)                             |
| Assault by other means                                                              | 43.0<br>(36.0 to 51.7)                  | 19.3<br>(16.4 to 22.4)                | 1.5<br>(1.0 to 2.2)                  | 1.8<br>(-1.1 to 4.3)                              | -3.6<br>(-6.0 to -1.5)                              |
| <b>Forces of nature, conflict and terrorism, and executions and police conflict</b> | <b>14.7</b><br><b>(5.3 to 27.3)</b>     | <b>0.1†</b><br><b>(0.1 to 0.1)</b>    | <b>0.4</b><br><b>(0.1 to 1.1)</b>    | <b>-23.2</b><br><b>(-29.4 to -18.9)</b>           | <b>-28.5</b><br><b>(-34.1 to -24.7)</b>             |
| Exposure to forces of nature                                                        | 1.6<br>(0.8 to 2.6)                     | --                                    | $< 0.05$<br>( $< 0.05$ to 0.1)       | -18.9<br>(-40.0 to -8.2)                          | -23.4<br>(-44.2 to -12.7)                           |
| Conflict and terrorism                                                              | 12.9<br>(3.9 to 25.2)                   | --                                    | 0.3<br>(0.1 to 0.9)                  | -24.2<br>(-28.6 to -20.4)                         | -29.8<br>(-34.0 to -26.4)                           |
| Executions and police conflict                                                      | 0.3<br>(0.2 to 0.5)                     | 0.1<br>(0.1 to 0.1)                   | $< 0.05$<br>( $< 0.05$ to $< 0.05$ ) | 2.2<br>(-4.3 to 8.1)                              | 3.8<br>(-1.9 to 9.2)                                |
| <b>Impairments</b>                                                                  | --                                      | --                                    | --                                   | --                                                | --                                                  |
| Anaemia                                                                             | 1,010.9<br>(937.9 to 1,079.9)           | --                                    | 19.9<br>(13.1 to 29.0)               | -8.2<br>(-14.8 to -0.4)                           | -8.1<br>(-15.6 to 1.3)                              |
| Developmental intellectual disability                                               | 98.1<br>(76.4 to 120.2)                 | --                                    | 11.3<br>(8.0 to 15.8)                | -10.8<br>(-14.9 to -5.8)                          | -6.0<br>(-10.6 to -0.9)                             |
| Epilepsy                                                                            | 22.7<br>(14.4 to 32.6)                  | --                                    | 7.3<br>(4.2 to 12.0)                 | -16.5<br>(-49.0 to 30.1)                          | -13.1<br>(-46.9 to 34.6)                            |
| Guillain-Barre syndrome                                                             | $< 0.05$<br>( $< 0.05$ to 0.1)          | --                                    | $< 0.05$<br>( $< 0.05$ to $< 0.05$ ) | 1.7<br>(-3.3 to 8.4)                              | 0.1<br>(0.0 to 0.1)                                 |
| Hearing loss                                                                        | 925.1<br>(884.5 to 969.9)               | --                                    | 28.6<br>(20.1 to 39.1)               | 3.2<br>(0.7 to 5.7)                               | -4.2<br>(-5.9 to -2.4)                              |
| Heart failure                                                                       | 57.6<br>(50.6 to 65.8)                  | --                                    | 5.4<br>(4.0 to 7.1)                  | 12.2<br>(5.4 to 20.1)                             | -0.4<br>(-6.4 to 6.5)                               |
| Infertility                                                                         | 74.4<br>(59.2 to 93.5)                  | --                                    | 0.5<br>(0.2 to 0.9)                  | 18.9<br>(1.2 to 37.9)                             | 14.1<br>(-1.4 to 31.2)                              |
| Pelvic inflammatory disease                                                         | 2.4<br>(2.0 to 2.9)                     | --                                    | 0.3<br>(0.2 to 0.5)                  | -4.9<br>(-20.1 to 11.4)                           | -9.7<br>(-24.2 to 5.9)                              |
| Vision loss                                                                         | 599.9<br>(554.4 to 648.2)               | --                                    | 14.8<br>(10.1 to 21.5)               | -0.2<br>(-4.6 to 4.3)                             | -5.5<br>(-8.8 to -1.6)                              |

We did not calculate incidence for the nine impairments, certain NTDs, and causes with only birth prevalence. Blank cells mean that no estimate is available.

† Incidence for aggregate causes represents the sum of the incidence of the causes below the aggregate.

‡ Incidence estimates for stroke represent first-ever stroke only.

^ Incidence of HIV/AIDS represents new infections of HIV only and does not include new infections of Tuberculosis in HIV positive cases.



SR Table 14: Prevalence, incidence, and YLDs for 2016, percentage change of YLD counts and percentage change of age-standardised YLD rates between 2006 and 2016 by cause and impairments, for all ages, Mongolia.

| Cause                                                                                | Prevalence in thousands (95% UI)       | Incidence in thousands (95% UI)            | YLDs in thousands (95% UI)       |                                                   |                                                     |
|--------------------------------------------------------------------------------------|----------------------------------------|--------------------------------------------|----------------------------------|---------------------------------------------------|-----------------------------------------------------|
|                                                                                      | 2016 counts                            | 2016 counts                                | 2016 counts                      | Percentage change in counts between 2006 and 2016 | Percentage change in age-standardised rates between |
| <b>All causes</b>                                                                    | <b>2,864.5</b><br>(2,850.6 to 2,879.9) | <b>15,442.9†</b><br>(14,644.0 to 16,358.8) | <b>295.0</b><br>(217.0 to 385.7) | <b>23.6</b><br>(20.4 to 26.6)                     | <b>0.6</b><br>(-1.5 to 2.6)                         |
| <b>Communicable, maternal, neonatal, and nutritional disorders</b>                   | <b>1,641.3</b><br>(1,598.2 to 1,687.9) | <b>6,425.5†</b><br>(5,739.1 to 7,229.0)    | <b>33.0</b><br>(23.4 to 44.9)    | <b>11.1</b><br>(4.8 to 17.4)                      | <b>-6.4</b><br>(-11.5 to -1.2)                      |
| <b>HIV/AIDS and tuberculosis</b>                                                     | <b>537.5</b><br>(494.4 to 574.8)       | <b>5.0†</b><br>(4.4 to 5.8)                | <b>0.6</b><br>(0.4 to 0.9)       | <b>-14.1</b><br>(-26.7 to 2.0)                    | <b>-25.9</b><br>(-35.9 to -14.1)                    |
| Tuberculosis                                                                         | 504.8<br>(464.3 to 549.7)              | 5.0†<br>(4.4 to 5.7)                       | 0.6<br>(0.4 to 0.8)              | -16.5<br>(-29.1 to -2.6)                          | -27.8<br>(-37.4 to -16.8)                           |
| Drug-susceptible tuberculosis                                                        | 1.8<br>(1.6 to 2.1)                    | 4.8<br>(4.1 to 5.5)                        | 0.6<br>(0.4 to 0.8)              | -17.8<br>(-31.6 to -1.8)                          | -29.0<br>(-40.4 to -16.6)                           |
| Multidrug-resistant tuberculosis without extensive drug resistance                   | 0.1<br>(< 0.05 to 0.2)                 | 0.2<br>(< 0.05 to 0.5)                     | < 0.05<br>(< 0.05 to 0.1)        | 13.4<br>(-82.2 to 297.7)                          | -2.2<br>(-84.6 to 245.3)                            |
| Extensively drug-resistant tuberculosis                                              | < 0.05<br>(< 0.05 to < 0.05)           | < 0.05<br>(< 0.05 to 0.1)                  | < 0.05<br>(< 0.05 to < 0.05)     | 249.7<br>(-45.2 to 1,126.8)                       | 201.4<br>(-52.6 to 964.6)                           |
| Latent tuberculosis infection                                                        | 502.9<br>(462.2 to 548.0)              | --                                         | --                               | --                                                | --                                                  |
| HIV/AIDS                                                                             | 0.2<br>(< 0.05 to 0.5)                 | < 0.05^<br>(< 0.05 to 0.1)                 | < 0.05<br>(< 0.05 to 0.1)        | 571.7<br>(153.4 to 1,621.0)                       | 470.9<br>(118.3 to 1,400.2)                         |
| Drug-susceptible HIV/AIDS - Tuberculosis                                             | < 0.05<br>(< 0.05 to < 0.05)           | < 0.05<br>(< 0.05 to < 0.05)               | < 0.05<br>(< 0.05 to < 0.05)     | 87.6<br>(59.1 to 123.0)                           | 62.9<br>(38.2 to 93.7)                              |
| Multidrug-resistant HIV/AIDS - Tuberculosis without extensive drug resistance        | < 0.05<br>(< 0.05 to < 0.05)           | < 0.05<br>(< 0.05 to < 0.05)               | < 0.05<br>(< 0.05 to < 0.05)     | 165.5<br>(-58.6 to 822.6)                         | 130.6<br>(-64.0 to 701.3)                           |
| Extensively drug-resistant HIV/AIDS - Tuberculosis                                   | < 0.05<br>(< 0.05 to < 0.05)           | < 0.05<br>(< 0.05 to < 0.05)               | < 0.05<br>(< 0.05 to < 0.05)     | 718.4<br>(27.5 to 2,743.5)                        | 610.7<br>(10.8 to 2,369.7)                          |
| HIV/AIDS resulting in other diseases                                                 | 0.2<br>(< 0.05 to 0.5)                 | < 0.05<br>(< 0.05 to 0.1)                  | < 0.05<br>(< 0.05 to 0.1)        | 729.6<br>(176.5 to 2,610.5)                       | 600.0<br>(126.7 to 2,376.1)                         |
| <b>Diarrhoea, lower respiratory infections, and other common infectious diseases</b> | <b>121.9</b><br>(113.8 to 130.4)       | <b>5,844.0†</b><br>(5,163.6 to 6,659.1)    | <b>6.2</b><br>(4.3 to 8.7)       | <b>20.1</b><br>(15.4 to 24.9)                     | <b>-1.0</b><br>(-4.4 to 2.4)                        |
| Diarrhoeal diseases                                                                  | 21.2<br>(19.5 to 23.1)                 | 1,364.3<br>(1,262.9 to 1,485.2)            | 2.4<br>(1.7 to 3.4)              | 36.9<br>(27.4 to 47.9)                            | 8.1<br>(1.3 to 16.1)                                |
| Intestinal infectious diseases                                                       | < 0.05<br>(< 0.05 to < 0.05)           | < 0.05†<br>(< 0.05 to < 0.05)              | < 0.05<br>(< 0.05 to < 0.05)     | 12.5<br>(-3.9 to 30.7)                            | -11.2<br>(-22.8 to 0.8)                             |
| Typhoid fever                                                                        | < 0.05<br>(< 0.05 to < 0.05)           | < 0.05<br>(< 0.05 to < 0.05)               | < 0.05<br>(< 0.05 to < 0.05)     | 10.1<br>(-6.5 to 29.3)                            | -12.9<br>(-25.0 to -0.5)                            |
| Paratyphoid fever                                                                    | < 0.05<br>(< 0.05 to < 0.05)           | < 0.05<br>(< 0.05 to < 0.05)               | < 0.05<br>(< 0.05 to < 0.05)     | 75.9<br>(37.3 to 130.2)                           | 43.0<br>(15.7 to 80.5)                              |
| Other intestinal infectious diseases                                                 | --                                     | --                                         | < 0.05<br>(< 0.05 to < 0.05)     | -9.1<br>(-34.6 to 27.4)                           | -34.8<br>(-48.9 to -15.8)                           |
| Lower respiratory infections                                                         | 3.5<br>(3.2 to 3.9)                    | 154.6<br>(140.4 to 169.8)                  | 0.2<br>(0.1 to 0.3)              | 19.4<br>(6.2 to 34.7)                             | -4.3<br>(-14.1 to 6.6)                              |
| Upper respiratory infections                                                         | 54.0<br>(45.0 to 64.6)                 | 4,016.7<br>(3,327.1 to 4,843.0)            | 1.4<br>(0.8 to 2.1)              | 14.8<br>(6.2 to 24.7)                             | -0.6<br>(-6.9 to 6.6)                               |
| Otitis media                                                                         | 40.8<br>(36.4 to 45.4)                 | 214.7<br>(169.8 to 271.2)                  | 1.2<br>(0.8 to 1.8)              | 3.2<br>(-4.6 to 12.0)                             | -13.9<br>(-20.1 to -7.3)                            |
| Meningitis                                                                           | 6.0<br>(5.3 to 6.7)                    | 1.1<br>(0.9 to 1.3)                        | 0.7<br>(0.5 to 0.9)              | 7.2<br>(-0.1 to 15.8)                             | -7.2<br>(-13.2 to -0.5)                             |
| Pneumococcal meningitis                                                              | 2.7<br>(2.3 to 3.2)                    | 0.2<br>(0.2 to 0.3)                        | 0.3<br>(0.2 to 0.4)              | 6.4<br>(-9.4 to 24.8)                             | -8.1<br>(-20.6 to 7.0)                              |
| H influenzae type B meningitis                                                       | 0.8<br>(0.7 to 1.0)                    | 0.1<br>(0.1 to 0.2)                        | 0.1<br>(0.1 to 0.2)              | 3.4<br>(-2.5 to 8.8)                              | -8.6<br>(-13.8 to -4.2)                             |
| Meningococcal infection                                                              | 1.1<br>(0.9 to 1.4)                    | 0.4<br>(0.3 to 0.4)                        | 0.1<br>(0.1 to 0.2)              | 9.1<br>(4.1 to 14.6)                              | -5.5<br>(-9.7 to -0.9)                              |
| Other meningitis                                                                     | 1.3<br>(1.0 to 1.6)                    | 0.4<br>(0.3 to 0.5)                        | 0.1<br>(0.1 to 0.2)              | 10.6<br>(5.0 to 16.7)                             | -5.9<br>(-10.7 to -1.2)                             |
| Encephalitis                                                                         | 1.7<br>(1.3 to 2.4)                    | 0.8<br>(0.7 to 0.9)                        | 0.2<br>(0.1 to 0.3)              | 13.8<br>(1.1 to 28.1)                             | -4.8<br>(-14.7 to 6.5)                              |
| Diphtheria                                                                           | < 0.05<br>(< 0.05 to < 0.05)           | < 0.05<br>(< 0.05 to < 0.05)               | < 0.05<br>(< 0.05 to < 0.05)     | -11.6<br>(-50.5 to 59.1)                          | -32.5<br>(-61.5 to 18.6)                            |
| Whooping cough                                                                       | 0.5<br>(0.4 to 0.7)                    | 3.8<br>(2.9 to 4.8)                        | < 0.05<br>(< 0.05 to < 0.05)     | 33.3<br>(3.2 to 70.9)                             | -11.1<br>(-31.2 to 14.7)                            |
| Tetanus                                                                              | < 0.05<br>(< 0.05 to < 0.05)           | < 0.05<br>(< 0.05 to < 0.05)               | < 0.05<br>(< 0.05 to < 0.05)     | 8.2<br>(-4.9 to 21.4)                             | -4.9<br>(-16.1 to 6.1)                              |
| Measles                                                                              | 0.6<br>(0.6 to 0.6)                    | 20.9<br>(20.6 to 21.1)                     | 0.1<br>(< 0.05 to 0.1)           | 400,368.6<br>(82,659.5 to 7.4e+79)                | 269,834.8<br>(55,983.6 to 5.3e+79)                  |
| Varicella and herpes zoster                                                          | 2.4<br>(2.2 to 2.6)                    | 67.2<br>(64.2 to 70.2)                     | 0.1<br>(< 0.05 to 0.1)           | 25.9<br>(7.9 to 48.6)                             | -0.1<br>(-12.7 to 14.0)                             |
| <b>Neglected tropical diseases and malaria</b>                                       | <b>37.3</b><br>(33.9 to 42.3)          | <b>0.4†</b><br>(0.1 to 1.2)                | <b>1.3</b><br>(0.8 to 1.9)       | <b>1.8</b><br>(-35.1 to 46.5)                     | <b>-21.4</b><br>(-50.8 to 13.3)                     |
| Malaria                                                                              | --                                     | --                                         | --                               | --                                                | --                                                  |
| Chagas disease                                                                       | --                                     | --                                         | --                               | --                                                | --                                                  |
| Leishmaniasis                                                                        | --                                     | --                                         | --                               | --                                                | --                                                  |
| Visceral leishmaniasis                                                               | --                                     | --                                         | --                               | --                                                | --                                                  |
| Cutaneous and mucocutaneous leishmaniasis                                            | --                                     | --                                         | --                               | --                                                | --                                                  |
| African trypanosomiasis                                                              | --                                     | --                                         | --                               | --                                                | --                                                  |
| Schistosomiasis                                                                      | --                                     | --                                         | --                               | --                                                | --                                                  |
| Cysticercosis                                                                        | 2.5<br>(1.8 to 3.2)                    | --                                         | 0.4<br>(0.2 to 0.7)              | 5.6<br>(-22.4 to 35.1)                            | -17.6<br>(-39.4 to 5.7)                             |
| Cystic echinococcosis                                                                | 1.7<br>(0.4 to 5.7)                    | 0.4<br>(0.1 to 1.2)                        | 0.2<br>(< 0.05 to 0.6)           | -50.5<br>(-92.3 to 165.1)                         | -59.6<br>(-93.1 to 110.2)                           |
| Lymphatic filariasis                                                                 | --                                     | --                                         | --                               | --                                                | --                                                  |
| Onchocerciasis                                                                       | --                                     | --                                         | --                               | --                                                | --                                                  |
| Trachoma                                                                             | --                                     | --                                         | --                               | --                                                | --                                                  |
| Dengue                                                                               | --                                     | --                                         | --                               | --                                                | --                                                  |
| Yellow fever                                                                         | --                                     | --                                         | --                               | --                                                | --                                                  |
| Rabies                                                                               | < 0.05<br>(< 0.05 to < 0.05)           | < 0.05<br>(< 0.05 to < 0.05)               | < 0.05<br>(< 0.05 to < 0.05)     | -35.4<br>(-70.2 to 37.1)                          | -40.8<br>(-71.8 to 17.3)                            |
| Intestinal nematode infections                                                       | 6.5<br>(5.4 to 7.8)                    | --                                         | < 0.05<br>(< 0.05 to < 0.05)     | 38.8<br>(-1.6 to 91.6)                            | 15.6<br>(-17.2 to 60.1)                             |
| Ascariasis                                                                           | 2.2<br>(1.7 to 2.9)                    | --                                         | --                               | --                                                | --                                                  |



| Cause                                                                   | Prevalence in thousands (95% UI)              | Incidence in thousands (95% UI)                | YLDs in thousands (95% UI)              |                                                   |                                                     |
|-------------------------------------------------------------------------|-----------------------------------------------|------------------------------------------------|-----------------------------------------|---------------------------------------------------|-----------------------------------------------------|
|                                                                         | 2016 counts                                   | 2016 counts                                    | 2016 counts                             | Percentage change in counts between 2006 and 2016 | Percentage change in age-standardised rates between |
| Trichuriasis                                                            | 2.3<br>(1.7 to 3.0)                           | --                                             | --                                      | --                                                | --                                                  |
| Hookworm disease                                                        | 2.2<br>(1.7 to 2.8)                           | --                                             | < 0.05<br>(< 0.05 to < 0.05)            | 38.8<br>(-1.6 to 91.6)                            | 15.6<br>(-17.2 to 60.1)                             |
| Food-borne trematodiasis                                                | --                                            | --                                             | --                                      | --                                                | --                                                  |
| Leprosy                                                                 | --                                            | --                                             | --                                      | --                                                | --                                                  |
| Ebola virus disease                                                     | --                                            | --                                             | --                                      | --                                                | --                                                  |
| Zika virus disease                                                      | --                                            | --                                             | --                                      | --                                                | --                                                  |
| Guinea worm disease                                                     | --                                            | --                                             | --                                      | --                                                | --                                                  |
| Other neglected tropical diseases                                       | 25.5<br>(23.0 to 28.3)                        | --                                             | 0.7<br>(0.4 to 1.0)                     | 31.3<br>(12.3 to 53.3)                            | 2.3<br>(-11.9 to 18.8)                              |
| <b>Maternal disorders</b>                                               | <b>3.4</b><br><b>(2.7 to 4.2)</b>             | <b>70.0†</b><br><b>(36.6 to 117.3)</b>         | <b>0.2</b><br><b>(0.1 to 0.3)</b>       | <b>28.7</b><br><b>(-5.5 to 75.0)</b>              | <b>15.8</b><br><b>(-14.8 to 57.6)</b>               |
| Maternal haemorrhage                                                    | 1.0<br>(0.7 to 1.3)                           | 4.6<br>(3.4 to 6.2)                            | < 0.05<br>(< 0.05 to 0.1)               | 49.9<br>(3.5 to 119.2)                            | 36.2<br>(-6.0 to 97.4)                              |
| Maternal sepsis and other pregnancy related infections                  | 1.6<br>(1.1 to 2.2)                           | 11.5<br>(8.5 to 15.1)                          | < 0.05<br>(< 0.05 to 0.1)               | 29.0<br>(-37.1 to 158.4)                          | 18.2<br>(-42.2 to 138.8)                            |
| Maternal hypertensive disorders                                         | 0.6<br>(0.4 to 0.9)                           | 2.5<br>(1.8 to 3.2)                            | < 0.05<br>(< 0.05 to 0.1)               | -1.0<br>(-45.5 to 86.2)                           | -12.2<br>(-51.1 to 63.5)                            |
| Maternal obstructed labour and uterine rupture                          | < 0.05<br>(< 0.05 to < 0.05)                  | 2.1<br>(1.5 to 3.0)                            | < 0.05<br>(< 0.05 to < 0.05)            | 46.7<br>(-21.6 to 181.5)                          | 29.2<br>(-30.4 to 148.8)                            |
| Maternal abortion, miscarriage, and ectopic pregnancy                   | 0.4<br>(0.1 to 0.8)                           | 49.3<br>(16.8 to 95.2)                         | < 0.05<br>(< 0.05 to 0.1)               | 40.9<br>(-25.2 to 167.4)                          | 25.0<br>(-34.3 to 135.8)                            |
| Other maternal disorders                                                | --                                            | --                                             | < 0.05<br>(< 0.05 to < 0.05)            | 21.4<br>(-11.0 to 65.0)                           | 9.9<br>(-19.2 to 49.5)                              |
| <b>Neonatal disorders</b>                                               | <b>36.9</b><br><b>(30.2 to 45.2)</b>          | --                                             | <b>5.7</b><br><b>(3.5 to 9.0)</b>       | <b>16.1</b><br><b>(-2.7 to 39.6)</b>              | <b>-0.1</b><br><b>(-16.3 to 20.3)</b>               |
| Neonatal preterm birth complications                                    | 24.9<br>(19.4 to 33.0)                        | --                                             | 1.9<br>(1.3 to 2.8)                     | 0.5<br>(-21.3 to 25.7)                            | -12.0<br>(-31.1 to 9.5)                             |
| Neonatal encephalopathy due to birth asphyxia and trauma                | 13.0<br>(6.0 to 22.3)                         | --                                             | 2.0<br>(0.3 to 4.4)                     | 23.3<br>(-25.5 to 219.1)                          | 7.5<br>(-35.4 to 169.4)                             |
| Neonatal sepsis and other neonatal infections                           | 2.4<br>(1.1 to 5.1)                           | --                                             | 1.0<br>(0.4 to 2.4)                     | 39.8<br>(6.6 to 268.0)                            | 20.4<br>(-7.3 to 204.3)                             |
| Hemolytic disease and other neonatal jaundice                           | 1.7<br>(1.5 to 2.0)                           | --                                             | 0.5<br>(0.4 to 0.7)                     | 7.2<br>(-7.8 to 24.5)                             | -6.8<br>(-19.3 to 7.8)                              |
| Other neonatal disorders                                                | --                                            | --                                             | 0.2<br>(0.1 to 0.4)                     | 45.9<br>(18.8 to 79.2)                            | -5.6<br>(-23.1 to 16.2)                             |
| <b>Nutritional deficiencies</b>                                         | <b>613.2</b><br><b>(574.0 to 644.1)</b>       | <b>15.6†</b><br><b>(12.6 to 19.1)</b>          | <b>17.0</b><br><b>(11.2 to 24.5)</b>    | <b>9.2</b><br><b>(1.0 to 18.2)</b>                | <b>-7.6</b><br><b>(-13.9 to -0.7)</b>               |
| Protein-energy malnutrition                                             | 9.3<br>(7.0 to 12.6)                          | 3.5<br>(2.6 to 4.7)                            | 0.5<br>(0.3 to 0.8)                     | 14.8<br>(-26.4 to 81.9)                           | -25.4<br>(-52.4 to 19.1)                            |
| Iodine deficiency                                                       | 53.9<br>(47.4 to 61.1)                        | 1.3<br>(1.1 to 1.4)                            | 1.3<br>(0.8 to 1.9)                     | 9.9<br>(-1.7 to 22.9)                             | -5.6<br>(-15.0 to 4.1)                              |
| Vitamin A deficiency                                                    | 13.1<br>(9.6 to 17.1)                         | 10.8<br>(8.0 to 14.1)                          | 0.1<br>(0.1 to 0.2)                     | 20.7<br>(3.0 to 40.5)                             | -1.5<br>(-14.4 to 13.0)                             |
| Iron-deficiency anaemia                                                 | 551.9<br>(512.8 to 591.6)                     | --                                             | 15.0<br>(9.9 to 21.8)                   | 8.9<br>(-0.2 to 18.6)                             | -7.2<br>(-14.5 to 0.7)                              |
| Other nutritional deficiencies                                          | --                                            | --                                             | < 0.05<br>(< 0.05 to < 0.05)            | 13.3<br>(-29.7 to 83.6)                           | -26.6<br>(-54.5 to 20.3)                            |
| <b>Other communicable, maternal, neonatal, and nutritional diseases</b> | <b>829.1</b><br><b>(785.3 to 875.8)</b>       | <b>490.4</b><br><b>(440.0 to 543.9)</b>        | <b>1.9</b><br><b>(1.2 to 2.8)</b>       | <b>9.2</b><br><b>(2.2 to 16.9)</b>                | <b>-5.7</b><br><b>(-11.3 to 0.6)</b>                |
| Sexually transmitted diseases excluding HIV                             | 448.1<br>(421.6 to 480.5)                     | 316.7<br>(278.6 to 360.7)                      | 1.2<br>(0.7 to 1.9)                     | 9.9<br>(2.2 to 18.3)                              | -4.0<br>(-10.1 to 2.6)                              |
| Syphilis                                                                | 34.1<br>(29.2 to 38.9)                        | 26.1<br>(20.9 to 31.8)                         | 0.1<br>(0.1 to 0.1)                     | 41.7<br>(23.5 to 63.0)                            | 2.4<br>(-12.0 to 20.6)                              |
| Chlamydial infection                                                    | 58.5<br>(45.5 to 73.6)                        | 46.5<br>(35.9 to 58.9)                         | 0.3<br>(0.2 to 0.5)                     | 11.4<br>(-3.1 to 26.8)                            | -5.1<br>(-16.9 to 7.9)                              |
| Gonococcal infection                                                    | 40.7<br>(32.6 to 52.1)                        | 135.9<br>(103.9 to 175.9)                      | 0.2<br>(0.1 to 0.4)                     | -1.5<br>(-15.5 to 14.9)                           | -4.7<br>(-17.2 to 9.8)                              |
| Trichomoniasis                                                          | 83.5<br>(71.0 to 96.6)                        | 71.9<br>(60.3 to 84.1)                         | 0.1<br>(< 0.05 to 0.2)                  | 15.5<br>(5.5 to 25.6)                             | -2.5<br>(-9.7 to 4.6)                               |
| Genital herpes                                                          | 263.4<br>(226.8 to 307.4)                     | 18.9<br>(16.0 to 22.9)                         | 0.1<br>(< 0.05 to 0.1)                  | 26.7<br>(18.1 to 35.2)                            | -0.1<br>(-5.5 to 5.8)                               |
| Other sexually transmitted diseases                                     | 14.9<br>(11.7 to 18.7)                        | 17.4<br>(14.3 to 21.0)                         | 0.4<br>(0.2 to 0.6)                     | 6.5<br>(-4.0 to 18.0)                             | -6.4<br>(-15.6 to 3.4)                              |
| Hepatitis                                                               | 447.2<br>(395.5 to 507.6)                     | 173.7<br>(136.3 to 205.9)                      | 0.1<br>(0.1 to 0.2)                     | -34.9<br>(-49.4 to -18.2)                         | -38.2<br>(-51.7 to -22.5)                           |
| Acute hepatitis A                                                       | 8.3<br>(5.7 to 10.2)                          | 107.6<br>(73.7 to 132.7)                       | 0.1<br>(< 0.05 to 0.1)                  | -38.9<br>(-56.8 to -13.4)                         | -41.0<br>(-58.4 to -16.6)                           |
| Hepatitis B                                                             | 234.1<br>(191.6 to 286.2)                     | 51.9<br>(36.6 to 73.1)                         | < 0.05<br>(< 0.05 to 0.1)               | -33.4<br>(-52.6 to -6.9)                          | -36.3<br>(-53.6 to -11.8)                           |
| Hepatitis C                                                             | 204.6<br>(179.8 to 231.2)                     | 10.4<br>(9.1 to 11.8)                          | < 0.05<br>(< 0.05 to < 0.05)            | 23.0<br>(-19.7 to 93.5)                           | -14.9<br>(-42.6 to 34.3)                            |
| Acute hepatitis E                                                       | 0.3<br>(0.2 to 0.4)                           | 3.9<br>(3.2 to 4.7)                            | < 0.05<br>(< 0.05 to < 0.05)            | -44.2<br>(-64.9 to -13.3)                         | -40.2<br>(-63.3 to -8.2)                            |
| Other infectious diseases                                               | 20.8<br>(18.9 to 22.9)                        | < 0.05<br>(< 0.05 to < 0.05)                   | 0.6<br>(0.4 to 0.8)                     | 28.0<br>(11.2 to 48.3)                            | 3.9<br>(-9.0 to 19.4)                               |
| <b>Non-communicable diseases</b>                                        | <b>2,701.6</b><br><b>(2,680.7 to 2,725.4)</b> | <b>8,616.3†</b><br><b>(8,201.5 to 9,093.6)</b> | <b>229.4</b><br><b>(169.1 to 298.3)</b> | <b>23.2</b><br><b>(19.4 to 26.9)</b>              | <b>-0.3</b><br><b>(-2.8 to 2.2)</b>                 |
| <b>Neoplasms</b>                                                        | <b>7.6</b><br><b>(7.1 to 8.1)</b>             | <b>5.9</b><br><b>(5.3 to 6.3)</b>              | <b>1.4</b><br><b>(1.0 to 1.8)</b>       | <b>35.4</b><br><b>(23.4 to 48.5)</b>              | <b>-4.9</b><br><b>(-13.0 to 3.6)</b>                |
| Lip and oral cavity cancer                                              | 0.3<br>(0.2 to 0.3)                           | 0.1<br>(0.1 to 0.1)                            | < 0.05<br>(< 0.05 to < 0.05)            | 30.3<br>(7.9 to 54.7)                             | -8.4<br>(-24.8 to 10.9)                             |
| Nasopharynx cancer                                                      | < 0.05<br>(< 0.05 to < 0.05)                  | < 0.05<br>(< 0.05 to < 0.05)                   | < 0.05<br>(< 0.05 to < 0.05)            | 34.9<br>(5.5 to 69.7)                             | -3.9<br>(-23.9 to 18.5)                             |
| Other pharynx cancer                                                    | < 0.05<br>(< 0.05 to < 0.05)                  | < 0.05<br>(< 0.05 to < 0.05)                   | < 0.05<br>(< 0.05 to < 0.05)            | 40.1<br>(14.5 to 69.8)                            | -2.9<br>(-20.5 to 18.5)                             |
| Oesophageal cancer                                                      | 0.3<br>(0.3 to 0.4)                           | 0.3<br>(0.3 to 0.4)                            | 0.1<br>(0.1 to 0.1)                     | 31.0<br>(9.4 to 56.7)                             | -9.2<br>(-25.0 to 9.1)                              |
| Stomach cancer                                                          | 1.1<br>(1.0 to 1.1)                           | 0.7<br>(0.7 to 0.8)                            | 0.2<br>(0.1 to 0.2)                     | 13.6<br>(-2.6 to 32.1)                            | -21.5<br>(-31.9 to -9.3)                            |
| Colon and rectum cancer                                                 | 0.5<br>(0.5 to 0.6)                           | 0.2<br>(0.1 to 0.2)                            | 0.1<br>(< 0.05 to 0.1)                  | 40.6<br>(15.9 to 75.2)                            | -1.9<br>(-19.9 to 24.5)                             |
| Liver cancer                                                            | 1.4<br>(1.2 to 1.6)                           | 1.9<br>(1.5 to 2.2)                            | 0.4<br>(0.2 to 0.5)                     | 60.3<br>(31.1 to 93.7)                            | 9.8<br>(-9.9 to 31.3)                               |
| Liver cancer due to hepatitis B                                         | 0.5<br>(0.4 to 0.6)                           | 0.5<br>(0.4 to 0.7)                            | 0.1<br>(0.1 to 0.1)                     | 59.6<br>(23.4 to 103.7)                           | 9.0<br>(-15.6 to 36.7)                              |

| Cause                                              | Prevalence in thousands (95% UI)        | Incidence in thousands (95% UI)       | YLDs in thousands (95% UI)           |                                                   |                                                     |
|----------------------------------------------------|-----------------------------------------|---------------------------------------|--------------------------------------|---------------------------------------------------|-----------------------------------------------------|
|                                                    | 2016 counts                             | 2016 counts                           | 2016 counts                          | Percentage change in counts between 2006 and 2016 | Percentage change in age-standardised rates between |
| Liver cancer due to hepatitis C                    | 0.6<br>(0.4 to 0.7)                     | 0.7<br>(0.5 to 0.8)                   | 0.1<br>(0.1 to 0.2)                  | 59.3<br>(26.1 to 98.5)                            | 8.9<br>(-13.5 to 35.1)                              |
| Liver cancer due to alcohol use                    | 0.3<br>(0.2 to 0.4)                     | 0.4<br>(0.3 to 0.5)                   | 0.1<br>( $< 0.05$ to 0.1)            | 68.6<br>(29.3 to 120.3)                           | 15.9<br>(-12.0 to 50.9)                             |
| Liver cancer due to other causes                   | 0.2<br>(0.2 to 0.3)                     | 0.3<br>(0.2 to 0.3)                   | 0.1<br>( $< 0.05$ to 0.1)            | 53.1<br>(19.6 to 94.3)                            | 5.2<br>(-17.7 to 31.7)                              |
| Gallbladder and biliary tract cancer               | $< 0.05$<br>( $< 0.05$ to $< 0.05$ )    | $< 0.05$<br>( $< 0.05$ to 0.1)        | $< 0.05$<br>( $< 0.05$ to $< 0.05$ ) | 29.4<br>(7.5 to 55.0)                             | -10.2<br>(-25.8 to 6.9)                             |
| Pancreatic cancer                                  | 0.1<br>(0.1 to 0.1)                     | 0.1<br>(0.1 to 0.1)                   | $< 0.05$<br>( $< 0.05$ to $< 0.05$ ) | 58.2<br>(37.4 to 77.6)                            | 4.7<br>(-9.1 to 17.7)                               |
| Larynx cancer                                      | 0.1<br>(0.1 to 0.1)                     | $< 0.05$<br>( $< 0.05$ to $< 0.05$ )  | $< 0.05$<br>( $< 0.05$ to $< 0.05$ ) | 37.1<br>(10.9 to 69.9)                            | -2.6<br>(-23.1 to 24.5)                             |
| Tracheal, bronchus, and lung cancer                | 0.5<br>(0.4 to 0.5)                     | 0.5<br>(0.4 to 0.5)                   | 0.1<br>(0.1 to 0.1)                  | 32.6<br>(6.2 to 66.0)                             | -7.4<br>(-24.9 to 13.8)                             |
| Malignant skin melanoma                            | $< 0.05$<br>( $< 0.05$ to $< 0.05$ )    | $< 0.05$<br>( $< 0.05$ to $< 0.05$ )  | $< 0.05$<br>( $< 0.05$ to $< 0.05$ ) | 52.6<br>(27.2 to 73.0)                            | 9.7<br>(-9.3 to 24.0)                               |
| Non-melanoma skin cancer                           | 0.4<br>(0.3 to 0.7)                     | 0.7<br>(0.5 to 1.1)                   | $< 0.05$<br>( $< 0.05$ to $< 0.05$ ) | 20.0<br>(-36.2 to 112.2)                          | -17.8<br>(-59.0 to 49.3)                            |
| Non-melanoma skin cancer (squamous-cell carcinoma) | 0.4<br>(0.2 to 0.7)                     | 0.3<br>(0.2 to 0.5)                   | $< 0.05$<br>( $< 0.05$ to $< 0.05$ ) | 19.1<br>(-37.5 to 115.5)                          | -18.3<br>(-60.1 to 50.1)                            |
| Non-melanoma skin cancer (basal-cell carcinoma)    | 0.1<br>( $< 0.05$ to 0.1)               | 0.4<br>(0.2 to 0.7)                   | $< 0.05$<br>( $< 0.05$ to $< 0.05$ ) | 48.6<br>(14.8 to 87.6)                            | 2.4<br>(-25.0 to 36.6)                              |
| Breast cancer                                      | 1.0<br>(0.8 to 1.2)                     | 0.2<br>(0.2 to 0.2)                   | 0.1<br>(0.1 to 0.1)                  | 32.5<br>(-1.3 to 81.9)                            | -6.8<br>(-29.4 to 24.9)                             |
| Cervical cancer                                    | 1.1<br>(0.9 to 1.4)                     | 0.3<br>(0.2 to 0.4)                   | 0.1<br>(0.1 to 0.1)                  | 17.0<br>(-10.8 to 67.4)                           | -15.9<br>(-35.4 to 21.4)                            |
| Uterine cancer                                     | 0.4<br>(0.4 to 0.5)                     | 0.1<br>(0.1 to 0.1)                   | $< 0.05$<br>( $< 0.05$ to $< 0.05$ ) | 36.3<br>(3.7 to 90.4)                             | -2.2<br>(-23.8 to 34.4)                             |
| Ovarian cancer                                     | 0.2<br>(0.2 to 0.2)                     | 0.1<br>(0.1 to 0.1)                   | $< 0.05$<br>( $< 0.05$ to $< 0.05$ ) | 48.1<br>(9.7 to 92.0)                             | 5.1<br>(-23.5 to 43.0)                              |
| Prostate cancer                                    | 0.2<br>(0.1 to 0.2)                     | 0.1<br>( $< 0.05$ to 0.1)             | $< 0.05$<br>( $< 0.05$ to $< 0.05$ ) | 44.3<br>(8.7 to 89.1)                             | -0.4<br>(-23.8 to 29.7)                             |
| Testicular cancer                                  | $< 0.05$<br>( $< 0.05$ to $< 0.05$ )    | $< 0.05$<br>( $< 0.05$ to $< 0.05$ )  | $< 0.05$<br>( $< 0.05$ to $< 0.05$ ) | 12.7<br>(-13.6 to 49.8)                           | -8.1<br>(-28.3 to 20.1)                             |
| Kidney cancer                                      | 0.3<br>(0.3 to 0.4)                     | 0.1<br>(0.1 to 0.1)                   | $< 0.05$<br>( $< 0.05$ to $< 0.05$ ) | 57.7<br>(30.2 to 89.2)                            | 12.1<br>(-7.6 to 31.8)                              |
| Bladder cancer                                     | 0.1<br>(0.1 to 0.1)                     | $< 0.05$<br>( $< 0.05$ to $< 0.05$ )  | $< 0.05$<br>( $< 0.05$ to $< 0.05$ ) | 36.0<br>(13.8 to 63.4)                            | -5.3<br>(-21.3 to 14.2)                             |
| Brain and nervous system cancer                    | 0.2<br>(0.1 to 0.2)                     | 0.1<br>(0.1 to 0.1)                   | $< 0.05$<br>( $< 0.05$ to $< 0.05$ ) | 34.5<br>(13.7 to 59.3)                            | -0.6<br>(-16.0 to 17.4)                             |
| Thyroid cancer                                     | 0.1<br>(0.1 to 0.2)                     | $< 0.05$<br>( $< 0.05$ to $< 0.05$ )  | $< 0.05$<br>( $< 0.05$ to $< 0.05$ ) | 55.4<br>(21.4 to 102.7)                           | 5.1<br>(-18.4 to 40.0)                              |
| Mesothelioma                                       | $< 0.05$<br>( $< 0.05$ to $< 0.05$ )    | $< 0.05$<br>( $< 0.05$ to $< 0.05$ )  | $< 0.05$<br>( $< 0.05$ to $< 0.05$ ) | 4.6<br>(-9.7 to 22.5)                             | -29.2<br>(-39.1 to -17.5)                           |
| Hodgkin lymphoma                                   | $< 0.05$<br>( $< 0.05$ to $< 0.05$ )    | $< 0.05$<br>( $< 0.05$ to $< 0.05$ )  | $< 0.05$<br>( $< 0.05$ to $< 0.05$ ) | 4.3<br>(-11.1 to 24.7)                            | -20.6<br>(-30.6 to -7.9)                            |
| Non-Hodgkin's lymphoma                             | 0.2<br>(0.1 to 0.2)                     | 0.1<br>( $< 0.05$ to 0.1)             | $< 0.05$<br>( $< 0.05$ to $< 0.05$ ) | 38.1<br>(21.4 to 57.6)                            | -0.0<br>(-12.5 to 14.1)                             |
| Multiple myeloma                                   | $< 0.05$<br>( $< 0.05$ to $< 0.05$ )    | $< 0.05$<br>( $< 0.05$ to $< 0.05$ )  | $< 0.05$<br>( $< 0.05$ to $< 0.05$ ) | 43.9<br>(23.8 to 66.4)                            | -0.6<br>(-14.5 to 14.7)                             |
| Leukaemia                                          | 0.2<br>(0.2 to 0.3)                     | 0.1<br>(0.1 to 0.1)                   | $< 0.05$<br>( $< 0.05$ to $< 0.05$ ) | 14.3<br>(-1.1 to 34.9)                            | -10.4<br>(-22.4 to 4.5)                             |
| Acute lymphoid leukaemia                           | 0.1<br>(0.1 to 0.1)                     | $< 0.05$<br>( $< 0.05$ to $< 0.05$ )  | $< 0.05$<br>( $< 0.05$ to $< 0.05$ ) | 5.6<br>(-16.9 to 35.0)                            | -10.3<br>(-28.5 to 11.8)                            |
| Chronic lymphoid leukaemia                         | 0.1<br>(0.1 to 0.1)                     | $< 0.05$<br>( $< 0.05$ to $< 0.05$ )  | $< 0.05$<br>( $< 0.05$ to $< 0.05$ ) | 26.8<br>(4.3 to 57.7)                             | -8.7<br>(-24.7 to 12.7)                             |
| Acute myeloid leukaemia                            | $< 0.05$<br>( $< 0.05$ to $< 0.05$ )    | $< 0.05$<br>( $< 0.05$ to $< 0.05$ )  | $< 0.05$<br>( $< 0.05$ to $< 0.05$ ) | 21.2<br>(2.1 to 45.7)                             | -0.7<br>(-15.4 to 16.0)                             |
| Chronic myeloid leukaemia                          | $< 0.05$<br>( $< 0.05$ to $< 0.05$ )    | $< 0.05$<br>( $< 0.05$ to $< 0.05$ )  | $< 0.05$<br>( $< 0.05$ to $< 0.05$ ) | 9.1<br>(-9.7 to 33.6)                             | -18.8<br>(-31.7 to -1.7)                            |
| Other leukaemia                                    | $< 0.05$<br>( $< 0.05$ to $< 0.05$ )    | $< 0.05$<br>( $< 0.05$ to $< 0.05$ )  | $< 0.05$<br>( $< 0.05$ to $< 0.05$ ) | 2.5<br>(-16.9 to 30.4)                            | -17.5<br>(-33.1 to 3.3)                             |
| Other neoplasms                                    | 0.5<br>(0.4 to 0.6)                     | 0.2<br>(0.1 to 0.2)                   | $< 0.05$<br>( $< 0.05$ to 0.1)       | 24.1<br>(3.2 to 44.2)                             | -10.1<br>(-26.5 to 6.1)                             |
| <b>Cardiovascular diseases</b>                     | <b>125.7</b><br><b>(120.2 to 131.1)</b> | <b>14.4†</b><br><b>(13.8 to 15.1)</b> | <b>10.0</b><br><b>(7.3 to 12.9)</b>  | <b>35.3</b><br><b>(30.2 to 40.7)</b>              | <b>-2.9</b><br><b>(-6.4 to 0.8)</b>                 |
| Rheumatic heart disease                            | 0.4<br>(0.4 to 0.5)                     | 0.1<br>(0.1 to 0.1)                   | $< 0.05$<br>( $< 0.05$ to $< 0.05$ ) | 2.2<br>(-15.3 to 24.0)                            | -25.7<br>(-38.3 to -9.4)                            |
| Ischaemic heart disease                            | 46.1<br>(43.4 to 48.7)                  | 5.1<br>(4.8 to 5.4)                   | 2.8<br>(1.9 to 3.8)                  | 36.4<br>(30.0 to 42.9)                            | -2.8<br>(-7.0 to 1.3)                               |
| Cerebrovascular disease                            | 21.6<br>(20.1 to 23.0)                  | 4.5‡<br>(4.2 to 4.8)                  | 4.2<br>(2.9 to 5.3)                  | 33.5<br>(24.1 to 43.2)                            | -5.3<br>(-12.2 to 1.6)                              |
| Ischaemic stroke                                   | 14.3<br>(12.6 to 15.8)                  | 2.0‡<br>(1.8 to 2.2)                  | 2.6<br>(1.9 to 3.4)                  | 39.0<br>(25.5 to 52.7)                            | -1.6<br>(-11.3 to 8.2)                              |
| Hemorrhagic stroke                                 | 8.3<br>(7.5 to 9.2)                     | 2.5‡<br>(2.3 to 2.7)                  | 1.5<br>(1.1 to 2.0)                  | 25.0<br>(13.3 to 38.1)                            | -11.7<br>(-19.5 to -2.9)                            |
| Hypertensive heart disease                         | 5.2<br>(4.4 to 6.2)                     | --                                    | 0.4<br>(0.3 to 0.6)                  | 49.7<br>(35.8 to 65.7)                            | 3.7<br>(-5.5 to 13.3)                               |
| Cardiomyopathy and myocarditis                     | 2.9<br>(2.6 to 3.2)                     | 0.4†<br>(0.4 to 0.5)                  | 0.3<br>(0.2 to 0.4)                  | 30.8<br>(15.0 to 48.6)                            | 2.0<br>(-8.6 to 14.0)                               |
| Myocarditis                                        | 0.8<br>(0.7 to 0.9)                     | 0.4<br>(0.4 to 0.5)                   | 0.1<br>( $< 0.05$ to 0.1)            | 24.8<br>(5.8 to 47.0)                             | 0.9<br>(-14.3 to 18.4)                              |
| Alcoholic cardiomyopathy                           | 0.3<br>(0.2 to 0.4)                     | --                                    | $< 0.05$<br>( $< 0.05$ to $< 0.05$ ) | 45.2<br>(18.8 to 79.2)                            | 2.2<br>(-17.8 to 28.1)                              |
| Other cardiomyopathy                               | 2.2<br>(1.9 to 2.5)                     | --                                    | 0.2<br>(0.1 to 0.3)                  | 31.3<br>(11.5 to 54.8)                            | 2.3<br>(-11.0 to 17.0)                              |
| Atrial fibrillation and flutter                    | 10.2<br>(9.0 to 11.7)                   | 0.9<br>(0.8 to 1.1)                   | 0.8<br>(0.5 to 1.1)                  | 43.2<br>(33.5 to 54.6)                            | 0.2<br>(-5.4 to 6.9)                                |
| Peripheral vascular disease                        | 30.2<br>(25.8 to 35.1)                  | 3.1<br>(2.7 to 3.6)                   | 0.1<br>(0.1 to 0.2)                  | 34.3<br>(22.4 to 46.8)                            | -6.3<br>(-13.9 to 1.9)                              |
| Endocarditis                                       | $< 0.05$<br>( $< 0.05$ to 0.1)          | 0.3<br>(0.2 to 0.3)                   | $< 0.05$<br>( $< 0.05$ to $< 0.05$ ) | 38.5<br>(29.3 to 47.8)                            | 2.6<br>(-6.9 to 12.1)                               |
| Other cardiovascular and circulatory diseases      | 26.0<br>(22.2 to 30.2)                  | --                                    | 1.4<br>(0.9 to 1.9)                  | 32.7<br>(20.9 to 44.8)                            | 1.4<br>(-6.2 to 9.4)                                |
| <b>Chronic respiratory diseases</b>                | <b>190.5</b><br><b>(183.4 to 198.0)</b> | <b>29.6†</b><br><b>(27.9 to 31.6)</b> | <b>7.3</b><br><b>(5.4 to 9.8)</b>    | <b>27.9</b><br><b>(22.4 to 34.5)</b>              | <b>4.8</b><br><b>(0.5 to 9.5)</b>                   |
| Chronic obstructive pulmonary disease              | 59.0<br>(55.9 to 62.2)                  | 3.8<br>(3.6 to 4.0)                   | 1.6<br>(1.2 to 1.9)                  | 38.5<br>(20.8 to 55.7)                            | 0.4<br>(-12.3 to 13.3)                              |
| Pneumoconiosis                                     | 0.2<br>(0.2 to 0.2)                     | $< 0.05$<br>( $< 0.05$ to $< 0.05$ )  | $< 0.05$<br>( $< 0.05$ to $< 0.05$ ) | 73.5<br>(55.4 to 93.9)                            | 19.9<br>(5.0 to 36.7)                               |
| Silicosis                                          | $< 0.05$<br>( $< 0.05$ to $< 0.05$ )    | $< 0.05$<br>( $< 0.05$ to $< 0.05$ )  | $< 0.05$<br>( $< 0.05$ to $< 0.05$ ) | 87.3<br>(77.1 to 97.9)                            | 30.6<br>(24.2 to 37.3)                              |

| Cause                                                          | Prevalence in thousands (95% UI)              | Incidence in thousands (95% UI)          | YLDs in thousands (95% UI)           |                                                   |                                                     |
|----------------------------------------------------------------|-----------------------------------------------|------------------------------------------|--------------------------------------|---------------------------------------------------|-----------------------------------------------------|
|                                                                | 2016 counts                                   | 2016 counts                              | 2016 counts                          | Percentage change in counts between 2006 and 2016 | Percentage change in age-standardised rates between |
| Asbestosis                                                     | < 0.05<br>(< 0.05 to < 0.05)                  | < 0.05<br>(< 0.05 to < 0.05)             | < 0.05<br>(< 0.05 to < 0.05)         | 43.6<br>(35.1 to 52.6)                            | -1.3<br>(-7.0 to 4.3)                               |
| Coal workers pneumoconiosis                                    | < 0.05<br>(< 0.05 to < 0.05)                  | < 0.05<br>(< 0.05 to < 0.05)             | < 0.05<br>(< 0.05 to < 0.05)         | 88.3<br>(71.8 to 108.4)                           | 26.1<br>(15.8 to 38.3)                              |
| Other pneumoconiosis                                           | 0.1<br>(0.1 to 0.1)                           | < 0.05<br>(< 0.05 to < 0.05)             | < 0.05<br>(< 0.05 to < 0.05)         | 81.4<br>(46.5 to 124.6)                           | 25.5<br>(-2.2 to 58.9)                              |
| Asthma                                                         | 132.9<br>(123.8 to 142.8)                     | 25.6<br>(23.9 to 27.5)                   | 5.2<br>(3.4 to 7.5)                  | 25.2<br>(19.4 to 32.5)                            | 6.7<br>(2.2 to 12.0)                                |
| Interstitial lung disease and pulmonary sarcoidosis            | 3.4<br>(3.1 to 3.8)                           | 0.2<br>(0.2 to 0.2)                      | 0.4<br>(0.2 to 0.5)                  | 16.1<br>(-2.2 to 39.8)                            | -5.5<br>(-18.0 to 9.2)                              |
| Other chronic respiratory diseases                             | --                                            | --                                       | 0.2<br>(0.1 to 0.3)                  | 43.4<br>(17.8 to 78.3)                            | 27.7<br>(5.9 to 58.6)                               |
| <b>Cirrhosis and other chronic liver diseases</b>              | <b>23.9</b><br><b>(22.6 to 25.3)</b>          | <b>1.3</b><br><b>(1.3 to 1.4)</b>        | <b>0.9</b><br><b>(0.7 to 1.3)</b>    | <b>32.4</b><br><b>(20.4 to 46.4)</b>              | <b>6.2</b><br><b>(-1.6 to 14.8)</b>                 |
| Cirrhosis and other chronic liver diseases due to hepatitis B  | 7.8<br>(7.2 to 8.6)                           | 0.4<br>(0.4 to 0.5)                      | 0.3<br>(0.2 to 0.4)                  | 41.1<br>(20.2 to 64.9)                            | 6.1<br>(-5.8 to 19.9)                               |
| Cirrhosis and other chronic liver diseases due to hepatitis C  | 4.3<br>(3.8 to 4.9)                           | 0.2<br>(0.2 to 0.3)                      | 0.1<br>(0.1 to 0.2)                  | 38.0<br>(12.8 to 66.9)                            | 1.8<br>(-13.4 to 20.2)                              |
| Cirrhosis and other chronic liver diseases due to alcohol use  | 5.4<br>(4.9 to 6.0)                           | 0.3<br>(0.3 to 0.4)                      | 0.2<br>(0.1 to 0.2)                  | 52.4<br>(27.0 to 84.0)                            | 8.6<br>(-6.4 to 26.4)                               |
| Cirrhosis and other chronic liver diseases due to other causes | 6.4<br>(5.9 to 6.9)                           | 0.3<br>(0.3 to 0.3)                      | 0.4<br>(0.3 to 0.6)                  | 19.3<br>(2.3 to 40.1)                             | 6.9<br>(-7.7 to 23.2)                               |
| <b>Digestive diseases</b>                                      | <b>94.9</b><br><b>(89.6 to 101.0)</b>         | <b>106.8†</b><br><b>(100.3 to 113.8)</b> | <b>3.6</b><br><b>(2.6 to 4.9)</b>    | <b>24.3</b><br><b>(14.8 to 34.8)</b>              | <b>-4.6</b><br><b>(-11.0 to 2.5)</b>                |
| Peptic ulcer disease                                           | 28.4<br>(26.1 to 31.2)                        | 5.5<br>(4.9 to 6.0)                      | 0.7<br>(0.5 to 1.0)                  | 70.3<br>(52.4 to 91.1)                            | 22.9<br>(11.3 to 35.4)                              |
| Gastritis and duodenitis                                       | 37.7<br>(33.0 to 42.6)                        | 31.2<br>(27.7 to 34.9)                   | 0.8<br>(0.5 to 1.1)                  | 55.0<br>(38.7 to 73.0)                            | 19.0<br>(8.1 to 30.5)                               |
| Appendicitis                                                   | 0.6<br>(0.5 to 0.6)                           | 15.3<br>(14.1 to 16.6)                   | 0.2<br>(0.1 to 0.3)                  | -16.4<br>(-35.8 to 8.6)                           | -18.4<br>(-36.8 to 3.9)                             |
| Paralytic ileus and intestinal obstruction                     | < 0.05<br>(< 0.05 to < 0.05)                  | 1.1<br>(1.0 to 1.2)                      | < 0.05<br>(< 0.05 to < 0.05)         | 18.2<br>(13.2 to 23.3)                            | -7.9<br>(-11.3 to -4.7)                             |
| Inguinal, femoral, and abdominal hernia                        | 21.8<br>(19.3 to 24.5)                        | 26.1<br>(22.4 to 30.3)                   | 1.5<br>(1.0 to 2.1)                  | 5.2<br>(-6.0 to 16.7)                             | -21.6<br>(-28.8 to -13.7)                           |
| Inflammatory bowel disease                                     | 0.5<br>(0.5 to 0.6)                           | 1.5<br>(1.4 to 1.6)                      | 0.1<br>(0.1 to 0.1)                  | 38.8<br>(17.7 to 62.8)                            | 10.2<br>(-7.3 to 30.6)                              |
| Vascular intestinal disorders                                  | < 0.05<br>(< 0.05 to < 0.05)                  | 0.1<br>(0.1 to 0.2)                      | < 0.05<br>(< 0.05 to < 0.05)         | 37.1<br>(29.4 to 45.6)                            | 3.7<br>(-0.5 to 7.9)                                |
| Gallbladder and biliary diseases                               | 8.4<br>(7.4 to 9.5)                           | 24.9<br>(21.4 to 28.6)                   | 0.1<br>(0.1 to 0.2)                  | 24.4<br>(0.7 to 52.7)                             | -6.1<br>(-21.2 to 12.3)                             |
| Pancreatitis                                                   | 0.1<br>(0.1 to 0.1)                           | 1.1<br>(1.0 to 1.2)                      | < 0.05<br>(< 0.05 to < 0.05)         | 57.9<br>(50.5 to 65.8)                            | 18.7<br>(14.0 to 23.2)                              |
| Other digestive diseases                                       | --                                            | --                                       | 0.3<br>(0.2 to 0.4)                  | 27.9<br>(16.6 to 39.9)                            | -3.1<br>(-10.3 to 4.7)                              |
| <b>Neurological disorders</b>                                  | <b>1,138.0</b><br><b>(1,089.5 to 1,188.6)</b> | <b>540.9</b><br><b>(455.8 to 632.6)</b>  | <b>29.1</b><br><b>(18.8 to 40.8)</b> | <b>17.4</b><br><b>(-6.0 to 46.6)</b>              | <b>0.1</b><br><b>(-18.7 to 23.6)</b>                |
| Alzheimer's disease and other dementias                        | 5.6<br>(4.7 to 6.7)                           | 1.0<br>(0.8 to 1.2)                      | 0.8<br>(0.6 to 1.1)                  | 49.3<br>(40.2 to 58.8)                            | -0.4<br>(-5.2 to 4.7)                               |
| Parkinson's disease                                            | 1.4<br>(1.1 to 1.7)                           | 0.2<br>(0.1 to 0.2)                      | 0.2<br>(0.1 to 0.2)                  | 47.5<br>(31.6 to 66.5)                            | 2.7<br>(-8.3 to 14.4)                               |
| Epilepsy                                                       | 11.1<br>(2.5 to 20.8)                         | 1.3<br>(0.3 to 2.5)                      | 3.8<br>(0.8 to 8.2)                  | 13.1<br>(-79.7 to 556.9)                          | -1.7<br>(-82.6 to 465.4)                            |
| Multiple sclerosis                                             | 0.7<br>(0.6 to 0.8)                           | < 0.05<br>(< 0.05 to < 0.05)             | 0.2<br>(0.1 to 0.3)                  | 47.5<br>(26.4 to 72.9)                            | 16.4<br>(0.9 to 34.9)                               |
| Motor neuron disease                                           | 0.1<br>(0.1 to 0.1)                           | < 0.05<br>(< 0.05 to < 0.05)             | < 0.05<br>(< 0.05 to < 0.05)         | 26.1<br>(19.7 to 32.6)                            | 5.6<br>(1.8 to 9.3)                                 |
| Migraine                                                       | 472.3<br>(442.6 to 503.0)                     | 50.3<br>(47.0 to 53.7)                   | 20.2<br>(12.9 to 28.5)               | 16.1<br>(11.5 to 20.7)                            | -0.2<br>(-3.6 to 3.4)                               |
| Tension-type headache                                          | 845.6<br>(751.8 to 946.2)                     | 488.1<br>(402.9 to 580.6)                | 3.1<br>(2.0 to 4.5)                  | 17.8<br>(11.6 to 24.7)                            | -0.1<br>(-4.8 to 4.9)                               |
| Other neurological disorders                                   | < 0.05<br>(< 0.05 to < 0.05)                  | < 0.05<br>(< 0.05 to < 0.05)             | 0.8<br>(0.2 to 1.8)                  | 35.3<br>(-69.6 to 508.7)                          | 18.3<br>(-70.9 to 367.9)                            |
| <b>Mental and substance use disorders</b>                      | <b>442.9</b><br><b>(426.0 to 460.5)</b>       | <b>192.0†</b><br><b>(178.7 to 208.1)</b> | <b>59.8</b><br><b>(43.5 to 77.5)</b> | <b>18.9</b><br><b>(15.7 to 22.4)</b>              | <b>1.7</b><br><b>(-0.7 to 4.4)</b>                  |
| Schizophrenia                                                  | 6.2<br>(5.4 to 7.1)                           | 0.4<br>(0.4 to 0.5)                      | 4.0<br>(2.9 to 5.1)                  | 30.8<br>(18.6 to 43.2)                            | 2.4<br>(-6.0 to 11.4)                               |
| Alcohol use disorders                                          | 105.2<br>(91.8 to 119.3)                      | 50.3<br>(42.5 to 58.6)                   | 10.6<br>(7.1 to 14.4)                | 35.8<br>(23.7 to 49.1)                            | 10.2<br>(1.0 to 20.2)                               |
| Drug use disorders                                             | 20.7<br>(19.2 to 22.4)                        | 2.9<br>(2.7 to 3.2)                      | 4.4<br>(3.1 to 5.8)                  | 26.6<br>(14.9 to 40.4)                            | 9.0<br>(-0.3 to 19.2)                               |
| Opioid use disorders                                           | 7.3<br>(6.1 to 8.6)                           | 1.1<br>(0.9 to 1.3)                      | 3.0<br>(2.0 to 4.1)                  | 31.4<br>(16.0 to 49.3)                            | 9.4<br>(-2.2 to 22.6)                               |
| Cocaine use disorders                                          | 2.2<br>(1.9 to 2.5)                           | 0.2<br>(0.1 to 0.2)                      | 0.3<br>(0.2 to 0.5)                  | 21.0<br>(-6.9 to 54.2)                            | 8.1<br>(-13.6 to 34.9)                              |
| Amphetamine use disorders                                      | 2.3<br>(1.6 to 3.2)                           | 0.2<br>(0.1 to 0.3)                      | 0.3<br>(0.2 to 0.5)                  | 14.6<br>(-13.2 to 52.2)                           | 10.5<br>(-15.9 to 45.7)                             |
| Cannabis use disorders                                         | 7.7<br>(6.3 to 9.2)                           | 1.2<br>(1.0 to 1.4)                      | 0.2<br>(0.1 to 0.3)                  | 2.1<br>(-15.4 to 23.5)                            | 0.0<br>(-15.8 to 19.1)                              |
| Other drug use disorders                                       | 1.7<br>(1.5 to 1.9)                           | 0.3<br>(0.3 to 0.4)                      | 0.6<br>(0.4 to 0.8)                  | 24.3<br>(-2.0 to 59.4)                            | 10.8<br>(-11.7 to 40.4)                             |
| Depressive disorders                                           | 100.9<br>(94.2 to 108.0)                      | 110.7<br>(99.7 to 123.0)                 | 17.5<br>(12.0 to 24.1)               | 16.6<br>(10.8 to 23.0)                            | -2.0<br>(-6.0 to 2.7)                               |
| Major depressive disorder                                      | 69.9<br>(63.0 to 77.9)                        | 104.9<br>(93.7 to 117.2)                 | 14.3<br>(9.8 to 19.5)                | 15.1<br>(8.2 to 22.8)                             | -2.4<br>(-7.4 to 3.1)                               |
| Dysthymia                                                      | 33.1<br>(28.8 to 38.2)                        | 5.8<br>(5.0 to 6.7)                      | 3.2<br>(2.1 to 4.7)                  | 24.2<br>(18.4 to 30.3)                            | -0.0<br>(-3.4 to 3.6)                               |
| Bipolar disorder                                               | 17.9<br>(15.4 to 20.8)                        | 1.5<br>(1.3 to 1.8)                      | 3.7<br>(2.3 to 5.4)                  | 13.9<br>(5.5 to 23.1)                             | 0.1<br>(-6.2 to 6.7)                                |
| Anxiety disorders                                              | 74.5<br>(67.8 to 82.2)                        | 13.3<br>(12.2 to 14.5)                   | 7.2<br>(5.0 to 9.8)                  | 17.4<br>(8.4 to 27.2)                             | 2.6<br>(-5.0 to 10.6)                               |
| Eating disorders                                               | 3.5<br>(2.8 to 4.3)                           | 1.9<br>(1.4 to 2.5)                      | 0.7<br>(0.4 to 1.0)                  | 28.7<br>(10.4 to 51.1)                            | 24.5<br>(7.8 to 44.0)                               |
| Anorexia nervosa                                               | 0.8<br>(0.5 to 1.0)                           | 0.3<br>(0.2 to 0.4)                      | 0.2<br>(0.1 to 0.2)                  | 14.8<br>(-13.0 to 54.3)                           | 19.3<br>(-9.7 to 58.0)                              |
| Bulimia nervosa                                                | 2.6<br>(1.9 to 3.5)                           | 1.6<br>(1.1 to 2.2)                      | 0.5<br>(0.3 to 0.8)                  | 33.5<br>(12.3 to 60.0)                            | 26.2<br>(7.2 to 50.6)                               |
| Autistic spectrum disorders                                    | 25.3<br>(22.6 to 28.5)                        | 0.2<br>(0.1 to 0.3)                      | 3.7<br>(2.5 to 5.2)                  | 14.5<br>(8.9 to 20.6)                             | -0.1<br>(-5.1 to 4.9)                               |
| Autism                                                         | 7.3<br>(6.3 to 8.5)                           | < 0.05<br>(< 0.05 to < 0.05)             | 1.9<br>(1.2 to 2.7)                  | 14.0<br>(4.2 to 25.0)                             | -0.0<br>(-8.6 to 8.4)                               |
| Asperger syndrome and other autistic spectrum disorders        | 17.9<br>(14.9 to 21.6)                        | 0.2<br>(0.1 to 0.3)                      | 1.8<br>(1.2 to 2.6)                  | 15.0<br>(8.9 to 20.6)                             | -0.3<br>(-5.3 to 4.1)                               |



| Cause                                                      | Prevalence in thousands (95% UI)        | Incidence in thousands (95% UI)          | YLDs in thousands (95% UI)     |                                                   |                                                     |
|------------------------------------------------------------|-----------------------------------------|------------------------------------------|--------------------------------|---------------------------------------------------|-----------------------------------------------------|
|                                                            | 2016 counts                             | 2016 counts                              | 2016 counts                    | Percentage change in counts between 2006 and 2016 | Percentage change in age-standardised rates between |
| Attention-deficit/hyperactivity disorder                   | 24.3<br>(21.9 to 27.2)                  | 1.3<br>(1.1 to 1.5)                      | 0.3<br>(0.2 to 0.5)            | 2.9<br>(-5.6 to 12.0)                             | 0.1<br>(-7.8 to 8.8)                                |
| Conduct disorder                                           | 21.3<br>(17.6 to 25.2)                  | 7.5<br>(6.0 to 9.0)                      | 2.6<br>(1.6 to 4.0)            | -15.0<br>(-20.4 to -8.9)                          | -0.2<br>(-6.3 to 6.4)                               |
| Idiopathic developmental intellectual disability           | 28.8<br>(14.3 to 43.3)                  | --                                       | 1.1<br>(0.5 to 2.0)            | -8.4<br>(-18.6 to -1.0)                           | -17.1<br>(-25.8 to -10.5)                           |
| Other mental and substance use disorders                   | 54.8<br>(48.1 to 63.3)                  | 1.9<br>(1.7 to 2.1)                      | 4.1<br>(2.8 to 5.9)            | 23.9<br>(17.3 to 31.1)                            | -0.2<br>(-5.1 to 4.6)                               |
| <b>Diabetes, urogenital, blood, and endocrine diseases</b> | <b>875.6<br/>(855.5 to 893.9)</b>       | <b>438.6†<br/>(408.1 to 474.0)</b>       | <b>18.8<br/>(13.5 to 25.5)</b> | <b>28.9<br/>(24.4 to 33.6)</b>                    | <b>-1.0<br/>(-4.1 to 2.2)</b>                       |
| Diabetes mellitus                                          | 49.4<br>(43.7 to 55.9)                  | 3.0<br>(2.7 to 3.5)                      | 4.1<br>(2.8 to 5.8)            | 50.3<br>(40.4 to 61.8)                            | 6.8<br>(-0.3 to 14.5)                               |
| Acute glomerulonephritis                                   | 0.1<br>(< 0.05 to 0.1)                  | 0.8<br>(0.7 to 0.9)                      | < 0.05<br>(< 0.05 to < 0.05)   | 20.2<br>(14.0 to 27.2)                            | 0.5<br>(-3.8 to 4.6)                                |
| Chronic kidney disease                                     | 140.4<br>(126.8 to 154.9)               | 11.1<br>(9.7 to 12.6)                    | 4.5<br>(3.3 to 5.9)            | 24.8<br>(17.1 to 33.6)                            | -6.8<br>(-12.0 to -1.4)                             |
| Chronic kidney disease due to diabetes mellitus            | 57.2<br>(49.1 to 66.6)                  | 4.5<br>(3.7 to 5.4)                      | 1.8<br>(1.2 to 2.3)            | 29.9<br>(18.9 to 42.6)                            | -7.8<br>(-14.3 to -0.8)                             |
| Chronic kidney disease due to hypertension                 | 21.8<br>(18.6 to 25.2)                  | 2.8<br>(2.3 to 3.3)                      | 0.3<br>(0.2 to 0.4)            | 30.2<br>(15.9 to 46.5)                            | -7.6<br>(-17.2 to 3.6)                              |
| Chronic kidney disease due to glomerulonephritis           | 22.9<br>(19.4 to 26.4)                  | 0.8<br>(0.6 to 1.0)                      | 1.2<br>(0.8 to 1.6)            | 18.2<br>(5.9 to 31.4)                             | -6.7<br>(-14.3 to 1.7)                              |
| Chronic kidney disease due to other causes                 | 38.5<br>(32.1 to 45.9)                  | 3.1<br>(2.6 to 3.7)                      | 1.3<br>(0.9 to 1.7)            | 23.4<br>(12.1 to 36.4)                            | -5.1<br>(-12.0 to 2.2)                              |
| Urinary diseases and male infertility                      | 46.9<br>(41.6 to 52.2)                  | 286.9†<br>(257.7 to 320.3)               | 1.3<br>(0.8 to 1.9)            | 30.2<br>(22.0 to 38.4)                            | -6.4<br>(-12.1 to -1.4)                             |
| Interstitial nephritis and urinary tract infections        | 4.9<br>(4.3 to 5.5)                     | 251.2<br>(223.3 to 283.9)                | 0.2<br>(0.1 to 0.2)            | 11.4<br>(-1.7 to 26.7)                            | -4.5<br>(-15.1 to 7.2)                              |
| Urolithiasis                                               | 1.2<br>(1.1 to 1.4)                     | 32.0<br>(28.1 to 36.6)                   | 0.1<br>(0.1 to 0.1)            | 31.7<br>(13.1 to 52.1)                            | 2.6<br>(-12.9 to 20.7)                              |
| Benign prostatic hyperplasia                               | 26.6<br>(22.4 to 31.6)                  | 3.7<br>(3.1 to 4.4)                      | 0.9<br>(0.6 to 1.3)            | 41.0<br>(29.4 to 52.3)                            | -6.5<br>(-13.7 to -0.0)                             |
| Male infertility                                           | 12.3<br>(9.3 to 16.2)                   | --                                       | 0.1<br>(< 0.05 to 0.1)         | 15.6<br>(5.8 to 26.0)                             | 0.0<br>(-7.9 to 8.5)                                |
| Other urinary diseases                                     | --                                      | --                                       | 0.1<br>(0.1 to 0.1)            | -2.0<br>(-11.5 to 8.6)                            | -18.9<br>(-26.3 to -10.6)                           |
| Gynecological diseases                                     | 340.2<br>(325.0 to 357.5)               | 130.0†<br>(120.7 to 140.5)               | 4.4<br>(3.0 to 6.4)            | 19.0<br>(13.4 to 24.6)                            | -0.8<br>(-5.0 to 3.4)                               |
| Uterine fibroids                                           | 44.5<br>(39.0 to 50.3)                  | 5.2<br>(4.4 to 6.0)                      | 0.7<br>(0.4 to 1.1)            | 26.9<br>(17.1 to 36.1)                            | -4.2<br>(-11.2 to 2.1)                              |
| Polycystic ovarian syndrome                                | 3.5<br>(2.6 to 4.6)                     | 1.2<br>(0.9 to 1.6)                      | < 0.05<br>(< 0.05 to 0.1)      | 13.3<br>(0.2 to 29.7)                             | -0.8<br>(-12.0 to 12.7)                             |
| Female infertility                                         | 5.5<br>(2.1 to 10.8)                    | --                                       | < 0.05<br>(< 0.05 to 0.1)      | 15.1<br>(-15.5 to 46.4)                           | 2.4<br>(-21.0 to 29.2)                              |
| Endometriosis                                              | 1.5<br>(1.2 to 1.8)                     | 4.4<br>(3.5 to 5.7)                      | 0.1<br>(0.1 to 0.2)            | 12.9<br>(-15.4 to 49.6)                           | 0.3<br>(-25.3 to 31.4)                              |
| Genital prolapse                                           | 85.4<br>(74.4 to 98.0)                  | 6.5<br>(5.5 to 7.6)                      | 0.3<br>(0.1 to 0.5)            | 72.6<br>(57.6 to 90.8)                            | 21.2<br>(10.1 to 34.5)                              |
| Premenstrual syndrome                                      | 198.1<br>(185.6 to 210.1)               | 70.0<br>(64.8 to 75.2)                   | 1.7<br>(1.0 to 2.6)            | 10.1<br>(2.1 to 18.4)                             | -2.8<br>(-9.5 to 4.4)                               |
| Other gynecological diseases                               | 47.2<br>(40.7 to 54.7)                  | 42.8<br>(35.4 to 51.3)                   | 1.6<br>(1.1 to 2.3)            | 20.4<br>(10.8 to 30.0)                            | -1.7<br>(-9.4 to 5.7)                               |
| Hemoglobinopathies and hemolytic anaemias                  | 413.1<br>(396.8 to 428.9)               | --                                       | 2.8<br>(1.8 to 4.0)            | 27.1<br>(13.8 to 41.2)                            | 3.7<br>(-5.8 to 14.6)                               |
| Thalassemias                                               | 0.1<br>(< 0.05 to 0.1)                  | --                                       | < 0.05<br>(< 0.05 to < 0.05)   | 44.6<br>(19.7 to 75.7)                            | 0.2<br>(-16.4 to 21.2)                              |
| Thalassaemias trait                                        | 90.8<br>(71.7 to 110.4)                 | --                                       | 2.0<br>(1.2 to 2.9)            | 33.1<br>(18.8 to 49.1)                            | 6.6<br>(-4.2 to 18.3)                               |
| Sickle cell disorders                                      | < 0.05<br>(< 0.05 to < 0.05)            | --                                       | < 0.05<br>(< 0.05 to < 0.05)   | 24.5<br>(12.8 to 35.6)                            | 9.3<br>(0.2 to 18.6)                                |
| Sickle cell trait                                          | 54.1<br>(51.6 to 56.7)                  | --                                       | 0.2<br>(0.1 to 0.3)            | 35.3<br>(15.5 to 59.8)                            | 9.8<br>(-5.3 to 28.2)                               |
| G6PD deficiency                                            | 29.4<br>(28.0 to 31.0)                  | --                                       | < 0.05<br>(< 0.05 to < 0.05)   | 56.6<br>(36.6 to 78.7)                            | 23.7<br>(10.5 to 39.1)                              |
| G6PD trait                                                 | 228.3<br>(222.7 to 234.9)               | --                                       | < 0.05<br>(< 0.05 to < 0.05)   | 38.0<br>(24.6 to 53.0)                            | 12.9<br>(2.5 to 24.2)                               |
| Other hemoglobinopathies and hemolytic anaemias            | 29.1<br>(26.3 to 31.8)                  | --                                       | 0.6<br>(0.4 to 0.9)            | 8.2<br>(-6.7 to 24.8)                             | -6.7<br>(-18.7 to 6.0)                              |
| Endocrine, metabolic, blood, and immune disorders          | 53.3<br>(49.4 to 57.3)                  | 6.8<br>(6.0 to 7.6)                      | 1.7<br>(1.1 to 2.3)            | 25.7<br>(17.6 to 34.3)                            | -1.3<br>(-6.8 to 4.6)                               |
| <b>Musculoskeletal disorders</b>                           | <b>387.2<br/>(366.5 to 409.4)</b>       | <b>164.3<br/>(147.1 to 181.8)</b>        | <b>43.8<br/>(31.4 to 57.7)</b> | <b>29.9<br/>(25.9 to 34.4)</b>                    | <b>-1.7<br/>(-4.2 to 0.9)</b>                       |
| Rheumatoid arthritis                                       | 6.7<br>(6.0 to 7.6)                     | 0.4<br>(0.4 to 0.5)                      | 1.6<br>(1.1 to 2.1)            | 47.4<br>(33.6 to 63.7)                            | 10.7<br>(1.7 to 20.7)                               |
| Osteoarthritis                                             | 81.1<br>(75.4 to 86.8)                  | 4.8<br>(4.4 to 5.2)                      | 5.0<br>(3.5 to 6.8)            | 52.7<br>(46.3 to 59.3)                            | 5.2<br>(1.3 to 9.4)                                 |
| Low back and neck pain                                     | 290.2<br>(267.9 to 314.3)               | 132.6<br>(116.7 to 149.4)                | 34.0<br>(24.0 to 45.1)         | 28.3<br>(23.7 to 33.6)                            | -2.6<br>(-5.5 to 0.5)                               |
| Low back pain                                              | 216.3<br>(190.8 to 248.3)               | 110.5<br>(95.2 to 128.0)                 | 24.6<br>(17.3 to 32.5)         | 26.2<br>(20.1 to 33.3)                            | -3.5<br>(-7.3 to 0.7)                               |
| Neck pain                                                  | 94.7<br>(80.7 to 110.2)                 | 22.1<br>(18.9 to 26.1)                   | 9.5<br>(6.3 to 13.7)           | 34.1<br>(29.4 to 39.0)                            | 0.0<br>(-2.2 to 2.1)                                |
| Gout                                                       | 8.6<br>(7.6 to 9.8)                     | 1.8<br>(1.5 to 2.0)                      | 0.3<br>(0.2 to 0.4)            | 38.7<br>(17.9 to 61.5)                            | -1.5<br>(-13.9 to 12.9)                             |
| Other musculoskeletal disorders                            | 32.9<br>(25.0 to 43.3)                  | 24.7<br>(17.9 to 32.5)                   | 2.9<br>(1.8 to 4.4)            | 8.6<br>(-4.4 to 27.7)                             | -12.5<br>(-22.5 to 1.6)                             |
| <b>Other non-communicable diseases</b>                     | <b>2,218.2<br/>(2,182.4 to 2,259.5)</b> | <b>7,122.4†<br/>(6,727.8 to 7,579.1)</b> | <b>54.6<br/>(37.7 to 76.9)</b> | <b>21.2<br/>(19.3 to 23.0)</b>                    | <b>-0.6<br/>(-1.5 to 0.4)</b>                       |
| Congenital anomalies                                       | 39.7<br>(36.2 to 43.3)                  | --                                       | 5.4<br>(4.0 to 7.2)            | 22.7<br>(15.2 to 29.7)                            | 2.9<br>(-3.0 to 8.6)                                |
| Neural tube defects                                        | 5.7<br>(5.0 to 6.5)                     | --                                       | 1.7<br>(1.2 to 2.3)            | 23.4<br>(9.6 to 37.8)                             | 4.7<br>(-6.8 to 15.9)                               |
| Congenital heart anomalies                                 | 10.3<br>(8.9 to 11.8)                   | --                                       | 0.5<br>(0.2 to 0.9)            | 27.9<br>(14.4 to 42.0)                            | 8.0<br>(-2.8 to 19.8)                               |
| Orofacial clefts                                           | 1.4<br>(1.3 to 1.6)                     | --                                       | < 0.05<br>(< 0.05 to < 0.05)   | 12.6<br>(-1.1 to 27.8)                            | -7.3<br>(-18.7 to 4.8)                              |
| Down's syndrome                                            | 3.1<br>(2.7 to 3.6)                     | --                                       | 0.3<br>(0.2 to 0.4)            | 20.5<br>(7.5 to 36.0)                             | 3.8<br>(-6.9 to 16.8)                               |
| Turner syndrome                                            | 2.9<br>(2.4 to 3.4)                     | --                                       | 0.1<br>(< 0.05 to 0.1)         | 8.1<br>(-14.9 to 41.2)                            | -1.9<br>(-22.6 to 26.6)                             |
| Klinefelter syndrome                                       | 2.4<br>(2.0 to 2.9)                     | --                                       | < 0.05<br>(< 0.05 to < 0.05)   | 15.6<br>(-7.7 to 44.6)                            | 2.6<br>(-18.0 to 28.1)                              |



| Cause                                         | Prevalence in thousands (95% UI)        | Incidence in thousands (95% UI)          | YLDs in thousands (95% UI)           |                                                   |                                                     |
|-----------------------------------------------|-----------------------------------------|------------------------------------------|--------------------------------------|---------------------------------------------------|-----------------------------------------------------|
|                                               | 2016 counts                             | 2016 counts                              | 2016 counts                          | Percentage change in counts between 2006 and 2016 | Percentage change in age-standardised rates between |
| Other chromosomal abnormalities               | 1.9<br>(1.6 to 2.2)                     | --                                       | 0.4<br>(0.2 to 0.5)                  | 37.3<br>(10.9 to 69.8)                            | 4.7<br>(-14.9 to 28.9)                              |
| Congenital musculoskeletal and limb anomalies | 3.1<br>(2.8 to 3.4)                     | --                                       | 0.4<br>(0.3 to 0.6)                  | 14.9<br>(3.4 to 28.4)                             | -1.5<br>(-10.9 to 8.8)                              |
| Urogenital congenital anomalies               | 3.7<br>(3.2 to 4.2)                     | --                                       | 0.1<br>(0.1 to 0.2)                  | 16.3<br>(2.4 to 32.7)                             | -0.4<br>(-12.8 to 13.4)                             |
| Digestive congenital anomalies                | 3.9<br>(3.4 to 4.4)                     | --                                       | 0.2<br>(0.1 to 0.2)                  | 18.8<br>(1.5 to 40.3)                             | 0.8<br>(-12.9 to 17.0)                              |
| Other congenital anomalies                    | 10.2<br>(6.7 to 15.0)                   | --                                       | 1.8<br>(1.2 to 2.6)                  | 22.0<br>(10.9 to 34.0)                            | 1.4<br>(-7.5 to 11.0)                               |
| Skin and subcutaneous diseases                | 794.6<br>(774.9 to 815.4)               | 1,663.3<br>(1,580.9 to 1,757.5)          | 19.2<br>(12.9 to 27.8)               | 9.6<br>(6.7 to 12.7)                              | 1.1<br>(-0.9 to 3.2)                                |
| Dermatitis                                    | 93.4<br>(83.8 to 103.2)                 | 123.6<br>(112.9 to 135.5)                | 3.5<br>(2.1 to 5.7)                  | 18.6<br>(13.2 to 24.6)                            | -0.0<br>(-4.0 to 4.4)                               |
| Psoriasis                                     | 24.4<br>(23.2 to 25.6)                  | 3.5<br>(3.4 to 3.7)                      | 2.1<br>(1.5 to 2.8)                  | 23.1<br>(12.8 to 34.6)                            | 2.7<br>(-5.0 to 11.3)                               |
| Cellulitis                                    | 1.1<br>(1.0 to 1.2)                     | 19.3<br>(18.0 to 20.6)                   | 0.1<br>(< 0.05 to 0.1)               | 20.1<br>(-4.6 to 54.5)                            | 1.5<br>(-17.0 to 25.1)                              |
| Pyoderma                                      | 5.3<br>(5.2 to 5.5)                     | 111.3<br>(107.4 to 115.3)                | < 0.05<br>(< 0.05 to 0.1)            | 29.1<br>(17.7 to 40.8)                            | 0.8<br>(-6.5 to 8.7)                                |
| Scabies                                       | 31.7<br>(27.7 to 36.5)                  | 95.7<br>(82.4 to 110.7)                  | 0.8<br>(0.5 to 1.3)                  | 5.2<br>(-1.4 to 12.0)                             | -6.0<br>(-10.2 to -1.6)                             |
| Fungal skin diseases                          | 221.7<br>(199.2 to 245.2)               | 766.6<br>(688.1 to 855.5)                | 1.2<br>(0.5 to 2.6)                  | 21.9<br>(18.6 to 25.6)                            | -0.1<br>(-1.2 to 1.0)                               |
| Viral skin diseases                           | 78.1<br>(74.6 to 81.5)                  | 113.8<br>(108.7 to 119.5)                | 2.4<br>(1.5 to 3.6)                  | 11.5<br>(7.5 to 16.1)                             | 0.1<br>(-3.0 to 3.5)                                |
| Acne vulgaris                                 | 212.7<br>(190.3 to 236.0)               | 139.7<br>(117.3 to 170.3)                | 5.5<br>(3.7 to 8.0)                  | -9.4<br>(-14.4 to -4.1)                           | 1.7<br>(-3.1 to 6.7)                                |
| Alopecia areata                               | 5.8<br>(5.6 to 6.1)                     | 10.3<br>(9.9 to 10.8)                    | 0.2<br>(0.1 to 0.3)                  | 18.7<br>(6.4 to 32.2)                             | 0.0<br>(-9.7 to 10.9)                               |
| Pruritus                                      | 25.0<br>(21.9 to 28.3)                  | 20.1<br>(17.9 to 22.7)                   | 0.3<br>(0.1 to 0.5)                  | 27.3<br>(19.9 to 35.6)                            | 2.4<br>(-2.3 to 8.1)                                |
| Urticaria                                     | 33.1<br>(28.7 to 38.5)                  | 59.8<br>(51.6 to 69.6)                   | 2.0<br>(1.3 to 2.9)                  | 24.0<br>(16.9 to 31.9)                            | -0.1<br>(-5.0 to 5.2)                               |
| Decubitus ulcer                               | 0.6<br>(0.5 to 0.6)                     | 2.0<br>(1.8 to 2.3)                      | 0.1<br>(0.1 to 0.1)                  | 34.3<br>(22.8 to 47.5)                            | 2.7<br>(-10.2 to 17.2)                              |
| Other skin and subcutaneous diseases          | 174.2<br>(169.0 to 179.6)               | 197.6<br>(191.2 to 204.1)                | 1.0<br>(0.5 to 1.8)                  | 38.5<br>(34.8 to 42.6)                            | 9.6<br>(7.2 to 12.4)                                |
| Sense organ diseases                          | 643.0<br>(627.2 to 659.9)               | 278.0†<br>(260.4 to 298.0)               | 22.2<br>(15.1 to 31.0)               | 28.8<br>(26.1 to 31.5)                            | -2.4<br>(-3.8 to -1.0)                              |
| Glaucoma                                      | 1.9<br>(1.6 to 2.3)                     | --                                       | 0.2<br>(0.1 to 0.3)                  | 44.4<br>(29.6 to 62.1)                            | -0.1<br>(-9.7 to 10.7)                              |
| Cataract                                      | 23.7<br>(20.3 to 27.4)                  | --                                       | 1.3<br>(0.9 to 1.8)                  | 40.2<br>(32.5 to 48.9)                            | -3.0<br>(-7.8 to 1.7)                               |
| Macular degeneration                          | 0.8<br>(0.6 to 0.9)                     | --                                       | < 0.05<br>(< 0.05 to 0.1)            | 48.2<br>(27.5 to 70.6)                            | 1.9<br>(-11.1 to 16.4)                              |
| Refraction and accommodation disorders        | 342.8<br>(328.0 to 358.1)               | --                                       | 6.2<br>(3.8 to 9.8)                  | 25.6<br>(21.7 to 29.6)                            | -3.1<br>(-5.6 to -0.3)                              |
| Age-related and other hearing loss            | 388.6<br>(365.4 to 413.9)               | --                                       | 11.4<br>(8.0 to 16.0)                | 28.1<br>(23.1 to 32.5)                            | -2.7<br>(-5.0 to -0.7)                              |
| Other vision loss                             | 13.6<br>(11.9 to 15.4)                  | --                                       | 0.9<br>(0.6 to 1.2)                  | 37.6<br>(27.7 to 49.1)                            | -0.1<br>(-6.1 to 6.6)                               |
| Other sense organ diseases                    | 69.8<br>(64.4 to 75.4)                  | 278.0<br>(260.4 to 298.0)                | 2.2<br>(1.4 to 3.3)                  | 30.7<br>(24.3 to 36.9)                            | 0.3<br>(-3.5 to 4.3)                                |
| Oral disorders                                | 1,707.2<br>(1,647.4 to 1,771.7)         | 5,181.1†<br>(4,786.6 to 5,614.1)         | 7.8<br>(4.8 to 11.7)                 | 32.3<br>(29.0 to 35.9)                            | 0.3<br>(-1.6 to 2.4)                                |
| Caries of deciduous teeth                     | 297.2<br>(248.1 to 348.5)               | 1,148.5<br>(883.1 to 1,464.2)            | 0.1<br>(< 0.05 to 0.1)               | 41.8<br>(26.3 to 58.5)                            | -0.2<br>(-10.6 to 10.8)                             |
| Caries of permanent teeth                     | 1,251.6<br>(1,187.9 to 1,318.6)         | 3,992.8<br>(3,715.3 to 4,267.4)          | 0.7<br>(0.3 to 1.4)                  | 4.4<br>(0.8 to 8.1)                               | -6.5<br>(-9.2 to -3.9)                              |
| Periodontal disease                           | 205.8<br>(168.2 to 247.9)               | 26.9<br>(21.5 to 33.5)                   | 1.4<br>(0.5 to 2.8)                  | 37.2<br>(31.9 to 42.9)                            | -0.6<br>(-3.7 to 2.9)                               |
| Edentulism and severe tooth loss              | 147.2<br>(127.9 to 166.0)               | 13.0<br>(10.9 to 15.1)                   | 4.1<br>(2.7 to 5.8)                  | 43.6<br>(38.9 to 48.6)                            | 1.6<br>(-1.6 to 4.5)                                |
| Other oral disorders                          | 52.8<br>(50.4 to 55.3)                  | --                                       | 1.6<br>(1.0 to 2.3)                  | 18.5<br>(14.3 to 23.3)                            | -0.1<br>(-3.2 to 3.2)                               |
| <b>Injuries</b>                               | <b>864.1</b><br><b>(805.1 to 943.2)</b> | <b>401.1†</b><br><b>(376.8 to 429.9)</b> | <b>32.6</b><br><b>(22.4 to 45.1)</b> | <b>43.6</b><br><b>(40.3 to 46.8)</b>              | <b>15.2</b><br><b>(13.0 to 17.2)</b>                |
| <b>Transport injuries</b>                     | <b>87.9</b><br><b>(81.0 to 95.0)</b>    | <b>36.0</b><br><b>(32.1 to 40.4)</b>     | <b>4.8</b><br><b>(3.2 to 6.8)</b>    | <b>60.0</b><br><b>(56.0 to 64.1)</b>              | <b>24.6</b><br><b>(22.1 to 27.0)</b>                |
| Road injuries                                 | 82.0<br>(75.2 to 88.8)                  | 34.5<br>(30.5 to 38.9)                   | 4.4<br>(3.0 to 6.4)                  | 63.7<br>(59.7 to 67.8)                            | 26.7<br>(24.3 to 29.1)                              |
| Pedestrian road injuries                      | 17.6<br>(15.3 to 20.2)                  | 5.2<br>(4.3 to 6.2)                      | 0.9<br>(0.6 to 1.4)                  | 58.6<br>(54.5 to 63.0)                            | 24.4<br>(22.0 to 27.1)                              |
| Cyclist road injuries                         | 11.8<br>(9.8 to 14.1)                   | 5.2<br>(4.0 to 6.4)                      | 0.6<br>(0.4 to 0.9)                  | 66.6<br>(62.1 to 71.2)                            | 33.2<br>(30.4 to 35.9)                              |
| Motorcyclist road injuries                    | 13.2<br>(11.3 to 16.3)                  | 3.9<br>(3.1 to 4.8)                      | 0.7<br>(0.4 to 1.0)                  | 64.0<br>(59.8 to 68.4)                            | 24.0<br>(21.4 to 26.5)                              |
| Motor vehicle road injuries                   | 33.3<br>(27.9 to 38.6)                  | 17.0<br>(14.5 to 19.7)                   | 1.9<br>(1.3 to 2.8)                  | 73.3<br>(68.9 to 77.6)                            | 32.6<br>(30.1 to 35.2)                              |
| Other road injuries                           | 6.1<br>(5.1 to 7.3)                     | 3.2<br>(2.6 to 4.0)                      | 0.3<br>(0.2 to 0.4)                  | 26.3<br>(23.0 to 29.4)                            | -0.3<br>(-2.4 to 1.6)                               |
| Other transport injuries                      | 6.0<br>(5.0 to 7.2)                     | 1.5<br>(1.3 to 1.8)                      | 0.3<br>(0.2 to 0.5)                  | 22.1<br>(18.1 to 26.3)                            | -0.6<br>(-3.3 to 2.1)                               |
| <b>Unintentional injuries</b>                 | <b>735.0</b><br><b>(676.3 to 811.5)</b> | <b>343.9</b><br><b>(319.4 to 372.6)</b>  | <b>25.9</b><br><b>(17.9 to 35.9)</b> | <b>42.8</b><br><b>(39.5 to 46.2)</b>              | <b>14.9</b><br><b>(12.6 to 17.0)</b>                |
| Falls                                         | 389.5<br>(342.4 to 446.7)               | 196.0<br>(175.3 to 222.2)                | 15.8<br>(11.1 to 21.6)               | 48.2<br>(45.0 to 51.3)                            | 17.8<br>(15.6 to 19.7)                              |
| Drowning                                      | 1.9<br>(1.6 to 2.2)                     | 0.4<br>(0.4 to 0.5)                      | 0.1<br>(0.1 to 0.1)                  | 11.4<br>(7.4 to 15.5)                             | -10.6<br>(-13.4 to -7.8)                            |
| Fire, heat, and hot substances                | 80.8<br>(68.5 to 98.1)                  | 11.1<br>(9.3 to 12.8)                    | 2.2<br>(1.4 to 3.1)                  | 33.6<br>(27.0 to 39.9)                            | 12.3<br>(7.6 to 16.3)                               |
| Poisonings                                    | 2.2<br>(1.9 to 2.6)                     | 3.8<br>(3.1 to 4.5)                      | 0.2<br>(0.1 to 0.3)                  | 30.0<br>(21.4 to 39.4)                            | 9.5<br>(3.1 to 16.5)                                |
| Exposure to mechanical forces                 | 128.3<br>(109.8 to 158.0)               | 55.9<br>(48.1 to 63.4)                   | 3.1<br>(2.1 to 4.6)                  | 54.4<br>(49.6 to 59.4)                            | 24.0<br>(20.9 to 27.1)                              |
| Unintentional firearm injuries                | 2.1<br>(1.8 to 2.6)                     | 0.6<br>(0.4 to 0.8)                      | 0.1<br>(0.1 to 0.1)                  | 38.1<br>(33.9 to 42.4)                            | 11.4<br>(8.5 to 14.0)                               |
| Unintentional suffocation                     | 10.3<br>(7.7 to 13.4)                   | 2.8<br>(2.0 to 3.8)                      | 0.3<br>(0.2 to 0.5)                  | 21.6<br>(18.5 to 25.2)                            | 0.5<br>(-1.5 to 2.6)                                |
| Other exposure to mechanical forces           | 115.9<br>(98.1 to 145.0)                | 52.6<br>(45.0 to 60.2)                   | 2.7<br>(1.8 to 3.9)                  | 60.2<br>(55.3 to 65.3)                            | 28.0<br>(24.4 to 31.2)                              |

| Cause                                                                               | Prevalence in thousands (95% UI)     | Incidence in thousands (95% UI)          | YLDs in thousands (95% UI)              |                                                   |                                                     |
|-------------------------------------------------------------------------------------|--------------------------------------|------------------------------------------|-----------------------------------------|---------------------------------------------------|-----------------------------------------------------|
|                                                                                     | 2016 counts                          | 2016 counts                              | 2016 counts                             | Percentage change in counts between 2006 and 2016 | Percentage change in age-standardised rates between |
| Adverse effects of medical treatment                                                | 0.7<br>(0.6 to 0.9)                  | 9.5<br>(8.1 to 11.0)                     | 0.1<br>(0.1 to 0.1)                     | 54.0<br>(45.5 to 63.0)                            | 12.3<br>(7.7 to 17.3)                               |
| Animal contact                                                                      | 11.3<br>(9.8 to 13.4)                | 14.0<br>(11.5 to 16.9)                   | 0.4<br>(0.2 to 0.6)                     | 8.9<br>(3.2 to 15.3)                              | -9.0<br>(-13.2 to -4.5)                             |
| Venomous animal contact                                                             | 4.4<br>(3.6 to 5.4)                  | 5.7<br>(4.3 to 7.2)                      | 0.3<br>(0.2 to 0.4)                     | 13.9<br>(5.5 to 23.1)                             | -2.9<br>(-9.2 to 4.1)                               |
| Non-venomous animal contact                                                         | 6.9<br>(5.7 to 9.0)                  | 8.3<br>(6.7 to 10.2)                     | 0.1<br>(0.1 to 0.2)                     | -1.6<br>(-5.9 to 2.2)                             | -20.5<br>(-23.6 to -17.8)                           |
| Foreign body                                                                        | 33.8<br>(27.6 to 39.8)               | 20.7<br>(18.2 to 23.7)                   | 1.3<br>(0.8 to 1.9)                     | 17.7<br>(13.6 to 22.0)                            | -2.2<br>(-5.2 to 0.6)                               |
| Pulmonary aspiration and foreign body in airway                                     | 16.6<br>(12.5 to 22.4)               | 6.9<br>(5.8 to 8.3)                      | 0.7<br>(0.5 to 1.1)                     | 7.4<br>(3.8 to 11.1)                              | -10.5<br>(-13.1 to -7.9)                            |
| Foreign body in eyes                                                                | 1.3<br>(0.7 to 1.9)                  | 6.7<br>(5.2 to 9.0)                      | 0.1<br>(< 0.05 to 0.1)                  | 23.4<br>(17.6 to 29.9)                            | -0.5<br>(-3.3 to 2.6)                               |
| Foreign body in other body part                                                     | 15.9<br>(13.0 to 20.1)               | 7.1<br>(6.0 to 8.5)                      | 0.5<br>(0.3 to 0.7)                     | 36.5<br>(30.9 to 41.8)                            | 12.3<br>(8.2 to 16.0)                               |
| Environmental heat and cold exposure                                                | 28.9<br>(25.3 to 32.9)               | 9.8<br>(8.5 to 11.3)                     | 1.1<br>(0.7 to 1.6)                     | 12.1<br>(9.3 to 15.2)                             | -10.7<br>(-12.7 to -8.7)                            |
| Other unintentional injuries                                                        | 57.5<br>(46.3 to 70.6)               | 22.7<br>(18.9 to 26.9)                   | 1.6<br>(1.1 to 2.4)                     | 50.8<br>(48.0 to 53.8)                            | 22.0<br>(19.9 to 23.9)                              |
| <b>Self-harm and interpersonal violence</b>                                         | <b>79.8</b><br><b>(72.7 to 87.4)</b> | <b>21.2†</b><br><b>(18.2 to 24.4)</b>    | <b>1.9</b><br><b>(1.2 to 2.6)</b>       | <b>20.2</b><br><b>(17.1 to 23.0)</b>              | <b>-2.3</b><br><b>(-4.2 to -0.6)</b>                |
| Self-harm                                                                           | 6.3<br>(5.2 to 7.5)                  | 3.0<br>(2.5 to 3.4)                      | 0.3<br>(0.2 to 0.4)                     | 22.1<br>(18.0 to 26.5)                            | -3.8<br>(-6.7 to -1.0)                              |
| Self-harm by firearm                                                                | 0.1<br>(0.1 to 0.1)                  | < 0.05<br>(< 0.05 to < 0.05)             | < 0.05<br>(< 0.05 to < 0.05)            | -23.8<br>(-27.4 to -20.7)                         | -44.5<br>(-46.7 to -42.6)                           |
| Self-harm by other specified means                                                  | 6.2<br>(5.1 to 7.4)                  | 2.9<br>(2.5 to 3.4)                      | 0.3<br>(0.2 to 0.4)                     | 22.8<br>(18.6 to 27.3)                            | -3.1<br>(-6.0 to -0.3)                              |
| Interpersonal violence                                                              | 73.5<br>(66.4 to 81.2)               | 18.2†<br>(15.3 to 21.4)                  | 1.6<br>(1.1 to 2.2)                     | 19.8<br>(16.5 to 22.7)                            | -1.9<br>(-3.8 to -0.3)                              |
| Assault by firearm                                                                  | 0.3<br>(0.2 to 0.3)                  | 0.1<br>(0.1 to 0.1)                      | < 0.05<br>(< 0.05 to < 0.05)            | 39.6<br>(34.3 to 44.8)                            | 13.2<br>(10.0 to 16.4)                              |
| Assault by sharp object                                                             | 6.7<br>(5.4 to 8.1)                  | 2.8<br>(2.1 to 3.6)                      | 0.2<br>(0.1 to 0.3)                     | 18.4<br>(13.8 to 22.7)                            | -4.1<br>(-6.8 to -1.5)                              |
| Sexual violence                                                                     | 41.8<br>(36.1 to 47.9)               | --                                       | 0.3<br>(0.2 to 0.5)                     | 3.6<br>(-1.4 to 8.8)                              | -4.4<br>(-7.7 to -0.8)                              |
| Assault by other means                                                              | 24.8<br>(20.5 to 30.4)               | 15.3<br>(12.9 to 18.0)                   | 1.0<br>(0.7 to 1.4)                     | 26.7<br>(23.7 to 29.8)                            | -0.9<br>(-2.9 to 1.0)                               |
| <b>Forces of nature, conflict and terrorism, and executions and police conflict</b> | <b>3.1</b><br><b>(1.5 to 5.0)</b>    | <b>0.1†</b><br><b>(&lt; 0.05 to 0.1)</b> | <b>0.1</b><br><b>(&lt; 0.05 to 0.3)</b> | <b>49.5</b><br><b>(44.3 to 57.4)</b>              | <b>32.2</b><br><b>(27.3 to 39.5)</b>                |
| Exposure to forces of nature                                                        | 2.9<br>(1.3 to 4.8)                  | --                                       | 0.1<br>(< 0.05 to 0.2)                  | 51.3<br>(45.8 to 60.5)                            | 33.3<br>(28.4 to 41.8)                              |
| Conflict and terrorism                                                              | --                                   | --                                       | --                                      | --                                                | --                                                  |
| Executions and police conflict                                                      | 0.2<br>(0.1 to 0.3)                  | 0.1<br>(< 0.05 to 0.1)                   | < 0.05<br>(< 0.05 to < 0.05)            | 22.7<br>(15.6 to 28.2)                            | 13.3<br>(7.2 to 18.2)                               |
| <b>Impairments</b>                                                                  | --                                   | --                                       | --                                      | --                                                | --                                                  |
| Anaemia                                                                             | 854.4<br>(794.3 to 913.8)            | --                                       | 25.7<br>(17.3 to 36.5)                  | 16.8<br>(8.3 to 25.8)                             | -3.8<br>(-9.7 to 3.1)                               |
| Developmental intellectual disability                                               | 67.3<br>(52.9 to 81.7)               | --                                       | 7.5<br>(5.5 to 10.0)                    | 9.2<br>(3.2 to 16.2)                              | -4.4<br>(-9.3 to 1.2)                               |
| Epilepsy                                                                            | 20.0<br>(10.9 to 30.4)               | --                                       | 6.7<br>(3.2 to 11.4)                    | 11.8<br>(-50.4 to 143.3)                          | -3.0<br>(-57.6 to 116.0)                            |
| Guillain-Barre syndrome                                                             | < 0.05<br>(< 0.05 to < 0.05)         | --                                       | < 0.05<br>(< 0.05 to < 0.05)            | 21.8<br>(15.6 to 28.1)                            | -0.1<br>(-0.2 to 0.0)                               |
| Hearing loss                                                                        | 428.8<br>(406.1 to 454.0)            | --                                       | 13.5<br>(9.4 to 18.8)                   | 23.7<br>(19.5 to 27.5)                            | -3.8<br>(-5.7 to -2.0)                              |
| Heart failure                                                                       | 22.7<br>(19.8 to 25.9)               | --                                       | 2.1<br>(1.6 to 2.8)                     | 41.9<br>(32.9 to 50.9)                            | 0.8<br>(-5.4 to 6.9)                                |
| Infertility                                                                         | 43.9<br>(33.8 to 56.9)               | --                                       | 0.3<br>(0.1 to 0.6)                     | 15.1<br>(7.2 to 22.8)                             | -0.1<br>(-6.5 to 6.5)                               |
| Pelvic inflammatory disease                                                         | 1.7<br>(1.5 to 2.1)                  | --                                       | 0.2<br>(0.1 to 0.3)                     | 7.2<br>(-9.3 to 28.2)                             | -11.0<br>(-24.2 to 6.1)                             |
| Vision loss                                                                         | 393.8<br>(376.1 to 411.9)            | --                                       | 10.3<br>(7.1 to 15.0)                   | 28.4<br>(24.2 to 33.3)                            | -1.7<br>(-4.1 to 1.1)                               |

We did not calculate incidence for the nine impairments, certain NTDs, and causes with only birth prevalence. Blank cells mean that no estimate is available.

† Incidence for aggregate causes represents the sum of the incidence of the causes below the aggregate.

‡ Incidence estimates for stroke represent first-ever stroke only.

^ Incidence of HIV/AIDS represents new infections of HIV only and does not include new infections of Tuberculosis in HIV positive cases.

SR Table 14: Prevalence, incidence, and YLDs for 2016, percentage change of YLD counts and percentage change of age-standardised YLD rates between 2006 and 2016 by cause and impairments, for all ages, Montenegro.

| Cause                                                                                | Prevalence in thousands (95% UI)            | Incidence in thousands (95% UI)                  | YLDs in thousands (95% UI)                            |                                                   |                                                     |
|--------------------------------------------------------------------------------------|---------------------------------------------|--------------------------------------------------|-------------------------------------------------------|---------------------------------------------------|-----------------------------------------------------|
|                                                                                      | 2016 counts                                 | 2016 counts                                      | 2016 counts                                           | Percentage change in counts between 2006 and 2016 | Percentage change in age-standardised rates between |
| <b>All causes</b>                                                                    | <b>595.7</b><br>(593.1 to 598.4)            | <b>3,091.7†</b><br>(2,957.9 to 3,233.2)          | <b>76.9</b><br>(57.0 to 99.6)                         | <b>6.9</b><br>(5.3 to 8.6)                        | <b>0.2</b><br>(-1.5 to 1.9)                         |
| <b>Communicable, maternal, neonatal, and nutritional disorders</b>                   | <b>278.0</b><br>(269.2 to 287.3)            | <b>1,150.7†</b><br>(1,049.8 to 1,259.9)          | <b>3.6</b><br>(2.6 to 5.0)                            | <b>-6.8</b><br>(-12.3 to -0.8)                    | <b>-6.1</b><br>(-11.9 to 0.0)                       |
| <b>HIV/AIDS and tuberculosis</b>                                                     | <b>137.3</b><br>(125.9 to 145.7)            | <b>0.1†</b><br>(0.1 to 0.1)                      | <b>&lt; 0.05</b><br>( <b>&lt; 0.05 to &lt; 0.05</b> ) | <b>-8.5</b><br>(-25.1 to 12.4)                    | <b>-11.7</b><br>(-27.7 to 7.1)                      |
| Tuberculosis                                                                         | 129.1<br>(120.1 to 139.9)                   | 0.1†<br>(0.1 to 0.1)                             | < 0.05<br>( <b>&lt; 0.05 to &lt; 0.05</b> )           | -12.3<br>(-30.3 to 12.1)                          | -16.1<br>(-33.5 to 5.5)                             |
| Drug-susceptible tuberculosis                                                        | 0.1<br>(0.1 to 0.1)                         | 0.1<br>(0.1 to 0.1)                              | < 0.05<br>( <b>&lt; 0.05 to &lt; 0.05</b> )           | -12.3<br>(-30.2 to 12.0)                          | -16.1<br>(-33.5 to 5.5)                             |
| Multidrug-resistant tuberculosis without extensive drug resistance                   | < 0.05<br>( <b>&lt; 0.05 to &lt; 0.05</b> ) | < 0.05<br>( <b>&lt; 0.05 to &lt; 0.05</b> )      | < 0.05<br>( <b>&lt; 0.05 to &lt; 0.05</b> )           | -33.6<br>(-92.0 to 383.8)                         | -36.9<br>(-92.4 to 360.7)                           |
| Extensively drug-resistant tuberculosis                                              | < 0.05<br>( <b>&lt; 0.05 to &lt; 0.05</b> ) | < 0.05<br>( <b>&lt; 0.05 to &lt; 0.05</b> )      | < 0.05<br>( <b>&lt; 0.05 to &lt; 0.05</b> )           | 104.6<br>(-75.3 to 1,389.7)                       | 94.7<br>(-76.6 to 1,320.9)                          |
| Latent tuberculosis infection                                                        | 129.1<br>(120.0 to 139.9)                   | --                                               | --                                                    | --                                                | --                                                  |
| HIV/AIDS                                                                             | < 0.05<br>( <b>&lt; 0.05 to &lt; 0.05</b> ) | < 0.05^<br>( <b>&lt; 0.05 to &lt; 0.05</b> )     | < 0.05<br>( <b>&lt; 0.05 to &lt; 0.05</b> )           | 14.6<br>(-0.5 to 26.8)                            | 14.5<br>(-0.4 to 27.7)                              |
| Drug-susceptible HIV/AIDS - Tuberculosis                                             | < 0.05<br>( <b>&lt; 0.05 to &lt; 0.05</b> ) | < 0.05<br>( <b>&lt; 0.05 to &lt; 0.05</b> )      | < 0.05<br>( <b>&lt; 0.05 to &lt; 0.05</b> )           | -16.5<br>(-21.6 to -9.7)                          | -15.9<br>(-21.0 to -9.9)                            |
| Multidrug-resistant HIV/AIDS - Tuberculosis without extensive drug resistance        | < 0.05<br>( <b>&lt; 0.05 to &lt; 0.05</b> ) | < 0.05<br>( <b>&lt; 0.05 to &lt; 0.05</b> )      | < 0.05<br>( <b>&lt; 0.05 to &lt; 0.05</b> )           | -37.0<br>(-92.4 to 378.9)                         | -36.5<br>(-92.4 to 378.4)                           |
| Extensively drug-resistant HIV/AIDS - Tuberculosis                                   | < 0.05<br>( <b>&lt; 0.05 to &lt; 0.05</b> ) | < 0.05<br>( <b>&lt; 0.05 to &lt; 0.05</b> )      | < 0.05<br>( <b>&lt; 0.05 to &lt; 0.05</b> )           | 94.2<br>(-76.7 to 1,376.3)                        | 95.8<br>(-76.5 to 1,374.7)                          |
| HIV/AIDS resulting in other diseases                                                 | < 0.05<br>( <b>&lt; 0.05 to &lt; 0.05</b> ) | < 0.05<br>( <b>&lt; 0.05 to &lt; 0.05</b> )      | < 0.05<br>( <b>&lt; 0.05 to &lt; 0.05</b> )           | 17.9<br>(1.3 to 33.6)                             | 17.8<br>(1.6 to 34.1)                               |
| <b>Diarrhoea, lower respiratory infections, and other common infectious diseases</b> | <b>21.8</b><br>(20.7 to 23.0)               | <b>1,090.8†</b><br>(988.6 to 1,200.5)            | <b>0.9</b><br>(0.6 to 1.3)                            | <b>0.8</b><br>(-2.4 to 3.6)                       | <b>0.7</b><br>(-2.5 to 3.7)                         |
| Diarrhoeal diseases                                                                  | 2.2<br>(2.0 to 2.4)                         | 145.3<br>(135.0 to 157.4)                        | 0.2<br>(0.2 to 0.4)                                   | 4.5<br>(-2.0 to 11.3)                             | 4.4<br>(-2.2 to 11.4)                               |
| Intestinal infectious diseases                                                       | < 0.05<br>( <b>&lt; 0.05 to &lt; 0.05</b> ) | < 0.05†<br>( <b>&lt; 0.05 to &lt; 0.05</b> )     | < 0.05<br>( <b>&lt; 0.05 to &lt; 0.05</b> )           | -13.4<br>(-27.9 to 3.2)                           | -18.7<br>(-31.6 to -3.9)                            |
| Typhoid fever                                                                        | < 0.05<br>( <b>&lt; 0.05 to &lt; 0.05</b> ) | < 0.05<br>( <b>&lt; 0.05 to &lt; 0.05</b> )      | < 0.05<br>( <b>&lt; 0.05 to &lt; 0.05</b> )           | -6.5<br>(-25.3 to 16.1)                           | -11.2<br>(-28.6 to 10.2)                            |
| Paratyphoid fever                                                                    | < 0.05<br>( <b>&lt; 0.05 to &lt; 0.05</b> ) | < 0.05<br>( <b>&lt; 0.05 to &lt; 0.05</b> )      | < 0.05<br>( <b>&lt; 0.05 to &lt; 0.05</b> )           | -17.1<br>(-33.3 to 1.6)                           | -22.3<br>(-36.7 to -5.2)                            |
| Other intestinal infectious diseases                                                 | --                                          | --                                               | < 0.05<br>( <b>&lt; 0.05 to &lt; 0.05</b> )           | -39.1<br>(-54.5 to -20.4)                         | -42.9<br>(-58.6 to -21.9)                           |
| Lower respiratory infections                                                         | 1.0<br>(0.9 to 1.1)                         | 41.0<br>(36.9 to 45.7)                           | 0.1<br>( <b>&lt; 0.05 to 0.1</b> )                    | 35.8<br>(23.0 to 50.4)                            | 31.8<br>(18.6 to 46.5)                              |
| Upper respiratory infections                                                         | 11.7<br>(10.3 to 13.1)                      | 866.3<br>(765.9 to 974.6)                        | 0.3<br>(0.2 to 0.5)                                   | -0.5<br>(-5.6 to 4.9)                             | -0.5<br>(-5.3 to 4.7)                               |
| Otitis media                                                                         | 6.6<br>(5.9 to 7.3)                         | 28.3<br>(23.2 to 34.4)                           | 0.2<br>(0.1 to 0.3)                                   | -8.8<br>(-15.3 to -1.9)                           | -7.2<br>(-13.5 to -0.5)                             |
| Meningitis                                                                           | 0.5<br>(0.4 to 0.6)                         | 0.1<br>(0.1 to 0.1)                              | 0.1<br>( <b>&lt; 0.05 to 0.1</b> )                    | -1.3<br>(-3.9 to 1.1)                             | -2.9<br>(-5.4 to -0.4)                              |
| Pneumococcal meningitis                                                              | 0.2<br>(0.2 to 0.3)                         | < 0.05<br>( <b>&lt; 0.05 to &lt; 0.05</b> )      | < 0.05<br>( <b>&lt; 0.05 to &lt; 0.05</b> )           | -1.6<br>(-5.2 to 2.1)                             | -3.3<br>(-7.0 to 0.4)                               |
| H influenzae type B meningitis                                                       | < 0.05<br>( <b>&lt; 0.05 to 0.1</b> )       | < 0.05<br>( <b>&lt; 0.05 to &lt; 0.05</b> )      | < 0.05<br>( <b>&lt; 0.05 to &lt; 0.05</b> )           | -7.1<br>(-12.2 to -2.4)                           | -8.0<br>(-13.4 to -3.1)                             |
| Meningococcal infection                                                              | 0.1<br>(0.1 to 0.1)                         | < 0.05<br>( <b>&lt; 0.05 to &lt; 0.05</b> )      | < 0.05<br>( <b>&lt; 0.05 to &lt; 0.05</b> )           | -2.9<br>(-6.8 to 1.1)                             | -4.5<br>(-8.4 to -0.4)                              |
| Other meningitis                                                                     | 0.1<br>(0.1 to 0.2)                         | < 0.05<br>( <b>&lt; 0.05 to &lt; 0.05</b> )      | < 0.05<br>( <b>&lt; 0.05 to &lt; 0.05</b> )           | 4.0<br>(0.2 to 7.9)                               | 2.4<br>(-1.2 to 6.2)                                |
| Encephalitis                                                                         | 0.5<br>(0.3 to 0.6)                         | 0.2<br>(0.2 to 0.2)                              | < 0.05<br>( <b>&lt; 0.05 to 0.1</b> )                 | 0.1<br>(-11.8 to 13.2)                            | -3.1<br>(-14.1 to 9.5)                              |
| Diphtheria                                                                           | < 0.05<br>( <b>&lt; 0.05 to &lt; 0.05</b> ) | < 0.05<br>( <b>&lt; 0.05 to &lt; 0.05</b> )      | < 0.05<br>( <b>&lt; 0.05 to &lt; 0.05</b> )           | -22.4<br>(-56.4 to 41.5)                          | -24.8<br>(-55.9 to 31.1)                            |
| Whooping cough                                                                       | < 0.05<br>( <b>&lt; 0.05 to 0.1</b> )       | 0.3<br>(0.2 to 0.4)                              | < 0.05<br>( <b>&lt; 0.05 to &lt; 0.05</b> )           | -17.2<br>(-35.6 to 7.8)                           | -12.8<br>(-32.4 to 13.5)                            |
| Tetanus                                                                              | < 0.05<br>( <b>&lt; 0.05 to &lt; 0.05</b> ) | < 0.05<br>( <b>&lt; 0.05 to &lt; 0.05</b> )      | < 0.05<br>( <b>&lt; 0.05 to &lt; 0.05</b> )           | -5.1<br>(-12.6 to 3.4)                            | -5.9<br>(-14.2 to 3.6)                              |
| Measles                                                                              | < 0.05<br>( <b>&lt; 0.05 to &lt; 0.05</b> ) | < 0.05<br>( <b>&lt; 0.05 to 0.1</b> )            | < 0.05<br>( <b>&lt; 0.05 to &lt; 0.05</b> )           | 14,201.1<br>(3,043.1 to 7.5e+77)                  | 14,931.6<br>(3,203.6 to 9.9e+77)                    |
| Varicella and herpes zoster                                                          | 0.5<br>(0.4 to 0.5)                         | 9.2<br>(8.9 to 9.5)                              | < 0.05<br>( <b>&lt; 0.05 to &lt; 0.05</b> )           | 7.5<br>(-4.9 to 21.5)                             | -0.2<br>(-11.6 to 13.1)                             |
| <b>Neglected tropical diseases and malaria</b>                                       | <b>0.1</b><br>( <b>&lt; 0.05 to 0.2</b> )   | <b>&lt; 0.05†</b><br>( <b>&lt; 0.05 to 0.1</b> ) | <b>&lt; 0.05</b><br>( <b>&lt; 0.05 to &lt; 0.05</b> ) | <b>-54.7</b><br>(-86.0 to 35.6)                   | <b>-56.8</b><br>(-86.7 to 35.5)                     |
| Malaria                                                                              | --                                          | --                                               | --                                                    | --                                                | --                                                  |
| Chagas disease                                                                       | --                                          | --                                               | --                                                    | --                                                | --                                                  |
| Leishmaniasis                                                                        | < 0.05<br>( <b>&lt; 0.05 to &lt; 0.05</b> ) | < 0.05<br>( <b>&lt; 0.05 to &lt; 0.05</b> )      | < 0.05<br>( <b>&lt; 0.05 to &lt; 0.05</b> )           | 3.8<br>(-86.8 to 618.4)                           | 2.4<br>(-88.1 to 680.9)                             |
| Visceral leishmaniasis                                                               | < 0.05<br>( <b>&lt; 0.05 to &lt; 0.05</b> ) | < 0.05<br>( <b>&lt; 0.05 to &lt; 0.05</b> )      | < 0.05<br>( <b>&lt; 0.05 to &lt; 0.05</b> )           | -43.8<br>(-84.1 to 51.8)                          | -50.1<br>(-85.1 to 30.0)                            |
| Cutaneous and mucocutaneous leishmaniasis                                            | < 0.05<br>( <b>&lt; 0.05 to &lt; 0.05</b> ) | < 0.05<br>( <b>&lt; 0.05 to &lt; 0.05</b> )      | < 0.05<br>( <b>&lt; 0.05 to &lt; 0.05</b> )           | 15.1<br>(-91.8 to 2,307.0)                        | 12.8<br>(-92.0 to 2,240.6)                          |
| African trypanosomiasis                                                              | --                                          | --                                               | --                                                    | --                                                | --                                                  |
| Schistosomiasis                                                                      | --                                          | --                                               | --                                                    | --                                                | --                                                  |
| Cysticercosis                                                                        | < 0.05<br>( <b>&lt; 0.05 to 0.1</b> )       | --                                               | < 0.05<br>( <b>&lt; 0.05 to &lt; 0.05</b> )           | -65.8<br>(-87.5 to -33.0)                         | -68.2<br>(-88.4 to -38.4)                           |
| Cystic echinococcosis                                                                | < 0.05<br>( <b>&lt; 0.05 to 0.2</b> )       | < 0.05<br>( <b>&lt; 0.05 to &lt; 0.05</b> )      | < 0.05<br>( <b>&lt; 0.05 to &lt; 0.05</b> )           | -40.2<br>(-94.3 to 426.9)                         | -43.0<br>(-93.9 to 393.2)                           |
| Lymphatic filariasis                                                                 | --                                          | --                                               | --                                                    | --                                                | --                                                  |
| Onchocerciasis                                                                       | --                                          | --                                               | --                                                    | --                                                | --                                                  |
| Trachoma                                                                             | --                                          | --                                               | --                                                    | --                                                | --                                                  |
| Dengue                                                                               | --                                          | --                                               | --                                                    | --                                                | --                                                  |
| Yellow fever                                                                         | --                                          | --                                               | --                                                    | --                                                | --                                                  |
| Rabies                                                                               | < 0.05<br>( <b>&lt; 0.05 to &lt; 0.05</b> ) | < 0.05<br>( <b>&lt; 0.05 to &lt; 0.05</b> )      | < 0.05<br>( <b>&lt; 0.05 to &lt; 0.05</b> )           | -18.0<br>(-42.5 to 18.1)                          | -26.8<br>(-47.8 to 4.8)                             |
| Intestinal nematode infections                                                       | --                                          | --                                               | --                                                    | --                                                | --                                                  |
| Ascariasis                                                                           | --                                          | --                                               | --                                                    | --                                                | --                                                  |



| Cause                                                                   | Prevalence in thousands (95% UI)        | Incidence in thousands (95% UI)                | YLDs in thousands (95% UI)                          |                                                   |                                                     |
|-------------------------------------------------------------------------|-----------------------------------------|------------------------------------------------|-----------------------------------------------------|---------------------------------------------------|-----------------------------------------------------|
|                                                                         | 2016 counts                             | 2016 counts                                    | 2016 counts                                         | Percentage change in counts between 2006 and 2016 | Percentage change in age-standardised rates between |
| Trichuriasis                                                            | --                                      | --                                             | --                                                  | --                                                | --                                                  |
| Hookworm disease                                                        | --                                      | --                                             | --                                                  | --                                                | --                                                  |
| Food-borne trematodiasis                                                | --                                      | --                                             | --                                                  | --                                                | --                                                  |
| Leprosy                                                                 | --                                      | --                                             | --                                                  | --                                                | --                                                  |
| Ebola virus disease                                                     | --                                      | --                                             | --                                                  | --                                                | --                                                  |
| Zika virus disease                                                      | --                                      | --                                             | --                                                  | --                                                | --                                                  |
| Guinea worm disease                                                     | --                                      | --                                             | --                                                  | --                                                | --                                                  |
| Other neglected tropical diseases                                       | --                                      | --                                             | < 0.05<br>(< 0.05 to < 0.05)                        | --                                                | --                                                  |
| <b>Maternal disorders</b>                                               | <b>0.6</b><br><b>(0.5 to 0.8)</b>       | <b>8.7†</b><br><b>(7.1 to 10.8)</b>            | <b>&lt; 0.05</b><br><b>(&lt; 0.05 to &lt; 0.05)</b> | <b>0.2</b><br><b>(-24.1 to 29.4)</b>              | <b>4.0</b><br><b>(-21.6 to 34.4)</b>                |
| Maternal haemorrhage                                                    | 0.4<br>(0.2 to 0.5)                     | 1.3<br>(1.0 to 1.7)                            | < 0.05<br>(< 0.05 to < 0.05)                        | 17.9<br>(-25.7 to 77.8)                           | 23.7<br>(-23.2 to 88.0)                             |
| Maternal sepsis and other pregnancy related infections                  | 0.1<br>(0.1 to 0.1)                     | 0.8<br>(0.6 to 1.1)                            | < 0.05<br>(< 0.05 to < 0.05)                        | -14.9<br>(-60.6 to 73.5)                          | -10.3<br>(-58.5 to 84.6)                            |
| Maternal hypertensive disorders                                         | 0.1<br>(0.1 to 0.2)                     | 0.5<br>(0.4 to 0.7)                            | < 0.05<br>(< 0.05 to < 0.05)                        | -4.8<br>(-46.4 to 68.4)                           | -2.1<br>(-44.8 to 72.6)                             |
| Maternal obstructed labour and uterine rupture                          | < 0.05<br>(< 0.05 to < 0.05)            | 0.2<br>(0.1 to 0.4)                            | < 0.05<br>(< 0.05 to < 0.05)                        | -3.3<br>(-49.9 to 79.5)                           | -0.9<br>(-48.2 to 84.2)                             |
| Maternal abortion, miscarriage, and ectopic pregnancy                   | < 0.05<br>(< 0.05 to 0.1)               | 5.9<br>(4.4 to 8.1)                            | < 0.05<br>(< 0.05 to < 0.05)                        | -4.7<br>(-50.3 to 78.1)                           | -3.1<br>(-50.3 to 77.1)                             |
| Other maternal disorders                                                | --                                      | --                                             | < 0.05<br>(< 0.05 to < 0.05)                        | -5.2<br>(-28.2 to 22.8)                           | -1.3<br>(-25.2 to 27.2)                             |
| <b>Neonatal disorders</b>                                               | <b>6.1</b><br><b>(5.1 to 7.2)</b>       | --                                             | <b>1.1</b><br><b>(0.8 to 1.6)</b>                   | <b>-4.3</b><br><b>(-15.0 to 12.2)</b>             | <b>-4.0</b><br><b>(-14.8 to 12.6)</b>               |
| Neonatal preterm birth complications                                    | 3.9<br>(3.1 to 5.1)                     | --                                             | 0.4<br>(0.3 to 0.6)                                 | -9.1<br>(-29.6 to 15.3)                           | -8.4<br>(-29.1 to 16.7)                             |
| Neonatal encephalopathy due to birth asphyxia and trauma                | 2.5<br>(1.4 to 3.9)                     | --                                             | 0.5<br>(0.2 to 0.8)                                 | 7.0<br>(-14.2 to 74.5)                            | 7.1<br>(-13.9 to 74.8)                              |
| Neonatal sepsis and other neonatal infections                           | 0.5<br>(0.2 to 0.9)                     | --                                             | 0.2<br>(0.1 to 0.4)                                 | -15.8<br>(-28.6 to 1.4)                           | -15.6<br>(-28.5 to 1.4)                             |
| Hemolytic disease and other neonatal jaundice                           | 0.2<br>(0.2 to 0.2)                     | --                                             | 0.1<br>(< 0.05 to 0.1)                              | -4.3<br>(-19.2 to 12.7)                           | -4.3<br>(-19.7 to 13.1)                             |
| Other neonatal disorders                                                | --                                      | --                                             | < 0.05<br>(< 0.05 to < 0.05)                        | -12.2<br>(-25.3 to 5.7)                           | -7.6<br>(-21.4 to 11.1)                             |
| <b>Nutritional deficiencies</b>                                         | <b>82.5</b><br><b>(74.2 to 88.8)</b>    | <b>1.5†</b><br><b>(1.2 to 1.9)</b>             | <b>1.3</b><br><b>(0.8 to 2.0)</b>                   | <b>-13.1</b><br><b>(-22.6 to -1.9)</b>            | <b>-11.4</b><br><b>(-21.9 to 0.9)</b>               |
| Protein-energy malnutrition                                             | 1.3<br>(0.9 to 1.8)                     | 0.6<br>(0.4 to 0.8)                            | 0.1<br>(< 0.05 to 0.1)                              | -26.8<br>(-53.1 to 17.5)                          | -22.7<br>(-50.1 to 23.2)                            |
| Iodine deficiency                                                       | 6.0<br>(4.3 to 8.1)                     | 0.1<br>(0.1 to 0.1)                            | 0.1<br>(0.1 to 0.2)                                 | 6.8<br>(-4.6 to 19.8)                             | 3.5<br>(-7.9 to 16.6)                               |
| Vitamin A deficiency                                                    | 1.0<br>(0.7 to 1.4)                     | 0.8<br>(0.6 to 1.2)                            | --                                                  | --                                                | --                                                  |
| Iron-deficiency anaemia                                                 | 71.0<br>(62.8 to 79.5)                  | --                                             | 1.1<br>(0.7 to 1.7)                                 | -14.3<br>(-25.2 to -1.4)                          | -11.8<br>(-23.6 to 1.9)                             |
| Other nutritional deficiencies                                          | --                                      | --                                             | < 0.05<br>(< 0.05 to < 0.05)                        | -28.5<br>(-54.7 to 17.9)                          | -24.6<br>(-52.1 to 24.4)                            |
| <b>Other communicable, maternal, neonatal, and nutritional diseases</b> | <b>104.3</b><br><b>(97.0 to 111.8)</b>  | <b>49.5</b><br><b>(42.6 to 57.9)</b>           | <b>0.2</b><br><b>(0.1 to 0.4)</b>                   | <b>-2.7</b><br><b>(-8.2 to 2.8)</b>               | <b>-3.2</b><br><b>(-9.1 to 2.6)</b>                 |
| Sexually transmitted diseases excluding HIV                             | 79.9<br>(73.5 to 87.3)                  | 45.9<br>(39.1 to 54.3)                         | 0.2<br>(0.1 to 0.3)                                 | -1.4<br>(-7.5 to 5.1)                             | -2.8<br>(-9.2 to 3.6)                               |
| Syphilis                                                                | 0.3<br>(0.3 to 0.4)                     | 0.1<br>(0.1 to 0.2)                            | < 0.05<br>(< 0.05 to < 0.05)                        | 10.2<br>(-7.4 to 29.4)                            | -0.8<br>(-15.8 to 15.7)                             |
| Chlamydial infection                                                    | 6.8<br>(4.6 to 10.1)                    | 5.4<br>(3.7 to 8.0)                            | < 0.05<br>(< 0.05 to 0.1)                           | -4.4<br>(-16.7 to 8.7)                            | -3.5<br>(-16.0 to 9.7)                              |
| Gonococcal infection                                                    | 6.8<br>(5.1 to 9.0)                     | 23.6<br>(17.2 to 31.8)                         | < 0.05<br>(< 0.05 to < 0.05)                        | -4.5<br>(-16.6 to 8.8)                            | -1.1<br>(-13.7 to 12.2)                             |
| Trichomoniasis                                                          | 13.7<br>(11.9 to 15.6)                  | 11.5<br>(9.9 to 13.2)                          | < 0.05<br>(< 0.05 to < 0.05)                        | -0.8<br>(-7.0 to 5.6)                             | -1.7<br>(-8.0 to 4.8)                               |
| Genital herpes                                                          | 54.0<br>(46.1 to 64.1)                  | 2.4<br>(2.0 to 3.0)                            | < 0.05<br>(< 0.05 to < 0.05)                        | 5.3<br>(-2.3 to 13.7)                             | -0.5<br>(-7.5 to 7.8)                               |
| Other sexually transmitted diseases                                     | 2.4<br>(1.9 to 3.0)                     | 2.9<br>(2.4 to 3.5)                            | 0.1<br>(< 0.05 to 0.1)                              | -4.4<br>(-15.6 to 7.6)                            | -4.7<br>(-15.8 to 7.5)                              |
| Hepatitis                                                               | 26.6<br>(23.2 to 30.8)                  | 3.6<br>(2.9 to 4.2)                            | < 0.05<br>(< 0.05 to < 0.05)                        | -17.8<br>(-32.6 to -0.3)                          | -21.1<br>(-36.7 to -2.4)                            |
| Acute hepatitis A                                                       | 0.1<br>(0.1 to 0.2)                     | 1.8<br>(1.1 to 2.2)                            | < 0.05<br>(< 0.05 to < 0.05)                        | -22.4<br>(-47.1 to 12.1)                          | -23.7<br>(-48.9 to 12.1)                            |
| Hepatitis B                                                             | 16.0<br>(12.9 to 19.9)                  | 1.5<br>(1.1 to 1.9)                            | < 0.05<br>(< 0.05 to < 0.05)                        | -14.0<br>(-30.6 to 4.8)                           | -19.9<br>(-33.9 to -4.1)                            |
| Hepatitis C                                                             | 10.5<br>(9.4 to 11.6)                   | 0.2<br>(0.1 to 0.2)                            | < 0.05<br>(< 0.05 to < 0.05)                        | -5.1<br>(-6.2 to -3.9)                            | -4.1<br>(-5.0 to -3.3)                              |
| Acute hepatitis E                                                       | < 0.05<br>(< 0.05 to < 0.05)            | 0.1<br>(0.1 to 0.2)                            | < 0.05<br>(< 0.05 to < 0.05)                        | -11.9<br>(-20.9 to -2.6)                          | -17.4<br>(-23.7 to -10.6)                           |
| Other infectious diseases                                               | 2.5<br>(2.2 to 2.8)                     | < 0.05<br>(< 0.05 to < 0.05)                   | < 0.05<br>(< 0.05 to 0.1)                           | -5.4<br>(-17.8 to 9.0)                            | -2.9<br>(-16.8 to 14.0)                             |
| <b>Non-communicable diseases</b>                                        | <b>575.8</b><br><b>(572.2 to 579.6)</b> | <b>1,839.2†</b><br><b>(1,736.7 to 1,937.0)</b> | <b>63.3</b><br><b>(47.0 to 81.5)</b>                | <b>6.5</b><br><b>(4.6 to 8.4)</b>                 | <b>-0.5</b><br><b>(-2.3 to 1.5)</b>                 |
| <b>Neoplasms</b>                                                        | <b>5.3</b><br><b>(5.0 to 5.6)</b>       | <b>2.1</b><br><b>(2.0 to 2.3)</b>              | <b>0.6</b><br><b>(0.5 to 0.8)</b>                   | <b>16.0</b><br><b>(9.3 to 24.3)</b>               | <b>3.5</b><br><b>(-2.8 to 11.2)</b>                 |
| Lip and oral cavity cancer                                              | 0.1<br>(0.1 to 0.1)                     | < 0.05<br>(< 0.05 to < 0.05)                   | < 0.05<br>(< 0.05 to < 0.05)                        | 9.5<br>(-5.9 to 28.7)                             | -2.8<br>(-15.9 to 13.7)                             |
| Nasopharynx cancer                                                      | < 0.05<br>(< 0.05 to < 0.05)            | < 0.05<br>(< 0.05 to < 0.05)                   | < 0.05<br>(< 0.05 to < 0.05)                        | 1.8<br>(-11.8 to 16.2)                            | -6.9<br>(-19.6 to 6.9)                              |
| Other pharynx cancer                                                    | < 0.05<br>(< 0.05 to < 0.05)            | < 0.05<br>(< 0.05 to < 0.05)                   | < 0.05<br>(< 0.05 to < 0.05)                        | 18.7<br>(-7.3 to 49.0)                            | 6.4<br>(-17.0 to 32.6)                              |
| Oesophageal cancer                                                      | < 0.05<br>(< 0.05 to < 0.05)            | < 0.05<br>(< 0.05 to < 0.05)                   | < 0.05<br>(< 0.05 to < 0.05)                        | 6.1<br>(-7.9 to 23.1)                             | -6.7<br>(-18.7 to 8.1)                              |
| Stomach cancer                                                          | 0.1<br>(0.1 to 0.1)                     | 0.1<br>(0.1 to 0.1)                            | < 0.05<br>(< 0.05 to < 0.05)                        | 3.2<br>(-14.3 to 24.1)                            | -10.2<br>(-24.8 to 7.8)                             |
| Colon and rectum cancer                                                 | 0.7<br>(0.6 to 0.8)                     | 0.2<br>(0.2 to 0.2)                            | 0.1<br>(0.1 to 0.1)                                 | 22.5<br>(5.8 to 42.5)                             | 7.0<br>(-7.5 to 24.4)                               |
| Liver cancer                                                            | < 0.05<br>(< 0.05 to < 0.05)            | 0.1<br>(< 0.05 to 0.1)                         | < 0.05<br>(< 0.05 to < 0.05)                        | 14.1<br>(0.5 to 28.9)                             | -0.0<br>(-11.7 to 12.7)                             |
| Liver cancer due to hepatitis B                                         | < 0.05<br>(< 0.05 to < 0.05)            | < 0.05<br>(< 0.05 to < 0.05)                   | < 0.05<br>(< 0.05 to < 0.05)                        | 13.5<br>(-1.5 to 30.0)                            | 0.2<br>(-12.4 to 14.2)                              |



| Cause                                              | Prevalence in thousands (95% UI)     | Incidence in thousands (95% UI)    | YLDs in thousands (95% UI)        |                                                   |                                                     |
|----------------------------------------------------|--------------------------------------|------------------------------------|-----------------------------------|---------------------------------------------------|-----------------------------------------------------|
|                                                    | 2016 counts                          | 2016 counts                        | 2016 counts                       | Percentage change in counts between 2006 and 2016 | Percentage change in age-standardised rates between |
| Liver cancer due to hepatitis C                    | < 0.05<br>(< 0.05 to < 0.05)         | < 0.05<br>(< 0.05 to < 0.05)       | < 0.05<br>(< 0.05 to < 0.05)      | 14.6<br>(0.2 to 31.0)                             | -1.2<br>(-13.5 to 12.2)                             |
| Liver cancer due to alcohol use                    | < 0.05<br>(< 0.05 to < 0.05)         | < 0.05<br>(< 0.05 to < 0.05)       | < 0.05<br>(< 0.05 to < 0.05)      | 15.9<br>(1.2 to 31.7)                             | 1.9<br>(-10.6 to 15.7)                              |
| Liver cancer due to other causes                   | < 0.05<br>(< 0.05 to < 0.05)         | < 0.05<br>(< 0.05 to < 0.05)       | < 0.05<br>(< 0.05 to < 0.05)      | 11.8<br>(-4.5 to 29.5)                            | -1.7<br>(-15.6 to 12.2)                             |
| Gallbladder and biliary tract cancer               | < 0.05<br>(< 0.05 to < 0.05)         | < 0.05<br>(< 0.05 to < 0.05)       | < 0.05<br>(< 0.05 to < 0.05)      | 7.0<br>(-4.5 to 19.2)                             | -8.1<br>(-17.8 to 2.1)                              |
| Pancreatic cancer                                  | 0.1<br>(< 0.05 to 0.1)               | 0.1<br>(0.1 to 0.1)                | < 0.05<br>(< 0.05 to < 0.05)      | 17.0<br>(1.2 to 36.1)                             | 1.8<br>(-11.5 to 17.4)                              |
| Larynx cancer                                      | 0.2<br>(0.2 to 0.2)                  | 0.1<br>(0.1 to 0.1)                | < 0.05<br>(< 0.05 to < 0.05)      | 11.7<br>(-10.2 to 37.6)                           | -1.6<br>(-20.1 to 20.5)                             |
| Tracheal, bronchus, and lung cancer                | 0.4<br>(0.4 to 0.5)                  | 0.4<br>(0.3 to 0.4)                | 0.1<br>(0.1 to 0.1)               | 4.4<br>(-12.5 to 24.7)                            | -7.9<br>(-22.7 to 9.4)                              |
| Malignant skin melanoma                            | 0.2<br>(0.1 to 0.2)                  | < 0.05<br>(< 0.05 to < 0.05)       | < 0.05<br>(< 0.05 to < 0.05)      | 36.5<br>(13.1 to 63.8)                            | 24.3<br>(3.1 to 50.1)                               |
| Non-melanoma skin cancer                           | 0.1<br>(0.1 to 0.1)                  | 0.2<br>(0.1 to 0.4)                | < 0.05<br>(< 0.05 to < 0.05)      | -15.9<br>(-61.4 to 63.3)                          | -28.0<br>(-67.1 to 38.3)                            |
| Non-melanoma skin cancer (squamous-cell carcinoma) | 0.1<br>(< 0.05 to 0.1)               | 0.1<br>(< 0.05 to 0.1)             | < 0.05<br>(< 0.05 to < 0.05)      | -18.1<br>(-62.6 to 68.9)                          | -30.0<br>(-68.2 to 42.1)                            |
| Non-melanoma skin cancer (basal-cell carcinoma)    | < 0.05<br>(< 0.05 to < 0.05)         | 0.2<br>(0.1 to 0.3)                | < 0.05<br>(< 0.05 to < 0.05)      | 28.3<br>(-7.1 to 75.5)                            | 11.5<br>(-16.7 to 49.0)                             |
| Breast cancer                                      | 1.3<br>(1.1 to 1.6)                  | 0.3<br>(0.2 to 0.3)                | 0.1<br>(0.1 to 0.2)               | 15.6<br>(-4.4 to 37.2)                            | 4.5<br>(-13.1 to 24.6)                              |
| Cervical cancer                                    | 0.2<br>(0.2 to 0.3)                  | 0.1<br>(< 0.05 to 0.1)             | < 0.05<br>(< 0.05 to < 0.05)      | -8.2<br>(-25.9 to 16.6)                           | -14.7<br>(-30.7 to 9.2)                             |
| Uterine cancer                                     | 0.3<br>(0.2 to 0.3)                  | 0.1<br>(< 0.05 to 0.1)             | < 0.05<br>(< 0.05 to < 0.05)      | 32.7<br>(4.5 to 71.9)                             | 19.2<br>(-5.1 to 52.4)                              |
| Ovarian cancer                                     | 0.1<br>(0.1 to 0.1)                  | < 0.05<br>(< 0.05 to < 0.05)       | < 0.05<br>(< 0.05 to < 0.05)      | 16.8<br>(-17.4 to 65.7)                           | 7.0<br>(-23.2 to 48.1)                              |
| Prostate cancer                                    | 0.7<br>(0.5 to 1.1)                  | 0.2<br>(0.1 to 0.3)                | 0.1<br>(< 0.05 to 0.1)            | 31.1<br>(3.9 to 63.5)                             | 13.9<br>(-9.4 to 40.1)                              |
| Testicular cancer                                  | 0.1<br>(< 0.05 to 0.1)               | < 0.05<br>(< 0.05 to < 0.05)       | < 0.05<br>(< 0.05 to < 0.05)      | 18.5<br>(-18.1 to 66.9)                           | 20.4<br>(-17.5 to 72.0)                             |
| Kidney cancer                                      | 0.2<br>(0.2 to 0.2)                  | < 0.05<br>(< 0.05 to 0.1)          | < 0.05<br>(< 0.05 to < 0.05)      | 15.2<br>(-1.6 to 33.9)                            | 3.3<br>(-10.8 to 19.0)                              |
| Bladder cancer                                     | 0.3<br>(0.2 to 0.3)                  | 0.1<br>(0.1 to 0.1)                | < 0.05<br>(< 0.05 to < 0.05)      | 19.4<br>(1.9 to 39.7)                             | 3.1<br>(-11.1 to 19.5)                              |
| Brain and nervous system cancer                    | 0.1<br>(0.1 to 0.1)                  | 0.1<br>(< 0.05 to 0.1)             | < 0.05<br>(< 0.05 to < 0.05)      | 9.6<br>(-5.0 to 25.9)                             | 1.2<br>(-12.5 to 15.6)                              |
| Thyroid cancer                                     | 0.2<br>(0.1 to 0.2)                  | < 0.05<br>(< 0.05 to < 0.05)       | < 0.05<br>(< 0.05 to < 0.05)      | 32.3<br>(6.2 to 61.9)                             | 22.1<br>(-1.2 to 49.9)                              |
| Mesothelioma                                       | < 0.05<br>(< 0.05 to < 0.05)         | < 0.05<br>(< 0.05 to < 0.05)       | < 0.05<br>(< 0.05 to < 0.05)      | 4.8<br>(-6.8 to 17.1)                             | -6.1<br>(-16.0 to 4.7)                              |
| Hodgkin lymphoma                                   | 0.1<br>(0.1 to 0.1)                  | < 0.05<br>(< 0.05 to < 0.05)       | < 0.05<br>(< 0.05 to < 0.05)      | 9.0<br>(-14.3 to 36.4)                            | 9.3<br>(-15.1 to 40.3)                              |
| Non-Hodgkin's lymphoma                             | 0.1<br>(0.1 to 0.1)                  | < 0.05<br>(< 0.05 to < 0.05)       | < 0.05<br>(< 0.05 to < 0.05)      | 38.6<br>(21.3 to 60.1)                            | 25.5<br>(10.4 to 43.9)                              |
| Multiple myeloma                                   | < 0.05<br>(< 0.05 to < 0.05)         | < 0.05<br>(< 0.05 to < 0.05)       | < 0.05<br>(< 0.05 to < 0.05)      | 26.8<br>(13.2 to 43.3)                            | 11.7<br>(0.1 to 26.5)                               |
| Leukaemia                                          | 0.2<br>(0.1 to 0.2)                  | 0.1<br>(< 0.05 to 0.1)             | < 0.05<br>(< 0.05 to < 0.05)      | 18.0<br>(3.1 to 37.2)                             | 8.3<br>(-5.7 to 25.6)                               |
| Acute lymphoid leukaemia                           | < 0.05<br>(< 0.05 to < 0.05)         | < 0.05<br>(< 0.05 to < 0.05)       | < 0.05<br>(< 0.05 to < 0.05)      | 27.4<br>(-0.9 to 69.4)                            | 33.7<br>(-2.5 to 90.2)                              |
| Chronic lymphoid leukaemia                         | 0.1<br>(0.1 to 0.1)                  | < 0.05<br>(< 0.05 to < 0.05)       | < 0.05<br>(< 0.05 to < 0.05)      | 20.1<br>(-1.6 to 49.4)                            | 4.9<br>(-13.5 to 28.7)                              |
| Acute myeloid leukaemia                            | < 0.05<br>(< 0.05 to < 0.05)         | < 0.05<br>(< 0.05 to < 0.05)       | < 0.05<br>(< 0.05 to < 0.05)      | 15.3<br>(1.4 to 32.4)                             | 7.9<br>(-7.7 to 28.6)                               |
| Chronic myeloid leukaemia                          | < 0.05<br>(< 0.05 to < 0.05)         | < 0.05<br>(< 0.05 to < 0.05)       | < 0.05<br>(< 0.05 to < 0.05)      | 2.2<br>(-14.3 to 20.8)                            | -7.0<br>(-21.5 to 9.3)                              |
| Other leukaemia                                    | < 0.05<br>(< 0.05 to < 0.05)         | < 0.05<br>(< 0.05 to < 0.05)       | < 0.05<br>(< 0.05 to < 0.05)      | 10.0<br>(-7.3 to 34.8)                            | -3.8<br>(-19.9 to 19.3)                             |
| Other neoplasms                                    | 0.1<br>(0.1 to 0.1)                  | < 0.05<br>(< 0.05 to < 0.05)       | < 0.05<br>(< 0.05 to < 0.05)      | 27.8<br>(11.5 to 45.7)                            | 16.5<br>(2.0 to 32.5)                               |
| <b>Cardiovascular diseases</b>                     | <b>67.8</b><br><b>(65.2 to 70.4)</b> | <b>7.8†</b><br><b>(7.4 to 8.2)</b> | <b>5.6</b><br><b>(4.1 to 7.3)</b> | <b>11.6</b><br><b>(6.5 to 16.5)</b>               | <b>-2.6</b><br><b>(-7.0 to 1.6)</b>                 |
| Rheumatic heart disease                            | 0.1<br>(0.1 to 0.1)                  | < 0.05<br>(< 0.05 to < 0.05)       | < 0.05<br>(< 0.05 to < 0.05)      | 6.9<br>(-11.7 to 31.3)                            | -4.1<br>(-19.6 to 15.2)                             |
| Ischaemic heart disease                            | 28.7<br>(26.7 to 30.7)               | 3.0<br>(2.7 to 3.2)                | 1.7<br>(1.2 to 2.3)               | 12.7<br>(8.2 to 17.3)                             | -0.4<br>(-4.3 to 3.6)                               |
| Cerebrovascular disease                            | 11.0<br>(10.2 to 11.8)               | 2.4†<br>(2.2 to 2.6)               | 2.2<br>(1.6 to 2.8)               | 10.4<br>(-0.4 to 21.0)                            | -4.9<br>(-13.9 to 3.8)                              |
| Ischaemic stroke                                   | 8.0<br>(7.0 to 9.2)                  | 1.4†<br>(1.2 to 1.6)               | 1.5<br>(1.1 to 2.0)               | 15.8<br>(0.8 to 31.5)                             | -0.9<br>(-13.5 to 12.7)                             |
| Hemorrhagic stroke                                 | 3.6<br>(3.2 to 4.0)                  | 1.0†<br>(0.9 to 1.1)               | 0.7<br>(0.5 to 0.9)               | 0.1<br>(-9.9 to 10.6)                             | -12.6<br>(-20.6 to -4.2)                            |
| Hypertensive heart disease                         | 1.0<br>(0.8 to 1.2)                  | --                                 | 0.1<br>(0.1 to 0.1)               | 14.2<br>(1.7 to 28.7)                             | -3.5<br>(-13.2 to 7.7)                              |
| Cardiomyopathy and myocarditis                     | 3.9<br>(3.5 to 4.4)                  | 0.3†<br>(0.2 to 0.3)               | 0.3<br>(0.2 to 0.4)               | 11.9<br>(2.5 to 21.9)                             | -1.8<br>(-9.5 to 6.6)                               |
| Myocarditis                                        | 0.2<br>(0.2 to 0.2)                  | 0.3<br>(0.2 to 0.3)                | < 0.05<br>(< 0.05 to < 0.05)      | 2.6<br>(-10.6 to 18.1)                            | -0.6<br>(-13.2 to 14.4)                             |
| Alcoholic cardiomyopathy                           | 2.7<br>(2.3 to 3.2)                  | --                                 | 0.2<br>(0.1 to 0.3)               | 11.1<br>(0.7 to 23.0)                             | -2.2<br>(-11.1 to 7.5)                              |
| Other cardiomyopathy                               | 1.1<br>(0.9 to 1.2)                  | --                                 | 0.1<br>(0.1 to 0.1)               | 15.7<br>(3.2 to 29.6)                             | -1.0<br>(-10.6 to 10.2)                             |
| Atrial fibrillation and flutter                    | 6.3<br>(5.5 to 7.4)                  | 0.5<br>(0.4 to 0.6)                | 0.5<br>(0.3 to 0.7)               | 16.6<br>(9.4 to 24.7)                             | 0.1<br>(-6.0 to 6.6)                                |
| Peripheral vascular disease                        | 17.1<br>(14.8 to 19.9)               | 1.6<br>(1.3 to 1.8)                | 0.1<br>(< 0.05 to 0.1)            | 9.6<br>(2.0 to 18.7)                              | -7.6<br>(-13.2 to -0.7)                             |
| Endocarditis                                       | < 0.05<br>(< 0.05 to < 0.05)         | 0.1<br>(0.1 to 0.1)                | < 0.05<br>(< 0.05 to < 0.05)      | 11.0<br>(-9.0 to 35.4)                            | -1.4<br>(-17.1 to 18.1)                             |
| Other cardiovascular and circulatory diseases      | 14.4<br>(12.1 to 17.1)               | --                                 | 0.7<br>(0.5 to 1.0)               | 8.9<br>(0.1 to 18.3)                              | -1.9<br>(-9.1 to 6.0)                               |
| <b>Chronic respiratory diseases</b>                | <b>44.1</b><br><b>(42.4 to 45.8)</b> | <b>6.0†</b><br><b>(5.7 to 6.4)</b> | <b>1.7</b><br><b>(1.3 to 2.2)</b> | <b>9.6</b><br><b>(4.7 to 15.1)</b>                | <b>3.6</b><br><b>(-0.7 to 7.9)</b>                  |
| Chronic obstructive pulmonary disease              | 18.5<br>(17.5 to 19.5)               | 1.0<br>(1.0 to 1.1)                | 0.6<br>(0.5 to 0.7)               | 15.2<br>(2.4 to 28.2)                             | 3.1<br>(-8.0 to 14.7)                               |
| Pneumoconiosis                                     | 0.1<br>(0.1 to 0.1)                  | < 0.05<br>(< 0.05 to < 0.05)       | < 0.05<br>(< 0.05 to < 0.05)      | 18.8<br>(1.2 to 41.0)                             | 4.0<br>(-10.8 to 22.9)                              |
| Silicosis                                          | < 0.05<br>(< 0.05 to < 0.05)         | < 0.05<br>(< 0.05 to < 0.05)       | < 0.05<br>(< 0.05 to < 0.05)      | 27.6<br>(-11.9 to 87.0)                           | 11.4<br>(-21.8 to 63.2)                             |

| Cause                                                          | Prevalence in thousands (95% UI)  | Incidence in thousands (95% UI)   | YLDs in thousands (95% UI)        |                                                                            |                                                                               |
|----------------------------------------------------------------|-----------------------------------|-----------------------------------|-----------------------------------|----------------------------------------------------------------------------|-------------------------------------------------------------------------------|
|                                                                | 2016 counts<br>(< 0.05 to < 0.05) | 2016 counts<br>(< 0.05 to < 0.05) | 2016 counts<br>(< 0.05 to < 0.05) | Percentage change in counts between 2006 and 2016<br>6.3<br>(-1.1 to 14.5) | Percentage change in age-standardised rates between<br>-5.9<br>(-12.1 to 1.4) |
| Asbestosis                                                     | < 0.05<br>(< 0.05 to < 0.05)      | < 0.05<br>(< 0.05 to < 0.05)      | < 0.05<br>(< 0.05 to < 0.05)      | 6.3<br>(-1.1 to 14.5)                                                      | -5.9<br>(-12.1 to 1.4)                                                        |
| Coal workers pneumoconiosis                                    | --                                | --                                | --                                | --                                                                         | --                                                                            |
| Other pneumoconiosis                                           | < 0.05<br>(< 0.05 to < 0.05)      | < 0.05<br>(< 0.05 to < 0.05)      | < 0.05<br>(< 0.05 to < 0.05)      | 22.7<br>(-10.9 to 67.9)                                                    | 6.7<br>(-21.1 to 43.4)                                                        |
| Asthma                                                         | 26.5<br>(24.9 to 28.3)            | 5.0<br>(4.7 to 5.3)               | 1.0<br>(0.7 to 1.5)               | 6.1<br>(1.8 to 10.4)                                                       | 3.1<br>(-1.3 to 7.1)                                                          |
| Interstitial lung disease and pulmonary sarcoidosis            | 0.6<br>(0.5 to 0.6)               | < 0.05<br>(< 0.05 to < 0.05)      | 0.1<br>(< 0.05 to 0.1)            | 10.3<br>(-4.1 to 26.1)                                                     | 2.3<br>(-10.5 to 15.4)                                                        |
| Other chronic respiratory diseases                             | --                                | --                                | < 0.05<br>(< 0.05 to < 0.05)      | 35.7<br>(23.9 to 49.1)                                                     | 36.5<br>(24.6 to 49.3)                                                        |
| <b>Cirrhosis and other chronic liver diseases</b>              | <b>4.9<br/>(4.7 to 5.2)</b>       | <b>0.1<br/>(0.1 to 0.1)</b>       | <b>0.1<br/>(0.1 to 0.2)</b>       | <b>19.8<br/>(7.6 to 32.3)</b>                                              | <b>12.6<br/>(1.0 to 24.5)</b>                                                 |
| Cirrhosis and other chronic liver diseases due to hepatitis B  | 0.8<br>(0.7 to 0.9)               | < 0.05<br>(< 0.05 to < 0.05)      | < 0.05<br>(< 0.05 to < 0.05)      | 23.2<br>(-1.4 to 57.1)                                                     | 14.0<br>(-8.2 to 44.7)                                                        |
| Cirrhosis and other chronic liver diseases due to hepatitis C  | 1.2<br>(0.8 to 1.5)               | < 0.05<br>(< 0.05 to < 0.05)      | < 0.05<br>(< 0.05 to < 0.05)      | 23.1<br>(-2.3 to 54.1)                                                     | 13.6<br>(-9.0 to 42.2)                                                        |
| Cirrhosis and other chronic liver diseases due to alcohol use  | 1.6<br>(1.3 to 1.9)               | < 0.05<br>(< 0.05 to < 0.05)      | < 0.05<br>(< 0.05 to < 0.05)      | 28.8<br>(7.7 to 53.6)                                                      | 18.0<br>(-1.8 to 41.1)                                                        |
| Cirrhosis and other chronic liver diseases due to other causes | 1.4<br>(1.2 to 1.5)               | < 0.05<br>(< 0.05 to < 0.05)      | < 0.05<br>(< 0.05 to 0.1)         | 10.0<br>(-7.5 to 32.7)                                                     | 8.4<br>(-9.4 to 30.7)                                                         |
| <b>Digestive diseases</b>                                      | <b>28.4<br/>(26.6 to 30.7)</b>    | <b>35.3†<br/>(32.7 to 38.0)</b>   | <b>1.2<br/>(0.9 to 1.7)</b>       | <b>16.4<br/>(8.0 to 26.1)</b>                                              | <b>7.4<br/>(-0.2 to 17.0)</b>                                                 |
| Peptic ulcer disease                                           | 9.8<br>(8.7 to 11.3)              | 0.7<br>(0.6 to 0.8)               | 0.2<br>(0.1 to 0.4)               | 27.8<br>(5.2 to 55.4)                                                      | 17.1<br>(-3.9 to 44.6)                                                        |
| Gastritis and duodenitis                                       | 10.0<br>(8.6 to 11.4)             | 7.4<br>(6.6 to 8.3)               | 0.2<br>(0.1 to 0.3)               | 21.7<br>(3.0 to 42.7)                                                      | 10.7<br>(-5.8 to 30.6)                                                        |
| Appendicitis                                                   | < 0.05<br>(< 0.05 to < 0.05)      | 1.0<br>(0.9 to 1.0)               | < 0.05<br>(< 0.05 to < 0.05)      | -2.6<br>(-26.4 to 28.1)                                                    | -1.1<br>(-27.5 to 34.0)                                                       |
| Paralytic ileus and intestinal obstruction                     | < 0.05<br>(< 0.05 to < 0.05)      | 0.3<br>(0.3 to 0.3)               | < 0.05<br>(< 0.05 to < 0.05)      | 10.6<br>(5.0 to 16.7)                                                      | -0.1<br>(-4.6 to 4.9)                                                         |
| Inguinal, femoral, and abdominal hernia                        | 6.0<br>(5.3 to 6.6)               | 14.0<br>(12.0 to 16.0)            | 0.4<br>(0.3 to 0.6)               | 12.9<br>(2.8 to 24.1)                                                      | 4.7<br>(-4.6 to 14.7)                                                         |
| Inflammatory bowel disease                                     | 1.3<br>(1.0 to 1.6)               | 0.5<br>(0.4 to 0.6)               | 0.2<br>(0.1 to 0.3)               | 5.5<br>(-5.1 to 18.1)                                                      | -0.9<br>(-10.8 to 10.1)                                                       |
| Vascular intestinal disorders                                  | < 0.05<br>(< 0.05 to < 0.05)      | 0.1<br>(0.1 to 0.1)               | < 0.05<br>(< 0.05 to < 0.05)      | 9.3<br>(-10.4 to 32.4)                                                     | -1.7<br>(-16.7 to 15.5)                                                       |
| Gallbladder and biliary diseases                               | 2.2<br>(1.9 to 2.5)               | 10.7<br>(9.3 to 12.3)             | < 0.05<br>(< 0.05 to 0.1)         | 18.8<br>(-0.6 to 44.4)                                                     | 8.4<br>(-8.9 to 31.0)                                                         |
| Pancreatitis                                                   | 0.1<br>(0.1 to 0.1)               | 0.7<br>(0.6 to 0.8)               | < 0.05<br>(< 0.05 to < 0.05)      | 26.9<br>(17.8 to 37.3)                                                     | 16.7<br>(9.0 to 25.3)                                                         |
| Other digestive diseases                                       | --                                | --                                | 0.1<br>(0.1 to 0.1)               | 21.8<br>(13.3 to 31.3)                                                     | 11.0<br>(2.9 to 19.8)                                                         |
| <b>Neurological disorders</b>                                  | <b>226.9<br/>(217.5 to 237.3)</b> | <b>95.2<br/>(82.6 to 109.0)</b>   | <b>7.0<br/>(4.8 to 9.4)</b>       | <b>3.6<br/>(-8.4 to 18.2)</b>                                              | <b>-0.8<br/>(-13.3 to 14.3)</b>                                               |
| Alzheimer's disease and other dementias                        | 4.5<br>(3.8 to 5.5)               | 0.8<br>(0.6 to 1.0)               | 0.7<br>(0.5 to 0.9)               | 25.2<br>(17.8 to 32.0)                                                     | -0.5<br>(-5.0 to 4.6)                                                         |
| Parkinson's disease                                            | 1.0<br>(0.8 to 1.3)               | 0.1<br>(0.1 to 0.2)               | 0.1<br>(0.1 to 0.2)               | 20.6<br>(9.0 to 34.5)                                                      | 3.5<br>(-5.8 to 14.6)                                                         |
| Epilepsy                                                       | 1.8<br>(0.4 to 3.5)               | 0.2<br>(< 0.05 to 0.4)            | 0.5<br>(0.1 to 1.2)               | -1.4<br>(-85.1 to 547.9)                                                   | -3.1<br>(-85.5 to 542.4)                                                      |
| Multiple sclerosis                                             | 0.3<br>(0.3 to 0.3)               | < 0.05<br>(< 0.05 to < 0.05)      | 0.1<br>(0.1 to 0.1)               | 15.4<br>(-2.6 to 36.2)                                                     | 9.1<br>(-7.5 to 28.7)                                                         |
| Motor neuron disease                                           | < 0.05<br>(< 0.05 to < 0.05)      | < 0.05<br>(< 0.05 to < 0.05)      | < 0.05<br>(< 0.05 to < 0.05)      | 9.6<br>(6.0 to 13.5)                                                       | 4.2<br>(0.7 to 7.8)                                                           |
| Migraine                                                       | 101.0<br>(95.2 to 106.6)          | 10.4<br>(9.7 to 11.2)             | 4.7<br>(3.1 to 6.6)               | 1.2<br>(-2.3 to 4.5)                                                       | -1.1<br>(-4.6 to 2.2)                                                         |
| Tension-type headache                                          | 156.3<br>(139.8 to 174.0)         | 83.7<br>(70.9 to 97.7)            | 0.8<br>(0.5 to 1.2)               | 1.9<br>(-3.0 to 7.5)                                                       | -1.6<br>(-6.3 to 3.5)                                                         |
| Other neurological disorders                                   | < 0.05<br>(< 0.05 to < 0.05)      | < 0.05<br>(< 0.05 to < 0.05)      | 0.1<br>(< 0.05 to 0.2)            | 15.2<br>(-66.0 to 282.8)                                                   | 16.4<br>(-70.0 to 322.9)                                                      |
| <b>Mental and substance use disorders</b>                      | <b>88.1<br/>(85.3 to 90.7)</b>    | <b>32.3†<br/>(30.3 to 34.6)</b>   | <b>11.7<br/>(8.5 to 15.1)</b>     | <b>2.2<br/>(0.0 to 4.7)</b>                                                | <b>-0.3<br/>(-2.4 to 2.0)</b>                                                 |
| Schizophrenia                                                  | 1.5<br>(1.3 to 1.8)               | 0.1<br>(0.1 to 0.1)               | 1.0<br>(0.7 to 1.3)               | 4.7<br>(-3.7 to 14.7)                                                      | 0.7<br>(-7.8 to 10.5)                                                         |
| Alcohol use disorders                                          | 10.5<br>(9.2 to 11.8)             | 5.7<br>(5.0 to 6.5)               | 1.1<br>(0.7 to 1.4)               | 5.8<br>(-1.6 to 13.5)                                                      | 4.8<br>(-2.5 to 12.4)                                                         |
| Drug use disorders                                             | 4.5<br>(4.1 to 4.8)               | 0.6<br>(0.5 to 0.7)               | 0.9<br>(0.7 to 1.2)               | -2.3<br>(-10.5 to 6.1)                                                     | -2.6<br>(-11.3 to 6.1)                                                        |
| Opioid use disorders                                           | 1.7<br>(1.4 to 1.9)               | 0.2<br>(0.2 to 0.2)               | 0.7<br>(0.5 to 0.9)               | -3.4<br>(-13.7 to 6.9)                                                     | -4.7<br>(-15.4 to 6.1)                                                        |
| Cocaine use disorders                                          | 0.4<br>(0.3 to 0.4)               | < 0.05<br>(< 0.05 to < 0.05)      | < 0.05<br>(< 0.05 to 0.1)         | 1.8<br>(-20.7 to 31.1)                                                     | 1.6<br>(-21.8 to 32.2)                                                        |
| Amphetamine use disorders                                      | 0.4<br>(0.3 to 0.5)               | < 0.05<br>(< 0.05 to < 0.05)      | 0.1<br>(< 0.05 to 0.1)            | -1.2<br>(-23.9 to 28.7)                                                    | 4.3<br>(-20.7 to 37.9)                                                        |
| Cannabis use disorders                                         | 1.8<br>(1.5 to 2.1)               | 0.3<br>(0.2 to 0.3)               | 0.1<br>(< 0.05 to 0.1)            | -2.8<br>(-17.0 to 13.6)                                                    | 1.0<br>(-14.0 to 18.5)                                                        |
| Other drug use disorders                                       | 0.4<br>(0.4 to 0.4)               | 0.1<br>(0.1 to 0.1)               | 0.1<br>(0.1 to 0.1)               | 3.4<br>(-14.1 to 27.2)                                                     | 4.2<br>(-14.4 to 29.1)                                                        |
| Depressive disorders                                           | 19.1<br>(18.1 to 20.2)            | 20.2<br>(18.3 to 22.2)            | 3.2<br>(2.2 to 4.3)               | 3.4<br>(-1.4 to 8.4)                                                       | -1.9<br>(-6.4 to 2.6)                                                         |
| Major depressive disorder                                      | 12.5<br>(11.3 to 13.8)            | 19.0<br>(17.1 to 21.0)            | 2.5<br>(1.7 to 3.4)               | 2.9<br>(-3.1 to 9.1)                                                       | -2.4<br>(-7.9 to 3.3)                                                         |
| Dysthymia                                                      | 7.0<br>(6.1 to 8.0)               | 1.2<br>(1.1 to 1.4)               | 0.7<br>(0.5 to 1.0)               | 5.5<br>(1.5 to 9.5)                                                        | -0.3<br>(-4.0 to 3.6)                                                         |
| Bipolar disorder                                               | 4.2<br>(3.7 to 4.9)               | 0.3<br>(0.3 to 0.4)               | 0.9<br>(0.5 to 1.3)               | 1.4<br>(-4.4 to 7.2)                                                       | -0.1<br>(-5.8 to 5.8)                                                         |
| Anxiety disorders                                              | 22.3<br>(20.3 to 24.4)            | 3.3<br>(3.1 to 3.6)               | 2.1<br>(1.5 to 2.9)               | 2.1<br>(-4.3 to 8.9)                                                       | -0.4<br>(-6.7 to 6.3)                                                         |
| Eating disorders                                               | 0.7<br>(0.5 to 0.8)               | 0.3<br>(0.2 to 0.4)               | 0.1<br>(0.1 to 0.2)               | 8.6<br>(-5.1 to 24.1)                                                      | 11.8<br>(-1.9 to 27.5)                                                        |
| Anorexia nervosa                                               | 0.1<br>(0.1 to 0.2)               | 0.1<br>(< 0.05 to 0.1)            | < 0.05<br>(< 0.05 to < 0.05)      | 3.4<br>(-20.9 to 36.8)                                                     | 9.3<br>(-15.8 to 44.0)                                                        |
| Bulimia nervosa                                                | 0.5<br>(0.4 to 0.7)               | 0.3<br>(0.2 to 0.4)               | 0.1<br>(0.1 to 0.2)               | 10.2<br>(-6.0 to 29.2)                                                     | 12.5<br>(-4.1 to 32.2)                                                        |
| Autistic spectrum disorders                                    | 5.3<br>(4.7 to 5.9)               | < 0.05<br>(< 0.05 to < 0.05)      | 0.8<br>(0.5 to 1.1)               | 1.0<br>(-3.9 to 6.1)                                                       | 0.5<br>(-4.5 to 5.5)                                                          |
| Autism                                                         | 1.7<br>(1.5 to 2.0)               | < 0.05<br>(< 0.05 to < 0.05)      | 0.4<br>(0.3 to 0.6)               | 1.2<br>(-6.5 to 9.4)                                                       | 0.4<br>(-7.4 to 8.7)                                                          |
| Asperger syndrome and other autistic spectrum disorders        | 3.6<br>(3.0 to 4.3)               | < 0.05<br>(< 0.05 to < 0.05)      | 0.4<br>(0.2 to 0.5)               | 0.8<br>(-3.8 to 5.2)                                                       | 0.6<br>(-4.0 to 5.1)                                                          |

| Cause                                                      | Prevalence in thousands (95% UI)        | Incidence in thousands (95% UI)                | YLDs in thousands (95% UI)           |                                                   |                                                     |
|------------------------------------------------------------|-----------------------------------------|------------------------------------------------|--------------------------------------|---------------------------------------------------|-----------------------------------------------------|
|                                                            | 2016 counts                             | 2016 counts                                    | 2016 counts                          | Percentage change in counts between 2006 and 2016 | Percentage change in age-standardised rates between |
| Attention-deficit/hyperactivity disorder                   | 4.2<br>(3.8 to 4.7)                     | 0.2<br>(0.1 to 0.2)                            | 0.1<br>( $< 0.05$ to 0.1)            | -3.9<br>(-11.2 to 4.1)                            | -0.0<br>(-7.7 to 8.3)                               |
| Conduct disorder                                           | 3.7<br>(3.1 to 4.4)                     | 1.2<br>(1.0 to 1.5)                            | 0.5<br>(0.3 to 0.7)                  | -6.1<br>(-11.5 to -0.1)                           | 0.1<br>(-5.9 to 6.4)                                |
| Idiopathic developmental intellectual disability           | 5.5<br>(3.0 to 8.2)                     | --                                             | 0.2<br>(0.1 to 0.4)                  | -7.7<br>(-13.5 to -1.5)                           | -8.0<br>(-14.1 to -1.7)                             |
| Other mental and substance use disorders                   | 13.3<br>(11.8 to 15.3)                  | 0.3<br>(0.3 to 0.4)                            | 1.0<br>(0.7 to 1.4)                  | 4.5<br>(-0.3 to 9.3)                              | 0.2<br>(-4.4 to 5.1)                                |
| <b>Diabetes, urogenital, blood, and endocrine diseases</b> | <b>201.3</b><br><b>(196.3 to 206.8)</b> | <b>79.8†</b><br><b>(75.1 to 85.0)</b>          | <b>5.7</b><br><b>(4.1 to 7.8)</b>    | <b>8.7</b><br><b>(4.3 to 13.2)</b>                | <b>-0.3</b><br><b>(-4.2 to 3.6)</b>                 |
| Diabetes mellitus                                          | 31.7<br>(28.0 to 35.5)                  | 1.6<br>(1.4 to 1.8)                            | 2.8<br>(1.9 to 3.9)                  | 12.2<br>(3.5 to 21.3)                             | 0.6<br>(-7.1 to 8.7)                                |
| Acute glomerulonephritis                                   | $< 0.05$<br>( $< 0.05$ to $< 0.05$ )    | 0.2<br>(0.1 to 0.2)                            | $< 0.05$<br>( $< 0.05$ to $< 0.05$ ) | 1.5<br>(-2.8 to 6.7)                              | -0.3<br>(-4.1 to 5.4)                               |
| Chronic kidney disease                                     | 24.2<br>(21.8 to 26.9)                  | 1.7<br>(1.5 to 2.0)                            | 0.7<br>(0.5 to 1.0)                  | 11.2<br>(1.8 to 20.8)                             | -3.3<br>(-10.8 to 4.3)                              |
| Chronic kidney disease due to diabetes mellitus            | 8.6<br>(7.5 to 9.8)                     | 0.6<br>(0.5 to 0.8)                            | 0.2<br>(0.2 to 0.3)                  | 16.2<br>(3.3 to 31.4)                             | 2.8<br>(-8.2 to 15.3)                               |
| Chronic kidney disease due to hypertension                 | 5.5<br>(4.8 to 6.3)                     | 0.4<br>(0.4 to 0.5)                            | 0.1<br>(0.1 to 0.2)                  | 40.0<br>(21.0 to 61.3)                            | 13.1<br>(-1.3 to 29.4)                              |
| Chronic kidney disease due to glomerulonephritis           | 5.3<br>(4.6 to 6.0)                     | 0.3<br>(0.3 to 0.4)                            | 0.2<br>(0.1 to 0.2)                  | 0.1<br>(-11.1 to 12.5)                            | -9.7<br>(-19.5 to 0.6)                              |
| Chronic kidney disease due to other causes                 | 4.9<br>(4.2 to 5.8)                     | 0.4<br>(0.3 to 0.4)                            | 0.1<br>(0.1 to 0.2)                  | -2.0<br>(-13.5 to 12.2)                           | -15.0<br>(-24.4 to -3.5)                            |
| Urinary diseases and male infertility                      | 18.1<br>(16.2 to 20.2)                  | 46.7†<br>(42.5 to 51.1)                        | 0.6<br>(0.4 to 0.8)                  | 11.2<br>(5.1 to 17.3)                             | -0.2<br>(-5.4 to 5.0)                               |
| Interstitial nephritis and urinary tract infections        | 0.7<br>(0.6 to 0.7)                     | 33.6<br>(29.8 to 37.6)                         | $< 0.05$<br>( $< 0.05$ to $< 0.05$ ) | 1.6<br>(-10.6 to 16.2)                            | 1.0<br>(-11.3 to 16.1)                              |
| Urolithiasis                                               | 0.4<br>(0.4 to 0.5)                     | 11.2<br>(9.9 to 12.7)                          | $< 0.05$<br>( $< 0.05$ to $< 0.05$ ) | 8.4<br>(-9.9 to 28.5)                             | 1.1<br>(-14.2 to 19.4)                              |
| Benign prostatic hyperplasia                               | 14.6<br>(12.4 to 16.9)                  | 1.8<br>(1.5 to 2.2)                            | 0.5<br>(0.3 to 0.7)                  | 13.5<br>(6.0 to 20.9)                             | 0.9<br>(-5.0 to 7.1)                                |
| Male infertility                                           | 1.8<br>(1.4 to 2.4)                     | --                                             | $< 0.05$<br>( $< 0.05$ to $< 0.05$ ) | -6.9<br>(-14.6 to 1.9)                            | -6.5<br>(-14.1 to 2.2)                              |
| Other urinary diseases                                     | --                                      | --                                             | $< 0.05$<br>( $< 0.05$ to $< 0.05$ ) | -13.4<br>(-23.0 to -3.3)                          | -16.9<br>(-25.5 to -7.6)                            |
| Gynecological diseases                                     | 73.4<br>(70.3 to 77.6)                  | 26.9†<br>(24.9 to 29.1)                        | 0.9<br>(0.6 to 1.2)                  | -2.5<br>(-6.5 to 1.6)                             | -1.2<br>(-5.3 to 3.0)                               |
| Uterine fibroids                                           | 7.4<br>(6.5 to 8.5)                     | 0.7<br>(0.6 to 0.8)                            | 0.1<br>( $< 0.05$ to 0.1)            | -1.3<br>(-12.1 to 10.8)                           | -3.3<br>(-14.0 to 9.2)                              |
| Polycystic ovarian syndrome                                | 0.6<br>(0.5 to 0.8)                     | 0.3<br>(0.2 to 0.4)                            | $< 0.05$<br>( $< 0.05$ to $< 0.05$ ) | -0.2<br>(-12.1 to 14.0)                           | -1.1<br>(-12.9 to 12.6)                             |
| Female infertility                                         | 0.6<br>(0.2 to 1.3)                     | --                                             | $< 0.05$<br>( $< 0.05$ to $< 0.05$ ) | 14.3<br>(-12.9 to 66.8)                           | 18.9<br>(-10.2 to 67.6)                             |
| Endometriosis                                              | 0.3<br>(0.2 to 0.3)                     | 1.1<br>(0.8 to 1.4)                            | $< 0.05$<br>( $< 0.05$ to $< 0.05$ ) | -6.3<br>(-27.3 to 19.2)                           | -1.3<br>(-23.1 to 25.7)                             |
| Genital prolapse                                           | 23.9<br>(20.3 to 27.7)                  | 1.1<br>(0.9 to 1.2)                            | 0.1<br>( $< 0.05$ to 0.1)            | 11.2<br>(0.5 to 22.0)                             | -0.9<br>(-10.1 to 8.5)                              |
| Premenstrual syndrome                                      | 37.9<br>(35.9 to 39.9)                  | 13.2<br>(12.3 to 14.1)                         | 0.3<br>(0.2 to 0.5)                  | -3.8<br>(-10.2 to 2.9)                            | -1.2<br>(-7.9 to 5.9)                               |
| Other gynecological diseases                               | 10.4<br>(8.9 to 12.2)                   | 10.6<br>(8.8 to 12.7)                          | 0.4<br>(0.2 to 0.5)                  | -3.8<br>(-9.3 to 2.3)                             | -1.1<br>(-6.7 to 5.4)                               |
| Hemoglobinopathies and hemolytic anaemias                  | 79.5<br>(74.0 to 84.8)                  | --                                             | 0.2<br>(0.1 to 0.4)                  | 4.7<br>(-8.8 to 20.3)                             | 0.4<br>(-13.3 to 16.2)                              |
| Thalassemias                                               | $< 0.05$<br>( $< 0.05$ to $< 0.05$ )    | --                                             | $< 0.05$<br>( $< 0.05$ to $< 0.05$ ) | -10.8<br>(-27.6 to 11.3)                          | -6.0<br>(-24.4 to 18.3)                             |
| Thalassaemias trait                                        | 7.8<br>(5.4 to 10.4)                    | --                                             | 0.1<br>(0.1 to 0.2)                  | 8.4<br>(-9.1 to 29.4)                             | 3.1<br>(-14.0 to 24.6)                              |
| Sickle cell disorders                                      | $< 0.05$<br>( $< 0.05$ to $< 0.05$ )    | --                                             | $< 0.05$<br>( $< 0.05$ to $< 0.05$ ) | 5.7<br>(-1.8 to 14.5)                             | 9.5<br>(1.2 to 19.5)                                |
| Sickle cell trait                                          | 8.2<br>(8.0 to 8.5)                     | --                                             | $< 0.05$<br>( $< 0.05$ to 0.1)       | 10.0<br>(-9.5 to 37.4)                            | 5.8<br>(-15.2 to 35.8)                              |
| G6PD deficiency                                            | 12.1<br>(10.5 to 14.0)                  | --                                             | $< 0.05$<br>( $< 0.05$ to $< 0.05$ ) | -2.9<br>(-23.3 to 21.6)                           | -6.2<br>(-29.3 to 22.1)                             |
| G6PD trait                                                 | 48.7<br>(44.2 to 53.6)                  | --                                             | $< 0.05$<br>( $< 0.05$ to $< 0.05$ ) | 26.1<br>(-2.0 to 64.0)                            | 25.2<br>(-4.6 to 66.6)                              |
| Other hemoglobinopathies and hemolytic anaemias            | 4.8<br>(4.2 to 5.3)                     | --                                             | 0.1<br>( $< 0.05$ to 0.1)            | -3.9<br>(-16.6 to 12.0)                           | -7.0<br>(-19.8 to 8.8)                              |
| Endocrine, metabolic, blood, and immune disorders          | 17.7<br>(16.0 to 19.4)                  | 2.8<br>(2.5 to 3.1)                            | 0.6<br>(0.4 to 0.8)                  | 7.7<br>(1.7 to 13.7)                              | 0.4<br>(-4.9 to 5.8)                                |
| <b>Musculoskeletal disorders</b>                           | <b>131.7</b><br><b>(125.4 to 138.4)</b> | <b>56.1</b><br><b>(49.9 to 63.1)</b>           | <b>15.3</b><br><b>(11.0 to 20.0)</b> | <b>7.2</b><br><b>(4.2 to 10.4)</b>                | <b>-1.0</b><br><b>(-3.5 to 1.8)</b>                 |
| Rheumatoid arthritis                                       | 2.3<br>(2.1 to 2.6)                     | 0.1<br>(0.1 to 0.1)                            | 0.5<br>(0.4 to 0.7)                  | 13.2<br>(5.0 to 22.2)                             | 2.7<br>(-4.8 to 10.6)                               |
| Osteoarthritis                                             | 35.5<br>(33.1 to 37.9)                  | 1.6<br>(1.5 to 1.7)                            | 2.2<br>(1.5 to 2.9)                  | 14.8<br>(10.8 to 18.7)                            | 1.6<br>(-1.8 to 5.1)                                |
| Low back and neck pain                                     | 101.3<br>(94.7 to 108.9)                | 48.9<br>(42.6 to 55.6)                         | 12.1<br>(8.5 to 15.9)                | 5.8<br>(2.1 to 9.7)                               | -1.5<br>(-4.5 to 1.8)                               |
| Low back pain                                              | 83.3<br>(74.0 to 93.9)                  | 43.0<br>(36.9 to 49.8)                         | 9.3<br>(6.6 to 12.4)                 | 5.6<br>(0.9 to 10.6)                              | -1.8<br>(-5.5 to 2.3)                               |
| Neck pain                                                  | 27.6<br>(23.8 to 32.0)                  | 5.9<br>(5.1 to 6.9)                            | 2.7<br>(1.9 to 3.9)                  | 6.4<br>(3.6 to 9.4)                               | -0.2<br>(-2.4 to 1.8)                               |
| Gout                                                       | 3.0<br>(2.6 to 3.4)                     | 0.6<br>(0.5 to 0.7)                            | 0.1<br>(0.1 to 0.1)                  | 11.8<br>(-2.4 to 28.1)                            | 0.6<br>(-12.1 to 14.6)                              |
| Other musculoskeletal disorders                            | 5.7<br>(4.4 to 7.3)                     | 4.9<br>(3.8 to 6.7)                            | 0.5<br>(0.3 to 0.7)                  | 2.8<br>(-10.6 to 16.9)                            | -2.1<br>(-15.6 to 12.1)                             |
| <b>Other non-communicable diseases</b>                     | <b>484.6</b><br><b>(475.7 to 494.2)</b> | <b>1,524.4†</b><br><b>(1,422.2 to 1,621.1)</b> | <b>14.3</b><br><b>(9.9 to 20.2)</b>  | <b>6.5</b><br><b>(5.2 to 7.9)</b>                 | <b>-0.7</b><br><b>(-1.8 to 0.6)</b>                 |
| Congenital anomalies                                       | 7.2<br>(6.5 to 7.8)                     | --                                             | 0.8<br>(0.6 to 1.1)                  | 3.0<br>(-1.9 to 8.0)                              | 2.2<br>(-2.6 to 7.3)                                |
| Neural tube defects                                        | 0.5<br>(0.5 to 0.6)                     | --                                             | 0.2<br>(0.1 to 0.2)                  | 5.8<br>(-6.4 to 20.0)                             | 4.1<br>(-8.0 to 18.3)                               |
| Congenital heart anomalies                                 | 1.9<br>(1.6 to 2.1)                     | --                                             | 0.1<br>( $< 0.05$ to 0.2)            | 6.9<br>(-3.2 to 17.2)                             | 6.5<br>(-4.1 to 16.9)                               |
| Orofacial clefts                                           | 0.3<br>(0.3 to 0.4)                     | --                                             | $< 0.05$<br>( $< 0.05$ to $< 0.05$ ) | -10.4<br>(-21.9 to 2.0)                           | -11.6<br>(-23.6 to 1.6)                             |
| Down's syndrome                                            | 0.3<br>(0.3 to 0.4)                     | --                                             | $< 0.05$<br>( $< 0.05$ to $< 0.05$ ) | -0.3<br>(-9.5 to 8.7)                             | -0.6<br>(-10.0 to 8.8)                              |
| Turner syndrome                                            | 0.3<br>(0.3 to 0.4)                     | --                                             | $< 0.05$<br>( $< 0.05$ to $< 0.05$ ) | -1.8<br>(-26.0 to 31.2)                           | -0.4<br>(-26.1 to 35.1)                             |
| Klinefelter syndrome                                       | 0.3<br>(0.2 to 0.4)                     | --                                             | $< 0.05$<br>( $< 0.05$ to $< 0.05$ ) | -0.6<br>(-21.1 to 26.3)                           | 3.2<br>(-18.4 to 30.6)                              |



| Cause                                         | Prevalence in thousands (95% UI)        | Incidence in thousands (95% UI)         | YLDs in thousands (95% UI)           |                                                   |                                                     |
|-----------------------------------------------|-----------------------------------------|-----------------------------------------|--------------------------------------|---------------------------------------------------|-----------------------------------------------------|
|                                               | 2016 counts                             | 2016 counts                             | 2016 counts                          | Percentage change in counts between 2006 and 2016 | Percentage change in age-standardised rates between |
| Other chromosomal abnormalities               | 0.6<br>(0.5 to 0.7)                     | --                                      | 0.1<br>( $< 0.05$ to 0.1)            | -0.9<br>(-13.8 to 14.3)                           | 4.8<br>(-9.5 to 21.6)                               |
| Congenital musculoskeletal and limb anomalies | 1.3<br>(1.2 to 1.5)                     | --                                      | 0.2<br>(0.1 to 0.2)                  | 2.3<br>(-7.1 to 12.5)                             | 0.0<br>(-9.1 to 10.0)                               |
| Urogenital congenital anomalies               | 0.8<br>(0.7 to 0.8)                     | --                                      | $< 0.05$<br>( $< 0.05$ to $< 0.05$ ) | -3.0<br>(-13.7 to 8.0)                            | 0.2<br>(-11.4 to 12.2)                              |
| Digestive congenital anomalies                | 0.8<br>(0.7 to 0.9)                     | --                                      | $< 0.05$<br>( $< 0.05$ to 0.1)       | 2.4<br>(-11.1 to 17.9)                            | 0.9<br>(-12.7 to 16.3)                              |
| Other congenital anomalies                    | 1.7<br>(1.1 to 2.6)                     | --                                      | 0.2<br>(0.2 to 0.4)                  | 2.9<br>(-5.5 to 12.9)                             | 1.0<br>(-7.2 to 10.7)                               |
| Skin and subcutaneous diseases                | 185.1<br>(180.2 to 190.2)               | 469.0<br>(440.4 to 498.3)               | 4.1<br>(2.8 to 6.0)                  | 1.5<br>(-0.5 to 3.5)                              | 1.2<br>(-0.8 to 3.1)                                |
| Dermatitis                                    | 20.6<br>(19.0 to 22.2)                  | 28.6<br>(26.2 to 31.2)                  | 0.8<br>(0.5 to 1.2)                  | 1.3<br>(-3.4 to 6.2)                              | 0.9<br>(-4.0 to 6.5)                                |
| Psoriasis                                     | 6.9<br>(6.6 to 7.2)                     | 0.9<br>(0.8 to 0.9)                     | 0.6<br>(0.4 to 0.8)                  | 8.1<br>(0.9 to 15.8)                              | 3.9<br>(-2.8 to 11.3)                               |
| Cellulitis                                    | 0.3<br>(0.2 to 0.3)                     | 5.1<br>(4.8 to 5.4)                     | $< 0.05$<br>( $< 0.05$ to $< 0.05$ ) | 4.2<br>(-16.4 to 29.2)                            | 1.6<br>(-18.7 to 27.6)                              |
| Pyoderma                                      | 2.9<br>(2.8 to 3.0)                     | 76.2<br>(73.3 to 79.4)                  | $< 0.05$<br>( $< 0.05$ to $< 0.05$ ) | 9.2<br>(3.6 to 15.1)                              | 0.7<br>(-4.5 to 6.0)                                |
| Scabies                                       | 4.4<br>(3.9 to 5.0)                     | 13.2<br>(11.6 to 14.9)                  | 0.1<br>(0.1 to 0.2)                  | -3.4<br>(-7.8 to 1.3)                             | -2.1<br>(-6.5 to 2.5)                               |
| Fungal skin diseases                          | 58.3<br>(52.1 to 64.6)                  | 216.6<br>(191.0 to 244.9)               | 0.3<br>(0.1 to 0.7)                  | 6.6<br>(5.0 to 8.4)                               | 0.0<br>(-1.1 to 1.1)                                |
| Viral skin diseases                           | 14.6<br>(14.0 to 15.2)                  | 21.8<br>(20.9 to 22.7)                  | 0.4<br>(0.3 to 0.7)                  | -0.9<br>(-3.9 to 2.0)                             | -0.3<br>(-3.3 to 2.6)                               |
| Acne vulgaris                                 | 41.2<br>(36.9 to 45.9)                  | 26.9<br>(22.4 to 33.1)                  | 1.1<br>(0.7 to 1.5)                  | -3.8<br>(-8.1 to 0.3)                             | 1.1<br>(-3.3 to 5.4)                                |
| Alopecia areata                               | 1.2<br>(1.2 to 1.2)                     | 2.1<br>(2.0 to 2.2)                     | $< 0.05$<br>( $< 0.05$ to 0.1)       | 1.7<br>(-7.9 to 11.8)                             | 0.1<br>(-9.4 to 10.2)                               |
| Pruritus                                      | 6.4<br>(5.6 to 7.3)                     | 5.0<br>(4.5 to 5.7)                     | 0.1<br>( $< 0.05$ to 0.1)            | 6.4<br>(1.1 to 12.1)                              | 1.0<br>(-3.8 to 6.0)                                |
| Urticaria                                     | 5.7<br>(5.0 to 6.4)                     | 10.1<br>(8.9 to 11.5)                   | 0.3<br>(0.2 to 0.5)                  | -0.7<br>(-5.2 to 4.7)                             | -0.0<br>(-4.5 to 5.0)                               |
| Decubitus ulcer                               | 0.2<br>(0.2 to 0.3)                     | 0.9<br>(0.8 to 1.0)                     | $< 0.05$<br>( $< 0.05$ to 0.1)       | 15.3<br>(-2.3 to 36.6)                            | 2.7<br>(-10.8 to 18.6)                              |
| Other skin and subcutaneous diseases          | 52.3<br>(50.8 to 54.0)                  | 61.7<br>(59.5 to 64.0)                  | 0.3<br>(0.1 to 0.5)                  | 11.6<br>(8.9 to 14.3)                             | 4.2<br>(1.9 to 6.7)                                 |
| Sense organ diseases                          | 193.8<br>(187.4 to 200.5)               | 66.0†<br>(62.2 to 70.2)                 | 7.0<br>(4.9 to 9.8)                  | 8.7<br>(6.5 to 11.0)                              | -2.9<br>(-4.7 to -0.9)                              |
| Glaucoma                                      | 0.6<br>(0.5 to 0.7)                     | --                                      | $< 0.05$<br>( $< 0.05$ to 0.1)       | 16.1<br>(1.7 to 35.1)                             | -1.2<br>(-13.2 to 14.2)                             |
| Cataract                                      | 10.1<br>(8.5 to 11.8)                   | --                                      | 0.5<br>(0.3 to 0.7)                  | 14.5<br>(8.3 to 21.0)                             | -3.2<br>(-8.0 to 2.2)                               |
| Macular degeneration                          | 0.3<br>(0.3 to 0.4)                     | --                                      | $< 0.05$<br>( $< 0.05$ to $< 0.05$ ) | 19.2<br>(2.4 to 41.4)                             | 0.9<br>(-13.0 to 18.4)                              |
| Refraction and accommodation disorders        | 84.7<br>(72.1 to 99.5)                  | --                                      | 1.5<br>(0.9 to 2.3)                  | 3.6<br>(-3.1 to 10.6)                             | -4.6<br>(-10.5 to 1.6)                              |
| Age-related and other hearing loss            | 146.6<br>(140.3 to 153.3)               | --                                      | 4.1<br>(2.8 to 5.7)                  | 9.4<br>(6.9 to 11.8)                              | -2.8<br>(-5.1 to -0.9)                              |
| Other vision loss                             | 3.7<br>(3.2 to 4.3)                     | --                                      | 0.2<br>(0.1 to 0.3)                  | 12.0<br>(3.8 to 20.4)                             | -1.2<br>(-8.2 to 5.9)                               |
| Other sense organ diseases                    | 23.5<br>(21.6 to 25.5)                  | 66.0<br>(62.2 to 70.2)                  | 0.7<br>(0.5 to 1.1)                  | 10.1<br>(6.2 to 14.8)                             | 0.4<br>(-3.1 to 4.4)                                |
| Oral disorders                                | 364.9<br>(349.2 to 380.6)               | 989.3†<br>(893.7 to 1,081.1)            | 2.4<br>(1.5 to 3.6)                  | 10.3<br>(8.1 to 12.8)                             | 0.3<br>(-1.6 to 2.1)                                |
| Caries of deciduous teeth                     | 36.6<br>(30.9 to 42.8)                  | 149.2<br>(117.2 to 189.4)               | $< 0.05$<br>( $< 0.05$ to $< 0.05$ ) | -5.1<br>(-14.2 to 3.8)                            | -1.1<br>(-10.4 to 8.2)                              |
| Caries of permanent teeth                     | 268.3<br>(247.5 to 293.2)               | 827.4<br>(738.2 to 908.9)               | 0.2<br>(0.1 to 0.3)                  | -0.1<br>(-3.7 to 3.9)                             | -2.6<br>(-6.2 to 1.2)                               |
| Periodontal disease                           | 68.0<br>(55.9 to 81.3)                  | 8.6<br>(6.6 to 10.6)                    | 0.4<br>(0.2 to 0.9)                  | 8.8<br>(5.0 to 13.3)                              | 0.4<br>(-2.8 to 4.0)                                |
| Edentulism and severe tooth loss              | 53.0<br>(45.9 to 60.0)                  | 4.2<br>(3.5 to 4.9)                     | 1.4<br>(1.0 to 2.0)                  | 14.2<br>(10.6 to 17.8)                            | 0.9<br>(-2.4 to 3.9)                                |
| Other oral disorders                          | 12.2<br>(11.8 to 12.8)                  | --                                      | 0.4<br>(0.2 to 0.5)                  | 3.0<br>(-0.0 to 6.2)                              | -0.2<br>(-3.1 to 2.9)                               |
| <b>Injuries</b>                               | <b>292.9</b><br><b>(272.1 to 320.2)</b> | <b>101.9†</b><br><b>(95.5 to 108.8)</b> | <b>9.9</b><br><b>(6.7 to 13.9)</b>   | <b>16.5</b><br><b>(15.2 to 17.9)</b>              | <b>8.3</b><br><b>(7.1 to 9.5)</b>                   |
| <b>Transport injuries</b>                     | <b>36.5</b><br><b>(33.7 to 39.5)</b>    | <b>10.0</b><br><b>(9.0 to 11.2)</b>     | <b>1.7</b><br><b>(1.2 to 2.5)</b>    | <b>19.4</b><br><b>(17.6 to 21.1)</b>              | <b>11.5</b><br><b>(9.7 to 13.1)</b>                 |
| Road injuries                                 | 35.1<br>(32.3 to 38.0)                  | 9.8<br>(8.8 to 11.0)                    | 1.7<br>(1.1 to 2.4)                  | 19.6<br>(17.8 to 21.3)                            | 11.6<br>(9.8 to 13.2)                               |
| Pedestrian road injuries                      | 7.8<br>(6.8 to 8.9)                     | 1.6<br>(1.4 to 1.9)                     | 0.4<br>(0.2 to 0.5)                  | 8.9<br>(7.2 to 10.3)                              | 1.0<br>(-0.6 to 2.5)                                |
| Cyclist road injuries                         | 8.9<br>(7.5 to 10.5)                    | 2.8<br>(2.3 to 3.2)                     | 0.4<br>(0.3 to 0.6)                  | 21.2<br>(19.1 to 23.1)                            | 13.1<br>(11.0 to 14.9)                              |
| Motorcyclist road injuries                    | 4.2<br>(3.5 to 5.2)                     | 0.7<br>(0.6 to 0.9)                     | 0.2<br>(0.1 to 0.3)                  | 12.4<br>(10.6 to 14.2)                            | 5.7<br>(3.8 to 7.5)                                 |
| Motor vehicle road injuries                   | 13.0<br>(10.8 to 15.2)                  | 4.2<br>(3.6 to 4.8)                     | 0.7<br>(0.5 to 1.0)                  | 28.1<br>(26.1 to 30.1)                            | 19.8<br>(17.9 to 21.7)                              |
| Other road injuries                           | 1.2<br>(1.0 to 1.4)                     | 0.4<br>(0.3 to 0.5)                     | 0.1<br>( $< 0.05$ to 0.1)            | 13.0<br>(11.3 to 14.7)                            | 5.2<br>(3.7 to 6.9)                                 |
| Other transport injuries                      | 1.4<br>(1.2 to 1.6)                     | 0.2<br>(0.2 to 0.3)                     | 0.1<br>( $< 0.05$ to 0.1)            | 14.4<br>(12.7 to 16.1)                            | 7.9<br>(6.3 to 9.6)                                 |
| <b>Unintentional injuries</b>                 | <b>245.9</b><br><b>(226.6 to 272.6)</b> | <b>87.9</b><br><b>(81.4 to 95.2)</b>    | <b>7.8</b><br><b>(5.3 to 11.0)</b>   | <b>16.6</b><br><b>(15.3 to 18.1)</b>              | <b>8.2</b><br><b>(7.0 to 9.4)</b>                   |
| Falls                                         | 133.2<br>(117.5 to 152.5)               | 50.7<br>(45.2 to 56.9)                  | 5.0<br>(3.5 to 6.9)                  | 21.3<br>(19.8 to 23.0)                            | 11.8<br>(10.5 to 13.1)                              |
| Drowning                                      | 0.3<br>(0.2 to 0.3)                     | $< 0.05$<br>( $< 0.05$ to $< 0.05$ )    | $< 0.05$<br>( $< 0.05$ to $< 0.05$ ) | 17.7<br>(14.9 to 20.8)                            | 11.4<br>(9.0 to 14.0)                               |
| Fire, heat, and hot substances                | 11.2<br>(9.8 to 13.3)                   | 1.1<br>(0.9 to 1.3)                     | 0.3<br>(0.2 to 0.4)                  | 12.7<br>(9.9 to 15.5)                             | 6.4<br>(3.7 to 9.3)                                 |
| Poisonings                                    | 0.5<br>(0.4 to 0.6)                     | 0.5<br>(0.4 to 0.7)                     | $< 0.05$<br>( $< 0.05$ to 0.1)       | 32.0<br>(22.8 to 42.1)                            | 28.3<br>(19.1 to 38.4)                              |
| Exposure to mechanical forces                 | 64.9<br>(55.6 to 79.1)                  | 20.5<br>(18.1 to 23.0)                  | 1.4<br>(0.9 to 2.0)                  | 12.4<br>(11.0 to 13.8)                            | 5.2<br>(3.9 to 6.4)                                 |
| Unintentional firearm injuries                | 0.8<br>(0.7 to 1.0)                     | 0.2<br>(0.1 to 0.2)                     | $< 0.05$<br>( $< 0.05$ to $< 0.05$ ) | -7.0<br>(-8.4 to -5.6)                            | -13.2<br>(-14.5 to -11.8)                           |
| Unintentional suffocation                     | 0.6<br>(0.5 to 0.7)                     | 0.1<br>(0.1 to 0.1)                     | $< 0.05$<br>( $< 0.05$ to $< 0.05$ ) | 1.4<br>(-0.2 to 3.0)                              | -3.5<br>(-5.2 to -1.8)                              |
| Other exposure to mechanical forces           | 63.5<br>(54.2 to 77.7)                  | 20.3<br>(17.9 to 22.8)                  | 1.4<br>(0.9 to 1.9)                  | 13.1<br>(11.8 to 14.5)                            | 5.9<br>(4.6 to 7.1)                                 |



| Cause                                                                               | Prevalence in thousands (95% UI)        | Incidence in thousands (95% UI)                      | YLDs in thousands (95% UI)                          |                                                   |                                                     |
|-------------------------------------------------------------------------------------|-----------------------------------------|------------------------------------------------------|-----------------------------------------------------|---------------------------------------------------|-----------------------------------------------------|
|                                                                                     | 2016 counts                             | 2016 counts                                          | 2016 counts                                         | Percentage change in counts between 2006 and 2016 | Percentage change in age-standardised rates between |
| Adverse effects of medical treatment                                                | 0.1<br>(0.1 to 0.2)                     | 1.8<br>(1.6 to 2.0)                                  | < 0.05<br>(< 0.05 to < 0.05)                        | 12.7<br>(8.2 to 18.3)                             | 3.4<br>(-0.5 to 7.9)                                |
| Animal contact                                                                      | 2.8<br>(2.5 to 3.2)                     | 2.6<br>(2.2 to 3.2)                                  | 0.1<br>(0.1 to 0.1)                                 | -18.4<br>(-23.0 to -14.0)                         | -21.8<br>(-26.3 to -17.4)                           |
| Venomous animal contact                                                             | 1.1<br>(0.9 to 1.3)                     | 1.1<br>(0.8 to 1.4)                                  | 0.1<br>(< 0.05 to 0.1)                              | -19.5<br>(-25.7 to -13.1)                         | -22.0<br>(-28.0 to -15.6)                           |
| Non-venomous animal contact                                                         | 1.7<br>(1.5 to 2.1)                     | 1.6<br>(1.3 to 1.9)                                  | < 0.05<br>(< 0.05 to < 0.05)                        | -15.8<br>(-17.3 to -14.2)                         | -21.2<br>(-22.6 to -19.8)                           |
| Foreign body                                                                        | 5.8<br>(5.0 to 6.6)                     | 3.3<br>(2.9 to 3.9)                                  | 0.2<br>(0.1 to 0.3)                                 | 4.9<br>(3.5 to 6.4)                               | -1.0<br>(-2.5 to 0.6)                               |
| Pulmonary aspiration and foreign body in airway                                     | 2.7<br>(2.1 to 3.3)                     | 0.7<br>(0.6 to 0.9)                                  | 0.1<br>(0.1 to 0.1)                                 | 9.8<br>(7.7 to 11.9)                              | 3.9<br>(1.7 to 6.1)                                 |
| Foreign body in eyes                                                                | 0.4<br>(0.2 to 0.5)                     | 1.7<br>(1.3 to 2.1)                                  | < 0.05<br>(< 0.05 to < 0.05)                        | 9.5<br>(6.0 to 13.7)                              | 4.3<br>(1.6 to 7.1)                                 |
| Foreign body in other body part                                                     | 2.8<br>(2.3 to 3.3)                     | 0.9<br>(0.8 to 1.1)                                  | 0.1<br>(< 0.05 to 0.1)                              | -2.5<br>(-3.7 to -1.2)                            | -8.7<br>(-10.0 to -7.5)                             |
| Environmental heat and cold exposure                                                | 5.4<br>(4.6 to 6.4)                     | 1.1<br>(0.9 to 1.3)                                  | 0.2<br>(0.1 to 0.2)                                 | 17.5<br>(16.1 to 19.0)                            | 10.7<br>(9.3 to 12.1)                               |
| Other unintentional injuries                                                        | 21.7<br>(18.1 to 25.7)                  | 6.1<br>(5.4 to 6.9)                                  | 0.6<br>(0.4 to 0.9)                                 | 1.8<br>(0.2 to 3.4)                               | -3.7<br>(-5.5 to -1.9)                              |
| <b>Self-harm and interpersonal violence</b>                                         | <b>18.8</b><br><b>(17.2 to 20.5)</b>    | <b>3.9†</b><br><b>(3.4 to 4.5)</b>                   | <b>0.4</b><br><b>(0.3 to 0.6)</b>                   | <b>4.2</b><br><b>(2.5 to 5.8)</b>                 | <b>-0.7</b><br><b>(-2.2 to 0.7)</b>                 |
| Self-harm                                                                           | 1.6<br>(1.4 to 1.9)                     | 0.6<br>(0.5 to 0.7)                                  | 0.1<br>(< 0.05 to 0.1)                              | 14.3<br>(11.5 to 17.1)                            | 6.9<br>(4.2 to 9.6)                                 |
| Self-harm by firearm                                                                | 0.1<br>(0.1 to 0.1)                     | < 0.05<br>(< 0.05 to < 0.05)                         | < 0.05<br>(< 0.05 to < 0.05)                        | -24.4<br>(-26.0 to -22.6)                         | -28.8<br>(-30.4 to -27.2)                           |
| Self-harm by other specified means                                                  | 1.6<br>(1.3 to 1.8)                     | 0.6<br>(0.5 to 0.7)                                  | 0.1<br>(< 0.05 to 0.1)                              | 16.6<br>(13.6 to 19.5)                            | 9.0<br>(6.2 to 11.8)                                |
| Interpersonal violence                                                              | 17.2<br>(15.6 to 18.9)                  | 3.3‡<br>(2.9 to 3.9)                                 | 0.4<br>(0.2 to 0.5)                                 | 2.6<br>(1.0 to 4.2)                               | -1.9<br>(-3.5 to -0.4)                              |
| Assault by firearm                                                                  | 0.2<br>(0.2 to 0.2)                     | < 0.05<br>(< 0.05 to 0.1)                            | < 0.05<br>(< 0.05 to < 0.05)                        | -4.0<br>(-6.0 to -2.0)                            | -9.3<br>(-11.3 to -7.2)                             |
| Assault by sharp object                                                             | 1.4<br>(1.1 to 1.6)                     | 0.4<br>(0.3 to 0.5)                                  | < 0.05<br>(< 0.05 to < 0.05)                        | 7.2<br>(4.9 to 9.0)                               | 1.7<br>(-0.4 to 3.6)                                |
| Sexual violence                                                                     | 8.3<br>(7.3 to 9.4)                     | --                                                   | 0.1<br>(< 0.05 to 0.1)                              | -5.9<br>(-9.2 to -2.3)                            | -5.1<br>(-8.6 to -1.5)                              |
| Assault by other means                                                              | 7.2<br>(6.0 to 8.8)                     | 2.9<br>(2.5 to 3.4)                                  | 0.2<br>(0.2 to 0.4)                                 | 4.7<br>(3.1 to 6.2)                               | -1.1<br>(-2.7 to 0.5)                               |
| <b>Forces of nature, conflict and terrorism, and executions and police conflict</b> | <b>0.1</b><br><b>(&lt; 0.05 to 0.1)</b> | <b>&lt; 0.05†</b><br><b>(&lt; 0.05 to &lt; 0.05)</b> | <b>&lt; 0.05</b><br><b>(&lt; 0.05 to &lt; 0.05)</b> | <b>-18.1</b><br><b>(-76.0 to 92.9)</b>            | <b>-23.0</b><br><b>(-76.6 to 80.1)</b>              |
| Exposure to forces of nature                                                        | < 0.05<br>(< 0.05 to 0.1)               | --                                                   | < 0.05<br>(< 0.05 to < 0.05)                        | -40.3<br>(-92.5 to 279.3)                         | -45.9<br>(-93.2 to 243.1)                           |
| Conflict and terrorism                                                              | --                                      | --                                                   | --                                                  | --                                                | --                                                  |
| Executions and police conflict                                                      | < 0.05<br>(< 0.05 to 0.1)               | < 0.05<br>(< 0.05 to < 0.05)                         | < 0.05<br>(< 0.05 to < 0.05)                        | 28.3<br>(19.6 to 32.4)                            | 24.8<br>(17.4 to 28.6)                              |
| <b>Impairments</b>                                                                  | --                                      | --                                                   | --                                                  | --                                                | --                                                  |
| Anaemia                                                                             | 120.0<br>(105.7 to 133.9)               | --                                                   | 2.5<br>(1.6 to 3.7)                                 | -0.4<br>(-11.0 to 11.5)                           | -4.9<br>(-14.9 to 6.9)                              |
| Developmental intellectual disability                                               | 12.2<br>(9.6 to 14.9)                   | --                                                   | 1.3<br>(1.0 to 1.8)                                 | -4.7<br>(-8.8 to -0.4)                            | -4.9<br>(-9.1 to -0.7)                              |
| Epilepsy                                                                            | 3.2<br>(1.8 to 5.0)                     | --                                                   | 1.0<br>(0.5 to 1.7)                                 | -6.8<br>(-55.8 to 85.3)                           | -7.7<br>(-55.9 to 82.0)                             |
| Guillain-Barre syndrome                                                             | < 0.05<br>(< 0.05 to < 0.05)            | --                                                   | < 0.05<br>(< 0.05 to < 0.05)                        | 5.4<br>(2.5 to 9.0)                               | 0.1<br>(0.0 to 0.2)                                 |
| Hearing loss                                                                        | 153.5<br>(147.1 to 160.1)               | --                                                   | 4.4<br>(3.1 to 6.1)                                 | 8.0<br>(5.5 to 10.2)                              | -3.3<br>(-5.4 to -1.5)                              |
| Heart failure                                                                       | 13.2<br>(11.5 to 15.2)                  | --                                                   | 1.1<br>(0.8 to 1.5)                                 | 13.3<br>(5.3 to 21.4)                             | -1.8<br>(-8.7 to 4.8)                               |
| Infertility                                                                         | 6.5<br>(5.1 to 8.4)                     | --                                                   | < 0.05<br>(< 0.05 to 0.1)                           | 0.0<br>(-6.6 to 7.2)                              | 0.1<br>(-6.1 to 7.2)                                |
| Pelvic inflammatory disease                                                         | 0.3<br>(0.2 to 0.3)                     | --                                                   | < 0.05<br>(< 0.05 to 0.1)                           | -9.7<br>(-23.6 to 6.5)                            | -10.5<br>(-24.8 to 6.4)                             |
| Vision loss                                                                         | 100.8<br>(87.9 to 115.5)                | --                                                   | 2.5<br>(1.7 to 3.6)                                 | 4.8<br>(-0.2 to 9.7)                              | -4.8<br>(-9.1 to -0.6)                              |

We did not calculate incidence for the nine impairments, certain NTDs, and causes with only birth prevalence. Blank cells mean that no estimate is available.

† Incidence for aggregate causes represents the sum of the incidence of the causes below the aggregate.

‡ Incidence estimates for stroke represent first-ever stroke only.

^ Incidence of HIV/AIDS represents new infections of HIV only and does not include new infections of Tuberculosis in HIV positive cases.

SR Table 14: Prevalence, incidence, and YLDs for 2016, percentage change of YLD counts and percentage change of age-standardised YLD rates between 2006 and 2016 by cause and impairments, for all ages, Morocco.

| Cause                                                                                | Prevalence in thousands (95% UI)          | Incidence in thousands (95% UI)               | YLDs in thousands (95% UI)             |                                                   |                                                     |
|--------------------------------------------------------------------------------------|-------------------------------------------|-----------------------------------------------|----------------------------------------|---------------------------------------------------|-----------------------------------------------------|
|                                                                                      | 2016 counts                               | 2016 counts                                   | 2016 counts                            | Percentage change in counts between 2006 and 2016 | Percentage change in age-standardised rates between |
| <b>All causes</b>                                                                    | <b>32,698.2</b><br>(32,568.1 to 32,822.9) | <b>211,935.7†</b><br>(199,780.6 to 225,398.4) | <b>4,059.3</b><br>(3,004.3 to 5,279.0) | <b>16.1</b><br>(13.7 to 18.8)                     | <b>-1.7</b><br>(-3.5 to 0.3)                        |
| <b>Communicable, maternal, neonatal, and nutritional disorders</b>                   | <b>22,928.8</b><br>(21,737.0 to 24,089.1) | <b>116,880.5†</b><br>(106,226.2 to 128,230.4) | <b>370.0</b><br>(257.0 to 516.1)       | <b>-8.1</b><br>(-16.2 to 0.6)                     | <b>-12.9</b><br>(-20.2 to -5.3)                     |
| <b>HIV/AIDS and tuberculosis</b>                                                     | <b>12,995.8</b><br>(9,630.6 to 15,758.9)  | <b>61.5†</b><br>(41.6 to 86.6)                | <b>8.8</b><br>(4.9 to 14.4)            | <b>-1.2</b><br>(-17.6 to 17.5)                    | <b>-15.8</b><br>(-28.3 to -1.3)                     |
| Tuberculosis                                                                         | 10,974.5<br>(7,640.2 to 14,492.7)         | 60.8†<br>(41.4 to 85.9)                       | 7.4<br>(4.3 to 11.6)                   | -4.0<br>(-20.4 to 12.2)                           | -17.9<br>(-30.2 to -5.8)                            |
| Drug-susceptible tuberculosis                                                        | 24.3<br>(16.4 to 34.4)                    | 60.0<br>(40.7 to 85.2)                        | 7.3<br>(4.2 to 11.4)                   | -3.9<br>(-21.2 to 13.2)                           | -17.8<br>(-30.4 to -4.8)                            |
| Multidrug-resistant tuberculosis without extensive drug resistance                   | 0.3<br>(0.1 to 0.8)                       | 0.8<br>(0.2 to 1.9)                           | 0.1<br>(< 0.05 to 0.3)                 | -12.4<br>(-80.6 to 559.1)                         | -25.3<br>(-83.5 to 467.0)                           |
| Extensively drug-resistant tuberculosis                                              | < 0.05<br>(< 0.05 to < 0.05)              | < 0.05<br>(< 0.05 to 0.1)                     | < 0.05<br>(< 0.05 to < 0.05)           | 98.8<br>(-56.0 to 1,397.0)                        | 69.6<br>(-62.5 to 1,187.9)                          |
| Latent tuberculosis infection                                                        | 10,949.9<br>(7,616.0 to 14,465.1)         | --                                            | --                                     | --                                                | --                                                  |
| HIV/AIDS                                                                             | 11.3<br>(1.8 to 33.2)                     | 0.7^<br>(0.1 to 2.3)                          | 1.4<br>(0.3 to 4.7)                    | 16.3<br>(-29.2 to 86.8)                           | -2.0<br>(-41.1 to 60.4)                             |
| Drug-susceptible HIV/AIDS - Tuberculosis                                             | 0.7<br>(0.3 to 1.2)                       | 1.6<br>(0.8 to 2.9)                           | 0.3<br>(0.1 to 0.5)                    | -24.4<br>(-35.1 to -14.4)                         | -34.6<br>(-43.8 to -25.9)                           |
| Multidrug-resistant HIV/AIDS - Tuberculosis without extensive drug resistance        | < 0.05<br>(< 0.05 to < 0.05)              | < 0.05<br>(< 0.05 to 0.1)                     | < 0.05<br>(< 0.05 to < 0.05)           | -31.7<br>(-85.0 to 409.9)                         | -40.9<br>(-87.0 to 341.0)                           |
| Extensively drug-resistant HIV/AIDS - Tuberculosis                                   | < 0.05<br>(< 0.05 to < 0.05)              | < 0.05<br>(< 0.05 to < 0.05)                  | < 0.05<br>(< 0.05 to < 0.05)           | 55.1<br>(-65.8 to 1,057.9)                        | 34.2<br>(-70.4 to 901.5)                            |
| HIV/AIDS resulting in other diseases                                                 | 10.7<br>(1.0 to 32.5)                     | 0.7<br>(0.1 to 2.3)                           | 1.2<br>(0.1 to 4.4)                    | 33.4<br>(-30.3 to 423.6)                          | 11.3<br>(-43.0 to 390.8)                            |
| <b>Diarrhoea, lower respiratory infections, and other common infectious diseases</b> | <b>1,997.9</b><br>(1,880.4 to 2,129.8)    | <b>109,547.2†</b><br>(98,829.1 to 120,762.2)  | <b>95.2</b><br>(66.0 to 131.1)         | <b>-1.2</b><br>(-4.4 to 2.2)                      | <b>-5.9</b><br>(-8.6 to -3.0)                       |
| Diarrhoeal diseases                                                                  | 289.9<br>(269.8 to 312.8)                 | 19,015.3<br>(17,675.3 to 20,520.3)            | 32.7<br>(22.5 to 45.0)                 | -6.5<br>(-11.9 to -0.8)                           | -6.6<br>(-11.8 to -1.0)                             |
| Intestinal infectious diseases                                                       | 0.8<br>(0.7 to 1.0)                       | 16.3†<br>(14.2 to 18.7)                       | 0.1<br>(0.1 to 0.2)                    | -24.1<br>(-35.3 to -11.5)                         | -27.2<br>(-36.9 to -15.8)                           |
| Typhoid fever                                                                        | 0.8<br>(0.7 to 1.0)                       | 13.3<br>(11.5 to 15.3)                        | 0.1<br>(0.1 to 0.2)                    | -24.2<br>(-35.9 to -10.5)                         | -27.1<br>(-37.4 to -14.9)                           |
| Paratyphoid fever                                                                    | 0.1<br>(0.1 to 0.2)                       | 3.0<br>(2.5 to 3.5)                           | < 0.05<br>(< 0.05 to < 0.05)           | -18.5<br>(-31.3 to -3.4)                          | -23.1<br>(-34.7 to -10.0)                           |
| Other intestinal infectious diseases                                                 | --                                        | --                                            | < 0.05<br>(< 0.05 to < 0.05)           | -43.3<br>(-53.1 to -31.7)                         | -44.4<br>(-53.4 to -34.0)                           |
| Lower respiratory infections                                                         | 37.2<br>(34.2 to 40.4)                    | 1,662.7<br>(1,515.6 to 1,816.7)               | 2.2<br>(1.4 to 3.2)                    | 3.4<br>(-6.6 to 15.0)                             | -7.5<br>(-16.0 to 1.9)                              |
| Upper respiratory infections                                                         | 1,141.6<br>(1,007.4 to 1,289.2)           | 86,048.0<br>(75,508.0 to 97,538.0)            | 28.4<br>(16.4 to 44.6)                 | 4.1<br>(-2.2 to 10.3)                             | -2.2<br>(-7.8 to 3.7)                               |
| Otitis media                                                                         | 468.8<br>(418.6 to 516.6)                 | 2,123.1<br>(1,716.5 to 2,628.9)               | 13.8<br>(8.6 to 20.9)                  | -5.7<br>(-11.8 to 0.8)                            | -8.0<br>(-13.8 to -2.1)                             |
| Meningitis                                                                           | 68.8<br>(59.5 to 79.9)                    | 9.4<br>(8.1 to 11.1)                          | 7.4<br>(5.1 to 9.8)                    | 1.9<br>(-5.1 to 9.2)                              | -7.9<br>(-14.0 to -1.5)                             |
| Pneumococcal meningitis                                                              | 27.1<br>(22.5 to 33.5)                    | 1.7<br>(1.3 to 2.2)                           | 2.9<br>(2.0 to 4.0)                    | -9.2<br>(-22.5 to 6.9)                            | -18.5<br>(-29.8 to -5.1)                            |
| H influenzae type B meningitis                                                       | 10.5<br>(8.7 to 13.1)                     | 1.0<br>(0.7 to 1.4)                           | 1.6<br>(1.1 to 2.1)                    | -6.5<br>(-14.3 to 0.4)                            | -15.0<br>(-22.2 to -8.7)                            |
| Meningococcal infection                                                              | 17.6<br>(12.7 to 23.4)                    | 4.2<br>(3.4 to 5.3)                           | 1.5<br>(1.0 to 2.0)                    | 10.8<br>(4.2 to 18.3)                             | 0.2<br>(-5.9 to 7.0)                                |
| Other meningitis                                                                     | 13.6<br>(10.4 to 17.5)                    | 2.5<br>(1.9 to 3.1)                           | 1.4<br>(1.0 to 2.0)                    | 37.4<br>(24.9 to 54.0)                            | 25.4<br>(13.8 to 41.3)                              |
| Encephalitis                                                                         | 86.1<br>(58.0 to 125.3)                   | 37.8<br>(33.4 to 42.8)                        | 9.3<br>(6.5 to 12.3)                   | 10.2<br>(-2.6 to 23.3)                            | -5.5<br>(-16.0 to 5.2)                              |
| Diphtheria                                                                           | < 0.05<br>(< 0.05 to < 0.05)              | < 0.05<br>(< 0.05 to < 0.05)                  | < 0.05<br>(< 0.05 to < 0.05)           | -28.0<br>(-57.9 to 26.2)                          | -32.9<br>(-60.8 to 17.7)                            |
| Whooping cough                                                                       | 1.6<br>(1.2 to 2.0)                       | 11.3<br>(8.6 to 14.7)                         | 0.1<br>(< 0.05 to 0.1)                 | -53.3<br>(-66.9 to -36.0)                         | -43.7<br>(-60.4 to -22.9)                           |
| Tetanus                                                                              | 0.1<br>(0.1 to 0.1)                       | 0.2<br>(< 0.05 to 0.6)                        | < 0.05<br>(< 0.05 to < 0.05)           | -23.7<br>(-48.3 to 1.4)                           | -31.6<br>(-52.4 to -9.3)                            |
| Measles                                                                              | 0.2<br>(0.1 to 0.4)                       | 6.2<br>(2.1 to 14.1)                          | < 0.05<br>(< 0.05 to < 0.05)           | -95.3<br>(-97.0 to -92.6)                         | -94.4<br>(-96.4 to -91.2)                           |
| Varicella and herpes zoster                                                          | 30.3<br>(27.8 to 33.0)                    | 617.1<br>(590.4 to 642.3)                     | 1.2<br>(0.7 to 1.8)                    | 19.8<br>(5.6 to 36.9)                             | 0.0<br>(-10.5 to 12.2)                              |
| <b>Neglected tropical diseases and malaria</b>                                       | <b>5,224.2</b><br>(4,524.1 to 6,026.1)    | <b>114.8†</b><br>(91.7 to 145.3)              | <b>16.7</b><br>(10.4 to 26.1)          | <b>5.6</b><br>(-28.1 to 48.1)                     | <b>-4.5</b><br>(-34.9 to 31.5)                      |
| Malaria                                                                              | 0.7<br>(0.6 to 0.9)                       | --                                            | 0.2<br>(0.2 to 0.3)                    | 10.2<br>(2.4 to 18.0)                             | -1.1<br>(-8.0 to 5.8)                               |
| Chagas disease                                                                       | --                                        | --                                            | --                                     | --                                                | --                                                  |
| Leishmaniasis                                                                        | 78.8<br>(67.0 to 94.1)                    | 9.5<br>(3.5 to 19.2)                          | 4.5<br>(2.9 to 6.8)                    | 88.1<br>(44.2 to 156.6)                           | 58.9<br>(20.1 to 122.5)                             |
| Visceral leishmaniasis                                                               | 0.1<br>(0.1 to 0.1)                       | 0.2<br>(0.2 to 0.3)                           | < 0.05<br>(< 0.05 to < 0.05)           | -36.3<br>(-46.1 to -25.1)                         | -49.9<br>(-59.3 to -39.5)                           |
| Cutaneous and mucocutaneous leishmaniasis                                            | 71.5<br>(58.2 to 91.5)                    | 9.2<br>(3.2 to 19.0)                          | 4.5<br>(2.9 to 6.8)                    | 88.5<br>(44.4 to 157.6)                           | 59.2<br>(20.3 to 123.3)                             |
| African trypanosomiasis                                                              | --                                        | --                                            | --                                     | --                                                | --                                                  |
| Schistosomiasis                                                                      | 351.5<br>(275.4 to 447.8)                 | 101.0<br>(80.7 to 129.1)                      | 2.5<br>(1.1 to 4.8)                    | 31.1<br>(17.0 to 50.3)                            | 7.1<br>(-4.2 to 22.6)                               |
| Cysticercosis                                                                        | --                                        | --                                            | --                                     | --                                                | --                                                  |
| Cystic echinococcosis                                                                | 20.3<br>(4.7 to 69.9)                     | 4.2<br>(1.0 to 16.0)                          | 1.9<br>(0.4 to 6.7)                    | -38.3<br>(-89.6 to 306.6)                         | -47.5<br>(-90.1 to 219.2)                           |
| Lymphatic filariasis                                                                 | --                                        | --                                            | --                                     | --                                                | --                                                  |
| Onchocerciasis                                                                       | --                                        | --                                            | --                                     | --                                                | --                                                  |
| Trachoma                                                                             | 16.4<br>(10.4 to 25.5)                    | --                                            | 1.1<br>(0.6 to 1.7)                    | -1.5<br>(-32.1 to 41.1)                           | -25.7<br>(-50.7 to 10.3)                            |
| Dengue                                                                               | --                                        | --                                            | --                                     | --                                                | --                                                  |
| Yellow fever                                                                         | --                                        | --                                            | --                                     | --                                                | --                                                  |
| Rabies                                                                               | < 0.05<br>(< 0.05 to < 0.05)              | < 0.05<br>(< 0.05 to < 0.05)                  | < 0.05<br>(< 0.05 to < 0.05)           | -44.7<br>(-74.9 to 37.2)                          | -51.3<br>(-78.9 to 28.7)                            |
| Intestinal nematode infections                                                       | 4,632.8<br>(3,911.4 to 5,456.9)           | --                                            | 1.2<br>(0.6 to 2.1)                    | 23.4<br>(-16.7 to 84.7)                           | 13.9<br>(-23.9 to 69.0)                             |
| Ascariasis                                                                           | 2,783.0<br>(2,205.3 to 3,488.0)           | --                                            | 0.9<br>(0.5 to 1.6)                    | 7.2<br>(-32.8 to 72.5)                            | 0.1<br>(-37.6 to 63.6)                              |

| Cause                                                                   | Prevalence in thousands (95% UI)                 | Incidence in thousands (95% UI)                   | YLDs in thousands (95% UI)                    |                                                   |                                                     |
|-------------------------------------------------------------------------|--------------------------------------------------|---------------------------------------------------|-----------------------------------------------|---------------------------------------------------|-----------------------------------------------------|
|                                                                         | 2016 counts                                      | 2016 counts                                       | 2016 counts                                   | Percentage change in counts between 2006 and 2016 | Percentage change in age-standardised rates between |
| Trichuriasis                                                            | 2,021.1<br>(1,546.0 to 2,606.5)                  | --                                                | 0.2<br>(0.1 to 0.4)                           | 296.7<br>(95.6 to 669.2)                          | 265.3<br>(79.2 to 619.1)                            |
| Hookworm disease                                                        | 26.2<br>(20.0 to 33.7)                           | --                                                | 0.1<br>(0.1 to 0.2)                           | 38.5<br>(-9.1 to 109.5)                           | 16.3<br>(-23.0 to 76.0)                             |
| Food-borne trematodiasis                                                | --                                               | --                                                | --                                            | --                                                | --                                                  |
| Leprosy                                                                 | 0.3<br>(0.2 to 0.4)                              | < 0.05<br>(< 0.05 to < 0.05)                      | < 0.05<br>(< 0.05 to < 0.05)                  | -3.1<br>(-11.3 to 7.6)                            | -24.8<br>(-32.4 to -14.9)                           |
| Ebola virus disease                                                     | --                                               | --                                                | --                                            | --                                                | --                                                  |
| Zika virus disease                                                      | --                                               | --                                                | --                                            | --                                                | --                                                  |
| Guinea worm disease                                                     | --                                               | --                                                | --                                            | --                                                | --                                                  |
| Other neglected tropical diseases                                       | 231.2<br>(185.3 to 275.7)                        | --                                                | 5.3<br>(2.9 to 8.6)                           | -14.9<br>(-38.8 to 12.6)                          | -9.8<br>(-34.2 to 19.7)                             |
| <b>Maternal disorders</b>                                               | <b>35.2</b><br><b>(27.2 to 44.6)</b>             | <b>287.8†</b><br><b>(257.2 to 320.5)</b>          | <b>2.1</b><br><b>(1.2 to 3.2)</b>             | <b>-12.8</b><br><b>(-39.4 to 26.0)</b>            | <b>-22.7</b><br><b>(-45.9 to 11.9)</b>              |
| Maternal haemorrhage                                                    | 4.1<br>(2.9 to 5.6)                              | 28.2<br>(18.9 to 41.7)                            | 0.1<br>(0.1 to 0.2)                           | -24.1<br>(-49.5 to 12.9)                          | -32.0<br>(-54.2 to 1.3)                             |
| Maternal sepsis and other pregnancy related infections                  | 6.3<br>(4.0 to 9.4)                              | 55.9<br>(41.9 to 75.9)                            | 0.2<br>(0.1 to 0.4)                           | -19.6<br>(-64.0 to 61.7)                          | -28.1<br>(-66.6 to 44.2)                            |
| Maternal hypertensive disorders                                         | 26.0<br>(16.8 to 35.6)                           | 112.7<br>(95.8 to 127.9)                          | 1.2<br>(0.7 to 2.0)                           | -8.1<br>(-44.7 to 56.3)                           | -18.9<br>(-51.0 to 37.8)                            |
| Maternal obstructed labour and uterine rupture                          | 0.1<br>(0.1 to 0.2)                              | 9.3<br>(6.7 to 13.0)                              | < 0.05<br>(< 0.05 to 0.1)                     | -7.5<br>(-49.6 to 68.3)                           | -18.1<br>(-55.6 to 49.1)                            |
| Maternal abortion, miscarriage, and ectopic pregnancy                   | 0.7<br>(0.4 to 1.0)                              | 81.7<br>(62.6 to 105.0)                           | 0.1<br>(< 0.05 to 0.1)                        | -19.0<br>(-53.6 to 51.6)                          | -29.4<br>(-59.8 to 33.9)                            |
| Other maternal disorders                                                | --                                               | --                                                | 0.3<br>(0.2 to 0.5)                           | -17.2<br>(-42.4 to 19.6)                          | -26.2<br>(-48.3 to 6.7)                             |
| <b>Neonatal disorders</b>                                               | <b>355.0</b><br><b>(274.8 to 508.8)</b>          | --                                                | <b>78.4</b><br><b>(47.3 to 151.0)</b>         | <b>5.1</b><br><b>(-8.9 to 27.2)</b>               | <b>-0.3</b><br><b>(-13.9 to 21.3)</b>               |
| Neonatal preterm birth complications                                    | 253.5<br>(192.1 to 335.3)                        | --                                                | 31.9<br>(19.3 to 50.8)                        | 0.3<br>(-23.4 to 33.9)                            | -5.9<br>(-28.1 to 25.3)                             |
| Neonatal encephalopathy due to birth asphyxia and trauma                | 45.5<br>(21.4 to 87.3)                           | --                                                | 6.2<br>(1.2 to 17.0)                          | 24.0<br>(-27.9 to 125.4)                          | 15.4<br>(-32.8 to 109.0)                            |
| Neonatal sepsis and other neonatal infections                           | 72.8<br>(24.2 to 227.8)                          | --                                                | 31.6<br>(8.9 to 104.6)                        | 9.6<br>(-11.5 to 75.5)                            | 3.9<br>(-16.6 to 70.2)                              |
| Hemolytic disease and other neonatal jaundice                           | 22.3<br>(19.5 to 25.5)                           | --                                                | 6.7<br>(5.0 to 8.7)                           | 6.0<br>(-8.4 to 22.2)                             | -2.2<br>(-15.2 to 12.0)                             |
| Other neonatal disorders                                                | --                                               | --                                                | 2.0<br>(1.1 to 4.0)                           | -23.5<br>(-36.0 to -5.6)                          | -5.8<br>(-21.0 to 16.1)                             |
| <b>Nutritional deficiencies</b>                                         | <b>7,909.3</b><br><b>(7,181.7 to 8,615.4)</b>    | <b>2,180.8†</b><br><b>(1,840.9 to 2,658.8)</b>    | <b>138.7</b><br><b>(85.4 to 214.3)</b>        | <b>-21.4</b><br><b>(-35.6 to -5.7)</b>            | <b>-23.7</b><br><b>(-36.2 to -9.4)</b>              |
| Protein-energy malnutrition                                             | 92.5<br>(69.1 to 125.2)                          | 44.2<br>(33.2 to 59.2)                            | 5.5<br>(3.4 to 8.4)                           | -48.0<br>(-61.6 to -31.0)                         | -35.8<br>(-52.4 to -15.1)                           |
| Iodine deficiency                                                       | 624.7<br>(484.8 to 781.1)                        | 13.6<br>(10.7 to 16.9)                            | 14.8<br>(8.7 to 22.8)                         | -5.5<br>(-15.2 to 6.7)                            | -19.2<br>(-27.5 to -9.5)                            |
| Vitamin A deficiency                                                    | 2,330.1<br>(1,971.2 to 2,785.7)                  | 2,123.0<br>(1,786.6 to 2,607.9)                   | 2.5<br>(1.4 to 4.0)                           | -0.8<br>(-17.5 to 22.4)                           | -2.7<br>(-18.4 to 17.6)                             |
| Iron-deficiency anaemia                                                 | 5,380.5<br>(4,486.2 to 6,332.8)                  | --                                                | 115.7<br>(69.5 to 183.3)                      | -21.5<br>(-37.8 to -2.5)                          | -23.7<br>(-38.2 to -6.0)                            |
| Other nutritional deficiencies                                          | --                                               | --                                                | 0.2<br>(0.1 to 0.3)                           | -48.7<br>(-62.8 to -31.3)                         | -36.9<br>(-54.0 to -15.7)                           |
| <b>Other communicable, maternal, neonatal, and nutritional diseases</b> | <b>7,368.2</b><br><b>(6,920.3 to 7,817.3)</b>    | <b>4,688.4</b><br><b>(4,088.4 to 5,342.5)</b>     | <b>28.1</b><br><b>(17.4 to 44.2)</b>          | <b>12.4</b><br><b>(4.4 to 21.6)</b>               | <b>-0.6</b><br><b>(-7.2 to 7.0)</b>                 |
| Sexually transmitted diseases excluding HIV                             | 5,534.0<br>(5,147.1 to 5,943.0)                  | 4,491.7<br>(3,894.4 to 5,140.3)                   | 23.1<br>(14.1 to 37.0)                        | 17.8<br>(9.2 to 26.4)                             | 1.1<br>(-6.0 to 8.3)                                |
| Syphilis                                                                | 350.9<br>(260.3 to 452.7)                        | 240.6<br>(169.8 to 326.7)                         | 0.5<br>(0.3 to 0.6)                           | 30.2<br>(13.6 to 47.0)                            | 2.0<br>(-8.9 to 14.1)                               |
| Chlamydial infection                                                    | 470.3<br>(367.3 to 587.3)                        | 353.5<br>(283.6 to 443.4)                         | 2.4<br>(1.4 to 4.0)                           | 14.5<br>(-0.2 to 30.5)                            | 1.0<br>(-11.4 to 14.6)                              |
| Gonococcal infection                                                    | 842.1<br>(698.7 to 1,001.5)                      | 3,029.4<br>(2,457.3 to 3,674.6)                   | 11.2<br>(6.6 to 18.5)                         | 17.8<br>(6.3 to 30.6)                             | 1.1<br>(-8.4 to 12.2)                               |
| Trichomoniasis                                                          | 517.0<br>(445.1 to 593.6)                        | 436.4<br>(373.7 to 504.5)                         | 0.6<br>(0.2 to 1.2)                           | 18.9<br>(9.1 to 30.3)                             | 2.1<br>(-6.4 to 11.8)                               |
| Genital herpes                                                          | 3,600.9<br>(3,091.7 to 4,251.5)                  | 229.8<br>(195.0 to 273.2)                         | 0.9<br>(0.3 to 2.1)                           | 21.0<br>(7.3 to 34.0)                             | -0.6<br>(-10.6 to 10.3)                             |
| Other sexually transmitted diseases                                     | 197.9<br>(165.4 to 224.9)                        | 202.0<br>(156.9 to 254.5)                         | 7.6<br>(4.8 to 11.8)                          | 17.8<br>(8.0 to 27.6)                             | 1.1<br>(-7.5 to 9.4)                                |
| Hepatitis                                                               | 2,086.4<br>(1,725.1 to 2,530.4)                  | 196.6<br>(153.1 to 249.8)                         | 0.2<br>(0.1 to 0.4)                           | -3.1<br>(-21.7 to 20.5)                           | -16.9<br>(-31.8 to 1.8)                             |
| Acute hepatitis A                                                       | 3.3<br>(1.2 to 6.3)                              | 43.1<br>(15.2 to 81.5)                            | < 0.05<br>(< 0.05 to 0.1)                     | -9.3<br>(-57.0 to 108.7)                          | -15.8<br>(-58.6 to 80.2)                            |
| Hepatitis B                                                             | 1,758.8<br>(1,408.2 to 2,190.3)                  | 139.2<br>(109.4 to 178.7)                         | 0.2<br>(0.1 to 0.3)                           | -1.5<br>(-20.9 to 21.0)                           | -18.2<br>(-34.1 to 0.8)                             |
| Hepatitis C                                                             | 323.8<br>(289.2 to 362.9)                        | 7.3<br>(6.5 to 8.2)                               | < 0.05<br>(< 0.05 to < 0.05)                  | -4.2<br>(-6.7 to -1.2)                            | -1.7<br>(-2.3 to -1.1)                              |
| Acute hepatitis E                                                       | 0.5<br>(0.4 to 0.7)                              | 7.0<br>(5.5 to 9.3)                               | < 0.05<br>(< 0.05 to < 0.05)                  | 1.2<br>(-11.0 to 14.0)                            | -12.0<br>(-19.1 to -4.7)                            |
| Other infectious diseases                                               | 190.5<br>(154.4 to 227.8)                        | < 0.05<br>(< 0.05 to 0.1)                         | 4.7<br>(2.8 to 7.5)                           | -7.8<br>(-27.2 to 16.0)                           | -6.0<br>(-25.1 to 18.0)                             |
| <b>Non-communicable diseases</b>                                        | <b>31,123.5</b><br><b>(30,904.2 to 31,333.4)</b> | <b>92,879.6†</b><br><b>(87,051.7 to 98,739.8)</b> | <b>3,489.7</b><br><b>(2,576.4 to 4,513.2)</b> | <b>19.1</b><br><b>(16.6 to 21.6)</b>              | <b>-0.6</b><br><b>(-2.4 to 1.3)</b>                 |
| <b>Neoplasms</b>                                                        | <b>88.5</b><br><b>(82.7 to 96.0)</b>             | <b>34.0</b><br><b>(30.1 to 36.3)</b>              | <b>11.4</b><br><b>(8.1 to 15.1)</b>           | <b>41.1</b><br><b>(30.7 to 52.0)</b>              | <b>6.4</b><br><b>(-0.9 to 13.9)</b>                 |
| Lip and oral cavity cancer                                              | 1.9<br>(1.8 to 2.1)                              | 0.5<br>(0.5 to 0.6)                               | 0.2<br>(0.1 to 0.3)                           | 37.3<br>(19.7 to 56.1)                            | 1.9<br>(-11.3 to 16.5)                              |
| Nasopharynx cancer                                                      | 1.9<br>(1.6 to 2.3)                              | 0.6<br>(0.5 to 0.7)                               | 0.2<br>(0.2 to 0.3)                           | 19.1<br>(-1.8 to 45.7)                            | -5.5<br>(-21.5 to 14.2)                             |
| Other pharynx cancer                                                    | 0.4<br>(0.4 to 0.5)                              | 0.2<br>(0.1 to 0.2)                               | 0.1<br>(< 0.05 to 0.1)                        | 50.0<br>(26.3 to 72.9)                            | 6.3<br>(-10.6 to 22.7)                              |
| Oesophageal cancer                                                      | 0.4<br>(0.4 to 0.4)                              | 0.3<br>(0.3 to 0.4)                               | 0.1<br>(0.1 to 0.1)                           | 23.6<br>(11.7 to 36.4)                            | -6.7<br>(-15.8 to 3.3)                              |
| Stomach cancer                                                          | 1.8<br>(1.6 to 1.9)                              | 1.2<br>(1.1 to 1.3)                               | 0.3<br>(0.2 to 0.4)                           | 16.2<br>(4.8 to 29.5)                             | -14.2<br>(-22.8 to -3.5)                            |
| Colon and rectum cancer                                                 | 8.7<br>(7.5 to 9.6)                              | 2.8<br>(2.4 to 3.0)                               | 1.0<br>(0.7 to 1.3)                           | 50.9<br>(25.8 to 75.5)                            | 10.4<br>(-8.1 to 29.5)                              |
| Liver cancer                                                            | 0.2<br>(0.2 to 0.2)                              | 0.5<br>(0.4 to 0.5)                               | 0.1<br>(0.1 to 0.1)                           | 35.8<br>(19.7 to 54.6)                            | 1.3<br>(-11.3 to 14.9)                              |
| Liver cancer due to hepatitis B                                         | 0.1<br>(0.1 to 0.2)                              | 0.2<br>(0.1 to 0.2)                               | < 0.05<br>(< 0.05 to 0.1)                     | 35.0<br>(17.0 to 55.6)                            | 0.8<br>(-12.1 to 15.9)                              |



| Cause                                              | Prevalence in thousands (95% UI)              | Incidence in thousands (95% UI)          | YLDs in thousands (95% UI)              |                                                   |                                                     |
|----------------------------------------------------|-----------------------------------------------|------------------------------------------|-----------------------------------------|---------------------------------------------------|-----------------------------------------------------|
|                                                    | 2016 counts                                   | 2016 counts                              | 2016 counts                             | Percentage change in counts between 2006 and 2016 | Percentage change in age-standardised rates between |
| Liver cancer due to hepatitis C                    | 0.1<br>(0.1 to 0.2)                           | 0.2<br>(0.1 to 0.2)                      | < 0.05<br>(< 0.05 to 0.1)               | 38.9<br>(20.6 to 59.6)                            | 2.0<br>(-11.1 to 17.4)                              |
| Liver cancer due to alcohol use                    | < 0.05<br>(< 0.05 to < 0.05)                  | < 0.05<br>(< 0.05 to 0.1)                | < 0.05<br>(< 0.05 to < 0.05)            | 23.9<br>(3.0 to 48.9)                             | -7.3<br>(-22.7 to 12.3)                             |
| Liver cancer due to other causes                   | 0.1<br>(0.1 to 0.1)                           | 0.1<br>(0.1 to 0.2)                      | < 0.05<br>(< 0.05 to < 0.05)            | 36.9<br>(17.5 to 59.3)                            | 3.8<br>(-10.9 to 21.4)                              |
| Gallbladder and biliary tract cancer               | 0.2<br>(0.2 to 0.3)                           | 0.3<br>(0.2 to 0.3)                      | 0.1<br>(< 0.05 to 0.1)                  | 22.2<br>(10.6 to 34.1)                            | -9.6<br>(-17.6 to -1.3)                             |
| Pancreatic cancer                                  | 0.7<br>(0.6 to 0.7)                           | 0.9<br>(0.8 to 1.0)                      | 0.2<br>(0.1 to 0.3)                     | 46.4<br>(34.2 to 59.4)                            | 6.7<br>(-1.9 to 15.5)                               |
| Larynx cancer                                      | 2.7<br>(2.4 to 3.0)                           | 0.8<br>(0.7 to 0.9)                      | 0.3<br>(0.2 to 0.5)                     | 42.7<br>(21.5 to 68.1)                            | 2.4<br>(-12.9 to 19.4)                              |
| Tracheal, bronchus, and lung cancer                | 4.6<br>(4.1 to 5.1)                           | 4.0<br>(3.6 to 4.5)                      | 0.9<br>(0.7 to 1.3)                     | 37.2<br>(6.4 to 78.4)                             | 0.2<br>(-21.2 to 27.6)                              |
| Malignant skin melanoma                            | 0.4<br>(0.4 to 0.6)                           | 0.1<br>(0.1 to 0.1)                      | < 0.05<br>(< 0.05 to 0.1)               | 63.1<br>(41.4 to 85.4)                            | 20.6<br>(5.5 to 38.5)                               |
| Non-melanoma skin cancer                           | 0.2<br>(0.1 to 0.4)                           | 1.1<br>(0.7 to 1.7)                      | < 0.05<br>(< 0.05 to < 0.05)            | 83.5<br>(38.7 to 157.8)                           | 29.3<br>(-2.9 to 83.8)                              |
| Non-melanoma skin cancer (squamous-cell carcinoma) | 0.2<br>(0.1 to 0.3)                           | 0.3<br>(0.2 to 0.4)                      | < 0.05<br>(< 0.05 to < 0.05)            | 75.4<br>(27.6 to 155.7)                           | 23.5<br>(-10.5 to 83.7)                             |
| Non-melanoma skin cancer (basal-cell carcinoma)    | 0.1<br>(0.1 to 0.2)                           | 0.8<br>(0.5 to 1.5)                      | < 0.05<br>(< 0.05 to < 0.05)            | 174.5<br>(92.4 to 280.5)                          | 104.7<br>(43.9 to 193.1)                            |
| Breast cancer                                      | 35.3<br>(27.0 to 41.8)                        | 7.6<br>(6.0 to 9.0)                      | 3.1<br>(2.0 to 4.3)                     | 47.8<br>(15.3 to 82.0)                            | 12.8<br>(-12.0 to 37.0)                             |
| Cervical cancer                                    | 6.4<br>(3.0 to 7.9)                           | 1.7<br>(0.8 to 2.1)                      | 0.6<br>(0.3 to 0.9)                     | 18.7<br>(-7.1 to 51.2)                            | -11.3<br>(-30.0 to 12.4)                            |
| Uterine cancer                                     | 2.7<br>(2.3 to 3.2)                           | 0.6<br>(0.5 to 0.7)                      | 0.2<br>(0.1 to 0.3)                     | 60.2<br>(25.2 to 105.2)                           | 15.1<br>(-8.4 to 44.9)                              |
| Ovarian cancer                                     | 2.8<br>(2.3 to 3.2)                           | 0.9<br>(0.8 to 1.0)                      | 0.4<br>(0.3 to 0.6)                     | 42.1<br>(11.4 to 80.7)                            | 7.9<br>(-16.9 to 41.2)                              |
| Prostate cancer                                    | 6.0<br>(3.1 to 7.7)                           | 1.6<br>(0.9 to 2.0)                      | 0.7<br>(0.3 to 1.0)                     | 68.6<br>(31.9 to 116.2)                           | 20.2<br>(-5.4 to 51.0)                              |
| Testicular cancer                                  | 0.4<br>(0.3 to 0.4)                           | 0.1<br>(0.1 to 0.1)                      | < 0.05<br>(< 0.05 to < 0.05)            | 32.7<br>(1.2 to 68.9)                             | 16.7<br>(-10.3 to 47.2)                             |
| Kidney cancer                                      | 1.6<br>(1.4 to 1.8)                           | 0.4<br>(0.4 to 0.5)                      | 0.1<br>(0.1 to 0.2)                     | 47.1<br>(25.9 to 69.2)                            | 14.6<br>(-2.1 to 32.5)                              |
| Bladder cancer                                     | 4.2<br>(3.6 to 4.7)                           | 1.1<br>(0.9 to 1.2)                      | 0.4<br>(0.3 to 0.6)                     | 62.9<br>(37.1 to 90.7)                            | 16.1<br>(-2.1 to 36.1)                              |
| Brain and nervous system cancer                    | 1.6<br>(1.2 to 1.9)                           | 0.8<br>(0.6 to 0.9)                      | 0.2<br>(0.2 to 0.3)                     | 28.9<br>(12.7 to 49.3)                            | 4.7<br>(-7.8 to 21.7)                               |
| Thyroid cancer                                     | 6.7<br>(3.1 to 8.2)                           | 1.3<br>(0.6 to 1.6)                      | 0.4<br>(0.2 to 0.6)                     | 84.0<br>(42.3 to 137.4)                           | 40.1<br>(9.1 to 79.1)                               |
| Mesothelioma                                       | 0.1<br>(0.1 to 0.1)                           | 0.1<br>(0.1 to 0.1)                      | < 0.05<br>(< 0.05 to < 0.05)            | 52.8<br>(33.8 to 73.2)                            | 19.5<br>(4.5 to 36.0)                               |
| Hodgkin lymphoma                                   | 0.9<br>(0.5 to 1.1)                           | 0.3<br>(0.2 to 0.4)                      | 0.1<br>(0.1 to 0.2)                     | -1.4<br>(-13.6 to 10.6)                           | -16.4<br>(-25.3 to -6.3)                            |
| Non-Hodgkin's lymphoma                             | 4.2<br>(2.6 to 5.0)                           | 1.6<br>(1.0 to 1.8)                      | 0.5<br>(0.3 to 0.7)                     | 38.6<br>(21.5 to 56.7)                            | 4.7<br>(-8.6 to 18.5)                               |
| Multiple myeloma                                   | 0.4<br>(0.4 to 0.5)                           | 0.3<br>(0.2 to 0.3)                      | 0.1<br>(0.1 to 0.2)                     | 47.0<br>(32.4 to 63.5)                            | 8.2<br>(-2.6 to 20.9)                               |
| Leukaemia                                          | 2.8<br>(2.2 to 3.1)                           | 0.8<br>(0.6 to 0.8)                      | 0.4<br>(0.2 to 0.5)                     | 14.7<br>(4.5 to 25.0)                             | -5.9<br>(-14.4 to 2.9)                              |
| Acute lymphoid leukaemia                           | 0.3<br>(0.2 to 0.4)                           | 0.1<br>(0.1 to 0.1)                      | < 0.05<br>(< 0.05 to 0.1)               | 7.2<br>(-9.8 to 28.2)                             | -0.0<br>(-15.8 to 19.3)                             |
| Chronic lymphoid leukaemia                         | 0.3<br>(0.2 to 0.4)                           | 0.1<br>(0.1 to 0.1)                      | < 0.05<br>(< 0.05 to 0.1)               | 40.3<br>(20.4 to 64.6)                            | 6.3<br>(-8.4 to 24.4)                               |
| Acute myeloid leukaemia                            | 0.2<br>(0.1 to 0.2)                           | 0.1<br>(0.1 to 0.2)                      | < 0.05<br>(< 0.05 to < 0.05)            | 24.5<br>(8.6 to 41.1)                             | 6.7<br>(-5.8 to 19.8)                               |
| Chronic myeloid leukaemia                          | 0.2<br>(0.1 to 0.3)                           | 0.1<br>(< 0.05 to 0.1)                   | < 0.05<br>(< 0.05 to < 0.05)            | 15.6<br>(-0.9 to 34.5)                            | -9.1<br>(-21.6 to 6.0)                              |
| Other leukaemia                                    | 1.8<br>(1.4 to 2.0)                           | 0.4<br>(0.3 to 0.5)                      | 0.2<br>(0.1 to 0.3)                     | 10.9<br>(-2.2 to 23.7)                            | -9.7<br>(-20.3 to 0.9)                              |
| Other neoplasms                                    | 4.5<br>(4.2 to 4.9)                           | 1.6<br>(1.4 to 1.7)                      | 0.5<br>(0.3 to 0.6)                     | 20.2<br>(7.1 to 35.8)                             | -0.7<br>(-10.8 to 11.7)                             |
| <b>Cardiovascular diseases</b>                     | <b>2,415.1</b><br><b>(2,327.6 to 2,495.4)</b> | <b>278.7†</b><br><b>(264.1 to 293.3)</b> | <b>137.5</b><br><b>(100.2 to 178.8)</b> | <b>31.3</b><br><b>(27.1 to 35.8)</b>              | <b>0.9</b><br><b>(-2.3 to 4.3)</b>                  |
| Rheumatic heart disease                            | 182.2<br>(161.9 to 204.7)                     | 5.1<br>(4.5 to 5.7)                      | 8.6<br>(5.4 to 12.6)                    | 19.7<br>(9.8 to 30.8)                             | 2.7<br>(-5.8 to 11.9)                               |
| Ischaemic heart disease                            | 1,160.4<br>(1,097.6 to 1,221.2)               | 148.9<br>(137.7 to 161.0)                | 44.2<br>(30.8 to 60.5)                  | 36.3<br>(30.8 to 42.1)                            | 2.6<br>(-1.3 to 6.7)                                |
| Cerebrovascular disease                            | 274.3<br>(257.0 to 292.3)                     | 42.8‡<br>(39.0 to 46.8)                  | 42.3<br>(30.5 to 53.8)                  | 32.6<br>(22.9 to 42.1)                            | -0.5<br>(-7.5 to 6.6)                               |
| Ischaemic stroke                                   | 241.3<br>(217.4 to 267.4)                     | 32.0‡<br>(28.3 to 36.0)                  | 35.9<br>(25.9 to 45.5)                  | 32.4<br>(21.4 to 43.1)                            | -1.0<br>(-8.7 to 7.0)                               |
| Hemorrhagic stroke                                 | 43.1<br>(38.8 to 47.7)                        | 10.8‡<br>(9.7 to 12.0)                   | 6.4<br>(4.6 to 8.2)                     | 33.9<br>(19.0 to 50.4)                            | 2.7<br>(-8.2 to 14.9)                               |
| Hypertensive heart disease                         | 39.9<br>(34.1 to 47.0)                        | --                                       | 3.2<br>(2.2 to 4.4)                     | 39.1<br>(23.9 to 56.4)                            | 2.6<br>(-7.7 to 13.8)                               |
| Cardiomyopathy and myocarditis                     | 15.9<br>(14.1 to 17.7)                        | 13.0†<br>(11.2 to 15.0)                  | 1.7<br>(1.1 to 2.4)                     | 26.8<br>(13.6 to 43.0)                            | 6.3<br>(-4.3 to 19.0)                               |
| Myocarditis                                        | 6.5<br>(5.8 to 7.2)                           | 13.0<br>(11.2 to 15.0)                   | 0.5<br>(0.3 to 0.7)                     | 17.6<br>(8.3 to 27.1)                             | 4.7<br>(-4.1 to 13.4)                               |
| Alcoholic cardiomyopathy                           | 1.9<br>(1.5 to 2.2)                           | --                                       | 0.2<br>(0.1 to 0.2)                     | 42.9<br>(17.9 to 73.8)                            | 6.0<br>(-14.8 to 31.0)                              |
| Other cardiomyopathy                               | 12.8<br>(11.1 to 14.6)                        | --                                       | 1.1<br>(0.7 to 1.6)                     | 28.9<br>(10.4 to 55.1)                            | 6.9<br>(-7.9 to 25.9)                               |
| Atrial fibrillation and flutter                    | 142.8<br>(124.5 to 164.3)                     | 12.3<br>(10.5 to 14.3)                   | 11.0<br>(7.3 to 15.2)                   | 34.6<br>(25.3 to 45.0)                            | -0.3<br>(-6.8 to 6.5)                               |
| Peripheral vascular disease                        | 516.2<br>(446.1 to 600.1)                     | 51.3<br>(44.0 to 60.2)                   | 2.3<br>(1.1 to 4.3)                     | 30.2<br>(20.3 to 41.0)                            | -5.0<br>(-11.6 to 1.4)                              |
| Endocarditis                                       | 2.0<br>(1.8 to 2.3)                           | 5.4<br>(4.8 to 6.0)                      | 0.2<br>(0.1 to 0.2)                     | 28.3<br>(11.7 to 46.9)                            | 1.3<br>(-13.9 to 19.5)                              |
| Other cardiovascular and circulatory diseases      | 463.7<br>(399.9 to 535.1)                     | --                                       | 24.0<br>(16.3 to 34.0)                  | 23.4<br>(14.9 to 33.8)                            | 0.6<br>(-6.3 to 8.0)                                |
| <b>Chronic respiratory diseases</b>                | <b>2,500.3</b><br><b>(2,412.1 to 2,591.9)</b> | <b>430.2†</b><br><b>(405.8 to 457.4)</b> | <b>104.8</b><br><b>(77.7 to 136.7)</b>  | <b>24.6</b><br><b>(19.3 to 30.3)</b>              | <b>6.1</b><br><b>(1.9 to 10.8)</b>                  |
| Chronic obstructive pulmonary disease              | 862.1<br>(827.1 to 899.0)                     | 53.4<br>(50.9 to 55.8)                   | 34.4<br>(28.6 to 40.0)                  | 36.1<br>(24.7 to 48.0)                            | 4.6<br>(-4.1 to 13.9)                               |
| Pneumoconiosis                                     | 2.0<br>(1.8 to 2.2)                           | 0.1<br>(0.1 to 0.1)                      | 0.3<br>(0.2 to 0.4)                     | 36.0<br>(30.0 to 42.9)                            | 4.6<br>(-0.0 to 9.7)                                |
| Silicosis                                          | 0.4<br>(0.4 to 0.5)                           | < 0.05<br>(< 0.05 to < 0.05)             | 0.1<br>(< 0.05 to 0.1)                  | 29.8<br>(22.8 to 37.0)                            | 3.0<br>(-2.5 to 8.7)                                |



| Cause                                                          | Prevalence in thousands (95% UI)                 | Incidence in thousands (95% UI)                | YLDs in thousands (95% UI)                |                                                   |                                                     |
|----------------------------------------------------------------|--------------------------------------------------|------------------------------------------------|-------------------------------------------|---------------------------------------------------|-----------------------------------------------------|
|                                                                | 2016 counts                                      | 2016 counts                                    | 2016 counts                               | Percentage change in counts between 2006 and 2016 | Percentage change in age-standardised rates between |
| Asbestosis                                                     | 0.6<br>(0.5 to 0.6)                              | < 0.05<br>(< 0.05 to < 0.05)                   | 0.1<br>(0.1 to 0.1)                       | 35.0<br>(28.4 to 42.4)                            | 2.3<br>(-2.4 to 7.7)                                |
| Coal workers pneumoconiosis                                    | --                                               | --                                             | --                                        | --                                                | --                                                  |
| Other pneumoconiosis                                           | 1.0<br>(0.9 to 1.2)                              | 0.1<br>(0.1 to 0.1)                            | 0.2<br>(0.1 to 0.2)                       | 39.3<br>(28.8 to 52.4)                            | 6.5<br>(-2.1 to 16.0)                               |
| Asthma                                                         | 1,718.9<br>(1,607.8 to 1,849.0)                  | 375.5<br>(351.7 to 402.2)                      | 66.5<br>(43.8 to 94.9)                    | 18.5<br>(13.0 to 24.4)                            | 6.3<br>(1.6 to 11.3)                                |
| Interstitial lung disease and pulmonary sarcoidosis            | 11.3<br>(10.2 to 12.6)                           | 1.2<br>(1.1 to 1.3)                            | 1.2<br>(0.8 to 1.8)                       | 34.9<br>(22.5 to 49.1)                            | 3.2<br>(-7.5 to 15.1)                               |
| Other chronic respiratory diseases                             | --                                               | --                                             | 2.3<br>(1.8 to 2.8)                       | 48.1<br>(24.0 to 80.8)                            | 36.8<br>(16.2 to 63.6)                              |
| <b>Cirrhosis and other chronic liver diseases</b>              | <b>146.2</b><br><b>(138.1 to 154.9)</b>          | <b>7.3</b><br><b>(6.9 to 7.7)</b>              | <b>6.7</b><br><b>(4.6 to 9.4)</b>         | <b>25.2</b><br><b>(13.7 to 38.5)</b>              | <b>6.5</b><br><b>(-2.0 to 17.0)</b>                 |
| Cirrhosis and other chronic liver diseases due to hepatitis B  | 42.2<br>(34.6 to 50.2)                           | 2.3<br>(1.9 to 2.8)                            | 1.6<br>(1.1 to 2.4)                       | 39.2<br>(15.6 to 67.0)                            | 8.0<br>(-9.2 to 26.4)                               |
| Cirrhosis and other chronic liver diseases due to hepatitis C  | 43.2<br>(34.2 to 53.9)                           | 2.3<br>(1.8 to 2.8)                            | 1.7<br>(1.0 to 2.4)                       | 53.5<br>(27.4 to 85.4)                            | 18.7<br>(0.5 to 40.6)                               |
| Cirrhosis and other chronic liver diseases due to alcohol use  | 10.4<br>(8.7 to 12.1)                            | 0.6<br>(0.5 to 0.7)                            | 0.4<br>(0.3 to 0.6)                       | 21.5<br>(-4.5 to 56.3)                            | -7.1<br>(-26.0 to 17.4)                             |
| Cirrhosis and other chronic liver diseases due to other causes | 50.4<br>(45.5 to 56.1)                           | 2.1<br>(1.9 to 2.4)                            | 3.0<br>(2.0 to 4.3)                       | 8.4<br>(-8.5 to 27.1)                             | 1.6<br>(-12.8 to 17.8)                              |
| <b>Digestive diseases</b>                                      | <b>1,317.1</b><br><b>(1,180.2 to 1,428.3)</b>    | <b>824.4†</b><br><b>(773.0 to 882.1)</b>       | <b>43.1</b><br><b>(29.5 to 60.7)</b>      | <b>37.0</b><br><b>(21.4 to 56.9)</b>              | <b>13.1</b><br><b>(0.8 to 28.6)</b>                 |
| Peptic ulcer disease                                           | 403.2<br>(332.3 to 493.6)                        | 30.8<br>(27.3 to 34.6)                         | 9.9<br>(5.8 to 16.0)                      | 79.6<br>(37.1 to 133.1)                           | 41.9<br>(9.9 to 81.4)                               |
| Gastritis and duodenitis                                       | 442.0<br>(374.1 to 520.0)                        | 359.9<br>(318.2 to 410.0)                      | 8.8<br>(5.2 to 13.9)                      | 71.9<br>(35.0 to 116.0)                           | 36.5<br>(9.8 to 68.8)                               |
| Appendicitis                                                   | 3.8<br>(3.4 to 4.1)                              | 98.1<br>(90.0 to 107.2)                        | 1.2<br>(0.7 to 1.7)                       | 8.5<br>(-21.9 to 52.1)                            | 1.4<br>(-25.1 to 37.3)                              |
| Paralytic ileus and intestinal obstruction                     | 0.4<br>(0.4 to 0.5)                              | 11.3<br>(10.0 to 12.8)                         | 0.1<br>(0.1 to 0.2)                       | 24.0<br>(20.0 to 28.9)                            | 4.1<br>(1.4 to 6.9)                                 |
| Inguinal, femoral, and abdominal hernia                        | 443.8<br>(391.3 to 501.1)                        | 126.0<br>(108.6 to 144.5)                      | 18.0<br>(12.3 to 25.3)                    | 13.0<br>(2.4 to 25.3)                             | -5.3<br>(-13.7 to 4.0)                              |
| Inflammatory bowel disease                                     | 5.5<br>(4.2 to 7.0)                              | 26.1<br>(19.1 to 34.3)                         | 0.8<br>(0.5 to 1.3)                       | 31.3<br>(16.4 to 48.7)                            | 8.1<br>(-3.5 to 22.3)                               |
| Vascular intestinal disorders                                  | 0.2<br>(0.2 to 0.3)                              | 1.4<br>(1.2 to 1.6)                            | 0.1<br>(0.1 to 0.1)                       | 27.7<br>(20.7 to 35.0)                            | 6.1<br>(1.6 to 10.8)                                |
| Gallbladder and biliary diseases                               | 59.2<br>(51.9 to 67.3)                           | 162.2<br>(140.3 to 186.1)                      | 0.8<br>(0.6 to 1.2)                       | 33.8<br>(6.9 to 63.6)                             | 5.4<br>(-16.0 to 28.4)                              |
| Pancreatitis                                                   | 0.9<br>(0.8 to 1.1)                              | 8.5<br>(7.5 to 9.6)                            | 0.1<br>(0.1 to 0.2)                       | 33.8<br>(28.7 to 39.3)                            | 7.0<br>(3.8 to 10.5)                                |
| Other digestive diseases                                       | --                                               | --                                             | 3.2<br>(2.2 to 4.5)                       | 39.1<br>(23.5 to 58.8)                            | 16.2<br>(4.2 to 30.6)                               |
| <b>Neurological disorders</b>                                  | <b>14,283.3</b><br><b>(13,745.5 to 14,931.3)</b> | <b>6,959.0</b><br><b>(5,894.8 to 8,116.9)</b>  | <b>413.5</b><br><b>(277.0 to 571.4)</b>   | <b>16.3</b><br><b>(0.9 to 34.1)</b>               | <b>0.0</b><br><b>(-12.9 to 14.8)</b>                |
| Alzheimer's disease and other dementias                        | 197.5<br>(165.6 to 233.4)                        | 32.8<br>(27.4 to 39.5)                         | 27.7<br>(19.4 to 36.8)                    | 37.5<br>(31.2 to 44.8)                            | -1.5<br>(-5.4 to 2.7)                               |
| Parkinson's disease                                            | 20.9<br>(16.6 to 26.1)                           | 2.5<br>(2.0 to 3.2)                            | 2.4<br>(1.6 to 3.3)                       | 53.3<br>(35.6 to 74.6)                            | 11.9<br>(0.6 to 25.7)                               |
| Epilepsy                                                       | 131.5<br>(39.4 to 202.8)                         | 14.1<br>(4.2 to 21.7)                          | 47.5<br>(12.5 to 86.2)                    | 1.3<br>(-73.0 to 223.0)                           | -5.7<br>(-74.4 to 199.7)                            |
| Multiple sclerosis                                             | 14.2<br>(12.7 to 16.2)                           | 0.5<br>(0.5 to 0.6)                            | 3.7<br>(2.6 to 5.0)                       | 32.2<br>(11.2 to 57.7)                            | 7.2<br>(-9.8 to 27.3)                               |
| Motor neuron disease                                           | 0.8<br>(0.7 to 0.9)                              | 0.1<br>(0.1 to 0.1)                            | 0.2<br>(0.1 to 0.2)                       | 20.0<br>(14.5 to 26.6)                            | 3.1<br>(-1.0 to 7.5)                                |
| Migraine                                                       | 5,883.0<br>(5,509.6 to 6,260.1)                  | 633.9<br>(586.5 to 683.7)                      | 271.2<br>(174.1 to 382.3)                 | 16.3<br>(11.8 to 20.9)                            | 0.4<br>(-3.3 to 4.0)                                |
| Tension-type headache                                          | 10,851.2<br>(9,726.4 to 12,093.5)                | 6,274.8<br>(5,239.4 to 7,457.7)                | 49.5<br>(31.4 to 73.8)                    | 19.3<br>(12.9 to 25.9)                            | 1.3<br>(-3.8 to 6.2)                                |
| Other neurological disorders                                   | 0.1<br>(0.1 to 0.2)                              | 0.2<br>(0.2 to 0.4)                            | 11.2<br>(3.9 to 19.4)                     | 19.5<br>(-57.1 to 217.8)                          | 13.8<br>(-57.2 to 183.8)                            |
| <b>Mental and substance use disorders</b>                      | <b>6,035.0</b><br><b>(5,812.4 to 6,294.1)</b>    | <b>3,063.0†</b><br><b>(2,771.4 to 3,382.6)</b> | <b>891.0</b><br><b>(644.8 to 1,154.7)</b> | <b>12.9</b><br><b>(9.6 to 16.0)</b>               | <b>-2.3</b><br><b>(-5.1 to 0.2)</b>                 |
| Schizophrenia                                                  | 63.5<br>(55.1 to 72.4)                           | 4.3<br>(3.7 to 4.8)                            | 40.1<br>(29.4 to 50.2)                    | 24.4<br>(13.2 to 36.8)                            | 1.0<br>(-7.9 to 10.4)                               |
| Alcohol use disorders                                          | 164.1<br>(138.4 to 192.0)                        | 92.5<br>(77.9 to 107.5)                        | 16.4<br>(11.1 to 22.9)                    | 16.5<br>(5.3 to 29.0)                             | 0.8<br>(-8.6 to 11.0)                               |
| Drug use disorders                                             | 292.7<br>(259.9 to 331.0)                        | 35.6<br>(31.6 to 40.1)                         | 93.9<br>(64.8 to 126.5)                   | 25.1<br>(14.9 to 35.9)                            | 6.3<br>(-1.9 to 14.9)                               |
| Opioid use disorders                                           | 211.3<br>(172.2 to 258.2)                        | 21.5<br>(18.0 to 25.9)                         | 86.9<br>(59.1 to 117.9)                   | 25.9<br>(14.3 to 38.0)                            | 6.5<br>(-2.8 to 16.1)                               |
| Cocaine use disorders                                          | 14.1<br>(12.0 to 16.5)                           | 1.4<br>(1.1 to 1.7)                            | 1.9<br>(1.2 to 2.9)                       | 16.1<br>(-14.0 to 59.8)                           | 3.6<br>(-21.9 to 38.8)                              |
| Amphetamine use disorders                                      | 2.6<br>(1.8 to 3.5)                              | 0.4<br>(0.3 to 0.6)                            | 0.4<br>(0.2 to 0.6)                       | 16.1<br>(7.2 to 27.1)                             | 3.5<br>(-3.8 to 12.6)                               |
| Cannabis use disorders                                         | 55.2<br>(45.1 to 67.5)                           | 9.6<br>(7.9 to 11.6)                           | 1.6<br>(1.0 to 2.5)                       | 9.3<br>(-12.3 to 33.1)                            | 0.9<br>(-17.8 to 21.4)                              |
| Other drug use disorders                                       | 14.0<br>(12.4 to 15.8)                           | 2.7<br>(2.4 to 3.1)                            | 3.0<br>(1.9 to 4.2)                       | 20.0<br>(-4.1 to 48.1)                            | 3.9<br>(-15.3 to 26.1)                              |
| Depressive disorders                                           | 1,924.7<br>(1,790.1 to 2,070.2)                  | 2,506.8<br>(2,228.4 to 2,819.9)                | 357.1<br>(247.4 to 483.4)                 | 10.6<br>(3.5 to 17.0)                             | -6.8<br>(-12.6 to -1.6)                             |
| Major depressive disorder                                      | 1,589.5<br>(1,417.5 to 1,775.8)                  | 2,441.2<br>(2,166.0 to 2,750.7)                | 321.9<br>(223.2 to 440.9)                 | 9.6<br>(1.8 to 16.4)                              | -7.5<br>(-13.9 to -1.7)                             |
| Dysthymia                                                      | 370.3<br>(323.5 to 427.0)                        | 65.6<br>(57.3 to 75.2)                         | 35.2<br>(23.9 to 50.6)                    | 21.3<br>(16.0 to 26.4)                            | -0.1<br>(-3.9 to 3.6)                               |
| Bipolar disorder                                               | 288.0<br>(247.8 to 337.3)                        | 23.6<br>(20.4 to 27.5)                         | 58.4<br>(35.5 to 86.6)                    | 13.8<br>(7.2 to 20.8)                             | -0.1<br>(-5.4 to 5.5)                               |
| Anxiety disorders                                              | 1,760.8<br>(1,553.6 to 1,987.8)                  | 246.4<br>(216.1 to 279.1)                      | 168.7<br>(115.5 to 230.8)                 | 13.1<br>(9.0 to 17.2)                             | -0.1<br>(-2.9 to 2.8)                               |
| Eating disorders                                               | 53.7<br>(42.9 to 67.2)                           | 27.5<br>(20.4 to 36.9)                         | 10.6<br>(6.7 to 15.8)                     | 20.0<br>(3.9 to 37.5)                             | 11.5<br>(-3.0 to 27.5)                              |
| Anorexia nervosa                                               | 8.2<br>(6.0 to 11.0)                             | 3.7<br>(2.7 to 4.8)                            | 1.8<br>(1.0 to 2.7)                       | 11.7<br>(-16.1 to 50.1)                           | 9.3<br>(-17.8 to 44.7)                              |
| Bulimia nervosa                                                | 42.3<br>(31.6 to 56.8)                           | 23.8<br>(16.7 to 33.1)                         | 8.9<br>(5.4 to 13.5)                      | 21.8<br>(4.1 to 41.9)                             | 12.0<br>(-3.8 to 29.8)                              |
| Autistic spectrum disorders                                    | 299.8<br>(269.3 to 339.3)                        | 1.8<br>(1.2 to 2.5)                            | 42.9<br>(28.9 to 60.3)                    | 9.1<br>(3.8 to 14.7)                              | 0.5<br>(-4.2 to 5.2)                                |
| Autism                                                         | 84.4<br>(72.3 to 98.4)                           | 0.2<br>(0.1 to 0.3)                            | 21.3<br>(13.7 to 31.3)                    | 9.6<br>(0.6 to 19.4)                              | 0.4<br>(-7.8 to 9.3)                                |
| Asperger syndrome and other autistic spectrum disorders        | 215.9<br>(181.1 to 259.4)                        | 1.6<br>(1.0 to 2.3)                            | 21.5<br>(14.1 to 31.6)                    | 8.7<br>(3.5 to 14.2)                              | 0.6<br>(-3.9 to 5.4)                                |

| Cause                                                      | Prevalence in thousands (95% UI)                 | Incidence in thousands (95% UI)                              | YLDs in thousands (95% UI)                |                                                   |                                                     |
|------------------------------------------------------------|--------------------------------------------------|--------------------------------------------------------------|-------------------------------------------|---------------------------------------------------|-----------------------------------------------------|
|                                                            | 2016 counts                                      | 2016 counts                                                  | 2016 counts                               | Percentage change in counts between 2006 and 2016 | Percentage change in age-standardised rates between |
| Attention-deficit/hyperactivity disorder                   | 366.6<br>(298.7 to 452.1)                        | 13.9<br>(11.0 to 17.4)                                       | 4.4<br>(2.5 to 7.2)                       | 5.0<br>(-1.7 to 12.8)                             | 0.6<br>(-5.5 to 7.5)                                |
| Conduct disorder                                           | 263.5<br>(214.0 to 312.2)                        | 88.5<br>(70.4 to 107.0)                                      | 32.0<br>(19.6 to 48.7)                    | -6.6<br>(-12.2 to -0.5)                           | 0.2<br>(-5.7 to 6.4)                                |
| Idiopathic developmental intellectual disability           | 553.8<br>(307.6 to 815.7)                        | --                                                           | 19.7<br>(8.2 to 35.6)                     | 1.4<br>(-6.7 to 11.2)                             | -8.0<br>(-15.8 to 0.7)                              |
| Other mental and substance use disorders                   | 638.9<br>(562.2 to 737.4)                        | 22.2<br>(19.8 to 25.3)                                       | 47.1<br>(32.1 to 67.8)                    | 21.6<br>(15.4 to 27.4)                            | 0.2<br>(-4.5 to 4.9)                                |
| <b>Diabetes, urogenital, blood, and endocrine diseases</b> | <b>14,338.4</b><br><b>(13,962.4 to 14,693.3)</b> | <b>4,013.5<sup>+</sup></b><br><b>(3,762.0 to 4,273.4)</b>    | <b>397.8</b><br><b>(280.7 to 544.1)</b>   | <b>29.2</b><br><b>(23.4 to 35.6)</b>              | <b>2.1</b><br><b>(-2.4 to 6.8)</b>                  |
| Diabetes mellitus                                          | 2,311.5<br>(2,069.2 to 2,552.7)                  | 142.6<br>(125.9 to 160.0)                                    | 211.3<br>(143.9 to 298.4)                 | 37.0<br>(28.9 to 45.3)                            | 3.7<br>(-2.1 to 9.9)                                |
| Acute glomerulonephritis                                   | 0.3<br>(0.3 to 0.4)                              | 4.9<br>(4.2 to 5.6)                                          | < 0.05<br>(< 0.05 to < 0.05)              | 14.1<br>(8.2 to 20.4)                             | 0.1<br>(-4.3 to 4.3)                                |
| Chronic kidney disease                                     | 1,224.6<br>(1,111.5 to 1,353.6)                  | 86.1<br>(76.3 to 96.9)                                       | 47.8<br>(35.2 to 61.8)                    | 26.9<br>(16.9 to 38.2)                            | -1.8<br>(-9.3 to 6.5)                               |
| Chronic kidney disease due to diabetes mellitus            | 465.3<br>(391.5 to 548.1)                        | 32.7<br>(26.7 to 39.3)                                       | 17.6<br>(12.5 to 23.4)                    | 32.8<br>(17.9 to 48.6)                            | 0.4<br>(-9.8 to 11.5)                               |
| Chronic kidney disease due to hypertension                 | 164.5<br>(139.5 to 193.0)                        | 10.2<br>(8.3 to 12.4)                                        | 6.9<br>(4.8 to 9.3)                       | 34.9<br>(17.1 to 56.6)                            | -0.8<br>(-12.9 to 13.8)                             |
| Chronic kidney disease due to glomerulonephritis           | 157.8<br>(131.9 to 183.2)                        | 11.7<br>(9.4 to 14.4)                                        | 6.1<br>(4.3 to 8.2)                       | 18.1<br>(4.1 to 35.2)                             | -3.0<br>(-13.7 to 9.8)                              |
| Chronic kidney disease due to other causes                 | 437.1<br>(369.7 to 508.1)                        | 31.5<br>(26.4 to 37.1)                                       | 17.2<br>(12.5 to 22.9)                    | 21.8<br>(9.2 to 35.8)                             | -4.0<br>(-12.9 to 6.1)                              |
| Urinary diseases and male infertility                      | 887.7<br>(784.9 to 1,005.6)                      | 2,008.8 <sup>+</sup><br>(1,812.4 to 2,220.3)                 | 25.0<br>(16.1 to 36.6)                    | 27.4<br>(13.1 to 43.9)                            | -7.5<br>(-17.5 to 3.6)                              |
| Interstitial nephritis and urinary tract infections        | 29.5<br>(25.9 to 33.4)                           | 1,537.9<br>(1,352.1 to 1,739.1)                              | 1.0<br>(0.6 to 1.5)                       | 12.8<br>(-4.0 to 31.8)                            | 1.1<br>(-12.7 to 16.6)                              |
| Urolithiasis                                               | 15.1<br>(13.2 to 17.3)                           | 398.4<br>(348.7 to 460.1)                                    | 1.1<br>(0.7 to 1.6)                       | 25.1<br>(4.1 to 48.5)                             | 1.9<br>(-15.0 to 22.4)                              |
| Benign prostatic hyperplasia                               | 647.8<br>(542.7 to 785.2)                        | 72.5<br>(60.3 to 87.2)                                       | 21.2<br>(13.3 to 31.0)                    | 28.0<br>(10.9 to 47.0)                            | -9.2<br>(-20.2 to 3.2)                              |
| Male infertility                                           | 163.9<br>(129.6 to 208.0)                        | --                                                           | 1.0<br>(0.4 to 2.1)                       | 70.5<br>(42.1 to 103.9)                           | 49.3<br>(24.5 to 78.8)                              |
| Other urinary diseases                                     | --                                               | --                                                           | 0.8<br>(0.5 to 1.1)                       | -1.4<br>(-12.0 to 10.3)                           | -15.2<br>(-24.2 to -4.7)                            |
| Gynecological diseases                                     | 4,003.4<br>(3,798.1 to 4,217.5)                  | 1,695.8 <sup>+</sup><br>(1,562.4 to 1,844.2)                 | 53.2<br>(36.2 to 76.4)                    | 10.2<br>(4.9 to 15.5)                             | -5.8<br>(-10.2 to -1.4)                             |
| Uterine fibroids                                           | 389.4<br>(342.0 to 440.4)                        | 42.7<br>(36.8 to 49.5)                                       | 5.7<br>(3.1 to 9.7)                       | 1.5<br>(-16.8 to 19.4)                            | -18.3<br>(-32.8 to -4.1)                            |
| Polycystic ovarian syndrome                                | 31.0<br>(23.0 to 40.2)                           | 38.5<br>(26.4 to 51.3)                                       | 0.3<br>(0.1 to 0.5)                       | 17.9<br>(1.4 to 37.5)                             | 3.0<br>(-11.2 to 20.5)                              |
| Female infertility                                         | 108.1<br>(58.2 to 194.2)                         | --                                                           | 0.7<br>(0.2 to 1.5)                       | 227.3<br>(102.7 to 462.5)                         | 206.5<br>(94.3 to 425.8)                            |
| Endometriosis                                              | 8.0<br>(6.4 to 9.5)                              | 22.5<br>(18.5 to 27.9)                                       | 0.8<br>(0.5 to 1.1)                       | 10.9<br>(-17.9 to 49.3)                           | -0.1<br>(-24.9 to 33.6)                             |
| Genital prolapse                                           | 943.0<br>(811.2 to 1,069.9)                      | 62.8<br>(54.0 to 73.1)                                       | 2.9<br>(1.4 to 5.3)                       | 1.9<br>(-6.1 to 10.2)                             | -23.1<br>(-29.1 to -16.6)                           |
| Premenstrual syndrome                                      | 2,391.6<br>(2,226.0 to 2,558.6)                  | 869.3<br>(796.1 to 943.9)                                    | 19.8<br>(12.4 to 30.4)                    | 8.4<br>(0.5 to 17.0)                              | -2.9<br>(-9.8 to 4.5)                               |
| Other gynecological diseases                               | 678.8<br>(575.3 to 794.0)                        | 660.0<br>(541.5 to 797.0)                                    | 23.1<br>(15.1 to 33.2)                    | 13.0<br>(5.2 to 21.4)                             | -3.4<br>(-9.8 to 3.5)                               |
| Hemoglobinopathies and hemolytic anaemias                  | 9,082.5<br>(8,607.5 to 9,538.8)                  | --                                                           | 44.9<br>(27.3 to 70.0)                    | 30.5<br>(2.4 to 62.6)                             | 18.4<br>(-5.0 to 44.5)                              |
| Thalassemias                                               | 1.9<br>(1.7 to 2.0)                              | --                                                           | 0.1<br>(0.1 to 0.2)                       | -16.2<br>(-38.9 to 16.4)                          | -2.5<br>(-28.9 to 37.2)                             |
| Thalassaemias trait                                        | 2,340.8<br>(2,200.1 to 2,505.7)                  | --                                                           | 35.4<br>(21.3 to 55.6)                    | 38.6<br>(7.7 to 73.3)                             | 24.8<br>(-1.2 to 53.1)                              |
| Sickle cell disorders                                      | 1.1<br>(0.8 to 1.4)                              | --                                                           | 0.2<br>(0.1 to 0.2)                       | 4.1<br>(-5.7 to 15.8)                             | 4.3<br>(-5.9 to 16.3)                               |
| Sickle cell trait                                          | 1,217.7<br>(1,107.4 to 1,348.4)                  | --                                                           | 3.9<br>(2.2 to 6.3)                       | 46.2<br>(10.3 to 91.6)                            | 37.1<br>(5.2 to 77.3)                               |
| G6PD deficiency                                            | 1,483.0<br>(1,240.7 to 1,774.4)                  | --                                                           | 0.2<br>(0.1 to 0.2)                       | 16.5<br>(-9.0 to 52.3)                            | 8.5<br>(-15.5 to 39.5)                              |
| G6PD trait                                                 | 4,693.2<br>(4,368.0 to 5,044.7)                  | --                                                           | < 0.05<br>(< 0.05 to < 0.05)              | 67.4<br>(18.7 to 132.7)                           | 48.0<br>(6.5 to 100.6)                              |
| Other hemoglobinopathies and hemolytic anaemias            | 290.2<br>(235.7 to 348.0)                        | --                                                           | 5.2<br>(3.1 to 8.0)                       | -10.6<br>(-28.1 to 13.0)                          | -15.9<br>(-30.8 to 2.9)                             |
| Endocrine, metabolic, blood, and immune disorders          | 538.3<br>(487.5 to 588.9)                        | 75.3<br>(67.5 to 83.8)                                       | 15.5<br>(10.5 to 21.6)                    | 14.0<br>(2.9 to 24.9)                             | -1.9<br>(-9.4 to 5.8)                               |
| <b>Musculoskeletal disorders</b>                           | <b>6,693.5</b><br><b>(6,393.5 to 7,013.7)</b>    | <b>3,656.1</b><br><b>(3,306.8 to 4,040.2)</b>                | <b>769.4</b><br><b>(555.8 to 1,007.4)</b> | <b>24.6</b><br><b>(20.2 to 29.0)</b>              | <b>-0.1</b><br><b>(-3.2 to 2.9)</b>                 |
| Rheumatoid arthritis                                       | 116.3<br>(103.2 to 130.7)                        | 6.8<br>(6.0 to 7.6)                                          | 26.9<br>(18.3 to 36.1)                    | 34.7<br>(24.0 to 46.3)                            | 5.1<br>(-2.4 to 13.5)                               |
| Osteoarthritis                                             | 1,238.4<br>(1,151.7 to 1,321.2)                  | 64.6<br>(59.6 to 69.8)                                       | 75.4<br>(53.5 to 102.5)                   | 37.6<br>(32.5 to 42.5)                            | 1.8<br>(-1.9 to 5.3)                                |
| Low back and neck pain                                     | 4,275.2<br>(4,011.5 to 4,588.6)                  | 1,813.2<br>(1,608.8 to 2,035.1)                              | 501.3<br>(356.1 to 661.4)                 | 23.2<br>(17.3 to 28.9)                            | -0.6<br>(-5.1 to 3.6)                               |
| Low back pain                                              | 3,031.3<br>(2,693.0 to 3,428.3)                  | 1,477.2<br>(1,273.3 to 1,702.8)                              | 339.4<br>(240.6 to 447.1)                 | 21.5<br>(12.9 to 29.9)                            | -0.9<br>(-7.4 to 5.1)                               |
| Neck pain                                                  | 1,643.2<br>(1,419.0 to 1,894.0)                  | 336.0<br>(292.4 to 401.2)                                    | 161.9<br>(108.5 to 226.7)                 | 26.8<br>(23.4 to 30.5)                            | 0.1<br>(-1.7 to 1.9)                                |
| Gout                                                       | 112.8<br>(100.2 to 128.1)                        | 23.1<br>(20.2 to 26.2)                                       | 3.5<br>(2.4 to 4.9)                       | 32.7<br>(14.8 to 55.1)                            | 0.6<br>(-12.8 to 15.7)                              |
| Other musculoskeletal disorders                            | 1,915.1<br>(1,615.1 to 2,221.2)                  | 1,748.5<br>(1,467.2 to 2,081.5)                              | 162.2<br>(109.7 to 226.9)                 | 22.0<br>(13.8 to 31.1)                            | -0.6<br>(-7.4 to 6.6)                               |
| <b>Other non-communicable diseases</b>                     | <b>25,171.0</b><br><b>(24,546.9 to 25,715.5)</b> | <b>73,613.4<sup>+</sup></b><br><b>(68,136.7 to 79,599.5)</b> | <b>714.6</b><br><b>(495.0 to 999.6)</b>   | <b>14.1</b><br><b>(12.4 to 15.8)</b>              | <b>-2.7</b><br><b>(-3.8 to -1.6)</b>                |
| Congenital anomalies                                       | 459.5<br>(413.2 to 517.1)                        | --                                                           | 64.0<br>(45.4 to 85.6)                    | 4.3<br>(-1.0 to 9.7)                              | -1.1<br>(-6.0 to 4.1)                               |
| Neural tube defects                                        | 55.9<br>(49.3 to 63.7)                           | --                                                           | 16.6<br>(11.7 to 22.5)                    | 8.9<br>(-2.6 to 21.2)                             | -0.5<br>(-10.8 to 11.0)                             |
| Congenital heart anomalies                                 | 77.6<br>(66.8 to 88.7)                           | --                                                           | 3.7<br>(1.6 to 6.4)                       | 2.5<br>(-8.5 to 15.2)                             | 2.4<br>(-8.0 to 14.5)                               |
| Orofacial clefts                                           | 13.9<br>(12.0 to 16.0)                           | --                                                           | 0.2<br>(0.1 to 0.3)                       | -1.4<br>(-12.5 to 10.9)                           | -9.0<br>(-18.8 to 2.6)                              |
| Down's syndrome                                            | 13.8<br>(11.9 to 16.3)                           | --                                                           | 1.2<br>(0.8 to 1.8)                       | 8.1<br>(-0.6 to 16.8)                             | 2.7<br>(-5.6 to 10.7)                               |
| Turner syndrome                                            | 12.3<br>(10.6 to 14.4)                           | --                                                           | 0.2<br>(0.1 to 0.4)                       | -3.2<br>(-32.3 to 36.0)                           | -8.0<br>(-35.4 to 28.5)                             |
| Klinefelter syndrome                                       | 14.2<br>(12.0 to 16.9)                           | --                                                           | 0.1<br>(< 0.05 to 0.2)                    | 7.7<br>(-18.9 to 40.6)                            | 0.7<br>(-22.8 to 30.8)                              |



| Cause                                         | Prevalence in thousands (95% UI)              | Incidence in thousands (95% UI)                | YLDs in thousands (95% UI)              |                                                   |                                                     |
|-----------------------------------------------|-----------------------------------------------|------------------------------------------------|-----------------------------------------|---------------------------------------------------|-----------------------------------------------------|
|                                               | 2016 counts                                   | 2016 counts                                    | 2016 counts                             | Percentage change in counts between 2006 and 2016 | Percentage change in age-standardised rates between |
| Other chromosomal abnormalities               | 88.2<br>(73.4 to 106.8)                       | --                                             | 8.2<br>(5.4 to 11.4)                    | -7.0<br>(-17.2 to 4.4)                            | 1.6<br>(-9.6 to 13.9)                               |
| Congenital musculoskeletal and limb anomalies | 62.3<br>(56.3 to 68.9)                        | --                                             | 9.3<br>(6.2 to 13.0)                    | 8.3<br>(-1.5 to 18.5)                             | -0.4<br>(-9.0 to 8.6)                               |
| Urogenital congenital anomalies               | 30.6<br>(26.6 to 35.0)                        | --                                             | 1.0<br>(0.6 to 1.6)                     | -4.7<br>(-15.8 to 7.8)                            | 0.1<br>(-11.3 to 13.9)                              |
| Digestive congenital anomalies                | 41.1<br>(36.1 to 46.3)                        | --                                             | 1.7<br>(1.1 to 2.5)                     | 9.0<br>(-7.6 to 27.7)                             | 0.3<br>(-14.6 to 16.3)                              |
| Other congenital anomalies                    | 130.2<br>(78.8 to 202.5)                      | --                                             | 21.6<br>(13.3 to 33.6)                  | 4.5<br>(-4.4 to 13.4)                             | -3.6<br>(-11.6 to 4.3)                              |
| Skin and subcutaneous diseases                | 9,396.4<br>(9,158.4 to 9,660.2)               | 19,537.9<br>(18,612.7 to 20,603.7)             | 236.3<br>(159.9 to 337.8)               | 7.2<br>(4.5 to 9.9)                               | 2.0<br>(-0.0 to 4.3)                                |
| Dermatitis                                    | 1,463.6<br>(1,354.2 to 1,584.3)               | 2,199.8<br>(2,021.5 to 2,396.6)                | 54.0<br>(32.0 to 87.9)                  | 4.4<br>(-0.6 to 9.8)                              | -0.7<br>(-4.9 to 4.0)                               |
| Psoriasis                                     | 239.2<br>(226.5 to 254.1)                     | 34.7<br>(32.8 to 36.8)                         | 20.6<br>(14.7 to 27.1)                  | 26.2<br>(14.9 to 38.4)                            | 8.1<br>(-1.0 to 17.5)                               |
| Cellulitis                                    | 16.4<br>(15.3 to 17.7)                        | 352.0<br>(328.5 to 376.9)                      | 0.9<br>(0.6 to 1.3)                     | 11.9<br>(-12.4 to 40.3)                           | 0.6<br>(-19.7 to 23.4)                              |
| Pyoderma                                      | 75.9<br>(73.3 to 78.5)                        | 1,748.9<br>(1,684.6 to 1,817.0)                | 0.4<br>(0.2 to 0.9)                     | 15.5<br>(6.7 to 24.4)                             | 0.8<br>(-6.0 to 7.7)                                |
| Scabies                                       | 388.9<br>(331.9 to 462.4)                     | 1,178.8<br>(1,001.8 to 1,402.4)                | 10.0<br>(5.6 to 16.2)                   | 0.5<br>(-4.6 to 5.9)                              | -3.8<br>(-8.1 to 0.7)                               |
| Fungal skin diseases                          | 2,113.7<br>(1,912.0 to 2,342.0)               | 7,464.0<br>(6,698.9 to 8,322.0)                | 11.8<br>(4.7 to 24.2)                   | 13.6<br>(11.1 to 16.1)                            | 0.1<br>(-1.1 to 1.3)                                |
| Viral skin diseases                           | 906.0<br>(861.0 to 956.4)                     | 1,314.4<br>(1,241.7 to 1,388.9)                | 27.7<br>(17.3 to 41.1)                  | 5.1<br>(1.6 to 8.7)                               | -0.1<br>(-3.1 to 3.2)                               |
| Acne vulgaris                                 | 2,885.8<br>(2,563.9 to 3,239.7)               | 1,978.8<br>(1,609.7 to 2,540.3)                | 74.2<br>(49.2 to 106.7)                 | 3.5<br>(-1.6 to 9.3)                              | 5.0<br>(0.1 to 10.8)                                |
| Alopecia areata                               | 66.4<br>(62.1 to 70.7)                        | 117.6<br>(110.0 to 125.1)                      | 2.2<br>(1.4 to 3.2)                     | 15.5<br>(3.2 to 28.9)                             | 0.1<br>(-10.2 to 11.6)                              |
| Pruritus                                      | 287.6<br>(254.8 to 326.1)                     | 229.6<br>(205.1 to 259.2)                      | 3.0<br>(1.4 to 5.6)                     | 18.0<br>(11.4 to 25.3)                            | 1.2<br>(-3.8 to 6.9)                                |
| Urticaria                                     | 314.9<br>(274.9 to 360.9)                     | 557.0<br>(489.9 to 643.1)                      | 18.9<br>(11.9 to 27.0)                  | 2.6<br>(-3.2 to 9.1)                              | 0.0<br>(-4.9 to 5.8)                                |
| Decubitus ulcer                               | 10.1<br>(9.1 to 11.2)                         | 37.1<br>(33.2 to 41.2)                         | 1.6<br>(1.1 to 2.1)                     | 32.9<br>(18.9 to 48.5)                            | 3.1<br>(-8.3 to 16.9)                               |
| Other skin and subcutaneous diseases          | 2,040.0<br>(1,981.7 to 2,098.2)               | 2,325.3<br>(2,253.6 to 2,396.9)                | 11.1<br>(5.4 to 20.1)                   | 24.9<br>(21.3 to 28.2)                            | 4.5<br>(1.8 to 7.2)                                 |
| Sense organ diseases                          | 8,033.2<br>(7,869.7 to 8,214.8)               | 3,092.7+<br>(2,908.3 to 3,300.5)               | 306.0<br>(214.7 to 423.6)               | 18.5<br>(15.9 to 21.2)                            | -6.5<br>(-8.3 to -4.8)                              |
| Glaucoma                                      | 32.8<br>(27.2 to 38.9)                        | --                                             | 3.3<br>(2.2 to 4.5)                     | 37.3<br>(23.6 to 53.5)                            | -0.0<br>(-9.7 to 11.0)                              |
| Cataract                                      | 471.6<br>(416.2 to 533.9)                     | --                                             | 33.9<br>(24.2 to 46.0)                  | 25.1<br>(19.8 to 30.7)                            | -7.4<br>(-11.1 to -3.6)                             |
| Macular degeneration                          | 22.2<br>(18.1 to 27.0)                        | --                                             | 1.7<br>(1.1 to 2.3)                     | 40.6<br>(24.8 to 59.5)                            | 2.6<br>(-8.8 to 15.4)                               |
| Refraction and accommodation disorders        | 4,673.7<br>(4,493.9 to 4,860.9)               | --                                             | 71.4<br>(42.4 to 115.5)                 | 7.8<br>(4.6 to 11.2)                              | -12.3<br>(-14.9 to -9.6)                            |
| Age-related and other hearing loss            | 4,602.7<br>(4,332.2 to 4,930.4)               | --                                             | 156.8<br>(109.8 to 219.2)               | 20.2<br>(15.2 to 24.9)                            | -5.5<br>(-8.5 to -2.8)                              |
| Other vision loss                             | 147.2<br>(130.5 to 165.9)                     | --                                             | 11.7<br>(8.1 to 15.6)                   | 25.5<br>(16.6 to 35.7)                            | -1.3<br>(-7.7 to 5.9)                               |
| Other sense organ diseases                    | 884.9<br>(814.8 to 954.1)                     | 3,092.7<br>(2,908.3 to 3,300.5)                | 27.2<br>(17.1 to 41.2)                  | 25.7<br>(20.0 to 31.5)                            | 1.1<br>(-2.7 to 5.0)                                |
| Oral disorders                                | 19,226.6<br>(18,215.5 to 20,078.8)            | 50,982.8+<br>(45,352.8 to 56,714.6)            | 108.4<br>(65.4 to 169.1)                | 25.8<br>(23.2 to 28.3)                            | -0.3<br>(-2.1 to 1.6)                               |
| Caries of deciduous teeth                     | 2,261.3<br>(1,719.9 to 2,824.2)               | 9,280.5<br>(6,423.3 to 12,631.8)               | 0.5<br>(0.2 to 1.1)                     | -5.7<br>(-14.8 to 4.5)                            | -0.1<br>(-10.0 to 11.2)                             |
| Caries of permanent teeth                     | 13,543.5<br>(12,290.6 to 14,899.4)            | 40,942.3<br>(35,992.8 to 45,558.3)             | 7.9<br>(3.5 to 15.2)                    | 10.6<br>(5.7 to 15.3)                             | -2.5<br>(-6.4 to 1.3)                               |
| Periodontal disease                           | 5,032.8<br>(4,303.5 to 5,855.2)               | 621.0<br>(525.8 to 724.3)                      | 32.8<br>(13.2 to 68.7)                  | 27.6<br>(23.5 to 31.5)                            | 0.1<br>(-3.0 to 2.8)                                |
| Edentulism and severe tooth loss              | 1,785.6<br>(1,574.1 to 1,994.9)               | 139.0<br>(117.9 to 160.0)                      | 49.1<br>(32.4 to 69.1)                  | 31.8<br>(26.6 to 36.8)                            | -0.3<br>(-3.9 to 3.1)                               |
| Other oral disorders                          | 620.9<br>(593.6 to 649.2)                     | --                                             | 18.1<br>(11.3 to 27.2)                  | 16.6<br>(12.5 to 20.7)                            | -0.0<br>(-3.2 to 3.1)                               |
| <b>Injuries</b>                               | <b>5,405.8</b><br><b>(5,054.7 to 5,773.8)</b> | <b>2,175.6+</b><br><b>(2,048.1 to 2,312.3)</b> | <b>199.6</b><br><b>(134.0 to 283.4)</b> | <b>22.9</b><br><b>(20.1 to 25.4)</b>              | <b>2.6</b><br><b>(0.6 to 4.6)</b>                   |
| <b>Transport injuries</b>                     | <b>832.6</b><br><b>(771.1 to 898.5)</b>       | <b>275.8</b><br><b>(245.6 to 309.3)</b>        | <b>44.3</b><br><b>(29.8 to 62.8)</b>    | <b>22.9</b><br><b>(20.0 to 25.6)</b>              | <b>0.1</b><br><b>(-2.0 to 2.1)</b>                  |
| Road injuries                                 | 619.8<br>(574.3 to 668.0)                     | 230.9<br>(202.5 to 264.4)                      | 33.1<br>(22.1 to 46.9)                  | 25.9<br>(23.2 to 28.6)                            | 1.1<br>(-0.8 to 3.1)                                |
| Pedestrian road injuries                      | 120.7<br>(107.0 to 137.1)                     | 31.9<br>(26.2 to 38.5)                         | 6.3<br>(4.2 to 9.0)                     | 22.9<br>(20.2 to 25.6)                            | -1.8<br>(-3.8 to 0.2)                               |
| Cyclist road injuries                         | 95.8<br>(80.0 to 113.6)                       | 37.3<br>(28.9 to 46.3)                         | 4.7<br>(3.1 to 6.8)                     | 28.2<br>(25.0 to 31.2)                            | 5.0<br>(2.8 to 7.0)                                 |
| Motorcyclist road injuries                    | 91.5<br>(77.5 to 110.2)                       | 21.8<br>(17.3 to 27.3)                         | 4.6<br>(3.1 to 6.7)                     | 29.6<br>(26.6 to 32.7)                            | 5.2<br>(2.9 to 7.4)                                 |
| Motor vehicle road injuries                   | 255.2<br>(217.3 to 290.3)                     | 113.3<br>(96.7 to 131.3)                       | 14.7<br>(10.0 to 20.5)                  | 24.6<br>(21.9 to 27.4)                            | -0.5<br>(-2.5 to 1.5)                               |
| Other road injuries                           | 56.6<br>(48.1 to 66.4)                        | 26.6<br>(20.5 to 34.0)                         | 2.8<br>(1.8 to 4.0)                     | 30.7<br>(27.7 to 33.6)                            | 4.7<br>(2.5 to 6.7)                                 |
| Other transport injuries                      | 212.9<br>(177.3 to 255.1)                     | 44.9<br>(38.1 to 53.3)                         | 11.2<br>(7.6 to 16.0)                   | 14.8<br>(11.5 to 18.2)                            | -2.7<br>(-5.3 to -0.3)                              |
| <b>Unintentional injuries</b>                 | <b>4,356.4</b><br><b>(4,014.9 to 4,685.5)</b> | <b>1,834.6</b><br><b>(1,715.2 to 1,969.6)</b>  | <b>142.2</b><br><b>(96.1 to 201.6)</b>  | <b>24.8</b><br><b>(21.9 to 27.3)</b>              | <b>4.5</b><br><b>(2.3 to 6.5)</b>                   |
| Falls                                         | 1,506.0<br>(1,290.2 to 1,715.6)               | 596.4<br>(514.7 to 697.7)                      | 58.0<br>(40.3 to 80.9)                  | 23.0<br>(20.3 to 25.3)                            | 2.4<br>(0.3 to 4.3)                                 |
| Drowning                                      | 11.1<br>(9.6 to 12.9)                         | 2.0<br>(1.7 to 2.3)                            | 0.6<br>(0.4 to 0.8)                     | 13.4<br>(9.9 to 16.9)                             | -5.1<br>(-7.9 to -2.5)                              |
| Fire, heat, and hot substances                | 422.1<br>(354.9 to 508.4)                     | 49.4<br>(39.9 to 59.0)                         | 11.2<br>(7.5 to 16.4)                   | 30.0<br>(23.5 to 36.1)                            | 8.5<br>(3.8 to 13.0)                                |
| Poisonings                                    | 20.6<br>(17.4 to 24.4)                        | 27.5<br>(21.8 to 34.1)                         | 1.8<br>(1.2 to 2.7)                     | 27.1<br>(17.9 to 36.9)                            | 11.2<br>(3.8 to 19.1)                               |
| Exposure to mechanical forces                 | 664.5<br>(565.4 to 826.0)                     | 255.9<br>(214.4 to 299.5)                      | 16.2<br>(10.7 to 23.7)                  | 29.6<br>(26.0 to 32.9)                            | 6.1<br>(3.4 to 8.4)                                 |
| Unintentional firearm injuries                | 31.4<br>(25.7 to 38.3)                        | 7.9<br>(5.5 to 11.0)                           | 1.3<br>(0.8 to 1.9)                     | 36.2<br>(32.3 to 40.0)                            | 10.7<br>(7.8 to 13.2)                               |
| Unintentional suffocation                     | 25.3<br>(19.8 to 31.8)                        | 4.6<br>(3.2 to 6.4)                            | 0.9<br>(0.6 to 1.3)                     | 18.6<br>(15.3 to 21.7)                            | 2.3<br>(-0.2 to 4.5)                                |
| Other exposure to mechanical forces           | 607.8<br>(510.7 to 765.8)                     | 243.5<br>(203.1 to 284.8)                      | 14.1<br>(9.3 to 20.5)                   | 29.8<br>(26.0 to 33.1)                            | 6.0<br>(3.2 to 8.3)                                 |

| Cause                                                                               | Prevalence in thousands (95% UI)        | Incidence in thousands (95% UI)       | YLDs in thousands (95% UI)          |                                                   |                                                     |
|-------------------------------------------------------------------------------------|-----------------------------------------|---------------------------------------|-------------------------------------|---------------------------------------------------|-----------------------------------------------------|
|                                                                                     | 2016 counts                             | 2016 counts                           | 2016 counts                         | Percentage change in counts between 2006 and 2016 | Percentage change in age-standardised rates between |
| Adverse effects of medical treatment                                                | 8.3<br>(6.6 to 10.3)                    | 109.2<br>(95.3 to 124.0)              | 1.1<br>(0.7 to 1.7)                 | 12.1<br>(7.3 to 17.4)                             | 2.7<br>(-1.3 to 6.6)                                |
| Animal contact                                                                      | 209.9<br>(184.5 to 244.3)               | 239.9<br>(194.1 to 286.9)             | 6.4<br>(4.3 to 9.0)                 | 14.7<br>(8.9 to 20.4)                             | -1.5<br>(-5.7 to 2.9)                               |
| Venomous animal contact                                                             | 81.9<br>(67.3 to 97.4)                  | 99.3<br>(74.9 to 130.2)               | 4.4<br>(2.9 to 6.2)                 | 16.5<br>(8.8 to 24.6)                             | 1.6<br>(-4.6 to 8.2)                                |
| Non-venomous animal contact                                                         | 128.0<br>(106.1 to 157.5)               | 140.6<br>(111.4 to 172.7)             | 2.0<br>(1.3 to 3.1)                 | 11.0<br>(6.7 to 14.8)                             | -7.3<br>(-10.7 to -4.6)                             |
| Foreign body                                                                        | 276.6<br>(232.3 to 332.6)               | 165.9<br>(142.8 to 194.6)             | 9.4<br>(6.1 to 13.8)                | 18.1<br>(14.2 to 21.9)                            | 1.5<br>(-1.5 to 4.2)                                |
| Pulmonary aspiration and foreign body in airway                                     | 80.2<br>(60.5 to 107.4)                 | 24.0<br>(19.7 to 29.6)                | 3.3<br>(2.1 to 5.0)                 | 12.1<br>(8.2 to 15.9)                             | -2.0<br>(-4.9 to 0.8)                               |
| Foreign body in eyes                                                                | 15.2<br>(8.8 to 22.3)                   | 76.1<br>(58.2 to 101.9)               | 0.8<br>(0.4 to 1.4)                 | 17.0<br>(12.5 to 22.1)                            | 0.4<br>(-2.6 to 3.4)                                |
| Foreign body in other body part                                                     | 181.2<br>(148.6 to 231.4)               | 65.8<br>(55.1 to 78.5)                | 5.2<br>(3.5 to 7.6)                 | 22.5<br>(17.8 to 27.0)                            | 4.0<br>(0.4 to 7.4)                                 |
| Environmental heat and cold exposure                                                | 280.5<br>(236.0 to 330.4)               | 70.5<br>(57.6 to 85.5)                | 10.3<br>(6.8 to 14.7)               | 17.3<br>(14.4 to 20.2)                            | -1.4<br>(-3.6 to 0.6)                               |
| Other unintentional injuries                                                        | 956.8<br>(762.2 to 1,181.2)             | 318.0<br>(264.7 to 378.8)             | 27.1<br>(17.8 to 39.0)              | 33.1<br>(30.6 to 35.5)                            | 12.2<br>(10.1 to 14.0)                              |
| <b>Self-harm and interpersonal violence</b>                                         | <b>811.9</b><br><b>(718.6 to 906.2)</b> | <b>64.4†</b><br><b>(54.3 to 75.5)</b> | <b>11.2</b><br><b>(7.7 to 15.5)</b> | <b>10.1</b><br><b>(6.4 to 13.7)</b>               | <b>-3.5</b><br><b>(-5.9 to -1.0)</b>                |
| Self-harm                                                                           | 26.9<br>(22.9 to 31.1)                  | 10.3<br>(8.5 to 12.2)                 | 1.3<br>(0.8 to 1.9)                 | 26.6<br>(22.2 to 31.1)                            | 4.6<br>(1.4 to 7.8)                                 |
| Self-harm by firearm                                                                | 1.5<br>(1.3 to 1.9)                     | 0.3<br>(0.2 to 0.5)                   | 0.1<br>(< 0.05 to 0.1)              | 11.2<br>(7.0 to 15.2)                             | -4.6<br>(-8.0 to -1.6)                              |
| Self-harm by other specified means                                                  | 25.3<br>(21.4 to 29.5)                  | 10.0<br>(8.2 to 11.9)                 | 1.2<br>(0.8 to 1.8)                 | 27.4<br>(22.8 to 32.0)                            | 5.1<br>(1.8 to 8.4)                                 |
| Interpersonal violence                                                              | 785.0<br>(690.7 to 879.2)               | 54.1†<br>(44.5 to 64.8)               | 9.9<br>(6.8 to 13.8)                | 8.3<br>(4.5 to 12.0)                              | -4.5<br>(-7.1 to -1.9)                              |
| Assault by firearm                                                                  | 4.2<br>(3.6 to 4.9)                     | 1.3<br>(0.9 to 1.8)                   | 0.2<br>(0.1 to 0.3)                 | 29.0<br>(24.6 to 33.8)                            | 7.0<br>(3.8 to 10.4)                                |
| Assault by sharp object                                                             | 37.0<br>(30.1 to 44.3)                  | 13.7<br>(9.9 to 18.2)                 | 1.1<br>(0.7 to 1.6)                 | 23.9<br>(20.1 to 27.7)                            | 3.7<br>(1.0 to 6.2)                                 |
| Sexual violence                                                                     | 669.4<br>(579.0 to 765.1)               | --                                    | 5.6<br>(3.7 to 8.0)                 | -3.4<br>(-7.4 to 0.8)                             | -11.9<br>(-15.0 to -8.5)                            |
| Assault by other means                                                              | 74.4<br>(63.4 to 88.6)                  | 39.2<br>(31.5 to 47.1)                | 3.0<br>(2.0 to 4.3)                 | 30.4<br>(27.4 to 33.4)                            | 7.2<br>(5.0 to 9.3)                                 |
| <b>Forces of nature, conflict and terrorism, and executions and police conflict</b> | <b>74.2</b><br><b>(44.9 to 116.0)</b>   | <b>0.8†</b><br><b>(0.6 to 1.1)</b>    | <b>1.9</b><br><b>(0.5 to 5.4)</b>   | <b>-16.3</b><br><b>(-19.5 to -13.6)</b>           | <b>-27.0</b><br><b>(-29.7 to -24.7)</b>             |
| Exposure to forces of nature                                                        | 6.9<br>(1.9 to 12.8)                    | --                                    | 0.2<br>(< 0.05 to 0.6)              | -14.7<br>(-18.2 to -3.7)                          | -24.9<br>(-28.1 to -15.1)                           |
| Conflict and terrorism                                                              | 65.0<br>(37.1 to 104.9)                 | --                                    | 1.6<br>(0.4 to 4.6)                 | -17.6<br>(-21.1 to -14.7)                         | -28.2<br>(-31.2 to -25.9)                           |
| Executions and police conflict                                                      | 2.4<br>(1.4 to 3.9)                     | 0.8<br>(0.6 to 1.1)                   | 0.1<br>(< 0.05 to 0.2)              | 24.4<br>(15.7 to 30.5)                            | 11.3<br>(4.1 to 17.3)                               |
| <b>Impairments</b>                                                                  | --                                      | --                                    | --                                  | --                                                | --                                                  |
| Anaemia                                                                             | 9,427.1<br>(7,920.5 to 11,059.8)        | --                                    | 237.8<br>(153.0 to 354.5)           | -2.9<br>(-20.0 to 18.0)                           | -9.9<br>(-24.4 to 7.1)                              |
| Developmental intellectual disability                                               | 1,044.4<br>(795.1 to 1,325.3)           | --                                    | 114.4<br>(79.0 to 191.3)            | 4.8<br>(-2.2 to 14.4)                             | -2.6<br>(-9.2 to 6.9)                               |
| Epilepsy                                                                            | 247.4<br>(134.3 to 399.9)               | --                                    | 95.5<br>(46.6 to 177.9)             | 4.0<br>(-42.5 to 87.2)                            | -3.1<br>(-46.7 to 77.0)                             |
| Guillain-Barre syndrome                                                             | 0.3<br>(0.3 to 0.4)                     | --                                    | 0.1<br>(0.1 to 0.1)                 | 16.1<br>(11.7 to 21.2)                            | 0.1<br>(-0.1 to 0.2)                                |
| Hearing loss                                                                        | 5,095.0<br>(4,817.2 to 5,406.5)         | --                                    | 184.3<br>(130.2 to 253.8)           | 16.0<br>(11.5 to 20.0)                            | -6.0<br>(-8.7 to -3.6)                              |
| Heart failure                                                                       | 231.5<br>(202.6 to 265.6)               | --                                    | 23.6<br>(17.2 to 30.6)              | 41.4<br>(31.8 to 51.8)                            | 6.0<br>(-0.9 to 13.2)                               |
| Infertility                                                                         | 587.2<br>(470.8 to 748.3)               | --                                    | 3.7<br>(1.6 to 7.2)                 | 57.9<br>(33.6 to 87.9)                            | 38.1<br>(16.9 to 64.0)                              |
| Pelvic inflammatory disease                                                         | 20.0<br>(15.5 to 25.2)                  | --                                    | 2.6<br>(1.7 to 3.9)                 | 9.8<br>(-7.8 to 29.6)                             | -7.0<br>(-21.4 to 9.6)                              |
| Vision loss                                                                         | 5,594.8<br>(5,361.6 to 5,823.8)         | --                                    | 163.6<br>(112.5 to 246.3)           | 13.5<br>(5.8 to 19.6)                             | -7.3<br>(-10.8 to -3.1)                             |

We did not calculate incidence for the nine impairments, certain NTDs, and causes with only birth prevalence. Blank cells mean that no estimate is available.

† Incidence for aggregate causes represents the sum of the incidence of the causes below the aggregate.

‡ Incidence estimates for stroke represent first-ever stroke only.

^ Incidence of HIV/AIDS represents new infections of HIV only and does not include new infections of Tuberculosis in HIV positive cases.



SR Table 14: Prevalence, incidence, and YLDs for 2016, percentage change of YLD counts and percentage change of age-standardised YLD rates between 2006 and 2016 by cause and impairments, for all ages, Mozambique.

| Cause                                                                                | Prevalence in thousands (95% UI)          | Incidence in thousands (95% UI)               | YLDs in thousands (95% UI)             |                                                   |                                                     |
|--------------------------------------------------------------------------------------|-------------------------------------------|-----------------------------------------------|----------------------------------------|---------------------------------------------------|-----------------------------------------------------|
|                                                                                      | 2016 counts                               | 2016 counts                                   | 2016 counts                            | Percentage change in counts between 2006 and 2016 | Percentage change in age-standardised rates between |
| <b>All causes</b>                                                                    | <b>28,321.6</b><br>(28,268.3 to 28,378.0) | <b>183,870.3†</b><br>(174,305.6 to 194,671.9) | <b>2,824.2</b><br>(2,076.5 to 3,701.5) | <b>26.6</b><br>(22.1 to 31.2)                     | <b>-4.8</b><br>(-8.0 to -1.9)                       |
| <b>Communicable, maternal, neonatal, and nutritional disorders</b>                   | <b>25,615.2</b><br>(25,398.2 to 25,812.7) | <b>101,863.6†</b><br>(93,750.3 to 110,567.7)  | <b>888.3</b><br>(626.3 to 1,204.2)     | <b>13.3</b><br>(4.6 to 20.9)                      | <b>-17.5</b><br>(-26.3 to -10.7)                    |
| <b>HIV/AIDS and tuberculosis</b>                                                     | <b>7,747.4</b><br>(7,131.7 to 8,439.2)    | <b>169.3†</b><br>(136.1 to 206.4)             | <b>195.9</b><br>(139.1 to 261.8)       | <b>4.8</b><br>(-17.3 to 30.2)                     | <b>-25.2</b><br>(-43.0 to -3.2)                     |
| Tuberculosis                                                                         | 6,371.6<br>(5,553.6 to 7,251.7)           | 69.2†<br>(54.3 to 89.0)                       | 13.3<br>(8.3 to 19.7)                  | 35.4<br>(15.2 to 60.0)                            | -11.8<br>(-22.7 to 2.3)                             |
| Drug-susceptible tuberculosis                                                        | 41.5<br>(31.7 to 54.7)                    | 66.8<br>(51.9 to 85.4)                        | 12.8<br>(8.0 to 19.0)                  | 35.3<br>(14.6 to 60.4)                            | -11.8<br>(-23.6 to 2.1)                             |
| Multidrug-resistant tuberculosis without extensive drug resistance                   | 1.5<br>(0.5 to 3.5)                       | 2.5<br>(0.8 to 5.7)                           | 0.5<br>(0.1 to 1.2)                    | 36.4<br>(-55.3 to 231.2)                          | -11.7<br>(-70.7 to 116.6)                           |
| Extensively drug-resistant tuberculosis                                              | < 0.05<br>(< 0.05 to < 0.05)              | < 0.05<br>(< 0.05 to < 0.05)                  | < 0.05<br>(< 0.05 to < 0.05)           | 308.7<br>(37.0 to 882.2)                          | 162.4<br>(-15.6 to 538.4)                           |
| Latent tuberculosis infection                                                        | 6,328.6<br>(5,506.8 to 7,211.0)           | --                                            | --                                     | --                                                | --                                                  |
| HIV/AIDS                                                                             | 1,724.2<br>(1,541.0 to 1,918.7)           | 100.1^<br>(72.2 to 135.6)                     | 182.6<br>(128.9 to 246.9)              | 3.1<br>(-19.9 to 30.2)                            | -25.9<br>(-44.3 to -2.6)                            |
| Drug-susceptible HIV/AIDS - Tuberculosis                                             | 34.0<br>(24.4 to 44.7)                    | 48.5<br>(35.4 to 63.3)                        | 12.8<br>(7.6 to 19.1)                  | -2.8<br>(-16.8 to 12.7)                           | -22.6<br>(-32.5 to -11.6)                           |
| Multidrug-resistant HIV/AIDS - Tuberculosis without extensive drug resistance        | 1.5<br>(0.5 to 3.4)                       | 2.1<br>(0.7 to 4.9)                           | 0.6<br>(0.2 to 1.5)                    | 1.4<br>(-65.2 to 154.3)                           | -19.4<br>(-72.7 to 99.9)                            |
| Extensively drug-resistant HIV/AIDS - Tuberculosis                                   | < 0.05<br>(< 0.05 to < 0.05)              | < 0.05<br>(< 0.05 to < 0.05)                  | < 0.05<br>(< 0.05 to < 0.05)           | 199.8<br>(0.2 to 647.6)                           | 137.8<br>(-20.1 to 491.4)                           |
| HIV/AIDS resulting in other diseases                                                 | 1,688.7<br>(1,504.1 to 1,880.3)           | 100.1<br>(72.2 to 135.6)                      | 169.2<br>(118.5 to 229.9)              | 3.6<br>(-21.0 to 33.6)                            | -26.2<br>(-45.8 to -0.2)                            |
| <b>Diarrhoea, lower respiratory infections, and other common infectious diseases</b> | <b>1,823.2</b><br>(1,757.0 to 1,906.9)    | <b>81,569.5†</b><br>(74,059.0 to 89,311.2)    | <b>104.2</b><br>(73.5 to 139.7)        | <b>21.3</b><br>(17.4 to 25.5)                     | <b>-7.2</b><br>(-10.0 to -4.5)                      |
| Diarrhoeal diseases                                                                  | 353.6<br>(328.1 to 382.3)                 | 23,762.2<br>(21,985.0 to 25,716.7)            | 39.8<br>(27.5 to 55.1)                 | 14.8<br>(8.8 to 21.7)                             | -10.1<br>(-14.1 to -5.6)                            |
| Intestinal infectious diseases                                                       | 3.1<br>(2.2 to 4.4)                       | 52.7†<br>(37.2 to 73.8)                       | 0.5<br>(0.3 to 0.8)                    | 1.7<br>(-24.2 to 34.5)                            | -24.3<br>(-39.3 to -5.1)                            |
| Typhoid fever                                                                        | 3.1<br>(2.1 to 4.3)                       | 48.4<br>(33.9 to 68.2)                        | 0.5<br>(0.3 to 0.8)                    | 3.1<br>(-24.1 to 37.6)                            | -23.7<br>(-39.0 to -3.5)                            |
| Paratyphoid fever                                                                    | 0.2<br>(0.1 to 0.3)                       | 4.3<br>(2.7 to 6.6)                           | < 0.05<br>(< 0.05 to < 0.05)           | 13.2<br>(-18.0 to 56.6)                           | -16.2<br>(-36.1 to 9.6)                             |
| Other intestinal infectious diseases                                                 | --                                        | --                                            | < 0.05<br>(< 0.05 to < 0.05)           | -46.3<br>(-63.1 to -23.4)                         | -54.2<br>(-65.2 to -40.1)                           |
| Lower respiratory infections                                                         | 34.9<br>(31.6 to 38.4)                    | 1,550.9<br>(1,402.4 to 1,719.0)               | 2.1<br>(1.4 to 3.1)                    | 13.4<br>(-1.8 to 29.6)                            | -11.3<br>(-20.2 to -1.7)                            |
| Upper respiratory infections                                                         | 701.9<br>(610.6 to 807.6)                 | 52,384.3<br>(45,205.6 to 60,522.0)            | 17.5<br>(10.4 to 27.7)                 | 28.4<br>(19.0 to 38.5)                            | -2.7<br>(-8.6 to 3.5)                               |
| Otitis media                                                                         | 594.2<br>(526.9 to 660.9)                 | 2,718.9<br>(2,102.0 to 3,495.6)               | 19.6<br>(12.2 to 29.2)                 | 23.3<br>(14.1 to 33.4)                            | -8.3<br>(-14.5 to -1.8)                             |
| Meningitis                                                                           | 148.3<br>(124.5 to 176.2)                 | 33.9<br>(28.9 to 40.6)                        | 15.2<br>(10.8 to 20.0)                 | 32.2<br>(22.0 to 42.7)                            | -1.5<br>(-8.3 to 5.5)                               |
| Pneumococcal meningitis                                                              | 48.5<br>(40.4 to 58.4)                    | 5.3<br>(4.0 to 7.0)                           | 5.6<br>(3.9 to 7.7)                    | 23.9<br>(4.9 to 46.2)                             | -8.9<br>(-20.1 to 5.2)                              |
| H influenzae type B meningitis                                                       | 26.8<br>(20.6 to 35.4)                    | 5.7<br>(3.8 to 8.2)                           | 3.3<br>(2.2 to 4.5)                    | 15.3<br>(0.0 to 32.4)                             | -14.6<br>(-24.7 to -3.4)                            |
| Meningococcal infection                                                              | 10.6<br>(7.5 to 14.6)                     | 3.4<br>(2.4 to 4.7)                           | 1.1<br>(0.8 to 1.6)                    | 36.0<br>(27.7 to 45.2)                            | 1.7<br>(-4.8 to 8.7)                                |
| Other meningitis                                                                     | 62.5<br>(44.8 to 82.7)                    | 19.5<br>(15.7 to 24.0)                        | 5.1<br>(3.5 to 7.0)                    | 57.7<br>(40.0 to 77.6)                            | 19.0<br>(7.1 to 32.5)                               |
| Encephalitis                                                                         | 74.6<br>(47.0 to 112.6)                   | 32.4<br>(28.2 to 37.4)                        | 7.8<br>(5.5 to 10.2)                   | 28.8<br>(12.8 to 45.9)                            | -3.7<br>(-13.7 to 7.4)                              |
| Diphtheria                                                                           | < 0.05<br>(< 0.05 to < 0.05)              | < 0.05<br>(< 0.05 to < 0.05)                  | < 0.05<br>(< 0.05 to < 0.05)           | -34.6<br>(-73.4 to 57.6)                          | -46.2<br>(-74.0 to 12.9)                            |
| Whooping cough                                                                       | 15.7<br>(12.3 to 19.8)                    | 114.8<br>(89.5 to 144.3)                      | 0.8<br>(0.5 to 1.2)                    | 4.6<br>(-11.8 to 24.2)                            | -18.7<br>(-31.6 to -3.3)                            |
| Tetanus                                                                              | 0.4<br>(0.4 to 0.5)                       | 0.9<br>(0.4 to 1.4)                           | < 0.05<br>(< 0.05 to < 0.05)           | -9.5<br>(-32.4 to 18.2)                           | -31.6<br>(-47.7 to -12.9)                           |
| Measles                                                                              | 2.1<br>(0.8 to 4.8)                       | 77.6<br>(27.5 to 173.7)                       | 0.2<br>(0.1 to 0.5)                    | -61.1<br>(-78.8 to -37.3)                         | -70.3<br>(-83.4 to -52.1)                           |
| Varicella and herpes zoster                                                          | 27.4<br>(25.6 to 29.4)                    | 840.9<br>(784.6 to 902.8)                     | 0.8<br>(0.5 to 1.2)                    | 32.9<br>(13.8 to 56.8)                            | 0.1<br>(-10.9 to 13.7)                              |
| <b>Neglected tropical diseases and malaria</b>                                       | <b>17,661.8</b><br>(17,105.6 to 18,158.0) | <b>9,971.4†</b><br>(7,467.3 to 12,725.3)      | <b>182.2</b><br>(122.7 to 263.9)       | <b>3.0</b><br>(-6.4 to 10.8)                      | <b>-23.6</b><br>(-31.3 to -17.6)                    |
| Malaria                                                                              | 6,244.7<br>(5,343.5 to 7,123.9)           | 8,939.8<br>(6,432.2 to 11,714.9)              | 67.1<br>(46.9 to 95.0)                 | -5.4<br>(-16.6 to 5.7)                            | -29.3<br>(-37.0 to -21.6)                           |
| Chagas disease                                                                       | --                                        | --                                            | --                                     | --                                                | --                                                  |
| Leishmaniasis                                                                        | --                                        | --                                            | --                                     | --                                                | --                                                  |
| Visceral leishmaniasis                                                               | --                                        | --                                            | --                                     | --                                                | --                                                  |
| Cutaneous and mucocutaneous leishmaniasis                                            | --                                        | --                                            | --                                     | --                                                | --                                                  |
| African trypanosomiasis                                                              | --                                        | --                                            | --                                     | --                                                | --                                                  |
| Schistosomiasis                                                                      | 1,029.9<br>(870.6 to 1,220.4)             | 422.0<br>(367.7 to 487.2)                     | 7.6<br>(3.6 to 14.4)                   | -24.4<br>(-28.6 to -19.8)                         | -42.9<br>(-45.8 to -39.7)                           |
| Cysticercosis                                                                        | 13.3<br>(9.4 to 17.3)                     | --                                            | 2.5<br>(1.4 to 4.0)                    | 7.0<br>(-24.8 to 38.3)                            | -18.6<br>(-41.3 to 4.2)                             |
| Cystic echinococcosis                                                                | 17.6<br>(3.9 to 62.6)                     | 3.7<br>(0.9 to 13.1)                          | 1.6<br>(0.3 to 6.0)                    | -25.1<br>(-89.2 to 349.1)                         | -44.0<br>(-91.2 to 173.3)                           |
| Lymphatic filariasis                                                                 | 951.7<br>(758.5 to 1,164.4)               | 413.1<br>(347.2 to 487.2)                     | 39.6<br>(19.6 to 67.0)                 | -5.9<br>(-29.4 to 13.2)                           | -28.5<br>(-45.9 to -13.7)                           |
| Onchocerciasis                                                                       | --                                        | --                                            | --                                     | --                                                | --                                                  |
| Trachoma                                                                             | 19.2<br>(13.5 to 26.7)                    | --                                            | 1.7<br>(1.1 to 2.5)                    | -9.2<br>(-28.1 to 15.5)                           | -32.0<br>(-48.4 to -10.1)                           |
| Dengue                                                                               | 11.5<br>(5.8 to 20.1)                     | 192.4<br>(107.5 to 309.1)                     | 1.9<br>(0.8 to 3.7)                    | 194.4<br>(101.1 to 583.8)                         | 119.0<br>(58.2 to 419.0)                            |
| Yellow fever                                                                         | --                                        | --                                            | --                                     | --                                                | --                                                  |
| Rabies                                                                               | < 0.05<br>(< 0.05 to < 0.05)              | 0.1<br>(0.1 to 0.2)                           | < 0.05<br>(< 0.05 to < 0.05)           | 4.9<br>(-41.4 to 114.2)                           | -17.4<br>(-50.8 to 53.4)                            |
| Intestinal nematode infections                                                       | 13,422.3<br>(12,951.3 to 13,881.9)        | --                                            | 42.9<br>(25.1 to 68.8)                 | 32.5<br>(24.9 to 40.7)                            | -0.3<br>(-6.7 to 6.5)                               |
| Ascariasis                                                                           | 3,110.4<br>(2,862.8 to 3,389.2)           | --                                            | 1.4<br>(0.7 to 2.3)                    | 33.2<br>(13.5 to 52.3)                            | -0.1<br>(-15.4 to 15.6)                             |

| Cause                                                                   | Prevalence in thousands (95% UI)                 | Incidence in thousands (95% UI)                   | YLDs in thousands (95% UI)                    |                                                   |                                                     |
|-------------------------------------------------------------------------|--------------------------------------------------|---------------------------------------------------|-----------------------------------------------|---------------------------------------------------|-----------------------------------------------------|
|                                                                         | 2016 counts                                      | 2016 counts                                       | 2016 counts                                   | Percentage change in counts between 2006 and 2016 | Percentage change in age-standardised rates between |
| Trichuriasis                                                            | 7,841.6<br>(7,313.6 to 8,430.1)                  | --                                                | 17.4<br>(9.6 to 28.9)                         | 33.7<br>(20.2 to 47.4)                            | -0.1<br>(-11.6 to 12.6)                             |
| Hookworm disease                                                        | 5,603.2<br>(5,229.1 to 6,028.8)                  | --                                                | 24.1<br>(14.5 to 37.5)                        | 31.7<br>(21.1 to 41.9)                            | -0.5<br>(-8.9 to 8.2)                               |
| Food-borne trematodiasis                                                | --                                               | --                                                | --                                            | --                                                | --                                                  |
| Leprosy                                                                 | 7.9<br>(7.5 to 8.3)                              | 0.3<br>(0.3 to 0.4)                               | 0.5<br>(0.3 to 0.7)                           | -10.6<br>(-21.3 to 2.1)                           | -27.7<br>(-34.6 to -20.1)                           |
| Ebola virus disease                                                     | --                                               | --                                                | --                                            | --                                                | --                                                  |
| Zika virus disease                                                      | --                                               | --                                                | --                                            | --                                                | --                                                  |
| Guinea worm disease                                                     | --                                               | --                                                | --                                            | --                                                | --                                                  |
| Other neglected tropical diseases                                       | 484.9<br>(451.3 to 517.6)                        | --                                                | 16.9<br>(10.8 to 24.4)                        | 20.7<br>(8.8 to 33.7)                             | -9.1<br>(-17.5 to -0.1)                             |
| <b>Maternal disorders</b>                                               | <b>95.0</b><br><b>(78.5 to 115.0)</b>            | <b>1,372.6†</b><br><b>(958.7 to 1,881.5)</b>      | <b>13.2</b><br><b>(8.9 to 18.6)</b>           | <b>-9.8</b><br><b>(-23.3 to 6.6)</b>              | <b>-33.4</b><br><b>(-43.3 to -22.0)</b>             |
| Maternal haemorrhage                                                    | 8.8<br>(6.7 to 11.4)                             | 100.4<br>(66.0 to 142.8)                          | 0.5<br>(0.3 to 0.8)                           | 17.1<br>(-25.8 to 82.8)                           | -11.8<br>(-42.9 to 35.2)                            |
| Maternal sepsis and other pregnancy related infections                  | 11.4<br>(8.9 to 14.5)                            | 53.8<br>(40.9 to 73.5)                            | 0.2<br>(0.1 to 0.5)                           | 22.2<br>(-39.3 to 134.2)                          | -7.9<br>(-52.3 to 75.1)                             |
| Maternal hypertensive disorders                                         | 46.4<br>(29.6 to 66.2)                           | 188.5<br>(147.5 to 235.1)                         | 2.2<br>(1.1 to 3.7)                           | 16.4<br>(-29.2 to 92.9)                           | -12.4<br>(-46.2 to 45.0)                            |
| Maternal obstructed labour and uterine rupture                          | 22.9<br>(17.1 to 30.0)                           | 81.4<br>(57.7 to 111.2)                           | 7.3<br>(4.5 to 11.3)                          | -18.6<br>(-32.9 to -3.0)                          | -39.2<br>(-48.9 to -27.9)                           |
| Maternal abortion, miscarriage, and ectopic pregnancy                   | 7.8<br>(4.0 to 13.1)                             | 948.6<br>(546.5 to 1,464.1)                       | 0.8<br>(0.4 to 1.6)                           | 21.9<br>(-28.0 to 111.9)                          | -9.0<br>(-46.9 to 55.1)                             |
| Other maternal disorders                                                | --                                               | --                                                | 2.0<br>(1.4 to 2.9)                           | -13.8<br>(-26.8 to 1.7)                           | -36.5<br>(-45.6 to -25.8)                           |
| <b>Neonatal disorders</b>                                               | <b>393.2</b><br><b>(307.6 to 501.9)</b>          | --                                                | <b>49.9</b><br><b>(26.0 to 88.0)</b>          | <b>76.5</b><br><b>(26.5 to 130.0)</b>             | <b>37.2</b><br><b>(-2.9 to 82.0)</b>                |
| Neonatal preterm birth complications                                    | 244.9<br>(180.7 to 345.9)                        | --                                                | 13.1<br>(8.5 to 19.1)                         | 33.5<br>(3.2 to 69.0)                             | 1.7<br>(-22.0 to 29.6)                              |
| Neonatal encephalopathy due to birth asphyxia and trauma                | 126.7<br>(64.7 to 224.4)                         | --                                                | 12.2<br>(2.4 to 34.4)                         | 137.2<br>(-4.9 to 396.4)                          | 84.7<br>(-29.2 to 291.5)                            |
| Neonatal sepsis and other neonatal infections                           | 46.0<br>(13.1 to 107.5)                          | --                                                | 17.4<br>(3.0 to 47.2)                         | 111.8<br>(-11.9 to 257.5)                         | 72.6<br>(-33.8 to 207.8)                            |
| Hemolytic disease and other neonatal jaundice                           | 7.9<br>(6.7 to 9.2)                              | --                                                | 2.7<br>(2.0 to 3.5)                           | 27.3<br>(11.3 to 44.0)                            | -2.8<br>(-12.9 to 7.8)                              |
| Other neonatal disorders                                                | --                                               | --                                                | 4.5<br>(2.6 to 7.8)                           | 51.3<br>(14.4 to 91.5)                            | 18.4<br>(-10.6 to 50.7)                             |
| <b>Nutritional deficiencies</b>                                         | <b>10,130.6</b><br><b>(9,762.1 to 10,462.3)</b>  | <b>2,406.7†</b><br><b>(2,032.4 to 2,820.4)</b>    | <b>313.5</b><br><b>(205.1 to 446.2)</b>       | <b>17.1</b><br><b>(9.7 to 24.2)</b>               | <b>-12.6</b><br><b>(-17.2 to -8.6)</b>              |
| Protein-energy malnutrition                                             | 215.2<br>(154.2 to 297.6)                        | 147.9<br>(109.0 to 199.5)                         | 9.1<br>(5.5 to 14.1)                          | -6.7<br>(-30.6 to 28.9)                           | -28.7<br>(-47.3 to -1.3)                            |
| Iodine deficiency                                                       | 419.5<br>(358.7 to 483.3)                        | 17.2<br>(14.7 to 19.8)                            | 12.9<br>(8.7 to 18.0)                         | 7.5<br>(-5.8 to 21.2)                             | -19.0<br>(-27.6 to -10.6)                           |
| Vitamin A deficiency                                                    | 2,448.4<br>(2,053.3 to 2,844.3)                  | 2,241.6<br>(1,869.3 to 2,629.6)                   | 0.7<br>(0.4 to 1.1)                           | 12.7<br>(-16.3 to 44.3)                           | -16.4<br>(-36.8 to 4.2)                             |
| Iron-deficiency anaemia                                                 | 8,568.6<br>(8,132.5 to 8,986.9)                  | --                                                | 290.5<br>(188.3 to 416.5)                     | 18.6<br>(10.8 to 26.3)                            | -11.8<br>(-16.7 to -7.4)                            |
| Other nutritional deficiencies                                          | --                                               | --                                                | 0.3<br>(0.2 to 0.5)                           | -7.9<br>(-32.4 to 28.1)                           | -29.7<br>(-48.5 to -1.9)                            |
| <b>Other communicable, maternal, neonatal, and nutritional diseases</b> | <b>10,374.3</b><br><b>(9,766.8 to 10,922.6)</b>  | <b>6,374.1</b><br><b>(5,458.5 to 7,753.9)</b>     | <b>29.4</b><br><b>(18.7 to 44.7)</b>          | <b>25.4</b><br><b>(18.9 to 32.0)</b>              | <b>-6.3</b><br><b>(-10.3 to -1.9)</b>               |
| Sexually transmitted diseases excluding HIV                             | 7,369.8<br>(6,903.1 to 7,817.0)                  | 4,542.6<br>(4,102.5 to 5,005.8)                   | 15.3<br>(9.4 to 25.0)                         | 26.9<br>(20.1 to 34.3)                            | -5.5<br>(-10.1 to 0.2)                              |
| Syphilis                                                                | 659.7<br>(550.4 to 791.3)                        | 465.4<br>(381.9 to 564.0)                         | 1.0<br>(0.7 to 1.3)                           | 24.4<br>(7.0 to 46.1)                             | -4.0<br>(-18.4 to 13.2)                             |
| Chlamydial infection                                                    | 463.4<br>(370.8 to 567.9)                        | 393.0<br>(320.4 to 476.6)                         | 2.9<br>(1.8 to 4.6)                           | 27.6<br>(14.2 to 44.3)                            | -6.2<br>(-15.6 to 6.3)                              |
| Gonococcal infection                                                    | 413.1<br>(336.9 to 514.1)                        | 1,315.2<br>(1,022.4 to 1,686.3)                   | 2.8<br>(1.7 to 4.7)                           | 30.4<br>(14.2 to 48.7)                            | -2.7<br>(-13.6 to 9.3)                              |
| Trichomoniasis                                                          | 1,440.6<br>(1,231.8 to 1,664.2)                  | 1,406.4<br>(1,173.7 to 1,668.4)                   | 2.1<br>(0.8 to 4.5)                           | 29.0<br>(21.1 to 37.3)                            | -3.3<br>(-8.5 to 1.9)                               |
| Genital herpes                                                          | 5,722.2<br>(4,929.3 to 6,642.9)                  | 684.5<br>(563.5 to 838.5)                         | 1.6<br>(0.5 to 3.5)                           | 30.3<br>(18.5 to 43.4)                            | -1.7<br>(-9.3 to 6.7)                               |
| Other sexually transmitted diseases                                     | 206.7<br>(191.3 to 222.7)                        | 278.1<br>(232.1 to 335.7)                         | 4.9<br>(3.2 to 7.3)                           | 23.1<br>(12.8 to 35.9)                            | -9.1<br>(-16.6 to 0.8)                              |
| Hepatitis                                                               | 3,837.1<br>(3,149.8 to 4,618.1)                  | 1,831.5<br>(1,081.2 to 3,153.5)                   | 1.7<br>(1.0 to 2.6)                           | 2.0<br>(-22.6 to 33.8)                            | -15.8<br>(-31.3 to 2.3)                             |
| Acute hepatitis A                                                       | 51.3<br>(4.4 to 152.1)                           | 667.3<br>(57.4 to 1,977.4)                        | 0.3<br>(0.1 to 0.6)                           | 4.3<br>(-75.4 to 375.5)                           | -13.3<br>(-68.4 to 188.6)                           |
| Hepatitis B                                                             | 2,934.2<br>(2,267.2 to 3,742.2)                  | 1,019.4<br>(745.5 to 1,385.3)                     | 1.2<br>(0.7 to 1.9)                           | -0.8<br>(-19.8 to 23.2)                           | -17.4<br>(-33.3 to 0.2)                             |
| Hepatitis C                                                             | 846.4<br>(740.7 to 960.8)                        | 77.2<br>(69.0 to 85.7)                            | 0.1<br>(< 0.05 to 0.1)                        | 31.7<br>(-16.5 to 109.2)                          | 0.8<br>(-24.9 to 34.4)                              |
| Acute hepatitis E                                                       | 5.2<br>(4.2 to 6.7)                              | 67.5<br>(54.2 to 87.2)                            | 0.1<br>(0.1 to 0.2)                           | 13.7<br>(-20.5 to 58.5)                           | -9.9<br>(-29.9 to 12.1)                             |
| Other infectious diseases                                               | 359.0<br>(335.9 to 380.9)                        | < 0.05<br>(< 0.05 to < 0.05)                      | 12.4<br>(8.0 to 17.7)                         | 27.5<br>(15.1 to 40.0)                            | -5.4<br>(-13.6 to 2.8)                              |
| <b>Non-communicable diseases</b>                                        | <b>25,448.8</b><br><b>(25,194.6 to 25,704.3)</b> | <b>79,891.7†</b><br><b>(74,430.4 to 85,458.6)</b> | <b>1,784.0</b><br><b>(1,312.4 to 2,342.0)</b> | <b>34.3</b><br><b>(28.7 to 40.1)</b>              | <b>0.4</b><br><b>(-2.4 to 3.5)</b>                  |
| <b>Neoplasms</b>                                                        | <b>28.8</b><br><b>(25.8 to 31.6)</b>             | <b>14.9</b><br><b>(13.3 to 17.3)</b>              | <b>4.6</b><br><b>(3.2 to 6.5)</b>             | <b>33.6</b><br><b>(23.4 to 43.4)</b>              | <b>2.2</b><br><b>(-5.2 to 9.9)</b>                  |
| Lip and oral cavity cancer                                              | 1.0<br>(0.9 to 1.1)                              | 0.3<br>(0.3 to 0.3)                               | 0.1<br>(0.1 to 0.1)                           | 38.7<br>(19.0 to 63.0)                            | 3.5<br>(-12.6 to 24.2)                              |
| Nasopharynx cancer                                                      | 0.1<br>(0.1 to 0.1)                              | < 0.05<br>(< 0.05 to < 0.05)                      | < 0.05<br>(< 0.05 to < 0.05)                  | 31.8<br>(15.8 to 50.6)                            | -0.5<br>(-12.2 to 13.6)                             |
| Other pharynx cancer                                                    | 0.2<br>(0.1 to 0.3)                              | 0.1<br>(0.1 to 0.1)                               | < 0.05<br>(< 0.05 to 0.1)                     | 29.4<br>(13.8 to 48.2)                            | 0.2<br>(-11.8 to 15.2)                              |
| Oesophageal cancer                                                      | 0.5<br>(0.5 to 0.6)                              | 0.5<br>(0.5 to 0.5)                               | 0.1<br>(0.1 to 0.2)                           | 30.5<br>(10.2 to 54.2)                            | -0.7<br>(-16.0 to 18.8)                             |
| Stomach cancer                                                          | 1.2<br>(1.2 to 1.4)                              | 0.9<br>(0.8 to 1.0)                               | 0.2<br>(0.1 to 0.3)                           | 20.4<br>(2.5 to 41.5)                             | -8.9<br>(-22.7 to 8.1)                              |
| Colon and rectum cancer                                                 | 1.9<br>(1.7 to 2.0)                              | 0.8<br>(0.7 to 0.8)                               | 0.3<br>(0.2 to 0.3)                           | 43.5<br>(21.8 to 66.1)                            | 6.5<br>(-10.0 to 24.8)                              |
| Liver cancer                                                            | 0.9<br>(0.8 to 1.1)                              | 1.9<br>(1.7 to 2.2)                               | 0.4<br>(0.3 to 0.6)                           | 34.8<br>(17.6 to 56.6)                            | 1.8<br>(-10.9 to 17.7)                              |
| Liver cancer due to hepatitis B                                         | 0.8<br>(0.7 to 1.0)                              | 1.0<br>(0.8 to 1.1)                               | 0.2<br>(0.1 to 0.3)                           | 33.6<br>(12.3 to 60.1)                            | 1.7<br>(-14.8 to 22.5)                              |



| Cause                                              | Prevalence in thousands (95% UI)              | Incidence in thousands (95% UI)          | YLDs in thousands (95% UI)            |                                                   |                                                     |
|----------------------------------------------------|-----------------------------------------------|------------------------------------------|---------------------------------------|---------------------------------------------------|-----------------------------------------------------|
|                                                    | 2016 counts                                   | 2016 counts                              | 2016 counts                           | Percentage change in counts between 2006 and 2016 | Percentage change in age-standardised rates between |
| Liver cancer due to hepatitis C                    | 0.2<br>(0.1 to 0.3)                           | 0.2<br>(0.2 to 0.3)                      | < 0.05<br>(< 0.05 to 0.1)             | 38.9<br>(19.6 to 62.1)                            | 3.0<br>(-10.8 to 19.7)                              |
| Liver cancer due to alcohol use                    | 0.2<br>(0.2 to 0.3)                           | 0.3<br>(0.2 to 0.3)                      | 0.1<br>(< 0.05 to 0.1)                | 38.5<br>(20.4 to 61.5)                            | 4.2<br>(-9.2 to 21.0)                               |
| Liver cancer due to other causes                   | 0.4<br>(0.4 to 0.5)                           | 0.5<br>(0.4 to 0.6)                      | 0.1<br>(0.1 to 0.1)                   | 33.3<br>(15.8 to 55.7)                            | 0.2<br>(-13.7 to 18.4)                              |
| Gallbladder and biliary tract cancer               | 0.1<br>(0.1 to 0.1)                           | 0.1<br>(0.1 to 0.1)                      | < 0.05<br>(< 0.05 to < 0.05)          | 27.4<br>(15.8 to 39.7)                            | -3.8<br>(-12.1 to 5.0)                              |
| Pancreatic cancer                                  | 0.2<br>(0.2 to 0.3)                           | 0.3<br>(0.3 to 0.4)                      | 0.1<br>(< 0.05 to 0.1)                | 45.6<br>(30.3 to 65.1)                            | 9.2<br>(-2.5 to 23.7)                               |
| Larynx cancer                                      | 0.4<br>(0.3 to 0.5)                           | 0.1<br>(0.1 to 0.2)                      | 0.1<br>(< 0.05 to 0.1)                | 27.2<br>(9.8 to 46.3)                             | -2.4<br>(-14.8 to 11.6)                             |
| Tracheal, bronchus, and lung cancer                | 0.6<br>(0.5 to 0.7)                           | 0.6<br>(0.5 to 0.6)                      | 0.1<br>(0.1 to 0.2)                   | 40.7<br>(16.8 to 69.5)                            | 6.3<br>(-12.2 to 27.8)                              |
| Malignant skin melanoma                            | 0.5<br>(0.3 to 0.6)                           | 0.1<br>(0.1 to 0.2)                      | < 0.05<br>(< 0.05 to 0.1)             | 39.7<br>(19.1 to 67.9)                            | 5.9<br>(-10.2 to 26.8)                              |
| Non-melanoma skin cancer                           | 0.1<br>(0.1 to 0.2)                           | 0.7<br>(0.5 to 1.1)                      | < 0.05<br>(< 0.05 to < 0.05)          | 43.9<br>(18.5 to 73.7)                            | 6.2<br>(-13.6 to 30.2)                              |
| Non-melanoma skin cancer (squamous-cell carcinoma) | 0.1<br>(< 0.05 to 0.1)                        | 0.2<br>(0.2 to 0.2)                      | < 0.05<br>(< 0.05 to < 0.05)          | 44.7<br>(14.5 to 82.9)                            | 6.0<br>(-17.7 to 33.7)                              |
| Non-melanoma skin cancer (basal-cell carcinoma)    | 0.1<br>(< 0.05 to 0.1)                        | 0.5<br>(0.3 to 0.9)                      | < 0.05<br>(< 0.05 to < 0.05)          | 40.1<br>(26.6 to 55.8)                            | 7.2<br>(-2.1 to 18.0)                               |
| Breast cancer                                      | 3.3<br>(2.8 to 3.7)                           | 0.8<br>(0.7 to 0.9)                      | 0.4<br>(0.3 to 0.5)                   | 41.1<br>(11.7 to 77.1)                            | 8.7<br>(-13.8 to 36.6)                              |
| Cervical cancer                                    | 10.2<br>(5.6 to 17.2)                         | 3.0<br>(1.7 to 4.9)                      | 1.0<br>(0.5 to 1.9)                   | 29.3<br>(2.4 to 68.1)                             | 0.7<br>(-20.6 to 28.9)                              |
| Uterine cancer                                     | 1.0<br>(0.7 to 1.4)                           | 0.2<br>(0.2 to 0.3)                      | 0.1<br>(0.1 to 0.1)                   | 41.2<br>(11.1 to 82.7)                            | 7.8<br>(-13.8 to 37.7)                              |
| Ovarian cancer                                     | 1.5<br>(0.9 to 1.8)                           | 0.5<br>(0.3 to 0.6)                      | 0.2<br>(0.1 to 0.4)                   | 39.6<br>(3.7 to 101.2)                            | 6.8<br>(-21.2 to 56.8)                              |
| Prostate cancer                                    | 1.2<br>(0.9 to 1.4)                           | 0.4<br>(0.3 to 0.5)                      | 0.2<br>(0.1 to 0.3)                   | 42.1<br>(10.8 to 84.7)                            | 1.9<br>(-18.4 to 28.4)                              |
| Testicular cancer                                  | < 0.05<br>(< 0.05 to < 0.05)                  | < 0.05<br>(< 0.05 to < 0.05)             | < 0.05<br>(< 0.05 to < 0.05)          | 11.2<br>(-19.3 to 40.7)                           | -16.2<br>(-38.1 to 5.2)                             |
| Kidney cancer                                      | 1.1<br>(0.8 to 1.4)                           | 0.3<br>(0.2 to 0.3)                      | 0.1<br>(0.1 to 0.1)                   | 44.5<br>(-3.6 to 110.6)                           | 15.0<br>(-4.0 to 36.3)                              |
| Bladder cancer                                     | 0.8<br>(0.6 to 1.0)                           | 0.2<br>(0.2 to 0.3)                      | 0.1<br>(0.1 to 0.1)                   | 39.3<br>(23.1 to 56.8)                            | 3.6<br>(-8.0 to 16.9)                               |
| Brain and nervous system cancer                    | 1.4<br>(1.1 to 1.9)                           | 0.5<br>(0.4 to 0.6)                      | 0.2<br>(0.1 to 0.2)                   | 36.4<br>(2.7 to 75.6)                             | 8.2<br>(-11.4 to 32.4)                              |
| Thyroid cancer                                     | 0.8<br>(0.4 to 1.2)                           | 0.2<br>(0.1 to 0.3)                      | 0.1<br>(< 0.05 to 0.1)                | 30.8<br>(6.2 to 65.1)                             | -0.8<br>(-19.2 to 24.3)                             |
| Mesothelioma                                       | < 0.05<br>(< 0.05 to < 0.05)                  | < 0.05<br>(< 0.05 to < 0.05)             | < 0.05<br>(< 0.05 to < 0.05)          | 30.9<br>(14.9 to 50.0)                            | 0.4<br>(-12.2 to 16.3)                              |
| Hodgkin lymphoma                                   | 0.5<br>(0.2 to 0.7)                           | 0.2<br>(0.1 to 0.2)                      | 0.1<br>(< 0.05 to 0.1)                | 11.6<br>(-2.6 to 29.8)                            | -12.6<br>(-20.7 to -2.4)                            |
| Non-Hodgkin's lymphoma                             | 1.0<br>(0.8 to 1.6)                           | 0.4<br>(0.3 to 0.5)                      | 0.1<br>(0.1 to 0.2)                   | 36.3<br>(21.9 to 52.4)                            | 3.1<br>(-10.4 to 19.9)                              |
| Multiple myeloma                                   | 0.3<br>(0.1 to 0.4)                           | 0.2<br>(0.1 to 0.2)                      | 0.1<br>(< 0.05 to 0.1)                | 40.2<br>(23.8 to 68.5)                            | 7.6<br>(-5.4 to 28.9)                               |
| Leukaemia                                          | 1.3<br>(1.1 to 1.7)                           | 0.4<br>(0.3 to 0.5)                      | 0.2<br>(0.1 to 0.2)                   | 25.7<br>(16.5 to 38.7)                            | -3.0<br>(-9.1 to 3.7)                               |
| Acute lymphoid leukaemia                           | 0.4<br>(0.3 to 0.5)                           | 0.1<br>(0.1 to 0.1)                      | < 0.05<br>(< 0.05 to 0.1)             | 26.4<br>(5.4 to 51.9)                             | -0.9<br>(-12.8 to 12.1)                             |
| Chronic lymphoid leukaemia                         | 0.2<br>(0.1 to 0.2)                           | < 0.05<br>(< 0.05 to < 0.05)             | < 0.05<br>(< 0.05 to < 0.05)          | 40.4<br>(20.3 to 63.4)                            | 4.8<br>(-10.0 to 21.8)                              |
| Acute myeloid leukaemia                            | 0.1<br>(0.1 to 0.2)                           | 0.1<br>(0.1 to 0.1)                      | < 0.05<br>(< 0.05 to < 0.05)          | 37.1<br>(20.8 to 57.5)                            | 7.3<br>(-3.7 to 19.0)                               |
| Chronic myeloid leukaemia                          | 0.1<br>(0.1 to 0.2)                           | < 0.05<br>(< 0.05 to 0.1)                | < 0.05<br>(< 0.05 to < 0.05)          | 24.2<br>(6.6 to 45.4)                             | -4.9<br>(-17.9 to 10.2)                             |
| Other leukaemia                                    | 0.5<br>(0.4 to 0.7)                           | 0.1<br>(0.1 to 0.1)                      | 0.1<br>(< 0.05 to 0.1)                | 17.7<br>(4.7 to 33.8)                             | -9.0<br>(-17.9 to 1.2)                              |
| Other neoplasms                                    | 3.1<br>(2.4 to 3.6)                           | 1.1<br>(0.8 to 1.2)                      | 0.3<br>(0.2 to 0.4)                   | 26.7<br>(10.9 to 47.4)                            | -3.2<br>(-15.1 to 14.7)                             |
| <b>Cardiovascular diseases</b>                     | <b>1,600.7</b><br><b>(1,510.0 to 1,692.3)</b> | <b>112.4†</b><br><b>(107.6 to 117.5)</b> | <b>88.9</b><br><b>(63.6 to 119.1)</b> | <b>38.1</b><br><b>(32.8 to 43.9)</b>              | <b>1.8</b><br><b>(-1.9 to 5.8)</b>                  |
| Rheumatic heart disease                            | 390.4<br>(345.2 to 443.2)                     | 18.2<br>(16.0 to 20.7)                   | 18.6<br>(11.8 to 27.2)                | 52.7<br>(38.5 to 66.3)                            | 14.6<br>(4.1 to 24.4)                               |
| Ischaemic heart disease                            | 286.7<br>(267.2 to 307.7)                     | 41.0<br>(38.1 to 44.1)                   | 13.1<br>(8.9 to 18.2)                 | 34.5<br>(27.5 to 41.7)                            | 1.8<br>(-2.6 to 6.4)                                |
| Cerebrovascular disease                            | 81.6<br>(75.6 to 87.5)                        | 16.8‡<br>(15.3 to 18.2)                  | 11.7<br>(8.5 to 14.7)                 | 37.4<br>(26.9 to 48.6)                            | 3.0<br>(-4.7 to 11.2)                               |
| Ischaemic stroke                                   | 71.8<br>(64.9 to 79.2)                        | 11.1‡<br>(9.8 to 12.5)                   | 9.8<br>(7.1 to 12.3)                  | 38.1<br>(25.9 to 50.5)                            | 3.6<br>(-5.3 to 12.8)                               |
| Hemorrhagic stroke                                 | 13.5<br>(11.9 to 15.2)                        | 5.7‡<br>(5.1 to 6.3)                     | 1.9<br>(1.3 to 2.4)                   | 33.6<br>(17.3 to 52.7)                            | 0.2<br>(-13.0 to 15.2)                              |
| Hypertensive heart disease                         | 17.3<br>(13.8 to 21.3)                        | --                                       | 1.4<br>(0.9 to 2.0)                   | 27.4<br>(12.2 to 43.8)                            | -4.4<br>(-14.8 to 7.1)                              |
| Cardiomyopathy and myocarditis                     | 6.5<br>(5.6 to 7.6)                           | 6.7†<br>(5.9 to 7.6)                     | 0.6<br>(0.4 to 0.9)                   | 37.6<br>(22.8 to 56.2)                            | 5.2<br>(-8.4 to 22.3)                               |
| Myocarditis                                        | 2.6<br>(2.3 to 2.9)                           | 6.7<br>(5.9 to 7.6)                      | 0.2<br>(0.1 to 0.2)                   | 37.2<br>(28.3 to 46.5)                            | 3.7<br>(-5.7 to 14.2)                               |
| Alcoholic cardiomyopathy                           | 0.6<br>(0.4 to 0.8)                           | --                                       | 0.1<br>(< 0.05 to 0.1)                | 35.1<br>(18.1 to 53.7)                            | 5.7<br>(-7.8 to 20.3)                               |
| Other cardiomyopathy                               | 5.1<br>(4.1 to 6.4)                           | --                                       | 0.4<br>(0.3 to 0.6)                   | 38.1<br>(17.0 to 65.2)                            | 5.5<br>(-11.6 to 28.2)                              |
| Atrial fibrillation and flutter                    | 52.8<br>(46.2 to 60.6)                        | 4.6<br>(4.0 to 5.4)                      | 4.1<br>(2.7 to 5.7)                   | 35.9<br>(26.2 to 46.9)                            | -0.1<br>(-6.2 to 6.7)                               |
| Peripheral vascular disease                        | 207.4<br>(179.6 to 239.6)                     | 20.8<br>(17.9 to 24.2)                   | 1.1<br>(0.5 to 2.1)                   | 33.5<br>(23.0 to 45.4)                            | -2.2<br>(-9.3 to 5.3)                               |
| Endocarditis                                       | 2.0<br>(1.7 to 2.3)                           | 4.3<br>(3.7 to 4.8)                      | 0.2<br>(0.1 to 0.2)                   | 33.6<br>(21.7 to 46.4)                            | -3.5<br>(-15.0 to 9.4)                              |
| Other cardiovascular and circulatory diseases      | 722.1<br>(613.2 to 852.1)                     | --                                       | 38.1<br>(26.0 to 54.8)                | 34.0<br>(24.5 to 44.7)                            | -2.0<br>(-9.0 to 5.5)                               |
| <b>Chronic respiratory diseases</b>                | <b>2,019.0</b><br><b>(1,880.2 to 2,151.8)</b> | <b>413.6†</b><br><b>(378.0 to 454.3)</b> | <b>91.5</b><br><b>(65.7 to 123.8)</b> | <b>39.6</b><br><b>(33.6 to 46.0)</b>              | <b>4.6</b><br><b>(0.4 to 8.4)</b>                   |
| Chronic obstructive pulmonary disease              | 246.0<br>(235.6 to 256.9)                     | 17.5<br>(16.8 to 18.2)                   | 19.0<br>(16.5 to 21.1)                | 36.1<br>(26.5 to 46.9)                            | 3.9<br>(-2.9 to 11.3)                               |
| Pneumoconiosis                                     | 0.3<br>(0.2 to 0.3)                           | < 0.05<br>(< 0.05 to < 0.05)             | < 0.05<br>(< 0.05 to 0.1)             | 33.4<br>(25.2 to 41.6)                            | 2.8<br>(-3.5 to 8.9)                                |
| Silicosis                                          | < 0.05<br>(< 0.05 to < 0.05)                  | < 0.05<br>(< 0.05 to < 0.05)             | < 0.05<br>(< 0.05 to < 0.05)          | 31.6<br>(21.0 to 42.4)                            | 1.6<br>(-4.9 to 8.5)                                |

| Cause                                                          | Prevalence in thousands (95% UI)        | Incidence in thousands (95% UI)          | YLDs in thousands (95% UI)        |                                                   |                                                     |
|----------------------------------------------------------------|-----------------------------------------|------------------------------------------|-----------------------------------|---------------------------------------------------|-----------------------------------------------------|
|                                                                | 2016 counts                             | 2016 counts                              | 2016 counts                       | Percentage change in counts between 2006 and 2016 | Percentage change in age-standardised rates between |
| Asbestosis                                                     | 0.1<br>(0.1 to 0.1)                     | < 0.05<br>(< 0.05 to < 0.05)             | < 0.05<br>(< 0.05 to < 0.05)      | 33.7<br>(23.8 to 44.9)                            | 1.8<br>(-4.3 to 8.4)                                |
| Coal workers pneumoconiosis                                    | --                                      | --                                       | --                                | --                                                | --                                                  |
| Other pneumoconiosis                                           | 0.1<br>(0.1 to 0.2)                     | < 0.05<br>(< 0.05 to < 0.05)             | < 0.05<br>(< 0.05 to < 0.05)      | 33.5<br>(21.0 to 46.2)                            | 3.6<br>(-6.5 to 14.0)                               |
| Asthma                                                         | 1,770.2<br>(1,610.5 to 1,953.6)         | 395.9<br>(360.6 to 436.2)                | 69.6<br>(45.5 to 100.7)           | 39.5<br>(32.4 to 47.2)                            | 4.2<br>(0.0 to 8.9)                                 |
| Interstitial lung disease and pulmonary sarcoidosis            | 1.9<br>(1.7 to 2.2)                     | 0.2<br>(0.2 to 0.2)                      | 0.2<br>(0.1 to 0.3)               | 35.7<br>(31.7 to 40.1)                            | 1.2<br>(-3.1 to 5.8)                                |
| Other chronic respiratory diseases                             | --                                      | --                                       | 2.6<br>(2.0 to 3.2)               | 80.6<br>(35.0 to 136.0)                           | 34.9<br>(9.5 to 63.3)                               |
| <b>Cirrhosis and other chronic liver diseases</b>              | <b>50.2<br/>(47.6 to 52.8)</b>          | <b>4.8<br/>(4.5 to 5.0)</b>              | <b>4.3<br/>(3.0 to 6.0)</b>       | <b>39.7<br/>(22.3 to 61.0)</b>                    | <b>5.9<br/>(-3.8 to 17.3)</b>                       |
| Cirrhosis and other chronic liver diseases due to hepatitis B  | 14.8<br>(12.5 to 17.2)                  | 1.5<br>(1.3 to 1.7)                      | 1.0<br>(0.6 to 1.4)               | 40.9<br>(14.1 to 69.8)                            | 6.9<br>(-9.2 to 25.0)                               |
| Cirrhosis and other chronic liver diseases due to hepatitis C  | 8.0<br>(5.4 to 11.2)                    | 0.8<br>(0.6 to 1.2)                      | 0.5<br>(0.3 to 0.8)               | 41.1<br>(14.5 to 74.4)                            | 7.4<br>(-12.4 to 29.6)                              |
| Cirrhosis and other chronic liver diseases due to alcohol use  | 7.8<br>(6.7 to 8.9)                     | 0.9<br>(0.8 to 1.0)                      | 0.5<br>(0.3 to 0.7)               | 40.2<br>(14.3 to 70.0)                            | 7.1<br>(-11.7 to 28.4)                              |
| Cirrhosis and other chronic liver diseases due to other causes | 19.6<br>(18.0 to 21.4)                  | 1.6<br>(1.4 to 1.7)                      | 2.4<br>(1.6 to 3.4)               | 38.9<br>(11.9 to 75.0)                            | 3.6<br>(-14.0 to 26.9)                              |
| <b>Digestive diseases</b>                                      | <b>410.9<br/>(373.8 to 443.7)</b>       | <b>379.5†<br/>(361.3 to 399.3)</b>       | <b>13.7<br/>(9.7 to 18.7)</b>     | <b>31.6<br/>(20.4 to 44.2)</b>                    | <b>0.7<br/>(-5.6 to 6.9)</b>                        |
| Peptic ulcer disease                                           | 52.9<br>(48.7 to 57.8)                  | 32.5<br>(29.1 to 36.6)                   | 1.2<br>(0.8 to 1.7)               | 41.4<br>(26.1 to 58.7)                            | 6.8<br>(-3.2 to 17.7)                               |
| Gastritis and duodenitis                                       | 145.8<br>(128.4 to 163.9)               | 122.4<br>(110.4 to 136.3)                | 1.8<br>(1.2 to 2.6)               | 45.3<br>(29.9 to 62.3)                            | 12.7<br>(3.2 to 23.1)                               |
| Appendicitis                                                   | 3.7<br>(3.4 to 4.0)                     | 98.4<br>(90.2 to 107.0)                  | 1.1<br>(0.7 to 1.7)               | 32.3<br>(-6.5 to 84.7)                            | -2.6<br>(-25.5 to 24.6)                             |
| Paralytic ileus and intestinal obstruction                     | 0.6<br>(0.6 to 0.7)                     | 18.0<br>(16.3 to 19.9)                   | 0.2<br>(0.1 to 0.3)               | 33.1<br>(23.4 to 44.2)                            | 0.2<br>(-12.2 to 14.2)                              |
| Inguinal, femoral, and abdominal hernia                        | 204.7<br>(167.2 to 248.4)               | 31.7<br>(27.9 to 35.9)                   | 7.5<br>(5.0 to 10.4)              | 26.3<br>(10.5 to 44.5)                            | -4.3<br>(-13.8 to 5.7)                              |
| Inflammatory bowel disease                                     | 1.2<br>(1.1 to 1.3)                     | 9.4<br>(9.0 to 9.8)                      | 0.2<br>(0.1 to 0.3)               | 34.3<br>(31.0 to 37.6)                            | 1.9<br>(-0.7 to 4.5)                                |
| Vascular intestinal disorders                                  | 0.1<br>(0.1 to 0.2)                     | 0.9<br>(0.8 to 1.0)                      | < 0.05<br>(< 0.05 to 0.1)         | 40.4<br>(33.2 to 48.8)                            | 7.4<br>(3.2 to 12.1)                                |
| Gallbladder and biliary diseases                               | 14.1<br>(12.4 to 15.8)                  | 63.1<br>(55.0 to 72.2)                   | 0.4<br>(0.2 to 0.5)               | 35.4<br>(21.5 to 50.8)                            | 3.9<br>(-8.7 to 19.2)                               |
| Pancreatitis                                                   | 0.3<br>(0.3 to 0.4)                     | 3.1<br>(2.7 to 3.5)                      | < 0.05<br>(< 0.05 to 0.1)         | 39.4<br>(34.7 to 44.6)                            | 6.5<br>(2.9 to 9.8)                                 |
| Other digestive diseases                                       | --                                      | --                                       | 1.3<br>(0.9 to 1.8)               | 35.1<br>(20.3 to 52.2)                            | 4.2<br>(-3.2 to 11.6)                               |
| <b>Neurological disorders</b>                                  | <b>7,853.3<br/>(7,461.6 to 8,294.2)</b> | <b>3,710.7<br/>(3,146.4 to 4,320.7)</b>  | <b>191.8<br/>(116.5 to 290.0)</b> | <b>37.7<br/>(-6.8 to 102.6)</b>                   | <b>1.7<br/>(-24.3 to 35.8)</b>                      |
| Alzheimer's disease and other dementias                        | 41.4<br>(34.8 to 49.6)                  | 7.2<br>(6.0 to 8.8)                      | 5.8<br>(4.0 to 7.8)               | 41.6<br>(34.5 to 49.7)                            | -1.6<br>(-6.1 to 3.2)                               |
| Parkinson's disease                                            | 3.4<br>(2.6 to 4.2)                     | 0.5<br>(0.4 to 0.6)                      | 0.4<br>(0.2 to 0.6)               | 50.4<br>(27.5 to 78.0)                            | 8.6<br>(-6.9 to 26.0)                               |
| Epilepsy                                                       | 112.4<br>(19.2 to 231.7)                | 16.3<br>(2.8 to 33.7)                    | 44.1<br>(6.8 to 100.9)            | 43.9<br>(-75.3 to 855.0)                          | 7.0<br>(-82.1 to 600.9)                             |
| Multiple sclerosis                                             | 1.2<br>(1.0 to 1.4)                     | 0.1<br>(0.1 to 0.1)                      | 0.3<br>(0.2 to 0.5)               | 43.7<br>(39.0 to 48.5)                            | 10.2<br>(6.7 to 13.9)                               |
| Motor neuron disease                                           | 0.3<br>(0.2 to 0.3)                     | 0.1<br>(0.1 to 0.1)                      | 0.1<br>(< 0.05 to 0.1)            | 38.1<br>(32.1 to 44.6)                            | 4.1<br>(0.7 to 7.8)                                 |
| Migraine                                                       | 2,629.2<br>(2,461.3 to 2,797.5)         | 350.0<br>(327.7 to 375.1)                | 111.3<br>(70.8 to 157.7)          | 33.2<br>(27.7 to 39.2)                            | -0.2<br>(-3.9 to 3.5)                               |
| Tension-type headache                                          | 5,946.9<br>(5,278.6 to 6,719.1)         | 3,336.3<br>(2,774.9 to 3,950.0)          | 18.8<br>(11.9 to 27.7)            | 31.7<br>(24.6 to 39.5)                            | -1.1<br>(-6.0 to 4.1)                               |
| Other neurological disorders                                   | 0.1<br>(< 0.05 to 0.1)                  | 0.1<br>(0.1 to 0.2)                      | 10.9<br>(1.9 to 24.6)             | 78.1<br>(-66.7 to 928.4)                          | 28.1<br>(-72.7 to 500.1)                            |
| <b>Mental and substance use disorders</b>                      | <b>4,019.8<br/>(3,789.4 to 4,211.9)</b> | <b>1,530.2†<br/>(1,414.1 to 1,661.8)</b> | <b>471.3<br/>(339.4 to 615.7)</b> | <b>33.9<br/>(30.8 to 37.3)</b>                    | <b>0.3<br/>(-2.0 to 2.8)</b>                        |
| Schizophrenia                                                  | 33.3<br>(29.0 to 38.0)                  | 3.2<br>(2.8 to 3.6)                      | 21.2<br>(15.6 to 26.7)            | 34.7<br>(22.1 to 49.2)                            | 2.6<br>(-5.8 to 12.2)                               |
| Alcohol use disorders                                          | 339.1<br>(286.8 to 397.3)               | 180.0<br>(151.1 to 209.7)                | 33.8<br>(23.2 to 47.7)            | 38.3<br>(27.4 to 49.5)                            | 3.5<br>(-3.9 to 11.0)                               |
| Drug use disorders                                             | 113.3<br>(98.8 to 127.6)                | 20.7<br>(17.5 to 23.9)                   | 22.7<br>(15.9 to 31.7)            | 40.2<br>(27.2 to 56.2)                            | 5.1<br>(-3.9 to 15.6)                               |
| Opioid use disorders                                           | 46.2<br>(36.4 to 59.4)                  | 6.6<br>(5.4 to 8.2)                      | 19.1<br>(12.7 to 27.4)            | 40.9<br>(24.9 to 61.2)                            | 5.6<br>(-5.1 to 18.7)                               |
| Cocaine use disorders                                          | 3.1<br>(2.6 to 3.8)                     | 0.5<br>(0.4 to 0.6)                      | 0.5<br>(0.3 to 0.7)               | 37.8<br>(30.2 to 46.5)                            | 3.4<br>(-2.0 to 9.2)                                |
| Amphetamine use disorders                                      | 1.7<br>(1.1 to 2.4)                     | 0.3<br>(0.2 to 0.5)                      | 0.2<br>(0.1 to 0.4)               | 38.9<br>(27.1 to 52.1)                            | 3.9<br>(-4.6 to 13.8)                               |
| Cannabis use disorders                                         | 58.6<br>(46.2 to 73.7)                  | 11.7<br>(9.1 to 14.9)                    | 1.7<br>(1.0 to 2.7)               | 36.0<br>(12.3 to 66.5)                            | 0.9<br>(-15.8 to 21.3)                              |
| Other drug use disorders                                       | 7.1<br>(6.2 to 8.1)                     | 1.6<br>(1.4 to 1.8)                      | 1.2<br>(0.8 to 1.7)               | 36.5<br>(15.2 to 61.4)                            | 3.1<br>(-11.9 to 20.4)                              |
| Depressive disorders                                           | 852.8<br>(795.3 to 919.8)               | 982.8<br>(870.2 to 1,104.8)              | 147.3<br>(102.0 to 199.4)         | 33.8<br>(27.9 to 40.6)                            | 0.6<br>(-4.1 to 5.7)                                |
| Major depressive disorder                                      | 597.8<br>(529.9 to 674.5)               | 933.8<br>(819.9 to 1,054.1)              | 121.7<br>(82.8 to 167.2)          | 34.1<br>(26.9 to 42.4)                            | 0.7<br>(-4.9 to 7.0)                                |
| Dysthymia                                                      | 267.4<br>(231.5 to 307.9)               | 49.0<br>(42.8 to 56.5)                   | 25.6<br>(17.2 to 37.1)            | 32.6<br>(27.2 to 37.9)                            | 0.0<br>(-3.0 to 3.3)                                |
| Bipolar disorder                                               | 141.0<br>(118.9 to 167.3)               | 17.2<br>(14.5 to 20.5)                   | 28.8<br>(17.8 to 42.9)            | 34.6<br>(24.8 to 44.5)                            | 0.3<br>(-5.4 to 6.5)                                |
| Anxiety disorders                                              | 827.6<br>(736.6 to 933.1)               | 149.7<br>(134.2 to 167.4)                | 80.1<br>(55.0 to 108.9)           | 34.3<br>(25.6 to 45.0)                            | 0.1<br>(-5.6 to 7.0)                                |
| Eating disorders                                               | 19.1<br>(15.7 to 23.2)                  | 17.0<br>(12.2 to 23.1)                   | 3.9<br>(2.5 to 5.7)               | 51.8<br>(28.3 to 78.3)                            | 11.2<br>(-5.4 to 30.5)                              |
| Anorexia nervosa                                               | 5.5<br>(4.0 to 7.4)                     | 2.8<br>(2.0 to 3.7)                      | 1.2<br>(0.7 to 1.9)               | 49.6<br>(7.0 to 107.9)                            | 9.0<br>(-22.1 to 50.3)                              |
| Bulimia nervosa                                                | 13.0<br>(9.5 to 17.5)                   | 14.3<br>(9.6 to 20.4)                    | 2.7<br>(1.6 to 4.1)               | 52.8<br>(23.5 to 86.2)                            | 12.0<br>(-7.8 to 37.3)                              |
| Autistic spectrum disorders                                    | 238.0<br>(213.9 to 270.7)               | 3.2<br>(2.2 to 4.5)                      | 33.9<br>(22.4 to 48.1)            | 35.4<br>(27.8 to 43.7)                            | 1.0<br>(-3.9 to 6.2)                                |
| Autism                                                         | 65.4<br>(56.2 to 76.2)                  | 0.5<br>(0.2 to 0.8)                      | 16.7<br>(10.6 to 24.7)            | 35.9<br>(22.3 to 51.1)                            | 1.2<br>(-7.2 to 10.6)                               |
| Asperger syndrome and other autistic spectrum disorders        | 172.5<br>(141.9 to 209.6)               | 2.8<br>(1.8 to 4.0)                      | 17.2<br>(11.2 to 25.4)            | 34.9<br>(27.5 to 42.2)                            | 0.8<br>(-3.7 to 5.2)                                |



| Cause                                                      | Prevalence in thousands (95% UI)                 | Incidence in thousands (95% UI)                   | YLDs in thousands (95% UI)              |                                                   |                                                     |
|------------------------------------------------------------|--------------------------------------------------|---------------------------------------------------|-----------------------------------------|---------------------------------------------------|-----------------------------------------------------|
|                                                            | 2016 counts                                      | 2016 counts                                       | 2016 counts                             | Percentage change in counts between 2006 and 2016 | Percentage change in age-standardised rates between |
| Attention-deficit/hyperactivity disorder                   | 383.2<br>(341.7 to 432.2)                        | 25.9<br>(22.4 to 30.3)                            | 4.6<br>(2.8 to 7.2)                     | 36.3<br>(26.3 to 46.7)                            | 0.6<br>(-6.4 to 8.0)                                |
| Conduct disorder                                           | 303.6<br>(246.2 to 359.9)                        | 111.0<br>(86.4 to 135.9)                          | 36.5<br>(22.0 to 56.1)                  | 38.2<br>(29.5 to 47.6)                            | 0.1<br>(-6.4 to 6.7)                                |
| Idiopathic developmental intellectual disability           | 771.4<br>(493.9 to 1,057.7)                      | --                                                | 31.6<br>(15.3 to 54.0)                  | 17.0<br>(8.3 to 25.4)                             | -12.9<br>(-19.0 to -7.5)                            |
| Other mental and substance use disorders                   | 363.6<br>(318.0 to 421.4)                        | 19.6<br>(17.1 to 22.7)                            | 26.9<br>(18.3 to 38.6)                  | 33.3<br>(26.3 to 41.2)                            | 0.5<br>(-3.8 to 5.4)                                |
| <b>Diabetes, urogenital, blood, and endocrine diseases</b> | <b>10,864.0</b><br><b>(10,623.5 to 11,119.4)</b> | <b>2,556.6†</b><br><b>(2,396.2 to 2,727.7)</b>    | <b>149.0</b><br><b>(105.6 to 202.7)</b> | <b>33.9</b><br><b>(29.3 to 38.2)</b>              | <b>2.7</b><br><b>(-0.4 to 5.6)</b>                  |
| Diabetes mellitus                                          | 509.5<br>(457.7 to 566.0)                        | 35.4<br>(32.1 to 39.1)                            | 47.4<br>(32.9 to 65.8)                  | 43.0<br>(35.1 to 50.8)                            | 9.0<br>(2.9 to 15.0)                                |
| Acute glomerulonephritis                                   | 0.2<br>(0.2 to 0.3)                              | 3.6<br>(3.1 to 4.2)                               | < 0.05<br>(< 0.05 to < 0.05)            | 33.5<br>(27.9 to 39.1)                            | -0.4<br>(-4.1 to 3.5)                               |
| Chronic kidney disease                                     | 999.4<br>(897.5 to 1,107.0)                      | 75.9<br>(67.6 to 85.1)                            | 27.3<br>(19.9 to 35.8)                  | 44.1<br>(35.3 to 53.4)                            | 6.5<br>(0.6 to 12.4)                                |
| Chronic kidney disease due to diabetes mellitus            | 312.3<br>(263.4 to 365.3)                        | 22.1<br>(18.3 to 26.8)                            | 8.2<br>(5.9 to 11.0)                    | 44.6<br>(32.5 to 57.3)                            | 7.7<br>(-0.4 to 16.4)                               |
| Chronic kidney disease due to hypertension                 | 211.4<br>(181.7 to 241.2)                        | 19.6<br>(16.4 to 23.0)                            | 4.5<br>(3.1 to 6.1)                     | 42.5<br>(28.8 to 58.9)                            | 3.4<br>(-6.3 to 14.3)                               |
| Chronic kidney disease due to glomerulonephritis           | 202.7<br>(175.0 to 230.7)                        | 12.1<br>(9.6 to 14.9)                             | 6.9<br>(4.9 to 9.3)                     | 43.3<br>(29.0 to 59.0)                            | 6.7<br>(-2.4 to 16.6)                               |
| Chronic kidney disease due to other causes                 | 273.0<br>(228.6 to 318.7)                        | 22.2<br>(18.7 to 25.8)                            | 7.6<br>(5.5 to 10.5)                    | 45.3<br>(32.4 to 58.9)                            | 7.7<br>(-0.3 to 16.2)                               |
| Urinary diseases and male infertility                      | 365.7<br>(328.2 to 404.4)                        | 1,321.4†<br>(1,187.6 to 1,486.7)                  | 9.4<br>(6.1 to 13.6)                    | 27.0<br>(18.3 to 36.3)                            | -2.3<br>(-8.9 to 4.6)                               |
| Interstitial nephritis and urinary tract infections        | 22.1<br>(19.5 to 25.1)                           | 1,159.7<br>(1,022.8 to 1,315.0)                   | 0.7<br>(0.5 to 1.2)                     | 36.1<br>(12.9 to 62.2)                            | 2.1<br>(-12.5 to 19.5)                              |
| Urolithiasis                                               | 5.0<br>(4.5 to 5.8)                              | 134.0<br>(119.3 to 152.8)                         | 0.4<br>(0.2 to 0.6)                     | 34.6<br>(25.2 to 44.2)                            | 2.6<br>(-5.8 to 11.3)                               |
| Benign prostatic hyperplasia                               | 224.2<br>(191.2 to 260.0)                        | 27.7<br>(23.3 to 32.5)                            | 7.3<br>(4.5 to 10.5)                    | 27.1<br>(16.3 to 39.3)                            | -1.8<br>(-9.0 to 6.7)                               |
| Male infertility                                           | 102.5<br>(83.3 to 126.3)                         | --                                                | 0.6<br>(0.2 to 1.2)                     | 24.7<br>(13.9 to 37.4)                            | -11.0<br>(-18.6 to -2.5)                            |
| Other urinary diseases                                     | --                                               | --                                                | 0.4<br>(0.3 to 0.6)                     | 10.6<br>(-2.6 to 24.7)                            | -14.8<br>(-22.6 to -6.0)                            |
| Gynecological diseases                                     | 3,148.9<br>(3,006.6 to 3,298.7)                  | 1,100.7+<br>(1,024.6 to 1,185.9)                  | 35.6<br>(23.8 to 51.3)                  | 26.6<br>(21.6 to 31.7)                            | -3.9<br>(-7.2 to -0.5)                              |
| Uterine fibroids                                           | 194.9<br>(171.5 to 219.4)                        | 23.6<br>(20.4 to 27.2)                            | 5.2<br>(3.3 to 7.8)                     | 20.5<br>(11.8 to 28.7)                            | -6.1<br>(-13.0 to 0.6)                              |
| Polycystic ovarian syndrome                                | 23.8<br>(17.8 to 31.1)                           | 62.2<br>(45.5 to 81.9)                            | 0.2<br>(0.1 to 0.4)                     | 24.6<br>(8.6 to 42.6)                             | -7.9<br>(-20.1 to 4.4)                              |
| Female infertility                                         | 68.3<br>(47.3 to 95.9)                           | --                                                | 0.4<br>(0.1 to 0.8)                     | 57.0<br>(11.6 to 128.5)                           | 7.0<br>(-24.6 to 50.5)                              |
| Endometriosis                                              | 5.4<br>(4.5 to 6.5)                              | 22.5<br>(18.2 to 28.3)                            | 0.5<br>(0.3 to 0.8)                     | 29.7<br>(-6.7 to 81.2)                            | -3.4<br>(-27.8 to 29.2)                             |
| Genital prolapse                                           | 1,509.4<br>(1,339.7 to 1,685.5)                  | 135.4<br>(113.1 to 161.4)                         | 4.7<br>(2.3 to 8.5)                     | 28.5<br>(20.7 to 36.5)                            | -0.7<br>(-7.0 to 5.8)                               |
| Premenstrual syndrome                                      | 1,452.1<br>(1,339.0 to 1,566.9)                  | 562.1<br>(512.1 to 612.2)                         | 12.1<br>(7.5 to 18.9)                   | 29.8<br>(19.1 to 41.4)                            | -2.8<br>(-10.3 to 5.4)                              |
| Other gynecological diseases                               | 364.7<br>(320.8 to 413.8)                        | 294.8<br>(243.1 to 352.0)                         | 12.5<br>(8.3 to 17.7)                   | 24.8<br>(16.7 to 33.6)                            | -5.7<br>(-11.1 to 0.4)                              |
| Hemoglobinopathies and hemolytic anaemias                  | 7,660.4<br>(7,415.4 to 7,895.6)                  | --                                                | 15.8<br>(10.3 to 22.9)                  | 25.7<br>(1.3 to 42.3)                             | -9.6<br>(-28.3 to 1.1)                              |
| Thalassemias                                               | < 0.05<br>(< 0.05 to 0.1)                        | --                                                | < 0.05<br>(< 0.05 to < 0.05)            | 16.6<br>(-54.7 to 64.2)                           | -11.5<br>(-65.3 to 24.7)                            |
| Thalassaemias trait                                        | 143.0<br>(47.0 to 279.1)                         | --                                                | 2.1<br>(0.6 to 4.5)                     | 15.7<br>(-69.9 to 64.5)                           | -10.4<br>(-76.8 to 26.2)                            |
| Sickle cell disorders                                      | 0.5<br>(0.4 to 0.6)                              | --                                                | 0.1<br>(< 0.05 to 0.1)                  | 38.6<br>(23.7 to 55.6)                            | 4.7<br>(-5.8 to 16.6)                               |
| Sickle cell trait                                          | 689.0<br>(631.8 to 755.0)                        | --                                                | 2.2<br>(1.4 to 3.2)                     | 45.4<br>(28.0 to 67.4)                            | 14.3<br>(2.1 to 28.6)                               |
| G6PD deficiency                                            | 2,379.2<br>(2,196.3 to 2,593.1)                  | --                                                | 0.2<br>(0.1 to 0.3)                     | 16.1<br>(-4.4 to 39.4)                            | -14.8<br>(-26.0 to -2.6)                            |
| G6PD trait                                                 | 4,535.0<br>(4,475.2 to 4,614.8)                  | --                                                | < 0.05<br>(< 0.05 to < 0.05)            | 25.0<br>(11.8 to 40.2)                            | -5.2<br>(-13.7 to 3.7)                              |
| Other hemoglobinopathies and hemolytic anaemias            | 388.4<br>(363.9 to 412.3)                        | --                                                | 11.3<br>(7.2 to 16.3)                   | 24.5<br>(11.5 to 38.5)                            | -12.7<br>(-19.9 to -5.1)                            |
| Endocrine, metabolic, blood, and immune disorders          | 421.3<br>(400.0 to 441.5)                        | 19.5<br>(17.4 to 21.8)                            | 13.6<br>(9.0 to 19.2)                   | 21.7<br>(12.4 to 31.3)                            | -7.7<br>(-12.9 to -2.5)                             |
| <b>Musculoskeletal disorders</b>                           | <b>2,450.9</b><br><b>(2,316.8 to 2,584.8)</b>    | <b>1,177.3</b><br><b>(1,059.9 to 1,298.8)</b>     | <b>267.4</b><br><b>(191.3 to 349.1)</b> | <b>34.3</b><br><b>(30.0 to 39.1)</b>              | <b>1.8</b><br><b>(-1.1 to 4.9)</b>                  |
| Rheumatoid arthritis                                       | 33.5<br>(29.7 to 37.7)                           | 2.2<br>(2.0 to 2.5)                               | 7.9<br>(5.4 to 10.6)                    | 33.6<br>(19.5 to 48.8)                            | 2.1<br>(-6.7 to 11.5)                               |
| Osteoarthritis                                             | 442.5<br>(413.2 to 471.9)                        | 24.3<br>(22.4 to 26.1)                            | 27.0<br>(19.0 to 36.4)                  | 34.7<br>(29.3 to 39.4)                            | 3.0<br>(-0.8 to 6.6)                                |
| Low back and neck pain                                     | 1,706.3<br>(1,579.8 to 1,832.7)                  | 786.8<br>(702.6 to 882.1)                         | 194.9<br>(138.3 to 256.8)               | 32.9<br>(27.9 to 38.1)                            | 1.0<br>(-2.5 to 4.5)                                |
| Low back pain                                              | 1,350.7<br>(1,202.7 to 1,530.2)                  | 674.6<br>(592.7 to 766.7)                         | 151.0<br>(106.8 to 201.0)               | 33.5<br>(27.3 to 40.1)                            | 1.2<br>(-3.4 to 5.7)                                |
| Neck pain                                                  | 442.6<br>(384.2 to 511.4)                        | 112.3<br>(97.2 to 130.3)                          | 43.9<br>(29.8 to 61.7)                  | 30.9<br>(27.1 to 35.0)                            | 0.3<br>(-2.2 to 2.6)                                |
| Gout                                                       | 54.7<br>(48.3 to 61.6)                           | 11.3<br>(9.9 to 12.8)                             | 1.7<br>(1.2 to 2.4)                     | 31.8<br>(14.5 to 52.8)                            | 0.4<br>(-12.1 to 15.6)                              |
| Other musculoskeletal disorders                            | 416.1<br>(317.6 to 524.3)                        | 352.6<br>(271.4 to 440.8)                         | 35.9<br>(22.4 to 54.1)                  | 42.2<br>(25.8 to 67.8)                            | 5.6<br>(-5.4 to 21.8)                               |
| <b>Other non-communicable diseases</b>                     | <b>20,715.8</b><br><b>(20,168.5 to 21,209.7)</b> | <b>69,991.8†</b><br><b>(64,611.4 to 75,489.1)</b> | <b>501.4</b><br><b>(338.1 to 717.1)</b> | <b>32.0</b><br><b>(29.8 to 34.3)</b>              | <b>-2.7</b><br><b>(-4.0 to -1.3)</b>                |
| Congenital anomalies                                       | 319.1<br>(256.9 to 407.8)                        | --                                                | 43.2<br>(28.5 to 63.4)                  | 28.5<br>(19.1 to 38.4)                            | -3.7<br>(-10.5 to 3.1)                              |
| Neural tube defects                                        | 32.1<br>(28.6 to 36.0)                           | --                                                | 9.6<br>(6.7 to 13.0)                    | 32.5<br>(16.3 to 48.8)                            | -0.7<br>(-11.4 to 10.4)                             |
| Congenital heart anomalies                                 | 38.0<br>(30.9 to 45.6)                           | --                                                | 1.9<br>(0.9 to 3.1)                     | 26.3<br>(8.6 to 47.6)                             | -2.8<br>(-15.4 to 12.6)                             |
| Orofacial clefts                                           | 7.0<br>(6.1 to 8.1)                              | --                                                | 0.1<br>(0.1 to 0.2)                     | 27.5<br>(12.3 to 43.5)                            | -4.2<br>(-15.8 to 8.1)                              |
| Down's syndrome                                            | 5.2<br>(4.3 to 6.2)                              | --                                                | 0.5<br>(0.3 to 0.6)                     | 37.5<br>(27.4 to 49.6)                            | 2.7<br>(-4.6 to 11.6)                               |
| Turner syndrome                                            | 18.6<br>(15.5 to 21.9)                           | --                                                | 0.3<br>(0.1 to 0.5)                     | 26.0<br>(-11.1 to 80.1)                           | -5.7<br>(-32.0 to 30.0)                             |
| Klinefelter syndrome                                       | 18.8<br>(15.7 to 22.3)                           | --                                                | 0.1<br>(< 0.05 to 0.1)                  | 36.5<br>(6.7 to 81.5)                             | 2.5<br>(-20.0 to 34.8)                              |

| Cause                                         | Prevalence in thousands (95% UI)              | Incidence in thousands (95% UI)                | YLDs in thousands (95% UI)             |                                                   |                                                     |
|-----------------------------------------------|-----------------------------------------------|------------------------------------------------|----------------------------------------|---------------------------------------------------|-----------------------------------------------------|
|                                               | 2016 counts                                   | 2016 counts                                    | 2016 counts                            | Percentage change in counts between 2006 and 2016 | Percentage change in age-standardised rates between |
| Other chromosomal abnormalities               | 4.8<br>(4.1 to 5.7)                           | --                                             | 1.0<br>(0.6 to 1.5)                    | 31.4<br>(-9.8 to 96.1)                            | 0.4<br>(-29.8 to 46.6)                              |
| Congenital musculoskeletal and limb anomalies | 32.6<br>(28.9 to 37.0)                        | --                                             | 4.7<br>(3.1 to 6.7)                    | 32.4<br>(14.2 to 52.8)                            | -0.9<br>(-12.0 to 12.8)                             |
| Urogenital congenital anomalies               | 34.0<br>(29.8 to 38.8)                        | --                                             | 0.9<br>(0.5 to 1.4)                    | 33.9<br>(22.2 to 46.9)                            | -0.2<br>(-8.4 to 8.2)                               |
| Digestive congenital anomalies                | 14.8<br>(13.1 to 16.7)                        | --                                             | 0.7<br>(0.4 to 0.9)                    | 34.4<br>(1.5 to 79.3)                             | 0.5<br>(-20.2 to 26.5)                              |
| Other congenital anomalies                    | 168.3<br>(97.1 to 282.6)                      | --                                             | 23.7<br>(12.9 to 40.8)                 | 25.7<br>(12.8 to 40.8)                            | -5.9<br>(-15.4 to 4.4)                              |
| Skin and subcutaneous diseases                | 9,815.0<br>(9,417.0 to 10,313.3)              | 23,860.9<br>(22,054.0 to 25,964.2)             | 234.7<br>(153.4 to 343.5)              | 38.0<br>(34.7 to 41.7)                            | 2.0<br>(0.0 to 4.3)                                 |
| Dermatitis                                    | 1,387.1<br>(1,239.2 to 1,543.8)               | 1,167.8<br>(1,030.2 to 1,346.5)                | 55.8<br>(32.2 to 92.9)                 | 36.8<br>(28.3 to 46.5)                            | 1.4<br>(-3.7 to 7.4)                                |
| Psoriasis                                     | 130.8<br>(124.5 to 137.1)                     | 21.3<br>(20.3 to 22.3)                         | 11.4<br>(8.1 to 15.3)                  | 44.5<br>(28.1 to 62.9)                            | 8.2<br>(-1.5 to 18.4)                               |
| Cellulitis                                    | 10.5<br>(9.6 to 11.4)                         | 180.9<br>(166.9 to 195.1)                      | 0.6<br>(0.4 to 0.9)                    | 34.8<br>(4.9 to 70.1)                             | 1.4<br>(-18.1 to 23.4)                              |
| Pyoderma                                      | 196.7<br>(186.4 to 207.3)                     | 3,766.7<br>(3,571.0 to 3,960.7)                | 1.1<br>(0.5 to 2.3)                    | 35.3<br>(27.6 to 43.7)                            | 1.5<br>(-3.4 to 6.8)                                |
| Scabies                                       | 684.2<br>(585.5 to 798.4)                     | 2,111.7<br>(1,797.8 to 2,481.4)                | 17.7<br>(9.9 to 28.8)                  | 25.6<br>(20.2 to 31.4)                            | -6.4<br>(-9.9 to -2.9)                              |
| Fungal skin diseases                          | 3,984.2<br>(3,400.5 to 4,657.2)               | 11,180.8<br>(9,500.3 to 13,142.3)              | 22.5<br>(8.9 to 47.2)                  | 34.3<br>(32.7 to 36.0)                            | 0.3<br>(-0.6 to 1.2)                                |
| Viral skin diseases                           | 982.6<br>(856.6 to 1,129.3)                   | 1,298.8<br>(1,113.1 to 1,495.5)                | 30.1<br>(18.8 to 45.4)                 | 34.7<br>(30.0 to 39.6)                            | -0.0<br>(-2.9 to 3.0)                               |
| Acne vulgaris                                 | 2,623.6<br>(2,237.8 to 3,013.8)               | 2,026.1<br>(1,533.2 to 2,688.0)                | 67.4<br>(44.1 to 98.5)                 | 46.1<br>(38.7 to 54.6)                            | 5.5<br>(0.6 to 11.2)                                |
| Alopecia areata                               | 44.4<br>(41.3 to 47.2)                        | 79.3<br>(73.8 to 84.3)                         | 1.4<br>(0.9 to 2.1)                    | 33.6<br>(18.3 to 52.0)                            | 0.1<br>(-9.6 to 11.3)                               |
| Pruritus                                      | 193.5<br>(170.0 to 219.5)                     | 158.3<br>(140.4 to 178.9)                      | 2.1<br>(1.0 to 3.8)                    | 35.2<br>(27.9 to 43.3)                            | 1.5<br>(-3.3 to 6.4)                                |
| Urticaria                                     | 293.6<br>(249.0 to 347.4)                     | 530.0<br>(447.8 to 623.5)                      | 17.7<br>(11.0 to 26.0)                 | 33.3<br>(24.5 to 42.8)                            | 0.1<br>(-5.6 to 6.2)                                |
| Decubitus ulcer                               | 2.7<br>(2.4 to 2.9)                           | 9.7<br>(8.7 to 10.8)                           | 0.4<br>(0.3 to 0.6)                    | 35.5<br>(22.2 to 50.1)                            | 1.9<br>(-11.6 to 17.4)                              |
| Other skin and subcutaneous diseases          | 1,179.6<br>(1,144.8 to 1,217.5)               | 1,329.5<br>(1,288.7 to 1,373.0)                | 6.5<br>(3.1 to 11.8)                   | 39.5<br>(35.2 to 44.0)                            | 4.7<br>(2.2 to 7.4)                                 |
| Sense organ diseases                          | 4,978.8<br>(4,749.5 to 5,251.5)               | 2,572.0†<br>(2,377.0 to 2,784.7)               | 184.7<br>(127.2 to 260.5)              | 25.9<br>(21.6 to 30.4)                            | -5.6<br>(-7.8 to -3.3)                              |
| Glaucoma                                      | 14.2<br>(11.9 to 16.7)                        | --                                             | 1.6<br>(1.1 to 2.3)                    | 26.9<br>(13.8 to 41.8)                            | -5.3<br>(-14.1 to 5.4)                              |
| Cataract                                      | 132.2<br>(113.7 to 151.3)                     | --                                             | 11.5<br>(8.2 to 15.8)                  | 18.6<br>(11.1 to 26.4)                            | -12.3<br>(-17.4 to -6.7)                            |
| Macular degeneration                          | 19.2<br>(15.4 to 23.9)                        | --                                             | 1.5<br>(1.0 to 2.0)                    | 26.5<br>(12.0 to 42.9)                            | -5.6<br>(-15.8 to 5.9)                              |
| Refraction and accommodation disorders        | 2,639.0<br>(2,381.8 to 2,961.4)               | --                                             | 40.9<br>(24.0 to 66.9)                 | 18.3<br>(11.2 to 25.6)                            | -11.5<br>(-17.2 to -5.5)                            |
| Age-related and other hearing loss            | 2,868.6<br>(2,662.4 to 3,084.1)               | --                                             | 106.9<br>(72.0 to 149.7)               | 29.1<br>(22.3 to 35.7)                            | -2.9<br>(-5.8 to -0.1)                              |
| Other vision loss                             | 86.6<br>(78.0 to 96.6)                        | --                                             | 7.3<br>(5.1 to 10.0)                   | 21.6<br>(12.3 to 30.9)                            | -7.7<br>(-13.9 to -1.2)                             |
| Other sense organ diseases                    | 497.6<br>(460.6 to 534.9)                     | 2,572.0<br>(2,377.0 to 2,784.7)                | 15.0<br>(9.6 to 22.8)                  | 34.7<br>(28.2 to 41.4)                            | 1.3<br>(-2.3 to 4.9)                                |
| Oral disorders                                | 14,812.0<br>(13,852.4 to 15,667.0)            | 43,558.9†<br>(38,661.8 to 48,622.9)            | 38.7<br>(21.7 to 65.5)                 | 31.3<br>(28.1 to 34.8)                            | -0.3<br>(-2.8 to 2.4)                               |
| Caries of deciduous teeth                     | 3,735.0<br>(2,933.7 to 4,633.0)               | 14,186.5<br>(10,288.9 to 19,031.5)             | 0.9<br>(0.4 to 1.8)                    | 31.7<br>(17.3 to 47.7)                            | -0.7<br>(-11.5 to 11.3)                             |
| Caries of permanent teeth                     | 9,722.8<br>(8,870.6 to 10,583.9)              | 29,126.5<br>(26,363.3 to 31,582.8)             | 5.7<br>(2.5 to 10.9)                   | 29.6<br>(24.5 to 34.5)                            | -3.2<br>(-6.4 to -0.1)                              |
| Periodontal disease                           | 1,885.3<br>(1,136.4 to 2,692.7)               | 227.6<br>(143.5 to 328.4)                      | 12.3<br>(4.5 to 27.5)                  | 29.7<br>(21.0 to 38.0)                            | -0.2<br>(-6.3 to 5.4)                               |
| Edentulism and severe tooth loss              | 274.9<br>(235.8 to 314.1)                     | 18.4<br>(15.5 to 21.1)                         | 7.6<br>(5.0 to 10.8)                   | 32.0<br>(25.8 to 38.3)                            | 0.6<br>(-3.3 to 4.6)                                |
| Other oral disorders                          | 417.6<br>(398.0 to 439.4)                     | --                                             | 12.2<br>(7.6 to 18.3)                  | 33.4<br>(28.1 to 38.9)                            | 0.0<br>(-3.2 to 3.2)                                |
| <b>Injuries</b>                               | <b>3,692.1</b><br><b>(3,262.7 to 4,222.3)</b> | <b>2,114.9†</b><br><b>(1,998.5 to 2,247.2)</b> | <b>151.9</b><br><b>(97.2 to 230.0)</b> | <b>28.1</b><br><b>(17.9 to 40.4)</b>              | <b>-0.3</b><br><b>(-5.9 to 6.0)</b>                 |
| <b>Transport injuries</b>                     | <b>365.4</b><br><b>(340.9 to 392.1)</b>       | <b>184.9</b><br><b>(163.5 to 208.7)</b>        | <b>21.9</b><br><b>(13.7 to 33.0)</b>   | <b>39.5</b><br><b>(29.9 to 49.3)</b>              | <b>6.7</b><br><b>(1.6 to 11.6)</b>                  |
| Road injuries                                 | 306.1<br>(286.0 to 328.7)                     | 163.6<br>(142.5 to 188.0)                      | 18.2<br>(11.4 to 27.3)                 | 39.3<br>(29.7 to 48.9)                            | 6.9<br>(1.9 to 11.8)                                |
| Pedestrian road injuries                      | 116.2<br>(102.7 to 132.2)                     | 48.0<br>(39.6 to 57.6)                         | 7.0<br>(4.4 to 10.5)                   | 32.3<br>(23.2 to 42.2)                            | 1.8<br>(-3.2 to 6.7)                                |
| Cyclist road injuries                         | 60.3<br>(50.9 to 71.4)                        | 38.2<br>(30.1 to 47.4)                         | 3.3<br>(2.1 to 5.0)                    | 46.1<br>(35.9 to 56.2)                            | 12.2<br>(6.8 to 17.5)                               |
| Motorcyclist road injuries                    | 34.6<br>(29.7 to 41.5)                        | 13.2<br>(10.6 to 16.6)                         | 2.0<br>(1.2 to 3.0)                    | 37.8<br>(27.4 to 48.6)                            | 5.4<br>(-0.2 to 10.8)                               |
| Motor vehicle road injuries                   | 71.5<br>(61.4 to 81.3)                        | 47.2<br>(39.1 to 55.8)                         | 4.6<br>(2.9 to 7.0)                    | 47.0<br>(37.3 to 55.7)                            | 12.6<br>(7.5 to 17.1)                               |
| Other road injuries                           | 23.6<br>(20.2 to 28.0)                        | 17.0<br>(12.7 to 22.7)                         | 1.3<br>(0.8 to 1.9)                    | 39.2<br>(29.7 to 48.0)                            | 6.3<br>(1.2 to 10.9)                                |
| Other transport injuries                      | 59.3<br>(49.8 to 71.2)                        | 21.3<br>(17.8 to 26.2)                         | 3.8<br>(2.4 to 5.7)                    | 40.5<br>(30.2 to 51.5)                            | 5.6<br>(-0.1 to 11.7)                               |
| <b>Unintentional injuries</b>                 | <b>2,609.4</b><br><b>(2,415.1 to 2,858.2)</b> | <b>1,816.9</b><br><b>(1,703.6 to 1,943.1)</b>  | <b>99.8</b><br><b>(67.0 to 142.5)</b>  | <b>40.1</b><br><b>(31.3 to 49.9)</b>              | <b>6.0</b><br><b>(1.2 to 10.8)</b>                  |
| Falls                                         | 964.6<br>(833.7 to 1,100.1)                   | 642.9<br>(559.3 to 751.2)                      | 43.4<br>(29.7 to 60.9)                 | 44.4<br>(33.8 to 55.9)                            | 8.5<br>(3.5 to 13.7)                                |
| Drowning                                      | 10.3<br>(8.8 to 11.8)                         | 3.2<br>(2.7 to 3.7)                            | 0.7<br>(0.4 to 1.0)                    | 26.0<br>(16.0 to 37.0)                            | -3.0<br>(-8.3 to 2.2)                               |
| Fire, heat, and hot substances                | 369.1<br>(305.2 to 456.7)                     | 77.5<br>(63.1 to 94.2)                         | 11.2<br>(7.4 to 15.8)                  | 32.9<br>(20.3 to 46.4)                            | 2.0<br>(-4.9 to 9.6)                                |
| Poisonings                                    | 7.7<br>(6.1 to 9.5)                           | 15.3<br>(11.7 to 19.5)                         | 0.8<br>(0.5 to 1.2)                    | 51.1<br>(36.0 to 68.0)                            | 12.6<br>(3.8 to 22.0)                               |
| Exposure to mechanical forces                 | 379.8<br>(323.4 to 464.9)                     | 223.3<br>(187.2 to 260.9)                      | 10.6<br>(6.6 to 16.3)                  | 38.5<br>(29.9 to 47.2)                            | 5.6<br>(0.8 to 10.3)                                |
| Unintentional firearm injuries                | 17.8<br>(14.6 to 21.8)                        | 6.9<br>(4.9 to 9.4)                            | 0.8<br>(0.5 to 1.3)                    | 40.6<br>(30.0 to 51.4)                            | 7.0<br>(0.8 to 13.0)                                |
| Unintentional suffocation                     | 31.6<br>(22.8 to 41.8)                        | 11.8<br>(8.1 to 16.6)                          | 1.1<br>(0.6 to 1.8)                    | 33.9<br>(22.8 to 46.8)                            | 1.5<br>(-5.6 to 9.7)                                |
| Other exposure to mechanical forces           | 330.4<br>(276.6 to 412.4)                     | 204.6<br>(172.1 to 238.2)                      | 8.6<br>(5.5 to 13.1)                   | 38.8<br>(30.8 to 46.9)                            | 5.9<br>(1.3 to 10.2)                                |

| Cause                                                                               | Prevalence in thousands (95% UI)            | Incidence in thousands (95% UI)         | YLDs in thousands (95% UI)           |                                                   |                                                     |
|-------------------------------------------------------------------------------------|---------------------------------------------|-----------------------------------------|--------------------------------------|---------------------------------------------------|-----------------------------------------------------|
|                                                                                     | 2016 counts                                 | 2016 counts                             | 2016 counts                          | Percentage change in counts between 2006 and 2016 | Percentage change in age-standardised rates between |
| Adverse effects of medical treatment                                                | 10.6<br>(8.2 to 13.2)                       | 138.4<br>(117.8 to 160.0)               | 1.4<br>(0.9 to 2.2)                  | 21.6<br>(13.8 to 28.7)                            | -2.6<br>(-6.9 to 1.4)                               |
| Animal contact                                                                      | 174.1<br>(153.3 to 202.8)                   | 303.4<br>(257.0 to 353.6)               | 6.1<br>(4.0 to 8.7)                  | 31.9<br>(23.9 to 39.6)                            | -1.4<br>(-5.3 to 2.7)                               |
| Venomous animal contact                                                             | 61.4<br>(51.3 to 75.0)                      | 120.1<br>(94.7 to 148.9)                | 3.9<br>(2.6 to 5.6)                  | 34.1<br>(23.0 to 45.8)                            | 0.1<br>(-6.0 to 6.7)                                |
| Non-venomous animal contact                                                         | 112.7<br>(95.1 to 137.4)                    | 183.2<br>(151.1 to 218.2)               | 2.2<br>(1.4 to 3.2)                  | 28.2<br>(23.3 to 33.2)                            | -3.5<br>(-6.6 to -0.6)                              |
| Foreign body                                                                        | 188.8<br>(151.8 to 228.2)                   | 161.2<br>(139.2 to 185.8)               | 8.6<br>(5.3 to 13.0)                 | 28.3<br>(19.6 to 37.9)                            | -2.2<br>(-7.3 to 3.2)                               |
| Pulmonary aspiration and foreign body in airway                                     | 104.4<br>(75.5 to 144.1)                    | 60.5<br>(48.6 to 76.7)                  | 5.3<br>(3.3 to 8.2)                  | 23.7<br>(15.3 to 32.9)                            | -5.5<br>(-10.3 to -0.1)                             |
| Foreign body in eyes                                                                | 9.7<br>(5.0 to 15.2)                        | 55.2<br>(41.3 to 74.4)                  | 0.6<br>(0.3 to 1.0)                  | 34.0<br>(28.0 to 40.0)                            | 0.1<br>(-3.2 to 3.5)                                |
| Foreign body in other body part                                                     | 74.6<br>(59.5 to 99.3)                      | 45.5<br>(36.3 to 55.0)                  | 2.7<br>(1.7 to 4.1)                  | 37.3<br>(26.0 to 49.4)                            | 3.8<br>(-2.8 to 10.6)                               |
| Environmental heat and cold exposure                                                | 149.5<br>(122.4 to 184.1)                   | 62.3<br>(50.1 to 78.0)                  | 6.4<br>(4.0 to 9.7)                  | 41.6<br>(31.3 to 53.0)                            | 4.7<br>(-1.0 to 10.1)                               |
| Other unintentional injuries                                                        | 355.0<br>(276.2 to 462.7)                   | 189.6<br>(156.2 to 232.2)               | 10.7<br>(6.8 to 16.1)                | 51.4<br>(42.1 to 60.3)                            | 11.7<br>(7.0 to 16.2)                               |
| <b>Self-harm and interpersonal violence</b>                                         | <b>1,024.0</b><br><b>(925.9 to 1,142.5)</b> | <b>111.5†</b><br><b>(95.1 to 128.9)</b> | <b>14.5</b><br><b>(10.0 to 20.2)</b> | <b>26.0</b><br><b>(18.5 to 32.2)</b>              | <b>-2.8</b><br><b>(-7.6 to 1.0)</b>                 |
| Self-harm                                                                           | 16.3<br>(14.3 to 18.4)                      | 10.6<br>(9.1 to 12.3)                   | 0.9<br>(0.6 to 1.4)                  | 41.8<br>(33.5 to 51.1)                            | 6.6<br>(2.8 to 10.2)                                |
| Self-harm by firearm                                                                | 1.6<br>(1.4 to 1.9)                         | 0.8<br>(0.5 to 1.2)                     | 0.1<br>( $< 0.05$ to 0.1)            | 25.8<br>(19.7 to 32.8)                            | -6.5<br>(-9.6 to -3.0)                              |
| Self-harm by other specified means                                                  | 14.6<br>(12.6 to 16.8)                      | 9.8<br>(8.4 to 11.5)                    | 0.8<br>(0.5 to 1.3)                  | 43.3<br>(34.8 to 52.8)                            | 8.1<br>(4.1 to 11.9)                                |
| Interpersonal violence                                                              | 1,007.7<br>(909.5 to 1,126.4)               | 100.8†<br>(84.7 to 118.0)               | 13.6<br>(9.3 to 18.9)                | 25.0<br>(17.2 to 31.4)                            | -3.6<br>(-8.7 to 0.4)                               |
| Assault by firearm                                                                  | 3.7<br>(3.2 to 4.4)                         | 1.7<br>(1.2 to 2.4)                     | 0.2<br>(0.1 to 0.3)                  | 46.1<br>(35.5 to 57.2)                            | 11.8<br>(5.0 to 18.3)                               |
| Assault by sharp object                                                             | 38.5<br>(31.3 to 46.3)                      | 22.0<br>(16.6 to 28.9)                  | 1.3<br>(0.9 to 2.0)                  | 44.3<br>(33.5 to 55.9)                            | 9.9<br>(3.4 to 16.6)                                |
| Sexual violence                                                                     | 868.8<br>(772.4 to 986.8)                   | --                                      | 7.8<br>(5.2 to 11.0)                 | 12.5<br>(2.2 to 20.8)                             | -16.8<br>(-23.7 to -11.1)                           |
| Assault by other means                                                              | 96.6<br>(82.6 to 116.0)                     | 77.1<br>(64.0 to 91.3)                  | 4.3<br>(2.8 to 6.4)                  | 47.9<br>(37.0 to 59.1)                            | 13.6<br>(7.3 to 20.1)                               |
| <b>Forces of nature, conflict and terrorism, and executions and police conflict</b> | <b>562.1</b><br><b>(172.2 to 1,082.6)</b>   | <b>1.7†</b><br><b>(0.8 to 3.3)</b>      | <b>15.7</b><br><b>(4.0 to 35.6)</b>  | <b>-22.1</b><br><b>(-32.6 to -13.6)</b>           | <b>-26.8</b><br><b>(-36.0 to -20.0)</b>             |
| Exposure to forces of nature                                                        | 4.5<br>(2.3 to 7.4)                         | --                                      | 0.2<br>(0.1 to 0.5)                  | -1.7<br>(-8.2 to 6.0)                             | -14.6<br>(-19.7 to -8.1)                            |
| Conflict and terrorism                                                              | 553.2<br>(165.8 to 1,073.5)                 | --                                      | 15.4<br>(3.9 to 34.7)                | -22.6<br>(-33.0 to -14.2)                         | -27.0<br>(-36.3 to -20.3)                           |
| Executions and police conflict                                                      | 4.3<br>(2.1 to 9.8)                         | 1.7<br>(0.8 to 3.3)                     | 0.1<br>( $< 0.05$ to 0.5)            | 24.0<br>(1.8 to 54.9)                             | 0.7<br>(-12.8 to 17.7)                              |
| <b>Impairments</b>                                                                  | --                                          | --                                      | --                                   | --                                                | --                                                  |
| Anaemia                                                                             | 14,364.1<br>(13,693.1 to 15,048.5)          | --                                      | 622.1<br>(429.0 to 856.1)            | 11.5<br>(0.1 to 21.3)                             | -18.1<br>(-29.1 to -8.8)                            |
| Developmental intellectual disability                                               | 1,163.9<br>(878.3 to 1,453.9)               | --                                      | 106.7<br>(76.8 to 145.5)             | 35.3<br>(23.6 to 53.0)                            | 0.1<br>(-7.6 to 12.5)                               |
| Epilepsy                                                                            | 220.5<br>(114.8 to 357.2)                   | --                                      | 85.2<br>(40.7 to 146.1)              | 53.5<br>(-31.3 to 244.5)                          | 13.1<br>(-51.1 to 169.8)                            |
| Guillain-Barre syndrome                                                             | 0.2<br>(0.1 to 0.2)                         | --                                      | 0.1<br>( $< 0.05$ to 0.1)            | 33.8<br>(32.8 to 34.7)                            | 0.0<br>(-0.1 to 0.2)                                |
| Hearing loss                                                                        | 3,508.3<br>(3,308.1 to 3,721.5)             | --                                      | 145.1<br>(100.9 to 199.3)            | 27.1<br>(22.1 to 31.8)                            | -3.9<br>(-6.5 to -1.4)                              |
| Heart failure                                                                       | 76.0<br>(66.9 to 86.1)                      | --                                      | 8.6<br>(6.1 to 11.1)                 | 37.0<br>(27.0 to 47.2)                            | 0.5<br>(-6.9 to 8.1)                                |
| Infertility                                                                         | 502.3<br>(465.7 to 541.8)                   | --                                      | 3.0<br>(1.3 to 5.9)                  | 12.5<br>(4.9 to 20.3)                             | -20.4<br>(-25.6 to -15.2)                           |
| Pelvic inflammatory disease                                                         | 27.6<br>(23.4 to 33.0)                      | --                                      | 3.6<br>(2.4 to 5.0)                  | 28.6<br>(11.8 to 46.8)                            | -3.5<br>(-15.1 to 9.5)                              |
| Vision loss                                                                         | 3,034.1<br>(2,766.1 to 3,357.4)             | --                                      | 87.2<br>(59.7 to 125.5)              | 28.8<br>(18.1 to 46.5)                            | -8.1<br>(-13.1 to -1.0)                             |

We did not calculate incidence for the nine impairments, certain NTDs, and causes with only birth prevalence. Blank cells mean that no estimate is available.

† Incidence for aggregate causes represents the sum of the incidence of the causes below the aggregate.

‡ Incidence estimates for stroke represent first-ever stroke only.

^ Incidence of HIV/AIDS represents new infections of HIV only and does not include new infections of Tuberculosis in HIV positive cases.



SR Table 14: Prevalence, incidence, and YLDs for 2016, percentage change of YLD counts and percentage change of age-standardised YLD rates between 2006 and 2016 by cause and impairments, for all ages, Myanmar.

| Cause                                                                                | Prevalence in thousands (95% UI)          | Incidence in thousands (95% UI)               | YLDs in thousands (95% UI)             |                                                   |                                                     |
|--------------------------------------------------------------------------------------|-------------------------------------------|-----------------------------------------------|----------------------------------------|---------------------------------------------------|-----------------------------------------------------|
|                                                                                      | 2016 counts                               | 2016 counts                                   | 2016 counts                            | Percentage change in counts between 2006 and 2016 | Percentage change in age-standardised rates between |
| <b>All causes</b>                                                                    | <b>52,486.7</b><br>(52,308.8 to 52,666.8) | <b>309,651.1†</b><br>(293,076.4 to 327,769.6) | <b>5,350.1</b><br>(3,957.6 to 6,947.3) | <b>9.5</b><br>(6.4 to 12.6)                       | <b>-4.4</b><br>(-6.8 to -2.1)                       |
| <b>Communicable, maternal, neonatal, and nutritional disorders</b>                   | <b>39,003.7</b><br>(37,768.6 to 40,231.2) | <b>176,310.5†</b><br>(161,325.6 to 193,362.0) | <b>712.8</b><br>(507.0 to 969.0)       | <b>-23.8</b><br>(-29.5 to -18.6)                  | <b>-29.6</b><br>(-35.2 to -25.0)                    |
| <b>HIV/AIDS and tuberculosis</b>                                                     | <b>16,830.8</b><br>(14,133.5 to 19,283.2) | <b>102.1†</b><br>(80.4 to 131.2)              | <b>68.5</b><br>(46.2 to 96.6)          | <b>-15.2</b><br>(-22.5 to -6.1)                   | <b>-27.8</b><br>(-33.9 to -20.1)                    |
| Tuberculosis                                                                         | 14,957.9<br>(12,235.0 to 18,023.6)        | 92.9†<br>(71.0 to 122.1)                      | 37.0<br>(23.0 to 54.6)                 | -18.5<br>(-26.8 to -7.6)                          | -32.1<br>(-38.5 to -24.8)                           |
| Drug-susceptible tuberculosis                                                        | 115.9<br>(86.6 to 154.1)                  | 88.3<br>(66.9 to 116.3)                       | 35.1<br>(21.8 to 51.8)                 | -19.2<br>(-29.0 to -7.6)                          | -32.7<br>(-39.9 to -24.8)                           |
| Multidrug-resistant tuberculosis without extensive drug resistance                   | 5.6<br>(2.0 to 12.0)                      | 4.3<br>(1.6 to 9.3)                           | 1.7<br>(0.6 to 3.9)                    | -7.5<br>(-68.7 to 131.5)                          | -23.2<br>(-74.3 to 94.2)                            |
| Extensively drug-resistant tuberculosis                                              | 0.5<br>(0.2 to 1.1)                       | 0.4<br>(0.1 to 0.8)                           | 0.2<br>(0.1 to 0.4)                    | 200.4<br>(1.7 to 642.2)                           | 148.7<br>(-16.7 to 523.6)                           |
| Latent tuberculosis infection                                                        | 14,836.0<br>(12,127.8 to 17,891.0)        | --                                            | --                                     | --                                                | --                                                  |
| HIV/AIDS                                                                             | 244.9<br>(218.1 to 272.4)                 | 9.2^<br>(7.1 to 12.4)                         | 31.5<br>(20.9 to 45.4)                 | -11.0<br>(-24.2 to 4.5)                           | -21.0<br>(-33.4 to -6.0)                            |
| Drug-susceptible HIV/AIDS - Tuberculosis                                             | 19.8<br>(11.5 to 31.6)                    | 15.1<br>(8.9 to 23.9)                         | 7.6<br>(3.8 to 13.1)                   | -50.0<br>(-58.9 to -39.6)                         | -54.8<br>(-62.6 to -45.7)                           |
| Multidrug-resistant HIV/AIDS - Tuberculosis without extensive drug resistance        | 1.2<br>(0.4 to 2.8)                       | 0.9<br>(0.3 to 2.1)                           | 0.5<br>(0.1 to 1.2)                    | -40.5<br>(-80.3 to 57.8)                          | -46.5<br>(-82.4 to 40.9)                            |
| Extensively drug-resistant HIV/AIDS - Tuberculosis                                   | 0.1<br>(< 0.05 to 0.2)                    | 0.1<br>(< 0.05 to 0.2)                        | < 0.05<br>(< 0.05 to 0.1)              | 89.1<br>(-36.0 to 360.5)                          | 70.5<br>(-42.3 to 314.5)                            |
| HIV/AIDS resulting in other diseases                                                 | 223.9<br>(192.3 to 253.2)                 | 9.2<br>(7.1 to 12.4)                          | 23.4<br>(14.9 to 36.1)                 | 20.5<br>(-6.7 to 56.0)                            | 5.5<br>(-22.5 to 39.4)                              |
| <b>Diarrhoea, lower respiratory infections, and other common infectious diseases</b> | <b>3,096.2</b><br>(2,943.0 to 3,285.8)    | <b>168,535.4†</b><br>(153,608.5 to 185,488.4) | <b>167.6</b><br>(116.6 to 229.3)       | <b>-3.5</b><br>(-6.7 to -0.2)                     | <b>-9.8</b><br>(-12.5 to -7.1)                      |
| Diarrhoeal diseases                                                                  | 617.2<br>(577.4 to 657.7)                 | 41,331.7<br>(38,765.3 to 43,994.0)            | 69.6<br>(48.3 to 95.9)                 | -3.3<br>(-8.6 to 2.2)                             | -9.6<br>(-14.2 to -5.2)                             |
| Intestinal infectious diseases                                                       | 6.9<br>(5.5 to 8.8)                       | 132.4†<br>(106.6 to 166.8)                    | 1.1<br>(0.7 to 1.7)                    | -27.4<br>(-42.1 to -9.2)                          | -30.5<br>(-43.4 to -14.5)                           |
| Typhoid fever                                                                        | 6.7<br>(5.2 to 8.6)                       | 105.2<br>(83.7 to 133.4)                      | 1.0<br>(0.6 to 1.6)                    | -27.4<br>(-43.2 to -7.4)                          | -30.4<br>(-44.4 to -12.8)                           |
| Paratyphoid fever                                                                    | 1.2<br>(1.0 to 1.5)                       | 27.2<br>(21.9 to 33.8)                        | 0.1<br>(< 0.05 to 0.1)                 | -23.1<br>(-35.9 to -8.3)                          | -27.1<br>(-38.4 to -13.8)                           |
| Other intestinal infectious diseases                                                 | --                                        | --                                            | < 0.05<br>(< 0.05 to < 0.05)           | -50.3<br>(-60.8 to -36.3)                         | -48.5<br>(-57.4 to -37.0)                           |
| Lower respiratory infections                                                         | 39.1<br>(35.7 to 42.9)                    | 1,752.4<br>(1,590.2 to 1,934.0)               | 2.4<br>(1.5 to 3.5)                    | -7.5<br>(-18.9 to 6.0)                            | -12.3<br>(-22.2 to -1.1)                            |
| Upper respiratory infections                                                         | 1,624.6<br>(1,441.4 to 1,832.6)           | 121,863.0<br>(107,712.8 to 138,491.2)         | 40.6<br>(23.8 to 62.3)                 | 5.6<br>(0.2 to 11.4)                              | -0.6<br>(-5.5 to 4.8)                               |
| Otitis media                                                                         | 658.2<br>(587.0 to 731.9)                 | 2,181.5<br>(1,753.7 to 2,717.1)               | 20.5<br>(12.9 to 30.5)                 | -14.8<br>(-21.4 to -7.3)                          | -18.5<br>(-24.4 to -12.2)                           |
| Meningitis                                                                           | 123.1<br>(103.6 to 144.0)                 | 18.0<br>(15.6 to 20.9)                        | 13.7<br>(9.7 to 18.0)                  | -6.1<br>(-12.1 to 0.8)                            | -13.6<br>(-19.0 to -7.3)                            |
| Pneumococcal meningitis                                                              | 52.6<br>(43.5 to 63.6)                    | 3.9<br>(3.1 to 4.9)                           | 6.0<br>(4.1 to 8.1)                    | -9.8<br>(-19.8 to 1.8)                            | -17.6<br>(-26.2 to -7.1)                            |
| H influenzae type B meningitis                                                       | 17.6<br>(14.5 to 21.4)                    | 2.0<br>(1.5 to 2.7)                           | 2.7<br>(1.8 to 3.6)                    | -28.8<br>(-37.4 to -16.8)                         | -34.1<br>(-42.4 to -22.6)                           |
| Meningococcal infection                                                              | 5.2<br>(3.8 to 7.0)                       | 1.2<br>(0.9 to 1.5)                           | 0.6<br>(0.4 to 0.8)                    | -3.9<br>(-9.9 to 2.2)                             | -12.1<br>(-17.7 to -6.6)                            |
| Other meningitis                                                                     | 47.7<br>(35.4 to 61.4)                    | 11.0<br>(9.3 to 12.9)                         | 4.5<br>(3.0 to 6.0)                    | 24.5<br>(16.6 to 33.9)                            | 14.8<br>(7.7 to 23.1)                               |
| Encephalitis                                                                         | 151.2<br>(98.2 to 224.0)                  | 60.1<br>(52.9 to 69.0)                        | 16.9<br>(11.7 to 22.3)                 | -3.5<br>(-15.3 to 8.1)                            | -12.6<br>(-22.7 to -2.7)                            |
| Diphtheria                                                                           | < 0.05<br>(< 0.05 to < 0.05)              | < 0.05<br>(< 0.05 to < 0.05)                  | < 0.05<br>(< 0.05 to < 0.05)           | -52.7<br>(-73.3 to -16.6)                         | -55.1<br>(-74.8 to -20.5)                           |
| Whooping cough                                                                       | 5.2<br>(4.0 to 6.6)                       | 37.9<br>(29.2 to 48.5)                        | 0.3<br>(0.1 to 0.4)                    | -52.0<br>(-63.5 to -38.2)                         | -46.6<br>(-59.3 to -31.2)                           |
| Tetanus                                                                              | 0.4<br>(0.4 to 0.4)                       | 0.7<br>(0.2 to 1.3)                           | < 0.05<br>(< 0.05 to < 0.05)           | -50.9<br>(-65.5 to -16.8)                         | -60.1<br>(-71.8 to -25.3)                           |
| Measles                                                                              | 0.1<br>(< 0.05 to 0.3)                    | 5.1<br>(1.7 to 12.1)                          | < 0.05<br>(< 0.05 to < 0.05)           | -96.7<br>(-98.0 to -94.5)                         | -96.3<br>(-97.8 to -93.9)                           |
| Varicella and herpes zoster                                                          | 61.5<br>(56.2 to 67.1)                    | 1,152.6<br>(1,115.4 to 1,194.0)               | 2.5<br>(1.5 to 3.9)                    | 19.0<br>(6.3 to 33.0)                             | 0.5<br>(-9.0 to 10.3)                               |
| <b>Neglected tropical diseases and malaria</b>                                       | <b>17,584.9</b><br>(15,147.2 to 20,771.8) | <b>789.8†</b><br>(634.7 to 977.9)             | <b>103.6</b><br>(59.9 to 175.8)        | <b>-50.8</b><br>(-64.8 to -36.5)                  | <b>-55.3</b><br>(-68.4 to -42.5)                    |
| Malaria                                                                              | 31.1<br>(25.9 to 37.9)                    | 144.3<br>(105.1 to 181.6)                     | 1.3<br>(0.9 to 1.7)                    | -47.1<br>(-58.3 to -33.5)                         | -50.6<br>(-60.8 to -38.4)                           |
| Chagas disease                                                                       | --                                        | --                                            | --                                     | --                                                | --                                                  |
| Leishmaniasis                                                                        | --                                        | --                                            | --                                     | --                                                | --                                                  |
| Visceral leishmaniasis                                                               | --                                        | --                                            | --                                     | --                                                | --                                                  |
| Cutaneous and mucocutaneous leishmaniasis                                            | --                                        | --                                            | --                                     | --                                                | --                                                  |
| African trypanosomiasis                                                              | --                                        | --                                            | --                                     | --                                                | --                                                  |
| Schistosomiasis                                                                      | --                                        | --                                            | --                                     | --                                                | --                                                  |
| Cysticercosis                                                                        | 9.2<br>(5.2 to 14.2)                      | --                                            | 1.8<br>(0.8 to 3.3)                    | -3.4<br>(-50.2 to 58.2)                           | -19.4<br>(-57.8 to 30.1)                            |
| Cystic echinococcosis                                                                | 0.5<br>(0.1 to 2.4)                       | 0.1<br>(< 0.05 to 0.5)                        | < 0.05<br>(< 0.05 to 0.2)              | -62.9<br>(-97.7 to 306.3)                         | -67.6<br>(-97.9 to 268.7)                           |
| Lymphatic filariasis                                                                 | 649.5<br>(414.4 to 1,106.4)               | 205.3<br>(185.7 to 226.3)                     | 45.7<br>(16.5 to 103.4)                | -43.2<br>(-73.1 to -19.3)                         | -50.8<br>(-76.7 to -30.2)                           |
| Onchocerciasis                                                                       | --                                        | --                                            | --                                     | --                                                | --                                                  |
| Trachoma                                                                             | 19.2<br>(12.0 to 28.3)                    | --                                            | 1.7<br>(1.1 to 2.6)                    | -30.8<br>(-51.2 to -3.1)                          | -44.4<br>(-62.3 to -18.3)                           |
| Dengue                                                                               | 26.3<br>(15.2 to 42.8)                    | 438.9<br>(288.7 to 626.7)                     | 4.3<br>(2.0 to 7.8)                    | 51.7<br>(11.6 to 259.2)                           | 40.0<br>(3.4 to 229.6)                              |
| Yellow fever                                                                         | --                                        | --                                            | --                                     | --                                                | --                                                  |
| Rabies                                                                               | < 0.05<br>(< 0.05 to < 0.05)              | 0.3<br>(0.1 to 0.5)                           | < 0.05<br>(< 0.05 to < 0.05)           | -54.3<br>(-73.0 to -24.2)                         | -61.0<br>(-76.2 to -38.5)                           |
| Intestinal nematode infections                                                       | 16,826.7<br>(14,290.8 to 20,045.4)        | --                                            | 38.5<br>(19.4 to 68.3)                 | -63.8<br>(-75.6 to -46.3)                         | -66.5<br>(-77.5 to -49.8)                           |
| Ascariasis                                                                           | 8,194.1<br>(5,982.1 to 10,956.0)          | --                                            | 12.8<br>(6.0 to 24.4)                  | -64.8<br>(-80.4 to -37.4)                         | -67.1<br>(-81.9 to -41.1)                           |



| Cause                                                                   | Prevalence in thousands (95% UI)                 | Incidence in thousands (95% UI)                      | YLDs in thousands (95% UI)                    |                                                   |                                                     |
|-------------------------------------------------------------------------|--------------------------------------------------|------------------------------------------------------|-----------------------------------------------|---------------------------------------------------|-----------------------------------------------------|
|                                                                         | 2016 counts                                      | 2016 counts                                          | 2016 counts                                   | Percentage change in counts between 2006 and 2016 | Percentage change in age-standardised rates between |
| Trichuriasis                                                            | 9,630.1<br>(7,433.7 to 12,622.9)                 | --                                                   | 22.1<br>(10.4 to 42.1)                        | -63.3<br>(-80.0 to -32.0)                         | -66.2<br>(-81.7 to -37.6)                           |
| Hookworm disease                                                        | 1,314.6<br>(934.2 to 1,837.7)                    | --                                                   | 3.7<br>(2.0 to 6.5)                           | -63.7<br>(-77.6 to -40.2)                         | -66.6<br>(-79.7 to -44.8)                           |
| Food-borne trematodiasis                                                | --                                               | --                                                   | --                                            | --                                                | --                                                  |
| Leprosy                                                                 | 17.0<br>(16.1 to 18.0)                           | 0.9<br>(0.9 to 1.0)                                  | 1.1<br>(0.7 to 1.5)                           | -4.4<br>(-18.8 to 12.9)                           | -21.9<br>(-32.0 to -10.5)                           |
| Ebola virus disease                                                     | --                                               | --                                                   | --                                            | --                                                | --                                                  |
| Zika virus disease                                                      | --                                               | --                                                   | --                                            | --                                                | --                                                  |
| Guinea worm disease                                                     | --                                               | --                                                   | --                                            | --                                                | --                                                  |
| Other neglected tropical diseases                                       | 436.4<br>(401.4 to 476.4)                        | --                                                   | 9.3<br>(5.4 to 14.1)                          | -27.2<br>(-37.1 to -16.6)                         | -25.2<br>(-35.4 to -14.9)                           |
| <b>Maternal disorders</b>                                               | <b>59.1</b><br><b>(42.9 to 76.9)</b>             | <b>840.2†</b><br><b>(726.8 to 961.7)</b>             | <b>4.0</b><br><b>(2.5 to 6.0)</b>             | <b>-11.2</b><br><b>(-34.1 to 20.1)</b>            | <b>-14.8</b><br><b>(-37.1 to 14.9)</b>              |
| Maternal haemorrhage                                                    | 13.1<br>(9.6 to 17.7)                            | 91.1<br>(68.3 to 119.3)                              | 0.5<br>(0.3 to 0.8)                           | -18.7<br>(-42.9 to 17.5)                          | -22.6<br>(-45.3 to 11.9)                            |
| Maternal sepsis and other pregnancy related infections                  | 7.8<br>(4.0 to 12.8)                             | 93.0<br>(68.8 to 127.9)                              | 0.4<br>(0.1 to 0.7)                           | -15.9<br>(-63.9 to 87.2)                          | -18.5<br>(-64.9 to 82.2)                            |
| Maternal hypertensive disorders                                         | 37.2<br>(22.0 to 55.8)                           | 201.2<br>(153.4 to 246.2)                            | 1.9<br>(0.9 to 3.2)                           | -3.9<br>(-41.3 to 61.1)                           | -7.8<br>(-43.7 to 56.1)                             |
| Maternal obstructed labour and uterine rupture                          | 0.9<br>(0.5 to 1.4)                              | 63.7<br>(46.1 to 84.6)                               | 0.3<br>(0.1 to 0.5)                           | -15.7<br>(-64.5 to 95.2)                          | -18.5<br>(-66.0 to 90.2)                            |
| Maternal abortion, miscarriage, and ectopic pregnancy                   | 3.2<br>(2.0 to 4.7)                              | 391.3<br>(297.4 to 503.1)                            | 0.4<br>(0.2 to 0.6)                           | -17.8<br>(-58.4 to 58.1)                          | -22.2<br>(-60.1 to 50.1)                            |
| Other maternal disorders                                                | --                                               | --                                                   | 0.6<br>(0.4 to 0.9)                           | -15.3<br>(-37.2 to 14.6)                          | -18.6<br>(-39.8 to 9.6)                             |
| <b>Neonatal disorders</b>                                               | <b>662.3</b><br><b>(529.2 to 858.0)</b>          | --                                                   | <b>85.2</b><br><b>(59.2 to 117.3)</b>         | <b>4.4</b><br><b>(-13.6 to 22.9)</b>              | <b>0.6</b><br><b>(-16.8 to 18.5)</b>                |
| Neonatal preterm birth complications                                    | 615.6<br>(472.1 to 852.4)                        | --                                                   | 62.7<br>(43.0 to 88.4)                        | 1.7<br>(-19.5 to 24.8)                            | -2.5<br>(-23.2 to 19.4)                             |
| Neonatal encephalopathy due to birth asphyxia and trauma                | 37.1<br>(13.7 to 71.4)                           | --                                                   | 5.9<br>(0.8 to 16.3)                          | 23.3<br>(-23.6 to 132.6)                          | 18.2<br>(-26.2 to 123.4)                            |
| Neonatal sepsis and other neonatal infections                           | 19.8<br>(6.1 to 48.2)                            | --                                                   | 8.3<br>(1.9 to 23.5)                          | 30.8<br>(-19.6 to 186.3)                          | 27.6<br>(-21.4 to 184.3)                            |
| Hemolytic disease and other neonatal jaundice                           | 16.4<br>(14.2 to 18.9)                           | --                                                   | 5.5<br>(4.2 to 7.1)                           | 0.3<br>(-10.8 to 12.9)                            | -5.2<br>(-15.5 to 6.4)                              |
| Other neonatal disorders                                                | --                                               | --                                                   | 2.8<br>(1.9 to 4.0)                           | -17.6<br>(-33.4 to 0.1)                           | -8.6<br>(-26.1 to 11.0)                             |
| <b>Nutritional deficiencies</b>                                         | <b>12,713.1</b><br><b>(11,971.9 to 13,464.2)</b> | <b>1,986.2†</b><br><b>(1,356.6 to 2,917.0)</b>       | <b>252.7</b><br><b>(160.2 to 372.4)</b>       | <b>-27.2</b><br><b>(-33.9 to -20.6)</b>           | <b>-31.3</b><br><b>(-37.2 to -25.6)</b>             |
| Protein-energy malnutrition                                             | 324.3<br>(267.7 to 392.6)                        | 141.0<br>(118.1 to 168.5)                            | 8.7<br>(5.0 to 14.1)                          | -36.6<br>(-58.1 to 0.4)                           | -29.5<br>(-53.3 to 11.4)                            |
| Iodine deficiency                                                       | 405.8<br>(357.4 to 460.8)                        | 11.9<br>(10.6 to 13.2)                               | 10.3<br>(6.9 to 14.7)                         | -11.4<br>(-20.3 to -0.6)                          | -22.1<br>(-29.7 to -12.8)                           |
| Vitamin A deficiency                                                    | 2,185.7<br>(1,458.3 to 3,192.1)                  | 1,833.2<br>(1,206.7 to 2,761.1)                      | 1.0<br>(0.6 to 1.6)                           | -6.0<br>(-24.4 to 18.9)                           | -8.1<br>(-25.9 to 14.5)                             |
| Iron-deficiency anaemia                                                 | 10,683.6<br>(10,018.0 to 11,415.5)               | --                                                   | 232.3<br>(147.9 to 345.3)                     | -27.4<br>(-34.4 to -20.6)                         | -31.8<br>(-38.0 to -25.6)                           |
| Other nutritional deficiencies                                          | --                                               | --                                                   | 0.3<br>(0.2 to 0.5)                           | -37.4<br>(-59.1 to -0.0)                          | -30.6<br>(-54.7 to 10.3)                            |
| <b>Other communicable, maternal, neonatal, and nutritional diseases</b> | <b>12,568.3</b><br><b>(11,776.6 to 13,413.2)</b> | <b>4,056.8</b><br><b>(3,712.0 to 4,448.7)</b>        | <b>27.6</b><br><b>(18.0 to 41.4)</b>          | <b>-6.6</b><br><b>(-12.6 to -1.0)</b>             | <b>-13.2</b><br><b>(-18.9 to -8.2)</b>              |
| Sexually transmitted diseases excluding HIV                             | 8,577.4<br>(7,903.5 to 9,244.4)                  | 3,064.9<br>(2,772.2 to 3,377.3)                      | 18.0<br>(11.7 to 27.6)                        | 5.7<br>(-1.6 to 13.6)                             | -4.6<br>(-10.8 to 2.1)                              |
| Syphilis                                                                | 441.1<br>(368.4 to 529.3)                        | 261.6<br>(217.1 to 318.6)                            | 1.2<br>(0.8 to 1.6)                           | 24.2<br>(9.8 to 39.0)                             | -0.4<br>(-12.1 to 11.8)                             |
| Chlamydial infection                                                    | 846.6<br>(645.9 to 1,075.9)                      | 718.6<br>(566.7 to 913.1)                            | 5.3<br>(3.1 to 8.1)                           | 2.9<br>(-9.8 to 16.4)                             | -3.0<br>(-15.0 to 9.2)                              |
| Gonococcal infection                                                    | 100.1<br>(66.7 to 145.9)                         | 270.4<br>(147.4 to 442.3)                            | 0.7<br>(0.4 to 1.1)                           | 2.8<br>(-16.7 to 29.0)                            | -5.9<br>(-23.7 to 16.6)                             |
| Trichomoniasis                                                          | 944.4<br>(794.1 to 1,106.2)                      | 802.0<br>(668.0 to 946.3)                            | 0.9<br>(0.4 to 2.0)                           | 10.0<br>(1.4 to 20.5)                             | -1.0<br>(-8.6 to 7.5)                               |
| Genital herpes                                                          | 6,415.5<br>(5,434.5 to 7,471.7)                  | 431.2<br>(363.7 to 513.8)                            | 1.7<br>(0.5 to 3.8)                           | 16.6<br>(7.3 to 26.6)                             | 0.2<br>(-6.7 to 8.5)                                |
| Other sexually transmitted diseases                                     | 404.0<br>(322.5 to 499.0)                        | 581.0<br>(494.9 to 690.2)                            | 8.3<br>(5.5 to 12.1)                          | 3.2<br>(-7.0 to 14.8)                             | -7.5<br>(-16.6 to 2.8)                              |
| Hepatitis                                                               | 4,641.9<br>(3,987.2 to 5,460.9)                  | 991.8<br>(789.4 to 1,205.2)                          | 1.4<br>(0.9 to 2.1)                           | -23.5<br>(-38.4 to -5.3)                          | -29.5<br>(-42.2 to -14.4)                           |
| Acute hepatitis A                                                       | 27.4<br>(16.2 to 35.4)                           | 355.9<br>(210.6 to 460.2)                            | 0.5<br>(0.3 to 0.7)                           | -25.2<br>(-51.6 to 16.2)                          | -28.6<br>(-52.4 to 6.5)                             |
| Hepatitis B                                                             | 3,117.4<br>(2,490.0 to 3,884.5)                  | 545.1<br>(407.5 to 734.9)                            | 0.8<br>(0.5 to 1.3)                           | -23.4<br>(-42.1 to -1.7)                          | -31.3<br>(-47.1 to -12.8)                           |
| Hepatitis C                                                             | 1,494.3<br>(1,318.4 to 1,676.1)                  | 54.2<br>(48.4 to 60.5)                               | < 0.05<br>(< 0.05 to 0.1)                     | -9.9<br>(-51.0 to 65.6)                           | -9.4<br>(-49.8 to 60.3)                             |
| Acute hepatitis E                                                       | 2.8<br>(2.3 to 3.6)                              | 36.7<br>(29.6 to 46.8)                               | 0.1<br>(< 0.05 to 0.1)                        | -20.8<br>(-28.7 to -12.0)                         | -25.1<br>(-32.0 to -17.5)                           |
| Other infectious diseases                                               | 357.5<br>(331.8 to 385.2)                        | < 0.05<br>(< 0.05 to 0.1)                            | 8.2<br>(5.0 to 12.5)                          | -23.4<br>(-32.3 to -13.8)                         | -24.4<br>(-33.1 to -15.0)                           |
| <b>Non-communicable diseases</b>                                        | <b>48,795.5</b><br><b>(48,461.7 to 49,129.7)</b> | <b>130,547.6†</b><br><b>(123,661.5 to 137,618.0)</b> | <b>4,323.8</b><br><b>(3,175.2 to 5,602.1)</b> | <b>16.0</b><br><b>(12.9 to 19.1)</b>              | <b>-0.4</b><br><b>(-2.7 to 1.9)</b>                 |
| <b>Neoplasms</b>                                                        | <b>104.0</b><br><b>(96.4 to 112.3)</b>           | <b>56.6</b><br><b>(54.1 to 59.0)</b>                 | <b>18.4</b><br><b>(13.3 to 24.1)</b>          | <b>25.1</b><br><b>(15.6 to 38.1)</b>              | <b>-0.4</b><br><b>(-7.3 to 8.2)</b>                 |
| Lip and oral cavity cancer                                              | 7.6<br>(6.5 to 8.9)                              | 2.2<br>(1.9 to 2.5)                                  | 0.8<br>(0.6 to 1.1)                           | 32.8<br>(15.0 to 56.5)                            | 3.5<br>(-10.5 to 20.9)                              |
| Nasopharynx cancer                                                      | 3.2<br>(2.6 to 3.9)                              | 1.0<br>(0.8 to 1.2)                                  | 0.4<br>(0.3 to 0.6)                           | 17.0<br>(-6.0 to 51.5)                            | -5.4<br>(-22.2 to 18.0)                             |
| Other pharynx cancer                                                    | 1.2<br>(1.0 to 1.4)                              | 0.5<br>(0.4 to 0.6)                                  | 0.2<br>(0.1 to 0.2)                           | 31.7<br>(5.5 to 62.5)                             | 0.4<br>(-18.6 to 21.7)                              |
| Oesophageal cancer                                                      | 0.9<br>(0.8 to 1.0)                              | 0.8<br>(0.8 to 1.0)                                  | 0.2<br>(0.1 to 0.3)                           | 24.9<br>(5.7 to 44.6)                             | -3.4<br>(-19.7 to 14.3)                             |
| Stomach cancer                                                          | 4.5<br>(4.1 to 5.2)                              | 3.1<br>(2.8 to 3.6)                                  | 0.8<br>(0.5 to 1.1)                           | -4.3<br>(-18.4 to 12.7)                           | -23.7<br>(-35.5 to -9.2)                            |
| Colon and rectum cancer                                                 | 14.8<br>(13.2 to 16.6)                           | 5.0<br>(4.4 to 5.6)                                  | 1.7<br>(1.2 to 2.3)                           | 42.0<br>(15.1 to 73.6)                            | 10.6<br>(-9.8 to 34.1)                              |
| Liver cancer                                                            | 1.0<br>(0.8 to 1.2)                              | 2.5<br>(2.1 to 2.9)                                  | 0.5<br>(0.4 to 0.7)                           | 27.9<br>(8.6 to 47.9)                             | -0.8<br>(-15.7 to 13.8)                             |
| Liver cancer due to hepatitis B                                         | 1.0<br>(0.8 to 1.2)                              | 1.1<br>(0.9 to 1.3)                                  | 0.2<br>(0.1 to 0.3)                           | 27.1<br>(6.9 to 47.4)                             | -1.3<br>(-16.1 to 13.4)                             |

| Cause                                              | Prevalence in thousands (95% UI)              | Incidence in thousands (95% UI)          | YLDs in thousands (95% UI)              |                                                   |                                                     |
|----------------------------------------------------|-----------------------------------------------|------------------------------------------|-----------------------------------------|---------------------------------------------------|-----------------------------------------------------|
|                                                    | 2016 counts                                   | 2016 counts                              | 2016 counts                             | Percentage change in counts between 2006 and 2016 | Percentage change in age-standardised rates between |
| Liver cancer due to hepatitis C                    | 0.6<br>(0.5 to 0.8)                           | 0.7<br>(0.6 to 0.9)                      | 0.1<br>(0.1 to 0.2)                     | 27.7<br>(5.8 to 48.3)                             | -1.3<br>(-16.7 to 13.8)                             |
| Liver cancer due to alcohol use                    | 0.2<br>(0.1 to 0.2)                           | 0.2<br>(0.1 to 0.3)                      | < 0.05<br>(< 0.05 to 0.1)               | 32.7<br>(11.8 to 55.5)                            | 1.6<br>(-14.2 to 19.6)                              |
| Liver cancer due to other causes                   | 0.4<br>(0.3 to 0.6)                           | 0.5<br>(0.3 to 0.7)                      | 0.1<br>(0.1 to 0.1)                     | 28.4<br>(9.0 to 52.2)                             | -0.0<br>(-14.2 to 18.3)                             |
| Gallbladder and biliary tract cancer               | 0.5<br>(0.4 to 0.6)                           | 0.6<br>(0.5 to 0.7)                      | 0.1<br>(0.1 to 0.2)                     | 12.7<br>(-1.7 to 28.1)                            | -12.6<br>(-22.9 to -1.5)                            |
| Pancreatic cancer                                  | 1.2<br>(1.1 to 1.3)                           | 1.7<br>(1.5 to 1.8)                      | 0.4<br>(0.2 to 0.5)                     | 40.2<br>(28.3 to 52.4)                            | 7.4<br>(-1.3 to 16.7)                               |
| Larynx cancer                                      | 2.8<br>(2.2 to 3.2)                           | 0.9<br>(0.7 to 1.1)                      | 0.4<br>(0.2 to 0.5)                     | 26.5<br>(8.4 to 46.9)                             | -2.6<br>(-17.2 to 14.7)                             |
| Tracheal, bronchus, and lung cancer                | 10.4<br>(9.1 to 11.7)                         | 9.9<br>(8.7 to 11.0)                     | 2.2<br>(1.5 to 3.0)                     | 32.0<br>(4.5 to 60.8)                             | 2.9<br>(-18.3 to 24.2)                              |
| Malignant skin melanoma                            | 0.6<br>(0.5 to 0.8)                           | 0.2<br>(0.1 to 0.2)                      | 0.1<br>(< 0.05 to 0.1)                  | 38.8<br>(12.3 to 61.7)                            | 9.9<br>(-9.7 to 27.3)                               |
| Non-melanoma skin cancer                           | 0.2<br>(0.1 to 0.4)                           | 1.4<br>(1.0 to 2.1)                      | < 0.05<br>(< 0.05 to < 0.05)            | 44.5<br>(-4.0 to 94.4)                            | 10.1<br>(-35.6 to 54.8)                             |
| Non-melanoma skin cancer (squamous-cell carcinoma) | 0.2<br>(0.1 to 0.4)                           | 0.6<br>(0.5 to 0.7)                      | < 0.05<br>(< 0.05 to < 0.05)            | 47.6<br>(-6.9 to 106.6)                           | 11.6<br>(-38.3 to 62.1)                             |
| Non-melanoma skin cancer (basal-cell carcinoma)    | 0.1<br>(0.1 to 0.2)                           | 0.8<br>(0.4 to 1.5)                      | < 0.05<br>(< 0.05 to < 0.05)            | 22.7<br>(7.7 to 39.0)                             | -3.5<br>(-16.8 to 8.9)                              |
| Breast cancer                                      | 19.4<br>(16.2 to 24.9)                        | 4.3<br>(3.6 to 5.7)                      | 2.0<br>(1.3 to 2.8)                     | 35.4<br>(0.6 to 81.4)                             | 5.1<br>(-20.9 to 38.6)                              |
| Cervical cancer                                    | 20.6<br>(14.4 to 26.1)                        | 5.5<br>(3.9 to 6.9)                      | 1.9<br>(1.2 to 2.8)                     | 3.1<br>(-21.1 to 41.9)                            | -18.8<br>(-37.0 to 9.3)                             |
| Uterine cancer                                     | 5.0<br>(4.1 to 6.0)                           | 1.1<br>(0.9 to 1.3)                      | 0.4<br>(0.3 to 0.6)                     | 35.3<br>(6.1 to 76.1)                             | 0.6<br>(-19.9 to 28.8)                              |
| Ovarian cancer                                     | 5.7<br>(4.8 to 6.5)                           | 1.8<br>(1.6 to 2.1)                      | 0.8<br>(0.6 to 1.2)                     | 41.3<br>(0.1 to 97.9)                             | 10.5<br>(-21.6 to 55.1)                             |
| Prostate cancer                                    | 8.8<br>(5.6 to 10.8)                          | 2.6<br>(1.7 to 3.1)                      | 1.2<br>(0.7 to 1.6)                     | 55.9<br>(24.4 to 92.7)                            | 18.5<br>(-3.4 to 43.7)                              |
| Testicular cancer                                  | 0.5<br>(0.4 to 0.7)                           | 0.1<br>(0.1 to 0.2)                      | < 0.05<br>(< 0.05 to 0.1)               | 14.5<br>(-6.9 to 40.5)                            | 0.8<br>(-15.6 to 21.1)                              |
| Kidney cancer                                      | 5.1<br>(4.2 to 5.9)                           | 1.4<br>(1.2 to 1.6)                      | 0.5<br>(0.3 to 0.7)                     | 51.0<br>(26.0 to 77.7)                            | 21.9<br>(5.4 to 41.4)                               |
| Bladder cancer                                     | 5.0<br>(4.1 to 6.0)                           | 1.4<br>(1.2 to 1.7)                      | 0.5<br>(0.4 to 0.8)                     | 50.5<br>(24.7 to 76.7)                            | 14.6<br>(-4.5 to 33.6)                              |
| Brain and nervous system cancer                    | 2.4<br>(1.8 to 2.7)                           | 1.1<br>(0.9 to 1.2)                      | 0.4<br>(0.2 to 0.5)                     | 20.1<br>(9.3 to 29.5)                             | 2.4<br>(-6.8 to 11.9)                               |
| Thyroid cancer                                     | 3.8<br>(3.1 to 4.4)                           | 0.8<br>(0.6 to 0.9)                      | 0.3<br>(0.2 to 0.4)                     | 53.5<br>(17.1 to 100.4)                           | 12.6<br>(-12.2 to 43.9)                             |
| Mesothelioma                                       | 0.2<br>(0.2 to 0.2)                           | 0.1<br>(0.1 to 0.2)                      | < 0.05<br>(< 0.05 to 0.1)               | 1.8<br>(-16.4 to 18.6)                            | -19.9<br>(-34.8 to -6.9)                            |
| Hodgkin lymphoma                                   | 0.8<br>(0.7 to 1.2)                           | 0.3<br>(0.2 to 0.4)                      | 0.1<br>(0.1 to 0.2)                     | -14.0<br>(-23.2 to -5.1)                          | -28.2<br>(-34.9 to -21.2)                           |
| Non-Hodgkin's lymphoma                             | 3.6<br>(3.2 to 4.0)                           | 1.3<br>(1.2 to 1.5)                      | 0.4<br>(0.3 to 0.6)                     | 26.8<br>(11.6 to 42.2)                            | 3.7<br>(-9.6 to 17.9)                               |
| Multiple myeloma                                   | 0.6<br>(0.4 to 0.6)                           | 0.3<br>(0.3 to 0.4)                      | 0.1<br>(0.1 to 0.2)                     | 45.6<br>(30.0 to 64.6)                            | 12.2<br>(0.2 to 26.3)                               |
| Leukaemia                                          | 8.0<br>(7.1 to 10.0)                          | 2.2<br>(2.0 to 2.7)                      | 1.0<br>(0.7 to 1.4)                     | -7.2<br>(-22.5 to 13.8)                           | -18.3<br>(-30.0 to -2.3)                            |
| Acute lymphoid leukaemia                           | 1.8<br>(1.5 to 2.6)                           | 0.5<br>(0.4 to 0.7)                      | 0.2<br>(0.2 to 0.3)                     | 2.7<br>(-24.9 to 26.3)                            | -8.8<br>(-29.0 to 7.9)                              |
| Chronic lymphoid leukaemia                         | 0.6<br>(0.5 to 0.8)                           | 0.1<br>(0.1 to 0.2)                      | 0.1<br>(0.1 to 0.1)                     | 19.2<br>(-6.0 to 50.1)                            | -3.0<br>(-21.5 to 20.2)                             |
| Acute myeloid leukaemia                            | 0.6<br>(0.5 to 0.8)                           | 0.4<br>(0.3 to 0.5)                      | 0.1<br>(0.1 to 0.1)                     | 14.4<br>(-5.2 to 36.5)                            | 1.8<br>(-14.3 to 17.5)                              |
| Chronic myeloid leukaemia                          | 0.5<br>(0.4 to 0.7)                           | 0.2<br>(0.1 to 0.2)                      | 0.1<br>(< 0.05 to 0.1)                  | -7.1<br>(-24.4 to 16.6)                           | -23.4<br>(-36.9 to -6.5)                            |
| Other leukaemia                                    | 4.6<br>(3.8 to 5.4)                           | 1.0<br>(0.8 to 1.2)                      | 0.6<br>(0.4 to 0.8)                     | -16.2<br>(-32.3 to 10.3)                          | -25.1<br>(-38.5 to -4.7)                            |
| Other neoplasms                                    | 6.8<br>(6.0 to 7.4)                           | 2.4<br>(2.2 to 2.6)                      | 0.7<br>(0.5 to 0.9)                     | 18.1<br>(3.1 to 34.2)                             | -1.9<br>(-13.2 to 10.2)                             |
| <b>Cardiovascular diseases</b>                     | <b>2,861.9</b><br><b>(2,758.1 to 2,976.2)</b> | <b>283.8†</b><br><b>(272.0 to 297.4)</b> | <b>188.4</b><br><b>(137.2 to 245.7)</b> | <b>22.8</b><br><b>(18.1 to 27.7)</b>              | <b>-0.4</b><br><b>(-4.0 to 3.4)</b>                 |
| Rheumatic heart disease                            | 637.8<br>(567.5 to 712.1)                     | 18.2<br>(16.2 to 20.3)                   | 30.5<br>(19.1 to 45.3)                  | 5.6<br>(-4.0 to 14.3)                             | -6.2<br>(-14.6 to 1.4)                              |
| Ischaemic heart disease                            | 822.1<br>(777.4 to 868.2)                     | 108.3<br>(100.4 to 117.5)                | 33.9<br>(22.8 to 47.4)                  | 29.1<br>(22.5 to 36.4)                            | 1.9<br>(-2.8 to 6.8)                                |
| Cerebrovascular disease                            | 358.2<br>(334.0 to 381.5)                     | 64.2‡<br>(58.7 to 69.3)                  | 72.7<br>(51.2 to 93.4)                  | 27.6<br>(18.9 to 37.2)                            | -0.2<br>(-7.0 to 7.1)                               |
| Ischaemic stroke                                   | 289.7<br>(258.5 to 321.6)                     | 40.2‡<br>(35.4 to 45.2)                  | 56.2<br>(39.4 to 72.6)                  | 30.1<br>(18.9 to 42.2)                            | 1.7<br>(-7.0 to 10.6)                               |
| Hemorrhagic stroke                                 | 85.9<br>(76.4 to 96.2)                        | 24.1‡<br>(21.8 to 26.6)                  | 16.5<br>(11.5 to 21.4)                  | 19.6<br>(7.3 to 33.0)                             | -6.5<br>(-15.7 to 3.3)                              |
| Hypertensive heart disease                         | 111.1<br>(96.2 to 128.4)                      | --                                       | 9.0<br>(6.1 to 12.5)                    | 34.6<br>(21.9 to 49.2)                            | 4.0<br>(-4.9 to 13.8)                               |
| Cardiomyopathy and myocarditis                     | 16.8<br>(14.8 to 18.9)                        | 9.2†<br>(8.0 to 10.6)                    | 2.1<br>(1.4 to 3.0)                     | 22.0<br>(8.8 to 37.7)                             | 5.4<br>(-6.1 to 17.8)                               |
| Myocarditis                                        | 8.0<br>(6.9 to 9.0)                           | 9.2<br>(8.0 to 10.6)                     | 0.6<br>(0.4 to 0.9)                     | 15.0<br>(4.5 to 25.7)                             | 4.7<br>(-4.9 to 14.8)                               |
| Alcoholic cardiomyopathy                           | 3.6<br>(3.0 to 4.5)                           | --                                       | 0.3<br>(0.2 to 0.5)                     | 35.3<br>(17.5 to 56.2)                            | 6.6<br>(-7.0 to 22.8)                               |
| Other cardiomyopathy                               | 13.4<br>(11.5 to 15.6)                        | --                                       | 1.1<br>(0.7 to 1.6)                     | 22.7<br>(1.8 to 48.6)                             | 5.4<br>(-11.8 to 25.2)                              |
| Atrial fibrillation and flutter                    | 207.3<br>(180.6 to 237.2)                     | 18.4<br>(15.8 to 21.4)                   | 16.3<br>(10.9 to 22.5)                  | 27.1<br>(18.2 to 36.4)                            | -0.7<br>(-6.8 to 5.4)                               |
| Peripheral vascular disease                        | 581.9<br>(502.9 to 676.5)                     | 56.2<br>(48.4 to 65.7)                   | 3.1<br>(1.5 to 5.8)                     | 23.3<br>(12.1 to 35.5)                            | -5.7<br>(-13.8 to 3.3)                              |
| Endocarditis                                       | 2.4<br>(2.1 to 2.7)                           | 9.2<br>(8.3 to 10.1)                     | 0.2<br>(0.1 to 0.3)                     | 19.1<br>(11.2 to 28.2)                            | 1.9<br>(-7.7 to 12.5)                               |
| Other cardiovascular and circulatory diseases      | 389.8<br>(332.9 to 457.8)                     | --                                       | 20.6<br>(13.7 to 29.4)                  | 18.3<br>(7.2 to 29.7)                             | 1.6<br>(-6.9 to 9.8)                                |
| <b>Chronic respiratory diseases</b>                | <b>4,113.9</b><br><b>(3,971.5 to 4,264.7)</b> | <b>896.3†</b><br><b>(846.1 to 948.9)</b> | <b>272.1</b><br><b>(219.0 to 328.7)</b> | <b>29.5</b><br><b>(25.0 to 34.7)</b>              | <b>8.5</b><br><b>(5.1 to 12.4)</b>                  |
| Chronic obstructive pulmonary disease              | 1,719.1<br>(1,640.5 to 1,798.4)               | 142.0<br>(135.0 to 149.4)                | 159.9<br>(137.4 to 178.4)               | 39.2<br>(32.7 to 46.1)                            | 9.9<br>(5.0 to 15.0)                                |
| Pneumoconiosis                                     | 4.4<br>(3.9 to 4.9)                           | 0.5<br>(0.4 to 0.5)                      | 0.6<br>(0.4 to 0.9)                     | 39.7<br>(9.5 to 75.7)                             | 6.6<br>(-16.7 to 34.9)                              |
| Silicosis                                          | 3.5<br>(3.0 to 4.0)                           | 0.4<br>(0.3 to 0.4)                      | 0.5<br>(0.3 to 0.7)                     | 41.7<br>(3.3 to 90.7)                             | 7.6<br>(-21.8 to 45.2)                              |



| Cause                                                          | Prevalence in thousands (95% UI)           | Incidence in thousands (95% UI)                     | YLDs in thousands (95% UI)          |                                                   |                                                     |
|----------------------------------------------------------------|--------------------------------------------|-----------------------------------------------------|-------------------------------------|---------------------------------------------------|-----------------------------------------------------|
|                                                                | 2016 counts                                | 2016 counts                                         | 2016 counts                         | Percentage change in counts between 2006 and 2016 | Percentage change in age-standardised rates between |
| Asbestosis                                                     | 0.6<br>(0.5 to 0.7)                        | < 0.05<br>(< 0.05 to 0.1)                           | 0.1<br>(0.1 to 0.1)                 | 33.2<br>(25.6 to 41.7)                            | 1.4<br>(-4.3 to 7.2)                                |
| Coal workers pneumoconiosis                                    | --                                         | --                                                  | --                                  | --                                                | --                                                  |
| Other pneumoconiosis                                           | 0.3<br>(0.2 to 0.3)                        | < 0.05<br>(< 0.05 to < 0.05)                        | < 0.05<br>(< 0.05 to 0.1)           | 32.9<br>(18.3 to 47.2)                            | 6.8<br>(-5.0 to 18.7)                               |
| Asthma                                                         | 2,539.5<br>(2,370.9 to 2,708.1)            | 750.5<br>(700.8 to 801.5)                           | 99.4<br>(65.6 to 143.7)             | 14.7<br>(9.3 to 20.4)                             | 4.2<br>(-0.4 to 8.9)                                |
| Interstitial lung disease and pulmonary sarcoidosis            | 36.3<br>(32.3 to 40.8)                     | 3.4<br>(3.0 to 3.8)                                 | 3.6<br>(2.4 to 5.2)                 | 33.5<br>(18.3 to 51.3)                            | 6.0<br>(-5.7 to 18.6)                               |
| Other chronic respiratory diseases                             | --                                         | --                                                  | 8.5<br>(7.0 to 9.9)                 | 55.6<br>(35.5 to 79.4)                            | 40.1<br>(24.1 to 58.7)                              |
| <b>Cirrhosis and other chronic liver diseases</b>              | <b>280.5<br/>(264.5 to 298.1)</b>          | <b>20.6<br/>(19.6 to 21.7)</b>                      | <b>9.7<br/>(6.8 to 13.5)</b>        | <b>11.5<br/>(1.0 to 23.6)</b>                     | <b>-5.5<br/>(-13.5 to 3.5)</b>                      |
| Cirrhosis and other chronic liver diseases due to hepatitis B  | 86.9<br>(74.7 to 99.9)                     | 6.8<br>(5.9 to 7.9)                                 | 2.5<br>(1.7 to 3.6)                 | 20.7<br>(1.0 to 47.2)                             | -3.3<br>(-18.2 to 14.4)                             |
| Cirrhosis and other chronic liver diseases due to hepatitis C  | 62.6<br>(51.8 to 75.9)                     | 4.7<br>(4.0 to 5.6)                                 | 1.8<br>(1.2 to 2.6)                 | 18.0<br>(-3.7 to 42.7)                            | -6.0<br>(-22.0 to 11.6)                             |
| Cirrhosis and other chronic liver diseases due to alcohol use  | 46.3<br>(38.1 to 56.1)                     | 3.8<br>(3.1 to 4.6)                                 | 1.4<br>(0.8 to 2.0)                 | 22.4<br>(-1.9 to 54.1)                            | -4.0<br>(-21.1 to 17.2)                             |
| Cirrhosis and other chronic liver diseases due to other causes | 84.7<br>(76.6 to 93.4)                     | 5.2<br>(4.7 to 5.8)                                 | 4.0<br>(2.8 to 5.9)                 | 1.2<br>(-15.7 to 22.2)                            | -7.3<br>(-21.3 to 10.6)                             |
| <b>Digestive diseases</b>                                      | <b>553.1<br/>(519.5 to 585.4)</b>          | <b>725.1<sup>†</sup><br/>(686.6 to 770.1)</b>       | <b>16.8<br/>(11.7 to 23.1)</b>      | <b>18.7<br/>(9.7 to 27.9)</b>                     | <b>-0.9<br/>(-7.4 to 5.6)</b>                       |
| Peptic ulcer disease                                           | 181.2<br>(167.3 to 198.5)                  | 104.0<br>(94.5 to 114.5)                            | 4.1<br>(2.7 to 6.0)                 | 28.0<br>(15.0 to 42.9)                            | 2.0<br>(-7.2 to 12.0)                               |
| Gastritis and duodenitis                                       | 272.9<br>(240.1 to 306.7)                  | 280.0<br>(249.9 to 318.5)                           | 4.2<br>(2.7 to 6.1)                 | 31.6<br>(17.8 to 47.8)                            | 8.0<br>(-2.2 to 18.9)                               |
| Appendicitis                                                   | 3.9<br>(3.6 to 4.2)                        | 103.6<br>(96.4 to 111.5)                            | 1.2<br>(0.8 to 1.7)                 | 5.2<br>(-14.8 to 29.2)                            | -4.6<br>(-20.7 to 12.8)                             |
| Paralytic ileus and intestinal obstruction                     | 0.5<br>(0.4 to 0.5)                        | 13.1<br>(11.6 to 14.6)                              | 0.1<br>(0.1 to 0.2)                 | 18.9<br>(14.9 to 22.9)                            | 3.7<br>(-0.9 to 8.5)                                |
| Inguinal, femoral, and abdominal hernia                        | 85.5<br>(72.5 to 98.0)                     | 69.0<br>(59.7 to 79.2)                              | 4.0<br>(2.7 to 5.6)                 | 0.9<br>(-14.1 to 18.7)                            | -14.1<br>(-25.7 to -0.7)                            |
| Inflammatory bowel disease                                     | 4.8<br>(3.6 to 6.3)                        | 29.9<br>(22.8 to 38.2)                              | 0.8<br>(0.5 to 1.1)                 | 23.8<br>(14.2 to 34.6)                            | 5.7<br>(-1.6 to 14.3)                               |
| Vascular intestinal disorders                                  | 0.3<br>(0.3 to 0.4)                        | 2.1<br>(1.8 to 2.4)                                 | 0.1<br>(0.1 to 0.1)                 | 23.6<br>(17.5 to 30.6)                            | 11.3<br>(6.6 to 16.0)                               |
| Gallbladder and biliary diseases                               | 32.4<br>(28.3 to 36.6)                     | 108.8<br>(94.1 to 125.6)                            | 0.7<br>(0.5 to 1.0)                 | 31.4<br>(18.5 to 45.1)                            | 6.4<br>(-3.9 to 17.7)                               |
| Pancreatitis                                                   | 1.6<br>(1.4 to 1.8)                        | 14.9<br>(13.4 to 16.4)                              | 0.2<br>(0.1 to 0.3)                 | 32.0<br>(27.0 to 37.6)                            | 11.0<br>(7.0 to 14.8)                               |
| Other digestive diseases                                       | --                                         | --                                                  | 1.3<br>(0.9 to 1.8)                 | 20.9<br>(11.4 to 31.6)                            | 1.8<br>(-5.0 to 8.9)                                |
| <b>Neurological disorders</b>                                  | <b>19,491.2<br/>(18,652.5 to 20,450.8)</b> | <b>9,124.5<br/>(7,766.3 to 10,673.2)</b>            | <b>464.9<br/>(303.5 to 650.6)</b>   | <b>13.7<br/>(-9.5 to 41.0)</b>                    | <b>0.6<br/>(-18.4 to 22.6)</b>                      |
| Alzheimer's disease and other dementias                        | 232.1<br>(198.6 to 272.9)                  | 38.8<br>(32.7 to 46.1)                              | 32.3<br>(22.7 to 43.1)              | 26.1<br>(20.0 to 32.7)                            | -0.7<br>(-4.7 to 3.5)                               |
| Parkinson's disease                                            | 28.2<br>(22.6 to 34.7)                     | 3.1<br>(2.4 to 3.9)                                 | 3.3<br>(2.1 to 4.7)                 | 43.5<br>(26.5 to 64.2)                            | 12.5<br>(0.8 to 26.7)                               |
| Epilepsy                                                       | 196.1<br>(60.9 to 313.4)                   | 25.3<br>(7.9 to 40.5)                               | 78.1<br>(19.0 to 147.0)             | 10.5<br>(-74.0 to 278.8)                          | 2.4<br>(-75.7 to 249.2)                             |
| Multiple sclerosis                                             | 2.5<br>(2.2 to 2.8)                        | 0.2<br>(0.1 to 0.2)                                 | 0.7<br>(0.5 to 0.9)                 | 37.6<br>(32.9 to 43.3)                            | 17.7<br>(13.9 to 22.1)                              |
| Motor neuron disease                                           | 1.3<br>(1.1 to 1.5)                        | 0.3<br>(0.2 to 0.3)                                 | 0.3<br>(0.2 to 0.4)                 | 21.7<br>(16.5 to 26.8)                            | 7.4<br>(3.7 to 11.3)                                |
| Migraine                                                       | 7,065.4<br>(6,641.1 to 7,496.3)            | 750.9<br>(704.0 to 801.8)                           | 288.9<br>(184.1 to 409.9)           | 12.3<br>(8.3 to 16.5)                             | -0.6<br>(-4.0 to 3.1)                               |
| Tension-type headache                                          | 14,831.1<br>(13,211.1 to 16,598.8)         | 8,305.8<br>(6,962.0 to 9,877.5)                     | 43.4<br>(26.9 to 65.6)              | 12.1<br>(6.2 to 18.6)                             | -1.3<br>(-6.2 to 3.9)                               |
| Other neurological disorders                                   | 0.1<br>(0.1 to 0.2)                        | 0.3<br>(0.2 to 0.4)                                 | 17.8<br>(5.5 to 32.5)               | 32.0<br>(-60.0 to 287.3)                          | 21.7<br>(-60.9 to 238.8)                            |
| <b>Mental and substance use disorders</b>                      | <b>6,770.0<br/>(6,485.6 to 7,087.1)</b>    | <b>1,662.4<sup>†</sup><br/>(1,560.2 to 1,775.8)</b> | <b>839.7<br/>(609.9 to 1,090.7)</b> | <b>13.1<br/>(10.3 to 16.1)</b>                    | <b>0.6<br/>(-1.6 to 3.1)</b>                        |
| Schizophrenia                                                  | 140.2<br>(122.6 to 159.4)                  | 8.9<br>(7.8 to 10.1)                                | 90.6<br>(65.2 to 114.0)             | 19.6<br>(9.1 to 30.7)                             | 4.2<br>(-4.8 to 13.7)                               |
| Alcohol use disorders                                          | 448.9<br>(392.2 to 508.9)                  | 242.2<br>(210.8 to 275.6)                           | 45.1<br>(31.1 to 63.0)              | 11.5<br>(2.0 to 21.9)                             | 0.1<br>(-7.9 to 9.1)                                |
| Drug use disorders                                             | 368.5<br>(331.8 to 410.8)                  | 55.2<br>(48.1 to 63.3)                              | 62.3<br>(44.3 to 85.1)              | 13.6<br>(2.8 to 25.2)                             | 5.1<br>(-4.5 to 14.9)                               |
| Opioid use disorders                                           | 105.9<br>(87.5 to 128.5)                   | 13.6<br>(11.3 to 16.3)                              | 44.1<br>(29.9 to 61.0)              | 15.6<br>(2.0 to 30.6)                             | 5.3<br>(-6.2 to 17.7)                               |
| Cocaine use disorders                                          | 8.2<br>(6.9 to 9.7)                        | 1.0<br>(0.8 to 1.2)                                 | 1.2<br>(0.7 to 1.8)                 | 16.4<br>(10.2 to 23.2)                            | 5.6<br>(0.6 to 11.4)                                |
| Amphetamine use disorders                                      | 35.7<br>(21.8 to 52.5)                     | 4.3<br>(2.7 to 6.3)                                 | 4.8<br>(2.4 to 8.5)                 | 4.4<br>(-24.5 to 43.1)                            | 3.5<br>(-25.1 to 41.6)                              |
| Cannabis use disorders                                         | 206.0<br>(167.7 to 250.4)                  | 32.1<br>(26.0 to 39.6)                              | 6.1<br>(3.7 to 9.2)                 | 7.6<br>(-8.8 to 27.9)                             | 3.0<br>(-12.3 to 21.9)                              |
| Other drug use disorders                                       | 21.2<br>(18.7 to 23.7)                     | 4.2<br>(3.7 to 4.7)                                 | 6.2<br>(3.9 to 9.4)                 | 12.6<br>(-11.1 to 42.5)                           | 6.7<br>(-14.5 to 33.4)                              |
| Depressive disorders                                           | 1,269.5<br>(1,172.0 to 1,390.5)            | 794.4<br>(709.1 to 880.1)                           | 169.4<br>(117.1 to 233.7)           | 20.2<br>(15.3 to 25.5)                            | 2.2<br>(-1.6 to 6.0)                                |
| Major depressive disorder                                      | 427.9<br>(377.8 to 484.1)                  | 662.7<br>(582.9 to 747.9)                           | 87.9<br>(59.0 to 121.5)             | 19.4<br>(11.0 to 28.8)                            | 4.1<br>(-2.6 to 11.6)                               |
| Dysthymia                                                      | 849.1<br>(736.6 to 973.6)                  | 131.7<br>(115.0 to 150.5)                           | 81.4<br>(54.9 to 117.1)             | 21.1<br>(16.8 to 25.5)                            | 0.3<br>(-2.5 to 3.4)                                |
| Bipolar disorder                                               | 282.5<br>(242.6 to 326.1)                  | 27.1<br>(23.4 to 31.5)                              | 58.1<br>(36.1 to 85.9)              | 13.5<br>(5.4 to 22.8)                             | 0.5<br>(-6.4 to 8.0)                                |
| Anxiety disorders                                              | 1,898.5<br>(1,675.4 to 2,128.3)            | 305.2<br>(270.6 to 343.7)                           | 183.8<br>(126.2 to 251.9)           | 13.9<br>(6.5 to 21.6)                             | 0.6<br>(-5.9 to 6.8)                                |
| Eating disorders                                               | 49.2<br>(39.9 to 59.3)                     | 33.3<br>(24.7 to 43.9)                              | 10.1<br>(6.3 to 14.8)               | 35.4<br>(15.7 to 60.7)                            | 29.6<br>(11.0 to 54.0)                              |
| Anorexia nervosa                                               | 15.4<br>(11.3 to 20.8)                     | 7.0<br>(5.1 to 9.3)                                 | 3.3<br>(1.9 to 5.2)                 | 28.8<br>(-1.8 to 68.6)                            | 24.5<br>(-4.8 to 62.5)                              |
| Bulimia nervosa                                                | 32.2<br>(24.0 to 43.2)                     | 26.3<br>(18.2 to 36.6)                              | 6.8<br>(4.1 to 10.6)                | 38.8<br>(15.7 to 70.2)                            | 32.2<br>(10.1 to 63.1)                              |
| Autistic spectrum disorders                                    | 437.9<br>(390.5 to 496.3)                  | 3.2<br>(2.2 to 4.5)                                 | 63.0<br>(42.4 to 88.2)              | 8.1<br>(2.8 to 13.9)                              | 0.6<br>(-4.0 to 5.7)                                |
| Autism                                                         | 123.8<br>(106.9 to 144.3)                  | 0.4<br>(0.2 to 0.6)                                 | 31.7<br>(20.8 to 45.1)              | 8.0<br>(-1.6 to 18.2)                             | 0.7<br>(-7.7 to 9.9)                                |
| Asperger syndrome and other autistic spectrum disorders        | 312.3<br>(258.7 to 376.3)                  | 2.9<br>(1.8 to 4.2)                                 | 31.3<br>(20.6 to 45.6)              | 8.1<br>(3.1 to 13.4)                              | 0.5<br>(-4.1 to 5.2)                                |

| Cause                                                      | Prevalence in thousands (95% UI)                 | Incidence in thousands (95% UI)                      | YLDs in thousands (95% UI)                  |                                                   |                                                     |
|------------------------------------------------------------|--------------------------------------------------|------------------------------------------------------|---------------------------------------------|---------------------------------------------------|-----------------------------------------------------|
|                                                            | 2016 counts                                      | 2016 counts                                          | 2016 counts                                 | Percentage change in counts between 2006 and 2016 | Percentage change in age-standardised rates between |
| Attention-deficit/hyperactivity disorder                   | 287.6<br>(228.9 to 360.5)                        | 13.2<br>(9.8 to 17.4)                                | 3.5<br>(2.0 to 5.6)                         | 4.9<br>(-6.5 to 17.6)                             | 0.3<br>(-10.5 to 12.0)                              |
| Conduct disorder                                           | 428.0<br>(348.1 to 507.5)                        | 144.2<br>(113.9 to 174.3)                            | 52.1<br>(32.0 to 79.8)                      | 5.1<br>(-2.1 to 11.7)                             | 0.4<br>(-6.4 to 6.8)                                |
| Idiopathic developmental intellectual disability           | 636.3<br>(316.5 to 1,022.2)                      | --                                                   | 27.7<br>(12.2 to 49.7)                      | -21.3<br>(-30.8 to -12.8)                         | -27.1<br>(-35.8 to -19.2)                           |
| Other mental and substance use disorders                   | 993.2<br>(874.2 to 1,146.9)                      | 35.5<br>(31.5 to 40.5)                               | 74.2<br>(50.3 to 107.0)                     | 15.5<br>(9.9 to 21.9)                             | 0.3<br>(-4.2 to 5.6)                                |
| <b>Diabetes, urogenital, blood, and endocrine diseases</b> | <b>23,226.3</b><br><b>(22,822.8 to 23,619.3)</b> | <b>4,964.3†</b><br><b>(4,658.6 to 5,290.3)</b>       | <b>373.4</b><br><b>(262.6 to 514.8)</b>     | <b>23.2</b><br><b>(19.0 to 28.1)</b>              | <b>3.5</b><br><b>(-0.0 to 7.1)</b>                  |
| Diabetes mellitus                                          | 2,648.4<br>(2,395.6 to 2,905.2)                  | 154.8<br>(140.1 to 169.8)                            | 189.5<br>(128.1 to 263.7)                   | 45.2<br>(37.6 to 53.8)                            | 15.8<br>(9.8 to 22.3)                               |
| Acute glomerulonephritis                                   | 0.7<br>(0.6 to 0.8)                              | 10.0<br>(8.7 to 11.4)                                | < 0.05<br>(< 0.05 to 0.1)                   | 11.6<br>(5.7 to 16.8)                             | 0.5<br>(-3.9 to 4.4)                                |
| Chronic kidney disease                                     | 1,217.8<br>(1,092.8 to 1,350.1)                  | 87.7<br>(77.6 to 98.0)                               | 44.8<br>(33.2 to 58.5)                      | 21.9<br>(13.6 to 30.3)                            | -0.8<br>(-6.8 to 4.8)                               |
| Chronic kidney disease due to diabetes mellitus            | 728.3<br>(632.0 to 825.3)                        | 51.8<br>(44.1 to 59.3)                               | 26.4<br>(19.4 to 34.2)                      | 23.3<br>(11.6 to 35.6)                            | -1.4<br>(-9.7 to 7.2)                               |
| Chronic kidney disease due to hypertension                 | 188.4<br>(162.5 to 218.5)                        | 7.3<br>(6.0 to 8.8)                                  | 11.4<br>(8.0 to 15.2)                       | 26.0<br>(13.0 to 40.0)                            | 0.2<br>(-9.4 to 10.2)                               |
| Chronic kidney disease due to glomerulonephritis           | 222.2<br>(189.3 to 262.3)                        | 21.9<br>(18.2 to 26.3)                               | 3.8<br>(2.6 to 5.2)                         | 11.5<br>(3.1 to 19.8)                             | 1.4<br>(-5.5 to 8.5)                                |
| Chronic kidney disease due to other causes                 | 79.0<br>(65.0 to 94.9)                           | 6.7<br>(5.6 to 8.0)                                  | 3.3<br>(2.3 to 4.6)                         | 11.9<br>(4.0 to 19.9)                             | -2.3<br>(-8.2 to 4.0)                               |
| Urinary diseases and male infertility                      | 545.1<br>(483.8 to 609.1)                        | 2,775.7†<br>(2,496.2 to 3,083.3)                     | 13.4<br>(8.7 to 19.0)                       | 21.3<br>(14.0 to 29.4)                            | -3.5<br>(-8.6 to 2.3)                               |
| Interstitial nephritis and urinary tract infections        | 48.8<br>(43.5 to 54.6)                           | 2,551.6<br>(2,262.6 to 2,860.5)                      | 1.6<br>(1.0 to 2.5)                         | 11.9<br>(-3.9 to 29.4)                            | 0.1<br>(-13.2 to 14.2)                              |
| Urolithiasis                                               | 7.0<br>(6.1 to 8.0)                              | 186.0<br>(162.1 to 213.8)                            | 0.5<br>(0.4 to 0.8)                         | 25.3<br>(17.1 to 33.8)                            | 1.2<br>(-6.9 to 9.5)                                |
| Benign prostatic hyperplasia                               | 290.3<br>(243.3 to 339.7)                        | 38.1<br>(31.8 to 45.4)                               | 9.5<br>(6.1 to 13.7)                        | 27.7<br>(18.3 to 38.5)                            | -3.5<br>(-10.1 to 3.9)                              |
| Male infertility                                           | 173.7<br>(134.1 to 226.3)                        | --                                                   | 1.0<br>(0.4 to 2.1)                         | 8.3<br>(0.1 to 17.3)                              | 1.3<br>(-6.8 to 9.3)                                |
| Other urinary diseases                                     | --                                               | --                                                   | 0.8<br>(0.5 to 1.1)                         | -6.0<br>(-17.3 to 6.1)                            | -16.7<br>(-26.0 to -7.4)                            |
| Gynecological diseases                                     | 5,608.5<br>(5,405.5 to 5,824.9)                  | 1,839.4†<br>(1,739.9 to 1,939.6)                     | 63.1<br>(41.7 to 92.7)                      | 2.0<br>(-3.1 to 7.1)                              | -10.2<br>(-14.7 to -5.6)                            |
| Uterine fibroids                                           | 804.3<br>(703.6 to 916.9)                        | 88.9<br>(75.8 to 104.8)                              | 14.0<br>(8.4 to 22.8)                       | 2.0<br>(-9.7 to 13.5)                             | -16.5<br>(-25.9 to -7.5)                            |
| Polycystic ovarian syndrome                                | 43.5<br>(32.3 to 56.0)                           | 32.4<br>(23.5 to 42.0)                               | 0.4<br>(0.2 to 0.7)                         | 7.5<br>(-8.0 to 24.8)                             | -1.0<br>(-14.9 to 14.9)                             |
| Female infertility                                         | 90.5<br>(32.7 to 200.5)                          | --                                                   | 0.5<br>(0.1 to 1.5)                         | -15.0<br>(-38.3 to 11.8)                          | -16.8<br>(-40.6 to 8.8)                             |
| Endometriosis                                              | 5.5<br>(4.6 to 6.6)                              | 43.6<br>(35.7 to 53.1)                               | 0.5<br>(0.3 to 0.8)                         | 10.0<br>(-19.3 to 53.7)                           | 0.5<br>(-25.8 to 38.3)                              |
| Genital prolapse                                           | 1,207.5<br>(1,041.0 to 1,389.4)                  | 80.6<br>(68.3 to 94.8)                               | 3.8<br>(1.8 to 7.1)                         | 9.7<br>(0.2 to 21.3)                              | -15.4<br>(-23.6 to -5.9)                            |
| Premenstrual syndrome                                      | 3,585.1<br>(3,384.6 to 3,764.3)                  | 1,294.1<br>(1,208.6 to 1,375.6)                      | 30.1<br>(18.7 to 46.5)                      | 6.2<br>(-1.2 to 14.1)                             | -2.5<br>(-9.3 to 4.7)                               |
| Other gynecological diseases                               | 450.7<br>(400.0 to 501.7)                        | 299.8<br>(248.3 to 351.1)                            | 13.8<br>(9.3 to 19.7)                       | -7.2<br>(-17.4 to 3.5)                            | -16.1<br>(-25.0 to -6.5)                            |
| Hemoglobinopathies and hemolytic anaemias                  | 16,943.6<br>(16,503.1 to 17,402.6)               | --                                                   | 39.1<br>(24.7 to 57.3)                      | -3.5<br>(-12.3 to 6.0)                            | -11.4<br>(-19.0 to -3.4)                            |
| Thalassemias                                               | 6.2<br>(4.8 to 7.9)                              | --                                                   | 0.4<br>(0.2 to 0.7)                         | -1.9<br>(-23.0 to 22.4)                           | 7.3<br>(-16.1 to 34.3)                              |
| Thalassaemia trait                                         | 4,070.8<br>(3,703.4 to 4,453.4)                  | --                                                   | 28.4<br>(17.7 to 42.0)                      | 2.3<br>(-8.5 to 14.0)                             | -4.9<br>(-14.3 to 5.2)                              |
| Sickle cell disorders                                      | < 0.05<br>(< 0.05 to < 0.05)                     | --                                                   | < 0.05<br>(< 0.05 to < 0.05)                | 2.8<br>(-11.5 to 21.3)                            | 6.7<br>(-8.3 to 26.4)                               |
| Sickle cell trait                                          | 234.8<br>(214.9 to 258.6)                        | --                                                   | 0.4<br>(0.2 to 0.6)                         | -15.4<br>(-37.0 to 12.3)                          | -21.2<br>(-40.3 to 2.5)                             |
| G6PD deficiency                                            | 4,603.1<br>(4,315.1 to 4,915.5)                  | --                                                   | 0.2<br>(0.1 to 0.3)                         | -8.5<br>(-26.4 to 10.7)                           | -16.6<br>(-30.5 to -1.4)                            |
| G6PD trait                                                 | 9,152.1<br>(8,883.0 to 9,436.2)                  | --                                                   | < 0.05<br>(< 0.05 to < 0.05)                | 15.3<br>(-3.6 to 40.6)                            | 6.1<br>(-10.5 to 27.5)                              |
| Other hemoglobinopathies and hemolytic anaemias            | 577.1<br>(544.8 to 608.9)                        | --                                                   | 9.6<br>(6.2 to 14.6)                        | -16.9<br>(-25.0 to -7.7)                          | -24.8<br>(-31.2 to -18.0)                           |
| Endocrine, metabolic, blood, and immune disorders          | 846.0<br>(791.4 to 911.2)                        | 96.6<br>(85.5 to 110.0)                              | 23.4<br>(15.7 to 33.0)                      | 5.1<br>(-2.5 to 12.6)                             | -8.1<br>(-13.7 to -2.5)                             |
| <b>Musculoskeletal disorders</b>                           | <b>8,125.3</b><br><b>(7,724.5 to 8,574.8)</b>    | <b>4,393.7</b><br><b>(3,973.6 to 4,848.4)</b>        | <b>887.1</b><br><b>(636.4 to 1,160.5)</b>   | <b>26.4</b><br><b>(21.2 to 32.7)</b>              | <b>4.3</b><br><b>(0.3 to 8.9)</b>                   |
| Rheumatoid arthritis                                       | 67.2<br>(59.6 to 76.0)                           | 4.1<br>(3.6 to 4.6)                                  | 16.0<br>(10.7 to 21.7)                      | 31.9<br>(18.4 to 46.5)                            | 6.7<br>(-2.7 to 17.5)                               |
| Osteoarthritis                                             | 1,535.8<br>(1,431.5 to 1,645.9)                  | 82.5<br>(76.2 to 89.0)                               | 94.9<br>(66.6 to 129.9)                     | 38.3<br>(32.8 to 44.2)                            | 5.9<br>(2.0 to 10.0)                                |
| Low back and neck pain                                     | 4,807.4<br>(4,463.3 to 5,182.3)                  | 2,080.3<br>(1,850.4 to 2,335.4)                      | 557.4<br>(393.6 to 733.5)                   | 30.9<br>(23.2 to 40.0)                            | 8.2<br>(2.3 to 15.1)                                |
| Low back pain                                              | 3,481.9<br>(3,083.0 to 3,957.0)                  | 1,701.5<br>(1,479.0 to 1,952.0)                      | 395.7<br>(278.1 to 529.3)                   | 34.8<br>(23.9 to 48.3)                            | 11.7<br>(3.4 to 21.8)                               |
| Neck pain                                                  | 1,614.1<br>(1,385.7 to 1,872.5)                  | 378.8<br>(326.9 to 448.4)                            | 161.7<br>(108.9 to 231.1)                   | 22.3<br>(18.8 to 26.2)                            | 0.3<br>(-1.8 to 2.6)                                |
| Gout                                                       | 201.2<br>(176.6 to 229.1)                        | 40.5<br>(34.9 to 46.0)                               | 6.4<br>(4.3 to 8.8)                         | 27.3<br>(9.2 to 47.6)                             | 0.1<br>(-13.0 to 13.3)                              |
| Other musculoskeletal disorders                            | 2,469.3<br>(2,104.0 to 2,878.4)                  | 2,186.4<br>(1,833.0 to 2,589.6)                      | 212.5<br>(142.6 to 304.6)                   | 11.7<br>(3.6 to 20.3)                             | -5.7<br>(-12.2 to 1.1)                              |
| <b>Other non-communicable diseases</b>                     | <b>37,284.9</b><br><b>(36,455.4 to 38,051.1)</b> | <b>108,420.3†</b><br><b>(101,529.9 to 115,403.3)</b> | <b>1,253.3</b><br><b>(870.0 to 1,737.1)</b> | <b>7.2</b><br><b>(5.2 to 9.0)</b>                 | <b>-6.8</b><br><b>(-8.5 to -5.4)</b>                |
| Congenital anomalies                                       | 595.1<br>(524.5 to 693.6)                        | --                                                   | 75.8<br>(52.3 to 104.1)                     | -4.8<br>(-11.1 to 2.4)                            | -11.2<br>(-17.1 to -4.6)                            |
| Neural tube defects                                        | 36.0<br>(31.8 to 40.8)                           | --                                                   | 10.8<br>(7.4 to 14.6)                       | 3.5<br>(-10.7 to 20.1)                            | -4.6<br>(-16.9 to 9.7)                              |
| Congenital heart anomalies                                 | 115.0<br>(99.3 to 131.6)                         | --                                                   | 5.1<br>(2.2 to 8.5)                         | -2.6<br>(-13.9 to 10.1)                           | -2.8<br>(-14.0 to 9.7)                              |
| Orofacial clefts                                           | 29.3<br>(25.9 to 32.9)                           | --                                                   | 0.5<br>(0.3 to 0.7)                         | 5.2<br>(-6.8 to 18.6)                             | -2.2<br>(-13.4 to 10.3)                             |
| Down's syndrome                                            | 16.3<br>(13.9 to 19.3)                           | --                                                   | 1.5<br>(1.0 to 2.1)                         | 8.4<br>(0.6 to 17.1)                              | 3.4<br>(-4.0 to 11.6)                               |
| Turner syndrome                                            | 14.6<br>(12.4 to 17.1)                           | --                                                   | 0.3<br>(0.1 to 0.5)                         | 1.4<br>(-32.3 to 60.2)                            | -1.3<br>(-34.4 to 53.9)                             |
| Klinefelter syndrome                                       | 14.5<br>(12.2 to 17.2)                           | --                                                   | 0.1<br>(< 0.05 to 0.1)                      | 4.2<br>(-23.7 to 41.7)                            | 2.4<br>(-24.6 to 38.9)                              |



| Cause                                         | Prevalence in thousands (95% UI)              | Incidence in thousands (95% UI)                | YLDs in thousands (95% UI)              |                                                   |                                                     |
|-----------------------------------------------|-----------------------------------------------|------------------------------------------------|-----------------------------------------|---------------------------------------------------|-----------------------------------------------------|
|                                               | 2016 counts                                   | 2016 counts                                    | 2016 counts                             | Percentage change in counts between 2006 and 2016 | Percentage change in age-standardised rates between |
| Other chromosomal abnormalities               | 14.5<br>(12.1 to 17.4)                        | --                                             | 1.7<br>(1.1 to 2.4)                     | -2.4<br>(-21.2 to 21.8)                           | 1.3<br>(-18.2 to 26.6)                              |
| Congenital musculoskeletal and limb anomalies | 47.3<br>(43.0 to 51.8)                        | --                                             | 6.9<br>(4.7 to 9.6)                     | 12.7<br>(0.3 to 26.2)                             | 5.1<br>(-5.4 to 16.8)                               |
| Urogenital congenital anomalies               | 40.0<br>(35.4 to 45.2)                        | --                                             | 0.8<br>(0.5 to 1.4)                     | -2.6<br>(-11.2 to 6.9)                            | -2.4<br>(-11.0 to 6.9)                              |
| Digestive congenital anomalies                | 60.7<br>(53.7 to 68.2)                        | --                                             | 2.7<br>(1.8 to 4.0)                     | 11.7<br>(-4.3 to 31.2)                            | 3.8<br>(-10.8 to 21.2)                              |
| Other congenital anomalies                    | 319.7<br>(239.5 to 436.8)                     | --                                             | 45.5<br>(29.1 to 68.2)                  | -10.3<br>(-18.2 to -0.5)                          | -17.0<br>(-24.4 to -8.1)                            |
| Skin and subcutaneous diseases                | 18,518.5<br>(17,873.5 to 19,163.5)            | 42,282.6<br>(39,434.8 to 45,974.2)             | 464.2<br>(304.2 to 676.4)               | 8.2<br>(5.8 to 10.7)                              | 1.5<br>(-0.7 to 3.8)                                |
| Dermatitis                                    | 2,510.3<br>(2,267.6 to 2,773.4)               | 3,096.0<br>(2,869.6 to 3,341.1)                | 95.7<br>(56.0 to 158.6)                 | 4.9<br>(1.1 to 8.8)                               | 0.3<br>(-3.0 to 3.7)                                |
| Psoriasis                                     | 347.2<br>(331.4 to 365.3)                     | 49.6<br>(47.4 to 52.0)                         | 30.4<br>(21.6 to 40.3)                  | 30.0<br>(18.1 to 43.8)                            | 14.6<br>(4.5 to 25.3)                               |
| Cellulitis                                    | 22.6<br>(21.0 to 24.5)                        | 476.5<br>(444.2 to 510.7)                      | 1.3<br>(0.8 to 1.9)                     | 10.7<br>(-11.8 to 38.3)                           | 1.6<br>(-18.1 to 24.8)                              |
| Pyoderma                                      | 52.0<br>(50.3 to 53.9)                        | 1,014.4<br>(978.0 to 1,051.6)                  | 0.3<br>(0.1 to 0.6)                     | 18.7<br>(6.4 to 31.7)                             | 1.4<br>(-7.5 to 10.8)                               |
| Scabies                                       | 2,689.6<br>(2,145.2 to 3,464.5)               | 8,566.5<br>(6,755.3 to 11,349.1)               | 69.5<br>(37.6 to 115.8)                 | -4.2<br>(-12.2 to 2.5)                            | -9.5<br>(-17.1 to -3.6)                             |
| Fungal skin diseases                          | 5,599.2<br>(4,987.5 to 6,216.5)               | 18,263.0<br>(16,139.7 to 20,433.9)             | 31.5<br>(12.5 to 67.7)                  | 12.0<br>(9.8 to 14.2)                             | 0.2<br>(-0.7 to 1.2)                                |
| Viral skin diseases                           | 1,581.7<br>(1,422.5 to 1,750.0)               | 2,237.2<br>(1,997.1 to 2,485.0)                | 48.6<br>(30.3 to 71.8)                  | 6.3<br>(2.7 to 10.2)                              | 0.2<br>(-2.8 to 3.5)                                |
| Acne vulgaris                                 | 5,174.6<br>(4,560.8 to 5,835.7)               | 3,768.3<br>(2,974.9 to 4,929.8)                | 133.8<br>(88.0 to 193.5)                | 11.8<br>(6.7 to 17.2)                             | 6.0<br>(1.2 to 11.1)                                |
| Alopecia areata                               | 103.3<br>(99.6 to 107.2)                      | 182.9<br>(176.4 to 189.7)                      | 3.4<br>(2.1 to 5.2)                     | 10.6<br>(-0.7 to 22.7)                            | 0.2<br>(-9.9 to 10.8)                               |
| Pruritus                                      | 447.7<br>(393.1 to 504.2)                     | 358.3<br>(320.0 to 404.9)                      | 4.8<br>(2.2 to 8.8)                     | 17.1<br>(10.1 to 23.9)                            | 3.1<br>(-2.2 to 8.3)                                |
| Urticaria                                     | 452.8<br>(394.6 to 521.4)                     | 803.8<br>(705.9 to 923.4)                      | 27.4<br>(17.6 to 39.4)                  | 3.7<br>(-2.5 to 10.9)                             | 0.3<br>(-5.6 to 6.4)                                |
| Decubitus ulcer                               | 5.0<br>(4.4 to 5.5)                           | 18.3<br>(16.3 to 20.5)                         | 0.8<br>(0.5 to 1.1)                     | 32.8<br>(18.3 to 50.1)                            | 7.7<br>(-6.5 to 22.9)                               |
| Other skin and subcutaneous diseases          | 3,042.0<br>(2,946.8 to 3,133.1)               | 3,447.9<br>(3,333.3 to 3,559.7)                | 16.7<br>(8.1 to 30.8)                   | 30.9<br>(27.1 to 34.4)                            | 12.1<br>(9.2 to 14.8)                               |
| Sense organ diseases                          | 10,979.6<br>(10,698.5 to 11,291.4)            | 4,971.1†<br>(4,662.0 to 5,312.5)               | 624.8<br>(444.0 to 840.1)               | 6.4<br>(3.6 to 9.1)                               | -11.4<br>(-13.4 to -9.5)                            |
| Glaucoma                                      | 24.4<br>(20.2 to 29.0)                        | --                                             | 2.7<br>(1.8 to 3.9)                     | 38.1<br>(18.1 to 62.1)                            | 3.2<br>(-10.6 to 20.2)                              |
| Cataract                                      | 991.4<br>(879.9 to 1,112.9)                   | --                                             | 72.9<br>(51.4 to 100.0)                 | 3.9<br>(-3.8 to 11.8)                             | -18.0<br>(-24.1 to -12.2)                           |
| Macular degeneration                          | 8.7<br>(6.8 to 11.2)                          | --                                             | 0.7<br>(0.4 to 1.0)                     | 32.8<br>(8.8 to 59.2)                             | 0.5<br>(-16.8 to 19.3)                              |
| Refraction and accommodation disorders        | 4,192.8<br>(3,946.3 to 4,440.9)               | --                                             | 126.6<br>(86.3 to 183.6)                | -3.4<br>(-7.6 to 1.1)                             | -19.2<br>(-22.8 to -15.7)                           |
| Age-related and other hearing loss            | 7,399.3<br>(7,019.7 to 7,852.7)               | --                                             | 363.7<br>(257.7 to 482.7)               | 8.2<br>(4.1 to 12.4)                              | -8.6<br>(-11.0 to -6.2)                             |
| Other vision loss                             | 203.5<br>(179.6 to 230.8)                     | --                                             | 16.2<br>(11.1 to 22.0)                  | 23.1<br>(11.6 to 35.6)                            | 0.3<br>(-8.2 to 9.2)                                |
| Other sense organ diseases                    | 1,352.8<br>(1,243.8 to 1,459.5)               | 4,971.1<br>(4,662.0 to 5,312.5)                | 42.1<br>(26.4 to 63.8)                  | 22.9<br>(17.1 to 28.7)                            | 2.1<br>(-2.1 to 6.5)                                |
| Oral disorders                                | 23,296.4<br>(21,933.3 to 24,524.5)            | 61,166.6†<br>(55,402.6 to 67,517.6)            | 88.6<br>(51.4 to 146.1)                 | 21.0<br>(17.5 to 25.0)                            | 0.8<br>(-1.6 to 3.6)                                |
| Caries of deciduous teeth                     | 2,152.3<br>(1,432.9 to 2,818.7)               | 9,168.8<br>(5,243.6 to 13,786.5)               | 0.5<br>(0.2 to 1.0)                     | 27.8<br>(-0.4 to 66.0)                            | 35.8<br>(5.7 to 76.3)                               |
| Caries of permanent teeth                     | 17,221.6<br>(15,881.2 to 18,507.5)            | 51,420.2<br>(46,883.3 to 56,190.8)             | 10.2<br>(4.4 to 19.4)                   | 3.4<br>(-0.5 to 7.5)                              | -7.2<br>(-10.4 to -3.8)                             |
| Periodontal disease                           | 4,232.0<br>(2,972.2 to 6,064.6)               | 514.5<br>(352.9 to 720.5)                      | 27.6<br>(10.0 to 61.1)                  | 27.0<br>(17.2 to 38.3)                            | -0.6<br>(-6.3 to 6.2)                               |
| Edentulism and severe tooth loss              | 774.6<br>(677.8 to 873.6)                     | 63.1<br>(53.9 to 72.6)                         | 21.5<br>(14.3 to 30.2)                  | 35.5<br>(28.9 to 42.8)                            | 5.7<br>(1.5 to 10.6)                                |
| Other oral disorders                          | 980.6<br>(937.6 to 1,025.3)                   | --                                             | 28.8<br>(17.7 to 43.1)                  | 13.5<br>(9.8 to 17.5)                             | 0.3<br>(-2.8 to 3.4)                                |
| <b>Injuries</b>                               | <b>7,648.3</b><br><b>(6,946.1 to 8,462.0)</b> | <b>2,793.0†</b><br><b>(2,650.8 to 2,937.0)</b> | <b>313.6</b><br><b>(198.9 to 486.4)</b> | <b>39.7</b><br><b>(28.8 to 52.5)</b>              | <b>19.7</b><br><b>(10.8 to 29.8)</b>                |
| <b>Transport injuries</b>                     | <b>1,088.0</b><br><b>(1,002.8 to 1,186.6)</b> | <b>360.9</b><br><b>(318.4 to 407.4)</b>        | <b>64.0</b><br><b>(42.4 to 93.0)</b>    | <b>53.5</b><br><b>(43.9 to 64.3)</b>              | <b>31.1</b><br><b>(23.4 to 39.5)</b>                |
| Road injuries                                 | 726.0<br>(676.4 to 785.0)                     | 281.1<br>(241.7 to 326.2)                      | 42.1<br>(27.8 to 61.2)                  | 84.1<br>(73.7 to 95.2)                            | 52.4<br>(44.5 to 61.0)                              |
| Pedestrian road injuries                      | 89.2<br>(79.0 to 102.0)                       | 25.8<br>(20.4 to 32.5)                         | 5.4<br>(3.5 to 7.8)                     | 86.5<br>(75.9 to 97.6)                            | 50.6<br>(42.9 to 59.1)                              |
| Cyclist road injuries                         | 116.0<br>(97.4 to 137.6)                      | 51.0<br>(39.4 to 64.0)                         | 6.4<br>(4.2 to 9.5)                     | 91.4<br>(80.7 to 103.5)                           | 58.6<br>(50.6 to 67.8)                              |
| Motorcyclist road injuries                    | 239.0<br>(204.8 to 293.4)                     | 63.8<br>(51.1 to 78.9)                         | 13.4<br>(8.9 to 19.4)                   | 82.7<br>(71.8 to 94.5)                            | 52.8<br>(44.4 to 61.7)                              |
| Motor vehicle road injuries                   | 170.8<br>(144.9 to 196.7)                     | 82.5<br>(66.2 to 100.1)                        | 10.8<br>(7.2 to 15.5)                   | 79.8<br>(70.2 to 91.2)                            | 48.6<br>(41.4 to 57.3)                              |
| Other road injuries                           | 110.9<br>(94.0 to 131.1)                      | 58.1<br>(45.2 to 73.3)                         | 6.0<br>(4.0 to 8.8)                     | 85.7<br>(75.7 to 97.4)                            | 53.9<br>(46.1 to 62.9)                              |
| Other transport injuries                      | 362.1<br>(298.8 to 442.5)                     | 79.7<br>(66.9 to 96.5)                         | 21.9<br>(14.5 to 31.9)                  | 16.3<br>(7.7 to 26.7)                             | 2.5<br>(-4.4 to 10.9)                               |
| <b>Unintentional injuries</b>                 | <b>4,778.9</b><br><b>(4,464.3 to 5,090.6)</b> | <b>2,193.7</b><br><b>(2,064.4 to 2,333.0)</b>  | <b>178.7</b><br><b>(120.6 to 251.5)</b> | <b>25.4</b><br><b>(18.2 to 34.1)</b>              | <b>7.9</b><br><b>(2.3 to 14.4)</b>                  |
| Falls                                         | 1,667.9<br>(1,475.4 to 1,861.5)               | 791.9<br>(703.1 to 896.6)                      | 74.1<br>(51.8 to 103.6)                 | 39.6<br>(32.3 to 48.1)                            | 16.8<br>(11.2 to 23.3)                              |
| Drowning                                      | 29.1<br>(25.1 to 33.8)                        | 5.5<br>(4.7 to 6.4)                            | 1.7<br>(1.1 to 2.5)                     | 2.1<br>(-5.6 to 12.3)                             | -10.7<br>(-17.1 to -2.5)                            |
| Fire, heat, and hot substances                | 468.2<br>(395.8 to 564.7)                     | 57.9<br>(47.1 to 68.6)                         | 13.7<br>(9.1 to 19.9)                   | 15.0<br>(2.4 to 31.6)                             | 0.5<br>(-9.4 to 14.5)                               |
| Poisonings                                    | 12.0<br>(10.2 to 13.8)                        | 21.3<br>(16.9 to 26.2)                         | 1.0<br>(0.6 to 1.5)                     | 44.7<br>(31.5 to 62.9)                            | 26.5<br>(15.8 to 40.9)                              |
| Exposure to mechanical forces                 | 704.0<br>(604.8 to 855.4)                     | 290.9<br>(243.1 to 340.6)                      | 19.5<br>(12.6 to 28.8)                  | 48.0<br>(38.2 to 59.7)                            | 25.7<br>(17.8 to 35.1)                              |
| Unintentional firearm injuries                | 28.7<br>(23.8 to 34.9)                        | 7.3<br>(5.0 to 10.3)                           | 1.3<br>(0.8 to 2.0)                     | 27.1<br>(18.3 to 37.4)                            | 9.0<br>(1.7 to 17.6)                                |
| Unintentional suffocation                     | 42.7<br>(33.2 to 54.2)                        | 8.8<br>(6.4 to 12.2)                           | 1.6<br>(1.0 to 2.4)                     | 10.4<br>(3.1 to 19.6)                             | -2.0<br>(-8.1 to 5.6)                               |
| Other exposure to mechanical forces           | 632.6<br>(534.1 to 777.9)                     | 274.8<br>(230.2 to 322.0)                      | 16.7<br>(10.8 to 24.5)                  | 55.0<br>(44.5 to 67.5)                            | 30.6<br>(22.2 to 40.4)                              |

| Cause                                                                               | Prevalence in thousands (95% UI)              | Incidence in thousands (95% UI)          | YLDs in thousands (95% UI)            |                                                   |                                                     |
|-------------------------------------------------------------------------------------|-----------------------------------------------|------------------------------------------|---------------------------------------|---------------------------------------------------|-----------------------------------------------------|
|                                                                                     | 2016 counts                                   | 2016 counts                              | 2016 counts                           | Percentage change in counts between 2006 and 2016 | Percentage change in age-standardised rates between |
| Adverse effects of medical treatment                                                | 14.5<br>(11.5 to 17.9)                        | 189.7<br>(166.7 to 215.7)                | 1.9<br>(1.2 to 2.9)                   | 0.8<br>(-4.2 to 6.3)                              | -7.1<br>(-11.2 to -2.6)                             |
| Animal contact                                                                      | 177.9<br>(154.0 to 210.9)                     | 215.2<br>(177.7 to 254.4)                | 5.3<br>(3.5 to 7.7)                   | 3.6<br>(-4.2 to 13.7)                             | -9.9<br>(-16.1 to -1.7)                             |
| Venomous animal contact                                                             | 46.9<br>(39.1 to 55.4)                        | 74.4<br>(56.9 to 96.0)                   | 3.0<br>(1.9 to 4.3)                   | 16.9<br>(5.2 to 32.5)                             | 3.5<br>(-6.0 to 15.9)                               |
| Non-venomous animal contact                                                         | 130.9<br>(108.8 to 164.0)                     | 140.8<br>(114.0 to 170.0)                | 2.4<br>(1.5 to 3.5)                   | -9.3<br>(-16.9 to 0.3)                            | -22.0<br>(-28.2 to -14.2)                           |
| Foreign body                                                                        | 329.9<br>(266.4 to 396.8)                     | 167.0<br>(147.7 to 189.9)                | 14.8<br>(9.2 to 22.3)                 | 0.2<br>(-7.9 to 10.4)                             | -10.0<br>(-16.6 to -1.8)                            |
| Pulmonary aspiration and foreign body in airway                                     | 226.5<br>(171.8 to 301.6)                     | 74.7<br>(63.5 to 89.2)                   | 11.0<br>(6.7 to 16.8)                 | -3.5<br>(-11.5 to 6.5)                            | -12.3<br>(-19.0 to -4.0)                            |
| Foreign body in eyes                                                                | 10.3<br>(6.0 to 15.3)                         | 52.9<br>(40.0 to 71.9)                   | 0.6<br>(0.3 to 1.0)                   | 15.2<br>(10.5 to 21.7)                            | 0.7<br>(-3.1 to 4.8)                                |
| Foreign body in other body part                                                     | 93.1<br>(76.1 to 114.5)                       | 39.4<br>(33.2 to 46.9)                   | 3.2<br>(2.0 to 4.9)                   | 11.8<br>(1.7 to 23.9)                             | -3.5<br>(-11.5 to 5.9)                              |
| Environmental heat and cold exposure                                                | 457.6<br>(381.3 to 542.1)                     | 121.3<br>(97.6 to 149.6)                 | 18.9<br>(12.4 to 27.5)                | 12.8<br>(5.3 to 21.7)                             | -1.9<br>(-7.8 to 5.3)                               |
| Other unintentional injuries                                                        | 917.9<br>(750.1 to 1,109.1)                   | 333.1<br>(283.9 to 390.7)                | 27.7<br>(18.1 to 40.1)                | 18.8<br>(11.8 to 27.3)                            | 2.5<br>(-2.9 to 9.0)                                |
| <b>Self-harm and interpersonal violence</b>                                         | <b>1,361.8</b><br><b>(1,236.2 to 1,497.2)</b> | <b>236.4†</b><br><b>(198.4 to 274.7)</b> | <b>26.5</b><br><b>(18.2 to 37.1)</b>  | <b>15.6</b><br><b>(9.6 to 22.2)</b>               | <b>1.2</b><br><b>(-3.4 to 6.3)</b>                  |
| Self-harm                                                                           | 41.2<br>(35.3 to 47.5)                        | 19.7<br>(16.6 to 23.4)                   | 2.3<br>(1.5 to 3.4)                   | 14.2<br>(6.9 to 23.5)                             | -5.1<br>(-10.9 to 2.0)                              |
| Self-harm by firearm                                                                | 1.4<br>(1.1 to 1.7)                           | 0.3<br>(0.1 to 0.5)                      | 0.1<br>(< 0.05 to 0.1)                | 2.5<br>(-7.1 to 14.9)                             | -12.3<br>(-20.3 to -2.2)                            |
| Self-harm by other specified means                                                  | 39.8<br>(33.8 to 46.1)                        | 19.4<br>(16.4 to 23.1)                   | 2.2<br>(1.4 to 3.4)                   | 14.6<br>(7.2 to 23.6)                             | -4.9<br>(-10.6 to 2.0)                              |
| Interpersonal violence                                                              | 1,320.5<br>(1,193.2 to 1,456.3)               | 216.7†<br>(179.3 to 254.0)               | 24.2<br>(16.6 to 33.6)                | 15.8<br>(9.6 to 22.3)                             | 1.9<br>(-2.6 to 7.0)                                |
| Assault by firearm                                                                  | 5.6<br>(4.9 to 6.4)                           | 1.8<br>(1.3 to 2.5)                      | 0.3<br>(0.2 to 0.4)                   | 31.7<br>(23.5 to 40.7)                            | 10.7<br>(4.3 to 17.9)                               |
| Assault by sharp object                                                             | 102.7<br>(83.3 to 122.4)                      | 41.5<br>(31.1 to 54.3)                   | 3.4<br>(2.2 to 5.0)                   | 22.1<br>(14.1 to 31.6)                            | 4.6<br>(-1.9 to 11.9)                               |
| Sexual violence                                                                     | 915.6<br>(800.7 to 1,040.5)                   | --                                       | 7.6<br>(5.1 to 10.9)                  | -9.6<br>(-15.0 to -5.0)                           | -15.8<br>(-20.2 to -11.8)                           |
| Assault by other means                                                              | 296.7<br>(247.4 to 361.4)                     | 173.3<br>(143.8 to 204.7)                | 12.9<br>(8.8 to 18.8)                 | 36.0<br>(28.1 to 45.6)                            | 13.6<br>(7.4 to 21.0)                               |
| <b>Forces of nature, conflict and terrorism, and executions and police conflict</b> | <b>1,335.2</b><br><b>(725.3 to 2,075.5)</b>   | <b>2.0†</b><br><b>(1.1 to 2.8)</b>       | <b>44.4</b><br><b>(12.5 to 104.4)</b> | <b>155.9</b><br><b>(129.4 to 187.9)</b>           | <b>118.0</b><br><b>(96.2 to 143.8)</b>              |
| Exposure to forces of nature                                                        | 809.2<br>(333.5 to 1,393.8)                   | --                                       | 29.4<br>(8.6 to 65.8)                 | 20,246.5<br>(15,621.8 to 22,771.5)                | 18,483.9<br>(14,390.0 to 20,787.3)                  |
| Conflict and terrorism                                                              | 519.1<br>(257.1 to 873.5)                     | --                                       | 14.7<br>(3.8 to 37.8)                 | -13.4<br>(-23.9 to -4.1)                          | -23.0<br>(-32.2 to -14.9)                           |
| Executions and police conflict                                                      | 7.0<br>(3.0 to 11.4)                          | 2.0<br>(1.1 to 2.8)                      | 0.2<br>(0.1 to 0.6)                   | 2.0<br>(-5.8 to 13.8)                             | -12.2<br>(-19.3 to -1.5)                            |
| <b>Impairments</b>                                                                  | --                                            | --                                       | --                                    | --                                                | --                                                  |
| Anaemia                                                                             | 15,271.1<br>(14,359.0 to 16,224.1)            | --                                       | 385.5<br>(254.2 to 555.0)             | -20.5<br>(-26.7 to -13.9)                         | -26.0<br>(-31.5 to -20.4)                           |
| Developmental intellectual disability                                               | 1,187.2<br>(855.4 to 1,564.7)                 | --                                       | 118.7<br>(84.2 to 159.1)              | -6.4<br>(-12.0 to -0.4)                           | -12.4<br>(-17.7 to -6.7)                            |
| Epilepsy                                                                            | 315.1<br>(170.8 to 437.6)                     | --                                       | 123.4<br>(62.2 to 199.4)              | 6.2<br>(-48.8 to 107.5)                           | -0.6<br>(-52.9 to 96.9)                             |
| Guillain-Barre syndrome                                                             | 0.4<br>(0.3 to 0.5)                           | --                                       | 0.1<br>(0.1 to 0.1)                   | 12.7<br>(9.2 to 17.0)                             | 0.0<br>(-0.0 to 0.1)                                |
| Hearing loss                                                                        | 8,277.0<br>(7,903.2 to 8,699.9)               | --                                       | 423.9<br>(301.7 to 570.3)             | 4.3<br>(1.1 to 7.7)                               | -10.1<br>(-12.2 to -8.0)                            |
| Heart failure                                                                       | 230.8<br>(202.6 to 263.0)                     | --                                       | 28.9<br>(20.5 to 38.6)                | 34.4<br>(24.1 to 44.6)                            | 5.6<br>(-2.2 to 13.0)                               |
| Infertility                                                                         | 804.9<br>(613.8 to 1,049.0)                   | --                                       | 4.8<br>(2.0 to 9.8)                   | 2.5<br>(-4.4 to 9.9)                              | -5.1<br>(-11.5 to 1.8)                              |
| Pelvic inflammatory disease                                                         | 51.7<br>(44.0 to 60.4)                        | --                                       | 6.7<br>(4.4 to 9.5)                   | 2.4<br>(-10.8 to 17.8)                            | -10.2<br>(-21.6 to 3.1)                             |
| Vision loss                                                                         | 5,614.2<br>(5,306.9 to 5,939.6)               | --                                       | 245.2<br>(173.9 to 334.0)             | 1.8<br>(-2.3 to 5.9)                              | -16.2<br>(-19.9 to -12.6)                           |

We did not calculate incidence for the nine impairments, certain NTDs, and causes with only birth prevalence. Blank cells mean that no estimate is available.

† Incidence for aggregate causes represents the sum of the incidence of the causes below the aggregate.

‡ Incidence estimates for stroke represent first-ever stroke only.

^ Incidence of HIV/AIDS represents new infections of HIV only and does not include new infections of Tuberculosis in HIV positive cases.

SR Table 14: Prevalence, incidence, and YLDs for 2016, percentage change of YLD counts and percentage change of age-standardised YLD rates between 2006 and 2016 by cause and impairments, for all ages, Namibia.

| Cause                                                                                | Prevalence in thousands (95% UI)       | Incidence in thousands (95% UI)            | YLDs in thousands (95% UI)       |                                                   |                                                     |
|--------------------------------------------------------------------------------------|----------------------------------------|--------------------------------------------|----------------------------------|---------------------------------------------------|-----------------------------------------------------|
|                                                                                      | 2016 counts                            | 2016 counts                                | 2016 counts                      | Percentage change in counts between 2006 and 2016 | Percentage change in age-standardised rates between |
| <b>All causes</b>                                                                    | <b>2,407.0</b><br>(2,397.4 to 2,416.8) | <b>16,062.0†</b><br>(15,176.0 to 17,053.0) | <b>245.4</b><br>(183.6 to 318.4) | <b>17.2</b><br>(11.3 to 21.7)                     | <b>-6.4</b><br>(-11.2 to -2.8)                      |
| <b>Communicable, maternal, neonatal, and nutritional disorders</b>                   | <b>1,911.1</b><br>(1,851.7 to 1,957.9) | <b>9,895.1†</b><br>(9,084.0 to 10,763.7)   | <b>58.8</b><br>(42.6 to 79.1)    | <b>-1.3</b><br>(-15.6 to 11.4)                    | <b>-21.4</b><br>(-35.6 to -8.7)                     |
| <b>HIV/AIDS and tuberculosis</b>                                                     | <b>929.2</b><br>(834.4 to 1,021.8)     | <b>23.8†</b><br>(19.1 to 29.6)             | <b>25.4</b><br>(18.0 to 34.7)    | <b>-13.4</b><br>(-33.4 to 10.8)                   | <b>-30.8</b><br>(-48.8 to -8.2)                     |
| Tuberculosis                                                                         | 757.2<br>(633.0 to 897.0)              | 13.5†<br>(10.1 to 18.3)                    | 1.8<br>(1.1 to 2.7)              | -5.9<br>(-19.9 to 11.2)                           | -27.1<br>(-37.0 to -14.4)                           |
| Drug-susceptible tuberculosis                                                        | 5.5<br>(4.0 to 7.3)                    | 13.0<br>(9.7 to 17.6)                      | 1.7<br>(1.1 to 2.5)              | -6.2<br>(-20.7 to 12.8)                           | -27.3<br>(-37.7 to -12.9)                           |
| Multidrug-resistant tuberculosis without extensive drug resistance                   | 0.2<br>(0.1 to 0.4)                    | 0.6<br>(0.3 to 0.9)                        | 0.1<br>(< 0.05 to 0.1)           | -0.3<br>(-64.8 to 260.3)                          | -22.8<br>(-72.9 to 177.5)                           |
| Extensively drug-resistant tuberculosis                                              | < 0.05<br>(< 0.05 to < 0.05)           | < 0.05<br>(< 0.05 to < 0.05)               | < 0.05<br>(< 0.05 to < 0.05)     | 203.5<br>(14.0 to 906.9)                          | 132.5<br>(-12.3 to 675.6)                           |
| Latent tuberculosis infection                                                        | 751.5<br>(627.6 to 891.0)              | --                                         | --                               | --                                                | --                                                  |
| HIV/AIDS                                                                             | 243.9<br>(219.6 to 269.4)              | 10.2^<br>(7.4 to 13.6)                     | 23.7<br>(16.7 to 32.7)           | -13.9<br>(-35.1 to 11.9)                          | -31.0<br>(-49.4 to -7.1)                            |
| Drug-susceptible HIV/AIDS - Tuberculosis                                             | 3.8<br>(2.6 to 5.1)                    | 8.8<br>(6.1 to 11.8)                       | 1.4<br>(0.8 to 2.1)              | -44.6<br>(-53.6 to -34.0)                         | -53.2<br>(-60.3 to -44.9)                           |
| Multidrug-resistant HIV/AIDS - Tuberculosis without extensive drug resistance        | 0.2<br>(0.1 to 0.3)                    | 0.5<br>(0.2 to 0.7)                        | 0.1<br>(< 0.05 to 0.1)           | -39.6<br>(-77.7 to 114.7)                         | -49.2<br>(-81.4 to 82.0)                            |
| Extensively drug-resistant HIV/AIDS - Tuberculosis                                   | < 0.05<br>(< 0.05 to < 0.05)           | < 0.05<br>(< 0.05 to < 0.05)               | < 0.05<br>(< 0.05 to < 0.05)     | 79.8<br>(-31.6 to 501.7)                          | 50.8<br>(-42.4 to 399.1)                            |
| HIV/AIDS resulting in other diseases                                                 | 240.0<br>(215.6 to 265.8)              | 10.2<br>(7.4 to 13.6)                      | 22.2<br>(15.5 to 30.9)           | -10.6<br>(-34.2 to 19.4)                          | -28.8<br>(-49.1 to -0.6)                            |
| <b>Diarrhoea, lower respiratory infections, and other common infectious diseases</b> | <b>166.4</b><br>(158.8 to 175.8)       | <b>9,190.9†</b><br>(8,358.1 to 10,059.8)   | <b>8.4</b><br>(5.8 to 11.5)      | <b>15.1</b><br>(11.1 to 19.3)                     | <b>-5.7</b><br>(-8.5 to -2.6)                       |
| Diarrhoeal diseases                                                                  | 32.4<br>(29.9 to 34.9)                 | 2,142.9<br>(1,976.8 to 2,308.4)            | 3.7<br>(2.6 to 5.0)              | 11.8<br>(4.9 to 19.8)                             | -9.8<br>(-14.3 to -4.5)                             |
| Intestinal infectious diseases                                                       | < 0.05<br>(< 0.05 to < 0.05)           | 0.1†<br>(0.1 to 0.1)                       | < 0.05<br>(< 0.05 to < 0.05)     | 18.6<br>(-0.7 to 41.9)                            | 0.8<br>(-13.8 to 17.7)                              |
| Typhoid fever                                                                        | < 0.05<br>(< 0.05 to < 0.05)           | 0.1<br>(0.1 to 0.1)                        | < 0.05<br>(< 0.05 to < 0.05)     | 21.0<br>(-0.1 to 45.3)                            | 2.6<br>(-13.0 to 20.1)                              |
| Paratyphoid fever                                                                    | < 0.05<br>(< 0.05 to < 0.05)           | < 0.05<br>(< 0.05 to < 0.05)               | < 0.05<br>(< 0.05 to < 0.05)     | 23.2<br>(1.2 to 50.5)                             | 3.5<br>(-12.5 to 22.2)                              |
| Other intestinal infectious diseases                                                 | --                                     | --                                         | < 0.05<br>(< 0.05 to < 0.05)     | -17.0<br>(-44.4 to 25.1)                          | -30.8<br>(-52.1 to 0.8)                             |
| Lower respiratory infections                                                         | 3.8<br>(3.5 to 4.1)                    | 163.2<br>(148.9 to 179.6)                  | 0.2<br>(0.1 to 0.3)              | 7.5<br>(-4.6 to 20.9)                             | -11.4<br>(-19.4 to -2.3)                            |
| Upper respiratory infections                                                         | 87.8<br>(77.9 to 98.0)                 | 6,617.2<br>(5,827.1 to 7,433.3)            | 2.2<br>(1.3 to 3.5)              | 25.6<br>(19.0 to 32.6)                            | 3.3<br>(-1.4 to 8.7)                                |
| Otitis media                                                                         | 40.7<br>(36.1 to 45.3)                 | 195.9<br>(154.1 to 249.4)                  | 1.2<br>(0.7 to 1.8)              | 8.5<br>(0.6 to 17.0)                              | -7.6<br>(-14.0 to -0.8)                             |
| Meningitis                                                                           | 5.8<br>(5.0 to 6.7)                    | 1.3<br>(1.2 to 1.6)                        | 0.7<br>(0.5 to 0.9)              | 16.3<br>(7.5 to 25.8)                             | -4.1<br>(-10.5 to 3.0)                              |
| Pneumococcal meningitis                                                              | 2.6<br>(2.2 to 3.1)                    | 0.3<br>(0.2 to 0.4)                        | 0.3<br>(0.2 to 0.4)              | 5.6<br>(-9.9 to 23.2)                             | -13.7<br>(-24.4 to -0.9)                            |
| H influenzae type B meningitis                                                       | 0.7<br>(0.6 to 0.8)                    | 0.1<br>(0.1 to 0.2)                        | 0.1<br>(0.1 to 0.1)              | 3.1<br>(-4.9 to 11.0)                             | -14.4<br>(-21.6 to -7.2)                            |
| Meningococcal infection                                                              | 0.5<br>(0.3 to 0.6)                    | 0.2<br>(0.1 to 0.2)                        | 0.1<br>(< 0.05 to 0.1)           | 17.4<br>(11.6 to 23.2)                            | -3.2<br>(-7.9 to 1.5)                               |
| Other meningitis                                                                     | 2.0<br>(1.5 to 2.5)                    | 0.8<br>(0.6 to 0.9)                        | 0.2<br>(0.1 to 0.2)              | 51.9<br>(40.2 to 67.6)                            | 26.4<br>(17.2 to 38.6)                              |
| Encephalitis                                                                         | 3.7<br>(2.4 to 5.4)                    | 2.3<br>(2.0 to 2.7)                        | 0.4<br>(0.3 to 0.5)              | 22.2<br>(7.5 to 38.7)                             | -0.7<br>(-11.0 to 11.1)                             |
| Diphtheria                                                                           | < 0.05<br>(< 0.05 to < 0.05)           | < 0.05<br>(< 0.05 to < 0.05)               | < 0.05<br>(< 0.05 to < 0.05)     | -38.8<br>(-68.7 to 22.5)                          | -50.4<br>(-73.5 to -6.1)                            |
| Whooping cough                                                                       | 0.9<br>(0.7 to 1.1)                    | 6.4<br>(5.0 to 8.0)                        | < 0.05<br>(< 0.05 to 0.1)        | -16.1<br>(-30.9 to 1.1)                           | -29.0<br>(-41.6 to -14.4)                           |
| Tetanus                                                                              | < 0.05<br>(< 0.05 to < 0.05)           | < 0.05<br>(< 0.05 to < 0.05)               | < 0.05<br>(< 0.05 to < 0.05)     | -10.2<br>(-30.7 to 14.4)                          | -34.6<br>(-49.8 to -10.0)                           |
| Measles                                                                              | 0.1<br>(< 0.05 to 0.1)                 | 2.1<br>(0.7 to 4.7)                        | < 0.05<br>(< 0.05 to < 0.05)     | -54.4<br>(-75.2 to -8.3)                          | -61.0<br>(-78.8 to -21.7)                           |
| Varicella and herpes zoster                                                          | 2.2<br>(2.1 to 2.4)                    | 59.4<br>(56.3 to 62.5)                     | 0.1<br>(< 0.05 to 0.1)           | 25.3<br>(8.0 to 47.0)                             | 0.1<br>(-10.7 to 12.7)                              |
| <b>Neglected tropical diseases and malaria</b>                                       | <b>767.1</b><br>(630.3 to 890.0)       | <b>91.9†</b><br>(49.7 to 134.9)            | <b>5.7</b><br>(3.7 to 8.9)       | <b>19.5</b><br>(9.5 to 28.0)                      | <b>-3.9</b><br>(-11.8 to 3.4)                       |
| Malaria                                                                              | 2.9<br>(2.3 to 4.1)                    | 9.3<br>(9.3 to 9.3)                        | 0.4<br>(0.3 to 0.5)              | -5.1<br>(-20.6 to 12.0)                           | -18.6<br>(-31.1 to -4.9)                            |
| Chagas disease                                                                       | --                                     | --                                         | --                               | --                                                | --                                                  |
| Leishmaniasis                                                                        | < 0.05<br>(< 0.05 to < 0.05)           | < 0.05<br>(< 0.05 to < 0.05)               | < 0.05<br>(< 0.05 to < 0.05)     | 14.1<br>(-82.6 to 1,375.3)                        | -6.6<br>(-85.5 to 1,097.6)                          |
| Visceral leishmaniasis                                                               | --                                     | --                                         | --                               | --                                                | --                                                  |
| Cutaneous and mucocutaneous leishmaniasis                                            | < 0.05<br>(< 0.05 to < 0.05)           | < 0.05<br>(< 0.05 to < 0.05)               | < 0.05<br>(< 0.05 to < 0.05)     | 14.1<br>(-82.6 to 1,375.3)                        | -6.6<br>(-85.5 to 1,097.6)                          |
| African trypanosomiasis                                                              | --                                     | --                                         | --                               | --                                                | --                                                  |
| Schistosomiasis                                                                      | 238.6<br>(88.0 to 390.4)               | 82.6<br>(40.4 to 125.6)                    | 1.7<br>(0.5 to 3.8)              | 35.9<br>(28.2 to 44.5)                            | 5.6<br>(-0.1 to 11.9)                               |
| Cysticercosis                                                                        | 7.1<br>(5.6 to 8.6)                    | --                                         | 1.2<br>(0.7 to 1.9)              | 15.6<br>(-7.5 to 38.8)                            | -11.1<br>(-28.0 to 4.8)                             |
| Cystic echinococcosis                                                                | 0.2<br>(< 0.05 to 0.7)                 | < 0.05<br>(< 0.05 to 0.1)                  | < 0.05<br>(< 0.05 to 0.1)        | -47.1<br>(-93.0 to 294.4)                         | -57.5<br>(-93.9 to 206.1)                           |
| Lymphatic filariasis                                                                 | --                                     | --                                         | --                               | --                                                | --                                                  |
| Onchocerciasis                                                                       | --                                     | --                                         | --                               | --                                                | --                                                  |
| Trachoma                                                                             | 1.8<br>(1.2 to 2.5)                    | --                                         | 0.1<br>(0.1 to 0.2)              | 17.4<br>(-9.6 to 53.2)                            | -10.4<br>(-34.3 to 23.6)                            |
| Dengue                                                                               | --                                     | --                                         | --                               | --                                                | --                                                  |
| Yellow fever                                                                         | --                                     | --                                         | --                               | --                                                | --                                                  |
| Rabies                                                                               | < 0.05<br>(< 0.05 to < 0.05)           | < 0.05<br>(< 0.05 to < 0.05)               | < 0.05<br>(< 0.05 to < 0.05)     | -27.7<br>(-66.8 to 77.8)                          | -38.1<br>(-66.7 to 26.0)                            |
| Intestinal nematode infections                                                       | 576.2<br>(467.0 to 703.1)              | --                                         | 1.7<br>(1.0 to 2.7)              | 24.2<br>(7.5 to 45.8)                             | 1.9<br>(-13.0 to 20.9)                              |
| Ascariasis                                                                           | 49.8<br>(34.7 to 70.8)                 | --                                         | < 0.05<br>(< 0.05 to < 0.05)     | 18.3<br>(-6.1 to 46.5)                            | 0.2<br>(-24.2 to 28.5)                              |



| Cause                                                                   | Prevalence in thousands (95% UI)              | Incidence in thousands (95% UI)                | YLDs in thousands (95% UI)              |                                                   |                                                     |
|-------------------------------------------------------------------------|-----------------------------------------------|------------------------------------------------|-----------------------------------------|---------------------------------------------------|-----------------------------------------------------|
|                                                                         | 2016 counts                                   | 2016 counts                                    | 2016 counts                             | Percentage change in counts between 2006 and 2016 | Percentage change in age-standardised rates between |
| Trichuriasis                                                            | 116.4<br>(81.4 to 168.2)                      | --                                             | < 0.05<br>(< 0.05 to < 0.05)            | 18.5<br>(-20.7 to 77.8)                           | -0.2<br>(-34.1 to 50.1)                             |
| Hookworm disease                                                        | 431.6<br>(325.2 to 570.2)                     | --                                             | 1.7<br>(1.0 to 2.7)                     | 24.2<br>(7.2 to 46.1)                             | 1.9<br>(-13.3 to 20.9)                              |
| Food-borne trematodiasis                                                | --                                            | --                                             | --                                      | --                                                | --                                                  |
| Leprosy                                                                 | 0.1<br>(< 0.05 to 0.1)                        | < 0.05<br>(< 0.05 to < 0.05)                   | < 0.05<br>(< 0.05 to < 0.05)            | 76.9<br>(34.5 to 140.2)                           | 29.0<br>(-3.3 to 84.6)                              |
| Ebola virus disease                                                     | --                                            | --                                             | --                                      | --                                                | --                                                  |
| Zika virus disease                                                      | --                                            | --                                             | --                                      | --                                                | --                                                  |
| Guinea worm disease                                                     | --                                            | --                                             | --                                      | --                                                | --                                                  |
| Other neglected tropical diseases                                       | 20.8<br>(19.7 to 22.1)                        | --                                             | 0.6<br>(0.4 to 0.9)                     | 1.3<br>(-10.5 to 15.9)                            | -12.4<br>(-22.3 to -0.2)                            |
| <b>Maternal disorders</b>                                               | <b>5.7</b><br><b>(4.5 to 7.0)</b>             | <b>48.5†</b><br><b>(42.2 to 56.1)</b>          | <b>0.5</b><br><b>(0.3 to 0.6)</b>       | <b>1.3</b><br><b>(-19.7 to 28.5)</b>              | <b>-22.3</b><br><b>(-38.5 to -2.8)</b>              |
| Maternal haemorrhage                                                    | 1.1<br>(0.8 to 1.4)                           | 5.1<br>(3.7 to 7.0)                            | < 0.05<br>(< 0.05 to 0.1)               | 31.5<br>(-10.3 to 89.9)                           | 2.3<br>(-29.5 to 47.7)                              |
| Maternal sepsis and other pregnancy related infections                  | 0.8<br>(0.7 to 1.0)                           | 3.8<br>(2.8 to 5.2)                            | < 0.05<br>(< 0.05 to < 0.05)            | 18.7<br>(-39.6 to 146.5)                          | -7.3<br>(-50.2 to 84.3)                             |
| Maternal hypertensive disorders                                         | 3.2<br>(2.1 to 4.6)                           | 14.8<br>(11.8 to 17.9)                         | 0.2<br>(0.1 to 0.2)                     | 22.1<br>(-23.8 to 103.5)                          | -4.8<br>(-40.8 to 58.9)                             |
| Maternal obstructed labour and uterine rupture                          | 0.5<br>(0.4 to 0.6)                           | 2.3<br>(1.7 to 3.1)                            | 0.2<br>(0.1 to 0.2)                     | -17.7<br>(-36.1 to 5.7)                           | -36.1<br>(-50.3 to -18.5)                           |
| Maternal abortion, miscarriage, and ectopic pregnancy                   | 0.2<br>(0.1 to 0.3)                           | 22.4<br>(17.2 to 28.8)                         | < 0.05<br>(< 0.05 to < 0.05)            | 14.0<br>(-41.9 to 124.9)                          | -11.3<br>(-53.9 to 71.4)                            |
| Other maternal disorders                                                | --                                            | --                                             | 0.1<br>(< 0.05 to 0.1)                  | -3.1<br>(-23.2 to 22.8)                           | -25.9<br>(-41.2 to -7.4)                            |
| <b>Neonatal disorders</b>                                               | <b>27.2</b><br><b>(22.9 to 32.4)</b>          | --                                             | <b>4.6</b><br><b>(2.9 to 7.1)</b>       | <b>24.3</b><br><b>(3.0 to 47.2)</b>               | <b>8.3</b><br><b>(-10.5 to 28.1)</b>                |
| Neonatal preterm birth complications                                    | 22.9<br>(17.5 to 30.2)                        | --                                             | 2.6<br>(1.7 to 3.9)                     | 13.7<br>(-10.5 to 44.2)                           | -2.2<br>(-22.5 to 23.0)                             |
| Neonatal encephalopathy due to birth asphyxia and trauma                | 3.0<br>(1.5 to 5.5)                           | --                                             | 0.3<br>(< 0.05 to 1.0)                  | 19.5<br>(-63.8 to 92.5)                           | 6.0<br>(-68.1 to 68.3)                              |
| Neonatal sepsis and other neonatal infections                           | 3.1<br>(0.8 to 7.3)                           | --                                             | 1.2<br>(0.2 to 3.1)                     | 66.9<br>(20.0 to 170.5)                           | 51.9<br>(6.6 to 149.3)                              |
| Hemolytic disease and other neonatal jaundice                           | 0.7<br>(0.6 to 0.8)                           | --                                             | 0.2<br>(0.2 to 0.3)                     | 8.2<br>(-7.8 to 26.7)                             | -7.4<br>(-19.4 to 5.8)                              |
| Other neonatal disorders                                                | --                                            | --                                             | 0.3<br>(0.2 to 0.4)                     | 13.3<br>(-6.4 to 35.1)                            | -3.9<br>(-20.5 to 14.7)                             |
| <b>Nutritional deficiencies</b>                                         | <b>472.8</b><br><b>(455.1 to 490.6)</b>       | <b>93.5†</b><br><b>(79.7 to 111.3)</b>         | <b>12.3</b><br><b>(8.2 to 17.4)</b>     | <b>-1.2</b><br><b>(-8.3 to 7.0)</b>               | <b>-20.0</b><br><b>(-24.9 to -14.7)</b>             |
| Protein-energy malnutrition                                             | 27.2<br>(21.4 to 34.4)                        | 14.7<br>(11.9 to 18.3)                         | 1.1<br>(0.7 to 1.8)                     | 23.0<br>(-25.1 to 102.2)                          | 4.4<br>(-36.7 to 71.9)                              |
| Iodine deficiency                                                       | 95.3<br>(82.6 to 109.3)                       | 3.0<br>(2.6 to 3.4)                            | 2.5<br>(1.6 to 3.6)                     | 14.2<br>(4.3 to 23.7)                             | -7.9<br>(-15.9 to -0.5)                             |
| Vitamin A deficiency                                                    | 87.6<br>(73.2 to 107.2)                       | 75.8<br>(62.2 to 92.3)                         | 0.1<br>(0.1 to 0.1)                     | 21.5<br>(0.7 to 47.1)                             | 1.1<br>(-15.2 to 20.9)                              |
| Iron-deficiency anaemia                                                 | 312.0<br>(298.2 to 327.3)                     | --                                             | 8.5<br>(5.6 to 12.4)                    | -7.6<br>(-15.3 to -0.1)                           | -26.2<br>(-31.6 to -21.1)                           |
| Other nutritional deficiencies                                          | --                                            | --                                             | < 0.05<br>(< 0.05 to 0.1)               | 21.8<br>(-26.7 to 105.0)                          | 3.5<br>(-37.6 to 74.3)                              |
| <b>Other communicable, maternal, neonatal, and nutritional diseases</b> | <b>833.4</b><br><b>(784.7 to 883.5)</b>       | <b>446.6</b><br><b>(402.6 to 497.8)</b>        | <b>2.0</b><br><b>(1.3 to 3.0)</b>       | <b>21.7</b><br><b>(14.8 to 28.9)</b>              | <b>-2.8</b><br><b>(-7.8 to 2.4)</b>                 |
| Sexually transmitted diseases excluding HIV                             | 677.0<br>(632.8 to 724.0)                     | 424.4<br>(381.0 to 476.6)                      | 1.5<br>(0.9 to 2.3)                     | 26.9<br>(19.0 to 35.2)                            | -1.3<br>(-7.1 to 4.7)                               |
| Syphilis                                                                | 73.8<br>(60.3 to 89.3)                        | 52.6<br>(41.4 to 67.7)                         | 0.1<br>(0.1 to 0.1)                     | 22.8<br>(6.2 to 41.2)                             | -7.1<br>(-20.4 to 7.9)                              |
| Chlamydial infection                                                    | 40.4<br>(29.5 to 53.3)                        | 37.8<br>(29.1 to 48.9)                         | 0.2<br>(0.1 to 0.3)                     | 26.7<br>(7.7 to 47.1)                             | -1.0<br>(-15.3 to 14.0)                             |
| Gonococcal infection                                                    | 45.1<br>(35.8 to 56.9)                        | 157.6<br>(122.0 to 199.8)                      | 0.4<br>(0.2 to 0.7)                     | 28.3<br>(14.7 to 45.0)                            | 0.3<br>(-10.0 to 12.8)                              |
| Trichomoniasis                                                          | 103.9<br>(87.0 to 121.1)                      | 96.3<br>(79.1 to 115.0)                        | 0.1<br>(0.1 to 0.3)                     | 27.8<br>(20.3 to 35.9)                            | -0.4<br>(-5.7 to 5.7)                               |
| Genital herpes                                                          | 519.0<br>(447.7 to 600.9)                     | 53.4<br>(44.5 to 64.8)                         | 0.1<br>(< 0.05 to 0.3)                  | 29.2<br>(18.6 to 42.0)                            | 0.2<br>(-6.8 to 8.6)                                |
| Other sexually transmitted diseases                                     | 11.1<br>(9.8 to 12.7)                         | 26.7<br>(22.2 to 32.0)                         | 0.5<br>(0.3 to 0.7)                     | 25.6<br>(14.2 to 37.9)                            | -1.8<br>(-10.9 to 7.5)                              |
| Hepatitis                                                               | 216.3<br>(180.6 to 259.4)                     | 22.2<br>(16.1 to 29.8)                         | < 0.05<br>(< 0.05 to < 0.05)            | -12.5<br>(-32.5 to 10.8)                          | -28.5<br>(-42.4 to -13.6)                           |
| Acute hepatitis A                                                       | 0.4<br>(0.1 to 0.9)                           | 5.1<br>(0.7 to 12.2)                           | < 0.05<br>(< 0.05 to < 0.05)            | -16.6<br>(-76.4 to 210.1)                         | -28.1<br>(-74.5 to 94.5)                            |
| Hepatitis B                                                             | 163.0<br>(127.8 to 205.5)                     | 14.1<br>(10.8 to 18.2)                         | < 0.05<br>(< 0.05 to < 0.05)            | -14.8<br>(-32.0 to 3.9)                           | -30.5<br>(-44.6 to -14.8)                           |
| Hepatitis C                                                             | 52.9<br>(46.9 to 59.6)                        | 2.2<br>(1.9 to 2.6)                            | < 0.05<br>(< 0.05 to < 0.05)            | 13.7<br>(-13.4 to 47.6)                           | -8.7<br>(-26.8 to 12.5)                             |
| Acute hepatitis E                                                       | 0.1<br>(0.1 to 0.1)                           | 0.8<br>(0.7 to 0.9)                            | < 0.05<br>(< 0.05 to < 0.05)            | -9.5<br>(-17.1 to -1.2)                           | -22.5<br>(-30.5 to -13.6)                           |
| Other infectious diseases                                               | 14.7<br>(13.9 to 15.5)                        | < 0.05<br>(< 0.05 to < 0.05)                   | 0.5<br>(0.3 to 0.7)                     | 9.2<br>(-1.8 to 23.3)                             | -6.8<br>(-15.6 to 4.4)                              |
| <b>Non-communicable diseases</b>                                        | <b>2,201.7</b><br><b>(2,184.9 to 2,218.4)</b> | <b>6,000.1†</b><br><b>(5,616.0 to 6,425.5)</b> | <b>174.7</b><br><b>(127.9 to 227.3)</b> | <b>24.6</b><br><b>(19.7 to 29.4)</b>              | <b>-1.6</b><br><b>(-4.5 to 1.5)</b>                 |
| <b>Neoplasms</b>                                                        | <b>3.5</b><br><b>(3.3 to 3.7)</b>             | <b>1.4</b><br><b>(1.2 to 1.6)</b>              | <b>0.5</b><br><b>(0.3 to 0.6)</b>       | <b>27.1</b><br><b>(10.1 to 49.1)</b>              | <b>-3.3</b><br><b>(-15.3 to 11.8)</b>               |
| Lip and oral cavity cancer                                              | 0.2<br>(0.2 to 0.3)                           | 0.1<br>(0.1 to 0.1)                            | < 0.05<br>(< 0.05 to < 0.05)            | 29.1<br>(4.9 to 58.8)                             | -4.4<br>(-21.9 to 16.6)                             |
| Nasopharynx cancer                                                      | < 0.05<br>(< 0.05 to < 0.05)                  | < 0.05<br>(< 0.05 to < 0.05)                   | < 0.05<br>(< 0.05 to < 0.05)            | 23.9<br>(-2.0 to 57.2)                            | -7.8<br>(-26.1 to 15.0)                             |
| Other pharynx cancer                                                    | < 0.05<br>(< 0.05 to < 0.05)                  | < 0.05<br>(< 0.05 to < 0.05)                   | < 0.05<br>(< 0.05 to < 0.05)            | 35.6<br>(4.3 to 76.5)                             | -0.3<br>(-22.0 to 28.6)                             |
| Oesophageal cancer                                                      | < 0.05<br>(< 0.05 to < 0.05)                  | < 0.05<br>(< 0.05 to < 0.05)                   | < 0.05<br>(< 0.05 to < 0.05)            | 9.3<br>(-8.0 to 36.2)                             | -17.7<br>(-30.1 to 0.2)                             |
| Stomach cancer                                                          | < 0.05<br>(< 0.05 to < 0.05)                  | < 0.05<br>(< 0.05 to < 0.05)                   | < 0.05<br>(< 0.05 to < 0.05)            | -1.2<br>(-10.4 to 8.6)                            | -23.8<br>(-31.6 to -15.1)                           |
| Colon and rectum cancer                                                 | 0.2<br>(0.2 to 0.3)                           | 0.1<br>(0.1 to 0.1)                            | < 0.05<br>(< 0.05 to < 0.05)            | 31.2<br>(5.5 to 68.8)                             | -1.6<br>(-21.4 to 25.3)                             |
| Liver cancer                                                            | < 0.05<br>(< 0.05 to < 0.05)                  | < 0.05<br>(< 0.05 to < 0.05)                   | < 0.05<br>(< 0.05 to < 0.05)            | 39.6<br>(10.3 to 63.4)                            | 3.6<br>(-16.9 to 20.6)                              |
| Liver cancer due to hepatitis B                                         | < 0.05<br>(< 0.05 to < 0.05)                  | < 0.05<br>(< 0.05 to < 0.05)                   | < 0.05<br>(< 0.05 to < 0.05)            | 38.2<br>(8.6 to 63.2)                             | 2.2<br>(-18.6 to 19.2)                              |



| Cause                                              | Prevalence in thousands (95% UI)        | Incidence in thousands (95% UI)       | YLDs in thousands (95% UI)          |                                                   |                                                     |
|----------------------------------------------------|-----------------------------------------|---------------------------------------|-------------------------------------|---------------------------------------------------|-----------------------------------------------------|
|                                                    | 2016 counts                             | 2016 counts                           | 2016 counts                         | Percentage change in counts between 2006 and 2016 | Percentage change in age-standardised rates between |
| Liver cancer due to hepatitis C                    | < 0.05<br>(< 0.05 to < 0.05)            | < 0.05<br>(< 0.05 to < 0.05)          | < 0.05<br>(< 0.05 to < 0.05)        | 34.8<br>(8.6 to 59.6)                             | 0.0<br>(-17.9 to 17.2)                              |
| Liver cancer due to alcohol use                    | < 0.05<br>(< 0.05 to < 0.05)            | < 0.05<br>(< 0.05 to < 0.05)          | < 0.05<br>(< 0.05 to < 0.05)        | 56.7<br>(21.9 to 84.8)                            | 16.0<br>(-7.4 to 35.9)                              |
| Liver cancer due to other causes                   | < 0.05<br>(< 0.05 to < 0.05)            | < 0.05<br>(< 0.05 to < 0.05)          | < 0.05<br>(< 0.05 to < 0.05)        | 31.3<br>(3.7 to 52.7)                             | -2.3<br>(-21.9 to 13.8)                             |
| Gallbladder and biliary tract cancer               | < 0.05<br>(< 0.05 to < 0.05)            | < 0.05<br>(< 0.05 to < 0.05)          | < 0.05<br>(< 0.05 to < 0.05)        | 16.9<br>(-3.8 to 39.6)                            | -11.6<br>(-25.9 to 3.9)                             |
| Pancreatic cancer                                  | < 0.05<br>(< 0.05 to < 0.05)            | < 0.05<br>(< 0.05 to < 0.05)          | < 0.05<br>(< 0.05 to < 0.05)        | 31.6<br>(17.5 to 46.1)                            | -1.7<br>(-11.7 to 8.6)                              |
| Larynx cancer                                      | 0.1<br>(0.1 to 0.1)                     | < 0.05<br>(< 0.05 to < 0.05)          | < 0.05<br>(< 0.05 to < 0.05)        | 11.5<br>(-5.5 to 39.1)                            | -15.6<br>(-28.5 to 4.4)                             |
| Tracheal, bronchus, and lung cancer                | 0.1<br>(< 0.05 to 0.1)                  | 0.1<br>(< 0.05 to 0.1)                | < 0.05<br>(< 0.05 to < 0.05)        | 11.0<br>(-9.2 to 35.9)                            | -16.4<br>(-31.8 to 4.5)                             |
| Malignant skin melanoma                            | 0.1<br>(0.1 to 0.1)                     | < 0.05<br>(< 0.05 to < 0.05)          | < 0.05<br>(< 0.05 to < 0.05)        | 63.8<br>(21.6 to 100.5)                           | 21.0<br>(-8.0 to 47.3)                              |
| Non-melanoma skin cancer                           | 0.1<br>(< 0.05 to 0.1)                  | 0.2<br>(0.1 to 0.2)                   | < 0.05<br>(< 0.05 to < 0.05)        | 57.1<br>(37.3 to 81.1)                            | 18.3<br>(2.5 to 37.8)                               |
| Non-melanoma skin cancer (squamous-cell carcinoma) | < 0.05<br>(< 0.05 to 0.1)               | 0.1<br>(0.1 to 0.1)                   | < 0.05<br>(< 0.05 to < 0.05)        | 59.1<br>(37.4 to 86.1)                            | 19.8<br>(2.9 to 40.4)                               |
| Non-melanoma skin cancer (basal-cell carcinoma)    | < 0.05<br>(< 0.05 to < 0.05)            | 0.1<br>(0.1 to 0.1)                   | < 0.05<br>(< 0.05 to < 0.05)        | 32.8<br>(17.5 to 51.4)                            | -1.3<br>(-16.0 to 17.2)                             |
| Breast cancer                                      | 1.0<br>(0.7 to 1.2)                     | 0.2<br>(0.1 to 0.3)                   | 0.1<br>(0.1 to 0.1)                 | 29.6<br>(-7.2 to 87.8)                            | -2.8<br>(-28.6 to 35.1)                             |
| Cervical cancer                                    | 0.4<br>(0.2 to 0.6)                     | 0.1<br>(0.1 to 0.1)                   | < 0.05<br>(< 0.05 to 0.1)           | -0.0<br>(-26.0 to 44.3)                           | -24.7<br>(-44.4 to 7.7)                             |
| Uterine cancer                                     | 0.1<br>(0.1 to 0.1)                     | < 0.05<br>(< 0.05 to < 0.05)          | < 0.05<br>(< 0.05 to < 0.05)        | 41.5<br>(5.8 to 99.2)                             | 4.4<br>(-20.9 to 45.9)                              |
| Ovarian cancer                                     | 0.1<br>(0.1 to 0.1)                     | < 0.05<br>(< 0.05 to < 0.05)          | < 0.05<br>(< 0.05 to < 0.05)        | 39.3<br>(7.6 to 65.5)                             | 3.7<br>(-19.0 to 24.4)                              |
| Prostate cancer                                    | 0.5<br>(0.2 to 0.6)                     | 0.1<br>(0.1 to 0.2)                   | 0.1<br>(< 0.05 to 0.1)              | 56.6<br>(9.1 to 101.8)                            | 15.0<br>(-17.1 to 45.4)                             |
| Testicular cancer                                  | < 0.05<br>(< 0.05 to < 0.05)            | < 0.05<br>(< 0.05 to < 0.05)          | < 0.05<br>(< 0.05 to < 0.05)        | 22.0<br>(0.8 to 47.9)                             | -9.8<br>(-25.0 to 7.0)                              |
| Kidney cancer                                      | 0.1<br>(0.1 to 0.1)                     | < 0.05<br>(< 0.05 to < 0.05)          | < 0.05<br>(< 0.05 to < 0.05)        | 34.4<br>(7.0 to 61.3)                             | 3.4<br>(-16.1 to 24.1)                              |
| Bladder cancer                                     | 0.1<br>(0.1 to 0.1)                     | < 0.05<br>(< 0.05 to < 0.05)          | < 0.05<br>(< 0.05 to < 0.05)        | 44.0<br>(18.5 to 71.2)                            | 8.3<br>(-10.5 to 28.0)                              |
| Brain and nervous system cancer                    | 0.1<br>(< 0.05 to 0.1)                  | < 0.05<br>(< 0.05 to < 0.05)          | < 0.05<br>(< 0.05 to < 0.05)        | 25.6<br>(12.8 to 40.9)                            | -0.5<br>(-9.2 to 9.6)                               |
| Thyroid cancer                                     | 0.1<br>(< 0.05 to 0.1)                  | < 0.05<br>(< 0.05 to < 0.05)          | < 0.05<br>(< 0.05 to < 0.05)        | 37.8<br>(0.5 to 94.2)                             | -0.2<br>(-26.7 to 39.4)                             |
| Mesothelioma                                       | < 0.05<br>(< 0.05 to < 0.05)            | < 0.05<br>(< 0.05 to < 0.05)          | < 0.05<br>(< 0.05 to < 0.05)        | 14.5<br>(-10.8 to 40.4)                           | -14.5<br>(-32.4 to 3.9)                             |
| Hodgkin lymphoma                                   | < 0.05<br>(< 0.05 to < 0.05)            | < 0.05<br>(< 0.05 to < 0.05)          | < 0.05<br>(< 0.05 to < 0.05)        | -4.0<br>(-15.1 to 10.5)                           | -27.8<br>(-35.1 to -18.1)                           |
| Non-Hodgkin's lymphoma                             | 0.1<br>(0.1 to 0.1)                     | < 0.05<br>(< 0.05 to < 0.05)          | < 0.05<br>(< 0.05 to < 0.05)        | 35.9<br>(11.8 to 55.5)                            | 3.1<br>(-13.7 to 17.6)                              |
| Multiple myeloma                                   | < 0.05<br>(< 0.05 to < 0.05)            | < 0.05<br>(< 0.05 to < 0.05)          | < 0.05<br>(< 0.05 to < 0.05)        | 28.7<br>(12.2 to 53.6)                            | -4.0<br>(-15.0 to 12.7)                             |
| Leukaemia                                          | 0.1<br>(0.1 to 0.1)                     | < 0.05<br>(< 0.05 to < 0.05)          | < 0.05<br>(< 0.05 to < 0.05)        | 7.3<br>(-10.6 to 29.6)                            | -15.9<br>(-28.1 to 0.1)                             |
| Acute lymphoid leukaemia                           | < 0.05<br>(< 0.05 to < 0.05)            | < 0.05<br>(< 0.05 to < 0.05)          | < 0.05<br>(< 0.05 to < 0.05)        | 6.6<br>(-19.2 to 33.2)                            | -9.8<br>(-29.7 to 7.9)                              |
| Chronic lymphoid leukaemia                         | < 0.05<br>(< 0.05 to < 0.05)            | < 0.05<br>(< 0.05 to < 0.05)          | < 0.05<br>(< 0.05 to < 0.05)        | 16.4<br>(-10.2 to 45.2)                           | -13.4<br>(-31.3 to 7.4)                             |
| Acute myeloid leukaemia                            | < 0.05<br>(< 0.05 to < 0.05)            | < 0.05<br>(< 0.05 to < 0.05)          | < 0.05<br>(< 0.05 to < 0.05)        | 19.1<br>(0.9 to 40.7)                             | -3.8<br>(-15.6 to 10.5)                             |
| Chronic myeloid leukaemia                          | < 0.05<br>(< 0.05 to < 0.05)            | < 0.05<br>(< 0.05 to < 0.05)          | < 0.05<br>(< 0.05 to < 0.05)        | -3.6<br>(-21.2 to 21.0)                           | -26.9<br>(-39.0 to -10.4)                           |
| Other leukaemia                                    | < 0.05<br>(< 0.05 to < 0.05)            | < 0.05<br>(< 0.05 to < 0.05)          | < 0.05<br>(< 0.05 to < 0.05)        | -0.3<br>(-25.8 to 33.1)                           | -22.0<br>(-39.9 to 1.4)                             |
| Other neoplasms                                    | 0.6<br>(0.4 to 0.7)                     | 0.2<br>(0.1 to 0.2)                   | 0.1<br>(< 0.05 to 0.1)              | 23.9<br>(-2.4 to 46.6)                            | -3.8<br>(-22.6 to 12.4)                             |
| <b>Cardiovascular diseases</b>                     | <b>102.8</b><br><b>(98.5 to 108.0)</b>  | <b>9.7†</b><br><b>(9.2 to 10.1)</b>   | <b>5.7</b><br><b>(4.2 to 7.5)</b>   | <b>24.7</b><br><b>(20.1 to 29.2)</b>              | <b>-4.5</b><br><b>(-7.5 to -1.3)</b>                |
| Rheumatic heart disease                            | 27.8<br>(24.7 to 31.0)                  | 1.0<br>(0.9 to 1.2)                   | 1.4<br>(0.9 to 2.0)                 | 21.2<br>(9.8 to 32.3)                             | -4.0<br>(-13.1 to 3.9)                              |
| Ischaemic heart disease                            | 25.6<br>(24.2 to 26.9)                  | 3.4<br>(3.2 to 3.7)                   | 1.1<br>(0.8 to 1.5)                 | 22.1<br>(15.8 to 29.0)                            | -7.7<br>(-11.7 to -3.6)                             |
| Cerebrovascular disease                            | 10.3<br>(9.6 to 11.0)                   | 1.6‡<br>(1.4 to 1.7)                  | 1.5<br>(1.1 to 1.9)                 | 27.3<br>(18.1 to 37.1)                            | -4.4<br>(-11.2 to 2.7)                              |
| Ischaemic stroke                                   | 9.0<br>(8.1 to 9.9)                     | 1.1‡<br>(1.0 to 1.2)                  | 1.2<br>(0.9 to 1.6)                 | 28.8<br>(18.5 to 40.6)                            | -3.3<br>(-11.3 to 5.2)                              |
| Hemorrhagic stroke                                 | 1.8<br>(1.6 to 2.0)                     | 0.5‡<br>(0.5 to 0.6)                  | 0.2<br>(0.2 to 0.3)                 | 20.1<br>(7.5 to 33.5)                             | -9.5<br>(-19.0 to 1.5)                              |
| Hypertensive heart disease                         | 1.2<br>(0.9 to 1.5)                     | --                                    | 0.1<br>(0.1 to 0.1)                 | 25.4<br>(9.6 to 44.1)                             | -6.2<br>(-17.2 to 5.5)                              |
| Cardiomyopathy and myocarditis                     | 2.0<br>(1.8 to 2.3)                     | 0.6†<br>(0.5 to 0.7)                  | 0.2<br>(0.1 to 0.3)                 | 28.2<br>(15.4 to 42.1)                            | -3.3<br>(-13.6 to 7.2)                              |
| Myocarditis                                        | 0.4<br>(0.3 to 0.4)                     | 0.6<br>(0.5 to 0.7)                   | < 0.05<br>(< 0.05 to < 0.05)        | 22.6<br>(14.7 to 31.5)                            | -1.7<br>(-8.9 to 6.4)                               |
| Alcoholic cardiomyopathy                           | 0.2<br>(0.1 to 0.2)                     | --                                    | < 0.05<br>(< 0.05 to < 0.05)        | 33.2<br>(4.7 to 66.5)                             | -3.4<br>(-23.3 to 19.6)                             |
| Other cardiomyopathy                               | 1.7<br>(1.5 to 2.1)                     | --                                    | 0.1<br>(0.1 to 0.2)                 | 28.8<br>(13.7 to 45.5)                            | -3.5<br>(-14.6 to 8.4)                              |
| Atrial fibrillation and flutter                    | 5.5<br>(4.8 to 6.3)                     | 0.5<br>(0.4 to 0.6)                   | 0.4<br>(0.3 to 0.6)                 | 30.9<br>(20.7 to 41.9)                            | -0.8<br>(-7.2 to 6.2)                               |
| Peripheral vascular disease                        | 24.0<br>(20.8 to 27.7)                  | 2.2<br>(1.9 to 2.6)                   | 0.1<br>(0.1 to 0.2)                 | 18.6<br>(10.4 to 27.7)                            | -10.0<br>(-16.2 to -3.4)                            |
| Endocarditis                                       | 0.1<br>(0.1 to 0.1)                     | 0.3<br>(0.2 to 0.3)                   | < 0.05<br>(< 0.05 to < 0.05)        | 27.4<br>(16.3 to 39.3)                            | -1.8<br>(-15.6 to 12.5)                             |
| Other cardiovascular and circulatory diseases      | 16.7<br>(13.3 to 20.7)                  | --                                    | 0.9<br>(0.6 to 1.3)                 | 26.6<br>(14.6 to 39.4)                            | -1.5<br>(-8.9 to 6.3)                               |
| <b>Chronic respiratory diseases</b>                | <b>210.0</b><br><b>(198.4 to 221.5)</b> | <b>38.0†</b><br><b>(35.0 to 41.0)</b> | <b>10.3</b><br><b>(7.8 to 13.5)</b> | <b>21.0</b><br><b>(16.5 to 25.9)</b>              | <b>-3.4</b><br><b>(-6.9 to 0.1)</b>                 |
| Chronic obstructive pulmonary disease              | 38.4<br>(36.7 to 40.2)                  | 2.9<br>(2.8 to 3.1)                   | 3.2<br>(2.8 to 3.6)                 | 25.4<br>(17.0 to 34.4)                            | -5.9<br>(-11.8 to 0.0)                              |
| Pneumoconiosis                                     | 0.1<br>(< 0.05 to 0.1)                  | < 0.05<br>(< 0.05 to < 0.05)          | < 0.05<br>(< 0.05 to < 0.05)        | 26.6<br>(20.0 to 33.2)                            | -6.4<br>(-11.3 to -1.6)                             |
| Silicosis                                          | < 0.05<br>(< 0.05 to < 0.05)            | < 0.05<br>(< 0.05 to < 0.05)          | < 0.05<br>(< 0.05 to < 0.05)        | 28.2<br>(20.1 to 38.7)                            | -4.7<br>(-9.6 to 1.0)                               |

| Cause                                                          | Prevalence in thousands (95% UI)        | Incidence in thousands (95% UI)          | YLDs in thousands (95% UI)           |                                                   |                                                     |
|----------------------------------------------------------------|-----------------------------------------|------------------------------------------|--------------------------------------|---------------------------------------------------|-----------------------------------------------------|
|                                                                | 2016 counts                             | 2016 counts                              | 2016 counts                          | Percentage change in counts between 2006 and 2016 | Percentage change in age-standardised rates between |
| Asbestosis                                                     | < 0.05<br>(< 0.05 to < 0.05)            | < 0.05<br>(< 0.05 to < 0.05)             | < 0.05<br>(< 0.05 to < 0.05)         | 27.2<br>(20.8 to 33.8)                            | -5.1<br>(-9.8 to -0.4)                              |
| Coal workers pneumoconiosis                                    | --                                      | --                                       | --                                   | --                                                | --                                                  |
| Other pneumoconiosis                                           | < 0.05<br>(< 0.05 to < 0.05)            | < 0.05<br>(< 0.05 to < 0.05)             | < 0.05<br>(< 0.05 to < 0.05)         | 25.8<br>(14.5 to 38.8)                            | -7.9<br>(-16.3 to 1.5)                              |
| Asthma                                                         | 174.1<br>(160.6 to 188.5)               | 35.1<br>(32.1 to 38.0)                   | 6.8<br>(4.5 to 9.9)                  | 18.1<br>(12.7 to 24.2)                            | -2.0<br>(-5.8 to 2.1)                               |
| Interstitial lung disease and pulmonary sarcoidosis            | 0.3<br>(0.3 to 0.4)                     | < 0.05<br>(< 0.05 to 0.1)                | < 0.05<br>(< 0.05 to 0.1)            | 27.6<br>(16.8 to 39.6)                            | -2.0<br>(-13.6 to 11.2)                             |
| Other chronic respiratory diseases                             | --                                      | --                                       | 0.2<br>(0.2 to 0.3)                  | 54.6<br>(24.4 to 91.9)                            | 27.4<br>(9.4 to 48.6)                               |
| <b>Cirrhosis and other chronic liver diseases</b>              | <b>3.5</b><br><b>(3.3 to 3.7)</b>       | <b>0.3</b><br><b>(0.3 to 0.3)</b>        | <b>0.3</b><br><b>(0.2 to 0.4)</b>    | <b>26.7</b><br><b>(9.3 to 45.2)</b>               | <b>1.7</b><br><b>(-8.9 to 13.0)</b>                 |
| Cirrhosis and other chronic liver diseases due to hepatitis B  | 0.8<br>(0.8 to 0.9)                     | 0.1<br>(0.1 to 0.1)                      | 0.1<br>(< 0.05 to 0.1)               | 31.5<br>(3.1 to 69.7)                             | -0.3<br>(-18.8 to 22.0)                             |
| Cirrhosis and other chronic liver diseases due to hepatitis C  | 0.4<br>(0.4 to 0.5)                     | < 0.05<br>(< 0.05 to < 0.05)             | < 0.05<br>(< 0.05 to < 0.05)         | 30.7<br>(5.9 to 61.3)                             | -1.3<br>(-22.3 to 24.3)                             |
| Cirrhosis and other chronic liver diseases due to alcohol use  | 0.9<br>(0.8 to 1.0)                     | 0.1<br>(0.1 to 0.1)                      | 0.1<br>(< 0.05 to 0.1)               | 38.0<br>(9.4 to 72.2)                             | 3.0<br>(-15.6 to 24.3)                              |
| Cirrhosis and other chronic liver diseases due to other causes | 1.4<br>(1.3 to 1.5)                     | 0.1<br>(0.1 to 0.1)                      | 0.2<br>(0.1 to 0.2)                  | 20.9<br>(-5.2 to 52.6)                            | 3.0<br>(-16.9 to 26.4)                              |
| <b>Digestive diseases</b>                                      | <b>33.4</b><br><b>(31.3 to 35.6)</b>    | <b>43.0†</b><br><b>(40.7 to 45.5)</b>    | <b>1.0</b><br><b>(0.7 to 1.3)</b>    | <b>31.2</b><br><b>(19.9 to 43.1)</b>              | <b>2.5</b><br><b>(-4.4 to 9.3)</b>                  |
| Peptic ulcer disease                                           | 6.9<br>(6.2 to 7.6)                     | 1.8<br>(1.6 to 2.0)                      | 0.1<br>(0.1 to 0.2)                  | 52.6<br>(34.1 to 71.4)                            | 9.1<br>(-0.9 to 19.9)                               |
| Gastritis and duodenitis                                       | 13.5<br>(11.9 to 15.2)                  | 16.3<br>(14.6 to 18.3)                   | 0.2<br>(0.1 to 0.3)                  | 61.9<br>(46.5 to 79.1)                            | 23.5<br>(13.8 to 34.4)                              |
| Appendicitis                                                   | 0.3<br>(0.3 to 0.4)                     | 9.0<br>(8.2 to 9.8)                      | 0.1<br>(0.1 to 0.1)                  | 15.2<br>(-19.7 to 59.1)                           | -4.1<br>(-28.0 to 23.7)                             |
| Paralytic ileus and intestinal obstruction                     | < 0.05<br>(< 0.05 to < 0.05)            | 1.1<br>(1.0 to 1.2)                      | < 0.05<br>(< 0.05 to < 0.05)         | 27.8<br>(23.3 to 32.6)                            | 1.9<br>(-4.8 to 9.4)                                |
| Inguinal, femoral, and abdominal hernia                        | 11.7<br>(9.8 to 14.1)                   | 5.9<br>(5.2 to 6.6)                      | 0.4<br>(0.2 to 0.5)                  | 14.2<br>(-1.5 to 33.3)                            | -11.1<br>(-21.4 to 1.4)                             |
| Inflammatory bowel disease                                     | 0.3<br>(0.2 to 0.3)                     | 0.9<br>(0.9 to 1.0)                      | < 0.05<br>(< 0.05 to 0.1)            | 75.7<br>(62.8 to 89.6)                            | 36.6<br>(22.9 to 51.3)                              |
| Vascular intestinal disorders                                  | < 0.05<br>(< 0.05 to < 0.05)            | 0.1<br>(0.1 to 0.1)                      | < 0.05<br>(< 0.05 to < 0.05)         | 26.2<br>(20.2 to 32.8)                            | 2.9<br>(-1.0 to 7.3)                                |
| Gallbladder and biliary diseases                               | 1.7<br>(1.5 to 1.9)                     | 7.6<br>(6.5 to 8.7)                      | < 0.05<br>(< 0.05 to 0.1)            | 28.8<br>(9.7 to 51.9)                             | -2.4<br>(-18.2 to 18.1)                             |
| Pancreatitis                                                   | < 0.05<br>(< 0.05 to < 0.05)            | 0.3<br>(0.3 to 0.4)                      | < 0.05<br>(< 0.05 to < 0.05)         | 31.2<br>(26.5 to 36.1)                            | 1.7<br>(-1.4 to 5.3)                                |
| Other digestive diseases                                       | --                                      | --                                       | 0.1<br>(0.1 to 0.1)                  | 31.1<br>(17.8 to 45.4)                            | 5.3<br>(-1.9 to 12.6)                               |
| <b>Neurological disorders</b>                                  | <b>758.9</b><br><b>(724.2 to 800.3)</b> | <b>362.1</b><br><b>(306.7 to 425.3)</b>  | <b>19.5</b><br><b>(12.3 to 28.3)</b> | <b>22.0</b><br><b>(-11.4 to 68.7)</b>             | <b>-2.2</b><br><b>(-26.3 to 30.7)</b>               |
| Alzheimer's disease and other dementias                        | 4.2<br>(3.5 to 5.0)                     | 0.7<br>(0.6 to 0.9)                      | 0.6<br>(0.4 to 0.8)                  | 30.0<br>(23.4 to 37.1)                            | -0.5<br>(-5.1 to 4.2)                               |
| Parkinson's disease                                            | 0.4<br>(0.4 to 0.6)                     | 0.1<br>(< 0.05 to 0.1)                   | 0.1<br>(< 0.05 to 0.1)               | 40.3<br>(22.4 to 62.4)                            | 6.9<br>(-5.9 to 22.3)                               |
| Epilepsy                                                       | 11.8<br>(3.2 to 20.4)                   | 1.2<br>(0.3 to 2.0)                      | 4.1<br>(1.0 to 8.5)                  | 8.3<br>(-72.3 to 389.0)                           | -11.7<br>(-77.4 to 313.0)                           |
| Multiple sclerosis                                             | 0.2<br>(0.2 to 0.2)                     | < 0.05<br>(< 0.05 to < 0.05)             | 0.1<br>(< 0.05 to 0.1)               | 42.6<br>(37.9 to 48.4)                            | 10.3<br>(7.0 to 14.6)                               |
| Motor neuron disease                                           | < 0.05<br>(< 0.05 to < 0.05)            | < 0.05<br>(< 0.05 to < 0.05)             | < 0.05<br>(< 0.05 to < 0.05)         | 27.4<br>(21.5 to 33.4)                            | 3.6<br>(0.1 to 7.2)                                 |
| Migraine                                                       | 274.5<br>(257.4 to 290.7)               | 33.8<br>(31.8 to 35.9)                   | 11.8<br>(7.5 to 16.5)                | 25.7<br>(20.4 to 31.1)                            | 0.1<br>(-3.6 to 3.7)                                |
| Tension-type headache                                          | 568.2<br>(504.7 to 645.6)               | 326.3<br>(271.1 to 389.1)                | 1.9<br>(1.2 to 2.9)                  | 26.5<br>(19.1 to 34.0)                            | 0.0<br>(-4.6 to 5.3)                                |
| Other neurological disorders                                   | < 0.05<br>(< 0.05 to < 0.05)            | < 0.05<br>(< 0.05 to < 0.05)             | 0.9<br>(0.2 to 1.9)                  | 30.6<br>(-64.5 to 439.9)                          | 6.4<br>(-69.1 to 302.9)                             |
| <b>Mental and substance use disorders</b>                      | <b>360.2</b><br><b>(346.4 to 374.4)</b> | <b>134.8†</b><br><b>(125.1 to 146.5)</b> | <b>46.1</b><br><b>(33.6 to 59.6)</b> | <b>25.2</b><br><b>(22.4 to 28.4)</b>              | <b>-0.1</b><br><b>(-2.2 to 2.2)</b>                 |
| Schizophrenia                                                  | 4.0<br>(3.4 to 4.5)                     | 0.3<br>(0.3 to 0.4)                      | 2.5<br>(1.8 to 3.2)                  | 33.8<br>(21.3 to 47.4)                            | 2.4<br>(-6.2 to 11.6)                               |
| Alcohol use disorders                                          | 36.2<br>(30.9 to 42.2)                  | 18.8<br>(16.0 to 21.7)                   | 3.6<br>(2.5 to 5.0)                  | 30.4<br>(19.7 to 41.3)                            | 0.2<br>(-7.5 to 7.9)                                |
| Drug use disorders                                             | 16.3<br>(14.4 to 18.2)                  | 2.4<br>(2.1 to 2.7)                      | 4.5<br>(3.1 to 6.0)                  | 27.7<br>(14.6 to 43.1)                            | -0.5<br>(-10.0 to 9.9)                              |
| Opioid use disorders                                           | 9.9<br>(8.2 to 11.7)                    | 1.2<br>(1.0 to 1.4)                      | 4.1<br>(2.8 to 5.6)                  | 27.5<br>(13.3 to 44.5)                            | -0.7<br>(-11.1 to 11.0)                             |
| Cocaine use disorders                                          | 0.4<br>(0.4 to 0.5)                     | 0.1<br>(< 0.05 to 0.1)                   | 0.1<br>(< 0.05 to 0.1)               | 31.0<br>(24.4 to 38.5)                            | 1.5<br>(-4.0 to 7.3)                                |
| Amphetamine use disorders                                      | 0.3<br>(0.2 to 0.4)                     | < 0.05<br>(< 0.05 to 0.1)                | < 0.05<br>(< 0.05 to 0.1)            | 30.8<br>(-16.3 to 101.3)                          | 3.1<br>(-31.6 to 53.1)                              |
| Cannabis use disorders                                         | 5.4<br>(4.5 to 6.5)                     | 1.0<br>(0.8 to 1.2)                      | 0.2<br>(0.1 to 0.2)                  | 27.1<br>(3.6 to 57.3)                             | -0.1<br>(-16.5 to 20.5)                             |
| Other drug use disorders                                       | 0.8<br>(0.7 to 0.9)                     | 0.2<br>(0.1 to 0.2)                      | 0.2<br>(0.1 to 0.2)                  | 33.3<br>(11.0 to 60.1)                            | 3.6<br>(-11.8 to 22.1)                              |
| Depressive disorders                                           | 76.7<br>(71.6 to 82.8)                  | 83.1<br>(74.0 to 93.5)                   | 13.0<br>(9.0 to 17.7)                | 28.6<br>(21.9 to 35.9)                            | 0.1<br>(-4.4 to 4.8)                                |
| Major depressive disorder                                      | 50.7<br>(44.8 to 57.4)                  | 78.3<br>(69.0 to 88.7)                   | 10.4<br>(7.1 to 14.2)                | 28.4<br>(20.3 to 37.6)                            | 0.0<br>(-5.7 to 6.0)                                |
| Dysthymia                                                      | 27.2<br>(23.5 to 31.5)                  | 4.8<br>(4.2 to 5.5)                      | 2.6<br>(1.7 to 3.8)                  | 29.4<br>(24.0 to 34.7)                            | 0.3<br>(-2.9 to 3.6)                                |
| Bipolar disorder                                               | 14.1<br>(11.9 to 16.7)                  | 1.5<br>(1.3 to 1.8)                      | 2.9<br>(1.8 to 4.3)                  | 26.4<br>(17.3 to 35.7)                            | 0.2<br>(-6.0 to 7.0)                                |
| Anxiety disorders                                              | 83.0<br>(74.4 to 92.8)                  | 14.5<br>(13.2 to 16.0)                   | 8.1<br>(5.5 to 11.0)                 | 23.0<br>(14.3 to 32.4)                            | -0.1<br>(-6.5 to 6.9)                               |
| Eating disorders                                               | 3.6<br>(2.9 to 4.3)                     | 2.1<br>(1.6 to 2.9)                      | 0.7<br>(0.5 to 1.1)                  | 38.1<br>(21.0 to 58.6)                            | 12.3<br>(-1.5 to 28.6)                              |
| Anorexia nervosa                                               | 0.9<br>(0.7 to 1.2)                     | 0.4<br>(0.3 to 0.5)                      | 0.2<br>(0.1 to 0.3)                  | 33.7<br>(4.1 to 76.4)                             | 10.8<br>(-14.0 to 44.5)                             |
| Bulimia nervosa                                                | 2.5<br>(1.9 to 3.4)                     | 1.8<br>(1.2 to 2.5)                      | 0.5<br>(0.3 to 0.8)                  | 39.9<br>(19.1 to 65.0)                            | 12.8<br>(-4.2 to 31.8)                              |
| Autistic spectrum disorders                                    | 20.9<br>(18.5 to 23.4)                  | 0.2<br>(0.1 to 0.3)                      | 3.0<br>(2.0 to 4.3)                  | 20.1<br>(13.1 to 27.0)                            | 0.1<br>(-5.1 to 5.1)                                |
| Autism                                                         | 6.0<br>(5.1 to 7.0)                     | < 0.05<br>(< 0.05 to < 0.05)             | 1.5<br>(1.0 to 2.2)                  | 19.5<br>(8.2 to 32.0)                             | 0.2<br>(-8.3 to 9.4)                                |
| Asperger syndrome and other autistic spectrum disorders        | 14.9<br>(12.3 to 18.0)                  | 0.2<br>(0.1 to 0.3)                      | 1.5<br>(1.0 to 2.2)                  | 20.7<br>(14.2 to 27.6)                            | 0.1<br>(-4.8 to 5.1)                                |



| Cause                                                      | Prevalence in thousands (95% UI)              | Incidence in thousands (95% UI)                | YLDs in thousands (95% UI)           |                                                   |                                                     |
|------------------------------------------------------------|-----------------------------------------------|------------------------------------------------|--------------------------------------|---------------------------------------------------|-----------------------------------------------------|
|                                                            | 2016 counts                                   | 2016 counts                                    | 2016 counts                          | Percentage change in counts between 2006 and 2016 | Percentage change in age-standardised rates between |
| Attention-deficit/hyperactivity disorder                   | 32.4<br>(29.0 to 36.4)                        | 1.8<br>(1.5 to 2.1)                            | 0.4<br>(0.2 to 0.6)                  | 17.4<br>(9.1 to 26.7)                             | 0.2<br>(-6.5 to 7.7)                                |
| Conduct disorder                                           | 23.7<br>(19.5 to 28.1)                        | 8.2<br>(6.6 to 9.9)                            | 2.9<br>(1.8 to 4.5)                  | 10.7<br>(4.1 to 18.0)                             | 0.4<br>(-5.9 to 7.2)                                |
| Idiopathic developmental intellectual disability           | 43.7<br>(26.9 to 61.5)                        | --                                             | 1.6<br>(0.8 to 2.9)                  | 8.3<br>(0.8 to 14.7)                              | -10.8<br>(-17.0 to -5.5)                            |
| Other mental and substance use disorders                   | 37.9<br>(33.2 to 43.9)                        | 1.8<br>(1.6 to 2.1)                            | 2.8<br>(1.9 to 4.1)                  | 30.3<br>(22.7 to 37.7)                            | 0.4<br>(-4.5 to 5.0)                                |
| <b>Diabetes, urogenital, blood, and endocrine diseases</b> | <b>938.0</b><br><b>(922.9 to 953.1)</b>       | <b>252.4†</b><br><b>(236.2 to 269.9)</b>       | <b>14.3</b><br><b>(10.2 to 19.5)</b> | <b>23.4</b><br><b>(19.9 to 27.2)</b>              | <b>-6.0</b><br><b>(-8.8 to -3.2)</b>                |
| Diabetes mellitus                                          | 74.5<br>(67.2 to 82.1)                        | 5.4<br>(4.9 to 5.9)                            | 6.0<br>(4.2 to 8.2)                  | 21.6<br>(15.7 to 28.2)                            | -9.1<br>(-13.6 to -4.2)                             |
| Acute glomerulonephritis                                   | < 0.05<br>(< 0.05 to < 0.05)                  | 0.3<br>(0.3 to 0.4)                            | < 0.05<br>(< 0.05 to < 0.05)         | 21.9<br>(14.9 to 29.3)                            | -1.7<br>(-6.7 to 3.8)                               |
| Chronic kidney disease                                     | 102.7<br>(92.5 to 114.3)                      | 7.9<br>(7.0 to 8.8)                            | 2.8<br>(2.0 to 3.6)                  | 30.1<br>(21.3 to 38.8)                            | -2.1<br>(-7.5 to 4.1)                               |
| Chronic kidney disease due to diabetes mellitus            | 32.6<br>(27.3 to 38.5)                        | 2.4<br>(2.0 to 2.9)                            | 0.8<br>(0.6 to 1.1)                  | 32.3<br>(20.2 to 45.1)                            | -0.8<br>(-8.6 to 7.6)                               |
| Chronic kidney disease due to hypertension                 | 20.4<br>(17.7 to 23.4)                        | 2.0<br>(1.6 to 2.3)                            | 0.5<br>(0.3 to 0.6)                  | 31.0<br>(17.7 to 44.9)                            | -2.4<br>(-11.1 to 6.9)                              |
| Chronic kidney disease due to glomerulonephritis           | 21.7<br>(18.6 to 24.8)                        | 1.2<br>(1.0 to 1.5)                            | 0.7<br>(0.5 to 1.0)                  | 31.0<br>(17.2 to 45.7)                            | 0.0<br>(-8.8 to 8.9)                                |
| Chronic kidney disease due to other causes                 | 28.0<br>(23.3 to 32.9)                        | 2.3<br>(1.9 to 2.6)                            | 0.8<br>(0.6 to 1.0)                  | 26.3<br>(14.1 to 39.4)                            | -5.0<br>(-12.2 to 2.4)                              |
| Urinary diseases and male infertility                      | 27.4<br>(24.4 to 30.5)                        | 124.2†<br>(110.4 to 139.9)                     | 0.9<br>(0.6 to 1.2)                  | 31.3<br>(22.8 to 40.1)                            | -2.6<br>(-8.7 to 3.6)                               |
| Interstitial nephritis and urinary tract infections        | 2.1<br>(1.8 to 2.4)                           | 107.9<br>(93.9 to 123.2)                       | 0.1<br>(< 0.05 to 0.1)               | 24.9<br>(4.7 to 48.4)                             | 1.3<br>(-13.1 to 18.7)                              |
| Urolithiasis                                               | 0.5<br>(0.5 to 0.6)                           | 13.6<br>(11.9 to 15.6)                         | < 0.05<br>(< 0.05 to 0.1)            | 31.5<br>(23.2 to 40.4)                            | 1.5<br>(-5.5 to 9.0)                                |
| Benign prostatic hyperplasia                               | 21.3<br>(17.8 to 24.8)                        | 2.8<br>(2.3 to 3.3)                            | 0.7<br>(0.4 to 1.0)                  | 33.9<br>(23.6 to 44.5)                            | -2.5<br>(-9.2 to 4.3)                               |
| Male infertility                                           | 2.8<br>(2.4 to 3.3)                           | --                                             | < 0.05<br>(< 0.05 to < 0.05)         | 32.9<br>(11.4 to 56.5)                            | 2.5<br>(-13.4 to 20.8)                              |
| Other urinary diseases                                     | --                                            | --                                             | < 0.05<br>(< 0.05 to 0.1)            | 4.3<br>(-7.9 to 17.0)                             | -15.5<br>(-23.6 to -7.0)                            |
| Gynecological diseases                                     | 289.7<br>(274.9 to 304.1)                     | 111.4†<br>(102.9 to 120.5)                     | 3.2<br>(2.2 to 4.6)                  | 24.7<br>(19.1 to 30.1)                            | -3.6<br>(-7.5 to 0.1)                               |
| Uterine fibroids                                           | 21.3<br>(18.8 to 24.1)                        | 2.6<br>(2.2 to 3.0)                            | 0.2<br>(0.1 to 0.4)                  | 7.3<br>(-4.1 to 16.7)                             | -17.1<br>(-25.3 to -10.9)                           |
| Polycystic ovarian syndrome                                | 2.3<br>(1.7 to 3.0)                           | 4.4<br>(3.1 to 5.9)                            | < 0.05<br>(< 0.05 to < 0.05)         | 27.3<br>(10.7 to 46.1)                            | -0.3<br>(-12.8 to 14.5)                             |
| Female infertility                                         | 0.8<br>(0.7 to 0.9)                           | --                                             | < 0.05<br>(< 0.05 to < 0.05)         | 27.9<br>(1.9 to 59.0)                             | -2.2<br>(-21.4 to 21.6)                             |
| Endometriosis                                              | 0.5<br>(0.5 to 0.7)                           | 2.2<br>(1.8 to 2.7)                            | 0.1<br>(< 0.05 to 0.1)               | 26.8<br>(-7.5 to 73.4)                            | -0.7<br>(-25.4 to 30.1)                             |
| Genital prolapse                                           | 126.3<br>(111.0 to 142.8)                     | 10.8<br>(9.2 to 12.8)                          | 0.4<br>(0.2 to 0.7)                  | 32.0<br>(23.7 to 40.8)                            | -1.5<br>(-8.1 to 5.0)                               |
| Premenstrual syndrome                                      | 141.4<br>(131.9 to 151.4)                     | 52.7<br>(48.6 to 56.7)                         | 1.2<br>(0.7 to 1.8)                  | 25.3<br>(14.3 to 36.6)                            | -1.9<br>(-10.0 to 5.9)                              |
| Other gynecological diseases                               | 37.3<br>(31.3 to 43.9)                        | 38.7<br>(31.8 to 46.7)                         | 1.3<br>(0.8 to 1.9)                  | 25.6<br>(17.5 to 34.8)                            | -2.8<br>(-9.1 to 4.3)                               |
| Hemoglobinopathies and hemolytic anaemias                  | 631.6<br>(617.8 to 645.4)                     | --                                             | 0.7<br>(0.5 to 1.0)                  | 12.4<br>(2.9 to 23.6)                             | -6.2<br>(-12.7 to 1.0)                              |
| Thalassemias                                               | < 0.05<br>(< 0.05 to < 0.05)                  | --                                             | < 0.05<br>(< 0.05 to < 0.05)         | 18.2<br>(2.8 to 43.5)                             | 1.8<br>(-11.5 to 23.4)                              |
| Thalassaemias trait                                        | 10.7<br>(10.0 to 11.5)                        | --                                             | 0.2<br>(0.1 to 0.2)                  | 41.2<br>(23.7 to 61.8)                            | 17.1<br>(4.2 to 32.4)                               |
| Sickle cell disorders                                      | 0.1<br>(0.1 to 0.1)                           | --                                             | < 0.05<br>(< 0.05 to < 0.05)         | 20.5<br>(8.1 to 33.2)                             | 5.1<br>(-5.2 to 15.8)                               |
| Sickle cell trait                                          | 64.2<br>(58.7 to 70.3)                        | --                                             | 0.2<br>(0.1 to 0.3)                  | 30.0<br>(14.7 to 47.2)                            | 12.4<br>(0.6 to 25.7)                               |
| G6PD deficiency                                            | 178.0<br>(168.1 to 189.9)                     | --                                             | < 0.05<br>(< 0.05 to < 0.05)         | 13.8<br>(-2.4 to 29.8)                            | -0.4<br>(-11.1 to 10.4)                             |
| G6PD trait                                                 | 401.1<br>(392.3 to 411.4)                     | --                                             | < 0.05<br>(< 0.05 to < 0.05)         | 48.4<br>(33.9 to 63.2)                            | 20.3<br>(11.1 to 29.8)                              |
| Other hemoglobinopathies and hemolytic anaemias            | 12.9<br>(12.3 to 13.6)                        | --                                             | 0.3<br>(0.2 to 0.5)                  | -5.2<br>(-16.2 to 7.9)                            | -23.7<br>(-31.2 to -15.2)                           |
| Endocrine, metabolic, blood, and immune disorders          | 26.7<br>(25.1 to 28.4)                        | 3.2<br>(2.9 to 3.7)                            | 0.8<br>(0.6 to 1.2)                  | 14.4<br>(6.2 to 23.7)                             | -6.7<br>(-12.2 to -1.2)                             |
| <b>Musculoskeletal disorders</b>                           | <b>258.6</b><br><b>(244.5 to 272.2)</b>       | <b>128.9</b><br><b>(116.3 to 142.3)</b>        | <b>28.4</b><br><b>(20.5 to 37.2)</b> | <b>33.8</b><br><b>(28.7 to 39.9)</b>              | <b>1.4</b><br><b>(-2.3 to 5.5)</b>                  |
| Rheumatoid arthritis                                       | 4.9<br>(4.4 to 5.5)                           | 0.3<br>(0.3 to 0.4)                            | 1.2<br>(0.8 to 1.6)                  | 32.4<br>(21.9 to 44.9)                            | 0.6<br>(-6.6 to 8.8)                                |
| Osteoarthritis                                             | 46.2<br>(43.1 to 49.3)                        | 2.7<br>(2.5 to 2.9)                            | 2.8<br>(2.0 to 3.8)                  | 37.3<br>(32.3 to 42.7)                            | 2.0<br>(-1.5 to 5.9)                                |
| Low back and neck pain                                     | 169.0<br>(157.3 to 182.5)                     | 76.2<br>(68.1 to 85.8)                         | 19.4<br>(13.6 to 25.6)               | 34.4<br>(27.8 to 42.2)                            | 1.6<br>(-3.5 to 7.1)                                |
| Low back pain                                              | 126.5<br>(111.9 to 144.6)                     | 63.5<br>(55.6 to 72.8)                         | 14.2<br>(10.1 to 19.0)               | 35.1<br>(25.9 to 45.6)                            | 2.1<br>(-4.7 to 9.4)                                |
| Neck pain                                                  | 51.7<br>(44.5 to 59.9)                        | 12.8<br>(11.0 to 15.0)                         | 5.2<br>(3.5 to 7.4)                  | 32.4<br>(28.8 to 36.3)                            | 0.3<br>(-1.8 to 2.8)                                |
| Gout                                                       | 5.7<br>(5.1 to 6.5)                           | 1.2<br>(1.0 to 1.3)                            | 0.2<br>(0.1 to 0.2)                  | 32.3<br>(14.0 to 53.8)                            | -1.1<br>(-13.7 to 13.5)                             |
| Other musculoskeletal disorders                            | 56.1<br>(45.5 to 67.6)                        | 48.5<br>(39.1 to 59.0)                         | 4.8<br>(3.2 to 7.0)                  | 29.8<br>(19.2 to 42.5)                            | 0.2<br>(-7.7 to 9.0)                                |
| <b>Other non-communicable diseases</b>                     | <b>1,740.4</b><br><b>(1,707.4 to 1,774.0)</b> | <b>5,029.6†</b><br><b>(4,660.3 to 5,441.7)</b> | <b>48.7</b><br><b>(33.0 to 67.9)</b> | <b>21.0</b><br><b>(19.0 to 22.8)</b>              | <b>-2.0</b><br><b>(-3.4 to -0.8)</b>                |
| Congenital anomalies                                       | 24.6<br>(20.2 to 30.6)                        | --                                             | 3.7<br>(2.5 to 5.5)                  | 16.9<br>(8.0 to 29.8)                             | -3.0<br>(-10.0 to 7.5)                              |
| Neural tube defects                                        | 2.7<br>(2.4 to 3.1)                           | --                                             | 0.8<br>(0.6 to 1.1)                  | 22.4<br>(8.0 to 38.3)                             | 1.1<br>(-10.1 to 13.3)                              |
| Congenital heart anomalies                                 | 3.0<br>(2.6 to 3.5)                           | --                                             | 0.1<br>(0.1 to 0.2)                  | 18.0<br>(0.6 to 38.1)                             | 2.1<br>(-12.0 to 18.6)                              |
| Orofacial clefts                                           | 0.7<br>(0.6 to 0.8)                           | --                                             | < 0.05<br>(< 0.05 to < 0.05)         | 5.6<br>(-5.9 to 19.1)                             | -12.7<br>(-22.1 to -1.6)                            |
| Down's syndrome                                            | 0.5<br>(0.4 to 0.6)                           | --                                             | < 0.05<br>(< 0.05 to 0.1)            | 18.9<br>(11.2 to 27.9)                            | 0.4<br>(-6.1 to 8.0)                                |
| Turner syndrome                                            | 1.2<br>(1.0 to 1.4)                           | --                                             | < 0.05<br>(< 0.05 to < 0.05)         | 3.8<br>(-26.8 to 46.1)                            | -11.7<br>(-37.2 to 21.8)                            |
| Klinefelter syndrome                                       | 1.5<br>(1.2 to 1.7)                           | --                                             | < 0.05<br>(< 0.05 to < 0.05)         | 21.7<br>(-7.0 to 57.9)                            | -0.5<br>(-23.6 to 27.8)                             |

| Cause                                         | Prevalence in thousands (95% UI)        | Incidence in thousands (95% UI)          | YLDs in thousands (95% UI)          |                                                   |                                                     |
|-----------------------------------------------|-----------------------------------------|------------------------------------------|-------------------------------------|---------------------------------------------------|-----------------------------------------------------|
|                                               | 2016 counts                             | 2016 counts                              | 2016 counts                         | Percentage change in counts between 2006 and 2016 | Percentage change in age-standardised rates between |
| Other chromosomal abnormalities               | 0.5<br>(0.4 to 0.5)                     | --                                       | 0.1<br>(0.1 to 0.1)                 | 15.8<br>(-16.1 to 61.1)                           | 0.2<br>(-26.9 to 38.8)                              |
| Congenital musculoskeletal and limb anomalies | 3.1<br>(2.7 to 3.4)                     | --                                       | 0.4<br>(0.3 to 0.6)                 | 24.1<br>(9.3 to 41.0)                             | 3.0<br>(-8.7 to 15.4)                               |
| Urogenital congenital anomalies               | 1.8<br>(1.6 to 2.1)                     | --                                       | < 0.05<br>(< 0.05 to 0.1)           | 14.9<br>(5.9 to 24.4)                             | -0.6<br>(-7.9 to 7.5)                               |
| Digestive congenital anomalies                | 2.0<br>(1.8 to 2.3)                     | --                                       | 0.1<br>(0.1 to 0.1)                 | 26.7<br>(3.5 to 52.8)                             | 5.1<br>(-13.1 to 24.6)                              |
| Other congenital anomalies                    | 12.7<br>(7.2 to 20.6)                   | --                                       | 2.0<br>(1.1 to 3.5)                 | 13.2<br>(0.2 to 35.9)                             | -6.4<br>(-16.9 to 11.8)                             |
| Skin and subcutaneous diseases                | 872.8<br>(845.9 to 899.8)               | 1,907.2<br>(1,803.5 to 2,030.4)          | 22.2<br>(14.6 to 32.3)              | 20.0<br>(17.4 to 22.4)                            | 1.5<br>(-0.3 to 3.3)                                |
| Dermatitis                                    | 155.7<br>(142.0 to 169.7)               | 116.3<br>(106.8 to 126.5)                | 6.4<br>(3.7 to 10.7)                | 16.9<br>(13.2 to 21.1)                            | 0.2<br>(-2.7 to 3.2)                                |
| Psoriasis                                     | 17.8<br>(16.9 to 18.7)                  | 2.6<br>(2.4 to 2.7)                      | 1.6<br>(1.1 to 2.1)                 | 33.4<br>(21.0 to 46.6)                            | 7.0<br>(-1.3 to 15.9)                               |
| Cellulitis                                    | 1.0<br>(0.9 to 1.1)                     | 16.8<br>(15.6 to 18.0)                   | 0.1<br>(< 0.05 to 0.1)              | 24.1<br>(-2.8 to 57.3)                            | 2.4<br>(-16.9 to 24.8)                              |
| Pyoderma                                      | 13.1<br>(12.5 to 13.7)                  | 261.2<br>(250.2 to 272.4)                | 0.1<br>(< 0.05 to 0.2)              | 20.5<br>(13.5 to 27.8)                            | 1.8<br>(-3.4 to 7.2)                                |
| Scabies                                       | 38.2<br>(33.0 to 44.1)                  | 117.1<br>(100.2 to 136.1)                | 1.0<br>(0.6 to 1.6)                 | 13.4<br>(8.3 to 18.3)                             | -4.8<br>(-8.5 to -1.2)                              |
| Fungal skin diseases                          | 303.2<br>(269.4 to 344.3)               | 871.8<br>(778.3 to 981.0)                | 1.7<br>(0.7 to 3.5)                 | 19.7<br>(18.0 to 21.6)                            | 0.1<br>(-0.7 to 1.0)                                |
| Viral skin diseases                           | 70.7<br>(65.5 to 75.7)                  | 100.1<br>(92.8 to 108.3)                 | 2.2<br>(1.4 to 3.2)                 | 18.2<br>(13.9 to 22.4)                            | 0.2<br>(-3.1 to 3.2)                                |
| Acne vulgaris                                 | 256.2<br>(228.4 to 287.1)               | 187.2<br>(151.5 to 238.5)                | 6.6<br>(4.4 to 9.6)                 | 20.5<br>(14.6 to 26.3)                            | 3.1<br>(-1.5 to 7.7)                                |
| Alopecia areata                               | 4.3<br>(4.1 to 4.5)                     | 7.7<br>(7.4 to 8.0)                      | 0.1<br>(0.1 to 0.2)                 | 26.2<br>(12.6 to 42.2)                            | 0.3<br>(-10.0 to 11.8)                              |
| Pruritus                                      | 19.0<br>(16.7 to 21.5)                  | 15.2<br>(13.6 to 17.2)                   | 0.2<br>(0.1 to 0.4)                 | 26.0<br>(18.9 to 34.0)                            | 1.4<br>(-3.5 to 6.8)                                |
| Urticaria                                     | 23.4<br>(20.1 to 27.4)                  | 42.0<br>(35.9 to 48.9)                   | 1.4<br>(0.9 to 2.1)                 | 18.8<br>(11.8 to 27.0)                            | 0.2<br>(-5.4 to 6.4)                                |
| Decubitus ulcer                               | 0.4<br>(0.4 to 0.4)                     | 1.4<br>(1.3 to 1.6)                      | 0.1<br>(< 0.05 to 0.1)              | 28.2<br>(13.2 to 44.4)                            | -0.2<br>(-14.0 to 14.8)                             |
| Other skin and subcutaneous diseases          | 144.9<br>(140.5 to 149.2)               | 167.9<br>(162.3 to 173.0)                | 0.8<br>(0.4 to 1.5)                 | 31.9<br>(28.3 to 35.7)                            | 4.6<br>(2.2 to 6.9)                                 |
| Sense organ diseases                          | 493.4<br>(481.1 to 507.9)               | 226.6†<br>(211.5 to 243.3)               | 16.7<br>(11.5 to 23.4)              | 22.8<br>(18.2 to 27.1)                            | -3.7<br>(-5.9 to -1.5)                              |
| Glaucoma                                      | 1.2<br>(0.9 to 1.4)                     | --                                       | 0.1<br>(0.1 to 0.1)                 | 37.1<br>(21.5 to 56.3)                            | 3.0<br>(-7.6 to 16.4)                               |
| Cataract                                      | 6.7<br>(5.6 to 8.0)                     | --                                       | 0.7<br>(0.5 to 1.0)                 | 29.7<br>(18.5 to 41.7)                            | -1.6<br>(-10.3 to 9.4)                              |
| Macular degeneration                          | 0.7<br>(0.5 to 0.8)                     | --                                       | < 0.05<br>(< 0.05 to 0.1)           | 39.6<br>(19.2 to 62.0)                            | 5.3<br>(-9.1 to 21.2)                               |
| Refraction and accommodation disorders        | 274.1<br>(263.7 to 284.7)               | --                                       | 4.1<br>(2.4 to 6.7)                 | 19.4<br>(16.0 to 23.4)                            | -6.3<br>(-8.9 to -3.1)                              |
| Age-related and other hearing loss            | 278.1<br>(259.4 to 297.2)               | --                                       | 9.5<br>(6.5 to 13.4)                | 21.8<br>(14.0 to 28.7)                            | -4.2<br>(-8.1 to -1.0)                              |
| Other vision loss                             | 9.0<br>(7.9 to 10.1)                    | --                                       | 0.7<br>(0.5 to 0.9)                 | 35.3<br>(25.3 to 45.6)                            | 2.8<br>(-3.6 to 10.0)                               |
| Other sense organ diseases                    | 49.7<br>(46.0 to 53.6)                  | 226.6<br>(211.5 to 243.3)                | 1.5<br>(1.0 to 2.3)                 | 29.6<br>(23.5 to 35.8)                            | 1.4<br>(-2.3 to 5.2)                                |
| Oral disorders                                | 1,087.2<br>(1,028.3 to 1,144.8)         | 2,895.8†<br>(2,549.7 to 3,284.4)         | 6.1<br>(4.0 to 9.0)                 | 22.5<br>(14.7 to 28.9)                            | -4.5<br>(-9.8 to -0.2)                              |
| Caries of deciduous teeth                     | 219.8<br>(172.8 to 270.9)               | 856.6<br>(581.9 to 1,203.4)              | 0.1<br>(< 0.05 to 0.1)              | 12.8<br>(-0.4 to 26.3)                            | -0.3<br>(-12.2 to 11.6)                             |
| Caries of permanent teeth                     | 723.8<br>(661.6 to 785.2)               | 2,026.8<br>(1,810.6 to 2,255.6)          | 0.4<br>(0.2 to 0.8)                 | 19.5<br>(14.8 to 24.4)                            | -3.3<br>(-6.5 to 0.2)                               |
| Periodontal disease                           | 43.8<br>(35.9 to 53.2)                  | 5.2<br>(4.2 to 6.4)                      | 0.3<br>(0.1 to 0.6)                 | 35.0<br>(29.1 to 40.8)                            | 1.5<br>(-2.4 to 5.5)                                |
| Edentulism and severe tooth loss              | 148.7<br>(128.5 to 168.8)               | 7.2<br>(6.2 to 8.3)                      | 4.2<br>(2.8 to 6.0)                 | 21.3<br>(10.7 to 30.6)                            | -6.0<br>(-12.7 to 0.1)                              |
| Other oral disorders                          | 40.1<br>(38.3 to 42.1)                  | --                                       | 1.2<br>(0.7 to 1.8)                 | 25.4<br>(20.8 to 30.4)                            | 0.2<br>(-3.0 to 3.5)                                |
| <b>Injuries</b>                               | <b>302.4</b><br><b>(284.0 to 323.2)</b> | <b>166.8†</b><br><b>(157.5 to 177.1)</b> | <b>11.9</b><br><b>(8.0 to 16.9)</b> | <b>24.8</b><br><b>(22.1 to 27.3)</b>              | <b>-1.4</b><br><b>(-3.1 to 0.2)</b>                 |
| <b>Transport injuries</b>                     | <b>49.7</b><br><b>(45.8 to 53.7)</b>    | <b>23.0</b><br><b>(20.3 to 26.0)</b>     | <b>2.8</b><br><b>(1.8 to 4.0)</b>   | <b>21.2</b><br><b>(18.4 to 23.9)</b>              | <b>-5.9</b><br><b>(-7.8 to -4.0)</b>                |
| Road injuries                                 | 41.9<br>(38.6 to 45.3)                  | 20.6<br>(18.0 to 23.6)                   | 2.3<br>(1.5 to 3.3)                 | 20.2<br>(17.5 to 22.9)                            | -7.1<br>(-8.9 to -5.3)                              |
| Pedestrian road injuries                      | 9.6<br>(8.2 to 11.3)                    | 3.4<br>(2.8 to 4.1)                      | 0.5<br>(0.4 to 0.8)                 | 12.4<br>(9.6 to 15.1)                             | -13.6<br>(-15.4 to -11.9)                           |
| Cyclist road injuries                         | 5.6<br>(4.7 to 6.6)                     | 3.0<br>(2.2 to 3.8)                      | 0.3<br>(0.2 to 0.4)                 | 36.6<br>(33.1 to 40.4)                            | 7.8<br>(5.5 to 10.3)                                |
| Motorcyclist road injuries                    | 4.2<br>(3.5 to 5.0)                     | 1.3<br>(1.0 to 1.7)                      | 0.2<br>(0.1 to 0.3)                 | 26.1<br>(23.0 to 29.6)                            | -1.0<br>(-3.2 to 1.4)                               |
| Motor vehicle road injuries                   | 19.2<br>(16.4 to 22.0)                  | 10.9<br>(9.2 to 12.7)                    | 1.1<br>(0.8 to 1.6)                 | 16.9<br>(14.4 to 19.8)                            | -10.0<br>(-11.6 to -8.0)                            |
| Other road injuries                           | 3.4<br>(2.9 to 4.0)                     | 2.1<br>(1.6 to 2.7)                      | 0.2<br>(0.1 to 0.2)                 | 40.6<br>(37.0 to 44.1)                            | 9.3<br>(7.1 to 11.6)                                |
| Other transport injuries                      | 7.8<br>(6.5 to 9.3)                     | 2.4<br>(2.0 to 2.9)                      | 0.5<br>(0.3 to 0.7)                 | 26.5<br>(22.3 to 30.8)                            | 1.6<br>(-1.3 to 4.3)                                |
| <b>Unintentional injuries</b>                 | <b>229.4</b><br><b>(211.4 to 250.3)</b> | <b>129.7</b><br><b>(121.2 to 138.8)</b>  | <b>7.8</b><br><b>(5.1 to 11.1)</b>  | <b>26.7</b><br><b>(23.5 to 29.4)</b>              | <b>0.5</b><br><b>(-1.5 to 2.2)</b>                  |
| Falls                                         | 55.8<br>(47.7 to 64.4)                  | 31.3<br>(26.1 to 38.3)                   | 2.3<br>(1.6 to 3.3)                 | 34.2<br>(31.0 to 37.1)                            | 4.6<br>(2.5 to 6.6)                                 |
| Drowning                                      | 0.9<br>(0.8 to 1.1)                     | 0.2<br>(0.2 to 0.3)                      | 0.1<br>(< 0.05 to 0.1)              | 14.8<br>(10.8 to 18.8)                            | -10.5<br>(-13.2 to -8.0)                            |
| Fire, heat, and hot substances                | 35.5<br>(29.9 to 43.2)                  | 6.0<br>(4.9 to 7.2)                      | 1.0<br>(0.7 to 1.4)                 | 28.3<br>(22.2 to 34.3)                            | 1.8<br>(-1.9 to 6.1)                                |
| Poisonings                                    | 1.1<br>(0.9 to 1.3)                     | 1.8<br>(1.4 to 2.2)                      | 0.1<br>(0.1 to 0.2)                 | 27.7<br>(18.1 to 40.0)                            | 3.3<br>(-3.4 to 11.5)                               |
| Exposure to mechanical forces                 | 51.3<br>(43.1 to 62.6)                  | 25.4<br>(21.3 to 29.7)                   | 1.3<br>(0.8 to 1.9)                 | 22.6<br>(18.9 to 25.8)                            | -3.4<br>(-5.9 to -1.4)                              |
| Unintentional firearm injuries                | 1.7<br>(1.4 to 2.1)                     | 0.6<br>(0.4 to 0.8)                      | 0.1<br>(< 0.05 to 0.1)              | 26.2<br>(22.3 to 29.9)                            | -1.0<br>(-3.4 to 1.3)                               |
| Unintentional suffocation                     | 3.8<br>(2.8 to 4.8)                     | 1.1<br>(0.8 to 1.4)                      | 0.1<br>(0.1 to 0.2)                 | 23.4<br>(19.4 to 27.2)                            | -2.1<br>(-4.7 to 0.4)                               |
| Other exposure to mechanical forces           | 45.8<br>(37.9 to 57.1)                  | 23.7<br>(19.9 to 27.7)                   | 1.1<br>(0.7 to 1.6)                 | 22.3<br>(18.3 to 25.6)                            | -3.8<br>(-6.4 to -1.6)                              |



| Cause                                                                               | Prevalence in thousands (95% UI)     | Incidence in thousands (95% UI)                      | YLDs in thousands (95% UI)                    |                                                   |                                                     |
|-------------------------------------------------------------------------------------|--------------------------------------|------------------------------------------------------|-----------------------------------------------|---------------------------------------------------|-----------------------------------------------------|
|                                                                                     | 2016 counts                          | 2016 counts                                          | 2016 counts                                   | Percentage change in counts between 2006 and 2016 | Percentage change in age-standardised rates between |
| Adverse effects of medical treatment                                                | 0.8<br>(0.7 to 1.1)                  | 11.1<br>(9.2 to 13.1)                                | 0.1<br>(0.1 to 0.2)                           | 18.3<br>(11.2 to 26.5)                            | -4.9<br>(-9.5 to 0.1)                               |
| Animal contact                                                                      | 13.6<br>(11.8 to 16.0)               | 20.0<br>(16.6 to 23.5)                               | 0.5<br>(0.3 to 0.6)                           | 16.2<br>(10.7 to 22.6)                            | -8.4<br>(-12.2 to -4.5)                             |
| Venomous animal contact                                                             | 4.7<br>(3.8 to 5.7)                  | 7.7<br>(6.0 to 9.8)                                  | 0.3<br>(0.2 to 0.4)                           | 22.4<br>(14.0 to 32.9)                            | -1.9<br>(-7.5 to 5.2)                               |
| Non-venomous animal contact                                                         | 8.9<br>(7.3 to 11.1)                 | 12.3<br>(10.1 to 14.9)                               | 0.2<br>(0.1 to 0.2)                           | 6.0<br>(1.0 to 10.4)                              | -17.7<br>(-21.2 to -14.7)                           |
| Foreign body                                                                        | 18.9<br>(15.2 to 22.6)               | 13.0<br>(11.3 to 15.1)                               | 0.8<br>(0.5 to 1.1)                           | 24.4<br>(19.6 to 28.6)                            | 1.4<br>(-1.9 to 4.1)                                |
| Pulmonary aspiration and foreign body in airway                                     | 9.3<br>(6.9 to 12.6)                 | 4.3<br>(3.5 to 5.2)                                  | 0.4<br>(0.3 to 0.7)                           | 24.6<br>(19.9 to 29.4)                            | 1.6<br>(-1.4 to 4.4)                                |
| Foreign body in eyes                                                                | 0.8<br>(0.4 to 1.3)                  | 4.5<br>(3.4 to 6.0)                                  | < 0.05<br>(< 0.05 to 0.1)                     | 31.1<br>(27.0 to 36.1)                            | 5.5<br>(2.8 to 8.1)                                 |
| Foreign body in other body part                                                     | 8.8<br>(6.8 to 11.4)                 | 4.2<br>(3.4 to 5.2)                                  | 0.3<br>(0.2 to 0.4)                           | 22.9<br>(17.3 to 28.3)                            | 0.3<br>(-3.6 to 3.9)                                |
| Environmental heat and cold exposure                                                | 18.4<br>(15.1 to 23.0)               | 6.3<br>(5.1 to 7.8)                                  | 0.7<br>(0.5 to 1.1)                           | 19.6<br>(16.0 to 22.8)                            | -5.0<br>(-7.4 to -3.1)                              |
| Other unintentional injuries                                                        | 33.0<br>(25.4 to 43.1)               | 14.6<br>(11.8 to 18.2)                               | 1.0<br>(0.6 to 1.4)                           | 28.2<br>(25.2 to 31.1)                            | 3.2<br>(1.2 to 4.9)                                 |
| <b>Self-harm and interpersonal violence</b>                                         | <b>76.2</b><br><b>(69.2 to 84.2)</b> | <b>14.2†</b><br><b>(12.1 to 16.4)</b>                | <b>1.4</b><br><b>(0.9 to 1.9)</b>             | <b>21.6</b><br><b>(17.9 to 24.8)</b>              | <b>-2.4</b><br><b>(-4.7 to -0.4)</b>                |
| Self-harm                                                                           | 2.2<br>(1.9 to 2.6)                  | 1.3<br>(1.1 to 1.6)                                  | 0.1<br>(0.1 to 0.2)                           | 20.8<br>(16.5 to 24.9)                            | -7.9<br>(-10.6 to -5.4)                             |
| Self-harm by firearm                                                                | 0.1<br>(0.1 to 0.1)                  | 0.1<br>(< 0.05 to 0.1)                               | < 0.05<br>(< 0.05 to < 0.05)                  | 16.2<br>(11.6 to 21.0)                            | -12.0<br>(-14.9 to -9.0)                            |
| Self-harm by other specified means                                                  | 2.1<br>(1.8 to 2.5)                  | 1.3<br>(1.1 to 1.5)                                  | 0.1<br>(0.1 to 0.2)                           | 21.0<br>(16.7 to 25.2)                            | -7.7<br>(-10.5 to -5.0)                             |
| Interpersonal violence                                                              | 73.9<br>(66.8 to 81.9)               | 12.8†<br>(10.8 to 15.0)                              | 1.2<br>(0.9 to 1.7)                           | 21.7<br>(17.7 to 25.1)                            | -1.7<br>(-4.3 to 0.5)                               |
| Assault by firearm                                                                  | 0.5<br>(0.4 to 0.6)                  | 0.2<br>(0.1 to 0.3)                                  | < 0.05<br>(< 0.05 to < 0.05)                  | 36.4<br>(31.7 to 41.1)                            | 7.4<br>(4.6 to 10.5)                                |
| Assault by sharp object                                                             | 8.2<br>(6.7 to 9.9)                  | 4.7<br>(3.6 to 5.9)                                  | 0.3<br>(0.2 to 0.4)                           | 28.8<br>(25.1 to 32.5)                            | 0.9<br>(-1.5 to 3.3)                                |
| Sexual violence                                                                     | 54.3<br>(47.3 to 61.8)               | --                                                   | 0.5<br>(0.3 to 0.7)                           | 6.0<br>(0.1 to 11.0)                              | -13.1<br>(-17.3 to -9.2)                            |
| Assault by other means                                                              | 10.9<br>(9.2 to 13.1)                | 8.0<br>(6.6 to 9.5)                                  | 0.5<br>(0.3 to 0.7)                           | 37.0<br>(33.7 to 40.5)                            | 6.9<br>(4.7 to 9.4)                                 |
| <b>Forces of nature, conflict and terrorism, and executions and police conflict</b> | <b>1.5</b><br><b>(0.7 to 2.6)</b>    | <b>&lt; 0.05†</b><br><b>(&lt; 0.05 to &lt; 0.05)</b> | <b>&lt; 0.05</b><br><b>(&lt; 0.05 to 0.1)</b> | <b>44.0</b><br><b>(33.9 to 59.8)</b>              | <b>31.7</b><br><b>(22.8 to 45.4)</b>                |
| Exposure to forces of nature                                                        | 0.6<br>(0.2 to 1.1)                  | --                                                   | < 0.05<br>(< 0.05 to 0.1)                     | --                                                | --                                                  |
| Conflict and terrorism                                                              | 0.8<br>(0.3 to 1.6)                  | --                                                   | < 0.05<br>(< 0.05 to 0.1)                     | -23.3<br>(-27.2 to -19.5)                         | -27.9<br>(-31.1 to -24.5)                           |
| Executions and police conflict                                                      | 0.1<br>(0.1 to 0.1)                  | < 0.05<br>(< 0.05 to < 0.05)                         | < 0.05<br>(< 0.05 to < 0.05)                  | 6.2<br>(0.1 to 14.3)                              | -13.7<br>(-18.4 to -6.3)                            |
| <b>Impairments</b>                                                                  | --                                   | --                                                   | --                                            | --                                                | --                                                  |
| Anaemia                                                                             | 754.0<br>(718.8 to 790.2)            | --                                                   | 38.0<br>(26.9 to 51.5)                        | -8.5<br>(-25.9 to 7.6)                            | -26.5<br>(-42.3 to -10.7)                           |
| Developmental intellectual disability                                               | 70.7<br>(53.8 to 87.9)               | --                                                   | 7.2<br>(5.1 to 9.9)                           | 18.8<br>(11.3 to 29.5)                            | -0.3<br>(-6.9 to 9.2)                               |
| Epilepsy                                                                            | 25.5<br>(15.8 to 35.1)               | --                                                   | 8.0<br>(4.1 to 13.2)                          | 15.5<br>(-39.0 to 125.7)                          | -6.1<br>(-50.6 to 89.2)                             |
| Guillain-Barre syndrome                                                             | < 0.05<br>(< 0.05 to < 0.05)         | --                                                   | < 0.05<br>(< 0.05 to < 0.05)                  | 21.9<br>(19.2 to 24.8)                            | 0.0<br>(-0.0 to 0.1)                                |
| Hearing loss                                                                        | 321.8<br>(303.4 to 341.7)            | --                                                   | 12.2<br>(8.5 to 16.9)                         | 18.6<br>(13.7 to 23.2)                            | -5.0<br>(-7.8 to -2.5)                              |
| Heart failure                                                                       | 8.0<br>(7.1 to 8.9)                  | --                                                   | 0.8<br>(0.6 to 1.1)                           | 18.3<br>(9.0 to 28.0)                             | -10.2<br>(-17.4 to -2.9)                            |
| Infertility                                                                         | 20.7<br>(18.1 to 23.6)               | --                                                   | 0.1<br>(0.1 to 0.2)                           | 26.6<br>(14.9 to 39.4)                            | -2.1<br>(-11.2 to 7.7)                              |
| Pelvic inflammatory disease                                                         | 2.7<br>(2.2 to 3.2)                  | --                                                   | 0.4<br>(0.2 to 0.5)                           | 23.1<br>(6.9 to 42.2)                             | -3.7<br>(-16.0 to 10.8)                             |
| Vision loss                                                                         | 303.0<br>(291.6 to 315.3)            | --                                                   | 7.4<br>(5.0 to 10.8)                          | 26.2<br>(20.7 to 35.2)                            | -1.6<br>(-5.4 to 4.0)                               |

We did not calculate incidence for the nine impairments, certain NTDs, and causes with only birth prevalence. Blank cells mean that no estimate is available.

† Incidence for aggregate causes represents the sum of the incidence of the causes below the aggregate.

‡ Incidence estimates for stroke represent first-ever stroke only.

^ Incidence of HIV/AIDS represents new infections of HIV only and does not include new infections of Tuberculosis in HIV positive cases.

SR Table 14: Prevalence, incidence, and YLDs for 2016, percentage change of YLD counts and percentage change of age-standardised YLD rates between 2006 and 2016 by cause and impairments, for all ages, Nepal.

| Cause                                                                                | Prevalence in thousands (95% UI)          | Incidence in thousands (95% UI)               | YLDs in thousands (95% UI)             |                                                   |                                                     |
|--------------------------------------------------------------------------------------|-------------------------------------------|-----------------------------------------------|----------------------------------------|---------------------------------------------------|-----------------------------------------------------|
|                                                                                      | 2016 counts                               | 2016 counts                                   | 2016 counts                            | Percentage change in counts between 2006 and 2016 | Percentage change in age-standardised rates between |
| <b>All causes</b>                                                                    | <b>29,233.7</b><br>(29,069.1 to 29,439.1) | <b>180,924.1†</b><br>(171,568.3 to 191,495.1) | <b>3,025.2</b><br>(2,239.9 to 3,915.0) | <b>17.6</b><br>(15.0 to 20.1)                     | <b>-3.0</b><br>(-4.8 to -1.3)                       |
| <b>Communicable, maternal, neonatal, and nutritional disorders</b>                   | <b>23,178.2</b><br>(22,505.2 to 23,913.9) | <b>112,902.8†</b><br>(104,605.4 to 121,933.4) | <b>486.0</b><br>(344.9 to 662.3)       | <b>-7.0</b><br>(-12.9 to -1.7)                    | <b>-20.2</b><br>(-26.1 to -15.4)                    |
| <b>HIV/AIDS and tuberculosis</b>                                                     | <b>7,476.7</b><br>(6,866.9 to 7,906.5)    | <b>36.6†</b><br>(31.9 to 41.6)                | <b>13.9</b><br>(8.1 to 24.0)           | <b>-7.4</b><br>(-20.2 to 11.7)                    | <b>-26.4</b><br>(-35.9 to -13.0)                    |
| Tuberculosis                                                                         | 7,034.8<br>(6,547.0 to 7,586.2)           | 35.4†<br>(31.0 to 40.0)                       | 10.2<br>(6.8 to 14.2)                  | -11.8<br>(-20.8 to -2.0)                          | -29.9<br>(-36.3 to -22.8)                           |
| Drug-susceptible tuberculosis                                                        | 33.3<br>(28.6 to 38.6)                    | 34.5<br>(30.2 to 39.0)                        | 10.0<br>(6.6 to 13.9)                  | -12.0<br>(-21.1 to -2.1)                          | -30.1<br>(-36.7 to -23.1)                           |
| Multidrug-resistant tuberculosis without extensive drug resistance                   | 0.9<br>(0.7 to 1.1)                       | 0.9<br>(0.7 to 1.1)                           | 0.3<br>(0.2 to 0.4)                    | -4.0<br>(-29.7 to 31.6)                           | -23.3<br>(-44.9 to 7.9)                             |
| Extensively drug-resistant tuberculosis                                              | < 0.05<br>(< 0.05 to < 0.05)              | < 0.05<br>(< 0.05 to < 0.05)                  | < 0.05<br>(< 0.05 to < 0.05)           | 149.4<br>(95.0 to 217.4)                          | 97.6<br>(54.6 to 152.6)                             |
| Latent tuberculosis infection                                                        | 7,000.7<br>(6,511.8 to 7,552.3)           | --                                            | --                                     | --                                                | --                                                  |
| HIV/AIDS                                                                             | 28.2<br>(4.7 to 87.6)                     | 1.2^<br>(0.1 to 4.1)                          | 3.6<br>(0.5 to 12.3)                   | 7.7<br>(-37.9 to 87.0)                            | -11.9<br>(-49.9 to 57.2)                            |
| Drug-susceptible HIV/AIDS - Tuberculosis                                             | 0.6<br>(0.3 to 0.9)                       | 0.6<br>(0.3 to 1.0)                           | 0.2<br>(0.1 to 0.4)                    | -21.9<br>(-37.7 to -2.0)                          | -33.9<br>(-46.1 to -18.9)                           |
| Multidrug-resistant HIV/AIDS - Tuberculosis without extensive drug resistance        | < 0.05<br>(< 0.05 to < 0.05)              | < 0.05<br>(< 0.05 to < 0.05)                  | < 0.05<br>(< 0.05 to < 0.05)           | -17.6<br>(-35.3 to 5.5)                           | -30.1<br>(-45.1 to -10.5)                           |
| Extensively drug-resistant HIV/AIDS - Tuberculosis                                   | < 0.05<br>(< 0.05 to < 0.05)              | < 0.05<br>(< 0.05 to < 0.05)                  | < 0.05<br>(< 0.05 to < 0.05)           | 117.4<br>(70.7 to 178.2)                          | 84.3<br>(44.7 to 135.9)                             |
| HIV/AIDS resulting in other diseases                                                 | 27.6<br>(4.1 to 86.9)                     | 1.2<br>(0.1 to 4.1)                           | 3.4<br>(0.3 to 12.1)                   | 10.6<br>(-40.2 to 144.1)                          | -9.8<br>(-52.0 to 119.5)                            |
| <b>Diarrhoea, lower respiratory infections, and other common infectious diseases</b> | <b>2,264.1</b><br>(2,165.2 to 2,381.2)    | <b>105,998.0†</b><br>(97,702.0 to 115,111.3)  | <b>120.1</b><br>(84.0 to 163.4)        | <b>8.1</b><br>(5.0 to 11.4)                       | <b>-7.5</b><br>(-10.0 to -5.1)                      |
| Diarrhoeal diseases                                                                  | 477.7<br>(453.3 to 504.0)                 | 32,404.1<br>(30,723.3 to 34,209.2)            | 53.5<br>(37.2 to 73.2)                 | 11.8<br>(6.7 to 17.0)                             | -8.4<br>(-12.6 to -4.6)                             |
| Intestinal infectious diseases                                                       | 9.1<br>(7.4 to 11.0)                      | 182.6†<br>(152.3 to 219.3)                    | 1.4<br>(0.9 to 2.1)                    | -20.8<br>(-39.6 to 3.7)                           | -26.2<br>(-40.9 to -6.5)                            |
| Typhoid fever                                                                        | 8.3<br>(6.6 to 10.5)                      | 131.0<br>(107.7 to 159.8)                     | 1.3<br>(0.8 to 1.9)                    | -22.1<br>(-42.2 to 4.6)                           | -27.2<br>(-43.1 to -5.2)                            |
| Paratyphoid fever                                                                    | 2.3<br>(1.9 to 2.7)                       | 51.6<br>(43.4 to 60.9)                        | 0.1<br>(0.1 to 0.2)                    | -2.2<br>(-18.4 to 17.5)                           | -13.4<br>(-25.9 to 1.4)                             |
| Other intestinal infectious diseases                                                 | --                                        | --                                            | < 0.05<br>(< 0.05 to < 0.05)           | -37.5<br>(-54.9 to -16.2)                         | -44.6<br>(-56.5 to -30.9)                           |
| Lower respiratory infections                                                         | 28.6<br>(25.9 to 31.4)                    | 1,182.8<br>(1,062.2 to 1,312.3)               | 1.7<br>(1.1 to 2.5)                    | -7.5<br>(-18.8 to 6.0)                            | -16.4<br>(-25.1 to -6.3)                            |
| Upper respiratory infections                                                         | 893.2<br>(792.6 to 1,013.0)               | 66,960.6<br>(59,043.5 to 76,414.9)            | 22.3<br>(13.3 to 34.8)                 | 12.2<br>(6.1 to 18.2)                             | -1.8<br>(-7.2 to 3.5)                               |
| Otitis media                                                                         | 829.1<br>(736.6 to 928.5)                 | 4,445.5<br>(3,510.4 to 5,596.6)               | 22.9<br>(14.1 to 34.5)                 | -1.4<br>(-11.0 to 6.3)                            | -10.2<br>(-18.0 to -4.1)                            |
| Meningitis                                                                           | 91.9<br>(79.4 to 106.7)                   | 16.6<br>(14.4 to 19.7)                        | 10.1<br>(7.1 to 13.3)                  | 12.7<br>(5.1 to 20.2)                             | -3.2<br>(-9.4 to 3.0)                               |
| Pneumococcal meningitis                                                              | 35.3<br>(30.1 to 41.5)                    | 2.9<br>(2.4 to 3.6)                           | 4.3<br>(2.9 to 5.8)                    | 4.1<br>(-10.1 to 21.1)                            | -11.2<br>(-22.2 to 1.5)                             |
| H influenzae type B meningitis                                                       | 12.0<br>(9.8 to 14.6)                     | 1.7<br>(1.3 to 2.3)                           | 1.8<br>(1.2 to 2.4)                    | -2.3<br>(-10.0 to 5.1)                            | -15.0<br>(-22.3 to -8.2)                            |
| Meningococcal infection                                                              | 5.8<br>(4.3 to 7.8)                       | 1.6<br>(1.2 to 2.1)                           | 0.6<br>(0.4 to 0.9)                    | 13.1<br>(7.7 to 19.4)                             | -2.9<br>(-7.5 to 2.3)                               |
| Other meningitis                                                                     | 38.9<br>(28.8 to 49.8)                    | 10.4<br>(8.8 to 12.5)                         | 3.4<br>(2.4 to 4.7)                    | 37.5<br>(28.1 to 47.8)                            | 18.2<br>(10.7 to 27.0)                              |
| Encephalitis                                                                         | 54.1<br>(38.2 to 75.0)                    | 19.1<br>(17.7 to 20.6)                        | 6.8<br>(4.7 to 9.2)                    | 13.1<br>(-1.2 to 27.8)                            | -5.9<br>(-16.4 to 5.8)                              |
| Diphtheria                                                                           | < 0.05<br>(< 0.05 to < 0.05)              | < 0.05<br>(< 0.05 to < 0.05)                  | < 0.05<br>(< 0.05 to < 0.05)           | -58.1<br>(-79.2 to -21.5)                         | -60.1<br>(-78.3 to -30.8)                           |
| Whooping cough                                                                       | 7.3<br>(5.7 to 9.2)                       | 53.0<br>(41.5 to 67.5)                        | 0.4<br>(0.2 to 0.6)                    | -30.7<br>(-44.7 to -13.9)                         | -39.5<br>(-51.8 to -25.1)                           |
| Tetanus                                                                              | 0.8<br>(0.8 to 0.9)                       | 1.5<br>(0.7 to 2.8)                           | < 0.05<br>(< 0.05 to < 0.05)           | -34.7<br>(-54.7 to -8.9)                          | -43.0<br>(-57.9 to -24.5)                           |
| Measles                                                                              | 0.5<br>(0.2 to 1.0)                       | 16.6<br>(5.7 to 37.6)                         | < 0.05<br>(< 0.05 to 0.1)              | -71.9<br>(-84.8 to -37.4)                         | -75.0<br>(-86.5 to -44.5)                           |
| Varicella and herpes zoster                                                          | 28.0<br>(26.0 to 30.1)                    | 715.5<br>(681.4 to 748.9)                     | 0.9<br>(0.6 to 1.5)                    | 22.2<br>(6.4 to 40.1)                             | 0.1<br>(-10.7 to 12.4)                              |
| <b>Neglected tropical diseases and malaria</b>                                       | <b>14,930.2</b><br>(13,553.0 to 16,527.2) | <b>543.5†</b><br>(402.7 to 715.4)             | <b>85.6</b><br>(54.2 to 129.0)         | <b>-28.5</b><br>(-43.5 to -16.0)                  | <b>-40.2</b><br>(-53.5 to -28.6)                    |
| Malaria                                                                              | 2.2<br>(1.8 to 2.7)                       | 20.7<br>(20.7 to 20.7)                        | 0.4<br>(0.3 to 0.5)                    | 11.0<br>(-0.3 to 21.7)                            | -4.5<br>(-13.8 to 4.5)                              |
| Chagas disease                                                                       | --                                        | --                                            | --                                     | --                                                | --                                                  |
| Leishmaniasis                                                                        | 0.2<br>(0.2 to 0.2)                       | 0.8<br>(0.7 to 0.9)                           | < 0.05<br>(< 0.05 to < 0.05)           | -81.2<br>(-84.0 to -78.0)                         | -84.6<br>(-86.8 to -82.0)                           |
| Visceral leishmaniasis                                                               | 0.2<br>(0.2 to 0.2)                       | 0.8<br>(0.7 to 0.9)                           | < 0.05<br>(< 0.05 to < 0.05)           | -81.2<br>(-84.0 to -78.0)                         | -84.6<br>(-86.8 to -82.0)                           |
| Cutaneous and mucocutaneous leishmaniasis                                            | --                                        | --                                            | --                                     | --                                                | --                                                  |
| African trypanosomiasis                                                              | --                                        | --                                            | --                                     | --                                                | --                                                  |
| Schistosomiasis                                                                      | --                                        | --                                            | --                                     | --                                                | --                                                  |
| Cysticercosis                                                                        | 17.9<br>(13.9 to 22.3)                    | --                                            | 2.6<br>(1.4 to 4.3)                    | -29.2<br>(-45.3 to -9.6)                          | -43.8<br>(-55.9 to -29.0)                           |
| Cystic echinococcosis                                                                | 8.1<br>(1.9 to 28.5)                      | 1.7<br>(0.4 to 6.1)                           | 0.8<br>(0.1 to 2.7)                    | -41.1<br>(-91.3 to 319.3)                         | -51.3<br>(-92.6 to 224.0)                           |
| Lymphatic filariasis                                                                 | 266.1<br>(174.5 to 434.3)                 | 76.9<br>(67.1 to 86.7)                        | 18.8<br>(7.4 to 39.9)                  | -47.0<br>(-75.4 to -21.1)                         | -55.8<br>(-79.5 to -33.9)                           |
| Onchocerciasis                                                                       | --                                        | --                                            | --                                     | --                                                | --                                                  |
| Trachoma                                                                             | 34.9<br>(24.4 to 49.3)                    | --                                            | 2.4<br>(1.5 to 3.5)                    | 8.3<br>(-18.5 to 45.0)                            | -23.7<br>(-44.3 to 7.2)                             |
| Dengue                                                                               | 26.5<br>(15.8 to 41.9)                    | 442.7<br>(304.4 to 612.8)                     | 4.3<br>(2.0 to 7.8)                    | 202.9<br>(121.4 to 714.5)                         | 163.9<br>(94.5 to 605.6)                            |
| Yellow fever                                                                         | --                                        | --                                            | --                                     | --                                                | --                                                  |
| Rabies                                                                               | < 0.05<br>(< 0.05 to < 0.05)              | 0.1<br>(0.1 to 0.3)                           | < 0.05<br>(< 0.05 to < 0.05)           | -59.4<br>(-75.2 to -34.4)                         | -64.3<br>(-75.5 to -47.0)                           |
| Intestinal nematode infections                                                       | 14,576.1<br>(13,194.0 to 16,214.9)        | --                                            | 47.4<br>(27.1 to 75.4)                 | -27.4<br>(-39.4 to -13.7)                         | -38.1<br>(-49.4 to -25.3)                           |
| Ascariasis                                                                           | 5,436.9<br>(4,091.6 to 7,011.3)           | --                                            | 4.6<br>(2.2 to 8.1)                    | -39.5<br>(-60.6 to -9.2)                          | -48.4<br>(-67.9 to -19.4)                           |

| Cause                                                                   | Prevalence in thousands (95% UI)                 | Incidence in thousands (95% UI)                   | YLDs in thousands (95% UI)                    |                                                   |                                                     |
|-------------------------------------------------------------------------|--------------------------------------------------|---------------------------------------------------|-----------------------------------------------|---------------------------------------------------|-----------------------------------------------------|
|                                                                         | 2016 counts                                      | 2016 counts                                       | 2016 counts                                   | Percentage change in counts between 2006 and 2016 | Percentage change in age-standardised rates between |
| Trichuriasis                                                            | 5,045.8<br>(3,795.5 to 6,549.4)                  | --                                                | 7.1<br>(3.4 to 12.5)                          | -29.3<br>(-57.7 to 11.9)                          | -40.9<br>(-66.2 to -2.9)                            |
| Hookworm disease                                                        | 7,969.7<br>(6,604.1 to 9,493.2)                  | --                                                | 35.7<br>(20.7 to 56.2)                        | -25.0<br>(-39.6 to -8.0)                          | -35.9<br>(-49.0 to -19.2)                           |
| Food-borne trematodiasis                                                | --                                               | --                                                | --                                            | --                                                | --                                                  |
| Leprosy                                                                 | 7.8<br>(7.4 to 8.1)                              | 0.7<br>(0.7 to 0.7)                               | 0.5<br>(0.3 to 0.7)                           | -13.5<br>(-25.7 to -0.2)                          | -30.9<br>(-39.7 to -21.6)                           |
| Ebola virus disease                                                     | --                                               | --                                                | --                                            | --                                                | --                                                  |
| Zika virus disease                                                      | --                                               | --                                                | --                                            | --                                                | --                                                  |
| Guinea worm disease                                                     | --                                               | --                                                | --                                            | --                                                | --                                                  |
| Other neglected tropical diseases                                       | 320.4<br>(295.9 to 347.7)                        | --                                                | 8.6<br>(5.4 to 13.0)                          | -10.7<br>(-21.3 to 1.0)                           | -13.1<br>(-22.9 to -2.5)                            |
| <b>Maternal disorders</b>                                               | <b>16.9</b><br><b>(13.5 to 21.5)</b>             | <b>502.9†</b><br><b>(441.7 to 582.1)</b>          | <b>1.9</b><br><b>(1.3 to 2.7)</b>             | <b>-18.5</b><br><b>(-35.6 to 5.9)</b>             | <b>-34.9</b><br><b>(-48.5 to -16.0)</b>             |
| Maternal haemorrhage                                                    | 2.3<br>(1.9 to 2.9)                              | 21.5<br>(16.7 to 27.2)                            | 0.1<br>(0.1 to 0.2)                           | 5.1<br>(-26.6 to 54.6)                            | -15.0<br>(-39.1 to 20.9)                            |
| Maternal sepsis and other pregnancy related infections                  | 8.0<br>(5.9 to 11.0)                             | 50.4<br>(36.6 to 70.2)                            | 0.2<br>(0.1 to 0.4)                           | 16.8<br>(-44.2 to 142.3)                          | -6.8<br>(-54.5 to 92.9)                             |
| Maternal hypertensive disorders                                         | 2.6<br>(1.7 to 3.6)                              | 14.4<br>(12.8 to 16.3)                            | 0.1<br>(0.1 to 0.2)                           | -8.8<br>(-51.3 to 66.5)                           | -26.2<br>(-60.7 to 32.9)                            |
| Maternal obstructed labour and uterine rupture                          | 2.4<br>(1.9 to 3.0)                              | 21.8<br>(17.8 to 26.1)                            | 0.8<br>(0.5 to 1.2)                           | -34.0<br>(-53.1 to -6.2)                          | -45.9<br>(-62.4 to -23.2)                           |
| Maternal abortion, miscarriage, and ectopic pregnancy                   | 3.2<br>(2.1 to 4.5)                              | 394.8<br>(335.9 to 469.8)                         | 0.4<br>(0.2 to 0.6)                           | 8.1<br>(-43.0 to 98.9)                            | -14.2<br>(-53.4 to 56.3)                            |
| Other maternal disorders                                                | --                                               | --                                                | 0.3<br>(0.2 to 0.4)                           | -21.8<br>(-38.2 to 1.6)                           | -37.6<br>(-50.4 to -19.5)                           |
| <b>Neonatal disorders</b>                                               | <b>371.9</b><br><b>(307.9 to 450.9)</b>          | --                                                | <b>71.6</b><br><b>(48.7 to 100.2)</b>         | <b>9.6</b><br><b>(-5.9 to 26.5)</b>               | <b>-2.9</b><br><b>(-16.5 to 12.3)</b>               |
| Neonatal preterm birth complications                                    | 323.5<br>(249.5 to 427.1)                        | --                                                | 43.9<br>(30.0 to 62.5)                        | -0.2<br>(-19.6 to 22.2)                           | -11.8<br>(-28.4 to 7.9)                             |
| Neonatal encephalopathy due to birth asphyxia and trauma                | 29.0<br>(13.1 to 53.8)                           | --                                                | 4.3<br>(0.7 to 12.5)                          | 41.0<br>(-13.2 to 202.4)                          | 25.6<br>(-22.5 to 170.4)                            |
| Neonatal sepsis and other neonatal infections                           | 39.7<br>(15.0 to 87.7)                           | --                                                | 15.1<br>(4.9 to 38.1)                         | 39.1<br>(-2.7 to 130.2)                           | 24.2<br>(-14.8 to 111.1)                            |
| Hemolytic disease and other neonatal jaundice                           | 13.3<br>(11.4 to 15.4)                           | --                                                | 4.2<br>(3.2 to 5.5)                           | 15.3<br>(-1.4 to 33.1)                            | 0.8<br>(-12.3 to 14.4)                              |
| Other neonatal disorders                                                | --                                               | --                                                | 4.0<br>(2.7 to 5.6)                           | 7.8<br>(-9.3 to 27.4)                             | -6.6<br>(-21.5 to 10.4)                             |
| <b>Nutritional deficiencies</b>                                         | <b>7,150.5</b><br><b>(6,859.7 to 7,428.5)</b>    | <b>1,300.0†</b><br><b>(1,110.9 to 1,534.2)</b>    | <b>177.4</b><br><b>(117.0 to 255.3)</b>       | <b>-8.6</b><br><b>(-15.0 to -1.6)</b>             | <b>-18.5</b><br><b>(-23.6 to -13.3)</b>             |
| Protein-energy malnutrition                                             | 430.2<br>(328.7 to 545.5)                        | 269.4<br>(211.7 to 333.4)                         | 15.8<br>(9.3 to 24.9)                         | 20.4<br>(-23.4 to 89.0)                           | 4.0<br>(-33.5 to 63.1)                              |
| Iodine deficiency                                                       | 100.3<br>(87.5 to 114.1)                         | 3.2<br>(2.8 to 3.6)                               | 3.1<br>(2.0 to 4.4)                           | -28.4<br>(-40.1 to -14.2)                         | -40.1<br>(-49.0 to -29.8)                           |
| Vitamin A deficiency                                                    | 1,183.0<br>(978.7 to 1,428.8)                    | 1,027.4<br>(848.9 to 1,236.7)                     | 1.2<br>(0.7 to 1.9)                           | 4.1<br>(-15.3 to 27.9)                            | -6.3<br>(-22.2 to 12.5)                             |
| Iron-deficiency anaemia                                                 | 6,181.2<br>(5,869.2 to 6,520.5)                  | --                                                | 156.8<br>(101.9 to 233.2)                     | -10.4<br>(-16.9 to -4.1)                          | -19.2<br>(-24.6 to -14.3)                           |
| Other nutritional deficiencies                                          | --                                               | --                                                | 0.5<br>(0.3 to 0.8)                           | 17.9<br>(-26.8 to 91.9)                           | 2.0<br>(-36.6 to 65.6)                              |
| <b>Other communicable, maternal, neonatal, and nutritional diseases</b> | <b>4,126.0</b><br><b>(3,808.6 to 4,436.9)</b>    | <b>4,521.8</b><br><b>(2,981.8 to 6,444.2)</b>     | <b>15.5</b><br><b>(9.7 to 23.8)</b>           | <b>1.7</b><br><b>(-5.6 to 9.4)</b>                | <b>-10.1</b><br><b>(-15.9 to -4.1)</b>              |
| Sexually transmitted diseases excluding HIV                             | 2,943.5<br>(2,661.9 to 3,231.1)                  | 2,613.6<br>(1,747.0 to 3,672.0)                   | 7.2<br>(4.3 to 11.7)                          | 19.4<br>(10.1 to 28.3)                            | -2.4<br>(-9.8 to 4.4)                               |
| Syphilis                                                                | 337.8<br>(218.0 to 513.2)                        | 242.3<br>(147.1 to 382.9)                         | 0.7<br>(0.5 to 1.0)                           | 32.2<br>(16.1 to 49.2)                            | 3.1<br>(-10.4 to 17.9)                              |
| Chlamydial infection                                                    | 159.8<br>(126.9 to 207.9)                        | 135.4<br>(108.9 to 171.5)                         | 1.0<br>(0.6 to 1.6)                           | 14.9<br>(-2.0 to 33.7)                            | -5.9<br>(-19.6 to 9.6)                              |
| Gonococcal infection                                                    | 451.3<br>(221.0 to 753.7)                        | 1,604.7<br>(715.7 to 2,640.1)                     | 2.3<br>(1.1 to 4.3)                           | 18.6<br>(0.9 to 36.0)                             | -2.3<br>(-16.2 to 10.6)                             |
| Trichomoniasis                                                          | 472.9<br>(405.8 to 543.5)                        | 407.6<br>(349.2 to 471.0)                         | 0.5<br>(0.2 to 1.1)                           | 27.2<br>(17.8 to 37.7)                            | 3.1<br>(-4.1 to 11.3)                               |
| Genital herpes                                                          | 1,664.4<br>(1,423.8 to 1,942.0)                  | 132.2<br>(112.2 to 156.2)                         | 0.4<br>(0.1 to 1.0)                           | 26.9<br>(16.7 to 37.6)                            | 0.9<br>(-7.2 to 9.3)                                |
| Other sexually transmitted diseases                                     | 71.1<br>(62.9 to 80.9)                           | 91.5<br>(78.8 to 105.6)                           | 2.2<br>(1.3 to 3.4)                           | 15.5<br>(3.4 to 29.2)                             | -5.0<br>(-15.0 to 5.6)                              |
| Hepatitis                                                               | 1,053.2<br>(878.3 to 1,269.2)                    | 1,908.1<br>(863.4 to 3,426.2)                     | 1.6<br>(1.0 to 2.5)                           | -28.4<br>(-46.1 to -6.1)                          | -34.5<br>(-48.2 to -18.8)                           |
| Acute hepatitis A                                                       | 93.6<br>(14.9 to 210.6)                          | 1,216.5<br>(194.0 to 2,737.3)                     | 0.5<br>(0.2 to 0.9)                           | -33.1<br>(-70.0 to 51.0)                          | -37.7<br>(-68.7 to 28.2)                            |
| Hepatitis B                                                             | 733.6<br>(594.4 to 909.6)                        | 564.3<br>(444.3 to 715.1)                         | 0.9<br>(0.5 to 1.4)                           | -24.0<br>(-37.3 to -8.9)                          | -32.2<br>(-44.3 to -18.1)                           |
| Hepatitis C                                                             | 218.3<br>(195.4 to 244.1)                        | 26.4<br>(24.1 to 28.9)                            | < 0.05<br>(< 0.05 to < 0.05)                  | -2.6<br>(-5.6 to 0.7)                             | -17.8<br>(-19.4 to -16.0)                           |
| Acute hepatitis E                                                       | 7.8<br>(6.3 to 9.7)                              | 100.9<br>(82.1 to 126.6)                          | 0.2<br>(0.1 to 0.3)                           | -34.5<br>(-51.2 to -13.1)                         | -38.5<br>(-52.6 to -20.7)                           |
| Other infectious diseases                                               | 237.6<br>(221.2 to 255.7)                        | < 0.05<br>(< 0.05 to 0.1)                         | 6.7<br>(4.2 to 10.1)                          | -4.0<br>(-14.5 to 7.3)                            | -9.3<br>(-18.1 to 0.3)                              |
| <b>Non-communicable diseases</b>                                        | <b>26,792.6</b><br><b>(26,302.7 to 27,568.7)</b> | <b>65,326.5†</b><br><b>(61,372.1 to 69,462.2)</b> | <b>2,340.0</b><br><b>(1,733.3 to 3,036.7)</b> | <b>23.2</b><br><b>(20.7 to 25.9)</b>              | <b>-0.3</b><br><b>(-2.1 to 1.4)</b>                 |
| <b>Neoplasms</b>                                                        | <b>29.9</b><br><b>(26.8 to 32.8)</b>             | <b>17.7</b><br><b>(15.9 to 19.6)</b>              | <b>5.9</b><br><b>(4.1 to 8.0)</b>             | <b>25.8</b><br><b>(19.3 to 32.8)</b>              | <b>-3.7</b><br><b>(-8.6 to 1.6)</b>                 |
| Lip and oral cavity cancer                                              | 5.2<br>(4.4 to 6.4)                              | 1.5<br>(1.3 to 1.9)                               | 0.6<br>(0.4 to 0.8)                           | 27.2<br>(9.6 to 46.8)                             | -3.7<br>(-16.4 to 11.7)                             |
| Nasopharynx cancer                                                      | 0.6<br>(0.5 to 0.8)                              | 0.2<br>(0.1 to 0.3)                               | 0.1<br>(0.1 to 0.1)                           | 14.6<br>(0.7 to 31.7)                             | -10.9<br>(-21.1 to 2.2)                             |
| Other pharynx cancer                                                    | 1.7<br>(1.4 to 2.3)                              | 0.8<br>(0.6 to 1.1)                               | 0.3<br>(0.2 to 0.4)                           | 24.4<br>(4.2 to 46.6)                             | -6.3<br>(-22.0 to 10.7)                             |
| Oesophageal cancer                                                      | 0.9<br>(0.8 to 1.1)                              | 0.9<br>(0.7 to 1.0)                               | 0.2<br>(0.1 to 0.3)                           | 24.8<br>(10.8 to 40.3)                            | -6.3<br>(-17.9 to 6.0)                              |
| Stomach cancer                                                          | 2.3<br>(2.1 to 2.5)                              | 1.6<br>(1.4 to 1.7)                               | 0.4<br>(0.3 to 0.5)                           | 9.8<br>(-4.9 to 25.4)                             | -16.9<br>(-28.8 to -4.4)                            |
| Colon and rectum cancer                                                 | 2.6<br>(2.1 to 3.3)                              | 1.0<br>(0.8 to 1.2)                               | 0.3<br>(0.2 to 0.5)                           | 35.7<br>(18.5 to 54.0)                            | 1.4<br>(-11.1 to 16.2)                              |
| Liver cancer                                                            | 0.2<br>(0.2 to 0.3)                              | 0.7<br>(0.5 to 0.8)                               | 0.1<br>(0.1 to 0.2)                           | 46.5<br>(23.7 to 72.4)                            | 9.2<br>(-7.9 to 28.1)                               |
| Liver cancer due to hepatitis B                                         | 0.2<br>(0.1 to 0.3)                              | 0.2<br>(0.2 to 0.3)                               | 0.1<br>(< 0.05 to 0.1)                        | 44.5<br>(21.2 to 71.2)                            | 9.1<br>(-8.0 to 28.5)                               |



| Cause                                              | Prevalence in thousands (95% UI)              | Incidence in thousands (95% UI)          | YLDs in thousands (95% UI)              |                                                   |                                                     |
|----------------------------------------------------|-----------------------------------------------|------------------------------------------|-----------------------------------------|---------------------------------------------------|-----------------------------------------------------|
|                                                    | 2016 counts                                   | 2016 counts                              | 2016 counts                             | Percentage change in counts between 2006 and 2016 | Percentage change in age-standardised rates between |
| Liver cancer due to hepatitis C                    | 0.2<br>(0.1 to 0.2)                           | 0.2<br>(0.1 to 0.2)                      | < 0.05<br>(< 0.05 to 0.1)               | 48.8<br>(22.7 to 76.3)                            | 9.2<br>(-8.9 to 28.1)                               |
| Liver cancer due to alcohol use                    | 0.1<br>(< 0.05 to 0.1)                        | 0.1<br>(0.1 to 0.1)                      | < 0.05<br>(< 0.05 to < 0.05)            | 51.2<br>(26.7 to 79.2)                            | 11.2<br>(-7.1 to 31.2)                              |
| Liver cancer due to other causes                   | 0.1<br>(0.1 to 0.2)                           | 0.2<br>(0.1 to 0.2)                      | < 0.05<br>(< 0.05 to < 0.05)            | 44.9<br>(21.5 to 72.7)                            | 8.7<br>(-8.8 to 29.1)                               |
| Gallbladder and biliary tract cancer               | 0.4<br>(0.3 to 0.5)                           | 0.5<br>(0.4 to 0.6)                      | 0.1<br>(0.1 to 0.2)                     | 23.8<br>(12.0 to 38.4)                            | -7.2<br>(-15.5 to 3.5)                              |
| Pancreatic cancer                                  | 0.3<br>(0.3 to 0.4)                           | 0.5<br>(0.4 to 0.5)                      | 0.1<br>(0.1 to 0.1)                     | 36.9<br>(25.9 to 48.7)                            | 0.5<br>(-7.3 to 9.5)                                |
| Larynx cancer                                      | 1.3<br>(1.1 to 1.7)                           | 0.4<br>(0.4 to 0.6)                      | 0.2<br>(0.1 to 0.3)                     | 19.9<br>(6.4 to 35.4)                             | -10.3<br>(-20.8 to 1.1)                             |
| Tracheal, bronchus, and lung cancer                | 1.6<br>(1.2 to 2.0)                           | 1.4<br>(1.1 to 1.8)                      | 0.4<br>(0.2 to 0.5)                     | 31.7<br>(7.4 to 61.6)                             | -1.6<br>(-20.1 to 20.7)                             |
| Malignant skin melanoma                            | 0.1<br>(0.1 to 0.2)                           | < 0.05<br>(< 0.05 to 0.1)                | < 0.05<br>(< 0.05 to < 0.05)            | 41.4<br>(20.7 to 59.9)                            | 6.4<br>(-7.4 to 19.8)                               |
| Non-melanoma skin cancer                           | < 0.05<br>(< 0.05 to 0.1)                     | 0.1<br>(0.1 to 0.2)                      | < 0.05<br>(< 0.05 to < 0.05)            | 25.9<br>(-20.5 to 94.2)                           | -19.0<br>(-51.1 to 32.7)                            |
| Non-melanoma skin cancer (squamous-cell carcinoma) | < 0.05<br>(< 0.05 to 0.1)                     | 0.1<br>(0.1 to 0.1)                      | < 0.05<br>(< 0.05 to < 0.05)            | 25.8<br>(-22.1 to 96.8)                           | -19.4<br>(-52.2 to 32.8)                            |
| Non-melanoma skin cancer (basal-cell carcinoma)    | < 0.05<br>(< 0.05 to < 0.05)                  | < 0.05<br>(< 0.05 to 0.1)                | < 0.05<br>(< 0.05 to < 0.05)            | 29.7<br>(13.2 to 51.5)                            | 2.5<br>(-10.6 to 18.2)                              |
| Breast cancer                                      | 6.7<br>(5.1 to 10.5)                          | 1.6<br>(1.2 to 2.6)                      | 0.7<br>(0.5 to 1.2)                     | 35.9<br>(6.4 to 73.3)                             | 3.3<br>(-17.6 to 30.7)                              |
| Cervical cancer                                    | 5.4<br>(2.9 to 7.8)                           | 1.5<br>(0.8 to 2.2)                      | 0.6<br>(0.3 to 0.9)                     | 11.8<br>(-15.0 to 45.4)                           | -13.2<br>(-34.8 to 13.3)                            |
| Uterine cancer                                     | 0.8<br>(0.7 to 1.0)                           | 0.2<br>(0.1 to 0.2)                      | 0.1<br>(< 0.05 to 0.1)                  | 29.7<br>(-0.2 to 68.9)                            | -4.6<br>(-25.5 to 23.4)                             |
| Ovarian cancer                                     | 1.3<br>(0.8 to 1.9)                           | 0.4<br>(0.3 to 0.7)                      | 0.2<br>(0.1 to 0.3)                     | 32.3<br>(4.0 to 68.8)                             | -0.6<br>(-24.6 to 29.8)                             |
| Prostate cancer                                    | 1.5<br>(1.1 to 2.0)                           | 0.5<br>(0.4 to 0.6)                      | 0.2<br>(0.1 to 0.3)                     | 49.3<br>(9.2 to 98.4)                             | 5.3<br>(-19.9 to 34.5)                              |
| Testicular cancer                                  | 0.1<br>(0.1 to 0.1)                           | < 0.05<br>(< 0.05 to < 0.05)             | < 0.05<br>(< 0.05 to < 0.05)            | -2.2<br>(-21.7 to 20.8)                           | -21.3<br>(-36.0 to -3.8)                            |
| Kidney cancer                                      | 0.7<br>(0.5 to 1.0)                           | 0.2<br>(0.1 to 0.3)                      | 0.1<br>(< 0.05 to 0.1)                  | 51.6<br>(29.0 to 75.3)                            | 18.1<br>(0.9 to 36.3)                               |
| Bladder cancer                                     | 0.9<br>(0.7 to 1.1)                           | 0.3<br>(0.2 to 0.3)                      | 0.1<br>(0.1 to 0.1)                     | 40.3<br>(21.9 to 59.8)                            | 2.8<br>(-10.2 to 18.1)                              |
| Brain and nervous system cancer                    | 0.9<br>(0.5 to 1.3)                           | 0.4<br>(0.2 to 0.6)                      | 0.1<br>(0.1 to 0.2)                     | 19.7<br>(7.2 to 33.8)                             | -1.5<br>(-11.9 to 14.1)                             |
| Thyroid cancer                                     | 1.1<br>(0.9 to 1.2)                           | 0.2<br>(0.2 to 0.3)                      | 0.1<br>(0.1 to 0.1)                     | 31.4<br>(5.3 to 63.7)                             | -2.0<br>(-21.7 to 22.0)                             |
| Mesothelioma                                       | 0.1<br>(< 0.05 to 0.1)                        | < 0.05<br>(< 0.05 to 0.1)                | < 0.05<br>(< 0.05 to < 0.05)            | 30.9<br>(14.2 to 48.7)                            | -0.6<br>(-13.2 to 12.3)                             |
| Hodgkin lymphoma                                   | 0.3<br>(0.2 to 0.5)                           | 0.1<br>(0.1 to 0.2)                      | < 0.05<br>(< 0.05 to 0.1)               | -15.8<br>(-29.5 to -4.3)                          | -28.1<br>(-36.7 to -21.7)                           |
| Non-Hodgkin's lymphoma                             | 1.1<br>(0.7 to 1.4)                           | 0.4<br>(0.3 to 0.6)                      | 0.1<br>(0.1 to 0.2)                     | 30.2<br>(17.2 to 44.8)                            | 1.8<br>(-9.0 to 14.4)                               |
| Multiple myeloma                                   | 0.2<br>(0.1 to 0.3)                           | 0.1<br>(0.1 to 0.2)                      | 0.1<br>(< 0.05 to 0.1)                  | 39.6<br>(24.8 to 53.5)                            | 3.7<br>(-7.2 to 14.7)                               |
| Leukaemia                                          | 2.2<br>(1.7 to 2.7)                           | 0.7<br>(0.5 to 0.8)                      | 0.3<br>(0.2 to 0.4)                     | 6.8<br>(-7.5 to 23.4)                             | -10.3<br>(-19.2 to 0.3)                             |
| Acute lymphoid leukaemia                           | 0.7<br>(0.5 to 0.9)                           | 0.2<br>(0.1 to 0.2)                      | 0.1<br>(0.1 to 0.1)                     | -0.5<br>(-29.8 to 26.0)                           | -9.9<br>(-32.5 to 9.0)                              |
| Chronic lymphoid leukaemia                         | 0.4<br>(0.3 to 0.5)                           | 0.1<br>(0.1 to 0.1)                      | 0.1<br>(< 0.05 to 0.1)                  | 34.7<br>(17.0 to 59.3)                            | 0.0<br>(-12.5 to 16.9)                              |
| Acute myeloid leukaemia                            | 0.3<br>(0.2 to 0.4)                           | 0.2<br>(0.1 to 0.2)                      | 0.1<br>(< 0.05 to 0.1)                  | 18.3<br>(-0.4 to 40.2)                            | 0.8<br>(-12.2 to 15.4)                              |
| Chronic myeloid leukaemia                          | 0.2<br>(0.2 to 0.3)                           | 0.1<br>(0.1 to 0.1)                      | < 0.05<br>(< 0.05 to 0.1)               | 3.5<br>(-11.2 to 22.1)                            | -18.6<br>(-29.7 to -4.7)                            |
| Other leukaemia                                    | 0.6<br>(0.4 to 0.8)                           | 0.1<br>(0.1 to 0.2)                      | 0.1<br>(< 0.05 to 0.1)                  | -5.9<br>(-19.7 to 11.4)                           | -20.4<br>(-30.6 to -8.6)                            |
| Other neoplasms                                    | 3.9<br>(2.5 to 4.6)                           | 1.4<br>(0.9 to 1.6)                      | 0.4<br>(0.2 to 0.6)                     | 34.0<br>(18.0 to 51.5)                            | 5.0<br>(-7.7 to 19.6)                               |
| <b>Cardiovascular diseases</b>                     | <b>1,145.9</b><br><b>(1,105.8 to 1,187.0)</b> | <b>149.2†</b><br><b>(142.2 to 156.6)</b> | <b>67.0</b><br><b>(49.1 to 87.4)</b>    | <b>33.6</b><br><b>(29.1 to 38.5)</b>              | <b>1.2</b><br><b>(-2.2 to 4.6)</b>                  |
| Rheumatic heart disease                            | 149.1<br>(130.9 to 170.3)                     | 5.7<br>(5.0 to 6.4)                      | 7.3<br>(4.6 to 10.6)                    | 4.3<br>(-5.5 to 15.1)                             | -14.1<br>(-21.5 to -6.0)                            |
| Ischaemic heart disease                            | 515.3<br>(487.4 to 544.0)                     | 68.8<br>(64.1 to 74.3)                   | 23.3<br>(16.0 to 32.0)                  | 39.6<br>(33.4 to 46.6)                            | 4.6<br>(0.2 to 9.7)                                 |
| Cerebrovascular disease                            | 136.7<br>(127.1 to 146.3)                     | 25.3‡<br>(23.1 to 27.5)                  | 21.0<br>(15.2 to 26.7)                  | 38.8<br>(27.6 to 49.7)                            | 3.3<br>(-4.8 to 11.1)                               |
| Ischaemic stroke                                   | 119.2<br>(107.1 to 132.6)                     | 17.4‡<br>(15.5 to 19.5)                  | 17.5<br>(12.5 to 22.4)                  | 39.4<br>(26.6 to 52.6)                            | 3.3<br>(-6.3 to 12.7)                               |
| Hemorrhagic stroke                                 | 23.9<br>(21.4 to 26.8)                        | 7.9‡<br>(7.0 to 8.7)                     | 3.5<br>(2.5 to 4.6)                     | 36.0<br>(19.2 to 54.4)                            | 3.0<br>(-9.6 to 17.4)                               |
| Hypertensive heart disease                         | 35.1<br>(29.6 to 41.4)                        | --                                       | 2.8<br>(1.9 to 3.9)                     | 38.1<br>(23.3 to 56.2)                            | 1.6<br>(-8.2 to 12.6)                               |
| Cardiomyopathy and myocarditis                     | 7.4<br>(6.4 to 8.5)                           | 7.6†<br>(6.6 to 8.6)                     | 0.8<br>(0.5 to 1.2)                     | 28.3<br>(8.7 to 49.1)                             | 5.7<br>(-9.5 to 21.9)                               |
| Myocarditis                                        | 5.8<br>(5.0 to 6.7)                           | 7.6<br>(6.6 to 8.6)                      | 0.4<br>(0.3 to 0.7)                     | 25.3<br>(7.3 to 45.8)                             | 5.7<br>(-10.1 to 22.6)                              |
| Alcoholic cardiomyopathy                           | 0.2<br>(0.2 to 0.2)                           | --                                       | < 0.05<br>(< 0.05 to < 0.05)            | 33.0<br>(22.3 to 46.1)                            | 3.4<br>(-4.6 to 13.1)                               |
| Other cardiomyopathy                               | 4.3<br>(3.5 to 5.2)                           | --                                       | 0.4<br>(0.2 to 0.6)                     | 31.8<br>(-1.0 to 72.6)                            | 5.9<br>(-17.7 to 34.1)                              |
| Atrial fibrillation and flutter                    | 111.9<br>(97.1 to 130.3)                      | 10.1<br>(8.6 to 11.9)                    | 8.7<br>(5.8 to 12.1)                    | 38.5<br>(28.4 to 48.5)                            | 0.1<br>(-6.8 to 6.8)                                |
| Peripheral vascular disease                        | 291.1<br>(252.1 to 337.2)                     | 28.7<br>(24.7 to 33.5)                   | 1.5<br>(0.7 to 2.8)                     | 32.0<br>(22.5 to 42.7)                            | -6.3<br>(-12.7 to 1.0)                              |
| Endocarditis                                       | 1.1<br>(1.0 to 1.2)                           | 3.1<br>(2.8 to 3.5)                      | 0.1<br>(0.1 to 0.1)                     | 27.0<br>(16.9 to 37.2)                            | -2.2<br>(-12.7 to 10.3)                             |
| Other cardiovascular and circulatory diseases      | 29.9<br>(25.3 to 34.9)                        | --                                       | 1.6<br>(1.0 to 2.2)                     | 28.9<br>(10.4 to 50.4)                            | -2.2<br>(-14.3 to 10.6)                             |
| <b>Chronic respiratory diseases</b>                | <b>2,164.4</b><br><b>(2,084.6 to 2,241.5)</b> | <b>392.5†</b><br><b>(370.6 to 414.9)</b> | <b>148.3</b><br><b>(123.2 to 174.0)</b> | <b>39.6</b><br><b>(32.3 to 48.1)</b>              | <b>8.0</b><br><b>(1.8 to 14.5)</b>                  |
| Chronic obstructive pulmonary disease              | 960.7<br>(918.4 to 1,003.8)                   | 77.6<br>(74.1 to 81.2)                   | 88.5<br>(77.3 to 98.0)                  | 28.7<br>(20.2 to 39.0)                            | -2.1<br>(-8.7 to 5.7)                               |
| Pneumoconiosis                                     | 0.8<br>(0.7 to 0.8)                           | 0.1<br>(0.1 to 0.1)                      | 0.1<br>(0.1 to 0.2)                     | 35.8<br>(26.6 to 43.9)                            | 3.8<br>(-3.1 to 10.4)                               |
| Silicosis                                          | < 0.05<br>(< 0.05 to 0.1)                     | < 0.05<br>(< 0.05 to < 0.05)             | < 0.05<br>(< 0.05 to < 0.05)            | 26.3<br>(20.3 to 32.6)                            | -1.6<br>(-6.2 to 3.0)                               |



| Cause                                                          | Prevalence in thousands (95% UI)           | Incidence in thousands (95% UI)                     | YLDs in thousands (95% UI)        |                                                   |                                                     |
|----------------------------------------------------------------|--------------------------------------------|-----------------------------------------------------|-----------------------------------|---------------------------------------------------|-----------------------------------------------------|
|                                                                | 2016 counts                                | 2016 counts                                         | 2016 counts                       | Percentage change in counts between 2006 and 2016 | Percentage change in age-standardised rates between |
| Asbestosis                                                     | 0.2<br>(0.2 to 0.2)                        | < 0.05<br>(< 0.05 to < 0.05)                        | < 0.05<br>(< 0.05 to < 0.05)      | 29.1<br>(20.6 to 37.8)                            | -0.1<br>(-5.8 to 6.0)                               |
| Coal workers pneumoconiosis                                    | --                                         | --                                                  | --                                | --                                                | --                                                  |
| Other pneumoconiosis                                           | 0.5<br>(0.4 to 0.6)                        | 0.1<br>(0.1 to 0.1)                                 | 0.1<br>(0.1 to 0.1)               | 39.6<br>(26.4 to 52.4)                            | 5.8<br>(-4.2 to 15.3)                               |
| Asthma                                                         | 1,373.8<br>(1,283.4 to 1,469.4)            | 314.0<br>(292.5 to 336.0)                           | 52.9<br>(35.0 to 75.0)            | 62.9<br>(54.4 to 71.4)                            | 34.4<br>(27.9 to 41.1)                              |
| Interstitial lung disease and pulmonary sarcoidosis            | 6.0<br>(5.4 to 6.7)                        | 0.8<br>(0.7 to 0.8)                                 | 0.7<br>(0.5 to 1.0)               | 34.3<br>(24.7 to 45.1)                            | 5.0<br>(-4.5 to 15.6)                               |
| Other chronic respiratory diseases                             | --                                         | --                                                  | 6.2<br>(5.2 to 7.2)               | 40.6<br>(19.1 to 68.5)                            | 27.6<br>(11.6 to 46.9)                              |
| <b>Cirrhosis and other chronic liver diseases</b>              | <b>81.6<br/>(77.5 to 86.1)</b>             | <b>6.2<br/>(6.0 to 6.5)</b>                         | <b>7.7<br/>(5.3 to 10.6)</b>      | <b>21.7<br/>(10.2 to 34.2)</b>                    | <b>1.3<br/>(-6.9 to 10.1)</b>                       |
| Cirrhosis and other chronic liver diseases due to hepatitis B  | 26.4<br>(23.6 to 29.3)                     | 2.1<br>(1.9 to 2.4)                                 | 2.2<br>(1.5 to 3.1)               | 26.5<br>(8.9 to 45.0)                             | -0.7<br>(-13.3 to 12.7)                             |
| Cirrhosis and other chronic liver diseases due to hepatitis C  | 6.1<br>(5.2 to 7.0)                        | 0.5<br>(0.4 to 0.6)                                 | 0.5<br>(0.3 to 0.7)               | 25.8<br>(-1.7 to 64.0)                            | -1.2<br>(-23.0 to 28.6)                             |
| Cirrhosis and other chronic liver diseases due to alcohol use  | 17.9<br>(15.8 to 20.3)                     | 1.6<br>(1.4 to 1.8)                                 | 1.5<br>(1.0 to 2.1)               | 35.8<br>(15.4 to 61.4)                            | 5.3<br>(-9.5 to 23.2)                               |
| Cirrhosis and other chronic liver diseases due to other causes | 31.2<br>(28.6 to 34.6)                     | 2.0<br>(1.9 to 2.2)                                 | 3.5<br>(2.3 to 5.0)               | 13.4<br>(-4.2 to 34.3)                            | 1.3<br>(-13.2 to 17.9)                              |
| <b>Digestive diseases</b>                                      | <b>574.9<br/>(547.6 to 605.0)</b>          | <b>630.1<sup>†</sup><br/>(595.2 to 670.9)</b>       | <b>16.1<br/>(11.5 to 21.7)</b>    | <b>22.2<br/>(13.3 to 30.7)</b>                    | <b>0.8<br/>(-5.1 to 6.5)</b>                        |
| Peptic ulcer disease                                           | 145.3<br>(134.1 to 157.3)                  | 56.6<br>(50.6 to 63.2)                              | 2.4<br>(1.5 to 3.5)               | 28.6<br>(16.1 to 41.3)                            | 3.5<br>(-5.7 to 12.5)                               |
| Gastritis and duodenitis                                       | 268.2<br>(238.7 to 299.4)                  | 345.4<br>(312.7 to 384.2)                           | 3.4<br>(2.2 to 4.8)               | 38.5<br>(27.1 to 51.5)                            | 11.4<br>(2.9 to 20.9)                               |
| Appendicitis                                                   | 2.6<br>(2.4 to 2.8)                        | 67.1<br>(61.7 to 73.2)                              | 0.8<br>(0.5 to 1.2)               | 8.3<br>(-21.3 to 56.7)                            | -8.9<br>(-30.2 to 20.8)                             |
| Paralytic ileus and intestinal obstruction                     | 0.3<br>(0.3 to 0.4)                        | 9.4<br>(8.5 to 10.4)                                | 0.1<br>(0.1 to 0.1)               | 12.6<br>(8.4 to 17.4)                             | -8.4<br>(-11.7 to -4.7)                             |
| Inguinal, femoral, and abdominal hernia                        | 144.6<br>(131.4 to 157.6)                  | 47.6<br>(42.1 to 53.7)                              | 7.2<br>(4.9 to 9.8)               | 15.1<br>(2.6 to 28.4)                             | -4.4<br>(-13.2 to 5.2)                              |
| Inflammatory bowel disease                                     | 2.6<br>(2.5 to 2.8)                        | 14.1<br>(13.5 to 14.7)                              | 0.4<br>(0.3 to 0.6)               | 11.4<br>(-1.3 to 25.7)                            | -10.9<br>(-23.2 to 3.5)                             |
| Vascular intestinal disorders                                  | 0.2<br>(0.1 to 0.2)                        | 1.0<br>(0.9 to 1.2)                                 | 0.1<br>(< 0.05 to 0.1)            | 33.6<br>(26.6 to 40.3)                            | 10.9<br>(6.1 to 15.2)                               |
| Gallbladder and biliary diseases                               | 33.8<br>(30.1 to 37.7)                     | 83.4<br>(72.4 to 93.7)                              | 0.4<br>(0.3 to 0.6)               | 34.4<br>(15.9 to 58.8)                            | 7.0<br>(-9.5 to 29.1)                               |
| Pancreatitis                                                   | 0.6<br>(0.5 to 0.7)                        | 5.5<br>(4.9 to 6.2)                                 | 0.1<br>(< 0.05 to 0.1)            | 32.8<br>(28.1 to 37.4)                            | 6.2<br>(2.8 to 9.7)                                 |
| Other digestive diseases                                       | --                                         | --                                                  | 1.4<br>(1.0 to 1.8)               | 24.4<br>(13.5 to 34.7)                            | 4.9<br>(-1.7 to 11.3)                               |
| <b>Neurological disorders</b>                                  | <b>12,183.1<br/>(11,706.7 to 12,678.7)</b> | <b>5,814.1<br/>(4,977.0 to 6,784.4)</b>             | <b>318.5<br/>(210.1 to 441.6)</b> | <b>23.8<br/>(7.0 to 42.3)</b>                     | <b>1.7<br/>(-10.2 to 14.7)</b>                      |
| Alzheimer's disease and other dementias                        | 64.1<br>(53.6 to 76.4)                     | 11.0<br>(9.1 to 13.3)                               | 9.0<br>(6.2 to 12.0)              | 40.5<br>(32.5 to 48.5)                            | -2.4<br>(-7.0 to 2.4)                               |
| Parkinson's disease                                            | 9.4<br>(7.4 to 11.8)                       | 1.2<br>(0.9 to 1.5)                                 | 1.1<br>(0.7 to 1.6)               | 53.0<br>(31.4 to 78.5)                            | 10.0<br>(-4.1 to 26.2)                              |
| Epilepsy                                                       | 113.5<br>(35.3 to 174.6)                   | 13.8<br>(4.4 to 21.3)                               | 33.7<br>(9.8 to 66.4)             | 22.4<br>(-67.8 to 360.4)                          | 4.8<br>(-72.3 to 299.3)                             |
| Multiple sclerosis                                             | 4.2<br>(3.7 to 4.7)                        | 0.2<br>(0.2 to 0.2)                                 | 1.2<br>(0.8 to 1.6)               | 39.1<br>(20.1 to 59.8)                            | 10.9<br>(-4.6 to 29.1)                              |
| Motor neuron disease                                           | 0.5<br>(0.5 to 0.6)                        | 0.1<br>(0.1 to 0.1)                                 | 0.1<br>(0.1 to 0.1)               | 23.8<br>(18.6 to 29.4)                            | 4.0<br>(0.4 to 7.9)                                 |
| Migraine                                                       | 5,671.9<br>(5,426.1 to 5,912.1)            | 601.6<br>(569.0 to 637.2)                           | 234.2<br>(148.3 to 328.1)         | 22.5<br>(18.6 to 26.5)                            | 0.9<br>(-2.1 to 4.0)                                |
| Tension-type headache                                          | 8,813.3<br>(7,993.8 to 9,847.1)            | 5,186.0<br>(4,334.6 to 6,163.7)                     | 31.4<br>(19.9 to 46.6)            | 24.7<br>(18.4 to 31.0)                            | 1.8<br>(-2.9 to 6.8)                                |
| Other neurological disorders                                   | 0.1<br>(0.1 to 0.1)                        | 0.2<br>(0.1 to 0.3)                                 | 7.9<br>(2.6 to 15.1)              | 46.6<br>(-55.5 to 381.9)                          | 25.4<br>(-59.2 to 278.7)                            |
| <b>Mental and substance use disorders</b>                      | <b>4,148.7<br/>(3,966.7 to 4,345.6)</b>    | <b>1,606.4<sup>†</sup><br/>(1,493.0 to 1,733.1)</b> | <b>539.7<br/>(392.4 to 701.5)</b> | <b>20.3<br/>(17.6 to 23.3)</b>                    | <b>-1.4<br/>(-3.6 to 0.9)</b>                       |
| Schizophrenia                                                  | 59.1<br>(51.7 to 66.7)                     | 3.8<br>(3.3 to 4.3)                                 | 37.6<br>(27.7 to 47.4)            | 25.7<br>(14.9 to 37.1)                            | 0.6<br>(-7.8 to 9.2)                                |
| Alcohol use disorders                                          | 400.9<br>(354.1 to 449.9)                  | 213.8<br>(185.6 to 243.5)                           | 40.1<br>(27.4 to 54.9)            | 32.1<br>(21.9 to 43.7)                            | 5.4<br>(-2.2 to 14.2)                               |
| Drug use disorders                                             | 155.6<br>(139.2 to 170.8)                  | 23.9<br>(20.9 to 27.1)                              | 39.0<br>(26.4 to 53.1)            | 27.2<br>(15.1 to 39.8)                            | 3.0<br>(-6.0 to 13.0)                               |
| Opioid use disorders                                           | 82.7<br>(66.3 to 103.6)                    | 9.8<br>(8.0 to 12.0)                                | 34.5<br>(22.5 to 48.0)            | 27.2<br>(13.7 to 41.6)                            | 3.1<br>(-7.1 to 14.0)                               |
| Cocaine use disorders                                          | 6.3<br>(5.4 to 7.5)                        | 0.8<br>(0.6 to 0.9)                                 | 0.9<br>(0.5 to 1.4)               | 29.4<br>(1.2 to 63.8)                             | 3.3<br>(-17.3 to 27.8)                              |
| Amphetamine use disorders                                      | 1.2<br>(0.8 to 1.6)                        | 0.2<br>(0.2 to 0.3)                                 | 0.2<br>(0.1 to 0.3)               | 25.0<br>(14.3 to 37.4)                            | 0.8<br>(-7.5 to 10.5)                               |
| Cannabis use disorders                                         | 61.0<br>(49.4 to 74.3)                     | 11.2<br>(9.1 to 13.8)                               | 1.8<br>(1.1 to 2.7)               | 23.6<br>(1.3 to 49.8)                             | -0.8<br>(-17.3 to 17.9)                             |
| Other drug use disorders                                       | 9.1<br>(8.0 to 10.2)                       | 1.9<br>(1.7 to 2.2)                                 | 1.7<br>(1.1 to 2.4)               | 30.8<br>(8.9 to 57.1)                             | 5.4<br>(-11.4 to 25.7)                              |
| Depressive disorders                                           | 955.7<br>(893.8 to 1,030.7)                | 1,045.5<br>(939.0 to 1,162.4)                       | 160.8<br>(110.4 to 218.3)         | 19.3<br>(13.3 to 25.6)                            | -5.4<br>(-10.3 to -0.6)                             |
| Major depressive disorder                                      | 629.6<br>(563.7 to 700.9)                  | 985.3<br>(876.2 to 1,100.8)                         | 127.7<br>(86.6 to 172.5)          | 17.6<br>(9.9 to 25.3)                             | -6.8<br>(-12.9 to -0.6)                             |
| Dysthymia                                                      | 346.0<br>(299.3 to 396.8)                  | 60.2<br>(52.9 to 69.6)                              | 33.2<br>(22.4 to 48.0)            | 26.6<br>(21.9 to 31.4)                            | 0.7<br>(-2.4 to 4.1)                                |
| Bipolar disorder                                               | 144.5<br>(124.2 to 168.7)                  | 14.9<br>(12.7 to 17.6)                              | 29.6<br>(18.1 to 44.1)            | 24.6<br>(15.6 to 34.7)                            | 0.7<br>(-6.5 to 8.1)                                |
| Anxiety disorders                                              | 1,040.0<br>(942.7 to 1,150.6)              | 172.3<br>(158.0 to 188.5)                           | 100.3<br>(69.8 to 136.5)          | 21.1<br>(16.6 to 26.2)                            | 0.9<br>(-2.4 to 4.6)                                |
| Eating disorders                                               | 26.1<br>(21.0 to 32.1)                     | 19.6<br>(14.3 to 26.5)                              | 5.3<br>(3.4 to 7.9)               | 34.5<br>(15.5 to 59.8)                            | 12.7<br>(-3.5 to 33.2)                              |
| Anorexia nervosa                                               | 6.9<br>(4.9 to 9.3)                        | 3.2<br>(2.3 to 4.4)                                 | 1.5<br>(0.8 to 2.3)               | 27.8<br>(-5.3 to 74.5)                            | 8.2<br>(-18.7 to 47.0)                              |
| Bulimia nervosa                                                | 18.3<br>(13.6 to 24.4)                     | 16.4<br>(11.1 to 23.4)                              | 3.9<br>(2.3 to 6.0)               | 37.2<br>(13.8 to 67.3)                            | 14.3<br>(-5.3 to 39.8)                              |
| Autistic spectrum disorders                                    | 252.8<br>(223.3 to 287.9)                  | 2.5<br>(1.8 to 3.5)                                 | 35.5<br>(23.9 to 49.5)            | 14.3<br>(8.2 to 20.6)                             | -0.8<br>(-5.6 to 4.2)                               |
| Autism                                                         | 65.6<br>(56.1 to 76.8)                     | 0.3<br>(0.1 to 0.5)                                 | 16.7<br>(10.9 to 24.3)            | 14.3<br>(4.0 to 25.9)                             | -0.6<br>(-8.8 to 8.3)                               |
| Asperger syndrome and other autistic spectrum disorders        | 186.9<br>(154.7 to 225.3)                  | 2.2<br>(1.5 to 3.2)                                 | 18.7<br>(12.3 to 27.4)            | 14.2<br>(8.7 to 20.7)                             | -1.0<br>(-5.5 to 4.0)                               |

| Cause                                                      | Prevalence in thousands (95% UI)           | Incidence in thousands (95% UI)                        | YLDs in thousands (95% UI)        |                                                   |                                                     |
|------------------------------------------------------------|--------------------------------------------|--------------------------------------------------------|-----------------------------------|---------------------------------------------------|-----------------------------------------------------|
|                                                            | 2016 counts                                | 2016 counts                                            | 2016 counts                       | Percentage change in counts between 2006 and 2016 | Percentage change in age-standardised rates between |
| Attention-deficit/hyperactivity disorder                   | 118.1<br>(98.7 to 140.5)                   | 6.6<br>(5.3 to 8.2)                                    | 1.4<br>(0.8 to 2.3)               | 10.9<br>(-3.0 to 26.2)                            | 0.4<br>(-11.7 to 13.1)                              |
| Conduct disorder                                           | 244.6<br>(199.7 to 293.2)                  | 82.5<br>(64.0 to 101.0)                                | 29.6<br>(18.1 to 44.8)            | 8.4<br>(0.7 to 16.5)                              | 1.1<br>(-5.9 to 8.8)                                |
| Idiopathic developmental intellectual disability           | 631.7<br>(370.0 to 918.9)                  | --                                                     | 25.5<br>(12.6 to 44.3)            | 3.4<br>(-6.3 to 12.7)                             | -10.5<br>(-18.8 to -2.5)                            |
| Other mental and substance use disorders                   | 468.5<br>(410.8 to 542.0)                  | 20.8<br>(18.3 to 24.0)                                 | 34.8<br>(24.0 to 50.7)            | 24.9<br>(18.4 to 32.2)                            | -0.3<br>(-5.1 to 4.9)                               |
| <b>Diabetes, urogenital, blood, and endocrine diseases</b> | <b>12,867.6<br/>(9,979.3 to 16,427.9)</b>  | <b>2,750.2<sup>†</sup><br/>(2,591.6 to 2,923.2)</b>    | <b>202.2<br/>(139.9 to 291.5)</b> | <b>31.1<br/>(26.1 to 36.5)</b>                    | <b>5.8<br/>(2.3 to 9.4)</b>                         |
| Diabetes mellitus                                          | 1,264.2<br>(1,130.7 to 1,394.2)            | 73.3<br>(65.7 to 81.7)                                 | 85.7<br>(58.3 to 119.6)           | 54.0<br>(44.5 to 63.3)                            | 19.1<br>(11.6 to 26.4)                              |
| Acute glomerulonephritis                                   | 0.3<br>(0.2 to 0.3)                        | 4.4<br>(3.8 to 5.1)                                    | < 0.05<br>(< 0.05 to < 0.05)      | 21.1<br>(13.9 to 32.5)                            | 0.2<br>(-5.2 to 7.7)                                |
| Chronic kidney disease                                     | 1,456.7<br>(1,314.8 to 1,603.4)            | 106.4<br>(93.7 to 119.6)                               | 34.9<br>(25.4 to 45.1)            | 26.6<br>(19.5 to 34.0)                            | -3.8<br>(-8.8 to 1.4)                               |
| Chronic kidney disease due to diabetes mellitus            | 490.5<br>(410.8 to 577.6)                  | 34.8<br>(28.1 to 42.2)                                 | 10.6<br>(7.5 to 14.2)             | 27.1<br>(16.4 to 39.8)                            | -5.1<br>(-12.6 to 3.8)                              |
| Chronic kidney disease due to hypertension                 | 286.8<br>(248.7 to 326.3)                  | 15.5<br>(12.8 to 18.5)                                 | 9.6<br>(6.7 to 12.9)              | 28.6<br>(14.4 to 45.3)                            | -4.7<br>(-14.5 to 6.7)                              |
| Chronic kidney disease due to glomerulonephritis           | 322.9<br>(274.6 to 370.4)                  | 28.3<br>(22.8 to 34.1)                                 | 5.6<br>(3.9 to 7.6)               | 24.5<br>(8.7 to 41.0)                             | -0.2<br>(-11.5 to 11.5)                             |
| Chronic kidney disease due to other causes                 | 356.4<br>(299.5 to 417.6)                  | 27.8<br>(23.3 to 32.5)                                 | 9.1<br>(6.5 to 12.5)              | 25.2<br>(14.4 to 37.1)                            | -3.0<br>(-10.7 to 5.4)                              |
| Urinary diseases and male infertility                      | 330.3<br>(296.0 to 364.6)                  | 1,534.8 <sup>†</sup><br>(1,396.7 to 1,690.1)           | 10.2<br>(6.5 to 14.7)             | 25.2<br>(18.0 to 35.1)                            | -4.4<br>(-9.8 to 3.1)                               |
| Interstitial nephritis and urinary tract infections        | 24.7<br>(21.9 to 27.7)                     | 1,282.1<br>(1,143.1 to 1,437.9)                        | 0.8<br>(0.5 to 1.3)               | 21.0<br>(2.6 to 43.4)                             | 2.1<br>(-12.2 to 19.2)                              |
| Urolithiasis                                               | 8.4<br>(7.5 to 9.5)                        | 224.3<br>(198.5 to 254.8)                              | 0.6<br>(0.4 to 0.9)               | 31.1<br>(11.1 to 54.1)                            | 5.0<br>(-12.0 to 25.2)                              |
| Benign prostatic hyperplasia                               | 241.7<br>(204.0 to 279.9)                  | 28.4<br>(24.0 to 33.2)                                 | 7.9<br>(4.9 to 11.6)              | 26.6<br>(17.5 to 39.2)                            | -5.2<br>(-11.5 to 3.5)                              |
| Male infertility                                           | 47.3<br>(40.1 to 56.2)                     | --                                                     | 0.3<br>(0.1 to 0.6)               | 42.5<br>(21.7 to 64.4)                            | 11.0<br>(-4.4 to 27.4)                              |
| Other urinary diseases                                     | --                                         | --                                                     | 0.5<br>(0.4 to 0.8)               | 1.2<br>(-10.4 to 14.5)                            | -14.3<br>(-24.0 to -3.9)                            |
| Gynecological diseases                                     | 3,234.7<br>(3,068.9 to 3,384.4)            | 981.7 <sup>†</sup><br>(916.7 to 1,054.4)               | 31.0<br>(20.5 to 45.5)            | 22.8<br>(16.9 to 29.0)                            | -1.4<br>(-6.0 to 3.2)                               |
| Uterine fibroids                                           | 272.0<br>(239.3 to 306.5)                  | 31.9<br>(27.5 to 36.9)                                 | 5.0<br>(3.1 to 8.0)               | 20.7<br>(10.6 to 30.3)                            | -3.4<br>(-11.5 to 4.3)                              |
| Polycystic ovarian syndrome                                | 30.2<br>(22.6 to 39.5)                     | 42.6<br>(30.3 to 59.7)                                 | 0.3<br>(0.1 to 0.5)               | 28.0<br>(11.6 to 46.1)                            | 6.2<br>(-6.6 to 20.0)                               |
| Female infertility                                         | 77.1<br>(57.7 to 100.7)                    | --                                                     | 0.5<br>(0.2 to 1.0)               | 92.3<br>(56.5 to 140.7)                           | 53.5<br>(25.2 to 91.4)                              |
| Endometriosis                                              | 9.4<br>(7.8 to 11.2)                       | 25.5<br>(20.6 to 31.7)                                 | 0.9<br>(0.5 to 1.3)               | 25.0<br>(-7.5 to 70.2)                            | 2.2<br>(-24.0 to 36.5)                              |
| Genital prolapse                                           | 1,107.2<br>(977.1 to 1,240.5)              | 78.8<br>(67.9 to 90.2)                                 | 3.4<br>(1.7 to 6.2)               | 21.5<br>(12.3 to 30.9)                            | -8.2<br>(-15.2 to -0.7)                             |
| Premenstrual syndrome                                      | 1,909.8<br>(1,771.0 to 2,057.6)            | 721.0<br>(662.6 to 787.1)                              | 16.0<br>(9.9 to 24.3)             | 25.3<br>(15.5 to 35.6)                            | 2.2<br>(-5.2 to 10.6)                               |
| Other gynecological diseases                               | 165.6<br>(148.0 to 184.2)                  | 81.9<br>(64.7 to 100.8)                                | 5.0<br>(3.3 to 7.0)               | 13.7<br>(2.1 to 27.3)                             | -6.2<br>(-16.3 to 4.3)                              |
| Hemoglobinopathies and hemolytic anaemias                  | 9,317.0<br>(5,592.3 to 13,466.5)           | --                                                     | 27.3<br>(10.6 to 59.7)            | 5.2<br>(-4.9 to 15.0)                             | -5.2<br>(-13.9 to 2.9)                              |
| Thalassemias                                               | 0.4<br>(0.3 to 0.5)                        | --                                                     | < 0.05<br>(< 0.05 to 0.1)         | 10.3<br>(-4.2 to 24.0)                            | -1.0<br>(-13.9 to 10.9)                             |
| Thalassaemias trait                                        | 408.1<br>(371.6 to 446.2)                  | --                                                     | 3.3<br>(2.1 to 4.8)               | 17.2<br>(5.2 to 30.3)                             | 6.0<br>(-3.9 to 17.4)                               |
| Sickle cell disorders                                      | 26.4<br>(0.4 to 115.7)                     | --                                                     | 1.6<br>(< 0.05 to 8.0)            | 8.7<br>(-41.1 to 85.1)                            | 2.5<br>(-44.7 to 75.4)                              |
| Sickle cell trait                                          | 5,906.7<br>(1,033.6 to 12,658.6)           | --                                                     | 16.6<br>(2.6 to 41.1)             | 8.1<br>(-6.2 to 21.5)                             | -2.2<br>(-15.0 to 9.4)                              |
| G6PD deficiency                                            | 576.7<br>(512.2 to 648.2)                  | --                                                     | 0.1<br>(< 0.05 to 0.1)            | 19.7<br>(6.6 to 34.1)                             | 4.0<br>(-5.3 to 14.1)                               |
| G6PD trait                                                 | 2,708.8<br>(2,565.6 to 2,856.6)            | --                                                     | < 0.05<br>(< 0.05 to < 0.05)      | 21.1<br>(10.9 to 33.2)                            | 5.8<br>(-2.6 to 14.9)                               |
| Other hemoglobinopathies and hemolytic anaemias            | 270.1<br>(255.9 to 285.4)                  | --                                                     | 5.7<br>(3.7 to 8.3)               | -8.8<br>(-17.4 to 1.3)                            | -19.3<br>(-25.7 to -12.2)                           |
| Endocrine, metabolic, blood, and immune disorders          | 451.4<br>(426.1 to 478.2)                  | 49.7<br>(44.7 to 55.1)                                 | 13.1<br>(8.8 to 18.4)             | 12.5<br>(5.1 to 20.2)                             | -1.0<br>(-6.3 to 4.2)                               |
| <b>Musculoskeletal disorders</b>                           | <b>4,467.9<br/>(4,258.9 to 4,717.9)</b>    | <b>2,669.1<br/>(2,393.3 to 2,967.4)</b>                | <b>500.8<br/>(364.5 to 654.1)</b> | <b>21.6<br/>(17.4 to 26.2)</b>                    | <b>-3.9<br/>(-7.2 to -0.5)</b>                      |
| Rheumatoid arthritis                                       | 68.7<br>(61.0 to 76.9)                     | 4.2<br>(3.8 to 4.7)                                    | 16.1<br>(10.9 to 21.6)            | 42.2<br>(30.1 to 55.4)                            | 10.3<br>(1.9 to 19.8)                               |
| Osteoarthritis                                             | 722.0<br>(675.2 to 771.2)                  | 37.4<br>(34.8 to 40.1)                                 | 44.2<br>(31.0 to 60.3)            | 46.2<br>(40.9 to 51.9)                            | 9.7<br>(6.0 to 13.8)                                |
| Low back and neck pain                                     | 2,518.3<br>(2,330.8 to 2,722.9)            | 1,121.1<br>(996.3 to 1,259.6)                          | 290.8<br>(204.5 to 383.5)         | 16.9<br>(10.2 to 23.3)                            | -7.4<br>(-12.5 to -2.3)                             |
| Low back pain                                              | 2,055.6<br>(1,827.0 to 2,332.6)            | 973.0<br>(846.6 to 1,116.0)                            | 231.2<br>(161.2 to 306.4)         | 14.4<br>(6.4 to 22.5)                             | -9.3<br>(-15.5 to -2.9)                             |
| Neck pain                                                  | 600.1<br>(519.8 to 690.5)                  | 148.1<br>(128.9 to 173.2)                              | 59.6<br>(40.5 to 83.3)            | 27.7<br>(24.1 to 31.6)                            | 0.4<br>(-2.1 to 3.2)                                |
| Gout                                                       | 76.0<br>(67.2 to 86.5)                     | 15.7<br>(13.7 to 17.9)                                 | 2.4<br>(1.6 to 3.3)               | 28.9<br>(10.8 to 49.1)                            | -1.2<br>(-14.5 to 13.5)                             |
| Other musculoskeletal disorders                            | 1,723.0<br>(1,469.8 to 1,998.2)            | 1,490.7<br>(1,249.2 to 1,766.6)                        | 147.4<br>(100.0 to 209.5)         | 23.3<br>(16.2 to 31.3)                            | -2.4<br>(-7.7 to 3.5)                               |
| <b>Other non-communicable diseases</b>                     | <b>20,039.2<br/>(19,625.2 to 20,470.4)</b> | <b>51,291.0<sup>†</sup><br/>(47,486.6 to 55,175.3)</b> | <b>533.9<br/>(365.1 to 749.4)</b> | <b>19.3<br/>(17.3 to 21.3)</b>                    | <b>-1.8<br/>(-3.2 to -0.4)</b>                      |
| Congenital anomalies                                       | 361.2<br>(280.2 to 472.1)                  | --                                                     | 34.0<br>(23.4 to 49.0)            | 6.2<br>(-1.5 to 14.1)                             | -8.3<br>(-14.6 to -1.4)                             |
| Neural tube defects                                        | 11.6<br>(10.3 to 13.0)                     | --                                                     | 3.4<br>(2.4 to 4.7)               | 13.8<br>(-1.8 to 31.0)                            | -2.1<br>(-14.8 to 12.1)                             |
| Congenital heart anomalies                                 | 52.5<br>(44.3 to 61.9)                     | --                                                     | 2.5<br>(1.1 to 4.2)               | 32.8<br>(13.3 to 59.7)                            | 19.6<br>(2.5 to 42.9)                               |
| Orofacial clefts                                           | 4.5<br>(3.9 to 5.2)                        | --                                                     | 0.1<br>(< 0.05 to 0.1)            | 4.1<br>(-8.1 to 16.6)                             | -10.0<br>(-20.6 to 1.1)                             |
| Down's syndrome                                            | 8.1<br>(6.9 to 9.4)                        | --                                                     | 0.7<br>(0.5 to 1.0)               | 21.3<br>(11.8 to 30.6)                            | 7.5<br>(-0.6 to 15.6)                               |
| Turner syndrome                                            | 14.6<br>(12.3 to 17.1)                     | --                                                     | 0.2<br>(0.1 to 0.4)               | 9.4<br>(-22.8 to 54.8)                            | -3.3<br>(-29.9 to 36.3)                             |
| Klinefelter syndrome                                       | 14.5<br>(12.3 to 17.0)                     | --                                                     | 0.1<br>(< 0.05 to 0.1)            | 14.9<br>(-11.9 to 52.0)                           | -2.0<br>(-25.1 to 28.7)                             |



| Cause                                         | Prevalence in thousands (95% UI)              | Incidence in thousands (95% UI)                | YLDs in thousands (95% UI)              |                                                   |                                                     |
|-----------------------------------------------|-----------------------------------------------|------------------------------------------------|-----------------------------------------|---------------------------------------------------|-----------------------------------------------------|
|                                               | 2016 counts                                   | 2016 counts                                    | 2016 counts                             | Percentage change in counts between 2006 and 2016 | Percentage change in age-standardised rates between |
| Other chromosomal abnormalities               | 6.0<br>(5.1 to 7.0)                           | --                                             | 1.5<br>(0.9 to 2.3)                     | 11.3<br>(-18.4 to 53.9)                           | -0.5<br>(-26.4 to 37.0)                             |
| Congenital musculoskeletal and limb anomalies | 26.4<br>(23.6 to 29.2)                        | --                                             | 4.0<br>(2.6 to 5.6)                     | 15.0<br>(-0.1 to 30.2)                            | 0.8<br>(-11.3 to 13.1)                              |
| Urogenital congenital anomalies               | 26.1<br>(23.1 to 29.4)                        | --                                             | 0.6<br>(0.3 to 1.0)                     | 9.7<br>(0.5 to 19.5)                              | 0.1<br>(-7.8 to 8.9)                                |
| Digestive congenital anomalies                | 24.8<br>(22.1 to 28.0)                        | --                                             | 1.1<br>(0.7 to 1.6)                     | 18.7<br>(-3.2 to 44.7)                            | 2.8<br>(-14.3 to 23.1)                              |
| Other congenital anomalies                    | 225.9<br>(131.7 to 373.0)                     | --                                             | 19.9<br>(12.0 to 32.2)                  | -0.5<br>(-9.8 to 10.1)                            | -14.4<br>(-21.9 to -5.5)                            |
| Skin and subcutaneous diseases                | 8,829.5<br>(8,570.7 to 9,109.8)               | 19,283.1<br>(18,255.7 to 20,356.8)             | 226.7<br>(150.4 to 330.8)               | 15.6<br>(12.9 to 18.4)                            | 0.9<br>(-1.2 to 3.0)                                |
| Dermatitis                                    | 1,312.4<br>(1,127.9 to 1,513.0)               | 1,545.0<br>(1,430.3 to 1,667.0)                | 50.6<br>(28.7 to 83.0)                  | 10.8<br>(6.3 to 15.6)                             | 0.3<br>(-3.4 to 4.0)                                |
| Psoriasis                                     | 192.4<br>(182.8 to 202.6)                     | 29.0<br>(27.7 to 30.3)                         | 16.8<br>(11.9 to 22.3)                  | 30.8<br>(18.6 to 45.4)                            | 9.2<br>(0.1 to 19.7)                                |
| Cellulitis                                    | 10.3<br>(9.5 to 11.1)                         | 190.4<br>(177.3 to 204.3)                      | 0.6<br>(0.4 to 0.8)                     | 18.3<br>(-1.3 to 43.0)                            | 1.8<br>(-14.3 to 21.5)                              |
| Pyoderma                                      | 79.6<br>(77.2 to 82.0)                        | 1,804.9<br>(1,740.4 to 1,873.3)                | 0.5<br>(0.2 to 0.9)                     | 23.2<br>(14.5 to 32.5)                            | 2.5<br>(-3.3 to 9.0)                                |
| Scabies                                       | 669.0<br>(581.3 to 769.8)                     | 2,050.3<br>(1,770.1 to 2,370.2)                | 17.3<br>(9.6 to 27.7)                   | 8.9<br>(3.8 to 13.9)                              | -5.0<br>(-8.9 to -1.3)                              |
| Fungal skin diseases                          | 2,425.5<br>(2,182.7 to 2,680.8)               | 8,128.8<br>(7,213.3 to 9,072.6)                | 13.6<br>(5.5 to 28.4)                   | 19.2<br>(17.0 to 21.5)                            | -0.1<br>(-1.2 to 0.9)                               |
| Viral skin diseases                           | 843.0<br>(797.8 to 889.8)                     | 1,197.4<br>(1,139.5 to 1,260.0)                | 25.9<br>(16.2 to 37.9)                  | 11.8<br>(7.8 to 15.8)                             | 0.5<br>(-2.6 to 3.9)                                |
| Acne vulgaris                                 | 2,664.9<br>(2,351.3 to 3,003.3)               | 1,833.7<br>(1,502.5 to 2,302.6)                | 68.7<br>(45.5 to 98.5)                  | 17.8<br>(10.4 to 24.5)                            | 0.8<br>(-5.3 to 6.4)                                |
| Alopecia areata                               | 49.1<br>(47.1 to 51.1)                        | 87.5<br>(84.0 to 91.1)                         | 1.6<br>(1.0 to 2.4)                     | 20.6<br>(7.6 to 35.6)                             | -0.0<br>(-9.9 to 11.1)                              |
| Pruritus                                      | 235.5<br>(207.7 to 262.8)                     | 190.7<br>(170.9 to 213.1)                      | 2.5<br>(1.2 to 4.6)                     | 19.9<br>(13.3 to 27.4)                            | 0.1<br>(-4.7 to 5.4)                                |
| Urticaria                                     | 336.0<br>(289.6 to 395.2)                     | 604.0<br>(518.9 to 709.5)                      | 20.3<br>(12.8 to 29.3)                  | 12.5<br>(6.3 to 19.4)                             | 0.1<br>(-5.0 to 5.4)                                |
| Decubitus ulcer                               | 3.3<br>(3.0 to 3.7)                           | 12.0<br>(10.8 to 13.4)                         | 0.6<br>(0.4 to 0.8)                     | 30.8<br>(19.5 to 43.2)                            | 5.4<br>(-8.0 to 19.5)                               |
| Other skin and subcutaneous diseases          | 1,428.5<br>(1,383.7 to 1,470.7)               | 1,609.5<br>(1,556.2 to 1,659.6)                | 7.8<br>(3.8 to 14.4)                    | 28.4<br>(24.8 to 32.2)                            | 4.2<br>(1.6 to 6.8)                                 |
| Sense organ diseases                          | 6,153.1<br>(5,906.0 to 6,424.4)               | 2,724.6†<br>(2,543.5 to 2,924.5)               | 227.6<br>(158.1 to 316.2)               | 24.2<br>(21.0 to 27.4)                            | -3.3<br>(-5.4 to -1.0)                              |
| Glaucoma                                      | 12.5<br>(10.5 to 14.7)                        | --                                             | 1.2<br>(0.8 to 1.6)                     | 50.8<br>(30.2 to 74.1)                            | 8.7<br>(-5.1 to 24.1)                               |
| Cataract                                      | 369.6<br>(326.1 to 416.8)                     | --                                             | 25.8<br>(18.3 to 35.2)                  | 40.4<br>(29.2 to 51.3)                            | 0.7<br>(-7.2 to 8.2)                                |
| Macular degeneration                          | 26.1<br>(21.2 to 31.8)                        | --                                             | 1.7<br>(1.1 to 2.3)                     | 55.8<br>(36.5 to 78.1)                            | 11.3<br>(-2.0 to 26.3)                              |
| Refraction and accommodation disorders        | 2,280.7<br>(2,181.0 to 2,382.7)               | --                                             | 50.0<br>(33.0 to 74.8)                  | 17.9<br>(12.9 to 23.5)                            | -5.7<br>(-9.5 to -1.1)                              |
| Age-related and other hearing loss            | 4,625.7<br>(4,250.6 to 5,009.9)               | --                                             | 120.5<br>(82.4 to 171.3)                | 21.9<br>(17.3 to 26.0)                            | -5.0<br>(-7.4 to -2.7)                              |
| Other vision loss                             | 101.7<br>(90.8 to 112.4)                      | --                                             | 8.3<br>(5.7 to 11.0)                    | 37.2<br>(26.4 to 49.2)                            | 5.9<br>(-2.0 to 14.1)                               |
| Other sense organ diseases                    | 658.1<br>(608.2 to 708.2)                     | 2,724.6<br>(2,543.5 to 2,924.5)                | 20.2<br>(12.5 to 30.3)                  | 28.4<br>(22.5 to 34.7)                            | 1.6<br>(-2.2 to 5.8)                                |
| Oral disorders                                | 12,852.5<br>(12,200.2 to 13,462.6)            | 29,283.3†<br>(25,796.3 to 32,918.3)            | 45.6<br>(25.8 to 74.6)                  | 26.4<br>(21.2 to 32.4)                            | 1.7<br>(-2.3 to 6.6)                                |
| Caries of deciduous teeth                     | 2,890.1<br>(2,394.3 to 3,385.7)               | 9,935.3<br>(6,927.5 to 13,100.5)               | 0.7<br>(0.3 to 1.3)                     | -6.0<br>(-22.0 to 8.0)                            | -9.1<br>(-25.1 to 4.9)                              |
| Caries of permanent teeth                     | 7,679.1<br>(7,038.9 to 8,380.5)               | 19,041.9<br>(17,216.6 to 21,222.4)             | 4.5<br>(2.0 to 8.6)                     | 13.3<br>(8.1 to 18.7)                             | -4.5<br>(-8.3 to -0.6)                              |
| Periodontal disease                           | 2,437.0<br>(2,021.5 to 2,914.4)               | 276.9<br>(220.1 to 342.7)                      | 15.9<br>(6.3 to 32.7)                   | 30.5<br>(16.8 to 46.6)                            | 2.7<br>(-7.2 to 15.2)                               |
| Edentulism and severe tooth loss              | 368.7<br>(320.9 to 416.6)                     | 29.3<br>(25.0 to 33.6)                         | 10.1<br>(6.7 to 14.3)                   | 39.5<br>(32.6 to 46.6)                            | 4.1<br>(-0.7 to 9.0)                                |
| Other oral disorders                          | 491.5<br>(469.8 to 514.9)                     | --                                             | 14.4<br>(8.8 to 21.7)                   | 20.6<br>(15.9 to 25.2)                            | 0.5<br>(-2.8 to 4.0)                                |
| <b>Injuries</b>                               | <b>4,701.0</b><br><b>(4,439.5 to 4,985.0)</b> | <b>2,694.8†</b><br><b>(2,551.2 to 2,844.6)</b> | <b>199.3</b><br><b>(135.6 to 283.0)</b> | <b>33.0</b><br><b>(30.1 to 35.8)</b>              | <b>7.0</b><br><b>(4.8 to 9.2)</b>                   |
| <b>Transport injuries</b>                     | <b>694.2</b><br><b>(643.8 to 750.0)</b>       | <b>267.8</b><br><b>(236.3 to 301.3)</b>        | <b>40.0</b><br><b>(26.8 to 57.0)</b>    | <b>40.8</b><br><b>(37.4 to 43.9)</b>              | <b>12.6</b><br><b>(10.2 to 14.7)</b>                |
| Road injuries                                 | 499.8<br>(467.2 to 539.2)                     | 212.5<br>(184.1 to 244.4)                      | 28.4<br>(19.1 to 40.4)                  | 45.8<br>(42.4 to 48.8)                            | 15.5<br>(13.1 to 17.6)                              |
| Pedestrian road injuries                      | 120.5<br>(105.7 to 137.8)                     | 41.0<br>(33.3 to 50.2)                         | 7.0<br>(4.8 to 10.0)                    | 48.8<br>(45.2 to 52.1)                            | 18.3<br>(15.9 to 20.6)                              |
| Cyclist road injuries                         | 92.0<br>(77.1 to 109.4)                       | 48.7<br>(38.7 to 60.3)                         | 5.0<br>(3.3 to 7.2)                     | 48.8<br>(44.8 to 52.5)                            | 19.0<br>(16.2 to 21.6)                              |
| Motorcyclist road injuries                    | 164.6<br>(141.8 to 200.3)                     | 52.6<br>(42.7 to 64.2)                         | 9.1<br>(6.2 to 13.0)                    | 44.2<br>(40.9 to 47.4)                            | 14.0<br>(11.6 to 16.3)                              |
| Motor vehicle road injuries                   | 78.5<br>(66.5 to 89.6)                        | 43.3<br>(34.6 to 52.1)                         | 4.9<br>(3.3 to 7.1)                     | 48.9<br>(45.4 to 52.2)                            | 17.4<br>(15.0 to 19.9)                              |
| Other road injuries                           | 44.2<br>(38.1 to 51.2)                        | 26.9<br>(21.0 to 34.0)                         | 2.4<br>(1.6 to 3.5)                     | 32.0<br>(29.1 to 35.0)                            | 3.6<br>(1.6 to 5.5)                                 |
| Other transport injuries                      | 194.4<br>(164.0 to 229.4)                     | 55.2<br>(46.9 to 65.5)                         | 11.5<br>(7.8 to 16.4)                   | 29.8<br>(26.0 to 33.5)                            | 5.6<br>(3.1 to 8.1)                                 |
| <b>Unintentional injuries</b>                 | <b>3,647.8</b><br><b>(3,411.7 to 3,899.9)</b> | <b>2,344.6</b><br><b>(2,198.8 to 2,490.4)</b>  | <b>137.8</b><br><b>(94.3 to 192.2)</b>  | <b>32.2</b><br><b>(29.3 to 35.0)</b>              | <b>5.5</b><br><b>(3.6 to 7.5)</b>                   |
| Falls                                         | 1,376.0<br>(1,215.2 to 1,532.4)               | 764.9<br>(683.3 to 865.5)                      | 61.7<br>(43.6 to 84.5)                  | 35.0<br>(32.2 to 37.8)                            | 5.4<br>(3.3 to 7.3)                                 |
| Drowning                                      | 13.1<br>(11.3 to 15.2)                        | 3.1<br>(2.6 to 3.6)                            | 0.8<br>(0.5 to 1.1)                     | 11.6<br>(7.8 to 15.6)                             | -8.5<br>(-11.1 to -5.8)                             |
| Fire, heat, and hot substances                | 305.5<br>(257.5 to 372.6)                     | 45.0<br>(36.0 to 55.0)                         | 8.8<br>(6.0 to 12.6)                    | 35.5<br>(28.3 to 42.4)                            | 10.1<br>(4.9 to 15.2)                               |
| Poisonings                                    | 8.9<br>(7.3 to 10.7)                          | 15.0<br>(11.5 to 19.2)                         | 0.8<br>(0.5 to 1.3)                     | 35.1<br>(25.9 to 44.6)                            | 13.6<br>(6.9 to 20.7)                               |
| Exposure to mechanical forces                 | 372.7<br>(316.9 to 456.3)                     | 175.5<br>(147.0 to 203.8)                      | 10.0<br>(6.6 to 14.5)                   | 29.6<br>(26.3 to 32.7)                            | 4.1<br>(1.7 to 6.4)                                 |
| Unintentional firearm injuries                | 9.8<br>(8.2 to 11.8)                          | 2.9<br>(2.0 to 4.2)                            | 0.5<br>(0.3 to 0.7)                     | 29.3<br>(25.6 to 33.0)                            | 4.8<br>(2.2 to 7.3)                                 |
| Unintentional suffocation                     | 16.8<br>(12.7 to 21.4)                        | 4.4<br>(2.9 to 6.1)                            | 0.6<br>(0.4 to 1.0)                     | 17.4<br>(13.1 to 21.7)                            | -1.1<br>(-3.9 to 1.7)                               |
| Other exposure to mechanical forces           | 346.1<br>(291.0 to 430.4)                     | 168.3<br>(141.0 to 196.2)                      | 8.9<br>(5.9 to 12.9)                    | 30.5<br>(27.2 to 33.7)                            | 4.4<br>(1.9 to 6.7)                                 |

| Cause                                                                               | Prevalence in thousands (95% UI)            | Incidence in thousands (95% UI)       | YLDs in thousands (95% UI)          |                                                   |                                                     |
|-------------------------------------------------------------------------------------|---------------------------------------------|---------------------------------------|-------------------------------------|---------------------------------------------------|-----------------------------------------------------|
|                                                                                     | 2016 counts                                 | 2016 counts                           | 2016 counts                         | Percentage change in counts between 2006 and 2016 | Percentage change in age-standardised rates between |
| Adverse effects of medical treatment                                                | 14.1<br>(11.2 to 17.4)                      | 184.5<br>(160.5 to 209.4)             | 1.9<br>(1.2 to 2.8)                 | 16.9<br>(11.8 to 22.5)                            | -7.8<br>(-11.3 to -4.2)                             |
| Animal contact                                                                      | 433.7<br>(383.5 to 500.7)                   | 622.9<br>(532.3 to 717.5)             | 14.9<br>(10.1 to 20.7)              | 31.1<br>(25.0 to 36.9)                            | 6.7<br>(2.4 to 10.7)                                |
| Venomous animal contact                                                             | 237.5<br>(197.6 to 286.1)                   | 318.0<br>(258.5 to 388.1)             | 11.5<br>(7.7 to 16.0)               | 34.0<br>(26.7 to 41.5)                            | 10.1<br>(4.6 to 15.5)                               |
| Non-venomous animal contact                                                         | 196.2<br>(163.9 to 235.4)                   | 304.9<br>(248.1 to 369.6)             | 3.4<br>(2.2 to 5.0)                 | 21.9<br>(17.0 to 26.4)                            | -2.3<br>(-5.9 to 1.0)                               |
| Foreign body                                                                        | 213.4<br>(173.7 to 252.7)                   | 163.9<br>(140.8 to 192.0)             | 8.7<br>(5.6 to 12.8)                | 25.1<br>(20.7 to 29.5)                            | 4.9<br>(1.9 to 7.9)                                 |
| Pulmonary aspiration and foreign body in airway                                     | 87.5<br>(63.7 to 119.0)                     | 38.2<br>(30.3 to 48.5)                | 4.2<br>(2.6 to 6.3)                 | 19.9<br>(15.3 to 24.5)                            | 1.4<br>(-1.6 to 4.4)                                |
| Foreign body in eyes                                                                | 13.8<br>(7.7 to 20.8)                       | 73.4<br>(56.3 to 97.6)                | 0.8<br>(0.4 to 1.3)                 | 21.8<br>(17.3 to 27.3)                            | 1.3<br>(-1.8 to 4.4)                                |
| Foreign body in other body part                                                     | 112.1<br>(89.0 to 144.0)                    | 52.3<br>(42.6 to 63.5)                | 3.7<br>(2.4 to 5.5)                 | 32.2<br>(26.9 to 37.6)                            | 9.8<br>(6.1 to 13.5)                                |
| Environmental heat and cold exposure                                                | 253.9<br>(214.0 to 299.2)                   | 84.2<br>(68.8 to 102.6)               | 10.4<br>(6.9 to 15.0)               | 26.5<br>(22.9 to 29.8)                            | 3.0<br>(0.6 to 5.1)                                 |
| Other unintentional injuries                                                        | 656.5<br>(534.8 to 795.0)                   | 285.6<br>(243.3 to 339.3)             | 19.7<br>(13.1 to 28.4)              | 33.3<br>(30.4 to 36.3)                            | 7.8<br>(5.6 to 9.9)                                 |
| <b>Self-harm and interpersonal violence</b>                                         | <b>1,075.3</b><br><b>(967.3 to 1,196.5)</b> | <b>72.8†</b><br><b>(61.5 to 85.6)</b> | <b>13.9</b><br><b>(9.7 to 19.2)</b> | <b>13.7</b><br><b>(8.6 to 18.2)</b>               | <b>-4.8</b><br><b>(-8.5 to -1.4)</b>                |
| Self-harm                                                                           | 33.4<br>(28.3 to 38.8)                      | 17.4<br>(14.3 to 20.9)                | 1.8<br>(1.1 to 2.6)                 | 20.9<br>(17.2 to 24.4)                            | -4.2<br>(-6.8 to -1.7)                              |
| Self-harm by firearm                                                                | 1.9<br>(1.7 to 2.3)                         | 0.6<br>(0.4 to 1.0)                   | 0.1<br>(0.1 to 0.1)                 | 7.9<br>(3.7 to 11.8)                              | -14.7<br>(-17.7 to -11.9)                           |
| Self-harm by other specified means                                                  | 31.5<br>(26.4 to 36.9)                      | 16.8<br>(13.8 to 20.1)                | 1.7<br>(1.1 to 2.5)                 | 21.6<br>(17.8 to 25.3)                            | -3.6<br>(-6.3 to -1.1)                              |
| Interpersonal violence                                                              | 1,041.9<br>(933.6 to 1,163.5)               | 55.4†<br>(44.8 to 67.0)               | 12.2<br>(8.4 to 16.9)               | 12.8<br>(7.5 to 17.7)                             | -4.9<br>(-8.9 to -1.1)                              |
| Assault by firearm                                                                  | 2.2<br>(1.9 to 2.6)                         | 0.8<br>(0.5 to 1.2)                   | 0.1<br>(0.1 to 0.2)                 | 22.6<br>(17.7 to 27.0)                            | -0.2<br>(-3.4 to 2.7)                               |
| Assault by sharp object                                                             | 23.9<br>(19.2 to 28.6)                      | 10.3<br>(7.4 to 14.2)                 | 0.8<br>(0.5 to 1.1)                 | 29.5<br>(25.5 to 33.4)                            | 6.2<br>(3.4 to 9.0)                                 |
| Sexual violence                                                                     | 942.4<br>(836.0 to 1,064.0)                 | --                                    | 8.3<br>(5.5 to 12.0)                | 5.8<br>(-0.2 to 11.9)                             | -10.2<br>(-15.2 to -4.9)                            |
| Assault by other means                                                              | 73.5<br>(62.0 to 87.5)                      | 44.3<br>(35.8 to 53.8)                | 3.1<br>(2.1 to 4.4)                 | 31.8<br>(28.3 to 34.9)                            | 6.6<br>(4.1 to 8.8)                                 |
| <b>Forces of nature, conflict and terrorism, and executions and police conflict</b> | <b>226.1</b><br><b>(135.8 to 336.0)</b>     | <b>9.7†</b><br><b>(3.9 to 15.9)</b>   | <b>7.6</b><br><b>(2.1 to 19.4)</b>  | <b>53.9</b><br><b>(43.5 to 62.1)</b>              | <b>37.1</b><br><b>(29.9 to 45.0)</b>                |
| Exposure to forces of nature                                                        | 115.7<br>(52.5 to 194.6)                    | 9.2<br>(3.4 to 15.4)                  | 4.3<br>(1.3 to 10.6)                | 207.6<br>(163.1 to 236.6)                         | 139.7<br>(114.8 to 161.0)                           |
| Conflict and terrorism                                                              | 109.1<br>(65.7 to 170.2)                    | --                                    | 3.2<br>(0.8 to 8.8)                 | -7.7<br>(-15.5 to -0.5)                           | -12.2<br>(-18.0 to -7.4)                            |
| Executions and police conflict                                                      | 1.2<br>(0.7 to 2.1)                         | 0.5<br>(0.3 to 0.7)                   | < 0.05<br>(< 0.05 to 0.1)           | 22.6<br>(13.5 to 31.7)                            | -5.1<br>(-20.2 to 12.3)                             |
| <b>Impairments</b>                                                                  | --                                          | --                                    | --                                  | --                                                | --                                                  |
| Anaemia                                                                             | 9,543.6<br>(8,723.7 to 10,650.0)            | --                                    | 257.1<br>(168.5 to 374.6)           | -4.7<br>(-10.8 to 1.6)                            | -14.5<br>(-19.0 to -9.6)                            |
| Developmental intellectual disability                                               | 966.0<br>(710.5 to 1,250.4)                 | --                                    | 94.0<br>(68.5 to 127.3)             | 9.0<br>(2.1 to 16.5)                              | -5.0<br>(-10.8 to 1.6)                              |
| Epilepsy                                                                            | 236.1<br>(150.3 to 311.9)                   | --                                    | 75.8<br>(44.7 to 113.1)             | 13.3<br>(-32.5 to 81.8)                           | -2.1<br>(-42.8 to 60.3)                             |
| Guillain-Barre syndrome                                                             | 0.3<br>(0.2 to 0.4)                         | --                                    | 0.1<br>(< 0.05 to 0.1)              | 17.8<br>(14.1 to 21.6)                            | -0.2<br>(-0.4 to 0.0)                               |
| Hearing loss                                                                        | 5,443.7<br>(5,075.8 to 5,823.0)             | --                                    | 158.2<br>(109.2 to 222.2)           | 14.8<br>(11.2 to 18.2)                            | -6.7<br>(-8.9 to -4.6)                              |
| Heart failure                                                                       | 176.0<br>(152.7 to 201.6)                   | --                                    | 28.2<br>(20.9 to 35.8)              | 46.2<br>(35.1 to 59.3)                            | 4.8<br>(-2.8 to 13.8)                               |
| Infertility                                                                         | 267.6<br>(238.3 to 302.9)                   | --                                    | 1.8<br>(0.8 to 3.5)                 | 35.1<br>(23.3 to 48.1)                            | 7.9<br>(-0.9 to 17.9)                               |
| Pelvic inflammatory disease                                                         | 10.3<br>(8.8 to 11.9)                       | --                                    | 1.4<br>(0.9 to 1.9)                 | 12.2<br>(-5.3 to 33.5)                            | -7.8<br>(-21.2 to 8.6)                              |
| Vision loss                                                                         | 2,952.7<br>(2,812.7 to 3,104.1)             | --                                    | 112.1<br>(80.6 to 153.7)            | 25.0<br>(18.9 to 31.4)                            | -1.7<br>(-6.2 to 2.8)                               |

We did not calculate incidence for the nine impairments, certain NTDs, and causes with only birth prevalence. Blank cells mean that no estimate is available.

† Incidence for aggregate causes represents the sum of the incidence of the causes below the aggregate.

‡ Incidence estimates for stroke represent first-ever stroke only.

^ Incidence of HIV/AIDS represents new infections of HIV only and does not include new infections of Tuberculosis in HIV positive cases.



SR Table 14: Prevalence, incidence, and YLDs for 2016, percentage change of YLD counts and percentage change of age-standardised YLD rates between 2006 and 2016 by cause and impairments, for all ages, Netherlands.

| Cause                                                                                | Prevalence in thousands (95% UI)          | Incidence in thousands (95% UI)               | YLDs in thousands (95% UI)             |                                                   |                                                     |
|--------------------------------------------------------------------------------------|-------------------------------------------|-----------------------------------------------|----------------------------------------|---------------------------------------------------|-----------------------------------------------------|
|                                                                                      | 2016 counts                               | 2016 counts                                   | 2016 counts                            | Percentage change in counts between 2006 and 2016 | Percentage change in age-standardised rates between |
| <b>All causes</b>                                                                    | <b>16,074.1</b><br>(15,997.8 to 16,143.7) | <b>109,030.3†</b><br>(102,420.0 to 116,447.9) | <b>2,240.3</b><br>(1,673.5 to 2,893.0) | <b>8.9</b><br>(7.3 to 10.5)                       | <b>-0.9</b><br>(-2.5 to 0.5)                        |
| <b>Communicable, maternal, neonatal, and nutritional disorders</b>                   | <b>5,626.6</b><br>(5,349.2 to 5,951.6)    | <b>65,761.6†</b><br>(59,333.3 to 72,620.2)    | <b>72.2</b><br>(51.1 to 96.8)          | <b>0.0</b><br>(-5.3 to 5.3)                       | <b>-1.8</b><br>(-7.0 to 3.6)                        |
| <b>HIV/AIDS and tuberculosis</b>                                                     | <b>1,836.4</b><br>(1,513.7 to 2,129.8)    | <b>1.5†</b><br>(1.1 to 1.9)                   | <b>2.6</b><br>(1.3 to 4.5)             | <b>13.3</b><br>(-2.2 to 28.3)                     | <b>4.6</b><br>(-10.5 to 18.9)                       |
| Tuberculosis                                                                         | 1,624.5<br>(1,308.4 to 1,970.2)           | 0.9†<br>(0.7 to 1.1)                          | 0.2<br>(0.1 to 0.4)                    | -19.5<br>(-30.0 to -9.0)                          | -21.6<br>(-32.5 to -10.3)                           |
| Drug-susceptible tuberculosis                                                        | 0.7<br>(0.5 to 0.9)                       | 0.8<br>(0.7 to 1.1)                           | 0.2<br>(0.1 to 0.4)                    | -20.0<br>(-30.4 to -9.3)                          | -22.0<br>(-32.8 to -10.8)                           |
| Multidrug-resistant tuberculosis without extensive drug resistance                   | < 0.05<br>(< 0.05 to < 0.05)              | < 0.05<br>(< 0.05 to < 0.05)                  | < 0.05<br>(< 0.05 to < 0.05)           | 21.9<br>(-18.4 to 80.6)                           | 18.6<br>(-21.3 to 73.0)                             |
| Extensively drug-resistant tuberculosis                                              | < 0.05<br>(< 0.05 to < 0.05)              | < 0.05<br>(< 0.05 to < 0.05)                  | < 0.05<br>(< 0.05 to < 0.05)           | 162.1<br>(75.5 to 288.4)                          | 155.1<br>(69.2 to 272.3)                            |
| Latent tuberculosis infection                                                        | 1,623.8<br>(1,307.7 to 1,969.5)           | --                                            | --                                     | --                                                | --                                                  |
| HIV/AIDS                                                                             | 26.8<br>(13.8 to 44.6)                    | 0.7^<br>(0.3 to 1.1)                          | 2.4<br>(1.1 to 4.3)                    | 18.0<br>(0.8 to 35.1)                             | 8.8<br>(-8.2 to 25.3)                               |
| Drug-susceptible HIV/AIDS - Tuberculosis                                             | 0.1<br>(< 0.05 to 0.1)                    | 0.1<br>(< 0.05 to 0.1)                        | < 0.05<br>(< 0.05 to < 0.05)           | -43.0<br>(-49.4 to -36.2)                         | -47.4<br>(-53.2 to -41.1)                           |
| Multidrug-resistant HIV/AIDS - Tuberculosis without extensive drug resistance        | < 0.05<br>(< 0.05 to < 0.05)              | < 0.05<br>(< 0.05 to < 0.05)                  | < 0.05<br>(< 0.05 to < 0.05)           | -12.1<br>(-41.6 to 30.6)                          | -18.9<br>(-46.1 to 20.5)                            |
| Extensively drug-resistant HIV/AIDS - Tuberculosis                                   | < 0.05<br>(< 0.05 to < 0.05)              | < 0.05<br>(< 0.05 to < 0.05)                  | < 0.05<br>(< 0.05 to < 0.05)           | 89.0<br>(25.8 to 180.7)                           | 74.4<br>(15.9 to 159.2)                             |
| HIV/AIDS resulting in other diseases                                                 | 26.8<br>(13.8 to 44.5)                    | 0.7<br>(0.3 to 1.1)                           | 2.3<br>(1.1 to 4.3)                    | 19.3<br>(1.9 to 36.9)                             | 10.0<br>(-7.2 to 26.9)                              |
| <b>Diarrhoea, lower respiratory infections, and other common infectious diseases</b> | <b>1,022.6</b><br>(954.0 to 1,092.0)      | <b>65,026.6†</b><br>(58,522.6 to 71,831.8)    | <b>32.8</b><br>(21.6 to 47.4)          | <b>3.9</b><br>(0.6 to 9.0)                        | <b>1.2</b><br>(-1.9 to 4.7)                         |
| Diarrhoeal diseases                                                                  | 62.0<br>(57.7 to 66.6)                    | 4,101.5<br>(3,816.9 to 4,407.6)               | 6.9<br>(4.8 to 9.5)                    | 8.1<br>(1.0 to 15.8)                              | 5.0<br>(-2.2 to 13.1)                               |
| Intestinal infectious diseases                                                       | < 0.05<br>(< 0.05 to < 0.05)              | 0.1†<br>(0.1 to 0.1)                          | < 0.05<br>(< 0.05 to < 0.05)           | 6.6<br>(-9.0 to 25.4)                             | -4.0<br>(-18.3 to 12.4)                             |
| Typhoid fever                                                                        | < 0.05<br>(< 0.05 to < 0.05)              | < 0.05<br>(< 0.05 to 0.1)                     | < 0.05<br>(< 0.05 to < 0.05)           | 31.0<br>(8.8 to 57.5)                             | 21.1<br>(1.2 to 45.6)                               |
| Paratyphoid fever                                                                    | < 0.05<br>(< 0.05 to < 0.05)              | 0.1<br>(< 0.05 to 0.1)                        | < 0.05<br>(< 0.05 to < 0.05)           | -20.3<br>(-34.9 to -2.1)                          | -25.3<br>(-38.3 to -9.9)                            |
| Other intestinal infectious diseases                                                 | --                                        | --                                            | < 0.05<br>(< 0.05 to < 0.05)           | -44.8<br>(-61.2 to -21.9)                         | -49.4<br>(-66.7 to -24.7)                           |
| Lower respiratory infections                                                         | 9.1<br>(8.4 to 9.8)                       | 407.5<br>(373.5 to 444.2)                     | 0.5<br>(0.4 to 0.8)                    | 18.9<br>(4.7 to 35.2)                             | 0.2<br>(-11.9 to 13.6)                              |
| Upper respiratory infections                                                         | 774.6<br>(692.6 to 861.1)                 | 59,236.0<br>(52,606.5 to 66,141.8)            | 19.2<br>(11.6 to 29.7)                 | 2.2<br>(-2.6 to 7.5)                              | 0.4<br>(-4.0 to 5.0)                                |
| Otitis media                                                                         | 173.3<br>(149.7 to 204.7)                 | 1,030.1<br>(714.0 to 1,585.4)                 | 4.4<br>(2.7 to 6.7)                    | -1.1<br>(-8.2 to 6.5)                             | -1.8<br>(-8.6 to 5.8)                               |
| Meningitis                                                                           | 1.9<br>(1.2 to 8.9)                       | 0.1<br>(0.1 to 0.1)                           | 0.3<br>(0.2 to 1.4)                    | 38.2<br>(-2.7 to 552.8)                           | 14.6<br>(-7.5 to 270.9)                             |
| Pneumococcal meningitis                                                              | 0.4<br>(0.3 to 0.4)                       | < 0.05<br>(< 0.05 to < 0.05)                  | 0.1<br>(< 0.05 to 0.1)                 | -1.6<br>(-6.9 to 3.1)                             | -6.7<br>(-12.0 to -1.8)                             |
| H influenzae type B meningitis                                                       | 0.2<br>(0.1 to 0.2)                       | < 0.05<br>(< 0.05 to < 0.05)                  | < 0.05<br>(< 0.05 to < 0.05)           | 2.0<br>(-3.7 to 7.5)                              | -3.0<br>(-9.6 to 2.9)                               |
| Meningococcal infection                                                              | 0.8<br>(0.2 to 7.6)                       | < 0.05<br>(< 0.05 to < 0.05)                  | 0.1<br>(< 0.05 to 1.1)                 | 236.7<br>(-6.9 to 3,122.2)                        | 117.9<br>(-12.4 to 1,624.2)                         |
| Other meningitis                                                                     | 0.6<br>(0.5 to 0.8)                       | 0.1<br>(0.1 to 0.1)                           | 0.1<br>(0.1 to 0.1)                    | 0.7<br>(-3.1 to 4.8)                              | -3.6<br>(-7.9 to 0.8)                               |
| Encephalitis                                                                         | 3.8<br>(3.2 to 4.5)                       | 1.1<br>(1.0 to 1.3)                           | 0.7<br>(0.5 to 0.9)                    | 8.2<br>(4.4 to 12.1)                              | 1.8<br>(-1.6 to 5.3)                                |
| Diphtheria                                                                           | < 0.05<br>(< 0.05 to < 0.05)              | < 0.05<br>(< 0.05 to < 0.05)                  | < 0.05<br>(< 0.05 to < 0.05)           | -21.2<br>(-58.9 to 45.2)                          | -23.7<br>(-56.8 to 32.7)                            |
| Whooping cough                                                                       | 0.7<br>(0.5 to 0.9)                       | 5.2<br>(4.0 to 6.7)                           | < 0.05<br>(< 0.05 to 0.1)              | -15.0<br>(-37.9 to 18.1)                          | -7.0<br>(-32.3 to 28.8)                             |
| Tetanus                                                                              | < 0.05<br>(< 0.05 to < 0.05)              | < 0.05<br>(< 0.05 to < 0.05)                  | < 0.05<br>(< 0.05 to < 0.05)           | -39.3<br>(-53.7 to -25.7)                         | -44.0<br>(-55.6 to -32.0)                           |
| Measles                                                                              | < 0.05<br>(< 0.05 to < 0.05)              | 0.1<br>(0.1 to 0.1)                           | < 0.05<br>(< 0.05 to < 0.05)           | 1,720.3<br>(848.8 to 20,145.6)                    | 1,907.2<br>(946.2 to 22,224.5)                      |
| Varicella and herpes zoster                                                          | 16.1<br>(14.4 to 17.9)                    | 245.0<br>(235.2 to 255.2)                     | 0.7<br>(0.4 to 1.1)                    | 18.9<br>(3.8 to 36.9)                             | 4.9<br>(-8.5 to 21.0)                               |
| <b>Neglected tropical diseases and malaria</b>                                       | <b>1.1</b><br>(0.9 to 1.3)                | <b>&lt; 0.05†</b><br>(< 0.05 to < 0.05)       | <b>&lt; 0.05</b><br>(< 0.05 to < 0.05) | <b>2.9</b><br>(-44.9 to 72.7)                     | <b>-6.1</b><br>(-53.6 to 67.5)                      |
| Malaria                                                                              | --                                        | --                                            | --                                     | --                                                | --                                                  |
| Chagas disease                                                                       | 1.1<br>(0.9 to 1.3)                       | --                                            | < 0.05<br>(< 0.05 to < 0.05)           | 13.9<br>(2.3 to 27.0)                             | 4.9<br>(-5.5 to 15.9)                               |
| Leishmaniasis                                                                        | --                                        | --                                            | --                                     | --                                                | --                                                  |
| Visceral leishmaniasis                                                               | --                                        | --                                            | --                                     | --                                                | --                                                  |
| Cutaneous and mucocutaneous leishmaniasis                                            | --                                        | --                                            | --                                     | --                                                | --                                                  |
| African trypanosomiasis                                                              | --                                        | --                                            | --                                     | --                                                | --                                                  |
| Schistosomiasis                                                                      | --                                        | --                                            | --                                     | --                                                | --                                                  |
| Cysticercosis                                                                        | --                                        | --                                            | --                                     | --                                                | --                                                  |
| Cystic echinococcosis                                                                | < 0.05<br>(< 0.05 to 0.1)                 | < 0.05<br>(< 0.05 to < 0.05)                  | < 0.05<br>(< 0.05 to < 0.05)           | -38.8<br>(-97.0 to 943.3)                         | -42.6<br>(-97.0 to 925.6)                           |
| Lymphatic filariasis                                                                 | --                                        | --                                            | --                                     | --                                                | --                                                  |
| Onchocerciasis                                                                       | --                                        | --                                            | --                                     | --                                                | --                                                  |
| Trachoma                                                                             | --                                        | --                                            | --                                     | --                                                | --                                                  |
| Dengue                                                                               | --                                        | --                                            | --                                     | --                                                | --                                                  |
| Yellow fever                                                                         | --                                        | --                                            | --                                     | --                                                | --                                                  |
| Rabies                                                                               | < 0.05<br>(< 0.05 to < 0.05)              | < 0.05<br>(< 0.05 to < 0.05)                  | < 0.05<br>(< 0.05 to < 0.05)           | 33.9<br>(7.4 to 60.9)                             | 14.1<br>(-9.9 to 38.6)                              |
| Intestinal nematode infections                                                       | --                                        | --                                            | --                                     | --                                                | --                                                  |
| Ascariasis                                                                           | --                                        | --                                            | --                                     | --                                                | --                                                  |

| Cause                                                                   | Prevalence in thousands (95% UI)                 | Incidence in thousands (95% UI)                   | YLDs in thousands (95% UI)                    |                                                   |                                                     |
|-------------------------------------------------------------------------|--------------------------------------------------|---------------------------------------------------|-----------------------------------------------|---------------------------------------------------|-----------------------------------------------------|
|                                                                         | 2016 counts                                      | 2016 counts                                       | 2016 counts                                   | Percentage change in counts between 2006 and 2016 | Percentage change in age-standardised rates between |
| Trichuriasis                                                            | --                                               | --                                                | --                                            | --                                                | --                                                  |
| Hookworm disease                                                        | --                                               | --                                                | --                                            | --                                                | --                                                  |
| Food-borne trematodiasis                                                | --                                               | --                                                | --                                            | --                                                | --                                                  |
| Leprosy                                                                 | --                                               | --                                                | --                                            | --                                                | --                                                  |
| Ebola virus disease                                                     | --                                               | --                                                | --                                            | --                                                | --                                                  |
| Zika virus disease                                                      | --                                               | --                                                | --                                            | --                                                | --                                                  |
| Guinea worm disease                                                     | --                                               | --                                                | --                                            | --                                                | --                                                  |
| Other neglected tropical diseases                                       | --                                               | --                                                | < 0.05<br>(< 0.05 to < 0.05)                  | --                                                | --                                                  |
| <b>Maternal disorders</b>                                               | <b>12.5</b><br><b>(9.7 to 17.1)</b>              | <b>190.4†</b><br><b>(124.7 to 292.7)</b>          | <b>0.7</b><br><b>(0.4 to 1.0)</b>             | <b>5.5</b><br><b>(-22.5 to 43.0)</b>              | <b>10.4</b><br><b>(-18.8 to 49.5)</b>               |
| Maternal haemorrhage                                                    | 5.0<br>(2.3 to 9.5)                              | 20.7<br>(15.2 to 28.4)                            | 0.1<br>(0.1 to 0.3)                           | 15.8<br>(-29.5 to 91.8)                           | 23.5<br>(-24.5 to 106.8)                            |
| Maternal sepsis and other pregnancy related infections                  | 2.8<br>(2.2 to 3.7)                              | 14.5<br>(10.4 to 20.5)                            | 0.1<br>(< 0.05 to 0.1)                        | -3.6<br>(-52.4 to 104.3)                          | -1.6<br>(-53.3 to 113.1)                            |
| Maternal hypertensive disorders                                         | 4.0<br>(2.5 to 5.9)                              | 16.4<br>(12.3 to 21.9)                            | 0.2<br>(0.1 to 0.3)                           | 15.6<br>(-37.4 to 112.9)                          | 19.8<br>(-34.5 to 120.2)                            |
| Maternal obstructed labour and uterine rupture                          | 0.1<br>(0.1 to 0.2)                              | 8.1<br>(5.1 to 12.1)                              | < 0.05<br>(< 0.05 to 0.1)                     | -3.9<br>(-49.2 to 82.1)                           | 1.3<br>(-47.3 to 92.0)                              |
| Maternal abortion, miscarriage, and ectopic pregnancy                   | 1.1<br>(0.5 to 2.0)                              | 130.8<br>(65.0 to 230.0)                          | 0.1<br>(< 0.05 to 0.2)                        | -7.1<br>(-54.3 to 79.5)                           | -2.1<br>(-52.0 to 92.4)                             |
| Other maternal disorders                                                | --                                               | --                                                | 0.1<br>(0.1 to 0.1)                           | 0.9<br>(-25.9 to 36.8)                            | 5.2<br>(-22.5 to 42.8)                              |
| <b>Neonatal disorders</b>                                               | <b>128.0</b><br><b>(107.0 to 149.0)</b>          | --                                                | <b>21.9</b><br><b>(15.2 to 31.1)</b>          | <b>1.9</b><br><b>(-10.1 to 14.0)</b>              | <b>0.4</b><br><b>(-11.7 to 12.9)</b>                |
| Neonatal preterm birth complications                                    | 102.4<br>(81.7 to 131.5)                         | --                                                | 10.2<br>(6.9 to 14.6)                         | -0.1<br>(-17.1 to 20.6)                           | -1.4<br>(-18.9 to 19.1)                             |
| Neonatal encephalopathy due to birth asphyxia and trauma                | 30.1<br>(20.1 to 42.7)                           | --                                                | 5.3<br>(2.9 to 8.5)                           | 1.9<br>(-23.7 to 28.2)                            | -0.0<br>(-25.7 to 25.2)                             |
| Neonatal sepsis and other neonatal infections                           | 13.6<br>(6.2 to 28.8)                            | --                                                | 5.7<br>(2.3 to 13.2)                          | 6.6<br>(-8.4 to 25.2)                             | 4.4<br>(-11.0 to 22.7)                              |
| Hemolytic disease and other neonatal jaundice                           | 1.3<br>(1.1 to 1.5)                              | --                                                | 0.3<br>(0.2 to 0.5)                           | 1.8<br>(-4.7 to 9.4)                              | -0.7<br>(-7.0 to 6.6)                               |
| Other neonatal disorders                                                | --                                               | --                                                | 0.4<br>(0.2 to 0.6)                           | -12.4<br>(-28.0 to 4.9)                           | -2.1<br>(-19.5 to 17.2)                             |
| <b>Nutritional deficiencies</b>                                         | <b>917.1</b><br><b>(773.9 to 1,071.0)</b>        | <b>104.1†</b><br><b>(81.2 to 129.0)</b>           | <b>12.2</b><br><b>(7.5 to 18.1)</b>           | <b>-13.5</b><br><b>(-28.0 to 3.5)</b>             | <b>-13.1</b><br><b>(-28.5 to 5.2)</b>               |
| Protein-energy malnutrition                                             | 8.0<br>(7.8 to 8.2)                              | 5.0<br>(4.9 to 5.1)                               | 0.9<br>(0.6 to 1.2)                           | -11.6<br>(-22.1 to -0.0)                          | -1.2<br>(-12.9 to 11.7)                             |
| Iodine deficiency                                                       | 199.6<br>(151.9 to 259.3)                        | 2.8<br>(2.2 to 3.6)                               | 5.0<br>(3.1 to 7.7)                           | 6.3<br>(-4.4 to 18.2)                             | -0.6<br>(-11.2 to 11.2)                             |
| Vitamin A deficiency                                                    | 117.7<br>(91.4 to 149.7)                         | 96.3<br>(73.4 to 121.4)                           | --                                            | --                                                | --                                                  |
| Iron-deficiency anaemia                                                 | 546.3<br>(416.9 to 715.4)                        | --                                                | 6.2<br>(3.4 to 10.4)                          | -25.1<br>(-46.9 to 3.9)                           | -20.9<br>(-43.9 to 9.1)                             |
| Other nutritional deficiencies                                          | --                                               | --                                                | < 0.05<br>(< 0.05 to < 0.05)                  | -12.0<br>(-22.9 to -0.1)                          | -1.5<br>(-13.6 to 11.6)                             |
| <b>Other communicable, maternal, neonatal, and nutritional diseases</b> | <b>2,800.8</b><br><b>(2,573.2 to 3,066.0)</b>    | <b>438.9</b><br><b>(382.0 to 560.5)</b>           | <b>2.1</b><br><b>(1.2 to 3.7)</b>             | <b>0.8</b><br><b>(-5.6 to 6.9)</b>                | <b>-2.7</b><br><b>(-10.4 to 4.9)</b>                |
| Sexually transmitted diseases excluding HIV                             | 2,494.4<br>(2,285.7 to 2,748.4)                  | 408.9<br>(352.6 to 532.4)                         | 1.4<br>(0.8 to 2.7)                           | 1.9<br>(-4.5 to 8.7)                              | -3.3<br>(-10.6 to 4.1)                              |
| Syphilis                                                                | 12.9<br>(10.0 to 16.7)                           | 12.0<br>(8.5 to 16.6)                             | 0.2<br>(0.1 to 0.3)                           | 16.0<br>(2.0 to 32.8)                             | -0.3<br>(-12.2 to 14.4)                             |
| Chlamydial infection                                                    | 75.5<br>(55.6 to 100.2)                          | 53.3<br>(37.6 to 73.4)                            | 0.2<br>(0.1 to 0.4)                           | -6.5<br>(-24.1 to 13.4)                           | -8.5<br>(-26.6 to 12.6)                             |
| Gonococcal infection                                                    | 15.6<br>(7.0 to 47.7)                            | 41.1<br>(8.9 to 166.7)                            | 0.1<br>(< 0.05 to 0.1)                        | -16.2<br>(-28.2 to 0.6)                           | -12.8<br>(-27.3 to 6.3)                             |
| Trichomoniasis                                                          | 260.6<br>(228.8 to 296.4)                        | 216.1<br>(189.1 to 247.4)                         | 0.2<br>(0.1 to 0.5)                           | 7.0<br>(-1.7 to 17.3)                             | 3.2<br>(-5.3 to 13.6)                               |
| Genital herpes                                                          | 2,165.9<br>(1,857.1 to 2,533.3)                  | 80.9<br>(68.5 to 95.6)                            | 0.5<br>(0.2 to 1.2)                           | 7.0<br>(-1.5 to 15.4)                             | -0.3<br>(-8.4 to 8.2)                               |
| Other sexually transmitted diseases                                     | 15.3<br>(12.9 to 17.8)                           | 5.6<br>(3.6 to 8.0)                               | 0.2<br>(0.1 to 0.4)                           | -8.4<br>(-20.4 to 5.9)                            | -6.2<br>(-19.3 to 9.8)                              |
| Hepatitis                                                               | 383.6<br>(333.1 to 440.5)                        | 30.0<br>(25.0 to 35.9)                            | < 0.05<br>(< 0.05 to 0.1)                     | 14.7<br>(-3.4 to 35.9)                            | 2.0<br>(-17.2 to 24.7)                              |
| Acute hepatitis A                                                       | 1.0<br>(0.7 to 1.4)                              | 12.8<br>(9.3 to 17.6)                             | < 0.05<br>(< 0.05 to < 0.05)                  | 9.2<br>(-17.6 to 45.9)                            | -0.7<br>(-29.1 to 38.8)                             |
| Hepatitis B                                                             | 227.1<br>(180.5 to 282.5)                        | 14.8<br>(11.6 to 18.7)                            | < 0.05<br>(< 0.05 to < 0.05)                  | 22.3<br>(3.4 to 44.4)                             | 6.4<br>(-9.5 to 25.2)                               |
| Hepatitis C                                                             | 155.4<br>(139.2 to 172.4)                        | 1.6<br>(1.4 to 1.8)                               | < 0.05<br>(< 0.05 to < 0.05)                  | 2.0<br>(0.2 to 4.2)                               | 1.8<br>(1.3 to 2.3)                                 |
| Acute hepatitis E                                                       | 0.1<br>(< 0.05 to 0.1)                           | 0.7<br>(0.5 to 0.9)                               | < 0.05<br>(< 0.05 to < 0.05)                  | 32.9<br>(23.0 to 43.6)                            | 8.6<br>(1.2 to 16.0)                                |
| Other infectious diseases                                               | 16.1<br>(12.0 to 20.8)                           | < 0.05<br>(< 0.05 to < 0.05)                      | 0.6<br>(0.4 to 1.0)                           | -2.6<br>(-15.2 to 10.5)                           | -1.8<br>(-17.6 to 15.2)                             |
| <b>Non-communicable diseases</b>                                        | <b>15,691.4</b><br><b>(15,600.9 to 15,766.4)</b> | <b>41,722.2†</b><br><b>(40,039.3 to 43,538.3)</b> | <b>2,016.6</b><br><b>(1,506.1 to 2,600.9)</b> | <b>8.1</b><br><b>(6.3 to 9.8)</b>                 | <b>-1.8</b><br><b>(-3.4 to -0.3)</b>                |
| <b>Neoplasms</b>                                                        | <b>432.8</b><br><b>(418.0 to 449.3)</b>          | <b>130.5</b><br><b>(123.0 to 136.4)</b>           | <b>41.9</b><br><b>(31.3 to 54.5)</b>          | <b>25.1</b><br><b>(19.8 to 30.6)</b>              | <b>2.6</b><br><b>(-1.8 to 7.0)</b>                  |
| Lip and oral cavity cancer                                              | 4.2<br>(3.8 to 4.7)                              | 1.1<br>(1.0 to 1.2)                               | 0.4<br>(0.3 to 0.6)                           | 15.0<br>(-0.0 to 31.3)                            | -6.1<br>(-17.9 to 6.9)                              |
| Nasopharynx cancer                                                      | 0.6<br>(0.5 to 0.7)                              | 0.2<br>(0.1 to 0.2)                               | 0.1<br>(< 0.05 to 0.1)                        | 1.7<br>(-10.8 to 16.9)                            | -13.5<br>(-23.9 to -0.6)                            |
| Other pharynx cancer                                                    | 2.3<br>(2.1 to 2.5)                              | 0.6<br>(0.6 to 0.7)                               | 0.2<br>(0.2 to 0.3)                           | 27.3<br>(9.5 to 48.5)                             | 4.8<br>(-10.1 to 22.2)                              |
| Oesophageal cancer                                                      | 3.1<br>(2.7 to 3.7)                              | 2.2<br>(2.0 to 2.4)                               | 0.6<br>(0.4 to 0.8)                           | 33.9<br>(9.2 to 63.4)                             | 7.9<br>(-12.7 to 31.3)                              |
| Stomach cancer                                                          | 8.7<br>(7.6 to 10.0)                             | 4.0<br>(3.6 to 4.5)                               | 1.1<br>(0.8 to 1.4)                           | 17.9<br>(-1.3 to 41.3)                            | -5.6<br>(-21.0 to 13.1)                             |
| Colon and rectum cancer                                                 | 65.9<br>(60.5 to 71.9)                           | 16.7<br>(15.5 to 18.1)                            | 5.8<br>(4.2 to 7.6)                           | 25.7<br>(13.3 to 38.8)                            | 0.5<br>(-9.6 to 11.2)                               |
| Liver cancer                                                            | 1.3<br>(1.0 to 1.6)                              | 1.4<br>(1.2 to 1.6)                               | 0.4<br>(0.2 to 0.5)                           | 72.9<br>(43.2 to 108.3)                           | 40.4<br>(16.4 to 68.5)                              |
| Liver cancer due to hepatitis B                                         | 0.4<br>(0.3 to 0.5)                              | 0.2<br>(0.2 to 0.3)                               | 0.1<br>(< 0.05 to 0.1)                        | 70.5<br>(41.4 to 105.8)                           | 43.1<br>(19.2 to 72.1)                              |

| Cause                                              | Prevalence in thousands (95% UI)              | Incidence in thousands (95% UI)          | YLDs in thousands (95% UI)             |                                                   |                                                     |
|----------------------------------------------------|-----------------------------------------------|------------------------------------------|----------------------------------------|---------------------------------------------------|-----------------------------------------------------|
|                                                    | 2016 counts                                   | 2016 counts                              | 2016 counts                            | Percentage change in counts between 2006 and 2016 | Percentage change in age-standardised rates between |
| Liver cancer due to hepatitis C                    | 0.6<br>(0.4 to 0.8)                           | 0.4<br>(0.3 to 0.5)                      | 0.1<br>(0.1 to 0.1)                    | 76.3<br>(41.1 to 120.5)                           | 40.3<br>(13.8 to 73.1)                              |
| Liver cancer due to alcohol use                    | 0.9<br>(0.6 to 1.2)                           | 0.5<br>(0.4 to 0.7)                      | 0.1<br>(0.1 to 0.2)                    | 69.4<br>(37.3 to 105.8)                           | 36.9<br>(11.7 to 65.6)                              |
| Liver cancer due to other causes                   | 0.5<br>(0.4 to 0.7)                           | 0.3<br>(0.2 to 0.4)                      | 0.1<br>(< 0.05 to 0.1)                 | 77.1<br>(42.3 to 118.5)                           | 44.2<br>(16.0 to 75.8)                              |
| Gallbladder and biliary tract cancer               | 0.8<br>(0.6 to 1.4)                           | 0.8<br>(0.7 to 1.1)                      | 0.2<br>(0.1 to 0.3)                    | 12.7<br>(-18.1 to 56.4)                           | -10.4<br>(-34.5 to 21.3)                            |
| Pancreatic cancer                                  | 2.8<br>(2.4 to 3.4)                           | 3.2<br>(2.9 to 3.5)                      | 0.6<br>(0.4 to 0.8)                    | 33.5<br>(9.2 to 62.2)                             | 6.3<br>(-12.1 to 28.2)                              |
| Larynx cancer                                      | 2.9<br>(2.5 to 3.3)                           | 0.8<br>(0.7 to 0.9)                      | 0.3<br>(0.2 to 0.4)                    | 9.7<br>(-8.7 to 31.4)                             | -11.1<br>(-25.7 to 6.1)                             |
| Tracheal, bronchus, and lung cancer                | 25.0<br>(21.6 to 28.4)                        | 15.1<br>(13.7 to 16.5)                   | 3.6<br>(2.5 to 4.7)                    | 23.4<br>(5.3 to 44.7)                             | -0.9<br>(-15.1 to 16.1)                             |
| Malignant skin melanoma                            | 32.7<br>(21.9 to 37.5)                        | 6.5<br>(4.4 to 7.5)                      | 2.0<br>(1.2 to 3.0)                    | 36.5<br>(18.7 to 55.1)                            | 18.4<br>(3.4 to 34.0)                               |
| Non-melanoma skin cancer                           | 5.1<br>(3.7 to 7.1)                           | 6.8<br>(4.7 to 9.5)                      | 0.2<br>(0.1 to 0.3)                    | 39.1<br>(-5.5 to 99.4)                            | 10.1<br>(-25.3 to 56.2)                             |
| Non-melanoma skin cancer (squamous-cell carcinoma) | 4.3<br>(3.0 to 6.6)                           | 3.9<br>(2.8 to 5.8)                      | 0.2<br>(0.1 to 0.3)                    | 39.2<br>(-5.7 to 101.2)                           | 10.1<br>(-25.7 to 58.0)                             |
| Non-melanoma skin cancer (basal-cell carcinoma)    | 0.4<br>(0.2 to 0.8)                           | 2.9<br>(1.5 to 4.8)                      | < 0.05<br>(< 0.05 to < 0.05)           | 32.6<br>(8.8 to 62.8)                             | 9.1<br>(-7.0 to 30.2)                               |
| Breast cancer                                      | 78.2<br>(71.9 to 85.6)                        | 16.0<br>(14.8 to 17.6)                   | 7.0<br>(5.0 to 9.3)                    | 8.1<br>(-2.6 to 19.7)                             | -8.7<br>(-17.5 to 1.1)                              |
| Cervical cancer                                    | 2.8<br>(2.4 to 3.4)                           | 0.7<br>(0.6 to 0.8)                      | 0.3<br>(0.2 to 0.4)                    | -9.4<br>(-26.1 to 10.3)                           | -15.7<br>(-31.8 to 4.9)                             |
| Uterine cancer                                     | 15.3<br>(13.2 to 17.7)                        | 3.2<br>(2.8 to 3.7)                      | 1.1<br>(0.8 to 1.6)                    | 32.9<br>(8.9 to 65.0)                             | 9.5<br>(-10.1 to 35.8)                              |
| Ovarian cancer                                     | 5.2<br>(4.4 to 6.2)                           | 1.7<br>(1.4 to 1.9)                      | 0.7<br>(0.5 to 1.0)                    | 5.0<br>(-23.2 to 40.9)                            | -12.5<br>(-35.4 to 17.4)                            |
| Prostate cancer                                    | 77.9<br>(60.7 to 92.5)                        | 18.5<br>(15.0 to 21.5)                   | 6.6<br>(4.6 to 8.8)                    | 40.9<br>(20.9 to 64.0)                            | 9.7<br>(-5.9 to 28.3)                               |
| Testicular cancer                                  | 4.0<br>(3.3 to 4.9)                           | 0.8<br>(0.6 to 0.9)                      | 0.3<br>(0.2 to 0.4)                    | 6.7<br>(-18.6 to 40.2)                            | 6.1<br>(-20.4 to 41.1)                              |
| Kidney cancer                                      | 10.8<br>(9.5 to 12.0)                         | 3.0<br>(2.7 to 3.2)                      | 1.0<br>(0.7 to 1.3)                    | 24.4<br>(6.4 to 43.5)                             | 2.7<br>(-12.2 to 18.2)                              |
| Bladder cancer                                     | 22.2<br>(20.3 to 24.3)                        | 5.2<br>(4.8 to 5.6)                      | 1.9<br>(1.4 to 2.6)                    | 25.5<br>(10.8 to 41.3)                            | 0.3<br>(-11.4 to 12.9)                              |
| Brain and nervous system cancer                    | 6.5<br>(4.3 to 8.1)                           | 2.4<br>(1.6 to 3.0)                      | 0.8<br>(0.5 to 1.1)                    | 27.8<br>(1.9 to 58.7)                             | 14.6<br>(-7.6 to 40.5)                              |
| Thyroid cancer                                     | 8.2<br>(7.3 to 9.3)                           | 1.6<br>(1.4 to 1.8)                      | 0.5<br>(0.3 to 0.7)                    | 37.4<br>(14.5 to 61.1)                            | 22.8<br>(2.3 to 44.2)                               |
| Mesothelioma                                       | 1.1<br>(1.0 to 1.2)                           | 0.7<br>(0.6 to 0.8)                      | 0.2<br>(0.1 to 0.3)                    | 23.9<br>(-10.0 to 68.4)                           | -1.6<br>(-28.0 to 33.1)                             |
| Hodgkin lymphoma                                   | 3.1<br>(2.8 to 3.6)                           | 0.7<br>(0.6 to 0.8)                      | 0.3<br>(0.2 to 0.4)                    | 7.0<br>(-10.1 to 28.8)                            | 0.4<br>(-17.4 to 23.8)                              |
| Non-Hodgkin's lymphoma                             | 20.0<br>(17.4 to 22.7)                        | 4.9<br>(4.3 to 5.5)                      | 1.5<br>(1.1 to 2.1)                    | 31.3<br>(14.3 to 51.1)                            | 9.3<br>(-4.8 to 25.7)                               |
| Multiple myeloma                                   | 4.3<br>(3.4 to 5.1)                           | 1.4<br>(1.2 to 1.7)                      | 0.7<br>(0.5 to 1.0)                    | 36.9<br>(5.8 to 75.4)                             | 10.7<br>(-14.8 to 42.0)                             |
| Leukaemia                                          | 13.1<br>(11.8 to 14.5)                        | 3.9<br>(3.6 to 4.3)                      | 1.7<br>(1.2 to 2.2)                    | 30.1<br>(14.5 to 48.6)                            | 3.5<br>(-9.8 to 18.5)                               |
| Acute lymphoid leukaemia                           | 1.6<br>(1.4 to 1.9)                           | 0.4<br>(0.3 to 0.5)                      | 0.2<br>(0.1 to 0.3)                    | 6.6<br>(-22.6 to 42.0)                            | -2.1<br>(-33.6 to 41.0)                             |
| Chronic lymphoid leukaemia                         | 2.9<br>(2.2 to 5.6)                           | 0.7<br>(0.5 to 1.3)                      | 0.4<br>(0.2 to 0.7)                    | -27.7<br>(-47.9 to 38.5)                          | -42.8<br>(-58.9 to 9.4)                             |
| Acute myeloid leukaemia                            | 1.6<br>(1.2 to 1.9)                           | 1.2<br>(0.9 to 1.3)                      | 0.3<br>(0.2 to 0.4)                    | 71.6<br>(29.8 to 106.5)                           | 35.5<br>(3.1 to 62.4)                               |
| Chronic myeloid leukaemia                          | 1.0<br>(0.8 to 1.1)                           | 0.3<br>(0.3 to 0.4)                      | 0.1<br>(0.1 to 0.2)                    | 10.3<br>(-10.2 to 30.9)                           | -11.1<br>(-27.7 to 5.5)                             |
| Other leukaemia                                    | 6.0<br>(4.2 to 7.0)                           | 1.4<br>(1.0 to 1.6)                      | 0.7<br>(0.4 to 1.0)                    | 112.7<br>(54.7 to 165.9)                          | 63.4<br>(18.4 to 103.5)                             |
| Other neoplasms                                    | 26.0<br>(21.8 to 29.7)                        | 6.6<br>(5.6 to 7.4)                      | 1.9<br>(1.3 to 2.6)                    | 39.3<br>(17.7 to 64.2)                            | 18.1<br>(1.1 to 38.3)                               |
| <b>Cardiovascular diseases</b>                     | <b>2,167.4</b><br><b>(2,076.1 to 2,247.4)</b> | <b>230.0†</b><br><b>(216.2 to 245.5)</b> | <b>127.3</b><br><b>(92.5 to 166.1)</b> | <b>16.9</b><br><b>(12.7 to 21.8)</b>              | <b>-4.5</b><br><b>(-7.7 to -0.6)</b>                |
| Rheumatic heart disease                            | 1.3<br>(1.1 to 1.4)                           | 0.5<br>(0.5 to 0.5)                      | 0.1<br>(0.1 to 0.1)                    | 19.0<br>(7.6 to 31.1)                             | 0.5<br>(-8.1 to 9.6)                                |
| Ischaemic heart disease                            | 694.7<br>(652.2 to 737.9)                     | 89.8<br>(81.1 to 99.6)                   | 28.0<br>(19.7 to 38.0)                 | 18.1<br>(12.1 to 24.4)                            | -3.4<br>(-8.2 to 1.7)                               |
| Cerebrovascular disease                            | 252.7<br>(235.6 to 268.3)                     | 35.4‡<br>(32.6 to 38.5)                  | 39.6<br>(28.4 to 50.4)                 | 12.3<br>(4.0 to 21.3)                             | -7.8<br>(-14.3 to -0.7)                             |
| Ischaemic stroke                                   | 204.2<br>(182.5 to 226.0)                     | 23.9‡<br>(21.1 to 26.8)                  | 30.9<br>(21.9 to 39.6)                 | 12.3<br>(2.4 to 23.6)                             | -8.2<br>(-16.1 to 0.5)                              |
| Hemorrhagic stroke                                 | 59.0<br>(52.6 to 65.8)                        | 11.5‡<br>(10.3 to 12.7)                  | 8.8<br>(6.3 to 11.2)                   | 12.2<br>(-0.3 to 25.6)                            | -6.5<br>(-16.5 to 4.3)                              |
| Hypertensive heart disease                         | 22.6<br>(18.7 to 27.2)                        | --                                       | 1.8<br>(1.2 to 2.6)                    | 22.2<br>(7.4 to 41.0)                             | -2.1<br>(-14.2 to 12.2)                             |
| Cardiomyopathy and myocarditis                     | 33.6<br>(29.7 to 37.8)                        | 9.9†<br>(8.4 to 11.8)                    | 2.8<br>(1.9 to 4.1)                    | 18.8<br>(6.6 to 32.3)                             | -0.7<br>(-10.1 to 10.1)                             |
| Myocarditis                                        | 5.9<br>(5.3 to 6.6)                           | 9.9<br>(8.4 to 11.8)                     | 0.4<br>(0.3 to 0.6)                    | 5.2<br>(-8.3 to 20.2)                             | -3.9<br>(-16.5 to 9.3)                              |
| Alcoholic cardiomyopathy                           | 9.6<br>(7.9 to 11.5)                          | --                                       | 0.8<br>(0.5 to 1.2)                    | 21.4<br>(-1.5 to 50.5)                            | 3.1<br>(-16.7 to 27.1)                              |
| Other cardiomyopathy                               | 20.2<br>(16.9 to 24.0)                        | --                                       | 1.6<br>(1.1 to 2.3)                    | 21.6<br>(6.6 to 37.8)                             | -1.4<br>(-13.1 to 11.8)                             |
| Atrial fibrillation and flutter                    | 278.7<br>(241.5 to 324.1)                     | 22.9<br>(19.3 to 27.1)                   | 21.7<br>(14.7 to 30.2)                 | 22.5<br>(15.5 to 30.2)                            | -1.7<br>(-7.2 to 4.5)                               |
| Peripheral vascular disease                        | 811.6<br>(713.1 to 926.4)                     | 66.5<br>(56.8 to 78.2)                   | 3.0<br>(1.4 to 5.7)                    | 16.6<br>(9.5 to 26.7)                             | -8.5<br>(-14.3 to -0.7)                             |
| Endocarditis                                       | 4.1<br>(3.5 to 4.9)                           | 5.0<br>(4.5 to 5.5)                      | 0.3<br>(0.2 to 0.5)                    | 20.2<br>(-0.5 to 47.0)                            | -2.7<br>(-18.7 to 17.4)                             |
| Other cardiovascular and circulatory diseases      | 580.7<br>(495.5 to 678.0)                     | --                                       | 29.9<br>(20.0 to 42.1)                 | 17.8<br>(8.1 to 28.2)                             | -2.9<br>(-10.6 to 5.3)                              |
| <b>Chronic respiratory diseases</b>                | <b>1,972.4</b><br><b>(1,908.0 to 2,045.3)</b> | <b>157.0†</b><br><b>(150.2 to 165.0)</b> | <b>84.3</b><br><b>(65.4 to 106.2)</b>  | <b>2.2</b><br><b>(-4.1 to 8.2)</b>                | <b>-7.5</b><br><b>(-12.5 to -2.8)</b>               |
| Chronic obstructive pulmonary disease              | 926.1<br>(881.1 to 971.7)                     | 55.7<br>(52.8 to 58.7)                   | 37.9<br>(31.6 to 44.7)                 | -1.5<br>(-13.0 to 10.7)                           | -17.7<br>(-26.9 to -8.0)                            |
| Pneumoconiosis                                     | 0.2<br>(0.1 to 0.2)                           | < 0.05<br>(< 0.05 to 0.1)                | < 0.05<br>(< 0.05 to < 0.05)           | 8.5<br>(-0.1 to 18.2)                             | -15.5<br>(-21.9 to -8.2)                            |
| Silicosis                                          | 0.1<br>(0.1 to 0.2)                           | < 0.05<br>(< 0.05 to 0.1)                | < 0.05<br>(< 0.05 to < 0.05)           | 7.5<br>(-2.4 to 18.5)                             | -17.0<br>(-24.2 to -8.6)                            |



| Cause                                                          | Prevalence in thousands (95% UI)              | Incidence in thousands (95% UI)               | YLDs in thousands (95% UI)              |                                                   |                                                     |
|----------------------------------------------------------------|-----------------------------------------------|-----------------------------------------------|-----------------------------------------|---------------------------------------------------|-----------------------------------------------------|
|                                                                | 2016 counts                                   | 2016 counts                                   | 2016 counts                             | Percentage change in counts between 2006 and 2016 | Percentage change in age-standardised rates between |
| Asbestosis                                                     | < 0.05<br>(< 0.05 to < 0.05)                  | < 0.05<br>(< 0.05 to < 0.05)                  | < 0.05<br>(< 0.05 to < 0.05)            | 19.2<br>(0.7 to 38.5)                             | -1.5<br>(-17.5 to 15.5)                             |
| Coal workers pneumoconiosis                                    | --                                            | --                                            | --                                      | --                                                | --                                                  |
| Other pneumoconiosis                                           | < 0.05<br>(< 0.05 to < 0.05)                  | < 0.05<br>(< 0.05 to < 0.05)                  | < 0.05<br>(< 0.05 to < 0.05)            | 5.8<br>(-6.0 to 31.2)                             | -13.5<br>(-23.1 to 4.2)                             |
| Asthma                                                         | 1,140.9<br>(1,073.7 to 1,218.1)               | 100.1<br>(93.4 to 107.6)                      | 44.2<br>(28.8 to 62.5)                  | 4.6<br>(0.4 to 8.6)                               | -1.4<br>(-5.7 to 2.8)                               |
| Interstitial lung disease and pulmonary sarcoidosis            | 10.4<br>(9.3 to 11.6)                         | 1.2<br>(1.1 to 1.3)                           | 1.1<br>(0.7 to 1.6)                     | 26.0<br>(9.9 to 44.0)                             | 4.0<br>(-8.4 to 17.6)                               |
| Other chronic respiratory diseases                             | --                                            | --                                            | 1.1<br>(0.9 to 1.3)                     | 18.7<br>(4.1 to 36.7)                             | 15.0<br>(-2.6 to 36.0)                              |
| <b>Cirrhosis and other chronic liver diseases</b>              | <b>149.2</b><br><b>(141.0 to 156.8)</b>       | <b>2.8</b><br><b>(2.7 to 2.9)</b>             | <b>3.4</b><br><b>(2.4 to 4.8)</b>       | <b>16.2</b><br><b>(4.8 to 27.5)</b>               | <b>6.3</b><br><b>(-4.5 to 17.6)</b>                 |
| Cirrhosis and other chronic liver diseases due to hepatitis B  | 21.7<br>(17.3 to 26.9)                        | 0.4<br>(0.3 to 0.5)                           | 0.5<br>(0.3 to 0.7)                     | 17.5<br>(-10.2 to 52.5)                           | 6.0<br>(-19.6 to 39.5)                              |
| Cirrhosis and other chronic liver diseases due to hepatitis C  | 42.6<br>(33.0 to 54.6)                        | 0.7<br>(0.6 to 0.9)                           | 0.9<br>(0.6 to 1.3)                     | 18.4<br>(-2.6 to 43.0)                            | 7.4<br>(-13.8 to 30.8)                              |
| Cirrhosis and other chronic liver diseases due to alcohol use  | 71.0<br>(60.6 to 81.6)                        | 1.3<br>(1.2 to 1.5)                           | 1.5<br>(1.0 to 2.1)                     | 17.9<br>(0.6 to 36.8)                             | 5.5<br>(-10.1 to 22.9)                              |
| Cirrhosis and other chronic liver diseases due to other causes | 13.9<br>(10.9 to 17.8)                        | 0.3<br>(0.3 to 0.4)                           | 0.6<br>(0.4 to 0.9)                     | 8.6<br>(-12.6 to 35.7)                            | 6.5<br>(-15.2 to 33.8)                              |
| <b>Digestive diseases</b>                                      | <b>411.6</b><br><b>(379.3 to 449.2)</b>       | <b>534.3†</b><br><b>(495.8 to 576.6)</b>      | <b>13.7</b><br><b>(9.8 to 18.3)</b>     | <b>14.1</b><br><b>(4.9 to 24.9)</b>               | <b>3.4</b><br><b>(-5.4 to 14.2)</b>                 |
| Peptic ulcer disease                                           | 96.3<br>(82.8 to 113.7)                       | 21.2<br>(18.9 to 23.9)                        | 1.2<br>(0.7 to 1.9)                     | 35.4<br>(-4.7 to 92.6)                            | 32.5<br>(-9.1 to 96.3)                              |
| Gastritis and duodenitis                                       | 169.6<br>(142.9 to 198.1)                     | 109.8<br>(95.3 to 126.5)                      | 1.4<br>(0.8 to 2.2)                     | 46.0<br>(10.1 to 93.7)                            | 38.7<br>(1.9 to 88.2)                               |
| Appendicitis                                                   | 0.7<br>(0.7 to 0.8)                           | 19.0<br>(17.5 to 20.6)                        | 0.2<br>(0.1 to 0.3)                     | -1.5<br>(-19.2 to 20.8)                           | -4.1<br>(-25.1 to 23.1)                             |
| Paralytic ileus and intestinal obstruction                     | 0.4<br>(0.3 to 0.4)                           | 10.8<br>(9.7 to 12.0)                         | 0.1<br>(0.1 to 0.2)                     | 18.2<br>(5.2 to 32.7)                             | 2.0<br>(-6.0 to 11.2)                               |
| Inguinal, femoral, and abdominal hernia                        | 103.3<br>(92.9 to 115.3)                      | 238.3<br>(204.9 to 271.0)                     | 6.6<br>(4.4 to 9.1)                     | 10.1<br>(0.1 to 21.2)                             | -1.8<br>(-11.3 to 8.9)                              |
| Inflammatory bowel disease                                     | 14.0<br>(13.2 to 14.9)                        | 4.7<br>(4.6 to 4.8)                           | 2.0<br>(1.3 to 2.8)                     | 0.0<br>(-14.2 to 16.6)                            | -7.4<br>(-21.0 to 8.4)                              |
| Vascular intestinal disorders                                  | 0.8<br>(0.7 to 0.9)                           | 3.5<br>(3.1 to 3.9)                           | 0.2<br>(0.1 to 0.3)                     | 23.3<br>(-5.9 to 61.7)                            | 2.2<br>(-20.1 to 31.1)                              |
| Gallbladder and biliary diseases                               | 35.3<br>(31.0 to 39.7)                        | 121.7<br>(105.6 to 138.6)                     | 0.7<br>(0.4 to 1.0)                     | 13.3<br>(-8.5 to 38.7)                            | -0.7<br>(-18.0 to 20.0)                             |
| Pancreatitis                                                   | 0.6<br>(0.5 to 0.7)                           | 5.2<br>(4.7 to 5.8)                           | 0.1<br>(0.1 to 0.1)                     | 10.8<br>(5.6 to 16.5)                             | -4.2<br>(-8.3 to -0.0)                              |
| Other digestive diseases                                       | --                                            | --                                            | 1.1<br>(0.8 to 1.4)                     | 20.5<br>(11.2 to 31.1)                            | 8.1<br>(-1.1 to 18.5)                               |
| <b>Neurological disorders</b>                                  | <b>7,175.4</b><br><b>(6,938.9 to 7,495.6)</b> | <b>2,775.0</b><br><b>(2,393.2 to 3,194.2)</b> | <b>215.5</b><br><b>(146.7 to 291.0)</b> | <b>6.1</b><br><b>(-3.8 to 17.8)</b>               | <b>-0.4</b><br><b>(-10.7 to 11.8)</b>               |
| Alzheimer's disease and other dementias                        | 192.4<br>(169.7 to 221.9)                     | 38.5<br>(33.2 to 45.0)                        | 29.0<br>(20.4 to 38.2)                  | 26.2<br>(20.3 to 32.6)                            | -2.7<br>(-7.2 to 2.0)                               |
| Parkinson's disease                                            | 33.3<br>(25.9 to 41.6)                        | 4.0<br>(3.1 to 5.1)                           | 3.8<br>(2.4 to 5.5)                     | 14.9<br>(-7.1 to 39.0)                            | -8.1<br>(-25.5 to 11.4)                             |
| Epilepsy                                                       | 51.7<br>(12.8 to 90.5)                        | 5.3<br>(1.4 to 9.4)                           | 11.7<br>(2.1 to 27.5)                   | 3.1<br>(-83.1 to 514.7)                           | -4.9<br>(-84.4 to 474.2)                            |
| Multiple sclerosis                                             | 25.2<br>(22.7 to 27.8)                        | 0.6<br>(0.5 to 0.6)                           | 6.4<br>(4.5 to 8.4)                     | 11.6<br>(-1.7 to 26.5)                            | 4.6<br>(-8.1 to 18.8)                               |
| Motor neuron disease                                           | 3.4<br>(3.1 to 3.6)                           | 0.6<br>(0.6 to 0.6)                           | 0.7<br>(0.5 to 0.9)                     | 18.7<br>(12.8 to 24.9)                            | 3.8<br>(-0.9 to 8.7)                                |
| Migraine                                                       | 3,489.2<br>(3,341.6 to 3,621.0)               | 286.1<br>(271.7 to 300.9)                     | 142.3<br>(90.8 to 199.7)                | 2.6<br>(-0.2 to 5.7)                              | -0.1<br>(-3.0 to 3.0)                               |
| Tension-type headache                                          | 4,834.2<br>(4,344.1 to 5,369.2)               | 2,439.7<br>(2,059.3 to 2,859.1)               | 18.2<br>(11.6 to 26.8)                  | 4.0<br>(-0.9 to 9.3)                              | -0.1<br>(-4.9 to 4.6)                               |
| Other neurological disorders                                   | 0.1<br>(< 0.05 to 0.1)                        | 0.1<br>(0.1 to 0.2)                           | 3.2<br>(1.7 to 5.7)                     | 17.0<br>(-46.1 to 173.5)                          | 13.3<br>(-56.1 to 194.1)                            |
| <b>Mental and substance use disorders</b>                      | <b>2,991.2</b><br><b>(2,903.1 to 3,089.5)</b> | <b>970.6†</b><br><b>(908.4 to 1,036.8)</b>    | <b>420.9</b><br><b>(304.3 to 547.3)</b> | <b>1.8</b><br><b>(-0.5 to 4.4)</b>                | <b>-3.0</b><br><b>(-5.1 to -0.5)</b>                |
| Schizophrenia                                                  | 71.7<br>(64.4 to 80.2)                        | 3.4<br>(3.0 to 3.8)                           | 45.3<br>(34.0 to 55.8)                  | 1.0<br>(-6.5 to 8.7)                              | -3.5<br>(-10.8 to 4.1)                              |
| Alcohol use disorders                                          | 125.9<br>(109.5 to 142.4)                     | 58.8<br>(50.9 to 67.3)                        | 12.5<br>(8.5 to 17.5)                   | 12.6<br>(2.1 to 25.3)                             | 8.4<br>(-2.1 to 21.3)                               |
| Drug use disorders                                             | 151.3<br>(141.7 to 161.4)                     | 18.7<br>(16.9 to 20.8)                        | 25.9<br>(18.3 to 34.0)                  | 8.1<br>(-1.2 to 19.2)                             | 5.1<br>(-4.5 to 16.2)                               |
| Opioid use disorders                                           | 30.1<br>(26.1 to 34.8)                        | 4.1<br>(3.5 to 4.8)                           | 12.3<br>(8.6 to 16.5)                   | 1.4<br>(-10.5 to 14.6)                            | -2.8<br>(-14.5 to 10.2)                             |
| Cocaine use disorders                                          | 31.9<br>(28.2 to 36.2)                        | 1.7<br>(1.4 to 2.1)                           | 4.3<br>(2.7 to 6.3)                     | 12.3<br>(-4.4 to 32.4)                            | 8.4<br>(-9.0 to 28.5)                               |
| Amphetamine use disorders                                      | 14.1<br>(10.2 to 19.1)                        | 1.4<br>(1.0 to 1.9)                           | 1.9<br>(1.0 to 3.0)                     | 35.2<br>(-0.4 to 79.9)                            | 33.3<br>(-3.7 to 79.5)                              |
| Cannabis use disorders                                         | 66.0<br>(56.5 to 78.0)                        | 9.4<br>(7.8 to 11.3)                          | 1.9<br>(1.2 to 2.9)                     | 6.5<br>(-11.9 to 26.4)                            | 3.7<br>(-15.5 to 24.6)                              |
| Other drug use disorders                                       | 13.2<br>(11.8 to 14.7)                        | 2.1<br>(1.9 to 2.3)                           | 5.5<br>(3.5 to 7.9)                     | 14.7<br>(-8.9 to 41.8)                            | 12.8<br>(-11.5 to 41.3)                             |
| Depressive disorders                                           | 765.0<br>(722.3 to 817.5)                     | 704.9<br>(643.7 to 768.0)                     | 120.9<br>(83.4 to 163.1)                | 5.0<br>(0.0 to 9.7)                               | -1.5<br>(-6.1 to 3.0)                               |
| Major depressive disorder                                      | 436.1<br>(400.7 to 474.1)                     | 660.8<br>(600.6 to 724.3)                     | 88.2<br>(60.1 to 119.4)                 | 3.8<br>(-2.1 to 10.0)                             | -2.2<br>(-7.9 to 3.7)                               |
| Dysthymia                                                      | 344.0<br>(298.5 to 396.1)                     | 44.1<br>(38.8 to 50.3)                        | 32.7<br>(21.9 to 47.6)                  | 8.3<br>(1.8 to 14.9)                              | 0.6<br>(-5.3 to 6.4)                                |
| Bipolar disorder                                               | 151.2<br>(138.8 to 164.3)                     | 9.6<br>(8.7 to 10.7)                          | 30.5<br>(19.0 to 44.4)                  | 5.2<br>(-0.5 to 10.9)                             | 0.1<br>(-5.2 to 5.3)                                |
| Anxiety disorders                                              | 1,169.6<br>(1,049.3 to 1,297.8)               | 122.7<br>(113.6 to 133.4)                     | 111.5<br>(77.5 to 151.7)                | -5.8<br>(-11.4 to 0.2)                            | -10.3<br>(-15.7 to -4.9)                            |
| Eating disorders                                               | 46.1<br>(39.3 to 54.9)                        | 11.4<br>(8.8 to 14.6)                         | 9.6<br>(6.3 to 13.5)                    | 5.1<br>(-4.9 to 15.9)                             | 7.7<br>(-1.5 to 18.4)                               |
| Anorexia nervosa                                               | 13.6<br>(10.4 to 17.6)                        | 2.2<br>(1.7 to 2.8)                           | 2.9<br>(1.8 to 4.3)                     | 7.9<br>(-9.1 to 27.0)                             | 7.7<br>(-9.5 to 27.2)                               |
| Bulimia nervosa                                                | 32.0<br>(25.5 to 40.0)                        | 9.2<br>(6.7 to 12.3)                          | 6.7<br>(4.3 to 9.9)                     | 3.9<br>(-7.1 to 17.7)                             | 7.6<br>(-3.2 to 21.1)                               |
| Autistic spectrum disorders                                    | 127.8<br>(114.6 to 143.2)                     | 0.6<br>(0.4 to 0.8)                           | 20.4<br>(13.8 to 28.4)                  | 4.0<br>(-0.9 to 9.3)                              | 0.1<br>(-4.9 to 5.4)                                |
| Autism                                                         | 50.9<br>(43.2 to 59.8)                        | 0.1<br>(< 0.05 to 0.1)                        | 12.8<br>(8.2 to 18.5)                   | 4.3<br>(-3.0 to 12.5)                             | 0.1<br>(-7.4 to 8.2)                                |
| Asperger syndrome and other autistic spectrum disorders        | 77.1<br>(63.7 to 92.7)                        | 0.5<br>(0.3 to 0.7)                           | 7.6<br>(5.0 to 11.2)                    | 3.6<br>(-2.0 to 8.6)                              | 0.1<br>(-5.3 to 5.3)                                |



| Cause                                                      | Prevalence in thousands (95% UI)                 | Incidence in thousands (95% UI)                   | YLDs in thousands (95% UI)              |                                                   |                                                     |
|------------------------------------------------------------|--------------------------------------------------|---------------------------------------------------|-----------------------------------------|---------------------------------------------------|-----------------------------------------------------|
|                                                            | 2016 counts                                      | 2016 counts                                       | 2016 counts                             | Percentage change in counts between 2006 and 2016 | Percentage change in age-standardised rates between |
| Attention-deficit/hyperactivity disorder                   | 116.8<br>(104.2 to 130.7)                        | 4.8<br>(4.2 to 5.6)                               | 1.4<br>(0.8 to 2.3)                     | -0.9<br>(-10.1 to 9.0)                            | -0.8<br>(-10.1 to 9.5)                              |
| Conduct disorder                                           | 86.0<br>(71.4 to 100.4)                          | 26.6<br>(21.2 to 31.6)                            | 10.5<br>(6.4 to 15.8)                   | 1.0<br>(-5.4 to 8.1)                              | 0.0<br>(-6.3 to 6.9)                                |
| Idiopathic developmental intellectual disability           | 59.1<br>(22.6 to 96.0)                           | --                                                | 2.9<br>(1.2 to 5.2)                     | 1.2<br>(-7.6 to 10.3)                             | -2.7<br>(-11.2 to 6.0)                              |
| Other mental and substance use disorders                   | 401.9<br>(350.3 to 464.7)                        | 9.2<br>(8.2 to 10.4)                              | 29.5<br>(20.5 to 41.8)                  | 6.4<br>(1.9 to 11.5)                              | 0.1<br>(-4.4 to 4.8)                                |
| <b>Diabetes, urogenital, blood, and endocrine diseases</b> | <b>5,583.7</b><br><b>(5,432.6 to 5,744.1)</b>    | <b>1,601.8†</b><br><b>(1,516.7 to 1,701.8)</b>    | <b>148.2</b><br><b>(105.1 to 200.3)</b> | <b>14.9</b><br><b>(8.9 to 21.1)</b>               | <b>-0.4</b><br><b>(-5.1 to 4.7)</b>                 |
| Diabetes mellitus                                          | 978.2<br>(882.7 to 1,084.0)                      | 53.5<br>(47.3 to 60.3)                            | 81.3<br>(56.4 to 113.3)                 | 14.5<br>(4.7 to 24.7)                             | -3.2<br>(-11.5 to 5.2)                              |
| Acute glomerulonephritis                                   | 0.2<br>(0.2 to 0.2)                              | 2.9<br>(2.5 to 3.2)                               | < 0.05<br>(< 0.05 to < 0.05)            | 9.2<br>(4.0 to 14.4)                              | 0.5<br>(-3.4 to 4.8)                                |
| Chronic kidney disease                                     | 559.5<br>(495.4 to 619.6)                        | 48.5<br>(42.3 to 54.9)                            | 15.5<br>(11.6 to 19.5)                  | 27.2<br>(16.5 to 38.9)                            | 7.0<br>(-1.3 to 16.1)                               |
| Chronic kidney disease due to diabetes mellitus            | 146.7<br>(129.4 to 164.8)                        | 13.5<br>(11.3 to 15.4)                            | 4.3<br>(3.2 to 5.4)                     | 46.5<br>(29.2 to 67.5)                            | 22.4<br>(8.2 to 39.6)                               |
| Chronic kidney disease due to hypertension                 | 118.3<br>(102.0 to 134.7)                        | 8.1<br>(7.0 to 9.1)                               | 3.0<br>(2.1 to 3.8)                     | 39.7<br>(20.6 to 60.2)                            | 11.2<br>(-3.6 to 26.9)                              |
| Chronic kidney disease due to glomerulonephritis           | 102.7<br>(89.4 to 115.9)                         | 10.3<br>(8.6 to 12.3)                             | 2.9<br>(2.2 to 3.7)                     | 6.0<br>(-6.4 to 20.6)                             | -6.3<br>(-16.1 to 4.6)                              |
| Chronic kidney disease due to other causes                 | 191.8<br>(169.2 to 214.5)                        | 16.7<br>(14.4 to 18.9)                            | 5.3<br>(4.0 to 6.8)                     | 21.8<br>(8.4 to 37.4)                             | 4.0<br>(-6.7 to 17.0)                               |
| Urinary diseases and male infertility                      | 516.9<br>(465.2 to 580.5)                        | 885.4†<br>(802.1 to 976.8)                        | 16.0<br>(10.5 to 23.2)                  | 19.8<br>(12.4 to 28.2)                            | 0.5<br>(-5.5 to 7.5)                                |
| Interstitial nephritis and urinary tract infections        | 12.1<br>(10.6 to 13.8)                           | 630.7<br>(553.4 to 718.0)                         | 0.4<br>(0.2 to 0.6)                     | 4.2<br>(-11.4 to 21.5)                            | 1.6<br>(-14.0 to 18.4)                              |
| Urolithiasis                                               | 7.7<br>(6.8 to 8.8)                              | 203.7<br>(180.3 to 231.6)                         | 0.6<br>(0.4 to 0.8)                     | 10.5<br>(-8.5 to 33.2)                            | 0.2<br>(-15.1 to 17.9)                              |
| Benign prostatic hyperplasia                               | 442.8<br>(377.2 to 523.5)                        | 51.0<br>(42.8 to 61.1)                            | 14.5<br>(9.4 to 21.0)                   | 22.4<br>(14.2 to 32.3)                            | 1.3<br>(-5.4 to 9.1)                                |
| Male infertility                                           | 38.6<br>(28.2 to 53.4)                           | --                                                | 0.2<br>(0.1 to 0.5)                     | -14.6<br>(-22.8 to -5.7)                          | -6.6<br>(-14.4 to 2.0)                              |
| Other urinary diseases                                     | --                                               | --                                                | 0.3<br>(0.2 to 0.5)                     | -11.0<br>(-21.7 to -0.6)                          | -15.1<br>(-24.5 to -5.5)                            |
| Gynecological diseases                                     | 2,216.3<br>(2,079.2 to 2,373.2)                  | 522.8†<br>(493.8 to 554.1)                        | 18.0<br>(12.2 to 26.4)                  | 1.6<br>(-3.4 to 7.0)                              | -0.3<br>(-5.0 to 4.8)                               |
| Uterine fibroids                                           | 151.0<br>(128.4 to 176.0)                        | 13.0<br>(10.6 to 15.8)                            | 1.4<br>(0.7 to 2.6)                     | -3.7<br>(-16.7 to 9.3)                            | -5.8<br>(-18.4 to 7.3)                              |
| Polycystic ovarian syndrome                                | 4.5<br>(3.4 to 6.0)                              | 14.8<br>(10.2 to 20.0)                            | < 0.05<br>(< 0.05 to 0.1)               | -7.2<br>(-26.7 to 16.2)                           | 1.1<br>(-20.3 to 26.4)                              |
| Female infertility                                         | 66.0<br>(40.8 to 102.5)                          | --                                                | 0.4<br>(0.1 to 0.8)                     | -3.2<br>(-13.7 to 8.2)                            | 6.1<br>(-3.9 to 17.4)                               |
| Endometriosis                                              | 9.3<br>(7.5 to 11.4)                             | 24.2<br>(18.3 to 32.4)                            | 0.9<br>(0.6 to 1.3)                     | 1.1<br>(-19.2 to 27.0)                            | -0.2<br>(-20.1 to 26.7)                             |
| Genital prolapse                                           | 1,181.8<br>(1,018.6 to 1,376.6)                  | 52.9<br>(43.9 to 64.0)                            | 3.7<br>(1.8 to 6.7)                     | 15.3<br>(5.2 to 27.6)                             | -1.3<br>(-9.7 to 8.6)                               |
| Premenstrual syndrome                                      | 862.3<br>(811.5 to 914.4)                        | 290.8<br>(271.7 to 310.2)                         | 7.2<br>(4.5 to 10.9)                    | -0.9<br>(-8.6 to 7.2)                             | 0.5<br>(-6.9 to 8.3)                                |
| Other gynecological diseases                               | 133.8<br>(113.5 to 155.5)                        | 127.2<br>(106.6 to 149.8)                         | 4.5<br>(2.9 to 6.4)                     | -1.9<br>(-11.0 to 9.4)                            | -0.3<br>(-9.7 to 10.0)                              |
| Hemoglobinopathies and hemolytic anaemias                  | 2,197.4<br>(2,051.8 to 2,355.8)                  | --                                                | 2.6<br>(1.5 to 4.1)                     | 30.8<br>(-2.9 to 74.0)                            | 32.8<br>(-3.4 to 81.6)                              |
| Thalassemias                                               | 0.1<br>(0.1 to 0.1)                              | --                                                | < 0.05<br>(< 0.05 to < 0.05)            | 14.3<br>(-6.4 to 40.4)                            | 21.6<br>(-2.0 to 51.3)                              |
| Thalassaemias trait                                        | 173.0<br>(153.7 to 195.5)                        | --                                                | 1.6<br>(0.9 to 2.5)                     | 47.9<br>(3.0 to 106.9)                            | 52.4<br>(5.0 to 115.4)                              |
| Sickle cell disorders                                      | 0.1<br>(0.1 to 0.1)                              | --                                                | < 0.05<br>(< 0.05 to < 0.05)            | 22.6<br>(10.9 to 36.8)                            | 24.8<br>(11.8 to 40.7)                              |
| Sickle cell trait                                          | 216.5<br>(186.0 to 300.5)                        | --                                                | 0.5<br>(0.3 to 0.9)                     | 30.5<br>(-17.4 to 97.7)                           | 38.3<br>(-13.3 to 112.4)                            |
| G6PD deficiency                                            | 291.1<br>(243.2 to 348.7)                        | --                                                | < 0.05<br>(< 0.05 to < 0.05)            | 51.9<br>(-2.0 to 132.4)                           | 57.1<br>(-4.6 to 152.3)                             |
| G6PD trait                                                 | 1,547.8<br>(1,423.8 to 1,680.7)                  | --                                                | < 0.05<br>(< 0.05 to < 0.05)            | 164.0<br>(30.0 to 423.7)                          | 187.1<br>(36.9 to 486.8)                            |
| Other hemoglobinopathies and hemolytic anaemias            | 23.2<br>(19.0 to 27.6)                           | --                                                | 0.5<br>(0.3 to 0.7)                     | -6.2<br>(-20.7 to 11.3)                           | -17.0<br>(-32.4 to 3.2)                             |
| Endocrine, metabolic, blood, and immune disorders          | 434.0<br>(390.1 to 483.1)                        | 88.7<br>(79.0 to 99.7)                            | 14.8<br>(10.0 to 20.6)                  | 16.5<br>(10.1 to 23.5)                            | 0.4<br>(-5.4 to 6.0)                                |
| <b>Musculoskeletal disorders</b>                           | <b>4,804.3</b><br><b>(4,606.5 to 5,004.1)</b>    | <b>2,398.8</b><br><b>(2,179.7 to 2,645.8)</b>     | <b>534.8</b><br><b>(387.6 to 694.4)</b> | <b>7.7</b><br><b>(4.3 to 11.2)</b>                | <b>-1.9</b><br><b>(-5.0 to 1.2)</b>                 |
| Rheumatoid arthritis                                       | 89.6<br>(79.7 to 101.3)                          | 4.4<br>(3.9 to 5.0)                               | 20.7<br>(14.1 to 27.7)                  | 10.7<br>(2.0 to 19.8)                             | -3.3<br>(-10.8 to 4.6)                              |
| Osteoarthritis                                             | 1,234.5<br>(1,163.0 to 1,309.8)                  | 55.0<br>(51.1 to 58.9)                            | 43.1<br>(28.4 to 62.5)                  | 24.3<br>(20.2 to 28.5)                            | 3.9<br>(0.5 to 7.4)                                 |
| Low back and neck pain                                     | 3,285.0<br>(3,096.1 to 3,499.9)                  | 1,370.6<br>(1,208.8 to 1,543.5)                   | 398.5<br>(280.8 to 524.7)               | 7.3<br>(3.0 to 11.6)                              | -1.1<br>(-4.8 to 2.4)                               |
| Low back pain                                              | 2,387.2<br>(2,118.4 to 2,692.3)                  | 1,158.4<br>(998.6 to 1,330.0)                     | 269.1<br>(190.9 to 359.0)               | 8.0<br>(2.2 to 13.8)                              | -0.1<br>(-5.0 to 4.8)                               |
| Neck pain                                                  | 1,309.1<br>(1,142.0 to 1,503.5)                  | 212.2<br>(185.8 to 246.9)                         | 129.4<br>(87.7 to 181.0)                | 5.9<br>(0.2 to 11.9)                              | -3.2<br>(-7.8 to 1.6)                               |
| Gout                                                       | 193.2<br>(169.5 to 219.9)                        | 30.8<br>(26.6 to 35.2)                            | 6.0<br>(4.0 to 8.2)                     | 16.4<br>(3.8 to 29.9)                             | 0.6<br>(-10.8 to 11.9)                              |
| Other musculoskeletal disorders                            | 784.9<br>(635.9 to 950.6)                        | 938.1<br>(793.4 to 1,132.1)                       | 66.4<br>(44.3 to 94.3)                  | -0.3<br>(-9.2 to 9.8)                             | -8.3<br>(-15.8 to 0.2)                              |
| <b>Other non-communicable diseases</b>                     | <b>12,634.8</b><br><b>(12,405.1 to 12,873.8)</b> | <b>32,921.5†</b><br><b>(31,280.6 to 34,687.9)</b> | <b>426.6</b><br><b>(292.9 to 599.2)</b> | <b>11.2</b><br><b>(9.8 to 12.8)</b>               | <b>-0.1</b><br><b>(-1.3 to 1.0)</b>                 |
| Congenital anomalies                                       | 204.9<br>(194.0 to 216.3)                        | --                                                | 22.8<br>(16.2 to 30.6)                  | 5.1<br>(0.0 to 10.3)                              | 0.7<br>(-4.0 to 5.8)                                |
| Neural tube defects                                        | 7.6<br>(6.8 to 8.5)                              | --                                                | 2.2<br>(1.5 to 3.1)                     | 4.8<br>(-11.2 to 22.4)                            | 0.1<br>(-15.2 to 18.0)                              |
| Congenital heart anomalies                                 | 37.8<br>(33.8 to 42.2)                           | --                                                | 2.1<br>(0.9 to 3.6)                     | -0.5<br>(-11.8 to 11.4)                           | -4.2<br>(-15.3 to 7.4)                              |
| Orofacial clefts                                           | 12.2<br>(10.7 to 14.0)                           | --                                                | 0.1<br>(0.1 to 0.2)                     | -0.3<br>(-13.4 to 14.5)                           | -4.9<br>(-17.2 to 9.2)                              |
| Down's syndrome                                            | 8.6<br>(7.5 to 9.7)                              | --                                                | 0.8<br>(0.5 to 1.1)                     | -10.3<br>(-20.5 to 0.9)                           | -9.6<br>(-20.1 to 1.9)                              |
| Turner syndrome                                            | 8.3<br>(7.1 to 9.7)                              | --                                                | 0.1<br>(0.1 to 0.2)                     | 7.3<br>(-20.1 to 41.1)                            | 7.9<br>(-19.3 to 44.8)                              |
| Klinefelter syndrome                                       | 11.2<br>(9.7 to 13.1)                            | --                                                | 0.1<br>(< 0.05 to 0.1)                  | 1.8<br>(-17.9 to 24.8)                            | 4.3<br>(-16.6 to 27.6)                              |

| Cause                                         | Prevalence in thousands (95% UI)              | Incidence in thousands (95% UI)                           | YLDs in thousands (95% UI)              |                                                   |                                                     |
|-----------------------------------------------|-----------------------------------------------|-----------------------------------------------------------|-----------------------------------------|---------------------------------------------------|-----------------------------------------------------|
|                                               | 2016 counts                                   | 2016 counts                                               | 2016 counts                             | Percentage change in counts between 2006 and 2016 | Percentage change in age-standardised rates between |
| Other chromosomal abnormalities               | 19.7<br>(16.7 to 23.1)                        | --                                                        | 1.8<br>(1.2 to 2.5)                     | -2.9<br>(-14.5 to 9.5)                            | 0.3<br>(-11.2 to 13.0)                              |
| Congenital musculoskeletal and limb anomalies | 73.3<br>(67.2 to 79.6)                        | --                                                        | 9.9<br>(6.8 to 13.6)                    | 9.6<br>(1.3 to 18.7)                              | 3.8<br>(-4.8 to 12.4)                               |
| Urogenital congenital anomalies               | 15.4<br>(13.7 to 17.1)                        | --                                                        | 0.4<br>(0.2 to 0.7)                     | -10.7<br>(-23.2 to 2.0)                           | -11.0<br>(-24.2 to 2.8)                             |
| Digestive congenital anomalies                | 29.6<br>(26.9 to 32.6)                        | --                                                        | 1.3<br>(0.8 to 1.9)                     | 8.4<br>(-4.6 to 23.0)                             | 3.9<br>(-8.7 to 18.3)                               |
| Other congenital anomalies                    | 22.4<br>(8.8 to 41.5)                         | --                                                        | 4.0<br>(2.0 to 7.1)                     | 6.0<br>(-4.2 to 18.3)                             | 0.6<br>(-8.9 to 12.0)                               |
| Skin and subcutaneous diseases                | 6,198.0<br>(6,074.9 to 6,317.1)               | 13,653.3<br>(12,883.3 to 14,490.0)                        | 160.3<br>(110.7 to 226.5)               | 5.8<br>(4.0 to 7.6)                               | 1.1<br>(-0.6 to 2.8)                                |
| Dermatitis                                    | 1,087.1<br>(1,048.4 to 1,127.8)               | 1,148.4<br>(1,064.8 to 1,236.4)                           | 40.4<br>(24.0 to 65.5)                  | 2.6<br>(-0.7 to 6.0)                              | 0.6<br>(-2.8 to 4.2)                                |
| Psoriasis                                     | 370.2<br>(348.0 to 395.0)                     | 32.1<br>(30.3 to 34.2)                                    | 31.7<br>(22.5 to 41.8)                  | 10.7<br>(5.4 to 17.0)                             | 2.5<br>(-2.6 to 8.2)                                |
| Cellulitis                                    | 7.8<br>(7.3 to 8.3)                           | 145.9<br>(136.6 to 155.7)                                 | 0.4<br>(0.3 to 0.6)                     | 9.5<br>(-11.3 to 35.0)                            | 0.9<br>(-19.3 to 26.2)                              |
| Pyoderma                                      | 71.5<br>(69.2 to 74.0)                        | 1,927.3<br>(1,859.5 to 1,998.9)                           | 0.4<br>(0.2 to 0.8)                     | 10.8<br>(5.0 to 17.4)                             | 0.4<br>(-5.5 to 6.2)                                |
| Scabies                                       | 15.1<br>(11.1 to 20.7)                        | 45.4<br>(33.5 to 62.5)                                    | 0.4<br>(0.2 to 0.7)                     | 1.7<br>(-9.2 to 15.0)                             | -0.1<br>(-11.5 to 12.7)                             |
| Fungal skin diseases                          | 1,314.1<br>(1,164.1 to 1,467.2)               | 5,152.1<br>(4,469.3 to 5,913.2)                           | 7.2<br>(2.9 to 15.2)                    | 13.4<br>(11.2 to 15.6)                            | 0.1<br>(-1.3 to 1.4)                                |
| Viral skin diseases                           | 464.3<br>(442.3 to 487.2)                     | 625.6<br>(598.7 to 653.3)                                 | 14.2<br>(8.8 to 20.9)                   | 2.3<br>(-0.8 to 5.3)                              | 0.5<br>(-2.5 to 3.5)                                |
| Acne vulgaris                                 | 1,642.2<br>(1,507.5 to 1,781.5)               | 1,263.0<br>(1,020.2 to 1,600.3)                           | 42.1<br>(28.4 to 61.2)                  | 3.0<br>(-0.8 to 6.8)                              | 1.2<br>(-2.6 to 5.1)                                |
| Alopecia areata                               | 51.4<br>(49.6 to 53.2)                        | 90.3<br>(87.3 to 93.4)                                    | 1.7<br>(1.1 to 2.5)                     | 2.5<br>(-5.2 to 11.9)                             | -0.1<br>(-7.8 to 9.0)                               |
| Pruritus                                      | 162.5<br>(143.6 to 184.8)                     | 128.4<br>(113.8 to 145.4)                                 | 1.7<br>(0.8 to 3.1)                     | 9.3<br>(3.3 to 15.7)                              | 0.7<br>(-4.7 to 6.2)                                |
| Urticaria                                     | 106.3<br>(93.8 to 119.8)                      | 188.0<br>(167.0 to 211.3)                                 | 6.3<br>(4.1 to 8.9)                     | 2.6<br>(-4.1 to 9.6)                              | 0.0<br>(-6.2 to 6.6)                                |
| Decubitus ulcer                               | 12.8<br>(11.3 to 14.4)                        | 46.8<br>(41.2 to 53.2)                                    | 1.9<br>(1.4 to 2.7)                     | 14.4<br>(1.0 to 29.2)                             | -4.9<br>(-15.2 to 5.8)                              |
| Other skin and subcutaneous diseases          | 2,201.4<br>(2,141.1 to 2,263.5)               | 2,859.9<br>(2,754.0 to 2,966.0)                           | 11.9<br>(5.7 to 21.7)                   | 15.8<br>(13.4 to 18.2)                            | 2.5<br>(0.4 to 4.6)                                 |
| Sense organ diseases                          | 4,924.3<br>(4,628.1 to 5,204.7)               | 1,867.5 <sup>+</sup><br>(1,766.4 to 1,978.4)              | 145.1<br>(99.2 to 208.1)                | 16.9<br>(14.2 to 19.8)                            | -1.2<br>(-3.5 to 0.9)                               |
| Glaucoma                                      | 9.5<br>(8.0 to 11.0)                          | --                                                        | 1.0<br>(0.7 to 1.5)                     | 25.1<br>(7.6 to 47.1)                             | -0.9<br>(-15.4 to 17.4)                             |
| Cataract                                      | 41.4<br>(34.8 to 49.0)                        | --                                                        | 2.9<br>(2.0 to 4.0)                     | 17.2<br>(7.5 to 28.2)                             | -5.2<br>(-13.8 to 4.5)                              |
| Macular degeneration                          | 21.9<br>(18.8 to 25.4)                        | --                                                        | 2.2<br>(1.5 to 3.1)                     | 27.4<br>(14.9 to 41.5)                            | -0.1<br>(-9.7 to 10.8)                              |
| Refraction and accommodation disorders        | 1,147.5<br>(1,104.8 to 1,194.5)               | --                                                        | 19.4<br>(12.0 to 31.0)                  | 8.3<br>(5.2 to 11.9)                              | -3.2<br>(-5.9 to -0.1)                              |
| Age-related and other hearing loss            | 4,108.8<br>(3,622.3 to 4,593.9)               | --                                                        | 94.0<br>(62.6 to 138.6)                 | 18.7<br>(14.3 to 23.1)                            | -1.1<br>(-4.6 to 2.2)                               |
| Other vision loss                             | 40.4<br>(35.8 to 45.8)                        | --                                                        | 3.5<br>(2.4 to 4.7)                     | 15.7<br>(6.0 to 26.5)                             | -0.1<br>(-8.8 to 9.9)                               |
| Other sense organ diseases                    | 712.8<br>(657.2 to 769.3)                     | 1,867.5<br>(1,766.4 to 1,978.4)                           | 22.2<br>(14.1 to 33.3)                  | 16.6<br>(12.3 to 20.9)                            | 0.6<br>(-3.2 to 4.3)                                |
| Oral disorders                                | 8,247.7<br>(7,850.8 to 8,600.2)               | 17,400.7 <sup>+</sup><br>(15,944.9 to 18,867.7)           | 98.2<br>(62.5 to 144.9)                 | 14.1<br>(10.9 to 17.2)                            | -2.0<br>(-4.2 to 0.1)                               |
| Caries of deciduous teeth                     | 461.1<br>(310.0 to 581.1)                     | 1,609.1<br>(771.1 to 2,449.3)                             | 0.2<br>(0.1 to 0.4)                     | -4.0<br>(-30.5 to 18.4)                           | 6.6<br>(-22.4 to 31.7)                              |
| Caries of permanent teeth                     | 4,580.8<br>(4,308.0 to 4,864.1)               | 15,273.5<br>(14,120.4 to 16,463.4)                        | 4.5<br>(1.9 to 8.5)                     | 3.3<br>(-0.2 to 7.0)                              | -1.5<br>(-4.7 to 2.1)                               |
| Periodontal disease                           | 2,581.2<br>(1,886.6 to 3,373.3)               | 319.0<br>(232.9 to 406.3)                                 | 16.9<br>(6.4 to 36.3)                   | 7.0<br>(0.3 to 14.4)                              | -0.9<br>(-5.5 to 4.1)                               |
| Edentulism and severe tooth loss              | 2,424.4<br>(2,141.6 to 2,692.1)               | 199.1<br>(165.9 to 236.2)                                 | 66.8<br>(43.9 to 93.8)                  | 18.3<br>(14.3 to 22.4)                            | -2.8<br>(-6.1 to 0.5)                               |
| Other oral disorders                          | 340.7<br>(325.7 to 357.0)                     | --                                                        | 9.9<br>(6.1 to 15.1)                    | 6.0<br>(2.5 to 9.4)                               | 0.0<br>(-3.3 to 3.3)                                |
| <b>Injuries</b>                               | <b>4,702.4</b><br><b>(4,405.5 to 4,999.3)</b> | <b>1,546.5<sup>+</sup></b><br><b>(1,478.1 to 1,621.3)</b> | <b>151.5</b><br><b>(101.9 to 213.7)</b> | <b>27.5</b><br><b>(25.7 to 29.5)</b>              | <b>13.5</b><br><b>(11.7 to 15.4)</b>                |
| <b>Transport injuries</b>                     | <b>793.3</b><br><b>(738.7 to 855.2)</b>       | <b>182.3</b><br><b>(175.1 to 189.9)</b>                   | <b>35.5</b><br><b>(23.5 to 51.5)</b>    | <b>21.9</b><br><b>(19.5 to 24.3)</b>              | <b>9.2</b><br><b>(7.0 to 11.6)</b>                  |
| Road injuries                                 | 740.0<br>(687.5 to 797.9)                     | 175.2<br>(168.0 to 182.8)                                 | 33.7<br>(22.3 to 48.8)                  | 21.8<br>(19.4 to 24.1)                            | 9.1<br>(6.8 to 11.6)                                |
| Pedestrian road injuries                      | 115.0<br>(100.1 to 133.3)                     | 16.8<br>(14.0 to 20.2)                                    | 5.7<br>(3.8 to 8.3)                     | 46.3<br>(43.5 to 49.4)                            | 31.0<br>(28.2 to 34.0)                              |
| Cyclist road injuries                         | 228.0<br>(191.2 to 268.9)                     | 69.5<br>(61.3 to 77.4)                                    | 9.6<br>(6.3 to 13.8)                    | 15.7<br>(13.6 to 17.8)                            | 2.2<br>(0.2 to 4.3)                                 |
| Motorcyclist road injuries                    | 143.6<br>(122.5 to 169.3)                     | 20.8<br>(17.2 to 24.8)                                    | 6.8<br>(4.5 to 9.8)                     | 13.8<br>(11.3 to 16.6)                            | 2.8<br>(0.5 to 5.4)                                 |
| Motor vehicle road injuries                   | 201.1<br>(170.6 to 231.7)                     | 56.5<br>(50.1 to 63.9)                                    | 9.7<br>(6.5 to 13.8)                    | 19.3<br>(16.8 to 21.8)                            | 7.5<br>(5.2 to 10.0)                                |
| Other road injuries                           | 52.4<br>(43.9 to 61.7)                        | 11.7<br>(9.3 to 14.6)                                     | 1.9<br>(1.2 to 2.8)                     | 37.0<br>(33.8 to 40.8)                            | 24.6<br>(21.4 to 28.1)                              |
| Other transport injuries                      | 53.2<br>(44.3 to 62.7)                        | 7.1<br>(6.3 to 8.0)                                       | 1.9<br>(1.2 to 2.7)                     | 23.9<br>(20.9 to 26.6)                            | 11.4<br>(8.3 to 14.2)                               |
| <b>Unintentional injuries</b>                 | <b>3,701.0</b><br><b>(3,428.7 to 3,994.8)</b> | <b>1,287.6</b><br><b>(1,221.4 to 1,365.7)</b>             | <b>108.5</b><br><b>(73.2 to 154.2)</b>  | <b>29.8</b><br><b>(27.8 to 32.0)</b>              | <b>15.0</b><br><b>(13.0 to 16.9)</b>                |
| Falls                                         | 1,952.5<br>(1,735.7 to 2,167.6)               | 708.1<br>(661.1 to 761.8)                                 | 69.7<br>(48.1 to 96.5)                  | 34.5<br>(32.0 to 37.2)                            | 18.0<br>(15.7 to 20.2)                              |
| Drowning                                      | 5.5<br>(4.9 to 6.2)                           | 0.6<br>(0.5 to 0.6)                                       | 0.2<br>(0.2 to 0.4)                     | 24.6<br>(18.0 to 31.8)                            | 11.7<br>(5.0 to 19.1)                               |
| Fire, heat, and hot substances                | 261.9<br>(223.8 to 304.5)                     | 13.8<br>(11.9 to 15.7)                                    | 4.5<br>(2.5 to 7.5)                     | 6.5<br>(3.1 to 9.9)                               | -2.3<br>(-5.7 to 0.9)                               |
| Poisonings                                    | 19.2<br>(15.9 to 23.6)                        | 16.8<br>(15.8 to 17.9)                                    | 1.6<br>(1.1 to 2.3)                     | 4.8<br>(-4.9 to 14.5)                             | -1.6<br>(-11.1 to 8.5)                              |
| Exposure to mechanical forces                 | 713.8<br>(602.6 to 890.0)                     | 166.4<br>(149.1 to 183.3)                                 | 12.8<br>(8.0 to 19.7)                   | 37.6<br>(35.3 to 40.1)                            | 25.4<br>(22.9 to 27.9)                              |
| Unintentional firearm injuries                | 27.0<br>(22.1 to 33.0)                        | 2.5<br>(1.9 to 3.2)                                       | 0.4<br>(0.2 to 0.7)                     | 24.9<br>(22.1 to 27.6)                            | 13.2<br>(10.5 to 16.2)                              |
| Unintentional suffocation                     | 7.8<br>(6.4 to 9.2)                           | 1.6<br>(1.1 to 2.2)                                       | 0.2<br>(0.1 to 0.3)                     | 31.6<br>(29.1 to 34.2)                            | 19.4<br>(16.6 to 22.3)                              |
| Other exposure to mechanical forces           | 679.1<br>(567.2 to 855.3)                     | 162.3<br>(145.7 to 179.4)                                 | 12.2<br>(7.7 to 18.7)                   | 38.1<br>(35.8 to 40.7)                            | 25.9<br>(23.4 to 28.5)                              |

| Cause                                                                               | Prevalence in thousands (95% UI)        | Incidence in thousands (95% UI)       | YLDs in thousands (95% UI)                           |                                                   |                                                     |
|-------------------------------------------------------------------------------------|-----------------------------------------|---------------------------------------|------------------------------------------------------|---------------------------------------------------|-----------------------------------------------------|
|                                                                                     | 2016 counts                             | 2016 counts                           | 2016 counts                                          | Percentage change in counts between 2006 and 2016 | Percentage change in age-standardised rates between |
| Adverse effects of medical treatment                                                | 5.8<br>(4.6 to 7.0)                     | 75.8<br>(68.5 to 83.9)                | 0.8<br>(0.5 to 1.1)                                  | 22.4<br>(14.1 to 30.7)                            | 12.2<br>(4.2 to 20.4)                               |
| Animal contact                                                                      | 40.8<br>(36.3 to 47.0)                  | 23.3<br>(20.6 to 26.3)                | 0.7<br>(0.5 to 1.1)                                  | 16.4<br>(11.9 to 20.7)                            | 5.2<br>(0.7 to 9.8)                                 |
| Venomous animal contact                                                             | 6.8<br>(5.9 to 7.7)                     | 7.6<br>(6.0 to 9.4)                   | 0.3<br>(0.2 to 0.4)                                  | 8.8<br>(0.7 to 17.9)                              | 1.5<br>(-6.9 to 10.3)                               |
| Non-venomous animal contact                                                         | 34.0<br>(29.8 to 39.9)                  | 15.6<br>(13.4 to 18.1)                | 0.4<br>(0.3 to 0.7)                                  | 22.1<br>(19.4 to 24.9)                            | 8.2<br>(5.4 to 11.0)                                |
| Foreign body                                                                        | 82.5<br>(71.3 to 98.6)                  | 47.7<br>(42.3 to 54.2)                | 2.3<br>(1.5 to 3.5)                                  | 15.3<br>(12.6 to 17.9)                            | 4.5<br>(1.6 to 7.3)                                 |
| Pulmonary aspiration and foreign body in airway                                     | 11.6<br>(9.2 to 14.2)                   | 12.4<br>(11.2 to 14.1)                | 0.3<br>(0.2 to 0.5)                                  | 32.4<br>(29.8 to 35.2)                            | 18.6<br>(15.4 to 21.7)                              |
| Foreign body in eyes                                                                | 5.8<br>(4.0 to 7.9)                     | 22.5<br>(18.0 to 28.7)                | 0.4<br>(0.2 to 0.6)                                  | 6.4<br>(-1.6 to 15.2)                             | -3.5<br>(-11.3 to 5.9)                              |
| Foreign body in other body part                                                     | 65.1<br>(54.3 to 80.4)                  | 12.7<br>(10.9 to 14.9)                | 1.6<br>(1.0 to 2.4)                                  | 14.9<br>(12.6 to 17.3)                            | 4.6<br>(2.2 to 7.2)                                 |
| Environmental heat and cold exposure                                                | 50.0<br>(44.6 to 56.5)                  | 11.0<br>(9.3 to 13.1)                 | 1.8<br>(1.1 to 2.6)                                  | 19.0<br>(14.6 to 24.1)                            | 4.0<br>(-0.1 to 8.4)                                |
| Other unintentional injuries                                                        | 569.0<br>(479.4 to 678.9)               | 224.1<br>(188.5 to 262.6)             | 14.1<br>(9.1 to 20.9)                                | 19.6<br>(17.9 to 21.4)                            | 6.4<br>(4.6 to 8.2)                                 |
| <b>Self-harm and interpersonal violence</b>                                         | <b>395.0</b><br><b>(359.4 to 432.1)</b> | <b>76.0†</b><br><b>(71.2 to 81.0)</b> | <b>7.3</b><br><b>(4.9 to 10.4)</b>                   | <b>21.9</b><br><b>(18.7 to 24.9)</b>              | <b>12.2</b><br><b>(9.0 to 15.1)</b>                 |
| Self-harm                                                                           | 48.0<br>(39.1 to 57.3)                  | 36.2<br>(33.7 to 38.8)                | 1.8<br>(1.2 to 2.6)                                  | 18.6<br>(12.7 to 25.1)                            | 8.3<br>(2.4 to 15.1)                                |
| Self-harm by firearm                                                                | 0.4<br>(0.4 to 0.5)                     | 0.1<br>( $< 0.05$ to 0.1)             | $< 0.05$<br>( $< 0.05$ to $< 0.05$ )                 | 53.1<br>(49.3 to 57.2)                            | 41.2<br>(37.4 to 45.0)                              |
| Self-harm by other specified means                                                  | 47.6<br>(38.7 to 56.9)                  | 36.2<br>(33.7 to 38.8)                | 1.8<br>(1.2 to 2.6)                                  | 18.4<br>(12.5 to 25.0)                            | 8.2<br>(2.2 to 15.0)                                |
| Interpersonal violence                                                              | 347.0<br>(312.5 to 382.6)               | 39.7†<br>(35.7 to 44.4)               | 5.5<br>(3.7 to 7.9)                                  | 23.0<br>(19.2 to 26.6)                            | 13.4<br>(9.6 to 16.8)                               |
| Assault by firearm                                                                  | 10.4<br>(8.5 to 12.8)                   | 1.2<br>(1.0 to 1.5)                   | 0.2<br>(0.1 to 0.4)                                  | 26.2<br>(23.5 to 28.9)                            | 16.2<br>(13.5 to 18.8)                              |
| Assault by sharp object                                                             | 23.7<br>(19.2 to 28.6)                  | 5.6<br>(4.4 to 7.1)                   | 0.4<br>(0.3 to 0.7)                                  | 15.8<br>(13.2 to 18.5)                            | 6.7<br>(4.0 to 9.5)                                 |
| Sexual violence                                                                     | 194.7<br>(171.6 to 221.5)               | --                                    | 1.6<br>(1.1 to 2.3)                                  | 0.4<br>(-3.7 to 4.5)                              | -3.2<br>(-7.4 to 0.7)                               |
| Assault by other means                                                              | 118.2<br>(95.9 to 147.9)                | 32.9<br>(29.2 to 37.1)                | 3.2<br>(2.1 to 4.9)                                  | 39.3<br>(36.7 to 41.9)                            | 29.0<br>(26.4 to 31.5)                              |
| <b>Forces of nature, conflict and terrorism, and executions and police conflict</b> | <b>7.8</b><br><b>(4.0 to 12.8)</b>      | <b>0.6†</b><br><b>(0.4 to 0.8)</b>    | <b>0.2</b><br><b>(<math>&lt; 0.05</math> to 0.5)</b> | <b>364.8</b><br><b>(189.9 to 444.2)</b>           | <b>360.9</b><br><b>(180.2 to 448.4)</b>             |
| Exposure to forces of nature                                                        | --                                      | --                                    | --                                                   | --                                                | --                                                  |
| Conflict and terrorism                                                              | 5.8<br>(2.2 to 10.7)                    | --                                    | 0.1<br>( $< 0.05$ to 0.4)                            | --                                                | --                                                  |
| Executions and police conflict                                                      | 2.0<br>(1.1 to 3.2)                     | 0.6<br>(0.4 to 0.8)                   | $< 0.05$<br>( $< 0.05$ to 0.1)                       | 34.7<br>(24.7 to 38.6)                            | 24.1<br>(16.3 to 27.7)                              |
| <b>Impairments</b>                                                                  | --                                      | --                                    | --                                                   | --                                                | --                                                  |
| Anaemia                                                                             | 1,285.1<br>(1,058.3 to 1,552.9)         | --                                    | 24.4<br>(16.2 to 34.8)                               | 8.1<br>(-10.8 to 32.6)                            | -1.0<br>(-20.0 to 22.6)                             |
| Developmental intellectual disability                                               | 203.2<br>(163.4 to 243.4)               | --                                    | 28.8<br>(20.9 to 39.0)                               | 2.7<br>(-1.8 to 7.5)                              | -0.4<br>(-5.0 to 4.5)                               |
| Epilepsy                                                                            | 78.2<br>(37.3 to 121.1)                 | --                                    | 21.9<br>(10.2 to 39.4)                               | 3.2<br>(-53.9 to 132.1)                           | -2.0<br>(-54.6 to 117.7)                            |
| Guillain-Barre syndrome                                                             | 0.2<br>(0.1 to 0.2)                     | --                                    | $< 0.05$<br>( $< 0.05$ to 0.1)                       | 10.9<br>(7.3 to 14.5)                             | 0.1<br>(-0.0 to 0.2)                                |
| Hearing loss                                                                        | 4,246.2<br>(3,765.0 to 4,731.3)         | --                                    | 100.0<br>(66.8 to 147.6)                             | 17.4<br>(13.3 to 21.5)                            | -1.2<br>(-4.5 to 1.8)                               |
| Heart failure                                                                       | 275.9<br>(240.7 to 317.2)               | --                                    | 34.9<br>(26.8 to 42.7)                               | 19.3<br>(10.8 to 30.3)                            | -4.9<br>(-11.7 to 3.6)                              |
| Infertility                                                                         | 145.9<br>(109.8 to 197.2)               | --                                    | 1.0<br>(0.5 to 1.9)                                  | -5.1<br>(-12.1 to 2.9)                            | 1.9<br>(-4.8 to 9.0)                                |
| Pelvic inflammatory disease                                                         | 0.6<br>(0.4 to 0.9)                     | --                                    | 0.1<br>( $< 0.05$ to 0.1)                            | -8.3<br>(-28.5 to 17.7)                           | -4.7<br>(-27.3 to 25.4)                             |
| Vision loss                                                                         | 1,288.9<br>(1,239.5 to 1,339.6)         | --                                    | 36.0<br>(25.6 to 50.9)                               | 10.6<br>(7.1 to 14.5)                             | -1.4<br>(-4.8 to 2.6)                               |

We did not calculate incidence for the nine impairments, certain NTDs, and causes with only birth prevalence. Blank cells mean that no estimate is available.

† Incidence for aggregate causes represents the sum of the incidence of the causes below the aggregate.

‡ Incidence estimates for stroke represent first-ever stroke only.

^ Incidence of HIV/AIDS represents new infections of HIV only and does not include new infections of Tuberculosis in HIV positive cases.



SR Table 14: Prevalence, incidence, and YLDs for 2016, percentage change of YLD counts and percentage change of age-standardised YLD rates between 2006 and 2016 by cause and impairments, for all ages, New Zealand.

| Cause                                                                                | Prevalence in thousands (95% UI)       | Incidence in thousands (95% UI)                            | YLDs in thousands (95% UI)                                |                                                   |                                                     |
|--------------------------------------------------------------------------------------|----------------------------------------|------------------------------------------------------------|-----------------------------------------------------------|---------------------------------------------------|-----------------------------------------------------|
|                                                                                      | 2016 counts                            | 2016 counts                                                | 2016 counts                                               | Percentage change in counts between 2006 and 2016 | Percentage change in age-standardised rates between |
| <b>All causes</b>                                                                    | <b>4,156.9</b><br>(4,134.5 to 4,174.0) | <b>24,471.8†</b><br>(22,816.9 to 26,185.2)                 | <b>551.4</b><br>(409.4 to 711.5)                          | <b>12.8</b><br>(11.3 to 14.4)                     | <b>-0.6</b><br>(-1.9 to 0.9)                        |
| <b>Communicable, maternal, neonatal, and nutritional disorders</b>                   | <b>1,351.2</b><br>(1,292.4 to 1,412.4) | <b>14,862.7†</b><br>(13,269.1 to 16,442.9)                 | <b>16.4</b><br>(11.7 to 22.2)                             | <b>3.5</b><br>(-1.7 to 9.2)                       | <b>-2.9</b><br>(-8.0 to 2.6)                        |
| <b>HIV/AIDS and tuberculosis</b>                                                     | <b>409.3</b><br>(369.9 to 441.2)       | <b>0.4†</b><br>(0.3 to 0.6)                                | <b>0.5</b><br>(0.2 to 0.9)                                | <b>28.0</b><br>(10.1 to 45.2)                     | <b>17.2</b><br>(0.0 to 33.6)                        |
| Tuberculosis                                                                         | 378.4<br>(342.4 to 420.2)              | 0.3†<br>(0.2 to 0.3)                                       | 0.1<br>( $< 0.05$ to 0.1)                                 | -11.3<br>(-17.3 to -4.9)                          | -19.9<br>(-24.9 to -14.0)                           |
| Drug-susceptible tuberculosis                                                        | 0.2<br>(0.2 to 0.2)                    | 0.3<br>(0.2 to 0.3)                                        | 0.1<br>( $< 0.05$ to 0.1)                                 | -11.6<br>(-17.8 to -5.2)                          | -20.2<br>(-25.2 to -14.3)                           |
| Multidrug-resistant tuberculosis without extensive drug resistance                   | $< 0.05$<br>( $< 0.05$ to $< 0.05$ )   | $< 0.05$<br>( $< 0.05$ to $< 0.05$ )                       | $< 0.05$<br>( $< 0.05$ to $< 0.05$ )                      | 8.2<br>(-70.8 to 258.7)                           | -2.3<br>(-73.7 to 225.0)                            |
| Extensively drug-resistant tuberculosis                                              | $< 0.05$<br>( $< 0.05$ to $< 0.05$ )   | $< 0.05$<br>( $< 0.05$ to $< 0.05$ )                       | $< 0.05$<br>( $< 0.05$ to $< 0.05$ )                      | 132.6<br>(-37.2 to 671.3)                         | 110.2<br>(-43.4 to 598.8)                           |
| Latent tuberculosis infection                                                        | 378.2<br>(342.2 to 419.9)              | --                                                         | --                                                        | --                                                | --                                                  |
| HIV/AIDS                                                                             | 5.0<br>(2.5 to 8.5)                    | 0.2 <sup>a</sup><br>(0.1 to 0.3)                           | 0.4<br>(0.2 to 0.8)                                       | 37.2<br>(17.6 to 57.8)                            | 26.0<br>(7.4 to 45.5)                               |
| Drug-susceptible HIV/AIDS - Tuberculosis                                             | $< 0.05$<br>( $< 0.05$ to $< 0.05$ )   | $< 0.05$<br>( $< 0.05$ to $< 0.05$ )                       | $< 0.05$<br>( $< 0.05$ to $< 0.05$ )                      | -34.9<br>(-40.4 to -29.4)                         | -40.2<br>(-45.3 to -35.2)                           |
| Multidrug-resistant HIV/AIDS - Tuberculosis without extensive drug resistance        | $< 0.05$<br>( $< 0.05$ to $< 0.05$ )   | $< 0.05$<br>( $< 0.05$ to $< 0.05$ )                       | $< 0.05$<br>( $< 0.05$ to $< 0.05$ )                      | -19.2<br>(-77.9 to 165.4)                         | -25.9<br>(-79.7 to 143.3)                           |
| Extensively drug-resistant HIV/AIDS - Tuberculosis                                   | $< 0.05$<br>( $< 0.05$ to $< 0.05$ )   | $< 0.05$<br>( $< 0.05$ to $< 0.05$ )                       | $< 0.05$<br>( $< 0.05$ to $< 0.05$ )                      | 73.7<br>(-52.4 to 470.3)                          | 59.3<br>(-56.4 to 422.8)                            |
| HIV/AIDS resulting in other diseases                                                 | 5.0<br>(2.5 to 8.5)                    | 0.2<br>(0.1 to 0.3)                                        | 0.4<br>(0.2 to 0.8)                                       | 37.9<br>(18.2 to 58.8)                            | 26.7<br>(7.8 to 46.3)                               |
| <b>Diarrhoea, lower respiratory infections, and other common infectious diseases</b> | <b>226.9</b><br>(211.0 to 243.2)       | <b>14,641.9†</b><br>(13,039.1 to 16,230.3)                 | <b>7.0</b><br>(4.6 to 10.3)                               | <b>5.7</b><br>(1.7 to 9.6)                        | <b>-1.9</b><br>(-5.4 to 1.6)                        |
| Diarrhoeal diseases                                                                  | 8.7<br>(8.1 to 9.3)                    | 572.3<br>(535.6 to 611.3)                                  | 1.0<br>(0.7 to 1.4)                                       | -1.0<br>(-9.8 to 9.1)                             | -8.8<br>(-17.3 to -0.0)                             |
| Intestinal infectious diseases                                                       | $< 0.05$<br>( $< 0.05$ to $< 0.05$ )   | 0.1†<br>(0.1 to 0.1)                                       | $< 0.05$<br>( $< 0.05$ to $< 0.05$ )                      | 50.7<br>(23.5 to 87.1)                            | 27.7<br>(4.4 to 58.9)                               |
| Typhoid fever                                                                        | $< 0.05$<br>( $< 0.05$ to $< 0.05$ )   | $< 0.05$<br>( $< 0.05$ to $< 0.05$ )                       | $< 0.05$<br>( $< 0.05$ to $< 0.05$ )                      | 47.6<br>(17.2 to 87.5)                            | 29.7<br>(2.9 to 65.5)                               |
| Paratyphoid fever                                                                    | $< 0.05$<br>( $< 0.05$ to $< 0.05$ )   | 0.1<br>( $< 0.05$ to 0.1)                                  | $< 0.05$<br>( $< 0.05$ to $< 0.05$ )                      | 64.8<br>(29.8 to 111.7)                           | 40.1<br>(9.7 to 80.3)                               |
| Other intestinal infectious diseases                                                 | --                                     | --                                                         | $< 0.05$<br>( $< 0.05$ to $< 0.05$ )                      | -44.8<br>(-60.8 to -25.1)                         | -55.0<br>(-69.5 to -34.2)                           |
| Lower respiratory infections                                                         | 2.9<br>(2.7 to 3.0)                    | 135.1<br>(127.6 to 143.6)                                  | 0.2<br>(0.1 to 0.2)                                       | 22.3<br>(9.4 to 37.3)                             | 1.9<br>(-10.0 to 15.2)                              |
| Upper respiratory infections                                                         | 180.3<br>(160.3 to 200.7)              | 13,687.9<br>(12,091.9 to 15,306.3)                         | 4.5<br>(2.6 to 6.9)                                       | 6.6<br>(0.9 to 12.0)                              | -0.0<br>(-5.3 to 4.7)                               |
| Otitis media                                                                         | 30.4<br>(27.4 to 33.5)                 | 165.6<br>(136.1 to 202.7)                                  | 0.9<br>(0.6 to 1.3)                                       | 4.2<br>(-4.5 to 13.2)                             | -2.4<br>(-10.5 to 6.4)                              |
| Meningitis                                                                           | 1.3<br>(1.1 to 1.5)                    | 0.3<br>(0.2 to 0.3)                                        | 0.1<br>(0.1 to 0.2)                                       | -1.8<br>(-6.6 to 5.0)                             | -10.4<br>(-14.8 to -5.4)                            |
| Pneumococcal meningitis                                                              | 0.6<br>(0.5 to 0.7)                    | $< 0.05$<br>( $< 0.05$ to 0.1)                             | 0.1<br>( $< 0.05$ to 0.1)                                 | -7.4<br>(-14.5 to -1.0)                           | -15.0<br>(-21.7 to -8.7)                            |
| H influenzae type B meningitis                                                       | 0.1<br>(0.1 to 0.1)                    | $< 0.05$<br>( $< 0.05$ to $< 0.05$ )                       | $< 0.05$<br>( $< 0.05$ to $< 0.05$ )                      | -2.5<br>(-9.4 to 4.0)                             | -11.5<br>(-18.6 to -5.2)                            |
| Meningococcal infection                                                              | 0.1<br>(0.1 to 0.2)                    | $< 0.05$<br>( $< 0.05$ to 0.1)                             | $< 0.05$<br>( $< 0.05$ to $< 0.05$ )                      | -1.5<br>(-13.7 to 46.5)                           | -13.6<br>(-22.9 to 15.2)                            |
| Other meningitis                                                                     | 0.5<br>(0.4 to 0.6)                    | 0.1<br>(0.1 to 0.2)                                        | $< 0.05$<br>( $< 0.05$ to 0.1)                            | 6.2<br>(0.9 to 11.5)                              | -2.7<br>(-8.0 to 2.2)                               |
| Encephalitis                                                                         | 1.5<br>(1.1 to 2.0)                    | 0.8<br>(0.7 to 0.8)                                        | 0.2<br>(0.1 to 0.3)                                       | 13.3<br>(9.6 to 17.1)                             | 2.0<br>(-1.5 to 5.3)                                |
| Diphtheria                                                                           | $< 0.05$<br>( $< 0.05$ to $< 0.05$ )   | $< 0.05$<br>( $< 0.05$ to $< 0.05$ )                       | $< 0.05$<br>( $< 0.05$ to $< 0.05$ )                      | -29.4<br>(-61.5 to 25.8)                          | -33.7<br>(-62.1 to 14.0)                            |
| Whooping cough                                                                       | 0.4<br>(0.3 to 0.5)                    | 2.9<br>(2.2 to 3.6)                                        | $< 0.05$<br>( $< 0.05$ to $< 0.05$ )                      | -28.7<br>(-42.6 to -9.0)                          | -28.2<br>(-42.2 to -8.0)                            |
| Tetanus                                                                              | $< 0.05$<br>( $< 0.05$ to $< 0.05$ )   | $< 0.05$<br>( $< 0.05$ to $< 0.05$ )                       | $< 0.05$<br>( $< 0.05$ to $< 0.05$ )                      | -22.5<br>(-37.1 to -7.7)                          | -30.2<br>(-43.0 to -16.5)                           |
| Measles                                                                              | $< 0.05$<br>( $< 0.05$ to $< 0.05$ )   | $< 0.05$<br>( $< 0.05$ to $< 0.05$ )                       | $< 0.05$<br>( $< 0.05$ to $< 0.05$ )                      | -56.9<br>(-84.2 to -15.2)                         | -57.2<br>(-84.3 to -15.8)                           |
| Varicella and herpes zoster                                                          | 4.6<br>(4.1 to 5.0)                    | 77.2<br>(74.6 to 80.0)                                     | 0.2<br>(0.1 to 0.3)                                       | 17.3<br>(1.7 to 34.5)                             | 0.2<br>(-12.9 to 14.9)                              |
| <b>Neglected tropical diseases and malaria</b>                                       | <b>0.2</b><br>(0.2 to 0.3)             | <b><math>&lt; 0.05</math>†</b><br>( $< 0.05$ to $< 0.05$ ) | <b><math>&lt; 0.05</math></b><br>( $< 0.05$ to $< 0.05$ ) | <b>12.1</b><br>(-41.1 to 116.4)                   | <b>-5.2</b><br>(-51.3 to 97.8)                      |
| Malaria                                                                              | --                                     | --                                                         | --                                                        | --                                                | --                                                  |
| Chagas disease                                                                       | 0.2<br>(0.2 to 0.3)                    | --                                                         | $< 0.05$<br>( $< 0.05$ to $< 0.05$ )                      | 54.3<br>(15.0 to 106.5)                           | 33.3<br>(1.6 to 74.5)                               |
| Leishmaniasis                                                                        | --                                     | --                                                         | --                                                        | --                                                | --                                                  |
| Visceral leishmaniasis                                                               | --                                     | --                                                         | --                                                        | --                                                | --                                                  |
| Cutaneous and mucocutaneous leishmaniasis                                            | --                                     | --                                                         | --                                                        | --                                                | --                                                  |
| African trypanosomiasis                                                              | --                                     | --                                                         | --                                                        | --                                                | --                                                  |
| Schistosomiasis                                                                      | --                                     | --                                                         | --                                                        | --                                                | --                                                  |
| Cysticercosis                                                                        | --                                     | --                                                         | --                                                        | --                                                | --                                                  |
| Cystic echinococcosis                                                                | $< 0.05$<br>( $< 0.05$ to $< 0.05$ )   | $< 0.05$<br>( $< 0.05$ to $< 0.05$ )                       | $< 0.05$<br>( $< 0.05$ to $< 0.05$ )                      | -28.2<br>(-95.7 to 930.5)                         | -35.6<br>(-96.4 to 773.1)                           |
| Lymphatic filariasis                                                                 | --                                     | --                                                         | --                                                        | --                                                | --                                                  |
| Onchocerciasis                                                                       | --                                     | --                                                         | --                                                        | --                                                | --                                                  |
| Trachoma                                                                             | --                                     | --                                                         | --                                                        | --                                                | --                                                  |
| Dengue                                                                               | --                                     | --                                                         | --                                                        | --                                                | --                                                  |
| Yellow fever                                                                         | --                                     | --                                                         | --                                                        | --                                                | --                                                  |
| Rabies                                                                               | $< 0.05$<br>( $< 0.05$ to $< 0.05$ )   | $< 0.05$<br>( $< 0.05$ to $< 0.05$ )                       | $< 0.05$<br>( $< 0.05$ to $< 0.05$ )                      | 7.3<br>(-14.9 to 34.3)                            | -7.5<br>(-27.4 to 18.7)                             |
| Intestinal nematode infections                                                       | --                                     | --                                                         | --                                                        | --                                                | --                                                  |
| Ascariasis                                                                           | --                                     | --                                                         | --                                                        | --                                                | --                                                  |



| Cause                                                                   | Prevalence in thousands (95% UI)              | Incidence in thousands (95% UI)                | YLDs in thousands (95% UI)              |                                                   |                                                     |
|-------------------------------------------------------------------------|-----------------------------------------------|------------------------------------------------|-----------------------------------------|---------------------------------------------------|-----------------------------------------------------|
|                                                                         | 2016 counts                                   | 2016 counts                                    | 2016 counts                             | Percentage change in counts between 2006 and 2016 | Percentage change in age-standardised rates between |
| Trichuriasis                                                            | --                                            | --                                             | --                                      | --                                                | --                                                  |
| Hookworm disease                                                        | --                                            | --                                             | --                                      | --                                                | --                                                  |
| Food-borne trematodiasis                                                | --                                            | --                                             | --                                      | --                                                | --                                                  |
| Leprosy                                                                 | < 0.05<br>(< 0.05 to 0.1)                     | < 0.05<br>(< 0.05 to < 0.05)                   | < 0.05<br>(< 0.05 to < 0.05)            | -6.2<br>(-21.6 to 38.1)                           | -24.4<br>(-38.5 to 14.6)                            |
| Ebola virus disease                                                     | --                                            | --                                             | --                                      | --                                                | --                                                  |
| Zika virus disease                                                      | --                                            | --                                             | --                                      | --                                                | --                                                  |
| Guinea worm disease                                                     | --                                            | --                                             | --                                      | --                                                | --                                                  |
| Other neglected tropical diseases                                       | --                                            | --                                             | < 0.05<br>(< 0.05 to < 0.05)            | --                                                | --                                                  |
| <b>Maternal disorders</b>                                               | <b>6.2</b><br><b>(5.2 to 7.7)</b>             | <b>50.9†</b><br><b>(49.0 to 53.0)</b>          | <b>0.3</b><br><b>(0.2 to 0.4)</b>       | <b>-6.4</b><br><b>(-31.3 to 26.3)</b>             | <b>-8.3</b><br><b>(-32.6 to 23.7)</b>               |
| Maternal haemorrhage                                                    | 2.1<br>(1.7 to 2.4)                           | 6.6<br>(6.0 to 7.2)                            | 0.1<br>(< 0.05 to 0.1)                  | -16.1<br>(-38.5 to 15.4)                          | -18.0<br>(-40.0 to 12.9)                            |
| Maternal sepsis and other pregnancy related infections                  | 1.5<br>(1.1 to 2.0)                           | 10.9<br>(10.2 to 11.6)                         | < 0.05<br>(< 0.05 to 0.1)               | -1.8<br>(-51.2 to 101.8)                          | -5.4<br>(-52.7 to 97.5)                             |
| Maternal hypertensive disorders                                         | 2.7<br>(1.8 to 3.6)                           | 11.3<br>(10.6 to 12.1)                         | 0.1<br>(0.1 to 0.2)                     | 1.0<br>(-38.2 to 67.1)                            | -0.6<br>(-39.3 to 64.6)                             |
| Maternal obstructed labour and uterine rupture                          | < 0.05<br>(< 0.05 to < 0.05)                  | 1.3<br>(0.9 to 1.7)                            | < 0.05<br>(< 0.05 to < 0.05)            | -2.7<br>(-48.4 to 79.4)                           | -3.9<br>(-48.8 to 77.3)                             |
| Maternal abortion, miscarriage, and ectopic pregnancy                   | 0.2<br>(0.1 to 0.2)                           | 20.8<br>(19.4 to 22.4)                         | < 0.05<br>(< 0.05 to < 0.05)            | -22.9<br>(-60.8 to 50.8)                          | -23.5<br>(-61.4 to 48.8)                            |
| Other maternal disorders                                                | --                                            | --                                             | < 0.05<br>(< 0.05 to 0.1)               | -10.3<br>(-33.8 to 20.9)                          | -12.4<br>(-35.6 to 17.9)                            |
| <b>Neonatal disorders</b>                                               | <b>36.9</b><br><b>(31.4 to 42.8)</b>          | --                                             | <b>5.5</b><br><b>(3.8 to 7.8)</b>       | <b>-0.0</b><br><b>(-14.1 to 14.7)</b>             | <b>-5.8</b><br><b>(-19.4 to 8.7)</b>                |
| Neonatal preterm birth complications                                    | 33.0<br>(26.3 to 41.6)                        | --                                             | 3.5<br>(2.2 to 5.0)                     | 9.5<br>(-12.1 to 33.2)                            | 3.3<br>(-17.4 to 26.0)                              |
| Neonatal encephalopathy due to birth asphyxia and trauma                | 4.2<br>(2.7 to 6.2)                           | --                                             | 0.8<br>(0.4 to 1.3)                     | -20.2<br>(-42.1 to 2.3)                           | -25.2<br>(-45.9 to -3.8)                            |
| Neonatal sepsis and other neonatal infections                           | 2.8<br>(1.4 to 5.8)                           | --                                             | 1.2<br>(0.5 to 2.6)                     | -7.6<br>(-22.1 to 8.0)                            | -13.2<br>(-27.3 to 1.6)                             |
| Hemolytic disease and other neonatal jaundice                           | 0.2<br>(0.2 to 0.2)                           | --                                             | 0.1<br>(< 0.05 to 0.1)                  | 8.2<br>(0.8 to 18.5)                              | 1.0<br>(-5.6 to 10.5)                               |
| Other neonatal disorders                                                | --                                            | --                                             | 0.1<br>(0.1 to 0.2)                     | -9.4<br>(-28.9 to 11.5)                           | -9.9<br>(-29.3 to 11.1)                             |
| <b>Nutritional deficiencies</b>                                         | <b>135.7</b><br><b>(125.1 to 146.2)</b>       | <b>8.6†</b><br><b>(6.6 to 11.2)</b>            | <b>2.3</b><br><b>(1.5 to 3.4)</b>       | <b>2.3</b><br><b>(-6.5 to 12.6)</b>               | <b>-2.1</b><br><b>(-11.5 to 9.1)</b>                |
| Protein-energy malnutrition                                             | 3.6<br>(2.5 to 5.2)                           | 2.4<br>(1.7 to 3.6)                            | 0.3<br>(0.2 to 0.4)                     | 2.0<br>(-24.5 to 37.6)                            | 1.5<br>(-24.9 to 37.2)                              |
| Iodine deficiency                                                       | 38.5<br>(33.9 to 43.6)                        | 0.7<br>(0.6 to 0.7)                            | 1.0<br>(0.7 to 1.4)                     | 4.9<br>(-6.7 to 17.5)                             | -5.5<br>(-16.0 to 6.4)                              |
| Vitamin A deficiency                                                    | 6.5<br>(4.6 to 9.2)                           | 5.5<br>(3.8 to 7.7)                            | --                                      | --                                                | --                                                  |
| Iron-deficiency anaemia                                                 | 86.3<br>(76.0 to 99.4)                        | --                                             | 1.0<br>(0.6 to 1.7)                     | -0.1<br>(-13.6 to 18.6)                           | -0.6<br>(-15.2 to 20.3)                             |
| Other nutritional deficiencies                                          | --                                            | --                                             | < 0.05<br>(< 0.05 to < 0.05)            | 1.8<br>(-26.0 to 38.8)                            | 1.1<br>(-26.3 to 37.7)                              |
| <b>Other communicable, maternal, neonatal, and nutritional diseases</b> | <b>740.5</b><br><b>(684.7 to 799.4)</b>       | <b>160.8</b><br><b>(148.4 to 173.9)</b>        | <b>0.7</b><br><b>(0.4 to 1.2)</b>       | <b>6.8</b><br><b>(0.8 to 13.8)</b>                | <b>0.2</b><br><b>(-6.1 to 7.2)</b>                  |
| Sexually transmitted diseases excluding HIV                             | 552.6<br>(508.9 to 608.7)                     | 151.8<br>(139.5 to 164.2)                      | 0.6<br>(0.3 to 1.0)                     | 5.1<br>(-1.9 to 13.2)                             | -2.1<br>(-9.4 to 6.1)                               |
| Syphilis                                                                | 2.4<br>(1.9 to 3.1)                           | 1.6<br>(1.2 to 2.2)                            | < 0.05<br>(< 0.05 to 0.1)               | 25.0<br>(12.1 to 39.0)                            | -0.6<br>(-10.5 to 10.2)                             |
| Chlamydial infection                                                    | 29.2<br>(25.9 to 32.5)                        | 23.2<br>(19.6 to 26.7)                         | 0.1<br>(0.1 to 0.2)                     | 5.6<br>(-11.1 to 26.7)                            | 1.3<br>(-15.3 to 21.3)                              |
| Gonococcal infection                                                    | 9.1<br>(8.0 to 10.5)                          | 26.9<br>(22.1 to 32.4)                         | 0.1<br>(< 0.05 to 0.1)                  | -4.0<br>(-23.2 to 17.7)                           | -7.8<br>(-27.2 to 14.5)                             |
| Trichomoniasis                                                          | 90.5<br>(79.2 to 103.1)                       | 76.1<br>(66.0 to 87.0)                         | 0.1<br>(< 0.05 to 0.2)                  | 9.7<br>(1.4 to 18.5)                              | 1.9<br>(-5.7 to 10.6)                               |
| Genital herpes                                                          | 433.4<br>(369.5 to 507.9)                     | 18.5<br>(15.8 to 21.9)                         | 0.1<br>(< 0.05 to 0.2)                  | 9.7<br>(-0.4 to 19.6)                             | -2.2<br>(-11.5 to 6.8)                              |
| Other sexually transmitted diseases                                     | 6.3<br>(5.0 to 7.3)                           | 5.5<br>(4.8 to 6.3)                            | 0.1<br>(0.1 to 0.2)                     | -1.9<br>(-15.6 to 12.8)                           | -4.1<br>(-17.5 to 10.6)                             |
| Hepatitis                                                               | 220.5<br>(188.3 to 259.9)                     | 9.0<br>(7.6 to 10.7)                           | < 0.05<br>(< 0.05 to < 0.05)            | 9.4<br>(-7.1 to 27.4)                             | -1.4<br>(-17.0 to 16.6)                             |
| Acute hepatitis A                                                       | 0.1<br>(0.1 to 0.2)                           | 1.8<br>(1.2 to 2.2)                            | < 0.05<br>(< 0.05 to < 0.05)            | 11.1<br>(-23.3 to 61.5)                           | 1.6<br>(-31.9 to 49.2)                              |
| Hepatitis B                                                             | 161.4<br>(131.0 to 199.3)                     | 6.5<br>(5.1 to 8.2)                            | < 0.05<br>(< 0.05 to < 0.05)            | 8.2<br>(-8.7 to 26.9)                             | -5.0<br>(-19.9 to 10.5)                             |
| Hepatitis C                                                             | 59.0<br>(52.8 to 65.6)                        | 0.7<br>(0.6 to 0.8)                            | < 0.05<br>(< 0.05 to < 0.05)            | 2.7<br>(2.0 to 3.3)                               | 0.5<br>(0.1 to 0.9)                                 |
| Acute hepatitis E                                                       | < 0.05<br>(< 0.05 to < 0.05)                  | 0.1<br>(0.1 to 0.2)                            | < 0.05<br>(< 0.05 to < 0.05)            | 25.2<br>(15.2 to 36.4)                            | 5.1<br>(-1.8 to 12.9)                               |
| Other infectious diseases                                               | 2.7<br>(2.2 to 3.5)                           | < 0.05<br>(< 0.05 to < 0.05)                   | 0.1<br>(0.1 to 0.2)                     | 14.4<br>(5.9 to 25.5)                             | 10.0<br>(0.2 to 22.8)                               |
| <b>Non-communicable diseases</b>                                        | <b>4,039.3</b><br><b>(4,015.5 to 4,058.8)</b> | <b>9,180.2†</b><br><b>(8,755.3 to 9,620.1)</b> | <b>495.8</b><br><b>(367.7 to 640.7)</b> | <b>12.9</b><br><b>(11.2 to 14.6)</b>              | <b>-0.6</b><br><b>(-2.0 to 1.1)</b>                 |
| <b>Neoplasms</b>                                                        | <b>100.4</b><br><b>(95.7 to 105.4)</b>        | <b>34.6</b><br><b>(31.6 to 38.1)</b>           | <b>9.5</b><br><b>(7.0 to 12.2)</b>      | <b>29.1</b><br><b>(23.0 to 35.4)</b>              | <b>1.8</b><br><b>(-2.8 to 6.6)</b>                  |
| Lip and oral cavity cancer                                              | 1.4<br>(1.2 to 1.5)                           | 0.3<br>(0.3 to 0.4)                            | 0.1<br>(0.1 to 0.2)                     | 26.5<br>(8.4 to 47.3)                             | -0.4<br>(-14.2 to 15.9)                             |
| Nasopharynx cancer                                                      | 0.1<br>(0.1 to 0.1)                           | < 0.05<br>(< 0.05 to < 0.05)                   | < 0.05<br>(< 0.05 to < 0.05)            | 5.7<br>(-3.6 to 17.1)                             | -12.4<br>(-20.0 to -3.0)                            |
| Other pharynx cancer                                                    | 0.3<br>(0.3 to 0.3)                           | 0.1<br>(0.1 to 0.1)                            | < 0.05<br>(< 0.05 to < 0.05)            | 32.0<br>(13.0 to 52.6)                            | 3.4<br>(-11.6 to 19.6)                              |
| Oesophageal cancer                                                      | 0.6<br>(0.6 to 0.7)                           | 0.4<br>(0.3 to 0.4)                            | 0.1<br>(0.1 to 0.1)                     | 32.4<br>(8.5 to 60.1)                             | 2.2<br>(-16.2 to 24.4)                              |
| Stomach cancer                                                          | 1.2<br>(1.1 to 1.4)                           | 0.6<br>(0.5 to 0.6)                            | 0.2<br>(0.1 to 0.2)                     | 26.8<br>(8.1 to 48.6)                             | -1.2<br>(-15.4 to 15.4)                             |
| Colon and rectum cancer                                                 | 14.4<br>(13.3 to 15.6)                        | 3.7<br>(3.5 to 4.0)                            | 1.3<br>(1.0 to 1.7)                     | 27.2<br>(14.7 to 40.6)                            | -2.3<br>(-11.8 to 8.3)                              |
| Liver cancer                                                            | 0.3<br>(0.2 to 0.3)                           | 0.3<br>(0.3 to 0.4)                            | 0.1<br>(0.1 to 0.1)                     | 56.1<br>(33.3 to 82.2)                            | 23.5<br>(5.7 to 44.2)                               |
| Liver cancer due to hepatitis B                                         | 0.1<br>(0.1 to 0.1)                           | 0.1<br>(0.1 to 0.1)                            | < 0.05<br>(< 0.05 to < 0.05)            | 48.6<br>(25.3 to 74.6)                            | 21.3<br>(2.3 to 43.2)                               |

| Cause                                              | Prevalence in thousands (95% UI)        | Incidence in thousands (95% UI)       | YLDs in thousands (95% UI)           |                                                   |                                                     |
|----------------------------------------------------|-----------------------------------------|---------------------------------------|--------------------------------------|---------------------------------------------------|-----------------------------------------------------|
|                                                    | 2016 counts                             | 2016 counts                           | 2016 counts                          | Percentage change in counts between 2006 and 2016 | Percentage change in age-standardised rates between |
| Liver cancer due to hepatitis C                    | 0.1<br>(0.1 to 0.2)                     | 0.1<br>(0.1 to 0.1)                   | < 0.05<br>(< 0.05 to < 0.05)         | 56.5<br>(31.5 to 86.7)                            | 21.4<br>(1.7 to 44.5)                               |
| Liver cancer due to alcohol use                    | 0.2<br>(0.2 to 0.3)                     | 0.1<br>(0.1 to 0.2)                   | < 0.05<br>(< 0.05 to < 0.05)         | 59.6<br>(33.4 to 89.5)                            | 25.7<br>(5.2 to 49.1)                               |
| Liver cancer due to other causes                   | 0.1<br>(0.1 to 0.1)                     | < 0.05<br>(< 0.05 to 0.1)             | < 0.05<br>(< 0.05 to < 0.05)         | 57.1<br>(30.4 to 89.5)                            | 25.0<br>(3.5 to 51.9)                               |
| Gallbladder and biliary tract cancer               | 0.2<br>(0.1 to 0.2)                     | 0.1<br>(0.1 to 0.2)                   | < 0.05<br>(< 0.05 to < 0.05)         | 29.3<br>(17.7 to 42.5)                            | -0.1<br>(-8.3 to 9.5)                               |
| Pancreatic cancer                                  | 0.5<br>(0.5 to 0.6)                     | 0.6<br>(0.5 to 0.6)                   | 0.1<br>(0.1 to 0.1)                  | 40.3<br>(18.7 to 67.1)                            | 7.7<br>(-8.8 to 28.4)                               |
| Larynx cancer                                      | 0.4<br>(0.3 to 0.4)                     | 0.1<br>(0.1 to 0.1)                   | < 0.05<br>(< 0.05 to 0.1)            | 23.7<br>(7.4 to 43.4)                             | -4.9<br>(-17.5 to 10.4)                             |
| Tracheal, bronchus, and lung cancer                | 4.0<br>(3.7 to 4.3)                     | 2.4<br>(2.2 to 2.5)                   | 0.6<br>(0.4 to 0.8)                  | 37.1<br>(18.1 to 58.6)                            | 4.9<br>(-9.8 to 21.3)                               |
| Malignant skin melanoma                            | 15.5<br>(12.3 to 17.5)                  | 3.1<br>(2.5 to 3.5)                   | 1.0<br>(0.7 to 1.4)                  | 46.4<br>(29.5 to 65.5)                            | 18.9<br>(4.8 to 34.0)                               |
| Non-melanoma skin cancer                           | 7.8<br>(5.1 to 10.5)                    | 7.7<br>(5.2 to 11.2)                  | 0.3<br>(0.1 to 0.5)                  | -20.3<br>(-53.7 to 27.4)                          | -39.1<br>(-64.2 to -3.6)                            |
| Non-melanoma skin cancer (squamous-cell carcinoma) | 6.4<br>(3.8 to 9.6)                     | 5.9<br>(3.6 to 9.1)                   | 0.3<br>(0.1 to 0.5)                  | -20.5<br>(-54.1 to 27.5)                          | -39.3<br>(-64.6 to -3.6)                            |
| Non-melanoma skin cancer (basal-cell carcinoma)    | 0.2<br>(0.1 to 0.4)                     | 1.8<br>(0.9 to 3.0)                   | < 0.05<br>(< 0.05 to < 0.05)         | 17.9<br>(-15.4 to 71.4)                           | -4.7<br>(-30.7 to 35.8)                             |
| Breast cancer                                      | 15.4<br>(14.2 to 16.8)                  | 3.1<br>(2.9 to 3.4)                   | 1.4<br>(1.0 to 1.9)                  | 20.8<br>(8.7 to 34.5)                             | -1.3<br>(-11.3 to 9.9)                              |
| Cervical cancer                                    | 0.7<br>(0.6 to 0.8)                     | 0.2<br>(0.2 to 0.2)                   | 0.1<br>(< 0.05 to 0.1)               | -5.7<br>(-21.6 to 11.8)                           | -15.0<br>(-29.6 to 1.4)                             |
| Uterine cancer                                     | 2.7<br>(2.4 to 3.1)                     | 0.6<br>(0.5 to 0.7)                   | 0.2<br>(0.1 to 0.3)                  | 43.1<br>(15.4 to 74.5)                            | 13.1<br>(-8.6 to 38.1)                              |
| Ovarian cancer                                     | 1.0<br>(0.9 to 1.1)                     | 0.3<br>(0.3 to 0.4)                   | 0.1<br>(0.1 to 0.2)                  | 13.1<br>(-13.8 to 48.3)                           | -8.5<br>(-29.5 to 19.8)                             |
| Prostate cancer                                    | 18.8<br>(14.6 to 24.1)                  | 4.7<br>(3.8 to 5.7)                   | 1.6<br>(1.1 to 2.3)                  | 35.6<br>(12.9 to 64.3)                            | 1.1<br>(-16.4 to 22.6)                              |
| Testicular cancer                                  | 0.7<br>(0.6 to 0.9)                     | 0.1<br>(0.1 to 0.2)                   | < 0.05<br>(< 0.05 to 0.1)            | 13.6<br>(-11.3 to 47.6)                           | 10.1<br>(-15.4 to 43.6)                             |
| Kidney cancer                                      | 2.4<br>(2.2 to 2.6)                     | 0.6<br>(0.6 to 0.7)                   | 0.2<br>(0.1 to 0.3)                  | 31.7<br>(14.5 to 51.1)                            | 4.7<br>(-8.7 to 20.0)                               |
| Bladder cancer                                     | 2.2<br>(2.0 to 2.4)                     | 0.5<br>(0.5 to 0.6)                   | 0.2<br>(0.1 to 0.3)                  | 18.7<br>(4.2 to 36.0)                             | -8.6<br>(-19.7 to 5.0)                              |
| Brain and nervous system cancer                    | 0.7<br>(0.6 to 0.8)                     | 0.3<br>(0.2 to 0.4)                   | 0.1<br>(0.1 to 0.1)                  | 26.3<br>(11.0 to 41.3)                            | 5.6<br>(-6.8 to 18.0)                               |
| Thyroid cancer                                     | 1.5<br>(1.3 to 1.7)                     | 0.3<br>(0.2 to 0.3)                   | 0.1<br>(0.1 to 0.1)                  | 35.1<br>(14.5 to 59.7)                            | 16.4<br>(-1.1 to 37.6)                              |
| Mesothelioma                                       | 0.2<br>(0.1 to 0.2)                     | 0.1<br>(0.1 to 0.1)                   | < 0.05<br>(< 0.05 to < 0.05)         | 22.5<br>(-2.1 to 58.9)                            | -6.6<br>(-25.2 to 22.0)                             |
| Hodgkin lymphoma                                   | 0.6<br>(0.5 to 0.6)                     | 0.1<br>(0.1 to 0.1)                   | < 0.05<br>(< 0.05 to 0.1)            | 43.8<br>(21.1 to 70.0)                            | 30.2<br>(8.5 to 55.9)                               |
| Non-Hodgkin's lymphoma                             | 4.1<br>(3.7 to 4.5)                     | 1.0<br>(0.9 to 1.1)                   | 0.3<br>(0.2 to 0.5)                  | 45.0<br>(27.6 to 66.3)                            | 15.6<br>(2.5 to 32.9)                               |
| Multiple myeloma                                   | 1.2<br>(0.9 to 1.4)                     | 0.4<br>(0.3 to 0.5)                   | 0.2<br>(0.1 to 0.3)                  | 54.7<br>(25.2 to 91.3)                            | 19.7<br>(-3.4 to 48.4)                              |
| Leukaemia                                          | 4.2<br>(3.9 to 4.5)                     | 1.2<br>(1.2 to 1.3)                   | 0.5<br>(0.4 to 0.7)                  | 22.0<br>(9.5 to 37.1)                             | -2.3<br>(-12.4 to 10.0)                             |
| Acute lymphoid leukaemia                           | 0.7<br>(0.6 to 0.8)                     | 0.2<br>(0.1 to 0.2)                   | 0.1<br>(0.1 to 0.1)                  | 35.4<br>(6.7 to 69.5)                             | 24.8<br>(-8.5 to 65.8)                              |
| Chronic lymphoid leukaemia                         | 2.1<br>(1.9 to 2.4)                     | 0.5<br>(0.4 to 0.5)                   | 0.2<br>(0.2 to 0.3)                  | 20.2<br>(0.8 to 44.8)                             | -8.7<br>(-23.7 to 10.2)                             |
| Acute myeloid leukaemia                            | 0.5<br>(0.4 to 0.6)                     | 0.4<br>(0.3 to 0.4)                   | 0.1<br>(0.1 to 0.1)                  | 23.9<br>(6.1 to 46.2)                             | -2.0<br>(-16.6 to 14.4)                             |
| Chronic myeloid leukaemia                          | 0.2<br>(0.2 to 0.3)                     | 0.1<br>(0.1 to 0.1)                   | < 0.05<br>(< 0.05 to < 0.05)         | -1.3<br>(-16.9 to 17.0)                           | -20.7<br>(-33.2 to -5.9)                            |
| Other leukaemia                                    | 0.6<br>(0.5 to 0.7)                     | 0.1<br>(0.1 to 0.2)                   | 0.1<br>(< 0.05 to 0.1)               | 23.9<br>(1.8 to 53.3)                             | -4.9<br>(-21.9 to 16.6)                             |
| Other neoplasms                                    | 5.2<br>(4.6 to 5.8)                     | 1.3<br>(1.2 to 1.4)                   | 0.4<br>(0.3 to 0.5)                  | 46.0<br>(27.4 to 65.4)                            | 19.2<br>(4.4 to 35.1)                               |
| <b>Cardiovascular diseases</b>                     | <b>366.7</b><br><b>(352.0 to 384.0)</b> | <b>37.9†</b><br><b>(35.9 to 40.2)</b> | <b>23.4</b><br><b>(17.2 to 30.5)</b> | <b>21.8</b><br><b>(17.3 to 26.3)</b>              | <b>-4.0</b><br><b>(-7.5 to -0.3)</b>                |
| Rheumatic heart disease                            | 0.5<br>(0.5 to 0.6)                     | 0.2<br>(0.2 to 0.2)                   | < 0.05<br>(< 0.05 to 0.1)            | 14.7<br>(0.1 to 30.1)                             | -3.2<br>(-13.7 to 7.9)                              |
| Ischaemic heart disease                            | 95.7<br>(88.0 to 103.7)                 | 9.6<br>(8.7 to 10.6)                  | 5.0<br>(3.5 to 6.7)                  | 18.8<br>(13.6 to 24.7)                            | -6.5<br>(-10.7 to -1.9)                             |
| Cerebrovascular disease                            | 50.2<br>(46.5 to 54.5)                  | 9.6†<br>(8.9 to 10.2)                 | 8.4<br>(5.9 to 10.8)                 | 25.9<br>(15.6 to 35.3)                            | -0.3<br>(-8.3 to 7.1)                               |
| Ischaemic stroke                                   | 40.3<br>(35.6 to 46.1)                  | 6.8†<br>(6.1 to 7.3)                  | 6.4<br>(4.5 to 8.4)                  | 26.2<br>(13.6 to 38.7)                            | -0.2<br>(-10.0 to 9.3)                              |
| Hemorrhagic stroke                                 | 12.2<br>(10.8 to 13.8)                  | 2.8†<br>(2.6 to 3.0)                  | 1.9<br>(1.4 to 2.5)                  | 24.7<br>(12.0 to 39.3)                            | -0.4<br>(-10.2 to 11.4)                             |
| Hypertensive heart disease                         | 5.8<br>(4.9 to 7.0)                     | --                                    | 0.5<br>(0.3 to 0.7)                  | 18.9<br>(5.3 to 35.2)                             | -7.6<br>(-18.6 to 4.6)                              |
| Cardiomyopathy and myocarditis                     | 6.6<br>(5.7 to 7.4)                     | 1.8†<br>(1.6 to 2.1)                  | 0.6<br>(0.4 to 0.8)                  | 12.7<br>(1.8 to 24.4)                             | -6.3<br>(-14.9 to 3.6)                              |
| Myocarditis                                        | 1.4<br>(1.2 to 1.5)                     | 1.8<br>(1.6 to 2.1)                   | 0.1<br>(0.1 to 0.1)                  | 4.1<br>(-13.7 to 25.2)                            | -5.2<br>(-21.0 to 14.0)                             |
| Alcoholic cardiomyopathy                           | 2.7<br>(2.2 to 3.2)                     | --                                    | 0.2<br>(0.1 to 0.3)                  | 16.9<br>(-2.4 to 39.7)                            | -6.5<br>(-21.6 to 10.7)                             |
| Other cardiomyopathy                               | 3.2<br>(2.7 to 3.7)                     | --                                    | 0.3<br>(0.2 to 0.4)                  | 12.9<br>(-1.9 to 29.9)                            | -6.6<br>(-19.4 to 7.7)                              |
| Atrial fibrillation and flutter                    | 56.5<br>(49.0 to 65.3)                  | 4.6<br>(3.9 to 5.4)                   | 4.5<br>(3.0 to 6.3)                  | 25.4<br>(18.8 to 32.7)                            | -2.4<br>(-7.7 to 3.1)                               |
| Peripheral vascular disease                        | 134.9<br>(117.7 to 154.6)               | 11.3<br>(9.7 to 13.2)                 | 0.5<br>(0.2 to 0.9)                  | 21.8<br>(13.0 to 30.9)                            | -7.8<br>(-14.6 to -1.4)                             |
| Endocarditis                                       | 0.3<br>(0.2 to 0.3)                     | 0.7<br>(0.7 to 0.8)                   | < 0.05<br>(< 0.05 to < 0.05)         | 15.1<br>(-5.2 to 38.5)                            | -8.1<br>(-22.8 to 9.1)                              |
| Other cardiovascular and circulatory diseases      | 77.6<br>(65.1 to 91.9)                  | --                                    | 4.0<br>(2.7 to 5.6)                  | 15.5<br>(6.5 to 25.0)                             | -8.2<br>(-15.3 to -1.1)                             |
| <b>Chronic respiratory diseases</b>                | <b>679.8</b><br><b>(661.2 to 697.9)</b> | <b>65.9†</b><br><b>(62.4 to 69.7)</b> | <b>26.7</b><br><b>(19.2 to 36.4)</b> | <b>3.3</b><br><b>(-1.6 to 8.8)</b>                | <b>-7.6</b><br><b>(-11.9 to -3.1)</b>               |
| Chronic obstructive pulmonary disease              | 176.2<br>(168.0 to 184.6)               | 11.0<br>(10.5 to 11.5)                | 5.4<br>(4.3 to 6.5)                  | 13.8<br>(0.1 to 29.0)                             | -9.2<br>(-20.3 to 2.6)                              |
| Pneumoconiosis                                     | 0.2<br>(0.2 to 0.3)                     | < 0.05<br>(< 0.05 to < 0.05)          | < 0.05<br>(< 0.05 to 0.1)            | 23.5<br>(-2.9 to 57.4)                            | -5.8<br>(-26.1 to 20.5)                             |
| Silicosis                                          | < 0.05<br>(< 0.05 to < 0.05)            | < 0.05<br>(< 0.05 to < 0.05)          | < 0.05<br>(< 0.05 to < 0.05)         | 33.6<br>(23.9 to 43.2)                            | 3.1<br>(-3.8 to 10.3)                               |

| Cause                                                          | Prevalence in thousands (95% UI)              | Incidence in thousands (95% UI)          | YLDs in thousands (95% UI)             |                                                   |                                                     |
|----------------------------------------------------------------|-----------------------------------------------|------------------------------------------|----------------------------------------|---------------------------------------------------|-----------------------------------------------------|
|                                                                | 2016 counts                                   | 2016 counts                              | 2016 counts                            | Percentage change in counts between 2006 and 2016 | Percentage change in age-standardised rates between |
| Asbestosis                                                     | 0.2<br>(0.2 to 0.2)                           | < 0.05<br>(< 0.05 to < 0.05)             | < 0.05<br>(< 0.05 to < 0.05)           | 22.7<br>(-8.2 to 65.1)                            | -6.4<br>(-30.4 to 26.9)                             |
| Coal workers pneumoconiosis                                    | < 0.05<br>(< 0.05 to 0.1)                     | < 0.05<br>(< 0.05 to < 0.05)             | < 0.05<br>(< 0.05 to < 0.05)           | 27.8<br>(10.3 to 58.6)                            | -3.6<br>(-16.7 to 18.7)                             |
| Other pneumoconiosis                                           | < 0.05<br>(< 0.05 to < 0.05)                  | < 0.05<br>(< 0.05 to < 0.05)             | < 0.05<br>(< 0.05 to < 0.05)           | 12.1<br>(0.7 to 26.1)                             | -12.8<br>(-20.9 to -2.4)                            |
| Asthma                                                         | 534.0<br>(512.2 to 557.2)                     | 54.6<br>(51.3 to 58.3)                   | 20.8<br>(13.8 to 30.1)                 | 0.4<br>(-4.6 to 5.6)                              | -7.6<br>(-12.3 to -2.5)                             |
| Interstitial lung disease and pulmonary sarcoidosis            | 2.7<br>(2.5 to 3.0)                           | 0.3<br>(0.3 to 0.4)                      | 0.3<br>(0.2 to 0.4)                    | 28.6<br>(13.5 to 45.9)                            | 2.8<br>(-9.3 to 16.1)                               |
| Other chronic respiratory diseases                             | --                                            | --                                       | 0.2<br>(0.1 to 0.2)                    | 31.4<br>(16.3 to 48.2)                            | 22.0<br>(6.6 to 38.7)                               |
| <b>Cirrhosis and other chronic liver diseases</b>              | <b>30.3</b><br><b>(28.7 to 31.9)</b>          | <b>0.4</b><br><b>(0.4 to 0.4)</b>        | <b>0.4</b><br><b>(0.3 to 0.6)</b>      | <b>26.2</b><br><b>(9.9 to 44.5)</b>               | <b>10.2</b><br><b>(-4.0 to 27.0)</b>                |
| Cirrhosis and other chronic liver diseases due to hepatitis B  | 8.9<br>(8.1 to 9.8)                           | 0.1<br>(0.1 to 0.1)                      | 0.1<br>(0.1 to 0.2)                    | 28.7<br>(-0.8 to 65.3)                            | 10.8<br>(-15.5 to 42.2)                             |
| Cirrhosis and other chronic liver diseases due to hepatitis C  | 7.5<br>(6.8 to 8.4)                           | 0.1<br>(0.1 to 0.1)                      | 0.1<br>(0.1 to 0.1)                    | 28.2<br>(-4.8 to 75.4)                            | 10.6<br>(-18.8 to 51.2)                             |
| Cirrhosis and other chronic liver diseases due to alcohol use  | 8.1<br>(7.3 to 8.9)                           | 0.1<br>(0.1 to 0.1)                      | 0.1<br>(0.1 to 0.1)                    | 32.4<br>(-2.5 to 80.5)                            | 13.2<br>(-15.8 to 52.6)                             |
| Cirrhosis and other chronic liver diseases due to other causes | 5.8<br>(5.2 to 6.4)                           | 0.1<br>(0.1 to 0.1)                      | 0.1<br>(0.1 to 0.2)                    | 17.8<br>(-8.9 to 53.6)                            | 7.7<br>(-17.8 to 43.5)                              |
| <b>Digestive diseases</b>                                      | <b>100.5</b><br><b>(94.5 to 106.6)</b>        | <b>117.5†</b><br><b>(112.2 to 122.3)</b> | <b>3.5</b><br><b>(2.5 to 4.7)</b>      | <b>11.1</b><br><b>(4.6 to 18.1)</b>               | <b>-3.6</b><br><b>(-9.7 to 2.5)</b>                 |
| Peptic ulcer disease                                           | 38.3<br>(34.9 to 42.3)                        | 3.2<br>(2.9 to 3.6)                      | 0.5<br>(0.3 to 0.8)                    | 7.9<br>(-7.1 to 23.2)                             | -0.7<br>(-14.5 to 14.4)                             |
| Gastritis and duodenitis                                       | 35.7<br>(32.7 to 39.0)                        | 24.9<br>(22.8 to 27.4)                   | 0.4<br>(0.3 to 0.7)                    | 12.0<br>(-2.0 to 27.6)                            | 2.4<br>(-10.9 to 17.5)                              |
| Appendicitis                                                   | 0.2<br>(0.2 to 0.2)                           | 5.2<br>(4.8 to 5.6)                      | 0.1<br>(< 0.05 to 0.1)                 | 7.3<br>(-9.2 to 25.1)                             | 1.0<br>(-15.7 to 19.6)                              |
| Paralytic ileus and intestinal obstruction                     | 0.1<br>(0.1 to 0.1)                           | 2.9<br>(2.7 to 3.1)                      | < 0.05<br>(< 0.05 to < 0.05)           | 24.6<br>(10.1 to 42.5)                            | 2.2<br>(-7.5 to 13.8)                               |
| Inguinal, femoral, and abdominal hernia                        | 17.8<br>(16.5 to 19.0)                        | 30.8<br>(26.8 to 34.8)                   | 1.2<br>(0.8 to 1.6)                    | 15.3<br>(4.2 to 26.5)                             | -4.6<br>(-14.2 to 4.9)                              |
| Inflammatory bowel disease                                     | 5.0<br>(4.7 to 5.3)                           | 1.9<br>(1.9 to 2.0)                      | 0.7<br>(0.5 to 1.0)                    | 0.7<br>(-10.6 to 13.2)                            | -11.4<br>(-21.8 to 0.4)                             |
| Vascular intestinal disorders                                  | 0.1<br>(0.1 to 0.1)                           | 0.5<br>(0.4 to 0.5)                      | < 0.05<br>(< 0.05 to 0.1)              | 40.2<br>(9.2 to 79.2)                             | 13.2<br>(-9.2 to 41.7)                              |
| Gallbladder and biliary diseases                               | 5.9<br>(5.5 to 6.3)                           | 43.9<br>(41.2 to 46.1)                   | 0.2<br>(0.1 to 0.3)                    | 20.1<br>(-3.6 to 49.9)                            | 3.3<br>(-16.7 to 29.7)                              |
| Pancreatitis                                                   | 0.5<br>(0.4 to 0.5)                           | 4.2<br>(3.8 to 4.6)                      | 0.1<br>(< 0.05 to 0.1)                 | 28.4<br>(15.9 to 42.2)                            | 7.7<br>(-1.7 to 18.1)                               |
| Other digestive diseases                                       | --                                            | --                                       | 0.3<br>(0.2 to 0.4)                    | 16.4<br>(9.9 to 23.7)                             | -0.9<br>(-7.4 to 5.5)                               |
| <b>Neurological disorders</b>                                  | <b>1,768.1</b><br><b>(1,703.0 to 1,847.8)</b> | <b>796.9</b><br><b>(682.6 to 921.5)</b>  | <b>48.7</b><br><b>(32.8 to 66.2)</b>   | <b>9.5</b><br><b>(0.1 to 20.4)</b>                | <b>-0.5</b><br><b>(-9.8 to 10.2)</b>                |
| Alzheimer's disease and other dementias                        | 40.2<br>(33.9 to 47.9)                        | 7.5<br>(6.2 to 9.1)                      | 6.1<br>(4.2 to 8.2)                    | 27.2<br>(20.4 to 34.0)                            | -2.4<br>(-7.6 to 2.7)                               |
| Parkinson's disease                                            | 6.2<br>(4.9 to 7.7)                           | 0.7<br>(0.6 to 0.9)                      | 0.7<br>(0.5 to 1.0)                    | 36.5<br>(22.1 to 53.8)                            | 5.8<br>(-5.7 to 18.8)                               |
| Epilepsy                                                       | 10.1<br>(2.5 to 17.9)                         | 1.1<br>(0.3 to 2.0)                      | 2.4<br>(0.4 to 6.0)                    | 3.5<br>(-82.9 to 462.9)                           | -5.9<br>(-84.5 to 419.9)                            |
| Multiple sclerosis                                             | 3.8<br>(3.4 to 4.2)                           | 0.1<br>(0.1 to 0.1)                      | 1.0<br>(0.7 to 1.3)                    | 23.9<br>(4.4 to 44.5)                             | 10.4<br>(-6.9 to 28.9)                              |
| Motor neuron disease                                           | 0.8<br>(0.8 to 0.9)                           | 0.2<br>(0.2 to 0.2)                      | 0.2<br>(0.1 to 0.2)                    | 25.3<br>(19.4 to 32.3)                            | 5.0<br>(0.6 to 10.5)                                |
| Migraine                                                       | 791.8<br>(754.7 to 830.1)                     | 70.9<br>(67.1 to 74.9)                   | 32.9<br>(21.0 to 46.3)                 | 6.3<br>(2.6 to 10.1)                              | -0.6<br>(-4.0 to 3.1)                               |
| Tension-type headache                                          | 1,282.3<br>(1,162.4 to 1,415.4)               | 716.4<br>(603.1 to 840.2)                | 4.7<br>(3.0 to 6.9)                    | 8.1<br>(3.1 to 13.3)                              | -0.0<br>(-4.7 to 4.6)                               |
| Other neurological disorders                                   | < 0.05<br>(< 0.05 to < 0.05)                  | < 0.05<br>(< 0.05 to < 0.05)             | 0.7<br>(0.3 to 1.3)                    | 22.9<br>(-47.7 to 210.7)                          | 14.0<br>(-56.7 to 212.2)                            |
| <b>Mental and substance use disorders</b>                      | <b>870.4</b><br><b>(848.9 to 895.5)</b>       | <b>309.0†</b><br><b>(288.6 to 331.8)</b> | <b>124.0</b><br><b>(89.6 to 160.8)</b> | <b>7.0</b><br><b>(4.4 to 9.8)</b>                 | <b>-0.8</b><br><b>(-3.3 to 1.9)</b>                 |
| Schizophrenia                                                  | 15.4<br>(13.6 to 17.4)                        | 0.7<br>(0.6 to 0.8)                      | 9.8<br>(7.3 to 12.2)                   | 8.6<br>(0.9 to 17.0)                              | -0.5<br>(-8.2 to 7.3)                               |
| Alcohol use disorders                                          | 72.3<br>(61.9 to 83.5)                        | 33.7<br>(28.7 to 39.1)                   | 7.2<br>(5.0 to 10.1)                   | 20.0<br>(10.8 to 30.0)                            | 11.8<br>(3.3 to 21.6)                               |
| Drug use disorders                                             | 71.3<br>(66.0 to 77.3)                        | 8.2<br>(7.2 to 9.2)                      | 11.5<br>(8.2 to 15.4)                  | 4.5<br>(-6.4 to 15.3)                             | -2.0<br>(-12.8 to 9.1)                              |
| Opioid use disorders                                           | 13.5<br>(11.5 to 16.1)                        | 1.7<br>(1.4 to 2.0)                      | 5.6<br>(3.8 to 7.5)                    | 13.4<br>(1.9 to 26.4)                             | 5.4<br>(-5.5 to 17.8)                               |
| Cocaine use disorders                                          | 3.7<br>(3.2 to 4.3)                           | 0.2<br>(0.2 to 0.3)                      | 0.5<br>(0.3 to 0.8)                    | 6.5<br>(-13.7 to 30.8)                            | -1.2<br>(-20.4 to 22.8)                             |
| Amphetamine use disorders                                      | 16.1<br>(11.7 to 21.6)                        | 1.0<br>(0.7 to 1.4)                      | 2.1<br>(1.2 to 3.4)                    | -8.4<br>(-28.7 to 13.3)                           | -12.3<br>(-32.1 to 9.3)                             |
| Cannabis use disorders                                         | 34.8<br>(29.6 to 40.8)                        | 4.5<br>(3.7 to 5.4)                      | 1.0<br>(0.6 to 1.5)                    | 3.2<br>(-9.6 to 18.1)                             | -2.0<br>(-14.6 to 12.2)                             |
| Other drug use disorders                                       | 5.4<br>(4.8 to 6.0)                           | 0.7<br>(0.7 to 0.8)                      | 2.3<br>(1.4 to 3.5)                    | -1.6<br>(-25.4 to 28.6)                           | -6.9<br>(-29.9 to 22.6)                             |
| Depressive disorders                                           | 204.3<br>(191.6 to 218.9)                     | 208.8<br>(189.8 to 230.8)                | 34.0<br>(23.4 to 46.4)                 | 7.6<br>(2.1 to 14.0)                              | -1.5<br>(-7.0 to 4.6)                               |
| Major depressive disorder                                      | 129.0<br>(117.6 to 142.1)                     | 196.9<br>(178.0 to 218.7)                | 26.4<br>(17.9 to 35.9)                 | 6.1<br>(-0.8 to 13.7)                             | -2.1<br>(-8.8 to 5.4)                               |
| Dysthymia                                                      | 79.2<br>(69.4 to 91.2)                        | 11.9<br>(10.4 to 13.7)                   | 7.6<br>(5.1 to 11.1)                   | 13.1<br>(5.7 to 21.2)                             | 1.1<br>(-5.4 to 7.8)                                |
| Bipolar disorder                                               | 54.3<br>(47.2 to 62.6)                        | 3.9<br>(3.4 to 4.5)                      | 11.0<br>(6.8 to 16.3)                  | 8.0<br>(3.6 to 13.1)                              | 0.1<br>(-4.2 to 4.8)                                |
| Anxiety disorders                                              | 290.8<br>(265.4 to 320.3)                     | 35.1<br>(32.5 to 38.0)                   | 27.9<br>(19.5 to 37.8)                 | 3.0<br>(-4.3 to 11.2)                             | -4.5<br>(-11.4 to 3.0)                              |
| Eating disorders                                               | 17.1<br>(14.1 to 21.3)                        | 4.5<br>(3.4 to 5.9)                      | 3.5<br>(2.2 to 5.0)                    | 5.9<br>(-3.0 to 15.3)                             | 4.9<br>(-3.6 to 14.0)                               |
| Anorexia nervosa                                               | 3.2<br>(2.3 to 4.2)                           | 0.8<br>(0.6 to 1.0)                      | 0.7<br>(0.4 to 1.0)                    | 6.3<br>(-10.7 to 27.3)                            | 3.5<br>(-13.2 to 24.5)                              |
| Bulimia nervosa                                                | 13.2<br>(10.1 to 17.2)                        | 3.8<br>(2.7 to 5.2)                      | 2.8<br>(1.7 to 4.1)                    | 5.8<br>(-3.9 to 16.7)                             | 5.3<br>(-4.2 to 15.7)                               |
| Autistic spectrum disorders                                    | 39.4<br>(35.6 to 43.8)                        | 0.2<br>(0.1 to 0.2)                      | 6.5<br>(4.4 to 9.1)                    | 8.2<br>(3.0 to 13.9)                              | 0.3<br>(-4.5 to 5.8)                                |
| Autism                                                         | 17.2<br>(14.7 to 20.1)                        | < 0.05<br>(< 0.05 to < 0.05)             | 4.3<br>(2.8 to 6.2)                    | 8.4<br>(1.3 to 16.2)                              | 0.3<br>(-6.5 to 7.7)                                |
| Asperger syndrome and other autistic spectrum disorders        | 22.1<br>(18.4 to 26.6)                        | 0.1<br>(0.1 to 0.2)                      | 2.2<br>(1.4 to 3.2)                    | 7.6<br>(2.6 to 12.7)                              | 0.2<br>(-4.5 to 5.5)                                |



| Cause                                                      | Prevalence in thousands (95% UI)              | Incidence in thousands (95% UI)                | YLDs in thousands (95% UI)             |                                                   |                                                     |
|------------------------------------------------------------|-----------------------------------------------|------------------------------------------------|----------------------------------------|---------------------------------------------------|-----------------------------------------------------|
|                                                            | 2016 counts                                   | 2016 counts                                    | 2016 counts                            | Percentage change in counts between 2006 and 2016 | Percentage change in age-standardised rates between |
| Attention-deficit/hyperactivity disorder                   | 57.9<br>(51.1 to 65.7)                        | 2.6<br>(2.3 to 3.1)                            | 0.7<br>(0.4 to 1.1)                    | 2.7<br>(-3.1 to 8.9)                              | 0.1<br>(-5.5 to 6.4)                                |
| Conduct disorder                                           | 26.5<br>(21.7 to 31.2)                        | 8.8<br>(7.0 to 10.6)                           | 3.2<br>(1.9 to 4.9)                    | -0.2<br>(-6.3 to 6.4)                             | 0.2<br>(-5.9 to 6.7)                                |
| Idiopathic developmental intellectual disability           | 21.5<br>(9.0 to 34.2)                         | --                                             | 1.1<br>(0.5 to 1.9)                    | 15.3<br>(6.9 to 26.9)                             | 7.8<br>(0.0 to 18.5)                                |
| Other mental and substance use disorders                   | 101.0<br>(89.2 to 115.4)                      | 2.6<br>(2.3 to 3.0)                            | 7.5<br>(5.0 to 10.7)                   | 11.0<br>(6.1 to 16.6)                             | -0.0<br>(-4.4 to 5.0)                               |
| <b>Diabetes, urogenital, blood, and endocrine diseases</b> | <b>1,089.5</b><br><b>(1,068.2 to 1,111.7)</b> | <b>460.7†</b><br><b>(435.9 to 487.7)</b>       | <b>25.2</b><br><b>(18.1 to 33.6)</b>   | <b>20.7</b><br><b>(15.9 to 26.1)</b>              | <b>1.6</b><br><b>(-2.2 to 5.7)</b>                  |
| Diabetes mellitus                                          | 147.7<br>(132.6 to 163.4)                     | 7.7<br>(6.8 to 8.6)                            | 11.4<br>(7.8 to 15.5)                  | 30.0<br>(19.8 to 40.9)                            | 5.1<br>(-2.8 to 13.6)                               |
| Acute glomerulonephritis                                   | < 0.05<br>(< 0.05 to 0.1)                     | 0.7<br>(0.7 to 0.8)                            | < 0.05<br>(< 0.05 to < 0.05)           | 2.2<br>(-3.0 to 8.0)                              | -7.7<br>(-12.1 to -2.4)                             |
| Chronic kidney disease                                     | 188.0<br>(168.0 to 209.1)                     | 16.9<br>(14.8 to 19.3)                         | 4.0<br>(3.0 to 5.1)                    | 22.5<br>(13.0 to 33.4)                            | 0.1<br>(-7.6 to 8.8)                                |
| Chronic kidney disease due to diabetes mellitus            | 120.0<br>(106.8 to 133.8)                     | 11.2<br>(9.7 to 12.8)                          | 2.5<br>(1.8 to 3.2)                    | 27.3<br>(15.1 to 41.6)                            | 2.5<br>(-7.5 to 14.0)                               |
| Chronic kidney disease due to hypertension                 | 22.9<br>(20.2 to 25.8)                        | 2.3<br>(2.0 to 2.7)                            | 0.3<br>(0.2 to 0.5)                    | 20.0<br>(4.7 to 39.2)                             | -6.4<br>(-17.6 to 8.0)                              |
| Chronic kidney disease due to glomerulonephritis           | 22.6<br>(20.1 to 25.3)                        | 1.4<br>(1.2 to 1.7)                            | 0.7<br>(0.5 to 0.9)                    | 9.5<br>(-3.4 to 24.5)                             | -5.1<br>(-16.7 to 8.8)                              |
| Chronic kidney disease due to other causes                 | 22.4<br>(19.8 to 25.4)                        | 1.9<br>(1.7 to 2.2)                            | 0.5<br>(0.4 to 0.7)                    | 21.7<br>(9.7 to 36.2)                             | 1.7<br>(-7.4 to 12.5)                               |
| Urinary diseases and male infertility                      | 69.8<br>(65.5 to 74.6)                        | 273.6†<br>(250.0 to 298.8)                     | 2.3<br>(1.5 to 3.2)                    | 19.4<br>(13.1 to 26.3)                            | -4.2<br>(-9.5 to 1.3)                               |
| Interstitial nephritis and urinary tract infections        | 4.3<br>(3.9 to 4.8)                           | 225.2<br>(202.1 to 250.1)                      | 0.1<br>(0.1 to 0.2)                    | 6.5<br>(-7.0 to 23.3)                             | -1.7<br>(-14.9 to 13.9)                             |
| Urolithiasis                                               | 1.6<br>(1.4 to 1.7)                           | 40.8<br>(38.1 to 44.1)                         | 0.1<br>(0.1 to 0.2)                    | 3.1<br>(-13.5 to 20.3)                            | -11.2<br>(-24.2 to 2.4)                             |
| Benign prostatic hyperplasia                               | 59.0<br>(54.6 to 63.8)                        | 7.6<br>(6.7 to 8.6)                            | 1.9<br>(1.3 to 2.8)                    | 24.4<br>(17.3 to 32.4)                            | -2.6<br>(-8.3 to 3.9)                               |
| Male infertility                                           | 4.0<br>(2.9 to 5.5)                           | --                                             | < 0.05<br>(< 0.05 to < 0.05)           | -10.4<br>(-22.1 to 2.4)                           | -8.1<br>(-19.6 to 3.6)                              |
| Other urinary diseases                                     | --                                            | --                                             | 0.1<br>(0.1 to 0.1)                    | -13.8<br>(-22.7 to -4.0)                          | -21.2<br>(-29.5 to -12.3)                           |
| Gynecological diseases                                     | 433.3<br>(415.5 to 452.0)                     | 148.8†<br>(140.9 to 157.7)                     | 4.3<br>(2.9 to 6.2)                    | 3.8<br>(-2.2 to 9.9)                              | -0.9<br>(-6.7 to 5.2)                               |
| Uterine fibroids                                           | 15.0<br>(13.3 to 17.0)                        | 1.4<br>(1.3 to 1.6)                            | 0.1<br>(0.1 to 0.3)                    | 7.9<br>(-3.5 to 20.7)                             | 1.8<br>(-9.1 to 14.2)                               |
| Polycystic ovarian syndrome                                | 2.8<br>(2.2 to 3.6)                           | 2.3<br>(1.8 to 3.0)                            | < 0.05<br>(< 0.05 to < 0.05)           | -1.3<br>(-16.6 to 15.9)                           | 0.6<br>(-14.8 to 17.8)                              |
| Female infertility                                         | 1.4<br>(0.5 to 4.3)                           | --                                             | < 0.05<br>(< 0.05 to < 0.05)           | -1.1<br>(-58.2 to 122.1)                          | -1.6<br>(-61.0 to 120.0)                            |
| Endometriosis                                              | 3.9<br>(3.2 to 4.6)                           | 17.1<br>(12.6 to 22.8)                         | 0.4<br>(0.2 to 0.5)                    | -1.6<br>(-21.1 to 21.6)                           | -6.5<br>(-25.0 to 15.6)                             |
| Genital prolapse                                           | 144.2<br>(129.3 to 161.0)                     | 6.6<br>(5.9 to 7.5)                            | 0.5<br>(0.2 to 0.8)                    | 17.9<br>(7.4 to 29.9)                             | -4.2<br>(-12.5 to 5.4)                              |
| Premenstrual syndrome                                      | 261.0<br>(247.7 to 274.5)                     | 89.5<br>(83.9 to 95.2)                         | 2.2<br>(1.4 to 3.3)                    | 1.7<br>(-6.1 to 9.3)                              | -0.4<br>(-8.1 to 7.3)                               |
| Other gynecological diseases                               | 32.4<br>(28.9 to 36.0)                        | 31.8<br>(28.0 to 35.6)                         | 1.1<br>(0.7 to 1.6)                    | 4.5<br>(-8.0 to 18.3)                             | 0.9<br>(-11.2 to 14.7)                              |
| Hemoglobinopathies and hemolytic anaemias                  | 362.3<br>(354.8 to 369.3)                     | --                                             | 1.1<br>(0.7 to 1.7)                    | 1.0<br>(-11.3 to 14.0)                            | -4.5<br>(-17.3 to 9.0)                              |
| Thalassemias                                               | 0.2<br>(0.2 to 0.2)                           | --                                             | < 0.05<br>(< 0.05 to < 0.05)           | 11.4<br>(-14.6 to 44.9)                           | 9.7<br>(-17.7 to 45.9)                              |
| Thalassaemias trait                                        | 105.8<br>(100.4 to 111.8)                     | --                                             | 0.9<br>(0.6 to 1.5)                    | 0.4<br>(-12.6 to 14.7)                            | -5.1<br>(-18.2 to 9.3)                              |
| Sickle cell disorders                                      | < 0.05<br>(< 0.05 to < 0.05)                  | --                                             | < 0.05<br>(< 0.05 to < 0.05)           | 49.4<br>(37.3 to 61.2)                            | 41.8<br>(30.0 to 53.4)                              |
| Sickle cell trait                                          | 44.8<br>(43.1 to 46.9)                        | --                                             | 0.1<br>(0.1 to 0.2)                    | -1.2<br>(-20.2 to 17.7)                           | -5.3<br>(-24.1 to 14.3)                             |
| G6PD deficiency                                            | 12.5<br>(11.8 to 13.3)                        | --                                             | < 0.05<br>(< 0.05 to < 0.05)           | 43.1<br>(14.4 to 77.9)                            | 34.7<br>(6.5 to 69.6)                               |
| G6PD trait                                                 | 204.1<br>(199.4 to 209.1)                     | --                                             | < 0.05<br>(< 0.05 to < 0.05)           | 43.0<br>(12.3 to 81.6)                            | 36.5<br>(5.3 to 74.9)                               |
| Other hemoglobinopathies and hemolytic anaemias            | 3.6<br>(3.2 to 4.0)                           | --                                             | < 0.05<br>(< 0.05 to 0.1)              | 12.0<br>(-5.1 to 32.5)                            | 2.1<br>(-17.0 to 26.1)                              |
| Endocrine, metabolic, blood, and immune disorders          | 60.9<br>(58.4 to 63.7)                        | 13.0<br>(12.1 to 14.1)                         | 2.1<br>(1.4 to 2.9)                    | 23.9<br>(17.2 to 31.6)                            | 4.9<br>(-1.2 to 11.7)                               |
| <b>Musculoskeletal disorders</b>                           | <b>1,199.0</b><br><b>(1,150.8 to 1,248.0)</b> | <b>699.0</b><br><b>(641.5 to 769.7)</b>        | <b>135.3</b><br><b>(98.5 to 175.1)</b> | <b>16.3</b><br><b>(12.7 to 20.2)</b>              | <b>0.7</b><br><b>(-2.3 to 3.8)</b>                  |
| Rheumatoid arthritis                                       | 28.2<br>(25.4 to 31.5)                        | 1.4<br>(1.3 to 1.6)                            | 6.6<br>(4.6 to 8.8)                    | 20.3<br>(11.3 to 29.9)                            | 0.0<br>(-7.4 to 7.7)                                |
| Osteoarthritis                                             | 270.3<br>(255.8 to 285.9)                     | 12.6<br>(11.8 to 13.5)                         | 9.5<br>(6.2 to 13.8)                   | 26.3<br>(21.5 to 31.6)                            | 0.7<br>(-3.1 to 4.9)                                |
| Low back and neck pain                                     | 778.3<br>(733.3 to 827.7)                     | 351.2<br>(310.8 to 393.7)                      | 93.7<br>(66.3 to 123.0)                | 13.2<br>(9.3 to 17.7)                             | -0.6<br>(-3.8 to 2.8)                               |
| Low back pain                                              | 638.7<br>(575.5 to 709.1)                     | 310.2<br>(269.9 to 353.2)                      | 72.4<br>(51.4 to 95.7)                 | 12.6<br>(7.8 to 18.1)                             | -0.8<br>(-4.7 to 3.6)                               |
| Neck pain                                                  | 214.7<br>(186.1 to 247.9)                     | 41.0<br>(35.4 to 48.1)                         | 21.3<br>(14.4 to 30.1)                 | 15.4<br>(12.1 to 18.8)                            | 0.1<br>(-1.9 to 2.3)                                |
| Gout                                                       | 67.5<br>(60.7 to 74.7)                        | 10.3<br>(9.0 to 11.7)                          | 2.1<br>(1.4 to 2.9)                    | 23.7<br>(11.2 to 39.0)                            | 1.5<br>(-8.8 to 14.1)                               |
| Other musculoskeletal disorders                            | 275.3<br>(232.6 to 325.7)                     | 323.5<br>(279.4 to 379.3)                      | 23.4<br>(15.8 to 32.8)                 | 24.3<br>(13.2 to 37.8)                            | 6.1<br>(-2.9 to 15.8)                               |
| <b>Other non-communicable diseases</b>                     | <b>2,969.1</b><br><b>(2,925.2 to 3,010.7)</b> | <b>6,658.2†</b><br><b>(6,256.0 to 7,052.6)</b> | <b>99.0</b><br><b>(68.1 to 139.2)</b>  | <b>15.5</b><br><b>(13.9 to 17.0)</b>              | <b>0.5</b><br><b>(-0.8 to 1.8)</b>                  |
| Congenital anomalies                                       | 40.2<br>(38.0 to 42.9)                        | --                                             | 4.4<br>(3.2 to 5.7)                    | 6.1<br>(0.2 to 12.4)                              | -1.4<br>(-6.9 to 4.4)                               |
| Neural tube defects                                        | 2.4<br>(2.1 to 2.6)                           | --                                             | 0.7<br>(0.5 to 1.0)                    | 8.3<br>(-6.5 to 26.2)                             | -0.4<br>(-14.4 to 15.6)                             |
| Congenital heart anomalies                                 | 12.3<br>(11.1 to 13.7)                        | --                                             | 0.7<br>(0.3 to 1.1)                    | 8.5<br>(-2.7 to 22.6)                             | 1.0<br>(-9.5 to 14.3)                               |
| Orofacial clefts                                           | 3.3<br>(2.9 to 3.7)                           | --                                             | < 0.05<br>(< 0.05 to < 0.05)           | 5.8<br>(-6.7 to 19.7)                             | -2.2<br>(-14.0 to 10.9)                             |
| Down's syndrome                                            | 1.7<br>(1.5 to 1.9)                           | --                                             | 0.1<br>(0.1 to 0.2)                    | -2.9<br>(-10.2 to 5.4)                            | -5.7<br>(-12.8 to 2.4)                              |
| Turner syndrome                                            | 1.4<br>(1.2 to 1.6)                           | --                                             | < 0.05<br>(< 0.05 to < 0.05)           | 6.0<br>(-26.8 to 60.4)                            | 2.4<br>(-30.2 to 57.5)                              |
| Klinefelter syndrome                                       | 3.1<br>(2.7 to 3.6)                           | --                                             | < 0.05<br>(< 0.05 to < 0.05)           | 0.8<br>(-16.8 to 22.3)                            | -1.7<br>(-19.1 to 19.3)                             |



| Cause                                         | Prevalence in thousands (95% UI)              | Incidence in thousands (95% UI)          | YLDs in thousands (95% UI)           |                                                   |                                                     |
|-----------------------------------------------|-----------------------------------------------|------------------------------------------|--------------------------------------|---------------------------------------------------|-----------------------------------------------------|
|                                               | 2016 counts                                   | 2016 counts                              | 2016 counts                          | Percentage change in counts between 2006 and 2016 | Percentage change in age-standardised rates between |
| Other chromosomal abnormalities               | 5.2<br>(4.5 to 5.9)                           | --                                       | 0.6<br>(0.4 to 0.9)                  | -6.6<br>(-21.1 to 8.7)                            | -8.0<br>(-22.1 to 7.7)                              |
| Congenital musculoskeletal and limb anomalies | 5.4<br>(4.9 to 5.9)                           | --                                       | 0.8<br>(0.5 to 1.1)                  | 12.5<br>(1.5 to 23.9)                             | 2.5<br>(-7.7 to 13.1)                               |
| Urogenital congenital anomalies               | 6.3<br>(5.6 to 6.9)                           | --                                       | 0.1<br>(0.1 to 0.2)                  | 3.0<br>(-8.5 to 16.3)                             | -1.5<br>(-13.3 to 12.2)                             |
| Digestive congenital anomalies                | 4.9<br>(4.3 to 5.4)                           | --                                       | 0.2<br>(0.1 to 0.3)                  | 1.8<br>(-12.8 to 18.6)                            | -6.0<br>(-19.9 to 9.9)                              |
| Other congenital anomalies                    | 6.2<br>(3.9 to 9.5)                           | --                                       | 1.0<br>(0.7 to 1.5)                  | 10.4<br>(0.2 to 22.4)                             | 0.8<br>(-8.1 to 11.8)                               |
| Skin and subcutaneous diseases                | 1,699.0<br>(1,655.6 to 1,740.4)               | 3,985.0<br>(3,740.4 to 4,242.8)          | 41.3<br>(28.1 to 59.5)               | 9.2<br>(7.2 to 11.1)                              | 1.6<br>(-0.4 to 3.4)                                |
| Dermatitis                                    | 298.7<br>(286.0 to 312.3)                     | 326.1<br>(301.7 to 352.7)                | 11.1<br>(6.6 to 17.9)                | 8.8<br>(5.0 to 12.5)                              | 1.2<br>(-2.3 to 5.0)                                |
| Psoriasis                                     | 64.4<br>(61.5 to 67.4)                        | 6.2<br>(5.9 to 6.5)                      | 5.6<br>(4.0 to 7.4)                  | 15.2<br>(8.2 to 22.1)                             | 2.9<br>(-3.7 to 9.3)                                |
| Cellulitis                                    | 4.6<br>(4.3 to 4.9)                           | 118.2<br>(111.8 to 125.1)                | 0.2<br>(0.2 to 0.4)                  | 12.7<br>(-2.7 to 29.4)                            | -0.8<br>(-14.5 to 15.3)                             |
| Pyoderma                                      | 17.0<br>(16.5 to 17.6)                        | 458.3<br>(443.8 to 472.4)                | 0.1<br>( $< 0.05$ to 0.2)            | 13.4<br>(7.1 to 20.0)                             | 0.4<br>(-5.3 to 6.8)                                |
| Scabies                                       | 17.2<br>(15.2 to 19.5)                        | 51.6<br>(45.3 to 58.7)                   | 0.4<br>(0.2 to 0.7)                  | 6.6<br>(1.0 to 12.7)                              | 0.1<br>(-5.2 to 5.8)                                |
| Fungal skin diseases                          | 488.4<br>(433.4 to 549.3)                     | 1,736.3<br>(1,513.3 to 1,975.1)          | 2.7<br>(1.1 to 5.7)                  | 16.2<br>(14.0 to 18.4)                            | -0.0<br>(-1.0 to 1.0)                               |
| Viral skin diseases                           | 127.5<br>(122.5 to 133.2)                     | 170.7<br>(162.5 to 178.3)                | 3.9<br>(2.4 to 5.8)                  | 6.3<br>(3.0 to 9.5)                               | 0.0<br>(-3.0 to 3.1)                                |
| Acne vulgaris                                 | 442.4<br>(411.3 to 474.6)                     | 335.7<br>(280.8 to 408.8)                | 11.3<br>(7.6 to 16.5)                | 4.1<br>(-0.1 to 8.5)                              | 2.4<br>(-1.6 to 6.8)                                |
| Alopecia areata                               | 14.8<br>(14.3 to 15.4)                        | 26.2<br>(25.2 to 27.2)                   | 0.5<br>(0.3 to 0.7)                  | 8.1<br>(-0.1 to 17.3)                             | 0.3<br>(-7.5 to 9.3)                                |
| Pruritus                                      | 42.6<br>(37.5 to 48.4)                        | 33.6<br>(30.1 to 38.0)                   | 0.5<br>(0.2 to 0.8)                  | 13.5<br>(7.5 to 20.5)                             | 0.2<br>(-5.1 to 6.0)                                |
| Urticaria                                     | 31.2<br>(27.6 to 35.2)                        | 55.3<br>(49.0 to 62.7)                   | 1.9<br>(1.2 to 2.6)                  | 6.4<br>(0.2 to 12.9)                              | -0.2<br>(-5.9 to 5.9)                               |
| Decubitus ulcer                               | 1.7<br>(1.5 to 1.9)                           | 6.2<br>(5.5 to 7.0)                      | 0.3<br>(0.2 to 0.4)                  | 26.3<br>(9.6 to 45.5)                             | 0.5<br>(-12.2 to 14.9)                              |
| Other skin and subcutaneous diseases          | 519.4<br>(505.0 to 534.3)                     | 660.7<br>(637.5 to 684.8)                | 2.8<br>(1.4 to 5.2)                  | 20.5<br>(18.0 to 22.9)                            | 2.8<br>(0.7 to 4.9)                                 |
| Sense organ diseases                          | 1,084.6<br>(1,060.1 to 1,109.9)               | 478.5†<br>(450.9 to 508.2)               | 35.1<br>(24.1 to 49.1)               | 21.7<br>(18.8 to 24.6)                            | -0.9<br>(-3.3 to 1.4)                               |
| Glaucoma                                      | 3.5<br>(3.0 to 4.1)                           | --                                       | 0.3<br>(0.2 to 0.5)                  | 30.6<br>(13.4 to 48.6)                            | -0.4<br>(-14.0 to 13.4)                             |
| Cataract                                      | 18.1<br>(15.4 to 21.2)                        | --                                       | 1.1<br>(0.8 to 1.5)                  | 23.1<br>(15.0 to 32.4)                            | -3.5<br>(-9.8 to 3.9)                               |
| Macular degeneration                          | 3.4<br>(2.9 to 4.0)                           | --                                       | 0.3<br>(0.2 to 0.4)                  | 29.2<br>(14.7 to 45.2)                            | -1.6<br>(-12.5 to 10.7)                             |
| Refraction and accommodation disorders        | 399.2<br>(377.4 to 420.7)                     | --                                       | 6.3<br>(3.7 to 10.1)                 | 14.1<br>(10.2 to 18.6)                            | -1.6<br>(-5.1 to 2.1)                               |
| Age-related and other hearing loss            | 786.9<br>(748.3 to 827.9)                     | --                                       | 20.6<br>(14.1 to 29.3)               | 24.1<br>(19.5 to 28.9)                            | -1.0<br>(-4.7 to 2.6)                               |
| Other vision loss                             | 15.9<br>(14.0 to 17.9)                        | --                                       | 1.2<br>(0.8 to 1.6)                  | 19.4<br>(10.5 to 29.4)                            | -0.7<br>(-8.6 to 7.7)                               |
| Other sense organ diseases                    | 170.5<br>(156.9 to 184.2)                     | 478.5<br>(450.9 to 508.2)                | 5.3<br>(3.3 to 8.1)                  | 21.5<br>(17.0 to 26.1)                            | 0.9<br>(-2.9 to 4.8)                                |
| Oral disorders                                | 1,448.3<br>(1,381.4 to 1,511.6)               | 2,194.7†<br>(1,898.7 to 2,512.4)         | 18.2<br>(11.8 to 26.4)               | 22.2<br>(19.5 to 25.4)                            | 0.8<br>(-1.1 to 3.0)                                |
| Caries of deciduous teeth                     | 128.7<br>(79.2 to 172.3)                      | 473.1<br>(230.1 to 741.8)                | $< 0.05$<br>( $< 0.05$ to 0.1)       | 36.0<br>(-4.2 to 78.5)                            | 30.6<br>(-7.4 to 70.7)                              |
| Caries of permanent teeth                     | 742.1<br>(690.1 to 794.1)                     | 1,661.8<br>(1,540.5 to 1,795.6)          | 0.7<br>(0.3 to 1.4)                  | 7.6<br>(3.4 to 12.2)                              | -0.3<br>(-4.4 to 4.0)                               |
| Periodontal disease                           | 210.2<br>(172.5 to 252.0)                     | 22.2<br>(17.7 to 26.9)                   | 1.4<br>(0.5 to 2.9)                  | 12.8<br>(4.2 to 19.2)                             | -2.6<br>(-10.1 to 3.6)                              |
| Edentulism and severe tooth loss              | 483.4<br>(425.8 to 540.3)                     | 37.6<br>(31.6 to 44.5)                   | 13.5<br>(8.8 to 19.2)                | 26.8<br>(23.6 to 30.8)                            | 1.3<br>(-1.2 to 4.3)                                |
| Other oral disorders                          | 88.0<br>(84.1 to 92.0)                        | --                                       | 2.6<br>(1.6 to 3.9)                  | 10.3<br>(6.9 to 13.6)                             | -0.0<br>(-3.2 to 3.1)                               |
| <b>Injuries</b>                               | <b>1,262.9</b><br><b>(1,184.8 to 1,353.5)</b> | <b>428.9†</b><br><b>(404.3 to 455.1)</b> | <b>39.2</b><br><b>(25.9 to 56.2)</b> | <b>16.5</b><br><b>(15.0 to 18.1)</b>              | <b>0.6</b><br><b>(-0.7 to 1.9)</b>                  |
| <b>Transport injuries</b>                     | <b>209.7</b><br><b>(193.0 to 227.2)</b>       | <b>50.7</b><br><b>(45.9 to 56.2)</b>     | <b>9.2</b><br><b>(6.0 to 13.3)</b>   | <b>4.7</b><br><b>(2.7 to 6.7)</b>                 | <b>-9.2</b><br><b>(-11.2 to -7.4)</b>               |
| Road injuries                                 | 170.2<br>(156.3 to 185.4)                     | 44.6<br>(40.0 to 50.0)                   | 7.8<br>(5.2 to 11.2)                 | 4.0<br>(1.9 to 6.1)                               | -9.7<br>(-11.8 to -7.8)                             |
| Pedestrian road injuries                      | 24.0<br>(20.7 to 27.9)                        | 3.8<br>(3.1 to 4.7)                      | 1.2<br>(0.8 to 1.7)                  | 14.8<br>(12.6 to 17.0)                            | -0.8<br>(-2.8 to 1.2)                               |
| Cyclist road injuries                         | 35.6<br>(29.1 to 42.7)                        | 11.1<br>(8.9 to 13.5)                    | 1.4<br>(0.9 to 2.1)                  | 11.8<br>(9.8 to 14.1)                             | -2.6<br>(-4.5 to -0.7)                              |
| Motorcyclist road injuries                    | 30.1<br>(25.3 to 35.9)                        | 4.8<br>(3.9 to 5.9)                      | 1.4<br>(0.9 to 2.0)                  | 6.4<br>(4.1 to 8.7)                               | -7.5<br>(-9.6 to -5.4)                              |
| Motor vehicle road injuries                   | 74.0<br>(62.1 to 85.8)                        | 23.2<br>(20.4 to 26.6)                   | 3.5<br>(2.4 to 5.0)                  | -3.2<br>(-5.3 to -1.2)                            | -16.2<br>(-18.2 to -14.4)                           |
| Other road injuries                           | 6.5<br>(5.5 to 7.6)                           | 1.7<br>(1.3 to 2.2)                      | 0.2<br>(0.1 to 0.3)                  | 14.8<br>(12.4 to 17.5)                            | -0.8<br>(-2.8 to 1.5)                               |
| Other transport injuries                      | 39.5<br>(32.7 to 46.2)                        | 6.1<br>(5.3 to 6.9)                      | 1.4<br>(0.9 to 2.1)                  | 8.4<br>(6.7 to 10.0)                              | -6.3<br>(-7.8 to -4.8)                              |
| <b>Unintentional injuries</b>                 | <b>994.8</b><br><b>(919.3 to 1,083.2)</b>     | <b>356.3</b><br><b>(332.6 to 382.9)</b>  | <b>27.6</b><br><b>(18.4 to 39.7)</b> | <b>21.2</b><br><b>(19.6 to 23.1)</b>              | <b>4.2</b><br><b>(2.9 to 5.5)</b>                   |
| Falls                                         | 445.5<br>(389.3 to 502.0)                     | 166.3<br>(147.0 to 186.9)                | 15.8<br>(10.8 to 22.1)               | 22.8<br>(20.8 to 24.9)                            | 4.3<br>(2.8 to 5.9)                                 |
| Drowning                                      | 2.1<br>(1.9 to 2.4)                           | 0.2<br>(0.2 to 0.3)                      | 0.1<br>(0.1 to 0.1)                  | 16.5<br>(10.3 to 23.3)                            | 2.2<br>(-3.3 to 8.3)                                |
| Fire, heat, and hot substances                | 95.8<br>(81.6 to 114.2)                       | 5.6<br>(4.5 to 6.7)                      | 1.7<br>(0.9 to 2.8)                  | 20.6<br>(17.8 to 23.8)                            | 6.2<br>(3.6 to 9.0)                                 |
| Poisonings                                    | 4.8<br>(4.0 to 5.9)                           | 4.9<br>(4.0 to 6.0)                      | 0.4<br>(0.3 to 0.6)                  | 20.7<br>(11.0 to 31.4)                            | 10.1<br>(0.9 to 20.0)                               |
| Exposure to mechanical forces                 | 238.2<br>(200.0 to 299.9)                     | 60.6<br>(51.7 to 69.7)                   | 4.3<br>(2.7 to 6.6)                  | 20.3<br>(18.4 to 22.2)                            | 5.0<br>(3.5 to 6.5)                                 |
| Unintentional firearm injuries                | 9.0<br>(7.2 to 11.4)                          | 0.9<br>(0.6 to 1.2)                      | 0.1<br>(0.1 to 0.2)                  | 21.2<br>(19.1 to 23.4)                            | 5.9<br>(4.0 to 7.8)                                 |
| Unintentional suffocation                     | 5.8<br>(4.2 to 7.8)                           | 0.7<br>(0.5 to 1.0)                      | 0.1<br>(0.1 to 0.2)                  | 12.8<br>(10.6 to 15.3)                            | 1.2<br>(-1.1 to 3.8)                                |
| Other exposure to mechanical forces           | 223.4<br>(185.9 to 284.8)                     | 59.0<br>(50.4 to 67.9)                   | 4.0<br>(2.5 to 6.1)                  | 20.5<br>(18.6 to 22.4)                            | 5.1<br>(3.6 to 6.7)                                 |

| Cause                                                                               | Prevalence in thousands (95% UI)        | Incidence in thousands (95% UI)       | YLDs in thousands (95% UI)              |                                                   |                                                     |
|-------------------------------------------------------------------------------------|-----------------------------------------|---------------------------------------|-----------------------------------------|---------------------------------------------------|-----------------------------------------------------|
|                                                                                     | 2016 counts                             | 2016 counts                           | 2016 counts                             | Percentage change in counts between 2006 and 2016 | Percentage change in age-standardised rates between |
| Adverse effects of medical treatment                                                | 2.1<br>(1.7 to 2.6)                     | 27.5<br>(24.0 to 31.4)                | 0.3<br>(0.2 to 0.4)                     | 19.8<br>(15.8 to 24.4)                            | 4.5<br>(1.5 to 7.9)                                 |
| Animal contact                                                                      | 30.2<br>(26.3 to 35.5)                  | 17.2<br>(14.1 to 20.9)                | 0.6<br>(0.4 to 0.9)                     | 12.1<br>(7.7 to 16.1)                             | -1.2<br>(-5.1 to 2.4)                               |
| Venomous animal contact                                                             | 4.2<br>(3.5 to 4.8)                     | 5.0<br>(3.6 to 6.5)                   | 0.2<br>(0.1 to 0.4)                     | 9.7<br>(1.2 to 18.4)                              | -0.7<br>(-9.0 to 7.6)                               |
| Non-venomous animal contact                                                         | 26.0<br>(22.2 to 31.2)                  | 12.2<br>(9.8 to 15.0)                 | 0.3<br>(0.2 to 0.6)                     | 13.9<br>(11.9 to 15.8)                            | -1.7<br>(-3.4 to -0.0)                              |
| Foreign body                                                                        | 29.9<br>(25.5 to 36.0)                  | 20.0<br>(17.4 to 23.6)                | 0.9<br>(0.5 to 1.3)                     | 16.9<br>(15.1 to 18.9)                            | 2.0<br>(0.4 to 3.6)                                 |
| Pulmonary aspiration and foreign body in airway                                     | 4.0<br>(3.1 to 4.9)                     | 3.6<br>(3.1 to 4.3)                   | 0.1<br>(0.1 to 0.1)                     | 17.6<br>(15.5 to 19.9)                            | 2.7<br>(0.7 to 4.7)                                 |
| Foreign body in eyes                                                                | 2.7<br>(1.8 to 3.7)                     | 11.0<br>(8.6 to 14.4)                 | 0.2<br>(0.1 to 0.3)                     | 14.5<br>(11.0 to 19.3)                            | 1.9<br>(-1.0 to 5.2)                                |
| Foreign body in other body part                                                     | 23.2<br>(19.2 to 29.4)                  | 5.3<br>(4.4 to 6.3)                   | 0.6<br>(0.4 to 0.9)                     | 17.5<br>(15.6 to 19.6)                            | 1.9<br>(0.2 to 3.6)                                 |
| Environmental heat and cold exposure                                                | 17.2<br>(14.9 to 20.1)                  | 3.4<br>(2.8 to 4.0)                   | 0.6<br>(0.4 to 0.9)                     | 20.5<br>(16.2 to 25.0)                            | 3.5<br>(-0.1 to 7.4)                                |
| Other unintentional injuries                                                        | 129.1<br>(106.0 to 155.6)               | 50.6<br>(42.5 to 59.2)                | 3.1<br>(2.0 to 4.7)                     | 18.8<br>(17.2 to 20.6)                            | 2.5<br>(1.2 to 3.9)                                 |
| <b>Self-harm and interpersonal violence</b>                                         | <b>115.2</b><br><b>(104.9 to 125.5)</b> | <b>21.8†</b><br><b>(19.6 to 24.1)</b> | <b>2.2</b><br><b>(1.4 to 3.1)</b>       | <b>9.6</b><br><b>(7.2 to 12.0)</b>                | <b>-1.7</b><br><b>(-4.0 to 0.5)</b>                 |
| Self-harm                                                                           | 14.9<br>(12.2 to 17.6)                  | 10.6<br>(9.2 to 12.0)                 | 0.7<br>(0.4 to 1.0)                     | 8.6<br>(2.6 to 14.7)                              | -3.7<br>(-9.1 to 1.8)                               |
| Self-harm by firearm                                                                | 0.2<br>(0.2 to 0.3)                     | < 0.05<br>(< 0.05 to < 0.05)          | < 0.05<br>(< 0.05 to < 0.05)            | 7.0<br>(4.6 to 9.4)                               | -3.6<br>(-6.0 to -1.2)                              |
| Self-harm by other specified means                                                  | 14.7<br>(12.0 to 17.4)                  | 10.6<br>(9.2 to 12.0)                 | 0.7<br>(0.4 to 1.0)                     | 8.6<br>(2.5 to 14.8)                              | -3.7<br>(-9.1 to 1.9)                               |
| Interpersonal violence                                                              | 100.4<br>(90.6 to 110.8)                | 11.2†<br>(9.4 to 13.0)                | 1.5<br>(1.0 to 2.1)                     | 10.2<br>(8.0 to 12.3)                             | -0.8<br>(-2.8 to 1.2)                               |
| Assault by firearm                                                                  | 1.9<br>(1.6 to 2.2)                     | 0.3<br>(0.2 to 0.4)                   | < 0.05<br>(< 0.05 to 0.1)               | 27.5<br>(25.2 to 29.8)                            | 11.5<br>(9.3 to 13.6)                               |
| Assault by sharp object                                                             | 8.6<br>(7.0 to 10.4)                    | 2.3<br>(1.7 to 2.9)                   | 0.2<br>(0.1 to 0.2)                     | 15.0<br>(13.0 to 16.9)                            | 1.1<br>(-0.5 to 2.8)                                |
| Sexual violence                                                                     | 63.3<br>(55.0 to 72.8)                  | --                                    | 0.5<br>(0.4 to 0.8)                     | 2.8<br>(-1.9 to 7.3)                              | -2.9<br>(-7.2 to 1.3)                               |
| Assault by other means                                                              | 26.6<br>(21.9 to 32.3)                  | 8.7<br>(7.2 to 10.2)                  | 0.8<br>(0.5 to 1.1)                     | 14.0<br>(12.2 to 16.0)                            | -0.1<br>(-1.7 to 1.5)                               |
| <b>Forces of nature, conflict and terrorism, and executions and police conflict</b> | <b>6.4</b><br><b>(2.9 to 10.4)</b>      | <b>0.2†</b><br><b>(0.1 to 0.2)</b>    | <b>0.1</b><br><b>(&lt; 0.05 to 0.4)</b> | <b>276.6</b><br><b>(224.4 to 290.9)</b>           | <b>241.9</b><br><b>(193.6 to 255.5)</b>             |
| Exposure to forces of nature                                                        | 5.7<br>(2.3 to 9.6)                     | --                                    | 0.1<br>(< 0.05 to 0.4)                  | 340.0<br>(310.3 to 352.7)                         | 301.9<br>(276.4 to 313.1)                           |
| Conflict and terrorism                                                              | 0.2<br>(0.1 to 0.4)                     | --                                    | < 0.05<br>(< 0.05 to < 0.05)            | --                                                | --                                                  |
| Executions and police conflict                                                      | 0.5<br>(0.3 to 0.9)                     | 0.2<br>(0.1 to 0.2)                   | < 0.05<br>(< 0.05 to < 0.05)            | 37.5<br>(24.0 to 42.8)                            | 24.4<br>(13.3 to 28.9)                              |
| <b>Impairments</b>                                                                  | --                                      | --                                    | --                                      | --                                                | --                                                  |
| Anaemia                                                                             | 300.8<br>(275.7 to 329.7)               | --                                    | 6.3<br>(4.4 to 8.9)                     | 12.0<br>(2.9 to 22.4)                             | 0.7<br>(-7.9 to 10.4)                               |
| Developmental intellectual disability                                               | 66.3<br>(53.1 to 79.6)                  | --                                    | 9.2<br>(6.8 to 12.2)                    | 6.5<br>(2.4 to 11.4)                              | -0.7<br>(-4.8 to 3.8)                               |
| Epilepsy                                                                            | 17.1<br>(8.9 to 25.2)                   | --                                    | 5.1<br>(2.6 to 8.9)                     | 2.4<br>(-49.4 to 106.6)                           | -5.5<br>(-52.7 to 88.9)                             |
| Guillain-Barre syndrome                                                             | < 0.05<br>(< 0.05 to 0.1)               | --                                    | < 0.05<br>(< 0.05 to < 0.05)            | 9.8<br>(1.9 to 17.8)                              | -3.7<br>(-10.2 to 2.8)                              |
| Hearing loss                                                                        | 814.8<br>(776.1 to 855.2)               | --                                    | 21.9<br>(15.0 to 31.1)                  | 22.5<br>(18.2 to 26.9)                            | -1.3<br>(-4.8 to 1.9)                               |
| Heart failure                                                                       | 51.2<br>(44.3 to 58.9)                  | --                                    | 6.0<br>(4.7 to 7.4)                     | 21.2<br>(13.7 to 29.6)                            | -6.5<br>(-12.3 to 0.2)                              |
| Infertility                                                                         | 19.9<br>(15.8 to 25.5)                  | --                                    | 0.2<br>(0.1 to 0.3)                     | -0.1<br>(-9.5 to 10.8)                            | -0.0<br>(-9.9 to 10.9)                              |
| Pelvic inflammatory disease                                                         | 0.7<br>(0.7 to 0.8)                     | --                                    | 0.1<br>(0.1 to 0.1)                     | -8.8<br>(-26.6 to 12.6)                           | -11.5<br>(-28.8 to 10.3)                            |
| Vision loss                                                                         | 449.7<br>(426.5 to 472.5)               | --                                    | 10.9<br>(7.6 to 15.8)                   | 13.5<br>(9.4 to 17.4)                             | -3.0<br>(-6.4 to 0.1)                               |

We did not calculate incidence for the nine impairments, certain NTDs, and causes with only birth prevalence. Blank cells mean that no estimate is available.

† Incidence for aggregate causes represents the sum of the incidence of the causes below the aggregate.

‡ Incidence estimates for stroke represent first-ever stroke only.

^ Incidence of HIV/AIDS represents new infections of HIV only and does not include new infections of Tuberculosis in HIV positive cases.

SR Table 14: Prevalence, incidence, and YLDs for 2016, percentage change of YLD counts and percentage change of age-standardised YLD rates between 2006 and 2016 by cause and impairments, for all ages, Nicaragua.

| Cause                                                                                | Prevalence in thousands (95% UI)       | Incidence in thousands (95% UI)            | YLDs in thousands (95% UI)       |                                                   |                                                     |
|--------------------------------------------------------------------------------------|----------------------------------------|--------------------------------------------|----------------------------------|---------------------------------------------------|-----------------------------------------------------|
|                                                                                      | 2016 counts                            | 2016 counts                                | 2016 counts                      | Percentage change in counts between 2006 and 2016 | Percentage change in age-standardised rates between |
| <b>All causes</b>                                                                    | <b>5,800.5</b><br>(5,766.1 to 5,834.8) | <b>33,358.2†</b><br>(31,445.3 to 35,516.7) | <b>525.3</b><br>(387.7 to 687.5) | <b>21.6</b><br>(18.3 to 25.2)                     | <b>-0.1</b><br>(-2.2 to 2.4)                        |
| <b>Communicable, maternal, neonatal, and nutritional disorders</b>                   | <b>3,447.6</b><br>(3,312.7 to 3,592.5) | <b>19,142.2†</b><br>(17,461.2 to 20,946.2) | <b>39.6</b><br>(28.1 to 53.9)    | <b>4.4</b><br>(-1.5 to 11.0)                      | <b>-3.5</b><br>(-8.8 to 2.5)                        |
| <b>HIV/AIDS and tuberculosis</b>                                                     | <b>1,415.9</b><br>(1,255.2 to 1,540.5) | <b>2.8†</b><br>(2.4 to 3.4)                | <b>0.8</b><br>(0.5 to 1.4)       | <b>62.2</b><br>(27.6 to 108.7)                    | <b>25.7</b><br>(0.3 to 62.1)                        |
| Tuberculosis                                                                         | 1,302.5<br>(1,168.3 to 1,453.5)        | 2.1†<br>(1.8 to 2.4)                       | 0.2<br>(0.2 to 0.4)              | -2.7<br>(-25.7 to 27.6)                           | -21.9<br>(-37.8 to -1.1)                            |
| Drug-susceptible tuberculosis                                                        | 0.8<br>(0.7 to 0.9)                    | 2.1<br>(1.8 to 2.4)                        | 0.2<br>(0.2 to 0.4)              | -2.8<br>(-25.9 to 28.1)                           | -21.9<br>(-38.4 to -0.9)                            |
| Multidrug-resistant tuberculosis without extensive drug resistance                   | < 0.05<br>(< 0.05 to < 0.05)           | < 0.05<br>(< 0.05 to < 0.05)               | < 0.05<br>(< 0.05 to < 0.05)     | -5.5<br>(-50.2 to 84.4)                           | -24.4<br>(-60.6 to 47.5)                            |
| Extensively drug-resistant tuberculosis                                              | < 0.05<br>(< 0.05 to < 0.05)           | < 0.05<br>(< 0.05 to < 0.05)               | < 0.05<br>(< 0.05 to < 0.05)     | 151.5<br>(32.5 to 391.2)                          | 101.2<br>(4.9 to 292.8)                             |
| Latent tuberculosis infection                                                        | 1,301.7<br>(1,167.4 to 1,452.7)        | --                                         | --                               | --                                                | --                                                  |
| HIV/AIDS                                                                             | 6.4<br>(4.1 to 9.9)                    | 0.7^<br>(0.4 to 1.2)                       | 0.6<br>(0.3 to 1.1)              | 131.0<br>(60.0 to 249.2)                          | 87.3<br>(26.6 to 192.2)                             |
| Drug-susceptible HIV/AIDS - Tuberculosis                                             | < 0.05<br>(< 0.05 to < 0.05)           | 0.1<br>(< 0.05 to 0.1)                     | < 0.05<br>(< 0.05 to < 0.05)     | -12.2<br>(-17.9 to -5.8)                          | -25.9<br>(-30.7 to -20.5)                           |
| Multidrug-resistant HIV/AIDS - Tuberculosis without extensive drug resistance        | < 0.05<br>(< 0.05 to < 0.05)           | < 0.05<br>(< 0.05 to < 0.05)               | < 0.05<br>(< 0.05 to < 0.05)     | -14.7<br>(-55.0 to 66.8)                          | -28.0<br>(-62.0 to 40.9)                            |
| Extensively drug-resistant HIV/AIDS - Tuberculosis                                   | < 0.05<br>(< 0.05 to < 0.05)           | < 0.05<br>(< 0.05 to < 0.05)               | < 0.05<br>(< 0.05 to < 0.05)     | 127.1<br>(20.0 to 344.4)                          | 91.7<br>(1.3 to 275.2)                              |
| HIV/AIDS resulting in other diseases                                                 | 6.4<br>(4.0 to 9.9)                    | 0.7<br>(0.4 to 1.2)                        | 0.6<br>(0.3 to 1.1)              | 138.2<br>(61.6 to 270.7)                          | 92.7<br>(27.4 to 209.5)                             |
| <b>Diarrhoea, lower respiratory infections, and other common infectious diseases</b> | <b>338.3</b><br>(319.8 to 359.1)       | <b>18,037.5†</b><br>(16,318.4 to 19,870.3) | <b>16.0</b><br>(10.9 to 22.3)    | <b>4.4</b><br>(0.6 to 8.1)                        | <b>-0.2</b><br>(-3.5 to 3.0)                        |
| Diarrhoeal diseases                                                                  | 63.5<br>(59.3 to 68.4)                 | 4,240.8<br>(3,963.4 to 4,543.6)            | 7.2<br>(5.0 to 10.0)             | 4.6<br>(-1.6 to 11.5)                             | 2.5<br>(-3.2 to 8.5)                                |
| Intestinal infectious diseases                                                       | < 0.05<br>(< 0.05 to < 0.05)           | 0.2†<br>(0.1 to 0.4)                       | < 0.05<br>(< 0.05 to < 0.05)     | 0.9<br>(-18.4 to 24.5)                            | -16.7<br>(-30.1 to -2.0)                            |
| Typhoid fever                                                                        | < 0.05<br>(< 0.05 to < 0.05)           | 0.2<br>(0.1 to 0.3)                        | < 0.05<br>(< 0.05 to < 0.05)     | 1.7<br>(-17.5 to 25.6)                            | -16.2<br>(-29.9 to -1.2)                            |
| Paratyphoid fever                                                                    | < 0.05<br>(< 0.05 to < 0.05)           | < 0.05<br>(< 0.05 to < 0.05)               | < 0.05<br>(< 0.05 to < 0.05)     | 8.9<br>(-32.8 to 64.7)                            | -8.4<br>(-42.4 to 36.0)                             |
| Other intestinal infectious diseases                                                 | --                                     | --                                         | < 0.05<br>(< 0.05 to < 0.05)     | -29.0<br>(-50.9 to -1.1)                          | -35.0<br>(-48.9 to -19.9)                           |
| Lower respiratory infections                                                         | 2.5<br>(2.2 to 2.8)                    | 115.5<br>(103.7 to 129.9)                  | 0.2<br>(0.1 to 0.2)              | -4.4<br>(-20.3 to 15.2)                           | -3.9<br>(-17.0 to 13.3)                             |
| Upper respiratory infections                                                         | 175.3<br>(153.3 to 198.7)              | 13,145.3<br>(11,437.5 to 14,985.4)         | 4.4<br>(2.6 to 6.9)              | 8.9<br>(2.9 to 15.7)                              | 0.8<br>(-4.4 to 6.8)                                |
| Otitis media                                                                         | 99.6<br>(88.6 to 110.1)                | 400.7<br>(321.2 to 500.1)                  | 3.0<br>(1.9 to 4.5)              | -2.4<br>(-9.7 to 4.6)                             | -4.7<br>(-11.0 to 1.8)                              |
| Meningitis                                                                           | 4.2<br>(3.6 to 4.8)                    | 0.8<br>(0.7 to 0.9)                        | 0.5<br>(0.4 to 0.7)              | 5.2<br>(1.6 to 8.8)                               | -8.9<br>(-12.1 to -5.9)                             |
| Pneumococcal meningitis                                                              | 1.7<br>(1.5 to 2.0)                    | 0.1<br>(0.1 to 0.1)                        | 0.2<br>(0.2 to 0.3)              | -1.0<br>(-7.3 to 5.2)                             | -15.2<br>(-20.7 to -9.8)                            |
| H influenzae type B meningitis                                                       | 0.4<br>(0.4 to 0.5)                    | 0.1<br>(< 0.05 to 0.1)                     | 0.1<br>(< 0.05 to 0.1)           | 6.6<br>(0.8 to 12.0)                              | -5.5<br>(-10.3 to -1.1)                             |
| Meningococcal infection                                                              | 0.3<br>(0.2 to 0.4)                    | 0.1<br>(0.1 to 0.1)                        | < 0.05<br>(< 0.05 to < 0.05)     | 8.8<br>(2.7 to 14.4)                              | -6.5<br>(-11.3 to -2.1)                             |
| Other meningitis                                                                     | 1.8<br>(1.4 to 2.2)                    | 0.5<br>(0.4 to 0.6)                        | 0.2<br>(0.1 to 0.2)              | 13.9<br>(8.4 to 19.7)                             | -0.7<br>(-5.2 to 4.1)                               |
| Encephalitis                                                                         | 3.6<br>(2.5 to 5.2)                    | 1.4<br>(1.2 to 1.6)                        | 0.4<br>(0.3 to 0.6)              | 13.0<br>(5.0 to 20.9)                             | -3.9<br>(-9.5 to 1.5)                               |
| Diphtheria                                                                           | < 0.05<br>(< 0.05 to < 0.05)           | < 0.05<br>(< 0.05 to < 0.05)               | < 0.05<br>(< 0.05 to < 0.05)     | -42.0<br>(-67.8 to 12.2)                          | -42.0<br>(-66.3 to 6.2)                             |
| Whooping cough                                                                       | 0.2<br>(0.2 to 0.3)                    | 1.5<br>(1.1 to 2.1)                        | < 0.05<br>(< 0.05 to < 0.05)     | -76.9<br>(-84.8 to -67.0)                         | -73.5<br>(-82.5 to -62.3)                           |
| Tetanus                                                                              | < 0.05<br>(< 0.05 to < 0.05)           | < 0.05<br>(< 0.05 to < 0.05)               | < 0.05<br>(< 0.05 to < 0.05)     | -12.2<br>(-24.8 to 2.8)                           | -30.1<br>(-43.3 to -12.0)                           |
| Measles                                                                              | < 0.05<br>(0.0 to < 0.05)              | < 0.05<br>(0.0 to < 0.05)                  | < 0.05<br>(0.0 to < 0.05)        | --                                                | --                                                  |
| Varicella and herpes zoster                                                          | 5.5<br>(5.1 to 6.0)                    | 131.2<br>(127.8 to 135.3)                  | 0.2<br>(0.1 to 0.3)              | 22.3<br>(6.7 to 40.5)                             | 0.1<br>(-11.0 to 12.5)                              |
| <b>Neglected tropical diseases and malaria</b>                                       | <b>854.1</b><br>(689.6 to 1,104.1)     | <b>305.9†</b><br>(210.4 to 437.6)          | <b>4.0</b><br>(2.4 to 6.1)       | <b>43.1</b><br>(3.1 to 93.4)                      | <b>21.7</b><br>(-11.6 to 63.2)                      |
| Malaria                                                                              | 0.1<br>(0.1 to 0.2)                    | 2.3<br>(2.3 to 2.3)                        | < 0.05<br>(< 0.05 to < 0.05)     | -59.8<br>(-70.1 to -38.5)                         | -64.1<br>(-73.1 to -45.7)                           |
| Chagas disease                                                                       | 26.0<br>(20.6 to 33.1)                 | 0.9<br>(0.7 to 1.1)                        | 0.2<br>(0.1 to 0.3)              | 33.7<br>(13.4 to 56.5)                            | -0.7<br>(-14.5 to 14.5)                             |
| Leishmaniasis                                                                        | 4.4<br>(2.7 to 6.7)                    | 7.3<br>(3.3 to 13.1)                       | 0.2<br>(0.1 to 0.5)              | -31.3<br>(-70.0 to 37.4)                          | -39.7<br>(-73.9 to 21.0)                            |
| Visceral leishmaniasis                                                               | < 0.05<br>(< 0.05 to < 0.05)           | < 0.05<br>(< 0.05 to < 0.05)               | < 0.05<br>(< 0.05 to < 0.05)     | -82.1<br>(-100.0 to 105.4)                        | -86.3<br>(-100.0 to 41.9)                           |
| Cutaneous and mucocutaneous leishmaniasis                                            | 3.7<br>(1.7 to 6.5)                    | 7.3<br>(3.3 to 13.1)                       | 0.2<br>(0.1 to 0.5)              | -31.3<br>(-70.0 to 37.5)                          | -39.7<br>(-73.9 to 21.1)                            |
| African trypanosomiasis                                                              | --                                     | --                                         | --                               | --                                                | --                                                  |
| Schistosomiasis                                                                      | --                                     | --                                         | --                               | --                                                | --                                                  |
| Cysticercosis                                                                        | 3.2<br>(1.1 to 6.0)                    | --                                         | 0.4<br>(0.1 to 1.0)              | 1.3<br>(-60.5 to 66.5)                            | -23.1<br>(-68.6 to 25.8)                            |
| Cystic echinococcosis                                                                | --                                     | --                                         | --                               | --                                                | --                                                  |
| Lymphatic filariasis                                                                 | --                                     | --                                         | --                               | --                                                | --                                                  |
| Onchocerciasis                                                                       | --                                     | --                                         | --                               | --                                                | --                                                  |
| Trachoma                                                                             | --                                     | --                                         | --                               | --                                                | --                                                  |
| Dengue                                                                               | 13.2<br>(7.8 to 21.2)                  | 220.6<br>(147.8 to 310.6)                  | 2.2<br>(1.0 to 3.9)              | 453.2<br>(317.4 to 1,311.4)                       | 400.6<br>(283.5 to 1,158.5)                         |
| Yellow fever                                                                         | --                                     | --                                         | --                               | --                                                | --                                                  |
| Rabies                                                                               | < 0.05<br>(< 0.05 to < 0.05)           | < 0.05<br>(< 0.05 to < 0.05)               | < 0.05<br>(< 0.05 to < 0.05)     | -16.2<br>(-46.7 to 29.6)                          | -25.0<br>(-51.2 to 10.2)                            |
| Intestinal nematode infections                                                       | 798.4<br>(632.1 to 1,052.1)            | --                                         | 0.4<br>(0.2 to 0.8)              | -59.6<br>(-73.6 to -39.4)                         | -64.1<br>(-77.1 to -44.5)                           |
| Ascariasis                                                                           | 357.9<br>(249.7 to 497.4)              | --                                         | 0.1<br>(0.1 to 0.3)              | -61.4<br>(-81.5 to -25.0)                         | -65.1<br>(-83.7 to -30.2)                           |



| Cause                                                                   | Prevalence in thousands (95% UI)              | Incidence in thousands (95% UI)                   | YLDs in thousands (95% UI)              |                                                   |                                                     |
|-------------------------------------------------------------------------|-----------------------------------------------|---------------------------------------------------|-----------------------------------------|---------------------------------------------------|-----------------------------------------------------|
|                                                                         | 2016 counts                                   | 2016 counts                                       | 2016 counts                             | Percentage change in counts between 2006 and 2016 | Percentage change in age-standardised rates between |
| Trichuriasis                                                            | 442.4<br>(314.9 to 615.8)                     | --                                                | 0.2<br>(0.1 to 0.4)                     | -59.8<br>(-79.2 to -26.6)                         | -64.3<br>(-82.1 to -33.5)                           |
| Hookworm disease                                                        | 19.9<br>(14.2 to 27.5)                        | --                                                | < 0.05<br>(< 0.05 to 0.1)               | -52.2<br>(-68.1 to -27.6)                         | -59.0<br>(-72.2 to -38.0)                           |
| Food-borne trematodiasis                                                | --                                            | --                                                | --                                      | --                                                | --                                                  |
| Leprosy                                                                 | < 0.05<br>(< 0.05 to < 0.05)                  | < 0.05<br>(< 0.05 to < 0.05)                      | < 0.05<br>(< 0.05 to < 0.05)            | 35.9<br>(-9.2 to 155.6)                           | -1.7<br>(-33.7 to 88.1)                             |
| Ebola virus disease                                                     | --                                            | --                                                | --                                      | --                                                | --                                                  |
| Zika virus disease                                                      | 1.2<br>(0.5 to 2.8)                           | 74.9<br>(31.8 to 169.0)                           | < 0.05<br>(< 0.05 to 0.1)               | --                                                | --                                                  |
| Guinea worm disease                                                     | --                                            | --                                                | --                                      | --                                                | --                                                  |
| Other neglected tropical diseases                                       | 21.5<br>(18.0 to 25.9)                        | --                                                | 0.5<br>(0.3 to 0.8)                     | 9.6<br>(-16.3 to 43.8)                            | 16.6<br>(-10.5 to 52.8)                             |
| <b>Maternal disorders</b>                                               | <b>8.4</b><br><b>(6.5 to 9.9)</b>             | <b>105.3†</b><br><b>(91.3 to 121.5)</b>           | <b>0.5</b><br><b>(0.3 to 0.7)</b>       | <b>-6.8</b><br><b>(-30.5 to 26.8)</b>             | <b>-17.3</b><br><b>(-38.3 to 12.7)</b>              |
| Maternal haemorrhage                                                    | 1.6<br>(1.2 to 2.2)                           | 6.9<br>(5.1 to 9.3)                               | < 0.05<br>(< 0.05 to 0.1)               | -10.1<br>(-38.6 to 32.2)                          | -19.8<br>(-45.1 to 17.9)                            |
| Maternal sepsis and other pregnancy related infections                  | 2.2<br>(1.6 to 3.0)                           | 15.3<br>(11.2 to 20.9)                            | 0.1<br>(< 0.05 to 0.1)                  | -14.7<br>(-59.6 to 83.2)                          | -22.7<br>(-62.6 to 64.8)                            |
| Maternal hypertensive disorders                                         | 4.5<br>(2.9 to 6.6)                           | 24.1<br>(19.4 to 28.8)                            | 0.2<br>(0.1 to 0.4)                     | 29.4<br>(-18.7 to 110.0)                          | 14.0<br>(-28.0 to 83.2)                             |
| Maternal obstructed labour and uterine rupture                          | 0.1<br>(< 0.05 to 0.1)                        | 4.7<br>(3.2 to 6.3)                               | < 0.05<br>(< 0.05 to < 0.05)            | -16.7<br>(-55.7 to 51.1)                          | -25.5<br>(-59.9 to 35.3)                            |
| Maternal abortion, miscarriage, and ectopic pregnancy                   | 0.5<br>(0.3 to 0.7)                           | 54.3<br>(42.5 to 69.2)                            | < 0.05<br>(< 0.05 to 0.1)               | -53.5<br>(-76.3 to -15.9)                         | -59.2<br>(-78.9 to -27.1)                           |
| Other maternal disorders                                                | --                                            | --                                                | 0.1<br>(< 0.05 to 0.1)                  | -11.9<br>(-34.4 to 19.8)                          | -21.2<br>(-41.1 to 7.2)                             |
| <b>Neonatal disorders</b>                                               | <b>38.9</b><br><b>(33.4 to 45.9)</b>          | <b>7.0</b><br><b>(4.8 to 10.1)</b>                | <b>9.2</b><br><b>(4.8 to 10.1)</b>      | <b>-4.2</b><br><b>(-21.7 to 13.4)</b>             | <b>1.1</b><br><b>(-11.4 to 15.5)</b>                |
| Neonatal preterm birth complications                                    | 32.6<br>(26.0 to 41.6)                        | --                                                | 3.5<br>(2.4 to 4.9)                     | 4.2<br>(-16.1 to 26.5)                            | -4.7<br>(-23.4 to 15.6)                             |
| Neonatal encephalopathy due to birth asphyxia and trauma                | 8.0<br>(4.0 to 14.2)                          | --                                                | 1.1<br>(0.2 to 2.8)                     | 45.5<br>(-5.4 to 167.5)                           | 33.6<br>(-12.9 to 143.3)                            |
| Neonatal sepsis and other neonatal infections                           | 3.1<br>(1.3 to 6.5)                           | --                                                | 1.3<br>(0.5 to 3.0)                     | 5.5<br>(-18.0 to 53.1)                            | -1.1<br>(-22.9 to 46.5)                             |
| Hemolytic disease and other neonatal jaundice                           | 3.3<br>(2.9 to 3.8)                           | --                                                | 1.0<br>(0.7 to 1.2)                     | 9.4<br>(-6.6 to 27.8)                             | -1.2<br>(-13.9 to 14.1)                             |
| Other neonatal disorders                                                | --                                            | --                                                | 0.2<br>(0.1 to 0.3)                     | -14.6<br>(-28.2 to 1.7)                           | -2.2<br>(-17.7 to 16.4)                             |
| <b>Nutritional deficiencies</b>                                         | <b>700.7</b><br><b>(654.8 to 753.7)</b>       | <b>221.5†</b><br><b>(180.8 to 280.6)</b>          | <b>9.6</b><br><b>(6.2 to 14.4)</b>      | <b>-11.3</b><br><b>(-21.7 to 3.4)</b>             | <b>-19.0</b><br><b>(-27.9 to -6.1)</b>              |
| Protein-energy malnutrition                                             | 11.2<br>(8.4 to 14.6)                         | 5.7<br>(4.2 to 7.4)                               | 0.5<br>(0.2 to 0.8)                     | -20.6<br>(-50.6 to 31.1)                          | -9.1<br>(-43.1 to 49.3)                             |
| Iodine deficiency                                                       | 81.7<br>(72.4 to 92.7)                        | 2.1<br>(1.8 to 2.3)                               | 2.1<br>(1.4 to 3.0)                     | 7.7<br>(-2.0 to 19.1)                             | -9.2<br>(-16.7 to 0.4)                              |
| Vitamin A deficiency                                                    | 247.3<br>(207.6 to 307.6)                     | 213.7<br>(172.6 to 273.0)                         | 0.2<br>(0.1 to 0.3)                     | 4.7<br>(-13.9 to 28.8)                            | 0.4<br>(-16.4 to 20.5)                              |
| Iron-deficiency anaemia                                                 | 388.3<br>(345.5 to 440.0)                     | --                                                | 6.8<br>(4.2 to 10.8)                    | -15.7<br>(-29.1 to 4.1)                           | -22.9<br>(-34.8 to -5.0)                            |
| Other nutritional deficiencies                                          | --                                            | --                                                | < 0.05<br>(< 0.05 to < 0.05)            | -20.5<br>(-52.7 to 34.4)                          | -9.1<br>(-45.5 to 52.3)                             |
| <b>Other communicable, maternal, neonatal, and nutritional diseases</b> | <b>1,443.1</b><br><b>(1,338.0 to 1,560.7)</b> | <b>469.1</b><br><b>(413.5 to 538.0)</b>           | <b>1.7</b><br><b>(1.0 to 2.9)</b>       | <b>15.5</b><br><b>(5.7 to 25.0)</b>               | <b>-0.5</b><br><b>(-7.3 to 6.4)</b>                 |
| Sexually transmitted diseases excluding HIV                             | 1,166.1<br>(1,069.1 to 1,280.6)               | 389.4<br>(351.2 to 430.9)                         | 1.2<br>(0.7 to 2.1)                     | 23.1<br>(14.2 to 33.3)                            | -0.2<br>(-6.5 to 6.8)                               |
| Syphilis                                                                | 12.5<br>(10.2 to 15.7)                        | 9.1<br>(7.1 to 11.4)                              | 0.1<br>(0.1 to 0.1)                     | 42.9<br>(26.5 to 61.2)                            | 3.0<br>(-8.8 to 16.9)                               |
| Chlamydial infection                                                    | 68.3<br>(51.4 to 87.2)                        | 54.2<br>(41.1 to 70.7)                            | 0.3<br>(0.1 to 0.5)                     | 18.5<br>(-0.9 to 42.6)                            | -0.1<br>(-16.3 to 19.3)                             |
| Gonococcal infection                                                    | 21.4<br>(17.2 to 26.8)                        | 71.0<br>(55.8 to 90.2)                            | 0.1<br>(0.1 to 0.2)                     | 22.2<br>(-3.1 to 53.2)                            | -0.1<br>(-20.3 to 24.7)                             |
| Trichomoniasis                                                          | 198.3<br>(169.7 to 227.2)                     | 174.6<br>(147.5 to 204.7)                         | 0.3<br>(0.1 to 0.6)                     | 21.5<br>(13.1 to 30.6)                            | -0.5<br>(-6.3 to 5.8)                               |
| Genital herpes                                                          | 947.1<br>(810.4 to 1,113.1)                   | 74.9<br>(63.0 to 89.9)                            | 0.2<br>(0.1 to 0.6)                     | 27.2<br>(17.1 to 36.2)                            | -0.2<br>(-5.9 to 5.5)                               |
| Other sexually transmitted diseases                                     | 6.7<br>(6.2 to 7.4)                           | 5.6<br>(4.7 to 6.7)                               | 0.2<br>(0.1 to 0.4)                     | 20.7<br>(6.8 to 36.6)                             | -1.7<br>(-13.4 to 10.9)                             |
| Hepatitis                                                               | 348.3<br>(306.3 to 394.2)                     | 79.6<br>(41.1 to 130.7)                           | 0.1<br>(< 0.05 to 0.1)                  | -33.0<br>(-58.7 to 11.0)                          | -31.9<br>(-54.4 to 2.4)                             |
| Acute hepatitis A                                                       | 3.4<br>(0.5 to 7.5)                           | 44.3<br>(6.8 to 97.1)                             | < 0.05<br>(< 0.05 to < 0.05)            | -38.1<br>(-82.3 to 164.2)                         | -35.3<br>(-79.7 to 125.0)                           |
| Hepatitis B                                                             | 140.8<br>(111.1 to 181.3)                     | 25.8<br>(20.1 to 33.8)                            | < 0.05<br>(< 0.05 to < 0.05)            | -31.8<br>(-44.9 to -17.3)                         | -33.2<br>(-43.6 to -21.3)                           |
| Hepatitis C                                                             | 203.9<br>(179.9 to 230.8)                     | 7.2<br>(6.3 to 8.3)                               | < 0.05<br>(< 0.05 to < 0.05)            | -16.6<br>(-57.2 to 54.6)                          | -9.7<br>(-51.4 to 56.7)                             |
| Acute hepatitis E                                                       | 0.2<br>(0.1 to 0.2)                           | 2.2<br>(2.0 to 2.6)                               | < 0.05<br>(< 0.05 to < 0.05)            | -28.5<br>(-37.7 to -18.0)                         | -28.9<br>(-36.9 to -20.8)                           |
| Other infectious diseases                                               | 16.1<br>(13.7 to 19.1)                        | < 0.05<br>(< 0.05 to < 0.05)                      | 0.4<br>(0.2 to 0.6)                     | 6.9<br>(-12.5 to 36.2)                            | 6.4<br>(-12.4 to 34.9)                              |
| <b>Non-communicable diseases</b>                                        | <b>5,459.3</b><br><b>(5,409.8 to 5,507.9)</b> | <b>13,889.5†</b><br><b>(12,936.9 to 14,900.1)</b> | <b>457.7</b><br><b>(334.7 to 597.7)</b> | <b>23.3</b><br><b>(19.5 to 27.4)</b>              | <b>0.2</b><br><b>(-2.2 to 2.9)</b>                  |
| <b>Neoplasms</b>                                                        | <b>9.5</b><br><b>(8.8 to 10.2)</b>            | <b>5.5</b><br><b>(5.1 to 6.1)</b>                 | <b>1.5</b><br><b>(1.1 to 1.9)</b>       | <b>44.3</b><br><b>(36.3 to 52.9)</b>              | <b>5.2</b><br><b>(-0.9 to 11.3)</b>                 |
| Lip and oral cavity cancer                                              | 0.2<br>(0.2 to 0.2)                           | 0.1<br>(0.1 to 0.1)                               | < 0.05<br>(< 0.05 to < 0.05)            | 49.2<br>(34.1 to 66.3)                            | 4.9<br>(-6.3 to 18.9)                               |
| Nasopharynx cancer                                                      | 0.1<br>(0.1 to 0.1)                           | < 0.05<br>(< 0.05 to < 0.05)                      | < 0.05<br>(< 0.05 to < 0.05)            | 41.9<br>(20.7 to 67.2)                            | 11.8<br>(-2.1 to 27.9)                              |
| Other pharynx cancer                                                    | < 0.05<br>(< 0.05 to < 0.05)                  | < 0.05<br>(< 0.05 to < 0.05)                      | < 0.05<br>(< 0.05 to < 0.05)            | 51.9<br>(35.3 to 72.4)                            | 5.6<br>(-6.8 to 19.9)                               |
| Oesophageal cancer                                                      | < 0.05<br>(< 0.05 to < 0.05)                  | < 0.05<br>(< 0.05 to < 0.05)                      | < 0.05<br>(< 0.05 to < 0.05)            | 43.6<br>(29.6 to 57.1)                            | -2.1<br>(-11.8 to 7.6)                              |
| Stomach cancer                                                          | 0.6<br>(0.6 to 0.6)                           | 0.4<br>(0.4 to 0.4)                               | 0.1<br>(0.1 to 0.1)                     | 33.0<br>(15.6 to 52.4)                            | -7.9<br>(-21.1 to 6.8)                              |
| Colon and rectum cancer                                                 | 1.2<br>(1.1 to 1.2)                           | 0.4<br>(0.3 to 0.4)                               | 0.1<br>(0.1 to 0.2)                     | 71.2<br>(51.8 to 93.2)                            | 18.5<br>(4.3 to 35.4)                               |
| Liver cancer                                                            | 0.1<br>(0.1 to 0.1)                           | 0.3<br>(0.3 to 0.4)                               | 0.1<br>(< 0.05 to 0.1)                  | 46.1<br>(31.5 to 61.8)                            | 2.9<br>(-8.0 to 14.8)                               |
| Liver cancer due to hepatitis B                                         | 0.1<br>(< 0.05 to 0.1)                        | 0.1<br>(0.1 to 0.1)                               | < 0.05<br>(< 0.05 to < 0.05)            | 50.2<br>(33.7 to 68.4)                            | 8.4<br>(-3.6 to 21.1)                               |



| Cause                                              | Prevalence in thousands (95% UI)        | Incidence in thousands (95% UI)       | YLDs in thousands (95% UI)           |                                                   |                                                     |
|----------------------------------------------------|-----------------------------------------|---------------------------------------|--------------------------------------|---------------------------------------------------|-----------------------------------------------------|
|                                                    | 2016 counts                             | 2016 counts                           | 2016 counts                          | Percentage change in counts between 2006 and 2016 | Percentage change in age-standardised rates between |
| Liver cancer due to hepatitis C                    | 0.1<br>(0.1 to 0.1)                     | 0.1<br>(0.1 to 0.1)                   | < 0.05<br>(< 0.05 to < 0.05)         | 57.2<br>(38.3 to 78.2)                            | 8.4<br>(-5.0 to 22.7)                               |
| Liver cancer due to alcohol use                    | 0.1<br>(< 0.05 to 0.1)                  | 0.1<br>(0.1 to 0.1)                   | < 0.05<br>(< 0.05 to < 0.05)         | 26.4<br>(8.3 to 45.6)                             | -13.5<br>(-26.5 to 0.1)                             |
| Liver cancer due to other causes                   | 0.1<br>(< 0.05 to 0.1)                  | 0.1<br>(0.1 to 0.1)                   | < 0.05<br>(< 0.05 to < 0.05)         | 47.9<br>(32.2 to 64.2)                            | 10.4<br>(-2.3 to 23.4)                              |
| Gallbladder and biliary tract cancer               | 0.1<br>(0.1 to 0.1)                     | 0.1<br>(0.1 to 0.1)                   | < 0.05<br>(< 0.05 to < 0.05)         | 27.1<br>(14.4 to 42.7)                            | -13.2<br>(-21.9 to -2.7)                            |
| Pancreatic cancer                                  | 0.1<br>(0.1 to 0.1)                     | 0.1<br>(0.1 to 0.1)                   | < 0.05<br>(< 0.05 to < 0.05)         | 51.1<br>(41.1 to 62.3)                            | 3.8<br>(-3.5 to 11.9)                               |
| Larynx cancer                                      | 0.1<br>(0.1 to 0.1)                     | < 0.05<br>(< 0.05 to < 0.05)          | < 0.05<br>(< 0.05 to < 0.05)         | 48.4<br>(29.3 to 69.7)                            | 2.7<br>(-11.0 to 18.1)                              |
| Tracheal, bronchus, and lung cancer                | 0.3<br>(0.2 to 0.3)                     | 0.2<br>(0.2 to 0.2)                   | 0.1<br>(< 0.05 to 0.1)               | 44.0<br>(20.9 to 69.5)                            | 0.8<br>(-16.9 to 20.9)                              |
| Malignant skin melanoma                            | 0.1<br>(0.1 to 0.1)                     | < 0.05<br>(< 0.05 to < 0.05)          | < 0.05<br>(< 0.05 to < 0.05)         | 65.3<br>(48.2 to 84.9)                            | 16.9<br>(4.2 to 32.1)                               |
| Non-melanoma skin cancer                           | 0.3<br>(0.2 to 0.4)                     | 1.2<br>(0.7 to 1.7)                   | < 0.05<br>(< 0.05 to < 0.05)         | 17.0<br>(-46.0 to 105.4)                          | -22.6<br>(-65.7 to 44.3)                            |
| Non-melanoma skin cancer (squamous-cell carcinoma) | 0.2<br>(0.1 to 0.3)                     | 0.2<br>(0.1 to 0.3)                   | < 0.05<br>(< 0.05 to < 0.05)         | 14.0<br>(-49.9 to 115.2)                          | -24.9<br>(-68.6 to 50.6)                            |
| Non-melanoma skin cancer (basal-cell carcinoma)    | 0.1<br>(0.1 to 0.2)                     | 1.0<br>(0.5 to 1.5)                   | < 0.05<br>(< 0.05 to < 0.05)         | 45.2<br>(12.4 to 88.4)                            | 1.6<br>(-23.6 to 36.8)                              |
| Breast cancer                                      | 1.9<br>(1.6 to 2.2)                     | 0.4<br>(0.4 to 0.5)                   | 0.2<br>(0.1 to 0.2)                  | 64.6<br>(33.4 to 100.6)                           | 16.1<br>(-5.9 to 42.3)                              |
| Cervical cancer                                    | 2.4<br>(1.9 to 2.9)                     | 0.7<br>(0.5 to 0.8)                   | 0.2<br>(0.2 to 0.3)                  | 27.3<br>(-0.7 to 65.9)                            | -8.8<br>(-28.9 to 17.7)                             |
| Uterine cancer                                     | 0.3<br>(0.2 to 0.3)                     | 0.1<br>(0.1 to 0.1)                   | < 0.05<br>(< 0.05 to < 0.05)         | 92.6<br>(52.8 to 138.1)                           | 29.7<br>(3.4 to 60.6)                               |
| Ovarian cancer                                     | 0.3<br>(0.3 to 0.4)                     | 0.1<br>(0.1 to 0.1)                   | < 0.05<br>(< 0.05 to 0.1)            | 46.0<br>(21.8 to 71.5)                            | 8.5<br>(-8.4 to 27.1)                               |
| Prostate cancer                                    | 1.8<br>(1.3 to 2.1)                     | 0.5<br>(0.3 to 0.5)                   | 0.2<br>(0.1 to 0.3)                  | 70.6<br>(43.0 to 100.6)                           | 15.6<br>(-3.8 to 36.0)                              |
| Testicular cancer                                  | 0.1<br>(0.1 to 0.1)                     | < 0.05<br>(< 0.05 to < 0.05)          | < 0.05<br>(< 0.05 to < 0.05)         | 100.4<br>(59.8 to 150.2)                          | 59.3<br>(30.3 to 94.6)                              |
| Kidney cancer                                      | 0.5<br>(0.4 to 0.5)                     | 0.1<br>(0.1 to 0.1)                   | < 0.05<br>(< 0.05 to 0.1)            | 46.0<br>(23.0 to 70.7)                            | 15.4<br>(-1.0 to 33.5)                              |
| Bladder cancer                                     | 0.2<br>(0.2 to 0.2)                     | < 0.05<br>(< 0.05 to 0.1)             | < 0.05<br>(< 0.05 to < 0.05)         | 58.6<br>(41.5 to 77.9)                            | 8.7<br>(-3.9 to 23.2)                               |
| Brain and nervous system cancer                    | 0.3<br>(0.3 to 0.3)                     | 0.1<br>(0.1 to 0.1)                   | < 0.05<br>(< 0.05 to 0.1)            | 23.0<br>(6.9 to 46.5)                             | 2.3<br>(-8.8 to 21.2)                               |
| Thyroid cancer                                     | 0.2<br>(0.2 to 0.2)                     | < 0.05<br>(< 0.05 to < 0.05)          | < 0.05<br>(< 0.05 to < 0.05)         | 81.7<br>(51.8 to 119.0)                           | 24.0<br>(0.9 to 52.2)                               |
| Mesothelioma                                       | < 0.05<br>(< 0.05 to < 0.05)            | < 0.05<br>(< 0.05 to < 0.05)          | < 0.05<br>(< 0.05 to < 0.05)         | 44.7<br>(29.1 to 61.2)                            | 4.7<br>(-6.2 to 16.6)                               |
| Hodgkin lymphoma                                   | < 0.05<br>(< 0.05 to < 0.05)            | < 0.05<br>(< 0.05 to < 0.05)          | < 0.05<br>(< 0.05 to < 0.05)         | 11.9<br>(0.4 to 23.5)                             | -11.4<br>(-20.5 to -2.2)                            |
| Non-Hodgkin's lymphoma                             | 0.2<br>(0.2 to 0.3)                     | 0.1<br>(0.1 to 0.1)                   | < 0.05<br>(< 0.05 to < 0.05)         | 32.0<br>(18.0 to 47.9)                            | 3.7<br>(-8.1 to 16.6)                               |
| Multiple myeloma                                   | < 0.05<br>(< 0.05 to 0.1)               | < 0.05<br>(< 0.05 to < 0.05)          | < 0.05<br>(< 0.05 to < 0.05)         | 57.5<br>(40.4 to 79.1)                            | 9.2<br>(-2.2 to 23.7)                               |
| Leukaemia                                          | 0.8<br>(0.6 to 0.9)                     | 0.2<br>(0.2 to 0.3)                   | 0.1<br>(0.1 to 0.1)                  | 9.1<br>(-0.4 to 19.9)                             | -5.0<br>(-12.7 to 2.7)                              |
| Acute lymphoid leukaemia                           | 0.3<br>(0.2 to 0.4)                     | 0.1<br>(0.1 to 0.1)                   | < 0.05<br>(< 0.05 to 0.1)            | 3.6<br>(-12.4 to 20.9)                            | -0.8<br>(-14.0 to 13.3)                             |
| Chronic lymphoid leukaemia                         | 0.1<br>(0.1 to 0.2)                     | < 0.05<br>(< 0.05 to < 0.05)          | < 0.05<br>(< 0.05 to < 0.05)         | 35.5<br>(18.3 to 54.5)                            | 1.4<br>(-11.2 to 15.3)                              |
| Acute myeloid leukaemia                            | 0.1<br>(< 0.05 to 0.1)                  | < 0.05<br>(< 0.05 to < 0.05)          | < 0.05<br>(< 0.05 to < 0.05)         | 7.2<br>(-7.0 to 22.2)                             | -3.6<br>(-14.9 to 8.5)                              |
| Chronic myeloid leukaemia                          | 0.1<br>(< 0.05 to 0.1)                  | < 0.05<br>(< 0.05 to < 0.05)          | < 0.05<br>(< 0.05 to < 0.05)         | 33.2<br>(16.6 to 53.6)                            | 0.5<br>(-11.5 to 14.6)                              |
| Other leukaemia                                    | 0.2<br>(0.2 to 0.3)                     | 0.1<br>(< 0.05 to 0.1)                | < 0.05<br>(< 0.05 to < 0.05)         | -0.1<br>(-12.2 to 13.4)                           | -14.7<br>(-24.9 to -3.5)                            |
| Other neoplasms                                    | 0.7<br>(0.6 to 0.8)                     | 0.2<br>(0.2 to 0.2)                   | 0.1<br>(< 0.05 to 0.1)               | 43.8<br>(25.8 to 63.5)                            | 14.7<br>(1.4 to 31.2)                               |
| <b>Cardiovascular diseases</b>                     | <b>273.9</b><br><b>(264.1 to 284.9)</b> | <b>24.3†</b><br><b>(23.1 to 25.6)</b> | <b>15.5</b><br><b>(11.1 to 20.4)</b> | <b>39.0</b><br><b>(34.6 to 43.5)</b>              | <b>1.1</b><br><b>(-2.0 to 4.7)</b>                  |
| Rheumatic heart disease                            | 51.0<br>(45.4 to 57.3)                  | 1.6<br>(1.4 to 1.8)                   | 2.4<br>(1.5 to 3.6)                  | 39.3<br>(27.2 to 52.7)                            | 14.9<br>(5.4 to 25.6)                               |
| Ischaemic heart disease                            | 67.1<br>(63.2 to 71.2)                  | 7.3<br>(6.9 to 7.8)                   | 4.0<br>(2.7 to 5.5)                  | 40.4<br>(33.8 to 47.8)                            | -0.1<br>(-4.5 to 4.8)                               |
| Cerebrovascular disease                            | 30.3<br>(28.2 to 32.4)                  | 4.6†<br>(4.2 to 5.1)                  | 3.1<br>(2.2 to 3.9)                  | 42.1<br>(31.1 to 53.3)                            | -0.7<br>(-9.1 to 7.7)                               |
| Ischaemic stroke                                   | 24.8<br>(21.9 to 27.5)                  | 3.1†<br>(2.7 to 3.5)                  | 2.4<br>(1.7 to 3.1)                  | 43.6<br>(30.3 to 58.3)                            | -0.1<br>(-10.1 to 10.4)                             |
| Hemorrhagic stroke                                 | 7.2<br>(6.5 to 7.9)                     | 1.6†<br>(1.4 to 1.7)                  | 0.7<br>(0.5 to 0.9)                  | 36.9<br>(21.9 to 53.7)                            | -3.1<br>(-14.9 to 10.0)                             |
| Hypertensive heart disease                         | 12.8<br>(11.0 to 14.9)                  | --                                    | 1.0<br>(0.7 to 1.4)                  | 45.9<br>(33.0 to 60.2)                            | 0.7<br>(-7.8 to 10.5)                               |
| Cardiomyopathy and myocarditis                     | 2.4<br>(2.1 to 2.7)                     | 1.3†<br>(1.2 to 1.5)                  | 0.3<br>(0.2 to 0.4)                  | 24.3<br>(9.2 to 41.1)                             | 1.8<br>(-10.1 to 13.9)                              |
| Myocarditis                                        | 0.7<br>(0.7 to 0.8)                     | 1.3<br>(1.2 to 1.5)                   | 0.1<br>(< 0.05 to 0.1)               | 18.3<br>(8.6 to 28.6)                             | 1.5<br>(-8.2 to 11.6)                               |
| Alcoholic cardiomyopathy                           | 0.3<br>(0.2 to 0.3)                     | --                                    | < 0.05<br>(< 0.05 to < 0.05)         | 41.0<br>(23.7 to 60.5)                            | 2.1<br>(-12.1 to 18.5)                              |
| Other cardiomyopathy                               | 2.1<br>(1.8 to 2.4)                     | --                                    | 0.2<br>(0.1 to 0.3)                  | 24.1<br>(3.9 to 47.7)                             | 1.8<br>(-14.0 to 18.4)                              |
| Atrial fibrillation and flutter                    | 26.6<br>(23.3 to 30.3)                  | 2.1<br>(1.8 to 2.5)                   | 2.1<br>(1.4 to 2.9)                  | 43.8<br>(34.4 to 54.3)                            | -0.6<br>(-6.4 to 6.3)                               |
| Peripheral vascular disease                        | 68.5<br>(59.5 to 79.4)                  | 6.8<br>(5.9 to 7.9)                   | 0.3<br>(0.1 to 0.6)                  | 40.6<br>(30.8 to 51.2)                            | -4.5<br>(-10.7 to 2.2)                              |
| Endocarditis                                       | 0.2<br>(0.2 to 0.3)                     | 0.5<br>(0.4 to 0.5)                   | < 0.05<br>(< 0.05 to < 0.05)         | 26.3<br>(17.7 to 35.6)                            | 0.0<br>(-7.8 to 8.2)                                |
| Other cardiovascular and circulatory diseases      | 42.8<br>(36.2 to 49.9)                  | --                                    | 2.3<br>(1.5 to 3.2)                  | 27.5<br>(16.3 to 40.3)                            | -0.4<br>(-8.4 to 8.8)                               |
| <b>Chronic respiratory diseases</b>                | <b>434.7</b><br><b>(413.9 to 456.4)</b> | <b>78.7†</b><br><b>(73.0 to 84.7)</b> | <b>15.6</b><br><b>(11.3 to 21.0)</b> | <b>11.1</b><br><b>(4.9 to 17.7)</b>               | <b>1.0</b><br><b>(-4.2 to 6.5)</b>                  |
| Chronic obstructive pulmonary disease              | 138.2<br>(129.3 to 150.1)               | 9.5<br>(8.9 to 10.3)                  | 3.0<br>(2.4 to 3.6)                  | 38.9<br>(21.9 to 60.7)                            | 3.2<br>(-9.1 to 18.9)                               |
| Pneumoconiosis                                     | 0.6<br>(0.5 to 0.6)                     | < 0.05<br>(< 0.05 to 0.1)             | 0.1<br>(0.1 to 0.1)                  | 46.6<br>(27.2 to 66.9)                            | 4.0<br>(-12.3 to 21.2)                              |
| Silicosis                                          | 0.1<br>(0.1 to 0.1)                     | < 0.05<br>(< 0.05 to < 0.05)          | < 0.05<br>(< 0.05 to < 0.05)         | 47.4<br>(27.8 to 71.8)                            | 4.1<br>(-14.3 to 27.0)                              |

| Cause                                                          | Prevalence in thousands (95% UI)        | Incidence in thousands (95% UI)       | YLDs in thousands (95% UI)       |                                                   |                                                     |
|----------------------------------------------------------------|-----------------------------------------|---------------------------------------|----------------------------------|---------------------------------------------------|-----------------------------------------------------|
|                                                                | 2016 counts                             | 2016 counts                           | 2016 counts                      | Percentage change in counts between 2006 and 2016 | Percentage change in age-standardised rates between |
| Asbestosis                                                     | 0.1<br>(0.1 to 0.2)                     | < 0.05<br>(< 0.05 to < 0.05)          | < 0.05<br>(< 0.05 to < 0.05)     | 38.8<br>(20.8 to 59.5)                            | 0.5<br>(-16.1 to 19.9)                              |
| Coal workers pneumoconiosis                                    | --                                      | --                                    | --                               | --                                                | --                                                  |
| Other pneumoconiosis                                           | 0.3<br>(0.2 to 0.3)                     | < 0.05<br>(< 0.05 to < 0.05)          | < 0.05<br>(< 0.05 to 0.1)        | 50.3<br>(15.1 to 93.0)                            | 5.6<br>(-21.5 to 38.3)                              |
| Asthma                                                         | 301.7<br>(277.1 to 328.0)               | 68.9<br>(63.4 to 75.0)                | 12.0<br>(7.8 to 17.3)            | 4.7<br>(-1.9 to 11.2)                             | -0.7<br>(-6.5 to 5.2)                               |
| Interstitial lung disease and pulmonary sarcoidosis            | 1.8<br>(1.6 to 1.9)                     | 0.2<br>(0.1 to 0.2)                   | 0.2<br>(0.1 to 0.3)              | 36.1<br>(27.6 to 46.1)                            | 6.6<br>(-1.7 to 16.2)                               |
| Other chronic respiratory diseases                             | --                                      | --                                    | 0.4<br>(0.3 to 0.4)              | 43.6<br>(10.3 to 92.5)                            | 38.0<br>(8.1 to 78.7)                               |
| <b>Cirrhosis and other chronic liver diseases</b>              | <b>51.3<br/>(48.6 to 54.2)</b>          | <b>1.6<br/>(1.6 to 1.7)</b>           | <b>1.3<br/>(0.9 to 1.8)</b>      | <b>37.0<br/>(24.8 to 49.8)</b>                    | <b>6.6<br/>(-1.4 to 14.8)</b>                       |
| Cirrhosis and other chronic liver diseases due to hepatitis B  | 1.8<br>(1.6 to 2.0)                     | 0.1<br>(0.1 to 0.1)                   | < 0.05<br>(< 0.05 to 0.1)        | 49.7<br>(13.6 to 96.4)                            | 8.4<br>(-19.0 to 43.3)                              |
| Cirrhosis and other chronic liver diseases due to hepatitis C  | 21.3<br>(19.6 to 23.1)                  | 0.7<br>(0.6 to 0.7)                   | 0.5<br>(0.3 to 0.7)              | 46.3<br>(26.2 to 68.3)                            | 6.1<br>(-6.1 to 19.1)                               |
| Cirrhosis and other chronic liver diseases due to alcohol use  | 18.0<br>(16.6 to 19.6)                  | 0.6<br>(0.5 to 0.6)                   | 0.4<br>(0.3 to 0.6)              | 53.7<br>(34.4 to 74.8)                            | 8.6<br>(-3.0 to 22.1)                               |
| Cirrhosis and other chronic liver diseases due to other causes | 10.3<br>(9.4 to 11.2)                   | 0.3<br>(0.3 to 0.3)                   | 0.4<br>(0.3 to 0.6)              | 14.7<br>(-6.3 to 40.1)                            | 4.6<br>(-11.4 to 23.7)                              |
| <b>Digestive diseases</b>                                      | <b>134.0<br/>(123.4 to 143.9)</b>       | <b>106.0†<br/>(98.5 to 114.7)</b>     | <b>6.3<br/>(4.4 to 8.5)</b>      | <b>37.1<br/>(26.6 to 48.2)</b>                    | <b>9.7<br/>(2.7 to 17.5)</b>                        |
| Peptic ulcer disease                                           | 54.1<br>(48.8 to 61.1)                  | 2.7<br>(2.5 to 3.1)                   | 1.1<br>(0.7 to 1.6)              | 93.5<br>(69.1 to 123.3)                           | 40.2<br>(22.6 to 61.4)                              |
| Gastritis and duodenitis                                       | 26.1<br>(22.7 to 30.2)                  | 11.8<br>(10.5 to 13.3)                | 0.7<br>(0.4 to 1.0)              | 101.0<br>(74.5 to 130.6)                          | 46.0<br>(27.2 to 67.0)                              |
| Appendicitis                                                   | 0.5<br>(0.4 to 0.5)                     | 12.4<br>(11.3 to 13.6)                | 0.1<br>(0.1 to 0.2)              | 4.5<br>(-28.4 to 54.2)                            | -2.1<br>(-28.4 to 34.8)                             |
| Paralytic ileus and intestinal obstruction                     | 0.1<br>(< 0.05 to 0.1)                  | 1.5<br>(1.3 to 1.7)                   | < 0.05<br>(< 0.05 to < 0.05)     | 14.7<br>(10.0 to 19.9)                            | 1.8<br>(-1.4 to 5.2)                                |
| Inguinal, femoral, and abdominal hernia                        | 50.9<br>(45.8 to 56.1)                  | 23.2<br>(20.3 to 26.4)                | 3.4<br>(2.3 to 4.8)              | 19.4<br>(9.4 to 30.3)                             | -1.9<br>(-9.5 to 5.5)                               |
| Inflammatory bowel disease                                     | 1.0<br>(1.0 to 1.1)                     | 1.4<br>(1.4 to 1.5)                   | 0.1<br>(0.1 to 0.2)              | 51.3<br>(27.5 to 78.8)                            | 12.4<br>(-6.4 to 34.4)                              |
| Vascular intestinal disorders                                  | < 0.05<br>(< 0.05 to 0.1)               | 0.2<br>(0.2 to 0.3)                   | < 0.05<br>(< 0.05 to < 0.05)     | 30.0<br>(21.4 to 38.7)                            | 13.5<br>(8.0 to 18.8)                               |
| Gallbladder and biliary diseases                               | 5.4<br>(4.9 to 5.9)                     | 50.4<br>(43.6 to 57.9)                | 0.2<br>(0.1 to 0.3)              | 47.9<br>(19.4 to 83.0)                            | 11.7<br>(-9.9 to 38.6)                              |
| Pancreatitis                                                   | 0.3<br>(0.2 to 0.3)                     | 2.4<br>(2.1 to 2.7)                   | < 0.05<br>(< 0.05 to < 0.05)     | 36.9<br>(32.0 to 42.2)                            | 8.8<br>(5.4 to 12.5)                                |
| Other digestive diseases                                       | --                                      | --                                    | 0.5<br>(0.4 to 0.7)              | 34.5<br>(23.3 to 45.5)                            | 12.7<br>(5.5 to 20.0)                               |
| <b>Neurological disorders</b>                                  | <b>2,312.7<br/>(2,205.9 to 2,413.5)</b> | <b>1,091.8<br/>(932.0 to 1,254.5)</b> | <b>61.8<br/>(40.8 to 85.5)</b>   | <b>21.1<br/>(-2.4 to 52.3)</b>                    | <b>-0.1<br/>(-17.4 to 21.2)</b>                     |
| Alzheimer's disease and other dementias                        | 25.4<br>(21.4 to 30.2)                  | 4.5<br>(3.7 to 5.4)                   | 3.8<br>(2.6 to 5.0)              | 50.4<br>(44.0 to 57.2)                            | -0.6<br>(-4.5 to 3.8)                               |
| Parkinson's disease                                            | 2.3<br>(1.8 to 2.8)                     | 0.3<br>(0.2 to 0.3)                   | 0.3<br>(0.2 to 0.4)              | 53.6<br>(34.8 to 75.9)                            | 5.8<br>(-6.7 to 20.2)                               |
| Epilepsy                                                       | 29.3<br>(8.5 to 49.0)                   | 3.5<br>(1.0 to 5.9)                   | 8.5<br>(2.0 to 18.0)             | 8.5<br>(-74.5 to 422.9)                           | -2.5<br>(-77.3 to 370.9)                            |
| Multiple sclerosis                                             | 0.4<br>(0.3 to 0.4)                     | < 0.05<br>(< 0.05 to < 0.05)          | 0.1<br>(0.1 to 0.1)              | 47.1<br>(41.4 to 53.3)                            | 11.8<br>(7.7 to 16.6)                               |
| Motor neuron disease                                           | 0.1<br>(0.1 to 0.2)                     | < 0.05<br>(< 0.05 to < 0.05)          | < 0.05<br>(< 0.05 to < 0.05)     | 22.4<br>(16.4 to 28.8)                            | 3.0<br>(-0.6 to 7.0)                                |
| Migraine                                                       | 843.9<br>(793.9 to 895.4)               | 97.1<br>(91.5 to 103.4)               | 39.7<br>(25.7 to 55.7)           | 21.3<br>(16.9 to 26.1)                            | -0.2<br>(-3.5 to 3.1)                               |
| Tension-type headache                                          | 1,768.4<br>(1,582.4 to 1,971.9)         | 986.5<br>(827.2 to 1,152.2)           | 7.5<br>(4.8 to 11.2)             | 21.7<br>(15.2 to 29.4)                            | -0.7<br>(-5.1 to 4.7)                               |
| Other neurological disorders                                   | < 0.05<br>(< 0.05 to < 0.05)            | < 0.05<br>(< 0.05 to 0.1)             | 1.9<br>(0.5 to 3.9)              | 27.2<br>(-65.5 to 441.7)                          | 17.4<br>(-65.7 to 327.2)                            |
| <b>Mental and substance use disorders</b>                      | <b>802.9<br/>(775.6 to 833.5)</b>       | <b>320.3†<br/>(297.8 to 345.9)</b>    | <b>110.1<br/>(79.1 to 142.9)</b> | <b>18.3<br/>(15.6 to 21.3)</b>                    | <b>-0.6<br/>(-2.6 to 1.6)</b>                       |
| Schizophrenia                                                  | 11.3<br>(9.8 to 12.9)                   | 0.8<br>(0.7 to 1.0)                   | 7.4<br>(5.4 to 9.4)              | 32.0<br>(20.7 to 45.1)                            | 1.0<br>(-7.4 to 9.9)                                |
| Alcohol use disorders                                          | 111.9<br>(97.9 to 127.3)                | 58.7<br>(50.4 to 67.3)                | 11.4<br>(7.7 to 15.9)            | 24.5<br>(12.6 to 36.7)                            | 0.1<br>(-8.8 to 9.2)                                |
| Drug use disorders                                             | 28.4<br>(25.4 to 31.9)                  | 4.1<br>(3.7 to 4.6)                   | 7.9<br>(5.4 to 10.8)             | 23.9<br>(12.4 to 37.0)                            | 2.7<br>(-6.4 to 12.7)                               |
| Opioid use disorders                                           | 13.4<br>(10.4 to 17.1)                  | 1.8<br>(1.4 to 2.1)                   | 5.6<br>(3.6 to 8.0)              | 27.3<br>(13.2 to 43.8)                            | 3.1<br>(-7.5 to 15.4)                               |
| Cocaine use disorders                                          | 2.0<br>(1.7 to 2.4)                     | 0.2<br>(0.1 to 0.2)                   | 0.3<br>(0.2 to 0.4)              | 13.1<br>(-18.0 to 54.4)                           | -4.4<br>(-27.9 to 24.9)                             |
| Amphetamine use disorders                                      | 6.1<br>(4.1 to 8.7)                     | 0.6<br>(0.4 to 0.9)                   | 0.8<br>(0.4 to 1.4)              | 13.9<br>(-11.2 to 49.4)                           | 3.4<br>(-19.3 to 33.2)                              |
| Cannabis use disorders                                         | 5.6<br>(4.7 to 6.7)                     | 1.1<br>(0.9 to 1.3)                   | 0.2<br>(0.1 to 0.3)              | 21.7<br>(-7.2 to 58.7)                            | 7.4<br>(-15.2 to 35.7)                              |
| Other drug use disorders                                       | 2.4<br>(2.1 to 2.7)                     | 0.5<br>(0.4 to 0.5)                   | 1.0<br>(0.6 to 1.5)              | 17.9<br>(-9.7 to 50.8)                            | 1.8<br>(-20.5 to 28.1)                              |
| Depressive disorders                                           | 168.2<br>(157.8 to 182.1)               | 193.9<br>(173.1 to 217.9)             | 29.9<br>(20.3 to 40.7)           | 18.8<br>(12.1 to 25.3)                            | -2.8<br>(-7.3 to 2.1)                               |
| Major depressive disorder                                      | 120.6<br>(108.1 to 135.9)               | 184.5<br>(163.5 to 208.3)             | 25.0<br>(16.9 to 34.5)           | 17.4<br>(9.8 to 25.0)                             | -3.3<br>(-8.7 to 2.6)                               |
| Dysthymia                                                      | 49.7<br>(43.3 to 57.0)                  | 9.5<br>(8.3 to 10.9)                  | 4.8<br>(3.2 to 7.1)              | 26.8<br>(20.5 to 33.3)                            | -0.0<br>(-4.2 to 4.0)                               |
| Bipolar disorder                                               | 47.9<br>(40.7 to 56.3)                  | 4.1<br>(3.5 to 4.9)                   | 10.0<br>(6.0 to 14.8)            | 18.4<br>(11.2 to 26.1)                            | -0.1<br>(-5.4 to 5.9)                               |
| Anxiety disorders                                              | 172.7<br>(156.8 to 190.7)               | 29.3<br>(26.8 to 32.0)                | 16.9<br>(11.7 to 23.1)           | 17.8<br>(12.1 to 24.0)                            | -0.2<br>(-4.4 to 4.3)                               |
| Eating disorders                                               | 8.2<br>(6.6 to 10.0)                    | 4.6<br>(3.4 to 6.1)                   | 1.7<br>(1.1 to 2.4)              | 19.7<br>(3.9 to 38.8)                             | 5.6<br>(-8.0 to 21.6)                               |
| Anorexia nervosa                                               | 1.8<br>(1.3 to 2.4)                     | 0.8<br>(0.6 to 1.0)                   | 0.4<br>(0.2 to 0.6)              | 12.4<br>(-13.3 to 47.2)                           | 6.0<br>(-18.0 to 38.9)                              |
| Bulimia nervosa                                                | 6.1<br>(4.5 to 8.1)                     | 3.8<br>(2.6 to 5.3)                   | 1.3<br>(0.8 to 2.0)              | 22.0<br>(3.3 to 44.7)                             | 5.5<br>(-10.3 to 24.2)                              |
| Autistic spectrum disorders                                    | 54.3<br>(48.3 to 61.6)                  | 0.4<br>(0.3 to 0.6)                   | 8.1<br>(5.5 to 11.5)             | 11.0<br>(5.1 to 16.9)                             | 0.5<br>(-4.3 to 5.5)                                |
| Autism                                                         | 16.7<br>(14.2 to 19.6)                  | < 0.05<br>(< 0.05 to 0.1)             | 4.3<br>(2.7 to 6.3)              | 11.7<br>(2.1 to 21.5)                             | 0.5<br>(-7.3 to 8.7)                                |
| Asperger syndrome and other autistic spectrum disorders        | 37.7<br>(31.3 to 45.5)                  | 0.4<br>(0.2 to 0.5)                   | 3.8<br>(2.5 to 5.6)              | 10.3<br>(4.7 to 16.8)                             | 0.5<br>(-4.2 to 6.0)                                |



| Cause                                                      | Prevalence in thousands (95% UI)              | Incidence in thousands (95% UI)                   | YLDs in thousands (95% UI)             |                                                   |                                                     |
|------------------------------------------------------------|-----------------------------------------------|---------------------------------------------------|----------------------------------------|---------------------------------------------------|-----------------------------------------------------|
|                                                            | 2016 counts                                   | 2016 counts                                       | 2016 counts                            | Percentage change in counts between 2006 and 2016 | Percentage change in age-standardised rates between |
| Attention-deficit/hyperactivity disorder                   | 53.1<br>(41.6 to 66.8)                        | 2.5<br>(1.9 to 3.3)                               | 0.7<br>(0.4 to 1.0)                    | 5.3<br>(-3.9 to 14.5)                             | 0.6<br>(-8.2 to 8.9)                                |
| Conduct disorder                                           | 51.7<br>(41.7 to 62.1)                        | 17.4<br>(13.6 to 21.2)                            | 6.3<br>(3.9 to 9.7)                    | -4.6<br>(-10.9 to 2.5)                            | 0.1<br>(-6.3 to 7.5)                                |
| Idiopathic developmental intellectual disability           | 51.1<br>(28.0 to 74.4)                        | --                                                | 2.0<br>(0.9 to 3.6)                    | 6.6<br>(-1.4 to 14.8)                             | -6.0<br>(-13.0 to 0.7)                              |
| Other mental and substance use disorders                   | 106.6<br>(93.5 to 123.4)                      | 4.3<br>(3.8 to 4.9)                               | 8.0<br>(5.5 to 11.5)                   | 27.6<br>(20.7 to 34.5)                            | -0.1<br>(-5.1 to 4.6)                               |
| <b>Diabetes, urogenital, blood, and endocrine diseases</b> | <b>1,899.4</b><br><b>(1,819.2 to 1,971.5)</b> | <b>465.2†</b><br><b>(439.1 to 494.2)</b>          | <b>41.8</b><br><b>(29.9 to 56.9)</b>   | <b>38.7</b><br><b>(32.8 to 44.9)</b>              | <b>3.5</b><br><b>(-1.1 to 8.2)</b>                  |
| Diabetes mellitus                                          | 267.2<br>(242.4 to 295.6)                     | 15.8<br>(14.3 to 17.4)                            | 23.7<br>(16.4 to 32.8)                 | 43.7<br>(33.6 to 54.2)                            | 4.7<br>(-2.9 to 12.3)                               |
| Acute glomerulonephritis                                   | 0.1<br>(0.1 to 0.1)                           | 1.1<br>(1.0 to 1.2)                               | < 0.05<br>(< 0.05 to < 0.05)           | 22.6<br>(16.8 to 29.1)                            | 0.1<br>(-3.9 to 4.3)                                |
| Chronic kidney disease                                     | 309.0<br>(282.2 to 338.7)                     | 27.2<br>(23.9 to 30.9)                            | 7.6<br>(5.7 to 9.7)                    | 48.3<br>(38.2 to 59.4)                            | 6.7<br>(-0.4 to 14.4)                               |
| Chronic kidney disease due to diabetes mellitus            | 111.4<br>(94.4 to 129.6)                      | 10.2<br>(8.3 to 12.4)                             | 2.4<br>(1.8 to 3.2)                    | 55.1<br>(40.6 to 70.6)                            | 8.4<br>(-1.4 to 18.8)                               |
| Chronic kidney disease due to hypertension                 | 64.9<br>(55.5 to 74.2)                        | 8.0<br>(6.5 to 9.5)                               | 0.9<br>(0.6 to 1.2)                    | 54.9<br>(38.3 to 74.2)                            | 4.2<br>(-7.5 to 18.0)                               |
| Chronic kidney disease due to glomerulonephritis           | 66.5<br>(57.5 to 75.2)                        | 3.2<br>(2.5 to 4.0)                               | 2.5<br>(1.9 to 3.3)                    | 42.0<br>(27.8 to 58.7)                            | 6.6<br>(-2.5 to 17.4)                               |
| Chronic kidney disease due to other causes                 | 66.2<br>(54.4 to 78.1)                        | 5.8<br>(4.7 to 7.1)                               | 1.7<br>(1.2 to 2.3)                    | 45.6<br>(31.9 to 62.3)                            | 5.9<br>(-2.8 to 16.7)                               |
| Urinary diseases and male infertility                      | 66.5<br>(59.8 to 73.3)                        | 211.3†<br>(187.7 to 238.5)                        | 1.9<br>(1.2 to 2.7)                    | 36.7<br>(29.3 to 45.2)                            | -2.3<br>(-7.6 to 3.8)                               |
| Interstitial nephritis and urinary tract infections        | 3.6<br>(3.1 to 4.1)                           | 189.4<br>(165.9 to 216.0)                         | 0.1<br>(0.1 to 0.2)                    | 20.2<br>(-1.7 to 46.5)                            | 4.1<br>(-12.7 to 24.8)                              |
| Urolithiasis                                               | 0.6<br>(0.5 to 0.7)                           | 15.4<br>(13.6 to 17.5)                            | < 0.05<br>(< 0.05 to 0.1)              | 30.9<br>(25.3 to 36.6)                            | 1.6<br>(-2.1 to 5.4)                                |
| Benign prostatic hyperplasia                               | 48.3<br>(40.9 to 56.4)                        | 6.5<br>(5.5 to 7.8)                               | 1.6<br>(1.0 to 2.3)                    | 40.1<br>(31.6 to 50.2)                            | -2.7<br>(-8.6 to 3.9)                               |
| Male infertility                                           | 11.1<br>(8.4 to 14.8)                         | --                                                | 0.1<br>(< 0.05 to 0.1)                 | 44.9<br>(14.8 to 78.9)                            | 17.9<br>(-6.5 to 45.6)                              |
| Other urinary diseases                                     | --                                            | --                                                | 0.1<br>(< 0.05 to 0.1)                 | -0.1<br>(-14.6 to 16.6)                           | -14.3<br>(-25.1 to -1.8)                            |
| Gynecological diseases                                     | 615.3<br>(587.6 to 644.8)                     | 203.2†<br>(190.2 to 215.7)                        | 5.7<br>(3.8 to 8.5)                    | 17.2<br>(10.9 to 24.1)                            | -6.6<br>(-11.6 to -1.1)                             |
| Uterine fibroids                                           | 43.6<br>(38.0 to 50.0)                        | 5.3<br>(4.5 to 6.2)                               | 0.4<br>(0.2 to 0.8)                    | 8.8<br>(-4.8 to 20.1)                             | -19.3<br>(-28.9 to -11.6)                           |
| Polycystic ovarian syndrome                                | 0.8<br>(0.6 to 1.0)                           | 4.4<br>(3.1 to 5.6)                               | < 0.05<br>(< 0.05 to < 0.05)           | 25.1<br>(-13.0 to 77.8)                           | -1.3<br>(-30.8 to 37.5)                             |
| Female infertility                                         | 26.2<br>(17.5 to 38.4)                        | --                                                | 0.1<br>(0.1 to 0.3)                    | 51.0<br>(11.9 to 97.2)                            | 20.3<br>(-10.8 to 59.2)                             |
| Endometriosis                                              | 0.3<br>(0.2 to 0.3)                           | 1.3<br>(1.1 to 1.6)                               | < 0.05<br>(< 0.05 to < 0.05)           | 17.2<br>(-1.0 to 40.0)                            | -0.1<br>(-18.2 to 22.3)                             |
| Genital prolapse                                           | 156.6<br>(135.3 to 180.0)                     | 10.7<br>(9.1 to 12.5)                             | 0.5<br>(0.2 to 0.9)                    | 14.3<br>(3.4 to 26.2)                             | -19.4<br>(-27.4 to -10.7)                           |
| Premenstrual syndrome                                      | 402.5<br>(375.3 to 430.0)                     | 147.4<br>(136.4 to 158.4)                         | 3.4<br>(2.1 to 5.2)                    | 15.8<br>(7.1 to 26.0)                             | -3.3<br>(-10.7 to 5.0)                              |
| Other gynecological diseases                               | 36.6<br>(31.5 to 42.2)                        | 34.1<br>(28.4 to 40.5)                            | 1.2<br>(0.8 to 1.8)                    | 22.4<br>(8.8 to 37.7)                             | -3.0<br>(-13.6 to 8.3)                              |
| Hemoglobinopathies and hemolytic anaemias                  | 1,010.9<br>(924.8 to 1,094.5)                 | --                                                | 1.7<br>(1.0 to 2.7)                    | 30.1<br>(13.0 to 51.0)                            | 15.0<br>(0.6 to 32.5)                               |
| Thalassemias                                               | < 0.05<br>(< 0.05 to 0.1)                     | --                                                | < 0.05<br>(< 0.05 to < 0.05)           | -0.1<br>(-32.6 to 30.4)                           | 12.3<br>(-24.2 to 46.8)                             |
| Thalassaemias trait                                        | 28.2<br>(9.7 to 53.1)                         | --                                                | 0.4<br>(0.1 to 0.9)                    | 34.9<br>(1.1 to 81.6)                             | 17.2<br>(-10.4 to 59.9)                             |
| Sickle cell disorders                                      | 0.5<br>(0.2 to 0.8)                           | --                                                | < 0.05<br>(< 0.05 to 0.1)              | 32.0<br>(3.5 to 69.8)                             | 27.7<br>(2.0 to 61.7)                               |
| Sickle cell trait                                          | 234.0<br>(162.4 to 330.7)                     | --                                                | 0.9<br>(0.5 to 1.6)                    | 40.7<br>(20.1 to 63.9)                            | 28.6<br>(11.0 to 48.3)                              |
| G6PD deficiency                                            | 138.2<br>(119.3 to 159.0)                     | --                                                | < 0.05<br>(< 0.05 to < 0.05)           | 40.8<br>(24.0 to 59.8)                            | 15.8<br>(3.6 to 29.4)                               |
| G6PD trait                                                 | 638.8<br>(589.1 to 690.1)                     | --                                                | < 0.05<br>(< 0.05 to < 0.05)           | 68.4<br>(50.2 to 90.1)                            | 45.1<br>(30.7 to 62.4)                              |
| Other hemoglobinopathies and hemolytic anaemias            | 17.7<br>(15.6 to 19.8)                        | --                                                | 0.3<br>(0.2 to 0.5)                    | 0.1<br>(-15.6 to 22.1)                            | -15.8<br>(-27.7 to -0.1)                            |
| Endocrine, metabolic, blood, and immune disorders          | 41.7<br>(38.3 to 45.1)                        | 6.7<br>(6.0 to 7.4)                               | 1.2<br>(0.8 to 1.7)                    | 25.2<br>(14.6 to 37.0)                            | 0.9<br>(-6.0 to 8.7)                                |
| <b>Musculoskeletal disorders</b>                           | <b>773.8</b><br><b>(738.2 to 809.0)</b>       | <b>385.8</b><br><b>(350.2 to 427.5)</b>           | <b>82.5</b><br><b>(59.1 to 108.4)</b>  | <b>32.5</b><br><b>(28.5 to 36.6)</b>              | <b>1.1</b><br><b>(-1.6 to 3.8)</b>                  |
| Rheumatoid arthritis                                       | 10.6<br>(9.4 to 11.9)                         | 0.7<br>(0.6 to 0.7)                               | 2.5<br>(1.7 to 3.4)                    | 37.5<br>(24.4 to 52.0)                            | 3.3<br>(-5.6 to 13.0)                               |
| Osteoarthritis                                             | 161.2<br>(151.0 to 171.9)                     | 8.7<br>(8.1 to 9.3)                               | 10.0<br>(7.1 to 13.6)                  | 50.0<br>(44.7 to 55.9)                            | 4.5<br>(0.9 to 8.4)                                 |
| Low back and neck pain                                     | 430.8<br>(400.6 to 464.6)                     | 170.3<br>(152.8 to 188.3)                         | 49.1<br>(34.3 to 65.7)                 | 30.3<br>(26.0 to 35.1)                            | -0.0<br>(-2.9 to 2.9)                               |
| Low back pain                                              | 269.7<br>(237.3 to 306.9)                     | 127.8<br>(112.2 to 146.1)                         | 30.8<br>(21.5 to 41.4)                 | 28.1<br>(21.8 to 35.3)                            | -0.1<br>(-4.3 to 4.5)                               |
| Neck pain                                                  | 181.2<br>(155.4 to 209.9)                     | 42.4<br>(36.6 to 50.0)                            | 18.3<br>(12.3 to 26.1)                 | 34.3<br>(30.3 to 38.1)                            | 0.0<br>(-2.4 to 2.3)                                |
| Gout                                                       | 11.4<br>(10.1 to 12.8)                        | 2.3<br>(2.0 to 2.6)                               | 0.4<br>(0.2 to 0.5)                    | 38.3<br>(16.0 to 65.1)                            | 0.2<br>(-14.5 to 17.2)                              |
| Other musculoskeletal disorders                            | 234.7<br>(197.5 to 275.5)                     | 203.9<br>(171.3 to 241.8)                         | 20.5<br>(13.7 to 29.4)                 | 29.6<br>(19.4 to 41.4)                            | 1.5<br>(-5.8 to 9.4)                                |
| <b>Other non-communicable diseases</b>                     | <b>4,479.8</b><br><b>(4,377.8 to 4,581.6)</b> | <b>11,410.2†</b><br><b>(10,492.5 to 12,378.2)</b> | <b>121.2</b><br><b>(82.7 to 170.8)</b> | <b>17.9</b><br><b>(16.1 to 19.4)</b>              | <b>-1.6</b><br><b>(-2.5 to -0.6)</b>                |
| Congenital anomalies                                       | 64.0<br>(55.8 to 73.0)                        | --                                                | 8.5<br>(6.1 to 11.4)                   | 8.2<br>(1.9 to 14.9)                              | -0.2<br>(-6.1 to 6.0)                               |
| Neural tube defects                                        | 5.8<br>(5.2 to 6.5)                           | --                                                | 1.7<br>(1.2 to 2.3)                    | 12.3<br>(-1.4 to 27.6)                            | 0.6<br>(-11.5 to 13.2)                              |
| Congenital heart anomalies                                 | 6.7<br>(5.8 to 7.8)                           | --                                                | 0.3<br>(0.1 to 0.5)                    | 5.5<br>(-7.2 to 21.0)                             | 3.9<br>(-8.3 to 18.7)                               |
| Orofacial clefts                                           | 3.0<br>(2.6 to 3.3)                           | --                                                | < 0.05<br>(< 0.05 to 0.1)              | 3.0<br>(-7.8 to 15.1)                             | -6.7<br>(-16.6 to 4.4)                              |
| Down's syndrome                                            | 5.4<br>(4.6 to 6.3)                           | --                                                | 0.5<br>(0.3 to 0.7)                    | 19.6<br>(7.5 to 34.0)                             | 9.3<br>(-1.5 to 21.1)                               |
| Turner syndrome                                            | 1.8<br>(1.5 to 2.1)                           | --                                                | < 0.05<br>(< 0.05 to 0.1)              | 7.6<br>(-29.2 to 58.8)                            | -0.8<br>(-32.1 to 41.2)                             |
| Klinefelter syndrome                                       | 2.8<br>(2.4 to 3.4)                           | --                                                | < 0.05<br>(< 0.05 to < 0.05)           | 12.6<br>(-15.1 to 49.4)                           | 2.2<br>(-22.1 to 34.5)                              |

| Cause                                         | Prevalence in thousands (95% UI)        | Incidence in thousands (95% UI)          | YLDs in thousands (95% UI)           |                                                   |                                                     |
|-----------------------------------------------|-----------------------------------------|------------------------------------------|--------------------------------------|---------------------------------------------------|-----------------------------------------------------|
|                                               | 2016 counts                             | 2016 counts                              | 2016 counts                          | Percentage change in counts between 2006 and 2016 | Percentage change in age-standardised rates between |
| Other chromosomal abnormalities               | 6.6<br>(5.6 to 7.9)                     | --                                       | 0.8<br>(0.5 to 1.1)                  | 4.4<br>(-8.1 to 18.9)                             | 13.4<br>(0.1 to 29.0)                               |
| Congenital musculoskeletal and limb anomalies | 8.6<br>(7.9 to 9.3)                     | --                                       | 1.2<br>(0.8 to 1.7)                  | 19.6<br>(8.5 to 32.9)                             | 7.0<br>(-2.8 to 18.3)                               |
| Urogenital congenital anomalies               | 7.4<br>(6.5 to 8.3)                     | --                                       | 0.2<br>(0.1 to 0.3)                  | -3.6<br>(-12.1 to 5.7)                            | -1.1<br>(-9.6 to 8.2)                               |
| Digestive congenital anomalies                | 7.2<br>(6.4 to 8.1)                     | --                                       | 0.3<br>(0.2 to 0.5)                  | 13.2<br>(-3.7 to 31.5)                            | 2.3<br>(-12.6 to 18.1)                              |
| Other congenital anomalies                    | 25.3<br>(16.4 to 37.2)                  | --                                       | 3.5<br>(2.2 to 5.3)                  | 3.1<br>(-7.2 to 16.3)                             | -6.5<br>(-15.7 to 4.6)                              |
| Skin and subcutaneous diseases                | 1,714.4<br>(1,663.5 to 1,765.7)         | 3,402.2<br>(3,244.6 to 3,581.3)          | 45.8<br>(30.3 to 66.3)               | 8.0<br>(5.7 to 10.4)                              | 1.4<br>(-0.4 to 3.3)                                |
| Dermatitis                                    | 298.1<br>(266.8 to 332.3)               | 313.6<br>(289.1 to 338.3)                | 11.8<br>(6.8 to 19.6)                | 4.1<br>(0.2 to 8.8)                               | -0.0<br>(-3.5 to 3.7)                               |
| Psoriasis                                     | 43.1<br>(41.1 to 45.2)                  | 6.4<br>(6.2 to 6.7)                      | 3.8<br>(2.7 to 5.0)                  | 28.4<br>(16.4 to 41.3)                            | 7.2<br>(-1.7 to 17.1)                               |
| Cellulitis                                    | 2.1<br>(1.9 to 2.2)                     | 34.9<br>(32.3 to 37.6)                   | 0.1<br>(0.1 to 0.2)                  | 10.3<br>(-15.5 to 43.4)                           | 1.0<br>(-19.7 to 26.6)                              |
| Pyoderma                                      | 12.2<br>(11.9 to 12.6)                  | 268.7<br>(260.2 to 277.4)                | 0.1<br>(< 0.05 to 0.1)               | 22.2<br>(12.7 to 32.1)                            | 1.1<br>(-6.4 to 8.4)                                |
| Scabies                                       | 93.7<br>(81.6 to 108.4)                 | 285.6<br>(246.5 to 329.4)                | 2.4<br>(1.4 to 3.9)                  | 1.2<br>(-3.3 to 6.4)                              | -4.0<br>(-7.9 to 0.3)                               |
| Fungal skin diseases                          | 372.6<br>(337.7 to 414.9)               | 1,320.5<br>(1,189.4 to 1,459.5)          | 2.1<br>(0.8 to 4.3)                  | 13.9<br>(11.0 to 16.7)                            | 0.1<br>(-1.3 to 1.3)                                |
| Viral skin diseases                           | 176.3<br>(168.1 to 185.0)               | 262.4<br>(250.0 to 275.5)                | 5.4<br>(3.4 to 8.0)                  | 6.8<br>(3.3 to 10.4)                              | -0.1<br>(-2.9 to 2.8)                               |
| Acne vulgaris                                 | 519.5<br>(460.3 to 585.2)               | 354.4<br>(289.8 to 437.0)                | 13.5<br>(8.9 to 19.4)                | 5.7<br>(0.5 to 10.7)                              | 3.0<br>(-1.6 to 7.7)                                |
| Alopecia areata                               | 10.7<br>(10.2 to 11.1)                  | 19.0<br>(18.2 to 19.8)                   | 0.4<br>(0.2 to 0.5)                  | 20.6<br>(6.7 to 36.1)                             | 0.4<br>(-10.5 to 12.2)                              |
| Pruritus                                      | 49.0<br>(43.0 to 55.3)                  | 39.3<br>(35.2 to 44.2)                   | 0.5<br>(0.2 to 1.0)                  | 20.7<br>(13.3 to 28.2)                            | 1.1<br>(-4.2 to 6.3)                                |
| Urticaria                                     | 57.9<br>(50.3 to 66.8)                  | 103.1<br>(90.3 to 119.0)                 | 3.5<br>(2.2 to 5.1)                  | 3.2<br>(-2.9 to 10.1)                             | -0.1<br>(-5.3 to 5.8)                               |
| Decubitus ulcer                               | 1.5<br>(1.4 to 1.7)                     | 5.6<br>(5.0 to 6.2)                      | 0.2<br>(0.2 to 0.3)                  | 33.0<br>(20.8 to 46.7)                            | 6.1<br>(-7.0 to 20.4)                               |
| Other skin and subcutaneous diseases          | 341.3<br>(331.5 to 351.4)               | 388.8<br>(376.8 to 401.6)                | 1.9<br>(0.9 to 3.5)                  | 26.0<br>(22.4 to 29.6)                            | 2.5<br>(0.0 to 4.9)                                 |
| Sense organ diseases                          | 1,362.4<br>(1,331.3 to 1,398.5)         | 559.2†<br>(522.0 to 598.4)               | 50.7<br>(35.0 to 71.2)               | 25.8<br>(23.1 to 28.4)                            | -4.0<br>(-5.6 to -2.6)                              |
| Glaucoma                                      | 4.1<br>(3.4 to 4.8)                     | --                                       | 0.5<br>(0.3 to 0.6)                  | 47.3<br>(32.1 to 64.5)                            | 0.4<br>(-9.5 to 11.2)                               |
| Cataract                                      | 61.6<br>(54.8 to 68.7)                  | --                                       | 5.1<br>(3.6 to 7.0)                  | 37.3<br>(31.6 to 43.4)                            | -5.8<br>(-9.6 to -1.8)                              |
| Macular degeneration                          | 2.0<br>(1.6 to 2.5)                     | --                                       | 0.2<br>(0.1 to 0.2)                  | 50.6<br>(32.0 to 72.5)                            | 2.5<br>(-9.8 to 16.8)                               |
| Refraction and accommodation disorders        | 767.7<br>(728.4 to 808.5)               | --                                       | 13.8<br>(8.4 to 21.7)                | 14.9<br>(10.5 to 18.8)                            | -6.9<br>(-10.1 to -4.0)                             |
| Age-related and other hearing loss            | 787.6<br>(743.6 to 835.7)               | --                                       | 24.9<br>(17.4 to 34.8)               | 28.5<br>(23.8 to 33.0)                            | -3.4<br>(-5.7 to -1.4)                              |
| Other vision loss                             | 21.1<br>(18.8 to 23.6)                  | --                                       | 1.9<br>(1.3 to 2.6)                  | 33.1<br>(22.0 to 44.2)                            | 0.2<br>(-6.9 to 7.1)                                |
| Other sense organ diseases                    | 142.2<br>(131.5 to 153.0)               | 559.2<br>(522.0 to 598.4)                | 4.4<br>(2.8 to 6.7)                  | 29.9<br>(24.3 to 35.8)                            | 0.9<br>(-2.8 to 4.9)                                |
| Oral disorders                                | 3,376.7<br>(3,194.2 to 3,537.1)         | 7,448.8†<br>(6,539.1 to 8,395.3)         | 16.1<br>(9.8 to 25.1)                | 32.7<br>(29.9 to 35.7)                            | 0.1<br>(-1.6 to 1.8)                                |
| Caries of deciduous teeth                     | 416.4<br>(319.9 to 500.2)               | 1,543.5<br>(991.2 to 2,167.2)            | 0.1<br>(< 0.05 to 0.2)               | -8.3<br>(-19.0 to 4.0)                            | -0.7<br>(-12.4 to 12.7)                             |
| Caries of permanent teeth                     | 2,477.7<br>(2,261.3 to 2,691.2)         | 5,805.0<br>(5,130.3 to 6,544.2)          | 1.5<br>(0.7 to 2.8)                  | 12.0<br>(7.8 to 16.4)                             | -2.9<br>(-6.0 to 0.5)                               |
| Periodontal disease                           | 629.7<br>(527.2 to 742.2)               | 78.4<br>(63.9 to 94.8)                   | 4.2<br>(1.6 to 8.5)                  | 37.7<br>(32.6 to 43.1)                            | 1.2<br>(-2.3 to 4.7)                                |
| Edentulism and severe tooth loss              | 260.2<br>(228.1 to 291.3)               | 21.9<br>(18.7 to 25.4)                   | 7.3<br>(4.8 to 10.3)                 | 42.1<br>(37.8 to 46.6)                            | 0.1<br>(-2.7 to 3.0)                                |
| Other oral disorders                          | 106.7<br>(101.8 to 111.8)               | --                                       | 3.2<br>(1.9 to 4.8)                  | 20.4<br>(16.0 to 25.0)                            | -0.1<br>(-3.3 to 3.3)                               |
| <b>Injuries</b>                               | <b>745.6</b><br><b>(662.1 to 855.9)</b> | <b>326.4†</b><br><b>(305.4 to 350.6)</b> | <b>28.0</b><br><b>(18.2 to 41.5)</b> | <b>21.9</b><br><b>(14.7 to 30.8)</b>              | <b>-0.7</b><br><b>(-5.1 to 4.5)</b>                 |
| <b>Transport injuries</b>                     | <b>79.8</b><br><b>(74.5 to 85.3)</b>    | <b>33.6</b><br><b>(29.6 to 37.9)</b>     | <b>4.3</b><br><b>(2.8 to 6.2)</b>    | <b>32.0</b><br><b>(26.0 to 38.0)</b>              | <b>3.0</b><br><b>(-0.4 to 6.4)</b>                  |
| Road injuries                                 | 76.0<br>(70.7 to 81.3)                  | 32.5<br>(28.6 to 36.8)                   | 4.1<br>(2.7 to 6.0)                  | 32.7<br>(26.6 to 38.6)                            | 3.5<br>(0.1 to 6.9)                                 |
| Pedestrian road injuries                      | 14.6<br>(13.0 to 16.5)                  | 4.4<br>(3.6 to 5.3)                      | 0.8<br>(0.5 to 1.2)                  | 22.7<br>(17.0 to 28.8)                            | -3.8<br>(-6.9 to -0.5)                              |
| Cyclist road injuries                         | 13.5<br>(11.1 to 16.0)                  | 6.1<br>(4.8 to 7.5)                      | 0.7<br>(0.4 to 1.0)                  | 28.9<br>(22.1 to 36.0)                            | 4.6<br>(0.4 to 8.6)                                 |
| Motorcyclist road injuries                    | 10.3<br>(8.8 to 12.3)                   | 2.9<br>(2.3 to 3.5)                      | 0.5<br>(0.3 to 0.8)                  | 44.0<br>(36.8 to 51.4)                            | 11.3<br>(7.3 to 15.4)                               |
| Motor vehicle road injuries                   | 25.6<br>(22.1 to 29.1)                  | 12.7<br>(10.7 to 14.7)                   | 1.5<br>(1.0 to 2.2)                  | 37.6<br>(31.6 to 43.4)                            | 5.8<br>(2.3 to 9.1)                                 |
| Other road injuries                           | 11.9<br>(10.4 to 13.9)                  | 6.5<br>(5.2 to 8.0)                      | 0.6<br>(0.4 to 0.9)                  | 30.0<br>(24.6 to 35.5)                            | 1.3<br>(-1.9 to 4.3)                                |
| Other transport injuries                      | 3.9<br>(3.4 to 4.5)                     | 1.1<br>(0.9 to 1.2)                      | 0.2<br>(0.1 to 0.3)                  | 19.9<br>(14.9 to 25.9)                            | -6.2<br>(-9.4 to -2.8)                              |
| <b>Unintentional injuries</b>                 | <b>503.0</b><br><b>(458.1 to 561.4)</b> | <b>266.6</b><br><b>(246.7 to 290.0)</b>  | <b>18.1</b><br><b>(12.1 to 25.7)</b> | <b>30.8</b><br><b>(24.6 to 38.1)</b>              | <b>4.7</b><br><b>(0.9 to 8.7)</b>                   |
| Falls                                         | 257.8<br>(222.1 to 298.0)               | 134.2<br>(116.2 to 154.9)                | 10.7<br>(7.4 to 14.8)                | 39.0<br>(31.9 to 47.0)                            | 8.5<br>(4.6 to 13.1)                                |
| Drowning                                      | 2.2<br>(2.0 to 2.5)                     | 0.6<br>(0.5 to 0.7)                      | 0.1<br>(0.1 to 0.2)                  | 20.2<br>(14.1 to 27.1)                            | -9.4<br>(-13.2 to -5.6)                             |
| Fire, heat, and hot substances                | 45.3<br>(35.9 to 59.5)                  | 6.2<br>(4.7 to 7.8)                      | 1.2<br>(0.8 to 1.8)                  | 25.9<br>(15.0 to 37.7)                            | 5.5<br>(-1.9 to 13.3)                               |
| Poisonings                                    | 1.4<br>(1.2 to 1.7)                     | 2.2<br>(1.7 to 2.7)                      | 0.1<br>(0.1 to 0.2)                  | 35.0<br>(23.4 to 47.7)                            | 15.1<br>(6.1 to 25.0)                               |
| Exposure to mechanical forces                 | 94.5<br>(80.1 to 115.9)                 | 40.9<br>(34.1 to 48.0)                   | 2.3<br>(1.4 to 3.4)                  | 30.0<br>(24.1 to 36.0)                            | 2.6<br>(-1.0 to 6.2)                                |
| Unintentional firearm injuries                | 5.4<br>(4.4 to 6.6)                     | 1.6<br>(1.2 to 2.2)                      | 0.2<br>(0.1 to 0.3)                  | 22.8<br>(17.5 to 28.8)                            | -4.8<br>(-8.2 to -1.1)                              |
| Unintentional suffocation                     | 2.7<br>(1.9 to 3.5)                     | 0.6<br>(0.4 to 0.8)                      | 0.1<br>(0.1 to 0.1)                  | 22.6<br>(15.0 to 31.4)                            | 6.1<br>(0.4 to 12.4)                                |
| Other exposure to mechanical forces           | 86.4<br>(72.4 to 107.3)                 | 38.7<br>(32.3 to 45.5)                   | 1.9<br>(1.2 to 2.9)                  | 31.2<br>(25.4 to 37.2)                            | 3.3<br>(-0.2 to 6.9)                                |



| Cause                                                                               | Prevalence in thousands (95% UI)        | Incidence in thousands (95% UI)                | YLDs in thousands (95% UI)        |                                                   |                                                     |
|-------------------------------------------------------------------------------------|-----------------------------------------|------------------------------------------------|-----------------------------------|---------------------------------------------------|-----------------------------------------------------|
|                                                                                     | 2016 counts                             | 2016 counts                                    | 2016 counts                       | Percentage change in counts between 2006 and 2016 | Percentage change in age-standardised rates between |
| Adverse effects of medical treatment                                                | 0.6<br>(0.5 to 0.8)                     | 8.2<br>(7.3 to 9.2)                            | 0.1<br>(0.1 to 0.1)               | 15.3<br>(9.7 to 21.4)                             | -1.1<br>(-5.2 to 3.4)                               |
| Animal contact                                                                      | 25.9<br>(22.6 to 30.7)                  | 33.3<br>(27.4 to 39.8)                         | 0.9<br>(0.6 to 1.3)               | 16.3<br>(8.9 to 24.3)                             | -2.6<br>(-8.0 to 3.3)                               |
| Venomous animal contact                                                             | 12.1<br>(9.9 to 14.9)                   | 15.0<br>(11.6 to 18.8)                         | 0.7<br>(0.5 to 1.0)               | 17.4<br>(7.7 to 27.8)                             | -0.3<br>(-7.5 to 7.6)                               |
| Non-venomous animal contact                                                         | 13.8<br>(11.5 to 17.1)                  | 18.3<br>(14.5 to 22.4)                         | 0.2<br>(0.1 to 0.3)               | 12.8<br>(7.3 to 17.8)                             | -8.6<br>(-12.1 to -5.4)                             |
| Foreign body                                                                        | 28.7<br>(23.3 to 33.8)                  | 23.9<br>(20.8 to 27.9)                         | 1.2<br>(0.7 to 1.8)               | 5.2<br>(0.1 to 10.7)                              | -10.0<br>(-13.5 to -6.3)                            |
| Pulmonary aspiration and foreign body in airway                                     | 20.5<br>(15.8 to 25.8)                  | 7.8<br>(6.8 to 9.0)                            | 0.9<br>(0.5 to 1.3)               | 3.4<br>(-1.7 to 9.2)                              | -10.6<br>(-14.4 to -6.7)                            |
| Foreign body in eyes                                                                | 2.6<br>(1.5 to 3.9)                     | 13.7<br>(10.7 to 17.4)                         | 0.1<br>(0.1 to 0.2)               | 19.6<br>(14.1 to 25.9)                            | -2.5<br>(-5.0 to -0.0)                              |
| Foreign body in other body part                                                     | 5.5<br>(4.4 to 7.0)                     | 2.5<br>(2.1 to 3.0)                            | 0.2<br>(0.1 to 0.2)               | 3.4<br>(-3.0 to 10.7)                             | -13.3<br>(-17.5 to -8.8)                            |
| Environmental heat and cold exposure                                                | 9.1<br>(7.7 to 11.2)                    | 2.7<br>(2.2 to 3.3)                            | 0.3<br>(0.2 to 0.5)               | 19.6<br>(13.8 to 25.8)                            | -2.4<br>(-5.9 to 1.2)                               |
| Other unintentional injuries                                                        | 37.4<br>(30.6 to 46.2)                  | 14.4<br>(12.0 to 17.1)                         | 1.1<br>(0.7 to 1.6)               | 17.9<br>(12.9 to 22.3)                            | -3.8<br>(-6.9 to -1.1)                              |
| <b>Self-harm and interpersonal violence</b>                                         | <b>156.8</b><br><b>(140.2 to 173.8)</b> | <b>26.2†</b><br><b>(22.5 to 30.3)</b>          | <b>2.7</b><br><b>(1.9 to 3.8)</b> | <b>14.2</b><br><b>(9.2 to 19.0)</b>               | <b>-6.1</b><br><b>(-9.5 to -3.2)</b>                |
| Self-harm                                                                           | 3.6<br>(3.1 to 4.1)                     | 1.8<br>(1.6 to 2.1)                            | 0.2<br>(0.1 to 0.3)               | 14.2<br>(8.7 to 20.4)                             | -11.2<br>(-14.7 to -7.6)                            |
| Self-harm by firearm                                                                | 0.3<br>(0.3 to 0.4)                     | 0.1<br>(0.1 to 0.2)                            | < 0.05<br>(< 0.05 to < 0.05)      | 4.7<br>(-0.5 to 11.1)                             | -19.3<br>(-22.3 to -16.1)                           |
| Self-harm by other specified means                                                  | 3.3<br>(2.8 to 3.8)                     | 1.7<br>(1.5 to 2.0)                            | 0.2<br>(0.1 to 0.2)               | 15.0<br>(9.1 to 21.4)                             | -10.6<br>(-14.1 to -6.8)                            |
| Interpersonal violence                                                              | 153.2<br>(136.7 to 170.2)               | 24.4†<br>(20.7 to 28.6)                        | 2.5<br>(1.7 to 3.5)               | 14.2<br>(9.0 to 19.3)                             | -5.7<br>(-9.3 to -2.6)                              |
| Assault by firearm                                                                  | 3.0<br>(2.5 to 3.5)                     | 1.2<br>(0.9 to 1.5)                            | 0.1<br>(0.1 to 0.2)               | 34.0<br>(27.5 to 40.9)                            | 3.4<br>(-0.6 to 7.7)                                |
| Assault by sharp object                                                             | 21.6<br>(17.8 to 25.7)                  | 12.0<br>(9.6 to 14.7)                          | 0.7<br>(0.5 to 1.1)               | 23.7<br>(18.2 to 29.4)                            | -4.2<br>(-7.7 to -0.8)                              |
| Sexual violence                                                                     | 112.5<br>(97.5 to 129.0)                | --                                             | 1.0<br>(0.6 to 1.4)               | -3.7<br>(-12.7 to 3.3)                            | -15.3<br>(-22.3 to -9.7)                            |
| Assault by other means                                                              | 16.1<br>(13.6 to 19.3)                  | 11.2<br>(9.2 to 13.4)                          | 0.7<br>(0.5 to 1.0)               | 33.3<br>(27.9 to 38.6)                            | 3.6<br>(0.3 to 6.7)                                 |
| <b>Forces of nature, conflict and terrorism, and executions and police conflict</b> | <b>118.6</b><br><b>(50.6 to 212.3)</b>  | <b>&lt; 0.05†</b><br><b>(&lt; 0.05 to 0.1)</b> | <b>2.9</b><br><b>(0.8 to 6.6)</b> | <b>-17.2</b><br><b>(-24.1 to -12.0)</b>           | <b>-26.4</b><br><b>(-31.2 to -23.1)</b>             |
| Exposure to forces of nature                                                        | 18.0<br>(8.8 to 29.2)                   | --                                             | 0.6<br>(0.2 to 1.4)               | -14.1<br>(-18.7 to -9.8)                          | -23.6<br>(-27.0 to -20.1)                           |
| Conflict and terrorism                                                              | 100.5<br>(33.3 to 195.0)                | --                                             | 2.4<br>(0.6 to 5.3)               | -18.0<br>(-25.7 to -12.0)                         | -27.0<br>(-32.4 to -23.3)                           |
| Executions and police conflict                                                      | 0.1<br>(0.1 to 0.1)                     | < 0.05<br>(< 0.05 to 0.1)                      | < 0.05<br>(< 0.05 to < 0.05)      | 30.1<br>(18.2 to 39.8)                            | 20.6<br>(10.8 to 28.7)                              |
| <b>Impairments</b>                                                                  | --                                      | --                                             | --                                | --                                                | --                                                  |
| Anaemia                                                                             | 748.9<br>(679.5 to 821.6)               | --                                             | 17.9<br>(12.2 to 25.6)            | 13.3<br>(2.3 to 28.0)                             | -3.4<br>(-11.4 to 7.0)                              |
| Developmental intellectual disability                                               | 100.7<br>(77.2 to 124.2)                | --                                             | 11.3<br>(8.1 to 14.9)             | 8.8<br>(3.7 to 14.6)                              | -1.3<br>(-5.5 to 3.9)                               |
| Epilepsy                                                                            | 40.8<br>(19.2 to 61.4)                  | --                                             | 12.1<br>(5.4 to 22.0)             | 7.9<br>(-54.1 to 164.7)                           | -3.8<br>(-59.8 to 135.3)                            |
| Guillain-Barre syndrome                                                             | 0.1<br>(0.1 to 0.1)                     | --                                             | < 0.05<br>(< 0.05 to < 0.05)      | 28.9<br>(16.2 to 54.9)                            | 13.7<br>(5.9 to 32.5)                               |
| Hearing loss                                                                        | 891.2<br>(846.5 to 937.2)               | --                                             | 30.4<br>(21.3 to 41.9)            | 21.9<br>(18.1 to 25.3)                            | -4.0<br>(-6.1 to -2.4)                              |
| Heart failure                                                                       | 32.9<br>(29.2 to 37.3)                  | --                                             | 3.5<br>(2.5 to 4.5)               | 44.3<br>(34.7 to 54.8)                            | 1.6<br>(-5.6 to 9.0)                                |
| Infertility                                                                         | 51.4<br>(40.5 to 67.4)                  | --                                             | 0.3<br>(0.1 to 0.6)               | 37.9<br>(16.0 to 63.7)                            | 11.5<br>(-5.7 to 33.7)                              |
| Pelvic inflammatory disease                                                         | 0.6<br>(0.5 to 0.7)                     | --                                             | 0.1<br>(< 0.05 to 0.1)            | 18.5<br>(-4.5 to 48.5)                            | -7.2<br>(-25.1 to 15.1)                             |
| Vision loss                                                                         | 873.8<br>(832.4 to 916.3)               | --                                             | 24.1<br>(16.8 to 34.7)            | 20.6<br>(17.1 to 24.6)                            | -5.2<br>(-7.6 to -2.8)                              |

We did not calculate incidence for the nine impairments, certain NTDs, and causes with only birth prevalence. Blank cells mean that no estimate is available.

† Incidence for aggregate causes represents the sum of the incidence of the causes below the aggregate.

‡ Incidence estimates for stroke represent first-ever stroke only.

^ Incidence of HIV/AIDS represents new infections of HIV only and does not include new infections of Tuberculosis in HIV positive cases.

SR Table 14: Prevalence, incidence, and YLDs for 2016, percentage change of YLD counts and percentage change of age-standardised YLD rates between 2006 and 2016 by cause and impairments, for all ages, Niger.

| Cause                                                                                | Prevalence in thousands (95% UI)          | Incidence in thousands (95% UI)               | YLDs in thousands (95% UI)             |                                                   |                                                     |
|--------------------------------------------------------------------------------------|-------------------------------------------|-----------------------------------------------|----------------------------------------|---------------------------------------------------|-----------------------------------------------------|
|                                                                                      | 2016 counts                               | 2016 counts                                   | 2016 counts                            | Percentage change in counts between 2006 and 2016 | Percentage change in age-standardised rates between |
| <b>All causes</b>                                                                    | <b>19,752.5</b><br>(19,700.3 to 19,800.4) | <b>133,469.6†</b><br>(125,124.3 to 142,001.8) | <b>1,776.9</b><br>(1,306.8 to 2,352.2) | <b>39.8</b><br>(35.9 to 44.1)                     | <b>-3.4</b><br>(-5.6 to -1.1)                       |
| <b>Communicable, maternal, neonatal, and nutritional disorders</b>                   | <b>16,593.8</b><br>(16,195.9 to 17,012.5) | <b>81,736.4†</b><br>(74,497.5 to 89,371.3)    | <b>474.1</b><br>(331.2 to 654.6)       | <b>25.0</b><br>(18.7 to 31.7)                     | <b>-18.5</b><br>(-22.9 to -14.2)                    |
| <b>HIV/AIDS and tuberculosis</b>                                                     | <b>4,387.6</b><br>(3,788.7 to 4,954.5)    | <b>22.5†</b><br>(18.9 to 26.9)                | <b>11.5</b><br>(7.8 to 16.4)           | <b>-21.3</b><br>(-32.2 to -7.9)                   | <b>-43.7</b><br>(-51.6 to -33.4)                    |
| Tuberculosis                                                                         | 3,980.0<br>(3,436.5 to 4,626.5)           | 19.0†<br>(15.7 to 22.9)                       | 4.0<br>(2.6 to 5.6)                    | 20.5<br>(4.2 to 39.5)                             | -15.0<br>(-24.1 to -4.0)                            |
| Drug-susceptible tuberculosis                                                        | 12.8<br>(10.4 to 15.5)                    | 18.7<br>(15.3 to 22.6)                        | 3.9<br>(2.5 to 5.5)                    | 20.7<br>(3.7 to 40.8)                             | -14.9<br>(-24.0 to -3.9)                            |
| Multidrug-resistant tuberculosis without extensive drug resistance                   | 0.2<br>(0.1 to 0.6)                       | 0.3<br>(0.1 to 0.8)                           | 0.1<br>(< 0.05 to 0.2)                 | 8.3<br>(-66.2 to 214.5)                           | -24.0<br>(-76.6 to 122.6)                           |
| Extensively drug-resistant tuberculosis                                              | < 0.05<br>(< 0.05 to < 0.05)              | < 0.05<br>(< 0.05 to < 0.05)                  | < 0.05<br>(< 0.05 to < 0.05)           | 230.1<br>(3.0 to 858.0)                           | 131.7<br>(-28.6 to 578.0)                           |
| Latent tuberculosis infection                                                        | 3,966.9<br>(3,423.8 to 4,612.0)           | --                                            | --                                     | --                                                | --                                                  |
| HIV/AIDS                                                                             | 50.8<br>(44.6 to 58.0)                    | 3.5^<br>(2.2 to 5.3)                          | 7.5<br>(4.8 to 11.3)                   | -33.6<br>(-43.9 to -18.4)                         | -53.3<br>(-60.8 to -43.1)                           |
| Drug-susceptible HIV/AIDS - Tuberculosis                                             | 1.1<br>(0.7 to 1.8)                       | 1.6<br>(1.0 to 2.6)                           | 0.5<br>(0.2 to 0.8)                    | -32.5<br>(-46.2 to -14.8)                         | -49.3<br>(-60.6 to -35.6)                           |
| Multidrug-resistant HIV/AIDS - Tuberculosis without extensive drug resistance        | < 0.05<br>(< 0.05 to 0.1)                 | < 0.05<br>(< 0.05 to 0.1)                     | < 0.05<br>(< 0.05 to < 0.05)           | -40.0<br>(-80.6 to 76.9)                          | -54.9<br>(-85.4 to 32.8)                            |
| Extensively drug-resistant HIV/AIDS - Tuberculosis                                   | < 0.05<br>(< 0.05 to < 0.05)              | < 0.05<br>(< 0.05 to < 0.05)                  | < 0.05<br>(< 0.05 to < 0.05)           | 83.0<br>(-41.0 to 438.9)                          | 37.3<br>(-55.7 to 304.6)                            |
| HIV/AIDS resulting in other diseases                                                 | 49.7<br>(43.4 to 56.7)                    | 3.5<br>(2.2 to 5.3)                           | 7.1<br>(4.5 to 10.8)                   | -33.7<br>(-44.6 to -17.7)                         | -53.5<br>(-61.2 to -42.4)                           |
| <b>Diarrhoea, lower respiratory infections, and other common infectious diseases</b> | <b>1,502.3</b><br>(1,441.3 to 1,574.1)    | <b>64,113.8†</b><br>(58,749.5 to 69,622.6)    | <b>90.8</b><br>(63.6 to 122.5)         | <b>28.3</b><br>(23.3 to 33.6)                     | <b>-9.1</b><br>(-11.8 to -6.3)                      |
| Diarrhoeal diseases                                                                  | 352.1<br>(326.3 to 383.1)                 | 23,373.0<br>(21,612.2 to 25,402.3)            | 39.8<br>(27.3 to 55.1)                 | 17.1<br>(8.4 to 26.9)                             | -13.7<br>(-18.1 to -9.0)                            |
| Intestinal infectious diseases                                                       | 2.2<br>(1.4 to 3.3)                       | 42.9†<br>(27.0 to 64.7)                       | 0.4<br>(0.2 to 0.6)                    | -7.3<br>(-28.8 to 20.2)                           | -39.4<br>(-49.5 to -25.8)                           |
| Typhoid fever                                                                        | 2.1<br>(1.3 to 3.2)                       | 32.6<br>(20.3 to 49.8)                        | 0.3<br>(0.2 to 0.6)                    | -7.3<br>(-30.8 to 24.4)                           | -39.5<br>(-50.7 to -24.3)                           |
| Paratyphoid fever                                                                    | 0.5<br>(0.2 to 0.8)                       | 10.2<br>(5.7 to 18.1)                         | < 0.05<br>(< 0.05 to 0.1)              | -0.1<br>(-23.9 to 29.5)                           | -35.0<br>(-48.0 to -19.4)                           |
| Other intestinal infectious diseases                                                 | --                                        | --                                            | < 0.05<br>(< 0.05 to < 0.05)           | -36.0<br>(-51.2 to -13.9)                         | -55.2<br>(-62.8 to -45.8)                           |
| Lower respiratory infections                                                         | 27.2<br>(24.9 to 29.7)                    | 1,173.1<br>(1,062.1 to 1,298.5)               | 1.7<br>(1.1 to 2.4)                    | 16.5<br>(1.9 to 32.4)                             | -12.1<br>(-20.3 to -3.1)                            |
| Upper respiratory infections                                                         | 491.4<br>(427.8 to 563.9)                 | 36,728.8<br>(31,826.6 to 42,324.5)            | 12.3<br>(7.3 to 19.5)                  | 40.8<br>(32.8 to 49.8)                            | -2.9<br>(-7.7 to 2.1)                               |
| Otitis media                                                                         | 536.8<br>(479.6 to 598.1)                 | 2,010.1<br>(1,552.9 to 2,581.1)               | 19.0<br>(11.9 to 28.2)                 | 44.4<br>(34.6 to 54.2)                            | -3.3<br>(-9.3 to 2.9)                               |
| Meningitis                                                                           | 126.5<br>(101.6 to 156.2)                 | 40.2<br>(34.1 to 47.9)                        | 11.1<br>(7.9 to 14.6)                  | 38.6<br>(28.6 to 49.5)                            | -5.6<br>(-12.7 to 1.6)                              |
| Pneumococcal meningitis                                                              | 27.1<br>(22.1 to 33.2)                    | 3.1<br>(2.3 to 4.3)                           | 3.2<br>(2.2 to 4.4)                    | 31.8<br>(13.3 to 53.2)                            | -10.9<br>(-22.8 to 3.7)                             |
| H influenzae type B meningitis                                                       | 14.7<br>(10.9 to 19.8)                    | 3.7<br>(2.5 to 5.2)                           | 1.7<br>(1.1 to 2.2)                    | 15.1<br>(-0.5 to 33.2)                            | -22.8<br>(-32.8 to -12.0)                           |
| Meningococcal infection                                                              | 65.2<br>(43.7 to 89.8)                    | 27.9<br>(23.1 to 33.8)                        | 4.4<br>(2.9 to 6.0)                    | 39.8<br>(25.0 to 56.2)                            | -4.7<br>(-14.1 to 5.9)                              |
| Other meningitis                                                                     | 19.5<br>(14.1 to 26.1)                    | 5.5<br>(4.1 to 7.6)                           | 1.8<br>(1.2 to 2.5)                    | 85.9<br>(65.0 to 110.2)                           | 30.4<br>(16.7 to 46.5)                              |
| Encephalitis                                                                         | 49.5<br>(31.2 to 74.8)                    | 21.7<br>(18.6 to 25.2)                        | 5.4<br>(3.8 to 7.1)                    | 42.7<br>(26.7 to 60.7)                            | -1.4<br>(-11.6 to 9.4)                              |
| Diphtheria                                                                           | < 0.05<br>(< 0.05 to < 0.05)              | < 0.05<br>(< 0.05 to < 0.05)                  | < 0.05<br>(< 0.05 to < 0.05)           | -77.1<br>(-92.7 to -28.8)                         | -82.8<br>(-93.4 to -54.1)                           |
| Whooping cough                                                                       | 11.9<br>(9.3 to 15.0)                     | 87.2<br>(68.0 to 109.6)                       | 0.6<br>(0.3 to 0.9)                    | -22.2<br>(-33.6 to -8.7)                          | -45.6<br>(-53.8 to -36.4)                           |
| Tetanus                                                                              | 0.4<br>(0.3 to 0.4)                       | 1.1<br>(0.6 to 2.0)                           | < 0.05<br>(< 0.05 to < 0.05)           | -20.1<br>(-50.5 to 17.8)                          | -43.1<br>(-67.7 to -16.1)                           |
| Measles                                                                              | 0.9<br>(0.3 to 2.1)                       | 33.3<br>(10.9 to 76.0)                        | 0.1<br>(< 0.05 to 0.2)                 | -53.3<br>(-72.8 to -17.4)                         | -67.7<br>(-81.1 to -43.0)                           |
| Varicella and herpes zoster                                                          | 19.2<br>(17.8 to 20.6)                    | 602.4<br>(556.9 to 653.1)                     | 0.5<br>(0.3 to 0.8)                    | 46.6<br>(25.7 to 71.4)                            | 0.1<br>(-10.2 to 12.2)                              |
| <b>Neglected tropical diseases and malaria</b>                                       | <b>5,667.6</b><br>(4,992.0 to 6,371.7)    | <b>7,718.6†</b><br>(4,366.6 to 11,995.2)      | <b>86.9</b><br>(59.7 to 125.2)         | <b>1.8</b><br>(-14.3 to 18.5)                     | <b>-40.0</b><br>(-50.3 to -29.2)                    |
| Malaria                                                                              | 4,171.3<br>(3,406.3 to 5,194.1)           | 7,277.8<br>(3,933.8 to 11,540.0)              | 53.6<br>(37.9 to 76.0)                 | 53.9<br>(36.2 to 74.0)                            | 3.7<br>(-6.3 to 14.7)                               |
| Chagas disease                                                                       | --                                        | --                                            | --                                     | --                                                | --                                                  |
| Leishmaniasis                                                                        | 7.3<br>(5.6 to 9.6)                       | 0.2<br>(0.1 to 0.5)                           | 0.4<br>(0.2 to 0.6)                    | 4.9<br>(-10.4 to 27.0)                            | -23.5<br>(-33.4 to -8.6)                            |
| Visceral leishmaniasis                                                               | < 0.05<br>(< 0.05 to < 0.05)              | < 0.05<br>(< 0.05 to < 0.05)                  | < 0.05<br>(< 0.05 to < 0.05)           | -3.4<br>(-67.0 to 153.0)                          | -35.5<br>(-78.6 to 83.8)                            |
| Cutaneous and mucocutaneous leishmaniasis                                            | 6.1<br>(4.2 to 8.7)                       | 0.2<br>(0.1 to 0.4)                           | 0.4<br>(0.2 to 0.6)                    | 4.9<br>(-10.4 to 27.2)                            | -23.5<br>(-33.3 to -8.6)                            |
| African trypanosomiasis                                                              | --                                        | --                                            | --                                     | --                                                | --                                                  |
| Schistosomiasis                                                                      | 626.2<br>(454.1 to 848.2)                 | 301.1<br>(231.8 to 387.2)                     | 5.7<br>(2.7 to 11.2)                   | -73.0<br>(-75.2 to -70.2)                         | -81.2<br>(-82.7 to -79.1)                           |
| Cysticercosis                                                                        | 0.3<br>(0.2 to 0.4)                       | --                                            | 0.1<br>(< 0.05 to 0.1)                 | 38.1<br>(21.4 to 54.8)                            | -2.7<br>(-14.8 to 8.5)                              |
| Cystic echinococcosis                                                                | 18.7<br>(4.9 to 58.1)                     | 4.0<br>(1.0 to 12.5)                          | 1.7<br>(0.4 to 5.9)                    | -13.9<br>(-85.3 to 365.2)                         | -40.4<br>(-88.7 to 203.0)                           |
| Lymphatic filariasis                                                                 | 141.5<br>(94.5 to 222.3)                  | 50.5<br>(40.8 to 61.2)                        | 8.8<br>(3.2 to 19.0)                   | -31.2<br>(-67.3 to -1.6)                          | -50.1<br>(-75.7 to -26.9)                           |
| Onchocerciasis                                                                       | --                                        | --                                            | --                                     | --                                                | --                                                  |
| Trachoma                                                                             | 21.7<br>(14.0 to 31.4)                    | --                                            | 1.9<br>(1.1 to 3.2)                    | -20.0<br>(-34.0 to -2.3)                          | -45.0<br>(-56.3 to -30.0)                           |
| Dengue                                                                               | 4.8<br>(2.0 to 9.5)                       | 80.9<br>(35.1 to 153.1)                       | 0.8<br>(0.3 to 1.7)                    | 205.4<br>(101.7 to 638.7)                         | 103.2<br>(46.5 to 379.7)                            |
| Yellow fever                                                                         | 0.1<br>(< 0.05 to 0.3)                    | 3.6<br>(0.9 to 10.6)                          | < 0.05<br>(< 0.05 to < 0.05)           | -7.8<br>(-58.9 to 105.4)                          | -37.6<br>(-69.4 to 24.0)                            |
| Rabies                                                                               | < 0.05<br>(< 0.05 to < 0.05)              | 0.4<br>(0.1 to 1.2)                           | < 0.05<br>(< 0.05 to < 0.05)           | -25.7<br>(-61.3 to 43.0)                          | -45.7<br>(-66.1 to -14.2)                           |
| Intestinal nematode infections                                                       | 680.9<br>(577.6 to 819.8)                 | --                                            | 0.9<br>(0.5 to 1.4)                    | -38.6<br>(-50.0 to -23.8)                         | -61.4<br>(-68.7 to -52.4)                           |
| Ascariasis                                                                           | 269.6<br>(207.1 to 343.9)                 | --                                            | < 0.05<br>(< 0.05 to < 0.05)           | -43.9<br>(-56.9 to -24.7)                         | -62.6<br>(-73.1 to -46.5)                           |

| Cause                                                                   | Prevalence in thousands (95% UI)                 | Incidence in thousands (95% UI)                   | YLDs in thousands (95% UI)                  |                                                   |                                                     |
|-------------------------------------------------------------------------|--------------------------------------------------|---------------------------------------------------|---------------------------------------------|---------------------------------------------------|-----------------------------------------------------|
|                                                                         | 2016 counts                                      | 2016 counts                                       | 2016 counts                                 | Percentage change in counts between 2006 and 2016 | Percentage change in age-standardised rates between |
| Trichuriasis                                                            | 56.3<br>(41.6 to 76.3)                           | --                                                | < 0.05<br>(< 0.05 to < 0.05)                | -45.7<br>(-70.5 to 2.6)                           | -63.9<br>(-82.9 to -21.1)                           |
| Hookworm disease                                                        | 358.6<br>(273.1 to 475.6)                        | --                                                | 0.9<br>(0.5 to 1.4)                         | -38.5<br>(-50.0 to -23.7)                         | -61.4<br>(-68.7 to -52.3)                           |
| Food-borne trematodiasis                                                | --                                               | --                                                | --                                          | --                                                | --                                                  |
| Leprosy                                                                 | 3.3<br>(3.0 to 3.6)                              | 0.1<br>(0.1 to 0.1)                               | 0.2<br>(0.1 to 0.3)                         | -9.0<br>(-22.8 to 7.0)                            | -31.7<br>(-40.1 to -22.5)                           |
| Ebola virus disease                                                     | --                                               | --                                                | --                                          | --                                                | --                                                  |
| Zika virus disease                                                      | --                                               | --                                                | --                                          | --                                                | --                                                  |
| Guinea worm disease                                                     | --                                               | --                                                | --                                          | --                                                | --                                                  |
| Other neglected tropical diseases                                       | 376.2<br>(355.5 to 396.1)                        | --                                                | 12.8<br>(8.5 to 18.9)                       | 31.0<br>(18.1 to 44.6)                            | -10.7<br>(-18.6 to -2.3)                            |
| <b>Maternal disorders</b>                                               | <b>42.3</b><br><b>(33.3 to 52.2)</b>             | <b>458.9†</b><br><b>(390.1 to 542.0)</b>          | <b>4.3</b><br><b>(3.0 to 6.1)</b>           | <b>8.2</b><br><b>(-8.8 to 30.9)</b>               | <b>-25.3</b><br><b>(-36.6 to -10.3)</b>             |
| Maternal haemorrhage                                                    | 9.1<br>(7.2 to 11.9)                             | 71.8<br>(48.4 to 102.8)                           | 0.4<br>(0.2 to 0.7)                         | 40.3<br>(-3.6 to 106.8)                           | -4.5<br>(-34.7 to 38.7)                             |
| Maternal sepsis and other pregnancy related infections                  | 8.9<br>(6.2 to 12.5)                             | 66.4<br>(50.5 to 88.1)                            | 0.3<br>(0.1 to 0.5)                         | 41.0<br>(-30.2 to 188.0)                          | -3.3<br>(-51.1 to 91.1)                             |
| Maternal hypertensive disorders                                         | 18.4<br>(11.6 to 26.8)                           | 81.9<br>(64.1 to 101.6)                           | 0.9<br>(0.5 to 1.5)                         | 22.9<br>(-24.7 to 102.4)                          | -15.9<br>(-48.2 to 39.6)                            |
| Maternal obstructed labour and uterine rupture                          | 5.8<br>(4.7 to 7.0)                              | 32.5<br>(24.5 to 43.1)                            | 1.9<br>(1.2 to 2.8)                         | -8.0<br>(-24.0 to 13.4)                           | -34.6<br>(-46.1 to -19.7)                           |
| Maternal abortion, miscarriage, and ectopic pregnancy                   | 1.7<br>(1.0 to 2.5)                              | 206.2<br>(150.2 to 280.6)                         | 0.2<br>(0.1 to 0.3)                         | 113.5<br>(15.4 to 299.6)                          | 47.4<br>(-19.9 to 170.3)                            |
| Other maternal disorders                                                | --                                               | --                                                | 0.7<br>(0.5 to 0.9)                         | 3.5<br>(-12.8 to 25.1)                            | -28.7<br>(-39.5 to -14.5)                           |
| <b>Neonatal disorders</b>                                               | <b>267.9</b><br><b>(224.4 to 325.8)</b>          | --                                                | <b>21.9</b><br><b>(13.1 to 37.5)</b>        | <b>67.0</b><br><b>(29.0 to 116.1)</b>             | <b>18.0</b><br><b>(-11.1 to 56.9)</b>               |
| Neonatal preterm birth complications                                    | 169.5<br>(123.7 to 237.5)                        | --                                                | 7.1<br>(4.8 to 10.0)                        | 48.6<br>(13.2 to 91.2)                            | 3.4<br>(-22.8 to 37.8)                              |
| Neonatal encephalopathy due to birth asphyxia and trauma                | 99.6<br>(54.6 to 168.1)                          | --                                                | 4.8<br>(1.8 to 16.3)                        | 74.6<br>(-9.3 to 240.7)                           | 23.1<br>(-38.8 to 150.6)                            |
| Neonatal sepsis and other neonatal infections                           | 17.8<br>(6.6 to 41.9)                            | --                                                | 6.0<br>(1.2 to 16.9)                        | 105.8<br>(4.4 to 226.9)                           | 55.6<br>(-30.6 to 162.7)                            |
| Hemolytic disease and other neonatal jaundice                           | 4.5<br>(3.8 to 5.2)                              | --                                                | 1.6<br>(1.2 to 2.0)                         | 47.8<br>(30.4 to 69.2)                            | 1.8<br>(-8.8 to 14.0)                               |
| Other neonatal disorders                                                | --                                               | --                                                | 2.4<br>(1.5 to 3.9)                         | 50.5<br>(21.4 to 84.5)                            | 6.5<br>(-14.7 to 31.7)                              |
| <b>Nutritional deficiencies</b>                                         | <b>9,724.9</b><br><b>(8,923.8 to 10,736.7)</b>   | <b>6,407.2†</b><br><b>(4,229.0 to 9,478.5)</b>    | <b>241.1</b><br><b>(162.5 to 344.7)</b>     | <b>35.1</b><br><b>(26.4 to 43.7)</b>              | <b>-8.3</b><br><b>(-12.4 to -4.0)</b>               |
| Protein-energy malnutrition                                             | 658.6<br>(530.6 to 790.3)                        | 480.9<br>(396.3 to 565.6)                         | 25.6<br>(15.7 to 38.2)                      | 59.3<br>(19.7 to 108.7)                           | 12.1<br>(-16.4 to 48.6)                             |
| Iodine deficiency                                                       | 172.7<br>(152.2 to 196.0)                        | 7.9<br>(7.0 to 8.9)                               | 5.9<br>(4.0 to 8.2)                         | -21.5<br>(-30.7 to -11.9)                         | -45.7<br>(-51.3 to -39.7)                           |
| Vitamin A deficiency                                                    | 5,159.4<br>(3,709.5 to 6,904.2)                  | 5,918.5<br>(3,746.4 to 8,963.2)                   | 2.0<br>(1.1 to 3.2)                         | 45.0<br>(13.5 to 86.2)                            | -1.2<br>(-20.2 to 22.3)                             |
| Iron-deficiency anaemia                                                 | 6,278.5<br>(6,042.9 to 6,518.0)                  | --                                                | 206.8<br>(137.8 to 298.0)                   | 35.1<br>(26.6 to 43.5)                            | -6.9<br>(-11.1 to -2.7)                             |
| Other nutritional deficiencies                                          | --                                               | --                                                | 0.8<br>(0.5 to 1.3)                         | 58.7<br>(17.8 to 111.8)                           | 11.8<br>(-17.4 to 50.3)                             |
| <b>Other communicable, maternal, neonatal, and nutritional diseases</b> | <b>7,073.3</b><br><b>(6,294.6 to 7,950.2)</b>    | <b>3,015.3</b><br><b>(2,476.6 to 3,758.5)</b>     | <b>17.6</b><br><b>(11.4 to 25.8)</b>        | <b>37.8</b><br><b>(30.0 to 46.0)</b>              | <b>-4.2</b><br><b>(-8.7 to 0.2)</b>                 |
| Sexually transmitted diseases excluding HIV                             | 2,914.8<br>(2,700.7 to 3,154.0)                  | 1,667.5<br>(1,492.9 to 1,855.9)                   | 7.0<br>(4.4 to 11.0)                        | 40.1<br>(31.3 to 48.9)                            | -1.0<br>(-6.6 to 5.0)                               |
| Syphilis                                                                | 37.1<br>(30.7 to 45.1)                           | 25.7<br>(20.3 to 32.2)                            | 0.4<br>(0.2 to 0.5)                         | 45.2<br>(27.2 to 67.9)                            | 3.7<br>(-10.0 to 20.4)                              |
| Chlamydial infection                                                    | 168.9<br>(135.1 to 207.3)                        | 163.7<br>(135.7 to 196.0)                         | 1.4<br>(0.9 to 2.1)                         | 41.7<br>(23.1 to 61.0)                            | -0.8<br>(-13.9 to 13.1)                             |
| Gonococcal infection                                                    | 145.9<br>(119.9 to 181.9)                        | 504.1<br>(394.4 to 641.2)                         | 1.3<br>(0.8 to 2.0)                         | 40.4<br>(24.2 to 58.1)                            | -0.9<br>(-12.5 to 11.8)                             |
| Trichomoniasis                                                          | 611.1<br>(502.2 to 728.9)                        | 567.2<br>(457.3 to 695.3)                         | 0.8<br>(0.3 to 1.8)                         | 41.8<br>(31.5 to 51.3)                            | -0.6<br>(-7.0 to 5.7)                               |
| Genital herpes                                                          | 2,181.2<br>(1,895.3 to 2,547.0)                  | 234.2<br>(198.0 to 282.6)                         | 0.6<br>(0.2 to 1.3)                         | 41.9<br>(28.4 to 56.2)                            | -0.1<br>(-8.4 to 8.2)                               |
| Other sexually transmitted diseases                                     | 113.5<br>(104.2 to 123.6)                        | 172.5<br>(143.9 to 206.7)                         | 2.6<br>(1.7 to 3.8)                         | 37.5<br>(23.8 to 52.6)                            | -2.3<br>(-11.7 to 8.2)                              |
| Hepatitis                                                               | 4,586.6<br>(3,522.1 to 5,983.8)                  | 1,347.8<br>(869.8 to 2,048.0)                     | 1.2<br>(0.7 to 2.0)                         | 5.5<br>(-19.2 to 36.1)                            | -21.2<br>(-36.6 to -2.7)                            |
| Acute hepatitis A                                                       | 29.3<br>(2.5 to 78.8)                            | 380.4<br>(32.9 to 1,024.7)                        | 0.2<br>(< 0.05 to 0.4)                      | -1.8<br>(-82.0 to 390.0)                          | -26.5<br>(-80.0 to 191.8)                           |
| Hepatitis B                                                             | 3,906.5<br>(2,825.6 to 5,287.7)                  | 816.8<br>(571.6 to 1,131.1)                       | 0.9<br>(0.5 to 1.4)                         | 5.3<br>(-16.4 to 31.4)                            | -20.5<br>(-36.7 to -2.6)                            |
| Hepatitis C                                                             | 643.6<br>(566.3 to 729.5)                        | 57.8<br>(51.4 to 64.4)                            | 0.1<br>(< 0.05 to 0.1)                      | 33.3<br>(-17.6 to 117.7)                          | -8.3<br>(-31.9 to 24.9)                             |
| Acute hepatitis E                                                       | 7.1<br>(6.0 to 8.7)                              | 92.8<br>(77.6 to 112.5)                           | 0.1<br>(0.1 to 0.2)                         | 8.5<br>(-22.3 to 50.4)                            | -23.5<br>(-41.4 to 1.8)                             |
| Other infectious diseases                                               | 275.3<br>(261.8 to 288.6)                        | < 0.05<br>(< 0.05 to < 0.05)                      | 9.3<br>(6.1 to 13.5)                        | 41.9<br>(29.6 to 56.5)                            | -4.5<br>(-11.8 to 3.9)                              |
| <b>Non-communicable diseases</b>                                        | <b>18,217.6</b><br><b>(18,050.0 to 18,366.1)</b> | <b>50,356.7†</b><br><b>(46,704.4 to 54,370.6)</b> | <b>1,217.2</b><br><b>(893.7 to 1,586.0)</b> | <b>46.3</b><br><b>(40.9 to 51.7)</b>              | <b>0.8</b><br><b>(-1.7 to 3.3)</b>                  |
| <b>Neoplasms</b>                                                        | <b>12.3</b><br><b>(11.2 to 13.5)</b>             | <b>8.6</b><br><b>(7.5 to 9.2)</b>                 | <b>2.7</b><br><b>(1.9 to 3.6)</b>           | <b>44.1</b><br><b>(33.6 to 54.2)</b>              | <b>2.3</b><br><b>(-4.3 to 9.1)</b>                  |
| Lip and oral cavity cancer                                              | 0.4<br>(0.4 to 0.5)                              | 0.1<br>(0.1 to 0.1)                               | < 0.05<br>(< 0.05 to 0.1)                   | 52.6<br>(33.4 to 74.1)                            | 5.7<br>(-6.9 to 20.2)                               |
| Nasopharynx cancer                                                      | 0.1<br>(0.1 to 0.1)                              | < 0.05<br>(< 0.05 to < 0.05)                      | < 0.05<br>(< 0.05 to < 0.05)                | 50.6<br>(28.3 to 73.0)                            | 5.8<br>(-9.7 to 20.7)                               |
| Other pharynx cancer                                                    | 0.1<br>(0.1 to 0.1)                              | < 0.05<br>(< 0.05 to < 0.05)                      | < 0.05<br>(< 0.05 to < 0.05)                | 49.7<br>(34.8 to 65.5)                            | 6.9<br>(-3.3 to 17.8)                               |
| Oesophageal cancer                                                      | 0.3<br>(0.2 to 0.3)                              | 0.2<br>(0.2 to 0.3)                               | 0.1<br>(< 0.05 to 0.1)                      | 80.8<br>(58.4 to 106.5)                           | 24.4<br>(7.6 to 43.6)                               |
| Stomach cancer                                                          | 1.1<br>(1.0 to 1.2)                              | 0.8<br>(0.7 to 0.8)                               | 0.2<br>(0.1 to 0.2)                         | 49.2<br>(27.7 to 74.5)                            | 4.6<br>(-11.2 to 23.6)                              |
| Colon and rectum cancer                                                 | 0.8<br>(0.5 to 1.0)                              | 0.3<br>(0.2 to 0.4)                               | 0.1<br>(0.1 to 0.2)                         | 49.5<br>(30.9 to 70.0)                            | 3.8<br>(-10.7 to 20.6)                              |
| Liver cancer                                                            | 0.7<br>(0.5 to 0.8)                              | 1.2<br>(0.9 to 1.4)                               | 0.3<br>(0.2 to 0.4)                         | 31.2<br>(15.0 to 50.4)                            | -6.5<br>(-16.9 to 6.0)                              |
| Liver cancer due to hepatitis B                                         | 0.6<br>(0.5 to 0.8)                              | 0.6<br>(0.5 to 0.8)                               | 0.1<br>(0.1 to 0.2)                         | 30.0<br>(13.7 to 49.5)                            | -6.9<br>(-18.1 to 6.7)                              |



| Cause                                              | Prevalence in thousands (95% UI)              | Incidence in thousands (95% UI)          | YLDs in thousands (95% UI)           |                                                   |                                                     |
|----------------------------------------------------|-----------------------------------------------|------------------------------------------|--------------------------------------|---------------------------------------------------|-----------------------------------------------------|
|                                                    | 2016 counts                                   | 2016 counts                              | 2016 counts                          | Percentage change in counts between 2006 and 2016 | Percentage change in age-standardised rates between |
| Liver cancer due to hepatitis C                    | 0.1<br>( $< 0.05$ to 0.1)                     | 0.1<br>( $< 0.05$ to 0.1)                | $< 0.05$<br>( $< 0.05$ to $< 0.05$ ) | 35.6<br>(16.0 to 59.2)                            | -5.2<br>(-18.2 to 8.7)                              |
| Liver cancer due to alcohol use                    | 0.1<br>(0.1 to 0.1)                           | 0.1<br>(0.1 to 0.1)                      | $< 0.05$<br>( $< 0.05$ to $< 0.05$ ) | 30.9<br>(12.4 to 52.7)                            | -6.8<br>(-19.1 to 8.4)                              |
| Liver cancer due to other causes                   | 0.4<br>(0.3 to 0.4)                           | 0.4<br>(0.3 to 0.4)                      | 0.1<br>(0.1 to 0.1)                  | 32.5<br>(15.0 to 53.2)                            | -5.9<br>(-17.6 to 9.2)                              |
| Gallbladder and biliary tract cancer               | 0.1<br>(0.1 to 0.1)                           | 0.1<br>(0.1 to 0.1)                      | $< 0.05$<br>( $< 0.05$ to $< 0.05$ ) | 37.0<br>(23.5 to 49.2)                            | -6.0<br>(-14.7 to 1.9)                              |
| Pancreatic cancer                                  | 0.2<br>(0.2 to 0.2)                           | 0.2<br>(0.2 to 0.3)                      | 0.1<br>( $< 0.05$ to 0.1)            | 56.6<br>(45.1 to 71.5)                            | 6.4<br>(-1.6 to 15.6)                               |
| Larynx cancer                                      | 0.2<br>(0.1 to 0.2)                           | 0.1<br>( $< 0.05$ to 0.1)                | $< 0.05$<br>( $< 0.05$ to $< 0.05$ ) | 62.7<br>(40.9 to 87.9)                            | 11.1<br>(-2.5 to 26.2)                              |
| Tracheal, bronchus, and lung cancer                | 0.5<br>(0.4 to 0.5)                           | 0.4<br>(0.4 to 0.5)                      | 0.1<br>(0.1 to 0.1)                  | 50.9<br>(28.7 to 76.9)                            | 3.0<br>(-13.7 to 23.5)                              |
| Malignant skin melanoma                            | 0.1<br>(0.1 to 0.1)                           | $< 0.05$<br>( $< 0.05$ to $< 0.05$ )     | $< 0.05$<br>( $< 0.05$ to $< 0.05$ ) | 39.2<br>(25.4 to 52.7)                            | -2.9<br>(-12.2 to 6.9)                              |
| Non-melanoma skin cancer                           | 0.1<br>( $< 0.05$ to 0.1)                     | 0.4<br>(0.3 to 0.7)                      | $< 0.05$<br>( $< 0.05$ to $< 0.05$ ) | 44.3<br>(-4.3 to 104.7)                           | -5.3<br>(-40.8 to 42.8)                             |
| Non-melanoma skin cancer (squamous-cell carcinoma) | 0.1<br>( $< 0.05$ to 0.1)                     | 0.1<br>(0.1 to 0.1)                      | $< 0.05$<br>( $< 0.05$ to $< 0.05$ ) | 44.0<br>(-10.8 to 116.8)                          | -6.1<br>(-45.8 to 44.2)                             |
| Non-melanoma skin cancer (basal-cell carcinoma)    | $< 0.05$<br>( $< 0.05$ to 0.1)                | 0.3<br>(0.2 to 0.6)                      | $< 0.05$<br>( $< 0.05$ to $< 0.05$ ) | 45.7<br>(29.7 to 66.0)                            | 2.8<br>(-8.5 to 17.7)                               |
| Breast cancer                                      | 2.1<br>(1.6 to 2.9)                           | 0.5<br>(0.4 to 0.7)                      | 0.2<br>(0.2 to 0.4)                  | 43.4<br>(14.1 to 82.7)                            | 2.3<br>(-17.7 to 28.6)                              |
| Cervical cancer                                    | 4.7<br>(3.4 to 5.8)                           | 1.4<br>(1.0 to 1.7)                      | 0.5<br>(0.3 to 0.7)                  | 32.9<br>(-6.6 to 73.3)                            | -3.9<br>(-31.6 to 22.2)                             |
| Uterine cancer                                     | 0.4<br>(0.4 to 0.5)                           | 0.1<br>(0.1 to 0.1)                      | $< 0.05$<br>( $< 0.05$ to 0.1)       | 44.3<br>(14.3 to 86.0)                            | 2.4<br>(-17.3 to 31.1)                              |
| Ovarian cancer                                     | 0.3<br>(0.2 to 0.4)                           | 0.1<br>(0.1 to 0.1)                      | 0.1<br>( $< 0.05$ to 0.1)            | 38.2<br>(20.4 to 59.5)                            | -2.5<br>(-15.3 to 11.4)                             |
| Prostate cancer                                    | 1.6<br>(1.0 to 2.0)                           | 0.5<br>(0.3 to 0.7)                      | 0.3<br>(0.1 to 0.4)                  | 76.0<br>(32.8 to 130.3)                           | 14.3<br>(-10.8 to 42.0)                             |
| Testicular cancer                                  | $< 0.05$<br>( $< 0.05$ to 0.1)                | $< 0.05$<br>( $< 0.05$ to $< 0.05$ )     | $< 0.05$<br>( $< 0.05$ to $< 0.05$ ) | 33.4<br>(-5.7 to 68.7)                            | -6.4<br>(-33.5 to 19.4)                             |
| Kidney cancer                                      | 0.7<br>(0.5 to 0.9)                           | 0.2<br>(0.1 to 0.2)                      | 0.1<br>( $< 0.05$ to 0.1)            | 50.7<br>(-2.6 to 115.7)                           | 8.3<br>(-10.8 to 25.7)                              |
| Bladder cancer                                     | 0.4<br>(0.4 to 0.5)                           | 0.1<br>(0.1 to 0.1)                      | 0.1<br>( $< 0.05$ to 0.1)            | 42.6<br>(28.5 to 59.6)                            | -1.1<br>(-11.5 to 10.8)                             |
| Brain and nervous system cancer                    | 0.5<br>(0.3 to 0.7)                           | 0.2<br>(0.1 to 0.3)                      | 0.1<br>( $< 0.05$ to 0.1)            | 52.4<br>(39.7 to 70.0)                            | 6.1<br>(-1.9 to 19.8)                               |
| Thyroid cancer                                     | 0.1<br>(0.1 to 0.1)                           | $< 0.05$<br>( $< 0.05$ to $< 0.05$ )     | $< 0.05$<br>( $< 0.05$ to $< 0.05$ ) | 24.5<br>(9.3 to 41.7)                             | -11.3<br>(-21.6 to -0.2)                            |
| Mesothelioma                                       | $< 0.05$<br>( $< 0.05$ to $< 0.05$ )          | $< 0.05$<br>( $< 0.05$ to $< 0.05$ )     | $< 0.05$<br>( $< 0.05$ to $< 0.05$ ) | 28.1<br>(13.0 to 43.2)                            | -9.4<br>(-18.3 to 0.6)                              |
| Hodgkin lymphoma                                   | 0.1<br>(0.1 to 0.2)                           | $< 0.05$<br>( $< 0.05$ to 0.1)           | $< 0.05$<br>( $< 0.05$ to $< 0.05$ ) | 23.7<br>(8.1 to 43.3)                             | -8.8<br>(-16.2 to 1.4)                              |
| Non-Hodgkin's lymphoma                             | 0.9<br>(0.7 to 1.1)                           | 0.3<br>(0.2 to 0.4)                      | 0.1<br>(0.1 to 0.1)                  | 42.6<br>(23.0 to 62.6)                            | -0.8<br>(-9.7 to 8.0)                               |
| Multiple myeloma                                   | 0.1<br>(0.1 to 0.1)                           | 0.1<br>( $< 0.05$ to 0.1)                | $< 0.05$<br>( $< 0.05$ to $< 0.05$ ) | 39.1<br>(23.2 to 56.6)                            | -4.2<br>(-15.0 to 7.5)                              |
| Leukaemia                                          | 1.3<br>(0.9 to 1.6)                           | 0.4<br>(0.3 to 0.4)                      | 0.2<br>(0.1 to 0.2)                  | 40.8<br>(21.4 to 62.3)                            | -1.4<br>(-12.8 to 8.1)                              |
| Acute lymphoid leukaemia                           | 0.3<br>(0.2 to 0.4)                           | 0.1<br>( $< 0.05$ to 0.1)                | $< 0.05$<br>( $< 0.05$ to $< 0.05$ ) | 38.7<br>(3.4 to 78.3)                             | -3.2<br>(-22.3 to 16.2)                             |
| Chronic lymphoid leukaemia                         | 0.1<br>(0.1 to 0.2)                           | $< 0.05$<br>( $< 0.05$ to $< 0.05$ )     | $< 0.05$<br>( $< 0.05$ to $< 0.05$ ) | 47.6<br>(19.1 to 79.3)                            | -0.1<br>(-19.1 to 20.3)                             |
| Acute myeloid leukaemia                            | 0.3<br>(0.2 to 0.4)                           | 0.1<br>(0.1 to 0.2)                      | $< 0.05$<br>( $< 0.05$ to 0.1)       | 48.8<br>(14.6 to 92.0)                            | 3.7<br>(-11.2 to 22.4)                              |
| Chronic myeloid leukaemia                          | 0.1<br>(0.1 to 0.1)                           | $< 0.05$<br>( $< 0.05$ to 0.1)           | $< 0.05$<br>( $< 0.05$ to $< 0.05$ ) | 39.2<br>(18.3 to 66.9)                            | -0.9<br>(-14.7 to 18.1)                             |
| Other leukaemia                                    | 0.5<br>(0.3 to 0.7)                           | 0.1<br>(0.1 to 0.1)                      | 0.1<br>( $< 0.05$ to 0.1)            | 36.1<br>(15.1 to 59.4)                            | -3.3<br>(-18.6 to 12.2)                             |
| Other neoplasms                                    | 1.8<br>(1.6 to 2.1)                           | 0.6<br>(0.5 to 0.7)                      | 0.2<br>(0.1 to 0.2)                  | 37.5<br>(4.1 to 70.2)                             | -2.6<br>(-14.8 to 10.3)                             |
| <b>Cardiovascular diseases</b>                     | <b>839.3</b><br><b>(795.8 to 893.4)</b>       | <b>63.3†</b><br><b>(60.3 to 66.4)</b>    | <b>47.6</b><br><b>(33.8 to 63.8)</b> | <b>50.1</b><br><b>(43.9 to 56.4)</b>              | <b>2.4</b><br><b>(-1.2 to 6.1)</b>                  |
| Rheumatic heart disease                            | 143.9<br>(127.0 to 162.6)                     | 7.2<br>(6.4 to 8.2)                      | 7.0<br>(4.5 to 10.4)                 | 45.9<br>(32.1 to 60.5)                            | 0.9<br>(-8.3 to 10.5)                               |
| Ischaemic heart disease                            | 163.4<br>(151.7 to 176.0)                     | 23.5<br>(21.7 to 25.3)                   | 7.0<br>(4.7 to 9.8)                  | 40.9<br>(31.6 to 50.5)                            | -1.7<br>(-7.2 to 3.4)                               |
| Cerebrovascular disease                            | 56.8<br>(53.3 to 60.9)                        | 10.3‡<br>(9.4 to 11.2)                   | 8.2<br>(5.9 to 10.3)                 | 51.0<br>(39.0 to 63.2)                            | 3.9<br>(-4.1 to 12.1)                               |
| Ischaemic stroke                                   | 48.1<br>(43.4 to 53.4)                        | 6.7‡<br>(5.9 to 7.6)                     | 6.6<br>(4.7 to 8.4)                  | 52.6<br>(38.2 to 67.5)                            | 4.5<br>(-4.9 to 13.7)                               |
| Hemorrhagic stroke                                 | 11.8<br>(10.5 to 13.2)                        | 3.6‡<br>(3.2 to 4.0)                     | 1.6<br>(1.1 to 2.1)                  | 44.6<br>(27.1 to 64.8)                            | 1.3<br>(-9.8 to 14.1)                               |
| Hypertensive heart disease                         | 13.7<br>(11.0 to 16.7)                        | --                                       | 1.1<br>(0.7 to 1.6)                  | 40.4<br>(25.4 to 56.2)                            | -4.8<br>(-13.2 to 4.3)                              |
| Cardiomyopathy and myocarditis                     | 8.4<br>(7.2 to 9.5)                           | 4.2†<br>(3.6 to 4.8)                     | 0.8<br>(0.5 to 1.1)                  | 47.6<br>(31.0 to 65.7)                            | 1.4<br>(-9.8 to 14.2)                               |
| Myocarditis                                        | 2.5<br>(2.2 to 2.9)                           | 4.2<br>(3.6 to 4.8)                      | 0.2<br>(0.1 to 0.3)                  | 44.8<br>(30.4 to 61.0)                            | 0.8<br>(-11.6 to 15.9)                              |
| Alcoholic cardiomyopathy                           | 0.9<br>(0.7 to 1.2)                           | --                                       | 0.1<br>( $< 0.05$ to 0.1)            | 38.1<br>(0.6 to 87.5)                             | 0.4<br>(-25.4 to 31.6)                              |
| Other cardiomyopathy                               | 6.3<br>(4.9 to 7.7)                           | --                                       | 0.5<br>(0.3 to 0.8)                  | 50.2<br>(28.5 to 74.4)                            | 1.6<br>(-11.8 to 17.5)                              |
| Atrial fibrillation and flutter                    | 32.5<br>(28.2 to 37.3)                        | 3.0<br>(2.6 to 3.6)                      | 2.6<br>(1.7 to 3.6)                  | 49.3<br>(36.9 to 61.9)                            | 1.0<br>(-4.9 to 7.5)                                |
| Peripheral vascular disease                        | 119.6<br>(102.7 to 140.0)                     | 12.1<br>(10.3 to 14.3)                   | 0.6<br>(0.3 to 1.2)                  | 52.9<br>(41.4 to 65.3)                            | 0.7<br>(-6.4 to 8.1)                                |
| Endocarditis                                       | 1.1<br>(1.0 to 1.4)                           | 3.0<br>(2.6 to 3.4)                      | 0.1<br>(0.1 to 0.1)                  | 58.2<br>(40.5 to 80.0)                            | 4.5<br>(-10.8 to 23.7)                              |
| Other cardiovascular and circulatory diseases      | 381.6<br>(313.9 to 455.8)                     | --                                       | 20.2<br>(13.3 to 28.7)               | 55.4<br>(42.4 to 69.2)                            | 4.9<br>(-3.4 to 12.8)                               |
| <b>Chronic respiratory diseases</b>                | <b>1,077.5</b><br><b>(1,005.5 to 1,156.9)</b> | <b>229.9†</b><br><b>(211.0 to 252.9)</b> | <b>48.8</b><br><b>(35.3 to 65.5)</b> | <b>51.8</b><br><b>(43.7 to 59.0)</b>              | <b>3.0</b><br><b>(-1.4 to 7.0)</b>                  |
| Chronic obstructive pulmonary disease              | 167.5<br>(160.0 to 174.7)                     | 12.2<br>(11.7 to 12.7)                   | 11.3<br>(9.7 to 12.8)                | 47.8<br>(36.9 to 60.4)                            | 2.9<br>(-3.9 to 10.3)                               |
| Pneumoconiosis                                     | 0.2<br>(0.1 to 0.2)                           | $< 0.05$<br>( $< 0.05$ to $< 0.05$ )     | $< 0.05$<br>( $< 0.05$ to $< 0.05$ ) | 47.3<br>(39.1 to 56.3)                            | 4.5<br>(-1.0 to 10.7)                               |
| Silicosis                                          | $< 0.05$<br>( $< 0.05$ to $< 0.05$ )          | $< 0.05$<br>( $< 0.05$ to $< 0.05$ )     | $< 0.05$<br>( $< 0.05$ to $< 0.05$ ) | 37.4<br>(26.6 to 50.3)                            | 1.2<br>(-5.5 to 9.2)                                |



| Cause                                                          | Prevalence in thousands (95% UI)        | Incidence in thousands (95% UI)         | YLDs in thousands (95% UI)        |                                                   |                                                     |
|----------------------------------------------------------------|-----------------------------------------|-----------------------------------------|-----------------------------------|---------------------------------------------------|-----------------------------------------------------|
|                                                                | 2016 counts                             | 2016 counts                             | 2016 counts                       | Percentage change in counts between 2006 and 2016 | Percentage change in age-standardised rates between |
| Asbestosis                                                     | 0.1<br>(0.1 to 0.1)                     | < 0.05<br>(< 0.05 to < 0.05)            | < 0.05<br>(< 0.05 to < 0.05)      | 45.9<br>(36.0 to 56.0)                            | 2.7<br>(-2.9 to 8.7)                                |
| Coal workers pneumoconiosis                                    | --                                      | --                                      | --                                | --                                                | --                                                  |
| Other pneumoconiosis                                           | 0.1<br>(0.1 to 0.1)                     | < 0.05<br>(< 0.05 to < 0.05)            | < 0.05<br>(< 0.05 to < 0.05)      | 50.1<br>(35.2 to 67.1)                            | 6.7<br>(-3.6 to 19.9)                               |
| Asthma                                                         | 908.3<br>(826.7 to 1,002.1)             | 217.7<br>(198.3 to 240.7)               | 35.8<br>(23.5 to 52.2)            | 51.7<br>(42.9 to 60.8)                            | 2.2<br>(-2.5 to 6.8)                                |
| Interstitial lung disease and pulmonary sarcoidosis            | 1.2<br>(1.1 to 1.4)                     | 0.1<br>(0.1 to 0.1)                     | 0.1<br>(0.1 to 0.2)               | 46.6<br>(42.7 to 50.6)                            | 0.0<br>(-3.5 to 3.7)                                |
| Other chronic respiratory diseases                             | --                                      | --                                      | 1.4<br>(1.1 to 1.8)               | 99.8<br>(46.9 to 171.4)                           | 33.7<br>(8.9 to 62.8)                               |
| <b>Cirrhosis and other chronic liver diseases</b>              | <b>40.8<br/>(38.7 to 43.0)</b>          | <b>4.2<br/>(4.0 to 4.4)</b>             | <b>4.1<br/>(2.8 to 5.8)</b>       | <b>50.4<br/>(33.5 to 69.3)</b>                    | <b>3.4<br/>(-5.6 to 11.6)</b>                       |
| Cirrhosis and other chronic liver diseases due to hepatitis B  | 13.9<br>(12.0 to 15.8)                  | 1.4<br>(1.2 to 1.6)                     | 1.1<br>(0.7 to 1.6)               | 49.5<br>(28.1 to 74.6)                            | 4.5<br>(-7.8 to 19.4)                               |
| Cirrhosis and other chronic liver diseases due to hepatitis C  | 6.5<br>(4.8 to 8.5)                     | 0.7<br>(0.5 to 1.0)                     | 0.5<br>(0.3 to 0.8)               | 46.8<br>(19.3 to 78.0)                            | 3.3<br>(-15.0 to 24.4)                              |
| Cirrhosis and other chronic liver diseases due to alcohol use  | 5.4<br>(4.7 to 6.2)                     | 0.7<br>(0.6 to 0.8)                     | 0.4<br>(0.3 to 0.6)               | 46.7<br>(17.3 to 81.6)                            | 4.3<br>(-14.3 to 25.1)                              |
| Cirrhosis and other chronic liver diseases due to other causes | 15.0<br>(13.8 to 16.3)                  | 1.4<br>(1.3 to 1.5)                     | 2.1<br>(1.4 to 3.0)               | 52.6<br>(24.6 to 89.5)                            | 1.5<br>(-14.7 to 21.4)                              |
| <b>Digestive diseases</b>                                      | <b>313.0<br/>(282.8 to 346.6)</b>       | <b>260.4†<br/>(248.0 to 274.4)</b>      | <b>10.4<br/>(7.2 to 14.0)</b>     | <b>43.6<br/>(30.3 to 56.4)</b>                    | <b>0.4<br/>(-5.5 to 6.8)</b>                        |
| Peptic ulcer disease                                           | 40.1<br>(36.5 to 44.0)                  | 22.9<br>(20.2 to 25.6)                  | 0.8<br>(0.5 to 1.2)               | 46.6<br>(31.3 to 63.7)                            | 1.8<br>(-6.5 to 11.5)                               |
| Gastritis and duodenitis                                       | 86.5<br>(75.9 to 98.5)                  | 85.2<br>(76.5 to 95.7)                  | 1.2<br>(0.8 to 1.7)               | 51.1<br>(34.2 to 69.1)                            | 7.9<br>(-1.0 to 17.4)                               |
| Appendicitis                                                   | 2.7<br>(2.5 to 3.0)                     | 73.0<br>(67.2 to 79.2)                  | 0.8<br>(0.5 to 1.2)               | 40.7<br>(-1.0 to 99.6)                            | -5.5<br>(-25.9 to 20.4)                             |
| Paralytic ileus and intestinal obstruction                     | 0.4<br>(0.3 to 0.4)                     | 9.7<br>(8.7 to 10.8)                    | 0.1<br>(0.1 to 0.1)               | 43.9<br>(38.9 to 49.0)                            | -1.2<br>(-7.6 to 5.9)                               |
| Inguinal, femoral, and abdominal hernia                        | 181.3<br>(143.5 to 229.5)               | 22.1<br>(19.4 to 25.3)                  | 6.0<br>(4.0 to 8.5)               | 41.7<br>(24.3 to 59.4)                            | -0.9<br>(-9.6 to 9.0)                               |
| Inflammatory bowel disease                                     | 0.8<br>(0.7 to 0.8)                     | 6.3<br>(6.0 to 6.6)                     | 0.1<br>(0.1 to 0.2)               | 37.8<br>(34.3 to 41.5)                            | -6.3<br>(-8.7 to -3.9)                              |
| Vascular intestinal disorders                                  | 0.1<br>(0.1 to 0.1)                     | 0.6<br>(0.5 to 0.7)                     | < 0.05<br>(< 0.05 to 0.1)         | 49.4<br>(41.6 to 58.3)                            | 4.2<br>(0.4 to 8.7)                                 |
| Gallbladder and biliary diseases                               | 8.1<br>(7.1 to 9.1)                     | 37.5<br>(32.3 to 42.7)                  | 0.2<br>(0.1 to 0.3)               | 42.6<br>(31.0 to 55.1)                            | 1.8<br>(-8.1 to 13.2)                               |
| Pancreatitis                                                   | 0.3<br>(0.3 to 0.4)                     | 3.1<br>(2.7 to 3.4)                     | < 0.05<br>(< 0.05 to 0.1)         | 43.4<br>(37.1 to 49.3)                            | 3.1<br>(-1.3 to 7.5)                                |
| Other digestive diseases                                       | --                                      | --                                      | 1.0<br>(0.7 to 1.4)               | 47.6<br>(30.3 to 64.9)                            | 3.9<br>(-2.8 to 10.9)                               |
| <b>Neurological disorders</b>                                  | <b>6,045.2<br/>(5,741.2 to 6,364.8)</b> | <b>3,173.5<br/>(2,670.3 to 3,719.3)</b> | <b>132.8<br/>(83.6 to 194.1)</b>  | <b>47.9<br/>(7.6 to 105.0)</b>                    | <b>1.1<br/>(-20.5 to 28.9)</b>                      |
| Alzheimer's disease and other dementias                        | 17.4<br>(14.6 to 20.6)                  | 3.0<br>(2.5 to 3.6)                     | 2.4<br>(1.7 to 3.2)               | 52.5<br>(43.4 to 62.1)                            | -0.5<br>(-5.4 to 4.2)                               |
| Parkinson's disease                                            | 1.7<br>(1.4 to 2.2)                     | 0.2<br>(0.2 to 0.3)                     | 0.2<br>(0.1 to 0.3)               | 55.0<br>(29.8 to 86.6)                            | 3.6<br>(-11.7 to 21.2)                              |
| Epilepsy                                                       | 59.8<br>(11.4 to 127.6)                 | 9.4<br>(1.8 to 20.4)                    | 24.3<br>(4.0 to 57.3)             | 51.4<br>(-75.9 to 862.6)                          | 2.5<br>(-83.8 to 549.8)                             |
| Multiple sclerosis                                             | 0.7<br>(0.6 to 0.8)                     | < 0.05<br>(< 0.05 to < 0.05)            | 0.2<br>(0.1 to 0.3)               | 48.0<br>(42.1 to 53.1)                            | 5.7<br>(1.7 to 9.3)                                 |
| Motor neuron disease                                           | 0.2<br>(0.2 to 0.2)                     | 0.1<br>(< 0.05 to 0.1)                  | < 0.05<br>(< 0.05 to 0.1)         | 47.9<br>(41.9 to 53.9)                            | 2.4<br>(-0.6 to 5.5)                                |
| Migraine                                                       | 2,091.2<br>(1,959.9 to 2,214.6)         | 278.2<br>(260.0 to 296.6)               | 86.1<br>(54.4 to 122.8)           | 45.0<br>(38.5 to 51.6)                            | 0.2<br>(-3.4 to 3.8)                                |
| Tension-type headache                                          | 4,735.2<br>(4,249.3 to 5,331.1)         | 2,882.6<br>(2,387.2 to 3,425.2)         | 13.6<br>(8.5 to 20.7)             | 45.4<br>(37.4 to 53.1)                            | 0.8<br>(-3.9 to 5.9)                                |
| Other neurological disorders                                   | 0.1<br>(< 0.05 to 0.1)                  | 0.1<br>(0.1 to 0.1)                     | 6.1<br>(1.1 to 13.8)              | 87.7<br>(-67.4 to 972.2)                          | 22.4<br>(-75.9 to 506.0)                            |
| <b>Mental and substance use disorders</b>                      | <b>2,668.9<br/>(2,489.9 to 2,817.0)</b> | <b>903.6†<br/>(836.8 to 978.6)</b>      | <b>303.1<br/>(219.7 to 396.0)</b> | <b>47.0<br/>(43.5 to 50.5)</b>                    | <b>0.7<br/>(-1.5 to 2.8)</b>                        |
| Schizophrenia                                                  | 23.1<br>(20.2 to 26.1)                  | 2.1<br>(1.9 to 2.4)                     | 14.8<br>(10.8 to 18.7)            | 40.4<br>(27.4 to 54.9)                            | 0.8<br>(-7.9 to 10.7)                               |
| Alcohol use disorders                                          | 165.0<br>(138.9 to 192.3)               | 92.1<br>(77.6 to 106.5)                 | 16.5<br>(11.4 to 23.3)            | 47.6<br>(35.6 to 60.5)                            | 3.0<br>(-4.8 to 11.8)                               |
| Drug use disorders                                             | 63.2<br>(56.1 to 69.9)                  | 11.4<br>(10.2 to 12.9)                  | 16.5<br>(11.5 to 22.4)            | 51.6<br>(36.7 to 68.2)                            | 6.4<br>(-2.9 to 17.2)                               |
| Opioid use disorders                                           | 34.9<br>(28.9 to 42.6)                  | 4.8<br>(4.0 to 5.8)                     | 14.6<br>(9.8 to 20.0)             | 52.1<br>(35.6 to 70.8)                            | 6.9<br>(-3.7 to 19.1)                               |
| Cocaine use disorders                                          | 2.1<br>(1.7 to 2.5)                     | 0.3<br>(0.2 to 0.4)                     | 0.3<br>(0.2 to 0.4)               | 48.6<br>(40.6 to 56.5)                            | 3.7<br>(-1.2 to 8.8)                                |
| Amphetamine use disorders                                      | 1.0<br>(0.7 to 1.4)                     | 0.2<br>(0.1 to 0.3)                     | 0.1<br>(0.1 to 0.2)               | 52.6<br>(39.2 to 68.3)                            | 3.9<br>(-4.8 to 14.0)                               |
| Cannabis use disorders                                         | 23.5<br>(19.5 to 28.1)                  | 5.1<br>(4.2 to 6.3)                     | 0.7<br>(0.4 to 1.1)               | 47.5<br>(16.6 to 83.7)                            | 0.4<br>(-18.2 to 22.2)                              |
| Other drug use disorders                                       | 4.8<br>(4.2 to 5.4)                     | 1.0<br>(0.9 to 1.2)                     | 0.8<br>(0.5 to 1.1)               | 46.3<br>(23.4 to 74.2)                            | 3.2<br>(-12.6 to 22.2)                              |
| Depressive disorders                                           | 500.5<br>(467.0 to 539.2)               | 556.1<br>(491.9 to 623.2)               | 85.5<br>(58.1 to 116.9)           | 44.3<br>(38.5 to 50.8)                            | 0.0<br>(-4.1 to 4.3)                                |
| Major depressive disorder                                      | 334.4<br>(295.0 to 376.5)               | 523.9<br>(460.0 to 591.7)               | 68.7<br>(46.7 to 94.8)            | 44.5<br>(37.0 to 52.9)                            | 0.0<br>(-5.1 to 5.4)                                |
| Dysthymia                                                      | 173.9<br>(150.9 to 201.2)               | 32.2<br>(28.1 to 37.1)                  | 16.8<br>(11.4 to 24.2)            | 43.3<br>(37.3 to 49.4)                            | 0.1<br>(-3.0 to 3.6)                                |
| Bipolar disorder                                               | 94.4<br>(79.9 to 111.9)                 | 11.5<br>(9.6 to 13.9)                   | 19.4<br>(11.8 to 29.0)            | 45.8<br>(35.7 to 57.2)                            | 0.3<br>(-5.3 to 6.8)                                |
| Anxiety disorders                                              | 507.1<br>(453.6 to 564.5)               | 100.2<br>(90.2 to 110.6)                | 49.6<br>(34.5 to 68.4)            | 48.0<br>(37.7 to 59.3)                            | 0.3<br>(-5.9 to 6.9)                                |
| Eating disorders                                               | 11.8<br>(9.5 to 14.9)                   | 11.0<br>(7.9 to 15.0)                   | 2.4<br>(1.5 to 3.5)               | 54.7<br>(29.6 to 84.5)                            | 4.2<br>(-12.2 to 23.5)                              |
| Anorexia nervosa                                               | 3.5<br>(2.5 to 4.7)                     | 1.8<br>(1.3 to 2.4)                     | 0.8<br>(0.4 to 1.2)               | 55.6<br>(11.0 to 122.0)                           | 2.5<br>(-25.0 to 44.6)                              |
| Bulimia nervosa                                                | 7.9<br>(5.8 to 10.7)                    | 9.2<br>(6.1 to 13.1)                    | 1.7<br>(1.0 to 2.6)               | 54.4<br>(25.4 to 91.1)                            | 4.8<br>(-14.4 to 29.3)                              |
| Autistic spectrum disorders                                    | 165.3<br>(148.1 to 189.7)               | 2.5<br>(1.7 to 3.5)                     | 23.3<br>(15.6 to 33.1)            | 49.2<br>(40.8 to 58.0)                            | 0.8<br>(-3.7 to 5.5)                                |
| Autism                                                         | 43.1<br>(37.2 to 50.2)                  | 0.4<br>(0.2 to 0.6)                     | 11.1<br>(7.1 to 16.2)             | 50.0<br>(35.3 to 66.8)                            | 1.0<br>(-7.2 to 10.9)                               |
| Asperger syndrome and other autistic spectrum disorders        | 122.2<br>(100.3 to 148.6)               | 2.1<br>(1.4 to 3.1)                     | 12.3<br>(8.0 to 18.1)             | 48.6<br>(40.2 to 56.9)                            | 0.6<br>(-3.9 to 5.1)                                |

| Cause                                                      | Prevalence in thousands (95% UI)                 | Incidence in thousands (95% UI)                   | YLDs in thousands (95% UI)              |                                                   |                                                     |
|------------------------------------------------------------|--------------------------------------------------|---------------------------------------------------|-----------------------------------------|---------------------------------------------------|-----------------------------------------------------|
|                                                            | 2016 counts                                      | 2016 counts                                       | 2016 counts                             | Percentage change in counts between 2006 and 2016 | Percentage change in age-standardised rates between |
| Attention-deficit/hyperactivity disorder                   | 277.4<br>(247.6 to 310.8)                        | 20.8<br>(18.1 to 24.2)                            | 3.3<br>(2.0 to 5.3)                     | 51.5<br>(39.7 to 64.4)                            | 0.3<br>(-6.7 to 8.0)                                |
| Conduct disorder                                           | 218.8<br>(179.5 to 261.4)                        | 83.2<br>(66.1 to 100.8)                           | 26.4<br>(16.3 to 40.6)                  | 56.7<br>(46.1 to 67.4)                            | 0.6<br>(-6.0 to 7.2)                                |
| Idiopathic developmental intellectual disability           | 626.4<br>(405.3 to 859.7)                        | --                                                | 27.3<br>(13.9 to 45.1)                  | 46.8<br>(37.7 to 56.8)                            | -1.5<br>(-7.0 to 4.3)                               |
| Other mental and substance use disorders                   | 238.2<br>(208.5 to 276.3)                        | 12.7<br>(11.1 to 14.7)                            | 17.8<br>(12.1 to 25.9)                  | 42.2<br>(34.3 to 50.0)                            | 0.5<br>(-4.4 to 5.2)                                |
| <b>Diabetes, urogenital, blood, and endocrine diseases</b> | <b>9,223.1</b><br><b>(8,969.0 to 9,523.6)</b>    | <b>1,884.9†</b><br><b>(1,759.8 to 2,012.8)</b>    | <b>116.5</b><br><b>(81.5 to 158.8)</b>  | <b>46.3</b><br><b>(42.4 to 50.5)</b>              | <b>3.2</b><br><b>(0.7 to 5.5)</b>                   |
| Diabetes mellitus                                          | 322.5<br>(289.6 to 356.5)                        | 21.7<br>(19.5 to 23.9)                            | 22.6<br>(15.3 to 31.5)                  | 52.2<br>(43.3 to 60.5)                            | 7.4<br>(1.5 to 13.2)                                |
| Acute glomerulonephritis                                   | 0.2<br>(0.1 to 0.2)                              | 2.4<br>(2.0 to 2.8)                               | < 0.05<br>(< 0.05 to < 0.05)            | 47.4<br>(40.9 to 53.8)                            | 0.3<br>(-3.6 to 3.9)                                |
| Chronic kidney disease                                     | 834.7<br>(748.2 to 928.9)                        | 64.9<br>(57.0 to 73.2)                            | 22.5<br>(16.3 to 29.4)                  | 51.4<br>(42.9 to 60.4)                            | 5.3<br>(0.1 to 10.6)                                |
| Chronic kidney disease due to diabetes mellitus            | 255.4<br>(213.5 to 301.7)                        | 18.3<br>(14.9 to 22.4)                            | 6.6<br>(4.7 to 8.8)                     | 52.1<br>(39.0 to 66.8)                            | 6.0<br>(-1.8 to 14.5)                               |
| Chronic kidney disease due to hypertension                 | 180.6<br>(154.9 to 207.3)                        | 16.8<br>(14.1 to 19.8)                            | 3.9<br>(2.7 to 5.3)                     | 55.3<br>(38.6 to 74.5)                            | 4.8<br>(-5.2 to 16.7)                               |
| Chronic kidney disease due to glomerulonephritis           | 169.9<br>(145.6 to 196.3)                        | 10.6<br>(8.3 to 13.2)                             | 5.7<br>(4.0 to 7.8)                     | 50.3<br>(35.9 to 65.5)                            | 5.8<br>(-2.5 to 15.0)                               |
| Chronic kidney disease due to other causes                 | 228.7<br>(189.9 to 269.9)                        | 19.2<br>(16.1 to 22.5)                            | 6.3<br>(4.4 to 8.5)                     | 49.3<br>(36.3 to 63.4)                            | 4.5<br>(-3.1 to 13.0)                               |
| Urinary diseases and male infertility                      | 306.1<br>(278.9 to 332.8)                        | 1,100.8†<br>(988.7 to 1,230.4)                    | 7.5<br>(4.8 to 11.0)                    | 47.7<br>(37.3 to 59.5)                            | 2.0<br>(-5.3 to 9.4)                                |
| Interstitial nephritis and urinary tract infections        | 19.0<br>(16.9 to 21.5)                           | 992.4<br>(880.6 to 1,121.0)                       | 0.6<br>(0.4 to 1.0)                     | 46.9<br>(25.1 to 73.0)                            | 0.9<br>(-12.8 to 15.5)                              |
| Urolithiasis                                               | 3.2<br>(2.9 to 3.7)                              | 86.4<br>(76.3 to 98.9)                            | 0.2<br>(0.2 to 0.4)                     | 43.8<br>(32.5 to 55.9)                            | 2.1<br>(-6.3 to 11.6)                               |
| Benign prostatic hyperplasia                               | 175.0<br>(147.1 to 205.0)                        | 22.0<br>(18.4 to 26.2)                            | 5.8<br>(3.6 to 8.4)                     | 52.7<br>(38.8 to 67.6)                            | 3.4<br>(-5.0 to 11.9)                               |
| Male infertility                                           | 102.4<br>(91.9 to 113.5)                         | --                                                | 0.6<br>(0.2 to 1.2)                     | 27.8<br>(18.1 to 37.6)                            | -11.3<br>(-17.9 to -4.5)                            |
| Other urinary diseases                                     | --                                               | --                                                | 0.3<br>(0.2 to 0.5)                     | 17.4<br>(3.8 to 33.5)                             | -16.0<br>(-23.9 to -7.4)                            |
| Gynecological diseases                                     | 1,870.0<br>(1,767.4 to 1,966.1)                  | 683.1†<br>(627.4 to 742.4)                        | 22.2<br>(15.0 to 32.0)                  | 39.5<br>(33.8 to 45.5)                            | 0.2<br>(-3.5 to 3.9)                                |
| Uterine fibroids                                           | 121.3<br>(106.8 to 136.6)                        | 15.0<br>(12.9 to 17.2)                            | 3.1<br>(2.0 to 4.7)                     | 35.4<br>(26.8 to 43.7)                            | 0.5<br>(-5.9 to 7.2)                                |
| Polycystic ovarian syndrome                                | 14.7<br>(10.9 to 19.1)                           | 35.1<br>(25.3 to 47.7)                            | 0.1<br>(0.1 to 0.2)                     | 40.6<br>(23.5 to 62.1)                            | 0.3<br>(-11.7 to 15.1)                              |
| Female infertility                                         | 11.6<br>(8.3 to 18.2)                            | --                                                | 0.1<br>(< 0.05 to 0.1)                  | 69.5<br>(17.8 to 154.7)                           | 13.3<br>(-15.8 to 57.5)                             |
| Endometriosis                                              | 3.4<br>(2.8 to 4.0)                              | 14.5<br>(11.6 to 18.1)                            | 0.3<br>(0.2 to 0.5)                     | 43.7<br>(1.9 to 97.1)                             | 0.8<br>(-25.5 to 35.3)                              |
| Genital prolapse                                           | 990.8<br>(880.4 to 1,102.9)                      | 99.8<br>(82.7 to 119.6)                           | 3.1<br>(1.5 to 5.6)                     | 36.3<br>(28.9 to 43.7)                            | -4.4<br>(-9.6 to 0.6)                               |
| Premenstrual syndrome                                      | 753.3<br>(666.8 to 832.1)                        | 290.2<br>(256.7 to 321.6)                         | 6.3<br>(3.9 to 9.8)                     | 39.3<br>(24.7 to 55.1)                            | 0.0<br>(-9.5 to 10.8)                               |
| Other gynecological diseases                               | 266.2<br>(231.8 to 305.3)                        | 228.5<br>(187.6 to 274.7)                         | 9.2<br>(6.0 to 13.0)                    | 42.0<br>(32.6 to 51.4)                            | 2.8<br>(-3.5 to 9.5)                                |
| Hemoglobinopathies and hemolytic anaemias                  | 7,402.8<br>(7,093.7 to 7,744.7)                  | --                                                | 32.1<br>(21.2 to 46.2)                  | 46.8<br>(38.0 to 56.3)                            | 0.0<br>(-4.6 to 5.1)                                |
| Thalassemias                                               | 0.5<br>(0.4 to 0.6)                              | --                                                | 0.1<br>(< 0.05 to 0.1)                  | 46.0<br>(3.6 to 104.4)                            | 1.4<br>(-24.9 to 37.7)                              |
| Thalassaemias trait                                        | 631.4<br>(587.4 to 675.1)                        | --                                                | 10.1<br>(6.7 to 14.4)                   | 47.3<br>(36.4 to 59.9)                            | 1.6<br>(-4.6 to 8.3)                                |
| Sickle cell disorders                                      | 30.6<br>(27.1 to 36.7)                           | --                                                | 2.4<br>(1.6 to 3.4)                     | 60.6<br>(41.8 to 82.9)                            | 10.7<br>(-1.1 to 24.6)                              |
| Sickle cell trait                                          | 3,019.9<br>(2,849.4 to 3,358.4)                  | --                                                | 11.6<br>(7.7 to 16.9)                   | 52.0<br>(41.1 to 63.5)                            | 4.4<br>(-2.4 to 11.1)                               |
| G6PD deficiency                                            | 1,459.5<br>(1,221.8 to 1,699.8)                  | --                                                | 0.1<br>(0.1 to 0.2)                     | 58.7<br>(37.8 to 82.7)                            | 0.3<br>(-9.0 to 10.5)                               |
| G6PD trait                                                 | 3,110.2<br>(2,909.7 to 3,321.8)                  | --                                                | < 0.05<br>(< 0.05 to < 0.05)            | 59.1<br>(44.0 to 74.1)                            | 7.5<br>(-0.5 to 15.8)                               |
| Other hemoglobinopathies and hemolytic anaemias            | 284.0<br>(272.1 to 294.7)                        | --                                                | 7.8<br>(5.2 to 11.2)                    | 35.5<br>(23.9 to 47.8)                            | -9.2<br>(-14.7 to -3.3)                             |
| Endocrine, metabolic, blood, and immune disorders          | 301.5<br>(289.8 to 313.1)                        | 12.1<br>(10.8 to 13.5)                            | 9.6<br>(6.3 to 13.6)                    | 36.3<br>(25.7 to 46.8)                            | -4.9<br>(-10.2 to 0.1)                              |
| <b>Musculoskeletal disorders</b>                           | <b>1,804.8</b><br><b>(1,705.9 to 1,901.3)</b>    | <b>877.0</b><br><b>(792.1 to 971.1)</b>           | <b>200.1</b><br><b>(144.0 to 262.8)</b> | <b>42.2</b><br><b>(37.8 to 46.6)</b>              | <b>0.4</b><br><b>(-2.4 to 3.0)</b>                  |
| Rheumatoid arthritis                                       | 16.3<br>(14.3 to 18.5)                           | 1.1<br>(1.0 to 1.3)                               | 3.9<br>(2.6 to 5.3)                     | 47.1<br>(31.4 to 65.1)                            | 3.7<br>(-5.7 to 14.5)                               |
| Osteoarthritis                                             | 279.1<br>(261.5 to 298.0)                        | 16.1<br>(14.9 to 17.3)                            | 17.2<br>(12.1 to 23.4)                  | 47.0<br>(41.3 to 53.0)                            | 3.0<br>(-0.7 to 6.8)                                |
| Low back and neck pain                                     | 1,295.4<br>(1,204.6 to 1,390.4)                  | 586.8<br>(522.8 to 660.1)                         | 149.4<br>(105.6 to 197.1)               | 41.3<br>(36.2 to 46.4)                            | -0.4<br>(-3.7 to 2.9)                               |
| Low back pain                                              | 1,006.6<br>(886.9 to 1,147.0)                    | 501.3<br>(437.3 to 574.0)                         | 113.8<br>(79.9 to 151.1)                | 41.8<br>(35.2 to 48.6)                            | -0.6<br>(-4.8 to 3.7)                               |
| Neck pain                                                  | 355.2<br>(307.4 to 408.5)                        | 85.5<br>(73.8 to 100.1)                           | 35.6<br>(23.9 to 50.1)                  | 39.9<br>(36.1 to 43.8)                            | 0.2<br>(-2.1 to 2.3)                                |
| Gout                                                       | 38.4<br>(33.7 to 43.7)                           | 8.0<br>(6.9 to 9.1)                               | 1.2<br>(0.8 to 1.7)                     | 42.5<br>(20.4 to 66.8)                            | 1.1<br>(-12.1 to 15.1)                              |
| Other musculoskeletal disorders                            | 327.9<br>(265.0 to 390.6)                        | 265.0<br>(211.9 to 326.7)                         | 28.4<br>(18.6 to 40.9)                  | 43.7<br>(31.7 to 56.9)                            | 2.0<br>(-6.5 to 11.1)                               |
| <b>Other non-communicable diseases</b>                     | <b>14,851.2</b><br><b>(14,478.9 to 15,156.7)</b> | <b>42,951.4†</b><br><b>(39,344.3 to 46,951.3)</b> | <b>351.2</b><br><b>(236.8 to 496.1)</b> | <b>46.3</b><br><b>(44.1 to 48.6)</b>              | <b>-0.6</b><br><b>(-1.9 to 0.8)</b>                 |
| Congenital anomalies                                       | 255.8<br>(221.2 to 300.8)                        | --                                                | 36.4<br>(25.5 to 49.4)                  | 44.9<br>(35.3 to 55.0)                            | -1.8<br>(-7.8 to 4.7)                               |
| Neural tube defects                                        | 29.3<br>(25.9 to 32.8)                           | --                                                | 8.8<br>(6.1 to 11.8)                    | 45.8<br>(28.4 to 66.2)                            | -0.8<br>(-11.8 to 11.1)                             |
| Congenital heart anomalies                                 | 66.0<br>(53.5 to 79.3)                           | --                                                | 3.3<br>(1.6 to 5.4)                     | 48.1<br>(28.6 to 70.5)                            | 1.6<br>(-10.9 to 16.2)                              |
| Orofacial clefts                                           | 5.6<br>(4.9 to 6.4)                              | --                                                | 0.1<br>(0.1 to 0.1)                     | 43.4<br>(27.2 to 61.2)                            | -2.6<br>(-13.7 to 9.5)                              |
| Down's syndrome                                            | 3.3<br>(2.7 to 3.9)                              | --                                                | 0.3<br>(0.2 to 0.4)                     | 49.0<br>(38.6 to 60.6)                            | 0.4<br>(-6.6 to 8.2)                                |
| Turner syndrome                                            | 12.7<br>(10.8 to 15.1)                           | --                                                | 0.2<br>(0.1 to 0.4)                     | 43.5<br>(-2.4 to 106.9)                           | -3.1<br>(-30.9 to 34.7)                             |
| Klinefelter syndrome                                       | 11.9<br>(10.0 to 14.1)                           | --                                                | < 0.05<br>(< 0.05 to 0.1)               | 48.4<br>(12.1 to 95.4)                            | 0.6<br>(-23.4 to 31.0)                              |



| Cause                                         | Prevalence in thousands (95% UI)              | Incidence in thousands (95% UI)                | YLDs in thousands (95% UI)            |                                                   |                                                     |
|-----------------------------------------------|-----------------------------------------------|------------------------------------------------|---------------------------------------|---------------------------------------------------|-----------------------------------------------------|
|                                               | 2016 counts                                   | 2016 counts                                    | 2016 counts                           | Percentage change in counts between 2006 and 2016 | Percentage change in age-standardised rates between |
| Other chromosomal abnormalities               | 4.0<br>(3.4 to 4.7)                           | --                                             | 0.8<br>(0.5 to 1.2)                   | 37.6<br>(-2.9 to 96.4)                            | -6.0<br>(-33.2 to 31.3)                             |
| Congenital musculoskeletal and limb anomalies | 18.7<br>(16.3 to 21.4)                        | --                                             | 2.8<br>(1.8 to 4.0)                   | 46.1<br>(25.9 to 69.4)                            | -1.4<br>(-13.2 to 10.5)                             |
| Urogenital congenital anomalies               | 17.1<br>(14.8 to 19.9)                        | --                                             | 0.4<br>(0.2 to 0.6)                   | 47.0<br>(31.2 to 64.5)                            | -1.6<br>(-10.6 to 8.3)                              |
| Digestive congenital anomalies                | 19.5<br>(17.3 to 21.9)                        | --                                             | 0.9<br>(0.6 to 1.3)                   | 51.5<br>(24.6 to 83.2)                            | 2.9<br>(-13.4 to 22.2)                              |
| Other congenital anomalies                    | 111.0<br>(75.8 to 163.0)                      | --                                             | 18.9<br>(12.1 to 28.5)                | 43.7<br>(31.7 to 56.8)                            | -2.9<br>(-10.9 to 5.8)                              |
| Skin and subcutaneous diseases                | 6,743.1<br>(6,465.5 to 7,047.3)               | 15,955.4<br>(14,815.2 to 17,181.1)             | 154.7<br>(100.0 to 229.0)             | 51.4<br>(48.1 to 54.7)                            | 1.0<br>(-0.8 to 2.9)                                |
| Dermatitis                                    | 975.1<br>(802.0 to 1,172.8)                   | 818.2<br>(720.0 to 941.0)                      | 39.4<br>(21.8 to 66.2)                | 49.9<br>(43.3 to 56.1)                            | 0.3<br>(-3.3 to 3.8)                                |
| Psoriasis                                     | 79.6<br>(74.9 to 84.5)                        | 13.3<br>(12.5 to 14.2)                         | 7.0<br>(4.9 to 9.3)                   | 51.8<br>(33.4 to 73.2)                            | 4.1<br>(-5.8 to 14.9)                               |
| Cellulitis                                    | 7.0<br>(6.4 to 7.6)                           | 119.9<br>(110.7 to 129.6)                      | 0.4<br>(0.2 to 0.6)                   | 49.2<br>(22.4 to 81.6)                            | 1.6<br>(-16.6 to 22.8)                              |
| Pyoderma                                      | 113.8<br>(107.5 to 120.2)                     | 2,235.5<br>(2,119.1 to 2,352.6)                | 0.7<br>(0.2 to 1.4)                   | 49.3<br>(39.0 to 59.5)                            | 1.1<br>(-4.3 to 6.2)                                |
| Scabies                                       | 376.4<br>(296.8 to 479.1)                     | 1,170.1<br>(915.6 to 1,496.7)                  | 9.7<br>(5.2 to 16.4)                  | 44.5<br>(36.0 to 52.2)                            | -2.9<br>(-7.7 to 1.4)                               |
| Fungal skin diseases                          | 3,109.8<br>(2,663.0 to 3,596.0)               | 8,170.2<br>(7,175.2 to 9,256.8)                | 17.7<br>(7.0 to 36.6)                 | 48.6<br>(46.6 to 50.4)                            | 0.2<br>(-0.7 to 1.0)                                |
| Viral skin diseases                           | 607.9<br>(575.2 to 643.3)                     | 829.4<br>(782.0 to 885.9)                      | 18.7<br>(11.5 to 27.5)                | 50.2<br>(44.2 to 56.4)                            | 0.0<br>(-3.2 to 3.4)                                |
| Acne vulgaris                                 | 1,608.6<br>(1,368.7 to 1,898.6)               | 1,199.2<br>(907.0 to 1,641.8)                  | 41.5<br>(27.1 to 60.6)                | 58.4<br>(49.6 to 67.1)                            | 2.8<br>(-2.6 to 8.2)                                |
| Alopecia areata                               | 30.1<br>(28.2 to 32.0)                        | 53.8<br>(50.4 to 57.2)                         | 1.0<br>(0.6 to 1.5)                   | 44.5<br>(26.6 to 62.6)                            | 0.2<br>(-10.6 to 10.6)                              |
| Pruritus                                      | 131.2<br>(114.4 to 148.8)                     | 108.0<br>(95.5 to 122.1)                       | 1.4<br>(0.7 to 2.6)                   | 47.0<br>(38.0 to 57.1)                            | 0.8<br>(-4.2 to 6.2)                                |
| Urticaria                                     | 212.4<br>(178.5 to 252.8)                     | 385.4<br>(322.4 to 455.6)                      | 12.8<br>(8.1 to 18.8)                 | 47.3<br>(38.0 to 57.1)                            | 0.1<br>(-5.5 to 6.2)                                |
| Decubitus ulcer                               | 1.4<br>(1.2 to 1.5)                           | 4.9<br>(4.4 to 5.5)                            | 0.2<br>(0.2 to 0.3)                   | 50.0<br>(40.1 to 61.5)                            | 4.5<br>(-7.5 to 19.1)                               |
| Other skin and subcutaneous diseases          | 755.9<br>(733.7 to 779.8)                     | 847.4<br>(820.9 to 875.2)                      | 4.2<br>(2.0 to 7.7)                   | 48.3<br>(43.4 to 53.0)                            | 1.6<br>(-0.9 to 4.0)                                |
| Sense organ diseases                          | 3,683.8<br>(3,523.3 to 3,874.7)               | 1,770.6†<br>(1,642.3 to 1,913.0)               | 130.2<br>(90.4 to 184.2)              | 41.8<br>(37.6 to 46.2)                            | -1.4<br>(-3.6 to 0.9)                               |
| Glaucoma                                      | 5.1<br>(4.1 to 6.2)                           | --                                             | 0.6<br>(0.4 to 0.8)                   | 64.3<br>(41.0 to 91.1)                            | 8.5<br>(-5.1 to 23.1)                               |
| Cataract                                      | 133.5<br>(115.6 to 153.0)                     | --                                             | 12.2<br>(8.3 to 17.5)                 | 50.6<br>(41.0 to 60.9)                            | 3.3<br>(-3.6 to 10.2)                               |
| Macular degeneration                          | 5.5<br>(4.1 to 7.3)                           | --                                             | 0.5<br>(0.3 to 0.7)                   | 63.5<br>(39.6 to 91.0)                            | 8.5<br>(-4.7 to 24.2)                               |
| Refraction and accommodation disorders        | 2,259.4<br>(2,030.3 to 2,523.1)               | --                                             | 36.2<br>(21.0 to 59.6)                | 37.8<br>(30.7 to 45.5)                            | -4.3<br>(-8.8 to 0.9)                               |
| Age-related and other hearing loss            | 1,837.0<br>(1,713.4 to 1,974.3)               | --                                             | 66.1<br>(45.5 to 92.2)                | 41.3<br>(35.3 to 48.7)                            | -2.2<br>(-4.7 to 0.3)                               |
| Other vision loss                             | 51.3<br>(44.5 to 58.4)                        | --                                             | 5.0<br>(3.4 to 7.1)                   | 45.3<br>(32.3 to 59.2)                            | 3.2<br>(-4.8 to 11.1)                               |
| Other sense organ diseases                    | 324.1<br>(300.3 to 348.2)                     | 1,770.6<br>(1,642.3 to 1,913.0)                | 9.8<br>(6.1 to 14.9)                  | 46.2<br>(38.3 to 54.9)                            | 0.7<br>(-3.1 to 4.6)                                |
| Oral disorders                                | 10,859.6<br>(10,295.1 to 11,332.8)            | 25,225.4†<br>(21,864.3 to 29,080.7)            | 29.9<br>(16.9 to 48.8)                | 43.2<br>(40.4 to 46.2)                            | 0.2<br>(-1.6 to 2.1)                                |
| Caries of deciduous teeth                     | 3,595.2<br>(2,996.8 to 4,134.8)               | 10,257.7<br>(7,507.1 to 13,540.2)              | 0.8<br>(0.4 to 1.6)                   | 49.4<br>(35.2 to 64.7)                            | 0.2<br>(-9.4 to 10.5)                               |
| Caries of permanent teeth                     | 6,218.2<br>(5,612.2 to 6,810.3)               | 14,774.3<br>(13,149.7 to 16,556.3)             | 3.7<br>(1.6 to 7.1)                   | 45.9<br>(40.4 to 51.7)                            | -0.7<br>(-3.9 to 2.2)                               |
| Periodontal disease                           | 1,536.1<br>(1,288.4 to 1,816.7)               | 177.7<br>(143.7 to 216.2)                      | 10.1<br>(4.0 to 20.9)                 | 40.1<br>(35.2 to 44.6)                            | 0.2<br>(-3.0 to 3.2)                                |
| Edentulism and severe tooth loss              | 249.5<br>(211.0 to 292.2)                     | 15.7<br>(13.1 to 18.3)                         | 7.0<br>(4.6 to 10.0)                  | 42.7<br>(36.3 to 49.9)                            | 0.7<br>(-3.1 to 4.7)                                |
| Other oral disorders                          | 280.4<br>(266.9 to 295.4)                     | --                                             | 8.3<br>(5.1 to 12.5)                  | 46.0<br>(40.3 to 51.8)                            | 0.2<br>(-3.0 to 3.1)                                |
| <b>Injuries</b>                               | <b>1,967.3</b><br><b>(1,845.0 to 2,106.4)</b> | <b>1,376.5†</b><br><b>(1,298.3 to 1,462.4)</b> | <b>85.6</b><br><b>(58.4 to 120.5)</b> | <b>43.4</b><br><b>(40.5 to 46.2)</b>              | <b>-0.3</b><br><b>(-1.8 to 1.3)</b>                 |
| <b>Transport injuries</b>                     | <b>187.9</b><br><b>(174.7 to 202.9)</b>       | <b>92.4</b><br><b>(82.1 to 103.9)</b>          | <b>11.7</b><br><b>(7.7 to 16.9)</b>   | <b>46.6</b><br><b>(43.1 to 50.1)</b>              | <b>3.1</b><br><b>(1.1 to 5.0)</b>                   |
| Road injuries                                 | 140.3<br>(131.8 to 149.9)                     | 73.8<br>(64.2 to 84.5)                         | 8.6<br>(5.7 to 12.4)                  | 47.0<br>(43.7 to 50.2)                            | 3.9<br>(1.9 to 5.9)                                 |
| Pedestrian road injuries                      | 29.8<br>(26.4 to 33.9)                        | 11.2<br>(9.0 to 13.8)                          | 1.8<br>(1.2 to 2.6)                   | 45.9<br>(42.5 to 49.2)                            | 3.6<br>(1.5 to 5.6)                                 |
| Cyclist road injuries                         | 25.6<br>(21.5 to 30.2)                        | 15.6<br>(12.0 to 19.7)                         | 1.5<br>(1.0 to 2.1)                   | 53.4<br>(49.7 to 57.1)                            | 8.5<br>(6.2 to 10.6)                                |
| Motorcyclist road injuries                    | 23.1<br>(19.9 to 27.2)                        | 8.1<br>(6.5 to 10.0)                           | 1.4<br>(0.9 to 2.0)                   | 39.1<br>(35.8 to 42.3)                            | -1.6<br>(-3.6 to 0.3)                               |
| Motor vehicle road injuries                   | 43.5<br>(37.6 to 49.1)                        | 26.5<br>(22.2 to 31.2)                         | 2.9<br>(1.9 to 4.1)                   | 49.9<br>(46.2 to 53.5)                            | 6.4<br>(4.3 to 8.5)                                 |
| Other road injuries                           | 18.4<br>(15.9 to 21.6)                        | 12.4<br>(9.6 to 16.0)                          | 1.0<br>(0.7 to 1.5)                   | 43.6<br>(40.2 to 46.8)                            | -0.1<br>(-2.2 to 1.7)                               |
| Other transport injuries                      | 47.6<br>(39.3 to 58.4)                        | 18.5<br>(14.7 to 23.6)                         | 3.1<br>(2.0 to 4.5)                   | 45.6<br>(40.4 to 51.0)                            | 0.3<br>(-2.1 to 2.9)                                |
| <b>Unintentional injuries</b>                 | <b>1,710.9</b><br><b>(1,588.1 to 1,848.5)</b> | <b>1,246.8</b><br><b>(1,169.7 to 1,330.9)</b>  | <b>66.3</b><br><b>(44.9 to 93.0)</b>  | <b>43.1</b><br><b>(40.2 to 46.3)</b>              | <b>-0.7</b><br><b>(-2.2 to 0.7)</b>                 |
| Falls                                         | 553.3<br>(480.5 to 630.1)                     | 381.0<br>(327.8 to 450.2)                      | 25.0<br>(17.5 to 34.5)                | 47.9<br>(44.7 to 50.9)                            | 1.5<br>(-0.2 to 3.1)                                |
| Drowning                                      | 6.3<br>(5.3 to 7.4)                           | 2.0<br>(1.7 to 2.4)                            | 0.4<br>(0.3 to 0.6)                   | 36.9<br>(32.3 to 41.5)                            | -4.0<br>(-6.3 to -1.6)                              |
| Fire, heat, and hot substances                | 177.4<br>(147.2 to 218.3)                     | 39.1<br>(31.4 to 47.5)                         | 5.7<br>(3.9 to 7.9)                   | 34.6<br>(27.5 to 42.4)                            | -6.6<br>(-10.7 to -2.3)                             |
| Poisonings                                    | 5.5<br>(4.3 to 6.8)                           | 11.3<br>(8.7 to 14.3)                          | 0.6<br>(0.4 to 0.9)                   | 42.3<br>(28.2 to 56.0)                            | -3.1<br>(-10.2 to 3.9)                              |
| Exposure to mechanical forces                 | 303.1<br>(260.2 to 362.4)                     | 178.9<br>(151.5 to 209.6)                      | 8.5<br>(5.6 to 12.4)                  | 44.1<br>(40.3 to 48.1)                            | 0.4<br>(-1.7 to 2.4)                                |
| Unintentional firearm injuries                | 17.7<br>(14.7 to 21.5)                        | 6.8<br>(5.0 to 8.9)                            | 0.9<br>(0.6 to 1.3)                   | 45.1<br>(41.2 to 49.2)                            | 1.8<br>(-0.6 to 4.0)                                |
| Unintentional suffocation                     | 26.6<br>(18.9 to 35.8)                        | 10.2<br>(7.0 to 14.4)                          | 0.9<br>(0.6 to 1.5)                   | 46.9<br>(41.4 to 52.4)                            | 0.6<br>(-1.9 to 3.2)                                |
| Other exposure to mechanical forces           | 258.9<br>(217.7 to 315.6)                     | 161.9<br>(136.5 to 190.4)                      | 6.7<br>(4.5 to 9.6)                   | 43.6<br>(39.5 to 47.7)                            | 0.2<br>(-2.0 to 2.3)                                |

| Cause                                                                               | Prevalence in thousands (95% UI)        | Incidence in thousands (95% UI)       | YLDs in thousands (95% UI)         |                                                   |                                                     |
|-------------------------------------------------------------------------------------|-----------------------------------------|---------------------------------------|------------------------------------|---------------------------------------------------|-----------------------------------------------------|
|                                                                                     | 2016 counts                             | 2016 counts                           | 2016 counts                        | Percentage change in counts between 2006 and 2016 | Percentage change in age-standardised rates between |
| Adverse effects of medical treatment                                                | 7.5<br>(5.9 to 9.5)                     | 98.3<br>(84.3 to 114.7)               | 1.0<br>(0.6 to 1.5)                | 24.6<br>(17.8 to 31.7)                            | -13.5<br>(-16.4 to -9.8)                            |
| Animal contact                                                                      | 116.8<br>(102.4 to 136.7)               | 208.9<br>(175.7 to 243.7)             | 4.2<br>(2.8 to 5.9)                | 40.9<br>(33.7 to 48.4)                            | -3.3<br>(-7.0 to 0.3)                               |
| Venomous animal contact                                                             | 43.2<br>(35.8 to 52.1)                  | 84.8<br>(66.4 to 104.9)               | 2.8<br>(1.9 to 4.0)                | 40.1<br>(29.5 to 51.4)                            | -4.2<br>(-9.5 to 1.4)                               |
| Non-venomous animal contact                                                         | 73.6<br>(61.3 to 90.4)                  | 124.1<br>(101.2 to 150.2)             | 1.5<br>(1.0 to 2.1)                | 42.3<br>(37.0 to 47.4)                            | -1.9<br>(-5.0 to 0.9)                               |
| Foreign body                                                                        | 132.0<br>(106.0 to 159.1)               | 116.6<br>(100.5 to 134.5)             | 6.2<br>(4.0 to 9.1)                | 43.4<br>(37.6 to 48.4)                            | -1.8<br>(-4.2 to 0.5)                               |
| Pulmonary aspiration and foreign body in airway                                     | 77.4<br>(56.9 to 105.1)                 | 48.3<br>(39.0 to 60.4)                | 4.0<br>(2.6 to 6.0)                | 46.0<br>(40.0 to 51.6)                            | -0.4<br>(-2.9 to 2.1)                               |
| Foreign body in eyes                                                                | 6.6<br>(3.4 to 10.3)                    | 37.7<br>(28.6 to 50.9)                | 0.4<br>(0.2 to 0.7)                | 50.3<br>(43.8 to 56.6)                            | 3.4<br>(0.3 to 6.3)                                 |
| Foreign body in other body part                                                     | 48.1<br>(37.6 to 62.6)                  | 30.6<br>(24.5 to 37.6)                | 1.8<br>(1.2 to 2.6)                | 36.5<br>(30.1 to 42.4)                            | -5.7<br>(-8.7 to -2.8)                              |
| Environmental heat and cold exposure                                                | 161.1<br>(135.9 to 190.1)               | 71.0<br>(58.5 to 85.6)                | 7.1<br>(4.8 to 10.3)               | 40.1<br>(36.7 to 43.5)                            | -2.3<br>(-4.1 to -0.6)                              |
| Other unintentional injuries                                                        | 247.8<br>(195.6 to 316.7)               | 139.6<br>(115.8 to 167.2)             | 7.5<br>(4.9 to 10.8)               | 41.1<br>(37.9 to 44.5)                            | -0.4<br>(-1.9 to 1.2)                               |
| <b>Self-harm and interpersonal violence</b>                                         | <b>598.8</b><br><b>(525.0 to 679.3)</b> | <b>37.0†</b><br><b>(31.4 to 43.0)</b> | <b>7.2</b><br><b>(4.9 to 10.0)</b> | <b>39.0</b><br><b>(34.7 to 43.2)</b>              | <b>-3.6</b><br><b>(-5.8 to -1.3)</b>                |
| Self-harm                                                                           | 7.0<br>(6.1 to 7.8)                     | 4.3<br>(3.6 to 5.0)                   | 0.4<br>(0.3 to 0.6)                | 53.8<br>(49.8 to 58.0)                            | 7.2<br>(4.8 to 9.4)                                 |
| Self-harm by firearm                                                                | 0.7<br>(0.6 to 0.8)                     | 0.3<br>(0.2 to 0.5)                   | < 0.05<br>(< 0.05 to < 0.05)       | 43.7<br>(39.0 to 48.8)                            | -0.9<br>(-3.7 to 2.0)                               |
| Self-harm by other specified means                                                  | 6.3<br>(5.4 to 7.2)                     | 3.9<br>(3.3 to 4.7)                   | 0.4<br>(0.2 to 0.6)                | 54.7<br>(50.5 to 59.1)                            | 8.0<br>(5.5 to 10.4)                                |
| Interpersonal violence                                                              | 591.9<br>(517.9 to 672.8)               | 32.7†<br>(27.1 to 39.0)               | 6.8<br>(4.6 to 9.5)                | 38.2<br>(33.9 to 42.6)                            | -4.5<br>(-6.8 to -2.2)                              |
| Assault by firearm                                                                  | 2.4<br>(2.0 to 2.8)                     | 1.1<br>(0.8 to 1.4)                   | 0.1<br>(0.1 to 0.2)                | 33.5<br>(29.2 to 37.9)                            | -5.6<br>(-8.2 to -2.9)                              |
| Assault by sharp object                                                             | 18.8<br>(15.4 to 22.3)                  | 11.0<br>(8.4 to 14.3)                 | 0.7<br>(0.5 to 1.0)                | 43.7<br>(39.7 to 47.3)                            | 1.7<br>(-0.8 to 3.8)                                |
| Sexual violence                                                                     | 544.8<br>(471.0 to 625.4)               | --                                    | 4.8<br>(3.2 to 7.0)                | 35.9<br>(29.9 to 42.3)                            | -7.8<br>(-11.1 to -4.6)                             |
| Assault by other means                                                              | 25.9<br>(22.3 to 30.8)                  | 20.6<br>(16.6 to 25.3)                | 1.2<br>(0.8 to 1.8)                | 45.6<br>(42.1 to 49.2)                            | 2.3<br>(0.2 to 4.6)                                 |
| <b>Forces of nature, conflict and terrorism, and executions and police conflict</b> | <b>14.5</b><br><b>(8.4 to 22.9)</b>     | <b>0.4†</b><br><b>(0.2 to 0.6)</b>    | <b>0.4</b><br><b>(0.1 to 1.3)</b>  | <b>69.2</b><br><b>(60.8 to 82.4)</b>              | <b>23.7</b><br><b>(18.6 to 32.7)</b>                |
| Exposure to forces of nature                                                        | 0.6<br>(0.3 to 1.1)                     | --                                    | < 0.05<br>(< 0.05 to 0.1)          | 219.8<br>(201.8 to 288.7)                         | 106.1<br>(95.0 to 149.3)                            |
| Conflict and terrorism                                                              | 13.1<br>(7.4 to 21.2)                   | --                                    | 0.4<br>(0.1 to 1.2)                | 66.3<br>(59.5 to 78.1)                            | 22.1<br>(17.7 to 30.4)                              |
| Executions and police conflict                                                      | 0.8<br>(0.4 to 2.3)                     | 0.4<br>(0.2 to 0.6)                   | < 0.05<br>(< 0.05 to 0.1)          | 41.5<br>(18.6 to 73.8)                            | 4.7<br>(-19.3 to 29.9)                              |
| <b>Impairments</b>                                                                  | --                                      | --                                    | --                                 | --                                                | --                                                  |
| Anaemia                                                                             | 9,668.4<br>(9,234.7 to 10,093.1)        | --                                    | 339.4<br>(230.2 to 486.7)          | 33.7<br>(25.4 to 41.6)                            | -8.8<br>(-13.2 to -4.9)                             |
| Developmental intellectual disability                                               | 936.8<br>(718.5 to 1,162.6)             | --                                    | 75.5<br>(54.0 to 101.0)            | 47.8<br>(40.1 to 57.3)                            | -0.1<br>(-4.7 to 6.0)                               |
| Epilepsy                                                                            | 112.8<br>(60.3 to 185.7)                | --                                    | 45.8<br>(22.5 to 83.2)             | 60.4<br>(-30.5 to 273.6)                          | 8.0<br>(-56.5 to 168.3)                             |
| Guillain-Barre syndrome                                                             | 0.1<br>(0.1 to 0.2)                     | --                                    | < 0.05<br>(< 0.05 to 0.1)          | 47.5<br>(45.2 to 49.6)                            | 0.0<br>(-0.2 to 0.2)                                |
| Hearing loss                                                                        | 2,398.1<br>(2,268.5 to 2,538.9)         | --                                    | 98.9<br>(69.1 to 134.5)            | 41.0<br>(36.6 to 45.8)                            | -2.8<br>(-5.0 to -0.8)                              |
| Heart failure                                                                       | 43.5<br>(38.4 to 48.9)                  | --                                    | 4.5<br>(3.3 to 6.0)                | 45.9<br>(36.4 to 56.7)                            | -1.7<br>(-8.6 to 5.4)                               |
| Infertility                                                                         | 293.0<br>(270.8 to 317.2)               | --                                    | 1.7<br>(0.7 to 3.5)                | 31.8<br>(23.3 to 41.2)                            | -7.0<br>(-13.1 to -0.6)                             |
| Pelvic inflammatory disease                                                         | 17.2<br>(14.4 to 20.5)                  | --                                    | 2.2<br>(1.5 to 3.2)                | 38.4<br>(19.2 to 60.2)                            | -1.3<br>(-14.5 to 14.2)                             |
| Vision loss                                                                         | 2,578.8<br>(2,332.7 to 2,836.4)         | --                                    | 69.9<br>(48.1 to 100.0)            | 42.2<br>(36.0 to 49.6)                            | -3.6<br>(-6.9 to 0.1)                               |

We did not calculate incidence for the nine impairments, certain NTDs, and causes with only birth prevalence. Blank cells mean that no estimate is available.

† Incidence for aggregate causes represents the sum of the incidence of the causes below the aggregate.

‡ Incidence estimates for stroke represent first-ever stroke only.

^ Incidence of HIV/AIDS represents new infections of HIV only and does not include new infections of Tuberculosis in HIV positive cases.



SR Table 14: Prevalence, incidence, and YLDs for 2016, percentage change of YLD counts and percentage change of age-standardised YLD rates between 2006 and 2016 by cause and impairments, for all ages, Nigeria.

| Cause                                                                                | Prevalence in thousands (95% UI)             | Incidence in thousands (95% UI)                   | YLDs in thousands (95% UI)                |                                                   |                                                     |
|--------------------------------------------------------------------------------------|----------------------------------------------|---------------------------------------------------|-------------------------------------------|---------------------------------------------------|-----------------------------------------------------|
|                                                                                      | 2016 counts                                  | 2016 counts                                       | 2016 counts                               | Percentage change in counts between 2006 and 2016 | Percentage change in age-standardised rates between |
| <b>All causes</b>                                                                    | <b>182,229.4</b><br>(181,939.5 to 182,519.1) | <b>1,049,301.9†</b><br>(995,634.2 to 1,110,261.3) | <b>17,313.9</b><br>(12,789.2 to 22,848.8) | <b>21.4</b><br>(18.4 to 24.7)                     | <b>-6.2</b><br>(-8.3 to -4.1)                       |
| <b>Communicable, maternal, neonatal, and nutritional disorders</b>                   | <b>162,656.6</b><br>(160,560.6 to 164,504.7) | <b>607,766.2†</b><br>(562,656.6 to 654,394.2)     | <b>4,817.9</b><br>(3,384.6 to 6,725.4)    | <b>7.9</b><br>(2.2 to 13.2)                       | <b>-19.1</b><br>(-24.2 to -14.7)                    |
| <b>HIV/AIDS and tuberculosis</b>                                                     | <b>54,412.5</b><br>(47,574.1 to 60,774.3)    | <b>466.5†</b><br>(387.3 to 558.8)                 | <b>443.0</b><br>(308.8 to 605.9)          | <b>-15.0</b><br>(-33.7 to 7.0)                    | <b>-37.6</b><br>(-52.3 to -19.4)                    |
| Tuberculosis                                                                         | 48,433.3<br>(41,931.3 to 56,136.6)           | 291.8†<br>(237.2 to 356.9)                        | 60.2<br>(38.6 to 86.1)                    | -10.4<br>(-20.9 to 3.0)                           | -31.6<br>(-38.0 to -23.3)                           |
| Drug-susceptible tuberculosis                                                        | 189.5<br>(152.9 to 234.3)                    | 282.6<br>(228.7 to 346.8)                         | 58.2<br>(37.6 to 82.7)                    | -10.3<br>(-21.6 to 3.5)                           | -31.6<br>(-38.5 to -22.7)                           |
| Multidrug-resistant tuberculosis without extensive drug resistance                   | 6.1<br>(2.6 to 12.4)                         | 9.2<br>(3.9 to 18.7)                              | 2.0<br>(0.8 to 4.1)                       | -13.8<br>(-69.7 to 150.0)                         | -33.8<br>(-76.8 to 92.9)                            |
| Extensively drug-resistant tuberculosis                                              | < 0.05<br>(< 0.05 to 0.1)                    | 0.1<br>(< 0.05 to 0.1)                            | < 0.05<br>(< 0.05 to < 0.05)              | 158.6<br>(-7.6 to 622.7)                          | 96.4<br>(-29.7 to 442.1)                            |
| Latent tuberculosis infection                                                        | 48,237.6<br>(41,729.5 to 55,942.0)           | --                                                | --                                        | --                                                | --                                                  |
| HIV/AIDS                                                                             | 3,314.0<br>(3,049.2 to 3,637.6)              | 174.7^<br>(121.1 to 242.1)                        | 382.9<br>(264.2 to 529.0)                 | -15.6<br>(-36.2 to 9.9)                           | -38.6<br>(-54.5 to -16.9)                           |
| Drug-susceptible HIV/AIDS - Tuberculosis                                             | 40.4<br>(24.1 to 63.3)                       | 60.2<br>(35.8 to 94.0)                            | 15.7<br>(8.0 to 27.1)                     | -37.8<br>(-49.0 to -24.9)                         | -50.8<br>(-59.4 to -40.6)                           |
| Multidrug-resistant HIV/AIDS - Tuberculosis without extensive drug resistance        | 1.6<br>(0.6 to 3.5)                          | 2.4<br>(0.9 to 5.4)                               | 0.7<br>(0.2 to 1.5)                       | -41.7<br>(-79.4 to 56.3)                          | -53.9<br>(-83.7 to 23.6)                            |
| Extensively drug-resistant HIV/AIDS - Tuberculosis                                   | < 0.05<br>(< 0.05 to < 0.05)                 | < 0.05<br>(< 0.05 to < 0.05)                      | < 0.05<br>(< 0.05 to < 0.05)              | 77.8<br>(-37.3 to 376.4)                          | 40.6<br>(-50.4 to 276.7)                            |
| HIV/AIDS resulting in other diseases                                                 | 3,272.0<br>(3,007.4 to 3,604.7)              | 174.7<br>(121.1 to 242.1)                         | 366.5<br>(252.9 to 511.8)                 | -14.3<br>(-36.0 to 14.2)                          | -37.9<br>(-54.6 to -14.1)                           |
| <b>Diarrhoea, lower respiratory infections, and other common infectious diseases</b> | <b>10,793.4</b><br>(10,344.5 to 11,252.0)    | <b>475,994.1†</b><br>(436,777.4 to 517,312.1)     | <b>649.0</b><br>(454.9 to 874.2)          | <b>18.3</b><br>(13.7 to 22.4)                     | <b>-7.9</b><br>(-11.0 to -5.0)                      |
| Diarrhoeal diseases                                                                  | 2,457.2<br>(2,308.6 to 2,644.7)              | 164,017.8<br>(153,727.8 to 176,411.1)             | 277.3<br>(190.1 to 380.8)                 | 20.3<br>(14.1 to 27.3)                            | -6.8<br>(-10.8 to -2.3)                             |
| Intestinal infectious diseases                                                       | 24.4<br>(16.0 to 36.0)                       | 545.6†<br>(349.4 to 817.1)                        | 4.1<br>(2.2 to 6.8)                       | 4.9<br>(-17.4 to 34.0)                            | -20.8<br>(-34.5 to -3.7)                            |
| Typhoid fever                                                                        | 23.2<br>(14.7 to 35.7)                       | 364.8<br>(232.1 to 551.4)                         | 3.6<br>(1.9 to 6.0)                       | 4.9<br>(-20.2 to 39.7)                            | -20.9<br>(-36.3 to -0.8)                            |
| Paratyphoid fever                                                                    | 7.9<br>(5.0 to 12.3)                         | 180.8<br>(115.8 to 280.1)                         | 0.5<br>(0.3 to 0.9)                       | 10.1<br>(-11.8 to 36.6)                           | -16.9<br>(-31.3 to -1.0)                            |
| Other intestinal infectious diseases                                                 | --                                           | --                                                | < 0.05<br>(< 0.05 to 0.1)                 | -31.7<br>(-47.0 to -12.2)                         | -43.4<br>(-52.4 to -33.4)                           |
| Lower respiratory infections                                                         | 192.3<br>(176.6 to 209.5)                    | 8,606.3<br>(7,793.7 to 9,465.0)                   | 11.6<br>(7.7 to 16.5)                     | 10.4<br>(-3.6 to 27.2)                            | -11.7<br>(-20.3 to -2.0)                            |
| Upper respiratory infections                                                         | 3,734.7<br>(3,236.5 to 4,245.9)              | 278,283.9<br>(239,972.9 to 317,894.6)             | 93.2<br>(55.7 to 146.9)                   | 24.7<br>(15.3 to 34.4)                            | -2.6<br>(-8.9 to 4.2)                               |
| Otitis media                                                                         | 3,519.0<br>(3,118.6 to 3,936.0)              | 16,642.6<br>(12,921.5 to 21,297.2)                | 111.5<br>(69.9 to 168.0)                  | 11.7<br>(-2.8 to 22.5)                            | -14.8<br>(-25.0 to -7.0)                            |
| Meningitis                                                                           | 992.4<br>(829.0 to 1,205.2)                  | 312.6<br>(258.9 to 390.3)                         | 91.3<br>(63.9 to 119.3)                   | 19.3<br>(11.9 to 27.7)                            | -8.7<br>(-14.2 to -2.6)                             |
| Pneumococcal meningitis                                                              | 409.4<br>(322.9 to 517.0)                    | 65.9<br>(48.8 to 87.8)                            | 36.0<br>(24.8 to 48.6)                    | 3.5<br>(-9.3 to 18.6)                             | -20.8<br>(-29.9 to -10.3)                           |
| H influenzae type B meningitis                                                       | 113.4<br>(85.9 to 149.8)                     | 34.1<br>(22.8 to 48.9)                            | 14.0<br>(9.6 to 18.8)                     | 8.8<br>(-3.4 to 21.7)                             | -16.7<br>(-26.0 to -7.9)                            |
| Meningococcal infection                                                              | 231.6<br>(165.1 to 315.6)                    | 110.5<br>(82.7 to 145.1)                          | 22.4<br>(15.4 to 30.6)                    | 27.8<br>(20.0 to 35.8)                            | -2.2<br>(-8.0 to 3.9)                               |
| Other meningitis                                                                     | 238.1<br>(170.1 to 322.3)                    | 102.1<br>(78.9 to 135.6)                          | 18.9<br>(12.8 to 26.1)                    | 66.2<br>(49.8 to 84.4)                            | 28.5<br>(17.4 to 41.7)                              |
| Encephalitis                                                                         | 347.8<br>(236.5 to 506.6)                    | 196.2<br>(170.7 to 227.3)                         | 42.3<br>(29.6 to 56.5)                    | 30.6<br>(14.3 to 49.1)                            | 0.1<br>(-11.1 to 13.2)                              |
| Diphtheria                                                                           | 0.1<br>(< 0.05 to 0.2)                       | 1.1<br>(0.5 to 2.2)                               | < 0.05<br>(< 0.05 to < 0.05)              | -54.8<br>(-85.0 to 34.4)                          | -64.4<br>(-87.1 to -2.4)                            |
| Whooping cough                                                                       | 208.6<br>(159.2 to 264.8)                    | 1,522.4<br>(1,161.8 to 1,932.8)                   | 10.3<br>(6.0 to 16.5)                     | 3.2<br>(-7.8 to 16.2)                             | -16.7<br>(-25.8 to -6.0)                            |
| Tetanus                                                                              | 3.0<br>(2.8 to 3.4)                          | 4.6<br>(1.9 to 11.5)                              | 0.1<br>(0.1 to 0.2)                       | -20.4<br>(-46.3 to 12.1)                          | -38.1<br>(-55.3 to -17.6)                           |
| Measles                                                                              | 25.8<br>(9.2 to 58.3)                        | 942.4<br>(334.2 to 2,129.1)                       | 2.3<br>(0.7 to 5.7)                       | -63.7<br>(-76.6 to -47.3)                         | -71.3<br>(-81.5 to -58.3)                           |
| Varicella and herpes zoster                                                          | 167.3<br>(155.9 to 179.5)                    | 4,918.7<br>(4,583.5 to 5,267.7)                   | 5.0<br>(3.0 to 7.7)                       | 30.2<br>(12.2 to 52.2)                            | 0.2<br>(-10.1 to 13.2)                              |
| <b>Neglected tropical diseases and malaria</b>                                       | <b>110,838.7</b><br>(106,331.1 to 115,666.5) | <b>73,516.1†</b><br>(56,712.0 to 94,656.0)        | <b>1,428.7</b><br>(965.5 to 2,118.1)      | <b>-2.1</b><br>(-9.0 to 5.2)                      | <b>-25.5</b><br>(-31.4 to -18.8)                    |
| Malaria                                                                              | 36,892.9<br>(31,135.7 to 43,133.3)           | 55,631.2<br>(39,017.2 to 76,334.7)                | 447.5<br>(322.2 to 624.2)                 | -5.3<br>(-16.3 to 5.2)                            | -27.5<br>(-35.0 to -20.1)                           |
| Chagas disease                                                                       | --                                           | --                                                | --                                        | --                                                | --                                                  |
| Leishmaniasis                                                                        | 0.9<br>(0.6 to 1.3)                          | < 0.05<br>(< 0.05 to 0.1)                         | 0.1<br>(< 0.05 to 0.1)                    | -6.8<br>(-16.5 to 6.8)                            | -25.0<br>(-32.1 to -14.2)                           |
| Visceral leishmaniasis                                                               | < 0.05<br>(< 0.05 to < 0.05)                 | < 0.05<br>(< 0.05 to < 0.05)                      | < 0.05<br>(< 0.05 to < 0.05)              | -26.4<br>(-74.2 to 93.8)                          | -43.4<br>(-82.4 to 66.7)                            |
| Cutaneous and mucocutaneous leishmaniasis                                            | 0.9<br>(0.6 to 1.3)                          | < 0.05<br>(< 0.05 to 0.1)                         | 0.1<br>(< 0.05 to 0.1)                    | -6.7<br>(-16.4 to 6.9)                            | -24.9<br>(-32.1 to -14.1)                           |
| African trypanosomiasis                                                              | --                                           | --                                                | --                                        | --                                                | --                                                  |
| Schistosomiasis                                                                      | 35,206.2<br>(32,707.3 to 37,635.9)           | 13,251.0<br>(12,297.1 to 14,261.7)                | 269.9<br>(132.2 to 511.2)                 | -7.7<br>(-10.2 to -5.3)                           | -29.3<br>(-31.2 to -27.5)                           |
| Cysticercosis                                                                        | 66.2<br>(42.8 to 92.0)                       | --                                                | 11.5<br>(5.6 to 19.3)                     | 2.7<br>(-34.1 to 45.7)                            | -20.2<br>(-48.1 to 9.9)                             |
| Cystic echinococcosis                                                                | 18.7<br>(4.0 to 71.1)                        | 4.0<br>(0.8 to 14.9)                              | 1.8<br>(0.3 to 6.3)                       | -51.9<br>(-94.6 to 254.3)                         | -63.5<br>(-95.4 to 154.1)                           |
| Lymphatic filariasis                                                                 | 6,089.4<br>(4,893.6 to 7,654.6)              | 1,707.6<br>(1,460.0 to 1,989.7)                   | 272.2<br>(124.9 to 490.1)                 | 17.2<br>(-1.0 to 34.1)                            | -10.0<br>(-24.3 to 2.9)                             |
| Onchocerciasis                                                                       | 2,277.4<br>(1,282.0 to 3,593.3)              | 482.5<br>(202.5 to 1,076.1)                       | 162.9<br>(61.7 to 325.1)                  | -33.7<br>(-58.9 to -3.0)                          | -45.6<br>(-65.4 to -20.1)                           |
| Trachoma                                                                             | 106.0<br>(74.3 to 145.0)                     | --                                                | 8.2<br>(5.3 to 12.1)                      | -10.8<br>(-28.2 to 10.0)                          | -30.4<br>(-46.4 to -8.0)                            |
| Dengue                                                                               | 144.8<br>(85.7 to 229.9)                     | 2,419.6<br>(1,645.9 to 3,377.0)                   | 23.6<br>(11.2 to 43.2)                    | 186.8<br>(113.9 to 545.4)                         | 119.4<br>(67.1 to 394.8)                            |
| Yellow fever                                                                         | 0.5<br>(0.1 to 1.3)                          | 17.9<br>(5.2 to 46.8)                             | < 0.05<br>(< 0.05 to < 0.05)              | -36.1<br>(-50.4 to -18.9)                         | -51.1<br>(-60.5 to -40.4)                           |
| Rabies                                                                               | < 0.05<br>(< 0.05 to 0.1)                    | 1.2<br>(0.4 to 2.9)                               | < 0.05<br>(< 0.05 to < 0.05)              | 2.3<br>(-55.2 to 124.3)                           | -23.4<br>(-59.9 to 39.2)                            |
| Intestinal nematode infections                                                       | 66,062.8<br>(58,627.6 to 73,787.4)           | --                                                | 130.5<br>(75.0 to 211.9)                  | 30.2<br>(23.4 to 37.2)                            | -0.1<br>(-5.5 to 5.7)                               |
| Ascariasis                                                                           | 47,675.9<br>(39,831.0 to 57,009.5)           | --                                                | 76.2<br>(41.6 to 127.3)                   | 30.2<br>(23.2 to 37.2)                            | -0.3<br>(-6.3 to 6.2)                               |

| Cause                                                                   | Prevalence in thousands (95% UI)              | Incidence in thousands (95% UI)                | YLDs in thousands (95% UI)                |                                                   |                                                     |
|-------------------------------------------------------------------------|-----------------------------------------------|------------------------------------------------|-------------------------------------------|---------------------------------------------------|-----------------------------------------------------|
|                                                                         | 2016 counts                                   | 2016 counts                                    | 2016 counts                               | Percentage change in counts between 2006 and 2016 | Percentage change in age-standardised rates between |
| Trichuriasis                                                            | 8,954.6<br>(6,945.1 to 11,375.6)              | --                                             | 1.0<br>(0.5 to 1.7)                       | 30.7<br>(0.7 to 66.9)                             | -0.4<br>(-20.5 to 23.3)                             |
| Hookworm disease                                                        | 17,038.9<br>(13,971.3 to 20,604.7)            | --                                             | 53.4<br>(32.0 to 84.6)                    | 30.2<br>(18.0 to 43.5)                            | 0.1<br>(-9.5 to 10.7)                               |
| Food-borne trematodiasis                                                | --                                            | --                                             | --                                        | --                                                | --                                                  |
| Leprosy                                                                 | 15.0<br>(14.1 to 15.9)                        | 1.1<br>(1.1 to 1.2)                            | 0.9<br>(0.6 to 1.3)                       | -0.8<br>(-20.0 to 22.6)                           | -21.2<br>(-33.9 to -5.8)                            |
| Ebola virus disease                                                     | --                                            | --                                             | --                                        | --                                                | --                                                  |
| Zika virus disease                                                      | --                                            | --                                             | --                                        | --                                                | --                                                  |
| Guinea worm disease                                                     | --                                            | --                                             | --                                        | --                                                | --                                                  |
| Other neglected tropical diseases                                       | 2,828.3<br>(2,681.6 to 2,988.0)               | --                                             | 99.7<br>(65.4 to 144.7)                   | 19.8<br>(8.9 to 30.3)                             | -7.4<br>(-15.4 to 0.3)                              |
| <b>Maternal disorders</b>                                               | <b>572.0<br/>(465.1 to 698.2)</b>             | <b>3,414.1†<br/>(3,064.5 to 3,776.7)</b>       | <b>64.2<br/>(43.6 to 88.5)</b>            | <b>3.8<br/>(-13.1 to 24.2)</b>                    | <b>-22.1<br/>(-34.3 to -7.3)</b>                    |
| Maternal haemorrhage                                                    | 51.8<br>(40.6 to 65.7)                        | 277.4<br>(203.6 to 366.7)                      | 1.9<br>(1.2 to 2.9)                       | 22.1<br>(-11.8 to 67.9)                           | -4.1<br>(-30.9 to 31.1)                             |
| Maternal sepsis and other pregnancy related infections                  | 104.2<br>(80.2 to 134.1)                      | 594.1<br>(456.7 to 784.0)                      | 2.6<br>(1.3 to 4.7)                       | 17.8<br>(-42.1 to 126.1)                          | -8.8<br>(-54.0 to 75.1)                             |
| Maternal hypertensive disorders                                         | 325.3<br>(207.1 to 454.3)                     | 1,532.5<br>(1,257.8 to 1,778.0)                | 15.8<br>(8.5 to 26.0)                     | 40.8<br>(-15.4 to 136.1)                          | 9.3<br>(-34.5 to 82.2)                              |
| Maternal obstructed labour and uterine rupture                          | 103.4<br>(87.7 to 121.9)                      | 351.8<br>(266.2 to 455.7)                      | 33.4<br>(21.9 to 47.7)                    | -8.4<br>(-22.2 to 10.3)                           | -31.2<br>(-41.4 to -17.9)                           |
| Maternal abortion, miscarriage, and ectopic pregnancy                   | 5.4<br>(3.7 to 7.5)                           | 658.3<br>(526.6 to 836.5)                      | 0.6<br>(0.3 to 1.0)                       | 37.2<br>(-24.9 to 133.8)                          | 5.4<br>(-41.3 to 80.2)                              |
| Other maternal disorders                                                | --                                            | --                                             | 9.9<br>(6.7 to 13.6)                      | -1.1<br>(-17.3 to 18.3)                           | -25.7<br>(-37.1 to -11.9)                           |
| <b>Neonatal disorders</b>                                               | <b>2,070.9<br/>(1,636.2 to 2,638.6)</b>       | <b>--</b>                                      | <b>227.3<br/>(129.1 to 412.9)</b>         | <b>65.3<br/>(21.2 to 112.7)</b>                   | <b>33.6<br/>(-4.5 to 75.9)</b>                      |
| Neonatal preterm birth complications                                    | 1,240.3<br>(861.3 to 1,849.2)                 | --                                             | 62.1<br>(40.7 to 93.9)                    | 28.7<br>(-5.3 to 66.7)                            | 2.9<br>(-26.2 to 37.1)                              |
| Neonatal encephalopathy due to birth asphyxia and trauma                | 689.6<br>(340.7 to 1,203.8)                   | --                                             | 36.7<br>(11.0 to 118.7)                   | 61.5<br>(-24.6 to 211.8)                          | 28.8<br>(-43.0 to 154.0)                            |
| Neonatal sepsis and other neonatal infections                           | 267.8<br>(103.5 to 626.5)                     | --                                             | 93.3<br>(23.8 to 243.9)                   | 130.1<br>(14.1 to 269.3)                          | 96.5<br>(-10.2 to 248.3)                            |
| Hemolytic disease and other neonatal jaundice                           | 38.8<br>(33.0 to 44.6)                        | --                                             | 13.0<br>(9.5 to 16.9)                     | 24.8<br>(9.0 to 44.3)                             | -2.3<br>(-13.5 to 9.6)                              |
| Other neonatal disorders                                                | --                                            | --                                             | 22.2<br>(13.2 to 38.0)                    | 42.2<br>(12.3 to 74.4)                            | 16.3<br>(-8.3 to 43.2)                              |
| <b>Nutritional deficiencies</b>                                         | <b>64,212.2<br/>(62,005.5 to 66,345.7)</b>    | <b>21,582.0†<br/>(18,576.5 to 25,172.6)</b>    | <b>1,839.8<br/>(1,224.7 to 2,615.4)</b>   | <b>14.2<br/>(7.5 to 20.2)</b>                     | <b>-11.9<br/>(-15.8 to -8.4)</b>                    |
| Protein-energy malnutrition                                             | 3,460.0<br>(3,111.2 to 3,814.8)               | 2,554.7<br>(2,301.5 to 2,827.4)                | 112.3<br>(69.2 to 163.3)                  | -14.6<br>(-32.8 to 8.0)                           | -31.6<br>(-46.4 to -13.3)                           |
| Iodine deficiency                                                       | 2,399.4<br>(2,100.7 to 2,745.2)               | 92.9<br>(81.4 to 106.1)                        | 61.6<br>(40.9 to 87.8)                    | -9.4<br>(-18.6 to -0.2)                           | -30.4<br>(-37.2 to -23.9)                           |
| Vitamin A deficiency                                                    | 20,152.1<br>(17,151.5 to 23,489.4)            | 18,934.4<br>(15,922.1 to 22,530.9)             | 7.6<br>(4.4 to 11.9)                      | 24.2<br>(-5.0 to 58.6)                            | -4.4<br>(-23.1 to 17.9)                             |
| Iron-deficiency anaemia                                                 | 49,680.1<br>(47,861.8 to 51,660.8)            | --                                             | 1,654.6<br>(1,095.9 to 2,405.4)           | 18.1<br>(11.3 to 24.5)                            | -9.5<br>(-13.5 to -5.7)                             |
| Other nutritional deficiencies                                          | --                                            | --                                             | 3.7<br>(2.3 to 5.4)                       | -16.4<br>(-35.0 to 6.6)                           | -33.1<br>(-48.4 to -14.8)                           |
| <b>Other communicable, maternal, neonatal, and nutritional diseases</b> | <b>60,985.2<br/>(57,179.2 to 64,798.6)</b>    | <b>32,793.3<br/>(26,600.1 to 42,979.9)</b>     | <b>165.8<br/>(106.3 to 249.0)</b>         | <b>30.7<br/>(23.9 to 37.3)</b>                    | <b>-0.1<br/>(-5.0 to 4.5)</b>                       |
| Sexually transmitted diseases excluding HIV                             | 35,205.9<br>(33,013.4 to 37,483.2)            | 21,308.5<br>(19,345.4 to 23,455.0)             | 83.2<br>(51.4 to 133.8)                   | 35.5<br>(26.5 to 44.6)                            | 3.4<br>(-3.2 to 10.2)                               |
| Syphilis                                                                | 2,178.4<br>(1,757.8 to 2,665.3)               | 1,504.2<br>(1,184.4 to 1,916.8)                | 3.9<br>(2.7 to 5.4)                       | 36.9<br>(20.9 to 53.7)                            | 4.7<br>(-8.2 to 18.5)                               |
| Chlamydial infection                                                    | 4,282.2<br>(3,450.8 to 5,228.1)               | 3,257.8<br>(2,634.4 to 3,982.8)                | 17.8<br>(10.9 to 28.1)                    | 39.8<br>(22.7 to 58.0)                            | 7.2<br>(-5.8 to 21.2)                               |
| Gonococcal infection                                                    | 2,055.1<br>(1,671.2 to 2,528.2)               | 6,390.1<br>(4,970.9 to 8,174.7)                | 15.0<br>(8.7 to 24.3)                     | 34.2<br>(16.5 to 52.0)                            | 2.9<br>(-10.6 to 16.1)                              |
| Trichomoniasis                                                          | 6,284.0<br>(5,310.3 to 7,320.0)               | 5,768.3<br>(4,831.8 to 6,818.5)                | 8.4<br>(3.2 to 17.5)                      | 23.4<br>(11.4 to 33.2)                            | -4.1<br>(-12.0 to 2.6)                              |
| Genital herpes                                                          | 24,740.2<br>(21,436.8 to 28,656.0)            | 2,582.5<br>(2,176.1 to 3,078.3)                | 6.6<br>(2.3 to 14.8)                      | 21.2<br>(7.0 to 34.0)                             | -6.5<br>(-16.2 to 2.2)                              |
| Other sexually transmitted diseases                                     | 1,666.6<br>(1,314.0 to 2,011.9)               | 1,805.7<br>(1,507.2 to 2,168.6)                | 31.5<br>(20.1 to 47.6)                    | 40.6<br>(25.8 to 56.0)                            | 6.5<br>(-4.5 to 18.4)                               |
| Hepatitis                                                               | 30,777.0<br>(25,861.3 to 36,426.6)            | 11,484.6<br>(6,090.1 to 21,385.5)              | 8.2<br>(4.9 to 13.1)                      | -9.3<br>(-30.0 to 18.3)                           | -27.9<br>(-41.7 to -11.3)                           |
| Acute hepatitis A                                                       | 396.0<br>(20.4 to 1,152.6)                    | 5,148.1<br>(264.5 to 14,984.3)                 | 1.3<br>(0.4 to 2.9)                       | -4.6<br>(-77.8 to 334.5)                          | -24.0<br>(-73.9 to 135.1)                           |
| Hepatitis B                                                             | 21,612.4<br>(16,704.0 to 27,365.2)            | 5,223.3<br>(3,944.8 to 6,914.1)                | 5.7<br>(3.4 to 9.5)                       | -11.8<br>(-28.7 to 8.8)                           | -29.4<br>(-43.8 to -14.1)                           |
| Hepatitis C                                                             | 8,731.4<br>(7,675.0 to 9,914.1)               | 629.9<br>(557.2 to 710.6)                      | 0.6<br>(0.2 to 1.2)                       | 15.5<br>(-30.2 to 81.1)                           | -11.4<br>(-40.2 to 25.5)                            |
| Acute hepatitis E                                                       | 37.2<br>(32.2 to 43.4)                        | 483.3<br>(419.0 to 563.8)                      | 0.6<br>(0.4 to 1.0)                       | -12.9<br>(-35.8 to 18.6)                          | -27.6<br>(-43.9 to -5.5)                            |
| Other infectious diseases                                               | 2,096.3<br>(1,993.8 to 2,203.0)               | 0.2<br>(0.1 to 0.3)                            | 74.4<br>(48.7 to 109.4)                   | 32.0<br>(20.6 to 43.7)                            | 0.3<br>(-7.4 to 8.3)                                |
| <b>Non-communicable diseases</b>                                        | <b>167,799.8<br/>(166,690.8 to 168,856.1)</b> | <b>427,851.9†<br/>(392,272.0 to 465,044.5)</b> | <b>11,618.4<br/>(8,536.1 to 15,254.4)</b> | <b>27.1<br/>(22.5 to 32.1)</b>                    | <b>-2.3<br/>(-4.8 to 0.5)</b>                       |
| <b>Neoplasms</b>                                                        | <b>230.8<br/>(214.3 to 246.9)</b>             | <b>102.7<br/>(81.8 to 112.6)</b>               | <b>34.6<br/>(23.2 to 46.5)</b>            | <b>23.3<br/>(10.3 to 40.7)</b>                    | <b>-3.8<br/>(-13.2 to 8.3)</b>                      |
| Lip and oral cavity cancer                                              | 3.3<br>(3.0 to 3.7)                           | 0.9<br>(0.8 to 1.0)                            | 0.4<br>(0.2 to 0.5)                       | 32.3<br>(8.9 to 61.0)                             | 1.4<br>(-14.2 to 20.5)                              |
| Nasopharynx cancer                                                      | 1.5<br>(1.2 to 1.9)                           | 0.4<br>(0.3 to 0.5)                            | 0.2<br>(0.1 to 0.2)                       | 27.4<br>(-1.9 to 67.7)                            | -4.8<br>(-23.8 to 21.1)                             |
| Other pharynx cancer                                                    | 0.8<br>(0.7 to 0.9)                           | 0.4<br>(0.3 to 0.4)                            | 0.1<br>(0.1 to 0.2)                       | 21.0<br>(1.3 to 42.6)                             | -4.4<br>(-20.0 to 11.2)                             |
| Oesophageal cancer                                                      | 2.1<br>(1.6 to 2.8)                           | 2.0<br>(1.5 to 2.6)                            | 0.5<br>(0.3 to 0.8)                       | 34.5<br>(13.7 to 57.7)                            | 5.1<br>(-11.3 to 24.1)                              |
| Stomach cancer                                                          | 3.1<br>(2.9 to 3.3)                           | 2.1<br>(2.0 to 2.3)                            | 0.6<br>(0.4 to 0.8)                       | -0.8<br>(-9.5 to 9.3)                             | -20.1<br>(-28.0 to -11.7)                           |
| Colon and rectum cancer                                                 | 13.8<br>(12.6 to 15.0)                        | 4.9<br>(4.4 to 5.2)                            | 1.7<br>(1.2 to 2.3)                       | 27.6<br>(3.1 to 56.4)                             | -0.6<br>(-19.2 to 22.0)                             |
| Liver cancer                                                            | 11.0<br>(7.9 to 13.8)                         | 17.2<br>(11.9 to 21.4)                         | 3.8<br>(2.3 to 5.5)                       | 5.5<br>(-12.3 to 29.7)                            | -17.0<br>(-30.1 to 0.4)                             |
| Liver cancer due to hepatitis B                                         | 10.3<br>(6.8 to 13.5)                         | 10.0<br>(6.9 to 12.6)                          | 2.2<br>(1.3 to 3.3)                       | 8.0<br>(-10.9 to 34.9)                            | -14.9<br>(-29.9 to 5.7)                             |



| Cause                                              | Prevalence in thousands (95% UI)                 | Incidence in thousands (95% UI)                | YLDs in thousands (95% UI)              |                                                   |                                                     |
|----------------------------------------------------|--------------------------------------------------|------------------------------------------------|-----------------------------------------|---------------------------------------------------|-----------------------------------------------------|
|                                                    | 2016 counts                                      | 2016 counts                                    | 2016 counts                             | Percentage change in counts between 2006 and 2016 | Percentage change in age-standardised rates between |
| Liver cancer due to hepatitis C                    | 1.2<br>(0.8 to 1.6)                              | 1.1<br>(0.8 to 1.5)                            | 0.2<br>(0.1 to 0.4)                     | 7.0<br>(-10.5 to 30.4)                            | -14.6<br>(-27.1 to 2.7)                             |
| Liver cancer due to alcohol use                    | 3.1<br>(2.0 to 4.2)                              | 3.1<br>(2.0 to 4.0)                            | 0.7<br>(0.4 to 1.0)                     | -9.2<br>(-25.4 to 13.0)                           | -28.4<br>(-40.3 to -11.6)                           |
| Liver cancer due to other causes                   | 3.1<br>(2.0 to 4.0)                              | 2.9<br>(2.0 to 3.8)                            | 0.7<br>(0.4 to 1.0)                     | 15.7<br>(-5.1 to 43.9)                            | -8.6<br>(-24.0 to 11.4)                             |
| Gallbladder and biliary tract cancer               | 0.6<br>(0.5 to 0.8)                              | 0.9<br>(0.7 to 1.0)                            | 0.2<br>(0.1 to 0.3)                     | 9.4<br>(-8.0 to 28.1)                             | -13.8<br>(-27.1 to 0.2)                             |
| Pancreatic cancer                                  | 1.4<br>(1.3 to 1.5)                              | 1.9<br>(1.7 to 2.0)                            | 0.4<br>(0.3 to 0.5)                     | 33.8<br>(21.9 to 47.0)                            | 4.4<br>(-4.4 to 13.7)                               |
| Larynx cancer                                      | 1.9<br>(1.6 to 2.1)                              | 0.6<br>(0.5 to 0.7)                            | 0.2<br>(0.2 to 0.3)                     | 11.3<br>(-10.1 to 37.1)                           | -11.9<br>(-27.9 to 7.3)                             |
| Tracheal, bronchus, and lung cancer                | 3.3<br>(3.0 to 3.6)                              | 3.1<br>(2.8 to 3.3)                            | 0.7<br>(0.5 to 1.0)                     | 17.4<br>(-6.6 to 46.2)                            | -7.9<br>(-28.0 to 16.2)                             |
| Malignant skin melanoma                            | 1.5<br>(1.3 to 1.7)                              | 0.4<br>(0.4 to 0.5)                            | 0.1<br>(0.1 to 0.2)                     | 43.1<br>(16.4 to 68.7)                            | 7.5<br>(-11.9 to 27.8)                              |
| Non-melanoma skin cancer                           | 1.1<br>(0.7 to 1.6)                              | 3.7<br>(2.5 to 5.5)                            | 0.1<br>( $< 0.05$ to 0.1)               | 46.0<br>(10.9 to 85.6)                            | 7.3<br>(-24.0 to 43.2)                              |
| Non-melanoma skin cancer (squamous-cell carcinoma) | 1.0<br>(0.6 to 1.5)                              | 1.1<br>(0.8 to 1.6)                            | $< 0.05$<br>( $< 0.05$ to 0.1)          | 47.3<br>(9.5 to 90.5)                             | 7.6<br>(-25.3 to 45.2)                              |
| Non-melanoma skin cancer (basal-cell carcinoma)    | 0.4<br>(0.2 to 0.7)                              | 2.6<br>(1.5 to 4.4)                            | $< 0.05$<br>( $< 0.05$ to $< 0.05$ )    | 33.7<br>(19.4 to 46.7)                            | 3.4<br>(-9.0 to 15.2)                               |
| Breast cancer                                      | 83.6<br>(56.5 to 97.1)                           | 19.2<br>(13.4 to 22.2)                         | 8.0<br>(5.1 to 11.1)                    | 26.4<br>(-6.5 to 72.8)                            | -3.7<br>(-27.8 to 29.6)                             |
| Cervical cancer                                    | 31.1<br>(17.5 to 37.1)                           | 8.6<br>(4.9 to 10.2)                           | 3.1<br>(1.5 to 4.4)                     | 4.7<br>(-21.4 to 44.1)                            | -20.0<br>(-40.0 to 8.6)                             |
| Uterine cancer                                     | 5.4<br>(4.5 to 6.4)                              | 1.2<br>(1.0 to 1.4)                            | 0.5<br>(0.3 to 0.6)                     | 17.5<br>(-11.0 to 60.7)                           | -8.9<br>(-30.0 to 22.1)                             |
| Ovarian cancer                                     | 6.2<br>(5.0 to 7.0)                              | 2.1<br>(1.7 to 2.4)                            | 1.0<br>(0.7 to 1.4)                     | 36.1<br>(6.4 to 73.9)                             | 2.8<br>(-20.1 to 31.1)                              |
| Prostate cancer                                    | 55.6<br>(20.3 to 76.5)                           | 15.5<br>(6.4 to 20.9)                          | 7.0<br>(2.5 to 10.7)                    | 42.7<br>(11.0 to 72.6)                            | 7.7<br>(-14.2 to 27.8)                              |
| Testicular cancer                                  | 0.4<br>(0.3 to 0.5)                              | 0.1<br>(0.1 to 0.1)                            | $< 0.05$<br>( $< 0.05$ to 0.1)          | 14.4<br>(-8.7 to 47.3)                            | -12.3<br>(-30.4 to 14.8)                            |
| Kidney cancer                                      | 6.1<br>(5.2 to 7.0)                              | 1.5<br>(1.4 to 1.8)                            | 0.5<br>(0.4 to 0.7)                     | 41.6<br>(18.9 to 69.1)                            | 11.5<br>(-2.9 to 28.8)                              |
| Bladder cancer                                     | 2.3<br>(2.1 to 2.6)                              | 0.7<br>(0.6 to 0.8)                            | 0.3<br>(0.2 to 0.4)                     | 34.3<br>(14.5 to 55.6)                            | 2.9<br>(-12.3 to 18.4)                              |
| Brain and nervous system cancer                    | 6.4<br>(4.3 to 9.6)                              | 2.6<br>(1.9 to 3.5)                            | 0.8<br>(0.5 to 1.2)                     | 39.9<br>(28.4 to 58.3)                            | 7.5<br>(-1.8 to 18.7)                               |
| Thyroid cancer                                     | 1.1<br>(0.9 to 1.3)                              | 0.2<br>(0.2 to 0.3)                            | 0.1<br>(0.1 to 0.1)                     | 38.5<br>(15.8 to 66.1)                            | 0.2<br>(-15.0 to 17.9)                              |
| Mesothelioma                                       | 0.2<br>(0.1 to 0.2)                              | 0.1<br>(0.1 to 0.1)                            | $< 0.05$<br>( $< 0.05$ to 0.1)          | 2.7<br>(-11.3 to 20.2)                            | -20.8<br>(-30.6 to -9.5)                            |
| Hodgkin lymphoma                                   | 3.1<br>(2.2 to 4.3)                              | 1.1<br>(0.8 to 1.4)                            | 0.4<br>(0.3 to 0.6)                     | -9.0<br>(-20.4 to 3.8)                            | -27.9<br>(-35.1 to -18.6)                           |
| Non-Hodgkin's lymphoma                             | 8.1<br>(6.4 to 9.4)                              | 2.7<br>(2.2 to 3.1)                            | 0.9<br>(0.6 to 1.2)                     | 31.1<br>(12.2 to 52.1)                            | 0.9<br>(-11.9 to 13.1)                              |
| Multiple myeloma                                   | 0.9<br>(0.6 to 1.1)                              | 0.6<br>(0.5 to 0.7)                            | 0.3<br>(0.2 to 0.4)                     | 27.6<br>(7.9 to 44.5)                             | 0.4<br>(-14.0 to 13.3)                              |
| Leukaemia                                          | 8.5<br>(7.5 to 9.7)                              | 2.6<br>(2.3 to 3.0)                            | 1.1<br>(0.8 to 1.5)                     | 14.3<br>(-1.8 to 36.5)                            | -10.6<br>(-21.7 to 4.6)                             |
| Acute lymphoid leukaemia                           | 1.6<br>(1.2 to 2.2)                              | 0.4<br>(0.4 to 0.6)                            | 0.2<br>(0.1 to 0.3)                     | 13.1<br>(-13.7 to 46.5)                           | -10.4<br>(-28.1 to 8.9)                             |
| Chronic lymphoid leukaemia                         | 1.4<br>(0.8 to 1.8)                              | 0.3<br>(0.2 to 0.4)                            | 0.2<br>(0.1 to 0.3)                     | 22.2<br>(-3.2 to 57.0)                            | -5.4<br>(-24.8 to 21.0)                             |
| Acute myeloid leukaemia                            | 2.0<br>(1.6 to 2.9)                              | 1.0<br>(0.8 to 1.2)                            | 0.3<br>(0.2 to 0.4)                     | 25.6<br>(4.1 to 55.9)                             | -1.7<br>(-14.5 to 15.0)                             |
| Chronic myeloid leukaemia                          | 0.8<br>(0.5 to 1.1)                              | 0.3<br>(0.2 to 0.4)                            | 0.1<br>(0.1 to 0.1)                     | 5.6<br>(-18.0 to 40.2)                            | -18.1<br>(-34.6 to 5.0)                             |
| Other leukaemia                                    | 2.7<br>(2.3 to 3.1)                              | 0.6<br>(0.5 to 0.7)                            | 0.3<br>(0.2 to 0.5)                     | 5.3<br>(-12.5 to 30.8)                            | -16.2<br>(-29.4 to 0.7)                             |
| Other neoplasms                                    | 17.8<br>(14.7 to 24.0)                           | 5.5<br>(4.8 to 6.6)                            | 1.6<br>(1.1 to 2.3)                     | 22.9<br>(0.2 to 48.7)                             | -2.9<br>(-15.4 to 11.2)                             |
| <b>Cardiovascular diseases</b>                     | <b>7,190.6</b><br><b>(6,811.8 to 7,555.2)</b>    | <b>573.2†</b><br><b>(547.0 to 601.3)</b>       | <b>402.1</b><br><b>(287.9 to 537.1)</b> | <b>27.7</b><br><b>(21.5 to 34.0)</b>              | <b>0.3</b><br><b>(-3.6 to 4.3)</b>                  |
| Rheumatic heart disease                            | 1,302.9<br>(1,153.5 to 1,470.7)                  | 57.0<br>(50.6 to 64.3)                         | 62.7<br>(39.8 to 91.6)                  | 36.3<br>(23.8 to 48.8)                            | 4.5<br>(-4.6 to 13.3)                               |
| Ischaemic heart disease                            | 1,739.0<br>(1,611.5 to 1,866.9)                  | 222.4<br>(206.6 to 238.1)                      | 74.3<br>(49.3 to 103.0)                 | 30.0<br>(21.6 to 38.4)                            | 0.5<br>(-4.6 to 5.9)                                |
| Cerebrovascular disease                            | 489.9<br>(454.6 to 525.7)                        | 84.2‡<br>(76.4 to 92.7)                        | 71.5<br>(51.5 to 90.8)                  | 28.0<br>(16.9 to 39.9)                            | -1.6<br>(-9.5 to 7.5)                               |
| Ischaemic stroke                                   | 417.4<br>(371.0 to 464.4)                        | 58.4‡<br>(50.8 to 66.3)                        | 57.6<br>(41.0 to 74.1)                  | 26.9<br>(14.0 to 41.5)                            | -2.5<br>(-11.5 to 7.8)                              |
| Hemorrhagic stroke                                 | 100.5<br>(90.5 to 111.5)                         | 25.8‡<br>(22.9 to 28.7)                        | 13.9<br>(10.1 to 17.8)                  | 32.8<br>(15.7 to 50.7)                            | 2.9<br>(-9.5 to 16.8)                               |
| Hypertensive heart disease                         | 184.1<br>(152.1 to 219.7)                        | --                                             | 14.9<br>(9.9 to 20.9)                   | 7.3<br>(-6.1 to 20.4)                             | -17.7<br>(-27.4 to -7.9)                            |
| Cardiomyopathy and myocarditis                     | 103.0<br>(88.9 to 119.1)                         | 39.9†<br>(34.7 to 45.5)                        | 9.7<br>(6.3 to 13.9)                    | 76.6<br>(55.4 to 100.4)                           | 38.5<br>(20.7 to 59.1)                              |
| Myocarditis                                        | 25.7<br>(22.7 to 29.3)                           | 39.9<br>(34.7 to 45.5)                         | 1.9<br>(1.2 to 2.7)                     | 54.9<br>(42.9 to 67.0)                            | 21.0<br>(10.2 to 33.0)                              |
| Alcoholic cardiomyopathy                           | 18.7<br>(14.6 to 23.4)                           | --                                             | 1.6<br>(1.0 to 2.4)                     | 93.4<br>(43.9 to 160.3)                           | 47.3<br>(11.7 to 93.2)                              |
| Other cardiomyopathy                               | 74.3<br>(60.4 to 90.4)                           | --                                             | 6.2<br>(4.0 to 9.2)                     | 80.5<br>(53.5 to 114.7)                           | 40.1<br>(19.3 to 63.5)                              |
| Atrial fibrillation and flutter                    | 326.9<br>(284.5 to 375.6)                        | 30.0<br>(25.7 to 35.4)                         | 25.8<br>(17.0 to 36.0)                  | 32.6<br>(22.8 to 45.1)                            | 1.8<br>(-4.3 to 8.5)                                |
| Peripheral vascular disease                        | 1,164.1<br>(1,001.8 to 1,359.7)                  | 112.8<br>(97.0 to 132.0)                       | 5.3<br>(2.5 to 10.0)                    | 23.1<br>(13.0 to 34.6)                            | -4.0<br>(-11.3 to 3.6)                              |
| Endocarditis                                       | 8.8<br>(7.5 to 10.5)                             | 26.9<br>(23.6 to 30.1)                         | 0.7<br>(0.5 to 1.0)                     | 29.3<br>(12.5 to 48.4)                            | 9.0<br>(-9.9 to 29.6)                               |
| Other cardiovascular and circulatory diseases      | 2,593.6<br>(2,098.9 to 3,176.2)                  | --                                             | 137.1<br>(89.5 to 199.4)                | 22.3<br>(9.3 to 36.3)                             | 2.4<br>(-7.0 to 12.2)                               |
| <b>Chronic respiratory diseases</b>                | <b>11,545.8</b><br><b>(10,884.4 to 12,336.1)</b> | <b>2,319.0†</b><br><b>(2,126.6 to 2,536.9)</b> | <b>512.8</b><br><b>(370.3 to 695.6)</b> | <b>33.5</b><br><b>(27.6 to 39.9)</b>              | <b>2.3</b><br><b>(-1.4 to 6.4)</b>                  |
| Chronic obstructive pulmonary disease              | 1,587.0<br>(1,519.2 to 1,661.2)                  | 109.9<br>(105.2 to 114.8)                      | 107.6<br>(92.5 to 120.8)                | 33.2<br>(22.8 to 44.7)                            | 3.7<br>(-3.3 to 11.6)                               |
| Pneumoconiosis                                     | 1.6<br>(1.4 to 1.8)                              | 0.2<br>(0.1 to 0.2)                            | 0.2<br>(0.2 to 0.4)                     | 33.4<br>(25.3 to 41.2)                            | 3.0<br>(-2.8 to 9.1)                                |
| Silicosis                                          | 0.1<br>(0.1 to 0.1)                              | $< 0.05$<br>( $< 0.05$ to $< 0.05$ )           | $< 0.05$<br>( $< 0.05$ to $< 0.05$ )    | 33.5<br>(22.2 to 47.2)                            | 1.8<br>(-5.3 to 9.8)                                |

| Cause                                                          | Prevalence in thousands (95% UI)           | Incidence in thousands (95% UI)                      | YLDs in thousands (95% UI)              |                                                   |                                                     |
|----------------------------------------------------------------|--------------------------------------------|------------------------------------------------------|-----------------------------------------|---------------------------------------------------|-----------------------------------------------------|
|                                                                | 2016 counts                                | 2016 counts                                          | 2016 counts                             | Percentage change in counts between 2006 and 2016 | Percentage change in age-standardised rates between |
| Asbestosis                                                     | 0.7<br>(0.6 to 0.9)                        | 0.1<br>(0.1 to 0.1)                                  | 0.1<br>(0.1 to 0.2)                     | 32.6<br>(22.0 to 43.5)                            | 1.8<br>(-4.2 to 8.3)                                |
| Coal workers pneumoconiosis                                    | --                                         | --                                                   | --                                      | --                                                | --                                                  |
| Other pneumoconiosis                                           | 0.7<br>(0.6 to 0.9)                        | 0.1<br>(0.1 to 0.1)                                  | 0.1<br>(0.1 to 0.2)                     | 34.2<br>(21.5 to 47.9)                            | 4.2<br>(-6.8 to 16.0)                               |
| Asthma                                                         | 9,932.7<br>(9,060.9 to 10,971.2)           | 2,207.9<br>(2,015.8 to 2,427.0)                      | 391.1<br>(255.8 to 571.0)               | 32.5<br>(25.4 to 39.8)                            | 0.7<br>(-3.7 to 5.3)                                |
| Interstitial lung disease and pulmonary sarcoidosis            | 12.5<br>(10.9 to 14.3)                     | 1.0<br>(0.9 to 1.1)                                  | 1.4<br>(0.9 to 2.1)                     | 32.0<br>(28.4 to 35.8)                            | 0.7<br>(-3.6 to 5.0)                                |
| Other chronic respiratory diseases                             | --                                         | --                                                   | 12.4<br>(9.4 to 15.8)                   | 77.0<br>(35.4 to 134.9)                           | 33.8<br>(10.4 to 65.3)                              |
| <b>Cirrhosis and other chronic liver diseases</b>              | <b>445.7<br/>(422.4 to 469.2)</b>          | <b>39.0<br/>(37.0 to 41.2)</b>                       | <b>40.3<br/>(27.8 to 56.5)</b>          | <b>29.6<br/>(15.9 to 44.9)</b>                    | <b>-0.8<br/>(-8.2 to 7.8)</b>                       |
| Cirrhosis and other chronic liver diseases due to hepatitis B  | 180.1<br>(158.4 to 201.1)                  | 15.6<br>(14.0 to 17.4)                               | 13.0<br>(8.7 to 18.5)                   | 31.7<br>(13.4 to 53.3)                            | 0.8<br>(-10.6 to 13.2)                              |
| Cirrhosis and other chronic liver diseases due to hepatitis C  | 30.4<br>(21.8 to 43.5)                     | 2.8<br>(2.1 to 3.9)                                  | 2.2<br>(1.3 to 3.4)                     | 35.5<br>(6.0 to 75.0)                             | 3.7<br>(-19.3 to 33.8)                              |
| Cirrhosis and other chronic liver diseases due to alcohol use  | 83.0<br>(72.6 to 93.8)                     | 8.4<br>(7.5 to 9.5)                                  | 5.7<br>(3.8 to 8.1)                     | 23.7<br>(1.4 to 49.9)                             | -5.2<br>(-19.2 to 11.5)                             |
| Cirrhosis and other chronic liver diseases due to other causes | 152.2<br>(139.9 to 166.2)                  | 12.1<br>(11.3 to 13.0)                               | 19.5<br>(12.7 to 27.7)                  | 29.4<br>(6.0 to 57.7)                             | -0.8<br>(-16.3 to 17.6)                             |
| <b>Digestive diseases</b>                                      | <b>2,302.3<br/>(2,124.9 to 2,497.8)</b>    | <b>2,452.3<sup>†</sup><br/>(2,323.8 to 2,591.1)</b>  | <b>70.3<br/>(49.2 to 95.7)</b>          | <b>23.1<br/>(11.9 to 35.0)</b>                    | <b>-3.6<br/>(-9.9 to 2.8)</b>                       |
| Peptic ulcer disease                                           | 392.7<br>(353.4 to 435.9)                  | 155.7<br>(136.2 to 177.7)                            | 7.7<br>(5.0 to 11.5)                    | 33.0<br>(16.4 to 50.4)                            | 3.5<br>(-6.4 to 13.7)                               |
| Gastritis and duodenitis                                       | 847.8<br>(740.3 to 956.3)                  | 784.5<br>(695.6 to 886.6)                            | 10.9<br>(7.0 to 16.0)                   | 35.9<br>(20.4 to 53.4)                            | 9.2<br>(-0.7 to 19.2)                               |
| Appendicitis                                                   | 23.2<br>(21.3 to 25.3)                     | 616.7<br>(566.8 to 671.1)                            | 7.2<br>(4.3 to 10.7)                    | 30.6<br>(-9.0 to 86.6)                            | -0.9<br>(-23.9 to 27.6)                             |
| Paralytic ileus and intestinal obstruction                     | 3.0<br>(2.7 to 3.4)                        | 82.0<br>(72.9 to 92.1)                               | 1.0<br>(0.6 to 1.4)                     | 31.7<br>(27.2 to 36.1)                            | 1.0<br>(-5.8 to 8.2)                                |
| Inguinal, femoral, and abdominal hernia                        | 1,016.9<br>(829.3 to 1,245.9)              | 335.5<br>(293.5 to 382.0)                            | 31.8<br>(21.0 to 45.1)                  | 12.7<br>(-3.1 to 32.3)                            | -12.5<br>(-21.6 to -1.8)                            |
| Inflammatory bowel disease                                     | 15.7<br>(14.7 to 16.9)                     | 59.6<br>(57.0 to 62.4)                               | 2.5<br>(1.6 to 3.4)                     | 61.5<br>(51.9 to 72.3)                            | 23.5<br>(13.2 to 35.7)                              |
| Vascular intestinal disorders                                  | 1.1<br>(0.9 to 1.3)                        | 5.9<br>(5.1 to 6.8)                                  | 0.3<br>(0.2 to 0.5)                     | 33.9<br>(26.2 to 42.3)                            | 4.1<br>(0.1 to 8.5)                                 |
| Gallbladder and biliary diseases                               | 81.9<br>(71.0 to 92.7)                     | 381.1<br>(326.3 to 438.8)                            | 2.1<br>(1.4 to 3.1)                     | 33.2<br>(20.1 to 47.6)                            | 1.6<br>(-9.5 to 13.8)                               |
| Pancreatitis                                                   | 3.4<br>(3.0 to 3.9)                        | 31.4<br>(27.7 to 35.4)                               | 0.4<br>(0.3 to 0.6)                     | 35.4<br>(30.5 to 40.9)                            | 3.8<br>(0.0 to 8.0)                                 |
| Other digestive diseases                                       | --                                         | --                                                   | 6.4<br>(4.4 to 8.7)                     | 23.8<br>(9.5 to 41.2)                             | -1.0<br>(-8.5 to 6.6)                               |
| <b>Neurological disorders</b>                                  | <b>55,513.4<br/>(52,878.0 to 58,149.1)</b> | <b>28,124.2<br/>(23,842.1 to 33,145.0)</b>           | <b>1,253.3<br/>(804.2 to 1,878.6)</b>   | <b>30.1<br/>(-3.9 to 84.1)</b>                    | <b>-0.5<br/>(-22.2 to 31.8)</b>                     |
| Alzheimer's disease and other dementias                        | 152.7<br>(129.0 to 179.8)                  | 26.4<br>(22.2 to 31.3)                               | 20.9<br>(14.5 to 28.0)                  | 28.7<br>(19.7 to 37.8)                            | -1.7<br>(-7.0 to 3.6)                               |
| Parkinson's disease                                            | 20.9<br>(16.3 to 26.3)                     | 2.8<br>(2.1 to 3.5)                                  | 2.5<br>(1.6 to 3.6)                     | 42.3<br>(19.1 to 68.8)                            | 8.8<br>(-5.5 to 26.1)                               |
| Epilepsy                                                       | 578.0<br>(92.3 to 1,265.8)                 | 82.7<br>(13.2 to 181.5)                              | 209.8<br>(32.0 to 531.4)                | 22.2<br>(-80.6 to 772.4)                          | -6.0<br>(-85.3 to 581.9)                            |
| Multiple sclerosis                                             | 6.9<br>(6.1 to 7.9)                        | 0.4<br>(0.3 to 0.4)                                  | 2.0<br>(1.4 to 2.6)                     | 47.2<br>(42.5 to 52.8)                            | 12.5<br>(9.1 to 16.5)                               |
| Motor neuron disease                                           | 1.9<br>(1.7 to 2.3)                        | 0.4<br>(0.4 to 0.5)                                  | 0.4<br>(0.3 to 0.6)                     | 35.6<br>(30.2 to 41.8)                            | 4.8<br>(1.6 to 8.4)                                 |
| Migraine                                                       | 20,102.4<br>(19,040.6 to 21,198.2)         | 2,557.0<br>(2,415.7 to 2,710.1)                      | 836.1<br>(535.3 to 1,176.1)             | 31.0<br>(26.2 to 35.9)                            | 0.1<br>(-3.2 to 3.6)                                |
| Tension-type headache                                          | 42,325.4<br>(37,780.9 to 47,530.2)         | 25,453.6<br>(21,189.6 to 30,466.7)                   | 130.9<br>(81.8 to 196.8)                | 31.2<br>(24.4 to 38.6)                            | 0.3<br>(-4.4 to 5.2)                                |
| Other neurological disorders                                   | 0.5<br>(0.3 to 0.7)                        | 0.9<br>(0.6 to 1.3)                                  | 50.8<br>(8.7 to 126.0)                  | 51.2<br>(-73.4 to 856.7)                          | 12.8<br>(-77.4 to 510.9)                            |
| <b>Mental and substance use disorders</b>                      | <b>24,359.1<br/>(23,222.1 to 25,397.0)</b> | <b>9,708.3<sup>†</sup><br/>(8,946.8 to 10,549.1)</b> | <b>3,043.6<br/>(2,206.1 to 3,977.5)</b> | <b>27.5<br/>(24.4 to 30.8)</b>                    | <b>-2.1<br/>(-4.6 to 0.4)</b>                       |
| Schizophrenia                                                  | 268.3<br>(234.7 to 305.3)                  | 23.0<br>(20.1 to 26.1)                               | 172.2<br>(123.7 to 217.3)               | 35.3<br>(23.6 to 48.2)                            | 3.1<br>(-4.9 to 12.0)                               |
| Alcohol use disorders                                          | 1,764.9<br>(1,481.7 to 2,073.2)            | 977.0<br>(817.2 to 1,140.2)                          | 176.7<br>(118.7 to 249.3)               | 37.4<br>(25.6 to 49.9)                            | 5.6<br>(-2.8 to 14.2)                               |
| Drug use disorders                                             | 704.2<br>(625.4 to 786.2)                  | 117.4<br>(105.2 to 131.2)                            | 195.9<br>(133.6 to 264.1)               | 43.2<br>(28.1 to 59.6)                            | 10.7<br>(0.7 to 22.0)                               |
| Opioid use disorders                                           | 421.8<br>(349.6 to 512.7)                  | 53.3<br>(44.3 to 64.0)                               | 175.9<br>(116.9 to 241.6)               | 44.6<br>(27.8 to 63.2)                            | 11.6<br>(0.6 to 24.5)                               |
| Cocaine use disorders                                          | 21.3<br>(17.8 to 25.7)                     | 3.0<br>(2.4 to 3.6)                                  | 3.1<br>(1.9 to 4.6)                     | 32.2<br>(25.1 to 39.4)                            | 3.0<br>(-2.3 to 8.0)                                |
| Amphetamine use disorders                                      | 11.1<br>(7.4 to 15.0)                      | 2.0<br>(1.4 to 2.8)                                  | 1.6<br>(0.8 to 2.5)                     | 30.0<br>(18.3 to 41.8)                            | 2.7<br>(-6.2 to 11.7)                               |
| Cannabis use disorders                                         | 227.9<br>(189.7 to 270.3)                  | 48.2<br>(39.8 to 58.0)                               | 6.7<br>(3.9 to 10.2)                    | 31.4<br>(1.0 to 66.8)                             | 2.3<br>(-18.6 to 27.4)                              |
| Other drug use disorders                                       | 51.7<br>(45.2 to 59.2)                     | 10.8<br>(9.4 to 12.4)                                | 8.7<br>(5.7 to 12.3)                    | 33.5<br>(12.3 to 57.8)                            | 3.2<br>(-12.0 to 20.2)                              |
| Depressive disorders                                           | 5,579.4<br>(5,222.5 to 6,031.7)            | 6,411.1<br>(5,706.2 to 7,209.7)                      | 972.6<br>(664.4 to 1,330.8)             | 19.7<br>(13.6 to 26.0)                            | -7.0<br>(-11.3 to -2.4)                             |
| Major depressive disorder                                      | 3,917.0<br>(3,481.4 to 4,421.3)            | 6,090.1<br>(5,377.7 to 6,875.3)                      | 801.9<br>(545.8 to 1,106.0)             | 17.5<br>(10.3 to 24.8)                            | -8.4<br>(-13.5 to -3.0)                             |
| Dysthymia                                                      | 1,770.1<br>(1,526.9 to 2,052.4)            | 321.0<br>(280.4 to 370.2)                            | 170.7<br>(112.7 to 247.5)               | 31.0<br>(25.9 to 36.0)                            | 0.4<br>(-2.8 to 3.5)                                |
| Bipolar disorder                                               | 961.9<br>(818.2 to 1,140.2)                | 107.0<br>(90.8 to 127.8)                             | 197.3<br>(120.7 to 294.1)               | 30.7<br>(21.7 to 40.2)                            | 0.4<br>(-5.7 to 6.3)                                |
| Anxiety disorders                                              | 4,895.4<br>(4,391.7 to 5,455.0)            | 935.8<br>(852.2 to 1,030.0)                          | 475.9<br>(329.3 to 652.0)               | 31.2<br>(21.7 to 42.0)                            | 1.0<br>(-5.4 to 8.2)                                |
| Eating disorders                                               | 195.8<br>(157.7 to 236.2)                  | 138.6<br>(100.6 to 185.1)                            | 39.8<br>(25.2 to 58.2)                  | 55.3<br>(34.7 to 79.2)                            | 19.9<br>(4.4 to 37.4)                               |
| Anorexia nervosa                                               | 52.2<br>(37.8 to 71.2)                     | 22.8<br>(16.5 to 30.7)                               | 11.0<br>(6.4 to 17.3)                   | 50.3<br>(13.6 to 99.4)                            | 16.3<br>(-11.4 to 52.5)                             |
| Bulimia nervosa                                                | 137.4<br>(103.1 to 184.5)                  | 115.8<br>(79.4 to 161.4)                             | 28.8<br>(17.0 to 44.3)                  | 57.3<br>(31.0 to 85.4)                            | 21.2<br>(1.4 to 43.7)                               |
| Autistic spectrum disorders                                    | 1,544.6<br>(1,389.4 to 1,760.2)            | 19.8<br>(13.8 to 27.6)                               | 218.0<br>(144.4 to 306.5)               | 31.6<br>(24.4 to 38.9)                            | 0.8<br>(-4.1 to 5.6)                                |
| Autism                                                         | 408.3<br>(349.2 to 475.1)                  | 2.8<br>(1.4 to 4.5)                                  | 104.4<br>(66.5 to 154.3)                | 31.9<br>(19.3 to 45.1)                            | 1.0<br>(-7.8 to 9.8)                                |
| Asperger syndrome and other autistic spectrum disorders        | 1,132.7<br>(934.9 to 1,374.4)              | 17.0<br>(11.1 to 24.7)                               | 113.6<br>(74.3 to 164.7)                | 31.3<br>(24.6 to 38.9)                            | 0.7<br>(-3.8 to 5.9)                                |



| Cause                                                      | Prevalence in thousands (95% UI)                    | Incidence in thousands (95% UI)                      | YLDs in thousands (95% UI)                    |                                                   |                                                     |
|------------------------------------------------------------|-----------------------------------------------------|------------------------------------------------------|-----------------------------------------------|---------------------------------------------------|-----------------------------------------------------|
|                                                            | 2016 counts                                         | 2016 counts                                          | 2016 counts                                   | Percentage change in counts between 2006 and 2016 | Percentage change in age-standardised rates between |
| Attention-deficit/hyperactivity disorder                   | 2,553.0<br>(2,344.2 to 2,798.8)                     | 168.2<br>(149.5 to 192.2)                            | 30.7<br>(18.3 to 47.8)                        | 31.6<br>(22.8 to 41.2)                            | 0.1<br>(-6.4 to 7.0)                                |
| Conduct disorder                                           | 1,860.8<br>(1,557.2 to 2,174.7)                     | 686.7<br>(557.5 to 817.7)                            | 224.1<br>(137.8 to 343.8)                     | 33.0<br>(24.4 to 42.4)                            | 0.3<br>(-6.2 to 7.3)                                |
| Idiopathic developmental intellectual disability           | 3,515.2<br>(2,086.7 to 4,968.6)                     | --                                                   | 154.7<br>(76.1 to 261.4)                      | 8.1<br>(-1.6 to 16.0)                             | -17.4<br>(-24.6 to -11.7)                           |
| Other mental and substance use disorders                   | 2,490.2<br>(2,177.0 to 2,886.4)                     | 123.8<br>(108.5 to 142.9)                            | 185.7<br>(126.7 to 265.2)                     | 31.1<br>(24.3 to 38.4)                            | 0.4<br>(-4.0 to 5.2)                                |
| <b>Diabetes, urogenital, blood, and endocrine diseases</b> | <b>104,584.4</b><br><b>(103,252.0 to 105,952.8)</b> | <b>18,611.1†</b><br><b>(17,363.9 to 19,937.3)</b>    | <b>1,096.0</b><br><b>(770.7 to 1,497.2)</b>   | <b>29.0</b><br><b>(24.9 to 32.8)</b>              | <b>-0.1</b><br><b>(-3.1 to 2.6)</b>                 |
| Diabetes mellitus                                          | 2,676.0<br>(2,388.6 to 2,986.7)                     | 174.4<br>(155.5 to 194.4)                            | 186.8<br>(128.2 to 260.2)                     | 42.2<br>(34.0 to 50.6)                            | 9.2<br>(2.8 to 15.6)                                |
| Acute glomerulonephritis                                   | 1.5<br>(1.2 to 1.8)                                 | 22.5<br>(19.1 to 26.1)                               | 0.1<br>(< 0.05 to 0.1)                        | 31.4<br>(26.8 to 37.0)                            | 0.4<br>(-3.0 to 3.9)                                |
| Chronic kidney disease                                     | 8,060.9<br>(7,241.9 to 8,976.3)                     | 603.2<br>(535.2 to 676.3)                            | 191.1<br>(136.2 to 251.4)                     | 21.4<br>(12.4 to 30.7)                            | -6.1<br>(-12.2 to -0.2)                             |
| Chronic kidney disease due to diabetes mellitus            | 2,516.2<br>(2,119.9 to 2,959.1)                     | 173.0<br>(142.6 to 209.0)                            | 58.4<br>(41.0 to 78.7)                        | 25.3<br>(13.9 to 37.2)                            | -3.8<br>(-11.4 to 4.4)                              |
| Chronic kidney disease due to hypertension                 | 1,732.8<br>(1,483.1 to 1,989.6)                     | 160.1<br>(133.7 to 188.0)                            | 31.9<br>(21.7 to 43.4)                        | 14.7<br>(0.7 to 30.7)                             | -9.9<br>(-19.3 to 0.8)                              |
| Chronic kidney disease due to glomerulonephritis           | 1,616.9<br>(1,395.3 to 1,852.6)                     | 92.9<br>(73.8 to 115.6)                              | 48.1<br>(33.9 to 66.6)                        | 21.0<br>(8.5 to 34.6)                             | -6.5<br>(-14.4 to 2.5)                              |
| Chronic kidney disease due to other causes                 | 2,195.0<br>(1,825.7 to 2,595.5)                     | 177.2<br>(147.7 to 209.9)                            | 52.8<br>(36.7 to 72.6)                        | 21.8<br>(10.1 to 34.0)                            | -5.3<br>(-13.1 to 3.0)                              |
| Urinary diseases and male infertility                      | 3,234.7<br>(2,844.0 to 3,684.8)                     | 10,749.5†<br>(9,632.6 to 11,999.9)                   | 69.6<br>(45.0 to 102.9)                       | 32.3<br>(22.5 to 42.3)                            | 1.8<br>(-5.2 to 8.4)                                |
| Interstitial nephritis and urinary tract infections        | 185.5<br>(163.2 to 208.6)                           | 9,658.9<br>(8,542.0 to 10,892.6)                     | 6.2<br>(3.7 to 9.5)                           | 27.6<br>(10.0 to 48.1)                            | -1.8<br>(-13.7 to 12.2)                             |
| Urolithiasis                                               | 33.6<br>(29.4 to 38.6)                              | 891.9<br>(783.3 to 1,022.0)                          | 2.6<br>(1.7 to 3.7)                           | 33.0<br>(24.5 to 43.1)                            | 1.9<br>(-5.6 to 10.6)                               |
| Benign prostatic hyperplasia                               | 1,521.4<br>(1,267.9 to 1,785.2)                     | 198.8<br>(164.6 to 234.0)                            | 49.9<br>(31.5 to 73.5)                        | 29.5<br>(18.2 to 41.1)                            | 0.9<br>(-6.8 to 8.4)                                |
| Male infertility                                           | 1,326.8<br>(1,039.4 to 1,703.4)                     | --                                                   | 7.5<br>(2.9 to 15.4)                          | 86.4<br>(48.5 to 133.4)                           | 36.1<br>(7.8 to 71.3)                               |
| Other urinary diseases                                     | --                                                  | --                                                   | 3.4<br>(2.2 to 4.9)                           | 5.0<br>(-6.2 to 18.2)                             | -17.4<br>(-24.6 to -9.0)                            |
| Gynecological diseases                                     | 18,520.3<br>(17,519.7 to 19,617.3)                  | 6,941.5†<br>(6,419.9 to 7,519.4)                     | 220.9<br>(149.8 to 319.0)                     | 29.9<br>(24.2 to 35.6)                            | -1.0<br>(-4.9 to 3.1)                               |
| Uterine fibroids                                           | 1,286.8<br>(1,132.3 to 1,450.6)                     | 159.5<br>(137.4 to 183.9)                            | 28.7<br>(18.0 to 44.0)                        | 40.9<br>(31.2 to 51.3)                            | 6.9<br>(-0.2 to 14.8)                               |
| Polycystic ovarian syndrome                                | 160.5<br>(119.2 to 208.6)                           | 391.3<br>(275.6 to 521.9)                            | 1.4<br>(0.6 to 2.6)                           | 38.5<br>(22.2 to 59.8)                            | 3.6<br>(-8.4 to 19.5)                               |
| Female infertility                                         | 278.5<br>(113.2 to 759.0)                           | --                                                   | 1.5<br>(0.4 to 4.5)                           | 260.0<br>(47.4 to 881.3)                          | 145.9<br>(5.3 to 603.3)                             |
| Endometriosis                                              | 34.4<br>(28.3 to 41.2)                              | 138.5<br>(112.8 to 172.5)                            | 3.2<br>(2.0 to 4.8)                           | 31.9<br>(-2.4 to 80.1)                            | 1.6<br>(-23.5 to 33.2)                              |
| Genital prolapse                                           | 9,075.5<br>(8,016.0 to 10,099.2)                    | 874.5<br>(728.5 to 1,043.5)                          | 28.4<br>(13.8 to 51.6)                        | 22.4<br>(14.7 to 29.6)                            | -5.7<br>(-11.7 to 0.2)                              |
| Premenstrual syndrome                                      | 7,830.4<br>(7,165.5 to 8,432.8)                     | 2,983.1<br>(2,716.6 to 3,240.8)                      | 65.1<br>(40.1 to 102.0)                       | 26.4<br>(13.8 to 38.8)                            | -3.1<br>(-12.3 to 6.1)                              |
| Other gynecological diseases                               | 2,707.4<br>(2,334.2 to 3,113.5)                     | 2,394.5<br>(1,960.5 to 2,889.3)                      | 92.5<br>(60.6 to 132.4)                       | 30.2<br>(22.5 to 38.2)                            | -0.8<br>(-6.5 to 5.3)                               |
| Hemoglobinopathies and hemolytic anaemias                  | 90,314.6<br>(88,968.8 to 91,838.1)                  | --                                                   | 348.8<br>(236.5 to 494.9)                     | 27.2<br>(19.8 to 35.0)                            | -0.9<br>(-5.5 to 3.9)                               |
| Thalassemias                                               | 0.2<br>(0.1 to 0.2)                                 | --                                                   | < 0.05<br>(< 0.05 to < 0.05)                  | 18.3<br>(-9.6 to 43.8)                            | -5.7<br>(-27.9 to 14.6)                             |
| Thalassaemias trait                                        | 1,258.6<br>(1,132.1 to 1,398.5)                     | --                                                   | 18.7<br>(11.8 to 27.2)                        | 26.2<br>(9.2 to 43.0)                             | -1.8<br>(-14.5 to 9.4)                              |
| Sickle cell disorders                                      | 1,074.4<br>(991.5 to 1,162.5)                       | --                                                   | 85.7<br>(59.4 to 119.6)                       | 29.7<br>(17.4 to 43.8)                            | 0.4<br>(-9.2 to 11.3)                               |
| Sickle cell trait                                          | 47,676.9<br>(45,974.8 to 49,680.4)                  | --                                                   | 178.8<br>(118.0 to 257.5)                     | 29.9<br>(21.4 to 38.5)                            | 1.7<br>(-4.0 to 7.5)                                |
| G6PD deficiency                                            | 25,293.6<br>(24,152.3 to 26,535.3)                  | --                                                   | 1.2<br>(0.8 to 1.8)                           | 14.3<br>(-17.9 to 59.5)                           | -7.3<br>(-26.3 to 17.1)                             |
| G6PD trait                                                 | 32,113.7<br>(31,424.5 to 32,949.5)                  | --                                                   | < 0.05<br>(< 0.05 to < 0.05)                  | 23.6<br>(11.2 to 37.5)                            | -4.2<br>(-11.2 to 3.5)                              |
| Other hemoglobinopathies and hemolytic anaemias            | 2,277.6<br>(2,190.7 to 2,373.1)                     | --                                                   | 64.4<br>(43.0 to 92.0)                        | 18.1<br>(8.0 to 29.1)                             | -8.0<br>(-14.2 to -1.6)                             |
| Endocrine, metabolic, blood, and immune disorders          | 2,465.9<br>(2,371.2 to 2,558.9)                     | 120.0<br>(107.1 to 134.0)                            | 78.7<br>(53.5 to 111.5)                       | 23.2<br>(14.5 to 33.1)                            | -3.3<br>(-8.2 to 1.9)                               |
| <b>Musculoskeletal disorders</b>                           | <b>18,528.2</b><br><b>(17,506.1 to 19,463.6)</b>    | <b>8,899.5</b><br><b>(7,993.5 to 9,869.5)</b>        | <b>2,059.7</b><br><b>(1,477.1 to 2,691.9)</b> | <b>22.9</b><br><b>(17.7 to 28.0)</b>              | <b>-4.9</b><br><b>(-8.4 to -1.7)</b>                |
| Rheumatoid arthritis                                       | 174.3<br>(152.8 to 197.5)                           | 11.7<br>(10.4 to 13.2)                               | 41.6<br>(28.2 to 56.3)                        | 35.0<br>(21.1 to 51.2)                            | 3.8<br>(-5.5 to 13.8)                               |
| Osteoarthritis                                             | 2,991.1<br>(2,782.8 to 3,195.8)                     | 178.2<br>(164.6 to 191.5)                            | 184.5<br>(128.7 to 252.4)                     | 31.4<br>(26.0 to 37.0)                            | 0.6<br>(-3.0 to 4.7)                                |
| Low back and neck pain                                     | 13,494.6<br>(12,558.5 to 14,509.0)                  | 6,069.7<br>(5,391.0 to 6,845.7)                      | 1,558.8<br>(1,106.7 to 2,052.0)               | 21.0<br>(14.6 to 27.6)                            | -6.3<br>(-10.7 to -2.3)                             |
| Low back pain                                              | 10,527.0<br>(9,237.3 to 12,040.0)                   | 5,179.2<br>(4,526.8 to 5,939.8)                      | 1,188.4<br>(832.6 to 1,578.2)                 | 17.6<br>(10.1 to 25.3)                            | -8.6<br>(-14.1 to -3.4)                             |
| Neck pain                                                  | 3,704.0<br>(3,190.6 to 4,269.2)                     | 890.5<br>(770.4 to 1,037.6)                          | 370.4<br>(248.2 to 521.8)                     | 33.6<br>(27.3 to 40.2)                            | 1.6<br>(-2.9 to 6.6)                                |
| Gout                                                       | 378.6<br>(334.9 to 427.7)                           | 78.6<br>(68.7 to 89.0)                               | 12.1<br>(8.2 to 16.8)                         | 30.7<br>(12.3 to 51.3)                            | 0.1<br>(-12.2 to 14.2)                              |
| Other musculoskeletal disorders                            | 3,042.1<br>(2,431.4 to 3,733.4)                     | 2,561.3<br>(2,008.9 to 3,179.2)                      | 262.7<br>(168.6 to 384.2)                     | 26.9<br>(15.1 to 39.3)                            | -3.3<br>(-12.7 to 5.8)                              |
| <b>Other non-communicable diseases</b>                     | <b>122,487.2</b><br><b>(118,994.7 to 125,661.6)</b> | <b>357,022.7†</b><br><b>(321,229.9 to 394,427.6)</b> | <b>3,105.7</b><br><b>(2,123.2 to 4,386.9)</b> | <b>26.7</b><br><b>(24.5 to 28.5)</b>              | <b>-2.8</b><br><b>(-4.0 to -1.6)</b>                |
| Congenital anomalies                                       | 1,819.1<br>(1,582.8 to 2,055.7)                     | --                                                   | 276.9<br>(196.6 to 370.4)                     | 20.6<br>(12.5 to 29.6)                            | -6.8<br>(-13.2 to 0.6)                              |
| Neural tube defects                                        | 256.3<br>(228.4 to 287.1)                           | --                                                   | 76.7<br>(53.9 to 105.0)                       | 27.1<br>(13.8 to 42.7)                            | -2.1<br>(-11.9 to 9.3)                              |
| Congenital heart anomalies                                 | 373.9<br>(312.3 to 445.5)                           | --                                                   | 18.5<br>(8.7 to 30.4)                         | 17.5<br>(2.9 to 35.6)                             | -5.0<br>(-16.3 to 8.9)                              |
| Orofacial clefts                                           | 48.6<br>(42.1 to 55.6)                              | --                                                   | 0.9<br>(0.6 to 1.3)                           | 22.6<br>(8.5 to 38.4)                             | -5.5<br>(-16.4 to 6.7)                              |
| Down's syndrome                                            | 30.1<br>(25.3 to 35.7)                              | --                                                   | 2.6<br>(1.7 to 3.7)                           | 30.5<br>(21.6 to 40.1)                            | 0.8<br>(-5.9 to 8.1)                                |
| Turner syndrome                                            | 85.0<br>(71.6 to 99.4)                              | --                                                   | 1.4<br>(0.6 to 2.4)                           | 14.4<br>(-20.1 to 66.4)                           | -10.2<br>(-35.5 to 26.6)                            |
| Klinefelter syndrome                                       | 101.3<br>(84.5 to 120.1)                            | --                                                   | 0.5<br>(0.2 to 0.9)                           | 29.5<br>(-1.8 to 73.7)                            | 0.5<br>(-23.3 to 33.3)                              |

| Cause                                         | Prevalence in thousands (95% UI)                 | Incidence in thousands (95% UI)                   | YLDs in thousands (95% UI)                |                                                   |                                                     |
|-----------------------------------------------|--------------------------------------------------|---------------------------------------------------|-------------------------------------------|---------------------------------------------------|-----------------------------------------------------|
|                                               | 2016 counts                                      | 2016 counts                                       | 2016 counts                               | Percentage change in counts between 2006 and 2016 | Percentage change in age-standardised rates between |
| Other chromosomal abnormalities               | 36.0<br>(30.4 to 43.2)                           | --                                                | 7.0<br>(4.3 to 10.2)                      | 22.9<br>(-12.6 to 71.4)                           | -3.0<br>(-30.5 to 33.4)                             |
| Congenital musculoskeletal and limb anomalies | 180.4<br>(158.3 to 205.1)                        | --                                                | 26.3<br>(17.3 to 37.0)                    | 26.2<br>(9.9 to 46.0)                             | -2.1<br>(-13.7 to 10.9)                             |
| Urogenital congenital anomalies               | 126.0<br>(111.7 to 142.9)                        | --                                                | 3.0<br>(1.7 to 4.9)                       | 27.9<br>(17.2 to 40.4)                            | -1.4<br>(-9.0 to 7.3)                               |
| Digestive congenital anomalies                | 184.9<br>(163.6 to 206.4)                        | --                                                | 8.3<br>(5.4 to 11.8)                      | 32.7<br>(10.0 to 60.7)                            | 2.0<br>(-13.8 to 20.4)                              |
| Other congenital anomalies                    | 818.0<br>(593.3 to 1,156.2)                      | --                                                | 131.8<br>(89.3 to 189.9)                  | 15.6<br>(3.9 to 30.6)                             | -11.2<br>(-20.4 to 0.1)                             |
| Skin and subcutaneous diseases                | 65,568.4<br>(63,445.7 to 67,800.5)               | 153,742.1<br>(144,817.1 to 163,231.2)             | 1,502.2<br>(993.0 to 2,229.1)             | 31.8<br>(28.7 to 34.9)                            | 1.3<br>(-0.7 to 3.3)                                |
| Dermatitis                                    | 8,137.8<br>(7,519.8 to 8,770.3)                  | 7,952.8<br>(7,320.9 to 8,607.1)                   | 320.2<br>(188.8 to 525.8)                 | 31.5<br>(23.8 to 39.6)                            | 0.2<br>(-4.7 to 5.2)                                |
| Psoriasis                                     | 1,019.7<br>(967.6 to 1,077.2)                    | 157.2<br>(149.5 to 165.1)                         | 89.5<br>(63.9 to 119.4)                   | 44.6<br>(29.0 to 59.7)                            | 10.4<br>(0.8 to 20.2)                               |
| Cellulitis                                    | 65.0<br>(59.5 to 70.9)                           | 1,122.8<br>(1,035.7 to 1,210.5)                   | 3.7<br>(2.4 to 5.6)                       | 33.2<br>(6.4 to 67.4)                             | 3.1<br>(-16.5 to 25.7)                              |
| Pyoderma                                      | 1,035.0<br>(979.1 to 1,089.5)                    | 20,274.9<br>(19,223.2 to 21,276.4)                | 5.9<br>(2.3 to 12.4)                      | 31.5<br>(23.1 to 39.5)                            | 1.2<br>(-4.2 to 6.4)                                |
| Scabies                                       | 4,400.1<br>(3,774.7 to 5,104.4)                  | 13,316.8<br>(11,473.0 to 15,610.5)                | 113.7<br>(63.8 to 182.1)                  | 29.6<br>(23.4 to 37.6)                            | -1.2<br>(-5.4 to 3.6)                               |
| Fungal skin diseases                          | 28,422.2<br>(25,455.1 to 31,582.1)               | 75,567.6<br>(67,568.9 to 85,053.8)                | 161.0<br>(63.7 to 334.6)                  | 31.3<br>(29.8 to 32.7)                            | 0.3<br>(-0.5 to 1.1)                                |
| Viral skin diseases                           | 5,382.6<br>(5,127.6 to 5,672.2)                  | 7,442.0<br>(7,070.1 to 7,859.0)                   | 165.2<br>(102.8 to 244.3)                 | 31.3<br>(26.7 to 36.4)                            | 0.1<br>(-3.1 to 3.4)                                |
| Acne vulgaris                                 | 17,698.0<br>(16,202.2 to 19,637.8)               | 12,654.4<br>(10,817.9 to 15,344.3)                | 455.1<br>(308.0 to 653.2)                 | 30.0<br>(22.8 to 37.2)                            | 0.2<br>(-4.9 to 5.3)                                |
| Alopecia areata                               | 310.9<br>(297.5 to 323.8)                        | 554.3<br>(530.1 to 578.4)                         | 10.2<br>(6.5 to 15.5)                     | 31.4<br>(16.9 to 48.7)                            | 0.6<br>(-9.4 to 12.0)                               |
| Pruritus                                      | 1,317.5<br>(1,155.0 to 1,489.5)                  | 1,061.7<br>(945.3 to 1,200.0)                     | 14.1<br>(6.4 to 25.7)                     | 33.6<br>(25.5 to 42.2)                            | 2.3<br>(-3.0 to 7.8)                                |
| Urticaria                                     | 1,847.7<br>(1,572.9 to 2,176.6)                  | 3,330.4<br>(2,815.2 to 3,915.4)                   | 111.5<br>(70.5 to 162.8)                  | 30.0<br>(21.4 to 38.4)                            | 0.4<br>(-5.2 to 5.9)                                |
| Decubitus ulcer                               | 13.3<br>(11.9 to 14.8)                           | 48.1<br>(42.8 to 53.6)                            | 2.3<br>(1.5 to 3.1)                       | 34.7<br>(25.8 to 44.7)                            | 6.8<br>(-6.1 to 20.3)                               |
| Other skin and subcutaneous diseases          | 9,040.9<br>(8,761.7 to 9,335.5)                  | 10,258.9<br>(9,935.4 to 10,606.5)                 | 49.9<br>(23.8 to 91.8)                    | 40.2<br>(36.2 to 44.2)                            | 7.5<br>(5.0 to 9.8)                                 |
| Sense organ diseases                          | 31,290.7<br>(30,077.1 to 32,562.6)               | 16,615.7†<br>(15,447.6 to 17,914.1)               | 1,138.7<br>(792.3 to 1,572.7)             | 21.4<br>(17.9 to 24.6)                            | -5.1<br>(-6.9 to -3.2)                              |
| Glaucoma                                      | 49.3<br>(40.8 to 58.3)                           | --                                                | 4.8<br>(3.2 to 7.0)                       | 38.6<br>(20.0 to 60.9)                            | 7.2<br>(-5.6 to 21.0)                               |
| Cataract                                      | 1,427.8<br>(1,267.8 to 1,590.1)                  | --                                                | 112.7<br>(80.2 to 152.0)                  | 25.4<br>(18.6 to 32.2)                            | -3.3<br>(-8.0 to 1.7)                               |
| Macular degeneration                          | 133.9<br>(107.4 to 164.3)                        | --                                                | 9.3<br>(6.2 to 13.0)                      | 46.9<br>(30.2 to 66.6)                            | 14.4<br>(2.8 to 27.9)                               |
| Refraction and accommodation disorders        | 14,422.1<br>(13,117.2 to 16,009.1)               | --                                                | 263.6<br>(161.9 to 415.2)                 | 17.0<br>(10.9 to 24.4)                            | -9.1<br>(-13.8 to -3.7)                             |
| Age-related and other hearing loss            | 18,953.3<br>(17,762.1 to 20,210.8)               | --                                                | 608.8<br>(421.8 to 846.3)                 | 19.7<br>(14.2 to 24.6)                            | -6.3<br>(-9.1 to -3.6)                              |
| Other vision loss                             | 480.0<br>(422.4 to 543.4)                        | --                                                | 40.0<br>(27.4 to 55.1)                    | 35.7<br>(23.8 to 49.9)                            | 6.6<br>(-1.2 to 15.8)                               |
| Other sense organ diseases                    | 3,263.5<br>(3,017.7 to 3,516.7)                  | 16,615.7<br>(15,447.6 to 17,914.1)                | 99.4<br>(62.1 to 150.4)                   | 32.7<br>(26.1 to 39.4)                            | 1.7<br>(-2.2 to 5.7)                                |
| Oral disorders                                | 72,580.3<br>(65,579.9 to 77,751.4)               | 186,664.9†<br>(153,398.3 to 222,397.5)            | 187.9<br>(110.6 to 293.9)                 | 30.5<br>(27.4 to 33.8)                            | 0.4<br>(-1.8 to 2.6)                                |
| Caries of deciduous teeth                     | 20,372.3<br>(15,828.9 to 24,967.8)               | 67,370.8<br>(45,020.0 to 95,245.7)                | 4.8<br>(2.0 to 9.5)                       | 29.6<br>(14.4 to 45.3)                            | -0.9<br>(-12.7 to 11.0)                             |
| Caries of permanent teeth                     | 43,560.4<br>(36,758.3 to 50,047.2)               | 118,686.5<br>(95,938.4 to 143,722.5)              | 25.7<br>(10.9 to 49.7)                    | 21.1<br>(14.1 to 28.2)                            | -7.2<br>(-11.8 to -2.3)                             |
| Periodontal disease                           | 4,998.9<br>(4,104.5 to 6,005.1)                  | 504.7<br>(406.3 to 613.3)                         | 32.7<br>(12.9 to 67.2)                    | 31.6<br>(26.6 to 36.3)                            | 0.2<br>(-3.5 to 3.8)                                |
| Edentulism and severe tooth loss              | 1,570.2<br>(1,364.5 to 1,782.7)                  | 102.9<br>(89.6 to 116.8)                          | 44.0<br>(28.9 to 61.9)                    | 34.4<br>(27.0 to 42.0)                            | 3.4<br>(-1.3 to 7.9)                                |
| Other oral disorders                          | 2,748.3<br>(2,622.4 to 2,888.8)                  | --                                                | 80.8<br>(49.4 to 121.7)                   | 31.3<br>(26.1 to 36.4)                            | 0.3<br>(-2.9 to 3.5)                                |
| <b>Injuries</b>                               | <b>21,885.3</b><br><b>(20,352.5 to 23,554.0)</b> | <b>13,683.8†</b><br><b>(12,900.7 to 14,554.8)</b> | <b>877.6</b><br><b>(590.2 to 1,248.3)</b> | <b>33.6</b><br><b>(30.7 to 36.3)</b>              | <b>2.7</b><br><b>(0.8 to 4.4)</b>                   |
| <b>Transport injuries</b>                     | <b>2,156.3</b><br><b>(2,005.5 to 2,313.0)</b>    | <b>1,031.6</b><br><b>(914.6 to 1,162.1)</b>       | <b>126.2</b><br><b>(84.0 to 181.5)</b>    | <b>37.8</b><br><b>(34.6 to 40.9)</b>              | <b>6.1</b><br><b>(4.0 to 8.1)</b>                   |
| Road injuries                                 | 1,684.7<br>(1,581.0 to 1,798.4)                  | 868.3<br>(761.6 to 994.2)                         | 98.0<br>(65.6 to 141.1)                   | 39.6<br>(36.4 to 42.7)                            | 7.3<br>(5.3 to 9.3)                                 |
| Pedestrian road injuries                      | 353.7<br>(314.8 to 401.6)                        | 130.9<br>(105.2 to 160.7)                         | 20.7<br>(13.8 to 29.9)                    | 37.3<br>(34.1 to 40.4)                            | 5.4<br>(3.3 to 7.5)                                 |
| Cyclist road injuries                         | 324.3<br>(272.1 to 380.7)                        | 187.3<br>(144.8 to 234.8)                         | 17.7<br>(11.7 to 25.7)                    | 39.7<br>(36.2 to 43.1)                            | 8.3<br>(6.1 to 10.5)                                |
| Motorcyclist road injuries                    | 287.9<br>(247.0 to 341.0)                        | 99.6<br>(80.8 to 124.4)                           | 16.1<br>(10.7 to 23.3)                    | 36.5<br>(33.1 to 39.6)                            | 4.2<br>(2.0 to 6.1)                                 |
| Motor vehicle road injuries                   | 497.9<br>(430.0 to 564.3)                        | 304.4<br>(254.6 to 357.8)                         | 31.5<br>(21.2 to 45.0)                    | 41.8<br>(38.4 to 45.1)                            | 9.0<br>(6.7 to 11.1)                                |
| Other road injuries                           | 220.8<br>(190.5 to 257.1)                        | 146.0<br>(112.6 to 185.5)                         | 11.9<br>(7.9 to 17.3)                     | 42.1<br>(38.8 to 45.3)                            | 9.3<br>(7.1 to 11.3)                                |
| Other transport injuries                      | 471.6<br>(389.7 to 575.6)                        | 163.2<br>(131.7 to 206.0)                         | 28.1<br>(18.6 to 40.8)                    | 31.7<br>(27.2 to 36.1)                            | 1.1<br>(-1.8 to 3.7)                                |
| <b>Unintentional injuries</b>                 | <b>18,928.8</b><br><b>(17,374.3 to 20,559.7)</b> | <b>12,322.1</b><br><b>(11,588.5 to 13,150.7)</b>  | <b>690.1</b><br><b>(464.0 to 980.2)</b>   | <b>33.0</b><br><b>(30.1 to 35.9)</b>              | <b>2.0</b><br><b>(0.1 to 3.7)</b>                   |
| Falls                                         | 6,713.7<br>(5,802.2 to 7,666.2)                  | 4,277.8<br>(3,711.0 to 4,979.2)                   | 285.7<br>(199.3 to 392.3)                 | 33.8<br>(30.8 to 36.5)                            | 2.2<br>(0.1 to 3.9)                                 |
| Drowning                                      | 64.4<br>(54.0 to 76.1)                           | 18.7<br>(15.6 to 22.1)                            | 3.8<br>(2.5 to 5.5)                       | 23.8<br>(19.7 to 27.8)                            | -4.6<br>(-7.2 to -2.1)                              |
| Fire, heat, and hot substances                | 2,015.2<br>(1,663.4 to 2,470.7)                  | 393.3<br>(312.0 to 483.7)                         | 59.7<br>(40.5 to 84.3)                    | 32.3<br>(25.9 to 39.3)                            | 1.9<br>(-2.2 to 5.8)                                |
| Poisonings                                    | 68.2<br>(53.0 to 84.5)                           | 124.3<br>(97.6 to 155.6)                          | 7.1<br>(4.4 to 10.6)                      | 41.4<br>(28.5 to 53.8)                            | 8.3<br>(0.3 to 16.2)                                |
| Exposure to mechanical forces                 | 3,471.8<br>(2,948.8 to 4,196.6)                  | 1,892.8<br>(1,579.7 to 2,209.6)                   | 90.0<br>(58.4 to 132.1)                   | 39.4<br>(35.5 to 43.1)                            | 6.4<br>(3.9 to 8.7)                                 |
| Unintentional firearm injuries                | 173.9<br>(144.3 to 212.5)                        | 64.5<br>(47.1 to 85.7)                            | 7.9<br>(5.1 to 11.7)                      | 41.6<br>(37.2 to 45.5)                            | 8.3<br>(5.6 to 10.8)                                |
| Unintentional suffocation                     | 317.4<br>(222.2 to 430.7)                        | 104.6<br>(71.1 to 150.0)                          | 10.6<br>(6.3 to 16.7)                     | 40.5<br>(36.0 to 44.7)                            | 7.3<br>(4.6 to 9.8)                                 |
| Other exposure to mechanical forces           | 2,980.6<br>(2,479.8 to 3,664.8)                  | 1,723.7<br>(1,429.7 to 2,004.6)                   | 71.5<br>(46.6 to 103.7)                   | 39.0<br>(34.5 to 43.1)                            | 6.1<br>(3.4 to 8.6)                                 |



| Cause                                                                               | Prevalence in thousands (95% UI)              | Incidence in thousands (95% UI)          | YLDs in thousands (95% UI)           |                                                   |                                                     |
|-------------------------------------------------------------------------------------|-----------------------------------------------|------------------------------------------|--------------------------------------|---------------------------------------------------|-----------------------------------------------------|
|                                                                                     | 2016 counts                                   | 2016 counts                              | 2016 counts                          | Percentage change in counts between 2006 and 2016 | Percentage change in age-standardised rates between |
| Adverse effects of medical treatment                                                | 78.7<br>(61.1 to 99.6)                        | 1,029.3<br>(874.0 to 1,194.2)            | 10.5<br>(6.5 to 15.9)                | 25.3<br>(17.7 to 34.2)                            | -2.1<br>(-6.3 to 2.5)                               |
| Animal contact                                                                      | 877.5<br>(769.4 to 1,024.3)                   | 1,459.4<br>(1,213.0 to 1,742.4)          | 32.1<br>(20.9 to 45.2)               | 21.2<br>(14.7 to 27.5)                            | -8.5<br>(-12.5 to -4.8)                             |
| Venomous animal contact                                                             | 387.5<br>(319.2 to 466.5)                     | 648.6<br>(505.6 to 812.9)                | 23.3<br>(15.0 to 33.5)               | 25.1<br>(16.0 to 33.9)                            | -5.1<br>(-10.6 to 0.5)                              |
| Non-venomous animal contact                                                         | 489.9<br>(408.4 to 612.0)                     | 810.7<br>(654.4 to 986.4)                | 8.8<br>(5.7 to 12.9)                 | 11.9<br>(7.3 to 16.3)                             | -15.3<br>(-18.6 to -12.2)                           |
| Foreign body                                                                        | 1,593.1<br>(1,274.5 to 1,915.9)               | 1,234.6<br>(1,073.6 to 1,423.1)          | 67.9<br>(43.6 to 100.9)              | 28.0<br>(23.5 to 32.5)                            | -1.3<br>(-4.1 to 1.4)                               |
| Pulmonary aspiration and foreign body in airway                                     | 951.5<br>(690.8 to 1,308.5)                   | 515.7<br>(422.2 to 643.3)                | 45.2<br>(28.7 to 67.7)               | 25.5<br>(20.8 to 30.4)                            | -3.3<br>(-6.0 to -0.6)                              |
| Foreign body in eyes                                                                | 70.3<br>(36.8 to 109.6)                       | 397.5<br>(303.9 to 529.9)                | 3.9<br>(1.9 to 7.0)                  | 47.6<br>(41.5 to 53.6)                            | 12.9<br>(9.3 to 16.2)                               |
| Foreign body in other body part                                                     | 571.3<br>(445.9 to 740.2)                     | 321.4<br>(258.8 to 392.4)                | 18.8<br>(12.1 to 27.7)               | 30.4<br>(24.9 to 35.8)                            | 0.8<br>(-2.6 to 4.2)                                |
| Environmental heat and cold exposure                                                | 1,413.0<br>(1,184.1 to 1,671.5)               | 563.4<br>(457.9 to 687.8)                | 57.4<br>(37.9 to 83.0)               | 29.5<br>(26.2 to 32.6)                            | -0.2<br>(-2.4 to 1.8)                               |
| Other unintentional injuries                                                        | 2,633.2<br>(2,047.9 to 3,444.1)               | 1,328.6<br>(1,099.5 to 1,602.6)          | 76.0<br>(49.1 to 112.7)              | 37.5<br>(34.2 to 40.5)                            | 6.5<br>(4.6 to 8.2)                                 |
| <b>Self-harm and interpersonal violence</b>                                         | <b>4,177.1</b><br><b>(3,745.6 to 4,642.3)</b> | <b>327.3†</b><br><b>(275.3 to 386.5)</b> | <b>53.0</b><br><b>(36.7 to 73.1)</b> | <b>24.5</b><br><b>(20.7 to 28.2)</b>              | <b>-2.6</b><br><b>(-5.1 to -0.0)</b>                |
| Self-harm                                                                           | 108.0<br>(93.4 to 123.4)                      | 66.5<br>(55.6 to 79.0)                   | 5.7<br>(3.7 to 8.4)                  | 39.3<br>(35.0 to 43.4)                            | 6.5<br>(3.6 to 9.2)                                 |
| Self-harm by firearm                                                                | 6.2<br>(5.4 to 7.0)                           | 2.9<br>(1.7 to 4.4)                      | 0.3<br>(0.2 to 0.4)                  | 26.8<br>(22.3 to 31.4)                            | -4.5<br>(-7.7 to -1.4)                              |
| Self-harm by other specified means                                                  | 101.9<br>(87.6 to 117.2)                      | 63.7<br>(52.9 to 75.5)                   | 5.5<br>(3.5 to 8.0)                  | 40.0<br>(35.6 to 44.2)                            | 7.1<br>(4.1 to 9.9)                                 |
| Interpersonal violence                                                              | 4,069.1<br>(3,637.6 to 4,538.8)               | 260.8†<br>(209.5 to 318.3)               | 47.3<br>(32.6 to 65.5)               | 22.9<br>(19.0 to 27.0)                            | -4.2<br>(-6.8 to -1.5)                              |
| Assault by firearm                                                                  | 16.7<br>(14.4 to 19.5)                        | 7.4<br>(5.2 to 10.6)                     | 0.8<br>(0.6 to 1.3)                  | 48.7<br>(43.6 to 53.7)                            | 16.0<br>(12.8 to 19.1)                              |
| Assault by sharp object                                                             | 143.7<br>(116.6 to 174.8)                     | 79.1<br>(56.6 to 106.4)                  | 4.8<br>(3.1 to 7.0)                  | 39.2<br>(35.2 to 43.2)                            | 8.0<br>(5.3 to 10.6)                                |
| Sexual violence                                                                     | 3,678.0<br>(3,251.2 to 4,156.4)               | --                                       | 31.5<br>(21.0 to 44.4)               | 15.1<br>(10.6 to 20.2)                            | -12.0<br>(-15.0 to -8.5)                            |
| Assault by other means                                                              | 230.8<br>(197.3 to 272.6)                     | 174.2<br>(136.6 to 216.3)                | 10.1<br>(6.7 to 14.6)                | 43.1<br>(39.6 to 46.6)                            | 10.9<br>(8.6 to 13.2)                               |
| <b>Forces of nature, conflict and terrorism, and executions and police conflict</b> | <b>301.0</b><br><b>(176.8 to 473.8)</b>       | <b>2.8†</b><br><b>(1.8 to 4.2)</b>       | <b>8.4</b><br><b>(2.0 to 23.8)</b>   | <b>99.6</b><br><b>(88.3 to 113.7)</b>             | <b>60.4</b><br><b>(52.6 to 71.2)</b>                |
| Exposure to forces of nature                                                        | 2.4<br>(0.8 to 4.5)                           | --                                       | 0.1<br>(< 0.05 to 0.3)               | 80.9<br>(72.6 to 94.6)                            | 45.0<br>(38.6 to 56.4)                              |
| Conflict and terrorism                                                              | 292.0<br>(171.1 to 461.4)                     | --                                       | 8.1<br>(1.9 to 22.9)                 | 102.8<br>(92.3 to 117.6)                          | 63.4<br>(55.3 to 74.8)                              |
| Executions and police conflict                                                      | 6.7<br>(3.3 to 13.2)                          | 2.8<br>(1.8 to 4.2)                      | 0.2<br>(0.1 to 0.6)                  | 25.6<br>(8.4 to 44.9)                             | -0.4<br>(-16.3 to 14.8)                             |
| <b>Impairments</b>                                                                  | --                                            | --                                       | --                                   | --                                                | --                                                  |
| Anaemia                                                                             | 85,489.5<br>(82,284.2 to 88,974.1)            | --                                       | 3,205.5<br>(2,201.9 to 4,498.0)      | 9.9<br>(2.0 to 17.1)                              | -17.1<br>(-24.8 to -11.1)                           |
| Developmental intellectual disability                                               | 5,877.4<br>(4,501.7 to 7,326.1)               | --                                       | 565.1<br>(405.4 to 775.5)            | 29.1<br>(18.8 to 46.4)                            | -1.7<br>(-8.8 to 10.6)                              |
| Epilepsy                                                                            | 1,189.9<br>(654.3 to 1,923.2)                 | --                                       | 438.6<br>(225.5 to 773.9)            | 35.2<br>(-36.6 to 202.9)                          | 2.5<br>(-54.1 to 150.9)                             |
| Guillain-Barre syndrome                                                             | 1.2<br>(0.9 to 1.7)                           | --                                       | 0.4<br>(0.2 to 0.6)                  | 30.9<br>(30.1 to 31.7)                            | 0.0<br>(-0.0 to 0.0)                                |
| Hearing loss                                                                        | 22,550.3<br>(21,353.1 to 23,816.2)            | --                                       | 812.1<br>(569.5 to 1,109.4)          | 16.8<br>(12.9 to 20.5)                            | -7.9<br>(-10.3 to -5.5)                             |
| Heart failure                                                                       | 445.6<br>(392.0 to 502.7)                     | --                                       | 47.9<br>(33.9 to 63.2)               | 30.8<br>(20.7 to 40.5)                            | 1.3<br>(-7.1 to 8.8)                                |
| Infertility                                                                         | 4,243.9<br>(3,277.8 to 5,586.3)               | --                                       | 24.2<br>(9.8 to 48.4)                | 76.4<br>(40.4 to 121.7)                           | 28.9<br>(0.9 to 63.6)                               |
| Pelvic inflammatory disease                                                         | 180.1<br>(151.5 to 214.3)                     | --                                       | 23.4<br>(15.4 to 33.2)               | 32.1<br>(16.4 to 50.2)                            | 0.7<br>(-11.1 to 14.5)                              |
| Vision loss                                                                         | 17,552.1<br>(16,195.6 to 19,180.6)            | --                                       | 581.2<br>(408.5 to 808.0)            | 27.1<br>(18.7 to 41.5)                            | -4.0<br>(-8.2 to 1.8)                               |

We did not calculate incidence for the nine impairments, certain NTDs, and causes with only birth prevalence. Blank cells mean that no estimate is available.

† Incidence for aggregate causes represents the sum of the incidence of the causes below the aggregate.

‡ Incidence estimates for stroke represent first-ever stroke only.

^ Incidence of HIV/AIDS represents new infections of HIV only and does not include new infections of Tuberculosis in HIV positive cases.

SR Table 14: Prevalence, incidence, and YLDs for 2016, percentage change of YLD counts and percentage change of age-standardised YLD rates between 2006 and 2016 by cause and impairments, for all ages, North Korea.

| Cause                                                                                | Prevalence in thousands (95% UI)          | Incidence in thousands (95% UI)               | YLDs in thousands (95% UI)             |                                                   |                                                     |
|--------------------------------------------------------------------------------------|-------------------------------------------|-----------------------------------------------|----------------------------------------|---------------------------------------------------|-----------------------------------------------------|
|                                                                                      | 2016 counts                               | 2016 counts                                   | 2016 counts                            | Percentage change in counts between 2006 and 2016 | Percentage change in age-standardised rates between |
| <b>All causes</b>                                                                    | <b>25,463.2</b><br>(25,373.6 to 25,551.3) | <b>153,133.3†</b><br>(145,694.4 to 160,825.5) | <b>2,593.7</b><br>(1,935.2 to 3,375.8) | <b>9.1</b><br>(7.6 to 10.9)                       | <b>-2.2</b><br>(-3.5 to -0.8)                       |
| <b>Communicable, maternal, neonatal, and nutritional disorders</b>                   | <b>18,849.4</b><br>(18,348.2 to 19,352.3) | <b>87,705.1†</b><br>(81,106.4 to 94,790.6)    | <b>292.9</b><br>(208.1 to 398.7)       | <b>-17.5</b><br>(-21.2 to -12.9)                  | <b>-21.0</b><br>(-24.5 to -16.9)                    |
| <b>HIV/AIDS and tuberculosis</b>                                                     | <b>6,942.3</b><br>(6,431.6 to 7,306.3)    | <b>76.5†</b><br>(67.7 to 86.7)                | <b>20.3</b><br>(13.0 to 31.8)          | <b>9.6</b><br>(-1.8 to 28.9)                      | <b>-2.7</b><br>(-12.6 to 14.0)                      |
| Tuberculosis                                                                         | 6,585.3<br>(6,171.1 to 7,053.9)           | 75.5†<br>(67.0 to 84.6)                       | 18.1<br>(11.9 to 25.2)                 | 5.4<br>(-4.0 to 16.6)                             | -6.7<br>(-14.6 to 2.5)                              |
| Drug-susceptible tuberculosis                                                        | 57.8<br>(51.1 to 66.1)                    | 73.7<br>(65.4 to 82.7)                        | 17.6<br>(11.7 to 24.4)                 | 5.4<br>(-4.2 to 16.9)                             | -6.7<br>(-14.9 to 2.8)                              |
| Multidrug-resistant tuberculosis without extensive drug resistance                   | 1.3<br>(0.8 to 2.0)                       | 1.7<br>(1.0 to 2.6)                           | 0.4<br>(0.2 to 0.7)                    | 0.0<br>(-43.9 to 72.6)                            | -11.1<br>(-50.1 to 55.1)                            |
| Extensively drug-resistant tuberculosis                                              | 0.1<br>(0.1 to 0.2)                       | 0.1<br>(0.1 to 0.2)                           | < 0.05<br>(< 0.05 to 0.1)              | 226.6<br>(93.0 to 460.2)                          | 187.8<br>(72.7 to 393.7)                            |
| Latent tuberculosis infection                                                        | 6,526.1<br>(6,114.2 to 6,989.9)           | --                                            | --                                     | --                                                | --                                                  |
| HIV/AIDS                                                                             | 12.8<br>(2.2 to 72.0)                     | 1.0^<br>(< 0.05 to 5.5)                       | 2.2<br>(0.5 to 11.5)                   | 63.1<br>(2.1 to 184.6)                            | 51.5<br>(-4.5 to 168.3)                             |
| Drug-susceptible HIV/AIDS - Tuberculosis                                             | 1.9<br>(1.2 to 3.1)                       | 2.5<br>(1.5 to 4.0)                           | 0.8<br>(0.4 to 1.4)                    | 38.6<br>(1.9 to 91.2)                             | 29.7<br>(-4.1 to 77.0)                              |
| Multidrug-resistant HIV/AIDS - Tuberculosis without extensive drug resistance        | 0.1<br>(< 0.05 to 0.1)                    | 0.1<br>(< 0.05 to 0.1)                        | < 0.05<br>(< 0.05 to < 0.05)           | 31.4<br>(-21.4 to 127.1)                          | 23.1<br>(-26.5 to 112.7)                            |
| Extensively drug-resistant HIV/AIDS - Tuberculosis                                   | < 0.05<br>(< 0.05 to < 0.05)              | < 0.05<br>(< 0.05 to < 0.05)                  | < 0.05<br>(< 0.05 to < 0.05)           | 332.6<br>(158.5 to 647.2)                         | 305.1<br>(142.1 to 599.7)                           |
| HIV/AIDS resulting in other diseases                                                 | 10.9<br>(0.4 to 70.5)                     | 1.0<br>(< 0.05 to 5.5)                        | 1.4<br>(< 0.05 to 10.7)                | 81.2<br>(-43.6 to 374.4)                          | 67.8<br>(-46.4 to 343.8)                            |
| <b>Diarrhoea, lower respiratory infections, and other common infectious diseases</b> | <b>1,594.1</b><br>(1,508.3 to 1,675.3)    | <b>80,643.3†</b><br>(73,828.1 to 87,731.0)    | <b>83.5</b><br>(58.5 to 113.8)         | <b>5.4</b><br>(1.6 to 9.2)                        | <b>4.1</b><br>(0.6 to 7.5)                          |
| Diarrhoeal diseases                                                                  | 327.3<br>(303.6 to 351.8)                 | 21,432.3<br>(19,925.7 to 23,068.6)            | 37.1<br>(25.7 to 50.9)                 | 11.7<br>(4.1 to 18.6)                             | 12.4<br>(5.2 to 18.9)                               |
| Intestinal infectious diseases                                                       | 0.2<br>(0.1 to 0.2)                       | 3.5†<br>(3.0 to 3.9)                          | < 0.05<br>(< 0.05 to < 0.05)           | -19.9<br>(-30.7 to -7.8)                          | -19.7<br>(-30.5 to -6.9)                            |
| Typhoid fever                                                                        | 0.2<br>(0.1 to 0.2)                       | 2.6<br>(2.2 to 2.9)                           | < 0.05<br>(< 0.05 to < 0.05)           | -19.7<br>(-31.6 to -6.5)                          | -19.3<br>(-31.3 to -5.4)                            |
| Paratyphoid fever                                                                    | < 0.05<br>(< 0.05 to < 0.05)              | 0.9<br>(0.8 to 1.0)                           | < 0.05<br>(< 0.05 to < 0.05)           | -17.0<br>(-29.7 to -3.2)                          | -18.1<br>(-30.5 to -4.2)                            |
| Other intestinal infectious diseases                                                 | --                                        | --                                            | < 0.05<br>(< 0.05 to < 0.05)           | -41.4<br>(-54.0 to -24.3)                         | -41.1<br>(-52.5 to -27.0)                           |
| Lower respiratory infections                                                         | 30.4<br>(27.2 to 34.1)                    | 1,220.0<br>(1,082.5 to 1,381.6)               | 1.8<br>(1.2 to 2.6)                    | 9.9<br>(-1.8 to 22.9)                             | 6.4<br>(-4.2 to 18.2)                               |
| Upper respiratory infections                                                         | 753.1<br>(670.5 to 844.5)                 | 56,396.8<br>(49,954.5 to 63,477.6)            | 18.8<br>(11.1 to 29.5)                 | 0.9<br>(-4.5 to 7.4)                              | -0.5<br>(-5.2 to 5.7)                               |
| Otitis media                                                                         | 402.1<br>(358.9 to 447.2)                 | 893.4<br>(709.2 to 1,116.7)                   | 12.8<br>(8.0 to 19.0)                  | 1.5<br>(-5.3 to 8.5)                              | 0.8<br>(-6.1 to 7.8)                                |
| Meningitis                                                                           | 17.1<br>(14.5 to 19.9)                    | 2.0<br>(1.7 to 2.3)                           | 2.2<br>(1.6 to 2.9)                    | 5.4<br>(2.8 to 8.0)                               | 0.7<br>(-1.9 to 3.0)                                |
| Pneumococcal meningitis                                                              | 5.6<br>(4.8 to 6.6)                       | 0.3<br>(0.2 to 0.4)                           | 0.8<br>(0.5 to 1.1)                    | 8.4<br>(4.7 to 12.5)                              | 3.0<br>(-0.6 to 6.7)                                |
| H influenzae type B meningitis                                                       | 1.9<br>(1.6 to 2.3)                       | 0.1<br>(0.1 to 0.2)                           | 0.3<br>(0.2 to 0.5)                    | -9.0<br>(-15.6 to -3.0)                           | -12.5<br>(-19.1 to -6.5)                            |
| Meningococcal infection                                                              | 1.5<br>(1.1 to 2.0)                       | 0.2<br>(0.2 to 0.3)                           | 0.2<br>(0.1 to 0.2)                    | 8.2<br>(3.3 to 13.3)                              | 2.5<br>(-1.9 to 7.4)                                |
| Other meningitis                                                                     | 8.1<br>(6.3 to 10.2)                      | 1.3<br>(1.1 to 1.5)                           | 0.9<br>(0.6 to 1.3)                    | 8.6<br>(4.7 to 12.8)                              | 4.1<br>(0.4 to 8.2)                                 |
| Encephalitis                                                                         | 91.7<br>(56.4 to 141.4)                   | 23.6<br>(20.3 to 27.4)                        | 9.1<br>(6.4 to 12.0)                   | -0.9<br>(-12.1 to 11.4)                           | -6.4<br>(-16.6 to 5.3)                              |
| Diphtheria                                                                           | < 0.05<br>(< 0.05 to < 0.05)              | < 0.05<br>(< 0.05 to < 0.05)                  | < 0.05<br>(< 0.05 to < 0.05)           | -49.3<br>(-73.0 to -2.4)                          | -50.5<br>(-72.6 to -7.2)                            |
| Whooping cough                                                                       | 1.6<br>(1.2 to 2.0)                       | 11.3<br>(8.5 to 14.9)                         | 0.1<br>(< 0.05 to 0.1)                 | -78.2<br>(-85.3 to -68.8)                         | -76.5<br>(-84.0 to -66.6)                           |
| Tetanus                                                                              | 0.1<br>(0.1 to 0.1)                       | 0.1<br>(< 0.05 to 0.2)                        | < 0.05<br>(< 0.05 to < 0.05)           | -16.3<br>(-35.3 to -1.6)                          | -20.2<br>(-36.2 to -7.4)                            |
| Measles                                                                              | 0.1<br>(< 0.05 to 0.2)                    | 2.8<br>(0.9 to 6.8)                           | < 0.05<br>(< 0.05 to < 0.05)           | -87.1<br>(-92.3 to -78.5)                         | -85.9<br>(-91.6 to -76.4)                           |
| Varicella and herpes zoster                                                          | 36.2<br>(32.9 to 39.9)                    | 657.5<br>(627.9 to 689.0)                     | 1.5<br>(0.9 to 2.3)                    | 13.6<br>(1.9 to 26.5)                             | 0.1<br>(-9.3 to 11.0)                               |
| <b>Neglected tropical diseases and malaria</b>                                       | <b>4,211.2</b><br>(3,183.1 to 5,441.2)    | <b>4.7†</b><br>(4.6 to 5.0)                   | <b>8.0</b><br>(5.2 to 12.2)            | <b>-41.7</b><br>(-62.0 to -16.1)                  | <b>-43.5</b><br>(-63.1 to -17.5)                    |
| Malaria                                                                              | 0.3<br>(0.2 to 0.4)                       | 4.6<br>(4.5 to 4.6)                           | < 0.05<br>(< 0.05 to < 0.05)           | -92.6<br>(-94.4 to -90.2)                         | -92.0<br>(-93.8 to -89.8)                           |
| Chagas disease                                                                       | --                                        | --                                            | --                                     | --                                                | --                                                  |
| Leishmaniasis                                                                        | --                                        | --                                            | --                                     | --                                                | --                                                  |
| Visceral leishmaniasis                                                               | --                                        | --                                            | --                                     | --                                                | --                                                  |
| Cutaneous and mucocutaneous leishmaniasis                                            | --                                        | --                                            | --                                     | --                                                | --                                                  |
| African trypanosomiasis                                                              | --                                        | --                                            | --                                     | --                                                | --                                                  |
| Schistosomiasis                                                                      | --                                        | --                                            | --                                     | --                                                | --                                                  |
| Cysticercosis                                                                        | 8.4<br>(5.9 to 11.1)                      | --                                            | 1.4<br>(0.7 to 2.4)                    | 2.5<br>(-31.9 to 59.4)                            | -9.6<br>(-40.5 to 39.8)                             |
| Cystic echinococcosis                                                                | 0.4<br>(0.1 to 1.9)                       | 0.1<br>(< 0.05 to 0.4)                        | < 0.05<br>(< 0.05 to 0.2)              | -15.6<br>(-92.0 to 87.7)                          | -22.7<br>(-93.3 to 78.6.1)                          |
| Lymphatic filariasis                                                                 | --                                        | --                                            | --                                     | --                                                | --                                                  |
| Onchocerciasis                                                                       | --                                        | --                                            | --                                     | --                                                | --                                                  |
| Trachoma                                                                             | --                                        | --                                            | --                                     | --                                                | --                                                  |
| Dengue                                                                               | --                                        | --                                            | --                                     | --                                                | --                                                  |
| Yellow fever                                                                         | --                                        | --                                            | --                                     | --                                                | --                                                  |
| Rabies                                                                               | < 0.05<br>(< 0.05 to < 0.05)              | < 0.05<br>(< 0.05 to < 0.05)                  | < 0.05<br>(< 0.05 to < 0.05)           | -28.3<br>(-57.3 to 14.9)                          | -31.9<br>(-61.0 to 10.5)                            |
| Intestinal nematode infections                                                       | 4,096.4<br>(3,080.0 to 5,376.6)           | --                                            | 2.4<br>(0.9 to 5.3)                    | -63.8<br>(-85.7 to -8.5)                          | -65.8<br>(-86.7 to -13.7)                           |
| Ascariasis                                                                           | 3,511.5<br>(2,456.7 to 4,876.9)           | --                                            | 2.3<br>(0.8 to 5.2)                    | -64.8<br>(-86.7 to -9.1)                          | -66.7<br>(-87.3 to -14.3)                           |



| Cause                                                                   | Prevalence in thousands (95% UI)                 | Incidence in thousands (95% UI)                   | YLDs in thousands (95% UI)                    |                                                   |                                                     |
|-------------------------------------------------------------------------|--------------------------------------------------|---------------------------------------------------|-----------------------------------------------|---------------------------------------------------|-----------------------------------------------------|
|                                                                         | 2016 counts                                      | 2016 counts                                       | 2016 counts                                   | Percentage change in counts between 2006 and 2016 | Percentage change in age-standardised rates between |
| Trichuriasis                                                            | 105.9<br>(68.9 to 161.0)                         | --                                                | < 0.05<br>(< 0.05 to < 0.05)                  | -66.2<br>(-98.3 to 495.1)                         | -68.7<br>(-98.4 to 473.6)                           |
| Hookworm disease                                                        | 21.4<br>(14.6 to 30.0)                           | --                                                | 0.1<br>(0.1 to 0.1)                           | 19.1<br>(-28.0 to 89.2)                           | 7.9<br>(-34.9 to 72.6)                              |
| Food-borne trematodiasis                                                | --                                               | --                                                | --                                            | --                                                | --                                                  |
| Leprosy                                                                 | --                                               | --                                                | --                                            | --                                                | --                                                  |
| Ebola virus disease                                                     | --                                               | --                                                | --                                            | --                                                | --                                                  |
| Zika virus disease                                                      | --                                               | --                                                | --                                            | --                                                | --                                                  |
| Guinea worm disease                                                     | --                                               | --                                                | --                                            | --                                                | --                                                  |
| Other neglected tropical diseases                                       | 203.7<br>(190.5 to 218.1)                        | --                                                | 4.2<br>(2.6 to 6.3)                           | -26.6<br>(-34.7 to -16.1)                         | -24.4<br>(-32.2 to -14.9)                           |
| <b>Maternal disorders</b>                                               | <b>14.9</b><br><b>(12.2 to 18.2)</b>             | <b>539.0†</b><br><b>(419.9 to 724.3)</b>          | <b>1.3</b><br><b>(0.8 to 1.9)</b>             | <b>-4.9</b><br><b>(-29.0 to 22.6)</b>             | <b>-9.9</b><br><b>(-33.1 to 17.6)</b>               |
| Maternal haemorrhage                                                    | 6.9<br>(5.0 to 9.6)                              | 63.6<br>(44.6 to 90.7)                            | 0.4<br>(0.2 to 0.6)                           | -5.1<br>(-38.7 to 43.4)                           | -10.2<br>(-41.7 to 36.8)                            |
| Maternal sepsis and other pregnancy related infections                  | 1.2<br>(0.6 to 2.0)                              | 13.5<br>(9.2 to 19.7)                             | 0.1<br>(< 0.05 to 0.1)                        | -0.5<br>(-62.6 to 154.8)                          | -7.4<br>(-65.2 to 135.9)                            |
| Maternal hypertensive disorders                                         | 3.6<br>(2.1 to 5.4)                              | 15.6<br>(11.4 to 20.6)                            | 0.2<br>(0.1 to 0.3)                           | 2.2<br>(-44.3 to 90.4)                            | -1.7<br>(-46.2 to 83.0)                             |
| Maternal obstructed labour and uterine rupture                          | 0.6<br>(0.3 to 1.0)                              | 44.3<br>(29.7 to 65.8)                            | 0.2<br>(0.1 to 0.4)                           | -2.3<br>(-59.6 to 125.7)                          | -8.9<br>(-64.2 to 114.0)                            |
| Maternal abortion, miscarriage, and ectopic pregnancy                   | 3.3<br>(1.9 to 5.3)                              | 402.1<br>(287.9 to 589.0)                         | 0.4<br>(0.2 to 0.7)                           | -7.7<br>(-49.3 to 60.5)                           | -12.0<br>(-52.6 to 51.9)                            |
| Other maternal disorders                                                | --                                               | --                                                | 0.2<br>(0.1 to 0.3)                           | -8.5<br>(-31.7 to 18.1)                           | -13.6<br>(-35.7 to 13.5)                            |
| <b>Neonatal disorders</b>                                               | <b>256.4</b><br><b>(209.3 to 341.2)</b>          | --                                                | <b>32.5</b><br><b>(22.1 to 45.9)</b>          | <b>9.5</b><br><b>(-9.1 to 32.5)</b>               | <b>9.5</b><br><b>(-9.2 to 32.6)</b>                 |
| Neonatal preterm birth complications                                    | 236.8<br>(181.0 to 322.5)                        | --                                                | 26.6<br>(17.8 to 38.2)                        | 12.9<br>(-10.0 to 42.9)                           | 12.6<br>(-10.3 to 41.7)                             |
| Neonatal encephalopathy due to birth asphyxia and trauma                | 11.5<br>(5.9 to 21.4)                            | --                                                | 1.2<br>(0.2 to 4.1)                           | -19.3<br>(-70.3 to 79.3)                          | -20.2<br>(-70.8 to 80.3)                            |
| Neonatal sepsis and other neonatal infections                           | 4.9<br>(1.3 to 11.2)                             | --                                                | 2.0<br>(0.5 to 5.0)                           | 6.2<br>(-20.0 to 86.1)                            | 6.2<br>(-18.9 to 88.6)                              |
| Hemolytic disease and other neonatal jaundice                           | 4.1<br>(3.5 to 4.8)                              | --                                                | 1.4<br>(1.1 to 1.8)                           | -0.6<br>(-9.8 to 9.0)                             | -2.4<br>(-10.7 to 6.5)                              |
| Other neonatal disorders                                                | --                                               | --                                                | 1.3<br>(0.8 to 1.8)                           | -4.9<br>(-23.7 to 17.7)                           | 4.2<br>(-16.4 to 28.8)                              |
| <b>Nutritional deficiencies</b>                                         | <b>8,392.3</b><br><b>(8,032.8 to 8,819.6)</b>    | <b>4,265.4†</b><br><b>(3,403.9 to 5,171.2)</b>    | <b>133.0</b><br><b>(88.5 to 194.8)</b>        | <b>-32.4</b><br><b>(-35.8 to -28.9)</b>           | <b>-36.2</b><br><b>(-39.1 to -33.0)</b>             |
| Protein-energy malnutrition                                             | 180.1<br>(146.3 to 219.6)                        | 71.7<br>(58.1 to 87.2)                            | 3.2<br>(1.9 to 5.0)                           | -38.6<br>(-55.4 to -9.8)                          | -32.5<br>(-50.9 to -1.2)                            |
| Iodine deficiency                                                       | 15.5<br>(13.2 to 18.2)                           | 0.5<br>(0.4 to 0.6)                               | 0.4<br>(0.3 to 0.6)                           | 6.5<br>(-9.2 to 24.2)                             | -7.0<br>(-20.9 to 9.5)                              |
| Vitamin A deficiency                                                    | 3,821.9<br>(3,318.7 to 4,453.9)                  | 4,193.2<br>(3,336.7 to 5,097.7)                   | 0.3<br>(0.2 to 0.6)                           | -6.6<br>(-24.0 to 14.1)                           | -3.7<br>(-22.2 to 17.2)                             |
| Iron-deficiency anaemia                                                 | 5,407.3<br>(5,182.8 to 5,633.7)                  | --                                                | 129.0<br>(85.8 to 189.6)                      | -32.4<br>(-35.8 to -28.7)                         | -36.4<br>(-39.4 to -33.2)                           |
| Other nutritional deficiencies                                          | --                                               | --                                                | 0.1<br>(0.1 to 0.2)                           | -39.0<br>(-56.2 to -10.5)                         | -32.9<br>(-51.7 to -1.7)                            |
| <b>Other communicable, maternal, neonatal, and nutritional diseases</b> | <b>7,604.3</b><br><b>(7,069.5 to 8,152.1)</b>    | <b>2,176.2</b><br><b>(1,860.0 to 2,418.1)</b>     | <b>13.1</b><br><b>(8.5 to 19.7)</b>           | <b>-7.3</b><br><b>(-12.8 to -1.8)</b>             | <b>-10.0</b><br><b>(-15.3 to -5.2)</b>              |
| Sexually transmitted diseases excluding HIV                             | 3,783.7<br>(3,519.6 to 4,113.7)                  | 1,276.2<br>(1,158.0 to 1,402.2)                   | 8.7<br>(5.6 to 13.5)                          | 0.1<br>(-7.2 to 7.4)                              | -3.9<br>(-10.8 to 2.8)                              |
| Syphilis                                                                | 50.1<br>(40.3 to 62.4)                           | 27.8<br>(21.5 to 35.5)                            | 0.5<br>(0.3 to 0.7)                           | 22.9<br>(8.4 to 40.5)                             | 2.5<br>(-10.0 to 18.8)                              |
| Chlamydial infection                                                    | 438.4<br>(341.1 to 547.0)                        | 348.8<br>(274.2 to 435.5)                         | 2.6<br>(1.5 to 4.2)                           | 1.4<br>(-10.4 to 13.7)                            | -1.8<br>(-13.4 to 10.2)                             |
| Gonococcal infection                                                    | 22.2<br>(18.6 to 25.5)                           | 32.8<br>(27.2 to 39.2)                            | 0.3<br>(0.2 to 0.4)                           | -7.2<br>(-26.6 to 17.1)                           | -7.0<br>(-25.8 to 16.9)                             |
| Trichomoniasis                                                          | 539.3<br>(467.4 to 619.0)                        | 454.3<br>(391.7 to 522.3)                         | 0.6<br>(0.2 to 1.2)                           | 7.3<br>(-1.3 to 16.1)                             | -1.1<br>(-8.1 to 6.4)                               |
| Genital herpes                                                          | 2,767.6<br>(2,387.9 to 3,238.3)                  | 143.0<br>(122.2 to 170.3)                         | 0.7<br>(0.2 to 1.6)                           | 11.1<br>(2.6 to 19.8)                             | -0.4<br>(-7.9 to 7.2)                               |
| Other sexually transmitted diseases                                     | 201.8<br>(162.3 to 234.7)                        | 269.5<br>(228.8 to 318.1)                         | 4.0<br>(2.6 to 6.0)                           | -5.0<br>(-14.6 to 5.3)                            | -6.8<br>(-15.7 to 2.9)                              |
| Hepatitis                                                               | 4,457.3<br>(3,814.7 to 5,221.2)                  | 900.0<br>(597.2 to 1,082.8)                       | 0.6<br>(0.4 to 0.9)                           | -0.1<br>(-18.6 to 21.7)                           | -9.3<br>(-25.1 to 8.6)                              |
| Acute hepatitis A                                                       | 41.3<br>(18.2 to 53.3)                           | 536.4<br>(236.2 to 693.5)                         | 0.1<br>(0.1 to 0.2)                           | 0.1<br>(-28.1 to 40.9)                            | -7.9<br>(-33.3 to 29.6)                             |
| Hepatitis B                                                             | 3,263.6<br>(2,640.4 to 3,990.6)                  | 307.1<br>(239.9 to 393.6)                         | 0.4<br>(0.2 to 0.7)                           | 0.3<br>(-23.7 to 29.1)                            | -10.6<br>(-30.6 to 14.0)                            |
| Hepatitis C                                                             | 1,151.7<br>(1,027.1 to 1,295.3)                  | 45.6<br>(39.4 to 53.0)                            | < 0.05<br>(< 0.05 to 0.1)                     | -6.0<br>(-51.0 to 81.4)                           | -0.6<br>(-46.7 to 85.8)                             |
| Acute hepatitis E                                                       | 0.8<br>(0.6 to 1.1)                              | 10.9<br>(8.3 to 14.6)                             | < 0.05<br>(< 0.05 to < 0.05)                  | 4.9<br>(-5.3 to 15.5)                             | -7.0<br>(-16.1 to 2.1)                              |
| Other infectious diseases                                               | 172.5<br>(163.0 to 182.7)                        | < 0.05<br>(< 0.05 to < 0.05)                      | 3.8<br>(2.4 to 5.7)                           | -21.4<br>(-29.1 to -12.2)                         | -21.4<br>(-28.4 to -13.1)                           |
| <b>Non-communicable diseases</b>                                        | <b>23,260.7</b><br><b>(23,084.7 to 23,431.3)</b> | <b>64,105.0†</b><br><b>(61,016.0 to 67,567.6)</b> | <b>2,164.3</b><br><b>(1,615.2 to 2,800.3)</b> | <b>13.0</b><br><b>(11.1 to 14.7)</b>              | <b>0.1</b><br><b>(-1.4 to 1.4)</b>                  |
| <b>Neoplasms</b>                                                        | <b>69.0</b><br><b>(64.5 to 73.2)</b>             | <b>49.9</b><br><b>(46.0 to 53.8)</b>              | <b>14.1</b><br><b>(10.1 to 18.5)</b>          | <b>17.7</b><br><b>(11.4 to 24.6)</b>              | <b>-3.4</b><br><b>(-8.4 to 2.3)</b>                 |
| Lip and oral cavity cancer                                              | 1.9<br>(1.4 to 2.6)                              | 0.5<br>(0.4 to 0.7)                               | 0.2<br>(0.1 to 0.3)                           | 26.3<br>(10.0 to 45.4)                            | 3.6<br>(-9.8 to 18.2)                               |
| Nasopharynx cancer                                                      | 2.5<br>(1.7 to 3.3)                              | 0.7<br>(0.5 to 0.9)                               | 0.3<br>(0.2 to 0.5)                           | 12.9<br>(-8.2 to 37.6)                            | -2.1<br>(-19.9 to 17.9)                             |
| Other pharynx cancer                                                    | 0.2<br>(0.1 to 0.2)                              | 0.1<br>(0.1 to 0.1)                               | < 0.05<br>(< 0.05 to < 0.05)                  | 24.9<br>(10.1 to 43.7)                            | 1.3<br>(-10.2 to 15.5)                              |
| Oesophageal cancer                                                      | 3.4<br>(3.0 to 3.8)                              | 3.2<br>(2.9 to 3.6)                               | 0.8<br>(0.5 to 1.1)                           | 15.5<br>(-7.1 to 45.6)                            | -8.0<br>(-25.2 to 15.0)                             |
| Stomach cancer                                                          | 10.7<br>(9.4 to 12.3)                            | 7.3<br>(6.4 to 8.3)                               | 1.8<br>(1.2 to 2.4)                           | 16.6<br>(-0.5 to 37.5)                            | -5.4<br>(-19.4 to 10.7)                             |
| Colon and rectum cancer                                                 | 8.2<br>(7.0 to 10.1)                             | 2.8<br>(2.4 to 3.5)                               | 1.0<br>(0.7 to 1.3)                           | 26.1<br>(6.6 to 50.0)                             | 1.2<br>(-15.1 to 22.1)                              |
| Liver cancer                                                            | 3.8<br>(3.1 to 4.8)                              | 6.1<br>(4.8 to 7.9)                               | 1.3<br>(0.9 to 1.9)                           | 20.5<br>(3.6 to 39.3)                             | -1.7<br>(-14.8 to 13.4)                             |
| Liver cancer due to hepatitis B                                         | 3.4<br>(2.6 to 4.5)                              | 3.5<br>(2.7 to 4.5)                               | 0.7<br>(0.5 to 1.1)                           | 19.0<br>(-1.6 to 43.0)                            | -2.0<br>(-18.2 to 17.2)                             |

| Cause                                              | Prevalence in thousands (95% UI)              | Incidence in thousands (95% UI)          | YLDs in thousands (95% UI)             |                                                   |                                                     |
|----------------------------------------------------|-----------------------------------------------|------------------------------------------|----------------------------------------|---------------------------------------------------|-----------------------------------------------------|
|                                                    | 2016 counts                                   | 2016 counts                              | 2016 counts                            | Percentage change in counts between 2006 and 2016 | Percentage change in age-standardised rates between |
| Liver cancer due to hepatitis C                    | 0.9<br>(0.7 to 1.2)                           | 1.0<br>(0.7 to 1.3)                      | 0.2<br>(0.1 to 0.3)                    | 22.0<br>(5.7 to 41.8)                             | -3.8<br>(-15.4 to 10.4)                             |
| Liver cancer due to alcohol use                    | 0.5<br>(0.3 to 0.7)                           | 0.5<br>(0.4 to 0.8)                      | 0.1<br>(0.1 to 0.2)                    | 26.5<br>(7.9 to 48.6)                             | 1.9<br>(-12.8 to 19.0)                              |
| Liver cancer due to other causes                   | 1.1<br>(0.9 to 1.6)                           | 1.1<br>(0.9 to 1.6)                      | 0.2<br>(0.2 to 0.4)                    | 20.9<br>(2.6 to 41.8)                             | -0.3<br>(-13.9 to 15.4)                             |
| Gallbladder and biliary tract cancer               | 0.4<br>(0.3 to 0.4)                           | 0.5<br>(0.4 to 0.6)                      | 0.1<br>(0.1 to 0.1)                    | 22.0<br>(9.0 to 33.0)                             | -4.2<br>(-14.2 to 4.9)                              |
| Pancreatic cancer                                  | 0.8<br>(0.7 to 0.9)                           | 1.0<br>(0.9 to 1.1)                      | 0.2<br>(0.1 to 0.3)                    | 23.2<br>(12.7 to 34.1)                            | -1.3<br>(-9.3 to 7.0)                               |
| Larynx cancer                                      | 1.3<br>(0.9 to 1.6)                           | 0.5<br>(0.3 to 0.5)                      | 0.2<br>(0.1 to 0.2)                    | 20.6<br>(5.0 to 38.5)                             | -2.2<br>(-14.7 to 11.3)                             |
| Tracheal, bronchus, and lung cancer                | 17.2<br>(14.2 to 19.8)                        | 15.0<br>(12.5 to 17.2)                   | 3.5<br>(2.4 to 4.7)                    | 14.6<br>(-4.4 to 35.5)                            | -7.8<br>(-22.3 to 8.6)                              |
| Malignant skin melanoma                            | 0.3<br>(0.2 to 0.3)                           | 0.1<br>(0.1 to 0.1)                      | < 0.05<br>(< 0.05 to < 0.05)           | 25.1<br>(14.5 to 38.5)                            | 0.8<br>(-6.8 to 10.2)                               |
| Non-melanoma skin cancer                           | 0.2<br>(0.1 to 0.3)                           | 0.4<br>(0.3 to 0.6)                      | < 0.05<br>(< 0.05 to < 0.05)           | 3.2<br>(-68.7 to 112.6)                           | -19.5<br>(-76.6 to 66.6)                            |
| Non-melanoma skin cancer (squamous-cell carcinoma) | 0.2<br>(0.1 to 0.3)                           | 0.4<br>(0.3 to 0.5)                      | < 0.05<br>(< 0.05 to < 0.05)           | 3.1<br>(-69.2 to 115.8)                           | -19.7<br>(-77.0 to 68.7)                            |
| Non-melanoma skin cancer (basal-cell carcinoma)    | < 0.05<br>(< 0.05 to < 0.05)                  | 0.1<br>(< 0.05 to 0.2)                   | < 0.05<br>(< 0.05 to < 0.05)           | 14.9<br>(3.9 to 33.1)                             | -0.8<br>(-9.8 to 9.3)                               |
| Breast cancer                                      | 9.1<br>(7.1 to 13.2)                          | 2.0<br>(1.5 to 3.1)                      | 1.0<br>(0.7 to 1.6)                    | 24.0<br>(-0.4 to 55.6)                            | 1.0<br>(-17.9 to 24.5)                              |
| Cervical cancer                                    | 8.1<br>(5.1 to 12.0)                          | 2.1<br>(1.3 to 3.2)                      | 0.8<br>(0.5 to 1.2)                    | 14.0<br>(-8.4 to 39.5)                            | -4.1<br>(-21.7 to 15.7)                             |
| Uterine cancer                                     | 2.3<br>(1.9 to 2.9)                           | 0.5<br>(0.4 to 0.6)                      | 0.2<br>(0.1 to 0.3)                    | 20.5<br>(-2.9 to 50.5)                            | -3.7<br>(-21.8 to 18.6)                             |
| Ovarian cancer                                     | 1.5<br>(1.3 to 1.8)                           | 0.5<br>(0.4 to 0.6)                      | 0.2<br>(0.2 to 0.3)                    | 22.0<br>(6.2 to 41.0)                             | 0.1<br>(-12.1 to 14.3)                              |
| Prostate cancer                                    | 1.8<br>(1.2 to 2.3)                           | 0.6<br>(0.4 to 0.7)                      | 0.3<br>(0.2 to 0.4)                    | 45.0<br>(7.7 to 93.4)                             | 12.5<br>(-14.0 to 46.2)                             |
| Testicular cancer                                  | 0.1<br>(0.1 to 0.2)                           | < 0.05<br>(< 0.05 to < 0.05)             | < 0.05<br>(< 0.05 to < 0.05)           | 8.3<br>(-13.1 to 33.2)                            | 0.9<br>(-18.6 to 23.1)                              |
| Kidney cancer                                      | 2.1<br>(1.5 to 2.8)                           | 0.6<br>(0.4 to 0.8)                      | 0.2<br>(0.1 to 0.3)                    | 22.5<br>(3.1 to 44.1)                             | 4.2<br>(-10.2 to 20.7)                              |
| Bladder cancer                                     | 2.5<br>(1.8 to 3.1)                           | 0.7<br>(0.5 to 0.9)                      | 0.3<br>(0.2 to 0.4)                    | 29.6<br>(12.5 to 50.6)                            | 2.6<br>(-10.7 to 17.7)                              |
| Brain and nervous system cancer                    | 1.9<br>(1.1 to 2.5)                           | 0.9<br>(0.5 to 1.1)                      | 0.3<br>(0.1 to 0.5)                    | 14.9<br>(3.1 to 28.4)                             | 1.3<br>(-8.6 to 13.1)                               |
| Thyroid cancer                                     | 0.8<br>(0.6 to 0.9)                           | 0.2<br>(0.1 to 0.2)                      | 0.1<br>(< 0.05 to 0.1)                 | 25.9<br>(8.1 to 50.1)                             | 1.7<br>(-12.8 to 20.4)                              |
| Mesothelioma                                       | 0.1<br>(0.1 to 0.1)                           | 0.1<br>(< 0.05 to 0.1)                   | < 0.05<br>(< 0.05 to < 0.05)           | 27.2<br>(11.8 to 45.3)                            | 2.5<br>(-8.9 to 15.4)                               |
| Hodgkin lymphoma                                   | 0.2<br>(0.1 to 0.3)                           | 0.1<br>(0.1 to 0.1)                      | < 0.05<br>(< 0.05 to 0.1)              | 0.5<br>(-10.8 to 11.8)                            | -12.6<br>(-22.6 to -3.0)                            |
| Non-Hodgkin's lymphoma                             | 1.5<br>(1.2 to 1.7)                           | 0.6<br>(0.5 to 0.6)                      | 0.2<br>(0.1 to 0.2)                    | 19.3<br>(6.6 to 34.2)                             | 1.1<br>(-9.9 to 13.8)                               |
| Multiple myeloma                                   | 0.2<br>(0.1 to 0.3)                           | 0.1<br>(0.1 to 0.2)                      | 0.1<br>(< 0.05 to 0.1)                 | 26.1<br>(17.0 to 37.6)                            | 3.0<br>(-4.5 to 12.0)                               |
| Leukaemia                                          | 6.2<br>(3.7 to 7.8)                           | 1.5<br>(0.9 to 1.9)                      | 0.8<br>(0.4 to 1.1)                    | 2.7<br>(-6.1 to 12.8)                             | -5.2<br>(-12.8 to 3.8)                              |
| Acute lymphoid leukaemia                           | 0.9<br>(0.6 to 1.2)                           | 0.2<br>(0.2 to 0.3)                      | 0.1<br>(0.1 to 0.2)                    | -1.1<br>(-15.6 to 16.8)                           | -3.2<br>(-17.0 to 12.5)                             |
| Chronic lymphoid leukaemia                         | 0.8<br>(0.6 to 1.2)                           | 0.2<br>(0.1 to 0.3)                      | 0.1<br>(0.1 to 0.2)                    | 18.9<br>(5.0 to 35.9)                             | 2.9<br>(-8.5 to 16.7)                               |
| Acute myeloid leukaemia                            | 0.3<br>(0.2 to 0.4)                           | 0.1<br>(0.1 to 0.2)                      | < 0.05<br>(< 0.05 to 0.1)              | 3.3<br>(-10.6 to 18.5)                            | -3.2<br>(-14.6 to 9.7)                              |
| Chronic myeloid leukaemia                          | 0.1<br>(0.1 to 0.2)                           | 0.1<br>(< 0.05 to 0.1)                   | < 0.05<br>(< 0.05 to < 0.05)           | 0.7<br>(-17.4 to 21.5)                            | -12.3<br>(-27.4 to 4.4)                             |
| Other leukaemia                                    | 4.0<br>(1.9 to 5.5)                           | 0.9<br>(0.4 to 1.2)                      | 0.5<br>(0.2 to 0.8)                    | 0.5<br>(-10.9 to 13.4)                            | -7.1<br>(-17.4 to 4.3)                              |
| Other neoplasms                                    | 3.3<br>(2.7 to 3.6)                           | 1.2<br>(1.0 to 1.3)                      | 0.4<br>(0.2 to 0.5)                    | 19.6<br>(5.7 to 34.4)                             | 1.6<br>(-9.1 to 14.3)                               |
| <b>Cardiovascular diseases</b>                     | <b>1,444.5</b><br><b>(1,393.2 to 1,500.8)</b> | <b>176.2†</b><br><b>(168.2 to 184.1)</b> | <b>126.0</b><br><b>(92.0 to 162.2)</b> | <b>20.6</b><br><b>(15.5 to 26.1)</b>              | <b>-1.9</b><br><b>(-5.8 to 2.3)</b>                 |
| Rheumatic heart disease                            | 172.2<br>(153.3 to 192.6)                     | 4.4<br>(3.9 to 4.9)                      | 8.6<br>(5.4 to 12.6)                   | -5.8<br>(-13.2 to 1.8)                            | -13.1<br>(-20.0 to -6.3)                            |
| Ischaemic heart disease                            | 331.4<br>(313.8 to 350.0)                     | 48.1<br>(44.6 to 51.7)                   | 17.3<br>(11.9 to 23.6)                 | 24.3<br>(17.9 to 31.6)                            | 0.4<br>(-4.5 to 5.7)                                |
| Cerebrovascular disease                            | 343.1<br>(320.9 to 365.3)                     | 64.1‡<br>(59.4 to 68.8)                  | 71.7<br>(50.6 to 91.9)                 | 21.9<br>(13.7 to 30.5)                            | -2.1<br>(-8.6 to 4.7)                               |
| Ischaemic stroke                                   | 268.9<br>(239.2 to 297.4)                     | 37.2‡<br>(33.1 to 41.6)                  | 53.9<br>(37.4 to 69.5)                 | 22.4<br>(12.2 to 33.5)                            | -2.1<br>(-10.4 to 6.5)                              |
| Hemorrhagic stroke                                 | 88.8<br>(79.8 to 99.0)                        | 26.9‡<br>(24.4 to 29.6)                  | 17.8<br>(12.4 to 23.3)                 | 20.1<br>(8.3 to 32.0)                             | -2.1<br>(-11.1 to 7.7)                              |
| Hypertensive heart disease                         | 56.4<br>(47.4 to 66.1)                        | --                                       | 4.6<br>(3.1 to 6.4)                    | 31.9<br>(19.4 to 47.1)                            | 3.2<br>(-5.7 to 13.4)                               |
| Cardiomyopathy and myocarditis                     | 9.5<br>(8.6 to 10.7)                          | 10.9†<br>(9.7 to 12.3)                   | 1.1<br>(0.7 to 1.6)                    | 14.1<br>(3.3 to 26.5)                             | 3.6<br>(-5.7 to 13.6)                               |
| Myocarditis                                        | 7.8<br>(7.0 to 8.7)                           | 10.9<br>(9.7 to 12.3)                    | 0.6<br>(0.4 to 0.8)                    | 11.3<br>(-4.0 to 30.0)                            | 3.1<br>(-10.9 to 19.8)                              |
| Alcoholic cardiomyopathy                           | 0.8<br>(0.7 to 1.0)                           | --                                       | 0.1<br>(< 0.05 to 0.1)                 | 22.2<br>(11.5 to 33.5)                            | 5.3<br>(-3.0 to 13.8)                               |
| Other cardiomyopathy                               | 5.2<br>(4.4 to 6.0)                           | --                                       | 0.5<br>(0.3 to 0.7)                    | 16.8<br>(2.1 to 32.3)                             | 3.9<br>(-8.3 to 17.6)                               |
| Atrial fibrillation and flutter                    | 140.8<br>(122.3 to 163.6)                     | 12.0<br>(10.3 to 14.1)                   | 11.2<br>(7.5 to 15.8)                  | 30.1<br>(20.4 to 40.9)                            | 0.0<br>(-6.9 to 6.9)                                |
| Peripheral vascular disease                        | 342.6<br>(297.4 to 398.0)                     | 33.2<br>(28.6 to 38.5)                   | 1.7<br>(0.8 to 3.3)                    | 23.5<br>(11.5 to 36.2)                            | -5.2<br>(-12.6 to 3.0)                              |
| Endocarditis                                       | 0.6<br>(0.5 to 0.7)                           | 3.5<br>(3.1 to 3.9)                      | < 0.05<br>(< 0.05 to 0.1)              | 26.0<br>(19.4 to 32.4)                            | 3.4<br>(-1.9 to 8.8)                                |
| Other cardiovascular and circulatory diseases      | 182.3<br>(157.3 to 212.2)                     | --                                       | 9.6<br>(6.5 to 13.6)                   | 20.6<br>(10.0 to 32.2)                            | 1.5<br>(-6.5 to 10.0)                               |
| <b>Chronic respiratory diseases</b>                | <b>2,119.2</b><br><b>(2,046.3 to 2,188.7)</b> | <b>447.6†</b><br><b>(423.6 to 473.1)</b> | <b>110.0</b><br><b>(88.0 to 133.2)</b> | <b>20.5</b><br><b>(14.3 to 27.4)</b>              | <b>5.8</b><br><b>(0.7 to 11.1)</b>                  |
| Chronic obstructive pulmonary disease              | 1,082.3<br>(1,028.8 to 1,134.0)               | 103.4<br>(98.2 to 108.6)                 | 60.3<br>(51.3 to 69.0)                 | 29.5<br>(19.6 to 40.9)                            | 5.0<br>(-2.9 to 14.0)                               |
| Pneumoconiosis                                     | 10.6<br>(9.8 to 11.5)                         | 1.1<br>(1.0 to 1.2)                      | 1.5<br>(1.0 to 2.1)                    | 23.9<br>(4.7 to 46.0)                             | 5.7<br>(-10.5 to 23.3)                              |
| Silicosis                                          | 5.3<br>(4.7 to 6.0)                           | 0.6<br>(0.6 to 0.7)                      | 0.8<br>(0.5 to 1.1)                    | 18.2<br>(-7.3 to 47.5)                            | 2.8<br>(-19.3 to 27.7)                              |



| Cause                                                          | Prevalence in thousands (95% UI)              | Incidence in thousands (95% UI)                | YLDs in thousands (95% UI)              |                                                   |                                                     |
|----------------------------------------------------------------|-----------------------------------------------|------------------------------------------------|-----------------------------------------|---------------------------------------------------|-----------------------------------------------------|
|                                                                | 2016 counts                                   | 2016 counts                                    | 2016 counts                             | Percentage change in counts between 2006 and 2016 | Percentage change in age-standardised rates between |
| Asbestosis                                                     | 0.5<br>(0.4 to 0.6)                           | < 0.05<br>(< 0.05 to < 0.05)                   | 0.1<br>(0.1 to 0.1)                     | 24.1<br>(16.3 to 32.0)                            | 3.1<br>(-3.1 to 9.2)                                |
| Coal workers pneumoconiosis                                    | 3.0<br>(2.6 to 3.6)                           | 0.3<br>(0.2 to 0.3)                            | 0.4<br>(0.3 to 0.7)                     | 35.2<br>(-4.0 to 88.0)                            | 13.2<br>(-17.9 to 55.0)                             |
| Other pneumoconiosis                                           | 1.7<br>(1.5 to 2.0)                           | 0.2<br>(0.1 to 0.2)                            | 0.2<br>(0.1 to 0.4)                     | 23.8<br>(-10.4 to 74.6)                           | 4.1<br>(-24.1 to 43.6)                              |
| Asthma                                                         | 1,103.2<br>(1,035.9 to 1,174.7)               | 341.3<br>(318.2 to 366.7)                      | 43.4<br>(28.5 to 62.4)                  | 8.7<br>(3.6 to 14.2)                              | 5.8<br>(1.1 to 10.9)                                |
| Interstitial lung disease and pulmonary sarcoidosis            | 21.8<br>(19.2 to 24.5)                        | 1.8<br>(1.6 to 2.0)                            | 2.2<br>(1.4 to 3.2)                     | 23.1<br>(8.4 to 41.4)                             | -2.2<br>(-12.8 to 10.8)                             |
| Other chronic respiratory diseases                             | --                                            | --                                             | 2.6<br>(2.1 to 3.0)                     | 44.8<br>(25.5 to 66.0)                            | 39.8<br>(19.1 to 62.1)                              |
| <b>Cirrhosis and other chronic liver diseases</b>              | <b>172.5</b><br><b>(162.0 to 183.8)</b>       | <b>5.1</b><br><b>(4.9 to 5.5)</b>              | <b>4.8</b><br><b>(3.3 to 6.7)</b>       | <b>16.7</b><br><b>(5.2 to 29.9)</b>               | <b>0.9</b><br><b>(-8.9 to 11.4)</b>                 |
| Cirrhosis and other chronic liver diseases due to hepatitis B  | 76.9<br>(69.6 to 84.1)                        | 2.2<br>(2.0 to 2.5)                            | 2.0<br>(1.4 to 2.8)                     | 19.9<br>(2.0 to 40.4)                             | 1.1<br>(-13.0 to 17.8)                              |
| Cirrhosis and other chronic liver diseases due to hepatitis C  | 31.6<br>(25.4 to 39.5)                        | 0.9<br>(0.7 to 1.1)                            | 0.8<br>(0.5 to 1.2)                     | 21.8<br>(-5.6 to 54.6)                            | 1.8<br>(-19.1 to 26.9)                              |
| Cirrhosis and other chronic liver diseases due to alcohol use  | 24.1<br>(21.2 to 27.6)                        | 0.7<br>(0.6 to 0.8)                            | 0.6<br>(0.4 to 0.9)                     | 22.4<br>(-6.3 to 58.7)                            | 0.6<br>(-21.2 to 28.9)                              |
| Cirrhosis and other chronic liver diseases due to other causes | 40.0<br>(35.9 to 44.4)                        | 1.3<br>(1.2 to 1.4)                            | 1.5<br>(1.0 to 2.1)                     | 8.4<br>(-10.6 to 31.1)                            | 0.2<br>(-16.4 to 20.8)                              |
| <b>Digestive diseases</b>                                      | <b>1,084.3</b><br><b>(1,016.9 to 1,157.5)</b> | <b>830.6†</b><br><b>(775.8 to 892.0)</b>       | <b>28.9</b><br><b>(20.3 to 39.4)</b>    | <b>22.2</b><br><b>(15.8 to 29.3)</b>              | <b>7.1</b><br><b>(1.7 to 12.6)</b>                  |
| Peptic ulcer disease                                           | 243.8<br>(223.7 to 268.8)                     | 48.6<br>(43.9 to 53.7)                         | 4.9<br>(3.2 to 7.1)                     | 20.9<br>(11.0 to 31.9)                            | 0.7<br>(-7.4 to 9.1)                                |
| Gastritis and duodenitis                                       | 648.8<br>(561.9 to 737.7)                     | 396.8<br>(353.2 to 446.2)                      | 8.6<br>(5.8 to 12.4)                    | 23.3<br>(14.8 to 33.1)                            | 3.6<br>(-3.0 to 11.2)                               |
| Appendicitis                                                   | 2.0<br>(1.8 to 2.1)                           | 52.2<br>(48.5 to 56.0)                         | 0.6<br>(0.4 to 0.9)                     | 8.2<br>(-18.8 to 42.9)                            | 2.9<br>(-23.3 to 37.8)                              |
| Paralytic ileus and intestinal obstruction                     | 0.5<br>(0.5 to 0.6)                           | 13.8<br>(12.2 to 15.5)                         | 0.2<br>(0.1 to 0.2)                     | 19.3<br>(13.2 to 25.3)                            | 3.2<br>(-3.3 to 9.8)                                |
| Inguinal, femoral, and abdominal hernia                        | 144.4<br>(129.1 to 160.0)                     | 55.9<br>(48.1 to 64.5)                         | 9.6<br>(6.4 to 13.5)                    | 31.0<br>(17.7 to 46.1)                            | 22.4<br>(10.6 to 35.6)                              |
| Inflammatory bowel disease                                     | 10.4<br>(9.0 to 12.1)                         | 22.3<br>(19.6 to 25.2)                         | 1.5<br>(1.0 to 2.1)                     | -14.6<br>(-29.3 to 1.8)                           | -27.1<br>(-38.7 to -14.1)                           |
| Vascular intestinal disorders                                  | 0.2<br>(0.1 to 0.2)                           | 1.1<br>(1.0 to 1.3)                            | 0.1<br>(< 0.05 to 0.1)                  | 18.0<br>(11.2 to 25.2)                            | 6.7<br>(2.4 to 11.1)                                |
| Gallbladder and biliary diseases                               | 76.5<br>(67.2 to 87.1)                        | 234.2<br>(204.8 to 266.3)                      | 0.9<br>(0.6 to 1.3)                     | 20.4<br>(-2.8 to 51.1)                            | 1.0<br>(-17.7 to 23.6)                              |
| Pancreatitis                                                   | 0.6<br>(0.6 to 0.7)                           | 5.8<br>(5.1 to 6.5)                            | 0.1<br>(0.1 to 0.1)                     | 21.6<br>(15.7 to 27.3)                            | 2.7<br>(-0.8 to 6.1)                                |
| Other digestive diseases                                       | --                                            | --                                             | 2.4<br>(1.7 to 3.3)                     | 26.3<br>(19.1 to 34.1)                            | 12.9<br>(7.0 to 19.2)                               |
| <b>Neurological disorders</b>                                  | <b>6,987.7</b><br><b>(6,647.2 to 7,362.4)</b> | <b>2,823.2</b><br><b>(2,427.2 to 3,264.6)</b>  | <b>178.2</b><br><b>(120.5 to 244.7)</b> | <b>10.2</b><br><b>(-4.8 to 28.7)</b>              | <b>-0.2</b><br><b>(-13.5 to 15.5)</b>               |
| Alzheimer's disease and other dementias                        | 136.4<br>(114.5 to 161.6)                     | 23.3<br>(19.2 to 28.4)                         | 19.7<br>(13.6 to 26.5)                  | 41.6<br>(33.4 to 50.1)                            | -1.7<br>(-6.6 to 3.4)                               |
| Parkinson's disease                                            | 14.1<br>(11.1 to 17.5)                        | 1.7<br>(1.3 to 2.1)                            | 1.7<br>(1.1 to 2.4)                     | 38.5<br>(19.2 to 60.4)                            | 5.2<br>(-7.3 to 20.7)                               |
| Epilepsy                                                       | 58.2<br>(17.3 to 88.9)                        | 6.7<br>(2.0 to 10.4)                           | 20.4<br>(5.5 to 38.3)                   | 2.2<br>(-72.8 to 240.0)                           | -1.2<br>(-73.6 to 228.7)                            |
| Multiple sclerosis                                             | 1.7<br>(1.5 to 1.9)                           | 0.1<br>(0.1 to 0.1)                            | 0.5<br>(0.3 to 0.7)                     | 20.8<br>(16.4 to 25.1)                            | 7.6<br>(4.0 to 11.1)                                |
| Motor neuron disease                                           | 1.0<br>(0.8 to 1.1)                           | 0.2<br>(0.2 to 0.3)                            | 0.2<br>(0.1 to 0.3)                     | 14.2<br>(9.4 to 19.0)                             | 4.3<br>(0.5 to 8.0)                                 |
| Migraine                                                       | 2,593.9<br>(2,448.7 to 2,746.0)               | 277.9<br>(259.7 to 297.8)                      | 112.5<br>(71.4 to 159.2)                | 7.2<br>(2.7 to 11.8)                              | -0.4<br>(-4.4 to 3.6)                               |
| Tension-type headache                                          | 4,963.2<br>(4,412.1 to 5,605.2)               | 2,513.2<br>(2,122.2 to 2,951.9)                | 18.3<br>(11.4 to 27.5)                  | 7.5<br>(1.1 to 14.4)                              | -0.5<br>(-5.9 to 5.6)                               |
| Other neurological disorders                                   | 0.1<br>(< 0.05 to 0.1)                        | 0.1<br>(0.1 to 0.2)                            | 4.9<br>(1.8 to 8.7)                     | 22.9<br>(-54.2 to 220.0)                          | 18.2<br>(-56.4 to 198.9)                            |
| <b>Mental and substance use disorders</b>                      | <b>3,665.8</b><br><b>(3,537.2 to 3,805.4)</b> | <b>1,121.7†</b><br><b>(1,047.0 to 1,203.8)</b> | <b>478.2</b><br><b>(350.9 to 619.4)</b> | <b>8.3</b><br><b>(5.9 to 10.8)</b>                | <b>-0.2</b><br><b>(-2.5 to 2.0)</b>                 |
| Schizophrenia                                                  | 105.7<br>(93.2 to 119.5)                      | 5.5<br>(4.8 to 6.2)                            | 68.6<br>(50.4 to 86.2)                  | 5.8<br>(-1.6 to 13.3)                             | -2.2<br>(-8.9 to 4.8)                               |
| Alcohol use disorders                                          | 273.3<br>(237.7 to 311.2)                     | 141.6<br>(122.3 to 161.9)                      | 27.5<br>(18.2 to 37.7)                  | 10.7<br>(0.9 to 20.8)                             | 2.5<br>(-6.4 to 11.7)                               |
| Drug use disorders                                             | 208.0<br>(192.0 to 225.9)                     | 27.9<br>(25.0 to 31.2)                         | 41.8<br>(29.7 to 54.6)                  | 9.8<br>(0.5 to 19.3)                              | 4.1<br>(-4.5 to 12.9)                               |
| Opioid use disorders                                           | 74.5<br>(63.6 to 87.3)                        | 8.8<br>(7.6 to 10.2)                           | 31.0<br>(21.2 to 41.2)                  | 9.3<br>(-1.6 to 21.0)                             | 3.4<br>(-6.6 to 14.0)                               |
| Cocaine use disorders                                          | 6.6<br>(5.7 to 7.7)                           | 0.7<br>(0.6 to 0.8)                            | 0.9<br>(0.5 to 1.4)                     | 11.5<br>(-16.2 to 53.8)                           | 4.1<br>(-20.5 to 40.4)                              |
| Amphetamine use disorders                                      | 22.1<br>(14.7 to 31.1)                        | 2.2<br>(1.5 to 3.1)                            | 2.9<br>(1.6 to 4.9)                     | 14.7<br>(-10.7 to 49.9)                           | 10.1<br>(-14.6 to 44.1)                             |
| Cannabis use disorders                                         | 96.5<br>(79.5 to 116.5)                       | 13.6<br>(11.2 to 16.8)                         | 2.8<br>(1.7 to 4.3)                     | 4.0<br>(-9.7 to 19.3)                             | 0.1<br>(-12.6 to 14.6)                              |
| Other drug use disorders                                       | 14.1<br>(12.6 to 15.7)                        | 2.7<br>(2.4 to 3.0)                            | 4.0<br>(2.6 to 6.1)                     | 14.9<br>(-7.6 to 43.5)                            | 8.4<br>(-13.0 to 35.7)                              |
| Depressive disorders                                           | 886.9<br>(828.3 to 953.2)                     | 718.0<br>(649.0 to 793.8)                      | 132.8<br>(93.0 to 181.9)                | 11.7<br>(6.7 to 16.3)                             | -2.0<br>(-6.2 to 1.9)                               |
| Major depressive disorder                                      | 429.3<br>(386.0 to 479.5)                     | 649.9<br>(579.8 to 727.6)                      | 87.6<br>(59.8 to 120.6)                 | 10.1<br>(3.0 to 16.6)                             | -2.8<br>(-8.9 to 2.8)                               |
| Dysthymia                                                      | 473.2<br>(410.5 to 540.1)                     | 68.1<br>(59.1 to 77.8)                         | 45.3<br>(30.4 to 65.3)                  | 15.0<br>(11.2 to 18.6)                            | -0.5<br>(-3.4 to 2.4)                               |
| Bipolar disorder                                               | 87.0<br>(75.7 to 99.9)                        | 7.6<br>(6.7 to 8.7)                            | 17.8<br>(11.1 to 25.9)                  | 9.9<br>(0.4 to 19.8)                              | 0.1<br>(-8.4 to 8.5)                                |
| Anxiety disorders                                              | 868.1<br>(791.4 to 944.7)                     | 137.0<br>(126.8 to 148.4)                      | 83.9<br>(58.1 to 115.1)                 | 8.3<br>(1.9 to 15.8)                              | -0.0<br>(-5.7 to 6.7)                               |
| Eating disorders                                               | 15.2<br>(12.5 to 18.2)                        | 11.5<br>(8.5 to 15.1)                          | 3.2<br>(2.0 to 4.6)                     | -1.9<br>(-16.4 to 15.9)                           | 0.8<br>(-14.0 to 18.9)                              |
| Anorexia nervosa                                               | 4.9<br>(3.6 to 6.5)                           | 2.3<br>(1.7 to 3.1)                            | 1.1<br>(0.6 to 1.6)                     | 1.6<br>(-23.1 to 34.2)                            | 1.7<br>(-23.0 to 33.9)                              |
| Bulimia nervosa                                                | 9.9<br>(7.4 to 13.2)                          | 9.1<br>(6.2 to 12.5)                           | 2.1<br>(1.2 to 3.2)                     | -3.6<br>(-21.9 to 19.8)                           | 0.3<br>(-19.0 to 24.2)                              |
| Autistic spectrum disorders                                    | 203.7<br>(182.5 to 229.0)                     | 1.6<br>(1.1 to 2.3)                            | 29.4<br>(19.6 to 41.6)                  | 3.4<br>(-1.3 to 8.8)                              | 0.7<br>(-3.9 to 6.0)                                |
| Autism                                                         | 57.2<br>(48.8 to 66.6)                        | 0.2<br>(0.1 to 0.3)                            | 14.6<br>(9.4 to 21.2)                   | 3.7<br>(-4.6 to 13.0)                             | 0.7<br>(-7.4 to 10.1)                               |
| Asperger syndrome and other autistic spectrum disorders        | 146.5<br>(121.9 to 175.8)                     | 1.4<br>(0.9 to 2.1)                            | 14.7<br>(9.7 to 21.3)                   | 3.1<br>(-1.8 to 8.5)                              | 0.7<br>(-4.1 to 5.8)                                |

| Cause                                                      | Prevalence in thousands (95% UI)                 | Incidence in thousands (95% UI)                   | YLDs in thousands (95% UI)              |                                                   |                                                     |
|------------------------------------------------------------|--------------------------------------------------|---------------------------------------------------|-----------------------------------------|---------------------------------------------------|-----------------------------------------------------|
|                                                            | 2016 counts                                      | 2016 counts                                       | 2016 counts                             | Percentage change in counts between 2006 and 2016 | Percentage change in age-standardised rates between |
| Attention-deficit/hyperactivity disorder                   | 302.9<br>(273.7 to 336.7)                        | 13.8<br>(12.0 to 16.0)                            | 3.7<br>(2.2 to 5.8)                     | -1.0<br>(-7.5 to 6.0)                             | 0.1<br>(-6.5 to 7.2)                                |
| Conduct disorder                                           | 129.3<br>(101.6 to 157.7)                        | 42.3<br>(31.8 to 52.6)                            | 15.7<br>(9.5 to 23.8)                   | -5.9<br>(-12.2 to 1.6)                            | 0.0<br>(-6.7 to 7.8)                                |
| Idiopathic developmental intellectual disability           | 358.4<br>(204.1 to 522.0)                        | --                                                | 15.5<br>(7.6 to 27.0)                   | 6.0<br>(-3.9 to 16.3)                             | 2.5<br>(-7.2 to 12.5)                               |
| Other mental and substance use disorders                   | 514.2<br>(454.1 to 592.3)                        | 15.0<br>(13.3 to 16.9)                            | 38.5<br>(26.5 to 55.5)                  | 10.7<br>(5.1 to 16.4)                             | 0.5<br>(-4.1 to 5.3)                                |
| <b>Diabetes, urogenital, blood, and endocrine diseases</b> | <b>8,928.0</b><br><b>(8,503.2 to 9,440.7)</b>    | <b>2,762.1†</b><br><b>(2,599.9 to 2,930.0)</b>    | <b>226.3</b><br><b>(160.2 to 313.9)</b> | <b>14.2</b><br><b>(10.8 to 17.7)</b>              | <b>-0.0</b><br><b>(-2.9 to 2.9)</b>                 |
| Diabetes mellitus                                          | 1,348.7<br>(1,200.2 to 1,500.3)                  | 62.3<br>(55.3 to 70.1)                            | 91.4<br>(61.8 to 130.8)                 | 24.6<br>(16.9 to 32.5)                            | 5.2<br>(-1.3 to 11.8)                               |
| Acute glomerulonephritis                                   | 0.7<br>(0.6 to 0.8)                              | 9.7<br>(8.6 to 11.0)                              | < 0.05<br>(< 0.05 to 0.1)               | 6.3<br>(-9.5 to 25.2)                             | -4.8<br>(-20.2 to 14.1)                             |
| Chronic kidney disease                                     | 715.7<br>(645.9 to 788.8)                        | 48.7<br>(42.5 to 55.1)                            | 31.9<br>(23.9 to 40.6)                  | 29.3<br>(21.7 to 37.5)                            | 6.9<br>(1.3 to 12.9)                                |
| Chronic kidney disease due to diabetes mellitus            | 381.4<br>(332.6 to 432.3)                        | 26.0<br>(22.2 to 30.2)                            | 17.2<br>(12.8 to 21.8)                  | 30.2<br>(19.0 to 42.5)                            | 8.4<br>(-0.1 to 17.8)                               |
| Chronic kidney disease due to hypertension                 | 131.5<br>(111.2 to 150.4)                        | 4.0<br>(3.3 to 4.8)                               | 9.2<br>(6.5 to 12.2)                    | 34.3<br>(16.9 to 53.2)                            | 6.3<br>(-6.0 to 19.8)                               |
| Chronic kidney disease due to glomerulonephritis           | 138.8<br>(117.0 to 161.3)                        | 14.0<br>(11.1 to 16.9)                            | 2.6<br>(1.8 to 3.5)                     | 18.2<br>(8.4 to 28.4)                             | 4.6<br>(-3.3 to 12.8)                               |
| Chronic kidney disease due to other causes                 | 64.0<br>(52.0 to 77.4)                           | 4.7<br>(3.9 to 5.7)                               | 3.0<br>(2.1 to 4.1)                     | 20.3<br>(8.2 to 32.9)                             | 3.0<br>(-6.5 to 13.1)                               |
| Urinary diseases and male infertility                      | 449.8<br>(401.0 to 499.9)                        | 1,090.6†<br>(991.6 to 1,198.0)                    | 12.5<br>(8.2 to 18.1)                   | 26.0<br>(18.1 to 35.1)                            | 5.2<br>(-0.9 to 12.1)                               |
| Interstitial nephritis and urinary tract infections        | 15.4<br>(13.6 to 17.3)                           | 800.5<br>(707.5 to 903.8)                         | 0.5<br>(0.3 to 0.8)                     | 8.9<br>(-7.8 to 28.9)                             | 2.2<br>(-13.1 to 21.4)                              |
| Urolithiasis                                               | 9.2<br>(8.0 to 10.6)                             | 242.8<br>(211.3 to 280.4)                         | 0.7<br>(0.4 to 1.0)                     | 20.2<br>(-0.3 to 44.9)                            | 3.3<br>(-14.3 to 23.8)                              |
| Benign prostatic hyperplasia                               | 314.7<br>(265.3 to 370.8)                        | 47.2<br>(38.9 to 57.5)                            | 10.4<br>(6.7 to 15.2)                   | 31.2<br>(21.4 to 42.6)                            | 6.6<br>(-0.6 to 14.9)                               |
| Male infertility                                           | 92.3<br>(69.4 to 123.8)                          | --                                                | 0.5<br>(0.2 to 1.1)                     | -4.0<br>(-13.5 to 6.3)                            | 0.4<br>(-7.8 to 9.5)                                |
| Other urinary diseases                                     | --                                               | --                                                | 0.4<br>(0.3 to 0.6)                     | -6.4<br>(-17.1 to 6.5)                            | -14.1<br>(-23.6 to -2.5)                            |
| Gynecological diseases                                     | 3,396.1<br>(3,262.4 to 3,528.7)                  | 1,491.4†<br>(1,372.5 to 1,628.4)                  | 53.6<br>(36.6 to 76.1)                  | -0.5<br>(-3.9 to 3.5)                             | -8.8<br>(-11.8 to -5.5)                             |
| Uterine fibroids                                           | 443.0<br>(383.9 to 508.3)                        | 42.9<br>(36.3 to 50.3)                            | 8.5<br>(5.3 to 13.4)                    | -10.5<br>(-17.8 to -3.4)                          | -24.2<br>(-30.4 to -18.7)                           |
| Polycystic ovarian syndrome                                | 25.2<br>(18.8 to 32.6)                           | 12.2<br>(8.9 to 16.2)                             | 0.2<br>(0.1 to 0.4)                     | -7.3<br>(-18.9 to 7.0)                            | -0.4<br>(-12.6 to 14.5)                             |
| Female infertility                                         | 87.2<br>(31.0 to 181.1)                          | --                                                | 0.5<br>(0.1 to 1.2)                     | -22.0<br>(-41.7 to 5.2)                           | -16.5<br>(-36.0 to 3.5)                             |
| Endometriosis                                              | 20.3<br>(17.1 to 23.8)                           | 52.7<br>(41.5 to 67.7)                            | 1.9<br>(1.2 to 2.7)                     | 9.1<br>(-10.4 to 31.5)                            | 0.4<br>(-17.4 to 21.4)                              |
| Genital prolapse                                           | 824.6<br>(711.8 to 955.3)                        | 48.1<br>(40.2 to 57.5)                            | 2.6<br>(1.2 to 4.7)                     | 9.9<br>(-0.1 to 22.7)                             | -12.7<br>(-20.6 to -2.4)                            |
| Premenstrual syndrome                                      | 1,837.9<br>(1,740.6 to 1,940.6)                  | 646.6<br>(605.1 to 690.2)                         | 15.4<br>(9.4 to 23.6)                   | 6.4<br>(-0.6 to 14.0)                             | 0.1<br>(-6.6 to 7.4)                                |
| Other gynecological diseases                               | 697.7<br>(604.1 to 802.0)                        | 688.9<br>(574.0 to 823.1)                         | 24.6<br>(16.4 to 35.1)                  | -1.7<br>(-7.3 to 3.9)                             | -8.1<br>(-12.9 to -3.1)                             |
| Hemoglobinopathies and hemolytic anaemias                  | 4,311.5<br>(3,759.5 to 4,897.5)                  | --                                                | 23.5<br>(12.0 to 40.2)                  | 4.5<br>(-6.5 to 17.0)                             | -1.1<br>(-11.2 to 9.7)                              |
| Thalassemias                                               | 1.8<br>(1.0 to 3.6)                              | --                                                | 0.1<br>(0.1 to 0.3)                     | -3.3<br>(-25.1 to 27.0)                           | 5.5<br>(-16.6 to 34.5)                              |
| Thalassaemias trait                                        | 1,492.6<br>(870.0 to 2,383.4)                    | --                                                | 17.9<br>(7.7 to 33.3)                   | 13.4<br>(-0.2 to 27.8)                            | 7.8<br>(-4.8 to 21.3)                               |
| Sickle cell disorders                                      | < 0.05<br>(< 0.05 to < 0.05)                     | --                                                | < 0.05<br>(< 0.05 to < 0.05)            | -4.6<br>(-32.2 to 34.6)                           | 1.0<br>(-26.1 to 40.2)                              |
| Sickle cell trait                                          | 56.6<br>(41.2 to 76.6)                           | --                                                | 0.2<br>(0.1 to 0.3)                     | -25.2<br>(-42.4 to -2.1)                          | -26.9<br>(-42.8 to -5.1)                            |
| G6PD deficiency                                            | 523.8<br>(483.8 to 573.8)                        | --                                                | 0.1<br>(< 0.05 to 0.1)                  | 16.3<br>(2.8 to 30.9)                             | 11.1<br>(0.2 to 23.4)                               |
| G6PD trait                                                 | 2,130.9<br>(2,047.8 to 2,239.6)                  | --                                                | < 0.05<br>(< 0.05 to < 0.05)            | 17.2<br>(6.5 to 27.8)                             | 11.0<br>(2.3 to 20.2)                               |
| Other hemoglobinopathies and hemolytic anaemias            | 295.4<br>(284.5 to 307.1)                        | --                                                | 5.2<br>(3.4 to 7.6)                     | -16.9<br>(-22.8 to -10.4)                         | -21.8<br>(-27.3 to -16.3)                           |
| Endocrine, metabolic, blood, and immune disorders          | 470.1<br>(437.8 to 506.1)                        | 59.4<br>(52.4 to 67.5)                            | 13.3<br>(9.0 to 18.5)                   | -3.1<br>(-9.3 to 3.6)                             | -13.1<br>(-17.7 to -7.7)                            |
| <b>Musculoskeletal disorders</b>                           | <b>4,416.3</b><br><b>(4,212.8 to 4,619.3)</b>    | <b>2,017.6</b><br><b>(1,831.5 to 2,220.5)</b>     | <b>477.3</b><br><b>(343.5 to 626.9)</b> | <b>15.1</b><br><b>(11.8 to 18.2)</b>              | <b>-1.0</b><br><b>(-3.1 to 1.1)</b>                 |
| Rheumatoid arthritis                                       | 67.0<br>(60.1 to 75.2)                           | 3.7<br>(3.3 to 4.1)                               | 15.8<br>(10.8 to 21.3)                  | 24.0<br>(12.5 to 35.5)                            | 4.4<br>(-4.4 to 13.7)                               |
| Osteoarthritis                                             | 1,033.2<br>(960.7 to 1,110.9)                    | 49.8<br>(45.6 to 54.3)                            | 64.0<br>(44.7 to 87.6)                  | 22.9<br>(18.2 to 28.4)                            | -0.3<br>(-4.0 to 3.8)                               |
| Low back and neck pain                                     | 2,625.7<br>(2,448.6 to 2,831.7)                  | 953.0<br>(854.3 to 1,056.1)                       | 299.7<br>(211.6 to 398.4)               | 16.0<br>(12.0 to 19.9)                            | -0.2<br>(-2.6 to 2.3)                               |
| Low back pain                                              | 1,395.6<br>(1,236.0 to 1,600.6)                  | 675.2<br>(583.7 to 777.1)                         | 159.0<br>(111.3 to 211.9)               | 14.7<br>(8.2 to 21.4)                             | -0.2<br>(-4.5 to 4.2)                               |
| Neck pain                                                  | 1,402.3<br>(1,199.7 to 1,634.2)                  | 277.8<br>(239.4 to 325.7)                         | 140.7<br>(94.9 to 200.9)                | 17.4<br>(13.2 to 21.7)                            | -0.2<br>(-2.0 to 1.7)                               |
| Gout                                                       | 126.7<br>(111.2 to 144.3)                        | 24.8<br>(21.4 to 28.3)                            | 4.1<br>(2.7 to 5.7)                     | 21.0<br>(4.5 to 40.5)                             | 1.9<br>(-11.2 to 16.2)                              |
| Other musculoskeletal disorders                            | 1,085.2<br>(916.1 to 1,263.7)                    | 986.5<br>(827.7 to 1,170.1)                       | 93.6<br>(62.3 to 132.2)                 | 6.3<br>(-2.3 to 15.2)                             | -4.7<br>(-11.6 to 2.2)                              |
| <b>Other non-communicable diseases</b>                     | <b>18,849.9</b><br><b>(18,566.3 to 19,131.4)</b> | <b>53,870.9†</b><br><b>(50,762.0 to 57,274.9)</b> | <b>520.6</b><br><b>(354.4 to 742.5)</b> | <b>12.1</b><br><b>(10.4 to 13.5)</b>              | <b>0.4</b><br><b>(-0.8 to 1.5)</b>                  |
| Congenital anomalies                                       | 346.4<br>(299.0 to 418.8)                        | --                                                | 36.3<br>(24.8 to 51.0)                  | 5.0<br>(-1.4 to 12.1)                             | 1.9<br>(-4.3 to 8.8)                                |
| Neural tube defects                                        | 10.2<br>(9.0 to 11.5)                            | --                                                | 3.0<br>(2.0 to 4.1)                     | 4.6<br>(-10.6 to 22.8)                            | -0.1<br>(-14.6 to 16.1)                             |
| Congenital heart anomalies                                 | 68.4<br>(59.2 to 78.7)                           | --                                                | 3.1<br>(1.3 to 5.2)                     | 10.6<br>(-1.2 to 22.2)                            | 11.8<br>(0.4 to 24.0)                               |
| Orofacial clefts                                           | 17.4<br>(15.2 to 19.6)                           | --                                                | 0.2<br>(0.1 to 0.3)                     | -8.7<br>(-19.8 to 4.2)                            | -11.9<br>(-22.5 to 0.3)                             |
| Down's syndrome                                            | 4.0<br>(3.4 to 4.6)                              | --                                                | 0.4<br>(0.2 to 0.5)                     | 2.7<br>(-5.3 to 10.4)                             | 1.4<br>(-6.2 to 9.0)                                |
| Turner syndrome                                            | 6.5<br>(5.5 to 7.5)                              | --                                                | 0.1<br>(0.1 to 0.2)                     | 10.0<br>(-25.6 to 62.4)                           | 10.6<br>(-26.0 to 66.6)                             |
| Klinefelter syndrome                                       | 5.8<br>(4.9 to 6.8)                              | --                                                | < 0.05<br>(< 0.05 to 0.1)               | 1.4<br>(-26.4 to 39.4)                            | 2.5<br>(-25.2 to 41.1)                              |



| Cause                                         | Prevalence in thousands (95% UI)              | Incidence in thousands (95% UI)                | YLDs in thousands (95% UI)             |                                                   |                                                     |
|-----------------------------------------------|-----------------------------------------------|------------------------------------------------|----------------------------------------|---------------------------------------------------|-----------------------------------------------------|
|                                               | 2016 counts                                   | 2016 counts                                    | 2016 counts                            | Percentage change in counts between 2006 and 2016 | Percentage change in age-standardised rates between |
| Other chromosomal abnormalities               | 5.2<br>(4.4 to 6.2)                           | --                                             | 0.7<br>(0.4 to 0.9)                    | -6.5<br>(-29.1 to 24.3)                           | 1.4<br>(-20.0 to 28.9)                              |
| Congenital musculoskeletal and limb anomalies | 28.7<br>(25.9 to 31.5)                        | --                                             | 3.9<br>(2.6 to 5.4)                    | 12.5<br>(1.3 to 25.4)                             | 7.0<br>(-3.3 to 19.7)                               |
| Urogenital congenital anomalies               | 23.5<br>(20.8 to 26.5)                        | --                                             | 0.7<br>(0.4 to 1.0)                    | -6.6<br>(-18.4 to 6.2)                            | -2.4<br>(-14.3 to 10.7)                             |
| Digestive congenital anomalies                | 64.0<br>(56.5 to 72.5)                        | --                                             | 2.8<br>(1.8 to 4.0)                    | 3.3<br>(-8.0 to 16.1)                             | -0.5<br>(-11.0 to 12.3)                             |
| Other congenital anomalies                    | 168.5<br>(113.8 to 251.7)                     | --                                             | 21.5<br>(13.2 to 34.0)                 | 4.2<br>(-5.4 to 14.8)                             | 0.7<br>(-8.5 to 11.0)                               |
| Skin and subcutaneous diseases                | 7,045.1<br>(6,826.9 to 7,255.5)               | 15,766.1<br>(14,846.1 to 16,827.5)             | 169.4<br>(112.2 to 246.4)              | 2.2<br>(0.1 to 4.3)                               | 0.3<br>(-1.8 to 2.3)                                |
| Dermatitis                                    | 881.2<br>(828.7 to 938.9)                     | 1,486.1<br>(1,380.8 to 1,604.5)                | 31.3<br>(18.7 to 50.1)                 | 0.6<br>(-3.8 to 5.5)                              | 0.2<br>(-4.1 to 4.7)                                |
| Psoriasis                                     | 125.0<br>(109.9 to 141.8)                     | 18.0<br>(15.9 to 20.3)                         | 10.9<br>(7.6 to 14.8)                  | 12.3<br>(0.6 to 25.0)                             | 3.7<br>(-7.1 to 15.2)                               |
| Cellulitis                                    | 4.5<br>(4.2 to 4.8)                           | 68.3<br>(63.4 to 73.0)                         | 0.3<br>(0.2 to 0.4)                    | 6.7<br>(3.3 to 10.2)                              | 0.3<br>(-2.6 to 3.2)                                |
| Pyoderma                                      | 50.6<br>(48.9 to 52.5)                        | 1,315.1<br>(1,265.0 to 1,364.7)                | 0.3<br>(0.1 to 0.6)                    | 16.2<br>(7.6 to 25.9)                             | 0.8<br>(-6.3 to 8.6)                                |
| Scabies                                       | 818.3<br>(693.4 to 980.1)                     | 2,564.1<br>(2,168.8 to 3,092.3)                | 21.2<br>(11.7 to 34.1)                 | -1.1<br>(-6.7 to 4.2)                             | -3.7<br>(-8.2 to 0.7)                               |
| Fungal skin diseases                          | 1,612.3<br>(1,415.3 to 1,838.5)               | 5,695.4<br>(4,926.8 to 6,573.2)                | 9.1<br>(3.6 to 18.9)                   | 8.2<br>(5.2 to 11.3)                              | 0.1<br>(-1.1 to 1.5)                                |
| Viral skin diseases                           | 633.6<br>(604.8 to 662.8)                     | 939.6<br>(896.6 to 985.9)                      | 19.4<br>(12.1 to 28.9)                 | 0.1<br>(-3.0 to 3.5)                              | -0.1<br>(-3.1 to 3.1)                               |
| Acne vulgaris                                 | 1,933.5<br>(1,697.8 to 2,182.8)               | 1,298.0<br>(1,039.6 to 1,654.4)                | 50.0<br>(33.0 to 72.9)                 | 1.3<br>(-3.5 to 6.5)                              | 1.7<br>(-3.2 to 6.8)                                |
| Alopecia areata                               | 49.6<br>(47.9 to 51.4)                        | 87.5<br>(84.6 to 90.6)                         | 1.6<br>(1.0 to 2.5)                    | 4.7<br>(-4.6 to 16.1)                             | 0.1<br>(-9.2 to 10.8)                               |
| Pruritus                                      | 227.6<br>(201.4 to 258.9)                     | 184.6<br>(165.0 to 209.6)                      | 2.4<br>(1.1 to 4.5)                    | 9.4<br>(3.3 to 16.8)                              | -0.1<br>(-4.8 to 5.3)                               |
| Urticaria                                     | 233.2<br>(203.1 to 267.8)                     | 418.9<br>(365.9 to 485.1)                      | 14.1<br>(9.0 to 20.3)                  | -1.0<br>(-6.9 to 5.4)                             | -0.1<br>(-5.4 to 5.7)                               |
| Decubitus ulcer                               | 4.0<br>(3.6 to 4.6)                           | 14.9<br>(13.0 to 17.1)                         | 0.7<br>(0.4 to 0.9)                    | 29.3<br>(9.2 to 52.4)                             | 1.8<br>(-13.6 to 19.9)                              |
| Other skin and subcutaneous diseases          | 1,475.5<br>(1,432.7 to 1,519.7)               | 1,675.6<br>(1,623.5 to 1,731.6)                | 8.1<br>(3.9 to 15.0)                   | 12.1<br>(9.2 to 15.3)                             | -0.3<br>(-2.8 to 2.4)                               |
| Sense organ diseases                          | 7,510.9<br>(7,341.4 to 7,716.0)               | 2,517.8†<br>(2,365.6 to 2,678.0)               | 265.2<br>(181.8 to 372.1)              | 19.6<br>(16.7 to 22.4)                            | 0.3<br>(-1.7 to 2.2)                                |
| Glaucoma                                      | 12.1<br>(9.9 to 14.6)                         | --                                             | 1.2<br>(0.8 to 1.7)                    | 24.5<br>(5.5 to 47.3)                             | -0.7<br>(-14.6 to 16.4)                             |
| Cataract                                      | 125.8<br>(104.6 to 149.3)                     | --                                             | 7.2<br>(4.9 to 10.1)                   | 25.0<br>(15.8 to 34.8)                            | -7.0<br>(-13.2 to -0.3)                             |
| Macular degeneration                          | 20.8<br>(16.3 to 26.3)                        | --                                             | 0.9<br>(0.6 to 1.4)                    | 25.1<br>(8.5 to 45.0)                             | -1.6<br>(-13.3 to 12.4)                             |
| Refraction and accommodation disorders        | 4,114.7<br>(3,943.5 to 4,293.2)               | --                                             | 55.8<br>(31.2 to 95.7)                 | 20.3<br>(16.0 to 24.3)                            | 2.5<br>(-1.1 to 5.7)                                |
| Age-related and other hearing loss            | 5,363.5<br>(5,069.7 to 5,673.0)               | --                                             | 168.7<br>(118.5 to 238.9)              | 19.4<br>(15.4 to 23.9)                            | 0.1<br>(-2.5 to 3.0)                                |
| Other vision loss                             | 114.3<br>(100.1 to 129.2)                     | --                                             | 7.5<br>(5.1 to 10.3)                   | 20.0<br>(10.6 to 29.0)                            | -2.2<br>(-9.1 to 4.4)                               |
| Other sense organ diseases                    | 763.6<br>(704.1 to 823.7)                     | 2,517.8<br>(2,365.6 to 2,678.0)                | 23.9<br>(14.9 to 35.9)                 | 16.4<br>(11.2 to 21.6)                            | 0.2<br>(-3.9 to 4.2)                                |
| Oral disorders                                | 12,655.7<br>(12,159.9 to 13,122.6)            | 35,587.1†<br>(32,692.1 to 38,551.2)            | 49.8<br>(29.8 to 77.9)                 | 16.8<br>(14.4 to 19.3)                            | 0.6<br>(-1.3 to 2.5)                                |
| Caries of deciduous teeth                     | 1,868.7<br>(1,508.9 to 2,227.7)               | 6,114.4<br>(4,391.8 to 8,234.7)                | 0.4<br>(0.2 to 0.9)                    | -10.1<br>(-20.2 to 0.3)                           | 1.6<br>(-10.0 to 13.4)                              |
| Caries of permanent teeth                     | 9,125.1<br>(8,582.8 to 9,640.3)               | 29,196.8<br>(27,093.9 to 31,499.1)             | 5.4<br>(2.4 to 10.2)                   | 13.5<br>(9.4 to 17.7)                             | 6.3<br>(2.9 to 10.3)                                |
| Periodontal disease                           | 1,899.3<br>(1,545.6 to 2,291.9)               | 223.9<br>(175.6 to 279.7)                      | 12.4<br>(4.9 to 25.8)                  | 20.9<br>(15.7 to 26.8)                            | 0.6<br>(-2.9 to 4.4)                                |
| Edentulism and severe tooth loss              | 624.4<br>(540.6 to 706.7)                     | 52.0<br>(44.2 to 60.5)                         | 17.3<br>(11.2 to 24.7)                 | 23.9<br>(18.7 to 29.1)                            | -0.5<br>(-4.2 to 3.0)                               |
| Other oral disorders                          | 483.4<br>(462.6 to 503.4)                     | --                                             | 14.2<br>(8.7 to 21.4)                  | 8.3<br>(4.8 to 12.3)                              | -0.0<br>(-3.3 to 3.2)                               |
| <b>Injuries</b>                               | <b>3,413.1</b><br><b>(3,253.1 to 3,582.2)</b> | <b>1,323.2†</b><br><b>(1,253.0 to 1,389.8)</b> | <b>136.5</b><br><b>(92.1 to 195.1)</b> | <b>29.3</b><br><b>(26.5 to 31.8)</b>              | <b>15.3</b><br><b>(13.0 to 17.5)</b>                |
| <b>Transport injuries</b>                     | <b>870.5</b><br><b>(811.8 to 935.5)</b>       | <b>261.8</b><br><b>(233.2 to 291.9)</b>        | <b>46.0</b><br><b>(31.0 to 65.3)</b>   | <b>37.0</b><br><b>(33.7 to 40.4)</b>              | <b>20.5</b><br><b>(17.6 to 23.2)</b>                |
| Road injuries                                 | 654.3<br>(607.9 to 704.4)                     | 213.8<br>(187.0 to 243.3)                      | 34.7<br>(23.2 to 49.2)                 | 49.6<br>(46.1 to 53.1)                            | 30.6<br>(27.7 to 33.3)                              |
| Pedestrian road injuries                      | 190.9<br>(167.3 to 217.1)                     | 50.3<br>(41.3 to 60.7)                         | 10.2<br>(6.9 to 14.4)                  | 50.1<br>(46.6 to 53.8)                            | 29.6<br>(26.8 to 32.5)                              |
| Cyclist road injuries                         | 122.7<br>(103.2 to 144.4)                     | 48.6<br>(38.8 to 59.1)                         | 6.2<br>(4.1 to 8.9)                    | 56.1<br>(52.4 to 59.8)                            | 36.0<br>(32.9 to 39.0)                              |
| Motorcyclist road injuries                    | 177.7<br>(152.2 to 216.7)                     | 43.3<br>(35.5 to 51.8)                         | 9.1<br>(6.1 to 13.0)                   | 45.5<br>(41.8 to 49.1)                            | 28.0<br>(25.1 to 30.9)                              |
| Motor vehicle road injuries                   | 115.0<br>(97.4 to 132.3)                      | 49.9<br>(40.7 to 59.9)                         | 6.8<br>(4.5 to 9.7)                    | 47.8<br>(44.0 to 51.6)                            | 29.4<br>(26.2 to 32.4)                              |
| Other road injuries                           | 48.1<br>(41.4 to 57.2)                        | 21.8<br>(16.8 to 27.7)                         | 2.4<br>(1.6 to 3.5)                    | 53.1<br>(49.4 to 56.5)                            | 34.8<br>(31.8 to 37.6)                              |
| Other transport injuries                      | 216.2<br>(183.0 to 254.7)                     | 48.0<br>(41.7 to 56.7)                         | 11.3<br>(7.7 to 16.1)                  | 9.0<br>(5.8 to 12.1)                              | -2.0<br>(-4.9 to 0.8)                               |
| <b>Unintentional injuries</b>                 | <b>2,287.0</b><br><b>(2,141.7 to 2,430.7)</b> | <b>933.1</b><br><b>(879.8 to 989.3)</b>        | <b>75.9</b><br><b>(51.2 to 108.6)</b>  | <b>28.8</b><br><b>(25.8 to 31.7)</b>              | <b>15.4</b><br><b>(13.0 to 17.6)</b>                |
| Falls                                         | 730.4<br>(643.7 to 814.3)                     | 299.5<br>(266.5 to 338.3)                      | 29.5<br>(20.4 to 40.7)                 | 50.1<br>(46.6 to 53.5)                            | 31.9<br>(29.1 to 34.6)                              |
| Drowning                                      | 21.5<br>(18.6 to 24.7)                        | 3.6<br>(3.2 to 4.1)                            | 1.1<br>(0.7 to 1.6)                    | 7.7<br>(4.2 to 11.0)                              | -3.4<br>(-6.4 to -0.6)                              |
| Fire, heat, and hot substances                | 179.6<br>(151.1 to 216.9)                     | 19.3<br>(15.4 to 22.9)                         | 4.6<br>(3.0 to 6.8)                    | 16.3<br>(10.3 to 21.4)                            | 5.8<br>(0.6 to 10.5)                                |
| Poisonings                                    | 6.9<br>(5.9 to 7.9)                           | 10.8<br>(9.0 to 12.8)                          | 0.5<br>(0.3 to 0.8)                    | 33.4<br>(22.2 to 46.3)                            | 22.5<br>(12.3 to 33.8)                              |
| Exposure to mechanical forces                 | 495.2<br>(430.0 to 592.4)                     | 181.4<br>(157.3 to 207.2)                      | 12.1<br>(7.9 to 17.5)                  | 37.4<br>(33.6 to 40.8)                            | 22.6<br>(19.4 to 25.3)                              |
| Unintentional firearm injuries                | 14.3<br>(11.9 to 17.2)                        | 3.1<br>(2.2 to 4.2)                            | 0.6<br>(0.4 to 0.8)                    | 20.0<br>(16.4 to 23.5)                            | 8.4<br>(5.5 to 11.2)                                |
| Unintentional suffocation                     | 56.8<br>(42.0 to 76.4)                        | 15.8<br>(11.5 to 20.9)                         | 1.5<br>(0.9 to 2.3)                    | 10.2<br>(7.2 to 13.3)                             | 4.1<br>(1.3 to 7.0)                                 |
| Other exposure to mechanical forces           | 424.2<br>(359.6 to 517.9)                     | 162.5<br>(141.2 to 185.6)                      | 10.0<br>(6.6 to 14.4)                  | 44.0<br>(39.7 to 47.7)                            | 27.1<br>(23.4 to 30.1)                              |

| Cause                                                                               | Prevalence in thousands (95% UI)        | Incidence in thousands (95% UI)        | YLDs in thousands (95% UI)          |                                                   |                                                     |
|-------------------------------------------------------------------------------------|-----------------------------------------|----------------------------------------|-------------------------------------|---------------------------------------------------|-----------------------------------------------------|
|                                                                                     | 2016 counts                             | 2016 counts                            | 2016 counts                         | Percentage change in counts between 2006 and 2016 | Percentage change in age-standardised rates between |
| Adverse effects of medical treatment                                                | 6.4<br>(4.9 to 8.1)                     | 83.1<br>(69.8 to 99.2)                 | 0.8<br>(0.5 to 1.3)                 | 4.8<br>(-2.5 to 12.0)                             | 4.9<br>(-1.3 to 11.3)                               |
| Animal contact                                                                      | 55.5<br>(46.9 to 70.2)                  | 62.5<br>(52.0 to 75.0)                 | 1.4<br>(0.9 to 2.1)                 | 10.8<br>(4.2 to 17.4)                             | 2.2<br>(-3.3 to 8.1)                                |
| Venomous animal contact                                                             | 10.1<br>(8.2 to 12.3)                   | 17.4<br>(13.0 to 23.0)                 | 0.7<br>(0.4 to 1.0)                 | 15.8<br>(3.8 to 30.0)                             | 8.8<br>(-2.7 to 21.8)                               |
| Non-venomous animal contact                                                         | 45.4<br>(37.4 to 59.8)                  | 45.2<br>(37.1 to 54.7)                 | 0.7<br>(0.5 to 1.1)                 | 6.6<br>(2.4 to 10.1)                              | -3.2<br>(-6.5 to -0.4)                              |
| Foreign body                                                                        | 112.1<br>(92.3 to 131.5)                | 58.2<br>(51.1 to 66.9)                 | 4.3<br>(2.7 to 6.3)                 | 8.5<br>(4.8 to 12.3)                              | -0.2<br>(-3.5 to 3.0)                               |
| Pulmonary aspiration and foreign body in airway                                     | 71.4<br>(55.1 to 91.1)                  | 26.1<br>(21.4 to 32.1)                 | 3.0<br>(1.9 to 4.5)                 | 7.9<br>(3.7 to 11.9)                              | -0.5<br>(-4.0 to 2.9)                               |
| Foreign body in eyes                                                                | 3.4<br>(2.1 to 5.0)                     | 16.9<br>(12.6 to 22.6)                 | 0.2<br>(0.1 to 0.3)                 | 10.5<br>(5.1 to 16.0)                             | 1.1<br>(-2.3 to 4.1)                                |
| Foreign body in other body part                                                     | 37.3<br>(29.6 to 46.8)                  | 15.3<br>(12.7 to 18.7)                 | 1.1<br>(0.7 to 1.6)                 | 10.0<br>(5.8 to 13.8)                             | 0.4<br>(-3.2 to 3.8)                                |
| Environmental heat and cold exposure                                                | 260.0<br>(219.4 to 307.6)               | 67.2<br>(55.5 to 79.2)                 | 9.5<br>(6.3 to 13.6)                | 11.1<br>(8.2 to 13.8)                             | 0.3<br>(-2.1 to 2.6)                                |
| Other unintentional injuries                                                        | 419.5<br>(345.6 to 502.6)               | 147.5<br>(125.9 to 171.7)              | 12.0<br>(7.9 to 17.5)               | 14.6<br>(12.2 to 16.7)                            | 3.1<br>(1.1 to 5.0)                                 |
| <b>Self-harm and interpersonal violence</b>                                         | <b>818.2</b><br><b>(737.7 to 904.7)</b> | <b>97.9†</b><br><b>(84.2 to 111.7)</b> | <b>13.3</b><br><b>(9.1 to 18.6)</b> | <b>9.3</b><br><b>(6.4 to 12.1)</b>                | <b>-0.4</b><br><b>(-2.6 to 1.8)</b>                 |
| Self-harm                                                                           | 24.8<br>(21.4 to 28.4)                  | 11.5<br>(10.0 to 13.2)                 | 1.2<br>(0.8 to 1.7)                 | 10.8<br>(6.9 to 14.8)                             | -4.7<br>(-8.1 to -1.6)                              |
| Self-harm by firearm                                                                | 0.6<br>(0.5 to 0.8)                     | 0.1<br>(0.1 to 0.2)                    | < 0.05<br>(< 0.05 to < 0.05)        | 19.7<br>(14.9 to 23.9)                            | 8.7<br>(4.6 to 12.5)                                |
| Self-harm by other specified means                                                  | 24.2<br>(20.7 to 27.8)                  | 11.4<br>(9.8 to 13.1)                  | 1.1<br>(0.8 to 1.7)                 | 10.6<br>(6.7 to 14.6)                             | -5.0<br>(-8.3 to -1.8)                              |
| Interpersonal violence                                                              | 793.4<br>(713.5 to 878.3)               | 86.4†<br>(72.7 to 100.2)               | 12.1<br>(8.4 to 16.9)               | 9.1<br>(6.1 to 12.0)                              | 0.0<br>(-2.3 to 2.3)                                |
| Assault by firearm                                                                  | 2.3<br>(2.0 to 2.7)                     | 0.6<br>(0.5 to 0.9)                    | 0.1<br>(0.1 to 0.1)                 | 12.9<br>(9.2 to 16.7)                             | 0.9<br>(-2.0 to 3.9)                                |
| Assault by sharp object                                                             | 43.2<br>(35.1 to 51.8)                  | 14.3<br>(10.9 to 18.5)                 | 1.2<br>(0.8 to 1.8)                 | 3.8<br>(0.3 to 7.0)                               | -6.2<br>(-8.9 to -3.7)                              |
| Sexual violence                                                                     | 602.3<br>(525.4 to 685.2)               | --                                     | 5.0<br>(3.4 to 7.2)                 | -0.2<br>(-4.7 to 4.3)                             | -3.8<br>(-7.6 to 0.4)                               |
| Assault by other means                                                              | 145.6<br>(121.8 to 176.0)               | 71.4<br>(59.1 to 82.6)                 | 5.8<br>(3.9 to 8.3)                 | 20.2<br>(17.2 to 23.0)                            | 5.5<br>(3.2 to 7.7)                                 |
| <b>Forces of nature, conflict and terrorism, and executions and police conflict</b> | <b>39.6</b><br><b>(10.5 to 70.2)</b>    | <b>30.3†</b><br><b>(8.7 to 54.7)</b>   | <b>1.4</b><br><b>(0.4 to 3.4)</b>   | <b>41.0</b><br><b>(25.4 to 100.8)</b>             | <b>30.1</b><br><b>(14.2 to 90.5)</b>                |
| Exposure to forces of nature                                                        | 11.5<br>(1.9 to 23.4)                   | 24.9<br>(3.9 to 49.6)                  | 0.6<br>(0.2 to 1.3)                 | 163.2<br>(148.8 to 182.8)                         | 146.2<br>(130.2 to 168.3)                           |
| Conflict and terrorism                                                              | --                                      | --                                     | --                                  | --                                                | --                                                  |
| Executions and police conflict                                                      | 28.1<br>(3.4 to 52.8)                   | 5.4<br>(1.1 to 11.4)                   | 0.7<br>(0.1 to 2.2)                 | 0.6<br>(-16.1 to 12.8)                            | -10.0<br>(-23.5 to 3.3)                             |
| <b>Impairments</b>                                                                  | --                                      | --                                     | --                                  | --                                                | --                                                  |
| Anaemia                                                                             | 7,955.3<br>(7,492.2 to 8,535.2)         | --                                     | 208.9<br>(142.8 to 301.1)           | -22.4<br>(-26.1 to -17.9)                         | -27.6<br>(-30.9 to -23.7)                           |
| Developmental intellectual disability                                               | 601.4<br>(458.5 to 767.8)               | --                                     | 55.0<br>(39.6 to 72.1)              | 6.5<br>(0.6 to 13.4)                              | 3.6<br>(-2.2 to 10.2)                               |
| Epilepsy                                                                            | 110.4<br>(68.7 to 145.0)                | --                                     | 39.0<br>(22.2 to 59.6)              | 5.6<br>(-41.1 to 85.0)                            | 2.8<br>(-43.0 to 81.1)                              |
| Guillain-Barre syndrome                                                             | 0.1<br>(0.1 to 0.2)                     | --                                     | < 0.05<br>(< 0.05 to 0.1)           | 8.2<br>(4.0 to 13.4)                              | 0.2<br>(0.1 to 0.3)                                 |
| Hearing loss                                                                        | 5,887.4<br>(5,597.7 to 6,183.2)         | --                                     | 200.2<br>(141.0 to 275.0)           | 16.4<br>(13.2 to 19.4)                            | 0.1<br>(-2.1 to 2.3)                                |
| Heart failure                                                                       | 190.4<br>(165.8 to 217.6)               | --                                     | 31.1<br>(22.9 to 38.8)              | 32.9<br>(23.3 to 43.8)                            | 2.3<br>(-4.8 to 10.0)                               |
| Infertility                                                                         | 440.9<br>(325.5 to 593.9)               | --                                     | 2.5<br>(1.0 to 5.2)                 | -9.3<br>(-16.7 to -0.6)                           | -5.1<br>(-10.7 to 1.3)                              |
| Pelvic inflammatory disease                                                         | 22.4<br>(19.1 to 26.4)                  | --                                     | 2.9<br>(1.9 to 4.1)                 | -5.4<br>(-18.2 to 10.0)                           | -10.3<br>(-21.9 to 2.7)                             |
| Vision loss                                                                         | 4,451.9<br>(4,275.6 to 4,638.2)         | --                                     | 80.4<br>(52.6 to 123.2)             | 19.7<br>(16.1 to 23.0)                            | 1.2<br>(-1.6 to 4.0)                                |

We did not calculate incidence for the nine impairments, certain NTDs, and causes with only birth prevalence. Blank cells mean that no estimate is available.

† Incidence for aggregate causes represents the sum of the incidence of the causes below the aggregate.

‡ Incidence estimates for stroke represent first-ever stroke only.

^ Incidence of HIV/AIDS represents new infections of HIV only and does not include new infections of Tuberculosis in HIV positive cases.

SR Table 14: Prevalence, incidence, and YLDs for 2016, percentage change of YLD counts and percentage change of age-standardised YLD rates between 2006 and 2016 by cause and impairments, for all ages, Northern Mariana Islands.

| Cause                                                                                | Prevalence in thousands (95% UI) | Incidence in thousands (95% UI)   | YLDs in thousands (95% UI)          |                                                   |                                                     |
|--------------------------------------------------------------------------------------|----------------------------------|-----------------------------------|-------------------------------------|---------------------------------------------------|-----------------------------------------------------|
|                                                                                      | 2016 counts                      | 2016 counts                       | 2016 counts                         | Percentage change in counts between 2006 and 2016 | Percentage change in age-standardised rates between |
| <b>All causes</b>                                                                    | <b>119.4</b><br>(118.7 to 120.0) | <b>771.9†</b><br>(725.6 to 820.7) | <b>11.2</b><br>(8.3 to 14.7)        | <b>45.2</b><br>(42.0 to 48.7)                     | <b>2.4</b><br>(0.7 to 4.4)                          |
| <b>Communicable, maternal, neonatal, and nutritional disorders</b>                   | <b>79.8</b><br>(77.8 to 81.9)    | <b>473.9†</b><br>(433.5 to 519.3) | <b>1.5</b><br>(1.0 to 2.1)          | <b>48.5</b><br>(33.9 to 71.9)                     | <b>9.9</b><br>(0.2 to 25.8)                         |
| <b>HIV/AIDS and tuberculosis</b>                                                     | <b>37.7</b><br>(34.6 to 40.2)    | <b>0.1†</b><br>(0.1 to 0.1)       | <b>&lt; 0.05</b><br>(< 0.05 to 0.1) | <b>65.3</b><br>(14.9 to 161.7)                    | <b>17.3</b><br>(-10.7 to 71.5)                      |
| Tuberculosis                                                                         | 35.6<br>(32.7 to 38.7)           | 0.1†<br>(< 0.05 to 0.1)           | < 0.05<br>(< 0.05 to < 0.05)        | 34.0<br>(10.3 to 63.2)                            | 1.6<br>(-11.4 to 18.3)                              |
| Drug-susceptible tuberculosis                                                        | 0.1<br>(0.1 to 0.1)              | 0.1<br>(< 0.05 to 0.1)            | < 0.05<br>(< 0.05 to < 0.05)        | 38.8<br>(8.3 to 78.2)                             | 5.3<br>(-12.9 to 28.2)                              |
| Multidrug-resistant tuberculosis without extensive drug resistance                   | < 0.05<br>(< 0.05 to < 0.05)     | < 0.05<br>(< 0.05 to < 0.05)      | < 0.05<br>(< 0.05 to < 0.05)        | -41.6<br>(-96.4 to 330.2)                         | -54.8<br>(-97.2 to 223.6)                           |
| Extensively drug-resistant tuberculosis                                              | < 0.05<br>(< 0.05 to < 0.05)     | < 0.05<br>(< 0.05 to < 0.05)      | < 0.05<br>(< 0.05 to < 0.05)        | 91.3<br>(-88.3 to 1,304.4)                        | 45.0<br>(-91.1 to 937.7)                            |
| Latent tuberculosis infection                                                        | 35.5<br>(32.6 to 38.7)           | --                                | --                                  | --                                                | --                                                  |
| HIV/AIDS                                                                             | 0.1<br>(< 0.05 to 0.5)           | < 0.05^<br>(< 0.05 to 0.1)        | < 0.05<br>(< 0.05 to 0.1)           | 155.1<br>(9.1 to 753.6)                           | 73.7<br>(-23.2 to 458.2)                            |
| Drug-susceptible HIV/AIDS - Tuberculosis                                             | < 0.05<br>(< 0.05 to < 0.05)     | < 0.05<br>(< 0.05 to < 0.05)      | < 0.05<br>(< 0.05 to < 0.05)        | 97.0<br>(66.6 to 136.0)                           | 36.2<br>(15.3 to 62.9)                              |
| Multidrug-resistant HIV/AIDS - Tuberculosis without extensive drug resistance        | < 0.05<br>(< 0.05 to < 0.05)     | < 0.05<br>(< 0.05 to < 0.05)      | < 0.05<br>(< 0.05 to < 0.05)        | -20.3<br>(-95.0 to 508.4)                         | -44.9<br>(-96.5 to 322.1)                           |
| Extensively drug-resistant HIV/AIDS - Tuberculosis                                   | < 0.05<br>(< 0.05 to < 0.05)     | < 0.05<br>(< 0.05 to < 0.05)      | < 0.05<br>(< 0.05 to < 0.05)        | 162.3<br>(-83.5 to 1,901.4)                       | 81.4<br>(-88.6 to 1,289.0)                          |
| HIV/AIDS resulting in other diseases                                                 | 0.1<br>(< 0.05 to 0.5)           | < 0.05<br>(< 0.05 to 0.1)         | < 0.05<br>(< 0.05 to 0.1)           | 163.5<br>(-7.9 to 1,301.8)                        | 78.6<br>(-32.5 to 801.7)                            |
| <b>Diarrhoea, lower respiratory infections, and other common infectious diseases</b> | <b>8.0</b><br>(7.6 to 8.5)       | <b>451.3†</b><br>(411.0 to 496.6) | <b>0.5</b><br>(0.3 to 0.6)          | <b>45.7</b><br>(40.2 to 51.1)                     | <b>8.8</b><br>(5.2 to 12.0)                         |
| Diarrhoeal diseases                                                                  | 2.1<br>(1.9 to 2.3)              | 140.4<br>(129.8 to 152.6)         | 0.2<br>(0.2 to 0.3)                 | 49.2<br>(40.1 to 58.6)                            | 13.0<br>(7.3 to 19.1)                               |
| Intestinal infectious diseases                                                       | < 0.05<br>(< 0.05 to < 0.05)     | 0.1†<br>(0.1 to 0.2)              | < 0.05<br>(< 0.05 to < 0.05)        | 7.5<br>(-9.3 to 26.9)                             | -20.6<br>(-33.8 to -5.7)                            |
| Typhoid fever                                                                        | < 0.05<br>(< 0.05 to < 0.05)     | 0.1<br>(0.1 to 0.1)               | < 0.05<br>(< 0.05 to < 0.05)        | 8.0<br>(-10.2 to 29.2)                            | -20.4<br>(-34.5 to -3.8)                            |
| Paratyphoid fever                                                                    | < 0.05<br>(< 0.05 to < 0.05)     | < 0.05<br>(< 0.05 to < 0.05)      | < 0.05<br>(< 0.05 to < 0.05)        | 11.9<br>(-6.0 to 31.6)                            | -17.9<br>(-30.4 to -4.4)                            |
| Other intestinal infectious diseases                                                 | --                               | --                                | < 0.05<br>(< 0.05 to < 0.05)        | -33.3<br>(-48.1 to -13.1)                         | -41.2<br>(-51.2 to -29.4)                           |
| Lower respiratory infections                                                         | 0.2<br>(0.2 to 0.2)              | 7.8<br>(7.0 to 8.7)               | < 0.05<br>(< 0.05 to < 0.05)        | 67.0<br>(46.3 to 89.9)                            | 22.6<br>(10.5 to 36.9)                              |
| Upper respiratory infections                                                         | 3.9<br>(3.4 to 4.5)              | 294.4<br>(255.5 to 337.4)         | 0.1<br>(0.1 to 0.1)                 | 34.2<br>(27.0 to 42.0)                            | -0.3<br>(-5.4 to 5.4)                               |
| Otitis media                                                                         | 1.3<br>(1.2 to 1.5)              | 5.2<br>(4.1 to 6.6)               | < 0.05<br>(< 0.05 to 0.1)           | 47.4<br>(34.7 to 61.4)                            | 12.6<br>(3.7 to 22.3)                               |
| Meningitis                                                                           | 0.4<br>(0.4 to 0.5)              | 0.1<br>(0.1 to 0.1)               | < 0.05<br>(< 0.05 to 0.1)           | 45.3<br>(32.0 to 60.4)                            | 4.6<br>(-4.7 to 14.1)                               |
| Pneumococcal meningitis                                                              | 0.3<br>(0.2 to 0.4)              | < 0.05<br>(< 0.05 to < 0.05)      | < 0.05<br>(< 0.05 to < 0.05)        | 46.6<br>(26.9 to 69.6)                            | 5.4<br>(-8.0 to 19.4)                               |
| H influenzae type B meningitis                                                       | 0.1<br>(0.1 to 0.1)              | < 0.05<br>(< 0.05 to < 0.05)      | < 0.05<br>(< 0.05 to < 0.05)        | 44.6<br>(37.5 to 51.6)                            | 4.7<br>(-0.5 to 9.8)                                |
| Meningococcal infection                                                              | < 0.05<br>(< 0.05 to < 0.05)     | < 0.05<br>(< 0.05 to < 0.05)      | < 0.05<br>(< 0.05 to < 0.05)        | 44.1<br>(36.4 to 51.2)                            | 3.8<br>(-1.7 to 9.2)                                |
| Other meningitis                                                                     | < 0.05<br>(< 0.05 to < 0.05)     | < 0.05<br>(< 0.05 to < 0.05)      | < 0.05<br>(< 0.05 to < 0.05)        | 39.7<br>(29.8 to 49.7)                            | 0.6<br>(-5.1 to 6.5)                                |
| Encephalitis                                                                         | 0.4<br>(0.3 to 0.5)              | 0.1<br>(0.1 to 0.2)               | < 0.05<br>(< 0.05 to 0.1)           | 50.4<br>(29.9 to 73.3)                            | 6.3<br>(-6.2 to 19.2)                               |
| Diphtheria                                                                           | < 0.05<br>(< 0.05 to < 0.05)     | < 0.05<br>(< 0.05 to < 0.05)      | < 0.05<br>(< 0.05 to < 0.05)        | 44.5<br>(-22.6 to 174.2)                          | 1.5<br>(-44.8 to 100.8)                             |
| Whooping cough                                                                       | < 0.05<br>(< 0.05 to < 0.05)     | < 0.05<br>(< 0.05 to < 0.05)      | < 0.05<br>(< 0.05 to < 0.05)        | 21.1<br>(-38.9 to 134.0)                          | 9.0<br>(-44.0 to 106.3)                             |
| Tetanus                                                                              | < 0.05<br>(< 0.05 to < 0.05)     | < 0.05<br>(< 0.05 to < 0.05)      | < 0.05<br>(< 0.05 to < 0.05)        | 22.3<br>(10.3 to 35.5)                            | 1.3<br>(-7.1 to 11.1)                               |
| Measles                                                                              | < 0.05<br>(< 0.05 to < 0.05)     | 0.1<br>(< 0.05 to 0.3)            | < 0.05<br>(< 0.05 to < 0.05)        | --                                                | --                                                  |
| Varicella and herpes zoster                                                          | 0.1<br>(0.1 to 0.1)              | 3.0<br>(2.8 to 3.1)               | < 0.05<br>(< 0.05 to < 0.05)        | 41.4<br>(22.2 to 62.8)                            | 0.0<br>(-10.2 to 10.7)                              |
| <b>Neglected tropical diseases and malaria</b>                                       | <b>1.2</b><br>(1.0 to 1.3)       | <b>2.1†</b><br>(1.5 to 2.9)       | <b>&lt; 0.05</b><br>(< 0.05 to 0.1) | <b>80.4</b><br>(39.4 to 140.4)                    | <b>48.4</b><br>(16.8 to 92.1)                       |
| Malaria                                                                              | --                               | --                                | --                                  | --                                                | --                                                  |
| Chagas disease                                                                       | --                               | --                                | --                                  | --                                                | --                                                  |
| Leishmaniasis                                                                        | --                               | --                                | --                                  | --                                                | --                                                  |
| Visceral leishmaniasis                                                               | --                               | --                                | --                                  | --                                                | --                                                  |
| Cutaneous and mucocutaneous leishmaniasis                                            | --                               | --                                | --                                  | --                                                | --                                                  |
| African trypanosomiasis                                                              | --                               | --                                | --                                  | --                                                | --                                                  |
| Schistosomiasis                                                                      | --                               | --                                | --                                  | --                                                | --                                                  |
| Cysticercosis                                                                        | --                               | --                                | --                                  | --                                                | --                                                  |
| Cystic echinococcosis                                                                | < 0.05<br>(< 0.05 to < 0.05)     | < 0.05<br>(< 0.05 to < 0.05)      | < 0.05<br>(< 0.05 to < 0.05)        | 64.9<br>(-87.9 to 2,662.8)                        | 17.6<br>(-90.3 to 1,801.0)                          |
| Lymphatic filariasis                                                                 | --                               | --                                | --                                  | --                                                | --                                                  |
| Onchocerciasis                                                                       | --                               | --                                | --                                  | --                                                | --                                                  |
| Trachoma                                                                             | --                               | --                                | --                                  | --                                                | --                                                  |
| Dengue                                                                               | 0.1<br>(0.1 to 0.2)              | 2.1<br>(1.5 to 2.9)               | < 0.05<br>(< 0.05 to < 0.05)        | 282.1<br>(185.5 to 764.6)                         | 177.2<br>(110.8 to 534.0)                           |
| Yellow fever                                                                         | --                               | --                                | --                                  | --                                                | --                                                  |
| Rabies                                                                               | < 0.05<br>(< 0.05 to < 0.05)     | < 0.05<br>(< 0.05 to < 0.05)      | < 0.05<br>(< 0.05 to < 0.05)        | 14.7<br>(-28.1 to 77.8)                           | -29.3<br>(-58.7 to 20.0)                            |
| Intestinal nematode infections                                                       | < 0.05<br>(< 0.05 to < 0.05)     | --                                | < 0.05<br>(< 0.05 to < 0.05)        | -1.2<br>(-24.2 to 28.8)                           | -27.6<br>(-42.5 to -8.5)                            |
| Ascariasis                                                                           | < 0.05<br>(< 0.05 to < 0.05)     | --                                | --                                  | --                                                | --                                                  |



| Cause                                                                   | Prevalence in thousands (95% UI)        | Incidence in thousands (95% UI)          | YLDs in thousands (95% UI)                          |                                                   |                                                     |
|-------------------------------------------------------------------------|-----------------------------------------|------------------------------------------|-----------------------------------------------------|---------------------------------------------------|-----------------------------------------------------|
|                                                                         | 2016 counts                             | 2016 counts                              | 2016 counts                                         | Percentage change in counts between 2006 and 2016 | Percentage change in age-standardised rates between |
| Trichuriasis                                                            | < 0.05<br>(< 0.05 to < 0.05)            | --                                       | --                                                  | --                                                | --                                                  |
| Hookworm disease                                                        | < 0.05<br>(< 0.05 to < 0.05)            | --                                       | < 0.05<br>(< 0.05 to < 0.05)                        | -1.2<br>(-24.2 to 28.8)                           | -27.6<br>(-42.5 to -8.5)                            |
| Food-borne trematodiasis                                                | --                                      | --                                       | --                                                  | --                                                | --                                                  |
| Leprosy                                                                 | --                                      | --                                       | --                                                  | --                                                | --                                                  |
| Ebola virus disease                                                     | --                                      | --                                       | --                                                  | --                                                | --                                                  |
| Zika virus disease                                                      | --                                      | --                                       | --                                                  | --                                                | --                                                  |
| Guinea worm disease                                                     | --                                      | --                                       | --                                                  | --                                                | --                                                  |
| Other neglected tropical diseases                                       | 1.0<br>(0.8 to 1.1)                     | --                                       | < 0.05<br>(< 0.05 to < 0.05)                        | 17.1<br>(-10.1 to 54.6)                           | -1.3<br>(-22.1 to 27.7)                             |
| <b>Maternal disorders</b>                                               | <b>0.2</b><br><b>(0.1 to 0.2)</b>       | <b>2.2†</b><br><b>(1.8 to 2.6)</b>       | <b>&lt; 0.05</b><br><b>(&lt; 0.05 to &lt; 0.05)</b> | <b>34.7</b><br><b>(-3.2 to 85.3)</b>              | <b>-8.9</b><br><b>(-32.9 to 24.4)</b>               |
| Maternal haemorrhage                                                    | 0.1<br>(< 0.05 to 0.1)                  | 0.3<br>(0.2 to 0.4)                      | < 0.05<br>(< 0.05 to < 0.05)                        | 25.1<br>(-20.4 to 95.2)                           | -16.0<br>(-44.8 to 30.0)                            |
| Maternal sepsis and other pregnancy related infections                  | < 0.05<br>(< 0.05 to < 0.05)            | 0.1<br>(0.1 to 0.2)                      | < 0.05<br>(< 0.05 to < 0.05)                        | 10.1<br>(-55.1 to 176.5)                          | -26.2<br>(-69.0 to 76.4)                            |
| Maternal hypertensive disorders                                         | 0.1<br>(0.1 to 0.1)                     | 0.4<br>(0.3 to 0.6)                      | < 0.05<br>(< 0.05 to < 0.05)                        | 62.2<br>(-3.0 to 189.2)                           | 10.3<br>(-35.2 to 94.3)                             |
| Maternal obstructed labour and uterine rupture                          | < 0.05<br>(< 0.05 to < 0.05)            | 0.2<br>(0.2 to 0.3)                      | < 0.05<br>(< 0.05 to < 0.05)                        | 12.8<br>(-59.7 to 282.9)                          | -22.9<br>(-68.2 to 121.2)                           |
| Maternal abortion, miscarriage, and ectopic pregnancy                   | < 0.05<br>(< 0.05 to < 0.05)            | 1.1<br>(0.8 to 1.4)                      | < 0.05<br>(< 0.05 to < 0.05)                        | 6.8<br>(-50.6 to 129.4)                           | -27.8<br>(-64.6 to 47.1)                            |
| Other maternal disorders                                                | --                                      | --                                       | < 0.05<br>(< 0.05 to < 0.05)                        | 28.2<br>(-7.8 to 77.0)                            | -13.7<br>(-36.1 to 18.1)                            |
| <b>Neonatal disorders</b>                                               | <b>1.9</b><br><b>(1.4 to 2.6)</b>       | <b>0.3</b><br><b>--</b>                  | <b>0.3</b><br><b>(0.2 to 0.5)</b>                   | <b>97.6</b><br><b>(38.2 to 231.6)</b>             | <b>45.2</b><br><b>(2.0 to 144.1)</b>                |
| Neonatal preterm birth complications                                    | 1.7<br>(1.2 to 2.6)                     | --                                       | 0.2<br>(0.1 to 0.5)                                 | 113.5<br>(39.6 to 277.1)                          | 55.5<br>(2.2 to 174.4)                              |
| Neonatal encephalopathy due to birth asphyxia and trauma                | 0.1<br>(0.1 to 0.1)                     | --                                       | < 0.05<br>(< 0.05 to < 0.05)                        | 48.1<br>(16.1 to 89.2)                            | 8.3<br>(-14.0 to 37.0)                              |
| Neonatal sepsis and other neonatal infections                           | < 0.05<br>(< 0.05 to 0.1)               | --                                       | < 0.05<br>(< 0.05 to < 0.05)                        | 29.2<br>(3.6 to 61.3)                             | -4.7<br>(-22.0 to 17.2)                             |
| Hemolytic disease and other neonatal jaundice                           | < 0.05<br>(< 0.05 to < 0.05)            | --                                       | < 0.05<br>(< 0.05 to < 0.05)                        | 38.6<br>(26.6 to 51.1)                            | 0.6<br>(-7.9 to 9.6)                                |
| Other neonatal disorders                                                | --                                      | --                                       | < 0.05<br>(< 0.05 to < 0.05)                        | 63.7<br>(8.8 to 188.7)                            | 49.1<br>(-0.9 to 163.1)                             |
| <b>Nutritional deficiencies</b>                                         | <b>26.8</b><br><b>(23.8 to 29.3)</b>    | <b>1.9†</b><br><b>(1.2 to 2.5)</b>       | <b>0.6</b><br><b>(0.4 to 0.8)</b>                   | <b>33.0</b><br><b>(12.9 to 58.0)</b>              | <b>-1.8</b><br><b>(-14.4 to 14.0)</b>               |
| Protein-energy malnutrition                                             | 0.8<br>(0.6 to 1.1)                     | 0.3<br>(0.2 to 0.4)                      | < 0.05<br>(< 0.05 to 0.1)                           | 37.2<br>(-17.9 to 119.9)                          | 24.9<br>(-25.4 to 100.3)                            |
| Iodine deficiency                                                       | 0.1<br>(0.1 to 0.1)                     | < 0.05<br>(< 0.05 to < 0.05)             | < 0.05<br>(< 0.05 to < 0.05)                        | 38.1<br>(19.8 to 57.6)                            | -2.6<br>(-13.8 to 10.4)                             |
| Vitamin A deficiency                                                    | 1.9<br>(1.2 to 2.7)                     | 1.6<br>(0.9 to 2.2)                      | --                                                  | --                                                | --                                                  |
| Iron-deficiency anaemia                                                 | 23.1<br>(19.9 to 26.5)                  | --                                       | 0.5<br>(0.3 to 0.8)                                 | 32.6<br>(10.9 to 58.8)                            | -3.0<br>(-16.3 to 13.5)                             |
| Other nutritional deficiencies                                          | --                                      | --                                       | < 0.05<br>(< 0.05 to < 0.05)                        | 36.8<br>(-19.7 to 123.7)                          | 24.7<br>(-26.8 to 103.8)                            |
| <b>Other communicable, maternal, neonatal, and nutritional diseases</b> | <b>39.3</b><br><b>(36.7 to 41.5)</b>    | <b>16.3</b><br><b>(14.1 to 18.8)</b>     | <b>0.1</b><br><b>(&lt; 0.05 to 0.1)</b>             | <b>38.1</b><br><b>(28.4 to 48.6)</b>              | <b>1.3</b><br><b>(-5.0 to 7.9)</b>                  |
| Sexually transmitted diseases excluding HIV                             | 30.4<br>(27.9 to 32.6)                  | 13.8<br>(11.7 to 16.1)                   | 0.1<br>(< 0.05 to 0.1)                              | 38.5<br>(28.8 to 47.7)                            | -1.8<br>(-7.5 to 3.6)                               |
| Syphilis                                                                | 4.3<br>(2.7 to 6.5)                     | 2.7<br>(1.6 to 4.2)                      | < 0.05<br>(< 0.05 to < 0.05)                        | 41.4<br>(27.5 to 56.2)                            | -2.3<br>(-12.3 to 8.9)                              |
| Chlamydial infection                                                    | 3.5<br>(2.3 to 5.1)                     | 2.8<br>(1.8 to 4.4)                      | < 0.05<br>(< 0.05 to < 0.05)                        | 38.8<br>(22.1 to 57.5)                            | -1.7<br>(-12.0 to 10.7)                             |
| Gonococcal infection                                                    | 0.5<br>(0.3 to 0.7)                     | 1.2<br>(0.6 to 2.0)                      | < 0.05<br>(< 0.05 to < 0.05)                        | 38.8<br>(11.0 to 72.3)                            | -0.9<br>(-17.1 to 17.6)                             |
| Trichomoniasis                                                          | 4.5<br>(3.5 to 5.6)                     | 4.0<br>(3.0 to 5.1)                      | < 0.05<br>(< 0.05 to < 0.05)                        | 42.8<br>(31.2 to 56.4)                            | 0.3<br>(-6.3 to 7.5)                                |
| Genital herpes                                                          | 20.7<br>(17.7 to 24.0)                  | 1.7<br>(1.4 to 2.0)                      | < 0.05<br>(< 0.05 to < 0.05)                        | 42.8<br>(29.4 to 56.7)                            | -0.1<br>(-8.1 to 7.3)                               |
| Other sexually transmitted diseases                                     | 1.5<br>(1.3 to 1.6)                     | 1.5<br>(1.3 to 1.8)                      | < 0.05<br>(< 0.05 to < 0.05)                        | 35.9<br>(20.6 to 52.9)                            | -2.8<br>(-12.6 to 6.9)                              |
| Hepatitis                                                               | 11.6<br>(9.7 to 13.9)                   | 2.6<br>(2.1 to 3.2)                      | < 0.05<br>(< 0.05 to < 0.05)                        | 64.0<br>(30.3 to 105.8)                           | 14.9<br>(-4.7 to 38.0)                              |
| Acute hepatitis A                                                       | < 0.05<br>(< 0.05 to 0.1)               | 0.6<br>(0.5 to 0.7)                      | < 0.05<br>(< 0.05 to < 0.05)                        | 63.7<br>(8.7 to 149.4)                            | 16.0<br>(-20.8 to 68.5)                             |
| Hepatitis B                                                             | 8.8<br>(7.0 to 11.1)                    | 1.7<br>(1.3 to 2.3)                      | < 0.05<br>(< 0.05 to < 0.05)                        | 66.2<br>(21.8 to 125.2)                           | 14.6<br>(-11.3 to 47.8)                             |
| Hepatitis C                                                             | 2.7<br>(2.4 to 3.1)                     | 0.1<br>(0.1 to 0.2)                      | < 0.05<br>(< 0.05 to < 0.05)                        | 27.8<br>(4.7 to 59.1)                             | 8.8<br>(-6.0 to 27.3)                               |
| Acute hepatitis E                                                       | < 0.05<br>(< 0.05 to < 0.05)            | 0.1<br>(0.1 to 0.1)                      | < 0.05<br>(< 0.05 to < 0.05)                        | 65.9<br>(30.0 to 106.2)                           | 15.8<br>(-12.0 to 49.4)                             |
| Other infectious diseases                                               | 0.8<br>(0.7 to 0.9)                     | < 0.05<br>(< 0.05 to < 0.05)             | < 0.05<br>(< 0.05 to < 0.05)                        | 31.7<br>(6.0 to 63.2)                             | 5.1<br>(-13.0 to 28.0)                              |
| <b>Non-communicable diseases</b>                                        | <b>110.2</b><br><b>(109.3 to 111.0)</b> | <b>289.6†</b><br><b>(272.4 to 307.6)</b> | <b>9.2</b><br><b>(6.8 to 11.9)</b>                  | <b>44.2</b><br><b>(41.3 to 47.1)</b>              | <b>1.3</b><br><b>(-0.5 to 2.9)</b>                  |
| <b>Neoplasms</b>                                                        | <b>0.3</b><br><b>(0.3 to 0.3)</b>       | <b>0.1</b><br><b>(0.1 to 0.1)</b>        | <b>&lt; 0.05</b><br><b>(&lt; 0.05 to 0.1)</b>       | <b>53.1</b><br><b>(42.3 to 65.3)</b>              | <b>6.5</b><br><b>(0.0 to 12.8)</b>                  |
| Lip and oral cavity cancer                                              | < 0.05<br>(< 0.05 to < 0.05)            | < 0.05<br>(< 0.05 to < 0.05)             | < 0.05<br>(< 0.05 to < 0.05)                        | 45.1<br>(23.6 to 73.7)                            | 0.7<br>(-12.4 to 16.1)                              |
| Nasopharynx cancer                                                      | < 0.05<br>(< 0.05 to < 0.05)            | < 0.05<br>(< 0.05 to < 0.05)             | < 0.05<br>(< 0.05 to < 0.05)                        | 60.2<br>(22.8 to 102.7)                           | 7.4<br>(-14.5 to 32.5)                              |
| Other pharynx cancer                                                    | < 0.05<br>(< 0.05 to < 0.05)            | < 0.05<br>(< 0.05 to < 0.05)             | < 0.05<br>(< 0.05 to < 0.05)                        | 50.0<br>(25.7 to 81.0)                            | 5.0<br>(-11.0 to 23.9)                              |
| Oesophageal cancer                                                      | < 0.05<br>(< 0.05 to < 0.05)            | < 0.05<br>(< 0.05 to < 0.05)             | < 0.05<br>(< 0.05 to < 0.05)                        | 50.0<br>(32.0 to 70.7)                            | 1.4<br>(-10.6 to 15.7)                              |
| Stomach cancer                                                          | < 0.05<br>(< 0.05 to < 0.05)            | < 0.05<br>(< 0.05 to < 0.05)             | < 0.05<br>(< 0.05 to < 0.05)                        | 59.6<br>(41.1 to 79.4)                            | 7.5<br>(-7.9 to 25.6)                               |
| Colon and rectum cancer                                                 | < 0.05<br>(< 0.05 to < 0.05)            | < 0.05<br>(< 0.05 to < 0.05)             | < 0.05<br>(< 0.05 to < 0.05)                        | 57.3<br>(30.5 to 86.9)                            | 6.0<br>(-10.8 to 24.9)                              |
| Liver cancer                                                            | < 0.05<br>(< 0.05 to < 0.05)            | < 0.05<br>(< 0.05 to < 0.05)             | < 0.05<br>(< 0.05 to < 0.05)                        | 49.7<br>(29.0 to 74.7)                            | 1.1<br>(-10.8 to 14.3)                              |
| Liver cancer due to hepatitis B                                         | < 0.05<br>(< 0.05 to < 0.05)            | < 0.05<br>(< 0.05 to < 0.05)             | < 0.05<br>(< 0.05 to < 0.05)                        | 50.4<br>(29.4 to 75.6)                            | 1.5<br>(-10.8 to 15.8)                              |



| Cause                                              | Prevalence in thousands (95% UI)     | Incidence in thousands (95% UI)    | YLDs in thousands (95% UI)        |                                                   |                                                     |
|----------------------------------------------------|--------------------------------------|------------------------------------|-----------------------------------|---------------------------------------------------|-----------------------------------------------------|
|                                                    | 2016 counts                          | 2016 counts                        | 2016 counts                       | Percentage change in counts between 2006 and 2016 | Percentage change in age-standardised rates between |
| Liver cancer due to hepatitis C                    | < 0.05<br>(< 0.05 to < 0.05)         | < 0.05<br>(< 0.05 to < 0.05)       | < 0.05<br>(< 0.05 to < 0.05)      | 47.0<br>(27.7 to 70.4)                            | 0.5<br>(-11.4 to 14.6)                              |
| Liver cancer due to alcohol use                    | < 0.05<br>(< 0.05 to < 0.05)         | < 0.05<br>(< 0.05 to < 0.05)       | < 0.05<br>(< 0.05 to < 0.05)      | 46.9<br>(24.5 to 74.6)                            | -1.8<br>(-14.7 to 12.3)                             |
| Liver cancer due to other causes                   | < 0.05<br>(< 0.05 to < 0.05)         | < 0.05<br>(< 0.05 to < 0.05)       | < 0.05<br>(< 0.05 to < 0.05)      | 50.3<br>(27.5 to 80.5)                            | 2.0<br>(-11.4 to 18.2)                              |
| Gallbladder and biliary tract cancer               | < 0.05<br>(< 0.05 to < 0.05)         | < 0.05<br>(< 0.05 to < 0.05)       | < 0.05<br>(< 0.05 to < 0.05)      | 44.6<br>(27.5 to 66.4)                            | -1.0<br>(-12.3 to 11.7)                             |
| Pancreatic cancer                                  | < 0.05<br>(< 0.05 to < 0.05)         | < 0.05<br>(< 0.05 to < 0.05)       | < 0.05<br>(< 0.05 to < 0.05)      | 34.4<br>(21.4 to 48.4)                            | -6.1<br>(-17.6 to 6.9)                              |
| Larynx cancer                                      | < 0.05<br>(< 0.05 to < 0.05)         | < 0.05<br>(< 0.05 to < 0.05)       | < 0.05<br>(< 0.05 to < 0.05)      | 48.1<br>(26.4 to 73.3)                            | 1.1<br>(-14.1 to 17.3)                              |
| Tracheal, bronchus, and lung cancer                | < 0.05<br>(< 0.05 to < 0.05)         | < 0.05<br>(< 0.05 to < 0.05)       | < 0.05<br>(< 0.05 to < 0.05)      | 57.1<br>(30.3 to 88.5)                            | 15.1<br>(-7.9 to 39.0)                              |
| Malignant skin melanoma                            | < 0.05<br>(< 0.05 to < 0.05)         | < 0.05<br>(< 0.05 to < 0.05)       | < 0.05<br>(< 0.05 to < 0.05)      | 43.0<br>(15.9 to 77.1)                            | -7.8<br>(-26.9 to 17.0)                             |
| Non-melanoma skin cancer                           | < 0.05<br>(< 0.05 to < 0.05)         | < 0.05<br>(< 0.05 to < 0.05)       | < 0.05<br>(< 0.05 to < 0.05)      | -13.3<br>(-59.0 to 73.2)                          | -44.7<br>(-75.6 to 38.9)                            |
| Non-melanoma skin cancer (squamous-cell carcinoma) | < 0.05<br>(< 0.05 to < 0.05)         | < 0.05<br>(< 0.05 to < 0.05)       | < 0.05<br>(< 0.05 to < 0.05)      | -13.8<br>(-59.6 to 73.5)                          | -44.8<br>(-75.7 to 39.2)                            |
| Non-melanoma skin cancer (basal-cell carcinoma)    | < 0.05<br>(< 0.05 to < 0.05)         | < 0.05<br>(< 0.05 to < 0.05)       | < 0.05<br>(< 0.05 to < 0.05)      | 45.8<br>(32.0 to 67.5)                            | 0.9<br>(-8.8 to 13.9)                               |
| Breast cancer                                      | 0.1<br>(0.1 to 0.1)                  | < 0.05<br>(< 0.05 to < 0.05)       | < 0.05<br>(< 0.05 to < 0.05)      | 63.8<br>(33.2 to 106.3)                           | 12.0<br>(-4.2 to 33.5)                              |
| Cervical cancer                                    | < 0.05<br>(< 0.05 to < 0.05)         | < 0.05<br>(< 0.05 to < 0.05)       | < 0.05<br>(< 0.05 to < 0.05)      | 40.8<br>(5.7 to 83.9)                             | 0.0<br>(-22.8 to 27.9)                              |
| Uterine cancer                                     | < 0.05<br>(< 0.05 to < 0.05)         | < 0.05<br>(< 0.05 to < 0.05)       | < 0.05<br>(< 0.05 to < 0.05)      | 65.1<br>(20.0 to 125.7)                           | 9.1<br>(-14.8 to 36.5)                              |
| Ovarian cancer                                     | < 0.05<br>(< 0.05 to < 0.05)         | < 0.05<br>(< 0.05 to < 0.05)       | < 0.05<br>(< 0.05 to < 0.05)      | 35.4<br>(12.0 to 65.7)                            | -9.4<br>(-31.3 to 21.1)                             |
| Prostate cancer                                    | < 0.05<br>(< 0.05 to < 0.05)         | < 0.05<br>(< 0.05 to < 0.05)       | < 0.05<br>(< 0.05 to < 0.05)      | 52.8<br>(28.9 to 81.9)                            | 7.9<br>(-9.0 to 28.0)                               |
| Testicular cancer                                  | < 0.05<br>(< 0.05 to < 0.05)         | < 0.05<br>(< 0.05 to < 0.05)       | < 0.05<br>(< 0.05 to < 0.05)      | 54.4<br>(-2.3 to 148.1)                           | 8.7<br>(-21.4 to 51.7)                              |
| Kidney cancer                                      | < 0.05<br>(< 0.05 to < 0.05)         | < 0.05<br>(< 0.05 to < 0.05)       | < 0.05<br>(< 0.05 to < 0.05)      | 40.3<br>(8.1 to 79.5)                             | -6.0<br>(-22.6 to 13.9)                             |
| Bladder cancer                                     | < 0.05<br>(< 0.05 to < 0.05)         | < 0.05<br>(< 0.05 to < 0.05)       | < 0.05<br>(< 0.05 to < 0.05)      | 58.6<br>(34.8 to 83.4)                            | 8.8<br>(-4.5 to 24.1)                               |
| Brain and nervous system cancer                    | < 0.05<br>(< 0.05 to < 0.05)         | < 0.05<br>(< 0.05 to < 0.05)       | < 0.05<br>(< 0.05 to < 0.05)      | 43.8<br>(21.4 to 70.7)                            | 4.8<br>(-7.5 to 19.3)                               |
| Thyroid cancer                                     | < 0.05<br>(< 0.05 to < 0.05)         | < 0.05<br>(< 0.05 to < 0.05)       | < 0.05<br>(< 0.05 to < 0.05)      | 33.1<br>(-1.1 to 78.4)                            | -7.5<br>(-25.0 to 13.2)                             |
| Mesothelioma                                       | < 0.05<br>(< 0.05 to < 0.05)         | < 0.05<br>(< 0.05 to < 0.05)       | < 0.05<br>(< 0.05 to < 0.05)      | 73.1<br>(46.9 to 98.9)                            | 20.9<br>(1.6 to 38.7)                               |
| Hodgkin lymphoma                                   | < 0.05<br>(< 0.05 to < 0.05)         | < 0.05<br>(< 0.05 to < 0.05)       | < 0.05<br>(< 0.05 to < 0.05)      | 58.3<br>(20.7 to 103.6)                           | 10.7<br>(-11.5 to 37.6)                             |
| Non-Hodgkin's lymphoma                             | < 0.05<br>(< 0.05 to < 0.05)         | < 0.05<br>(< 0.05 to < 0.05)       | < 0.05<br>(< 0.05 to < 0.05)      | 46.6<br>(24.8 to 72.7)                            | 3.7<br>(-9.6 to 19.5)                               |
| Multiple myeloma                                   | < 0.05<br>(< 0.05 to < 0.05)         | < 0.05<br>(< 0.05 to < 0.05)       | < 0.05<br>(< 0.05 to < 0.05)      | 66.3<br>(41.2 to 95.8)                            | 12.5<br>(-12.0 to 40.6)                             |
| Leukaemia                                          | < 0.05<br>(< 0.05 to < 0.05)         | < 0.05<br>(< 0.05 to < 0.05)       | < 0.05<br>(< 0.05 to < 0.05)      | 45.2<br>(16.6 to 76.2)                            | 6.5<br>(-8.0 to 22.3)                               |
| Acute lymphoid leukaemia                           | < 0.05<br>(< 0.05 to < 0.05)         | < 0.05<br>(< 0.05 to < 0.05)       | < 0.05<br>(< 0.05 to < 0.05)      | 26.8<br>(-19.7 to 96.9)                           | -1.8<br>(-26.6 to 31.3)                             |
| Chronic lymphoid leukaemia                         | < 0.05<br>(< 0.05 to < 0.05)         | < 0.05<br>(< 0.05 to < 0.05)       | < 0.05<br>(< 0.05 to < 0.05)      | 58.2<br>(20.0 to 109.9)                           | 12.4<br>(-14.5 to 50.1)                             |
| Acute myeloid leukaemia                            | < 0.05<br>(< 0.05 to < 0.05)         | < 0.05<br>(< 0.05 to < 0.05)       | < 0.05<br>(< 0.05 to < 0.05)      | 39.8<br>(1.2 to 86.8)                             | 3.8<br>(-16.6 to 25.6)                              |
| Chronic myeloid leukaemia                          | < 0.05<br>(< 0.05 to < 0.05)         | < 0.05<br>(< 0.05 to < 0.05)       | < 0.05<br>(< 0.05 to < 0.05)      | 56.3<br>(20.4 to 101.2)                           | 3.4<br>(-16.2 to 28.3)                              |
| Other leukaemia                                    | < 0.05<br>(< 0.05 to < 0.05)         | < 0.05<br>(< 0.05 to < 0.05)       | < 0.05<br>(< 0.05 to < 0.05)      | 67.0<br>(34.8 to 106.2)                           | 14.5<br>(-9.0 to 43.4)                              |
| Other neoplasms                                    | < 0.05<br>(< 0.05 to < 0.05)         | < 0.05<br>(< 0.05 to < 0.05)       | < 0.05<br>(< 0.05 to < 0.05)      | 58.0<br>(28.9 to 95.4)                            | 13.1<br>(-1.3 to 30.2)                              |
| <b>Cardiovascular diseases</b>                     | <b>3.4</b><br><b>(3.2 to 3.6)</b>    | <b>0.3†</b><br><b>(0.3 to 0.4)</b> | <b>0.2</b><br><b>(0.2 to 0.3)</b> | <b>41.0</b><br><b>(34.6 to 47.9)</b>              | <b>-3.8</b><br><b>(-7.5 to -0.1)</b>                |
| Rheumatic heart disease                            | < 0.05<br>(< 0.05 to < 0.05)         | < 0.05<br>(< 0.05 to < 0.05)       | < 0.05<br>(< 0.05 to < 0.05)      | 38.9<br>(14.5 to 68.7)                            | -2.0<br>(-20.0 to 17.9)                             |
| Ischaemic heart disease                            | 1.0<br>(1.0 to 1.1)                  | 0.1<br>(0.1 to 0.1)                | 0.1<br>(< 0.05 to 0.1)            | 43.1<br>(32.9 to 54.3)                            | -1.4<br>(-5.5 to 3.0)                               |
| Cerebrovascular disease                            | 0.6<br>(0.5 to 0.6)                  | 0.1‡<br>(0.1 to 0.1)               | 0.1<br>(0.1 to 0.1)               | 40.0<br>(29.9 to 51.6)                            | -6.7<br>(-13.2 to -0.2)                             |
| Ischaemic stroke                                   | 0.4<br>(0.4 to 0.5)                  | < 0.05‡<br>(< 0.05 to 0.1)         | 0.1<br>(0.1 to 0.1)               | 41.9<br>(29.0 to 56.9)                            | -6.0<br>(-14.2 to 2.2)                              |
| Hemorrhagic stroke                                 | 0.2<br>(0.1 to 0.2)                  | < 0.05‡<br>(< 0.05 to < 0.05)      | < 0.05<br>(< 0.05 to < 0.05)      | 35.6<br>(18.8 to 54.5)                            | -8.6<br>(-17.1 to 1.7)                              |
| Hypertensive heart disease                         | 0.1<br>(0.1 to 0.1)                  | --                                 | < 0.05<br>(< 0.05 to < 0.05)      | 43.2<br>(21.1 to 66.4)                            | -0.7<br>(-9.2 to 9.6)                               |
| Cardiomyopathy and myocarditis                     | 0.1<br>(0.1 to 0.1)                  | < 0.05†<br>(< 0.05 to < 0.05)      | < 0.05<br>(< 0.05 to < 0.05)      | 43.1<br>(22.4 to 67.2)                            | 0.7<br>(-9.3 to 12.2)                               |
| Myocarditis                                        | < 0.05<br>(< 0.05 to < 0.05)         | < 0.05<br>(< 0.05 to < 0.05)       | < 0.05<br>(< 0.05 to < 0.05)      | 41.5<br>(12.9 to 76.0)                            | 0.6<br>(-15.7 to 19.8)                              |
| Alcoholic cardiomyopathy                           | < 0.05<br>(< 0.05 to < 0.05)         | --                                 | < 0.05<br>(< 0.05 to < 0.05)      | 49.8<br>(27.4 to 76.7)                            | 1.0<br>(-20.4 to 25.1)                              |
| Other cardiomyopathy                               | 0.1<br>(0.1 to 0.1)                  | --                                 | < 0.05<br>(< 0.05 to < 0.05)      | 43.3<br>(17.3 to 76.8)                            | 0.7<br>(-11.0 to 14.7)                              |
| Atrial fibrillation and flutter                    | 0.2<br>(0.2 to 0.2)                  | < 0.05<br>(< 0.05 to < 0.05)       | < 0.05<br>(< 0.05 to < 0.05)      | 39.8<br>(23.2 to 57.4)                            | -0.9<br>(-7.6 to 5.0)                               |
| Peripheral vascular disease                        | 0.6<br>(0.5 to 0.8)                  | 0.1<br>(0.1 to 0.1)                | < 0.05<br>(< 0.05 to < 0.05)      | 32.7<br>(21.7 to 44.3)                            | -2.8<br>(-10.0 to 4.6)                              |
| Endocarditis                                       | < 0.05<br>(< 0.05 to < 0.05)         | < 0.05<br>(< 0.05 to < 0.05)       | < 0.05<br>(< 0.05 to < 0.05)      | 41.0<br>(32.4 to 50.2)                            | 0.2<br>(-13.6 to 15.2)                              |
| Other cardiovascular and circulatory diseases      | 1.1<br>(0.9 to 1.2)                  | --                                 | 0.1<br>(< 0.05 to 0.1)            | 40.9<br>(27.9 to 54.9)                            | -0.5<br>(-7.5 to 7.0)                               |
| <b>Chronic respiratory diseases</b>                | <b>12.9</b><br><b>(12.3 to 13.5)</b> | <b>2.9†</b><br><b>(2.7 to 3.1)</b> | <b>0.7</b><br><b>(0.5 to 0.9)</b> | <b>66.9</b><br><b>(59.5 to 74.3)</b>              | <b>13.0</b><br><b>(8.2 to 18.0)</b>                 |
| Chronic obstructive pulmonary disease              | 3.2<br>(3.1 to 3.3)                  | 0.2<br>(0.2 to 0.3)                | 0.2<br>(0.2 to 0.3)               | 43.6<br>(34.0 to 54.2)                            | -3.0<br>(-8.9 to 3.3)                               |
| Pneumoconiosis                                     | < 0.05<br>(< 0.05 to < 0.05)         | < 0.05<br>(< 0.05 to < 0.05)       | < 0.05<br>(< 0.05 to < 0.05)      | 37.6<br>(18.7 to 59.0)                            | -7.7<br>(-24.6 to 11.6)                             |
| Silicosis                                          | < 0.05<br>(< 0.05 to < 0.05)         | < 0.05<br>(< 0.05 to < 0.05)       | < 0.05<br>(< 0.05 to < 0.05)      | 38.8<br>(8.9 to 74.8)                             | -6.7<br>(-30.9 to 24.7)                             |

| Cause                                                          | Prevalence in thousands (95% UI) | Incidence in thousands (95% UI)               | YLDs in thousands (95% UI)                    |                                                   |                                                     |
|----------------------------------------------------------------|----------------------------------|-----------------------------------------------|-----------------------------------------------|---------------------------------------------------|-----------------------------------------------------|
|                                                                | 2016 counts                      | 2016 counts                                   | 2016 counts                                   | Percentage change in counts between 2006 and 2016 | Percentage change in age-standardised rates between |
| Asbestosis                                                     | < 0.05<br>(< 0.05 to < 0.05)     | < 0.05<br>(< 0.05 to < 0.05)                  | < 0.05<br>(< 0.05 to < 0.05)                  | 40.4<br>(30.6 to 51.0)                            | -4.2<br>(-11.9 to 4.1)                              |
| Coal workers pneumoconiosis                                    | --                               | --                                            | --                                            | --                                                | --                                                  |
| Other pneumoconiosis                                           | < 0.05<br>(< 0.05 to < 0.05)     | < 0.05<br>(< 0.05 to < 0.05)                  | < 0.05<br>(< 0.05 to < 0.05)                  | 32.0<br>(10.0 to 55.1)                            | -12.7<br>(-35.9 to 15.3)                            |
| Asthma                                                         | 10.2<br>(9.5 to 10.9)            | 2.7<br>(2.5 to 2.9)                           | 0.4<br>(0.3 to 0.6)                           | 84.6<br>(75.2 to 94.1)                            | 34.4<br>(28.6 to 40.2)                              |
| Interstitial lung disease and pulmonary sarcoidosis            | 0.1<br>(0.1 to 0.1)              | < 0.05<br>(< 0.05 to < 0.05)                  | < 0.05<br>(< 0.05 to < 0.05)                  | 37.1<br>(21.1 to 54.4)                            | -4.1<br>(-13.0 to 5.1)                              |
| Other chronic respiratory diseases                             | --                               | --                                            | < 0.05<br>(< 0.05 to < 0.05)                  | 88.9<br>(67.1 to 113.3)                           | 34.8<br>(18.2 to 53.1)                              |
| <b>Cirrhosis and other chronic liver diseases</b>              | <b>0.7<br/>(0.7 to 0.8)</b>      | <b>&lt; 0.05<br/>(&lt; 0.05 to &lt; 0.05)</b> | <b>&lt; 0.05<br/>(&lt; 0.05 to &lt; 0.05)</b> | <b>46.7<br/>(29.4 to 64.5)</b>                    | <b>3.3<br/>(-6.0 to 12.6)</b>                       |
| Cirrhosis and other chronic liver diseases due to hepatitis B  | 0.3<br>(0.2 to 0.3)              | < 0.05<br>(< 0.05 to < 0.05)                  | < 0.05<br>(< 0.05 to < 0.05)                  | 52.0<br>(21.2 to 90.0)                            | 3.1<br>(-11.0 to 20.1)                              |
| Cirrhosis and other chronic liver diseases due to hepatitis C  | 0.1<br>(0.1 to 0.1)              | < 0.05<br>(< 0.05 to < 0.05)                  | < 0.05<br>(< 0.05 to < 0.05)                  | 53.2<br>(12.2 to 109.9)                           | 3.6<br>(-18.2 to 27.6)                              |
| Cirrhosis and other chronic liver diseases due to alcohol use  | 0.1<br>(0.1 to 0.1)              | < 0.05<br>(< 0.05 to < 0.05)                  | < 0.05<br>(< 0.05 to < 0.05)                  | 52.9<br>(13.4 to 104.7)                           | 2.4<br>(-18.3 to 28.2)                              |
| Cirrhosis and other chronic liver diseases due to other causes | 0.2<br>(0.2 to 0.3)              | < 0.05<br>(< 0.05 to < 0.05)                  | < 0.05<br>(< 0.05 to < 0.05)                  | 41.1<br>(17.2 to 69.9)                            | 3.5<br>(-10.4 to 20.3)                              |
| <b>Digestive diseases</b>                                      | <b>1.9<br/>(1.7 to 2.0)</b>      | <b>2.2<sup>†</sup><br/>(2.0 to 2.3)</b>       | <b>0.1<br/>(&lt; 0.05 to 0.1)</b>             | <b>58.4<br/>(40.3 to 80.4)</b>                    | <b>7.1<br/>(-1.8 to 17.0)</b>                       |
| Peptic ulcer disease                                           | 0.7<br>(0.6 to 0.8)              | 0.2<br>(0.2 to 0.3)                           | < 0.05<br>(< 0.05 to < 0.05)                  | 77.7<br>(42.9 to 119.6)                           | 12.8<br>(-3.1 to 31.6)                              |
| Gastritis and duodenitis                                       | 0.9<br>(0.7 to 1.0)              | 0.7<br>(0.6 to 0.8)                           | < 0.05<br>(< 0.05 to < 0.05)                  | 73.0<br>(42.9 to 110.8)                           | 13.4<br>(-1.5 to 30.9)                              |
| Appendicitis                                                   | < 0.05<br>(< 0.05 to < 0.05)     | 0.5<br>(0.4 to 0.5)                           | < 0.05<br>(< 0.05 to < 0.05)                  | 42.4<br>(-1.1 to 101.1)                           | 1.5<br>(-23.5 to 34.6)                              |
| Paralytic ileus and intestinal obstruction                     | < 0.05<br>(< 0.05 to < 0.05)     | < 0.05<br>(< 0.05 to < 0.05)                  | < 0.05<br>(< 0.05 to < 0.05)                  | 36.0<br>(31.1 to 40.8)                            | -3.3<br>(-6.6 to 0.1)                               |
| Inguinal, femoral, and abdominal hernia                        | 0.2<br>(0.2 to 0.2)              | 0.2<br>(0.2 to 0.3)                           | < 0.05<br>(< 0.05 to < 0.05)                  | 81.0<br>(47.6 to 123.7)                           | 27.2<br>(8.8 to 48.2)                               |
| Inflammatory bowel disease                                     | < 0.05<br>(< 0.05 to 0.1)        | < 0.05<br>(< 0.05 to 0.1)                     | < 0.05<br>(< 0.05 to < 0.05)                  | 3.9<br>(-15.7 to 27.2)                            | -28.2<br>(-38.8 to -16.9)                           |
| Vascular intestinal disorders                                  | < 0.05<br>(< 0.05 to < 0.05)     | < 0.05<br>(< 0.05 to < 0.05)                  | < 0.05<br>(< 0.05 to < 0.05)                  | 37.4<br>(29.0 to 45.2)                            | 0.5<br>(-3.8 to 5.3)                                |
| Gallbladder and biliary diseases                               | 0.2<br>(0.1 to 0.2)              | 0.5<br>(0.4 to 0.6)                           | < 0.05<br>(< 0.05 to < 0.05)                  | 41.7<br>(14.2 to 77.2)                            | -2.5<br>(-19.7 to 18.7)                             |
| Pancreatitis                                                   | < 0.05<br>(< 0.05 to < 0.05)     | < 0.05<br>(< 0.05 to < 0.05)                  | < 0.05<br>(< 0.05 to < 0.05)                  | 39.1<br>(34.0 to 43.9)                            | -6.6<br>(-9.7 to -3.4)                              |
| Other digestive diseases                                       | --                               | --                                            | < 0.05<br>(< 0.05 to < 0.05)                  | 63.7<br>(45.9 to 84.6)                            | 12.5<br>(3.7 to 22.5)                               |
| <b>Neurological disorders</b>                                  | <b>39.7<br/>(37.5 to 41.8)</b>   | <b>18.4<br/>(15.2 to 22.2)</b>                | <b>0.9<br/>(0.6 to 1.2)</b>                   | <b>41.7<br/>(19.3 to 69.8)</b>                    | <b>0.1<br/>(-14.9 to 18.3)</b>                      |
| Alzheimer's disease and other dementias                        | 0.1<br>(0.1 to 0.1)              | < 0.05<br>(< 0.05 to < 0.05)                  | < 0.05<br>(< 0.05 to < 0.05)                  | 33.1<br>(24.6 to 41.9)                            | -0.6<br>(-5.0 to 4.3)                               |
| Parkinson's disease                                            | < 0.05<br>(< 0.05 to < 0.05)     | < 0.05<br>(< 0.05 to < 0.05)                  | < 0.05<br>(< 0.05 to < 0.05)                  | 42.5<br>(17.8 to 74.0)                            | 2.1<br>(-9.9 to 15.5)                               |
| Epilepsy                                                       | 0.4<br>(0.1 to 0.5)              | < 0.05<br>(< 0.05 to 0.1)                     | 0.1<br>(< 0.05 to 0.2)                        | 38.3<br>(-59.2 to 412.2)                          | -0.6<br>(-71.4 to 265.5)                            |
| Multiple sclerosis                                             | < 0.05<br>(< 0.05 to < 0.05)     | < 0.05<br>(< 0.05 to < 0.05)                  | < 0.05<br>(< 0.05 to < 0.05)                  | 50.8<br>(45.1 to 56.3)                            | 5.0<br>(1.6 to 8.2)                                 |
| Motor neuron disease                                           | < 0.05<br>(< 0.05 to < 0.05)     | < 0.05<br>(< 0.05 to < 0.05)                  | < 0.05<br>(< 0.05 to < 0.05)                  | 39.7<br>(34.1 to 45.8)                            | -0.1<br>(-3.4 to 3.4)                               |
| Migraine                                                       | 15.2<br>(14.2 to 16.2)           | 1.7<br>(1.6 to 1.8)                           | 0.6<br>(0.4 to 0.9)                           | 41.7<br>(35.1 to 48.4)                            | -0.3<br>(-4.4 to 4.0)                               |
| Tension-type headache                                          | 29.4<br>(25.5 to 34.1)           | 16.6<br>(13.4 to 20.5)                        | 0.1<br>(0.1 to 0.1)                           | 41.6<br>(33.5 to 51.1)                            | -0.2<br>(-5.3 to 5.3)                               |
| Other neurological disorders                                   | < 0.05<br>(< 0.05 to < 0.05)     | < 0.05<br>(< 0.05 to < 0.05)                  | < 0.05<br>(< 0.05 to < 0.05)                  | 67.0<br>(-46.3 to 442.9)                          | 19.7<br>(-56.0 to 224.9)                            |
| <b>Mental and substance use disorders</b>                      | <b>16.2<br/>(15.6 to 16.7)</b>   | <b>5.3<sup>†</sup><br/>(4.9 to 5.7)</b>       | <b>2.2<br/>(1.6 to 2.9)</b>                   | <b>41.9<br/>(38.1 to 45.5)</b>                    | <b>-0.2<br/>(-2.4 to 2.0)</b>                       |
| Schizophrenia                                                  | 0.5<br>(0.4 to 0.6)              | < 0.05<br>(< 0.05 to < 0.05)                  | 0.3<br>(0.2 to 0.4)                           | 38.4<br>(25.8 to 52.2)                            | -3.4<br>(-11.1 to 4.3)                              |
| Alcohol use disorders                                          | 1.5<br>(1.3 to 1.7)              | 0.8<br>(0.7 to 0.9)                           | 0.1<br>(0.1 to 0.2)                           | 44.3<br>(31.3 to 59.0)                            | 0.6<br>(-7.6 to 10.2)                               |
| Drug use disorders                                             | 1.0<br>(0.9 to 1.1)              | 0.1<br>(0.1 to 0.1)                           | 0.2<br>(0.1 to 0.2)                           | 46.2<br>(32.5 to 61.2)                            | 3.0<br>(-5.3 to 12.1)                               |
| Opioid use disorders                                           | 0.3<br>(0.2 to 0.4)              | < 0.05<br>(< 0.05 to < 0.05)                  | 0.1<br>(0.1 to 0.2)                           | 46.7<br>(29.1 to 67.4)                            | 3.2<br>(-7.5 to 15.3)                               |
| Cocaine use disorders                                          | < 0.05<br>(< 0.05 to < 0.05)     | < 0.05<br>(< 0.05 to < 0.05)                  | < 0.05<br>(< 0.05 to < 0.05)                  | 44.0<br>(34.1 to 55.4)                            | 1.3<br>(-4.0 to 7.0)                                |
| Amphetamine use disorders                                      | 0.1<br>(0.1 to 0.1)              | < 0.05<br>(< 0.05 to < 0.05)                  | < 0.05<br>(< 0.05 to < 0.05)                  | 49.4<br>(8.5 to 106.3)                            | 5.8<br>(-20.9 to 41.9)                              |
| Cannabis use disorders                                         | 0.6<br>(0.5 to 0.7)              | 0.1<br>(0.1 to 0.1)                           | < 0.05<br>(< 0.05 to < 0.05)                  | 40.3<br>(21.2 to 64.2)                            | -0.4<br>(-12.6 to 13.9)                             |
| Other drug use disorders                                       | 0.1<br>(0.1 to 0.1)              | < 0.05<br>(< 0.05 to < 0.05)                  | < 0.05<br>(< 0.05 to < 0.05)                  | 47.0<br>(17.6 to 87.2)                            | 3.3<br>(-15.2 to 28.7)                              |
| Depressive disorders                                           | 3.6<br>(3.3 to 3.9)              | 3.1<br>(2.8 to 3.5)                           | 0.6<br>(0.4 to 0.8)                           | 44.6<br>(37.0 to 51.9)                            | 0.7<br>(-3.4 to 5.2)                                |
| Major depressive disorder                                      | 1.9<br>(1.7 to 2.2)              | 2.9<br>(2.5 to 3.2)                           | 0.4<br>(0.3 to 0.6)                           | 44.9<br>(35.1 to 55.2)                            | 1.1<br>(-4.8 to 7.1)                                |
| Dysthymia                                                      | 1.7<br>(1.4 to 2.0)              | 0.3<br>(0.2 to 0.3)                           | 0.2<br>(0.1 to 0.2)                           | 44.0<br>(37.5 to 50.4)                            | -0.1<br>(-2.8 to 2.8)                               |
| Bipolar disorder                                               | 0.6<br>(0.5 to 0.7)              | < 0.05<br>(< 0.05 to 0.1)                     | 0.1<br>(0.1 to 0.2)                           | 42.0<br>(29.6 to 55.9)                            | -0.4<br>(-6.8 to 6.8)                               |
| Anxiety disorders                                              | 4.1<br>(3.6 to 4.5)              | 0.7<br>(0.6 to 0.8)                           | 0.4<br>(0.3 to 0.6)                           | 42.1<br>(32.3 to 53.1)                            | -0.1<br>(-5.7 to 6.5)                               |
| Eating disorders                                               | 0.2<br>(0.2 to 0.2)              | 0.1<br>(0.1 to 0.1)                           | < 0.05<br>(< 0.05 to 0.1)                     | 16.4<br>(0.6 to 33.3)                             | -16.5<br>(-26.6 to -5.0)                            |
| Anorexia nervosa                                               | 0.1<br>(< 0.05 to 0.1)           | < 0.05<br>(< 0.05 to < 0.05)                  | < 0.05<br>(< 0.05 to < 0.05)                  | 18.8<br>(-8.2 to 52.6)                            | -14.8<br>(-32.3 to 8.6)                             |
| Bulimia nervosa                                                | 0.1<br>(0.1 to 0.2)              | 0.1<br>(0.1 to 0.1)                           | < 0.05<br>(< 0.05 to < 0.05)                  | 15.5<br>(-2.4 to 35.6)                            | -17.2<br>(-29.7 to -3.6)                            |
| Autistic spectrum disorders                                    | 1.1<br>(0.9 to 1.2)              | < 0.05<br>(< 0.05 to < 0.05)                  | 0.1<br>(0.1 to 0.2)                           | 37.3<br>(29.8 to 44.7)                            | -0.4<br>(-5.2 to 4.5)                               |
| Autism                                                         | 0.3<br>(0.3 to 0.4)              | < 0.05<br>(< 0.05 to < 0.05)                  | 0.1<br>(0.1 to 0.1)                           | 37.4<br>(25.7 to 50.6)                            | -0.7<br>(-8.2 to 8.2)                               |
| Asperger syndrome and other autistic spectrum disorders        | 0.7<br>(0.6 to 0.9)              | < 0.05<br>(< 0.05 to < 0.05)                  | 0.1<br>(< 0.05 to 0.1)                        | 37.1<br>(29.9 to 44.8)                            | -0.2<br>(-4.5 to 4.6)                               |

| Cause                                                      | Prevalence in thousands (95% UI)     | Incidence in thousands (95% UI)          | YLDs in thousands (95% UI)        |                                                   |                                                     |
|------------------------------------------------------------|--------------------------------------|------------------------------------------|-----------------------------------|---------------------------------------------------|-----------------------------------------------------|
|                                                            | 2016 counts                          | 2016 counts                              | 2016 counts                       | Percentage change in counts between 2006 and 2016 | Percentage change in age-standardised rates between |
| Attention-deficit/hyperactivity disorder                   | 1.0<br>(0.9 to 1.1)                  | < 0.05<br>(< 0.05 to 0.1)                | < 0.05<br>(< 0.05 to < 0.05)      | 39.5<br>(26.9 to 53.5)                            | -0.2<br>(-8.7 to 9.2)                               |
| Conduct disorder                                           | 0.6<br>(0.5 to 0.7)                  | 0.2<br>(0.2 to 0.3)                      | 0.1<br>(< 0.05 to 0.1)            | 38.0<br>(28.9 to 48.0)                            | -0.4<br>(-6.8 to 6.6)                               |
| Idiopathic developmental intellectual disability           | 0.9<br>(0.4 to 1.4)                  | --                                       | < 0.05<br>(< 0.05 to 0.1)         | 57.1<br>(43.4 to 74.0)                            | 12.2<br>(3.5 to 24.1)                               |
| Other mental and substance use disorders                   | 2.5<br>(2.2 to 2.9)                  | 0.1<br>(0.1 to 0.1)                      | 0.2<br>(0.1 to 0.3)               | 42.6<br>(33.9 to 51.8)                            | -0.3<br>(-4.9 to 4.7)                               |
| <b>Diabetes, urogenital, blood, and endocrine diseases</b> | <b>45.9</b><br><b>(44.6 to 47.3)</b> | <b>14.0†</b><br><b>(13.1 to 15.1)</b>    | <b>1.2</b><br><b>(0.9 to 1.7)</b> | <b>46.2</b><br><b>(40.6 to 52.3)</b>              | <b>1.2</b><br><b>(-2.4 to 5.0)</b>                  |
| Diabetes mellitus                                          | 11.8<br>(10.5 to 13.3)               | 1.0<br>(0.8 to 1.1)                      | 0.8<br>(0.5 to 1.1)               | 45.4<br>(37.3 to 53.8)                            | -0.3<br>(-5.4 to 4.9)                               |
| Acute glomerulonephritis                                   | < 0.05<br>(< 0.05 to < 0.05)         | < 0.05<br>(< 0.05 to < 0.05)             | < 0.05<br>(< 0.05 to < 0.05)      | 40.7<br>(35.1 to 47.5)                            | -0.0<br>(-3.6 to 4.2)                               |
| Chronic kidney disease                                     | 2.3<br>(2.0 to 2.5)                  | 0.2<br>(0.2 to 0.2)                      | 0.1<br>(0.1 to 0.2)               | 65.9<br>(51.7 to 81.7)                            | 14.0<br>(5.9 to 22.6)                               |
| Chronic kidney disease due to diabetes mellitus            | 1.3<br>(1.2 to 1.5)                  | 0.1<br>(0.1 to 0.1)                      | 0.1<br>(0.1 to 0.1)               | 68.5<br>(49.1 to 90.9)                            | 14.4<br>(4.4 to 25.6)                               |
| Chronic kidney disease due to hypertension                 | 0.4<br>(0.3 to 0.4)                  | < 0.05<br>(< 0.05 to < 0.05)             | < 0.05<br>(< 0.05 to < 0.05)      | 58.4<br>(37.0 to 82.6)                            | 12.3<br>(-0.7 to 26.7)                              |
| Chronic kidney disease due to glomerulonephritis           | 0.3<br>(0.3 to 0.4)                  | < 0.05<br>(< 0.05 to < 0.05)             | < 0.05<br>(< 0.05 to < 0.05)      | 64.5<br>(38.3 to 97.2)                            | 16.2<br>(3.6 to 29.4)                               |
| Chronic kidney disease due to other causes                 | 0.2<br>(0.2 to 0.3)                  | < 0.05<br>(< 0.05 to < 0.05)             | < 0.05<br>(< 0.05 to < 0.05)      | 66.5<br>(45.1 to 94.8)                            | 15.0<br>(3.6 to 27.7)                               |
| Urinary diseases and male infertility                      | 1.6<br>(1.3 to 1.8)                  | 6.6†<br>(5.8 to 7.5)                     | < 0.05<br>(< 0.05 to < 0.05)      | 39.4<br>(29.7 to 49.6)                            | -1.9<br>(-7.9 to 4.8)                               |
| Interstitial nephritis and urinary tract infections        | 0.1<br>(0.1 to 0.1)                  | 5.9<br>(5.1 to 6.9)                      | < 0.05<br>(< 0.05 to < 0.05)      | 34.1<br>(10.7 to 62.5)                            | -2.8<br>(-17.2 to 13.8)                             |
| Urolithiasis                                               | < 0.05<br>(< 0.05 to < 0.05)         | 0.6<br>(0.5 to 0.7)                      | < 0.05<br>(< 0.05 to < 0.05)      | 43.9<br>(33.5 to 54.2)                            | -1.8<br>(-13.0 to 10.7)                             |
| Benign prostatic hyperplasia                               | 0.4<br>(0.4 to 0.5)                  | 0.1<br>(0.1 to 0.1)                      | < 0.05<br>(< 0.05 to < 0.05)      | 47.1<br>(32.4 to 63.1)                            | -1.1<br>(-8.4 to 7.5)                               |
| Male infertility                                           | 0.9<br>(0.7 to 1.2)                  | --                                       | < 0.05<br>(< 0.05 to < 0.05)      | 36.6<br>(27.7 to 45.6)                            | -0.4<br>(-6.7 to 6.1)                               |
| Other urinary diseases                                     | --                                   | --                                       | < 0.05<br>(< 0.05 to < 0.05)      | 12.7<br>(-2.6 to 30.6)                            | -18.8<br>(-27.7 to -8.8)                            |
| Gynecological diseases                                     | 14.1<br>(13.2 to 14.9)               | 6.0†<br>(5.5 to 6.5)                     | 0.2<br>(0.1 to 0.3)               | 41.8<br>(34.2 to 49.8)                            | -1.6<br>(-6.2 to 3.3)                               |
| Uterine fibroids                                           | 1.4<br>(1.2 to 1.6)                  | 0.2<br>(0.2 to 0.2)                      | < 0.05<br>(< 0.05 to < 0.05)      | 40.9<br>(23.1 to 62.7)                            | -3.1<br>(-14.4 to 10.6)                             |
| Polycystic ovarian syndrome                                | 0.2<br>(0.1 to 0.2)                  | 0.1<br>(0.1 to 0.1)                      | < 0.05<br>(< 0.05 to < 0.05)      | 38.3<br>(18.7 to 61.0)                            | 0.5<br>(-12.5 to 16.6)                              |
| Female infertility                                         | 1.0<br>(0.5 to 1.9)                  | --                                       | < 0.05<br>(< 0.05 to < 0.05)      | 45.4<br>(20.1 to 76.5)                            | 3.6<br>(-13.3 to 25.1)                              |
| Endometriosis                                              | < 0.05<br>(< 0.05 to 0.1)            | 0.2<br>(0.1 to 0.2)                      | < 0.05<br>(< 0.05 to < 0.05)      | 44.4<br>(1.6 to 104.6)                            | 1.0<br>(-24.8 to 36.9)                              |
| Genital prolapse                                           | 1.3<br>(1.2 to 1.5)                  | 0.1<br>(0.1 to 0.2)                      | < 0.05<br>(< 0.05 to < 0.05)      | 18.0<br>(6.1 to 31.1)                             | -20.2<br>(-27.1 to -12.3)                           |
| Premenstrual syndrome                                      | 9.5<br>(8.8 to 10.3)                 | 3.4<br>(3.1 to 3.7)                      | 0.1<br>(< 0.05 to 0.1)            | 43.2<br>(31.9 to 56.6)                            | 0.3<br>(-6.9 to 8.7)                                |
| Other gynecological diseases                               | 2.3<br>(1.9 to 2.6)                  | 2.0<br>(1.6 to 2.4)                      | 0.1<br>(< 0.05 to 0.1)            | 41.9<br>(29.8 to 55.6)                            | -0.2<br>(-7.9 to 8.1)                               |
| Hemoglobinopathies and hemolytic anaemias                  | 24.3<br>(23.1 to 25.7)               | --                                       | < 0.05<br>(< 0.05 to 0.1)         | 50.5<br>(15.2 to 167.2)                           | 7.9<br>(-13.1 to 73.4)                              |
| Thalassemias                                               | < 0.05<br>(< 0.05 to < 0.05)         | --                                       | < 0.05<br>(< 0.05 to < 0.05)      | 45.3<br>(3.4 to 106.6)                            | 27.6<br>(-2.8 to 72.3)                              |
| Thalassaemias trait                                        | 1.6<br>(0.8 to 2.9)                  | --                                       | < 0.05<br>(< 0.05 to < 0.05)      | 72.2<br>(13.5 to 448.1)                           | 22.2<br>(-16.4 to 265.3)                            |
| Sickle cell disorders                                      | < 0.05<br>(< 0.05 to < 0.05)         | --                                       | < 0.05<br>(< 0.05 to < 0.05)      | 43.5<br>(32.5 to 70.0)                            | 6.9<br>(-1.2 to 27.0)                               |
| Sickle cell trait                                          | 0.1<br>(0.1 to 0.2)                  | --                                       | < 0.05<br>(< 0.05 to < 0.05)      | 85.3<br>(40.5 to 145.4)                           | 52.1<br>(23.3 to 92.9)                              |
| G6PD deficiency                                            | 5.3<br>(4.6 to 6.0)                  | --                                       | < 0.05<br>(< 0.05 to < 0.05)      | 81.4<br>(43.5 to 128.8)                           | 29.7<br>(10.1 to 55.5)                              |
| G6PD trait                                                 | 17.0<br>(16.4 to 17.7)               | --                                       | < 0.05<br>(< 0.05 to < 0.05)      | 89.2<br>(45.9 to 149.2)                           | 32.3<br>(9.7 to 64.5)                               |
| Other hemoglobinopathies and hemolytic anaemias            | 1.0<br>(0.9 to 1.2)                  | --                                       | < 0.05<br>(< 0.05 to < 0.05)      | 27.4<br>(6.0 to 55.4)                             | -4.1<br>(-16.9 to 11.7)                             |
| Endocrine, metabolic, blood, and immune disorders          | 2.0<br>(1.8 to 2.2)                  | 0.3<br>(0.2 to 0.3)                      | 0.1<br>(< 0.05 to 0.1)            | 37.4<br>(26.2 to 49.4)                            | -1.8<br>(-7.7 to 4.0)                               |
| <b>Musculoskeletal disorders</b>                           | <b>17.2</b><br><b>(16.2 to 18.2)</b> | <b>8.8</b><br><b>(7.7 to 9.9)</b>        | <b>1.9</b><br><b>(1.3 to 2.5)</b> | <b>44.1</b><br><b>(39.5 to 49.0)</b>              | <b>-0.6</b><br><b>(-2.8 to 1.8)</b>                 |
| Rheumatoid arthritis                                       | 0.1<br>(0.1 to 0.2)                  | < 0.05<br>(< 0.05 to < 0.05)             | < 0.05<br>(< 0.05 to 0.1)         | 44.8<br>(24.7 to 67.9)                            | 0.1<br>(-9.0 to 9.6)                                |
| Osteoarthritis                                             | 2.9<br>(2.7 to 3.1)                  | 0.2<br>(0.2 to 0.2)                      | 0.2<br>(0.1 to 0.2)               | 42.5<br>(36.2 to 49.1)                            | -2.9<br>(-6.2 to 0.8)                               |
| Low back and neck pain                                     | 10.4<br>(9.5 to 11.4)                | 4.3<br>(3.8 to 4.9)                      | 1.2<br>(0.8 to 1.6)               | 46.0<br>(40.7 to 51.1)                            | 1.0<br>(-2.0 to 3.9)                                |
| Low back pain                                              | 6.9<br>(6.0 to 8.1)                  | 3.3<br>(2.8 to 3.9)                      | 0.8<br>(0.6 to 1.1)               | 46.3<br>(38.5 to 53.9)                            | 1.5<br>(-2.8 to 5.9)                                |
| Neck pain                                                  | 4.0<br>(3.4 to 4.7)                  | 1.0<br>(0.8 to 1.2)                      | 0.4<br>(0.3 to 0.6)               | 45.2<br>(40.4 to 50.1)                            | -0.1<br>(-2.2 to 1.9)                               |
| Gout                                                       | 0.4<br>(0.3 to 0.4)                  | 0.1<br>(0.1 to 0.1)                      | < 0.05<br>(< 0.05 to < 0.05)      | 45.6<br>(19.4 to 77.7)                            | 0.2<br>(-13.0 to 15.3)                              |
| Other musculoskeletal disorders                            | 4.9<br>(4.0 to 5.9)                  | 4.1<br>(3.3 to 5.1)                      | 0.4<br>(0.3 to 0.6)               | 39.8<br>(27.3 to 53.5)                            | -3.7<br>(-10.7 to 4.0)                              |
| <b>Other non-communicable diseases</b>                     | <b>83.0</b><br><b>(81.0 to 84.7)</b> | <b>237.6†</b><br><b>(220.9 to 255.5)</b> | <b>1.9</b><br><b>(1.2 to 2.6)</b> | <b>39.9</b><br><b>(37.8 to 42.1)</b>              | <b>1.7</b><br><b>(0.4 to 3.1)</b>                   |
| Congenital anomalies                                       | 1.0<br>(0.9 to 1.2)                  | --                                       | 0.1<br>(0.1 to 0.2)               | 43.9<br>(34.3 to 54.3)                            | 5.7<br>(-0.9 to 12.4)                               |
| Neural tube defects                                        | 0.1<br>(0.1 to 0.1)                  | --                                       | < 0.05<br>(< 0.05 to < 0.05)      | 43.7<br>(20.2 to 71.5)                            | 5.0<br>(-10.0 to 21.9)                              |
| Congenital heart anomalies                                 | 0.3<br>(0.2 to 0.3)                  | --                                       | < 0.05<br>(< 0.05 to < 0.05)      | 48.8<br>(31.0 to 68.5)                            | 8.0<br>(-3.5 to 19.9)                               |
| Orofacial clefts                                           | 0.1<br>(0.1 to 0.1)                  | --                                       | < 0.05<br>(< 0.05 to < 0.05)      | 34.0<br>(19.6 to 49.8)                            | -1.3<br>(-12.0 to 10.3)                             |
| Down's syndrome                                            | < 0.05<br>(< 0.05 to < 0.05)         | --                                       | < 0.05<br>(< 0.05 to < 0.05)      | 39.4<br>(27.6 to 50.8)                            | 2.2<br>(-6.5 to 10.4)                               |
| Turner syndrome                                            | < 0.05<br>(< 0.05 to < 0.05)         | --                                       | < 0.05<br>(< 0.05 to < 0.05)      | 65.2<br>(36.5 to 94.3)                            | 19.5<br>(2.1 to 38.9)                               |
| Klinefelter syndrome                                       | < 0.05<br>(< 0.05 to < 0.05)         | --                                       | < 0.05<br>(< 0.05 to < 0.05)      | 41.5<br>(4.9 to 90.2)                             | 2.6<br>(-24.1 to 37.4)                              |



| Cause                                         | Prevalence in thousands (95% UI)     | Incidence in thousands (95% UI)    | YLDs in thousands (95% UI)        |                                                   |                                                     |
|-----------------------------------------------|--------------------------------------|------------------------------------|-----------------------------------|---------------------------------------------------|-----------------------------------------------------|
|                                               | 2016 counts                          | 2016 counts                        | 2016 counts                       | Percentage change in counts between 2006 and 2016 | Percentage change in age-standardised rates between |
| Other chromosomal abnormalities               | < 0.05<br>(< 0.05 to 0.1)            | --                                 | < 0.05<br>(< 0.05 to < 0.05)      | 24.0<br>(-0.1 to 53.0)                            | 1.1<br>(-16.1 to 22.8)                              |
| Congenital musculoskeletal and limb anomalies | 0.1<br>(0.1 to 0.1)                  | --                                 | < 0.05<br>(< 0.05 to < 0.05)      | 47.2<br>(29.3 to 66.0)                            | 6.2<br>(-5.1 to 17.6)                               |
| Urogenital congenital anomalies               | 0.1<br>(0.1 to 0.1)                  | --                                 | < 0.05<br>(< 0.05 to < 0.05)      | 29.9<br>(20.3 to 40.2)                            | -0.4<br>(-7.6 to 7.7)                               |
| Digestive congenital anomalies                | 0.2<br>(0.2 to 0.2)                  | --                                 | < 0.05<br>(< 0.05 to < 0.05)      | 37.6<br>(16.7 to 63.6)                            | 0.3<br>(-13.8 to 16.4)                              |
| Other congenital anomalies                    | 0.4<br>(0.3 to 0.6)                  | --                                 | 0.1<br>(< 0.05 to 0.1)            | 45.8<br>(28.3 to 65.5)                            | 7.1<br>(-4.4 to 20.5)                               |
| Skin and subcutaneous diseases                | 37.1<br>(36.2 to 38.2)               | 77.4<br>(73.2 to 82.1)             | 1.0<br>(0.6 to 1.4)               | 35.5<br>(32.5 to 38.3)                            | -0.6<br>(-2.3 to 1.3)                               |
| Dermatitis                                    | 5.3<br>(4.9 to 5.7)                  | 7.7<br>(7.1 to 8.4)                | 0.2<br>(0.1 to 0.3)               | 30.5<br>(25.2 to 35.8)                            | -0.0<br>(-3.5 to 3.4)                               |
| Psoriasis                                     | 0.9<br>(0.8 to 0.9)                  | 0.1<br>(0.1 to 0.1)                | 0.1<br>(0.1 to 0.1)               | 41.8<br>(28.7 to 56.8)                            | 0.6<br>(-7.2 to 9.0)                                |
| Cellulitis                                    | < 0.05<br>(< 0.05 to < 0.05)         | 0.6<br>(0.6 to 0.7)                | < 0.05<br>(< 0.05 to < 0.05)      | 35.2<br>(17.0 to 56.7)                            | -5.0<br>(-18.6 to 11.2)                             |
| Pyoderma                                      | 0.1<br>(0.1 to 0.1)                  | 2.8<br>(2.7 to 2.9)                | < 0.05<br>(< 0.05 to < 0.05)      | 38.0<br>(23.0 to 55.1)                            | -0.5<br>(-7.7 to 7.1)                               |
| Scabies                                       | 4.8<br>(4.1 to 5.6)                  | 15.1<br>(12.8 to 17.7)             | 0.1<br>(0.1 to 0.2)               | 36.2<br>(31.1 to 41.9)                            | -0.3<br>(-3.4 to 3.1)                               |
| Fungal skin diseases                          | 8.5<br>(7.6 to 9.6)                  | 28.6<br>(25.4 to 32.1)             | < 0.05<br>(< 0.05 to 0.1)         | 36.3<br>(33.8 to 39.0)                            | -0.1<br>(-1.3 to 1.0)                               |
| Viral skin diseases                           | 3.3<br>(3.1 to 3.5)                  | 4.8<br>(4.5 to 5.2)                | 0.1<br>(0.1 to 0.1)               | 36.3<br>(31.1 to 41.9)                            | 0.0<br>(-3.2 to 3.6)                                |
| Acne vulgaris                                 | 10.9<br>(10.0 to 11.9)               | 6.6<br>(5.7 to 7.9)                | 0.3<br>(0.2 to 0.4)               | 39.5<br>(32.4 to 46.2)                            | -0.2<br>(-4.9 to 4.5)                               |
| Alopecia areata                               | 0.3<br>(0.3 to 0.3)                  | 0.5<br>(0.5 to 0.5)                | < 0.05<br>(< 0.05 to < 0.05)      | 40.1<br>(23.9 to 59.1)                            | -0.5<br>(-10.4 to 11.2)                             |
| Pruritus                                      | 1.0<br>(0.9 to 1.2)                  | 0.8<br>(0.7 to 0.9)                | < 0.05<br>(< 0.05 to < 0.05)      | 36.1<br>(27.4 to 45.6)                            | -2.2<br>(-7.2 to 3.1)                               |
| Urticaria                                     | 1.1<br>(1.0 to 1.3)                  | 2.0<br>(1.8 to 2.4)                | 0.1<br>(< 0.05 to 0.1)            | 29.1<br>(20.4 to 38.1)                            | 0.1<br>(-5.8 to 6.1)                                |
| Decubitus ulcer                               | < 0.05<br>(< 0.05 to < 0.05)         | < 0.05<br>(< 0.05 to < 0.05)       | < 0.05<br>(< 0.05 to < 0.05)      | 40.0<br>(31.7 to 48.5)                            | -5.2<br>(-17.5 to 10.1)                             |
| Other skin and subcutaneous diseases          | 6.9<br>(6.6 to 7.1)                  | 7.6<br>(7.4 to 7.9)                | < 0.05<br>(< 0.05 to 0.1)         | 28.6<br>(24.6 to 33.0)                            | -7.9<br>(-10.1 to -5.5)                             |
| Sense organ diseases                          | 19.3<br>(18.6 to 20.0)               | 10.9†<br>(10.1 to 11.7)            | 0.6<br>(0.4 to 0.9)               | 45.1<br>(41.3 to 49.1)                            | 3.3<br>(1.4 to 5.6)                                 |
| Glaucoma                                      | < 0.05<br>(< 0.05 to < 0.05)         | --                                 | < 0.05<br>(< 0.05 to < 0.05)      | 36.4<br>(13.5 to 63.1)                            | -1.2<br>(-14.1 to 14.0)                             |
| Cataract                                      | 0.3<br>(0.2 to 0.3)                  | --                                 | < 0.05<br>(< 0.05 to < 0.05)      | 30.7<br>(18.8 to 43.2)                            | -3.3<br>(-8.4 to 2.2)                               |
| Macular degeneration                          | < 0.05<br>(< 0.05 to < 0.05)         | --                                 | < 0.05<br>(< 0.05 to < 0.05)      | 36.4<br>(16.8 to 61.8)                            | 0.1<br>(-12.5 to 15.0)                              |
| Refraction and accommodation disorders        | 7.6<br>(7.2 to 8.1)                  | --                                 | 0.2<br>(0.1 to 0.2)               | 40.1<br>(34.7 to 45.6)                            | -0.1<br>(-2.8 to 2.7)                               |
| Age-related and other hearing loss            | 11.6<br>(10.6 to 12.7)               | --                                 | 0.4<br>(0.2 to 0.5)               | 49.7<br>(44.0 to 56.8)                            | 6.6<br>(3.3 to 10.6)                                |
| Other vision loss                             | 0.3<br>(0.2 to 0.3)                  | --                                 | < 0.05<br>(< 0.05 to < 0.05)      | 30.9<br>(11.9 to 47.9)                            | -3.7<br>(-11.1 to 4.3)                              |
| Other sense organ diseases                    | 2.5<br>(2.3 to 2.7)                  | 10.9<br>(10.1 to 11.7)             | 0.1<br>(< 0.05 to 0.1)            | 42.1<br>(34.2 to 50.6)                            | 0.0<br>(-3.9 to 3.7)                                |
| Oral disorders                                | 56.2<br>(53.0 to 58.8)               | 149.3†<br>(134.2 to 165.9)         | 0.1<br>(0.1 to 0.2)               | 45.7<br>(41.7 to 49.4)                            | 1.1<br>(-1.1 to 3.2)                                |
| Caries of deciduous teeth                     | 5.4<br>(3.7 to 6.9)                  | 22.9<br>(13.3 to 32.7)             | < 0.05<br>(< 0.05 to < 0.05)      | 20.1<br>(5.7 to 38.4)                             | 0.2<br>(-12.5 to 15.1)                              |
| Caries of permanent teeth                     | 47.3<br>(43.7 to 50.6)               | 126.1<br>(113.5 to 138.9)          | < 0.05<br>(< 0.05 to 0.1)         | 60.2<br>(53.6 to 67.0)                            | 12.8<br>(8.8 to 16.8)                               |
| Periodontal disease                           | 1.4<br>(1.1 to 1.8)                  | 0.2<br>(0.1 to 0.2)                | < 0.05<br>(< 0.05 to < 0.05)      | 47.4<br>(39.8 to 55.6)                            | 0.7<br>(-3.5 to 5.2)                                |
| Edentulism and severe tooth loss              | 1.5<br>(1.3 to 1.8)                  | 0.1<br>(0.1 to 0.2)                | < 0.05<br>(< 0.05 to 0.1)         | 43.0<br>(35.2 to 50.9)                            | -1.0<br>(-4.3 to 2.6)                               |
| Other oral disorders                          | 2.3<br>(2.1 to 2.4)                  | --                                 | 0.1<br>(< 0.05 to 0.1)            | 42.4<br>(36.6 to 48.1)                            | -0.0<br>(-3.3 to 2.8)                               |
| <b>Injuries</b>                               | <b>16.9</b><br><b>(16.0 to 17.8)</b> | <b>8.4†</b><br><b>(8.0 to 8.9)</b> | <b>0.6</b><br><b>(0.4 to 0.9)</b> | <b>52.4</b><br><b>(49.5 to 55.5)</b>              | <b>7.9</b><br><b>(6.2 to 9.6)</b>                   |
| <b>Transport injuries</b>                     | <b>3.1</b><br><b>(2.9 to 3.4)</b>    | <b>1.2</b><br><b>(1.1 to 1.4)</b>  | <b>0.2</b><br><b>(0.1 to 0.2)</b> | <b>58.4</b><br><b>(54.2 to 62.9)</b>              | <b>12.0</b><br><b>(9.7 to 14.3)</b>                 |
| Road injuries                                 | 2.0<br>(1.8 to 2.1)                  | 0.9<br>(0.8 to 1.1)                | 0.1<br>(0.1 to 0.1)               | 68.7<br>(64.5 to 73.2)                            | 17.7<br>(15.4 to 20.1)                              |
| Pedestrian road injuries                      | 0.4<br>(0.4 to 0.5)                  | 0.1<br>(0.1 to 0.2)                | < 0.05<br>(< 0.05 to < 0.05)      | 70.3<br>(66.0 to 75.0)                            | 18.8<br>(16.5 to 21.1)                              |
| Cyclist road injuries                         | 0.3<br>(0.2 to 0.3)                  | 0.1<br>(0.1 to 0.2)                | < 0.05<br>(< 0.05 to < 0.05)      | 76.1<br>(71.8 to 81.0)                            | 21.2<br>(18.9 to 23.7)                              |
| Motorcyclist road injuries                    | 0.5<br>(0.4 to 0.6)                  | 0.2<br>(0.1 to 0.2)                | < 0.05<br>(< 0.05 to < 0.05)      | 80.6<br>(75.9 to 85.5)                            | 26.6<br>(23.9 to 29.3)                              |
| Motor vehicle road injuries                   | 0.6<br>(0.5 to 0.7)                  | 0.3<br>(0.3 to 0.4)                | < 0.05<br>(< 0.05 to < 0.05)      | 53.1<br>(48.9 to 57.6)                            | 7.2<br>(4.8 to 9.5)                                 |
| Other road injuries                           | 0.3<br>(0.2 to 0.3)                  | 0.2<br>(0.1 to 0.2)                | < 0.05<br>(< 0.05 to < 0.05)      | 83.9<br>(79.3 to 88.9)                            | 29.4<br>(27.0 to 31.9)                              |
| Other transport injuries                      | 1.2<br>(1.0 to 1.4)                  | 0.3<br>(0.3 to 0.4)                | 0.1<br>(< 0.05 to 0.1)            | 42.5<br>(38.1 to 47.2)                            | 2.1<br>(-0.2 to 4.7)                                |
| <b>Unintentional injuries</b>                 | <b>12.0</b><br><b>(11.2 to 12.8)</b> | <b>6.1</b><br><b>(5.7 to 6.6)</b>  | <b>0.4</b><br><b>(0.2 to 0.5)</b> | <b>51.7</b><br><b>(48.7 to 54.9)</b>              | <b>7.6</b><br><b>(5.9 to 9.4)</b>                   |
| Falls                                         | 2.9<br>(2.5 to 3.3)                  | 1.4<br>(1.2 to 1.6)                | 0.1<br>(0.1 to 0.1)               | 70.2<br>(66.6 to 74.2)                            | 20.2<br>(18.2 to 22.4)                              |
| Drowning                                      | 0.2<br>(0.1 to 0.2)                  | < 0.05<br>(< 0.05 to < 0.05)       | < 0.05<br>(< 0.05 to < 0.05)      | 48.8<br>(44.4 to 53.1)                            | 4.0<br>(1.1 to 7.1)                                 |
| Fire, heat, and hot substances                | 1.4<br>(1.1 to 1.7)                  | 0.2<br>(0.1 to 0.2)                | < 0.05<br>(< 0.05 to 0.1)         | 55.3<br>(48.8 to 62.7)                            | 8.4<br>(5.0 to 12.5)                                |
| Poisonings                                    | 0.1<br>(< 0.05 to 0.1)               | 0.1<br>(0.1 to 0.1)                | < 0.05<br>(< 0.05 to < 0.05)      | 46.5<br>(33.2 to 59.8)                            | 4.5<br>(-3.2 to 12.4)                               |
| Exposure to mechanical forces                 | 2.2<br>(1.9 to 2.7)                  | 1.0<br>(0.9 to 1.2)                | 0.1<br>(< 0.05 to 0.1)            | 63.2<br>(59.8 to 67.0)                            | 13.3<br>(11.5 to 15.3)                              |
| Unintentional firearm injuries                | 0.1<br>(0.1 to 0.1)                  | < 0.05<br>(< 0.05 to < 0.05)       | < 0.05<br>(< 0.05 to < 0.05)      | 46.8<br>(42.7 to 51.1)                            | 1.4<br>(-0.7 to 3.7)                                |
| Unintentional suffocation                     | 0.1<br>(0.1 to 0.2)                  | < 0.05<br>(< 0.05 to < 0.05)       | < 0.05<br>(< 0.05 to < 0.05)      | 42.0<br>(38.1 to 46.2)                            | 1.6<br>(-0.6 to 3.9)                                |
| Other exposure to mechanical forces           | 1.9<br>(1.6 to 2.5)                  | 1.0<br>(0.8 to 1.2)                | < 0.05<br>(< 0.05 to 0.1)         | 68.0<br>(64.4 to 71.9)                            | 16.0<br>(14.1 to 18.1)                              |



| Cause                                                                               | Prevalence in thousands (95% UI)     | Incidence in thousands (95% UI)                                                             | YLDs in thousands (95% UI)                                                                 |                                                   |                                                     |
|-------------------------------------------------------------------------------------|--------------------------------------|---------------------------------------------------------------------------------------------|--------------------------------------------------------------------------------------------|---------------------------------------------------|-----------------------------------------------------|
|                                                                                     | 2016 counts                          | 2016 counts                                                                                 | 2016 counts                                                                                | Percentage change in counts between 2006 and 2016 | Percentage change in age-standardised rates between |
| Adverse effects of medical treatment                                                | 0.1<br>( $< 0.05$ to 0.1)            | 0.8<br>(0.7 to 0.9)                                                                         | $< 0.05$<br>( $< 0.05$ to $< 0.05$ )                                                       | 20.6<br>(12.6 to 27.7)                            | -5.3<br>(-10.1 to -0.6)                             |
| Animal contact                                                                      | 0.6<br>(0.5 to 0.7)                  | 0.7<br>(0.6 to 0.9)                                                                         | $< 0.05$<br>( $< 0.05$ to $< 0.05$ )                                                       | 62.1<br>(51.4 to 72.6)                            | 15.5<br>(9.5 to 21.6)                               |
| Venomous animal contact                                                             | 0.3<br>(0.2 to 0.3)                  | 0.3<br>(0.3 to 0.4)                                                                         | $< 0.05$<br>( $< 0.05$ to $< 0.05$ )                                                       | 60.3<br>(47.1 to 73.7)                            | 14.2<br>(6.6 to 22.1)                               |
| Non-venomous animal contact                                                         | 0.3<br>(0.2 to 0.4)                  | 0.4<br>(0.3 to 0.5)                                                                         | $< 0.05$<br>( $< 0.05$ to $< 0.05$ )                                                       | 68.1<br>(63.5 to 73.1)                            | 19.2<br>(16.6 to 21.9)                              |
| Foreign body                                                                        | 0.7<br>(0.6 to 0.9)                  | 0.4<br>(0.4 to 0.5)                                                                         | $< 0.05$<br>( $< 0.05$ to $< 0.05$ )                                                       | 29.3<br>(25.3 to 33.3)                            | -6.4<br>(-8.5 to -4.1)                              |
| Pulmonary aspiration and foreign body in airway                                     | 0.5<br>(0.4 to 0.6)                  | 0.2<br>(0.2 to 0.2)                                                                         | $< 0.05$<br>( $< 0.05$ to $< 0.05$ )                                                       | 27.4<br>(23.2 to 31.7)                            | -7.3<br>(-9.7 to -4.9)                              |
| Foreign body in eyes                                                                | $< 0.05$<br>( $< 0.05$ to $< 0.05$ ) | 0.1<br>(0.1 to 0.2)                                                                         | $< 0.05$<br>( $< 0.05$ to $< 0.05$ )                                                       | 43.1<br>(36.6 to 50.7)                            | 2.2<br>(-0.8 to 6.0)                                |
| Foreign body in other body part                                                     | 0.2<br>(0.2 to 0.3)                  | 0.1<br>(0.1 to 0.1)                                                                         | $< 0.05$<br>( $< 0.05$ to $< 0.05$ )                                                       | 32.4<br>(28.2 to 37.2)                            | -4.9<br>(-7.2 to -2.2)                              |
| Environmental heat and cold exposure                                                | 1.7<br>(1.4 to 2.0)                  | 0.5<br>(0.4 to 0.6)                                                                         | 0.1<br>( $< 0.05$ to 0.1)                                                                  | 47.5<br>(44.4 to 50.9)                            | 4.2<br>(2.4 to 6.2)                                 |
| Other unintentional injuries                                                        | 2.3<br>(1.8 to 2.7)                  | 1.0<br>(0.8 to 1.1)                                                                         | 0.1<br>( $< 0.05$ to 0.1)                                                                  | 33.6<br>(30.8 to 36.5)                            | -4.9<br>(-6.5 to -3.3)                              |
| <b>Self-harm and interpersonal violence</b>                                         | <b>4.5</b><br><b>(4.0 to 5.1)</b>    | <b>1.0†</b><br><b>(0.9 to 1.2)</b>                                                          | <b>0.1</b><br><b>(0.1 to 0.1)</b>                                                          | <b>43.7</b><br><b>(40.5 to 47.1)</b>              | <b>0.3</b><br><b>(-1.4 to 2.1)</b>                  |
| Self-harm                                                                           | 0.2<br>(0.2 to 0.2)                  | 0.1<br>(0.1 to 0.1)                                                                         | $< 0.05$<br>( $< 0.05$ to $< 0.05$ )                                                       | 39.8<br>(34.6 to 45.5)                            | -3.7<br>(-6.3 to -0.8)                              |
| Self-harm by firearm                                                                | $< 0.05$<br>( $< 0.05$ to $< 0.05$ ) | $< 0.05$<br>( $< 0.05$ to $< 0.05$ )                                                        | $< 0.05$<br>( $< 0.05$ to $< 0.05$ )                                                       | 56.3<br>(50.8 to 62.3)                            | 7.8<br>(4.7 to 11.1)                                |
| Self-harm by other specified means                                                  | 0.2<br>(0.1 to 0.2)                  | 0.1<br>(0.1 to 0.1)                                                                         | $< 0.05$<br>( $< 0.05$ to $< 0.05$ )                                                       | 39.0<br>(33.6 to 44.9)                            | -4.2<br>(-6.8 to -1.2)                              |
| Interpersonal violence                                                              | 4.4<br>(3.8 to 4.9)                  | 0.9†<br>(0.8 to 1.1)                                                                        | 0.1<br>(0.1 to 0.1)                                                                        | 44.1<br>(40.8 to 47.6)                            | 0.8<br>(-1.1 to 2.6)                                |
| Assault by firearm                                                                  | $< 0.05$<br>( $< 0.05$ to $< 0.05$ ) | $< 0.05$<br>( $< 0.05$ to $< 0.05$ )                                                        | $< 0.05$<br>( $< 0.05$ to $< 0.05$ )                                                       | 29.6<br>(24.7 to 35.0)                            | -10.6<br>(-13.2 to -7.7)                            |
| Assault by sharp object                                                             | 0.3<br>(0.2 to 0.4)                  | 0.1<br>(0.1 to 0.2)                                                                         | $< 0.05$<br>( $< 0.05$ to $< 0.05$ )                                                       | 37.7<br>(33.2 to 42.0)                            | -4.6<br>(-6.9 to -2.2)                              |
| Sexual violence                                                                     | 2.9<br>(2.5 to 3.5)                  | --                                                                                          | $< 0.05$<br>( $< 0.05$ to $< 0.05$ )                                                       | 38.0<br>(31.4 to 44.4)                            | -1.8<br>(-5.7 to 2.4)                               |
| Assault by other means                                                              | 1.1<br>(0.9 to 1.3)                  | 0.8<br>(0.7 to 0.9)                                                                         | $< 0.05$<br>( $< 0.05$ to 0.1)                                                             | 50.1<br>(46.4 to 54.0)                            | 3.4<br>(1.3 to 5.4)                                 |
| <b>Forces of nature, conflict and terrorism, and executions and police conflict</b> | <b>0.1</b><br><b>(0.1 to 0.2)</b>    | <b><math>&lt; 0.05†</math></b><br><b>(<math>&lt; 0.05</math> to <math>&lt; 0.05</math>)</b> | <b><math>&lt; 0.05</math></b><br><b>(<math>&lt; 0.05</math> to <math>&lt; 0.05</math>)</b> | <b>117.3</b><br><b>(102.0 to 132.8)</b>           | <b>121.0</b><br><b>(105.2 to 135.7)</b>             |
| Exposure to forces of nature                                                        | --                                   | --                                                                                          | --                                                                                         | --                                                | --                                                  |
| Conflict and terrorism                                                              | 0.1<br>(0.1 to 0.1)                  | --                                                                                          | $< 0.05$<br>( $< 0.05$ to $< 0.05$ )                                                       | 124.5<br>(107.7 to 143.7)                         | 144.5<br>(126.2 to 165.9)                           |
| Executions and police conflict                                                      | $< 0.05$<br>( $< 0.05$ to $< 0.05$ ) | $< 0.05$<br>( $< 0.05$ to $< 0.05$ )                                                        | $< 0.05$<br>( $< 0.05$ to $< 0.05$ )                                                       | 65.8<br>(57.3 to 72.2)                            | 22.3<br>(16.0 to 26.2)                              |
| <b>Impairments</b>                                                                  | --                                   | --                                                                                          | --                                                                                         | --                                                | --                                                  |
| Anaemia                                                                             | 30.9<br>(26.6 to 35.2)               | --                                                                                          | 0.8<br>(0.5 to 1.2)                                                                        | 38.9<br>(19.0 to 62.2)                            | 2.8<br>(-8.9 to 17.4)                               |
| Developmental intellectual disability                                               | 2.1<br>(1.6 to 2.6)                  | --                                                                                          | 0.2<br>(0.2 to 0.3)                                                                        | 49.6<br>(40.9 to 58.8)                            | 7.7<br>(2.0 to 13.5)                                |
| Epilepsy                                                                            | 0.6<br>(0.4 to 0.9)                  | --                                                                                          | 0.2<br>(0.1 to 0.4)                                                                        | 55.4<br>(-16.2 to 193.3)                          | 10.8<br>(-42.6 to 117.1)                            |
| Guillain-Barre syndrome                                                             | $< 0.05$<br>( $< 0.05$ to $< 0.05$ ) | --                                                                                          | $< 0.05$<br>( $< 0.05$ to $< 0.05$ )                                                       | 38.4<br>(35.4 to 41.8)                            | -0.0<br>(-0.0 to -0.0)                              |
| Hearing loss                                                                        | 13.1<br>(12.1 to 14.1)               | --                                                                                          | 0.4<br>(0.3 to 0.6)                                                                        | 49.3<br>(44.3 to 54.9)                            | 6.9<br>(3.8 to 10.4)                                |
| Heart failure                                                                       | 0.3<br>(0.3 to 0.4)                  | --                                                                                          | $< 0.05$<br>( $< 0.05$ to $< 0.05$ )                                                       | 41.1<br>(30.9 to 53.1)                            | -0.7<br>(-7.1 to 6.9)                               |
| Infertility                                                                         | 3.9<br>(3.1 to 5.0)                  | --                                                                                          | $< 0.05$<br>( $< 0.05$ to $< 0.05$ )                                                       | 39.2<br>(32.2 to 46.6)                            | 1.0<br>(-4.2 to 6.0)                                |
| Pelvic inflammatory disease                                                         | 0.1<br>(0.1 to 0.2)                  | --                                                                                          | $< 0.05$<br>( $< 0.05$ to $< 0.05$ )                                                       | 34.8<br>(14.0 to 58.0)                            | -4.7<br>(-17.6 to 9.4)                              |
| Vision loss                                                                         | 8.5<br>(8.0 to 9.0)                  | --                                                                                          | 0.2<br>(0.2 to 0.4)                                                                        | 41.3<br>(36.2 to 47.2)                            | 0.1<br>(-2.2 to 2.6)                                |

We did not calculate incidence for the nine impairments, certain NTDs, and causes with only birth prevalence. Blank cells mean that no estimate is available.

† Incidence for aggregate causes represents the sum of the incidence of the causes below the aggregate.

‡ Incidence estimates for stroke represent first-ever stroke only.

^ Incidence of HIV/AIDS represents new infections of HIV only and does not include new infections of Tuberculosis in HIV positive cases.

SR Table 14: Prevalence, incidence, and YLDs for 2016, percentage change of YLD counts and percentage change of age-standardised YLD rates between 2006 and 2016 by cause and impairments, for all ages, Norway.

| Cause                                                                                | Prevalence in thousands (95% UI)       | Incidence in thousands (95% UI)                            | YLDs in thousands (95% UI)                                |                                                   |                                                     |
|--------------------------------------------------------------------------------------|----------------------------------------|------------------------------------------------------------|-----------------------------------------------------------|---------------------------------------------------|-----------------------------------------------------|
|                                                                                      | 2016 counts                            | 2016 counts                                                | 2016 counts                                               | Percentage change in counts between 2006 and 2016 | Percentage change in age-standardised rates between |
| <b>All causes</b>                                                                    | <b>4,867.2</b><br>(4,846.8 to 4,890.8) | <b>34,505.8†</b><br>(32,370.0 to 36,753.3)                 | <b>633.9</b><br>(471.6 to 819.8)                          | <b>13.3</b><br>(11.6 to 14.9)                     | <b>-1.1</b><br>(-2.7 to 0.4)                        |
| <b>Communicable, maternal, neonatal, and nutritional disorders</b>                   | <b>1,602.5</b><br>(1,518.7 to 1,681.1) | <b>20,053.1†</b><br>(17,926.2 to 22,218.2)                 | <b>21.4</b><br>(15.3 to 28.9)                             | <b>11.8</b><br>(5.8 to 18.8)                      | <b>0.2</b><br>(-5.3 to 6.9)                         |
| <b>HIV/AIDS and tuberculosis</b>                                                     | <b>493.3</b><br>(403.2 to 572.4)       | <b>0.6†</b><br>(0.4 to 0.7)                                | <b>0.6</b><br>(0.3 to 1.0)                                | <b>34.0</b><br>(12.6 to 52.1)                     | <b>15.1</b><br>(-3.7 to 31.7)                       |
| Tuberculosis                                                                         | 436.8<br>(351.3 to 531.1)              | 0.3†<br>(0.2 to 0.4)                                       | 0.1<br>( $< 0.05$ to 0.1)                                 | -4.8<br>(-11.7 to 3.3)                            | -15.7<br>(-22.7 to -8.4)                            |
| Drug-susceptible tuberculosis                                                        | 0.2<br>(0.2 to 0.3)                    | 0.3<br>(0.2 to 0.4)                                        | 0.1<br>( $< 0.05$ to 0.1)                                 | -5.1<br>(-12.1 to 3.1)                            | -16.0<br>(-23.2 to -8.7)                            |
| Multidrug-resistant tuberculosis without extensive drug resistance                   | $< 0.05$<br>( $< 0.05$ to $< 0.05$ )   | $< 0.05$<br>( $< 0.05$ to $< 0.05$ )                       | $< 0.05$<br>( $< 0.05$ to $< 0.05$ )                      | 2.7<br>(-32.1 to 49.8)                            | -9.1<br>(-40.2 to 32.5)                             |
| Extensively drug-resistant tuberculosis                                              | $< 0.05$<br>( $< 0.05$ to $< 0.05$ )   | $< 0.05$<br>( $< 0.05$ to $< 0.05$ )                       | $< 0.05$<br>( $< 0.05$ to $< 0.05$ )                      | 121.0<br>(45.9 to 222.3)                          | 95.6<br>(28.7 to 184.9)                             |
| Latent tuberculosis infection                                                        | 436.5<br>(351.1 to 530.9)              | --                                                         | --                                                        | --                                                | --                                                  |
| HIV/AIDS                                                                             | 6.0<br>(2.9 to 10.1)                   | 0.3^<br>(0.1 to 0.4)                                       | 0.5<br>(0.2 to 1.0)                                       | 42.2<br>(16.6 to 65.2)                            | 21.8<br>(-0.8 to 43.3)                              |
| Drug-susceptible HIV/AIDS - Tuberculosis                                             | $< 0.05$<br>( $< 0.05$ to $< 0.05$ )   | $< 0.05$<br>( $< 0.05$ to $< 0.05$ )                       | $< 0.05$<br>( $< 0.05$ to $< 0.05$ )                      | -33.5<br>(-40.0 to -25.8)                         | -43.1<br>(-48.6 to -36.5)                           |
| Multidrug-resistant HIV/AIDS - Tuberculosis without extensive drug resistance        | $< 0.05$<br>( $< 0.05$ to $< 0.05$ )   | $< 0.05$<br>( $< 0.05$ to $< 0.05$ )                       | $< 0.05$<br>( $< 0.05$ to $< 0.05$ )                      | -27.8<br>(-52.6 to 6.9)                           | -38.3<br>(-59.5 to -8.6)                            |
| Extensively drug-resistant HIV/AIDS - Tuberculosis                                   | $< 0.05$<br>( $< 0.05$ to $< 0.05$ )   | $< 0.05$<br>( $< 0.05$ to $< 0.05$ )                       | $< 0.05$<br>( $< 0.05$ to $< 0.05$ )                      | 55.2<br>(1.8 to 129.7)                            | 32.8<br>(-12.9 to 96.4)                             |
| HIV/AIDS resulting in other diseases                                                 | 6.0<br>(2.9 to 10.1)                   | 0.3<br>(0.1 to 0.4)                                        | 0.5<br>(0.2 to 1.0)                                       | 43.2<br>(17.6 to 66.2)                            | 22.7<br>(-0.3 to 44.3)                              |
| <b>Diarrhoea, lower respiratory infections, and other common infectious diseases</b> | <b>310.3</b><br>(290.2 to 331.8)       | <b>19,839.2†</b><br>(17,720.9 to 21,998.0)                 | <b>9.4</b><br>(6.1 to 13.9)                               | <b>10.8</b><br>(6.9 to 15.8)                      | <b>-0.9</b><br>(-4.2 to 2.6)                        |
| Diarrhoeal diseases                                                                  | 11.6<br>(10.8 to 12.5)                 | 777.9<br>(723.5 to 837.3)                                  | 1.3<br>(0.9 to 1.8)                                       | 7.1<br>(-0.8 to 16.3)                             | -4.2<br>(-12.0 to 4.7)                              |
| Intestinal infectious diseases                                                       | $< 0.05$<br>( $< 0.05$ to $< 0.05$ )   | $< 0.05†$<br>( $< 0.05$ to $< 0.05$ )                      | $< 0.05$<br>( $< 0.05$ to $< 0.05$ )                      | 5.4<br>(-10.3 to 24.4)                            | -8.5<br>(-22.1 to 7.9)                              |
| Typhoid fever                                                                        | $< 0.05$<br>( $< 0.05$ to $< 0.05$ )   | $< 0.05$<br>( $< 0.05$ to $< 0.05$ )                       | $< 0.05$<br>( $< 0.05$ to $< 0.05$ )                      | 10.6<br>(-9.5 to 35.1)                            | -2.9<br>(-20.4 to 19.0)                             |
| Paratyphoid fever                                                                    | $< 0.05$<br>( $< 0.05$ to $< 0.05$ )   | $< 0.05$<br>( $< 0.05$ to $< 0.05$ )                       | $< 0.05$<br>( $< 0.05$ to $< 0.05$ )                      | -0.5<br>(-18.1 to 21.7)                           | -13.1<br>(-28.0 to 5.4)                             |
| Other intestinal infectious diseases                                                 | --                                     | --                                                         | $< 0.05$<br>( $< 0.05$ to $< 0.05$ )                      | -32.5<br>(-50.6 to -10.3)                         | -42.9<br>(-61.0 to -19.2)                           |
| Lower respiratory infections                                                         | 2.7<br>(2.6 to 3.0)                    | 122.1<br>(112.9 to 132.4)                                  | 0.2<br>(0.1 to 0.2)                                       | 15.2<br>(1.5 to 30.6)                             | 0.7<br>(-11.4 to 14.7)                              |
| Upper respiratory infections                                                         | 241.8<br>(215.7 to 268.7)              | 18,510.2<br>(16,438.2 to 20,702.4)                         | 6.0<br>(3.6 to 9.4)                                       | 11.8<br>(6.5 to 17.2)                             | 0.3<br>(-4.2 to 4.9)                                |
| Otitis media                                                                         | 50.2<br>(42.9 to 61.1)                 | 341.1<br>(232.3 to 547.9)                                  | 1.2<br>(0.8 to 1.9)                                       | 7.4<br>(0.0 to 15.5)                              | -2.5<br>(-9.5 to 4.9)                               |
| Meningitis                                                                           | 1.0<br>(0.7 to 2.9)                    | 0.2<br>(0.2 to 0.2)                                        | 0.1<br>(0.1 to 0.4)                                       | 36.7<br>(3.9 to 389.7)                            | 7.7<br>(-8.5 to 172.2)                              |
| Pneumococcal meningitis                                                              | 0.2<br>(0.1 to 0.2)                    | $< 0.05$<br>( $< 0.05$ to $< 0.05$ )                       | $< 0.05$<br>( $< 0.05$ to $< 0.05$ )                      | 1.2<br>(-5.3 to 6.8)                              | -11.3<br>(-16.9 to -6.3)                            |
| H influenzae type B meningitis                                                       | 0.1<br>( $< 0.05$ to 0.1)              | $< 0.05$<br>( $< 0.05$ to $< 0.05$ )                       | $< 0.05$<br>( $< 0.05$ to $< 0.05$ )                      | 14.3<br>(8.4 to 19.9)                             | 0.8<br>(-4.9 to 5.9)                                |
| Meningococcal infection                                                              | 0.2<br>(0.1 to 2.1)                    | $< 0.05$<br>( $< 0.05$ to $< 0.05$ )                       | $< 0.05$<br>( $< 0.05$ to 0.3)                            | 243.6<br>(4.5 to 2,868.7)                         | 108.1<br>(-7.6 to 1,367.5)                          |
| Other meningitis                                                                     | 0.5<br>(0.4 to 0.7)                    | 0.2<br>(0.2 to 0.2)                                        | $< 0.05$<br>( $< 0.05$ to 0.1)                            | 7.4<br>(3.1 to 12.0)                              | -5.4<br>(-9.3 to -1.1)                              |
| Encephalitis                                                                         | 3.0<br>(1.9 to 4.5)                    | 2.5<br>(2.5 to 2.6)                                        | 0.3<br>(0.2 to 0.4)                                       | 12.0<br>(8.1 to 16.0)                             | -2.0<br>(-5.5 to 1.4)                               |
| Diphtheria                                                                           | $< 0.05$<br>( $< 0.05$ to $< 0.05$ )   | $< 0.05$<br>( $< 0.05$ to $< 0.05$ )                       | $< 0.05$<br>( $< 0.05$ to $< 0.05$ )                      | -27.6<br>(-61.0 to 29.8)                          | -35.9<br>(-63.9 to 8.1)                             |
| Whooping cough                                                                       | 0.3<br>(0.2 to 0.4)                    | 2.0<br>(1.6 to 2.6)                                        | $< 0.05$<br>( $< 0.05$ to $< 0.05$ )                      | -29.1<br>(-47.6 to -7.5)                          | -32.7<br>(-50.5 to -11.8)                           |
| Tetanus                                                                              | $< 0.05$<br>( $< 0.05$ to $< 0.05$ )   | $< 0.05$<br>( $< 0.05$ to $< 0.05$ )                       | $< 0.05$<br>( $< 0.05$ to $< 0.05$ )                      | -24.5<br>(-42.6 to -6.0)                          | -33.6<br>(-48.8 to -18.1)                           |
| Measles                                                                              | $< 0.05$<br>( $< 0.05$ to $< 0.05$ )   | $< 0.05$<br>( $< 0.05$ to $< 0.05$ )                       | $< 0.05$<br>( $< 0.05$ to $< 0.05$ )                      | --                                                | --                                                  |
| Varicella and herpes zoster                                                          | 5.2<br>(4.7 to 5.8)                    | 83.1<br>(80.2 to 86.4)                                     | 0.2<br>(0.1 to 0.4)                                       | 15.1<br>(1.3 to 30.7)                             | -0.1<br>(-12.5 to 14.3)                             |
| <b>Neglected tropical diseases and malaria</b>                                       | <b>0.8</b><br>(0.6 to 0.9)             | <b><math>&lt; 0.05†</math></b><br>( $< 0.05$ to $< 0.05$ ) | <b><math>&lt; 0.05</math></b><br>( $< 0.05$ to $< 0.05$ ) | <b>25.7</b><br>(-38.2 to 118.9)                   | <b>7.1</b><br>(-50.9 to 98.7)                       |
| Malaria                                                                              | --                                     | --                                                         | --                                                        | --                                                | --                                                  |
| Chagas disease                                                                       | 0.7<br>(0.5 to 0.8)                    | --                                                         | $< 0.05$<br>( $< 0.05$ to $< 0.05$ )                      | 42.5<br>(17.8 to 73.7)                            | 22.9<br>(3.5 to 46.4)                               |
| Leishmaniasis                                                                        | --                                     | --                                                         | --                                                        | --                                                | --                                                  |
| Visceral leishmaniasis                                                               | --                                     | --                                                         | --                                                        | --                                                | --                                                  |
| Cutaneous and mucocutaneous leishmaniasis                                            | --                                     | --                                                         | --                                                        | --                                                | --                                                  |
| African trypanosomiasis                                                              | --                                     | --                                                         | --                                                        | --                                                | --                                                  |
| Schistosomiasis                                                                      | --                                     | --                                                         | --                                                        | --                                                | --                                                  |
| Cysticercosis                                                                        | --                                     | --                                                         | --                                                        | --                                                | --                                                  |
| Cystic echinococcosis                                                                | $< 0.05$<br>( $< 0.05$ to 0.1)         | $< 0.05$<br>( $< 0.05$ to $< 0.05$ )                       | $< 0.05$<br>( $< 0.05$ to $< 0.05$ )                      | -30.1<br>(-95.7 to 926.7)                         | -39.0<br>(-96.3 to 832.0)                           |
| Lymphatic filariasis                                                                 | --                                     | --                                                         | --                                                        | --                                                | --                                                  |
| Onchocerciasis                                                                       | --                                     | --                                                         | --                                                        | --                                                | --                                                  |
| Trachoma                                                                             | --                                     | --                                                         | --                                                        | --                                                | --                                                  |
| Dengue                                                                               | --                                     | --                                                         | --                                                        | --                                                | --                                                  |
| Yellow fever                                                                         | --                                     | --                                                         | --                                                        | --                                                | --                                                  |
| Rabies                                                                               | $< 0.05$<br>( $< 0.05$ to $< 0.05$ )   | $< 0.05$<br>( $< 0.05$ to $< 0.05$ )                       | $< 0.05$<br>( $< 0.05$ to $< 0.05$ )                      | -10.0<br>(-28.6 to 14.8)                          | -21.7<br>(-38.5 to 0.5)                             |
| Intestinal nematode infections                                                       | --                                     | --                                                         | --                                                        | --                                                | --                                                  |
| Ascariasis                                                                           | --                                     | --                                                         | --                                                        | --                                                | --                                                  |

| Cause                                                                   | Prevalence in thousands (95% UI)              | Incidence in thousands (95% UI)                   | YLDs in thousands (95% UI)              |                                                   |                                                     |
|-------------------------------------------------------------------------|-----------------------------------------------|---------------------------------------------------|-----------------------------------------|---------------------------------------------------|-----------------------------------------------------|
|                                                                         | 2016 counts                                   | 2016 counts                                       | 2016 counts                             | Percentage change in counts between 2006 and 2016 | Percentage change in age-standardised rates between |
| Trichuriasis                                                            | --                                            | --                                                | --                                      | --                                                | --                                                  |
| Hookworm disease                                                        | --                                            | --                                                | --                                      | --                                                | --                                                  |
| Food-borne trematodiasis                                                | --                                            | --                                                | --                                      | --                                                | --                                                  |
| Leprosy                                                                 | --                                            | --                                                | --                                      | --                                                | --                                                  |
| Ebola virus disease                                                     | --                                            | --                                                | --                                      | --                                                | --                                                  |
| Zika virus disease                                                      | --                                            | --                                                | --                                      | --                                                | --                                                  |
| Guinea worm disease                                                     | --                                            | --                                                | --                                      | --                                                | --                                                  |
| Other neglected tropical diseases                                       | --                                            | --                                                | < 0.05<br>(< 0.05 to < 0.05)            | --                                                | --                                                  |
| <b>Maternal disorders</b>                                               | <b>3.8</b><br><b>(3.0 to 4.7)</b>             | <b>42.2†</b><br><b>(39.4 to 45.1)</b>             | <b>0.2</b><br><b>(0.1 to 0.3)</b>       | <b>19.4</b><br><b>(-15.2 to 65.3)</b>             | <b>3.1</b><br><b>(-27.1 to 44.2)</b>                |
| Maternal haemorrhage                                                    | 0.6<br>(0.4 to 1.0)                           | 3.8<br>(3.2 to 4.6)                               | < 0.05<br>(< 0.05 to < 0.05)            | 12.0<br>(-33.1 to 96.3)                           | -0.8<br>(-40.7 to 73.0)                             |
| Maternal sepsis and other pregnancy related infections                  | 1.0<br>(0.8 to 1.2)                           | 5.5<br>(4.7 to 6.3)                               | < 0.05<br>(< 0.05 to < 0.05)            | 7.9<br>(-48.0 to 118.9)                           | -7.5<br>(-56.4 to 88.3)                             |
| Maternal hypertensive disorders                                         | 2.2<br>(1.4 to 3.0)                           | 8.9<br>(7.8 to 10.0)                              | 0.1<br>(0.1 to 0.2)                     | 29.4<br>(-23.2 to 126.3)                          | 11.5<br>(-33.4 to 94.1)                             |
| Maternal obstructed labour and uterine rupture                          | 0.1<br>(< 0.05 to 0.1)                        | 3.8<br>(3.3 to 4.4)                               | < 0.05<br>(< 0.05 to < 0.05)            | 10.6<br>(-59.7 to 264.6)                          | -4.2<br>(-64.9 to 215.9)                            |
| Maternal abortion, miscarriage, and ectopic pregnancy                   | 0.2<br>(0.1 to 0.2)                           | 20.2<br>(18.0 to 22.7)                            | < 0.05<br>(< 0.05 to < 0.05)            | 13.7<br>(-44.3 to 122.3)                          | -3.4<br>(-53.4 to 90.5)                             |
| Other maternal disorders                                                | --                                            | --                                                | < 0.05<br>(< 0.05 to < 0.05)            | 14.0<br>(-19.3 to 57.7)                           | -2.0<br>(-30.1 to 37.4)                             |
| <b>Neonatal disorders</b>                                               | <b>40.0</b><br><b>(34.6 to 47.1)</b>          | <b>6.7</b><br><b>--</b>                           | <b>6.7</b><br><b>(4.8 to 9.1)</b>       | <b>16.4</b><br><b>(3.1 to 32.8)</b>               | <b>3.8</b><br><b>(-8.4 to 18.5)</b>                 |
| Neonatal preterm birth complications                                    | 31.5<br>(24.6 to 41.4)                        | --                                                | 3.1<br>(2.0 to 4.7)                     | 12.8<br>(-11.4 to 43.5)                           | 0.7<br>(-21.0 to 29.2)                              |
| Neonatal encephalopathy due to birth asphyxia and trauma                | 11.7<br>(8.8 to 15.9)                         | --                                                | 2.1<br>(1.4 to 3.1)                     | 21.3<br>(2.4 to 51.5)                             | 7.9<br>(-9.0 to 34.6)                               |
| Neonatal sepsis and other neonatal infections                           | 2.9<br>(1.5 to 5.9)                           | --                                                | 1.2<br>(0.5 to 2.6)                     | 19.4<br>(1.7 to 39.1)                             | 6.2<br>(-10.3 to 23.7)                              |
| Hemolytic disease and other neonatal jaundice                           | 0.3<br>(0.3 to 0.4)                           | --                                                | 0.1<br>(0.1 to 0.1)                     | 11.2<br>(3.5 to 19.9)                             | -1.1<br>(-7.9 to 6.6)                               |
| Other neonatal disorders                                                | --                                            | --                                                | 0.1<br>(0.1 to 0.2)                     | 5.9<br>(-13.4 to 29.4)                            | 1.0<br>(-17.5 to 23.4)                              |
| <b>Nutritional deficiencies</b>                                         | <b>289.9</b><br><b>(240.9 to 339.1)</b>       | <b>40.7†</b><br><b>(32.5 to 49.9)</b>             | <b>3.8</b><br><b>(2.4 to 5.9)</b>       | <b>3.6</b><br><b>(-14.1 to 23.4)</b>              | <b>-4.5</b><br><b>(-22.0 to 14.7)</b>               |
| Protein-energy malnutrition                                             | 2.7<br>(2.7 to 2.8)                           | 1.7<br>(1.6 to 1.7)                               | 0.3<br>(0.2 to 0.4)                     | 3.3<br>(-8.5 to 17.7)                             | -1.5<br>(-12.8 to 12.2)                             |
| Iodine deficiency                                                       | 61.1<br>(46.4 to 79.2)                        | 0.9<br>(0.7 to 1.2)                               | 1.6<br>(1.0 to 2.4)                     | 10.9<br>(-0.8 to 22.9)                            | -2.9<br>(-13.6 to 8.1)                              |
| Vitamin A deficiency                                                    | 47.0<br>(37.2 to 59.7)                        | 38.1<br>(29.9 to 47.4)                            | --                                      | --                                                | --                                                  |
| Iron-deficiency anaemia                                                 | 167.2<br>(124.0 to 217.7)                     | --                                                | 1.9<br>(1.1 to 3.3)                     | -1.5<br>(-30.6 to 38.3)                           | -6.1<br>(-34.8 to 33.9)                             |
| Other nutritional deficiencies                                          | --                                            | --                                                | < 0.05<br>(< 0.05 to < 0.05)            | 2.9<br>(-9.4 to 17.4)                             | -1.8<br>(-13.7 to 12.0)                             |
| <b>Other communicable, maternal, neonatal, and nutritional diseases</b> | <b>756.8</b><br><b>(692.8 to 822.7)</b>       | <b>130.5</b><br><b>(119.8 to 142.5)</b>           | <b>0.7</b><br><b>(0.4 to 1.2)</b>       | <b>12.5</b><br><b>(6.3 to 19.2)</b>               | <b>-1.0</b><br><b>(-7.7 to 5.9)</b>                 |
| Sexually transmitted diseases excluding HIV                             | 636.6<br>(579.5 to 701.2)                     | 121.5<br>(110.6 to 133.5)                         | 0.5<br>(0.3 to 0.9)                     | 12.7<br>(5.5 to 20.2)                             | -2.8<br>(-9.6 to 4.3)                               |
| Syphilis                                                                | 1.4<br>(1.2 to 1.5)                           | 0.7<br>(0.5 to 0.9)                               | 0.1<br>(0.1 to 0.1)                     | 23.0<br>(7.0 to 38.5)                             | 5.4<br>(-8.4 to 18.2)                               |
| Chlamydial infection                                                    | 26.8<br>(25.2 to 28.1)                        | 20.0<br>(17.6 to 22.6)                            | 0.1<br>(< 0.05 to 0.2)                  | 10.4<br>(-6.9 to 30.5)                            | -6.1<br>(-21.5 to 12.8)                             |
| Gonococcal infection                                                    | 1.8<br>(1.6 to 2.1)                           | 1.5<br>(1.2 to 1.8)                               | < 0.05<br>(< 0.05 to < 0.05)            | -1.4<br>(-12.5 to 11.6)                           | -11.2<br>(-21.0 to 0.7)                             |
| Trichomoniasis                                                          | 89.4<br>(77.9 to 101.6)                       | 74.2<br>(64.6 to 85.0)                            | 0.1<br>(< 0.05 to 0.2)                  | 15.7<br>(6.1 to 28.7)                             | 1.1<br>(-7.6 to 13.1)                               |
| Genital herpes                                                          | 528.4<br>(452.3 to 617.8)                     | 21.9<br>(18.6 to 26.1)                            | 0.1<br>(< 0.05 to 0.3)                  | 13.3<br>(2.0 to 23.6)                             | -1.6<br>(-11.0 to 7.9)                              |
| Other sexually transmitted diseases                                     | 5.0<br>(4.3 to 5.7)                           | 3.2<br>(2.5 to 4.2)                               | 0.1<br>(< 0.05 to 0.1)                  | 3.2<br>(-12.8 to 20.4)                            | -8.5<br>(-22.3 to 6.8)                              |
| Hepatitis                                                               | 142.0<br>(126.2 to 159.8)                     | 9.0<br>(7.7 to 10.4)                              | < 0.05<br>(< 0.05 to < 0.05)            | -24.2<br>(-34.6 to -11.2)                         | -31.5<br>(-41.6 to -19.2)                           |
| Acute hepatitis A                                                       | 0.3<br>(0.2 to 0.3)                           | 3.6<br>(2.7 to 4.3)                               | < 0.05<br>(< 0.05 to < 0.05)            | -22.4<br>(-38.1 to 0.5)                           | -29.9<br>(-45.2 to -7.9)                            |
| Hepatitis B                                                             | 60.2<br>(47.4 to 75.8)                        | 4.1<br>(3.2 to 5.3)                               | < 0.05<br>(< 0.05 to < 0.05)            | -29.8<br>(-43.2 to -14.5)                         | -39.4<br>(-51.1 to -25.5)                           |
| Hepatitis C                                                             | 81.5<br>(73.1 to 90.3)                        | 1.1<br>(0.9 to 1.2)                               | < 0.05<br>(< 0.05 to < 0.05)            | -5.1<br>(-7.1 to -3.1)                            | -8.0<br>(-9.8 to -6.2)                              |
| Acute hepatitis E                                                       | < 0.05<br>(< 0.05 to < 0.05)                  | 0.2<br>(0.2 to 0.3)                               | < 0.05<br>(< 0.05 to < 0.05)            | -22.4<br>(-27.5 to -17.4)                         | -32.0<br>(-36.3 to -27.3)                           |
| Other infectious diseases                                               | 5.0<br>(3.8 to 6.8)                           | < 0.05<br>(< 0.05 to < 0.05)                      | 0.2<br>(0.1 to 0.3)                     | 15.8<br>(2.8 to 30.5)                             | 6.1<br>(-9.0 to 24.2)                               |
| <b>Non-communicable diseases</b>                                        | <b>4,738.5</b><br><b>(4,715.2 to 4,763.6)</b> | <b>13,875.2†</b><br><b>(13,272.0 to 14,509.0)</b> | <b>559.7</b><br><b>(415.9 to 721.9)</b> | <b>13.2</b><br><b>(11.3 to 15.0)</b>              | <b>-1.3</b><br><b>(-3.1 to 0.4)</b>                 |
| <b>Neoplasms</b>                                                        | <b>111.5</b><br><b>(107.8 to 115.7)</b>       | <b>34.5</b><br><b>(32.0 to 36.8)</b>              | <b>10.8</b><br><b>(7.9 to 14.0)</b>     | <b>23.3</b><br><b>(17.8 to 29.0)</b>              | <b>2.6</b><br><b>(-2.3 to 7.5)</b>                  |
| Lip and oral cavity cancer                                              | 1.0<br>(0.8 to 1.1)                           | 0.2<br>(0.2 to 0.3)                               | 0.1<br>(0.1 to 0.1)                     | 15.7<br>(-0.6 to 33.7)                            | -4.9<br>(-17.9 to 10.0)                             |
| Nasopharynx cancer                                                      | 0.1<br>(0.1 to 0.1)                           | < 0.05<br>(< 0.05 to < 0.05)                      | < 0.05<br>(< 0.05 to < 0.05)            | 4.8<br>(-6.1 to 17.6)                             | -11.7<br>(-20.8 to -0.4)                            |
| Other pharynx cancer                                                    | 0.7<br>(0.7 to 0.8)                           | 0.2<br>(0.2 to 0.2)                               | 0.1<br>(< 0.05 to 0.1)                  | 25.0<br>(7.3 to 46.0)                             | 1.8<br>(-12.6 to 18.4)                              |
| Oesophageal cancer                                                      | 0.4<br>(0.4 to 0.5)                           | 0.3<br>(0.2 to 0.3)                               | 0.1<br>(0.1 to 0.1)                     | 30.8<br>(3.7 to 65.6)                             | 8.3<br>(-13.6 to 35.6)                              |
| Stomach cancer                                                          | 1.2<br>(1.1 to 1.4)                           | 0.6<br>(0.6 to 0.7)                               | 0.2<br>(0.1 to 0.2)                     | 2.5<br>(-13.5 to 21.0)                            | -12.6<br>(-26.4 to 2.9)                             |
| Colon and rectum cancer                                                 | 17.3<br>(16.2 to 18.9)                        | 4.5<br>(4.2 to 4.8)                               | 1.6<br>(1.1 to 2.0)                     | 21.5<br>(10.0 to 34.4)                            | 1.4<br>(-8.7 to 12.5)                               |
| Liver cancer                                                            | 0.2<br>(0.1 to 0.2)                           | 0.3<br>(0.2 to 0.3)                               | 0.1<br>(< 0.05 to 0.1)                  | 55.0<br>(29.4 to 83.7)                            | 33.4<br>(12.2 to 57.5)                              |
| Liver cancer due to hepatitis B                                         | 0.1<br>(< 0.05 to 0.1)                        | < 0.05<br>(< 0.05 to 0.1)                         | < 0.05<br>(< 0.05 to < 0.05)            | 58.4<br>(30.3 to 91.8)                            | 36.2<br>(13.2 to 65.0)                              |



| Cause                                              | Prevalence in thousands (95% UI)        | Incidence in thousands (95% UI)       | YLDs in thousands (95% UI)           |                                                   |                                                     |
|----------------------------------------------------|-----------------------------------------|---------------------------------------|--------------------------------------|---------------------------------------------------|-----------------------------------------------------|
|                                                    | 2016 counts                             | 2016 counts                           | 2016 counts                          | Percentage change in counts between 2006 and 2016 | Percentage change in age-standardised rates between |
| Liver cancer due to hepatitis C                    | 0.1<br>(0.1 to 0.2)                     | 0.1<br>(0.1 to 0.1)                   | < 0.05<br>(< 0.05 to < 0.05)         | 52.0<br>(24.4 to 82.6)                            | 31.4<br>(8.9 to 55.4)                               |
| Liver cancer due to alcohol use                    | 0.1<br>(0.1 to 0.2)                     | 0.1<br>(0.1 to 0.1)                   | < 0.05<br>(< 0.05 to < 0.05)         | 56.1<br>(27.9 to 88.4)                            | 32.6<br>(9.6 to 58.9)                               |
| Liver cancer due to other causes                   | 0.1<br>(0.1 to 0.1)                     | 0.1<br>(< 0.05 to 0.1)                | < 0.05<br>(< 0.05 to < 0.05)         | 55.6<br>(26.7 to 92.1)                            | 35.3<br>(10.9 to 66.7)                              |
| Gallbladder and biliary tract cancer               | 0.2<br>(0.2 to 0.4)                     | 0.2<br>(0.2 to 0.3)                   | < 0.05<br>(< 0.05 to 0.1)            | 15.9<br>(-6.8 to 50.7)                            | -2.1<br>(-21.7 to 28.1)                             |
| Pancreatic cancer                                  | 0.8<br>(0.7 to 0.9)                     | 0.8<br>(0.8 to 0.9)                   | 0.2<br>(0.1 to 0.2)                  | 18.2<br>(-2.5 to 43.0)                            | -0.3<br>(-17.5 to 21.0)                             |
| Larynx cancer                                      | 0.6<br>(0.5 to 0.7)                     | 0.1<br>(0.1 to 0.2)                   | 0.1<br>(< 0.05 to 0.1)               | 8.7<br>(-8.6 to 28.6)                             | -11.1<br>(-25.0 to 4.9)                             |
| Tracheal, bronchus, and lung cancer                | 5.2<br>(4.7 to 5.7)                     | 3.1<br>(2.8 to 3.3)                   | 0.7<br>(0.6 to 1.0)                  | 22.2<br>(3.9 to 41.8)                             | -0.6<br>(-15.2 to 15.4)                             |
| Malignant skin melanoma                            | 9.3<br>(7.0 to 10.5)                    | 1.9<br>(1.4 to 2.1)                   | 0.6<br>(0.4 to 0.8)                  | 46.7<br>(25.3 to 66.1)                            | 23.1<br>(5.6 to 39.4)                               |
| Non-melanoma skin cancer                           | 1.6<br>(1.1 to 2.4)                     | 3.5<br>(2.2 to 5.2)                   | 0.1<br>(< 0.05 to 0.1)               | -0.5<br>(-39.0 to 88.2)                           | -16.3<br>(-48.8 to 57.9)                            |
| Non-melanoma skin cancer (squamous-cell carcinoma) | 1.3<br>(0.8 to 2.2)                     | 1.2<br>(0.8 to 2.0)                   | 0.1<br>(< 0.05 to 0.1)               | -1.0<br>(-40.4 to 93.9)                           | -16.8<br>(-49.9 to 60.5)                            |
| Non-melanoma skin cancer (basal-cell carcinoma)    | 0.2<br>(0.1 to 0.4)                     | 2.3<br>(1.2 to 3.9)                   | < 0.05<br>(< 0.05 to < 0.05)         | 14.9<br>(-16.3 to 54.3)                           | -2.9<br>(-29.4 to 30.1)                             |
| Breast cancer                                      | 15.6<br>(14.5 to 16.8)                  | 3.2<br>(2.9 to 3.4)                   | 1.4<br>(1.0 to 1.9)                  | 12.1<br>(1.4 to 22.9)                             | -5.6<br>(-15.1 to 4.0)                              |
| Cervical cancer                                    | 1.3<br>(1.1 to 1.6)                     | 0.3<br>(0.3 to 0.4)                   | 0.1<br>(0.1 to 0.2)                  | -8.0<br>(-24.3 to 11.4)                           | -19.4<br>(-34.9 to -1.4)                            |
| Uterine cancer                                     | 4.3<br>(3.8 to 5.0)                     | 0.9<br>(0.8 to 1.1)                   | 0.3<br>(0.2 to 0.4)                  | 25.6<br>(3.3 to 55.1)                             | 4.5<br>(-14.4 to 28.4)                              |
| Ovarian cancer                                     | 1.8<br>(1.5 to 2.0)                     | 0.6<br>(0.5 to 0.6)                   | 0.2<br>(0.2 to 0.3)                  | 5.6<br>(-19.0 to 36.8)                            | -11.4<br>(-31.9 to 15.2)                            |
| Prostate cancer                                    | 25.8<br>(18.6 to 30.3)                  | 6.0<br>(4.6 to 6.9)                   | 2.2<br>(1.4 to 2.9)                  | 36.8<br>(18.5 to 59.1)                            | 10.6<br>(-4.4 to 28.7)                              |
| Testicular cancer                                  | 1.6<br>(1.3 to 1.8)                     | 0.3<br>(0.2 to 0.4)                   | 0.1<br>(0.1 to 0.1)                  | 7.5<br>(-19.7 to 41.2)                            | -7.3<br>(-31.4 to 21.7)                             |
| Kidney cancer                                      | 3.2<br>(2.8 to 3.6)                     | 0.8<br>(0.8 to 0.9)                   | 0.3<br>(0.2 to 0.4)                  | 30.7<br>(11.6 to 51.1)                            | 9.4<br>(-6.4 to 26.5)                               |
| Bladder cancer                                     | 5.0<br>(4.6 to 5.5)                     | 1.2<br>(1.1 to 1.3)                   | 0.4<br>(0.3 to 0.6)                  | 10.8<br>(-3.1 to 26.0)                            | -7.5<br>(-19.7 to 5.5)                              |
| Brain and nervous system cancer                    | 3.0<br>(2.3 to 3.5)                     | 1.1<br>(0.8 to 1.3)                   | 0.4<br>(0.2 to 0.5)                  | 10.1<br>(-8.7 to 30.3)                            | -5.0<br>(-20.8 to 12.0)                             |
| Thyroid cancer                                     | 1.5<br>(1.4 to 1.7)                     | 0.3<br>(0.3 to 0.3)                   | 0.1<br>(0.1 to 0.1)                  | 25.1<br>(5.3 to 48.4)                             | 7.6<br>(-10.7 to 28.7)                              |
| Mesothelioma                                       | 0.1<br>(0.1 to 0.1)                     | 0.1<br>(0.1 to 0.1)                   | < 0.05<br>(< 0.05 to < 0.05)         | 20.6<br>(4.5 to 35.4)                             | -0.5<br>(-13.8 to 11.7)                             |
| Hodgkin lymphoma                                   | 0.7<br>(0.6 to 0.8)                     | 0.1<br>(0.1 to 0.2)                   | 0.1<br>(< 0.05 to 0.1)               | 20.2<br>(-1.0 to 45.4)                            | 3.5<br>(-16.7 to 29.1)                              |
| Non-Hodgkin's lymphoma                             | 4.4<br>(3.9 to 5.2)                     | 1.1<br>(1.0 to 1.3)                   | 0.4<br>(0.2 to 0.5)                  | 41.1<br>(21.7 to 65.0)                            | 18.8<br>(2.5 to 38.9)                               |
| Multiple myeloma                                   | 1.4<br>(1.1 to 1.8)                     | 0.5<br>(0.4 to 0.6)                   | 0.2<br>(0.2 to 0.3)                  | 32.4<br>(6.1 to 65.8)                             | 10.7<br>(-10.9 to 38.1)                             |
| Leukaemia                                          | 3.4<br>(3.1 to 3.8)                     | 1.0<br>(0.9 to 1.1)                   | 0.4<br>(0.3 to 0.6)                  | 26.5<br>(9.7 to 44.6)                             | 5.7<br>(-8.5 to 22.0)                               |
| Acute lymphoid leukaemia                           | 0.4<br>(0.4 to 0.5)                     | 0.1<br>(0.1 to 0.1)                   | < 0.05<br>(< 0.05 to 0.1)            | 10.0<br>(-19.6 to 53.1)                           | -3.4<br>(-34.8 to 44.8)                             |
| Chronic lymphoid leukaemia                         | 1.6<br>(1.3 to 1.8)                     | 0.4<br>(0.3 to 0.4)                   | 0.2<br>(0.1 to 0.3)                  | 33.5<br>(5.0 to 63.9)                             | 11.1<br>(-12.5 to 38.0)                             |
| Acute myeloid leukaemia                            | 0.3<br>(0.3 to 0.4)                     | 0.2<br>(0.2 to 0.3)                   | 0.1<br>(< 0.05 to 0.1)               | 21.9<br>(3.0 to 44.9)                             | 2.6<br>(-11.9 to 19.9)                              |
| Chronic myeloid leukaemia                          | 0.3<br>(0.3 to 0.4)                     | 0.1<br>(0.1 to 0.1)                   | < 0.05<br>(< 0.05 to < 0.05)         | 2.9<br>(-14.1 to 24.1)                            | -10.7<br>(-25.2 to 7.2)                             |
| Other leukaemia                                    | 0.8<br>(0.7 to 1.0)                     | 0.2<br>(0.2 to 0.2)                   | 0.1<br>(0.1 to 0.1)                  | 37.1<br>(6.5 to 73.3)                             | 15.0<br>(-10.3 to 44.8)                             |
| Other neoplasms                                    | 5.0<br>(4.3 to 5.7)                     | 1.3<br>(1.1 to 1.4)                   | 0.4<br>(0.3 to 0.5)                  | 32.0<br>(11.5 to 54.6)                            | 12.1<br>(-4.2 to 30.5)                              |
| <b>Cardiovascular diseases</b>                     | <b>579.9</b><br><b>(556.1 to 609.4)</b> | <b>55.1†</b><br><b>(52.2 to 58.2)</b> | <b>39.1</b><br><b>(28.5 to 50.4)</b> | <b>5.4</b><br><b>(1.0 to 9.8)</b>                 | <b>-9.1</b><br><b>(-12.8 to -5.4)</b>               |
| Rheumatic heart disease                            | 0.3<br>(0.2 to 0.3)                     | 0.1<br>(0.1 to 0.1)                   | < 0.05<br>(< 0.05 to < 0.05)         | 5.3<br>(-3.6 to 14.5)                             | -9.2<br>(-16.5 to -1.9)                             |
| Ischaemic heart disease                            | 149.7<br>(138.1 to 162.3)               | 15.2<br>(14.3 to 16.5)                | 8.9<br>(6.2 to 11.9)                 | 7.1<br>(1.6 to 12.7)                              | -8.8<br>(-13.6 to -4.2)                             |
| Cerebrovascular disease                            | 81.3<br>(75.0 to 87.5)                  | 12.2‡<br>(11.3 to 13.3)               | 12.8<br>(9.0 to 16.3)                | 3.6<br>(-5.6 to 12.5)                             | -8.2<br>(-16.2 to -0.6)                             |
| Ischaemic stroke                                   | 66.2<br>(57.9 to 74.5)                  | 8.4‡<br>(7.5 to 9.3)                  | 10.1<br>(7.0 to 13.1)                | 0.8<br>(-10.3 to 11.9)                            | -10.6<br>(-19.9 to -1.1)                            |
| Hemorrhagic stroke                                 | 18.4<br>(16.3 to 20.7)                  | 3.9‡<br>(3.5 to 4.3)                  | 2.7<br>(2.0 to 3.5)                  | 15.9<br>(4.2 to 28.8)                             | 1.4<br>(-8.5 to 11.5)                               |
| Hypertensive heart disease                         | 7.7<br>(6.6 to 9.2)                     | --                                    | 0.6<br>(0.4 to 0.8)                  | 2.0<br>(-10.2 to 15.0)                            | -12.6<br>(-22.7 to -1.3)                            |
| Cardiomyopathy and myocarditis                     | 9.6<br>(8.4 to 10.8)                    | 3.1†<br>(2.8 to 3.5)                  | 0.8<br>(0.6 to 1.2)                  | 5.0<br>(-4.8 to 15.8)                             | -9.7<br>(-18.2 to -0.7)                             |
| Myocarditis                                        | 2.0<br>(1.8 to 2.2)                     | 3.1<br>(2.8 to 3.5)                   | 0.1<br>(0.1 to 0.2)                  | 5.9<br>(-9.3 to 23.3)                             | -7.4<br>(-21.0 to 7.5)                              |
| Alcoholic cardiomyopathy                           | 2.2<br>(1.9 to 2.7)                     | --                                    | 0.2<br>(0.1 to 0.3)                  | 7.6<br>(-11.8 to 29.2)                            | -9.7<br>(-25.5 to 8.8)                              |
| Other cardiomyopathy                               | 5.9<br>(5.1 to 6.9)                     | --                                    | 0.5<br>(0.3 to 0.7)                  | 3.7<br>(-7.8 to 17.6)                             | -10.6<br>(-21.7 to 1.6)                             |
| Atrial fibrillation and flutter                    | 74.3<br>(64.9 to 85.1)                  | 6.0<br>(5.1 to 7.0)                   | 5.8<br>(3.9 to 8.0)                  | 12.3<br>(5.5 to 20.3)                             | -3.4<br>(-9.3 to 3.7)                               |
| Peripheral vascular disease                        | 210.3<br>(184.7 to 238.2)               | 17.0<br>(14.7 to 19.9)                | 0.8<br>(0.4 to 1.4)                  | 8.4<br>(0.1 to 17.1)                              | -9.0<br>(-15.5 to -3.0)                             |
| Endocarditis                                       | 0.9<br>(0.8 to 1.0)                     | 1.4<br>(1.3 to 1.5)                   | 0.1<br>(< 0.05 to 0.1)               | -0.6<br>(-17.5 to 18.9)                           | -13.6<br>(-27.6 to 3.5)                             |
| Other cardiovascular and circulatory diseases      | 181.5<br>(156.9 to 208.8)               | --                                    | 9.4<br>(6.4 to 13.0)                 | 2.5<br>(-5.1 to 10.9)                             | -13.1<br>(-19.5 to -6.3)                            |
| <b>Chronic respiratory diseases</b>                | <b>618.7</b><br><b>(598.7 to 639.3)</b> | <b>49.2†</b><br><b>(46.9 to 51.7)</b> | <b>23.7</b><br><b>(17.9 to 30.7)</b> | <b>6.1</b><br><b>(0.7 to 11.5)</b>                | <b>-7.2</b><br><b>(-11.6 to -2.9)</b>               |
| Chronic obstructive pulmonary disease              | 288.1<br>(274.9 to 302.3)               | 17.4<br>(16.5 to 18.4)                | 9.0<br>(7.2 to 10.9)                 | 4.2<br>(-7.6 to 17.4)                             | -11.5<br>(-21.3 to -0.8)                            |
| Pneumoconiosis                                     | < 0.05<br>(< 0.05 to < 0.05)            | < 0.05<br>(< 0.05 to < 0.05)          | < 0.05<br>(< 0.05 to < 0.05)         | 19.8<br>(13.1 to 27.2)                            | -3.7<br>(-8.8 to 2.0)                               |
| Silicosis                                          | < 0.05<br>(< 0.05 to < 0.05)            | < 0.05<br>(< 0.05 to < 0.05)          | < 0.05<br>(< 0.05 to < 0.05)         | 32.9<br>(24.1 to 43.5)                            | 4.5<br>(-2.1 to 12.3)                               |



| Cause                                                          | Prevalence in thousands (95% UI)              | Incidence in thousands (95% UI)          | YLDs in thousands (95% UI)             |                                                   |                                                     |
|----------------------------------------------------------------|-----------------------------------------------|------------------------------------------|----------------------------------------|---------------------------------------------------|-----------------------------------------------------|
|                                                                | 2016 counts                                   | 2016 counts                              | 2016 counts                            | Percentage change in counts between 2006 and 2016 | Percentage change in age-standardised rates between |
| Asbestosis                                                     | < 0.05<br>(< 0.05 to < 0.05)                  | < 0.05<br>(< 0.05 to < 0.05)             | < 0.05<br>(< 0.05 to < 0.05)           | 4.5<br>(-4.7 to 14.5)                             | -13.5<br>(-21.2 to -4.9)                            |
| Coal workers pneumoconiosis                                    | --                                            | --                                       | --                                     | --                                                | --                                                  |
| Other pneumoconiosis                                           | < 0.05<br>(< 0.05 to < 0.05)                  | < 0.05<br>(< 0.05 to < 0.05)             | < 0.05<br>(< 0.05 to < 0.05)           | -0.0<br>(-10.9 to 20.7)                           | -12.1<br>(-20.6 to 3.4)                             |
| Asthma                                                         | 360.8<br>(337.9 to 384.9)                     | 31.3<br>(29.2 to 33.7)                   | 14.0<br>(9.3 to 20.0)                  | 6.4<br>(2.3 to 10.5)                              | -5.7<br>(-9.6 to -1.7)                              |
| Interstitial lung disease and pulmonary sarcoidosis            | 3.8<br>(3.4 to 4.2)                           | 0.4<br>(0.4 to 0.4)                      | 0.4<br>(0.3 to 0.6)                    | 20.2<br>(7.1 to 35.2)                             | 2.5<br>(-8.1 to 14.5)                               |
| Other chronic respiratory diseases                             | --                                            | --                                       | 0.3<br>(0.2 to 0.3)                    | 33.6<br>(15.9 to 53.4)                            | 21.1<br>(3.0 to 42.1)                               |
| <b>Cirrhosis and other chronic liver diseases</b>              | <b>37.0</b><br><b>(35.2 to 38.9)</b>          | <b>0.7</b><br><b>(0.6 to 0.7)</b>        | <b>0.9</b><br><b>(0.6 to 1.2)</b>      | <b>27.4</b><br><b>(14.2 to 41.4)</b>              | <b>10.7</b><br><b>(-1.6 to 23.9)</b>                |
| Cirrhosis and other chronic liver diseases due to hepatitis B  | 5.2<br>(4.1 to 6.4)                           | 0.1<br>(0.1 to 0.1)                      | 0.1<br>(0.1 to 0.2)                    | 29.3<br>(-1.8 to 75.5)                            | 11.2<br>(-15.5 to 50.1)                             |
| Cirrhosis and other chronic liver diseases due to hepatitis C  | 11.8<br>(9.4 to 14.9)                         | 0.2<br>(0.2 to 0.2)                      | 0.3<br>(0.2 to 0.4)                    | 29.5<br>(6.5 to 60.5)                             | 11.4<br>(-9.3 to 39.3)                              |
| Cirrhosis and other chronic liver diseases due to alcohol use  | 16.5<br>(14.0 to 19.1)                        | 0.3<br>(0.3 to 0.3)                      | 0.4<br>(0.2 to 0.5)                    | 29.2<br>(9.0 to 52.5)                             | 11.3<br>(-7.2 to 32.2)                              |
| Cirrhosis and other chronic liver diseases due to other causes | 3.5<br>(2.8 to 4.3)                           | 0.1<br>(0.1 to 0.1)                      | 0.2<br>(0.1 to 0.2)                    | 19.4<br>(-6.8 to 52.1)                            | 8.9<br>(-17.4 to 41.8)                              |
| <b>Digestive diseases</b>                                      | <b>110.0</b><br><b>(102.1 to 118.2)</b>       | <b>147.3†</b><br><b>(138.7 to 155.8)</b> | <b>3.7</b><br><b>(2.7 to 5.0)</b>      | <b>15.4</b><br><b>(6.3 to 26.4)</b>               | <b>0.4</b><br><b>(-8.1 to 10.9)</b>                 |
| Peptic ulcer disease                                           | 29.3<br>(25.6 to 34.1)                        | 11.7<br>(10.6 to 13.0)                   | 0.4<br>(0.2 to 0.6)                    | 24.8<br>(-9.7 to 80.5)                            | 14.8<br>(-19.9 to 73.0)                             |
| Gastritis and duodenitis                                       | 43.5<br>(37.7 to 49.7)                        | 30.9<br>(27.8 to 34.3)                   | 0.3<br>(0.2 to 0.5)                    | 26.4<br>(-4.1 to 76.2)                            | 13.5<br>(-16.6 to 65.1)                             |
| Appendicitis                                                   | 0.3<br>(0.3 to 0.3)                           | 7.2<br>(6.7 to 7.8)                      | 0.1<br>(0.1 to 0.1)                    | 12.2<br>(-12.5 to 42.4)                           | 0.7<br>(-24.5 to 33.6)                              |
| Paralytic ileus and intestinal obstruction                     | 0.1<br>(0.1 to 0.1)                           | 3.2<br>(2.9 to 3.5)                      | < 0.05<br>(< 0.05 to 0.1)              | 21.6<br>(10.4 to 33.2)                            | 5.0<br>(-1.1 to 12.2)                               |
| Inguinal, femoral, and abdominal hernia                        | 21.5<br>(19.6 to 23.7)                        | 54.8<br>(47.7 to 61.6)                   | 1.5<br>(1.0 to 2.1)                    | 11.0<br>(-0.5 to 23.6)                            | -4.5<br>(-14.5 to 6.9)                              |
| Inflammatory bowel disease                                     | 5.5<br>(5.2 to 5.9)                           | 1.5<br>(1.5 to 1.6)                      | 0.8<br>(0.5 to 1.1)                    | 14.6<br>(1.3 to 30.1)                             | -1.1<br>(-13.5 to 13.2)                             |
| Vascular intestinal disorders                                  | 0.2<br>(0.2 to 0.2)                           | 0.9<br>(0.8 to 1.0)                      | 0.1<br>(< 0.05 to 0.1)                 | 22.4<br>(-6.7 to 57.9)                            | 5.7<br>(-16.5 to 31.8)                              |
| Gallbladder and biliary diseases                               | 12.6<br>(11.3 to 14.0)                        | 33.6<br>(29.8 to 37.6)                   | 0.2<br>(0.1 to 0.3)                    | 15.0<br>(-3.4 to 38.2)                            | -1.3<br>(-16.7 to 17.3)                             |
| Pancreatitis                                                   | 0.4<br>(0.4 to 0.4)                           | 3.4<br>(3.1 to 3.8)                      | 0.1<br>(< 0.05 to 0.1)                 | 16.6<br>(11.9 to 21.6)                            | 0.3<br>(-3.2 to 3.8)                                |
| Other digestive diseases                                       | --                                            | --                                       | 0.3<br>(0.2 to 0.4)                    | 18.7<br>(9.6 to 29.1)                             | 3.6<br>(-4.6 to 13.6)                               |
| <b>Neurological disorders</b>                                  | <b>1,978.0</b><br><b>(1,909.1 to 2,064.8)</b> | <b>791.5</b><br><b>(683.6 to 906.7)</b>  | <b>61.8</b><br><b>(41.5 to 83.2)</b>   | <b>12.3</b><br><b>(-0.7 to 27.8)</b>              | <b>-0.5</b><br><b>(-13.5 to 15.0)</b>               |
| Alzheimer's disease and other dementias                        | 67.2<br>(57.1 to 79.6)                        | 13.2<br>(10.9 to 15.9)                   | 10.2<br>(7.1 to 13.6)                  | 8.9<br>(3.9 to 14.2)                              | -2.5<br>(-6.5 to 1.8)                               |
| Parkinson's disease                                            | 7.5<br>(5.9 to 9.5)                           | 0.9<br>(0.7 to 1.2)                      | 0.9<br>(0.5 to 1.2)                    | 50.6<br>(25.1 to 84.7)                            | 30.8<br>(9.2 to 60.3)                               |
| Epilepsy                                                       | 18.1<br>(4.9 to 30.7)                         | 1.7<br>(0.5 to 2.9)                      | 4.1<br>(0.9 to 9.7)                    | 8.4<br>(-80.7 to 510.7)                           | -4.1<br>(-82.7 to 452.0)                            |
| Multiple sclerosis                                             | 7.5<br>(6.8 to 8.2)                           | 0.2<br>(0.2 to 0.2)                      | 1.9<br>(1.4 to 2.6)                    | -3.5<br>(-15.6 to 9.9)                            | -16.6<br>(-27.0 to -4.4)                            |
| Motor neuron disease                                           | 1.1<br>(1.0 to 1.2)                           | 0.2<br>(0.1 to 0.2)                      | 0.2<br>(0.2 to 0.3)                    | 21.7<br>(16.0 to 27.5)                            | 4.0<br>(-0.7 to 8.5)                                |
| Migraine                                                       | 895.0<br>(855.3 to 933.2)                     | 79.7<br>(75.7 to 83.9)                   | 37.9<br>(24.5 to 53.2)                 | 13.4<br>(9.5 to 17.4)                             | 0.2<br>(-3.2 to 3.9)                                |
| Tension-type headache                                          | 1,340.9<br>(1,205.0 to 1,497.8)               | 695.7<br>(587.5 to 809.0)                | 5.4<br>(3.4 to 7.9)                    | 14.5<br>(7.7 to 21.6)                             | 0.9<br>(-5.2 to 7.4)                                |
| Other neurological disorders                                   | < 0.05<br>(< 0.05 to < 0.05)                  | < 0.05<br>(< 0.05 to 0.1)                | 1.1<br>(0.6 to 2.0)                    | 20.7<br>(-47.4 to 178.2)                          | 9.4<br>(-58.4 to 178.0)                             |
| <b>Mental and substance use disorders</b>                      | <b>900.2</b><br><b>(873.5 to 927.0)</b>       | <b>306.7†</b><br><b>(287.4 to 329.0)</b> | <b>128.9</b><br><b>(93.2 to 166.9)</b> | <b>13.0</b><br><b>(10.2 to 15.8)</b>              | <b>-0.9</b><br><b>(-3.3 to 1.7)</b>                 |
| Schizophrenia                                                  | 15.1<br>(12.3 to 18.0)                        | 0.7<br>(0.6 to 0.9)                      | 9.6<br>(6.9 to 12.5)                   | 15.1<br>(5.3 to 25.2)                             | 0.6<br>(-8.2 to 9.2)                                |
| Alcohol use disorders                                          | 83.2<br>(72.9 to 94.4)                        | 30.7<br>(26.5 to 35.4)                   | 8.3<br>(5.7 to 11.5)                   | 16.1<br>(6.0 to 27.5)                             | 0.8<br>(-8.3 to 10.6)                               |
| Drug use disorders                                             | 51.9<br>(49.1 to 55.0)                        | 6.2<br>(5.8 to 6.8)                      | 12.3<br>(8.9 to 15.9)                  | -4.2<br>(-12.7 to 4.7)                            | -16.9<br>(-24.2 to -8.8)                            |
| Opioid use disorders                                           | 20.5<br>(17.9 to 23.5)                        | 2.3<br>(2.0 to 2.6)                      | 8.6<br>(5.9 to 11.1)                   | -12.2<br>(-21.5 to -2.0)                          | -24.3<br>(-32.6 to -15.0)                           |
| Cocaine use disorders                                          | 5.6<br>(4.9 to 6.4)                           | 0.3<br>(0.3 to 0.4)                      | 0.8<br>(0.5 to 1.1)                    | 21.4<br>(-0.1 to 48.9)                            | 5.5<br>(-14.2 to 31.4)                              |
| Amphetamine use disorders                                      | 5.3<br>(4.1 to 7.0)                           | 0.5<br>(0.4 to 0.6)                      | 0.7<br>(0.4 to 1.1)                    | 21.7<br>(-6.1 to 55.2)                            | 5.2<br>(-19.7 to 35.0)                              |
| Cannabis use disorders                                         | 12.8<br>(11.0 to 15.0)                        | 2.1<br>(1.8 to 2.5)                      | 0.4<br>(0.2 to 0.6)                    | 25.8<br>(4.0 to 53.4)                             | 10.1<br>(-10.0 to 35.4)                             |
| Other drug use disorders                                       | 8.9<br>(8.1 to 9.7)                           | 1.1<br>(1.0 to 1.2)                      | 1.9<br>(1.3 to 2.7)                    | 19.4<br>(1.0 to 42.1)                             | 4.6<br>(-13.2 to 25.3)                              |
| Depressive disorders                                           | 214.4<br>(202.1 to 228.9)                     | 209.8<br>(191.3 to 231.1)                | 34.9<br>(24.0 to 47.4)                 | 18.4<br>(12.4 to 24.5)                            | 4.0<br>(-1.6 to 9.6)                                |
| Major depressive disorder                                      | 130.3<br>(118.4 to 143.5)                     | 197.7<br>(179.0 to 218.0)                | 26.6<br>(18.1 to 36.1)                 | 19.6<br>(12.0 to 27.5)                            | 5.4<br>(-1.7 to 12.7)                               |
| Dysthymia                                                      | 87.7<br>(77.1 to 100.7)                       | 12.1<br>(10.7 to 13.8)                   | 8.4<br>(5.7 to 12.2)                   | 14.9<br>(7.5 to 22.0)                             | -0.5<br>(-7.1 to 6.0)                               |
| Bipolar disorder                                               | 45.8<br>(39.8 to 52.6)                        | 2.9<br>(2.6 to 3.3)                      | 9.3<br>(5.8 to 13.7)                   | 14.5<br>(8.8 to 20.7)                             | -0.1<br>(-5.2 to 5.7)                               |
| Anxiety disorders                                              | 322.6<br>(295.1 to 352.4)                     | 38.6<br>(35.8 to 41.9)                   | 30.9<br>(21.9 to 42.1)                 | 12.7<br>(5.8 to 18.9)                             | -0.6<br>(-6.3 to 5.5)                               |
| Eating disorders                                               | 19.9<br>(16.5 to 24.1)                        | 5.4<br>(4.1 to 6.9)                      | 4.1<br>(2.6 to 5.9)                    | 17.1<br>(7.2 to 27.4)                             | 4.0<br>(-4.5 to 12.8)                               |
| Anorexia nervosa                                               | 4.6<br>(3.4 to 6.1)                           | 1.2<br>(0.9 to 1.6)                      | 1.0<br>(0.6 to 1.5)                    | 14.3<br>(-2.5 to 32.9)                            | 0.7<br>(-14.1 to 17.2)                              |
| Bulimia nervosa                                                | 14.7<br>(11.3 to 19.4)                        | 4.1<br>(3.0 to 5.6)                      | 3.1<br>(1.9 to 4.6)                    | 18.0<br>(6.0 to 31.1)                             | 5.1<br>(-5.5 to 16.4)                               |
| Autistic spectrum disorders                                    | 38.1<br>(34.3 to 41.7)                        | 0.2<br>(0.1 to 0.3)                      | 6.0<br>(4.0 to 8.5)                    | 13.3<br>(7.5 to 18.8)                             | 0.5<br>(-4.8 to 5.6)                                |
| Autism                                                         | 14.4<br>(12.3 to 17.0)                        | < 0.05<br>(< 0.05 to < 0.05)             | 3.6<br>(2.4 to 5.3)                    | 13.2<br>(4.2 to 22.1)                             | 0.4<br>(-7.4 to 8.5)                                |
| Asperger syndrome and other autistic spectrum disorders        | 23.9<br>(20.4 to 28.4)                        | 0.2<br>(0.1 to 0.2)                      | 2.4<br>(1.6 to 3.5)                    | 13.4<br>(7.6 to 19.2)                             | 0.8<br>(-4.3 to 6.1)                                |

| Cause                                                      | Prevalence in thousands (95% UI)              | Incidence in thousands (95% UI)                              | YLDs in thousands (95% UI)             |                                                   |                                                     |
|------------------------------------------------------------|-----------------------------------------------|--------------------------------------------------------------|----------------------------------------|---------------------------------------------------|-----------------------------------------------------|
|                                                            | 2016 counts                                   | 2016 counts                                                  | 2016 counts                            | Percentage change in counts between 2006 and 2016 | Percentage change in age-standardised rates between |
| Attention-deficit/hyperactivity disorder                   | 29.3<br>(26.4 to 32.8)                        | 1.4<br>(1.2 to 1.6)                                          | 0.4<br>(0.2 to 0.6)                    | 10.6<br>(-0.8 to 23.2)                            | 1.6<br>(-9.1 to 13.8)                               |
| Conduct disorder                                           | 24.6<br>(20.1 to 29.0)                        | 7.8<br>(6.2 to 9.4)                                          | 3.0<br>(1.8 to 4.6)                    | 5.9<br>(-2.5 to 16.3)                             | 1.1<br>(-7.1 to 10.8)                               |
| Idiopathic developmental intellectual disability           | 19.9<br>(7.5 to 32.3)                         | --                                                           | 1.0<br>(0.4 to 1.8)                    | 10.7<br>(0.8 to 21.1)                             | -2.3<br>(-11.1 to 6.5)                              |
| Other mental and substance use disorders                   | 121.5<br>(105.8 to 140.4)                     | 3.0<br>(2.6 to 3.4)                                          | 9.0<br>(6.2 to 12.7)                   | 15.6<br>(10.4 to 21.2)                            | 0.5<br>(-4.2 to 5.6)                                |
| <b>Diabetes, urogenital, blood, and endocrine diseases</b> | <b>1,709.7</b><br><b>(1,661.5 to 1,757.5)</b> | <b>519.2<sup>†</sup></b><br><b>(488.4 to 554.1)</b>          | <b>41.4</b><br><b>(29.1 to 54.8)</b>   | <b>15.4</b><br><b>(9.6 to 21.7)</b>               | <b>-1.9</b><br><b>(-6.6 to 3.4)</b>                 |
| Diabetes mellitus                                          | 277.7<br>(248.4 to 308.7)                     | 14.8<br>(13.1 to 16.8)                                       | 21.5<br>(14.7 to 29.6)                 | 14.9<br>(4.9 to 26.2)                             | -3.0<br>(-11.1 to 6.8)                              |
| Acute glomerulonephritis                                   | 0.1<br>( $< 0.05$ to 0.1)                     | 0.8<br>(0.7 to 0.9)                                          | $< 0.05$<br>( $< 0.05$ to $< 0.05$ )   | 14.7<br>(9.7 to 19.7)                             | 0.1<br>(-3.9 to 4.3)                                |
| Chronic kidney disease                                     | 136.8<br>(120.1 to 151.9)                     | 11.6<br>(10.0 to 13.1)                                       | 3.6<br>(2.7 to 4.6)                    | 22.3<br>(10.8 to 34.4)                            | 7.5<br>(-1.8 to 16.4)                               |
| Chronic kidney disease due to diabetes mellitus            | 31.6<br>(27.9 to 35.4)                        | 2.8<br>(2.4 to 3.2)                                          | 0.9<br>(0.7 to 1.1)                    | 39.9<br>(22.6 to 59.7)                            | 18.9<br>(5.1 to 35.2)                               |
| Chronic kidney disease due to hypertension                 | 32.7<br>(28.4 to 36.7)                        | 2.8<br>(2.5 to 3.2)                                          | 0.6<br>(0.5 to 0.8)                    | 29.7<br>(11.1 to 51.0)                            | 15.5<br>(-0.2 to 33.0)                              |
| Chronic kidney disease due to glomerulonephritis           | 29.6<br>(25.9 to 33.4)                        | 2.3<br>(1.9 to 2.7)                                          | 1.0<br>(0.7 to 1.2)                    | 12.1<br>(-0.9 to 26.3)                            | 0.4<br>(-9.9 to 12.0)                               |
| Chronic kidney disease due to other causes                 | 42.8<br>(37.5 to 47.7)                        | 3.6<br>(3.1 to 4.1)                                          | 1.1<br>(0.8 to 1.4)                    | 16.4<br>(3.1 to 30.6)                             | 3.2<br>(-7.9 to 15.0)                               |
| Urinary diseases and male infertility                      | 176.4<br>(157.8 to 202.0)                     | 314.3 <sup>†</sup><br>(284.1 to 348.3)                       | 5.5<br>(3.6 to 8.0)                    | 21.7<br>(14.2 to 30.9)                            | 2.0<br>(-4.1 to 9.5)                                |
| Interstitial nephritis and urinary tract infections        | 4.3<br>(3.7 to 4.9)                           | 224.0<br>(195.6 to 256.6)                                    | 0.1<br>(0.1 to 0.2)                    | 15.3<br>(-1.6 to 34.3)                            | 0.7<br>(-14.2 to 17.7)                              |
| Urolithiasis                                               | 2.7<br>(2.5 to 3.1)                           | 72.6<br>(65.2 to 81.6)                                       | 0.2<br>(0.1 to 0.3)                    | 16.9<br>(-1.9 to 39.2)                            | 0.6<br>(-15.0 to 18.7)                              |
| Benign prostatic hyperplasia                               | 151.1<br>(129.2 to 179.1)                     | 17.7<br>(14.5 to 21.6)                                       | 4.9<br>(3.2 to 7.2)                    | 23.2<br>(14.9 to 33.6)                            | 3.1<br>(-4.0 to 12.1)                               |
| Male infertility                                           | 13.4<br>(9.8 to 18.2)                         | --                                                           | 0.1<br>( $< 0.05$ to 0.2)              | 2.1<br>(-7.6 to 12.9)                             | -6.7<br>(-14.8 to 2.0)                              |
| Other urinary diseases                                     | --                                            | --                                                           | 0.1<br>(0.1 to 0.2)                    | -2.4<br>(-13.5 to 9.8)                            | -15.5<br>(-24.8 to -5.1)                            |
| Gynecological diseases                                     | 696.7<br>(658.3 to 743.5)                     | 151.7 <sup>†</sup><br>(142.3 to 160.6)                       | 5.1<br>(3.4 to 7.6)                    | 10.8<br>(5.8 to 16.2)                             | -2.8<br>(-7.3 to 1.9)                               |
| Uterine fibroids                                           | 30.2<br>(27.4 to 33.1)                        | 3.0<br>(2.6 to 3.3)                                          | 0.3<br>(0.1 to 0.5)                    | 1.9<br>(-11.5 to 16.0)                            | -9.6<br>(-21.5 to 3.4)                              |
| Polycystic ovarian syndrome                                | 1.3<br>(1.0 to 1.7)                           | 5.0<br>(3.5 to 6.8)                                          | $< 0.05$<br>( $< 0.05$ to $< 0.05$ )   | 8.1<br>(-15.4 to 40.9)                            | -1.6<br>(-23.1 to 28.3)                             |
| Female infertility                                         | 21.2<br>(13.6 to 31.8)                        | --                                                           | 0.1<br>( $< 0.05$ to 0.3)              | 14.7<br>(3.1 to 27.9)                             | 4.9<br>(-4.5 to 16.0)                               |
| Endometriosis                                              | 2.4<br>(2.0 to 2.8)                           | 6.6<br>(5.2 to 8.4)                                          | 0.2<br>(0.1 to 0.3)                    | 14.7<br>(-8.8 to 47.5)                            | -1.2<br>(-22.3 to 27.0)                             |
| Genital prolapse                                           | 402.4<br>(352.3 to 458.5)                     | 19.4<br>(16.4 to 22.9)                                       | 1.2<br>(0.6 to 2.3)                    | 11.6<br>(2.6 to 23.2)                             | -5.0<br>(-12.7 to 4.6)                              |
| Premenstrual syndrome                                      | 261.6<br>(243.7 to 279.9)                     | 89.5<br>(82.1 to 97.4)                                       | 2.2<br>(1.3 to 3.4)                    | 11.3<br>(3.1 to 20.1)                             | -1.7<br>(-9.0 to 6.2)                               |
| Other gynecological diseases                               | 31.2<br>(27.6 to 35.4)                        | 28.2<br>(24.7 to 32.3)                                       | 1.0<br>(0.7 to 1.5)                    | 10.5<br>(-2.2 to 23.8)                            | -2.5<br>(-13.7 to 9.5)                              |
| Hemoglobinopathies and hemolytic anaemias                  | 689.5<br>(648.6 to 734.3)                     | --                                                           | 1.1<br>(0.6 to 1.8)                    | -0.9<br>(-27.5 to 39.4)                           | -16.0<br>(-40.0 to 20.0)                            |
| Thalassemias                                               | 0.1<br>(0.1 to 0.2)                           | --                                                           | $< 0.05$<br>( $< 0.05$ to $< 0.05$ )   | 7.0<br>(-8.2 to 25.2)                             | -3.4<br>(-18.4 to 15.0)                             |
| Thalassaemias trait                                        | 136.3<br>(128.1 to 146.3)                     | --                                                           | 0.8<br>(0.5 to 1.4)                    | -0.1<br>(-30.1 to 46.4)                           | -17.1<br>(-42.5 to 23.2)                            |
| Sickle cell disorders                                      | $< 0.05$<br>( $< 0.05$ to $< 0.05$ )          | --                                                           | $< 0.05$<br>( $< 0.05$ to $< 0.05$ )   | 23.2<br>(13.2 to 34.1)                            | 9.8<br>(0.7 to 20.0)                                |
| Sickle cell trait                                          | 57.2<br>(54.4 to 60.0)                        | --                                                           | 0.1<br>(0.1 to 0.2)                    | 7.6<br>(-29.6 to 67.7)                            | -10.3<br>(-42.7 to 38.8)                            |
| G6PD deficiency                                            | 78.2<br>(65.6 to 93.0)                        | --                                                           | $< 0.05$<br>( $< 0.05$ to $< 0.05$ )   | 15.8<br>(-20.7 to 72.9)                           | -0.4<br>(-32.5 to 47.9)                             |
| G6PD trait                                                 | 434.8<br>(400.2 to 469.9)                     | --                                                           | $< 0.05$<br>( $< 0.05$ to $< 0.05$ )   | 214.5<br>(58.7 to 554.1)                          | 161.3<br>(27.1 to 454.4)                            |
| Other hemoglobinopathies and hemolytic anaemias            | 6.8<br>(5.7 to 8.2)                           | --                                                           | 0.1<br>(0.1 to 0.2)                    | -12.2<br>(-26.3 to 5.9)                           | -16.2<br>(-32.0 to 5.3)                             |
| Endocrine, metabolic, blood, and immune disorders          | 131.8<br>(122.0 to 142.3)                     | 26.0<br>(23.6 to 28.8)                                       | 4.5<br>(3.1 to 6.2)                    | 15.5<br>(10.0 to 21.4)                            | -0.9<br>(-6.0 to 4.3)                               |
| <b>Musculoskeletal disorders</b>                           | <b>1,256.0</b><br><b>(1,202.5 to 1,311.4)</b> | <b>560.1</b><br><b>(499.0 to 624.5)</b>                      | <b>132.8</b><br><b>(96.5 to 174.2)</b> | <b>14.5</b><br><b>(10.6 to 18.6)</b>              | <b>-1.2</b><br><b>(-4.6 to 2.3)</b>                 |
| Rheumatoid arthritis                                       | 25.4<br>(22.8 to 28.5)                        | 1.3<br>(1.2 to 1.4)                                          | 5.9<br>(4.0 to 7.9)                    | 12.9<br>(4.3 to 22.1)                             | -3.7<br>(-11.0 to 4.5)                              |
| Osteoarthritis                                             | 371.3<br>(349.9 to 393.5)                     | 16.5<br>(15.5 to 17.7)                                       | 13.0<br>(8.5 to 18.6)                  | 19.9<br>(16.0 to 23.5)                            | 1.4<br>(-2.0 to 4.6)                                |
| Low back and neck pain                                     | 831.0<br>(777.1 to 892.4)                     | 312.8<br>(264.8 to 368.2)                                    | 98.4<br>(69.4 to 131.2)                | 15.4<br>(10.9 to 20.6)                            | 0.0<br>(-4.0 to 4.6)                                |
| Low back pain                                              | 556.1<br>(478.8 to 646.7)                     | 251.6<br>(203.9 to 307.7)                                    | 63.0<br>(44.4 to 84.2)                 | 17.2<br>(11.3 to 24.2)                            | 1.9<br>(-3.7 to 8.1)                                |
| Neck pain                                                  | 356.0<br>(317.6 to 397.6)                     | 61.3<br>(54.1 to 70.9)                                       | 35.4<br>(24.2 to 49.0)                 | 12.4<br>(6.6 to 18.3)                             | -3.3<br>(-8.6 to 2.1)                               |
| Gout                                                       | 47.7<br>(41.3 to 54.3)                        | 8.0<br>(6.9 to 9.1)                                          | 1.5<br>(1.0 to 2.1)                    | 24.5<br>(10.7 to 40.3)                            | 6.6<br>(-6.1 to 21.4)                               |
| Other musculoskeletal disorders                            | 164.7<br>(132.6 to 202.8)                     | 221.4<br>(184.7 to 260.3)                                    | 14.0<br>(9.4 to 20.2)                  | 3.6<br>(-11.8 to 20.3)                            | -10.2<br>(-23.3 to 4.5)                             |
| <b>Other non-communicable diseases</b>                     | <b>3,863.2</b><br><b>(3,811.8 to 3,916.3)</b> | <b>11,410.9<sup>†</sup></b><br><b>(10,822.9 to 12,014.0)</b> | <b>116.7</b><br><b>(80.1 to 165.6)</b> | <b>15.0</b><br><b>(13.8 to 16.2)</b>              | <b>0.8</b><br><b>(-0.4 to 1.9)</b>                  |
| Congenital anomalies                                       | 57.6<br>(55.0 to 61.1)                        | --                                                           | 6.2<br>(4.5 to 8.1)                    | 13.1<br>(8.0 to 18.8)                             | 1.0<br>(-3.8 to 5.9)                                |
| Neural tube defects                                        | 2.9<br>(2.6 to 3.2)                           | --                                                           | 0.9<br>(0.6 to 1.2)                    | 27.4<br>(10.4 to 49.0)                            | 13.1<br>(-3.5 to 33.8)                              |
| Congenital heart anomalies                                 | 13.7<br>(12.2 to 15.2)                        | --                                                           | 0.8<br>(0.3 to 1.3)                    | 7.3<br>(-4.7 to 21.7)                             | -5.0<br>(-15.8 to 7.4)                              |
| Orofacial clefts                                           | 5.0<br>(4.4 to 5.7)                           | --                                                           | $< 0.05$<br>( $< 0.05$ to 0.1)         | 6.5<br>(-6.6 to 21.3)                             | -5.5<br>(-17.2 to 8.0)                              |
| Down's syndrome                                            | 3.5<br>(3.1 to 3.9)                           | --                                                           | 0.3<br>(0.2 to 0.5)                    | 4.2<br>(-7.3 to 17.0)                             | -5.9<br>(-16.5 to 6.5)                              |
| Turner syndrome                                            | 1.5<br>(1.4 to 1.7)                           | --                                                           | $< 0.05$<br>( $< 0.05$ to $< 0.05$ )   | 16.0<br>(-18.8 to 67.9)                           | 3.9<br>(-27.4 to 54.2)                              |
| Klinefelter syndrome                                       | 2.6<br>(2.3 to 2.9)                           | --                                                           | $< 0.05$<br>( $< 0.05$ to $< 0.05$ )   | 33.6<br>(8.6 to 67.2)                             | 18.5<br>(-4.0 to 49.1)                              |



| Cause                                         | Prevalence in thousands (95% UI)              | Incidence in thousands (95% UI)          | YLDs in thousands (95% UI)           |                                                   |                                                     |
|-----------------------------------------------|-----------------------------------------------|------------------------------------------|--------------------------------------|---------------------------------------------------|-----------------------------------------------------|
|                                               | 2016 counts                                   | 2016 counts                              | 2016 counts                          | Percentage change in counts between 2006 and 2016 | Percentage change in age-standardised rates between |
| Other chromosomal abnormalities               | 8.6<br>(7.5 to 9.8)                           | --                                       | 0.8<br>(0.6 to 1.1)                  | 6.4<br>(-5.4 to 19.9)                             | 0.8<br>(-10.7 to 13.9)                              |
| Congenital musculoskeletal and limb anomalies | 13.1<br>(12.0 to 14.3)                        | --                                       | 1.7<br>(1.2 to 2.4)                  | 14.1<br>(3.8 to 25.2)                             | 0.6<br>(-8.9 to 10.7)                               |
| Urogenital congenital anomalies               | 6.1<br>(5.5 to 6.8)                           | --                                       | 0.1<br>(0.1 to 0.2)                  | 3.9<br>(-8.2 to 16.6)                             | -6.0<br>(-17.8 to 6.6)                              |
| Digestive congenital anomalies                | 8.7<br>(7.7 to 9.8)                           | --                                       | 0.4<br>(0.2 to 0.6)                  | 4.4<br>(-8.3 to 19.1)                             | -7.3<br>(-19.0 to 5.8)                              |
| Other congenital anomalies                    | 5.9<br>(4.2 to 8.5)                           | --                                       | 1.1<br>(0.8 to 1.6)                  | 18.9<br>(10.1 to 29.0)                            | 4.5<br>(-3.6 to 13.5)                               |
| Skin and subcutaneous diseases                | 1,865.7<br>(1,830.1 to 1,904.1)               | 4,102.6<br>(3,884.8 to 4,353.7)          | 49.2<br>(33.5 to 70.5)               | 13.5<br>(11.5 to 15.7)                            | 1.3<br>(-0.6 to 3.3)                                |
| Dermatitis                                    | 356.9<br>(338.7 to 374.4)                     | 362.6<br>(333.1 to 393.6)                | 13.4<br>(8.0 to 21.7)                | 11.6<br>(7.7 to 15.5)                             | 0.8<br>(-2.9 to 4.7)                                |
| Psoriasis                                     | 114.9<br>(109.5 to 120.3)                     | 10.5<br>(10.1 to 11.0)                   | 9.9<br>(7.1 to 13.0)                 | 18.1<br>(12.3 to 23.8)                            | 2.6<br>(-2.7 to 7.9)                                |
| Cellulitis                                    | 1.8<br>(1.7 to 1.9)                           | 26.9<br>(25.3 to 28.6)                   | 0.1<br>(0.1 to 0.1)                  | 14.6<br>(-2.0 to 31.8)                            | 0.7<br>(-13.6 to 17.1)                              |
| Pyoderma                                      | 23.1<br>(22.4 to 23.8)                        | 631.4<br>(610.4 to 652.8)                | 0.1<br>(0.1 to 0.3)                  | 14.1<br>(8.6 to 19.6)                             | 0.4<br>(-4.8 to 5.8)                                |
| Scabies                                       | 4.8<br>(3.5 to 6.6)                           | 14.4<br>(10.5 to 19.9)                   | 0.1<br>(0.1 to 0.2)                  | 11.9<br>(-0.4 to 25.8)                            | 0.6<br>(-10.8 to 13.4)                              |
| Fungal skin diseases                          | 388.4<br>(346.0 to 432.5)                     | 1,522.9<br>(1,325.1 to 1,735.2)          | 2.1<br>(0.9 to 4.5)                  | 14.5<br>(12.8 to 16.1)                            | 0.1<br>(-1.1 to 1.4)                                |
| Viral skin diseases                           | 124.1<br>(117.2 to 131.5)                     | 176.4<br>(168.7 to 185.3)                | 3.8<br>(2.3 to 5.6)                  | 10.1<br>(6.7 to 13.6)                             | -0.2<br>(-3.1 to 2.9)                               |
| Acne vulgaris                                 | 482.1<br>(440.2 to 521.4)                     | 363.7<br>(292.9 to 464.3)                | 12.4<br>(8.3 to 18.0)                | 11.7<br>(7.4 to 16.4)                             | 1.8<br>(-2.3 to 6.2)                                |
| Alopecia areata                               | 15.9<br>(15.3 to 16.4)                        | 28.0<br>(27.0 to 29.0)                   | 0.5<br>(0.3 to 0.8)                  | 13.5<br>(4.6 to 23.7)                             | -0.2<br>(-8.3 to 8.8)                               |
| Pruritus                                      | 49.5<br>(43.8 to 55.9)                        | 38.8<br>(34.6 to 43.8)                   | 0.5<br>(0.2 to 1.0)                  | 14.7<br>(8.8 to 20.9)                             | 0.0<br>(-5.0 to 5.5)                                |
| Urticaria                                     | 32.7<br>(29.0 to 36.8)                        | 58.0<br>(51.5 to 65.4)                   | 1.9<br>(1.3 to 2.8)                  | 11.8<br>(4.9 to 19.0)                             | -0.4<br>(-6.4 to 6.1)                               |
| Decubitus ulcer                               | 3.7<br>(3.3 to 4.1)                           | 13.6<br>(12.1 to 15.3)                   | 0.6<br>(0.4 to 0.8)                  | 16.1<br>(2.5 to 31.3)                             | 1.4<br>(-9.9 to 13.9)                               |
| Other skin and subcutaneous diseases          | 658.9<br>(640.5 to 677.1)                     | 855.1<br>(824.0 to 887.1)                | 3.6<br>(1.7 to 6.5)                  | 19.2<br>(16.8 to 21.7)                            | 2.7<br>(0.6 to 4.9)                                 |
| Sense organ diseases                          | 1,243.3<br>(1,212.8 to 1,275.1)               | 558.3†<br>(525.3 to 591.8)               | 37.5<br>(25.4 to 53.0)               | 14.8<br>(13.1 to 16.6)                            | -0.9<br>(-2.3 to 0.7)                               |
| Glaucoma                                      | 2.5<br>(2.0 to 2.9)                           | --                                       | 0.2<br>(0.2 to 0.4)                  | 18.9<br>(1.1 to 41.1)                             | 0.7<br>(-14.3 to 20.2)                              |
| Cataract                                      | 18.2<br>(14.6 to 22.6)                        | --                                       | 1.5<br>(1.0 to 2.2)                  | 11.1<br>(2.5 to 20.7)                             | -2.8<br>(-10.3 to 5.8)                              |
| Macular degeneration                          | 4.7<br>(3.8 to 5.7)                           | --                                       | 0.4<br>(0.3 to 0.6)                  | 18.3<br>(5.0 to 32.9)                             | 1.9<br>(-10.1 to 15.2)                              |
| Refraction and accommodation disorders        | 330.7<br>(304.6 to 357.2)                     | --                                       | 5.7<br>(3.5 to 9.0)                  | 11.8<br>(7.1 to 16.7)                             | -2.3<br>(-6.2 to 1.7)                               |
| Age-related and other hearing loss            | 979.0<br>(933.9 to 1,026.1)                   | --                                       | 22.2<br>(14.7 to 32.4)               | 14.8<br>(12.5 to 16.9)                            | -0.9<br>(-2.8 to 0.8)                               |
| Other vision loss                             | 11.5<br>(10.1 to 13.1)                        | --                                       | 1.0<br>(0.6 to 1.3)                  | 15.9<br>(5.1 to 27.6)                             | 0.6<br>(-8.9 to 11.4)                               |
| Other sense organ diseases                    | 204.1<br>(188.0 to 220.1)                     | 558.3<br>(525.3 to 591.8)                | 6.4<br>(4.0 to 9.7)                  | 17.7<br>(13.4 to 22.2)                            | 0.6<br>(-3.2 to 4.6)                                |
| Oral disorders                                | 2,691.0<br>(2,604.4 to 2,779.3)               | 6,750.1†<br>(6,222.7 to 7,325.1)         | 23.8<br>(14.7 to 36.2)               | 19.1<br>(16.7 to 21.9)                            | 1.5<br>(-0.5 to 3.3)                                |
| Caries of deciduous teeth                     | 91.6<br>(46.5 to 143.2)                       | 366.6<br>(168.2 to 666.0)                | < 0.05<br>(< 0.05 to 0.1)            | 4.3<br>(-11.0 to 19.1)                            | -0.7<br>(-15.4 to 13.3)                             |
| Caries of permanent teeth                     | 1,889.0<br>(1,787.5 to 1,993.4)               | 6,254.2<br>(5,775.6 to 6,711.5)          | 1.8<br>(0.8 to 3.5)                  | 12.7<br>(9.3 to 15.9)                             | -0.6<br>(-3.8 to 2.6)                               |
| Periodontal disease                           | 790.1<br>(673.4 to 920.3)                     | 90.6<br>(73.2 to 110.1)                  | 5.2<br>(2.0 to 10.8)                 | 14.9<br>(10.2 to 20.6)                            | -0.0<br>(-4.2 to 5.1)                               |
| Edentulism and severe tooth loss              | 497.4<br>(436.4 to 557.2)                     | 38.7<br>(32.2 to 46.0)                   | 13.7<br>(8.9 to 19.2)                | 23.0<br>(19.1 to 26.6)                            | 3.0<br>(0.1 to 6.0)                                 |
| Other oral disorders                          | 102.6<br>(98.2 to 107.3)                      | --                                       | 3.0<br>(1.8 to 4.5)                  | 14.1<br>(10.4 to 17.7)                            | -0.1<br>(-3.4 to 3.1)                               |
| <b>Injuries</b>                               | <b>1,659.8</b><br><b>(1,552.2 to 1,788.9)</b> | <b>577.5†</b><br><b>(543.1 to 615.5)</b> | <b>52.7</b><br><b>(35.4 to 74.5)</b> | <b>15.6</b><br><b>(14.2 to 17.0)</b>              | <b>0.5</b><br><b>(-0.8 to 1.8)</b>                  |
| <b>Transport injuries</b>                     | <b>221.5</b><br><b>(205.0 to 238.5)</b>       | <b>51.8</b><br><b>(46.9 to 57.5)</b>     | <b>9.9</b><br><b>(6.5 to 14.3)</b>   | <b>7.3</b><br><b>(5.5 to 9.2)</b>                 | <b>-7.1</b><br><b>(-8.8 to -5.3)</b>                |
| Road injuries                                 | 194.7<br>(180.1 to 210.4)                     | 47.9<br>(42.9 to 53.6)                   | 8.9<br>(5.8 to 12.9)                 | 7.2<br>(5.4 to 9.2)                               | -7.1<br>(-8.9 to -5.4)                              |
| Pedestrian road injuries                      | 30.6<br>(26.4 to 35.8)                        | 4.7<br>(3.8 to 5.9)                      | 1.5<br>(1.0 to 2.2)                  | 21.5<br>(19.4 to 23.8)                            | 6.2<br>(4.2 to 8.4)                                 |
| Cyclist road injuries                         | 55.9<br>(46.3 to 66.5)                        | 17.2<br>(14.2 to 20.2)                   | 2.3<br>(1.5 to 3.4)                  | 15.2<br>(13.4 to 17.1)                            | -0.3<br>(-2.0 to 1.4)                               |
| Motorcyclist road injuries                    | 37.0<br>(31.1 to 44.0)                        | 5.7<br>(4.6 to 7.0)                      | 1.8<br>(1.2 to 2.5)                  | 3.1<br>(0.9 to 5.2)                               | -11.3<br>(-13.3 to -9.4)                            |
| Motor vehicle road injuries                   | 57.2<br>(48.2 to 66.3)                        | 17.0<br>(14.6 to 19.5)                   | 2.8<br>(1.8 to 4.0)                  | -3.3<br>(-5.2 to -1.4)                            | -16.2<br>(-18.0 to -14.5)                           |
| Other road injuries                           | 14.0<br>(11.7 to 16.6)                        | 3.4<br>(2.6 to 4.4)                      | 0.5<br>(0.3 to 0.8)                  | 13.8<br>(11.3 to 16.6)                            | -1.1<br>(-3.4 to 1.6)                               |
| Other transport injuries                      | 26.8<br>(22.1 to 31.6)                        | 3.9<br>(3.3 to 4.4)                      | 1.0<br>(0.6 to 1.4)                  | 8.2<br>(6.7 to 9.8)                               | -6.4<br>(-7.8 to -4.9)                              |
| <b>Unintentional injuries</b>                 | <b>1,372.9</b><br><b>(1,268.2 to 1,492.4)</b> | <b>498.9</b><br><b>(463.9 to 536.7)</b>  | <b>40.4</b><br><b>(27.1 to 57.6)</b> | <b>17.9</b><br><b>(16.4 to 19.6)</b>              | <b>2.8</b><br><b>(1.5 to 4.2)</b>                   |
| Falls                                         | 730.1<br>(640.7 to 823.8)                     | 285.6<br>(255.4 to 318.9)                | 26.4<br>(18.2 to 36.4)               | 17.0<br>(15.1 to 19.1)                            | 2.3<br>(0.8 to 4.0)                                 |
| Drowning                                      | 3.0<br>(2.6 to 3.3)                           | 0.3<br>(0.3 to 0.4)                      | 0.1<br>(0.1 to 0.2)                  | 16.2<br>(10.5 to 22.2)                            | 1.2<br>(-4.7 to 6.8)                                |
| Fire, heat, and hot substances                | 127.7<br>(109.6 to 151.4)                     | 7.4<br>(6.2 to 8.6)                      | 2.2<br>(1.2 to 3.7)                  | 13.8<br>(11.1 to 16.5)                            | -0.6<br>(-3.1 to 1.9)                               |
| Poisonings                                    | 6.0<br>(4.8 to 7.7)                           | 5.0<br>(4.1 to 6.0)                      | 0.6<br>(0.4 to 0.8)                  | 12.2<br>(3.5 to 22.2)                             | -1.1<br>(-9.4 to 8.5)                               |
| Exposure to mechanical forces                 | 269.2<br>(225.0 to 343.3)                     | 68.0<br>(57.6 to 79.6)                   | 4.9<br>(3.0 to 7.5)                  | 20.9<br>(19.5 to 22.5)                            | 4.5<br>(3.1 to 6.0)                                 |
| Unintentional firearm injuries                | 8.2<br>(6.7 to 10.2)                          | 0.8<br>(0.6 to 1.1)                      | 0.1<br>(0.1 to 0.2)                  | 21.2<br>(19.2 to 23.2)                            | 4.4<br>(2.6 to 6.2)                                 |
| Unintentional suffocation                     | 3.4<br>(2.8 to 4.1)                           | 0.7<br>(0.5 to 1.0)                      | 0.1<br>(0.1 to 0.1)                  | 26.0<br>(23.9 to 28.1)                            | 7.5<br>(5.6 to 9.4)                                 |
| Other exposure to mechanical forces           | 257.6<br>(213.7 to 330.4)                     | 66.5<br>(56.2 to 78.0)                   | 4.6<br>(2.9 to 7.2)                  | 20.9<br>(19.4 to 22.4)                            | 4.4<br>(3.1 to 5.9)                                 |

| Cause                                                                               | Prevalence in thousands (95% UI)        | Incidence in thousands (95% UI)       | YLDs in thousands (95% UI)              |                                                   |                                                     |
|-------------------------------------------------------------------------------------|-----------------------------------------|---------------------------------------|-----------------------------------------|---------------------------------------------------|-----------------------------------------------------|
|                                                                                     | 2016 counts                             | 2016 counts                           | 2016 counts                             | Percentage change in counts between 2006 and 2016 | Percentage change in age-standardised rates between |
| Adverse effects of medical treatment                                                | 1.9<br>(1.5 to 2.3)                     | 24.3<br>(21.4 to 27.5)                | 0.2<br>(0.2 to 0.4)                     | 19.7<br>(13.8 to 25.9)                            | 3.4<br>(-0.6 to 7.5)                                |
| Animal contact                                                                      | 17.5<br>(15.4 to 20.1)                  | 9.9<br>(7.9 to 12.2)                  | 0.3<br>(0.2 to 0.5)                     | 11.2<br>(7.7 to 14.9)                             | -3.5<br>(-7.0 to 0.3)                               |
| Venomous animal contact                                                             | 2.8<br>(2.4 to 3.3)                     | 3.2<br>(2.3 to 4.3)                   | 0.1<br>(0.1 to 0.2)                     | 11.0<br>(3.0 to 19.4)                             | -2.9<br>(-10.4 to 5.3)                              |
| Non-venomous animal contact                                                         | 14.7<br>(12.7 to 17.3)                  | 6.7<br>(5.3 to 8.4)                   | 0.2<br>(0.1 to 0.3)                     | 11.4<br>(9.6 to 13.2)                             | -4.0<br>(-5.5 to -2.4)                              |
| Foreign body                                                                        | 31.4<br>(27.1 to 37.2)                  | 24.4<br>(21.2 to 28.6)                | 0.9<br>(0.6 to 1.4)                     | 23.2<br>(21.6 to 24.9)                            | 6.9<br>(5.4 to 8.6)                                 |
| Pulmonary aspiration and foreign body in airway                                     | 5.3<br>(4.3 to 6.4)                     | 6.6<br>(5.9 to 7.5)                   | 0.1<br>(0.1 to 0.2)                     | 27.1<br>(24.5 to 29.8)                            | 9.4<br>(7.3 to 11.5)                                |
| Foreign body in eyes                                                                | 3.2<br>(2.1 to 4.4)                     | 12.9<br>(10.0 to 17.0)                | 0.2<br>(0.1 to 0.3)                     | 24.0<br>(20.1 to 28.0)                            | 8.8<br>(5.7 to 12.2)                                |
| Foreign body in other body part                                                     | 22.9<br>(19.1 to 28.5)                  | 4.9<br>(4.0 to 5.8)                   | 0.6<br>(0.4 to 0.9)                     | 22.0<br>(20.3 to 23.9)                            | 5.6<br>(4.0 to 7.3)                                 |
| Environmental heat and cold exposure                                                | 15.7<br>(14.1 to 17.6)                  | 4.1<br>(3.6 to 4.8)                   | 0.6<br>(0.4 to 0.8)                     | 16.6<br>(12.8 to 20.4)                            | -0.2<br>(-3.8 to 3.2)                               |
| Other unintentional injuries                                                        | 170.5<br>(143.0 to 201.2)               | 69.9<br>(58.7 to 82.1)                | 4.2<br>(2.7 to 6.3)                     | 22.8<br>(21.5 to 24.2)                            | 6.4<br>(5.2 to 7.7)                                 |
| <b>Self-harm and interpersonal violence</b>                                         | <b>123.9</b><br><b>(113.0 to 134.3)</b> | <b>26.6†</b><br><b>(23.7 to 29.7)</b> | <b>2.4</b><br><b>(1.6 to 3.4)</b>       | <b>12.8</b><br><b>(10.6 to 14.9)</b>              | <b>-2.0</b><br><b>(-4.0 to -0.0)</b>                |
| Self-harm                                                                           | 17.6<br>(14.3 to 21.4)                  | 13.7<br>(12.1 to 15.6)                | 0.7<br>(0.5 to 1.0)                     | 7.6<br>(2.0 to 13.1)                              | -7.1<br>(-12.1 to -2.0)                             |
| Self-harm by firearm                                                                | 0.1<br>(0.1 to 0.2)                     | < 0.05<br>(< 0.05 to < 0.05)          | < 0.05<br>(< 0.05 to < 0.05)            | -3.0<br>(-5.1 to -1.0)                            | -15.5<br>(-17.6 to -13.5)                           |
| Self-harm by other specified means                                                  | 17.5<br>(14.1 to 21.3)                  | 13.7<br>(12.0 to 15.6)                | 0.7<br>(0.5 to 1.0)                     | 7.6<br>(2.1 to 13.1)                              | -7.0<br>(-12.1 to -1.9)                             |
| Interpersonal violence                                                              | 106.2<br>(96.2 to 116.5)                | 12.8†<br>(10.6 to 15.5)               | 1.7<br>(1.1 to 2.4)                     | 15.1<br>(13.4 to 17.0)                            | 0.0<br>(-1.6 to 1.9)                                |
| Assault by firearm                                                                  | 3.0<br>(2.4 to 3.6)                     | 0.4<br>(0.3 to 0.5)                   | 0.1<br>(< 0.05 to 0.1)                  | 24.2<br>(22.2 to 26.2)                            | 7.4<br>(5.4 to 9.2)                                 |
| Assault by sharp object                                                             | 8.4<br>(6.8 to 10.2)                    | 2.2<br>(1.6 to 2.9)                   | 0.1<br>(0.1 to 0.2)                     | 17.9<br>(16.1 to 19.7)                            | 1.9<br>(0.2 to 3.5)                                 |
| Sexual violence                                                                     | 61.4<br>(53.6 to 70.2)                  | --                                    | 0.5<br>(0.3 to 0.7)                     | 8.4<br>(4.7 to 12.4)                              | -3.8<br>(-7.2 to 0.3)                               |
| Assault by other means                                                              | 33.5<br>(27.5 to 41.6)                  | 10.3<br>(8.5 to 12.5)                 | 0.9<br>(0.6 to 1.4)                     | 18.0<br>(16.3 to 19.8)                            | 2.0<br>(0.4 to 3.7)                                 |
| <b>Forces of nature, conflict and terrorism, and executions and police conflict</b> | <b>2.9</b><br><b>(1.6 to 4.3)</b>       | <b>0.2†</b><br><b>(0.1 to 0.2)</b>    | <b>0.1</b><br><b>(&lt; 0.05 to 0.2)</b> | <b>53.1</b><br><b>(45.4 to 56.3)</b>              | <b>29.8</b><br><b>(23.0 to 32.9)</b>                |
| Exposure to forces of nature                                                        | 2.1<br>(1.0 to 3.4)                     | --                                    | < 0.05<br>(< 0.05 to 0.1)               | 44.4<br>(41.6 to 47.0)                            | 21.7<br>(18.8 to 24.0)                              |
| Conflict and terrorism                                                              | 0.2<br>(0.1 to 0.3)                     | --                                    | < 0.05<br>(< 0.05 to < 0.05)            | --                                                | --                                                  |
| Executions and police conflict                                                      | 0.6<br>(0.3 to 1.0)                     | 0.2<br>(0.1 to 0.2)                   | < 0.05<br>(< 0.05 to < 0.05)            | 46.8<br>(35.5 to 51.5)                            | 24.4<br>(16.5 to 28.1)                              |
| <b>Impairments</b>                                                                  | --                                      | --                                    | --                                      | --                                                | --                                                  |
| Anaemia                                                                             | 380.2<br>(308.4 to 457.5)               | --                                    | 6.7<br>(4.5 to 9.9)                     | 9.2<br>(-10.2 to 35.5)                            | -2.7<br>(-22.2 to 21.1)                             |
| Developmental intellectual disability                                               | 69.0<br>(56.0 to 82.9)                  | --                                    | 8.9<br>(6.7 to 11.7)                    | 12.4<br>(8.0 to 17.3)                             | 0.1<br>(-3.9 to 4.7)                                |
| Epilepsy                                                                            | 25.9<br>(12.5 to 38.5)                  | --                                    | 7.0<br>(3.4 to 12.7)                    | 11.3<br>(-54.8 to 175.2)                          | -1.4<br>(-59.6 to 138.7)                            |
| Guillain-Barre syndrome                                                             | 0.1<br>(0.1 to 0.1)                     | --                                    | < 0.05<br>(< 0.05 to < 0.05)            | 15.1<br>(12.6 to 17.9)                            | 0.3<br>(0.2 to 0.4)                                 |
| Hearing loss                                                                        | 1,016.0<br>(971.2 to 1,062.4)           | --                                    | 23.8<br>(15.9 to 34.3)                  | 14.4<br>(12.2 to 16.3)                            | -1.1<br>(-2.8 to 0.5)                               |
| Heart failure                                                                       | 100.7<br>(89.0 to 113.2)                | --                                    | 11.2<br>(8.7 to 13.7)                   | 3.8<br>(-3.2 to 11.0)                             | -12.3<br>(-18.2 to -6.5)                            |
| Infertility                                                                         | 46.8<br>(35.6 to 61.9)                  | --                                    | 0.3<br>(0.1 to 0.6)                     | 11.0<br>(3.8 to 19.0)                             | 0.6<br>(-5.3 to 7.2)                                |
| Pelvic inflammatory disease                                                         | 0.4<br>(0.3 to 0.5)                     | --                                    | < 0.05<br>(< 0.05 to 0.1)               | -6.9<br>(-26.4 to 17.3)                           | -15.9<br>(-33.3 to 6.5)                             |
| Vision loss                                                                         | 376.3<br>(349.9 to 402.8)               | --                                    | 10.7<br>(7.6 to 15.2)                   | 13.4<br>(10.2 to 17.3)                            | -0.7<br>(-4.0 to 3.1)                               |

We did not calculate incidence for the nine impairments, certain NTDs, and causes with only birth prevalence. Blank cells mean that no estimate is available.

† Incidence for aggregate causes represents the sum of the incidence of the causes below the aggregate.

‡ Incidence estimates for stroke represent first-ever stroke only.

^ Incidence of HIV/AIDS represents new infections of HIV only and does not include new infections of Tuberculosis in HIV positive cases.



SR Table 14: Prevalence, incidence, and YLDs for 2016, percentage change of YLD counts and percentage change of age-standardised YLD rates between 2006 and 2016 by cause and impairments, for all ages, Oman.

| Cause                                                                                | Prevalence in thousands (95% UI)       | Incidence in thousands (95% UI)            | YLDs in thousands (95% UI)       |                                                   |                                                     |
|--------------------------------------------------------------------------------------|----------------------------------------|--------------------------------------------|----------------------------------|---------------------------------------------------|-----------------------------------------------------|
|                                                                                      | 2016 counts                            | 2016 counts                                | 2016 counts                      | Percentage change in counts between 2006 and 2016 | Percentage change in age-standardised rates between |
| <b>All causes</b>                                                                    | <b>4,531.5</b><br>(4,509.3 to 4,553.0) | <b>28,285.5†</b><br>(26,584.9 to 30,267.0) | <b>476.9</b><br>(351.0 to 624.5) | <b>91.8</b><br>(87.2 to 96.6)                     | <b>-1.8</b><br>(-3.4 to -0.2)                       |
| <b>Communicable, maternal, neonatal, and nutritional disorders</b>                   | <b>2,971.4</b><br>(2,738.1 to 3,200.6) | <b>16,280.8†</b><br>(14,750.4 to 18,037.1) | <b>40.6</b><br>(28.3 to 57.0)    | <b>43.2</b><br>(33.0 to 54.9)                     | <b>-11.3</b><br>(-16.6 to -5.6)                     |
| <b>HIV/AIDS and tuberculosis</b>                                                     | <b>1,871.6</b><br>(1,359.2 to 2,344.0) | <b>0.8†</b><br>(0.6 to 1.1)                | <b>0.3</b><br>(0.2 to 0.5)       | <b>168.3</b><br>(101.8 to 237.4)                  | <b>22.5</b><br>(-2.7 to 48.2)                       |
| Tuberculosis                                                                         | 1,583.0<br>(1,041.3 to 2,195.2)        | 0.6†<br>(0.4 to 0.9)                       | 0.1<br>(0.1 to 0.2)              | 86.5<br>(38.1 to 146.8)                           | -10.5<br>(-30.8 to 15.7)                            |
| Drug-susceptible tuberculosis                                                        | 0.4<br>(0.2 to 0.5)                    | 0.6<br>(0.4 to 0.8)                        | 0.1<br>(0.1 to 0.2)              | 85.4<br>(35.4 to 146.2)                           | -11.1<br>(-32.0 to 15.3)                            |
| Multidrug-resistant tuberculosis without extensive drug resistance                   | < 0.05<br>(< 0.05 to < 0.05)           | < 0.05<br>(< 0.05 to < 0.05)               | < 0.05<br>(< 0.05 to < 0.05)     | 182.0<br>(-16.2 to 854.1)                         | 35.2<br>(-59.7 to 346.2)                            |
| Extensively drug-resistant tuberculosis                                              | < 0.05<br>(< 0.05 to < 0.05)           | < 0.05<br>(< 0.05 to < 0.05)               | < 0.05<br>(< 0.05 to < 0.05)     | 540.4<br>(90.1 to 2,065.5)                        | 206.9<br>(-8.6 to 914.5)                            |
| Latent tuberculosis infection                                                        | 1,582.7<br>(1,041.0 to 2,194.9)        | --                                         | --                               | --                                                | --                                                  |
| HIV/AIDS                                                                             | 1.8<br>(1.0 to 2.8)                    | 0.2^<br>(0.1 to 0.4)                       | 0.2<br>(0.1 to 0.3)              | 269.0<br>(149.7 to 373.2)                         | 65.3<br>(23.1 to 104.0)                             |
| Drug-susceptible HIV/AIDS - Tuberculosis                                             | < 0.05<br>(< 0.05 to < 0.05)           | < 0.05<br>(< 0.05 to < 0.05)               | < 0.05<br>(< 0.05 to < 0.05)     | 157.6<br>(111.3 to 205.0)                         | 11.3<br>(-8.8 to 31.6)                              |
| Multidrug-resistant HIV/AIDS - Tuberculosis without extensive drug resistance        | < 0.05<br>(< 0.05 to < 0.05)           | < 0.05<br>(< 0.05 to < 0.05)               | < 0.05<br>(< 0.05 to < 0.05)     | 295.3<br>(17.4 to 1,231.7)                        | 70.9<br>(-49.1 to 475.2)                            |
| Extensively drug-resistant HIV/AIDS - Tuberculosis                                   | < 0.05<br>(< 0.05 to < 0.05)           | < 0.05<br>(< 0.05 to < 0.05)               | < 0.05<br>(< 0.05 to < 0.05)     | 797.7<br>(166.8 to 2,921.9)                       | 288.2<br>(15.5 to 1,205.9)                          |
| HIV/AIDS resulting in other diseases                                                 | 1.8<br>(1.0 to 2.8)                    | 0.2<br>(0.1 to 0.4)                        | 0.2<br>(0.1 to 0.3)              | 273.0<br>(147.2 to 382.2)                         | 67.2<br>(23.7 to 107.3)                             |
| <b>Diarrhoea, lower respiratory infections, and other common infectious diseases</b> | <b>255.2</b><br>(239.6 to 272.5)       | <b>15,032.1†</b><br>(13,485.8 to 16,690.1) | <b>12.7</b><br>(8.8 to 17.4)     | <b>57.8</b><br>(50.6 to 64.7)                     | <b>3.7</b><br>(0.6 to 7.0)                          |
| Diarrhoeal diseases                                                                  | 44.7<br>(40.7 to 48.6)                 | 2,977.2<br>(2,714.2 to 3,247.1)            | 5.1<br>(3.5 to 7.1)              | 52.9<br>(40.8 to 67.2)                            | 11.6<br>(4.6 to 19.0)                               |
| Intestinal infectious diseases                                                       | 0.1<br>(0.1 to 0.1)                    | 2.3†<br>(2.0 to 2.6)                       | < 0.05<br>(< 0.05 to < 0.05)     | -10.5<br>(-23.8 to 5.6)                           | -38.0<br>(-46.2 to -28.5)                           |
| Typhoid fever                                                                        | 0.1<br>(0.1 to 0.1)                    | 1.8<br>(1.6 to 2.1)                        | < 0.05<br>(< 0.05 to < 0.05)     | -10.6<br>(-24.9 to 6.5)                           | -37.9<br>(-46.7 to -27.7)                           |
| Paratyphoid fever                                                                    | < 0.05<br>(< 0.05 to < 0.05)           | 0.4<br>(0.4 to 0.5)                        | < 0.05<br>(< 0.05 to < 0.05)     | 0.5<br>(-16.9 to 22.2)                            | -34.5<br>(-44.0 to -22.8)                           |
| Other intestinal infectious diseases                                                 | --                                     | --                                         | < 0.05<br>(< 0.05 to < 0.05)     | -42.0<br>(-54.6 to -25.7)                         | -52.5<br>(-59.9 to -43.8)                           |
| Lower respiratory infections                                                         | 6.2<br>(5.6 to 6.8)                    | 260.1<br>(234.0 to 286.7)                  | 0.4<br>(0.2 to 0.5)              | 66.6<br>(46.6 to 89.0)                            | 5.1<br>(-4.0 to 15.4)                               |
| Upper respiratory infections                                                         | 151.0<br>(130.9 to 172.1)              | 11,368.9<br>(9,807.5 to 13,021.6)          | 3.8<br>(2.2 to 5.9)              | 59.8<br>(47.5 to 73.4)                            | -0.1<br>(-5.0 to 5.1)                               |
| Otitis media                                                                         | 47.0<br>(41.6 to 52.9)                 | 321.7<br>(258.7 to 402.1)                  | 1.2<br>(0.7 to 1.8)              | 28.4<br>(17.5 to 41.1)                            | -4.7<br>(-11.8 to 3.0)                              |
| Meningitis                                                                           | 6.6<br>(5.9 to 7.5)                    | 1.2<br>(1.0 to 1.5)                        | 0.9<br>(0.6 to 1.2)              | 85.6<br>(71.5 to 100.8)                           | -0.6<br>(-7.2 to 6.5)                               |
| Pneumococcal meningitis                                                              | 2.4<br>(2.1 to 2.8)                    | 0.1<br>(0.1 to 0.2)                        | 0.3<br>(0.2 to 0.5)              | 79.8<br>(47.9 to 117.2)                           | -5.9<br>(-20.4 to 11.6)                             |
| H influenzae type B meningitis                                                       | 1.3<br>(1.1 to 1.6)                    | 0.2<br>(0.1 to 0.3)                        | 0.2<br>(0.1 to 0.3)              | 85.0<br>(76.1 to 95.0)                            | -0.2<br>(-4.1 to 4.1)                               |
| Meningococcal infection                                                              | 1.1<br>(0.8 to 1.4)                    | 0.3<br>(0.2 to 0.4)                        | 0.1<br>(0.1 to 0.2)              | 85.9<br>(76.8 to 95.1)                            | -1.9<br>(-6.2 to 2.4)                               |
| Other meningitis                                                                     | 1.9<br>(1.4 to 2.4)                    | 0.6<br>(0.5 to 0.7)                        | 0.2<br>(0.1 to 0.3)              | 96.6<br>(82.6 to 111.3)                           | 10.3<br>(4.1 to 17.7)                               |
| Encephalitis                                                                         | 9.5<br>(7.0 to 13.0)                   | 6.0<br>(5.3 to 6.8)                        | 1.2<br>(0.8 to 1.6)              | 98.3<br>(71.4 to 130.4)                           | -2.9<br>(-14.1 to 9.2)                              |
| Diphtheria                                                                           | < 0.05<br>(< 0.05 to < 0.05)           | < 0.05<br>(< 0.05 to < 0.05)               | < 0.05<br>(< 0.05 to < 0.05)     | 54.9<br>(-15.9 to 182.8)                          | -8.3<br>(-51.1 to 64.2)                             |
| Whooping cough                                                                       | < 0.05<br>(< 0.05 to < 0.05)           | 0.2<br>(0.1 to 0.3)                        | < 0.05<br>(< 0.05 to < 0.05)     | -57.3<br>(-73.5 to -33.4)                         | -56.9<br>(-73.0 to -33.1)                           |
| Tetanus                                                                              | < 0.05<br>(< 0.05 to < 0.05)           | < 0.05<br>(< 0.05 to < 0.05)               | < 0.05<br>(< 0.05 to < 0.05)     | 64.8<br>(38.1 to 85.1)                            | -13.3<br>(-38.4 to 6.5)                             |
| Measles                                                                              | < 0.05<br>(< 0.05 to < 0.05)           | 0.5<br>(0.1 to 1.1)                        | < 0.05<br>(< 0.05 to < 0.05)     | -64.6<br>(-70.5 to -58.3)                         | -64.3<br>(-70.2 to -57.9)                           |
| Varicella and herpes zoster                                                          | 3.9<br>(3.6 to 4.2)                    | 93.9<br>(90.8 to 96.7)                     | 0.1<br>(0.1 to 0.2)              | 85.0<br>(53.7 to 123.5)                           | -0.3<br>(-11.7 to 13.5)                             |
| <b>Neglected tropical diseases and malaria</b>                                       | <b>91.3</b><br>(80.7 to 104.0)         | <b>5.0†</b><br>(3.8 to 6.5)                | <b>1.1</b><br>(0.7 to 1.6)       | <b>18.8</b><br>(-3.0 to 44.7)                     | <b>-20.4</b><br>(-35.9 to -0.8)                     |
| Malaria                                                                              | 0.1<br>(< 0.05 to 0.1)                 | 0.1<br>(< 0.05 to 0.2)                     | < 0.05<br>(< 0.05 to < 0.05)     | 94.5<br>(76.5 to 112.0)                           | 2.8<br>(-6.0 to 11.4)                               |
| Chagas disease                                                                       | --                                     | --                                         | --                               | --                                                | --                                                  |
| Leishmaniasis                                                                        | < 0.05<br>(< 0.05 to < 0.05)           | < 0.05<br>(< 0.05 to < 0.05)               | < 0.05<br>(< 0.05 to < 0.05)     | -88.1<br>(-99.1 to -3.8)                          | -90.3<br>(-99.1 to -36.2)                           |
| Visceral leishmaniasis                                                               | < 0.05<br>(< 0.05 to < 0.05)           | < 0.05<br>(< 0.05 to < 0.05)               | < 0.05<br>(< 0.05 to < 0.05)     | -50.9<br>(-93.3 to 94.1)                          | -74.3<br>(-96.6 to 13.2)                            |
| Cutaneous and mucocutaneous leishmaniasis                                            | < 0.05<br>(< 0.05 to < 0.05)           | < 0.05<br>(< 0.05 to < 0.05)               | < 0.05<br>(< 0.05 to < 0.05)     | -91.8<br>(-100.0 to 3.1)                          | -94.1<br>(-100.0 to -25.4)                          |
| African trypanosomiasis                                                              | --                                     | --                                         | --                               | --                                                | --                                                  |
| Schistosomiasis                                                                      | 16.1<br>(11.8 to 21.4)                 | 4.8<br>(3.7 to 6.3)                        | 0.1<br>(< 0.05 to 0.2)           | 103.9<br>(74.6 to 135.6)                          | -9.6<br>(-21.1 to 2.6)                              |
| Cysticercosis                                                                        | --                                     | --                                         | --                               | --                                                | --                                                  |
| Cystic echinococcosis                                                                | 0.3<br>(0.1 to 1.2)                    | 0.1<br>(< 0.05 to 0.3)                     | < 0.05<br>(< 0.05 to 0.1)        | 12.5<br>(-88.4 to 992.5)                          | -41.9<br>(-92.2 to 378.9)                           |
| Lymphatic filariasis                                                                 | --                                     | --                                         | --                               | --                                                | --                                                  |
| Onchocerciasis                                                                       | --                                     | --                                         | --                               | --                                                | --                                                  |
| Trachoma                                                                             | 3.5<br>(2.2 to 5.2)                    | --                                         | 0.3<br>(0.2 to 0.4)              | 58.0<br>(23.5 to 107.0)                           | -22.5<br>(-45.0 to 12.5)                            |
| Dengue                                                                               | --                                     | --                                         | --                               | --                                                | --                                                  |
| Yellow fever                                                                         | --                                     | --                                         | --                               | --                                                | --                                                  |
| Rabies                                                                               | < 0.05<br>(< 0.05 to < 0.05)           | < 0.05<br>(< 0.05 to < 0.05)               | < 0.05<br>(< 0.05 to < 0.05)     | 17.0<br>(-58.2 to 184.9)                          | -24.3<br>(-75.4 to 132.4)                           |
| Intestinal nematode infections                                                       | 33.9<br>(26.2 to 44.4)                 | --                                         | < 0.05<br>(< 0.05 to < 0.05)     | 101.0<br>(22.6 to 225.8)                          | 0.4<br>(-39.0 to 61.2)                              |
| Ascariasis                                                                           | 10.1<br>(6.8 to 14.9)                  | --                                         | < 0.05<br>(< 0.05 to < 0.05)     | 45.4<br>(-79.7 to 827.9)                          | 6.0<br>(-84.8 to 576.4)                             |

| Cause                                                                   | Prevalence in thousands (95% UI)              | Incidence in thousands (95% UI)                   | YLDs in thousands (95% UI)              |                                                   |                                                     |
|-------------------------------------------------------------------------|-----------------------------------------------|---------------------------------------------------|-----------------------------------------|---------------------------------------------------|-----------------------------------------------------|
|                                                                         | 2016 counts                                   | 2016 counts                                       | 2016 counts                             | Percentage change in counts between 2006 and 2016 | Percentage change in age-standardised rates between |
| Trichuriasis                                                            | 20.0<br>(13.3 to 30.7)                        | --                                                | < 0.05<br>(< 0.05 to < 0.05)            | 40.7<br>(-87.5 to 1,495.7)                        | -9.2<br>(-91.4 to 997.1)                            |
| Hookworm disease                                                        | 3.9<br>(2.6 to 5.7)                           | --                                                | < 0.05<br>(< 0.05 to < 0.05)            | 101.0<br>(22.6 to 225.9)                          | 0.4<br>(-39.0 to 61.2)                              |
| Food-borne trematodiasis                                                | --                                            | --                                                | --                                      | --                                                | --                                                  |
| Leprosy                                                                 | 0.1<br>(0.1 to 0.2)                           | < 0.05<br>(< 0.05 to < 0.05)                      | < 0.05<br>(< 0.05 to < 0.05)            | 24.3<br>(-8.2 to 87.6)                            | -35.3<br>(-52.7 to -3.5)                            |
| Ebola virus disease                                                     | --                                            | --                                                | --                                      | --                                                | --                                                  |
| Zika virus disease                                                      | --                                            | --                                                | --                                      | --                                                | --                                                  |
| Guinea worm disease                                                     | --                                            | --                                                | --                                      | --                                                | --                                                  |
| Other neglected tropical diseases                                       | 39.4<br>(33.7 to 45.1)                        | --                                                | 0.6<br>(0.4 to 1.0)                     | -1.0<br>(-23.3 to 26.0)                           | -18.5<br>(-36.4 to 4.4)                             |
| <b>Maternal disorders</b>                                               | <b>4.4</b><br><b>(3.3 to 5.8)</b>             | <b>54.2†</b><br><b>(46.6 to 63.2)</b>             | <b>0.3</b><br><b>(0.2 to 0.4)</b>       | <b>41.5</b><br><b>(-0.0 to 98.2)</b>              | <b>-42.0</b><br><b>(-58.5 to -19.4)</b>             |
| Maternal haemorrhage                                                    | 0.7<br>(0.5 to 1.0)                           | 5.7<br>(3.7 to 8.8)                               | < 0.05<br>(< 0.05 to 0.1)               | -0.4<br>(-35.8 to 54.3)                           | -59.6<br>(-72.7 to -39.6)                           |
| Maternal sepsis and other pregnancy related infections                  | 1.1<br>(0.6 to 1.7)                           | 11.0<br>(7.9 to 15.4)                             | < 0.05<br>(< 0.05 to 0.1)               | -2.2<br>(-55.0 to 102.7)                          | -59.5<br>(-81.5 to -15.8)                           |
| Maternal hypertensive disorders                                         | 2.5<br>(1.5 to 3.8)                           | 11.1<br>(7.8 to 15.1)                             | 0.1<br>(0.1 to 0.2)                     | 142.5<br>(39.6 to 335.8)                          | -1.2<br>(-42.6 to 79.6)                             |
| Maternal obstructed labour and uterine rupture                          | 0.1<br>(< 0.05 to 0.1)                        | 4.9<br>(3.4 to 7.2)                               | < 0.05<br>(< 0.05 to < 0.05)            | -1.4<br>(-66.4 to 204.7)                          | -59.4<br>(-83.7 to 15.7)                            |
| Maternal abortion, miscarriage, and ectopic pregnancy                   | 0.2<br>(0.1 to 0.3)                           | 21.4<br>(16.1 to 29.0)                            | < 0.05<br>(< 0.05 to < 0.05)            | 16.2<br>(-46.1 to 129.3)                          | -54.3<br>(-78.4 to -11.9)                           |
| Other maternal disorders                                                | --                                            | --                                                | < 0.05<br>(< 0.05 to 0.1)               | 33.2<br>(-6.3 to 87.7)                            | -44.8<br>(-60.5 to -23.3)                           |
| <b>Neonatal disorders</b>                                               | <b>32.1</b><br><b>(27.3 to 38.2)</b>          | --                                                | <b>5.7</b><br><b>(3.7 to 8.4)</b>       | <b>67.5</b><br><b>(40.8 to 105.9)</b>             | <b>0.5</b><br><b>(-15.1 to 23.0)</b>                |
| Neonatal preterm birth complications                                    | 28.9<br>(22.6 to 37.4)                        | --                                                | 3.6<br>(2.2 to 5.9)                     | 69.2<br>(29.8 to 126.5)                           | -1.0<br>(-23.4 to 32.5)                             |
| Neonatal encephalopathy due to birth asphyxia and trauma                | 5.5<br>(3.5 to 8.4)                           | --                                                | 1.0<br>(0.5 to 1.8)                     | 80.0<br>(43.7 to 149.1)                           | 4.5<br>(-16.2 to 41.7)                              |
| Neonatal sepsis and other neonatal infections                           | 0.9<br>(0.3 to 2.3)                           | --                                                | 0.4<br>(0.1 to 1.1)                     | 68.2<br>(38.7 to 109.2)                           | 9.1<br>(-10.2 to 34.8)                              |
| Hemolytic disease and other neonatal jaundice                           | 1.6<br>(1.4 to 1.8)                           | --                                                | 0.5<br>(0.3 to 0.6)                     | 70.6<br>(38.5 to 110.1)                           | -2.3<br>(-18.4 to 16.6)                             |
| Other neonatal disorders                                                | --                                            | --                                                | 0.1<br>(0.1 to 0.2)                     | -4.4<br>(-25.4 to 25.4)                           | -0.9<br>(-22.7 to 29.9)                             |
| <b>Nutritional deficiencies</b>                                         | <b>1,056.0</b><br><b>(963.3 to 1,148.6)</b>   | <b>193.1†</b><br><b>(158.4 to 240.9)</b>          | <b>14.8</b><br><b>(9.3 to 22.7)</b>     | <b>10.8</b><br><b>(-3.9 to 27.5)</b>              | <b>-26.5</b><br><b>(-35.3 to -16.9)</b>             |
| Protein-energy malnutrition                                             | 33.6<br>(28.1 to 40.0)                        | 16.1<br>(13.6 to 18.9)                            | 0.7<br>(0.4 to 1.1)                     | 17.4<br>(-14.8 to 57.7)                           | 21.0<br>(-12.0 to 62.7)                             |
| Iodine deficiency                                                       | 85.2<br>(66.0 to 107.6)                       | 1.6<br>(1.3 to 2.0)                               | 1.9<br>(1.1 to 3.1)                     | 94.9<br>(70.2 to 122.7)                           | -6.8<br>(-17.3 to 3.6)                              |
| Vitamin A deficiency                                                    | 195.1<br>(160.1 to 247.8)                     | 175.4<br>(141.2 to 223.6)                         | 0.6<br>(0.4 to 0.9)                     | 25.9<br>(5.9 to 53.6)                             | -6.5<br>(-19.9 to 8.9)                              |
| Iron-deficiency anaemia                                                 | 798.5<br>(693.5 to 909.7)                     | --                                                | 11.5<br>(7.0 to 18.4)                   | 2.3<br>(-13.6 to 20.7)                            | -31.4<br>(-41.3 to -20.3)                           |
| Other nutritional deficiencies                                          | --                                            | --                                                | < 0.05<br>(< 0.05 to < 0.05)            | 14.8<br>(-19.4 to 60.5)                           | 18.7<br>(-16.7 to 65.8)                             |
| <b>Other communicable, maternal, neonatal, and nutritional diseases</b> | <b>1,065.3</b><br><b>(996.4 to 1,139.7)</b>   | <b>995.7</b><br><b>(807.5 to 1,203.8)</b>         | <b>5.8</b><br><b>(3.5 to 9.5)</b>       | <b>143.0</b><br><b>(117.5 to 168.5)</b>           | <b>7.0</b><br><b>(-1.4 to 15.4)</b>                 |
| Sexually transmitted diseases excluding HIV                             | 793.2<br>(729.0 to 860.4)                     | 954.5<br>(767.8 to 1,159.4)                       | 5.2<br>(3.0 to 8.6)                     | 173.5<br>(147.2 to 202.8)                         | 11.1<br>(1.9 to 21.4)                               |
| Syphilis                                                                | 19.5<br>(13.8 to 26.5)                        | 13.4<br>(9.1 to 18.4)                             | < 0.05<br>(< 0.05 to 0.1)               | 144.5<br>(117.5 to 175.4)                         | 8.5<br>(-2.9 to 21.1)                               |
| Chlamydial infection                                                    | 56.6<br>(37.3 to 84.6)                        | 41.6<br>(27.2 to 64.2)                            | 0.4<br>(0.2 to 0.8)                     | 147.1<br>(100.3 to 197.7)                         | 0.5<br>(-15.7 to 19.0)                              |
| Gonococcal infection                                                    | 214.4<br>(167.7 to 269.5)                     | 777.2<br>(589.4 to 981.6)                         | 3.0<br>(1.7 to 5.1)                     | 191.8<br>(160.1 to 228.8)                         | 17.6<br>(5.5 to 30.5)                               |
| Trichomoniasis                                                          | 85.3<br>(65.3 to 108.1)                       | 71.8<br>(54.5 to 92.1)                            | 0.1<br>(< 0.05 to 0.1)                  | 62.0<br>(45.7 to 80.7)                            | -24.8<br>(-30.7 to -18.1)                           |
| Genital herpes                                                          | 462.9<br>(392.9 to 544.6)                     | 34.3<br>(28.8 to 41.9)                            | 0.1<br>(< 0.05 to 0.3)                  | 109.5<br>(90.2 to 125.3)                          | -6.1<br>(-11.4 to -0.7)                             |
| Other sexually transmitted diseases                                     | 18.2<br>(14.9 to 20.9)                        | 16.2<br>(12.3 to 21.4)                            | 1.5<br>(0.9 to 2.5)                     | 163.0<br>(136.1 to 191.4)                         | 6.8<br>(-2.9 to 16.9)                               |
| Hepatitis                                                               | 309.3<br>(252.2 to 375.9)                     | 41.2<br>(28.3 to 58.9)                            | 0.1<br>(< 0.05 to 0.1)                  | 53.9<br>(21.6 to 95.2)                            | -24.6<br>(-40.5 to -2.5)                            |
| Acute hepatitis A                                                       | 1.0<br>(0.2 to 2.1)                           | 12.6<br>(3.2 to 27.8)                             | < 0.05<br>(< 0.05 to < 0.05)            | 57.0<br>(-27.1 to 280.9)                          | -12.4<br>(-59.5 to 122.5)                           |
| Hepatitis B                                                             | 233.8<br>(185.2 to 294.1)                     | 24.8<br>(18.9 to 32.5)                            | < 0.05<br>(< 0.05 to 0.1)               | 53.7<br>(15.3 to 99.2)                            | -28.6<br>(-46.8 to -5.0)                            |
| Hepatitis C                                                             | 74.4<br>(46.9 to 108.2)                       | 2.4<br>(1.6 to 3.6)                               | < 0.05<br>(< 0.05 to < 0.05)            | 30.6<br>(13.8 to 55.2)                            | -10.8<br>(-13.9 to -7.1)                            |
| Acute hepatitis E                                                       | 0.1<br>(0.1 to 0.1)                           | 1.4<br>(1.0 to 1.9)                               | < 0.05<br>(< 0.05 to < 0.05)            | 67.6<br>(47.8 to 85.1)                            | -13.4<br>(-25.6 to -1.3)                            |
| Other infectious diseases                                               | 33.6<br>(28.4 to 38.6)                        | < 0.05<br>(< 0.05 to < 0.05)                      | 0.6<br>(0.4 to 0.9)                     | 24.6<br>(1.7 to 50.3)                             | -9.2<br>(-24.4 to 8.8)                              |
| <b>Non-communicable diseases</b>                                        | <b>4,309.9</b><br><b>(4,281.9 to 4,336.5)</b> | <b>11,611.0†</b><br><b>(10,762.1 to 12,481.2)</b> | <b>405.2</b><br><b>(295.4 to 528.3)</b> | <b>96.8</b><br><b>(92.2 to 101.8)</b>             | <b>-1.4</b><br><b>(-3.1 to 0.4)</b>                 |
| <b>Neoplasms</b>                                                        | <b>3.7</b><br><b>(3.4 to 4.0)</b>             | <b>2.1</b><br><b>(1.9 to 2.6)</b>                 | <b>0.7</b><br><b>(0.5 to 0.9)</b>       | <b>151.6</b><br><b>(129.4 to 179.8)</b>           | <b>24.0</b><br><b>(14.0 to 35.7)</b>                |
| Lip and oral cavity cancer                                              | 0.2<br>(0.1 to 0.2)                           | < 0.05<br>(< 0.05 to 0.1)                         | < 0.05<br>(< 0.05 to < 0.05)            | 109.5<br>(80.5 to 147.7)                          | 3.1<br>(-11.5 to 23.6)                              |
| Nasopharynx cancer                                                      | < 0.05<br>(< 0.05 to < 0.05)                  | < 0.05<br>(< 0.05 to < 0.05)                      | < 0.05<br>(< 0.05 to < 0.05)            | 98.3<br>(66.2 to 137.6)                           | -8.1<br>(-20.7 to 8.2)                              |
| Other pharynx cancer                                                    | < 0.05<br>(< 0.05 to < 0.05)                  | < 0.05<br>(< 0.05 to < 0.05)                      | < 0.05<br>(< 0.05 to < 0.05)            | 154.9<br>(111.6 to 200.3)                         | 21.8<br>(0.9 to 42.9)                               |
| Oesophageal cancer                                                      | < 0.05<br>(< 0.05 to < 0.05)                  | < 0.05<br>(< 0.05 to < 0.05)                      | < 0.05<br>(< 0.05 to < 0.05)            | 81.1<br>(62.4 to 104.5)                           | -14.4<br>(-23.0 to -3.8)                            |
| Stomach cancer                                                          | 0.1<br>(0.1 to 0.1)                           | 0.1<br>(0.1 to 0.1)                               | < 0.05<br>(< 0.05 to < 0.05)            | 67.7<br>(47.7 to 90.0)                            | -16.2<br>(-28.8 to -1.8)                            |
| Colon and rectum cancer                                                 | 0.6<br>(0.5 to 0.7)                           | 0.2<br>(0.1 to 0.2)                               | 0.1<br>(< 0.05 to 0.1)                  | 193.9<br>(124.8 to 252.0)                         | 38.6<br>(6.6 to 67.5)                               |
| Liver cancer                                                            | < 0.05<br>(< 0.05 to 0.1)                     | 0.1<br>(0.1 to 0.1)                               | < 0.05<br>(< 0.05 to < 0.05)            | 133.9<br>(101.6 to 172.2)                         | 15.0<br>(-1.7 to 32.7)                              |
| Liver cancer due to hepatitis B                                         | < 0.05<br>(< 0.05 to < 0.05)                  | < 0.05<br>(< 0.05 to 0.1)                         | < 0.05<br>(< 0.05 to < 0.05)            | 136.4<br>(102.4 to 175.3)                         | 13.6<br>(-3.4 to 33.6)                              |

| Cause                                              | Prevalence in thousands (95% UI)        | Incidence in thousands (95% UI)       | YLDs in thousands (95% UI)          |                                                   |                                                     |
|----------------------------------------------------|-----------------------------------------|---------------------------------------|-------------------------------------|---------------------------------------------------|-----------------------------------------------------|
|                                                    | 2016 counts                             | 2016 counts                           | 2016 counts                         | Percentage change in counts between 2006 and 2016 | Percentage change in age-standardised rates between |
| Liver cancer due to hepatitis C                    | < 0.05<br>(< 0.05 to < 0.05)            | < 0.05<br>(< 0.05 to < 0.05)          | < 0.05<br>(< 0.05 to < 0.05)        | 126.9<br>(93.1 to 168.6)                          | 14.3<br>(-2.7 to 34.3)                              |
| Liver cancer due to alcohol use                    | < 0.05<br>(< 0.05 to < 0.05)            | < 0.05<br>(< 0.05 to < 0.05)          | < 0.05<br>(< 0.05 to < 0.05)        | 132.6<br>(93.3 to 176.4)                          | 13.5<br>(-6.6 to 34.8)                              |
| Liver cancer due to other causes                   | < 0.05<br>(< 0.05 to < 0.05)            | < 0.05<br>(< 0.05 to < 0.05)          | < 0.05<br>(< 0.05 to < 0.05)        | 139.6<br>(100.3 to 186.8)                         | 18.4<br>(-1.2 to 42.3)                              |
| Gallbladder and biliary tract cancer               | < 0.05<br>(< 0.05 to < 0.05)            | < 0.05<br>(< 0.05 to < 0.05)          | < 0.05<br>(< 0.05 to < 0.05)        | 102.7<br>(76.5 to 130.5)                          | 2.4<br>(-11.5 to 15.2)                              |
| Pancreatic cancer                                  | < 0.05<br>(< 0.05 to 0.1)               | 0.1<br>(0.1 to 0.1)                   | < 0.05<br>(< 0.05 to < 0.05)        | 134.0<br>(112.3 to 157.4)                         | 14.2<br>(3.0 to 27.7)                               |
| Larynx cancer                                      | 0.1<br>(0.1 to 0.1)                     | < 0.05<br>(< 0.05 to < 0.05)          | < 0.05<br>(< 0.05 to < 0.05)        | 158.0<br>(119.5 to 205.2)                         | 24.1<br>(6.3 to 45.0)                               |
| Tracheal, bronchus, and lung cancer                | 0.2<br>(0.2 to 0.2)                     | 0.2<br>(0.1 to 0.2)                   | < 0.05<br>(< 0.05 to 0.1)           | 197.5<br>(131.6 to 268.3)                         | 56.0<br>(18.7 to 98.0)                              |
| Malignant skin melanoma                            | 0.1<br>(0.1 to 0.1)                     | < 0.05<br>(< 0.05 to < 0.05)          | < 0.05<br>(< 0.05 to < 0.05)        | 282.0<br>(196.1 to 417.2)                         | 62.1<br>(28.3 to 117.7)                             |
| Non-melanoma skin cancer                           | < 0.05<br>(< 0.05 to < 0.05)            | 0.1<br>(0.1 to 0.1)                   | < 0.05<br>(< 0.05 to < 0.05)        | 130.6<br>(102.5 to 158.7)                         | 15.3<br>(0.7 to 30.4)                               |
| Non-melanoma skin cancer (squamous-cell carcinoma) | < 0.05<br>(< 0.05 to < 0.05)            | < 0.05<br>(< 0.05 to < 0.05)          | < 0.05<br>(< 0.05 to < 0.05)        | 131.9<br>(101.8 to 162.8)                         | 16.1<br>(0.3 to 32.6)                               |
| Non-melanoma skin cancer (basal-cell carcinoma)    | < 0.05<br>(< 0.05 to < 0.05)            | 0.1<br>(< 0.05 to 0.1)                | < 0.05<br>(< 0.05 to < 0.05)        | 119.2<br>(96.5 to 145.8)                          | 6.2<br>(-5.4 to 18.6)                               |
| Breast cancer                                      | 1.3<br>(1.0 to 1.8)                     | 0.3<br>(0.2 to 0.4)                   | 0.1<br>(0.1 to 0.2)                 | 162.8<br>(86.2 to 246.0)                          | 20.0<br>(-13.5 to 56.4)                             |
| Cervical cancer                                    | 0.2<br>(0.1 to 0.2)                     | < 0.05<br>(< 0.05 to 0.1)             | < 0.05<br>(< 0.05 to < 0.05)        | 62.1<br>(21.2 to 118.2)                           | -25.9<br>(-43.6 to -2.8)                            |
| Uterine cancer                                     | 0.1<br>(0.1 to 0.2)                     | < 0.05<br>(< 0.05 to < 0.05)          | < 0.05<br>(< 0.05 to < 0.05)        | 197.8<br>(129.1 to 290.2)                         | 35.3<br>(4.2 to 76.6)                               |
| Ovarian cancer                                     | 0.1<br>(0.1 to 0.1)                     | < 0.05<br>(< 0.05 to < 0.05)          | < 0.05<br>(< 0.05 to < 0.05)        | 102.1<br>(66.2 to 143.6)                          | -2.3<br>(-25.6 to 26.3)                             |
| Prostate cancer                                    | 0.6<br>(0.5 to 0.9)                     | 0.1<br>(0.1 to 0.2)                   | 0.1<br>(< 0.05 to 0.1)              | 259.9<br>(174.5 to 369.6)                         | 68.8<br>(28.3 to 118.0)                             |
| Testicular cancer                                  | 0.1<br>(0.1 to 0.1)                     | < 0.05<br>(< 0.05 to < 0.05)          | < 0.05<br>(< 0.05 to < 0.05)        | 497.5<br>(361.7 to 674.9)                         | 138.4<br>(91.5 to 201.4)                            |
| Kidney cancer                                      | 0.3<br>(0.2 to 0.4)                     | 0.1<br>(0.1 to 0.1)                   | < 0.05<br>(< 0.05 to < 0.05)        | 203.6<br>(137.8 to 298.2)                         | 51.8<br>(18.2 to 101.2)                             |
| Bladder cancer                                     | 0.3<br>(0.2 to 0.3)                     | 0.1<br>(0.1 to 0.1)                   | < 0.05<br>(< 0.05 to < 0.05)        | 213.0<br>(167.1 to 264.2)                         | 44.9<br>(23.4 to 68.0)                              |
| Brain and nervous system cancer                    | 0.2<br>(0.1 to 0.3)                     | 0.1<br>(0.1 to 0.1)                   | < 0.05<br>(< 0.05 to < 0.05)        | 138.7<br>(80.3 to 299.8)                          | 26.4<br>(-3.4 to 97.2)                              |
| Thyroid cancer                                     | 0.2<br>(0.1 to 0.5)                     | < 0.05<br>(< 0.05 to 0.1)             | < 0.05<br>(< 0.05 to < 0.05)        | 347.2<br>(259.6 to 442.1)                         | 72.5<br>(43.1 to 104.8)                             |
| Mesothelioma                                       | < 0.05<br>(< 0.05 to < 0.05)            | < 0.05<br>(< 0.05 to < 0.05)          | < 0.05<br>(< 0.05 to < 0.05)        | 171.2<br>(107.8 to 230.7)                         | 25.1<br>(-6.6 to 56.2)                              |
| Hodgkin lymphoma                                   | 0.1<br>(< 0.05 to 0.2)                  | < 0.05<br>(< 0.05 to 0.1)             | < 0.05<br>(< 0.05 to < 0.05)        | 160.2<br>(106.3 to 196.6)                         | 11.5<br>(-7.2 to 24.6)                              |
| Non-Hodgkin's lymphoma                             | 0.4<br>(0.3 to 0.6)                     | 0.1<br>(0.1 to 0.2)                   | < 0.05<br>(< 0.05 to 0.1)           | 158.3<br>(114.9 to 221.7)                         | 26.1<br>(4.5 to 54.1)                               |
| Multiple myeloma                                   | 0.1<br>(< 0.05 to 0.1)                  | < 0.05<br>(< 0.05 to 0.1)             | < 0.05<br>(< 0.05 to < 0.05)        | 186.6<br>(120.0 to 270.5)                         | 36.0<br>(1.3 to 78.3)                               |
| Leukaemia                                          | 0.4<br>(0.3 to 0.6)                     | 0.1<br>(0.1 to 0.2)                   | 0.1<br>(< 0.05 to 0.1)              | 86.5<br>(56.9 to 123.2)                           | 2.3<br>(-13.1 to 17.9)                              |
| Acute lymphoid leukaemia                           | 0.1<br>(0.1 to 0.1)                     | < 0.05<br>(< 0.05 to < 0.05)          | < 0.05<br>(< 0.05 to < 0.05)        | 67.2<br>(29.2 to 129.6)                           | 8.5<br>(-11.2 to 38.6)                              |
| Chronic lymphoid leukaemia                         | 0.1<br>(< 0.05 to 0.1)                  | < 0.05<br>(< 0.05 to < 0.05)          | < 0.05<br>(< 0.05 to < 0.05)        | 142.8<br>(104.1 to 187.6)                         | 17.9<br>(-1.9 to 40.4)                              |
| Acute myeloid leukaemia                            | 0.1<br>(< 0.05 to 0.1)                  | < 0.05<br>(< 0.05 to 0.1)             | < 0.05<br>(< 0.05 to < 0.05)        | 128.1<br>(72.6 to 212.1)                          | 25.6<br>(-0.1 to 61.2)                              |
| Chronic myeloid leukaemia                          | < 0.05<br>(< 0.05 to 0.1)               | < 0.05<br>(< 0.05 to < 0.05)          | < 0.05<br>(< 0.05 to < 0.05)        | 130.1<br>(81.5 to 191.9)                          | 5.4<br>(-15.0 to 30.4)                              |
| Other leukaemia                                    | 0.2<br>(0.1 to 0.3)                     | < 0.05<br>(< 0.05 to 0.1)             | < 0.05<br>(< 0.05 to < 0.05)        | 63.6<br>(30.2 to 99.5)                            | -8.4<br>(-27.2 to 12.4)                             |
| Other neoplasms                                    | 0.4<br>(0.3 to 0.5)                     | 0.1<br>(0.1 to 0.2)                   | < 0.05<br>(< 0.05 to 0.1)           | 108.7<br>(78.5 to 165.0)                          | 9.4<br>(-7.6 to 38.1)                               |
| <b>Cardiovascular diseases</b>                     | <b>232.6</b><br><b>(220.5 to 246.9)</b> | <b>22.5†</b><br><b>(21.1 to 24.0)</b> | <b>12.9</b><br><b>(9.1 to 17.3)</b> | <b>97.8</b><br><b>(88.6 to 107.3)</b>             | <b>-1.7</b><br><b>(-5.3 to 2.0)</b>                 |
| Rheumatic heart disease                            | 0.2<br>(0.2 to 0.3)                     | < 0.05<br>(< 0.05 to 0.1)             | < 0.05<br>(< 0.05 to < 0.05)        | 104.0<br>(86.4 to 124.0)                          | 3.8<br>(-10.5 to 20.1)                              |
| Ischaemic heart disease                            | 100.2<br>(94.0 to 106.3)                | 12.7<br>(11.6 to 14.1)                | 3.9<br>(2.6 to 5.4)                 | 114.8<br>(103.2 to 127.7)                         | 0.4<br>(-3.9 to 4.6)                                |
| Cerebrovascular disease                            | 18.6<br>(16.9 to 20.3)                  | 3.1‡<br>(2.8 to 3.4)                  | 2.8<br>(2.0 to 3.6)                 | 90.3<br>(74.1 to 107.3)                           | -6.8<br>(-15.4 to 2.0)                              |
| Ischaemic stroke                                   | 14.7<br>(12.9 to 16.7)                  | 2.0‡<br>(1.7 to 2.3)                  | 2.1<br>(1.4 to 2.7)                 | 93.7<br>(70.9 to 116.8)                           | -6.3<br>(-17.6 to 5.2)                              |
| Hemorrhagic stroke                                 | 5.2<br>(4.8 to 5.8)                     | 1.0‡<br>(0.9 to 1.1)                  | 0.7<br>(0.5 to 0.9)                 | 81.5<br>(63.2 to 100.5)                           | -8.5<br>(-17.3 to 0.6)                              |
| Hypertensive heart disease                         | 2.3<br>(2.0 to 2.7)                     | --                                    | 0.2<br>(0.1 to 0.3)                 | 96.9<br>(69.5 to 129.3)                           | -5.5<br>(-15.7 to 5.9)                              |
| Cardiomyopathy and myocarditis                     | 1.7<br>(1.4 to 1.9)                     | 1.6†<br>(1.4 to 1.9)                  | 0.2<br>(0.1 to 0.3)                 | 102.9<br>(71.5 to 137.1)                          | 1.8<br>(-9.2 to 13.3)                               |
| Myocarditis                                        | 0.9<br>(0.8 to 1.0)                     | 1.6<br>(1.4 to 1.9)                   | 0.1<br>(< 0.05 to 0.1)              | 79.3<br>(65.9 to 94.0)                            | -0.8<br>(-8.4 to 7.9)                               |
| Alcoholic cardiomyopathy                           | 0.2<br>(0.1 to 0.2)                     | --                                    | < 0.05<br>(< 0.05 to < 0.05)        | 156.7<br>(131.2 to 186.9)                         | 7.5<br>(-4.5 to 20.7)                               |
| Other cardiomyopathy                               | 1.4<br>(1.1 to 1.6)                     | --                                    | 0.1<br>(0.1 to 0.2)                 | 112.8<br>(60.6 to 174.9)                          | 2.3<br>(-13.9 to 22.0)                              |
| Atrial fibrillation and flutter                    | 9.8<br>(8.6 to 11.2)                    | 0.9<br>(0.8 to 1.0)                   | 0.8<br>(0.5 to 1.1)                 | 108.0<br>(88.6 to 131.0)                          | 1.0<br>(-5.5 to 7.9)                                |
| Peripheral vascular disease                        | 34.3<br>(29.4 to 40.2)                  | 3.5<br>(3.0 to 4.1)                   | 0.1<br>(0.1 to 0.2)                 | 91.0<br>(75.6 to 106.4)                           | -2.9<br>(-9.8 to 3.9)                               |
| Endocarditis                                       | 0.3<br>(0.3 to 0.4)                     | 0.7<br>(0.6 to 0.8)                   | < 0.05<br>(< 0.05 to < 0.05)        | 91.9<br>(74.5 to 110.6)                           | -0.6<br>(-13.9 to 14.1)                             |
| Other cardiovascular and circulatory diseases      | 91.3<br>(76.0 to 108.4)                 | --                                    | 4.8<br>(3.2 to 6.8)                 | 88.5<br>(71.5 to 107.6)                           | 0.8<br>(-5.8 to 8.1)                                |
| <b>Chronic respiratory diseases</b>                | <b>323.4</b><br><b>(309.1 to 338.2)</b> | <b>60.5†</b><br><b>(56.1 to 65.2)</b> | <b>13.3</b><br><b>(9.6 to 18.0)</b> | <b>87.1</b><br><b>(77.2 to 99.2)</b>              | <b>5.9</b><br><b>(1.5 to 10.5)</b>                  |
| Chronic obstructive pulmonary disease              | 88.9<br>(84.8 to 93.4)                  | 5.9<br>(5.6 to 6.2)                   | 3.5<br>(2.9 to 4.1)                 | 125.6<br>(104.5 to 149.8)                         | 4.7<br>(-4.0 to 14.4)                               |
| Pneumoconiosis                                     | 0.2<br>(0.2 to 0.3)                     | < 0.05<br>(< 0.05 to < 0.05)          | < 0.05<br>(< 0.05 to 0.1)           | 149.9<br>(138.6 to 162.4)                         | 9.3<br>(4.1 to 14.9)                                |
| Silicosis                                          | 0.1<br>(0.1 to 0.1)                     | < 0.05<br>(< 0.05 to < 0.05)          | < 0.05<br>(< 0.05 to < 0.05)        | 177.0<br>(160.3 to 195.3)                         | 12.8<br>(7.1 to 18.9)                               |



| Cause                                                          | Prevalence in thousands (95% UI)        | Incidence in thousands (95% UI)     | YLDs in thousands (95% UI)       |                                                   |                                                     |
|----------------------------------------------------------------|-----------------------------------------|-------------------------------------|----------------------------------|---------------------------------------------------|-----------------------------------------------------|
|                                                                | 2016 counts                             | 2016 counts                         | 2016 counts                      | Percentage change in counts between 2006 and 2016 | Percentage change in age-standardised rates between |
| Asbestosis                                                     | 0.1<br>(0.1 to 0.1)                     | < 0.05<br>(< 0.05 to < 0.05)        | < 0.05<br>(< 0.05 to < 0.05)     | 150.0<br>(134.5 to 165.3)                         | 11.1<br>(5.9 to 16.3)                               |
| Coal workers pneumoconiosis                                    | --                                      | --                                  | --                               | --                                                | --                                                  |
| Other pneumoconiosis                                           | 0.1<br>(0.1 to 0.1)                     | < 0.05<br>(< 0.05 to < 0.05)        | < 0.05<br>(< 0.05 to < 0.05)     | 133.1<br>(114.5 to 158.1)                         | 6.6<br>(-2.7 to 17.4)                               |
| Asthma                                                         | 241.1<br>(222.4 to 260.9)               | 54.5<br>(50.1 to 59.3)              | 9.5<br>(6.2 to 13.6)             | 74.7<br>(64.7 to 85.5)                            | 6.0<br>(1.3 to 11.0)                                |
| Interstitial lung disease and pulmonary sarcoidosis            | 0.8<br>(0.7 to 0.9)                     | 0.1<br>(0.1 to 0.1)                 | 0.1<br>(0.1 to 0.1)              | 101.7<br>(86.8 to 116.8)                          | -1.4<br>(-12.8 to 11.5)                             |
| Other chronic respiratory diseases                             | --                                      | --                                  | 0.3<br>(0.2 to 0.4)              | 136.5<br>(100.7 to 179.2)                         | 37.9<br>(18.7 to 59.8)                              |
| <b>Cirrhosis and other chronic liver diseases</b>              | <b>18.7<br/>(17.6 to 19.9)</b>          | <b>0.6<br/>(0.5 to 0.6)</b>         | <b>0.8<br/>(0.5 to 1.1)</b>      | <b>91.0<br/>(67.2 to 119.4)</b>                   | <b>8.4<br/>(-1.8 to 18.9)</b>                       |
| Cirrhosis and other chronic liver diseases due to hepatitis B  | 5.7<br>(4.6 to 6.8)                     | 0.2<br>(0.1 to 0.2)                 | 0.2<br>(0.1 to 0.3)              | 158.8<br>(95.3 to 241.2)                          | 13.6<br>(-6.6 to 37.0)                              |
| Cirrhosis and other chronic liver diseases due to hepatitis C  | 6.3<br>(5.0 to 7.8)                     | 0.2<br>(0.1 to 0.2)                 | 0.2<br>(0.1 to 0.3)              | 158.0<br>(96.9 to 228.8)                          | 14.0<br>(-4.2 to 35.6)                              |
| Cirrhosis and other chronic liver diseases due to alcohol use  | 1.1<br>(0.9 to 1.3)                     | < 0.05<br>(< 0.05 to < 0.05)        | < 0.05<br>(< 0.05 to 0.1)        | 142.1<br>(89.3 to 216.2)                          | 7.2<br>(-18.5 to 47.2)                              |
| Cirrhosis and other chronic liver diseases due to other causes | 5.6<br>(4.9 to 6.3)                     | 0.2<br>(0.2 to 0.2)                 | 0.3<br>(0.2 to 0.5)              | 39.6<br>(13.7 to 70.1)                            | 1.7<br>(-13.8 to 20.8)                              |
| <b>Digestive diseases</b>                                      | <b>126.0<br/>(118.2 to 135.2)</b>       | <b>112.8†<br/>(104.9 to 121.6)</b>  | <b>3.5<br/>(2.4 to 4.7)</b>      | <b>112.6<br/>(93.1 to 135.7)</b>                  | <b>3.8<br/>(-3.5 to 12.2)</b>                       |
| Peptic ulcer disease                                           | 38.9<br>(34.2 to 44.0)                  | 4.4<br>(3.7 to 5.2)                 | 0.6<br>(0.4 to 0.9)              | 120.7<br>(87.2 to 160.7)                          | 1.9<br>(-10.4 to 16.6)                              |
| Gastritis and duodenitis                                       | 43.9<br>(38.0 to 50.6)                  | 43.4<br>(37.6 to 50.7)              | 0.6<br>(0.4 to 0.8)              | 121.5<br>(89.5 to 158.2)                          | 7.2<br>(-5.6 to 23.1)                               |
| Appendicitis                                                   | 0.6<br>(0.6 to 0.7)                     | 16.2<br>(14.8 to 17.7)              | 0.2<br>(0.1 to 0.3)              | 77.9<br>(20.7 to 153.5)                           | 2.4<br>(-24.6 to 37.0)                              |
| Paralytic ileus and intestinal obstruction                     | < 0.05<br>(< 0.05 to 0.1)               | 1.3<br>(1.1 to 1.5)                 | < 0.05<br>(< 0.05 to < 0.05)     | 93.6<br>(79.5 to 107.4)                           | 8.0<br>(5.0 to 11.1)                                |
| Inguinal, femoral, and abdominal hernia                        | 37.1<br>(32.2 to 42.6)                  | 25.3<br>(21.8 to 29.3)              | 1.6<br>(1.1 to 2.3)              | 111.3<br>(84.9 to 145.0)                          | 2.6<br>(-7.6 to 14.4)                               |
| Inflammatory bowel disease                                     | 1.1<br>(0.9 to 1.4)                     | 2.1<br>(1.9 to 2.5)                 | 0.2<br>(0.1 to 0.3)              | 121.9<br>(69.0 to 187.7)                          | 2.1<br>(-17.8 to 25.8)                              |
| Vascular intestinal disorders                                  | < 0.05<br>(< 0.05 to < 0.05)            | 0.1<br>(0.1 to 0.2)                 | < 0.05<br>(< 0.05 to < 0.05)     | 86.0<br>(70.0 to 105.2)                           | 2.2<br>(-2.4 to 7.0)                                |
| Gallbladder and biliary diseases                               | 8.0<br>(6.8 to 9.4)                     | 18.9<br>(16.0 to 22.1)              | 0.1<br>(0.1 to 0.2)              | 132.5<br>(91.7 to 181.9)                          | 3.7<br>(-15.8 to 28.7)                              |
| Pancreatitis                                                   | 0.1<br>(0.1 to 0.1)                     | 1.0<br>(0.9 to 1.2)                 | < 0.05<br>(< 0.05 to < 0.05)     | 127.3<br>(117.8 to 137.7)                         | 5.2<br>(2.4 to 8.3)                                 |
| Other digestive diseases                                       | --                                      | --                                  | 0.2<br>(0.2 to 0.3)              | 104.0<br>(82.6 to 127.8)                          | 8.4<br>(0.7 to 17.1)                                |
| <b>Neurological disorders</b>                                  | <b>1,929.0<br/>(1,830.1 to 2,034.4)</b> | <b>939.0<br/>(774.9 to 1,125.9)</b> | <b>51.5<br/>(34.6 to 70.7)</b>   | <b>94.1<br/>(67.7 to 127.2)</b>                   | <b>-2.1<br/>(-13.8 to 13.1)</b>                     |
| Alzheimer's disease and other dementias                        | 10.3<br>(8.8 to 12.3)                   | 1.8<br>(1.5 to 2.1)                 | 1.4<br>(1.0 to 1.9)              | 81.1<br>(72.0 to 90.1)                            | -1.1<br>(-5.5 to 3.2)                               |
| Parkinson's disease                                            | 1.5<br>(1.2 to 1.9)                     | 0.2<br>(0.1 to 0.2)                 | 0.2<br>(0.1 to 0.2)              | 144.5<br>(111.1 to 187.8)                         | 22.4<br>(8.4 to 37.7)                               |
| Epilepsy                                                       | 16.1<br>(5.5 to 23.5)                   | 2.0<br>(0.7 to 3.0)                 | 4.9<br>(1.3 to 9.7)              | 57.1<br>(-56.9 to 545.9)                          | 0.5<br>(-73.4 to 308.4)                             |
| Multiple sclerosis                                             | 1.3<br>(1.2 to 1.5)                     | 0.1<br>(0.1 to 0.1)                 | 0.4<br>(0.2 to 0.5)              | 153.4<br>(115.4 to 196.6)                         | 9.0<br>(-5.9 to 26.5)                               |
| Motor neuron disease                                           | 0.1<br>(0.1 to 0.1)                     | < 0.05<br>(< 0.05 to < 0.05)        | < 0.05<br>(< 0.05 to < 0.05)     | 93.8<br>(82.9 to 105.0)                           | 3.7<br>(-0.4 to 7.8)                                |
| Migraine                                                       | 773.9<br>(720.6 to 827.2)               | 87.0<br>(79.5 to 94.6)              | 36.6<br>(23.4 to 50.8)           | 98.2<br>(88.4 to 108.0)                           | -4.0<br>(-7.2 to -0.6)                              |
| Tension-type headache                                          | 1,476.3<br>(1,287.9 to 1,688.0)         | 847.9<br>(681.1 to 1,032.1)         | 6.9<br>(4.3 to 10.4)             | 109.5<br>(93.7 to 126.6)                          | -1.2<br>(-6.3 to 4.7)                               |
| Other neurological disorders                                   | < 0.05<br>(< 0.05 to < 0.05)            | < 0.05<br>(< 0.05 to < 0.05)        | 1.1<br>(0.4 to 2.2)              | 74.7<br>(-39.8 to 518.3)                          | 21.1<br>(-54.4 to 256.3)                            |
| <b>Mental and substance use disorders</b>                      | <b>769.2<br/>(733.5 to 802.9)</b>       | <b>283.0†<br/>(257.6 to 313.5)</b>  | <b>112.4<br/>(81.7 to 146.8)</b> | <b>102.5<br/>(95.7 to 109.4)</b>                  | <b>-0.1<br/>(-2.1 to 1.9)</b>                       |
| Schizophrenia                                                  | 10.7<br>(9.1 to 12.3)                   | 0.8<br>(0.7 to 0.9)                 | 6.9<br>(5.0 to 8.9)              | 145.6<br>(119.7 to 173.0)                         | 1.2<br>(-7.8 to 11.0)                               |
| Alcohol use disorders                                          | 38.1<br>(31.5 to 45.4)                  | 20.9<br>(17.2 to 24.8)              | 3.9<br>(2.6 to 5.5)              | 144.5<br>(115.8 to 175.6)                         | 6.8<br>(-3.7 to 18.3)                               |
| Drug use disorders                                             | 54.9<br>(46.7 to 63.2)                  | 5.4<br>(4.7 to 6.2)                 | 17.9<br>(11.8 to 25.2)           | 162.4<br>(134.3 to 190.0)                         | 8.0<br>(-1.2 to 18.4)                               |
| Opioid use disorders                                           | 39.9<br>(31.0 to 50.9)                  | 3.3<br>(2.6 to 4.0)                 | 16.7<br>(10.9 to 23.5)           | 165.9<br>(137.2 to 193.9)                         | 8.2<br>(-1.5 to 19.5)                               |
| Cocaine use disorders                                          | 2.5<br>(2.1 to 2.9)                     | 0.2<br>(0.1 to 0.2)                 | 0.3<br>(0.2 to 0.5)              | 116.5<br>(52.0 to 210.0)                          | 6.7<br>(-20.5 to 44.0)                              |
| Amphetamine use disorders                                      | 0.6<br>(0.4 to 0.8)                     | 0.1<br>(0.1 to 0.1)                 | 0.1<br>(< 0.05 to 0.1)           | 153.3<br>(124.2 to 187.1)                         | 12.0<br>(2.4 to 23.6)                               |
| Cannabis use disorders                                         | 10.2<br>(8.2 to 12.5)                   | 1.4<br>(1.2 to 1.7)                 | 0.3<br>(0.2 to 0.5)              | 111.7<br>(64.0 to 175.2)                          | 6.7<br>(-14.1 to 30.9)                              |
| Other drug use disorders                                       | 2.3<br>(2.0 to 2.6)                     | 0.4<br>(0.4 to 0.5)                 | 0.5<br>(0.3 to 0.8)              | 130.7<br>(81.5 to 189.8)                          | 3.8<br>(-15.9 to 28.0)                              |
| Depressive disorders                                           | 166.3<br>(154.3 to 180.5)               | 200.0<br>(175.1 to 229.9)           | 30.0<br>(20.5 to 41.6)           | 102.0<br>(89.0 to 116.0)                          | -2.2<br>(-6.4 to 2.1)                               |
| Major depressive disorder                                      | 124.0<br>(108.2 to 143.6)               | 191.8<br>(167.0 to 221.6)           | 25.6<br>(17.2 to 35.5)           | 101.1<br>(86.0 to 117.2)                          | -2.0<br>(-6.9 to 3.2)                               |
| Dysthymia                                                      | 45.7<br>(39.1 to 53.4)                  | 8.2<br>(7.0 to 9.6)                 | 4.4<br>(2.9 to 6.5)              | 107.8<br>(95.2 to 121.1)                          | -3.5<br>(-7.4 to 0.6)                               |
| Bipolar disorder                                               | 41.2<br>(35.1 to 48.8)                  | 2.7<br>(2.3 to 3.2)                 | 8.5<br>(5.2 to 12.9)             | 95.0<br>(80.2 to 110.7)                           | -2.1<br>(-7.7 to 3.6)                               |
| Anxiety disorders                                              | 224.0<br>(194.5 to 257.8)               | 34.5<br>(29.9 to 40.0)              | 21.7<br>(14.7 to 30.0)           | 81.8<br>(71.7 to 92.6)                            | -4.8<br>(-8.1 to -1.5)                              |
| Eating disorders                                               | 13.1<br>(10.6 to 16.1)                  | 5.1<br>(3.8 to 6.7)                 | 2.6<br>(1.6 to 3.9)              | 89.1<br>(65.4 to 118.0)                           | -3.7<br>(-13.7 to 7.9)                              |
| Anorexia nervosa                                               | 1.6<br>(1.1 to 2.1)                     | 0.6<br>(0.4 to 0.7)                 | 0.3<br>(0.2 to 0.5)              | 48.2<br>(14.8 to 90.7)                            | -6.2<br>(-26.2 to 17.8)                             |
| Bulimia nervosa                                                | 10.8<br>(8.1 to 14.5)                   | 4.5<br>(3.3 to 6.1)                 | 2.3<br>(1.3 to 3.5)              | 97.0<br>(68.8 to 131.4)                           | -3.2<br>(-14.4 to 9.0)                              |
| Autistic spectrum disorders                                    | 51.2<br>(45.4 to 59.0)                  | 0.3<br>(0.2 to 0.4)                 | 7.2<br>(4.9 to 10.1)             | 87.9<br>(77.5 to 98.7)                            | 6.6<br>(1.4 to 11.9)                                |
| Autism                                                         | 13.9<br>(11.9 to 16.2)                  | < 0.05<br>(< 0.05 to < 0.05)        | 3.5<br>(2.3 to 5.2)              | 87.6<br>(70.9 to 106.9)                           | 5.5<br>(-3.0 to 14.8)                               |
| Asperger syndrome and other autistic spectrum disorders        | 36.8<br>(30.9 to 44.2)                  | 0.2<br>(0.1 to 0.4)                 | 3.7<br>(2.4 to 5.4)              | 88.1<br>(78.4 to 99.0)                            | 7.6<br>(2.9 to 12.8)                                |



| Cause                                                      | Prevalence in thousands (95% UI)              | Incidence in thousands (95% UI)                 | YLDs in thousands (95% UI)            |                                                   |                                                     |
|------------------------------------------------------------|-----------------------------------------------|-------------------------------------------------|---------------------------------------|---------------------------------------------------|-----------------------------------------------------|
|                                                            | 2016 counts                                   | 2016 counts                                     | 2016 counts                           | Percentage change in counts between 2006 and 2016 | Percentage change in age-standardised rates between |
| Attention-deficit/hyperactivity disorder                   | 57.0<br>(46.0 to 70.7)                        | 1.7<br>(1.4 to 2.2)                             | 0.7<br>(0.4 to 1.1)                   | 74.3<br>(57.7 to 90.1)                            | 4.6<br>(-2.9 to 12.7)                               |
| Conduct disorder                                           | 25.1<br>(20.5 to 29.6)                        | 8.3<br>(6.6 to 10.1)                            | 3.1<br>(1.9 to 4.6)                   | -1.2<br>(-7.4 to 5.5)                             | 1.4<br>(-4.5 to 8.1)                                |
| Idiopathic developmental intellectual disability           | 60.8<br>(33.6 to 90.2)                        | --                                              | 2.1<br>(0.9 to 4.0)                   | 79.7<br>(65.0 to 101.2)                           | -3.5<br>(-11.2 to 5.0)                              |
| Other mental and substance use disorders                   | 103.4<br>(90.2 to 119.6)                      | 3.3<br>(2.9 to 3.8)                             | 7.8<br>(5.3 to 11.3)                  | 141.2<br>(127.3 to 158.0)                         | 3.1<br>(-1.9 to 8.6)                                |
| <b>Diabetes, urogenital, blood, and endocrine diseases</b> | <b>2,258.1</b><br><b>(2,222.5 to 2,291.8)</b> | <b>484.3†</b><br><b>(450.2 to 520.1)</b>        | <b>49.1</b><br><b>(34.4 to 67.3)</b>  | <b>110.5</b><br><b>(100.7 to 120.1)</b>           | <b>2.3</b><br><b>(-2.2 to 7.2)</b>                  |
| Diabetes mellitus                                          | 332.0<br>(294.6 to 370.4)                     | 26.8<br>(23.5 to 30.6)                          | 29.9<br>(20.0 to 42.6)                | 140.2<br>(124.6 to 156.3)                         | 9.6<br>(2.3 to 17.7)                                |
| Acute glomerulonephritis                                   | < 0.05<br>(< 0.05 to < 0.05)                  | 0.6<br>(0.5 to 0.7)                             | < 0.05<br>(< 0.05 to < 0.05)          | 76.8<br>(62.9 to 92.2)                            | 0.4<br>(-4.2 to 4.8)                                |
| Chronic kidney disease                                     | 144.0<br>(129.9 to 160.0)                     | 10.7<br>(9.6 to 12.0)                           | 6.6<br>(4.9 to 8.5)                   | 110.8<br>(94.2 to 127.5)                          | -4.2<br>(-10.0 to 1.8)                              |
| Chronic kidney disease due to diabetes mellitus            | 60.4<br>(52.2 to 69.9)                        | 4.5<br>(3.8 to 5.4)                             | 2.6<br>(1.9 to 3.4)                   | 114.7<br>(92.2 to 138.1)                          | -4.9<br>(-12.9 to 3.2)                              |
| Chronic kidney disease due to hypertension                 | 21.6<br>(18.2 to 25.2)                        | 1.7<br>(1.4 to 2.1)                             | 0.8<br>(0.6 to 1.0)                   | 102.8<br>(76.5 to 131.5)                          | -4.1<br>(-15.2 to 7.0)                              |
| Chronic kidney disease due to glomerulonephritis           | 19.9<br>(16.8 to 23.2)                        | 1.3<br>(1.1 to 1.5)                             | 1.2<br>(0.8 to 1.7)                   | 109.4<br>(76.2 to 147.9)                          | -2.5<br>(-12.7 to 9.5)                              |
| Chronic kidney disease due to other causes                 | 42.1<br>(35.1 to 49.6)                        | 3.2<br>(2.7 to 3.8)                             | 2.0<br>(1.4 to 2.7)                   | 109.9<br>(82.5 to 142.1)                          | -4.0<br>(-12.5 to 5.4)                              |
| Urinary diseases and male infertility                      | 122.1<br>(106.0 to 139.3)                     | 273.6†<br>(243.5 to 305.9)                      | 2.9<br>(1.9 to 4.2)                   | 122.2<br>(92.3 to 148.0)                          | 4.5<br>(-9.4 to 17.4)                               |
| Interstitial nephritis and urinary tract infections        | 4.0<br>(3.5 to 4.6)                           | 208.0<br>(179.4 to 240.3)                       | 0.1<br>(0.1 to 0.2)                   | 78.7<br>(49.3 to 114.4)                           | -2.6<br>(-16.1 to 12.4)                             |
| Urolithiasis                                               | 2.1<br>(1.8 to 2.5)                           | 56.4<br>(48.1 to 66.6)                          | 0.2<br>(0.1 to 0.2)                   | 132.3<br>(83.9 to 191.4)                          | 1.9<br>(-18.3 to 27.3)                              |
| Benign prostatic hyperplasia                               | 67.5<br>(54.2 to 82.7)                        | 9.2<br>(7.3 to 11.6)                            | 2.2<br>(1.4 to 3.3)                   | 124.9<br>(87.0 to 159.1)                          | 5.3<br>(-10.2 to 19.7)                              |
| Male infertility                                           | 41.9<br>(32.8 to 54.8)                        | --                                              | 0.3<br>(0.1 to 0.5)                   | 153.7<br>(131.5 to 178.8)                         | 7.1<br>(-0.6 to 15.7)                               |
| Other urinary diseases                                     | --                                            | --                                              | 0.1<br>(0.1 to 0.2)                   | 72.0<br>(46.1 to 98.6)                            | -16.9<br>(-28.2 to -4.4)                            |
| Gynecological diseases                                     | 362.1<br>(344.6 to 379.2)                     | 162.1†<br>(149.1 to 176.7)                      | 4.8<br>(3.3 to 6.9)                   | 55.0<br>(47.8 to 63.2)                            | -30.6<br>(-33.6 to -27.6)                           |
| Uterine fibroids                                           | 26.9<br>(23.7 to 30.4)                        | 3.7<br>(3.2 to 4.3)                             | 0.4<br>(0.2 to 0.7)                   | 52.9<br>(36.1 to 70.4)                            | -35.5<br>(-42.4 to -28.8)                           |
| Polycystic ovarian syndrome                                | 3.2<br>(2.4 to 4.1)                           | 4.5<br>(3.1 to 5.9)                             | < 0.05<br>(< 0.05 to 0.1)             | 71.7<br>(47.0 to 101.5)                           | -25.4<br>(-35.7 to -12.8)                           |
| Female infertility                                         | 9.9<br>(5.1 to 17.5)                          | --                                              | 0.1<br>(< 0.05 to 0.1)                | 60.2<br>(31.3 to 110.9)                           | -12.2<br>(-24.9 to 7.5)                             |
| Endometriosis                                              | 0.6<br>(0.5 to 0.8)                           | 2.1<br>(1.7 to 2.6)                             | 0.1<br>(< 0.05 to 0.1)                | 47.2<br>(8.4 to 94.3)                             | -24.6<br>(-43.1 to -0.9)                            |
| Genital prolapse                                           | 83.9<br>(72.8 to 96.0)                        | 7.1<br>(6.0 to 8.3)                             | 0.3<br>(0.1 to 0.5)                   | 15.1<br>(7.0 to 23.9)                             | -44.2<br>(-48.5 to -39.9)                           |
| Premenstrual syndrome                                      | 225.9<br>(209.1 to 242.5)                     | 82.9<br>(76.0 to 90.3)                          | 1.9<br>(1.2 to 2.8)                   | 49.9<br>(38.1 to 63.6)                            | -26.0<br>(-31.5 to -20.1)                           |
| Other gynecological diseases                               | 62.6<br>(52.8 to 74.1)                        | 61.9<br>(50.3 to 75.9)                          | 2.1<br>(1.4 to 3.1)                   | 67.4<br>(55.2 to 79.8)                            | -29.4<br>(-34.0 to -24.7)                           |
| Hemoglobinopathies and hemolytic anaemias                  | 1,731.4<br>(1,693.7 to 1,770.9)               | --                                              | 2.8<br>(1.8 to 4.3)                   | 32.7<br>(16.0 to 51.5)                            | -11.7<br>(-21.2 to -1.5)                            |
| Thalassemias                                               | 0.1<br>(0.1 to 0.1)                           | --                                              | < 0.05<br>(< 0.05 to < 0.05)          | -0.2<br>(-25.1 to 33.4)                           | -0.9<br>(-25.3 to 30.0)                             |
| Thalassaemias trait                                        | 113.2<br>(104.6 to 122.0)                     | --                                              | 0.8<br>(0.5 to 1.2)                   | 25.3<br>(6.2 to 47.5)                             | -13.1<br>(-24.3 to -0.7)                            |
| Sickle cell disorders                                      | 4.9<br>(4.2 to 5.7)                           | --                                              | 0.5<br>(0.3 to 0.7)                   | 75.3<br>(48.4 to 110.6)                           | 5.9<br>(-9.5 to 26.1)                               |
| Sickle cell trait                                          | 593.6<br>(559.4 to 627.5)                     | --                                              | 0.9<br>(0.5 to 1.4)                   | 22.9<br>(3.5 to 44.5)                             | -11.9<br>(-24.7 to 1.0)                             |
| G6PD deficiency                                            | 636.4<br>(608.7 to 670.0)                     | --                                              | < 0.05<br>(< 0.05 to < 0.05)          | 35.3<br>(1.2 to 84.6)                             | -7.4<br>(-27.5 to 22.1)                             |
| G6PD trait                                                 | 578.8<br>(562.7 to 597.1)                     | --                                              | < 0.05<br>(< 0.05 to < 0.05)          | 36.5<br>(8.6 to 66.7)                             | -15.2<br>(-28.7 to -0.4)                            |
| Other hemoglobinopathies and hemolytic anaemias            | 52.8<br>(43.7 to 62.6)                        | --                                              | 0.6<br>(0.4 to 1.0)                   | 32.9<br>(9.4 to 64.7)                             | -17.4<br>(-28.0 to -5.0)                            |
| Endocrine, metabolic, blood, and immune disorders          | 81.3<br>(74.4 to 88.1)                        | 10.5<br>(9.3 to 11.7)                           | 2.2<br>(1.4 to 3.0)                   | 70.0<br>(56.2 to 84.7)                            | -3.1<br>(-8.4 to 2.3)                               |
| <b>Musculoskeletal disorders</b>                           | <b>777.2</b><br><b>(728.4 to 822.1)</b>       | <b>423.4</b><br><b>(372.8 to 474.7)</b>         | <b>86.4</b><br><b>(62.2 to 113.5)</b> | <b>114.9</b><br><b>(107.2 to 123.4)</b>           | <b>-3.5</b><br><b>(-5.7 to -1.0)</b>                |
| Rheumatoid arthritis                                       | 10.5<br>(9.2 to 11.9)                         | 0.7<br>(0.6 to 0.8)                             | 2.5<br>(1.7 to 3.4)                   | 99.1<br>(80.2 to 119.0)                           | -5.5<br>(-12.2 to 1.6)                              |
| Osteoarthritis                                             | 120.7<br>(112.4 to 128.8)                     | 7.9<br>(7.2 to 8.6)                             | 7.5<br>(5.3 to 10.1)                  | 120.6<br>(111.5 to 130.8)                         | -0.1<br>(-3.4 to 3.9)                               |
| Low back and neck pain                                     | 474.5<br>(437.0 to 517.8)                     | 202.9<br>(179.3 to 231.0)                       | 55.3<br>(39.0 to 73.7)                | 115.6<br>(106.0 to 125.8)                         | -3.4<br>(-6.2 to -0.3)                              |
| Low back pain                                              | 326.8<br>(286.3 to 378.8)                     | 160.6<br>(137.7 to 187.7)                       | 37.2<br>(25.9 to 50.2)                | 115.5<br>(101.5 to 130.2)                         | -2.6<br>(-7.0 to 1.8)                               |
| Neck pain                                                  | 180.2<br>(153.5 to 210.3)                     | 42.3<br>(35.7 to 50.6)                          | 18.1<br>(12.0 to 26.2)                | 115.8<br>(107.0 to 124.1)                         | -4.8<br>(-6.5 to -2.9)                              |
| Gout                                                       | 14.1<br>(12.4 to 16.2)                        | 3.0<br>(2.6 to 3.4)                             | 0.5<br>(0.3 to 0.6)                   | 146.5<br>(103.0 to 201.3)                         | 6.9<br>(-8.3 to 23.9)                               |
| Other musculoskeletal disorders                            | 240.3<br>(194.1 to 290.0)                     | 208.9<br>(164.5 to 257.3)                       | 20.7<br>(13.5 to 30.0)                | 112.5<br>(94.1 to 132.1)                          | -5.6<br>(-12.0 to 1.7)                              |
| <b>Other non-communicable diseases</b>                     | <b>3,174.3</b><br><b>(3,075.0 to 3,264.5)</b> | <b>9,282.8†</b><br><b>(8,431.8 to 10,107.2)</b> | <b>74.5</b><br><b>(51.0 to 105.8)</b> | <b>68.2</b><br><b>(64.4 to 72.1)</b>              | <b>-4.3</b><br><b>(-5.7 to -3.0)</b>                |
| Congenital anomalies                                       | 45.4<br>(41.8 to 49.0)                        | --                                              | 7.1<br>(5.2 to 9.3)                   | 47.6<br>(38.2 to 57.0)                            | -1.7<br>(-7.0 to 4.2)                               |
| Neural tube defects                                        | 8.4<br>(7.5 to 9.5)                           | --                                              | 2.5<br>(1.7 to 3.4)                   | 59.8<br>(41.4 to 79.0)                            | -4.1<br>(-14.3 to 5.9)                              |
| Congenital heart anomalies                                 | 7.3<br>(6.3 to 8.2)                           | --                                              | 0.4<br>(0.2 to 0.6)                   | 56.6<br>(37.0 to 79.4)                            | 3.4<br>(-8.3 to 16.7)                               |
| Orofacial clefts                                           | 1.8<br>(1.6 to 2.1)                           | --                                              | < 0.05<br>(< 0.05 to < 0.05)          | 40.6<br>(25.2 to 59.6)                            | -13.7<br>(-23.1 to -2.3)                            |
| Down's syndrome                                            | 1.9<br>(1.6 to 2.2)                           | --                                              | 0.2<br>(0.1 to 0.2)                   | 62.4<br>(50.5 to 73.6)                            | 0.4<br>(-6.7 to 6.9)                                |
| Turner syndrome                                            | 0.9<br>(0.8 to 1.0)                           | --                                              | < 0.05<br>(< 0.05 to < 0.05)          | 25.1<br>(-18.5 to 94.2)                           | -19.9<br>(-45.5 to 21.0)                            |
| Klinefelter syndrome                                       | 2.5<br>(2.1 to 2.9)                           | --                                              | < 0.05<br>(< 0.05 to < 0.05)          | 138.6<br>(77.0 to 223.3)                          | 15.2<br>(-12.3 to 50.8)                             |

| Cause                                         | Prevalence in thousands (95% UI)        | Incidence in thousands (95% UI)          | YLDs in thousands (95% UI)           |                                                   |                                                     |
|-----------------------------------------------|-----------------------------------------|------------------------------------------|--------------------------------------|---------------------------------------------------|-----------------------------------------------------|
|                                               | 2016 counts                             | 2016 counts                              | 2016 counts                          | Percentage change in counts between 2006 and 2016 | Percentage change in age-standardised rates between |
| Other chromosomal abnormalities               | 9.7<br>(8.1 to 11.7)                    | --                                       | 0.9<br>(0.6 to 1.3)                  | 0.1<br>(-11.8 to 13.8)                            | -1.0<br>(-12.4 to 12.5)                             |
| Congenital musculoskeletal and limb anomalies | 8.4<br>(7.6 to 9.2)                     | --                                       | 1.2<br>(0.8 to 1.8)                  | 80.1<br>(60.9 to 103.4)                           | 3.9<br>(-6.1 to 15.8)                               |
| Urogenital congenital anomalies               | 4.3<br>(3.7 to 4.9)                     | --                                       | 0.1<br>(0.1 to 0.2)                  | 11.8<br>(-4.5 to 28.4)                            | -1.0<br>(-14.8 to 13.3)                             |
| Digestive congenital anomalies                | 5.5<br>(4.8 to 6.1)                     | --                                       | 0.2<br>(0.1 to 0.3)                  | 76.0<br>(44.7 to 112.9)                           | 5.3<br>(-11.3 to 24.0)                              |
| Other congenital anomalies                    | 7.7<br>(4.7 to 12.3)                    | --                                       | 1.5<br>(1.0 to 2.0)                  | 47.2<br>(34.1 to 60.1)                            | -4.5<br>(-11.9 to 2.9)                              |
| Skin and subcutaneous diseases                | 1,249.0<br>(1,214.5 to 1,284.0)         | 2,536.3<br>(2,418.1 to 2,661.0)          | 31.1<br>(20.8 to 44.5)               | 56.9<br>(51.8 to 61.9)                            | 3.3<br>(1.1 to 5.5)                                 |
| Dermatitis                                    | 184.6<br>(171.8 to 198.0)               | 329.0<br>(294.8 to 362.9)                | 6.7<br>(4.0 to 10.9)                 | 51.8<br>(43.1 to 61.5)                            | 0.1<br>(-4.3 to 4.8)                                |
| Psoriasis                                     | 36.1<br>(33.7 to 38.7)                  | 5.1<br>(4.8 to 5.5)                      | 3.1<br>(2.2 to 4.2)                  | 133.7<br>(108.6 to 161.6)                         | 18.8<br>(9.0 to 29.2)                               |
| Cellulitis                                    | 2.2<br>(2.1 to 2.4)                     | 46.6<br>(43.0 to 50.8)                   | 0.1<br>(0.1 to 0.2)                  | 75.2<br>(33.3 to 129.4)                           | 1.0<br>(-18.3 to 25.8)                              |
| Pyoderma                                      | 10.2<br>(9.7 to 10.6)                   | 230.1<br>(220.1 to 240.1)                | 0.1<br>(< 0.05 to 0.1)               | 78.4<br>(62.3 to 97.4)                            | 0.8<br>(-6.2 to 9.1)                                |
| Scabies                                       | 51.5<br>(43.2 to 61.8)                  | 156.2<br>(130.3 to 187.9)                | 1.3<br>(0.7 to 2.2)                  | 43.6<br>(31.2 to 57.2)                            | -6.5<br>(-11.0 to -2.0)                             |
| Fungal skin diseases                          | 260.8<br>(232.4 to 292.2)               | 902.5<br>(801.8 to 1,010.0)              | 1.5<br>(0.6 to 3.1)                  | 67.3<br>(59.4 to 76.5)                            | 0.5<br>(-0.9 to 1.9)                                |
| Viral skin diseases                           | 109.3<br>(103.5 to 116.1)               | 156.6<br>(147.1 to 166.3)                | 3.4<br>(2.1 to 5.0)                  | 42.3<br>(35.9 to 49.1)                            | -3.5<br>(-6.9 to -0.5)                              |
| Acne vulgaris                                 | 372.4<br>(335.5 to 411.8)               | 227.9<br>(193.3 to 273.7)                | 9.6<br>(6.3 to 14.0)                 | 47.3<br>(37.5 to 58.8)                            | 7.8<br>(2.6 to 13.0)                                |
| Alopecia areata                               | 10.7<br>(9.9 to 11.6)                   | 18.9<br>(17.5 to 20.4)                   | 0.4<br>(0.2 to 0.5)                  | 115.0<br>(89.2 to 146.3)                          | 0.3<br>(-10.0 to 12.3)                              |
| Pruritus                                      | 38.7<br>(33.8 to 44.2)                  | 30.9<br>(26.9 to 35.8)                   | 0.4<br>(0.2 to 0.8)                  | 85.2<br>(70.3 to 101.8)                           | -0.7<br>(-6.1 to 4.7)                               |
| Urticaria                                     | 44.6<br>(38.6 to 51.2)                  | 80.0<br>(69.5 to 92.1)                   | 2.7<br>(1.7 to 3.9)                  | 39.8<br>(28.5 to 53.2)                            | -1.0<br>(-6.6 to 4.4)                               |
| Decubitus ulcer                               | 1.0<br>(0.9 to 1.1)                     | 3.7<br>(3.4 to 4.1)                      | 0.2<br>(0.1 to 0.2)                  | 95.4<br>(75.8 to 117.7)                           | 2.5<br>(-10.7 to 17.2)                              |
| Other skin and subcutaneous diseases          | 306.6<br>(296.2 to 317.3)               | 348.7<br>(336.4 to 361.3)                | 1.7<br>(0.8 to 3.1)                  | 91.8<br>(85.5 to 97.9)                            | 1.9<br>(-0.3 to 4.3)                                |
| Sense organ diseases                          | 798.2<br>(769.3 to 830.4)               | 394.2†<br>(368.6 to 421.5)               | 25.6<br>(17.6 to 36.4)               | 74.2<br>(68.9 to 79.4)                            | -11.0<br>(-13.0 to -9.1)                            |
| Glaucoma                                      | 3.2<br>(2.6 to 3.9)                     | --                                       | 0.3<br>(0.2 to 0.4)                  | 94.0<br>(74.5 to 116.2)                           | -4.0<br>(-13.7 to 5.8)                              |
| Cataract                                      | 40.5<br>(34.2 to 46.9)                  | --                                       | 3.3<br>(2.3 to 4.5)                  | 77.5<br>(66.0 to 88.1)                            | -12.8<br>(-18.0 to -7.9)                            |
| Macular degeneration                          | 3.8<br>(2.9 to 4.9)                     | --                                       | 0.3<br>(0.2 to 0.4)                  | 97.9<br>(75.2 to 120.8)                           | -1.2<br>(-10.6 to 8.9)                              |
| Refraction and accommodation disorders        | 418.3<br>(380.8 to 457.2)               | --                                       | 9.4<br>(6.1 to 14.1)                 | 54.0<br>(45.8 to 63.3)                            | -17.8<br>(-21.2 to -14.2)                           |
| Age-related and other hearing loss            | 379.5<br>(348.6 to 414.2)               | --                                       | 7.5<br>(4.8 to 11.3)                 | 87.0<br>(74.7 to 97.1)                            | -8.4<br>(-12.3 to -5.0)                             |
| Other vision loss                             | 23.7<br>(20.2 to 28.0)                  | --                                       | 1.9<br>(1.3 to 2.5)                  | 89.4<br>(71.2 to 109.0)                           | -5.8<br>(-12.5 to 1.7)                              |
| Other sense organ diseases                    | 97.9<br>(89.6 to 106.2)                 | 394.2<br>(368.6 to 421.5)                | 3.0<br>(1.9 to 4.6)                  | 104.1<br>(91.9 to 116.0)                          | 1.6<br>(-2.4 to 5.7)                                |
| Oral disorders                                | 2,291.8<br>(2,138.3 to 2,426.9)         | 6,352.3†<br>(5,502.1 to 7,153.3)         | 10.7<br>(6.3 to 16.9)                | 116.6<br>(110.1 to 123.4)                         | 0.4<br>(-1.5 to 2.3)                                |
| Caries of deciduous teeth                     | 279.4<br>(226.2 to 323.9)               | 1,029.4<br>(711.6 to 1,356.9)            | 0.1<br>(< 0.05 to 0.1)               | 8.1<br>(-3.0 to 21.7)                             | 0.2<br>(-10.9 to 12.7)                              |
| Caries of permanent teeth                     | 1,622.2<br>(1,426.8 to 1,816.8)         | 5,250.7<br>(4,497.9 to 6,014.1)          | 1.0<br>(0.4 to 1.9)                  | 88.9<br>(76.0 to 103.5)                           | -1.4<br>(-5.4 to 3.6)                               |
| Periodontal disease                           | 480.9<br>(388.8 to 591.2)               | 59.9<br>(46.8 to 76.0)                   | 3.2<br>(1.2 to 6.8)                  | 139.6<br>(128.3 to 154.2)                         | 1.9<br>(-1.6 to 5.6)                                |
| Edentulism and severe tooth loss              | 144.1<br>(122.9 to 167.3)               | 12.3<br>(10.4 to 14.2)                   | 4.0<br>(2.6 to 5.8)                  | 124.0<br>(115.1 to 134.6)                         | 0.6<br>(-2.3 to 3.7)                                |
| Other oral disorders                          | 83.0<br>(78.4 to 87.6)                  | --                                       | 2.4<br>(1.5 to 3.7)                  | 98.0<br>(88.9 to 107.6)                           | -1.9<br>(-5.4 to 1.4)                               |
| <b>Injuries</b>                               | <b>909.1</b><br><b>(849.8 to 972.8)</b> | <b>393.7†</b><br><b>(369.8 to 418.3)</b> | <b>31.2</b><br><b>(20.6 to 44.9)</b> | <b>115.4</b><br><b>(111.5 to 119.3)</b>           | <b>3.9</b><br><b>(2.4 to 5.3)</b>                   |
| <b>Transport injuries</b>                     | <b>198.2</b><br><b>(183.7 to 213.7)</b> | <b>82.6</b><br><b>(73.0 to 91.9)</b>     | <b>9.8</b><br><b>(6.5 to 14.0)</b>   | <b>118.4</b><br><b>(113.7 to 123.3)</b>           | <b>-1.4</b><br><b>(-3.1 to 0.3)</b>                 |
| Road injuries                                 | 168.8<br>(156.0 to 182.4)               | 75.6<br>(66.0 to 85.1)                   | 8.5<br>(5.6 to 12.1)                 | 121.3<br>(116.3 to 126.4)                         | -2.0<br>(-3.8 to -0.3)                              |
| Pedestrian road injuries                      | 73.4<br>(63.8 to 84.1)                  | 26.9<br>(22.5 to 31.4)                   | 3.6<br>(2.4 to 5.1)                  | 102.2<br>(97.5 to 106.8)                          | -11.0<br>(-12.6 to -9.4)                            |
| Cyclist road injuries                         | 20.1<br>(16.7 to 23.9)                  | 9.4<br>(7.1 to 12.1)                     | 0.9<br>(0.6 to 1.4)                  | 141.3<br>(135.5 to 148.2)                         | 10.7<br>(8.7 to 12.8)                               |
| Motorcyclist road injuries                    | 19.4<br>(16.5 to 23.9)                  | 6.0<br>(4.5 to 7.7)                      | 0.9<br>(0.6 to 1.3)                  | 169.9<br>(163.6 to 177.0)                         | 20.7<br>(18.6 to 22.9)                              |
| Motor vehicle road injuries                   | 44.4<br>(37.2 to 51.5)                  | 26.5<br>(22.2 to 31.3)                   | 2.5<br>(1.7 to 3.6)                  | 127.8<br>(121.4 to 134.0)                         | 1.1<br>(-0.9 to 3.0)                                |
| Other road injuries                           | 11.4<br>(9.5 to 13.4)                   | 6.8<br>(5.0 to 8.9)                      | 0.5<br>(0.3 to 0.8)                  | 134.1<br>(127.9 to 140.3)                         | 5.1<br>(3.2 to 6.9)                                 |
| Other transport injuries                      | 29.4<br>(24.3 to 35.5)                  | 7.0<br>(5.8 to 8.5)                      | 1.3<br>(0.9 to 1.9)                  | 101.4<br>(95.3 to 107.8)                          | 3.1<br>(1.2 to 5.2)                                 |
| <b>Unintentional injuries</b>                 | <b>684.7</b><br><b>(630.1 to 740.8)</b> | <b>298.5</b><br><b>(278.0 to 321.7)</b>  | <b>19.8</b><br><b>(13.0 to 28.5)</b> | <b>115.7</b><br><b>(111.3 to 120.0)</b>           | <b>7.2</b><br><b>(5.7 to 8.5)</b>                   |
| Falls                                         | 203.0<br>(171.4 to 235.1)               | 84.2<br>(72.2 to 99.0)                   | 7.0<br>(4.8 to 10.1)                 | 117.2<br>(112.7 to 121.8)                         | 6.1<br>(4.6 to 7.5)                                 |
| Drowning                                      | 1.9<br>(1.7 to 2.3)                     | 0.4<br>(0.3 to 0.4)                      | 0.1<br>(0.1 to 0.1)                  | 108.3<br>(103.7 to 114.0)                         | 1.5<br>(-0.3 to 3.3)                                |
| Fire, heat, and hot substances                | 69.1<br>(56.6 to 85.9)                  | 8.6<br>(6.7 to 10.4)                     | 1.6<br>(1.0 to 2.5)                  | 134.5<br>(125.5 to 143.9)                         | 14.1<br>(11.0 to 17.6)                              |
| Poisonings                                    | 3.5<br>(3.0 to 4.3)                     | 5.2<br>(4.0 to 6.6)                      | 0.3<br>(0.2 to 0.5)                  | 112.5<br>(93.4 to 133.4)                          | 11.5<br>(3.6 to 19.8)                               |
| Exposure to mechanical forces                 | 126.0<br>(107.3 to 155.5)               | 56.7<br>(47.9 to 66.5)                   | 2.7<br>(1.7 to 4.0)                  | 125.3<br>(120.8 to 130.2)                         | 3.0<br>(1.4 to 4.6)                                 |
| Unintentional firearm injuries                | 5.5<br>(4.5 to 6.8)                     | 1.6<br>(1.1 to 2.3)                      | 0.2<br>(0.1 to 0.3)                  | 160.0<br>(152.1 to 167.7)                         | 18.2<br>(15.8 to 20.7)                              |
| Unintentional suffocation                     | 3.5<br>(2.7 to 4.4)                     | 0.7<br>(0.5 to 1.0)                      | 0.1<br>(0.1 to 0.2)                  | 101.5<br>(95.1 to 108.6)                          | 7.3<br>(5.2 to 9.6)                                 |
| Other exposure to mechanical forces           | 117.0<br>(98.7 to 146.2)                | 54.4<br>(45.9 to 63.6)                   | 2.4<br>(1.5 to 3.6)                  | 123.9<br>(119.6 to 128.8)                         | 1.7<br>(0.1 to 3.3)                                 |

| Cause                                                                               | Prevalence in thousands (95% UI)       | Incidence in thousands (95% UI)       | YLDs in thousands (95% UI)                    |                                                   |                                                     |
|-------------------------------------------------------------------------------------|----------------------------------------|---------------------------------------|-----------------------------------------------|---------------------------------------------------|-----------------------------------------------------|
|                                                                                     | 2016 counts                            | 2016 counts                           | 2016 counts                                   | Percentage change in counts between 2006 and 2016 | Percentage change in age-standardised rates between |
| Adverse effects of medical treatment                                                | 1.3<br>(1.0 to 1.6)                    | 16.5<br>(13.9 to 19.4)                | 0.2<br>(0.1 to 0.2)                           | 52.1<br>(39.0 to 67.0)                            | 5.3<br>(1.0 to 10.4)                                |
| Animal contact                                                                      | 21.4<br>(18.6 to 25.0)                 | 26.2<br>(20.6 to 32.4)                | 0.7<br>(0.4 to 1.0)                           | 94.5<br>(81.4 to 109.0)                           | 1.7<br>(-3.7 to 7.3)                                |
| Venomous animal contact                                                             | 10.2<br>(8.2 to 12.3)                  | 12.2<br>(9.0 to 16.1)                 | 0.5<br>(0.3 to 0.8)                           | 94.1<br>(78.3 to 112.5)                           | 2.5<br>(-4.7 to 9.7)                                |
| Non-venomous animal contact                                                         | 11.2<br>(9.2 to 14.3)                  | 14.1<br>(10.7 to 17.9)                | 0.2<br>(0.1 to 0.2)                           | 95.8<br>(86.9 to 103.8)                           | -0.5<br>(-2.4 to 1.4)                               |
| Foreign body                                                                        | 40.2<br>(33.5 to 49.1)                 | 26.3<br>(22.2 to 31.5)                | 1.1<br>(0.7 to 1.7)                           | 104.8<br>(99.3 to 110.5)                          | 7.7<br>(5.8 to 9.6)                                 |
| Pulmonary aspiration and foreign body in airway                                     | 10.0<br>(7.5 to 13.5)                  | 3.5<br>(2.8 to 4.3)                   | 0.4<br>(0.2 to 0.6)                           | 95.7<br>(89.3 to 102.2)                           | 6.9<br>(4.5 to 9.5)                                 |
| Foreign body in eyes                                                                | 2.2<br>(1.2 to 3.5)                    | 12.1<br>(8.9 to 16.6)                 | 0.1<br>(0.1 to 0.2)                           | 106.2<br>(88.4 to 123.6)                          | 5.9<br>(3.0 to 9.1)                                 |
| Foreign body in other body part                                                     | 28.0<br>(22.6 to 36.1)                 | 10.7<br>(8.8 to 13.1)                 | 0.7<br>(0.4 to 1.0)                           | 110.0<br>(104.3 to 115.9)                         | 8.5<br>(6.4 to 10.5)                                |
| Environmental heat and cold exposure                                                | 56.1<br>(47.1 to 66.0)                 | 15.4<br>(12.5 to 18.9)                | 1.8<br>(1.2 to 2.6)                           | 106.9<br>(101.5 to 112.9)                         | 5.8<br>(4.2 to 7.5)                                 |
| Other unintentional injuries                                                        | 162.3<br>(128.9 to 200.7)              | 59.0<br>(47.0 to 72.4)                | 4.2<br>(2.8 to 6.2)                           | 115.3<br>(109.6 to 120.8)                         | 10.9<br>(9.4 to 12.5)                               |
| <b>Self-harm and interpersonal violence</b>                                         | <b>111.1</b><br><b>(97.3 to 125.7)</b> | <b>12.3†</b><br><b>(10.0 to 14.9)</b> | <b>1.6</b><br><b>(1.1 to 2.2)</b>             | <b>94.1</b><br><b>(82.4 to 105.2)</b>             | <b>-0.1</b><br><b>(-4.1 to 3.7)</b>                 |
| Self-harm                                                                           | 4.2<br>(3.6 to 4.9)                    | 1.7<br>(1.4 to 2.0)                   | 0.2<br>(0.1 to 0.3)                           | 138.9<br>(129.6 to 149.2)                         | 10.2<br>(7.1 to 13.8)                               |
| Self-harm by firearm                                                                | 0.3<br>(0.2 to 0.3)                    | < 0.05<br>(< 0.05 to 0.1)             | < 0.05<br>(< 0.05 to < 0.05)                  | 130.4<br>(121.3 to 140.8)                         | 12.3<br>(9.3 to 15.8)                               |
| Self-harm by other specified means                                                  | 3.9<br>(3.3 to 4.6)                    | 1.6<br>(1.3 to 2.0)                   | 0.2<br>(0.1 to 0.2)                           | 139.4<br>(129.6 to 150.1)                         | 10.2<br>(6.9 to 13.8)                               |
| Interpersonal violence                                                              | 106.9<br>(93.1 to 121.6)               | 10.6†                                 | 1.4<br>(1.0 to 2.0)                           | 89.7<br>(77.8 to 101.5)                           | -1.4<br>(-5.7 to 2.8)                               |
| Assault by firearm                                                                  | 1.3<br>(1.1 to 1.6)                    | 0.5<br>(0.3 to 0.7)                   | 0.1<br>(< 0.05 to 0.1)                        | 183.6<br>(171.3 to 196.1)                         | 31.1<br>(27.7 to 34.6)                              |
| Assault by sharp object                                                             | 6.7<br>(5.4 to 8.2)                    | 2.8<br>(2.0 to 3.8)                   | 0.2<br>(0.1 to 0.3)                           | 166.0<br>(155.5 to 176.2)                         | 27.1<br>(24.6 to 29.6)                              |
| Sexual violence                                                                     | 86.7<br>(73.2 to 101.9)                | --                                    | 0.7<br>(0.5 to 1.0)                           | 46.7<br>(36.4 to 57.7)                            | -21.9<br>(-25.3 to -18.6)                           |
| Assault by other means                                                              | 12.1<br>(10.1 to 14.6)                 | 7.4<br>(5.8 to 9.2)                   | 0.5<br>(0.3 to 0.7)                           | 165.5<br>(158.5 to 173.1)                         | 24.4<br>(22.1 to 26.7)                              |
| <b>Forces of nature, conflict and terrorism, and executions and police conflict</b> | <b>1.8</b><br><b>(1.2 to 2.9)</b>      | <b>0.3†</b><br><b>(0.1 to 0.6)</b>    | <b>&lt; 0.05</b><br><b>(&lt; 0.05 to 0.1)</b> | <b>248.8</b><br><b>(224.7 to 288.5)</b>           | <b>68.8</b><br><b>(59.5 to 86.0)</b>                |
| Exposure to forces of nature                                                        | 1.0<br>(0.5 to 1.8)                    | --                                    | < 0.05<br>(< 0.05 to 0.1)                     | 354.2<br>(331.4 to 459.3)                         | 110.7<br>(101.9 to 152.9)                           |
| Conflict and terrorism                                                              | --                                     | --                                    | --                                            | --                                                | --                                                  |
| Executions and police conflict                                                      | 0.8<br>(0.5 to 1.4)                    | 0.3<br>(0.1 to 0.6)                   | < 0.05<br>(< 0.05 to < 0.05)                  | 152.8<br>(118.6 to 197.3)                         | 25.3<br>(13.3 to 43.3)                              |
| <b>Impairments</b>                                                                  | --                                     | --                                    | --                                            | --                                                | --                                                  |
| Anaemia                                                                             | 1,195.6<br>(1,046.1 to 1,350.6)        | --                                    | 21.5<br>(14.1 to 31.9)                        | 21.9<br>(6.3 to 41.2)                             | -21.4<br>(-29.7 to -12.6)                           |
| Developmental intellectual disability                                               | 111.2<br>(83.8 to 140.4)               | --                                    | 10.9<br>(7.8 to 14.5)                         | 74.0<br>(64.7 to 83.3)                            | -0.3<br>(-4.6 to 4.0)                               |
| Epilepsy                                                                            | 22.8<br>(11.3 to 30.9)                 | --                                    | 7.2<br>(3.3 to 12.2)                          | 65.6<br>(-25.6 to 313.9)                          | 0.1<br>(-56.5 to 151.3)                             |
| Guillain-Barre syndrome                                                             | < 0.05<br>(< 0.05 to 0.1)              | --                                    | < 0.05<br>(< 0.05 to < 0.05)                  | 85.4<br>(66.6 to 107.5)                           | 1.1<br>(0.4 to 1.8)                                 |
| Hearing loss                                                                        | 417.2<br>(387.4 to 450.0)              | --                                    | 9.0<br>(6.0 to 13.3)                          | 75.0<br>(64.3 to 84.6)                            | -8.7<br>(-12.5 to -5.5)                             |
| Heart failure                                                                       | 16.4<br>(14.5 to 18.5)                 | --                                    | 1.5<br>(1.0 to 2.0)                           | 103.4<br>(89.3 to 118.0)                          | 1.1<br>(-5.8 to 8.6)                                |
| Infertility                                                                         | 82.2<br>(65.5 to 104.8)                | --                                    | 0.5<br>(0.2 to 1.0)                           | 109.2<br>(94.2 to 125.5)                          | -9.0<br>(-14.2 to -3.7)                             |
| Pelvic inflammatory disease                                                         | 1.6<br>(1.2 to 2.1)                    | --                                    | 0.2<br>(0.1 to 0.3)                           | 64.3<br>(34.0 to 97.9)                            | -29.8<br>(-41.2 to -16.5)                           |
| Vision loss                                                                         | 521.2<br>(477.1 to 568.8)              | --                                    | 18.1<br>(12.7 to 25.2)                        | 64.5<br>(57.8 to 72.1)                            | -13.3<br>(-16.4 to -10.5)                           |

We did not calculate incidence for the nine impairments, certain NTDs, and causes with only birth prevalence. Blank cells mean that no estimate is available.

† Incidence for aggregate causes represents the sum of the incidence of the causes below the aggregate.

‡ Incidence estimates for stroke represent first-ever stroke only.

^ Incidence of HIV/AIDS represents new infections of HIV only and does not include new infections of Tuberculosis in HIV positive cases.



SR Table 14: Prevalence, incidence, and YLDs for 2016, percentage change of YLD counts and percentage change of age-standardised YLD rates between 2006 and 2016 by cause and impairments, for all ages, Pakistan.

| Cause                                                                                | Prevalence in thousands (95% UI)             | Incidence in thousands (95% UI)                     | YLDs in thousands (95% UI)                |                                                   |                                                     |
|--------------------------------------------------------------------------------------|----------------------------------------------|-----------------------------------------------------|-------------------------------------------|---------------------------------------------------|-----------------------------------------------------|
|                                                                                      | 2016 counts                                  | 2016 counts                                         | 2016 counts                               | Percentage change in counts between 2006 and 2016 | Percentage change in age-standardised rates between |
| <b>All causes</b>                                                                    | <b>181,901.0</b><br>(181,079.2 to 182,764.9) | <b>1,110,059.8†</b><br>(1,054,187.4 to 1,175,133.8) | <b>19,240.0</b><br>(14,361.0 to 25,105.3) | <b>24.5</b><br>(21.1 to 27.9)                     | <b>-1.3</b><br>(-3.3 to 0.8)                        |
| <b>Communicable, maternal, neonatal, and nutritional disorders</b>                   | <b>126,530.3</b><br>(121,168.2 to 131,451.2) | <b>706,589.8†</b><br>(651,453.2 to 765,254.7)       | <b>3,400.4</b><br>(2,380.4 to 4,671.2)    | <b>8.5</b><br>(-0.1 to 18.0)                      | <b>-11.1</b><br>(-17.0 to -4.5)                     |
| <b>HIV/AIDS and tuberculosis</b>                                                     | <b>42,705.0</b><br>(36,683.7 to 48,256.6)    | <b>409.3†</b><br>(325.3 to 513.5)                   | <b>106.3</b><br>(67.1 to 155.5)           | <b>9.2</b><br>(-4.6 to 25.8)                      | <b>-16.0</b><br>(-24.8 to -5.8)                     |
| Tuberculosis                                                                         | 38,405.8<br>(32,501.7 to 45,871.9)           | 401.5†<br>(320.1 to 502.6)                          | 99.6<br>(63.2 to 141.0)                   | 4.0<br>(-7.2 to 16.0)                             | -19.2<br>(-26.6 to -11.6)                           |
| Drug-susceptible tuberculosis                                                        | 316.4<br>(252.0 to 397.3)                    | 386.4<br>(308.5 to 483.6)                           | 95.8<br>(60.9 to 135.0)                   | 4.0<br>(-7.5 to 15.6)                             | -19.2<br>(-26.6 to -11.3)                           |
| Multidrug-resistant tuberculosis without extensive drug resistance                   | 12.1<br>(8.9 to 16.4)                        | 14.7<br>(10.7 to 19.5)                              | 3.8<br>(2.2 to 5.7)                       | 2.0<br>(-26.5 to 40.4)                            | -20.8<br>(-43.5 to 10.7)                            |
| Extensively drug-resistant tuberculosis                                              | 0.3<br>(0.2 to 0.4)                          | 0.4<br>(0.3 to 0.5)                                 | 0.1<br>(0.1 to 0.1)                       | 168.7<br>(106.7 to 250.2)                         | 108.4<br>(61.1 to 168.7)                            |
| Latent tuberculosis infection                                                        | 38,077.0<br>(32,159.0 to 45,549.4)           | --                                                  | --                                        | --                                                | --                                                  |
| HIV/AIDS                                                                             | 50.4<br>(6.2 to 173.7)                       | 7.8^<br>(0.7 to 27.8)                               | 6.7<br>(1.1 to 22.6)                      | 314.7<br>(53.4 to 745.3)                          | 207.6<br>(11.1 to 553.1)                            |
| Drug-susceptible HIV/AIDS - Tuberculosis                                             | 1.8<br>(1.0 to 3.1)                          | 2.2<br>(1.2 to 3.8)                                 | 0.8<br>(0.4 to 1.3)                       | 98.3<br>(74.2 to 125.3)                           | 48.4<br>(30.4 to 68.6)                              |
| Multidrug-resistant HIV/AIDS - Tuberculosis without extensive drug resistance        | 0.1<br>(< 0.05 to 0.1)                       | 0.1<br>(0.1 to 0.2)                                 | < 0.05<br>(< 0.05 to 0.1)                 | 94.0<br>(46.8 to 155.5)                           | 45.2<br>(9.9 to 91.3)                               |
| Extensively drug-resistant HIV/AIDS - Tuberculosis                                   | < 0.05<br>(< 0.05 to < 0.05)                 | < 0.05<br>(< 0.05 to < 0.05)                        | < 0.05<br>(< 0.05 to < 0.05)              | 411.6<br>(287.0 to 573.5)                         | 282.9<br>(189.8 to 404.3)                           |
| HIV/AIDS resulting in other diseases                                                 | 48.4<br>(4.0 to 172.2)                       | 7.8<br>(0.7 to 27.8)                                | 5.9<br>(0.3 to 21.7)                      | 385.6<br>(29.4 to 1,183.1)                        | 256.5<br>(-6.3 to 946.2)                            |
| <b>Diarrhoea, lower respiratory infections, and other common infectious diseases</b> | <b>13,533.7</b><br>(12,910.4 to 14,216.6)    | <b>650,373.1†</b><br>(594,954.5 to 708,210.4)       | <b>726.4</b><br>(509.0 to 985.4)          | <b>26.3</b><br>(22.4 to 30.3)                     | <b>1.7</b><br>(-1.2 to 4.5)                         |
| Diarrhoeal diseases                                                                  | 2,908.7<br>(2,731.5 to 3,075.8)              | 196,433.2<br>(184,382.9 to 208,082.7)               | 326.2<br>(226.0 to 446.6)                 | 37.3<br>(30.2 to 44.3)                            | 6.4<br>(1.5 to 11.3)                                |
| Intestinal infectious diseases                                                       | 38.9<br>(32.4 to 46.2)                       | 861.7†<br>(749.4 to 992.3)                          | 6.5<br>(4.2 to 9.5)                       | -5.8<br>(-26.5 to 21.9)                           | -19.5<br>(-33.9 to -1.1)                            |
| Typhoid fever                                                                        | 36.5<br>(29.8 to 44.1)                       | 574.4<br>(494.7 to 673.6)                           | 5.6<br>(3.5 to 8.4)                       | -5.4<br>(-28.6 to 26.2)                           | -18.6<br>(-35.5 to 3.5)                             |
| Paratyphoid fever                                                                    | 12.6<br>(10.7 to 14.7)                       | 287.3<br>(251.2 to 330.4)                           | 0.8<br>(0.5 to 1.2)                       | -5.7<br>(-20.9 to 11.1)                           | -22.4<br>(-33.1 to -10.2)                           |
| Other intestinal infectious diseases                                                 | --                                           | --                                                  | 0.1<br>(< 0.05 to 0.1)                    | -28.6<br>(-45.5 to -6.5)                          | -38.8<br>(-50.1 to -24.1)                           |
| Lower respiratory infections                                                         | 202.3<br>(181.4 to 224.1)                    | 8,311.2<br>(7,361.7 to 9,398.8)                     | 12.4<br>(8.0 to 18.1)                     | 16.1<br>(2.6 to 32.3)                             | -4.2<br>(-14.1 to 6.8)                              |
| Upper respiratory infections                                                         | 5,545.3<br>(4,876.9 to 6,273.7)              | 415,649.4<br>(363,329.7 to 472,861.0)               | 138.3<br>(81.6 to 215.8)                  | 21.6<br>(15.0 to 28.8)                            | -0.3<br>(-5.2 to 5.6)                               |
| Otitis media                                                                         | 4,578.6<br>(4,024.9 to 5,161.0)              | 23,711.2<br>(18,508.8 to 30,948.6)                  | 125.0<br>(77.5 to 189.2)                  | 13.9<br>(7.0 to 21.2)                             | -4.4<br>(-9.6 to 1.4)                               |
| Meningitis                                                                           | 540.3<br>(464.6 to 623.6)                    | 105.8<br>(91.3 to 125.3)                            | 63.4<br>(45.2 to 83.7)                    | 23.2<br>(15.7 to 31.2)                            | -0.6<br>(-6.4 to 5.6)                               |
| Pneumococcal meningitis                                                              | 194.4<br>(167.4 to 223.5)                    | 13.9<br>(10.8 to 18.0)                              | 26.4<br>(18.4 to 36.0)                    | 22.7<br>(6.9 to 41.1)                             | -2.1<br>(-13.7 to 10.9)                             |
| H influenzae type B meningitis                                                       | 77.3<br>(63.0 to 94.8)                       | 12.7<br>(9.3 to 17.0)                               | 11.5<br>(7.7 to 15.3)                     | 10.7<br>(3.6 to 17.7)                             | -9.8<br>(-16.0 to -4.0)                             |
| Meningococcal infection                                                              | 33.1<br>(25.0 to 44.1)                       | 9.7<br>(7.3 to 13.1)                                | 4.0<br>(2.7 to 5.4)                       | 23.6<br>(17.8 to 30.3)                            | -0.2<br>(-4.9 to 4.9)                               |
| Other meningitis                                                                     | 235.6<br>(176.1 to 301.6)                    | 69.5<br>(58.9 to 83.5)                              | 21.5<br>(14.6 to 29.4)                    | 31.7<br>(22.0 to 41.9)                            | 6.8<br>(-0.8 to 14.7)                               |
| Encephalitis                                                                         | 375.3<br>(255.9 to 544.7)                    | 179.4<br>(161.1 to 200.4)                           | 43.5<br>(30.3 to 58.6)                    | 29.4<br>(14.1 to 45.7)                            | 2.7<br>(-8.6 to 14.9)                               |
| Diphtheria                                                                           | < 0.05<br>(< 0.05 to < 0.05)                 | 0.1<br>(0.1 to 0.1)                                 | < 0.05<br>(< 0.05 to < 0.05)              | -7.4<br>(-54.2 to 87.3)                           | -21.8<br>(-60.1 to 51.6)                            |
| Whooping cough                                                                       | 105.3<br>(81.5 to 132.8)                     | 768.9<br>(594.8 to 969.3)                           | 5.2<br>(3.0 to 8.2)                       | 27.9<br>(10.3 to 48.3)                            | 6.3<br>(-8.2 to 23.2)                               |
| Tetanus                                                                              | 5.2<br>(4.9 to 5.9)                          | 11.0<br>(6.0 to 21.8)                               | 0.2<br>(0.1 to 0.3)                       | -26.4<br>(-47.3 to 7.5)                           | -37.9<br>(-52.6 to -8.2)                            |
| Measles                                                                              | 1.8<br>(0.6 to 3.9)                          | 64.0<br>(22.2 to 143.8)                             | 0.2<br>(< 0.05 to 0.4)                    | -94.3<br>(-96.1 to -91.9)                         | -95.3<br>(-96.8 to -93.3)                           |
| Varicella and herpes zoster                                                          | 169.1<br>(157.5 to 182.0)                    | 4,277.2<br>(4,084.8 to 4,467.1)                     | 5.7<br>(3.5 to 8.7)                       | 26.3<br>(11.2 to 43.3)                            | 0.1<br>(-10.2 to 11.8)                              |
| <b>Neglected tropical diseases and malaria</b>                                       | <b>32,907.4</b><br>(27,473.6 to 39,912.3)    | <b>3,564.1†</b><br>(2,724.6 to 4,589.4)             | <b>204.6</b><br>(132.2 to 303.2)          | <b>11.9</b><br>(-1.4 to 27.1)                     | <b>-13.3</b><br>(-23.3 to -1.3)                     |
| Malaria                                                                              | 71.3<br>(52.4 to 91.8)                       | 976.0<br>(813.6 to 1,179.7)                         | 5.6<br>(4.2 to 7.3)                       | -24.3<br>(-39.6 to -5.9)                          | -36.5<br>(-48.5 to -21.9)                           |
| Chagas disease                                                                       | --                                           | --                                                  | --                                        | --                                                | --                                                  |
| Leishmaniasis                                                                        | 464.4<br>(386.2 to 554.6)                    | 13.1<br>(7.7 to 19.7)                               | 26.7<br>(16.1 to 39.5)                    | 0.0<br>(-7.5 to 9.8)                              | -20.5<br>(-25.8 to -13.4)                           |
| Visceral leishmaniasis                                                               | < 0.05<br>(< 0.05 to < 0.05)                 | < 0.05<br>(< 0.05 to < 0.05)                        | < 0.05<br>(< 0.05 to < 0.05)              | -49.2<br>(-69.5 to -16.3)                         | -60.2<br>(-76.2 to -35.8)                           |
| Cutaneous and mucocutaneous leishmaniasis                                            | 425.3<br>(331.0 to 543.2)                    | 13.0<br>(7.7 to 19.6)                               | 26.7<br>(16.1 to 39.5)                    | 0.0<br>(-7.5 to 9.8)                              | -20.5<br>(-25.8 to -13.4)                           |
| African trypanosomiasis                                                              | --                                           | --                                                  | --                                        | --                                                | --                                                  |
| Schistosomiasis                                                                      | --                                           | --                                                  | --                                        | --                                                | --                                                  |
| Cysticercosis                                                                        | --                                           | --                                                  | --                                        | --                                                | --                                                  |
| Cystic echinococcosis                                                                | 13.7<br>(2.7 to 56.3)                        | 2.9<br>(0.6 to 11.4)                                | 1.3<br>(0.2 to 5.3)                       | -30.1<br>(-92.2 to 573.0)                         | -44.3<br>(-93.6 to 378.4)                           |
| Lymphatic filariasis                                                                 | --                                           | --                                                  | --                                        | --                                                | --                                                  |
| Onchocerciasis                                                                       | --                                           | --                                                  | --                                        | --                                                | --                                                  |
| Trachoma                                                                             | 101.2<br>(65.6 to 149.3)                     | --                                                  | 7.8<br>(4.8 to 11.9)                      | -47.4<br>(-63.3 to -28.1)                         | -59.2<br>(-72.2 to -42.4)                           |
| Dengue                                                                               | 153.8<br>(91.0 to 244.4)                     | 2,571.0<br>(1,746.2 to 3,592.5)                     | 25.0<br>(11.8 to 44.5)                    | 197.8<br>(117.4 to 623.5)                         | 144.7<br>(80.0 to 492.2)                            |
| Yellow fever                                                                         | --                                           | --                                                  | --                                        | --                                                | --                                                  |
| Rabies                                                                               | < 0.05<br>(< 0.05 to 0.1)                    | 0.9<br>(0.5 to 1.9)                                 | < 0.05<br>(< 0.05 to < 0.05)              | -50.0<br>(-74.2 to -9.4)                          | -58.6<br>(-75.8 to -31.8)                           |
| Intestinal nematode infections                                                       | 30,423.6<br>(24,850.7 to 37,600.9)           | --                                                  | 55.2<br>(29.6 to 97.0)                    | 22.5<br>(-9.1 to 62.8)                            | -0.9<br>(-28.4 to 35.6)                             |
| Ascariasis                                                                           | 25,330.3<br>(19,496.9 to 33,150.5)           | --                                                  | 49.1<br>(25.5 to 87.3)                    | 22.8<br>(-10.7 to 67.8)                           | -0.4<br>(-29.5 to 41.9)                             |



| Cause                                                                   | Prevalence in thousands (95% UI)                    | Incidence in thousands (95% UI)                      | YLDs in thousands (95% UI)                       |                                                   |                                                     |
|-------------------------------------------------------------------------|-----------------------------------------------------|------------------------------------------------------|--------------------------------------------------|---------------------------------------------------|-----------------------------------------------------|
|                                                                         | 2016 counts                                         | 2016 counts                                          | 2016 counts                                      | Percentage change in counts between 2006 and 2016 | Percentage change in age-standardised rates between |
| Trichuriasis                                                            | 1,981.0<br>(1,522.8 to 2,569.8)                     | --                                                   | 0.1<br>(< 0.05 to 0.3)                           | 22.1<br>(-70.7 to 394.5)                          | -2.0<br>(-78.7 to 335.1)                            |
| Hookworm disease                                                        | 2,368.0<br>(1,828.4 to 2,996.5)                     | --                                                   | 6.0<br>(3.4 to 10.2)                             | 19.9<br>(-19.9 to 75.4)                           | -4.2<br>(-37.7 to 45.1)                             |
| Food-borne trematodiasis                                                | --                                                  | --                                                   | --                                               | --                                                | --                                                  |
| Leprosy                                                                 | 5.0<br>(4.6 to 5.4)                                 | 0.1<br>(0.1 to 0.2)                                  | 0.3<br>(0.2 to 0.5)                              | -14.1<br>(-34.6 to 11.9)                          | -32.4<br>(-49.4 to -10.7)                           |
| Ebola virus disease                                                     | --                                                  | --                                                   | --                                               | --                                                | --                                                  |
| Zika virus disease                                                      | --                                                  | --                                                   | --                                               | --                                                | --                                                  |
| Guinea worm disease                                                     | --                                                  | --                                                   | --                                               | --                                                | --                                                  |
| Other neglected tropical diseases                                       | 2,784.3<br>(2,422.8 to 3,207.5)                     | --                                                   | 82.5<br>(49.7 to 124.3)                          | 5.7<br>(-13.4 to 29.6)                            | -10.8<br>(-26.3 to 7.5)                             |
| <b>Maternal disorders</b>                                               | <b>244.3</b><br><b>(207.2 to 284.1)</b>             | <b>2,120.8†</b><br><b>(1,872.4 to 2,436.9)</b>       | <b>64.8</b><br><b>(42.6 to 91.0)</b>             | <b>1.6</b><br><b>(-12.9 to 18.1)</b>              | <b>-23.5</b><br><b>(-34.5 to -11.4)</b>             |
| Maternal haemorrhage                                                    | 17.2<br>(12.6 to 23.4)                              | 138.2<br>(96.3 to 189.3)                             | 1.0<br>(0.6 to 1.6)                              | -7.0<br>(-32.7 to 28.1)                           | -30.1<br>(-49.4 to -4.1)                            |
| Maternal sepsis and other pregnancy related infections                  | 43.8<br>(33.0 to 58.9)                              | 260.2<br>(187.7 to 364.5)                            | 1.2<br>(0.5 to 2.2)                              | 15.1<br>(-45.4 to 147.0)                          | -12.4<br>(-56.9 to 82.6)                            |
| Maternal hypertensive disorders                                         | 34.3<br>(20.9 to 52.0)                              | 249.9<br>(202.4 to 306.5)                            | 1.8<br>(0.9 to 3.0)                              | 56.3<br>(-12.7 to 180.2)                          | 19.6<br>(-32.8 to 115.2)                            |
| Maternal obstructed labour and uterine rupture                          | 153.4<br>(125.4 to 183.1)                           | 182.0<br>(136.9 to 239.6)                            | 49.8<br>(31.9 to 71.2)                           | 0.8<br>(-14.9 to 18.5)                            | -24.0<br>(-35.6 to -11.0)                           |
| Maternal abortion, miscarriage, and ectopic pregnancy                   | 10.6<br>(7.0 to 15.0)                               | 1,290.4<br>(1,051.7 to 1,587.5)                      | 1.2<br>(0.6 to 2.0)                              | 21.5<br>(-35.6 to 128.0)                          | -10.3<br>(-52.2 to 65.1)                            |
| Other maternal disorders                                                | --                                                  | --                                                   | 9.9<br>(6.5 to 13.9)                             | -3.1<br>(-16.8 to 12.8)                           | -27.0<br>(-37.3 to -15.3)                           |
| <b>Neonatal disorders</b>                                               | <b>2,208.7</b><br><b>(1,812.6 to 2,665.4)</b>       | --                                                   | <b>414.5</b><br><b>(286.6 to 598.1)</b>          | <b>27.7</b><br><b>(9.0 to 50.1)</b>               | <b>6.5</b><br><b>(-9.2 to 25.5)</b>                 |
| Neonatal preterm birth complications                                    | 1,953.5<br>(1,487.4 to 2,600.8)                     | --                                                   | 287.5<br>(194.3 to 416.4)                        | 26.2<br>(2.9 to 53.0)                             | 5.3<br>(-13.8 to 27.9)                              |
| Neonatal encephalopathy due to birth asphyxia and trauma                | 181.4<br>(82.5 to 362.7)                            | --                                                   | 17.2<br>(3.1 to 59.7)                            | 5.6<br>(-64.7 to 119.6)                           | -11.5<br>(-70.5 to 83.8)                            |
| Neonatal sepsis and other neonatal infections                           | 169.5<br>(52.2 to 385.5)                            | --                                                   | 63.0<br>(13.8 to 157.3)                          | 52.6<br>(-1.4 to 141.3)                           | 29.3<br>(-16.7 to 109.3)                            |
| Hemolytic disease and other neonatal jaundice                           | 77.7<br>(66.2 to 90.0)                              | --                                                   | 24.8<br>(18.2 to 32.7)                           | 19.3<br>(4.2 to 37.1)                             | -1.6<br>(-12.6 to 11.7)                             |
| Other neonatal disorders                                                | --                                                  | --                                                   | 22.0<br>(15.1 to 31.6)                           | 19.0<br>(1.1 to 40.7)                             | -3.0<br>(-17.8 to 14.7)                             |
| <b>Nutritional deficiencies</b>                                         | <b>65,328.5</b><br><b>(60,772.3 to 70,175.7)</b>    | <b>12,067.5†</b><br><b>(10,134.3 to 14,929.3)</b>    | <b>1,758.4</b><br><b>(1,120.6 to 2,551.7)</b>    | <b>-1.2</b><br><b>(-14.0 to 14.0)</b>             | <b>-17.9</b><br><b>(-27.6 to -7.0)</b>              |
| Protein-energy malnutrition                                             | 3,784.5<br>(3,279.7 to 4,323.2)                     | 2,599.1<br>(2,302.7 to 2,920.3)                      | 127.7<br>(74.9 to 197.3)                         | -19.3<br>(-47.1 to 23.2)                          | -34.0<br>(-56.7 to 0.8)                             |
| Iodine deficiency                                                       | 2,419.5<br>(2,108.9 to 2,750.1)                     | 72.9<br>(63.9 to 82.8)                               | 67.9<br>(44.3 to 97.4)                           | -32.3<br>(-40.9 to -23.4)                         | -45.6<br>(-52.4 to -38.8)                           |
| Vitamin A deficiency                                                    | 10,721.1<br>(8,747.7 to 13,794.1)                   | 9,395.5<br>(7,493.1 to 12,218.9)                     | 13.0<br>(7.9 to 20.2)                            | 15.1<br>(-7.1 to 42.2)                            | -7.4<br>(-24.6 to 11.5)                             |
| Iron-deficiency anaemia                                                 | 55,530.6<br>(49,616.0 to 62,304.2)                  | --                                                   | 1,545.7<br>(966.7 to 2,304.7)                    | 2.7<br>(-11.6 to 19.1)                            | -14.3<br>(-25.0 to -2.4)                            |
| Other nutritional deficiencies                                          | --                                                  | --                                                   | 4.2<br>(2.4 to 6.6)                              | -21.0<br>(-49.9 to 24.7)                          | -35.8<br>(-59.2 to 1.3)                             |
| <b>Other communicable, maternal, neonatal, and nutritional diseases</b> | <b>32,580.4</b><br><b>(30,829.0 to 34,536.0)</b>    | <b>38,055.2</b><br><b>(26,285.0 to 49,242.7)</b>     | <b>125.3</b><br><b>(80.8 to 187.4)</b>           | <b>14.5</b><br><b>(1.9 to 28.9)</b>               | <b>-6.9</b><br><b>(-15.5 to 3.1)</b>                |
| Sexually transmitted diseases excluding HIV                             | 17,794.1<br>(16,533.4 to 19,102.9)                  | 13,802.0<br>(11,303.3 to 16,980.5)                   | 44.1<br>(28.0 to 69.7)                           | 29.8<br>(13.5 to 48.6)                            | -1.8<br>(-13.3 to 10.8)                             |
| Syphilis                                                                | 2,545.6<br>(1,881.7 to 3,349.3)                     | 1,684.0<br>(1,184.5 to 2,281.9)                      | 4.7<br>(3.3 to 6.5)                              | 29.1<br>(10.1 to 50.8)                            | -0.5<br>(-14.0 to 15.9)                             |
| Chlamydial infection                                                    | 1,426.7<br>(1,187.3 to 1,719.4)                     | 1,095.6<br>(913.6 to 1,318.4)                        | 8.6<br>(5.4 to 13.7)                             | 25.9<br>(9.8 to 43.7)                             | -4.7<br>(-16.9 to 8.8)                              |
| Gonococcal infection                                                    | 2,039.9<br>(1,415.8 to 2,986.3)                     | 7,047.3<br>(4,732.4 to 10,036.4)                     | 10.6<br>(5.9 to 18.4)                            | 34.0<br>(-6.2 to 90.1)                            | 0.6<br>(-29.7 to 42.9)                              |
| Trichomoniasis                                                          | 2,881.7<br>(2,440.1 to 3,317.8)                     | 2,474.8<br>(2,099.1 to 2,870.8)                      | 2.8<br>(1.1 to 5.9)                              | 32.0<br>(20.5 to 44.7)                            | 1.2<br>(-6.7 to 9.7)                                |
| Genital herpes                                                          | 9,477.2<br>(8,154.6 to 11,212.1)                    | 784.0<br>(666.8 to 939.4)                            | 2.5<br>(0.8 to 5.6)                              | 36.0<br>(24.5 to 48.6)                            | 2.9<br>(-5.2 to 12.0)                               |
| Other sexually transmitted diseases                                     | 730.6<br>(671.2 to 793.6)                           | 716.3<br>(603.7 to 844.2)                            | 14.9<br>(9.5 to 23.1)                            | 28.1<br>(10.9 to 47.7)                            | -3.6<br>(-16.9 to 10.8)                             |
| Hepatitis                                                               | 14,271.5<br>(12,530.0 to 16,113.2)                  | 24,253.0<br>(12,967.8 to 34,650.2)                   | 17.9<br>(11.0 to 27.4)                           | -4.4<br>(-29.7 to 30.1)                           | -18.9<br>(-36.6 to 3.2)                             |
| Acute hepatitis A                                                       | 1,371.0<br>(494.2 to 2,166.8)                       | 17,823.5<br>(6,425.0 to 28,168.8)                    | 9.2<br>(4.7 to 15.2)                             | -7.9<br>(-49.6 to 69.8)                           | -20.7<br>(-52.9 to 32.4)                            |
| Hepatitis B                                                             | 6,308.1<br>(5,227.0 to 7,659.0)                     | 4,782.6<br>(3,604.0 to 6,221.8)                      | 6.3<br>(3.6 to 10.0)                             | -1.0<br>(-21.3 to 23.5)                           | -18.4<br>(-33.4 to -0.4)                            |
| Hepatitis C                                                             | 6,506.6<br>(5,744.5 to 7,390.7)                     | 532.9<br>(491.2 to 578.3)                            | 0.5<br>(0.2 to 1.0)                              | 7.2<br>(-28.3 to 50.8)                            | -11.4<br>(-35.9 to 17.1)                            |
| Acute hepatitis E                                                       | 85.7<br>(71.1 to 105.5)                             | 1,114.1<br>(924.3 to 1,370.9)                        | 2.0<br>(1.1 to 3.2)                              | -0.4<br>(-21.6 to 27.7)                           | -14.0<br>(-30.4 to 6.3)                             |
| Other infectious diseases                                               | 2,117.5<br>(1,857.1 to 2,410.9)                     | 0.2<br>(0.2 to 0.4)                                  | 63.3<br>(38.8 to 94.4)                           | 11.5<br>(-7.0 to 32.5)                            | -6.8<br>(-20.6 to 9.2)                              |
| <b>Non-communicable diseases</b>                                        | <b>164,200.2</b><br><b>(162,944.3 to 165,500.7)</b> | <b>385,882.7†</b><br><b>(365,594.5 to 412,886.2)</b> | <b>14,482.2</b><br><b>(10,690.2 to 18,613.7)</b> | <b>27.7</b><br><b>(24.4 to 31.2)</b>              | <b>-0.1</b><br><b>(-2.2 to 2.0)</b>                 |
| <b>Neoplasms</b>                                                        | <b>421.9</b><br><b>(398.8 to 443.6)</b>             | <b>194.9</b><br><b>(186.5 to 214.3)</b>              | <b>66.7</b><br><b>(48.4 to 87.9)</b>             | <b>33.4</b><br><b>(25.4 to 42.1)</b>              | <b>1.0</b><br><b>(-4.8 to 7.5)</b>                  |
| Lip and oral cavity cancer                                              | 96.9<br>(87.4 to 106.7)                             | 27.0<br>(24.3 to 29.8)                               | 9.8<br>(7.1 to 13.1)                             | 35.9<br>(16.1 to 61.6)                            | 2.0<br>(-12.9 to 20.7)                              |
| Nasopharynx cancer                                                      | 5.5<br>(4.8 to 6.4)                                 | 1.6<br>(1.4 to 1.9)                                  | 0.7<br>(0.5 to 0.9)                              | 23.1<br>(5.5 to 43.2)                             | -7.1<br>(-20.7 to 7.5)                              |
| Other pharynx cancer                                                    | 14.7<br>(12.0 to 16.9)                              | 6.4<br>(5.3 to 7.4)                                  | 2.1<br>(1.4 to 2.9)                              | 32.9<br>(5.4 to 62.6)                             | 0.2<br>(-21.5 to 23.5)                              |
| Oesophageal cancer                                                      | 10.2<br>(9.4 to 11.1)                               | 8.6<br>(7.9 to 9.2)                                  | 2.2<br>(1.5 to 3.0)                              | 21.9<br>(4.0 to 43.0)                             | -7.8<br>(-22.8 to 10.5)                             |
| Stomach cancer                                                          | 9.5<br>(8.7 to 10.3)                                | 6.3<br>(5.8 to 6.9)                                  | 1.7<br>(1.2 to 2.2)                              | 8.4<br>(-5.4 to 23.4)                             | -17.4<br>(-28.9 to -4.9)                            |
| Colon and rectum cancer                                                 | 30.8<br>(26.2 to 34.4)                              | 10.4<br>(8.8 to 11.6)                                | 3.6<br>(2.6 to 4.9)                              | 39.6<br>(18.1 to 61.1)                            | 5.7<br>(-10.8 to 22.8)                              |
| Liver cancer                                                            | 3.1<br>(2.4 to 3.6)                                 | 5.9<br>(4.9 to 6.7)                                  | 1.3<br>(0.8 to 1.8)                              | 34.1<br>(15.6 to 53.0)                            | 0.9<br>(-12.3 to 14.9)                              |
| Liver cancer due to hepatitis B                                         | 1.4<br>(1.1 to 1.7)                                 | 1.4<br>(1.1 to 1.7)                                  | 0.3<br>(0.2 to 0.4)                              | 36.7<br>(17.3 to 56.3)                            | 2.3<br>(-12.0 to 17.8)                              |

| Cause                                              | Prevalence in thousands (95% UI)                 | Incidence in thousands (95% UI)                | YLDs in thousands (95% UI)              |                                                   |                                                     |
|----------------------------------------------------|--------------------------------------------------|------------------------------------------------|-----------------------------------------|---------------------------------------------------|-----------------------------------------------------|
|                                                    | 2016 counts                                      | 2016 counts                                    | 2016 counts                             | Percentage change in counts between 2006 and 2016 | Percentage change in age-standardised rates between |
| Liver cancer due to hepatitis C                    | 2.9<br>(2.3 to 3.5)                              | 3.0<br>(2.5 to 3.5)                            | 0.7<br>(0.4 to 0.9)                     | 33.1<br>(13.8 to 52.3)                            | 0.2<br>(-13.5 to 14.1)                              |
| Liver cancer due to alcohol use                    | 0.2<br>(0.2 to 0.3)                              | 0.2<br>(0.2 to 0.3)                            | < 0.05<br>(< 0.05 to 0.1)               | 34.4<br>(14.1 to 54.6)                            | 1.9<br>(-13.3 to 17.0)                              |
| Liver cancer due to other causes                   | 1.2<br>(1.0 to 1.4)                              | 1.2<br>(1.0 to 1.4)                            | 0.3<br>(0.2 to 0.4)                     | 33.5<br>(13.9 to 53.9)                            | 1.0<br>(-13.6 to 17.4)                              |
| Gallbladder and biliary tract cancer               | 2.8<br>(1.8 to 3.3)                              | 3.5<br>(2.4 to 4.0)                            | 0.8<br>(0.5 to 1.1)                     | 20.4<br>(7.0 to 35.0)                             | -9.1<br>(-19.1 to 1.6)                              |
| Pancreatic cancer                                  | 2.4<br>(2.2 to 2.5)                              | 3.2<br>(3.0 to 3.4)                            | 0.7<br>(0.5 to 0.9)                     | 34.9<br>(24.2 to 45.8)                            | 2.2<br>(-6.1 to 10.4)                               |
| Larynx cancer                                      | 22.4<br>(19.9 to 24.9)                           | 7.4<br>(6.6 to 8.2)                            | 2.8<br>(2.0 to 3.7)                     | 22.8<br>(-1.3 to 50.9)                            | -7.3<br>(-25.7 to 14.0)                             |
| Tracheal, bronchus, and lung cancer                | 18.7<br>(16.5 to 21.7)                           | 16.9<br>(14.8 to 19.5)                         | 3.9<br>(2.7 to 5.4)                     | 24.8<br>(-0.6 to 57.9)                            | -5.1<br>(-24.4 to 20.0)                             |
| Malignant skin melanoma                            | 2.3<br>(1.7 to 2.8)                              | 0.6<br>(0.5 to 0.7)                            | 0.2<br>(0.1 to 0.3)                     | 53.4<br>(32.8 to 75.7)                            | 13.7<br>(-0.5 to 29.6)                              |
| Non-melanoma skin cancer                           | 0.4<br>(0.2 to 0.7)                              | 0.9<br>(0.6 to 1.5)                            | < 0.05<br>(< 0.05 to < 0.05)            | -29.0<br>(-53.4 to 0.7)                           | -43.0<br>(-65.1 to -18.7)                           |
| Non-melanoma skin cancer (squamous-cell carcinoma) | 0.4<br>(0.2 to 0.7)                              | 0.6<br>(0.4 to 0.9)                            | < 0.05<br>(< 0.05 to < 0.05)            | -25.1<br>(-51.4 to 6.6)                           | -40.7<br>(-63.3 to -15.1)                           |
| Non-melanoma skin cancer (basal-cell carcinoma)    | < 0.05<br>(< 0.05 to 0.1)                        | 0.3<br>(0.1 to 0.8)                            | < 0.05<br>(< 0.05 to < 0.05)            | -76.8<br>(-93.5 to -16.8)                         | -86.0<br>(-95.6 to -52.0)                           |
| Breast cancer                                      | 114.2<br>(87.3 to 213.9)                         | 26.5<br>(20.1 to 50.4)                         | 11.0<br>(6.9 to 21.1)                   | 44.7<br>(13.4 to 79.1)                            | 7.9<br>(-13.8 to 33.1)                              |
| Cervical cancer                                    | 15.1<br>(10.8 to 19.3)                           | 4.2<br>(3.0 to 5.3)                            | 1.6<br>(1.0 to 2.3)                     | 17.7<br>(-4.3 to 44.0)                            | -12.7<br>(-28.7 to 6.1)                             |
| Uterine cancer                                     | 20.4<br>(17.3 to 24.0)                           | 4.6<br>(3.9 to 5.4)                            | 1.7<br>(1.2 to 2.4)                     | 43.6<br>(13.6 to 81.9)                            | 6.9<br>(-15.2 to 34.9)                              |
| Ovarian cancer                                     | 22.6<br>(17.9 to 25.7)                           | 7.5<br>(6.2 to 8.4)                            | 3.4<br>(2.3 to 4.8)                     | 48.9<br>(11.2 to 102.3)                           | 10.8<br>(-17.4 to 52.6)                             |
| Prostate cancer                                    | 20.4<br>(10.0 to 26.6)                           | 5.8<br>(3.1 to 7.4)                            | 2.7<br>(1.3 to 4.0)                     | 40.3<br>(9.2 to 81.5)                             | 5.0<br>(-17.1 to 33.2)                              |
| Testicular cancer                                  | 4.0<br>(3.2 to 5.1)                              | 0.9<br>(0.7 to 1.2)                            | 0.3<br>(0.2 to 0.5)                     | 38.2<br>(9.8 to 72.9)                             | 3.6<br>(-16.7 to 28.6)                              |
| Kidney cancer                                      | 9.8<br>(8.6 to 10.8)                             | 2.8<br>(2.4 to 3.1)                            | 0.9<br>(0.7 to 1.2)                     | 51.6<br>(31.0 to 74.1)                            | 15.7<br>(-0.7 to 34.8)                              |
| Bladder cancer                                     | 28.9<br>(25.5 to 32.5)                           | 8.1<br>(7.2 to 9.1)                            | 2.8<br>(2.0 to 3.8)                     | 41.3<br>(18.5 to 68.9)                            | 6.5<br>(-10.7 to 27.3)                              |
| Brain and nervous system cancer                    | 10.7<br>(7.8 to 13.4)                            | 4.9<br>(3.7 to 6.2)                            | 1.6<br>(1.0 to 2.2)                     | 31.6<br>(15.2 to 48.2)                            | 4.3<br>(-8.6 to 19.9)                               |
| Thyroid cancer                                     | 18.4<br>(13.0 to 23.3)                           | 3.7<br>(2.7 to 4.6)                            | 1.2<br>(0.8 to 1.9)                     | 61.9<br>(24.5 to 110.4)                           | 18.6<br>(-7.2 to 50.8)                              |
| Mesothelioma                                       | 0.5<br>(0.4 to 0.6)                              | 0.3<br>(0.2 to 0.4)                            | 0.1<br>(0.1 to 0.1)                     | 29.7<br>(14.2 to 47.3)                            | -2.1<br>(-13.9 to 11.2)                             |
| Hodgkin lymphoma                                   | 5.2<br>(3.0 to 6.8)                              | 1.8<br>(1.1 to 2.3)                            | 0.7<br>(0.4 to 1.0)                     | 1.5<br>(-12.5 to 19.2)                            | -18.6<br>(-27.2 to -8.0)                            |
| Non-Hodgkin's lymphoma                             | 21.9<br>(13.4 to 26.0)                           | 7.9<br>(5.2 to 9.4)                            | 2.5<br>(1.5 to 3.5)                     | 31.6<br>(17.9 to 46.7)                            | 1.3<br>(-9.6 to 13.6)                               |
| Multiple myeloma                                   | 3.1<br>(1.7 to 4.0)                              | 1.9<br>(1.2 to 2.4)                            | 0.9<br>(0.5 to 1.3)                     | 39.3<br>(24.7 to 54.2)                            | 5.1<br>(-5.6 to 17.1)                               |
| Leukaemia                                          | 19.8<br>(16.0 to 23.3)                           | 6.1<br>(4.9 to 7.1)                            | 2.6<br>(1.8 to 3.6)                     | 14.5<br>(3.1 to 27.8)                             | -8.3<br>(-16.4 to 0.5)                              |
| Acute lymphoid leukaemia                           | 6.2<br>(5.0 to 7.7)                              | 1.7<br>(1.3 to 2.0)                            | 0.8<br>(0.5 to 1.1)                     | 11.9<br>(-8.0 to 35.7)                            | -6.7<br>(-20.9 to 10.1)                             |
| Chronic lymphoid leukaemia                         | 3.4<br>(2.5 to 4.2)                              | 0.8<br>(0.6 to 1.0)                            | 0.5<br>(0.3 to 0.6)                     | 32.8<br>(14.1 to 55.2)                            | 0.6<br>(-12.6 to 16.6)                              |
| Acute myeloid leukaemia                            | 2.8<br>(2.1 to 3.6)                              | 1.7<br>(1.2 to 2.1)                            | 0.5<br>(0.3 to 0.7)                     | 28.5<br>(11.3 to 48.1)                            | 3.1<br>(-8.4 to 15.9)                               |
| Chronic myeloid leukaemia                          | 2.5<br>(1.7 to 3.4)                              | 0.9<br>(0.6 to 1.2)                            | 0.3<br>(0.2 to 0.5)                     | 14.2<br>(-5.7 to 37.6)                            | -14.0<br>(-27.7 to 1.7)                             |
| Other leukaemia                                    | 4.9<br>(3.6 to 6.0)                              | 1.1<br>(0.8 to 1.3)                            | 0.6<br>(0.4 to 0.8)                     | -1.5<br>(-16.2 to 15.2)                           | -20.2<br>(-30.4 to -8.3)                            |
| Other neoplasms                                    | 26.9<br>(21.8 to 30.3)                           | 9.2<br>(7.9 to 10.5)                           | 2.8<br>(1.9 to 3.7)                     | 24.9<br>(10.3 to 39.7)                            | -1.8<br>(-12.5 to 11.2)                             |
| <b>Cardiovascular diseases</b>                     | <b>8,536.5</b><br><b>(8,260.1 to 8,841.1)</b>    | <b>1,097.5†</b><br><b>(1,055.5 to 1,143.5)</b> | <b>482.0</b><br><b>(352.3 to 626.6)</b> | <b>25.5</b><br><b>(21.1 to 29.8)</b>              | <b>-3.1</b><br><b>(-6.4 to -0.1)</b>                |
| Rheumatic heart disease                            | 2,078.2<br>(1,867.4 to 2,320.7)                  | 75.4<br>(67.8 to 84.1)                         | 99.6<br>(62.5 to 146.4)                 | 10.3<br>(0.4 to 21.2)                             | -13.2<br>(-20.4 to -5.4)                            |
| Ischaemic heart disease                            | 3,830.7<br>(3,648.8 to 4,025.6)                  | 588.2<br>(554.5 to 625.7)                      | 143.9<br>(100.1 to 196.0)               | 30.9<br>(24.9 to 36.7)                            | -0.9<br>(-4.9 to 3.0)                               |
| Cerebrovascular disease                            | 948.1<br>(889.3 to 1,014.0)                      | 165.0‡<br>(150.5 to 179.3)                     | 144.4<br>(104.3 to 184.5)               | 29.5<br>(20.8 to 39.6)                            | -1.9<br>(-8.6 to 5.7)                               |
| Ischaemic stroke                                   | 818.1<br>(741.1 to 915.4)                        | 112.8‡<br>(99.8 to 126.6)                      | 119.6<br>(84.9 to 153.8)                | 30.4<br>(19.9 to 42.1)                            | -1.5<br>(-9.3 to 7.1)                               |
| Hemorrhagic stroke                                 | 169.7<br>(152.0 to 189.3)                        | 52.1‡<br>(46.7 to 57.7)                        | 24.8<br>(17.8 to 32.2)                  | 25.7<br>(10.6 to 42.0)                            | -4.3<br>(-16.1 to 8.7)                              |
| Hypertensive heart disease                         | 286.9<br>(246.1 to 335.6)                        | --                                             | 22.9<br>(15.6 to 32.1)                  | 33.8<br>(21.1 to 46.6)                            | 1.0<br>(-8.2 to 9.9)                                |
| Cardiomyopathy and myocarditis                     | 45.5<br>(39.3 to 52.6)                           | 43.9†<br>(38.5 to 49.8)                        | 5.2<br>(3.3 to 7.9)                     | 28.5<br>(9.6 to 50.6)                             | 1.0<br>(-12.3 to 15.7)                              |
| Myocarditis                                        | 34.4<br>(29.7 to 39.6)                           | 43.9<br>(38.5 to 49.8)                         | 2.6<br>(1.7 to 3.9)                     | 25.4<br>(6.0 to 47.6)                             | 1.0<br>(-13.7 to 18.1)                              |
| Alcoholic cardiomyopathy                           | 1.6<br>(1.3 to 1.9)                              | --                                             | 0.1<br>(0.1 to 0.2)                     | 37.0<br>(25.2 to 49.6)                            | 0.4<br>(-7.4 to 9.3)                                |
| Other cardiomyopathy                               | 28.4<br>(23.4 to 34.1)                           | --                                             | 2.5<br>(1.5 to 3.7)                     | 31.6<br>(1.1 to 76.4)                             | 1.0<br>(-18.8 to 28.3)                              |
| Atrial fibrillation and flutter                    | 579.4<br>(507.0 to 664.4)                        | 50.8<br>(43.5 to 59.3)                         | 45.0<br>(30.3 to 63.3)                  | 30.5<br>(20.6 to 40.1)                            | -1.2<br>(-7.8 to 5.5)                               |
| Peripheral vascular disease                        | 1,549.7<br>(1,339.8 to 1,798.0)                  | 150.6<br>(129.3 to 176.8)                      | 8.3<br>(3.8 to 15.7)                    | 24.1<br>(14.4 to 34.0)                            | -4.8<br>(-11.9 to 2.6)                              |
| Endocarditis                                       | 8.3<br>(7.2 to 9.5)                              | 23.6<br>(20.9 to 26.5)                         | 0.7<br>(0.4 to 1.0)                     | 29.3<br>(16.7 to 42.9)                            | -0.5<br>(-13.8 to 15.0)                             |
| Other cardiovascular and circulatory diseases      | 232.3<br>(197.0 to 269.8)                        | --                                             | 12.1<br>(8.0 to 17.5)                   | 26.4<br>(11.0 to 44.4)                            | -1.6<br>(-12.0 to 9.4)                              |
| <b>Chronic respiratory diseases</b>                | <b>13,113.1</b><br><b>(12,674.2 to 13,604.3)</b> | <b>2,390.1†</b><br><b>(2,256.1 to 2,530.4)</b> | <b>826.5</b><br><b>(673.5 to 987.8)</b> | <b>39.5</b><br><b>(32.9 to 46.3)</b>              | <b>6.8</b><br><b>(1.7 to 12.4)</b>                  |
| Chronic obstructive pulmonary disease              | 5,044.5<br>(4,850.0 to 5,253.6)                  | 391.0<br>(374.8 to 407.6)                      | 442.6<br>(385.0 to 493.2)               | 31.4<br>(22.5 to 41.2)                            | -0.5<br>(-7.4 to 7.2)                               |
| Pneumoconiosis                                     | 5.2<br>(4.7 to 5.8)                              | 0.7<br>(0.7 to 0.8)                            | 0.8<br>(0.6 to 1.2)                     | 40.1<br>(32.1 to 49.1)                            | 5.2<br>(-0.8 to 12.0)                               |
| Silicosis                                          | 0.3<br>(0.3 to 0.4)                              | 0.1<br>(0.1 to 0.2)                            | 0.1<br>(< 0.05 to 0.1)                  | 37.2<br>(30.8 to 45.0)                            | 1.4<br>(-3.0 to 6.7)                                |



| Cause                                                          | Prevalence in thousands (95% UI)           | Incidence in thousands (95% UI)                      | YLDs in thousands (95% UI)              |                                                   |                                                     |
|----------------------------------------------------------------|--------------------------------------------|------------------------------------------------------|-----------------------------------------|---------------------------------------------------|-----------------------------------------------------|
|                                                                | 2016 counts                                | 2016 counts                                          | 2016 counts                             | Percentage change in counts between 2006 and 2016 | Percentage change in age-standardised rates between |
| Asbestosis                                                     | 1.3<br>(1.0 to 1.5)                        | 0.1<br>(0.1 to 0.1)                                  | 0.2<br>(0.1 to 0.3)                     | 33.5<br>(24.8 to 43.1)                            | 0.3<br>(-5.4 to 6.6)                                |
| Coal workers pneumoconiosis                                    | 0.6<br>(0.5 to 0.7)                        | 0.1<br>(0.1 to 0.1)                                  | 0.1<br>(0.1 to 0.1)                     | 42.8<br>(34.2 to 53.1)                            | 7.5<br>(1.8 to 14.2)                                |
| Other pneumoconiosis                                           | 3.1<br>(2.6 to 3.6)                        | 0.4<br>(0.3 to 0.4)                                  | 0.5<br>(0.3 to 0.7)                     | 42.8<br>(28.9 to 57.3)                            | 7.0<br>(-2.6 to 17.9)                               |
| Asthma                                                         | 8,914.9<br>(8,358.8 to 9,556.6)            | 1,994.5<br>(1,857.8 to 2,130.5)                      | 343.9<br>(227.9 to 486.6)               | 49.3<br>(42.3 to 56.6)                            | 19.7<br>(14.4 to 24.8)                              |
| Interstitial lung disease and pulmonary sarcoidosis            | 35.0<br>(31.3 to 38.7)                     | 3.9<br>(3.5 to 4.3)                                  | 3.9<br>(2.6 to 5.7)                     | 36.1<br>(28.2 to 45.1)                            | 5.7<br>(-2.4 to 14.9)                               |
| Other chronic respiratory diseases                             | --                                         | --                                                   | 35.2<br>(29.3 to 41.4)                  | 61.6<br>(37.7 to 91.8)                            | 34.0<br>(18.1 to 53.0)                              |
| <b>Cirrhosis and other chronic liver diseases</b>              | <b>545.7<br/>(517.7 to 573.6)</b>          | <b>40.9<br/>(39.0 to 42.9)</b>                       | <b>53.3<br/>(36.7 to 74.9)</b>          | <b>21.6<br/>(11.1 to 32.4)</b>                    | <b>-1.4<br/>(-8.8 to 6.5)</b>                       |
| Cirrhosis and other chronic liver diseases due to hepatitis B  | 133.2<br>(114.3 to 152.9)                  | 10.4<br>(9.1 to 11.9)                                | 11.2<br>(7.5 to 16.1)                   | 31.2<br>(10.7 to 54.9)                            | 0.1<br>(-13.7 to 16.1)                              |
| Cirrhosis and other chronic liver diseases due to hepatitis C  | 196.7<br>(174.8 to 219.6)                  | 14.9<br>(13.4 to 16.7)                               | 16.4<br>(10.7 to 22.7)                  | 34.6<br>(16.6 to 56.4)                            | 2.6<br>(-10.0 to 17.0)                              |
| Cirrhosis and other chronic liver diseases due to alcohol use  | 38.3<br>(30.9 to 46.8)                     | 3.4<br>(2.8 to 4.2)                                  | 3.3<br>(2.0 to 4.8)                     | 27.7<br>(0.5 to 61.0)                             | -4.3<br>(-23.8 to 18.9)                             |
| Cirrhosis and other chronic liver diseases due to other causes | 177.6<br>(161.5 to 194.6)                  | 12.2<br>(11.3 to 13.1)                               | 22.4<br>(15.0 to 32.4)                  | 9.1<br>(-5.8 to 25.5)                             | -6.1<br>(-18.4 to 7.2)                              |
| <b>Digestive diseases</b>                                      | <b>3,507.5<br/>(3,281.1 to 3,735.7)</b>    | <b>3,860.0<sup>†</sup><br/>(3,666.5 to 4,080.7)</b>  | <b>105.8<br/>(73.9 to 143.9)</b>        | <b>25.4<br/>(14.7 to 37.0)</b>                    | <b>-2.4<br/>(-10.1 to 5.9)</b>                      |
| Peptic ulcer disease                                           | 1,274.2<br>(1,161.2 to 1,395.1)            | 335.9<br>(302.7 to 372.1)                            | 22.0<br>(14.2 to 33.4)                  | 21.9<br>(3.9 to 40.9)                             | -6.0<br>(-19.9 to 9.0)                              |
| Gastritis and duodenitis                                       | 902.9<br>(799.9 to 1,005.6)                | 1,547.8<br>(1,388.1 to 1,738.0)                      | 19.3<br>(12.3 to 28.6)                  | 24.8<br>(7.8 to 44.1)                             | -3.7<br>(-16.5 to 11.0)                             |
| Appendicitis                                                   | 34.1<br>(31.6 to 36.8)                     | 900.9<br>(836.2 to 972.9)                            | 10.4<br>(6.8 to 14.8)                   | 17.2<br>(-12.4 to 55.3)                           | -2.8<br>(-24.9 to 24.9)                             |
| Paralytic ileus and intestinal obstruction                     | 4.2<br>(3.7 to 4.7)                        | 114.7<br>(102.2 to 128.4)                            | 1.4<br>(0.9 to 1.9)                     | 34.6<br>(30.4 to 39.6)                            | 6.9<br>(3.4 to 10.5)                                |
| Inguinal, femoral, and abdominal hernia                        | 1,206.4<br>(1,047.5 to 1,384.5)            | 376.1<br>(329.6 to 426.7)                            | 38.7<br>(26.0 to 54.8)                  | 28.2<br>(13.5 to 44.8)                            | -0.7<br>(-11.2 to 10.7)                             |
| Inflammatory bowel disease                                     | 13.8<br>(12.4 to 15.4)                     | 108.8<br>(98.4 to 121.0)                             | 2.1<br>(1.4 to 3.0)                     | 18.1<br>(11.4 to 24.8)                            | -10.8<br>(-17.6 to -4.5)                            |
| Vascular intestinal disorders                                  | 1.2<br>(1.0 to 1.4)                        | 7.2<br>(6.4 to 8.1)                                  | 0.4<br>(0.3 to 0.5)                     | 36.4<br>(30.5 to 42.6)                            | 7.6<br>(3.3 to 12.4)                                |
| Gallbladder and biliary diseases                               | 196.8<br>(173.3 to 219.8)                  | 430.2<br>(376.7 to 490.2)                            | 2.5<br>(1.6 to 3.6)                     | 34.7<br>(12.8 to 60.4)                            | 2.3<br>(-17.6 to 26.0)                              |
| Pancreatitis                                                   | 4.1<br>(3.7 to 4.6)                        | 38.6<br>(34.4 to 42.9)                               | 0.5<br>(0.4 to 0.8)                     | 36.7<br>(32.2 to 41.4)                            | 5.6<br>(2.0 to 8.9)                                 |
| Other digestive diseases                                       | --                                         | --                                                   | 8.6<br>(6.0 to 11.8)                    | 30.9<br>(19.4 to 42.9)                            | 2.6<br>(-5.3 to 11.2)                               |
| <b>Neurological disorders</b>                                  | <b>75,101.8<br/>(72,254.6 to 78,354.8)</b> | <b>36,458.2<br/>(31,213.2 to 42,321.5)</b>           | <b>1,842.7<br/>(1,233.7 to 2,582.8)</b> | <b>25.6<br/>(4.9 to 52.9)</b>                     | <b>-0.6<br/>(-15.0 to 17.7)</b>                     |
| Alzheimer's disease and other dementias                        | 346.4<br>(290.1 to 410.1)                  | 59.3<br>(49.7 to 71.6)                               | 48.7<br>(33.8 to 65.0)                  | 30.4<br>(23.3 to 37.9)                            | -2.1<br>(-6.7 to 3.1)                               |
| Parkinson's disease                                            | 56.2<br>(44.0 to 70.1)                     | 6.8<br>(5.3 to 8.6)                                  | 6.5<br>(4.1 to 9.3)                     | 44.4<br>(26.0 to 66.2)                            | 9.5<br>(-4.4 to 24.7)                               |
| Epilepsy                                                       | 690.6<br>(204.9 to 1,169.8)                | 79.6<br>(23.0 to 135.8)                              | 229.3<br>(63.6 to 469.5)                | 16.4<br>(-72.5 to 426.3)                          | -4.2<br>(-77.6 to 336.6)                            |
| Multiple sclerosis                                             | 29.8<br>(26.3 to 33.8)                     | 1.4<br>(1.3 to 1.6)                                  | 8.2<br>(5.5 to 11.2)                    | 47.5<br>(28.7 to 69.8)                            | 11.1<br>(-3.7 to 28.5)                              |
| Motor neuron disease                                           | 3.5<br>(3.0 to 4.0)                        | 0.6<br>(0.5 to 0.7)                                  | 0.7<br>(0.5 to 1.0)                     | 29.1<br>(23.4 to 34.3)                            | 3.4<br>(-0.2 to 6.8)                                |
| Migraine                                                       | 30,772.7<br>(29,418.1 to 32,056.0)         | 3,441.3<br>(3,249.2 to 3,635.9)                      | 1,299.0<br>(829.0 to 1,845.5)           | 26.3<br>(22.3 to 30.8)                            | -0.5<br>(-3.5 to 2.6)                               |
| Tension-type headache                                          | 56,439.8<br>(51,246.0 to 62,527.5)         | 32,867.8<br>(27,657.4 to 38,697.2)                   | 197.1<br>(122.2 to 293.0)               | 26.7<br>(20.8 to 33.3)                            | -0.5<br>(-4.7 to 4.1)                               |
| Other neurological disorders                                   | 0.6<br>(0.4 to 0.9)                        | 1.3<br>(0.8 to 1.8)                                  | 53.1<br>(16.6 to 105.2)                 | 38.2<br>(-62.4 to 437.6)                          | 14.1<br>(-65.4 to 307.3)                            |
| <b>Mental and substance use disorders</b>                      | <b>26,342.9<br/>(25,140.3 to 27,443.8)</b> | <b>9,523.5<sup>†</sup><br/>(8,852.1 to 10,242.4)</b> | <b>3,535.1<br/>(2,580.1 to 4,561.8)</b> | <b>28.8<br/>(24.5 to 32.8)</b>                    | <b>0.8<br/>(-2.1 to 3.7)</b>                        |
| Schizophrenia                                                  | 392.5<br>(342.2 to 444.0)                  | 25.1<br>(22.1 to 28.5)                               | 251.1<br>(184.1 to 316.4)               | 34.1<br>(23.5 to 46.0)                            | 0.3<br>(-7.1 to 8.4)                                |
| Alcohol use disorders                                          | 2,688.1<br>(2,312.4 to 3,081.7)            | 1,439.5<br>(1,224.1 to 1,665.9)                      | 269.8<br>(183.2 to 377.5)               | 37.0<br>(26.2 to 47.9)                            | 4.2<br>(-3.4 to 12.5)                               |
| Drug use disorders                                             | 1,497.5<br>(1,296.9 to 1,673.2)            | 189.7<br>(163.7 to 212.7)                            | 446.6<br>(292.5 to 609.6)               | 76.2<br>(36.5 to 117.9)                           | 31.9<br>(3.8 to 60.3)                               |
| Opioid use disorders                                           | 988.2<br>(717.6 to 1,145.8)                | 97.7<br>(76.0 to 115.7)                              | 415.6<br>(265.7 to 568.9)               | 80.5<br>(38.2 to 126.4)                           | 34.6<br>(4.5 to 65.8)                               |
| Cocaine use disorders                                          | 42.5<br>(36.2 to 50.2)                     | 5.0<br>(4.1 to 5.9)                                  | 6.0<br>(3.5 to 9.3)                     | 34.7<br>(0.7 to 80.4)                             | 4.4<br>(-18.8 to 34.4)                              |
| Amphetamine use disorders                                      | 7.5<br>(6.1 to 9.2)                        | 1.4<br>(1.1 to 1.9)                                  | 1.0<br>(0.6 to 1.6)                     | 19.9<br>(-2.1 to 49.8)                            | -7.8<br>(-23.9 to 13.3)                             |
| Cannabis use disorders                                         | 436.3<br>(361.7 to 525.3)                  | 73.2<br>(60.7 to 88.5)                               | 12.8<br>(7.9 to 19.6)                   | 32.6<br>(8.3 to 62.5)                             | 5.3<br>(-14.1 to 26.8)                              |
| Other drug use disorders                                       | 60.4<br>(52.8 to 68.3)                     | 12.5<br>(10.8 to 14.2)                               | 11.2<br>(7.3 to 15.5)                   | 36.1<br>(12.4 to 65.8)                            | 3.8<br>(-13.6 to 24.9)                              |
| Depressive disorders                                           | 5,498.7<br>(5,149.7 to 5,923.2)            | 5,803.3<br>(5,171.4 to 6,510.2)                      | 907.0<br>(625.7 to 1,229.0)             | 20.9<br>(14.2 to 28.3)                            | -6.4<br>(-11.2 to -1.2)                             |
| Major depressive disorder                                      | 3,451.8<br>(3,076.7 to 3,897.6)            | 5,427.3<br>(4,810.7 to 6,144.0)                      | 700.8<br>(479.9 to 960.0)               | 18.4<br>(10.1 to 27.1)                            | -8.2<br>(-14.3 to -1.7)                             |
| Dysthymia                                                      | 2,147.3<br>(1,850.2 to 2,470.2)            | 376.0<br>(329.8 to 434.9)                            | 206.2<br>(138.8 to 298.9)               | 30.3<br>(26.0 to 35.5)                            | 0.3<br>(-2.6 to 3.7)                                |
| Bipolar disorder                                               | 919.4<br>(789.1 to 1,071.6)                | 91.4<br>(79.0 to 106.9)                              | 188.4<br>(117.7 to 279.8)               | 27.5<br>(18.9 to 36.5)                            | 0.2<br>(-6.1 to 7.0)                                |
| Anxiety disorders                                              | 6,525.1<br>(5,913.8 to 7,224.5)            | 1,110.6<br>(1,016.9 to 1,217.1)                      | 629.8<br>(432.5 to 861.4)               | 25.5<br>(19.5 to 32.0)                            | 0.2<br>(-4.4 to 5.2)                                |
| Eating disorders                                               | 204.8<br>(167.8 to 245.8)                  | 139.3<br>(101.2 to 189.6)                            | 41.8<br>(26.2 to 62.0)                  | 34.8<br>(18.1 to 55.3)                            | 9.0<br>(-4.0 to 24.8)                               |
| Anorexia nervosa                                               | 51.5<br>(37.3 to 70.1)                     | 22.6<br>(16.6 to 30.1)                               | 11.0<br>(6.3 to 16.7)                   | 27.1<br>(-1.8 to 62.2)                            | 6.9<br>(-17.1 to 35.6)                              |
| Bulimia nervosa                                                | 146.2<br>(108.6 to 196.4)                  | 116.8<br>(79.4 to 165.7)                             | 30.8<br>(18.6 to 47.6)                  | 37.8<br>(17.0 to 62.8)                            | 9.7<br>(-6.4 to 30.2)                               |
| Autistic spectrum disorders                                    | 1,666.9<br>(1,499.5 to 1,900.7)            | 15.9<br>(10.8 to 22.2)                               | 233.5<br>(159.2 to 325.4)               | 22.2<br>(16.1 to 28.2)                            | -0.1<br>(-4.7 to 4.5)                               |
| Autism                                                         | 430.7<br>(368.6 to 503.6)                  | 1.8<br>(0.9 to 2.9)                                  | 109.8<br>(71.8 to 158.6)                | 22.2<br>(11.1 to 33.7)                            | 0.0<br>(-8.3 to 8.6)                                |
| Asperger syndrome and other autistic spectrum disorders        | 1,234.3<br>(1,022.1 to 1,485.5)            | 14.1<br>(9.0 to 20.3)                                | 123.6<br>(81.0 to 180.6)                | 22.2<br>(16.2 to 28.0)                            | -0.2<br>(-4.7 to 4.4)                               |

| Cause                                                      | Prevalence in thousands (95% UI)                    | Incidence in thousands (95% UI)                      | YLDs in thousands (95% UI)                    |                                                   |                                                     |
|------------------------------------------------------------|-----------------------------------------------------|------------------------------------------------------|-----------------------------------------------|---------------------------------------------------|-----------------------------------------------------|
|                                                            | 2016 counts                                         | 2016 counts                                          | 2016 counts                                   | Percentage change in counts between 2006 and 2016 | Percentage change in age-standardised rates between |
| Attention-deficit/hyperactivity disorder                   | 776.4<br>(646.8 to 922.8)                           | 44.6<br>(36.0 to 55.1)                               | 9.3<br>(5.3 to 14.9)                          | 16.9<br>(4.0 to 31.8)                             | 0.1<br>(-11.1 to 12.6)                              |
| Conduct disorder                                           | 1,513.6<br>(1,237.1 to 1,814.5)                     | 530.7<br>(413.7 to 644.9)                            | 183.5<br>(112.7 to 281.1)                     | 8.6<br>(2.0 to 16.4)                              | 0.5<br>(-5.7 to 7.8)                                |
| Idiopathic developmental intellectual disability           | 3,797.4<br>(2,361.4 to 5,279.2)                     | --                                                   | 146.1<br>(70.2 to 252.2)                      | 7.9<br>(-0.6 to 15.6)                             | -11.8<br>(-18.6 to -5.7)                            |
| Other mental and substance use disorders                   | 3,063.7<br>(2,684.0 to 3,548.0)                     | 133.3<br>(117.7 to 153.1)                            | 228.2<br>(156.7 to 327.4)                     | 32.0<br>(24.5 to 39.9)                            | 0.0<br>(-5.0 to 5.2)                                |
| <b>Diabetes, urogenital, blood, and endocrine diseases</b> | <b>64,265.2</b><br><b>(62,646.6 to 65,878.8)</b>    | <b>18,406.2†</b><br><b>(17,293.1 to 19,699.5)</b>    | <b>1,546.4</b><br><b>(1,076.0 to 2,137.3)</b> | <b>36.4</b><br><b>(29.9 to 43.5)</b>              | <b>6.3</b><br><b>(1.4 to 11.4)</b>                  |
| Diabetes mellitus                                          | 11,828.4<br>(10,598.7 to 13,097.0)                  | 734.4<br>(656.0 to 818.0)                            | 789.6<br>(530.1 to 1,099.1)                   | 56.8<br>(46.6 to 69.3)                            | 18.0<br>(10.4 to 27.3)                              |
| Acute glomerulonephritis                                   | 1.8<br>(1.5 to 2.1)                                 | 26.6<br>(23.2 to 30.4)                               | 0.1<br>(0.1 to 0.1)                           | 23.7<br>(17.4 to 30.8)                            | -0.9<br>(-5.1 to 4.4)                               |
| Chronic kidney disease                                     | 4,599.7<br>(4,199.3 to 5,059.2)                     | 331.9<br>(299.4 to 364.9)                            | 148.5<br>(110.9 to 193.5)                     | 24.3<br>(14.1 to 37.1)                            | -6.2<br>(-14.0 to 2.7)                              |
| Chronic kidney disease due to diabetes mellitus            | 1,701.0<br>(1,458.2 to 1,973.9)                     | 118.6<br>(99.7 to 141.0)                             | 50.3<br>(36.1 to 67.0)                        | 25.9<br>(11.1 to 43.0)                            | -5.7<br>(-16.6 to 6.8)                              |
| Chronic kidney disease due to hypertension                 | 836.8<br>(723.4 to 955.1)                           | 52.9<br>(43.8 to 62.6)                               | 31.0<br>(22.0 to 40.9)                        | 23.0<br>(6.5 to 42.3)                             | -7.3<br>(-19.3 to 7.0)                              |
| Chronic kidney disease due to glomerulonephritis           | 852.5<br>(727.2 to 979.8)                           | 67.3<br>(55.8 to 79.5)                               | 26.4<br>(18.1 to 36.4)                        | 24.6<br>(8.0 to 44.0)                             | -4.9<br>(-15.8 to 7.0)                              |
| Chronic kidney disease due to other causes                 | 1,209.5<br>(1,030.4 to 1,405.6)                     | 93.1<br>(79.8 to 107.5)                              | 40.7<br>(29.3 to 55.2)                        | 23.1<br>(9.2 to 39.0)                             | -6.7<br>(-16.0 to 3.8)                              |
| Urinary diseases and male infertility                      | 2,549.4<br>(2,317.2 to 2,799.0)                     | 10,674.6†<br>(9,610.3 to 11,871.7)                   | 66.3<br>(43.1 to 95.4)                        | 29.5<br>(20.6 to 39.0)                            | -2.9<br>(-9.5 to 4.1)                               |
| Interstitial nephritis and urinary tract infections        | 174.4<br>(154.4 to 196.9)                           | 9,068.6<br>(8,028.6 to 10,222.9)                     | 5.8<br>(3.5 to 9.1)                           | 27.5<br>(9.7 to 48.5)                             | 2.0<br>(-10.6 to 17.9)                              |
| Urolithiasis                                               | 53.8<br>(47.7 to 61.4)                              | 1,428.5<br>(1,261.1 to 1,630.7)                      | 4.0<br>(2.6 to 5.7)                           | 36.5<br>(18.0 to 58.6)                            | 4.8<br>(-11.0 to 24.4)                              |
| Benign prostatic hyperplasia                               | 1,459.6<br>(1,225.1 to 1,722.0)                     | 177.6<br>(148.0 to 207.2)                            | 47.6<br>(29.5 to 69.3)                        | 29.9<br>(18.6 to 42.4)                            | -3.6<br>(-11.0 to 4.4)                              |
| Male infertility                                           | 802.6<br>(708.4 to 905.7)                           | --                                                   | 5.3<br>(2.2 to 10.8)                          | 41.7<br>(27.3 to 57.5)                            | 10.1<br>(-0.4 to 21.7)                              |
| Other urinary diseases                                     | --                                                  | --                                                   | 3.7<br>(2.4 to 5.3)                           | 7.7<br>(-3.7 to 19.9)                             | -14.4<br>(-23.0 to -4.2)                            |
| Gynecological diseases                                     | 22,635.5<br>(21,661.4 to 23,718.2)                  | 6,364.2†<br>(5,958.1 to 6,796.3)                     | 224.7<br>(149.6 to 327.7)                     | 23.2<br>(16.3 to 29.5)                            | -6.0<br>(-10.8 to -1.3)                             |
| Uterine fibroids                                           | 1,602.7<br>(1,410.5 to 1,807.0)                     | 191.7<br>(165.5 to 220.8)                            | 36.1<br>(21.4 to 56.3)                        | 25.5<br>(11.0 to 39.4)                            | -7.7<br>(-19.0 to 3.3)                              |
| Polycystic ovarian syndrome                                | 197.1<br>(148.3 to 255.1)                           | 228.3<br>(159.4 to 307.0)                            | 1.8<br>(0.8 to 3.4)                           | 31.4<br>(15.6 to 49.2)                            | 0.3<br>(-11.7 to 13.4)                              |
| Female infertility                                         | 1,323.0<br>(1,091.1 to 1,587.2)                     | --                                                   | 8.5<br>(3.6 to 17.1)                          | 44.0<br>(24.5 to 66.9)                            | 12.2<br>(-3.5 to 30.1)                              |
| Endometriosis                                              | 58.1<br>(48.4 to 69.1)                              | 151.4<br>(122.6 to 188.2)                            | 5.5<br>(3.3 to 8.2)                           | 29.4<br>(-3.3 to 71.9)                            | 0.5<br>(-25.4 to 32.6)                              |
| Genital prolapse                                           | 9,963.7<br>(8,777.8 to 11,180.3)                    | 842.5<br>(709.6 to 997.2)                            | 30.9<br>(14.8 to 56.2)                        | 18.2<br>(10.4 to 26.9)                            | -11.3<br>(-17.2 to -4.1)                            |
| Premenstrual syndrome                                      | 11,143.9<br>(10,228.2 to 12,035.5)                  | 4,150.2<br>(3,804.5 to 4,515.8)                      | 92.9<br>(57.6 to 144.1)                       | 22.5<br>(12.9 to 32.7)                            | -4.0<br>(-11.5 to 3.9)                              |
| Other gynecological diseases                               | 1,527.1<br>(1,337.4 to 1,742.9)                     | 800.1<br>(646.2 to 976.9)                            | 49.0<br>(32.7 to 69.9)                        | 22.0<br>(6.5 to 38.7)                             | -6.0<br>(-17.6 to 5.3)                              |
| Hemoglobinopathies and hemolytic anaemias                  | 34,027.6<br>(32,382.8 to 35,961.9)                  | --                                                   | 219.1<br>(139.1 to 323.1)                     | 14.2<br>(-1.4 to 32.7)                            | -6.5<br>(-18.1 to 8.2)                              |
| Thalassemias                                               | 12.6<br>(11.2 to 14.1)                              | --                                                   | 1.0<br>(0.6 to 1.5)                           | 30.1<br>(2.9 to 66.6)                             | 8.9<br>(-13.9 to 39.9)                              |
| Thalassaemia trait                                         | 11,122.8<br>(10,369.6 to 11,899.4)                  | --                                                   | 153.8<br>(97.8 to 226.6)                      | 18.1<br>(0.9 to 38.6)                             | -3.9<br>(-16.0 to 11.3)                             |
| Sickle cell disorders                                      | 0.6<br>(0.5 to 0.7)                                 | --                                                   | 0.1<br>(0.1 to 0.1)                           | 23.2<br>(10.2 to 38.9)                            | 5.7<br>(-4.9 to 18.7)                               |
| Sickle cell trait                                          | 1,758.1<br>(1,693.5 to 1,829.6)                     | --                                                   | 5.4<br>(3.3 to 8.4)                           | 26.4<br>(0.4 to 56.8)                             | 2.6<br>(-17.7 to 25.4)                              |
| G6PD deficiency                                            | 3,697.3<br>(3,352.4 to 4,141.0)                     | --                                                   | 0.5<br>(0.3 to 0.7)                           | 21.6<br>(1.6 to 46.1)                             | -2.2<br>(-17.4 to 16.1)                             |
| G6PD trait                                                 | 16,953.8<br>(15,562.6 to 18,459.8)                  | --                                                   | < 0.05<br>(< 0.05 to < 0.05)                  | 24.1<br>(-2.4 to 57.7)                            | -0.8<br>(-19.8 to 24.7)                             |
| Other hemoglobinopathies and hemolytic anaemias            | 2,585.4<br>(2,292.1 to 2,935.2)                     | --                                                   | 58.4<br>(36.1 to 86.5)                        | 3.8<br>(-13.0 to 24.0)                            | -13.3<br>(-25.7 to 0.7)                             |
| Endocrine, metabolic, blood, and immune disorders          | 3,335.4<br>(3,055.9 to 3,634.5)                     | 274.4<br>(247.5 to 305.4)                            | 98.1<br>(64.6 to 138.7)                       | 15.2<br>(3.1 to 27.8)                             | -4.2<br>(-11.4 to 3.2)                              |
| <b>Musculoskeletal disorders</b>                           | <b>23,536.5</b><br><b>(22,378.0 to 24,859.0)</b>    | <b>13,732.5</b><br><b>(12,229.0 to 15,419.4)</b>     | <b>2,541.6</b><br><b>(1,843.2 to 3,304.2)</b> | <b>30.4</b><br><b>(26.4 to 34.4)</b>              | <b>-0.6</b><br><b>(-3.2 to 2.1)</b>                 |
| Rheumatoid arthritis                                       | 427.4<br>(379.7 to 480.2)                           | 27.4<br>(24.6 to 30.7)                               | 100.2<br>(68.4 to 134.0)                      | 35.1<br>(19.4 to 51.2)                            | 2.4<br>(-8.7 to 13.7)                               |
| Osteoarthritis                                             | 4,198.2<br>(3,922.6 to 4,485.8)                     | 228.6<br>(212.2 to 246.5)                            | 256.8<br>(180.3 to 348.2)                     | 41.9<br>(36.8 to 47.5)                            | 6.2<br>(2.6 to 10.2)                                |
| Low back and neck pain                                     | 12,415.2<br>(11,507.3 to 13,423.8)                  | 5,518.9<br>(4,918.0 to 6,164.9)                      | 1,413.2<br>(992.6 to 1,868.5)                 | 31.4<br>(26.5 to 36.9)                            | -0.5<br>(-3.9 to 3.3)                               |
| Low back pain                                              | 9,278.8<br>(8,159.7 to 10,490.8)                    | 4,586.7<br>(4,011.2 to 5,230.0)                      | 1,044.2<br>(731.8 to 1,385.0)                 | 30.7<br>(24.3 to 37.7)                            | -0.7<br>(-5.2 to 4.3)                               |
| Neck pain                                                  | 3,707.4<br>(3,200.7 to 4,282.6)                     | 932.2<br>(803.4 to 1,093.9)                          | 369.0<br>(247.5 to 521.2)                     | 33.5<br>(29.5 to 37.5)                            | 0.2<br>(-2.3 to 2.8)                                |
| Gout                                                       | 479.1<br>(424.9 to 539.6)                           | 99.4<br>(86.9 to 112.4)                              | 15.2<br>(10.1 to 21.3)                        | 33.2<br>(14.0 to 56.0)                            | -0.3<br>(-13.7 to 15.0)                             |
| Other musculoskeletal disorders                            | 8,855.8<br>(7,554.7 to 10,348.8)                    | 7,858.1<br>(6,506.4 to 9,473.8)                      | 756.2<br>(523.2 to 1,055.0)                   | 24.6<br>(16.1 to 33.5)                            | -4.3<br>(-10.1 to 2.2)                              |
| <b>Other non-communicable diseases</b>                     | <b>124,174.5</b><br><b>(121,805.2 to 126,632.1)</b> | <b>300,179.0†</b><br><b>(280,065.7 to 324,968.6)</b> | <b>3,482.1</b><br><b>(2,371.5 to 4,913.3)</b> | <b>20.6</b><br><b>(18.6 to 22.4)</b>              | <b>-4.1</b><br><b>(-5.7 to -2.8)</b>                |
| Congenital anomalies                                       | 2,551.1<br>(1,965.5 to 3,352.5)                     | --                                                   | 317.5<br>(217.5 to 449.3)                     | 17.6<br>(9.4 to 26.2)                             | -4.1<br>(-10.7 to 2.9)                              |
| Neural tube defects                                        | 285.6<br>(252.9 to 321.9)                           | --                                                   | 84.8<br>(59.6 to 115.3)                       | 23.3<br>(9.5 to 38.0)                             | 0.3<br>(-10.7 to 11.8)                              |
| Congenital heart anomalies                                 | 176.8<br>(152.7 to 203.1)                           | --                                                   | 8.4<br>(3.7 to 14.2)                          | 24.3<br>(6.8 to 44.9)                             | 4.4<br>(-9.5 to 20.7)                               |
| Orofacial clefts                                           | 45.2<br>(38.9 to 51.7)                              | --                                                   | 0.8<br>(0.5 to 1.2)                           | 18.3<br>(4.4 to 33.0)                             | -3.7<br>(-15.1 to 8.2)                              |
| Down's syndrome                                            | 30.4<br>(25.3 to 36.1)                              | --                                                   | 2.6<br>(1.8 to 3.8)                           | 20.3<br>(11.0 to 30.4)                            | -0.3<br>(-8.1 to 7.9)                               |
| Turner syndrome                                            | 98.0<br>(83.0 to 114.5)                             | --                                                   | 1.7<br>(0.8 to 2.8)                           | 16.8<br>(-15.4 to 63.1)                           | -2.8<br>(-29.4 to 33.9)                             |
| Klinefelter syndrome                                       | 95.8<br>(80.6 to 113.2)                             | --                                                   | 0.5<br>(0.2 to 0.9)                           | 23.8<br>(-6.7 to 67.0)                            | -1.0<br>(-25.0 to 31.4)                             |



| Cause                                         | Prevalence in thousands (95% UI)                 | Incidence in thousands (95% UI)                   | YLDs in thousands (95% UI)                  |                                                   |                                                     |
|-----------------------------------------------|--------------------------------------------------|---------------------------------------------------|---------------------------------------------|---------------------------------------------------|-----------------------------------------------------|
|                                               | 2016 counts                                      | 2016 counts                                       | 2016 counts                                 | Percentage change in counts between 2006 and 2016 | Percentage change in age-standardised rates between |
| Other chromosomal abnormalities               | 42.7<br>(36.1 to 50.4)                           | --                                                | 9.5<br>(6.1 to 14.2)                        | 17.5<br>(-8.9 to 51.7)                            | -1.2<br>(-23.5 to 28.5)                             |
| Congenital musculoskeletal and limb anomalies | 184.2<br>(165.0 to 205.7)                        | --                                                | 27.7<br>(18.6 to 38.7)                      | 24.3<br>(11.1 to 38.9)                            | 1.6<br>(-8.2 to 12.1)                               |
| Urogenital congenital anomalies               | 166.7<br>(146.9 to 188.3)                        | --                                                | 4.4<br>(2.5 to 7.0)                         | 15.8<br>(8.0 to 24.7)                             | -0.8<br>(-7.5 to 6.3)                               |
| Digestive congenital anomalies                | 159.2<br>(139.3 to 180.0)                        | --                                                | 6.9<br>(4.3 to 9.9)                         | 27.5<br>(6.2 to 53.7)                             | 4.0<br>(-12.2 to 24.0)                              |
| Other congenital anomalies                    | 1,647.3<br>(947.1 to 2,681.5)                    | --                                                | 170.2<br>(100.3 to 273.1)                   | 13.3<br>(3.0 to 25.3)                             | -7.8<br>(-16.0 to 1.8)                              |
| Skin and subcutaneous diseases                | 55,582.1<br>(53,756.8 to 57,535.1)               | 115,480.1<br>(107,946.7 to 124,086.2)             | 1,441.8<br>(955.0 to 2,078.0)               | 19.8<br>(17.1 to 22.6)                            | 0.6<br>(-1.4 to 2.8)                                |
| Dermatitis                                    | 8,933.2<br>(8,326.4 to 9,588.0)                  | 9,923.1<br>(9,181.8 to 10,682.6)                  | 347.0<br>(201.5 to 571.6)                   | 21.4<br>(15.1 to 27.8)                            | 1.4<br>(-3.2 to 6.3)                                |
| Psoriasis                                     | 1,243.2<br>(1,172.6 to 1,326.3)                  | 186.7<br>(175.9 to 199.2)                         | 108.5<br>(76.5 to 143.6)                    | 35.7<br>(23.7 to 49.5)                            | 7.7<br>(-0.9 to 17.0)                               |
| Cellulitis                                    | 57.8<br>(53.4 to 62.4)                           | 966.6<br>(902.4 to 1,040.8)                       | 3.4<br>(2.2 to 4.9)                         | 24.7<br>(14.2 to 36.1)                            | 1.7<br>(-9.4 to 13.6)                               |
| Pyoderma                                      | 440.5<br>(426.2 to 453.8)                        | 9,042.7<br>(8,762.3 to 9,331.5)                   | 2.5<br>(1.0 to 5.2)                         | 29.3<br>(19.8 to 38.7)                            | 3.2<br>(-3.4 to 9.8)                                |
| Scabies                                       | 3,987.0<br>(3,452.1 to 4,627.7)                  | 12,223.2<br>(10,443.9 to 14,136.9)                | 103.0<br>(57.4 to 164.4)                    | 18.6<br>(13.0 to 24.7)                            | -1.7<br>(-5.5 to 2.7)                               |
| Fungal skin diseases                          | 14,307.8<br>(12,199.6 to 16,860.6)               | 48,063.1<br>(41,091.0 to 55,862.7)                | 80.4<br>(32.4 to 170.8)                     | 23.7<br>(21.1 to 26.2)                            | 0.1<br>(-1.0 to 1.1)                                |
| Viral skin diseases                           | 5,223.5<br>(4,669.1 to 5,835.3)                  | 7,254.9<br>(6,390.6 to 8,153.1)                   | 160.1<br>(100.5 to 235.6)                   | 19.6<br>(15.3 to 23.9)                            | 0.3<br>(-3.0 to 3.5)                                |
| Acne vulgaris                                 | 16,708.0<br>(14,465.3 to 19,228.6)               | 11,460.6<br>(8,941.8 to 15,059.8)                 | 430.6<br>(279.5 to 622.1)                   | 12.4<br>(5.8 to 19.1)                             | -1.8<br>(-7.2 to 3.9)                               |
| Alopecia areata                               | 321.4<br>(308.2 to 335.7)                        | 572.0<br>(548.8 to 597.4)                         | 10.6<br>(6.6 to 15.7)                       | 28.5<br>(14.2 to 44.5)                            | -0.1<br>(-10.3 to 11.5)                             |
| Pruritus                                      | 1,507.0<br>(1,322.7 to 1,703.0)                  | 1,210.8<br>(1,079.0 to 1,360.1)                   | 16.1<br>(7.5 to 29.6)                       | 26.5<br>(19.3 to 33.8)                            | -0.1<br>(-4.8 to 4.8)                               |
| Urticaria                                     | 2,047.1<br>(1,762.0 to 2,378.4)                  | 3,660.8<br>(3,158.1 to 4,263.5)                   | 123.5<br>(78.5 to 181.7)                    | 22.1<br>(15.1 to 29.6)                            | 0.2<br>(-4.8 to 5.8)                                |
| Decubitus ulcer                               | 20.2<br>(18.0 to 22.4)                           | 72.5<br>(64.7 to 80.8)                            | 3.4<br>(2.3 to 4.6)                         | 32.9<br>(21.9 to 44.5)                            | 5.6<br>(-7.3 to 19.4)                               |
| Other skin and subcutaneous diseases          | 9,617.9<br>(9,338.0 to 9,907.9)                  | 10,843.2<br>(10,501.8 to 11,190.9)                | 52.8<br>(25.2 to 97.3)                      | 31.3<br>(27.7 to 34.8)                            | 3.2<br>(0.7 to 5.7)                                 |
| Sense organ diseases                          | 38,081.7<br>(36,567.8 to 39,820.3)               | 17,138.3†<br>(15,918.0 to 18,382.7)               | 1,364.2<br>(947.2 to 1,899.0)               | 19.6<br>(16.3 to 22.9)                            | -7.9<br>(-10.3 to -5.6)                             |
| Glaucoma                                      | 60.7<br>(49.1 to 73.7)                           | --                                                | 5.2<br>(3.4 to 7.4)                         | 26.5<br>(8.8 to 48.4)                             | -3.0<br>(-16.0 to 12.2)                             |
| Cataract                                      | 2,235.7<br>(1,978.6 to 2,506.7)                  | --                                                | 169.7<br>(119.9 to 232.0)                   | 9.1<br>(-0.5 to 19.4)                             | -16.4<br>(-23.6 to -8.8)                            |
| Macular degeneration                          | 54.0<br>(43.0 to 66.9)                           | --                                                | 4.1<br>(2.7 to 5.8)                         | 25.8<br>(5.4 to 52.0)                             | -3.5<br>(-18.7 to 15.0)                             |
| Refraction and accommodation disorders        | 13,012.4<br>(12,317.5 to 13,679.9)               | --                                                | 267.0<br>(168.2 to 411.1)                   | 9.8<br>(3.4 to 16.1)                              | -16.1<br>(-21.4 to -10.8)                           |
| Age-related and other hearing loss            | 28,901.5<br>(26,425.4 to 31,437.2)               | --                                                | 761.7<br>(519.4 to 1,100.0)                 | 23.9<br>(18.9 to 28.3)                            | -3.7<br>(-6.3 to -1.1)                              |
| Other vision loss                             | 406.1<br>(359.2 to 456.3)                        | --                                                | 33.9<br>(23.3 to 45.9)                      | 29.9<br>(18.1 to 43.9)                            | -1.1<br>(-9.5 to 8.5)                               |
| Other sense organ diseases                    | 4,003.6<br>(3,696.5 to 4,306.2)                  | 17,138.3<br>(15,918.0 to 18,382.7)                | 122.6<br>(76.6 to 184.3)                    | 30.8<br>(24.9 to 36.8)                            | 1.4<br>(-2.6 to 5.3)                                |
| Oral disorders                                | 78,664.1<br>(74,811.5 to 82,587.3)               | 167,560.6†<br>(148,603.2 to 190,678.3)            | 358.5<br>(206.5 to 581.0)                   | 31.5<br>(29.0 to 33.8)                            | 0.5<br>(-1.3 to 2.1)                                |
| Caries of deciduous teeth                     | 11,804.2<br>(10,074.2 to 14,203.7)               | 45,171.4<br>(31,782.0 to 64,556.8)                | 2.8<br>(1.2 to 5.2)                         | 32.4<br>(12.6 to 56.3)                            | 9.6<br>(-6.9 to 29.0)                               |
| Caries of permanent teeth                     | 49,330.8<br>(44,782.6 to 54,038.0)               | 119,660.1<br>(108,328.1 to 133,170.5)             | 29.0<br>(12.8 to 54.8)                      | 28.9<br>(23.3 to 35.4)                            | 5.6<br>(1.6 to 9.9)                                 |
| Periodontal disease                           | 19,449.4<br>(16,641.9 to 22,840.8)               | 2,423.5<br>(2,012.9 to 2,884.3)                   | 127.0<br>(50.8 to 260.1)                    | 34.4<br>(30.6 to 38.3)                            | 0.1<br>(-2.7 to 2.9)                                |
| Edentulism and severe tooth loss              | 3,921.0<br>(3,419.7 to 4,432.4)                  | 305.6<br>(261.2 to 350.8)                         | 108.0<br>(71.2 to 152.8)                    | 33.2<br>(27.8 to 38.2)                            | 0.2<br>(-3.6 to 3.7)                                |
| Other oral disorders                          | 3,129.0<br>(2,980.9 to 3,280.3)                  | --                                                | 91.8<br>(56.4 to 137.7)                     | 26.7<br>(22.2 to 31.7)                            | 0.1<br>(-2.9 to 3.6)                                |
| <b>Injuries</b>                               | <b>31,066.1</b><br><b>(29,304.7 to 32,959.7)</b> | <b>17,587.2†</b><br><b>(16,639.0 to 18,555.5)</b> | <b>1,357.4</b><br><b>(922.5 to 1,918.7)</b> | <b>37.6</b><br><b>(34.9 to 40.6)</b>              | <b>6.9</b><br><b>(4.9 to 9.1)</b>                   |
| <b>Transport injuries</b>                     | <b>5,153.6</b><br><b>(4,750.3 to 5,565.1)</b>    | <b>2,098.2</b><br><b>(1,872.0 to 2,336.5)</b>     | <b>309.8</b><br><b>(208.9 to 444.2)</b>     | <b>44.3</b><br><b>(41.2 to 47.3)</b>              | <b>10.6</b><br><b>(8.5 to 12.6)</b>                 |
| Road injuries                                 | 3,915.6<br>(3,635.0 to 4,232.4)                  | 1,743.0<br>(1,529.6 to 1,980.4)                   | 231.2<br>(156.0 to 331.0)                   | 49.9<br>(46.9 to 53.0)                            | 13.9<br>(11.8 to 16.0)                              |
| Pedestrian road injuries                      | 1,033.3<br>(893.8 to 1,187.3)                    | 369.6<br>(308.2 to 441.9)                         | 63.1<br>(42.6 to 90.0)                      | 50.0<br>(46.9 to 53.1)                            | 14.7<br>(12.5 to 16.7)                              |
| Cyclist road injuries                         | 732.5<br>(609.2 to 872.4)                        | 400.5<br>(321.0 to 489.6)                         | 40.8<br>(27.1 to 58.2)                      | 55.8<br>(52.1 to 59.5)                            | 19.7<br>(17.4 to 22.1)                              |
| Motorcyclist road injuries                    | 1,254.7<br>(1,070.5 to 1,542.8)                  | 431.5<br>(354.4 to 526.2)                         | 71.5<br>(48.3 to 101.9)                     | 47.0<br>(43.6 to 50.2)                            | 10.7<br>(8.4 to 12.7)                               |
| Motor vehicle road injuries                   | 640.7<br>(545.2 to 736.4)                        | 380.6<br>(310.4 to 453.1)                         | 41.8<br>(28.0 to 59.9)                      | 49.7<br>(46.2 to 52.9)                            | 13.5<br>(11.2 to 15.5)                              |
| Other road injuries                           | 254.4<br>(220.4 to 297.0)                        | 160.8<br>(123.9 to 204.9)                         | 14.1<br>(9.3 to 20.4)                       | 49.4<br>(46.5 to 52.2)                            | 14.0<br>(12.1 to 16.0)                              |
| Other transport injuries                      | 1,238.0<br>(1,037.8 to 1,467.3)                  | 355.1<br>(303.8 to 418.4)                         | 78.6<br>(53.2 to 111.7)                     | 30.0<br>(26.6 to 33.3)                            | 1.5<br>(-0.8 to 3.7)                                |
| <b>Unintentional injuries</b>                 | <b>24,040.8</b><br><b>(22,423.8 to 25,748.5)</b> | <b>14,860.2</b><br><b>(13,954.6 to 15,786.9)</b>  | <b>925.2</b><br><b>(632.1 to 1,291.4)</b>   | <b>35.6</b><br><b>(33.1 to 38.0)</b>              | <b>5.5</b><br><b>(3.8 to 7.1)</b>                   |
| Falls                                         | 8,370.5<br>(7,286.4 to 9,394.8)                  | 4,509.4<br>(3,963.2 to 5,197.3)                   | 377.4<br>(266.1 to 517.9)                   | 41.0<br>(38.5 to 43.5)                            | 8.3<br>(6.3 to 9.9)                                 |
| Drowning                                      | 72.5<br>(61.2 to 84.6)                           | 16.6<br>(13.9 to 19.5)                            | 4.5<br>(3.0 to 6.5)                         | 23.1<br>(19.6 to 27.1)                            | -2.8<br>(-5.3 to -0.4)                              |
| Fire, heat, and hot substances                | 2,058.4<br>(1,742.1 to 2,489.3)                  | 302.8<br>(239.9 to 365.2)                         | 62.5<br>(43.2 to 87.1)                      | 43.8<br>(36.6 to 51.4)                            | 13.7<br>(8.8 to 18.9)                               |
| Poisonings                                    | 62.2<br>(51.1 to 74.4)                           | 102.9<br>(79.8 to 129.9)                          | 6.2<br>(3.9 to 9.2)                         | 33.8<br>(25.1 to 42.5)                            | 7.3<br>(1.3 to 13.3)                                |
| Exposure to mechanical forces                 | 2,447.6<br>(2,087.0 to 3,000.6)                  | 1,152.4<br>(971.3 to 1,348.7)                     | 68.9<br>(45.6 to 100.7)                     | 30.6<br>(27.7 to 33.7)                            | 1.1<br>(-1.1 to 3.1)                                |
| Unintentional firearm injuries                | 58.8<br>(49.5 to 71.0)                           | 17.8<br>(11.9 to 25.3)                            | 2.9<br>(1.9 to 4.2)                         | 32.3<br>(29.0 to 35.8)                            | 2.5<br>(0.2 to 4.6)                                 |
| Unintentional suffocation                     | 119.1<br>(88.4 to 155.6)                         | 29.4<br>(19.8 to 41.6)                            | 4.6<br>(2.8 to 7.1)                         | 23.5<br>(19.8 to 27.4)                            | -1.1<br>(-3.5 to 1.4)                               |
| Other exposure to mechanical forces           | 2,269.8<br>(1,915.2 to 2,808.0)                  | 1,105.2<br>(930.3 to 1,291.9)                     | 61.5<br>(40.9 to 89.0)                      | 31.1<br>(27.9 to 34.2)                            | 1.2<br>(-1.1 to 3.3)                                |

| Cause                                                                               | Prevalence in thousands (95% UI)              | Incidence in thousands (95% UI)          | YLDs in thousands (95% UI)            |                                                   |                                                     |
|-------------------------------------------------------------------------------------|-----------------------------------------------|------------------------------------------|---------------------------------------|---------------------------------------------------|-----------------------------------------------------|
|                                                                                     | 2016 counts                                   | 2016 counts                              | 2016 counts                           | Percentage change in counts between 2006 and 2016 | Percentage change in age-standardised rates between |
| Adverse effects of medical treatment                                                | 96.0<br>(75.8 to 119.7)                       | 1,256.3<br>(1,098.7 to 1,439.1)          | 12.8<br>(7.9 to 19.1)                 | 15.7<br>(9.9 to 22.2)                             | -10.0<br>(-13.7 to -5.5)                            |
| Animal contact                                                                      | 2,496.2<br>(2,196.4 to 2,905.4)               | 3,610.0<br>(3,039.8 to 4,195.6)          | 91.4<br>(62.2 to 126.4)               | 37.3<br>(31.5 to 43.1)                            | 7.8<br>(3.7 to 11.7)                                |
| Venomous animal contact                                                             | 1,474.6<br>(1,221.2 to 1,782.4)               | 1,946.6<br>(1,566.9 to 2,399.0)          | 72.9<br>(49.8 to 101.5)               | 39.0<br>(31.9 to 46.1)                            | 9.7<br>(4.9 to 14.7)                                |
| Non-venomous animal contact                                                         | 1,021.6<br>(850.0 to 1,234.7)                 | 1,663.4<br>(1,328.1 to 2,015.0)          | 18.5<br>(12.2 to 27.1)                | 31.2<br>(26.5 to 35.2)                            | 1.6<br>(-1.8 to 4.3)                                |
| Foreign body                                                                        | 1,383.8<br>(1,117.7 to 1,645.8)               | 1,001.2<br>(861.0 to 1,174.6)            | 60.9<br>(39.2 to 89.7)                | 27.3<br>(23.3 to 31.6)                            | 2.0<br>(-0.7 to 4.6)                                |
| Pulmonary aspiration and foreign body in airway                                     | 625.2<br>(449.5 to 875.6)                     | 255.7<br>(202.9 to 326.6)                | 31.7<br>(19.8 to 48.3)                | 22.7<br>(18.6 to 27.1)                            | -1.0<br>(-3.7 to 1.9)                               |
| Foreign body in eyes                                                                | 81.0<br>(44.5 to 123.2)                       | 434.7<br>(330.9 to 581.0)                | 4.5<br>(2.2 to 7.8)                   | 26.9<br>(22.1 to 31.5)                            | -0.0<br>(-2.6 to 2.6)                               |
| Foreign body in other body part                                                     | 677.5<br>(536.0 to 869.1)                     | 310.8<br>(254.0 to 376.1)                | 24.6<br>(16.2 to 35.7)                | 33.9<br>(29.1 to 38.7)                            | 6.3<br>(2.9 to 9.5)                                 |
| Environmental heat and cold exposure                                                | 1,789.8<br>(1,502.1 to 2,113.9)               | 588.2<br>(474.4 to 718.1)                | 77.8<br>(51.4 to 112.1)               | 32.7<br>(29.7 to 35.6)                            | 4.9<br>(2.8 to 6.8)                                 |
| Other unintentional injuries                                                        | 5,263.8<br>(4,392.4 to 6,191.0)               | 2,320.5<br>(1,991.2 to 2,691.4)          | 162.8<br>(110.4 to 228.9)             | 29.2<br>(26.8 to 31.5)                            | 0.4<br>(-1.2 to 2.0)                                |
| <b>Self-harm and interpersonal violence</b>                                         | <b>6,362.7</b><br><b>(5,621.9 to 7,132.2)</b> | <b>604.8†</b><br><b>(517.2 to 700.3)</b> | <b>92.2</b><br><b>(64.2 to 128.2)</b> | <b>18.1</b><br><b>(15.1 to 21.0)</b>              | <b>-6.9</b><br><b>(-8.7 to -5.1)</b>                |
| Self-harm                                                                           | 163.0<br>(138.8 to 189.3)                     | 84.1<br>(68.3 to 102.0)                  | 9.3<br>(6.0 to 13.9)                  | 27.8<br>(23.9 to 31.3)                            | -3.1<br>(-5.6 to -0.8)                              |
| Self-harm by firearm                                                                | 10.8<br>(9.1 to 12.7)                         | 3.3<br>(1.8 to 5.4)                      | 0.5<br>(0.3 to 0.7)                   | 13.8<br>(9.7 to 18.1)                             | -13.0<br>(-15.7 to -10.3)                           |
| Self-harm by other specified means                                                  | 152.1<br>(127.6 to 178.7)                     | 80.9<br>(65.4 to 98.1)                   | 8.9<br>(5.7 to 13.2)                  | 28.6<br>(24.6 to 32.3)                            | -2.6<br>(-5.1 to -0.2)                              |
| Interpersonal violence                                                              | 6,199.7<br>(5,457.3 to 6,980.1)               | 520.6†<br>(435.8 to 611.7)               | 82.9<br>(57.7 to 114.4)               | 17.1<br>(14.0 to 20.2)                            | -7.3<br>(-9.2 to -5.5)                              |
| Assault by firearm                                                                  | 18.1<br>(15.6 to 21.3)                        | 6.8<br>(4.8 to 9.4)                      | 0.9<br>(0.6 to 1.3)                   | 15.9<br>(11.7 to 20.0)                            | -10.7<br>(-13.5 to -8.0)                            |
| Assault by sharp object                                                             | 194.4<br>(157.5 to 232.3)                     | 85.2<br>(64.2 to 111.7)                  | 6.5<br>(4.2 to 9.4)                   | 30.4<br>(26.3 to 34.3)                            | 1.4<br>(-1.4 to 3.9)                                |
| Sexual violence                                                                     | 5,300.9<br>(4,578.4 to 6,081.2)               | --                                       | 45.9<br>(30.2 to 65.6)                | 11.4<br>(7.0 to 16.1)                             | -10.6<br>(-13.6 to -7.3)                            |
| Assault by other means                                                              | 686.2<br>(578.6 to 825.5)                     | 428.6<br>(356.6 to 506.0)                | 29.7<br>(20.1 to 43.0)                | 24.0<br>(21.3 to 26.7)                            | -4.8<br>(-6.6 to -2.9)                              |
| <b>Forces of nature, conflict and terrorism, and executions and police conflict</b> | <b>810.0</b><br><b>(468.9 to 1,205.6)</b>     | <b>24.1†</b><br><b>(11.4 to 37.9)</b>    | <b>30.1</b><br><b>(7.8 to 81.2)</b>   | <b>173.3</b><br><b>(157.5 to 184.8)</b>           | <b>125.6</b><br><b>(114.6 to 133.6)</b>             |
| Exposure to forces of nature                                                        | 414.5<br>(167.5 to 728.5)                     | 20.8<br>(8.1 to 34.0)                    | 17.2<br>(4.5 to 43.8)                 | 67.9<br>(61.2 to 74.9)                            | 46.2<br>(41.3 to 51.4)                              |
| Conflict and terrorism                                                              | 387.6<br>(235.1 to 602.0)                     | --                                       | 12.7<br>(3.2 to 35.4)                 | 2,046.6<br>(1,875.4 to 2,318.7)                   | 1,570.3<br>(1,458.9 to 1,752.1)                     |
| Executions and police conflict                                                      | 7.9<br>(4.6 to 13.6)                          | 3.2<br>(2.1 to 4.4)                      | 0.3<br>(0.1 to 0.7)                   | 32.3<br>(24.1 to 40.9)                            | 2.0<br>(-9.3 to 17.5)                               |
| <b>Impairments</b>                                                                  | --                                            | --                                       | --                                    | --                                                | --                                                  |
| Anaemia                                                                             | 75,701.5<br>(67,852.0 to 84,591.5)            | --                                       | 2,180.8<br>(1,388.2 to 3,224.5)       | 5.7<br>(-8.5 to 21.9)                             | -12.4<br>(-23.1 to -1.2)                            |
| Developmental intellectual disability                                               | 5,783.7<br>(4,349.5 to 7,266.7)               | --                                       | 576.2<br>(417.2 to 768.8)             | 17.0<br>(10.9 to 24.9)                            | -3.7<br>(-8.6 to 2.5)                               |
| Epilepsy                                                                            | 1,256.8<br>(715.6 to 1,795.6)                 | --                                       | 446.1<br>(244.2 to 707.7)             | 21.5<br>(-35.3 to 143.4)                          | 0.5<br>(-48.6 to 110.8)                             |
| Guillain-Barre syndrome                                                             | 1.7<br>(1.3 to 2.2)                           | --                                       | 0.5<br>(0.3 to 0.8)                   | 24.2<br>(21.0 to 27.4)                            | -0.1<br>(-0.1 to -0.0)                              |
| Hearing loss                                                                        | 33,920.8<br>(31,451.9 to 36,594.2)            | --                                       | 1,009.9<br>(698.6 to 1,415.9)         | 20.4<br>(16.6 to 23.8)                            | -4.6<br>(-6.8 to -2.5)                              |
| Heart failure                                                                       | 1,052.0<br>(919.8 to 1,195.9)                 | --                                       | 126.2<br>(91.1 to 168.5)              | 32.8<br>(22.5 to 42.9)                            | 0.8<br>(-7.2 to 8.7)                                |
| Infertility                                                                         | 3,519.8<br>(3,216.8 to 3,878.9)               | --                                       | 23.6<br>(10.5 to 45.6)                | 35.9<br>(26.1 to 46.4)                            | 4.2<br>(-2.7 to 11.3)                               |
| Pelvic inflammatory disease                                                         | 78.7<br>(66.3 to 92.2)                        | --                                       | 10.3<br>(6.8 to 14.7)                 | 23.2<br>(4.4 to 45.6)                             | -6.7<br>(-20.4 to 9.3)                              |
| Vision loss                                                                         | 16,721.7<br>(15,868.7 to 17,576.3)            | --                                       | 613.4<br>(439.0 to 847.8)             | 13.3<br>(7.3 to 20.1)                             | -14.3<br>(-19.1 to -9.3)                            |

We did not calculate incidence for the nine impairments, certain NTDs, and causes with only birth prevalence. Blank cells mean that no estimate is available.

† Incidence for aggregate causes represents the sum of the incidence of the causes below the aggregate.

‡ Incidence estimates for stroke represent first-ever stroke only.

^ Incidence of HIV/AIDS represents new infections of HIV only and does not include new infections of Tuberculosis in HIV positive cases.

SR Table 14: Prevalence, incidence, and YLDs for 2016, percentage change of YLD counts and percentage change of age-standardised YLD rates between 2006 and 2016 by cause and impairments, for all ages, Palestine.

| Cause                                                                                | Prevalence in thousands (95% UI)       | Incidence in thousands (95% UI)            | YLDs in thousands (95% UI)       |                                                   |                                                     |
|--------------------------------------------------------------------------------------|----------------------------------------|--------------------------------------------|----------------------------------|---------------------------------------------------|-----------------------------------------------------|
|                                                                                      | 2016 counts                            | 2016 counts                                | 2016 counts                      | Percentage change in counts between 2006 and 2016 | Percentage change in age-standardised rates between |
| <b>All causes</b>                                                                    | <b>4,917.7</b><br>(4,873.2 to 4,961.9) | <b>34,612.9†</b><br>(32,390.0 to 37,083.8) | <b>470.3</b><br>(350.9 to 611.4) | <b>42.2</b><br>(38.9 to 45.4)                     | <b>0.9</b><br>(-0.8 to 2.4)                         |
| <b>Communicable, maternal, neonatal, and nutritional disorders</b>                   | <b>3,333.3</b><br>(3,131.8 to 3,532.5) | <b>20,822.0†</b><br>(18,764.7 to 23,010.4) | <b>58.7</b><br>(40.8 to 84.7)    | <b>46.3</b><br>(37.2 to 56.3)                     | <b>1.5</b><br>(-4.0 to 7.5)                         |
| <b>HIV/AIDS and tuberculosis</b>                                                     | <b>1,445.9</b><br>(1,046.2 to 1,801.4) | <b>0.2†</b><br>(0.1 to 0.2)                | <b>0.1</b><br>(< 0.05 to 0.1)    | <b>39.7</b><br>(17.6 to 64.8)                     | <b>-3.0</b><br>(-15.8 to 12.7)                      |
| Tuberculosis                                                                         | 1,218.7<br>(843.0 to 1,637.5)          | 0.1†<br>(0.1 to 0.2)                       | < 0.05<br>(< 0.05 to 0.1)        | 2.3<br>(-10.6 to 17.2)                            | -25.1<br>(-33.7 to -15.5)                           |
| Drug-susceptible tuberculosis                                                        | 0.1<br>(0.1 to 0.1)                    | 0.1<br>(0.1 to 0.2)                        | < 0.05<br>(< 0.05 to 0.1)        | 1.6<br>(-11.2 to 17.0)                            | -25.6<br>(-34.4 to -15.6)                           |
| Multidrug-resistant tuberculosis without extensive drug resistance                   | < 0.05<br>(< 0.05 to < 0.05)           | < 0.05<br>(< 0.05 to < 0.05)               | < 0.05<br>(< 0.05 to < 0.05)     | 53.3<br>(-75.9 to 924.0)                          | 11.8<br>(-82.2 to 660.1)                            |
| Extensively drug-resistant tuberculosis                                              | < 0.05<br>(< 0.05 to < 0.05)           | < 0.05<br>(< 0.05 to < 0.05)               | < 0.05<br>(< 0.05 to < 0.05)     | 248.1<br>(-45.3 to 2,226.8)                       | 153.8<br>(-59.5 to 1,628.0)                         |
| Latent tuberculosis infection                                                        | 1,218.6<br>(842.9 to 1,637.4)          | --                                         | --                               | --                                                | --                                                  |
| HIV/AIDS                                                                             | 0.3<br>(0.1 to 0.5)                    | < 0.05^<br>(< 0.05 to 0.1)                 | < 0.05<br>(< 0.05 to 0.1)        | 96.9<br>(76.3 to 120.5)                           | 32.6<br>(20.2 to 46.8)                              |
| Drug-susceptible HIV/AIDS - Tuberculosis                                             | < 0.05<br>(< 0.05 to < 0.05)           | < 0.05<br>(< 0.05 to < 0.05)               | < 0.05<br>(< 0.05 to < 0.05)     | 14.7<br>(-1.0 to 32.2)                            | -21.1<br>(-31.9 to -9.0)                            |
| Multidrug-resistant HIV/AIDS - Tuberculosis without extensive drug resistance        | < 0.05<br>(< 0.05 to < 0.05)           | < 0.05<br>(< 0.05 to < 0.05)               | < 0.05<br>(< 0.05 to < 0.05)     | 72.1<br>(-72.5 to 1,092.1)                        | 18.4<br>(-81.1 to 719.3)                            |
| Extensively drug-resistant HIV/AIDS - Tuberculosis                                   | < 0.05<br>(< 0.05 to < 0.05)           | < 0.05<br>(< 0.05 to < 0.05)               | < 0.05<br>(< 0.05 to < 0.05)     | 290.9<br>(-37.6 to 2,608.1)                       | 168.8<br>(-57.1 to 1,760.6)                         |
| HIV/AIDS resulting in other diseases                                                 | 0.3<br>(0.1 to 0.5)                    | < 0.05<br>(< 0.05 to 0.1)                  | < 0.05<br>(< 0.05 to 0.1)        | 98.4<br>(78.0 to 122.1)                           | 33.5<br>(21.2 to 48.1)                              |
| <b>Diarrhoea, lower respiratory infections, and other common infectious diseases</b> | <b>362.6</b><br>(342.6 to 385.0)       | <b>19,266.7†</b><br>(17,139.6 to 21,415.8) | <b>18.4</b><br>(12.7 to 25.4)    | <b>51.6</b><br>(45.8 to 57.9)                     | <b>3.6</b><br>(0.8 to 6.9)                          |
| Diarrhoeal diseases                                                                  | 66.1<br>(59.1 to 73.1)                 | 4,299.6<br>(3,845.3 to 4,738.1)            | 7.6<br>(5.2 to 10.5)             | 73.3<br>(59.6 to 89.6)                            | 13.2<br>(6.7 to 20.7)                               |
| Intestinal infectious diseases                                                       | 0.2<br>(0.1 to 0.2)                    | 3.4†<br>(2.9 to 4.0)                       | < 0.05<br>(< 0.05 to < 0.05)     | 19.9<br>(0.1 to 43.9)                             | -7.4<br>(-19.9 to 7.3)                              |
| Typhoid fever                                                                        | 0.2<br>(0.1 to 0.2)                    | 2.8<br>(2.4 to 3.3)                        | < 0.05<br>(< 0.05 to < 0.05)     | 19.6<br>(-1.2 to 45.0)                            | -7.3<br>(-20.4 to 8.3)                              |
| Paratyphoid fever                                                                    | < 0.05<br>(< 0.05 to < 0.05)           | 0.6<br>(0.5 to 0.7)                        | < 0.05<br>(< 0.05 to < 0.05)     | 28.3<br>(4.0 to 56.6)                             | -2.2<br>(-16.7 to 14.8)                             |
| Other intestinal infectious diseases                                                 | --                                     | --                                         | < 0.05<br>(< 0.05 to < 0.05)     | 13.0<br>(-15.2 to 50.1)                           | -29.5<br>(-40.9 to -16.7)                           |
| Lower respiratory infections                                                         | 9.1<br>(8.2 to 10.2)                   | 383.3<br>(339.0 to 432.4)                  | 0.6<br>(0.4 to 0.8)              | 39.1<br>(22.7 to 57.5)                            | -1.8<br>(-10.4 to 7.2)                              |
| Upper respiratory infections                                                         | 182.1<br>(156.9 to 209.6)              | 13,754.0<br>(11,757.1 to 15,974.0)         | 4.6<br>(2.7 to 7.1)              | 40.1<br>(32.4 to 48.3)                            | -0.5<br>(-5.4 to 4.3)                               |
| Otitis media                                                                         | 98.9<br>(87.2 to 111.7)                | 619.0<br>(472.4 to 805.1)                  | 3.1<br>(1.9 to 4.7)              | 41.1<br>(30.9 to 52.1)                            | -0.6<br>(-7.0 to 6.7)                               |
| Meningitis                                                                           | 9.6<br>(8.3 to 11.1)                   | 2.3<br>(1.9 to 2.8)                        | 1.0<br>(0.7 to 1.4)              | 38.5<br>(30.0 to 46.8)                            | 0.4<br>(-4.8 to 5.6)                                |
| Pneumococcal meningitis                                                              | 3.9<br>(3.2 to 4.7)                    | 0.5<br>(0.4 to 0.7)                        | 0.4<br>(0.3 to 0.6)              | 40.2<br>(20.9 to 61.2)                            | 1.6<br>(-10.5 to 14.6)                              |
| H influenzae type B meningitis                                                       | 2.9<br>(2.2 to 3.7)                    | 1.0<br>(0.7 to 1.3)                        | 0.3<br>(0.2 to 0.4)              | 34.8<br>(28.2 to 41.2)                            | -1.4<br>(-5.9 to 3.1)                               |
| Meningococcal infection                                                              | 1.5<br>(1.1 to 2.0)                    | 0.6<br>(0.4 to 0.8)                        | 0.2<br>(0.1 to 0.2)              | 34.5<br>(27.3 to 41.2)                            | -2.0<br>(-6.7 to 2.4)                               |
| Other meningitis                                                                     | 1.3<br>(1.0 to 1.6)                    | 0.3<br>(0.2 to 0.4)                        | 0.2<br>(0.1 to 0.2)              | 44.9<br>(31.4 to 60.6)                            | 3.2<br>(-2.4 to 10.0)                               |
| Encephalitis                                                                         | 11.5<br>(8.0 to 16.6)                  | 6.1<br>(5.2 to 7.0)                        | 1.2<br>(0.9 to 1.7)              | 35.9<br>(20.5 to 54.0)                            | -2.6<br>(-11.8 to 7.8)                              |
| Diphtheria                                                                           | < 0.05<br>(< 0.05 to < 0.05)           | < 0.05<br>(< 0.05 to < 0.05)               | < 0.05<br>(< 0.05 to < 0.05)     | -10.2<br>(-58.2 to 96.7)                          | -30.7<br>(-63.1 to 26.8)                            |
| Whooping cough                                                                       | 0.7<br>(0.5 to 0.9)                    | 5.0<br>(3.8 to 6.5)                        | < 0.05<br>(< 0.05 to 0.1)        | -4.6<br>(-33.6 to 31.0)                           | -45.5<br>(-61.8 to -25.3)                           |
| Tetanus                                                                              | < 0.05<br>(< 0.05 to < 0.05)           | < 0.05<br>(< 0.05 to < 0.05)               | < 0.05<br>(< 0.05 to < 0.05)     | 47.0<br>(34.8 to 59.6)                            | 2.4<br>(-7.1 to 11.6)                               |
| Measles                                                                              | 0.4<br>(0.1 to 0.8)                    | 12.8<br>(3.8 to 30.4)                      | < 0.05<br>(< 0.05 to 0.1)        | 12.6<br>(-55.1 to 111.4)                          | -34.5<br>(-72.7 to 21.5)                            |
| Varicella and herpes zoster                                                          | 5.4<br>(5.0 to 5.8)                    | 181.3<br>(166.1 to 197.3)                  | 0.1<br>(0.1 to 0.2)              | 41.7<br>(21.3 to 64.6)                            | -0.1<br>(-11.1 to 11.1)                             |
| <b>Neglected tropical diseases and malaria</b>                                       | <b>580.1</b><br>(478.8 to 686.3)       | <b>1.5†</b><br>(0.5 to 3.2)                | <b>1.2</b><br>(0.7 to 2.0)       | <b>40.3</b><br>(-2.5 to 99.0)                     | <b>-5.3</b><br>(-42.6 to 47.5)                      |
| Malaria                                                                              | --                                     | --                                         | --                               | --                                                | --                                                  |
| Chagas disease                                                                       | --                                     | --                                         | --                               | --                                                | --                                                  |
| Leishmaniasis                                                                        | 0.8<br>(0.3 to 1.4)                    | 1.2<br>(0.3 to 2.7)                        | < 0.05<br>(< 0.05 to 0.1)        | 39.6<br>(-70.7 to 399.5)                          | -4.9<br>(-79.4 to 253.6)                            |
| Visceral leishmaniasis                                                               | < 0.05<br>(< 0.05 to < 0.05)           | < 0.05<br>(< 0.05 to 0.1)                  | < 0.05<br>(< 0.05 to < 0.05)     | 86.0<br>(-3.8 to 248.7)                           | 21.5<br>(-47.4 to 163.2)                            |
| Cutaneous and mucocutaneous leishmaniasis                                            | 0.6<br>(0.1 to 1.4)                    | 1.2<br>(0.3 to 2.7)                        | < 0.05<br>(< 0.05 to 0.1)        | 38.9<br>(-72.1 to 407.0)                          | -5.4<br>(-80.8 to 270.0)                            |
| African trypanosomiasis                                                              | --                                     | --                                         | --                               | --                                                | --                                                  |
| Schistosomiasis                                                                      | --                                     | --                                         | --                               | --                                                | --                                                  |
| Cysticercosis                                                                        | --                                     | --                                         | --                               | --                                                | --                                                  |
| Cystic echinococcosis                                                                | 1.4<br>(0.3 to 5.1)                    | 0.3<br>(0.1 to 1.1)                        | 0.1<br>(< 0.05 to 0.5)           | -3.9<br>(-85.2 to 521.7)                          | -32.0<br>(-87.8 to 288.4)                           |
| Lymphatic filariasis                                                                 | --                                     | --                                         | --                               | --                                                | --                                                  |
| Onchocerciasis                                                                       | --                                     | --                                         | --                               | --                                                | --                                                  |
| Trachoma                                                                             | --                                     | --                                         | --                               | --                                                | --                                                  |
| Dengue                                                                               | --                                     | --                                         | --                               | --                                                | --                                                  |
| Yellow fever                                                                         | --                                     | --                                         | --                               | --                                                | --                                                  |
| Rabies                                                                               | < 0.05<br>(< 0.05 to < 0.05)           | < 0.05<br>(< 0.05 to < 0.05)               | < 0.05<br>(< 0.05 to < 0.05)     | 132.7<br>(-15.7 to 439.1)                         | 63.6<br>(-49.5 to 365.4)                            |
| Intestinal nematode infections                                                       | 555.9<br>(453.6 to 662.3)              | --                                         | 0.2<br>(0.1 to 0.4)              | 39.5<br>(-38.2 to 185.4)                          | 1.2<br>(-58.9 to 144.6)                             |
| Ascariasis                                                                           | 493.7<br>(397.6 to 609.2)              | --                                         | 0.2<br>(0.1 to 0.4)              | 39.4<br>(-42.0 to 200.1)                          | 1.2<br>(-62.4 to 165.1)                             |



| Cause                                                                   | Prevalence in thousands (95% UI)              | Incidence in thousands (95% UI)                   | YLDs in thousands (95% UI)              |                                                   |                                                     |
|-------------------------------------------------------------------------|-----------------------------------------------|---------------------------------------------------|-----------------------------------------|---------------------------------------------------|-----------------------------------------------------|
|                                                                         | 2016 counts                                   | 2016 counts                                       | 2016 counts                             | Percentage change in counts between 2006 and 2016 | Percentage change in age-standardised rates between |
| Trichuriasis                                                            | 2.2<br>(1.8 to 2.8)                           | --                                                | --                                      | --                                                | --                                                  |
| Hookworm disease                                                        | 3.0<br>(2.2 to 4.0)                           | --                                                | < 0.05<br>(< 0.05 to < 0.05)            | 41.7<br>(-5.6 to 107.6)                           | 1.0<br>(-31.9 to 48.8)                              |
| Food-borne trematodiasis                                                | --                                            | --                                                | --                                      | --                                                | --                                                  |
| Leprosy                                                                 | --                                            | --                                                | --                                      | --                                                | --                                                  |
| Ebola virus disease                                                     | --                                            | --                                                | --                                      | --                                                | --                                                  |
| Zika virus disease                                                      | --                                            | --                                                | --                                      | --                                                | --                                                  |
| Guinea worm disease                                                     | --                                            | --                                                | --                                      | --                                                | --                                                  |
| Other neglected tropical diseases                                       | 42.0<br>(38.8 to 45.6)                        | --                                                | 0.9<br>(0.5 to 1.3)                     | 50.7<br>(26.2 to 84.5)                            | 4.5<br>(-10.5 to 24.4)                              |
| <b>Maternal disorders</b>                                               | <b>4.6</b><br><b>(3.5 to 5.9)</b>             | <b>58.8†</b><br><b>(48.0 to 68.8)</b>             | <b>0.3</b><br><b>(0.2 to 0.5)</b>       | <b>55.6</b><br><b>(9.5 to 120.6)</b>              | <b>8.7</b><br><b>(-23.0 to 52.4)</b>                |
| Maternal haemorrhage                                                    | 1.4<br>(1.0 to 1.8)                           | 7.5<br>(5.4 to 10.1)                              | < 0.05<br>(< 0.05 to 0.1)               | 46.8<br>(1.4 to 110.7)                            | 2.7<br>(-28.8 to 47.3)                              |
| Maternal sepsis and other pregnancy related infections                  | 1.7<br>(0.8 to 2.6)                           | 17.4<br>(8.8 to 25.0)                             | 0.1<br>(< 0.05 to 0.1)                  | 49.9<br>(-40.9 to 234.1)                          | 5.0<br>(-57.6 to 133.4)                             |
| Maternal hypertensive disorders                                         | 1.6<br>(1.0 to 2.2)                           | 6.8<br>(5.2 to 8.7)                               | 0.1<br>(< 0.05 to 0.1)                  | 63.6<br>(-9.3 to 197.2)                           | 13.9<br>(-35.9 to 111.0)                            |
| Maternal obstructed labour and uterine rupture                          | 0.2<br>(0.1 to 0.3)                           | 12.9<br>(9.1 to 17.7)                             | 0.1<br>(< 0.05 to 0.1)                  | 66.2<br>(-36.8 to 307.5)                          | 15.6<br>(-55.7 to 185.1)                            |
| Maternal abortion, miscarriage, and ectopic pregnancy                   | 0.1<br>(0.1 to 0.2)                           | 14.2<br>(11.2 to 18.3)                            | < 0.05<br>(< 0.05 to < 0.05)            | 62.7<br>(-1.0 to 164.9)                           | 13.8<br>(-31.0 to 84.4)                             |
| Other maternal disorders                                                | --                                            | --                                                | < 0.05<br>(< 0.05 to 0.1)               | 48.8<br>(4.8 to 111.1)                            | 3.9<br>(-26.5 to 45.9)                              |
| <b>Neonatal disorders</b>                                               | <b>67.6</b><br><b>(51.1 to 108.8)</b>         | --                                                | <b>15.7</b><br><b>(8.4 to 35.6)</b>     | <b>43.2</b><br><b>(23.9 to 77.4)</b>              | <b>-0.2</b><br><b>(-13.9 to 23.7)</b>               |
| Neonatal preterm birth complications                                    | 45.6<br>(35.8 to 60.7)                        | --                                                | 5.3<br>(3.0 to 9.3)                     | 46.0<br>(7.7 to 107.9)                            | 4.8<br>(-21.4 to 48.6)                              |
| Neonatal encephalopathy due to birth asphyxia and trauma                | 5.8<br>(3.1 to 10.0)                          | --                                                | 0.8<br>(0.2 to 1.9)                     | 69.3<br>(20.1 to 281.2)                           | 20.1<br>(-15.4 to 173.0)                            |
| Neonatal sepsis and other neonatal infections                           | 18.9<br>(6.7 to 55.6)                         | --                                                | 8.2<br>(2.6 to 27.2)                    | 36.0<br>(16.1 to 72.0)                            | -4.9<br>(-18.1 to 20.8)                             |
| Hemolytic disease and other neonatal jaundice                           | 0.6<br>(0.5 to 0.7)                           | --                                                | 0.2<br>(0.1 to 0.2)                     | 39.5<br>(27.6 to 51.6)                            | -0.1<br>(-8.6 to 8.4)                               |
| Other neonatal disorders                                                | --                                            | --                                                | 1.1<br>(0.6 to 2.4)                     | 77.8<br>(48.1 to 118.8)                           | -1.9<br>(-18.2 to 20.9)                             |
| <b>Nutritional deficiencies</b>                                         | <b>1,584.4</b><br><b>(1,378.4 to 1,872.6)</b> | <b>899.2†</b><br><b>(563.3 to 1,445.5)</b>        | <b>19.4</b><br><b>(12.8 to 28.9)</b>    | <b>44.4</b><br><b>(31.9 to 59.6)</b>              | <b>1.6</b><br><b>(-5.3 to 9.4)</b>                  |
| Protein-energy malnutrition                                             | 30.3<br>(22.4 to 40.3)                        | 12.7<br>(9.3 to 16.8)                             | 1.0<br>(0.6 to 1.6)                     | 39.7<br>(-1.7 to 97.5)                            | -23.0<br>(-46.1 to 8.7)                             |
| Iodine deficiency                                                       | 94.8<br>(74.3 to 119.3)                       | 3.7<br>(2.9 to 4.6)                               | 2.2<br>(1.3 to 3.4)                     | 27.9<br>(15.2 to 43.3)                            | -7.8<br>(-17.0 to 1.7)                              |
| Vitamin A deficiency                                                    | 864.1<br>(590.8 to 1,274.6)                   | 882.9<br>(547.8 to 1,428.7)                       | 0.5<br>(0.3 to 0.8)                     | 40.3<br>(15.7 to 70.1)                            | -2.7<br>(-17.7 to 15.2)                             |
| Iron-deficiency anaemia                                                 | 767.6<br>(720.0 to 818.3)                     | --                                                | 15.7<br>(10.1 to 23.8)                  | 47.5<br>(32.2 to 66.0)                            | 5.1<br>(-2.9 to 14.8)                               |
| Other nutritional deficiencies                                          | --                                            | --                                                | < 0.05<br>(< 0.05 to 0.1)               | 38.0<br>(-4.4 to 97.3)                            | -24.0<br>(-47.8 to 8.8)                             |
| <b>Other communicable, maternal, neonatal, and nutritional diseases</b> | <b>940.2</b><br><b>(870.5 to 1,011.2)</b>     | <b>595.6</b><br><b>(503.4 to 703.2)</b>           | <b>3.5</b><br><b>(2.2 to 5.5)</b>       | <b>47.8</b><br><b>(38.4 to 58.0)</b>              | <b>1.8</b><br><b>(-4.3 to 8.8)</b>                  |
| Sexually transmitted diseases excluding HIV                             | 597.5<br>(553.2 to 648.8)                     | 569.4<br>(474.1 to 676.7)                         | 2.8<br>(1.7 to 4.5)                     | 44.9<br>(34.4 to 56.5)                            | 0.7<br>(-6.0 to 8.3)                                |
| Syphilis                                                                | 16.8<br>(9.3 to 30.0)                         | 13.4<br>(6.7 to 24.2)                             | < 0.05<br>(< 0.05 to < 0.05)            | 37.9<br>(23.3 to 54.2)                            | -8.5<br>(-19.8 to 2.8)                              |
| Chlamydial infection                                                    | 44.6<br>(30.1 to 63.2)                        | 35.6<br>(24.4 to 51.2)                            | 0.3<br>(0.1 to 0.5)                     | 42.1<br>(22.3 to 65.3)                            | -0.9<br>(-13.3 to 13.7)                             |
| Gonococcal infection                                                    | 109.7<br>(86.5 to 139.5)                      | 396.4<br>(308.2 to 500.9)                         | 1.4<br>(0.8 to 2.3)                     | 46.8<br>(33.5 to 62.3)                            | 1.9<br>(-7.1 to 12.1)                               |
| Trichomoniasis                                                          | 77.6<br>(65.9 to 89.5)                        | 67.2<br>(56.8 to 78.4)                            | 0.1<br>(< 0.05 to 0.2)                  | 37.8<br>(27.2 to 50.3)                            | -3.9<br>(-10.1 to 3.6)                              |
| Genital herpes                                                          | 378.8<br>(318.6 to 446.7)                     | 37.1<br>(30.9 to 44.1)                            | 0.1<br>(< 0.05 to 0.2)                  | 44.0<br>(31.8 to 55.5)                            | -0.2<br>(-6.0 to 5.8)                               |
| Other sexually transmitted diseases                                     | 20.1<br>(16.5 to 23.0)                        | 19.7<br>(15.1 to 25.0)                            | 0.9<br>(0.6 to 1.4)                     | 44.1<br>(33.0 to 56.2)                            | 0.7<br>(-6.6 to 8.8)                                |
| Hepatitis                                                               | 362.7<br>(284.9 to 450.9)                     | 26.1<br>(19.0 to 34.1)                            | < 0.05<br>(< 0.05 to < 0.05)            | 28.6<br>(-2.4 to 71.4)                            | -8.0<br>(-25.6 to 15.1)                             |
| Acute hepatitis A                                                       | 0.4<br>(0.1 to 0.8)                           | 5.1<br>(0.7 to 11.0)                              | < 0.05<br>(< 0.05 to < 0.05)            | 9.2<br>(-66.2 to 267.8)                           | -16.1<br>(-65.5 to 115.9)                           |
| Hepatitis B                                                             | 315.0<br>(238.8 to 403.3)                     | 18.1<br>(13.4 to 24.6)                            | < 0.05<br>(< 0.05 to < 0.05)            | 22.9<br>(2.6 to 47.5)                             | -6.7<br>(-23.1 to 12.3)                             |
| Hepatitis C                                                             | 47.2<br>(41.4 to 53.3)                        | 2.7<br>(2.2 to 3.2)                               | < 0.05<br>(< 0.05 to < 0.05)            | 77.7<br>(76.7 to 79.5)                            | -0.3<br>(-0.7 to 0.4)                               |
| Acute hepatitis E                                                       | < 0.05<br>(< 0.05 to < 0.05)                  | 0.3<br>(0.2 to 0.3)                               | < 0.05<br>(< 0.05 to < 0.05)            | 11.9<br>(-2.5 to 26.9)                            | -7.2<br>(-15.6 to 1.8)                              |
| Other infectious diseases                                               | 31.5<br>(29.2 to 34.1)                        | < 0.05<br>(< 0.05 to < 0.05)                      | 0.7<br>(0.5 to 1.1)                     | 60.6<br>(39.0 to 86.8)                            | 10.0<br>(-2.1 to 24.5)                              |
| <b>Non-communicable diseases</b>                                        | <b>4,550.6</b><br><b>(4,479.1 to 4,634.4)</b> | <b>13,408.7†</b><br><b>(12,397.1 to 14,516.1)</b> | <b>384.9</b><br><b>(283.7 to 500.0)</b> | <b>41.7</b><br><b>(38.0 to 45.4)</b>              | <b>0.8</b><br><b>(-1.0 to 2.6)</b>                  |
| <b>Neoplasms</b>                                                        | <b>4.6</b><br><b>(4.3 to 4.9)</b>             | <b>2.8</b><br><b>(2.7 to 3.0)</b>                 | <b>0.9</b><br><b>(0.7 to 1.2)</b>       | <b>59.7</b><br><b>(48.8 to 69.5)</b>              | <b>10.1</b><br><b>(3.3 to 17.0)</b>                 |
| Lip and oral cavity cancer                                              | 0.1<br>(0.1 to 0.1)                           | < 0.05<br>(< 0.05 to < 0.05)                      | < 0.05<br>(< 0.05 to < 0.05)            | 67.9<br>(49.6 to 89.2)                            | 10.7<br>(-2.2 to 25.1)                              |
| Nasopharynx cancer                                                      | < 0.05<br>(< 0.05 to < 0.05)                  | < 0.05<br>(< 0.05 to < 0.05)                      | < 0.05<br>(< 0.05 to < 0.05)            | 39.8<br>(18.8 to 65.0)                            | -2.7<br>(-15.6 to 12.0)                             |
| Other pharynx cancer                                                    | < 0.05<br>(< 0.05 to < 0.05)                  | < 0.05<br>(< 0.05 to < 0.05)                      | < 0.05<br>(< 0.05 to < 0.05)            | 40.6<br>(24.2 to 58.9)                            | -3.0<br>(-14.6 to 9.8)                              |
| Oesophageal cancer                                                      | < 0.05<br>(< 0.05 to < 0.05)                  | < 0.05<br>(< 0.05 to < 0.05)                      | < 0.05<br>(< 0.05 to < 0.05)            | 46.5<br>(31.9 to 62.5)                            | -1.3<br>(-12.5 to 12.1)                             |
| Stomach cancer                                                          | 0.2<br>(0.2 to 0.2)                           | 0.1<br>(0.1 to 0.1)                               | < 0.05<br>(< 0.05 to < 0.05)            | 72.1<br>(53.5 to 91.4)                            | 13.9<br>(-0.8 to 30.3)                              |
| Colon and rectum cancer                                                 | 0.9<br>(0.8 to 1.0)                           | 0.3<br>(0.3 to 0.4)                               | 0.1<br>(0.1 to 0.1)                     | 86.1<br>(59.1 to 116.2)                           | 23.8<br>(7.2 to 43.2)                               |
| Liver cancer                                                            | 0.1<br>(0.1 to 0.1)                           | 0.2<br>(0.1 to 0.2)                               | < 0.05<br>(< 0.05 to < 0.05)            | 54.2<br>(37.8 to 73.7)                            | 4.0<br>(-7.9 to 17.8)                               |
| Liver cancer due to hepatitis B                                         | < 0.05<br>(< 0.05 to 0.1)                     | 0.1<br>(< 0.05 to 0.1)                            | < 0.05<br>(< 0.05 to < 0.05)            | 52.8<br>(35.6 to 74.2)                            | 3.9<br>(-7.4 to 18.2)                               |



| Cause                                              | Prevalence in thousands (95% UI)        | Incidence in thousands (95% UI)       | YLDs in thousands (95% UI)           |                                                   |                                                     |
|----------------------------------------------------|-----------------------------------------|---------------------------------------|--------------------------------------|---------------------------------------------------|-----------------------------------------------------|
|                                                    | 2016 counts                             | 2016 counts                           | 2016 counts                          | Percentage change in counts between 2006 and 2016 | Percentage change in age-standardised rates between |
| Liver cancer due to hepatitis C                    | < 0.05<br>(< 0.05 to 0.1)               | 0.1<br>(< 0.05 to 0.1)                | < 0.05<br>(< 0.05 to < 0.05)         | 58.7<br>(38.3 to 85.8)                            | 4.5<br>(-11.1 to 24.1)                              |
| Liver cancer due to alcohol use                    | < 0.05<br>(< 0.05 to < 0.05)            | < 0.05<br>(< 0.05 to < 0.05)          | < 0.05<br>(< 0.05 to < 0.05)         | 53.8<br>(31.2 to 81.5)                            | 2.6<br>(-12.3 to 21.1)                              |
| Liver cancer due to other causes                   | < 0.05<br>(< 0.05 to < 0.05)            | < 0.05<br>(< 0.05 to 0.1)             | < 0.05<br>(< 0.05 to < 0.05)         | 50.6<br>(31.1 to 71.9)                            | 3.6<br>(-12.3 to 21.4)                              |
| Gallbladder and biliary tract cancer               | < 0.05<br>(< 0.05 to < 0.05)            | < 0.05<br>(< 0.05 to < 0.05)          | < 0.05<br>(< 0.05 to < 0.05)         | 96.8<br>(71.1 to 128.5)                           | 29.5<br>(12.8 to 50.3)                              |
| Pancreatic cancer                                  | 0.1<br>(0.1 to 0.1)                     | 0.1<br>(0.1 to 0.1)                   | < 0.05<br>(< 0.05 to < 0.05)         | 53.8<br>(40.2 to 69.0)                            | 1.3<br>(-9.6 to 13.7)                               |
| Larynx cancer                                      | 0.1<br>(< 0.05 to 0.1)                  | < 0.05<br>(< 0.05 to < 0.05)          | < 0.05<br>(< 0.05 to < 0.05)         | 33.6<br>(15.2 to 53.6)                            | -10.8<br>(-25.2 to 5.7)                             |
| Tracheal, bronchus, and lung cancer                | 0.4<br>(0.4 to 0.5)                     | 0.4<br>(0.4 to 0.5)                   | 0.1<br>(0.1 to 0.1)                  | 83.3<br>(50.4 to 124.7)                           | 22.9<br>(1.1 to 50.1)                               |
| Malignant skin melanoma                            | < 0.05<br>(< 0.05 to < 0.05)            | < 0.05<br>(< 0.05 to < 0.05)          | < 0.05<br>(< 0.05 to < 0.05)         | -5.3<br>(-21.7 to 45.8)                           | -41.4<br>(-53.2 to 1.9)                             |
| Non-melanoma skin cancer                           | < 0.05<br>(< 0.05 to < 0.05)            | 0.1<br>(0.1 to 0.2)                   | < 0.05<br>(< 0.05 to < 0.05)         | 6.5<br>(-52.6 to 121.1)                           | -37.0<br>(-75.1 to 51.5)                            |
| Non-melanoma skin cancer (squamous-cell carcinoma) | < 0.05<br>(< 0.05 to < 0.05)            | < 0.05<br>(< 0.05 to < 0.05)          | < 0.05<br>(< 0.05 to < 0.05)         | 2.6<br>(-56.1 to 127.3)                           | -39.3<br>(-76.8 to 55.9)                            |
| Non-melanoma skin cancer (basal-cell carcinoma)    | < 0.05<br>(< 0.05 to < 0.05)            | 0.1<br>(0.1 to 0.2)                   | < 0.05<br>(< 0.05 to < 0.05)         | 56.8<br>(41.6 to 74.5)                            | 4.9<br>(-5.1 to 15.9)                               |
| Breast cancer                                      | 1.5<br>(1.1 to 1.8)                     | 0.4<br>(0.3 to 0.4)                   | 0.2<br>(0.1 to 0.2)                  | 69.8<br>(29.5 to 114.7)                           | 15.0<br>(-13.0 to 43.3)                             |
| Cervical cancer                                    | 0.1<br>(0.1 to 0.1)                     | < 0.05<br>(< 0.05 to < 0.05)          | < 0.05<br>(< 0.05 to < 0.05)         | 48.5<br>(8.4 to 89.2)                             | 1.7<br>(-25.3 to 28.2)                              |
| Uterine cancer                                     | 0.2<br>(0.2 to 0.3)                     | 0.1<br>(< 0.05 to 0.1)                | < 0.05<br>(< 0.05 to < 0.05)         | 72.2<br>(37.1 to 114.8)                           | 16.4<br>(-6.6 to 44.9)                              |
| Ovarian cancer                                     | 0.1<br>(0.1 to 0.1)                     | < 0.05<br>(< 0.05 to 0.1)             | < 0.05<br>(< 0.05 to < 0.05)         | 55.2<br>(31.1 to 85.7)                            | 4.7<br>(-13.8 to 27.2)                              |
| Prostate cancer                                    | 0.3<br>(0.2 to 0.4)                     | 0.1<br>(0.1 to 0.1)                   | < 0.05<br>(< 0.05 to 0.1)            | 48.7<br>(19.8 to 83.1)                            | -2.6<br>(-20.0 to 16.7)                             |
| Testicular cancer                                  | < 0.05<br>(< 0.05 to < 0.05)            | < 0.05<br>(< 0.05 to < 0.05)          | < 0.05<br>(< 0.05 to < 0.05)         | -5.5<br>(-28.4 to 33.5)                           | -29.2<br>(-44.1 to -2.9)                            |
| Kidney cancer                                      | 0.2<br>(0.2 to 0.3)                     | 0.1<br>(0.1 to 0.1)                   | < 0.05<br>(< 0.05 to < 0.05)         | 40.7<br>(22.2 to 63.1)                            | 3.1<br>(-9.8 to 17.4)                               |
| Bladder cancer                                     | 0.2<br>(0.2 to 0.2)                     | 0.1<br>(0.1 to 0.1)                   | < 0.05<br>(< 0.05 to < 0.05)         | 64.0<br>(40.4 to 92.9)                            | 9.4<br>(-7.4 to 28.7)                               |
| Brain and nervous system cancer                    | 0.5<br>(0.4 to 0.6)                     | 0.2<br>(0.2 to 0.3)                   | 0.1<br>(< 0.05 to 0.1)               | 42.9<br>(10.3 to 70.3)                            | 1.5<br>(-18.0 to 18.5)                              |
| Thyroid cancer                                     | 0.1<br>(0.1 to 0.1)                     | < 0.05<br>(< 0.05 to < 0.05)          | < 0.05<br>(< 0.05 to < 0.05)         | 78.0<br>(48.6 to 108.6)                           | 26.0<br>(3.8 to 51.1)                               |
| Mesothelioma                                       | < 0.05<br>(< 0.05 to < 0.05)            | < 0.05<br>(< 0.05 to < 0.05)          | < 0.05<br>(< 0.05 to < 0.05)         | 48.6<br>(35.0 to 63.8)                            | -0.2<br>(-9.8 to 10.2)                              |
| Hodgkin lymphoma                                   | 0.1<br>(< 0.05 to 0.1)                  | < 0.05<br>(< 0.05 to < 0.05)          | < 0.05<br>(< 0.05 to < 0.05)         | 4.4<br>(-20.2 to 43.8)                            | -23.9<br>(-42.0 to 4.7)                             |
| Non-Hodgkin's lymphoma                             | 0.2<br>(0.2 to 0.2)                     | 0.1<br>(0.1 to 0.1)                   | < 0.05<br>(< 0.05 to < 0.05)         | 62.6<br>(35.9 to 83.9)                            | 13.7<br>(-5.5 to 29.9)                              |
| Multiple myeloma                                   | < 0.05<br>(< 0.05 to < 0.05)            | < 0.05<br>(< 0.05 to < 0.05)          | < 0.05<br>(< 0.05 to < 0.05)         | 67.1<br>(41.0 to 89.0)                            | 12.5<br>(-7.5 to 31.0)                              |
| Leukaemia                                          | 1.0<br>(0.9 to 1.2)                     | 0.2<br>(0.2 to 0.3)                   | 0.1<br>(0.1 to 0.2)                  | 49.0<br>(25.3 to 74.1)                            | 9.5<br>(-7.6 to 26.8)                               |
| Acute lymphoid leukaemia                           | 0.1<br>(0.1 to 0.1)                     | < 0.05<br>(< 0.05 to < 0.05)          | < 0.05<br>(< 0.05 to < 0.05)         | 32.8<br>(-3.9 to 76.0)                            | -3.9<br>(-24.4 to 16.9)                             |
| Chronic lymphoid leukaemia                         | < 0.05<br>(< 0.05 to 0.1)               | < 0.05<br>(< 0.05 to < 0.05)          | < 0.05<br>(< 0.05 to < 0.05)         | 47.5<br>(22.8 to 77.9)                            | -1.8<br>(-18.3 to 18.8)                             |
| Acute myeloid leukaemia                            | < 0.05<br>(< 0.05 to 0.1)               | < 0.05<br>(< 0.05 to < 0.05)          | < 0.05<br>(< 0.05 to < 0.05)         | 35.1<br>(10.4 to 62.3)                            | -7.0<br>(-19.7 to 6.9)                              |
| Chronic myeloid leukaemia                          | < 0.05<br>(< 0.05 to < 0.05)            | < 0.05<br>(< 0.05 to < 0.05)          | < 0.05<br>(< 0.05 to < 0.05)         | 45.6<br>(10.9 to 76.7)                            | -1.8<br>(-28.3 to 18.6)                             |
| Other leukaemia                                    | 0.8<br>(0.7 to 0.9)                     | 0.2<br>(0.2 to 0.2)                   | 0.1<br>(0.1 to 0.1)                  | 52.7<br>(25.1 to 84.1)                            | 13.2<br>(-7.3 to 34.0)                              |
| Other neoplasms                                    | 0.3<br>(0.3 to 0.3)                     | 0.1<br>(0.1 to 0.1)                   | < 0.05<br>(< 0.05 to < 0.05)         | 27.5<br>(15.2 to 45.0)                            | -8.6<br>(-18.9 to 4.8)                              |
| <b>Cardiovascular diseases</b>                     | <b>175.4</b><br><b>(168.6 to 182.3)</b> | <b>22.1†</b><br><b>(20.9 to 23.3)</b> | <b>10.5</b><br><b>(7.7 to 13.7)</b>  | <b>51.9</b><br><b>(47.0 to 57.0)</b>              | <b>4.3</b><br><b>(1.0 to 7.7)</b>                   |
| Rheumatic heart disease                            | 20.9<br>(18.5 to 23.6)                  | 0.9<br>(0.8 to 1.1)                   | 1.0<br>(0.6 to 1.5)                  | 32.3<br>(20.1 to 45.1)                            | -5.8<br>(-13.5 to 2.4)                              |
| Ischaemic heart disease                            | 78.8<br>(74.2 to 83.5)                  | 11.3<br>(10.4 to 12.3)                | 3.2<br>(2.2 to 4.4)                  | 47.7<br>(41.5 to 54.6)                            | -0.9<br>(-4.7 to 3.1)                               |
| Cerebrovascular disease                            | 21.5<br>(19.9 to 22.9)                  | 3.6†<br>(3.3 to 3.9)                  | 3.3<br>(2.4 to 4.2)                  | 72.7<br>(61.6 to 85.3)                            | 16.4<br>(8.8 to 25.1)                               |
| Ischaemic stroke                                   | 18.6<br>(16.7 to 20.6)                  | 2.7‡<br>(2.4 to 3.0)                  | 2.7<br>(1.9 to 3.5)                  | 86.7<br>(71.8 to 102.6)                           | 26.8<br>(17.4 to 37.6)                              |
| Hemorrhagic stroke                                 | 4.0<br>(3.7 to 4.5)                     | 0.9‡<br>(0.8 to 1.0)                  | 0.6<br>(0.4 to 0.8)                  | 28.4<br>(16.0 to 42.0)                            | -20.7<br>(-28.9 to -12.1)                           |
| Hypertensive heart disease                         | 3.4<br>(2.9 to 4.0)                     | --                                    | 0.3<br>(0.2 to 0.4)                  | 50.0<br>(35.1 to 68.4)                            | -0.9<br>(-10.1 to 10.3)                             |
| Cardiomyopathy and myocarditis                     | 2.3<br>(2.0 to 2.6)                     | 1.5†<br>(1.3 to 1.7)                  | 0.2<br>(0.2 to 0.4)                  | 43.4<br>(25.1 to 65.2)                            | 1.4<br>(-9.6 to 13.5)                               |
| Myocarditis                                        | 1.0<br>(0.9 to 1.1)                     | 1.5<br>(1.3 to 1.7)                   | 0.1<br>(< 0.05 to 0.1)               | 39.5<br>(21.1 to 60.3)                            | 1.1<br>(-10.9 to 14.6)                              |
| Alcoholic cardiomyopathy                           | 0.1<br>(0.1 to 0.1)                     | --                                    | < 0.05<br>(< 0.05 to < 0.05)         | 51.1<br>(37.1 to 66.9)                            | 1.3<br>(-9.9 to 14.3)                               |
| Other cardiomyopathy                               | 1.9<br>(1.7 to 2.2)                     | --                                    | 0.2<br>(0.1 to 0.2)                  | 44.7<br>(19.9 to 75.1)                            | 1.5<br>(-13.4 to 17.4)                              |
| Atrial fibrillation and flutter                    | 8.8<br>(7.7 to 10.1)                    | 0.8<br>(0.7 to 0.9)                   | 0.7<br>(0.5 to 1.0)                  | 50.2<br>(38.1 to 62.3)                            | -1.2<br>(-7.2 to 5.2)                               |
| Peripheral vascular disease                        | 30.7<br>(26.4 to 35.9)                  | 3.2<br>(2.8 to 3.8)                   | 0.1<br>(0.1 to 0.2)                  | 47.4<br>(35.9 to 60.1)                            | -2.1<br>(-9.2 to 5.9)                               |
| Endocarditis                                       | 0.3<br>(0.3 to 0.3)                     | 0.8<br>(0.8 to 0.9)                   | < 0.05<br>(< 0.05 to < 0.05)         | 48.1<br>(30.8 to 68.3)                            | -2.0<br>(-17.7 to 17.6)                             |
| Other cardiovascular and circulatory diseases      | 31.9<br>(27.2 to 37.2)                  | --                                    | 1.7<br>(1.1 to 2.4)                  | 41.3<br>(28.4 to 53.8)                            | -1.9<br>(-8.8 to 5.7)                               |
| <b>Chronic respiratory diseases</b>                | <b>358.8</b><br><b>(335.6 to 382.4)</b> | <b>76.4†</b><br><b>(68.9 to 84.8)</b> | <b>14.8</b><br><b>(10.5 to 20.1)</b> | <b>45.3</b><br><b>(38.0 to 55.1)</b>              | <b>5.8</b><br><b>(1.5 to 10.7)</b>                  |
| Chronic obstructive pulmonary disease              | 71.4<br>(68.4 to 74.6)                  | 4.8<br>(4.6 to 5.0)                   | 2.8<br>(2.4 to 3.3)                  | 49.8<br>(36.0 to 64.8)                            | 2.7<br>(-5.3 to 11.9)                               |
| Pneumoconiosis                                     | 0.2<br>(0.1 to 0.2)                     | < 0.05<br>(< 0.05 to < 0.05)          | < 0.05<br>(< 0.05 to < 0.05)         | 50.3<br>(44.5 to 56.9)                            | 1.6<br>(-2.7 to 6.4)                                |
| Silicosis                                          | < 0.05<br>(< 0.05 to < 0.05)            | < 0.05<br>(< 0.05 to < 0.05)          | < 0.05<br>(< 0.05 to < 0.05)         | 48.9<br>(41.1 to 57.0)                            | 1.5<br>(-3.1 to 6.5)                                |

| Cause                                                          | Prevalence in thousands (95% UI)              | Incidence in thousands (95% UI)           | YLDs in thousands (95% UI)             |                                                   |                                                     |
|----------------------------------------------------------------|-----------------------------------------------|-------------------------------------------|----------------------------------------|---------------------------------------------------|-----------------------------------------------------|
|                                                                | 2016 counts                                   | 2016 counts                               | 2016 counts                            | Percentage change in counts between 2006 and 2016 | Percentage change in age-standardised rates between |
| Asbestosis                                                     | < 0.05<br>(< 0.05 to < 0.05)                  | < 0.05<br>(< 0.05 to < 0.05)              | < 0.05<br>(< 0.05 to < 0.05)           | 49.1<br>(41.6 to 57.9)                            | 0.9<br>(-3.6 to 5.6)                                |
| Coal workers pneumoconiosis                                    | --                                            | --                                        | --                                     | --                                                | --                                                  |
| Other pneumoconiosis                                           | 0.1<br>(0.1 to 0.1)                           | < 0.05<br>(< 0.05 to < 0.05)              | < 0.05<br>(< 0.05 to < 0.05)           | 51.6<br>(40.8 to 64.1)                            | 2.0<br>(-5.7 to 10.8)                               |
| Asthma                                                         | 291.6<br>(264.2 to 323.5)                     | 71.4<br>(63.9 to 79.9)                    | 11.5<br>(7.5 to 16.6)                  | 43.4<br>(35.0 to 55.4)                            | 6.7<br>(1.8 to 12.9)                                |
| Interstitial lung disease and pulmonary sarcoidosis            | 1.1<br>(1.0 to 1.2)                           | 0.1<br>(0.1 to 0.1)                       | 0.1<br>(0.1 to 0.2)                    | 53.7<br>(41.6 to 67.3)                            | 5.7<br>(-4.8 to 18.7)                               |
| Other chronic respiratory diseases                             | --                                            | --                                        | 0.4<br>(0.3 to 0.4)                    | 75.2<br>(33.8 to 130.3)                           | 36.0<br>(11.4 to 65.0)                              |
| <b>Cirrhosis and other chronic liver diseases</b>              | <b>15.8</b><br><b>(14.9 to 16.8)</b>          | <b>0.7</b><br><b>(0.6 to 0.7)</b>         | <b>0.8</b><br><b>(0.6 to 1.2)</b>      | <b>48.2</b><br><b>(29.9 to 69.6)</b>              | <b>8.4</b><br><b>(-1.6 to 18.6)</b>                 |
| Cirrhosis and other chronic liver diseases due to hepatitis B  | 3.9<br>(3.2 to 4.6)                           | 0.1<br>(0.1 to 0.2)                       | 0.1<br>(0.1 to 0.2)                    | 58.9<br>(30.2 to 95.4)                            | 10.0<br>(-5.6 to 29.1)                              |
| Cirrhosis and other chronic liver diseases due to hepatitis C  | 4.5<br>(3.6 to 5.4)                           | 0.2<br>(0.1 to 0.2)                       | 0.2<br>(0.1 to 0.2)                    | 59.6<br>(32.5 to 92.1)                            | 10.7<br>(-4.6 to 29.0)                              |
| Cirrhosis and other chronic liver diseases due to alcohol use  | 0.8<br>(0.6 to 0.9)                           | < 0.05<br>(< 0.05 to < 0.05)              | < 0.05<br>(< 0.05 to < 0.05)           | 59.2<br>(26.7 to 99.5)                            | 8.6<br>(-16.0 to 38.5)                              |
| Cirrhosis and other chronic liver diseases due to other causes | 6.7<br>(6.1 to 7.4)                           | 0.3<br>(0.3 to 0.3)                       | 0.5<br>(0.3 to 0.7)                    | 41.4<br>(15.3 to 72.1)                            | 5.8<br>(-10.1 to 23.8)                              |
| <b>Digestive diseases</b>                                      | <b>131.1</b><br><b>(124.2 to 139.8)</b>       | <b>87.9†</b><br><b>(82.3 to 93.7)</b>     | <b>4.5</b><br><b>(3.1 to 6.1)</b>      | <b>53.0</b><br><b>(42.8 to 64.3)</b>              | <b>6.4</b><br><b>(0.8 to 12.8)</b>                  |
| Peptic ulcer disease                                           | 28.8<br>(25.7 to 32.2)                        | 3.6<br>(3.1 to 4.1)                       | 0.6<br>(0.4 to 0.8)                    | 63.6<br>(45.6 to 83.7)                            | 13.5<br>(1.9 to 26.7)                               |
| Gastritis and duodenitis                                       | 39.3<br>(34.6 to 44.5)                        | 36.6<br>(32.1 to 41.6)                    | 0.6<br>(0.4 to 0.8)                    | 60.8<br>(45.0 to 77.4)                            | 14.0<br>(3.9 to 24.9)                               |
| Appendicitis                                                   | 0.7<br>(0.6 to 0.7)                           | 17.2<br>(15.6 to 18.9)                    | 0.2<br>(0.1 to 0.3)                    | 32.8<br>(-5.6 to 85.7)                            | -0.3<br>(-26.3 to 32.5)                             |
| Paralytic ileus and intestinal obstruction                     | 0.1<br>(< 0.05 to 0.1)                        | 1.4<br>(1.2 to 1.6)                       | < 0.05<br>(< 0.05 to < 0.05)           | 50.3<br>(45.2 to 55.5)                            | 3.8<br>(0.5 to 7.0)                                 |
| Inguinal, femoral, and abdominal hernia                        | 59.3<br>(52.3 to 67.1)                        | 11.1<br>(9.8 to 12.7)                     | 2.5<br>(1.7 to 3.6)                    | 50.9<br>(36.4 to 67.5)                            | 3.2<br>(-4.5 to 11.2)                               |
| Inflammatory bowel disease                                     | 0.8<br>(0.6 to 1.1)                           | 2.6<br>(1.9 to 3.6)                       | 0.1<br>(0.1 to 0.2)                    | 34.6<br>(8.1 to 66.0)                             | -7.8<br>(-26.6 to 14.7)                             |
| Vascular intestinal disorders                                  | < 0.05<br>(< 0.05 to < 0.05)                  | 0.1<br>(0.1 to 0.2)                       | < 0.05<br>(< 0.05 to < 0.05)           | 56.7<br>(47.8 to 66.4)                            | 7.6<br>(3.0 to 12.2)                                |
| Gallbladder and biliary diseases                               | 5.8<br>(5.1 to 6.7)                           | 14.5<br>(12.5 to 16.6)                    | 0.1<br>(0.1 to 0.1)                    | 52.5<br>(27.6 to 79.8)                            | 5.1<br>(-13.8 to 27.6)                              |
| Pancreatitis                                                   | 0.1<br>(0.1 to 0.1)                           | 0.8<br>(0.7 to 0.9)                       | < 0.05<br>(< 0.05 to < 0.05)           | 51.2<br>(46.7 to 56.3)                            | 5.4<br>(2.2 to 8.7)                                 |
| Other digestive diseases                                       | --                                            | --                                        | 0.4<br>(0.3 to 0.5)                    | 61.0<br>(46.0 to 76.9)                            | 10.7<br>(4.4 to 17.8)                               |
| <b>Neurological disorders</b>                                  | <b>1,807.2</b><br><b>(1,728.2 to 1,893.3)</b> | <b>941.9</b><br><b>(791.2 to 1,112.8)</b> | <b>48.0</b><br><b>(31.6 to 66.7)</b>   | <b>39.7</b><br><b>(16.4 to 68.3)</b>              | <b>-0.2</b><br><b>(-12.6 to 13.8)</b>               |
| Alzheimer's disease and other dementias                        | 11.6<br>(9.8 to 13.8)                         | 2.0<br>(1.6 to 2.4)                       | 1.6<br>(1.1 to 2.1)                    | 55.4<br>(48.6 to 63.0)                            | -1.4<br>(-5.2 to 2.6)                               |
| Parkinson's disease                                            | 1.1<br>(0.9 to 1.4)                           | 0.1<br>(0.1 to 0.2)                       | 0.1<br>(0.1 to 0.2)                    | 56.2<br>(35.9 to 79.4)                            | 2.4<br>(-8.7 to 14.5)                               |
| Epilepsy                                                       | 20.2<br>(7.5 to 30.1)                         | 3.3<br>(1.2 to 4.9)                       | 6.7<br>(2.2 to 12.8)                   | 34.2<br>(-61.0 to 383.1)                          | -2.3<br>(-71.5 to 256.4)                            |
| Multiple sclerosis                                             | 1.1<br>(1.0 to 1.3)                           | 0.1<br>(0.1 to 0.1)                       | 0.3<br>(0.2 to 0.4)                    | 33.3<br>(12.5 to 59.2)                            | -7.4<br>(-22.0 to 10.4)                             |
| Motor neuron disease                                           | 0.1<br>(0.1 to 0.1)                           | < 0.05<br>(< 0.05 to < 0.05)              | < 0.05<br>(< 0.05 to < 0.05)           | 41.3<br>(34.0 to 49.3)                            | 1.5<br>(-2.3 to 5.5)                                |
| Migraine                                                       | 714.9<br>(666.7 to 761.4)                     | 87.7<br>(81.2 to 94.5)                    | 31.9<br>(20.4 to 45.0)                 | 38.8<br>(33.6 to 44.6)                            | -0.2<br>(-3.3 to 3.2)                               |
| Tension-type headache                                          | 1,399.9<br>(1,254.1 to 1,570.0)               | 848.7<br>(699.3 to 1,019.2)               | 5.5<br>(3.5 to 8.2)                    | 40.6<br>(33.5 to 48.1)                            | -0.1<br>(-4.4 to 4.6)                               |
| Other neurological disorders                                   | < 0.05<br>(< 0.05 to < 0.05)                  | < 0.05<br>(< 0.05 to < 0.05)              | 1.8<br>(0.7 to 3.3)                    | 67.0<br>(-46.5 to 431.5)                          | 16.7<br>(-55.9 to 205.9)                            |
| <b>Mental and substance use disorders</b>                      | <b>755.8</b><br><b>(718.9 to 790.2)</b>       | <b>326.8†</b><br><b>(297.9 to 360.1)</b>  | <b>107.2</b><br><b>(77.3 to 138.7)</b> | <b>34.6</b><br><b>(30.7 to 38.7)</b>              | <b>-2.9</b><br><b>(-5.7 to -0.2)</b>                |
| Schizophrenia                                                  | 6.6<br>(5.7 to 7.5)                           | 0.6<br>(0.5 to 0.6)                       | 4.2<br>(3.1 to 5.3)                    | 45.3<br>(31.1 to 60.3)                            | -0.2<br>(-8.6 to 9.3)                               |
| Alcohol use disorders                                          | 24.7<br>(20.4 to 29.4)                        | 13.9<br>(11.6 to 16.3)                    | 2.5<br>(1.7 to 3.6)                    | 46.0<br>(31.3 to 61.1)                            | 2.1<br>(-6.8 to 11.5)                               |
| Drug use disorders                                             | 43.8<br>(39.2 to 49.2)                        | 5.6<br>(5.0 to 6.4)                       | 14.5<br>(10.0 to 19.7)                 | 39.9<br>(25.8 to 56.9)                            | -2.4<br>(-11.1 to 7.8)                              |
| Opioid use disorders                                           | 32.9<br>(27.8 to 40.1)                        | 3.5<br>(3.0 to 4.2)                       | 13.7<br>(9.2 to 18.6)                  | 39.6<br>(24.6 to 57.1)                            | -2.6<br>(-11.8 to 7.8)                              |
| Cocaine use disorders                                          | 1.8<br>(1.5 to 2.2)                           | 0.2<br>(0.2 to 0.3)                       | 0.2<br>(0.1 to 0.4)                    | 45.1<br>(2.5 to 105.4)                            | 2.8<br>(-21.7 to 34.3)                              |
| Amphetamine use disorders                                      | 0.3<br>(0.2 to 0.5)                           | 0.1<br>(< 0.05 to 0.1)                    | < 0.05<br>(< 0.05 to 0.1)              | 48.1<br>(35.5 to 61.5)                            | 3.6<br>(-5.3 to 12.5)                               |
| Cannabis use disorders                                         | 7.8<br>(6.1 to 9.7)                           | 1.5<br>(1.2 to 1.9)                       | 0.2<br>(0.1 to 0.4)                    | 41.6<br>(14.7 to 78.0)                            | 0.5<br>(-16.2 to 22.7)                              |
| Other drug use disorders                                       | 1.6<br>(1.4 to 1.8)                           | 0.3<br>(0.3 to 0.4)                       | 0.4<br>(0.2 to 0.5)                    | 47.3<br>(19.8 to 83.1)                            | 3.2<br>(-14.4 to 23.7)                              |
| Depressive disorders                                           | 186.0<br>(171.7 to 201.7)                     | 238.8<br>(210.7 to 271.0)                 | 34.4<br>(23.4 to 46.9)                 | 30.4<br>(21.4 to 38.8)                            | -7.0<br>(-13.6 to -1.4)                             |
| Major depressive disorder                                      | 149.4<br>(131.6 to 168.8)                     | 231.5<br>(203.3 to 263.7)                 | 30.7<br>(20.7 to 42.2)                 | 29.1<br>(19.3 to 38.2)                            | -7.9<br>(-15.3 to -1.7)                             |
| Dysthymia                                                      | 38.4<br>(33.4 to 44.2)                        | 7.4<br>(6.4 to 8.5)                       | 3.7<br>(2.5 to 5.4)                    | 42.5<br>(36.1 to 49.3)                            | -0.1<br>(-3.5 to 3.4)                               |
| Bipolar disorder                                               | 36.3<br>(30.8 to 42.7)                        | 3.5<br>(3.0 to 4.2)                       | 7.4<br>(4.6 to 11.1)                   | 39.7<br>(31.6 to 48.6)                            | -0.1<br>(-5.1 to 5.3)                               |
| Anxiety disorders                                              | 219.0<br>(192.7 to 249.3)                     | 35.0<br>(30.7 to 39.8)                    | 21.2<br>(14.5 to 29.4)                 | 36.2<br>(29.4 to 43.5)                            | -0.1<br>(-4.1 to 4.3)                               |
| Eating disorders                                               | 6.5<br>(5.4 to 8.1)                           | 4.2<br>(3.1 to 5.8)                       | 1.3<br>(0.8 to 1.9)                    | 39.0<br>(21.9 to 60.0)                            | 1.7<br>(-10.8 to 17.0)                              |
| Anorexia nervosa                                               | 1.2<br>(0.8 to 1.5)                           | 0.6<br>(0.4 to 0.8)                       | 0.2<br>(0.1 to 0.4)                    | 32.9<br>(-1.5 to 81.4)                            | 0.6<br>(-24.2 to 34.6)                              |
| Bulimia nervosa                                                | 5.0<br>(3.7 to 6.8)                           | 3.7<br>(2.5 to 5.2)                       | 1.1<br>(0.6 to 1.6)                    | 40.5<br>(20.0 to 65.3)                            | 1.9<br>(-12.1 to 19.4)                              |
| Autistic spectrum disorders                                    | 47.3<br>(42.1 to 52.9)                        | 0.6<br>(0.4 to 0.9)                       | 6.8<br>(4.5 to 9.5)                    | 37.8<br>(30.7 to 44.8)                            | -0.1<br>(-4.7 to 4.4)                               |
| Autism                                                         | 13.0<br>(11.1 to 15.2)                        | 0.1<br>(< 0.05 to 0.1)                    | 3.3<br>(2.1 to 4.9)                    | 37.1<br>(24.8 to 51.1)                            | -0.1<br>(-8.0 to 8.2)                               |
| Asperger syndrome and other autistic spectrum disorders        | 34.4<br>(28.7 to 41.6)                        | 0.5<br>(0.3 to 0.8)                       | 3.5<br>(2.3 to 5.1)                    | 38.4<br>(31.2 to 45.9)                            | -0.1<br>(-4.3 to 4.4)                               |



| Cause                                                      | Prevalence in thousands (95% UI)              | Incidence in thousands (95% UI)                   | YLDs in thousands (95% UI)            |                                                   |                                                     |
|------------------------------------------------------------|-----------------------------------------------|---------------------------------------------------|---------------------------------------|---------------------------------------------------|-----------------------------------------------------|
|                                                            | 2016 counts                                   | 2016 counts                                       | 2016 counts                           | Percentage change in counts between 2006 and 2016 | Percentage change in age-standardised rates between |
| Attention-deficit/hyperactivity disorder                   | 57.9<br>(46.8 to 71.2)                        | 3.6<br>(2.9 to 4.6)                               | 0.7<br>(0.4 to 1.1)                   | 28.7<br>(19.5 to 39.7)                            | 0.2<br>(-6.3 to 8.0)                                |
| Conduct disorder                                           | 50.3<br>(40.7 to 59.7)                        | 17.4<br>(13.8 to 21.0)                            | 6.1<br>(3.7 to 9.3)                   | 17.7<br>(10.6 to 25.5)                            | -0.1<br>(-6.1 to 6.4)                               |
| Idiopathic developmental intellectual disability           | 87.1<br>(49.7 to 128.0)                       | --                                                | 3.0<br>(1.2 to 5.5)                   | 32.6<br>(21.4 to 44.3)                            | -1.6<br>(-9.6 to 6.7)                               |
| Other mental and substance use disorders                   | 67.8<br>(59.2 to 78.6)                        | 3.5<br>(3.0 to 4.0)                               | 5.0<br>(3.5 to 7.3)                   | 44.6<br>(36.9 to 53.0)                            | -0.1<br>(-4.5 to 4.7)                               |
| <b>Diabetes, urogenital, blood, and endocrine diseases</b> | <b>2,176.7</b><br><b>(1,973.0 to 2,485.3)</b> | <b>515.3†</b><br><b>(482.3 to 550.2)</b>          | <b>40.6</b><br><b>(28.8 to 55.1)</b>  | <b>54.8</b><br><b>(49.1 to 60.7)</b>              | <b>7.6</b><br><b>(3.4 to 11.7)</b>                  |
| Diabetes mellitus                                          | 214.7<br>(194.0 to 237.7)                     | 16.0<br>(14.4 to 17.7)                            | 19.2<br>(13.0 to 27.1)                | 63.5<br>(53.4 to 73.8)                            | 11.9<br>(4.7 to 19.4)                               |
| Acute glomerulonephritis                                   | < 0.05<br>(< 0.05 to 0.1)                     | 0.6<br>(0.5 to 0.7)                               | < 0.05<br>(< 0.05 to < 0.05)          | 36.5<br>(28.8 to 44.8)                            | -1.8<br>(-6.6 to 2.8)                               |
| Chronic kidney disease                                     | 187.2<br>(170.8 to 205.3)                     | 14.2<br>(12.8 to 15.8)                            | 6.9<br>(5.1 to 9.0)                   | 61.0<br>(50.0 to 72.3)                            | 9.4<br>(3.2 to 16.0)                                |
| Chronic kidney disease due to diabetes mellitus            | 78.5<br>(68.4 to 90.4)                        | 5.6<br>(4.7 to 6.6)                               | 2.6<br>(1.9 to 3.4)                   | 64.2<br>(50.1 to 78.5)                            | 10.1<br>(1.8 to 18.8)                               |
| Chronic kidney disease due to hypertension                 | 28.6<br>(24.4 to 32.9)                        | 2.6<br>(2.1 to 3.1)                               | 0.8<br>(0.6 to 1.1)                   | 62.9<br>(42.4 to 83.6)                            | 8.0<br>(-4.1 to 19.5)                               |
| Chronic kidney disease due to glomerulonephritis           | 26.1<br>(22.4 to 30.0)                        | 1.6<br>(1.3 to 1.9)                               | 1.3<br>(0.9 to 1.9)                   | 56.8<br>(37.6 to 80.2)                            | 9.0<br>(-1.5 to 22.0)                               |
| Chronic kidney disease due to other causes                 | 54.0<br>(45.5 to 63.1)                        | 4.4<br>(3.7 to 5.1)                               | 2.1<br>(1.5 to 2.9)                   | 59.1<br>(43.1 to 77.3)                            | 9.5<br>(0.6 to 19.5)                                |
| Urinary diseases and male infertility                      | 71.5<br>(64.0 to 80.4)                        | 266.4†<br>(239.2 to 297.6)                        | 1.9<br>(1.2 to 2.7)                   | 35.4<br>(21.7 to 49.5)                            | -9.6<br>(-19.0 to 0.2)                              |
| Interstitial nephritis and urinary tract infections        | 4.2<br>(3.7 to 4.8)                           | 220.7<br>(194.1 to 250.3)                         | 0.1<br>(0.1 to 0.2)                   | 43.0<br>(19.2 to 70.1)                            | 1.1<br>(-12.2 to 16.9)                              |
| Urolithiasis                                               | 1.5<br>(1.3 to 1.8)                           | 40.5<br>(35.5 to 46.6)                            | 0.1<br>(0.1 to 0.2)                   | 45.3<br>(24.3 to 69.5)                            | 1.1<br>(-15.4 to 20.8)                              |
| Benign prostatic hyperplasia                               | 42.8<br>(35.6 to 51.5)                        | 5.3<br>(4.4 to 6.4)                               | 1.4<br>(0.9 to 2.1)                   | 35.2<br>(17.1 to 53.4)                            | -10.4<br>(-20.9 to 0.6)                             |
| Male infertility                                           | 20.1<br>(15.8 to 25.7)                        | --                                                | 0.1<br>(0.1 to 0.3)                   | 36.2<br>(26.0 to 46.2)                            | -5.4<br>(-12.1 to 1.3)                              |
| Other urinary diseases                                     | --                                            | --                                                | 0.1<br>(0.1 to 0.1)                   | 18.2<br>(4.3 to 32.8)                             | -15.6<br>(-24.7 to -5.4)                            |
| Gynecological diseases                                     | 510.0<br>(486.2 to 535.3)                     | 210.5†<br>(194.4 to 228.1)                        | 6.1<br>(4.1 to 8.8)                   | 47.1<br>(40.9 to 53.6)                            | 1.3<br>(-2.9 to 5.3)                                |
| Uterine fibroids                                           | 34.2<br>(30.1 to 38.5)                        | 4.3<br>(3.7 to 5.0)                               | 0.5<br>(0.3 to 0.9)                   | 49.6<br>(38.0 to 63.3)                            | 1.8<br>(-5.5 to 10.4)                               |
| Polycystic ovarian syndrome                                | 3.6<br>(2.7 to 4.7)                           | 4.7<br>(3.4 to 6.1)                               | < 0.05<br>(< 0.05 to 0.1)             | 40.5<br>(20.2 to 65.3)                            | -0.8<br>(-15.0 to 15.6)                             |
| Female infertility                                         | 12.9<br>(7.0 to 21.6)                         | --                                                | 0.1<br>(< 0.05 to 0.2)                | 59.5<br>(37.7 to 89.5)                            | 11.2<br>(-5.3 to 34.4)                              |
| Endometriosis                                              | 1.0<br>(0.8 to 1.2)                           | 3.2<br>(2.6 to 4.1)                               | 0.1<br>(0.1 to 0.1)                   | 43.8<br>(2.6 to 98.2)                             | 0.1<br>(-25.4 to 33.2)                              |
| Genital prolapse                                           | 176.5<br>(155.3 to 199.1)                     | 15.7<br>(13.5 to 18.2)                            | 0.6<br>(0.3 to 1.0)                   | 55.6<br>(45.8 to 65.9)                            | 4.0<br>(-2.9 to 11.1)                               |
| Premenstrual syndrome                                      | 287.4<br>(265.6 to 310.7)                     | 111.2<br>(101.2 to 121.6)                         | 2.4<br>(1.5 to 3.7)                   | 46.3<br>(34.7 to 58.9)                            | 1.8<br>(-5.5 to 10.0)                               |
| Other gynecological diseases                               | 73.3<br>(62.7 to 85.3)                        | 71.4<br>(58.9 to 85.9)                            | 2.5<br>(1.6 to 3.6)                   | 45.6<br>(36.2 to 55.9)                            | -0.3<br>(-6.1 to 5.9)                               |
| Hemoglobinopathies and hemolytic anaemias                  | 1,618.3<br>(1,380.6 to 1,975.8)               | --                                                | 4.9<br>(2.9 to 8.4)                   | 38.6<br>(22.9 to 58.6)                            | 0.0<br>(-8.5 to 10.0)                               |
| Thalassemias                                               | 0.4<br>(0.3 to 0.5)                           | --                                                | < 0.05<br>(< 0.05 to < 0.05)          | 49.6<br>(14.1 to 93.7)                            | -6.0<br>(-27.4 to 20.5)                             |
| Thalassaemias trait                                        | 239.4<br>(203.7 to 275.6)                     | --                                                | 2.5<br>(1.6 to 3.8)                   | 36.8<br>(20.2 to 58.9)                            | -0.3<br>(-10.0 to 12.2)                             |
| Sickle cell disorders                                      | 3.4<br>(0.5 to 11.2)                          | --                                                | 0.2<br>(< 0.05 to 0.8)                | 44.8<br>(8.8 to 95.4)                             | 5.0<br>(-21.1 to 45.6)                              |
| Sickle cell trait                                          | 655.3<br>(270.1 to 1,330.4)                   | --                                                | 1.6<br>(0.6 to 3.6)                   | 37.1<br>(17.6 to 58.7)                            | -1.1<br>(-12.8 to 11.9)                             |
| G6PD deficiency                                            | 229.3<br>(191.7 to 273.2)                     | --                                                | < 0.05<br>(< 0.05 to < 0.05)          | 62.6<br>(36.5 to 100.3)                           | 14.9<br>(2.0 to 30.8)                               |
| G6PD trait                                                 | 700.6<br>(650.5 to 753.5)                     | --                                                | < 0.05<br>(< 0.05 to < 0.05)          | 44.2<br>(27.3 to 70.8)                            | 0.5<br>(-8.9 to 11.4)                               |
| Other hemoglobinopathies and hemolytic anaemias            | 34.6<br>(31.5 to 37.8)                        | --                                                | 0.6<br>(0.4 to 0.9)                   | 47.4<br>(25.9 to 72.8)                            | 2.4<br>(-8.2 to 14.4)                               |
| Endocrine, metabolic, blood, and immune disorders          | 60.5<br>(56.8 to 64.3)                        | 7.7<br>(6.8 to 8.5)                               | 1.6<br>(1.1 to 2.3)                   | 45.2<br>(34.2 to 56.8)                            | -0.3<br>(-6.0 to 5.6)                               |
| <b>Musculoskeletal disorders</b>                           | <b>619.4</b><br><b>(586.9 to 650.5)</b>       | <b>351.0</b><br><b>(316.0 to 387.9)</b>           | <b>69.3</b><br><b>(49.6 to 91.0)</b>  | <b>46.1</b><br><b>(42.0 to 51.0)</b>              | <b>0.3</b><br><b>(-2.0 to 2.9)</b>                  |
| Rheumatoid arthritis                                       | 10.2<br>(9.1 to 11.6)                         | 0.7<br>(0.6 to 0.8)                               | 2.4<br>(1.6 to 3.2)                   | 49.9<br>(37.5 to 63.1)                            | 3.8<br>(-3.7 to 11.1)                               |
| Osteoarthritis                                             | 102.6<br>(95.7 to 109.8)                      | 6.0<br>(5.5 to 6.5)                               | 6.3<br>(4.4 to 8.5)                   | 48.3<br>(42.9 to 53.8)                            | -0.9<br>(-4.3 to 2.6)                               |
| Low back and neck pain                                     | 382.8<br>(356.1 to 410.5)                     | 164.1<br>(146.5 to 183.3)                         | 44.3<br>(31.2 to 58.3)                | 43.8<br>(39.0 to 48.7)                            | -0.7<br>(-3.5 to 2.1)                               |
| Low back pain                                              | 262.7<br>(232.5 to 300.6)                     | 130.7<br>(114.1 to 149.2)                         | 29.5<br>(20.7 to 39.0)                | 42.6<br>(35.9 to 49.3)                            | -1.0<br>(-5.2 to 3.2)                               |
| Neck pain                                                  | 149.6<br>(129.1 to 172.6)                     | 33.4<br>(28.6 to 39.2)                            | 14.9<br>(10.0 to 20.9)                | 46.2<br>(42.6 to 50.1)                            | -0.1<br>(-2.0 to 1.8)                               |
| Gout                                                       | 9.2<br>(8.1 to 10.4)                          | 1.9<br>(1.7 to 2.2)                               | 0.3<br>(0.2 to 0.4)                   | 48.3<br>(27.8 to 72.1)                            | -0.1<br>(-12.9 to 13.7)                             |
| Other musculoskeletal disorders                            | 186.7<br>(145.8 to 225.1)                     | 178.2<br>(148.5 to 210.7)                         | 16.0<br>(10.2 to 23.2)                | 51.5<br>(37.8 to 70.8)                            | 3.5<br>(-4.2 to 13.9)                               |
| <b>Other non-communicable diseases</b>                     | <b>3,554.6</b><br><b>(3,429.6 to 3,664.9)</b> | <b>11,083.9†</b><br><b>(10,087.9 to 12,148.9)</b> | <b>88.3</b><br><b>(61.1 to 124.1)</b> | <b>40.5</b><br><b>(38.2 to 43.0)</b>              | <b>0.1</b><br><b>(-1.2 to 1.5)</b>                  |
| Congenital anomalies                                       | 92.6<br>(83.2 to 104.2)                       | --                                                | 12.0<br>(8.4 to 16.2)                 | 50.3<br>(41.5 to 59.5)                            | 6.8<br>(0.5 to 12.7)                                |
| Neural tube defects                                        | 7.9<br>(6.9 to 8.9)                           | --                                                | 2.4<br>(1.6 to 3.2)                   | 50.8<br>(32.3 to 69.5)                            | 7.3<br>(-4.1 to 19.1)                               |
| Congenital heart anomalies                                 | 20.2<br>(17.1 to 23.8)                        | --                                                | 0.9<br>(0.4 to 1.5)                   | 53.1<br>(36.1 to 72.5)                            | 4.0<br>(-6.6 to 15.7)                               |
| Orofacial clefts                                           | 1.9<br>(1.7 to 2.2)                           | --                                                | < 0.05<br>(< 0.05 to < 0.05)          | 31.0<br>(16.5 to 47.2)                            | -7.9<br>(-18.1 to 3.5)                              |
| Down's syndrome                                            | 2.4<br>(2.1 to 2.9)                           | --                                                | 0.2<br>(0.1 to 0.3)                   | 46.2<br>(35.5 to 57.5)                            | 4.2<br>(-3.4 to 12.0)                               |
| Turner syndrome                                            | 1.8<br>(1.5 to 2.1)                           | --                                                | < 0.05<br>(< 0.05 to 0.1)             | 36.7<br>(-13.0 to 104.0)                          | -2.4<br>(-33.5 to 43.1)                             |
| Klinefelter syndrome                                       | 2.6<br>(2.2 to 3.1)                           | --                                                | < 0.05<br>(< 0.05 to < 0.05)          | 40.6<br>(7.2 to 81.6)                             | -0.7<br>(-22.6 to 28.0)                             |

| Cause                                         | Prevalence in thousands (95% UI)        | Incidence in thousands (95% UI)          | YLDs in thousands (95% UI)           |                                                   |                                                     |
|-----------------------------------------------|-----------------------------------------|------------------------------------------|--------------------------------------|---------------------------------------------------|-----------------------------------------------------|
|                                               | 2016 counts                             | 2016 counts                              | 2016 counts                          | Percentage change in counts between 2006 and 2016 | Percentage change in age-standardised rates between |
| Other chromosomal abnormalities               | 21.3<br>(17.9 to 25.4)                  | --                                       | 2.1<br>(1.4 to 2.9)                  | 41.9<br>(25.4 to 63.2)                            | 1.1<br>(-10.3 to 15.5)                              |
| Congenital musculoskeletal and limb anomalies | 10.0<br>(9.1 to 11.1)                   | --                                       | 1.5<br>(1.0 to 2.1)                  | 40.0<br>(24.7 to 56.7)                            | 0.4<br>(-9.0 to 10.1)                               |
| Urogenital congenital anomalies               | 6.6<br>(5.7 to 7.6)                     | --                                       | 0.2<br>(0.1 to 0.4)                  | 37.7<br>(19.9 to 58.2)                            | -0.6<br>(-12.2 to 13.1)                             |
| Digestive congenital anomalies                | 5.7<br>(5.0 to 6.5)                     | --                                       | 0.2<br>(0.2 to 0.4)                  | 40.5<br>(15.3 to 69.2)                            | -0.1<br>(-15.7 to 16.9)                             |
| Other congenital anomalies                    | 25.1<br>(15.5 to 38.8)                  | --                                       | 4.4<br>(2.6 to 6.8)                  | 59.8<br>(43.8 to 76.6)                            | 12.4<br>(1.9 to 23.2)                               |
| Skin and subcutaneous diseases                | 1,351.2<br>(1,310.7 to 1,397.0)         | 2,648.5<br>(2,514.3 to 2,798.7)          | 36.6<br>(24.3 to 52.8)               | 34.5<br>(30.9 to 38.4)                            | -1.2<br>(-3.3 to 1.1)                               |
| Dermatitis                                    | 248.8<br>(230.2 to 268.6)               | 286.0<br>(262.1 to 311.0)                | 9.8<br>(5.7 to 16.0)                 | 38.2<br>(30.6 to 45.9)                            | -0.8<br>(-5.0 to 3.8)                               |
| Psoriasis                                     | 23.8<br>(22.4 to 25.3)                  | 4.0<br>(3.7 to 4.2)                      | 2.1<br>(1.5 to 2.8)                  | 32.1<br>(18.4 to 48.0)                            | -5.0<br>(-12.5 to 4.1)                              |
| Cellulitis                                    | 2.4<br>(2.2 to 2.6)                     | 47.5<br>(43.9 to 51.2)                   | 0.1<br>(0.1 to 0.2)                  | 40.2<br>(7.4 to 81.1)                             | 0.4<br>(-18.2 to 22.8)                              |
| Pyoderma                                      | 10.5<br>(10.1 to 10.8)                  | 229.5<br>(221.5 to 237.8)                | 0.1<br>(< 0.05 to 0.1)               | 45.0<br>(31.5 to 59.1)                            | -0.1<br>(-7.0 to 6.9)                               |
| Scabies                                       | 43.1<br>(36.9 to 49.9)                  | 135.8<br>(116.8 to 157.0)                | 1.1<br>(0.6 to 1.8)                  | 19.4<br>(5.7 to 30.2)                             | -11.6<br>(-19.0 to -5.3)                            |
| Fungal skin diseases                          | 297.4<br>(266.5 to 334.6)               | 1,003.7<br>(895.8 to 1,121.0)            | 1.7<br>(0.7 to 3.5)                  | 40.0<br>(36.9 to 43.4)                            | -0.1<br>(-1.2 to 1.1)                               |
| Viral skin diseases                           | 151.1<br>(143.2 to 159.3)               | 212.2<br>(200.4 to 224.7)                | 4.7<br>(2.9 to 6.9)                  | 33.9<br>(28.7 to 39.0)                            | -0.1<br>(-3.2 to 3.1)                               |
| Acne vulgaris                                 | 431.4<br>(374.0 to 495.4)               | 310.8<br>(244.9 to 404.3)                | 11.1<br>(7.5 to 16.4)                | 27.0<br>(19.5 to 34.8)                            | -0.8<br>(-6.0 to 4.9)                               |
| Alopecia areata                               | 8.4<br>(7.8 to 8.9)                     | 15.0<br>(14.0 to 16.0)                   | 0.3<br>(0.2 to 0.4)                  | 41.2<br>(25.9 to 59.1)                            | -0.2<br>(-10.0 to 10.5)                             |
| Pruritus                                      | 35.9<br>(31.5 to 40.6)                  | 29.8<br>(26.6 to 33.6)                   | 0.4<br>(0.2 to 0.7)                  | 42.4<br>(33.7 to 52.0)                            | -0.2<br>(-5.0 to 4.9)                               |
| Urticaria                                     | 65.4<br>(55.3 to 78.1)                  | 119.6<br>(100.8 to 142.1)                | 4.0<br>(2.5 to 5.9)                  | 48.8<br>(38.8 to 58.5)                            | -0.1<br>(-5.1 to 5.4)                               |
| Decubitus ulcer                               | 0.8<br>(0.7 to 0.9)                     | 2.9<br>(2.6 to 3.2)                      | 0.1<br>(0.1 to 0.2)                  | 51.9<br>(38.7 to 65.8)                            | 5.7<br>(-8.0 to 21.5)                               |
| Other skin and subcutaneous diseases          | 224.4<br>(217.2 to 231.8)               | 251.9<br>(243.6 to 260.1)                | 1.2<br>(0.6 to 2.3)                  | 44.8<br>(40.2 to 49.3)                            | 0.2<br>(-2.4 to 2.7)                                |
| Sense organ diseases                          | 862.2<br>(829.2 to 897.8)               | 467.1†<br>(432.9 to 503.6)               | 31.1<br>(21.7 to 43.8)               | 43.6<br>(39.0 to 48.4)                            | -0.2<br>(-2.7 to 2.2)                               |
| Glaucoma                                      | 1.9<br>(1.6 to 2.3)                     | --                                       | 0.2<br>(0.1 to 0.2)                  | 45.7<br>(28.1 to 64.5)                            | -2.4<br>(-13.1 to 9.0)                              |
| Cataract                                      | 36.3<br>(31.9 to 41.2)                  | --                                       | 2.5<br>(1.8 to 3.3)                  | 48.2<br>(38.7 to 57.4)                            | -2.7<br>(-8.5 to 3.3)                               |
| Macular degeneration                          | 1.9<br>(1.6 to 2.4)                     | --                                       | 0.1<br>(0.1 to 0.2)                  | 47.9<br>(27.9 to 69.2)                            | -1.8<br>(-13.4 to 10.5)                             |
| Refraction and accommodation disorders        | 551.6<br>(509.3 to 598.4)               | --                                       | 9.3<br>(5.6 to 15.0)                 | 42.0<br>(34.9 to 49.2)                            | 2.3<br>(-3.0 to 7.9)                                |
| Age-related and other hearing loss            | 387.1<br>(359.3 to 417.7)               | --                                       | 15.3<br>(10.4 to 21.5)               | 44.2<br>(36.6 to 52.5)                            | -0.3<br>(-3.4 to 2.6)                               |
| Other vision loss                             | 14.7<br>(13.0 to 16.7)                  | --                                       | 1.0<br>(0.7 to 1.4)                  | 40.7<br>(29.5 to 52.8)                            | -2.8<br>(-9.6 to 4.1)                               |
| Other sense organ diseases                    | 88.0<br>(81.7 to 94.5)                  | 467.1<br>(432.9 to 503.6)                | 2.7<br>(1.7 to 4.0)                  | 43.1<br>(35.2 to 51.1)                            | -0.9<br>(-4.8 to 2.8)                               |
| Oral disorders                                | 2,700.5<br>(2,512.3 to 2,866.6)         | 7,968.2†<br>(6,979.6 to 9,023.9)         | 8.7<br>(5.2 to 13.5)                 | 43.6<br>(40.9 to 46.6)                            | 0.0<br>(-1.8 to 1.9)                                |
| Caries of deciduous teeth                     | 663.9<br>(508.4 to 836.2)               | 2,434.7<br>(1,711.7 to 3,251.6)          | 0.2<br>(0.1 to 0.3)                  | 45.0<br>(27.1 to 65.2)                            | -1.1<br>(-11.6 to 10.5)                             |
| Caries of permanent teeth                     | 1,804.8<br>(1,614.6 to 2,001.6)         | 5,482.2<br>(4,813.1 to 6,148.2)          | 1.1<br>(0.5 to 2.1)                  | 33.4<br>(26.7 to 40.1)                            | -0.3<br>(-4.0 to 3.6)                               |
| Periodontal disease                           | 329.6<br>(270.7 to 395.5)               | 41.9<br>(33.6 to 51.5)                   | 2.1<br>(0.8 to 4.6)                  | 47.8<br>(43.1 to 52.6)                            | 0.1<br>(-3.0 to 3.2)                                |
| Edentulism and severe tooth loss              | 113.9<br>(97.2 to 130.1)                | 9.4<br>(7.9 to 10.9)                     | 3.1<br>(2.0 to 4.5)                  | 49.5<br>(44.7 to 54.8)                            | 0.1<br>(-2.8 to 3.3)                                |
| Other oral disorders                          | 73.2<br>(69.9 to 77.0)                  | --                                       | 2.1<br>(1.3 to 3.2)                  | 37.1<br>(32.1 to 42.9)                            | -0.0<br>(-3.0 to 3.1)                               |
| <b>Injuries</b>                               | <b>821.1</b><br><b>(708.9 to 954.3)</b> | <b>382.2†</b><br><b>(357.6 to 411.1)</b> | <b>26.7</b><br><b>(16.1 to 41.1)</b> | <b>39.9</b><br><b>(31.2 to 51.5)</b>              | <b>1.0</b><br><b>(-4.3 to 7.8)</b>                  |
| <b>Transport injuries</b>                     | <b>69.5</b><br><b>(63.4 to 75.9)</b>    | <b>32.6</b><br><b>(29.0 to 36.6)</b>     | <b>3.6</b><br><b>(2.3 to 5.4)</b>    | <b>50.6</b><br><b>(41.5 to 61.2)</b>              | <b>6.4</b><br><b>(1.4 to 12.3)</b>                  |
| Road injuries                                 | 45.0<br>(41.6 to 48.4)                  | 23.4<br>(20.5 to 26.5)                   | 2.4<br>(1.5 to 3.6)                  | 56.4<br>(47.1 to 67.3)                            | 9.6<br>(4.5 to 15.7)                                |
| Pedestrian road injuries                      | 6.9<br>(6.0 to 8.0)                     | 2.5<br>(1.9 to 3.1)                      | 0.4<br>(0.2 to 0.5)                  | 64.6<br>(53.8 to 77.6)                            | 14.8<br>(9.1 to 21.5)                               |
| Cyclist road injuries                         | 8.4<br>(6.9 to 10.0)                    | 4.7<br>(3.6 to 6.0)                      | 0.4<br>(0.2 to 0.6)                  | 49.8<br>(40.5 to 60.7)                            | 5.7<br>(0.5 to 12.0)                                |
| Motorcyclist road injuries                    | 6.9<br>(5.8 to 8.2)                     | 2.3<br>(1.8 to 3.0)                      | 0.3<br>(0.2 to 0.5)                  | 58.4<br>(47.9 to 70.9)                            | 10.7<br>(5.2 to 17.6)                               |
| Motor vehicle road injuries                   | 18.0<br>(15.4 to 20.5)                  | 10.8<br>(9.2 to 12.6)                    | 1.0<br>(0.7 to 1.5)                  | 56.7<br>(47.1 to 67.3)                            | 9.7<br>(4.5 to 15.9)                                |
| Other road injuries                           | 4.8<br>(4.1 to 5.7)                     | 3.1<br>(2.4 to 4.0)                      | 0.2<br>(0.1 to 0.4)                  | 52.9<br>(44.9 to 61.8)                            | 6.6<br>(2.1 to 11.6)                                |
| Other transport injuries                      | 24.5<br>(20.1 to 29.8)                  | 9.3<br>(7.5 to 11.8)                     | 1.2<br>(0.8 to 1.9)                  | 40.6<br>(31.4 to 51.8)                            | -0.4<br>(-5.7 to 5.6)                               |
| <b>Unintentional injuries</b>                 | <b>494.4</b><br><b>(453.5 to 536.0)</b> | <b>333.7</b><br><b>(308.6 to 361.1)</b>  | <b>15.8</b><br><b>(10.2 to 23.2)</b> | <b>51.4</b><br><b>(42.6 to 60.6)</b>              | <b>6.8</b><br><b>(1.9 to 12.1)</b>                  |
| Falls                                         | 170.3<br>(144.7 to 194.9)               | 109.1<br>(93.1 to 131.7)                 | 6.3<br>(4.1 to 8.9)                  | 53.6<br>(43.8 to 64.3)                            | 7.5<br>(1.9 to 13.5)                                |
| Drowning                                      | 1.3<br>(1.1 to 1.5)                     | 0.4<br>(0.3 to 0.5)                      | 0.1<br>(< 0.05 to 0.1)               | 42.5<br>(30.1 to 55.6)                            | 1.3<br>(-5.7 to 8.5)                                |
| Fire, heat, and hot substances                | 50.7<br>(42.1 to 62.4)                  | 9.5<br>(7.3 to 12.0)                     | 1.3<br>(0.8 to 2.0)                  | 54.9<br>(42.3 to 67.2)                            | 10.0<br>(2.6 to 17.1)                               |
| Poisonings                                    | 2.4<br>(1.9 to 2.8)                     | 5.1<br>(3.9 to 6.5)                      | 0.2<br>(0.1 to 0.3)                  | 55.6<br>(40.8 to 73.7)                            | 13.0<br>(5.5 to 21.9)                               |
| Exposure to mechanical forces                 | 69.8<br>(58.6 to 87.6)                  | 40.2<br>(32.6 to 48.1)                   | 1.6<br>(1.0 to 2.6)                  | 56.5<br>(47.5 to 66.6)                            | 10.3<br>(5.2 to 16.0)                               |
| Unintentional firearm injuries                | 3.1<br>(2.5 to 3.8)                     | 1.1<br>(0.8 to 1.7)                      | 0.1<br>(0.1 to 0.2)                  | 55.1<br>(45.4 to 66.5)                            | 8.7<br>(3.2 to 15.1)                                |
| Unintentional suffocation                     | 2.8<br>(2.2 to 3.6)                     | 1.1<br>(0.7 to 1.6)                      | 0.1<br>(0.1 to 0.2)                  | 45.4<br>(33.0 to 60.1)                            | 3.2<br>(-3.7 to 11.6)                               |
| Other exposure to mechanical forces           | 63.8<br>(52.9 to 81.6)                  | 38.1<br>(30.8 to 45.6)                   | 1.4<br>(0.9 to 2.2)                  | 57.5<br>(48.6 to 67.1)                            | 10.9<br>(6.0 to 16.3)                               |



| Cause                                                                               | Prevalence in thousands (95% UI)        | Incidence in thousands (95% UI)       | YLDs in thousands (95% UI)         |                                                   |                                                     |
|-------------------------------------------------------------------------------------|-----------------------------------------|---------------------------------------|------------------------------------|---------------------------------------------------|-----------------------------------------------------|
|                                                                                     | 2016 counts                             | 2016 counts                           | 2016 counts                        | Percentage change in counts between 2006 and 2016 | Percentage change in age-standardised rates between |
| Adverse effects of medical treatment                                                | 1.5<br>(1.1 to 1.9)                     | 19.2<br>(15.7 to 23.1)                | 0.2<br>(0.1 to 0.3)                | 58.4<br>(46.9 to 69.5)                            | 4.1<br>(-0.4 to 8.6)                                |
| Animal contact                                                                      | 25.8<br>(22.4 to 30.3)                  | 44.8<br>(35.9 to 54.6)                | 0.8<br>(0.6 to 1.2)                | 45.6<br>(35.3 to 57.1)                            | 3.8<br>(-0.8 to 9.5)                                |
| Venomous animal contact                                                             | 9.7<br>(7.9 to 11.8)                    | 18.0<br>(13.5 to 23.3)                | 0.6<br>(0.4 to 0.9)                | 45.6<br>(32.7 to 61.6)                            | 4.8<br>(-1.7 to 12.8)                               |
| Non-venomous animal contact                                                         | 16.1<br>(13.2 to 20.2)                  | 26.8<br>(21.1 to 33.2)                | 0.2<br>(0.2 to 0.4)                | 45.4<br>(39.2 to 51.3)                            | 1.8<br>(-1.5 to 5.0)                                |
| Foreign body                                                                        | 33.2<br>(27.4 to 39.9)                  | 31.1<br>(26.7 to 36.3)                | 1.1<br>(0.7 to 1.7)                | 38.4<br>(28.8 to 48.2)                            | -1.2<br>(-6.6 to 4.5)                               |
| Pulmonary aspiration and foreign body in airway                                     | 10.0<br>(7.3 to 13.5)                   | 6.3<br>(5.0 to 8.0)                   | 0.4<br>(0.2 to 0.7)                | 28.5<br>(19.1 to 39.3)                            | -7.6<br>(-12.6 to -2.1)                             |
| Foreign body in eyes                                                                | 2.0<br>(1.0 to 3.1)                     | 11.4<br>(8.6 to 15.2)                 | 0.1<br>(0.1 to 0.2)                | 42.9<br>(37.0 to 48.9)                            | 0.6<br>(-2.6 to 4.0)                                |
| Foreign body in other body part                                                     | 21.2<br>(16.9 to 27.5)                  | 13.4<br>(10.8 to 16.4)                | 0.6<br>(0.3 to 0.9)                | 45.5<br>(34.1 to 56.8)                            | 3.1<br>(-3.1 to 9.6)                                |
| Environmental heat and cold exposure                                                | 32.9<br>(27.3 to 39.2)                  | 13.9<br>(11.1 to 17.3)                | 1.2<br>(0.7 to 1.8)                | 38.3<br>(29.8 to 47.6)                            | -1.3<br>(-6.1 to 4.1)                               |
| Other unintentional injuries                                                        | 106.6<br>(83.2 to 134.1)                | 60.3<br>(48.6 to 73.9)                | 3.0<br>(1.9 to 4.4)                | 54.4<br>(46.2 to 62.7)                            | 8.8<br>(4.7 to 13.4)                                |
| <b>Self-harm and interpersonal violence</b>                                         | <b>129.4</b><br><b>(114.1 to 145.9)</b> | <b>15.7†</b><br><b>(13.2 to 18.5)</b> | <b>1.8</b><br><b>(1.2 to 2.5)</b>  | <b>46.3</b><br><b>(40.1 to 52.8)</b>              | <b>6.3</b><br><b>(2.7 to 10.2)</b>                  |
| Self-harm                                                                           | 2.6<br>(2.2 to 3.0)                     | 1.3<br>(1.0 to 1.6)                   | 0.1<br>(0.1 to 0.2)                | 43.1<br>(32.5 to 55.3)                            | 0.9<br>(-4.5 to 6.8)                                |
| Self-harm by firearm                                                                | 0.2<br>(0.2 to 0.2)                     | < 0.05<br>(< 0.05 to 0.1)             | < 0.05<br>(< 0.05 to < 0.05)       | 40.0<br>(28.7 to 52.8)                            | 1.0<br>(-5.9 to 8.8)                                |
| Self-harm by other specified means                                                  | 2.4<br>(2.0 to 2.8)                     | 1.2<br>(1.0 to 1.5)                   | 0.1<br>(0.1 to 0.2)                | 43.3<br>(32.6 to 55.5)                            | 0.9<br>(-4.5 to 6.8)                                |
| Interpersonal violence                                                              | 126.8<br>(111.6 to 143.4)               | 14.5†                                 | 1.7<br>(1.2 to 2.3)                | 46.5<br>(40.4 to 53.4)                            | 6.8<br>(3.2 to 10.8)                                |
| Assault by firearm                                                                  | 1.4<br>(1.1 to 1.7)                     | 0.7<br>(0.5 to 0.9)                   | 0.1<br>(< 0.05 to 0.1)             | 74.9<br>(62.5 to 91.1)                            | 21.4<br>(14.2 to 30.6)                              |
| Assault by sharp object                                                             | 6.9<br>(5.6 to 8.3)                     | 4.1<br>(3.1 to 5.3)                   | 0.2<br>(0.1 to 0.3)                | 60.4<br>(50.5 to 71.4)                            | 12.6<br>(6.3 to 19.6)                               |
| Sexual violence                                                                     | 106.4<br>(91.6 to 123.2)                | --                                    | 0.9<br>(0.6 to 1.3)                | 35.7<br>(27.6 to 45.5)                            | -0.1<br>(-4.8 to 5.6)                               |
| Assault by other means                                                              | 12.1<br>(10.1 to 14.6)                  | 9.7<br>(7.8 to 11.7)                  | 0.5<br>(0.3 to 0.7)                | 61.2<br>(52.3 to 71.6)                            | 12.5<br>(7.2 to 18.9)                               |
| <b>Forces of nature, conflict and terrorism, and executions and police conflict</b> | <b>234.2</b><br><b>(128.2 to 366.1)</b> | <b>0.2†</b><br><b>(0.1 to 0.3)</b>    | <b>5.5</b><br><b>(2.0 to 10.9)</b> | <b>9.8</b><br><b>(-1.8 to 23.4)</b>               | <b>-14.1</b><br><b>(-20.6 to -6.4)</b>              |
| Exposure to forces of nature                                                        | --                                      | --                                    | --                                 | --                                                | --                                                  |
| Conflict and terrorism                                                              | 233.9<br>(127.9 to 365.7)               | --                                    | 5.5<br>(2.0 to 10.8)               | 9.8<br>(-1.8 to 23.3)                             | -14.2<br>(-20.6 to -6.4)                            |
| Executions and police conflict                                                      | 0.3<br>(0.2 to 0.6)                     | 0.2<br>(0.1 to 0.3)                   | < 0.05<br>(< 0.05 to < 0.05)       | 56.0<br>(37.8 to 82.5)                            | 24.8<br>(13.7 to 38.8)                              |
| <b>Impairments</b>                                                                  | --                                      | --                                    | --                                 | --                                                | --                                                  |
| Anaemia                                                                             | 1,233.8<br>(1,141.8 to 1,346.1)         | --                                    | 29.5<br>(19.9 to 42.8)             | 49.4<br>(36.2 to 65.4)                            | 6.8<br>(-0.2 to 14.4)                               |
| Developmental intellectual disability                                               | 179.1<br>(137.3 to 230.0)               | --                                    | 21.3<br>(13.8 to 39.8)             | 37.1<br>(27.1 to 49.6)                            | -1.7<br>(-8.8 to 6.2)                               |
| Epilepsy                                                                            | 43.8<br>(25.8 to 83.5)                  | --                                    | 16.9<br>(8.7 to 34.4)              | 36.2<br>(-16.1 to 126.8)                          | -2.5<br>(-40.4 to 65.8)                             |
| Guillain-Barre syndrome                                                             | < 0.05<br>(< 0.05 to 0.1)               | --                                    | < 0.05<br>(< 0.05 to < 0.05)       | 39.8<br>(35.0 to 44.0)                            | 0.0<br>(-0.1 to 0.1)                                |
| Hearing loss                                                                        | 478.9<br>(450.6 to 509.5)               | --                                    | 21.2<br>(14.7 to 28.9)             | 45.1<br>(39.7 to 50.5)                            | 0.5<br>(-1.9 to 3.0)                                |
| Heart failure                                                                       | 20.4<br>(18.1 to 23.1)                  | --                                    | 2.0<br>(1.4 to 2.6)                | 50.9<br>(41.6 to 61.4)                            | 0.3<br>(-6.4 to 7.3)                                |
| Infertility                                                                         | 65.9<br>(52.7 to 82.7)                  | --                                    | 0.4<br>(0.2 to 0.8)                | 43.9<br>(35.9 to 51.3)                            | 0.7<br>(-4.7 to 5.8)                                |
| Pelvic inflammatory disease                                                         | 2.0<br>(1.5 to 2.5)                     | --                                    | 0.3<br>(0.2 to 0.4)                | 37.9<br>(15.8 to 67.6)                            | -3.6<br>(-17.7 to 14.7)                             |
| Vision loss                                                                         | 647.3<br>(599.4 to 698.8)               | --                                    | 22.0<br>(14.2 to 39.1)             | 41.3<br>(30.3 to 52.5)                            | -0.3<br>(-5.5 to 5.0)                               |

We did not calculate incidence for the nine impairments, certain NTDs, and causes with only birth prevalence. Blank cells mean that no estimate is available.

† Incidence for aggregate causes represents the sum of the incidence of the causes below the aggregate.

‡ Incidence estimates for stroke represent first-ever stroke only.

^ Incidence of HIV/AIDS represents new infections of HIV only and does not include new infections of Tuberculosis in HIV positive cases.

SR Table 14: Prevalence, incidence, and YLDs for 2016, percentage change of YLD counts and percentage change of age-standardised YLD rates between 2006 and 2016 by cause and impairments, for all ages, Panama.

| Cause                                                                                | Prevalence in thousands (95% UI)       | Incidence in thousands (95% UI)            | YLDs in thousands (95% UI)       |                                                   |                                                     |
|--------------------------------------------------------------------------------------|----------------------------------------|--------------------------------------------|----------------------------------|---------------------------------------------------|-----------------------------------------------------|
|                                                                                      | 2016 counts                            | 2016 counts                                | 2016 counts                      | Percentage change in counts between 2006 and 2016 | Percentage change in age-standardised rates between |
| <b>All causes</b>                                                                    | <b>3,748.8</b><br>(3,729.9 to 3,767.4) | <b>23,590.6†</b><br>(22,248.3 to 25,038.5) | <b>366.9</b><br>(269.1 to 478.3) | <b>26.1</b><br>(23.1 to 29.1)                     | <b>0.5</b><br>(-1.6 to 2.7)                         |
| <b>Communicable, maternal, neonatal, and nutritional disorders</b>                   | <b>2,261.2</b><br>(2,180.0 to 2,350.5) | <b>14,538.0†</b><br>(13,299.6 to 15,837.9) | <b>28.5</b><br>(20.0 to 38.4)    | <b>13.3</b><br>(8.2 to 18.6)                      | <b>-1.9</b><br>(-6.0 to 2.5)                        |
| <b>HIV/AIDS and tuberculosis</b>                                                     | <b>974.1</b><br>(875.7 to 1,050.2)     | <b>3.0†</b><br>(2.4 to 3.6)                | <b>2.0</b><br>(1.0 to 3.7)       | <b>47.3</b><br>(26.5 to 72.8)                     | <b>20.6</b><br>(3.1 to 42.0)                        |
| Tuberculosis                                                                         | 894.3<br>(800.3 to 1,000.8)            | 1.4†<br>(1.2 to 1.6)                       | 0.2<br>(0.1 to 0.3)              | 6.5<br>(-17.3 to 38.6)                            | -15.1<br>(-33.5 to 8.7)                             |
| Drug-susceptible tuberculosis                                                        | 0.6<br>(0.5 to 0.7)                    | 1.4<br>(1.2 to 1.6)                        | 0.2<br>(0.1 to 0.3)              | 6.7<br>(-17.5 to 39.1)                            | -15.0<br>(-33.4 to 8.8)                             |
| Multidrug-resistant tuberculosis without extensive drug resistance                   | < 0.05<br>(< 0.05 to < 0.05)           | < 0.05<br>(< 0.05 to < 0.05)               | < 0.05<br>(< 0.05 to < 0.05)     | -5.2<br>(-50.6 to 87.7)                           | -24.9<br>(-60.8 to 48.6)                            |
| Extensively drug-resistant tuberculosis                                              | < 0.05<br>(< 0.05 to < 0.05)           | < 0.05<br>(< 0.05 to < 0.05)               | < 0.05<br>(< 0.05 to < 0.05)     | 152.5<br>(31.7 to 399.9)                          | 99.9<br>(4.5 to 295.2)                              |
| Latent tuberculosis infection                                                        | 893.7<br>(799.7 to 1,000.2)            | --                                         | --                               | --                                                | --                                                  |
| HIV/AIDS                                                                             | 17.9<br>(12.7 to 25.7)                 | 1.6^<br>(1.1 to 2.2)                       | 1.8<br>(0.9 to 3.5)              | 53.7<br>(29.8 to 84.7)                            | 26.8<br>(6.5 to 52.4)                               |
| Drug-susceptible HIV/AIDS - Tuberculosis                                             | 0.1<br>(0.1 to 0.1)                    | 0.2<br>(0.1 to 0.3)                        | < 0.05<br>(< 0.05 to 0.1)        | -8.4<br>(-14.0 to -2.7)                           | -23.1<br>(-27.8 to -18.3)                           |
| Multidrug-resistant HIV/AIDS - Tuberculosis without extensive drug resistance        | < 0.05<br>(< 0.05 to < 0.05)           | < 0.05<br>(< 0.05 to < 0.05)               | < 0.05<br>(< 0.05 to < 0.05)     | -18.5<br>(-58.1 to 59.8)                          | -31.6<br>(-64.8 to 34.1)                            |
| Extensively drug-resistant HIV/AIDS - Tuberculosis                                   | < 0.05<br>(< 0.05 to < 0.05)           | < 0.05<br>(< 0.05 to < 0.05)               | < 0.05<br>(< 0.05 to < 0.05)     | 117.0<br>(11.7 to 325.5)                          | 82.1<br>(-6.3 to 257.1)                             |
| HIV/AIDS resulting in other diseases                                                 | 17.8<br>(12.6 to 25.6)                 | 1.6<br>(1.1 to 2.2)                        | 1.8<br>(0.8 to 3.5)              | 56.1<br>(31.1 to 89.4)                            | 28.7<br>(7.4 to 56.9)                               |
| <b>Diarrhoea, lower respiratory infections, and other common infectious diseases</b> | <b>233.8</b><br>(220.8 to 246.6)       | <b>13,765.1†</b><br>(12,557.5 to 15,057.2) | <b>11.7</b><br>(8.0 to 16.3)     | <b>23.5</b><br>(18.9 to 28.3)                     | <b>7.4</b><br>(3.6 to 11.3)                         |
| Diarrhoeal diseases                                                                  | 54.6<br>(50.9 to 58.8)                 | 3,642.6<br>(3,395.6 to 3,907.3)            | 6.2<br>(4.3 to 8.5)              | 35.9<br>(27.5 to 44.3)                            | 17.9<br>(11.0 to 24.9)                              |
| Intestinal infectious diseases                                                       | < 0.05<br>(< 0.05 to < 0.05)           | 0.1†<br>(0.1 to 0.2)                       | < 0.05<br>(< 0.05 to < 0.05)     | 13.3<br>(-9.4 to 39.0)                            | -9.8<br>(-27.6 to 7.5)                              |
| Typhoid fever                                                                        | < 0.05<br>(< 0.05 to < 0.05)           | 0.1<br>(0.1 to 0.2)                        | < 0.05<br>(< 0.05 to < 0.05)     | 14.0<br>(-9.0 to 40.1)                            | -9.2<br>(-27.4 to 8.9)                              |
| Paratyphoid fever                                                                    | < 0.05<br>(< 0.05 to < 0.05)           | < 0.05<br>(< 0.05 to < 0.05)               | < 0.05<br>(< 0.05 to < 0.05)     | 23.8<br>(-22.7 to 90.1)                           | -0.1<br>(-37.0 to 50.7)                             |
| Other intestinal infectious diseases                                                 | --                                     | --                                         | < 0.05<br>(< 0.05 to < 0.05)     | -13.9<br>(-39.7 to 15.3)                          | -30.8<br>(-47.1 to -12.2)                           |
| Lower respiratory infections                                                         | 3.8<br>(3.5 to 4.2)                    | 162.0<br>(145.8 to 180.4)                  | 0.2<br>(0.1 to 0.3)              | 62.1<br>(43.5 to 82.9)                            | 32.2<br>(18.3 to 47.7)                              |
| Upper respiratory infections                                                         | 128.0<br>(112.8 to 144.5)              | 9,637.1<br>(8,453.4 to 10,934.8)           | 3.2<br>(1.9 to 5.0)              | 14.7<br>(8.9 to 20.4)                             | -0.2<br>(-5.5 to 4.6)                               |
| Otitis media                                                                         | 49.2<br>(44.1 to 54.4)                 | 235.5<br>(189.6 to 292.6)                  | 1.4<br>(0.8 to 2.1)              | 0.6<br>(-6.8 to 8.7)                              | -10.8<br>(-17.3 to -4.0)                            |
| Meningitis                                                                           | 2.5<br>(2.2 to 2.8)                    | 0.5<br>(0.5 to 0.6)                        | 0.3<br>(0.2 to 0.4)              | 10.2<br>(6.7 to 13.9)                             | -8.1<br>(-11.1 to -5.1)                             |
| Pneumococcal meningitis                                                              | 1.2<br>(1.0 to 1.4)                    | 0.1<br>(0.1 to 0.1)                        | 0.1<br>(0.1 to 0.2)              | 3.0<br>(-2.9 to 8.7)                              | -14.5<br>(-19.3 to -9.5)                            |
| H influenzae type B meningitis                                                       | 0.3<br>(0.2 to 0.3)                    | < 0.05<br>(< 0.05 to 0.1)                  | < 0.05<br>(< 0.05 to 0.1)        | 12.0<br>(6.8 to 17.1)                             | -4.8<br>(-9.1 to -0.4)                              |
| Meningococcal infection                                                              | 0.2<br>(0.1 to 0.2)                    | 0.1<br>(< 0.05 to 0.1)                     | < 0.05<br>(< 0.05 to < 0.05)     | 14.4<br>(9.0 to 20.5)                             | -5.3<br>(-9.5 to -0.6)                              |
| Other meningitis                                                                     | 0.9<br>(0.7 to 1.1)                    | 0.3<br>(0.3 to 0.4)                        | 0.1<br>(0.1 to 0.1)              | 21.9<br>(17.3 to 27.0)                            | 1.5<br>(-2.1 to 5.4)                                |
| Encephalitis                                                                         | 1.9<br>(1.4 to 2.6)                    | 0.9<br>(0.8 to 1.1)                        | 0.2<br>(0.2 to 0.3)              | 16.5<br>(8.6 to 25.5)                             | -3.8<br>(-10.0 to 3.2)                              |
| Diphtheria                                                                           | < 0.05<br>(< 0.05 to < 0.05)           | < 0.05<br>(< 0.05 to < 0.05)               | < 0.05<br>(< 0.05 to < 0.05)     | -6.1<br>(-50.3 to 77.8)                           | -16.9<br>(-56.0 to 55.9)                            |
| Whooping cough                                                                       | 1.0<br>(0.8 to 1.3)                    | 7.6<br>(5.9 to 9.5)                        | 0.1<br>(< 0.05 to 0.1)           | -2.1<br>(-17.4 to 17.0)                           | -6.0<br>(-20.5 to 12.1)                             |
| Tetanus                                                                              | < 0.05<br>(< 0.05 to < 0.05)           | < 0.05<br>(< 0.05 to < 0.05)               | < 0.05<br>(< 0.05 to < 0.05)     | 17.2<br>(2.9 to 34.3)                             | -0.8<br>(-13.1 to 13.6)                             |
| Measles                                                                              | < 0.05<br>(0.0 to < 0.05)              | < 0.05<br>(0.0 to < 0.05)                  | < 0.05<br>(0.0 to < 0.05)        | --                                                | --                                                  |
| Varicella and herpes zoster                                                          | 3.7<br>(3.4 to 4.0)                    | 78.7<br>(76.4 to 81.2)                     | 0.1<br>(0.1 to 0.2)              | 27.4<br>(11.4 to 43.6)                            | 0.1<br>(-11.9 to 12.3)                              |
| <b>Neglected tropical diseases and malaria</b>                                       | <b>550.2</b><br>(453.9 to 682.3)       | <b>305.5†</b><br>(170.6 to 648.3)          | <b>2.0</b><br>(1.2 to 3.0)       | <b>29.9</b><br>(4.4 to 69.9)                      | <b>8.4</b><br>(-13.1 to 39.6)                       |
| Malaria                                                                              | < 0.05<br>(< 0.05 to < 0.05)           | 0.6<br>(0.6 to 0.6)                        | < 0.05<br>(< 0.05 to < 0.05)     | -80.0<br>(-88.2 to -48.9)                         | -82.6<br>(-89.7 to -55.7)                           |
| Chagas disease                                                                       | 20.9<br>(16.8 to 26.2)                 | 0.6<br>(0.5 to 0.8)                        | 0.2<br>(0.1 to 0.3)              | 30.8<br>(12.2 to 51.2)                            | -2.9<br>(-16.0 to 11.7)                             |
| Leishmaniasis                                                                        | 3.0<br>(0.5 to 7.4)                    | 4.0<br>(0.2 to 13.7)                       | 0.1<br>(< 0.05 to 0.5)           | -43.6<br>(-97.8 to 114.2)                         | -54.1<br>(-98.2 to 74.8)                            |
| Visceral leishmaniasis                                                               | --                                     | --                                         | --                               | --                                                | --                                                  |
| Cutaneous and mucocutaneous leishmaniasis                                            | 2.0<br>(0.1 to 6.9)                    | 4.0<br>(0.2 to 13.7)                       | 0.1<br>(< 0.05 to 0.5)           | -43.6<br>(-97.8 to 114.2)                         | -54.1<br>(-98.2 to 74.8)                            |
| African trypanosomiasis                                                              | --                                     | --                                         | --                               | --                                                | --                                                  |
| Schistosomiasis                                                                      | --                                     | --                                         | --                               | --                                                | --                                                  |
| Cysticercosis                                                                        | 3.1<br>(1.5 to 5.1)                    | --                                         | 0.4<br>(0.2 to 0.9)              | 96.4<br>(7.0 to 234.5)                            | 50.3<br>(-16.9 to 152.4)                            |
| Cystic echinococcosis                                                                | --                                     | --                                         | --                               | --                                                | --                                                  |
| Lymphatic filariasis                                                                 | --                                     | --                                         | --                               | --                                                | --                                                  |
| Onchocerciasis                                                                       | --                                     | --                                         | --                               | --                                                | --                                                  |
| Trachoma                                                                             | --                                     | --                                         | --                               | --                                                | --                                                  |
| Dengue                                                                               | 4.2<br>(2.5 to 6.7)                    | 70.5<br>(48.6 to 97.3)                     | 0.7<br>(0.3 to 1.2)              | 54.5<br>(22.6 to 233.9)                           | 31.9<br>(5.0 to 182.1)                              |
| Yellow fever                                                                         | < 0.05<br>(< 0.05 to < 0.05)           | < 0.05<br>(< 0.05 to 0.1)                  | < 0.05<br>(< 0.05 to < 0.05)     | -36.2<br>(-56.7 to -8.6)                          | -45.2<br>(-62.0 to -22.8)                           |
| Rabies                                                                               | < 0.05<br>(< 0.05 to < 0.05)           | < 0.05<br>(< 0.05 to < 0.05)               | < 0.05<br>(< 0.05 to < 0.05)     | -1.0<br>(-28.2 to 35.9)                           | -18.9<br>(-40.2 to 9.0)                             |
| Intestinal nematode infections                                                       | 521.7<br>(422.0 to 660.4)              | --                                         | 0.2<br>(0.1 to 0.5)              | 16.6<br>(-56.4 to 223.9)                          | -2.1<br>(-64.2 to 173.2)                            |
| Ascariasis                                                                           | 468.3<br>(369.3 to 598.6)              | --                                         | 0.2<br>(0.1 to 0.4)              | 17.8<br>(-58.0 to 240.5)                          | -0.9<br>(-65.4 to 190.6)                            |

| Cause                                                                   | Prevalence in thousands (95% UI)        | Incidence in thousands (95% UI)          | YLDs in thousands (95% UI)        |                                                   |                                                     |
|-------------------------------------------------------------------------|-----------------------------------------|------------------------------------------|-----------------------------------|---------------------------------------------------|-----------------------------------------------------|
|                                                                         | 2016 counts                             | 2016 counts                              | 2016 counts                       | Percentage change in counts between 2006 and 2016 | Percentage change in age-standardised rates between |
| Trichuriasis                                                            | 1.8<br>(1.3 to 2.6)                     | --                                       | --                                | --                                                | --                                                  |
| Hookworm disease                                                        | 1.9<br>(1.4 to 2.4)                     | --                                       | < 0.05<br>(< 0.05 to < 0.05)      | -8.7<br>(-37.2 to 36.7)                           | -26.8<br>(-49.6 to 9.7)                             |
| Food-borne trematodiasis                                                | --                                      | --                                       | --                                | --                                                | --                                                  |
| Leprosy                                                                 | < 0.05<br>(< 0.05 to < 0.05)            | < 0.05<br>(< 0.05 to < 0.05)             | < 0.05<br>(< 0.05 to < 0.05)      | -3.8<br>(-17.1 to 30.5)                           | -29.1<br>(-39.6 to -1.9)                            |
| Ebola virus disease                                                     | --                                      | --                                       | --                                | --                                                | --                                                  |
| Zika virus disease                                                      | 3.8<br>(1.6 to 9.3)                     | 229.8<br>(94.7 to 559.9)                 | 0.1<br>(< 0.05 to 0.2)            | --                                                | --                                                  |
| Guinea worm disease                                                     | --                                      | --                                       | --                                | --                                                | --                                                  |
| Other neglected tropical diseases                                       | 16.3<br>(13.9 to 19.0)                  | --                                       | 0.3<br>(0.2 to 0.5)               | -10.8<br>(-26.7 to 8.6)                           | -16.3<br>(-31.3 to 1.5)                             |
| <b>Maternal disorders</b>                                               | <b>5.2<br/>(4.2 to 6.7)</b>             | <b>113.8†<br/>(92.9 to 135.4)</b>        | <b>0.4<br/>(0.2 to 0.5)</b>       | <b>0.8<br/>(-25.1 to 34.6)</b>                    | <b>-9.3<br/>(-32.7 to 21.2)</b>                     |
| Maternal haemorrhage                                                    | 0.7<br>(0.5 to 1.0)                     | 3.8<br>(2.7 to 5.2)                      | < 0.05<br>(< 0.05 to < 0.05)      | 20.0<br>(-21.5 to 79.1)                           | 7.6<br>(-29.5 to 60.3)                              |
| Maternal sepsis and other pregnancy related infections                  | 1.3<br>(0.9 to 1.8)                     | 8.6<br>(6.2 to 11.6)                     | < 0.05<br>(< 0.05 to 0.1)         | -0.8<br>(-52.4 to 99.9)                           | -11.0<br>(-57.2 to 78.2)                            |
| Maternal hypertensive disorders                                         | 2.8<br>(1.9 to 4.1)                     | 15.1<br>(12.3 to 18.0)                   | 0.1<br>(0.1 to 0.2)               | 9.7<br>(-31.2 to 83.3)                            | -1.3<br>(-38.1 to 64.6)                             |
| Maternal obstructed labour and uterine rupture                          | < 0.05<br>(< 0.05 to 0.1)               | 2.5<br>(1.8 to 3.4)                      | < 0.05<br>(< 0.05 to < 0.05)      | -3.6<br>(-48.9 to 74.7)                           | -13.1<br>(-53.9 to 57.4)                            |
| Maternal abortion, miscarriage, and ectopic pregnancy                   | 0.7<br>(0.4 to 1.0)                     | 83.8<br>(63.8 to 104.2)                  | 0.1<br>(< 0.05 to 0.1)            | -12.9<br>(-51.0 to 53.8)                          | -21.5<br>(-55.9 to 39.2)                            |
| Other maternal disorders                                                | --                                      | --                                       | 0.1<br>(< 0.05 to 0.1)            | -3.7<br>(-28.6 to 28.6)                           | -13.3<br>(-35.8 to 15.9)                            |
| <b>Neonatal disorders</b>                                               | <b>24.1<br/>(20.6 to 28.4)</b>          | <b>4.1<br/>(2.8 to 5.9)</b>              | <b>13.7<br/>(-1.2 to 28.9)</b>    | <b>-1.1<br/>(-13.8 to 12.0)</b>                   |                                                     |
| Neonatal preterm birth complications                                    | 20.6<br>(16.5 to 26.0)                  | --                                       | 2.3<br>(1.5 to 3.3)               | 13.8<br>(-9.2 to 37.6)                            | -1.2<br>(-21.3 to 19.9)                             |
| Neonatal encephalopathy due to birth asphyxia and trauma                | 4.3<br>(2.1 to 7.8)                     | --                                       | 0.5<br>(0.1 to 1.5)               | 15.1<br>(-35.4 to 71.1)                           | -0.1<br>(-42.9 to 49.0)                             |
| Neonatal sepsis and other neonatal infections                           | 1.7<br>(0.7 to 3.7)                     | --                                       | 0.8<br>(0.3 to 1.8)               | 14.3<br>(-5.9 to 38.2)                            | -0.1<br>(-17.9 to 21.3)                             |
| Hemolytic disease and other neonatal jaundice                           | 1.5<br>(1.3 to 1.7)                     | --                                       | 0.4<br>(0.3 to 0.5)               | 13.3<br>(-4.9 to 35.0)                            | -2.6<br>(-17.7 to 15.3)                             |
| Other neonatal disorders                                                | --                                      | --                                       | 0.1<br>(0.1 to 0.2)               | 3.4<br>(-16.9 to 25.8)                            | -2.3<br>(-21.3 to 18.9)                             |
| <b>Nutritional deficiencies</b>                                         | <b>445.9<br/>(419.5 to 471.8)</b>       | <b>70.2†<br/>(58.9 to 85.7)</b>          | <b>7.2<br/>(4.5 to 10.6)</b>      | <b>-7.6<br/>(-15.7 to 1.3)</b>                    | <b>-19.2<br/>(-26.1 to -11.7)</b>                   |
| Protein-energy malnutrition                                             | 4.8<br>(3.6 to 6.6)                     | 2.7<br>(2.0 to 3.7)                      | 0.2<br>(0.1 to 0.4)               | -2.2<br>(-39.1 to 55.4)                           | -6.9<br>(-41.8 to 47.5)                             |
| Iodine deficiency                                                       | 49.5<br>(43.7 to 56.7)                  | 1.1<br>(1.0 to 1.3)                      | 1.3<br>(0.8 to 1.8)               | 21.0<br>(8.4 to 32.9)                             | -0.3<br>(-10.3 to 9.2)                              |
| Vitamin A deficiency                                                    | 77.8<br>(65.4 to 94.8)                  | 66.4<br>(55.1 to 82.0)                   | 0.1<br>(0.1 to 0.2)               | 17.4<br>(-0.2 to 40.8)                            | 2.8<br>(-12.6 to 22.1)                              |
| Iron-deficiency anaemia                                                 | 327.2<br>(294.2 to 360.0)               | --                                       | 5.5<br>(3.3 to 8.6)               | -13.0<br>(-22.2 to -2.3)                          | -23.4<br>(-31.4 to -14.2)                           |
| Other nutritional deficiencies                                          | --                                      | --                                       | < 0.05<br>(< 0.05 to < 0.05)      | -0.9<br>(-40.4 to 63.6)                           | -6.2<br>(-43.9 to 54.5)                             |
| <b>Other communicable, maternal, neonatal, and nutritional diseases</b> | <b>946.0<br/>(881.9 to 1,018.2)</b>     | <b>280.6<br/>(252.0 to 313.8)</b>        | <b>1.1<br/>(0.6 to 1.9)</b>       | <b>12.6<br/>(4.5 to 20.3)</b>                     | <b>-3.4<br/>(-9.7 to 2.7)</b>                       |
| Sexually transmitted diseases excluding HIV                             | 812.1<br>(751.0 to 884.6)               | 251.6<br>(224.1 to 279.9)                | 0.8<br>(0.4 to 1.4)               | 19.1<br>(10.5 to 27.7)                            | -0.3<br>(-6.9 to 6.5)                               |
| Syphilis                                                                | 20.5<br>(17.8 to 24.4)                  | 15.1<br>(12.5 to 18.4)                   | 0.1<br>(< 0.05 to 0.1)            | 41.3<br>(25.6 to 58.9)                            | 3.0<br>(-8.5 to 15.9)                               |
| Chlamydial infection                                                    | 52.9<br>(35.8 to 74.6)                  | 40.3<br>(26.7 to 59.8)                   | 0.2<br>(0.1 to 0.3)               | 12.2<br>(-6.8 to 33.8)                            | -0.8<br>(-17.3 to 17.6)                             |
| Gonococcal infection                                                    | 11.5<br>(8.8 to 14.9)                   | 39.5<br>(28.8 to 52.8)                   | 0.1<br>(< 0.05 to 0.1)            | 14.4<br>(-9.2 to 45.3)                            | -1.0<br>(-22.0 to 25.9)                             |
| Trichomoniasis                                                          | 126.7<br>(109.4 to 145.1)               | 110.5<br>(94.4 to 127.2)                 | 0.2<br>(0.1 to 0.4)               | 19.9<br>(12.6 to 27.5)                            | 0.4<br>(-5.2 to 6.5)                                |
| Genital herpes                                                          | 658.8<br>(566.7 to 765.9)               | 42.8<br>(36.0 to 51.1)                   | 0.2<br>(0.1 to 0.4)               | 24.9<br>(14.8 to 33.8)                            | -0.1<br>(-7.6 to 6.7)                               |
| Other sexually transmitted diseases                                     | 4.7<br>(4.1 to 5.3)                     | 3.4<br>(2.9 to 4.0)                      | 0.1<br>(0.1 to 0.2)               | 14.2<br>(0.7 to 29.9)                             | -1.9<br>(-13.4 to 11.5)                             |
| Hepatitis                                                               | 171.0<br>(150.6 to 192.5)               | 29.0<br>(17.3 to 45.0)                   | < 0.05<br>(< 0.05 to < 0.05)      | -12.5<br>(-41.3 to 32.3)                          | -24.5<br>(-48.2 to 12.4)                            |
| Acute hepatitis A                                                       | 1.1<br>(0.2 to 2.3)                     | 14.5<br>(3.0 to 30.4)                    | < 0.05<br>(< 0.05 to < 0.05)      | -12.3<br>(-74.8 to 178.8)                         | -21.8<br>(-76.9 to 140.2)                           |
| Hepatitis B                                                             | 64.8<br>(50.8 to 83.9)                  | 10.5<br>(8.2 to 13.6)                    | < 0.05<br>(< 0.05 to < 0.05)      | -16.3<br>(-28.6 to -2.4)                          | -30.3<br>(-40.1 to -19.2)                           |
| Hepatitis C                                                             | 105.0<br>(93.3 to 117.4)                | 3.0<br>(2.6 to 3.4)                      | < 0.05<br>(< 0.05 to < 0.05)      | 2.4<br>(-18.0 to 27.9)                            | -6.7<br>(-25.7 to 17.0)                             |
| Acute hepatitis E                                                       | 0.1<br>(0.1 to 0.1)                     | 1.1<br>(1.0 to 1.3)                      | < 0.05<br>(< 0.05 to < 0.05)      | -6.0<br>(-14.9 to 3.3)                            | -20.0<br>(-26.6 to -12.5)                           |
| Other infectious diseases                                               | 12.7<br>(11.1 to 14.6)                  | < 0.05<br>(< 0.05 to < 0.05)             | 0.3<br>(0.2 to 0.5)               | -0.5<br>(-15.2 to 15.5)                           | -9.1<br>(-22.2 to 4.7)                              |
| <b>Non-communicable diseases</b>                                        | <b>3,536.0<br/>(3,508.7 to 3,561.5)</b> | <b>8,812.9†<br/>(8,369.1 to 9,320.0)</b> | <b>317.1<br/>(231.9 to 414.5)</b> | <b>26.5<br/>(23.2 to 30.0)</b>                    | <b>0.2<br/>(-2.2 to 2.6)</b>                        |
| <b>Neoplasms</b>                                                        | <b>23.4<br/>(22.3 to 24.6)</b>          | <b>7.8<br/>(7.3 to 8.1)</b>              | <b>2.5<br/>(1.8 to 3.3)</b>       | <b>73.3<br/>(64.6 to 81.9)</b>                    | <b>22.1<br/>(15.4 to 28.4)</b>                      |
| Lip and oral cavity cancer                                              | 0.3<br>(0.3 to 0.3)                     | 0.1<br>(0.1 to 0.1)                      | < 0.05<br>(< 0.05 to < 0.05)      | 42.0<br>(28.0 to 57.7)                            | -1.0<br>(-11.1 to 10.8)                             |
| Nasopharynx cancer                                                      | 0.1<br>(0.1 to 0.1)                     | < 0.05<br>(< 0.05 to < 0.05)             | < 0.05<br>(< 0.05 to < 0.05)      | 46.9<br>(32.7 to 64.8)                            | 7.3<br>(-3.5 to 21.1)                               |
| Other pharynx cancer                                                    | 0.1<br>(0.1 to 0.1)                     | < 0.05<br>(< 0.05 to < 0.05)             | < 0.05<br>(< 0.05 to < 0.05)      | 79.8<br>(61.0 to 102.6)                           | 24.3<br>(10.6 to 40.5)                              |
| Oesophageal cancer                                                      | < 0.05<br>(< 0.05 to 0.1)               | < 0.05<br>(< 0.05 to < 0.05)             | < 0.05<br>(< 0.05 to < 0.05)      | 27.7<br>(16.3 to 39.6)                            | -12.4<br>(-20.2 to -3.8)                            |
| Stomach cancer                                                          | 1.4<br>(1.3 to 1.5)                     | 0.7<br>(0.6 to 0.7)                      | 0.2<br>(0.1 to 0.2)               | 95.7<br>(71.8 to 123.3)                           | 35.4<br>(18.0 to 55.8)                              |
| Colon and rectum cancer                                                 | 2.9<br>(2.6 to 3.1)                     | 0.8<br>(0.7 to 0.8)                      | 0.3<br>(0.2 to 0.3)               | 89.5<br>(66.2 to 115.4)                           | 30.1<br>(13.7 to 47.7)                              |
| Liver cancer                                                            | 0.1<br>(< 0.05 to 0.1)                  | 0.2<br>(0.1 to 0.2)                      | < 0.05<br>(< 0.05 to < 0.05)      | 57.7<br>(44.0 to 72.1)                            | 9.0<br>(-0.8 to 19.3)                               |
| Liver cancer due to hepatitis B                                         | < 0.05<br>(< 0.05 to < 0.05)            | < 0.05<br>(< 0.05 to < 0.05)             | < 0.05<br>(< 0.05 to < 0.05)      | 62.0<br>(44.6 to 81.5)                            | 15.2<br>(2.4 to 28.4)                               |



| Cause                                              | Prevalence in thousands (95% UI)        | Incidence in thousands (95% UI)       | YLDs in thousands (95% UI)          |                                                   |                                                     |
|----------------------------------------------------|-----------------------------------------|---------------------------------------|-------------------------------------|---------------------------------------------------|-----------------------------------------------------|
|                                                    | 2016 counts                             | 2016 counts                           | 2016 counts                         | Percentage change in counts between 2006 and 2016 | Percentage change in age-standardised rates between |
| Liver cancer due to hepatitis C                    | < 0.05<br>(< 0.05 to 0.1)               | 0.1<br>(< 0.05 to 0.1)                | < 0.05<br>(< 0.05 to < 0.05)        | 65.1<br>(48.5 to 84.5)                            | 12.2<br>(0.5 to 25.4)                               |
| Liver cancer due to alcohol use                    | < 0.05<br>(< 0.05 to < 0.05)            | < 0.05<br>(< 0.05 to 0.1)             | < 0.05<br>(< 0.05 to < 0.05)        | 44.8<br>(28.0 to 63.4)                            | -1.6<br>(-13.1 to 11.3)                             |
| Liver cancer due to other causes                   | < 0.05<br>(< 0.05 to < 0.05)            | < 0.05<br>(< 0.05 to < 0.05)          | < 0.05<br>(< 0.05 to < 0.05)        | 59.4<br>(43.8 to 77.8)                            | 13.0<br>(1.5 to 26.9)                               |
| Gallbladder and biliary tract cancer               | < 0.05<br>(< 0.05 to < 0.05)            | 0.1<br>(< 0.05 to 0.1)                | < 0.05<br>(< 0.05 to < 0.05)        | 24.7<br>(17.0 to 32.9)                            | -15.1<br>(-20.5 to -9.4)                            |
| Pancreatic cancer                                  | 0.1<br>(0.1 to 0.1)                     | 0.1<br>(0.1 to 0.1)                   | < 0.05<br>(< 0.05 to < 0.05)        | 48.6<br>(36.7 to 61.8)                            | 1.1<br>(-7.4 to 10.5)                               |
| Larynx cancer                                      | 0.2<br>(0.2 to 0.2)                     | 0.1<br>(0.1 to 0.1)                   | < 0.05<br>(< 0.05 to < 0.05)        | 40.0<br>(24.4 to 57.6)                            | -4.4<br>(-15.2 to 7.7)                              |
| Tracheal, bronchus, and lung cancer                | 0.4<br>(0.4 to 0.5)                     | 0.4<br>(0.3 to 0.4)                   | 0.1<br>(0.1 to 0.1)                 | 33.8<br>(10.0 to 61.8)                            | -8.6<br>(-25.5 to 11.1)                             |
| Malignant skin melanoma                            | 0.2<br>(0.2 to 0.3)                     | 0.1<br>(< 0.05 to 0.1)                | < 0.05<br>(< 0.05 to < 0.05)        | 96.7<br>(65.7 to 129.2)                           | 40.2<br>(16.9 to 66.7)                              |
| Non-melanoma skin cancer                           | 0.3<br>(0.1 to 0.5)                     | 0.5<br>(0.4 to 0.7)                   | < 0.05<br>(< 0.05 to < 0.05)        | 106.2<br>(1.3 to 325.1)                           | 44.2<br>(-30.2 to 202.4)                            |
| Non-melanoma skin cancer (squamous-cell carcinoma) | 0.2<br>(0.1 to 0.5)                     | 0.2<br>(0.1 to 0.4)                   | < 0.05<br>(< 0.05 to < 0.05)        | 111.0<br>(-1.6 to 345.7)                          | 47.5<br>(-32.2 to 212.5)                            |
| Non-melanoma skin cancer (basal-cell carcinoma)    | < 0.05<br>(< 0.05 to 0.1)               | 0.3<br>(0.2 to 0.3)                   | < 0.05<br>(< 0.05 to < 0.05)        | 35.6<br>(16.8 to 60.0)                            | -5.1<br>(-18.7 to 12.1)                             |
| Breast cancer                                      | 4.2<br>(3.7 to 4.7)                     | 0.9<br>(0.8 to 1.0)                   | 0.3<br>(0.2 to 0.5)                 | 74.8<br>(46.2 to 108.0)                           | 24.8<br>(5.3 to 48.1)                               |
| Cervical cancer                                    | 1.5<br>(1.3 to 1.7)                     | 0.4<br>(0.3 to 0.4)                   | 0.1<br>(0.1 to 0.2)                 | 16.3<br>(-4.0 to 39.9)                            | -12.6<br>(-27.5 to 4.9)                             |
| Uterine cancer                                     | 1.3<br>(1.1 to 1.4)                     | 0.3<br>(0.2 to 0.3)                   | 0.1<br>(0.1 to 0.1)                 | 134.8<br>(92.8 to 186.2)                          | 63.0<br>(32.6 to 98.5)                              |
| Ovarian cancer                                     | 0.4<br>(0.3 to 0.4)                     | 0.1<br>(0.1 to 0.1)                   | 0.1<br>(< 0.05 to 0.1)              | 50.9<br>(24.6 to 84.1)                            | 9.9<br>(-10.7 to 37.5)                              |
| Prostate cancer                                    | 7.5<br>(5.4 to 8.4)                     | 1.6<br>(1.2 to 1.8)                   | 0.6<br>(0.4 to 0.8)                 | 87.0<br>(64.4 to 113.0)                           | 25.7<br>(10.0 to 43.8)                              |
| Testicular cancer                                  | 0.2<br>(0.2 to 0.2)                     | < 0.05<br>(< 0.05 to < 0.05)          | < 0.05<br>(< 0.05 to < 0.05)        | 98.4<br>(33.5 to 190.8)                           | 65.9<br>(13.4 to 138.6)                             |
| Kidney cancer                                      | 0.6<br>(0.6 to 0.7)                     | 0.2<br>(0.2 to 0.2)                   | 0.1<br>(< 0.05 to 0.1)              | 71.4<br>(49.9 to 93.2)                            | 24.3<br>(8.8 to 39.8)                               |
| Bladder cancer                                     | 0.4<br>(0.3 to 0.4)                     | 0.1<br>(0.1 to 0.1)                   | < 0.05<br>(< 0.05 to < 0.05)        | 55.4<br>(36.5 to 75.1)                            | 5.6<br>(-7.2 to 19.7)                               |
| Brain and nervous system cancer                    | 0.3<br>(0.2 to 0.3)                     | 0.1<br>(0.1 to 0.1)                   | < 0.05<br>(< 0.05 to 0.1)           | 22.0<br>(5.0 to 54.1)                             | -6.3<br>(-19.5 to 18.9)                             |
| Thyroid cancer                                     | 0.5<br>(0.4 to 0.5)                     | 0.1<br>(0.1 to 0.1)                   | < 0.05<br>(< 0.05 to < 0.05)        | 101.4<br>(64.0 to 145.6)                          | 47.1<br>(19.9 to 78.8)                              |
| Mesothelioma                                       | < 0.05<br>(< 0.05 to < 0.05)            | < 0.05<br>(< 0.05 to < 0.05)          | < 0.05<br>(< 0.05 to < 0.05)        | 41.1<br>(29.8 to 52.6)                            | 0.2<br>(-8.2 to 8.8)                                |
| Hodgkin lymphoma                                   | 0.1<br>(0.1 to 0.1)                     | < 0.05<br>(< 0.05 to < 0.05)          | < 0.05<br>(< 0.05 to < 0.05)        | 120.0<br>(62.8 to 149.4)                          | 65.2<br>(23.2 to 86.8)                              |
| Non-Hodgkin's lymphoma                             | 0.5<br>(0.4 to 0.5)                     | 0.1<br>(0.1 to 0.2)                   | < 0.05<br>(< 0.05 to 0.1)           | 60.1<br>(44.1 to 78.8)                            | 16.0<br>(3.6 to 31.3)                               |
| Multiple myeloma                                   | 0.1<br>(0.1 to 0.2)                     | 0.1<br>(0.1 to 0.1)                   | < 0.05<br>(< 0.05 to < 0.05)        | 63.5<br>(40.9 to 90.4)                            | 12.6<br>(-4.2 to 32.8)                              |
| Leukaemia                                          | 0.7<br>(0.7 to 0.8)                     | 0.2<br>(0.2 to 0.2)                   | 0.1<br>(0.1 to 0.1)                 | 36.5<br>(26.8 to 46.9)                            | 3.8<br>(-3.6 to 11.8)                               |
| Acute lymphoid leukaemia                           | 0.2<br>(0.2 to 0.3)                     | 0.1<br>(0.1 to 0.1)                   | < 0.05<br>(< 0.05 to < 0.05)        | 35.3<br>(22.4 to 50.6)                            | 8.9<br>(-1.4 to 20.9)                               |
| Chronic lymphoid leukaemia                         | 0.2<br>(0.1 to 0.2)                     | < 0.05<br>(< 0.05 to < 0.05)          | < 0.05<br>(< 0.05 to < 0.05)        | 60.7<br>(40.6 to 83.2)                            | 11.8<br>(-2.6 to 27.7)                              |
| Acute myeloid leukaemia                            | 0.1<br>(0.1 to 0.1)                     | < 0.05<br>(< 0.05 to 0.1)             | < 0.05<br>(< 0.05 to < 0.05)        | 27.9<br>(16.0 to 42.9)                            | -0.6<br>(-9.7 to 10.7)                              |
| Chronic myeloid leukaemia                          | 0.1<br>(0.1 to 0.1)                     | < 0.05<br>(< 0.05 to < 0.05)          | < 0.05<br>(< 0.05 to < 0.05)        | 42.3<br>(23.5 to 64.5)                            | 4.4<br>(-8.7 to 19.9)                               |
| Other leukaemia                                    | 0.2<br>(0.1 to 0.2)                     | < 0.05<br>(< 0.05 to < 0.05)          | < 0.05<br>(< 0.05 to < 0.05)        | 22.5<br>(8.2 to 39.4)                             | -7.6<br>(-18.9 to 5.8)                              |
| Other neoplasms                                    | 2.6<br>(2.3 to 3.0)                     | 0.7<br>(0.6 to 0.7)                   | 0.2<br>(0.1 to 0.3)                 | 142.7<br>(102.9 to 186.7)                         | 77.5<br>(48.3 to 109.5)                             |
| <b>Cardiovascular diseases</b>                     | <b>189.8</b><br><b>(182.1 to 197.8)</b> | <b>18.1†</b><br><b>(17.2 to 19.1)</b> | <b>11.1</b><br><b>(8.0 to 14.6)</b> | <b>39.2</b><br><b>(34.7 to 43.9)</b>              | <b>-1.9</b><br><b>(-4.9 to 1.4)</b>                 |
| Rheumatic heart disease                            | 0.2<br>(0.2 to 0.2)                     | < 0.05<br>(< 0.05 to < 0.05)          | < 0.05<br>(< 0.05 to < 0.05)        | 16.7<br>(7.6 to 27.0)                             | -11.6<br>(-18.4 to -3.5)                            |
| Ischaemic heart disease                            | 56.4<br>(53.0 to 59.6)                  | 5.4<br>(5.1 to 5.8)                   | 3.4<br>(2.3 to 4.6)                 | 39.6<br>(33.9 to 46.2)                            | -1.4<br>(-5.3 to 3.0)                               |
| Cerebrovascular disease                            | 27.9<br>(26.1 to 29.7)                  | 4.0‡<br>(3.7 to 4.3)                  | 2.9<br>(2.1 to 3.6)                 | 40.4<br>(30.2 to 50.7)                            | -2.8<br>(-10.1 to 4.6)                              |
| Ischaemic stroke                                   | 22.8<br>(20.4 to 25.1)                  | 2.6‡<br>(2.3 to 3.0)                  | 2.2<br>(1.6 to 2.8)                 | 40.3<br>(27.8 to 53.4)                            | -3.6<br>(-12.3 to 5.5)                              |
| Hemorrhagic stroke                                 | 6.6<br>(6.1 to 7.3)                     | 1.4‡<br>(1.2 to 1.5)                  | 0.6<br>(0.5 to 0.8)                 | 40.4<br>(25.6 to 55.1)                            | 0.1<br>(-10.8 to 11.2)                              |
| Hypertensive heart disease                         | 6.4<br>(5.4 to 7.5)                     | --                                    | 0.5<br>(0.4 to 0.7)                 | 46.9<br>(32.2 to 63.7)                            | 0.3<br>(-9.8 to 11.3)                               |
| Cardiomyopathy and myocarditis                     | 2.8<br>(2.5 to 3.1)                     | 0.9†<br>(0.8 to 1.1)                  | 0.2<br>(0.2 to 0.4)                 | 31.5<br>(15.3 to 49.8)                            | 0.8<br>(-10.8 to 13.4)                              |
| Myocarditis                                        | 0.5<br>(0.4 to 0.5)                     | 0.9<br>(0.8 to 1.1)                   | < 0.05<br>(< 0.05 to < 0.05)        | 22.1<br>(14.1 to 30.8)                            | 0.6<br>(-7.3 to 9.2)                                |
| Alcoholic cardiomyopathy                           | 0.2<br>(0.2 to 0.2)                     | --                                    | < 0.05<br>(< 0.05 to < 0.05)        | 41.6<br>(25.2 to 58.4)                            | 0.8<br>(-10.4 to 13.0)                              |
| Other cardiomyopathy                               | 2.4<br>(2.1 to 2.8)                     | --                                    | 0.2<br>(0.1 to 0.3)                 | 32.2<br>(12.8 to 53.9)                            | 0.8<br>(-12.9 to 15.9)                              |
| Atrial fibrillation and flutter                    | 23.5<br>(20.6 to 26.9)                  | 1.9<br>(1.6 to 2.1)                   | 1.9<br>(1.3 to 2.6)                 | 44.1<br>(35.2 to 53.2)                            | -1.5<br>(-7.4 to 4.9)                               |
| Peripheral vascular disease                        | 57.6<br>(50.0 to 66.2)                  | 5.4<br>(4.7 to 6.3)                   | 0.3<br>(0.1 to 0.5)                 | 43.6<br>(33.7 to 55.1)                            | -3.7<br>(-10.5 to 3.6)                              |
| Endocarditis                                       | 0.2<br>(0.2 to 0.3)                     | 0.4<br>(0.4 to 0.5)                   | < 0.05<br>(< 0.05 to < 0.05)        | 35.5<br>(17.9 to 54.4)                            | -1.4<br>(-15.9 to 14.2)                             |
| Other cardiovascular and circulatory diseases      | 38.0<br>(32.4 to 44.3)                  | --                                    | 2.0<br>(1.4 to 2.8)                 | 31.6<br>(20.7 to 43.8)                            | -2.0<br>(-9.6 to 6.1)                               |
| <b>Chronic respiratory diseases</b>                | <b>382.7</b><br><b>(365.6 to 400.9)</b> | <b>62.8†</b><br><b>(58.5 to 67.1)</b> | <b>13.6</b><br><b>(9.8 to 18.5)</b> | <b>17.1</b><br><b>(11.5 to 23.4)</b>              | <b>-1.2</b><br><b>(-5.8 to 3.7)</b>                 |
| Chronic obstructive pulmonary disease              | 121.0<br>(112.5 to 132.1)               | 8.2<br>(7.7 to 9.0)                   | 2.5<br>(2.1 to 3.1)                 | 36.2<br>(19.6 to 57.2)                            | -1.6<br>(-13.7 to 13.6)                             |
| Pneumoconiosis                                     | 0.6<br>(0.5 to 0.6)                     | < 0.05<br>(< 0.05 to < 0.05)          | 0.1<br>(0.1 to 0.1)                 | 47.1<br>(24.6 to 74.6)                            | 3.6<br>(-13.3 to 25.0)                              |
| Silicosis                                          | 0.1<br>(0.1 to 0.1)                     | < 0.05<br>(< 0.05 to < 0.05)          | < 0.05<br>(< 0.05 to < 0.05)        | 44.5<br>(9.9 to 91.3)                             | 2.4<br>(-24.7 to 40.2)                              |



| Cause                                                          | Prevalence in thousands (95% UI)              | Incidence in thousands (95% UI)          | YLDs in thousands (95% UI)           |                                                   |                                                     |
|----------------------------------------------------------------|-----------------------------------------------|------------------------------------------|--------------------------------------|---------------------------------------------------|-----------------------------------------------------|
|                                                                | 2016 counts                                   | 2016 counts                              | 2016 counts                          | Percentage change in counts between 2006 and 2016 | Percentage change in age-standardised rates between |
| Asbestosis                                                     | 0.1<br>(0.1 to 0.1)                           | < 0.05<br>(< 0.05 to < 0.05)             | < 0.05<br>(< 0.05 to < 0.05)         | 39.0<br>(19.2 to 64.4)                            | 0.6<br>(-15.6 to 21.7)                              |
| Coal workers pneumoconiosis                                    | --                                            | --                                       | --                                   | --                                                | --                                                  |
| Other pneumoconiosis                                           | 0.3<br>(0.3 to 0.4)                           | < 0.05<br>(< 0.05 to < 0.05)             | < 0.05<br>(< 0.05 to 0.1)            | 52.1<br>(16.2 to 98.9)                            | 5.3<br>(-20.4 to 39.8)                              |
| Asthma                                                         | 267.5<br>(247.6 to 290.0)                     | 54.3<br>(50.1 to 58.7)                   | 10.6<br>(6.9 to 15.4)                | 12.2<br>(6.1 to 18.3)                             | -1.8<br>(-7.0 to 3.3)                               |
| Interstitial lung disease and pulmonary sarcoidosis            | 1.8<br>(1.7 to 2.0)                           | 0.2<br>(0.2 to 0.2)                      | 0.2<br>(0.1 to 0.3)                  | 49.1<br>(36.4 to 62.1)                            | 8.0<br>(-2.2 to 18.8)                               |
| Other chronic respiratory diseases                             | --                                            | --                                       | 0.2<br>(0.2 to 0.3)                  | 51.9<br>(18.3 to 94.1)                            | 33.7<br>(6.1 to 69.6)                               |
| <b>Cirrhosis and other chronic liver diseases</b>              | <b>28.3</b><br><b>(26.8 to 29.9)</b>          | <b>0.9</b><br><b>(0.8 to 0.9)</b>        | <b>0.8</b><br><b>(0.5 to 1.1)</b>    | <b>43.8</b><br><b>(30.8 to 58.2)</b>              | <b>8.7</b><br><b>(-0.2 to 18.3)</b>                 |
| Cirrhosis and other chronic liver diseases due to hepatitis B  | 1.0<br>(0.9 to 1.1)                           | < 0.05<br>(< 0.05 to < 0.05)             | < 0.05<br>(< 0.05 to < 0.05)         | 51.7<br>(24.0 to 89.5)                            | 9.9<br>(-12.7 to 40.6)                              |
| Cirrhosis and other chronic liver diseases due to hepatitis C  | 10.2<br>(9.3 to 11.0)                         | 0.3<br>(0.3 to 0.3)                      | 0.2<br>(0.2 to 0.3)                  | 43.9<br>(24.0 to 68.2)                            | 4.7<br>(-8.3 to 21.0)                               |
| Cirrhosis and other chronic liver diseases due to alcohol use  | 11.1<br>(10.2 to 12.0)                        | 0.3<br>(0.3 to 0.4)                      | 0.3<br>(0.2 to 0.4)                  | 62.4<br>(41.6 to 89.4)                            | 14.9<br>(1.0 to 32.6)                               |
| Cirrhosis and other chronic liver diseases due to other causes | 6.1<br>(5.6 to 6.6)                           | 0.2<br>(0.2 to 0.2)                      | 0.2<br>(0.2 to 0.4)                  | 27.0<br>(4.4 to 53.8)                             | 5.9<br>(-11.3 to 25.5)                              |
| <b>Digestive diseases</b>                                      | <b>86.9</b><br><b>(80.7 to 94.1)</b>          | <b>89.9†</b><br><b>(83.4 to 97.1)</b>    | <b>3.7</b><br><b>(2.6 to 5.0)</b>    | <b>40.8</b><br><b>(29.3 to 54.5)</b>              | <b>8.5</b><br><b>(-0.0 to 17.8)</b>                 |
| Peptic ulcer disease                                           | 40.2<br>(35.8 to 44.8)                        | 2.0<br>(1.8 to 2.3)                      | 0.7<br>(0.5 to 1.1)                  | 110.2<br>(79.3 to 150.0)                          | 54.4<br>(33.1 to 81.5)                              |
| Gastritis and duodenitis                                       | 17.4<br>(14.9 to 20.2)                        | 8.5<br>(7.5 to 9.7)                      | 0.5<br>(0.3 to 0.7)                  | 101.9<br>(72.6 to 137.0)                          | 49.0<br>(28.1 to 74.5)                              |
| Appendicitis                                                   | 0.4<br>(0.3 to 0.4)                           | 9.3<br>(8.6 to 10.1)                     | 0.1<br>(0.1 to 0.2)                  | 17.0<br>(-16.0 to 63.9)                           | 1.7<br>(-25.0 to 36.9)                              |
| Paralytic ileus and intestinal obstruction                     | < 0.05<br>(< 0.05 to 0.1)                     | 1.2<br>(1.1 to 1.4)                      | < 0.05<br>(< 0.05 to < 0.05)         | 31.7<br>(27.2 to 36.7)                            | 5.6<br>(1.8 to 9.1)                                 |
| Inguinal, femoral, and abdominal hernia                        | 26.4<br>(23.9 to 29.2)                        | 27.3<br>(23.7 to 31.1)                   | 1.7<br>(1.1 to 2.4)                  | 16.1<br>(5.6 to 28.2)                             | -8.9<br>(-16.7 to -0.1)                             |
| Inflammatory bowel disease                                     | 1.1<br>(1.0 to 1.1)                           | 1.0<br>(1.0 to 1.1)                      | 0.2<br>(0.1 to 0.2)                  | 41.0<br>(18.8 to 67.6)                            | 4.5<br>(-11.8 to 24.5)                              |
| Vascular intestinal disorders                                  | < 0.05<br>(< 0.05 to < 0.05)                  | 0.2<br>(0.2 to 0.2)                      | < 0.05<br>(< 0.05 to < 0.05)         | 44.0<br>(33.3 to 55.7)                            | 11.1<br>(2.6 to 20.0)                               |
| Gallbladder and biliary diseases                               | 4.3<br>(3.9 to 4.7)                           | 38.3<br>(33.2 to 43.8)                   | 0.2<br>(0.1 to 0.2)                  | 47.0<br>(18.8 to 79.9)                            | 12.1<br>(-9.4 to 36.3)                              |
| Pancreatitis                                                   | 0.2<br>(0.2 to 0.2)                           | 1.9<br>(1.7 to 2.1)                      | < 0.05<br>(< 0.05 to < 0.05)         | 43.5<br>(38.6 to 48.3)                            | 11.7<br>(8.0 to 15.2)                               |
| Other digestive diseases                                       | --                                            | --                                       | 0.3<br>(0.2 to 0.4)                  | 41.7<br>(29.3 to 55.9)                            | 10.7<br>(2.1 to 19.9)                               |
| <b>Neurological disorders</b>                                  | <b>1,442.8</b><br><b>(1,381.3 to 1,514.6)</b> | <b>659.6</b><br><b>(567.5 to 757.2)</b>  | <b>40.4</b><br><b>(25.9 to 56.1)</b> | <b>23.0</b><br><b>(2.4 to 46.5)</b>               | <b>-0.3</b><br><b>(-16.4 to 17.7)</b>               |
| Alzheimer's disease and other dementias                        | 22.4<br>(18.9 to 26.7)                        | 3.9<br>(3.3 to 4.7)                      | 3.3<br>(2.3 to 4.4)                  | 49.1<br>(42.4 to 56.2)                            | -2.6<br>(-7.0 to 2.0)                               |
| Parkinson's disease                                            | 2.4<br>(1.9 to 2.9)                           | 0.3<br>(0.2 to 0.3)                      | 0.3<br>(0.2 to 0.4)                  | 56.2<br>(38.5 to 76.7)                            | 5.8<br>(-6.4 to 20.0)                               |
| Epilepsy                                                       | 16.3<br>(3.8 to 29.2)                         | 1.8<br>(0.4 to 3.4)                      | 4.6<br>(1.1 to 10.3)                 | 14.6<br>(-74.4 to 426.6)                          | -3.1<br>(-78.2 to 344.2)                            |
| Multiple sclerosis                                             | 0.3<br>(0.2 to 0.3)                           | < 0.05<br>(< 0.05 to < 0.05)             | 0.1<br>(< 0.05 to 0.1)               | 41.1<br>(33.2 to 46.9)                            | 10.5<br>(4.4 to 15.3)                               |
| Motor neuron disease                                           | 0.1<br>(0.1 to 0.1)                           | < 0.05<br>(< 0.05 to < 0.05)             | < 0.05<br>(< 0.05 to < 0.05)         | 29.6<br>(24.4 to 34.4)                            | 3.9<br>(0.5 to 7.5)                                 |
| Migraine                                                       | 541.0<br>(507.9 to 573.3)                     | 60.5<br>(57.0 to 64.1)                   | 26.0<br>(16.7 to 36.5)               | 21.2<br>(16.9 to 25.6)                            | -0.1<br>(-3.4 to 3.5)                               |
| Tension-type headache                                          | 1,083.8<br>(970.0 to 1,210.0)                 | 593.0<br>(502.1 to 690.7)                | 5.0<br>(3.2 to 7.4)                  | 22.2<br>(16.5 to 28.4)                            | -0.5<br>(-5.1 to 4.0)                               |
| Other neurological disorders                                   | < 0.05<br>(< 0.05 to < 0.05)                  | < 0.05<br>(< 0.05 to < 0.05)             | 1.0<br>(0.3 to 2.1)                  | 35.7<br>(-62.2 to 386.8)                          | 15.8<br>(-66.8 to 283.8)                            |
| <b>Mental and substance use disorders</b>                      | <b>497.4</b><br><b>(480.6 to 514.4)</b>       | <b>193.2†</b><br><b>(180.3 to 208.5)</b> | <b>69.7</b><br><b>(50.0 to 90.4)</b> | <b>21.1</b><br><b>(18.4 to 23.8)</b>              | <b>0.6</b><br><b>(-1.7 to 2.7)</b>                  |
| Schizophrenia                                                  | 8.3<br>(7.3 to 9.5)                           | 0.5<br>(0.5 to 0.6)                      | 5.4<br>(4.0 to 6.8)                  | 27.3<br>(16.5 to 39.7)                            | 1.9<br>(-6.4 to 11.1)                               |
| Alcohol use disorders                                          | 54.5<br>(46.5 to 63.3)                        | 29.6<br>(25.4 to 34.2)                   | 5.5<br>(3.8 to 7.8)                  | 25.2<br>(15.4 to 35.7)                            | 6.2<br>(-1.6 to 14.8)                               |
| Drug use disorders                                             | 20.2<br>(18.4 to 22.1)                        | 2.8<br>(2.5 to 3.1)                      | 5.2<br>(3.7 to 7.0)                  | 21.0<br>(10.5 to 32.1)                            | 3.1<br>(-5.5 to 12.4)                               |
| Opioid use disorders                                           | 8.9<br>(7.2 to 10.9)                          | 1.1<br>(0.9 to 1.3)                      | 3.7<br>(2.5 to 5.2)                  | 22.8<br>(10.5 to 37.0)                            | 4.1<br>(-6.2 to 16.2)                               |
| Cocaine use disorders                                          | 1.6<br>(1.4 to 1.9)                           | 0.1<br>(0.1 to 0.1)                      | 0.2<br>(0.1 to 0.3)                  | 15.8<br>(-12.8 to 49.1)                           | -3.4<br>(-26.0 to 22.9)                             |
| Amphetamine use disorders                                      | 3.6<br>(2.5 to 5.0)                           | 0.4<br>(0.3 to 0.5)                      | 0.5<br>(0.3 to 0.8)                  | 16.7<br>(-9.4 to 50.0)                            | 3.5<br>(-20.0 to 32.8)                              |
| Cannabis use disorders                                         | 5.0<br>(4.2 to 5.9)                           | 0.8<br>(0.7 to 1.0)                      | 0.1<br>(0.1 to 0.2)                  | 7.1<br>(-14.2 to 38.3)                            | -7.1<br>(-25.1 to 18.7)                             |
| Other drug use disorders                                       | 1.7<br>(1.5 to 1.9)                           | 0.3<br>(0.3 to 0.4)                      | 0.6<br>(0.4 to 0.9)                  | 19.4<br>(-5.9 to 49.2)                            | 2.2<br>(-18.9 to 27.5)                              |
| Depressive disorders                                           | 108.5<br>(101.5 to 116.2)                     | 121.6<br>(109.5 to 134.3)                | 18.8<br>(13.0 to 25.6)               | 23.4<br>(17.9 to 29.7)                            | -1.2<br>(-5.2 to 3.7)                               |
| Major depressive disorder                                      | 75.0<br>(67.5 to 83.3)                        | 115.1<br>(103.0 to 127.9)                | 15.5<br>(10.6 to 21.0)               | 22.9<br>(16.4 to 30.2)                            | -1.4<br>(-6.5 to 4.3)                               |
| Dysthymia                                                      | 35.0<br>(30.6 to 40.1)                        | 6.5<br>(5.7 to 7.4)                      | 3.4<br>(2.3 to 4.9)                  | 26.1<br>(20.4 to 31.9)                            | -0.0<br>(-4.1 to 4.2)                               |
| Bipolar disorder                                               | 31.3<br>(26.9 to 36.4)                        | 2.5<br>(2.2 to 3.0)                      | 6.5<br>(4.1 to 9.7)                  | 19.7<br>(13.2 to 27.1)                            | 0.1<br>(-5.2 to 6.0)                                |
| Anxiety disorders                                              | 112.6<br>(102.8 to 122.9)                     | 18.7<br>(17.3 to 20.3)                   | 11.0<br>(7.6 to 14.9)                | 19.8<br>(12.2 to 28.3)                            | -0.2<br>(-6.5 to 6.4)                               |
| Eating disorders                                               | 7.5<br>(6.1 to 9.2)                           | 3.3<br>(2.5 to 4.4)                      | 1.5<br>(1.0 to 2.2)                  | 32.3<br>(18.0 to 48.6)                            | 17.9<br>(5.3 to 32.5)                               |
| Anorexia nervosa                                               | 1.5<br>(1.1 to 2.0)                           | 0.6<br>(0.4 to 0.8)                      | 0.3<br>(0.2 to 0.5)                  | 30.7<br>(4.8 to 62.9)                             | 18.0<br>(-5.2 to 47.0)                              |
| Bulimia nervosa                                                | 5.6<br>(4.2 to 7.4)                           | 2.7<br>(1.9 to 3.8)                      | 1.2<br>(0.7 to 1.8)                  | 32.7<br>(15.4 to 53.5)                            | 17.9<br>(2.8 to 35.8)                               |
| Autistic spectrum disorders                                    | 35.0<br>(31.3 to 39.6)                        | 0.2<br>(0.2 to 0.3)                      | 5.2<br>(3.5 to 7.4)                  | 16.3<br>(10.8 to 22.2)                            | -0.3<br>(-4.9 to 4.5)                               |
| Autism                                                         | 11.0<br>(9.3 to 12.9)                         | < 0.05<br>(< 0.05 to < 0.05)             | 2.8<br>(1.8 to 4.1)                  | 16.7<br>(7.2 to 27.0)                             | -0.2<br>(-8.0 to 8.0)                               |
| Asperger syndrome and other autistic spectrum disorders        | 24.1<br>(20.0 to 29.1)                        | 0.2<br>(0.1 to 0.3)                      | 2.4<br>(1.6 to 3.6)                  | 15.8<br>(10.5 to 21.6)                            | -0.3<br>(-4.8 to 4.4)                               |

| Cause                                                      | Prevalence in thousands (95% UI)              | Incidence in thousands (95% UI)                | YLDs in thousands (95% UI)            |                                                   |                                                     |
|------------------------------------------------------------|-----------------------------------------------|------------------------------------------------|---------------------------------------|---------------------------------------------------|-----------------------------------------------------|
|                                                            | 2016 counts                                   | 2016 counts                                    | 2016 counts                           | Percentage change in counts between 2006 and 2016 | Percentage change in age-standardised rates between |
| Attention-deficit/hyperactivity disorder                   | 31.7<br>(24.8 to 39.8)                        | 1.5<br>(1.1 to 1.9)                            | 0.4<br>(0.2 to 0.6)                   | 11.3<br>(2.2 to 20.5)                             | -0.1<br>(-8.1 to 7.9)                               |
| Conduct disorder                                           | 29.6<br>(23.9 to 35.6)                        | 10.0<br>(7.8 to 12.2)                          | 3.6<br>(2.2 to 5.5)                   | 8.0<br>(1.4 to 14.8)                              | -0.1<br>(-6.2 to 6.2)                               |
| Idiopathic developmental intellectual disability           | 21.7<br>(10.6 to 33.3)                        | --                                             | 0.9<br>(0.4 to 1.6)                   | 3.0<br>(-5.5 to 11.2)                             | -12.0<br>(-19.2 to -5.2)                            |
| Other mental and substance use disorders                   | 73.9<br>(65.2 to 85.3)                        | 2.5<br>(2.2 to 2.8)                            | 5.5<br>(3.8 to 8.0)                   | 24.2<br>(17.9 to 31.0)                            | -0.2<br>(-5.0 to 4.9)                               |
| <b>Diabetes, urogenital, blood, and endocrine diseases</b> | <b>1,279.8</b><br><b>(1,236.8 to 1,324.9)</b> | <b>308.9†</b><br><b>(292.4 to 325.8)</b>       | <b>31.6</b><br><b>(22.1 to 43.0)</b>  | <b>38.3</b><br><b>(31.6 to 45.2)</b>              | <b>2.9</b><br><b>(-2.1 to 7.9)</b>                  |
| Diabetes mellitus                                          | 210.9<br>(190.0 to 233.4)                     | 11.8<br>(10.7 to 13.1)                         | 19.1<br>(13.0 to 26.9)                | 44.5<br>(33.8 to 56.5)                            | 6.0<br>(-2.0 to 14.8)                               |
| Acute glomerulonephritis                                   | 0.1<br>(< 0.05 to 0.1)                        | 0.8<br>(0.7 to 0.9)                            | < 0.05<br>(< 0.05 to < 0.05)          | 27.2<br>(22.3 to 32.8)                            | 0.2<br>(-3.4 to 4.3)                                |
| Chronic kidney disease                                     | 204.4<br>(184.1 to 225.2)                     | 17.3<br>(15.1 to 19.7)                         | 5.0<br>(3.8 to 6.4)                   | 41.1<br>(32.2 to 50.6)                            | 0.8<br>(-5.7 to 7.6)                                |
| Chronic kidney disease due to diabetes mellitus            | 78.9<br>(67.0 to 92.2)                        | 7.0<br>(5.8 to 8.5)                            | 1.8<br>(1.3 to 2.3)                   | 43.7<br>(29.8 to 58.2)                            | 0.9<br>(-9.0 to 11.0)                               |
| Chronic kidney disease due to hypertension                 | 43.4<br>(36.9 to 49.5)                        | 4.5<br>(3.6 to 5.5)                            | 0.7<br>(0.5 to 0.9)                   | 47.2<br>(31.4 to 65.3)                            | -0.8<br>(-11.5 to 11.7)                             |
| Chronic kidney disease due to glomerulonephritis           | 40.4<br>(34.6 to 46.1)                        | 2.2<br>(1.7 to 2.8)                            | 1.5<br>(1.1 to 2.0)                   | 36.9<br>(23.9 to 51.5)                            | 2.0<br>(-7.1 to 12.3)                               |
| Chronic kidney disease due to other causes                 | 41.7<br>(34.2 to 49.9)                        | 3.5<br>(2.8 to 4.3)                            | 1.1<br>(0.8 to 1.4)                   | 38.9<br>(24.5 to 52.5)                            | 0.2<br>(-10.6 to 9.9)                               |
| Urinary diseases and male infertility                      | 68.8<br>(61.4 to 76.5)                        | 144.9†<br>(131.2 to 161.0)                     | 1.8<br>(1.2 to 2.6)                   | 37.5<br>(29.5 to 45.6)                            | -3.1<br>(-8.5 to 2.8)                               |
| Interstitial nephritis and urinary tract infections        | 2.4<br>(2.2 to 2.7)                           | 127.1<br>(113.6 to 143.2)                      | 0.1<br>(< 0.05 to 0.1)                | 21.9<br>(3.2 to 46.1)                             | 1.1<br>(-14.1 to 20.6)                              |
| Urolithiasis                                               | 0.4<br>(0.4 to 0.5)                           | 11.4<br>(10.0 to 12.9)                         | < 0.05<br>(< 0.05 to < 0.05)          | 31.1<br>(25.5 to 36.4)                            | 1.4<br>(-2.4 to 5.4)                                |
| Benign prostatic hyperplasia                               | 47.9<br>(40.9 to 56.1)                        | 6.4<br>(5.3 to 7.7)                            | 1.6<br>(1.0 to 2.3)                   | 41.9<br>(33.1 to 51.5)                            | -2.8<br>(-8.8 to 3.6)                               |
| Male infertility                                           | 14.8<br>(11.2 to 19.9)                        | --                                             | 0.1<br>(< 0.05 to 0.2)                | 8.1<br>(-0.4 to 17.9)                             | -6.7<br>(-14.0 to 1.9)                              |
| Other urinary diseases                                     | --                                            | --                                             | < 0.05<br>(< 0.05 to 0.1)             | 1.5<br>(-10.8 to 16.4)                            | -15.9<br>(-25.5 to -4.1)                            |
| Gynecological diseases                                     | 427.4<br>(404.9 to 450.9)                     | 128.6†<br>(121.5 to 135.7)                     | 3.9<br>(2.6 to 5.8)                   | 17.4<br>(12.0 to 23.1)                            | -4.3<br>(-8.5 to 0.3)                               |
| Uterine fibroids                                           | 31.6<br>(27.5 to 36.2)                        | 3.5<br>(3.0 to 4.1)                            | 0.4<br>(0.2 to 0.6)                   | 8.1<br>(-4.4 to 20.3)                             | -16.6<br>(-25.8 to -7.5)                            |
| Polycystic ovarian syndrome                                | 0.5<br>(0.4 to 0.6)                           | 2.6<br>(1.9 to 3.5)                            | < 0.05<br>(< 0.05 to < 0.05)          | 17.2<br>(-15.7 to 62.9)                           | 0.6<br>(-27.7 to 40.4)                              |
| Female infertility                                         | 38.9<br>(27.0 to 54.9)                        | --                                             | 0.2<br>(0.1 to 0.5)                   | 21.3<br>(11.8 to 31.2)                            | 4.4<br>(-3.5 to 13.5)                               |
| Endometriosis                                              | 0.2<br>(0.1 to 0.2)                           | 0.8<br>(0.7 to 1.0)                            | < 0.05<br>(< 0.05 to < 0.05)          | 20.5<br>(-1.7 to 47.8)                            | 0.2<br>(-19.0 to 24.6)                              |
| Genital prolapse                                           | 122.7<br>(105.1 to 141.5)                     | 7.7<br>(6.4 to 9.0)                            | 0.4<br>(0.2 to 0.7)                   | 24.1<br>(13.0 to 34.9)                            | -12.1<br>(-20.3 to -4.5)                            |
| Premenstrual syndrome                                      | 252.0<br>(238.5 to 266.5)                     | 91.0<br>(84.9 to 96.8)                         | 2.1<br>(1.3 to 3.3)                   | 16.9<br>(8.0 to 25.9)                             | -0.9<br>(-8.2 to 6.7)                               |
| Other gynecological diseases                               | 25.6<br>(22.0 to 29.5)                        | 22.9<br>(19.1 to 27.3)                         | 0.8<br>(0.5 to 1.2)                   | 19.0<br>(6.5 to 32.6)                             | -4.0<br>(-13.8 to 6.4)                              |
| Hemoglobinopathies and hemolytic anaemias                  | 631.8<br>(578.4 to 682.4)                     | --                                             | 0.8<br>(0.5 to 1.2)                   | 20.2<br>(-4.0 to 38.0)                            | 0.0<br>(-19.0 to 14.4)                              |
| Thalassemias                                               | < 0.05<br>(< 0.05 to < 0.05)                  | --                                             | < 0.05<br>(< 0.05 to < 0.05)          | 0.2<br>(-20.6 to 22.7)                            | -4.6<br>(-24.7 to 17.1)                             |
| Thalassaemias trait                                        | 16.5<br>(5.9 to 28.6)                         | --                                             | 0.2<br>(< 0.05 to 0.4)                | 27.8<br>(-40.6 to 85.0)                           | 6.2<br>(-50.9 to 55.1)                              |
| Sickle cell disorders                                      | 0.1<br>(0.1 to 0.3)                           | --                                             | < 0.05<br>(< 0.05 to < 0.05)          | 25.6<br>(7.7 to 47.8)                             | 13.5<br>(-2.9 to 33.4)                              |
| Sickle cell trait                                          | 107.7<br>(73.8 to 152.5)                      | --                                             | 0.3<br>(0.2 to 0.6)                   | 41.5<br>(18.2 to 68.8)                            | 21.4<br>(2.2 to 43.6)                               |
| G6PD deficiency                                            | 96.4<br>(83.2 to 110.9)                       | --                                             | < 0.05<br>(< 0.05 to < 0.05)          | -5.8<br>(-19.5 to 11.7)                           | -20.1<br>(-31.3 to -5.8)                            |
| G6PD trait                                                 | 417.3<br>(384.2 to 452.5)                     | --                                             | < 0.05<br>(< 0.05 to < 0.05)          | 62.4<br>(35.1 to 93.3)                            | 36.6<br>(14.4 to 61.6)                              |
| Other hemoglobinopathies and hemolytic anaemias            | 16.6<br>(15.0 to 18.3)                        | --                                             | 0.2<br>(0.1 to 0.4)                   | -2.1<br>(-14.6 to 11.2)                           | -19.9<br>(-29.3 to -9.8)                            |
| Endocrine, metabolic, blood, and immune disorders          | 35.3<br>(32.7 to 38.2)                        | 5.6<br>(5.0 to 6.2)                            | 1.0<br>(0.7 to 1.4)                   | 28.4<br>(18.6 to 38.5)                            | -0.8<br>(-7.5 to 6.4)                               |
| <b>Musculoskeletal disorders</b>                           | <b>544.6</b><br><b>(518.5 to 572.4)</b>       | <b>262.2</b><br><b>(236.1 to 289.9)</b>        | <b>58.2</b><br><b>(41.9 to 76.9)</b>  | <b>30.0</b><br><b>(26.3 to 33.5)</b>              | <b>0.1</b><br><b>(-2.5 to 2.6)</b>                  |
| Rheumatoid arthritis                                       | 7.9<br>(7.0 to 8.9)                           | 0.5<br>(0.4 to 0.5)                            | 1.9<br>(1.3 to 2.5)                   | 38.1<br>(25.8 to 51.0)                            | 3.5<br>(-5.0 to 12.8)                               |
| Osteoarthritis                                             | 118.4<br>(110.9 to 126.1)                     | 6.0<br>(5.6 to 6.4)                            | 7.3<br>(5.2 to 10.0)                  | 49.1<br>(43.8 to 54.6)                            | 5.3<br>(1.5 to 9.1)                                 |
| Low back and neck pain                                     | 311.0<br>(289.3 to 336.6)                     | 121.0<br>(108.6 to 134.0)                      | 35.5<br>(25.1 to 47.3)                | 28.8<br>(24.7 to 32.8)                            | -0.4<br>(-3.2 to 2.3)                               |
| Low back pain                                              | 190.4<br>(167.5 to 216.6)                     | 90.1<br>(78.4 to 102.7)                        | 21.7<br>(15.3 to 28.6)                | 27.0<br>(20.8 to 33.2)                            | -0.7<br>(-4.8 to 3.4)                               |
| Neck pain                                                  | 136.8<br>(117.2 to 158.6)                     | 31.0<br>(26.8 to 36.4)                         | 13.8<br>(9.3 to 19.8)                 | 31.9<br>(28.4 to 35.1)                            | 0.0<br>(-2.1 to 2.1)                                |
| Gout                                                       | 9.0<br>(8.0 to 10.1)                          | 1.8<br>(1.6 to 2.0)                            | 0.3<br>(0.2 to 0.4)                   | 35.2<br>(14.5 to 62.0)                            | 0.3<br>(-15.4 to 18.4)                              |
| Other musculoskeletal disorders                            | 152.4<br>(129.0 to 177.5)                     | 132.9<br>(109.6 to 159.1)                      | 13.2<br>(8.9 to 18.9)                 | 23.2<br>(13.3 to 32.8)                            | -1.9<br>(-9.3 to 6.0)                               |
| <b>Other non-communicable diseases</b>                     | <b>2,905.7</b><br><b>(2,853.7 to 2,958.1)</b> | <b>7,209.6†</b><br><b>(6,770.1 to 7,704.2)</b> | <b>85.5</b><br><b>(59.1 to 119.7)</b> | <b>25.0</b><br><b>(23.4 to 26.6)</b>              | <b>-1.1</b><br><b>(-2.2 to 0.0)</b>                 |
| Congenital anomalies                                       | 35.8<br>(31.2 to 41.0)                        | --                                             | 4.3<br>(3.1 to 5.8)                   | 13.2<br>(6.9 to 20.2)                             | -2.5<br>(-7.9 to 3.3)                               |
| Neural tube defects                                        | 2.6<br>(2.3 to 2.9)                           | --                                             | 0.8<br>(0.5 to 1.1)                   | 16.2<br>(-0.4 to 36.0)                            | -1.2<br>(-15.2 to 14.3)                             |
| Congenital heart anomalies                                 | 3.7<br>(3.2 to 4.2)                           | --                                             | 0.2<br>(0.1 to 0.3)                   | 16.2<br>(1.0 to 33.2)                             | 1.8<br>(-11.5 to 16.1)                              |
| Orofacial clefts                                           | 3.3<br>(2.8 to 3.7)                           | --                                             | < 0.05<br>(< 0.05 to 0.1)             | 12.2<br>(0.5 to 25.4)                             | -4.3<br>(-14.3 to 7.0)                              |
| Down's syndrome                                            | 3.1<br>(2.6 to 3.5)                           | --                                             | 0.3<br>(0.2 to 0.4)                   | 21.2<br>(9.1 to 33.9)                             | 4.6<br>(-5.7 to 15.1)                               |
| Turner syndrome                                            | 1.0<br>(0.9 to 1.2)                           | --                                             | < 0.05<br>(< 0.05 to < 0.05)          | 15.8<br>(-23.4 to 76.8)                           | 2.0<br>(-31.9 to 52.9)                              |
| Klinefelter syndrome                                       | 1.6<br>(1.3 to 1.9)                           | --                                             | < 0.05<br>(< 0.05 to < 0.05)          | 11.0<br>(-15.3 to 47.2)                           | -0.9<br>(-24.0 to 31.3)                             |



| Cause                                         | Prevalence in thousands (95% UI)        | Incidence in thousands (95% UI)          | YLDs in thousands (95% UI)           |                                                   |                                                     |
|-----------------------------------------------|-----------------------------------------|------------------------------------------|--------------------------------------|---------------------------------------------------|-----------------------------------------------------|
|                                               | 2016 counts                             | 2016 counts                              | 2016 counts                          | Percentage change in counts between 2006 and 2016 | Percentage change in age-standardised rates between |
| Other chromosomal abnormalities               | 3.4<br>(2.8 to 4.0)                     | --                                       | 0.4<br>(0.3 to 0.5)                  | 11.0<br>(-7.0 to 31.9)                            | 4.1<br>(-13.0 to 24.3)                              |
| Congenital musculoskeletal and limb anomalies | 5.0<br>(4.5 to 5.4)                     | --                                       | 0.7<br>(0.5 to 0.9)                  | 20.1<br>(8.0 to 34.0)                             | 1.2<br>(-8.3 to 12.6)                               |
| Urogenital congenital anomalies               | 4.3<br>(3.8 to 4.9)                     | --                                       | 0.1<br>(0.1 to 0.2)                  | 8.8<br>(-4.2 to 21.6)                             | -0.0<br>(-11.8 to 11.8)                             |
| Digestive congenital anomalies                | 4.4<br>(3.9 to 5.0)                     | --                                       | 0.2<br>(0.1 to 0.3)                  | 14.7<br>(-3.0 to 34.8)                            | -2.1<br>(-16.6 to 14.7)                             |
| Other congenital anomalies                    | 13.8<br>(8.6 to 20.8)                   | --                                       | 1.7<br>(1.0 to 2.5)                  | 8.6<br>(-2.0 to 20.0)                             | -7.5<br>(-16.5 to 1.9)                              |
| Skin and subcutaneous diseases                | 1,180.4<br>(1,154.5 to 1,207.7)         | 2,356.5<br>(2,249.6 to 2,472.2)          | 31.1<br>(20.8 to 44.3)               | 17.4<br>(14.9 to 20.0)                            | 1.8<br>(-0.4 to 4.0)                                |
| Dermatitis                                    | 221.7<br>(210.9 to 233.0)               | 208.4<br>(193.1 to 223.9)                | 8.9<br>(5.2 to 14.7)                 | 12.9<br>(8.3 to 17.8)                             | -0.9<br>(-4.9 to 3.1)                               |
| Psoriasis                                     | 35.4<br>(33.8 to 37.1)                  | 4.9<br>(4.7 to 5.1)                      | 3.1<br>(2.2 to 4.2)                  | 31.9<br>(22.0 to 42.6)                            | 7.6<br>(0.2 to 16.2)                                |
| Cellulitis                                    | 1.3<br>(1.2 to 1.4)                     | 23.0<br>(21.4 to 24.7)                   | 0.1<br>(< 0.05 to 0.1)               | 18.5<br>(-7.0 to 48.8)                            | 1.1<br>(-19.3 to 25.2)                              |
| Pyoderma                                      | 9.3<br>(9.0 to 9.6)                     | 206.5<br>(199.1 to 213.5)                | 0.1<br>(< 0.05 to 0.1)               | 30.6<br>(21.4 to 40.7)                            | 1.4<br>(-5.2 to 8.5)                                |
| Scabies                                       | 49.8<br>(43.8 to 57.5)                  | 153.0<br>(132.3 to 175.9)                | 1.3<br>(0.7 to 2.0)                  | 10.0<br>(5.0 to 15.1)                             | -3.4<br>(-7.5 to 0.8)                               |
| Fungal skin diseases                          | 254.6<br>(231.1 to 280.6)               | 922.9<br>(826.9 to 1,025.3)              | 1.4<br>(0.6 to 3.0)                  | 22.3<br>(19.8 to 24.8)                            | 0.0<br>(-1.3 to 1.3)                                |
| Viral skin diseases                           | 108.7<br>(103.7 to 113.9)               | 162.4<br>(154.9 to 170.3)                | 3.4<br>(2.1 to 5.0)                  | 14.6<br>(10.9 to 18.2)                            | 0.1<br>(-2.9 to 3.2)                                |
| Acne vulgaris                                 | 318.7<br>(285.5 to 354.7)               | 215.8<br>(178.3 to 266.5)                | 8.3<br>(5.6 to 12.0)                 | 15.8<br>(9.8 to 22.4)                             | 4.0<br>(-1.3 to 9.9)                                |
| Alopecia areata                               | 6.9<br>(6.6 to 7.2)                     | 12.2<br>(11.7 to 12.6)                   | 0.2<br>(0.1 to 0.4)                  | 18.4<br>(5.7 to 32.7)                             | -0.3<br>(-11.0 to 11.0)                             |
| Pruritus                                      | 35.4<br>(31.1 to 39.9)                  | 28.0<br>(25.0 to 31.6)                   | 0.4<br>(0.2 to 0.7)                  | 26.1<br>(19.4 to 33.4)                            | 1.9<br>(-3.3 to 7.3)                                |
| Urticaria                                     | 35.7<br>(31.3 to 41.1)                  | 63.5<br>(55.9 to 73.0)                   | 2.2<br>(1.4 to 3.1)                  | 13.6<br>(7.3 to 20.5)                             | 0.0<br>(-5.3 to 5.6)                                |
| Decubitus ulcer                               | 1.7<br>(1.5 to 1.9)                     | 6.2<br>(5.6 to 6.9)                      | 0.3<br>(0.2 to 0.4)                  | 46.9<br>(31.0 to 64.3)                            | 6.1<br>(-6.1 to 19.9)                               |
| Other skin and subcutaneous diseases          | 296.9<br>(288.6 to 305.8)               | 349.7<br>(338.4 to 361.8)                | 1.6<br>(0.8 to 3.0)                  | 35.9<br>(32.9 to 39.3)                            | 6.4<br>(4.1 to 9.0)                                 |
| Sense organ diseases                          | 958.0<br>(937.0 to 983.3)               | 382.1†<br>(358.5 to 408.4)               | 37.7<br>(26.2 to 52.2)               | 30.8<br>(28.5 to 33.3)                            | -3.3<br>(-5.1 to -1.6)                              |
| Glaucoma                                      | 3.6<br>(3.1 to 4.2)                     | --                                       | 0.4<br>(0.3 to 0.6)                  | 51.8<br>(36.4 to 68.6)                            | 2.7<br>(-7.7 to 13.9)                               |
| Cataract                                      | 60.0<br>(55.0 to 64.9)                  | --                                       | 5.2<br>(3.7 to 7.1)                  | 45.1<br>(38.4 to 52.1)                            | -1.6<br>(-6.2 to 3.5)                               |
| Macular degeneration                          | 1.6<br>(1.3 to 2.0)                     | --                                       | 0.1<br>(0.1 to 0.2)                  | 59.2<br>(38.6 to 82.8)                            | 7.1<br>(-6.8 to 22.7)                               |
| Refraction and accommodation disorders        | 461.8<br>(439.7 to 486.1)               | --                                       | 9.1<br>(5.7 to 14.1)                 | 20.0<br>(16.0 to 24.1)                            | -5.7<br>(-9.1 to -2.5)                              |
| Age-related and other hearing loss            | 629.5<br>(596.3 to 666.0)               | --                                       | 17.9<br>(12.4 to 25.3)               | 31.5<br>(27.9 to 34.9)                            | -4.1<br>(-6.5 to -2.0)                              |
| Other vision loss                             | 16.0<br>(14.6 to 17.5)                  | --                                       | 1.5<br>(1.1 to 2.1)                  | 37.0<br>(26.9 to 47.6)                            | 2.5<br>(-4.4 to 10.2)                               |
| Other sense organ diseases                    | 109.6<br>(100.9 to 118.4)               | 382.1<br>(358.5 to 408.4)                | 3.4<br>(2.2 to 5.1)                  | 33.1<br>(27.9 to 38.5)                            | 0.9<br>(-2.6 to 4.8)                                |
| Oral disorders                                | 2,122.2<br>(2,029.3 to 2,201.8)         | 4,471.0†<br>(4,041.2 to 4,945.4)         | 12.4<br>(7.5 to 19.3)                | 33.2<br>(30.4 to 36.5)                            | 0.0<br>(-1.7 to 1.9)                                |
| Caries of deciduous teeth                     | 227.9<br>(171.9 to 278.8)               | 852.3<br>(533.4 to 1,186.5)              | 0.1<br>(< 0.05 to 0.1)               | 4.4<br>(-7.9 to 17.3)                             | -1.4<br>(-12.9 to 10.7)                             |
| Caries of permanent teeth                     | 1,496.9<br>(1,399.8 to 1,596.4)         | 3,542.7<br>(3,238.1 to 3,863.8)          | 0.9<br>(0.4 to 1.7)                  | 9.7<br>(6.0 to 13.4)                              | -8.0<br>(-11.0 to -5.1)                             |
| Periodontal disease                           | 476.7<br>(401.2 to 563.6)               | 57.7<br>(47.5 to 70.8)                   | 3.1<br>(1.2 to 6.4)                  | 32.9<br>(27.8 to 38.1)                            | 0.9<br>(-2.7 to 4.3)                                |
| Edentulism and severe tooth loss              | 222.6<br>(194.5 to 249.4)               | 18.3<br>(15.5 to 21.3)                   | 6.2<br>(4.1 to 8.7)                  | 42.8<br>(38.4 to 47.1)                            | 0.8<br>(-2.2 to 3.8)                                |
| Other oral disorders                          | 71.3<br>(68.2 to 74.5)                  | --                                       | 2.1<br>(1.3 to 3.2)                  | 21.6<br>(17.5 to 26.0)                            | -0.1<br>(-3.2 to 3.4)                               |
| <b>Injuries</b>                               | <b>535.2</b><br><b>(502.4 to 579.9)</b> | <b>239.7†</b><br><b>(225.2 to 254.5)</b> | <b>21.3</b><br><b>(14.3 to 30.1)</b> | <b>39.8</b><br><b>(36.9 to 42.5)</b>              | <b>8.9</b><br><b>(6.8 to 10.7)</b>                  |
| <b>Transport injuries</b>                     | <b>93.2</b><br><b>(86.2 to 100.1)</b>   | <b>33.8</b><br><b>(30.2 to 37.6)</b>     | <b>4.9</b><br><b>(3.3 to 7.1)</b>    | <b>48.1</b><br><b>(44.7 to 51.5)</b>              | <b>13.9</b><br><b>(11.5 to 16.2)</b>                |
| Road injuries                                 | 90.9<br>(84.0 to 97.6)                  | 33.3<br>(29.7 to 37.0)                   | 4.8<br>(3.2 to 6.9)                  | 48.9<br>(45.4 to 52.3)                            | 14.4<br>(12.1 to 16.8)                              |
| Pedestrian road injuries                      | 18.4<br>(16.3 to 20.9)                  | 4.7<br>(3.9 to 5.6)                      | 1.0<br>(0.6 to 1.4)                  | 54.0<br>(50.2 to 57.5)                            | 17.1<br>(14.5 to 19.5)                              |
| Cyclist road injuries                         | 14.8<br>(12.2 to 17.5)                  | 5.7<br>(4.6 to 6.9)                      | 0.7<br>(0.5 to 1.1)                  | 35.3<br>(31.8 to 38.5)                            | 6.4<br>(3.9 to 8.7)                                 |
| Motorcyclist road injuries                    | 8.0<br>(6.8 to 9.4)                     | 1.8<br>(1.4 to 2.2)                      | 0.4<br>(0.3 to 0.6)                  | 52.9<br>(49.0 to 56.5)                            | 18.7<br>(15.9 to 21.2)                              |
| Motor vehicle road injuries                   | 38.9<br>(33.4 to 44.3)                  | 16.1<br>(13.9 to 18.4)                   | 2.2<br>(1.5 to 3.1)                  | 52.9<br>(49.2 to 56.7)                            | 17.1<br>(14.6 to 19.7)                              |
| Other road injuries                           | 10.7<br>(9.3 to 12.5)                   | 5.0<br>(4.0 to 6.1)                      | 0.5<br>(0.3 to 0.8)                  | 41.3<br>(37.8 to 44.7)                            | 7.9<br>(5.6 to 10.1)                                |
| Other transport injuries                      | 2.3<br>(2.0 to 2.7)                     | 0.5<br>(0.5 to 0.6)                      | 0.1<br>(0.1 to 0.2)                  | 23.6<br>(20.2 to 26.9)                            | -3.8<br>(-6.3 to -1.6)                              |
| <b>Unintentional injuries</b>                 | <b>390.8</b><br><b>(357.8 to 434.9)</b> | <b>182.3</b><br><b>(168.7 to 196.8)</b>  | <b>13.9</b><br><b>(9.5 to 19.6)</b>  | <b>36.9</b><br><b>(34.0 to 39.5)</b>              | <b>6.4</b><br><b>(4.3 to 8.3)</b>                   |
| Falls                                         | 201.7<br>(176.7 to 229.6)               | 95.5<br>(83.8 to 108.6)                  | 8.4<br>(5.9 to 11.5)                 | 41.8<br>(38.8 to 44.4)                            | 8.0<br>(5.9 to 9.9)                                 |
| Drowning                                      | 2.3<br>(2.0 to 2.6)                     | 0.5<br>(0.5 to 0.6)                      | 0.1<br>(0.1 to 0.2)                  | 29.0<br>(25.1 to 32.2)                            | -3.5<br>(-6.5 to -1.1)                              |
| Fire, heat, and hot substances                | 33.1<br>(26.7 to 42.5)                  | 4.1<br>(3.1 to 5.1)                      | 0.9<br>(0.6 to 1.3)                  | 29.3<br>(22.3 to 35.6)                            | 5.7<br>(0.8 to 10.5)                                |
| Poisonings                                    | 1.2<br>(1.0 to 1.4)                     | 1.6<br>(1.3 to 1.9)                      | 0.1<br>(0.1 to 0.2)                  | 38.7<br>(26.8 to 51.4)                            | 14.7<br>(5.2 to 24.7)                               |
| Exposure to mechanical forces                 | 77.9<br>(66.3 to 94.4)                  | 28.9<br>(24.5 to 33.6)                   | 1.8<br>(1.2 to 2.7)                  | 45.5<br>(41.4 to 49.2)                            | 14.7<br>(11.9 to 17.2)                              |
| Unintentional firearm injuries                | 4.5<br>(3.7 to 5.5)                     | 1.1<br>(0.8 to 1.5)                      | 0.2<br>(0.1 to 0.3)                  | 51.4<br>(47.1 to 55.4)                            | 17.8<br>(14.7 to 20.6)                              |
| Unintentional suffocation                     | 2.1<br>(1.5 to 2.8)                     | 0.4<br>(0.3 to 0.6)                      | 0.1<br>(< 0.05 to 0.1)               | 32.5<br>(28.3 to 36.8)                            | 10.8<br>(7.4 to 13.9)                               |
| Other exposure to mechanical forces           | 71.2<br>(59.9 to 87.5)                  | 27.4<br>(23.1 to 31.9)                   | 1.6<br>(1.0 to 2.3)                  | 45.5<br>(41.3 to 49.2)                            | 14.6<br>(11.7 to 17.1)                              |

| Cause                                                                               | Prevalence in thousands (95% UI)       | Incidence in thousands (95% UI)                                                             | YLDs in thousands (95% UI)                           |                                                   |                                                     |
|-------------------------------------------------------------------------------------|----------------------------------------|---------------------------------------------------------------------------------------------|------------------------------------------------------|---------------------------------------------------|-----------------------------------------------------|
|                                                                                     | 2016 counts                            | 2016 counts                                                                                 | 2016 counts                                          | Percentage change in counts between 2006 and 2016 | Percentage change in age-standardised rates between |
| Adverse effects of medical treatment                                                | 0.5<br>(0.4 to 0.6)                    | 6.4<br>(5.6 to 7.2)                                                                         | 0.1<br>( $< 0.05$ to 0.1)                            | 25.4<br>(19.4 to 32.1)                            | -1.1<br>(-5.9 to 3.9)                               |
| Animal contact                                                                      | 13.5<br>(11.9 to 15.8)                 | 15.9<br>(13.3 to 18.6)                                                                      | 0.5<br>(0.3 to 0.7)                                  | 8.4<br>(1.6 to 15.4)                              | -11.7<br>(-16.9 to -6.5)                            |
| Venomous animal contact                                                             | 7.5<br>(6.2 to 9.0)                    | 8.0<br>(6.4 to 9.8)                                                                         | 0.4<br>(0.2 to 0.6)                                  | 10.0<br>(1.3 to 19.0)                             | -9.5<br>(-16.1 to -2.5)                             |
| Non-venomous animal contact                                                         | 6.0<br>(5.1 to 7.4)                    | 7.8<br>(6.3 to 9.6)                                                                         | 0.1<br>(0.1 to 0.1)                                  | 2.4<br>(-1.8 to 6.0)                              | -19.4<br>(-22.3 to -16.8)                           |
| Foreign body                                                                        | 22.0<br>(17.8 to 26.2)                 | 16.8<br>(14.5 to 19.5)                                                                      | 0.9<br>(0.6 to 1.3)                                  | 17.7<br>(13.8 to 21.3)                            | -4.8<br>(-7.6 to -2.3)                              |
| Pulmonary aspiration and foreign body in airway                                     | 16.6<br>(12.7 to 20.9)                 | 5.8<br>(5.1 to 6.7)                                                                         | 0.7<br>(0.4 to 1.0)                                  | 15.5<br>(11.3 to 19.5)                            | -5.7<br>(-8.8 to -2.8)                              |
| Foreign body in eyes                                                                | 1.9<br>(1.1 to 2.8)                    | 9.5<br>(7.4 to 12.1)                                                                        | 0.1<br>(0.1 to 0.2)                                  | 29.1<br>(25.1 to 33.5)                            | -0.4<br>(-2.9 to 2.2)                               |
| Foreign body in other body part                                                     | 3.5<br>(2.9 to 4.5)                    | 1.5<br>(1.2 to 1.8)                                                                         | 0.1<br>(0.1 to 0.1)                                  | 21.9<br>(17.4 to 26.0)                            | -3.0<br>(-6.4 to -0.2)                              |
| Environmental heat and cold exposure                                                | 8.1<br>(7.0 to 9.8)                    | 2.3<br>(1.9 to 2.7)                                                                         | 0.3<br>(0.2 to 0.5)                                  | 29.1<br>(26.2 to 31.9)                            | 1.1<br>(-1.2 to 2.9)                                |
| Other unintentional injuries                                                        | 30.7<br>(25.4 to 37.2)                 | 10.4<br>(8.9 to 12.2)                                                                       | 0.9<br>(0.6 to 1.3)                                  | 29.8<br>(27.2 to 32.3)                            | 3.3<br>(1.4 to 5.2)                                 |
| <b>Self-harm and interpersonal violence</b>                                         | <b>107.5</b><br><b>(97.8 to 117.5)</b> | <b>23.5†</b><br><b>(20.2 to 27.2)</b>                                                       | <b>2.3</b><br><b>(1.6 to 3.3)</b>                    | <b>43.6</b><br><b>(38.7 to 48.4)</b>              | <b>15.5</b><br><b>(12.3 to 18.7)</b>                |
| Self-harm                                                                           | 2.6<br>(2.3 to 3.0)                    | 1.2<br>(1.0 to 1.4)                                                                         | 0.1<br>(0.1 to 0.2)                                  | 33.7<br>(29.0 to 37.8)                            | 2.1<br>(-1.1 to 4.9)                                |
| Self-harm by firearm                                                                | 0.2<br>(0.2 to 0.2)                    | 0.1<br>( $< 0.05$ to 0.1)                                                                   | $< 0.05$<br>( $< 0.05$ to $< 0.05$ )                 | 16.6<br>(12.6 to 20.2)                            | -10.4<br>(-13.3 to -7.9)                            |
| Self-harm by other specified means                                                  | 2.4<br>(2.1 to 2.8)                    | 1.1<br>(1.0 to 1.3)                                                                         | 0.1<br>(0.1 to 0.2)                                  | 35.0<br>(30.1 to 39.5)                            | 3.0<br>(-0.2 to 6.0)                                |
| Interpersonal violence                                                              | 104.9<br>(95.2 to 114.9)               | 22.3†<br>(19.0 to 25.9)                                                                     | 2.2<br>(1.5 to 3.1)                                  | 44.1<br>(39.1 to 49.3)                            | 16.4<br>(13.0 to 19.7)                              |
| Assault by firearm                                                                  | 5.6<br>(4.5 to 6.8)                    | 1.8<br>(1.4 to 2.4)                                                                         | 0.3<br>(0.2 to 0.4)                                  | 89.5<br>(83.5 to 96.1)                            | 48.8<br>(44.4 to 53.2)                              |
| Assault by sharp object                                                             | 21.9<br>(18.0 to 25.9)                 | 9.9<br>(8.0 to 12.0)                                                                        | 0.7<br>(0.4 to 1.0)                                  | 50.2<br>(45.4 to 54.8)                            | 17.8<br>(14.5 to 20.9)                              |
| Sexual violence                                                                     | 59.7<br>(52.0 to 68.2)                 | --                                                                                          | 0.5<br>(0.3 to 0.7)                                  | 4.8<br>(0.8 to 8.9)                               | -9.9<br>(-13.1 to -6.5)                             |
| Assault by other means                                                              | 17.7<br>(14.9 to 21.4)                 | 10.6<br>(8.9 to 12.5)                                                                       | 0.8<br>(0.5 to 1.1)                                  | 65.2<br>(61.1 to 69.7)                            | 28.4<br>(25.4 to 31.5)                              |
| <b>Forces of nature, conflict and terrorism, and executions and police conflict</b> | <b>3.5</b><br><b>(1.7 to 5.9)</b>      | <b><math>&lt; 0.05†</math></b><br><b>(<math>&lt; 0.05</math> to <math>&lt; 0.05</math>)</b> | <b>0.1</b><br><b>(<math>&lt; 0.05</math> to 0.3)</b> | <b>-0.7</b><br><b>(-14.2 to 3.9)</b>              | <b>-16.6</b><br><b>(-27.5 to -12.9)</b>             |
| Exposure to forces of nature                                                        | 1.2<br>(0.6 to 2.0)                    | --                                                                                          | $< 0.05$<br>( $< 0.05$ to 0.1)                       | 22.7<br>(-15.3 to 39.9)                           | 2.4<br>(-28.5 to 15.6)                              |
| Conflict and terrorism                                                              | 2.0<br>(0.3 to 4.3)                    | --                                                                                          | 0.1<br>( $< 0.05$ to 0.2)                            | -12.7<br>(-16.9 to -9.2)                          | -26.7<br>(-29.9 to -24.0)                           |
| Executions and police conflict                                                      | 0.3<br>(0.1 to 0.5)                    | $< 0.05$<br>( $< 0.05$ to $< 0.05$ )                                                        | $< 0.05$<br>( $< 0.05$ to $< 0.05$ )                 | -6.7<br>(-19.5 to -0.1)                           | -19.8<br>(-29.4 to -14.6)                           |
| <b>Impairments</b>                                                                  | --                                     | --                                                                                          | --                                                   | --                                                | --                                                  |
| Anaemia                                                                             | 572.4<br>(520.5 to 625.0)              | --                                                                                          | 13.9<br>(9.3 to 20.0)                                | 13.0<br>(3.6 to 23.4)                             | -6.5<br>(-13.8 to 1.4)                              |
| Developmental intellectual disability                                               | 50.1<br>(38.7 to 61.8)                 | --                                                                                          | 6.2<br>(4.3 to 8.3)                                  | 11.8<br>(6.6 to 17.8)                             | -3.8<br>(-8.2 to 1.4)                               |
| Epilepsy                                                                            | 23.7<br>(11.1 to 37.2)                 | --                                                                                          | 6.7<br>(2.9 to 12.4)                                 | 16.0<br>(-53.5 to 191.2)                          | -1.6<br>(-60.5 to 148.4)                            |
| Guillain-Barre syndrome                                                             | 0.1<br>( $< 0.05$ to 0.1)              | --                                                                                          | $< 0.05$<br>( $< 0.05$ to $< 0.05$ )                 | 102.8<br>(52.4 to 220.6)                          | 63.6<br>(25.4 to 154.1)                             |
| Hearing loss                                                                        | 680.0<br>(647.5 to 716.8)              | --                                                                                          | 20.4<br>(14.3 to 28.6)                               | 27.0<br>(23.7 to 29.9)                            | -5.0<br>(-7.1 to -3.1)                              |
| Heart failure                                                                       | 25.0<br>(22.1 to 28.3)                 | --                                                                                          | 2.8<br>(2.1 to 3.6)                                  | 45.0<br>(35.4 to 55.9)                            | -0.5<br>(-7.5 to 7.2)                               |
| Infertility                                                                         | 63.0<br>(47.4 to 83.9)                 | --                                                                                          | 0.4<br>(0.1 to 0.7)                                  | 17.3<br>(10.4 to 25.3)                            | 0.8<br>(-5.3 to 7.7)                                |
| Pelvic inflammatory disease                                                         | 0.3<br>(0.3 to 0.4)                    | --                                                                                          | $< 0.05$<br>( $< 0.05$ to 0.1)                       | 15.0<br>(-9.5 to 46.2)                            | -6.0<br>(-25.8 to 18.4)                             |
| Vision loss                                                                         | 554.0<br>(529.7 to 579.9)              | --                                                                                          | 18.1<br>(12.8 to 24.9)                               | 28.6<br>(24.7 to 32.5)                            | -2.9<br>(-5.8 to 0.1)                               |

We did not calculate incidence for the nine impairments, certain NTDs, and causes with only birth prevalence. Blank cells mean that no estimate is available.

† Incidence for aggregate causes represents the sum of the incidence of the causes below the aggregate.

‡ Incidence estimates for stroke represent first-ever stroke only.

^ Incidence of HIV/AIDS represents new infections of HIV only and does not include new infections of Tuberculosis in HIV positive cases.



SR Table 14: Prevalence, incidence, and YLDs for 2016, percentage change of YLD counts and percentage change of age-standardised YLD rates between 2006 and 2016 by cause and impairments, for all ages, Papua New Guinea.

| Cause                                                                                | Prevalence in thousands (95% UI)       | Incidence in thousands (95% UI)            | YLDs in thousands (95% UI)         |                                                   |                                                     |
|--------------------------------------------------------------------------------------|----------------------------------------|--------------------------------------------|------------------------------------|---------------------------------------------------|-----------------------------------------------------|
|                                                                                      | 2016 counts                            | 2016 counts                                | 2016 counts                        | Percentage change in counts between 2006 and 2016 | Percentage change in age-standardised rates between |
| <b>All causes</b>                                                                    | <b>7,686.5</b><br>(7,663.3 to 7,711.4) | <b>52,503.9†</b><br>(49,727.2 to 55,445.8) | <b>784.0</b><br>(581.3 to 1,021.7) | <b>28.7</b><br>(26.2 to 31.4)                     | <b>-0.3</b><br>(-2.0 to 1.4)                        |
| <b>Communicable, maternal, neonatal, and nutritional disorders</b>                   | <b>6,893.1</b><br>(6,808.0 to 6,980.7) | <b>31,743.4†</b><br>(29,207.1 to 34,389.0) | <b>173.5</b><br>(120.9 to 240.8)   | <b>17.8</b><br>(10.4 to 25.5)                     | <b>-6.0</b><br>(-12.1 to 0.7)                       |
| <b>HIV/AIDS and tuberculosis</b>                                                     | <b>2,113.8</b><br>(1,947.6 to 2,227.3) | <b>11.7†</b><br>(9.8 to 15.1)              | <b>4.3</b><br>(2.9 to 6.3)         | <b>23.0</b><br>(-4.9 to 57.8)                     | <b>-5.6</b><br>(-26.6 to 20.7)                      |
| Tuberculosis                                                                         | 1,990.9<br>(1,858.5 to 2,136.0)        | 9.7†<br>(8.4 to 11.0)                      | 1.9<br>(1.2 to 2.6)                | 5.6<br>(-7.2 to 21.4)                             | -20.3<br>(-28.4 to -10.8)                           |
| Drug-susceptible tuberculosis                                                        | 5.9<br>(5.0 to 6.9)                    | 9.2<br>(7.8 to 10.5)                       | 1.8<br>(1.1 to 2.5)                | 8.1<br>(-11.6 to 75.0)                            | -18.6<br>(-32.3 to 32.5)                            |
| Multidrug-resistant tuberculosis without extensive drug resistance                   | 0.2<br>(< 0.05 to 0.8)                 | 0.4<br>(0.1 to 1.3)                        | 0.1<br>(< 0.05 to 0.3)             | -30.9<br>(-93.7 to 2,421.6)                       | -47.4<br>(-95.3 to 1,858.4)                         |
| Extensively drug-resistant tuberculosis                                              | < 0.05<br>(< 0.05 to 0.1)              | < 0.05<br>(< 0.05 to 0.1)                  | < 0.05<br>(< 0.05 to < 0.05)       | 119.7<br>(-79.2 to 7,411.5)                       | 64.6<br>(-84.2 to 5,508.7)                          |
| Latent tuberculosis infection                                                        | 1,984.7<br>(1,852.2 to 2,129.8)        | --                                         | --                                 | --                                                | --                                                  |
| HIV/AIDS                                                                             | 27.8<br>(19.0 to 39.3)                 | 2.1^<br>(0.8 to 5.2)                       | 2.5<br>(1.4 to 4.0)                | 40.7<br>(-11.7 to 115.7)                          | 12.5<br>(-31.1 to 75.7)                             |
| Drug-susceptible HIV/AIDS - Tuberculosis                                             | 0.6<br>(0.4 to 0.9)                    | 0.9<br>(0.6 to 1.5)                        | 0.2<br>(0.1 to 0.4)                | -28.0<br>(-49.6 to 33.5)                          | -39.7<br>(-57.8 to 10.8)                            |
| Multidrug-resistant HIV/AIDS - Tuberculosis without extensive drug resistance        | < 0.05<br>(< 0.05 to 0.1)              | < 0.05<br>(< 0.05 to 0.2)                  | < 0.05<br>(< 0.05 to < 0.05)       | -55.7<br>(-96.0 to 1,351.9)                       | -63.0<br>(-96.6 to 1,112.4)                         |
| Extensively drug-resistant HIV/AIDS - Tuberculosis                                   | < 0.05<br>(< 0.05 to < 0.05)           | < 0.05<br>(< 0.05 to < 0.05)               | < 0.05<br>(< 0.05 to < 0.05)       | 45.9<br>(-86.7 to 4,680.1)                        | 21.8<br>(-88.9 to 3,891.3)                          |
| HIV/AIDS resulting in other diseases                                                 | 27.2<br>(18.3 to 38.7)                 | 2.1<br>(0.8 to 5.2)                        | 2.2<br>(1.2 to 3.7)                | 58.5<br>(-7.3 to 174.5)                           | 25.6<br>(-29.4 to 124.5)                            |
| <b>Diarrhoea, lower respiratory infections, and other common infectious diseases</b> | <b>567.3</b><br>(542.4 to 597.4)       | <b>29,425.9†</b><br>(26,917.5 to 32,104.8) | <b>33.8</b><br>(23.8 to 45.4)      | <b>21.2</b><br>(17.8 to 24.9)                     | <b>-3.0</b><br>(-5.4 to -0.3)                       |
| Diarrhoeal diseases                                                                  | 144.1<br>(134.5 to 154.5)              | 9,623.8<br>(8,990.7 to 10,335.3)           | 16.2<br>(11.3 to 22.0)             | 25.3<br>(19.2 to 31.7)                            | -0.9<br>(-5.2 to 3.5)                               |
| Intestinal infectious diseases                                                       | 1.3<br>(1.1 to 1.6)                    | 25.8†<br>(21.8 to 30.9)                    | 0.2<br>(0.1 to 0.3)                | -20.9<br>(-38.1 to 1.1)                           | -35.3<br>(-47.2 to -20.2)                           |
| Typhoid fever                                                                        | 1.3<br>(1.0 to 1.6)                    | 20.1<br>(16.9 to 24.1)                     | 0.2<br>(0.1 to 0.3)                | -20.7<br>(-39.2 to 3.9)                           | -35.1<br>(-47.9 to -19.1)                           |
| Paratyphoid fever                                                                    | 0.2<br>(0.2 to 0.3)                    | 5.7<br>(4.8 to 6.9)                        | < 0.05<br>(< 0.05 to < 0.05)       | -18.6<br>(-33.0 to -2.2)                          | -34.0<br>(-44.4 to -23.1)                           |
| Other intestinal infectious diseases                                                 | --                                     | --                                         | < 0.05<br>(< 0.05 to < 0.05)       | -45.0<br>(-58.3 to -26.4)                         | -51.3<br>(-59.8 to -40.6)                           |
| Lower respiratory infections                                                         | 14.1<br>(12.8 to 15.6)                 | 585.5<br>(522.5 to 654.0)                  | 0.8<br>(0.6 to 1.2)                | 32.1<br>(17.8 to 48.9)                            | 4.2<br>(-4.9 to 14.3)                               |
| Upper respiratory infections                                                         | 246.5<br>(215.2 to 281.9)              | 18,511.1<br>(16,122.8 to 21,295.7)         | 6.1<br>(3.6 to 9.6)                | 23.2<br>(16.6 to 30.3)                            | -0.2<br>(-4.9 to 4.9)                               |
| Otitis media                                                                         | 125.3<br>(111.2 to 139.2)              | 386.4<br>(302.2 to 493.9)                  | 4.1<br>(2.6 to 6.1)                | 12.7<br>(5.1 to 21.1)                             | -7.8<br>(-13.7 to -1.6)                             |
| Meningitis                                                                           | 27.8<br>(23.7 to 32.4)                 | 4.6<br>(4.0 to 5.5)                        | 2.8<br>(2.0 to 3.7)                | 17.9<br>(9.2 to 27.9)                             | -5.9<br>(-12.2 to 1.2)                              |
| Pneumococcal meningitis                                                              | 16.4<br>(13.6 to 19.7)                 | 1.8<br>(1.5 to 2.1)                        | 1.6<br>(1.1 to 2.2)                | 14.5<br>(1.0 to 30.9)                             | -8.8<br>(-18.5 to 2.7)                              |
| H influenzae type B meningitis                                                       | 3.6<br>(2.8 to 4.7)                    | 0.7<br>(0.5 to 1.0)                        | 0.5<br>(0.3 to 0.6)                | 4.9<br>(-2.5 to 12.4)                             | -16.3<br>(-22.6 to -9.8)                            |
| Meningococcal infection                                                              | 2.6<br>(1.9 to 3.6)                    | 0.8<br>(0.6 to 1.1)                        | 0.2<br>(0.2 to 0.3)                | 22.0<br>(15.9 to 28.1)                            | -3.0<br>(-7.6 to 2.0)                               |
| Other meningitis                                                                     | 5.2<br>(3.9 to 6.7)                    | 1.4<br>(1.1 to 1.7)                        | 0.5<br>(0.3 to 0.7)                | 47.7<br>(35.5 to 60.1)                            | 18.6<br>(9.2 to 28.0)                               |
| Encephalitis                                                                         | 28.5<br>(18.2 to 43.0)                 | 12.2<br>(10.6 to 13.9)                     | 2.9<br>(2.0 to 3.8)                | 16.2<br>(2.4 to 30.5)                             | -8.5<br>(-18.1 to 1.6)                              |
| Diphtheria                                                                           | < 0.05<br>(< 0.05 to < 0.05)           | < 0.05<br>(< 0.05 to 0.1)                  | < 0.05<br>(< 0.05 to < 0.05)       | -9.0<br>(-52.1 to 76.6)                           | -27.3<br>(-58.6 to 33.2)                            |
| Whooping cough                                                                       | 5.3<br>(4.1 to 6.7)                    | 38.4<br>(29.6 to 48.7)                     | 0.3<br>(0.1 to 0.4)                | 0.5<br>(-12.2 to 15.8)                            | -12.0<br>(-23.2 to 1.6)                             |
| Tetanus                                                                              | < 0.05<br>(< 0.05 to < 0.05)           | < 0.05<br>(< 0.05 to 0.1)                  | < 0.05<br>(< 0.05 to < 0.05)       | -12.0<br>(-35.7 to 18.1)                          | -35.3<br>(-51.6 to -10.8)                           |
| Measles                                                                              | 0.6<br>(0.2 to 1.3)                    | 21.2<br>(7.6 to 47.2)                      | 0.1<br>(< 0.05 to 0.1)             | -40.1<br>(-64.9 to -0.5)                          | -47.5<br>(-68.8 to -13.3)                           |
| Varicella and herpes zoster                                                          | 8.7<br>(8.1 to 9.3)                    | 216.8<br>(207.3 to 226.9)                  | 0.3<br>(0.2 to 0.5)                | 30.2<br>(13.7 to 49.3)                            | -0.3<br>(-9.7 to 10.4)                              |
| <b>Neglected tropical diseases and malaria</b>                                       | <b>5,371.1</b><br>(5,143.6 to 5,624.2) | <b>936.2†</b><br>(743.1 to 1,121.2)        | <b>59.7</b><br>(39.0 to 87.9)      | <b>18.5</b><br>(2.0 to 39.3)                      | <b>-6.2</b><br>(-20.3 to 12.0)                      |
| Malaria                                                                              | 248.0<br>(206.3 to 298.8)              | 775.4<br>(580.9 to 957.2)                  | 3.2<br>(2.2 to 4.5)                | -40.8<br>(-48.1 to -31.5)                         | -50.6<br>(-56.5 to -43.4)                           |
| Chagas disease                                                                       | --                                     | --                                         | --                                 | --                                                | --                                                  |
| Leishmaniasis                                                                        | --                                     | --                                         | --                                 | --                                                | --                                                  |
| Visceral leishmaniasis                                                               | --                                     | --                                         | --                                 | --                                                | --                                                  |
| Cutaneous and mucocutaneous leishmaniasis                                            | --                                     | --                                         | --                                 | --                                                | --                                                  |
| African trypanosomiasis                                                              | --                                     | --                                         | --                                 | --                                                | --                                                  |
| Schistosomiasis                                                                      | --                                     | --                                         | --                                 | --                                                | --                                                  |
| Cysticercosis                                                                        | 3.7<br>(3.0 to 4.4)                    | --                                         | 0.7<br>(0.4 to 1.1)                | 15.7<br>(-6.6 to 44.4)                            | -12.8<br>(-28.7 to 6.3)                             |
| Cystic echinococcosis                                                                | 0.3<br>(< 0.05 to 1.2)                 | 0.1<br>(< 0.05 to 0.3)                     | < 0.05<br>(< 0.05 to 0.1)          | -27.2<br>(-93.2 to 571.1)                         | -44.1<br>(-93.3 to 371.8)                           |
| Lymphatic filariasis                                                                 | 580.0<br>(505.0 to 670.5)              | 109.9<br>(91.2 to 133.4)                   | 18.5<br>(9.4 to 31.3)              | 26.9<br>(14.1 to 33.7)                            | -3.2<br>(-12.7 to 1.8)                              |
| Onchocerciasis                                                                       | --                                     | --                                         | --                                 | --                                                | --                                                  |
| Trachoma                                                                             | 16.1<br>(9.5 to 24.3)                  | --                                         | 0.8<br>(0.5 to 1.2)                | 24.9<br>(-8.0 to 67.0)                            | -11.7<br>(-37.2 to 22.4)                            |
| Dengue                                                                               | 3.0<br>(1.6 to 5.2)                    | 50.8<br>(30.1 to 78.2)                     | 0.5<br>(0.2 to 0.9)                | 246.2<br>(141.8 to 713.9)                         | 174.6<br>(100.7 to 530.7)                           |
| Yellow fever                                                                         | --                                     | --                                         | --                                 | --                                                | --                                                  |
| Rabies                                                                               | < 0.05<br>(< 0.05 to < 0.05)           | < 0.05<br>(< 0.05 to < 0.05)               | < 0.05<br>(< 0.05 to < 0.05)       | 0.8<br>(-44.2 to 88.0)                            | -30.1<br>(-62.5 to 29.7)                            |
| Intestinal nematode infections                                                       | 5,138.5<br>(4,870.3 to 5,449.7)        | --                                         | 33.7<br>(19.2 to 54.3)             | 25.4<br>(-5.0 to 67.0)                            | -0.8<br>(-27.9 to 36.0)                             |
| Ascariasis                                                                           | 1,814.8<br>(1,482.8 to 2,276.1)        | --                                         | 2.0<br>(1.0 to 3.8)                | 24.4<br>(-28.2 to 107.7)                          | 0.8<br>(-45.4 to 82.3)                              |

| Cause                                                                   | Prevalence in thousands (95% UI)              | Incidence in thousands (95% UI)                   | YLDs in thousands (95% UI)              |                                                   |                                                     |
|-------------------------------------------------------------------------|-----------------------------------------------|---------------------------------------------------|-----------------------------------------|---------------------------------------------------|-----------------------------------------------------|
|                                                                         | 2016 counts                                   | 2016 counts                                       | 2016 counts                             | Percentage change in counts between 2006 and 2016 | Percentage change in age-standardised rates between |
| Trichuriasis                                                            | 5.5<br>(3.5 to 8.2)                           | --                                                | --                                      | --                                                | --                                                  |
| Hookworm disease                                                        | 4,760.6<br>(4,383.0 to 5,134.7)               | --                                                | 31.7<br>(18.1 to 50.8)                  | 25.5<br>(-6.0 to 69.8)                            | -0.9<br>(-29.1 to 37.7)                             |
| Food-borne trematodiasis                                                | --                                            | --                                                | --                                      | --                                                | --                                                  |
| Leprosy                                                                 | 0.8<br>(0.7 to 0.8)                           | 0.1<br>( $< 0.05$ to 0.1)                         | $< 0.05$<br>( $< 0.05$ to 0.1)          | -0.6<br>(-24.0 to 27.4)                           | -23.3<br>(-38.1 to -5.8)                            |
| Ebola virus disease                                                     | --                                            | --                                                | --                                      | --                                                | --                                                  |
| Zika virus disease                                                      | --                                            | --                                                | --                                      | --                                                | --                                                  |
| Guinea worm disease                                                     | --                                            | --                                                | --                                      | --                                                | --                                                  |
| Other neglected tropical diseases                                       | 79.9<br>(73.1 to 86.8)                        | --                                                | 2.2<br>(1.4 to 3.4)                     | 7.1<br>(-6.9 to 23.3)                             | -8.0<br>(-18.7 to 4.5)                              |
| <b>Maternal disorders</b>                                               | <b>6.8</b><br><b>(5.4 to 8.2)</b>             | <b>156.6†</b><br><b>(133.9 to 181.5)</b>          | <b>0.5</b><br><b>(0.3 to 0.7)</b>       | <b>14.6</b><br><b>(-13.3 to 51.9)</b>             | <b>-8.0</b><br><b>(-30.5 to 21.1)</b>               |
| Maternal haemorrhage                                                    | 2.8<br>(2.1 to 3.5)                           | 25.2<br>(19.2 to 33.1)                            | 0.1<br>(0.1 to 0.2)                     | 11.5<br>(-29.1 to 76.0)                           | -9.9<br>(-42.4 to 40.5)                             |
| Maternal sepsis and other pregnancy related infections                  | 1.0<br>(0.6 to 1.6)                           | 10.7<br>(8.1 to 14.5)                             | $< 0.05$<br>( $< 0.05$ to 0.1)          | 15.4<br>(-49.6 to 184.4)                          | -8.1<br>(-58.9 to 124.4)                            |
| Maternal hypertensive disorders                                         | 2.4<br>(1.5 to 3.5)                           | 10.8<br>(8.4 to 13.5)                             | 0.1<br>(0.1 to 0.2)                     | 26.1<br>(-25.9 to 115.5)                          | 0.9<br>(-40.7 to 72.5)                              |
| Maternal obstructed labour and uterine rupture                          | 0.2<br>(0.1 to 0.4)                           | 17.0<br>(12.6 to 23.0)                            | 0.1<br>( $< 0.05$ to 0.1)               | 13.6<br>(-56.3 to 185.6)                          | -8.1<br>(-63.8 to 126.7)                            |
| Maternal abortion, miscarriage, and ectopic pregnancy                   | 0.8<br>(0.5 to 1.1)                           | 93.0<br>(72.9 to 116.7)                           | 0.1<br>( $< 0.05$ to 0.1)               | 10.9<br>(-38.9 to 93.7)                           | -11.8<br>(-51.4 to 53.2)                            |
| Other maternal disorders                                                | --                                            | --                                                | 0.1<br>(0.1 to 0.1)                     | 9.4<br>(-17.3 to 45.2)                            | -12.3<br>(-33.4 to 15.9)                            |
| <b>Neonatal disorders</b>                                               | <b>126.1</b><br><b>(103.4 to 166.9)</b>       | --                                                | <b>11.8</b><br><b>(8.3 to 16.3)</b>     | <b>28.7</b><br><b>(6.5 to 53.1)</b>               | <b>6.4</b><br><b>(-12.2 to 26.4)</b>                |
| Neonatal preterm birth complications                                    | 115.8<br>(90.8 to 160.4)                      | --                                                | 8.4<br>(5.7 to 12.0)                    | 27.6<br>(-1.1 to 57.2)                            | 5.0<br>(-18.8 to 29.6)                              |
| Neonatal encephalopathy due to birth asphyxia and trauma                | 7.6<br>(3.5 to 13.4)                          | --                                                | 1.0<br>(0.1 to 2.6)                     | 31.5<br>(-25.8 to 209.5)                          | 9.1<br>(-37.7 to 157.9)                             |
| Neonatal sepsis and other neonatal infections                           | 2.1<br>(0.6 to 5.5)                           | --                                                | 0.9<br>(0.1 to 2.6)                     | 69.5<br>(23.7 to 175.1)                           | 43.6<br>(5.0 to 139.4)                              |
| Hemolytic disease and other neonatal jaundice                           | 2.8<br>(2.4 to 3.3)                           | --                                                | 1.0<br>(0.7 to 1.2)                     | 17.9<br>(2.8 to 35.1)                             | -3.6<br>(-14.9 to 8.9)                              |
| Other neonatal disorders                                                | --                                            | --                                                | 0.6<br>(0.4 to 0.9)                     | 13.5<br>(-7.2 to 39.0)                            | -0.1<br>(-18.4 to 22.4)                             |
| <b>Nutritional deficiencies</b>                                         | <b>1,862.7</b><br><b>(1,779.8 to 1,934.2)</b> | <b>126.4†</b><br><b>(105.4 to 149.3)</b>          | <b>57.8</b><br><b>(38.2 to 82.0)</b>    | <b>13.2</b><br><b>(4.6 to 22.7)</b>               | <b>-9.3</b><br><b>(-14.5 to -3.5)</b>               |
| Protein-energy malnutrition                                             | 137.2<br>(106.0 to 175.2)                     | 50.2<br>(39.5 to 63.0)                            | 6.6<br>(3.9 to 10.6)                    | 37.5<br>(-12.7 to 117.5)                          | 21.2<br>(-23.4 to 92.3)                             |
| Iodine deficiency                                                       | 7.8<br>(6.7 to 9.0)                           | 0.3<br>(0.3 to 0.4)                               | 0.2<br>(0.1 to 0.3)                     | 17.3<br>(-2.4 to 41.2)                            | -10.0<br>(-24.4 to 7.9)                             |
| Vitamin A deficiency                                                    | 91.8<br>(69.8 to 116.1)                       | 75.8<br>(57.5 to 95.8)                            | 0.2<br>(0.1 to 0.3)                     | 18.5<br>(-3.8 to 45.9)                            | -1.9<br>(-17.9 to 16.7)                             |
| Iron-deficiency anaemia                                                 | 1,704.8<br>(1,604.8 to 1,796.8)               | --                                                | 50.6<br>(33.2 to 72.8)                  | 10.5<br>(3.3 to 18.4)                             | -11.4<br>(-16.1 to -6.6)                            |
| Other nutritional deficiencies                                          | --                                            | --                                                | 0.2<br>(0.1 to 0.4)                     | 37.6<br>(-13.4 to 120.2)                          | 21.3<br>(-24.0 to 94.8)                             |
| <b>Other communicable, maternal, neonatal, and nutritional diseases</b> | <b>2,460.3</b><br><b>(2,310.5 to 2,605.6)</b> | <b>1,086.6</b><br><b>(985.6 to 1,187.0)</b>       | <b>4.8</b><br><b>(3.0 to 7.5)</b>       | <b>21.0</b><br><b>(13.9 to 28.3)</b>              | <b>-3.9</b><br><b>(-9.1 to 1.2)</b>                 |
| Sexually transmitted diseases excluding HIV                             | 1,590.6<br>(1,479.5 to 1,705.7)               | 750.3<br>(681.2 to 825.9)                         | 2.6<br>(1.6 to 4.4)                     | 27.4<br>(19.1 to 35.9)                            | -2.3<br>(-8.5 to 3.9)                               |
| Syphilis                                                                | 241.8<br>(180.6 to 309.2)                     | 149.5<br>(109.1 to 199.1)                         | 0.2<br>(0.1 to 0.3)                     | 31.2<br>(20.2 to 43.5)                            | -2.8<br>(-11.8 to 7.7)                              |
| Chlamydial infection                                                    | 155.7<br>(120.6 to 194.8)                     | 129.8<br>(100.7 to 166.7)                         | 0.5<br>(0.3 to 0.8)                     | 26.4<br>(11.4 to 44.3)                            | -1.1<br>(-12.8 to 13.3)                             |
| Gonococcal infection                                                    | 26.6<br>(22.0 to 32.8)                        | 58.6<br>(47.7 to 74.6)                            | 0.1<br>(0.1 to 0.2)                     | 31.2<br>(7.9 to 60.8)                             | 1.8<br>(-15.5 to 23.3)                              |
| Trichomoniasis                                                          | 258.3<br>(220.3 to 299.1)                     | 232.1<br>(195.8 to 272.5)                         | 0.4<br>(0.1 to 0.8)                     | 31.5<br>(23.3 to 40.7)                            | 2.2<br>(-3.7 to 8.3)                                |
| Genital herpes                                                          | 1,085.1<br>(937.1 to 1,260.6)                 | 97.7<br>(82.2 to 116.5)                           | 0.3<br>(0.1 to 0.7)                     | 21.5<br>(5.9 to 37.8)                             | -7.0<br>(-17.5 to 4.0)                              |
| Other sexually transmitted diseases                                     | 69.2<br>(58.6 to 76.8)                        | 82.5<br>(69.3 to 98.4)                            | 1.2<br>(0.8 to 1.7)                     | 27.1<br>(14.5 to 40.7)                            | -3.2<br>(-12.8 to 6.9)                              |
| Hepatitis                                                               | 1,085.2<br>(907.0 to 1,279.6)                 | 336.3<br>(266.3 to 400.3)                         | 0.3<br>(0.2 to 0.5)                     | 15.8<br>(-4.8 to 39.7)                            | -10.3<br>(-25.7 to 6.8)                             |
| Acute hepatitis A                                                       | 12.6<br>(8.2 to 15.7)                         | 164.3<br>(106.2 to 204.4)                         | 0.1<br>(0.1 to 0.2)                     | 20.3<br>(-16.5 to 79.3)                           | -4.8<br>(-29.8 to 33.4)                             |
| Hepatitis B                                                             | 771.5<br>(593.6 to 969.5)                     | 141.0<br>(104.7 to 186.7)                         | 0.2<br>(0.1 to 0.3)                     | 13.4<br>(-14.1 to 44.3)                           | -13.3<br>(-33.2 to 10.2)                            |
| Hepatitis C                                                             | 300.0<br>(264.4 to 339.7)                     | 18.2<br>(16.1 to 20.5)                            | $< 0.05$<br>( $< 0.05$ to $< 0.05$ )    | 13.7<br>(-36.1 to 99.5)                           | -3.5<br>(-39.8 to 53.3)                             |
| Acute hepatitis E                                                       | 1.0<br>(0.8 to 1.2)                           | 12.8<br>(10.8 to 15.5)                            | $< 0.05$<br>( $< 0.05$ to $< 0.05$ )    | 16.8<br>(-22.0 to 74.5)                           | -7.5<br>(-31.2 to 25.4)                             |
| Other infectious diseases                                               | 62.7<br>(58.0 to 67.5)                        | $< 0.05$<br>( $< 0.05$ to $< 0.05$ )              | 1.8<br>(1.1 to 2.7)                     | 13.5<br>(1.3 to 27.7)                             | -5.3<br>(-14.1 to 4.6)                              |
| <b>Non-communicable diseases</b>                                        | <b>6,911.3</b><br><b>(6,851.9 to 6,962.2)</b> | <b>20,265.4†</b><br><b>(19,049.2 to 21,579.2)</b> | <b>571.7</b><br><b>(426.4 to 741.8)</b> | <b>31.5</b><br><b>(28.9 to 34.3)</b>              | <b>0.4</b><br><b>(-1.1 to 2.1)</b>                  |
| <b>Neoplasms</b>                                                        | <b>8.7</b><br><b>(7.5 to 9.8)</b>             | <b>5.8</b><br><b>(4.8 to 6.5)</b>                 | <b>1.9</b><br><b>(1.3 to 2.6)</b>       | <b>32.0</b><br><b>(23.8 to 43.2)</b>              | <b>-2.7</b><br><b>(-7.6 to 3.4)</b>                 |
| Lip and oral cavity cancer                                              | 0.5<br>(0.4 to 0.6)                           | 0.1<br>(0.1 to 0.2)                               | 0.1<br>( $< 0.05$ to 0.1)               | 41.3<br>(23.4 to 61.3)                            | 3.4<br>(-9.8 to 18.4)                               |
| Nasopharynx cancer                                                      | 0.3<br>(0.2 to 0.5)                           | 0.1<br>(0.1 to 0.1)                               | $< 0.05$<br>( $< 0.05$ to 0.1)          | 34.6<br>(10.6 to 65.6)                            | -2.6<br>(-18.5 to 17.3)                             |
| Other pharynx cancer                                                    | 0.2<br>(0.1 to 0.2)                           | 0.1<br>(0.1 to 0.1)                               | $< 0.05$<br>( $< 0.05$ to $< 0.05$ )    | 34.3<br>(18.4 to 56.0)                            | -2.6<br>(-13.3 to 11.5)                             |
| Oesophageal cancer                                                      | 0.1<br>(0.1 to 0.1)                           | 0.1<br>(0.1 to 0.1)                               | $< 0.05$<br>( $< 0.05$ to $< 0.05$ )    | 27.8<br>(13.6 to 43.1)                            | -8.4<br>(-19.1 to 2.6)                              |
| Stomach cancer                                                          | 0.7<br>(0.6 to 0.8)                           | 0.5<br>(0.4 to 0.5)                               | 0.1<br>(0.1 to 0.2)                     | 18.1<br>(4.1 to 34.1)                             | -14.0<br>(-26.1 to -0.6)                            |
| Colon and rectum cancer                                                 | 0.8<br>(0.6 to 1.2)                           | 0.3<br>(0.2 to 0.4)                               | 0.1<br>(0.1 to 0.2)                     | 40.1<br>(21.5 to 64.1)                            | 0.9<br>(-13.9 to 19.6)                              |
| Liver cancer                                                            | 0.1<br>(0.1 to 0.2)                           | 0.3<br>(0.2 to 0.4)                               | 0.1<br>( $< 0.05$ to 0.1)               | 36.6<br>(20.2 to 57.5)                            | -1.6<br>(-12.7 to 12.8)                             |
| Liver cancer due to hepatitis B                                         | 0.1<br>(0.1 to 0.2)                           | 0.1<br>(0.1 to 0.2)                               | $< 0.05$<br>( $< 0.05$ to 0.1)          | 36.1<br>(19.3 to 57.6)                            | -1.4<br>(-12.6 to 12.8)                             |

| Cause                                              | Prevalence in thousands (95% UI)        | Incidence in thousands (95% UI)          | YLDs in thousands (95% UI)           |                                                   |                                                     |
|----------------------------------------------------|-----------------------------------------|------------------------------------------|--------------------------------------|---------------------------------------------------|-----------------------------------------------------|
|                                                    | 2016 counts                             | 2016 counts                              | 2016 counts                          | Percentage change in counts between 2006 and 2016 | Percentage change in age-standardised rates between |
| Liver cancer due to hepatitis C                    | < 0.05<br>(< 0.05 to 0.1)               | < 0.05<br>(< 0.05 to 0.1)                | < 0.05<br>(< 0.05 to < 0.05)         | 38.7<br>(21.5 to 60.7)                            | -1.9<br>(-13.5 to 13.3)                             |
| Liver cancer due to alcohol use                    | < 0.05<br>(< 0.05 to < 0.05)            | < 0.05<br>(< 0.05 to < 0.05)             | < 0.05<br>(< 0.05 to < 0.05)         | 32.5<br>(14.7 to 54.6)                            | -6.3<br>(-18.1 to 8.4)                              |
| Liver cancer due to other causes                   | 0.1<br>(< 0.05 to 0.1)                  | 0.1<br>(< 0.05 to 0.1)                   | < 0.05<br>(< 0.05 to < 0.05)         | 37.7<br>(18.6 to 60.4)                            | -0.0<br>(-13.7 to 15.2)                             |
| Gallbladder and biliary tract cancer               | < 0.05<br>(< 0.05 to < 0.05)            | < 0.05<br>(< 0.05 to 0.1)                | < 0.05<br>(< 0.05 to < 0.05)         | 35.0<br>(23.5 to 50.0)                            | -4.7<br>(-12.8 to 4.8)                              |
| Pancreatic cancer                                  | 0.1<br>(0.1 to 0.1)                     | 0.1<br>(0.1 to 0.1)                      | < 0.05<br>(< 0.05 to < 0.05)         | 45.6<br>(34.7 to 57.6)                            | 3.1<br>(-4.7 to 11.7)                               |
| Larynx cancer                                      | 0.2<br>(0.1 to 0.2)                     | 0.1<br>(0.1 to 0.1)                      | < 0.05<br>(< 0.05 to < 0.05)         | 35.0<br>(21.5 to 49.8)                            | -3.2<br>(-13.8 to 9.2)                              |
| Tracheal, bronchus, and lung cancer                | 0.7<br>(0.6 to 0.9)                     | 0.7<br>(0.6 to 0.8)                      | 0.2<br>(0.1 to 0.2)                  | 36.5<br>(13.5 to 64.6)                            | -2.0<br>(-19.2 to 19.1)                             |
| Malignant skin melanoma                            | 0.1<br>(< 0.05 to 0.1)                  | < 0.05<br>(< 0.05 to < 0.05)             | < 0.05<br>(< 0.05 to < 0.05)         | 41.9<br>(25.3 to 64.2)                            | 1.9<br>(-10.0 to 16.0)                              |
| Non-melanoma skin cancer                           | 0.1<br>(0.1 to 0.1)                     | 0.1<br>(0.1 to 0.2)                      | < 0.05<br>(< 0.05 to < 0.05)         | -4.0<br>(-58.0 to 66.3)                           | -36.5<br>(-72.9 to 15.2)                            |
| Non-melanoma skin cancer (squamous-cell carcinoma) | 0.1<br>(< 0.05 to 0.1)                  | 0.1<br>(0.1 to 0.2)                      | < 0.05<br>(< 0.05 to < 0.05)         | -4.2<br>(-58.1 to 66.4)                           | -36.5<br>(-73.0 to 15.2)                            |
| Non-melanoma skin cancer (basal-cell carcinoma)    | < 0.05<br>(< 0.05 to < 0.05)            | < 0.05<br>(< 0.05 to < 0.05)             | < 0.05<br>(< 0.05 to < 0.05)         | 32.2<br>(18.4 to 50.4)                            | 0.3<br>(-8.4 to 11.9)                               |
| Breast cancer                                      | 2.8<br>(1.5 to 4.6)                     | 0.7<br>(0.4 to 1.1)                      | 0.3<br>(0.2 to 0.5)                  | 42.2<br>(14.9 to 82.2)                            | 2.1<br>(-15.1 to 24.8)                              |
| Cervical cancer                                    | 3.6<br>(1.9 to 5.0)                     | 1.0<br>(0.5 to 1.3)                      | 0.4<br>(0.2 to 0.5)                  | 24.1<br>(-1.1 to 60.5)                            | -9.8<br>(-26.8 to 12.5)                             |
| Uterine cancer                                     | 0.7<br>(0.5 to 0.9)                     | 0.2<br>(0.1 to 0.2)                      | 0.1<br>(< 0.05 to 0.1)               | 36.6<br>(9.3 to 80.2)                             | -2.3<br>(-22.6 to 29.1)                             |
| Ovarian cancer                                     | 0.3<br>(0.2 to 0.4)                     | 0.1<br>(0.1 to 0.1)                      | < 0.05<br>(< 0.05 to 0.1)            | 46.5<br>(13.4 to 88.3)                            | 5.8<br>(-24.2 to 46.3)                              |
| Prostate cancer                                    | 0.6<br>(0.4 to 0.8)                     | 0.2<br>(0.1 to 0.3)                      | 0.1<br>(0.1 to 0.1)                  | 50.9<br>(22.0 to 87.6)                            | 5.5<br>(-12.9 to 28.8)                              |
| Testicular cancer                                  | 0.1<br>(0.1 to 0.1)                     | < 0.05<br>(< 0.05 to < 0.05)             | < 0.05<br>(< 0.05 to < 0.05)         | 18.8<br>(-5.4 to 47.1)                            | -7.1<br>(-22.9 to 12.2)                             |
| Kidney cancer                                      | 0.2<br>(0.2 to 0.3)                     | 0.1<br>(0.1 to 0.1)                      | < 0.05<br>(< 0.05 to < 0.05)         | 37.2<br>(15.9 to 63.2)                            | 4.9<br>(-7.7 to 20.4)                               |
| Bladder cancer                                     | 0.2<br>(0.2 to 0.3)                     | 0.1<br>(0.1 to 0.1)                      | < 0.05<br>(< 0.05 to < 0.05)         | 51.4<br>(34.7 to 71.1)                            | 5.6<br>(-5.3 to 17.6)                               |
| Brain and nervous system cancer                    | 0.2<br>(0.1 to 0.2)                     | 0.1<br>(0.1 to 0.1)                      | < 0.05<br>(< 0.05 to < 0.05)         | 28.4<br>(14.7 to 39.3)                            | 0.6<br>(-7.8 to 8.6)                                |
| Thyroid cancer                                     | 0.2<br>(0.1 to 0.2)                     | < 0.05<br>(< 0.05 to < 0.05)             | < 0.05<br>(< 0.05 to < 0.05)         | 40.6<br>(15.0 to 71.7)                            | -2.6<br>(-20.1 to 19.4)                             |
| Mesothelioma                                       | < 0.05<br>(< 0.05 to < 0.05)            | < 0.05<br>(< 0.05 to < 0.05)             | < 0.05<br>(< 0.05 to < 0.05)         | 36.6<br>(19.9 to 54.6)                            | -2.2<br>(-13.7 to 11.0)                             |
| Hodgkin lymphoma                                   | 0.1<br>(0.1 to 0.1)                     | < 0.05<br>(< 0.05 to < 0.05)             | < 0.05<br>(< 0.05 to < 0.05)         | 5.2<br>(-5.4 to 18.8)                             | -18.2<br>(-25.4 to -9.2)                            |
| Non-Hodgkin's lymphoma                             | 0.3<br>(0.3 to 0.4)                     | 0.1<br>(0.1 to 0.1)                      | < 0.05<br>(< 0.05 to 0.1)            | 36.4<br>(22.4 to 52.0)                            | 3.7<br>(-5.5 to 14.3)                               |
| Multiple myeloma                                   | 0.1<br>(< 0.05 to 0.1)                  | < 0.05<br>(< 0.05 to 0.1)                | < 0.05<br>(< 0.05 to < 0.05)         | 45.7<br>(31.8 to 62.8)                            | 4.3<br>(-6.3 to 16.1)                               |
| Leukaemia                                          | 1.2<br>(0.8 to 1.6)                     | 0.4<br>(0.2 to 0.5)                      | 0.1<br>(0.1 to 0.2)                  | 13.5<br>(-1.2 to 37.1)                            | -7.7<br>(-16.6 to 6.0)                              |
| Acute lymphoid leukaemia                           | 0.2<br>(0.1 to 0.4)                     | 0.1<br>(< 0.05 to 0.1)                   | < 0.05<br>(< 0.05 to < 0.05)         | 9.2<br>(-19.9 to 56.7)                            | -6.6<br>(-27.0 to 20.7)                             |
| Chronic lymphoid leukaemia                         | 0.1<br>(< 0.05 to 0.1)                  | < 0.05<br>(< 0.05 to < 0.05)             | < 0.05<br>(< 0.05 to < 0.05)         | 44.2<br>(20.6 to 78.2)                            | 2.1<br>(-16.9 to 30.1)                              |
| Acute myeloid leukaemia                            | 0.2<br>(0.1 to 0.3)                     | 0.1<br>(0.1 to 0.1)                      | < 0.05<br>(< 0.05 to < 0.05)         | 26.3<br>(-0.3 to 53.9)                            | 3.7<br>(-11.2 to 19.2)                              |
| Chronic myeloid leukaemia                          | 0.2<br>(0.1 to 0.2)                     | 0.1<br>(< 0.05 to 0.1)                   | < 0.05<br>(< 0.05 to < 0.05)         | 14.5<br>(-2.0 to 34.0)                            | -12.0<br>(-23.9 to 1.6)                             |
| Other leukaemia                                    | 0.6<br>(0.3 to 0.9)                     | 0.1<br>(0.1 to 0.2)                      | 0.1<br>(< 0.05 to 0.1)               | 8.0<br>(-10.0 to 38.9)                            | -11.0<br>(-22.9 to 9.4)                             |
| Other neoplasms                                    | 0.9<br>(0.7 to 1.0)                     | 0.3<br>(0.2 to 0.4)                      | 0.1<br>(0.1 to 0.1)                  | 29.5<br>(10.3 to 48.2)                            | 0.0<br>(-11.6 to 11.4)                              |
| <b>Cardiovascular diseases</b>                     | <b>360.0</b><br><b>(343.7 to 377.7)</b> | <b>34.3†</b><br><b>(32.9 to 35.7)</b>    | <b>23.9</b><br><b>(17.6 to 31.1)</b> | <b>29.2</b><br><b>(24.0 to 34.1)</b>              | <b>-3.1</b><br><b>(-6.7 to 0.4)</b>                 |
| Rheumatic heart disease                            | 144.4<br>(128.4 to 161.8)               | 5.5<br>(4.9 to 6.2)                      | 6.8<br>(4.4 to 10.0)                 | 14.6<br>(5.5 to 25.4)                             | -11.2<br>(-18.1 to -3.5)                            |
| Ischaemic heart disease                            | 75.6<br>(71.6 to 80.0)                  | 11.1<br>(10.3 to 12.0)                   | 3.4<br>(2.3 to 4.8)                  | 43.9<br>(36.2 to 52.1)                            | 3.5<br>(-0.9 to 8.1)                                |
| Cerebrovascular disease                            | 46.1<br>(43.0 to 49.2)                  | 7.9‡<br>(7.3 to 8.4)                     | 9.1<br>(6.5 to 11.6)                 | 32.8<br>(24.2 to 41.9)                            | -3.6<br>(-9.9 to 3.0)                               |
| Ischaemic stroke                                   | 37.3<br>(33.6 to 41.3)                  | 4.6‡<br>(4.1 to 5.2)                     | 7.0<br>(5.0 to 9.0)                  | 36.3<br>(25.0 to 47.8)                            | -1.8<br>(-9.8 to 6.4)                               |
| Hemorrhagic stroke                                 | 11.2<br>(10.0 to 12.5)                  | 3.2‡<br>(2.9 to 3.6)                     | 2.1<br>(1.5 to 2.7)                  | 22.5<br>(10.2 to 36.3)                            | -9.9<br>(-18.1 to -0.2)                             |
| Hypertensive heart disease                         | 5.2<br>(4.4 to 6.1)                     | --                                       | 0.4<br>(0.3 to 0.6)                  | 44.0<br>(26.7 to 64.6)                            | 1.3<br>(-8.3 to 12.2)                               |
| Cardiomyopathy and myocarditis                     | 1.9<br>(1.7 to 2.1)                     | 1.7+<br>(1.5 to 1.9)                     | 0.2<br>(0.2 to 0.4)                  | 32.4<br>(19.0 to 47.2)                            | 2.6<br>(-7.1 to 13.3)                               |
| Myocarditis                                        | 1.3<br>(1.2 to 1.5)                     | 1.7<br>(1.5 to 1.9)                      | 0.1<br>(0.1 to 0.1)                  | 32.1<br>(21.9 to 42.3)                            | 2.6<br>(-6.6 to 12.7)                               |
| Alcoholic cardiomyopathy                           | 0.1<br>(0.1 to 0.2)                     | --                                       | < 0.05<br>(< 0.05 to < 0.05)         | 44.5<br>(30.6 to 59.6)                            | 2.8<br>(-10.5 to 17.2)                              |
| Other cardiomyopathy                               | 1.5<br>(1.3 to 1.7)                     | --                                       | 0.1<br>(0.1 to 0.2)                  | 31.6<br>(10.6 to 57.3)                            | 2.5<br>(-12.3 to 20.2)                              |
| Atrial fibrillation and flutter                    | 16.6<br>(14.5 to 19.1)                  | 1.5<br>(1.3 to 1.8)                      | 1.3<br>(0.9 to 1.8)                  | 42.7<br>(31.6 to 55.3)                            | -0.4<br>(-6.0 to 5.7)                               |
| Peripheral vascular disease                        | 50.9<br>(43.7 to 59.2)                  | 5.1<br>(4.4 to 6.0)                      | 0.3<br>(0.1 to 0.5)                  | 41.8<br>(29.4 to 54.0)                            | -2.3<br>(-10.2 to 4.9)                              |
| Endocarditis                                       | 0.3<br>(0.2 to 0.3)                     | 1.5<br>(1.4 to 1.6)                      | < 0.05<br>(< 0.05 to < 0.05)         | 34.2<br>(25.6 to 43.6)                            | 1.1<br>(-10.9 to 15.2)                              |
| Other cardiovascular and circulatory diseases      | 44.0<br>(36.5 to 51.9)                  | --                                       | 2.3<br>(1.5 to 3.3)                  | 33.6<br>(21.2 to 47.6)                            | 1.4<br>(-6.4 to 9.5)                                |
| <b>Chronic respiratory diseases</b>                | <b>905.7</b><br><b>(869.4 to 943.3)</b> | <b>204.4†</b><br><b>(191.0 to 218.3)</b> | <b>48.8</b><br><b>(37.9 to 61.2)</b> | <b>46.9</b><br><b>(41.3 to 52.5)</b>              | <b>10.6</b><br><b>(6.2 to 15.0)</b>                 |
| Chronic obstructive pulmonary disease              | 248.3<br>(238.3 to 258.4)               | 21.9<br>(21.0 to 22.9)                   | 18.8<br>(16.4 to 20.8)               | 36.7<br>(29.0 to 45.4)                            | -0.2<br>(-5.8 to 5.8)                               |
| Pneumoconiosis                                     | 0.5<br>(0.5 to 0.6)                     | 0.1<br>(0.1 to 0.1)                      | 0.1<br>(0.1 to 0.1)                  | 37.7<br>(15.0 to 64.9)                            | -3.6<br>(-19.9 to 15.7)                             |
| Silicosis                                          | 0.3<br>(0.3 to 0.4)                     | < 0.05<br>(< 0.05 to < 0.05)             | < 0.05<br>(< 0.05 to 0.1)            | 38.5<br>(3.0 to 86.5)                             | -3.3<br>(-26.9 to 30.0)                             |



| Cause                                                          | Prevalence in thousands (95% UI)              | Incidence in thousands (95% UI)             | YLDs in thousands (95% UI)             |                                                   |                                                     |
|----------------------------------------------------------------|-----------------------------------------------|---------------------------------------------|----------------------------------------|---------------------------------------------------|-----------------------------------------------------|
|                                                                | 2016 counts                                   | 2016 counts                                 | 2016 counts                            | Percentage change in counts between 2006 and 2016 | Percentage change in age-standardised rates between |
| Asbestosis                                                     | 0.1<br>(0.1 to 0.1)                           | < 0.05<br>(< 0.05 to < 0.05)                | < 0.05<br>(< 0.05 to < 0.05)           | 37.2<br>(28.2 to 46.4)                            | -3.5<br>(-10.0 to 3.5)                              |
| Coal workers pneumoconiosis                                    | --                                            | --                                          | --                                     | --                                                | --                                                  |
| Other pneumoconiosis                                           | 0.1<br>(0.1 to 0.1)                           | < 0.05<br>(< 0.05 to < 0.05)                | < 0.05<br>(< 0.05 to < 0.05)           | 36.1<br>(6.3 to 74.0)                             | -4.7<br>(-28.4 to 25.4)                             |
| Asthma                                                         | 706.6<br>(660.5 to 755.3)                     | 181.8<br>(168.3 to 195.4)                   | 27.5<br>(18.1 to 39.4)                 | 53.7<br>(46.9 to 60.8)                            | 24.3<br>(18.4 to 30.0)                              |
| Interstitial lung disease and pulmonary sarcoidosis            | 5.0<br>(4.4 to 5.6)                           | 0.5<br>(0.5 to 0.6)                         | 0.5<br>(0.3 to 0.7)                    | 39.7<br>(24.5 to 56.6)                            | 0.1<br>(-9.6 to 10.9)                               |
| Other chronic respiratory diseases                             | --                                            | --                                          | 1.9<br>(1.6 to 2.2)                    | 65.0<br>(40.8 to 95.7)                            | 31.4<br>(16.4 to 49.4)                              |
| <b>Cirrhosis and other chronic liver diseases</b>              | <b>33.3</b><br><b>(31.4 to 35.1)</b>          | <b>2.2</b><br><b>(2.1 to 2.4)</b>           | <b>1.6</b><br><b>(1.1 to 2.2)</b>      | <b>27.3</b><br><b>(14.1 to 42.9)</b>              | <b>-1.1</b><br><b>(-9.7 to 7.9)</b>                 |
| Cirrhosis and other chronic liver diseases due to hepatitis B  | 11.8<br>(10.8 to 12.8)                        | 0.8<br>(0.8 to 0.9)                         | 0.4<br>(0.3 to 0.5)                    | 34.8<br>(15.3 to 61.0)                            | -1.5<br>(-14.0 to 14.1)                             |
| Cirrhosis and other chronic liver diseases due to hepatitis C  | 4.8<br>(4.4 to 5.4)                           | 0.3<br>(0.3 to 0.4)                         | 0.1<br>(0.1 to 0.2)                    | 35.2<br>(7.5 to 70.4)                             | -1.1<br>(-19.8 to 24.2)                             |
| Cirrhosis and other chronic liver diseases due to alcohol use  | 3.6<br>(3.2 to 4.0)                           | 0.3<br>(0.2 to 0.3)                         | 0.1<br>(0.1 to 0.2)                    | 36.2<br>(4.3 to 71.8)                             | -2.4<br>(-24.0 to 20.6)                             |
| Cirrhosis and other chronic liver diseases due to other causes | 13.0<br>(12.2 to 13.9)                        | 0.8<br>(0.7 to 0.8)                         | 1.0<br>(0.7 to 1.4)                    | 22.6<br>(3.9 to 46.1)                             | -0.6<br>(-13.7 to 15.3)                             |
| <b>Digestive diseases</b>                                      | <b>107.1</b><br><b>(102.2 to 112.2)</b>       | <b>124.7†</b><br><b>(118.2 to 132.0)</b>    | <b>3.6</b><br><b>(2.5 to 4.9)</b>      | <b>32.9</b><br><b>(22.7 to 43.6)</b>              | <b>0.8</b><br><b>(-5.2 to 6.9)</b>                  |
| Peptic ulcer disease                                           | 35.6<br>(32.8 to 38.8)                        | 15.2<br>(13.9 to 16.7)                      | 0.8<br>(0.5 to 1.1)                    | 37.8<br>(24.3 to 51.0)                            | 1.7<br>(-6.6 to 9.9)                                |
| Gastritis and duodenitis                                       | 43.9<br>(38.2 to 49.9)                        | 42.4<br>(37.9 to 47.7)                      | 0.8<br>(0.5 to 1.1)                    | 41.5<br>(28.8 to 55.8)                            | 6.3<br>(-2.3 to 15.7)                               |
| Appendicitis                                                   | 0.9<br>(0.8 to 1.0)                           | 23.5<br>(21.9 to 25.3)                      | 0.3<br>(0.2 to 0.4)                    | 22.2<br>(-10.8 to 69.6)                           | -5.1<br>(-26.4 to 24.6)                             |
| Paralytic ileus and intestinal obstruction                     | 0.1<br>(0.1 to 0.1)                           | 1.6<br>(1.4 to 1.9)                         | < 0.05<br>(< 0.05 to < 0.05)           | 29.6<br>(25.0 to 34.2)                            | 1.3<br>(-2.2 to 4.6)                                |
| Inguinal, femoral, and abdominal hernia                        | 20.1<br>(17.9 to 22.6)                        | 9.2<br>(8.1 to 10.4)                        | 1.2<br>(0.8 to 1.7)                    | 27.4<br>(7.8 to 48.5)                             | -2.5<br>(-13.6 to 9.4)                              |
| Inflammatory bowel disease                                     | 0.5<br>(0.5 to 0.6)                           | 4.8<br>(4.4 to 5.3)                         | 0.1<br>(0.1 to 0.1)                    | 18.1<br>(7.5 to 29.9)                             | -12.4<br>(-22.9 to -0.4)                            |
| Vascular intestinal disorders                                  | < 0.05<br>(< 0.05 to < 0.05)                  | 0.2<br>(0.2 to 0.3)                         | < 0.05<br>(< 0.05 to < 0.05)           | 33.3<br>(25.9 to 40.6)                            | 8.3<br>(4.0 to 12.8)                                |
| Gallbladder and biliary diseases                               | 9.6<br>(8.5 to 10.8)                          | 26.5<br>(22.8 to 30.3)                      | 0.2<br>(0.1 to 0.2)                    | 36.8<br>(10.0 to 73.2)                            | 1.4<br>(-16.9 to 26.5)                              |
| Pancreatitis                                                   | 0.1<br>(0.1 to 0.1)                           | 1.1<br>(1.0 to 1.2)                         | < 0.05<br>(< 0.05 to < 0.05)           | 36.6<br>(31.5 to 41.4)                            | 2.8<br>(-0.7 to 5.8)                                |
| Other digestive diseases                                       | --                                            | --                                          | 0.3<br>(0.2 to 0.4)                    | 36.0<br>(22.6 to 50.0)                            | 5.3<br>(-1.2 to 12.0)                               |
| <b>Neurological disorders</b>                                  | <b>2,304.1</b><br><b>(2,198.4 to 2,426.2)</b> | <b>1,089.2</b><br><b>(925.0 to 1,282.4)</b> | <b>48.7</b><br><b>(32.2 to 68.1)</b>   | <b>30.4</b><br><b>(6.5 to 64.5)</b>               | <b>0.3</b><br><b>(-14.7 to 20.3)</b>                |
| Alzheimer's disease and other dementias                        | 15.4<br>(13.0 to 18.2)                        | 2.6<br>(2.2 to 3.2)                         | 2.1<br>(1.5 to 2.8)                    | 43.9<br>(36.9 to 51.7)                            | -1.3<br>(-5.4 to 3.0)                               |
| Parkinson's disease                                            | 1.4<br>(1.1 to 1.8)                           | 0.2<br>(0.1 to 0.2)                         | 0.2<br>(0.1 to 0.2)                    | 51.8<br>(30.1 to 80.4)                            | 5.7<br>(-7.3 to 21.1)                               |
| Epilepsy                                                       | 16.7<br>(4.3 to 30.4)                         | 2.4<br>(0.6 to 4.4)                         | 7.1<br>(1.7 to 14.4)                   | 29.9<br>(-71.0 to 567.7)                          | 3.4<br>(-77.1 to 429.3)                             |
| Multiple sclerosis                                             | 0.1<br>(0.1 to 0.1)                           | < 0.05<br>(< 0.05 to < 0.05)                | < 0.05<br>(< 0.05 to < 0.05)           | 46.4<br>(40.7 to 51.8)                            | 11.3<br>(7.4 to 15.6)                               |
| Motor neuron disease                                           | 0.1<br>(0.1 to 0.2)                           | < 0.05<br>(< 0.05 to < 0.05)                | < 0.05<br>(< 0.05 to < 0.05)           | 33.3<br>(27.5 to 39.2)                            | 5.0<br>(1.4 to 8.8)                                 |
| Migraine                                                       | 800.4<br>(752.0 to 850.0)                     | 96.1<br>(90.6 to 102.7)                     | 32.5<br>(20.4 to 46.0)                 | 28.7<br>(23.3 to 34.6)                            | -0.6<br>(-4.4 to 3.3)                               |
| Tension-type headache                                          | 1,757.4<br>(1,559.3 to 1,979.8)               | 987.8<br>(824.0 to 1,179.3)                 | 5.1<br>(3.2 to 7.7)                    | 29.1<br>(22.5 to 36.5)                            | -0.7<br>(-5.2 to 4.2)                               |
| Other neurological disorders                                   | < 0.05<br>(< 0.05 to < 0.05)                  | < 0.05<br>(< 0.05 to < 0.05)                | 1.7<br>(0.5 to 3.4)                    | 58.3<br>(-59.0 to 578.2)                          | 22.5<br>(-61.0 to 312.2)                            |
| <b>Mental and substance use disorders</b>                      | <b>963.4</b><br><b>(922.9 to 1,005.9)</b>     | <b>325.5†</b><br><b>(302.5 to 351.7)</b>    | <b>120.8</b><br><b>(87.7 to 156.7)</b> | <b>28.7</b><br><b>(25.8 to 31.7)</b>              | <b>-0.1</b><br><b>(-2.2 to 2.0)</b>                 |
| Schizophrenia                                                  | 18.3<br>(15.9 to 21.1)                        | 1.4<br>(1.2 to 1.6)                         | 11.7<br>(8.4 to 14.8)                  | 31.2<br>(20.2 to 42.7)                            | 0.6<br>(-7.4 to 8.7)                                |
| Alcohol use disorders                                          | 61.1<br>(52.1 to 70.3)                        | 33.7<br>(28.6 to 38.9)                      | 6.1<br>(4.2 to 8.5)                    | 30.9<br>(19.7 to 42.6)                            | 1.4<br>(-6.5 to 10.0)                               |
| Drug use disorders                                             | 55.5<br>(49.5 to 61.0)                        | 8.8<br>(7.5 to 10.3)                        | 7.8<br>(5.5 to 10.6)                   | 31.9<br>(19.7 to 45.1)                            | 4.3<br>(-4.4 to 14.0)                               |
| Opioid use disorders                                           | 12.2<br>(9.7 to 15.2)                         | 1.7<br>(1.4 to 2.1)                         | 5.1<br>(3.4 to 7.2)                    | 32.1<br>(16.4 to 51.0)                            | 4.4<br>(-6.8 to 17.8)                               |
| Cocaine use disorders                                          | 1.1<br>(0.9 to 1.3)                           | 0.1<br>(0.1 to 0.2)                         | 0.2<br>(0.1 to 0.2)                    | 33.0<br>(24.6 to 42.4)                            | 3.4<br>(-2.5 to 9.5)                                |
| Amphetamine use disorders                                      | 5.4<br>(3.5 to 7.9)                           | 0.6<br>(0.4 to 0.9)                         | 0.7<br>(0.4 to 1.2)                    | 33.7<br>(-0.8 to 80.7)                            | 6.9<br>(-19.1 to 42.5)                              |
| Cannabis use disorders                                         | 35.3<br>(28.4 to 43.4)                        | 5.8<br>(4.5 to 7.2)                         | 1.0<br>(0.6 to 1.6)                    | 27.3<br>(11.3 to 46.6)                            | 0.2<br>(-12.3 to 14.7)                              |
| Other drug use disorders                                       | 2.5<br>(2.2 to 2.8)                           | 0.5<br>(0.5 to 0.6)                         | 0.8<br>(0.5 to 1.3)                    | 34.5<br>(5.1 to 72.1)                             | 6.2<br>(-15.4 to 34.2)                              |
| Depressive disorders                                           | 209.6<br>(194.8 to 226.1)                     | 195.9<br>(173.7 to 220.9)                   | 33.3<br>(22.8 to 45.5)                 | 30.0<br>(24.4 to 35.7)                            | -0.9<br>(-4.5 to 3.2)                               |
| Major depressive disorder                                      | 119.2<br>(105.0 to 135.4)                     | 180.3<br>(158.6 to 205.4)                   | 24.4<br>(16.4 to 33.2)                 | 28.5<br>(21.5 to 36.1)                            | -1.3<br>(-6.2 to 4.1)                               |
| Dysthymia                                                      | 93.3<br>(80.9 to 107.1)                       | 15.5<br>(13.6 to 17.8)                      | 8.9<br>(6.0 to 12.6)                   | 34.2<br>(29.5 to 39.3)                            | 0.1<br>(-2.7 to 3.1)                                |
| Bipolar disorder                                               | 29.2<br>(24.8 to 34.0)                        | 3.3<br>(2.8 to 3.9)                         | 5.9<br>(3.6 to 8.8)                    | 30.5<br>(19.9 to 42.8)                            | 0.0<br>(-7.3 to 7.7)                                |
| Anxiety disorders                                              | 239.7<br>(216.3 to 265.9)                     | 42.6<br>(39.0 to 46.5)                      | 23.1<br>(16.1 to 31.7)                 | 29.0<br>(21.0 to 37.9)                            | 0.0<br>(-5.7 to 6.0)                                |
| Eating disorders                                               | 5.6<br>(4.6 to 6.9)                           | 4.6<br>(3.4 to 6.2)                         | 1.2<br>(0.7 to 1.7)                    | 37.8<br>(16.0 to 63.5)                            | 10.0<br>(-6.9 to 29.7)                              |
| Anorexia nervosa                                               | 1.9<br>(1.4 to 2.5)                           | 0.9<br>(0.7 to 1.2)                         | 0.4<br>(0.2 to 0.6)                    | 36.7<br>(0.4 to 87.3)                             | 8.8<br>(-19.6 to 46.0)                              |
| Bulimia nervosa                                                | 3.6<br>(2.7 to 4.8)                           | 3.7<br>(2.5 to 5.2)                         | 0.8<br>(0.4 to 1.2)                    | 38.5<br>(12.9 to 69.5)                            | 10.6<br>(-10.0 to 35.1)                             |
| Autistic spectrum disorders                                    | 65.2<br>(58.2 to 74.0)                        | 0.7<br>(0.5 to 1.0)                         | 9.3<br>(6.3 to 13.1)                   | 24.8<br>(18.6 to 31.3)                            | 0.3<br>(-4.3 to 5.2)                                |
| Autism                                                         | 18.0<br>(15.5 to 21.0)                        | 0.1<br>(< 0.05 to 0.1)                      | 4.6<br>(2.9 to 6.7)                    | 24.6<br>(13.7 to 36.1)                            | 0.4<br>(-8.1 to 9.0)                                |
| Asperger syndrome and other autistic spectrum disorders        | 46.9<br>(38.8 to 56.8)                        | 0.6<br>(0.4 to 0.9)                         | 4.7<br>(3.1 to 6.9)                    | 24.9<br>(18.5 to 31.5)                            | 0.2<br>(-4.4 to 5.0)                                |



| Cause                                                      | Prevalence in thousands (95% UI)              | Incidence in thousands (95% UI)                   | YLDs in thousands (95% UI)             |                                                   |                                                     |
|------------------------------------------------------------|-----------------------------------------------|---------------------------------------------------|----------------------------------------|---------------------------------------------------|-----------------------------------------------------|
|                                                            | 2016 counts                                   | 2016 counts                                       | 2016 counts                            | Percentage change in counts between 2006 and 2016 | Percentage change in age-standardised rates between |
| Attention-deficit/hyperactivity disorder                   | 69.5<br>(61.6 to 78.0)                        | 4.0<br>(3.5 to 4.7)                               | 0.8<br>(0.5 to 1.3)                    | 24.2<br>(13.6 to 35.4)                            | 0.2<br>(-7.8 to 8.4)                                |
| Conduct disorder                                           | 71.8<br>(58.3 to 85.4)                        | 25.2<br>(20.0 to 30.5)                            | 8.7<br>(5.3 to 13.2)                   | 25.0<br>(16.9 to 33.6)                            | 0.3<br>(-6.2 to 7.2)                                |
| Idiopathic developmental intellectual disability           | 92.4<br>(46.8 to 138.3)                       | --                                                | 4.2<br>(2.0 to 7.2)                    | 13.0<br>(2.9 to 23.3)                             | -10.3<br>(-18.0 to -2.6)                            |
| Other mental and substance use disorders                   | 118.8<br>(104.1 to 137.8)                     | 5.4<br>(4.7 to 6.2)                               | 8.8<br>(6.0 to 12.7)                   | 30.8<br>(23.4 to 38.5)                            | -0.0<br>(-4.9 to 5.0)                               |
| <b>Diabetes, urogenital, blood, and endocrine diseases</b> | <b>2,922.4</b><br><b>(2,865.7 to 2,981.7)</b> | <b>729.1†</b><br><b>(685.2 to 772.8)</b>          | <b>74.1</b><br><b>(52.3 to 102.3)</b>  | <b>37.2</b><br><b>(32.8 to 42.2)</b>              | <b>2.9</b><br><b>(-0.5 to 6.7)</b>                  |
| Diabetes mellitus                                          | 634.0<br>(574.9 to 700.8)                     | 45.6<br>(40.9 to 51.0)                            | 42.3<br>(28.9 to 59.4)                 | 45.7<br>(37.9 to 54.8)                            | 6.4<br>(0.7 to 12.8)                                |
| Acute glomerulonephritis                                   | 0.1<br>(0.1 to 0.1)                           | 1.7<br>(1.5 to 1.9)                               | < 0.05<br>(< 0.05 to < 0.05)           | 27.6<br>(21.3 to 34.0)                            | -1.6<br>(-5.8 to 2.6)                               |
| Chronic kidney disease                                     | 183.4<br>(165.9 to 203.2)                     | 15.0<br>(13.4 to 16.7)                            | 8.3<br>(6.2 to 10.7)                   | 42.3<br>(33.8 to 50.9)                            | 3.1<br>(-2.0 to 8.4)                                |
| Chronic kidney disease due to diabetes mellitus            | 103.6<br>(91.2 to 117.3)                      | 8.2<br>(7.0 to 9.4)                               | 4.6<br>(3.4 to 6.0)                    | 44.9<br>(33.6 to 57.7)                            | 4.2<br>(-2.9 to 12.2)                               |
| Chronic kidney disease due to hypertension                 | 28.7<br>(24.9 to 33.2)                        | 1.8<br>(1.5 to 2.1)                               | 1.7<br>(1.2 to 2.3)                    | 42.7<br>(25.5 to 61.8)                            | 0.7<br>(-9.9 to 12.2)                               |
| Chronic kidney disease due to glomerulonephritis           | 32.3<br>(27.5 to 37.6)                        | 3.2<br>(2.7 to 3.9)                               | 1.0<br>(0.7 to 1.4)                    | 36.5<br>(22.5 to 51.7)                            | 4.8<br>(-4.3 to 14.5)                               |
| Chronic kidney disease due to other causes                 | 18.8<br>(15.3 to 22.5)                        | 1.8<br>(1.5 to 2.1)                               | 1.0<br>(0.7 to 1.3)                    | 35.9<br>(27.4 to 45.4)                            | 2.7<br>(-4.1 to 9.9)                                |
| Urinary diseases and male infertility                      | 86.8<br>(76.0 to 100.2)                       | 359.5†<br>(322.7 to 398.9)                        | 1.7<br>(1.1 to 2.5)                    | 33.0<br>(24.8 to 41.3)                            | -2.3<br>(-8.1 to 3.7)                               |
| Interstitial nephritis and urinary tract infections        | 6.2<br>(5.5 to 7.0)                           | 322.8<br>(285.9 to 362.9)                         | 0.2<br>(0.1 to 0.3)                    | 25.9<br>(5.5 to 51.5)                             | 0.2<br>(-14.6 to 17.5)                              |
| Urolithiasis                                               | 1.2<br>(1.1 to 1.4)                           | 31.7<br>(27.9 to 36.4)                            | 0.1<br>(0.1 to 0.1)                    | 36.3<br>(26.6 to 47.1)                            | 0.8<br>(-9.1 to 11.8)                               |
| Benign prostatic hyperplasia                               | 33.2<br>(27.7 to 39.1)                        | 5.0<br>(4.1 to 5.9)                               | 1.1<br>(0.7 to 1.6)                    | 39.4<br>(27.3 to 51.5)                            | -2.1<br>(-9.4 to 5.7)                               |
| Male infertility                                           | 41.0<br>(32.4 to 52.2)                        | --                                                | 0.2<br>(0.1 to 0.5)                    | 28.8<br>(20.7 to 38.1)                            | 0.5<br>(-5.6 to 6.9)                                |
| Other urinary diseases                                     | --                                            | --                                                | 0.1<br>(0.1 to 0.2)                    | 4.1<br>(-9.5 to 18.9)                             | -16.6<br>(-25.3 to -7.0)                            |
| Gynecological diseases                                     | 749.6<br>(708.6 to 784.6)                     | 291.0†<br>(270.6 to 312.5)                        | 10.0<br>(6.8 to 14.2)                  | 26.3<br>(21.1 to 31.8)                            | -4.8<br>(-8.5 to -0.8)                              |
| Uterine fibroids                                           | 83.6<br>(73.0 to 95.4)                        | 10.4<br>(8.9 to 12.3)                             | 1.8<br>(1.1 to 2.8)                    | 28.0<br>(18.5 to 38.0)                            | -8.3<br>(-15.0 to -1.8)                             |
| Polycystic ovarian syndrome                                | 6.7<br>(5.0 to 8.7)                           | 3.5<br>(2.5 to 4.5)                               | 0.1<br>(< 0.05 to 0.1)                 | 29.4<br>(13.1 to 49.8)                            | -0.1<br>(-12.4 to 15.0)                             |
| Female infertility                                         | 36.3<br>(16.7 to 69.0)                        | --                                                | 0.2<br>(0.1 to 0.5)                    | -5.6<br>(-24.5 to 13.0)                           | -25.7<br>(-42.7 to -8.9)                            |
| Endometriosis                                              | 1.9<br>(1.6 to 2.3)                           | 9.7<br>(7.9 to 12.4)                              | 0.2<br>(0.1 to 0.3)                    | 30.2<br>(-0.6 to 73.2)                            | -0.1<br>(-22.9 to 30.7)                             |
| Genital prolapse                                           | 168.8<br>(147.6 to 191.9)                     | 13.6<br>(11.7 to 15.9)                            | 0.5<br>(0.2 to 1.0)                    | 25.7<br>(15.9 to 36.2)                            | -9.6<br>(-17.2 to -1.7)                             |
| Premenstrual syndrome                                      | 446.9<br>(413.6 to 478.7)                     | 168.7<br>(154.3 to 182.8)                         | 3.7<br>(2.3 to 5.6)                    | 28.1<br>(17.9 to 38.3)                            | -1.3<br>(-8.3 to 6.1)                               |
| Other gynecological diseases                               | 103.4<br>(91.2 to 117.9)                      | 85.1<br>(71.4 to 101.8)                           | 3.5<br>(2.3 to 5.0)                    | 25.9<br>(17.0 to 35.4)                            | -3.4<br>(-10.1 to 3.4)                              |
| Hemoglobinopathies and hemolytic anaemias                  | 1,831.9<br>(1,780.4 to 1,898.6)               | --                                                | 7.5<br>(4.9 to 10.8)                   | 15.5<br>(6.9 to 25.4)                             | -6.9<br>(-12.5 to -0.9)                             |
| Thalassemias                                               | 0.6<br>(0.6 to 0.7)                           | --                                                | < 0.05<br>(< 0.05 to 0.1)              | 15.9<br>(-6.0 to 42.9)                            | 1.1<br>(-17.6 to 23.7)                              |
| Thalassaemias trait                                        | 401.6<br>(369.4 to 436.4)                     | --                                                | 5.6<br>(3.6 to 8.1)                    | 16.2<br>(6.3 to 26.3)                             | -5.4<br>(-11.8 to 1.3)                              |
| Sickle cell disorders                                      | < 0.05<br>(< 0.05 to < 0.05)                  | --                                                | < 0.05<br>(< 0.05 to < 0.05)           | 23.7<br>(10.4 to 37.9)                            | 5.9<br>(-4.9 to 17.1)                               |
| Sickle cell trait                                          | 12.6<br>(10.7 to 14.0)                        | --                                                | 0.1<br>(< 0.05 to 0.1)                 | 15.9<br>(1.7 to 35.1)                             | -12.8<br>(-21.5 to -0.5)                            |
| G6PD deficiency                                            | 395.5<br>(361.9 to 436.7)                     | --                                                | < 0.05<br>(< 0.05 to 0.1)              | 25.0<br>(9.1 to 45.4)                             | -0.8<br>(-11.3 to 11.8)                             |
| G6PD trait                                                 | 1,076.4<br>(1,039.2 to 1,117.7)               | --                                                | < 0.05<br>(< 0.05 to < 0.05)           | 32.8<br>(19.2 to 50.2)                            | 7.6<br>(-0.8 to 18.6)                               |
| Other hemoglobinopathies and hemolytic anaemias            | 80.8<br>(75.6 to 85.9)                        | --                                                | 1.7<br>(1.1 to 2.5)                    | 13.0<br>(1.9 to 25.5)                             | -11.0<br>(-17.4 to -3.8)                            |
| Endocrine, metabolic, blood, and immune disorders          | 139.7<br>(130.4 to 149.3)                     | 16.4<br>(14.7 to 18.3)                            | 4.3<br>(2.9 to 6.0)                    | 24.3<br>(17.4 to 32.1)                            | -3.0<br>(-7.4 to 1.8)                               |
| <b>Musculoskeletal disorders</b>                           | <b>991.3</b><br><b>(935.3 to 1,041.4)</b>     | <b>508.3</b><br><b>(457.7 to 561.2)</b>           | <b>107.2</b><br><b>(77.0 to 141.1)</b> | <b>33.1</b><br><b>(29.2 to 36.8)</b>              | <b>-0.8</b><br><b>(-3.3 to 1.5)</b>                 |
| Rheumatoid arthritis                                       | 8.3<br>(7.2 to 9.3)                           | 0.5<br>(0.5 to 0.6)                               | 1.9<br>(1.3 to 2.6)                    | 39.3<br>(23.9 to 55.5)                            | 3.8<br>(-5.7 to 14.5)                               |
| Osteoarthritis                                             | 161.6<br>(150.9 to 172.8)                     | 9.5<br>(8.7 to 10.3)                              | 9.9<br>(6.9 to 13.5)                   | 40.2<br>(34.6 to 45.9)                            | -0.6<br>(-4.1 to 3.1)                               |
| Low back and neck pain                                     | 608.7<br>(565.5 to 657.5)                     | 256.2<br>(227.6 to 287.9)                         | 69.5<br>(49.0 to 92.5)                 | 34.2<br>(29.5 to 38.7)                            | -0.1<br>(-3.5 to 2.9)                               |
| Low back pain                                              | 432.8<br>(382.2 to 495.2)                     | 206.5<br>(179.4 to 236.8)                         | 48.6<br>(34.1 to 65.3)                 | 33.4<br>(26.9 to 39.7)                            | -0.1<br>(-5.0 to 4.1)                               |
| Neck pain                                                  | 211.3<br>(181.1 to 243.3)                     | 49.7<br>(42.7 to 58.1)                            | 21.0<br>(14.0 to 29.9)                 | 35.9<br>(32.1 to 39.8)                            | -0.1<br>(-2.1 to 2.1)                               |
| Gout                                                       | 20.4<br>(18.1 to 23.1)                        | 4.2<br>(3.6 to 4.8)                               | 0.6<br>(0.4 to 0.9)                    | 39.0<br>(17.8 to 63.1)                            | 0.2<br>(-12.7 to 14.0)                              |
| Other musculoskeletal disorders                            | 294.5<br>(249.5 to 342.0)                     | 237.9<br>(197.6 to 283.9)                         | 25.2<br>(17.0 to 35.7)                 | 27.2<br>(17.1 to 37.5)                            | -3.5<br>(-10.2 to 3.6)                              |
| <b>Other non-communicable diseases</b>                     | <b>5,635.2</b><br><b>(5,515.2 to 5,735.9)</b> | <b>17,242.0†</b><br><b>(16,043.5 to 18,495.4)</b> | <b>141.1</b><br><b>(96.7 to 197.8)</b> | <b>26.1</b><br><b>(24.3 to 27.9)</b>              | <b>-2.0</b><br><b>(-3.2 to -0.9)</b>                |
| Congenital anomalies                                       | 97.0<br>(84.8 to 113.0)                       | --                                                | 10.8<br>(7.5 to 15.1)                  | 21.0<br>(12.7 to 28.9)                            | -2.2<br>(-9.0 to 4.2)                               |
| Neural tube defects                                        | 4.3<br>(3.8 to 4.9)                           | --                                                | 1.3<br>(0.9 to 1.7)                    | 25.5<br>(7.7 to 46.5)                             | 0.8<br>(-12.0 to 15.6)                              |
| Congenital heart anomalies                                 | 26.6<br>(22.7 to 30.9)                        | --                                                | 1.1<br>(0.5 to 2.0)                    | 23.4<br>(8.8 to 40.3)                             | 4.0<br>(-8.1 to 17.5)                               |
| Orofacial clefts                                           | 4.5<br>(3.9 to 5.1)                           | --                                                | 0.1<br>(< 0.05 to 0.1)                 | 21.7<br>(7.8 to 36.3)                             | -2.0<br>(-13.1 to 9.8)                              |
| Down's syndrome                                            | 2.1<br>(1.8 to 2.5)                           | --                                                | 0.2<br>(0.1 to 0.3)                    | 26.1<br>(16.3 to 36.0)                            | 3.0<br>(-5.1 to 11.0)                               |
| Turner syndrome                                            | 2.9<br>(2.5 to 3.4)                           | --                                                | < 0.05<br>(< 0.05 to 0.1)              | 29.1<br>(-13.6 to 92.1)                           | 6.3<br>(-27.9 to 54.0)                              |
| Klinefelter syndrome                                       | 2.6<br>(2.2 to 3.1)                           | --                                                | < 0.05<br>(< 0.05 to < 0.05)           | 24.0<br>(-6.9 to 66.6)                            | 1.7<br>(-22.1 to 35.3)                              |

| Cause                                         | Prevalence in thousands (95% UI)        | Incidence in thousands (95% UI)          | YLDs in thousands (95% UI)           |                                                   |                                                     |
|-----------------------------------------------|-----------------------------------------|------------------------------------------|--------------------------------------|---------------------------------------------------|-----------------------------------------------------|
|                                               | 2016 counts                             | 2016 counts                              | 2016 counts                          | Percentage change in counts between 2006 and 2016 | Percentage change in age-standardised rates between |
| Other chromosomal abnormalities               | 2.9<br>(2.5 to 3.5)                     | --                                       | 0.3<br>(0.2 to 0.5)                  | 20.2<br>(-5.2 to 51.4)                            | 2.0<br>(-18.8 to 27.1)                              |
| Congenital musculoskeletal and limb anomalies | 7.6<br>(6.9 to 8.4)                     | --                                       | 1.1<br>(0.7 to 1.5)                  | 34.7<br>(20.8 to 51.0)                            | 9.0<br>(-1.3 to 20.6)                               |
| Urogenital congenital anomalies               | 8.6<br>(7.5 to 9.7)                     | --                                       | 0.2<br>(0.1 to 0.3)                  | 19.1<br>(8.8 to 30.6)                             | -0.3<br>(-8.2 to 8.9)                               |
| Digestive congenital anomalies                | 11.4<br>(10.0 to 12.9)                  | --                                       | 0.5<br>(0.3 to 0.7)                  | 30.2<br>(11.1 to 52.0)                            | 4.6<br>(-9.1 to 19.9)                               |
| Other congenital anomalies                    | 41.3<br>(28.8 to 60.2)                  | --                                       | 6.0<br>(3.8 to 9.1)                  | 16.8<br>(4.6 to 29.4)                             | -6.2<br>(-15.9 to 3.3)                              |
| Skin and subcutaneous diseases                | 2,384.9<br>(2,315.1 to 2,459.1)         | 5,217.2<br>(4,946.9 to 5,526.7)          | 63.3<br>(41.6 to 92.2)               | 24.3<br>(21.7 to 27.1)                            | -0.1<br>(-1.8 to 1.8)                               |
| Dermatitis                                    | 369.1<br>(340.3 to 399.7)               | 409.0<br>(379.4 to 440.0)                | 14.3<br>(8.4 to 23.9)                | 20.8<br>(16.4 to 25.9)                            | 0.0<br>(-3.5 to 3.6)                                |
| Psoriasis                                     | 32.5<br>(30.7 to 34.4)                  | 5.2<br>(4.9 to 5.5)                      | 2.8<br>(2.0 to 3.7)                  | 36.9<br>(21.9 to 56.5)                            | 6.5<br>(-4.5 to 19.3)                               |
| Cellulitis                                    | 2.2<br>(2.1 to 2.4)                     | 36.7<br>(33.9 to 39.4)                   | 0.1<br>(0.1 to 0.2)                  | 27.1<br>(12.7 to 43.2)                            | 1.0<br>(-10.6 to 15.0)                              |
| Pyoderma                                      | 9.3<br>(9.0 to 9.7)                     | 189.1<br>(182.2 to 196.2)                | 0.1<br>(< 0.05 to 0.1)               | 31.2<br>(17.4 to 46.4)                            | -0.0<br>(-7.6 to 8.2)                               |
| Scabies                                       | 406.5<br>(356.6 to 468.6)               | 1,281.5<br>(1,109.7 to 1,488.2)          | 10.5<br>(5.8 to 16.6)                | 15.7<br>(11.1 to 20.6)                            | -6.9<br>(-10.1 to -3.5)                             |
| Fungal skin diseases                          | 569.4<br>(513.4 to 637.3)               | 1,895.0<br>(1,696.7 to 2,115.8)          | 3.2<br>(1.3 to 6.6)                  | 26.0<br>(23.8 to 28.1)                            | -0.0<br>(-1.1 to 1.1)                               |
| Viral skin diseases                           | 229.2<br>(215.8 to 244.4)               | 323.4<br>(302.3 to 346.8)                | 7.0<br>(4.4 to 10.5)                 | 23.2<br>(19.1 to 27.5)                            | 0.0<br>(-2.9 to 3.2)                                |
| Acne vulgaris                                 | 686.6<br>(604.8 to 777.8)               | 494.6<br>(395.5 to 630.9)                | 17.6<br>(11.8 to 25.6)               | 30.9<br>(24.2 to 38.2)                            | 2.9<br>(-2.1 to 8.2)                                |
| Alopecia areata                               | 13.6<br>(13.1 to 14.1)                  | 24.2<br>(23.4 to 25.1)                   | 0.5<br>(0.3 to 0.7)                  | 27.4<br>(12.9 to 43.3)                            | 0.2<br>(-10.0 to 11.0)                              |
| Pruritus                                      | 56.4<br>(49.2 to 63.1)                  | 45.8<br>(40.8 to 51.9)                   | 0.6<br>(0.3 to 1.1)                  | 29.6<br>(22.6 to 37.8)                            | 1.2<br>(-3.7 to 6.5)                                |
| Urticaria                                     | 76.0<br>(65.5 to 89.3)                  | 136.7<br>(118.3 to 158.2)                | 4.6<br>(2.9 to 6.7)                  | 20.7<br>(12.7 to 29.0)                            | 0.0<br>(-5.8 to 6.5)                                |
| Decubitus ulcer                               | 0.7<br>(0.7 to 0.8)                     | 2.6<br>(2.4 to 2.9)                      | 0.1<br>(0.1 to 0.2)                  | 40.4<br>(27.3 to 55.4)                            | 2.2<br>(-10.4 to 18.3)                              |
| Other skin and subcutaneous diseases          | 335.2<br>(324.6 to 346.9)               | 373.3<br>(361.2 to 386.7)                | 1.8<br>(0.9 to 3.4)                  | 34.7<br>(30.8 to 38.9)                            | 3.4<br>(1.1 to 6.1)                                 |
| Sense organ diseases                          | 1,503.6<br>(1,468.0 to 1,544.4)         | 689.9†<br>(641.4 to 741.7)               | 57.8<br>(40.2 to 80.4)               | 28.2<br>(25.1 to 31.5)                            | -3.4<br>(-5.2 to -1.6)                              |
| Glaucoma                                      | 1.7<br>(1.4 to 2.0)                     | --                                       | 0.1<br>(0.1 to 0.2)                  | 45.9<br>(23.8 to 71.8)                            | 1.5<br>(-11.9 to 17.2)                              |
| Cataract                                      | 33.3<br>(28.8 to 38.2)                  | --                                       | 2.1<br>(1.5 to 2.9)                  | 35.4<br>(26.1 to 45.1)                            | -5.6<br>(-12.7 to 1.9)                              |
| Macular degeneration                          | 1.8<br>(1.4 to 2.2)                     | --                                       | 0.1<br>(0.1 to 0.1)                  | 46.3<br>(24.6 to 73.3)                            | 1.0<br>(-12.2 to 17.9)                              |
| Refraction and accommodation disorders        | 878.0<br>(839.0 to 916.0)               | --                                       | 16.3<br>(10.0 to 25.6)               | 25.9<br>(21.9 to 29.9)                            | -4.6<br>(-7.8 to -1.5)                              |
| Age-related and other hearing loss            | 813.7<br>(761.8 to 869.5)               | --                                       | 33.4<br>(23.4 to 45.5)               | 27.8<br>(22.7 to 33.3)                            | -3.3<br>(-5.6 to -0.9)                              |
| Other vision loss                             | 20.3<br>(17.9 to 22.9)                  | --                                       | 1.2<br>(0.8 to 1.7)                  | 36.7<br>(24.7 to 49.7)                            | 0.6<br>(-7.0 to 9.0)                                |
| Other sense organ diseases                    | 148.4<br>(137.0 to 159.7)               | 689.9<br>(641.4 to 741.7)                | 4.5<br>(2.8 to 6.8)                  | 33.8<br>(27.2 to 41.2)                            | 0.8<br>(-3.1 to 4.9)                                |
| Oral disorders                                | 4,139.9<br>(3,930.0 to 4,294.6)         | 11,334.9†<br>(10,213.7 to 12,552.1)      | 9.2<br>(5.6 to 14.0)                 | 31.6<br>(28.8 to 34.8)                            | -0.3<br>(-2.2 to 1.7)                               |
| Caries of deciduous teeth                     | 504.6<br>(356.8 to 638.2)               | 2,184.1<br>(1,329.6 to 3,122.1)          | 0.1<br>(< 0.05 to 0.2)               | 13.3<br>(-1.0 to 31.0)                            | -0.5<br>(-12.8 to 14.7)                             |
| Caries of permanent teeth                     | 3,524.6<br>(3,302.8 to 3,731.7)         | 9,133.0<br>(8,348.1 to 9,934.0)          | 2.1<br>(0.9 to 4.0)                  | 25.1<br>(21.0 to 28.9)                            | -2.4<br>(-5.1 to 0.2)                               |
| Periodontal disease                           | 78.5<br>(63.6 to 95.7)                  | 8.9<br>(7.2 to 10.9)                     | 0.5<br>(0.2 to 1.1)                  | 39.1<br>(32.4 to 46.3)                            | 0.6<br>(-3.5 to 5.2)                                |
| Edentulism and severe tooth loss              | 105.5<br>(91.0 to 119.6)                | 8.9<br>(7.6 to 10.2)                     | 2.9<br>(1.9 to 4.1)                  | 40.2<br>(34.7 to 46.1)                            | 0.1<br>(-3.1 to 3.7)                                |
| Other oral disorders                          | 124.7<br>(119.0 to 130.9)               | --                                       | 3.6<br>(2.3 to 5.4)                  | 28.9<br>(24.3 to 33.8)                            | -0.1<br>(-3.0 to 3.1)                               |
| <b>Injuries</b>                               | <b>863.7</b><br><b>(819.0 to 911.5)</b> | <b>495.1†</b><br><b>(470.5 to 519.8)</b> | <b>38.8</b><br><b>(26.3 to 55.5)</b> | <b>42.9</b><br><b>(39.6 to 46.2)</b>              | <b>9.9</b><br><b>(8.0 to 11.9)</b>                  |
| <b>Transport injuries</b>                     | <b>164.8</b><br><b>(152.1 to 179.8)</b> | <b>68.8</b><br><b>(61.0 to 77.8)</b>     | <b>10.1</b><br><b>(6.8 to 14.5)</b>  | <b>59.2</b><br><b>(55.1 to 63.2)</b>              | <b>20.7</b><br><b>(18.1 to 23.2)</b>                |
| Road injuries                                 | 107.7<br>(99.0 to 117.1)                | 51.1<br>(43.8 to 59.5)                   | 6.4<br>(4.3 to 9.2)                  | 82.8<br>(78.5 to 87.0)                            | 35.8<br>(33.1 to 38.4)                              |
| Pedestrian road injuries                      | 18.6<br>(16.2 to 21.4)                  | 6.5<br>(5.1 to 8.3)                      | 1.1<br>(0.8 to 1.6)                  | 87.2<br>(82.6 to 91.5)                            | 37.5<br>(34.6 to 40.2)                              |
| Cyclist road injuries                         | 11.1<br>(9.3 to 13.2)                   | 5.9<br>(4.4 to 7.5)                      | 0.6<br>(0.4 to 0.9)                  | 97.2<br>(92.0 to 102.5)                           | 49.2<br>(46.0 to 52.5)                              |
| Motorcyclist road injuries                    | 29.2<br>(24.9 to 36.7)                  | 9.6<br>(7.7 to 11.8)                     | 1.7<br>(1.1 to 2.4)                  | 78.8<br>(74.3 to 83.3)                            | 32.7<br>(30.0 to 35.5)                              |
| Motor vehicle road injuries                   | 36.7<br>(30.8 to 43.0)                  | 21.7<br>(17.8 to 26.0)                   | 2.3<br>(1.6 to 3.3)                  | 80.5<br>(76.2 to 85.0)                            | 34.0<br>(31.3 to 36.7)                              |
| Other road injuries                           | 11.9<br>(10.1 to 14.2)                  | 7.4<br>(5.7 to 9.4)                      | 0.7<br>(0.4 to 0.9)                  | 81.9<br>(77.5 to 86.3)                            | 36.4<br>(33.6 to 39.1)                              |
| Other transport injuries                      | 57.1<br>(47.7 to 67.9)                  | 17.7<br>(15.3 to 21.1)                   | 3.7<br>(2.5 to 5.2)                  | 30.1<br>(26.0 to 34.1)                            | -0.8<br>(-3.3 to 1.5)                               |
| <b>Unintentional injuries</b>                 | <b>596.2</b><br><b>(559.1 to 635.2)</b> | <b>374.3</b><br><b>(353.2 to 395.1)</b>  | <b>22.3</b><br><b>(15.2 to 31.6)</b> | <b>42.1</b><br><b>(38.8 to 45.5)</b>              | <b>8.6</b><br><b>(6.6 to 10.5)</b>                  |
| Falls                                         | 133.5<br>(115.0 to 154.0)               | 73.0<br>(62.5 to 87.4)                   | 5.7<br>(3.9 to 8.1)                  | 66.2<br>(61.9 to 70.6)                            | 26.8<br>(24.3 to 29.3)                              |
| Drowning                                      | 5.0<br>(4.4 to 5.8)                     | 1.3<br>(1.1 to 1.5)                      | 0.3<br>(0.2 to 0.5)                  | 26.0<br>(21.6 to 30.4)                            | -5.4<br>(-8.4 to -2.5)                              |
| Fire, heat, and hot substances                | 64.9<br>(54.8 to 77.6)                  | 10.2<br>(8.5 to 12.0)                    | 1.9<br>(1.3 to 2.7)                  | 40.7<br>(33.0 to 48.6)                            | 6.7<br>(1.6 to 11.7)                                |
| Poisonings                                    | 2.1<br>(1.8 to 2.5)                     | 4.0<br>(3.3 to 4.9)                      | 0.2<br>(0.1 to 0.3)                  | 54.3<br>(42.3 to 67.4)                            | 19.3<br>(11.6 to 27.7)                              |
| Exposure to mechanical forces                 | 107.2<br>(92.3 to 130.0)                | 55.4<br>(47.3 to 63.5)                   | 3.1<br>(2.0 to 4.5)                  | 63.7<br>(59.2 to 68.0)                            | 23.5<br>(20.7 to 26.1)                              |
| Unintentional firearm injuries                | 4.2<br>(3.4 to 5.4)                     | 1.4<br>(1.0 to 2.0)                      | 0.2<br>(0.1 to 0.3)                  | 45.8<br>(41.6 to 50.0)                            | 10.9<br>(8.2 to 13.6)                               |
| Unintentional suffocation                     | 6.5<br>(5.0 to 8.2)                     | 1.9<br>(1.4 to 2.5)                      | 0.3<br>(0.2 to 0.4)                  | 44.4<br>(40.0 to 49.0)                            | 12.0<br>(9.2 to 14.7)                               |
| Other exposure to mechanical forces           | 96.5<br>(81.7 to 118.8)                 | 52.1<br>(44.5 to 59.6)                   | 2.6<br>(1.7 to 3.8)                  | 67.6<br>(62.7 to 72.0)                            | 25.7<br>(22.7 to 28.3)                              |

| Cause                                                                               | Prevalence in thousands (95% UI)  | Incidence in thousands (95% UI) | YLDs in thousands (95% UI)   |                                                   |                                                     |
|-------------------------------------------------------------------------------------|-----------------------------------|---------------------------------|------------------------------|---------------------------------------------------|-----------------------------------------------------|
|                                                                                     | 2016 counts                       | 2016 counts                     | 2016 counts                  | Percentage change in counts between 2006 and 2016 | Percentage change in age-standardised rates between |
| Adverse effects of medical treatment                                                | 4.0<br>(3.1 to 4.9)               | 52.3<br>(45.9 to 59.2)          | 0.5<br>(0.3 to 0.8)          | 21.5<br>(16.1 to 27.6)                            | -2.5<br>(-5.9 to 1.0)                               |
| Animal contact                                                                      | 43.2<br>(37.7 to 50.3)            | 66.7<br>(58.2 to 76.0)          | 1.5<br>(1.0 to 2.2)          | 22.2<br>(16.3 to 28.6)                            | -6.9<br>(-10.5 to -3.4)                             |
| Venomous animal contact                                                             | 16.6<br>(13.8 to 19.6)            | 28.6<br>(23.4 to 34.3)          | 1.0<br>(0.7 to 1.4)          | 25.7<br>(17.1 to 35.3)                            | -3.8<br>(-8.8 to 1.4)                               |
| Non-venomous animal contact                                                         | 26.6<br>(22.1 to 33.1)            | 38.1<br>(31.7 to 45.4)          | 0.5<br>(0.3 to 0.8)          | 15.8<br>(10.8 to 20.3)                            | -12.2<br>(-15.1 to -9.3)                            |
| Foreign body                                                                        | 40.4<br>(32.9 to 47.9)            | 26.3<br>(23.1 to 29.9)          | 1.9<br>(1.2 to 2.8)          | 31.9<br>(26.5 to 36.7)                            | 2.2<br>(-0.8 to 4.9)                                |
| Pulmonary aspiration and foreign body in airway                                     | 26.6<br>(20.2 to 35.3)            | 13.1<br>(10.9 to 15.7)          | 1.4<br>(0.9 to 2.0)          | 33.7<br>(28.2 to 38.7)                            | 3.6<br>(0.6 to 6.4)                                 |
| Foreign body in eyes                                                                | 1.2<br>(0.7 to 1.9)               | 6.7<br>(5.1 to 9.1)             | 0.1<br>(< 0.05 to 0.1)       | 29.6<br>(24.3 to 35.0)                            | 0.5<br>(-2.5 to 3.3)                                |
| Foreign body in other body part                                                     | 12.6<br>(9.8 to 16.0)             | 6.5<br>(5.4 to 7.9)             | 0.5<br>(0.3 to 0.7)          | 27.2<br>(20.9 to 33.0)                            | -1.3<br>(-5.1 to 2.0)                               |
| Environmental heat and cold exposure                                                | 73.3<br>(62.6 to 85.2)            | 26.7<br>(22.4 to 31.9)          | 3.2<br>(2.2 to 4.6)          | 25.6<br>(22.3 to 28.9)                            | -4.5<br>(-6.5 to -2.6)                              |
| Other unintentional injuries                                                        | 122.6<br>(100.8 to 147.7)         | 58.3<br>(49.9 to 67.8)          | 3.8<br>(2.6 to 5.5)          | 32.7<br>(29.9 to 35.5)                            | 1.3<br>(-0.5 to 3.1)                                |
| <b>Self-harm and interpersonal violence</b>                                         | <b>311.1<br/>(277.5 to 346.7)</b> | <b>51.8†<br/>(43.5 to 61.0)</b> | <b>5.5<br/>(3.8 to 7.7)</b>  | <b>32.7<br/>(29.4 to 36.3)</b>                    | <b>2.6<br/>(0.7 to 4.7)</b>                         |
| Self-harm                                                                           | 7.0<br>(6.0 to 8.3)               | 3.9<br>(3.2 to 4.7)             | 0.4<br>(0.3 to 0.6)          | 36.5<br>(32.2 to 41.0)                            | 1.4<br>(-1.4 to 4.1)                                |
| Self-harm by firearm                                                                | 0.4<br>(0.3 to 0.5)               | 0.1<br>(0.1 to 0.2)             | < 0.05<br>(< 0.05 to < 0.05) | 21.0<br>(16.5 to 25.7)                            | -11.1<br>(-13.8 to -8.4)                            |
| Self-harm by other specified means                                                  | 6.7<br>(5.6 to 7.9)               | 3.8<br>(3.1 to 4.5)             | 0.4<br>(0.2 to 0.6)          | 37.3<br>(32.8 to 41.9)                            | 2.0<br>(-0.8 to 4.8)                                |
| Interpersonal violence                                                              | 304.1<br>(270.9 to 340.0)         | 47.9†<br>(39.7 to 57.1)         | 5.1<br>(3.6 to 7.2)          | 32.4<br>(28.9 to 36.1)                            | 2.8<br>(0.7 to 4.9)                                 |
| Assault by firearm                                                                  | 0.8<br>(0.7 to 1.0)               | 0.4<br>(0.2 to 0.5)             | < 0.05<br>(< 0.05 to 0.1)    | 27.0<br>(22.6 to 31.7)                            | -4.8<br>(-7.6 to -1.8)                              |
| Assault by sharp object                                                             | 12.7<br>(10.3 to 15.2)            | 6.4<br>(4.7 to 8.3)             | 0.5<br>(0.3 to 0.7)          | 31.3<br>(26.9 to 35.7)                            | -1.3<br>(-4.2 to 1.6)                               |
| Sexual violence                                                                     | 232.0<br>(201.9 to 268.2)         | --                              | 2.1<br>(1.4 to 3.0)          | 17.6<br>(12.7 to 22.8)                            | -6.9<br>(-10.1 to -3.3)                             |
| Assault by other means                                                              | 58.4<br>(47.7 to 72.5)            | 41.2<br>(33.9 to 49.4)          | 2.6<br>(1.8 to 3.7)          | 47.6<br>(44.0 to 51.1)                            | 10.2<br>(8.0 to 12.3)                               |
| <b>Forces of nature, conflict and terrorism, and executions and police conflict</b> | <b>23.7<br/>(15.2 to 34.1)</b>    | <b>0.2†<br/>(0.1 to 0.3)</b>    | <b>0.9<br/>(0.3 to 2.2)</b>  | <b>-8.8<br/>(-12.8 to -5.2)</b>                   | <b>-20.2<br/>(-23.0 to -17.5)</b>                   |
| Exposure to forces of nature                                                        | 16.3<br>(9.9 to 24.6)             | --                              | 0.6<br>(0.2 to 1.5)          | -10.8<br>(-15.0 to -7.3)                          | -21.8<br>(-24.7 to -19.2)                           |
| Conflict and terrorism                                                              | 6.8<br>(3.7 to 10.9)              | --                              | 0.2<br>(0.1 to 0.6)          | -5.4<br>(-9.6 to -1.4)                            | -16.8<br>(-19.9 to -13.6)                           |
| Executions and police conflict                                                      | 0.5<br>(0.3 to 0.8)               | 0.2<br>(0.1 to 0.3)             | < 0.05<br>(< 0.05 to < 0.05) | 42.4<br>(34.5 to 48.6)                            | 15.9<br>(10.2 to 20.2)                              |
| <b>Impairments</b>                                                                  | --                                | --                              | --                           | --                                                | --                                                  |
| Anaemia                                                                             | 2,681.0<br>(2,531.9 to 2,828.7)   | --                              | 85.2<br>(56.9 to 121.3)      | 11.8<br>(4.9 to 19.2)                             | -9.3<br>(-13.6 to -4.7)                             |
| Developmental intellectual disability                                               | 188.6<br>(145.5 to 231.6)         | --                              | 18.0<br>(13.2 to 23.6)       | 21.0<br>(14.4 to 27.6)                            | -3.0<br>(-8.0 to 2.3)                               |
| Epilepsy                                                                            | 36.2<br>(22.9 to 50.1)            | --                              | 14.2<br>(8.1 to 22.2)        | 28.5<br>(-31.6 to 147.8)                          | 2.6<br>(-46.8 to 103.7)                             |
| Guillain-Barre syndrome                                                             | < 0.05<br>(< 0.05 to 0.1)         | --                              | < 0.05<br>(< 0.05 to < 0.05) | 27.0<br>(24.6 to 30.0)                            | 0.0<br>(-0.0 to 0.0)                                |
| Hearing loss                                                                        | 963.7<br>(914.1 to 1,016.3)       | --                              | 42.6<br>(29.9 to 56.7)       | 24.4<br>(20.4 to 28.2)                            | -4.0<br>(-6.0 to -2.1)                              |
| Heart failure                                                                       | 19.4<br>(17.0 to 22.0)            | --                              | 2.7<br>(2.0 to 3.6)          | 46.8<br>(36.1 to 57.9)                            | 3.7<br>(-3.5 to 11.4)                               |
| Infertility                                                                         | 169.5<br>(133.6 to 217.2)         | --                              | 1.0<br>(0.4 to 2.0)          | 19.9<br>(13.7 to 26.5)                            | -7.6<br>(-12.2 to -2.5)                             |
| Pelvic inflammatory disease                                                         | 7.0<br>(5.9 to 8.3)               | --                              | 0.9<br>(0.6 to 1.3)          | 25.9<br>(9.6 to 44.8)                             | -4.1<br>(-15.8 to 10.0)                             |
| Vision loss                                                                         | 979.3<br>(936.6 to 1,023.1)       | --                              | 23.7<br>(16.2 to 34.6)       | 28.2<br>(24.6 to 31.8)                            | -4.2<br>(-7.1 to -1.6)                              |

We did not calculate incidence for the nine impairments, certain NTDs, and causes with only birth prevalence. Blank cells mean that no estimate is available.

† Incidence for aggregate causes represents the sum of the incidence of the causes below the aggregate.

‡ Incidence estimates for stroke represent first-ever stroke only.

^ Incidence of HIV/AIDS represents new infections of HIV only and does not include new infections of Tuberculosis in HIV positive cases.



SR Table 14: Prevalence, incidence, and YLDs for 2016, percentage change of YLD counts and percentage change of age-standardised YLD rates between 2006 and 2016 by cause and impairments, for all ages, Paraguay.

| Cause                                                                                | Prevalence in thousands (95% UI)       | Incidence in thousands (95% UI)            | YLDs in thousands (95% UI)       |                                                   |                                                     |
|--------------------------------------------------------------------------------------|----------------------------------------|--------------------------------------------|----------------------------------|---------------------------------------------------|-----------------------------------------------------|
|                                                                                      | 2016 counts                            | 2016 counts                                | 2016 counts                      | Percentage change in counts between 2006 and 2016 | Percentage change in age-standardised rates between |
| <b>All causes</b>                                                                    | <b>6,451.5</b><br>(6,430.6 to 6,470.8) | <b>50,137.9†</b><br>(47,825.1 to 52,560.2) | <b>668.1</b><br>(496.2 to 871.6) | <b>20.6</b><br>(18.3 to 23.1)                     | <b>0.6</b><br>(-1.0 to 2.4)                         |
| <b>Communicable, maternal, neonatal, and nutritional disorders</b>                   | <b>4,499.2</b><br>(4,405.1 to 4,604.2) | <b>28,369.5†</b><br>(26,277.3 to 30,615.1) | <b>75.8</b><br>(53.2 to 103.2)   | <b>8.5</b><br>(4.4 to 13.2)                       | <b>-0.3</b><br>(-3.9 to 3.8)                        |
| <b>HIV/AIDS and tuberculosis</b>                                                     | <b>1,535.9</b><br>(1,371.1 to 1,666.2) | <b>2.9†</b><br>(2.5 to 3.4)                | <b>1.0</b><br>(0.6 to 1.6)       | <b>31.4</b><br>(3.5 to 68.3)                      | <b>6.5</b><br>(-17.4 to 37.1)                       |
| Tuberculosis                                                                         | 1,422.0<br>(1,281.5 to 1,583.0)        | 2.5†<br>(2.1 to 2.9)                       | 0.3<br>(0.2 to 0.5)              | 8.3<br>(-16.7 to 40.1)                            | -12.8<br>(-30.9 to 10.7)                            |
| Drug-susceptible tuberculosis                                                        | 1.1<br>(0.9 to 1.2)                    | 2.5<br>(2.1 to 2.9)                        | 0.3<br>(0.2 to 0.5)              | 8.4<br>(-17.0 to 40.8)                            | -12.7<br>(-31.0 to 11.3)                            |
| Multidrug-resistant tuberculosis without extensive drug resistance                   | < 0.05<br>(< 0.05 to < 0.05)           | < 0.05<br>(< 0.05 to < 0.05)               | < 0.05<br>(< 0.05 to < 0.05)     | -3.4<br>(-24.0 to 24.2)                           | -22.8<br>(-38.8 to -0.9)                            |
| Extensively drug-resistant tuberculosis                                              | < 0.05<br>(< 0.05 to < 0.05)           | < 0.05<br>(< 0.05 to < 0.05)               | < 0.05<br>(< 0.05 to < 0.05)     | 157.3<br>(102.3 to 231.1)                         | 105.6<br>(63.1 to 163.7)                            |
| Latent tuberculosis infection                                                        | 1,420.9<br>(1,280.5 to 1,581.7)        | --                                         | --                               | --                                                | --                                                  |
| HIV/AIDS                                                                             | 6.9<br>(4.9 to 9.9)                    | 0.4 <sup>A</sup><br>(0.3 to 0.6)           | 0.6<br>(0.4 to 1.2)              | 47.8<br>(0.2 to 122.5)                            | 21.1<br>(-21.1 to 89.2)                             |
| Drug-susceptible HIV/AIDS - Tuberculosis                                             | 0.2<br>(0.1 to 0.2)                    | 0.4<br>(0.2 to 0.6)                        | 0.1<br>(< 0.05 to 0.1)           | -31.4<br>(-47.5 to -9.6)                          | -41.9<br>(-55.8 to -23.2)                           |
| Multidrug-resistant HIV/AIDS - Tuberculosis without extensive drug resistance        | < 0.05<br>(< 0.05 to < 0.05)           | < 0.05<br>(< 0.05 to < 0.05)               | < 0.05<br>(< 0.05 to < 0.05)     | -40.7<br>(-53.8 to -24.0)                         | -49.8<br>(-61.0 to -35.6)                           |
| Extensively drug-resistant HIV/AIDS - Tuberculosis                                   | < 0.05<br>(< 0.05 to < 0.05)           | < 0.05<br>(< 0.05 to < 0.05)               | < 0.05<br>(< 0.05 to < 0.05)     | 57.9<br>(22.8 to 102.1)                           | 33.7<br>(3.9 to 71.2)                               |
| HIV/AIDS resulting in other diseases                                                 | 6.7<br>(4.7 to 9.8)                    | 0.4<br>(0.3 to 0.6)                        | 0.6<br>(0.3 to 1.1)              | 70.4<br>(5.9 to 211.4)                            | 38.4<br>(-16.7 to 168.6)                            |
| <b>Diarrhoea, lower respiratory infections, and other common infectious diseases</b> | <b>461.7</b><br>(438.8 to 486.6)       | <b>27,342.0†</b><br>(25,275.5 to 29,600.7) | <b>27.9</b><br>(19.4 to 38.3)    | <b>16.4</b><br>(12.0 to 21.1)                     | <b>10.0</b><br>(6.2 to 13.9)                        |
| Diarrhoeal diseases                                                                  | 156.5<br>(144.8 to 168.0)              | 10,283.9<br>(9,571.0 to 11,057.3)          | 17.7<br>(12.3 to 24.5)           | 21.8<br>(15.2 to 29.0)                            | 16.9<br>(11.3 to 22.7)                              |
| Intestinal infectious diseases                                                       | < 0.05<br>(< 0.05 to < 0.05)           | 0.1†<br>(0.1 to 0.2)                       | < 0.05<br>(< 0.05 to < 0.05)     | -27.6<br>(-38.8 to -14.8)                         | -39.9<br>(-48.4 to -29.7)                           |
| Typhoid fever                                                                        | < 0.05<br>(< 0.05 to < 0.05)           | 0.1<br>(0.1 to 0.2)                        | < 0.05<br>(< 0.05 to < 0.05)     | -26.7<br>(-38.4 to -13.4)                         | -39.4<br>(-48.3 to -29.2)                           |
| Paratyphoid fever                                                                    | < 0.05<br>(< 0.05 to < 0.05)           | < 0.05<br>(< 0.05 to < 0.05)               | < 0.05<br>(< 0.05 to < 0.05)     | -22.5<br>(-39.3 to -0.9)                          | -34.6<br>(-48.2 to -18.3)                           |
| Other intestinal infectious diseases                                                 | --                                     | --                                         | < 0.05<br>(< 0.05 to < 0.05)     | -50.7<br>(-65.5 to -28.8)                         | -53.4<br>(-64.5 to -38.5)                           |
| Lower respiratory infections                                                         | 15.2<br>(13.7 to 16.8)                 | 645.0<br>(580.1 to 718.2)                  | 0.9<br>(0.6 to 1.3)              | 26.9<br>(13.9 to 40.8)                            | 17.6<br>(7.2 to 28.5)                               |
| Upper respiratory infections                                                         | 210.5<br>(185.2 to 239.6)              | 15,829.6<br>(13,840.5 to 18,084.4)         | 5.2<br>(3.1 to 8.3)              | 9.9<br>(4.0 to 16.0)                              | 0.1<br>(-4.9 to 5.3)                                |
| Otitis media                                                                         | 87.9<br>(78.4 to 97.3)                 | 426.0<br>(342.9 to 531.1)                  | 2.7<br>(1.7 to 4.0)              | -2.4<br>(-9.9 to 5.2)                             | -7.1<br>(-13.7 to -0.5)                             |
| Meningitis                                                                           | 4.1<br>(3.5 to 4.7)                    | 0.7<br>(0.6 to 0.8)                        | 0.5<br>(0.3 to 0.6)              | 8.8<br>(5.4 to 12.3)                              | -5.4<br>(-8.3 to -2.4)                              |
| Pneumococcal meningitis                                                              | 1.7<br>(1.4 to 2.0)                    | 0.1<br>(0.1 to 0.2)                        | 0.2<br>(0.1 to 0.3)              | 6.1<br>(0.7 to 11.3)                              | -7.9<br>(-12.5 to -3.7)                             |
| H influenzae type B meningitis                                                       | 0.1<br>(0.1 to 0.1)                    | < 0.05<br>(< 0.05 to < 0.05)               | < 0.05<br>(< 0.05 to < 0.05)     | 7.5<br>(0.1 to 15.1)                              | -6.4<br>(-12.1 to 0.1)                              |
| Meningococcal infection                                                              | 0.9<br>(0.7 to 1.1)                    | 0.3<br>(0.2 to 0.3)                        | 0.1<br>(0.1 to 0.1)              | 5.0<br>(-0.0 to 10.2)                             | -8.5<br>(-12.7 to -4.1)                             |
| Other meningitis                                                                     | 1.4<br>(1.1 to 1.7)                    | 0.3<br>(0.3 to 0.4)                        | 0.1<br>(0.1 to 0.2)              | 15.5<br>(11.5 to 20.2)                            | 0.5<br>(-2.8 to 4.1)                                |
| Encephalitis                                                                         | 4.6<br>(3.5 to 6.2)                    | 1.4<br>(1.2 to 1.7)                        | 0.6<br>(0.4 to 0.8)              | 16.3<br>(-0.8 to 36.8)                            | -0.4<br>(-13.2 to 15.6)                             |
| Diphtheria                                                                           | < 0.05<br>(< 0.05 to < 0.05)           | < 0.05<br>(< 0.05 to < 0.05)               | < 0.05<br>(< 0.05 to < 0.05)     | 3.5<br>(-40.6 to 82.2)                            | -1.0<br>(-43.4 to 69.5)                             |
| Whooping cough                                                                       | 2.0<br>(1.6 to 2.6)                    | 15.0<br>(11.7 to 18.9)                     | 0.1<br>(0.1 to 0.2)              | -3.4<br>(-18.5 to 14.9)                           | 4.3<br>(-11.8 to 23.8)                              |
| Tetanus                                                                              | < 0.05<br>(< 0.05 to < 0.05)           | < 0.05<br>(< 0.05 to < 0.05)               | < 0.05<br>(< 0.05 to < 0.05)     | -15.6<br>(-31.5 to -0.7)                          | -26.4<br>(-39.8 to -13.1)                           |
| Measles                                                                              | < 0.05<br>(0.0 to < 0.05)              | < 0.05<br>(0.0 to < 0.05)                  | < 0.05<br>(0.0 to < 0.05)        | --                                                | --                                                  |
| Varicella and herpes zoster                                                          | 6.1<br>(5.6 to 6.5)                    | 140.2<br>(136.0 to 145.1)                  | 0.2<br>(0.1 to 0.3)              | 20.3<br>(5.5 to 37.4)                             | -0.3<br>(-10.8 to 11.7)                             |
| <b>Neglected tropical diseases and malaria</b>                                       | <b>1,583.8</b><br>(1,411.4 to 1,792.8) | <b>111.1†</b><br>(78.3 to 150.4)           | <b>4.9</b><br>(3.2 to 7.3)       | <b>11.9</b><br>(-6.1 to 34.3)                     | <b>-1.2</b><br>(-17.8 to 19.0)                      |
| Malaria                                                                              | --                                     | --                                         | --                               | --                                                | --                                                  |
| Chagas disease                                                                       | 74.7<br>(58.5 to 93.3)                 | 2.3<br>(1.8 to 2.8)                        | 0.6<br>(0.4 to 0.9)              | 29.1<br>(11.1 to 49.0)                            | 0.9<br>(-12.3 to 15.1)                              |
| Leishmaniasis                                                                        | 1.5<br>(1.2 to 1.8)                    | 0.8<br>(0.4 to 1.3)                        | 0.1<br>(0.1 to 0.1)              | 24.9<br>(-22.7 to 123.3)                          | 6.5<br>(-33.6 to 86.2)                              |
| Visceral leishmaniasis                                                               | 0.1<br>(0.1 to 0.1)                    | 0.3<br>(0.2 to 0.3)                        | < 0.05<br>(< 0.05 to < 0.05)     | 133.5<br>(72.8 to 209.9)                          | 108.4<br>(55.4 to 176.6)                            |
| Cutaneous and mucocutaneous leishmaniasis                                            | 1.3<br>(1.0 to 1.6)                    | 0.5<br>(0.2 to 1.0)                        | 0.1<br>(< 0.05 to 0.1)           | 21.7<br>(-26.0 to 124.5)                          | 3.7<br>(-36.3 to 86.9)                              |
| African trypanosomiasis                                                              | --                                     | --                                         | --                               | --                                                | --                                                  |
| Schistosomiasis                                                                      | --                                     | --                                         | --                               | --                                                | --                                                  |
| Cysticercosis                                                                        | 2.5<br>(1.2 to 3.9)                    | --                                         | 0.4<br>(0.1 to 0.7)              | -20.8<br>(-62.8 to 25.2)                          | -36.9<br>(-69.6 to -0.1)                            |
| Cystic echinococcosis                                                                | 0.1<br>(< 0.05 to 0.6)                 | < 0.05<br>(< 0.05 to 0.1)                  | < 0.05<br>(< 0.05 to 0.1)        | -24.2<br>(-93.0 to 596.8)                         | -36.4<br>(-94.0 to 506.0)                           |
| Lymphatic filariasis                                                                 | --                                     | --                                         | --                               | --                                                | --                                                  |
| Onchocerciasis                                                                       | --                                     | --                                         | --                               | --                                                | --                                                  |
| Trachoma                                                                             | --                                     | --                                         | --                               | --                                                | --                                                  |
| Dengue                                                                               | 6.0<br>(3.6 to 9.6)                    | 101.1<br>(69.5 to 140.2)                   | 1.0<br>(0.5 to 1.8)              | 38.8<br>(10.8 to 145.3)                           | 23.4<br>(0.3 to 119.6)                              |
| Yellow fever                                                                         | < 0.05<br>(< 0.05 to < 0.05)           | 0.1<br>(< 0.05 to 0.3)                     | < 0.05<br>(< 0.05 to < 0.05)     | -42.8<br>(-66.1 to -2.5)                          | -48.9<br>(-69.0 to -16.6)                           |
| Rabies                                                                               | < 0.05<br>(< 0.05 to < 0.05)           | < 0.05<br>(< 0.05 to < 0.05)               | < 0.05<br>(< 0.05 to < 0.05)     | -38.8<br>(-73.0 to -14.8)                         | -44.8<br>(-73.7 to -22.4)                           |
| Intestinal nematode infections                                                       | 1,479.0<br>(1,303.3 to 1,692.1)        | --                                         | 1.7<br>(0.9 to 2.9)              | 15.8<br>(-26.3 to 81.1)                           | 1.7<br>(-37.5 to 66.1)                              |
| Ascariasis                                                                           | 776.0<br>(613.8 to 971.4)              | --                                         | 0.3<br>(0.1 to 0.8)              | 17.6<br>(-58.4 to 213.1)                          | 3.1<br>(-65.1 to 193.5)                             |



| Cause                                                                   | Prevalence in thousands (95% UI)              | Incidence in thousands (95% UI)                   | YLDs in thousands (95% UI)              |                                                   |                                                     |
|-------------------------------------------------------------------------|-----------------------------------------------|---------------------------------------------------|-----------------------------------------|---------------------------------------------------|-----------------------------------------------------|
|                                                                         | 2016 counts                                   | 2016 counts                                       | 2016 counts                             | Percentage change in counts between 2006 and 2016 | Percentage change in age-standardised rates between |
| Trichuriasis                                                            | 405.7<br>(322.5 to 502.9)                     | --                                                | < 0.05<br>(< 0.05 to 0.1)               | 19.9<br>(-75.3 to 403.4)                          | 3.4<br>(-79.8 to 375.2)                             |
| Hookworm disease                                                        | 428.1<br>(354.1 to 522.7)                     | --                                                | 1.3<br>(0.7 to 2.3)                     | 15.3<br>(-31.5 to 92.8)                           | 1.4<br>(-41.7 to 75.0)                              |
| Food-borne trematodiasis                                                | --                                            | --                                                | --                                      | --                                                | --                                                  |
| Leprosy                                                                 | 1.0<br>(0.9 to 1.1)                           | 0.1<br>(0.1 to 0.1)                               | 0.1<br>(< 0.05 to 0.1)                  | 23.8<br>(1.4 to 50.4)                             | -5.7<br>(-22.0 to 14.3)                             |
| Ebola virus disease                                                     | --                                            | --                                                | --                                      | --                                                | --                                                  |
| Zika virus disease                                                      | 0.1<br>(0.1 to 0.2)                           | 6.7<br>(3.2 to 15.0)                              | < 0.05<br>(< 0.05 to < 0.05)            | --                                                | --                                                  |
| Guinea worm disease                                                     | --                                            | --                                                | --                                      | --                                                | --                                                  |
| Other neglected tropical diseases                                       | 50.5<br>(46.4 to 54.8)                        | --                                                | 1.2<br>(0.7 to 1.8)                     | -3.2<br>(-14.1 to 8.5)                            | -2.9<br>(-13.4 to 8.6)                              |
| <b>Maternal disorders</b>                                               | <b>8.8</b><br><b>(6.8 to 11.6)</b>            | <b>132.6†</b><br><b>(113.1 to 160.1)</b>          | <b>0.6</b><br><b>(0.4 to 0.9)</b>       | <b>-1.0</b><br><b>(-26.9 to 37.6)</b>             | <b>-19.4</b><br><b>(-40.6 to 11.8)</b>              |
| Maternal haemorrhage                                                    | 0.7<br>(0.5 to 0.9)                           | 6.8<br>(4.9 to 9.1)                               | < 0.05<br>(< 0.05 to 0.1)               | -12.4<br>(-40.8 to 31.0)                          | -27.8<br>(-50.9 to 7.8)                             |
| Maternal sepsis and other pregnancy related infections                  | 1.9<br>(1.5 to 2.5)                           | 10.9<br>(8.2 to 14.8)                             | < 0.05<br>(< 0.05 to 0.1)               | -7.1<br>(-55.3 to 95.1)                           | -22.8<br>(-62.1 to 60.5)                            |
| Maternal hypertensive disorders                                         | 5.9<br>(3.9 to 8.3)                           | 30.6<br>(25.1 to 35.6)                            | 0.3<br>(0.2 to 0.5)                     | 8.0<br>(-33.3 to 78.6)                            | -12.5<br>(-45.8 to 45.4)                            |
| Maternal obstructed labour and uterine rupture                          | 0.1<br>(0.1 to 0.2)                           | 7.5<br>(5.5 to 10.1)                              | < 0.05<br>(< 0.05 to 0.1)               | -4.9<br>(-56.8 to 119.5)                          | -22.2<br>(-63.9 to 71.1)                            |
| Maternal abortion, miscarriage, and ectopic pregnancy                   | 0.6<br>(0.4 to 0.9)                           | 76.8<br>(58.5 to 105.2)                           | 0.1<br>(< 0.05 to 0.1)                  | -14.3<br>(-54.6 to 55.0)                          | -30.6<br>(-62.9 to 25.2)                            |
| Other maternal disorders                                                | --                                            | --                                                | 0.1<br>(0.1 to 0.1)                     | -5.9<br>(-30.7 to 30.6)                           | -22.9<br>(-43.2 to 7.6)                             |
| <b>Neonatal disorders</b>                                               | <b>68.2</b><br><b>(57.3 to 81.7)</b>          | --                                                | <b>11.3</b><br><b>(7.5 to 16.7)</b>     | <b>3.6</b><br><b>(-10.8 to 22.9)</b>              | <b>-5.5</b><br><b>(-18.6 to 11.9)</b>               |
| Neonatal preterm birth complications                                    | 55.9<br>(44.1 to 73.3)                        | --                                                | 5.8<br>(3.8 to 8.6)                     | 8.9<br>(-14.5 to 37.9)                            | -1.8<br>(-22.5 to 23.5)                             |
| Neonatal encephalopathy due to birth asphyxia and trauma                | 8.9<br>(4.4 to 16.3)                          | --                                                | 1.1<br>(0.2 to 3.0)                     | 26.6<br>(-33.4 to 168.8)                          | 14.4<br>(-39.5 to 143.3)                            |
| Neonatal sepsis and other neonatal infections                           | 6.8<br>(2.8 to 14.5)                          | --                                                | 2.9<br>(1.0 to 6.8)                     | -11.0<br>(-27.9 to 15.5)                          | -18.3<br>(-32.6 to 8.0)                             |
| Hemolytic disease and other neonatal jaundice                           | 4.0<br>(3.5 to 4.5)                           | --                                                | 1.1<br>(0.8 to 1.4)                     | 10.9<br>(-4.1 to 32.0)                            | -0.9<br>(-13.4 to 16.6)                             |
| Other neonatal disorders                                                | --                                            | --                                                | 0.4<br>(0.2 to 0.6)                     | -15.8<br>(-31.9 to 5.2)                           | -8.5<br>(-26.0 to 14.3)                             |
| <b>Nutritional deficiencies</b>                                         | <b>1,292.8</b><br><b>(1,240.4 to 1,340.0)</b> | <b>195.3†</b><br><b>(159.5 to 248.1)</b>          | <b>27.2</b><br><b>(17.8 to 39.9)</b>    | <b>2.1</b><br><b>(-4.4 to 8.3)</b>                | <b>-6.8</b><br><b>(-12.2 to -1.8)</b>               |
| Protein-energy malnutrition                                             | 11.2<br>(8.2 to 14.7)                         | 4.5<br>(3.3 to 5.9)                               | 0.8<br>(0.4 to 1.3)                     | 12.8<br>(-33.3 to 90.8)                           | 22.7<br>(-27.2 to 107.0)                            |
| Iodine deficiency                                                       | 27.9<br>(24.4 to 32.2)                        | 0.8<br>(0.7 to 0.9)                               | 0.7<br>(0.5 to 1.0)                     | 16.5<br>(1.0 to 36.8)                             | -3.1<br>(-15.2 to 11.8)                             |
| Vitamin A deficiency                                                    | 220.6<br>(180.7 to 270.4)                     | 190.1<br>(154.7 to 243.0)                         | 0.3<br>(0.1 to 0.4)                     | 4.9<br>(-11.1 to 26.6)                            | 0.0<br>(-14.1 to 18.8)                              |
| Iron-deficiency anaemia                                                 | 1,108.9<br>(1,051.6 to 1,168.8)               | --                                                | 25.4<br>(16.5 to 37.5)                  | 1.4<br>(-5.2 to 7.4)                              | -7.7<br>(-13.5 to -2.6)                             |
| Other nutritional deficiencies                                          | --                                            | --                                                | < 0.05<br>(< 0.05 to < 0.05)            | 12.5<br>(-35.1 to 93.4)                           | 22.2<br>(-29.4 to 109.9)                            |
| <b>Other communicable, maternal, neonatal, and nutritional diseases</b> | <b>1,871.8</b><br><b>(1,752.0 to 1,996.9)</b> | <b>585.5</b><br><b>(535.3 to 639.5)</b>           | <b>2.7</b><br><b>(1.6 to 4.4)</b>       | <b>14.6</b><br><b>(7.7 to 21.0)</b>               | <b>-0.6</b><br><b>(-5.6 to 4.7)</b>                 |
| Sexually transmitted diseases excluding HIV                             | 1,543.1<br>(1,433.3 to 1,663.5)               | 550.0<br>(500.4 to 599.4)                         | 1.7<br>(1.0 to 2.9)                     | 22.7<br>(14.8 to 31.2)                            | -1.0<br>(-6.9 to 5.4)                               |
| Syphilis                                                                | 107.6<br>(90.0 to 126.2)                      | 77.3<br>(62.2 to 93.8)                            | 0.1<br>(0.1 to 0.2)                     | 35.5<br>(17.4 to 52.4)                            | 3.9<br>(-8.4 to 17.0)                               |
| Chlamydial infection                                                    | 119.5<br>(90.6 to 151.0)                      | 92.1<br>(70.9 to 118.9)                           | 0.4<br>(0.2 to 0.7)                     | 21.4<br>(3.4 to 41.0)                             | -1.6<br>(-15.8 to 13.7)                             |
| Gonococcal infection                                                    | 27.5<br>(22.3 to 34.0)                        | 87.9<br>(68.4 to 111.1)                           | 0.2<br>(0.1 to 0.3)                     | 22.4<br>(0.1 to 50.1)                             | -1.0<br>(-18.4 to 20.3)                             |
| Trichomoniasis                                                          | 197.9<br>(168.9 to 228.2)                     | 173.8<br>(147.3 to 203.0)                         | 0.2<br>(0.1 to 0.5)                     | 21.4<br>(13.4 to 29.7)                            | -0.8<br>(-6.7 to 5.4)                               |
| Genital herpes                                                          | 1,240.2<br>(1,075.2 to 1,439.6)               | 103.5<br>(87.5 to 123.2)                          | 0.3<br>(0.1 to 0.7)                     | 25.4<br>(15.7 to 34.0)                            | 0.2<br>(-6.1 to 6.4)                                |
| Other sexually transmitted diseases                                     | 18.0<br>(16.8 to 19.5)                        | 15.5<br>(13.1 to 18.2)                            | 0.4<br>(0.2 to 0.6)                     | 19.4<br>(7.3 to 33.6)                             | -3.3<br>(-13.0 to 8.2)                              |
| Hepatitis                                                               | 421.2<br>(362.6 to 498.4)                     | 35.5<br>(27.4 to 45.0)                            | < 0.05<br>(< 0.05 to 0.1)               | 6.6<br>(-23.4 to 50.9)                            | -1.2<br>(-23.9 to 30.4)                             |
| Acute hepatitis A                                                       | 0.6<br>(0.2 to 1.1)                           | 7.6<br>(2.1 to 14.5)                              | < 0.05<br>(< 0.05 to < 0.05)            | -6.1<br>(-71.1 to 253.6)                          | -7.9<br>(-67.0 to 180.3)                            |
| Hepatitis B                                                             | 272.9<br>(217.8 to 345.6)                     | 23.1<br>(17.8 to 30.2)                            | < 0.05<br>(< 0.05 to < 0.05)            | 17.0<br>(0.9 to 36.0)                             | 1.6<br>(-12.4 to 17.2)                              |
| Hepatitis C                                                             | 147.7<br>(131.0 to 165.2)                     | 4.1<br>(3.5 to 4.7)                               | < 0.05<br>(< 0.05 to < 0.05)            | -5.7<br>(-26.7 to 22.0)                           | -0.4<br>(-22.4 to 28.1)                             |
| Acute hepatitis E                                                       | 0.1<br>(< 0.05 to 0.1)                        | 0.8<br>(0.6 to 0.9)                               | < 0.05<br>(< 0.05 to < 0.05)            | 5.2<br>(-7.7 to 18.9)                             | -3.3<br>(-11.8 to 4.9)                              |
| Other infectious diseases                                               | 40.6<br>(37.8 to 43.6)                        | < 0.05<br>(< 0.05 to < 0.05)                      | 1.0<br>(0.6 to 1.5)                     | 3.4<br>(-6.9 to 15.5)                             | 0.0<br>(-9.3 to 11.0)                               |
| <b>Non-communicable diseases</b>                                        | <b>6,092.8</b><br><b>(6,055.0 to 6,129.4)</b> | <b>21,331.3†</b><br><b>(20,581.3 to 22,221.4)</b> | <b>555.6</b><br><b>(409.8 to 724.4)</b> | <b>21.5</b><br><b>(18.6 to 24.4)</b>              | <b>0.1</b><br><b>(-1.9 to 2.1)</b>                  |
| <b>Neoplasms</b>                                                        | <b>22.8</b><br><b>(21.6 to 23.9)</b>          | <b>9.0</b><br><b>(8.4 to 9.5)</b>                 | <b>3.0</b><br><b>(2.2 to 3.9)</b>       | <b>51.6</b><br><b>(41.9 to 62.7)</b>              | <b>13.8</b><br><b>(6.1 to 22.3)</b>                 |
| Lip and oral cavity cancer                                              | 0.6<br>(0.5 to 0.6)                           | 0.2<br>(0.1 to 0.2)                               | 0.1<br>(< 0.05 to 0.1)                  | 44.0<br>(22.3 to 67.2)                            | 5.9<br>(-10.4 to 23.0)                              |
| Nasopharynx cancer                                                      | 0.1<br>(< 0.05 to 0.1)                        | < 0.05<br>(< 0.05 to < 0.05)                      | < 0.05<br>(< 0.05 to < 0.05)            | 22.0<br>(6.0 to 39.5)                             | -1.9<br>(-13.7 to 11.3)                             |
| Other pharynx cancer                                                    | 0.2<br>(0.1 to 0.2)                           | 0.1<br>(0.1 to 0.1)                               | < 0.05<br>(< 0.05 to < 0.05)            | 68.6<br>(38.6 to 104.1)                           | 24.4<br>(2.1 to 50.6)                               |
| Oesophageal cancer                                                      | 0.2<br>(0.2 to 0.2)                           | 0.2<br>(0.2 to 0.2)                               | < 0.05<br>(< 0.05 to 0.1)               | 43.6<br>(15.6 to 81.2)                            | 3.6<br>(-17.5 to 31.6)                              |
| Stomach cancer                                                          | 0.8<br>(0.7 to 0.8)                           | 0.5<br>(0.5 to 0.5)                               | 0.1<br>(0.1 to 0.2)                     | 24.7<br>(6.6 to 44.1)                             | -9.0<br>(-22.9 to 6.7)                              |
| Colon and rectum cancer                                                 | 2.7<br>(2.5 to 3.0)                           | 0.8<br>(0.8 to 0.9)                               | 0.3<br>(0.2 to 0.4)                     | 87.3<br>(61.4 to 116.2)                           | 35.9<br>(16.9 to 58.4)                              |
| Liver cancer                                                            | 0.1<br>(0.1 to 0.1)                           | 0.2<br>(0.1 to 0.2)                               | < 0.05<br>(< 0.05 to < 0.05)            | 42.2<br>(26.9 to 62.5)                            | 3.1<br>(-7.9 to 17.9)                               |
| Liver cancer due to hepatitis B                                         | < 0.05<br>(< 0.05 to < 0.05)                  | < 0.05<br>(< 0.05 to 0.1)                         | < 0.05<br>(< 0.05 to < 0.05)            | 41.8<br>(25.8 to 62.2)                            | 5.4<br>(-6.5 to 20.7)                               |

| Cause                                              | Prevalence in thousands (95% UI)        | Incidence in thousands (95% UI)         | YLDs in thousands (95% UI)           |                                                   |                                                     |
|----------------------------------------------------|-----------------------------------------|-----------------------------------------|--------------------------------------|---------------------------------------------------|-----------------------------------------------------|
|                                                    | 2016 counts                             | 2016 counts                             | 2016 counts                          | Percentage change in counts between 2006 and 2016 | Percentage change in age-standardised rates between |
| Liver cancer due to hepatitis C                    | 0.1<br>(0.1 to 0.1)                     | 0.1<br>(0.1 to 0.1)                     | < 0.05<br>(< 0.05 to < 0.05)         | 46.3<br>(28.7 to 67.8)                            | 4.8<br>(-7.6 to 20.2)                               |
| Liver cancer due to alcohol use                    | < 0.05<br>(< 0.05 to < 0.05)            | < 0.05<br>(< 0.05 to < 0.05)            | < 0.05<br>(< 0.05 to < 0.05)         | 35.8<br>(18.1 to 57.3)                            | -3.5<br>(-15.8 to 12.5)                             |
| Liver cancer due to other causes                   | < 0.05<br>(< 0.05 to < 0.05)            | < 0.05<br>(< 0.05 to < 0.05)            | < 0.05<br>(< 0.05 to < 0.05)         | 39.9<br>(24.0 to 59.4)                            | 4.0<br>(-8.0 to 19.6)                               |
| Gallbladder and biliary tract cancer               | 0.1<br>(0.1 to 0.1)                     | 0.1<br>(0.1 to 0.1)                     | < 0.05<br>(< 0.05 to < 0.05)         | 30.9<br>(18.7 to 44.4)                            | -5.6<br>(-15.3 to 4.7)                              |
| Pancreatic cancer                                  | 0.2<br>(0.2 to 0.2)                     | 0.3<br>(0.2 to 0.3)                     | 0.1<br>(< 0.05 to 0.1)               | 52.1<br>(36.5 to 70.0)                            | 9.5<br>(-2.6 to 23.4)                               |
| Larynx cancer                                      | 0.4<br>(0.3 to 0.4)                     | 0.1<br>(0.1 to 0.1)                     | < 0.05<br>(< 0.05 to 0.1)            | 65.7<br>(41.6 to 93.2)                            | 21.8<br>(3.0 to 41.6)                               |
| Tracheal, bronchus, and lung cancer                | 0.8<br>(0.8 to 0.9)                     | 0.8<br>(0.7 to 0.9)                     | 0.2<br>(0.1 to 0.2)                  | 37.1<br>(9.3 to 67.5)                             | 0.2<br>(-19.8 to 22.3)                              |
| Malignant skin melanoma                            | 0.3<br>(0.2 to 0.3)                     | 0.1<br>(< 0.05 to 0.1)                  | < 0.05<br>(< 0.05 to < 0.05)         | 88.0<br>(60.0 to 119.1)                           | 37.6<br>(17.5 to 62.5)                              |
| Non-melanoma skin cancer                           | 0.2<br>(0.1 to 0.3)                     | 0.3<br>(0.2 to 0.4)                     | < 0.05<br>(< 0.05 to < 0.05)         | -9.4<br>(-62.2 to 104.0)                          | -36.8<br>(-74.2 to 47.4)                            |
| Non-melanoma skin cancer (squamous-cell carcinoma) | 0.2<br>(0.1 to 0.3)                     | 0.2<br>(0.1 to 0.3)                     | < 0.05<br>(< 0.05 to < 0.05)         | -9.7<br>(-62.9 to 105.0)                          | -37.1<br>(-74.7 to 48.4)                            |
| Non-melanoma skin cancer (basal-cell carcinoma)    | < 0.05<br>(< 0.05 to < 0.05)            | 0.1<br>(< 0.05 to 0.2)                  | < 0.05<br>(< 0.05 to < 0.05)         | 29.6<br>(17.4 to 50.3)                            | -2.7<br>(-11.1 to 10.4)                             |
| Breast cancer                                      | 5.3<br>(4.0 to 6.1)                     | 1.2<br>(0.9 to 1.3)                     | 0.5<br>(0.3 to 0.6)                  | 66.4<br>(35.2 to 98.1)                            | 26.0<br>(3.5 to 49.2)                               |
| Cervical cancer                                    | 4.0<br>(2.5 to 4.7)                     | 1.1<br>(0.7 to 1.2)                     | 0.4<br>(0.2 to 0.5)                  | 20.0<br>(-2.5 to 48.5)                            | -8.0<br>(-24.8 to 13.7)                             |
| Uterine cancer                                     | 1.1<br>(1.0 to 1.3)                     | 0.2<br>(0.2 to 0.3)                     | 0.1<br>(0.1 to 0.1)                  | 68.2<br>(34.9 to 108.7)                           | 22.7<br>(-1.7 to 53.2)                              |
| Ovarian cancer                                     | 0.5<br>(0.4 to 0.6)                     | 0.2<br>(0.1 to 0.2)                     | 0.1<br>(0.1 to 0.1)                  | 53.1<br>(20.9 to 89.2)                            | 16.4<br>(-8.7 to 48.1)                              |
| Prostate cancer                                    | 4.1<br>(2.6 to 4.8)                     | 1.0<br>(0.7 to 1.2)                     | 0.4<br>(0.3 to 0.6)                  | 78.2<br>(51.7 to 109.4)                           | 24.2<br>(5.7 to 45.0)                               |
| Testicular cancer                                  | 0.3<br>(0.2 to 0.4)                     | 0.1<br>(0.1 to 0.1)                     | < 0.05<br>(< 0.05 to < 0.05)         | 141.2<br>(64.3 to 239.6)                          | 86.6<br>(33.1 to 155.2)                             |
| Kidney cancer                                      | 0.8<br>(0.7 to 0.9)                     | 0.2<br>(0.2 to 0.3)                     | 0.1<br>(0.1 to 0.1)                  | 53.6<br>(30.6 to 81.3)                            | 21.2<br>(2.9 to 42.7)                               |
| Bladder cancer                                     | 0.4<br>(0.4 to 0.5)                     | 0.1<br>(0.1 to 0.1)                     | < 0.05<br>(< 0.05 to 0.1)            | 68.4<br>(45.5 to 94.8)                            | 20.8<br>(4.1 to 40.4)                               |
| Brain and nervous system cancer                    | 0.3<br>(0.2 to 0.5)                     | 0.1<br>(0.1 to 0.2)                     | < 0.05<br>(< 0.05 to 0.1)            | 30.4<br>(10.2 to 73.9)                            | 6.8<br>(-10.1 to 43.9)                              |
| Thyroid cancer                                     | 0.6<br>(0.5 to 0.7)                     | 0.1<br>(0.1 to 0.1)                     | < 0.05<br>(< 0.05 to 0.1)            | 111.2<br>(76.0 to 155.8)                          | 53.6<br>(28.0 to 87.9)                              |
| Mesothelioma                                       | < 0.05<br>(< 0.05 to < 0.05)            | < 0.05<br>(< 0.05 to < 0.05)            | < 0.05<br>(< 0.05 to < 0.05)         | 49.2<br>(33.2 to 70.2)                            | 12.6<br>(0.5 to 29.6)                               |
| Hodgkin lymphoma                                   | 0.1<br>(0.1 to 0.1)                     | < 0.05<br>(< 0.05 to < 0.05)            | < 0.05<br>(< 0.05 to < 0.05)         | 48.3<br>(24.1 to 70.0)                            | 16.2<br>(-3.4 to 32.8)                              |
| Non-Hodgkin's lymphoma                             | 0.5<br>(0.4 to 0.6)                     | 0.2<br>(0.1 to 0.2)                     | 0.1<br>(< 0.05 to 0.1)               | 48.5<br>(32.5 to 69.7)                            | 14.2<br>(0.8 to 32.1)                               |
| Multiple myeloma                                   | 0.1<br>(0.1 to 0.1)                     | 0.1<br>(< 0.05 to 0.1)                  | < 0.05<br>(< 0.05 to < 0.05)         | 63.8<br>(39.9 to 95.7)                            | 19.5<br>(1.9 to 42.5)                               |
| Leukaemia                                          | 1.1<br>(1.0 to 1.4)                     | 0.3<br>(0.3 to 0.4)                     | 0.1<br>(0.1 to 0.2)                  | 13.5<br>(1.0 to 31.5)                             | -4.4<br>(-15.3 to 12.0)                             |
| Acute lymphoid leukaemia                           | 0.3<br>(0.2 to 0.4)                     | 0.1<br>(0.1 to 0.1)                     | < 0.05<br>(< 0.05 to 0.1)            | 8.0<br>(-8.0 to 26.6)                             | 2.3<br>(-12.2 to 19.3)                              |
| Chronic lymphoid leukaemia                         | 0.2<br>(0.2 to 0.2)                     | < 0.05<br>(< 0.05 to 0.1)               | < 0.05<br>(< 0.05 to < 0.05)         | 55.6<br>(27.3 to 94.0)                            | 12.5<br>(-8.4 to 40.6)                              |
| Acute myeloid leukaemia                            | 0.1<br>(0.1 to 0.2)                     | 0.1<br>(0.1 to 0.1)                     | < 0.05<br>(< 0.05 to < 0.05)         | 40.2<br>(22.0 to 57.1)                            | 18.4<br>(3.5 to 31.9)                               |
| Chronic myeloid leukaemia                          | 0.1<br>(0.1 to 0.1)                     | < 0.05<br>(< 0.05 to < 0.05)            | < 0.05<br>(< 0.05 to < 0.05)         | 33.8<br>(14.5 to 58.1)                            | 1.7<br>(-12.3 to 19.7)                              |
| Other leukaemia                                    | 0.4<br>(0.4 to 0.6)                     | 0.1<br>(0.1 to 0.1)                     | 0.1<br>(< 0.05 to 0.1)               | -6.4<br>(-21.9 to 23.6)                           | -21.4<br>(-34.8 to 3.0)                             |
| Other neoplasms                                    | 1.8<br>(1.5 to 2.2)                     | 0.6<br>(0.5 to 0.7)                     | 0.2<br>(0.1 to 0.2)                  | 66.8<br>(41.6 to 98.6)                            | 29.1<br>(8.3 to 55.8)                               |
| <b>Cardiovascular diseases</b>                     | <b>330.2</b><br><b>(317.0 to 342.3)</b> | <b>34.4†</b><br><b>(32.8 to 36.2)</b>   | <b>19.1</b><br><b>(13.7 to 25.2)</b> | <b>30.5</b><br><b>(26.5 to 35.0)</b>              | <b>-2.2</b><br><b>(-5.1 to 0.9)</b>                 |
| Rheumatic heart disease                            | 0.3<br>(0.3 to 0.4)                     | 0.1<br>(0.1 to 0.1)                     | < 0.05<br>(< 0.05 to < 0.05)         | 29.1<br>(20.9 to 37.9)                            | 3.3<br>(-3.6 to 10.9)                               |
| Ischaemic heart disease                            | 129.0<br>(122.2 to 136.4)               | 14.5<br>(13.6 to 15.6)                  | 6.6<br>(4.6 to 9.1)                  | 27.6<br>(22.0 to 33.8)                            | -4.3<br>(-8.3 to 0.1)                               |
| Cerebrovascular disease                            | 43.2<br>(40.3 to 46.0)                  | 6.8†<br>(6.3 to 7.4)                    | 4.3<br>(3.1 to 5.5)                  | 35.6<br>(26.8 to 45.0)                            | 0.1<br>(-6.6 to 7.2)                                |
| Ischaemic stroke                                   | 30.8<br>(27.6 to 34.1)                  | 4.0†<br>(3.5 to 4.5)                    | 3.0<br>(2.1 to 3.8)                  | 39.6<br>(28.1 to 52.0)                            | 2.0<br>(-6.2 to 11.0)                               |
| Hemorrhagic stroke                                 | 14.9<br>(13.5 to 16.4)                  | 2.9†<br>(2.6 to 3.1)                    | 1.4<br>(1.0 to 1.8)                  | 27.9<br>(16.2 to 41.0)                            | -4.1<br>(-13.1 to 5.5)                              |
| Hypertensive heart disease                         | 12.5<br>(10.6 to 14.8)                  | --                                      | 1.0<br>(0.7 to 1.4)                  | 38.9<br>(26.5 to 52.4)                            | 0.3<br>(-8.4 to 10.4)                               |
| Cardiomyopathy and myocarditis                     | 2.9<br>(2.5 to 3.2)                     | 1.5†<br>(1.3 to 1.7)                    | 0.3<br>(0.2 to 0.4)                  | 26.3<br>(10.6 to 42.9)                            | 0.7<br>(-11.0 to 13.3)                              |
| Myocarditis                                        | 0.9<br>(0.7 to 1.0)                     | 1.5<br>(1.3 to 1.7)                     | 0.1<br>(< 0.05 to 0.1)               | 17.4<br>(8.3 to 27.5)                             | 0.1<br>(-8.5 to 9.5)                                |
| Alcoholic cardiomyopathy                           | 0.2<br>(0.2 to 0.3)                     | --                                      | < 0.05<br>(< 0.05 to < 0.05)         | 35.3<br>(20.2 to 52.9)                            | 0.6<br>(-11.3 to 14.8)                              |
| Other cardiomyopathy                               | 2.4<br>(2.0 to 2.9)                     | --                                      | 0.2<br>(0.1 to 0.3)                  | 28.4<br>(7.9 to 50.5)                             | 0.8<br>(-13.6 to 16.4)                              |
| Atrial fibrillation and flutter                    | 34.0<br>(29.8 to 38.8)                  | 2.7<br>(2.3 to 3.1)                     | 2.7<br>(1.8 to 3.7)                  | 35.9<br>(26.7 to 45.6)                            | -1.8<br>(-8.0 to 4.6)                               |
| Peripheral vascular disease                        | 83.7<br>(72.4 to 97.2)                  | 8.1<br>(7.0 to 9.5)                     | 0.4<br>(0.2 to 0.8)                  | 36.7<br>(27.4 to 46.3)                            | -4.3<br>(-10.7 to 2.1)                              |
| Endocarditis                                       | 0.5<br>(0.4 to 0.5)                     | 0.7<br>(0.6 to 0.7)                     | < 0.05<br>(< 0.05 to 0.1)            | 24.6<br>(11.5 to 39.5)                            | -1.8<br>(-14.3 to 13.7)                             |
| Other cardiovascular and circulatory diseases      | 70.4<br>(59.3 to 82.9)                  | --                                      | 3.7<br>(2.5 to 5.3)                  | 24.1<br>(13.9 to 35.0)                            | -2.0<br>(-9.6 to 6.2)                               |
| <b>Chronic respiratory diseases</b>                | <b>631.1</b><br><b>(598.2 to 666.8)</b> | <b>104.8†</b><br><b>(96.9 to 114.1)</b> | <b>21.5</b><br><b>(15.1 to 30.0)</b> | <b>11.9</b><br><b>(5.2 to 19.3)</b>               | <b>3.9</b><br><b>(-2.1 to 9.9)</b>                  |
| Chronic obstructive pulmonary disease              | 173.5<br>(161.9 to 188.0)               | 11.8<br>(11.0 to 12.6)                  | 2.7<br>(2.0 to 3.6)                  | 37.3<br>(18.0 to 62.5)                            | 5.1<br>(-10.0 to 24.8)                              |
| Pneumoconiosis                                     | 0.4<br>(0.4 to 0.5)                     | < 0.05<br>(< 0.05 to < 0.05)            | 0.1<br>(< 0.05 to 0.1)               | 30.9<br>(7.5 to 60.3)                             | -3.4<br>(-21.9 to 20.9)                             |
| Silicosis                                          | 0.1<br>(0.1 to 0.1)                     | < 0.05<br>(< 0.05 to < 0.05)            | < 0.05<br>(< 0.05 to < 0.05)         | 44.3<br>(36.6 to 51.9)                            | 6.3<br>(0.4 to 12.0)                                |



| Cause                                                          | Prevalence in thousands (95% UI)              | Incidence in thousands (95% UI)               | YLDs in thousands (95% UI)              |                                                   |                                                     |
|----------------------------------------------------------------|-----------------------------------------------|-----------------------------------------------|-----------------------------------------|---------------------------------------------------|-----------------------------------------------------|
|                                                                | 2016 counts                                   | 2016 counts                                   | 2016 counts                             | Percentage change in counts between 2006 and 2016 | Percentage change in age-standardised rates between |
| Asbestosis                                                     | < 0.05<br>(< 0.05 to 0.1)                     | < 0.05<br>(< 0.05 to < 0.05)                  | < 0.05<br>(< 0.05 to < 0.05)            | 38.6<br>(28.7 to 48.5)                            | 2.4<br>(-5.1 to 10.5)                               |
| Coal workers pneumoconiosis                                    | --                                            | --                                            | --                                      | --                                                | --                                                  |
| Other pneumoconiosis                                           | 0.3<br>(0.3 to 0.3)                           | < 0.05<br>(< 0.05 to < 0.05)                  | < 0.05<br>(< 0.05 to 0.1)               | 26.9<br>(-3.0 to 66.5)                            | -6.2<br>(-29.9 to 26.2)                             |
| Asthma                                                         | 462.7<br>(421.9 to 509.4)                     | 92.8<br>(85.0 to 102.0)                       | 18.3<br>(11.9 to 26.9)                  | 8.3<br>(0.8 to 15.8)                              | 3.2<br>(-3.4 to 9.9)                                |
| Interstitial lung disease and pulmonary sarcoidosis            | 2.0<br>(1.8 to 2.2)                           | 0.2<br>(0.2 to 0.2)                           | 0.2<br>(0.1 to 0.3)                     | 38.0<br>(28.0 to 48.7)                            | 9.1<br>(-0.2 to 19.5)                               |
| Other chronic respiratory diseases                             | --                                            | --                                            | 0.2<br>(0.2 to 0.3)                     | 50.1<br>(26.3 to 77.6)                            | 39.9<br>(19.7 to 63.3)                              |
| <b>Cirrhosis and other chronic liver diseases</b>              | <b>37.9</b><br><b>(35.9 to 40.1)</b>          | <b>1.1</b><br><b>(1.0 to 1.1)</b>             | <b>0.9</b><br><b>(0.7 to 1.3)</b>       | <b>32.9</b><br><b>(18.6 to 48.6)</b>              | <b>9.3</b><br><b>(-1.1 to 20.7)</b>                 |
| Cirrhosis and other chronic liver diseases due to hepatitis B  | 5.5<br>(4.7 to 6.3)                           | 0.2<br>(0.1 to 0.2)                           | 0.1<br>(0.1 to 0.2)                     | 43.7<br>(13.9 to 81.1)                            | 10.5<br>(-11.2 to 38.9)                             |
| Cirrhosis and other chronic liver diseases due to hepatitis C  | 16.4<br>(15.2 to 17.7)                        | 0.5<br>(0.4 to 0.5)                           | 0.3<br>(0.2 to 0.5)                     | 44.5<br>(22.9 to 69.8)                            | 11.7<br>(-3.9 to 29.4)                              |
| Cirrhosis and other chronic liver diseases due to alcohol use  | 10.7<br>(9.8 to 11.7)                         | 0.3<br>(0.3 to 0.4)                           | 0.2<br>(0.2 to 0.3)                     | 44.3<br>(21.4 to 74.2)                            | 9.5<br>(-6.9 to 30.4)                               |
| Cirrhosis and other chronic liver diseases due to other causes | 5.4<br>(4.9 to 5.8)                           | 0.1<br>(0.1 to 0.1)                           | 0.2<br>(0.2 to 0.4)                     | 8.5<br>(-16.6 to 42.2)                            | 4.1<br>(-17.6 to 31.8)                              |
| <b>Digestive diseases</b>                                      | <b>180.7</b><br><b>(172.3 to 189.8)</b>       | <b>161.3†</b><br><b>(150.4 to 172.0)</b>      | <b>7.3</b><br><b>(5.1 to 9.8)</b>       | <b>20.3</b><br><b>(12.8 to 28.5)</b>              | <b>3.4</b><br><b>(-1.9 to 9.0)</b>                  |
| Peptic ulcer disease                                           | 50.6<br>(46.1 to 55.6)                        | 7.3<br>(6.6 to 8.1)                           | 0.9<br>(0.6 to 1.4)                     | 44.1<br>(31.3 to 58.6)                            | 13.4<br>(3.2 to 24.9)                               |
| Gastritis and duodenitis                                       | 64.7<br>(57.8 to 72.2)                        | 54.9<br>(49.0 to 61.7)                        | 1.0<br>(0.7 to 1.5)                     | 39.6<br>(28.4 to 50.9)                            | 11.2<br>(3.0 to 19.5)                               |
| Appendicitis                                                   | 0.2<br>(0.2 to 0.2)                           | 4.9<br>(4.5 to 5.4)                           | 0.1<br>(< 0.05 to 0.1)                  | 13.1<br>(7.9 to 18.6)                             | 2.6<br>(-3.6 to 9.3)                                |
| Paralytic ileus and intestinal obstruction                     | 0.1<br>(0.1 to 0.1)                           | 2.7<br>(2.4 to 3.0)                           | < 0.05<br>(< 0.05 to < 0.05)            | 19.2<br>(13.3 to 26.1)                            | 4.9<br>(-0.8 to 11.8)                               |
| Inguinal, femoral, and abdominal hernia                        | 57.5<br>(51.1 to 64.4)                        | 33.1<br>(29.1 to 37.6)                        | 4.0<br>(2.7 to 5.6)                     | 11.1<br>(1.4 to 22.0)                             | -1.6<br>(-9.4 to 6.5)                               |
| Inflammatory bowel disease                                     | 2.0<br>(1.9 to 2.2)                           | 2.1<br>(2.0 to 2.2)                           | 0.3<br>(0.2 to 0.4)                     | 19.6<br>(3.0 to 38.2)                             | -6.3<br>(-19.8 to 9.4)                              |
| Vascular intestinal disorders                                  | < 0.05<br>(< 0.05 to 0.1)                     | 0.3<br>(0.2 to 0.3)                           | < 0.05<br>(< 0.05 to < 0.05)            | 26.5<br>(19.3 to 33.7)                            | 12.1<br>(6.7 to 17.4)                               |
| Gallbladder and biliary diseases                               | 11.8<br>(10.5 to 13.1)                        | 52.9<br>(46.0 to 60.6)                        | 0.2<br>(0.2 to 0.4)                     | 45.7<br>(20.0 to 76.5)                            | 16.2<br>(-4.7 to 39.8)                              |
| Pancreatitis                                                   | 0.3<br>(0.3 to 0.4)                           | 3.0<br>(2.8 to 3.4)                           | < 0.05<br>(< 0.05 to 0.1)               | 47.7<br>(42.1 to 53.7)                            | 18.3<br>(13.6 to 23.5)                              |
| Other digestive diseases                                       | --                                            | --                                            | 0.7<br>(0.5 to 0.9)                     | 19.5<br>(10.4 to 29.1)                            | 7.2<br>(0.8 to 14.1)                                |
| <b>Neurological disorders</b>                                  | <b>2,802.2</b><br><b>(2,680.2 to 2,932.8)</b> | <b>1,402.1</b><br><b>(1,198.6 to 1,630.3)</b> | <b>65.4</b><br><b>(43.2 to 90.9)</b>    | <b>21.0</b><br><b>(1.5 to 45.1)</b>               | <b>-0.1</b><br><b>(-14.6 to 17.6)</b>               |
| Alzheimer's disease and other dementias                        | 34.7<br>(29.1 to 41.1)                        | 6.0<br>(5.0 to 7.3)                           | 5.0<br>(3.5 to 6.6)                     | 39.1<br>(32.8 to 44.8)                            | -2.1<br>(-6.3 to 1.9)                               |
| Parkinson's disease                                            | 2.9<br>(2.3 to 3.6)                           | 0.3<br>(0.3 to 0.4)                           | 0.3<br>(0.2 to 0.5)                     | 49.7<br>(30.6 to 69.5)                            | 7.1<br>(-5.9 to 20.6)                               |
| Epilepsy                                                       | 22.8<br>(5.4 to 42.1)                         | 2.2<br>(0.6 to 4.2)                           | 6.9<br>(1.3 to 16.1)                    | 15.1<br>(-77.7 to 506.8)                          | 1.2<br>(-80.5 to 431.4)                             |
| Multiple sclerosis                                             | 0.9<br>(0.8 to 1.0)                           | < 0.05<br>(< 0.05 to < 0.05)                  | 0.2<br>(0.2 to 0.3)                     | 41.0<br>(26.6 to 55.9)                            | 11.5<br>(-0.7 to 23.8)                              |
| Motor neuron disease                                           | 0.2<br>(0.2 to 0.2)                           | < 0.05<br>(< 0.05 to < 0.05)                  | < 0.05<br>(< 0.05 to 0.1)               | 26.8<br>(20.9 to 32.4)                            | 7.2<br>(3.5 to 11.3)                                |
| Migraine                                                       | 1,008.1<br>(952.3 to 1,067.4)                 | 112.3<br>(105.4 to 119.8)                     | 43.8<br>(27.9 to 61.3)                  | 19.9<br>(15.4 to 24.2)                            | -0.5<br>(-4.0 to 2.9)                               |
| Tension-type headache                                          | 2,207.0<br>(1,988.4 to 2,456.6)               | 1,281.2<br>(1,076.4 to 1,512.2)               | 7.5<br>(4.7 to 11.1)                    | 18.7<br>(13.0 to 25.6)                            | -1.4<br>(-5.9 to 3.6)                               |
| Other neurological disorders                                   | < 0.05<br>(< 0.05 to < 0.05)                  | < 0.05<br>(< 0.05 to < 0.05)                  | 1.6<br>(0.4 to 3.5)                     | 34.3<br>(-65.9 to 425.6)                          | 19.5<br>(-66.2 to 300.1)                            |
| <b>Mental and substance use disorders</b>                      | <b>1,098.5</b><br><b>(1,060.8 to 1,134.8)</b> | <b>393.3†</b><br><b>(366.9 to 422.2)</b>      | <b>147.8</b><br><b>(105.5 to 192.7)</b> | <b>20.9</b><br><b>(18.1 to 23.6)</b>              | <b>1.1</b><br><b>(-1.1 to 3.3)</b>                  |
| Schizophrenia                                                  | 12.4<br>(10.8 to 14.1)                        | 0.9<br>(0.8 to 1.0)                           | 8.0<br>(5.8 to 10.1)                    | 27.0<br>(15.9 to 39.7)                            | 0.7<br>(-7.8 to 10.2)                               |
| Alcohol use disorders                                          | 156.0<br>(134.8 to 179.5)                     | 77.8<br>(65.8 to 91.2)                        | 15.7<br>(10.8 to 21.9)                  | 29.6<br>(18.6 to 41.0)                            | 5.2<br>(-3.1 to 14.4)                               |
| Drug use disorders                                             | 34.1<br>(30.6 to 38.0)                        | 5.2<br>(4.6 to 5.8)                           | 8.3<br>(5.8 to 11.3)                    | 23.1<br>(10.6 to 37.3)                            | 0.7<br>(-8.6 to 11.2)                               |
| Opioid use disorders                                           | 14.2<br>(11.1 to 18.1)                        | 1.9<br>(1.5 to 2.3)                           | 5.9<br>(3.9 to 8.3)                     | 30.4<br>(14.9 to 46.9)                            | 3.8<br>(-7.4 to 16.5)                               |
| Cocaine use disorders                                          | 1.2<br>(1.0 to 1.4)                           | 0.1<br>(0.1 to 0.2)                           | 0.2<br>(0.1 to 0.3)                     | 25.4<br>(-6.7 to 68.5)                            | 3.6<br>(-17.9 to 29.9)                              |
| Amphetamine use disorders                                      | 7.1<br>(4.6 to 10.2)                          | 0.8<br>(0.5 to 1.1)                           | 0.9<br>(0.5 to 1.6)                     | 0.6<br>(-25.5 to 31.6)                            | -12.2<br>(-34.7 to 13.8)                            |
| Cannabis use disorders                                         | 10.5<br>(8.7 to 12.6)                         | 1.9<br>(1.6 to 2.3)                           | 0.3<br>(0.2 to 0.5)                     | 18.8<br>(-7.5 to 51.1)                            | 0.2<br>(-20.5 to 25.2)                              |
| Other drug use disorders                                       | 2.5<br>(2.1 to 2.8)                           | 0.5<br>(0.4 to 0.6)                           | 1.0<br>(0.6 to 1.5)                     | 10.2<br>(-14.8 to 42.9)                           | -5.6<br>(-25.9 to 19.9)                             |
| Depressive disorders                                           | 202.1<br>(188.3 to 217.0)                     | 218.2<br>(195.3 to 242.8)                     | 34.3<br>(23.6 to 46.7)                  | 24.9<br>(18.4 to 32.2)                            | 1.9<br>(-2.9 to 7.2)                                |
| Major depressive disorder                                      | 134.1<br>(118.9 to 149.8)                     | 205.7<br>(182.7 to 230.6)                     | 27.6<br>(18.9 to 37.8)                  | 25.0<br>(17.1 to 33.9)                            | 2.5<br>(-3.5 to 9.2)                                |
| Dysthymia                                                      | 70.2<br>(61.5 to 80.6)                        | 12.5<br>(10.9 to 14.3)                        | 6.8<br>(4.5 to 9.8)                     | 24.5<br>(19.6 to 30.1)                            | -0.2<br>(-3.6 to 3.5)                               |
| Bipolar disorder                                               | 71.2<br>(60.8 to 83.4)                        | 6.0<br>(5.1 to 7.1)                           | 14.7<br>(9.0 to 22.1)                   | 19.2<br>(12.8 to 25.4)                            | -0.1<br>(-5.1 to 4.7)                               |
| Anxiety disorders                                              | 393.3<br>(355.2 to 433.2)                     | 53.2<br>(48.7 to 58.2)                        | 38.1<br>(26.2 to 51.9)                  | 18.6<br>(14.2 to 23.4)                            | -0.1<br>(-3.6 to 3.8)                               |
| Eating disorders                                               | 11.1<br>(9.0 to 13.8)                         | 5.9<br>(4.3 to 7.9)                           | 2.2<br>(1.4 to 3.3)                     | 31.1<br>(15.3 to 49.0)                            | 11.0<br>(-2.0 to 26.0)                              |
| Anorexia nervosa                                               | 2.2<br>(1.6 to 2.9)                           | 0.9<br>(0.7 to 1.2)                           | 0.5<br>(0.3 to 0.7)                     | 22.7<br>(-7.4 to 56.0)                            | 9.3<br>(-17.1 to 38.5)                              |
| Bulimia nervosa                                                | 8.4<br>(6.2 to 11.1)                          | 5.0<br>(3.4 to 7.0)                           | 1.8<br>(1.1 to 2.7)                     | 33.6<br>(15.3 to 55.4)                            | 11.4<br>(-4.0 to 28.8)                              |
| Autistic spectrum disorders                                    | 56.8<br>(50.7 to 64.6)                        | 0.4<br>(0.3 to 0.6)                           | 8.6<br>(5.7 to 12.1)                    | 12.5<br>(6.6 to 18.9)                             | 0.1<br>(-4.7 to 5.3)                                |
| Autism                                                         | 18.9<br>(16.1 to 22.1)                        | 0.1<br>(< 0.05 to 0.1)                        | 4.8<br>(3.1 to 6.9)                     | 12.9<br>(4.2 to 22.9)                             | 0.0<br>(-7.1 to 8.7)                                |
| Asperger syndrome and other autistic spectrum disorders        | 37.8<br>(31.4 to 45.3)                        | 0.4<br>(0.2 to 0.5)                           | 3.8<br>(2.5 to 5.5)                     | 12.1<br>(6.4 to 18.3)                             | 0.1<br>(-4.7 to 4.8)                                |

| Cause                                                      | Prevalence in thousands (95% UI)              | Incidence in thousands (95% UI)                   | YLDs in thousands (95% UI)             |                                                   |                                                     |
|------------------------------------------------------------|-----------------------------------------------|---------------------------------------------------|----------------------------------------|---------------------------------------------------|-----------------------------------------------------|
|                                                            | 2016 counts                                   | 2016 counts                                       | 2016 counts                            | Percentage change in counts between 2006 and 2016 | Percentage change in age-standardised rates between |
| Attention-deficit/hyperactivity disorder                   | 61.0<br>(54.6 to 68.8)                        | 2.8<br>(2.4 to 3.2)                               | 0.7<br>(0.4 to 1.2)                    | 8.6<br>(-0.3 to 18.2)                             | 0.0<br>(-7.8 to 8.9)                                |
| Conduct disorder                                           | 54.2<br>(43.8 to 64.7)                        | 18.2<br>(14.2 to 22.0)                            | 6.6<br>(4.0 to 10.0)                   | 0.5<br>(-6.0 to 8.0)                              | 0.0<br>(-6.3 to 7.5)                                |
| Idiopathic developmental intellectual disability           | 44.5<br>(21.0 to 67.5)                        | --                                                | 1.9<br>(0.8 to 3.3)                    | 8.2<br>(-0.3 to 18.8)                             | -5.9<br>(-13.3 to 2.5)                              |
| Other mental and substance use disorders                   | 116.3<br>(102.0 to 134.4)                     | 4.8<br>(4.2 to 5.4)                               | 8.7<br>(5.9 to 12.5)                   | 25.5<br>(19.4 to 31.9)                            | -0.1<br>(-4.5 to 4.8)                               |
| <b>Diabetes, urogenital, blood, and endocrine diseases</b> | <b>2,266.4</b><br><b>(2,234.8 to 2,298.5)</b> | <b>985.2†</b><br><b>(912.1 to 1,071.2)</b>        | <b>48.4</b><br><b>(34.2 to 66.4)</b>   | <b>34.2</b><br><b>(27.9 to 40.3)</b>              | <b>6.0</b><br><b>(0.8 to 11.1)</b>                  |
| Diabetes mellitus                                          | 334.9<br>(303.3 to 369.6)                     | 20.7<br>(18.7 to 22.8)                            | 28.4<br>(19.7 to 39.0)                 | 43.1<br>(32.1 to 54.0)                            | 9.4<br>(0.9 to 17.8)                                |
| Acute glomerulonephritis                                   | 0.1<br>(0.1 to 0.1)                           | 1.4<br>(1.2 to 1.7)                               | < 0.05<br>(< 0.05 to < 0.05)           | 11.4<br>(5.1 to 17.6)                             | 0.1<br>(-4.3 to 4.8)                                |
| Chronic kidney disease                                     | 177.1<br>(159.6 to 195.2)                     | 14.6<br>(12.8 to 16.4)                            | 5.4<br>(4.1 to 7.0)                    | 46.1<br>(36.8 to 56.5)                            | 9.6<br>(2.8 to 17.5)                                |
| Chronic kidney disease due to diabetes mellitus            | 62.7<br>(52.8 to 73.6)                        | 5.3<br>(4.3 to 6.3)                               | 1.8<br>(1.3 to 2.3)                    | 51.3<br>(36.9 to 67.0)                            | 11.7<br>(0.9 to 23.0)                               |
| Chronic kidney disease due to hypertension                 | 40.2<br>(34.4 to 45.9)                        | 4.2<br>(3.5 to 5.0)                               | 0.8<br>(0.5 to 1.0)                    | 51.2<br>(35.5 to 69.5)                            | 7.7<br>(-3.6 to 20.6)                               |
| Chronic kidney disease due to glomerulonephritis           | 36.1<br>(30.7 to 41.2)                        | 2.0<br>(1.5 to 2.4)                               | 1.7<br>(1.2 to 2.2)                    | 41.8<br>(29.2 to 56.8)                            | 9.4<br>(-0.3 to 20.4)                               |
| Chronic kidney disease due to other causes                 | 38.1<br>(31.2 to 45.3)                        | 3.2<br>(2.6 to 3.8)                               | 1.2<br>(0.9 to 1.7)                    | 41.9<br>(30.4 to 55.7)                            | 8.3<br>(-0.4 to 18.6)                               |
| Urinary diseases and male infertility                      | 85.6<br>(75.9 to 95.8)                        | 704.7†<br>(635.9 to 788.5)                        | 2.2<br>(1.4 to 3.1)                    | 26.6<br>(19.7 to 34.0)                            | -1.3<br>(-6.5 to 4.3)                               |
| Interstitial nephritis and urinary tract infections        | 12.6<br>(11.2 to 14.2)                        | 662.6<br>(592.0 to 746.1)                         | 0.4<br>(0.2 to 0.6)                    | 17.1<br>(5.0 to 31.6)                             | 1.1<br>(-8.2 to 12.4)                               |
| Urolithiasis                                               | 1.4<br>(1.2 to 1.6)                           | 36.8<br>(32.8 to 41.4)                            | 0.1<br>(0.1 to 0.1)                    | 25.7<br>(19.5 to 32.6)                            | 2.2<br>(-4.1 to 8.6)                                |
| Benign prostatic hyperplasia                               | 40.5<br>(34.4 to 47.2)                        | 5.4<br>(4.5 to 6.5)                               | 1.3<br>(0.8 to 2.0)                    | 36.5<br>(26.2 to 47.1)                            | -0.5<br>(-7.5 to 7.1)                               |
| Male infertility                                           | 27.7<br>(21.7 to 35.7)                        | --                                                | 0.2<br>(0.1 to 0.3)                    | 25.9<br>(16.6 to 36.0)                            | 1.9<br>(-5.5 to 9.5)                                |
| Other urinary diseases                                     | --                                            | --                                                | 0.2<br>(0.1 to 0.3)                    | -3.8<br>(-12.4 to 6.4)                            | -16.4<br>(-22.8 to -8.5)                            |
| Gynecological diseases                                     | 708.2<br>(674.9 to 735.2)                     | 233.1†<br>(220.3 to 245.8)                        | 7.3<br>(4.9 to 10.5)                   | 16.7<br>(11.7 to 22.3)                            | -4.6<br>(-8.4 to -0.2)                              |
| Uterine fibroids                                           | 32.8<br>(28.7 to 37.5)                        | 3.9<br>(3.4 to 4.5)                               | 0.7<br>(0.4 to 1.1)                    | 13.3<br>(3.7 to 23.0)                             | -7.1<br>(-14.8 to 0.6)                              |
| Polycystic ovarian syndrome                                | 0.2<br>(0.1 to 0.3)                           | 2.0<br>(1.4 to 2.8)                               | < 0.05<br>(< 0.05 to < 0.05)           | 25.4<br>(-18.8 to 96.2)                           | 1.2<br>(-38.9 to 66.0)                              |
| Female infertility                                         | 48.3<br>(30.1 to 71.2)                        | --                                                | 0.3<br>(0.1 to 0.6)                    | 19.4<br>(6.7 to 31.8)                             | -3.4<br>(-13.5 to 6.7)                              |
| Endometriosis                                              | 0.9<br>(0.7 to 1.1)                           | 4.5<br>(3.6 to 5.5)                               | 0.1<br>(< 0.05 to 0.1)                 | 17.7<br>(-15.4 to 61.3)                           | 0.1<br>(-28.8 to 40.5)                              |
| Genital prolapse                                           | 221.8<br>(193.2 to 251.8)                     | 15.7<br>(13.3 to 18.4)                            | 0.7<br>(0.3 to 1.3)                    | -0.4<br>(-7.6 to 7.0)                             | -21.9<br>(-27.5 to -16.0)                           |
| Premenstrual syndrome                                      | 435.8<br>(412.2 to 458.8)                     | 161.7<br>(151.7 to 172.1)                         | 3.6<br>(2.2 to 5.7)                    | 20.2<br>(12.1 to 29.1)                            | -0.1<br>(-6.4 to 6.9)                               |
| Other gynecological diseases                               | 57.8<br>(51.3 to 65.0)                        | 45.3<br>(38.3 to 53.1)                            | 1.9<br>(1.3 to 2.8)                    | 18.3<br>(8.7 to 28.8)                             | -2.4<br>(-10.3 to 6.6)                              |
| Hemoglobinopathies and hemolytic anaemias                  | 1,340.1<br>(1,314.9 to 1,361.0)               | --                                                | 2.6<br>(1.7 to 3.8)                    | 6.5<br>(-0.8 to 14.3)                             | -4.6<br>(-10.8 to 1.5)                              |
| Thalassemias                                               | 0.1<br>(< 0.05 to 0.1)                        | --                                                | < 0.05<br>(< 0.05 to < 0.05)           | -8.2<br>(-21.6 to 6.1)                            | -1.4<br>(-16.0 to 14.0)                             |
| Thalassaemias trait                                        | 56.7<br>(53.1 to 60.1)                        | --                                                | 0.7<br>(0.5 to 1.0)                    | 12.8<br>(2.2 to 25.1)                             | 1.7<br>(-7.5 to 11.4)                               |
| Sickle cell disorders                                      | 0.7<br>(0.7 to 0.7)                           | --                                                | 0.1<br>(< 0.05 to 0.1)                 | 13.3<br>(0.2 to 28.7)                             | 5.5<br>(-5.8 to 18.3)                               |
| Sickle cell trait                                          | 270.6<br>(264.6 to 276.6)                     | --                                                | 0.8<br>(0.5 to 1.2)                    | 8.2<br>(-2.0 to 19.8)                             | -1.2<br>(-9.9 to 8.3)                               |
| G6PD deficiency                                            | 239.6<br>(227.8 to 251.9)                     | --                                                | < 0.05<br>(< 0.05 to < 0.05)           | 12.2<br>(1.0 to 22.3)                             | -3.8<br>(-12.1 to 3.9)                              |
| G6PD trait                                                 | 794.3<br>(777.3 to 812.5)                     | --                                                | < 0.05<br>(< 0.05 to < 0.05)           | 16.3<br>(6.0 to 27.0)                             | 2.0<br>(-5.7 to 9.8)                                |
| Other hemoglobinopathies and hemolytic anaemias            | 58.2<br>(55.0 to 61.5)                        | --                                                | 1.0<br>(0.6 to 1.5)                    | 0.6<br>(-8.6 to 10.9)                             | -11.8<br>(-18.6 to -4.1)                            |
| Endocrine, metabolic, blood, and immune disorders          | 88.7<br>(83.8 to 93.7)                        | 10.7<br>(9.5 to 11.8)                             | 2.5<br>(1.7 to 3.4)                    | 19.3<br>(11.8 to 27.9)                            | 2.9<br>(-2.5 to 9.1)                                |
| <b>Musculoskeletal disorders</b>                           | <b>978.0</b><br><b>(927.4 to 1,025.1)</b>     | <b>480.9</b><br><b>(436.7 to 528.8)</b>           | <b>108.7</b><br><b>(78.3 to 142.4)</b> | <b>23.3</b><br><b>(18.1 to 27.9)</b>              | <b>-2.3</b><br><b>(-6.2 to 1.2)</b>                 |
| Rheumatoid arthritis                                       | 17.2<br>(15.5 to 19.2)                        | 1.0<br>(0.9 to 1.2)                               | 4.1<br>(2.8 to 5.5)                    | 39.9<br>(28.6 to 52.1)                            | 9.2<br>(1.2 to 17.8)                                |
| Osteoarthritis                                             | 182.0<br>(171.0 to 194.3)                     | 9.4<br>(8.7 to 10.1)                              | 11.2<br>(7.9 to 15.0)                  | 36.8<br>(31.8 to 41.7)                            | 2.1<br>(-1.6 to 5.5)                                |
| Low back and neck pain                                     | 613.5<br>(569.6 to 659.9)                     | 259.9<br>(232.3 to 290.2)                         | 70.8<br>(49.8 to 93.9)                 | 20.1<br>(12.6 to 26.3)                            | -4.0<br>(-9.7 to 0.8)                               |
| Low back pain                                              | 451.3<br>(397.5 to 512.0)                     | 214.1<br>(186.7 to 245.1)                         | 51.1<br>(35.7 to 67.6)                 | 17.7<br>(7.8 to 26.3)                             | -5.5<br>(-13.1 to 1.1)                              |
| Neck pain                                                  | 197.0<br>(169.8 to 227.4)                     | 45.8<br>(39.7 to 53.8)                            | 19.7<br>(13.4 to 28.0)                 | 26.7<br>(23.3 to 30.3)                            | -0.1<br>(-2.3 to 2.0)                               |
| Gout                                                       | 15.5<br>(13.8 to 17.4)                        | 3.1<br>(2.8 to 3.6)                               | 0.5<br>(0.3 to 0.7)                    | 31.8<br>(11.0 to 54.4)                            | 0.8<br>(-13.6 to 17.4)                              |
| Other musculoskeletal disorders                            | 255.8<br>(218.2 to 297.2)                     | 207.5<br>(173.0 to 248.5)                         | 22.1<br>(14.9 to 31.1)                 | 24.9<br>(16.1 to 34.6)                            | -1.7<br>(-8.7 to 5.5)                               |
| <b>Other non-communicable diseases</b>                     | <b>5,011.8</b><br><b>(4,941.0 to 5,088.3)</b> | <b>17,759.2†</b><br><b>(17,003.3 to 18,620.6)</b> | <b>133.5</b><br><b>(90.2 to 189.3)</b> | <b>17.0</b><br><b>(15.5 to 18.6)</b>              | <b>-1.6</b><br><b>(-2.5 to -0.5)</b>                |
| Congenital anomalies                                       | 69.7<br>(61.9 to 79.4)                        | --                                                | 8.8<br>(6.2 to 11.7)                   | 9.6<br>(3.3 to 16.3)                              | -0.8<br>(-6.5 to 5.0)                               |
| Neural tube defects                                        | 4.3<br>(3.9 to 4.9)                           | --                                                | 1.3<br>(0.9 to 1.7)                    | 15.1<br>(0.2 to 34.5)                             | 1.8<br>(-11.1 to 17.9)                              |
| Congenital heart anomalies                                 | 10.9<br>(9.4 to 12.6)                         | --                                                | 0.5<br>(0.2 to 0.9)                    | 9.3<br>(-3.5 to 24.4)                             | 3.1<br>(-8.5 to 16.3)                               |
| Orofacial clefts                                           | 7.3<br>(6.4 to 8.2)                           | --                                                | 0.1<br>(0.1 to 0.1)                    | 5.8<br>(-8.6 to 22.2)                             | -5.6<br>(-17.7 to 7.8)                              |
| Down's syndrome                                            | 4.8<br>(4.2 to 5.6)                           | --                                                | 0.4<br>(0.3 to 0.6)                    | 15.5<br>(4.4 to 27.0)                             | 4.8<br>(-4.8 to 14.7)                               |
| Turner syndrome                                            | 1.1<br>(0.9 to 1.2)                           | --                                                | < 0.05<br>(< 0.05 to < 0.05)           | 15.5<br>(0.4 to 35.3)                             | 4.0<br>(-10.0 to 20.7)                              |
| Klinefelter syndrome                                       | 1.4<br>(1.2 to 1.7)                           | --                                                | < 0.05<br>(< 0.05 to < 0.05)           | 15.3<br>(-18.6 to 63.9)                           | 0.2<br>(-27.6 to 38.0)                              |



| Cause                                         | Prevalence in thousands (95% UI)          | Incidence in thousands (95% UI)          | YLDs in thousands (95% UI)           |                                                   |                                                     |
|-----------------------------------------------|-------------------------------------------|------------------------------------------|--------------------------------------|---------------------------------------------------|-----------------------------------------------------|
|                                               | 2016 counts                               | 2016 counts                              | 2016 counts                          | Percentage change in counts between 2006 and 2016 | Percentage change in age-standardised rates between |
| Other chromosomal abnormalities               | 5.8<br>(4.8 to 6.9)                       | --                                       | 0.6<br>(0.4 to 0.9)                  | -2.3<br>(-16.6 to 14.9)                           | 0.9<br>(-14.2 to 18.8)                              |
| Congenital musculoskeletal and limb anomalies | 16.4<br>(14.9 to 18.0)                    | --                                       | 2.4<br>(1.6 to 3.2)                  | 17.9<br>(7.7 to 29.6)                             | 4.5<br>(-3.9 to 14.5)                               |
| Urogenital congenital anomalies               | 4.9<br>(4.3 to 5.5)                       | --                                       | 0.1<br>(0.1 to 0.2)                  | 1.0<br>(-6.9 to 9.0)                              | -0.5<br>(-8.2 to 7.0)                               |
| Digestive congenital anomalies                | 3.8<br>(3.3 to 4.2)                       | --                                       | 0.2<br>(0.1 to 0.2)                  | 14.7<br>(-11.9 to 44.6)                           | 2.1<br>(-19.2 to 26.5)                              |
| Other congenital anomalies                    | 24.1<br>(16.1 to 35.0)                    | --                                       | 3.2<br>(2.0 to 4.8)                  | 4.2<br>(-6.7 to 16.6)                             | -6.8<br>(-16.3 to 4.6)                              |
| Skin and subcutaneous diseases                | 2,197.7<br>(2,137.2 to 2,259.2)           | 5,239.0<br>(4,948.1 to 5,530.0)          | 55.8<br>(37.2 to 80.5)               | 11.1<br>(8.9 to 13.5)                             | 1.2<br>(-0.5 to 3.1)                                |
| Dermatitis                                    | 327.7<br>(311.4 to 343.9)                 | 337.5<br>(311.5 to 363.5)                | 12.9<br>(7.6 to 21.4)                | 5.7<br>(1.0 to 10.7)                              | -0.5<br>(-4.6 to 3.6)                               |
| Psoriasis                                     | 59.2<br>(56.3 to 62.1)                    | 8.2<br>(7.9 to 8.7)                      | 5.2<br>(3.7 to 6.9)                  | 29.3<br>(18.2 to 40.7)                            | 8.3<br>(0.2 to 16.8)                                |
| Cellulitis                                    | 2.8<br>(2.5 to 3.0)                       | 50.6<br>(46.8 to 54.8)                   | 0.2<br>(0.1 to 0.2)                  | 11.8<br>(-11.1 to 40.6)                           | 2.6<br>(-16.3 to 26.2)                              |
| Pyoderma                                      | 20.3<br>(19.7 to 21.0)                    | 503.3<br>(485.9 to 521.2)                | 0.1<br>( $< 0.05$ to 0.2)            | 23.9<br>(16.6 to 31.7)                            | 1.7<br>(-3.4 to 7.5)                                |
| Scabies                                       | 230.2<br>(201.6 to 266.9)                 | 718.8<br>(622.0 to 838.0)                | 6.0<br>(3.4 to 9.5)                  | 1.8<br>(-2.0 to 6.0)                              | -5.8<br>(-8.9 to -2.2)                              |
| Fungal skin diseases                          | 666.8<br>(600.3 to 736.2)                 | 2,295.4<br>(2,043.9 to 2,567.8)          | 3.7<br>(1.5 to 7.9)                  | 15.8<br>(13.6 to 18.1)                            | -0.1<br>(-1.0 to 0.9)                               |
| Viral skin diseases                           | 193.6<br>(184.0 to 203.8)                 | 285.5<br>(269.5 to 302.1)                | 5.9<br>(3.7 to 8.7)                  | 9.2<br>(5.4 to 13.2)                              | -0.1<br>(-3.4 to 3.4)                               |
| Acne vulgaris                                 | 563.3<br>(498.7 to 630.5)                 | 382.2<br>(311.0 to 470.8)                | 14.5<br>(9.6 to 21.1)                | 12.6<br>(7.0 to 18.6)                             | 3.9<br>(-0.9 to 9.2)                                |
| Alopecia areata                               | 11.5<br>(11.0 to 11.9)                    | 20.4<br>(19.5 to 21.2)                   | 0.4<br>(0.2 to 0.6)                  | 20.6<br>(6.5 to 35.1)                             | -0.1<br>(-11.0 to 11.2)                             |
| Pruritus                                      | 54.4<br>(47.8 to 61.4)                    | 43.4<br>(38.6 to 48.7)                   | 0.6<br>(0.3 to 1.1)                  | 20.0<br>(13.2 to 27.1)                            | 1.2<br>(-3.7 to 6.4)                                |
| Urticaria                                     | 62.1<br>(54.1 to 71.5)                    | 110.5<br>(97.0 to 127.9)                 | 3.7<br>(2.4 to 5.4)                  | 5.8<br>(-0.2 to 12.4)                             | -0.0<br>(-5.4 to 5.9)                               |
| Decubitus ulcer                               | 1.9<br>(1.7 to 2.1)                       | 6.9<br>(6.2 to 7.7)                      | 0.3<br>(0.2 to 0.4)                  | 31.9<br>(18.0 to 46.2)                            | 8.5<br>(-5.1 to 22.8)                               |
| Other skin and subcutaneous diseases          | 411.6<br>(399.7 to 422.9)                 | 476.1<br>(460.6 to 489.8)                | 2.3<br>(1.1 to 4.2)                  | 26.5<br>(23.2 to 29.7)                            | 3.8<br>(1.5 to 6.2)                                 |
| Sense organ diseases                          | 1,502.2<br>(1,470.6 to 1,536.7)           | 618.1†<br>(577.3 to 662.7)               | 52.2<br>(35.6 to 73.6)               | 21.6<br>(19.4 to 24.4)                            | -4.5<br>(-6.0 to -2.7)                              |
| Glaucoma                                      | 6.9<br>(5.7 to 8.1)                       | --                                       | 0.5<br>(0.3 to 0.6)                  | 45.0<br>(29.7 to 61.3)                            | 2.1<br>(-8.2 to 13.2)                               |
| Cataract                                      | 46.9<br>(41.8 to 52.6)                    | --                                       | 3.2<br>(2.3 to 4.3)                  | 30.0<br>(22.1 to 38.6)                            | -6.6<br>(-12.0 to -0.9)                             |
| Macular degeneration                          | 3.5<br>(2.8 to 4.2)                       | --                                       | 0.2<br>(0.1 to 0.3)                  | 46.9<br>(28.8 to 66.5)                            | 3.5<br>(-9.2 to 17.2)                               |
| Refraction and accommodation disorders        | 882.9<br>(847.5 to 922.0)                 | --                                       | 15.9<br>(9.8 to 25.4)                | 10.6<br>(7.3 to 14.6)                             | -8.7<br>(-11.5 to -5.5)                             |
| Age-related and other hearing loss            | 850.3<br>(808.4 to 895.9)                 | --                                       | 26.0<br>(18.1 to 36.6)               | 26.1<br>(22.4 to 29.7)                            | -3.2<br>(-5.3 to -1.2)                              |
| Other vision loss                             | 22.2<br>(19.8 to 25.0)                    | --                                       | 1.4<br>(1.0 to 1.9)                  | 30.4<br>(19.8 to 41.4)                            | 1.0<br>(-6.2 to 8.9)                                |
| Other sense organ diseases                    | 161.6<br>(149.2 to 174.0)                 | 618.1<br>(577.3 to 662.7)                | 5.0<br>(3.2 to 7.6)                  | 27.6<br>(21.9 to 33.6)                            | 1.0<br>(-2.9 to 5.0)                                |
| Oral disorders                                | 3,693.4<br>(3,573.7 to 3,821.4)           | 11,902.1†<br>(11,174.8 to 12,695.9)      | 16.7<br>(10.2 to 26.1)               | 29.3<br>(26.3 to 32.7)                            | 1.3<br>(-0.6 to 3.4)                                |
| Caries of deciduous teeth                     | 431.8<br>(321.5 to 530.7)                 | 1,497.2<br>(925.5 to 2,166.6)            | 0.1<br>( $< 0.05$ to 0.2)            | -6.8<br>(-17.8 to 5.5)                            | -1.3<br>(-13.1 to 11.4)                             |
| Caries of permanent teeth                     | 2,863.6<br>(2,721.9 to 3,001.8)           | 10,301.9<br>(9,853.5 to 10,681.7)        | 1.7<br>(0.8 to 3.2)                  | 12.8<br>(9.1 to 16.4)                             | -2.9<br>(-5.7 to -0.1)                              |
| Periodontal disease                           | 647.9<br>(540.3 to 763.3)                 | 78.8<br>(64.1 to 95.2)                   | 4.2<br>(1.7 to 8.7)                  | 27.6<br>(23.4 to 32.0)                            | -0.2<br>(-3.3 to 2.9)                               |
| Edentulism and severe tooth loss              | 264.5<br>(230.5 to 299.4)                 | 24.2<br>(20.5 to 28.3)                   | 7.3<br>(4.8 to 10.3)                 | 41.2<br>(36.0 to 47.0)                            | 3.2<br>(-0.4 to 7.2)                                |
| Other oral disorders                          | 115.5<br>(110.2 to 120.9)                 | --                                       | 3.4<br>(2.1 to 5.1)                  | 19.7<br>(15.5 to 24.4)                            | -0.0<br>(-2.9 to 3.2)                               |
| <b>Injuries</b>                               | <b>923.8</b><br><b>(853.3 to 1,017.0)</b> | <b>437.1†</b><br><b>(405.9 to 473.5)</b> | <b>36.7</b><br><b>(25.0 to 51.3)</b> | <b>35.8</b><br><b>(33.1 to 38.5)</b>              | <b>11.2</b><br><b>(9.2 to 13.1)</b>                 |
| <b>Transport injuries</b>                     | <b>124.9</b><br><b>(114.4 to 135.8)</b>   | <b>50.4</b><br><b>(44.1 to 56.8)</b>     | <b>6.8</b><br><b>(4.5 to 9.7)</b>    | <b>64.7</b><br><b>(60.4 to 69.2)</b>              | <b>32.5</b><br><b>(29.5 to 35.6)</b>                |
| Road injuries                                 | 121.2<br>(110.9 to 132.1)                 | 49.5<br>(43.2 to 55.8)                   | 6.5<br>(4.3 to 9.4)                  | 66.6<br>(62.2 to 71.1)                            | 33.9<br>(30.9 to 37.0)                              |
| Pedestrian road injuries                      | 29.9<br>(25.7 to 34.5)                    | 10.3<br>(8.6 to 12.1)                    | 1.6<br>(1.1 to 2.4)                  | 53.4<br>(49.3 to 57.4)                            | 24.7<br>(21.9 to 27.4)                              |
| Cyclist road injuries                         | 16.3<br>(13.3 to 19.2)                    | 8.5<br>(6.5 to 10.6)                     | 0.8<br>(0.6 to 1.2)                  | 50.7<br>(46.4 to 55.2)                            | 23.7<br>(20.7 to 26.8)                              |
| Motorcyclist road injuries                    | 53.2<br>(45.2 to 63.4)                    | 18.2<br>(15.3 to 21.4)                   | 2.8<br>(1.9 to 4.0)                  | 99.5<br>(93.8 to 105.6)                           | 58.6<br>(54.6 to 62.7)                              |
| Motor vehicle road injuries                   | 14.2<br>(12.5 to 16.2)                    | 8.1<br>(6.7 to 9.7)                      | 0.9<br>(0.6 to 1.2)                  | 39.5<br>(35.8 to 43.4)                            | 10.6<br>(8.0 to 13.4)                               |
| Other road injuries                           | 7.5<br>(6.5 to 8.9)                       | 4.5<br>(3.4 to 5.8)                      | 0.4<br>(0.2 to 0.6)                  | 42.0<br>(38.0 to 45.9)                            | 14.7<br>(12.0 to 17.5)                              |
| Other transport injuries                      | 3.7<br>(3.1 to 4.3)                       | 0.9<br>(0.8 to 1.1)                      | 0.2<br>(0.1 to 0.3)                  | 19.0<br>(15.3 to 22.8)                            | -2.7<br>(-5.3 to -0.1)                              |
| <b>Unintentional injuries</b>                 | <b>757.2</b><br><b>(687.1 to 846.9)</b>   | <b>365.4</b><br><b>(334.2 to 401.3)</b>  | <b>27.2</b><br><b>(18.6 to 37.9)</b> | <b>32.7</b><br><b>(29.9 to 35.4)</b>              | <b>8.5</b><br><b>(6.6 to 10.4)</b>                  |
| Falls                                         | 396.1<br>(339.1 to 468.2)                 | 196.1<br>(168.1 to 228.6)                | 16.2<br>(11.3 to 22.2)               | 39.5<br>(36.6 to 42.4)                            | 13.2<br>(11.2 to 15.3)                              |
| Drowning                                      | 1.9<br>(1.7 to 2.2)                       | 0.4<br>(0.4 to 0.5)                      | 0.1<br>(0.1 to 0.1)                  | 24.4<br>(20.5 to 28.5)                            | -0.1<br>(-3.1 to 2.8)                               |
| Fire, heat, and hot substances                | 70.0<br>(58.0 to 87.6)                    | 9.6<br>(7.7 to 11.8)                     | 1.9<br>(1.3 to 2.8)                  | 21.2<br>(15.0 to 27.0)                            | 1.6<br>(-2.9 to 5.6)                                |
| Poisonings                                    | 1.0<br>(0.8 to 1.2)                       | 1.4<br>(1.1 to 1.7)                      | 0.1<br>(0.1 to 0.1)                  | 25.2<br>(12.1 to 39.3)                            | 6.8<br>(-2.9 to 17.4)                               |
| Exposure to mechanical forces                 | 98.4<br>(84.3 to 120.8)                   | 41.9<br>(35.7 to 48.7)                   | 2.4<br>(1.6 to 3.6)                  | 30.3<br>(26.8 to 33.7)                            | 5.7<br>(3.1 to 8.2)                                 |
| Unintentional firearm injuries                | 6.5<br>(5.3 to 8.2)                       | 1.9<br>(1.4 to 2.6)                      | 0.3<br>(0.2 to 0.4)                  | 21.2<br>(17.6 to 24.6)                            | -2.5<br>(-5.1 to -0.1)                              |
| Unintentional suffocation                     | 3.3<br>(2.4 to 4.3)                       | 0.7<br>(0.5 to 1.0)                      | 0.1<br>(0.1 to 0.2)                  | 24.2<br>(20.0 to 28.1)                            | 6.8<br>(3.5 to 9.6)                                 |
| Other exposure to mechanical forces           | 88.5<br>(75.3 to 110.3)                   | 39.4<br>(33.4 to 45.8)                   | 2.0<br>(1.3 to 3.0)                  | 32.0<br>(28.3 to 35.4)                            | 6.9<br>(4.2 to 9.3)                                 |

| Cause                                                                               | Prevalence in thousands (95% UI)        | Incidence in thousands (95% UI)          | YLDs in thousands (95% UI)              |                                                   |                                                     |
|-------------------------------------------------------------------------------------|-----------------------------------------|------------------------------------------|-----------------------------------------|---------------------------------------------------|-----------------------------------------------------|
|                                                                                     | 2016 counts                             | 2016 counts                              | 2016 counts                             | Percentage change in counts between 2006 and 2016 | Percentage change in age-standardised rates between |
| Adverse effects of medical treatment                                                | 1.1<br>(0.8 to 1.3)                     | 13.8<br>(12.4 to 15.2)                   | 0.1<br>(0.1 to 0.2)                     | 20.1<br>(15.2 to 25.6)                            | 1.3<br>(-2.7 to 5.4)                                |
| Animal contact                                                                      | 13.0<br>(11.5 to 15.1)                  | 16.9<br>(13.5 to 20.4)                   | 0.5<br>(0.3 to 0.7)                     | 9.2<br>(1.1 to 17.8)                              | -8.4<br>(-14.2 to -2.2)                             |
| Venomous animal contact                                                             | 7.5<br>(6.3 to 8.9)                     | 8.9<br>(6.9 to 11.4)                     | 0.4<br>(0.2 to 0.5)                     | 10.7<br>(0.9 to 21.4)                             | -6.6<br>(-13.9 to 1.1)                              |
| Non-venomous animal contact                                                         | 5.6<br>(4.7 to 6.8)                     | 7.9<br>(6.1 to 10.1)                     | 0.1<br>(0.1 to 0.1)                     | 3.5<br>(-0.3 to 7.0)                              | -14.7<br>(-17.7 to -12.2)                           |
| Foreign body                                                                        | 23.1<br>(18.6 to 27.7)                  | 26.9<br>(22.6 to 32.3)                   | 1.0<br>(0.6 to 1.5)                     | 15.5<br>(11.9 to 19.0)                            | -1.9<br>(-4.5 to 0.5)                               |
| Pulmonary aspiration and foreign body in airway                                     | 15.6<br>(11.9 to 19.9)                  | 6.1<br>(5.2 to 7.1)                      | 0.7<br>(0.4 to 1.0)                     | 14.6<br>(9.7 to 19.2)                             | -2.0<br>(-5.5 to 1.1)                               |
| Foreign body in eyes                                                                | 3.7<br>(2.1 to 5.4)                     | 19.2<br>(15.1 to 24.6)                   | 0.2<br>(0.1 to 0.4)                     | 19.0<br>(14.4 to 24.4)                            | -0.5<br>(-2.9 to 2.0)                               |
| Foreign body in other body part                                                     | 3.8<br>(3.1 to 4.8)                     | 1.6<br>(1.4 to 2.0)                      | 0.1<br>(0.1 to 0.2)                     | 14.6<br>(10.0 to 19.1)                            | -3.7<br>(-6.8 to -0.8)                              |
| Environmental heat and cold exposure                                                | 43.6<br>(37.6 to 50.4)                  | 13.6<br>(11.1 to 16.4)                   | 1.7<br>(1.1 to 2.4)                     | 19.9<br>(16.8 to 22.7)                            | -2.5<br>(-4.7 to -0.6)                              |
| Other unintentional injuries                                                        | 109.2<br>(90.3 to 129.2)                | 44.9<br>(39.3 to 51.4)                   | 3.2<br>(2.1 to 4.7)                     | 28.6<br>(26.1 to 31.1)                            | 5.2<br>(3.4 to 6.9)                                 |
| <b>Self-harm and interpersonal violence</b>                                         | <b>171.3</b><br><b>(153.1 to 190.8)</b> | <b>21.2†</b><br><b>(18.4 to 24.6)</b>    | <b>2.7</b><br><b>(1.8 to 3.8)</b>       | <b>13.2</b><br><b>(9.2 to 17.1)</b>               | <b>-5.1</b><br><b>(-7.7 to -2.7)</b>                |
| Self-harm                                                                           | 3.7<br>(3.2 to 4.3)                     | 1.8<br>(1.5 to 2.1)                      | 0.2<br>(0.1 to 0.3)                     | 32.4<br>(27.4 to 37.4)                            | 5.5<br>(2.1 to 9.0)                                 |
| Self-harm by firearm                                                                | 0.4<br>(0.3 to 0.4)                     | 0.1<br>(0.1 to 0.2)                      | < 0.05<br>(< 0.05 to < 0.05)            | -3.0<br>(-6.6 to 0.3)                             | -23.3<br>(-25.9 to -21.0)                           |
| Self-harm by other specified means                                                  | 3.4<br>(2.9 to 3.9)                     | 1.7<br>(1.4 to 1.9)                      | 0.2<br>(0.1 to 0.2)                     | 36.5<br>(31.0 to 42.0)                            | 8.8<br>(4.9 to 12.6)                                |
| Interpersonal violence                                                              | 167.5<br>(149.2 to 187.1)               | 19.4†<br>(16.6 to 22.7)                  | 2.5<br>(1.7 to 3.5)                     | 12.1<br>(8.1 to 16.0)                             | -5.9<br>(-8.5 to -3.3)                              |
| Assault by firearm                                                                  | 4.8<br>(4.0 to 5.8)                     | 1.9<br>(1.4 to 2.5)                      | 0.2<br>(0.2 to 0.4)                     | 15.0<br>(11.1 to 18.9)                            | -9.2<br>(-12.0 to -6.5)                             |
| Assault by sharp object                                                             | 16.3<br>(13.4 to 19.5)                  | 8.3<br>(6.6 to 10.2)                     | 0.5<br>(0.3 to 0.8)                     | 16.4<br>(12.8 to 19.5)                            | -6.5<br>(-9.0 to -4.3)                              |
| Sexual violence                                                                     | 131.8<br>(114.1 to 150.8)               | --                                       | 1.1<br>(0.8 to 1.6)                     | 2.1<br>(-4.4 to 8.6)                              | -10.9<br>(-15.7 to -5.9)                            |
| Assault by other means                                                              | 14.6<br>(12.4 to 17.4)                  | 9.3<br>(7.6 to 11.1)                     | 0.6<br>(0.4 to 0.9)                     | 29.8<br>(26.5 to 33.0)                            | 5.3<br>(2.9 to 7.5)                                 |
| <b>Forces of nature, conflict and terrorism, and executions and police conflict</b> | <b>2.3</b><br><b>(1.6 to 3.3)</b>       | <b>0.1†</b><br><b>(&lt; 0.05 to 0.2)</b> | <b>0.1</b><br><b>(&lt; 0.05 to 0.2)</b> | <b>8.9</b><br><b>(-11.2 to 15.9)</b>              | <b>-3.7</b><br><b>(-19.5 to 1.7)</b>                |
| Exposure to forces of nature                                                        | 1.6<br>(1.1 to 2.2)                     | --                                       | 0.1<br>(< 0.05 to 0.1)                  | 15.2<br>(-14.2 to 29.1)                           | 1.5<br>(-22.0 to 11.8)                              |
| Conflict and terrorism                                                              | 0.5<br>(0.1 to 1.1)                     | --                                       | < 0.05<br>(< 0.05 to < 0.05)            | -19.6<br>(-23.0 to -15.8)                         | -26.5<br>(-29.2 to -23.4)                           |
| Executions and police conflict                                                      | 0.2<br>(0.1 to 0.4)                     | 0.1<br>(< 0.05 to 0.2)                   | < 0.05<br>(< 0.05 to < 0.05)            | 59.8<br>(22.5 to 77.5)                            | 41.6<br>(9.6 to 56.0)                               |
| <b>Impairments</b>                                                                  | --                                      | --                                       | --                                      | --                                                | --                                                  |
| Anaemia                                                                             | 1,585.7<br>(1,506.5 to 1,665.3)         | --                                       | 39.3<br>(26.2 to 56.9)                  | 7.7<br>(1.4 to 13.8)                              | -3.5<br>(-8.6 to 1.4)                               |
| Developmental intellectual disability                                               | 105.0<br>(81.2 to 129.3)                | --                                       | 13.2<br>(9.4 to 18.6)                   | 4.8<br>(-2.2 to 12.4)                             | -6.2<br>(-12.1 to 0.2)                              |
| Epilepsy                                                                            | 38.5<br>(20.3 to 58.7)                  | --                                       | 12.5<br>(6.1 to 22.6)                   | 5.8<br>(-48.9 to 124.0)                           | -6.5<br>(-55.6 to 98.5)                             |
| Guillain-Barre syndrome                                                             | < 0.05<br>(< 0.05 to 0.1)               | --                                       | < 0.05<br>(< 0.05 to < 0.05)            | 17.7<br>(12.6 to 23.3)                            | 1.9<br>(0.9 to 4.3)                                 |
| Hearing loss                                                                        | 939.6<br>(899.3 to 985.9)               | --                                       | 31.0<br>(21.7 to 43.0)                  | 20.8<br>(17.6 to 23.7)                            | -4.0<br>(-5.9 to -2.2)                              |
| Heart failure                                                                       | 38.7<br>(34.1 to 44.2)                  | --                                       | 3.9<br>(2.9 to 5.0)                     | 37.6<br>(28.6 to 47.6)                            | 0.1<br>(-6.3 to 7.7)                                |
| Infertility                                                                         | 106.3<br>(81.9 to 135.8)                | --                                       | 0.6<br>(0.2 to 1.2)                     | 21.5<br>(14.2 to 28.2)                            | -1.4<br>(-7.1 to 4.2)                               |
| Pelvic inflammatory disease                                                         | 1.5<br>(1.3 to 1.8)                     | --                                       | 0.2<br>(0.1 to 0.3)                     | 13.0<br>(-6.8 to 37.7)                            | -7.6<br>(-22.4 to 10.9)                             |
| Vision loss                                                                         | 997.1<br>(959.8 to 1,037.7)             | --                                       | 25.9<br>(17.9 to 37.1)                  | 12.7<br>(7.4 to 17.6)                             | -7.4<br>(-10.3 to -4.2)                             |

We did not calculate incidence for the nine impairments, certain NTDs, and causes with only birth prevalence. Blank cells mean that no estimate is available.

† Incidence for aggregate causes represents the sum of the incidence of the causes below the aggregate.

‡ Incidence estimates for stroke represent first-ever stroke only.

^ Incidence of HIV/AIDS represents new infections of HIV only and does not include new infections of Tuberculosis in HIV positive cases.

SR Table 14: Prevalence, incidence, and YLDs for 2016, percentage change of YLD counts and percentage change of age-standardised YLD rates between 2006 and 2016 by cause and impairments, for all ages, Peru.

| Cause                                                                                | Prevalence in thousands (95% UI)          | Incidence in thousands (95% UI)               | YLDs in thousands (95% UI)             |                                                   |                                                     |
|--------------------------------------------------------------------------------------|-------------------------------------------|-----------------------------------------------|----------------------------------------|---------------------------------------------------|-----------------------------------------------------|
|                                                                                      | 2016 counts                               | 2016 counts                                   | 2016 counts                            | Percentage change in counts between 2006 and 2016 | Percentage change in age-standardised rates between |
| <b>All causes</b>                                                                    | <b>31,168.3</b><br>(31,066.4 to 31,261.6) | <b>226,122.0†</b><br>(214,733.7 to 238,364.2) | <b>3,025.1</b><br>(2,237.7 to 3,961.7) | <b>20.1</b><br>(17.4 to 23.0)                     | <b>-0.8</b><br>(-2.8 to 1.5)                        |
| <b>Communicable, maternal, neonatal, and nutritional disorders</b>                   | <b>21,583.5</b><br>(20,813.2 to 22,380.6) | <b>128,353.0†</b><br>(117,882.1 to 139,630.8) | <b>333.8</b><br>(238.8 to 461.8)       | <b>6.7</b><br>(1.8 to 13.3)                       | <b>-8.0</b><br>(-12.1 to -2.5)                      |
| <b>HIV/AIDS and tuberculosis</b>                                                     | <b>5,928.8</b><br>(5,427.9 to 6,350.4)    | <b>19.8†</b><br>(17.5 to 22.2)                | <b>4.9</b><br>(3.2 to 7.1)             | <b>-2.9</b><br>(-21.9 to 19.8)                    | <b>-16.7</b><br>(-34.0 to 2.7)                      |
| Tuberculosis                                                                         | 5,532.1<br>(5,066.4 to 6,032.4)           | 18.0†<br>(15.8 to 20.4)                       | 2.2<br>(1.4 to 3.2)                    | -23.9<br>(-38.3 to -5.6)                          | -34.0<br>(-46.3 to -19.4)                           |
| Drug-susceptible tuberculosis                                                        | 6.7<br>(5.9 to 7.5)                       | 17.1<br>(15.0 to 19.3)                        | 2.1<br>(1.3 to 3.0)                    | -24.4<br>(-39.7 to -5.0)                          | -34.5<br>(-47.2 to -19.1)                           |
| Multidrug-resistant tuberculosis without extensive drug resistance                   | 0.4<br>(0.3 to 0.4)                       | 0.9<br>(0.7 to 1.1)                           | 0.1<br>(0.1 to 0.2)                    | -17.4<br>(-40.5 to 14.4)                          | -28.5<br>(-48.3 to -0.6)                            |
| Extensively drug-resistant tuberculosis                                              | < 0.05<br>(< 0.05 to < 0.05)              | 0.1<br>(0.1 to 0.1)                           | < 0.05<br>(< 0.05 to < 0.05)           | 120.0<br>(58.2 to 204.7)                          | 90.3<br>(37.5 to 164.7)                             |
| Latent tuberculosis infection                                                        | 5,525.0<br>(5,058.8 to 6,025.1)           | --                                            | --                                     | --                                                | --                                                  |
| HIV/AIDS                                                                             | 31.0<br>(22.1 to 42.9)                    | 1.7^<br>(1.1 to 2.8)                          | 2.6<br>(1.6 to 4.2)                    | 26.2<br>(-19.7 to 77.0)                           | 7.1<br>(-32.8 to 52.2)                              |
| Drug-susceptible HIV/AIDS - Tuberculosis                                             | 0.4<br>(0.2 to 0.6)                       | 0.9<br>(0.6 to 1.5)                           | 0.1<br>(0.1 to 0.2)                    | -58.3<br>(-66.6 to -50.2)                         | -64.0<br>(-70.9 to -57.3)                           |
| Multidrug-resistant HIV/AIDS - Tuberculosis without extensive drug resistance        | < 0.05<br>(< 0.05 to < 0.05)              | 0.1<br>(< 0.05 to 0.1)                        | < 0.05<br>(< 0.05 to < 0.05)           | -55.0<br>(-68.3 to -36.1)                         | -61.1<br>(-72.6 to -44.8)                           |
| Extensively drug-resistant HIV/AIDS - Tuberculosis                                   | < 0.05<br>(< 0.05 to < 0.05)              | < 0.05<br>(< 0.05 to < 0.05)                  | < 0.05<br>(< 0.05 to < 0.05)           | 19.8<br>(-15.5 to 70.3)                           | 3.5<br>(-27.0 to 47.1)                              |
| HIV/AIDS resulting in other diseases                                                 | 30.6<br>(21.7 to 42.4)                    | 1.7<br>(1.1 to 2.8)                           | 2.5<br>(1.4 to 4.0)                    | 44.5<br>(-15.7 to 132.7)                          | 22.3<br>(-30.5 to 97.4)                             |
| <b>Diarrhoea, lower respiratory infections, and other common infectious diseases</b> | <b>2,092.9</b><br>(1,988.0 to 2,199.7)    | <b>124,375.1†</b><br>(113,963.3 to 135,635.5) | <b>96.2</b><br>(66.2 to 134.7)         | <b>13.2</b><br>(9.7 to 16.8)                      | <b>-2.4</b><br>(-5.3 to 0.5)                        |
| Diarrhoeal diseases                                                                  | 394.5<br>(371.1 to 417.7)                 | 26,368.1<br>(24,842.5 to 27,895.8)            | 44.6<br>(31.2 to 61.5)                 | 15.8<br>(9.8 to 21.6)                             | -1.8<br>(-6.5 to 3.0)                               |
| Intestinal infectious diseases                                                       | 0.1<br>(< 0.05 to 0.1)                    | 0.8†<br>(0.6 to 1.1)                          | < 0.05<br>(< 0.05 to < 0.05)           | 0.7<br>(-11.8 to 14.9)                            | -17.8<br>(-27.2 to -6.5)                            |
| Typhoid fever                                                                        | 0.1<br>(< 0.05 to 0.1)                    | 0.8<br>(0.6 to 1.1)                           | < 0.05<br>(< 0.05 to < 0.05)           | 1.4<br>(-11.3 to 15.8)                            | -17.1<br>(-27.0 to -5.5)                            |
| Paratyphoid fever                                                                    | < 0.05<br>(< 0.05 to < 0.05)              | < 0.05<br>(< 0.05 to < 0.05)                  | < 0.05<br>(< 0.05 to < 0.05)           | 7.6<br>(-13.2 to 32.3)                            | -10.7<br>(-27.9 to 9.0)                             |
| Other intestinal infectious diseases                                                 | --                                        | --                                            | < 0.05<br>(< 0.05 to < 0.05)           | -19.7<br>(-39.6 to 5.3)                           | -38.0<br>(-50.4 to -22.7)                           |
| Lower respiratory infections                                                         | 55.2<br>(51.6 to 58.9)                    | 2,332.1<br>(2,167.8 to 2,505.4)               | 3.3<br>(2.2 to 4.6)                    | 36.8<br>(23.9 to 50.4)                            | 9.5<br>(-0.1 to 19.2)                               |
| Upper respiratory infections                                                         | 1,224.5<br>(1,089.7 to 1,362.0)           | 92,756.2<br>(82,058.2 to 103,639.7)           | 30.6<br>(18.2 to 47.5)                 | 12.5<br>(6.4 to 18.7)                             | -1.3<br>(-6.2 to 3.9)                               |
| Otitis media                                                                         | 443.1<br>(397.9 to 490.6)                 | 2,128.5<br>(1,693.4 to 2,666.3)               | 12.2<br>(7.6 to 18.4)                  | 2.2<br>(-5.5 to 9.8)                              | -9.3<br>(-15.7 to -2.8)                             |
| Meningitis                                                                           | 15.4<br>(13.7 to 17.2)                    | 2.6<br>(2.2 to 3.1)                           | 2.1<br>(1.4 to 2.8)                    | 10.3<br>(7.1 to 13.3)                             | -5.1<br>(-7.8 to -2.6)                              |
| Pneumococcal meningitis                                                              | 5.5<br>(4.8 to 6.3)                       | 0.2<br>(0.2 to 0.3)                           | 0.8<br>(0.6 to 1.2)                    | 7.6<br>(2.0 to 12.7)                              | -7.9<br>(-12.6 to -3.8)                             |
| H influenzae type B meningitis                                                       | 2.0<br>(1.7 to 2.4)                       | 0.2<br>(0.2 to 0.3)                           | 0.3<br>(0.2 to 0.5)                    | 6.4<br>(0.5 to 12.3)                              | -7.0<br>(-11.9 to -1.6)                             |
| Meningococcal infection                                                              | 1.8<br>(1.4 to 2.3)                       | 0.5<br>(0.4 to 0.6)                           | 0.2<br>(0.2 to 0.3)                    | 8.5<br>(3.2 to 13.9)                              | -6.6<br>(-11.0 to -2.0)                             |
| Other meningitis                                                                     | 6.0<br>(4.9 to 7.3)                       | 1.7<br>(1.4 to 2.0)                           | 0.7<br>(0.5 to 0.9)                    | 16.8<br>(12.5 to 21.3)                            | 0.3<br>(-3.3 to 4.0)                                |
| Encephalitis                                                                         | 15.7<br>(11.6 to 21.2)                    | 6.3<br>(5.6 to 7.0)                           | 1.9<br>(1.3 to 2.6)                    | 11.3<br>(1.7 to 21.8)                             | -5.3<br>(-13.8 to 4.2)                              |
| Diphtheria                                                                           | < 0.05<br>(< 0.05 to < 0.05)              | < 0.05<br>(< 0.05 to < 0.05)                  | < 0.05<br>(< 0.05 to < 0.05)           | -23.6<br>(-63.1 to 54.6)                          | -35.2<br>(-67.1 to 26.6)                            |
| Whooping cough                                                                       | 6.5<br>(5.0 to 8.2)                       | 47.2<br>(36.9 to 60.1)                        | 0.3<br>(0.2 to 0.5)                    | 5.7<br>(-14.8 to 30.4)                            | -13.6<br>(-30.3 to 6.8)                             |
| Tetanus                                                                              | < 0.05<br>(< 0.05 to < 0.05)              | < 0.05<br>(< 0.05 to < 0.05)                  | < 0.05<br>(< 0.05 to < 0.05)           | -8.6<br>(-24.5 to 8.3)                            | -25.5<br>(-39.0 to -10.1)                           |
| Measles                                                                              | < 0.05<br>(< 0.05 to < 0.05)              | < 0.05<br>(< 0.05 to < 0.05)                  | < 0.05<br>(< 0.05 to < 0.05)           | --                                                | --                                                  |
| Varicella and herpes zoster                                                          | 31.0<br>(28.8 to 33.4)                    | 733.4<br>(709.8 to 761.0)                     | 1.1<br>(0.7 to 1.7)                    | 23.3<br>(9.0 to 40.5)                             | -0.0<br>(-10.8 to 11.5)                             |
| <b>Neglected tropical diseases and malaria</b>                                       | <b>9,657.5</b><br>(8,087.1 to 11,403.7)   | <b>462.8†</b><br>(335.8 to 655.9)             | <b>33.6</b><br>(21.3 to 49.5)          | <b>1.7</b><br>(-16.9 to 23.3)                     | <b>-14.6</b><br>(-29.6 to 3.0)                      |
| Malaria                                                                              | 7.5<br>(4.2 to 14.2)                      | 106.9<br>(83.0 to 132.6)                      | 0.2<br>(0.1 to 0.3)                    | 31.2<br>(-13.7 to 138.8)                          | 14.5<br>(-23.8 to 101.9)                            |
| Chagas disease                                                                       | 205.9<br>(165.8 to 250.4)                 | 5.9<br>(4.8 to 7.1)                           | 1.7<br>(1.1 to 2.5)                    | 21.9<br>(6.5 to 40.3)                             | -5.1<br>(-15.8 to 8.4)                              |
| Leishmaniasis                                                                        | 15.3<br>(10.9 to 20.7)                    | 20.6<br>(10.0 to 33.5)                        | 0.8<br>(0.4 to 1.5)                    | -9.5<br>(-51.1 to 54.8)                           | -24.2<br>(-58.5 to 27.9)                            |
| Visceral leishmaniasis                                                               | --                                        | --                                            | --                                     | --                                                | --                                                  |
| Cutaneous and mucocutaneous leishmaniasis                                            | 13.0<br>(7.6 to 19.5)                     | 20.6<br>(10.0 to 33.5)                        | 0.8<br>(0.4 to 1.5)                    | -9.5<br>(-51.1 to 54.8)                           | -24.2<br>(-58.5 to 27.9)                            |
| African trypanosomiasis                                                              | --                                        | --                                            | --                                     | --                                                | --                                                  |
| Schistosomiasis                                                                      | --                                        | --                                            | --                                     | --                                                | --                                                  |
| Cysticercosis                                                                        | 53.3<br>(35.6 to 71.8)                    | --                                            | 7.0<br>(3.2 to 12.5)                   | 31.9<br>(-6.2 to 77.8)                            | 4.5<br>(-26.1 to 38.8)                              |
| Cystic echinococcosis                                                                | 1.2<br>(0.2 to 4.3)                       | 0.2<br>(< 0.05 to 0.9)                        | 0.1<br>(< 0.05 to 0.5)                 | -48.2<br>(-94.4 to 395.3)                         | -56.7<br>(-95.3 to 288.8)                           |
| Lymphatic filariasis                                                                 | --                                        | --                                            | --                                     | --                                                | --                                                  |
| Onchocerciasis                                                                       | --                                        | --                                            | --                                     | --                                                | --                                                  |
| Trachoma                                                                             | --                                        | --                                            | --                                     | --                                                | --                                                  |
| Dengue                                                                               | 12.6<br>(6.2 to 22.1)                     | 210.4<br>(116.0 to 341.1)                     | 2.1<br>(0.8 to 4.1)                    | 181.4<br>(97.5 to 597.8)                          | 145.8<br>(76.7 to 504.4)                            |
| Yellow fever                                                                         | < 0.05<br>(< 0.05 to 0.1)                 | 1.3<br>(0.4 to 3.2)                           | < 0.05<br>(< 0.05 to < 0.05)           | -47.8<br>(-58.0 to -34.0)                         | -54.1<br>(-62.6 to -42.1)                           |
| Rabies                                                                               | < 0.05<br>(< 0.05 to < 0.05)              | < 0.05<br>(< 0.05 to < 0.05)                  | < 0.05<br>(< 0.05 to < 0.05)           | -56.1<br>(-80.9 to -14.4)                         | -58.3<br>(-80.3 to -24.1)                           |
| Intestinal nematode infections                                                       | 9,122.1<br>(7,493.2 to 10,912.0)          | --                                            | 10.6<br>(5.2 to 19.3)                  | -26.0<br>(-52.3 to 17.1)                          | -35.7<br>(-59.1 to 3.6)                             |
| Ascariasis                                                                           | 4,505.2<br>(3,120.3 to 6,308.5)           | --                                            | 4.4<br>(2.0 to 8.4)                    | -29.3<br>(-60.8 to 29.3)                          | -38.6<br>(-66.6 to 15.5)                            |



| Cause                                                                   | Prevalence in thousands (95% UI)                 | Incidence in thousands (95% UI)                    | YLDs in thousands (95% UI)                    |                                                   |                                                     |
|-------------------------------------------------------------------------|--------------------------------------------------|----------------------------------------------------|-----------------------------------------------|---------------------------------------------------|-----------------------------------------------------|
|                                                                         | 2016 counts                                      | 2016 counts                                        | 2016 counts                                   | Percentage change in counts between 2006 and 2016 | Percentage change in age-standardised rates between |
| Trichuriasis                                                            | 5,022.3<br>(3,751.4 to 6,871.0)                  | --                                                 | 5.2<br>(2.2 to 10.8)                          | -25.4<br>(-63.5 to 53.4)                          | -35.0<br>(-68.6 to 36.9)                            |
| Hookworm disease                                                        | 484.8<br>(354.3 to 669.9)                        | --                                                 | 1.0<br>(0.5 to 1.6)                           | -10.9<br>(-39.1 to 31.6)                          | -23.2<br>(-47.7 to 15.0)                            |
| Food-borne trematodiasis                                                | 232.2<br>(165.6 to 305.0)                        | 19.2<br>(13.9 to 24.5)                             | 5.8<br>(1.5 to 13.3)                          | 23.0<br>(-0.1 to 41.2)                            | -6.5<br>(-25.9 to 7.2)                              |
| Leprosy                                                                 | 0.2<br>(0.1 to 0.3)                              | < 0.05<br>(< 0.05 to < 0.05)                       | < 0.05<br>(< 0.05 to < 0.05)                  | -14.2<br>(-22.0 to -3.0)                          | -34.2<br>(-41.1 to -24.3)                           |
| Ebola virus disease                                                     | --                                               | --                                                 | --                                            | --                                                | --                                                  |
| Zika virus disease                                                      | 1.6<br>(0.6 to 4.0)                              | 98.3<br>(37.8 to 238.9)                            | < 0.05<br>(< 0.05 to 0.1)                     | --                                                | --                                                  |
| Guinea worm disease                                                     | --                                               | --                                                 | --                                            | --                                                | --                                                  |
| Other neglected tropical diseases                                       | 271.7<br>(259.4 to 285.8)                        | --                                                 | 5.3<br>(3.3 to 8.0)                           | 0.1<br>(-9.8 to 10.8)                             | -12.2<br>(-20.6 to -2.7)                            |
| <b>Maternal disorders</b>                                               | <b>56.0</b><br><b>(42.5 to 72.0)</b>             | <b>635.4†</b><br><b>(570.9 to 709.1)</b>           | <b>3.3</b><br><b>(2.0 to 5.1)</b>             | <b>16.0</b><br><b>(-16.5 to 63.6)</b>             | <b>3.3</b><br><b>(-25.4 to 45.6)</b>                |
| Maternal haemorrhage                                                    | 5.7<br>(4.4 to 7.5)                              | 53.1<br>(39.3 to 69.5)                             | 0.3<br>(0.2 to 0.5)                           | 21.4<br>(-19.7 to 83.2)                           | 7.6<br>(-28.4 to 62.0)                              |
| Maternal sepsis and other pregnancy related infections                  | 22.2<br>(14.8 to 32.0)                           | 185.4<br>(143.1 to 238.6)                          | 0.8<br>(0.4 to 1.5)                           | 22.3<br>(-38.9 to 145.4)                          | 9.2<br>(-45.4 to 117.8)                             |
| Maternal hypertensive disorders                                         | 27.9<br>(17.4 to 40.4)                           | 117.3<br>(91.5 to 146.6)                           | 1.3<br>(0.7 to 2.3)                           | 12.3<br>(-34.8 to 93.1)                           | -0.1<br>(-42.1 to 72.3)                             |
| Maternal obstructed labour and uterine rupture                          | 0.6<br>(0.3 to 0.9)                              | 41.8<br>(30.3 to 55.6)                             | 0.2<br>(0.1 to 0.4)                           | 17.7<br>(-57.4 to 211.6)                          | 5.6<br>(-60.9 to 175.1)                             |
| Maternal abortion, miscarriage, and ectopic pregnancy                   | 1.9<br>(1.3 to 2.7)                              | 237.7<br>(204.1 to 280.1)                          | 0.2<br>(0.1 to 0.4)                           | 24.5<br>(-34.6 to 140.4)                          | 9.5<br>(-42.6 to 111.5)                             |
| Other maternal disorders                                                | --                                               | --                                                 | 0.5<br>(0.3 to 0.8)                           | 10.2<br>(-20.9 to 55.5)                           | -1.5<br>(-29.2 to 38.8)                             |
| <b>Neonatal disorders</b>                                               | <b>366.8</b><br><b>(295.8 to 466.7)</b>          | --                                                 | <b>73.1</b><br><b>(44.5 to 119.3)</b>         | <b>15.3</b><br><b>(-1.2 to 48.6)</b>              | <b>1.2</b><br><b>(-13.4 to 30.8)</b>                |
| Neonatal preterm birth complications                                    | 240.8<br>(190.3 to 326.0)                        | --                                                 | 20.3<br>(13.2 to 29.6)                        | -10.5<br>(-29.4 to 11.4)                          | -21.4<br>(-37.7 to -2.1)                            |
| Neonatal encephalopathy due to birth asphyxia and trauma                | 66.1<br>(30.9 to 115.9)                          | --                                                 | 9.2<br>(1.7 to 22.1)                          | 32.5<br>(-13.2 to 171.1)                          | 16.2<br>(-24.2 to 136.5)                            |
| Neonatal sepsis and other neonatal infections                           | 86.0<br>(40.4 to 173.1)                          | --                                                 | 36.9<br>(14.7 to 82.5)                        | 32.0<br>(6.0 to 195.5)                            | 16.5<br>(-5.9 to 162.3)                             |
| Hemolytic disease and other neonatal jaundice                           | 14.5<br>(12.6 to 16.6)                           | --                                                 | 3.8<br>(2.7 to 5.0)                           | 13.8<br>(-4.2 to 35.5)                            | -0.9<br>(-16.6 to 16.9)                             |
| Other neonatal disorders                                                | --                                               | --                                                 | 2.8<br>(1.7 to 4.8)                           | 18.6<br>(-1.3 to 49.7)                            | -4.1<br>(-20.2 to 21.1)                             |
| <b>Nutritional deficiencies</b>                                         | <b>6,588.7</b><br><b>(6,309.0 to 6,871.4)</b>    | <b>1,104.3†</b><br><b>(904.0 to 1,387.4)</b>       | <b>111.0</b><br><b>(72.8 to 163.1)</b>        | <b>-1.3</b><br><b>(-7.5 to 4.9)</b>               | <b>-14.8</b><br><b>(-19.8 to -9.9)</b>              |
| Protein-energy malnutrition                                             | 27.1<br>(19.4 to 40.0)                           | 14.3<br>(10.2 to 20.9)                             | 2.1<br>(1.2 to 3.3)                           | 23.3<br>(-24.8 to 100.0)                          | -0.2<br>(-39.2 to 62.1)                             |
| Iodine deficiency                                                       | 29.3<br>(24.9 to 34.0)                           | 0.9<br>(0.8 to 1.0)                                | 0.8<br>(0.5 to 1.1)                           | 13.3<br>(-4.4 to 36.2)                            | -6.3<br>(-21.7 to 12.7)                             |
| Vitamin A deficiency                                                    | 1,239.5<br>(1,025.1 to 1,554.0)                  | 1,089.1<br>(889.1 to 1,370.6)                      | 1.6<br>(1.0 to 2.5)                           | 11.9<br>(-4.4 to 29.9)                            | -1.9<br>(-15.7 to 13.2)                             |
| Iron-deficiency anaemia                                                 | 5,645.5<br>(5,385.5 to 5,900.3)                  | --                                                 | 106.5<br>(69.8 to 157.5)                      | -2.0<br>(-8.1 to 4.3)                             | -15.3<br>(-20.1 to -10.1)                           |
| Other nutritional deficiencies                                          | --                                               | --                                                 | 0.1<br>(< 0.05 to 0.1)                        | 23.3<br>(-26.3 to 103.1)                          | -0.2<br>(-40.4 to 64.5)                             |
| <b>Other communicable, maternal, neonatal, and nutritional diseases</b> | <b>7,751.3</b><br><b>(7,200.6 to 8,301.2)</b>    | <b>1,755.8</b><br><b>(1,613.1 to 1,914.0)</b>      | <b>111.1</b><br><b>(6.8 to 17.8)</b>          | <b>9.4</b><br><b>(2.5 to 16.1)</b>                | <b>-6.5</b><br><b>(-12.1 to -1.1)</b>               |
| Sexually transmitted diseases excluding HIV                             | 6,502.5<br>(5,951.5 to 7,079.8)                  | 1,600.1<br>(1,458.5 to 1,745.7)                    | 6.3<br>(3.6 to 10.8)                          | 14.0<br>(4.1 to 23.7)                             | -3.9<br>(-11.5 to 3.7)                              |
| Syphilis                                                                | 308.4<br>(250.8 to 375.6)                        | 219.7<br>(172.9 to 280.1)                          | 0.6<br>(0.4 to 0.8)                           | 28.0<br>(11.6 to 45.1)                            | -1.6<br>(-13.2 to 11.3)                             |
| Chlamydial infection                                                    | 361.2<br>(278.6 to 452.5)                        | 259.8<br>(201.7 to 329.8)                          | 1.5<br>(0.9 to 2.5)                           | 7.8<br>(-9.3 to 27.1)                             | -5.6<br>(-20.3 to 10.9)                             |
| Gonococcal infection                                                    | 55.3<br>(46.4 to 66.1)                           | 168.2<br>(131.8 to 213.0)                          | 0.6<br>(0.3 to 0.9)                           | 13.5<br>(-18.2 to 61.7)                           | -3.3<br>(-29.8 to 36.4)                             |
| Trichomoniasis                                                          | 587.7<br>(503.9 to 672.6)                        | 501.4<br>(427.6 to 578.6)                          | 0.7<br>(0.3 to 1.5)                           | 19.1<br>(10.1 to 28.9)                            | 0.8<br>(-6.4 to 8.6)                                |
| Genital herpes                                                          | 5,535.4<br>(4,782.3 to 6,480.4)                  | 387.3<br>(325.6 to 465.3)                          | 1.4<br>(0.5 to 3.2)                           | 18.3<br>(5.6 to 30.0)                             | -3.3<br>(-13.0 to 6.3)                              |
| Other sexually transmitted diseases                                     | 75.2<br>(69.7 to 80.9)                           | 63.8<br>(54.2 to 75.3)                             | 1.5<br>(1.0 to 2.4)                           | 9.9<br>(-4.0 to 24.9)                             | -6.2<br>(-17.9 to 6.2)                              |
| Hepatitis                                                               | 1,503.5<br>(1,320.4 to 1,715.6)                  | 155.6<br>(114.1 to 218.0)                          | 0.2<br>(0.1 to 0.2)                           | -35.5<br>(-50.2 to -17.2)                         | -44.2<br>(-55.0 to -31.6)                           |
| Acute hepatitis A                                                       | 3.1<br>(0.6 to 7.9)                              | 41.0<br>(7.4 to 103.2)                             | < 0.05<br>(< 0.05 to 0.1)                     | -45.2<br>(-81.1 to 77.9)                          | -49.7<br>(-80.3 to 48.4)                            |
| Hepatitis B                                                             | 779.8<br>(622.3 to 986.3)                        | 80.9<br>(63.7 to 103.0)                            | 0.1<br>(< 0.05 to 0.1)                        | -34.4<br>(-44.3 to -22.6)                         | -44.6<br>(-52.7 to -34.9)                           |
| Hepatitis C                                                             | 719.7<br>(637.5 to 801.1)                        | 21.7<br>(18.7 to 25.2)                             | < 0.05<br>(< 0.05 to < 0.05)                  | 8.8<br>(-15.1 to 41.0)                            | -13.7<br>(-31.5 to 9.6)                             |
| Acute hepatitis E                                                       | 0.9<br>(0.8 to 1.2)                              | 12.0<br>(9.9 to 14.9)                              | < 0.05<br>(< 0.05 to < 0.05)                  | -45.2<br>(-51.6 to -37.9)                         | -48.8<br>(-53.8 to -43.6)                           |
| Other infectious diseases                                               | 217.8<br>(207.8 to 229.0)                        | < 0.05<br>(< 0.05 to 0.1)                          | 4.6<br>(3.0 to 7.1)                           | 6.0<br>(-3.5 to 16.3)                             | -7.6<br>(-15.3 to 1.1)                              |
| <b>Non-communicable diseases</b>                                        | <b>29,487.7</b><br><b>(29,329.2 to 29,665.9)</b> | <b>95,663.3†</b><br><b>(91,238.8 to 100,684.9)</b> | <b>2,523.6</b><br><b>(1,854.6 to 3,284.3)</b> | <b>21.6</b><br><b>(18.4 to 24.9)</b>              | <b>-0.1</b><br><b>(-2.5 to 2.5)</b>                 |
| <b>Neoplasms</b>                                                        | <b>94.1</b><br><b>(89.8 to 98.6)</b>             | <b>41.7</b><br><b>(38.8 to 44.7)</b>               | <b>12.4</b><br><b>(9.0 to 16.2)</b>           | <b>32.6</b><br><b>(25.7 to 40.4)</b>              | <b>-1.3</b><br><b>(-6.3 to 4.4)</b>                 |
| Lip and oral cavity cancer                                              | 2.1<br>(1.9 to 2.2)                              | 0.6<br>(0.5 to 0.6)                                | 0.2<br>(0.1 to 0.3)                           | 30.7<br>(16.2 to 46.9)                            | -3.5<br>(-14.4 to 8.7)                              |
| Nasopharynx cancer                                                      | 0.2<br>(0.2 to 0.2)                              | 0.1<br>(< 0.05 to 0.1)                             | < 0.05<br>(< 0.05 to < 0.05)                  | 16.3<br>(1.5 to 34.2)                             | -7.7<br>(-18.2 to 5.2)                              |
| Other pharynx cancer                                                    | 0.5<br>(0.4 to 0.6)                              | 0.2<br>(0.2 to 0.2)                                | 0.1<br>(< 0.05 to 0.1)                        | 12.2<br>(-0.3 to 25.6)                            | -18.1<br>(-27.5 to -7.8)                            |
| Oesophageal cancer                                                      | 0.3<br>(0.3 to 0.3)                              | 0.3<br>(0.3 to 0.3)                                | 0.1<br>(0.1 to 0.1)                           | 22.7<br>(10.8 to 38.0)                            | -11.8<br>(-21.2 to -0.2)                            |
| Stomach cancer                                                          | 6.3<br>(6.0 to 6.7)                              | 4.1<br>(3.9 to 4.3)                                | 1.0<br>(0.7 to 1.3)                           | 19.0<br>(4.3 to 36.5)                             | -13.5<br>(-24.8 to -0.0)                            |
| Colon and rectum cancer                                                 | 15.2<br>(13.8 to 16.7)                           | 4.1<br>(3.7 to 4.5)                                | 1.4<br>(1.0 to 1.9)                           | 50.6<br>(31.2 to 70.6)                            | 8.9<br>(-5.1 to 23.9)                               |
| Liver cancer                                                            | 0.8<br>(0.7 to 0.9)                              | 1.8<br>(1.6 to 2.0)                                | 0.4<br>(0.3 to 0.5)                           | 32.8<br>(19.7 to 47.5)                            | -2.5<br>(-12.0 to 8.4)                              |
| Liver cancer due to hepatitis B                                         | 0.8<br>(0.7 to 0.9)                              | 0.9<br>(0.8 to 1.0)                                | 0.2<br>(0.1 to 0.3)                           | 31.9<br>(18.0 to 46.6)                            | -2.2<br>(-12.1 to 8.8)                              |



| Cause                                              | Prevalence in thousands (95% UI)              | Incidence in thousands (95% UI)          | YLDs in thousands (95% UI)            |                                                   |                                                     |
|----------------------------------------------------|-----------------------------------------------|------------------------------------------|---------------------------------------|---------------------------------------------------|-----------------------------------------------------|
|                                                    | 2016 counts                                   | 2016 counts                              | 2016 counts                           | Percentage change in counts between 2006 and 2016 | Percentage change in age-standardised rates between |
| Liver cancer due to hepatitis C                    | 0.2<br>(0.2 to 0.2)                           | 0.2<br>(0.2 to 0.3)                      | < 0.05<br>(< 0.05 to 0.1)             | 43.7<br>(26.7 to 63.4)                            | 2.0<br>(-9.6 to 15.8)                               |
| Liver cancer due to alcohol use                    | 0.3<br>(0.2 to 0.4)                           | 0.4<br>(0.3 to 0.4)                      | 0.1<br>(0.1 to 0.1)                   | 25.8<br>(11.8 to 41.0)                            | -9.5<br>(-19.8 to 2.4)                              |
| Liver cancer due to other causes                   | 0.3<br>(0.2 to 0.3)                           | 0.3<br>(0.3 to 0.4)                      | 0.1<br>(< 0.05 to 0.1)                | 36.5<br>(21.4 to 52.1)                            | 2.4<br>(-8.8 to 14.5)                               |
| Gallbladder and biliary tract cancer               | 0.7<br>(0.6 to 0.8)                           | 0.9<br>(0.8 to 1.0)                      | 0.2<br>(0.1 to 0.3)                   | 28.8<br>(12.6 to 44.9)                            | -6.9<br>(-19.0 to 5.9)                              |
| Pancreatic cancer                                  | 0.8<br>(0.8 to 0.9)                           | 1.1<br>(1.0 to 1.2)                      | 0.2<br>(0.2 to 0.3)                   | 39.4<br>(28.1 to 52.4)                            | 0.7<br>(-7.8 to 10.6)                               |
| Larynx cancer                                      | 0.7<br>(0.6 to 0.8)                           | 0.2<br>(0.2 to 0.2)                      | 0.1<br>(0.1 to 0.1)                   | 17.1<br>(4.8 to 30.9)                             | -14.5<br>(-24.4 to -3.4)                            |
| Tracheal, bronchus, and lung cancer                | 2.6<br>(2.3 to 2.8)                           | 2.3<br>(2.1 to 2.5)                      | 0.5<br>(0.4 to 0.7)                   | 28.9<br>(8.4 to 51.9)                             | -6.2<br>(-21.5 to 11.8)                             |
| Malignant skin melanoma                            | 1.3<br>(1.1 to 1.7)                           | 0.3<br>(0.3 to 0.4)                      | 0.1<br>(0.1 to 0.1)                   | 48.3<br>(28.2 to 71.1)                            | 9.6<br>(-5.8 to 28.0)                               |
| Non-melanoma skin cancer                           | 1.4<br>(1.0 to 1.9)                           | 4.7<br>(2.9 to 6.9)                      | 0.1<br>(< 0.05 to 0.1)                | 61.5<br>(10.8 to 112.6)                           | 12.1<br>(-23.7 to 49.5)                             |
| Non-melanoma skin cancer (squamous-cell carcinoma) | 1.1<br>(0.7 to 1.6)                           | 1.0<br>(0.7 to 1.4)                      | 0.1<br>(< 0.05 to 0.1)                | 57.9<br>(3.3 to 113.5)                            | 9.7<br>(-28.5 to 51.3)                              |
| Non-melanoma skin cancer (basal-cell carcinoma)    | 0.5<br>(0.3 to 1.0)                           | 3.7<br>(2.0 to 5.8)                      | < 0.05<br>(< 0.05 to < 0.05)          | 103.9<br>(15.3 to 215.9)                          | 41.7<br>(-22.2 to 123.8)                            |
| Breast cancer                                      | 14.7<br>(12.4 to 19.6)                        | 3.2<br>(2.7 to 4.2)                      | 1.3<br>(0.9 to 1.9)                   | 33.0<br>(6.4 to 66.6)                             | -0.4<br>(-20.1 to 23.8)                             |
| Cervical cancer                                    | 11.7<br>(8.9 to 14.6)                         | 3.1<br>(2.5 to 3.8)                      | 1.1<br>(0.7 to 1.6)                   | 10.2<br>(-13.2 to 40.8)                           | -15.7<br>(-33.0 to 6.7)                             |
| Uterine cancer                                     | 5.5<br>(4.8 to 6.5)                           | 1.2<br>(1.0 to 1.4)                      | 0.4<br>(0.3 to 0.6)                   | 33.5<br>(6.7 to 64.4)                             | -2.0<br>(-21.6 to 21.0)                             |
| Ovarian cancer                                     | 2.7<br>(2.2 to 3.0)                           | 0.9<br>(0.7 to 1.0)                      | 0.4<br>(0.3 to 0.6)                   | 36.1<br>(4.8 to 74.0)                             | 3.8<br>(-22.5 to 37.6)                              |
| Prostate cancer                                    | 19.6<br>(15.7 to 26.3)                        | 4.7<br>(3.8 to 6.2)                      | 1.9<br>(1.3 to 2.7)                   | 53.3<br>(30.1 to 75.2)                            | 7.5<br>(-8.8 to 22.5)                               |
| Testicular cancer                                  | 0.9<br>(0.7 to 1.1)                           | 0.2<br>(0.1 to 0.2)                      | 0.1<br>(< 0.05 to 0.1)                | 19.9<br>(-15.4 to 64.9)                           | -0.3<br>(-26.4 to 32.1)                             |
| Kidney cancer                                      | 4.2<br>(3.6 to 4.7)                           | 1.2<br>(1.0 to 1.3)                      | 0.4<br>(0.3 to 0.5)                   | 45.4<br>(28.5 to 64.4)                            | 11.0<br>(-1.6 to 24.8)                              |
| Bladder cancer                                     | 2.0<br>(1.9 to 2.2)                           | 0.5<br>(0.5 to 0.6)                      | 0.2<br>(0.1 to 0.3)                   | 38.1<br>(22.6 to 56.0)                            | -1.3<br>(-12.6 to 12.1)                             |
| Brain and nervous system cancer                    | 2.2<br>(1.4 to 2.7)                           | 1.0<br>(0.7 to 1.2)                      | 0.3<br>(0.2 to 0.5)                   | 30.3<br>(16.6 to 46.7)                            | 4.3<br>(-5.6 to 16.6)                               |
| Thyroid cancer                                     | 3.1<br>(2.8 to 3.6)                           | 0.6<br>(0.6 to 0.7)                      | 0.2<br>(0.1 to 0.3)                   | 53.0<br>(24.9 to 88.9)                            | 14.2<br>(-5.7 to 39.9)                              |
| Mesothelioma                                       | 0.1<br>(0.1 to 0.1)                           | 0.1<br>(0.1 to 0.1)                      | < 0.05<br>(< 0.05 to < 0.05)          | 1.7<br>(-9.1 to 21.3)                             | -25.1<br>(-33.3 to -10.5)                           |
| Hodgkin lymphoma                                   | 0.2<br>(0.2 to 0.3)                           | 0.1<br>(0.1 to 0.1)                      | < 0.05<br>(< 0.05 to < 0.05)          | 5.2<br>(-3.9 to 15.8)                             | -17.5<br>(-25.0 to -9.8)                            |
| Non-Hodgkin's lymphoma                             | 3.3<br>(2.9 to 3.6)                           | 1.2<br>(1.0 to 1.2)                      | 0.4<br>(0.3 to 0.5)                   | 30.0<br>(17.7 to 43.5)                            | -0.9<br>(-11.0 to 9.8)                              |
| Multiple myeloma                                   | 0.6<br>(0.5 to 0.7)                           | 0.4<br>(0.3 to 0.5)                      | 0.2<br>(0.1 to 0.2)                   | 39.2<br>(27.1 to 52.4)                            | 1.5<br>(-7.5 to 11.0)                               |
| Leukaemia                                          | 5.1<br>(3.3 to 6.0)                           | 1.4<br>(0.9 to 1.6)                      | 0.6<br>(0.4 to 0.9)                   | 10.1<br>(-2.2 to 24.1)                            | -8.7<br>(-17.5 to 1.6)                              |
| Acute lymphoid leukaemia                           | 1.3<br>(0.7 to 1.6)                           | 0.3<br>(0.2 to 0.4)                      | 0.1<br>(0.1 to 0.2)                   | 26.5<br>(-6.0 to 57.9)                            | 10.8<br>(-16.0 to 35.7)                             |
| Chronic lymphoid leukaemia                         | 0.5<br>(0.4 to 0.6)                           | 0.1<br>(0.1 to 0.1)                      | 0.1<br>(< 0.05 to 0.1)                | 25.9<br>(11.0 to 43.3)                            | -3.0<br>(-14.6 to 10.0)                             |
| Acute myeloid leukaemia                            | 0.6<br>(0.3 to 0.7)                           | 0.3<br>(0.2 to 0.4)                      | 0.1<br>(0.1 to 0.1)                   | 37.2<br>(13.3 to 58.6)                            | 12.6<br>(-6.5 to 28.5)                              |
| Chronic myeloid leukaemia                          | 0.2<br>(0.1 to 0.3)                           | 0.1<br>(< 0.05 to 0.1)                   | < 0.05<br>(< 0.05 to < 0.05)          | 16.4<br>(2.0 to 33.0)                             | -8.9<br>(-19.6 to 3.0)                              |
| Other leukaemia                                    | 2.5<br>(1.7 to 3.1)                           | 0.6<br>(0.4 to 0.7)                      | 0.3<br>(0.2 to 0.4)                   | -5.5<br>(-19.5 to 10.7)                           | -21.0<br>(-31.5 to -8.8)                            |
| Other neoplasms                                    | 4.7<br>(4.0 to 5.9)                           | 1.5<br>(1.3 to 1.8)                      | 0.4<br>(0.3 to 0.6)                   | 33.2<br>(15.5 to 54.8)                            | 2.6<br>(-11.6 to 20.4)                              |
| <b>Cardiovascular diseases</b>                     | <b>1,388.0</b><br><b>(1,326.8 to 1,450.5)</b> | <b>137.5†</b><br><b>(130.7 to 144.9)</b> | <b>78.7</b><br><b>(56.0 to 104.0)</b> | <b>36.6</b><br><b>(31.8 to 41.8)</b>              | <b>2.4</b><br><b>(-1.0 to 6.1)</b>                  |
| Rheumatic heart disease                            | 2.1<br>(1.9 to 2.4)                           | 0.5<br>(0.5 to 0.5)                      | 0.2<br>(0.1 to 0.2)                   | 29.4<br>(18.1 to 40.9)                            | 1.3<br>(-8.2 to 11.5)                               |
| Ischaemic heart disease                            | 421.0<br>(399.0 to 442.8)                     | 50.5<br>(47.1 to 54.0)                   | 23.4<br>(16.1 to 31.9)                | 42.5<br>(36.6 to 49.2)                            | 5.4<br>(1.1 to 10.0)                                |
| Cerebrovascular disease                            | 175.7<br>(162.6 to 188.3)                     | 26.3‡<br>(24.0 to 28.7)                  | 17.8<br>(12.8 to 22.8)                | 35.7<br>(25.3 to 47.5)                            | -1.0<br>(-9.1 to 8.5)                               |
| Ischaemic stroke                                   | 147.3<br>(130.1 to 164.7)                     | 18.4‡<br>(16.3 to 20.8)                  | 14.3<br>(10.1 to 18.5)                | 34.1<br>(21.4 to 49.3)                            | -2.9<br>(-12.3 to 8.3)                              |
| Hemorrhagic stroke                                 | 37.6<br>(33.8 to 41.8)                        | 7.9‡<br>(7.1 to 8.7)                     | 3.6<br>(2.6 to 4.7)                   | 42.0<br>(25.5 to 58.1)                            | 8.1<br>(-4.4 to 21.7)                               |
| Hypertensive heart disease                         | 31.8<br>(26.8 to 37.8)                        | --                                       | 2.6<br>(1.8 to 3.6)                   | 42.4<br>(26.6 to 60.5)                            | 2.8<br>(-8.7 to 15.0)                               |
| Cardiomyopathy and myocarditis                     | 9.1<br>(8.0 to 10.3)                          | 6.5†<br>(5.7 to 7.4)                     | 1.1<br>(0.7 to 1.5)                   | 32.6<br>(21.1 to 46.4)                            | 8.3<br>(-2.1 to 20.4)                               |
| Myocarditis                                        | 4.4<br>(3.8 to 5.0)                           | 6.5<br>(5.7 to 7.4)                      | 0.3<br>(0.2 to 0.5)                   | 26.3<br>(16.4 to 37.1)                            | 7.0<br>(-1.4 to 16.5)                               |
| Alcoholic cardiomyopathy                           | 0.7<br>(0.5 to 0.8)                           | --                                       | 0.1<br>(< 0.05 to 0.1)                | 47.6<br>(34.6 to 60.8)                            | 8.7<br>(-1.0 to 18.7)                               |
| Other cardiomyopathy                               | 8.0<br>(6.8 to 9.3)                           | --                                       | 0.7<br>(0.4 to 1.0)                   | 34.7<br>(18.6 to 55.0)                            | 8.9<br>(-4.8 to 27.3)                               |
| Atrial fibrillation and flutter                    | 169.6<br>(148.0 to 194.2)                     | 13.5<br>(11.6 to 15.8)                   | 13.4<br>(9.0 to 18.8)                 | 40.2<br>(31.5 to 49.8)                            | 1.1<br>(-5.0 to 7.5)                                |
| Peripheral vascular disease                        | 380.0<br>(331.0 to 438.1)                     | 36.7<br>(31.7 to 42.9)                   | 1.7<br>(0.8 to 3.2)                   | 33.5<br>(22.7 to 45.3)                            | -5.3<br>(-12.9 to 2.9)                              |
| Endocarditis                                       | 2.2<br>(1.9 to 2.5)                           | 3.5<br>(3.1 to 3.8)                      | 0.2<br>(0.1 to 0.2)                   | 35.3<br>(18.6 to 53.6)                            | 3.3<br>(-11.6 to 19.9)                              |
| Other cardiovascular and circulatory diseases      | 347.5<br>(296.4 to 409.5)                     | --                                       | 18.4<br>(12.3 to 26.3)                | 28.3<br>(17.1 to 39.9)                            | 4.0<br>(-4.1 to 12.5)                               |
| <b>Chronic respiratory diseases</b>                | <b>2,775.7</b><br><b>(2,623.8 to 2,937.9)</b> | <b>502.4†</b><br><b>(462.0 to 544.0)</b> | <b>98.9</b><br><b>(69.8 to 135.5)</b> | <b>14.3</b><br><b>(8.1 to 20.7)</b>               | <b>2.3</b><br><b>(-3.1 to 7.5)</b>                  |
| Chronic obstructive pulmonary disease              | 751.7<br>(701.6 to 818.0)                     | 48.8<br>(45.6 to 52.8)                   | 13.9<br>(11.0 to 17.7)                | 35.4<br>(16.8 to 57.5)                            | 3.6<br>(-11.2 to 20.0)                              |
| Pneumoconiosis                                     | 0.7<br>(0.6 to 0.8)                           | 0.1<br>(0.1 to 0.1)                      | 0.1<br>(0.1 to 0.2)                   | 33.9<br>(26.9 to 40.9)                            | -2.3<br>(-7.6 to 2.9)                               |
| Silicosis                                          | 0.2<br>(0.2 to 0.2)                           | < 0.05<br>(< 0.05 to < 0.05)             | < 0.05<br>(< 0.05 to 0.1)             | 24.3<br>(17.4 to 32.3)                            | -8.5<br>(-13.8 to -2.5)                             |

| Cause                                                          | Prevalence in thousands (95% UI)           | Incidence in thousands (95% UI)          | YLDs in thousands (95% UI)        |                                                   |                                                     |
|----------------------------------------------------------------|--------------------------------------------|------------------------------------------|-----------------------------------|---------------------------------------------------|-----------------------------------------------------|
|                                                                | 2016 counts                                | 2016 counts                              | 2016 counts                       | Percentage change in counts between 2006 and 2016 | Percentage change in age-standardised rates between |
| Asbestosis                                                     | 0.1<br>(0.1 to 0.2)                        | < 0.05<br>(< 0.05 to < 0.05)             | < 0.05<br>(< 0.05 to < 0.05)      | 34.6<br>(26.3 to 43.1)                            | -2.8<br>(-8.6 to 2.9)                               |
| Coal workers pneumoconiosis                                    | --                                         | --                                       | --                                | --                                                | --                                                  |
| Other pneumoconiosis                                           | 0.4<br>(0.3 to 0.4)                        | < 0.05<br>(< 0.05 to 0.1)                | 0.1<br>(< 0.05 to 0.1)            | 40.0<br>(26.4 to 52.6)                            | 1.8<br>(-8.4 to 11.1)                               |
| Asthma                                                         | 2,028.5<br>(1,852.6 to 2,225.7)            | 448.5<br>(408.7 to 490.7)                | 80.5<br>(52.3 to 116.9)           | 9.9<br>(3.0 to 16.7)                              | 1.3<br>(-4.9 to 7.2)                                |
| Interstitial lung disease and pulmonary sarcoidosis            | 28.1<br>(25.5 to 31.2)                     | 5.0<br>(4.6 to 5.4)                      | 3.0<br>(2.0 to 4.2)               | 49.4<br>(35.2 to 64.0)                            | 6.8<br>(-3.8 to 17.2)                               |
| Other chronic respiratory diseases                             | --                                         | --                                       | 1.4<br>(1.1 to 1.8)               | 50.9<br>(15.8 to 98.8)                            | 37.8<br>(6.9 to 78.8)                               |
| <b>Cirrhosis and other chronic liver diseases</b>              | <b>287.7<br/>(273.2 to 304.4)</b>          | <b>7.4<br/>(7.1 to 7.7)</b>              | <b>5.3<br/>(3.6 to 7.3)</b>       | <b>34.4<br/>(22.7 to 47.7)</b>                    | <b>5.9<br/>(-2.2 to 15.0)</b>                       |
| Cirrhosis and other chronic liver diseases due to hepatitis B  | 58.2<br>(51.5 to 65.7)                     | 1.6<br>(1.4 to 1.8)                      | 0.9<br>(0.6 to 1.4)               | 42.7<br>(17.3 to 74.2)                            | 6.9<br>(-11.2 to 27.2)                              |
| Cirrhosis and other chronic liver diseases due to hepatitis C  | 48.2<br>(42.6 to 53.8)                     | 1.3<br>(1.1 to 1.4)                      | 0.8<br>(0.5 to 1.1)               | 47.1<br>(18.8 to 81.6)                            | 10.7<br>(-10.2 to 36.7)                             |
| Cirrhosis and other chronic liver diseases due to alcohol use  | 105.7<br>(96.6 to 115.0)                   | 2.8<br>(2.6 to 3.0)                      | 1.7<br>(1.1 to 2.3)               | 40.2<br>(22.5 to 61.4)                            | 3.6<br>(-8.4 to 17.4)                               |
| Cirrhosis and other chronic liver diseases due to other causes | 75.7<br>(69.9 to 82.6)                     | 1.7<br>(1.6 to 1.9)                      | 1.9<br>(1.3 to 2.8)               | 22.5<br>(2.2 to 47.4)                             | 5.6<br>(-10.2 to 23.5)                              |
| <b>Digestive diseases</b>                                      | <b>1,077.4<br/>(1,018.2 to 1,137.5)</b>    | <b>1,004.6†<br/>(938.2 to 1,066.1)</b>   | <b>37.9<br/>(26.5 to 51.0)</b>    | <b>31.0<br/>(22.2 to 40.8)</b>                    | <b>4.8<br/>(-1.6 to 11.9)</b>                       |
| Peptic ulcer disease                                           | 434.0<br>(392.8 to 478.7)                  | 25.5<br>(22.9 to 28.6)                   | 6.7<br>(4.2 to 10.1)              | 57.5<br>(41.7 to 75.9)                            | 21.0<br>(9.4 to 34.6)                               |
| Gastritis and duodenitis                                       | 307.2<br>(277.3 to 338.2)                  | 263.0<br>(238.1 to 290.5)                | 5.7<br>(3.7 to 8.4)               | 60.8<br>(47.6 to 76.8)                            | 22.7<br>(13.4 to 33.8)                              |
| Appendicitis                                                   | 3.2<br>(3.0 to 3.5)                        | 84.7<br>(78.2 to 92.3)                   | 1.0<br>(0.6 to 1.4)               | 10.6<br>(-16.8 to 47.4)                           | -0.8<br>(-23.6 to 29.1)                             |
| Paralytic ileus and intestinal obstruction                     | 0.6<br>(0.5 to 0.7)                        | 16.7<br>(14.9 to 18.7)                   | 0.2<br>(0.1 to 0.3)               | 18.6<br>(10.6 to 27.4)                            | -4.3<br>(-12.9 to 5.1)                              |
| Inguinal, femoral, and abdominal hernia                        | 253.2<br>(227.1 to 282.1)                  | 195.1<br>(171.1 to 222.7)                | 18.3<br>(12.2 to 25.7)            | 16.6<br>(6.0 to 27.6)                             | -5.7<br>(-14.0 to 2.9)                              |
| Inflammatory bowel disease                                     | 5.0<br>(4.7 to 5.4)                        | 6.1<br>(5.8 to 6.3)                      | 0.7<br>(0.5 to 1.0)               | 51.9<br>(28.3 to 80.8)                            | 18.0<br>(-1.6 to 41.5)                              |
| Vascular intestinal disorders                                  | 0.2<br>(0.2 to 0.2)                        | 1.0<br>(0.9 to 1.2)                      | 0.1<br>(< 0.05 to 0.1)            | 34.6<br>(27.1 to 43.1)                            | 9.2<br>(4.1 to 15.1)                                |
| Gallbladder and biliary diseases                               | 109.1<br>(97.6 to 121.5)                   | 393.9<br>(340.8 to 445.7)                | 1.7<br>(1.1 to 2.4)               | 37.7<br>(13.4 to 65.9)                            | 7.5<br>(-11.0 to 29.0)                              |
| Pancreatitis                                                   | 2.1<br>(1.9 to 2.3)                        | 18.6<br>(16.8 to 20.6)                   | 0.3<br>(0.2 to 0.4)               | 48.4<br>(43.2 to 53.9)                            | 18.7<br>(14.4 to 23.1)                              |
| Other digestive diseases                                       | --                                         | --                                       | 3.2<br>(2.2 to 4.3)               | 33.2<br>(23.1 to 43.7)                            | 7.5<br>(0.4 to 14.9)                                |
| <b>Neurological disorders</b>                                  | <b>11,151.0<br/>(10,707.0 to 11,684.4)</b> | <b>5,080.5<br/>(4,353.1 to 5,821.4)</b>  | <b>309.7<br/>(205.5 to 442.6)</b> | <b>18.9<br/>(-1.8 to 44.7)</b>                    | <b>-0.4<br/>(-16.9 to 20.2)</b>                     |
| Alzheimer's disease and other dementias                        | 107.8<br>(91.2 to 126.7)                   | 18.5<br>(15.6 to 22.1)                   | 15.9<br>(11.1 to 21.4)            | 46.4<br>(39.6 to 54.0)                            | -1.3<br>(-5.6 to 3.5)                               |
| Parkinson's disease                                            | 16.9<br>(13.4 to 20.9)                     | 1.9<br>(1.5 to 2.4)                      | 2.0<br>(1.2 to 2.8)               | 45.1<br>(28.4 to 65.3)                            | 4.1<br>(-7.5 to 17.7)                               |
| Epilepsy                                                       | 140.2<br>(32.6 to 254.2)                   | 21.9<br>(5.1 to 40.6)                    | 38.0<br>(7.8 to 89.7)             | 11.7<br>(-77.9 to 380.8)                          | -3.3<br>(-81.1 to 317.0)                            |
| Multiple sclerosis                                             | 2.2<br>(1.9 to 2.5)                        | 0.1<br>(0.1 to 0.1)                      | 0.6<br>(0.4 to 0.8)               | 36.1<br>(30.7 to 41.6)                            | 8.4<br>(4.2 to 12.7)                                |
| Motor neuron disease                                           | 0.8<br>(0.7 to 0.9)                        | 0.1<br>(0.1 to 0.1)                      | 0.2<br>(0.1 to 0.2)               | 26.4<br>(21.8 to 31.8)                            | 4.5<br>(1.3 to 8.1)                                 |
| Migraine                                                       | 4,469.4<br>(4,253.9 to 4,684.1)            | 506.6<br>(476.4 to 537.3)                | 207.7<br>(133.5 to 292.2)         | 17.9<br>(14.1 to 21.9)                            | -0.4<br>(-3.6 to 2.9)                               |
| Tension-type headache                                          | 8,177.4<br>(7,313.0 to 9,128.1)            | 4,531.1<br>(3,805.8 to 5,265.1)          | 37.1<br>(23.2 to 55.4)            | 18.7<br>(12.8 to 25.4)                            | -0.8<br>(-5.4 to 4.4)                               |
| Other neurological disorders                                   | 0.1<br>(0.1 to 0.2)                        | 0.2<br>(0.1 to 0.3)                      | 8.3<br>(2.2 to 18.9)              | 33.1<br>(-67.5 to 401.6)                          | 16.7<br>(-69.9 to 311.8)                            |
| <b>Mental and substance use disorders</b>                      | <b>4,357.7<br/>(4,209.5 to 4,510.2)</b>    | <b>1,360.1†<br/>(1,275.5 to 1,452.8)</b> | <b>578.8<br/>(416.0 to 752.8)</b> | <b>16.7<br/>(14.4 to 18.9)</b>                    | <b>-0.4<br/>(-2.2 to 1.5)</b>                       |
| Schizophrenia                                                  | 63.5<br>(55.6 to 71.9)                     | 4.3<br>(3.8 to 4.9)                      | 41.2<br>(29.7 to 52.0)            | 25.7<br>(15.4 to 37.3)                            | 1.6<br>(-6.5 to 11.0)                               |
| Alcohol use disorders                                          | 439.7<br>(376.4 to 505.4)                  | 236.2<br>(201.1 to 274.0)                | 44.5<br>(29.7 to 62.2)            | 15.6<br>(4.1 to 26.7)                             | -2.2<br>(-11.5 to 6.9)                              |
| Drug use disorders                                             | 186.7<br>(171.2 to 203.6)                  | 24.9<br>(22.7 to 27.6)                   | 48.9<br>(34.3 to 65.7)            | 15.6<br>(4.9 to 26.1)                             | -1.1<br>(-9.7 to 7.2)                               |
| Opioid use disorders                                           | 83.2<br>(68.7 to 101.4)                    | 10.1<br>(8.5 to 12.1)                    | 34.8<br>(23.8 to 47.5)            | 17.3<br>(4.3 to 30.1)                             | -1.2<br>(-11.2 to 9.0)                              |
| Cocaine use disorders                                          | 31.5<br>(27.1 to 36.4)                     | 2.2<br>(1.8 to 2.6)                      | 4.3<br>(2.7 to 6.5)               | 15.6<br>(-7.0 to 42.0)                            | 1.1<br>(-17.5 to 22.8)                              |
| Amphetamine use disorders                                      | 19.0<br>(11.8 to 27.8)                     | 2.1<br>(1.4 to 3.1)                      | 2.5<br>(1.3 to 4.4)               | 2.6<br>(-28.6 to 44.7)                            | -4.8<br>(-33.4 to 34.3)                             |
| Cannabis use disorders                                         | 43.4<br>(36.3 to 51.4)                     | 7.9<br>(6.6 to 9.3)                      | 1.3<br>(0.8 to 1.9)               | 11.2<br>(-11.3 to 44.2)                           | -0.4<br>(-19.9 to 27.9)                             |
| Other drug use disorders                                       | 13.5<br>(12.0 to 15.2)                     | 2.6<br>(2.3 to 2.9)                      | 5.9<br>(3.7 to 8.8)               | 13.4<br>(-11.4 to 46.1)                           | -0.1<br>(-21.1 to 27.8)                             |
| Depressive disorders                                           | 743.6<br>(695.8 to 798.9)                  | 726.9<br>(656.0 to 806.4)                | 120.2<br>(83.0 to 163.2)          | 18.9<br>(13.2 to 24.8)                            | -2.1<br>(-6.5 to 2.6)                               |
| Major depressive disorder                                      | 435.1<br>(389.2 to 487.3)                  | 669.6<br>(598.6 to 750.0)                | 89.5<br>(59.9 to 122.5)           | 17.7<br>(10.5 to 25.0)                            | -2.8<br>(-8.2 to 3.1)                               |
| Dysthymia                                                      | 317.8<br>(277.2 to 362.1)                  | 57.2<br>(50.5 to 65.9)                   | 30.7<br>(20.7 to 45.5)            | 22.9<br>(17.7 to 28.4)                            | -0.1<br>(-3.8 to 3.8)                               |
| Bipolar disorder                                               | 278.5<br>(238.0 to 327.1)                  | 22.8<br>(19.7 to 26.7)                   | 57.5<br>(35.4 to 87.0)            | 15.9<br>(9.3 to 22.8)                             | -0.2<br>(-5.4 to 5.1)                               |
| Anxiety disorders                                              | 1,298.4<br>(1,173.6 to 1,428.3)            | 195.6<br>(180.1 to 214.2)                | 126.3<br>(87.7 to 170.7)          | 16.6<br>(12.4 to 20.9)                            | 0.0<br>(-3.2 to 3.3)                                |
| Eating disorders                                               | 70.5<br>(57.1 to 86.7)                     | 28.8<br>(21.4 to 37.8)                   | 14.1<br>(9.0 to 20.4)             | 30.9<br>(15.3 to 48.1)                            | 18.4<br>(4.1 to 33.6)                               |
| Anorexia nervosa                                               | 9.8<br>(7.1 to 13.2)                       | 4.0<br>(3.0 to 5.3)                      | 2.1<br>(1.2 to 3.2)               | 19.2<br>(-5.3 to 49.0)                            | 12.1<br>(-10.7 to 39.2)                             |
| Bulimia nervosa                                                | 56.7<br>(43.2 to 74.0)                     | 24.8<br>(17.5 to 33.7)                   | 12.0<br>(7.3 to 17.8)             | 33.2<br>(15.8 to 52.6)                            | 19.5<br>(4.1 to 36.3)                               |
| Autistic spectrum disorders                                    | 274.1<br>(247.8 to 308.4)                  | 2.2<br>(1.5 to 3.0)                      | 41.1<br>(27.8 to 58.0)            | 14.4<br>(8.9 to 20.6)                             | 0.2<br>(-4.2 to 5.6)                                |
| Autism                                                         | 86.8<br>(74.4 to 101.3)                    | 0.3<br>(0.1 to 0.5)                      | 22.2<br>(14.5 to 32.8)            | 14.6<br>(5.4 to 25.6)                             | 0.3<br>(-7.5 to 9.6)                                |
| Asperger syndrome and other autistic spectrum disorders        | 188.1<br>(155.8 to 226.9)                  | 1.9<br>(1.2 to 2.7)                      | 18.9<br>(12.4 to 27.9)            | 14.1<br>(8.6 to 20.0)                             | 0.2<br>(-4.6 to 5.1)                                |



| Cause                                                      | Prevalence in thousands (95% UI)                 | Incidence in thousands (95% UI)                   | YLDs in thousands (95% UI)                |                                                   |                                                     |
|------------------------------------------------------------|--------------------------------------------------|---------------------------------------------------|-------------------------------------------|---------------------------------------------------|-----------------------------------------------------|
|                                                            | 2016 counts                                      | 2016 counts                                       | 2016 counts                               | Percentage change in counts between 2006 and 2016 | Percentage change in age-standardised rates between |
| Attention-deficit/hyperactivity disorder                   | 344.1<br>(307.7 to 385.8)                        | 16.2<br>(14.0 to 19.1)                            | 4.2<br>(2.4 to 6.7)                       | 7.7<br>(0.3 to 16.1)                              | 0.3<br>(-6.6 to 7.9)                                |
| Conduct disorder                                           | 240.1<br>(196.6 to 282.8)                        | 81.5<br>(64.1 to 98.3)                            | 29.2<br>(17.9 to 45.1)                    | -0.7<br>(-6.7 to 5.8)                             | 0.4<br>(-5.8 to 7.0)                                |
| Idiopathic developmental intellectual disability           | 190.9<br>(87.0 to 295.6)                         | --                                                | 8.2<br>(3.4 to 14.5)                      | 3.4<br>(-5.4 to 11.8)                             | -8.8<br>(-16.3 to -1.4)                             |
| Other mental and substance use disorders                   | 578.7<br>(509.5 to 667.8)                        | 20.7<br>(18.3 to 23.5)                            | 43.4<br>(29.7 to 62.9)                    | 22.4<br>(16.3 to 28.9)                            | 0.0<br>(-4.9 to 5.0)                                |
| <b>Diabetes, urogenital, blood, and endocrine diseases</b> | <b>10,276.4</b><br><b>(10,114.7 to 10,435.3)</b> | <b>4,161.5†</b><br><b>(3,849.7 to 4,492.5)</b>    | <b>181.0</b><br><b>(126.7 to 246.9)</b>   | <b>32.5</b><br><b>(27.5 to 37.9)</b>              | <b>3.6</b><br><b>(-0.5 to 7.9)</b>                  |
| Diabetes mellitus                                          | 932.5<br>(838.3 to 1,031.5)                      | 52.4<br>(47.3 to 58.0)                            | 88.5<br>(60.9 to 122.4)                   | 46.3<br>(35.7 to 57.9)                            | 11.0<br>(2.6 to 20.0)                               |
| Acute glomerulonephritis                                   | 0.3<br>(0.2 to 0.3)                              | 4.3<br>(3.8 to 5.0)                               | < 0.05<br>(< 0.05 to < 0.05)              | 18.4<br>(12.9 to 23.6)                            | 0.3<br>(-4.0 to 4.9)                                |
| Chronic kidney disease                                     | 752.6<br>(683.8 to 826.2)                        | 60.6<br>(53.8 to 67.7)                            | 20.4<br>(15.0 to 26.4)                    | 29.8<br>(21.4 to 38.0)                            | -3.2<br>(-9.4 to 3.1)                               |
| Chronic kidney disease due to diabetes mellitus            | 237.3<br>(198.6 to 280.6)                        | 19.5<br>(15.9 to 23.5)                            | 6.0<br>(4.4 to 8.1)                       | 31.1<br>(17.8 to 43.9)                            | -4.0<br>(-13.8 to 6.0)                              |
| Chronic kidney disease due to hypertension                 | 184.5<br>(159.8 to 208.2)                        | 18.0<br>(15.0 to 21.2)                            | 3.1<br>(2.1 to 4.1)                       | 40.5<br>(26.3 to 55.5)                            | -1.9<br>(-11.9 to 9.0)                              |
| Chronic kidney disease due to glomerulonephritis           | 158.5<br>(136.6 to 180.1)                        | 9.1<br>(7.4 to 11.1)                              | 6.5<br>(4.6 to 8.6)                       | 26.0<br>(15.1 to 37.0)                            | -2.9<br>(-11.1 to 4.9)                              |
| Chronic kidney disease due to other causes                 | 172.3<br>(142.3 to 202.1)                        | 14.0<br>(11.4 to 16.8)                            | 4.7<br>(3.4 to 6.4)                       | 26.9<br>(17.4 to 37.4)                            | -3.7<br>(-11.7 to 4.2)                              |
| Urinary diseases and male infertility                      | 422.6<br>(384.4 to 464.0)                        | 2,814.8†<br>(2,513.5 to 3,138.2)                  | 12.9<br>(8.4 to 18.4)                     | 28.9<br>(21.8 to 37.4)                            | -3.0<br>(-8.6 to 3.2)                               |
| Interstitial nephritis and urinary tract infections        | 50.7<br>(44.9 to 56.9)                           | 2,654.7<br>(2,353.1 to 2,977.7)                   | 1.7<br>(1.0 to 2.6)                       | 17.1<br>(5.0 to 31.3)                             | -1.2<br>(-11.4 to 9.9)                              |
| Urolithiasis                                               | 4.5<br>(4.0 to 5.2)                              | 120.1<br>(106.5 to 136.1)                         | 0.4<br>(0.2 to 0.5)                       | 26.8<br>(21.9 to 31.7)                            | 1.6<br>(-2.1 to 5.5)                                |
| Benign prostatic hyperplasia                               | 298.2<br>(251.5 to 344.6)                        | 40.0<br>(33.5 to 47.3)                            | 9.8<br>(6.2 to 14.3)                      | 35.0<br>(25.2 to 45.9)                            | -2.6<br>(-9.5 to 4.7)                               |
| Male infertility                                           | 56.7<br>(52.1 to 61.7)                           | --                                                | 0.3<br>(0.1 to 0.7)                       | 21.9<br>(7.5 to 36.5)                             | 5.1<br>(-7.2 to 17.7)                               |
| Other urinary diseases                                     | --                                               | --                                                | 0.8<br>(0.5 to 1.1)                       | -2.7<br>(-12.1 to 7.8)                            | -17.5<br>(-25.0 to -9.4)                            |
| Gynecological diseases                                     | 3,679.8<br>(3,513.0 to 3,854.6)                  | 1,177.1†<br>(1,109.3 to 1,248.3)                  | 37.8<br>(25.3 to 56.0)                    | 17.2<br>(12.0 to 22.6)                            | -2.8<br>(-6.8 to 1.3)                               |
| Uterine fibroids                                           | 384.9<br>(339.6 to 447.5)                        | 41.3<br>(34.8 to 48.8)                            | 5.4<br>(3.1 to 9.1)                       | 17.7<br>(8.9 to 26.2)                             | -7.7<br>(-14.3 to -1.2)                             |
| Polycystic ovarian syndrome                                | 7.8<br>(5.9 to 10.3)                             | 30.4<br>(21.0 to 41.8)                            | 0.1<br>(< 0.05 to 0.1)                    | 14.9<br>(-11.5 to 49.1)                           | -1.0<br>(-23.7 to 29.0)                             |
| Female infertility                                         | 53.6<br>(42.7 to 65.3)                           | --                                                | 0.3<br>(0.1 to 0.6)                       | 11.0<br>(-10.7 to 36.2)                           | -2.6<br>(-21.8 to 19.4)                             |
| Endometriosis                                              | 3.1<br>(2.6 to 3.7)                              | 13.3<br>(11.0 to 16.4)                            | 0.3<br>(0.2 to 0.5)                       | 16.7<br>(-16.3 to 61.9)                           | -0.3<br>(-28.0 to 38.2)                             |
| Genital prolapse                                           | 1,320.0<br>(1,153.8 to 1,503.0)                  | 88.1<br>(75.6 to 103.2)                           | 4.1<br>(2.0 to 7.5)                       | 37.6<br>(28.0 to 49.4)                            | 3.6<br>(-3.8 to 12.9)                               |
| Premenstrual syndrome                                      | 2,031.3<br>(1,910.4 to 2,150.6)                  | 734.2<br>(684.7 to 786.2)                         | 17.1<br>(10.7 to 26.6)                    | 14.1<br>(5.4 to 22.8)                             | -1.8<br>(-8.9 to 5.6)                               |
| Other gynecological diseases                               | 320.4<br>(279.8 to 364.9)                        | 269.7<br>(224.3 to 319.6)                         | 10.5<br>(6.8 to 15.1)                     | 15.4<br>(5.2 to 25.7)                             | -4.5<br>(-12.5 to 4.0)                              |
| Hemoglobinopathies and hemolytic anaemias                  | 6,015.2<br>(5,891.9 to 6,150.1)                  | --                                                | 9.7<br>(6.2 to 14.6)                      | 14.8<br>(6.8 to 23.7)                             | -2.9<br>(-9.3 to 4.0)                               |
| Thalassemias                                               | 0.2<br>(0.2 to 0.3)                              | --                                                | < 0.05<br>(< 0.05 to < 0.05)              | 18.4<br>(5.7 to 32.6)                             | -0.8<br>(-11.3 to 11.1)                             |
| Thalassaemia trait                                         | 56.9<br>(43.4 to 70.4)                           | --                                                | 0.6<br>(0.3 to 0.9)                       | 27.4<br>(6.9 to 52.0)                             | 8.4<br>(-8.3 to 29.3)                               |
| Sickle cell disorders                                      | 3.9<br>(3.2 to 4.5)                              | --                                                | 0.3<br>(0.2 to 0.5)                       | 21.0<br>(0.4 to 47.2)                             | 11.6<br>(-7.1 to 34.5)                              |
| Sickle cell trait                                          | 1,514.7<br>(1,379.9 to 1,656.2)                  | --                                                | 3.7<br>(2.3 to 5.5)                       | 17.7<br>(5.3 to 31.6)                             | 1.6<br>(-8.6 to 13.3)                               |
| G6PD deficiency                                            | 729.7<br>(698.1 to 767.2)                        | --                                                | 0.1<br>(0.1 to 0.1)                       | 35.6<br>(26.8 to 45.1)                            | 14.7<br>(7.5 to 22.4)                               |
| G6PD trait                                                 | 3,741.1<br>(3,665.7 to 3,823.5)                  | --                                                | < 0.05<br>(< 0.05 to < 0.05)              | 29.7<br>(19.1 to 40.6)                            | 10.5<br>(1.9 to 19.1)                               |
| Other hemoglobinopathies and hemolytic anaemias            | 318.5<br>(300.4 to 336.0)                        | --                                                | 5.0<br>(3.2 to 7.6)                       | 10.8<br>(1.1 to 21.8)                             | -7.7<br>(-14.8 to 0.3)                              |
| Endocrine, metabolic, blood, and immune disorders          | 449.6<br>(424.6 to 476.9)                        | 52.3<br>(47.2 to 58.1)                            | 11.8<br>(8.0 to 16.3)                     | 21.3<br>(13.6 to 29.9)                            | -2.8<br>(-8.3 to 3.2)                               |
| <b>Musculoskeletal disorders</b>                           | <b>4,614.4</b><br><b>(4,381.6 to 4,839.1)</b>    | <b>2,169.2</b><br><b>(1,967.6 to 2,403.3)</b>     | <b>513.2</b><br><b>(368.0 to 672.2)</b>   | <b>27.1</b><br><b>(23.6 to 30.5)</b>              | <b>0.5</b><br><b>(-2.1 to 2.9)</b>                  |
| Rheumatoid arthritis                                       | 78.5<br>(70.1 to 88.0)                           | 4.5<br>(4.1 to 5.0)                               | 18.7<br>(12.9 to 25.3)                    | 32.8<br>(21.5 to 44.9)                            | 3.0<br>(-5.5 to 11.7)                               |
| Osteoarthritis                                             | 992.0<br>(928.0 to 1,058.5)                      | 51.3<br>(47.6 to 55.1)                            | 61.4<br>(43.5 to 83.6)                    | 43.6<br>(38.4 to 49.4)                            | 5.5<br>(1.7 to 9.7)                                 |
| Low back and neck pain                                     | 3,006.2<br>(2,789.4 to 3,232.2)                  | 1,261.0<br>(1,125.7 to 1,415.5)                   | 350.2<br>(247.5 to 464.0)                 | 25.3<br>(21.0 to 30.0)                            | -0.3<br>(-3.6 to 2.9)                               |
| Low back pain                                              | 2,152.7<br>(1,900.8 to 2,459.6)                  | 1,023.3<br>(896.4 to 1,175.4)                     | 245.7<br>(172.0 to 328.5)                 | 24.0<br>(17.9 to 30.1)                            | -0.5<br>(-5.3 to 4.0)                               |
| Neck pain                                                  | 1,039.6<br>(891.5 to 1,203.0)                    | 237.7<br>(205.2 to 280.3)                         | 104.5<br>(70.3 to 148.9)                  | 28.6<br>(25.3 to 31.9)                            | 0.1<br>(-2.0 to 2.3)                                |
| Gout                                                       | 80.0<br>(71.2 to 89.8)                           | 16.1<br>(14.2 to 18.2)                            | 2.6<br>(1.7 to 3.6)                       | 32.4<br>(12.6 to 55.2)                            | 0.4<br>(-14.1 to 16.1)                              |
| Other musculoskeletal disorders                            | 923.6<br>(753.8 to 1,113.9)                      | 836.2<br>(681.5 to 1,019.4)                       | 80.3<br>(53.0 to 116.9)                   | 22.7<br>(12.0 to 33.1)                            | -0.7<br>(-9.1 to 7.5)                               |
| <b>Other non-communicable diseases</b>                     | <b>25,854.5</b><br><b>(25,507.1 to 26,173.1)</b> | <b>81,198.4†</b><br><b>(76,746.2 to 86,134.6)</b> | <b>707.7</b><br><b>(483.9 to 1,003.4)</b> | <b>19.4</b><br><b>(17.7 to 21.0)</b>              | <b>-2.1</b><br><b>(-3.3 to -0.9)</b>                |
| Congenital anomalies                                       | 260.0<br>(226.4 to 294.4)                        | --                                                | 37.4<br>(27.2 to 49.3)                    | 13.4<br>(7.1 to 20.6)                             | -1.4<br>(-6.8 to 4.6)                               |
| Neural tube defects                                        | 31.6<br>(28.1 to 35.6)                           | --                                                | 9.3<br>(6.4 to 12.4)                      | 13.6<br>(0.8 to 28.4)                             | -1.9<br>(-12.2 to 11.1)                             |
| Congenital heart anomalies                                 | 34.6<br>(29.7 to 39.7)                           | --                                                | 1.7<br>(0.7 to 2.8)                       | 19.1<br>(3.5 to 34.7)                             | 4.6<br>(-9.0 to 18.2)                               |
| Orofacial clefts                                           | 27.0<br>(23.5 to 30.6)                           | --                                                | 0.4<br>(0.2 to 0.5)                       | 10.0<br>(-2.8 to 23.6)                            | -5.0<br>(-16.0 to 6.7)                              |
| Down's syndrome                                            | 24.4<br>(21.2 to 28.1)                           | --                                                | 2.2<br>(1.5 to 3.1)                       | 17.5<br>(6.9 to 28.9)                             | 3.0<br>(-6.0 to 12.6)                               |
| Turner syndrome                                            | 4.5<br>(3.9 to 5.4)                              | --                                                | 0.1<br>(< 0.05 to 0.1)                    | 10.2<br>(-4.6 to 27.4)                            | -1.4<br>(-14.4 to 13.7)                             |
| Klinefelter syndrome                                       | 5.9<br>(5.0 to 7.0)                              | --                                                | < 0.05<br>(< 0.05 to 0.1)                 | 13.4<br>(-16.2 to 54.1)                           | 1.0<br>(-25.6 to 35.7)                              |

| Cause                                         | Prevalence in thousands (95% UI)              | Incidence in thousands (95% UI)                           | YLDs in thousands (95% UI)              |                                                   |                                                     |
|-----------------------------------------------|-----------------------------------------------|-----------------------------------------------------------|-----------------------------------------|---------------------------------------------------|-----------------------------------------------------|
|                                               | 2016 counts                                   | 2016 counts                                               | 2016 counts                             | Percentage change in counts between 2006 and 2016 | Percentage change in age-standardised rates between |
| Other chromosomal abnormalities               | 22.0<br>(18.5 to 26.5)                        | --                                                        | 2.5<br>(1.7 to 3.5)                     | 11.4<br>(-5.8 to 33.7)                            | 2.0<br>(-13.7 to 21.5)                              |
| Congenital musculoskeletal and limb anomalies | 38.1<br>(34.8 to 41.6)                        | --                                                        | 5.6<br>(3.8 to 7.9)                     | 20.1<br>(8.9 to 33.6)                             | 4.1<br>(-5.4 to 15.4)                               |
| Urogenital congenital anomalies               | 26.8<br>(23.7 to 30.4)                        | --                                                        | 0.8<br>(0.5 to 1.3)                     | 8.2<br>(1.5 to 16.2)                              | -0.3<br>(-6.4 to 7.0)                               |
| Digestive congenital anomalies                | 19.4<br>(17.0 to 21.9)                        | --                                                        | 0.9<br>(0.6 to 1.2)                     | 12.2<br>(-7.5 to 38.0)                            | -2.8<br>(-19.6 to 17.8)                             |
| Other congenital anomalies                    | 114.4<br>(77.9 to 162.7)                      | --                                                        | 13.9<br>(9.6 to 19.4)                   | 10.5<br>(0.0 to 22.5)                             | -4.7<br>(-13.6 to 5.4)                              |
| Skin and subcutaneous diseases                | 11,495.9<br>(11,147.0 to 11,893.0)            | 26,691.3<br>(25,019.3 to 28,490.8)                        | 277.8<br>(183.1 to 409.2)               | 13.7<br>(10.8 to 16.4)                            | 1.3<br>(-0.8 to 3.6)                                |
| Dermatitis                                    | 2,092.4<br>(1,959.2 to 2,233.6)               | 1,723.4<br>(1,598.3 to 1,851.5)                           | 85.1<br>(49.1 to 142.2)                 | 13.2<br>(7.0 to 19.9)                             | 0.9<br>(-4.5 to 6.4)                                |
| Psoriasis                                     | 275.1<br>(262.2 to 288.7)                     | 38.5<br>(36.8 to 40.2)                                    | 24.1<br>(17.1 to 31.9)                  | 23.5<br>(14.1 to 33.4)                            | 3.7<br>(-3.6 to 11.2)                               |
| Cellulitis                                    | 14.2<br>(13.1 to 15.4)                        | 284.9<br>(264.5 to 305.7)                                 | 0.8<br>(0.5 to 1.2)                     | 16.2<br>(-8.5 to 44.9)                            | 0.9<br>(-19.2 to 23.2)                              |
| Pyoderma                                      | 85.5<br>(82.7 to 88.2)                        | 2,068.1<br>(2,000.3 to 2,143.4)                           | 0.5<br>(0.2 to 1.0)                     | 27.8<br>(19.9 to 36.3)                            | 1.5<br>(-4.1 to 7.5)                                |
| Scabies                                       | 536.8<br>(471.2 to 614.4)                     | 1,658.5<br>(1,439.2 to 1,899.9)                           | 13.9<br>(7.7 to 22.2)                   | 8.9<br>(4.0 to 14.1)                              | -2.8<br>(-6.8 to 1.2)                               |
| Fungal skin diseases                          | 4,690.8<br>(4,195.0 to 5,199.3)               | 14,618.7<br>(12,978.7 to 16,364.1)                        | 26.4<br>(10.4 to 56.6)                  | 19.3<br>(17.4 to 21.3)                            | 0.0<br>(-0.8 to 0.8)                                |
| Viral skin diseases                           | 912.4<br>(874.7 to 951.5)                     | 1,348.9<br>(1,289.2 to 1,407.8)                           | 28.0<br>(17.2 to 41.5)                  | 11.4<br>(8.0 to 14.8)                             | -0.1<br>(-2.9 to 2.9)                               |
| Acne vulgaris                                 | 2,438.5<br>(2,216.8 to 2,690.0)               | 1,610.5<br>(1,375.6 to 1,921.6)                           | 63.1<br>(42.5 to 91.1)                  | 7.1<br>(1.9 to 12.6)                              | 2.8<br>(-2.1 to 7.7)                                |
| Alopecia areata                               | 55.3<br>(53.2 to 57.7)                        | 98.0<br>(94.1 to 102.0)                                   | 1.8<br>(1.2 to 2.8)                     | 17.9<br>(4.7 to 31.3)                             | 0.4<br>(-10.2 to 11.4)                              |
| Pruritus                                      | 274.8<br>(242.1 to 308.9)                     | 219.5<br>(195.9 to 247.0)                                 | 2.9<br>(1.4 to 5.4)                     | 23.2<br>(16.6 to 30.3)                            | 1.9<br>(-3.1 to 7.2)                                |
| Urticaria                                     | 304.3<br>(265.5 to 350.5)                     | 545.8<br>(478.5 to 629.7)                                 | 18.4<br>(11.7 to 26.5)                  | 15.3<br>(8.9 to 21.6)                             | 0.0<br>(-5.1 to 5.2)                                |
| Decubitus ulcer                               | 6.0<br>(5.4 to 6.7)                           | 21.8<br>(19.4 to 24.6)                                    | 1.0<br>(0.7 to 1.3)                     | 25.5<br>(10.6 to 41.7)                            | -6.6<br>(-19.5 to 7.6)                              |
| Other skin and subcutaneous diseases          | 2,116.8<br>(2,053.7 to 2,177.9)               | 2,454.7<br>(2,375.3 to 2,531.4)                           | 11.7<br>(5.6 to 21.4)                   | 31.4<br>(28.2 to 34.9)                            | 6.0<br>(3.6 to 8.6)                                 |
| Sense organ diseases                          | 8,192.3<br>(8,019.8 to 8,365.1)               | 3,045.2 <sup>†</sup><br>(2,851.8 to 3,249.8)              | 295.4<br>(205.4 to 409.3)               | 23.1<br>(20.9 to 25.3)                            | -5.2<br>(-6.9 to -3.6)                              |
| Glaucoma                                      | 33.9<br>(28.8 to 39.4)                        | --                                                        | 3.1<br>(2.1 to 4.3)                     | 33.9<br>(20.8 to 50.0)                            | -4.0<br>(-12.9 to 7.3)                              |
| Cataract                                      | 333.2<br>(301.2 to 366.5)                     | --                                                        | 25.7<br>(18.3 to 35.0)                  | 27.4<br>(20.8 to 34.9)                            | -10.3<br>(-15.0 to -5.0)                            |
| Macular degeneration                          | 54.8<br>(46.3 to 64.8)                        | --                                                        | 3.4<br>(2.3 to 4.8)                     | 30.9<br>(18.3 to 46.0)                            | -6.6<br>(-15.6 to 3.9)                              |
| Refraction and accommodation disorders        | 4,625.5<br>(4,452.4 to 4,804.8)               | --                                                        | 80.1<br>(49.2 to 128.1)                 | 15.3<br>(11.4 to 19.3)                            | -7.6<br>(-10.8 to -4.4)                             |
| Age-related and other hearing loss            | 5,035.8<br>(4,770.9 to 5,313.1)               | --                                                        | 148.6<br>(105.1 to 205.2)               | 25.5<br>(21.8 to 28.7)                            | -4.0<br>(-6.5 to -1.9)                              |
| Other vision loss                             | 97.5<br>(87.7 to 107.8)                       | --                                                        | 8.6<br>(6.0 to 11.7)                    | 28.2<br>(18.4 to 39.3)                            | -2.2<br>(-9.2 to 5.8)                               |
| Other sense organ diseases                    | 828.5<br>(761.7 to 892.3)                     | 3,045.2<br>(2,851.8 to 3,249.8)                           | 25.9<br>(16.0 to 38.9)                  | 28.0<br>(22.9 to 33.3)                            | 0.6<br>(-3.0 to 4.4)                                |
| Oral disorders                                | 20,406.5<br>(19,786.4 to 20,973.1)            | 51,461.9 <sup>†</sup><br>(47,384.2 to 55,853.1)           | 97.2<br>(58.7 to 152.1)                 | 28.2<br>(25.7 to 31.4)                            | 0.1<br>(-1.7 to 2.0)                                |
| Caries of deciduous teeth                     | 2,353.2<br>(1,893.9 to 2,877.5)               | 8,339.1<br>(5,688.9 to 11,588.5)                          | 0.6<br>(0.2 to 1.1)                     | 9.3<br>(-2.4 to 24.0)                             | -1.3<br>(-11.7 to 11.7)                             |
| Caries of permanent teeth                     | 16,129.6<br>(15,369.1 to 16,855.0)            | 42,505.1<br>(39,410.3 to 45,632.9)                        | 9.5<br>(4.2 to 18.2)                    | 11.0<br>(8.0 to 14.3)                             | -3.3<br>(-5.9 to -0.5)                              |
| Periodontal disease                           | 3,904.5<br>(3,275.8 to 4,594.2)               | 478.5<br>(392.8 to 577.4)                                 | 25.7<br>(10.2 to 53.2)                  | 29.2<br>(24.8 to 33.1)                            | 0.3<br>(-2.9 to 3.3)                                |
| Edentulism and severe tooth loss              | 1,611.1<br>(1,408.7 to 1,807.3)               | 139.2<br>(117.7 to 162.7)                                 | 44.8<br>(29.3 to 63.6)                  | 36.8<br>(32.5 to 41.3)                            | 0.7<br>(-2.2 to 3.8)                                |
| Other oral disorders                          | 562.6<br>(537.5 to 588.4)                     | --                                                        | 16.6<br>(10.2 to 24.9)                  | 18.1<br>(14.4 to 22.2)                            | -0.1<br>(-3.1 to 3.0)                               |
| <b>Injuries</b>                               | <b>4,618.0</b><br><b>(4,313.3 to 5,004.8)</b> | <b>2,105.7<sup>†</sup></b><br><b>(1,988.2 to 2,232.2)</b> | <b>167.6</b><br><b>(111.1 to 240.4)</b> | <b>28.1</b><br><b>(24.3 to 31.8)</b>              | <b>4.1</b><br><b>(1.4 to 6.8)</b>                   |
| <b>Transport injuries</b>                     | <b>486.5</b><br><b>(456.0 to 518.4)</b>       | <b>185.2</b><br><b>(165.6 to 204.1)</b>                   | <b>25.2</b><br><b>(16.8 to 36.3)</b>    | <b>44.2</b><br><b>(40.1 to 48.2)</b>              | <b>14.4</b><br><b>(11.3 to 17.3)</b>                |
| Road injuries                                 | 460.9<br>(432.3 to 491.4)                     | 178.7<br>(159.2 to 197.8)                                 | 23.9<br>(15.9 to 34.5)                  | 45.5<br>(41.3 to 49.4)                            | 15.3<br>(12.2 to 18.2)                              |
| Pedestrian road injuries                      | 116.0<br>(104.0 to 130.5)                     | 33.6<br>(28.3 to 39.2)                                    | 5.9<br>(4.0 to 8.6)                     | 47.0<br>(42.6 to 51.4)                            | 15.9<br>(12.8 to 19.0)                              |
| Cyclist road injuries                         | 82.4<br>(69.3 to 96.5)                        | 35.0<br>(28.0 to 42.8)                                    | 4.0<br>(2.7 to 5.9)                     | 53.0<br>(48.4 to 58.0)                            | 23.4<br>(20.0 to 26.8)                              |
| Motorcyclist road injuries                    | 71.2<br>(60.8 to 83.7)                        | 18.4<br>(14.6 to 22.7)                                    | 3.5<br>(2.3 to 5.1)                     | 48.5<br>(44.0 to 52.7)                            | 18.4<br>(15.0 to 21.5)                              |
| Motor vehicle road injuries                   | 135.6<br>(117.7 to 152.9)                     | 63.7<br>(54.9 to 73.1)                                    | 7.7<br>(5.2 to 11.1)                    | 36.8<br>(33.0 to 40.5)                            | 7.6<br>(4.8 to 10.3)                                |
| Other road injuries                           | 55.7<br>(48.5 to 64.4)                        | 28.0<br>(22.3 to 34.8)                                    | 2.7<br>(1.8 to 3.9)                     | 54.6<br>(50.1 to 59.1)                            | 23.0<br>(19.7 to 26.1)                              |
| Other transport injuries                      | 25.6<br>(21.9 to 29.9)                        | 6.5<br>(5.6 to 7.5)                                       | 1.2<br>(0.8 to 1.8)                     | 23.4<br>(19.0 to 28.1)                            | -0.2<br>(-3.6 to 3.2)                               |
| <b>Unintentional injuries</b>                 | <b>3,938.5</b><br><b>(3,637.2 to 4,314.5)</b> | <b>1,860.8</b><br><b>(1,745.3 to 1,990.2)</b>             | <b>131.4</b><br><b>(88.2 to 187.9)</b>  | <b>27.7</b><br><b>(23.6 to 31.4)</b>              | <b>3.6</b><br><b>(0.7 to 6.2)</b>                   |
| Falls                                         | 1,491.5<br>(1,290.2 to 1,705.8)               | 719.1<br>(628.1 to 829.7)                                 | 59.3<br>(41.4 to 82.0)                  | 41.0<br>(37.3 to 44.9)                            | 11.4<br>(8.5 to 14.2)                               |
| Drowning                                      | 12.8<br>(11.3 to 14.6)                        | 2.7<br>(2.4 to 3.0)                                       | 0.6<br>(0.4 to 0.9)                     | 1.8<br>(-2.4 to 6.0)                              | -18.7<br>(-21.9 to -15.6)                           |
| Fire, heat, and hot substances                | 352.6<br>(291.3 to 438.6)                     | 46.6<br>(37.5 to 55.8)                                    | 9.0<br>(5.8 to 13.4)                    | 23.8<br>(16.2 to 29.8)                            | 3.2<br>(-2.5 to 7.8)                                |
| Poisonings                                    | 10.4<br>(8.8 to 12.2)                         | 16.1<br>(13.1 to 19.5)                                    | 0.9<br>(0.6 to 1.4)                     | 42.9<br>(31.9 to 54.7)                            | 21.0<br>(12.5 to 30.2)                              |
| Exposure to mechanical forces                 | 740.2<br>(633.4 to 885.2)                     | 299.8<br>(259.6 to 337.3)                                 | 16.9<br>(10.9 to 24.8)                  | 26.3<br>(22.1 to 30.2)                            | 2.4<br>(-0.9 to 5.3)                                |
| Unintentional firearm injuries                | 56.7<br>(45.9 to 70.7)                        | 15.3<br>(11.6 to 19.9)                                    | 2.2<br>(1.4 to 3.3)                     | 21.1<br>(17.0 to 25.2)                            | -2.9<br>(-6.0 to 0.0)                               |
| Unintentional suffocation                     | 35.4<br>(25.9 to 47.1)                        | 7.9<br>(5.5 to 10.8)                                      | 1.1<br>(0.6 to 1.7)                     | 0.9<br>(-2.3 to 3.8)                              | -13.8<br>(-16.3 to -11.5)                           |
| Other exposure to mechanical forces           | 648.1<br>(545.8 to 791.3)                     | 276.7<br>(240.4 to 311.4)                                 | 13.6<br>(8.9 to 19.9)                   | 29.8<br>(25.3 to 33.7)                            | 4.7<br>(1.2 to 7.7)                                 |



| Cause                                                                               | Prevalence in thousands (95% UI)        | Incidence in thousands (95% UI)       | YLDs in thousands (95% UI)         |                                                   |                                                     |
|-------------------------------------------------------------------------------------|-----------------------------------------|---------------------------------------|------------------------------------|---------------------------------------------------|-----------------------------------------------------|
|                                                                                     | 2016 counts                             | 2016 counts                           | 2016 counts                        | Percentage change in counts between 2006 and 2016 | Percentage change in age-standardised rates between |
| Adverse effects of medical treatment                                                | 10.3<br>(8.1 to 12.8)                   | 135.2<br>(116.8 to 155.8)             | 1.4<br>(0.9 to 2.1)                | 21.2<br>(13.5 to 29.1)                            | -3.7<br>(-9.4 to 2.0)                               |
| Animal contact                                                                      | 82.8<br>(72.6 to 96.4)                  | 101.4<br>(83.1 to 123.4)              | 2.7<br>(1.7 to 4.0)                | 10.8<br>(4.2 to 17.4)                             | -7.2<br>(-12.0 to -2.1)                             |
| Venomous animal contact                                                             | 40.0<br>(33.5 to 47.3)                  | 47.9<br>(36.6 to 61.1)                | 2.0<br>(1.3 to 3.0)                | 13.8<br>(5.5 to 22.8)                             | -3.6<br>(-10.1 to 3.5)                              |
| Non-venomous animal contact                                                         | 42.9<br>(35.3 to 55.5)                  | 53.5<br>(42.4 to 66.6)                | 0.6<br>(0.4 to 1.0)                | 2.2<br>(-2.9 to 6.7)                              | -16.6<br>(-20.5 to -13.2)                           |
| Foreign body                                                                        | 468.1<br>(373.1 to 564.4)               | 271.4<br>(242.9 to 302.5)             | 17.5<br>(11.1 to 25.8)             | 3.1<br>(-1.4 to 7.5)                              | -13.2<br>(-16.7 to -10.0)                           |
| Pulmonary aspiration and foreign body in airway                                     | 355.8<br>(268.5 to 454.4)               | 137.0<br>(120.2 to 156.6)             | 14.0<br>(8.9 to 20.5)              | -0.6<br>(-4.8 to 3.7)                             | -15.9<br>(-19.3 to -12.7)                           |
| Foreign body in eyes                                                                | 18.4<br>(10.8 to 27.0)                  | 93.6<br>(73.9 to 120.3)               | 1.0<br>(0.5 to 1.8)                | 26.3<br>(22.3 to 30.8)                            | 1.8<br>(-0.7 to 4.6)                                |
| Foreign body in other body part                                                     | 94.0<br>(73.6 to 119.5)                 | 40.9<br>(34.2 to 48.6)                | 2.5<br>(1.5 to 3.8)                | 19.3<br>(13.3 to 25.2)                            | -1.8<br>(-6.7 to 2.6)                               |
| Environmental heat and cold exposure                                                | 259.8<br>(222.7 to 299.5)               | 76.8<br>(64.1 to 91.0)                | 9.1<br>(5.9 to 13.3)               | 17.0<br>(13.2 to 20.5)                            | -5.9<br>(-8.8 to -3.2)                              |
| Other unintentional injuries                                                        | 510.0<br>(407.9 to 632.3)               | 191.7<br>(158.7 to 230.5)             | 14.1<br>(9.1 to 20.9)              | 31.1<br>(27.9 to 34.0)                            | 7.1<br>(4.8 to 9.2)                                 |
| <b>Self-harm and interpersonal violence</b>                                         | <b>683.7</b><br><b>(619.4 to 750.9)</b> | <b>59.6†</b><br><b>(51.9 to 68.1)</b> | <b>9.1</b><br><b>(6.3 to 12.7)</b> | <b>11.3</b><br><b>(5.7 to 16.2)</b>               | <b>-5.2</b><br><b>(-9.4 to -1.6)</b>                |
| Self-harm                                                                           | 13.9<br>(12.1 to 15.7)                  | 6.3<br>(5.4 to 7.3)                   | 0.6<br>(0.4 to 0.9)                | 14.3<br>(9.5 to 18.8)                             | -9.8<br>(-13.5 to -6.6)                             |
| Self-harm by firearm                                                                | 1.2<br>(1.0 to 1.4)                     | 0.3<br>(0.2 to 0.5)                   | < 0.05<br>(< 0.05 to 0.1)          | 1.0<br>(-3.1 to 5.1)                              | -18.4<br>(-21.6 to -15.3)                           |
| Self-harm by other specified means                                                  | 12.7<br>(10.9 to 14.7)                  | 6.0<br>(5.1 to 7.0)                   | 0.6<br>(0.4 to 0.8)                | 15.4<br>(10.3 to 19.9)                            | -9.2<br>(-12.9 to -5.9)                             |
| Interpersonal violence                                                              | 669.8<br>(606.5 to 737.1)               | 53.3‡<br>(45.6 to 61.7)               | 8.5<br>(5.9 to 11.9)               | 11.1<br>(5.2 to 16.4)                             | -4.8<br>(-9.3 to -0.8)                              |
| Assault by firearm                                                                  | 6.9<br>(6.0 to 8.0)                     | 2.4<br>(1.8 to 3.1)                   | 0.3<br>(0.2 to 0.5)                | 32.1<br>(27.6 to 36.8)                            | 5.5<br>(2.3 to 8.8)                                 |
| Assault by sharp object                                                             | 43.9<br>(36.0 to 52.2)                  | 19.0<br>(15.2 to 23.5)                | 1.3<br>(0.8 to 1.9)                | 27.4<br>(22.7 to 31.8)                            | 3.9<br>(0.6 to 7.0)                                 |
| Sexual violence                                                                     | 565.0<br>(500.8 to 633.6)               | --                                    | 4.7<br>(3.2 to 6.8)                | 0.1<br>(-7.0 to 7.8)                              | -11.5<br>(-17.7 to -5.3)                            |
| Assault by other means                                                              | 54.0<br>(46.0 to 63.9)                  | 31.9<br>(26.4 to 37.7)                | 2.2<br>(1.5 to 3.2)                | 28.8<br>(25.2 to 32.5)                            | 4.0<br>(1.2 to 6.5)                                 |
| <b>Forces of nature, conflict and terrorism, and executions and police conflict</b> | <b>74.3</b><br><b>(24.6 to 140.6)</b>   | <b>0.2†</b><br><b>(0.1 to 0.2)</b>    | <b>1.9</b><br><b>(0.3 to 5.6)</b>  | <b>-14.1</b><br><b>(-18.7 to -10.6)</b>           | <b>-25.2</b><br><b>(-28.7 to -22.1)</b>             |
| Exposure to forces of nature                                                        | 16.4<br>(2.7 to 34.3)                   | --                                    | 0.5<br>(0.1 to 1.4)                | 3.3<br>(-0.5 to 7.3)                              | -11.4<br>(-14.6 to -7.9)                            |
| Conflict and terrorism                                                              | 57.4<br>(21.2 to 112.2)                 | --                                    | 1.4<br>(0.3 to 4.1)                | -19.3<br>(-23.6 to -15.6)                         | -29.3<br>(-32.8 to -26.1)                           |
| Executions and police conflict                                                      | 0.5<br>(0.3 to 0.7)                     | 0.2<br>(0.1 to 0.2)                   | < 0.05<br>(< 0.05 to < 0.05)       | 23.2<br>(16.7 to 29.5)                            | 9.2<br>(4.1 to 14.3)                                |
| <b>Impairments</b>                                                                  | --                                      | --                                    | --                                 | --                                                | --                                                  |
| Anaemia                                                                             | 7,972.1<br>(7,609.7 to 8,322.2)         | --                                    | 165.2<br>(109.7 to 239.9)          | 5.9<br>(-0.2 to 12.0)                             | -9.8<br>(-14.5 to -5.1)                             |
| Developmental intellectual disability                                               | 504.2<br>(387.2 to 626.9)               | --                                    | 81.5<br>(53.7 to 131.2)            | 17.4<br>(6.5 to 45.2)                             | 3.1<br>(-6.2 to 27.3)                               |
| Epilepsy                                                                            | 297.7<br>(169.8 to 434.8)               | --                                    | 89.1<br>(45.4 to 150.7)            | 17.7<br>(-36.1 to 123.6)                          | 1.9<br>(-44.9 to 93.5)                              |
| Guillain-Barre syndrome                                                             | 0.3<br>(0.2 to 0.4)                     | --                                    | 0.1<br>(0.1 to 0.1)                | 22.2<br>(17.0 to 30.4)                            | 3.8<br>(1.4 to 9.5)                                 |
| Hearing loss                                                                        | 5,479.3<br>(5,209.5 to 5,754.0)         | --                                    | 169.5<br>(119.3 to 232.3)          | 22.1<br>(19.0 to 25.1)                            | -4.6<br>(-6.9 to -2.5)                              |
| Heart failure                                                                       | 157.9<br>(140.3 to 179.6)               | --                                    | 18.5<br>(14.2 to 23.1)             | 46.6<br>(37.1 to 57.0)                            | 6.1<br>(-0.5 to 13.4)                               |
| Infertility                                                                         | 240.4<br>(226.6 to 255.4)               | --                                    | 1.4<br>(0.6 to 2.8)                | 16.0<br>(8.2 to 23.9)                             | -0.5<br>(-7.0 to 6.3)                               |
| Pelvic inflammatory disease                                                         | 6.4<br>(5.4 to 7.5)                     | --                                    | 0.8<br>(0.6 to 1.2)                | 5.8<br>(-12.6 to 29.7)                            | -11.0<br>(-26.1 to 7.8)                             |
| Vision loss                                                                         | 5,295.0<br>(5,102.4 to 5,496.0)         | --                                    | 159.7<br>(111.6 to 228.9)          | 21.2<br>(15.5 to 33.1)                            | -4.4<br>(-8.8 to 3.6)                               |

We did not calculate incidence for the nine impairments, certain NTDs, and causes with only birth prevalence. Blank cells mean that no estimate is available.

† Incidence for aggregate causes represents the sum of the incidence of the causes below the aggregate.

‡ Incidence estimates for stroke represent first-ever stroke only.

^ Incidence of HIV/AIDS represents new infections of HIV only and does not include new infections of Tuberculosis in HIV positive cases.

SR Table 14: Prevalence, incidence, and YLDs for 2016, percentage change of YLD counts and percentage change of age-standardised YLD rates between 2006 and 2016 by cause and impairments, for all ages, Philippines.

| Cause                                                                                | Prevalence in thousands (95% UI)            | Incidence in thousands (95% UI)               | YLDs in thousands (95% UI)              |                                                   |                                                     |
|--------------------------------------------------------------------------------------|---------------------------------------------|-----------------------------------------------|-----------------------------------------|---------------------------------------------------|-----------------------------------------------------|
|                                                                                      | 2016 counts                                 | 2016 counts                                   | 2016 counts                             | Percentage change in counts between 2006 and 2016 | Percentage change in age-standardised rates between |
| <b>All causes</b>                                                                    | <b>100,075.9</b><br>(99,759.4 to 100,362.8) | <b>735,125.9†</b><br>(696,043.0 to 775,629.9) | <b>9,404.9</b><br>(6,998.0 to 12,140.6) | <b>20.3</b><br>(17.0 to 23.8)                     | <b>-3.6</b><br>(-5.9 to -1.4)                       |
| <b>Communicable, maternal, neonatal, and nutritional disorders</b>                   | <b>81,823.7</b><br>(79,658.2 to 83,893.8)   | <b>419,728.4†</b><br>(384,569.1 to 458,103.7) | <b>1,148.4</b><br>(820.4 to 1,563.2)    | <b>-8.1</b><br>(-16.5 to 1.3)                     | <b>-22.9</b><br>(-30.1 to -15.0)                    |
| <b>HIV/AIDS and tuberculosis</b>                                                     | <b>31,707.6</b><br>(28,387.4 to 34,195.5)   | <b>252.4†</b><br>(220.8 to 284.7)             | <b>123.9</b><br>(81.2 to 175.1)         | <b>32.2</b><br>(19.3 to 45.6)                     | <b>0.2</b><br>(-7.8 to 9.2)                         |
| Tuberculosis                                                                         | 29,486.7<br>(26,872.7 to 32,659.9)          | 228.0†<br>(200.4 to 259.3)                    | 104.1<br>(68.0 to 141.6)                | 21.5<br>(11.3 to 33.1)                            | -6.4<br>(-13.6 to 1.4)                              |
| Drug-susceptible tuberculosis                                                        | 333.0<br>(287.8 to 386.5)                   | 221.1<br>(192.4 to 253.3)                     | 100.9<br>(65.4 to 138.5)                | 22.4<br>(9.7 to 39.1)                             | -5.8<br>(-15.0 to 7.1)                              |
| Multidrug-resistant tuberculosis without extensive drug resistance                   | 9.5<br>(2.9 to 23.4)                        | 6.3<br>(2.0 to 15.6)                          | 2.9<br>(0.9 to 7.4)                     | -7.0<br>(-84.5 to 507.3)                          | -28.6<br>(-88.0 to 352.3)                           |
| Extensively drug-resistant tuberculosis                                              | 0.9<br>(0.3 to 2.1)                         | 0.6<br>(0.2 to 1.4)                           | 0.3<br>(0.1 to 0.7)                     | 204.5<br>(-47.9 to 1,792.4)                       | 133.8<br>(-60.1 to 1,365.2)                         |
| Latent tuberculosis infection                                                        | 29,143.4<br>(26,515.7 to 32,324.4)          | --                                            | --                                      | --                                                | --                                                  |
| HIV/AIDS                                                                             | 169.8<br>(83.8 to 291.5)                    | 24.4^<br>(12.9 to 39.9)                       | 19.9<br>(8.0 to 42.8)                   | 144.5<br>(88.6 to 224.3)                          | 89.8<br>(46.1 to 156.5)                             |
| Drug-susceptible HIV/AIDS - Tuberculosis                                             | 0.6<br>(0.4 to 1.0)                         | 0.4<br>(0.2 to 0.7)                           | 0.3<br>(0.1 to 0.5)                     | 0.3<br>(-10.5 to 16.0)                            | -18.8<br>(-27.5 to -6.3)                            |
| Multidrug-resistant HIV/AIDS - Tuberculosis without extensive drug resistance        | < 0.05<br>(< 0.05 to 0.1)                   | < 0.05<br>(< 0.05 to < 0.05)                  | < 0.05<br>(< 0.05 to < 0.05)            | -24.8<br>(-87.6 to 371.7)                         | -39.1<br>(-90.0 to 281.8)                           |
| Extensively drug-resistant HIV/AIDS - Tuberculosis                                   | < 0.05<br>(< 0.05 to < 0.05)                | < 0.05<br>(< 0.05 to < 0.05)                  | < 0.05<br>(< 0.05 to < 0.05)            | 147.6<br>(-59.2 to 1,453.5)                       | 100.5<br>(-66.9 to 1,157.4)                         |
| HIV/AIDS resulting in other diseases                                                 | 169.1<br>(83.3 to 290.8)                    | 24.4<br>(12.9 to 39.9)                        | 19.6<br>(7.7 to 42.4)                   | 149.6<br>(92.1 to 237.7)                          | 93.4<br>(48.9 to 164.6)                             |
| <b>Diarrhoea, lower respiratory infections, and other common infectious diseases</b> | <b>6,566.6</b><br>(6,203.7 to 6,936.4)      | <b>382,343.1†</b><br>(347,167.4 to 421,054.5) | <b>308.7</b><br>(211.6 to 427.0)        | <b>11.0</b><br>(7.4 to 14.9)                      | <b>-4.0</b><br>(-6.9 to -0.9)                       |
| Diarrhoeal diseases                                                                  | 877.5<br>(821.8 to 938.8)                   | 58,874.6<br>(55,075.8 to 63,045.9)            | 99.8<br>(68.7 to 139.0)                 | 5.5<br>(-1.1 to 12.5)                             | -7.8<br>(-13.3 to -2.0)                             |
| Intestinal infectious diseases                                                       | 14.7<br>(12.2 to 17.6)                      | 278.4†<br>(241.4 to 324.3)                    | 2.4<br>(1.5 to 3.5)                     | 15.9<br>(-9.8 to 50.5)                            | 4.2<br>(-16.1 to 30.1)                              |
| Typhoid fever                                                                        | 14.1<br>(11.6 to 16.9)                      | 221.8<br>(190.8 to 260.3)                     | 2.2<br>(1.4 to 3.2)                     | 15.9<br>(-11.5 to 54.1)                           | 4.4<br>(-17.4 to 32.7)                              |
| Paratyphoid fever                                                                    | 2.5<br>(2.1 to 3.0)                         | 56.6<br>(48.7 to 66.3)                        | 0.2<br>(0.1 to 0.2)                     | 24.8<br>(2.7 to 50.9)                             | 10.8<br>(-6.6 to 31.5)                              |
| Other intestinal infectious diseases                                                 | --                                          | --                                            | < 0.05<br>(< 0.05 to < 0.05)            | -17.7<br>(-37.4 to 10.1)                          | -24.4<br>(-38.9 to -5.4)                            |
| Lower respiratory infections                                                         | 122.1<br>(113.7 to 131.8)                   | 5,128.4<br>(4,736.6 to 5,572.2)               | 7.4<br>(4.9 to 10.5)                    | 7.9<br>(-4.5 to 21.6)                             | -9.6<br>(-18.2 to -0.9)                             |
| Upper respiratory infections                                                         | 4,095.5<br>(3,648.4 to 4,574.5)             | 310,385.9<br>(274,868.8 to 348,321.8)         | 102.5<br>(61.1 to 159.2)                | 19.5<br>(13.3 to 26.0)                            | 3.2<br>(-1.8 to 8.3)                                |
| Otitis media                                                                         | 1,206.5<br>(1,072.9 to 1,340.4)             | 4,847.2<br>(3,816.8 to 6,118.2)               | 36.7<br>(22.8 to 55.6)                  | 4.2<br>(-3.5 to 12.6)                             | -7.5<br>(-14.0 to -0.5)                             |
| Meningitis                                                                           | 214.2<br>(183.6 to 246.5)                   | 39.9<br>(34.5 to 46.1)                        | 24.3<br>(16.7 to 32.5)                  | 4.7<br>(-2.5 to 12.7)                             | -10.7<br>(-16.6 to -4.0)                            |
| Pneumococcal meningitis                                                              | 82.6<br>(69.6 to 97.0)                      | 6.4<br>(5.0 to 8.1)                           | 10.1<br>(6.9 to 14.0)                   | -6.8<br>(-19.3 to 9.1)                            | -21.0<br>(-31.1 to -8.2)                            |
| H influenzae type B meningitis                                                       | 33.6<br>(27.4 to 41.0)                      | 5.4<br>(4.0 to 7.1)                           | 4.9<br>(3.3 to 6.5)                     | -8.1<br>(-16.1 to 0.3)                            | -21.0<br>(-28.2 to -13.5)                           |
| Meningococcal infection                                                              | 8.8<br>(6.5 to 11.6)                        | 2.5<br>(1.9 to 3.4)                           | 1.0<br>(0.7 to 1.4)                     | 8.8<br>(2.3 to 15.1)                              | -7.9<br>(-13.2 to -2.8)                             |
| Other meningitis                                                                     | 89.2<br>(67.6 to 112.3)                     | 25.6<br>(21.7 to 30.2)                        | 8.3<br>(5.6 to 11.3)                    | 35.1<br>(25.7 to 46.0)                            | 15.9<br>(8.2 to 25.1)                               |
| Encephalitis                                                                         | 251.0<br>(168.3 to 366.5)                   | 111.8<br>(96.8 to 129.5)                      | 29.2<br>(20.3 to 38.6)                  | 17.0<br>(0.8 to 34.0)                             | -2.4<br>(-15.1 to 10.5)                             |
| Diphtheria                                                                           | < 0.05<br>(< 0.05 to < 0.05)                | 0.1<br>(0.1 to 0.2)                           | < 0.05<br>(< 0.05 to < 0.05)            | 15.0<br>(-38.6 to 121.8)                          | 3.7<br>(-43.4 to 88.6)                              |
| Whooping cough                                                                       | 36.3<br>(28.3 to 45.7)                      | 265.2<br>(206.8 to 333.4)                     | 1.8<br>(1.1 to 2.9)                     | 25.6<br>(4.0 to 52.8)                             | 17.8<br>(-2.6 to 43.4)                              |
| Tetanus                                                                              | 0.8<br>(0.7 to 0.9)                         | 2.1<br>(1.3 to 3.1)                           | < 0.05<br>(< 0.05 to < 0.05)            | -28.1<br>(-41.6 to -9.0)                          | -41.4<br>(-51.9 to -25.0)                           |
| Measles                                                                              | 2.2<br>(0.8 to 5.1)                         | 80.4<br>(27.6 to 187.6)                       | 0.2<br>(0.1 to 0.5)                     | -60.8<br>(-78.6 to -23.7)                         | -63.1<br>(-79.8 to -28.3)                           |
| Varicella and herpes zoster                                                          | 112.7<br>(103.1 to 121.5)                   | 2,329.2<br>(2,233.8 to 2,422.1)               | 4.4<br>(2.7 to 6.9)                     | 28.5<br>(12.7 to 46.0)                            | 0.5<br>(-9.9 to 11.7)                               |
| <b>Neglected tropical diseases and malaria</b>                                       | <b>48,407.6</b><br>(43,775.2 to 53,219.4)   | <b>5,688.3†</b><br>(4,343.7 to 7,475.6)       | <b>244.2</b><br>(152.2 to 380.2)        | <b>-42.4</b><br>(-54.0 to -28.0)                  | <b>-52.0</b><br>(-62.1 to -40.0)                    |
| Malaria                                                                              | 1.9<br>(1.5 to 2.3)                         | 5.1<br>(5.1 to 5.1)                           | 0.6<br>(0.4 to 0.7)                     | -40.1<br>(-54.8 to -25.3)                         | -48.2<br>(-60.1 to -36.0)                           |
| Chagas disease                                                                       | < 0.05<br>(< 0.05 to < 0.05)                | --                                            | < 0.05<br>(< 0.05 to < 0.05)            | -51.9<br>(-66.6 to -25.3)                         | -67.0<br>(-78.9 to -46.2)                           |
| Leishmaniasis                                                                        | --                                          | --                                            | --                                      | --                                                | --                                                  |
| Visceral leishmaniasis                                                               | --                                          | --                                            | --                                      | --                                                | --                                                  |
| Cutaneous and mucocutaneous leishmaniasis                                            | --                                          | --                                            | --                                      | --                                                | --                                                  |
| African trypanosomiasis                                                              | --                                          | --                                            | --                                      | --                                                | --                                                  |
| Schistosomiasis                                                                      | 6,027.8<br>(5,774.4 to 6,284.8)             | 2,136.1<br>(2,011.8 to 2,268.6)               | 43.1<br>(21.1 to 81.1)                  | -13.0<br>(-16.7 to -7.5)                          | -31.4<br>(-34.4 to -27.3)                           |
| Cysticercosis                                                                        | 26.2<br>(17.9 to 35.2)                      | --                                            | 4.8<br>(2.5 to 7.7)                     | 38.4<br>(-7.6 to 99.5)                            | 4.2<br>(-29.5 to 47.4)                              |
| Cystic echinococcosis                                                                | 0.6<br>(0.1 to 2.6)                         | 0.1<br>(< 0.05 to 0.6)                        | 0.1<br>(< 0.05 to 0.3)                  | -33.3<br>(-95.2 to 838.5)                         | -46.2<br>(-95.9 to 537.9)                           |
| Lymphatic filariasis                                                                 | 333.7<br>(223.5 to 506.6)                   | 99.5<br>(90.5 to 109.3)                       | 24.3<br>(10.3 to 47.9)                  | -49.7<br>(-79.2 to -26.7)                         | -59.0<br>(-82.8 to -40.7)                           |
| Onchocerciasis                                                                       | --                                          | --                                            | --                                      | --                                                | --                                                  |
| Trachoma                                                                             | --                                          | --                                            | --                                      | --                                                | --                                                  |
| Dengue                                                                               | 204.1<br>(110.2 to 342.8)                   | 3,411.8<br>(2,082.8 to 5,145.6)               | 33.5<br>(14.4 to 62.8)                  | 96.6<br>(53.7 to 339.2)                           | 68.8<br>(34.1 to 274.1)                             |
| Yellow fever                                                                         | --                                          | --                                            | --                                      | --                                                | --                                                  |
| Rabies                                                                               | < 0.05<br>(< 0.05 to < 0.05)                | 0.2<br>(0.2 to 0.3)                           | < 0.05<br>(< 0.05 to < 0.05)            | -54.6<br>(-72.2 to -30.9)                         | -61.8<br>(-75.7 to -43.8)                           |
| Intestinal nematode infections                                                       | 44,514.7<br>(39,451.7 to 49,808.5)          | --                                            | 122.4<br>(65.6 to 211.8)                | -57.9<br>(-69.0 to -42.8)                         | -64.8<br>(-74.7 to -51.1)                           |
| Ascariasis                                                                           | 24,880.2<br>(18,821.7 to 32,912.7)          | --                                            | 42.4<br>(19.6 to 81.9)                  | -71.9<br>(-84.4 to -48.8)                         | -76.7<br>(-87.5 to -54.3)                           |

| Cause                                                                   | Prevalence in thousands (95% UI)                 | Incidence in thousands (95% UI)                      | YLDs in thousands (95% UI)                     |                                                   |                                                     |
|-------------------------------------------------------------------------|--------------------------------------------------|------------------------------------------------------|------------------------------------------------|---------------------------------------------------|-----------------------------------------------------|
|                                                                         | 2016 counts                                      | 2016 counts                                          | 2016 counts                                    | Percentage change in counts between 2006 and 2016 | Percentage change in age-standardised rates between |
| Trichuriasis                                                            | 15,067.8<br>(13,422.8 to 16,983.5)               | --                                                   | 23.8<br>(11.5 to 45.4)                         | -10.1<br>(-21.7 to 3.3)                           | -23.6<br>(-33.9 to -11.4)                           |
| Hookworm disease                                                        | 13,733.1<br>(10,815.1 to 17,378.6)               | --                                                   | 56.1<br>(30.3 to 97.0)                         | -50.4<br>(-66.8 to -25.5)                         | -58.2<br>(-72.8 to -34.6)                           |
| Food-borne trematodiasis                                                | 434.9<br>(364.7 to 510.1)                        | 30.6<br>(26.0 to 35.9)                               | 5.6<br>(2.8 to 10.1)                           | 32.5<br>(12.4 to 55.2)                            | 0.6<br>(-11.8 to 14.1)                              |
| Leprosy                                                                 | 3.1<br>(2.9 to 3.4)                              | 0.4<br>(0.4 to 0.5)                                  | 0.2<br>(0.1 to 0.3)                            | 5.7<br>(-18.6 to 37.1)                            | -22.0<br>(-40.1 to 2.5)                             |
| Ebola virus disease                                                     | --                                               | --                                                   | --                                             | --                                                | --                                                  |
| Zika virus disease                                                      | 0.1<br>( $< 0.05$ to 0.2)                        | 4.4<br>(1.3 to 13.4)                                 | $< 0.05$<br>( $< 0.05$ to $< 0.05$ )           | --                                                | --                                                  |
| Guinea worm disease                                                     | --                                               | --                                                   | --                                             | --                                                | --                                                  |
| Other neglected tropical diseases                                       | 412.7<br>(344.9 to 486.3)                        | --                                                   | 9.8<br>(5.6 to 15.4)                           | -1.4<br>(-18.8 to 20.0)                           | -7.5<br>(-23.1 to 11.2)                             |
| <b>Maternal disorders</b>                                               | <b>167.5</b><br><b>(127.2 to 216.3)</b>          | <b>2,950.8†</b><br><b>(2,723.0 to 3,269.1)</b>       | <b>11.6</b><br><b>(7.2 to 16.9)</b>            | <b>13.1</b><br><b>(-17.5 to 53.6)</b>             | <b>-4.6</b><br><b>(-30.4 to 29.8)</b>               |
| Maternal haemorrhage                                                    | 23.3<br>(20.0 to 28.2)                           | 145.4<br>(128.4 to 166.5)                            | 0.8<br>(0.5 to 1.2)                            | 1.3<br>(-34.4 to 55.1)                            | -14.6<br>(-44.4 to 31.5)                            |
| Maternal sepsis and other pregnancy related infections                  | 27.2<br>(15.1 to 42.3)                           | 326.2<br>(295.9 to 354.4)                            | 1.3<br>(0.6 to 2.3)                            | 29.3<br>(-42.4 to 186.1)                          | 8.3<br>(-51.6 to 140.6)                             |
| Maternal hypertensive disorders                                         | 105.2<br>(71.1 to 140.6)                         | 540.9<br>(517.3 to 565.6)                            | 5.2<br>(2.9 to 8.3)                            | 20.5<br>(-26.2 to 95.6)                           | 1.7<br>(-38.2 to 64.6)                              |
| Maternal obstructed labour and uterine rupture                          | 2.6<br>(1.6 to 3.9)                              | 189.9<br>(177.6 to 203.9)                            | 0.8<br>(0.4 to 1.5)                            | 1.4<br>(-56.9 to 174.9)                           | -14.8<br>(-64.2 to 132.7)                           |
| Maternal abortion, miscarriage, and ectopic pregnancy                   | 14.3<br>(9.5 to 20.0)                            | 1,748.5<br>(1,526.1 to 2,063.5)                      | 1.6<br>(0.9 to 2.6)                            | -0.2<br>(-43.9 to 78.8)                           | -15.5<br>(-52.8 to 52.5)                            |
| Other maternal disorders                                                | --                                               | --                                                   | 1.8<br>(1.1 to 2.6)                            | 7.9<br>(-21.2 to 46.9)                            | -9.0<br>(-33.5 to 23.9)                             |
| <b>Neonatal disorders</b>                                               | <b>1,375.7</b><br><b>(1,130.8 to 1,718.0)</b>    | --                                                   | <b>186.0</b><br><b>(128.7 to 264.6)</b>        | <b>17.0</b><br><b>(-3.0 to 41.5)</b>              | <b>3.2</b><br><b>(-14.3 to 24.5)</b>                |
| Neonatal preterm birth complications                                    | 1,287.5<br>(1,017.6 to 1,698.9)                  | --                                                   | 146.0<br>(98.4 to 210.8)                       | 17.8<br>(-5.9 to 47.0)                            | 3.6<br>(-16.9 to 29.2)                              |
| Neonatal encephalopathy due to birth asphyxia and trauma                | 21.4<br>(11.7 to 39.5)                           | --                                                   | 2.9<br>(0.6 to 8.5)                            | -9.6<br>(-57.4 to 125.1)                          | -20.9<br>(-62.6 to 97.3)                            |
| Neonatal sepsis and other neonatal infections                           | 55.1<br>(14.6 to 120.8)                          | --                                                   | 23.4<br>(4.7 to 58.0)                          | 21.8<br>(-2.2 to 98.2)                            | 7.6<br>(-12.7 to 84.0)                              |
| Hemolytic disease and other neonatal jaundice                           | 19.3<br>(16.5 to 22.4)                           | --                                                   | 6.2<br>(4.6 to 8.1)                            | 11.2<br>(-1.1 to 24.7)                            | -3.3<br>(-13.0 to 7.7)                              |
| Other neonatal disorders                                                | --                                               | --                                                   | 7.4<br>(4.9 to 10.9)                           | 5.5<br>(-14.5 to 31.7)                            | -1.2<br>(-19.9 to 23.3)                             |
| <b>Nutritional deficiencies</b>                                         | <b>27,351.7</b><br><b>(25,161.3 to 30,305.4)</b> | <b>21,262.7†</b><br><b>(17,227.0 to 27,072.2)</b>    | <b>228.6</b><br><b>(146.2 to 345.4)</b>        | <b>-5.3</b><br><b>(-17.6 to 9.2)</b>              | <b>-19.5</b><br><b>(-28.3 to -9.4)</b>              |
| Protein-energy malnutrition                                             | 824.8<br>(606.7 to 1,098.5)                      | 434.1<br>(324.7 to 566.7)                            | 24.9<br>(10.3 to 49.0)                         | 14.7<br>(-50.8 to 174.9)                          | 7.4<br>(-54.0 to 157.6)                             |
| Iodine deficiency                                                       | 608.3<br>(539.5 to 678.3)                        | 19.9<br>(18.0 to 22.0)                               | 15.5<br>(10.2 to 22.1)                         | 5.8<br>(-6.6 to 20.0)                             | -14.0<br>(-23.1 to -3.6)                            |
| Vitamin A deficiency                                                    | 19,163.0<br>(16,337.2 to 22,874.0)               | 20,808.7<br>(16,805.5 to 26,601.8)                   | 2.2<br>(1.2 to 3.8)                            | 1.7<br>(-17.1 to 26.0)                            | -8.8<br>(-24.7 to 11.2)                             |
| Iron-deficiency anaemia                                                 | 8,905.1<br>(8,066.8 to 9,839.2)                  | --                                                   | 185.1<br>(114.1 to 286.7)                      | -8.4<br>(-18.6 to 2.0)                            | -22.3<br>(-29.7 to -14.3)                           |
| Other nutritional deficiencies                                          | --                                               | --                                                   | 0.8<br>(0.3 to 1.7)                            | 14.3<br>(-53.4 to 177.1)                          | 7.1<br>(-56.3 to 159.6)                             |
| <b>Other communicable, maternal, neonatal, and nutritional diseases</b> | <b>21,523.5</b><br><b>(20,113.9 to 23,135.0)</b> | <b>7,231.1</b><br><b>(6,516.2 to 7,951.9)</b>        | <b>41.8</b><br><b>(26.8 to 62.9)</b>           | <b>8.7</b><br><b>(0.8 to 16.5)</b>                | <b>-10.0</b><br><b>(-16.5 to -3.8)</b>              |
| Sexually transmitted diseases excluding HIV                             | 13,353.4<br>(12,385.3 to 14,400.0)               | 5,183.5<br>(4,673.6 to 5,726.8)                      | 30.0<br>(19.1 to 46.3)                         | 18.9<br>(10.4 to 28.7)                            | -3.7<br>(-10.2 to 3.6)                              |
| Syphilis                                                                | 640.1<br>(537.5 to 762.1)                        | 383.6<br>(315.1 to 461.3)                            | 1.9<br>(1.3 to 2.5)                            | 41.0<br>(24.0 to 60.4)                            | 2.7<br>(-10.5 to 17.3)                              |
| Chlamydial infection                                                    | 1,511.0<br>(1,168.0 to 1,898.5)                  | 1,278.9<br>(1,026.9 to 1,595.8)                      | 9.5<br>(5.7 to 15.0)                           | 17.8<br>(4.9 to 34.7)                             | -2.8<br>(-13.6 to 10.7)                             |
| Gonococcal infection                                                    | 171.3<br>(112.8 to 250.2)                        | 469.3<br>(254.4 to 765.4)                            | 1.1<br>(0.7 to 1.9)                            | 15.5<br>(-5.2 to 40.2)                            | -5.2<br>(-22.9 to 15.9)                             |
| Trichomoniasis                                                          | 1,668.0<br>(1,397.9 to 1,965.5)                  | 1,427.5<br>(1,184.4 to 1,686.3)                      | 1.6<br>(0.6 to 3.4)                            | 23.2<br>(12.7 to 33.8)                            | -0.9<br>(-8.7 to 7.4)                               |
| Genital herpes                                                          | 9,630.4<br>(8,275.2 to 11,253.6)                 | 735.5<br>(625.6 to 874.0)                            | 2.5<br>(0.8 to 5.8)                            | 27.9<br>(17.8 to 38.3)                            | -0.3<br>(-7.3 to 6.8)                               |
| Other sexually transmitted diseases                                     | 645.5<br>(602.3 to 693.7)                        | 888.7<br>(763.3 to 1,054.6)                          | 13.5<br>(8.7 to 19.4)                          | 15.4<br>(4.1 to 28.6)                             | -6.3<br>(-15.7 to 4.2)                              |
| Hepatitis                                                               | 9,433.5<br>(7,916.5 to 11,295.7)                 | 2,047.5<br>(1,540.6 to 2,501.8)                      | 2.1<br>(1.4 to 3.3)                            | -5.2<br>(-23.2 to 16.6)                           | -20.9<br>(-35.4 to -4.0)                            |
| Acute hepatitis A                                                       | 71.1<br>(35.2 to 97.1)                           | 924.0<br>(457.8 to 1,261.8)                          | 0.7<br>(0.4 to 1.1)                            | -9.5<br>(-39.9 to 42.4)                           | -19.8<br>(-44.8 to 20.5)                            |
| Hepatitis B                                                             | 7,553.8<br>(6,026.4 to 9,360.2)                  | 990.8<br>(753.9 to 1,281.9)                          | 1.3<br>(0.8 to 2.2)                            | -3.7<br>(-26.3 to 24.1)                           | -22.4<br>(-40.7 to -1.0)                            |
| Hepatitis C                                                             | 1,804.2<br>(1,600.7 to 2,021.7)                  | 75.0<br>(66.6 to 84.3)                               | 0.1<br>( $< 0.05$ to 0.1)                      | 9.0<br>(-15.7 to 37.9)                            | -4.3<br>(-22.5 to 16.8)                             |
| Acute hepatitis E                                                       | 4.4<br>(3.7 to 5.5)                              | 57.6<br>(48.1 to 71.1)                               | 0.1<br>(0.1 to 0.2)                            | -2.3<br>(-12.2 to 8.3)                            | -15.7<br>(-22.8 to -7.9)                            |
| Other infectious diseases                                               | 311.2<br>(265.6 to 360.9)                        | 0.1<br>(0.1 to 0.1)                                  | 9.7<br>(5.8 to 15.1)                           | -12.0<br>(-27.2 to 6.2)                           | -24.3<br>(-38.4 to -8.0)                            |
| <b>Non-communicable diseases</b>                                        | <b>92,724.9</b><br><b>(92,151.6 to 93,313.9)</b> | <b>309,969.7†</b><br><b>(296,445.4 to 324,025.1)</b> | <b>7,759.8</b><br><b>(5,719.4 to 10,006.6)</b> | <b>25.1</b><br><b>(21.8 to 28.7)</b>              | <b>-1.2</b><br><b>(-3.4 to 1.0)</b>                 |
| <b>Neoplasms</b>                                                        | <b>247.4</b><br><b>(231.6 to 262.7)</b>          | <b>108.3</b><br><b>(105.2 to 112.1)</b>              | <b>37.2</b><br><b>(27.0 to 48.3)</b>           | <b>41.5</b><br><b>(34.8 to 49.1)</b>              | <b>1.3</b><br><b>(-3.4 to 6.2)</b>                  |
| Lip and oral cavity cancer                                              | 12.2<br>(11.5 to 13.1)                           | 3.5<br>(3.2 to 3.7)                                  | 1.3<br>(0.9 to 1.7)                            | 39.4<br>(23.9 to 56.0)                            | -4.4<br>(-17.1 to 8.2)                              |
| Nasopharynx cancer                                                      | 7.6<br>(6.7 to 8.7)                              | 2.3<br>(2.1 to 2.6)                                  | 1.0<br>(0.7 to 1.3)                            | 31.5<br>(14.7 to 51.9)                            | -4.0<br>(-14.3 to 8.5)                              |
| Other pharynx cancer                                                    | 1.2<br>(1.1 to 1.3)                              | 0.5<br>(0.5 to 0.5)                                  | 0.2<br>(0.1 to 0.2)                            | 37.7<br>(27.2 to 48.3)                            | -5.8<br>(-12.7 to 1.5)                              |
| Oesophageal cancer                                                      | 0.9<br>(0.8 to 1.0)                              | 0.8<br>(0.8 to 0.9)                                  | 0.2<br>(0.1 to 0.3)                            | 33.0<br>(21.6 to 44.7)                            | -9.9<br>(-17.0 to -2.3)                             |
| Stomach cancer                                                          | 3.9<br>(3.6 to 4.1)                              | 2.7<br>(2.5 to 2.8)                                  | 0.7<br>(0.5 to 0.9)                            | 22.0<br>(10.8 to 33.5)                            | -16.0<br>(-25.1 to -6.2)                            |
| Colon and rectum cancer                                                 | 32.4<br>(29.6 to 35.2)                           | 10.4<br>(9.5 to 11.3)                                | 3.6<br>(2.6 to 4.6)                            | 61.0<br>(38.4 to 87.3)                            | 10.3<br>(-5.1 to 28.1)                              |
| Liver cancer                                                            | 3.5<br>(3.0 to 4.1)                              | 7.8<br>(7.2 to 8.6)                                  | 1.7<br>(1.2 to 2.3)                            | 77.0<br>(58.5 to 98.0)                            | 23.6<br>(11.9 to 37.2)                              |
| Liver cancer due to hepatitis B                                         | 3.4<br>(2.8 to 4.1)                              | 3.6<br>(3.0 to 4.3)                                  | 0.8<br>(0.5 to 1.1)                            | 74.1<br>(55.7 to 96.4)                            | 23.5<br>(11.4 to 38.3)                              |



| Cause                                              | Prevalence in thousands (95% UI)              | Incidence in thousands (95% UI)                | YLDs in thousands (95% UI)              |                                                   |                                                     |
|----------------------------------------------------|-----------------------------------------------|------------------------------------------------|-----------------------------------------|---------------------------------------------------|-----------------------------------------------------|
|                                                    | 2016 counts                                   | 2016 counts                                    | 2016 counts                             | Percentage change in counts between 2006 and 2016 | Percentage change in age-standardised rates between |
| Liver cancer due to hepatitis C                    | 1.3<br>(0.9 to 1.7)                           | 1.4<br>(1.0 to 1.9)                            | 0.3<br>(0.2 to 0.5)                     | 82.6<br>(62.9 to 104.2)                           | 22.8<br>(10.1 to 37.0)                              |
| Liver cancer due to alcohol use                    | 1.1<br>(0.8 to 1.5)                           | 1.2<br>(0.9 to 1.6)                            | 0.3<br>(0.2 to 0.4)                     | 77.5<br>(54.9 to 102.1)                           | 21.5<br>(7.1 to 38.3)                               |
| Liver cancer due to other causes                   | 1.5<br>(1.1 to 2.0)                           | 1.6<br>(1.2 to 2.1)                            | 0.4<br>(0.2 to 0.5)                     | 78.6<br>(53.3 to 106.6)                           | 26.5<br>(9.7 to 44.5)                               |
| Gallbladder and biliary tract cancer               | 0.3<br>(0.3 to 0.5)                           | 0.4<br>(0.4 to 0.6)                            | 0.1<br>(0.1 to 0.1)                     | 29.2<br>(20.6 to 37.5)                            | -12.4<br>(-18.0 to -7.0)                            |
| Pancreatic cancer                                  | 1.6<br>(1.5 to 1.7)                           | 2.2<br>(2.1 to 2.3)                            | 0.5<br>(0.3 to 0.6)                     | 45.8<br>(36.1 to 56.5)                            | -1.3<br>(-8.0 to 6.1)                               |
| Larynx cancer                                      | 2.9<br>(2.7 to 3.1)                           | 0.9<br>(0.9 to 1.0)                            | 0.4<br>(0.3 to 0.5)                     | 35.0<br>(20.1 to 50.7)                            | -9.0<br>(-18.5 to 1.8)                              |
| Tracheal, bronchus, and lung cancer                | 13.7<br>(12.7 to 14.8)                        | 12.5<br>(11.5 to 13.4)                         | 2.9<br>(1.9 to 3.8)                     | 28.5<br>(5.6 to 57.0)                             | -12.7<br>(-27.3 to 5.1)                             |
| Malignant skin melanoma                            | 1.0<br>(0.8 to 1.5)                           | 0.3<br>(0.2 to 0.4)                            | 0.1<br>(0.1 to 0.1)                     | 32.2<br>(9.6 to 66.7)                             | -8.0<br>(-24.7 to 17.6)                             |
| Non-melanoma skin cancer                           | 0.2<br>(0.1 to 0.3)                           | 1.5<br>(1.3 to 1.8)                            | < 0.05<br>(< 0.05 to < 0.05)            | 18.2<br>(-16.2 to 59.2)                           | -21.1<br>(-44.9 to 10.5)                            |
| Non-melanoma skin cancer (squamous-cell carcinoma) | 0.2<br>(0.1 to 0.3)                           | 0.6<br>(0.5 to 0.7)                            | < 0.05<br>(< 0.05 to < 0.05)            | 13.8<br>(-24.9 to 59.6)                           | -23.9<br>(-50.2 to 10.9)                            |
| Non-melanoma skin cancer (basal-cell carcinoma)    | 0.1<br>(0.1 to 0.2)                           | 1.0<br>(0.7 to 1.2)                            | < 0.05<br>(< 0.05 to < 0.05)            | 57.6<br>(38.5 to 81.2)                            | 7.2<br>(-6.8 to 25.1)                               |
| Breast cancer                                      | 83.3<br>(74.0 to 91.9)                        | 18.3<br>(16.3 to 20.3)                         | 7.7<br>(5.4 to 10.3)                    | 49.4<br>(24.7 to 77.5)                            | 6.9<br>(-8.5 to 24.5)                               |
| Cervical cancer                                    | 27.1<br>(24.0 to 30.7)                        | 6.9<br>(6.1 to 7.7)                            | 2.5<br>(1.8 to 3.5)                     | 26.3<br>(3.8 to 53.1)                             | -6.6<br>(-23.4 to 13.9)                             |
| Uterine cancer                                     | 12.1<br>(10.7 to 13.5)                        | 2.6<br>(2.3 to 2.9)                            | 1.0<br>(0.7 to 1.4)                     | 40.1<br>(17.3 to 67.0)                            | -1.7<br>(-16.7 to 15.8)                             |
| Ovarian cancer                                     | 13.5<br>(12.0 to 15.1)                        | 4.2<br>(3.8 to 4.7)                            | 2.0<br>(1.3 to 2.7)                     | 45.5<br>(11.0 to 90.4)                            | 6.2<br>(-18.5 to 40.4)                              |
| Prostate cancer                                    | 22.9<br>(19.0 to 26.5)                        | 6.4<br>(5.4 to 7.3)                            | 2.8<br>(1.9 to 3.7)                     | 71.7<br>(43.5 to 108.6)                           | 10.5<br>(-6.7 to 31.8)                              |
| Testicular cancer                                  | 0.9<br>(0.8 to 1.1)                           | 0.2<br>(0.2 to 0.2)                            | 0.1<br>(0.1 to 0.1)                     | 24.8<br>(4.7 to 53.1)                             | -9.2<br>(-24.5 to 11.4)                             |
| Kidney cancer                                      | 10.8<br>(9.8 to 11.8)                         | 2.7<br>(2.5 to 2.9)                            | 0.9<br>(0.7 to 1.3)                     | 43.6<br>(22.0 to 68.6)                            | 7.6<br>(-6.0 to 22.2)                               |
| Bladder cancer                                     | 4.6<br>(4.2 to 4.9)                           | 1.2<br>(1.2 to 1.3)                            | 0.5<br>(0.4 to 0.7)                     | 50.5<br>(34.2 to 69.1)                            | 1.9<br>(-8.8 to 14.7)                               |
| Brain and nervous system cancer                    | 5.1<br>(4.2 to 5.8)                           | 2.3<br>(2.0 to 2.6)                            | 0.7<br>(0.5 to 1.0)                     | 26.7<br>(10.6 to 39.9)                            | -1.4<br>(-13.6 to 9.4)                              |
| Thyroid cancer                                     | 14.5<br>(13.0 to 17.0)                        | 2.9<br>(2.6 to 3.4)                            | 1.0<br>(0.7 to 1.4)                     | 61.8<br>(33.4 to 95.3)                            | 11.5<br>(-5.7 to 32.6)                              |
| Mesothelioma                                       | 0.3<br>(0.2 to 0.3)                           | 0.2<br>(0.2 to 0.2)                            | 0.1<br>(< 0.05 to 0.1)                  | 35.3<br>(24.2 to 47.0)                            | -1.3<br>(-9.1 to 6.5)                               |
| Hodgkin lymphoma                                   | 0.6<br>(0.5 to 1.1)                           | 0.2<br>(0.2 to 0.4)                            | 0.1<br>(0.1 to 0.1)                     | 17.8<br>(3.3 to 36.4)                             | -13.8<br>(-22.6 to -2.3)                            |
| Non-Hodgkin's lymphoma                             | 6.5<br>(6.0 to 7.6)                           | 2.3<br>(2.1 to 2.8)                            | 0.7<br>(0.5 to 1.0)                     | 32.1<br>(20.0 to 44.1)                            | -3.0<br>(-12.7 to 7.3)                              |
| Multiple myeloma                                   | 0.7<br>(0.6 to 1.1)                           | 0.4<br>(0.4 to 0.7)                            | 0.2<br>(0.1 to 0.3)                     | 54.3<br>(39.1 to 67.7)                            | 5.1<br>(-5.2 to 14.3)                               |
| Leukaemia                                          | 20.3<br>(18.4 to 22.7)                        | 5.5<br>(5.1 to 6.0)                            | 2.5<br>(1.8 to 3.3)                     | 11.4<br>(-0.5 to 25.3)                            | -7.7<br>(-15.1 to 1.5)                              |
| Acute lymphoid leukaemia                           | 5.0<br>(4.2 to 6.0)                           | 1.3<br>(1.1 to 1.5)                            | 0.6<br>(0.4 to 0.8)                     | 11.3<br>(-10.2 to 36.2)                           | -1.4<br>(-17.7 to 16.6)                             |
| Chronic lymphoid leukaemia                         | 1.1<br>(0.9 to 1.3)                           | 0.2<br>(0.2 to 0.3)                            | 0.1<br>(0.1 to 0.2)                     | 45.7<br>(23.0 to 75.8)                            | 5.2<br>(-9.5 to 23.7)                               |
| Acute myeloid leukaemia                            | 2.4<br>(2.0 to 2.9)                           | 1.3<br>(1.1 to 1.5)                            | 0.4<br>(0.3 to 0.5)                     | 23.7<br>(3.1 to 47.3)                             | 3.6<br>(-9.0 to 17.7)                               |
| Chronic myeloid leukaemia                          | 0.9<br>(0.8 to 1.1)                           | 0.3<br>(0.3 to 0.4)                            | 0.1<br>(0.1 to 0.2)                     | 22.9<br>(8.6 to 39.0)                             | -8.0<br>(-17.5 to 2.3)                              |
| Other leukaemia                                    | 10.9<br>(9.8 to 12.4)                         | 2.4<br>(2.1 to 2.6)                            | 1.2<br>(0.9 to 1.7)                     | 4.5<br>(-9.7 to 21.8)                             | -14.0<br>(-24.0 to -2.8)                            |
| Other neoplasms                                    | 17.2<br>(15.9 to 18.2)                        | 6.0<br>(5.6 to 6.4)                            | 1.8<br>(1.3 to 2.3)                     | 25.4<br>(12.2 to 39.2)                            | -7.1<br>(-17.4 to 4.0)                              |
| <b>Cardiovascular diseases</b>                     | <b>3,934.5</b><br><b>(3,797.6 to 4,075.8)</b> | <b>473.4†</b><br><b>(453.2 to 493.9)</b>       | <b>270.8</b><br><b>(197.1 to 354.3)</b> | <b>40.5</b><br><b>(35.1 to 46.1)</b>              | <b>0.3</b><br><b>(-3.6 to 4.1)</b>                  |
| Rheumatic heart disease                            | 353.9<br>(315.3 to 396.9)                     | 12.2<br>(10.9 to 13.8)                         | 17.0<br>(10.9 to 24.9)                  | 3.9<br>(-6.5 to 14.2)                             | -15.3<br>(-23.2 to -7.3)                            |
| Ischaemic heart disease                            | 1,598.3<br>(1,512.6 to 1,687.1)               | 220.7<br>(207.8 to 234.3)                      | 72.2<br>(49.1 to 99.5)                  | 45.2<br>(38.1 to 52.8)                            | 2.5<br>(-1.9 to 7.1)                                |
| Cerebrovascular disease                            | 544.8<br>(504.6 to 581.3)                     | 100.3‡<br>(92.3 to 108.1)                      | 110.9<br>(77.6 to 142.3)                | 45.2<br>(34.3 to 56.6)                            | 0.5<br>(-7.0 to 8.4)                                |
| Ischaemic stroke                                   | 410.5<br>(363.8 to 455.3)                     | 57.0‡<br>(50.3 to 64.4)                        | 79.8<br>(55.1 to 102.6)                 | 51.3<br>(36.7 to 67.2)                            | 3.1<br>(-6.8 to 13.9)                               |
| Hemorrhagic stroke                                 | 162.3<br>(146.6 to 180.6)                     | 43.3‡<br>(39.3 to 47.7)                        | 31.1<br>(22.0 to 40.8)                  | 31.7<br>(18.9 to 47.8)                            | -6.3<br>(-15.3 to 4.0)                              |
| Hypertensive heart disease                         | 191.9<br>(165.2 to 224.1)                     | --                                             | 15.6<br>(10.8 to 21.5)                  | 46.7<br>(32.9 to 61.9)                            | 1.3<br>(-7.3 to 10.1)                               |
| Cardiomyopathy and myocarditis                     | 31.9<br>(28.2 to 36.2)                        | 14.9†<br>(13.0 to 17.0)                        | 3.6<br>(2.4 to 5.3)                     | 27.2<br>(11.0 to 46.4)                            | 1.8<br>(-8.9 to 13.8)                               |
| Myocarditis                                        | 15.6<br>(13.5 to 18.0)                        | 14.9<br>(13.0 to 17.0)                         | 1.2<br>(0.8 to 1.8)                     | 20.2<br>(3.1 to 40.0)                             | 1.4<br>(-12.8 to 16.6)                              |
| Alcoholic cardiomyopathy                           | 4.6<br>(3.8 to 5.6)                           | --                                             | 0.4<br>(0.3 to 0.6)                     | 36.0<br>(16.6 to 60.5)                            | 2.1<br>(-10.7 to 19.1)                              |
| Other cardiomyopathy                               | 23.3<br>(20.0 to 27.1)                        | --                                             | 2.0<br>(1.3 to 2.9)                     | 30.2<br>(4.4 to 61.7)                             | 1.9<br>(-14.2 to 20.0)                              |
| Atrial fibrillation and flutter                    | 313.8<br>(274.0 to 358.7)                     | 27.9<br>(24.1 to 32.5)                         | 24.6<br>(16.4 to 34.8)                  | 50.3<br>(38.0 to 62.3)                            | 0.5<br>(-6.5 to 7.1)                                |
| Peripheral vascular disease                        | 891.1<br>(771.2 to 1,039.1)                   | 85.1<br>(73.3 to 98.8)                         | 4.6<br>(2.1 to 8.6)                     | 53.1<br>(40.9 to 66.5)                            | -1.2<br>(-8.7 to 7.2)                               |
| Endocarditis                                       | 3.5<br>(3.0 to 4.0)                           | 12.3<br>(11.0 to 13.7)                         | 0.3<br>(0.2 to 0.4)                     | 28.7<br>(21.8 to 36.5)                            | 0.7<br>(-6.0 to 7.7)                                |
| Other cardiovascular and circulatory diseases      | 411.6<br>(346.1 to 484.9)                     | --                                             | 21.9<br>(14.5 to 31.8)                  | 27.7<br>(14.3 to 41.8)                            | 1.0<br>(-8.1 to 10.4)                               |
| <b>Chronic respiratory diseases</b>                | <b>9,300.0</b><br><b>(8,943.3 to 9,652.0)</b> | <b>2,081.1†</b><br><b>(1,948.1 to 2,218.3)</b> | <b>596.5</b><br><b>(481.3 to 727.8)</b> | <b>33.7</b><br><b>(28.2 to 39.5)</b>              | <b>3.4</b><br><b>(-0.3 to 7.2)</b>                  |
| Chronic obstructive pulmonary disease              | 3,041.1<br>(2,907.1 to 3,177.6)               | 240.7<br>(228.1 to 252.8)                      | 311.4<br>(270.1 to 346.4)               | 43.9<br>(36.7 to 51.4)                            | 1.6<br>(-3.3 to 6.5)                                |
| Pneumoconiosis                                     | 6.5<br>(5.7 to 7.3)                           | 0.7<br>(0.6 to 0.8)                            | 0.9<br>(0.6 to 1.3)                     | 48.9<br>(16.8 to 95.5)                            | 0.8<br>(-21.5 to 31.9)                              |
| Silicosis                                          | 5.5<br>(4.7 to 6.3)                           | 0.6<br>(0.5 to 0.7)                            | 0.8<br>(0.5 to 1.1)                     | 50.6<br>(12.4 to 110.1)                           | 1.9<br>(-24.7 to 42.1)                              |



| Cause                                                          | Prevalence in thousands (95% UI)           | Incidence in thousands (95% UI)                     | YLDs in thousands (95% UI)              |                                                   |                                                     |
|----------------------------------------------------------------|--------------------------------------------|-----------------------------------------------------|-----------------------------------------|---------------------------------------------------|-----------------------------------------------------|
|                                                                | 2016 counts                                | 2016 counts                                         | 2016 counts                             | Percentage change in counts between 2006 and 2016 | Percentage change in age-standardised rates between |
| Asbestosis                                                     | 1.0<br>(0.8 to 1.2)                        | 0.1<br>(0.1 to 0.1)                                 | 0.2<br>(0.1 to 0.2)                     | 40.9<br>(32.3 to 48.9)                            | -4.5<br>(-10.3 to 0.7)                              |
| Coal workers pneumoconiosis                                    | --                                         | --                                                  | --                                      | --                                                | --                                                  |
| Other pneumoconiosis                                           | < 0.05<br>(< 0.05 to < 0.05)               | < 0.05<br>(< 0.05 to < 0.05)                        | < 0.05<br>(< 0.05 to < 0.05)            | 39.2<br>(29.0 to 52.0)                            | -5.4<br>(-13.0 to 4.2)                              |
| Asthma                                                         | 6,587.0<br>(6,168.9 to 7,030.5)            | 1,835.8<br>(1,704.2 to 1,975.0)                     | 259.7<br>(170.1 to 373.2)               | 21.6<br>(15.0 to 29.5)                            | 4.8<br>(-0.1 to 10.8)                               |
| Interstitial lung disease and pulmonary sarcoidosis            | 45.7<br>(40.5 to 51.4)                     | 3.9<br>(3.5 to 4.4)                                 | 4.6<br>(3.0 to 6.7)                     | 42.6<br>(25.7 to 61.2)                            | 1.0<br>(-10.5 to 13.7)                              |
| Other chronic respiratory diseases                             | --                                         | --                                                  | 19.9<br>(16.7 to 22.9)                  | 60.4<br>(40.1 to 87.3)                            | 36.6<br>(22.4 to 54.2)                              |
| <b>Cirrhosis and other chronic liver diseases</b>              | <b>321.9<br/>(305.1 to 339.9)</b>          | <b>16.4<br/>(15.7 to 17.1)</b>                      | <b>10.4<br/>(7.1 to 14.4)</b>           | <b>31.4<br/>(13.4 to 51.4)</b>                    | <b>2.9<br/>(-9.0 to 15.8)</b>                       |
| Cirrhosis and other chronic liver diseases due to hepatitis B  | 113.0<br>(98.6 to 127.8)                   | 6.2<br>(5.4 to 6.9)                                 | 2.9<br>(1.9 to 4.2)                     | 44.4<br>(16.2 to 82.4)                            | 4.1<br>(-14.6 to 28.5)                              |
| Cirrhosis and other chronic liver diseases due to hepatitis C  | 50.6<br>(41.7 to 61.8)                     | 2.6<br>(2.2 to 3.1)                                 | 1.3<br>(0.8 to 1.9)                     | 46.9<br>(11.6 to 90.8)                            | 6.3<br>(-19.2 to 38.1)                              |
| Cirrhosis and other chronic liver diseases due to alcohol use  | 52.9<br>(43.6 to 63.9)                     | 3.0<br>(2.5 to 3.6)                                 | 1.4<br>(0.8 to 2.0)                     | 40.4<br>(8.7 to 88.2)                             | -0.2<br>(-22.6 to 30.6)                             |
| Cirrhosis and other chronic liver diseases due to other causes | 105.4<br>(95.6 to 116.0)                   | 4.6<br>(4.2 to 5.0)                                 | 4.9<br>(3.2 to 7.0)                     | 19.5<br>(-6.2 to 53.6)                            | 2.1<br>(-17.2 to 26.1)                              |
| <b>Digestive diseases</b>                                      | <b>1,120.4<br/>(1,056.4 to 1,188.6)</b>    | <b>1,269.3<sup>†</sup><br/>(1,211.5 to 1,332.2)</b> | <b>30.5<br/>(21.2 to 42.0)</b>          | <b>44.2<br/>(32.2 to 57.3)</b>                    | <b>6.4<br/>(-1.0 to 14.9)</b>                       |
| Peptic ulcer disease                                           | 494.6<br>(456.2 to 537.5)                  | 192.0<br>(175.4 to 209.3)                           | 8.1<br>(5.3 to 12.0)                    | 56.2<br>(39.0 to 75.8)                            | 7.4<br>(-3.6 to 19.3)                               |
| Gastritis and duodenitis                                       | 517.2<br>(457.6 to 571.2)                  | 495.0<br>(448.1 to 549.8)                           | 9.1<br>(5.8 to 13.5)                    | 77.2<br>(57.1 to 101.5)                           | 22.8<br>(10.4 to 37.4)                              |
| Appendicitis                                                   | 7.9<br>(7.3 to 8.5)                        | 209.8<br>(194.2 to 226.5)                           | 2.5<br>(1.6 to 3.6)                     | 9.9<br>(-18.3 to 51.7)                            | -7.0<br>(-26.4 to 20.7)                             |
| Paralytic ileus and intestinal obstruction                     | 1.1<br>(0.9 to 1.2)                        | 29.2<br>(26.1 to 32.4)                              | 0.3<br>(0.2 to 0.5)                     | 14.0<br>(10.0 to 18.1)                            | -6.2<br>(-9.2 to -3.1)                              |
| Inguinal, femoral, and abdominal hernia                        | 85.2<br>(69.2 to 100.6)                    | 117.5<br>(102.7 to 133.8)                           | 5.2<br>(3.4 to 7.5)                     | 17.7<br>(-0.7 to 38.7)                            | -8.5<br>(-21.1 to 6.2)                              |
| Inflammatory bowel disease                                     | 7.4<br>(6.9 to 7.9)                        | 31.3<br>(30.2 to 32.5)                              | 1.2<br>(0.8 to 1.6)                     | 23.6<br>(12.3 to 35.6)                            | -4.1<br>(-15.0 to 8.0)                              |
| Vascular intestinal disorders                                  | 0.5<br>(0.5 to 0.6)                        | 3.4<br>(3.0 to 4.0)                                 | 0.2<br>(0.1 to 0.2)                     | 30.6<br>(23.3 to 37.8)                            | 7.5<br>(3.2 to 12.0)                                |
| Gallbladder and biliary diseases                               | 58.4<br>(52.2 to 64.9)                     | 165.8<br>(146.1 to 188.0)                           | 1.2<br>(0.8 to 1.7)                     | 34.7<br>(22.3 to 48.5)                            | -0.5<br>(-10.4 to 10.8)                             |
| Pancreatitis                                                   | 2.8<br>(2.4 to 3.1)                        | 25.3<br>(22.5 to 28.4)                              | 0.4<br>(0.2 to 0.5)                     | 39.0<br>(33.7 to 44.8)                            | 5.4<br>(1.4 to 9.3)                                 |
| Other digestive diseases                                       | --                                         | --                                                  | 2.4<br>(1.7 to 3.3)                     | 45.7<br>(33.3 to 59.4)                            | 8.4<br>(1.0 to 16.4)                                |
| <b>Neurological disorders</b>                                  | <b>34,051.2<br/>(32,490.5 to 35,867.3)</b> | <b>16,101.5<br/>(13,649.8 to 18,834.5)</b>          | <b>799.9<br/>(510.5 to 1,125.7)</b>     | <b>24.9<br/>(0.4 to 58.2)</b>                     | <b>1.0<br/>(-16.1 to 22.8)</b>                      |
| Alzheimer's disease and other dementias                        | 359.7<br>(304.8 to 426.8)                  | 60.0<br>(50.3 to 72.4)                              | 49.9<br>(34.6 to 66.8)                  | 53.5<br>(45.8 to 61.8)                            | -0.3<br>(-4.8 to 4.5)                               |
| Parkinson's disease                                            | 46.0<br>(37.0 to 56.8)                     | 5.0<br>(4.0 to 6.2)                                 | 5.5<br>(3.5 to 7.7)                     | 59.1<br>(39.2 to 81.4)                            | 7.4<br>(-4.0 to 20.2)                               |
| Epilepsy                                                       | 345.4<br>(95.4 to 570.8)                   | 49.9<br>(14.4 to 82.5)                              | 133.0<br>(32.3 to 263.4)                | 20.0<br>(-69.1 to 422.9)                          | 2.7<br>(-73.1 to 340.7)                             |
| Multiple sclerosis                                             | 3.0<br>(2.6 to 3.4)                        | 0.2<br>(0.2 to 0.2)                                 | 0.8<br>(0.6 to 1.2)                     | 43.1<br>(38.6 to 48.6)                            | 11.3<br>(8.0 to 15.0)                               |
| Motor neuron disease                                           | 2.3<br>(2.0 to 2.6)                        | 0.4<br>(0.4 to 0.5)                                 | 0.5<br>(0.3 to 0.7)                     | 28.0<br>(22.4 to 33.9)                            | 4.3<br>(0.8 to 8.1)                                 |
| Migraine                                                       | 12,301.5<br>(11,519.4 to 13,053.1)         | 1,372.8<br>(1,286.5 to 1,464.4)                     | 503.5<br>(319.5 to 716.5)               | 22.9<br>(18.2 to 28.0)                            | -0.1<br>(-3.6 to 3.7)                               |
| Tension-type headache                                          | 25,812.4<br>(22,895.1 to 29,075.5)         | 14,612.7<br>(12,145.6 to 17,339.5)                  | 75.2<br>(46.3 to 114.0)                 | 23.3<br>(17.2 to 30.2)                            | -0.3<br>(-4.9 to 4.6)                               |
| Other neurological disorders                                   | 0.2<br>(0.1 to 0.3)                        | 0.5<br>(0.3 to 0.7)                                 | 31.6<br>(9.0 to 60.9)                   | 43.1<br>(-56.3 to 403.5)                          | 22.4<br>(-58.0 to 265.4)                            |
| <b>Mental and substance use disorders</b>                      | <b>12,524.9<br/>(12,028.4 to 13,056.9)</b> | <b>3,683.0<sup>†</sup><br/>(3,442.1 to 3,944.1)</b> | <b>1,619.9<br/>(1,171.8 to 2,113.4)</b> | <b>23.2<br/>(20.3 to 26.1)</b>                    | <b>0.6<br/>(-1.6 to 2.7)</b>                        |
| Schizophrenia                                                  | 251.3<br>(220.6 to 285.7)                  | 17.0<br>(14.8 to 19.5)                              | 162.6<br>(116.4 to 206.1)               | 28.7<br>(18.3 to 40.5)                            | 1.5<br>(-6.4 to 10.2)                               |
| Alcohol use disorders                                          | 770.1<br>(672.2 to 869.6)                  | 415.5<br>(356.7 to 470.9)                           | 77.1<br>(53.1 to 107.2)                 | 21.7<br>(9.9 to 33.8)                             | -2.6<br>(-11.8 to 6.5)                              |
| Drug use disorders                                             | 799.6<br>(716.2 to 884.6)                  | 117.7<br>(101.0 to 136.4)                           | 134.0<br>(95.5 to 181.4)                | 27.1<br>(14.7 to 41.2)                            | 3.8<br>(-5.4 to 14.3)                               |
| Opioid use disorders                                           | 197.4<br>(162.1 to 243.4)                  | 25.8<br>(21.7 to 31.1)                              | 82.3<br>(56.5 to 112.3)                 | 29.2<br>(14.8 to 46.8)                            | 3.2<br>(-7.4 to 16.1)                               |
| Cocaine use disorders                                          | 14.7<br>(12.4 to 17.6)                     | 1.9<br>(1.5 to 2.3)                                 | 2.1<br>(1.3 to 3.2)                     | 29.9<br>(22.6 to 38.0)                            | 5.2<br>(-0.3 to 11.3)                               |
| Amphetamine use disorders                                      | 142.8<br>(93.0 to 203.4)                   | 15.3<br>(9.7 to 22.5)                               | 19.0<br>(9.9 to 31.8)                   | 24.3<br>(-2.1 to 58.1)                            | 6.4<br>(-16.4 to 34.9)                              |
| Cannabis use disorders                                         | 433.1<br>(346.6 to 539.9)                  | 67.2<br>(52.3 to 83.9)                              | 12.7<br>(7.7 to 18.9)                   | 18.3<br>(2.2 to 38.1)                             | 0.5<br>(-13.0 to 16.7)                              |
| Other drug use disorders                                       | 37.7<br>(33.0 to 42.7)                     | 7.5<br>(6.6 to 8.6)                                 | 17.9<br>(10.6 to 28.3)                  | 27.0<br>(-3.6 to 66.8)                            | 6.7<br>(-17.6 to 37.5)                              |
| Depressive disorders                                           | 2,579.9<br>(2,384.9 to 2,799.2)            | 2,051.9<br>(1,841.9 to 2,276.9)                     | 383.5<br>(263.5 to 528.8)               | 30.1<br>(24.2 to 36.2)                            | 1.4<br>(-2.7 to 5.5)                                |
| Major depressive disorder                                      | 1,201.9<br>(1,067.9 to 1,349.7)            | 1,827.1<br>(1,619.3 to 2,053.3)                     | 248.0<br>(168.5 to 343.5)               | 29.2<br>(20.5 to 38.3)                            | 2.1<br>(-4.1 to 8.7)                                |
| Dysthymia                                                      | 1,410.8<br>(1,228.0 to 1,610.2)            | 224.8<br>(197.2 to 256.7)                           | 135.5<br>(90.0 to 195.0)                | 31.8<br>(27.4 to 36.8)                            | 0.1<br>(-2.7 to 3.1)                                |
| Bipolar disorder                                               | 514.0<br>(439.0 to 602.1)                  | 48.8<br>(41.9 to 56.9)                              | 105.9<br>(66.0 to 157.7)                | 24.6<br>(16.0 to 34.6)                            | 0.5<br>(-6.0 to 7.7)                                |
| Anxiety disorders                                              | 3,349.5<br>(2,952.9 to 3,781.3)            | 558.1<br>(492.2 to 631.1)                           | 325.5<br>(223.9 to 450.4)               | 22.8<br>(14.5 to 31.2)                            | 0.5<br>(-5.8 to 6.8)                                |
| Eating disorders                                               | 103.5<br>(85.1 to 127.1)                   | 70.1<br>(52.5 to 92.9)                              | 21.4<br>(13.9 to 31.1)                  | 29.6<br>(12.1 to 50.9)                            | 11.4<br>(-3.7 to 29.9)                              |
| Anorexia nervosa                                               | 34.2<br>(25.0 to 46.1)                     | 14.8<br>(10.8 to 19.6)                              | 7.3<br>(4.4 to 11.4)                    | 25.0<br>(-1.6 to 60.8)                            | 9.4<br>(-13.8 to 41.7)                              |
| Bulimia nervosa                                                | 66.3<br>(49.7 to 88.8)                     | 55.3<br>(38.3 to 77.9)                              | 14.1<br>(8.5 to 21.5)                   | 32.1<br>(10.6 to 58.8)                            | 12.4<br>(-5.9 to 34.1)                              |
| Autistic spectrum disorders                                    | 848.4<br>(752.6 to 950.9)                  | 7.6<br>(5.1 to 10.7)                                | 122.9<br>(82.6 to 173.4)                | 16.8<br>(10.5 to 23.2)                            | 0.7<br>(-4.4 to 5.7)                                |
| Autism                                                         | 242.9<br>(209.0 to 283.3)                  | 0.8<br>(0.4 to 1.4)                                 | 62.3<br>(40.6 to 91.7)                  | 16.9<br>(6.2 to 28.2)                             | 0.7<br>(-8.0 to 9.9)                                |
| Asperger syndrome and other autistic spectrum disorders        | 602.6<br>(498.5 to 727.1)                  | 6.7<br>(4.3 to 9.8)                                 | 60.6<br>(39.6 to 88.6)                  | 16.8<br>(10.3 to 22.9)                            | 0.7<br>(-4.5 to 5.5)                                |

| Cause                                                      | Prevalence in thousands (95% UI)                 | Incidence in thousands (95% UI)                      | YLDs in thousands (95% UI)                    |                                                   |                                                     |
|------------------------------------------------------------|--------------------------------------------------|------------------------------------------------------|-----------------------------------------------|---------------------------------------------------|-----------------------------------------------------|
|                                                            | 2016 counts                                      | 2016 counts                                          | 2016 counts                                   | Percentage change in counts between 2006 and 2016 | Percentage change in age-standardised rates between |
| Attention-deficit/hyperactivity disorder                   | 566.6<br>(450.3 to 710.3)                        | 29.9<br>(22.3 to 39.6)                               | 6.9<br>(3.8 to 11.2)                          | 11.8<br>(0.3 to 24.2)                             | 0.5<br>(-9.4 to 11.3)                               |
| Conduct disorder                                           | 868.5<br>(706.8 to 1,026.5)                      | 296.6<br>(234.2 to 359.3)                            | 105.8<br>(65.0 to 163.0)                      | 6.5<br>(-0.7 to 13.7)                             | 0.7<br>(-6.2 to 7.5)                                |
| Idiopathic developmental intellectual disability           | 1,060.5<br>(491.2 to 1,723.0)                    | --                                                   | 45.7<br>(19.9 to 82.9)                        | -2.0<br>(-13.4 to 8.9)                            | -16.0<br>(-25.6 to -7.0)                            |
| Other mental and substance use disorders                   | 1,716.9<br>(1,506.4 to 1,986.0)                  | 69.8<br>(61.6 to 80.0)                               | 128.6<br>(88.1 to 185.3)                      | 28.0<br>(21.1 to 35.1)                            | 0.5<br>(-4.2 to 5.3)                                |
| <b>Diabetes, urogenital, blood, and endocrine diseases</b> | <b>32,037.5</b><br><b>(31,445.9 to 32,703.6)</b> | <b>9,500.9†</b><br><b>(8,764.2 to 10,265.3)</b>      | <b>721.6</b><br><b>(507.2 to 993.9)</b>       | <b>43.1</b><br><b>(35.5 to 51.2)</b>              | <b>6.8</b><br><b>(1.2 to 13.0)</b>                  |
| Diabetes mellitus                                          | 4,883.5<br>(4,389.1 to 5,414.1)                  | 294.9<br>(266.6 to 323.6)                            | 459.7<br>(309.1 to 649.3)                     | 51.1<br>(39.6 to 63.8)                            | 9.8<br>(1.4 to 19.4)                                |
| Acute glomerulonephritis                                   | 1.3<br>(1.2 to 1.5)                              | 19.6<br>(17.1 to 22.2)                               | 0.1<br>(< 0.05 to 0.1)                        | 13.7<br>(6.2 to 21.6)                             | -7.7<br>(-12.9 to -2.1)                             |
| Chronic kidney disease                                     | 2,341.9<br>(2,117.7 to 2,555.1)                  | 167.7<br>(151.6 to 184.3)                            | 90.1<br>(67.1 to 116.8)                       | 57.1<br>(44.3 to 70.5)                            | 14.3<br>(6.2 to 22.6)                               |
| Chronic kidney disease due to diabetes mellitus            | 1,388.2<br>(1,235.1 to 1,551.7)                  | 96.7<br>(85.0 to 110.5)                              | 50.6<br>(37.4 to 64.7)                        | 54.5<br>(38.8 to 72.0)                            | 12.2<br>(2.1 to 23.2)                               |
| Chronic kidney disease due to hypertension                 | 397.2<br>(338.8 to 454.9)                        | 16.8<br>(13.9 to 19.8)                               | 22.4<br>(15.8 to 29.8)                        | 68.6<br>(47.5 to 92.5)                            | 15.4<br>(3.4 to 28.5)                               |
| Chronic kidney disease due to glomerulonephritis           | 392.1<br>(333.9 to 456.4)                        | 39.6<br>(32.8 to 46.5)                               | 9.4<br>(6.2 to 13.0)                          | 46.9<br>(23.9 to 74.5)                            | 19.6<br>(4.0 to 37.2)                               |
| Chronic kidney disease due to other causes                 | 164.4<br>(134.2 to 196.6)                        | 14.5<br>(12.1 to 17.3)                               | 7.8<br>(5.4 to 10.8)                          | 56.3<br>(44.4 to 70.9)                            | 20.3<br>(10.9 to 31.2)                              |
| Urinary diseases and male infertility                      | 900.7<br>(824.3 to 972.4)                        | 5,831.6†<br>(5,176.8 to 6,544.1)                     | 23.2<br>(15.3 to 33.1)                        | 36.3<br>(28.0 to 45.9)                            | -1.8<br>(-7.3 to 4.6)                               |
| Interstitial nephritis and urinary tract infections        | 103.3<br>(90.8 to 116.4)                         | 5,407.5<br>(4,758.3 to 6,122.9)                      | 3.4<br>(2.1 to 5.2)                           | 28.6<br>(9.6 to 52.5)                             | 4.8<br>(-9.7 to 21.9)                               |
| Urolithiasis                                               | 13.6<br>(12.1 to 15.5)                           | 362.1<br>(321.5 to 411.5)                            | 1.0<br>(0.7 to 1.4)                           | 29.0<br>(14.3 to 45.2)                            | -6.2<br>(-19.3 to 8.8)                              |
| Benign prostatic hyperplasia                               | 469.9<br>(399.0 to 553.3)                        | 61.9<br>(51.9 to 73.2)                               | 15.3<br>(9.9 to 22.3)                         | 47.1<br>(36.1 to 59.9)                            | -1.0<br>(-7.7 to 6.6)                               |
| Male infertility                                           | 287.4<br>(254.2 to 324.9)                        | --                                                   | 1.7<br>(0.7 to 3.5)                           | 11.9<br>(0.9 to 23.2)                             | -7.0<br>(-16.0 to 2.2)                              |
| Other urinary diseases                                     | --                                               | --                                                   | 1.6<br>(1.0 to 2.4)                           | 5.2<br>(-7.7 to 20.9)                             | -15.0<br>(-24.4 to -4.0)                            |
| Gynecological diseases                                     | 9,250.9<br>(8,772.2 to 9,703.6)                  | 2,991.0†<br>(2,757.0 to 3,205.2)                     | 88.7<br>(58.6 to 130.2)                       | 13.3<br>(3.0 to 21.8)                             | -9.5<br>(-17.4 to -3.0)                             |
| Uterine fibroids                                           | 1,261.0<br>(1,102.2 to 1,433.3)                  | 143.6<br>(122.9 to 168.6)                            | 14.5<br>(8.0 to 25.4)                         | 11.6<br>(0.4 to 20.6)                             | -14.2<br>(-22.3 to -7.8)                            |
| Polycystic ovarian syndrome                                | 59.6<br>(44.8 to 75.5)                           | 60.0<br>(45.2 to 76.3)                               | 0.5<br>(0.2 to 1.0)                           | 20.2<br>(2.0 to 41.4)                             | -0.7<br>(-15.8 to 16.7)                             |
| Female infertility                                         | 84.1<br>(46.3 to 140.9)                          | --                                                   | 0.5<br>(0.2 to 1.1)                           | -6.1<br>(-39.1 to 51.7)                           | -20.6<br>(-47.9 to 25.4)                            |
| Endometriosis                                              | 10.0<br>(8.3 to 12.0)                            | 83.5<br>(68.3 to 102.5)                              | 1.0<br>(0.6 to 1.5)                           | 21.8<br>(-10.0 to 63.4)                           | -0.6<br>(-26.1 to 32.6)                             |
| Genital prolapse                                           | 2,347.2<br>(2,032.7 to 2,684.1)                  | 164.5<br>(140.4 to 192.7)                            | 7.4<br>(3.6 to 13.5)                          | 26.1<br>(13.9 to 37.5)                            | -11.1<br>(-20.1 to -2.5)                            |
| Premenstrual syndrome                                      | 5,866.9<br>(5,494.2 to 6,256.5)                  | 2,158.8<br>(2,000.7 to 2,321.1)                      | 49.3<br>(30.4 to 75.7)                        | 18.8<br>(9.1 to 28.6)                             | -2.1<br>(-10.0 to 5.7)                              |
| Other gynecological diseases                               | 506.6<br>(373.9 to 631.2)                        | 380.6<br>(241.4 to 517.6)                            | 15.6<br>(8.4 to 24.6)                         | -3.9<br>(-35.5 to 23.3)                           | -22.2<br>(-48.2 to 0.1)                             |
| Hemoglobinopathies and hemolytic anaemias                  | 19,543.9<br>(19,101.7 to 20,052.7)               | --                                                   | 23.1<br>(14.3 to 35.0)                        | 23.1<br>(9.7 to 38.3)                             | 2.1<br>(-7.0 to 13.6)                               |
| Thalassemias                                               | 2.0<br>(1.8 to 2.4)                              | --                                                   | 0.1<br>(0.1 to 0.2)                           | 4.1<br>(-18.1 to 24.9)                            | -0.6<br>(-21.4 to 19.2)                             |
| Thalassaemias trait                                        | 1,505.7<br>(1,367.8 to 1,639.3)                  | --                                                   | 15.3<br>(9.4 to 23.5)                         | 40.1<br>(23.3 to 61.4)                            | 19.4<br>(6.6 to 35.5)                               |
| Sickle cell disorders                                      | < 0.05<br>(< 0.05 to < 0.05)                     | --                                                   | < 0.05<br>(< 0.05 to < 0.05)                  | 30.5<br>(7.0 to 60.5)                             | 20.8<br>(-0.1 to 47.5)                              |
| Sickle cell trait                                          | 404.3<br>(367.3 to 449.3)                        | --                                                   | 0.9<br>(0.5 to 1.5)                           | 40.2<br>(0.3 to 99.1)                             | 26.6<br>(-6.1 to 73.0)                              |
| G6PD deficiency                                            | 4,314.9<br>(3,929.3 to 4,771.3)                  | --                                                   | 0.3<br>(0.2 to 0.4)                           | 32.5<br>(13.7 to 54.4)                            | 9.8<br>(-4.9 to 26.1)                               |
| G6PD trait                                                 | 13,676.0<br>(13,481.4 to 13,910.9)               | --                                                   | < 0.05<br>(< 0.05 to < 0.05)                  | 44.7<br>(20.9 to 74.8)                            | 21.9<br>(3.3 to 43.7)                               |
| Other hemoglobinopathies and hemolytic anaemias            | 402.9<br>(371.3 to 439.4)                        | --                                                   | 6.4<br>(3.9 to 9.8)                           | -6.0<br>(-18.7 to 7.7)                            | -22.7<br>(-31.4 to -13.3)                           |
| Endocrine, metabolic, blood, and immune disorders          | 1,197.7<br>(1,102.4 to 1,299.7)                  | 196.2<br>(173.8 to 220.0)                            | 36.9<br>(24.7 to 51.5)                        | 28.2<br>(19.1 to 37.8)                            | -2.1<br>(-8.1 to 3.9)                               |
| <b>Musculoskeletal disorders</b>                           | <b>14,448.6</b><br><b>(13,668.6 to 15,185.2)</b> | <b>7,906.1</b><br><b>(7,156.4 to 8,699.9)</b>        | <b>1,593.6</b><br><b>(1,152.7 to 2,092.6)</b> | <b>21.3</b><br><b>(14.9 to 27.2)</b>              | <b>-7.4</b><br><b>(-11.9 to -3.4)</b>               |
| Rheumatoid arthritis                                       | 108.2<br>(95.8 to 123.5)                         | 7.1<br>(6.4 to 8.0)                                  | 25.7<br>(17.4 to 35.0)                        | 41.9<br>(27.0 to 59.1)                            | 5.2<br>(-4.9 to 16.3)                               |
| Osteoarthritis                                             | 2,255.9<br>(2,108.6 to 2,407.5)                  | 122.6<br>(113.3 to 132.1)                            | 139.4<br>(98.1 to 189.2)                      | 45.4<br>(39.9 to 51.0)                            | 1.5<br>(-2.1 to 5.2)                                |
| Low back and neck pain                                     | 8,782.1<br>(8,108.3 to 9,475.5)                  | 3,820.8<br>(3,406.7 to 4,253.2)                      | 1,020.6<br>(722.8 to 1,348.9)                 | 16.1<br>(6.9 to 24.2)                             | -10.9<br>(-17.6 to -5.3)                            |
| Low back pain                                              | 6,635.0<br>(5,843.9 to 7,512.9)                  | 3,186.2<br>(2,777.0 to 3,636.1)                      | 753.8<br>(530.7 to 1,002.9)                   | 11.1<br>(-0.3 to 21.4)                            | -14.3<br>(-22.4 to -7.0)                            |
| Neck pain                                                  | 2,658.3<br>(2,292.0 to 3,079.8)                  | 634.7<br>(547.7 to 748.4)                            | 266.8<br>(179.7 to 383.4)                     | 33.0<br>(29.4 to 36.8)                            | 0.4<br>(-1.9 to 2.6)                                |
| Gout                                                       | 321.4<br>(284.6 to 365.4)                        | 65.4<br>(57.1 to 74.4)                               | 10.2<br>(6.8 to 14.0)                         | 40.7<br>(20.0 to 64.5)                            | 0.7<br>(-12.1 to 15.3)                              |
| Other musculoskeletal disorders                            | 4,608.6<br>(3,937.0 to 5,331.3)                  | 3,890.1<br>(3,284.3 to 4,611.1)                      | 397.8<br>(266.2 to 565.5)                     | 26.9<br>(18.3 to 36.3)                            | -2.2<br>(-8.6 to 4.4)                               |
| <b>Other non-communicable diseases</b>                     | <b>78,794.9</b><br><b>(77,792.4 to 79,779.8)</b> | <b>268,829.8†</b><br><b>(255,561.5 to 283,230.7)</b> | <b>2,079.4</b><br><b>(1,419.1 to 2,952.8)</b> | <b>19.9</b><br><b>(17.8 to 21.9)</b>              | <b>-2.5</b><br><b>(-4.0 to -1.3)</b>                |
| Congenital anomalies                                       | 880.5<br>(778.8 to 1,027.3)                      | --                                                   | 116.3<br>(81.7 to 157.6)                      | 15.6<br>(7.6 to 24.4)                             | -0.2<br>(-7.3 to 7.1)                               |
| Neural tube defects                                        | 92.6<br>(81.7 to 104.5)                          | --                                                   | 27.4<br>(18.9 to 37.5)                        | 20.9<br>(5.2 to 38.8)                             | 2.9<br>(-9.7 to 17.5)                               |
| Congenital heart anomalies                                 | 236.7<br>(205.3 to 271.6)                        | --                                                   | 10.4<br>(4.5 to 17.9)                         | 14.8<br>(1.6 to 29.6)                             | 3.2<br>(-7.8 to 15.8)                               |
| Orofacial clefts                                           | 56.7<br>(49.9 to 63.7)                           | --                                                   | 0.8<br>(0.5 to 1.2)                           | 29.1<br>(15.0 to 45.6)                            | 11.0<br>(-1.2 to 25.2)                              |
| Down's syndrome                                            | 31.5<br>(26.8 to 37.0)                           | --                                                   | 2.8<br>(1.9 to 4.0)                           | 16.6<br>(7.5 to 25.7)                             | 2.0<br>(-5.9 to 9.9)                                |
| Turner syndrome                                            | 25.1<br>(21.2 to 29.7)                           | --                                                   | 0.4<br>(0.2 to 0.8)                           | 19.1<br>(-24.9 to 87.6)                           | 4.8<br>(-31.0 to 59.6)                              |
| Klinefelter syndrome                                       | 28.2<br>(23.6 to 33.4)                           | --                                                   | 0.1<br>(0.1 to 0.3)                           | 18.8<br>(-15.0 to 67.2)                           | 2.7<br>(-25.1 to 42.1)                              |



| Cause                                         | Prevalence in thousands (95% UI)                 | Incidence in thousands (95% UI)                | YLDs in thousands (95% UI)              |                                                   |                                                     |
|-----------------------------------------------|--------------------------------------------------|------------------------------------------------|-----------------------------------------|---------------------------------------------------|-----------------------------------------------------|
|                                               | 2016 counts                                      | 2016 counts                                    | 2016 counts                             | Percentage change in counts between 2006 and 2016 | Percentage change in age-standardised rates between |
| Other chromosomal abnormalities               | 31.6<br>(26.1 to 38.0)                           | --                                             | 3.8<br>(2.5 to 5.2)                     | 7.4<br>(-5.9 to 24.4)                             | 1.3<br>(-11.2 to 17.7)                              |
| Congenital musculoskeletal and limb anomalies | 80.8<br>(73.3 to 88.4)                           | --                                             | 11.7<br>(7.8 to 16.3)                   | 27.3<br>(12.9 to 43.4)                            | 9.0<br>(-2.4 to 21.1)                               |
| Urogenital congenital anomalies               | 77.5<br>(68.8 to 87.7)                           | --                                             | 1.7<br>(0.9 to 2.8)                     | 8.0<br>(-1.0 to 17.6)                             | -0.9<br>(-8.7 to 7.3)                               |
| Digestive congenital anomalies                | 127.1<br>(111.6 to 142.1)                        | --                                             | 5.9<br>(3.8 to 8.3)                     | 13.8<br>(-2.9 to 31.6)                            | -2.6<br>(-16.0 to 11.7)                             |
| Other congenital anomalies                    | 340.2<br>(202.9 to 531.1)                        | --                                             | 51.4<br>(31.5 to 80.5)                  | 11.6<br>(0.0 to 24.8)                             | -4.4<br>(-14.2 to 7.0)                              |
| Skin and subcutaneous diseases                | 35,560.6<br>(34,435.4 to 36,840.6)               | 78,742.8<br>(73,441.3 to 85,551.4)             | 928.9<br>(614.4 to 1,353.4)             | 14.0<br>(11.3 to 16.5)                            | -0.3<br>(-2.6 to 1.7)                               |
| Dermatitis                                    | 5,360.7<br>(4,986.5 to 5,769.4)                  | 5,615.6<br>(5,218.0 to 6,043.0)                | 210.7<br>(122.8 to 345.7)               | 11.3<br>(4.4 to 17.7)                             | -1.0<br>(-6.3 to 4.1)                               |
| Psoriasis                                     | 657.2<br>(625.7 to 689.9)                        | 94.0<br>(89.5 to 98.5)                         | 57.6<br>(41.0 to 76.8)                  | 30.4<br>(18.4 to 43.7)                            | 6.5<br>(-2.0 to 15.7)                               |
| Cellulitis                                    | 43.2<br>(40.0 to 46.7)                           | 883.2<br>(824.0 to 943.7)                      | 2.5<br>(1.5 to 3.7)                     | 18.3<br>(-6.9 to 51.4)                            | -0.0<br>(-19.4 to 22.8)                             |
| Pyoderma                                      | 84.2<br>(81.2 to 87.0)                           | 1,604.6<br>(1,540.4 to 1,673.1)                | 0.5<br>(0.2 to 1.0)                     | 26.0<br>(12.1 to 41.0)                            | -0.1<br>(-8.7 to 9.3)                               |
| Scabies                                       | 5,197.0<br>(4,118.8 to 6,698.7)                  | 16,624.6<br>(12,997.7 to 21,828.0)             | 134.5<br>(72.9 to 227.8)                | 6.1<br>(-2.4 to 13.7)                             | -7.7<br>(-14.8 to -1.2)                             |
| Fungal skin diseases                          | 10,213.2<br>(9,134.7 to 11,375.3)                | 32,992.6<br>(29,278.6 to 36,799.3)             | 57.6<br>(22.9 to 123.4)                 | 21.2<br>(19.0 to 23.3)                            | 0.2<br>(-0.7 to 1.1)                                |
| Viral skin diseases                           | 3,045.0<br>(2,733.0 to 3,369.0)                  | 4,260.5<br>(3,794.8 to 4,757.9)                | 93.8<br>(58.7 to 138.7)                 | 13.4<br>(9.8 to 17.5)                             | 0.1<br>(-2.8 to 3.2)                                |
| Acne vulgaris                                 | 10,411.5<br>(9,191.1 to 11,721.4)                | 7,643.8<br>(5,993.4 to 10,040.8)               | 269.4<br>(178.9 to 388.8)               | 14.1<br>(9.1 to 19.5)                             | 1.7<br>(-2.6 to 6.3)                                |
| Alopecia areata                               | 185.8<br>(179.1 to 192.7)                        | 330.2<br>(318.8 to 342.1)                      | 6.1<br>(3.9 to 9.3)                     | 21.8<br>(8.3 to 35.4)                             | 0.2<br>(-10.6 to 10.7)                              |
| Pruritus                                      | 809.3<br>(710.5 to 912.8)                        | 650.2<br>(580.7 to 733.5)                      | 8.7<br>(4.0 to 15.7)                    | 24.8<br>(17.4 to 32.3)                            | 1.3<br>(-3.6 to 6.9)                                |
| Urticaria                                     | 911.2<br>(790.2 to 1,052.7)                      | 1,629.5<br>(1,418.8 to 1,878.5)                | 55.2<br>(35.0 to 80.4)                  | 12.7<br>(6.0 to 19.9)                             | 0.1<br>(-5.4 to 6.0)                                |
| Decubitus ulcer                               | 9.6<br>(8.6 to 10.6)                             | 34.9<br>(31.3 to 38.9)                         | 1.5<br>(1.1 to 2.1)                     | 36.8<br>(17.6 to 58.6)                            | -3.3<br>(-18.2 to 14.4)                             |
| Other skin and subcutaneous diseases          | 5,617.9<br>(5,438.0 to 5,789.6)                  | 6,379.2<br>(6,171.7 to 6,592.5)                | 31.0<br>(14.8 to 57.4)                  | 32.4<br>(28.8 to 36.0)                            | 4.4<br>(1.8 to 6.8)                                 |
| Sense organ diseases                          | 23,341.7<br>(22,792.6 to 23,842.3)               | 9,382.1†<br>(8,770.8 to 10,052.5)              | 842.1<br>(585.1 to 1,174.9)             | 26.2<br>(22.8 to 29.4)                            | -4.5<br>(-6.6 to -2.7)                              |
| Glaucoma                                      | 38.0<br>(31.6 to 45.1)                           | --                                             | 4.3<br>(2.8 to 6.1)                     | 50.8<br>(31.2 to 74.4)                            | -1.5<br>(-13.5 to 11.6)                             |
| Cataract                                      | 587.0<br>(500.7 to 677.0)                        | --                                             | 40.7<br>(28.8 to 56.1)                  | 46.3<br>(36.2 to 56.2)                            | -1.4<br>(-7.6 to 4.6)                               |
| Macular degeneration                          | 18.2<br>(14.4 to 22.7)                           | --                                             | 1.2<br>(0.8 to 1.7)                     | 65.3<br>(40.4 to 95.3)                            | 7.7<br>(-7.8 to 26.1)                               |
| Refraction and accommodation disorders        | 16,393.7<br>(15,769.1 to 16,997.3)               | --                                             | 252.6<br>(149.8 to 417.0)               | 20.5<br>(16.6 to 24.8)                            | -6.3<br>(-9.2 to -3.0)                              |
| Age-related and other hearing loss            | 10,749.4<br>(10,072.6 to 11,547.6)               | --                                             | 444.8<br>(314.1 to 606.5)               | 26.0<br>(20.2 to 31.7)                            | -5.2<br>(-8.2 to -2.4)                              |
| Other vision loss                             | 322.3<br>(287.1 to 364.7)                        | --                                             | 26.9<br>(18.7 to 36.1)                  | 38.8<br>(28.7 to 50.8)                            | 0.2<br>(-6.3 to 7.5)                                |
| Other sense organ diseases                    | 2,316.3<br>(2,137.1 to 2,497.6)                  | 9,382.1<br>(8,770.8 to 10,052.5)               | 71.7<br>(45.1 to 107.6)                 | 33.1<br>(27.3 to 39.5)                            | 1.0<br>(-2.6 to 5.0)                                |
| Oral disorders                                | 58,457.3<br>(56,430.3 to 60,438.7)               | 180,704.9†<br>(168,863.0 to 192,650.9)         | 192.1<br>(117.4 to 294.9)               | 27.1<br>(23.5 to 31.1)                            | -1.2<br>(-3.2 to 1.0)                               |
| Caries of deciduous teeth                     | 10,560.7<br>(9,020.6 to 12,153.5)                | 34,686.8<br>(25,582.9 to 44,803.9)             | 4.0<br>(1.8 to 7.9)                     | -17.9<br>(-26.7 to -7.0)                          | -20.4<br>(-29.1 to -9.7)                            |
| Caries of permanent teeth                     | 47,112.4<br>(44,803.0 to 49,267.3)               | 145,594.0<br>(137,935.7 to 152,696.9)          | 46.4<br>(20.3 to 88.0)                  | 16.4<br>(12.7 to 20.2)                            | -2.6<br>(-5.4 to 0.2)                               |
| Periodontal disease                           | 1,629.8<br>(1,316.2 to 1,973.0)                  | 195.5<br>(155.0 to 239.7)                      | 10.6<br>(4.1 to 21.9)                   | 40.2<br>(34.0 to 47.0)                            | 0.6<br>(-3.6 to 4.8)                                |
| Edentulism and severe tooth loss              | 2,877.0<br>(2,513.2 to 3,240.3)                  | 228.6<br>(193.9 to 263.0)                      | 80.0<br>(52.8 to 113.4)                 | 39.4<br>(33.0 to 45.6)                            | -0.8<br>(-4.2 to 2.9)                               |
| Other oral disorders                          | 1,732.8<br>(1,653.3 to 1,814.1)                  | --                                             | 51.1<br>(31.1 to 76.9)                  | 23.1<br>(18.8 to 27.9)                            | 0.3<br>(-2.9 to 3.6)                                |
| <b>Injuries</b>                               | <b>12,193.1</b><br><b>(11,432.0 to 12,978.8)</b> | <b>5,427.9†</b><br><b>(5,158.0 to 5,726.8)</b> | <b>496.8</b><br><b>(329.1 to 725.2)</b> | <b>35.5</b><br><b>(31.4 to 39.5)</b>              | <b>7.7</b><br><b>(5.0 to 10.4)</b>                  |
| <b>Transport injuries</b>                     | <b>1,970.5</b><br><b>(1,817.1 to 2,147.3)</b>    | <b>713.2</b><br><b>(645.8 to 785.3)</b>        | <b>113.3</b><br><b>(76.1 to 161.9)</b>  | <b>51.3</b><br><b>(46.9 to 55.9)</b>              | <b>19.9</b><br><b>(16.8 to 22.8)</b>                |
| Road injuries                                 | 1,272.2<br>(1,189.0 to 1,366.0)                  | 532.7<br>(472.9 to 598.1)                      | 72.4<br>(48.6 to 103.8)                 | 74.2<br>(69.2 to 79.2)                            | 34.5<br>(31.2 to 37.5)                              |
| Pedestrian road injuries                      | 169.1<br>(148.0 to 193.2)                        | 52.3<br>(42.9 to 63.3)                         | 9.8<br>(6.6 to 14.0)                    | 63.5<br>(58.5 to 68.4)                            | 25.3<br>(22.2 to 28.1)                              |
| Cyclist road injuries                         | 228.4<br>(192.3 to 267.2)                        | 108.2<br>(84.6 to 133.2)                       | 12.4<br>(8.2 to 17.8)                   | 80.7<br>(75.4 to 85.9)                            | 39.4<br>(36.0 to 42.4)                              |
| Motorcyclist road injuries                    | 377.6<br>(324.4 to 456.9)                        | 108.8<br>(89.9 to 132.7)                       | 20.8<br>(14.1 to 29.8)                  | 77.9<br>(72.5 to 83.5)                            | 37.9<br>(34.5 to 41.3)                              |
| Motor vehicle road injuries                   | 306.6<br>(264.8 to 349.1)                        | 157.6<br>(132.9 to 184.1)                      | 19.2<br>(12.9 to 27.3)                  | 67.4<br>(62.5 to 72.1)                            | 29.5<br>(26.3 to 32.6)                              |
| Other road injuries                           | 190.6<br>(162.5 to 224.8)                        | 105.8<br>(84.2 to 134.0)                       | 10.1<br>(6.8 to 14.7)                   | 84.4<br>(79.4 to 89.6)                            | 41.8<br>(38.4 to 45.1)                              |
| Other transport injuries                      | 698.3<br>(575.1 to 858.0)                        | 180.6<br>(153.3 to 218.8)                      | 40.9<br>(27.7 to 58.7)                  | 22.8<br>(18.5 to 27.1)                            | -0.9<br>(-3.8 to 1.9)                               |
| <b>Unintentional injuries</b>                 | <b>7,555.0</b><br><b>(7,023.0 to 8,054.2)</b>    | <b>3,678.5</b><br><b>(3,456.3 to 3,917.8)</b>  | <b>268.5</b><br><b>(181.3 to 380.7)</b> | <b>38.9</b><br><b>(35.1 to 42.8)</b>              | <b>10.9</b><br><b>(8.3 to 13.3)</b>                 |
| Falls                                         | 2,131.3<br>(1,847.0 to 2,400.8)                  | 1,039.1<br>(909.5 to 1,209.7)                  | 88.9<br>(61.0 to 124.2)                 | 57.8<br>(53.2 to 62.5)                            | 23.5<br>(20.4 to 26.5)                              |
| Drowning                                      | 64.3<br>(55.2 to 74.8)                           | 13.8<br>(11.9 to 16.0)                         | 3.7<br>(2.4 to 5.3)                     | 22.3<br>(17.3 to 27.4)                            | -3.0<br>(-6.7 to 0.4)                               |
| Fire, heat, and hot substances                | 752.5<br>(632.9 to 911.1)                        | 104.7<br>(84.0 to 126.8)                       | 21.7<br>(14.8 to 30.8)                  | 36.4<br>(28.4 to 44.5)                            | 9.3<br>(3.5 to 14.6)                                |
| Poisonings                                    | 22.5<br>(19.2 to 25.9)                           | 44.0<br>(34.1 to 55.7)                         | 1.8<br>(1.2 to 2.7)                     | 67.1<br>(53.9 to 81.7)                            | 34.0<br>(25.2 to 43.3)                              |
| Exposure to mechanical forces                 | 1,148.6<br>(981.4 to 1,421.4)                    | 511.6<br>(420.2 to 600.8)                      | 30.8<br>(20.2 to 45.0)                  | 61.1<br>(55.8 to 66.1)                            | 27.6<br>(24.2 to 30.8)                              |
| Unintentional firearm injuries                | 47.9<br>(39.9 to 58.2)                           | 13.7<br>(9.3 to 19.8)                          | 2.2<br>(1.4 to 3.2)                     | 36.7<br>(32.6 to 40.9)                            | 7.2<br>(4.4 to 10.0)                                |
| Unintentional suffocation                     | 84.9<br>(65.1 to 110.2)                          | 20.9<br>(15.1 to 28.2)                         | 2.9<br>(1.9 to 4.5)                     | 25.1<br>(21.1 to 29.5)                            | 2.5<br>(-0.2 to 5.5)                                |
| Other exposure to mechanical forces           | 1,015.9<br>(851.9 to 1,283.0)                    | 477.0<br>(391.2 to 563.7)                      | 25.6<br>(16.9 to 37.5)                  | 69.2<br>(63.7 to 74.3)                            | 33.1<br>(29.5 to 36.3)                              |

| Cause                                                                               | Prevalence in thousands (95% UI)              | Incidence in thousands (95% UI)              | YLDs in thousands (95% UI)            |                                                   |                                                     |
|-------------------------------------------------------------------------------------|-----------------------------------------------|----------------------------------------------|---------------------------------------|---------------------------------------------------|-----------------------------------------------------|
|                                                                                     | 2016 counts                                   | 2016 counts                                  | 2016 counts                           | Percentage change in counts between 2006 and 2016 | Percentage change in age-standardised rates between |
| Adverse effects of medical treatment                                                | 23.5<br>(18.4 to 29.6)                        | 307.5<br>(262.2 to 357.8)                    | 3.1<br>(1.9 to 4.7)                   | 22.6<br>(15.8 to 30.2)                            | 3.4<br>(-0.9 to 8.8)                                |
| Animal contact                                                                      | 300.7<br>(260.2 to 356.2)                     | 397.0<br>(327.8 to 473.4)                    | 9.4<br>(6.2 to 13.6)                  | 12.1<br>(5.5 to 19.3)                             | -8.7<br>(-13.3 to -4.1)                             |
| Venomous animal contact                                                             | 89.8<br>(74.9 to 106.6)                       | 144.6<br>(110.6 to 185.8)                    | 5.7<br>(3.7 to 8.3)                   | 13.4<br>(3.1 to 24.8)                             | -6.7<br>(-14.1 to 1.3)                              |
| Non-venomous animal contact                                                         | 211.0<br>(174.2 to 267.6)                     | 252.4<br>(202.7 to 306.7)                    | 3.7<br>(2.4 to 5.5)                   | 10.2<br>(5.5 to 14.0)                             | -11.5<br>(-14.8 to -9.0)                            |
| Foreign body                                                                        | 547.6<br>(442.4 to 657.0)                     | 313.9<br>(278.2 to 357.6)                    | 23.7<br>(15.3 to 35.1)                | 23.4<br>(18.9 to 28.4)                            | 1.8<br>(-1.3 to 5.1)                                |
| Pulmonary aspiration and foreign body in airway                                     | 368.2<br>(277.9 to 490.7)                     | 147.2<br>(125.1 to 177.9)                    | 17.3<br>(11.1 to 25.8)                | 21.7<br>(17.0 to 27.2)                            | 1.5<br>(-1.9 to 5.1)                                |
| Foreign body in eyes                                                                | 17.4<br>(9.9 to 26.2)                         | 91.6<br>(69.2 to 123.8)                      | 1.0<br>(0.5 to 1.7)                   | 25.2<br>(20.0 to 30.6)                            | 0.9<br>(-2.3 to 3.9)                                |
| Foreign body in other body part                                                     | 162.2<br>(130.9 to 202.1)                     | 75.1<br>(62.4 to 90.5)                       | 5.4<br>(3.5 to 8.1)                   | 28.5<br>(23.1 to 33.9)                            | 3.0<br>(-0.6 to 6.3)                                |
| Environmental heat and cold exposure                                                | 902.3<br>(752.3 to 1,065.5)                   | 273.3<br>(220.5 to 337.4)                    | 36.3<br>(24.2 to 52.1)                | 26.4<br>(22.4 to 30.6)                            | 1.5<br>(-1.2 to 4.0)                                |
| Other unintentional injuries                                                        | 1,661.7<br>(1,342.7 to 2,030.6)               | 673.5<br>(569.1 to 795.4)                    | 49.1<br>(32.8 to 70.4)                | 26.1<br>(23.0 to 29.0)                            | -0.4<br>(-2.6 to 1.6)                               |
| <b>Self-harm and interpersonal violence</b>                                         | <b>3,623.4</b><br><b>(3,297.8 to 3,953.5)</b> | <b>1,012.9†</b><br><b>(869.0 to 1,171.2)</b> | <b>86.5</b><br><b>(59.6 to 121.2)</b> | <b>23.1</b><br><b>(20.1 to 26.2)</b>              | <b>-4.7</b><br><b>(-6.8 to -2.5)</b>                |
| Self-harm                                                                           | 58.7<br>(50.4 to 67.8)                        | 28.1<br>(23.7 to 33.0)                       | 3.2<br>(2.0 to 4.6)                   | 39.9<br>(34.3 to 45.6)                            | 6.4<br>(3.0 to 9.9)                                 |
| Self-harm by firearm                                                                | 2.7<br>(2.2 to 3.3)                           | 0.6<br>(0.3 to 1.1)                          | 0.1<br>(0.1 to 0.2)                   | 35.2<br>(29.4 to 41.5)                            | 7.4<br>(3.5 to 11.5)                                |
| Self-harm by other specified means                                                  | 56.0<br>(47.5 to 65.0)                        | 27.4<br>(23.2 to 32.3)                       | 3.1<br>(2.0 to 4.5)                   | 40.1<br>(34.4 to 45.9)                            | 6.4<br>(2.9 to 10.0)                                |
| Interpersonal violence                                                              | 3,564.7<br>(3,241.1 to 3,895.6)               | 984.8†<br>(840.1 to 1,145.3)                 | 83.3<br>(57.4 to 116.5)               | 22.6<br>(19.5 to 25.7)                            | -5.1<br>(-7.2 to -2.9)                              |
| Assault by firearm                                                                  | 64.6<br>(55.7 to 76.0)                        | 25.3<br>(19.0 to 33.0)                       | 3.3<br>(2.1 to 4.9)                   | 12.9<br>(9.3 to 16.8)                             | -16.2<br>(-18.4 to -13.8)                           |
| Assault by sharp object                                                             | 644.0<br>(533.1 to 764.1)                     | 331.3<br>(266.2 to 406.5)                    | 22.3<br>(14.9 to 32.0)                | 6.2<br>(2.7 to 9.8)                               | -19.6<br>(-21.9 to -17.2)                           |
| Sexual violence                                                                     | 1,944.2<br>(1,692.6 to 2,223.2)               | --                                           | 16.6<br>(11.0 to 23.9)                | 10.6<br>(4.2 to 17.8)                             | -6.5<br>(-11.5 to -1.2)                             |
| Assault by other means                                                              | 911.9<br>(756.4 to 1,116.2)                   | 628.3<br>(531.4 to 734.9)                    | 41.1<br>(28.1 to 58.9)                | 41.6<br>(37.4 to 46.0)                            | 6.9<br>(4.2 to 9.6)                                 |
| <b>Forces of nature, conflict and terrorism, and executions and police conflict</b> | <b>988.4</b><br><b>(562.2 to 1,547.4)</b>     | <b>23.2‡</b><br><b>(12.9 to 34.4)</b>        | <b>28.6</b><br><b>(7.8 to 72.9)</b>   | <b>0.7</b><br><b>(-13.1 to 7.4)</b>               | <b>-15.7</b><br><b>(-24.9 to -11.0)</b>             |
| Exposure to forces of nature                                                        | 180.5<br>(80.9 to 301.3)                      | --                                           | 7.0<br>(2.0 to 17.6)                  | 14.3<br>(-27.7 to 34.3)                           | -3.1<br>(-34.9 to 10.7)                             |
| Conflict and terrorism                                                              | 729.3<br>(364.2 to 1,229.5)                   | --                                           | 19.2<br>(4.9 to 50.1)                 | -5.0<br>(-10.4 to -0.6)                           | -20.4<br>(-24.3 to -17.0)                           |
| Executions and police conflict                                                      | 78.5<br>(37.7 to 118.2)                       | 23.2<br>(12.9 to 34.4)                       | 2.4<br>(0.8 to 5.7)                   | 15.9<br>(-1.4 to 26.2)                            | -4.3<br>(-17.2 to 3.2)                              |
| <b>Impairments</b>                                                                  | --                                            | --                                           | --                                    | --                                                | --                                                  |
| Anaemia                                                                             | 15,229.3<br>(13,846.5 to 16,676.2)            | --                                           | 374.6<br>(249.2 to 544.6)             | 5.8<br>(-4.1 to 16.8)                             | -11.1<br>(-18.4 to -3.3)                            |
| Developmental intellectual disability                                               | 2,119.7<br>(1,549.6 to 2,769.5)               | --                                           | 226.1<br>(161.4 to 298.0)             | 9.0<br>(3.1 to 15.1)                              | -5.9<br>(-11.0 to -0.7)                             |
| Epilepsy                                                                            | 602.2<br>(339.6 to 846.1)                     | --                                           | 228.6<br>(119.3 to 361.3)             | 17.0<br>(-39.9 to 129.1)                          | 1.1<br>(-49.1 to 103.4)                             |
| Guillain-Barre syndrome                                                             | 0.6<br>(0.5 to 0.8)                           | --                                           | 0.2<br>(0.1 to 0.3)                   | 21.2<br>(17.4 to 25.7)                            | 0.1<br>(0.1 to 0.3)                                 |
| Hearing loss                                                                        | 12,058.0<br>(11,382.4 to 12,838.0)            | --                                           | 517.9<br>(365.8 to 695.1)             | 22.4<br>(17.5 to 26.9)                            | -5.6<br>(-8.4 to -3.2)                              |
| Heart failure                                                                       | 422.9<br>(371.3 to 481.3)                     | --                                           | 43.8<br>(30.9 to 59.6)                | 48.6<br>(38.4 to 59.4)                            | 2.9<br>(-4.0 to 10.1)                               |
| Infertility                                                                         | 1,244.0<br>(1,148.9 to 1,354.5)               | --                                           | 7.6<br>(3.3 to 15.3)                  | 14.3<br>(6.7 to 22.4)                             | -5.3<br>(-11.6 to 1.4)                              |
| Pelvic inflammatory disease                                                         | 79.7<br>(68.2 to 93.8)                        | --                                           | 10.4<br>(6.9 to 14.8)                 | 13.8<br>(-1.5 to 30.5)                            | -8.8<br>(-20.4 to 4.8)                              |
| Vision loss                                                                         | 17,688.7<br>(17,029.8 to 18,339.1)            | --                                           | 375.4<br>(257.1 to 553.9)             | 24.1<br>(20.3 to 28.6)                            | -4.1<br>(-6.9 to -1.0)                              |

We did not calculate incidence for the nine impairments, certain NTDs, and causes with only birth prevalence. Blank cells mean that no estimate is available.

† Incidence for aggregate causes represents the sum of the incidence of the causes below the aggregate.

‡ Incidence estimates for stroke represent first-ever stroke only.

^ Incidence of HIV/AIDS represents new infections of HIV only and does not include new infections of Tuberculosis in HIV positive cases.



SR Table 14: Prevalence, incidence, and YLDs for 2016, percentage change of YLD counts and percentage change of age-standardised YLD rates between 2006 and 2016 by cause and impairments, for all ages, Poland.

| Cause                                                                                | Prevalence in thousands (95% UI)          | Incidence in thousands (95% UI)               | YLDs in thousands (95% UI)             |                                                   |                                                     |
|--------------------------------------------------------------------------------------|-------------------------------------------|-----------------------------------------------|----------------------------------------|---------------------------------------------------|-----------------------------------------------------|
|                                                                                      | 2016 counts                               | 2016 counts                                   | 2016 counts                            | Percentage change in counts between 2006 and 2016 | Percentage change in age-standardised rates between |
| <b>All causes</b>                                                                    | <b>36,927.9</b><br>(36,802.1 to 37,077.4) | <b>192,904.2†</b><br>(184,031.6 to 201,680.2) | <b>5,066.2</b><br>(3,767.8 to 6,541.2) | <b>6.9</b><br>(5.4 to 8.4)                        | <b>-0.7</b><br>(-2.2 to 0.8)                        |
| <b>Communicable, maternal, neonatal, and nutritional disorders</b>                   | <b>17,929.1</b><br>(17,333.0 to 18,464.9) | <b>75,699.2†</b><br>(69,343.1 to 82,358.1)    | <b>203.8</b><br>(145.2 to 277.3)       | <b>-6.7</b><br>(-12.4 to -0.8)                    | <b>-5.8</b><br>(-12.0 to 0.6)                       |
| <b>HIV/AIDS and tuberculosis</b>                                                     | <b>9,857.2</b><br>(9,054.7 to 10,490.6)   | <b>6.5†</b><br>(5.7 to 7.3)                   | <b>2.4</b><br>(1.5 to 3.5)             | <b>0.1</b><br>(-20.0 to 22.3)                     | <b>-5.3</b><br>(-23.5 to 14.8)                      |
| Tuberculosis                                                                         | 9,258.5<br>(8,554.5 to 10,035.5)          | 6.0†<br>(5.3 to 6.8)                          | 1.3<br>(0.8 to 1.9)                    | -18.7<br>(-37.3 to 3.5)                           | -23.7<br>(-39.9 to -4.1)                            |
| Drug-susceptible tuberculosis                                                        | 4.3<br>(3.8 to 5.0)                       | 6.0<br>(5.3 to 6.7)                           | 1.3<br>(0.8 to 1.9)                    | -18.7<br>(-37.4 to 3.7)                           | -23.7<br>(-40.1 to -4.0)                            |
| Multidrug-resistant tuberculosis without extensive drug resistance                   | < 0.05<br>(< 0.05 to < 0.05)              | < 0.05<br>(< 0.05 to < 0.05)                  | < 0.05<br>(< 0.05 to < 0.05)           | -34.3<br>(-65.7 to 25.2)                          | -38.8<br>(-67.6 to 16.3)                            |
| Extensively drug-resistant tuberculosis                                              | < 0.05<br>(< 0.05 to < 0.05)              | < 0.05<br>(< 0.05 to < 0.05)                  | < 0.05<br>(< 0.05 to < 0.05)           | 102.5<br>(6.0 to 286.3)                           | 88.7<br>(-0.1 to 258.4)                             |
| Latent tuberculosis infection                                                        | 9,254.2<br>(8,550.6 to 10,031.1)          | --                                            | --                                     | --                                                | --                                                  |
| HIV/AIDS                                                                             | 10.8<br>(5.0 to 17.3)                     | 0.5^<br>(0.2 to 0.8)                          | 1.0<br>(0.5 to 1.8)                    | 42.0<br>(8.0 to 73.3)                             | 33.1<br>(1.2 to 62.4)                               |
| Drug-susceptible HIV/AIDS - Tuberculosis                                             | 0.1<br>(< 0.05 to 0.1)                    | 0.1<br>(< 0.05 to 0.2)                        | < 0.05<br>(< 0.05 to < 0.05)           | -26.6<br>(-31.4 to -20.6)                         | -31.0<br>(-35.5 to -25.4)                           |
| Multidrug-resistant HIV/AIDS - Tuberculosis without extensive drug resistance        | < 0.05<br>(< 0.05 to < 0.05)              | < 0.05<br>(< 0.05 to < 0.05)                  | < 0.05<br>(< 0.05 to < 0.05)           | -40.1<br>(-69.0 to 16.8)                          | -43.7<br>(-70.9 to 9.7)                             |
| Extensively drug-resistant HIV/AIDS - Tuberculosis                                   | < 0.05<br>(< 0.05 to < 0.05)              | < 0.05<br>(< 0.05 to < 0.05)                  | < 0.05<br>(< 0.05 to < 0.05)           | 84.7<br>(-4.3 to 260.3)                           | 73.6<br>(-10.1 to 238.6)                            |
| HIV/AIDS resulting in other diseases                                                 | 10.7<br>(5.0 to 17.2)                     | 0.5<br>(0.2 to 0.8)                           | 1.0<br>(0.4 to 1.8)                    | 45.6<br>(9.7 to 79.7)                             | 36.5<br>(2.6 to 70.5)                               |
| <b>Diarrhoea, lower respiratory infections, and other common infectious diseases</b> | <b>1,348.8</b><br>(1,280.4 to 1,433.2)    | <b>72,248.3†</b><br>(65,967.0 to 78,801.8)    | <b>65.1</b><br>(44.9 to 89.8)          | <b>-0.5</b><br>(-3.9 to 3.0)                      | <b>-0.7</b><br>(-4.2 to 3.0)                        |
| Diarrhoeal diseases                                                                  | 254.7<br>(235.4 to 276.4)                 | 16,580.8<br>(15,351.5 to 17,983.7)            | 28.7<br>(19.8 to 39.4)                 | 3.5<br>(-2.4 to 9.7)                              | 1.1<br>(-5.3 to 7.4)                                |
| Intestinal infectious diseases                                                       | < 0.05<br>(< 0.05 to < 0.05)              | < 0.05†<br>(< 0.05 to 0.1)                    | < 0.05<br>(< 0.05 to < 0.05)           | -3.8<br>(-16.8 to 11.5)                           | -12.3<br>(-23.5 to 0.2)                             |
| Typhoid fever                                                                        | < 0.05<br>(< 0.05 to < 0.05)              | < 0.05<br>(< 0.05 to < 0.05)                  | < 0.05<br>(< 0.05 to < 0.05)           | -9.9<br>(-24.6 to 8.4)                            | -13.6<br>(-26.7 to 2.2)                             |
| Paratyphoid fever                                                                    | < 0.05<br>(< 0.05 to < 0.05)              | < 0.05<br>(< 0.05 to < 0.05)                  | < 0.05<br>(< 0.05 to < 0.05)           | 11.5<br>(-6.8 to 35.5)                            | 0.6<br>(-14.5 to 19.5)                              |
| Other intestinal infectious diseases                                                 | --                                        | --                                            | < 0.05<br>(< 0.05 to < 0.05)           | -35.5<br>(-53.0 to -11.7)                         | -42.7<br>(-60.8 to -15.7)                           |
| Lower respiratory infections                                                         | 28.4<br>(26.5 to 30.7)                    | 1,329.9<br>(1,226.4 to 1,446.5)               | 1.7<br>(1.1 to 2.4)                    | 21.1<br>(7.6 to 37.3)                             | 5.4<br>(-8.1 to 20.3)                               |
| Upper respiratory infections                                                         | 703.9<br>(623.2 to 786.7)                 | 52,224.2<br>(46,164.9 to 58,555.7)            | 17.4<br>(10.2 to 27.1)                 | -2.0<br>(-7.5 to 4.5)                             | 0.0<br>(-5.0 to 5.6)                                |
| Otitis media                                                                         | 346.7<br>(311.4 to 382.8)                 | 1,548.5<br>(1,280.3 to 1,869.4)               | 9.6<br>(6.1 to 14.5)                   | -12.3<br>(-19.1 to -5.0)                          | -8.0<br>(-14.6 to -1.1)                             |
| Meningitis                                                                           | 21.4<br>(19.2 to 24.4)                    | 2.3<br>(2.0 to 2.6)                           | 3.4<br>(2.4 to 4.7)                    | -0.8<br>(-4.3 to 13.2)                            | -0.2<br>(-3.4 to 8.1)                               |
| Pneumococcal meningitis                                                              | 8.2<br>(7.3 to 9.3)                       | 0.2<br>(0.2 to 0.3)                           | 1.4<br>(0.9 to 1.9)                    | -1.1<br>(-4.4 to 2.1)                             | 0.1<br>(-3.2 to 3.1)                                |
| H influenzae type B meningitis                                                       | 2.5<br>(2.2 to 2.9)                       | 0.1<br>(0.1 to 0.1)                           | 0.5<br>(0.3 to 0.7)                    | -5.1<br>(-9.0 to -0.8)                            | -3.6<br>(-7.5 to 0.9)                               |
| Meningococcal infection                                                              | 3.2<br>(2.6 to 6.0)                       | 0.3<br>(0.2 to 0.4)                           | 0.6<br>(0.4 to 1.1)                    | 4.8<br>(-5.8 to 91.5)                             | 3.2<br>(-4.5 to 56.5)                               |
| Other meningitis                                                                     | 7.4<br>(6.0 to 8.9)                       | 1.7<br>(1.4 to 1.9)                           | 0.9<br>(0.6 to 1.2)                    | -1.3<br>(-4.5 to 1.9)                             | -0.8<br>(-4.2 to 2.9)                               |
| Encephalitis                                                                         | 19.5<br>(15.2 to 24.8)                    | 7.0<br>(6.9 to 7.2)                           | 2.9<br>(1.9 to 4.0)                    | 2.4<br>(-10.0 to 16.1)                            | 0.6<br>(-11.0 to 13.3)                              |
| Diphtheria                                                                           | < 0.05<br>(< 0.05 to < 0.05)              | < 0.05<br>(< 0.05 to < 0.05)                  | < 0.05<br>(< 0.05 to < 0.05)           | -26.8<br>(-62.3 to 43.4)                          | -23.9<br>(-58.4 to 37.3)                            |
| Whooping cough                                                                       | 0.6<br>(0.4 to 0.8)                       | 4.0<br>(3.0 to 5.5)                           | < 0.05<br>(< 0.05 to < 0.05)           | -28.5<br>(-56.2 to 11.8)                          | -29.6<br>(-57.4 to 11.9)                            |
| Tetanus                                                                              | < 0.05<br>(< 0.05 to < 0.05)              | < 0.05<br>(< 0.05 to < 0.05)                  | < 0.05<br>(< 0.05 to < 0.05)           | -46.5<br>(-59.9 to -28.2)                         | -48.6<br>(-62.6 to -30.1)                           |
| Measles                                                                              | 0.1<br>(0.1 to 0.1)                       | 2.2<br>(2.1 to 2.3)                           | < 0.05<br>(< 0.05 to < 0.05)           | 16,889.5<br>(11,132.0 to 35,946.8)                | 16,578.8<br>(10,926.6 to 35,287.6)                  |
| Varicella and herpes zoster                                                          | 34.0<br>(30.6 to 37.9)                    | 549.2<br>(524.0 to 574.3)                     | 1.4<br>(0.8 to 2.2)                    | 7.7<br>(-6.5 to 23.4)                             | -1.0<br>(-14.1 to 14.6)                             |
| <b>Neglected tropical diseases and malaria</b>                                       | <b>8.0</b><br>(3.1 to 14.9)               | <b>0.3†</b><br>(< 0.05 to 1.2)                | <b>0.8</b><br>(0.1 to 2.0)             | <b>-21.3</b><br>(-93.3 to 564.6)                  | <b>-28.0</b><br>(-93.6 to 439.3)                    |
| Malaria                                                                              | --                                        | --                                            | --                                     | --                                                | --                                                  |
| Chagas disease                                                                       | --                                        | --                                            | --                                     | --                                                | --                                                  |
| Leishmaniasis                                                                        | --                                        | --                                            | --                                     | --                                                | --                                                  |
| Visceral leishmaniasis                                                               | --                                        | --                                            | --                                     | --                                                | --                                                  |
| Cutaneous and mucocutaneous leishmaniasis                                            | --                                        | --                                            | --                                     | --                                                | --                                                  |
| African trypanosomiasis                                                              | --                                        | --                                            | --                                     | --                                                | --                                                  |
| Schistosomiasis                                                                      | --                                        | --                                            | --                                     | --                                                | --                                                  |
| Cysticercosis                                                                        | 5.2<br>(< 0.05 to 12.5)                   | --                                            | 0.7<br>(< 0.05 to 1.9)                 | --                                                | --                                                  |
| Cystic echinococcosis                                                                | 1.5<br>(0.2 to 6.0)                       | 0.3<br>(< 0.05 to 1.2)                        | 0.1<br>(< 0.05 to 0.6)                 | -53.3<br>(-94.9 to 283.3)                         | -55.0<br>(-94.9 to 230.5)                           |
| Lymphatic filariasis                                                                 | --                                        | --                                            | --                                     | --                                                | --                                                  |
| Onchocerciasis                                                                       | --                                        | --                                            | --                                     | --                                                | --                                                  |
| Trachoma                                                                             | --                                        | --                                            | --                                     | --                                                | --                                                  |
| Dengue                                                                               | --                                        | --                                            | --                                     | --                                                | --                                                  |
| Yellow fever                                                                         | --                                        | --                                            | --                                     | --                                                | --                                                  |
| Rabies                                                                               | < 0.05<br>(< 0.05 to < 0.05)              | < 0.05<br>(< 0.05 to < 0.05)                  | < 0.05<br>(< 0.05 to < 0.05)           | -12.3<br>(-31.7 to 7.7)                           | -20.8<br>(-38.0 to -1.8)                            |
| Intestinal nematode infections                                                       | --                                        | --                                            | --                                     | --                                                | --                                                  |
| Ascariasis                                                                           | --                                        | --                                            | --                                     | --                                                | --                                                  |

| Cause                                                                   | Prevalence in thousands (95% UI)                 | Incidence in thousands (95% UI)                      | YLDs in thousands (95% UI)                    |                                                   |                                                     |
|-------------------------------------------------------------------------|--------------------------------------------------|------------------------------------------------------|-----------------------------------------------|---------------------------------------------------|-----------------------------------------------------|
|                                                                         | 2016 counts                                      | 2016 counts                                          | 2016 counts                                   | Percentage change in counts between 2006 and 2016 | Percentage change in age-standardised rates between |
| Trichuriasis                                                            | --                                               | --                                                   | --                                            | --                                                | --                                                  |
| Hookworm disease                                                        | --                                               | --                                                   | --                                            | --                                                | --                                                  |
| Food-borne trematodiasis                                                | --                                               | --                                                   | --                                            | --                                                | --                                                  |
| Leprosy                                                                 | --                                               | --                                                   | --                                            | --                                                | --                                                  |
| Ebola virus disease                                                     | --                                               | --                                                   | --                                            | --                                                | --                                                  |
| Zika virus disease                                                      | --                                               | --                                                   | --                                            | --                                                | --                                                  |
| Guinea worm disease                                                     | --                                               | --                                                   | --                                            | --                                                | --                                                  |
| Other neglected tropical diseases                                       | --                                               | --                                                   | < 0.05<br>(< 0.05 to < 0.05)                  | --                                                | --                                                  |
| <b>Maternal disorders</b>                                               | <b>28.4</b><br><b>(23.3 to 36.0)</b>             | <b>353.8†</b><br><b>(328.8 to 391.9)</b>             | <b>1.5</b><br><b>(1.0 to 2.2)</b>             | <b>-4.8</b><br><b>(-27.1 to 26.1)</b>             | <b>0.5</b><br><b>(-23.2 to 33.1)</b>                |
| Maternal haemorrhage                                                    | 12.2<br>(9.0 to 15.7)                            | 68.6<br>(62.6 to 75.9)                               | 0.5<br>(0.3 to 0.7)                           | -5.6<br>(-37.5 to 40.8)                           | 1.8<br>(-34.0 to 54.2)                              |
| Maternal sepsis and other pregnancy related infections                  | 8.3<br>(6.2 to 11.1)                             | 59.7<br>(56.1 to 63.1)                               | 0.3<br>(0.1 to 0.5)                           | -1.6<br>(-50.7 to 108.8)                          | 7.5<br>(-47.7 to 127.1)                             |
| Maternal hypertensive disorders                                         | 7.2<br>(4.8 to 9.6)                              | 29.1<br>(27.5 to 30.8)                               | 0.3<br>(0.2 to 0.6)                           | -6.1<br>(-46.2 to 66.4)                           | -3.5<br>(-43.5 to 72.5)                             |
| Maternal obstructed labour and uterine rupture                          | 0.1<br>(< 0.05 to 0.1)                           | 4.5<br>(4.0 to 5.5)                                  | < 0.05<br>(< 0.05 to < 0.05)                  | -1.8<br>(-47.2 to 82.0)                           | -2.4<br>(-47.1 to 79.8)                             |
| Maternal abortion, miscarriage, and ectopic pregnancy                   | 1.6<br>(1.0 to 2.2)                              | 191.8<br>(167.8 to 227.7)                            | 0.2<br>(0.1 to 0.3)                           | 2.9<br>(-52.6 to 112.2)                           | 1.4<br>(-53.0 to 105.3)                             |
| Other maternal disorders                                                | --                                               | --                                                   | 0.2<br>(0.1 to 0.3)                           | -9.8<br>(-30.7 to 19.6)                           | -4.0<br>(-26.7 to 27.4)                             |
| <b>Neonatal disorders</b>                                               | <b>263.3</b><br><b>(228.8 to 303.8)</b>          | --                                                   | <b>49.5</b><br><b>(33.6 to 70.1)</b>          | <b>-12.5</b><br><b>(-23.0 to 0.5)</b>             | <b>-10.0</b><br><b>(-20.8 to 3.5)</b>               |
| Neonatal preterm birth complications                                    | 206.3<br>(167.2 to 260.5)                        | --                                                   | 22.9<br>(15.1 to 33.3)                        | -13.7<br>(-31.0 to 8.5)                           | -10.3<br>(-28.4 to 13.2)                            |
| Neonatal encephalopathy due to birth asphyxia and trauma                | 78.5<br>(46.6 to 114.8)                          | --                                                   | 14.2<br>(6.0 to 24.6)                         | 9.8<br>(-8.8 to 47.5)                             | 12.5<br>(-6.1 to 50.0)                              |
| Neonatal sepsis and other neonatal infections                           | 26.1<br>(12.4 to 52.4)                           | --                                                   | 10.5<br>(4.2 to 23.5)                         | -30.2<br>(-41.8 to -17.7)                         | -28.4<br>(-40.1 to -15.9)                           |
| Hemolytic disease and other neonatal jaundice                           | 3.3<br>(2.8 to 3.8)                              | --                                                   | 1.0<br>(0.7 to 1.3)                           | -5.1<br>(-12.0 to 2.4)                            | -2.6<br>(-9.8 to 5.1)                               |
| Other neonatal disorders                                                | --                                               | --                                                   | 0.8<br>(0.5 to 1.2)                           | -10.8<br>(-25.6 to 9.1)                           | -14.0<br>(-28.3 to 5.1)                             |
| <b>Nutritional deficiencies</b>                                         | <b>4,684.4</b><br><b>(4,197.2 to 5,080.0)</b>    | <b>119.9†</b><br><b>(91.9 to 149.9)</b>              | <b>71.4</b><br><b>(45.1 to 108.7)</b>         | <b>-8.6</b><br><b>(-20.7 to 4.5)</b>              | <b>-8.0</b><br><b>(-20.3 to 6.1)</b>                |
| Protein-energy malnutrition                                             | 68.7<br>(41.6 to 109.9)                          | 29.9<br>(18.3 to 47.7)                               | 2.8<br>(1.6 to 4.5)                           | -15.1<br>(-48.5 to 45.3)                          | -17.7<br>(-49.9 to 40.8)                            |
| Iodine deficiency                                                       | 285.1<br>(207.5 to 384.8)                        | 4.0<br>(3.0 to 5.2)                                  | 7.2<br>(4.3 to 11.2)                          | 6.1<br>(-6.9 to 20.6)                             | 4.2<br>(-9.0 to 18.7)                               |
| Vitamin A deficiency                                                    | 103.0<br>(77.0 to 134.1)                         | 86.0<br>(61.9 to 113.4)                              | --                                            | --                                                | --                                                  |
| Iron-deficiency anaemia                                                 | 4,002.9<br>(3,541.3 to 4,503.8)                  | --                                                   | 61.4<br>(37.0 to 95.2)                        | -9.7<br>(-22.8 to 5.0)                            | -8.1<br>(-21.4 to 8.9)                              |
| Other nutritional deficiencies                                          | --                                               | --                                                   | 0.1<br>(0.1 to 0.1)                           | -16.0<br>(-50.1 to 49.4)                          | -18.9<br>(-51.6 to 44.2)                            |
| <b>Other communicable, maternal, neonatal, and nutritional diseases</b> | <b>6,629.4</b><br><b>(6,127.3 to 7,118.5)</b>    | <b>2,970.3</b><br><b>(2,535.4 to 3,508.4)</b>        | <b>13.0</b><br><b>(7.9 to 21.2)</b>           | <b>-0.5</b><br><b>(-7.1 to 6.0)</b>               | <b>-0.8</b><br><b>(-8.0 to 6.3)</b>                 |
| Sexually transmitted diseases excluding HIV                             | 5,606.1<br>(5,181.2 to 6,079.6)                  | 2,908.4<br>(2,477.3 to 3,445.6)                      | 10.2<br>(6.1 to 17.3)                         | -2.2<br>(-9.0 to 5.0)                             | -3.1<br>(-10.0 to 3.5)                              |
| Syphilis                                                                | 23.9<br>(19.1 to 29.7)                           | 15.9<br>(11.3 to 21.2)                               | 0.7<br>(0.5 to 1.0)                           | 17.2<br>(0.5 to 37.0)                             | 2.9<br>(-11.4 to 20.4)                              |
| Chlamydial infection                                                    | 467.7<br>(313.8 to 689.9)                        | 360.0<br>(246.8 to 538.9)                            | 2.1<br>(1.2 to 3.7)                           | -3.1<br>(-15.6 to 9.5)                            | -3.8<br>(-15.4 to 8.3)                              |
| Gonococcal infection                                                    | 419.7<br>(317.9 to 549.0)                        | 1,428.1<br>(1,051.0 to 1,941.4)                      | 1.7<br>(0.9 to 3.1)                           | -9.2<br>(-20.5 to 4.0)                            | -1.9<br>(-13.3 to 11.8)                             |
| Trichomoniasis                                                          | 884.1<br>(763.9 to 1,012.4)                      | 736.2<br>(633.2 to 848.8)                            | 1.0<br>(0.4 to 2.1)                           | -1.1<br>(-8.8 to 6.5)                             | -0.8<br>(-8.2 to 6.2)                               |
| Genital herpes                                                          | 3,947.0<br>(3,373.9 to 4,656.5)                  | 167.6<br>(139.4 to 206.3)                            | 1.0<br>(0.3 to 2.3)                           | 3.7<br>(-5.7 to 12.6)                             | -2.9<br>(-11.6 to 5.9)                              |
| Other sexually transmitted diseases                                     | 187.0<br>(153.0 to 223.3)                        | 200.5<br>(171.2 to 235.4)                            | 3.7<br>(2.3 to 5.7)                           | -3.2<br>(-15.7 to 9.6)                            | -4.7<br>(-16.4 to 6.5)                              |
| Hepatitis                                                               | 1,124.5<br>(1,000.1 to 1,279.3)                  | 61.8<br>(52.5 to 73.5)                               | 0.1<br>(0.1 to 0.1)                           | -31.6<br>(-42.7 to -18.6)                         | -32.7<br>(-43.7 to -19.9)                           |
| Acute hepatitis A                                                       | 1.3<br>(1.0 to 1.6)                              | 16.9<br>(12.8 to 21.0)                               | < 0.05<br>(< 0.05 to 0.1)                     | -37.6<br>(-56.6 to -9.3)                          | -35.2<br>(-54.8 to -7.2)                            |
| Hepatitis B                                                             | 545.6<br>(428.1 to 688.8)                        | 35.6<br>(27.1 to 46.2)                               | < 0.05<br>(< 0.05 to 0.1)                     | -27.4<br>(-40.1 to -14.0)                         | -34.2<br>(-44.7 to -22.2)                           |
| Hepatitis C                                                             | 577.4<br>(518.5 to 641.2)                        | 6.2<br>(5.4 to 7.0)                                  | < 0.05<br>(< 0.05 to < 0.05)                  | -10.8<br>(-13.6 to -8.4)                          | -7.7<br>(-9.7 to -5.9)                              |
| Acute hepatitis E                                                       | 0.2<br>(0.2 to 0.3)                              | 3.1<br>(2.2 to 4.3)                                  | < 0.05<br>(< 0.05 to < 0.05)                  | -31.0<br>(-37.8 to -23.9)                         | -35.7<br>(-39.3 to -31.4)                           |
| Other infectious diseases                                               | 141.1<br>(123.2 to 159.7)                        | 0.1<br>(< 0.05 to 0.1)                               | 2.7<br>(1.6 to 4.2)                           | 8.6<br>(-8.4 to 29.1)                             | 7.5<br>(-11.1 to 31.1)                              |
| <b>Non-communicable diseases</b>                                        | <b>35,767.7</b><br><b>(35,582.0 to 35,975.6)</b> | <b>110,016.3†</b><br><b>(103,669.3 to 116,255.8)</b> | <b>4,145.5</b><br><b>(3,095.6 to 5,330.1)</b> | <b>6.2</b><br><b>(4.5 to 7.9)</b>                 | <b>-1.4</b><br><b>(-3.1 to 0.3)</b>                 |
| <b>Neoplasms</b>                                                        | <b>457.6</b><br><b>(435.2 to 481.0)</b>          | <b>173.1</b><br><b>(162.7 to 187.1)</b>              | <b>51.5</b><br><b>(37.7 to 66.4)</b>          | <b>24.5</b><br><b>(18.0 to 31.3)</b>              | <b>6.4</b><br><b>(0.7 to 12.5)</b>                  |
| Lip and oral cavity cancer                                              | 9.0<br>(8.1 to 10.0)                             | 2.6<br>(2.4 to 2.9)                                  | 1.0<br>(0.7 to 1.3)                           | 20.7<br>(4.0 to 38.4)                             | 2.5<br>(-11.8 to 17.7)                              |
| Nasopharynx cancer                                                      | 0.6<br>(0.6 to 0.7)                              | 0.2<br>(0.2 to 0.2)                                  | 0.1<br>(0.1 to 0.1)                           | -5.8<br>(-14.8 to 5.8)                            | -15.6<br>(-23.6 to -5.4)                            |
| Other pharynx cancer                                                    | 5.2<br>(4.6 to 5.9)                              | 1.7<br>(1.5 to 1.9)                                  | 0.6<br>(0.4 to 0.8)                           | 46.3<br>(23.9 to 73.0)                            | 26.3<br>(7.9 to 47.8)                               |
| Oesophageal cancer                                                      | 2.1<br>(1.9 to 2.4)                              | 1.9<br>(1.7 to 2.1)                                  | 0.5<br>(0.3 to 0.7)                           | 13.6<br>(-9.5 to 41.6)                            | -5.3<br>(-24.8 to 18.3)                             |
| Stomach cancer                                                          | 8.9<br>(8.3 to 9.5)                              | 5.8<br>(5.5 to 6.1)                                  | 1.4<br>(1.0 to 1.9)                           | -5.2<br>(-19.3 to 11.7)                           | -21.1<br>(-32.7 to -7.8)                            |
| Colon and rectum cancer                                                 | 61.2<br>(56.9 to 67.8)                           | 19.0<br>(17.7 to 21.0)                               | 6.2<br>(4.5 to 8.2)                           | 20.9<br>(6.8 to 37.7)                             | -0.4<br>(-11.6 to 13.4)                             |
| Liver cancer                                                            | 0.7<br>(0.6 to 0.8)                              | 2.1<br>(1.9 to 2.3)                                  | 0.5<br>(0.3 to 0.6)                           | 25.7<br>(12.7 to 38.1)                            | 4.0<br>(-6.7 to 13.6)                               |
| Liver cancer due to hepatitis B                                         | 0.5<br>(0.4 to 0.6)                              | 0.6<br>(0.4 to 0.7)                                  | 0.1<br>(0.1 to 0.2)                           | 26.0<br>(11.2 to 40.9)                            | 5.5<br>(-7.1 to 17.0)                               |

| Cause                                              | Prevalence in thousands (95% UI)              | Incidence in thousands (95% UI)          | YLDs in thousands (95% UI)              |                                                   |                                                     |
|----------------------------------------------------|-----------------------------------------------|------------------------------------------|-----------------------------------------|---------------------------------------------------|-----------------------------------------------------|
|                                                    | 2016 counts                                   | 2016 counts                              | 2016 counts                             | Percentage change in counts between 2006 and 2016 | Percentage change in age-standardised rates between |
| Liver cancer due to hepatitis C                    | 0.4<br>(0.3 to 0.6)                           | 0.5<br>(0.4 to 0.7)                      | 0.1<br>(0.1 to 0.2)                     | 26.6<br>(11.2 to 42.0)                            | 2.5<br>(-8.8 to 14.2)                               |
| Liver cancer due to alcohol use                    | 0.6<br>(0.5 to 0.7)                           | 0.7<br>(0.6 to 0.8)                      | 0.1<br>(0.1 to 0.2)                     | 24.4<br>(10.2 to 38.7)                            | 2.9<br>(-8.9 to 14.6)                               |
| Liver cancer due to other causes                   | 0.3<br>(0.2 to 0.4)                           | 0.3<br>(0.3 to 0.4)                      | 0.1<br>( $< 0.05$ to 0.1)               | 26.6<br>(12.0 to 42.0)                            | 5.8<br>(-6.7 to 18.2)                               |
| Gallbladder and biliary tract cancer               | 1.6<br>(1.5 to 1.7)                           | 2.3<br>(2.2 to 2.5)                      | 0.5<br>(0.3 to 0.7)                     | 1.7<br>(-14.2 to 20.6)                            | -17.5<br>(-29.4 to -3.3)                            |
| Pancreatic cancer                                  | 4.0<br>(3.7 to 4.3)                           | 5.4<br>(5.0 to 5.8)                      | 1.1<br>(0.7 to 1.4)                     | 22.6<br>(4.1 to 43.6)                             | 1.1<br>(-13.4 to 17.4)                              |
| Larynx cancer                                      | 8.7<br>(7.9 to 9.5)                           | 2.6<br>(2.3 to 2.8)                      | 1.0<br>(0.7 to 1.3)                     | 1.1<br>(-20.6 to 27.9)                            | -14.2<br>(-32.4 to 7.6)                             |
| Tracheal, bronchus, and lung cancer                | 26.4<br>(24.8 to 28.5)                        | 23.1<br>(21.7 to 24.7)                   | 5.1<br>(3.6 to 6.5)                     | 1.9<br>(-12.9 to 18.6)                            | -15.5<br>(-27.6 to -1.5)                            |
| Malignant skin melanoma                            | 16.7<br>(13.0 to 18.9)                        | 3.6<br>(2.9 to 4.1)                      | 1.2<br>(0.8 to 1.6)                     | 53.8<br>(28.9 to 81.2)                            | 34.8<br>(13.4 to 59.9)                              |
| Non-melanoma skin cancer                           | 9.7<br>(4.9 to 18.4)                          | 16.9<br>(9.4 to 28.7)                    | 0.3<br>(0.1 to 0.9)                     | 275.9<br>(82.4 to 886.9)                          | 197.1<br>(46.6 to 674.8)                            |
| Non-melanoma skin cancer (squamous-cell carcinoma) | 7.3<br>(3.4 to 17.9)                          | 6.9<br>(3.4 to 16.3)                     | 0.3<br>(0.1 to 0.9)                     | 284.8<br>(78.0 to 952.1)                          | 203.1<br>(41.6 to 721.1)                            |
| Non-melanoma skin cancer (basal-cell carcinoma)    | 1.5<br>(0.7 to 2.8)                           | 10.1<br>(5.1 to 16.6)                    | $< 0.05$<br>( $< 0.05$ to $< 0.05$ )    | 152.0<br>(30.0 to 326.0)                          | 112.0<br>(9.6 to 250.0)                             |
| Breast cancer                                      | 87.8<br>(79.5 to 99.1)                        | 18.3<br>(16.6 to 20.6)                   | 7.6<br>(5.5 to 10.2)                    | 22.8<br>(6.3 to 42.4)                             | 6.9<br>(-7.2 to 23.7)                               |
| Cervical cancer                                    | 11.1<br>(9.9 to 12.6)                         | 3.1<br>(2.8 to 3.5)                      | 1.1<br>(0.8 to 1.5)                     | -14.6<br>(-27.9 to 3.1)                           | -23.8<br>(-35.0 to -9.3)                            |
| Uterine cancer                                     | 34.5<br>(30.2 to 39.6)                        | 7.3<br>(6.4 to 8.4)                      | 2.5<br>(1.8 to 3.5)                     | 47.9<br>(19.5 to 85.8)                            | 25.0<br>(1.7 to 55.3)                               |
| Ovarian cancer                                     | 12.0<br>(10.2 to 13.4)                        | 4.0<br>(3.4 to 4.4)                      | 1.7<br>(1.2 to 2.4)                     | 8.2<br>(-20.0 to 42.3)                            | -4.1<br>(-28.4 to 25.8)                             |
| Prostate cancer                                    | 54.8<br>(41.3 to 67.9)                        | 13.6<br>(10.7 to 16.2)                   | 5.3<br>(3.6 to 7.1)                     | 53.5<br>(24.7 to 85.4)                            | 23.8<br>(0.9 to 49.9)                               |
| Testicular cancer                                  | 7.4<br>(6.1 to 8.9)                           | 1.4<br>(1.2 to 1.7)                      | 0.5<br>(0.3 to 0.7)                     | 37.4<br>(3.2 to 81.7)                             | 38.2<br>(3.1 to 82.6)                               |
| Kidney cancer                                      | 17.1<br>(15.2 to 18.8)                        | 5.3<br>(4.9 to 5.8)                      | 1.7<br>(1.2 to 2.2)                     | 21.4<br>(5.2 to 40.9)                             | 3.6<br>(-10.0 to 20.1)                              |
| Bladder cancer                                     | 30.7<br>(28.4 to 33.1)                        | 7.7<br>(7.2 to 8.3)                      | 2.8<br>(2.0 to 3.7)                     | 30.7<br>(14.6 to 48.6)                            | 7.6<br>(-5.4 to 21.9)                               |
| Brain and nervous system cancer                    | 7.5<br>(5.5 to 8.5)                           | 3.5<br>(2.6 to 3.9)                      | 1.1<br>(0.7 to 1.5)                     | 12.8<br>(-4.8 to 27.8)                            | 2.7<br>(-14.3 to 18.3)                              |
| Thyroid cancer                                     | 13.3<br>(11.7 to 15.4)                        | 2.5<br>(2.2 to 2.9)                      | 0.8<br>(0.6 to 1.2)                     | 41.7<br>(15.3 to 74.6)                            | 28.2<br>(4.2 to 57.7)                               |
| Mesothelioma                                       | 0.5<br>(0.4 to 0.5)                           | 0.3<br>(0.3 to 0.3)                      | 0.1<br>(0.1 to 0.1)                     | 53.2<br>(23.6 to 70.8)                            | 31.8<br>(6.1 to 46.4)                               |
| Hodgkin lymphoma                                   | 4.2<br>(3.5 to 5.2)                           | 1.0<br>(0.8 to 1.2)                      | 0.4<br>(0.2 to 0.5)                     | 1.4<br>(-19.5 to 27.2)                            | 5.9<br>(-18.7 to 35.4)                              |
| Non-Hodgkin's lymphoma                             | 14.9<br>(12.4 to 16.7)                        | 4.0<br>(3.4 to 4.5)                      | 1.3<br>(0.9 to 1.8)                     | 54.2<br>(33.1 to 76.5)                            | 35.1<br>(16.9 to 54.1)                              |
| Multiple myeloma                                   | 3.0<br>(2.0 to 3.6)                           | 1.5<br>(1.0 to 1.7)                      | 0.7<br>(0.4 to 0.9)                     | 28.2<br>(3.3 to 62.0)                             | 7.2<br>(-13.3 to 35.7)                              |
| Leukaemia                                          | 20.1<br>(17.8 to 22.5)                        | 5.5<br>(5.0 to 6.1)                      | 2.6<br>(1.8 to 3.5)                     | 47.5<br>(27.5 to 69.8)                            | 32.2<br>(13.3 to 53.9)                              |
| Acute lymphoid leukaemia                           | 3.0<br>(2.4 to 3.7)                           | 0.7<br>(0.6 to 0.9)                      | 0.4<br>(0.2 to 0.5)                     | 79.1<br>(36.6 to 137.7)                           | 92.2<br>(34.7 to 171.5)                             |
| Chronic lymphoid leukaemia                         | 12.1<br>(10.4 to 14.0)                        | 2.8<br>(2.4 to 3.2)                      | 1.5<br>(1.0 to 2.0)                     | 65.7<br>(31.0 to 104.8)                           | 38.4<br>(9.6 to 70.9)                               |
| Acute myeloid leukaemia                            | 1.6<br>(1.3 to 1.9)                           | 1.1<br>(0.9 to 1.3)                      | 0.3<br>(0.2 to 0.4)                     | 52.1<br>(30.7 to 75.0)                            | 31.1<br>(10.7 to 56.2)                              |
| Chronic myeloid leukaemia                          | 1.0<br>(0.8 to 1.2)                           | 0.4<br>(0.3 to 0.4)                      | 0.1<br>(0.1 to 0.2)                     | -8.0<br>(-21.9 to 9.0)                            | -18.4<br>(-30.9 to -3.5)                            |
| Other leukaemia                                    | 2.4<br>(2.0 to 2.8)                           | 0.5<br>(0.5 to 0.6)                      | 0.3<br>(0.2 to 0.4)                     | -2.9<br>(-18.7 to 17.6)                           | -19.2<br>(-32.7 to -2.6)                            |
| Other neoplasms                                    | 24.8<br>(21.2 to 28.3)                        | 6.9<br>(6.0 to 7.7)                      | 2.0<br>(1.4 to 2.7)                     | 61.0<br>(37.7 to 89.0)                            | 42.4<br>(22.0 to 65.2)                              |
| <b>Cardiovascular diseases</b>                     | <b>4,805.7</b><br><b>(4,604.9 to 5,010.3)</b> | <b>531.0†</b><br><b>(506.7 to 553.9)</b> | <b>384.5</b><br><b>(280.0 to 498.0)</b> | <b>9.6</b><br><b>(4.5 to 14.6)</b>                | <b>-8.1</b><br><b>(-12.3 to -4.2)</b>               |
| Rheumatic heart disease                            | 7.1<br>(6.4 to 7.8)                           | 1.6<br>(1.5 to 1.7)                      | 0.6<br>(0.4 to 0.8)                     | 0.2<br>(-19.6 to 23.2)                            | -12.6<br>(-29.1 to 7.1)                             |
| Ischaemic heart disease                            | 1,866.6<br>(1,744.0 to 1,987.8)               | 238.7<br>(225.0 to 252.2)                | 109.2<br>(76.6 to 148.1)                | 13.3<br>(8.3 to 19.1)                             | -4.2<br>(-8.3 to 0.5)                               |
| Cerebrovascular disease                            | 684.8<br>(630.2 to 749.0)                     | 124.5‡<br>(113.9 to 132.9)               | 135.8<br>(94.0 to 175.3)                | 8.3<br>(-2.0 to 19.8)                             | -10.6<br>(-18.6 to -1.9)                            |
| Ischaemic stroke                                   | 602.3<br>(533.3 to 686.1)                     | 102.0‡<br>(91.3 to 110.5)                | 116.2<br>(79.8 to 151.3)                | 8.4<br>(-3.4 to 22.3)                             | -11.1<br>(-20.2 to -0.6)                            |
| Hemorrhagic stroke                                 | 103.7<br>(94.2 to 114.3)                      | 22.5‡<br>(21.8 to 23.5)                  | 19.6<br>(14.0 to 25.4)                  | 7.8<br>(-3.3 to 20.5)                             | -8.2<br>(-17.2 to 2.3)                              |
| Hypertensive heart disease                         | 181.2<br>(150.4 to 215.0)                     | --                                       | 14.2<br>(9.7 to 19.8)                   | 3.5<br>(-7.8 to 16.0)                             | -14.8<br>(-24.0 to -4.7)                            |
| Cardiomyopathy and myocarditis                     | 212.7<br>(187.5 to 236.9)                     | 22.1†<br>(19.7 to 24.8)                  | 16.5<br>(11.1 to 23.5)                  | 38.2<br>(24.7 to 52.9)                            | 15.9<br>(5.5 to 27.3)                               |
| Myocarditis                                        | 17.5<br>(15.8 to 19.5)                        | 22.1<br>(19.7 to 24.8)                   | 1.3<br>(0.9 to 1.8)                     | 12.2<br>(-4.0 to 30.6)                            | 8.0<br>(-7.5 to 25.6)                               |
| Alcoholic cardiomyopathy                           | 31.3<br>(25.9 to 37.9)                        | --                                       | 2.6<br>(1.7 to 3.7)                     | 51.4<br>(24.6 to 85.1)                            | 33.7<br>(10.1 to 61.8)                              |
| Other cardiomyopathy                               | 161.8<br>(133.8 to 191.9)                     | --                                       | 12.7<br>(8.4 to 18.2)                   | 39.0<br>(23.2 to 56.0)                            | 13.7<br>(2.4 to 26.2)                               |
| Atrial fibrillation and flutter                    | 441.0<br>(383.9 to 512.6)                     | 35.4<br>(30.0 to 41.6)                   | 33.7<br>(22.8 to 46.8)                  | 24.0<br>(17.0 to 31.5)                            | 1.2<br>(-4.4 to 7.2)                                |
| Peripheral vascular disease                        | 1,158.0<br>(1,010.6 to 1,345.7)               | 102.8<br>(88.0 to 121.0)                 | 4.8<br>(2.2 to 8.8)                     | 18.6<br>(9.1 to 29.0)                             | -6.6<br>(-13.3 to 1.0)                              |
| Endocarditis                                       | 3.4<br>(2.9 to 3.9)                           | 5.9<br>(5.4 to 6.4)                      | 0.3<br>(0.2 to 0.4)                     | -5.5<br>(-22.4 to 15.2)                           | -16.9<br>(-30.3 to -1.6)                            |
| Other cardiovascular and circulatory diseases      | 1,364.7<br>(1,158.2 to 1,594.3)               | --                                       | 69.5<br>(46.6 to 96.5)                  | -2.6<br>(-10.9 to 7.4)                            | -15.3<br>(-22.4 to -7.3)                            |
| <b>Chronic respiratory diseases</b>                | <b>3,233.6</b><br><b>(3,125.0 to 3,340.0)</b> | <b>419.9†</b><br><b>(398.1 to 442.0)</b> | <b>122.4</b><br><b>(92.4 to 155.6)</b>  | <b>1.6</b><br><b>(-4.2 to 7.6)</b>                | <b>-4.6</b><br><b>(-9.8 to 0.3)</b>                 |
| Chronic obstructive pulmonary disease              | 1,509.4<br>(1,434.5 to 1,583.5)               | 88.3<br>(83.8 to 93.0)                   | 45.1<br>(36.3 to 54.4)                  | 3.4<br>(-9.4 to 16.7)                             | -10.3<br>(-21.1 to 1.1)                             |
| Pneumoconiosis                                     | 8.1<br>(7.4 to 8.8)                           | 0.5<br>(0.5 to 0.5)                      | 1.2<br>(0.8 to 1.7)                     | 10.9<br>(-7.9 to 36.9)                            | -6.2<br>(-21.6 to 15.1)                             |
| Silicosis                                          | 1.0<br>(0.9 to 1.1)                           | 0.1<br>(0.1 to 0.1)                      | 0.2<br>(0.1 to 0.2)                     | 7.8<br>(1.2 to 14.2)                              | -11.1<br>(-16.4 to -6.0)                            |



| Cause                                                          | Prevalence in thousands (95% UI)           | Incidence in thousands (95% UI)          | YLDs in thousands (95% UI)        |                                                   |                                                     |
|----------------------------------------------------------------|--------------------------------------------|------------------------------------------|-----------------------------------|---------------------------------------------------|-----------------------------------------------------|
|                                                                | 2016 counts                                | 2016 counts                              | 2016 counts                       | Percentage change in counts between 2006 and 2016 | Percentage change in age-standardised rates between |
| Asbestosis                                                     | 1.0<br>(0.9 to 1.1)                        | 0.1<br>( $< 0.05$ to 0.1)                | 0.2<br>(0.1 to 0.2)               | 15.0<br>(7.4 to 24.1)                             | -1.5<br>(-7.7 to 6.1)                               |
| Coal workers pneumoconiosis                                    | 3.9<br>(3.4 to 4.5)                        | 0.2<br>(0.2 to 0.2)                      | 0.6<br>(0.4 to 0.9)               | 9.0<br>(-24.2 to 63.7)                            | -5.8<br>(-34.2 to 38.9)                             |
| Other pneumoconiosis                                           | 2.2<br>(1.9 to 2.5)                        | 0.2<br>(0.1 to 0.2)                      | 0.3<br>(0.2 to 0.5)               | 14.2<br>(-13.2 to 51.9)                           | -6.5<br>(-28.5 to 24.7)                             |
| Asthma                                                         | 1,809.0<br>(1,696.5 to 1,933.0)            | 329.2<br>(309.2 to 351.0)                | 69.5<br>(46.2 to 98.7)            | -0.6<br>(-5.6 to 4.4)                             | -2.8<br>(-7.8 to 1.9)                               |
| Interstitial lung disease and pulmonary sarcoidosis            | 46.2<br>(42.5 to 50.5)                     | 1.9<br>(1.8 to 2.1)                      | 4.8<br>(3.1 to 7.0)               | 9.2<br>(-5.2 to 26.1)                             | -0.5<br>(-13.4 to 14.3)                             |
| Other chronic respiratory diseases                             | --                                         | --                                       | 1.9<br>(1.5 to 2.3)               | 21.9<br>(11.3 to 34.2)                            | 26.6<br>(15.8 to 39.0)                              |
| <b>Cirrhosis and other chronic liver diseases</b>              | <b>480.2<br/>(457.9 to 503.5)</b>          | <b>11.0<br/>(10.6 to 11.4)</b>           | <b>9.6<br/>(6.7 to 13.3)</b>      | <b>10.6<br/>(-0.6 to 21.4)</b>                    | <b>4.0<br/>(-6.2 to 15.4)</b>                       |
| Cirrhosis and other chronic liver diseases due to hepatitis B  | 74.6<br>(62.7 to 88.4)                     | 1.8<br>(1.5 to 2.2)                      | 1.4<br>(0.9 to 2.1)               | 14.9<br>(-8.0 to 44.9)                            | 5.2<br>(-16.5 to 30.8)                              |
| Cirrhosis and other chronic liver diseases due to hepatitis C  | 112.0<br>(83.1 to 148.5)                   | 2.7<br>(2.0 to 3.6)                      | 2.1<br>(1.3 to 3.3)               | 13.7<br>(-8.0 to 39.8)                            | 4.1<br>(-14.4 to 27.0)                              |
| Cirrhosis and other chronic liver diseases due to alcohol use  | 165.3<br>(134.4 to 197.7)                  | 4.0<br>(3.3 to 4.8)                      | 3.1<br>(2.0 to 4.5)               | 14.9<br>(-2.8 to 35.7)                            | 3.8<br>(-11.7 to 22.3)                              |
| Cirrhosis and other chronic liver diseases due to other causes | 128.3<br>(113.6 to 144.3)                  | 2.4<br>(2.1 to 2.8)                      | 2.9<br>(1.9 to 4.1)               | 2.5<br>(-13.7 to 22.8)                            | 3.6<br>(-13.0 to 24.2)                              |
| <b>Digestive diseases</b>                                      | <b>2,159.1<br/>(2,001.1 to 2,318.8)</b>    | <b>2,555.6†<br/>(2,447.4 to 2,663.7)</b> | <b>81.2<br/>(57.4 to 109.0)</b>   | <b>19.4<br/>(9.5 to 31.5)</b>                     | <b>7.9<br/>(-0.8 to 17.9)</b>                       |
| Peptic ulcer disease                                           | 717.7<br>(638.5 to 812.1)                  | 58.9<br>(53.4 to 64.5)                   | 15.3<br>(9.5 to 23.1)             | 47.8<br>(16.9 to 89.4)                            | 34.5<br>(5.8 to 74.7)                               |
| Gastritis and duodenitis                                       | 946.0<br>(827.8 to 1,068.6)                | 725.3<br>(654.3 to 798.5)                | 16.5<br>(10.3 to 24.3)            | 31.6<br>(9.5 to 59.3)                             | 17.6<br>(-1.6 to 41.6)                              |
| Appendicitis                                                   | 1.6<br>(1.5 to 1.8)                        | 42.5<br>(39.3 to 45.8)                   | 0.5<br>(0.3 to 0.7)               | -7.2<br>(-31.4 to 25.2)                           | 1.7<br>(-30.8 to 48.3)                              |
| Paralytic ileus and intestinal obstruction                     | 0.6<br>(0.5 to 0.6)                        | 15.8<br>(14.2 to 17.7)                   | 0.2<br>(0.1 to 0.2)               | 33.2<br>(21.3 to 45.9)                            | 13.1<br>(4.4 to 22.3)                               |
| Inguinal, femoral, and abdominal hernia                        | 308.4<br>(294.3 to 324.2)                  | 946.6<br>(882.8 to 1,015.5)              | 22.5<br>(15.5 to 30.6)            | 7.5<br>(-0.1 to 15.6)                             | -3.4<br>(-10.0 to 3.9)                              |
| Inflammatory bowel disease                                     | 109.7<br>(102.7 to 116.9)                  | 30.4<br>(29.4 to 31.4)                   | 15.4<br>(10.5 to 21.3)            | 5.7<br>(-2.9 to 15.1)                             | -1.3<br>(-9.7 to 7.8)                               |
| Vascular intestinal disorders                                  | 0.8<br>(0.8 to 0.9)                        | 5.1<br>(4.6 to 5.7)                      | 0.3<br>(0.2 to 0.4)               | 12.9<br>(-3.6 to 31.5)                            | -1.0<br>(-12.8 to 11.9)                             |
| Gallbladder and biliary diseases                               | 141.7<br>(134.7 to 151.8)                  | 652.2<br>(617.7 to 700.3)                | 2.9<br>(1.9 to 4.0)               | 15.5<br>(-5.0 to 40.1)                            | 2.8<br>(-14.7 to 24.4)                              |
| Pancreatitis                                                   | 8.8<br>(8.1 to 9.6)                        | 78.7<br>(72.8 to 85.7)                   | 1.1<br>(0.7 to 1.5)               | 17.0<br>(-4.4 to 43.9)                            | 5.4<br>(-11.5 to 26.1)                              |
| Other digestive diseases                                       | --                                         | --                                       | 6.5<br>(4.7 to 8.8)               | 25.2<br>(15.5 to 36.7)                            | 9.7<br>(1.3 to 18.7)                                |
| <b>Neurological disorders</b>                                  | <b>14,265.0<br/>(13,734.3 to 14,961.1)</b> | <b>5,914.2<br/>(5,076.9 to 6,820.9)</b>  | <b>456.2<br/>(312.1 to 615.5)</b> | <b>3.6<br/>(-7.6 to 17.1)</b>                     | <b>-0.2<br/>(-12.1 to 14.7)</b>                     |
| Alzheimer's disease and other dementias                        | 333.7<br>(277.9 to 399.0)                  | 56.9<br>(47.2 to 69.5)                   | 48.6<br>(33.7 to 65.2)            | 31.5<br>(24.1 to 39.6)                            | -0.8<br>(-5.4 to 3.9)                               |
| Parkinson's disease                                            | 74.9<br>(58.1 to 93.7)                     | 8.6<br>(6.7 to 10.9)                     | 8.5<br>(5.4 to 12.0)              | 27.8<br>(15.3 to 42.0)                            | 4.9<br>(-5.6 to 16.4)                               |
| Epilepsy                                                       | 107.1<br>(23.2 to 204.1)                   | 8.5<br>(1.8 to 16.2)                     | 27.2<br>(5.1 to 68.3)             | -0.8<br>(-82.0 to 646.4)                          | -1.4<br>(-82.5 to 631.4)                            |
| Multiple sclerosis                                             | 36.1<br>(31.7 to 42.6)                     | 1.2<br>(1.0 to 1.4)                      | 9.3<br>(6.2 to 12.7)              | 23.1<br>(1.5 to 51.3)                             | 15.5<br>(-4.4 to 42.0)                              |
| Motor neuron disease                                           | 1.7<br>(1.5 to 1.9)                        | 0.3<br>(0.3 to 0.4)                      | 0.4<br>(0.2 to 0.5)               | 10.3<br>(5.9 to 15.8)                             | 2.4<br>(-1.5 to 6.2)                                |
| Migraine                                                       | 6,377.0<br>(6,009.9 to 6,774.7)            | 638.8<br>(593.0 to 689.8)                | 301.5<br>(196.0 to 422.1)         | -0.3<br>(-3.7 to 3.3)                             | -0.7<br>(-3.9 to 2.6)                               |
| Tension-type headache                                          | 9,750.9<br>(8,677.4 to 10,895.7)           | 5,199.5<br>(4,362.8 to 6,107.9)          | 54.0<br>(34.0 to 79.5)            | 1.7<br>(-3.8 to 7.7)                              | -1.1<br>(-5.7 to 4.1)                               |
| Other neurological disorders                                   | 0.2<br>(0.1 to 0.2)                        | 0.3<br>(0.2 to 0.5)                      | 6.8<br>(3.0 to 13.4)              | 12.7<br>(-56.7 to 236.5)                          | 18.3<br>(-59.2 to 311.7)                            |
| <b>Mental and substance use disorders</b>                      | <b>5,498.5<br/>(5,314.5 to 5,671.1)</b>    | <b>1,856.2†<br/>(1,748.3 to 1,974.6)</b> | <b>712.1<br/>(519.9 to 924.1)</b> | <b>-0.2<br/>(-2.5 to 2.3)</b>                     | <b>-0.4<br/>(-2.6 to 2.0)</b>                       |
| Schizophrenia                                                  | 102.5<br>(85.6 to 120.6)                   | 5.0<br>(4.2 to 6.0)                      | 64.9<br>(46.7 to 83.2)            | 5.6<br>(-3.8 to 15.8)                             | 0.8<br>(-8.2 to 9.9)                                |
| Alcohol use disorders                                          | 794.9<br>(717.1 to 876.9)                  | 431.7<br>(385.9 to 480.9)                | 78.7<br>(53.9 to 107.5)           | 3.3<br>(-6.4 to 13.8)                             | 1.7<br>(-8.1 to 12.2)                               |
| Drug use disorders                                             | 290.7<br>(269.2 to 311.7)                  | 33.4<br>(30.5 to 36.8)                   | 50.7<br>(36.2 to 67.6)            | -6.2<br>(-14.5 to 2.8)                            | -2.7<br>(-12.2 to 7.2)                              |
| Opioid use disorders                                           | 63.5<br>(53.5 to 75.4)                     | 9.0<br>(7.6 to 10.5)                     | 26.1<br>(17.7 to 35.6)            | 2.3<br>(-10.8 to 15.6)                            | 0.4<br>(-11.7 to 14.0)                              |
| Cocaine use disorders                                          | 34.0<br>(29.5 to 39.1)                     | 2.0<br>(1.7 to 2.4)                      | 4.6<br>(2.8 to 6.9)               | -4.9<br>(-24.3 to 16.9)                           | 0.3<br>(-20.2 to 24.7)                              |
| Amphetamine use disorders                                      | 48.0<br>(33.5 to 65.3)                     | 3.1<br>(2.2 to 4.2)                      | 6.4<br>(3.5 to 10.4)              | -21.8<br>(-41.9 to 1.8)                           | -10.2<br>(-34.2 to 17.5)                            |
| Cannabis use disorders                                         | 127.0<br>(108.0 to 149.3)                  | 15.0<br>(12.7 to 17.7)                   | 3.7<br>(2.3 to 5.5)               | -16.8<br>(-29.3 to -3.5)                          | -5.5<br>(-21.1 to 11.2)                             |
| Other drug use disorders                                       | 25.2<br>(22.6 to 28.1)                     | 4.4<br>(3.9 to 4.9)                      | 9.8<br>(6.2 to 14.3)              | -10.5<br>(-29.4 to 13.2)                          | -4.3<br>(-25.5 to 22.5)                             |
| Depressive disorders                                           | 1,087.6<br>(1,016.1 to 1,161.2)            | 1,059.6<br>(970.0 to 1,166.4)            | 171.8<br>(121.4 to 232.9)         | 1.9<br>(-3.4 to 7.1)                              | -2.1<br>(-7.0 to 2.7)                               |
| Major depressive disorder                                      | 642.8<br>(590.5 to 700.5)                  | 981.2<br>(893.5 to 1,088.9)              | 128.7<br>(89.8 to 176.4)          | 0.7<br>(-5.8 to 7.4)                              | -2.7<br>(-8.8 to 3.6)                               |
| Dysthymia                                                      | 456.6<br>(400.8 to 524.5)                  | 78.5<br>(68.5 to 89.3)                   | 43.1<br>(29.3 to 62.8)            | 5.6<br>(1.0 to 10.0)                              | -0.2<br>(-4.2 to 3.4)                               |
| Bipolar disorder                                               | 267.3<br>(234.1 to 307.5)                  | 17.9<br>(15.7 to 20.3)                   | 54.1<br>(33.9 to 79.8)            | -1.4<br>(-7.5 to 5.5)                             | 0.2<br>(-5.7 to 6.8)                                |
| Anxiety disorders                                              | 1,409.0<br>(1,280.3 to 1,544.5)            | 202.0<br>(186.6 to 219.1)                | 133.8<br>(93.5 to 179.5)          | -0.1<br>(-6.4 to 6.3)                             | -0.0<br>(-6.4 to 6.2)                               |
| Eating disorders                                               | 48.4<br>(39.0 to 59.2)                     | 19.6<br>(15.0 to 25.3)                   | 9.9<br>(6.1 to 14.4)              | 6.0<br>(-5.9 to 20.4)                             | 14.3<br>(1.4 to 28.4)                               |
| Anorexia nervosa                                               | 10.0<br>(7.5 to 13.3)                      | 3.5<br>(2.6 to 4.5)                      | 2.1<br>(1.3 to 3.4)               | -4.9<br>(-25.5 to 21.0)                           | 11.3<br>(-12.3 to 41.9)                             |
| Bulimia nervosa                                                | 36.7<br>(27.3 to 49.0)                     | 16.1<br>(11.7 to 22.0)                   | 7.8<br>(4.6 to 11.6)              | 9.4<br>(-5.2 to 27.9)                             | 15.3<br>(0.3 to 32.7)                               |
| Autistic spectrum disorders                                    | 316.6<br>(283.0 to 357.7)                  | 1.3<br>(0.9 to 1.9)                      | 46.9<br>(31.7 to 66.0)            | -1.7<br>(-6.3 to 2.9)                             | 0.3<br>(-4.4 to 4.8)                                |
| Autism                                                         | 102.8<br>(88.0 to 119.9)                   | 0.1<br>(0.1 to 0.2)                      | 25.8<br>(16.6 to 37.1)            | -1.5<br>(-8.9 to 6.7)                             | 0.3<br>(-7.2 to 8.4)                                |
| Asperger syndrome and other autistic spectrum disorders        | 213.7<br>(177.9 to 255.7)                  | 1.2<br>(0.8 to 1.7)                      | 21.1<br>(13.7 to 30.9)            | -2.0<br>(-6.4 to 2.7)                             | 0.3<br>(-4.4 to 5.1)                                |



| Cause                                                      | Prevalence in thousands (95% UI)                 | Incidence in thousands (95% UI)                   | YLDs in thousands (95% UI)                |                                                   |                                                     |
|------------------------------------------------------------|--------------------------------------------------|---------------------------------------------------|-------------------------------------------|---------------------------------------------------|-----------------------------------------------------|
|                                                            | 2016 counts                                      | 2016 counts                                       | 2016 counts                               | Percentage change in counts between 2006 and 2016 | Percentage change in age-standardised rates between |
| Attention-deficit/hyperactivity disorder                   | 237.6<br>(215.2 to 263.9)                        | 8.4<br>(7.3 to 9.8)                               | 2.9<br>(1.7 to 4.5)                       | -11.4<br>(-18.6 to -4.0)                          | 0.1<br>(-7.8 to 8.6)                                |
| Conduct disorder                                           | 171.5<br>(141.9 to 202.5)                        | 57.8<br>(46.1 to 69.2)                            | 20.9<br>(12.9 to 31.9)                    | -24.5<br>(-29.5 to -19.5)                         | 0.2<br>(-6.4 to 6.8)                                |
| Idiopathic developmental intellectual disability           | 325.7<br>(179.1 to 469.5)                        | --                                                | 13.2<br>(5.8 to 23.2)                     | -12.2<br>(-18.8 to -6.2)                          | -9.5<br>(-16.4 to -3.5)                             |
| Other mental and substance use disorders                   | 876.2<br>(777.8 to 1,005.4)                      | 19.5<br>(17.4 to 21.9)                            | 64.3<br>(44.1 to 91.1)                    | 4.8<br>(0.1 to 9.8)                               | 0.2<br>(-4.5 to 5.3)                                |
| <b>Diabetes, urogenital, blood, and endocrine diseases</b> | <b>12,750.9</b><br><b>(12,459.7 to 13,045.4)</b> | <b>4,691.5†</b><br><b>(4,467.4 to 4,930.7)</b>    | <b>350.7</b><br><b>(248.0 to 467.1)</b>   | <b>9.1</b><br><b>(4.5 to 13.7)</b>                | <b>-1.1</b><br><b>(-5.0 to 3.0)</b>                 |
| Diabetes mellitus                                          | 1,819.1<br>(1,638.0 to 2,017.1)                  | 88.9<br>(79.8 to 98.5)                            | 156.3<br>(108.0 to 216.8)                 | 18.4<br>(8.9 to 27.9)                             | 3.6<br>(-4.9 to 12.3)                               |
| Acute glomerulonephritis                                   | 0.7<br>(0.6 to 0.8)                              | 10.3<br>(9.0 to 11.8)                             | < 0.05<br>(< 0.05 to 0.1)                 | 0.1<br>(-4.8 to 5.4)                              | 0.2<br>(-4.1 to 4.7)                                |
| Chronic kidney disease                                     | 1,713.1<br>(1,544.9 to 1,908.6)                  | 122.9<br>(108.7 to 139.9)                         | 50.5<br>(37.3 to 64.6)                    | 4.7<br>(-6.1 to 16.2)                             | -10.7<br>(-19.3 to -1.5)                            |
| Chronic kidney disease due to diabetes mellitus            | 734.4<br>(656.4 to 828.7)                        | 54.3<br>(47.0 to 62.8)                            | 20.9<br>(15.4 to 26.9)                    | 12.7<br>(-2.2 to 29.0)                            | -2.7<br>(-14.6 to 10.7)                             |
| Chronic kidney disease due to hypertension                 | 269.6<br>(237.3 to 304.5)                        | 21.4<br>(18.9 to 24.6)                            | 6.9<br>(4.8 to 9.1)                       | 27.3<br>(10.1 to 47.2)                            | -1.9<br>(-15.3 to 12.7)                             |
| Chronic kidney disease due to glomerulonephritis           | 262.4<br>(233.3 to 296.5)                        | 15.4<br>(12.7 to 18.7)                            | 9.5<br>(6.9 to 12.5)                      | -16.3<br>(-27.2 to -4.2)                          | -24.7<br>(-34.0 to -14.4)                           |
| Chronic kidney disease due to other causes                 | 446.8<br>(397.6 to 501.6)                        | 31.8<br>(28.0 to 36.4)                            | 13.3<br>(9.9 to 17.3)                     | 2.4<br>(-11.0 to 16.6)                            | -13.1<br>(-23.1 to -2.0)                            |
| Urinary diseases and male infertility                      | 1,188.6<br>(1,104.7 to 1,291.4)                  | 2,625.2†<br>(2,421.4 to 2,834.2)                  | 35.2<br>(23.7 to 49.6)                    | 13.8<br>(8.1 to 20.3)                             | -0.4<br>(-4.9 to 4.7)                               |
| Interstitial nephritis and urinary tract infections        | 34.7<br>(31.0 to 38.6)                           | 1,792.4<br>(1,610.3 to 1,989.4)                   | 1.1<br>(0.7 to 1.8)                       | 3.0<br>(-11.4 to 18.9)                            | 5.0<br>(-9.4 to 21.1)                               |
| Urolithiasis                                               | 27.0<br>(24.6 to 30.1)                           | 712.1<br>(653.2 to 789.5)                         | 1.9<br>(1.3 to 2.6)                       | 1.9<br>(-15.1 to 23.8)                            | -6.0<br>(-21.1 to 11.8)                             |
| Benign prostatic hyperplasia                               | 940.6<br>(861.5 to 1,035.0)                      | 120.8<br>(105.2 to 140.7)                         | 30.1<br>(19.9 to 42.7)                    | 17.4<br>(10.8 to 24.7)                            | 1.4<br>(-4.1 to 7.6)                                |
| Male infertility                                           | 161.9<br>(125.9 to 209.2)                        | --                                                | 0.9<br>(0.4 to 1.9)                       | -8.3<br>(-16.1 to 0.1)                            | -11.1<br>(-17.9 to -3.0)                            |
| Other urinary diseases                                     | --                                               | --                                                | 1.0<br>(0.7 to 1.4)                       | -15.1<br>(-25.7 to -3.4)                          | -18.7<br>(-27.8 to -8.8)                            |
| Gynecological diseases                                     | 4,922.6<br>(4,706.0 to 5,126.2)                  | 1,650.2†<br>(1,563.2 to 1,746.8)                  | 54.6<br>(37.4 to 78.5)                    | -10.7<br>(-16.0 to -5.5)                          | -5.8<br>(-11.0 to -0.7)                             |
| Uterine fibroids                                           | 473.8<br>(437.8 to 510.8)                        | 45.3<br>(40.6 to 49.9)                            | 4.9<br>(2.7 to 8.7)                       | -7.8<br>(-16.8 to 0.6)                            | -7.9<br>(-17.4 to 1.1)                              |
| Polycystic ovarian syndrome                                | 41.1<br>(30.9 to 54.2)                           | 19.8<br>(13.7 to 27.2)                            | 0.4<br>(0.2 to 0.7)                       | 5.7<br>(-7.6 to 19.9)                             | 0.5<br>(-12.1 to 13.7)                              |
| Female infertility                                         | 68.5<br>(24.1 to 140.8)                          | --                                                | 0.4<br>(0.1 to 1.1)                       | 19.7<br>(-10.2 to 73.8)                           | 24.6<br>(-2.5 to 73.0)                              |
| Endometriosis                                              | 15.4<br>(13.1 to 17.9)                           | 60.0<br>(49.2 to 71.0)                            | 1.5<br>(0.9 to 2.1)                       | -10.6<br>(-29.6 to 14.8)                          | -0.4<br>(-21.6 to 29.1)                             |
| Genital prolapse                                           | 1,849.1<br>(1,673.7 to 2,043.1)                  | 71.0<br>(63.2 to 80.2)                            | 5.7<br>(2.7 to 10.3)                      | 12.8<br>(1.3 to 25.4)                             | -1.3<br>(-10.9 to 9.5)                              |
| Premenstrual syndrome                                      | 2,349.5<br>(2,217.6 to 2,487.4)                  | 807.4<br>(752.1 to 864.4)                         | 19.7<br>(12.3 to 30.2)                    | -8.4<br>(-15.2 to -1.6)                           | -1.2<br>(-8.5 to 6.0)                               |
| Other gynecological diseases                               | 633.2<br>(575.9 to 694.6)                        | 646.8<br>(581.0 to 724.0)                         | 22.1<br>(14.8 to 31.3)                    | -18.2<br>(-26.7 to -8.3)                          | -10.8<br>(-20.0 to -0.6)                            |
| Hemoglobinopathies and hemolytic anaemias                  | 4,649.5<br>(4,317.0 to 4,937.7)                  | --                                                | 14.2<br>(8.7 to 22.2)                     | 16.8<br>(-1.8 to 38.9)                            | 9.7<br>(-8.7 to 31.1)                               |
| Thalassemias                                               | 0.1<br>(0.1 to 0.1)                              | --                                                | < 0.05<br>(< 0.05 to < 0.05)              | -5.2<br>(-25.1 to 15.7)                           | -3.6<br>(-23.5 to 20.4)                             |
| Thalassaemias trait                                        | 456.1<br>(313.8 to 609.6)                        | --                                                | 8.1<br>(4.3 to 13.3)                      | 18.3<br>(-6.8 to 47.2)                            | 10.7<br>(-13.1 to 38.6)                             |
| Sickle cell disorders                                      | 0.3<br>(0.2 to 0.3)                              | --                                                | < 0.05<br>(< 0.05 to 0.1)                 | -2.9<br>(-10.2 to 5.2)                            | 8.0<br>(-1.6 to 17.9)                               |
| Sickle cell trait                                          | 489.6<br>(475.3 to 504.9)                        | --                                                | 1.8<br>(1.1 to 2.8)                       | 26.7<br>(-3.8 to 63.0)                            | 20.9<br>(-8.0 to 59.1)                              |
| G6PD deficiency                                            | 647.5<br>(557.0 to 749.8)                        | --                                                | 0.1<br>(0.1 to 0.1)                       | 0.1<br>(-18.4 to 23.0)                            | -2.8<br>(-20.7 to 18.7)                             |
| G6PD trait                                                 | 2,889.5<br>(2,614.2 to 3,172.8)                  | --                                                | < 0.05<br>(< 0.05 to < 0.05)              | 42.5<br>(-3.6 to 105.5)                           | 40.5<br>(-7.2 to 108.9)                             |
| Other hemoglobinopathies and hemolytic anaemias            | 282.3<br>(250.6 to 314.1)                        | --                                                | 4.3<br>(2.7 to 6.4)                       | 11.2<br>(-4.6 to 31.4)                            | 3.8<br>(-11.7 to 22.9)                              |
| Endocrine, metabolic, blood, and immune disorders          | 1,233.4<br>(1,115.5 to 1,355.6)                  | 193.9<br>(170.2 to 218.1)                         | 39.8<br>(26.6 to 55.1)                    | 7.8<br>(1.3 to 14.2)                              | -1.4<br>(-7.1 to 4.2)                               |
| <b>Musculoskeletal disorders</b>                           | <b>8,525.6</b><br><b>(8,138.7 to 8,961.9)</b>    | <b>3,563.2</b><br><b>(3,182.5 to 4,001.4)</b>     | <b>986.4</b><br><b>(710.2 to 1,285.0)</b> | <b>8.7</b><br><b>(5.1 to 12.2)</b>                | <b>-1.1</b><br><b>(-4.0 to 1.8)</b>                 |
| Rheumatoid arthritis                                       | 193.1<br>(173.0 to 217.1)                        | 9.5<br>(8.4 to 10.8)                              | 44.3<br>(30.3 to 59.2)                    | 6.3<br>(-3.2 to 16.1)                             | -6.3<br>(-14.4 to 2.2)                              |
| Osteoarthritis                                             | 2,414.9<br>(2,262.0 to 2,574.1)                  | 104.1<br>(96.5 to 112.1)                          | 146.0<br>(103.5 to 198.2)                 | 19.0<br>(15.0 to 23.4)                            | 2.0<br>(-1.4 to 5.8)                                |
| Low back and neck pain                                     | 6,398.2<br>(5,982.3 to 6,860.2)                  | 3,084.5<br>(2,708.4 to 3,511.8)                   | 757.3<br>(533.3 to 994.0)                 | 7.2<br>(2.9 to 11.6)                              | -1.2<br>(-4.7 to 2.4)                               |
| Low back pain                                              | 5,182.6<br>(4,622.9 to 5,835.4)                  | 2,699.6<br>(2,318.8 to 3,133.3)                   | 578.5<br>(408.5 to 762.1)                 | 7.3<br>(1.6 to 12.6)                              | -1.5<br>(-6.1 to 3.1)                               |
| Neck pain                                                  | 1,821.2<br>(1,566.6 to 2,112.1)                  | 385.0<br>(334.6 to 452.0)                         | 178.8<br>(122.5 to 252.3)                 | 7.1<br>(3.1 to 11.1)                              | -0.1<br>(-2.6 to 1.9)                               |
| Gout                                                       | 197.1<br>(173.8 to 223.9)                        | 38.6<br>(33.4 to 43.9)                            | 6.1<br>(4.2 to 8.5)                       | 15.1<br>(-0.3 to 33.2)                            | 0.6<br>(-12.6 to 17.0)                              |
| Other musculoskeletal disorders                            | 386.6<br>(305.2 to 498.7)                        | 326.4<br>(254.5 to 424.5)                         | 32.7<br>(21.3 to 48.0)                    | 2.3<br>(-10.7 to 16.8)                            | -3.8<br>(-16.4 to 8.8)                              |
| <b>Other non-communicable diseases</b>                     | <b>30,429.8</b><br><b>(29,890.5 to 30,937.8)</b> | <b>90,300.6†</b><br><b>(83,769.6 to 96,294.3)</b> | <b>991.1</b><br><b>(678.6 to 1,413.0)</b> | <b>6.5</b><br><b>(5.3 to 7.7)</b>                 | <b>-1.4</b><br><b>(-2.4 to -0.3)</b>                |
| Congenital anomalies                                       | 435.2<br>(399.5 to 472.4)                        | --                                                | 52.5<br>(38.8 to 68.7)                    | 1.1<br>(-4.3 to 7.1)                              | 1.9<br>(-3.5 to 7.7)                                |
| Neural tube defects                                        | 32.8<br>(29.4 to 36.6)                           | --                                                | 9.8<br>(6.9 to 13.2)                      | -2.0<br>(-15.0 to 12.2)                           | -2.2<br>(-15.4 to 12.5)                             |
| Congenital heart anomalies                                 | 125.0<br>(112.6 to 138.8)                        | --                                                | 6.6<br>(2.8 to 11.5)                      | 6.0<br>(-5.7 to 17.6)                             | 6.7<br>(-5.1 to 18.4)                               |
| Orofacial clefts                                           | 18.0<br>(15.7 to 20.4)                           | --                                                | 0.2<br>(0.1 to 0.3)                       | -5.0<br>(-17.2 to 9.2)                            | -5.3<br>(-17.5 to 9.2)                              |
| Down's syndrome                                            | 16.6<br>(14.7 to 18.4)                           | --                                                | 1.6<br>(1.1 to 2.3)                       | 3.8<br>(-7.7 to 16.4)                             | 5.0<br>(-6.0 to 17.3)                               |
| Turner syndrome                                            | 17.0<br>(14.9 to 19.2)                           | --                                                | 0.3<br>(0.1 to 0.5)                       | 15.7<br>(-15.6 to 58.8)                           | 21.7<br>(-11.4 to 64.9)                             |
| Klinefelter syndrome                                       | 8.4<br>(7.2 to 9.7)                              | --                                                | 0.1<br>(< 0.05 to 0.1)                    | 12.2<br>(-20.1 to 53.8)                           | 19.4<br>(-14.2 to 62.4)                             |

| Cause                                         | Prevalence in thousands (95% UI)                 | Incidence in thousands (95% UI)                           | YLDs in thousands (95% UI)              |                                                   |                                                     |
|-----------------------------------------------|--------------------------------------------------|-----------------------------------------------------------|-----------------------------------------|---------------------------------------------------|-----------------------------------------------------|
|                                               | 2016 counts                                      | 2016 counts                                               | 2016 counts                             | Percentage change in counts between 2006 and 2016 | Percentage change in age-standardised rates between |
| Other chromosomal abnormalities               | 22.5<br>(19.2 to 25.8)                           | --                                                        | 2.6<br>(1.8 to 3.5)                     | -1.3<br>(-15.6 to 15.8)                           | 11.6<br>(-4.6 to 30.9)                              |
| Congenital musculoskeletal and limb anomalies | 102.7<br>(93.5 to 111.1)                         | --                                                        | 13.7<br>(9.4 to 18.8)                   | 3.9<br>(-7.2 to 15.2)                             | 3.2<br>(-7.3 to 14.1)                               |
| Urogenital congenital anomalies               | 33.6<br>(29.9 to 37.2)                           | --                                                        | 0.9<br>(0.5 to 1.4)                     | -1.2<br>(-11.4 to 9.3)                            | 3.7<br>(-7.0 to 16.1)                               |
| Digestive congenital anomalies                | 52.3<br>(46.2 to 58.3)                           | --                                                        | 2.3<br>(1.5 to 3.4)                     | -8.1<br>(-20.7 to 5.7)                            | -7.9<br>(-20.5 to 6.8)                              |
| Other congenital anomalies                    | 101.6<br>(62.2 to 151.6)                         | --                                                        | 14.4<br>(9.6 to 20.7)                   | 0.2<br>(-9.2 to 10.0)                             | -0.5<br>(-10.2 to 9.3)                              |
| Skin and subcutaneous diseases                | 11,838.8<br>(11,549.0 to 12,115.2)               | 30,661.6<br>(28,805.0 to 32,581.9)                        | 259.4<br>(176.7 to 376.2)               | -2.7<br>(-5.0 to -0.7)                            | 1.1<br>(-1.0 to 3.0)                                |
| Dermatitis                                    | 1,462.9<br>(1,381.0 to 1,554.2)                  | 1,841.8<br>(1,687.2 to 2,009.0)                           | 54.2<br>(32.6 to 86.9)                  | -2.6<br>(-6.8 to 1.9)                             | -2.0<br>(-6.9 to 2.6)                               |
| Psoriasis                                     | 473.0<br>(451.3 to 496.6)                        | 58.9<br>(56.0 to 61.8)                                    | 40.4<br>(29.1 to 53.3)                  | 9.0<br>(1.7 to 16.5)                              | 5.1<br>(-1.9 to 12.6)                               |
| Cellulitis                                    | 15.0<br>(14.0 to 16.1)                           | 280.7<br>(263.8 to 299.1)                                 | 0.8<br>(0.5 to 1.2)                     | 4.0<br>(-14.7 to 29.7)                            | 2.0<br>(-16.9 to 25.0)                              |
| Pyoderma                                      | 195.4<br>(188.8 to 201.9)                        | 5,270.2<br>(5,064.3 to 5,473.9)                           | 1.1<br>(0.4 to 2.2)                     | 11.6<br>(6.2 to 17.6)                             | 0.6<br>(-4.5 to 6.2)                                |
| Scabies                                       | 247.4<br>(218.8 to 278.7)                        | 750.4<br>(662.8 to 853.3)                                 | 6.3<br>(3.6 to 9.9)                     | -6.7<br>(-11.3 to -1.4)                           | -1.1<br>(-5.9 to 4.1)                               |
| Fungal skin diseases                          | 3,766.2<br>(3,364.1 to 4,175.8)                  | 14,274.8<br>(12,518.5 to 16,208.2)                        | 20.6<br>(8.2 to 42.8)                   | 8.4<br>(5.9 to 10.9)                              | 0.1<br>(-1.0 to 1.2)                                |
| Viral skin diseases                           | 858.0<br>(823.4 to 894.2)                        | 1,295.5<br>(1,239.8 to 1,352.4)                           | 26.1<br>(16.1 to 38.5)                  | -4.2<br>(-7.4 to -1.1)                            | -0.1<br>(-3.2 to 3.1)                               |
| Acne vulgaris                                 | 2,366.3<br>(2,163.6 to 2,597.2)                  | 1,454.8<br>(1,240.5 to 1,732.6)                           | 60.9<br>(41.0 to 88.3)                  | -16.9<br>(-20.8 to -12.8)                         | 2.1<br>(-2.3 to 6.9)                                |
| Alopecia areata                               | 76.7<br>(73.8 to 79.9)                           | 134.5<br>(129.2 to 140.0)                                 | 2.5<br>(1.6 to 3.8)                     | 1.4<br>(-8.6 to 13.0)                             | 0.4<br>(-9.8 to 11.8)                               |
| Pruritus                                      | 417.5<br>(368.4 to 471.3)                        | 327.2<br>(289.7 to 372.3)                                 | 4.4<br>(2.0 to 8.0)                     | 7.6<br>(1.0 to 13.8)                              | 1.4<br>(-3.9 to 6.8)                                |
| Urticaria                                     | 335.0<br>(297.3 to 376.6)                        | 593.4<br>(524.4 to 673.6)                                 | 20.0<br>(13.0 to 28.2)                  | -0.8<br>(-6.7 to 5.3)                             | 0.1<br>(-5.2 to 5.5)                                |
| Decubitus ulcer                               | 17.2<br>(15.2 to 19.3)                           | 62.4<br>(55.0 to 70.5)                                    | 2.6<br>(1.8 to 3.6)                     | 25.7<br>(7.6 to 46.0)                             | 8.9<br>(-6.1 to 25.2)                               |
| Other skin and subcutaneous diseases          | 3,620.3<br>(3,514.8 to 3,730.4)                  | 4,317.1<br>(4,163.3 to 4,475.1)                           | 19.5<br>(9.4 to 35.5)                   | 13.9<br>(11.2 to 16.7)                            | 5.2<br>(2.9 to 7.6)                                 |
| Sense organ diseases                          | 15,430.9<br>(15,186.2 to 15,707.7)               | 4,194.7 <sup>†</sup><br>(3,954.6 to 4,462.2)              | 513.4<br>(347.2 to 737.1)               | 10.5<br>(8.8 to 12.2)                             | -4.0<br>(-5.4 to -2.7)                              |
| Glaucoma                                      | 40.0<br>(32.7 to 47.9)                           | --                                                        | 2.8<br>(1.9 to 3.8)                     | 23.8<br>(8.5 to 41.2)                             | -1.0<br>(-13.7 to 12.5)                             |
| Cataract                                      | 695.7<br>(584.6 to 814.1)                        | --                                                        | 32.2<br>(22.1 to 44.9)                  | 18.5<br>(10.7 to 26.0)                            | -4.8<br>(-10.4 to 0.8)                              |
| Macular degeneration                          | 24.9<br>(19.6 to 31.1)                           | --                                                        | 1.2<br>(0.8 to 1.8)                     | 28.3<br>(10.8 to 48.5)                            | 1.8<br>(-11.6 to 17.7)                              |
| Refraction and accommodation disorders        | 10,879.0<br>(10,472.1 to 11,290.9)               | --                                                        | 147.6<br>(84.0 to 248.0)                | 3.8<br>(0.9 to 6.9)                               | -6.5<br>(-8.8 to -4.0)                              |
| Age-related and other hearing loss            | 9,827.3<br>(9,408.2 to 10,265.7)                 | --                                                        | 267.1<br>(186.1 to 371.7)               | 12.5<br>(9.6 to 15.2)                             | -3.5<br>(-5.8 to -1.4)                              |
| Other vision loss                             | 257.4<br>(222.4 to 298.0)                        | --                                                        | 13.8<br>(9.6 to 19.0)                   | 17.1<br>(8.7 to 26.2)                             | -0.1<br>(-7.0 to 7.6)                               |
| Other sense organ diseases                    | 1,576.8<br>(1,443.8 to 1,708.0)                  | 4,194.7<br>(3,954.6 to 4,462.2)                           | 48.6<br>(30.8 to 72.9)                  | 13.2<br>(9.1 to 17.8)                             | 0.5<br>(-3.1 to 4.2)                                |
| Oral disorders                                | 21,466.7<br>(20,383.5 to 22,350.4)               | 55,444.3 <sup>†</sup><br>(49,174.8 to 61,254.3)           | 165.9<br>(104.2 to 248.5)               | 12.5<br>(9.8 to 15.5)                             | 0.0<br>(-1.9 to 1.8)                                |
| Caries of deciduous teeth                     | 1,732.2<br>(1,446.2 to 2,002.5)                  | 7,544.7<br>(5,835.9 to 9,617.6)                           | 0.7<br>(0.3 to 1.3)                     | 5.4<br>(-4.7 to 18.1)                             | 0.2<br>(-9.4 to 12.3)                               |
| Caries of permanent teeth                     | 15,505.8<br>(14,132.6 to 16,970.1)               | 47,056.2<br>(41,202.3 to 52,408.7)                        | 15.0<br>(6.6 to 29.1)                   | -4.2<br>(-8.1 to 0.1)                             | -4.2<br>(-7.7 to -0.5)                              |
| Periodontal disease                           | 4,448.2<br>(3,663.2 to 5,308.1)                  | 563.9<br>(435.6 to 691.7)                                 | 28.7<br>(11.5 to 59.6)                  | 10.1<br>(5.5 to 15.1)                             | 0.1<br>(-3.3 to 3.4)                                |
| Edentulism and severe tooth loss              | 3,633.9<br>(3,169.3 to 4,122.1)                  | 279.5<br>(235.1 to 330.9)                                 | 98.8<br>(64.8 to 139.7)                 | 19.3<br>(15.3 to 23.3)                            | 1.0<br>(-2.0 to 4.0)                                |
| Other oral disorders                          | 783.0<br>(748.9 to 817.2)                        | --                                                        | 22.7<br>(13.9 to 33.9)                  | 2.0<br>(-1.1 to 5.0)                              | -0.1<br>(-3.0 to 2.9)                               |
| <b>Injuries</b>                               | <b>19,886.1</b><br><b>(18,548.3 to 21,655.5)</b> | <b>7,188.8<sup>†</sup></b><br><b>(6,710.0 to 7,697.9)</b> | <b>716.9</b><br><b>(494.4 to 990.6)</b> | <b>16.3</b><br><b>(14.8 to 17.9)</b>              | <b>5.9</b><br><b>(4.5 to 7.1)</b>                   |
| <b>Transport injuries</b>                     | <b>2,576.4</b><br><b>(2,374.9 to 2,788.6)</b>    | <b>663.6</b><br><b>(608.5 to 727.1)</b>                   | <b>122.4</b><br><b>(80.6 to 176.0)</b>  | <b>8.7</b><br><b>(7.0 to 10.4)</b>                | <b>0.9</b><br><b>(-0.7 to 2.5)</b>                  |
| Road injuries                                 | 2,480.6<br>(2,281.7 to 2,687.1)                  | 648.2<br>(593.2 to 711.5)                                 | 118.2<br>(77.9 to 170.1)                | 8.9<br>(7.2 to 10.6)                              | 1.0<br>(-0.5 to 2.6)                                |
| Pedestrian road injuries                      | 511.2<br>(444.5 to 587.5)                        | 98.5<br>(84.6 to 115.2)                                   | 23.5<br>(15.5 to 34.2)                  | 2.7<br>(1.1 to 4.3)                               | -5.2<br>(-6.8 to -3.6)                              |
| Cyclist road injuries                         | 624.6<br>(524.3 to 737.5)                        | 178.3<br>(151.4 to 206.7)                                 | 27.9<br>(18.4 to 40.3)                  | 5.2<br>(3.5 to 6.9)                               | -2.1<br>(-3.8 to -0.5)                              |
| Motorcyclist road injuries                    | 271.9<br>(229.3 to 336.2)                        | 44.3<br>(35.8 to 54.2)                                    | 12.1<br>(7.8 to 17.7)                   | 18.6<br>(16.7 to 20.7)                            | 10.7<br>(8.8 to 12.5)                               |
| Motor vehicle road injuries                   | 992.8<br>(828.3 to 1,147.6)                      | 301.8<br>(266.1 to 340.1)                                 | 51.3<br>(34.3 to 72.3)                  | 11.3<br>(9.5 to 13.3)                             | 3.3<br>(1.6 to 5.2)                                 |
| Other road injuries                           | 80.0<br>(69.0 to 93.8)                           | 25.2<br>(19.7 to 32.0)                                    | 3.5<br>(2.2 to 5.1)                     | 17.8<br>(15.7 to 20.0)                            | 9.2<br>(7.4 to 11.1)                                |
| Other transport injuries                      | 95.8<br>(81.6 to 111.6)                          | 15.4<br>(13.5 to 17.7)                                    | 4.1<br>(2.7 to 6.0)                     | 3.5<br>(1.8 to 5.3)                               | -2.6<br>(-4.3 to -0.9)                              |
| <b>Unintentional injuries</b>                 | <b>16,831.9</b><br><b>(15,532.7 to 18,546.0)</b> | <b>6,362.4</b><br><b>(5,881.1 to 6,863.2)</b>             | <b>574.5</b><br><b>(394.6 to 793.0)</b> | <b>18.6</b><br><b>(17.1 to 20.2)</b>              | <b>7.3</b><br><b>(5.9 to 8.5)</b>                   |
| Falls                                         | 10,911.7<br>(9,753.8 to 12,313.1)                | 4,559.8<br>(4,099.4 to 5,052.0)                           | 429.9<br>(304.1 to 588.9)               | 19.0<br>(17.3 to 20.8)                            | 6.1<br>(4.7 to 7.4)                                 |
| Drowning                                      | 20.2<br>(17.7 to 22.9)                           | 2.6<br>(2.3 to 3.0)                                       | 0.8<br>(0.5 to 1.2)                     | 3.6<br>(0.8 to 6.1)                               | -2.7<br>(-5.2 to -0.6)                              |
| Fire, heat, and hot substances                | 795.9<br>(694.3 to 931.0)                        | 75.9<br>(65.0 to 85.5)                                    | 18.0<br>(11.4 to 27.4)                  | 13.6<br>(10.7 to 16.4)                            | 7.1<br>(4.3 to 9.8)                                 |
| Poisonings                                    | 37.4<br>(31.3 to 44.9)                           | 35.3<br>(28.1 to 43.5)                                    | 3.0<br>(1.9 to 4.5)                     | 40.6<br>(31.9 to 50.2)                            | 38.7<br>(29.3 to 48.7)                              |
| Exposure to mechanical forces                 | 3,175.2<br>(2,703.1 to 3,926.2)                  | 932.5<br>(810.4 to 1,062.7)                               | 68.1<br>(44.4 to 100.6)                 | 20.6<br>(19.0 to 22.4)                            | 12.7<br>(11.2 to 14.1)                              |
| Unintentional firearm injuries                | 28.4<br>(23.9 to 33.6)                           | 5.1<br>(3.7 to 6.9)                                       | 1.1<br>(0.7 to 1.6)                     | 15.2<br>(13.2 to 17.2)                            | 7.7<br>(5.8 to 9.6)                                 |
| Unintentional suffocation                     | 36.6<br>(29.2 to 45.2)                           | 4.8<br>(3.5 to 6.6)                                       | 1.2<br>(0.7 to 1.8)                     | 7.1<br>(5.2 to 9.0)                               | 2.6<br>(0.7 to 4.5)                                 |
| Other exposure to mechanical forces           | 3,110.2<br>(2,641.4 to 3,861.0)                  | 922.6<br>(801.7 to 1,050.5)                               | 65.8<br>(42.9 to 97.4)                  | 21.0<br>(19.3 to 22.7)                            | 13.0<br>(11.5 to 14.4)                              |

| Cause                                                                               | Prevalence in thousands (95% UI)          | Incidence in thousands (95% UI)          | YLDs in thousands (95% UI)              |                                                   |                                                     |
|-------------------------------------------------------------------------------------|-------------------------------------------|------------------------------------------|-----------------------------------------|---------------------------------------------------|-----------------------------------------------------|
|                                                                                     | 2016 counts                               | 2016 counts                              | 2016 counts                             | Percentage change in counts between 2006 and 2016 | Percentage change in age-standardised rates between |
| Adverse effects of medical treatment                                                | 9.4<br>(7.4 to 11.4)                      | 122.3<br>(108.9 to 136.2)                | 1.2<br>(0.8 to 1.8)                     | 21.9<br>(16.0 to 28.4)                            | 7.2<br>(2.9 to 11.9)                                |
| Animal contact                                                                      | 148.7<br>(130.6 to 173.4)                 | 127.0<br>(105.1 to 155.2)                | 4.2<br>(2.7 to 6.1)                     | -7.5<br>(-11.8 to -3.1)                           | -9.9<br>(-14.2 to -5.2)                             |
| Venomous animal contact                                                             | 56.9<br>(47.8 to 68.5)                    | 50.9<br>(38.5 to 65.5)                   | 2.9<br>(1.9 to 4.3)                     | -6.1<br>(-12.2 to 0.3)                            | -7.1<br>(-13.3 to -0.5)                             |
| Non-venomous animal contact                                                         | 91.8<br>(77.8 to 113.1)                   | 76.1<br>(61.5 to 94.2)                   | 1.3<br>(0.8 to 2.0)                     | -10.4<br>(-12.3 to -8.5)                          | -16.3<br>(-18.0 to -14.8)                           |
| Foreign body                                                                        | 327.1<br>(281.3 to 372.8)                 | 192.3<br>(167.2 to 226.8)                | 10.6<br>(6.7 to 15.8)                   | 7.7<br>(5.9 to 9.4)                               | 1.9<br>(0.1 to 3.6)                                 |
| Pulmonary aspiration and foreign body in airway                                     | 186.3<br>(150.0 to 228.0)                 | 52.2<br>(46.2 to 59.6)                   | 6.5<br>(4.1 to 9.7)                     | 4.8<br>(2.9 to 6.6)                               | -0.7<br>(-2.7 to 1.2)                               |
| Foreign body in eyes                                                                | 24.1<br>(15.2 to 33.7)                    | 106.8<br>(83.2 to 138.1)                 | 1.3<br>(0.7 to 2.2)                     | 12.8<br>(8.8 to 17.4)                             | 6.9<br>(4.4 to 9.7)                                 |
| Foreign body in other body part                                                     | 116.7<br>(97.6 to 144.3)                  | 33.4<br>(27.9 to 39.7)                   | 2.7<br>(1.7 to 4.1)                     | 12.4<br>(10.4 to 14.4)                            | 6.3<br>(4.5 to 8.0)                                 |
| Environmental heat and cold exposure                                                | 355.9<br>(303.4 to 427.0)                 | 66.1<br>(57.0 to 76.2)                   | 11.2<br>(7.3 to 16.5)                   | 8.5<br>(7.0 to 10.1)                              | 1.9<br>(0.4 to 3.4)                                 |
| Other unintentional injuries                                                        | 1,050.5<br>(850.0 to 1,281.2)             | 248.6<br>(209.0 to 290.3)                | 27.4<br>(17.5 to 40.8)                  | 24.2<br>(22.4 to 26.1)                            | 17.2<br>(15.6 to 19.0)                              |
| <b>Self-harm and interpersonal violence</b>                                         | <b>936.5</b><br><b>(861.8 to 1,015.0)</b> | <b>162.2†</b><br><b>(143.1 to 181.6)</b> | <b>19.8</b><br><b>(13.2 to 28.2)</b>    | <b>3.5</b><br><b>(1.6 to 5.3)</b>                 | <b>-0.4</b><br><b>(-1.9 to 1.1)</b>                 |
| Self-harm                                                                           | 118.0<br>(99.4 to 136.9)                  | 40.1<br>(35.6 to 45.7)                   | 4.4<br>(2.8 to 6.5)                     | 12.2<br>(9.4 to 14.9)                             | 4.8<br>(2.1 to 7.5)                                 |
| Self-harm by firearm                                                                | 2.4<br>(2.1 to 2.8)                       | 0.4<br>(0.2 to 0.7)                      | 0.1<br>(< 0.05 to 0.1)                  | -3.7<br>(-6.7 to -1.1)                            | -7.1<br>(-9.9 to -4.7)                              |
| Self-harm by other specified means                                                  | 115.6<br>(96.9 to 134.4)                  | 39.7<br>(35.3 to 45.1)                   | 4.4<br>(2.8 to 6.4)                     | 12.5<br>(9.6 to 15.2)                             | 5.1<br>(2.2 to 7.7)                                 |
| Interpersonal violence                                                              | 818.5<br>(748.8 to 897.9)                 | 122.0†<br>(103.8 to 141.6)               | 15.3<br>(10.4 to 21.8)                  | 1.2<br>(-0.8 to 3.1)                              | -1.6<br>(-3.3 to -0.1)                              |
| Assault by firearm                                                                  | 5.6<br>(4.8 to 6.5)                       | 1.1<br>(0.8 to 1.5)                      | 0.2<br>(0.1 to 0.3)                     | 18.8<br>(16.3 to 21.6)                            | 13.2<br>(10.6 to 15.6)                              |
| Assault by sharp object                                                             | 57.9<br>(47.3 to 69.0)                    | 14.0<br>(10.5 to 18.3)                   | 1.4<br>(0.9 to 2.0)                     | 8.7<br>(6.5 to 10.9)                              | 3.9<br>(1.7 to 5.8)                                 |
| Sexual violence                                                                     | 465.2<br>(407.5 to 526.5)                 | --                                       | 3.7<br>(2.5 to 5.2)                     | -11.2<br>(-15.2 to -7.1)                          | -6.5<br>(-9.9 to -2.9)                              |
| Assault by other means                                                              | 289.8<br>(242.6 to 347.9)                 | 106.9<br>(90.3 to 124.0)                 | 10.1<br>(6.7 to 14.7)                   | 5.3<br>(3.5 to 7.0)                               | -0.3<br>(-1.9 to 1.4)                               |
| <b>Forces of nature, conflict and terrorism, and executions and police conflict</b> | <b>6.4</b><br><b>(4.1 to 9.5)</b>         | <b>0.6†</b><br><b>(0.5 to 0.8)</b>       | <b>0.2</b><br><b>(&lt; 0.05 to 0.4)</b> | <b>-8.1</b><br><b>(-9.9 to -6.2)</b>              | <b>-14.3</b><br><b>(-16.0 to -11.9)</b>             |
| Exposure to forces of nature                                                        | 3.7<br>(1.7 to 6.4)                       | --                                       | 0.1<br>(< 0.05 to 0.3)                  | -18.2<br>(-19.9 to -16.3)                         | -27.6<br>(-29.1 to -25.8)                           |
| Conflict and terrorism                                                              | --                                        | --                                       | --                                      | --                                                | --                                                  |
| Executions and police conflict                                                      | 2.7<br>(1.7 to 4.4)                       | 0.6<br>(0.5 to 0.8)                      | 0.1<br>(< 0.05 to 0.1)                  | 16.3<br>(11.4 to 19.3)                            | 14.5<br>(11.2 to 17.2)                              |
| <b>Impairments</b>                                                                  | --                                        | --                                       | --                                      | --                                                | --                                                  |
| Anaemia                                                                             | 7,129.4<br>(6,294.9 to 7,942.7)           | --                                       | 152.2<br>(99.8 to 223.9)                | 3.0<br>(-8.9 to 17.0)                             | -3.1<br>(-14.3 to 10.2)                             |
| Developmental intellectual disability                                               | 698.8<br>(553.9 to 843.3)                 | --                                       | 76.2<br>(56.0 to 100.0)                 | -9.4<br>(-14.2 to -4.7)                           | -7.3<br>(-12.3 to -2.5)                             |
| Epilepsy                                                                            | 179.3<br>(91.0 to 282.0)                  | --                                       | 53.0<br>(26.7 to 95.3)                  | -10.7<br>(-58.0 to 98.4)                          | -10.5<br>(-56.2 to 93.1)                            |
| Guillain-Barre syndrome                                                             | 0.4<br>(0.3 to 0.6)                       | --                                       | 0.1<br>(0.1 to 0.2)                     | 5.7<br>(0.7 to 11.2)                              | 0.1<br>(0.0 to 0.1)                                 |
| Hearing loss                                                                        | 10,192.9<br>(9,779.9 to 10,610.4)         | --                                       | 284.3<br>(200.7 to 395.6)               | 10.7<br>(8.2 to 13.2)                             | -4.0<br>(-6.0 to -2.1)                              |
| Heart failure                                                                       | 1,012.4<br>(882.2 to 1,160.1)             | --                                       | 92.9<br>(67.7 to 119.7)                 | 15.4<br>(7.1 to 24.1)                             | -5.0<br>(-11.4 to 1.6)                              |
| Infertility                                                                         | 535.2<br>(414.9 to 690.1)                 | --                                       | 3.3<br>(1.5 to 6.6)                     | 5.3<br>(-1.8 to 12.7)                             | 1.8<br>(-4.0 to 9.1)                                |
| Pelvic inflammatory disease                                                         | 19.9<br>(16.9 to 23.3)                    | --                                       | 2.6<br>(1.7 to 3.7)                     | -9.4<br>(-23.9 to 8.6)                            | -10.9<br>(-25.5 to 7.1)                             |
| Vision loss                                                                         | 11,969.6<br>(11,501.0 to 12,421.2)        | --                                       | 212.6<br>(139.3 to 327.2)               | 4.8<br>(1.3 to 7.9)                               | -7.2<br>(-10.2 to -4.7)                             |

We did not calculate incidence for the nine impairments, certain NTDs, and causes with only birth prevalence. Blank cells mean that no estimate is available.

† Incidence for aggregate causes represents the sum of the incidence of the causes below the aggregate.

‡ Incidence estimates for stroke represent first-ever stroke only.

^ Incidence of HIV/AIDS represents new infections of HIV only and does not include new infections of Tuberculosis in HIV positive cases.



SR Table 14: Prevalence, incidence, and YLDs for 2016, percentage change of YLD counts and percentage change of age-standardised YLD rates between 2006 and 2016 by cause and impairments, for all ages, Portugal.

| Cause                                                                                | Prevalence in thousands (95% UI)       | Incidence in thousands (95% UI)            | YLDs in thousands (95% UI)             |                                                   |                                                     |
|--------------------------------------------------------------------------------------|----------------------------------------|--------------------------------------------|----------------------------------------|---------------------------------------------------|-----------------------------------------------------|
|                                                                                      | 2016 counts                            | 2016 counts                                | 2016 counts                            | Percentage change in counts between 2006 and 2016 | Percentage change in age-standardised rates between |
| <b>All causes</b>                                                                    | <b>9,953.1</b><br>(9,912.6 to 9,988.8) | <b>69,331.3†</b><br>(65,325.0 to 73,599.0) | <b>1,395.8</b><br>(1,042.5 to 1,796.2) | <b>4.7</b><br>(3.3 to 6.1)                        | <b>-0.6</b><br>(-1.9 to 0.9)                        |
| <b>Communicable, maternal, neonatal, and nutritional disorders</b>                   | <b>3,870.0</b><br>(3,693.2 to 4,086.2) | <b>37,585.5†</b><br>(33,703.1 to 41,588.1) | <b>62.3</b><br>(41.1 to 90.5)          | <b>0.0</b><br>(-7.0 to 7.2)                       | <b>-0.5</b><br>(-6.6 to 6.0)                        |
| <b>HIV/AIDS and tuberculosis</b>                                                     | <b>1,467.9</b><br>(1,251.9 to 1,681.9) | <b>7.5†</b><br>(3.7 to 11.5)               | <b>20.0</b><br>(9.2 to 36.2)           | <b>21.9</b><br>(6.6 to 35.0)                      | <b>11.7</b><br>(-4.0 to 24.5)                       |
| Tuberculosis                                                                         | 1,189.7<br>(959.6 to 1,444.6)          | 1.7†<br>(1.3 to 2.3)                       | 0.4<br>(0.2 to 0.6)                    | -25.6<br>(-44.5 to -1.6)                          | -25.1<br>(-43.3 to -0.9)                            |
| Drug-susceptible tuberculosis                                                        | 1.3<br>(0.9 to 1.7)                    | 1.7<br>(1.3 to 2.3)                        | 0.4<br>(0.2 to 0.6)                    | -25.6<br>(-44.6 to -1.5)                          | -25.0<br>(-43.6 to -0.4)                            |
| Multidrug-resistant tuberculosis without extensive drug resistance                   | < 0.05<br>(< 0.05 to < 0.05)           | < 0.05<br>(< 0.05 to < 0.05)               | < 0.05<br>(< 0.05 to < 0.05)           | -32.6<br>(-53.0 to -2.8)                          | -31.8<br>(-52.6 to -1.9)                            |
| Extensively drug-resistant tuberculosis                                              | < 0.05<br>(< 0.05 to < 0.05)           | < 0.05<br>(< 0.05 to < 0.05)               | < 0.05<br>(< 0.05 to < 0.05)           | 45.0<br>(1.1 to 108.8)                            | 46.7<br>(2.0 to 110.8)                              |
| Latent tuberculosis infection                                                        | 1,188.4<br>(958.4 to 1,443.2)          | --                                         | --                                     | --                                                | --                                                  |
| HIV/AIDS                                                                             | 238.0<br>(118.4 to 399.3)              | 5.7^<br>(2.1 to 9.7)                       | 19.6<br>(8.8 to 35.7)                  | 23.6<br>(7.3 to 37.8)                             | 13.0<br>(-2.8 to 26.5)                              |
| Drug-susceptible HIV/AIDS - Tuberculosis                                             | 0.2<br>(0.1 to 0.3)                    | 0.3<br>(0.2 to 0.4)                        | 0.1<br>(< 0.05 to 0.1)                 | -48.9<br>(-62.1 to -28.1)                         | -53.1<br>(-65.2 to -33.5)                           |
| Multidrug-resistant HIV/AIDS - Tuberculosis without extensive drug resistance        | < 0.05<br>(< 0.05 to < 0.05)           | < 0.05<br>(< 0.05 to < 0.05)               | < 0.05<br>(< 0.05 to < 0.05)           | -54.5<br>(-68.5 to -35.4)                         | -58.2<br>(-71.1 to -40.6)                           |
| Extensively drug-resistant HIV/AIDS - Tuberculosis                                   | < 0.05<br>(< 0.05 to < 0.05)           | < 0.05<br>(< 0.05 to < 0.05)               | < 0.05<br>(< 0.05 to < 0.05)           | -2.0<br>(-32.3 to 38.6)                           | -10.1<br>(-37.9 to 27.6)                            |
| HIV/AIDS resulting in other diseases                                                 | 237.8<br>(118.2 to 399.0)              | 5.7<br>(2.1 to 9.7)                        | 19.5<br>(8.7 to 35.6)                  | 24.4<br>(8.1 to 38.9)                             | 13.7<br>(-2.1 to 27.3)                              |
| <b>Diarrhoea, lower respiratory infections, and other common infectious diseases</b> | <b>598.5</b><br>(555.9 to 641.2)       | <b>37,142.8†</b><br>(33,247.2 to 41,167.4) | <b>17.7</b><br>(11.6 to 25.8)          | <b>-2.3</b><br>(-6.1 to 3.8)                      | <b>0.8</b><br>(-2.6 to 4.9)                         |
| Diarrhoeal diseases                                                                  | 13.7<br>(12.8 to 14.7)                 | 926.5<br>(860.2 to 991.4)                  | 1.5<br>(1.1 to 2.1)                    | 5.3<br>(-4.1 to 16.5)                             | 10.9<br>(-0.0 to 23.7)                              |
| Intestinal infectious diseases                                                       | < 0.05<br>(< 0.05 to < 0.05)           | 0.2†<br>(0.1 to 0.2)                       | < 0.05<br>(< 0.05 to < 0.05)           | -7.2<br>(-18.7 to 5.1)                            | -13.3<br>(-23.4 to -2.0)                            |
| Typhoid fever                                                                        | < 0.05<br>(< 0.05 to < 0.05)           | 0.1<br>(< 0.05 to 0.1)                     | < 0.05<br>(< 0.05 to < 0.05)           | -5.8<br>(-20.4 to 10.5)                           | -11.4<br>(-24.2 to 2.8)                             |
| Paratyphoid fever                                                                    | < 0.05<br>(< 0.05 to < 0.05)           | 0.1<br>(0.1 to 0.2)                        | < 0.05<br>(< 0.05 to < 0.05)           | -7.0<br>(-22.7 to 9.0)                            | -11.9<br>(-26.0 to 2.8)                             |
| Other intestinal infectious diseases                                                 | --                                     | --                                         | < 0.05<br>(< 0.05 to < 0.05)           | -28.8<br>(-43.4 to -11.0)                         | -37.9<br>(-53.7 to -16.3)                           |
| Lower respiratory infections                                                         | 9.8<br>(9.1 to 10.6)                   | 409.4<br>(376.3 to 443.0)                  | 0.6<br>(0.4 to 0.8)                    | 11.2<br>(-0.9 to 25.1)                            | -4.1<br>(-14.5 to 8.0)                              |
| Upper respiratory infections                                                         | 459.8<br>(411.2 to 509.2)              | 35,098.4<br>(31,241.7 to 39,098.7)         | 11.4<br>(6.8 to 17.7)                  | -3.7<br>(-8.5 to 1.8)                             | 0.4<br>(-4.6 to 5.5)                                |
| Otitis media                                                                         | 105.9<br>(92.2 to 122.6)               | 557.1<br>(397.6 to 859.2)                  | 2.8<br>(1.7 to 4.2)                    | -6.8<br>(-13.3 to 0.2)                            | -1.6<br>(-8.0 to 5.3)                               |
| Meningitis                                                                           | 1.4<br>(0.9 to 6.6)                    | 0.1<br>(0.1 to 0.1)                        | 0.2<br>(0.1 to 1.0)                    | 36.0<br>(-6.5 to 513.2)                           | 12.6<br>(-6.6 to 211.0)                             |
| Pneumococcal meningitis                                                              | 0.2<br>(0.2 to 0.3)                    | < 0.05<br>(< 0.05 to < 0.05)               | < 0.05<br>(< 0.05 to 0.1)              | -8.2<br>(-13.5 to -3.5)                           | -8.7<br>(-14.3 to -3.8)                             |
| H influenzae type B meningitis                                                       | 0.1<br>(0.1 to 0.1)                    | < 0.05<br>(< 0.05 to < 0.05)               | < 0.05<br>(< 0.05 to < 0.05)           | -2.2<br>(-7.5 to 3.4)                             | -2.2<br>(-8.4 to 4.1)                               |
| Meningococcal infection                                                              | 0.6<br>(0.1 to 5.7)                    | < 0.05<br>(< 0.05 to < 0.05)               | 0.1<br>(< 0.05 to 0.9)                 | 237.3<br>(-10.3 to 2,939.5)                       | 97.4<br>(-11.1 to 1,213.7)                          |
| Other meningitis                                                                     | 0.5<br>(0.4 to 0.6)                    | 0.1<br>(0.1 to 0.1)                        | 0.1<br>(0.1 to 0.1)                    | -1.5<br>(-5.9 to 2.6)                             | -0.9<br>(-5.4 to 3.1)                               |
| Encephalitis                                                                         | 8.7<br>(5.0 to 13.8)                   | 6.6<br>(6.0 to 7.2)                        | 0.7<br>(0.5 to 1.0)                    | -0.5<br>(-4.6 to 3.7)                             | -3.8<br>(-7.5 to -0.3)                              |
| Diphtheria                                                                           | < 0.05<br>(< 0.05 to < 0.05)           | < 0.05<br>(< 0.05 to < 0.05)               | < 0.05<br>(< 0.05 to < 0.05)           | -28.5<br>(-63.5 to 33.2)                          | -32.8<br>(-62.9 to 21.9)                            |
| Whooping cough                                                                       | 0.2<br>(0.1 to 0.2)                    | 1.3<br>(1.0 to 1.8)                        | < 0.05<br>(< 0.05 to < 0.05)           | -56.5<br>(-71.3 to -35.2)                         | -44.9<br>(-63.6 to -17.8)                           |
| Tetanus                                                                              | < 0.05<br>(< 0.05 to < 0.05)           | < 0.05<br>(< 0.05 to < 0.05)               | < 0.05<br>(< 0.05 to < 0.05)           | -39.5<br>(-51.8 to -24.5)                         | -40.8<br>(-53.4 to -27.9)                           |
| Measles                                                                              | < 0.05<br>(< 0.05 to < 0.05)           | < 0.05<br>(< 0.05 to < 0.05)               | < 0.05<br>(< 0.05 to < 0.05)           | 18.3<br>(-66.1 to 485.2)                          | 48.5<br>(-57.5 to 634.6)                            |
| Varicella and herpes zoster                                                          | 10.9<br>(9.7 to 12.2)                  | 143.2<br>(135.6 to 151.4)                  | 0.5<br>(0.3 to 0.8)                    | 7.4<br>(-5.3 to 20.5)                             | 0.0<br>(-12.0 to 12.9)                              |
| <b>Neglected tropical diseases and malaria</b>                                       | <b>145.4</b><br>(114.1 to 177.3)       | <b>9.3†</b><br>(6.7 to 12.1)               | <b>2.8</b><br>(0.8 to 6.1)             | <b>-0.1</b><br>(-23.3 to 20.5)                    | <b>-7.9</b><br>(-28.2 to 11.1)                      |
| Malaria                                                                              | --                                     | --                                         | --                                     | --                                                | --                                                  |
| Chagas disease                                                                       | 4.0<br>(3.3 to 4.7)                    | --                                         | < 0.05<br>(< 0.05 to 0.1)              | 5.9<br>(-2.1 to 13.6)                             | 0.4<br>(-7.0 to 8.0)                                |
| Leishmaniasis                                                                        | < 0.05<br>(< 0.05 to < 0.05)           | < 0.05<br>(< 0.05 to < 0.05)               | < 0.05<br>(< 0.05 to < 0.05)           | -79.8<br>(-95.2 to -37.8)                         | -80.2<br>(-96.1 to -18.1)                           |
| Visceral leishmaniasis                                                               | < 0.05<br>(< 0.05 to < 0.05)           | < 0.05<br>(< 0.05 to < 0.05)               | < 0.05<br>(< 0.05 to < 0.05)           | -81.9<br>(-93.6 to -63.3)                         | -83.7<br>(-94.0 to -67.8)                           |
| Cutaneous and mucocutaneous leishmaniasis                                            | < 0.05<br>(< 0.05 to < 0.05)           | < 0.05<br>(0.0 to < 0.05)                  | < 0.05<br>(< 0.05 to < 0.05)           | -60.9<br>(-100.0 to 893,959,100.6)                | -59.9<br>(-100.0 to 942,778,303.2)                  |
| African trypanosomiasis                                                              | --                                     | --                                         | --                                     | --                                                | --                                                  |
| Schistosomiasis                                                                      | --                                     | --                                         | --                                     | --                                                | --                                                  |
| Cysticercosis                                                                        | 0.7<br>(0.1 to 1.3)                    | --                                         | 0.1<br>(< 0.05 to 0.2)                 | -11.9<br>(-82.3 to 328.9)                         | -19.0<br>(-83.6 to 288.5)                           |
| Cystic echinococcosis                                                                | 0.3<br>(< 0.05 to 1.4)                 | 0.1<br>(< 0.05 to 0.2)                     | < 0.05<br>(< 0.05 to 0.1)              | -40.5<br>(-93.7 to 610.4)                         | -42.3<br>(-93.9 to 580.3)                           |
| Lymphatic filariasis                                                                 | --                                     | --                                         | --                                     | --                                                | --                                                  |
| Onchocerciasis                                                                       | --                                     | --                                         | --                                     | --                                                | --                                                  |
| Trachoma                                                                             | --                                     | --                                         | --                                     | --                                                | --                                                  |
| Dengue                                                                               | --                                     | --                                         | --                                     | --                                                | --                                                  |
| Yellow fever                                                                         | --                                     | --                                         | --                                     | --                                                | --                                                  |
| Rabies                                                                               | < 0.05<br>(< 0.05 to < 0.05)           | < 0.05<br>(< 0.05 to < 0.05)               | < 0.05<br>(< 0.05 to < 0.05)           | 11.3<br>(-11.3 to 38.5)                           | -15.8<br>(-34.0 to 5.6)                             |
| Intestinal nematode infections                                                       | --                                     | --                                         | --                                     | --                                                | --                                                  |
| Ascariasis                                                                           | --                                     | --                                         | --                                     | --                                                | --                                                  |



| Cause                                                                   | Prevalence in thousands (95% UI)              | Incidence in thousands (95% UI)                   | YLDs in thousands (95% UI)                  |                                                   |                                                     |
|-------------------------------------------------------------------------|-----------------------------------------------|---------------------------------------------------|---------------------------------------------|---------------------------------------------------|-----------------------------------------------------|
|                                                                         | 2016 counts                                   | 2016 counts                                       | 2016 counts                                 | Percentage change in counts between 2006 and 2016 | Percentage change in age-standardised rates between |
| Trichuriasis                                                            | --                                            | --                                                | --                                          | --                                                | --                                                  |
| Hookworm disease                                                        | --                                            | --                                                | --                                          | --                                                | --                                                  |
| Food-borne trematodiasis                                                | 130.6<br>(93.6 to 171.4)                      | 9.3<br>(6.6 to 12.0)                              | 2.6<br>(0.6 to 6.0)                         | 1.0<br>(-23.4 to 20.5)                            | -6.9<br>(-27.9 to 10.5)                             |
| Leprosy                                                                 | < 0.05<br>(< 0.05 to < 0.05)                  | --                                                | < 0.05<br>(< 0.05 to < 0.05)                | -23.4<br>(-28.9 to -18.5)                         | -34.7<br>(-39.3 to -30.3)                           |
| Ebola virus disease                                                     | --                                            | --                                                | --                                          | --                                                | --                                                  |
| Zika virus disease                                                      | --                                            | --                                                | --                                          | --                                                | --                                                  |
| Guinea worm disease                                                     | --                                            | --                                                | --                                          | --                                                | --                                                  |
| Other neglected tropical diseases                                       | --                                            | --                                                | < 0.05<br>(< 0.05 to < 0.05)                | --                                                | --                                                  |
| <b>Maternal disorders</b>                                               | <b>6.4</b><br><b>(4.9 to 8.3)</b>             | <b>105.2†</b><br><b>(93.0 to 118.6)</b>           | <b>0.4</b><br><b>(0.3 to 0.6)</b>           | <b>36.0</b><br><b>(-3.2 to 88.7)</b>              | <b>50.9</b><br><b>(7.8 to 107.4)</b>                |
| Maternal haemorrhage                                                    | 0.7<br>(0.5 to 1.1)                           | 5.3<br>(4.4 to 6.5)                               | < 0.05<br>(< 0.05 to < 0.05)                | -18.7<br>(-48.7 to 32.0)                          | -10.5<br>(-42.5 to 41.9)                            |
| Maternal sepsis and other pregnancy related infections                  | 1.6<br>(1.3 to 2.0)                           | 7.5<br>(6.3 to 9.2)                               | < 0.05<br>(< 0.05 to 0.1)                   | -28.7<br>(-65.5 to 47.1)                          | -19.6<br>(-61.4 to 70.0)                            |
| Maternal hypertensive disorders                                         | 3.7<br>(2.5 to 4.9)                           | 15.0<br>(13.6 to 16.4)                            | 0.2<br>(0.1 to 0.3)                         | 125.9<br>(31.3 to 308.1)                          | 148.3<br>(46.1 to 343.2)                            |
| Maternal obstructed labour and uterine rupture                          | 0.2<br>(0.1 to 0.2)                           | 12.0<br>(9.3 to 14.5)                             | 0.1<br>(< 0.05 to 0.1)                      | -0.4<br>(-61.1 to 200.2)                          | 15.8<br>(-55.3 to 239.2)                            |
| Maternal abortion, miscarriage, and ectopic pregnancy                   | 0.5<br>(0.4 to 0.8)                           | 65.3<br>(53.2 to 78.3)                            | 0.1<br>(< 0.05 to 0.1)                      | 47.1<br>(-25.6 to 202.5)                          | 64.8<br>(-17.1 to 238.0)                            |
| Other maternal disorders                                                | --                                            | --                                                | 0.1<br>(< 0.05 to 0.1)                      | 28.1<br>(-8.5 to 77.9)                            | 41.8<br>(2.1 to 95.0)                               |
| <b>Neonatal disorders</b>                                               | <b>69.6</b><br><b>(54.9 to 87.3)</b>          | --                                                | <b>9.5</b><br><b>(6.7 to 12.8)</b>          | <b>-9.2</b><br><b>(-21.6 to 4.3)</b>              | <b>-5.2</b><br><b>(-18.4 to 9.4)</b>                |
| Neonatal preterm birth complications                                    | 65.0<br>(49.9 to 86.5)                        | --                                                | 6.7<br>(4.5 to 9.5)                         | -9.0<br>(-26.2 to 9.6)                            | -4.9<br>(-23.8 to 14.5)                             |
| Neonatal encephalopathy due to birth asphyxia and trauma                | 6.2<br>(4.4 to 8.9)                           | --                                                | 1.4<br>(0.8 to 2.2)                         | -9.3<br>(-22.0 to 9.0)                            | -6.8<br>(-20.9 to 13.3)                             |
| Neonatal sepsis and other neonatal infections                           | 2.7<br>(1.3 to 5.5)                           | --                                                | 1.1<br>(0.5 to 2.4)                         | -8.2<br>(-25.6 to 16.2)                           | -4.5<br>(-24.0 to 23.7)                             |
| Hemolytic disease and other neonatal jaundice                           | 0.7<br>(0.6 to 0.8)                           | --                                                | 0.2<br>(0.2 to 0.3)                         | -4.1<br>(-11.1 to 4.2)                            | -0.9<br>(-8.1 to 7.4)                               |
| Other neonatal disorders                                                | --                                            | --                                                | 0.1<br>(0.1 to 0.2)                         | -29.4<br>(-44.5 to -12.0)                         | -9.0<br>(-28.2 to 13.2)                             |
| <b>Nutritional deficiencies</b>                                         | <b>759.2</b><br><b>(643.6 to 867.6)</b>       | <b>34.0†</b><br><b>(26.3 to 41.9)</b>             | <b>10.5</b><br><b>(6.5 to 16.4)</b>         | <b>-15.4</b><br><b>(-30.4 to 3.9)</b>             | <b>-9.2</b><br><b>(-25.5 to 12.2)</b>               |
| Protein-energy malnutrition                                             | 4.5<br>(4.4 to 4.6)                           | 3.0<br>(2.9 to 3.1)                               | 0.5<br>(0.3 to 0.7)                         | -24.1<br>(-32.6 to -15.2)                         | -2.2<br>(-13.1 to 9.3)                              |
| Iodine deficiency                                                       | 133.3<br>(117.6 to 151.9)                     | 1.6<br>(1.4 to 1.8)                               | 3.4<br>(2.3 to 4.7)                         | 1.0<br>(-8.1 to 11.9)                             | -0.7<br>(-10.1 to 10.2)                             |
| Vitamin A deficiency                                                    | 35.6<br>(27.2 to 45.3)                        | 29.4<br>(21.7 to 37.1)                            | --                                          | --                                                | --                                                  |
| Iron-deficiency anaemia                                                 | 538.6<br>(427.8 to 657.4)                     | --                                                | 6.6<br>(3.7 to 11.4)                        | -21.2<br>(-41.8 to 7.1)                           | -12.8<br>(-35.3 to 19.1)                            |
| Other nutritional deficiencies                                          | --                                            | --                                                | < 0.05<br>(< 0.05 to < 0.05)                | -24.3<br>(-33.0 to -15.1)                         | -2.5<br>(-13.7 to 9.2)                              |
| <b>Other communicable, maternal, neonatal, and nutritional diseases</b> | <b>1,698.2</b><br><b>(1,574.3 to 1,839.1)</b> | <b>286.8</b><br><b>(245.8 to 379.1)</b>           | <b>1.4</b><br><b>(0.8 to 2.4)</b>           | <b>-21.8</b><br><b>(-35.2 to -8.4)</b>            | <b>-19.9</b><br><b>(-33.8 to -3.4)</b>              |
| Sexually transmitted diseases excluding HIV                             | 1,416.6<br>(1,296.6 to 1,557.1)               | 250.8<br>(209.7 to 339.7)                         | 0.9<br>(0.5 to 1.7)                         | -25.4<br>(-42.0 to -5.6)                          | -27.8<br>(-43.8 to -6.1)                            |
| Syphilis                                                                | 3.8<br>(3.0 to 4.8)                           | 3.3<br>(2.3 to 4.5)                               | 0.1<br>(0.1 to 0.1)                         | 25.8<br>(7.7 to 43.1)                             | 11.9<br>(-4.9 to 27.9)                              |
| Chlamydial infection                                                    | 35.8<br>(26.3 to 47.8)                        | 24.6<br>(17.3 to 33.4)                            | 0.1<br>(0.1 to 0.2)                         | -15.2<br>(-29.6 to 2.7)                           | -3.4<br>(-20.9 to 20.1)                             |
| Gonococcal infection                                                    | 12.7<br>(5.4 to 37.5)                         | 35.6<br>(7.8 to 128.2)                            | < 0.05<br>(< 0.05 to 0.1)                   | -82.0<br>(-91.0 to -52.1)                         | -82.0<br>(-91.4 to -54.7)                           |
| Trichomoniasis                                                          | 175.3<br>(151.8 to 202.3)                     | 144.5<br>(124.6 to 166.8)                         | 0.2<br>(0.1 to 0.4)                         | -1.0<br>(-8.6 to 7.6)                             | 2.1<br>(-5.7 to 11.2)                               |
| Genital herpes                                                          | 1,211.8<br>(1,042.1 to 1,419.1)               | 39.2<br>(33.3 to 46.4)                            | 0.3<br>(0.1 to 0.7)                         | 3.8<br>(-2.1 to 10.1)                             | 0.2<br>(-5.1 to 6.7)                                |
| Other sexually transmitted diseases                                     | 10.4<br>(8.9 to 12.0)                         | 3.6<br>(2.7 to 4.7)                               | 0.1<br>(0.1 to 0.2)                         | -39.8<br>(-57.8 to -11.0)                         | -37.7<br>(-56.1 to -7.7)                            |
| Hepatitis                                                               | 337.2<br>(300.2 to 377.9)                     | 36.0<br>(30.6 to 42.2)                            | 0.1<br>(< 0.05 to 0.1)                      | -36.7<br>(-49.6 to -21.2)                         | -37.2<br>(-52.4 to -17.9)                           |
| Acute hepatitis A                                                       | 1.1<br>(0.9 to 1.4)                           | 14.6<br>(11.3 to 17.7)                            | < 0.05<br>(< 0.05 to 0.1)                   | -39.6<br>(-59.6 to -7.6)                          | -38.6<br>(-61.4 to -0.8)                            |
| Hepatitis B                                                             | 141.5<br>(112.6 to 176.5)                     | 17.2<br>(13.2 to 22.2)                            | < 0.05<br>(< 0.05 to < 0.05)                | -34.4<br>(-47.1 to -19.9)                         | -37.7<br>(-49.4 to -24.1)                           |
| Hepatitis C                                                             | 194.5<br>(174.2 to 216.0)                     | 2.9<br>(2.6 to 3.2)                               | < 0.05<br>(< 0.05 to < 0.05)                | -27.1<br>(-28.3 to -25.9)                         | -14.4<br>(-16.6 to -12.3)                           |
| Acute hepatitis E                                                       | 0.1<br>(0.1 to 0.1)                           | 1.2<br>(0.9 to 1.6)                               | < 0.05<br>(< 0.05 to < 0.05)                | -30.4<br>(-37.3 to -23.4)                         | -37.5<br>(-41.6 to -33.6)                           |
| Other infectious diseases                                               | 14.7<br>(11.7 to 18.7)                        | < 0.05<br>(< 0.05 to < 0.05)                      | 0.4<br>(0.3 to 0.7)                         | -9.6<br>(-20.7 to 4.1)                            | 0.1<br>(-16.7 to 23.5)                              |
| <b>Non-communicable diseases</b>                                        | <b>9,736.1</b><br><b>(9,691.7 to 9,775.4)</b> | <b>30,787.8†</b><br><b>(29,682.4 to 31,986.8)</b> | <b>1,234.4</b><br><b>(916.7 to 1,589.7)</b> | <b>5.4</b><br><b>(3.9 to 7.0)</b>                 | <b>0.1</b><br><b>(-1.5 to 1.7)</b>                  |
| <b>Neoplasms</b>                                                        | <b>154.3</b><br><b>(148.7 to 159.8)</b>       | <b>53.7</b><br><b>(50.9 to 58.0)</b>              | <b>16.9</b><br><b>(12.5 to 21.8)</b>        | <b>14.6</b><br><b>(9.5 to 20.4)</b>               | <b>-1.1</b><br><b>(-5.6 to 3.8)</b>                 |
| Lip and oral cavity cancer                                              | 3.3<br>(3.0 to 3.7)                           | 0.9<br>(0.8 to 1.0)                               | 0.3<br>(0.2 to 0.4)                         | 16.4<br>(-1.2 to 35.9)                            | 0.4<br>(-14.4 to 18.5)                              |
| Nasopharynx cancer                                                      | 0.6<br>(0.5 to 0.8)                           | 0.2<br>(0.1 to 0.2)                               | 0.1<br>(< 0.05 to 0.1)                      | -3.2<br>(-23.1 to 20.9)                           | -11.5<br>(-30.3 to 11.4)                            |
| Other pharynx cancer                                                    | 1.8<br>(1.7 to 2.0)                           | 0.5<br>(0.5 to 0.6)                               | 0.2<br>(0.1 to 0.3)                         | 30.1<br>(11.2 to 51.3)                            | 16.0<br>(-1.4 to 36.0)                              |
| Oesophageal cancer                                                      | 0.7<br>(0.7 to 0.8)                           | 0.6<br>(0.6 to 0.7)                               | 0.2<br>(0.1 to 0.2)                         | 5.6<br>(-10.8 to 26.7)                            | -8.6<br>(-21.9 to 7.7)                              |
| Stomach cancer                                                          | 5.4<br>(5.0 to 5.9)                           | 3.0<br>(2.9 to 3.2)                               | 0.8<br>(0.6 to 1.0)                         | -4.7<br>(-18.8 to 12.1)                           | -18.7<br>(-30.4 to -5.1)                            |
| Colon and rectum cancer                                                 | 29.9<br>(27.5 to 33.3)                        | 8.1<br>(7.5 to 8.9)                               | 2.8<br>(2.0 to 3.7)                         | 14.8<br>(2.3 to 30.2)                             | -2.5<br>(-13.5 to 10.8)                             |
| Liver cancer                                                            | 0.4<br>(0.4 to 0.5)                           | 1.0<br>(0.9 to 1.1)                               | 0.2<br>(0.1 to 0.3)                         | 24.6<br>(10.5 to 39.5)                            | 7.1<br>(-4.8 to 20.9)                               |
| Liver cancer due to hepatitis B                                         | 0.1<br>(0.1 to 0.2)                           | 0.1<br>(0.1 to 0.2)                               | < 0.05<br>(< 0.05 to < 0.05)                | 24.3<br>(8.6 to 43.9)                             | 9.1<br>(-4.9 to 25.6)                               |

| Cause                                              | Prevalence in thousands (95% UI)              | Incidence in thousands (95% UI)          | YLDs in thousands (95% UI)            |                                                   |                                                     |
|----------------------------------------------------|-----------------------------------------------|------------------------------------------|---------------------------------------|---------------------------------------------------|-----------------------------------------------------|
|                                                    | 2016 counts                                   | 2016 counts                              | 2016 counts                           | Percentage change in counts between 2006 and 2016 | Percentage change in age-standardised rates between |
| Liver cancer due to hepatitis C                    | 0.3<br>(0.2 to 0.4)                           | 0.3<br>(0.2 to 0.4)                      | 0.1<br>( $< 0.05$ to 0.1)             | 28.3<br>(13.4 to 46.5)                            | 7.9<br>(-4.7 to 22.8)                               |
| Liver cancer due to alcohol use                    | 0.4<br>(0.3 to 0.5)                           | 0.4<br>(0.3 to 0.5)                      | 0.1<br>(0.1 to 0.1)                   | 20.0<br>(5.0 to 37.0)                             | 4.4<br>(-9.0 to 19.1)                               |
| Liver cancer due to other causes                   | 0.1<br>(0.1 to 0.2)                           | 0.1<br>(0.1 to 0.2)                      | $< 0.05$<br>( $< 0.05$ to $< 0.05$ )  | 31.3<br>(12.1 to 55.0)                            | 12.3<br>(-4.4 to 31.0)                              |
| Gallbladder and biliary tract cancer               | 0.5<br>(0.3 to 0.9)                           | 0.5<br>(0.4 to 0.7)                      | 0.1<br>(0.1 to 0.2)                   | 8.5<br>(-17.3 to 50.7)                            | -10.6<br>(-30.6 to 18.9)                            |
| Pancreatic cancer                                  | 1.1<br>(1.0 to 1.1)                           | 1.4<br>(1.3 to 1.5)                      | 0.3<br>(0.2 to 0.4)                   | 19.2<br>(0.4 to 40.1)                             | 0.5<br>(-13.4 to 15.2)                              |
| Larynx cancer                                      | 1.6<br>(1.4 to 1.7)                           | 0.5<br>(0.4 to 0.5)                      | 0.2<br>(0.1 to 0.3)                   | -8.4<br>(-24.0 to 9.6)                            | -20.8<br>(-34.2 to -5.4)                            |
| Tracheal, bronchus, and lung cancer                | 4.6<br>(4.4 to 4.9)                           | 4.0<br>(3.7 to 4.2)                      | 0.9<br>(0.7 to 1.2)                   | 1.8<br>(-16.1 to 23.0)                            | -12.3<br>(-27.4 to 6.2)                             |
| Malignant skin melanoma                            | 5.0<br>(3.4 to 5.8)                           | 1.1<br>(0.7 to 1.2)                      | 0.3<br>(0.2 to 0.5)                   | 35.3<br>(12.3 to 58.1)                            | 20.7<br>(0.2 to 41.5)                               |
| Non-melanoma skin cancer                           | 2.9<br>(1.7 to 5.2)                           | 4.9<br>(3.1 to 8.1)                      | 0.1<br>( $< 0.05$ to 0.3)             | 300.8<br>(130.0 to 843.3)                         | 232.2<br>(95.3 to 672.1)                            |
| Non-melanoma skin cancer (squamous-cell carcinoma) | 2.2<br>(1.3 to 5.1)                           | 2.1<br>(1.3 to 4.6)                      | 0.1<br>( $< 0.05$ to 0.3)             | 304.7<br>(125.7 to 877.2)                         | 234.1<br>(89.1 to 703.9)                            |
| Non-melanoma skin cancer (basal-cell carcinoma)    | 0.4<br>(0.2 to 0.8)                           | 2.8<br>(1.5 to 4.7)                      | $< 0.05$<br>( $< 0.05$ to $< 0.05$ )  | 227.2<br>(85.6 to 411.2)                          | 198.2<br>(79.3 to 345.6)                            |
| Breast cancer                                      | 29.7<br>(28.2 to 31.5)                        | 5.8<br>(5.3 to 6.3)                      | 2.9<br>(2.0 to 3.8)                   | 8.0<br>(-1.9 to 18.3)                             | -6.5<br>(-15.9 to 3.2)                              |
| Cervical cancer                                    | 2.6<br>(2.2 to 3.2)                           | 0.7<br>(0.6 to 0.8)                      | 0.2<br>(0.2 to 0.4)                   | -15.6<br>(-29.4 to 1.2)                           | -24.0<br>(-37.5 to -7.8)                            |
| Uterine cancer                                     | 6.9<br>(6.0 to 8.1)                           | 1.5<br>(1.3 to 1.7)                      | 0.5<br>(0.4 to 0.7)                   | 19.5<br>(-5.1 to 51.7)                            | 3.8<br>(-17.2 to 31.2)                              |
| Ovarian cancer                                     | 1.7<br>(1.5 to 2.0)                           | 0.6<br>(0.5 to 0.6)                      | 0.2<br>(0.2 to 0.4)                   | 1.7<br>(-23.4 to 39.6)                            | -10.7<br>(-32.6 to 22.8)                            |
| Prostate cancer                                    | 29.7<br>(25.3 to 44.9)                        | 7.8<br>(6.8 to 11.0)                     | 2.9<br>(2.0 to 4.3)                   | 17.6<br>(1.7 to 36.7)                             | -0.9<br>(-15.0 to 15.9)                             |
| Testicular cancer                                  | 0.7<br>(0.6 to 0.8)                           | 0.1<br>(0.1 to 0.2)                      | $< 0.05$<br>( $< 0.05$ to 0.1)        | 18.3<br>(-14.6 to 61.8)                           | 27.3<br>(-11.5 to 83.4)                             |
| Kidney cancer                                      | 3.4<br>(3.0 to 3.8)                           | 0.9<br>(0.8 to 1.0)                      | 0.3<br>(0.2 to 0.4)                   | 21.9<br>(6.1 to 41.2)                             | 7.9<br>(-6.6 to 25.5)                               |
| Bladder cancer                                     | 8.2<br>(7.4 to 8.9)                           | 2.0<br>(1.9 to 2.2)                      | 0.8<br>(0.5 to 1.0)                   | 26.4<br>(8.8 to 47.0)                             | 6.3<br>(-8.2 to 23.2)                               |
| Brain and nervous system cancer                    | 3.4<br>(2.2 to 4.6)                           | 1.4<br>(1.0 to 1.8)                      | 0.4<br>(0.3 to 0.6)                   | 28.4<br>(-2.3 to 66.2)                            | 16.8<br>(-9.5 to 44.9)                              |
| Thyroid cancer                                     | 2.5<br>(2.2 to 2.9)                           | 0.5<br>(0.4 to 0.6)                      | 0.2<br>(0.1 to 0.2)                   | 30.6<br>(8.6 to 59.5)                             | 17.5<br>(-3.4 to 45.1)                              |
| Mesothelioma                                       | 0.1<br>(0.1 to 0.2)                           | 0.1<br>(0.1 to 0.1)                      | $< 0.05$<br>( $< 0.05$ to $< 0.05$ )  | 52.6<br>(25.4 to 70.9)                            | 32.6<br>(9.1 to 48.8)                               |
| Hodgkin lymphoma                                   | 0.7<br>(0.6 to 0.9)                           | 0.2<br>(0.1 to 0.2)                      | 0.1<br>( $< 0.05$ to 0.1)             | 6.0<br>(-7.8 to 23.2)                             | 6.6<br>(-10.7 to 28.7)                              |
| Non-Hodgkin's lymphoma                             | 6.8<br>(6.0 to 7.8)                           | 1.8<br>(1.6 to 2.1)                      | 0.6<br>(0.4 to 0.8)                   | 36.2<br>(18.1 to 57.1)                            | 18.8<br>(2.5 to 35.1)                               |
| Multiple myeloma                                   | 0.7<br>(0.5 to 0.8)                           | 0.5<br>(0.4 to 0.6)                      | 0.2<br>(0.1 to 0.2)                   | 19.5<br>(-7.3 to 50.1)                            | 1.0<br>(-19.9 to 24.6)                              |
| Leukaemia                                          | 3.5<br>(3.2 to 3.8)                           | 1.0<br>(1.0 to 1.1)                      | 0.5<br>(0.3 to 0.6)                   | 12.4<br>(-0.3 to 26.2)                            | -3.7<br>(-13.3 to 6.7)                              |
| Acute lymphoid leukaemia                           | 0.2<br>(0.2 to 0.3)                           | 0.1<br>(0.1 to 0.1)                      | $< 0.05$<br>( $< 0.05$ to $< 0.05$ )  | 8.2<br>(-4.1 to 20.7)                             | 8.2<br>(-6.8 to 25.9)                               |
| Chronic lymphoid leukaemia                         | 1.7<br>(1.5 to 1.9)                           | 0.4<br>(0.3 to 0.5)                      | 0.2<br>(0.1 to 0.3)                   | 17.9<br>(-4.1 to 42.4)                            | -1.4<br>(-18.0 to 17.4)                             |
| Acute myeloid leukaemia                            | 0.4<br>(0.3 to 0.4)                           | 0.3<br>(0.2 to 0.3)                      | 0.1<br>(0.1 to 0.1)                   | 11.2<br>(0.0 to 24.0)                             | -2.0<br>(-12.3 to 9.4)                              |
| Chronic myeloid leukaemia                          | 0.3<br>(0.2 to 0.3)                           | 0.1<br>(0.1 to 0.1)                      | $< 0.05$<br>( $< 0.05$ to $< 0.05$ )  | -11.0<br>(-22.3 to 3.0)                           | -23.9<br>(-32.6 to -13.5)                           |
| Other leukaemia                                    | 0.8<br>(0.7 to 1.0)                           | 0.2<br>(0.2 to 0.2)                      | 0.1<br>(0.1 to 0.1)                   | 12.5<br>(-5.8 to 34.5)                            | -7.4<br>(-20.4 to 8.1)                              |
| Other neoplasms                                    | 8.2<br>(6.9 to 9.7)                           | 2.3<br>(2.0 to 2.6)                      | 0.7<br>(0.5 to 0.9)                   | 40.2<br>(18.2 to 66.6)                            | 24.6<br>(5.2 to 47.1)                               |
| <b>Cardiovascular diseases</b>                     | <b>1,337.9</b><br><b>(1,276.7 to 1,397.0)</b> | <b>126.5†</b><br><b>(119.4 to 134.3)</b> | <b>85.1</b><br><b>(62.8 to 111.0)</b> | <b>2.0</b><br><b>(-2.1 to 6.4)</b>                | <b>-12.3</b><br><b>(-15.6 to -8.6)</b>              |
| Rheumatic heart disease                            | 1.1<br>(1.0 to 1.2)                           | 0.5<br>(0.5 to 0.5)                      | 0.1<br>(0.1 to 0.1)                   | -2.2<br>(-20.9 to 22.0)                           | -12.8<br>(-26.6 to 3.5)                             |
| Ischaemic heart disease                            | 321.3<br>(295.0 to 348.5)                     | 36.4<br>(33.2 to 39.7)                   | 16.3<br>(11.4 to 22.2)                | 10.1<br>(4.5 to 15.4)                             | -5.6<br>(-10.4 to -1.1)                             |
| Cerebrovascular disease                            | 190.4<br>(179.3 to 202.8)                     | 27.4‡<br>(25.5 to 29.6)                  | 30.7<br>(21.8 to 39.0)                | 2.1<br>(-4.3 to 9.9)                              | -13.2<br>(-18.3 to -6.9)                            |
| Ischaemic stroke                                   | 152.7<br>(139.2 to 169.3)                     | 18.1‡<br>(16.3 to 20.1)                  | 23.8<br>(16.9 to 30.6)                | 2.7<br>(-5.5 to 12.3)                             | -13.1<br>(-19.6 to -5.6)                            |
| Hemorrhagic stroke                                 | 45.6<br>(40.6 to 50.9)                        | 9.3‡<br>(8.5 to 10.2)                    | 6.9<br>(5.0 to 8.9)                   | 0.1<br>(-10.0 to 11.5)                            | -13.6<br>(-21.7 to -3.8)                            |
| Hypertensive heart disease                         | 36.0<br>(30.1 to 42.8)                        | --                                       | 2.9<br>(1.9 to 4.0)                   | 2.6<br>(-7.8 to 14.4)                             | -15.7<br>(-24.4 to -6.1)                            |
| Cardiomyopathy and myocarditis                     | 17.1<br>(15.1 to 19.7)                        | 7.3†<br>(6.6 to 8.1)                     | 1.4<br>(1.0 to 2.0)                   | -1.8<br>(-11.6 to 9.2)                            | -12.5<br>(-20.9 to -2.8)                            |
| Myocarditis                                        | 3.2<br>(2.9 to 3.5)                           | 7.3<br>(6.6 to 8.1)                      | 0.2<br>(0.1 to 0.3)                   | -5.7<br>(-19.3 to 10.9)                           | -6.9<br>(-20.3 to 8.7)                              |
| Alcoholic cardiomyopathy                           | 3.6<br>(2.9 to 4.3)                           | --                                       | 0.3<br>(0.2 to 0.4)                   | -5.6<br>(-23.5 to 18.4)                           | -14.2<br>(-30.9 to 8.0)                             |
| Other cardiomyopathy                               | 11.5<br>(9.6 to 13.6)                         | --                                       | 0.9<br>(0.6 to 1.3)                   | 0.5<br>(-11.3 to 13.9)                            | -13.7<br>(-24.2 to -1.8)                            |
| Atrial fibrillation and flutter                    | 126.2<br>(110.2 to 143.6)                     | 10.2<br>(8.7 to 11.8)                    | 9.8<br>(6.6 to 13.8)                  | 1.5<br>(-5.4 to 8.4)                              | -15.5<br>(-21.2 to -9.5)                            |
| Peripheral vascular disease                        | 504.4<br>(443.1 to 575.5)                     | 41.3<br>(35.5 to 48.1)                   | 2.0<br>(0.9 to 3.7)                   | 7.2<br>(-1.5 to 16.3)                             | -10.1<br>(-16.6 to -2.8)                            |
| Endocarditis                                       | 2.8<br>(2.4 to 3.3)                           | 3.3<br>(3.0 to 3.6)                      | 0.2<br>(0.1 to 0.3)                   | 1.0<br>(-17.2 to 21.2)                            | -14.2<br>(-28.6 to 0.8)                             |
| Other cardiovascular and circulatory diseases      | 418.3<br>(361.7 to 485.1)                     | --                                       | 21.7<br>(14.8 to 30.3)                | -3.5<br>(-10.7 to 4.9)                            | -13.8<br>(-20.1 to -7.2)                            |
| <b>Chronic respiratory diseases</b>                | <b>1,352.3</b><br><b>(1,303.5 to 1,399.2)</b> | <b>102.0†</b><br><b>(97.4 to 107.1)</b>  | <b>48.1</b><br><b>(34.7 to 64.4)</b>  | <b>-0.8</b><br><b>(-5.5 to 3.9)</b>               | <b>-2.2</b><br><b>(-6.4 to 1.9)</b>                 |
| Chronic obstructive pulmonary disease              | 502.4<br>(478.4 to 528.1)                     | 31.0<br>(29.4 to 32.8)                   | 11.7<br>(8.8 to 15.2)                 | 4.1<br>(-9.8 to 19.5)                             | -9.1<br>(-21.3 to 4.4)                              |
| Pneumoconiosis                                     | 0.2<br>(0.1 to 0.2)                           | 0.1<br>(0.1 to 0.1)                      | $< 0.05$<br>( $< 0.05$ to $< 0.05$ )  | -18.1<br>(-25.0 to -10.3)                         | -29.8<br>(-35.9 to -23.1)                           |
| Silicosis                                          | 0.2<br>(0.1 to 0.2)                           | 0.1<br>(0.1 to 0.1)                      | $< 0.05$<br>( $< 0.05$ to $< 0.05$ )  | -19.4<br>(-26.5 to -11.4)                         | -31.1<br>(-37.5 to -24.3)                           |

| Cause                                                          | Prevalence in thousands (95% UI)              | Incidence in thousands (95% UI)               | YLDs in thousands (95% UI)              |                                                   |                                                     |
|----------------------------------------------------------------|-----------------------------------------------|-----------------------------------------------|-----------------------------------------|---------------------------------------------------|-----------------------------------------------------|
|                                                                | 2016 counts                                   | 2016 counts                                   | 2016 counts                             | Percentage change in counts between 2006 and 2016 | Percentage change in age-standardised rates between |
| Asbestosis                                                     | < 0.05<br>(< 0.05 to < 0.05)                  | < 0.05<br>(< 0.05 to < 0.05)                  | < 0.05<br>(< 0.05 to < 0.05)            | 13.6<br>(-2.8 to 34.4)                            | -1.5<br>(-16.4 to 17.0)                             |
| Coal workers pneumoconiosis                                    | --                                            | --                                            | --                                      | --                                                | --                                                  |
| Other pneumoconiosis                                           | < 0.05<br>(< 0.05 to < 0.05)                  | < 0.05<br>(< 0.05 to < 0.05)                  | < 0.05<br>(< 0.05 to < 0.05)            | 2.8<br>(-5.4 to 11.6)                             | -9.6<br>(-16.8 to -1.6)                             |
| Asthma                                                         | 910.2<br>(856.2 to 969.6)                     | 70.1<br>(65.8 to 74.8)                        | 35.2<br>(23.3 to 50.1)                  | -2.8<br>(-6.6 to 0.7)                             | -1.0<br>(-5.2 to 3.0)                               |
| Interstitial lung disease and pulmonary sarcoidosis            | 7.3<br>(6.5 to 8.1)                           | 0.9<br>(0.8 to 0.9)                           | 0.8<br>(0.5 to 1.1)                     | 22.0<br>(7.1 to 38.4)                             | 4.5<br>(-6.8 to 16.7)                               |
| Other chronic respiratory diseases                             | --                                            | --                                            | 0.3<br>(0.2 to 0.4)                     | 22.2<br>(6.8 to 38.8)                             | 24.3<br>(8.6 to 41.5)                               |
| <b>Cirrhosis and other chronic liver diseases</b>              | <b>117.4</b><br><b>(112.1 to 122.8)</b>       | <b>2.9</b><br><b>(2.8 to 3.0)</b>             | <b>3.0</b><br><b>(2.0 to 4.1)</b>       | <b>4.6</b><br><b>(-4.0 to 14.1)</b>               | <b>-0.8</b><br><b>(-9.7 to 8.5)</b>                 |
| Cirrhosis and other chronic liver diseases due to hepatitis B  | 15.8<br>(12.5 to 19.6)                        | 0.4<br>(0.3 to 0.5)                           | 0.4<br>(0.2 to 0.6)                     | 6.5<br>(-14.3 to 32.1)                            | -0.4<br>(-20.2 to 24.6)                             |
| Cirrhosis and other chronic liver diseases due to hepatitis C  | 32.7<br>(25.2 to 42.8)                        | 0.8<br>(0.6 to 1.0)                           | 0.8<br>(0.5 to 1.1)                     | 8.2<br>(-8.6 to 26.8)                             | 1.2<br>(-15.0 to 19.4)                              |
| Cirrhosis and other chronic liver diseases due to alcohol use  | 59.4<br>(50.8 to 67.8)                        | 1.5<br>(1.3 to 1.7)                           | 1.4<br>(1.0 to 2.0)                     | 4.2<br>(-8.3 to 19.1)                             | -5.1<br>(-17.4 to 8.8)                              |
| Cirrhosis and other chronic liver diseases due to other causes | 9.4<br>(7.3 to 12.1)                          | 0.2<br>(0.2 to 0.3)                           | 0.4<br>(0.3 to 0.6)                     | -1.6<br>(-20.4 to 19.8)                           | 5.5<br>(-15.9 to 30.9)                              |
| <b>Digestive diseases</b>                                      | <b>189.0</b><br><b>(176.7 to 201.9)</b>       | <b>261.0†</b><br><b>(241.0 to 280.4)</b>      | <b>7.4</b><br><b>(5.2 to 10.1)</b>      | <b>16.2</b><br><b>(7.5 to 26.3)</b>               | <b>8.4</b><br><b>(-0.1 to 18.0)</b>                 |
| Peptic ulcer disease                                           | 43.7<br>(38.0 to 50.8)                        | 13.2<br>(11.8 to 14.6)                        | 0.6<br>(0.3 to 0.9)                     | 31.7<br>(-3.5 to 79.6)                            | 18.3<br>(-14.3 to 61.9)                             |
| Gastritis and duodenitis                                       | 51.1<br>(44.2 to 59.3)                        | 24.9<br>(21.6 to 28.7)                        | 0.6<br>(0.3 to 0.9)                     | 43.7<br>(5.2 to 89.3)                             | 29.3<br>(-4.8 to 74.5)                              |
| Appendicitis                                                   | 0.3<br>(0.3 to 0.3)                           | 8.3<br>(7.7 to 8.9)                           | 0.1<br>(0.1 to 0.1)                     | -7.9<br>(-10.9 to -5.1)                           | -2.1<br>(-5.2 to 1.1)                               |
| Paralytic ileus and intestinal obstruction                     | 0.1<br>(0.1 to 0.1)                           | 3.7<br>(3.4 to 4.1)                           | < 0.05<br>(< 0.05 to 0.1)               | 16.3<br>(10.6 to 22.0)                            | 2.5<br>(-1.4 to 6.5)                                |
| Inguinal, femoral, and abdominal hernia                        | 71.4<br>(65.0 to 78.5)                        | 146.0<br>(127.2 to 163.9)                     | 4.1<br>(2.8 to 5.8)                     | 11.8<br>(1.8 to 23.7)                             | 5.6<br>(-4.8 to 17.8)                               |
| Inflammatory bowel disease                                     | 5.1<br>(4.8 to 5.4)                           | 2.9<br>(2.8 to 3.0)                           | 0.7<br>(0.5 to 1.0)                     | 11.7<br>(-6.0 to 33.3)                            | 8.2<br>(-8.7 to 30.2)                               |
| Vascular intestinal disorders                                  | 0.6<br>(0.6 to 0.7)                           | 2.7<br>(2.5 to 3.1)                           | 0.2<br>(0.1 to 0.3)                     | 26.5<br>(-5.0 to 69.5)                            | 7.4<br>(-15.9 to 38.5)                              |
| Gallbladder and biliary diseases                               | 22.9<br>(20.3 to 25.7)                        | 52.8<br>(47.1 to 58.8)                        | 0.4<br>(0.2 to 0.5)                     | 18.3<br>(-2.3 to 44.5)                            | 8.1<br>(-10.1 to 30.0)                              |
| Pancreatitis                                                   | 0.7<br>(0.7 to 0.8)                           | 6.5<br>(5.9 to 7.1)                           | 0.1<br>(0.1 to 0.1)                     | 4.6<br>(-0.0 to 9.7)                              | -5.8<br>(-9.6 to -2.2)                              |
| Other digestive diseases                                       | --                                            | --                                            | 0.6<br>(0.4 to 0.8)                     | 22.7<br>(13.6 to 33.3)                            | 13.6<br>(4.5 to 23.8)                               |
| <b>Neurological disorders</b>                                  | <b>4,226.3</b><br><b>(4,084.8 to 4,407.6)</b> | <b>1,607.0</b><br><b>(1,397.4 to 1,831.3)</b> | <b>138.7</b><br><b>(94.5 to 184.8)</b>  | <b>4.7</b><br><b>(-3.0 to 13.6)</b>               | <b>0.2</b><br><b>(-8.3 to 10.1)</b>                 |
| Alzheimer's disease and other dementias                        | 166.7<br>(139.6 to 201.6)                     | 32.5<br>(26.5 to 39.8)                        | 25.5<br>(17.5 to 34.3)                  | 29.2<br>(22.7 to 35.1)                            | -1.4<br>(-5.9 to 2.9)                               |
| Parkinson's disease                                            | 18.5<br>(14.5 to 23.2)                        | 2.2<br>(1.8 to 2.9)                           | 2.1<br>(1.4 to 3.0)                     | 25.2<br>(11.7 to 40.5)                            | 3.5<br>(-7.7 to 16.1)                               |
| Epilepsy                                                       | 24.4<br>(5.6 to 43.2)                         | 2.6<br>(0.6 to 4.6)                           | 5.9<br>(1.0 to 13.7)                    | -0.2<br>(-83.0 to 533.5)                          | -3.0<br>(-83.2 to 516.2)                            |
| Multiple sclerosis                                             | 8.4<br>(7.4 to 9.4)                           | 0.2<br>(0.1 to 0.2)                           | 2.2<br>(1.5 to 2.9)                     | 24.3<br>(5.6 to 44.6)                             | 18.2<br>(0.1 to 38.6)                               |
| Motor neuron disease                                           | 1.4<br>(1.2 to 1.5)                           | 0.2<br>(0.2 to 0.2)                           | 0.3<br>(0.2 to 0.4)                     | 13.4<br>(9.3 to 17.6)                             | 6.1<br>(2.0 to 10.2)                                |
| Migraine                                                       | 2,051.2<br>(1,936.4 to 2,165.1)               | 169.2<br>(157.4 to 182.5)                     | 88.4<br>(57.2 to 124.4)                 | -1.0<br>(-4.2 to 2.5)                             | 0.0<br>(-3.3 to 3.4)                                |
| Tension-type headache                                          | 2,783.8<br>(2,499.0 to 3,090.3)               | 1,400.0<br>(1,190.9 to 1,624.4)               | 12.8<br>(8.2 to 19.2)                   | 1.5<br>(-3.9 to 7.8)                              | 0.4<br>(-4.6 to 6.0)                                |
| Other neurological disorders                                   | < 0.05<br>(< 0.05 to 0.1)                     | 0.1<br>(0.1 to 0.1)                           | 1.5<br>(0.7 to 2.7)                     | 16.0<br>(-47.0 to 158.2)                          | 16.4<br>(-58.9 to 216.3)                            |
| <b>Mental and substance use disorders</b>                      | <b>1,831.0</b><br><b>(1,766.8 to 1,898.4)</b> | <b>736.4†</b><br><b>(693.9 to 784.4)</b>      | <b>264.0</b><br><b>(192.2 to 342.7)</b> | <b>-1.7</b><br><b>(-4.0 to 0.6)</b>               | <b>-1.6</b><br><b>(-3.6 to 0.6)</b>                 |
| Schizophrenia                                                  | 30.6<br>(25.4 to 36.3)                        | 1.3<br>(1.1 to 1.6)                           | 19.4<br>(13.9 to 25.0)                  | 2.5<br>(-5.9 to 11.2)                             | 0.3<br>(-8.0 to 8.9)                                |
| Alcohol use disorders                                          | 105.4<br>(92.1 to 119.4)                      | 43.6<br>(37.3 to 49.4)                        | 10.5<br>(7.1 to 14.6)                   | -9.3<br>(-18.2 to 0.8)                            | -2.1<br>(-12.0 to 8.3)                              |
| Drug use disorders                                             | 67.4<br>(62.8 to 71.5)                        | 9.3<br>(8.5 to 10.2)                          | 14.2<br>(10.1 to 18.4)                  | -9.4<br>(-17.1 to -1.3)                           | -4.2<br>(-12.7 to 4.8)                              |
| Opioid use disorders                                           | 24.0<br>(20.6 to 28.0)                        | 3.0<br>(2.6 to 3.5)                           | 9.8<br>(6.9 to 13.1)                    | -11.1<br>(-20.3 to -0.9)                          | -7.3<br>(-18.1 to 3.7)                              |
| Cocaine use disorders                                          | 6.2<br>(5.5 to 7.0)                           | 0.4<br>(0.4 to 0.5)                           | 0.8<br>(0.5 to 1.3)                     | -5.5<br>(-24.8 to 19.0)                           | -2.3<br>(-22.8 to 24.5)                             |
| Amphetamine use disorders                                      | 6.3<br>(4.4 to 8.3)                           | 0.7<br>(0.5 to 0.9)                           | 0.8<br>(0.5 to 1.4)                     | 1.0<br>(-22.3 to 30.9)                            | 14.9<br>(-13.4 to 51.6)                             |
| Cannabis use disorders                                         | 25.1<br>(21.6 to 29.4)                        | 3.9<br>(3.3 to 4.6)                           | 0.7<br>(0.5 to 1.1)                     | -20.2<br>(-33.4 to -3.9)                          | -11.0<br>(-27.5 to 8.8)                             |
| Other drug use disorders                                       | 8.2<br>(7.3 to 9.1)                           | 1.3<br>(1.2 to 1.5)                           | 2.0<br>(1.3 to 2.8)                     | -0.9<br>(-17.1 to 18.4)                           | 5.5<br>(-13.1 to 28.5)                              |
| Depressive disorders                                           | 576.1<br>(545.2 to 608.6)                     | 575.5<br>(535.3 to 622.1)                     | 94.9<br>(66.0 to 128.1)                 | -1.6<br>(-6.8 to 3.9)                             | -4.3<br>(-9.2 to 0.8)                               |
| Major depressive disorder                                      | 365.2<br>(341.6 to 390.0)                     | 547.5<br>(506.4 to 593.9)                     | 73.6<br>(50.3 to 99.6)                  | -1.2<br>(-7.4 to 5.2)                             | -3.9<br>(-9.7 to 2.3)                               |
| Dysthymia                                                      | 224.4<br>(196.3 to 257.1)                     | 27.9<br>(24.7 to 31.9)                        | 21.3<br>(14.2 to 30.6)                  | -3.0<br>(-9.4 to 3.7)                             | -5.5<br>(-11.8 to 1.1)                              |
| Bipolar disorder                                               | 120.9<br>(81.4 to 172.4)                      | 7.5<br>(5.2 to 10.1)                          | 24.3<br>(13.2 to 39.7)                  | 0.4<br>(-5.0 to 6.5)                              | 0.3<br>(-4.2 to 5.0)                                |
| Anxiety disorders                                              | 561.9<br>(496.1 to 633.0)                     | 68.3<br>(59.6 to 77.2)                        | 53.5<br>(36.9 to 73.5)                  | 0.3<br>(-3.7 to 4.6)                              | 0.3<br>(-3.5 to 4.3)                                |
| Eating disorders                                               | 32.5<br>(26.8 to 39.6)                        | 7.8<br>(5.9 to 10.1)                          | 6.7<br>(4.3 to 9.6)                     | -9.1<br>(-16.7 to -0.3)                           | 4.4<br>(-3.9 to 13.4)                               |
| Anorexia nervosa                                               | 8.2<br>(6.2 to 10.8)                          | 1.5<br>(1.2 to 2.0)                           | 1.8<br>(1.1 to 2.6)                     | -11.4<br>(-23.1 to 3.0)                           | 4.1<br>(-9.5 to 21.0)                               |
| Bulimia nervosa                                                | 23.5<br>(17.8 to 31.0)                        | 6.3<br>(4.5 to 8.6)                           | 4.9<br>(3.0 to 7.3)                     | -8.2<br>(-18.0 to 3.3)                            | 4.6<br>(-6.3 to 16.3)                               |
| Autistic spectrum disorders                                    | 74.5<br>(66.6 to 83.3)                        | 0.3<br>(0.2 to 0.4)                           | 11.8<br>(8.0 to 16.7)                   | -2.5<br>(-7.3 to 2.6)                             | -0.2<br>(-5.2 to 5.0)                               |
| Autism                                                         | 29.3<br>(25.0 to 34.1)                        | < 0.05<br>(< 0.05 to 0.1)                     | 7.3<br>(4.8 to 10.7)                    | -2.0<br>(-9.0 to 5.7)                             | -0.1<br>(-7.5 to 7.8)                               |
| Asperger syndrome and other autistic spectrum disorders        | 45.5<br>(37.6 to 54.6)                        | 0.2<br>(0.2 to 0.4)                           | 4.5<br>(2.9 to 6.7)                     | -3.2<br>(-8.4 to 1.9)                             | -0.4<br>(-6.0 to 5.3)                               |



| Cause                                                      | Prevalence in thousands (95% UI)              | Incidence in thousands (95% UI)                   | YLDs in thousands (95% UI)              |                                                   |                                                     |
|------------------------------------------------------------|-----------------------------------------------|---------------------------------------------------|-----------------------------------------|---------------------------------------------------|-----------------------------------------------------|
|                                                            | 2016 counts                                   | 2016 counts                                       | 2016 counts                             | Percentage change in counts between 2006 and 2016 | Percentage change in age-standardised rates between |
| Attention-deficit/hyperactivity disorder                   | 63.0<br>(46.3 to 84.3)                        | 2.4<br>(1.6 to 3.5)                               | 0.8<br>(0.4 to 1.3)                     | -8.7<br>(-15.6 to -1.0)                           | -0.3<br>(-7.5 to 7.9)                               |
| Conduct disorder                                           | 48.6<br>(36.7 to 61.5)                        | 15.4<br>(11.5 to 19.1)                            | 5.9<br>(3.5 to 9.3)                     | -6.2<br>(-12.0 to -0.2)                           | -0.1<br>(-6.0 to 6.3)                               |
| Idiopathic developmental intellectual disability           | 67.5<br>(28.8 to 112.4)                       | --                                                | 3.4<br>(1.5 to 6.2)                     | -4.6<br>(-14.3 to 6.5)                            | -1.8<br>(-11.9 to 9.7)                              |
| Other mental and substance use disorders                   | 253.3<br>(221.5 to 292.7)                     | 5.1<br>(4.5 to 5.7)                               | 18.6<br>(12.8 to 26.3)                  | 1.7<br>(-2.9 to 6.2)                              | 0.0<br>(-4.6 to 4.6)                                |
| <b>Diabetes, urogenital, blood, and endocrine diseases</b> | <b>3,280.6</b><br><b>(3,204.1 to 3,356.4)</b> | <b>913.8†</b><br><b>(865.5 to 968.1)</b>          | <b>94.5</b><br><b>(67.5 to 125.4)</b>   | <b>12.1</b><br><b>(6.6 to 17.7)</b>               | <b>0.1</b><br><b>(-4.4 to 4.5)</b>                  |
| Diabetes mellitus                                          | 619.4<br>(555.0 to 685.4)                     | 33.6<br>(29.9 to 37.7)                            | 49.8<br>(34.4 to 68.5)                  | 12.3<br>(3.1 to 21.9)                             | -1.5<br>(-9.2 to 6.8)                               |
| Acute glomerulonephritis                                   | 0.1<br>(0.1 to 0.1)                           | 1.7<br>(1.5 to 2.0)                               | < 0.05<br>(< 0.05 to < 0.05)            | 5.4<br>(-0.5 to 11.5)                             | 1.7<br>(-3.4 to 7.1)                                |
| Chronic kidney disease                                     | 409.2<br>(362.4 to 453.2)                     | 34.1<br>(29.4 to 38.8)                            | 15.2<br>(11.6 to 18.9)                  | 22.1<br>(12.2 to 32.5)                            | 4.6<br>(-3.2 to 12.7)                               |
| Chronic kidney disease due to diabetes mellitus            | 178.9<br>(155.7 to 201.9)                     | 15.5<br>(13.0 to 17.8)                            | 6.9<br>(5.2 to 8.6)                     | 28.9<br>(14.8 to 44.4)                            | 11.9<br>(0.1 to 25.7)                               |
| Chronic kidney disease due to hypertension                 | 71.8<br>(60.0 to 84.8)                        | 4.0<br>(3.1 to 5.0)                               | 2.4<br>(1.7 to 3.1)                     | 24.1<br>(6.1 to 45.1)                             | -1.3<br>(-15.4 to 14.5)                             |
| Chronic kidney disease due to glomerulonephritis           | 51.8<br>(42.3 to 61.8)                        | 5.9<br>(4.7 to 7.4)                               | 1.9<br>(1.4 to 2.6)                     | 6.2<br>(-11.5 to 39.7)                            | -5.4<br>(-19.9 to 20.5)                             |
| Chronic kidney disease due to other causes                 | 106.6<br>(91.2 to 124.0)                      | 8.8<br>(7.3 to 10.5)                              | 3.9<br>(2.9 to 5.0)                     | 18.7<br>(4.1 to 34.1)                             | 1.9<br>(-10.0 to 14.3)                              |
| Urinary diseases and male infertility                      | 313.7<br>(280.6 to 350.2)                     | 489.1†<br>(446.8 to 538.2)                        | 9.7<br>(6.3 to 14.0)                    | 12.3<br>(5.7 to 19.6)                             | -0.8<br>(-7.0 to 5.7)                               |
| Interstitial nephritis and urinary tract infections        | 6.7<br>(5.9 to 7.7)                           | 349.9<br>(307.1 to 396.9)                         | 0.2<br>(0.1 to 0.3)                     | -7.1<br>(-21.6 to 10.6)                           | -0.3<br>(-15.9 to 19.3)                             |
| Urolithiasis                                               | 4.1<br>(3.7 to 4.6)                           | 108.4<br>(97.1 to 121.2)                          | 0.3<br>(0.2 to 0.4)                     | 5.0<br>(-9.8 to 21.5)                             | -1.3<br>(-13.2 to 12.4)                             |
| Benign prostatic hyperplasia                               | 270.6<br>(232.4 to 315.4)                     | 30.8<br>(25.9 to 36.6)                            | 8.8<br>(5.7 to 12.9)                    | 14.6<br>(7.1 to 22.8)                             | -0.1<br>(-7.0 to 7.6)                               |
| Male infertility                                           | 22.5<br>(16.4 to 30.5)                        | --                                                | 0.1<br>(0.1 to 0.3)                     | -12.6<br>(-21.1 to -3.5)                          | -5.5<br>(-14.0 to 3.0)                              |
| Other urinary diseases                                     | --                                            | --                                                | 0.2<br>(0.1 to 0.2)                     | -18.5<br>(-27.3 to -8.0)                          | -16.8<br>(-25.6 to -6.9)                            |
| Gynecological diseases                                     | 1,093.6<br>(1,037.4 to 1,166.3)               | 303.1†<br>(283.2 to 322.6)                        | 10.1<br>(6.9 to 14.7)                   | -3.5<br>(-9.2 to 2.9)                             | 0.3<br>(-5.3 to 7.0)                                |
| Uterine fibroids                                           | 59.8<br>(53.0 to 67.0)                        | 5.7<br>(5.0 to 6.5)                               | 0.7<br>(0.4 to 1.2)                     | 2.6<br>(-11.9 to 17.9)                            | -2.8<br>(-16.3 to 11.6)                             |
| Polycystic ovarian syndrome                                | 3.0<br>(2.3 to 4.0)                           | 10.5<br>(7.2 to 14.4)                             | < 0.05<br>(< 0.05 to 0.1)               | -7.5<br>(-25.6 to 15.2)                           | 1.4<br>(-17.4 to 25.1)                              |
| Female infertility                                         | 41.2<br>(25.6 to 62.3)                        | --                                                | 0.2<br>(0.1 to 0.5)                     | -1.3<br>(-11.9 to 9.4)                            | 4.6<br>(-5.1 to 14.9)                               |
| Endometriosis                                              | 4.2<br>(3.4 to 4.9)                           | 11.2<br>(8.6 to 14.5)                             | 0.4<br>(0.2 to 0.6)                     | -11.9<br>(-29.3 to 11.5)                          | 1.5<br>(-18.4 to 28.0)                              |
| Genital prolapse                                           | 431.4<br>(373.9 to 491.6)                     | 17.2<br>(14.8 to 19.9)                            | 1.3<br>(0.6 to 2.4)                     | 2.9<br>(-6.6 to 13.2)                             | -8.5<br>(-16.9 to 0.5)                              |
| Premenstrual syndrome                                      | 547.5<br>(509.7 to 584.1)                     | 180.1<br>(164.6 to 195.4)                         | 4.5<br>(2.9 to 7.0)                     | -5.9<br>(-12.5 to 1.8)                            | 0.2<br>(-6.9 to 8.0)                                |
| Other gynecological diseases                               | 86.8<br>(73.6 to 98.1)                        | 78.3<br>(65.3 to 88.7)                            | 2.9<br>(1.9 to 4.1)                     | -2.7<br>(-16.1 to 18.0)                           | 3.5<br>(-10.0 to 25.1)                              |
| Hemoglobinopathies and hemolytic anaemias                  | 1,315.3<br>(1,279.9 to 1,364.9)               | --                                                | 1.3<br>(0.8 to 2.0)                     | 5.5<br>(-13.9 to 33.2)                            | 0.3<br>(-19.7 to 27.0)                              |
| Thalassemias                                               | < 0.05<br>(< 0.05 to < 0.05)                  | --                                                | < 0.05<br>(< 0.05 to < 0.05)            | -15.1<br>(-31.4 to 12.3)                          | -0.0<br>(-23.2 to 34.4)                             |
| Thalassaemias trait                                        | 69.3<br>(60.4 to 78.7)                        | --                                                | 0.6<br>(0.3 to 0.9)                     | 12.3<br>(-16.6 to 53.0)                           | 6.8<br>(-21.3 to 48.3)                              |
| Sickle cell disorders                                      | < 0.05<br>(< 0.05 to < 0.05)                  | --                                                | < 0.05<br>(< 0.05 to < 0.05)            | -17.5<br>(-30.7 to -1.8)                          | -8.8<br>(-25.3 to 9.4)                              |
| Sickle cell trait                                          | 85.4<br>(59.4 to 157.8)                       | --                                                | 0.2<br>(0.1 to 0.4)                     | 15.0<br>(-22.0 to 67.1)                           | 10.1<br>(-25.0 to 60.8)                             |
| G6PD deficiency                                            | 115.1<br>(110.8 to 119.6)                     | --                                                | < 0.05<br>(< 0.05 to < 0.05)            | 16.1<br>(-9.6 to 46.7)                            | 6.9<br>(-19.0 to 41.0)                              |
| G6PD trait                                                 | 1,050.7<br>(1,033.3 to 1,069.4)               | --                                                | < 0.05<br>(< 0.05 to < 0.05)            | 11.8<br>(-29.0 to 84.0)                           | 4.1<br>(-33.4 to 71.2)                              |
| Other hemoglobinopathies and hemolytic anaemias            | 27.1<br>(23.1 to 32.1)                        | --                                                | 0.5<br>(0.3 to 0.8)                     | -3.4<br>(-18.7 to 14.5)                           | -9.6<br>(-26.1 to 12.6)                             |
| Endocrine, metabolic, blood, and immune disorders          | 254.2<br>(230.6 to 280.2)                     | 52.1<br>(46.6 to 58.1)                            | 8.5<br>(5.7 to 11.8)                    | 17.3<br>(10.3 to 24.6)                            | 3.0<br>(-2.5 to 9.1)                                |
| <b>Musculoskeletal disorders</b>                           | <b>2,997.7</b><br><b>(2,868.3 to 3,146.8)</b> | <b>1,454.2</b><br><b>(1,313.8 to 1,604.0)</b>     | <b>320.8</b><br><b>(234.7 to 413.8)</b> | <b>10.1</b><br><b>(6.7 to 13.8)</b>               | <b>4.5</b><br><b>(1.2 to 8.2)</b>                   |
| Rheumatoid arthritis                                       | 54.6<br>(48.9 to 60.8)                        | 2.5<br>(2.2 to 2.8)                               | 12.7<br>(8.6 to 16.8)                   | 11.0<br>(3.0 to 19.6)                             | 1.0<br>(-6.6 to 8.9)                                |
| Osteoarthritis                                             | 920.7<br>(840.2 to 1,017.9)                   | 38.9<br>(34.8 to 43.8)                            | 32.1<br>(20.9 to 46.6)                  | 17.2<br>(13.1 to 21.1)                            | 2.2<br>(-1.5 to 5.7)                                |
| Low back and neck pain                                     | 1,948.9<br>(1,833.0 to 2,096.0)               | 826.2<br>(728.4 to 927.1)                         | 233.6<br>(164.9 to 307.8)               | 8.8<br>(4.6 to 13.3)                              | 4.4<br>(0.4 to 8.7)                                 |
| Low back pain                                              | 1,424.3<br>(1,258.0 to 1,599.3)               | 700.2<br>(605.4 to 802.4)                         | 160.5<br>(112.4 to 210.6)               | 9.6<br>(3.7 to 15.8)                              | 6.3<br>(0.6 to 12.4)                                |
| Neck pain                                                  | 739.4<br>(638.9 to 848.2)                     | 126.0<br>(109.9 to 147.3)                         | 73.1<br>(50.2 to 102.7)                 | 7.0<br>(4.8 to 9.2)                               | 0.2<br>(-1.7 to 2.0)                                |
| Gout                                                       | 125.2<br>(110.1 to 142.4)                     | 19.8<br>(17.0 to 22.7)                            | 3.9<br>(2.6 to 5.4)                     | 12.0<br>(0.5 to 24.2)                             | -0.3<br>(-11.3 to 11.4)                             |
| Other musculoskeletal disorders                            | 452.1<br>(358.1 to 557.4)                     | 566.8<br>(476.2 to 678.0)                         | 38.5<br>(25.4 to 55.2)                  | 12.3<br>(1.9 to 24.5)                             | 8.3<br>(-0.9 to 19.4)                               |
| <b>Other non-communicable diseases</b>                     | <b>8,247.0</b><br><b>(8,113.0 to 8,376.5)</b> | <b>25,530.3†</b><br><b>(24,409.4 to 26,746.0)</b> | <b>255.9</b><br><b>(176.5 to 365.8)</b> | <b>7.1</b><br><b>(5.6 to 8.8)</b>                 | <b>0.5</b><br><b>(-0.7 to 1.8)</b>                  |
| Congenital anomalies                                       | 68.3<br>(62.5 to 74.7)                        | --                                                | 8.3<br>(5.8 to 11.6)                    | -2.3<br>(-7.0 to 2.8)                             | 0.6<br>(-4.4 to 6.2)                                |
| Neural tube defects                                        | 2.6<br>(2.3 to 3.0)                           | --                                                | 0.8<br>(0.6 to 1.1)                     | -3.7<br>(-11.9 to 6.2)                            | -3.1<br>(-11.4 to 6.8)                              |
| Congenital heart anomalies                                 | 13.9<br>(12.4 to 15.7)                        | --                                                | 0.8<br>(0.3 to 1.3)                     | 5.0<br>(-6.3 to 18.6)                             | 10.0<br>(-2.4 to 25.0)                              |
| Orofacial clefts                                           | 3.2<br>(2.8 to 3.6)                           | --                                                | < 0.05<br>(< 0.05 to < 0.05)            | -4.5<br>(-15.6 to 8.3)                            | -2.6<br>(-13.9 to 10.1)                             |
| Down's syndrome                                            | 3.3<br>(2.8 to 3.8)                           | --                                                | 0.3<br>(0.2 to 0.4)                     | 1.6<br>(-6.0 to 11.0)                             | 8.5<br>(0.5 to 18.5)                                |
| Turner syndrome                                            | 2.6<br>(2.2 to 3.0)                           | --                                                | < 0.05<br>(< 0.05 to 0.1)               | -11.3<br>(-39.4 to 30.2)                          | -4.8<br>(-37.0 to 40.5)                             |
| Klinefelter syndrome                                       | 6.3<br>(5.4 to 7.3)                           | --                                                | < 0.05<br>(< 0.05 to 0.1)               | -12.9<br>(-28.4 to 6.5)                           | 0.1<br>(-18.1 to 21.4)                              |



| Cause                                         | Prevalence in thousands (95% UI)              | Incidence in thousands (95% UI)            | YLDs in thousands (95% UI)            |                                                   |                                                     |
|-----------------------------------------------|-----------------------------------------------|--------------------------------------------|---------------------------------------|---------------------------------------------------|-----------------------------------------------------|
|                                               | 2016 counts                                   | 2016 counts                                | 2016 counts                           | Percentage change in counts between 2006 and 2016 | Percentage change in age-standardised rates between |
| Other chromosomal abnormalities               | 9.1<br>(7.3 to 11.0)                          | --                                         | 0.8<br>(0.6 to 1.2)                   | -12.9<br>(-24.4 to 0.6)                           | -0.8<br>(-13.5 to 14.4)                             |
| Congenital musculoskeletal and limb anomalies | 17.7<br>(16.3 to 19.3)                        | --                                         | 2.4<br>(1.7 to 3.3)                   | -2.3<br>(-11.2 to 7.9)                            | -2.5<br>(-11.5 to 7.2)                              |
| Urogenital congenital anomalies               | 8.4<br>(7.5 to 9.3)                           | --                                         | 0.2<br>(0.1 to 0.3)                   | -8.6<br>(-16.7 to -0.5)                           | -2.1<br>(-11.1 to 6.6)                              |
| Digestive congenital anomalies                | 11.6<br>(10.3 to 13.0)                        | --                                         | 0.5<br>(0.3 to 0.7)                   | 10.5<br>(-7.5 to 30.1)                            | 12.3<br>(-7.7 to 33.9)                              |
| Other congenital anomalies                    | 14.8<br>(6.2 to 26.0)                         | --                                         | 2.3<br>(1.1 to 4.2)                   | -1.8<br>(-11.9 to 9.0)                            | -0.1<br>(-10.5 to 11.5)                             |
| Skin and subcutaneous diseases                | 3,600.7<br>(3,531.0 to 3,669.8)               | 8,002.2<br>(7,486.0 to 8,570.7)            | 84.9<br>(58.4 to 121.4)               | -0.3<br>(-2.4 to 1.7)                             | 1.6<br>(-0.4 to 3.7)                                |
| Dermatitis                                    | 510.5<br>(481.3 to 542.9)                     | 720.6<br>(648.4 to 799.2)                  | 17.7<br>(10.7 to 27.9)                | -2.0<br>(-5.6 to 1.4)                             | 1.4<br>(-2.6 to 5.3)                                |
| Psoriasis                                     | 201.9<br>(189.6 to 214.8)                     | 18.0<br>(16.9 to 19.2)                     | 17.3<br>(12.3 to 22.6)                | 6.5<br>(0.9 to 12.7)                              | 3.2<br>(-2.6 to 9.6)                                |
| Cellulitis                                    | 3.8<br>(3.6 to 4.0)                           | 58.1<br>(54.5 to 61.7)                     | 0.2<br>(0.1 to 0.3)                   | 3.4<br>(-10.9 to 20.5)                            | 0.3<br>(-14.0 to 16.6)                              |
| Pyoderma                                      | 32.9<br>(31.9 to 33.9)                        | 692.1<br>(667.9 to 716.0)                  | 0.2<br>(0.1 to 0.4)                   | 5.9<br>(-0.9 to 12.7)                             | 0.0<br>(-6.9 to 6.9)                                |
| Scabies                                       | 8.8<br>(6.6 to 12.1)                          | 26.5<br>(19.6 to 36.2)                     | 0.2<br>(0.1 to 0.4)                   | -6.2<br>(-16.7 to 5.8)                            | 0.1<br>(-11.0 to 12.5)                              |
| Fungal skin diseases                          | 871.0<br>(770.4 to 982.6)                     | 3,467.1<br>(2,985.6 to 3,991.2)            | 4.8<br>(1.9 to 10.0)                  | 9.7<br>(7.7 to 11.6)                              | 0.1<br>(-1.1 to 1.3)                                |
| Viral skin diseases                           | 248.1<br>(235.2 to 262.0)                     | 355.5<br>(339.6 to 373.4)                  | 7.5<br>(4.7 to 11.1)                  | -4.6<br>(-7.4 to -1.6)                            | 0.2<br>(-2.8 to 3.2)                                |
| Acne vulgaris                                 | 894.6<br>(831.0 to 959.7)                     | 664.4<br>(550.0 to 817.2)                  | 23.0<br>(15.4 to 33.5)                | -6.5<br>(-10.3 to -2.7)                           | 2.0<br>(-2.1 to 6.3)                                |
| Alopecia areata                               | 32.2<br>(31.1 to 33.3)                        | 56.5<br>(54.6 to 58.4)                     | 1.1<br>(0.7 to 1.6)                   | -2.9<br>(-10.3 to 4.4)                            | 0.2<br>(-7.6 to 8.2)                                |
| Pruritus                                      | 104.2<br>(92.0 to 118.4)                      | 82.0<br>(72.4 to 93.1)                     | 1.1<br>(0.5 to 2.0)                   | 4.2<br>(-1.9 to 10.2)                             | 0.1<br>(-5.2 to 5.6)                                |
| Urticaria                                     | 62.5<br>(55.1 to 70.4)                        | 110.5<br>(97.9 to 124.3)                   | 3.7<br>(2.4 to 5.2)                   | -3.0<br>(-9.3 to 3.6)                             | 0.4<br>(-6.0 to 7.0)                                |
| Decubitus ulcer                               | 6.0<br>(5.3 to 6.8)                           | 21.8<br>(18.9 to 24.9)                     | 0.9<br>(0.6 to 1.3)                   | 0.5<br>(-13.7 to 15.7)                            | -10.3<br>(-20.8 to 0.8)                             |
| Other skin and subcutaneous diseases          | 1,340.2<br>(1,302.0 to 1,377.1)               | 1,729.2<br>(1,664.8 to 1,793.9)            | 7.3<br>(3.5 to 13.2)                  | 10.3<br>(8.1 to 12.7)                             | 2.2<br>(0.2 to 4.3)                                 |
| Sense organ diseases                          | 3,348.7<br>(3,159.9 to 3,509.3)               | 1,161.6†<br>(1,097.3 to 1,230.5)           | 111.7<br>(77.7 to 158.9)              | 13.6<br>(10.8 to 17.1)                            | -0.4<br>(-2.6 to 2.1)                               |
| Glaucoma                                      | 7.8<br>(5.8 to 10.2)                          | --                                         | 0.8<br>(0.5 to 1.1)                   | 18.6<br>(1.9 to 39.9)                             | -0.3<br>(-15.3 to 18.3)                             |
| Cataract                                      | 61.3<br>(44.3 to 86.6)                        | --                                         | 4.9<br>(3.2 to 7.3)                   | 20.1<br>(9.8 to 31.6)                             | -3.0<br>(-10.9 to 5.7)                              |
| Macular degeneration                          | 14.6<br>(10.4 to 19.7)                        | --                                         | 1.3<br>(0.8 to 2.0)                   | 24.0<br>(8.8 to 40.3)                             | 0.9<br>(-11.6 to 14.3)                              |
| Refraction and accommodation disorders        | 966.9<br>(872.0 to 1,065.0)                   | --                                         | 17.2<br>(10.3 to 27.6)                | 4.4<br>(-0.5 to 9.5)                              | -2.9<br>(-7.3 to 1.5)                               |
| Age-related and other hearing loss            | 2,759.3<br>(2,458.4 to 3,064.9)               | --                                         | 70.4<br>(48.2 to 101.5)               | 16.0<br>(12.0 to 21.2)                            | 0.2<br>(-3.2 to 3.9)                                |
| Other vision loss                             | 35.1<br>(26.7 to 44.3)                        | --                                         | 2.7<br>(1.8 to 3.9)                   | 13.0<br>(2.7 to 24.9)                             | 0.9<br>(-8.2 to 11.1)                               |
| Other sense organ diseases                    | 462.6<br>(425.4 to 499.7)                     | 1,161.6<br>(1,097.3 to 1,230.5)            | 14.4<br>(9.1 to 22.1)                 | 11.3<br>(7.5 to 15.6)                             | 1.1<br>(-2.5 to 5.1)                                |
| Oral disorders                                | 6,110.1<br>(5,866.2 to 6,332.8)               | 16,366.6†<br>(15,370.6 to 17,388.2)        | 51.1<br>(31.7 to 79.5)                | 8.5<br>(5.4 to 11.7)                              | -0.7<br>(-3.2 to 1.5)                               |
| Caries of deciduous teeth                     | 232.5<br>(151.8 to 299.9)                     | 793.0<br>(358.2 to 1,293.2)                | 0.1<br>(< 0.05 to 0.2)                | -15.0<br>(-24.1 to -4.1)                          | 0.6<br>(-10.6 to 13.6)                              |
| Caries of permanent teeth                     | 4,483.2<br>(4,270.9 to 4,717.2)               | 15,292.2<br>(14,364.1 to 16,190.7)         | 4.4<br>(1.9 to 8.3)                   | -0.1<br>(-2.9 to 2.5)                             | -0.4<br>(-3.2 to 2.2)                               |
| Periodontal disease                           | 1,849.2<br>(1,376.6 to 2,386.6)               | 208.1<br>(151.3 to 266.5)                  | 12.1<br>(4.6 to 26.4)                 | 8.7<br>(3.1 to 14.5)                              | 0.3<br>(-5.0 to 5.2)                                |
| Edentulism and severe tooth loss              | 1,029.9<br>(897.0 to 1,164.5)                 | 73.3<br>(61.6 to 86.6)                     | 28.3<br>(18.5 to 39.9)                | 11.8<br>(6.4 to 16.6)                             | -1.6<br>(-6.1 to 2.3)                               |
| Other oral disorders                          | 213.7<br>(204.6 to 223.8)                     | --                                         | 6.2<br>(3.8 to 9.4)                   | 1.3<br>(-1.8 to 4.2)                              | 0.1<br>(-3.0 to 3.0)                                |
| <b>Injuries</b>                               | <b>3,148.4</b><br><b>(2,954.6 to 3,373.7)</b> | <b>958.0†</b><br><b>(906.3 to 1,015.4)</b> | <b>99.2</b><br><b>(66.3 to 140.2)</b> | <b>-0.4</b><br><b>(-1.9 to 1.3)</b>               | <b>-8.2</b><br><b>(-9.6 to -6.9)</b>                |
| <b>Transport injuries</b>                     | <b>510.1</b><br><b>(475.6 to 547.0)</b>       | <b>112.5</b><br><b>(103.3 to 121.6)</b>    | <b>22.7</b><br><b>(14.9 to 32.7)</b>  | <b>-15.2</b><br><b>(-16.8 to -13.7)</b>           | <b>-21.9</b><br><b>(-23.4 to -20.4)</b>             |
| Road injuries                                 | 447.2<br>(415.9 to 481.1)                     | 104.2<br>(94.7 to 113.3)                   | 20.5<br>(13.5 to 29.5)                | -17.7<br>(-19.1 to -16.1)                         | -24.2<br>(-25.7 to -22.7)                           |
| Pedestrian road injuries                      | 83.4<br>(74.7 to 95.7)                        | 13.5<br>(11.5 to 16.0)                     | 4.2<br>(2.8 to 6.1)                   | -36.1<br>(-37.4 to -34.7)                         | -42.3<br>(-43.6 to -40.9)                           |
| Cyclist road injuries                         | 121.7<br>(101.9 to 143.5)                     | 35.4<br>(29.8 to 41.0)                     | 5.1<br>(3.3 to 7.4)                   | -4.5<br>(-6.1 to -2.8)                            | -12.1<br>(-13.6 to -10.5)                           |
| Motorcyclist road injuries                    | 88.6<br>(75.3 to 105.6)                       | 12.7<br>(10.5 to 15.1)                     | 4.2<br>(2.8 to 6.0)                   | -11.1<br>(-13.0 to -9.0)                          | -17.3<br>(-19.1 to -15.3)                           |
| Motor vehicle road injuries                   | 124.2<br>(103.8 to 143.3)                     | 36.0<br>(31.4 to 40.8)                     | 5.9<br>(3.9 to 8.4)                   | -17.4<br>(-18.9 to -15.7)                         | -24.0<br>(-25.6 to -22.5)                           |
| Other road injuries                           | 29.3<br>(24.7 to 34.5)                        | 6.7<br>(5.3 to 8.3)                        | 1.1<br>(0.7 to 1.6)                   | -1.7<br>(-4.0 to 0.7)                             | -8.5<br>(-10.9 to -6.4)                             |
| Other transport injuries                      | 63.0<br>(52.0 to 74.1)                        | 8.3<br>(7.2 to 9.3)                        | 2.2<br>(1.4 to 3.2)                   | 16.9<br>(15.3 to 18.7)                            | 8.6<br>(7.1 to 10.2)                                |
| <b>Unintentional injuries</b>                 | <b>2,510.6</b><br><b>(2,325.0 to 2,717.6)</b> | <b>802.4</b><br><b>(751.2 to 860.7)</b>    | <b>71.8</b><br><b>(48.1 to 103.0)</b> | <b>5.6</b><br><b>(4.0 to 7.3)</b>                 | <b>-3.2</b><br><b>(-4.5 to -1.8)</b>                |
| Falls                                         | 1,220.0<br>(1,073.6 to 1,375.8)               | 399.4<br>(356.5 to 444.6)                  | 43.4<br>(29.7 to 60.2)                | 4.7<br>(2.8 to 6.8)                               | -5.7<br>(-7.1 to -4.0)                              |
| Drowning                                      | 5.3<br>(4.7 to 5.9)                           | 0.5<br>(0.4 to 0.6)                        | 0.2<br>(0.2 to 0.4)                   | 17.8<br>(12.5 to 23.4)                            | 11.9<br>(6.1 to 17.7)                               |
| Fire, heat, and hot substances                | 262.9<br>(224.5 to 310.2)                     | 12.6<br>(10.5 to 14.6)                     | 4.5<br>(2.5 to 7.6)                   | 9.8<br>(6.8 to 13.0)                              | 4.1<br>(1.1 to 7.2)                                 |
| Poisonings                                    | 11.0<br>(9.1 to 13.6)                         | 8.8<br>(7.2 to 10.7)                       | 0.9<br>(0.6 to 1.3)                   | 9.3<br>(-0.1 to 19.5)                             | 9.1<br>(-1.0 to 20.7)                               |
| Exposure to mechanical forces                 | 494.4<br>(414.1 to 620.4)                     | 106.8<br>(92.0 to 122.8)                   | 8.9<br>(5.6 to 13.7)                  | 2.8<br>(1.3 to 4.3)                               | -2.6<br>(-4.0 to -1.1)                              |
| Unintentional firearm injuries                | 21.0<br>(17.0 to 26.2)                        | 1.8<br>(1.2 to 2.4)                        | 0.3<br>(0.2 to 0.5)                   | 1.2<br>(-0.6 to 3.2)                              | -4.4<br>(-6.1 to -2.6)                              |
| Unintentional suffocation                     | 16.9<br>(14.0 to 20.4)                        | 2.2<br>(1.6 to 3.1)                        | 0.4<br>(0.3 to 0.6)                   | 15.2<br>(13.4 to 17.0)                            | 8.4<br>(6.5 to 10.2)                                |
| Other exposure to mechanical forces           | 456.5<br>(379.5 to 581.7)                     | 102.7<br>(88.2 to 118.4)                   | 8.2<br>(5.2 to 12.6)                  | 2.3<br>(0.9 to 3.9)                               | -3.0<br>(-4.4 to -1.5)                              |

| Cause                                                                               | Prevalence in thousands (95% UI)        | Incidence in thousands (95% UI)       | YLDs in thousands (95% UI)              |                                                   |                                                     |
|-------------------------------------------------------------------------------------|-----------------------------------------|---------------------------------------|-----------------------------------------|---------------------------------------------------|-----------------------------------------------------|
|                                                                                     | 2016 counts                             | 2016 counts                           | 2016 counts                             | Percentage change in counts between 2006 and 2016 | Percentage change in age-standardised rates between |
| Adverse effects of medical treatment                                                | 4.4<br>(3.5 to 5.4)                     | 57.7<br>(51.4 to 65.0)                | 0.6<br>(0.4 to 0.9)                     | 2.0<br>(-3.1 to 7.2)                              | -6.0<br>(-10.2 to -2.1)                             |
| Animal contact                                                                      | 42.0<br>(37.1 to 48.2)                  | 21.5<br>(17.5 to 26.1)                | 0.8<br>(0.5 to 1.2)                     | 4.0<br>(0.2 to 7.6)                               | -1.4<br>(-5.2 to 2.5)                               |
| Venomous animal contact                                                             | 6.6<br>(5.7 to 7.6)                     | 6.9<br>(5.1 to 9.2)                   | 0.3<br>(0.2 to 0.4)                     | 0.2<br>(-7.3 to 8.3)                              | -1.8<br>(-9.5 to 7.2)                               |
| Non-venomous animal contact                                                         | 35.5<br>(30.6 to 41.6)                  | 14.5<br>(11.7 to 17.9)                | 0.5<br>(0.3 to 0.8)                     | 6.7<br>(4.8 to 8.8)                               | -1.1<br>(-3.0 to 0.7)                               |
| Foreign body                                                                        | 79.2<br>(68.8 to 93.5)                  | 49.5<br>(43.8 to 57.0)                | 2.3<br>(1.4 to 3.4)                     | 11.2<br>(9.5 to 13.3)                             | 4.3<br>(2.5 to 6.1)                                 |
| Pulmonary aspiration and foreign body in airway                                     | 13.0<br>(10.6 to 15.5)                  | 15.1<br>(13.6 to 16.6)                | 0.4<br>(0.2 to 0.5)                     | 8.8<br>(6.3 to 11.9)                              | -3.8<br>(-5.7 to -1.7)                              |
| Foreign body in eyes                                                                | 6.0<br>(4.2 to 8.2)                     | 22.6<br>(17.6 to 29.6)                | 0.4<br>(0.3 to 0.6)                     | 15.1<br>(10.5 to 20.7)                            | 11.9<br>(8.5 to 15.6)                               |
| Foreign body in other body part                                                     | 60.1<br>(50.4 to 73.8)                  | 11.8<br>(10.1 to 13.8)                | 1.5<br>(0.9 to 2.2)                     | 10.8<br>(8.9 to 12.8)                             | 4.0<br>(2.0 to 5.9)                                 |
| Environmental heat and cold exposure                                                | 38.2<br>(34.2 to 43.1)                  | 8.4<br>(7.2 to 9.8)                   | 1.3<br>(0.9 to 2.0)                     | 14.0<br>(10.0 to 18.4)                            | 2.9<br>(-1.0 to 6.9)                                |
| Other unintentional injuries                                                        | 353.3<br>(298.2 to 415.8)               | 137.2<br>(116.8 to 159.0)             | 8.9<br>(5.7 to 13.1)                    | 8.1<br>(6.7 to 9.5)                               | -0.5<br>(-1.9 to 0.9)                               |
| <b>Self-harm and interpersonal violence</b>                                         | <b>253.0</b><br><b>(230.4 to 274.7)</b> | <b>42.8†</b><br><b>(38.5 to 47.3)</b> | <b>4.6</b><br><b>(3.1 to 6.5)</b>       | <b>-1.3</b><br><b>(-3.4 to 0.5)</b>               | <b>-3.8</b><br><b>(-5.7 to -2.0)</b>                |
| Self-harm                                                                           | 23.6<br>(19.5 to 27.7)                  | 17.2<br>(15.2 to 19.5)                | 0.9<br>(0.6 to 1.4)                     | 4.7<br>(-0.9 to 10.6)                             | -0.9<br>(-6.7 to 5.0)                               |
| Self-harm by firearm                                                                | 0.2<br>(0.2 to 0.3)                     | < 0.05<br>(< 0.05 to 0.1)             | < 0.05<br>(< 0.05 to < 0.05)            | 4.4<br>(2.2 to 6.5)                               | 0.3<br>(-2.1 to 2.5)                                |
| Self-harm by other specified means                                                  | 23.3<br>(19.3 to 27.5)                  | 17.2<br>(15.2 to 19.5)                | 0.9<br>(0.6 to 1.4)                     | 4.7<br>(-0.9 to 10.6)                             | -0.9<br>(-6.7 to 5.0)                               |
| Interpersonal violence                                                              | 229.4<br>(209.0 to 251.8)               | 25.5†<br>(21.6 to 29.5)               | 3.6<br>(2.4 to 5.2)                     | -2.7<br>(-4.5 to -1.0)                            | -4.5<br>(-6.3 to -2.5)                              |
| Assault by firearm                                                                  | 7.7<br>(6.3 to 9.2)                     | 0.9<br>(0.7 to 1.1)                   | 0.2<br>(0.1 to 0.3)                     | 2.2<br>(0.0 to 4.4)                               | -3.1<br>(-4.9 to -1.1)                              |
| Assault by sharp object                                                             | 19.7<br>(16.1 to 23.7)                  | 4.5<br>(3.5 to 5.9)                   | 0.4<br>(0.2 to 0.6)                     | 1.5<br>(-0.6 to 3.7)                              | -3.6<br>(-5.6 to -1.4)                              |
| Sexual violence                                                                     | 128.2<br>(113.3 to 146.3)               | --                                    | 1.0<br>(0.7 to 1.5)                     | -9.0<br>(-12.8 to -5.0)                           | -3.4<br>(-7.8 to 1.1)                               |
| Assault by other means                                                              | 73.9<br>(60.8 to 90.9)                  | 20.1<br>(16.9 to 23.5)                | 2.1<br>(1.3 to 3.1)                     | -0.4<br>(-2.1 to 1.4)                             | -5.5<br>(-7.3 to -3.6)                              |
| <b>Forces of nature, conflict and terrorism, and executions and police conflict</b> | <b>2.9</b><br><b>(1.7 to 4.3)</b>       | <b>0.3†</b><br><b>(0.2 to 0.5)</b>    | <b>0.1</b><br><b>(&lt; 0.05 to 0.2)</b> | <b>34.1</b><br><b>(27.9 to 36.9)</b>              | <b>29.1</b><br><b>(23.9 to 31.8)</b>                |
| Exposure to forces of nature                                                        | 1.6<br>(0.6 to 2.8)                     | --                                    | < 0.05<br>(< 0.05 to 0.1)               | 37.8<br>(35.3 to 41.5)                            | 33.1<br>(30.4 to 37.0)                              |
| Conflict and terrorism                                                              | --                                      | --                                    | --                                      | --                                                | --                                                  |
| Executions and police conflict                                                      | 1.2<br>(0.7 to 2.0)                     | 0.3<br>(0.2 to 0.5)                   | < 0.05<br>(< 0.05 to 0.1)               | 30.0<br>(19.7 to 34.3)                            | 25.4<br>(17.2 to 29.2)                              |
| <b>Impairments</b>                                                                  | --                                      | --                                    | --                                      | --                                                | --                                                  |
| Anaemia                                                                             | 1,221.9<br>(1,013.1 to 1,457.1)         | --                                    | 36.8<br>(22.1 to 57.0)                  | 11.2<br>(-2.3 to 25.4)                            | 2.9<br>(-10.4 to 17.1)                              |
| Developmental intellectual disability                                               | 147.3<br>(106.2 to 195.4)               | --                                    | 17.4<br>(12.8 to 23.1)                  | -4.1<br>(-8.7 to 0.5)                             | -1.2<br>(-6.0 to 3.6)                               |
| Epilepsy                                                                            | 38.1<br>(18.3 to 57.2)                  | --                                    | 10.9<br>(5.4 to 18.6)                   | -3.9<br>(-53.9 to 110.7)                          | -4.0<br>(-52.4 to 105.7)                            |
| Guillain-Barre syndrome                                                             | 0.1<br>(0.1 to 0.2)                     | --                                    | < 0.05<br>(< 0.05 to 0.1)               | 7.0<br>(0.2 to 13.8)                              | 2.6<br>(-2.9 to 8.2)                                |
| Hearing loss                                                                        | 2,848.5<br>(2,547.8 to 3,150.0)         | --                                    | 74.5<br>(51.2 to 107.4)                 | 14.5<br>(10.9 to 19.1)                            | -0.1<br>(-3.2 to 3.2)                               |
| Heart failure                                                                       | 179.1<br>(155.7 to 203.8)               | --                                    | 18.6<br>(14.2 to 23.4)                  | 9.4<br>(1.1 to 18.3)                              | -8.8<br>(-15.4 to -2.0)                             |
| Infertility                                                                         | 89.2<br>(67.6 to 118.0)                 | --                                    | 0.6<br>(0.3 to 1.2)                     | -6.1<br>(-12.7 to 0.3)                            | 0.7<br>(-5.6 to 7.0)                                |
| Pelvic inflammatory disease                                                         | 0.4<br>(0.3 to 0.5)                     | --                                    | 0.1<br>(< 0.05 to 0.1)                  | 32.3<br>(0.0 to 83.4)                             | 46.0<br>(10.6 to 100.5)                             |
| Vision loss                                                                         | 1,104.6<br>(998.2 to 1,217.7)           | --                                    | 29.7<br>(20.5 to 42.7)                  | 7.4<br>(3.1 to 11.7)                              | -2.7<br>(-6.0 to 0.6)                               |

We did not calculate incidence for the nine impairments, certain NTDs, and causes with only birth prevalence. Blank cells mean that no estimate is available.

† Incidence for aggregate causes represents the sum of the incidence of the causes below the aggregate.

‡ Incidence estimates for stroke represent first-ever stroke only.

^ Incidence of HIV/AIDS represents new infections of HIV only and does not include new infections of Tuberculosis in HIV positive cases.

SR Table 14: Prevalence, incidence, and YLDs for 2016, percentage change of YLD counts and percentage change of age-standardised YLD rates between 2006 and 2016 by cause and impairments, for all ages, Puerto Rico.

| Cause                                                                                | Prevalence in thousands (95% UI)       | Incidence in thousands (95% UI)            | YLDs in thousands (95% UI)       |                                                   |                                                     |
|--------------------------------------------------------------------------------------|----------------------------------------|--------------------------------------------|----------------------------------|---------------------------------------------------|-----------------------------------------------------|
|                                                                                      | 2016 counts                            | 2016 counts                                | 2016 counts                      | Percentage change in counts between 2006 and 2016 | Percentage change in age-standardised rates between |
| <b>All causes</b>                                                                    | <b>3,533.9</b><br>(3,523.5 to 3,545.9) | <b>22,636.0†</b><br>(21,522.8 to 23,813.0) | <b>438.0</b><br>(325.1 to 567.2) | <b>1.8</b><br>(0.1 to 3.5)                        | <b>-1.5</b><br>(-3.3 to 0.3)                        |
| <b>Communicable, maternal, neonatal, and nutritional disorders</b>                   | <b>2,084.8</b><br>(2,008.6 to 2,161.1) | <b>12,456.6†</b><br>(11,482.4 to 13,532.1) | <b>31.4</b><br>(22.2 to 42.7)    | <b>-8.6</b><br>(-14.5 to -2.0)                    | <b>-5.0</b><br>(-11.5 to 2.2)                       |
| <b>HIV/AIDS and tuberculosis</b>                                                     | <b>988.0</b><br>(883.4 to 1,074.0)     | <b>0.4†</b><br>(0.3 to 0.5)                | <b>0.7</b><br>(0.3 to 1.7)       | <b>-53.2</b><br>(-61.4 to -47.0)                  | <b>-54.6</b><br>(-62.2 to -48.3)                    |
| Tuberculosis                                                                         | 915.9<br>(824.0 to 1,017.2)            | 0.1†<br>(0.1 to 0.1)                       | < 0.05<br>(< 0.05 to < 0.05)     | -18.9<br>(-24.1 to -13.1)                         | -21.3<br>(-26.4 to -15.6)                           |
| Drug-susceptible tuberculosis                                                        | 0.1<br>(0.1 to 0.1)                    | 0.1<br>(0.1 to 0.1)                        | < 0.05<br>(< 0.05 to < 0.05)     | -18.4<br>(-23.7 to -11.9)                         | -20.8<br>(-26.2 to -14.6)                           |
| Multidrug-resistant tuberculosis without extensive drug resistance                   | < 0.05<br>(< 0.05 to < 0.05)           | < 0.05<br>(< 0.05 to < 0.05)               | < 0.05<br>(< 0.05 to < 0.05)     | -59.6<br>(-92.5 to 102.4)                         | -60.9<br>(-92.8 to 95.5)                            |
| Extensively drug-resistant tuberculosis                                              | < 0.05<br>(< 0.05 to < 0.05)           | < 0.05<br>(< 0.05 to < 0.05)               | < 0.05<br>(< 0.05 to < 0.05)     | 7.4<br>(-80.1 to 438.9)                           | 4.1<br>(-80.8 to 421.2)                             |
| Latent tuberculosis infection                                                        | 915.8<br>(823.9 to 1,017.1)            | --                                         | --                               | --                                                | --                                                  |
| HIV/AIDS                                                                             | 3.2<br>(1.9 to 5.7)                    | 0.3^<br>(0.2 to 0.3)                       | 0.7<br>(0.2 to 1.6)              | -54.1<br>(-62.6 to -48.1)                         | -55.5<br>(-63.3 to -49.1)                           |
| Drug-susceptible HIV/AIDS - Tuberculosis                                             | < 0.05<br>(< 0.05 to < 0.05)           | < 0.05<br>(< 0.05 to < 0.05)               | < 0.05<br>(< 0.05 to < 0.05)     | -41.9<br>(-46.8 to -36.8)                         | -42.7<br>(-47.5 to -37.6)                           |
| Multidrug-resistant HIV/AIDS - Tuberculosis without extensive drug resistance        | < 0.05<br>(< 0.05 to < 0.05)           | < 0.05<br>(< 0.05 to < 0.05)               | < 0.05<br>(< 0.05 to < 0.05)     | -70.5<br>(-94.5 to 52.7)                          | -70.9<br>(-94.5 to 50.6)                            |
| Extensively drug-resistant HIV/AIDS - Tuberculosis                                   | < 0.05<br>(< 0.05 to < 0.05)           | < 0.05<br>(< 0.05 to < 0.05)               | < 0.05<br>(< 0.05 to < 0.05)     | -21.4<br>(-85.3 to 306.6)                         | -22.4<br>(-85.5 to 301.0)                           |
| HIV/AIDS resulting in other diseases                                                 | 3.2<br>(1.9 to 5.6)                    | 0.3<br>(0.2 to 0.3)                        | 0.7<br>(0.2 to 1.6)              | -54.2<br>(-62.9 to -48.2)                         | -55.6<br>(-63.6 to -49.3)                           |
| <b>Diarrhoea, lower respiratory infections, and other common infectious diseases</b> | <b>192.5</b><br>(182.8 to 203.0)       | <b>11,602.0†</b><br>(10,693.6 to 12,599.6) | <b>9.0</b><br>(6.2 to 12.4)      | <b>1.2</b><br>(-1.8 to 4.4)                       | <b>3.5</b><br>(0.2 to 6.6)                          |
| Diarrhoeal diseases                                                                  | 37.4<br>(35.3 to 39.9)                 | 2,534.5<br>(2,386.9 to 2,691.8)            | 4.2<br>(2.9 to 5.7)              | 5.4<br>(0.1 to 11.2)                              | 6.3<br>(0.9 to 12.2)                                |
| Intestinal infectious diseases                                                       | < 0.05<br>(< 0.05 to < 0.05)           | 0.1†<br>(0.1 to 0.1)                       | < 0.05<br>(< 0.05 to < 0.05)     | 6.4<br>(-6.0 to 21.0)                             | -2.6<br>(-13.9 to 10.1)                             |
| Typhoid fever                                                                        | < 0.05<br>(< 0.05 to < 0.05)           | < 0.05<br>(< 0.05 to 0.1)                  | < 0.05<br>(< 0.05 to < 0.05)     | 26.6<br>(9.0 to 48.2)                             | 19.2<br>(3.3 to 38.3)                               |
| Paratyphoid fever                                                                    | < 0.05<br>(< 0.05 to < 0.05)           | 0.1<br>(< 0.05 to 0.1)                     | < 0.05<br>(< 0.05 to < 0.05)     | -17.8<br>(-30.6 to -2.6)                          | -23.7<br>(-35.1 to -10.7)                           |
| Other intestinal infectious diseases                                                 | --                                     | --                                         | < 0.05<br>(< 0.05 to < 0.05)     | -43.1<br>(-56.7 to -24.4)                         | -49.1<br>(-63.2 to -29.1)                           |
| Lower respiratory infections                                                         | 6.6<br>(6.2 to 7.2)                    | 288.2<br>(263.4 to 315.3)                  | 0.4<br>(0.3 to 0.5)              | 24.3<br>(13.0 to 36.8)                            | 17.3<br>(6.6 to 29.1)                               |
| Upper respiratory infections                                                         | 113.7<br>(101.8 to 126.5)              | 8,542.3<br>(7,617.4 to 9,544.8)            | 2.8<br>(1.7 to 4.4)              | -4.2<br>(-9.0 to 0.4)                             | -0.4<br>(-5.0 to 4.4)                               |
| Otitis media                                                                         | 34.4<br>(30.8 to 37.9)                 | 164.6<br>(134.8 to 201.4)                  | 0.9<br>(0.6 to 1.4)              | -7.1<br>(-13.9 to 0.3)                            | -0.1<br>(-7.2 to 7.8)                               |
| Meningitis                                                                           | 2.5<br>(2.2 to 2.9)                    | 0.5<br>(0.4 to 0.5)                        | 0.3<br>(0.2 to 0.4)              | -3.1<br>(-5.5 to 0.4)                             | -1.2<br>(-3.6 to 1.8)                               |
| Pneumococcal meningitis                                                              | 1.0<br>(0.9 to 1.2)                    | 0.1<br>(< 0.05 to 0.1)                     | 0.1<br>(0.1 to 0.2)              | -6.9<br>(-10.7 to -3.3)                           | -5.0<br>(-9.2 to -1.2)                              |
| H influenzae type B meningitis                                                       | 0.3<br>(0.3 to 0.4)                    | < 0.05<br>(< 0.05 to < 0.05)               | < 0.05<br>(< 0.05 to 0.1)        | -2.6<br>(-5.8 to 1.1)                             | 0.4<br>(-2.8 to 4.2)                                |
| Meningococcal infection                                                              | 0.1<br>(0.1 to 0.2)                    | < 0.05<br>(< 0.05 to < 0.05)               | < 0.05<br>(< 0.05 to < 0.05)     | 2.9<br>(-5.2 to 46.0)                             | 2.0<br>(-4.4 to 26.4)                               |
| Other meningitis                                                                     | 1.0<br>(0.8 to 1.3)                    | 0.3<br>(0.3 to 0.4)                        | 0.1<br>(0.1 to 0.1)              | 1.1<br>(-2.7 to 5.1)                              | 3.2<br>(-0.7 to 7.3)                                |
| Encephalitis                                                                         | 2.0<br>(1.5 to 2.9)                    | 1.0<br>(0.9 to 1.1)                        | 0.2<br>(0.2 to 0.3)              | 0.5<br>(-16.6 to 20.0)                            | 1.6<br>(-15.8 to 21.2)                              |
| Diphtheria                                                                           | < 0.05<br>(< 0.05 to < 0.05)           | < 0.05<br>(< 0.05 to < 0.05)               | < 0.05<br>(< 0.05 to < 0.05)     | -30.9<br>(-62.6 to 26.8)                          | -31.2<br>(-61.6 to 24.6)                            |
| Whooping cough                                                                       | 0.2<br>(0.2 to 0.3)                    | 1.6<br>(1.2 to 2.1)                        | < 0.05<br>(< 0.05 to < 0.05)     | -42.1<br>(-56.3 to -25.0)                         | -36.5<br>(-52.3 to -17.5)                           |
| Tetanus                                                                              | < 0.05<br>(< 0.05 to < 0.05)           | < 0.05<br>(< 0.05 to < 0.05)               | < 0.05<br>(< 0.05 to < 0.05)     | -7.2<br>(-21.9 to 7.7)                            | -5.0<br>(-18.7 to 9.7)                              |
| Measles                                                                              | 0.2<br>(0.1 to 0.5)                    | 8.7<br>(3.0 to 19.6)                       | < 0.05<br>(< 0.05 to 0.1)        | --                                                | --                                                  |
| Varicella and herpes zoster                                                          | 3.7<br>(3.4 to 4.1)                    | 60.5<br>(58.2 to 63.0)                     | 0.2<br>(0.1 to 0.2)              | 4.5<br>(-6.5 to 16.1)                             | -0.2<br>(-11.1 to 11.3)                             |
| <b>Neglected tropical diseases and malaria</b>                                       | <b>48.1</b><br>(39.2 to 58.8)          | <b>437.9†</b><br>(247.4 to 886.5)          | <b>1.5</b><br>(0.9 to 2.4)       | <b>55.5</b><br>(27.2 to 108.7)                    | <b>56.4</b><br>(28.0 to 106.3)                      |
| Malaria                                                                              | --                                     | --                                         | --                               | --                                                | --                                                  |
| Chagas disease                                                                       | 0.4<br>(0.3 to 0.5)                    | --                                         | < 0.05<br>(< 0.05 to < 0.05)     | 8.7<br>(-6.1 to 25.1)                             | 1.4<br>(-12.5 to 15.7)                              |
| Leishmaniasis                                                                        | --                                     | --                                         | --                               | --                                                | --                                                  |
| Visceral leishmaniasis                                                               | --                                     | --                                         | --                               | --                                                | --                                                  |
| Cutaneous and mucocutaneous leishmaniasis                                            | --                                     | --                                         | --                               | --                                                | --                                                  |
| African trypanosomiasis                                                              | --                                     | --                                         | --                               | --                                                | --                                                  |
| Schistosomiasis                                                                      | 18.0<br>(< 0.05 to 32.6)               | 4.2<br>(0.5 to 5.6)                        | 0.1<br>(< 0.05 to 0.4)           | 16.9<br>(-100.0 to 38.1)                          | 12.8<br>(-100.0 to 34.4)                            |
| Cysticercosis                                                                        | --                                     | --                                         | --                               | --                                                | --                                                  |
| Cystic echinococcosis                                                                | --                                     | --                                         | --                               | --                                                | --                                                  |
| Lymphatic filariasis                                                                 | --                                     | --                                         | --                               | --                                                | --                                                  |
| Onchocerciasis                                                                       | --                                     | --                                         | --                               | --                                                | --                                                  |
| Trachoma                                                                             | --                                     | --                                         | --                               | --                                                | --                                                  |
| Dengue                                                                               | 5.5<br>(3.1 to 9.0)                    | 91.5<br>(59.2 to 132.4)                    | 0.9<br>(0.4 to 1.6)              | 101.2<br>(61.2 to 322.9)                          | 105.2<br>(63.5 to 331.9)                            |
| Yellow fever                                                                         | --                                     | --                                         | --                               | --                                                | --                                                  |
| Rabies                                                                               | < 0.05<br>(< 0.05 to < 0.05)           | < 0.05<br>(< 0.05 to < 0.05)               | < 0.05<br>(< 0.05 to < 0.05)     | 5.0<br>(-30.4 to 59.6)                            | 5.3<br>(-31.6 to 68.1)                              |
| Intestinal nematode infections                                                       | --                                     | --                                         | --                               | --                                                | --                                                  |
| Ascariasis                                                                           | --                                     | --                                         | --                               | --                                                | --                                                  |



| Cause                                                                   | Prevalence in thousands (95% UI)              | Incidence in thousands (95% UI)                 | YLDs in thousands (95% UI)              |                                                   |                                                     |
|-------------------------------------------------------------------------|-----------------------------------------------|-------------------------------------------------|-----------------------------------------|---------------------------------------------------|-----------------------------------------------------|
|                                                                         | 2016 counts                                   | 2016 counts                                     | 2016 counts                             | Percentage change in counts between 2006 and 2016 | Percentage change in age-standardised rates between |
| Trichuriasis                                                            | --                                            | --                                              | --                                      | --                                                | --                                                  |
| Hookworm disease                                                        | --                                            | --                                              | --                                      | --                                                | --                                                  |
| Food-borne trematodiasis                                                | --                                            | --                                              | --                                      | --                                                | --                                                  |
| Leprosy                                                                 | --                                            | --                                              | --                                      | --                                                | --                                                  |
| Ebola virus disease                                                     | --                                            | --                                              | --                                      | --                                                | --                                                  |
| Zika virus disease                                                      | 5.7<br>(2.6 to 13.1)                          | 342.2<br>(159.1 to 788.9)                       | 0.1<br>(0.1 to 0.3)                     | --                                                | --                                                  |
| Guinea worm disease                                                     | --                                            | --                                              | --                                      | --                                                | --                                                  |
| Other neglected tropical diseases                                       | 17.8<br>(14.6 to 21.2)                        | --                                              | 0.4<br>(0.2 to 0.6)                     | -9.7<br>(-28.3 to 14.9)                           | 0.6<br>(-21.0 to 28.3)                              |
| <b>Maternal disorders</b>                                               | <b>4.0</b><br><b>(3.2 to 5.0)</b>             | <b>76.6†</b><br><b>(63.9 to 88.3)</b>           | <b>0.2</b><br><b>(0.1 to 0.4)</b>       | <b>-9.5</b><br><b>(-33.6 to 26.4)</b>             | <b>-6.2</b><br><b>(-31.2 to 31.1)</b>               |
| Maternal haemorrhage                                                    | 0.4<br>(0.3 to 0.6)                           | 2.4<br>(1.8 to 3.2)                             | < 0.05<br>(< 0.05 to < 0.05)            | 15.8<br>(-23.7 to 76.0)                           | 19.8<br>(-21.1 to 82.2)                             |
| Maternal sepsis and other pregnancy related infections                  | 1.0<br>(0.8 to 1.4)                           | 5.8<br>(4.3 to 7.8)                             | < 0.05<br>(< 0.05 to < 0.05)            | -7.2<br>(-57.4 to 91.3)                           | -3.8<br>(-56.3 to 99.0)                             |
| Maternal hypertensive disorders                                         | 2.3<br>(1.5 to 3.1)                           | 10.4<br>(8.8 to 11.8)                           | 0.1<br>(0.1 to 0.2)                     | -11.5<br>(-44.5 to 51.4)                          | -8.2<br>(-42.5 to 57.2)                             |
| Maternal obstructed labour and uterine rupture                          | < 0.05<br>(< 0.05 to < 0.05)                  | 2.0<br>(1.4 to 2.7)                             | < 0.05<br>(< 0.05 to < 0.05)            | -8.2<br>(-50.3 to 70.4)                           | -4.6<br>(-48.5 to 77.2)                             |
| Maternal abortion, miscarriage, and ectopic pregnancy                   | 0.5<br>(0.3 to 0.7)                           | 56.0<br>(43.2 to 67.5)                          | 0.1<br>(< 0.05 to 0.1)                  | -8.1<br>(-50.4 to 69.1)                           | -4.8<br>(-48.8 to 75.7)                             |
| Other maternal disorders                                                | --                                            | --                                              | < 0.05<br>(< 0.05 to 0.1)               | -14.5<br>(-37.3 to 19.8)                          | -11.2<br>(-34.9 to 24.2)                            |
| <b>Neonatal disorders</b>                                               | <b>47.7</b><br><b>(40.8 to 56.8)</b>          | <b>--</b>                                       | <b>8.4</b><br><b>(5.6 to 13.1)</b>      | <b>-12.1</b><br><b>(-22.3 to 2.8)</b>             | <b>-7.9</b><br><b>(-18.6 to 7.8)</b>                |
| Neonatal preterm birth complications                                    | 40.0<br>(32.0 to 50.9)                        | --                                              | 4.1<br>(2.7 to 6.1)                     | -10.6<br>(-28.0 to 15.6)                          | -5.8<br>(-24.5 to 21.3)                             |
| Neonatal encephalopathy due to birth asphyxia and trauma                | 2.6<br>(1.6 to 3.9)                           | --                                              | 0.4<br>(0.2 to 0.7)                     | 12.8<br>(-14.1 to 94.3)                           | 17.2<br>(-10.9 to 103.2)                            |
| Neonatal sepsis and other neonatal infections                           | 8.3<br>(4.0 to 16.9)                          | --                                              | 3.6<br>(1.6 to 8.0)                     | -15.6<br>(-27.8 to -2.2)                          | -12.3<br>(-24.6 to 1.5)                             |
| Hemolytic disease and other neonatal jaundice                           | 0.3<br>(0.3 to 0.4)                           | --                                              | 0.1<br>(0.1 to 0.1)                     | -3.3<br>(-10.8 to 5.2)                            | 0.8<br>(-6.8 to 9.5)                                |
| Other neonatal disorders                                                | --                                            | --                                              | 0.2<br>(0.1 to 0.3)                     | -19.2<br>(-31.9 to -2.0)                          | -11.1<br>(-24.9 to 7.9)                             |
| <b>Nutritional deficiencies</b>                                         | <b>524.0</b><br><b>(455.8 to 576.2)</b>       | <b>34.8†</b><br><b>(22.8 to 54.0)</b>           | <b>10.0</b><br><b>(6.2 to 15.0)</b>     | <b>-13.8</b><br><b>(-25.5 to -0.6)</b>            | <b>-9.3</b><br><b>(-22.2 to 5.7)</b>                |
| Protein-energy malnutrition                                             | 4.6<br>(3.5 to 6.2)                           | 2.3<br>(1.7 to 3.0)                             | 0.2<br>(0.1 to 0.3)                     | -10.8<br>(-38.3 to 25.4)                          | -1.9<br>(-32.0 to 37.2)                             |
| Iodine deficiency                                                       | 14.2<br>(12.4 to 16.3)                        | 0.3<br>(0.2 to 0.3)                             | 0.3<br>(0.2 to 0.5)                     | 4.0<br>(-8.7 to 19.4)                             | 1.2<br>(-11.8 to 16.5)                              |
| Vitamin A deficiency                                                    | 39.2<br>(25.5 to 60.9)                        | 32.3<br>(20.2 to 51.4)                          | --                                      | --                                                | --                                                  |
| Iron-deficiency anaemia                                                 | 442.3<br>(379.9 to 507.7)                     | --                                              | 9.4<br>(5.7 to 14.3)                    | -14.4<br>(-26.4 to -0.6)                          | -9.8<br>(-23.2 to 6.2)                              |
| Other nutritional deficiencies                                          | --                                            | --                                              | < 0.05<br>(< 0.05 to < 0.05)            | -12.3<br>(-41.0 to 25.9)                          | -3.6<br>(-34.9 to 37.9)                             |
| <b>Other communicable, maternal, neonatal, and nutritional diseases</b> | <b>1,058.5</b><br><b>(987.7 to 1,137.2)</b>   | <b>304.9</b><br><b>(242.8 to 393.1)</b>         | <b>1.6</b><br><b>(0.9 to 2.5)</b>       | <b>-0.2</b><br><b>(-7.5 to 8.5)</b>               | <b>1.6</b><br><b>(-6.3 to 11.7)</b>                 |
| Sexually transmitted diseases excluding HIV                             | 960.2<br>(887.7 to 1,038.9)                   | 284.7<br>(222.0 to 375.3)                       | 1.2<br>(0.6 to 2.0)                     | 2.6<br>(-5.2 to 11.6)                             | 2.1<br>(-6.0 to 11.8)                               |
| Syphilis                                                                | 23.3<br>(14.7 to 35.3)                        | 17.7<br>(10.0 to 27.2)                          | 0.1<br>(0.1 to 0.1)                     | 11.7<br>(-0.9 to 26.2)                            | 2.2<br>(-9.0 to 14.7)                               |
| Chlamydial infection                                                    | 31.4<br>(24.6 to 39.2)                        | 23.5<br>(18.4 to 29.6)                          | 0.2<br>(0.1 to 0.3)                     | -1.6<br>(-15.8 to 15.8)                           | 0.7<br>(-14.1 to 18.4)                              |
| Gonococcal infection                                                    | 25.8<br>(10.5 to 49.5)                        | 89.3<br>(31.9 to 175.6)                         | 0.3<br>(0.1 to 0.7)                     | 4.7<br>(-13.0 to 26.5)                            | 6.1<br>(-11.7 to 28.9)                              |
| Trichomoniasis                                                          | 125.1<br>(108.8 to 142.7)                     | 107.3<br>(92.2 to 123.9)                        | 0.1<br>(< 0.05 to 0.3)                  | -0.6<br>(-6.5 to 5.2)                             | -0.8<br>(-6.8 to 5.1)                               |
| Genital herpes                                                          | 812.9<br>(705.6 to 934.5)                     | 40.8<br>(34.3 to 48.7)                          | 0.2<br>(0.1 to 0.5)                     | 3.5<br>(-2.2 to 9.3)                              | 0.1<br>(-5.5 to 6.1)                                |
| Other sexually transmitted diseases                                     | 7.6<br>(7.0 to 8.4)                           | 6.1<br>(5.3 to 7.2)                             | 0.3<br>(0.1 to 0.5)                     | 0.2<br>(-11.1 to 12.8)                            | 1.4<br>(-10.3 to 14.8)                              |
| Hepatitis                                                               | 136.5<br>(121.6 to 152.0)                     | 20.2<br>(16.1 to 24.8)                          | < 0.05<br>(< 0.05 to 0.1)               | -27.3<br>(-46.4 to -2.6)                          | -29.5<br>(-48.6 to -5.6)                            |
| Acute hepatitis A                                                       | 0.3<br>(0.1 to 0.5)                           | 4.1<br>(1.9 to 6.8)                             | < 0.05<br>(< 0.05 to < 0.05)            | -28.0<br>(-74.0 to 121.9)                         | -29.3<br>(-75.0 to 118.0)                           |
| Hepatitis B                                                             | 52.5<br>(41.6 to 66.1)                        | 11.7<br>(8.6 to 15.6)                           | < 0.05<br>(< 0.05 to < 0.05)            | -27.3<br>(-45.5 to -3.6)                          | -30.7<br>(-48.4 to -7.7)                            |
| Hepatitis C                                                             | 83.5<br>(74.3 to 92.5)                        | 2.4<br>(2.1 to 2.6)                             | < 0.05<br>(< 0.05 to < 0.05)            | -20.9<br>(-30.4 to -10.3)                         | -16.9<br>(-30.7 to -1.3)                            |
| Acute hepatitis E                                                       | 0.1<br>(0.1 to 0.2)                           | 2.0<br>(1.4 to 2.7)                             | < 0.05<br>(< 0.05 to < 0.05)            | -28.2<br>(-33.5 to -22.7)                         | -30.8<br>(-35.4 to -25.9)                           |
| Other infectious diseases                                               | 14.6<br>(12.1 to 17.2)                        | < 0.05<br>(< 0.05 to < 0.05)                    | 0.3<br>(0.2 to 0.5)                     | -5.0<br>(-21.1 to 17.6)                           | 4.1<br>(-15.2 to 30.0)                              |
| <b>Non-communicable diseases</b>                                        | <b>3,404.8</b><br><b>(3,389.8 to 3,419.9)</b> | <b>9,889.7†</b><br><b>(9,422.0 to 10,404.1)</b> | <b>380.1</b><br><b>(280.7 to 491.2)</b> | <b>2.3</b><br><b>(0.4 to 4.2)</b>                 | <b>-1.5</b><br><b>(-3.5 to 0.4)</b>                 |
| <b>Neoplasms</b>                                                        | <b>50.1</b><br><b>(48.2 to 52.0)</b>          | <b>15.1</b><br><b>(14.5 to 15.8)</b>            | <b>5.0</b><br><b>(3.6 to 6.5)</b>       | <b>14.3</b><br><b>(9.6 to 18.9)</b>               | <b>2.8</b><br><b>(-1.4 to 7.1)</b>                  |
| Lip and oral cavity cancer                                              | 0.7<br>(0.6 to 0.7)                           | 0.2<br>(0.2 to 0.2)                             | 0.1<br>(< 0.05 to 0.1)                  | 5.1<br>(-6.5 to 18.4)                             | -6.0<br>(-16.3 to 5.6)                              |
| Nasopharynx cancer                                                      | 0.1<br>(0.1 to 0.1)                           | < 0.05<br>(< 0.05 to < 0.05)                    | < 0.05<br>(< 0.05 to < 0.05)            | 1.4<br>(-7.8 to 12.1)                             | -6.7<br>(-14.9 to 3.2)                              |
| Other pharynx cancer                                                    | 0.2<br>(0.2 to 0.2)                           | 0.1<br>(0.1 to 0.1)                             | < 0.05<br>(< 0.05 to < 0.05)            | 6.1<br>(-7.7 to 24.0)                             | -4.1<br>(-16.7 to 12.4)                             |
| Oesophageal cancer                                                      | 0.2<br>(0.2 to 0.2)                           | 0.1<br>(0.1 to 0.2)                             | < 0.05<br>(< 0.05 to 0.1)               | 2.1<br>(-16.6 to 24.4)                            | -9.5<br>(-25.8 to 10.5)                             |
| Stomach cancer                                                          | 1.5<br>(1.4 to 1.6)                           | 0.7<br>(0.6 to 0.7)                             | 0.2<br>(0.1 to 0.2)                     | 5.6<br>(-8.4 to 22.1)                             | -7.2<br>(-19.4 to 7.7)                              |
| Colon and rectum cancer                                                 | 9.7<br>(9.0 to 10.4)                          | 2.4<br>(2.3 to 2.6)                             | 0.8<br>(0.6 to 1.1)                     | 17.0<br>(4.7 to 29.0)                             | 3.7<br>(-7.5 to 14.9)                               |
| Liver cancer                                                            | 0.1<br>(0.1 to 0.2)                           | 0.3<br>(0.3 to 0.4)                             | 0.1<br>(0.1 to 0.1)                     | 22.8<br>(10.7 to 36.6)                            | 9.2<br>(-1.9 to 21.7)                               |
| Liver cancer due to hepatitis B                                         | 0.1<br>(0.1 to 0.1)                           | 0.1<br>(0.1 to 0.1)                             | < 0.05<br>(< 0.05 to < 0.05)            | 23.0<br>(9.7 to 38.8)                             | 10.7<br>(-1.2 to 24.9)                              |



| Cause                                              | Prevalence in thousands (95% UI)        | Incidence in thousands (95% UI)       | YLDs in thousands (95% UI)           |                                                   |                                                     |
|----------------------------------------------------|-----------------------------------------|---------------------------------------|--------------------------------------|---------------------------------------------------|-----------------------------------------------------|
|                                                    | 2016 counts                             | 2016 counts                           | 2016 counts                          | Percentage change in counts between 2006 and 2016 | Percentage change in age-standardised rates between |
| Liver cancer due to hepatitis C                    | 0.1<br>(0.1 to 0.1)                     | 0.1<br>(0.1 to 0.1)                   | < 0.05<br>(< 0.05 to < 0.05)         | 23.6<br>(10.3 to 39.2)                            | 8.4<br>(-3.4 to 21.9)                               |
| Liver cancer due to alcohol use                    | 0.1<br>(0.1 to 0.1)                     | 0.1<br>(0.1 to 0.1)                   | < 0.05<br>(< 0.05 to < 0.05)         | 20.5<br>(6.9 to 34.9)                             | 6.9<br>(-5.4 to 20.3)                               |
| Liver cancer due to other causes                   | 0.1<br>(0.1 to 0.1)                     | 0.1<br>(0.1 to 0.1)                   | < 0.05<br>(< 0.05 to < 0.05)         | 23.7<br>(10.2 to 39.9)                            | 10.0<br>(-2.1 to 24.3)                              |
| Gallbladder and biliary tract cancer               | < 0.05<br>(< 0.05 to < 0.05)            | < 0.05<br>(< 0.05 to < 0.05)          | < 0.05<br>(< 0.05 to < 0.05)         | -1.1<br>(-7.2 to 5.8)                             | -13.4<br>(-18.7 to -7.4)                            |
| Pancreatic cancer                                  | 0.2<br>(0.2 to 0.2)                     | 0.3<br>(0.3 to 0.3)                   | 0.1<br>(< 0.05 to 0.1)               | 22.8<br>(10.3 to 37.0)                            | 8.2<br>(-1.8 to 19.2)                               |
| Larynx cancer                                      | 0.6<br>(0.5 to 0.6)                     | 0.2<br>(0.1 to 0.2)                   | 0.1<br>(< 0.05 to 0.1)               | 3.9<br>(-12.9 to 24.0)                            | -7.0<br>(-21.8 to 10.5)                             |
| Tracheal, bronchus, and lung cancer                | 1.2<br>(1.1 to 1.4)                     | 0.8<br>(0.8 to 0.9)                   | 0.2<br>(0.1 to 0.3)                  | 14.2<br>(-3.6 to 36.0)                            | 0.1<br>(-15.6 to 19.7)                              |
| Malignant skin melanoma                            | 0.7<br>(0.6 to 0.9)                     | 0.1<br>(0.1 to 0.2)                   | < 0.05<br>(< 0.05 to 0.1)            | 15.3<br>(-1.7 to 34.9)                            | 6.2<br>(-9.6 to 25.4)                               |
| Non-melanoma skin cancer                           | 0.4<br>(0.2 to 0.6)                     | 0.7<br>(0.5 to 1.1)                   | < 0.05<br>(< 0.05 to < 0.05)         | -33.2<br>(-60.7 to 26.4)                          | -41.8<br>(-65.6 to 8.4)                             |
| Non-melanoma skin cancer (squamous-cell carcinoma) | 0.3<br>(0.2 to 0.6)                     | 0.3<br>(0.2 to 0.6)                   | < 0.05<br>(< 0.05 to < 0.05)         | -34.0<br>(-61.4 to 26.8)                          | -42.7<br>(-66.0 to 8.7)                             |
| Non-melanoma skin cancer (basal-cell carcinoma)    | < 0.05<br>(< 0.05 to 0.1)               | 0.4<br>(0.2 to 0.6)                   | < 0.05<br>(< 0.05 to < 0.05)         | 14.0<br>(0.5 to 28.5)                             | 2.7<br>(-8.6 to 14.7)                               |
| Breast cancer                                      | 8.9<br>(8.2 to 9.7)                     | 1.8<br>(1.7 to 2.0)                   | 0.7<br>(0.5 to 0.9)                  | 11.5<br>(-2.3 to 25.6)                            | 1.8<br>(-11.1 to 14.8)                              |
| Cervical cancer                                    | 0.9<br>(0.8 to 1.1)                     | 0.2<br>(0.2 to 0.3)                   | 0.1<br>(0.1 to 0.1)                  | 0.2<br>(-14.5 to 17.4)                            | -5.7<br>(-19.5 to 11.4)                             |
| Uterine cancer                                     | 3.4<br>(3.0 to 3.9)                     | 0.7<br>(0.6 to 0.8)                   | 0.2<br>(0.2 to 0.3)                  | 19.2<br>(-2.7 to 43.0)                            | 10.3<br>(-10.0 to 33.3)                             |
| Ovarian cancer                                     | 0.6<br>(0.5 to 0.6)                     | 0.2<br>(0.2 to 0.2)                   | 0.1<br>(0.1 to 0.1)                  | 8.2<br>(-16.4 to 41.5)                            | -0.8<br>(-22.7 to 29.0)                             |
| Prostate cancer                                    | 11.4<br>(10.1 to 14.7)                  | 2.6<br>(2.3 to 3.2)                   | 1.0<br>(0.7 to 1.3)                  | 16.7<br>(3.2 to 30.9)                             | 1.3<br>(-10.9 to 14.2)                              |
| Testicular cancer                                  | 0.5<br>(0.4 to 0.7)                     | 0.1<br>(0.1 to 0.1)                   | < 0.05<br>(< 0.05 to 0.1)            | 14.4<br>(-18.0 to 57.5)                           | 16.4<br>(-17.6 to 61.5)                             |
| Kidney cancer                                      | 0.8<br>(0.7 to 0.8)                     | 0.2<br>(0.2 to 0.2)                   | 0.1<br>(< 0.05 to 0.1)               | 7.9<br>(-4.9 to 22.4)                             | -1.1<br>(-13.1 to 12.7)                             |
| Bladder cancer                                     | 1.5<br>(1.4 to 1.6)                     | 0.4<br>(0.3 to 0.4)                   | 0.1<br>(0.1 to 0.2)                  | 17.9<br>(2.1 to 35.8)                             | 3.8<br>(-9.9 to 19.6)                               |
| Brain and nervous system cancer                    | 0.3<br>(0.3 to 0.4)                     | 0.1<br>(0.1 to 0.1)                   | < 0.05<br>(< 0.05 to 0.1)            | 23.6<br>(6.6 to 38.1)                             | 16.9<br>(1.2 to 30.8)                               |
| Thyroid cancer                                     | 1.0<br>(0.9 to 1.1)                     | 0.2<br>(0.2 to 0.2)                   | 0.1<br>(< 0.05 to 0.1)               | 8.3<br>(-9.5 to 27.8)                             | 2.4<br>(-14.8 to 21.8)                              |
| Mesothelioma                                       | < 0.05<br>(< 0.05 to < 0.05)            | < 0.05<br>(< 0.05 to < 0.05)          | < 0.05<br>(< 0.05 to < 0.05)         | 14.7<br>(4.6 to 25.7)                             | 4.5<br>(-5.0 to 14.5)                               |
| Hodgkin lymphoma                                   | 0.5<br>(0.4 to 0.5)                     | 0.1<br>(0.1 to 0.1)                   | < 0.05<br>(< 0.05 to 0.1)            | 2.5<br>(-14.0 to 24.2)                            | 2.2<br>(-14.4 to 24.2)                              |
| Non-Hodgkin's lymphoma                             | 2.2<br>(1.9 to 2.4)                     | 0.6<br>(0.5 to 0.6)                   | 0.2<br>(0.1 to 0.2)                  | 23.8<br>(9.7 to 39.4)                             | 14.1<br>(0.7 to 28.6)                               |
| Multiple myeloma                                   | 0.6<br>(0.5 to 0.7)                     | 0.2<br>(0.2 to 0.2)                   | 0.1<br>(0.1 to 0.1)                  | 26.9<br>(1.7 to 60.1)                             | 13.9<br>(-7.9 to 44.2)                              |
| Leukaemia                                          | 1.9<br>(1.7 to 2.1)                     | 0.5<br>(0.5 to 0.6)                   | 0.2<br>(0.2 to 0.3)                  | 22.6<br>(7.1 to 38.8)                             | 12.3<br>(-2.8 to 28.4)                              |
| Acute lymphoid leukaemia                           | 0.3<br>(0.2 to 0.4)                     | 0.1<br>(0.1 to 0.1)                   | < 0.05<br>(< 0.05 to 0.1)            | 14.0<br>(-16.1 to 56.0)                           | 21.1<br>(-18.4 to 77.7)                             |
| Chronic lymphoid leukaemia                         | 0.4<br>(0.3 to 0.5)                     | 0.1<br>(0.1 to 0.1)                   | 0.1<br>(< 0.05 to 0.1)               | 36.6<br>(12.3 to 66.2)                            | 20.2<br>(-1.2 to 46.0)                              |
| Acute myeloid leukaemia                            | 0.1<br>(0.1 to 0.1)                     | 0.1<br>(0.1 to 0.1)                   | < 0.05<br>(< 0.05 to < 0.05)         | 21.3<br>(6.9 to 37.5)                             | 11.2<br>(-2.9 to 27.7)                              |
| Chronic myeloid leukaemia                          | 0.1<br>(0.1 to 0.1)                     | < 0.05<br>(< 0.05 to < 0.05)          | < 0.05<br>(< 0.05 to < 0.05)         | -19.5<br>(-31.4 to -5.4)                          | -26.3<br>(-36.9 to -14.1)                           |
| Other leukaemia                                    | 1.0<br>(0.9 to 1.1)                     | 0.2<br>(0.2 to 0.3)                   | 0.1<br>(0.1 to 0.1)                  | 25.3<br>(2.8 to 51.6)                             | 10.3<br>(-9.6 to 32.4)                              |
| Other neoplasms                                    | 4.5<br>(4.1 to 4.8)                     | 1.1<br>(1.0 to 1.2)                   | 0.3<br>(0.2 to 0.4)                  | 10.2<br>(-2.1 to 22.9)                            | 2.0<br>(-9.9 to 13.9)                               |
| <b>Cardiovascular diseases</b>                     | <b>329.4</b><br><b>(317.7 to 341.0)</b> | <b>35.1†</b><br><b>(33.2 to 37.1)</b> | <b>18.8</b><br><b>(13.7 to 24.6)</b> | <b>11.2</b><br><b>(7.8 to 14.8)</b>               | <b>-0.5</b><br><b>(-3.5 to 2.6)</b>                 |
| Rheumatic heart disease                            | 0.2<br>(0.2 to 0.3)                     | 0.1<br>(0.1 to 0.1)                   | < 0.05<br>(< 0.05 to < 0.05)         | 3.3<br>(-10.8 to 19.1)                            | -5.7<br>(-17.4 to 7.8)                              |
| Ischaemic heart disease                            | 133.2<br>(126.5 to 140.0)               | 16.2<br>(14.8 to 17.6)                | 6.0<br>(4.2 to 8.1)                  | 10.5<br>(6.3 to 15.3)                             | -0.7<br>(-4.7 to 3.6)                               |
| Cerebrovascular disease                            | 44.8<br>(41.7 to 47.9)                  | 5.9‡<br>(5.4 to 6.4)                  | 4.8<br>(3.5 to 6.1)                  | 12.8<br>(5.3 to 20.4)                             | -0.4<br>(-6.9 to 6.5)                               |
| Ischaemic stroke                                   | 37.1<br>(33.4 to 40.9)                  | 4.0‡<br>(3.5 to 4.4)                  | 3.8<br>(2.7 to 4.9)                  | 15.3<br>(6.0 to 24.6)                             | 1.4<br>(-6.7 to 9.9)                                |
| Hemorrhagic stroke                                 | 9.8<br>(8.8 to 10.9)                    | 1.9‡<br>(1.7 to 2.1)                  | 1.0<br>(0.7 to 1.3)                  | 4.2<br>(-7.3 to 16.6)                             | -6.3<br>(-16.1 to 4.7)                              |
| Hypertensive heart disease                         | 14.0<br>(12.0 to 16.6)                  | --                                    | 1.1<br>(0.8 to 1.6)                  | 13.5<br>(3.1 to 24.6)                             | -0.1<br>(-9.7 to 9.9)                               |
| Cardiomyopathy and myocarditis                     | 4.2<br>(3.7 to 4.8)                     | 1.1†<br>(1.0 to 1.3)                  | 0.4<br>(0.3 to 0.5)                  | 8.6<br>(-2.2 to 20.1)                             | 0.7<br>(-9.4 to 11.6)                               |
| Myocarditis                                        | 1.0<br>(0.9 to 1.1)                     | 1.1<br>(1.0 to 1.3)                   | 0.1<br>(0.1 to 0.1)                  | 2.8<br>(-10.3 to 18.0)                            | 0.1<br>(-11.2 to 13.2)                              |
| Alcoholic cardiomyopathy                           | 0.5<br>(0.4 to 0.6)                     | --                                    | < 0.05<br>(< 0.05 to 0.1)            | 10.0<br>(-12.6 to 38.4)                           | 0.3<br>(-20.0 to 26.4)                              |
| Other cardiomyopathy                               | 3.2<br>(2.7 to 3.8)                     | --                                    | 0.3<br>(0.2 to 0.4)                  | 10.1<br>(-2.8 to 24.9)                            | 1.0<br>(-11.4 to 14.9)                              |
| Atrial fibrillation and flutter                    | 37.7<br>(32.8 to 43.4)                  | 2.8<br>(2.4 to 3.3)                   | 2.9<br>(2.0 to 4.1)                  | 13.7<br>(7.0 to 20.9)                             | -0.0<br>(-6.3 to 6.5)                               |
| Peripheral vascular disease                        | 94.6<br>(82.0 to 108.6)                 | 8.3<br>(7.2 to 9.6)                   | 0.4<br>(0.2 to 0.8)                  | 10.1<br>(2.9 to 18.3)                             | -4.8<br>(-11.4 to 2.4)                              |
| Endocarditis                                       | 0.4<br>(0.4 to 0.5)                     | 0.7<br>(0.6 to 0.7)                   | < 0.05<br>(< 0.05 to < 0.05)         | 10.1<br>(-5.9 to 29.7)                            | 0.2<br>(-12.8 to 15.8)                              |
| Other cardiovascular and circulatory diseases      | 58.5<br>(50.4 to 68.0)                  | --                                    | 3.0<br>(2.1 to 4.3)                  | 7.2<br>(-1.7 to 15.4)                             | -0.4<br>(-8.4 to 6.9)                               |
| <b>Chronic respiratory diseases</b>                | <b>444.9</b><br><b>(423.9 to 465.5)</b> | <b>65.4†</b><br><b>(61.5 to 69.5)</b> | <b>14.6</b><br><b>(10.6 to 19.5)</b> | <b>-3.1</b><br><b>(-7.5 to 1.4)</b>               | <b>0.2</b><br><b>(-4.3 to 4.7)</b>                  |
| Chronic obstructive pulmonary disease              | 171.4<br>(158.6 to 188.1)               | 10.7<br>(9.9 to 11.7)                 | 3.0<br>(2.3 to 3.8)                  | 4.8<br>(-10.5 to 19.9)                            | -4.3<br>(-17.7 to 9.6)                              |
| Pneumoconiosis                                     | 0.2<br>(0.2 to 0.2)                     | < 0.05<br>(< 0.05 to < 0.05)          | < 0.05<br>(< 0.05 to < 0.05)         | 10.7<br>(-4.4 to 27.9)                            | -2.3<br>(-14.3 to 10.9)                             |
| Silicosis                                          | < 0.05<br>(< 0.05 to 0.1)               | < 0.05<br>(< 0.05 to < 0.05)          | < 0.05<br>(< 0.05 to < 0.05)         | 12.7<br>(7.4 to 18.1)                             | 1.7<br>(-2.9 to 6.4)                                |

| Cause                                                          | Prevalence in thousands (95% UI)              | Incidence in thousands (95% UI)          | YLDs in thousands (95% UI)            |                                                   |                                                     |
|----------------------------------------------------------------|-----------------------------------------------|------------------------------------------|---------------------------------------|---------------------------------------------------|-----------------------------------------------------|
|                                                                | 2016 counts                                   | 2016 counts                              | 2016 counts                           | Percentage change in counts between 2006 and 2016 | Percentage change in age-standardised rates between |
| Asbestosis                                                     | 0.1<br>(0.1 to 0.1)                           | < 0.05<br>(< 0.05 to < 0.05)             | < 0.05<br>(< 0.05 to < 0.05)          | 9.6<br>(-14.6 to 41.8)                            | -3.9<br>(-23.2 to 19.8)                             |
| Coal workers pneumoconiosis                                    | --                                            | --                                       | --                                    | --                                                | --                                                  |
| Other pneumoconiosis                                           | 0.1<br>(0.1 to 0.1)                           | < 0.05<br>(< 0.05 to < 0.05)             | < 0.05<br>(< 0.05 to < 0.05)          | 10.7<br>(-13.4 to 41.1)                           | -3.0<br>(-22.9 to 20.8)                             |
| Asthma                                                         | 284.3<br>(264.5 to 306.0)                     | 54.3<br>(50.7 to 58.5)                   | 11.1<br>(7.3 to 16.1)                 | -5.7<br>(-9.7 to -1.6)                            | 0.7<br>(-3.6 to 5.2)                                |
| Interstitial lung disease and pulmonary sarcoidosis            | 3.0<br>(2.7 to 3.3)                           | 0.4<br>(0.3 to 0.4)                      | 0.3<br>(0.2 to 0.4)                   | 17.2<br>(5.7 to 30.8)                             | 3.5<br>(-6.3 to 15.0)                               |
| Other chronic respiratory diseases                             | --                                            | --                                       | 0.1<br>(0.1 to 0.2)                   | 24.3<br>(0.8 to 53.4)                             | 33.8<br>(5.8 to 67.3)                               |
| <b>Cirrhosis and other chronic liver diseases</b>              | <b>42.8</b><br><b>(40.6 to 45.3)</b>          | <b>1.1</b><br><b>(1.1 to 1.2)</b>        | <b>0.9</b><br><b>(0.6 to 1.2)</b>     | <b>5.7</b><br><b>(-2.9 to 15.0)</b>               | <b>-1.0</b><br><b>(-9.7 to 8.2)</b>                 |
| Cirrhosis and other chronic liver diseases due to hepatitis B  | 4.8<br>(4.0 to 5.8)                           | 0.1<br>(0.1 to 0.2)                      | 0.1<br>(0.1 to 0.1)                   | 6.9<br>(-13.1 to 32.8)                            | -2.5<br>(-20.6 to 21.8)                             |
| Cirrhosis and other chronic liver diseases due to hepatitis C  | 13.0<br>(11.7 to 14.4)                        | 0.3<br>(0.3 to 0.4)                      | 0.2<br>(0.2 to 0.4)                   | 6.7<br>(-8.3 to 24.6)                             | -2.1<br>(-16.5 to 15.3)                             |
| Cirrhosis and other chronic liver diseases due to alcohol use  | 16.7<br>(15.3 to 18.1)                        | 0.5<br>(0.4 to 0.5)                      | 0.3<br>(0.2 to 0.5)                   | 7.7<br>(-4.8 to 21.9)                             | -2.4<br>(-14.3 to 11.0)                             |
| Cirrhosis and other chronic liver diseases due to other causes | 8.3<br>(7.6 to 9.2)                           | 0.2<br>(0.2 to 0.2)                      | 0.2<br>(0.1 to 0.3)                   | 1.4<br>(-14.3 to 21.1)                            | 2.2<br>(-15.2 to 25.1)                              |
| <b>Digestive diseases</b>                                      | <b>139.2</b><br><b>(128.7 to 151.0)</b>       | <b>120.1†</b><br><b>(111.8 to 129.2)</b> | <b>4.5</b><br><b>(3.1 to 6.1)</b>     | <b>18.8</b><br><b>(7.3 to 31.6)</b>               | <b>14.7</b><br><b>(3.7 to 26.8)</b>                 |
| Peptic ulcer disease                                           | 54.8<br>(48.4 to 62.5)                        | 3.8<br>(3.3 to 4.2)                      | 1.1<br>(0.7 to 1.7)                   | 25.2<br>(2.4 to 52.4)                             | 19.8<br>(-2.9 to 47.6)                              |
| Gastritis and duodenitis                                       | 55.6<br>(48.2 to 63.7)                        | 24.1<br>(21.3 to 27.5)                   | 1.1<br>(0.7 to 1.6)                   | 39.6<br>(17.1 to 64.4)                            | 31.6<br>(10.2 to 56.5)                              |
| Appendicitis                                                   | 0.3<br>(0.2 to 0.3)                           | 7.0<br>(6.5 to 7.6)                      | 0.1<br>(0.1 to 0.1)                   | -3.4<br>(-28.4 to 29.8)                           | 1.7<br>(-28.3 to 42.2)                              |
| Paralytic ileus and intestinal obstruction                     | 0.1<br>(0.1 to 0.1)                           | 1.7<br>(1.5 to 1.8)                      | < 0.05<br>(< 0.05 to < 0.05)          | 9.6<br>(5.7 to 13.9)                              | 6.2<br>(3.3 to 9.5)                                 |
| Inguinal, femoral, and abdominal hernia                        | 24.4<br>(22.0 to 27.0)                        | 36.0<br>(31.2 to 40.9)                   | 1.5<br>(1.0 to 2.1)                   | 6.0<br>(-4.0 to 16.4)                             | 5.4<br>(-4.5 to 16.1)                               |
| Inflammatory bowel disease                                     | 0.4<br>(0.4 to 0.4)                           | 0.7<br>(0.7 to 0.7)                      | 0.1<br>(< 0.05 to 0.1)                | -0.3<br>(-7.4 to 7.6)                             | -4.5<br>(-10.4 to 1.7)                              |
| Vascular intestinal disorders                                  | < 0.05<br>(< 0.05 to < 0.05)                  | 0.2<br>(0.2 to 0.2)                      | < 0.05<br>(< 0.05 to < 0.05)          | 11.1<br>(4.9 to 18.0)                             | 4.9<br>(-0.4 to 10.7)                               |
| Gallbladder and biliary diseases                               | 7.1<br>(6.3 to 8.0)                           | 44.2<br>(38.7 to 50.6)                   | 0.2<br>(0.1 to 0.3)                   | 12.2<br>(-6.4 to 35.6)                            | 6.5<br>(-10.9 to 27.8)                              |
| Pancreatitis                                                   | 0.3<br>(0.2 to 0.3)                           | 2.4<br>(2.2 to 2.7)                      | < 0.05<br>(< 0.05 to < 0.05)          | 11.7<br>(7.6 to 16.5)                             | 4.1<br>(0.4 to 8.6)                                 |
| Other digestive diseases                                       | --                                            | --                                       | 0.4<br>(0.2 to 0.5)                   | 23.4<br>(12.5 to 36.0)                            | 19.1<br>(8.4 to 31.1)                               |
| <b>Neurological disorders</b>                                  | <b>1,425.1</b><br><b>(1,370.8 to 1,496.7)</b> | <b>641.0</b><br><b>(553.9 to 734.1)</b>  | <b>40.3</b><br><b>(27.4 to 55.5)</b>  | <b>0.3</b><br><b>(-13.7 to 17.1)</b>              | <b>-1.9</b><br><b>(-16.4 to 15.9)</b>               |
| Alzheimer's disease and other dementias                        | 31.2<br>(26.2 to 37.1)                        | 5.5<br>(4.5 to 6.5)                      | 4.7<br>(3.2 to 6.2)                   | 16.5<br>(11.0 to 22.1)                            | -0.7<br>(-5.3 to 3.9)                               |
| Parkinson's disease                                            | 4.3<br>(3.4 to 5.4)                           | 0.5<br>(0.4 to 0.6)                      | 0.5<br>(0.3 to 0.7)                   | 17.0<br>(5.5 to 29.6)                             | 2.4<br>(-8.1 to 14.0)                               |
| Epilepsy                                                       | 14.6<br>(3.9 to 26.0)                         | 1.4<br>(0.4 to 2.6)                      | 3.5<br>(0.8 to 7.6)                   | -15.1<br>(-81.3 to 317.9)                         | -13.9<br>(-81.1 to 318.4)                           |
| Multiple sclerosis                                             | 0.6<br>(0.6 to 0.7)                           | < 0.05<br>(< 0.05 to < 0.05)             | 0.2<br>(0.1 to 0.2)                   | 8.8<br>(-6.3 to 26.9)                             | 4.2<br>(-10.4 to 21.5)                              |
| Motor neuron disease                                           | 0.2<br>(0.1 to 0.2)                           | < 0.05<br>(< 0.05 to < 0.05)             | < 0.05<br>(< 0.05 to < 0.05)          | 4.6<br>(1.1 to 8.5)                               | 1.0<br>(-2.5 to 4.7)                                |
| Migraine                                                       | 538.5<br>(506.9 to 571.3)                     | 57.1<br>(53.3 to 61.3)                   | 25.7<br>(16.7 to 36.4)                | -0.2<br>(-3.5 to 3.2)                             | -0.6<br>(-3.9 to 2.9)                               |
| Tension-type headache                                          | 1,063.4<br>(955.2 to 1,186.2)                 | 576.3<br>(488.8 to 670.0)                | 5.0<br>(3.1 to 7.4)                   | 0.2<br>(-4.4 to 5.3)                              | -1.1<br>(-5.6 to 4.0)                               |
| Other neurological disorders                                   | < 0.05<br>(< 0.05 to < 0.05)                  | < 0.05<br>(< 0.05 to < 0.05)             | 0.7<br>(0.2 to 1.4)                   | 0.4<br>(-67.9 to 239.1)                           | 5.7<br>(-68.2 to 276.1)                             |
| <b>Mental and substance use disorders</b>                      | <b>597.7</b><br><b>(580.1 to 616.7)</b>       | <b>228.8†</b><br><b>(213.1 to 246.0)</b> | <b>82.3</b><br><b>(59.6 to 106.7)</b> | <b>-3.1</b><br><b>(-5.2 to -0.9)</b>              | <b>-3.4</b><br><b>(-5.6 to -1.3)</b>                |
| Schizophrenia                                                  | 8.3<br>(7.3 to 9.4)                           | 0.5<br>(0.4 to 0.5)                      | 5.3<br>(3.9 to 6.7)                   | 2.7<br>(-5.5 to 12.0)                             | 0.1<br>(-8.1 to 9.1)                                |
| Alcohol use disorders                                          | 64.1<br>(56.8 to 72.6)                        | 32.0<br>(27.4 to 36.5)                   | 6.4<br>(4.5 to 8.8)                   | -3.5<br>(-11.3 to 4.8)                            | -3.9<br>(-11.9 to 4.5)                              |
| Drug use disorders                                             | 36.1<br>(33.3 to 39.0)                        | 4.0<br>(3.6 to 4.4)                      | 8.9<br>(6.3 to 11.7)                  | -21.8<br>(-29.2 to -13.4)                         | -22.2<br>(-29.8 to -13.6)                           |
| Opioid use disorders                                           | 16.5<br>(14.2 to 19.4)                        | 1.6<br>(1.3 to 1.8)                      | 6.9<br>(4.7 to 9.1)                   | -21.9<br>(-30.9 to -11.3)                         | -22.5<br>(-31.8 to -11.5)                           |
| Cocaine use disorders                                          | 5.6<br>(4.9 to 6.3)                           | 0.3<br>(0.2 to 0.3)                      | 0.8<br>(0.5 to 1.1)                   | -29.2<br>(-40.6 to -16.1)                         | -28.9<br>(-40.7 to -15.1)                           |
| Amphetamine use disorders                                      | 0.5<br>(0.4 to 0.6)                           | 0.1<br>(0.1 to 0.1)                      | 0.1<br>(< 0.05 to 0.1)                | -29.0<br>(-52.6 to 4.4)                           | -27.7<br>(-52.8 to 6.8)                             |
| Cannabis use disorders                                         | 10.9<br>(9.0 to 13.1)                         | 1.6<br>(1.3 to 1.9)                      | 0.3<br>(0.2 to 0.5)                   | -3.9<br>(-17.3 to 10.9)                           | 0.2<br>(-13.7 to 15.8)                              |
| Other drug use disorders                                       | 3.4<br>(3.1 to 3.7)                           | 0.5<br>(0.5 to 0.6)                      | 0.9<br>(0.6 to 1.3)                   | -19.1<br>(-34.5 to 0.8)                           | -19.4<br>(-34.9 to 1.0)                             |
| Depressive disorders                                           | 138.2<br>(130.0 to 147.2)                     | 154.1<br>(139.0 to 170.7)                | 23.7<br>(16.2 to 32.3)                | 1.9<br>(-2.7 to 6.5)                              | -1.0<br>(-5.4 to 3.2)                               |
| Major depressive disorder                                      | 95.9<br>(86.9 to 105.9)                       | 146.5<br>(131.3 to 162.5)                | 19.4<br>(13.2 to 26.5)                | 1.5<br>(-3.7 to 6.8)                              | -1.2<br>(-6.5 to 4.1)                               |
| Dysthymia                                                      | 44.6<br>(39.2 to 50.8)                        | 7.6<br>(6.7 to 8.7)                      | 4.2<br>(2.8 to 6.2)                   | 3.7<br>(0.2 to 7.5)                               | 0.1<br>(-3.4 to 3.8)                                |
| Bipolar disorder                                               | 34.4<br>(29.6 to 39.8)                        | 2.5<br>(2.2 to 2.8)                      | 7.0<br>(4.4 to 10.4)                  | -0.5<br>(-5.5 to 4.8)                             | -0.0<br>(-4.9 to 5.6)                               |
| Anxiety disorders                                              | 160.2<br>(145.4 to 176.2)                     | 22.1<br>(20.5 to 24.0)                   | 15.4<br>(10.7 to 20.7)                | -0.5<br>(-3.8 to 2.8)                             | -0.2<br>(-3.5 to 3.0)                               |
| Eating disorders                                               | 8.1<br>(6.5 to 10.0)                          | 3.1<br>(2.3 to 4.1)                      | 1.6<br>(1.0 to 2.4)                   | -3.3<br>(-13.8 to 8.5)                            | 0.9<br>(-10.2 to 13.2)                              |
| Anorexia nervosa                                               | 1.4<br>(1.0 to 1.8)                           | 0.5<br>(0.4 to 0.6)                      | 0.3<br>(0.2 to 0.4)                   | -6.2<br>(-24.8 to 15.8)                           | 0.4<br>(-19.4 to 24.2)                              |
| Bulimia nervosa                                                | 6.4<br>(4.7 to 8.4)                           | 2.6<br>(1.8 to 3.6)                      | 1.3<br>(0.8 to 2.1)                   | -2.6<br>(-14.3 to 10.8)                           | 1.0<br>(-11.5 to 15.0)                              |
| Autistic spectrum disorders                                    | 30.4<br>(27.2 to 33.6)                        | 0.1<br>(0.1 to 0.2)                      | 4.5<br>(3.1 to 6.4)                   | -2.6<br>(-7.3 to 2.1)                             | 0.6<br>(-4.4 to 5.6)                                |
| Autism                                                         | 10.1<br>(8.6 to 11.7)                         | < 0.05<br>(< 0.05 to < 0.05)             | 2.5<br>(1.7 to 3.6)                   | -2.4<br>(-9.8 to 5.6)                             | 0.5<br>(-7.5 to 9.1)                                |
| Asperger syndrome and other autistic spectrum disorders        | 20.3<br>(16.9 to 24.2)                        | 0.1<br>(0.1 to 0.2)                      | 2.0<br>(1.3 to 3.0)                   | -2.9<br>(-7.3 to 2.1)                             | 0.6<br>(-4.3 to 5.6)                                |



| Cause                                                      | Prevalence in thousands (95% UI)              | Incidence in thousands (95% UI)                | YLDs in thousands (95% UI)            |                                                   |                                                     |
|------------------------------------------------------------|-----------------------------------------------|------------------------------------------------|---------------------------------------|---------------------------------------------------|-----------------------------------------------------|
|                                                            | 2016 counts                                   | 2016 counts                                    | 2016 counts                           | Percentage change in counts between 2006 and 2016 | Percentage change in age-standardised rates between |
| Attention-deficit/hyperactivity disorder                   | 60.2<br>(55.4 to 66.1)                        | 2.1<br>(1.8 to 2.4)                            | 0.7<br>(0.4 to 1.1)                   | -6.3<br>(-13.3 to 1.3)                            | 1.7<br>(-6.2 to 10.1)                               |
| Conduct disorder                                           | 19.5<br>(16.1 to 22.7)                        | 6.4<br>(5.1 to 7.6)                            | 2.4<br>(1.5 to 3.6)                   | -11.2<br>(-18.2 to -3.1)                          | 3.5<br>(-4.5 to 13.2)                               |
| Idiopathic developmental intellectual disability           | 14.7<br>(5.8 to 24.1)                         | --                                             | 0.6<br>(0.2 to 1.2)                   | -0.5<br>(-7.8 to 7.2)                             | 2.3<br>(-5.4 to 10.3)                               |
| Other mental and substance use disorders                   | 77.1<br>(68.3 to 88.6)                        | 2.1<br>(1.9 to 2.4)                            | 5.7<br>(3.9 to 8.2)                   | 3.2<br>(-1.8 to 8.3)                              | 0.2<br>(-4.8 to 5.2)                                |
| <b>Diabetes, urogenital, blood, and endocrine diseases</b> | <b>1,585.4</b><br><b>(1,547.6 to 1,623.8)</b> | <b>438.2†</b><br><b>(411.3 to 468.2)</b>       | <b>52.4</b><br><b>(37.1 to 70.5)</b>  | <b>3.4</b><br><b>(-2.1 to 10.0)</b>               | <b>-3.4</b><br><b>(-8.4 to 2.6)</b>                 |
| Diabetes mellitus                                          | 401.8<br>(368.4 to 436.7)                     | 20.2<br>(18.3 to 22.1)                         | 35.9<br>(25.1 to 49.1)                | 3.8<br>(-3.9 to 13.3)                             | -3.7<br>(-10.6 to 5.0)                              |
| Acute glomerulonephritis                                   | < 0.05<br>(< 0.05 to 0.1)                     | 0.7<br>(0.6 to 0.8)                            | < 0.05<br>(< 0.05 to < 0.05)          | 2.0<br>(-1.9 to 5.7)                              | 0.1<br>(-3.5 to 3.6)                                |
| Chronic kidney disease                                     | 203.7<br>(183.0 to 224.0)                     | 15.4<br>(13.6 to 17.3)                         | 6.3<br>(4.7 to 7.9)                   | 2.6<br>(-5.6 to 10.7)                             | -7.0<br>(-14.4 to 0.1)                              |
| Chronic kidney disease due to diabetes mellitus            | 80.3<br>(68.1 to 93.9)                        | 6.2<br>(5.2 to 7.4)                            | 2.3<br>(1.7 to 3.0)                   | 2.0<br>(-8.4 to 13.3)                             | -8.1<br>(-17.5 to 2.0)                              |
| Chronic kidney disease due to hypertension                 | 41.9<br>(35.6 to 48.4)                        | 3.8<br>(3.1 to 4.6)                            | 1.0<br>(0.7 to 1.3)                   | 7.9<br>(-4.7 to 23.2)                             | -6.1<br>(-17.2 to 7.1)                              |
| Chronic kidney disease due to glomerulonephritis           | 41.5<br>(35.1 to 48.2)                        | 2.3<br>(1.8 to 2.9)                            | 1.6<br>(1.2 to 2.2)                   | 0.6<br>(-9.6 to 11.8)                             | -6.7<br>(-16.5 to 3.6)                              |
| Chronic kidney disease due to other causes                 | 40.1<br>(32.5 to 48.4)                        | 3.0<br>(2.5 to 3.7)                            | 1.3<br>(1.0 to 1.7)                   | 2.3<br>(-7.6 to 13.0)                             | -6.4<br>(-15.2 to 3.4)                              |
| Urinary diseases and male infertility                      | 77.7<br>(69.3 to 85.5)                        | 266.5†<br>(240.3 to 295.7)                     | 2.0<br>(1.3 to 3.0)                   | 6.7<br>(0.1 to 13.1)                              | -2.8<br>(-8.8 to 2.9)                               |
| Interstitial nephritis and urinary tract infections        | 4.7<br>(4.2 to 5.2)                           | 242.8<br>(216.4 to 272.5)                      | 0.1<br>(0.1 to 0.2)                   | -0.8<br>(-11.7 to 11.9)                           | -0.8<br>(-12.1 to 12.8)                             |
| Urolithiasis                                               | 0.7<br>(0.6 to 0.7)                           | 17.2<br>(15.3 to 19.4)                         | 0.1<br>(< 0.05 to 0.1)                | 5.6<br>(1.4 to 9.7)                               | 1.0<br>(-3.0 to 4.5)                                |
| Benign prostatic hyperplasia                               | 51.4<br>(43.3 to 59.4)                        | 6.6<br>(5.4 to 7.8)                            | 1.7<br>(1.0 to 2.4)                   | 9.8<br>(1.7 to 17.6)                              | -1.9<br>(-9.2 to 5.4)                               |
| Male infertility                                           | 17.4<br>(13.8 to 22.7)                        | --                                             | 0.1<br>(< 0.05 to 0.2)                | -7.7<br>(-14.5 to -0.2)                           | -6.1<br>(-13.1 to 1.6)                              |
| Other urinary diseases                                     | --                                            | --                                             | 0.1<br>(< 0.05 to 0.1)                | -17.4<br>(-25.0 to -9.2)                          | -17.7<br>(-25.6 to -8.9)                            |
| Gynecological diseases                                     | 433.9<br>(412.3 to 457.7)                     | 123.1†<br>(115.2 to 131.2)                     | 4.3<br>(2.9 to 6.2)                   | -2.3<br>(-6.7 to 2.2)                             | -2.5<br>(-7.1 to 2.0)                               |
| Uterine fibroids                                           | 38.5<br>(33.6 to 44.0)                        | 3.6<br>(3.1 to 4.2)                            | 0.6<br>(0.3 to 1.0)                   | -3.4<br>(-15.9 to 10.2)                           | -5.0<br>(-17.2 to 8.5)                              |
| Polycystic ovarian syndrome                                | 0.4<br>(0.3 to 0.5)                           | 3.3<br>(2.3 to 4.5)                            | < 0.05<br>(< 0.05 to < 0.05)          | -2.6<br>(-32.5 to 34.0)                           | -1.5<br>(-31.9 to 35.6)                             |
| Female infertility                                         | 39.1<br>(27.1 to 54.4)                        | --                                             | 0.2<br>(0.1 to 0.5)                   | 1.9<br>(-6.2 to 11.2)                             | 3.2<br>(-4.8 to 12.8)                               |
| Endometriosis                                              | 0.3<br>(0.3 to 0.4)                           | 1.4<br>(1.2 to 1.7)                            | < 0.05<br>(< 0.05 to < 0.05)          | -0.8<br>(-23.3 to 27.9)                           | -0.4<br>(-22.3 to 27.0)                             |
| Genital prolapse                                           | 145.1<br>(125.3 to 166.6)                     | 6.7<br>(5.7 to 7.8)                            | 0.5<br>(0.2 to 0.8)                   | 1.9<br>(-6.8 to 9.7)                              | -5.7<br>(-13.7 to 1.5)                              |
| Premenstrual syndrome                                      | 224.2<br>(210.5 to 238.0)                     | 78.4<br>(73.0 to 84.0)                         | 1.9<br>(1.2 to 2.9)                   | -3.1<br>(-9.9 to 3.5)                             | -1.6<br>(-8.4 to 5.2)                               |
| Other gynecological diseases                               | 34.7<br>(29.9 to 39.8)                        | 29.7<br>(24.6 to 35.3)                         | 1.1<br>(0.8 to 1.6)                   | -2.7<br>(-11.4 to 6.4)                            | -2.9<br>(-11.6 to 6.2)                              |
| Hemoglobinopathies and hemolytic anaemias                  | 843.0<br>(793.7 to 886.2)                     | --                                             | 1.6<br>(1.0 to 2.4)                   | 3.9<br>(-10.4 to 20.2)                            | 6.5<br>(-9.5 to 23.6)                               |
| Thalassemias                                               | < 0.05<br>(< 0.05 to < 0.05)                  | --                                             | < 0.05<br>(< 0.05 to < 0.05)          | -12.8<br>(-30.5 to 6.4)                           | -1.1<br>(-21.6 to 19.3)                             |
| Thalassaemia trait                                         | 4.6<br>(3.6 to 5.7)                           | --                                             | < 0.05<br>(< 0.05 to 0.1)             | 12.2<br>(-10.1 to 41.0)                           | 15.4<br>(-7.5 to 44.5)                              |
| Sickle cell disorders                                      | 1.4<br>(1.1 to 1.7)                           | --                                             | 0.1<br>(0.1 to 0.2)                   | 1.8<br>(-10.9 to 17.4)                            | 8.7<br>(-5.5 to 26.0)                               |
| Sickle cell trait                                          | 295.6<br>(261.3 to 331.6)                     | --                                             | 1.0<br>(0.6 to 1.5)                   | 11.8<br>(-8.6 to 35.8)                            | 15.3<br>(-6.4 to 40.3)                              |
| G6PD deficiency                                            | 164.7<br>(143.0 to 186.7)                     | --                                             | < 0.05<br>(< 0.05 to < 0.05)          | 5.3<br>(-21.6 to 45.2)                            | 10.7<br>(-20.6 to 58.0)                             |
| G6PD trait                                                 | 413.1<br>(383.4 to 441.1)                     | --                                             | < 0.05<br>(< 0.05 to < 0.05)          | 33.0<br>(3.6 to 71.6)                             | 33.9<br>(2.8 to 73.8)                               |
| Other hemoglobinopathies and hemolytic anaemias            | 24.5<br>(20.6 to 28.1)                        | --                                             | 0.4<br>(0.3 to 0.7)                   | -10.2<br>(-23.2 to 6.0)                           | -11.0<br>(-24.9 to 5.9)                             |
| Endocrine, metabolic, blood, and immune disorders          | 73.8<br>(67.9 to 80.0)                        | 12.3<br>(11.0 to 13.6)                         | 2.3<br>(1.6 to 3.2)                   | 6.7<br>(0.2 to 13.5)                              | -0.4<br>(-6.4 to 6.4)                               |
| <b>Musculoskeletal disorders</b>                           | <b>699.8</b><br><b>(670.5 to 730.1)</b>       | <b>324.7</b><br><b>(293.8 to 363.4)</b>        | <b>74.9</b><br><b>(54.6 to 97.6)</b>  | <b>5.0</b><br><b>(2.4 to 7.6)</b>                 | <b>-0.8</b><br><b>(-3.3 to 1.7)</b>                 |
| Rheumatoid arthritis                                       | 19.5<br>(17.4 to 21.8)                        | 1.0<br>(0.8 to 1.1)                            | 4.5<br>(3.1 to 6.1)                   | 11.7<br>(3.8 to 19.4)                             | 3.7<br>(-3.5 to 10.8)                               |
| Osteoarthritis                                             | 214.0<br>(200.5 to 228.3)                     | 9.3<br>(8.6 to 10.0)                           | 13.1<br>(9.2 to 17.8)                 | 11.2<br>(7.6 to 15.2)                             | 0.8<br>(-2.5 to 4.3)                                |
| Low back and neck pain                                     | 348.8<br>(326.0 to 374.6)                     | 133.7<br>(120.5 to 147.7)                      | 39.4<br>(27.9 to 51.9)                | 5.1<br>(2.4 to 8.0)                               | 0.1<br>(-2.5 to 2.9)                                |
| Low back pain                                              | 210.5<br>(186.9 to 236.5)                     | 99.7<br>(87.5 to 113.4)                        | 23.7<br>(16.7 to 31.4)                | 4.8<br>(0.5 to 9.5)                               | 0.2<br>(-4.0 to 4.7)                                |
| Neck pain                                                  | 158.3<br>(136.9 to 183.0)                     | 33.9<br>(29.5 to 39.7)                         | 15.7<br>(10.7 to 22.3)                | 5.6<br>(3.3 to 7.9)                               | 0.1<br>(-2.1 to 2.2)                                |
| Gout                                                       | 14.0<br>(12.5 to 15.6)                        | 2.7<br>(2.4 to 3.1)                            | 0.4<br>(0.3 to 0.6)                   | 7.4<br>(-7.3 to 23.8)                             | -0.4<br>(-14.5 to 15.1)                             |
| Other musculoskeletal disorders                            | 205.0<br>(174.9 to 237.8)                     | 178.1<br>(149.8 to 215.2)                      | 17.5<br>(11.7 to 24.6)                | -1.0<br>(-8.7 to 6.6)                             | -4.9<br>(-12.1 to 2.7)                              |
| <b>Other non-communicable diseases</b>                     | <b>2,749.6</b><br><b>(2,711.3 to 2,790.4)</b> | <b>8,020.2†</b><br><b>(7,562.7 to 8,512.7)</b> | <b>86.5</b><br><b>(59.0 to 122.5)</b> | <b>3.7</b><br><b>(2.6 to 4.9)</b>                 | <b>-0.1</b><br><b>(-1.0 to 0.9)</b>                 |
| Congenital anomalies                                       | 29.1<br>(25.5 to 33.5)                        | --                                             | 3.4<br>(2.4 to 4.5)                   | -3.4<br>(-8.9 to 2.4)                             | -0.2<br>(-5.7 to 5.5)                               |
| Neural tube defects                                        | 2.0<br>(1.8 to 2.3)                           | --                                             | 0.6<br>(0.4 to 0.8)                   | -1.9<br>(-16.2 to 14.3)                           | -0.2<br>(-14.8 to 16.9)                             |
| Congenital heart anomalies                                 | 7.4<br>(6.6 to 8.3)                           | --                                             | 0.4<br>(0.2 to 0.7)                   | -6.9<br>(-17.3 to 4.2)                            | -4.3<br>(-15.6 to 6.8)                              |
| Orofacial clefts                                           | 2.2<br>(1.9 to 2.5)                           | --                                             | < 0.05<br>(< 0.05 to < 0.05)          | -11.3<br>(-21.4 to -0.5)                          | -9.3<br>(-19.6 to 1.8)                              |
| Down's syndrome                                            | 2.1<br>(1.8 to 2.5)                           | --                                             | 0.2<br>(0.1 to 0.3)                   | -1.8<br>(-11.9 to 9.3)                            | 3.0<br>(-8.1 to 14.8)                               |
| Turner syndrome                                            | 0.5<br>(0.4 to 0.6)                           | --                                             | < 0.05<br>(< 0.05 to < 0.05)          | -3.2<br>(-17.4 to 11.6)                           | 0.2<br>(-14.7 to 15.2)                              |
| Klinefelter syndrome                                       | 0.8<br>(0.7 to 0.9)                           | --                                             | < 0.05<br>(< 0.05 to < 0.05)          | -2.6<br>(-27.5 to 32.4)                           | 2.5<br>(-23.9 to 39.7)                              |

| Cause                                         | Prevalence in thousands (95% UI)        | Incidence in thousands (95% UI)          | YLDs in thousands (95% UI)           |                                                   |                                                     |
|-----------------------------------------------|-----------------------------------------|------------------------------------------|--------------------------------------|---------------------------------------------------|-----------------------------------------------------|
|                                               | 2016 counts                             | 2016 counts                              | 2016 counts                          | Percentage change in counts between 2006 and 2016 | Percentage change in age-standardised rates between |
| Other chromosomal abnormalities               | 2.0<br>(1.6 to 2.3)                     | --                                       | 0.2<br>(0.1 to 0.3)                  | -13.9<br>(-26.9 to 0.3)                           | -0.9<br>(-15.9 to 15.9)                             |
| Congenital musculoskeletal and limb anomalies | 3.1<br>(2.9 to 3.4)                     | --                                       | 0.5<br>(0.3 to 0.7)                  | 0.1<br>(-9.0 to 10.3)                             | 0.8<br>(-8.5 to 11.3)                               |
| Urogenital congenital anomalies               | 3.5<br>(3.0 to 4.2)                     | --                                       | 0.1<br>(0.1 to 0.2)                  | -11.5<br>(-23.8 to 3.1)                           | 1.1<br>(-13.2 to 18.3)                              |
| Digestive congenital anomalies                | 3.0<br>(2.6 to 3.3)                     | --                                       | 0.1<br>(0.1 to 0.2)                  | -2.9<br>(-17.7 to 14.2)                           | -0.9<br>(-16.9 to 17.5)                             |
| Other congenital anomalies                    | 10.4<br>(6.4 to 15.8)                   | --                                       | 1.2<br>(0.8 to 1.8)                  | -1.4<br>(-11.0 to 9.4)                            | 0.7<br>(-9.3 to 11.7)                               |
| Skin and subcutaneous diseases                | 1,295.1<br>(1,259.6 to 1,330.1)         | 3,286.8<br>(3,069.6 to 3,526.2)          | 29.4<br>(19.9 to 42.7)               | -3.5<br>(-5.2 to -1.7)                            | 0.1<br>(-1.4 to 1.9)                                |
| Dermatitis                                    | 167.2<br>(156.9 to 178.3)               | 200.2<br>(185.5 to 215.3)                | 6.4<br>(3.8 to 10.4)                 | -5.9<br>(-9.0 to -2.9)                            | -0.1<br>(-3.1 to 3.1)                               |
| Psoriasis                                     | 45.2<br>(43.1 to 47.4)                  | 5.5<br>(5.3 to 5.8)                      | 3.9<br>(2.8 to 5.1)                  | 2.4<br>(-3.6 to 9.1)                              | 1.0<br>(-5.3 to 7.5)                                |
| Cellulitis                                    | 1.5<br>(1.4 to 1.6)                     | 27.7<br>(25.9 to 29.5)                   | 0.1<br>(0.1 to 0.1)                  | -1.1<br>(-20.0 to 19.5)                           | 0.1<br>(-19.8 to 22.8)                              |
| Pyoderma                                      | 12.8<br>(12.3 to 13.3)                  | 318.7<br>(305.7 to 332.8)                | 0.1<br>(< 0.05 to 0.1)               | 6.5<br>(0.1 to 13.2)                              | 0.7<br>(-5.5 to 7.1)                                |
| Scabies                                       | 56.7<br>(50.1 to 64.4)                  | 175.3<br>(153.4 to 199.8)                | 1.5<br>(0.8 to 2.3)                  | -7.6<br>(-11.1 to -4.0)                           | -2.8<br>(-6.4 to 1.2)                               |
| Fungal skin diseases                          | 450.5<br>(404.2 to 497.1)               | 1,679.6<br>(1,465.7 to 1,916.0)          | 2.5<br>(1.0 to 5.2)                  | 2.9<br>(1.4 to 4.3)                               | 0.1<br>(-0.9 to 1.0)                                |
| Viral skin diseases                           | 96.9<br>(92.3 to 101.5)                 | 146.3<br>(138.5 to 154.0)                | 3.0<br>(1.8 to 4.4)                  | -4.9<br>(-7.8 to -2.1)                            | -0.3<br>(-3.2 to 2.6)                               |
| Acne vulgaris                                 | 287.6<br>(260.3 to 315.0)               | 189.1<br>(157.1 to 229.4)                | 7.4<br>(4.9 to 10.6)                 | -7.4<br>(-11.3 to -3.2)                           | 0.9<br>(-3.3 to 5.5)                                |
| Alopecia areata                               | 6.5<br>(6.2 to 6.7)                     | 11.4<br>(11.0 to 11.9)                   | 0.2<br>(0.1 to 0.3)                  | -0.3<br>(-10.3 to 11.0)                           | 0.1<br>(-10.3 to 11.9)                              |
| Pruritus                                      | 38.2<br>(33.8 to 43.4)                  | 29.9<br>(26.8 to 34.0)                   | 0.4<br>(0.2 to 0.7)                  | 2.8<br>(-2.5 to 7.9)                              | 0.3<br>(-4.7 to 5.1)                                |
| Urticaria                                     | 29.5<br>(26.1 to 33.4)                  | 52.3<br>(46.4 to 59.1)                   | 1.8<br>(1.1 to 2.5)                  | -4.9<br>(-10.1 to 0.2)                            | -0.1<br>(-5.7 to 5.0)                               |
| Decubitus ulcer                               | 2.4<br>(2.1 to 2.7)                     | 8.8<br>(7.8 to 10.0)                     | 0.4<br>(0.2 to 0.5)                  | 9.2<br>(-4.1 to 25.6)                             | -2.9<br>(-14.9 to 11.5)                             |
| Other skin and subcutaneous diseases          | 362.2<br>(351.9 to 372.6)               | 442.0<br>(426.7 to 457.5)                | 2.0<br>(1.0 to 3.6)                  | 4.7<br>(2.5 to 7.0)                               | -0.1<br>(-2.3 to 2.2)                               |
| Sense organ diseases                          | 1,058.7<br>(1,039.0 to 1,080.8)         | 389.8†<br>(367.9 to 414.5)               | 37.8<br>(26.4 to 52.8)               | 9.1<br>(7.4 to 11.0)                              | -0.4<br>(-2.0 to 1.2)                               |
| Glaucoma                                      | 6.1<br>(5.1 to 7.2)                     | --                                       | 0.7<br>(0.5 to 1.0)                  | 13.2<br>(2.0 to 25.4)                             | -1.1<br>(-11.3 to 10.0)                             |
| Cataract                                      | 56.7<br>(50.0 to 64.0)                  | --                                       | 4.3<br>(3.1 to 5.9)                  | 11.3<br>(6.9 to 15.9)                             | -3.2<br>(-7.2 to 1.0)                               |
| Macular degeneration                          | 1.8<br>(1.4 to 2.2)                     | --                                       | 0.1<br>(0.1 to 0.2)                  | 15.2<br>(-0.9 to 34.3)                            | 0.2<br>(-14.2 to 17.4)                              |
| Refraction and accommodation disorders        | 388.0<br>(372.5 to 403.2)               | --                                       | 5.9<br>(3.5 to 9.5)                  | 1.2<br>(-1.8 to 4.3)                              | -3.0<br>(-5.8 to 0.1)                               |
| Age-related and other hearing loss            | 824.2<br>(788.1 to 862.6)               | --                                       | 21.3<br>(14.7 to 30.1)               | 11.3<br>(8.6 to 14.2)                             | 0.9<br>(-1.6 to 3.5)                                |
| Other vision loss                             | 11.8<br>(10.6 to 13.1)                  | --                                       | 1.2<br>(0.8 to 1.6)                  | 7.4<br>(-0.5 to 16.3)                             | -0.7<br>(-8.0 to 7.7)                               |
| Other sense organ diseases                    | 137.8<br>(126.1 to 149.2)               | 389.8<br>(367.9 to 414.5)                | 4.3<br>(2.7 to 6.5)                  | 7.5<br>(3.8 to 11.4)                              | 0.2<br>(-3.2 to 3.9)                                |
| Oral disorders                                | 1,871.6<br>(1,802.3 to 1,936.3)         | 4,343.7†<br>(3,942.2 to 4,786.2)         | 15.9<br>(9.6 to 24.7)                | 7.4<br>(5.3 to 9.8)                               | 0.0<br>(-1.7 to 1.8)                                |
| Caries of deciduous teeth                     | 187.0<br>(150.8 to 223.4)               | 657.5<br>(463.0 to 893.8)                | 0.1<br>(< 0.05 to 0.1)               | -14.7<br>(-22.2 to -6.4)                          | -0.1<br>(-9.0 to 9.1)                               |
| Caries of permanent teeth                     | 1,073.9<br>(995.7 to 1,149.7)           | 3,583.6<br>(3,233.5 to 3,933.5)          | 1.1<br>(0.5 to 2.1)                  | 1.0<br>(-2.5 to 4.4)                              | 1.0<br>(-2.6 to 4.5)                                |
| Periodontal disease                           | 675.3<br>(583.4 to 781.8)               | 78.7<br>(66.2 to 92.2)                   | 4.4<br>(1.8 to 9.1)                  | 4.0<br>(1.1 to 6.9)                               | -0.6<br>(-3.5 to 2.1)                               |
| Edentulism and severe tooth loss              | 300.2<br>(261.7 to 340.4)               | 24.0<br>(20.2 to 28.3)                   | 8.2<br>(5.4 to 11.6)                 | 12.4<br>(9.0 to 15.8)                             | 0.4<br>(-2.8 to 3.4)                                |
| Other oral disorders                          | 71.5<br>(68.5 to 74.4)                  | --                                       | 2.1<br>(1.3 to 3.1)                  | 0.7<br>(-2.6 to 3.9)                              | -0.1<br>(-3.4 to 3.2)                               |
| <b>Injuries</b>                               | <b>744.8</b><br><b>(698.7 to 805.5)</b> | <b>289.8†</b><br><b>(272.3 to 307.8)</b> | <b>26.6</b><br><b>(17.9 to 37.9)</b> | <b>8.4</b><br><b>(6.5 to 10.0)</b>                | <b>3.3</b><br><b>(1.4 to 4.8)</b>                   |
| <b>Transport injuries</b>                     | <b>89.4</b><br><b>(83.4 to 95.8)</b>    | <b>26.2</b><br><b>(23.6 to 29.2)</b>     | <b>4.3</b><br><b>(2.8 to 6.2)</b>    | <b>3.3</b><br><b>(1.2 to 5.1)</b>                 | <b>-1.5</b><br><b>(-3.7 to 0.4)</b>                 |
| Road injuries                                 | 85.4<br>(79.7 to 91.7)                  | 25.5<br>(22.9 to 28.4)                   | 4.1<br>(2.7 to 6.0)                  | 3.3<br>(1.1 to 5.1)                               | -1.7<br>(-3.8 to 0.3)                               |
| Pedestrian road injuries                      | 14.3<br>(12.6 to 16.3)                  | 3.3<br>(2.8 to 3.9)                      | 0.7<br>(0.5 to 1.0)                  | 0.2<br>(-1.8 to 1.9)                              | -5.5<br>(-7.5 to -3.7)                              |
| Cyclist road injuries                         | 19.8<br>(16.5 to 23.2)                  | 6.4<br>(5.2 to 7.6)                      | 0.9<br>(0.6 to 1.3)                  | 15.3<br>(12.8 to 17.6)                            | 10.4<br>(7.9 to 12.7)                               |
| Motorcyclist road injuries                    | 18.0<br>(15.2 to 21.9)                  | 3.5<br>(2.9 to 4.3)                      | 0.8<br>(0.5 to 1.2)                  | 6.9<br>(4.6 to 9.3)                               | 2.2<br>(-0.2 to 4.4)                                |
| Motor vehicle road injuries                   | 24.4<br>(21.1 to 28.1)                  | 8.8<br>(7.6 to 10.0)                     | 1.3<br>(0.9 to 1.9)                  | -7.8<br>(-9.9 to -5.9)                            | -12.2<br>(-14.4 to -10.2)                           |
| Other road injuries                           | 8.8<br>(7.7 to 10.2)                    | 3.5<br>(2.8 to 4.4)                      | 0.4<br>(0.3 to 0.6)                  | 19.6<br>(17.4 to 21.8)                            | 12.8<br>(10.7 to 15.0)                              |
| Other transport injuries                      | 4.0<br>(3.4 to 4.8)                     | 0.7<br>(0.6 to 0.9)                      | 0.2<br>(0.1 to 0.3)                  | 4.9<br>(2.2 to 7.4)                               | 1.7<br>(-1.2 to 4.2)                                |
| <b>Unintentional injuries</b>                 | <b>608.0</b><br><b>(562.1 to 665.3)</b> | <b>245.1</b><br><b>(227.9 to 263.3)</b>  | <b>20.1</b><br><b>(13.8 to 28.5)</b> | <b>10.3</b><br><b>(8.5 to 12.0)</b>               | <b>4.9</b><br><b>(2.9 to 6.5)</b>                   |
| Falls                                         | 298.5<br>(264.9 to 335.2)               | 126.2<br>(111.8 to 142.3)                | 11.8<br>(8.3 to 16.4)                | 10.7<br>(8.7 to 12.6)                             | 3.6<br>(1.5 to 5.4)                                 |
| Drowning                                      | 1.9<br>(1.7 to 2.2)                     | 0.3<br>(0.3 to 0.4)                      | 0.1<br>(0.1 to 0.1)                  | 8.3<br>(5.7 to 10.6)                              | 3.5<br>(1.0 to 5.9)                                 |
| Fire, heat, and hot substances                | 63.3<br>(51.8 to 79.8)                  | 5.9<br>(4.7 to 7.1)                      | 1.4<br>(0.9 to 2.2)                  | 15.5<br>(11.1 to 19.5)                            | 14.1<br>(9.7 to 18.0)                               |
| Poisonings                                    | 2.0<br>(1.7 to 2.4)                     | 2.1<br>(1.7 to 2.5)                      | 0.2<br>(0.1 to 0.3)                  | 4.8<br>(-3.4 to 13.8)                             | 4.6<br>(-4.1 to 14.1)                               |
| Exposure to mechanical forces                 | 94.6<br>(80.1 to 114.4)                 | 28.5<br>(24.6 to 32.4)                   | 2.0<br>(1.3 to 3.0)                  | 14.1<br>(11.9 to 16.1)                            | 10.5<br>(8.3 to 12.5)                               |
| Unintentional firearm injuries                | 7.1<br>(5.8 to 8.8)                     | 1.4<br>(1.1 to 1.9)                      | 0.2<br>(0.2 to 0.4)                  | 10.1<br>(7.7 to 12.3)                             | 5.9<br>(3.6 to 7.9)                                 |
| Unintentional suffocation                     | 2.8<br>(2.0 to 3.5)                     | 0.4<br>(0.2 to 0.5)                      | 0.1<br>(< 0.05 to 0.1)               | 8.8<br>(6.1 to 11.3)                              | 9.2<br>(6.2 to 12.1)                                |
| Other exposure to mechanical forces           | 84.8<br>(71.0 to 104.4)                 | 26.7<br>(23.1 to 30.4)                   | 1.7<br>(1.1 to 2.5)                  | 15.1<br>(12.8 to 17.0)                            | 11.3<br>(9.2 to 13.3)                               |



| Cause                                                                               | Prevalence in thousands (95% UI) | Incidence in thousands (95% UI)                                                                | YLDs in thousands (95% UI)                                        |                                                   |                                                     |
|-------------------------------------------------------------------------------------|----------------------------------|------------------------------------------------------------------------------------------------|-------------------------------------------------------------------|---------------------------------------------------|-----------------------------------------------------|
|                                                                                     | 2016 counts                      | 2016 counts                                                                                    | 2016 counts                                                       | Percentage change in counts between 2006 and 2016 | Percentage change in age-standardised rates between |
| Adverse effects of medical treatment                                                | 1.8<br>(1.4 to 2.1)              | 22.9<br>(20.5 to 25.4)                                                                         | 0.2<br>(0.1 to 0.3)                                               | 4.9<br>(-0.5 to 12.1)                             | -1.6<br>(-6.7 to 4.9)                               |
| Animal contact                                                                      | 10.0<br>(8.9 to 11.5)            | 9.5<br>(7.8 to 11.5)                                                                           | 0.3<br>(0.2 to 0.5)                                               | 2.2<br>(-3.6 to 8.4)                              | 1.4<br>(-4.7 to 7.9)                                |
| Venomous animal contact                                                             | 5.7<br>(4.8 to 6.8)              | 4.9<br>(3.9 to 6.3)                                                                            | 0.3<br>(0.2 to 0.4)                                               | 2.4<br>(-4.7 to 10.1)                             | 2.1<br>(-5.4 to 10.1)                               |
| Non-venomous animal contact                                                         | 4.2<br>(3.6 to 5.3)              | 4.6<br>(3.6 to 5.7)                                                                            | 0.1<br>( $< 0.05$ to 0.1)                                         | 1.7<br>(-0.9 to 4.2)                              | -1.7<br>(-4.4 to 0.8)                               |
| Foreign body                                                                        | 24.7<br>(21.2 to 28.3)           | 21.4<br>(18.5 to 25.1)                                                                         | 0.9<br>(0.6 to 1.3)                                               | 7.3<br>(5.2 to 9.4)                               | 2.4<br>(0.3 to 4.5)                                 |
| Pulmonary aspiration and foreign body in airway                                     | 15.0<br>(12.0 to 18.5)           | 6.1<br>(5.4 to 6.9)                                                                            | 0.6<br>(0.4 to 0.8)                                               | 7.4<br>(4.8 to 10.0)                              | 2.2<br>(-0.4 to 4.7)                                |
| Foreign body in eyes                                                                | 2.8<br>(1.7 to 4.0)              | 12.8<br>(10.1 to 16.3)                                                                         | 0.2<br>(0.1 to 0.3)                                               | 8.0<br>(5.1 to 11.5)                              | 2.5<br>(-0.5 to 5.7)                                |
| Foreign body in other body part                                                     | 7.0<br>(5.6 to 8.7)              | 2.5<br>(2.1 to 2.9)                                                                            | 0.2<br>(0.1 to 0.2)                                               | 6.2<br>(3.7 to 8.8)                               | 3.0<br>(0.2 to 5.5)                                 |
| Environmental heat and cold exposure                                                | 36.2<br>(31.3 to 41.9)           | 8.3<br>(7.0 to 9.7)                                                                            | 1.2<br>(0.8 to 1.7)                                               | 6.7<br>(4.7 to 8.4)                               | 2.5<br>(0.4 to 4.1)                                 |
| Other unintentional injuries                                                        | 74.9<br>(59.4 to 93.4)           | 20.1<br>(17.0 to 23.5)                                                                         | 2.0<br>(1.3 to 3.0)                                               | 7.5<br>(5.6 to 9.3)                               | 4.2<br>(2.1 to 5.9)                                 |
| <b>Self-harm and interpersonal violence</b>                                         | <b>109.8<br/>(99.9 to 119.6)</b> | <b>18.4†<br/>(16.0 to 21.1)</b>                                                                | <b>2.1<br/>(1.4 to 3.0)</b>                                       | <b>1.8<br/>(-0.2 to 3.6)</b>                      | <b>-0.3<br/>(-2.3 to 1.5)</b>                       |
| Self-harm                                                                           | 4.3<br>(3.8 to 4.9)              | 1.8<br>(1.6 to 2.1)                                                                            | 0.2<br>(0.1 to 0.2)                                               | -0.1<br>(-2.6 to 2.1)                             | -6.0<br>(-8.5 to -3.9)                              |
| Self-harm by firearm                                                                | 0.3<br>(0.2 to 0.3)              | 0.1<br>( $< 0.05$ to 0.1)                                                                      | $< 0.05$<br>( $< 0.05$ to $< 0.05$ )                              | -18.7<br>(-21.1 to -16.5)                         | -21.2<br>(-23.7 to -18.9)                           |
| Self-harm by other specified means                                                  | 4.0<br>(3.5 to 4.6)              | 1.8<br>(1.5 to 2.0)                                                                            | 0.2<br>(0.1 to 0.2)                                               | 1.1<br>(-1.5 to 3.4)                              | -5.0<br>(-7.5 to -2.8)                              |
| Interpersonal violence                                                              | 105.5<br>(95.6 to 115.1)         | 16.6†<br>(14.2 to 19.4)                                                                        | 1.9<br>(1.3 to 2.7)                                               | 2.0<br>(-0.1 to 3.9)                              | 0.2<br>(-1.9 to 2.0)                                |
| Assault by firearm                                                                  | 9.3<br>(7.3 to 11.4)             | 2.7<br>(2.0 to 3.5)                                                                            | 0.4<br>(0.2 to 0.6)                                               | -2.8<br>(-5.5 to 0.0)                             | -6.4<br>(-9.1 to -3.6)                              |
| Assault by sharp object                                                             | 14.7<br>(12.0 to 17.7)           | 5.2<br>(4.1 to 6.5)                                                                            | 0.4<br>(0.2 to 0.5)                                               | 6.7<br>(4.2 to 8.8)                               | 3.5<br>(1.1 to 5.8)                                 |
| Sexual violence                                                                     | 63.8<br>(56.0 to 72.5)           | --                                                                                             | 0.5<br>(0.4 to 0.7)                                               | -5.0<br>(-9.1 to -0.7)                            | -1.9<br>(-6.2 to 2.5)                               |
| Assault by other means                                                              | 17.7<br>(15.1 to 21.2)           | 8.7<br>(7.3 to 10.4)                                                                           | 0.7<br>(0.4 to 1.0)                                               | 8.6<br>(6.5 to 10.7)                              | 4.7<br>(2.5 to 6.8)                                 |
| <b>Forces of nature, conflict and terrorism, and executions and police conflict</b> | <b>1.4<br/>(0.4 to 2.6)</b>      | <b><math>&lt; 0.05^{\dagger}</math><br/>(<math>&lt; 0.05</math> to <math>&lt; 0.05</math>)</b> | <b><math>&lt; 0.05</math><br/>(<math>&lt; 0.05</math> to 0.1)</b> | <b>-19.9<br/>(-22.0 to -15.2)</b>                 | <b>-25.1<br/>(-27.2 to -20.1)</b>                   |
| Exposure to forces of nature                                                        | 1.1<br>(0.2 to 2.4)              | --                                                                                             | $< 0.05$<br>( $< 0.05$ to 0.1)                                    | -24.6<br>(-26.5 to -22.1)                         | -29.8<br>(-31.7 to -27.4)                           |
| Conflict and terrorism                                                              | 0.1<br>(0.1 to 0.1)              | --                                                                                             | $< 0.05$<br>( $< 0.05$ to $< 0.05$ )                              | 129.0<br>(119.7 to 139.2)                         | 117.1<br>(108.1 to 127.0)                           |
| Executions and police conflict                                                      | 0.1<br>(0.1 to 0.2)              | $< 0.05$<br>( $< 0.05$ to $< 0.05$ )                                                           | $< 0.05$<br>( $< 0.05$ to $< 0.05$ )                              | -10.8<br>(-13.9 to -7.9)                          | -15.5<br>(-18.4 to -12.5)                           |
| <b>Impairments</b>                                                                  | --                               | --                                                                                             | --                                                                | --                                                | --                                                  |
| Anaemia                                                                             | 801.5<br>(693.8 to 903.9)        | --                                                                                             | 19.8<br>(13.2 to 28.8)                                            | -6.0<br>(-16.9 to 6.0)                            | -6.0<br>(-18.4 to 6.6)                              |
| Developmental intellectual disability                                               | 50.6<br>(39.7 to 62.3)           | --                                                                                             | 8.2<br>(5.6 to 12.8)                                              | -8.2<br>(-14.7 to -1.8)                           | -4.9<br>(-11.7 to 2.0)                              |
| Epilepsy                                                                            | 25.6<br>(13.7 to 40.2)           | --                                                                                             | 7.9<br>(3.9 to 13.6)                                              | -14.4<br>(-52.2 to 64.6)                          | -11.9<br>(-49.7 to 67.0)                            |
| Guillain-Barre syndrome                                                             | 0.1<br>(0.1 to 0.1)              | --                                                                                             | $< 0.05$<br>( $< 0.05$ to $< 0.05$ )                              | 114.1<br>(52.0 to 275.4)                          | 118.1<br>(52.8 to 285.4)                            |
| Hearing loss                                                                        | 860.3<br>(825.2 to 897.6)        | --                                                                                             | 23.0<br>(16.0 to 32.3)                                            | 9.9<br>(7.4 to 12.5)                              | 0.7<br>(-1.5 to 3.0)                                |
| Heart failure                                                                       | 42.5<br>(37.3 to 48.6)           | --                                                                                             | 4.6<br>(3.5 to 5.9)                                               | 13.6<br>(5.9 to 21.4)                             | -0.2<br>(-6.8 to 6.7)                               |
| Infertility                                                                         | 69.4<br>(53.8 to 90.3)           | --                                                                                             | 0.4<br>(0.2 to 0.8)                                               | -1.7<br>(-6.9 to 3.9)                             | -0.4<br>(-5.7 to 5.3)                               |
| Pelvic inflammatory disease                                                         | 0.6<br>(0.5 to 0.7)              | --                                                                                             | 0.1<br>(0.1 to 0.1)                                               | -5.6<br>(-23.4 to 17.0)                           | -5.7<br>(-23.6 to 16.4)                             |
| Vision loss                                                                         | 479.1<br>(459.8 to 498.0)        | --                                                                                             | 16.1<br>(11.6 to 22.6)                                            | 0.5<br>(-4.9 to 5.1)                              | -5.3<br>(-9.8 to -1.1)                              |

We did not calculate incidence for the nine impairments, certain NTDs, and causes with only birth prevalence. Blank cells mean that no estimate is available.

† Incidence for aggregate causes represents the sum of the incidence of the causes below the aggregate.

‡ Incidence estimates for stroke represent first-ever stroke only.

^ Incidence of HIV/AIDS represents new infections of HIV only and does not include new infections of Tuberculosis in HIV positive cases.

SR Table 14: Prevalence, incidence, and YLDs for 2016, percentage change of YLD counts and percentage change of age-standardised YLD rates between 2006 and 2016 by cause and impairments, for all ages, Qatar.

| Cause                                                                                | Prevalence in thousands (95% UI)       | Incidence in thousands (95% UI)            | YLDs in thousands (95% UI)       |                                                   |                                                     |
|--------------------------------------------------------------------------------------|----------------------------------------|--------------------------------------------|----------------------------------|---------------------------------------------------|-----------------------------------------------------|
|                                                                                      | 2016 counts                            | 2016 counts                                | 2016 counts                      | Percentage change in counts between 2006 and 2016 | Percentage change in age-standardised rates between |
| <b>All causes</b>                                                                    | <b>2,173.9</b><br>(2,156.1 to 2,192.5) | <b>12,249.1†</b><br>(11,411.6 to 13,283.2) | <b>239.2</b><br>(176.6 to 312.6) | <b>134.6</b><br>(130.5 to 139.1)                  | <b>-1.9</b><br>(-3.4 to -0.3)                       |
| <b>Communicable, maternal, neonatal, and nutritional disorders</b>                   | <b>1,346.1</b><br>(1,195.2 to 1,508.5) | <b>6,881.4†</b><br>(6,105.0 to 7,794.9)    | <b>14.7</b><br>(10.3 to 20.4)    | <b>125.6</b><br>(114.6 to 140.2)                  | <b>-3.3</b><br>(-8.0 to 2.8)                        |
| <b>HIV/AIDS and tuberculosis</b>                                                     | <b>955.3</b><br>(675.0 to 1,241.8)     | <b>0.9†</b><br>(0.6 to 1.3)                | <b>0.1</b><br>(0.1 to 0.2)       | <b>103.3</b><br>(37.6 to 191.1)                   | <b>-16.2</b><br>(-36.6 to 8.7)                      |
| Tuberculosis                                                                         | 808.2<br>(513.5 to 1,148.7)            | 0.9†<br>(0.6 to 1.3)                       | 0.1<br>(0.1 to 0.2)              | 114.3<br>(39.6 to 219.5)                          | -10.9<br>(-34.9 to 17.0)                            |
| Drug-susceptible tuberculosis                                                        | 0.4<br>(0.2 to 0.6)                    | 0.9<br>(0.5 to 1.3)                        | 0.1<br>(0.1 to 0.2)              | 113.1<br>(36.5 to 220.0)                          | -11.4<br>(-34.9 to 16.4)                            |
| Multidrug-resistant tuberculosis without extensive drug resistance                   | < 0.05<br>(< 0.05 to < 0.05)           | < 0.05<br>(< 0.05 to < 0.05)               | < 0.05<br>(< 0.05 to < 0.05)     | 225.4<br>(-39.7 to 1,247.0)                       | 36.4<br>(-74.4 to 453.4)                            |
| Extensively drug-resistant tuberculosis                                              | < 0.05<br>(< 0.05 to < 0.05)           | < 0.05<br>(< 0.05 to < 0.05)               | < 0.05<br>(< 0.05 to < 0.05)     | 638.9<br>(36.9 to 2,958.6)                        | 209.8<br>(-41.8 to 1,155.9)                         |
| Latent tuberculosis infection                                                        | 807.9<br>(513.1 to 1,148.2)            | --                                         | --                               | --                                                | --                                                  |
| HIV/AIDS                                                                             | 0.1<br>(< 0.05 to 0.1)                 | < 0.05^<br>(< 0.05 to < 0.05)              | < 0.05<br>(< 0.05 to < 0.05)     | 27.4<br>(11.8 to 46.0)                            | -50.8<br>(-56.4 to -46.8)                           |
| Drug-susceptible HIV/AIDS - Tuberculosis                                             | < 0.05<br>(< 0.05 to < 0.05)           | < 0.05<br>(< 0.05 to < 0.05)               | < 0.05<br>(< 0.05 to < 0.05)     | 30.1<br>(10.9 to 52.3)                            | -52.0<br>(-59.4 to -43.9)                           |
| Multidrug-resistant HIV/AIDS - Tuberculosis without extensive drug resistance        | < 0.05<br>(< 0.05 to < 0.05)           | < 0.05<br>(< 0.05 to < 0.05)               | < 0.05<br>(< 0.05 to < 0.05)     | 98.6<br>(-64.0 to 722.7)                          | -26.5<br>(-86.8 to 202.0)                           |
| Extensively drug-resistant HIV/AIDS - Tuberculosis                                   | < 0.05<br>(< 0.05 to < 0.05)           | < 0.05<br>(< 0.05 to < 0.05)               | < 0.05<br>(< 0.05 to < 0.05)     | 351.1<br>(-18.2 to 1,769.3)                       | 66.9<br>(-70.0 to 586.1)                            |
| HIV/AIDS resulting in other diseases                                                 | 0.1<br>(< 0.05 to 0.1)                 | < 0.05<br>(< 0.05 to < 0.05)               | < 0.05<br>(< 0.05 to < 0.05)     | 27.3<br>(11.2 to 46.4)                            | -50.8<br>(-56.6 to -46.6)                           |
| <b>Diarrhoea, lower respiratory infections, and other common infectious diseases</b> | <b>104.4</b><br>(95.8 to 112.8)        | <b>6,283.8†</b><br>(5,518.1 to 7,174.7)    | <b>4.5</b><br>(3.1 to 6.2)       | <b>126.9</b><br>(118.4 to 137.2)                  | <b>0.4</b><br>(-2.8 to 4.1)                         |
| Diarrhoeal diseases                                                                  | 9.3<br>(8.6 to 10.1)                   | 629.3<br>(578.0 to 681.5)                  | 1.1<br>(0.7 to 1.5)              | 117.0<br>(97.7 to 135.9)                          | 0.1<br>(-6.9 to 7.5)                                |
| Intestinal infectious diseases                                                       | < 0.05<br>(< 0.05 to 0.1)              | 0.8†<br>(0.7 to 1.0)                       | < 0.05<br>(< 0.05 to < 0.05)     | 72.0<br>(48.0 to 102.2)                           | -21.1<br>(-31.6 to -9.0)                            |
| Typhoid fever                                                                        | < 0.05<br>(< 0.05 to 0.1)              | 0.7<br>(0.6 to 0.8)                        | < 0.05<br>(< 0.05 to < 0.05)     | 71.9<br>(46.2 to 103.7)                           | -21.0<br>(-32.3 to -8.2)                            |
| Paratyphoid fever                                                                    | < 0.05<br>(< 0.05 to < 0.05)           | 0.2<br>(0.1 to 0.2)                        | < 0.05<br>(< 0.05 to < 0.05)     | 83.7<br>(52.3 to 123.7)                           | -16.7<br>(-29.8 to -1.9)                            |
| Other intestinal infectious diseases                                                 | --                                     | --                                         | < 0.05<br>(< 0.05 to < 0.05)     | 22.9<br>(0.7 to 50.6)                             | -39.9<br>(-49.5 to -28.4)                           |
| Lower respiratory infections                                                         | 1.3<br>(1.2 to 1.5)                    | 61.9<br>(55.4 to 68.8)                     | 0.1<br>(0.1 to 0.1)              | 138.6<br>(105.9 to 178.9)                         | 6.0<br>(-5.6 to 18.8)                               |
| Upper respiratory infections                                                         | 72.3<br>(62.3 to 83.8)                 | 5,437.2<br>(4,684.9 to 6,343.1)            | 1.8<br>(1.1 to 2.9)              | 128.9<br>(116.2 to 143.2)                         | 0.0<br>(-4.7 to 5.3)                                |
| Otitis media                                                                         | 17.9<br>(15.9 to 19.9)                 | 116.6<br>(96.8 to 142.4)                   | 0.5<br>(0.3 to 0.7)              | 100.7<br>(83.7 to 118.2)                          | -3.7<br>(-11.3 to 3.6)                              |
| Meningitis                                                                           | 3.1<br>(2.8 to 3.5)                    | 0.5<br>(0.4 to 0.6)                        | 0.4<br>(0.3 to 0.6)              | 137.7<br>(122.0 to 153.6)                         | 0.3<br>(-6.0 to 6.8)                                |
| Pneumococcal meningitis                                                              | 1.2<br>(1.1 to 1.5)                    | 0.1<br>(< 0.05 to 0.1)                     | 0.2<br>(0.1 to 0.2)              | 133.9<br>(99.0 to 171.6)                          | -1.8<br>(-15.9 to 13.1)                             |
| H influenzae type B meningitis                                                       | 0.6<br>(0.5 to 0.7)                    | 0.1<br>(< 0.05 to 0.1)                     | 0.1<br>(0.1 to 0.1)              | 143.9<br>(132.2 to 156.5)                         | 3.0<br>(-1.6 to 8.4)                                |
| Meningococcal infection                                                              | 0.5<br>(0.4 to 0.6)                    | 0.1<br>(0.1 to 0.2)                        | 0.1<br>(< 0.05 to 0.1)           | 136.4<br>(125.0 to 147.5)                         | -0.5<br>(-5.3 to 4.2)                               |
| Other meningitis                                                                     | 0.8<br>(0.6 to 1.0)                    | 0.2<br>(0.2 to 0.3)                        | 0.1<br>(0.1 to 0.1)              | 139.1<br>(125.9 to 152.1)                         | 2.1<br>(-4.1 to 9.3)                                |
| Encephalitis                                                                         | 4.0<br>(3.1 to 5.3)                    | 2.4<br>(2.1 to 2.8)                        | 0.6<br>(0.4 to 0.8)              | 160.1<br>(114.7 to 217.5)                         | 7.8<br>(-7.9 to 26.8)                               |
| Diphtheria                                                                           | < 0.05<br>(< 0.05 to < 0.05)           | < 0.05<br>(< 0.05 to < 0.05)               | < 0.05<br>(< 0.05 to < 0.05)     | 36.2<br>(-31.9 to 172.2)                          | -37.8<br>(-68.6 to 19.1)                            |
| Whooping cough                                                                       | 0.1<br>(0.1 to 0.1)                    | 0.5<br>(0.4 to 0.7)                        | < 0.05<br>(< 0.05 to < 0.05)     | 14.3<br>(-28.5 to 69.8)                           | -38.5<br>(-62.1 to -7.5)                            |
| Tetanus                                                                              | < 0.05<br>(< 0.05 to < 0.05)           | < 0.05<br>(< 0.05 to < 0.05)               | < 0.05<br>(< 0.05 to < 0.05)     | 140.8<br>(112.0 to 168.2)                         | 4.6<br>(-7.3 to 15.4)                               |
| Measles                                                                              | < 0.05<br>(< 0.05 to < 0.05)           | 0.4<br>(0.1 to 0.9)                        | < 0.05<br>(< 0.05 to < 0.05)     | 4.5<br>(-31.9 to 60.6)                            | -44.4<br>(-63.5 to -14.9)                           |
| Varicella and herpes zoster                                                          | 1.7<br>(1.5 to 1.9)                    | 34.0<br>(32.3 to 36.0)                     | 0.1<br>(< 0.05 to 0.1)           | 131.5<br>(86.9 to 182.6)                          | 0.1<br>(-12.6 to 13.9)                              |
| <b>Neglected tropical diseases and malaria</b>                                       | <b>14.4</b><br>(12.6 to 16.8)          | <b>&lt; 0.05†</b><br>(< 0.05 to < 0.05)    | <b>0.1</b><br>(0.1 to 0.2)       | <b>77.7</b><br>(43.7 to 116.4)                    | <b>-11.1</b><br>(-29.3 to 9.6)                      |
| Malaria                                                                              | --                                     | --                                         | --                               | --                                                | --                                                  |
| Chagas disease                                                                       | --                                     | --                                         | --                               | --                                                | --                                                  |
| Leishmaniasis                                                                        | --                                     | --                                         | --                               | --                                                | --                                                  |
| Visceral leishmaniasis                                                               | --                                     | --                                         | --                               | --                                                | --                                                  |
| Cutaneous and mucocutaneous leishmaniasis                                            | --                                     | --                                         | --                               | --                                                | --                                                  |
| African trypanosomiasis                                                              | --                                     | --                                         | --                               | --                                                | --                                                  |
| Schistosomiasis                                                                      | --                                     | --                                         | --                               | --                                                | --                                                  |
| Cysticercosis                                                                        | --                                     | --                                         | --                               | --                                                | --                                                  |
| Cystic echinococcosis                                                                | < 0.05<br>(< 0.05 to < 0.05)           | < 0.05<br>(< 0.05 to < 0.05)               | < 0.05<br>(< 0.05 to < 0.05)     | 6.4<br>(-96.1 to 1,768.7)                         | -55.1<br>(-97.3 to 496.3)                           |
| Lymphatic filariasis                                                                 | --                                     | --                                         | --                               | --                                                | --                                                  |
| Onchocerciasis                                                                       | --                                     | --                                         | --                               | --                                                | --                                                  |
| Trachoma                                                                             | --                                     | --                                         | --                               | --                                                | --                                                  |
| Dengue                                                                               | --                                     | --                                         | --                               | --                                                | --                                                  |
| Yellow fever                                                                         | --                                     | --                                         | --                               | --                                                | --                                                  |
| Rabies                                                                               | < 0.05<br>(< 0.05 to < 0.05)           | < 0.05<br>(< 0.05 to < 0.05)               | < 0.05<br>(< 0.05 to < 0.05)     | 66.1<br>(-26.7 to 170.2)                          | 29.0<br>(-63.8 to 104.7)                            |
| Intestinal nematode infections                                                       | 5.8<br>(4.8 to 7.0)                    | --                                         | < 0.05<br>(< 0.05 to < 0.05)     | 139.7<br>(68.9 to 240.0)                          | -2.0<br>(-31.1 to 35.4)                             |
| Ascariasis                                                                           | 2.0<br>(1.5 to 2.6)                    | --                                         | --                               | --                                                | --                                                  |

| Cause                                                                   | Prevalence in thousands (95% UI)              | Incidence in thousands (95% UI)                | YLDs in thousands (95% UI)              |                                                   |                                                     |
|-------------------------------------------------------------------------|-----------------------------------------------|------------------------------------------------|-----------------------------------------|---------------------------------------------------|-----------------------------------------------------|
|                                                                         | 2016 counts                                   | 2016 counts                                    | 2016 counts                             | Percentage change in counts between 2006 and 2016 | Percentage change in age-standardised rates between |
| Trichuriasis                                                            | 2.0<br>(1.4 to 2.8)                           | --                                             | --                                      | --                                                | --                                                  |
| Hookworm disease                                                        | 2.0<br>(1.5 to 2.5)                           | --                                             | < 0.05<br>(< 0.05 to < 0.05)            | 139.7<br>(68.9 to 240.0)                          | -2.0<br>(-31.1 to 35.4)                             |
| Food-borne trematodiasis                                                | --                                            | --                                             | --                                      | --                                                | --                                                  |
| Leprosy                                                                 | < 0.05<br>(< 0.05 to < 0.05)                  | < 0.05<br>(< 0.05 to < 0.05)                   | < 0.05<br>(< 0.05 to < 0.05)            | 99.8<br>(24.3 to 277.0)                           | -11.4<br>(-36.8 to 60.0)                            |
| Ebola virus disease                                                     | --                                            | --                                             | --                                      | --                                                | --                                                  |
| Zika virus disease                                                      | --                                            | --                                             | --                                      | --                                                | --                                                  |
| Guinea worm disease                                                     | --                                            | --                                             | --                                      | --                                                | --                                                  |
| Other neglected tropical diseases                                       | 8.3<br>(7.0 to 10.0)                          | --                                             | 0.1<br>(0.1 to 0.2)                     | 75.6<br>(40.1 to 116.0)                           | -11.1<br>(-29.8 to 10.6)                            |
| <b>Maternal disorders</b>                                               | <b>1.8</b><br><b>(1.3 to 2.3)</b>             | <b>22.7†</b><br><b>(19.7 to 26.1)</b>          | <b>0.1</b><br><b>(0.1 to 0.2)</b>       | <b>92.3</b><br><b>(37.1 to 167.3)</b>             | <b>-26.1</b><br><b>(-47.0 to 3.1)</b>               |
| Maternal haemorrhage                                                    | 0.3<br>(0.2 to 0.4)                           | 3.0<br>(2.2 to 4.0)                            | < 0.05<br>(< 0.05 to < 0.05)            | 59.3<br>(-0.2 to 163.2)                           | -38.8<br>(-60.8 to -1.6)                            |
| Maternal sepsis and other pregnancy related infections                  | 0.5<br>(0.3 to 0.7)                           | 4.7<br>(3.5 to 6.4)                            | < 0.05<br>(< 0.05 to < 0.05)            | 29.6<br>(-43.7 to 178.9)                          | -49.3<br>(-78.1 to 8.8)                             |
| Maternal hypertensive disorders                                         | 1.0<br>(0.7 to 1.4)                           | 4.8<br>(4.0 to 5.7)                            | < 0.05<br>(< 0.05 to 0.1)               | 188.1<br>(72.5 to 391.1)                          | 8.8<br>(-34.6 to 87.2)                              |
| Maternal obstructed labour and uterine rupture                          | < 0.05<br>(< 0.05 to < 0.05)                  | 1.4<br>(1.0 to 2.0)                            | < 0.05<br>(< 0.05 to < 0.05)            | 68.4<br>(-17.0 to 252.3)                          | -35.8<br>(-67.3 to 29.8)                            |
| Maternal abortion, miscarriage, and ectopic pregnancy                   | 0.1<br>(< 0.05 to 0.1)                        | 8.8<br>(6.6 to 11.4)                           | < 0.05<br>(< 0.05 to < 0.05)            | 48.6<br>(-29.7 to 209.9)                          | -42.8<br>(-72.5 to 15.4)                            |
| Other maternal disorders                                                | --                                            | --                                             | < 0.05<br>(< 0.05 to < 0.05)            | 82.3<br>(30.2 to 153.8)                           | -29.6<br>(-49.6 to -2.0)                            |
| <b>Neonatal disorders</b>                                               | <b>15.6</b><br><b>(13.1 to 18.8)</b>          | <b>2.9</b><br><b>--</b>                        | <b>2.9</b><br><b>(1.9 to 4.3)</b>       | <b>134.3</b><br><b>(93.1 to 191.1)</b>            | <b>1.5</b><br><b>(-15.2 to 25.6)</b>                |
| Neonatal preterm birth complications                                    | 14.3<br>(10.9 to 18.7)                        | --                                             | 2.0<br>(1.2 to 3.1)                     | 135.5<br>(75.9 to 213.3)                          | 0.8<br>(-24.2 to 34.6)                              |
| Neonatal encephalopathy due to birth asphyxia and trauma                | 1.7<br>(0.9 to 2.9)                           | --                                             | 0.3<br>(0.1 to 0.6)                     | 150.0<br>(75.0 to 334.3)                          | 7.1<br>(-24.5 to 84.4)                              |
| Neonatal sepsis and other neonatal infections                           | 1.3<br>(0.6 to 2.7)                           | --                                             | 0.5<br>(0.2 to 1.2)                     | 128.1<br>(84.1 to 188.6)                          | 2.0<br>(-16.7 to 26.7)                              |
| Hemolytic disease and other neonatal jaundice                           | 0.2<br>(0.2 to 0.3)                           | --                                             | 0.1<br>(0.1 to 0.1)                     | 131.8<br>(111.5 to 153.7)                         | -1.3<br>(-9.7 to 7.6)                               |
| Other neonatal disorders                                                | --                                            | --                                             | < 0.05<br>(< 0.05 to 0.1)               | 88.4<br>(46.7 to 139.6)                           | -0.6<br>(-22.9 to 26.6)                             |
| <b>Nutritional deficiencies</b>                                         | <b>257.4</b><br><b>(230.7 to 288.4)</b>       | <b>21.0†</b><br><b>(13.8 to 30.4)</b>          | <b>3.8</b><br><b>(2.5 to 5.8)</b>       | <b>101.0</b><br><b>(84.9 to 118.2)</b>            | <b>-11.1</b><br><b>(-18.9 to -2.5)</b>              |
| Protein-energy malnutrition                                             | 5.6<br>(4.1 to 7.8)                           | 3.6<br>(2.7 to 4.9)                            | 0.2<br>(0.1 to 0.3)                     | 77.0<br>(24.7 to 144.8)                           | -5.9<br>(-34.3 to 29.8)                             |
| Iodine deficiency                                                       | 55.0<br>(42.6 to 69.7)                        | 0.8<br>(0.6 to 0.9)                            | 1.4<br>(0.9 to 2.1)                     | 123.2<br>(100.7 to 148.5)                         | -6.3<br>(-15.0 to 3.7)                              |
| Vitamin A deficiency                                                    | 19.8<br>(12.2 to 31.3)                        | 16.6<br>(9.6 to 26.2)                          | --                                      | --                                                | --                                                  |
| Iron-deficiency anaemia                                                 | 182.3<br>(152.6 to 215.4)                     | --                                             | 2.2<br>(1.3 to 3.5)                     | 91.2<br>(66.8 to 116.5)                           | -14.2<br>(-26.1 to -1.6)                            |
| Other nutritional deficiencies                                          | --                                            | --                                             | < 0.05<br>(< 0.05 to < 0.05)            | 76.5<br>(22.4 to 145.9)                           | -6.6<br>(-35.5 to 30.4)                             |
| <b>Other communicable, maternal, neonatal, and nutritional diseases</b> | <b>543.6</b><br><b>(511.5 to 582.1)</b>       | <b>553.0</b><br><b>(450.3 to 663.6)</b>        | <b>3.1</b><br><b>(1.9 to 5.1)</b>       | <b>159.6</b><br><b>(137.0 to 183.8)</b>           | <b>2.4</b><br><b>(-5.7 to 10.6)</b>                 |
| Sexually transmitted diseases excluding HIV                             | 432.2<br>(401.4 to 473.2)                     | 544.8<br>(443.0 to 655.6)                      | 3.0<br>(1.8 to 4.9)                     | 162.3<br>(138.5 to 188.0)                         | 2.7<br>(-5.8 to 11.5)                               |
| Syphilis                                                                | 23.1<br>(16.8 to 31.6)                        | 15.8<br>(10.8 to 22.0)                         | < 0.05<br>(< 0.05 to < 0.05)            | 138.2<br>(109.5 to 170.5)                         | 2.7<br>(-8.8 to 15.8)                               |
| Chlamydial infection                                                    | 38.1<br>(29.6 to 48.0)                        | 26.7<br>(20.9 to 33.6)                         | 0.3<br>(0.1 to 0.5)                     | 171.7<br>(124.4 to 227.5)                         | 3.8<br>(-12.6 to 23.7)                              |
| Gonococcal infection                                                    | 120.4<br>(92.8 to 152.9)                      | 437.8<br>(336.0 to 549.8)                      | 1.7<br>(1.0 to 2.8)                     | 163.2<br>(135.9 to 193.6)                         | 3.0<br>(-7.4 to 14.1)                               |
| Trichomoniasis                                                          | 45.2<br>(34.1 to 57.7)                        | 37.9<br>(28.6 to 49.3)                         | < 0.05<br>(< 0.05 to 0.1)               | 131.2<br>(111.3 to 153.7)                         | -5.8<br>(-12.7 to 2.4)                              |
| Genital herpes                                                          | 236.7<br>(201.5 to 278.1)                     | 16.5<br>(13.7 to 20.3)                         | 0.1<br>(< 0.05 to 0.1)                  | 143.6<br>(126.6 to 161.9)                         | -1.0<br>(-6.7 to 5.2)                               |
| Other sexually transmitted diseases                                     | 9.8<br>(7.9 to 11.4)                          | 10.2<br>(8.3 to 12.4)                          | 0.9<br>(0.5 to 1.4)                     | 161.0<br>(137.3 to 186.0)                         | 2.4<br>(-6.1 to 11.2)                               |
| Hepatitis                                                               | 133.7<br>(110.3 to 163.4)                     | 8.2<br>(6.3 to 10.5)                           | < 0.05<br>(< 0.05 to < 0.05)            | 174.2<br>(110.1 to 252.3)                         | 29.9<br>(-0.1 to 67.8)                              |
| Acute hepatitis A                                                       | 0.1<br>(< 0.05 to 0.2)                        | 1.3<br>(0.5 to 2.4)                            | < 0.05<br>(< 0.05 to < 0.05)            | 175.9<br>(12.4 to 631.2)                          | 34.0<br>(-43.7 to 254.3)                            |
| Hepatitis B                                                             | 108.5<br>(86.0 to 137.7)                      | 6.3<br>(4.7 to 8.3)                            | < 0.05<br>(< 0.05 to < 0.05)            | 177.7<br>(107.8 to 264.3)                         | 29.9<br>(-5.7 to 75.4)                              |
| Hepatitis C                                                             | 25.0<br>(22.2 to 28.1)                        | 0.4<br>(0.4 to 0.5)                            | < 0.05<br>(< 0.05 to < 0.05)            | 115.3<br>(110.4 to 121.1)                         | 12.0<br>(9.8 to 14.6)                               |
| Acute hepatitis E                                                       | < 0.05<br>(< 0.05 to < 0.05)                  | 0.2<br>(0.1 to 0.2)                            | < 0.05<br>(< 0.05 to < 0.05)            | 190.0<br>(160.0 to 221.9)                         | 39.2<br>(25.3 to 52.4)                              |
| Other infectious diseases                                               | 7.3<br>(6.0 to 8.8)                           | < 0.05<br>(< 0.05 to < 0.05)                   | 0.1<br>(0.1 to 0.2)                     | 109.7<br>(83.4 to 139.1)                          | -2.5<br>(-17.1 to 13.2)                             |
| <b>Non-communicable diseases</b>                                        | <b>2,062.2</b><br><b>(2,039.9 to 2,085.1)</b> | <b>5,143.9†</b><br><b>(4,732.8 to 5,586.0)</b> | <b>206.4</b><br><b>(152.6 to 267.8)</b> | <b>135.1</b><br><b>(130.2 to 140.1)</b>           | <b>-1.9</b><br><b>(-3.7 to -0.1)</b>                |
| <b>Neoplasms</b>                                                        | <b>2.6</b><br><b>(2.4 to 2.9)</b>             | <b>1.1</b><br><b>(1.0 to 1.2)</b>              | <b>0.4</b><br><b>(0.3 to 0.5)</b>       | <b>142.7</b><br><b>(119.2 to 172.3)</b>           | <b>5.4</b><br><b>(-4.2 to 16.2)</b>                 |
| Lip and oral cavity cancer                                              | 0.1<br>(< 0.05 to 0.1)                        | < 0.05<br>(< 0.05 to < 0.05)                   | < 0.05<br>(< 0.05 to < 0.05)            | 124.5<br>(87.0 to 170.7)                          | -3.6<br>(-19.3 to 15.9)                             |
| Nasopharynx cancer                                                      | < 0.05<br>(< 0.05 to < 0.05)                  | < 0.05<br>(< 0.05 to < 0.05)                   | < 0.05<br>(< 0.05 to < 0.05)            | 108.0<br>(60.0 to 168.5)                          | -10.5<br>(-26.2 to 9.0)                             |
| Other pharynx cancer                                                    | < 0.05<br>(< 0.05 to < 0.05)                  | < 0.05<br>(< 0.05 to < 0.05)                   | < 0.05<br>(< 0.05 to < 0.05)            | 115.0<br>(78.1 to 165.2)                          | -3.5<br>(-20.8 to 18.4)                             |
| Oesophageal cancer                                                      | < 0.05<br>(< 0.05 to < 0.05)                  | < 0.05<br>(< 0.05 to < 0.05)                   | < 0.05<br>(< 0.05 to < 0.05)            | 88.4<br>(59.8 to 128.5)                           | -14.3<br>(-32.2 to 7.2)                             |
| Stomach cancer                                                          | < 0.05<br>(< 0.05 to 0.1)                     | < 0.05<br>(< 0.05 to < 0.05)                   | < 0.05<br>(< 0.05 to < 0.05)            | 70.9<br>(54.1 to 89.5)                            | -24.2<br>(-36.1 to -10.8)                           |
| Colon and rectum cancer                                                 | 0.4<br>(0.3 to 0.4)                           | 0.1<br>(0.1 to 0.1)                            | < 0.05<br>(< 0.05 to < 0.05)            | 154.2<br>(111.2 to 215.2)                         | 17.8<br>(-3.1 to 43.6)                              |
| Liver cancer                                                            | < 0.05<br>(< 0.05 to < 0.05)                  | < 0.05<br>(< 0.05 to 0.1)                      | < 0.05<br>(< 0.05 to < 0.05)            | 128.4<br>(87.1 to 166.3)                          | 3.0<br>(-13.7 to 19.3)                              |
| Liver cancer due to hepatitis B                                         | < 0.05<br>(< 0.05 to < 0.05)                  | < 0.05<br>(< 0.05 to < 0.05)                   | < 0.05<br>(< 0.05 to < 0.05)            | 123.3<br>(79.3 to 167.8)                          | 2.0<br>(-15.4 to 20.7)                              |



| Cause                                              | Prevalence in thousands (95% UI)        | Incidence in thousands (95% UI)       | YLDs in thousands (95% UI)        |                                                   |                                                     |
|----------------------------------------------------|-----------------------------------------|---------------------------------------|-----------------------------------|---------------------------------------------------|-----------------------------------------------------|
|                                                    | 2016 counts                             | 2016 counts                           | 2016 counts                       | Percentage change in counts between 2006 and 2016 | Percentage change in age-standardised rates between |
| Liver cancer due to hepatitis C                    | < 0.05<br>(< 0.05 to < 0.05)            | < 0.05<br>(< 0.05 to < 0.05)          | < 0.05<br>(< 0.05 to < 0.05)      | 131.3<br>(92.2 to 172.3)                          | 2.3<br>(-13.2 to 19.3)                              |
| Liver cancer due to alcohol use                    | < 0.05<br>(< 0.05 to < 0.05)            | < 0.05<br>(< 0.05 to < 0.05)          | < 0.05<br>(< 0.05 to < 0.05)      | 144.0<br>(93.7 to 198.2)                          | 9.1<br>(-12.8 to 33.2)                              |
| Liver cancer due to other causes                   | < 0.05<br>(< 0.05 to < 0.05)            | < 0.05<br>(< 0.05 to < 0.05)          | < 0.05<br>(< 0.05 to < 0.05)      | 127.8<br>(81.4 to 177.1)                          | 2.8<br>(-17.3 to 24.8)                              |
| Gallbladder and biliary tract cancer               | < 0.05<br>(< 0.05 to < 0.05)            | < 0.05<br>(< 0.05 to < 0.05)          | < 0.05<br>(< 0.05 to < 0.05)      | 77.2<br>(44.5 to 112.5)                           | -24.2<br>(-37.4 to -10.3)                           |
| Pancreatic cancer                                  | < 0.05<br>(< 0.05 to < 0.05)            | < 0.05<br>(< 0.05 to < 0.05)          | < 0.05<br>(< 0.05 to < 0.05)      | 123.2<br>(102.1 to 144.4)                         | 1.7<br>(-9.7 to 13.4)                               |
| Larynx cancer                                      | < 0.05<br>(< 0.05 to < 0.05)            | < 0.05<br>(< 0.05 to < 0.05)          | < 0.05<br>(< 0.05 to < 0.05)      | 56.2<br>(33.5 to 89.2)                            | -30.4<br>(-43.4 to -12.8)                           |
| Tracheal, bronchus, and lung cancer                | 0.1<br>(0.1 to 0.1)                     | 0.1<br>(0.1 to 0.1)                   | < 0.05<br>(< 0.05 to < 0.05)      | 138.8<br>(81.1 to 213.0)                          | 5.5<br>(-20.9 to 40.7)                              |
| Malignant skin melanoma                            | < 0.05<br>(< 0.05 to 0.1)               | < 0.05<br>(< 0.05 to < 0.05)          | < 0.05<br>(< 0.05 to < 0.05)      | 189.6<br>(133.5 to 245.8)                         | 15.7<br>(-5.6 to 41.2)                              |
| Non-melanoma skin cancer                           | < 0.05<br>(< 0.05 to < 0.05)            | 0.1<br>(0.1 to 0.1)                   | < 0.05<br>(< 0.05 to < 0.05)      | 179.9<br>(111.5 to 245.1)                         | 3.3<br>(-34.2 to 42.9)                              |
| Non-melanoma skin cancer (squamous-cell carcinoma) | < 0.05<br>(< 0.05 to < 0.05)            | < 0.05<br>(< 0.05 to < 0.05)          | < 0.05<br>(< 0.05 to < 0.05)      | 181.0<br>(107.6 to 249.1)                         | 2.8<br>(-35.7 to 44.4)                              |
| Non-melanoma skin cancer (basal-cell carcinoma)    | < 0.05<br>(< 0.05 to < 0.05)            | 0.1<br>(< 0.05 to 0.1)                | < 0.05<br>(< 0.05 to < 0.05)      | 165.5<br>(134.1 to 197.4)                         | 14.2<br>(2.0 to 25.0)                               |
| Breast cancer                                      | 1.2<br>(1.0 to 1.4)                     | 0.2<br>(0.2 to 0.3)                   | 0.1<br>(0.1 to 0.1)               | 162.0<br>(100.6 to 240.6)                         | 11.1<br>(-11.2 to 36.4)                             |
| Cervical cancer                                    | 0.1<br>(0.1 to 0.1)                     | < 0.05<br>(< 0.05 to < 0.05)          | < 0.05<br>(< 0.05 to < 0.05)      | 89.4<br>(41.6 to 152.0)                           | -24.8<br>(-37.3 to -6.1)                            |
| Uterine cancer                                     | 0.1<br>(0.1 to 0.1)                     | < 0.05<br>(< 0.05 to < 0.05)          | < 0.05<br>(< 0.05 to < 0.05)      | 235.1<br>(149.7 to 345.2)                         | 33.7<br>(5.1 to 71.5)                               |
| Ovarian cancer                                     | 0.1<br>(0.1 to 0.1)                     | < 0.05<br>(< 0.05 to < 0.05)          | < 0.05<br>(< 0.05 to < 0.05)      | 163.9<br>(95.7 to 244.8)                          | 11.1<br>(-18.9 to 50.6)                             |
| Prostate cancer                                    | 0.3<br>(0.2 to 0.4)                     | 0.1<br>(< 0.05 to 0.1)                | < 0.05<br>(< 0.05 to < 0.05)      | 211.5<br>(122.7 to 295.3)                         | 34.7<br>(-3.2 to 69.6)                              |
| Testicular cancer                                  | 0.1<br>(< 0.05 to 0.1)                  | < 0.05<br>(< 0.05 to < 0.05)          | < 0.05<br>(< 0.05 to < 0.05)      | 219.2<br>(147.0 to 310.5)                         | 19.4<br>(-3.6 to 49.1)                              |
| Kidney cancer                                      | 0.1<br>(0.1 to 0.1)                     | < 0.05<br>(< 0.05 to < 0.05)          | < 0.05<br>(< 0.05 to < 0.05)      | 75.9<br>(40.8 to 121.7)                           | -28.2<br>(-41.3 to -5.6)                            |
| Bladder cancer                                     | 0.1<br>(0.1 to 0.1)                     | < 0.05<br>(< 0.05 to < 0.05)          | < 0.05<br>(< 0.05 to < 0.05)      | 138.3<br>(100.2 to 178.2)                         | 3.7<br>(-14.3 to 27.2)                              |
| Brain and nervous system cancer                    | 0.1<br>(0.1 to 0.1)                     | < 0.05<br>(< 0.05 to < 0.05)          | < 0.05<br>(< 0.05 to < 0.05)      | 139.9<br>(115.5 to 163.2)                         | 4.8<br>(-4.2 to 16.4)                               |
| Thyroid cancer                                     | 0.1<br>(0.1 to 0.2)                     | < 0.05<br>(< 0.05 to < 0.05)          | < 0.05<br>(< 0.05 to < 0.05)      | 180.3<br>(106.3 to 270.8)                         | 12.5<br>(-12.6 to 44.1)                             |
| Mesothelioma                                       | < 0.05<br>(< 0.05 to < 0.05)            | < 0.05<br>(< 0.05 to < 0.05)          | < 0.05<br>(< 0.05 to < 0.05)      | 157.5<br>(86.9 to 216.1)                          | 14.8<br>(-16.6 to 39.5)                             |
| Hodgkin lymphoma                                   | < 0.05<br>(< 0.05 to < 0.05)            | < 0.05<br>(< 0.05 to < 0.05)          | < 0.05<br>(< 0.05 to < 0.05)      | 151.6<br>(112.8 to 196.2)                         | -3.9<br>(-15.6 to 10.1)                             |
| Non-Hodgkin's lymphoma                             | 0.1<br>(0.1 to 0.2)                     | < 0.05<br>(< 0.05 to < 0.05)          | < 0.05<br>(< 0.05 to < 0.05)      | 132.9<br>(92.4 to 180.9)                          | -4.2<br>(-19.6 to 17.9)                             |
| Multiple myeloma                                   | < 0.05<br>(< 0.05 to < 0.05)            | < 0.05<br>(< 0.05 to < 0.05)          | < 0.05<br>(< 0.05 to < 0.05)      | 122.5<br>(88.5 to 169.2)                          | -8.6<br>(-22.4 to 12.8)                             |
| Leukaemia                                          | 0.2<br>(0.2 to 0.2)                     | 0.1<br>(< 0.05 to 0.1)                | < 0.05<br>(< 0.05 to < 0.05)      | 108.5<br>(80.9 to 138.0)                          | -8.1<br>(-19.5 to 5.5)                              |
| Acute lymphoid leukaemia                           | < 0.05<br>(< 0.05 to < 0.05)            | < 0.05<br>(< 0.05 to < 0.05)          | < 0.05<br>(< 0.05 to < 0.05)      | 121.1<br>(70.5 to 177.0)                          | 4.0<br>(-16.9 to 25.5)                              |
| Chronic lymphoid leukaemia                         | < 0.05<br>(< 0.05 to < 0.05)            | < 0.05<br>(< 0.05 to < 0.05)          | < 0.05<br>(< 0.05 to < 0.05)      | 124.3<br>(84.4 to 171.8)                          | -5.7<br>(-24.9 to 16.0)                             |
| Acute myeloid leukaemia                            | < 0.05<br>(< 0.05 to < 0.05)            | < 0.05<br>(< 0.05 to < 0.05)          | < 0.05<br>(< 0.05 to < 0.05)      | 117.3<br>(89.5 to 154.1)                          | -3.3<br>(-14.3 to 9.6)                              |
| Chronic myeloid leukaemia                          | < 0.05<br>(< 0.05 to < 0.05)            | < 0.05<br>(< 0.05 to < 0.05)          | < 0.05<br>(< 0.05 to < 0.05)      | 82.2<br>(43.2 to 129.1)                           | -21.1<br>(-35.3 to -3.6)                            |
| Other leukaemia                                    | 0.1<br>(0.1 to 0.1)                     | < 0.05<br>(< 0.05 to < 0.05)          | < 0.05<br>(< 0.05 to < 0.05)      | 102.1<br>(65.4 to 149.2)                          | -10.1<br>(-27.3 to 13.0)                            |
| Other neoplasms                                    | 0.1<br>(0.1 to 0.2)                     | < 0.05<br>(< 0.05 to 0.1)             | < 0.05<br>(< 0.05 to < 0.05)      | 148.3<br>(114.0 to 181.5)                         | 4.8<br>(-9.3 to 18.9)                               |
| <b>Cardiovascular diseases</b>                     | <b>92.5</b><br><b>(87.3 to 98.3)</b>    | <b>10.3†</b><br><b>(9.6 to 11.1)</b>  | <b>5.2</b><br><b>(3.7 to 7.0)</b> | <b>123.6</b><br><b>(113.0 to 134.5)</b>           | <b>-5.6</b><br><b>(-9.2 to -2.1)</b>                |
| Rheumatic heart disease                            | 0.1<br>(0.1 to 0.1)                     | < 0.05<br>(< 0.05 to < 0.05)          | < 0.05<br>(< 0.05 to < 0.05)      | 107.4<br>(89.0 to 128.5)                          | -8.5<br>(-18.4 to 2.6)                              |
| Ischaemic heart disease                            | 42.3<br>(39.6 to 45.2)                  | 6.0<br>(5.3 to 6.7)                   | 1.7<br>(1.2 to 2.3)               | 127.1<br>(112.4 to 144.0)                         | -1.5<br>(-5.6 to 2.9)                               |
| Cerebrovascular disease                            | 9.1<br>(8.2 to 9.8)                     | 1.3‡<br>(1.1 to 1.4)                  | 1.3<br>(0.9 to 1.7)               | 111.7<br>(93.6 to 133.5)                          | -12.0<br>(-19.2 to -4.5)                            |
| Ischaemic stroke                                   | 7.6<br>(6.7 to 8.5)                     | 1.0‡<br>(0.8 to 1.1)                  | 1.0<br>(0.7 to 1.3)               | 105.8<br>(82.3 to 130.8)                          | -15.0<br>(-22.8 to -6.3)                            |
| Hemorrhagic stroke                                 | 2.0<br>(1.8 to 2.3)                     | 0.3‡<br>(0.3 to 0.4)                  | 0.3<br>(0.2 to 0.4)               | 136.7<br>(107.5 to 169.0)                         | 8.6<br>(-3.1 to 21.1)                               |
| Hypertensive heart disease                         | 1.3<br>(1.1 to 1.6)                     | --                                    | 0.1<br>(0.1 to 0.2)               | 123.4<br>(86.9 to 165.1)                          | -5.0<br>(-13.7 to 5.0)                              |
| Cardiomyopathy and myocarditis                     | 1.7<br>(1.5 to 1.9)                     | 0.9†<br>(0.8 to 1.1)                  | 0.2<br>(0.1 to 0.2)               | 134.6<br>(95.1 to 184.5)                          | -2.3<br>(-13.2 to 10.4)                             |
| Myocarditis                                        | 0.5<br>(0.4 to 0.6)                     | 0.9<br>(0.8 to 1.1)                   | < 0.05<br>(< 0.05 to 0.1)         | 135.4<br>(107.4 to 167.4)                         | -1.0<br>(-10.2 to 9.8)                              |
| Alcoholic cardiomyopathy                           | 0.1<br>(0.1 to 0.2)                     | --                                    | < 0.05<br>(< 0.05 to < 0.05)      | 126.2<br>(97.5 to 158.4)                          | -3.0<br>(-22.5 to 22.9)                             |
| Other cardiomyopathy                               | 1.5<br>(1.2 to 1.7)                     | --                                    | 0.1<br>(0.1 to 0.2)               | 135.2<br>(82.2 to 201.1)                          | -2.5<br>(-15.4 to 12.3)                             |
| Atrial fibrillation and flutter                    | 3.5<br>(3.1 to 4.0)                     | 0.3<br>(0.3 to 0.4)                   | 0.3<br>(0.2 to 0.4)               | 134.5<br>(101.2 to 171.6)                         | 0.4<br>(-6.3 to 7.6)                                |
| Peripheral vascular disease                        | 12.9<br>(10.8 to 15.3)                  | 1.5<br>(1.2 to 1.8)                   | < 0.05<br>(< 0.05 to 0.1)         | 123.6<br>(102.2 to 145.0)                         | -5.5<br>(-12.1 to 1.0)                              |
| Endocarditis                                       | 0.1<br>(0.1 to 0.1)                     | 0.3<br>(0.3 to 0.4)                   | < 0.05<br>(< 0.05 to < 0.05)      | 134.9<br>(118.8 to 151.6)                         | -2.2<br>(-14.9 to 12.8)                             |
| Other cardiovascular and circulatory diseases      | 30.3<br>(25.3 to 36.7)                  | --                                    | 1.6<br>(1.1 to 2.3)               | 127.3<br>(106.8 to 149.2)                         | -3.9<br>(-10.9 to 3.1)                              |
| <b>Chronic respiratory diseases</b>                | <b>136.4</b><br><b>(129.6 to 142.7)</b> | <b>24.3†</b><br><b>(22.8 to 26.1)</b> | <b>5.7</b><br><b>(4.2 to 7.5)</b> | <b>134.4</b><br><b>(122.2 to 147.2)</b>           | <b>1.8</b><br><b>(-3.0 to 6.7)</b>                  |
| Chronic obstructive pulmonary disease              | 49.0<br>(46.6 to 51.7)                  | 3.4<br>(3.2 to 3.6)                   | 1.9<br>(1.6 to 2.3)               | 129.3<br>(105.7 to 154.1)                         | -2.0<br>(-10.5 to 6.9)                              |
| Pneumoconiosis                                     | 0.1<br>(0.1 to 0.1)                     | < 0.05<br>(< 0.05 to < 0.05)          | < 0.05<br>(< 0.05 to < 0.05)      | 138.1<br>(126.7 to 151.8)                         | 1.8<br>(-3.6 to 7.8)                                |
| Silicosis                                          | < 0.05<br>(< 0.05 to 0.1)               | < 0.05<br>(< 0.05 to < 0.05)          | < 0.05<br>(< 0.05 to < 0.05)      | 145.8<br>(130.0 to 162.1)                         | 1.4<br>(-3.8 to 6.5)                                |



| Cause                                                          | Prevalence in thousands (95% UI)  | Incidence in thousands (95% UI)    | YLDs in thousands (95% UI)        |                                                                       |                                                                      |
|----------------------------------------------------------------|-----------------------------------|------------------------------------|-----------------------------------|-----------------------------------------------------------------------|----------------------------------------------------------------------|
|                                                                | 2016 counts<br>(< 0.05 to < 0.05) | 2016 counts<br>(< 0.05 to < 0.05)  | 2016 counts<br>(< 0.05 to < 0.05) | Percentage change in counts between 2006 and 2016<br>(120.3 to 149.5) | Percentage change in age-standardised rates between<br>(-2.6 to 7.7) |
| Asbestosis                                                     | < 0.05<br>(< 0.05 to < 0.05)      | < 0.05<br>(< 0.05 to < 0.05)       | < 0.05<br>(< 0.05 to < 0.05)      | 134.9<br>(120.3 to 149.5)                                             | 2.5<br>(-2.6 to 7.7)                                                 |
| Coal workers pneumoconiosis                                    | --                                | --                                 | --                                | --                                                                    | --                                                                   |
| Other pneumoconiosis                                           | 0.1<br>(< 0.05 to 0.1)            | < 0.05<br>(< 0.05 to < 0.05)       | < 0.05<br>(< 0.05 to < 0.05)      | 134.4<br>(108.3 to 161.8)                                             | 1.6<br>(-8.3 to 13.8)                                                |
| Asthma                                                         | 90.1<br>(83.4 to 97.3)            | 20.9<br>(19.4 to 22.7)             | 3.5<br>(2.3 to 5.0)               | 134.7<br>(122.3 to 147.8)                                             | 4.1<br>(-0.4 to 8.5)                                                 |
| Interstitial lung disease and pulmonary sarcoidosis            | 0.4<br>(0.3 to 0.4)               | < 0.05<br>(< 0.05 to < 0.05)       | < 0.05<br>(< 0.05 to 0.1)         | 126.8<br>(117.6 to 136.8)                                             | -6.0<br>(-14.7 to 3.4)                                               |
| Other chronic respiratory diseases                             | --                                | --                                 | 0.2<br>(0.1 to 0.2)               | 206.6<br>(164.6 to 254.3)                                             | 32.1<br>(9.9 to 56.7)                                                |
| <b>Cirrhosis and other chronic liver diseases</b>              | <b>11.4<br/>(10.7 to 12.2)</b>    | <b>0.2<br/>(0.2 to 0.3)</b>        | <b>0.4<br/>(0.3 to 0.6)</b>       | <b>137.3<br/>(107.4 to 173.4)</b>                                     | <b>3.9<br/>(-5.4 to 14.2)</b>                                        |
| Cirrhosis and other chronic liver diseases due to hepatitis B  | 3.7<br>(2.9 to 4.5)               | 0.1<br>(0.1 to 0.1)                | 0.1<br>(0.1 to 0.2)               | 149.1<br>(87.4 to 236.0)                                              | 4.8<br>(-11.6 to 24.2)                                               |
| Cirrhosis and other chronic liver diseases due to hepatitis C  | 3.8<br>(2.9 to 4.8)               | 0.1<br>(0.1 to 0.1)                | 0.1<br>(0.1 to 0.2)               | 142.3<br>(78.3 to 218.1)                                              | 2.6<br>(-13.3 to 20.9)                                               |
| Cirrhosis and other chronic liver diseases due to alcohol use  | 0.7<br>(0.6 to 0.9)               | < 0.05<br>(< 0.05 to < 0.05)       | < 0.05<br>(< 0.05 to < 0.05)      | 151.1<br>(89.3 to 231.4)                                              | 8.1<br>(-18.4 to 42.3)                                               |
| Cirrhosis and other chronic liver diseases due to other causes | 3.2<br>(2.8 to 3.7)               | 0.1<br>(0.1 to 0.1)                | 0.1<br>(0.1 to 0.2)               | 123.6<br>(78.2 to 180.6)                                              | 3.7<br>(-12.5 to 23.3)                                               |
| <b>Digestive diseases</b>                                      | <b>69.9<br/>(63.7 to 77.6)</b>    | <b>56.2†<br/>(52.2 to 60.6)</b>    | <b>1.8<br/>(1.2 to 2.4)</b>       | <b>120.3<br/>(98.1 to 144.2)</b>                                      | <b>-6.3<br/>(-13.1 to 1.8)</b>                                       |
| Peptic ulcer disease                                           | 29.8<br>(25.3 to 35.0)            | 2.3<br>(1.9 to 2.7)                | 0.4<br>(0.2 to 0.6)               | 152.8<br>(113.8 to 198.4)                                             | 1.5<br>(-10.1 to 14.5)                                               |
| Gastritis and duodenitis                                       | 19.9<br>(17.2 to 22.9)            | 15.5<br>(13.3 to 18.2)             | 0.3<br>(0.2 to 0.4)               | 158.6<br>(117.3 to 203.3)                                             | 6.3<br>(-4.9 to 18.0)                                                |
| Appendicitis                                                   | 0.4<br>(0.3 to 0.4)               | 9.6<br>(8.8 to 10.6)               | 0.1<br>(0.1 to 0.2)               | 140.5<br>(63.8 to 261.3)                                              | 2.4<br>(-23.5 to 41.6)                                               |
| Paralytic ileus and intestinal obstruction                     | < 0.05<br>(< 0.05 to < 0.05)      | 0.7<br>(0.6 to 0.8)                | < 0.05<br>(< 0.05 to < 0.05)      | 145.6<br>(129.1 to 160.7)                                             | 6.6<br>(1.2 to 11.5)                                                 |
| Inguinal, femoral, and abdominal hernia                        | 15.4<br>(13.4 to 17.7)            | 16.8<br>(14.2 to 19.6)             | 0.6<br>(0.4 to 0.9)               | 85.8<br>(51.9 to 122.3)                                               | -18.9<br>(-29.9 to -6.4)                                             |
| Inflammatory bowel disease                                     | 1.0<br>(0.9 to 1.1)               | 1.1<br>(1.0 to 1.1)                | 0.1<br>(0.1 to 0.2)               | 127.3<br>(78.5 to 200.3)                                              | -3.9<br>(-20.1 to 19.9)                                              |
| Vascular intestinal disorders                                  | < 0.05<br>(< 0.05 to < 0.05)      | 0.1<br>(0.1 to 0.1)                | < 0.05<br>(< 0.05 to < 0.05)      | 137.3<br>(121.8 to 152.3)                                             | 0.4<br>(-4.3 to 5.4)                                                 |
| Gallbladder and biliary diseases                               | 5.4<br>(4.6 to 6.4)               | 9.6<br>(8.1 to 11.3)               | 0.1<br>(< 0.05 to 0.1)            | 136.3<br>(88.2 to 192.2)                                              | 1.9<br>(-19.0 to 27.8)                                               |
| Pancreatitis                                                   | 0.1<br>(0.1 to 0.1)               | 0.5<br>(0.5 to 0.6)                | < 0.05<br>(< 0.05 to < 0.05)      | 113.4<br>(101.7 to 123.8)                                             | -10.0<br>(-13.7 to -6.3)                                             |
| Other digestive diseases                                       | --                                | --                                 | 0.1<br>(0.1 to 0.2)               | 125.9<br>(103.9 to 149.8)                                             | -2.3<br>(-9.3 to 5.9)                                                |
| <b>Neurological disorders</b>                                  | <b>942.1<br/>(887.9 to 990.7)</b> | <b>443.5<br/>(365.2 to 533.6)</b>  | <b>25.8<br/>(17.3 to 35.8)</b>    | <b>139.1<br/>(111.5 to 170.7)</b>                                     | <b>-0.5<br/>(-13.3 to 14.6)</b>                                      |
| Alzheimer's disease and other dementias                        | 2.7<br>(2.3 to 3.2)               | 0.5<br>(0.4 to 0.6)                | 0.4<br>(0.2 to 0.5)               | 137.7<br>(121.5 to 154.1)                                             | 0.2<br>(-3.9 to 4.5)                                                 |
| Parkinson's disease                                            | 0.6<br>(0.4 to 0.7)               | 0.1<br>(0.1 to 0.1)                | 0.1<br>(< 0.05 to 0.1)            | 153.7<br>(105.0 to 209.8)                                             | 11.4<br>(-1.4 to 25.0)                                               |
| Epilepsy                                                       | 7.5<br>(2.4 to 11.2)              | 0.8<br>(0.2 to 1.2)                | 2.1<br>(0.6 to 4.2)               | 110.8<br>(-45.5 to 802.9)                                             | -6.1<br>(-75.9 to 297.9)                                             |
| Multiple sclerosis                                             | 0.9<br>(0.8 to 1.0)               | < 0.05<br>(< 0.05 to < 0.05)       | 0.2<br>(0.1 to 0.3)               | 137.0<br>(92.6 to 187.2)                                              | -2.2<br>(-17.1 to 14.9)                                              |
| Motor neuron disease                                           | 0.1<br>(0.1 to 0.1)               | < 0.05<br>(< 0.05 to < 0.05)       | < 0.05<br>(< 0.05 to < 0.05)      | 136.8<br>(125.6 to 149.0)                                             | 2.1<br>(-1.9 to 6.4)                                                 |
| Migraine                                                       | 395.8<br>(367.5 to 425.1)         | 44.0<br>(40.0 to 48.2)             | 18.9<br>(12.2 to 26.6)            | 141.5<br>(131.6 to 152.3)                                             | -0.5<br>(-4.0 to 3.4)                                                |
| Tension-type headache                                          | 702.6<br>(610.4 to 805.9)         | 398.1<br>(320.4 to 488.7)          | 3.5<br>(2.2 to 5.4)               | 144.8<br>(128.6 to 163.0)                                             | 0.7<br>(-5.0 to 6.7)                                                 |
| Other neurological disorders                                   | < 0.05<br>(< 0.05 to < 0.05)      | < 0.05<br>(< 0.05 to < 0.05)       | 0.5<br>(0.2 to 0.9)               | 145.5<br>(-18.0 to 672.4)                                             | 14.1<br>(-59.2 to 222.6)                                             |
| <b>Mental and substance use disorders</b>                      | <b>398.2<br/>(381.9 to 415.5)</b> | <b>152.9†<br/>(136.9 to 170.6)</b> | <b>60.5<br/>(44.1 to 78.1)</b>    | <b>143.1<br/>(135.8 to 150.4)</b>                                     | <b>-0.1<br/>(-2.5 to 2.2)</b>                                        |
| Schizophrenia                                                  | 6.0<br>(5.1 to 7.0)               | 0.4<br>(0.4 to 0.5)                | 3.9<br>(2.8 to 5.0)               | 150.7<br>(123.0 to 179.0)                                             | 1.1<br>(-8.5 to 10.8)                                                |
| Alcohol use disorders                                          | 20.9<br>(17.3 to 25.1)            | 11.4<br>(9.5 to 13.6)              | 2.1<br>(1.4 to 3.0)               | 156.2<br>(125.2 to 187.3)                                             | 1.6<br>(-8.6 to 12.5)                                                |
| Drug use disorders                                             | 31.0<br>(26.9 to 35.6)            | 2.9<br>(2.5 to 3.3)                | 10.2<br>(6.9 to 14.0)             | 170.9<br>(140.6 to 202.4)                                             | 4.0<br>(-5.9 to 14.4)                                                |
| Opioid use disorders                                           | 22.7<br>(17.6 to 28.6)            | 1.8<br>(1.4 to 2.2)                | 9.5<br>(6.3 to 13.3)              | 171.9<br>(140.1 to 205.5)                                             | 4.0<br>(-6.4 to 14.8)                                                |
| Cocaine use disorders                                          | 1.3<br>(1.1 to 1.6)               | 0.1<br>(0.1 to 0.1)                | 0.2<br>(0.1 to 0.3)               | 154.8<br>(73.0 to 282.9)                                              | 3.6<br>(-24.8 to 45.2)                                               |
| Amphetamine use disorders                                      | 0.3<br>(0.2 to 0.4)               | < 0.05<br>(< 0.05 to 0.1)          | < 0.05<br>(< 0.05 to 0.1)         | 169.6<br>(143.8 to 193.7)                                             | 5.2<br>(-4.0 to 14.9)                                                |
| Cannabis use disorders                                         | 5.6<br>(4.5 to 6.9)               | 0.8<br>(0.6 to 0.9)                | 0.2<br>(0.1 to 0.2)               | 152.3<br>(94.6 to 229.2)                                              | 2.5<br>(-18.0 to 30.0)                                               |
| Other drug use disorders                                       | 1.2<br>(1.1 to 1.4)               | 0.2<br>(0.2 to 0.3)                | 0.3<br>(0.2 to 0.4)               | 160.3<br>(102.5 to 237.6)                                             | 4.2<br>(-17.2 to 32.5)                                               |
| Depressive disorders                                           | 90.9<br>(84.4 to 99.2)            | 110.5<br>(95.2 to 128.4)           | 16.5<br>(11.2 to 22.7)            | 134.4<br>(119.7 to 150.1)                                             | -2.6<br>(-7.6 to 2.6)                                                |
| Major depressive disorder                                      | 69.0<br>(59.9 to 80.0)            | 106.4<br>(91.0 to 124.5)           | 14.3<br>(9.6 to 19.7)             | 133.2<br>(116.5 to 151.6)                                             | -3.0<br>(-8.6 to 3.0)                                                |
| Dysthymia                                                      | 23.2<br>(19.6 to 27.4)            | 4.2<br>(3.5 to 4.9)                | 2.2<br>(1.5 to 3.4)               | 142.0<br>(127.7 to 157.3)                                             | -0.3<br>(-4.7 to 4.3)                                                |
| Bipolar disorder                                               | 21.9<br>(18.5 to 25.9)            | 1.4<br>(1.2 to 1.6)                | 4.5<br>(2.7 to 6.8)               | 141.2<br>(124.9 to 158.7)                                             | -0.4<br>(-5.9 to 5.1)                                                |
| Anxiety disorders                                              | 112.9<br>(97.7 to 130.3)          | 17.4<br>(14.9 to 20.3)             | 11.0<br>(7.4 to 15.1)             | 136.3<br>(125.8 to 146.4)                                             | -0.9<br>(-4.1 to 2.5)                                                |
| Eating disorders                                               | 9.0<br>(7.2 to 11.1)              | 3.1<br>(2.3 to 4.0)                | 1.8<br>(1.1 to 2.6)               | 156.6<br>(127.4 to 190.7)                                             | 2.1<br>(-7.4 to 13.9)                                                |
| Anorexia nervosa                                               | 1.0<br>(0.7 to 1.3)               | 0.3<br>(0.2 to 0.4)                | 0.2<br>(0.1 to 0.3)               | 130.6<br>(84.5 to 184.4)                                              | -1.7<br>(-19.1 to 18.7)                                              |
| Bulimia nervosa                                                | 7.4<br>(5.5 to 10.0)              | 2.8<br>(2.0 to 3.8)                | 1.6<br>(0.9 to 2.4)               | 160.4<br>(129.3 to 196.9)                                             | 2.8<br>(-8.0 to 15.4)                                                |
| Autistic spectrum disorders                                    | 26.5<br>(23.4 to 29.7)            | 0.1<br>(0.1 to 0.1)                | 3.8<br>(2.6 to 5.3)               | 138.6<br>(124.6 to 153.4)                                             | 1.7<br>(-3.2 to 6.6)                                                 |
| Autism                                                         | 7.4<br>(6.3 to 8.8)               | < 0.05<br>(< 0.05 to < 0.05)       | 1.9<br>(1.2 to 2.8)               | 138.2<br>(114.3 to 164.1)                                             | 1.4<br>(-7.0 to 10.2)                                                |
| Asperger syndrome and other autistic spectrum disorders        | 19.0<br>(16.0 to 22.8)            | 0.1<br>(< 0.05 to 0.1)             | 1.9<br>(1.2 to 2.8)               | 139.0<br>(126.1 to 153.2)                                             | 2.0<br>(-2.6 to 6.7)                                                 |

| Cause                                                      | Prevalence in thousands (95% UI)              | Incidence in thousands (95% UI)                | YLDs in thousands (95% UI)           |                                                   |                                                     |
|------------------------------------------------------------|-----------------------------------------------|------------------------------------------------|--------------------------------------|---------------------------------------------------|-----------------------------------------------------|
|                                                            | 2016 counts                                   | 2016 counts                                    | 2016 counts                          | Percentage change in counts between 2006 and 2016 | Percentage change in age-standardised rates between |
| Attention-deficit/hyperactivity disorder                   | 29.7<br>(23.9 to 37.1)                        | 0.6<br>(0.5 to 0.7)                            | 0.4<br>(0.2 to 0.6)                  | 135.8<br>(115.1 to 156.3)                         | 1.6<br>(-6.1 to 9.2)                                |
| Conduct disorder                                           | 11.3<br>(9.4 to 13.3)                         | 3.4<br>(2.7 to 4.1)                            | 1.4<br>(0.8 to 2.1)                  | 89.2<br>(76.0 to 102.2)                           | 1.6<br>(-5.1 to 8.4)                                |
| Idiopathic developmental intellectual disability           | 23.5<br>(12.2 to 35.1)                        | --                                             | 0.9<br>(0.4 to 1.7)                  | 134.5<br>(113.3 to 162.5)                         | -2.2<br>(-10.6 to 7.2)                              |
| Other mental and substance use disorders                   | 55.6<br>(48.4 to 64.4)                        | 1.7<br>(1.5 to 2.0)                            | 4.2<br>(2.9 to 6.0)                  | 150.3<br>(134.1 to 166.7)                         | 0.6<br>(-4.7 to 5.9)                                |
| <b>Diabetes, urogenital, blood, and endocrine diseases</b> | <b>818.2</b><br><b>(750.6 to 932.3)</b>       | <b>237.1†</b><br><b>(219.9 to 256.5)</b>       | <b>23.8</b><br><b>(16.6 to 32.8)</b> | <b>125.2</b><br><b>(113.3 to 138.1)</b>           | <b>-6.1</b><br><b>(-10.5 to -1.1)</b>               |
| Diabetes mellitus                                          | 179.8<br>(157.4 to 205.7)                     | 16.3<br>(14.0 to 19.1)                         | 16.1<br>(10.7 to 22.9)               | 125.4<br>(108.2 to 143.9)                         | -6.1<br>(-12.2 to 0.6)                              |
| Acute glomerulonephritis                                   | < 0.05<br>(< 0.05 to < 0.05)                  | 0.3<br>(0.2 to 0.4)                            | < 0.05<br>(< 0.05 to < 0.05)         | 130.6<br>(117.4 to 144.2)                         | 0.2<br>(-3.8 to 4.7)                                |
| Chronic kidney disease                                     | 60.7<br>(54.2 to 68.5)                        | 4.6<br>(4.0 to 5.2)                            | 2.8<br>(2.0 to 3.6)                  | 132.3<br>(111.3 to 155.9)                         | -5.6<br>(-11.6 to 0.8)                              |
| Chronic kidney disease due to diabetes mellitus            | 24.9<br>(21.2 to 29.4)                        | 1.9<br>(1.5 to 2.2)                            | 1.1<br>(0.8 to 1.4)                  | 125.0<br>(97.3 to 160.6)                          | -6.7<br>(-14.8 to 2.6)                              |
| Chronic kidney disease due to hypertension                 | 9.1<br>(7.5 to 10.9)                          | 0.8<br>(0.6 to 1.0)                            | 0.3<br>(0.2 to 0.4)                  | 131.2<br>(91.4 to 177.8)                          | -6.0<br>(-18.2 to 8.5)                              |
| Chronic kidney disease due to glomerulonephritis           | 8.0<br>(6.7 to 9.4)                           | 0.5<br>(0.4 to 0.6)                            | 0.5<br>(0.4 to 0.8)                  | 141.2<br>(99.4 to 194.9)                          | -3.1<br>(-14.4 to 10.0)                             |
| Chronic kidney disease due to other causes                 | 18.7<br>(15.5 to 22.3)                        | 1.4<br>(1.2 to 1.7)                            | 0.9<br>(0.6 to 1.2)                  | 136.7<br>(103.1 to 177.7)                         | -4.7<br>(-14.0 to 5.4)                              |
| Urinary diseases and male infertility                      | 58.5<br>(51.7 to 66.1)                        | 130.5†<br>(115.6 to 147.9)                     | 1.3<br>(0.8 to 1.9)                  | 93.8<br>(69.2 to 122.2)                           | -11.7<br>(-20.4 to -2.0)                            |
| Interstitial nephritis and urinary tract infections        | 1.8<br>(1.5 to 2.1)                           | 94.4<br>(79.8 to 111.0)                        | 0.1<br>(< 0.05 to 0.1)               | 135.0<br>(91.6 to 186.5)                          | -1.7<br>(-16.9 to 16.3)                             |
| Urolithiasis                                               | 1.2<br>(1.0 to 1.4)                           | 32.0<br>(27.2 to 38.2)                         | 0.1<br>(0.1 to 0.1)                  | 119.7<br>(60.4 to 193.0)                          | -7.8<br>(-27.8 to 18.4)                             |
| Benign prostatic hyperplasia                               | 28.5<br>(24.1 to 33.4)                        | 4.1<br>(3.5 to 4.9)                            | 0.9<br>(0.6 to 1.4)                  | 84.0<br>(56.9 to 120.2)                           | -12.1<br>(-21.8 to -1.4)                            |
| Male infertility                                           | 24.6<br>(19.1 to 31.6)                        | --                                             | 0.1<br>(0.1 to 0.3)                  | 138.6<br>(118.2 to 159.7)                         | -6.0<br>(-12.9 to 1.2)                              |
| Other urinary diseases                                     | --                                            | --                                             | 0.1<br>(< 0.05 to 0.1)               | 93.9<br>(57.6 to 134.8)                           | -21.1<br>(-33.6 to -6.4)                            |
| Gynecological diseases                                     | 155.3<br>(147.1 to 165.1)                     | 81.7†<br>(74.1 to 90.3)                        | 2.4<br>(1.6 to 3.4)                  | 135.1<br>(118.4 to 154.5)                         | -5.4<br>(-11.1 to 1.3)                              |
| Uterine fibroids                                           | 14.0<br>(12.3 to 15.9)                        | 2.0<br>(1.7 to 2.4)                            | 0.2<br>(0.1 to 0.3)                  | 128.0<br>(105.3 to 149.6)                         | -4.7<br>(-13.1 to 2.9)                              |
| Polycystic ovarian syndrome                                | 1.5<br>(1.1 to 2.0)                           | 2.4<br>(1.6 to 3.4)                            | < 0.05<br>(< 0.05 to < 0.05)         | 141.3<br>(110.2 to 179.8)                         | -5.3<br>(-17.8 to 10.1)                             |
| Female infertility                                         | 3.5<br>(1.7 to 7.1)                           | --                                             | < 0.05<br>(< 0.05 to 0.1)            | 126.9<br>(79.7 to 216.6)                          | -6.8<br>(-22.4 to 23.1)                             |
| Endometriosis                                              | 0.3<br>(0.3 to 0.4)                           | 1.0<br>(0.8 to 1.3)                            | < 0.05<br>(< 0.05 to < 0.05)         | 108.3<br>(54.9 to 177.3)                          | -15.5<br>(-35.8 to 10.8)                            |
| Genital prolapse                                           | 23.2<br>(19.9 to 26.5)                        | 2.4<br>(2.0 to 2.8)                            | 0.1<br>(< 0.05 to 0.1)               | 86.1<br>(70.9 to 102.8)                           | -22.8<br>(-29.4 to -16.1)                           |
| Premenstrual syndrome                                      | 100.8<br>(93.6 to 108.6)                      | 36.9<br>(33.6 to 40.5)                         | 0.8<br>(0.5 to 1.3)                  | 123.7<br>(105.4 to 141.6)                         | -7.0<br>(-13.9 to 0.1)                              |
| Other gynecological diseases                               | 34.9<br>(29.4 to 41.6)                        | 37.0<br>(30.4 to 45.2)                         | 1.2<br>(0.8 to 1.8)                  | 149.8<br>(120.6 to 185.1)                         | -0.6<br>(-11.5 to 11.9)                             |
| Hemoglobinopathies and hemolytic anaemias                  | 520.0<br>(439.8 to 647.7)                     | --                                             | 0.6<br>(0.3 to 1.2)                  | 133.8<br>(104.8 to 168.2)                         | 3.1<br>(-9.5 to 17.1)                               |
| Thalassemias                                               | < 0.05<br>(< 0.05 to < 0.05)                  | --                                             | < 0.05<br>(< 0.05 to < 0.05)         | 77.7<br>(42.5 to 115.8)                           | -4.5<br>(-23.9 to 17.4)                             |
| Thalassaemias trait                                        | 40.5<br>(36.7 to 43.9)                        | --                                             | 0.2<br>(0.1 to 0.3)                  | 137.6<br>(105.7 to 176.2)                         | 5.5<br>(-8.5 to 22.0)                               |
| Sickle cell disorders                                      | 0.5<br>(0.1 to 1.6)                           | --                                             | 0.1<br>(< 0.05 to 0.2)               | 139.7<br>(75.9 to 238.6)                          | 5.9<br>(-18.9 to 41.8)                              |
| Sickle cell trait                                          | 213.4<br>(97.9 to 418.0)                      | --                                             | 0.2<br>(0.1 to 0.6)                  | 132.6<br>(95.1 to 177.3)                          | 6.7<br>(-10.8 to 27.0)                              |
| G6PD deficiency                                            | 130.1<br>(108.2 to 154.4)                     | --                                             | < 0.05<br>(< 0.05 to < 0.05)         | 132.5<br>(97.2 to 169.5)                          | 1.4<br>(-11.3 to 16.0)                              |
| G6PD trait                                                 | 180.2<br>(167.5 to 193.3)                     | --                                             | < 0.05<br>(< 0.05 to < 0.05)         | 166.9<br>(124.6 to 217.9)                         | 15.0<br>(-3.8 to 40.2)                              |
| Other hemoglobinopathies and hemolytic anaemias            | 11.8<br>(9.3 to 14.6)                         | --                                             | 0.1<br>(0.1 to 0.2)                  | 128.6<br>(88.2 to 178.6)                          | -8.1<br>(-20.4 to 5.5)                              |
| Endocrine, metabolic, blood, and immune disorders          | 23.1<br>(20.7 to 25.7)                        | 3.7<br>(3.2 to 4.2)                            | 0.7<br>(0.4 to 0.9)                  | 122.0<br>(101.1 to 144.6)                         | -1.6<br>(-7.3 to 5.0)                               |
| <b>Musculoskeletal disorders</b>                           | <b>402.1</b><br><b>(371.2 to 425.7)</b>       | <b>209.8</b><br><b>(182.5 to 239.6)</b>        | <b>44.7</b><br><b>(32.1 to 59.2)</b> | <b>138.7</b><br><b>(130.3 to 147.8)</b>           | <b>-0.4</b><br><b>(-3.0 to 2.1)</b>                 |
| Rheumatoid arthritis                                       | 5.2<br>(4.5 to 6.0)                           | 0.4<br>(0.3 to 0.4)                            | 1.2<br>(0.8 to 1.7)                  | 142.2<br>(117.0 to 170.6)                         | 2.9<br>(-4.0 to 10.5)                               |
| Osteoarthritis                                             | 67.7<br>(62.7 to 73.0)                        | 5.1<br>(4.7 to 5.6)                            | 4.2<br>(3.0 to 5.8)                  | 128.4<br>(117.7 to 139.1)                         | -0.4<br>(-4.2 to 3.3)                               |
| Low back and neck pain                                     | 246.6<br>(223.5 to 269.8)                     | 106.1<br>(92.6 to 121.7)                       | 28.9<br>(20.2 to 38.5)               | 139.8<br>(130.5 to 149.5)                         | -0.6<br>(-3.6 to 2.6)                               |
| Low back pain                                              | 172.3<br>(149.0 to 201.8)                     | 83.9<br>(71.4 to 98.0)                         | 19.7<br>(13.7 to 26.7)               | 139.2<br>(126.4 to 153.9)                         | -0.9<br>(-5.3 to 3.7)                               |
| Neck pain                                                  | 91.9<br>(77.2 to 108.4)                       | 22.2<br>(18.6 to 26.7)                         | 9.3<br>(6.1 to 13.5)                 | 140.9<br>(132.8 to 149.4)                         | 0.1<br>(-1.9 to 2.2)                                |
| Gout                                                       | 7.2<br>(6.2 to 8.3)                           | 1.5<br>(1.3 to 1.8)                            | 0.2<br>(0.1 to 0.3)                  | 134.7<br>(85.8 to 194.5)                          | 1.0<br>(-14.2 to 17.9)                              |
| Other musculoskeletal disorders                            | 116.2<br>(91.2 to 144.3)                      | 96.6<br>(73.6 to 125.3)                        | 10.1<br>(6.6 to 14.8)                | 140.0<br>(115.4 to 166.5)                         | -0.7<br>(-9.0 to 8.7)                               |
| <b>Other non-communicable diseases</b>                     | <b>1,509.8</b><br><b>(1,459.0 to 1,560.1)</b> | <b>4,008.5†</b><br><b>(3,596.8 to 4,446.8)</b> | <b>38.1</b><br><b>(26.1 to 53.7)</b> | <b>125.2</b><br><b>(121.4 to 129.1)</b>           | <b>-2.2</b><br><b>(-3.5 to -1.0)</b>                |
| Congenital anomalies                                       | 34.8<br>(31.7 to 39.1)                        | --                                             | 5.4<br>(3.8 to 7.0)                  | 110.2<br>(97.1 to 124.2)                          | -6.9<br>(-12.0 to -1.5)                             |
| Neural tube defects                                        | 6.2<br>(5.5 to 7.0)                           | --                                             | 1.9<br>(1.3 to 2.5)                  | 107.9<br>(83.3 to 133.7)                          | -10.0<br>(-19.3 to -0.0)                            |
| Congenital heart anomalies                                 | 6.5<br>(5.7 to 7.3)                           | --                                             | 0.3<br>(0.1 to 0.6)                  | 127.7<br>(103.6 to 156.4)                         | -0.3<br>(-10.1 to 10.6)                             |
| Orofacial clefts                                           | 0.6<br>(0.5 to 0.7)                           | --                                             | < 0.05<br>(< 0.05 to < 0.05)         | 96.7<br>(74.2 to 124.4)                           | -13.3<br>(-23.0 to -1.6)                            |
| Down's syndrome                                            | 0.9<br>(0.8 to 1.0)                           | --                                             | 0.1<br>(0.1 to 0.1)                  | 134.9<br>(117.5 to 153.9)                         | 2.3<br>(-5.0 to 9.9)                                |
| Turner syndrome                                            | 0.3<br>(0.3 to 0.4)                           | --                                             | < 0.05<br>(< 0.05 to < 0.05)         | 96.8<br>(24.0 to 211.9)                           | -11.3<br>(-43.3 to 40.8)                            |
| Klinefelter syndrome                                       | 1.2<br>(1.1 to 1.5)                           | --                                             | < 0.05<br>(< 0.05 to < 0.05)         | 161.2<br>(91.8 to 256.4)                          | 4.1<br>(-20.4 to 36.8)                              |



| Cause                                         | Prevalence in thousands (95% UI)        | Incidence in thousands (95% UI)          | YLDs in thousands (95% UI)           |                                                   |                                                     |
|-----------------------------------------------|-----------------------------------------|------------------------------------------|--------------------------------------|---------------------------------------------------|-----------------------------------------------------|
|                                               | 2016 counts                             | 2016 counts                              | 2016 counts                          | Percentage change in counts between 2006 and 2016 | Percentage change in age-standardised rates between |
| Other chromosomal abnormalities               | 4.1<br>(3.5 to 4.9)                     | --                                       | 0.4<br>(0.2 to 0.5)                  | 49.0<br>(31.5 to 70.7)                            | -19.8<br>(-28.7 to -8.3)                            |
| Congenital musculoskeletal and limb anomalies | 8.0<br>(7.2 to 8.8)                     | --                                       | 1.2<br>(0.8 to 1.6)                  | 123.7<br>(99.9 to 152.2)                          | -4.0<br>(-12.6 to 6.3)                              |
| Urogenital congenital anomalies               | 1.7<br>(1.5 to 1.9)                     | --                                       | 0.1<br>(< 0.05 to 0.1)               | 94.2<br>(73.5 to 116.9)                           | -1.0<br>(-12.4 to 12.6)                             |
| Digestive congenital anomalies                | 3.3<br>(2.9 to 3.7)                     | --                                       | 0.1<br>(0.1 to 0.2)                  | 128.7<br>(90.0 to 174.4)                          | -0.8<br>(-14.3 to 14.2)                             |
| Other congenital anomalies                    | 7.7<br>(4.7 to 12.2)                    | --                                       | 1.3<br>(0.8 to 1.9)                  | 120.8<br>(99.4 to 144.4)                          | -1.2<br>(-9.3 to 7.7)                               |
| Skin and subcutaneous diseases                | 629.7<br>(610.7 to 649.6)               | 1,240.9<br>(1,181.2 to 1,305.1)          | 15.8<br>(10.5 to 22.6)               | 128.0<br>(122.3 to 134.2)                         | 1.1<br>(-0.7 to 3.0)                                |
| Dermatitis                                    | 98.4<br>(86.1 to 112.4)                 | 172.7<br>(154.2 to 191.0)                | 3.6<br>(2.1 to 5.7)                  | 121.6<br>(111.1 to 132.3)                         | -0.2<br>(-3.6 to 3.4)                               |
| Psoriasis                                     | 19.8<br>(18.4 to 21.2)                  | 2.7<br>(2.5 to 2.9)                      | 1.7<br>(1.2 to 2.3)                  | 149.4<br>(123.8 to 179.5)                         | 4.6<br>(-3.6 to 14.0)                               |
| Cellulitis                                    | 1.5<br>(1.4 to 1.6)                     | 36.8<br>(33.7 to 40.0)                   | 0.1<br>(0.1 to 0.1)                  | 126.8<br>(76.0 to 193.8)                          | -1.5<br>(-18.4 to 18.8)                             |
| Pyoderma                                      | 4.9<br>(4.6 to 5.1)                     | 110.8<br>(105.4 to 116.2)                | < 0.05<br>(< 0.05 to 0.1)            | 133.2<br>(109.3 to 159.5)                         | 0.8<br>(-6.6 to 8.5)                                |
| Scabies                                       | 21.7<br>(17.9 to 26.2)                  | 65.5<br>(54.0 to 79.0)                   | 0.6<br>(0.3 to 0.9)                  | 116.5<br>(101.1 to 133.4)                         | -4.4<br>(-9.4 to 0.8)                               |
| Fungal skin diseases                          | 120.4<br>(106.1 to 136.9)               | 414.7<br>(363.4 to 471.5)                | 0.7<br>(0.3 to 1.4)                  | 128.4<br>(122.2 to 134.8)                         | 0.2<br>(-1.1 to 1.6)                                |
| Viral skin diseases                           | 49.0<br>(46.1 to 52.5)                  | 70.5<br>(65.9 to 75.4)                   | 1.5<br>(0.9 to 2.2)                  | 117.7<br>(108.7 to 127.7)                         | -1.2<br>(-4.4 to 2.2)                               |
| Acne vulgaris                                 | 195.9<br>(177.5 to 216.2)               | 114.9<br>(99.0 to 134.8)                 | 5.0<br>(3.4 to 7.4)                  | 129.2<br>(116.8 to 142.0)                         | 2.8<br>(-1.6 to 7.3)                                |
| Alopecia areata                               | 5.6<br>(5.2 to 6.1)                     | 9.9<br>(9.1 to 10.7)                     | 0.2<br>(0.1 to 0.3)                  | 149.3<br>(117.5 to 186.4)                         | 0.1<br>(-11.3 to 12.1)                              |
| Pruritus                                      | 19.5<br>(16.6 to 22.5)                  | 15.3<br>(13.2 to 17.9)                   | 0.2<br>(0.1 to 0.4)                  | 136.1<br>(120.3 to 154.3)                         | 0.4<br>(-4.6 to 5.8)                                |
| Urticaria                                     | 19.2<br>(16.6 to 22.2)                  | 34.1<br>(29.7 to 39.5)                   | 1.2<br>(0.7 to 1.6)                  | 119.4<br>(103.1 to 136.7)                         | -0.4<br>(-6.2 to 5.0)                               |
| Decubitus ulcer                               | 0.4<br>(0.3 to 0.4)                     | 1.3<br>(1.2 to 1.5)                      | 0.1<br>(< 0.05 to 0.1)               | 135.7<br>(118.9 to 153.3)                         | 0.1<br>(-12.6 to 14.9)                              |
| Other skin and subcutaneous diseases          | 168.3<br>(161.9 to 175.0)               | 191.7<br>(183.9 to 200.1)                | 0.9<br>(0.5 to 1.7)                  | 140.4<br>(132.0 to 149.1)                         | 2.7<br>(0.3 to 5.2)                                 |
| Sense organ diseases                          | 380.1<br>(364.8 to 396.2)               | 180.4†<br>(168.2 to 193.0)               | 11.7<br>(8.0 to 16.9)                | 123.4<br>(116.4 to 130.2)                         | -4.2<br>(-6.3 to -2.1)                              |
| Glaucoma                                      | 0.9<br>(0.7 to 1.0)                     | --                                       | 0.1<br>(0.1 to 0.1)                  | 127.7<br>(97.5 to 160.2)                          | -3.4<br>(-12.6 to 6.2)                              |
| Cataract                                      | 11.4<br>(9.9 to 12.9)                   | --                                       | 0.9<br>(0.6 to 1.2)                  | 121.8<br>(106.7 to 139.3)                         | -6.9<br>(-10.6 to -2.6)                             |
| Macular degeneration                          | 0.9<br>(0.7 to 1.1)                     | --                                       | 0.1<br>(< 0.05 to 0.1)               | 136.6<br>(106.8 to 171.0)                         | -0.8<br>(-9.6 to 9.0)                               |
| Refraction and accommodation disorders        | 164.9<br>(151.7 to 179.7)               | --                                       | 3.6<br>(2.3 to 5.4)                  | 114.3<br>(104.4 to 125.0)                         | -7.4<br>(-10.6 to -3.4)                             |
| Age-related and other hearing loss            | 206.5<br>(186.7 to 226.5)               | --                                       | 4.9<br>(3.2 to 7.4)                  | 125.3<br>(112.7 to 137.4)                         | -2.7<br>(-6.8 to 1.3)                               |
| Other vision loss                             | 9.3<br>(8.2 to 10.6)                    | --                                       | 0.8<br>(0.5 to 1.0)                  | 129.1<br>(106.9 to 154.8)                         | -3.1<br>(-9.3 to 3.9)                               |
| Other sense organ diseases                    | 46.5<br>(42.6 to 50.6)                  | 180.4<br>(168.2 to 193.0)                | 1.5<br>(0.9 to 2.2)                  | 138.5<br>(123.9 to 154.7)                         | 0.7<br>(-3.5 to 5.0)                                |
| Oral disorders                                | 1,022.4<br>(942.7 to 1,095.3)           | 2,587.2†<br>(2,184.9 to 3,017.7)         | 5.3<br>(3.1 to 8.4)                  | 138.1<br>(131.7 to 145.3)                         | 0.5<br>(-1.6 to 2.6)                                |
| Caries of deciduous teeth                     | 94.7<br>(71.5 to 118.7)                 | 378.4<br>(261.0 to 509.9)                | < 0.05<br>(< 0.05 to < 0.05)         | 78.2<br>(59.3 to 100.5)                           | -0.5<br>(-10.7 to 12.0)                             |
| Caries of permanent teeth                     | 693.3<br>(598.5 to 793.0)               | 2,171.0<br>(1,799.7 to 2,577.6)          | 0.4<br>(0.2 to 0.8)                  | 134.3<br>(120.0 to 149.6)                         | -2.2<br>(-6.7 to 2.8)                               |
| Periodontal disease                           | 255.3<br>(204.9 to 318.9)               | 31.9<br>(24.5 to 41.4)                   | 1.7<br>(0.7 to 3.6)                  | 140.0<br>(127.4 to 153.5)                         | 0.3<br>(-3.5 to 4.6)                                |
| Edentulism and severe tooth loss              | 67.5<br>(56.9 to 79.4)                  | 5.9<br>(4.9 to 6.9)                      | 1.9<br>(1.2 to 2.7)                  | 137.6<br>(125.8 to 150.0)                         | 1.2<br>(-2.1 to 4.5)                                |
| Other oral disorders                          | 42.5<br>(40.0 to 44.9)                  | --                                       | 1.2<br>(0.8 to 1.9)                  | 138.9<br>(128.4 to 149.7)                         | -0.3<br>(-3.7 to 3.1)                               |
| <b>Injuries</b>                               | <b>533.6</b><br><b>(499.3 to 572.7)</b> | <b>223.8†</b><br><b>(209.4 to 238.1)</b> | <b>18.1</b><br><b>(11.9 to 25.9)</b> | <b>136.8</b><br><b>(132.4 to 141.1)</b>           | <b>-0.4</b><br><b>(-1.7 to 0.9)</b>                 |
| <b>Transport injuries</b>                     | <b>104.5</b><br><b>(96.1 to 112.9)</b>  | <b>42.1</b><br><b>(37.2 to 47.8)</b>     | <b>5.2</b><br><b>(3.4 to 7.4)</b>    | <b>117.9</b><br><b>(112.7 to 123.0)</b>           | <b>-8.2</b><br><b>(-9.8 to -6.7)</b>                |
| Road injuries                                 | 86.3<br>(78.9 to 93.7)                  | 38.0<br>(33.2 to 43.5)                   | 4.3<br>(2.9 to 6.2)                  | 116.9<br>(111.6 to 122.2)                         | -8.8<br>(-10.4 to -7.2)                             |
| Pedestrian road injuries                      | 16.8<br>(14.4 to 19.3)                  | 5.1<br>(4.1 to 6.2)                      | 0.8<br>(0.5 to 1.2)                  | 103.3<br>(98.5 to 108.3)                          | -14.5<br>(-15.9 to -13.0)                           |
| Cyclist road injuries                         | 12.0<br>(9.9 to 14.2)                   | 5.0<br>(3.9 to 6.5)                      | 0.6<br>(0.4 to 0.8)                  | 136.8<br>(130.7 to 142.9)                         | -0.9<br>(-2.6 to 1.0)                               |
| Motorcyclist road injuries                    | 11.9<br>(9.8 to 14.8)                   | 3.1<br>(2.4 to 4.0)                      | 0.6<br>(0.4 to 0.8)                  | 125.2<br>(119.4 to 131.1)                         | -3.7<br>(-5.4 to -1.8)                              |
| Motor vehicle road injuries                   | 39.7<br>(33.8 to 45.9)                  | 21.6<br>(18.4 to 25.1)                   | 2.2<br>(1.5 to 3.1)                  | 113.4<br>(107.5 to 119.0)                         | -10.2<br>(-11.9 to -8.6)                            |
| Other road injuries                           | 5.9<br>(4.9 to 7.1)                     | 3.2<br>(2.4 to 4.2)                      | 0.3<br>(0.2 to 0.4)                  | 138.9<br>(132.6 to 145.3)                         | -1.0<br>(-2.7 to 0.8)                               |
| Other transport injuries                      | 18.2<br>(15.2 to 21.7)                  | 4.1<br>(3.5 to 4.7)                      | 0.8<br>(0.6 to 1.2)                  | 123.2<br>(117.7 to 128.6)                         | -5.2<br>(-6.9 to -3.6)                              |
| <b>Unintentional injuries</b>                 | <b>414.4</b><br><b>(382.4 to 449.6)</b> | <b>174.2</b><br><b>(161.4 to 188.2)</b>  | <b>12.1</b><br><b>(8.0 to 17.3)</b>  | <b>144.9</b><br><b>(140.6 to 149.1)</b>           | <b>3.2</b><br><b>(1.9 to 4.6)</b>                   |
| Falls                                         | 139.5<br>(118.9 to 161.2)               | 59.1<br>(51.3 to 68.2)                   | 4.9<br>(3.3 to 6.9)                  | 136.0<br>(131.0 to 140.5)                         | -1.2<br>(-2.7 to 0.3)                               |
| Drowning                                      | 1.2<br>(1.0 to 1.4)                     | 0.2<br>(0.1 to 0.2)                      | 0.1<br>(< 0.05 to 0.1)               | 126.6<br>(120.9 to 131.9)                         | -4.3<br>(-6.9 to -2.1)                              |
| Fire, heat, and hot substances                | 37.6<br>(31.2 to 45.9)                  | 4.3<br>(3.5 to 5.1)                      | 0.9<br>(0.6 to 1.4)                  | 161.9<br>(152.5 to 171.7)                         | 9.7<br>(6.8 to 13.1)                                |
| Poisonings                                    | 1.8<br>(1.5 to 2.2)                     | 2.5<br>(1.9 to 3.1)                      | 0.2<br>(0.1 to 0.2)                  | 167.5<br>(143.8 to 195.1)                         | 12.9<br>(4.9 to 21.8)                               |
| Exposure to mechanical forces                 | 86.2<br>(73.4 to 106.2)                 | 41.5<br>(34.8 to 49.0)                   | 1.9<br>(1.2 to 2.7)                  | 155.7<br>(150.0 to 161.4)                         | 7.7<br>(6.0 to 9.3)                                 |
| Unintentional firearm injuries                | 3.0<br>(2.4 to 3.8)                     | 0.9<br>(0.6 to 1.3)                      | 0.1<br>(0.1 to 0.2)                  | 174.9<br>(167.5 to 183.3)                         | 15.0<br>(12.6 to 17.5)                              |
| Unintentional suffocation                     | 2.0<br>(1.5 to 2.6)                     | 0.3<br>(0.2 to 0.4)                      | 0.1<br>(< 0.05 to 0.1)               | 146.6<br>(140.6 to 153.0)                         | 4.8<br>(2.8 to 6.9)                                 |
| Other exposure to mechanical forces           | 81.1<br>(68.5 to 101.3)                 | 40.3<br>(33.7 to 47.7)                   | 1.7<br>(1.1 to 2.5)                  | 154.8<br>(149.0 to 160.4)                         | 7.3<br>(5.7 to 9.0)                                 |

| Cause                                                                               | Prevalence in thousands (95% UI)     | Incidence in thousands (95% UI)                | YLDs in thousands (95% UI)                          |                                                   |                                                     |
|-------------------------------------------------------------------------------------|--------------------------------------|------------------------------------------------|-----------------------------------------------------|---------------------------------------------------|-----------------------------------------------------|
|                                                                                     | 2016 counts                          | 2016 counts                                    | 2016 counts                                         | Percentage change in counts between 2006 and 2016 | Percentage change in age-standardised rates between |
| Adverse effects of medical treatment                                                | 0.6<br>(0.4 to 0.7)                  | 7.4<br>(6.2 to 8.7)                            | 0.1<br>(< 0.05 to 0.1)                              | 120.0<br>(105.6 to 134.3)                         | -5.3<br>(-9.9 to -0.4)                              |
| Animal contact                                                                      | 8.9<br>(7.8 to 10.5)                 | 10.2<br>(7.9 to 13.0)                          | 0.3<br>(0.2 to 0.4)                                 | 142.3<br>(125.5 to 162.5)                         | 1.8<br>(-3.6 to 8.1)                                |
| Venomous animal contact                                                             | 4.7<br>(3.8 to 5.7)                  | 5.1<br>(3.7 to 6.9)                            | 0.2<br>(0.1 to 0.3)                                 | 144.3<br>(123.5 to 169.1)                         | 2.8<br>(-4.2 to 10.7)                               |
| Non-venomous animal contact                                                         | 4.2<br>(3.5 to 5.4)                  | 5.1<br>(3.8 to 6.6)                            | 0.1<br>(< 0.05 to 0.1)                              | 134.3<br>(128.0 to 140.8)                         | -1.7<br>(-3.6 to 0.2)                               |
| Foreign body                                                                        | 21.0<br>(17.5 to 25.4)               | 12.6<br>(10.4 to 15.2)                         | 0.6<br>(0.4 to 0.9)                                 | 148.2<br>(142.8 to 154.0)                         | 5.5<br>(3.8 to 7.2)                                 |
| Pulmonary aspiration and foreign body in airway                                     | 5.3<br>(3.9 to 7.0)                  | 1.4<br>(1.1 to 1.7)                            | 0.2<br>(0.1 to 0.3)                                 | 137.8<br>(130.6 to 145.1)                         | 1.7<br>(-0.9 to 4.0)                                |
| Foreign body in eyes                                                                | 1.2<br>(0.7 to 1.8)                  | 6.4<br>(4.7 to 8.8)                            | 0.1<br>(< 0.05 to 0.1)                              | 153.0<br>(140.2 to 166.9)                         | 5.7<br>(2.2 to 8.9)                                 |
| Foreign body in other body part                                                     | 14.5<br>(11.7 to 18.7)               | 4.8<br>(3.8 to 5.8)                            | 0.3<br>(0.2 to 0.5)                                 | 153.5<br>(147.8 to 159.3)                         | 7.8<br>(6.0 to 9.5)                                 |
| Environmental heat and cold exposure                                                | 33.9<br>(28.4 to 40.3)               | 8.4<br>(6.8 to 10.4)                           | 1.1<br>(0.7 to 1.6)                                 | 149.1<br>(144.5 to 153.9)                         | 5.9<br>(4.5 to 7.4)                                 |
| Other unintentional injuries                                                        | 83.7<br>(67.2 to 102.2)              | 28.2<br>(23.5 to 33.4)                         | 2.1<br>(1.4 to 3.2)                                 | 148.0<br>(143.3 to 152.6)                         | 6.2<br>(4.7 to 7.7)                                 |
| <b>Self-harm and interpersonal violence</b>                                         | <b>56.1</b><br><b>(49.4 to 63.3)</b> | <b>7.5†</b><br><b>(6.2 to 8.8)</b>             | <b>0.8</b><br><b>(0.6 to 1.2)</b>                   | <b>149.3</b><br><b>(143.3 to 155.3)</b>           | <b>4.9</b><br><b>(2.9 to 7.0)</b>                   |
| Self-harm                                                                           | 3.4<br>(2.8 to 3.9)                  | 1.7<br>(1.4 to 2.0)                            | 0.1<br>(0.1 to 0.2)                                 | 132.6<br>(124.3 to 141.5)                         | -4.1<br>(-6.4 to -1.6)                              |
| Self-harm by firearm                                                                | 0.2<br>(0.1 to 0.2)                  | < 0.05<br>(< 0.05 to < 0.05)                   | < 0.05<br>(< 0.05 to < 0.05)                        | 167.7<br>(158.5 to 177.7)                         | 11.2<br>(8.4 to 14.3)                               |
| Self-harm by other specified means                                                  | 3.2<br>(2.7 to 3.8)                  | 1.6<br>(1.3 to 2.0)                            | 0.1<br>(0.1 to 0.2)                                 | 131.2<br>(122.8 to 140.5)                         | -4.6<br>(-7.0 to -2.0)                              |
| Interpersonal violence                                                              | 52.7<br>(45.9 to 60.1)               | 5.8†<br>(4.7 to 7.1)                           | 0.7<br>(0.5 to 1.0)                                 | 152.7<br>(146.0 to 159.4)                         | 7.0<br>(4.5 to 9.5)                                 |
| Assault by firearm                                                                  | 0.8<br>(0.7 to 0.9)                  | 0.3<br>(0.2 to 0.4)                            | < 0.05<br>(< 0.05 to 0.1)                           | 209.3<br>(197.8 to 221.4)                         | 29.3<br>(26.0 to 32.8)                              |
| Assault by sharp object                                                             | 3.6<br>(2.9 to 4.4)                  | 1.5<br>(1.0 to 2.0)                            | 0.1<br>(0.1 to 0.1)                                 | 170.5<br>(163.2 to 178.6)                         | 13.7<br>(11.4 to 15.9)                              |
| Sexual violence                                                                     | 41.6<br>(34.9 to 49.1)               | --                                             | 0.3<br>(0.2 to 0.5)                                 | 131.6<br>(121.1 to 143.2)                         | -3.0<br>(-7.0 to 1.2)                               |
| Assault by other means                                                              | 6.7<br>(5.6 to 8.1)                  | 4.1<br>(3.3 to 5.1)                            | 0.3<br>(0.2 to 0.4)                                 | 170.8<br>(164.2 to 177.6)                         | 14.0<br>(11.9 to 16.1)                              |
| <b>Forces of nature, conflict and terrorism, and executions and police conflict</b> | <b>0.2</b><br><b>(0.1 to 0.3)</b>    | <b>&lt; 0.05†</b><br><b>(&lt; 0.05 to 0.1)</b> | <b>&lt; 0.05</b><br><b>(&lt; 0.05 to &lt; 0.05)</b> | <b>271.8</b><br><b>(215.8 to 300.5)</b>           | <b>47.8</b><br><b>(28.5 to 57.5)</b>                |
| Exposure to forces of nature                                                        | --                                   | --                                             | --                                                  | --                                                | --                                                  |
| Conflict and terrorism                                                              | < 0.05<br>(< 0.05 to 0.1)            | --                                             | < 0.05<br>(< 0.05 to < 0.05)                        | --                                                | --                                                  |
| Executions and police conflict                                                      | 0.2<br>(0.1 to 0.3)                  | < 0.05<br>(< 0.05 to 0.1)                      | < 0.05<br>(< 0.05 to < 0.05)                        | 202.3<br>(180.9 to 213.2)                         | 22.7<br>(16.3 to 26.7)                              |
| <b>Impairments</b>                                                                  | --                                   | --                                             | --                                                  | --                                                | --                                                  |
| Anaemia                                                                             | 316.0<br>(269.1 to 366.9)            | --                                             | 5.5<br>(3.6 to 8.1)                                 | 109.5<br>(86.7 to 133.4)                          | -8.4<br>(-17.3 to 0.7)                              |
| Developmental intellectual disability                                               | 50.3<br>(39.2 to 62.2)               | --                                             | 5.5<br>(4.0 to 7.2)                                 | 124.8<br>(114.0 to 137.1)                         | -3.8<br>(-7.7 to 0.8)                               |
| Epilepsy                                                                            | 11.2<br>(6.1 to 15.4)                | --                                             | 3.5<br>(1.9 to 5.9)                                 | 120.1<br>(9.3 to 364.5)                           | -4.2<br>(-56.2 to 117.5)                            |
| Guillain-Barre syndrome                                                             | < 0.05<br>(< 0.05 to < 0.05)         | --                                             | < 0.05<br>(< 0.05 to < 0.05)                        | 134.1<br>(125.5 to 145.2)                         | 0.2<br>(0.0 to 0.5)                                 |
| Hearing loss                                                                        | 226.1<br>(206.9 to 245.2)            | --                                             | 6.0<br>(4.0 to 8.6)                                 | 123.5<br>(112.2 to 133.6)                         | -2.8<br>(-6.4 to 0.6)                               |
| Heart failure                                                                       | 9.2<br>(8.1 to 10.5)                 | --                                             | 0.8<br>(0.6 to 1.2)                                 | 123.9<br>(106.7 to 143.4)                         | -3.0<br>(-9.8 to 4.3)                               |
| Infertility                                                                         | 44.1<br>(34.8 to 56.0)               | --                                             | 0.3<br>(0.1 to 0.5)                                 | 143.4<br>(130.6 to 157.1)                         | -3.9<br>(-8.3 to 0.9)                               |
| Pelvic inflammatory disease                                                         | 1.0<br>(0.8 to 1.2)                  | --                                             | 0.1<br>(0.1 to 0.2)                                 | 153.9<br>(106.3 to 207.2)                         | 0.1<br>(-15.9 to 19.2)                              |
| Vision loss                                                                         | 195.2<br>(180.3 to 210.5)            | --                                             | 6.5<br>(4.6 to 9.1)                                 | 119.6<br>(112.2 to 128.2)                         | -5.9<br>(-8.3 to -3.5)                              |

We did not calculate incidence for the nine impairments, certain NTDs, and causes with only birth prevalence. Blank cells mean that no estimate is available.

† Incidence for aggregate causes represents the sum of the incidence of the causes below the aggregate.

‡ Incidence estimates for stroke represent first-ever stroke only.

^ Incidence of HIV/AIDS represents new infections of HIV only and does not include new infections of Tuberculosis in HIV positive cases.



SR Table 14: Prevalence, incidence, and YLDs for 2016, percentage change of YLD counts and percentage change of age-standardised YLD rates between 2006 and 2016 by cause and impairments, for all ages, Romania.

| Cause                                                                                | Prevalence in thousands (95% UI)          | Incidence in thousands (95% UI)              | YLDs in thousands (95% UI)             |                                                   |                                                     |
|--------------------------------------------------------------------------------------|-------------------------------------------|----------------------------------------------|----------------------------------------|---------------------------------------------------|-----------------------------------------------------|
|                                                                                      | 2016 counts                               | 2016 counts                                  | 2016 counts                            | Percentage change in counts between 2006 and 2016 | Percentage change in age-standardised rates between |
| <b>All causes</b>                                                                    | <b>18,663.4</b><br>(18,616.5 to 18,716.8) | <b>102,994.9†</b><br>(99,216.8 to 107,016.9) | <b>2,620.3</b><br>(1,945.5 to 3,379.4) | <b>-3.0</b><br>(-4.5 to -1.6)                     | <b>-1.1</b><br>(-2.8 to 0.6)                        |
| <b>Communicable, maternal, neonatal, and nutritional disorders</b>                   | <b>9,937.6</b><br>(9,696.2 to 10,186.4)   | <b>38,002.4†</b><br>(35,025.1 to 41,213.9)   | <b>151.1</b><br>(106.0 to 208.9)       | <b>-15.9</b><br>(-20.5 to -11.3)                  | <b>-6.0</b><br>(-11.2 to -0.9)                      |
| <b>HIV/AIDS and tuberculosis</b>                                                     | <b>4,978.4</b><br>(4,564.4 to 5,291.2)    | <b>13.2†</b><br>(11.7 to 14.7)               | <b>2.7</b><br>(1.8 to 3.7)             | <b>-23.2</b><br>(-35.4 to -9.3)                   | <b>-14.0</b><br>(-28.5 to 1.9)                      |
| Tuberculosis                                                                         | 4,678.9<br>(4,334.8 to 5,070.6)           | 12.7†<br>(11.2 to 14.2)                      | 2.0<br>(1.3 to 2.8)                    | -35.4<br>(-46.5 to -22.0)                         | -30.1<br>(-42.4 to -15.7)                           |
| Drug-susceptible tuberculosis                                                        | 6.3<br>(5.6 to 7.2)                       | 12.3<br>(10.9 to 13.8)                       | 1.9<br>(1.2 to 2.6)                    | -35.5<br>(-47.1 to -20.9)                         | -30.3<br>(-43.2 to -14.8)                           |
| Multidrug-resistant tuberculosis without extensive drug resistance                   | 0.2<br>(0.1 to 0.3)                       | 0.3<br>(0.1 to 0.6)                          | 0.1<br>(< 0.05 to 0.1)                 | -39.3<br>(-78.8 to 81.2)                          | -34.9<br>(-77.1 to 90.5)                            |
| Extensively drug-resistant tuberculosis                                              | < 0.05<br>(< 0.05 to 0.1)                 | 0.1<br>(< 0.05 to 0.1)                       | < 0.05<br>(< 0.05 to < 0.05)           | 87.2<br>(-34.7 to 458.4)                          | 100.7<br>(-29.3 to 487.3)                           |
| Latent tuberculosis infection                                                        | 4,672.4<br>(4,328.5 to 5,063.4)           | --                                           | --                                     | --                                                | --                                                  |
| HIV/AIDS                                                                             | 7.8<br>(5.6 to 10.7)                      | 0.5^<br>(0.2 to 0.7)                         | 0.7<br>(0.4 to 1.1)                    | 58.2<br>(20.8 to 94.2)                            | 91.8<br>(41.0 to 139.9)                             |
| Drug-susceptible HIV/AIDS - Tuberculosis                                             | 0.1<br>(0.1 to 0.2)                       | 0.2<br>(0.1 to 0.4)                          | 0.1<br>(< 0.05 to 0.1)                 | -35.2<br>(-39.6 to -30.1)                         | -21.1<br>(-26.4 to -15.0)                           |
| Multidrug-resistant HIV/AIDS - Tuberculosis without extensive drug resistance        | < 0.05<br>(< 0.05 to < 0.05)              | < 0.05<br>(< 0.05 to < 0.05)                 | < 0.05<br>(< 0.05 to < 0.05)           | -39.6<br>(-79.1 to 76.9)                          | -26.5<br>(-74.6 to 115.2)                           |
| Extensively drug-resistant HIV/AIDS - Tuberculosis                                   | < 0.05<br>(< 0.05 to < 0.05)              | < 0.05<br>(< 0.05 to < 0.05)                 | < 0.05<br>(< 0.05 to < 0.05)           | 86.2<br>(-35.7 to 445.0)                          | 126.6<br>(-21.6 to 562.9)                           |
| HIV/AIDS resulting in other diseases                                                 | 7.6<br>(5.5 to 10.6)                      | 0.5<br>(0.2 to 0.7)                          | 0.7<br>(0.4 to 1.1)                    | 79.7<br>(32.7 to 127.6)                           | 117.8<br>(56.2 to 180.7)                            |
| <b>Diarrhoea, lower respiratory infections, and other common infectious diseases</b> | <b>688.8</b><br>(653.6 to 730.5)          | <b>36,093.5†</b><br>(33,040.9 to 39,304.7)   | <b>33.0</b><br>(22.7 to 45.8)          | <b>-12.4</b><br>(-15.2 to -9.5)                   | <b>-3.3</b><br>(-6.5 to 0.1)                        |
| Diarrhoeal diseases                                                                  | 124.1<br>(115.6 to 134.0)                 | 8,049.4<br>(7,509.9 to 8,691.5)              | 13.9<br>(9.7 to 18.9)                  | -9.8<br>(-14.8 to -4.4)                           | -1.4<br>(-7.3 to 5.1)                               |
| Intestinal infectious diseases                                                       | < 0.05<br>(< 0.05 to < 0.05)              | 0.2†<br>(0.2 to 0.3)                         | < 0.05<br>(< 0.05 to < 0.05)           | -34.0<br>(-46.0 to -20.3)                         | -32.9<br>(-44.4 to -19.4)                           |
| Typhoid fever                                                                        | < 0.05<br>(< 0.05 to < 0.05)              | 0.1<br>(0.1 to 0.1)                          | < 0.05<br>(< 0.05 to < 0.05)           | -12.3<br>(-31.0 to 10.3)                          | -10.3<br>(-28.7 to 11.8)                            |
| Paratyphoid fever                                                                    | < 0.05<br>(< 0.05 to < 0.05)              | 0.1<br>(0.1 to 0.2)                          | < 0.05<br>(< 0.05 to < 0.05)           | -55.1<br>(-64.3 to -43.2)                         | -54.4<br>(-63.9 to -42.9)                           |
| Other intestinal infectious diseases                                                 | --                                        | --                                           | < 0.05<br>(< 0.05 to < 0.05)           | -41.3<br>(-54.0 to -25.5)                         | -43.7<br>(-59.2 to -21.7)                           |
| Lower respiratory infections                                                         | 23.9<br>(22.3 to 25.4)                    | 1,034.8<br>(956.0 to 1,117.4)                | 1.4<br>(0.9 to 2.0)                    | -8.3<br>(-17.3 to 2.8)                            | -9.8<br>(-18.7 to 0.3)                              |
| Upper respiratory infections                                                         | 350.5<br>(310.2 to 393.3)                 | 25,987.7<br>(22,937.1 to 29,226.2)           | 8.7<br>(5.1 to 13.5)                   | -11.9<br>(-17.2 to -6.8)                          | -0.8<br>(-5.9 to 3.9)                               |
| Otitis media                                                                         | 182.9<br>(164.4 to 202.2)                 | 754.5<br>(627.1 to 913.1)                    | 5.2<br>(3.2 to 7.7)                    | -21.2<br>(-27.1 to -14.8)                         | -10.1<br>(-16.9 to -2.8)                            |
| Meningitis                                                                           | 12.2<br>(11.0 to 13.5)                    | 1.4<br>(1.2 to 1.6)                          | 1.7<br>(1.2 to 2.2)                    | -13.7<br>(-16.5 to -11.1)                         | -4.8<br>(-7.8 to -1.9)                              |
| Pneumococcal meningitis                                                              | 4.8<br>(4.2 to 5.5)                       | 0.2<br>(0.1 to 0.2)                          | 0.7<br>(0.5 to 0.9)                    | -11.5<br>(-15.3 to -8.0)                          | -2.0<br>(-6.1 to 1.8)                               |
| H influenzae type B meningitis                                                       | 1.3<br>(1.1 to 1.5)                       | 0.1<br>(< 0.05 to 0.1)                       | 0.2<br>(0.2 to 0.4)                    | -18.8<br>(-23.5 to -14.6)                         | -9.6<br>(-15.1 to -4.4)                             |
| Meningococcal infection                                                              | 2.9<br>(2.2 to 3.6)                       | 0.6<br>(0.5 to 0.7)                          | 0.3<br>(0.2 to 0.4)                    | -18.0<br>(-22.4 to -13.9)                         | -10.1<br>(-14.9 to -5.3)                            |
| Other meningitis                                                                     | 3.3<br>(2.7 to 3.9)                       | 0.6<br>(0.5 to 0.7)                          | 0.4<br>(0.3 to 0.6)                    | -10.5<br>(-14.3 to -6.9)                          | -1.5<br>(-5.7 to 2.4)                               |
| Encephalitis                                                                         | 12.9<br>(9.2 to 17.9)                     | 4.7<br>(4.5 to 5.0)                          | 1.5<br>(1.0 to 2.0)                    | -11.4<br>(-23.4 to 1.1)                           | -4.7<br>(-16.7 to 7.8)                              |
| Diphtheria                                                                           | < 0.05<br>(< 0.05 to < 0.05)              | < 0.05<br>(< 0.05 to < 0.05)                 | < 0.05<br>(< 0.05 to < 0.05)           | -21.8<br>(-58.8 to 43.8)                          | -18.5<br>(-53.5 to 40.9)                            |
| Whooping cough                                                                       | 0.9<br>(0.7 to 1.1)                       | 6.5<br>(5.0 to 8.3)                          | < 0.05<br>(< 0.05 to 0.1)              | 8.1<br>(-19.9 to 46.1)                            | 26.4<br>(-6.9 to 72.1)                              |
| Tetanus                                                                              | < 0.05<br>(< 0.05 to < 0.05)              | < 0.05<br>(< 0.05 to < 0.05)                 | < 0.05<br>(< 0.05 to < 0.05)           | -44.6<br>(-57.4 to -30.3)                         | -41.1<br>(-54.6 to -25.2)                           |
| Measles                                                                              | < 0.05<br>(< 0.05 to < 0.05)              | < 0.05<br>(< 0.05 to < 0.05)                 | < 0.05<br>(< 0.05 to < 0.05)           | -99.9<br>(-100.0 to -99.7)                        | -99.8<br>(-100.0 to -99.7)                          |
| Varicella and herpes zoster                                                          | 15.5<br>(13.9 to 17.2)                    | 254.3<br>(242.7 to 266.1)                    | 0.7<br>(0.4 to 1.0)                    | -0.8<br>(-12.9 to 13.0)                           | -0.1<br>(-12.5 to 14.1)                             |
| <b>Neglected tropical diseases and malaria</b>                                       | <b>8.3</b><br>(3.5 to 20.4)               | <b>0.6†</b><br>(0.1 to 2.3)                  | <b>0.8</b><br>(0.2 to 1.8)             | <b>-35.5</b><br>(-87.0 to 106.1)                  | <b>-35.1</b><br>(-86.5 to 111.0)                    |
| Malaria                                                                              | --                                        | --                                           | --                                     | --                                                | --                                                  |
| Chagas disease                                                                       | --                                        | --                                           | --                                     | --                                                | --                                                  |
| Leishmaniasis                                                                        | < 0.05<br>(< 0.05 to < 0.05)              | < 0.05<br>(< 0.05 to < 0.05)                 | < 0.05<br>(< 0.05 to < 0.05)           | -35.6<br>(-88.6 to 207.8)                         | -37.2<br>(-87.6 to 180.9)                           |
| Visceral leishmaniasis                                                               | < 0.05<br>(< 0.05 to < 0.05)              | < 0.05<br>(< 0.05 to < 0.05)                 | < 0.05<br>(< 0.05 to < 0.05)           | -35.6<br>(-88.6 to 207.8)                         | -37.2<br>(-87.6 to 180.9)                           |
| Cutaneous and mucocutaneous leishmaniasis                                            | --                                        | --                                           | --                                     | --                                                | --                                                  |
| African trypanosomiasis                                                              | --                                        | --                                           | --                                     | --                                                | --                                                  |
| Schistosomiasis                                                                      | --                                        | --                                           | --                                     | --                                                | --                                                  |
| Cysticercosis                                                                        | 3.5<br>(< 0.05 to 7.9)                    | --                                           | 0.5<br>(< 0.05 to 1.3)                 | -4.3<br>(-100.0 to 211.8)                         | -3.8<br>(-100.0 to 215.6)                           |
| Cystic echinococcosis                                                                | 3.1<br>(0.6 to 11.7)                      | 0.6<br>(0.1 to 2.3)                          | 0.3<br>(< 0.05 to 1.0)                 | -58.4<br>(-94.3 to 166.5)                         | -56.0<br>(-94.4 to 189.6)                           |
| Lymphatic filariasis                                                                 | --                                        | --                                           | --                                     | --                                                | --                                                  |
| Onchocerciasis                                                                       | --                                        | --                                           | --                                     | --                                                | --                                                  |
| Trachoma                                                                             | --                                        | --                                           | --                                     | --                                                | --                                                  |
| Dengue                                                                               | --                                        | --                                           | --                                     | --                                                | --                                                  |
| Yellow fever                                                                         | --                                        | --                                           | --                                     | --                                                | --                                                  |
| Rabies                                                                               | < 0.05<br>(< 0.05 to < 0.05)              | < 0.05<br>(< 0.05 to < 0.05)                 | < 0.05<br>(< 0.05 to < 0.05)           | -69.9<br>(-79.2 to -58.5)                         | -70.2<br>(-79.6 to -56.7)                           |
| Intestinal nematode infections                                                       | --                                        | --                                           | --                                     | --                                                | --                                                  |
| Ascariasis                                                                           | --                                        | --                                           | --                                     | --                                                | --                                                  |

| Cause                                                                   | Prevalence in thousands (95% UI)                 | Incidence in thousands (95% UI)                   | YLDs in thousands (95% UI)                    |                                                   |                                                     |
|-------------------------------------------------------------------------|--------------------------------------------------|---------------------------------------------------|-----------------------------------------------|---------------------------------------------------|-----------------------------------------------------|
|                                                                         | 2016 counts                                      | 2016 counts                                       | 2016 counts                                   | Percentage change in counts between 2006 and 2016 | Percentage change in age-standardised rates between |
| Trichuriasis                                                            | --                                               | --                                                | --                                            | --                                                | --                                                  |
| Hookworm disease                                                        | --                                               | --                                                | --                                            | --                                                | --                                                  |
| Food-borne trematodiasis                                                | --                                               | --                                                | --                                            | --                                                | --                                                  |
| Leprosy                                                                 | --                                               | --                                                | --                                            | --                                                | --                                                  |
| Ebola virus disease                                                     | --                                               | --                                                | --                                            | --                                                | --                                                  |
| Zika virus disease                                                      | --                                               | --                                                | --                                            | --                                                | --                                                  |
| Guinea worm disease                                                     | --                                               | --                                                | --                                            | --                                                | --                                                  |
| Other neglected tropical diseases                                       | --                                               | --                                                | < 0.05<br>(< 0.05 to < 0.05)                  | --                                                | --                                                  |
| <b>Maternal disorders</b>                                               | <b>14.2</b><br><b>(12.1 to 16.7)</b>             | <b>271.9†</b><br><b>(249.8 to 299.8)</b>          | <b>1.0</b><br><b>(0.6 to 1.4)</b>             | <b>-20.7</b><br><b>(-38.1 to 4.3)</b>             | <b>5.4</b><br><b>(-17.9 to 37.9)</b>                |
| Maternal haemorrhage                                                    | 5.6<br>(4.3 to 7.3)                              | 59.8<br>(51.4 to 65.8)                            | 0.3<br>(0.2 to 0.5)                           | -14.7<br>(-43.2 to 28.0)                          | 13.1<br>(-25.1 to 68.7)                             |
| Maternal sepsis and other pregnancy related infections                  | 4.6<br>(3.3 to 6.2)                              | 34.6<br>(32.4 to 36.5)                            | 0.1<br>(0.1 to 0.3)                           | -24.7<br>(-62.1 to 53.3)                          | 2.9<br>(-50.0 to 110.2)                             |
| Maternal hypertensive disorders                                         | 3.3<br>(2.2 to 4.4)                              | 13.3<br>(12.5 to 14.1)                            | 0.2<br>(0.1 to 0.3)                           | -28.9<br>(-58.2 to 23.4)                          | -6.2<br>(-45.1 to 61.2)                             |
| Maternal obstructed labour and uterine rupture                          | 0.2<br>(0.1 to 0.3)                              | 15.3<br>(13.5 to 16.8)                            | 0.1<br>(< 0.05 to 0.1)                        | -18.3<br>(-66.0 to 88.6)                          | 9.5<br>(-53.8 to 148.8)                             |
| Maternal abortion, miscarriage, and ectopic pregnancy                   | 1.2<br>(0.8 to 1.7)                              | 148.9<br>(127.7 to 175.7)                         | 0.1<br>(0.1 to 0.2)                           | -12.6<br>(-54.2 to 65.1)                          | 12.7<br>(-40.9 to 116.3)                            |
| Other maternal disorders                                                | --                                               | --                                                | 0.1<br>(0.1 to 0.2)                           | -25.7<br>(-42.0 to -2.6)                          | -0.8<br>(-22.9 to 30.2)                             |
| <b>Neonatal disorders</b>                                               | <b>256.9</b><br><b>(198.1 to 321.2)</b>          | --                                                | <b>39.2</b><br><b>(21.8 to 63.6)</b>          | <b>-11.4</b><br><b>(-26.8 to 8.6)</b>             | <b>1.3</b><br><b>(-16.1 to 24.5)</b>                |
| Neonatal preterm birth complications                                    | 113.8<br>(91.3 to 148.6)                         | --                                                | 10.6<br>(7.0 to 15.2)                         | -17.3<br>(-32.8 to 0.8)                           | -5.1<br>(-23.1 to 16.4)                             |
| Neonatal encephalopathy due to birth asphyxia and trauma                | 152.0<br>(80.0 to 240.7)                         | --                                                | 22.5<br>(7.1 to 45.4)                         | -6.3<br>(-34.8 to 76.9)                           | 7.1<br>(-25.0 to 103.0)                             |
| Neonatal sepsis and other neonatal infections                           | 8.0<br>(3.4 to 17.5)                             | --                                                | 3.4<br>(1.2 to 7.9)                           | -17.8<br>(-32.8 to 3.1)                           | -7.1<br>(-24.2 to 15.8)                             |
| Hemolytic disease and other neonatal jaundice                           | 7.2<br>(6.3 to 8.3)                              | --                                                | 2.0<br>(1.5 to 2.8)                           | -17.1<br>(-29.0 to -3.5)                          | -5.9<br>(-19.9 to 10.4)                             |
| Other neonatal disorders                                                | --                                               | --                                                | 0.7<br>(0.4 to 1.1)                           | -17.1<br>(-33.4 to 5.0)                           | -2.5<br>(-21.7 to 23.4)                             |
| <b>Nutritional deficiencies</b>                                         | <b>3,608.6</b><br><b>(3,395.5 to 3,761.8)</b>    | <b>46.7†</b><br><b>(35.0 to 60.3)</b>             | <b>66.8</b><br><b>(43.6 to 98.5)</b>          | <b>-19.2</b><br><b>(-24.2 to -14.2)</b>           | <b>-11.1</b><br><b>(-16.9 to -5.1)</b>              |
| Protein-energy malnutrition                                             | 33.7<br>(19.4 to 55.9)                           | 14.5<br>(8.3 to 24.0)                             | 1.0<br>(0.5 to 1.7)                           | -29.6<br>(-58.9 to 14.1)                          | -17.2<br>(-51.5 to 34.2)                            |
| Iodine deficiency                                                       | 117.3<br>(103.2 to 133.8)                        | 1.7<br>(1.5 to 1.9)                               | 3.0<br>(2.0 to 4.2)                           | -6.3<br>(-16.2 to 5.4)                            | 0.8<br>(-10.2 to 13.9)                              |
| Vitamin A deficiency                                                    | 36.3<br>(26.5 to 48.9)                           | 30.5<br>(21.5 to 41.2)                            | --                                            | --                                                | --                                                  |
| Iron-deficiency anaemia                                                 | 3,395.7<br>(3,227.0 to 3,572.1)                  | --                                                | 62.8<br>(40.4 to 93.1)                        | -19.6<br>(-24.8 to -14.2)                         | -11.3<br>(-17.4 to -5.5)                            |
| Other nutritional deficiencies                                          | --                                               | --                                                | < 0.05<br>(< 0.05 to 0.1)                     | -30.1<br>(-59.6 to 15.9)                          | -17.8<br>(-52.5 to 36.2)                            |
| <b>Other communicable, maternal, neonatal, and nutritional diseases</b> | <b>3,528.0</b><br><b>(3,290.8 to 3,781.6)</b>    | <b>1,576.5</b><br><b>(1,378.7 to 1,799.5)</b>     | <b>7.5</b><br><b>(4.8 to 11.6)</b>            | <b>-14.0</b><br><b>(-17.9 to -9.4)</b>            | <b>-2.6</b><br><b>(-7.5 to 2.6)</b>                 |
| Sexually transmitted diseases excluding HIV                             | 2,645.3<br>(2,438.2 to 2,887.2)                  | 1,359.0<br>(1,167.9 to 1,587.2)                   | 5.3<br>(3.4 to 8.4)                           | -15.1<br>(-20.3 to -9.1)                          | -3.6<br>(-9.9 to 2.5)                               |
| Syphilis                                                                | 65.5<br>(51.8 to 81.9)                           | 48.5<br>(33.3 to 64.9)                            | 1.1<br>(0.8 to 1.6)                           | 1.8<br>(-14.9 to 22.0)                            | -2.1<br>(-17.2 to 16.4)                             |
| Chlamydial infection                                                    | 200.4<br>(134.5 to 296.5)                        | 154.5<br>(106.5 to 227.6)                         | 0.9<br>(0.5 to 1.5)                           | -21.4<br>(-31.7 to -10.6)                         | -4.7<br>(-17.2 to 9.0)                              |
| Gonococcal infection                                                    | 188.5<br>(143.1 to 244.3)                        | 648.0<br>(469.3 to 864.1)                         | 0.8<br>(0.4 to 1.3)                           | -23.2<br>(-33.5 to -12.0)                         | -1.7<br>(-14.6 to 11.0)                             |
| Trichomoniasis                                                          | 428.6<br>(374.4 to 492.9)                        | 356.3<br>(309.2 to 413.3)                         | 0.5<br>(0.2 to 1.0)                           | -12.1<br>(-18.2 to -5.2)                          | -0.9<br>(-7.7 to 6.0)                               |
| Genital herpes                                                          | 1,824.6<br>(1,554.8 to 2,165.4)                  | 67.2<br>(56.0 to 81.3)                            | 0.5<br>(0.1 to 1.1)                           | -3.8<br>(-11.3 to 2.9)                            | -0.4<br>(-7.9 to 7.2)                               |
| Other sexually transmitted diseases                                     | 75.2<br>(59.0 to 95.2)                           | 84.5<br>(71.0 to 99.8)                            | 1.6<br>(1.0 to 2.4)                           | -20.4<br>(-29.2 to -10.8)                         | -5.9<br>(-16.7 to 5.5)                              |
| Hepatitis                                                               | 956.0<br>(843.3 to 1,088.0)                      | 217.5<br>(175.7 to 254.3)                         | 0.3<br>(0.2 to 0.4)                           | 27.4<br>(2.5 to 58.5)                             | 32.1<br>(3.2 to 68.7)                               |
| Acute hepatitis A                                                       | 10.0<br>(6.9 to 12.2)                            | 129.3<br>(89.5 to 158.4)                          | 0.1<br>(0.1 to 0.2)                           | 9.5<br>(-23.2 to 58.9)                            | 21.7<br>(-19.9 to 83.8)                             |
| Hepatitis B                                                             | 498.6<br>(402.7 to 623.5)                        | 71.2<br>(55.1 to 91.9)                            | 0.1<br>(0.1 to 0.2)                           | 55.6<br>(27.0 to 90.1)                            | 53.7<br>(28.6 to 85.2)                              |
| Hepatitis C                                                             | 446.9<br>(404.0 to 490.7)                        | 9.4<br>(8.4 to 10.4)                              | < 0.05<br>(< 0.05 to < 0.05)                  | 30.0<br>(8.8 to 56.1)                             | 22.2<br>(-3.5 to 57.2)                              |
| Acute hepatitis E                                                       | 0.6<br>(0.5 to 0.7)                              | 7.6<br>(6.1 to 9.6)                               | < 0.05<br>(< 0.05 to < 0.05)                  | 34.9<br>(9.3 to 61.0)                             | 39.1<br>(22.2 to 58.1)                              |
| Other infectious diseases                                               | 107.3<br>(101.3 to 114.3)                        | < 0.05<br>(< 0.05 to < 0.05)                      | 2.0<br>(1.2 to 3.0)                           | -14.8<br>(-22.6 to -6.5)                          | -3.6<br>(-13.6 to 7.6)                              |
| <b>Non-communicable diseases</b>                                        | <b>18,066.3</b><br><b>(17,993.7 to 18,142.4)</b> | <b>61,676.7†</b><br><b>(59,543.9 to 64,159.1)</b> | <b>2,118.1</b><br><b>(1,571.7 to 2,733.4)</b> | <b>-2.4</b><br><b>(-4.1 to -0.6)</b>              | <b>-0.8</b><br><b>(-2.7 to 1.3)</b>                 |
| <b>Neoplasms</b>                                                        | <b>236.5</b><br><b>(225.3 to 250.3)</b>          | <b>87.7</b><br><b>(82.8 to 95.5)</b>              | <b>26.6</b><br><b>(19.5 to 34.4)</b>          | <b>17.0</b><br><b>(10.8 to 23.2)</b>              | <b>12.0</b><br><b>(6.3 to 17.8)</b>                 |
| Lip and oral cavity cancer                                              | 6.2<br>(5.6 to 7.0)                              | 1.8<br>(1.6 to 2.0)                               | 0.7<br>(0.4 to 0.9)                           | 13.7<br>(-10.1 to 44.5)                           | 8.3<br>(-13.8 to 37.3)                              |
| Nasopharynx cancer                                                      | 0.8<br>(0.7 to 1.0)                              | 0.2<br>(0.2 to 0.3)                               | 0.1<br>(0.1 to 0.1)                           | -6.0<br>(-20.2 to 11.0)                           | -5.5<br>(-20.6 to 13.2)                             |
| Other pharynx cancer                                                    | 4.4<br>(3.8 to 5.0)                              | 1.4<br>(1.2 to 1.6)                               | 0.5<br>(0.3 to 0.7)                           | 35.6<br>(7.2 to 67.2)                             | 31.1<br>(5.2 to 60.4)                               |
| Oesophageal cancer                                                      | 0.9<br>(0.8 to 0.9)                              | 0.8<br>(0.7 to 0.8)                               | 0.2<br>(0.1 to 0.3)                           | 8.2<br>(-2.9 to 20.4)                             | 2.8<br>(-7.9 to 14.9)                               |
| Stomach cancer                                                          | 6.0<br>(5.3 to 7.2)                              | 3.6<br>(3.3 to 4.1)                               | 0.9<br>(0.6 to 1.2)                           | -4.4<br>(-21.2 to 17.8)                           | -10.2<br>(-25.2 to 10.1)                            |
| Colon and rectum cancer                                                 | 42.3<br>(39.1 to 45.9)                           | 11.6<br>(10.8 to 12.5)                            | 3.9<br>(2.8 to 5.1)                           | 29.9<br>(14.3 to 47.9)                            | 22.1<br>(7.7 to 38.3)                               |
| Liver cancer                                                            | 1.0<br>(0.9 to 1.2)                              | 2.8<br>(2.6 to 3.0)                               | 0.6<br>(0.4 to 0.8)                           | 20.9<br>(9.0 to 34.3)                             | 14.5<br>(3.1 to 26.7)                               |
| Liver cancer due to hepatitis B                                         | 0.7<br>(0.5 to 0.9)                              | 0.8<br>(0.6 to 1.0)                               | 0.2<br>(0.1 to 0.2)                           | 18.2<br>(4.1 to 32.5)                             | 12.7<br>(-0.4 to 25.9)                              |

| Cause                                              | Prevalence in thousands (95% UI)              | Incidence in thousands (95% UI)          | YLDs in thousands (95% UI)              |                                                   |                                                     |
|----------------------------------------------------|-----------------------------------------------|------------------------------------------|-----------------------------------------|---------------------------------------------------|-----------------------------------------------------|
|                                                    | 2016 counts                                   | 2016 counts                              | 2016 counts                             | Percentage change in counts between 2006 and 2016 | Percentage change in age-standardised rates between |
| Liver cancer due to hepatitis C                    | 0.6<br>(0.5 to 0.8)                           | 0.7<br>(0.5 to 0.9)                      | 0.1<br>(0.1 to 0.2)                     | 21.3<br>(6.6 to 36.9)                             | 13.3<br>(-0.2 to 27.8)                              |
| Liver cancer due to alcohol use                    | 0.9<br>(0.7 to 1.1)                           | 0.9<br>(0.8 to 1.1)                      | 0.2<br>(0.1 to 0.3)                     | 25.1<br>(12.0 to 41.1)                            | 18.7<br>(6.3 to 33.4)                               |
| Liver cancer due to other causes                   | 0.4<br>(0.3 to 0.5)                           | 0.4<br>(0.4 to 0.5)                      | 0.1<br>(0.1 to 0.1)                     | 16.4<br>(3.1 to 31.6)                             | 10.8<br>(-1.9 to 24.8)                              |
| Gallbladder and biliary tract cancer               | 0.4<br>(0.4 to 0.5)                           | 0.6<br>(0.5 to 0.6)                      | 0.1<br>(0.1 to 0.2)                     | 2.4<br>(-4.6 to 10.0)                             | -4.9<br>(-11.5 to 1.9)                              |
| Pancreatic cancer                                  | 2.2<br>(2.0 to 2.3)                           | 2.8<br>(2.6 to 2.9)                      | 0.6<br>(0.4 to 0.7)                     | 12.9<br>(-4.4 to 32.4)                            | 5.8<br>(-9.1 to 22.3)                               |
| Larynx cancer                                      | 5.7<br>(5.2 to 6.3)                           | 1.7<br>(1.5 to 1.8)                      | 0.6<br>(0.4 to 0.8)                     | 11.4<br>(-12.8 to 43.0)                           | 6.4<br>(-16.0 to 35.4)                              |
| Tracheal, bronchus, and lung cancer                | 13.0<br>(11.9 to 14.5)                        | 10.2<br>(9.4 to 11.0)                    | 2.3<br>(1.7 to 3.0)                     | 12.0<br>(-5.1 to 34.6)                            | 5.8<br>(-10.8 to 27.2)                              |
| Malignant skin melanoma                            | 6.2<br>(4.9 to 7.1)                           | 1.3<br>(1.1 to 1.5)                      | 0.4<br>(0.3 to 0.6)                     | 39.3<br>(16.6 to 67.0)                            | 36.4<br>(13.2 to 64.9)                              |
| Non-melanoma skin cancer                           | 5.4<br>(2.1 to 12.3)                          | 8.2<br>(4.4 to 15.2)                     | 0.2<br>(0.1 to 0.6)                     | -52.2<br>(-68.5 to -2.6)                          | -56.6<br>(-71.1 to -11.8)                           |
| Non-melanoma skin cancer (squamous-cell carcinoma) | 4.0<br>(1.3 to 12.3)                          | 3.4<br>(1.2 to 10.0)                     | 0.2<br>(0.1 to 0.6)                     | -53.4<br>(-69.2 to -4.3)                          | -57.6<br>(-71.8 to -13.3)                           |
| Non-melanoma skin cancer (basal-cell carcinoma)    | 0.7<br>(0.3 to 1.3)                           | 4.8<br>(2.5 to 8.0)                      | < 0.05<br>(< 0.05 to < 0.05)            | 17.1<br>(-11.9 to 53.6)                           | 7.7<br>(-14.8 to 35.6)                              |
| Breast cancer                                      | 37.8<br>(34.3 to 42.1)                        | 8.0<br>(7.3 to 8.9)                      | 3.4<br>(2.4 to 4.5)                     | 10.1<br>(-4.2 to 26.4)                            | 4.3<br>(-9.1 to 19.9)                               |
| Cervical cancer                                    | 13.9<br>(12.2 to 15.9)                        | 3.6<br>(3.2 to 4.0)                      | 1.3<br>(0.9 to 1.7)                     | -18.6<br>(-34.4 to 0.1)                           | -20.2<br>(-35.9 to -2.5)                            |
| Uterine cancer                                     | 13.8<br>(12.1 to 15.7)                        | 2.9<br>(2.6 to 3.3)                      | 1.0<br>(0.7 to 1.4)                     | 37.9<br>(13.1 to 68.3)                            | 32.4<br>(8.6 to 59.5)                               |
| Ovarian cancer                                     | 4.9<br>(4.2 to 5.4)                           | 1.6<br>(1.4 to 1.7)                      | 0.7<br>(0.5 to 1.0)                     | 4.5<br>(-23.7 to 41.8)                            | 1.9<br>(-23.8 to 34.9)                              |
| Prostate cancer                                    | 34.7<br>(26.9 to 45.2)                        | 8.2<br>(6.6 to 10.4)                     | 3.1<br>(2.1 to 4.4)                     | 38.1<br>(10.2 to 73.8)                            | 29.5<br>(3.4 to 61.7)                               |
| Testicular cancer                                  | 2.7<br>(2.2 to 3.2)                           | 0.5<br>(0.4 to 0.6)                      | 0.2<br>(0.1 to 0.3)                     | 18.1<br>(-9.7 to 54.5)                            | 41.5<br>(7.4 to 87.1)                               |
| Kidney cancer                                      | 7.7<br>(7.0 to 8.4)                           | 2.1<br>(1.9 to 2.2)                      | 0.7<br>(0.5 to 0.9)                     | 16.1<br>(1.5 to 31.8)                             | 11.1<br>(-2.2 to 25.7)                              |
| Bladder cancer                                     | 13.9<br>(12.9 to 15.1)                        | 3.4<br>(3.2 to 3.7)                      | 1.3<br>(0.9 to 1.7)                     | 20.3<br>(3.0 to 38.4)                             | 12.8<br>(-2.9 to 29.9)                              |
| Brain and nervous system cancer                    | 3.5<br>(2.2 to 4.1)                           | 1.7<br>(1.1 to 1.9)                      | 0.5<br>(0.3 to 0.7)                     | 10.7<br>(-3.2 to 23.1)                            | 9.7<br>(-4.3 to 23.2)                               |
| Thyroid cancer                                     | 6.7<br>(5.8 to 7.5)                           | 1.3<br>(1.1 to 1.4)                      | 0.4<br>(0.3 to 0.6)                     | 43.7<br>(19.0 to 73.5)                            | 43.6<br>(19.4 to 75.7)                              |
| Mesothelioma                                       | 0.1<br>(0.1 to 0.1)                           | 0.1<br>(0.1 to 0.1)                      | < 0.05<br>(< 0.05 to < 0.05)            | 7.1<br>(-1.9 to 15.9)                             | 4.4<br>(-4.3 to 13.5)                               |
| Hodgkin lymphoma                                   | 1.7<br>(1.2 to 2.1)                           | 0.4<br>(0.3 to 0.5)                      | 0.1<br>(0.1 to 0.2)                     | 10.0<br>(-10.7 to 35.5)                           | 31.4<br>(1.7 to 72.6)                               |
| Non-Hodgkin's lymphoma                             | 6.1<br>(5.4 to 6.9)                           | 1.6<br>(1.5 to 1.8)                      | 0.5<br>(0.4 to 0.7)                     | 46.0<br>(29.4 to 66.3)                            | 42.9<br>(26.9 to 62.6)                              |
| Multiple myeloma                                   | 1.1<br>(0.9 to 1.3)                           | 0.5<br>(0.4 to 0.6)                      | 0.2<br>(0.2 to 0.3)                     | 33.1<br>(17.8 to 50.8)                            | 26.9<br>(11.3 to 44.3)                              |
| Leukaemia                                          | 7.1<br>(6.4 to 7.9)                           | 2.0<br>(1.8 to 2.2)                      | 0.9<br>(0.6 to 1.2)                     | 29.5<br>(14.8 to 46.7)                            | 33.6<br>(16.3 to 56.1)                              |
| Acute lymphoid leukaemia                           | 1.2<br>(0.9 to 1.6)                           | 0.3<br>(0.2 to 0.4)                      | 0.1<br>(0.1 to 0.2)                     | 51.1<br>(15.7 to 100.6)                           | 85.4<br>(25.6 to 174.4)                             |
| Chronic lymphoid leukaemia                         | 3.3<br>(2.9 to 3.8)                           | 0.8<br>(0.7 to 0.9)                      | 0.4<br>(0.3 to 0.6)                     | 36.9<br>(9.2 to 72.8)                             | 30.6<br>(5.1 to 63.9)                               |
| Acute myeloid leukaemia                            | 0.6<br>(0.5 to 0.8)                           | 0.4<br>(0.4 to 0.5)                      | 0.1<br>(0.1 to 0.2)                     | 37.2<br>(18.6 to 56.6)                            | 36.7<br>(13.9 to 63.4)                              |
| Chronic myeloid leukaemia                          | 0.3<br>(0.3 to 0.4)                           | 0.1<br>(0.1 to 0.1)                      | < 0.05<br>(< 0.05 to 0.1)               | -6.8<br>(-20.2 to 9.7)                            | -8.2<br>(-21.4 to 8.0)                              |
| Other leukaemia                                    | 1.6<br>(1.4 to 1.9)                           | 0.4<br>(0.3 to 0.4)                      | 0.2<br>(0.1 to 0.3)                     | 11.3<br>(-2.9 to 28.7)                            | 8.4<br>(-5.9 to 26.1)                               |
| Other neoplasms                                    | 10.7<br>(9.6 to 11.9)                         | 3.2<br>(2.9 to 3.5)                      | 0.9<br>(0.7 to 1.2)                     | 28.6<br>(12.1 to 48.6)                            | 27.8<br>(12.0 to 46.8)                              |
| <b>Cardiovascular diseases</b>                     | <b>2,527.2</b><br><b>(2,428.6 to 2,622.7)</b> | <b>309.0†</b><br><b>(294.7 to 323.6)</b> | <b>225.8</b><br><b>(164.5 to 291.6)</b> | <b>-0.6</b><br><b>(-5.3 to 4.8)</b>               | <b>-8.0</b><br><b>(-12.2 to -3.4)</b>               |
| Rheumatic heart disease                            | 3.2<br>(2.8 to 3.6)                           | 0.8<br>(0.8 to 0.8)                      | 0.3<br>(0.2 to 0.4)                     | -13.1<br>(-31.1 to 9.4)                           | -16.3<br>(-32.6 to 2.6)                             |
| Ischaemic heart disease                            | 973.2<br>(903.6 to 1,040.3)                   | 123.1<br>(115.9 to 130.6)                | 54.8<br>(37.9 to 74.2)                  | 2.3<br>(-1.5 to 6.4)                              | -4.5<br>(-8.0 to -0.8)                              |
| Cerebrovascular disease                            | 486.5<br>(449.9 to 532.2)                     | 103.1‡<br>(93.8 to 113.0)                | 97.7<br>(67.7 to 125.3)                 | -5.3<br>(-14.3 to 4.9)                            | -13.2<br>(-21.2 to -4.4)                            |
| Ischaemic stroke                                   | 423.1<br>(374.8 to 485.9)                     | 79.6‡<br>(70.2 to 89.4)                  | 81.8<br>(56.3 to 106.5)                 | -5.5<br>(-15.9 to 6.7)                            | -13.7<br>(-22.8 to -3.4)                            |
| Hemorrhagic stroke                                 | 83.3<br>(74.2 to 93.2)                        | 23.5‡<br>(21.3 to 25.7)                  | 15.9<br>(11.5 to 20.5)                  | -4.5<br>(-15.0 to 6.8)                            | -10.7<br>(-19.9 to -0.7)                            |
| Hypertensive heart disease                         | 199.1<br>(166.9 to 236.0)                     | --                                       | 15.6<br>(10.7 to 21.4)                  | 8.8<br>(-0.1 to 19.0)                             | -1.8<br>(-9.3 to 6.9)                               |
| Cardiomyopathy and myocarditis                     | 118.5<br>(103.7 to 133.0)                     | 7.1†<br>(6.3 to 8.2)                     | 9.3<br>(6.3 to 13.0)                    | 3.0<br>(-4.9 to 12.8)                             | -3.6<br>(-10.6 to 5.1)                              |
| Myocarditis                                        | 18.1<br>(15.6 to 20.9)                        | 7.1<br>(6.3 to 8.2)                      | 1.4<br>(1.0 to 2.0)                     | -7.2<br>(-19.1 to 6.5)                            | -3.6<br>(-16.0 to 10.7)                             |
| Alcoholic cardiomyopathy                           | 26.3<br>(21.9 to 31.5)                        | --                                       | 2.1<br>(1.4 to 3.1)                     | -1.8<br>(-14.5 to 14.4)                           | -3.9<br>(-16.2 to 11.6)                             |
| Other cardiomyopathy                               | 73.4<br>(60.8 to 87.9)                        | --                                       | 5.8<br>(3.9 to 8.1)                     | 7.9<br>(-2.2 to 19.6)                             | -3.4<br>(-12.0 to 6.5)                              |
| Atrial fibrillation and flutter                    | 238.2<br>(206.3 to 275.8)                     | 18.9<br>(16.1 to 22.3)                   | 18.2<br>(12.3 to 25.4)                  | 10.3<br>(3.4 to 17.9)                             | -0.7<br>(-6.7 to 6.3)                               |
| Peripheral vascular disease                        | 582.7<br>(504.4 to 674.8)                     | 52.8<br>(45.3 to 61.9)                   | 2.6<br>(1.2 to 4.9)                     | 3.9<br>(-4.6 to 13.7)                             | -7.6<br>(-14.8 to -0.1)                             |
| Endocarditis                                       | 0.9<br>(0.8 to 1.0)                           | 3.2<br>(2.8 to 3.6)                      | 0.1<br>(< 0.05 to 0.1)                  | -0.5<br>(-7.9 to 7.3)                             | -3.3<br>(-9.4 to 3.1)                               |
| Other cardiovascular and circulatory diseases      | 536.5<br>(453.7 to 629.6)                     | --                                       | 27.3<br>(18.6 to 38.6)                  | -0.9<br>(-8.6 to 7.7)                             | -4.7<br>(-11.8 to 3.3)                              |
| <b>Chronic respiratory diseases</b>                | <b>1,768.1</b><br><b>(1,707.4 to 1,829.3)</b> | <b>224.7†</b><br><b>(213.3 to 237.3)</b> | <b>68.0</b><br><b>(51.4 to 86.8)</b>    | <b>-2.8</b><br><b>(-7.7 to 2.1)</b>               | <b>-0.2</b><br><b>(-4.6 to 4.2)</b>                 |
| Chronic obstructive pulmonary disease              | 782.6<br>(745.2 to 822.6)                     | 45.2<br>(43.0 to 47.6)                   | 23.9<br>(19.4 to 28.2)                  | -0.2<br>(-11.7 to 11.3)                           | -5.0<br>(-15.8 to 5.8)                              |
| Pneumoconiosis                                     | 7.0<br>(6.4 to 7.5)                           | 0.4<br>(0.4 to 0.4)                      | 1.0<br>(0.7 to 1.4)                     | 8.2<br>(-9.8 to 30.9)                             | 1.9<br>(-14.7 to 22.5)                              |
| Silicosis                                          | 3.2<br>(2.8 to 3.6)                           | 0.2<br>(0.2 to 0.2)                      | 0.5<br>(0.3 to 0.7)                     | 7.2<br>(-20.0 to 43.1)                            | 0.6<br>(-23.5 to 33.5)                              |



| Cause                                                          | Prevalence in thousands (95% UI)        | Incidence in thousands (95% UI)          | YLDs in thousands (95% UI)        |                                                   |                                                     |
|----------------------------------------------------------------|-----------------------------------------|------------------------------------------|-----------------------------------|---------------------------------------------------|-----------------------------------------------------|
|                                                                | 2016 counts                             | 2016 counts                              | 2016 counts                       | Percentage change in counts between 2006 and 2016 | Percentage change in age-standardised rates between |
| Asbestosis                                                     | 1.9<br>(1.6 to 2.1)                     | 0.1<br>(0.1 to 0.1)                      | 0.3<br>(0.2 to 0.4)               | 5.5<br>(-25.7 to 46.8)                            | 0.5<br>(-27.1 to 38.7)                              |
| Coal workers pneumoconiosis                                    | --                                      | --                                       | --                                | --                                                | --                                                  |
| Other pneumoconiosis                                           | 1.9<br>(1.6 to 2.1)                     | 0.1<br>(0.1 to 0.1)                      | 0.3<br>(0.2 to 0.4)               | 13.1<br>(-18.2 to 51.8)                           | 5.8<br>(-22.3 to 40.1)                              |
| Asthma                                                         | 1,033.4<br>(972.4 to 1,102.8)           | 177.7<br>(166.5 to 190.3)                | 39.6<br>(26.2 to 56.1)            | -4.8<br>(-8.9 to -0.6)                            | 1.6<br>(-2.9 to 6.4)                                |
| Interstitial lung disease and pulmonary sarcoidosis            | 25.1<br>(22.8 to 27.6)                  | 1.4<br>(1.2 to 1.5)                      | 2.6<br>(1.7 to 3.8)               | -5.0<br>(-16.3 to 10.3)                           | -5.7<br>(-16.1 to 7.9)                              |
| Other chronic respiratory diseases                             | --                                      | --                                       | 0.9<br>(0.7 to 1.1)               | 17.9<br>(7.7 to 28.6)                             | 27.6<br>(17.3 to 38.9)                              |
| <b>Cirrhosis and other chronic liver diseases</b>              | <b>306.2<br/>(292.2 to 320.4)</b>       | <b>10.9<br/>(10.6 to 11.3)</b>           | <b>7.0<br/>(4.9 to 9.8)</b>       | <b>2.0<br/>(-5.7 to 10.5)</b>                     | <b>2.0<br/>(-5.7 to 10.1)</b>                       |
| Cirrhosis and other chronic liver diseases due to hepatitis B  | 47.9<br>(39.9 to 57.2)                  | 1.8<br>(1.5 to 2.2)                      | 1.1<br>(0.7 to 1.6)               | 4.5<br>(-13.2 to 27.5)                            | 2.7<br>(-16.1 to 25.0)                              |
| Cirrhosis and other chronic liver diseases due to hepatitis C  | 70.3<br>(51.1 to 94.3)                  | 2.6<br>(1.9 to 3.4)                      | 1.6<br>(1.0 to 2.4)               | 3.5<br>(-12.0 to 22.1)                            | 1.5<br>(-12.9 to 19.2)                              |
| Cirrhosis and other chronic liver diseases due to alcohol use  | 111.8<br>(90.9 to 132.9)                | 4.2<br>(3.5 to 4.9)                      | 2.5<br>(1.6 to 3.6)               | 6.1<br>(-6.8 to 20.6)                             | 3.1<br>(-9.8 to 17.2)                               |
| Cirrhosis and other chronic liver diseases due to other causes | 76.2<br>(66.5 to 86.4)                  | 2.3<br>(2.0 to 2.7)                      | 1.9<br>(1.3 to 2.7)               | -5.1<br>(-17.2 to 8.5)                            | 1.0<br>(-12.4 to 16.2)                              |
| <b>Digestive diseases</b>                                      | <b>1,066.2<br/>(1,018.9 to 1,114.6)</b> | <b>1,505.4†<br/>(1,406.4 to 1,605.3)</b> | <b>37.3<br/>(26.6 to 49.7)</b>    | <b>6.5<br/>(1.1 to 12.6)</b>                      | <b>5.5<br/>(0.3 to 11.5)</b>                        |
| Peptic ulcer disease                                           | 335.7<br>(307.9 to 365.2)               | 24.1<br>(21.7 to 26.8)                   | 5.4<br>(3.6 to 8.0)               | 23.6<br>(11.5 to 38.0)                            | 20.2<br>(8.6 to 33.7)                               |
| Gastritis and duodenitis                                       | 436.4<br>(387.0 to 490.9)               | 417.7<br>(372.1 to 471.3)                | 6.4<br>(4.2 to 9.2)               | 20.6<br>(11.0 to 31.1)                            | 16.8<br>(7.7 to 27.1)                               |
| Appendicitis                                                   | 1.6<br>(1.4 to 1.7)                     | 40.7<br>(37.7 to 43.8)                   | 0.5<br>(0.3 to 0.7)               | -16.0<br>(-34.0 to 8.5)                           | -1.5<br>(-27.1 to 34.0)                             |
| Paralytic ileus and intestinal obstruction                     | 0.5<br>(0.4 to 0.5)                     | 12.7<br>(11.7 to 13.6)                   | 0.1<br>(0.1 to 0.2)               | 7.1<br>(-3.7 to 20.9)                             | 2.9<br>(-5.3 to 12.2)                               |
| Inguinal, femoral, and abdominal hernia                        | 197.2<br>(179.6 to 215.3)               | 520.7<br>(453.4 to 584.7)                | 14.3<br>(9.7 to 19.7)             | -2.2<br>(-9.6 to 6.5)                             | -2.1<br>(-9.7 to 6.8)                               |
| Inflammatory bowel disease                                     | 35.9<br>(33.6 to 38.7)                  | 14.4<br>(13.9 to 14.9)                   | 5.0<br>(3.5 to 6.9)               | -1.3<br>(-11.4 to 8.9)                            | 1.4<br>(-8.7 to 12.6)                               |
| Vascular intestinal disorders                                  | 0.5<br>(0.4 to 0.5)                     | 2.8<br>(2.5 to 3.1)                      | 0.1<br>(0.1 to 0.2)               | 15.1<br>(9.0 to 21.1)                             | 9.7<br>(4.9 to 14.8)                                |
| Gallbladder and biliary diseases                               | 91.7<br>(80.7 to 103.7)                 | 436.6<br>(383.4 to 498.8)                | 1.7<br>(1.1 to 2.4)               | 10.8<br>(-7.3 to 31.9)                            | 9.2<br>(-7.7 to 29.9)                               |
| Pancreatitis                                                   | 4.0<br>(3.7 to 4.4)                     | 35.7<br>(32.6 to 39.1)                   | 0.5<br>(0.3 to 0.7)               | 17.4<br>(-3.3 to 42.5)                            | 14.3<br>(-3.1 to 35.5)                              |
| Other digestive diseases                                       | --                                      | --                                       | 3.1<br>(2.2 to 4.1)               | 13.0<br>(7.4 to 19.5)                             | 9.8<br>(3.5 to 16.9)                                |
| <b>Neurological disorders</b>                                  | <b>7,119.1<br/>(6,852.2 to 7,431.9)</b> | <b>2,900.3<br/>(2,531.1 to 3,329.8)</b>  | <b>229.3<br/>(155.8 to 315.8)</b> | <b>-5.7<br/>(-17.2 to 7.9)</b>                    | <b>-0.3<br/>(-14.3 to 16.3)</b>                     |
| Alzheimer's disease and other dementias                        | 182.1<br>(151.6 to 217.8)               | 31.2<br>(25.8 to 37.7)                   | 26.6<br>(18.5 to 35.7)            | 21.2<br>(14.0 to 28.8)                            | -1.0<br>(-5.8 to 4.1)                               |
| Parkinson's disease                                            | 40.5<br>(31.4 to 51.0)                  | 4.7<br>(3.6 to 6.0)                      | 4.6<br>(2.9 to 6.4)               | 15.7<br>(3.6 to 28.0)                             | 4.6<br>(-5.8 to 15.6)                               |
| Epilepsy                                                       | 58.8<br>(12.2 to 113.3)                 | 5.9<br>(1.2 to 11.4)                     | 16.1<br>(2.8 to 38.3)             | -9.8<br>(-84.1 to 522.6)                          | -1.5<br>(-83.0 to 567.5)                            |
| Multiple sclerosis                                             | 8.4<br>(7.4 to 9.6)                     | 0.3<br>(0.2 to 0.3)                      | 2.2<br>(1.5 to 3.0)               | 12.5<br>(-4.1 to 31.4)                            | 15.6<br>(-1.2 to 35.5)                              |
| Motor neuron disease                                           | 0.6<br>(0.6 to 0.7)                     | 0.1<br>(0.1 to 0.1)                      | 0.1<br>(0.1 to 0.2)               | 0.8<br>(-2.8 to 4.6)                              | 5.1<br>(1.6 to 9.3)                                 |
| Migraine                                                       | 3,174.9<br>(2,988.1 to 3,362.0)         | 316.1<br>(294.7 to 340.2)                | 149.5<br>(97.0 to 207.6)          | -9.4<br>(-12.3 to -6.3)                           | -0.6<br>(-3.8 to 2.7)                               |
| Tension-type headache                                          | 4,843.1<br>(4,363.1 to 5,372.7)         | 2,541.9<br>(2,172.8 to 2,974.0)          | 26.7<br>(16.9 to 39.9)            | -8.3<br>(-13.2 to -3.2)                           | -1.2<br>(-6.0 to 3.9)                               |
| Other neurological disorders                                   | 0.1<br>(0.1 to 0.1)                     | 0.2<br>(0.1 to 0.2)                      | 3.6<br>(1.4 to 7.4)               | 4.6<br>(-65.8 to 252.0)                           | 18.1<br>(-68.1 to 364.3)                            |
| <b>Mental and substance use disorders</b>                      | <b>2,668.9<br/>(2,579.5 to 2,756.8)</b> | <b>981.2†<br/>(919.9 to 1,054.8)</b>     | <b>353.5<br/>(258.1 to 454.9)</b> | <b>-9.3<br/>(-11.5 to -7.0)</b>                   | <b>-0.6<br/>(-2.8 to 1.7)</b>                       |
| Schizophrenia                                                  | 50.1<br>(42.0 to 59.6)                  | 2.3<br>(1.9 to 2.7)                      | 31.7<br>(22.8 to 40.9)            | -4.4<br>(-12.2 to 4.4)                            | 1.7<br>(-6.8 to 11.1)                               |
| Alcohol use disorders                                          | 307.4<br>(271.9 to 345.3)               | 168.3<br>(147.3 to 190.9)                | 30.4<br>(20.8 to 41.6)            | -14.5<br>(-21.4 to -6.8)                          | -3.3<br>(-11.1 to 5.6)                              |
| Drug use disorders                                             | 91.9<br>(85.8 to 98.3)                  | 13.4<br>(12.3 to 14.5)                   | 19.6<br>(14.1 to 25.3)            | -16.7<br>(-23.5 to -9.0)                          | -4.3<br>(-12.6 to 5.0)                              |
| Opioid use disorders                                           | 34.2<br>(29.7 to 39.4)                  | 4.6<br>(4.0 to 5.3)                      | 13.9<br>(9.6 to 18.8)             | -16.9<br>(-25.8 to -7.4)                          | -6.0<br>(-16.3 to 5.2)                              |
| Cocaine use disorders                                          | 10.8<br>(9.3 to 12.5)                   | 0.8<br>(0.6 to 0.9)                      | 1.5<br>(0.9 to 2.2)               | -15.4<br>(-33.8 to 5.7)                           | -0.8<br>(-22.9 to 24.5)                             |
| Amphetamine use disorders                                      | 3.1<br>(2.2 to 4.1)                     | 0.4<br>(0.3 to 0.5)                      | 0.4<br>(0.2 to 0.7)               | -32.1<br>(-50.4 to -6.7)                          | -9.2<br>(-37.1 to 30.4)                             |
| Cannabis use disorders                                         | 31.9<br>(27.7 to 36.8)                  | 5.1<br>(4.4 to 6.0)                      | 0.9<br>(0.6 to 1.4)               | -17.8<br>(-30.1 to -1.8)                          | 7.1<br>(-10.3 to 30.1)                              |
| Other drug use disorders                                       | 14.8<br>(13.5 to 16.2)                  | 2.5<br>(2.3 to 2.7)                      | 2.8<br>(1.9 to 4.0)               | -12.8<br>(-25.4 to 2.9)                           | -0.7<br>(-15.5 to 17.5)                             |
| Depressive disorders                                           | 595.3<br>(557.7 to 639.9)               | 632.2<br>(570.8 to 702.6)                | 98.0<br>(67.8 to 131.7)           | -5.3<br>(-10.4 to 0.0)                            | -0.4<br>(-5.4 to 5.0)                               |
| Major depressive disorder                                      | 391.0<br>(354.9 to 432.0)               | 594.5<br>(535.5 to 663.4)                | 77.9<br>(53.6 to 106.2)           | -6.5<br>(-12.8 to 0.1)                            | -1.4<br>(-7.0 to 4.9)                               |
| Dysthymia                                                      | 214.0<br>(187.0 to 246.0)               | 37.6<br>(33.0 to 43.2)                   | 20.2<br>(13.7 to 29.1)            | -0.6<br>(-7.5 to 7.1)                             | 3.6<br>(-3.3 to 11.1)                               |
| Bipolar disorder                                               | 147.4<br>(129.1 to 167.1)               | 10.2<br>(9.1 to 11.7)                    | 29.7<br>(18.5 to 43.4)            | -11.3<br>(-16.6 to -6.0)                          | -0.1<br>(-5.8 to 5.8)                               |
| Anxiety disorders                                              | 697.1<br>(636.4 to 762.8)               | 100.5<br>(92.7 to 108.3)                 | 66.0<br>(46.2 to 89.2)            | -8.2<br>(-13.8 to -2.4)                           | 0.1<br>(-5.7 to 6.3)                                |
| Eating disorders                                               | 17.9<br>(14.5 to 21.8)                  | 8.4<br>(6.4 to 11.1)                     | 3.6<br>(2.3 to 5.3)               | -9.3<br>(-21.3 to 5.1)                            | 17.3<br>(2.0 to 34.2)                               |
| Anorexia nervosa                                               | 3.9<br>(2.9 to 5.2)                     | 1.5<br>(1.1 to 2.0)                      | 0.8<br>(0.5 to 1.3)               | -14.3<br>(-34.1 to 12.9)                          | 14.4<br>(-11.3 to 49.6)                             |
| Bulimia nervosa                                                | 13.2<br>(10.1 to 17.7)                  | 6.9<br>(4.9 to 9.5)                      | 2.8<br>(1.7 to 4.2)               | -7.6<br>(-22.5 to 9.7)                            | 18.3<br>(0.6 to 39.4)                               |
| Autistic spectrum disorders                                    | 156.2<br>(140.7 to 174.2)               | 0.6<br>(0.4 to 0.9)                      | 23.0<br>(15.5 to 32.3)            | -10.8<br>(-14.7 to -6.4)                          | 0.2<br>(-4.2 to 4.9)                                |
| Autism                                                         | 50.0<br>(42.9 to 58.4)                  | 0.1<br>( $< 0.05$ to 0.1)                | 12.5<br>(7.9 to 18.3)             | -10.7<br>(-17.1 to -3.9)                          | 0.1<br>(-7.2 to 8.0)                                |
| Asperger syndrome and other autistic spectrum disorders        | 106.5<br>(88.6 to 127.5)                | 0.6<br>(0.4 to 0.8)                      | 10.5<br>(6.9 to 15.3)             | -11.0<br>(-14.9 to -6.9)                          | 0.3<br>(-4.1 to 4.8)                                |



| Cause                                                      | Prevalence in thousands (95% UI)                 | Incidence in thousands (95% UI)                              | YLDs in thousands (95% UI)              |                                                   |                                                     |
|------------------------------------------------------------|--------------------------------------------------|--------------------------------------------------------------|-----------------------------------------|---------------------------------------------------|-----------------------------------------------------|
|                                                            | 2016 counts                                      | 2016 counts                                                  | 2016 counts                             | Percentage change in counts between 2006 and 2016 | Percentage change in age-standardised rates between |
| Attention-deficit/hyperactivity disorder                   | 117.0<br>(105.9 to 130.1)                        | 4.1<br>(3.6 to 4.8)                                          | 1.4<br>(0.8 to 2.2)                     | -18.1<br>(-24.4 to -11.6)                         | 0.1<br>(-8.0 to 8.3)                                |
| Conduct disorder                                           | 94.2<br>(77.8 to 112.1)                          | 31.8<br>(25.3 to 38.0)                                       | 11.5<br>(7.0 to 17.5)                   | -21.1<br>(-26.3 to -15.4)                         | 0.1<br>(-6.2 to 6.8)                                |
| Idiopathic developmental intellectual disability           | 148.8<br>(70.6 to 224.1)                         | --                                                           | 6.7<br>(2.8 to 11.6)                    | -22.1<br>(-28.7 to -16.7)                         | -11.2<br>(-18.8 to -5.0)                            |
| Other mental and substance use disorders                   | 437.0<br>(388.2 to 500.7)                        | 9.2<br>(8.2 to 10.3)                                         | 32.0<br>(22.3 to 45.5)                  | -6.1<br>(-10.5 to -1.4)                           | 0.1<br>(-4.6 to 5.0)                                |
| <b>Diabetes, urogenital, blood, and endocrine diseases</b> | <b>6,095.5</b><br><b>(5,993.9 to 6,212.1)</b>    | <b>2,507.3<sup>+</sup></b><br><b>(2,375.7 to 2,653.2)</b>    | <b>156.8</b><br><b>(110.9 to 210.6)</b> | <b>2.3</b><br><b>(-1.5 to 6.6)</b>                | <b>0.9</b><br><b>(-2.6 to 4.8)</b>                  |
| Diabetes mellitus                                          | 719.3<br>(642.4 to 807.6)                        | 33.1<br>(29.6 to 36.9)                                       | 61.9<br>(42.6 to 84.9)                  | 10.4<br>(0.5 to 20.2)                             | 4.6<br>(-4.9 to 14.3)                               |
| Acute glomerulonephritis                                   | 0.3<br>(0.3 to 0.4)                              | 5.0<br>(4.5 to 5.5)                                          | < 0.05<br>(< 0.05 to < 0.05)            | -8.8<br>(-12.9 to -4.1)                           | 0.3<br>(-3.6 to 4.5)                                |
| Chronic kidney disease                                     | 815.3<br>(748.9 to 881.4)                        | 55.6<br>(49.2 to 61.6)                                       | 24.2<br>(18.0 to 30.5)                  | 5.2<br>(-3.1 to 13.5)                             | -2.0<br>(-9.5 to 5.0)                               |
| Chronic kidney disease due to diabetes mellitus            | 229.2<br>(210.1 to 249.1)                        | 16.2<br>(14.2 to 18.1)                                       | 7.0<br>(5.2 to 8.8)                     | 23.0<br>(6.4 to 41.1)                             | 15.8<br>(-0.2 to 32.4)                              |
| Chronic kidney disease due to hypertension                 | 155.7<br>(141.9 to 169.5)                        | 15.5<br>(13.8 to 17.2)                                       | 2.3<br>(1.6 to 3.0)                     | 23.8<br>(5.8 to 43.4)                             | 5.0<br>(-9.2 to 20.6)                               |
| Chronic kidney disease due to glomerulonephritis           | 143.8<br>(130.8 to 156.5)                        | 4.6<br>(3.7 to 5.6)                                          | 6.9<br>(5.1 to 8.6)                     | -19.6<br>(-28.2 to -9.9)                          | -22.8<br>(-30.7 to -14.0)                           |
| Chronic kidney disease due to other causes                 | 286.7<br>(262.8 to 310.7)                        | 19.3<br>(17.1 to 21.5)                                       | 8.1<br>(6.1 to 10.3)                    | 16.2<br>(2.6 to 30.9)                             | 7.9<br>(-3.6 to 20.8)                               |
| Urinary diseases and male infertility                      | 613.8<br>(552.3 to 684.3)                        | 1,576.5 <sup>+</sup><br>(1,451.9 to 1,709.7)                 | 18.8<br>(12.2 to 27.2)                  | 2.9<br>(-2.6 to 9.1)                              | -1.0<br>(-6.5 to 4.7)                               |
| Interstitial nephritis and urinary tract infections        | 21.0<br>(18.7 to 23.3)                           | 1,090.0<br>(973.8 to 1,206.7)                                | 0.7<br>(0.4 to 1.1)                     | -11.9<br>(-23.1 to 1.7)                           | 1.0<br>(-12.0 to 15.6)                              |
| Urolithiasis                                               | 16.0<br>(14.3 to 18.0)                           | 422.9<br>(377.9 to 474.0)                                    | 1.1<br>(0.8 to 1.6)                     | -1.5<br>(-17.5 to 16.3)                           | 0.3<br>(-14.8 to 17.3)                              |
| Benign prostatic hyperplasia                               | 501.1<br>(429.5 to 588.1)                        | 63.6<br>(52.3 to 76.7)                                       | 16.1<br>(10.2 to 23.4)                  | 5.9<br>(-0.9 to 12.7)                             | -0.1<br>(-6.5 to 6.6)                               |
| Male infertility                                           | 57.3<br>(43.5 to 75.5)                           | --                                                           | 0.3<br>(0.1 to 0.7)                     | -18.6<br>(-25.8 to -11.2)                         | -2.9<br>(-10.6 to 5.7)                              |
| Other urinary diseases                                     | --                                               | --                                                           | 0.6<br>(0.4 to 0.8)                     | -22.6<br>(-31.5 to -12.9)                         | -17.0<br>(-25.5 to -7.7)                            |
| Gynecological diseases                                     | 2,298.6<br>(2,206.4 to 2,398.2)                  | 746.0 <sup>+</sup><br>(703.6 to 792.9)                       | 26.8<br>(18.1 to 38.2)                  | -11.8<br>(-15.7 to -8.0)                          | -0.8<br>(-4.5 to 2.9)                               |
| Uterine fibroids                                           | 235.2<br>(213.2 to 265.6)                        | 22.7<br>(19.7 to 26.4)                                       | 3.9<br>(2.3 to 6.4)                     | -3.1<br>(-12.2 to 6.5)                            | -2.9<br>(-12.0 to 7.1)                              |
| Polycystic ovarian syndrome                                | 18.3<br>(13.8 to 23.9)                           | 8.7<br>(6.0 to 12.0)                                         | 0.2<br>(0.1 to 0.3)                     | -14.7<br>(-23.3 to -5.5)                          | 0.3<br>(-9.6 to 10.6)                               |
| Female infertility                                         | 16.4<br>(6.1 to 37.2)                            | --                                                           | 0.1<br>(< 0.05 to 0.3)                  | -13.5<br>(-35.2 to 24.2)                          | 11.7<br>(-18.1 to 57.2)                             |
| Endometriosis                                              | 5.8<br>(4.7 to 6.9)                              | 20.8<br>(16.8 to 25.2)                                       | 0.6<br>(0.3 to 0.8)                     | -23.9<br>(-40.7 to -1.4)                          | -1.0<br>(-23.5 to 29.6)                             |
| Genital prolapse                                           | 802.9<br>(707.0 to 913.5)                        | 32.4<br>(28.0 to 37.2)                                       | 2.5<br>(1.2 to 4.5)                     | 14.8<br>(3.5 to 28.4)                             | 10.4<br>(0.1 to 22.8)                               |
| Premenstrual syndrome                                      | 1,170.1<br>(1,105.3 to 1,239.7)                  | 401.9<br>(375.4 to 432.3)                                    | 9.8<br>(6.0 to 14.9)                    | -15.0<br>(-20.6 to -9.5)                          | -1.2<br>(-7.6 to 5.4)                               |
| Other gynecological diseases                               | 285.4<br>(256.8 to 321.2)                        | 259.4<br>(227.2 to 304.8)                                    | 9.8<br>(6.5 to 13.7)                    | -15.9<br>(-21.3 to -10.3)                         | -1.6<br>(-6.9 to 4.0)                               |
| Hemoglobinopathies and hemolytic anaemias                  | 2,255.0<br>(2,214.2 to 2,297.3)                  | --                                                           | 5.4<br>(3.5 to 7.9)                     | -7.2<br>(-14.2 to 0.3)                            | -2.6<br>(-10.5 to 5.8)                              |
| Thalassemias                                               | < 0.05<br>(< 0.05 to < 0.05)                     | --                                                           | < 0.05<br>(< 0.05 to < 0.05)            | -15.1<br>(-30.3 to -0.6)                          | -1.2<br>(-20.2 to 16.8)                             |
| Thalassaemias trait                                        | 97.9<br>(86.0 to 109.6)                          | --                                                           | 1.4<br>(0.8 to 2.0)                     | 5.5<br>(-7.6 to 17.9)                             | 7.7<br>(-5.5 to 20.4)                               |
| Sickle cell disorders                                      | 0.1<br>(0.1 to 0.1)                              | --                                                           | < 0.05<br>(< 0.05 to < 0.05)            | -18.8<br>(-23.1 to -14.2)                         | -2.4<br>(-8.5 to 3.9)                               |
| Sickle cell trait                                          | 269.7<br>(262.3 to 277.4)                        | --                                                           | 0.6<br>(0.4 to 1.0)                     | -8.5<br>(-19.6 to 5.0)                            | -0.2<br>(-13.2 to 16.4)                             |
| G6PD deficiency                                            | 228.4<br>(205.6 to 256.1)                        | --                                                           | < 0.05<br>(< 0.05 to < 0.05)            | -21.8<br>(-29.8 to -12.2)                         | -17.9<br>(-27.4 to -6.8)                            |
| G6PD trait                                                 | 1,494.8<br>(1,469.3 to 1,525.3)                  | --                                                           | < 0.05<br>(< 0.05 to < 0.05)            | 1.7<br>(-8.2 to 13.3)                             | 9.2<br>(-2.3 to 22.1)                               |
| Other hemoglobinopathies and hemolytic anaemias            | 227.4<br>(215.8 to 239.4)                        | --                                                           | 3.3<br>(2.2 to 5.0)                     | -11.1<br>(-18.2 to -2.4)                          | -6.5<br>(-14.7 to 3.0)                              |
| Endocrine, metabolic, blood, and immune disorders          | 639.7<br>(585.9 to 701.4)                        | 91.2<br>(81.2 to 102.3)                                      | 19.7<br>(13.3 to 27.2)                  | -0.4<br>(-5.4 to 5.0)                             | 0.3<br>(-4.5 to 5.2)                                |
| <b>Musculoskeletal disorders</b>                           | <b>4,546.9</b><br><b>(4,359.0 to 4,778.5)</b>    | <b>1,910.8</b><br><b>(1,695.0 to 2,140.4)</b>                | <b>528.5</b><br><b>(378.0 to 691.2)</b> | <b>0.9</b><br><b>(-2.3 to 4.2)</b>                | <b>0.6</b><br><b>(-2.4 to 3.6)</b>                  |
| Rheumatoid arthritis                                       | 81.7<br>(72.2 to 91.9)                           | 3.8<br>(3.3 to 4.3)                                          | 18.8<br>(12.8 to 24.9)                  | 7.0<br>(-0.6 to 16.0)                             | 4.2<br>(-3.0 to 12.3)                               |
| Osteoarthritis                                             | 1,306.7<br>(1,225.3 to 1,393.0)                  | 55.5<br>(51.6 to 59.7)                                       | 79.1<br>(55.8 to 107.4)                 | 8.4<br>(4.4 to 12.3)                              | 2.0<br>(-1.7 to 5.7)                                |
| Low back and neck pain                                     | 3,458.8<br>(3,233.6 to 3,686.5)                  | 1,676.1<br>(1,461.8 to 1,900.4)                              | 411.9<br>(289.6 to 541.8)               | -0.5<br>(-4.5 to 3.7)                             | 0.2<br>(-3.5 to 3.7)                                |
| Low back pain                                              | 2,856.4<br>(2,539.4 to 3,219.3)                  | 1,475.8<br>(1,262.3 to 1,698.8)                              | 318.6<br>(226.7 to 420.8)               | -0.6<br>(-5.7 to 4.7)                             | 0.3<br>(-4.5 to 4.8)                                |
| Neck pain                                                  | 950.3<br>(816.4 to 1,101.4)                      | 200.3<br>(173.0 to 235.4)                                    | 93.2<br>(63.8 to 132.0)                 | -0.0<br>(-3.0 to 2.7)                             | 0.0<br>(-2.0 to 2.1)                                |
| Gout                                                       | 104.1<br>(91.4 to 118.1)                         | 20.2<br>(17.6 to 23.1)                                       | 3.2<br>(2.1 to 4.5)                     | 5.2<br>(-8.1 to 21.2)                             | 0.8<br>(-12.5 to 16.4)                              |
| Other musculoskeletal disorders                            | 184.1<br>(145.6 to 236.7)                        | 155.1<br>(122.7 to 198.3)                                    | 15.6<br>(10.1 to 23.1)                  | -4.9<br>(-16.9 to 8.6)                            | 0.0<br>(-12.8 to 13.8)                              |
| <b>Other non-communicable diseases</b>                     | <b>15,418.7</b><br><b>(15,217.7 to 15,618.1)</b> | <b>51,239.4<sup>+</sup></b><br><b>(49,100.9 to 53,627.8)</b> | <b>485.2</b><br><b>(336.1 to 687.5)</b> | <b>-2.7</b><br><b>(-4.0 to -1.4)</b>              | <b>-1.2</b><br><b>(-2.5 to -0.0)</b>                |
| Congenital anomalies                                       | 217.8<br>(200.7 to 237.5)                        | --                                                           | 26.8<br>(19.7 to 35.0)                  | -11.8<br>(-16.6 to -6.8)                          | -2.4<br>(-7.8 to 3.1)                               |
| Neural tube defects                                        | 23.5<br>(21.1 to 26.2)                           | --                                                           | 7.0<br>(5.0 to 9.4)                     | -17.0<br>(-25.8 to -6.9)                          | -8.8<br>(-18.6 to 2.6)                              |
| Congenital heart anomalies                                 | 45.3<br>(39.9 to 51.0)                           | --                                                           | 2.4<br>(1.0 to 4.1)                     | 0.5<br>(-9.2 to 11.3)                             | 10.8<br>(0.3 to 22.9)                               |
| Orofacial clefts                                           | 12.3<br>(10.9 to 13.9)                           | --                                                           | 0.1<br>(0.1 to 0.2)                     | -25.3<br>(-33.3 to -16.5)                         | -17.6<br>(-26.9 to -7.6)                            |
| Down's syndrome                                            | 5.8<br>(5.0 to 6.6)                              | --                                                           | 0.6<br>(0.4 to 0.8)                     | -10.9<br>(-17.0 to -4.5)                          | 1.9<br>(-5.0 to 9.2)                                |
| Turner syndrome                                            | 16.8<br>(14.5 to 19.3)                           | --                                                           | 0.3<br>(0.1 to 0.5)                     | -17.8<br>(-33.1 to 4.0)                           | -3.2<br>(-21.7 to 21.7)                             |
| Klinefelter syndrome                                       | 5.9<br>(5.0 to 6.8)                              | --                                                           | < 0.05<br>(< 0.05 to 0.1)               | -17.0<br>(-37.3 to 6.9)                           | 3.6<br>(-20.6 to 33.0)                              |

| Cause                                         | Prevalence in thousands (95% UI)               | Incidence in thousands (95% UI)                           | YLDs in thousands (95% UI)              |                                                   |                                                     |
|-----------------------------------------------|------------------------------------------------|-----------------------------------------------------------|-----------------------------------------|---------------------------------------------------|-----------------------------------------------------|
|                                               | 2016 counts                                    | 2016 counts                                               | 2016 counts                             | Percentage change in counts between 2006 and 2016 | Percentage change in age-standardised rates between |
| Other chromosomal abnormalities               | 10.7<br>(9.4 to 12.3)                          | --                                                        | 1.4<br>(1.0 to 2.0)                     | -14.5<br>(-28.1 to -0.6)                          | 3.1<br>(-13.7 to 20.8)                              |
| Congenital musculoskeletal and limb anomalies | 38.9<br>(35.3 to 42.6)                         | --                                                        | 5.3<br>(3.7 to 7.4)                     | -7.2<br>(-15.8 to 2.0)                            | 1.0<br>(-8.2 to 11.0)                               |
| Urogenital congenital anomalies               | 29.8<br>(26.8 to 33.0)                         | --                                                        | 0.6<br>(0.4 to 1.0)                     | -12.8<br>(-21.6 to -4.2)                          | 0.4<br>(-10.7 to 11.8)                              |
| Digestive congenital anomalies                | 29.3<br>(25.8 to 33.0)                         | --                                                        | 1.3<br>(0.9 to 1.9)                     | -15.1<br>(-25.3 to -3.7)                          | -6.5<br>(-18.2 to 5.9)                              |
| Other congenital anomalies                    | 52.1<br>(32.2 to 78.6)                         | --                                                        | 7.8<br>(5.2 to 11.1)                    | -11.7<br>(-19.6 to -2.7)                          | -3.6<br>(-11.8 to 5.8)                              |
| Skin and subcutaneous diseases                | 5,885.7<br>(5,738.8 to 6,033.7)                | 16,334.8<br>(15,356.9 to 17,353.8)                        | 125.1<br>(84.6 to 181.9)                | -10.5<br>(-12.5 to -8.6)                          | 1.4<br>(-0.9 to 3.4)                                |
| Dermatitis                                    | 655.6<br>(616.3 to 701.5)                      | 919.0<br>(841.7 to 1,004.9)                               | 23.7<br>(14.3 to 37.7)                  | -9.7<br>(-13.5 to -5.9)                           | -0.1<br>(-4.6 to 4.8)                               |
| Psoriasis                                     | 229.8<br>(218.6 to 241.6)                      | 28.8<br>(27.4 to 30.2)                                    | 19.6<br>(14.0 to 25.6)                  | -0.4<br>(-6.4 to 6.2)                             | 5.9<br>(-1.2 to 13.2)                               |
| Cellulitis                                    | 10.4<br>(9.7 to 11.1)                          | 241.5<br>(226.9 to 256.7)                                 | 0.6<br>(0.4 to 0.8)                     | -6.2<br>(-23.4 to 13.8)                           | 1.4<br>(-16.9 to 24.3)                              |
| Pyoderma                                      | 114.1<br>(110.3 to 118.2)                      | 3,216.7<br>(3,091.3 to 3,341.3)                           | 0.6<br>(0.2 to 1.3)                     | 2.0<br>(-2.6 to 7.0)                              | 0.6<br>(-4.3 to 5.8)                                |
| Scabies                                       | 138.7<br>(123.5 to 156.8)                      | 418.1<br>(371.1 to 473.6)                                 | 3.5<br>(2.0 to 5.6)                     | -21.5<br>(-25.3 to -17.0)                         | -8.9<br>(-13.0 to -4.3)                             |
| Fungal skin diseases                          | 1,952.5<br>(1,742.0 to 2,168.0)                | 7,425.9<br>(6,473.0 to 8,442.6)                           | 10.7<br>(4.2 to 22.4)                   | -1.0<br>(-2.8 to 0.9)                             | 0.1<br>(-1.0 to 1.2)                                |
| Viral skin diseases                           | 427.9<br>(412.3 to 444.1)                      | 645.2<br>(619.6 to 669.6)                                 | 13.0<br>(8.0 to 19.2)                   | -12.2<br>(-15.1 to -9.3)                          | -0.1<br>(-3.2 to 3.2)                               |
| Acne vulgaris                                 | 1,114.9<br>(1,015.1 to 1,225.9)                | 723.0<br>(613.6 to 869.6)                                 | 28.7<br>(19.2 to 41.2)                  | -22.4<br>(-26.3 to -18.7)                         | 2.0<br>(-3.1 to 7.1)                                |
| Alopecia areata                               | 37.0<br>(35.7 to 38.5)                         | 64.9<br>(62.4 to 67.4)                                    | 1.2<br>(0.8 to 1.8)                     | -11.4<br>(-20.2 to -1.6)                          | -0.1<br>(-10.1 to 11.3)                             |
| Pruritus                                      | 211.1<br>(186.0 to 241.6)                      | 165.4<br>(146.3 to 189.2)                                 | 2.2<br>(1.0 to 4.1)                     | -1.9<br>(-6.9 to 3.8)                             | 1.8<br>(-2.9 to 7.0)                                |
| Urticaria                                     | 167.7<br>(149.6 to 188.5)                      | 296.6<br>(262.1 to 335.3)                                 | 10.0<br>(6.4 to 14.3)                   | -10.7<br>(-15.4 to -5.8)                          | -0.0<br>(-5.1 to 4.8)                               |
| Decubitus ulcer                               | 10.7<br>(9.6 to 12.0)                          | 39.1<br>(34.7 to 43.8)                                    | 1.6<br>(1.1 to 2.2)                     | 9.6<br>(-7.0 to 28.2)                             | 3.3<br>(-10.1 to 18.6)                              |
| Other skin and subcutaneous diseases          | 1,806.4<br>(1,753.5 to 1,861.8)                | 2,150.8<br>(2,077.2 to 2,231.3)                           | 9.7<br>(4.7 to 17.5)                    | 4.6<br>(2.2 to 7.1)                               | 6.3<br>(3.9 to 8.9)                                 |
| Sense organ diseases                          | 6,665.7<br>(6,450.8 to 6,885.8)                | 2,141.3 <sup>†</sup><br>(2,025.6 to 2,265.4)              | 245.8<br>(170.3 to 345.2)               | 1.3<br>(-0.8 to 3.5)                              | -3.5<br>(-5.6 to -1.4)                              |
| Glaucoma                                      | 21.7<br>(17.6 to 25.8)                         | --                                                        | 1.5<br>(1.0 to 2.1)                     | 10.6<br>(-3.7 to 25.2)                            | 0.0<br>(-12.9 to 12.9)                              |
| Cataract                                      | 381.7<br>(321.1 to 446.6)                      | --                                                        | 17.7<br>(12.2 to 24.8)                  | 7.4<br>(0.8 to 14.4)                              | -5.0<br>(-10.6 to 0.6)                              |
| Macular degeneration                          | 13.4<br>(10.5 to 16.7)                         | --                                                        | 0.7<br>(0.4 to 1.0)                     | 15.0<br>(-1.6 to 34.7)                            | 2.9<br>(-11.1 to 19.6)                              |
| Refraction and accommodation disorders        | 2,894.9<br>(2,411.6 to 3,488.9)                | --                                                        | 49.6<br>(30.0 to 79.1)                  | -3.2<br>(-9.8 to 4.9)                             | -4.2<br>(-10.3 to 2.5)                              |
| Age-related and other hearing loss            | 5,204.1<br>(4,992.4 to 5,423.1)                | --                                                        | 143.7<br>(100.3 to 199.8)               | 1.5<br>(-1.2 to 4.0)                              | -4.1<br>(-6.6 to -1.8)                              |
| Other vision loss                             | 136.3<br>(117.3 to 157.4)                      | --                                                        | 7.3<br>(5.1 to 10.1)                    | 7.1<br>(-0.5 to 15.1)                             | -0.1<br>(-6.9 to 7.1)                               |
| Other sense organ diseases                    | 822.0<br>(753.4 to 888.4)                      | 2,141.3<br>(2,025.6 to 2,265.4)                           | 25.4<br>(16.0 to 38.1)                  | 3.0<br>(-0.9 to 6.8)                              | 1.0<br>(-2.9 to 4.7)                                |
| Oral disorders                                | 11,617.4<br>(11,278.9 to 11,942.5)             | 32,763.2 <sup>†</sup><br>(30,780.6 to 34,977.8)           | 87.5<br>(54.6 to 131.5)                 | 2.1<br>(-0.1 to 4.5)                              | 0.1<br>(-1.6 to 2.0)                                |
| Caries of deciduous teeth                     | 1,062.7<br>(931.7 to 1,211.9)                  | 3,994.0<br>(3,148.6 to 5,066.7)                           | 0.4<br>(0.2 to 0.8)                     | -11.1<br>(-17.9 to -4.0)                          | -1.2<br>(-8.6 to 6.5)                               |
| Caries of permanent teeth                     | 8,723.5<br>(8,322.2 to 9,156.8)                | 28,335.5<br>(26,616.7 to 30,145.1)                        | 8.5<br>(3.8 to 15.9)                    | -12.5<br>(-14.7 to -10.2)                         | -4.2<br>(-6.7 to -1.8)                              |
| Periodontal disease                           | 2,297.4<br>(1,883.3 to 2,752.6)                | 289.0<br>(223.2 to 358.8)                                 | 14.8<br>(5.8 to 30.7)                   | 1.5<br>(-2.4 to 5.6)                              | 0.0<br>(-3.4 to 3.8)                                |
| Edentulism and severe tooth loss              | 1,927.3<br>(1,679.0 to 2,185.0)                | 144.8<br>(122.1 to 170.7)                                 | 52.5<br>(34.2 to 73.8)                  | 7.6<br>(4.4 to 11.1)                              | 1.4<br>(-1.6 to 4.5)                                |
| Other oral disorders                          | 392.3<br>(375.9 to 408.7)                      | --                                                        | 11.4<br>(7.0 to 17.2)                   | -7.5<br>(-10.3 to -4.6)                           | -0.1<br>(-3.3 to 3.2)                               |
| <b>Injuries</b>                               | <b>9,996.6</b><br><b>(9,323.8 to 10,926.2)</b> | <b>3,315.8<sup>†</sup></b><br><b>(3,091.6 to 3,533.2)</b> | <b>351.1</b><br><b>(240.6 to 486.8)</b> | <b>-0.1</b><br><b>(-2.4 to 2.0)</b>               | <b>0.3</b><br><b>(-2.1 to 2.5)</b>                  |
| <b>Transport injuries</b>                     | <b>1,182.2</b><br><b>(1,091.0 to 1,276.6)</b>  | <b>295.3</b><br><b>(270.2 to 323.9)</b>                   | <b>55.8</b><br><b>(37.0 to 80.0)</b>    | <b>7.8</b><br><b>(5.1 to 10.3)</b>                | <b>9.1</b><br><b>(6.6 to 11.3)</b>                  |
| Road injuries                                 | 1,126.7<br>(1,036.6 to 1,219.1)                | 285.9<br>(260.4 to 313.7)                                 | 53.4<br>(35.4 to 76.7)                  | 8.7<br>(6.1 to 11.2)                              | 10.0<br>(7.5 to 12.2)                               |
| Pedestrian road injuries                      | 238.9<br>(209.0 to 273.9)                      | 45.5<br>(39.4 to 53.1)                                    | 11.0<br>(7.2 to 15.9)                   | -5.6<br>(-8.3 to -3.1)                            | -5.4<br>(-7.8 to -3.1)                              |
| Cyclist road injuries                         | 286.4<br>(240.8 to 338.4)                      | 79.4<br>(67.5 to 92.9)                                    | 12.7<br>(8.4 to 18.4)                   | 10.5<br>(7.8 to 13.1)                             | 12.0<br>(9.6 to 14.4)                               |
| Motorcyclist road injuries                    | 126.7<br>(106.7 to 155.9)                      | 19.8<br>(16.2 to 24.4)                                    | 5.6<br>(3.6 to 8.2)                     | 11.9<br>(9.0 to 14.7)                             | 14.3<br>(11.5 to 16.9)                              |
| Motor vehicle road injuries                   | 433.6<br>(362.7 to 501.6)                      | 127.7<br>(113.1 to 143.5)                                 | 22.3<br>(15.0 to 31.6)                  | 16.9<br>(14.2 to 19.6)                            | 18.4<br>(15.9 to 20.8)                              |
| Other road injuries                           | 41.0<br>(35.4 to 47.6)                         | 13.5<br>(10.8 to 17.0)                                    | 1.8<br>(1.2 to 2.6)                     | -4.5<br>(-6.8 to -2.1)                            | -3.5<br>(-5.7 to -1.3)                              |
| Other transport injuries                      | 55.5<br>(47.5 to 63.7)                         | 9.5<br>(8.4 to 10.6)                                      | 2.4<br>(1.6 to 3.5)                     | -9.9<br>(-13.1 to -6.8)                           | -7.8<br>(-10.9 to -4.9)                             |
| <b>Unintentional injuries</b>                 | <b>8,530.6</b><br><b>(7,849.6 to 9,424.4)</b>  | <b>2,939.4</b><br><b>(2,722.5 to 3,156.1)</b>             | <b>284.2</b><br><b>(195.5 to 392.6)</b> | <b>-1.1</b><br><b>(-3.5 to 1.0)</b>               | <b>-1.0</b><br><b>(-3.5 to 1.2)</b>                 |
| Falls                                         | 5,456.6<br>(4,860.8 to 6,175.9)                | 2,023.4<br>(1,815.6 to 2,224.2)                           | 209.2<br>(147.4 to 286.3)               | -1.6<br>(-3.9 to 0.4)                             | -2.6<br>(-4.9 to -0.6)                              |
| Drowning                                      | 11.7<br>(10.3 to 13.2)                         | 1.6<br>(1.4 to 1.7)                                       | 0.5<br>(0.3 to 0.7)                     | -24.8<br>(-28.5 to -21.7)                         | -23.4<br>(-26.9 to -20.5)                           |
| Fire, heat, and hot substances                | 388.8<br>(339.2 to 454.1)                      | 36.8<br>(32.0 to 41.5)                                    | 8.7<br>(5.5 to 13.1)                    | -11.8<br>(-16.3 to -8.3)                          | -10.0<br>(-14.6 to -6.3)                            |
| Poisonings                                    | 17.9<br>(15.2 to 21.1)                         | 16.6<br>(13.3 to 20.4)                                    | 1.4<br>(0.9 to 2.0)                     | 16.7<br>(9.3 to 24.8)                             | 25.6<br>(17.7 to 34.0)                              |
| Exposure to mechanical forces                 | 1,659.8<br>(1,416.5 to 2,053.0)                | 466.6<br>(408.9 to 526.2)                                 | 35.4<br>(23.2 to 52.1)                  | 4.0<br>(0.6 to 7.0)                               | 6.3<br>(2.9 to 9.2)                                 |
| Unintentional firearm injuries                | 14.4<br>(12.1 to 17.2)                         | 2.5<br>(1.7 to 3.3)                                       | 0.5<br>(0.3 to 0.8)                     | 10.2<br>(6.9 to 13.4)                             | 12.7<br>(9.6 to 15.6)                               |
| Unintentional suffocation                     | 16.9<br>(13.7 to 20.8)                         | 2.1<br>(1.5 to 2.9)                                       | 0.5<br>(0.3 to 0.8)                     | -1.4<br>(-4.0 to 1.2)                             | 3.7<br>(0.9 to 6.2)                                 |
| Other exposure to mechanical forces           | 1,628.4<br>(1,386.9 to 2,021.4)                | 462.0<br>(404.4 to 521.1)                                 | 34.3<br>(22.5 to 50.5)                  | 4.0<br>(0.5 to 7.0)                               | 6.2<br>(2.9 to 9.2)                                 |

| Cause                                                                               | Prevalence in thousands (95% UI)        | Incidence in thousands (95% UI)       | YLDs in thousands (95% UI)          |                                                   |                                                     |
|-------------------------------------------------------------------------------------|-----------------------------------------|---------------------------------------|-------------------------------------|---------------------------------------------------|-----------------------------------------------------|
|                                                                                     | 2016 counts                             | 2016 counts                           | 2016 counts                         | Percentage change in counts between 2006 and 2016 | Percentage change in age-standardised rates between |
| Adverse effects of medical treatment                                                | 3.7<br>(2.9 to 4.6)                     | 48.7<br>(42.3 to 55.6)                | 0.5<br>(0.3 to 0.7)                 | 13.8<br>(8.5 to 19.1)                             | 11.7<br>(7.8 to 15.8)                               |
| Animal contact                                                                      | 90.9<br>(80.1 to 105.6)                 | 76.7<br>(64.0 to 91.7)                | 2.5<br>(1.6 to 3.6)                 | -13.8<br>(-17.7 to -9.7)                          | -8.0<br>(-12.1 to -3.8)                             |
| Venomous animal contact                                                             | 34.3<br>(28.8 to 41.4)                  | 30.5<br>(23.2 to 38.6)                | 1.7<br>(1.1 to 2.5)                 | -9.1<br>(-14.9 to -2.6)                           | -1.4<br>(-7.6 to 5.8)                               |
| Non-venomous animal contact                                                         | 56.6<br>(48.0 to 69.6)                  | 46.3<br>(37.9 to 56.9)                | 0.8<br>(0.5 to 1.2)                 | -22.6<br>(-26.1 to -19.8)                         | -21.2<br>(-24.8 to -18.3)                           |
| Foreign body                                                                        | 198.8<br>(170.3 to 228.2)               | 111.1<br>(97.0 to 129.2)              | 6.5<br>(4.1 to 9.7)                 | -14.5<br>(-17.7 to -11.2)                         | -12.0<br>(-15.6 to -8.6)                            |
| Pulmonary aspiration and foreign body in airway                                     | 123.0<br>(100.0 to 151.0)               | 33.6<br>(30.8 to 37.1)                | 4.3<br>(2.7 to 6.4)                 | -21.1<br>(-23.9 to -18.2)                         | -19.1<br>(-22.1 to -16.2)                           |
| Foreign body in eyes                                                                | 13.9<br>(9.0 to 19.3)                   | 60.4<br>(47.1 to 77.5)                | 0.8<br>(0.4 to 1.3)                 | 9.8<br>(5.2 to 14.5)                              | 15.0<br>(11.7 to 18.3)                              |
| Foreign body in other body part                                                     | 61.9<br>(51.9 to 76.3)                  | 17.1<br>(14.3 to 20.2)                | 1.4<br>(0.9 to 2.2)                 | -1.8<br>(-6.7 to 2.9)                             | 1.6<br>(-3.7 to 6.5)                                |
| Environmental heat and cold exposure                                                | 187.8<br>(162.1 to 220.0)               | 36.4<br>(31.7 to 41.1)                | 6.0<br>(3.9 to 8.7)                 | -7.2<br>(-10.1 to -4.4)                           | -4.2<br>(-7.4 to -1.4)                              |
| Other unintentional injuries                                                        | 514.6<br>(421.2 to 618.4)               | 121.5<br>(104.1 to 141.0)             | 13.5<br>(8.8 to 20.0)               | 16.9<br>(14.7 to 18.9)                            | 21.3<br>(18.6 to 23.6)                              |
| <b>Self-harm and interpersonal violence</b>                                         | <b>493.1</b><br><b>(453.1 to 536.9)</b> | <b>80.7†</b><br><b>(71.4 to 90.7)</b> | <b>10.2</b><br><b>(6.9 to 14.6)</b> | <b>-8.4</b><br><b>(-10.8 to -6.2)</b>             | <b>-3.1</b><br><b>(-5.2 to -1.2)</b>                |
| Self-harm                                                                           | 48.1<br>(40.6 to 55.7)                  | 15.6<br>(13.6 to 17.6)                | 1.8<br>(1.2 to 2.7)                 | 1.1<br>(-2.9 to 5.3)                              | 4.2<br>(0.3 to 8.2)                                 |
| Self-harm by firearm                                                                | 1.2<br>(1.0 to 1.4)                     | 0.2<br>(0.1 to 0.4)                   | < 0.05<br>(< 0.05 to 0.1)           | -21.7<br>(-25.0 to -18.4)                         | -17.0<br>(-20.4 to -13.9)                           |
| Self-harm by other specified means                                                  | 46.9<br>(39.5 to 54.4)                  | 15.3<br>(13.4 to 17.4)                | 1.8<br>(1.2 to 2.6)                 | 1.7<br>(-2.3 to 6.0)                              | 4.7<br>(0.8 to 8.7)                                 |
| Interpersonal violence                                                              | 444.9<br>(405.2 to 489.1)               | 65.2‡<br>(56.1 to 75.0)               | 8.4<br>(5.7 to 11.9)                | -10.3<br>(-12.6 to -8.2)                          | -4.4<br>(-6.4 to -2.6)                              |
| Assault by firearm                                                                  | 3.0<br>(2.6 to 3.5)                     | 0.6<br>(0.4 to 0.8)                   | 0.1<br>(0.1 to 0.2)                 | 7.8<br>(4.7 to 10.6)                              | 11.8<br>(8.6 to 14.7)                               |
| Assault by sharp object                                                             | 34.6<br>(28.4 to 41.2)                  | 8.2<br>(6.4 to 10.7)                  | 0.8<br>(0.5 to 1.2)                 | -8.6<br>(-11.8 to -5.6)                           | -4.4<br>(-7.5 to -1.6)                              |
| Sexual violence                                                                     | 248.5<br>(218.8 to 282.2)               | --                                    | 2.0<br>(1.3 to 2.8)                 | -19.9<br>(-23.5 to -16.1)                         | -7.3<br>(-11.4 to -3.4)                             |
| Assault by other means                                                              | 158.8<br>(132.6 to 191.8)               | 56.3<br>(48.4 to 65.0)                | 5.5<br>(3.6 to 7.9)                 | -6.9<br>(-9.2 to -4.9)                            | -3.3<br>(-5.4 to -1.4)                              |
| <b>Forces of nature, conflict and terrorism, and executions and police conflict</b> | <b>39.2</b><br><b>(24.9 to 55.9)</b>    | <b>0.3†</b><br><b>(0.2 to 0.4)</b>    | <b>1.0</b><br><b>(0.2 to 2.6)</b>   | <b>-22.0</b><br><b>(-28.7 to -17.7)</b>           | <b>-24.6</b><br><b>(-31.2 to -20.4)</b>             |
| Exposure to forces of nature                                                        | 14.2<br>(7.6 to 23.3)                   | --                                    | 0.4<br>(0.1 to 1.0)                 | -18.1<br>(-32.0 to -11.4)                         | -17.7<br>(-33.5 to -10.3)                           |
| Conflict and terrorism                                                              | 15.1<br>(7.9 to 24.9)                   | --                                    | 0.4<br>(0.1 to 1.0)                 | -25.6<br>(-29.1 to -21.9)                         | -29.5<br>(-32.9 to -26.2)                           |
| Executions and police conflict                                                      | 9.9<br>(1.2 to 17.2)                    | 0.3<br>(0.2 to 0.4)                   | 0.2<br>(< 0.05 to 0.5)              | -22.9<br>(-27.0 to -7.3)                          | -29.1<br>(-32.8 to -3.7)                            |
| <b>Impairments</b>                                                                  | --                                      | --                                    | --                                  | --                                                | --                                                  |
| Anaemia                                                                             | 4,965.6<br>(4,719.3 to 5,226.0)         | --                                    | 106.6<br>(70.5 to 154.0)            | -11.9<br>(-17.1 to -6.4)                          | -7.6<br>(-13.6 to -1.7)                             |
| Developmental intellectual disability                                               | 346.1<br>(270.8 to 420.6)               | --                                    | 39.0<br>(28.6 to 51.0)              | -16.2<br>(-19.9 to -12.2)                         | -5.2<br>(-9.3 to -0.8)                              |
| Epilepsy                                                                            | 105.8<br>(55.9 to 163.7)                | --                                    | 31.9<br>(16.6 to 55.7)              | -13.7<br>(-59.2 to 95.2)                          | -4.0<br>(-53.4 to 114.7)                            |
| Guillain-Barre syndrome                                                             | 0.2<br>(0.2 to 0.3)                     | --                                    | 0.1<br>(< 0.05 to 0.1)              | -3.3<br>(-6.5 to 0.2)                             | 0.0<br>(-0.0 to 0.1)                                |
| Hearing loss                                                                        | 5,399.3<br>(5,188.9 to 5,615.6)         | --                                    | 152.9<br>(107.2 to 212.7)           | -0.1<br>(-2.6 to 2.1)                             | -4.8<br>(-7.1 to -2.7)                              |
| Heart failure                                                                       | 599.1<br>(520.5 to 687.4)               | --                                    | 55.3<br>(40.9 to 71.5)              | 5.7<br>(-0.8 to 12.1)                             | -3.8<br>(-9.6 to 1.8)                               |
| Infertility                                                                         | 205.1<br>(159.9 to 265.2)               | --                                    | 1.4<br>(0.6 to 2.6)                 | -14.8<br>(-21.4 to -8.2)                          | 0.2<br>(-6.7 to 7.1)                                |
| Pelvic inflammatory disease                                                         | 8.5<br>(7.2 to 10.0)                    | --                                    | 1.1<br>(0.7 to 1.6)                 | -23.2<br>(-35.0 to -8.9)                          | -11.8<br>(-24.6 to 4.4)                             |
| Vision loss                                                                         | 3,484.5<br>(2,991.7 to 4,089.2)         | --                                    | 83.8<br>(56.5 to 123.4)             | -1.0<br>(-5.6 to 4.2)                             | -3.9<br>(-8.2 to 0.5)                               |

We did not calculate incidence for the nine impairments, certain NTDs, and causes with only birth prevalence. Blank cells mean that no estimate is available.

† Incidence for aggregate causes represents the sum of the incidence of the causes below the aggregate.

‡ Incidence estimates for stroke represent first-ever stroke only.

^ Incidence of HIV/AIDS represents new infections of HIV only and does not include new infections of Tuberculosis in HIV positive cases.



SR Table 14: Prevalence, incidence, and YLDs for 2016, percentage change of YLD counts and percentage change of age-standardised YLD rates between 2006 and 2016 by cause and impairments, for all ages, Russia.

| Cause                                                                                | Prevalence in thousands (95% UI)             | Incidence in thousands (95% UI)                     | YLDs in thousands (95% UI)                |                                                   |                                                     |
|--------------------------------------------------------------------------------------|----------------------------------------------|-----------------------------------------------------|-------------------------------------------|---------------------------------------------------|-----------------------------------------------------|
|                                                                                      | 2016 counts                                  | 2016 counts                                         | 2016 counts                               | Percentage change in counts between 2006 and 2016 | Percentage change in age-standardised rates between |
| <b>All causes</b>                                                                    | <b>139,935.9</b><br>(139,522.7 to 140,385.8) | <b>1,292,612.1†</b><br>(1,208,270.7 to 1,379,806.1) | <b>19,269.4</b><br>(14,416.9 to 24,835.5) | <b>3.8</b><br>(2.4 to 5.2)                        | <b>-1.7</b><br>(-3.1 to -0.3)                       |
| <b>Communicable, maternal, neonatal, and nutritional disorders</b>                   | <b>82,552.4</b><br>(80,285.1 to 85,057.1)    | <b>835,184.3†</b><br>(753,041.3 to 924,413.1)       | <b>1,015.9</b><br>(726.5 to 1,371.3)      | <b>0.8</b><br>(-4.3 to 7.8)                       | <b>-1.9</b><br>(-6.7 to 4.5)                        |
| <b>HIV/AIDS and tuberculosis</b>                                                     | <b>45,215.2</b><br>(41,444.3 to 48,198.9)    | <b>129.2†</b><br>(109.8 to 157.7)                   | <b>69.5</b><br>(34.8 to 143.6)            | <b>35.1</b><br>(8.5 to 65.7)                      | <b>31.3</b><br>(6.1 to 60.3)                        |
| Tuberculosis                                                                         | 42,367.3<br>(39,152.2 to 45,993.5)           | 93.2†<br>(80.6 to 106.6)                            | 14.8<br>(9.6 to 20.8)                     | -24.7<br>(-37.4 to -9.4)                          | -25.8<br>(-38.3 to -11.0)                           |
| Drug-susceptible tuberculosis                                                        | 39.7<br>(34.1 to 46.1)                       | 77.4<br>(65.8 to 90.1)                              | 12.1<br>(7.8 to 17.0)                     | -29.7<br>(-43.1 to -12.2)                         | -30.7<br>(-44.2 to -12.6)                           |
| Multidrug-resistant tuberculosis without extensive drug resistance                   | 6.6<br>(4.5 to 9.1)                          | 12.9<br>(8.8 to 17.6)                               | 2.2<br>(1.3 to 3.4)                       | -2.2<br>(-37.4 to 47.8)                           | -4.0<br>(-38.2 to 43.8)                             |
| Extensively drug-resistant tuberculosis                                              | 1.4<br>(1.0 to 2.0)                          | 2.8<br>(1.9 to 3.9)                                 | 0.5<br>(0.3 to 0.8)                       | 191.4<br>(95.3 to 307.0)                          | 186.3<br>(93.5 to 298.3)                            |
| Latent tuberculosis infection                                                        | 42,319.6<br>(39,105.2 to 45,946.3)           | --                                                  | --                                        | --                                                | --                                                  |
| HIV/AIDS                                                                             | 406.7<br>(256.0 to 703.0)                    | 36.1^<br>(22.8 to 61.3)                             | 54.7<br>(23.2 to 126.7)                   | 71.9<br>(42.9 to 106.9)                           | 65.2<br>(36.9 to 98.0)                              |
| Drug-susceptible HIV/AIDS - Tuberculosis                                             | 2.0<br>(1.2 to 3.2)                          | 3.9<br>(2.3 to 6.3)                                 | 0.8<br>(0.4 to 1.4)                       | -11.9<br>(-23.0 to 1.1)                           | -16.6<br>(-27.1 to -4.1)                            |
| Multidrug-resistant HIV/AIDS - Tuberculosis without extensive drug resistance        | 0.4<br>(0.2 to 0.7)                          | 0.8<br>(0.4 to 1.5)                                 | 0.2<br>(0.1 to 0.3)                       | 20.8<br>(-19.6 to 73.4)                           | 14.5<br>(-23.8 to 64.5)                             |
| Extensively drug-resistant HIV/AIDS - Tuberculosis                                   | 0.1<br>(< 0.05 to 0.2)                       | 0.2<br>(0.1 to 0.3)                                 | < 0.05<br>(< 0.05 to 0.1)                 | 272.4<br>(148.1 to 434.4)                         | 252.9<br>(135.0 to 406.9)                           |
| HIV/AIDS resulting in other diseases                                                 | 404.2<br>(253.3 to 700.2)                    | 36.1<br>(22.8 to 61.3)                              | 53.7<br>(22.5 to 125.9)                   | 74.6<br>(44.6 to 112.7)                           | 67.9<br>(38.4 to 103.6)                             |
| <b>Diarrhoea, lower respiratory infections, and other common infectious diseases</b> | <b>12,079.3</b><br>(11,369.2 to 12,890.5)    | <b>811,431.9†</b><br>(729,610.9 to 899,978.2)       | <b>426.4</b><br>(284.0 to 604.1)          | <b>1.5</b><br>(-3.1 to 5.8)                       | <b>-3.1</b><br>(-7.9 to 0.7)                        |
| Diarrhoeal diseases                                                                  | 804.7<br>(759.2 to 856.6)                    | 52,504.5<br>(49,402.7 to 55,933.6)                  | 90.7<br>(62.1 to 124.2)                   | 13.7<br>(7.5 to 20.8)                             | 1.0<br>(-4.8 to 7.1)                                |
| Intestinal infectious diseases                                                       | 0.1<br>(0.1 to 0.1)                          | 2.0†<br>(1.5 to 2.5)                                | < 0.05<br>(< 0.05 to < 0.05)              | -19.6<br>(-30.2 to -8.0)                          | -27.3<br>(-37.1 to -17.3)                           |
| Typhoid fever                                                                        | < 0.05<br>(< 0.05 to 0.1)                    | 0.7<br>(0.6 to 0.9)                                 | < 0.05<br>(< 0.05 to < 0.05)              | -26.5<br>(-38.8 to -12.2)                         | -30.5<br>(-41.3 to -17.6)                           |
| Paratyphoid fever                                                                    | 0.1<br>(< 0.05 to 0.1)                       | 1.2<br>(0.9 to 1.6)                                 | < 0.05<br>(< 0.05 to < 0.05)              | 6.8<br>(-12.1 to 31.7)                            | -2.9<br>(-19.2 to 16.9)                             |
| Other intestinal infectious diseases                                                 | --                                           | --                                                  | < 0.05<br>(< 0.05 to < 0.05)              | -36.5<br>(-57.6 to -4.8)                          | -51.2<br>(-68.5 to -23.5)                           |
| Lower respiratory infections                                                         | 289.3<br>(269.1 to 312.1)                    | 12,461.6<br>(11,413.6 to 13,638.6)                  | 17.0<br>(11.3 to 23.9)                    | 16.7<br>(4.4 to 29.7)                             | 4.9<br>(-5.7 to 16.0)                               |
| Upper respiratory infections                                                         | 9,427.9<br>(8,441.8 to 10,458.1)             | 737,248.7<br>(654,423.4 to 824,925.2)               | 232.9<br>(141.0 to 358.8)                 | -1.6<br>(-8.6 to 4.6)                             | -4.1<br>(-12.4 to 2.2)                              |
| Otitis media                                                                         | 1,453.1<br>(1,308.0 to 1,598.4)              | 6,600.2<br>(5,411.1 to 8,086.3)                     | 39.6<br>(24.8 to 58.8)                    | -6.6<br>(-13.3 to 1.1)                            | -8.4<br>(-15.0 to -1.1)                             |
| Meningitis                                                                           | 149.2<br>(130.3 to 168.9)                    | 24.8<br>(21.6 to 27.9)                              | 17.4<br>(12.3 to 23.2)                    | -5.9<br>(-8.9 to -3.0)                            | -5.7<br>(-8.8 to -2.9)                              |
| Pneumococcal meningitis                                                              | 53.4<br>(46.3 to 61.4)                       | 2.7<br>(2.2 to 3.3)                                 | 6.8<br>(4.7 to 9.3)                       | -12.3<br>(-17.6 to -7.2)                          | -12.2<br>(-17.7 to -6.8)                            |
| H influenzae type B meningitis                                                       | 18.2<br>(15.6 to 21.5)                       | 1.7<br>(1.4 to 2.2)                                 | 2.9<br>(2.0 to 4.0)                       | -17.3<br>(-23.5 to -11.6)                         | -17.1<br>(-23.5 to -11.4)                           |
| Meningococcal infection                                                              | 24.4<br>(19.1 to 30.8)                       | 5.7<br>(4.5 to 6.8)                                 | 2.9<br>(2.0 to 4.0)                       | -7.5<br>(-11.5 to -3.7)                           | -7.5<br>(-11.8 to -3.8)                             |
| Other meningitis                                                                     | 53.1<br>(41.2 to 66.5)                       | 14.7<br>(12.7 to 16.8)                              | 4.8<br>(3.3 to 6.5)                       | 17.8<br>(10.9 to 27.5)                            | 18.2<br>(11.4 to 26.8)                              |
| Encephalitis                                                                         | 234.3<br>(156.8 to 339.1)                    | 148.5<br>(134.4 to 164.3)                           | 22.7<br>(15.7 to 30.4)                    | 0.9<br>(-12.0 to 14.8)                            | -2.3<br>(-15.0 to 11.0)                             |
| Diphtheria                                                                           | < 0.05<br>(< 0.05 to < 0.05)                 | 0.1<br>(< 0.05 to 0.1)                              | < 0.05<br>(< 0.05 to < 0.05)              | -31.6<br>(-68.1 to 35.9)                          | -31.5<br>(-65.6 to 27.4)                            |
| Whooping cough                                                                       | 23.5<br>(18.3 to 29.6)                       | 171.7<br>(133.6 to 215.8)                           | 1.2<br>(0.7 to 1.9)                       | 27.2<br>(3.3 to 54.3)                             | -0.5<br>(-19.4 to 21.4)                             |
| Tetanus                                                                              | < 0.05<br>(< 0.05 to < 0.05)                 | < 0.05<br>(< 0.05 to < 0.05)                        | < 0.05<br>(< 0.05 to < 0.05)              | -26.7<br>(-48.2 to -8.9)                          | -26.8<br>(-47.6 to -10.3)                           |
| Measles                                                                              | < 0.05<br>(< 0.05 to < 0.05)                 | 0.8<br>(0.8 to 0.9)                                 | < 0.05<br>(< 0.05 to < 0.05)              | 144.0<br>(117.1 to 178.3)                         | 92.2<br>(71.0 to 119.1)                             |
| Varicella and herpes zoster                                                          | 124.1<br>(112.1 to 136.0)                    | 2,269.1<br>(2,208.8 to 2,336.3)                     | 5.0<br>(2.9 to 7.5)                       | 8.0<br>(-5.0 to 22.5)                             | 0.2<br>(-11.3 to 14.8)                              |
| <b>Neglected tropical diseases and malaria</b>                                       | <b>2,114.7</b><br>(1,913.7 to 2,316.3)       | <b>7,752.4†</b><br>(5,242.6 to 9,968.4)             | <b>32.4</b><br>(18.5 to 52.8)             | <b>0.6</b><br>(-27.6 to 23.0)                     | <b>-6.4</b><br>(-34.1 to 14.2)                      |
| Malaria                                                                              | --                                           | --                                                  | --                                        | --                                                | --                                                  |
| Chagas disease                                                                       | --                                           | --                                                  | --                                        | --                                                | --                                                  |
| Leishmaniasis                                                                        | --                                           | --                                                  | --                                        | --                                                | --                                                  |
| Visceral leishmaniasis                                                               | --                                           | --                                                  | --                                        | --                                                | --                                                  |
| Cutaneous and mucocutaneous leishmaniasis                                            | --                                           | --                                                  | --                                        | --                                                | --                                                  |
| African trypanosomiasis                                                              | --                                           | --                                                  | --                                        | --                                                | --                                                  |
| Schistosomiasis                                                                      | --                                           | --                                                  | --                                        | --                                                | --                                                  |
| Cysticercosis                                                                        | 10.8<br>(< 0.05 to 26.0)                     | --                                                  | 1.6<br>(< 0.05 to 4.2)                    | 11.3<br>(-100.0 to 1,327.5)                       | 4.7<br>(-100.0 to 1,270.4)                          |
| Cystic echinococcosis                                                                | 16.3<br>(3.1 to 59.1)                        | 3.3<br>(0.7 to 12.1)                                | 1.5<br>(0.2 to 5.8)                       | -58.1<br>(-94.4 to 214.8)                         | -59.5<br>(-94.4 to 190.1)                           |
| Lymphatic filariasis                                                                 | --                                           | --                                                  | --                                        | --                                                | --                                                  |
| Onchocerciasis                                                                       | --                                           | --                                                  | --                                        | --                                                | --                                                  |
| Trachoma                                                                             | --                                           | --                                                  | --                                        | --                                                | --                                                  |
| Dengue                                                                               | --                                           | --                                                  | --                                        | --                                                | --                                                  |
| Yellow fever                                                                         | --                                           | --                                                  | --                                        | --                                                | --                                                  |
| Rabies                                                                               | < 0.05<br>(< 0.05 to < 0.05)                 | < 0.05<br>(< 0.05 to < 0.05)                        | < 0.05<br>(< 0.05 to < 0.05)              | -65.2<br>(-75.9 to -49.4)                         | -66.7<br>(-76.8 to -50.6)                           |
| Intestinal nematode infections                                                       | --                                           | --                                                  | --                                        | --                                                | --                                                  |
| Ascariasis                                                                           | --                                           | --                                                  | --                                        | --                                                | --                                                  |



| Cause                                                                   | Prevalence in thousands (95% UI)                    | Incidence in thousands (95% UI)                      | YLDs in thousands (95% UI)                       |                                                   |                                                     |
|-------------------------------------------------------------------------|-----------------------------------------------------|------------------------------------------------------|--------------------------------------------------|---------------------------------------------------|-----------------------------------------------------|
|                                                                         | 2016 counts                                         | 2016 counts                                          | 2016 counts                                      | Percentage change in counts between 2006 and 2016 | Percentage change in age-standardised rates between |
| Trichuriasis                                                            | --                                                  | --                                                   | --                                               | --                                                | --                                                  |
| Hookworm disease                                                        | --                                                  | --                                                   | --                                               | --                                                | --                                                  |
| Food-borne trematodiasis                                                | 1,992.4<br>(1,760.0 to 2,255.1)                     | 7,749.1<br>(5,241.6 to 9,967.3)                      | 29.3<br>(16.6 to 48.2)                           | 7.8<br>(-3.4 to 18.5)                             | 0.6<br>(-8.2 to 10.3)                               |
| Leprosy                                                                 | < 0.05<br>(< 0.05 to < 0.05)                        | < 0.05<br>(< 0.05 to < 0.05)                         | < 0.05<br>(< 0.05 to < 0.05)                     | -16.6<br>(-17.8 to -15.4)                         | -25.5<br>(-26.6 to -24.3)                           |
| Ebola virus disease                                                     | --                                                  | --                                                   | --                                               | --                                                | --                                                  |
| Zika virus disease                                                      | --                                                  | --                                                   | --                                               | --                                                | --                                                  |
| Guinea worm disease                                                     | --                                                  | --                                                   | --                                               | --                                                | --                                                  |
| Other neglected tropical diseases                                       | --                                                  | --                                                   | < 0.05<br>(< 0.05 to < 0.05)                     | --                                                | --                                                  |
| <b>Maternal disorders</b>                                               | <b>247.8</b><br><b>(198.9 to 310.2)</b>             | <b>2,584.0†</b><br><b>(2,206.7 to 3,033.1)</b>       | <b>10.9</b><br><b>(7.0 to 16.1)</b>              | <b>7.0</b><br><b>(-18.6 to 39.0)</b>              | <b>8.3</b><br><b>(-17.9 to 40.4)</b>                |
| Maternal haemorrhage                                                    | 121.0<br>(79.4 to 183.9)                            | 394.3<br>(299.4 to 510.5)                            | 3.3<br>(1.9 to 5.4)                              | 40.4<br>(-8.5 to 120.2)                           | 38.9<br>(-7.5 to 115.9)                             |
| Maternal sepsis and other pregnancy related infections                  | 64.1<br>(50.8 to 81.2)                              | 310.7<br>(234.8 to 409.2)                            | 1.4<br>(0.7 to 2.7)                              | 1.1<br>(-46.7 to 99.0)                            | 9.3<br>(-43.6 to 112.8)                             |
| Maternal hypertensive disorders                                         | 54.7<br>(33.8 to 79.1)                              | 219.5<br>(163.9 to 284.1)                            | 2.6<br>(1.3 to 4.4)                              | -13.0<br>(-49.7 to 53.4)                          | -12.6<br>(-49.5 to 54.6)                            |
| Maternal obstructed labour and uterine rupture                          | 1.7<br>(1.0 to 2.8)                                 | 122.6<br>(87.4 to 167.8)                             | 0.5<br>(0.2 to 1.0)                              | 18.5<br>(-51.5 to 140.8)                          | 20.3<br>(-46.9 to 139.2)                            |
| Maternal abortion, miscarriage, and ectopic pregnancy                   | 12.6<br>(8.2 to 18.3)                               | 1,537.0<br>(1,195.6 to 1,958.6)                      | 1.4<br>(0.7 to 2.4)                              | 4.7<br>(-43.5 to 97.5)                            | 3.5<br>(-45.1 to 93.0)                              |
| Other maternal disorders                                                | --                                                  | --                                                   | 1.7<br>(1.1 to 2.4)                              | -0.6<br>(-24.7 to 28.8)                           | 1.7<br>(-22.8 to 31.4)                              |
| <b>Neonatal disorders</b>                                               | <b>1,553.7</b><br><b>(1,306.5 to 1,806.9)</b>       | --                                                   | <b>266.3</b><br><b>(179.0 to 376.2)</b>          | <b>3.9</b><br><b>(-9.1 to 26.0)</b>               | <b>2.4</b><br><b>(-10.5 to 24.6)</b>                |
| Neonatal preterm birth complications                                    | 891.8<br>(697.1 to 1,135.8)                         | --                                                   | 82.3<br>(54.3 to 120.3)                          | -7.2<br>(-25.5 to 13.4)                           | -7.2<br>(-25.9 to 13.9)                             |
| Neonatal encephalopathy due to birth asphyxia and trauma                | 655.0<br>(432.8 to 935.0)                           | --                                                   | 105.9<br>(53.8 to 173.2)                         | 15.1<br>(-9.8 to 107.6)                           | 13.9<br>(-9.8 to 106.0)                             |
| Neonatal sepsis and other neonatal infections                           | 138.1<br>(66.9 to 291.9)                            | --                                                   | 58.4<br>(23.6 to 139.4)                          | 3.7<br>(-12.3 to 28.1)                            | 2.3<br>(-13.6 to 23.8)                              |
| Hemolytic disease and other neonatal jaundice                           | 46.6<br>(40.4 to 53.7)                              | --                                                   | 12.8<br>(9.1 to 17.2)                            | -6.6<br>(-21.7 to 11.1)                           | -6.8<br>(-21.9 to 12.0)                             |
| Other neonatal disorders                                                | --                                                  | --                                                   | 7.0<br>(4.7 to 10.0)                             | 25.1<br>(5.7 to 57.5)                             | -4.4<br>(-19.3 to 20.4)                             |
| <b>Nutritional deficiencies</b>                                         | <b>11,136.6</b><br><b>(9,457.0 to 12,706.9)</b>     | <b>311.0†</b><br><b>(243.0 to 387.0)</b>             | <b>146.7</b><br><b>(92.2 to 223.7)</b>           | <b>-14.4</b><br><b>(-25.6 to -1.2)</b>            | <b>-12.7</b><br><b>(-25.7 to 2.5)</b>               |
| Protein-energy malnutrition                                             | 213.2<br>(168.8 to 269.5)                           | 101.0<br>(80.1 to 127.5)                             | 15.9<br>(9.3 to 24.6)                            | 2.2<br>(-29.9 to 47.4)                            | -22.1<br>(-46.5 to 12.4)                            |
| Iodine deficiency                                                       | 1,113.4<br>(980.6 to 1,261.8)                       | 15.9<br>(14.2 to 17.9)                               | 25.5<br>(15.6 to 37.2)                           | -2.8<br>(-14.3 to 11.6)                           | -6.0<br>(-17.2 to 7.0)                              |
| Vitamin A deficiency                                                    | 227.5<br>(154.7 to 309.0)                           | 194.1<br>(129.8 to 268.2)                            | --                                               | --                                                | --                                                  |
| Iron-deficiency anaemia                                                 | 8,696.2<br>(7,129.4 to 10,449.9)                    | --                                                   | 104.8<br>(61.0 to 171.1)                         | -18.8<br>(-31.9 to -2.5)                          | -11.9<br>(-27.6 to 7.4)                             |
| Other nutritional deficiencies                                          | --                                                  | --                                                   | 0.6<br>(0.3 to 0.9)                              | 2.1<br>(-30.8 to 49.5)                            | -22.2<br>(-47.3 to 13.9)                            |
| <b>Other communicable, maternal, neonatal, and nutritional diseases</b> | <b>38,918.4</b><br><b>(36,093.1 to 41,491.1)</b>    | <b>12,975.7</b><br><b>(11,626.9 to 14,530.5)</b>     | <b>62.6</b><br><b>(39.2 to 99.7)</b>             | <b>-3.1</b><br><b>(-10.9 to 5.6)</b>              | <b>-2.8</b><br><b>(-11.5 to 6.7)</b>                |
| Sexually transmitted diseases excluding HIV                             | 31,467.1<br>(29,188.8 to 34,001.0)                  | 11,889.8<br>(10,621.3 to 13,480.8)                   | 52.1<br>(32.9 to 83.4)                           | -3.9<br>(-13.1 to 6.5)                            | -3.5<br>(-13.9 to 8.2)                              |
| Syphilis                                                                | 1,410.3<br>(1,050.0 to 1,844.5)                     | 1,087.6<br>(748.6 to 1,532.0)                        | 8.4<br>(5.8 to 11.5)                             | 13.7<br>(-2.0 to 34.3)                            | 3.5<br>(-10.8 to 21.7)                              |
| Chlamydial infection                                                    | 2,191.6<br>(1,723.1 to 2,772.2)                     | 1,689.0<br>(1,326.2 to 2,130.6)                      | 9.1<br>(5.2 to 15.3)                             | -6.1<br>(-17.8 to 6.2)                            | -7.9<br>(-19.5 to 3.7)                              |
| Gonococcal infection                                                    | 1,859.9<br>(1,459.8 to 2,334.4)                     | 5,049.6<br>(3,894.5 to 6,448.5)                      | 9.7<br>(5.3 to 16.9)                             | -15.1<br>(-36.8 to 16.3)                          | -3.8<br>(-28.7 to 33.8)                             |
| Trichomoniasis                                                          | 2,666.6<br>(2,311.3 to 3,058.9)                     | 2,201.1<br>(1,890.4 to 2,541.2)                      | 2.6<br>(1.0 to 5.5)                              | -1.4<br>(-9.0 to 8.2)                             | -0.7<br>(-8.0 to 7.9)                               |
| Genital herpes                                                          | 24,654.5<br>(21,315.2 to 28,574.2)                  | 1,028.5<br>(861.7 to 1,258.1)                        | 6.2<br>(1.9 to 14.0)                             | 4.2<br>(-3.4 to 12.9)                             | -0.4<br>(-7.8 to 8.2)                               |
| Other sexually transmitted diseases                                     | 744.1<br>(609.3 to 896.2)                           | 834.0<br>(694.2 to 1,001.7)                          | 16.2<br>(10.0 to 25.2)                           | -6.0<br>(-17.4 to 7.5)                            | -4.8<br>(-16.8 to 9.3)                              |
| Hepatitis                                                               | 9,907.3<br>(8,618.2 to 11,452.9)                    | 1,085.6<br>(833.0 to 1,281.9)                        | 0.8<br>(0.5 to 1.2)                              | -44.3<br>(-55.4 to -29.7)                         | -42.5<br>(-55.3 to -26.7)                           |
| Acute hepatitis A                                                       | 48.4<br>(30.2 to 60.5)                              | 628.6<br>(392.2 to 786.3)                            | 0.4<br>(0.2 to 0.6)                              | -50.9<br>(-67.1 to -21.4)                         | -46.4<br>(-65.8 to -13.7)                           |
| Hepatitis B                                                             | 6,165.5<br>(5,008.9 to 7,664.7)                     | 391.6<br>(305.8 to 506.8)                            | 0.4<br>(0.2 to 0.6)                              | -40.3<br>(-51.6 to -26.6)                         | -41.5<br>(-52.3 to -29.1)                           |
| Hepatitis C                                                             | 3,692.7<br>(3,320.8 to 4,078.4)                     | 55.0<br>(47.6 to 63.3)                               | 0.1<br>(< 0.05 to 0.1)                           | 11.3<br>(-13.1 to 43.8)                           | -5.4<br>(-28.6 to 26.7)                             |
| Acute hepatitis E                                                       | 0.8<br>(0.7 to 1.0)                                 | 10.4<br>(8.8 to 12.4)                                | < 0.05<br>(< 0.05 to < 0.05)                     | -45.3<br>(-52.7 to -36.7)                         | -41.6<br>(-47.2 to -35.2)                           |
| Other infectious diseases                                               | 320.6<br>(249.5 to 399.3)                           | 0.2<br>(0.1 to 0.3)                                  | 9.8<br>(6.0 to 15.3)                             | 8.0<br>(-3.8 to 21.6)                             | 6.7<br>(-5.9 to 21.4)                               |
| <b>Non-communicable diseases</b>                                        | <b>134,504.5</b><br><b>(133,913.1 to 135,060.3)</b> | <b>433,344.6†</b><br><b>(416,061.9 to 451,462.9)</b> | <b>15,792.8</b><br><b>(11,777.0 to 20,393.5)</b> | <b>4.4</b><br><b>(2.6 to 6.0)</b>                 | <b>-1.2</b><br><b>(-2.8 to 0.4)</b>                 |
| <b>Neoplasms</b>                                                        | <b>1,664.7</b><br><b>(1,600.7 to 1,754.8)</b>       | <b>576.7</b><br><b>(557.3 to 597.4)</b>              | <b>186.8</b><br><b>(138.1 to 243.1)</b>          | <b>12.8</b><br><b>(6.6 to 20.2)</b>               | <b>0.8</b><br><b>(-4.7 to 7.2)</b>                  |
| Lip and oral cavity cancer                                              | 40.2<br>(35.9 to 45.4)                              | 11.5<br>(10.3 to 12.9)                               | 4.3<br>(3.0 to 5.9)                              | 15.4<br>(-6.4 to 44.4)                            | 2.1<br>(-16.5 to 26.7)                              |
| Nasopharynx cancer                                                      | 3.0<br>(2.7 to 3.5)                                 | 0.9<br>(0.8 to 1.0)                                  | 0.4<br>(0.3 to 0.5)                              | -7.1<br>(-18.2 to 8.2)                            | -12.4<br>(-23.0 to 2.8)                             |
| Other pharynx cancer                                                    | 19.3<br>(16.8 to 22.2)                              | 6.4<br>(5.6 to 7.1)                                  | 2.2<br>(1.5 to 3.0)                              | 34.5<br>(8.5 to 65.6)                             | 16.4<br>(-4.4 to 41.4)                              |
| Esophageal cancer                                                       | 8.8<br>(8.0 to 9.7)                                 | 8.0<br>(7.2 to 8.7)                                  | 2.0<br>(1.3 to 2.7)                              | 10.1<br>(-17.0 to 46.9)                           | -4.5<br>(-27.4 to 25.7)                             |
| Stomach cancer                                                          | 69.4<br>(64.5 to 75.1)                              | 41.0<br>(38.6 to 43.7)                               | 10.2<br>(7.2 to 13.3)                            | -6.1<br>(-19.9 to 9.6)                            | -16.9<br>(-28.7 to -3.6)                            |
| Colon and rectum cancer                                                 | 250.2<br>(230.9 to 272.2)                           | 73.3<br>(68.0 to 79.6)                               | 24.7<br>(18.1 to 32.4)                           | 13.0<br>(-1.9 to 33.1)                            | -0.7<br>(-12.7 to 17.3)                             |
| Liver cancer                                                            | 5.3<br>(4.3 to 6.5)                                 | 11.4<br>(10.3 to 12.6)                               | 2.6<br>(1.7 to 3.4)                              | 29.7<br>(12.1 to 49.1)                            | 13.9<br>(-1.5 to 30.5)                              |
| Liver cancer due to hepatitis B                                         | 4.5<br>(3.5 to 5.6)                                 | 4.1<br>(3.5 to 4.9)                                  | 0.9<br>(0.6 to 1.3)                              | 27.2<br>(9.0 to 46.1)                             | 11.7<br>(-3.8 to 27.9)                              |

| Cause                                              | Prevalence in thousands (95% UI)                 | Incidence in thousands (95% UI)                | YLDs in thousands (95% UI)                    |                                                   |                                                     |
|----------------------------------------------------|--------------------------------------------------|------------------------------------------------|-----------------------------------------------|---------------------------------------------------|-----------------------------------------------------|
|                                                    | 2016 counts                                      | 2016 counts                                    | 2016 counts                                   | Percentage change in counts between 2006 and 2016 | Percentage change in age-standardised rates between |
| Liver cancer due to hepatitis C                    | 1.6<br>(1.2 to 2.0)                              | 1.4<br>(1.2 to 1.7)                            | 0.3<br>(0.2 to 0.4)                           | 35.0<br>(13.8 to 60.0)                            | 16.1<br>(-2.4 to 37.8)                              |
| Liver cancer due to alcohol use                    | 4.5<br>(3.5 to 5.7)                              | 4.0<br>(3.4 to 4.6)                            | 0.9<br>(0.6 to 1.2)                           | 35.0<br>(15.0 to 58.0)                            | 19.6<br>(1.5 to 40.2)                               |
| Liver cancer due to other causes                   | 1.9<br>(1.6 to 2.3)                              | 1.9<br>(1.6 to 2.1)                            | 0.4<br>(0.3 to 0.6)                           | 21.1<br>(4.9 to 37.9)                             | 6.3<br>(-8.1 to 20.1)                               |
| Gallbladder and biliary tract cancer               | 2.9<br>(2.7 to 3.2)                              | 3.6<br>(3.4 to 4.0)                            | 0.8<br>(0.6 to 1.1)                           | 5.0<br>(-2.2 to 13.2)                             | -8.9<br>(-15.0 to -1.9)                             |
| Pancreatic cancer                                  | 13.9<br>(12.8 to 15.0)                           | 17.5<br>(16.3 to 18.6)                         | 3.5<br>(2.5 to 4.7)                           | 15.4<br>(-0.6 to 32.6)                            | 0.8<br>(-12.6 to 14.6)                              |
| Larynx cancer                                      | 31.1<br>(28.4 to 33.8)                           | 9.2<br>(8.4 to 10.0)                           | 3.6<br>(2.5 to 4.8)                           | -1.2<br>(-22.8 to 24.5)                           | -13.8<br>(-32.2 to 8.1)                             |
| Tracheal, bronchus, and lung cancer                | 62.8<br>(58.1 to 68.2)                           | 53.7<br>(49.7 to 58.2)                         | 12.2<br>(8.4 to 16.0)                         | -2.9<br>(-20.0 to 15.4)                           | -15.1<br>(-29.4 to 0.7)                             |
| Malignant skin melanoma                            | 62.3<br>(49.1 to 70.4)                           | 13.7<br>(10.8 to 15.4)                         | 4.5<br>(3.0 to 6.2)                           | 31.2<br>(9.6 to 52.0)                             | 18.9<br>(-0.8 to 37.9)                              |
| Non-melanoma skin cancer                           | 6.5<br>(4.6 to 9.7)                              | 23.8<br>(20.4 to 27.9)                         | 0.3<br>(0.1 to 0.5)                           | 58.1<br>(10.4 to 142.8)                           | 37.0<br>(-2.9 to 109.4)                             |
| Non-melanoma skin cancer (squamous-cell carcinoma) | 5.5<br>(3.4 to 9.0)                              | 6.2<br>(5.0 to 8.7)                            | 0.3<br>(0.1 to 0.5)                           | 59.6<br>(6.9 to 159.1)                            | 38.2<br>(-6.5 to 121.7)                             |
| Non-melanoma skin cancer (basal-cell carcinoma)    | 2.6<br>(1.8 to 4.2)                              | 17.6<br>(14.6 to 21.0)                         | < 0.05<br>(< 0.05 to 0.1)                     | 45.4<br>(18.9 to 76.0)                            | 26.7<br>(4.0 to 54.5)                               |
| Breast cancer                                      | 305.7<br>(277.9 to 335.1)                        | 65.4<br>(59.5 to 71.6)                         | 27.8<br>(19.9 to 37.1)                        | 3.7<br>(-10.2 to 20.3)                            | -6.8<br>(-19.4 to 8.3)                              |
| Cervical cancer                                    | 62.6<br>(52.6 to 73.7)                           | 15.8<br>(13.6 to 18.2)                         | 5.9<br>(4.1 to 8.2)                           | -0.9<br>(-19.4 to 20.6)                           | -7.2<br>(-24.9 to 13.8)                             |
| Uterine cancer                                     | 210.9<br>(178.9 to 249.6)                        | 44.9<br>(38.1 to 53.1)                         | 15.8<br>(10.8 to 22.2)                        | 34.6<br>(8.1 to 66.0)                             | 18.6<br>(-3.5 to 46.0)                              |
| Ovarian cancer                                     | 40.2<br>(35.2 to 45.0)                           | 13.1<br>(11.5 to 14.6)                         | 5.9<br>(3.9 to 8.1)                           | 3.2<br>(-25.1 to 40.6)                            | -5.3<br>(-30.8 to 27.0)                             |
| Prostate cancer                                    | 168.2<br>(130.9 to 200.4)                        | 42.0<br>(33.5 to 48.7)                         | 16.8<br>(11.3 to 22.7)                        | 33.4<br>(1.7 to 67.8)                             | 16.8<br>(-10.9 to 47.2)                             |
| Testicular cancer                                  | 12.6<br>(10.8 to 14.7)                           | 2.5<br>(2.2 to 2.9)                            | 0.9<br>(0.6 to 1.3)                           | 2.8<br>(-25.4 to 40.4)                            | -1.6<br>(-28.4 to 35.5)                             |
| Kidney cancer                                      | 96.6<br>(85.0 to 109.0)                          | 26.2<br>(23.4 to 29.2)                         | 8.5<br>(5.9 to 11.7)                          | 9.0<br>(-8.6 to 29.4)                             | -2.9<br>(-18.1 to 14.7)                             |
| Bladder cancer                                     | 69.5<br>(64.0 to 75.1)                           | 17.9<br>(16.6 to 19.4)                         | 6.7<br>(4.8 to 8.8)                           | 7.6<br>(-7.6 to 25.7)                             | -5.7<br>(-18.3 to 10.1)                             |
| Brain and nervous system cancer                    | 22.7<br>(19.1 to 25.5)                           | 10.1<br>(8.8 to 11.2)                          | 3.2<br>(2.2 to 4.3)                           | 24.4<br>(-1.3 to 42.4)                            | 13.2<br>(-9.0 to 29.7)                              |
| Thyroid cancer                                     | 55.5<br>(50.2 to 62.0)                           | 10.7<br>(9.7 to 11.9)                          | 3.6<br>(2.5 to 5.0)                           | 15.5<br>(-2.2 to 36.2)                            | 5.3<br>(-10.9 to 23.9)                              |
| Mesothelioma                                       | 1.4<br>(1.3 to 1.5)                              | 1.0<br>(0.9 to 1.1)                            | 0.3<br>(0.2 to 0.4)                           | 9.6<br>(-1.2 to 18.7)                             | -2.8<br>(-12.5 to 5.2)                              |
| Hodgkin lymphoma                                   | 19.3<br>(17.3 to 21.4)                           | 4.4<br>(4.0 to 4.9)                            | 1.8<br>(1.2 to 2.4)                           | -2.6<br>(-17.6 to 16.8)                           | -1.7<br>(-17.4 to 18.5)                             |
| Non-Hodgkin's lymphoma                             | 41.0<br>(36.4 to 45.8)                           | 11.1<br>(9.9 to 12.4)                          | 3.7<br>(2.6 to 5.0)                           | 44.0<br>(22.1 to 65.2)                            | 29.5<br>(10.8 to 47.6)                              |
| Multiple myeloma                                   | 11.5<br>(9.0 to 13.8)                            | 4.3<br>(3.5 to 5.1)                            | 2.4<br>(1.5 to 3.3)                           | 36.9<br>(8.3 to 60.8)                             | 21.0<br>(-4.9 to 41.7)                              |
| Leukaemia                                          | 48.8<br>(43.8 to 55.2)                           | 13.3<br>(12.2 to 14.7)                         | 6.4<br>(4.4 to 8.7)                           | 23.4<br>(7.6 to 40.0)                             | 13.8<br>(-3.6 to 32.9)                              |
| Acute lymphoid leukaemia                           | 11.6<br>(8.6 to 16.1)                            | 2.7<br>(2.1 to 3.6)                            | 1.3<br>(0.8 to 2.1)                           | 59.1<br>(11.8 to 123.5)                           | 49.7<br>(-1.2 to 124.0)                             |
| Chronic lymphoid leukaemia                         | 22.5<br>(20.2 to 25.2)                           | 5.2<br>(4.8 to 5.9)                            | 2.9<br>(2.0 to 4.0)                           | 22.4<br>(-1.8 to 50.9)                            | 7.3<br>(-12.2 to 32.8)                              |
| Acute myeloid leukaemia                            | 4.1<br>(3.2 to 5.3)                              | 2.5<br>(2.1 to 2.9)                            | 0.7<br>(0.5 to 1.0)                           | 31.6<br>(10.0 to 54.8)                            | 19.7<br>(-4.3 to 49.6)                              |
| Chronic myeloid leukaemia                          | 2.8<br>(2.5 to 3.2)                              | 1.0<br>(0.9 to 1.1)                            | 0.4<br>(0.3 to 0.5)                           | -14.5<br>(-24.9 to -2.1)                          | -22.2<br>(-31.2 to -11.4)                           |
| Other leukaemia                                    | 7.9<br>(6.5 to 9.3)                              | 1.8<br>(1.5 to 2.1)                            | 1.0<br>(0.7 to 1.4)                           | 7.8<br>(-8.2 to 26.8)                             | -4.2<br>(-19.7 to 15.7)                             |
| Other neoplasms                                    | 68.9<br>(55.9 to 84.0)                           | 20.2<br>(17.1 to 23.7)                         | 6.0<br>(4.2 to 8.2)                           | 25.5<br>(3.5 to 50.1)                             | 16.0<br>(-4.1 to 39.4)                              |
| <b>Cardiovascular diseases</b>                     | <b>15,125.3</b><br><b>(14,602.8 to 15,553.6)</b> | <b>2,462.7†</b><br><b>(2,363.8 to 2,569.0)</b> | <b>1,401.0</b><br><b>(1,029.2 to 1,784.4)</b> | <b>10.9</b><br><b>(4.8 to 17.1)</b>               | <b>-3.3</b><br><b>(-8.4 to 2.0)</b>                 |
| Rheumatic heart disease                            | 35.1<br>(31.2 to 39.2)                           | 6.6<br>(6.2 to 7.1)                            | 2.7<br>(1.8 to 3.9)                           | -0.9<br>(-22.0 to 25.2)                           | -10.6<br>(-28.4 to 11.2)                            |
| Ischaemic heart disease                            | 7,219.5<br>(6,893.7 to 7,531.5)                  | 1,219.0<br>(1,170.0 to 1,269.2)                | 310.0<br>(216.8 to 416.9)                     | 12.1<br>(7.3 to 16.9)                             | -1.4<br>(-5.4 to 2.4)                               |
| Cerebrovascular disease                            | 4,285.3<br>(3,998.3 to 4,602.6)                  | 676.9‡<br>(609.7 to 746.8)                     | 861.2<br>(609.7 to 1,113.5)                   | 8.7<br>(-0.7 to 18.0)                             | -5.6<br>(-13.5 to 2.0)                              |
| Ischaemic stroke                                   | 3,939.5<br>(3,550.3 to 4,403.9)                  | 543.1‡<br>(475.2 to 611.9)                     | 762.4<br>(540.6 to 993.5)                     | 8.9<br>(-1.7 to 19.6)                             | -5.7<br>(-14.8 to 3.2)                              |
| Hemorrhagic stroke                                 | 518.5<br>(461.8 to 580.8)                        | 133.8‡<br>(119.5 to 149.4)                     | 98.8<br>(70.2 to 127.9)                       | 7.3<br>(-4.2 to 20.6)                             | -4.8<br>(-14.9 to 6.4)                              |
| Hypertensive heart disease                         | 308.9<br>(253.5 to 376.0)                        | --                                             | 24.3<br>(16.5 to 34.4)                        | 21.4<br>(6.6 to 38.7)                             | 5.6<br>(-6.9 to 20.0)                               |
| Cardiomyopathy and myocarditis                     | 398.8<br>(352.2 to 447.4)                        | 66.2†<br>(58.2 to 75.3)                        | 32.5<br>(22.2 to 46.0)                        | 22.9<br>(9.4 to 37.2)                             | 11.8<br>(0.4 to 23.5)                               |
| Myocarditis                                        | 26.6<br>(23.9 to 29.4)                           | 66.2<br>(58.2 to 75.3)                         | 1.7<br>(1.1 to 2.5)                           | 2.4<br>(-8.0 to 14.1)                             | 1.2<br>(-7.6 to 10.9)                               |
| Alcoholic cardiomyopathy                           | 294.9<br>(246.8 to 349.1)                        | --                                             | 24.1<br>(16.1 to 34.5)                        | 27.2<br>(10.1 to 44.8)                            | 16.2<br>(1.9 to 31.9)                               |
| Other cardiomyopathy                               | 82.3<br>(71.2 to 94.0)                           | --                                             | 6.8<br>(4.6 to 9.6)                           | 14.8<br>(-3.6 to 38.0)                            | 3.6<br>(-12.6 to 22.2)                              |
| Atrial fibrillation and flutter                    | 1,476.2<br>(1,276.7 to 1,719.8)                  | 120.8<br>(102.9 to 141.0)                      | 113.4<br>(76.9 to 158.3)                      | 17.7<br>(10.1 to 25.7)                            | 1.7<br>(-4.6 to 8.5)                                |
| Peripheral vascular disease                        | 3,842.2<br>(3,315.1 to 4,430.2)                  | 349.0<br>(297.4 to 409.1)                      | 17.3<br>(7.9 to 32.6)                         | 9.2<br>(-0.9 to 20.5)                             | -7.8<br>(-15.4 to 0.0)                              |
| Endocarditis                                       | 5.7<br>(5.1 to 6.5)                              | 24.3<br>(21.9 to 26.9)                         | 0.5<br>(0.3 to 0.6)                           | 21.6<br>(9.7 to 35.2)                             | 5.5<br>(-3.3 to 15.6)                               |
| Other cardiovascular and circulatory diseases      | 767.5<br>(638.6 to 919.5)                        | --                                             | 39.0<br>(26.3 to 56.1)                        | 17.7<br>(4.3 to 32.7)                             | 7.9<br>(-4.1 to 20.2)                               |
| <b>Chronic respiratory diseases</b>                | <b>12,793.2</b><br><b>(12,262.4 to 13,349.2)</b> | <b>1,616.9†</b><br><b>(1,532.8 to 1,711.9)</b> | <b>411.1</b><br><b>(305.0 to 533.7)</b>       | <b>5.8</b><br><b>(0.4 to 11.9)</b>                | <b>0.5</b><br><b>(-4.2 to 5.6)</b>                  |
| Chronic obstructive pulmonary disease              | 5,982.6<br>(5,589.8 to 6,453.4)                  | 342.8<br>(320.4 to 371.4)                      | 114.3<br>(88.8 to 144.4)                      | 3.6<br>(-11.1 to 21.6)                            | -6.1<br>(-19.2 to 9.9)                              |
| Pneumoconiosis                                     | 16.9<br>(15.3 to 18.5)                           | 1.2<br>(1.0 to 1.3)                            | 2.6<br>(1.7 to 3.6)                           | 17.3<br>(0.1 to 38.8)                             | 3.4<br>(-11.6 to 21.6)                              |
| Silicosis                                          | 2.2<br>(1.9 to 2.5)                              | 0.2<br>(0.1 to 0.2)                            | 0.3<br>(0.2 to 0.5)                           | 16.2<br>(10.8 to 22.3)                            | 3.1<br>(-2.0 to 8.0)                                |



| Cause                                                          | Prevalence in thousands (95% UI)           | Incidence in thousands (95% UI)             | YLDs in thousands (95% UI)              |                                                   |                                                     |
|----------------------------------------------------------------|--------------------------------------------|---------------------------------------------|-----------------------------------------|---------------------------------------------------|-----------------------------------------------------|
|                                                                | 2016 counts                                | 2016 counts                                 | 2016 counts                             | Percentage change in counts between 2006 and 2016 | Percentage change in age-standardised rates between |
| Asbestosis                                                     | 4.0<br>(3.5 to 4.7)                        | 0.2<br>(0.2 to 0.2)                         | 0.6<br>(0.4 to 0.9)                     | 9.1<br>(1.6 to 17.9)                              | -1.0<br>(-7.5 to 6.5)                               |
| Coal workers pneumoconiosis                                    | 1.5<br>(1.2 to 1.8)                        | 0.1<br>(0.1 to 0.1)                         | 0.2<br>(0.1 to 0.3)                     | 51.0<br>(38.4 to 64.9)                            | 32.5<br>(22.1 to 44.9)                              |
| Other pneumoconiosis                                           | 9.2<br>(7.8 to 10.6)                       | 0.7<br>(0.6 to 0.8)                         | 1.4<br>(0.9 to 2.0)                     | 17.2<br>(-13.6 to 62.0)                           | 1.9<br>(-25.3 to 39.7)                              |
| Asthma                                                         | 7,116.2<br>(6,676.9 to 7,592.3)            | 1,267.6<br>(1,185.4 to 1,358.9)             | 273.4<br>(182.0 to 387.2)               | 6.0<br>(1.3 to 10.7)                              | 2.1<br>(-2.4 to 6.7)                                |
| Interstitial lung disease and pulmonary sarcoidosis            | 144.6<br>(131.3 to 159.3)                  | 5.4<br>(4.8 to 6.0)                         | 14.8<br>(9.8 to 21.7)                   | 8.8<br>(-7.5 to 28.1)                             | 1.9<br>(-12.2 to 17.7)                              |
| Other chronic respiratory diseases                             | --                                         | --                                          | 6.0<br>(4.8 to 7.6)                     | 31.9<br>(19.0 to 45.9)                            | 32.1<br>(20.9 to 44.1)                              |
| <b>Cirrhosis and other chronic liver diseases</b>              | <b>1,704.9<br/>(1,617.9 to 1,792.9)</b>    | <b>53.9<br/>(51.6 to 56.4)</b>              | <b>44.7<br/>(30.9 to 62.0)</b>          | <b>13.7<br/>(3.5 to 24.2)</b>                     | <b>7.5<br/>(-1.9 to 17.7)</b>                       |
| Cirrhosis and other chronic liver diseases due to hepatitis B  | 313.0<br>(280.3 to 351.0)                  | 10.2<br>(9.1 to 11.4)                       | 7.5<br>(5.1 to 10.9)                    | 16.9<br>(-4.3 to 47.8)                            | 9.0<br>(-10.9 to 37.4)                              |
| Cirrhosis and other chronic liver diseases due to hepatitis C  | 394.4<br>(355.2 to 440.5)                  | 12.8<br>(11.5 to 14.2)                      | 9.5<br>(6.4 to 13.4)                    | 16.7<br>(-4.8 to 40.4)                            | 9.2<br>(-10.0 to 31.7)                              |
| Cirrhosis and other chronic liver diseases due to alcohol use  | 563.2<br>(513.7 to 622.9)                  | 18.4<br>(16.8 to 20.3)                      | 13.5<br>(9.2 to 18.8)                   | 19.0<br>(-0.4 to 41.1)                            | 10.1<br>(-7.0 to 30.4)                              |
| Cirrhosis and other chronic liver diseases due to other causes | 434.4<br>(399.1 to 476.6)                  | 12.5<br>(11.5 to 13.8)                      | 14.1<br>(9.7 to 19.8)                   | 5.8<br>(-8.2 to 23.4)                             | 4.4<br>(-9.5 to 22.0)                               |
| <b>Digestive diseases</b>                                      | <b>8,216.0<br/>(7,575.7 to 8,811.0)</b>    | <b>8,804.6†<br/>(8,225.3 to 9,471.9)</b>    | <b>248.2<br/>(177.2 to 340.5)</b>       | <b>22.2<br/>(12.1 to 33.6)</b>                    | <b>13.6<br/>(3.9 to 24.1)</b>                       |
| Peptic ulcer disease                                           | 3,096.0<br>(2,727.7 to 3,545.5)            | 239.1<br>(216.3 to 262.6)                   | 49.2<br>(30.9 to 76.5)                  | 53.4<br>(24.5 to 91.1)                            | 48.8<br>(20.9 to 86.8)                              |
| Gastritis and duodenitis                                       | 3,277.0<br>(2,835.2 to 3,735.1)            | 2,293.7<br>(2,051.1 to 2,547.7)             | 48.1<br>(31.0 to 73.6)                  | 41.0<br>(17.5 to 70.7)                            | 31.1<br>(8.6 to 59.1)                               |
| Appendicitis                                                   | 11.8<br>(11.0 to 12.8)                     | 309.3<br>(287.0 to 336.5)                   | 3.8<br>(2.3 to 5.6)                     | -7.1<br>(-30.0 to 26.2)                           | 0.7<br>(-27.6 to 39.4)                              |
| Paralytic ileus and intestinal obstruction                     | 2.5<br>(2.3 to 2.8)                        | 68.2<br>(61.3 to 75.3)                      | 0.8<br>(0.5 to 1.2)                     | 12.3<br>(7.4 to 17.5)                             | 3.4<br>(0.3 to 6.8)                                 |
| Inguinal, femoral, and abdominal hernia                        | 1,129.5<br>(1,013.7 to 1,253.0)            | 2,472.1<br>(2,092.9 to 2,846.9)             | 80.4<br>(54.8 to 111.5)                 | 6.7<br>(-3.0 to 17.9)                             | -3.0<br>(-12.1 to 7.3)                              |
| Inflammatory bowel disease                                     | 195.5<br>(179.8 to 212.4)                  | 118.5<br>(114.2 to 122.8)                   | 27.4<br>(18.4 to 37.3)                  | 8.0<br>(-4.1 to 21.7)                             | 1.5<br>(-9.6 to 15.1)                               |
| Vascular intestinal disorders                                  | 4.0<br>(3.6 to 4.4)                        | 24.2<br>(21.9 to 26.7)                      | 1.2<br>(0.8 to 1.7)                     | 20.0<br>(-4.6 to 50.4)                            | 7.2<br>(-11.1 to 27.6)                              |
| Gallbladder and biliary diseases                               | 671.0<br>(594.9 to 753.4)                  | 2,899.1<br>(2,522.3 to 3,332.1)             | 12.2<br>(8.3 to 17.7)                   | 12.9<br>(-4.5 to 34.9)                            | 3.0<br>(-12.9 to 21.3)                              |
| Pancreatitis                                                   | 42.8<br>(39.1 to 47.2)                     | 380.4<br>(346.2 to 418.9)                   | 5.1<br>(3.3 to 7.4)                     | 24.5<br>(-0.2 to 52.4)                            | 15.2<br>(-5.2 to 37.7)                              |
| Other digestive diseases                                       | --                                         | --                                          | 20.0<br>(14.2 to 27.1)                  | 30.0<br>(19.9 to 41.2)                            | 16.8<br>(7.0 to 27.5)                               |
| <b>Neurological disorders</b>                                  | <b>56,541.5<br/>(54,709.9 to 58,613.8)</b> | <b>23,868.6<br/>(20,848.6 to 27,233.7)</b>  | <b>1,622.3<br/>(1,096.5 to 2,178.3)</b> | <b>2.5<br/>(-7.3 to 13.5)</b>                     | <b>-0.2<br/>(-10.5 to 11.6)</b>                     |
| Alzheimer's disease and other dementias                        | 1,025.7<br>(849.9 to 1,229.6)              | 176.9<br>(145.3 to 216.2)                   | 148.3<br>(102.0 to 198.9)               | 25.2<br>(17.0 to 33.4)                            | -1.0<br>(-6.2 to 4.5)                               |
| Parkinson's disease                                            | 244.6<br>(189.5 to 307.6)                  | 27.0<br>(20.8 to 34.3)                      | 28.0<br>(17.5 to 39.4)                  | 19.6<br>(5.7 to 33.9)                             | 4.1<br>(-6.4 to 16.1)                               |
| Epilepsy                                                       | 288.9<br>(57.0 to 544.3)                   | 28.6<br>(5.5 to 54.9)                       | 83.0<br>(13.4 to 200.2)                 | -2.3<br>(-85.9 to 416.5)                          | -4.2<br>(-86.2 to 404.6)                            |
| Multiple sclerosis                                             | 94.0<br>(83.0 to 106.8)                    | 3.1<br>(2.8 to 3.5)                         | 24.3<br>(16.4 to 33.1)                  | 25.1<br>(5.5 to 48.2)                             | 19.0<br>(0.5 to 40.7)                               |
| Motor neuron disease                                           | 4.6<br>(4.1 to 5.2)                        | 0.8<br>(0.7 to 0.9)                         | 1.0<br>(0.7 to 1.3)                     | 9.0<br>(5.1 to 13.4)                              | 3.9<br>(0.0 to 7.7)                                 |
| Migraine                                                       | 24,812.2<br>(23,707.4 to 25,854.4)         | 2,291.7<br>(2,166.5 to 2,422.7)             | 1,124.5<br>(730.2 to 1,560.5)           | -0.3<br>(-3.2 to 2.9)                             | -0.4<br>(-3.4 to 2.6)                               |
| Tension-type headache                                          | 39,795.9<br>(36,096.7 to 43,757.7)         | 21,339.4<br>(18,350.2 to 24,684.6)          | 191.9<br>(122.7 to 281.2)               | 1.3<br>(-3.6 to 6.5)                              | -0.3<br>(-4.5 to 4.5)                               |
| Other neurological disorders                                   | 0.6<br>(0.4 to 0.8)                        | 1.2<br>(0.8 to 1.6)                         | 21.3<br>(9.2 to 41.9)                   | 14.2<br>(-59.2 to 193.3)                          | 16.2<br>(-64.8 to 231.3)                            |
| <b>Mental and substance use disorders</b>                      | <b>25,940.9<br/>(25,066.4 to 26,855.3)</b> | <b>11,507.9†<br/>(10,758.2 to 12,293.9)</b> | <b>3,675.4<br/>(2,679.9 to 4,740.1)</b> | <b>-3.9<br/>(-6.5 to -1.1)</b>                    | <b>-4.8<br/>(-7.5 to -2.1)</b>                      |
| Schizophrenia                                                  | 350.0<br>(308.1 to 395.9)                  | 18.3<br>(15.8 to 21.0)                      | 221.5<br>(162.7 to 278.8)               | 8.4<br>(-1.2 to 19.2)                             | 4.1<br>(-5.3 to 14.7)                               |
| Alcohol use disorders                                          | 7,346.0<br>(6,539.7 to 8,177.7)            | 3,472.1<br>(2,993.3 to 3,935.8)             | 727.9<br>(495.4 to 999.7)               | -11.2<br>(-19.3 to -2.0)                          | -13.5<br>(-21.6 to -4.2)                            |
| Drug use disorders                                             | 1,766.0<br>(1,664.2 to 1,878.0)            | 189.9<br>(175.8 to 205.2)                   | 482.0<br>(348.1 to 620.5)               | -10.0<br>(-17.8 to -1.9)                          | -11.1<br>(-19.3 to -2.6)                            |
| Opioid use disorders                                           | 916.1<br>(815.3 to 1,027.5)                | 97.4<br>(86.4 to 110.4)                     | 375.2<br>(264.6 to 488.8)               | -11.3<br>(-20.8 to -2.0)                          | -14.8<br>(-24.9 to -5.2)                            |
| Cocaine use disorders                                          | 174.9<br>(154.7 to 197.3)                  | 7.9<br>(6.7 to 9.0)                         | 23.8<br>(14.8 to 34.2)                  | -5.6<br>(-22.1 to 14.6)                           | 0.8<br>(-17.6 to 23.2)                              |
| Amphetamine use disorders                                      | 176.5<br>(132.1 to 231.6)                  | 10.7<br>(8.2 to 13.9)                       | 23.2<br>(13.4 to 37.4)                  | -9.1<br>(-26.3 to 12.4)                           | 2.6<br>(-17.3 to 27.4)                              |
| Cannabis use disorders                                         | 371.9<br>(314.8 to 435.5)                  | 48.4<br>(40.7 to 56.8)                      | 10.8<br>(6.7 to 16.0)                   | -14.2<br>(-27.5 to 2.6)                           | 0.4<br>(-16.3 to 19.8)                              |
| Other drug use disorders                                       | 171.7<br>(156.8 to 187.8)                  | 25.5<br>(23.0 to 27.9)                      | 48.9<br>(31.9 to 70.5)                  | -0.8<br>(-19.7 to 23.0)                           | 4.4<br>(-16.0 to 29.9)                              |
| Depressive disorders                                           | 6,656.3<br>(6,257.9 to 7,134.7)            | 6,665.7<br>(6,043.0 to 7,329.6)             | 1,072.7<br>(746.4 to 1,448.6)           | 0.4<br>(-4.5 to 5.9)                              | -2.6<br>(-7.0 to 2.6)                               |
| Major depressive disorder                                      | 4,088.6<br>(3,721.4 to 4,467.1)            | 6,270.9<br>(5,662.6 to 6,906.3)             | 816.0<br>(563.3 to 1,117.5)             | -0.8<br>(-7.0 to 6.4)                             | -3.2<br>(-8.9 to 3.2)                               |
| Dysthymia                                                      | 2,717.9<br>(2,366.9 to 3,121.4)            | 394.9<br>(347.0 to 453.6)                   | 256.8<br>(173.3 to 371.2)               | 4.6<br>(1.0 to 8.0)                               | -0.3<br>(-3.6 to 2.8)                               |
| Bipolar disorder                                               | 948.8<br>(823.7 to 1,087.5)                | 69.0<br>(60.3 to 78.4)                      | 191.8<br>(119.5 to 282.4)               | -2.4<br>(-8.4 to 4.3)                             | 0.1<br>(-6.2 to 6.5)                                |
| Anxiety disorders                                              | 4,345.0<br>(3,946.2 to 4,749.0)            | 681.0<br>(628.9 to 737.3)                   | 412.0<br>(287.6 to 559.5)               | -0.6<br>(-5.1 to 4.0)                             | -0.1<br>(-4.7 to 4.8)                               |
| Eating disorders                                               | 177.8<br>(144.6 to 213.0)                  | 74.0<br>(56.4 to 96.0)                      | 36.0<br>(21.9 to 52.4)                  | 5.6<br>(-8.1 to 21.1)                             | 14.5<br>(0.7 to 29.9)                               |
| Anorexia nervosa                                               | 34.6<br>(25.6 to 46.9)                     | 12.8<br>(9.6 to 16.5)                       | 7.4<br>(4.3 to 11.6)                    | -5.5<br>(-26.8 to 21.5)                           | 11.5<br>(-13.0 to 41.2)                             |
| Bulimia nervosa                                                | 135.7<br>(101.2 to 181.1)                  | 61.3<br>(44.0 to 82.8)                      | 28.6<br>(16.7 to 43.8)                  | 9.0<br>(-7.3 to 27.5)                             | 15.4<br>(-1.1 to 34.7)                              |
| Autistic spectrum disorders                                    | 1,135.8<br>(1,020.4 to 1,280.7)            | 6.0<br>(4.1 to 8.4)                         | 164.9<br>(112.0 to 231.5)               | 0.1<br>(-4.5 to 5.0)                              | 0.6<br>(-4.1 to 5.6)                                |
| Autism                                                         | 344.7<br>(295.2 to 402.8)                  | 0.7<br>(0.3 to 1.1)                         | 86.7<br>(56.1 to 127.1)                 | -0.2<br>(-7.8 to 8.6)                             | 0.5<br>(-7.4 to 10.0)                               |
| Asperger syndrome and other autistic spectrum disorders        | 791.0<br>(658.4 to 949.3)                  | 5.3<br>(3.4 to 7.7)                         | 78.2<br>(50.8 to 114.6)                 | 0.5<br>(-4.4 to 5.4)                              | 0.7<br>(-4.2 to 5.7)                                |

| Cause                                                      | Prevalence in thousands (95% UI)                    | Incidence in thousands (95% UI)                      | YLDs in thousands (95% UI)                    |                                                   |                                                     |
|------------------------------------------------------------|-----------------------------------------------------|------------------------------------------------------|-----------------------------------------------|---------------------------------------------------|-----------------------------------------------------|
|                                                            | 2016 counts                                         | 2016 counts                                          | 2016 counts                                   | Percentage change in counts between 2006 and 2016 | Percentage change in age-standardised rates between |
| Attention-deficit/hyperactivity disorder                   | 899.5<br>(815.6 to 999.2)                           | 35.2<br>(30.6 to 41.1)                               | 10.8<br>(6.5 to 17.2)                         | -7.9<br>(-15.2 to -0.2)                           | 0.3<br>(-7.7 to 8.6)                                |
| Conduct disorder                                           | 643.4<br>(532.0 to 764.9)                           | 225.4<br>(179.5 to 270.2)                            | 78.5<br>(48.8 to 119.5)                       | -21.3<br>(-27.1 to -15.4)                         | 0.2<br>(-5.8 to 6.6)                                |
| Idiopathic developmental intellectual disability           | 1,033.1<br>(483.2 to 1,609.5)                       | --                                                   | 41.2<br>(16.2 to 75.9)                        | -11.8<br>(-18.4 to -6.1)                          | -9.2<br>(-15.8 to -3.2)                             |
| Other mental and substance use disorders                   | 3,220.4<br>(2,855.7 to 3,698.3)                     | 71.5<br>(64.0 to 80.6)                               | 236.1<br>(163.4 to 338.7)                     | 3.9<br>(-1.1 to 8.9)                              | 0.4<br>(-4.7 to 5.2)                                |
| <b>Diabetes, urogenital, blood, and endocrine diseases</b> | <b>49,430.9</b><br><b>(48,489.2 to 50,424.7)</b>    | <b>28,506.0†</b><br><b>(26,796.8 to 30,314.7)</b>    | <b>1,330.7</b><br><b>(942.8 to 1,799.6)</b>   | <b>10.3</b><br><b>(5.6 to 16.0)</b>               | <b>3.3</b><br><b>(-0.9 to 8.4)</b>                  |
| Diabetes mellitus                                          | 6,299.1<br>(5,575.6 to 7,194.2)                     | 299.8<br>(264.6 to 339.1)                            | 541.8<br>(376.5 to 748.7)                     | 15.7<br>(4.4 to 29.5)                             | 4.6<br>(-5.5 to 16.9)                               |
| Acute glomerulonephritis                                   | 3.2<br>(2.8 to 3.7)                                 | 46.8<br>(40.9 to 53.7)                               | 0.2<br>(0.1 to 0.2)                           | -2.9<br>(-8.7 to 3.2)                             | -5.0<br>(-9.9 to 0.2)                               |
| Chronic kidney disease                                     | 10,271.1<br>(9,216.7 to 11,378.9)                   | 743.8<br>(642.3 to 844.6)                            | 199.8<br>(146.2 to 263.0)                     | 17.6<br>(6.2 to 32.0)                             | 5.2<br>(-4.4 to 16.4)                               |
| Chronic kidney disease due to diabetes mellitus            | 2,490.4<br>(2,202.9 to 2,788.2)                     | 188.3<br>(159.9 to 219.1)                            | 45.4<br>(33.3 to 60.9)                        | 46.0<br>(25.6 to 70.3)                            | 33.5<br>(15.5 to 54.7)                              |
| Chronic kidney disease due to hypertension                 | 2,270.2<br>(1,933.8 to 2,638.1)                     | 293.4<br>(254.8 to 331.9)                            | 13.4<br>(9.3 to 18.0)                         | 59.9<br>(33.4 to 93.0)                            | 30.6<br>(10.2 to 55.2)                              |
| Chronic kidney disease due to glomerulonephritis           | 2,373.9<br>(2,037.6 to 2,732.6)                     | 38.3<br>(31.0 to 45.9)                               | 79.7<br>(58.2 to 105.2)                       | -10.0<br>(-19.6 to 2.1)                           | -17.9<br>(-26.3 to -7.6)                            |
| Chronic kidney disease due to other causes                 | 3,136.7<br>(2,783.0 to 3,487.2)                     | 223.8<br>(192.5 to 255.5)                            | 61.3<br>(44.4 to 80.7)                        | 46.4<br>(27.0 to 71.1)                            | 28.3<br>(12.1 to 48.2)                              |
| Urinary diseases and male infertility                      | 4,867.3<br>(4,380.4 to 5,414.4)                     | 18,740.6†<br>(17,204.1 to 20,347.6)                  | 149.8<br>(98.2 to 216.3)                      | 10.2<br>(3.7 to 16.1)                             | -0.9<br>(-6.5 to 4.1)                               |
| Interstitial nephritis and urinary tract infections        | 267.9<br>(240.4 to 296.9)                           | 13,896.5<br>(12,506.4 to 15,361.4)                   | 8.8<br>(5.4 to 13.4)                          | -5.9<br>(-15.8 to 4.4)                            | -4.2<br>(-13.7 to 6.3)                              |
| Urolithiasis                                               | 164.9<br>(146.4 to 185.6)                           | 4,371.3<br>(3,892.0 to 4,913.7)                      | 11.5<br>(7.9 to 15.9)                         | 9.2<br>(-7.2 to 29.6)                             | 0.5<br>(-13.9 to 18.2)                              |
| Benign prostatic hyperplasia                               | 3,686.3<br>(3,150.5 to 4,258.2)                     | 472.7<br>(392.5 to 560.9)                            | 119.0<br>(75.8 to 173.2)                      | 14.3<br>(6.4 to 21.3)                             | 1.4<br>(-5.5 to 7.4)                                |
| Male infertility                                           | 609.5<br>(467.3 to 782.4)                           | --                                                   | 3.6<br>(1.4 to 7.5)                           | -6.5<br>(-14.2 to 2.0)                            | -7.8<br>(-15.2 to -0.4)                             |
| Other urinary diseases                                     | --                                                  | --                                                   | 6.9<br>(4.6 to 9.6)                           | -14.7<br>(-23.1 to -5.1)                          | -19.0<br>(-26.7 to -10.7)                           |
| Gynecological diseases                                     | 19,737.7<br>(18,816.8 to 20,643.9)                  | 8,094.9†<br>(7,403.8 to 8,951.9)                     | 265.8<br>(181.5 to 379.6)                     | -5.6<br>(-9.3 to -1.5)                            | -1.0<br>(-4.4 to 3.0)                               |
| Uterine fibroids                                           | 2,212.1<br>(1,958.8 to 2,513.5)                     | 199.7<br>(170.4 to 231.4)                            | 19.7<br>(10.1 to 36.0)                        | -9.7<br>(-18.8 to -0.7)                           | -9.4<br>(-18.3 to -0.2)                             |
| Polycystic ovarian syndrome                                | 154.5<br>(116.4 to 203.3)                           | 58.0<br>(40.7 to 79.1)                               | 1.4<br>(0.6 to 2.6)                           | 1.0<br>(-11.7 to 15.8)                            | -0.8<br>(-12.9 to 13.3)                             |
| Female infertility                                         | 288.8<br>(112.4 to 561.7)                           | --                                                   | 1.7<br>(0.4 to 4.5)                           | 12.6<br>(-16.3 to 51.1)                           | 14.9<br>(-9.7 to 49.9)                              |
| Endometriosis                                              | 115.2<br>(93.4 to 141.0)                            | 276.8<br>(213.5 to 366.0)                            | 10.8<br>(6.9 to 16.1)                         | -9.0<br>(-28.0 to 11.5)                           | -2.3<br>(-21.3 to 20.0)                             |
| Genital prolapse                                           | 6,526.7<br>(5,586.9 to 7,564.9)                     | 263.1<br>(220.8 to 313.5)                            | 20.1<br>(9.9 to 36.8)                         | 34.9<br>(22.7 to 49.9)                            | 20.7<br>(9.7 to 33.5)                               |
| Premenstrual syndrome                                      | 9,168.9<br>(8,655.0 to 9,648.8)                     | 3,083.1<br>(2,874.5 to 3,281.4)                      | 76.5<br>(47.4 to 117.9)                       | -10.3<br>(-16.2 to -3.2)                          | -1.7<br>(-8.0 to 6.0)                               |
| Other gynecological diseases                               | 3,816.2<br>(3,265.9 to 4,440.5)                     | 4,214.1<br>(3,529.7 to 5,010.4)                      | 135.7<br>(88.8 to 195.7)                      | -6.3<br>(-12.1 to -0.3)                           | -1.5<br>(-6.9 to 4.6)                               |
| Hemoglobinopathies and hemolytic anaemias                  | 16,911.9<br>(16,502.1 to 17,365.8)                  | --                                                   | 51.3<br>(32.8 to 78.3)                        | 32.5<br>(12.9 to 59.2)                            | 26.1<br>(7.0 to 53.7)                               |
| Thalassemias                                               | 0.7<br>(0.6 to 0.7)                                 | --                                                   | 0.1<br>(< 0.05 to 0.1)                        | 12.0<br>(-10.8 to 44.9)                           | -10.0<br>(-28.2 to 16.8)                            |
| Thalassaemias trait                                        | 2,604.5<br>(2,359.5 to 2,860.2)                     | --                                                   | 37.3<br>(24.0 to 56.9)                        | 34.3<br>(11.4 to 64.2)                            | 27.9<br>(7.3 to 56.9)                               |
| Sickle cell disorders                                      | 1.2<br>(1.0 to 1.3)                                 | --                                                   | 0.1<br>(0.1 to 0.2)                           | 23.4<br>(13.8 to 34.8)                            | 33.3<br>(21.9 to 46.5)                              |
| Sickle cell trait                                          | 2,232.8<br>(2,140.4 to 2,347.6)                     | --                                                   | 7.0<br>(4.2 to 11.4)                          | 38.6<br>(10.5 to 75.7)                            | 27.6<br>(0.2 to 65.6)                               |
| G6PD deficiency                                            | 1,475.9<br>(1,398.3 to 1,573.2)                     | --                                                   | 0.3<br>(0.2 to 0.4)                           | 42.0<br>(11.7 to 81.3)                            | 36.1<br>(8.9 to 73.4)                               |
| G6PD trait                                                 | 10,589.6<br>(10,322.9 to 10,903.5)                  | --                                                   | < 0.05<br>(< 0.05 to < 0.05)                  | 36.5<br>(9.7 to 71.2)                             | 30.1<br>(5.2 to 63.0)                               |
| Other hemoglobinopathies and hemolytic anaemias            | 527.1<br>(416.5 to 653.0)                           | --                                                   | 6.5<br>(3.9 to 10.6)                          | 17.6<br>(-3.8 to 45.5)                            | 16.4<br>(-7.5 to 46.9)                              |
| Endocrine, metabolic, blood, and immune disorders          | 3,659.5<br>(3,253.4 to 4,116.7)                     | 580.2<br>(513.3 to 659.3)                            | 122.1<br>(81.0 to 171.3)                      | 9.2<br>(2.0 to 16.5)                              | 1.8<br>(-4.0 to 7.7)                                |
| <b>Musculoskeletal disorders</b>                           | <b>30,079.0</b><br><b>(28,678.4 to 31,777.5)</b>    | <b>12,138.1</b><br><b>(10,855.0 to 13,549.6)</b>     | <b>3,388.5</b><br><b>(2,460.5 to 4,388.4)</b> | <b>8.4</b><br><b>(4.4 to 12.3)</b>                | <b>0.8</b><br><b>(-2.4 to 4.0)</b>                  |
| Rheumatoid arthritis                                       | 574.9<br>(515.6 to 643.2)                           | 27.0<br>(23.9 to 30.3)                               | 132.6<br>(91.3 to 176.2)                      | 15.0<br>(5.3 to 25.0)                             | 5.2<br>(-3.1 to 14.3)                               |
| Osteoarthritis                                             | 9,190.3<br>(8,595.3 to 9,808.8)                     | 412.4<br>(380.6 to 443.7)                            | 558.1<br>(389.5 to 756.9)                     | 16.0<br>(11.6 to 20.3)                            | 3.1<br>(-0.7 to 6.9)                                |
| Low back and neck pain                                     | 21,624.9<br>(20,211.5 to 23,383.3)                  | 10,232.8<br>(9,031.3 to 11,573.1)                    | 2,540.1<br>(1,809.1 to 3,353.0)               | 6.8<br>(2.0 to 11.8)                              | 0.3<br>(-3.7 to 4.3)                                |
| Low back pain                                              | 16,808.7<br>(14,983.0 to 19,098.9)                  | 8,815.3<br>(7,596.5 to 10,143.7)                     | 1,875.8<br>(1,337.9 to 2,462.4)               | 7.4<br>(0.9 to 14.0)                              | 0.5<br>(-5.2 to 5.9)                                |
| Neck pain                                                  | 6,762.9<br>(5,817.8 to 7,871.3)                     | 1,417.4<br>(1,230.4 to 1,668.7)                      | 664.3<br>(454.6 to 936.7)                     | 5.4<br>(1.7 to 9.2)                               | -0.0<br>(-2.3 to 2.0)                               |
| Gout                                                       | 713.4<br>(626.6 to 809.2)                           | 140.0<br>(121.7 to 159.3)                            | 22.1<br>(15.2 to 30.5)                        | 11.7<br>(-3.4 to 29.2)                            | 0.8<br>(-12.9 to 16.5)                              |
| Other musculoskeletal disorders                            | 1,599.7<br>(1,226.3 to 2,129.7)                     | 1,325.9<br>(981.0 to 1,825.9)                        | 135.7<br>(86.4 to 208.7)                      | 2.0<br>(-11.5 to 17.9)                            | -2.8<br>(-15.3 to 12.7)                             |
| <b>Other non-communicable diseases</b>                     | <b>112,175.2</b><br><b>(110,847.9 to 113,653.6)</b> | <b>343,809.1†</b><br><b>(327,168.8 to 361,771.0)</b> | <b>3,484.1</b><br><b>(2,404.1 to 4,908.2)</b> | <b>4.5</b><br><b>(3.3 to 5.8)</b>                 | <b>-1.3</b><br><b>(-2.4 to -0.2)</b>                |
| Congenital anomalies                                       | 1,918.2<br>(1,750.5 to 2,103.2)                     | --                                                   | 215.6<br>(155.1 to 284.6)                     | 1.6<br>(-3.2 to 7.0)                              | -0.3<br>(-4.9 to 4.8)                               |
| Neural tube defects                                        | 86.2<br>(76.2 to 96.7)                              | --                                                   | 25.7<br>(17.8 to 34.7)                        | -3.2<br>(-16.9 to 13.2)                           | -5.1<br>(-18.4 to 11.5)                             |
| Congenital heart anomalies                                 | 200.6<br>(176.6 to 226.9)                           | --                                                   | 10.0<br>(4.2 to 17.1)                         | 14.7<br>(0.8 to 30.7)                             | 11.3<br>(-1.9 to 27.1)                              |
| Orofacial clefts                                           | 50.1<br>(43.8 to 57.4)                              | --                                                   | 0.5<br>(0.3 to 0.7)                           | -13.8<br>(-24.5 to -3.1)                          | -17.0<br>(-27.2 to -6.8)                            |
| Down's syndrome                                            | 138.5<br>(119.6 to 160.2)                           | --                                                   | 13.0<br>(8.6 to 18.5)                         | -8.4<br>(-20.0 to 3.0)                            | -8.9<br>(-21.3 to 2.8)                              |
| Turner syndrome                                            | 102.4<br>(87.4 to 119.2)                            | --                                                   | 1.8<br>(0.9 to 3.0)                           | -5.2<br>(-25.9 to 19.3)                           | -2.0<br>(-23.6 to 24.0)                             |
| Klinefelter syndrome                                       | 97.2<br>(82.1 to 115.2)                             | --                                                   | 0.6<br>(0.3 to 1.2)                           | 0.6<br>(-18.6 to 22.6)                            | 4.2<br>(-15.7 to 29.5)                              |



| Cause                                         | Prevalence in thousands (95% UI)                 | Incidence in thousands (95% UI)                   | YLDs in thousands (95% UI)                    |                                                   |                                                     |
|-----------------------------------------------|--------------------------------------------------|---------------------------------------------------|-----------------------------------------------|---------------------------------------------------|-----------------------------------------------------|
|                                               | 2016 counts                                      | 2016 counts                                       | 2016 counts                                   | Percentage change in counts between 2006 and 2016 | Percentage change in age-standardised rates between |
| Other chromosomal abnormalities               | 131.1<br>(111.1 to 153.4)                        | --                                                | 17.1<br>(11.6 to 23.6)                        | 10.1<br>(-5.1 to 28.4)                            | 5.0<br>(-9.8 to 21.8)                               |
| Congenital musculoskeletal and limb anomalies | 544.5<br>(496.7 to 597.1)                        | --                                                | 76.6<br>(52.2 to 105.5)                       | 4.9<br>(-3.1 to 13.4)                             | 3.2<br>(-4.6 to 11.4)                               |
| Urogenital congenital anomalies               | 191.1<br>(170.0 to 213.5)                        | --                                                | 5.5<br>(3.2 to 8.6)                           | 4.5<br>(-10.0 to 21.3)                            | 0.4<br>(-15.1 to 17.7)                              |
| Digestive congenital anomalies                | 230.8<br>(205.6 to 258.3)                        | --                                                | 10.4<br>(6.8 to 15.1)                         | -3.7<br>(-16.2 to 10.2)                           | -5.4<br>(-17.9 to 8.2)                              |
| Other congenital anomalies                    | 476.9<br>(303.2 to 716.7)                        | --                                                | 54.4<br>(35.1 to 80.4)                        | -1.1<br>(-10.4 to 10.6)                           | -3.6<br>(-13.1 to 7.9)                              |
| Skin and subcutaneous diseases                | 43,526.7<br>(42,439.6 to 44,643.2)               | 112,614.8<br>(106,196.1 to 119,508.4)             | 949.4<br>(642.3 to 1,377.6)                   | -1.9<br>(-4.0 to 0.5)                             | 1.3<br>(-0.7 to 3.5)                                |
| Dermatitis                                    | 4,975.1<br>(4,706.2 to 5,279.8)                  | 6,821.0<br>(6,222.1 to 7,447.7)                   | 181.3<br>(110.2 to 291.1)                     | 4.4<br>(-0.1 to 9.1)                              | 1.2<br>(-3.3 to 6.0)                                |
| Psoriasis                                     | 1,673.8<br>(1,593.1 to 1,761.3)                  | 214.8<br>(204.2 to 225.6)                         | 143.1<br>(103.6 to 187.9)                     | 7.0<br>(-0.3 to 14.9)                             | 3.7<br>(-3.9 to 11.3)                               |
| Cellulitis                                    | 98.3<br>(92.0 to 105.0)                          | 2,119.9<br>(1,982.2 to 2,261.3)                   | 5.4<br>(3.6 to 7.9)                           | 5.4<br>(-12.5 to 26.6)                            | 0.7<br>(-17.0 to 21.2)                              |
| Pyoderma                                      | 696.8<br>(672.2 to 721.1)                        | 18,482.2<br>(17,747.6 to 19,252.9)                | 3.8<br>(1.5 to 7.9)                           | 9.0<br>(3.1 to 15.1)                              | 0.6<br>(-4.9 to 6.3)                                |
| Scabies                                       | 1,149.7<br>(1,016.8 to 1,312.1)                  | 3,473.7<br>(3,059.6 to 3,945.3)                   | 29.5<br>(16.6 to 46.6)                        | -3.8<br>(-9.1 to 2.3)                             | -1.2<br>(-6.0 to 4.1)                               |
| Fungal skin diseases                          | 13,652.6<br>(12,204.8 to 15,149.1)               | 51,010.9<br>(44,948.1 to 57,755.6)                | 75.2<br>(29.8 to 157.0)                       | 7.8<br>(5.4 to 10.1)                              | 0.1<br>(-1.0 to 1.2)                                |
| Viral skin diseases                           | 3,309.7<br>(3,176.8 to 3,439.7)                  | 4,996.2<br>(4,784.9 to 5,237.3)                   | 100.6<br>(62.9 to 149.5)                      | -0.8<br>(-4.1 to 2.9)                             | -0.2<br>(-3.4 to 3.0)                               |
| Acne vulgaris                                 | 8,794.8<br>(8,032.4 to 9,598.9)                  | 5,555.5<br>(4,703.3 to 6,671.0)                   | 226.0<br>(151.8 to 326.6)                     | -19.2<br>(-23.2 to -15.1)                         | 1.1<br>(-3.4 to 5.8)                                |
| Alopecia areata                               | 288.8<br>(277.8 to 300.4)                        | 506.7<br>(486.3 to 527.3)                         | 9.4<br>(6.0 to 14.0)                          | 1.9<br>(-8.8 to 14.1)                             | 0.1<br>(-10.5 to 12.0)                              |
| Pruritus                                      | 1,549.9<br>(1,364.1 to 1,746.0)                  | 1,217.8<br>(1,073.4 to 1,384.6)                   | 16.3<br>(7.6 to 29.8)                         | 7.2<br>(0.9 to 13.9)                              | 1.3<br>(-4.0 to 6.6)                                |
| Urticaria                                     | 1,313.5<br>(1,165.6 to 1,491.2)                  | 2,340.3<br>(2,070.5 to 2,644.4)                   | 78.3<br>(50.4 to 111.2)                       | 5.7<br>(-0.6 to 13.0)                             | 0.0<br>(-5.1 to 5.7)                                |
| Decubitus ulcer                               | 58.4<br>(51.7 to 65.9)                           | 210.9<br>(185.1 to 239.8)                         | 9.2<br>(6.3 to 12.7)                          | 13.7<br>(-5.6 to 35.4)                            | 2.6<br>(-12.0 to 18.7)                              |
| Other skin and subcutaneous diseases          | 13,180.8<br>(12,761.0 to 13,585.8)               | 15,665.1<br>(15,101.1 to 16,199.4)                | 71.3<br>(34.3 to 130.6)                       | 12.7<br>(9.9 to 15.7)                             | 5.6<br>(3.0 to 8.1)                                 |
| Sense organ diseases                          | 46,851.2<br>(45,975.0 to 47,790.2)               | 15,594.3†<br>(14,714.6 to 16,568.1)               | 1,717.1<br>(1,196.1 to 2,409.8)               | 7.3<br>(5.2 to 9.3)                               | -3.9<br>(-5.5 to -2.3)                              |
| Glaucoma                                      | 158.4<br>(130.6 to 187.8)                        | --                                                | 13.3<br>(9.0 to 18.4)                         | 14.9<br>(0.7 to 30.5)                             | -2.4<br>(-13.8 to 10.5)                             |
| Cataract                                      | 2,393.8<br>(2,017.7 to 2,785.5)                  | --                                                | 125.7<br>(87.0 to 176.2)                      | 7.1<br>(-0.2 to 14.4)                             | -9.0<br>(-14.5 to -3.3)                             |
| Macular degeneration                          | 86.7<br>(69.2 to 107.9)                          | --                                                | 5.0<br>(3.2 to 7.1)                           | 14.2<br>(-1.6 to 36.3)                            | -3.6<br>(-16.5 to 14.0)                             |
| Refraction and accommodation disorders        | 22,410.3<br>(21,437.7 to 23,407.4)               | --                                                | 385.0<br>(237.6 to 606.1)                     | 1.6<br>(-2.7 to 5.4)                              | -6.7<br>(-10.2 to -3.6)                             |
| Age-related and other hearing loss            | 35,012.4<br>(33,442.2 to 36,622.1)               | --                                                | 954.4<br>(664.2 to 1,342.0)                   | 9.2<br>(6.6 to 12.1)                              | -2.7<br>(-5.0 to -0.5)                              |
| Other vision loss                             | 958.2<br>(836.2 to 1,098.9)                      | --                                                | 58.4<br>(40.3 to 79.0)                        | 8.2<br>(-0.2 to 17.4)                             | -4.1<br>(-11.5 to 3.3)                              |
| Other sense organ diseases                    | 5,670.4<br>(5,215.7 to 6,127.2)                  | 15,594.3<br>(14,714.6 to 16,568.1)                | 175.4<br>(110.4 to 263.2)                     | 9.7<br>(5.6 to 14.1)                              | 0.3<br>(-3.2 to 4.2)                                |
| Oral disorders                                | 82,002.9<br>(79,481.1 to 84,619.6)               | 215,600.1†<br>(200,714.2 to 231,822.1)            | 602.0<br>(378.5 to 903.9)                     | 8.9<br>(5.9 to 12.0)                              | -0.1<br>(-2.3 to 2.0)                               |
| Caries of deciduous teeth                     | 7,279.7<br>(6,127.7 to 8,390.4)                  | 29,252.7<br>(22,022.4 to 37,894.9)                | 2.8<br>(1.2 to 5.5)                           | 24.7<br>(9.2 to 40.1)                             | -2.0<br>(-14.6 to 10.7)                             |
| Caries of permanent teeth                     | 61,618.3<br>(58,580.5 to 64,611.1)               | 183,378.6<br>(171,016.0 to 196,781.2)             | 59.8<br>(26.6 to 112.4)                       | -5.2<br>(-7.8 to -2.4)                            | -5.2<br>(-7.7 to -2.5)                              |
| Periodontal disease                           | 15,399.1<br>(12,719.7 to 18,399.1)               | 1,941.8<br>(1,526.6 to 2,384.7)                   | 99.5<br>(39.7 to 204.9)                       | 7.4<br>(3.1 to 11.7)                              | -0.4<br>(-3.5 to 3.4)                               |
| Edentulism and severe tooth loss              | 13,005.4<br>(11,353.1 to 14,647.9)               | 1,027.0<br>(862.9 to 1,219.5)                     | 355.0<br>(231.8 to 499.0)                     | 14.0<br>(9.1 to 18.6)                             | 1.2<br>(-2.6 to 4.9)                                |
| Other oral disorders                          | 2,928.7<br>(2,798.0 to 3,056.7)                  | --                                                | 84.9<br>(52.2 to 127.4)                       | 1.7<br>(-1.6 to 5.0)                              | -0.1<br>(-3.2 to 3.3)                               |
| <b>Injuries</b>                               | <b>70,874.6</b><br><b>(66,437.9 to 76,544.6)</b> | <b>24,083.1†</b><br><b>(22,813.9 to 25,475.2)</b> | <b>2,460.8</b><br><b>(1,667.7 to 3,488.7)</b> | <b>1.7</b><br><b>(-0.6 to 3.8)</b>                | <b>-4.4</b><br><b>(-6.7 to -2.4)</b>                |
| <b>Transport injuries</b>                     | <b>8,351.0</b><br><b>(7,692.8 to 9,037.3)</b>    | <b>2,277.5</b><br><b>(2,070.6 to 2,495.8)</b>     | <b>400.3</b><br><b>(266.5 to 573.9)</b>       | <b>9.4</b><br><b>(6.9 to 11.7)</b>                | <b>2.9</b><br><b>(0.6 to 4.9)</b>                   |
| Road injuries                                 | 7,852.9<br>(7,198.4 to 8,530.3)                  | 2,189.2<br>(1,981.7 to 2,410.7)                   | 378.0<br>(251.5 to 542.4)                     | 11.1<br>(8.6 to 13.3)                             | 4.4<br>(2.1 to 6.4)                                 |
| Pedestrian road injuries                      | 1,855.0<br>(1,632.4 to 2,109.2)                  | 376.8<br>(322.4 to 440.4)                         | 86.2<br>(57.2 to 123.8)                       | -5.4<br>(-7.9 to -3.0)                            | -11.5<br>(-13.8 to -9.4)                            |
| Cyclist road injuries                         | 1,340.0<br>(1,117.1 to 1,594.7)                  | 393.8<br>(324.8 to 472.6)                         | 59.5<br>(38.8 to 86.6)                        | 21.6<br>(18.7 to 24.1)                            | 14.8<br>(12.2 to 17.1)                              |
| Motorcyclist road injuries                    | 769.0<br>(646.8 to 937.9)                        | 133.1<br>(108.8 to 165.8)                         | 34.3<br>(22.4 to 50.0)                        | 17.5<br>(14.5 to 20.2)                            | 11.4<br>(8.5 to 13.8)                               |
| Motor vehicle road injuries                   | 3,540.3<br>(2,944.4 to 4,128.1)                  | 1,162.9<br>(1,025.2 to 1,312.5)                   | 182.7<br>(123.0 to 260.1)                     | 15.3<br>(12.9 to 17.5)                            | 8.3<br>(6.0 to 10.5)                                |
| Other road injuries                           | 348.7<br>(294.5 to 410.0)                        | 122.6<br>(94.7 to 154.7)                          | 15.3<br>(9.9 to 22.4)                         | 20.8<br>(18.0 to 23.4)                            | 13.7<br>(11.1 to 16.1)                              |
| Other transport injuries                      | 498.1<br>(425.7 to 580.8)                        | 88.2<br>(77.6 to 99.4)                            | 22.3<br>(14.7 to 32.1)                        | -12.9<br>(-15.9 to -10.1)                         | -16.4<br>(-19.4 to -13.7)                           |
| <b>Unintentional injuries</b>                 | <b>58,217.6</b><br><b>(54,105.6 to 63,490.6)</b> | <b>20,294.7</b><br><b>(19,069.9 to 21,633.6)</b>  | <b>1,901.7</b><br><b>(1,296.3 to 2,656.4)</b> | <b>1.3</b><br><b>(-1.2 to 3.4)</b>                | <b>-5.0</b><br><b>(-7.4 to -2.9)</b>                |
| Falls                                         | 29,881.4<br>(26,573.4 to 34,298.9)               | 11,489.2<br>(10,418.4 to 12,729.4)                | 1,151.1<br>(797.2 to 1,589.5)                 | 3.4<br>(1.0 to 5.4)                               | -3.8<br>(-6.0 to -1.7)                              |
| Drowning                                      | 136.6<br>(120.1 to 155.4)                        | 20.8<br>(18.6 to 23.3)                            | 5.9<br>(3.8 to 8.5)                           | -25.0<br>(-28.5 to -22.1)                         | -29.1<br>(-32.2 to -26.4)                           |
| Fire, heat, and hot substances                | 5,298.6<br>(4,600.2 to 6,260.6)                  | 542.7<br>(482.2 to 600.2)                         | 119.3<br>(75.7 to 180.5)                      | -3.0<br>(-7.4 to 0.4)                             | -8.1<br>(-12.2 to -5.0)                             |
| Poisonings                                    | 136.8<br>(115.0 to 163.9)                        | 132.3<br>(110.7 to 157.4)                         | 11.7<br>(7.5 to 17.3)                         | 5.8<br>(-0.4 to 12.4)                             | 4.4<br>(-2.4 to 11.0)                               |
| Exposure to mechanical forces                 | 10,403.4<br>(8,953.9 to 12,688.5)                | 3,225.4<br>(2,890.5 to 3,571.6)                   | 228.3<br>(148.7 to 336.0)                     | 2.2<br>(-0.9 to 4.9)                              | -2.8<br>(-5.7 to -0.1)                              |
| Unintentional firearm injuries                | 141.2<br>(116.4 to 170.1)                        | 26.1<br>(19.1 to 34.1)                            | 5.3<br>(3.4 to 7.8)                           | 8.3<br>(5.3 to 11.2)                              | 3.3<br>(0.5 to 6.0)                                 |
| Unintentional suffocation                     | 393.2<br>(307.7 to 495.3)                        | 59.9<br>(45.5 to 78.5)                            | 12.3<br>(7.6 to 18.5)                         | 5.5<br>(2.8 to 7.9)                               | 0.9<br>(-1.8 to 3.3)                                |
| Other exposure to mechanical forces           | 9,868.9<br>(8,411.9 to 12,125.2)                 | 3,139.5<br>(2,818.0 to 3,486.1)                   | 210.8<br>(138.0 to 310.2)                     | 1.9<br>(-1.3 to 4.6)                              | -3.2<br>(-6.1 to -0.5)                              |

| Cause                                                                               | Prevalence in thousands (95% UI)              | Incidence in thousands (95% UI)                | YLDs in thousands (95% UI)             |                                                   |                                                     |
|-------------------------------------------------------------------------------------|-----------------------------------------------|------------------------------------------------|----------------------------------------|---------------------------------------------------|-----------------------------------------------------|
|                                                                                     | 2016 counts                                   | 2016 counts                                    | 2016 counts                            | Percentage change in counts between 2006 and 2016 | Percentage change in age-standardised rates between |
| Adverse effects of medical treatment                                                | 39.0<br>(30.9 to 47.7)                        | 509.1<br>(450.6 to 572.1)                      | 5.2<br>(3.2 to 7.6)                    | 20.4<br>(15.0 to 26.1)                            | 6.6<br>(2.1 to 11.1)                                |
| Animal contact                                                                      | 900.1<br>(793.1 to 1,036.8)                   | 792.7<br>(656.9 to 955.3)                      | 26.7<br>(17.4 to 38.0)                 | -4.7<br>(-8.8 to -0.7)                            | -7.0<br>(-11.3 to -2.7)                             |
| Venomous animal contact                                                             | 377.6<br>(313.0 to 455.5)                     | 335.7<br>(261.5 to 426.6)                      | 19.2<br>(12.6 to 27.5)                 | -1.0<br>(-6.7 to 4.8)                             | -2.4<br>(-8.4 to 3.6)                               |
| Non-venomous animal contact                                                         | 522.5<br>(438.4 to 642.1)                     | 457.1<br>(369.3 to 561.7)                      | 7.5<br>(4.7 to 11.8)                   | -13.1<br>(-17.1 to -9.9)                          | -17.7<br>(-21.6 to -14.6)                           |
| Foreign body                                                                        | 2,281.4<br>(1,945.5 to 2,619.8)               | 1,042.4<br>(944.5 to 1,164.5)                  | 75.0<br>(47.7 to 110.5)                | -6.9<br>(-10.5 to -3.8)                           | -11.6<br>(-15.0 to -8.4)                            |
| Pulmonary aspiration and foreign body in airway                                     | 1,437.2<br>(1,168.6 to 1,773.4)               | 479.4<br>(435.2 to 535.5)                      | 52.1<br>(33.2 to 77.4)                 | -11.4<br>(-14.5 to -8.5)                          | -16.1<br>(-19.2 to -13.3)                           |
| Foreign body in eyes                                                                | 73.8<br>(46.3 to 104.9)                       | 338.2<br>(264.9 to 437.3)                      | 4.1<br>(2.2 to 6.8)                    | 8.2<br>(4.2 to 12.3)                              | 2.0<br>(-0.9 to 5.2)                                |
| Foreign body in other body part                                                     | 770.3<br>(629.7 to 964.8)                     | 224.7<br>(190.2 to 269.2)                      | 18.8<br>(11.8 to 28.2)                 | 4.6<br>(-0.7 to 9.2)                              | -0.1<br>(-5.2 to 4.3)                               |
| Environmental heat and cold exposure                                                | 3,955.9<br>(3,509.7 to 4,481.5)               | 1,065.7<br>(950.9 to 1,192.5)                  | 136.8<br>(91.2 to 195.6)               | -14.5<br>(-17.1 to -11.9)                         | -20.5<br>(-23.1 to -18.1)                           |
| Other unintentional injuries                                                        | 5,184.5<br>(4,265.2 to 6,198.5)               | 1,474.5<br>(1,298.5 to 1,669.9)                | 141.7<br>(93.0 to 206.9)               | 12.1<br>(9.9 to 14.0)                             | 6.8<br>(4.4 to 9.2)                                 |
| <b>Self-harm and interpersonal violence</b>                                         | <b>5,743.2</b><br><b>(5,266.4 to 6,310.7)</b> | <b>1,503.2†</b><br><b>(1,331.4 to 1,697.6)</b> | <b>146.5</b><br><b>(97.8 to 209.3)</b> | <b>-9.3</b><br><b>(-11.3 to -7.5)</b>             | <b>-12.9</b><br><b>(-14.6 to -11.3)</b>             |
| Self-harm                                                                           | 661.1<br>(552.9 to 774.2)                     | 248.8<br>(218.3 to 284.3)                      | 25.1<br>(16.1 to 36.6)                 | -6.2<br>(-9.7 to -2.6)                            | -11.0<br>(-14.2 to -7.8)                            |
| Self-harm by firearm                                                                | 8.8<br>(7.5 to 10.1)                          | 2.2<br>(1.2 to 3.8)                            | 0.3<br>(0.2 to 0.4)                    | -38.4<br>(-41.6 to -35.4)                         | -39.3<br>(-42.5 to -36.5)                           |
| Self-harm by other specified means                                                  | 652.2<br>(544.7 to 765.5)                     | 246.6<br>(215.8 to 281.7)                      | 24.8<br>(15.9 to 36.2)                 | -5.7<br>(-9.2 to -2.0)                            | -10.5<br>(-13.7 to -7.3)                            |
| Interpersonal violence                                                              | 5,082.2<br>(4,601.7 to 5,663.1)               | 1,254.4†<br>(1,093.5 to 1,441.4)               | 121.4<br>(81.9 to 172.4)               | -9.9<br>(-11.8 to -8.2)                           | -13.2<br>(-14.9 to -11.7)                           |
| Assault by firearm                                                                  | 27.7<br>(24.1 to 32.2)                        | 6.2<br>(4.6 to 8.3)                            | 1.1<br>(0.7 to 1.6)                    | -11.2<br>(-13.8 to -8.9)                          | -14.4<br>(-16.8 to -12.0)                           |
| Assault by sharp object                                                             | 625.2<br>(516.7 to 743.0)                     | 180.8<br>(140.2 to 225.8)                      | 15.8<br>(10.2 to 22.9)                 | -17.8<br>(-20.7 to -15.1)                         | -21.3<br>(-23.8 to -18.8)                           |
| Sexual violence                                                                     | 1,921.2<br>(1,688.9 to 2,192.3)               | --                                             | 15.3<br>(10.3 to 21.7)                 | -9.7<br>(-13.8 to -5.2)                           | -5.1<br>(-8.3 to -1.6)                              |
| Assault by other means                                                              | 2,508.0<br>(2,091.9 to 3,029.8)               | 1,067.4<br>(924.6 to 1,233.8)                  | 89.2<br>(59.3 to 128.5)                | -8.4<br>(-10.4 to -6.6)                           | -13.3<br>(-15.1 to -11.6)                           |
| <b>Forces of nature, conflict and terrorism, and executions and police conflict</b> | <b>484.0</b><br><b>(276.3 to 760.6)</b>       | <b>7.7†</b><br><b>(5.4 to 11.0)</b>            | <b>12.4</b><br><b>(2.9 to 35.3)</b>    | <b>-5.5</b><br><b>(-11.0 to -0.3)</b>             | <b>-13.2</b><br><b>(-18.5 to -8.4)</b>              |
| Exposure to forces of nature                                                        | 92.9<br>(33.4 to 172.6)                       | --                                             | 2.7<br>(0.6 to 7.4)                    | -18.1<br>(-34.2 to -11.0)                         | -25.7<br>(-42.1 to -18.7)                           |
| Conflict and terrorism                                                              | 359.8<br>(187.8 to 601.8)                     | --                                             | 8.9<br>(2.1 to 26.0)                   | -2.0<br>(-7.0 to 4.5)                             | -10.1<br>(-14.7 to -4.1)                            |
| Executions and police conflict                                                      | 31.3<br>(19.7 to 49.8)                        | 7.7<br>(5.4 to 11.0)                           | 0.7<br>(0.2 to 1.8)                    | 10.8<br>(-9.5 to 21.7)                            | 5.4<br>(-13.8 to 14.8)                              |
| <b>Impairments</b>                                                                  | --                                            | --                                             | --                                     | --                                                | --                                                  |
| Anaemia                                                                             | 22,652.5<br>(19,371.4 to 26,061.5)            | --                                             | 494.5<br>(332.9 to 713.4)              | 16.1<br>(2.0 to 33.1)                             | 10.5<br>(-2.8 to 26.3)                              |
| Developmental intellectual disability                                               | 2,488.6<br>(1,934.4 to 3,052.5)               | --                                             | 293.7<br>(210.6 to 397.0)              | -2.6<br>(-7.2 to 2.7)                             | -2.5<br>(-7.2 to 2.6)                               |
| Epilepsy                                                                            | 620.1<br>(353.1 to 910.0)                     | --                                             | 203.1<br>(105.5 to 331.9)              | -1.0<br>(-46.5 to 83.7)                           | -2.2<br>(-46.8 to 78.4)                             |
| Guillain-Barre syndrome                                                             | 1.6<br>(1.2 to 2.0)                           | --                                             | 0.5<br>(0.3 to 0.7)                    | 5.6<br>(1.0 to 11.4)                              | 0.1<br>(0.0 to 0.2)                                 |
| Hearing loss                                                                        | 36,602.5<br>(35,023.9 to 38,221.9)            | --                                             | 1,032.0<br>(725.3 to 1,443.4)          | 7.7<br>(5.3 to 10.2)                              | -3.3<br>(-5.4 to -1.4)                              |
| Heart failure                                                                       | 2,150.7<br>(1,862.6 to 2,489.0)               | --                                             | 196.0<br>(140.9 to 260.5)              | 16.7<br>(7.7 to 26.4)                             | 1.1<br>(-6.2 to 8.4)                                |
| Infertility                                                                         | 2,188.5<br>(1,724.7 to 2,770.1)               | --                                             | 14.4<br>(6.5 to 28.3)                  | 1.4<br>(-5.6 to 8.5)                              | 0.5<br>(-5.6 to 6.8)                                |
| Pelvic inflammatory disease                                                         | 83.1<br>(70.6 to 99.1)                        | --                                             | 10.9<br>(7.2 to 15.5)                  | -5.7<br>(-20.0 to 13.1)                           | -7.7<br>(-21.9 to 10.1)                             |
| Vision loss                                                                         | 26,370.5<br>(25,176.9 to 27,552.1)            | --                                             | 664.9<br>(461.3 to 943.9)              | 3.8<br>(0.2 to 7.5)                               | -5.5<br>(-8.5 to -2.3)                              |

We did not calculate incidence for the nine impairments, certain NTDs, and causes with only birth prevalence. Blank cells mean that no estimate is available.

† Incidence for aggregate causes represents the sum of the incidence of the causes below the aggregate.

‡ Incidence estimates for stroke represent first-ever stroke only.

^ Incidence of HIV/AIDS represents new infections of HIV only and does not include new infections of Tuberculosis in HIV positive cases.

SR Table 14: Prevalence, incidence, and YLDs for 2016, percentage change of YLD counts and percentage change of age-standardised YLD rates between 2006 and 2016 by cause and impairments, for all ages, Rwanda.

| Cause                                                                                | Prevalence in thousands (95% UI)          | Incidence in thousands (95% UI)            | YLDs in thousands (95% UI)           |                                                   |                                                     |
|--------------------------------------------------------------------------------------|-------------------------------------------|--------------------------------------------|--------------------------------------|---------------------------------------------------|-----------------------------------------------------|
|                                                                                      | 2016 counts                               | 2016 counts                                | 2016 counts                          | Percentage change in counts between 2006 and 2016 | Percentage change in age-standardised rates between |
| <b>All causes</b>                                                                    | <b>11,729.7</b><br>(11,686.1 to 11,775.5) | <b>81,645.8†</b><br>(76,828.5 to 87,215.6) | <b>1,032.2</b><br>(764.2 to 1,345.0) | <b>23.2</b><br>(19.0 to 27.4)                     | <b>-5.6</b><br>(-8.2 to -3.1)                       |
| <b>Communicable, maternal, neonatal, and nutritional disorders</b>                   | <b>9,953.7</b><br>(9,751.5 to 10,163.8)   | <b>49,254.3†</b><br>(45,075.9 to 53,890.5) | <b>197.1</b><br>(138.3 to 272.7)     | <b>0.5</b><br>(-8.3 to 8.6)                       | <b>-22.3</b><br>(-32.4 to -15.2)                    |
| <b>HIV/AIDS and tuberculosis</b>                                                     | <b>3,275.8</b><br>(2,883.8 to 3,623.2)    | <b>27.1†</b><br>(21.1 to 34.0)             | <b>21.4</b><br>(15.1 to 29.2)        | <b>-30.7</b><br>(-53.6 to -6.9)                   | <b>-45.5</b><br>(-66.2 to -23.6)                    |
| Tuberculosis                                                                         | 2,926.4<br>(2,573.6 to 3,381.2)           | 24.2†<br>(19.4 to 30.6)                    | 4.1<br>(2.6 to 5.9)                  | 8.4<br>(-10.5 to 30.3)                            | -20.1<br>(-31.1 to -7.8)                            |
| Drug-susceptible tuberculosis                                                        | 12.9<br>(10.2 to 16.3)                    | 23.8<br>(19.1 to 30.1)                     | 4.0<br>(2.5 to 5.7)                  | 8.5<br>(-9.8 to 30.7)                             | -20.1<br>(-31.4 to -7.0)                            |
| Multidrug-resistant tuberculosis without extensive drug resistance                   | 0.2<br>(0.1 to 0.4)                       | 0.4<br>(0.2 to 0.7)                        | 0.1<br>(< 0.05 to 0.1)               | 5.1<br>(-57.7 to 228.6)                           | -22.8<br>(-69.1 to 141.1)                           |
| Extensively drug-resistant tuberculosis                                              | < 0.05<br>(< 0.05 to < 0.05)              | < 0.05<br>(< 0.05 to < 0.05)               | < 0.05<br>(< 0.05 to < 0.05)         | 218.3<br>(27.8 to 899.9)                          | 131.4<br>(-6.9 to 632.8)                            |
| Latent tuberculosis infection                                                        | 2,913.2<br>(2,560.5 to 3,366.0)           | --                                         | --                                   | --                                                | --                                                  |
| HIV/AIDS                                                                             | 195.8<br>(177.0 to 215.7)                 | 2.9^<br>(0.6 to 5.9)                       | 17.3<br>(12.0 to 24.2)               | -36.1<br>(-58.8 to -10.2)                         | -48.9<br>(-69.9 to -24.9)                           |
| Drug-susceptible HIV/AIDS - Tuberculosis                                             | 3.3<br>(2.0 to 5.0)                       | 6.0<br>(3.8 to 9.1)                        | 1.3<br>(0.7 to 2.1)                  | -55.6<br>(-64.6 to -45.3)                         | -62.6<br>(-70.1 to -54.4)                           |
| Multidrug-resistant HIV/AIDS - Tuberculosis without extensive drug resistance        | 0.1<br>(< 0.05 to 0.1)                    | 0.1<br>(0.1 to 0.2)                        | < 0.05<br>(< 0.05 to 0.1)            | -56.6<br>(-82.9 to 30.9)                          | -63.6<br>(-85.6 to 10.0)                            |
| Extensively drug-resistant HIV/AIDS - Tuberculosis                                   | < 0.05<br>(< 0.05 to < 0.05)              | < 0.05<br>(< 0.05 to < 0.05)               | < 0.05<br>(< 0.05 to < 0.05)         | 32.2<br>(-47.8 to 299.0)                          | 10.9<br>(-56.3 to 235.2)                            |
| HIV/AIDS resulting in other diseases                                                 | 192.4<br>(173.8 to 212.5)                 | 2.9<br>(0.6 to 5.9)                        | 16.0<br>(10.8 to 22.6)               | -33.8<br>(-58.8 to -2.6)                          | -47.3<br>(-70.3 to -18.5)                           |
| <b>Diarrhoea, lower respiratory infections, and other common infectious diseases</b> | <b>848.5</b><br>(811.3 to 897.2)          | <b>42,658.0†</b><br>(38,820.4 to 47,001.9) | <b>47.9</b><br>(33.8 to 64.2)        | <b>12.9</b><br>(9.3 to 16.7)                      | <b>-8.8</b><br>(-11.3 to -5.9)                      |
| Diarrhoeal diseases                                                                  | 172.6<br>(162.1 to 184.7)                 | 11,578.6<br>(10,895.5 to 12,398.9)         | 19.6<br>(13.4 to 26.9)               | 3.2<br>(-2.3 to 8.6)                              | -13.2<br>(-17.0 to -9.4)                            |
| Intestinal infectious diseases                                                       | 0.8<br>(0.5 to 1.1)                       | 13.2†<br>(9.3 to 18.2)                     | 0.1<br>(0.1 to 0.2)                  | -19.2<br>(-37.6 to 4.9)                           | -35.9<br>(-47.9 to -20.6)                           |
| Typhoid fever                                                                        | 0.8<br>(0.5 to 1.1)                       | 12.1<br>(8.5 to 16.8)                      | 0.1<br>(0.1 to 0.2)                  | -18.1<br>(-37.5 to 6.0)                           | -35.4<br>(-47.9 to -19.6)                           |
| Paratyphoid fever                                                                    | < 0.05<br>(< 0.05 to 0.1)                 | 1.1<br>(0.7 to 1.6)                        | < 0.05<br>(< 0.05 to < 0.05)         | -10.3<br>(-34.1 to 21.5)                          | -29.4<br>(-46.2 to -7.0)                            |
| Other intestinal infectious diseases                                                 | --                                        | --                                         | < 0.05<br>(< 0.05 to < 0.05)         | -58.6<br>(-71.0 to -40.5)                         | -60.4<br>(-69.9 to -47.7)                           |
| Lower respiratory infections                                                         | 16.8<br>(15.5 to 18.3)                    | 737.0<br>(669.5 to 807.1)                  | 1.0<br>(0.7 to 1.5)                  | 0.0<br>(-12.5 to 13.2)                            | -14.2<br>(-22.4 to -4.9)                            |
| Upper respiratory infections                                                         | 384.8<br>(337.3 to 440.8)                 | 28,903.6<br>(25,162.3 to 33,360.0)         | 9.6<br>(5.6 to 15.2)                 | 28.8<br>(18.5 to 40.2)                            | 1.1<br>(-5.6 to 8.8)                                |
| Otitis media                                                                         | 228.7<br>(203.2 to 254.4)                 | 1,058.1<br>(821.8 to 1,355.4)              | 7.4<br>(4.6 to 11.0)                 | 11.9<br>(3.9 to 20.2)                             | -10.5<br>(-16.4 to -4.2)                            |
| Meningitis                                                                           | 59.3<br>(50.0 to 69.9)                    | 12.7<br>(10.9 to 15.2)                     | 6.5<br>(4.5 to 8.4)                  | 23.1<br>(13.0 to 34.1)                            | -5.2<br>(-12.3 to 2.8)                              |
| Pneumococcal meningitis                                                              | 19.4<br>(16.4 to 23.0)                    | 1.8<br>(1.4 to 2.4)                        | 2.4<br>(1.7 to 3.3)                  | 19.2<br>(0.3 to 39.5)                             | -10.1<br>(-22.9 to 4.8)                             |
| H influenzae type B meningitis                                                       | 9.8<br>(7.8 to 12.5)                      | 1.8<br>(1.2 to 2.5)                        | 1.4<br>(0.9 to 1.8)                  | 23.3<br>(7.0 to 40.2)                             | -2.8<br>(-13.5 to 8.5)                              |
| Meningococcal infection                                                              | 4.2<br>(3.0 to 5.7)                       | 1.3<br>(0.9 to 1.8)                        | 0.5<br>(0.3 to 0.6)                  | 26.6<br>(18.5 to 34.9)                            | -2.3<br>(-9.0 to 4.2)                               |
| Other meningitis                                                                     | 25.9<br>(18.7 to 33.6)                    | 7.9<br>(6.6 to 9.7)                        | 2.2<br>(1.5 to 3.0)                  | 26.7<br>(12.5 to 42.9)                            | -1.3<br>(-10.4 to 9.2)                              |
| Encephalitis                                                                         | 30.4<br>(19.5 to 45.5)                    | 13.3<br>(11.4 to 15.1)                     | 3.3<br>(2.3 to 4.4)                  | 28.8<br>(13.6 to 48.0)                            | -2.8<br>(-12.3 to 10.6)                             |
| Diphtheria                                                                           | < 0.05<br>(< 0.05 to < 0.05)              | < 0.05<br>(< 0.05 to < 0.05)               | < 0.05<br>(< 0.05 to < 0.05)         | -45.3<br>(-78.6 to 52.5)                          | -49.4<br>(-77.1 to 16.0)                            |
| Whooping cough                                                                       | 1.5<br>(1.1 to 1.9)                       | 10.7<br>(8.2 to 13.9)                      | 0.1<br>(< 0.05 to 0.1)               | -40.0<br>(-56.0 to -20.6)                         | -46.3<br>(-60.5 to -28.6)                           |
| Tetanus                                                                              | 0.2<br>(0.2 to 0.2)                       | 0.3<br>(0.1 to 0.5)                        | < 0.05<br>(< 0.05 to < 0.05)         | -40.5<br>(-60.4 to -15.8)                         | -49.9<br>(-64.8 to -28.9)                           |
| Measles                                                                              | 0.1<br>(< 0.05 to 0.3)                    | 4.5<br>(1.5 to 10.0)                       | < 0.05<br>(< 0.05 to < 0.05)         | -67.2<br>(-80.4 to -44.9)                         | -71.3<br>(-82.6 to -52.2)                           |
| Varicella and herpes zoster                                                          | 11.1<br>(10.3 to 11.8)                    | 325.9<br>(306.1 to 346.7)                  | 0.3<br>(0.2 to 0.5)                  | 33.5<br>(14.9 to 54.9)                            | 0.1<br>(-11.2 to 12.9)                              |
| <b>Neglected tropical diseases and malaria</b>                                       | <b>7,136.9</b><br>(6,654.5 to 7,661.8)    | <b>3,200.5†</b><br>(2,080.2 to 4,495.0)    | <b>48.8</b><br>(31.7 to 73.2)        | <b>7.8</b><br>(-2.5 to 17.8)                      | <b>-17.1</b><br>(-25.2 to -8.8)                     |
| Malaria                                                                              | 1,416.0<br>(1,247.5 to 1,615.6)           | 2,864.1<br>(1,727.3 to 4,161.2)            | 18.0<br>(12.8 to 24.6)               | 6.7<br>(-7.1 to 21.9)                             | -14.4<br>(-24.4 to -3.8)                            |
| Chagas disease                                                                       | --                                        | --                                         | --                                   | --                                                | --                                                  |
| Leishmaniasis                                                                        | --                                        | --                                         | --                                   | --                                                | --                                                  |
| Visceral leishmaniasis                                                               | --                                        | --                                         | --                                   | --                                                | --                                                  |
| Cutaneous and mucocutaneous leishmaniasis                                            | --                                        | --                                         | --                                   | --                                                | --                                                  |
| African trypanosomiasis                                                              | --                                        | --                                         | --                                   | --                                                | --                                                  |
| Schistosomiasis                                                                      | 796.6<br>(614.1 to 941.8)                 | 283.2<br>(230.5 to 327.7)                  | 6.2<br>(3.0 to 11.7)                 | -19.4<br>(-24.5 to -13.4)                         | -41.1<br>(-44.4 to -36.9)                           |
| Cysticercosis                                                                        | 3.6<br>(2.1 to 5.2)                       | --                                         | 0.6<br>(0.3 to 1.1)                  | -3.6<br>(-45.3 to 44.0)                           | -28.9<br>(-58.5 to 4.0)                             |
| Cystic echinococcosis                                                                | 11.8<br>(3.0 to 39.0)                     | 2.5<br>(0.6 to 8.3)                        | 1.1<br>(0.2 to 3.7)                  | -39.0<br>(-90.0 to 216.9)                         | -54.4<br>(-91.5 to 111.4)                           |
| Lymphatic filariasis                                                                 | --                                        | --                                         | --                                   | --                                                | --                                                  |
| Onchocerciasis                                                                       | --                                        | --                                         | --                                   | --                                                | --                                                  |
| Trachoma                                                                             | --                                        | --                                         | --                                   | --                                                | --                                                  |
| Dengue                                                                               | 3.0<br>(1.3 to 5.9)                       | 50.4<br>(21.9 to 95.2)                     | 0.5<br>(0.2 to 1.1)                  | 169.9<br>(85.5 to 537.3)                          | 107.1<br>(49.0 to 387.2)                            |
| Yellow fever                                                                         | < 0.05<br>(< 0.05 to < 0.05)              | 0.3<br>(0.1 to 0.8)                        | < 0.05<br>(< 0.05 to < 0.05)         | -42.6<br>(-57.7 to -22.9)                         | -55.7<br>(-65.7 to -43.3)                           |
| Rabies                                                                               | < 0.05<br>(< 0.05 to < 0.05)              | < 0.05<br>(< 0.05 to 0.1)                  | < 0.05<br>(< 0.05 to < 0.05)         | -63.4<br>(-84.4 to -29.2)                         | -69.3<br>(-84.8 to -47.2)                           |
| Intestinal nematode infections                                                       | 6,068.5<br>(5,486.2 to 6,707.2)           | --                                         | 20.2<br>(11.8 to 32.5)               | 30.8<br>(19.3 to 43.5)                            | 1.9<br>(-8.0 to 13.2)                               |
| Ascariasis                                                                           | 2,637.8<br>(2,046.9 to 3,330.8)           | --                                         | 4.6<br>(2.5 to 7.7)                  | 28.8<br>(17.9 to 40.0)                            | 0.1<br>(-9.4 to 10.4)                               |



| Cause                                                                   | Prevalence in thousands (95% UI)                 | Incidence in thousands (95% UI)                   | YLDs in thousands (95% UI)              |                                                   |                                                     |
|-------------------------------------------------------------------------|--------------------------------------------------|---------------------------------------------------|-----------------------------------------|---------------------------------------------------|-----------------------------------------------------|
|                                                                         | 2016 counts<br>(1,437.5 to 2,751.8)              | 2016 counts                                       | 2016 counts                             | Percentage change in counts between 2006 and 2016 | Percentage change in age-standardised rates between |
| Trichuriasis                                                            | 1,938.4<br>(1,437.5 to 2,751.8)                  | --                                                | 1.4<br>(0.8 to 2.4)                     | 28.9<br>(13.6 to 45.0)                            | -0.6<br>(-13.8 to 14.8)                             |
| Hookworm disease                                                        | 3,181.6<br>(2,584.5 to 3,926.2)                  | --                                                | 14.2<br>(8.6 to 22.3)                   | 31.7<br>(16.1 to 50.1)                            | 2.6<br>(-10.5 to 18.5)                              |
| Food-borne trematodiasis                                                | --                                               | --                                                | --                                      | --                                                | --                                                  |
| Leprosy                                                                 | 0.2<br>(0.1 to 0.2)                              | < 0.05<br>(< 0.05 to < 0.05)                      | < 0.05<br>(< 0.05 to < 0.05)            | 71.4<br>(41.0 to 112.1)                           | 15.4<br>(-8.9 to 51.5)                              |
| Ebola virus disease                                                     | --                                               | --                                                | --                                      | --                                                | --                                                  |
| Zika virus disease                                                      | --                                               | --                                                | --                                      | --                                                | --                                                  |
| Guinea worm disease                                                     | --                                               | --                                                | --                                      | --                                                | --                                                  |
| Other neglected tropical diseases                                       | 77.8<br>(72.9 to 82.9)                           | --                                                | 2.1<br>(1.3 to 3.1)                     | -16.6<br>(-26.2 to -6.1)                          | -29.3<br>(-37.1 to -20.5)                           |
| <b>Maternal disorders</b>                                               | <b>47.4</b><br><b>(37.9 to 60.4)</b>             | <b>491.4†</b><br><b>(346.6 to 702.5)</b>          | <b>4.9</b><br><b>(3.2 to 6.9)</b>       | <b>-14.6</b><br><b>(-28.7 to 4.4)</b>             | <b>-40.4</b><br><b>(-50.2 to -27.6)</b>             |
| Maternal haemorrhage                                                    | 5.8<br>(4.2 to 7.8)                              | 33.9<br>(22.1 to 50.8)                            | 0.2<br>(0.1 to 0.3)                     | 9.8<br>(-28.9 to 66.3)                            | -19.3<br>(-46.5 to 22.9)                            |
| Maternal sepsis and other pregnancy related infections                  | 6.0<br>(5.1 to 7.1)                              | 16.8<br>(12.3 to 22.8)                            | 0.1<br>(< 0.05 to 0.2)                  | 7.3<br>(-43.7 to 98.5)                            | -20.3<br>(-55.7 to 40.1)                            |
| Maternal hypertensive disorders                                         | 27.1<br>(18.2 to 36.7)                           | 109.9<br>(98.3 to 117.1)                          | 1.3<br>(0.7 to 2.1)                     | 20.2<br>(-25.7 to 100.8)                          | -14.7<br>(-47.4 to 42.8)                            |
| Maternal obstructed labour and uterine rupture                          | 7.0<br>(5.0 to 9.4)                              | 28.5<br>(19.7 to 40.7)                            | 2.3<br>(1.3 to 3.4)                     | -28.7<br>(-42.6 to -10.5)                         | -49.6<br>(-58.6 to -38.1)                           |
| Maternal abortion, miscarriage, and ectopic pregnancy                   | 2.5<br>(1.2 to 4.5)                              | 302.3<br>(156.7 to 511.0)                         | 0.3<br>(0.1 to 0.5)                     | 5.0<br>(-40.9 to 79.1)                            | -26.4<br>(-57.6 to 25.4)                            |
| Other maternal disorders                                                | --                                               | --                                                | 0.7<br>(0.5 to 1.1)                     | -19.2<br>(-32.5 to -1.2)                          | -43.1<br>(-52.5 to -30.8)                           |
| <b>Neonatal disorders</b>                                               | <b>146.3</b><br><b>(117.2 to 183.6)</b>          | --                                                | <b>24.2</b><br><b>(13.0 to 44.9)</b>    | <b>63.6</b><br><b>(24.1 to 114.4)</b>             | <b>41.2</b><br><b>(4.1 to 89.0)</b>                 |
| Neonatal preterm birth complications                                    | 89.5<br>(67.3 to 123.3)                          | --                                                | 5.6<br>(3.6 to 8.5)                     | 6.3<br>(-16.6 to 36.2)                            | -13.0<br>(-31.6 to 11.1)                            |
| Neonatal encephalopathy due to birth asphyxia and trauma                | 40.8<br>(20.6 to 73.8)                           | --                                                | 4.3<br>(0.8 to 14.5)                    | 96.5<br>(-10.6 to 283.4)                          | 68.3<br>(-28.4 to 244.8)                            |
| Neonatal sepsis and other neonatal infections                           | 29.5<br>(8.7 to 67.1)                            | --                                                | 11.5<br>(2.8 to 29.0)                   | 125.7<br>(45.2 to 271.9)                          | 100.5<br>(26.4 to 242.6)                            |
| Hemolytic disease and other neonatal jaundice                           | 3.0<br>(2.5 to 3.5)                              | --                                                | 1.0<br>(0.8 to 1.3)                     | 27.3<br>(10.6 to 44.9)                            | 1.9<br>(-9.1 to 13.6)                               |
| Other neonatal disorders                                                | --                                               | --                                                | 1.8<br>(1.0 to 3.1)                     | 22.0<br>(-1.7 to 49.5)                            | 9.9<br>(-11.3 to 35.0)                              |
| <b>Nutritional deficiencies</b>                                         | <b>1,512.5</b><br><b>(1,458.1 to 1,566.5)</b>    | <b>189.9†</b><br><b>(160.7 to 226.7)</b>          | <b>39.3</b><br><b>(25.9 to 57.2)</b>    | <b>-18.7</b><br><b>(-24.2 to -13.0)</b>           | <b>-36.2</b><br><b>(-39.9 to -32.5)</b>             |
| Protein-energy malnutrition                                             | 58.3<br>(41.0 to 80.3)                           | 39.8<br>(28.8 to 53.6)                            | 2.5<br>(1.5 to 3.9)                     | -30.5<br>(-50.5 to -5.2)                          | -37.9<br>(-55.7 to -14.9)                           |
| Iodine deficiency                                                       | 265.0<br>(231.9 to 300.9)                        | 9.5<br>(8.3 to 10.8)                              | 6.8<br>(4.5 to 9.7)                     | -19.3<br>(-30.2 to -6.8)                          | -37.9<br>(-45.2 to -30.4)                           |
| Vitamin A deficiency                                                    | 166.6<br>(136.2 to 206.8)                        | 140.6<br>(113.1 to 173.4)                         | 0.4<br>(0.2 to 0.7)                     | 24.5<br>(1.5 to 50.6)                             | -1.8<br>(-18.7 to 17.4)                             |
| Iron-deficiency anaemia                                                 | 1,117.4<br>(1,058.3 to 1,179.0)                  | --                                                | 29.4<br>(18.8 to 43.8)                  | -17.6<br>(-24.0 to -10.8)                         | -35.8<br>(-40.2 to -30.8)                           |
| Other nutritional deficiencies                                          | --                                               | --                                                | 0.1<br>(< 0.05 to 0.1)                  | -31.2<br>(-52.0 to -5.0)                          | -38.7<br>(-57.3 to -15.0)                           |
| <b>Other communicable, maternal, neonatal, and nutritional diseases</b> | <b>3,655.8</b><br><b>(3,433.8 to 3,901.8)</b>    | <b>2,687.4</b><br><b>(2,150.1 to 3,373.4)</b>     | <b>10.6</b><br><b>(6.4 to 17.0)</b>     | <b>21.9</b><br><b>(12.8 to 31.8)</b>              | <b>-6.0</b><br><b>(-11.9 to -0.2)</b>               |
| Sexually transmitted diseases excluding HIV                             | 2,853.6<br>(2,638.8 to 3,086.5)                  | 2,025.0<br>(1,567.5 to 2,620.0)                   | 8.2<br>(4.7 to 13.8)                    | 36.4<br>(25.6 to 48.4)                            | -0.7<br>(-7.0 to 6.4)                               |
| Syphilis                                                                | 160.3<br>(131.0 to 196.6)                        | 112.2<br>(88.9 to 141.3)                          | 0.4<br>(0.2 to 0.5)                     | 34.0<br>(15.6 to 56.3)                            | -5.3<br>(-18.8 to 11.3)                             |
| Chlamydial infection                                                    | 148.5<br>(111.6 to 191.5)                        | 146.9<br>(118.3 to 179.9)                         | 1.1<br>(0.7 to 1.8)                     | 33.1<br>(15.8 to 53.4)                            | -0.6<br>(-12.9 to 14.0)                             |
| Gonococcal infection                                                    | 245.4<br>(129.9 to 405.1)                        | 890.7<br>(457.2 to 1,488.0)                       | 2.8<br>(1.2 to 5.9)                     | 40.1<br>(20.8 to 66.4)                            | 1.8<br>(-9.9 to 16.2)                               |
| Trichomoniasis                                                          | 563.1<br>(458.0 to 684.2)                        | 532.4<br>(421.1 to 672.2)                         | 0.8<br>(0.3 to 1.7)                     | 29.8<br>(20.0 to 40.3)                            | -1.7<br>(-7.6 to 4.6)                               |
| Genital herpes                                                          | 2,146.6<br>(1,843.7 to 2,527.7)                  | 222.4<br>(186.5 to 269.6)                         | 0.6<br>(0.2 to 1.3)                     | 33.3<br>(19.7 to 45.7)                            | -2.3<br>(-10.1 to 5.7)                              |
| Other sexually transmitted diseases                                     | 41.5<br>(33.2 to 53.0)                           | 120.6<br>(99.9 to 146.9)                          | 2.5<br>(1.6 to 4.1)                     | 37.1<br>(23.3 to 52.3)                            | -1.5<br>(-10.8 to 8.4)                              |
| Hepatitis                                                               | 1,055.0<br>(869.7 to 1,273.2)                    | 662.3<br>(398.4 to 1,108.0)                       | 0.6<br>(0.4 to 1.0)                     | -23.2<br>(-42.5 to 3.0)                           | -30.7<br>(-43.1 to -15.1)                           |
| Acute hepatitis A                                                       | 18.3<br>(1.8 to 52.6)                            | 237.8<br>(23.9 to 683.2)                          | 0.1<br>(< 0.05 to 0.2)                  | -31.4<br>(-83.3 to 244.0)                         | -35.1<br>(-77.5 to 114.3)                           |
| Hepatitis B                                                             | 819.3<br>(638.4 to 1,030.2)                      | 380.6<br>(288.0 to 497.8)                         | 0.5<br>(0.3 to 0.8)                     | -21.9<br>(-37.1 to -2.8)                          | -30.6<br>(-42.2 to -16.7)                           |
| Hepatitis C                                                             | 215.6<br>(189.6 to 243.4)                        | 20.4<br>(18.6 to 22.4)                            | < 0.05<br>(< 0.05 to < 0.05)            | 4.9<br>(-9.6 to 22.0)                             | -13.8<br>(-21.2 to -5.9)                            |
| Acute hepatitis E                                                       | 1.8<br>(1.5 to 2.3)                              | 23.6<br>(19.3 to 30.0)                            | < 0.05<br>(< 0.05 to 0.1)               | -22.2<br>(-41.6 to 7.3)                           | -27.8<br>(-42.9 to -10.3)                           |
| Other infectious diseases                                               | 54.1<br>(50.9 to 57.7)                           | < 0.05<br>(< 0.05 to < 0.05)                      | 1.8<br>(1.1 to 2.6)                     | -4.8<br>(-13.9 to 6.9)                            | -19.7<br>(-26.4 to -10.9)                           |
| <b>Non-communicable diseases</b>                                        | <b>10,520.7</b><br><b>(10,386.6 to 10,659.6)</b> | <b>31,581.9†</b><br><b>(29,002.1 to 34,216.1)</b> | <b>740.3</b><br><b>(545.9 to 968.7)</b> | <b>33.7</b><br><b>(28.1 to 39.1)</b>              | <b>-0.3</b><br><b>(-3.3 to 2.5)</b>                 |
| <b>Neoplasms</b>                                                        | <b>16.9</b><br><b>(15.5 to 18.6)</b>             | <b>7.0</b><br><b>(5.5 to 8.6)</b>                 | <b>2.4</b><br><b>(1.5 to 3.4)</b>       | <b>40.0</b><br><b>(29.9 to 50.8)</b>              | <b>0.3</b><br><b>(-6.5 to 7.1)</b>                  |
| Lip and oral cavity cancer                                              | 0.5<br>(0.4 to 0.6)                              | 0.2<br>(0.1 to 0.2)                               | 0.1<br>(< 0.05 to 0.1)                  | 48.8<br>(29.2 to 70.7)                            | 3.1<br>(-10.9 to 19.2)                              |
| Nasopharynx cancer                                                      | 0.2<br>(0.2 to 0.4)                              | 0.1<br>(0.1 to 0.1)                               | < 0.05<br>(< 0.05 to 0.1)               | 38.0<br>(13.7 to 64.9)                            | -5.1<br>(-20.1 to 11.5)                             |
| Other pharynx cancer                                                    | 0.1<br>(0.1 to 0.2)                              | 0.1<br>(< 0.05 to 0.1)                            | < 0.05<br>(< 0.05 to < 0.05)            | 37.8<br>(14.2 to 56.8)                            | -4.7<br>(-20.0 to 8.2)                              |
| Oesophageal cancer                                                      | 0.3<br>(0.2 to 0.3)                              | 0.3<br>(0.2 to 0.3)                               | 0.1<br>(< 0.05 to 0.1)                  | 27.2<br>(6.5 to 50.7)                             | -9.5<br>(-25.0 to 9.6)                              |
| Stomach cancer                                                          | 0.3<br>(0.3 to 0.4)                              | 0.2<br>(0.2 to 0.2)                               | 0.1<br>(< 0.05 to 0.1)                  | 10.3<br>(-2.6 to 25.1)                            | -21.3<br>(-31.1 to -9.6)                            |
| Colon and rectum cancer                                                 | 0.9<br>(0.7 to 1.1)                              | 0.3<br>(0.3 to 0.4)                               | 0.1<br>(0.1 to 0.2)                     | 47.5<br>(21.2 to 73.7)                            | 5.6<br>(-14.3 to 25.2)                              |
| Liver cancer                                                            | 0.2<br>(0.1 to 0.2)                              | 0.4<br>(0.3 to 0.5)                               | 0.1<br>(0.1 to 0.1)                     | 44.0<br>(25.0 to 62.6)                            | 0.9<br>(-11.9 to 14.5)                              |
| Liver cancer due to hepatitis B                                         | 0.1<br>(0.1 to 0.1)                              | 0.1<br>(0.1 to 0.1)                               | < 0.05<br>(< 0.05 to < 0.05)            | 45.4<br>(24.6 to 66.0)                            | 0.9<br>(-12.6 to 14.8)                              |



| Cause                                              | Prevalence in thousands (95% UI)            | Incidence in thousands (95% UI)          | YLDs in thousands (95% UI)           |                                                   |                                                     |
|----------------------------------------------------|---------------------------------------------|------------------------------------------|--------------------------------------|---------------------------------------------------|-----------------------------------------------------|
|                                                    | 2016 counts                                 | 2016 counts                              | 2016 counts                          | Percentage change in counts between 2006 and 2016 | Percentage change in age-standardised rates between |
| Liver cancer due to hepatitis C                    | 0.1<br>(0.1 to 0.2)                         | 0.1<br>(0.1 to 0.2)                      | < 0.05<br>(< 0.05 to < 0.05)         | 45.1<br>(23.1 to 67.9)                            | 1.9<br>(-12.6 to 17.7)                              |
| Liver cancer due to alcohol use                    | 0.1<br>(< 0.05 to 0.1)                      | 0.1<br>(0.1 to 0.1)                      | < 0.05<br>(< 0.05 to < 0.05)         | 42.6<br>(22.1 to 63.3)                            | -0.6<br>(-13.9 to 14.2)                             |
| Liver cancer due to other causes                   | 0.1<br>(< 0.05 to 0.1)                      | 0.1<br>(0.1 to 0.1)                      | < 0.05<br>(< 0.05 to < 0.05)         | 41.5<br>(23.3 to 60.0)                            | 0.8<br>(-12.2 to 13.7)                              |
| Gallbladder and biliary tract cancer               | < 0.05<br>(< 0.05 to < 0.05)                | < 0.05<br>(< 0.05 to < 0.05)             | < 0.05<br>(< 0.05 to < 0.05)         | 30.3<br>(17.2 to 43.7)                            | -10.6<br>(-19.0 to -1.6)                            |
| Pancreatic cancer                                  | 0.1<br>(0.1 to 0.1)                         | 0.1<br>(0.1 to 0.2)                      | < 0.05<br>(< 0.05 to < 0.05)         | 54.9<br>(42.0 to 68.3)                            | 8.1<br>(-0.8 to 18.3)                               |
| Larynx cancer                                      | 0.1<br>(0.1 to 0.2)                         | < 0.05<br>(< 0.05 to 0.1)                | < 0.05<br>(< 0.05 to < 0.05)         | 34.9<br>(16.2 to 59.4)                            | -8.1<br>(-20.9 to 7.9)                              |
| Tracheal, bronchus, and lung cancer                | 0.2<br>(0.2 to 0.3)                         | 0.2<br>(0.2 to 0.2)                      | 0.1<br>(< 0.05 to 0.1)               | 56.9<br>(31.2 to 84.4)                            | 10.0<br>(-10.1 to 33.0)                             |
| Malignant skin melanoma                            | 0.2<br>(0.2 to 0.3)                         | 0.1<br>(< 0.05 to 0.1)                   | < 0.05<br>(< 0.05 to < 0.05)         | 56.9<br>(27.6 to 90.5)                            | 8.9<br>(-10.8 to 32.1)                              |
| Non-melanoma skin cancer                           | < 0.05<br>(< 0.05 to 0.1)                   | 0.3<br>(0.2 to 0.5)                      | < 0.05<br>(< 0.05 to < 0.05)         | 50.6<br>(23.6 to 85.8)                            | 4.5<br>(-17.2 to 33.4)                              |
| Non-melanoma skin cancer (squamous-cell carcinoma) | < 0.05<br>(< 0.05 to < 0.05)                | 0.1<br>(0.1 to 0.1)                      | < 0.05<br>(< 0.05 to < 0.05)         | 50.3<br>(16.8 to 94.1)                            | 4.3<br>(-21.5 to 37.9)                              |
| Non-melanoma skin cancer (basal-cell carcinoma)    | < 0.05<br>(< 0.05 to 0.1)                   | 0.2<br>(0.1 to 0.4)                      | < 0.05<br>(< 0.05 to < 0.05)         | 52.0<br>(35.2 to 73.1)                            | 5.4<br>(-5.9 to 16.8)                               |
| Breast cancer                                      | 2.5<br>(1.7 to 3.7)                         | 0.6<br>(0.4 to 0.9)                      | 0.3<br>(0.2 to 0.5)                  | 64.0<br>(17.4 to 116.6)                           | 15.0<br>(-17.5 to 52.2)                             |
| Cervical cancer                                    | 4.4<br>(2.5 to 7.2)                         | 1.2<br>(0.7 to 2.0)                      | 0.4<br>(0.2 to 0.8)                  | 26.6<br>(-1.8 to 58.9)                            | -10.3<br>(-29.5 to 11.0)                            |
| Uterine cancer                                     | 0.4<br>(0.3 to 0.6)                         | 0.1<br>(0.1 to 0.1)                      | < 0.05<br>(< 0.05 to 0.1)            | 45.3<br>(15.1 to 86.7)                            | 1.0<br>(-19.4 to 29.1)                              |
| Ovarian cancer                                     | 0.8<br>(0.6 to 1.0)                         | 0.3<br>(0.2 to 0.4)                      | 0.1<br>(0.1 to 0.2)                  | 78.1<br>(27.3 to 140.9)                           | 26.2<br>(-10.7 to 74.3)                             |
| Prostate cancer                                    | 1.9<br>(0.7 to 2.7)                         | 0.6<br>(0.2 to 0.8)                      | 0.3<br>(0.1 to 0.4)                  | 44.7<br>(6.6 to 77.2)                             | 1.8<br>(-22.3 to 22.1)                              |
| Testicular cancer                                  | < 0.05<br>(< 0.05 to < 0.05)                | < 0.05<br>(< 0.05 to < 0.05)             | < 0.05<br>(< 0.05 to < 0.05)         | 16.5<br>(-7.3 to 47.4)                            | -16.9<br>(-35.0 to 6.3)                             |
| Kidney cancer                                      | 0.5<br>(0.3 to 0.7)                         | 0.1<br>(0.1 to 0.2)                      | < 0.05<br>(< 0.05 to 0.1)            | 43.5<br>(-5.4 to 112.0)                           | 17.0<br>(-2.8 to 41.5)                              |
| Bladder cancer                                     | 0.4<br>(0.3 to 0.4)                         | 0.1<br>(0.1 to 0.1)                      | < 0.05<br>(< 0.05 to 0.1)            | 48.3<br>(26.3 to 69.2)                            | 3.9<br>(-11.2 to 17.9)                              |
| Brain and nervous system cancer                    | 0.3<br>(0.3 to 0.4)                         | 0.1<br>(0.1 to 0.2)                      | < 0.05<br>(< 0.05 to 0.1)            | 42.4<br>(27.0 to 62.4)                            | 9.0<br>(-5.7 to 32.8)                               |
| Thyroid cancer                                     | 0.4<br>(0.2 to 0.5)                         | 0.1<br>(< 0.05 to 0.1)                   | < 0.05<br>(< 0.05 to < 0.05)         | 42.3<br>(12.0 to 79.4)                            | -2.3<br>(-22.2 to 22.7)                             |
| Mesothelioma                                       | < 0.05<br>(< 0.05 to < 0.05)                | < 0.05<br>(< 0.05 to < 0.05)             | < 0.05<br>(< 0.05 to < 0.05)         | 33.2<br>(14.2 to 51.0)                            | -5.6<br>(-19.6 to 7.9)                              |
| Hodgkin lymphoma                                   | 0.1<br>(0.1 to 0.2)                         | 0.1<br>(< 0.05 to 0.1)                   | < 0.05<br>(< 0.05 to < 0.05)         | 7.5<br>(-9.2 to 31.6)                             | -19.3<br>(-28.8 to -7.0)                            |
| Non-Hodgkin's lymphoma                             | 1.4<br>(0.9 to 1.9)                         | 0.5<br>(0.3 to 0.6)                      | 0.1<br>(0.1 to 0.2)                  | 33.6<br>(8.0 to 61.4)                             | 1.4<br>(-11.3 to 14.0)                              |
| Multiple myeloma                                   | 0.1<br>(0.1 to 0.2)                         | 0.1<br>(< 0.05 to 0.1)                   | < 0.05<br>(< 0.05 to 0.1)            | 59.6<br>(41.7 to 81.6)                            | 9.1<br>(-3.2 to 25.3)                               |
| Leukaemia                                          | 0.5<br>(0.4 to 0.6)                         | 0.1<br>(0.1 to 0.2)                      | 0.1<br>(< 0.05 to 0.1)               | 18.0<br>(5.2 to 32.0)                             | -10.8<br>(-17.8 to -3.0)                            |
| Acute lymphoid leukaemia                           | 0.2<br>(0.1 to 0.2)                         | < 0.05<br>(< 0.05 to 0.1)                | < 0.05<br>(< 0.05 to < 0.05)         | 20.5<br>(-5.3 to 47.6)                            | -5.7<br>(-19.4 to 7.5)                              |
| Chronic lymphoid leukaemia                         | 0.1<br>(< 0.05 to 0.1)                      | < 0.05<br>(< 0.05 to < 0.05)             | < 0.05<br>(< 0.05 to < 0.05)         | 45.2<br>(25.1 to 69.3)                            | -2.6<br>(-17.3 to 14.8)                             |
| Acute myeloid leukaemia                            | 0.1<br>(< 0.05 to 0.1)                      | < 0.05<br>(< 0.05 to < 0.05)             | < 0.05<br>(< 0.05 to < 0.05)         | 35.3<br>(16.0 to 60.2)                            | 5.0<br>(-7.4 to 17.2)                               |
| Chronic myeloid leukaemia                          | 0.1<br>(< 0.05 to 0.1)                      | < 0.05<br>(< 0.05 to < 0.05)             | < 0.05<br>(< 0.05 to < 0.05)         | 21.0<br>(-0.4 to 48.6)                            | -13.3<br>(-27.1 to 4.4)                             |
| Other leukaemia                                    | 0.2<br>(0.1 to 0.2)                         | < 0.05<br>(< 0.05 to 0.1)                | < 0.05<br>(< 0.05 to < 0.05)         | 2.1<br>(-14.5 to 20.3)                            | -20.1<br>(-31.1 to -8.6)                            |
| Other neoplasms                                    | 1.9<br>(1.5 to 2.2)                         | 0.7<br>(0.5 to 0.8)                      | 0.2<br>(0.1 to 0.3)                  | 31.7<br>(14.2 to 50.4)                            | -4.4<br>(-15.8 to 10.2)                             |
| <b>Cardiovascular diseases</b>                     | <b>481.1</b><br><b>(442.8 to 520.6)</b>     | <b>36.2†</b><br><b>(34.6 to 38.0)</b>    | <b>26.0</b><br><b>(18.2 to 35.8)</b> | <b>40.6</b><br><b>(33.8 to 47.7)</b>              | <b>2.6</b><br><b>(-1.6 to 7.2)</b>                  |
| Rheumatic heart disease                            | 141.0<br>(123.5 to 159.1)                   | 6.0<br>(5.2 to 6.8)                      | 6.7<br>(4.2 to 9.8)                  | 49.1<br>(36.3 to 62.7)                            | 10.3<br>(1.3 to 19.7)                               |
| Ischaemic heart disease                            | 82.5<br>(76.7 to 88.3)                      | 12.0<br>(11.1 to 12.8)                   | 3.9<br>(2.6 to 5.5)                  | 44.6<br>(35.7 to 53.2)                            | 2.3<br>(-2.5 to 7.1)                                |
| Cerebrovascular disease                            | 25.8<br>(23.9 to 27.5)                      | 5.0†<br>(4.6 to 5.5)                     | 3.8<br>(2.7 to 4.8)                  | 42.0<br>(30.3 to 54.6)                            | 0.3<br>(-7.6 to 9.3)                                |
| Ischaemic stroke                                   | 22.9<br>(20.5 to 25.5)                      | 3.4†<br>(3.0 to 3.8)                     | 3.1<br>(2.2 to 4.0)                  | 44.4<br>(30.3 to 59.7)                            | 1.7<br>(-7.5 to 12.2)                               |
| Hemorrhagic stroke                                 | 4.3<br>(3.8 to 4.9)                         | 1.7†<br>(1.5 to 1.9)                     | 0.6<br>(0.4 to 0.8)                  | 30.7<br>(13.9 to 48.6)                            | -6.3<br>(-19.4 to 8.0)                              |
| Hypertensive heart disease                         | 8.1<br>(6.4 to 10.1)                        | --                                       | 0.7<br>(0.4 to 0.9)                  | 39.6<br>(24.1 to 58.1)                            | -1.0<br>(-11.0 to 10.4)                             |
| Cardiomyopathy and myocarditis                     | 5.2<br>(4.1 to 6.4)                         | 2.5†<br>(2.2 to 2.8)                     | 0.5<br>(0.3 to 0.8)                  | 42.1<br>(26.3 to 58.8)                            | 1.1<br>(-11.6 to 15.5)                              |
| Myocarditis                                        | 1.4<br>(1.2 to 1.7)                         | 2.5<br>(2.2 to 2.8)                      | 0.1<br>(0.1 to 0.1)                  | 36.6<br>(28.0 to 44.9)                            | 1.4<br>(-6.7 to 9.7)                                |
| Alcoholic cardiomyopathy                           | 0.7<br>(0.5 to 1.1)                         | --                                       | 0.1<br>(< 0.05 to 0.1)               | 47.2<br>(11.7 to 94.1)                            | 0.5<br>(-24.7 to 32.9)                              |
| Other cardiomyopathy                               | 4.1<br>(3.0 to 5.5)                         | --                                       | 0.3<br>(0.2 to 0.5)                  | 42.9<br>(22.4 to 64.7)                            | 1.1<br>(-13.8 to 18.2)                              |
| Atrial fibrillation and flutter                    | 19.6<br>(17.1 to 22.2)                      | 1.7<br>(1.4 to 2.0)                      | 1.6<br>(1.0 to 2.1)                  | 39.8<br>(27.6 to 52.5)                            | 0.0<br>(-7.1 to 7.1)                                |
| Peripheral vascular disease                        | 75.6<br>(65.7 to 87.5)                      | 7.5<br>(6.5 to 8.9)                      | 0.4<br>(0.2 to 0.7)                  | 38.5<br>(27.7 to 51.9)                            | -2.2<br>(-9.4 to 6.0)                               |
| Endocarditis                                       | 0.5<br>(0.4 to 0.6)                         | 1.5<br>(1.4 to 1.7)                      | < 0.05<br>(< 0.05 to 0.1)            | 33.9<br>(21.0 to 48.3)                            | 0.7<br>(-14.3 to 16.5)                              |
| Other cardiovascular and circulatory diseases      | 158.7<br>(110.1 to 213.2)                   | --                                       | 8.5<br>(4.9 to 13.0)                 | 32.6<br>(18.9 to 49.8)                            | 2.3<br>(-9.2 to 16.0)                               |
| <b>Chronic respiratory diseases</b>                | <b>1,030.5</b><br><b>(967.3 to 1,096.9)</b> | <b>198.4†</b><br><b>(181.4 to 217.4)</b> | <b>46.2</b><br><b>(32.8 to 63.7)</b> | <b>32.6</b><br><b>(25.4 to 40.0)</b>              | <b>1.8</b><br><b>(-2.8 to 5.9)</b>                  |
| Chronic obstructive pulmonary disease              | 106.9<br>(102.3 to 111.6)                   | 7.9<br>(7.5 to 8.2)                      | 8.4<br>(7.3 to 9.4)                  | 42.5<br>(31.8 to 54.3)                            | 1.8<br>(-4.4 to 8.9)                                |
| Pneumoconiosis                                     | 0.1<br>(0.1 to 0.1)                         | < 0.05<br>(< 0.05 to < 0.05)             | < 0.05<br>(< 0.05 to < 0.05)         | 40.8<br>(33.8 to 48.6)                            | -2.3<br>(-7.2 to 3.2)                               |
| Silicosis                                          | < 0.05<br>(< 0.05 to < 0.05)                | < 0.05<br>(< 0.05 to < 0.05)             | < 0.05<br>(< 0.05 to < 0.05)         | 42.1<br>(29.3 to 55.3)                            | -0.9<br>(-7.9 to 5.7)                               |

| Cause                                                          | Prevalence in thousands (95% UI)              | Incidence in thousands (95% UI)               | YLDs in thousands (95% UI)              |                                                   |                                                     |
|----------------------------------------------------------------|-----------------------------------------------|-----------------------------------------------|-----------------------------------------|---------------------------------------------------|-----------------------------------------------------|
|                                                                | 2016 counts                                   | 2016 counts                                   | 2016 counts                             | Percentage change in counts between 2006 and 2016 | Percentage change in age-standardised rates between |
| Asbestosis                                                     | < 0.05<br>(< 0.05 to 0.1)                     | < 0.05<br>(< 0.05 to < 0.05)                  | < 0.05<br>(< 0.05 to < 0.05)            | 42.1<br>(31.5 to 53.9)                            | -0.6<br>(-6.7 to 5.6)                               |
| Coal workers pneumoconiosis                                    | --                                            | --                                            | --                                      | --                                                | --                                                  |
| Other pneumoconiosis                                           | 0.1<br>(< 0.05 to 0.1)                        | < 0.05<br>(< 0.05 to < 0.05)                  | < 0.05<br>(< 0.05 to < 0.05)            | 39.6<br>(29.2 to 51.4)                            | -3.6<br>(-11.8 to 5.3)                              |
| Asthma                                                         | 924.9<br>(844.3 to 1,012.1)                   | 190.4<br>(173.4 to 209.6)                     | 36.6<br>(23.7 to 53.6)                  | 29.5<br>(21.1 to 37.4)                            | 1.1<br>(-4.5 to 6.3)                                |
| Interstitial lung disease and pulmonary sarcoidosis            | 0.8<br>(0.7 to 0.9)                           | 0.1<br>(0.1 to 0.1)                           | 0.1<br>(0.1 to 0.1)                     | 37.3<br>(32.8 to 41.7)                            | 0.7<br>(-4.1 to 5.6)                                |
| Other chronic respiratory diseases                             | --                                            | --                                            | 1.1<br>(0.8 to 1.4)                     | 75.6<br>(33.2 to 132.7)                           | 33.6<br>(8.8 to 64.4)                               |
| <b>Cirrhosis and other chronic liver diseases</b>              | <b>24.2</b><br><b>(22.8 to 25.4)</b>          | <b>2.2</b><br><b>(2.1 to 2.3)</b>             | <b>1.9</b><br><b>(1.3 to 2.8)</b>       | <b>31.1</b><br><b>(15.9 to 48.5)</b>              | <b>-0.7</b><br><b>(-9.0 to 9.1)</b>                 |
| Cirrhosis and other chronic liver diseases due to hepatitis B  | 3.9<br>(3.2 to 4.6)                           | 0.4<br>(0.3 to 0.4)                           | 0.2<br>(0.1 to 0.4)                     | 39.0<br>(8.9 to 76.8)                             | -0.6<br>(-18.6 to 22.0)                             |
| Cirrhosis and other chronic liver diseases due to hepatitis C  | 8.5<br>(7.6 to 9.4)                           | 0.8<br>(0.7 to 0.9)                           | 0.5<br>(0.3 to 0.8)                     | 40.1<br>(15.8 to 70.4)                            | 0.1<br>(-14.5 to 15.6)                              |
| Cirrhosis and other chronic liver diseases due to alcohol use  | 3.8<br>(3.4 to 4.3)                           | 0.4<br>(0.4 to 0.5)                           | 0.2<br>(0.1 to 0.3)                     | 39.2<br>(14.7 to 71.3)                            | -2.3<br>(-17.9 to 18.2)                             |
| Cirrhosis and other chronic liver diseases due to other causes | 7.9<br>(7.3 to 8.6)                           | 0.6<br>(0.6 to 0.7)                           | 0.9<br>(0.6 to 1.4)                     | 23.0<br>(-1.4 to 53.7)                            | -0.8<br>(-17.5 to 20.7)                             |
| <b>Digestive diseases</b>                                      | <b>178.9</b><br><b>(166.7 to 192.8)</b>       | <b>148.5†</b><br><b>(140.5 to 157.0)</b>      | <b>5.8</b><br><b>(4.1 to 7.9)</b>       | <b>27.8</b><br><b>(16.6 to 39.7)</b>              | <b>-4.2</b><br><b>(-10.2 to 1.9)</b>                |
| Peptic ulcer disease                                           | 27.1<br>(24.5 to 29.7)                        | 12.4<br>(11.1 to 13.9)                        | 0.6<br>(0.4 to 0.9)                     | 59.9<br>(40.5 to 80.0)                            | 7.5<br>(-2.9 to 17.8)                               |
| Gastritis and duodenitis                                       | 70.3<br>(61.7 to 79.7)                        | 53.9<br>(48.3 to 60.2)                        | 1.0<br>(0.7 to 1.5)                     | 69.0<br>(50.9 to 89.2)                            | 18.3<br>(8.6 to 29.1)                               |
| Appendicitis                                                   | 1.0<br>(0.9 to 1.0)                           | 25.2<br>(23.1 to 27.4)                        | 0.3<br>(0.2 to 0.4)                     | 24.1<br>(-8.3 to 71.3)                            | -4.3<br>(-24.2 to 20.3)                             |
| Paralytic ileus and intestinal obstruction                     | 0.2<br>(0.2 to 0.3)                           | 6.9<br>(6.2 to 7.6)                           | 0.1<br>(< 0.05 to 0.1)                  | 33.4<br>(25.7 to 41.4)                            | -0.7<br>(-11.9 to 11.8)                             |
| Inguinal, femoral, and abdominal hernia                        | 78.4<br>(65.0 to 94.4)                        | 15.1<br>(13.4 to 17.1)                        | 3.0<br>(2.0 to 4.2)                     | 13.2<br>(-0.1 to 30.3)                            | -14.9<br>(-23.0 to -6.0)                            |
| Inflammatory bowel disease                                     | 0.6<br>(0.6 to 0.7)                           | 4.1<br>(3.9 to 4.3)                           | 0.1<br>(0.1 to 0.1)                     | 46.4<br>(41.3 to 51.8)                            | 10.6<br>(7.0 to 14.0)                               |
| Vascular intestinal disorders                                  | 0.1<br>(< 0.05 to 0.1)                        | 0.4<br>(0.3 to 0.4)                           | < 0.05<br>(< 0.05 to < 0.05)            | 33.1<br>(25.0 to 40.7)                            | 3.4<br>(-0.6 to 7.7)                                |
| Gallbladder and biliary diseases                               | 6.4<br>(5.6 to 7.2)                           | 29.1<br>(25.1 to 33.3)                        | 0.2<br>(0.1 to 0.2)                     | 39.4<br>(19.7 to 61.7)                            | -1.2<br>(-18.7 to 19.0)                             |
| Pancreatitis                                                   | 0.1<br>(0.1 to 0.2)                           | 1.4<br>(1.2 to 1.6)                           | < 0.05<br>(< 0.05 to < 0.05)            | 41.2<br>(35.6 to 47.8)                            | 3.5<br>(0.5 to 7.0)                                 |
| Other digestive diseases                                       | --                                            | --                                            | 0.5<br>(0.4 to 0.7)                     | 25.2<br>(11.4 to 41.0)                            | -1.9<br>(-8.8 to 4.7)                               |
| <b>Neurological disorders</b>                                  | <b>3,413.6</b><br><b>(3,241.0 to 3,604.5)</b> | <b>1,598.2</b><br><b>(1,359.9 to 1,871.7)</b> | <b>84.8</b><br><b>(54.1 to 122.9)</b>   | <b>33.0</b><br><b>(-7.3 to 84.8)</b>              | <b>0.3</b><br><b>(-24.1 to 30.1)</b>                |
| Alzheimer's disease and other dementias                        | 15.5<br>(13.2 to 18.3)                        | 2.7<br>(2.3 to 3.2)                           | 2.2<br>(1.5 to 3.0)                     | 32.7<br>(24.9 to 40.6)                            | 0.2<br>(-4.7 to 5.7)                                |
| Parkinson's disease                                            | 1.4<br>(1.1 to 1.7)                           | 0.2<br>(0.1 to 0.2)                           | 0.2<br>(0.1 to 0.2)                     | 49.6<br>(28.2 to 75.8)                            | 9.6<br>(-5.6 to 26.4)                               |
| Epilepsy                                                       | 51.1<br>(12.6 to 87.9)                        | 7.3<br>(1.8 to 12.6)                          | 19.0<br>(4.4 to 37.7)                   | 26.0<br>(-74.1 to 545.8)                          | -1.0<br>(-79.8 to 409.9)                            |
| Multiple sclerosis                                             | 0.3<br>(0.3 to 0.4)                           | < 0.05<br>(< 0.05 to < 0.05)                  | 0.1<br>(0.1 to 0.1)                     | 60.6<br>(54.8 to 67.0)                            | 14.5<br>(10.4 to 18.8)                              |
| Motor neuron disease                                           | 0.1<br>(0.1 to 0.1)                           | < 0.05<br>(< 0.05 to < 0.05)                  | < 0.05<br>(< 0.05 to < 0.05)            | 38.3<br>(32.4 to 44.8)                            | 4.3<br>(0.9 to 8.0)                                 |
| Migraine                                                       | 1,172.5<br>(1,096.2 to 1,251.2)               | 150.9<br>(141.8 to 160.9)                     | 50.3<br>(32.0 to 71.0)                  | 34.2<br>(28.4 to 40.6)                            | -0.1<br>(-4.0 to 3.6)                               |
| Tension-type headache                                          | 2,565.1<br>(2,258.7 to 2,912.3)               | 1,437.0<br>(1,198.4 to 1,713.6)               | 8.4<br>(5.2 to 12.7)                    | 33.5<br>(25.9 to 42.8)                            | -0.9<br>(-5.8 to 5.2)                               |
| Other neurological disorders                                   | < 0.05<br>(< 0.05 to < 0.05)                  | 0.1<br>(< 0.05 to 0.1)                        | 4.5<br>(1.1 to 8.8)                     | 52.3<br>(-66.5 to 637.1)                          | 18.9<br>(-71.2 to 405.9)                            |
| <b>Mental and substance use disorders</b>                      | <b>1,804.4</b><br><b>(1,717.4 to 1,887.0)</b> | <b>696.3†</b><br><b>(643.3 to 760.3)</b>      | <b>217.2</b><br><b>(157.4 to 285.6)</b> | <b>31.7</b><br><b>(28.1 to 35.4)</b>              | <b>-1.3</b><br><b>(-3.8 to 1.2)</b>                 |
| Schizophrenia                                                  | 16.0<br>(13.8 to 18.2)                        | 1.5<br>(1.3 to 1.7)                           | 10.3<br>(7.5 to 13.0)                   | 46.4<br>(31.8 to 63.1)                            | 3.0<br>(-6.2 to 13.6)                               |
| Alcohol use disorders                                          | 234.5<br>(195.3 to 273.2)                     | 108.9<br>(90.5 to 128.6)                      | 23.6<br>(15.8 to 33.1)                  | 40.3<br>(28.3 to 54.5)                            | 4.5<br>(-3.7 to 13.2)                               |
| Drug use disorders                                             | 66.4<br>(59.4 to 74.1)                        | 10.6<br>(9.2 to 12.1)                         | 11.1<br>(7.8 to 15.3)                   | 45.2<br>(30.6 to 61.4)                            | 5.1<br>(-3.9 to 15.5)                               |
| Opioid use disorders                                           | 21.7<br>(17.2 to 27.6)                        | 3.0<br>(2.4 to 3.6)                           | 9.1<br>(6.0 to 12.8)                    | 46.5<br>(29.4 to 66.8)                            | 4.6<br>(-5.8 to 17.1)                               |
| Cocaine use disorders                                          | 1.4<br>(1.2 to 1.7)                           | 0.2<br>(0.2 to 0.2)                           | 0.2<br>(0.1 to 0.3)                     | 35.6<br>(27.7 to 45.1)                            | 2.5<br>(-2.6 to 8.0)                                |
| Amphetamine use disorders                                      | 0.8<br>(0.5 to 1.1)                           | 0.1<br>(0.1 to 0.2)                           | 0.1<br>(0.1 to 0.2)                     | 32.0<br>(18.1 to 48.1)                            | 3.9<br>(-5.7 to 15.6)                               |
| Cannabis use disorders                                         | 40.4<br>(33.2 to 49.0)                        | 6.6<br>(5.4 to 8.0)                           | 1.2<br>(0.7 to 1.8)                     | 40.7<br>(17.2 to 69.3)                            | 11.3<br>(-5.8 to 32.4)                              |
| Other drug use disorders                                       | 3.4<br>(3.0 to 3.9)                           | 0.7<br>(0.6 to 0.8)                           | 0.6<br>(0.4 to 0.8)                     | 41.0<br>(20.1 to 65.5)                            | 3.7<br>(-11.1 to 20.8)                              |
| Depressive disorders                                           | 380.9<br>(354.0 to 412.4)                     | 434.0<br>(384.9 to 489.1)                     | 66.0<br>(45.5 to 90.4)                  | 26.4<br>(19.9 to 33.6)                            | -5.8<br>(-10.4 to -1.2)                             |
| Major depressive disorder                                      | 264.5<br>(234.0 to 298.5)                     | 412.3<br>(363.5 to 467.4)                     | 54.4<br>(37.0 to 75.3)                  | 24.3<br>(16.4 to 32.8)                            | -7.0<br>(-12.6 to -1.6)                             |
| Dysthymia                                                      | 120.2<br>(103.5 to 139.0)                     | 21.7<br>(19.0 to 25.1)                        | 11.6<br>(7.8 to 17.0)                   | 37.4<br>(31.3 to 43.4)                            | 0.3<br>(-2.9 to 3.5)                                |
| Bipolar disorder                                               | 63.0<br>(53.3 to 73.8)                        | 7.2<br>(6.1 to 8.6)                           | 13.0<br>(8.0 to 19.4)                   | 31.8<br>(22.3 to 41.8)                            | 0.5<br>(-5.3 to 6.8)                                |
| Anxiety disorders                                              | 362.0<br>(322.2 to 408.7)                     | 63.9<br>(57.3 to 71.6)                        | 35.3<br>(24.2 to 48.7)                  | 32.5<br>(23.4 to 42.8)                            | 0.4<br>(-6.0 to 7.4)                                |
| Eating disorders                                               | 9.7<br>(8.0 to 11.9)                          | 7.5<br>(5.5 to 10.1)                          | 1.9<br>(1.2 to 2.9)                     | 49.6<br>(25.0 to 77.6)                            | 15.0<br>(-3.4 to 35.4)                              |
| Anorexia nervosa                                               | 2.6<br>(1.9 to 3.5)                           | 1.2<br>(0.9 to 1.6)                           | 0.6<br>(0.3 to 0.9)                     | 37.8<br>(0.6 to 90.2)                             | 11.3<br>(-17.8 to 51.8)                             |
| Bulimia nervosa                                                | 6.7<br>(4.9 to 9.0)                           | 6.3<br>(4.3 to 8.9)                           | 1.4<br>(0.8 to 2.2)                     | 54.7<br>(23.4 to 90.9)                            | 16.4<br>(-5.3 to 40.8)                              |
| Autistic spectrum disorders                                    | 99.0<br>(88.4 to 111.6)                       | 1.2<br>(0.8 to 1.7)                           | 14.2<br>(9.6 to 20.0)                   | 28.9<br>(21.6 to 36.3)                            | 0.6<br>(-4.4 to 5.7)                                |
| Autism                                                         | 27.3<br>(23.6 to 31.7)                        | 0.2<br>(0.1 to 0.3)                           | 7.0<br>(4.5 to 10.1)                    | 28.6<br>(15.8 to 43.1)                            | 0.6<br>(-8.5 to 10.2)                               |
| Asperger syndrome and other autistic spectrum disorders        | 71.5<br>(59.0 to 86.7)                        | 1.1<br>(0.7 to 1.5)                           | 7.2<br>(4.6 to 10.6)                    | 29.3<br>(22.2 to 36.5)                            | 0.7<br>(-3.9 to 5.4)                                |



| Cause                                                      | Prevalence in thousands (95% UI)              | Incidence in thousands (95% UI)                   | YLDs in thousands (95% UI)              |                                                   |                                                     |
|------------------------------------------------------------|-----------------------------------------------|---------------------------------------------------|-----------------------------------------|---------------------------------------------------|-----------------------------------------------------|
|                                                            | 2016 counts                                   | 2016 counts                                       | 2016 counts                             | Percentage change in counts between 2006 and 2016 | Percentage change in age-standardised rates between |
| Attention-deficit/hyperactivity disorder                   | 158.7<br>(141.9 to 178.6)                     | 10.0<br>(8.6 to 11.7)                             | 1.9<br>(1.2 to 3.0)                     | 28.7<br>(19.4 to 38.7)                            | 0.6<br>(-6.0 to 7.9)                                |
| Conduct disorder                                           | 119.2<br>(96.6 to 141.2)                      | 43.4<br>(33.7 to 53.1)                            | 14.5<br>(8.8 to 22.3)                   | 24.9<br>(16.2 to 33.7)                            | 0.6<br>(-6.1 to 7.5)                                |
| Idiopathic developmental intellectual disability           | 302.3<br>(192.2 to 417.1)                     | --                                                | 12.9<br>(6.6 to 21.4)                   | 24.2<br>(13.7 to 38.2)                            | -4.3<br>(-12.4 to 6.2)                              |
| Other mental and substance use disorders                   | 166.3<br>(145.5 to 192.8)                     | 8.2<br>(7.2 to 9.4)                               | 12.5<br>(8.4 to 17.9)                   | 39.8<br>(31.9 to 48.1)                            | 0.6<br>(-4.0 to 5.4)                                |
| <b>Diabetes, urogenital, blood, and endocrine diseases</b> | <b>3,744.3</b><br><b>(3,656.7 to 3,840.6)</b> | <b>1,101.5†</b><br><b>(1,024.2 to 1,179.3)</b>    | <b>51.2</b><br><b>(36.3 to 69.9)</b>    | <b>36.8</b><br><b>(32.4 to 41.3)</b>              | <b>0.0</b><br><b>(-3.1 to 3.1)</b>                  |
| Diabetes mellitus                                          | 211.6<br>(190.2 to 234.8)                     | 15.3<br>(13.8 to 17.0)                            | 19.9<br>(13.9 to 27.7)                  | 49.8<br>(40.6 to 59.1)                            | 4.0<br>(-2.1 to 10.5)                               |
| Acute glomerulonephritis                                   | 0.1<br>(0.1 to 0.1)                           | 1.5<br>(1.3 to 1.8)                               | < 0.05<br>(< 0.05 to < 0.05)            | 31.2<br>(24.4 to 37.3)                            | -0.0<br>(-3.9 to 3.6)                               |
| Chronic kidney disease                                     | 361.3<br>(325.3 to 403.4)                     | 27.6<br>(24.6 to 31.1)                            | 9.6<br>(6.9 to 12.8)                    | 47.9<br>(38.1 to 58.2)                            | 3.5<br>(-2.9 to 10.1)                               |
| Chronic kidney disease due to diabetes mellitus            | 104.6<br>(87.5 to 124.2)                      | 7.5<br>(6.2 to 9.2)                               | 2.6<br>(1.8 to 3.5)                     | 52.6<br>(38.4 to 67.8)                            | 4.1<br>(-4.0 to 13.6)                               |
| Chronic kidney disease due to hypertension                 | 72.3<br>(62.2 to 83.2)                        | 7.4<br>(6.2 to 8.7)                               | 1.6<br>(1.1 to 2.1)                     | 44.6<br>(31.8 to 58.9)                            | 1.5<br>(-7.3 to 10.9)                               |
| Chronic kidney disease due to glomerulonephritis           | 81.7<br>(70.3 to 93.6)                        | 4.4<br>(3.6 to 5.4)                               | 2.7<br>(1.9 to 3.8)                     | 50.3<br>(33.6 to 68.2)                            | 7.1<br>(-1.6 to 16.4)                               |
| Chronic kidney disease due to other causes                 | 102.7<br>(86.1 to 120.0)                      | 8.3<br>(6.9 to 9.7)                               | 2.8<br>(2.0 to 3.8)                     | 43.5<br>(29.5 to 59.9)                            | 1.5<br>(-6.3 to 9.8)                                |
| Urinary diseases and male infertility                      | 133.1<br>(119.1 to 148.2)                     | 569.3†<br>(506.9 to 639.5)                        | 3.7<br>(2.4 to 5.3)                     | 38.6<br>(28.3 to 50.3)                            | -4.4<br>(-10.8 to 3.3)                              |
| Interstitial nephritis and urinary tract infections        | 9.5<br>(8.3 to 10.8)                          | 498.2<br>(436.2 to 566.7)                         | 0.3<br>(0.2 to 0.5)                     | 32.2<br>(10.1 to 58.1)                            | 2.5<br>(-12.7 to 19.4)                              |
| Urolithiasis                                               | 2.3<br>(2.0 to 2.6)                           | 60.1<br>(52.9 to 69.2)                            | 0.2<br>(0.1 to 0.2)                     | 42.1<br>(31.6 to 53.8)                            | 2.1<br>(-6.0 to 11.5)                               |
| Benign prostatic hyperplasia                               | 87.2<br>(73.6 to 100.9)                       | 11.0<br>(9.2 to 12.9)                             | 2.9<br>(1.8 to 4.2)                     | 39.2<br>(28.4 to 54.5)                            | -5.1<br>(-12.2 to 3.3)                              |
| Male infertility                                           | 29.7<br>(22.8 to 38.8)                        | --                                                | 0.2<br>(0.1 to 0.4)                     | 85.9<br>(47.9 to 137.7)                           | 28.4<br>(1.0 to 63.9)                               |
| Other urinary diseases                                     | --                                            | --                                                | 0.2<br>(0.1 to 0.3)                     | 11.9<br>(-1.3 to 27.9)                            | -14.8<br>(-23.2 to -5.7)                            |
| Gynecological diseases                                     | 1,275.8<br>(1,199.7 to 1,347.5)               | 479.4†<br>(440.4 to 518.9)                        | 13.1<br>(8.8 to 19.0)                   | 26.3<br>(19.8 to 32.9)                            | -7.0<br>(-10.7 to -3.1)                             |
| Uterine fibroids                                           | 93.5<br>(82.3 to 105.3)                       | 11.7<br>(10.1 to 13.4)                            | 0.9<br>(0.5 to 1.6)                     | 10.5<br>(-2.0 to 20.9)                            | -18.5<br>(-27.2 to -12.2)                           |
| Polycystic ovarian syndrome                                | 10.4<br>(7.7 to 13.5)                         | 31.4<br>(22.3 to 42.4)                            | 0.1<br>(< 0.05 to 0.2)                  | 42.9<br>(25.3 to 62.1)                            | 0.7<br>(-10.5 to 12.1)                              |
| Female infertility                                         | 3.0<br>(2.2 to 4.5)                           | --                                                | < 0.05<br>(< 0.05 to < 0.05)            | 46.2<br>(-23.8 to 135.6)                          | 5.1<br>(-42.1 to 61.5)                              |
| Endometriosis                                              | 2.4<br>(2.0 to 2.9)                           | 9.8<br>(8.0 to 12.3)                              | 0.2<br>(0.1 to 0.3)                     | 29.1<br>(-9.1 to 80.2)                            | -1.5<br>(-26.9 to 30.4)                             |
| Genital prolapse                                           | 600.6<br>(529.6 to 673.7)                     | 53.6<br>(45.1 to 63.5)                            | 1.9<br>(0.9 to 3.4)                     | 28.2<br>(21.0 to 36.6)                            | -8.9<br>(-14.3 to -2.8)                             |
| Premenstrual syndrome                                      | 595.9<br>(522.3 to 665.9)                     | 227.4<br>(198.6 to 254.1)                         | 5.0<br>(3.1 to 7.7)                     | 18.6<br>(6.4 to 31.0)                             | -7.1<br>(-15.0 to 1.6)                              |
| Other gynecological diseases                               | 141.0<br>(117.8 to 166.0)                     | 145.5<br>(118.9 to 174.5)                         | 5.0<br>(3.2 to 7.2)                     | 37.5<br>(27.0 to 49.0)                            | -2.5<br>(-9.0 to 4.6)                               |
| Hemoglobinopathies and hemolytic anaemias                  | 2,395.2<br>(2,310.2 to 2,483.4)               | --                                                | 2.5<br>(1.6 to 3.7)                     | 6.3<br>(-3.9 to 17.9)                             | -12.2<br>(-18.8 to -4.3)                            |
| Thalassemias                                               | < 0.05<br>(< 0.05 to < 0.05)                  | --                                                | < 0.05<br>(< 0.05 to < 0.05)            | 15.1<br>(4.3 to 28.7)                             | 1.0<br>(-8.4 to 12.9)                               |
| Thalassaemias trait                                        | 14.1<br>(11.8 to 16.0)                        | --                                                | 0.1<br>(0.1 to 0.2)                     | 34.9<br>(17.5 to 56.9)                            | 8.9<br>(-2.1 to 22.8)                               |
| Sickle cell disorders                                      | 0.4<br>(0.3 to 0.6)                           | --                                                | < 0.05<br>(< 0.05 to 0.1)               | 18.2<br>(7.3 to 31.1)                             | 0.2<br>(-8.6 to 10.8)                               |
| Sickle cell trait                                          | 351.4<br>(303.4 to 406.9)                     | --                                                | 1.1<br>(0.7 to 1.8)                     | 30.6<br>(15.8 to 48.1)                            | 6.6<br>(-4.3 to 18.3)                               |
| G6PD deficiency                                            | 545.9<br>(493.9 to 608.6)                     | --                                                | < 0.05<br>(< 0.05 to 0.1)               | 27.4<br>(3.3 to 60.4)                             | 5.8<br>(-10.2 to 26.9)                              |
| G6PD trait                                                 | 1,550.4<br>(1,493.8 to 1,613.4)               | --                                                | < 0.05<br>(< 0.05 to < 0.05)            | 49.9<br>(35.4 to 64.2)                            | 17.4<br>(8.2 to 27.9)                               |
| Other hemoglobinopathies and hemolytic anaemias            | 44.9<br>(42.2 to 48.2)                        | --                                                | 1.1<br>(0.7 to 1.7)                     | -13.0<br>(-24.3 to 0.6)                           | -29.4<br>(-37.0 to -20.0)                           |
| Endocrine, metabolic, blood, and immune disorders          | 79.5<br>(75.2 to 84.2)                        | 8.4<br>(7.4 to 9.4)                               | 2.4<br>(1.6 to 3.3)                     | 6.1<br>(-3.2 to 16.9)                             | -9.4<br>(-15.7 to -2.4)                             |
| <b>Musculoskeletal disorders</b>                           | <b>985.5</b><br><b>(919.1 to 1,047.2)</b>     | <b>522.8</b><br><b>(467.6 to 581.3)</b>           | <b>109.0</b><br><b>(77.4 to 145.1)</b>  | <b>44.1</b><br><b>(39.1 to 48.8)</b>              | <b>2.0</b><br><b>(-1.0 to 4.7)</b>                  |
| Rheumatoid arthritis                                       | 14.8<br>(13.0 to 16.6)                        | 1.0<br>(0.9 to 1.1)                               | 3.5<br>(2.4 to 4.7)                     | 38.2<br>(23.7 to 55.5)                            | -1.4<br>(-10.1 to 8.2)                              |
| Osteoarthritis                                             | 176.5<br>(164.7 to 188.7)                     | 10.3<br>(9.5 to 11.1)                             | 10.9<br>(7.6 to 14.9)                   | 52.6<br>(46.5 to 59.3)                            | 5.6<br>(1.8 to 9.7)                                 |
| Low back and neck pain                                     | 739.8<br>(685.3 to 795.1)                     | 338.2<br>(300.4 to 378.6)                         | 85.3<br>(59.9 to 112.6)                 | 41.0<br>(35.6 to 46.5)                            | 0.7<br>(-2.6 to 3.9)                                |
| Low back pain                                              | 576.3<br>(509.3 to 656.7)                     | 287.3<br>(250.3 to 328.2)                         | 65.2<br>(46.1 to 86.3)                  | 40.8<br>(34.0 to 47.7)                            | 0.8<br>(-3.6 to 5.0)                                |
| Neck pain                                                  | 199.5<br>(172.6 to 231.5)                     | 50.9<br>(43.7 to 59.6)                            | 20.0<br>(13.5 to 28.4)                  | 41.6<br>(36.4 to 46.9)                            | 0.4<br>(-2.0 to 2.7)                                |
| Gout                                                       | 22.9<br>(20.3 to 25.6)                        | 4.8<br>(4.2 to 5.4)                               | 0.7<br>(0.5 to 1.0)                     | 43.7<br>(24.4 to 67.0)                            | -0.8<br>(-12.4 to 13.0)                             |
| Other musculoskeletal disorders                            | 98.0<br>(59.4 to 158.3)                       | 168.6<br>(128.1 to 211.1)                         | 8.6<br>(4.1 to 15.8)                    | 73.0<br>(39.6 to 117.7)                           | 15.2<br>(-3.7 to 41.1)                              |
| <b>Other non-communicable diseases</b>                     | <b>8,425.1</b><br><b>(8,149.4 to 8,712.3)</b> | <b>27,270.7†</b><br><b>(24,638.0 to 29,936.0)</b> | <b>195.8</b><br><b>(131.3 to 280.0)</b> | <b>29.8</b><br><b>(27.4 to 32.3)</b>              | <b>-2.0</b><br><b>(-3.3 to -0.6)</b>                |
| Congenital anomalies                                       | 122.4<br>(99.7 to 156.1)                      | --                                                | 16.9<br>(11.3 to 24.8)                  | 18.9<br>(10.2 to 28.2)                            | -6.5<br>(-13.0 to 0.4)                              |
| Neural tube defects                                        | 13.3<br>(11.8 to 15.0)                        | --                                                | 4.0<br>(2.8 to 5.4)                     | 23.8<br>(8.7 to 42.2)                             | -3.4<br>(-14.5 to 9.1)                              |
| Congenital heart anomalies                                 | 14.3<br>(11.8 to 17.1)                        | --                                                | 0.7<br>(0.3 to 1.2)                     | 12.5<br>(-3.5 to 31.2)                            | -3.9<br>(-16.9 to 11.4)                             |
| Orofacial clefts                                           | 2.9<br>(2.5 to 3.3)                           | --                                                | < 0.05<br>(< 0.05 to 0.1)               | 16.7<br>(3.3 to 31.6)                             | -8.0<br>(-18.4 to 3.6)                              |
| Down's syndrome                                            | 2.1<br>(1.8 to 2.6)                           | --                                                | 0.2<br>(0.1 to 0.3)                     | 25.6<br>(16.5 to 35.2)                            | 0.5<br>(-6.8 to 8.2)                                |
| Turner syndrome                                            | 7.1<br>(6.0 to 8.4)                           | --                                                | 0.1<br>(0.1 to 0.2)                     | 14.7<br>(-19.6 to 59.2)                           | -6.8<br>(-32.3 to 24.7)                             |
| Klinefelter syndrome                                       | 7.4<br>(6.2 to 8.7)                           | --                                                | < 0.05<br>(< 0.05 to 0.1)               | 28.1<br>(-2.8 to 68.2)                            | 1.6<br>(-22.9 to 31.6)                              |

| Cause                                         | Prevalence in thousands (95% UI)              | Incidence in thousands (95% UI)          | YLDs in thousands (95% UI)            |                                                   |                                                     |
|-----------------------------------------------|-----------------------------------------------|------------------------------------------|---------------------------------------|---------------------------------------------------|-----------------------------------------------------|
|                                               | 2016 counts                                   | 2016 counts                              | 2016 counts                           | Percentage change in counts between 2006 and 2016 | Percentage change in age-standardised rates between |
| Other chromosomal abnormalities               | 1.9<br>(1.7 to 2.3)                           | --                                       | 0.4<br>(0.2 to 0.6)                   | 13.9<br>(-21.5 to 67.7)                           | -0.8<br>(-30.0 to 43.0)                             |
| Congenital musculoskeletal and limb anomalies | 14.0<br>(12.4 to 15.8)                        | --                                       | 2.0<br>(1.4 to 2.8)                   | 28.3<br>(11.4 to 47.0)                            | -0.2<br>(-11.9 to 12.7)                             |
| Urogenital congenital anomalies               | 12.0<br>(10.5 to 13.7)                        | --                                       | 0.3<br>(0.2 to 0.5)                   | 21.0<br>(10.0 to 31.9)                            | -0.3<br>(-8.4 to 8.0)                               |
| Digestive congenital anomalies                | 6.2<br>(5.5 to 6.9)                           | --                                       | 0.3<br>(0.2 to 0.4)                   | 29.1<br>(-1.1 to 68.5)                            | 1.1<br>(-18.8 to 27.8)                              |
| Other congenital anomalies                    | 63.5<br>(35.4 to 109.7)                       | --                                       | 8.8<br>(4.9 to 15.4)                  | 15.3<br>(2.6 to 29.1)                             | -9.9<br>(-20.4 to 0.2)                              |
| Skin and subcutaneous diseases                | 3,980.8<br>(3,812.2 to 4,176.1)               | 9,160.4<br>(8,570.2 to 9,843.9)          | 90.2<br>(58.7 to 131.6)               | 31.8<br>(28.4 to 35.6)                            | 4.4<br>(2.2 to 6.9)                                 |
| Dermatitis                                    | 426.9<br>(388.1 to 468.1)                     | 443.4<br>(404.9 to 486.5)                | 16.8<br>(9.8 to 27.6)                 | 26.2<br>(19.7 to 32.3)                            | 0.2<br>(-4.4 to 4.4)                                |
| Psoriasis                                     | 62.5<br>(59.4 to 65.7)                        | 9.8<br>(9.3 to 10.3)                     | 5.5<br>(3.9 to 7.4)                   | 50.7<br>(34.8 to 69.2)                            | 12.6<br>(3.4 to 22.9)                               |
| Cellulitis                                    | 4.4<br>(4.0 to 4.8)                           | 76.0<br>(70.5 to 81.9)                   | 0.2<br>(0.2 to 0.4)                   | 31.0<br>(2.1 to 68.3)                             | 2.3<br>(-17.6 to 26.1)                              |
| Pyoderma                                      | 79.3<br>(75.5 to 83.3)                        | 1,521.7<br>(1,451.9 to 1,594.6)          | 0.5<br>(0.2 to 1.0)                   | 28.7<br>(21.4 to 36.8)                            | 2.3<br>(-2.7 to 7.2)                                |
| Scabies                                       | 163.3<br>(140.4 to 193.3)                     | 516.1<br>(441.9 to 607.5)                | 4.2<br>(2.4 to 6.9)                   | 19.7<br>(12.7 to 26.6)                            | -4.7<br>(-9.1 to -0.3)                              |
| Fungal skin diseases                          | 1,699.2<br>(1,472.8 to 1,977.6)               | 4,289.4<br>(3,751.3 to 4,937.1)          | 9.7<br>(3.9 to 20.1)                  | 28.4<br>(26.2 to 30.3)                            | 0.1<br>(-0.8 to 1.0)                                |
| Viral skin diseases                           | 406.4<br>(354.1 to 468.9)                     | 541.0<br>(463.2 to 621.6)                | 12.5<br>(7.8 to 18.8)                 | 27.6<br>(23.4 to 32.5)                            | 0.1<br>(-2.4 to 3.1)                                |
| Acne vulgaris                                 | 1,122.6<br>(985.2 to 1,261.3)                 | 859.1<br>(664.1 to 1,110.4)              | 29.0<br>(19.3 to 42.4)                | 38.4<br>(29.0 to 49.3)                            | 11.8<br>(5.0 to 19.4)                               |
| Alopecia areata                               | 19.4<br>(18.6 to 20.3)                        | 34.7<br>(33.1 to 36.3)                   | 0.6<br>(0.4 to 1.0)                   | 35.6<br>(19.0 to 54.1)                            | 0.1<br>(-10.8 to 11.5)                              |
| Pruritus                                      | 83.6<br>(73.1 to 94.9)                        | 68.0<br>(60.2 to 76.8)                   | 0.9<br>(0.4 to 1.6)                   | 34.9<br>(26.1 to 43.5)                            | 1.9<br>(-3.6 to 7.1)                                |
| Urticaria                                     | 118.8<br>(101.0 to 140.0)                     | 213.5<br>(181.4 to 250.4)                | 7.2<br>(4.6 to 10.5)                  | 24.4<br>(16.4 to 33.3)                            | 0.3<br>(-5.4 to 6.4)                                |
| Decubitus ulcer                               | 1.1<br>(1.0 to 1.2)                           | 3.9<br>(3.5 to 4.3)                      | 0.2<br>(0.1 to 0.2)                   | 36.9<br>(24.6 to 50.3)                            | 2.6<br>(-11.8 to 18.8)                              |
| Other skin and subcutaneous diseases          | 518.9<br>(503.3 to 535.7)                     | 583.8<br>(565.5 to 603.4)                | 2.9<br>(1.4 to 5.3)                   | 40.9<br>(36.7 to 45.6)                            | 6.3<br>(3.8 to 8.9)                                 |
| Sense organ diseases                          | 1,990.0<br>(1,890.4 to 2,081.6)               | 1,069.9†<br>(991.1 to 1,152.6)           | 71.8<br>(49.5 to 101.5)               | 28.2<br>(23.6 to 33.3)                            | -5.4<br>(-7.4 to -3.1)                              |
| Glaucoma                                      | 4.6<br>(3.6 to 5.7)                           | --                                       | 0.6<br>(0.3 to 0.8)                   | 40.9<br>(23.5 to 58.7)                            | -2.6<br>(-13.4 to 9.3)                              |
| Cataract                                      | 49.4<br>(43.1 to 56.1)                        | --                                       | 4.3<br>(3.0 to 6.0)                   | 27.9<br>(20.5 to 36.1)                            | -7.5<br>(-12.4 to -2.2)                             |
| Macular degeneration                          | 7.3<br>(5.6 to 9.4)                           | --                                       | 0.5<br>(0.4 to 0.8)                   | 50.1<br>(33.8 to 66.2)                            | 3.9<br>(-6.5 to 14.2)                               |
| Refraction and accommodation disorders        | 944.6<br>(845.0 to 1,058.3)                   | --                                       | 14.6<br>(8.6 to 23.9)                 | 18.9<br>(11.9 to 25.8)                            | -12.1<br>(-17.6 to -6.7)                            |
| Age-related and other hearing loss            | 1,203.2<br>(1,113.8 to 1,298.1)               | --                                       | 42.8<br>(28.6 to 61.1)                | 29.4<br>(22.4 to 37.6)                            | -4.3<br>(-7.1 to -1.4)                              |
| Other vision loss                             | 28.2<br>(24.6 to 32.2)                        | --                                       | 2.4<br>(1.6 to 3.4)                   | 33.5<br>(21.2 to 45.6)                            | -3.0<br>(-10.4 to 3.9)                              |
| Other sense organ diseases                    | 213.7<br>(197.6 to 230.0)                     | 1,069.9<br>(991.1 to 1,152.6)            | 6.5<br>(4.1 to 10.0)                  | 39.6<br>(32.7 to 47.5)                            | 2.2<br>(-1.3 to 6.0)                                |
| Oral disorders                                | 5,917.2<br>(5,438.5 to 6,401.1)               | 17,040.5†<br>(14,422.4 to 19,602.7)      | 16.9<br>(9.4 to 28.8)                 | 38.1<br>(34.1 to 42.4)                            | -0.0<br>(-2.5 to 2.5)                               |
| Caries of deciduous teeth                     | 1,402.6<br>(1,106.2 to 1,707.2)               | 5,325.6<br>(3,839.2 to 7,170.5)          | 0.3<br>(0.1 to 0.6)                   | 19.1<br>(6.0 to 33.5)                             | -1.7<br>(-12.2 to 10.0)                             |
| Caries of permanent teeth                     | 3,791.1<br>(3,246.8 to 4,393.9)               | 11,603.8<br>(9,650.0 to 13,504.1)        | 2.2<br>(1.0 to 4.4)                   | 29.2<br>(21.8 to 36.9)                            | -2.7<br>(-7.4 to 1.9)                               |
| Periodontal disease                           | 841.6<br>(504.1 to 1,233.8)                   | 103.1<br>(64.6 to 153.2)                 | 5.5<br>(2.0 to 12.4)                  | 43.6<br>(34.3 to 52.2)                            | 0.1<br>(-5.2 to 5.4)                                |
| Edentulism and severe tooth loss              | 120.5<br>(102.7 to 138.8)                     | 8.0<br>(6.7 to 9.2)                      | 3.4<br>(2.2 to 4.8)                   | 43.9<br>(36.4 to 51.6)                            | 0.7<br>(-3.5 to 4.8)                                |
| Other oral disorders                          | 184.1<br>(175.4 to 193.5)                     | --                                       | 5.4<br>(3.3 to 8.2)                   | 34.4<br>(29.3 to 40.1)                            | 0.1<br>(-2.7 to 3.2)                                |
| <b>Injuries</b>                               | <b>2,218.8</b><br><b>(1,858.6 to 2,590.4)</b> | <b>809.7†</b><br><b>(761.4 to 860.2)</b> | <b>94.8</b><br><b>(55.7 to 146.8)</b> | <b>7.8</b><br><b>(1.0 to 15.0)</b>                | <b>-13.2</b><br><b>(-17.6 to -8.6)</b>              |
| <b>Transport injuries</b>                     | <b>145.9</b><br><b>(136.4 to 156.0)</b>       | <b>71.4</b><br><b>(63.0 to 81.3)</b>     | <b>9.2</b><br><b>(5.2 to 15.1)</b>    | <b>34.1</b><br><b>(24.9 to 45.0)</b>              | <b>-1.8</b><br><b>(-6.9 to 4.1)</b>                 |
| Road injuries                                 | 120.7<br>(113.2 to 129.3)                     | 63.0<br>(54.8 to 72.7)                   | 7.5<br>(4.2 to 12.4)                  | 34.1<br>(25.1 to 44.3)                            | -2.1<br>(-7.0 to 3.6)                               |
| Pedestrian road injuries                      | 39.0<br>(34.3 to 44.5)                        | 15.5<br>(12.7 to 18.9)                   | 2.5<br>(1.4 to 4.1)                   | 24.3<br>(15.5 to 34.6)                            | -8.5<br>(-13.4 to -2.8)                             |
| Cyclist road injuries                         | 29.2<br>(24.6 to 34.3)                        | 17.9<br>(14.3 to 21.9)                   | 1.7<br>(1.0 to 2.8)                   | 42.5<br>(32.7 to 53.5)                            | 4.6<br>(-0.7 to 10.8)                               |
| Motorcyclist road injuries                    | 18.5<br>(15.9 to 21.7)                        | 7.0<br>(5.7 to 8.7)                      | 1.1<br>(0.6 to 1.9)                   | 18.7<br>(10.8 to 27.9)                            | -14.3<br>(-18.7 to -9.5)                            |
| Motor vehicle road injuries                   | 24.1<br>(20.8 to 27.2)                        | 15.7<br>(12.9 to 18.8)                   | 1.7<br>(1.0 to 2.7)                   | 51.4<br>(42.5 to 60.6)                            | 9.8<br>(4.9 to 15.0)                                |
| Other road injuries                           | 10.0<br>(8.5 to 11.9)                         | 6.9<br>(5.1 to 9.2)                      | 0.6<br>(0.3 to 0.9)                   | 48.5<br>(39.3 to 57.8)                            | 8.7<br>(3.7 to 13.9)                                |
| Other transport injuries                      | 25.3<br>(21.1 to 30.4)                        | 8.4<br>(6.9 to 10.4)                     | 1.7<br>(0.9 to 2.8)                   | 33.8<br>(21.8 to 48.4)                            | -0.0<br>(-6.2 to 7.6)                               |
| <b>Unintentional injuries</b>                 | <b>1,082.1</b><br><b>(997.7 to 1,183.5)</b>   | <b>699.9</b><br><b>(653.1 to 750.3)</b>  | <b>42.7</b><br><b>(25.7 to 65.9)</b>  | <b>30.8</b><br><b>(21.4 to 41.2)</b>              | <b>-2.0</b><br><b>(-6.9 to 3.1)</b>                 |
| Falls                                         | 417.4<br>(360.5 to 478.0)                     | 262.2<br>(225.9 to 306.3)                | 19.2<br>(11.8 to 29.4)                | 32.2<br>(22.0 to 44.6)                            | -2.0<br>(-7.5 to 3.7)                               |
| Drowning                                      | 3.3<br>(2.8 to 3.9)                           | 1.0<br>(0.8 to 1.1)                      | 0.2<br>(0.1 to 0.4)                   | 13.4<br>(4.3 to 23.8)                             | -14.0<br>(-18.9 to -8.6)                            |
| Fire, heat, and hot substances                | 151.7<br>(122.9 to 190.9)                     | 28.5<br>(22.2 to 35.5)                   | 4.8<br>(2.8 to 7.5)                   | 27.4<br>(12.4 to 46.0)                            | -2.7<br>(-11.1 to 6.6)                              |
| Poisonings                                    | 3.6<br>(2.9 to 4.4)                           | 6.5<br>(4.9 to 8.3)                      | 0.4<br>(0.2 to 0.6)                   | 42.4<br>(29.7 to 58.8)                            | 8.4<br>(2.0 to 15.3)                                |
| Exposure to mechanical forces                 | 151.3<br>(128.3 to 186.5)                     | 84.7<br>(70.5 to 100.1)                  | 4.4<br>(2.5 to 7.3)                   | 34.5<br>(26.4 to 43.2)                            | -1.0<br>(-5.0 to 3.8)                               |
| Unintentional firearm injuries                | 7.0<br>(5.7 to 8.6)                           | 2.6<br>(1.8 to 3.6)                      | 0.4<br>(0.2 to 0.6)                   | 41.7<br>(33.1 to 51.9)                            | 3.1<br>(-1.9 to 8.7)                                |
| Unintentional suffocation                     | 14.0<br>(10.0 to 18.7)                        | 4.7<br>(3.1 to 6.8)                      | 0.5<br>(0.2 to 0.9)                   | 36.0<br>(22.2 to 55.4)                            | 3.7<br>(-4.8 to 16.0)                               |
| Other exposure to mechanical forces           | 130.4<br>(108.4 to 164.7)                     | 77.4<br>(64.3 to 91.8)                   | 3.5<br>(2.1 to 5.8)                   | 33.6<br>(26.2 to 41.4)                            | -1.9<br>(-5.6 to 2.5)                               |



| Cause                                                                               | Prevalence in thousands (95% UI)          | Incidence in thousands (95% UI)       | YLDs in thousands (95% UI)           |                                                   |                                                     |
|-------------------------------------------------------------------------------------|-------------------------------------------|---------------------------------------|--------------------------------------|---------------------------------------------------|-----------------------------------------------------|
|                                                                                     | 2016 counts                               | 2016 counts                           | 2016 counts                          | Percentage change in counts between 2006 and 2016 | Percentage change in age-standardised rates between |
| Adverse effects of medical treatment                                                | 3.8<br>(3.0 to 4.8)                       | 50.0<br>(42.4 to 58.7)                | 0.5<br>(0.3 to 0.8)                  | 8.2<br>(1.1 to 15.7)                              | -8.9<br>(-13.4 to -4.6)                             |
| Animal contact                                                                      | 65.3<br>(57.1 to 76.4)                    | 108.5<br>(90.2 to 128.8)              | 2.4<br>(1.5 to 3.6)                  | 19.2<br>(12.2 to 26.5)                            | -11.0<br>(-14.2 to -7.9)                            |
| Venomous animal contact                                                             | 23.9<br>(19.8 to 29.0)                    | 43.3<br>(33.6 to 54.4)                | 1.6<br>(1.0 to 2.4)                  | 19.3<br>(10.0 to 29.7)                            | -10.3<br>(-14.7 to -5.6)                            |
| Non-venomous animal contact                                                         | 41.4<br>(34.6 to 51.0)                    | 65.2<br>(52.6 to 78.9)                | 0.8<br>(0.5 to 1.2)                  | 19.0<br>(13.6 to 24.2)                            | -12.2<br>(-15.4 to -9.3)                            |
| Foreign body                                                                        | 80.3<br>(64.9 to 96.5)                    | 64.4<br>(55.8 to 74.7)                | 3.7<br>(2.1 to 6.1)                  | 23.1<br>(13.5 to 34.5)                            | -4.4<br>(-9.8 to 1.6)                               |
| Pulmonary aspiration and foreign body in airway                                     | 42.6<br>(30.9 to 58.8)                    | 22.2<br>(17.9 to 28.2)                | 2.2<br>(1.2 to 3.8)                  | 15.5<br>(6.3 to 27.2)                             | -9.3<br>(-14.5 to -3.1)                             |
| Foreign body in eyes                                                                | 4.1<br>(2.1 to 6.4)                       | 23.2<br>(17.5 to 31.3)                | 0.2<br>(0.1 to 0.4)                  | 33.8<br>(27.5 to 40.3)                            | 0.1<br>(-2.9 to 3.4)                                |
| Foreign body in other body part                                                     | 33.7<br>(26.8 to 44.8)                    | 19.0<br>(15.1 to 23.3)                | 1.2<br>(0.7 to 2.1)                  | 37.2<br>(25.4 to 50.9)                            | 4.4<br>(-2.1 to 11.6)                               |
| Environmental heat and cold exposure                                                | 61.9<br>(50.7 to 76.9)                    | 23.6<br>(18.7 to 29.6)                | 2.7<br>(1.5 to 4.5)                  | 44.0<br>(32.2 to 57.7)                            | 6.8<br>(0.8 to 13.5)                                |
| Other unintentional injuries                                                        | 143.4<br>(111.1 to 188.4)                 | 70.6<br>(57.2 to 86.2)                | 4.4<br>(2.6 to 6.8)                  | 34.7<br>(25.7 to 43.5)                            | 0.8<br>(-3.5 to 5.2)                                |
| <b>Self-harm and interpersonal violence</b>                                         | <b>447.5</b><br><b>(407.6 to 487.1)</b>   | <b>36.1†</b><br><b>(30.4 to 42.1)</b> | <b>6.0</b><br><b>(4.2 to 8.3)</b>    | <b>22.3</b><br><b>(15.5 to 28.3)</b>              | <b>-4.6</b><br><b>(-8.1 to -1.2)</b>                |
| Self-harm                                                                           | 6.0<br>(5.2 to 6.8)                       | 3.7<br>(3.2 to 4.3)                   | 0.4<br>(0.2 to 0.6)                  | 34.4<br>(26.1 to 43.1)                            | -3.1<br>(-8.0 to 1.8)                               |
| Self-harm by firearm                                                                | 0.4<br>(0.4 to 0.5)                       | 0.2<br>(0.1 to 0.3)                   | < 0.05<br>(< 0.05 to < 0.05)         | 15.4<br>(7.3 to 24.9)                             | -19.3<br>(-24.0 to -13.9)                           |
| Self-harm by other specified means                                                  | 5.6<br>(4.8 to 6.4)                       | 3.5<br>(3.0 to 4.1)                   | 0.3<br>(0.2 to 0.6)                  | 35.6<br>(27.2 to 44.6)                            | -1.8<br>(-6.9 to 3.3)                               |
| Interpersonal violence                                                              | 441.5<br>(401.2 to 481.2)                 | 32.4†<br>(26.8 to 38.3)               | 5.7<br>(3.9 to 7.8)                  | 21.6<br>(14.7 to 28.0)                            | -4.8<br>(-8.5 to -1.2)                              |
| Assault by firearm                                                                  | 1.3<br>(1.1 to 1.6)                       | 0.6<br>(0.4 to 0.8)                   | 0.1<br>(< 0.05 to 0.1)               | 49.9<br>(39.9 to 61.6)                            | 10.2<br>(4.3 to 17.3)                               |
| Assault by sharp object                                                             | 14.3<br>(11.6 to 17.3)                    | 7.9<br>(5.8 to 10.5)                  | 0.5<br>(0.3 to 0.9)                  | 44.8<br>(36.2 to 53.7)                            | 7.0<br>(1.6 to 12.7)                                |
| Sexual violence                                                                     | 394.5<br>(355.0 to 434.2)                 | --                                    | 3.6<br>(2.5 to 5.1)                  | 10.8<br>(3.4 to 18.8)                             | -12.8<br>(-17.2 to -7.9)                            |
| Assault by other means                                                              | 31.3<br>(26.4 to 37.4)                    | 23.9<br>(19.5 to 28.7)                | 1.4<br>(0.8 to 2.3)                  | 47.9<br>(38.5 to 57.2)                            | 8.3<br>(2.7 to 14.4)                                |
| <b>Forces of nature, conflict and terrorism, and executions and police conflict</b> | <b>937.8</b><br><b>(596.5 to 1,295.4)</b> | <b>2.3‡</b><br><b>(1.2 to 3.5)</b>    | <b>36.8</b><br><b>(18.4 to 59.7)</b> | <b>-15.3</b><br><b>(-24.9 to -7.8)</b>            | <b>-26.1</b><br><b>(-33.3 to -20.6)</b>             |
| Exposure to forces of nature                                                        | 1.0<br>(0.6 to 1.6)                       | 1.9<br>(0.9 to 3.1)                   | 0.1<br>(< 0.05 to 0.1)               | 106.5<br>(53.9 to 189.1)                          | 60.1<br>(23.1 to 117.5)                             |
| Conflict and terrorism                                                              | 934.8<br>(594.3 to 1,292.5)               | --                                    | 36.7<br>(18.3 to 59.4)               | -15.4<br>(-25.0 to -7.9)                          | -26.1<br>(-33.4 to -20.7)                           |
| Executions and police conflict                                                      | 2.0<br>(0.9 to 4.3)                       | 0.4<br>(0.2 to 0.7)                   | 0.1<br>(< 0.05 to 0.2)               | -2.5<br>(-11.1 to 18.5)                           | -19.6<br>(-26.1 to -8.4)                            |
| <b>Impairments</b>                                                                  | --                                        | --                                    | --                                   | --                                                | --                                                  |
| Anaemia                                                                             | 2,580.0<br>(2,453.6 to 2,711.7)           | --                                    | 83.8<br>(56.5 to 119.6)              | -13.0<br>(-26.3 to -3.1)                          | -30.2<br>(-45.0 to -19.9)                           |
| Developmental intellectual disability                                               | 458.9<br>(348.7 to 574.4)                 | --                                    | 45.4<br>(31.9 to 64.8)               | 30.1<br>(17.4 to 54.3)                            | 2.1<br>(-8.0 to 21.9)                               |
| Epilepsy                                                                            | 102.6<br>(56.2 to 153.6)                  | --                                    | 39.3<br>(20.9 to 65.1)               | 46.9<br>(-26.4 to 186.3)                          | 15.6<br>(-45.4 to 140.4)                            |
| Guillain-Barre syndrome                                                             | 0.1<br>(0.1 to 0.1)                       | --                                    | < 0.05<br>(< 0.05 to < 0.05)         | 30.2<br>(26.6 to 34.1)                            | 0.2<br>(0.1 to 0.3)                                 |
| Hearing loss                                                                        | 1,447.4<br>(1,365.3 to 1,539.9)           | --                                    | 57.0<br>(39.1 to 78.2)               | 24.2<br>(19.1 to 29.2)                            | -5.7<br>(-8.0 to -3.5)                              |
| Heart failure                                                                       | 26.9<br>(23.7 to 30.6)                    | --                                    | 3.1<br>(2.2 to 4.0)                  | 38.6<br>(28.9 to 49.4)                            | 1.9<br>(-5.8 to 10.6)                               |
| Infertility                                                                         | 98.5<br>(78.1 to 127.4)                   | --                                    | 0.6<br>(0.3 to 1.2)                  | 60.6<br>(32.8 to 95.2)                            | 14.3<br>(-5.8 to 42.0)                              |
| Pelvic inflammatory disease                                                         | 12.1<br>(10.1 to 14.5)                    | --                                    | 1.6<br>(1.0 to 2.3)                  | 29.4<br>(10.8 to 50.2)                            | -8.1<br>(-20.5 to 6.3)                              |
| Vision loss                                                                         | 1,088.2<br>(986.4 to 1,205.9)             | --                                    | 34.2<br>(23.1 to 51.6)               | 37.9<br>(25.2 to 63.0)                            | -1.9<br>(-8.6 to 10.6)                              |

We did not calculate incidence for the nine impairments, certain NTDs, and causes with only birth prevalence. Blank cells mean that no estimate is available.

† Incidence for aggregate causes represents the sum of the incidence of the causes below the aggregate.

‡ Incidence estimates for stroke represent first-ever stroke only.

^ Incidence of HIV/AIDS represents new infections of HIV only and does not include new infections of Tuberculosis in HIV positive cases.

SR Table 14: Prevalence, incidence, and YLDs for 2016, percentage change of YLD counts and percentage change of age-standardised YLD rates between 2006 and 2016 by cause and impairments, for all ages, Saint Lucia.

| Cause                                                                                | Prevalence in thousands (95% UI) | Incidence in thousands (95% UI)         | YLDs in thousands (95% UI)          |                                                   |                                                     |
|--------------------------------------------------------------------------------------|----------------------------------|-----------------------------------------|-------------------------------------|---------------------------------------------------|-----------------------------------------------------|
|                                                                                      | 2016 counts                      | 2016 counts                             | 2016 counts                         | Percentage change in counts between 2006 and 2016 | Percentage change in age-standardised rates between |
| <b>All causes</b>                                                                    | <b>178.5</b><br>(178.1 to 179.0) | <b>1,228.7†</b><br>(1,172.4 to 1,295.7) | <b>20.2</b><br>(15.0 to 26.3)       | <b>19.6</b><br>(17.0 to 22.1)                     | <b>0.3</b><br>(-1.9 to 2.3)                         |
| <b>Communicable, maternal, neonatal, and nutritional disorders</b>                   | <b>140.0</b><br>(135.1 to 145.2) | <b>714.1†</b><br>(659.1 to 772.8)       | <b>2.3</b><br>(1.6 to 3.1)          | <b>12.8</b><br>(5.0 to 21.6)                      | <b>7.3</b><br>(0.2 to 15.7)                         |
| <b>HIV/AIDS and tuberculosis</b>                                                     | <b>48.6</b><br>(43.3 to 52.8)    | <b>0.1†</b><br>(0.1 to 0.1)             | <b>&lt; 0.05</b><br>(< 0.05 to 0.1) | <b>&lt; 0.05</b><br>(-25.2 to -0.2)               | <b>-11.7</b><br>(-37.3 to -16.2)                    |
| Tuberculosis                                                                         | 44.9<br>(40.4 to 50.0)           | < 0.05†<br>(< 0.05 to 0.1)              | < 0.05<br>(< 0.05 to < 0.05)        | -7.9<br>(-30.7 to 23.0)                           | -21.4<br>(-39.7 to 4.4)                             |
| Drug-susceptible tuberculosis                                                        | < 0.05<br>(< 0.05 to < 0.05)     | < 0.05<br>(< 0.05 to 0.1)               | < 0.05<br>(< 0.05 to < 0.05)        | -7.7<br>(-30.6 to 23.1)                           | -21.3<br>(-39.6 to 4.0)                             |
| Multidrug-resistant tuberculosis without extensive drug resistance                   | < 0.05<br>(< 0.05 to < 0.05)     | < 0.05<br>(< 0.05 to < 0.05)            | < 0.05<br>(< 0.05 to < 0.05)        | -35.2<br>(-89.1 to 320.8)                         | -45.0<br>(-90.9 to 259.2)                           |
| Extensively drug-resistant tuberculosis                                              | < 0.05<br>(< 0.05 to < 0.05)     | < 0.05<br>(< 0.05 to < 0.05)            | < 0.05<br>(< 0.05 to < 0.05)        | 72.5<br>(-71.1 to 1,019.8)                        | 46.4<br>(-75.7 to 855.8)                            |
| Latent tuberculosis infection                                                        | 44.9<br>(40.3 to 50.0)           | --                                      | --                                  | --                                                | --                                                  |
| HIV/AIDS                                                                             | 0.1<br>(0.1 to 0.2)              | < 0.05^<br>(< 0.05 to < 0.05)           | < 0.05<br>(< 0.05 to < 0.05)        | -12.9<br>(-29.1 to 2.0)                           | -27.9<br>(-41.1 to -15.6)                           |
| Drug-susceptible HIV/AIDS - Tuberculosis                                             | < 0.05<br>(< 0.05 to < 0.05)     | < 0.05<br>(< 0.05 to < 0.05)            | < 0.05<br>(< 0.05 to < 0.05)        | -20.8<br>(-26.7 to -13.8)                         | -31.8<br>(-36.9 to -25.6)                           |
| Multidrug-resistant HIV/AIDS - Tuberculosis without extensive drug resistance        | < 0.05<br>(< 0.05 to < 0.05)     | < 0.05<br>(< 0.05 to < 0.05)            | < 0.05<br>(< 0.05 to < 0.05)        | -44.0<br>(-90.5 to 263.8)                         | -51.8<br>(-91.9 to 213.2)                           |
| Extensively drug-resistant HIV/AIDS - Tuberculosis                                   | < 0.05<br>(< 0.05 to < 0.05)     | < 0.05<br>(< 0.05 to < 0.05)            | < 0.05<br>(< 0.05 to < 0.05)        | 49.2<br>(-74.9 to 869.4)                          | 28.4<br>(-78.3 to 734.4)                            |
| HIV/AIDS resulting in other diseases                                                 | 0.1<br>(0.1 to 0.2)              | < 0.05<br>(< 0.05 to < 0.05)            | < 0.05<br>(< 0.05 to < 0.05)        | -12.5<br>(-29.8 to 3.7)                           | -27.7<br>(-41.6 to -14.3)                           |
| <b>Diarrhoea, lower respiratory infections, and other common infectious diseases</b> | <b>11.4</b><br>(10.8 to 12.0)    | <b>668.5†</b><br>(614.6 to 725.6)       | <b>0.6</b><br>(0.4 to 0.8)          | <b>23.2</b><br>(17.8 to 28.5)                     | <b>17.8</b><br>(13.0 to 22.7)                       |
| Diarrhoeal diseases                                                                  | 3.2<br>(3.0 to 3.4)              | 211.6<br>(197.7 to 225.8)               | 0.4<br>(0.2 to 0.5)                 | 40.3<br>(32.5 to 48.6)                            | 33.8<br>(26.9 to 40.8)                              |
| Intestinal infectious diseases                                                       | < 0.05<br>(< 0.05 to < 0.05)     | < 0.05†<br>(< 0.05 to < 0.05)           | < 0.05<br>(< 0.05 to < 0.05)        | -0.5<br>(-14.0 to 15.6)                           | -16.9<br>(-27.6 to -4.5)                            |
| Typhoid fever                                                                        | < 0.05<br>(< 0.05 to < 0.05)     | < 0.05<br>(< 0.05 to < 0.05)            | < 0.05<br>(< 0.05 to < 0.05)        | -0.9<br>(-15.0 to 16.0)                           | -17.4<br>(-28.7 to -4.4)                            |
| Paratyphoid fever                                                                    | < 0.05<br>(< 0.05 to < 0.05)     | < 0.05<br>(< 0.05 to < 0.05)            | < 0.05<br>(< 0.05 to < 0.05)        | 50.8<br>(23.0 to 82.4)                            | 21.0<br>(-0.7 to 45.7)                              |
| Other intestinal infectious diseases                                                 | --                               | --                                      | < 0.05<br>(< 0.05 to < 0.05)        | -36.1<br>(-50.3 to -16.6)                         | -36.8<br>(-51.9 to -16.7)                           |
| Lower respiratory infections                                                         | 0.3<br>(0.3 to 0.3)              | 12.1<br>(11.1 to 13.2)                  | < 0.05<br>(< 0.05 to < 0.05)        | 41.5<br>(27.3 to 56.6)                            | 27.4<br>(15.3 to 41.1)                              |
| Upper respiratory infections                                                         | 5.8<br>(5.1 to 6.5)              | 433.1<br>(381.3 to 488.5)               | 0.1<br>(0.1 to 0.2)                 | 4.9<br>(-0.5 to 11.1)                             | -0.0<br>(-4.8 to 5.2)                               |
| Otitis media                                                                         | 2.2<br>(2.0 to 2.4)              | 8.6<br>(7.0 to 10.5)                    | 0.1<br>(< 0.05 to 0.1)              | -2.0<br>(-9.2 to 5.8)                             | -2.0<br>(-8.8 to 5.3)                               |
| Meningitis                                                                           | 0.2<br>(0.1 to 0.2)              | < 0.05<br>(< 0.05 to < 0.05)            | < 0.05<br>(< 0.05 to < 0.05)        | 7.9<br>(5.0 to 10.7)                              | -2.1<br>(-4.7 to 0.3)                               |
| Pneumococcal meningitis                                                              | 0.1<br>(0.1 to 0.1)              | < 0.05<br>(< 0.05 to < 0.05)            | < 0.05<br>(< 0.05 to < 0.05)        | 8.8<br>(4.7 to 12.7)                              | -1.8<br>(-5.5 to 1.5)                               |
| H influenzae type B meningitis                                                       | < 0.05<br>(< 0.05 to < 0.05)     | < 0.05<br>(< 0.05 to < 0.05)            | < 0.05<br>(< 0.05 to < 0.05)        | -1.0<br>(-7.6 to 4.8)                             | -8.5<br>(-14.4 to -3.2)                             |
| Meningococcal infection                                                              | < 0.05<br>(< 0.05 to < 0.05)     | < 0.05<br>(< 0.05 to < 0.05)            | < 0.05<br>(< 0.05 to < 0.05)        | 10.1<br>(5.5 to 14.5)                             | -2.3<br>(-6.4 to 1.9)                               |
| Other meningitis                                                                     | 0.1<br>(< 0.05 to 0.1)           | < 0.05<br>(< 0.05 to < 0.05)            | < 0.05<br>(< 0.05 to < 0.05)        | 11.3<br>(7.3 to 15.7)                             | 1.4<br>(-2.4 to 5.3)                                |
| Encephalitis                                                                         | 0.1<br>(0.1 to 0.2)              | 0.1<br>(< 0.05 to 0.1)                  | < 0.05<br>(< 0.05 to < 0.05)        | 9.8<br>(-8.4 to 30.6)                             | -2.2<br>(-17.6 to 14.9)                             |
| Diphtheria                                                                           | < 0.05<br>(< 0.05 to < 0.05)     | < 0.05<br>(< 0.05 to < 0.05)            | < 0.05<br>(< 0.05 to < 0.05)        | -18.5<br>(-52.3 to 37.9)                          | -28.6<br>(-59.2 to 26.9)                            |
| Whooping cough                                                                       | < 0.05<br>(< 0.05 to < 0.05)     | < 0.05<br>(< 0.05 to < 0.05)            | < 0.05<br>(< 0.05 to < 0.05)        | -76.8<br>(-84.8 to -65.8)                         | -70.5<br>(-80.8 to -56.2)                           |
| Tetanus                                                                              | < 0.05<br>(< 0.05 to < 0.05)     | < 0.05<br>(< 0.05 to < 0.05)            | < 0.05<br>(< 0.05 to < 0.05)        | -37.3<br>(-52.8 to -20.3)                         | -47.2<br>(-59.8 to -32.5)                           |
| Measles                                                                              | < 0.05<br>(0.0 to < 0.05)        | < 0.05<br>(0.0 to < 0.05)               | < 0.05<br>(0.0 to < 0.05)           | --                                                | --                                                  |
| Varicella and herpes zoster                                                          | 0.2<br>(0.1 to 0.2)              | 3.1<br>(2.9 to 3.2)                     | < 0.05<br>(< 0.05 to < 0.05)        | 23.8<br>(8.9 to 40.1)                             | 0.4<br>(-10.7 to 12.8)                              |
| <b>Neglected tropical diseases and malaria</b>                                       | <b>79.3</b><br>(68.1 to 91.4)    | <b>17.0†</b><br>(10.8 to 30.2)          | <b>0.2</b><br>(0.2 to 0.4)          | <b>159.5</b><br>(95.5 to 245.2)                   | <b>130.7</b><br>(74.8 to 207.0)                     |
| Malaria                                                                              | --                               | --                                      | --                                  | --                                                | --                                                  |
| Chagas disease                                                                       | < 0.05<br>(< 0.05 to < 0.05)     | --                                      | < 0.05<br>(< 0.05 to < 0.05)        | 22.7<br>(-23.0 to 101.2)                          | -9.9<br>(-45.9 to 55.3)                             |
| Leishmaniasis                                                                        | --                               | --                                      | --                                  | --                                                | --                                                  |
| Visceral leishmaniasis                                                               | --                               | --                                      | --                                  | --                                                | --                                                  |
| Cutaneous and mucocutaneous leishmaniasis                                            | --                               | --                                      | --                                  | --                                                | --                                                  |
| African trypanosomiasis                                                              | --                               | --                                      | --                                  | --                                                | --                                                  |
| Schistosomiasis                                                                      | 2.9<br>(< 0.05 to 4.9)           | 0.8<br>(0.1 to 1.0)                     | < 0.05<br>(< 0.05 to 0.1)           | --                                                | --                                                  |
| Cysticercosis                                                                        | --                               | --                                      | --                                  | --                                                | --                                                  |
| Cystic echinococcosis                                                                | --                               | --                                      | --                                  | --                                                | --                                                  |
| Lymphatic filariasis                                                                 | --                               | --                                      | --                                  | --                                                | --                                                  |
| Onchocerciasis                                                                       | --                               | --                                      | --                                  | --                                                | --                                                  |
| Trachoma                                                                             | --                               | --                                      | --                                  | --                                                | --                                                  |
| Dengue                                                                               | 0.4<br>(0.2 to 0.7)              | 6.8<br>(4.4 to 9.9)                     | 0.1<br>(< 0.05 to 0.1)              | 375.2<br>(272.5 to 861.6)                         | 339.7<br>(246.5 to 781.2)                           |
| Yellow fever                                                                         | --                               | --                                      | --                                  | --                                                | --                                                  |
| Rabies                                                                               | < 0.05<br>(< 0.05 to < 0.05)     | < 0.05<br>(< 0.05 to < 0.05)            | < 0.05<br>(< 0.05 to < 0.05)        | 48.1<br>(2.0 to 119.2)                            | 35.8<br>(-6.8 to 101.7)                             |
| Intestinal nematode infections                                                       | 76.6<br>(65.2 to 89.4)           | --                                      | 0.1<br>(0.1 to 0.2)                 | 268.0<br>(99.6 to 559.3)                          | 228.9<br>(79.2 to 494.0)                            |
| Ascariasis                                                                           | 36.8<br>(26.8 to 50.4)           | --                                      | < 0.05<br>(< 0.05 to 0.1)           | 12.4<br>(-54.8 to 166.1)                          | 0.6<br>(-59.1 to 134.6)                             |

| Cause                                                                   | Prevalence in thousands (95% UI)        | Incidence in thousands (95% UI)          | YLDs in thousands (95% UI)                          |                                                   |                                                     |
|-------------------------------------------------------------------------|-----------------------------------------|------------------------------------------|-----------------------------------------------------|---------------------------------------------------|-----------------------------------------------------|
|                                                                         | 2016 counts                             | 2016 counts                              | 2016 counts                                         | Percentage change in counts between 2006 and 2016 | Percentage change in age-standardised rates between |
| Trichuriasis                                                            | 27.5<br>(20.0 to 37.7)                  | --                                       | < 0.05<br>(< 0.05 to < 0.05)                        | 12.7<br>(-66.9 to 258.6)                          | -0.3<br>(-70.8 to 219.6)                            |
| Hookworm disease                                                        | 26.2<br>(19.9 to 34.1)                  | --                                       | 0.1<br>(0.1 to 0.2)                                 | 10,663.0<br>(6,345.8 to 18,007.0)                 | 9,315.9<br>(5,616.0 to 15,662.6)                    |
| Food-borne trematodiasis                                                | --                                      | --                                       | --                                                  | --                                                | --                                                  |
| Leprosy                                                                 | < 0.05<br>(< 0.05 to < 0.05)            | < 0.05<br>(< 0.05 to < 0.05)             | < 0.05<br>(< 0.05 to < 0.05)                        | -7.0<br>(-26.5 to 32.0)                           | -30.4<br>(-44.9 to -0.9)                            |
| Ebola virus disease                                                     | --                                      | --                                       | --                                                  | --                                                | --                                                  |
| Zika virus disease                                                      | 0.2<br>(0.1 to 0.4)                     | 9.4<br>(4.4 to 22.1)                     | < 0.05<br>(< 0.05 to < 0.05)                        | --                                                | --                                                  |
| Guinea worm disease                                                     | --                                      | --                                       | --                                                  | --                                                | --                                                  |
| Other neglected tropical diseases                                       | 1.1<br>(0.9 to 1.3)                     | --                                       | < 0.05<br>(< 0.05 to < 0.05)                        | -16.6<br>(-33.5 to 5.6)                           | -8.5<br>(-27.9 to 17.1)                             |
| <b>Maternal disorders</b>                                               | <b>0.2</b><br><b>(0.1 to 0.3)</b>       | <b>3.6†</b><br><b>(3.0 to 4.1)</b>       | <b>&lt; 0.05</b><br><b>(&lt; 0.05 to &lt; 0.05)</b> | <b>-21.3</b><br><b>(-42.0 to 9.5)</b>             | <b>-24.2</b><br><b>(-44.3 to 5.1)</b>               |
| Maternal haemorrhage                                                    | < 0.05<br>(< 0.05 to < 0.05)            | 0.1<br>(0.1 to 0.1)                      | < 0.05<br>(< 0.05 to < 0.05)                        | -12.8<br>(-37.9 to 22.6)                          | -16.8<br>(-41.0 to 17.0)                            |
| Maternal sepsis and other pregnancy related infections                  | 0.1<br>(< 0.05 to 0.1)                  | 0.3<br>(0.2 to 0.4)                      | < 0.05<br>(< 0.05 to < 0.05)                        | -18.5<br>(-59.6 to 60.6)                          | -22.1<br>(-60.9 to 53.7)                            |
| Maternal hypertensive disorders                                         | 0.1<br>(0.1 to 0.1)                     | 0.5<br>(0.5 to 0.6)                      | < 0.05<br>(< 0.05 to < 0.05)                        | -20.5<br>(-50.9 to 32.2)                          | -23.5<br>(-52.8 to 26.3)                            |
| Maternal obstructed labour and uterine rupture                          | < 0.05<br>(< 0.05 to < 0.05)            | 0.1<br>(0.1 to 0.1)                      | < 0.05<br>(< 0.05 to < 0.05)                        | -22.1<br>(-57.4 to 43.1)                          | -24.8<br>(-58.8 to 38.6)                            |
| Maternal abortion, miscarriage, and ectopic pregnancy                   | < 0.05<br>(< 0.05 to < 0.05)            | 2.6<br>(2.0 to 3.1)                      | < 0.05<br>(< 0.05 to < 0.05)                        | -23.3<br>(-57.7 to 36.8)                          | -26.1<br>(-59.6 to 33.0)                            |
| Other maternal disorders                                                | --                                      | --                                       | < 0.05<br>(< 0.05 to < 0.05)                        | -25.1<br>(-44.8 to 4.3)                           | -27.7<br>(-46.9 to 0.2)                             |
| <b>Neonatal disorders</b>                                               | <b>3.3</b><br><b>(2.7 to 4.1)</b>       | <b>0.6</b><br><b>--</b>                  | <b>0.6</b><br><b>(0.4 to 1.0)</b>                   | <b>13.3</b><br><b>(-3.2 to 35.1)</b>              | <b>9.9</b><br><b>(-5.9 to 31.1)</b>                 |
| Neonatal preterm birth complications                                    | 2.7<br>(2.0 to 3.8)                     | --                                       | 0.3<br>(0.2 to 0.5)                                 | 11.2<br>(-12.6 to 42.5)                           | 7.4<br>(-15.6 to 38.8)                              |
| Neonatal encephalopathy due to birth asphyxia and trauma                | 0.1<br>(0.1 to 0.2)                     | --                                       | < 0.05<br>(< 0.05 to < 0.05)                        | 51.2<br>(-20.8 to 196.2)                          | 43.4<br>(-25.9 to 180.8)                            |
| Neonatal sepsis and other neonatal infections                           | 0.5<br>(0.2 to 1.2)                     | --                                       | 0.2<br>(0.1 to 0.6)                                 | 17.9<br>(-0.6 to 60.4)                            | 13.4<br>(-4.0 to 56.2)                              |
| Hemolytic disease and other neonatal jaundice                           | 0.1<br>(0.1 to 0.1)                     | --                                       | < 0.05<br>(< 0.05 to < 0.05)                        | 3.7<br>(-15.7 to 29.1)                            | -2.4<br>(-20.1 to 20.3)                             |
| Other neonatal disorders                                                | --                                      | --                                       | < 0.05<br>(< 0.05 to < 0.05)                        | -19.9<br>(-33.6 to -3.8)                          | 5.4<br>(-12.7 to 26.5)                              |
| <b>Nutritional deficiencies</b>                                         | <b>37.0</b><br><b>(33.2 to 40.7)</b>    | <b>8.8†</b><br><b>(6.0 to 12.7)</b>      | <b>0.7</b><br><b>(0.4 to 1.0)</b>                   | <b>-11.2</b><br><b>(-23.4 to 2.9)</b>             | <b>-14.5</b><br><b>(-25.3 to -1.6)</b>              |
| Protein-energy malnutrition                                             | 0.3<br>(0.2 to 0.4)                     | 0.2<br>(0.1 to 0.3)                      | < 0.05<br>(< 0.05 to < 0.05)                        | -29.8<br>(-51.1 to -2.1)                          | -7.9<br>(-35.4 to 28.2)                             |
| Iodine deficiency                                                       | 0.6<br>(0.5 to 0.7)                     | < 0.05<br>(< 0.05 to < 0.05)             | < 0.05<br>(< 0.05 to < 0.05)                        | 14.8<br>(-1.4 to 33.7)                            | -3.6<br>(-16.8 to 11.4)                             |
| Vitamin A deficiency                                                    | 9.8<br>(6.8 to 13.7)                    | 8.6<br>(5.8 to 12.5)                     | < 0.05<br>(< 0.05 to < 0.05)                        | 2.6<br>(-13.4 to 23.4)                            | 0.3<br>(-15.6 to 19.8)                              |
| Iron-deficiency anaemia                                                 | 27.8<br>(24.1 to 31.8)                  | --                                       | 0.6<br>(0.4 to 1.0)                                 | -11.2<br>(-23.8 to 3.8)                           | -15.1<br>(-26.7 to -0.6)                            |
| Other nutritional deficiencies                                          | --                                      | --                                       | < 0.05<br>(< 0.05 to < 0.05)                        | -30.6<br>(-52.4 to -2.2)                          | -8.9<br>(-37.3 to 27.6)                             |
| <b>Other communicable, maternal, neonatal, and nutritional diseases</b> | <b>50.8</b><br><b>(47.3 to 54.4)</b>    | <b>16.2</b><br><b>(12.9 to 21.2)</b>     | <b>0.1</b><br><b>(&lt; 0.05 to 0.1)</b>             | <b>8.4</b><br><b>(-0.9 to 17.9)</b>               | <b>-0.6</b><br><b>(-8.5 to 7.7)</b>                 |
| Sexually transmitted diseases excluding HIV                             | 45.5<br>(42.1 to 49.3)                  | 15.7<br>(12.4 to 20.7)                   | 0.1<br>(< 0.05 to 0.1)                              | 16.2<br>(6.8 to 26.0)                             | 1.8<br>(-6.3 to 10.3)                               |
| Syphilis                                                                | 1.9<br>(1.5 to 2.2)                     | 1.3<br>(1.1 to 1.7)                      | < 0.05<br>(< 0.05 to < 0.05)                        | 28.2<br>(12.5 to 45.5)                            | -4.3<br>(-15.7 to 9.0)                              |
| Chlamydial infection                                                    | 1.7<br>(1.3 to 2.2)                     | 1.3<br>(1.0 to 1.6)                      | < 0.05<br>(< 0.05 to < 0.05)                        | 9.7<br>(-7.1 to 29.4)                             | 1.8<br>(-14.0 to 20.0)                              |
| Gonococcal infection                                                    | 1.4<br>(0.6 to 2.7)                     | 4.8<br>(1.8 to 9.6)                      | < 0.05<br>(< 0.05 to < 0.05)                        | 16.6<br>(-4.4 to 39.6)                            | 5.5<br>(-14.5 to 24.1)                              |
| Trichomoniasis                                                          | 6.4<br>(5.6 to 7.4)                     | 5.6<br>(4.8 to 6.5)                      | < 0.05<br>(< 0.05 to < 0.05)                        | 15.0<br>(7.3 to 23.2)                             | -0.2<br>(-6.4 to 6.5)                               |
| Genital herpes                                                          | 37.4<br>(32.4 to 43.0)                  | 2.3<br>(2.0 to 2.8)                      | < 0.05<br>(< 0.05 to < 0.05)                        | 22.4<br>(13.9 to 29.9)                            | 0.2<br>(-5.5 to 5.9)                                |
| Other sexually transmitted diseases                                     | 0.4<br>(0.4 to 0.4)                     | 0.3<br>(0.3 to 0.4)                      | < 0.05<br>(< 0.05 to < 0.05)                        | 13.2<br>(1.1 to 26.6)                             | 1.9<br>(-8.7 to 13.4)                               |
| Hepatitis                                                               | 7.0<br>(6.1 to 7.9)                     | 0.5<br>(0.4 to 0.6)                      | < 0.05<br>(< 0.05 to < 0.05)                        | -24.2<br>(-43.7 to 2.2)                           | -33.0<br>(-49.2 to -12.3)                           |
| Acute hepatitis A                                                       | < 0.05<br>(< 0.05 to < 0.05)            | 0.1<br>(< 0.05 to 0.1)                   | < 0.05<br>(< 0.05 to < 0.05)                        | -25.8<br>(-75.3 to 141.2)                         | -32.4<br>(-76.3 to 104.1)                           |
| Hepatitis B                                                             | 3.0<br>(2.4 to 3.8)                     | 0.3<br>(0.2 to 0.4)                      | < 0.05<br>(< 0.05 to < 0.05)                        | -23.0<br>(-38.2 to -5.2)                          | -37.0<br>(-48.6 to -22.8)                           |
| Hepatitis C                                                             | 3.9<br>(3.5 to 4.4)                     | 0.1<br>(0.1 to 0.1)                      | < 0.05<br>(< 0.05 to < 0.05)                        | -20.8<br>(-37.7 to -0.2)                          | -9.1<br>(-32.1 to 19.0)                             |
| Acute hepatitis E                                                       | < 0.05<br>(< 0.05 to < 0.05)            | < 0.05<br>(< 0.05 to 0.1)                | < 0.05<br>(< 0.05 to < 0.05)                        | -28.2<br>(-34.8 to -20.1)                         | -35.5<br>(-40.1 to -30.2)                           |
| Other infectious diseases                                               | 0.9<br>(0.8 to 1.1)                     | < 0.05<br>(< 0.05 to < 0.05)             | < 0.05<br>(< 0.05 to < 0.05)                        | -7.9<br>(-23.5 to 11.3)                           | -4.1<br>(-20.2 to 17.1)                             |
| <b>Non-communicable diseases</b>                                        | <b>169.4</b><br><b>(168.6 to 170.2)</b> | <b>502.8†</b><br><b>(478.2 to 529.2)</b> | <b>16.9</b><br><b>(12.4 to 21.9)</b>                | <b>19.9</b><br><b>(17.1 to 22.9)</b>              | <b>-1.0</b><br><b>(-3.2 to 1.2)</b>                 |
| <b>Neoplasms</b>                                                        | <b>1.1</b><br><b>(1.1 to 1.2)</b>       | <b>0.4</b><br><b>(0.4 to 0.4)</b>        | <b>0.1</b><br><b>(0.1 to 0.2)</b>                   | <b>40.0</b><br><b>(33.2 to 46.9)</b>              | <b>2.1</b><br><b>(-3.0 to 7.4)</b>                  |
| Lip and oral cavity cancer                                              | < 0.05<br>(< 0.05 to < 0.05)            | < 0.05<br>(< 0.05 to < 0.05)             | < 0.05<br>(< 0.05 to < 0.05)                        | 29.7<br>(13.3 to 46.1)                            | -7.6<br>(-18.8 to 4.7)                              |
| Nasopharynx cancer                                                      | < 0.05<br>(< 0.05 to < 0.05)            | < 0.05<br>(< 0.05 to < 0.05)             | < 0.05<br>(< 0.05 to < 0.05)                        | 30.9<br>(18.2 to 45.8)                            | 3.9<br>(-6.0 to 15.4)                               |
| Other pharynx cancer                                                    | < 0.05<br>(< 0.05 to < 0.05)            | < 0.05<br>(< 0.05 to < 0.05)             | < 0.05<br>(< 0.05 to < 0.05)                        | 34.0<br>(15.8 to 57.3)                            | -7.7<br>(-20.5 to 8.7)                              |
| Oesophageal cancer                                                      | < 0.05<br>(< 0.05 to < 0.05)            | < 0.05<br>(< 0.05 to < 0.05)             | < 0.05<br>(< 0.05 to < 0.05)                        | 17.3<br>(-3.2 to 40.6)                            | -18.3<br>(-33.4 to -0.6)                            |
| Stomach cancer                                                          | < 0.05<br>(< 0.05 to < 0.05)            | < 0.05<br>(< 0.05 to < 0.05)             | < 0.05<br>(< 0.05 to < 0.05)                        | 23.4<br>(6.0 to 43.2)                             | -12.2<br>(-25.5 to 2.7)                             |
| Colon and rectum cancer                                                 | 0.1<br>(0.1 to 0.1)                     | < 0.05<br>(< 0.05 to < 0.05)             | < 0.05<br>(< 0.05 to < 0.05)                        | 57.7<br>(38.2 to 80.1)                            | 12.7<br>(-1.8 to 30.1)                              |
| Liver cancer                                                            | < 0.05<br>(< 0.05 to < 0.05)            | < 0.05<br>(< 0.05 to < 0.05)             | < 0.05<br>(< 0.05 to < 0.05)                        | 25.2<br>(15.7 to 35.4)                            | -10.1<br>(-17.2 to -2.5)                            |
| Liver cancer due to hepatitis B                                         | < 0.05<br>(< 0.05 to < 0.05)            | < 0.05<br>(< 0.05 to < 0.05)             | < 0.05<br>(< 0.05 to < 0.05)                        | 26.6<br>(16.5 to 38.4)                            | -8.3<br>(-16.0 to 0.7)                              |



| Cause                                              | Prevalence in thousands (95% UI)     | Incidence in thousands (95% UI)    | YLDs in thousands (95% UI)        |                                                   |                                                     |
|----------------------------------------------------|--------------------------------------|------------------------------------|-----------------------------------|---------------------------------------------------|-----------------------------------------------------|
|                                                    | 2016 counts                          | 2016 counts                        | 2016 counts                       | Percentage change in counts between 2006 and 2016 | Percentage change in age-standardised rates between |
| Liver cancer due to hepatitis C                    | < 0.05<br>(< 0.05 to < 0.05)         | < 0.05<br>(< 0.05 to < 0.05)       | < 0.05<br>(< 0.05 to < 0.05)      | 29.9<br>(19.1 to 41.4)                            | -6.6<br>(-14.4 to 1.9)                              |
| Liver cancer due to alcohol use                    | < 0.05<br>(< 0.05 to < 0.05)         | < 0.05<br>(< 0.05 to < 0.05)       | < 0.05<br>(< 0.05 to < 0.05)      | 12.9<br>(3.0 to 24.0)                             | -21.5<br>(-28.6 to -13.3)                           |
| Liver cancer due to other causes                   | < 0.05<br>(< 0.05 to < 0.05)         | < 0.05<br>(< 0.05 to < 0.05)       | < 0.05<br>(< 0.05 to < 0.05)      | 32.1<br>(20.5 to 44.7)                            | -2.6<br>(-11.5 to 6.9)                              |
| Gallbladder and biliary tract cancer               | < 0.05<br>(< 0.05 to < 0.05)         | < 0.05<br>(< 0.05 to < 0.05)       | < 0.05<br>(< 0.05 to < 0.05)      | 22.8<br>(15.6 to 30.4)                            | -12.9<br>(-18.1 to -7.4)                            |
| Pancreatic cancer                                  | < 0.05<br>(< 0.05 to < 0.05)         | < 0.05<br>(< 0.05 to < 0.05)       | < 0.05<br>(< 0.05 to < 0.05)      | 32.5<br>(21.3 to 44.9)                            | -6.2<br>(-13.6 to 2.0)                              |
| Larynx cancer                                      | < 0.05<br>(< 0.05 to < 0.05)         | < 0.05<br>(< 0.05 to < 0.05)       | < 0.05<br>(< 0.05 to < 0.05)      | 32.6<br>(14.2 to 53.1)                            | -8.3<br>(-21.3 to 6.3)                              |
| Tracheal, bronchus, and lung cancer                | < 0.05<br>(< 0.05 to < 0.05)         | < 0.05<br>(< 0.05 to < 0.05)       | < 0.05<br>(< 0.05 to < 0.05)      | 34.9<br>(13.0 to 61.7)                            | -6.3<br>(-22.6 to 13.8)                             |
| Malignant skin melanoma                            | < 0.05<br>(< 0.05 to < 0.05)         | < 0.05<br>(< 0.05 to < 0.05)       | < 0.05<br>(< 0.05 to < 0.05)      | 46.3<br>(22.5 to 73.4)                            | 9.6<br>(-9.2 to 30.1)                               |
| Non-melanoma skin cancer                           | < 0.05<br>(< 0.05 to < 0.05)         | < 0.05<br>(< 0.05 to < 0.05)       | < 0.05<br>(< 0.05 to < 0.05)      | -12.5<br>(-60.8 to 83.0)                          | -36.3<br>(-71.5 to 35.3)                            |
| Non-melanoma skin cancer (squamous-cell carcinoma) | < 0.05<br>(< 0.05 to < 0.05)         | < 0.05<br>(< 0.05 to < 0.05)       | < 0.05<br>(< 0.05 to < 0.05)      | -14.7<br>(-62.3 to 88.6)                          | -37.8<br>(-72.5 to 39.1)                            |
| Non-melanoma skin cancer (basal-cell carcinoma)    | < 0.05<br>(< 0.05 to < 0.05)         | < 0.05<br>(< 0.05 to < 0.05)       | < 0.05<br>(< 0.05 to < 0.05)      | 37.1<br>(17.9 to 59.6)                            | -1.2<br>(-13.7 to 15.8)                             |
| Breast cancer                                      | 0.2<br>(0.2 to 0.2)                  | < 0.05<br>(< 0.05 to 0.1)          | < 0.05<br>(< 0.05 to < 0.05)      | 45.4<br>(23.9 to 70.4)                            | 4.6<br>(-10.4 to 22.6)                              |
| Cervical cancer                                    | 0.1<br>(0.1 to 0.1)                  | < 0.05<br>(< 0.05 to < 0.05)       | < 0.05<br>(< 0.05 to < 0.05)      | 2.6<br>(-18.6 to 28.3)                            | -23.7<br>(-38.8 to -5.2)                            |
| Uterine cancer                                     | 0.1<br>(0.1 to 0.1)                  | < 0.05<br>(< 0.05 to < 0.05)       | < 0.05<br>(< 0.05 to < 0.05)      | 84.2<br>(54.1 to 121.8)                           | 27.6<br>(6.6 to 54.0)                               |
| Ovarian cancer                                     | < 0.05<br>(< 0.05 to < 0.05)         | < 0.05<br>(< 0.05 to < 0.05)       | < 0.05<br>(< 0.05 to < 0.05)      | 27.1<br>(-3.3 to 66.3)                            | -6.6<br>(-30.7 to 25.9)                             |
| Prostate cancer                                    | 0.4<br>(0.3 to 0.5)                  | 0.1<br>(0.1 to 0.1)                | < 0.05<br>(< 0.05 to 0.1)         | 45.4<br>(26.8 to 62.8)                            | 5.5<br>(-8.4 to 19.4)                               |
| Testicular cancer                                  | < 0.05<br>(< 0.05 to < 0.05)         | < 0.05<br>(< 0.05 to < 0.05)       | < 0.05<br>(< 0.05 to < 0.05)      | 7.5<br>(-24.3 to 51.5)                            | -5.3<br>(-32.9 to 32.2)                             |
| Kidney cancer                                      | < 0.05<br>(< 0.05 to < 0.05)         | < 0.05<br>(< 0.05 to < 0.05)       | < 0.05<br>(< 0.05 to < 0.05)      | 40.6<br>(23.2 to 59.5)                            | 6.2<br>(-6.6 to 20.2)                               |
| Bladder cancer                                     | < 0.05<br>(< 0.05 to < 0.05)         | < 0.05<br>(< 0.05 to < 0.05)       | < 0.05<br>(< 0.05 to < 0.05)      | 41.0<br>(22.1 to 60.5)                            | 1.3<br>(-12.3 to 16.0)                              |
| Brain and nervous system cancer                    | < 0.05<br>(< 0.05 to < 0.05)         | < 0.05<br>(< 0.05 to < 0.05)       | < 0.05<br>(< 0.05 to < 0.05)      | 19.0<br>(9.5 to 36.9)                             | -6.9<br>(-14.4 to 6.5)                              |
| Thyroid cancer                                     | < 0.05<br>(< 0.05 to < 0.05)         | < 0.05<br>(< 0.05 to < 0.05)       | < 0.05<br>(< 0.05 to < 0.05)      | 123.6<br>(75.7 to 179.8)                          | 69.8<br>(35.4 to 108.7)                             |
| Mesothelioma                                       | < 0.05<br>(< 0.05 to < 0.05)         | < 0.05<br>(< 0.05 to < 0.05)       | < 0.05<br>(< 0.05 to < 0.05)      | 34.2<br>(24.5 to 44.4)                            | -2.9<br>(-9.9 to 4.6)                               |
| Hodgkin lymphoma                                   | < 0.05<br>(< 0.05 to < 0.05)         | < 0.05<br>(< 0.05 to < 0.05)       | < 0.05<br>(< 0.05 to < 0.05)      | 23.7<br>(12.3 to 37.2)                            | 0.8<br>(-8.2 to 11.5)                               |
| Non-Hodgkin's lymphoma                             | < 0.05<br>(< 0.05 to < 0.05)         | < 0.05<br>(< 0.05 to < 0.05)       | < 0.05<br>(< 0.05 to < 0.05)      | 30.3<br>(16.4 to 44.9)                            | -0.9<br>(-10.8 to 10.3)                             |
| Multiple myeloma                                   | < 0.05<br>(< 0.05 to < 0.05)         | < 0.05<br>(< 0.05 to < 0.05)       | < 0.05<br>(< 0.05 to < 0.05)      | 64.7<br>(29.0 to 104.2)                           | 14.3<br>(-12.2 to 44.2)                             |
| Leukaemia                                          | < 0.05<br>(< 0.05 to < 0.05)         | < 0.05<br>(< 0.05 to < 0.05)       | < 0.05<br>(< 0.05 to < 0.05)      | 22.1<br>(13.1 to 31.6)                            | -3.0<br>(-10.4 to 4.5)                              |
| Acute lymphoid leukaemia                           | < 0.05<br>(< 0.05 to < 0.05)         | < 0.05<br>(< 0.05 to < 0.05)       | < 0.05<br>(< 0.05 to < 0.05)      | 13.3<br>(-2.0 to 28.4)                            | 11.3<br>(-2.8 to 26.0)                              |
| Chronic lymphoid leukaemia                         | < 0.05<br>(< 0.05 to < 0.05)         | < 0.05<br>(< 0.05 to < 0.05)       | < 0.05<br>(< 0.05 to < 0.05)      | 88.8<br>(40.1 to 129.4)                           | 34.8<br>(-0.6 to 64.6)                              |
| Acute myeloid leukaemia                            | < 0.05<br>(< 0.05 to < 0.05)         | < 0.05<br>(< 0.05 to < 0.05)       | < 0.05<br>(< 0.05 to < 0.05)      | 31.3<br>(18.9 to 44.1)                            | 10.0<br>(0.1 to 20.3)                               |
| Chronic myeloid leukaemia                          | < 0.05<br>(< 0.05 to < 0.05)         | < 0.05<br>(< 0.05 to < 0.05)       | < 0.05<br>(< 0.05 to < 0.05)      | 32.2<br>(15.7 to 53.9)                            | -0.5<br>(-13.0 to 15.9)                             |
| Other leukaemia                                    | < 0.05<br>(< 0.05 to < 0.05)         | < 0.05<br>(< 0.05 to < 0.05)       | < 0.05<br>(< 0.05 to < 0.05)      | -0.1<br>(-11.1 to 12.6)                           | -21.6<br>(-30.7 to -11.1)                           |
| Other neoplasms                                    | 0.1<br>(0.1 to 0.1)                  | < 0.05<br>(< 0.05 to < 0.05)       | < 0.05<br>(< 0.05 to < 0.05)      | 63.1<br>(40.6 to 90.8)                            | 26.6<br>(9.2 to 47.4)                               |
| <b>Cardiovascular diseases</b>                     | <b>13.2</b><br><b>(12.8 to 13.7)</b> | <b>1.3†</b><br><b>(1.2 to 1.4)</b> | <b>0.7</b><br><b>(0.5 to 1.0)</b> | <b>31.9</b><br><b>(28.1 to 35.9)</b>              | <b>-0.8</b><br><b>(-3.7 to 2.1)</b>                 |
| Rheumatic heart disease                            | 1.7<br>(1.5 to 1.9)                  | < 0.05<br>(< 0.05 to < 0.05)       | 0.1<br>(0.1 to 0.1)               | 21.1<br>(11.5 to 31.9)                            | 3.8<br>(-4.2 to 12.8)                               |
| Ischaemic heart disease                            | 4.1<br>(3.9 to 4.3)                  | 0.5<br>(0.5 to 0.6)                | 0.2<br>(0.1 to 0.2)               | 38.5<br>(32.4 to 44.8)                            | 0.6<br>(-3.6 to 5.2)                                |
| Cerebrovascular disease                            | 1.8<br>(1.7 to 1.9)                  | 0.2‡<br>(0.2 to 0.3)               | 0.2<br>(0.1 to 0.2)               | 29.0<br>(20.8 to 37.5)                            | -5.1<br>(-11.0 to 1.2)                              |
| Ischaemic stroke                                   | 1.4<br>(1.3 to 1.6)                  | 0.2‡<br>(0.1 to 0.2)               | 0.1<br>(0.1 to 0.2)               | 28.8<br>(19.1 to 39.7)                            | -5.7<br>(-12.5 to 2.5)                              |
| Hemorrhagic stroke                                 | 0.4<br>(0.4 to 0.5)                  | 0.1‡<br>(0.1 to 0.1)               | < 0.05<br>(< 0.05 to 0.1)         | 29.7<br>(16.1 to 44.7)                            | -3.2<br>(-13.9 to 8.3)                              |
| Hypertensive heart disease                         | 0.5<br>(0.4 to 0.6)                  | --                                 | < 0.05<br>(< 0.05 to 0.1)         | 36.4<br>(24.8 to 49.9)                            | -0.2<br>(-8.7 to 9.9)                               |
| Cardiomyopathy and myocarditis                     | 0.2<br>(0.2 to 0.2)                  | < 0.05†<br>(< 0.05 to 0.1)         | < 0.05<br>(< 0.05 to < 0.05)      | 29.2<br>(15.0 to 44.8)                            | 0.7<br>(-9.7 to 13.7)                               |
| Myocarditis                                        | < 0.05<br>(< 0.05 to < 0.05)         | < 0.05<br>(< 0.05 to 0.1)          | < 0.05<br>(< 0.05 to < 0.05)      | 21.8<br>(9.0 to 36.1)                             | 0.6<br>(-10.7 to 13.7)                              |
| Alcoholic cardiomyopathy                           | < 0.05<br>(< 0.05 to < 0.05)         | --                                 | < 0.05<br>(< 0.05 to < 0.05)      | 44.3<br>(16.3 to 82.8)                            | 0.8<br>(-18.3 to 27.1)                              |
| Other cardiomyopathy                               | 0.1<br>(0.1 to 0.1)                  | --                                 | < 0.05<br>(< 0.05 to < 0.05)      | 27.5<br>(10.1 to 48.1)                            | 0.8<br>(-12.5 to 16.3)                              |
| Atrial fibrillation and flutter                    | 1.3<br>(1.1 to 1.5)                  | 0.1<br>(0.1 to 0.1)                | 0.1<br>(0.1 to 0.1)               | 37.8<br>(29.1 to 46.6)                            | 0.2<br>(-6.0 to 6.5)                                |
| Peripheral vascular disease                        | 3.0<br>(2.6 to 3.5)                  | 0.3<br>(0.2 to 0.3)                | < 0.05<br>(< 0.05 to < 0.05)      | 32.0<br>(22.9 to 42.6)                            | -4.7<br>(-11.1 to 2.4)                              |
| Endocarditis                                       | < 0.05<br>(< 0.05 to < 0.05)         | < 0.05<br>(< 0.05 to < 0.05)       | < 0.05<br>(< 0.05 to < 0.05)      | 30.6<br>(11.2 to 50.7)                            | 0.6<br>(-15.2 to 17.7)                              |
| Other cardiovascular and circulatory diseases      | 2.5<br>(2.2 to 3.0)                  | --                                 | 0.1<br>(0.1 to 0.2)               | 29.9<br>(19.7 to 40.3)                            | 0.2<br>(-7.1 to 8.2)                                |
| <b>Chronic respiratory diseases</b>                | <b>20.5</b><br><b>(19.5 to 21.5)</b> | <b>3.0†</b><br><b>(2.8 to 3.2)</b> | <b>0.7</b><br><b>(0.5 to 1.0)</b> | <b>8.0</b><br><b>(3.5 to 13.2)</b>                | <b>1.4</b><br><b>(-2.8 to 5.9)</b>                  |
| Chronic obstructive pulmonary disease              | 5.6<br>(5.2 to 6.1)                  | 0.4<br>(0.3 to 0.4)                | 0.1<br>(0.1 to 0.1)               | 28.3<br>(10.3 to 48.7)                            | -5.0<br>(-18.8 to 10.8)                             |
| Pneumoconiosis                                     | < 0.05<br>(< 0.05 to < 0.05)         | < 0.05<br>(< 0.05 to < 0.05)       | < 0.05<br>(< 0.05 to < 0.05)      | 36.2<br>(22.0 to 51.5)                            | 0.1<br>(-9.2 to 10.1)                               |
| Silicosis                                          | < 0.05<br>(< 0.05 to < 0.05)         | < 0.05<br>(< 0.05 to < 0.05)       | < 0.05<br>(< 0.05 to < 0.05)      | 46.7<br>(39.8 to 53.6)                            | 3.7<br>(-1.4 to 8.8)                                |



| Cause                                                          | Prevalence in thousands (95% UI)  | Incidence in thousands (95% UI)               | YLDs in thousands (95% UI)                    |                                                   |                                                     |
|----------------------------------------------------------------|-----------------------------------|-----------------------------------------------|-----------------------------------------------|---------------------------------------------------|-----------------------------------------------------|
|                                                                | 2016 counts<br>(< 0.05 to < 0.05) | 2016 counts<br>(< 0.05 to < 0.05)             | 2016 counts<br>(< 0.05 to < 0.05)             | Percentage change in counts between 2006 and 2016 | Percentage change in age-standardised rates between |
| Asbestosis                                                     | < 0.05<br>(< 0.05 to < 0.05)      | < 0.05<br>(< 0.05 to < 0.05)                  | < 0.05<br>(< 0.05 to < 0.05)                  | 29.4<br>(-1.6 to 69.4)                            | -1.0<br>(-21.9 to 25.1)                             |
| Coal workers pneumoconiosis                                    | --                                | --                                            | --                                            | --                                                | --                                                  |
| Other pneumoconiosis                                           | < 0.05<br>(< 0.05 to < 0.05)      | < 0.05<br>(< 0.05 to < 0.05)                  | < 0.05<br>(< 0.05 to < 0.05)                  | 36.9<br>(23.2 to 54.9)                            | -0.7<br>(-10.7 to 12.8)                             |
| Asthma                                                         | 15.3<br>(14.1 to 16.4)            | 2.7<br>(2.5 to 2.9)                           | 0.6<br>(0.4 to 0.9)                           | 4.8<br>(0.0 to 9.8)                               | 2.1<br>(-2.3 to 6.8)                                |
| Interstitial lung disease and pulmonary sarcoidosis            | 0.1<br>(0.1 to 0.1)               | < 0.05<br>(< 0.05 to < 0.05)                  | < 0.05<br>(< 0.05 to < 0.05)                  | 31.1<br>(19.7 to 44.0)                            | 3.7<br>(-5.7 to 14.4)                               |
| Other chronic respiratory diseases                             | --                                | --                                            | < 0.05<br>(< 0.05 to < 0.05)                  | 35.7<br>(6.2 to 71.4)                             | 32.7<br>(4.7 to 67.2)                               |
| <b>Cirrhosis and other chronic liver diseases</b>              | <b>1.4<br/>(1.4 to 1.5)</b>       | <b>&lt; 0.05<br/>(&lt; 0.05 to &lt; 0.05)</b> | <b>&lt; 0.05<br/>(&lt; 0.05 to &lt; 0.05)</b> | <b>27.9<br/>(14.7 to 42.1)</b>                    | <b>2.0<br/>(-7.4 to 12.7)</b>                       |
| Cirrhosis and other chronic liver diseases due to hepatitis B  | 0.1<br>(0.1 to 0.2)               | < 0.05<br>(< 0.05 to < 0.05)                  | < 0.05<br>(< 0.05 to < 0.05)                  | 40.0<br>(9.8 to 78.6)                             | 3.2<br>(-19.5 to 31.1)                              |
| Cirrhosis and other chronic liver diseases due to hepatitis C  | 0.4<br>(0.4 to 0.5)               | < 0.05<br>(< 0.05 to < 0.05)                  | < 0.05<br>(< 0.05 to < 0.05)                  | 45.5<br>(20.7 to 75.7)                            | 7.3<br>(-10.0 to 29.2)                              |
| Cirrhosis and other chronic liver diseases due to alcohol use  | 0.5<br>(0.5 to 0.6)               | < 0.05<br>(< 0.05 to < 0.05)                  | < 0.05<br>(< 0.05 to < 0.05)                  | 33.6<br>(13.4 to 54.9)                            | -2.5<br>(-16.6 to 12.3)                             |
| Cirrhosis and other chronic liver diseases due to other causes | 0.3<br>(0.3 to 0.3)               | < 0.05<br>(< 0.05 to < 0.05)                  | < 0.05<br>(< 0.05 to < 0.05)                  | 8.6<br>(-12.4 to 33.7)                            | 2.6<br>(-16.6 to 25.9)                              |
| <b>Digestive diseases</b>                                      | <b>6.1<br/>(5.7 to 6.6)</b>       | <b>4.7<sup>†</sup><br/>(4.4 to 5.0)</b>       | <b>0.2<br/>(0.2 to 0.3)</b>                   | <b>45.3<br/>(31.5 to 61.0)</b>                    | <b>19.1<br/>(8.8 to 30.5)</b>                       |
| Peptic ulcer disease                                           | 2.2<br>(2.0 to 2.5)               | 0.2<br>(0.2 to 0.2)                           | < 0.05<br>(< 0.05 to 0.1)                     | 92.9<br>(59.6 to 134.5)                           | 46.6<br>(21.5 to 76.8)                              |
| Gastritis and duodenitis                                       | 2.3<br>(2.0 to 2.6)               | 1.1<br>(0.9 to 1.2)                           | < 0.05<br>(< 0.05 to 0.1)                     | 101.8<br>(69.8 to 138.5)                          | 54.7<br>(30.5 to 82.7)                              |
| Appendicitis                                                   | < 0.05<br>(< 0.05 to < 0.05)      | 0.4<br>(0.4 to 0.4)                           | < 0.05<br>(< 0.05 to < 0.05)                  | 1.5<br>(-28.3 to 41.6)                            | -1.1<br>(-29.4 to 35.4)                             |
| Paralytic ileus and intestinal obstruction                     | < 0.05<br>(< 0.05 to < 0.05)      | 0.1<br>(0.1 to 0.1)                           | < 0.05<br>(< 0.05 to < 0.05)                  | 18.8<br>(13.5 to 24.7)                            | 5.3<br>(2.1 to 9.2)                                 |
| Inguinal, femoral, and abdominal hernia                        | 1.5<br>(1.3 to 1.7)               | 1.1<br>(1.0 to 1.3)                           | 0.1<br>(0.1 to 0.1)                           | 19.9<br>(8.2 to 33.0)                             | 2.7<br>(-6.1 to 12.3)                               |
| Inflammatory bowel disease                                     | < 0.05<br>(< 0.05 to < 0.05)      | < 0.05<br>(< 0.05 to < 0.05)                  | < 0.05<br>(< 0.05 to < 0.05)                  | 26.1<br>(20.1 to 32.6)                            | -1.2<br>(-6.0 to 3.9)                               |
| Vascular intestinal disorders                                  | < 0.05<br>(< 0.05 to < 0.05)      | < 0.05<br>(< 0.05 to < 0.05)                  | < 0.05<br>(< 0.05 to < 0.05)                  | 21.7<br>(14.1 to 29.7)                            | 5.1<br>(0.3 to 10.1)                                |
| Gallbladder and biliary diseases                               | 0.3<br>(0.2 to 0.3)               | 1.8<br>(1.6 to 2.0)                           | < 0.05<br>(< 0.05 to < 0.05)                  | 44.4<br>(16.6 to 77.2)                            | 10.5<br>(-10.4 to 34.7)                             |
| Pancreatitis                                                   | < 0.05<br>(< 0.05 to < 0.05)      | 0.1<br>(0.1 to 0.1)                           | < 0.05<br>(< 0.05 to < 0.05)                  | 43.6<br>(38.1 to 49.7)                            | 14.3<br>(11.1 to 17.8)                              |
| Other digestive diseases                                       | --                                | --                                            | < 0.05<br>(< 0.05 to < 0.05)                  | 42.1<br>(28.5 to 58.1)                            | 21.1<br>(10.2 to 32.7)                              |
| <b>Neurological disorders</b>                                  | <b>73.9<br/>(70.9 to 77.4)</b>    | <b>34.7<br/>(29.7 to 40.2)</b>                | <b>1.9<br/>(1.3 to 2.7)</b>                   | <b>16.0<br/>(-4.4 to 39.8)</b>                    | <b>-0.7<br/>(-18.2 to 20.2)</b>                     |
| Alzheimer's disease and other dementias                        | 1.0<br>(0.8 to 1.2)               | 0.2<br>(0.1 to 0.2)                           | 0.1<br>(0.1 to 0.2)                           | 27.0<br>(20.9 to 32.9)                            | -1.1<br>(-5.2 to 3.1)                               |
| Parkinson's disease                                            | 0.1<br>(0.1 to 0.2)               | < 0.05<br>(< 0.05 to < 0.05)                  | < 0.05<br>(< 0.05 to < 0.05)                  | 43.6<br>(26.9 to 62.6)                            | 4.2<br>(-7.6 to 19.1)                               |
| Epilepsy                                                       | 0.7<br>(0.2 to 1.3)               | 0.1<br>(< 0.05 to 0.1)                        | 0.2<br>(< 0.05 to 0.5)                        | 6.0<br>(-79.7 to 483.0)                           | -4.1<br>(-81.3 to 428.4)                            |
| Multiple sclerosis                                             | < 0.05<br>(< 0.05 to < 0.05)      | < 0.05<br>(< 0.05 to < 0.05)                  | < 0.05<br>(< 0.05 to < 0.05)                  | 36.6<br>(31.5 to 42.4)                            | 8.0<br>(4.2 to 12.3)                                |
| Motor neuron disease                                           | < 0.05<br>(< 0.05 to < 0.05)      | < 0.05<br>(< 0.05 to < 0.05)                  | < 0.05<br>(< 0.05 to < 0.05)                  | 21.9<br>(16.7 to 27.5)                            | 3.1<br>(-0.6 to 6.9)                                |
| Migraine                                                       | 27.4<br>(25.8 to 29.1)            | 3.0<br>(2.8 to 3.2)                           | 1.3<br>(0.8 to 1.8)                           | 15.8<br>(11.7 to 20.5)                            | -0.5<br>(-3.9 to 3.0)                               |
| Tension-type headache                                          | 56.6<br>(50.9 to 62.9)            | 31.4<br>(26.5 to 36.9)                        | 0.2<br>(0.1 to 0.4)                           | 16.9<br>(10.8 to 23.5)                            | -1.2<br>(-5.7 to 3.7)                               |
| Other neurological disorders                                   | < 0.05<br>(< 0.05 to < 0.05)      | < 0.05<br>(< 0.05 to < 0.05)                  | < 0.05<br>(< 0.05 to 0.1)                     | 23.4<br>(-68.7 to 417.2)                          | 15.3<br>(-70.5 to 355.8)                            |
| <b>Mental and substance use disorders</b>                      | <b>29.5<br/>(28.6 to 30.4)</b>    | <b>11.0<sup>†</sup><br/>(10.3 to 11.8)</b>    | <b>3.8<br/>(2.8 to 5.0)</b>                   | <b>15.1<br/>(12.6 to 17.4)</b>                    | <b>-0.1<br/>(-2.0 to 1.9)</b>                       |
| Schizophrenia                                                  | 0.4<br>(0.3 to 0.4)               | < 0.05<br>(< 0.05 to < 0.05)                  | 0.2<br>(0.2 to 0.3)                           | 24.3<br>(13.8 to 37.3)                            | 0.5<br>(-7.8 to 10.6)                               |
| Alcohol use disorders                                          | 3.2<br>(2.8 to 3.6)               | 1.6<br>(1.4 to 1.9)                           | 0.3<br>(0.2 to 0.4)                           | 12.5<br>(3.2 to 22.2)                             | -3.4<br>(-11.4 to 4.7)                              |
| Drug use disorders                                             | 1.5<br>(1.3 to 1.6)               | 0.2<br>(0.2 to 0.2)                           | 0.3<br>(0.2 to 0.4)                           | 14.0<br>(4.4 to 23.7)                             | 0.4<br>(-7.7 to 8.8)                                |
| Opioid use disorders                                           | 0.5<br>(0.4 to 0.6)               | 0.1<br>(< 0.05 to 0.1)                        | 0.2<br>(0.1 to 0.3)                           | 16.8<br>(5.4 to 29.4)                             | 1.4<br>(-7.9 to 11.9)                               |
| Cocaine use disorders                                          | 0.2<br>(0.2 to 0.2)               | < 0.05<br>(< 0.05 to < 0.05)                  | < 0.05<br>(< 0.05 to < 0.05)                  | 13.4<br>(-7.0 to 41.2)                            | 0.8<br>(-17.1 to 24.2)                              |
| Amphetamine use disorders                                      | < 0.05<br>(< 0.05 to < 0.05)      | < 0.05<br>(< 0.05 to < 0.05)                  | < 0.05<br>(< 0.05 to < 0.05)                  | 8.6<br>(-27.5 to 60.7)                            | 0.3<br>(-31.8 to 45.1)                              |
| Cannabis use disorders                                         | 0.7<br>(0.6 to 0.9)               | 0.1<br>(0.1 to 0.1)                           | < 0.05<br>(< 0.05 to < 0.05)                  | -6.2<br>(-21.7 to 13.0)                           | -9.5<br>(-24.2 to 9.0)                              |
| Other drug use disorders                                       | 0.1<br>(0.1 to 0.1)               | < 0.05<br>(< 0.05 to < 0.05)                  | < 0.05<br>(< 0.05 to < 0.05)                  | 15.7<br>(-7.6 to 48.8)                            | 1.6<br>(-18.9 to 30.2)                              |
| Depressive disorders                                           | 6.4<br>(6.0 to 6.8)               | 7.1<br>(6.4 to 7.9)                           | 1.1<br>(0.8 to 1.5)                           | 21.2<br>(15.2 to 27.9)                            | 0.5<br>(-4.0 to 5.5)                                |
| Major depressive disorder                                      | 4.4<br>(3.9 to 4.9)               | 6.8<br>(6.0 to 7.5)                           | 0.9<br>(0.6 to 1.2)                           | 20.6<br>(13.5 to 28.7)                            | 0.6<br>(-4.9 to 6.8)                                |
| Dysthymia                                                      | 2.0<br>(1.8 to 2.3)               | 0.4<br>(0.3 to 0.4)                           | 0.2<br>(0.1 to 0.3)                           | 23.6<br>(17.9 to 29.3)                            | -0.1<br>(-3.8 to 3.7)                               |
| Bipolar disorder                                               | 1.7<br>(1.5 to 2.0)               | 0.1<br>(0.1 to 0.2)                           | 0.4<br>(0.2 to 0.5)                           | 13.5<br>(7.6 to 20.0)                             | -0.1<br>(-4.9 to 5.0)                               |
| Anxiety disorders                                              | 8.0<br>(7.2 to 8.7)               | 1.1<br>(1.1 to 1.2)                           | 0.8<br>(0.5 to 1.0)                           | 14.1<br>(9.9 to 18.3)                             | -0.2<br>(-3.4 to 3.0)                               |
| Eating disorders                                               | 0.3<br>(0.2 to 0.4)               | 0.1<br>(0.1 to 0.2)                           | 0.1<br>(< 0.05 to 0.1)                        | 6.4<br>(-5.9 to 20.6)                             | 3.1<br>(-8.6 to 16.7)                               |
| Anorexia nervosa                                               | 0.1<br>(< 0.05 to 0.1)            | < 0.05<br>(< 0.05 to < 0.05)                  | < 0.05<br>(< 0.05 to < 0.05)                  | 1.3<br>(-19.8 to 29.6)                            | 1.6<br>(-19.5 to 29.3)                              |
| Bulimia nervosa                                                | 0.2<br>(0.2 to 0.3)               | 0.1<br>(0.1 to 0.2)                           | 0.1<br>(< 0.05 to 0.1)                        | 7.8<br>(-6.7 to 23.4)                             | 3.5<br>(-10.1 to 18.4)                              |
| Autistic spectrum disorders                                    | 1.5<br>(1.4 to 1.7)               | < 0.05<br>(< 0.05 to < 0.05)                  | 0.2<br>(0.2 to 0.3)                           | 7.9<br>(2.4 to 13.8)                              | 0.3<br>(-4.7 to 5.6)                                |
| Autism                                                         | 0.5<br>(0.4 to 0.6)               | < 0.05<br>(< 0.05 to < 0.05)                  | 0.1<br>(0.1 to 0.2)                           | 8.2<br>(-0.4 to 17.7)                             | 0.3<br>(-7.4 to 9.1)                                |
| Asperger syndrome and other autistic spectrum disorders        | 1.0<br>(0.9 to 1.2)               | < 0.05<br>(< 0.05 to < 0.05)                  | 0.1<br>(0.1 to 0.1)                           | 7.4<br>(2.4 to 12.8)                              | 0.3<br>(-4.3 to 5.2)                                |

| Cause                                                      | Prevalence in thousands (95% UI)        | Incidence in thousands (95% UI)          | YLDs in thousands (95% UI)        |                                                   |                                                     |
|------------------------------------------------------------|-----------------------------------------|------------------------------------------|-----------------------------------|---------------------------------------------------|-----------------------------------------------------|
|                                                            | 2016 counts                             | 2016 counts                              | 2016 counts                       | Percentage change in counts between 2006 and 2016 | Percentage change in age-standardised rates between |
| Attention-deficit/hyperactivity disorder                   | 3.4<br>(3.1 to 3.8)                     | 0.1<br>(0.1 to 0.1)                      | < 0.05<br>(< 0.05 to 0.1)         | 1.1<br>(-4.3 to 6.7)                              | 0.3<br>(-4.9 to 5.8)                                |
| Conduct disorder                                           | 1.2<br>(1.0 to 1.4)                     | 0.4<br>(0.3 to 0.5)                      | 0.1<br>(0.1 to 0.2)               | -9.2<br>(-15.1 to -2.1)                           | 0.1<br>(-6.3 to 7.8)                                |
| Idiopathic developmental intellectual disability           | 1.0<br>(0.4 to 1.6)                     | --                                       | < 0.05<br>(< 0.05 to 0.1)         | 8.1<br>(-0.5 to 17.9)                             | -0.4<br>(-8.2 to 8.3)                               |
| Other mental and substance use disorders                   | 3.6<br>(3.2 to 4.2)                     | 0.1<br>(0.1 to 0.1)                      | 0.3<br>(0.2 to 0.4)               | 22.0<br>(16.0 to 27.9)                            | 0.2<br>(-4.4 to 4.8)                                |
| <b>Diabetes, urogenital, blood, and endocrine diseases</b> | <b>74.9</b><br><b>(73.0 to 77.0)</b>    | <b>20.9†</b><br><b>(19.7 to 22.4)</b>    | <b>1.9</b><br><b>(1.4 to 2.6)</b> | <b>25.0</b><br><b>(19.0 to 30.6)</b>              | <b>-5.8</b><br><b>(-10.4 to -1.5)</b>               |
| Diabetes mellitus                                          | 13.7<br>(12.6 to 15.1)                  | 0.8<br>(0.7 to 0.9)                      | 1.2<br>(0.8 to 1.7)               | 26.4<br>(17.6 to 35.1)                            | -8.8<br>(-14.8 to -2.5)                             |
| Acute glomerulonephritis                                   | < 0.05<br>(< 0.05 to < 0.05)            | < 0.05<br>(< 0.05 to < 0.05)             | < 0.05<br>(< 0.05 to < 0.05)      | 15.9<br>(10.5 to 21.2)                            | 0.4<br>(-3.1 to 4.0)                                |
| Chronic kidney disease                                     | 7.8<br>(7.0 to 8.6)                     | 0.6<br>(0.5 to 0.7)                      | 0.2<br>(0.2 to 0.3)               | 37.6<br>(26.6 to 49.7)                            | 4.0<br>(-4.5 to 13.2)                               |
| Chronic kidney disease due to diabetes mellitus            | 2.8<br>(2.4 to 3.3)                     | 0.2<br>(0.2 to 0.3)                      | 0.1<br>(0.1 to 0.1)               | 46.1<br>(31.2 to 64.2)                            | 5.3<br>(-4.7 to 17.9)                               |
| Chronic kidney disease due to hypertension                 | 1.7<br>(1.4 to 1.9)                     | 0.2<br>(0.1 to 0.2)                      | < 0.05<br>(< 0.05 to < 0.05)      | 37.6<br>(22.8 to 55.4)                            | 3.9<br>(-7.3 to 17.2)                               |
| Chronic kidney disease due to glomerulonephritis           | 1.7<br>(1.4 to 1.9)                     | 0.1<br>(0.1 to 0.1)                      | 0.1<br>(0.1 to 0.1)               | 31.1<br>(17.0 to 48.3)                            | 2.3<br>(-7.8 to 14.2)                               |
| Chronic kidney disease due to other causes                 | 1.7<br>(1.4 to 2.0)                     | 0.1<br>(0.1 to 0.1)                      | 0.1<br>(< 0.05 to 0.1)            | 34.4<br>(20.0 to 49.9)                            | 4.4<br>(-6.9 to 16.1)                               |
| Urinary diseases and male infertility                      | 3.4<br>(3.0 to 3.8)                     | 12.5†<br>(11.3 to 13.9)                  | 0.1<br>(0.1 to 0.1)               | 35.7<br>(27.3 to 45.3)                            | -1.3<br>(-7.3 to 5.3)                               |
| Interstitial nephritis and urinary tract infections        | 0.2<br>(0.2 to 0.2)                     | 11.5<br>(10.3 to 12.8)                   | < 0.05<br>(< 0.05 to < 0.05)      | 13.5<br>(-0.7 to 30.4)                            | 1.4<br>(-11.3 to 15.8)                              |
| Urolithiasis                                               | < 0.05<br>(< 0.05 to < 0.05)            | 0.8<br>(0.7 to 0.9)                      | < 0.05<br>(< 0.05 to < 0.05)      | 27.4<br>(21.6 to 33.5)                            | 1.4<br>(-2.3 to 5.3)                                |
| Benign prostatic hyperplasia                               | 2.1<br>(1.8 to 2.4)                     | 0.3<br>(0.2 to 0.3)                      | 0.1<br>(< 0.05 to 0.1)            | 45.8<br>(35.1 to 58.0)                            | -0.7<br>(-8.1 to 7.5)                               |
| Male infertility                                           | 0.9<br>(0.7 to 1.2)                     | --                                       | < 0.05<br>(< 0.05 to < 0.05)      | 5.4<br>(-1.9 to 13.1)                             | -2.2<br>(-9.4 to 5.2)                               |
| Other urinary diseases                                     | --                                      | --                                       | < 0.05<br>(< 0.05 to < 0.05)      | -5.5<br>(-15.5 to 6.0)                            | -16.3<br>(-24.8 to -6.5)                            |
| Gynecological diseases                                     | 20.8<br>(19.8 to 21.7)                  | 6.6†<br>(6.2 to 7.1)                     | 0.2<br>(0.1 to 0.3)               | 11.5<br>(5.7 to 17.2)                             | -5.5<br>(-10.3 to -0.7)                             |
| Uterine fibroids                                           | 1.8<br>(1.6 to 2.0)                     | 0.2<br>(0.2 to 0.2)                      | < 0.05<br>(< 0.05 to 0.1)         | 16.1<br>(-1.6 to 34.3)                            | -10.7<br>(-23.6 to 3.1)                             |
| Polycystic ovarian syndrome                                | < 0.05<br>(< 0.05 to < 0.05)            | 0.1<br>(0.1 to 0.2)                      | < 0.05<br>(< 0.05 to < 0.05)      | 7.0<br>(-22.6 to 52.2)                            | -1.4<br>(-28.9 to 40.6)                             |
| Female infertility                                         | 2.1<br>(1.4 to 2.9)                     | --                                       | < 0.05<br>(< 0.05 to < 0.05)      | 10.4<br>(2.1 to 18.6)                             | 2.1<br>(-5.5 to 9.7)                                |
| Endometriosis                                              | < 0.05<br>(< 0.05 to < 0.05)            | 0.1<br>(0.1 to 0.1)                      | < 0.05<br>(< 0.05 to < 0.05)      | 20.1<br>(-9.0 to 62.7)                            | 1.2<br>(-23.0 to 36.3)                              |
| Genital prolapse                                           | 5.0<br>(4.3 to 5.7)                     | 0.3<br>(0.3 to 0.4)                      | < 0.05<br>(< 0.05 to < 0.05)      | 11.2<br>(1.9 to 21.1)                             | -20.1<br>(-26.3 to -13.3)                           |
| Premenstrual syndrome                                      | 12.4<br>(11.7 to 13.1)                  | 4.4<br>(4.1 to 4.7)                      | 0.1<br>(0.1 to 0.2)               | 8.7<br>(0.7 to 17.1)                              | -2.6<br>(-9.5 to 4.9)                               |
| Other gynecological diseases                               | 1.9<br>(1.6 to 2.2)                     | 1.5<br>(1.3 to 1.8)                      | 0.1<br>(< 0.05 to 0.1)            | 14.4<br>(3.2 to 26.4)                             | -4.2<br>(-13.1 to 5.7)                              |
| Hemoglobinopathies and hemolytic anaemias                  | 44.5<br>(42.1 to 46.9)                  | --                                       | 0.1<br>(0.1 to 0.1)               | 16.3<br>(-1.2 to 34.0)                            | 7.1<br>(-7.6 to 23.5)                               |
| Thalassemias                                               | < 0.05<br>(< 0.05 to < 0.05)            | --                                       | < 0.05<br>(< 0.05 to < 0.05)      | -22.7<br>(-37.7 to -4.1)                          | -3.6<br>(-22.7 to 21.1)                             |
| Thalassaemias trait                                        | 0.3<br>(0.2 to 0.4)                     | --                                       | < 0.05<br>(< 0.05 to < 0.05)      | 38.5<br>(4.2 to 73.2)                             | 23.2<br>(-4.2 to 52.2)                              |
| Sickle cell disorders                                      | 0.1<br>(0.1 to 0.1)                     | --                                       | < 0.05<br>(< 0.05 to < 0.05)      | 8.9<br>(-6.1 to 26.5)                             | 10.4<br>(-4.8 to 27.9)                              |
| Sickle cell trait                                          | 16.6<br>(14.7 to 18.7)                  | --                                       | 0.1<br>(< 0.05 to 0.1)            | 26.9<br>(4.0 to 52.0)                             | 17.6<br>(-2.3 to 39.8)                              |
| G6PD deficiency                                            | 8.9<br>(7.7 to 10.2)                    | --                                       | < 0.05<br>(< 0.05 to < 0.05)      | 57.8<br>(10.9 to 120.9)                           | 48.9<br>(5.7 to 107.0)                              |
| G6PD trait                                                 | 20.7<br>(19.2 to 22.2)                  | --                                       | < 0.05<br>(< 0.05 to < 0.05)      | 52.1<br>(22.7 to 85.0)                            | 35.1<br>(10.5 to 63.4)                              |
| Other hemoglobinopathies and hemolytic anaemias            | 1.5<br>(1.3 to 1.8)                     | --                                       | < 0.05<br>(< 0.05 to < 0.05)      | -1.6<br>(-18.9 to 18.1)                           | -11.7<br>(-25.8 to 4.2)                             |
| Endocrine, metabolic, blood, and immune disorders          | 2.7<br>(2.5 to 3.0)                     | 0.4<br>(0.3 to 0.4)                      | 0.1<br>(0.1 to 0.1)               | 13.6<br>(5.2 to 22.7)                             | -5.8<br>(-12.1 to 1.2)                              |
| <b>Musculoskeletal disorders</b>                           | <b>31.4</b><br><b>(30.0 to 32.8)</b>    | <b>15.9</b><br><b>(14.5 to 17.7)</b>     | <b>3.4</b><br><b>(2.4 to 4.4)</b> | <b>26.7</b><br><b>(22.9 to 30.3)</b>              | <b>-1.8</b><br><b>(-4.2 to 0.7)</b>                 |
| Rheumatoid arthritis                                       | 0.7<br>(0.7 to 0.8)                     | < 0.05<br>(< 0.05 to < 0.05)             | 0.2<br>(0.1 to 0.2)               | 39.9<br>(28.0 to 51.9)                            | 4.8<br>(-3.6 to 13.2)                               |
| Osteoarthritis                                             | 7.2<br>(6.7 to 7.7)                     | 0.4<br>(0.3 to 0.4)                      | 0.4<br>(0.3 to 0.6)               | 42.8<br>(37.9 to 47.9)                            | 0.8<br>(-2.6 to 4.3)                                |
| Low back and neck pain                                     | 16.0<br>(14.9 to 17.1)                  | 6.2<br>(5.6 to 6.9)                      | 1.8<br>(1.3 to 2.4)               | 27.1<br>(22.5 to 31.5)                            | -0.5<br>(-3.5 to 2.3)                               |
| Low back pain                                              | 9.9<br>(8.7 to 11.1)                    | 4.7<br>(4.1 to 5.3)                      | 1.1<br>(0.8 to 1.5)               | 24.3<br>(18.0 to 30.6)                            | -0.8<br>(-5.5 to 3.6)                               |
| Neck pain                                                  | 7.0<br>(6.0 to 8.1)                     | 1.6<br>(1.3 to 1.8)                      | 0.7<br>(0.5 to 1.0)               | 31.9<br>(27.6 to 36.4)                            | 0.1<br>(-2.1 to 2.2)                                |
| Gout                                                       | 0.6<br>(0.5 to 0.7)                     | 0.1<br>(0.1 to 0.1)                      | < 0.05<br>(< 0.05 to < 0.05)      | 35.3<br>(15.9 to 57.9)                            | -0.0<br>(-14.0 to 16.9)                             |
| Other musculoskeletal disorders                            | 10.9<br>(9.4 to 12.4)                   | 9.2<br>(7.8 to 10.8)                     | 0.9<br>(0.6 to 1.3)               | 17.5<br>(9.1 to 26.7)                             | -6.4<br>(-12.3 to 0.1)                              |
| <b>Other non-communicable diseases</b>                     | <b>136.5</b><br><b>(134.3 to 138.8)</b> | <b>410.7†</b><br><b>(386.2 to 436.5)</b> | <b>3.9</b><br><b>(2.6 to 5.5)</b> | <b>17.6</b><br><b>(15.8 to 19.1)</b>              | <b>-0.6</b><br><b>(-1.5 to 0.3)</b>                 |
| Congenital anomalies                                       | 1.4<br>(1.2 to 1.7)                     | --                                       | 0.2<br>(0.1 to 0.2)               | 5.6<br>(-0.7 to 11.9)                             | 0.1<br>(-5.6 to 6.3)                                |
| Neural tube defects                                        | 0.1<br>(0.1 to 0.1)                     | --                                       | < 0.05<br>(< 0.05 to < 0.05)      | 11.6<br>(-4.5 to 30.3)                            | 2.0<br>(-11.7 to 18.8)                              |
| Congenital heart anomalies                                 | 0.3<br>(0.3 to 0.4)                     | --                                       | < 0.05<br>(< 0.05 to < 0.05)      | 7.2<br>(-3.8 to 20.9)                             | 5.3<br>(-5.4 to 17.9)                               |
| Orofacial clefts                                           | 0.1<br>(0.1 to 0.1)                     | --                                       | < 0.05<br>(< 0.05 to < 0.05)      | -1.4<br>(-12.1 to 10.6)                           | -8.8<br>(-18.6 to 2.6)                              |
| Down's syndrome                                            | 0.1<br>(0.1 to 0.1)                     | --                                       | < 0.05<br>(< 0.05 to < 0.05)      | 10.7<br>(2.2 to 19.1)                             | 5.5<br>(-2.6 to 13.5)                               |
| Turner syndrome                                            | < 0.05<br>(< 0.05 to < 0.05)            | --                                       | < 0.05<br>(< 0.05 to < 0.05)      | 4.1<br>(-34.0 to 67.4)                            | 1.3<br>(-36.2 to 61.3)                              |
| Klinefelter syndrome                                       | < 0.05<br>(< 0.05 to 0.1)               | --                                       | < 0.05<br>(< 0.05 to < 0.05)      | 4.4<br>(-22.1 to 42.1)                            | 1.7<br>(-23.4 to 38.3)                              |

| Cause                                         | Prevalence in thousands (95% UI)     | Incidence in thousands (95% UI)       | YLDs in thousands (95% UI)        |                                                   |                                                     |
|-----------------------------------------------|--------------------------------------|---------------------------------------|-----------------------------------|---------------------------------------------------|-----------------------------------------------------|
|                                               | 2016 counts                          | 2016 counts                           | 2016 counts                       | Percentage change in counts between 2006 and 2016 | Percentage change in age-standardised rates between |
| Other chromosomal abnormalities               | 0.1<br>(0.1 to 0.1)                  | --                                    | < 0.05<br>(< 0.05 to < 0.05)      | -11.4<br>(-25.6 to 4.8)                           | 2.0<br>(-14.5 to 21.8)                              |
| Congenital musculoskeletal and limb anomalies | 0.1<br>(0.1 to 0.2)                  | --                                    | < 0.05<br>(< 0.05 to < 0.05)      | 14.1<br>(2.2 to 26.6)                             | 2.6<br>(-7.5 to 13.2)                               |
| Urogenital congenital anomalies               | 0.1<br>(0.1 to 0.2)                  | --                                    | < 0.05<br>(< 0.05 to < 0.05)      | -9.6<br>(-22.1 to 3.8)                            | 0.2<br>(-13.6 to 15.0)                              |
| Digestive congenital anomalies                | 0.2<br>(0.1 to 0.2)                  | --                                    | < 0.05<br>(< 0.05 to < 0.05)      | 14.0<br>(-3.9 to 35.4)                            | 5.1<br>(-11.0 to 24.4)                              |
| Other congenital anomalies                    | 0.6<br>(0.4 to 0.9)                  | --                                    | 0.1<br>(< 0.05 to 0.1)            | 4.8<br>(-7.3 to 17.2)                             | -3.3<br>(-14.1 to 7.8)                              |
| Skin and subcutaneous diseases                | 60.3<br>(58.6 to 62.1)               | 144.2<br>(135.4 to 153.8)             | 1.4<br>(1.0 to 2.1)               | 5.5<br>(3.2 to 7.7)                               | 1.0<br>(-0.8 to 2.9)                                |
| Dermatitis                                    | 8.5<br>(8.0 to 9.1)                  | 9.9<br>(9.1 to 10.6)                  | 0.3<br>(0.2 to 0.5)               | 0.4<br>(-3.1 to 4.3)                              | 0.0<br>(-3.1 to 3.3)                                |
| Psoriasis                                     | 1.8<br>(1.7 to 1.9)                  | 0.2<br>(0.2 to 0.2)                   | 0.1<br>(0.1 to 0.2)               | 22.1<br>(13.3 to 32.3)                            | 3.9<br>(-3.0 to 11.8)                               |
| Cellulitis                                    | 0.1<br>(0.1 to 0.1)                  | 1.3<br>(1.2 to 1.4)                   | < 0.05<br>(< 0.05 to < 0.05)      | 9.5<br>(-12.8 to 37.5)                            | 1.1<br>(-18.8 to 25.8)                              |
| Pyoderma                                      | 0.5<br>(0.5 to 0.6)                  | 13.0<br>(12.5 to 13.6)                | < 0.05<br>(< 0.05 to < 0.05)      | 26.7<br>(18.6 to 34.8)                            | 1.1<br>(-5.0 to 7.6)                                |
| Scabies                                       | 3.3<br>(2.9 to 3.8)                  | 10.1<br>(8.8 to 11.5)                 | 0.1<br>(< 0.05 to 0.1)            | -2.2<br>(-6.3 to 2.1)                             | -4.5<br>(-7.9 to -1.2)                              |
| Fungal skin diseases                          | 19.9<br>(17.9 to 21.9)               | 71.0<br>(62.7 to 80.4)                | 0.1<br>(< 0.05 to 0.2)            | 14.8<br>(12.0 to 17.8)                            | 0.0<br>(-0.9 to 1.1)                                |
| Viral skin diseases                           | 5.0<br>(4.8 to 5.3)                  | 7.5<br>(7.1 to 7.9)                   | 0.1<br>(0.1 to 0.2)               | 3.8<br>(0.5 to 7.3)                               | -0.2<br>(-3.3 to 2.9)                               |
| Acne vulgaris                                 | 15.3<br>(13.7 to 17.1)               | 10.3<br>(8.5 to 12.8)                 | 0.4<br>(0.3 to 0.6)               | 1.2<br>(-3.6 to 6.4)                              | 3.6<br>(-1.3 to 8.8)                                |
| Alopecia areata                               | 0.3<br>(0.3 to 0.3)                  | 0.6<br>(0.6 to 0.6)                   | < 0.05<br>(< 0.05 to < 0.05)      | 13.5<br>(1.0 to 26.5)                             | 0.1<br>(-11.1 to 11.1)                              |
| Pruritus                                      | 1.7<br>(1.5 to 1.9)                  | 1.3<br>(1.2 to 1.5)                   | < 0.05<br>(< 0.05 to < 0.05)      | 18.8<br>(12.1 to 26.0)                            | 0.5<br>(-4.6 to 5.8)                                |
| Urticaria                                     | 1.5<br>(1.3 to 1.7)                  | 2.6<br>(2.3 to 3.0)                   | 0.1<br>(0.1 to 0.1)               | 1.0<br>(-5.1 to 7.6)                              | 0.2<br>(-5.3 to 5.8)                                |
| Decubitus ulcer                               | 0.1<br>(0.1 to 0.1)                  | 0.4<br>(0.3 to 0.4)                   | < 0.05<br>(< 0.05 to < 0.05)      | 26.3<br>(11.6 to 42.6)                            | -1.5<br>(-14.1 to 12.3)                             |
| Other skin and subcutaneous diseases          | 13.5<br>(13.1 to 13.9)               | 15.9<br>(15.3 to 16.4)                | 0.1<br>(< 0.05 to 0.1)            | 24.3<br>(21.2 to 27.2)                            | 0.9<br>(-1.5 to 3.3)                                |
| Sense organ diseases                          | 46.9<br>(45.9 to 48.1)               | 17.5+<br>(16.4 to 18.6)               | 1.6<br>(1.1 to 2.3)               | 27.0<br>(24.8 to 29.2)                            | -2.2<br>(-3.6 to -0.7)                              |
| Glaucoma                                      | 0.2<br>(0.2 to 0.2)                  | --                                    | < 0.05<br>(< 0.05 to < 0.05)      | 40.6<br>(27.2 to 55.0)                            | -1.1<br>(-10.3 to 9.4)                              |
| Cataract                                      | 1.9<br>(1.7 to 2.2)                  | --                                    | 0.1<br>(0.1 to 0.2)               | 28.3<br>(22.5 to 34.3)                            | -4.1<br>(-8.3 to 0.4)                               |
| Macular degeneration                          | 0.1<br>(< 0.05 to 0.1)               | --                                    | < 0.05<br>(< 0.05 to < 0.05)      | 41.2<br>(21.5 to 64.3)                            | 1.1<br>(-13.5 to 18.5)                              |
| Refraction and accommodation disorders        | 21.1<br>(20.2 to 21.9)               | --                                    | 0.3<br>(0.2 to 0.5)               | 17.5<br>(13.9 to 21.2)                            | -5.4<br>(-8.0 to -2.6)                              |
| Age-related and other hearing loss            | 32.9<br>(31.2 to 34.8)               | --                                    | 0.9<br>(0.7 to 1.3)               | 29.2<br>(25.2 to 32.8)                            | -1.4<br>(-3.6 to 0.7)                               |
| Other vision loss                             | 0.5<br>(0.4 to 0.5)                  | --                                    | < 0.05<br>(< 0.05 to 0.1)         | 30.1<br>(19.8 to 41.2)                            | -1.1<br>(-8.1 to 6.7)                               |
| Other sense organ diseases                    | 5.5<br>(5.1 to 5.9)                  | 17.5<br>(16.4 to 18.6)                | 0.2<br>(0.1 to 0.3)               | 29.1<br>(23.7 to 34.6)                            | 0.5<br>(-3.4 to 4.5)                                |
| Oral disorders                                | 97.1<br>(93.5 to 101.0)              | 249.0+<br>(226.4 to 272.6)            | 0.7<br>(0.4 to 1.1)               | 29.6<br>(26.5 to 33.0)                            | -0.3<br>(-1.9 to 1.6)                               |
| Caries of deciduous teeth                     | 10.6<br>(8.6 to 12.8)                | 37.8<br>(27.4 to 52.1)                | < 0.05<br>(< 0.05 to < 0.05)      | -15.3<br>(-23.4 to -5.9)                          | 0.1<br>(-8.6 to 10.4)                               |
| Caries of permanent teeth                     | 63.3<br>(58.8 to 68.1)               | 206.7<br>(185.4 to 226.3)             | 0.1<br>(< 0.05 to 0.1)            | 10.5<br>(6.5 to 14.6)                             | -2.8<br>(-6.1 to 0.3)                               |
| Periodontal disease                           | 30.6<br>(26.3 to 35.7)               | 3.6<br>(3.0 to 4.3)                   | 0.2<br>(0.1 to 0.4)               | 29.4<br>(24.7 to 34.1)                            | -0.5<br>(-3.5 to 2.5)                               |
| Edentulism and severe tooth loss              | 10.6<br>(9.2 to 11.9)                | 0.9<br>(0.8 to 1.0)                   | 0.3<br>(0.2 to 0.4)               | 41.3<br>(37.1 to 46.4)                            | 0.4<br>(-2.5 to 3.8)                                |
| Other oral disorders                          | 3.5<br>(3.3 to 3.6)                  | --                                    | 0.1<br>(0.1 to 0.1)               | 16.9<br>(13.1 to 20.9)                            | -0.1<br>(-3.2 to 3.2)                               |
| <b>Injuries</b>                               | <b>29.9</b><br><b>(28.1 to 32.3)</b> | <b>11.8+</b><br><b>(11.2 to 12.5)</b> | <b>1.1</b><br><b>(0.8 to 1.6)</b> | <b>29.1</b><br><b>(26.4 to 31.3)</b>              | <b>5.8</b><br><b>(3.9 to 7.4)</b>                   |
| <b>Transport injuries</b>                     | <b>3.7</b><br><b>(3.5 to 4.0)</b>    | <b>1.2</b><br><b>(1.1 to 1.4)</b>     | <b>0.2</b><br><b>(0.1 to 0.3)</b> | <b>32.6</b><br><b>(29.5 to 35.8)</b>              | <b>6.2</b><br><b>(4.0 to 8.4)</b>                   |
| Road injuries                                 | 3.5<br>(3.2 to 3.7)                  | 1.2<br>(1.1 to 1.3)                   | 0.2<br>(0.1 to 0.3)               | 34.2<br>(31.1 to 37.4)                            | 7.2<br>(5.0 to 9.4)                                 |
| Pedestrian road injuries                      | 0.4<br>(0.4 to 0.5)                  | 0.1<br>(0.1 to 0.1)                   | < 0.05<br>(< 0.05 to < 0.05)      | 34.7<br>(31.4 to 38.1)                            | 7.9<br>(5.6 to 10.1)                                |
| Cyclist road injuries                         | 0.8<br>(0.7 to 1.0)                  | 0.3<br>(0.2 to 0.4)                   | < 0.05<br>(< 0.05 to 0.1)         | 42.3<br>(38.5 to 46.3)                            | 15.7<br>(13.1 to 18.4)                              |
| Motorcyclist road injuries                    | 0.7<br>(0.6 to 0.9)                  | 0.2<br>(0.1 to 0.2)                   | < 0.05<br>(< 0.05 to 0.1)         | 32.2<br>(28.9 to 35.6)                            | 5.4<br>(3.1 to 7.8)                                 |
| Motor vehicle road injuries                   | 1.1<br>(1.0 to 1.2)                  | 0.5<br>(0.4 to 0.5)                   | 0.1<br>(< 0.05 to 0.1)            | 29.6<br>(26.5 to 32.8)                            | 2.8<br>(0.6 to 5.0)                                 |
| Other road injuries                           | 0.4<br>(0.3 to 0.4)                  | 0.2<br>(0.1 to 0.2)                   | < 0.05<br>(< 0.05 to < 0.05)      | 36.1<br>(33.0 to 39.3)                            | 8.3<br>(6.0 to 10.4)                                |
| Other transport injuries                      | 0.3<br>(0.2 to 0.3)                  | 0.1<br>(< 0.05 to 0.1)                | < 0.05<br>(< 0.05 to < 0.05)      | 14.6<br>(11.4 to 17.7)                            | -5.4<br>(-7.7 to -3.2)                              |
| <b>Unintentional injuries</b>                 | <b>24.3</b><br><b>(22.5 to 26.7)</b> | <b>9.8</b><br><b>(9.1 to 10.5)</b>    | <b>0.8</b><br><b>(0.6 to 1.2)</b> | <b>29.5</b><br><b>(26.7 to 32.0)</b>              | <b>6.1</b><br><b>(4.1 to 7.7)</b>                   |
| Falls                                         | 10.0<br>(8.7 to 11.5)                | 4.1<br>(3.6 to 4.7)                   | 0.4<br>(0.3 to 0.6)               | 38.1<br>(35.1 to 40.6)                            | 9.6<br>(7.4 to 11.4)                                |
| Drowning                                      | 0.1<br>(0.1 to 0.2)                  | < 0.05<br>(< 0.05 to < 0.05)          | < 0.05<br>(< 0.05 to < 0.05)      | 18.7<br>(15.2 to 21.7)                            | -4.9<br>(-7.5 to -2.6)                              |
| Fire, heat, and hot substances                | 2.9<br>(2.4 to 3.5)                  | 0.3<br>(0.2 to 0.4)                   | 0.1<br>(< 0.05 to 0.1)            | 20.0<br>(14.6 to 25.1)                            | 2.2<br>(-2.0 to 6.2)                                |
| Poisonings                                    | 0.1<br>(0.1 to 0.1)                  | 0.1<br>(0.1 to 0.1)                   | < 0.05<br>(< 0.05 to < 0.05)      | 33.6<br>(22.9 to 46.0)                            | 17.1<br>(7.8 to 27.8)                               |
| Exposure to mechanical forces                 | 4.7<br>(4.0 to 5.7)                  | 1.6<br>(1.4 to 1.8)                   | 0.1<br>(0.1 to 0.2)               | 29.0<br>(25.8 to 31.9)                            | 5.0<br>(2.6 to 7.0)                                 |
| Unintentional firearm injuries                | 0.4<br>(0.3 to 0.5)                  | 0.1<br>(0.1 to 0.1)                   | < 0.05<br>(< 0.05 to < 0.05)      | 19.2<br>(16.2 to 22.4)                            | -5.0<br>(-7.3 to -2.7)                              |
| Unintentional suffocation                     | 0.2<br>(0.1 to 0.2)                  | < 0.05<br>(< 0.05 to < 0.05)          | < 0.05<br>(< 0.05 to < 0.05)      | 15.8<br>(12.6 to 19.0)                            | 2.8<br>(0.1 to 5.4)                                 |
| Other exposure to mechanical forces           | 4.2<br>(3.5 to 5.1)                  | 1.5<br>(1.3 to 1.7)                   | 0.1<br>(0.1 to 0.1)               | 31.5<br>(28.2 to 34.4)                            | 6.8<br>(4.3 to 8.9)                                 |



| Cause                                                                               | Prevalence in thousands (95% UI)        | Incidence in thousands (95% UI)                      | YLDs in thousands (95% UI)                          |                                                   |                                                     |
|-------------------------------------------------------------------------------------|-----------------------------------------|------------------------------------------------------|-----------------------------------------------------|---------------------------------------------------|-----------------------------------------------------|
|                                                                                     | 2016 counts                             | 2016 counts                                          | 2016 counts                                         | Percentage change in counts between 2006 and 2016 | Percentage change in age-standardised rates between |
| Adverse effects of medical treatment                                                | 0.1<br>(0.1 to 0.1)                     | 0.9<br>(0.8 to 1.0)                                  | < 0.05<br>(< 0.05 to < 0.05)                        | 14.7<br>(9.6 to 20.4)                             | 6.6<br>(1.4 to 12.0)                                |
| Animal contact                                                                      | 0.6<br>(0.5 to 0.7)                     | 0.6<br>(0.5 to 0.7)                                  | < 0.05<br>(< 0.05 to < 0.05)                        | 13.0<br>(6.2 to 20.6)                             | -2.2<br>(-7.9 to 4.0)                               |
| Venomous animal contact                                                             | 0.3<br>(0.3 to 0.4)                     | 0.3<br>(0.2 to 0.4)                                  | < 0.05<br>(< 0.05 to < 0.05)                        | 13.2<br>(4.9 to 23.2)                             | -1.0<br>(-8.2 to 7.4)                               |
| Non-venomous animal contact                                                         | 0.3<br>(0.2 to 0.4)                     | 0.3<br>(0.2 to 0.4)                                  | < 0.05<br>(< 0.05 to < 0.05)                        | 12.0<br>(7.9 to 15.8)                             | -6.4<br>(-9.4 to -3.7)                              |
| Foreign body                                                                        | 1.2<br>(1.0 to 1.4)                     | 0.9<br>(0.8 to 1.1)                                  | < 0.05<br>(< 0.05 to 0.1)                           | 14.3<br>(11.1 to 17.3)                            | -1.3<br>(-3.8 to 1.2)                               |
| Pulmonary aspiration and foreign body in airway                                     | 0.7<br>(0.6 to 1.0)                     | 0.2<br>(0.2 to 0.2)                                  | < 0.05<br>(< 0.05 to < 0.05)                        | 12.8<br>(9.4 to 16.2)                             | -1.4<br>(-4.4 to 1.6)                               |
| Foreign body in eyes                                                                | 0.1<br>(0.1 to 0.2)                     | 0.6<br>(0.5 to 0.8)                                  | < 0.05<br>(< 0.05 to < 0.05)                        | 22.5<br>(17.3 to 28.0)                            | 0.5<br>(-1.8 to 2.9)                                |
| Foreign body in other body part                                                     | 0.3<br>(0.3 to 0.4)                     | 0.1<br>(0.1 to 0.1)                                  | < 0.05<br>(< 0.05 to < 0.05)                        | 13.8<br>(9.8 to 17.7)                             | -2.2<br>(-5.2 to 0.7)                               |
| Environmental heat and cold exposure                                                | 1.5<br>(1.2 to 1.7)                     | 0.3<br>(0.3 to 0.4)                                  | 0.1<br>(< 0.05 to 0.1)                              | 17.4<br>(14.4 to 20.1)                            | -2.1<br>(-4.2 to -0.2)                              |
| Other unintentional injuries                                                        | 3.2<br>(2.5 to 4.1)                     | 0.9<br>(0.7 to 1.1)                                  | 0.1<br>(0.1 to 0.1)                                 | 25.6<br>(23.1 to 28.3)                            | 7.2<br>(5.3 to 8.9)                                 |
| <b>Self-harm and interpersonal violence</b>                                         | <b>6.0</b><br><b>(5.4 to 6.6)</b>       | <b>0.8†</b><br><b>(0.7 to 0.9)</b>                   | <b>0.1</b><br><b>(0.1 to 0.1)</b>                   | <b>18.3</b><br><b>(14.8 to 21.6)</b>              | <b>1.2</b><br><b>(-0.9 to 3.2)</b>                  |
| Self-harm                                                                           | 0.1<br>(0.1 to 0.2)                     | 0.1<br>(0.1 to 0.1)                                  | < 0.05<br>(< 0.05 to < 0.05)                        | 29.1<br>(24.9 to 32.9)                            | 1.5<br>(-1.4 to 4.2)                                |
| Self-harm by firearm                                                                | < 0.05<br>(< 0.05 to < 0.05)            | < 0.05<br>(< 0.05 to < 0.05)                         | < 0.05<br>(< 0.05 to < 0.05)                        | 12.9<br>(9.3 to 16.9)                             | -8.4<br>(-11.0 to -5.7)                             |
| Self-harm by other specified means                                                  | 0.1<br>(0.1 to 0.2)                     | 0.1<br>(0.1 to 0.1)                                  | < 0.05<br>(< 0.05 to < 0.05)                        | 30.1<br>(25.8 to 34.1)                            | 2.2<br>(-0.8 to 5.0)                                |
| Interpersonal violence                                                              | 5.8<br>(5.2 to 6.5)                     | 0.7†<br>(0.6 to 0.8)                                 | 0.1<br>(0.1 to 0.1)                                 | 17.6<br>(13.9 to 20.9)                            | 1.2<br>(-1.1 to 3.3)                                |
| Assault by firearm                                                                  | 0.1<br>(0.1 to 0.2)                     | < 0.05<br>(< 0.05 to 0.1)                            | < 0.05<br>(< 0.05 to < 0.05)                        | 38.9<br>(34.3 to 44.2)                            | 12.0<br>(8.7 to 15.6)                               |
| Assault by sharp object                                                             | 0.8<br>(0.7 to 1.0)                     | 0.3<br>(0.3 to 0.4)                                  | < 0.05<br>(< 0.05 to < 0.05)                        | 32.8<br>(28.7 to 36.3)                            | 7.7<br>(5.1 to 10.3)                                |
| Sexual violence                                                                     | 4.2<br>(3.7 to 4.8)                     | --                                                   | < 0.05<br>(< 0.05 to 0.1)                           | 0.1<br>(-4.3 to 4.2)                              | -6.5<br>(-10.2 to -3.2)                             |
| Assault by other means                                                              | 0.6<br>(0.6 to 0.8)                     | 0.3<br>(0.3 to 0.4)                                  | < 0.05<br>(< 0.05 to < 0.05)                        | 28.2<br>(25.2 to 31.0)                            | 3.6<br>(1.4 to 5.6)                                 |
| <b>Forces of nature, conflict and terrorism, and executions and police conflict</b> | <b>0.1</b><br><b>(&lt; 0.05 to 0.1)</b> | <b>&lt; 0.05†</b><br><b>(&lt; 0.05 to &lt; 0.05)</b> | <b>&lt; 0.05</b><br><b>(&lt; 0.05 to &lt; 0.05)</b> | <b>210.8</b><br><b>(85.1 to 254.0)</b>            | <b>167.2</b><br><b>(60.9 to 202.5)</b>              |
| Exposure to forces of nature                                                        | < 0.05<br>(< 0.05 to 0.1)               | --                                                   | < 0.05<br>(< 0.05 to < 0.05)                        | 1,261.9<br>(1,216.2 to 1,311.0)                   | 1,112.0<br>(1,073.3 to 1,154.5)                     |
| Conflict and terrorism                                                              | --                                      | --                                                   | --                                                  | --                                                | --                                                  |
| Executions and police conflict                                                      | < 0.05<br>(< 0.05 to < 0.05)            | < 0.05<br>(< 0.05 to < 0.05)                         | < 0.05<br>(< 0.05 to < 0.05)                        | 31.7<br>(12.9 to 40.2)                            | 10.3<br>(-3.0 to 16.7)                              |
| <b>Impairments</b>                                                                  | --                                      | --                                                   | --                                                  | --                                                | --                                                  |
| Anaemia                                                                             | 46.6<br>(40.6 to 52.7)                  | --                                                   | 1.2<br>(0.8 to 1.7)                                 | 5.3<br>(-8.2 to 20.7)                             | -4.6<br>(-16.7 to 8.9)                              |
| Developmental intellectual disability                                               | 3.1<br>(2.4 to 3.9)                     | --                                                   | 0.5<br>(0.3 to 0.8)                                 | 12.8<br>(4.0 to 26.8)                             | 6.8<br>(-1.6 to 21.0)                               |
| Epilepsy                                                                            | 1.5<br>(0.8 to 2.3)                     | --                                                   | 0.5<br>(0.3 to 0.9)                                 | 11.7<br>(-37.0 to 112.0)                          | 4.5<br>(-41.3 to 97.9)                              |
| Guillain-Barre syndrome                                                             | < 0.05<br>(< 0.05 to < 0.05)            | --                                                   | < 0.05<br>(< 0.05 to < 0.05)                        | 89.9<br>(47.7 to 188.8)                           | 63.2<br>(27.9 to 146.8)                             |
| Hearing loss                                                                        | 35.3<br>(33.6 to 37.1)                  | --                                                   | 1.1<br>(0.7 to 1.5)                                 | 25.3<br>(21.5 to 28.5)                            | -1.8<br>(-3.8 to 0.2)                               |
| Heart failure                                                                       | 1.2<br>(1.1 to 1.4)                     | --                                                   | 0.1<br>(0.1 to 0.2)                                 | 34.8<br>(25.6 to 45.2)                            | 0.4<br>(-6.2 to 9.2)                                |
| Infertility                                                                         | 3.7<br>(2.9 to 4.8)                     | --                                                   | < 0.05<br>(< 0.05 to < 0.05)                        | 8.9<br>(3.3 to 14.6)                              | 0.4<br>(-4.9 to 5.7)                                |
| Pelvic inflammatory disease                                                         | < 0.05<br>(< 0.05 to < 0.05)            | --                                                   | < 0.05<br>(< 0.05 to < 0.05)                        | 11.4<br>(-8.7 to 36.4)                            | -4.6<br>(-22.1 to 17.2)                             |
| Vision loss                                                                         | 24.8<br>(23.7 to 25.8)                  | --                                                   | 0.8<br>(0.6 to 1.2)                                 | 20.3<br>(14.0 to 28.3)                            | -0.1<br>(-4.5 to 7.6)                               |

We did not calculate incidence for the nine impairments, certain NTDs, and causes with only birth prevalence. Blank cells mean that no estimate is available.

† Incidence for aggregate causes represents the sum of the incidence of the causes below the aggregate.

‡ Incidence estimates for stroke represent first-ever stroke only.

^ Incidence of HIV/AIDS represents new infections of HIV only and does not include new infections of Tuberculosis in HIV positive cases.



SR Table 14: Prevalence, incidence, and YLDs for 2016, percentage change of YLD counts and percentage change of age-standardised YLD rates between 2006 and 2016 by cause and impairments, for all ages, Saint Vincent and the Grenadines.

| Cause                                                                                | Prevalence in thousands (95% UI)     | Incidence in thousands (95% UI)               | YLDs in thousands (95% UI)                          |                                                   |                                                     |
|--------------------------------------------------------------------------------------|--------------------------------------|-----------------------------------------------|-----------------------------------------------------|---------------------------------------------------|-----------------------------------------------------|
|                                                                                      | 2016 counts                          | 2016 counts                                   | 2016 counts                                         | Percentage change in counts between 2006 and 2016 | Percentage change in age-standardised rates between |
| <b>All causes</b>                                                                    | <b>107.3</b><br>(107.0 to 107.6)     | <b>704.2†</b><br>(667.7 to 744.1)             | <b>12.0</b><br>(8.9 to 15.6)                        | <b>7.7</b><br>(5.2 to 10.0)                       | <b>0.5</b><br>(-1.5 to 2.6)                         |
| <b>Communicable, maternal, neonatal, and nutritional disorders</b>                   | <b>76.2</b><br>(73.6 to 79.1)        | <b>385.7†</b><br>(353.6 to 421.3)             | <b>1.3</b><br>(0.9 to 1.8)                          | <b>-0.5</b><br>(-7.9 to 7.0)                      | <b>1.1</b><br>(-6.1 to 8.5)                         |
| <b>HIV/AIDS and tuberculosis</b>                                                     | <b>27.9</b><br>(25.1 to 30.2)        | <b>0.1†</b><br>( $< 0.05$ to 0.1)             | <b><math>&lt; 0.05</math></b><br>( $< 0.05$ to 0.1) | <b>-24.1</b><br>(-34.0 to -15.3)                  | <b>-29.2</b><br>(-38.5 to -20.9)                    |
| Tuberculosis                                                                         | 25.7<br>(23.1 to 28.4)               | $< 0.05†$<br>( $< 0.05$ to $< 0.05$ )         | $< 0.05$<br>( $< 0.05$ to $< 0.05$ )                | -5.0<br>(-27.7 to 25.3)                           | -9.7<br>(-30.5 to 17.5)                             |
| Drug-susceptible tuberculosis                                                        | $< 0.05$<br>( $< 0.05$ to $< 0.05$ ) | $< 0.05$<br>( $< 0.05$ to $< 0.05$ )          | $< 0.05$<br>( $< 0.05$ to $< 0.05$ )                | -4.8<br>(-28.1 to 25.7)                           | -9.5<br>(-30.4 to 17.6)                             |
| Multidrug-resistant tuberculosis without extensive drug resistance                   | $< 0.05$<br>( $< 0.05$ to $< 0.05$ ) | $< 0.05$<br>( $< 0.05$ to $< 0.05$ )          | $< 0.05$<br>( $< 0.05$ to $< 0.05$ )                | -34.0<br>(-89.3 to 230.7)                         | -37.8<br>(-90.1 to 209.4)                           |
| Extensively drug-resistant tuberculosis                                              | $< 0.05$<br>( $< 0.05$ to $< 0.05$ ) | $< 0.05$<br>( $< 0.05$ to $< 0.05$ )          | $< 0.05$<br>( $< 0.05$ to $< 0.05$ )                | 75.8<br>(-71.6 to 780.2)                          | 65.7<br>(-73.6 to 724.4)                            |
| Latent tuberculosis infection                                                        | 25.6<br>(23.1 to 28.4)               | --                                            | --                                                  | --                                                | --                                                  |
| HIV/AIDS                                                                             | 0.3<br>(0.2 to 0.5)                  | $< 0.05^{\wedge}$<br>( $< 0.05$ to $< 0.05$ ) | $< 0.05$<br>( $< 0.05$ to 0.1)                      | -25.4<br>(-36.7 to -16.1)                         | -30.6<br>(-41.1 to -21.9)                           |
| Drug-susceptible HIV/AIDS - Tuberculosis                                             | $< 0.05$<br>( $< 0.05$ to $< 0.05$ ) | $< 0.05$<br>( $< 0.05$ to $< 0.05$ )          | $< 0.05$<br>( $< 0.05$ to $< 0.05$ )                | -17.2<br>(-23.1 to -10.8)                         | -21.0<br>(-26.6 to -14.9)                           |
| Multidrug-resistant HIV/AIDS - Tuberculosis without extensive drug resistance        | $< 0.05$<br>( $< 0.05$ to $< 0.05$ ) | $< 0.05$<br>( $< 0.05$ to $< 0.05$ )          | $< 0.05$<br>( $< 0.05$ to $< 0.05$ )                | -42.3<br>(-90.7 to 188.6)                         | -45.0<br>(-91.1 to 175.2)                           |
| Extensively drug-resistant HIV/AIDS - Tuberculosis                                   | $< 0.05$<br>( $< 0.05$ to $< 0.05$ ) | $< 0.05$<br>( $< 0.05$ to $< 0.05$ )          | $< 0.05$<br>( $< 0.05$ to $< 0.05$ )                | 53.7<br>(-75.2 to 668.7)                          | 46.6<br>(-76.4 to 632.9)                            |
| HIV/AIDS resulting in other diseases                                                 | 0.3<br>(0.1 to 0.5)                  | $< 0.05$<br>( $< 0.05$ to $< 0.05$ )          | $< 0.05$<br>( $< 0.05$ to 0.1)                      | -25.6<br>(-37.2 to -16.1)                         | -30.8<br>(-41.6 to -22.0)                           |
| <b>Diarrhoea, lower respiratory infections, and other common infectious diseases</b> | <b>6.3</b><br>(6.0 to 6.7)           | <b>362.3†</b><br>(331.1 to 397.8)             | <b>0.3</b><br>(0.2 to 0.4)                          | <b>5.0</b><br>(1.7 to 8.8)                        | <b>6.1</b><br>(2.8 to 9.6)                          |
| Diarrhoeal diseases                                                                  | 1.2<br>(1.1 to 1.3)                  | 78.4<br>(73.6 to 83.9)                        | 0.1<br>(0.1 to 0.2)                                 | 14.9<br>(8.7 to 21.4)                             | 15.1<br>(9.3 to 21.2)                               |
| Intestinal infectious diseases                                                       | $< 0.05$<br>( $< 0.05$ to $< 0.05$ ) | $< 0.05†$<br>( $< 0.05$ to $< 0.05$ )         | $< 0.05$<br>( $< 0.05$ to $< 0.05$ )                | 4.6<br>(-8.3 to 18.6)                             | -3.6<br>(-14.6 to 8.8)                              |
| Typhoid fever                                                                        | $< 0.05$<br>( $< 0.05$ to $< 0.05$ ) | $< 0.05$<br>( $< 0.05$ to $< 0.05$ )          | $< 0.05$<br>( $< 0.05$ to $< 0.05$ )                | 8.0<br>(-5.9 to 23.6)                             | -0.7<br>(-12.4 to 12.8)                             |
| Paratyphoid fever                                                                    | $< 0.05$<br>( $< 0.05$ to $< 0.05$ ) | $< 0.05$<br>( $< 0.05$ to $< 0.05$ )          | $< 0.05$<br>( $< 0.05$ to $< 0.05$ )                | -18.9<br>(-34.0 to 0.3)                           | -28.1<br>(-41.8 to -11.9)                           |
| Other intestinal infectious diseases                                                 | --                                   | --                                            | $< 0.05$<br>( $< 0.05$ to $< 0.05$ )                | -35.1<br>(-53.3 to -8.0)                          | -32.8<br>(-50.9 to -6.9)                            |
| Lower respiratory infections                                                         | 0.1<br>(0.1 to 0.2)                  | 6.4<br>(5.9 to 7.0)                           | $< 0.05$<br>( $< 0.05$ to $< 0.05$ )                | 19.1<br>(6.9 to 33.2)                             | 15.1<br>(3.8 to 27.6)                               |
| Upper respiratory infections                                                         | 3.6<br>(3.2 to 4.0)                  | 269.1<br>(238.8 to 305.2)                     | 0.1<br>(0.1 to 0.1)                                 | -1.5<br>(-6.2 to 4.4)                             | 0.1<br>(-4.6 to 5.6)                                |
| Otitis media                                                                         | 1.4<br>(1.3 to 1.6)                  | 6.3<br>(5.1 to 7.8)                           | $< 0.05$<br>( $< 0.05$ to 0.1)                      | -7.4<br>(-14.5 to -0.3)                           | -3.7<br>(-11.0 to 3.4)                              |
| Meningitis                                                                           | 0.1<br>(0.1 to 0.1)                  | $< 0.05$<br>( $< 0.05$ to $< 0.05$ )          | $< 0.05$<br>( $< 0.05$ to $< 0.05$ )                | -3.0<br>(-5.7 to -0.5)                            | -3.9<br>(-6.6 to -1.4)                              |
| Pneumococcal meningitis                                                              | 0.1<br>( $< 0.05$ to 0.1)            | $< 0.05$<br>( $< 0.05$ to $< 0.05$ )          | $< 0.05$<br>( $< 0.05$ to $< 0.05$ )                | -2.4<br>(-6.2 to 1.2)                             | -3.6<br>(-7.3 to -0.2)                              |
| H influenzae type B meningitis                                                       | $< 0.05$<br>( $< 0.05$ to $< 0.05$ ) | $< 0.05$<br>( $< 0.05$ to $< 0.05$ )          | $< 0.05$<br>( $< 0.05$ to $< 0.05$ )                | -10.3<br>(-17.0 to -4.3)                          | -9.7<br>(-16.5 to -3.8)                             |
| Meningococcal infection                                                              | $< 0.05$<br>( $< 0.05$ to $< 0.05$ ) | $< 0.05$<br>( $< 0.05$ to $< 0.05$ )          | $< 0.05$<br>( $< 0.05$ to $< 0.05$ )                | -1.1<br>(-5.8 to 3.5)                             | -3.4<br>(-8.0 to 1.3)                               |
| Other meningitis                                                                     | $< 0.05$<br>( $< 0.05$ to $< 0.05$ ) | $< 0.05$<br>( $< 0.05$ to $< 0.05$ )          | $< 0.05$<br>( $< 0.05$ to $< 0.05$ )                | 0.3<br>(-3.6 to 4.2)                              | -0.8<br>(-4.5 to 3.1)                               |
| Encephalitis                                                                         | 0.1<br>( $< 0.05$ to 0.1)            | $< 0.05$<br>( $< 0.05$ to $< 0.05$ )          | $< 0.05$<br>( $< 0.05$ to $< 0.05$ )                | 0.6<br>(-13.8 to 19.3)                            | -1.7<br>(-15.5 to 15.6)                             |
| Diphtheria                                                                           | $< 0.05$<br>( $< 0.05$ to $< 0.05$ ) | $< 0.05$<br>( $< 0.05$ to $< 0.05$ )          | $< 0.05$<br>( $< 0.05$ to $< 0.05$ )                | 5.7<br>(-40.6 to 89.1)                            | 0.6<br>(-43.4 to 80.6)                              |
| Whooping cough                                                                       | $< 0.05$<br>( $< 0.05$ to $< 0.05$ ) | $< 0.05$<br>( $< 0.05$ to $< 0.05$ )          | $< 0.05$<br>( $< 0.05$ to $< 0.05$ )                | -32.3<br>(-55.9 to -1.2)                          | -26.4<br>(-52.9 to 9.1)                             |
| Tetanus                                                                              | $< 0.05$<br>( $< 0.05$ to $< 0.05$ ) | $< 0.05$<br>( $< 0.05$ to $< 0.05$ )          | $< 0.05$<br>( $< 0.05$ to $< 0.05$ )                | -12.0<br>(-27.5 to 5.1)                           | -15.6<br>(-31.3 to 1.1)                             |
| Measles                                                                              | $< 0.05$<br>(0.0 to $< 0.05$ )       | $< 0.05$<br>(0.0 to $< 0.05$ )                | $< 0.05$<br>(0.0 to $< 0.05$ )                      | --                                                | --                                                  |
| Varicella and herpes zoster                                                          | 0.1<br>(0.1 to 0.1)                  | 2.1<br>(2.1 to 2.2)                           | $< 0.05$<br>( $< 0.05$ to $< 0.05$ )                | 9.9<br>(-3.9 to 25.1)                             | 0.3<br>(-11.0 to 12.3)                              |
| <b>Neglected tropical diseases and malaria</b>                                       | <b>31.0</b><br>(26.5 to 36.7)        | <b>8.4†</b><br>(5.1 to 16.2)                  | <b>0.1</b><br>(0.1 to 0.2)                          | <b>219.0</b><br>(138.6 to 335.4)                  | <b>224.1</b><br>(144.2 to 340.9)                    |
| Malaria                                                                              | --                                   | --                                            | --                                                  | --                                                | --                                                  |
| Chagas disease                                                                       | $< 0.05$<br>( $< 0.05$ to $< 0.05$ ) | --                                            | $< 0.05$<br>( $< 0.05$ to $< 0.05$ )                | 46.3<br>(24.2 to 73.1)                            | 25.8<br>(4.8 to 52.4)                               |
| Leishmaniasis                                                                        | --                                   | --                                            | --                                                  | --                                                | --                                                  |
| Visceral leishmaniasis                                                               | --                                   | --                                            | --                                                  | --                                                | --                                                  |
| Cutaneous and mucocutaneous leishmaniasis                                            | --                                   | --                                            | --                                                  | --                                                | --                                                  |
| African trypanosomiasis                                                              | --                                   | --                                            | --                                                  | --                                                | --                                                  |
| Schistosomiasis                                                                      | --                                   | --                                            | --                                                  | --                                                | --                                                  |
| Cysticercosis                                                                        | --                                   | --                                            | --                                                  | --                                                | --                                                  |
| Cystic echinococcosis                                                                | --                                   | --                                            | --                                                  | --                                                | --                                                  |
| Lymphatic filariasis                                                                 | --                                   | --                                            | --                                                  | --                                                | --                                                  |
| Onchocerciasis                                                                       | --                                   | --                                            | --                                                  | --                                                | --                                                  |
| Trachoma                                                                             | --                                   | --                                            | --                                                  | --                                                | --                                                  |
| Dengue                                                                               | 0.1<br>(0.1 to 0.2)                  | 2.3<br>(1.6 to 3.2)                           | $< 0.05$<br>( $< 0.05$ to $< 0.05$ )                | 310.6<br>(216.0 to 726.2)                         | 311.8<br>(220.5 to 737.6)                           |
| Yellow fever                                                                         | --                                   | --                                            | --                                                  | --                                                | --                                                  |
| Rabies                                                                               | $< 0.05$<br>( $< 0.05$ to $< 0.05$ ) | $< 0.05$<br>( $< 0.05$ to $< 0.05$ )          | $< 0.05$<br>( $< 0.05$ to $< 0.05$ )                | 51.0<br>(3.4 to 129.2)                            | 52.3<br>(7.0 to 122.5)                              |
| Intestinal nematode infections                                                       | 30.2<br>(25.7 to 36.0)               | --                                            | 0.1<br>( $< 0.05$ to 0.1)                           | 833.9<br>(424.4 to 1,466.7)                       | 823.8<br>(416.2 to 1,460.8)                         |
| Ascariasis                                                                           | 12.3<br>(8.8 to 16.7)                | --                                            | $< 0.05$<br>( $< 0.05$ to $< 0.05$ )                | 1.8<br>(-60.9 to 159.3)                           | -0.1<br>(-61.5 to 157.0)                            |

| Cause                                                                   | Prevalence in thousands (95% UI)  | Incidence in thousands (95% UI)    | YLDs in thousands (95% UI)                    |                                                   |                                                     |
|-------------------------------------------------------------------------|-----------------------------------|------------------------------------|-----------------------------------------------|---------------------------------------------------|-----------------------------------------------------|
|                                                                         | 2016 counts                       | 2016 counts                        | 2016 counts                                   | Percentage change in counts between 2006 and 2016 | Percentage change in age-standardised rates between |
| Trichuriasis                                                            | 5.4<br>(3.7 to 7.9)               | --                                 | < 0.05<br>(< 0.05 to < 0.05)                  | 1.6<br>(-74.7 to 276.3)                           | -1.5<br>(-75.3 to 266.1)                            |
| Hookworm disease                                                        | 16.2<br>(12.4 to 21.2)            | --                                 | 0.1<br>(< 0.05 to 0.1)                        | 1,924.7<br>(1,152.9 to 3,246.7)                   | 1,927.4<br>(1,145.9 to 3,230.1)                     |
| Food-borne trematodiasis                                                | --                                | --                                 | --                                            | --                                                | --                                                  |
| Leprosy                                                                 | < 0.05<br>(< 0.05 to < 0.05)      | --                                 | < 0.05<br>(< 0.05 to < 0.05)                  | -33.2<br>(-36.8 to -30.0)                         | -42.1<br>(-45.3 to -39.1)                           |
| Ebola virus disease                                                     | --                                | --                                 | --                                            | --                                                | --                                                  |
| Zika virus disease                                                      | 0.1<br>(< 0.05 to 0.2)            | 6.1<br>(2.9 to 13.7)               | < 0.05<br>(< 0.05 to < 0.05)                  | --                                                | --                                                  |
| Guinea worm disease                                                     | --                                | --                                 | --                                            | --                                                | --                                                  |
| Other neglected tropical diseases                                       | 0.8<br>(0.7 to 1.0)               | --                                 | < 0.05<br>(< 0.05 to < 0.05)                  | -13.7<br>(-32.4 to 6.8)                           | -6.9<br>(-26.9 to 15.1)                             |
| <b>Maternal disorders</b>                                               | <b>0.1<br/>(0.1 to 0.2)</b>       | <b>3.7†<br/>(3.3 to 4.0)</b>       | <b>&lt; 0.05<br/>(&lt; 0.05 to &lt; 0.05)</b> | <b>-12.3<br/>(-34.6 to 16.3)</b>                  | <b>-9.1<br/>(-32.0 to 20.7)</b>                     |
| Maternal haemorrhage                                                    | < 0.05<br>(< 0.05 to < 0.05)      | 0.1<br>(0.1 to 0.1)                | < 0.05<br>(< 0.05 to < 0.05)                  | 0.3<br>(-33.0 to 51.0)                            | 4.0<br>(-30.9 to 55.3)                              |
| Maternal sepsis and other pregnancy related infections                  | < 0.05<br>(< 0.05 to 0.1)         | 0.2<br>(0.2 to 0.3)                | < 0.05<br>(< 0.05 to < 0.05)                  | -8.1<br>(-56.9 to 85.4)                           | -4.7<br>(-55.3 to 93.5)                             |
| Maternal hypertensive disorders                                         | 0.1<br>(0.1 to 0.1)               | 0.4<br>(0.3 to 0.5)                | < 0.05<br>(< 0.05 to < 0.05)                  | -14.7<br>(-46.3 to 41.5)                          | -11.6<br>(-44.3 to 46.3)                            |
| Maternal obstructed labour and uterine rupture                          | < 0.05<br>(< 0.05 to < 0.05)      | 0.1<br>(0.1 to 0.1)                | < 0.05<br>(< 0.05 to < 0.05)                  | -9.7<br>(-50.6 to 63.2)                           | -6.3<br>(-48.6 to 69.5)                             |
| Maternal abortion, miscarriage, and ectopic pregnancy                   | < 0.05<br>(< 0.05 to < 0.05)      | 2.9<br>(2.5 to 3.1)                | < 0.05<br>(< 0.05 to < 0.05)                  | -7.0<br>(-50.5 to 51.8)                           | -7.0<br>(-48.5 to 56.3)                             |
| Other maternal disorders                                                | --                                | --                                 | < 0.05<br>(< 0.05 to < 0.05)                  | -16.5<br>(-37.8 to 11.1)                          | -13.2<br>(-35.2 to 15.6)                            |
| <b>Neonatal disorders</b>                                               | <b>1.9<br/>(1.7 to 2.4)</b>       | <b>--</b>                          | <b>0.3<br/>(0.2 to 0.6)</b>                   | <b>-2.8<br/>(-15.8 to 12.6)</b>                   | <b>0.4<br/>(-13.0 to 16.5)</b>                      |
| Neonatal preterm birth complications                                    | 1.6<br>(1.3 to 2.2)               | --                                 | 0.2<br>(0.1 to 0.2)                           | -2.4<br>(-22.2 to 22.3)                           | 0.8<br>(-19.6 to 26.2)                              |
| Neonatal encephalopathy due to birth asphyxia and trauma                | 0.1<br>(< 0.05 to 0.1)            | --                                 | < 0.05<br>(< 0.05 to < 0.05)                  | 32.0<br>(-40.4 to 158.8)                          | 34.3<br>(-38.5 to 162.0)                            |
| Neonatal sepsis and other neonatal infections                           | 0.3<br>(0.1 to 0.7)               | --                                 | 0.1<br>(< 0.05 to 0.4)                        | -4.1<br>(-20.6 to 17.7)                           | -1.0<br>(-17.4 to 22.0)                             |
| Hemolytic disease and other neonatal jaundice                           | < 0.05<br>(< 0.05 to 0.1)         | --                                 | < 0.05<br>(< 0.05 to < 0.05)                  | -3.2<br>(-19.9 to 17.5)                           | -1.9<br>(-18.3 to 17.9)                             |
| Other neonatal disorders                                                | --                                | --                                 | < 0.05<br>(< 0.05 to < 0.05)                  | -10.5<br>(-24.9 to 6.1)                           | -2.8<br>(-18.4 to 14.9)                             |
| <b>Nutritional deficiencies</b>                                         | <b>22.2<br/>(19.7 to 24.2)</b>    | <b>1.9†<br/>(1.2 to 2.8)</b>       | <b>0.5<br/>(0.3 to 0.7)</b>                   | <b>-12.8<br/>(-24.0 to 0.4)</b>                   | <b>-11.0<br/>(-22.0 to 2.1)</b>                     |
| Protein-energy malnutrition                                             | 0.3<br>(0.2 to 0.4)               | 0.1<br>(0.1 to 0.2)                | < 0.05<br>(< 0.05 to < 0.05)                  | -14.1<br>(-40.4 to 23.4)                          | -6.7<br>(-35.2 to 33.0)                             |
| Iodine deficiency                                                       | 0.4<br>(0.3 to 0.4)               | < 0.05<br>(< 0.05 to < 0.05)       | < 0.05<br>(< 0.05 to < 0.05)                  | 6.6<br>(-8.8 to 25.1)                             | 0.2<br>(-13.8 to 17.0)                              |
| Vitamin A deficiency                                                    | 2.1<br>(1.3 to 3.1)               | 1.7<br>(1.0 to 2.7)                | < 0.05<br>(< 0.05 to < 0.05)                  | -2.4<br>(-18.4 to 15.8)                           | 0.4<br>(-16.1 to 18.8)                              |
| Iron-deficiency anaemia                                                 | 19.1<br>(16.8 to 21.5)            | --                                 | 0.4<br>(0.3 to 0.7)                           | -13.2<br>(-24.7 to 0.5)                           | -11.4<br>(-22.8 to 2.1)                             |
| Other nutritional deficiencies                                          | --                                | --                                 | < 0.05<br>(< 0.05 to < 0.05)                  | -15.4<br>(-42.4 to 24.5)                          | -8.2<br>(-37.7 to 34.0)                             |
| <b>Other communicable, maternal, neonatal, and nutritional diseases</b> | <b>29.1<br/>(27.2 to 31.1)</b>    | <b>9.3<br/>(7.3 to 12.2)</b>       | <b>0.1<br/>(&lt; 0.05 to 0.1)</b>             | <b>-0.2<br/>(-8.7 to 8.4)</b>                     | <b>-0.3<br/>(-8.7 to 8.0)</b>                       |
| Sexually transmitted diseases excluding HIV                             | 25.8<br>(23.9 to 27.7)            | 9.1<br>(7.1 to 12.0)               | < 0.05<br>(< 0.05 to 0.1)                     | 3.7<br>(-4.3 to 13.1)                             | 0.9<br>(-6.5 to 9.7)                                |
| Syphilis                                                                | 0.8<br>(0.5 to 1.1)               | 0.6<br>(0.3 to 0.9)                | < 0.05<br>(< 0.05 to < 0.05)                  | 16.8<br>(1.8 to 35.2)                             | -0.8<br>(-14.6 to 16.4)                             |
| Chlamydial infection                                                    | 1.0<br>(0.8 to 1.3)               | 0.8<br>(0.6 to 1.0)                | < 0.05<br>(< 0.05 to < 0.05)                  | -0.9<br>(-17.2 to 16.3)                           | 0.5<br>(-15.9 to 17.9)                              |
| Gonococcal infection                                                    | 0.8<br>(0.3 to 1.6)               | 2.9<br>(1.1 to 5.7)                | < 0.05<br>(< 0.05 to < 0.05)                  | 1.8<br>(-15.2 to 21.3)                            | 2.4<br>(-14.8 to 22.4)                              |
| Trichomoniasis                                                          | 3.8<br>(3.3 to 4.3)               | 3.3<br>(2.8 to 3.8)                | < 0.05<br>(< 0.05 to < 0.05)                  | 4.6<br>(-2.0 to 11.6)                             | 1.2<br>(-4.7 to 7.3)                                |
| Genital herpes                                                          | 21.2<br>(18.4 to 24.4)            | 1.4<br>(1.2 to 1.7)                | < 0.05<br>(< 0.05 to < 0.05)                  | 8.7<br>(-0.5 to 17.6)                             | 0.3<br>(-7.4 to 7.9)                                |
| Other sexually transmitted diseases                                     | 0.2<br>(0.2 to 0.2)               | 0.2<br>(0.2 to 0.2)                | < 0.05<br>(< 0.05 to < 0.05)                  | 1.0<br>(-10.0 to 13.9)                            | 0.6<br>(-10.3 to 13.1)                              |
| Hepatitis                                                               | 4.1<br>(3.6 to 4.6)               | 0.2<br>(0.2 to 0.3)                | < 0.05<br>(< 0.05 to < 0.05)                  | -30.2<br>(-45.2 to -10.2)                         | -32.3<br>(-45.7 to -14.6)                           |
| Acute hepatitis A                                                       | < 0.05<br>(< 0.05 to < 0.05)      | < 0.05<br>(< 0.05 to 0.1)          | < 0.05<br>(< 0.05 to < 0.05)                  | -34.3<br>(-75.1 to 78.5)                          | -34.1<br>(-73.8 to 69.1)                            |
| Hepatitis B                                                             | 1.9<br>(1.5 to 2.3)               | 0.1<br>(0.1 to 0.2)                | < 0.05<br>(< 0.05 to < 0.05)                  | -31.7<br>(-42.6 to -18.9)                         | -36.9<br>(-46.7 to -26.5)                           |
| Hepatitis C                                                             | 2.3<br>(2.0 to 2.5)               | < 0.05<br>(< 0.05 to 0.1)          | < 0.05<br>(< 0.05 to < 0.05)                  | -11.1<br>(-33.5 to 18.1)                          | -6.6<br>(-31.3 to 24.9)                             |
| Acute hepatitis E                                                       | < 0.05<br>(< 0.05 to < 0.05)      | < 0.05<br>(< 0.05 to < 0.05)       | < 0.05<br>(< 0.05 to < 0.05)                  | -35.8<br>(-41.3 to -30.1)                         | -36.3<br>(-40.7 to -32.1)                           |
| Other infectious diseases                                               | 0.7<br>(0.6 to 0.8)               | < 0.05<br>(< 0.05 to < 0.05)       | < 0.05<br>(< 0.05 to < 0.05)                  | -7.5<br>(-24.7 to 11.2)                           | -2.2<br>(-20.1 to 17.5)                             |
| <b>Non-communicable diseases</b>                                        | <b>102.0<br/>(101.5 to 102.5)</b> | <b>310.8†<br/>(296.9 to 325.8)</b> | <b>10.0<br/>(7.3 to 13.0)</b>                 | <b>8.1<br/>(5.4 to 10.6)</b>                      | <b>-0.1<br/>(-2.3 to 2.2)</b>                       |
| <b>Neoplasms</b>                                                        | <b>0.7<br/>(0.7 to 0.8)</b>       | <b>0.3<br/>(0.2 to 0.3)</b>        | <b>0.1<br/>(0.1 to 0.1)</b>                   | <b>35.4<br/>(28.2 to 42.5)</b>                    | <b>14.9<br/>(8.9 to 21.1)</b>                       |
| Lip and oral cavity cancer                                              | < 0.05<br>(< 0.05 to < 0.05)      | < 0.05<br>(< 0.05 to < 0.05)       | < 0.05<br>(< 0.05 to < 0.05)                  | 33.4<br>(15.5 to 55.4)                            | 9.7<br>(-5.6 to 27.8)                               |
| Nasopharynx cancer                                                      | < 0.05<br>(< 0.05 to < 0.05)      | < 0.05<br>(< 0.05 to < 0.05)       | < 0.05<br>(< 0.05 to < 0.05)                  | 7.9<br>(-1.9 to 18.9)                             | -3.7<br>(-11.6 to 5.5)                              |
| Other pharynx cancer                                                    | < 0.05<br>(< 0.05 to < 0.05)      | < 0.05<br>(< 0.05 to < 0.05)       | < 0.05<br>(< 0.05 to < 0.05)                  | 27.4<br>(11.1 to 47.0)                            | 1.5<br>(-11.7 to 16.4)                              |
| Oesophageal cancer                                                      | < 0.05<br>(< 0.05 to < 0.05)      | < 0.05<br>(< 0.05 to < 0.05)       | < 0.05<br>(< 0.05 to < 0.05)                  | 14.8<br>(-0.8 to 32.3)                            | -6.1<br>(-19.3 to 8.3)                              |
| Stomach cancer                                                          | < 0.05<br>(< 0.05 to < 0.05)      | < 0.05<br>(< 0.05 to < 0.05)       | < 0.05<br>(< 0.05 to < 0.05)                  | 17.6<br>(0.4 to 37.8)                             | -2.0<br>(-16.7 to 16.5)                             |
| Colon and rectum cancer                                                 | 0.1<br>(0.1 to 0.1)               | < 0.05<br>(< 0.05 to < 0.05)       | < 0.05<br>(< 0.05 to < 0.05)                  | 48.9<br>(30.5 to 70.7)                            | 24.3<br>(8.9 to 42.3)                               |
| Liver cancer                                                            | < 0.05<br>(< 0.05 to < 0.05)      | < 0.05<br>(< 0.05 to < 0.05)       | < 0.05<br>(< 0.05 to < 0.05)                  | 37.6<br>(27.8 to 48.0)                            | 15.4<br>(7.2 to 24.4)                               |
| Liver cancer due to hepatitis B                                         | < 0.05<br>(< 0.05 to < 0.05)      | < 0.05<br>(< 0.05 to < 0.05)       | < 0.05<br>(< 0.05 to < 0.05)                  | 39.8<br>(28.3 to 52.8)                            | 16.6<br>(7.3 to 26.8)                               |

| Cause                                              | Prevalence in thousands (95% UI)     | Incidence in thousands (95% UI)    | YLDs in thousands (95% UI)        |                                                   |                                                     |
|----------------------------------------------------|--------------------------------------|------------------------------------|-----------------------------------|---------------------------------------------------|-----------------------------------------------------|
|                                                    | 2016 counts                          | 2016 counts                        | 2016 counts                       | Percentage change in counts between 2006 and 2016 | Percentage change in age-standardised rates between |
| Liver cancer due to hepatitis C                    | < 0.05<br>(< 0.05 to < 0.05)         | < 0.05<br>(< 0.05 to < 0.05)       | < 0.05<br>(< 0.05 to < 0.05)      | 35.2<br>(24.4 to 47.3)                            | 13.8<br>(4.7 to 23.9)                               |
| Liver cancer due to alcohol use                    | < 0.05<br>(< 0.05 to < 0.05)         | < 0.05<br>(< 0.05 to < 0.05)       | < 0.05<br>(< 0.05 to < 0.05)      | 39.1<br>(26.2 to 53.0)                            | 14.8<br>(4.6 to 26.0)                               |
| Liver cancer due to other causes                   | < 0.05<br>(< 0.05 to < 0.05)         | < 0.05<br>(< 0.05 to < 0.05)       | < 0.05<br>(< 0.05 to < 0.05)      | 35.8<br>(24.2 to 49.2)                            | 16.0<br>(6.3 to 27.6)                               |
| Gallbladder and biliary tract cancer               | < 0.05<br>(< 0.05 to < 0.05)         | < 0.05<br>(< 0.05 to < 0.05)       | < 0.05<br>(< 0.05 to < 0.05)      | 12.2<br>(5.5 to 19.5)                             | -6.5<br>(-12.1 to -0.4)                             |
| Pancreatic cancer                                  | < 0.05<br>(< 0.05 to < 0.05)         | < 0.05<br>(< 0.05 to < 0.05)       | < 0.05<br>(< 0.05 to < 0.05)      | 22.1<br>(7.5 to 39.1)                             | 1.9<br>(-10.1 to 16.8)                              |
| Larynx cancer                                      | < 0.05<br>(< 0.05 to < 0.05)         | < 0.05<br>(< 0.05 to < 0.05)       | < 0.05<br>(< 0.05 to < 0.05)      | 41.3<br>(13.0 to 75.3)                            | 12.9<br>(-9.7 to 41.9)                              |
| Tracheal, bronchus, and lung cancer                | < 0.05<br>(< 0.05 to < 0.05)         | < 0.05<br>(< 0.05 to < 0.05)       | < 0.05<br>(< 0.05 to < 0.05)      | 30.0<br>(6.4 to 56.5)                             | 6.1<br>(-13.3 to 27.7)                              |
| Malignant skin melanoma                            | < 0.05<br>(< 0.05 to < 0.05)         | < 0.05<br>(< 0.05 to < 0.05)       | < 0.05<br>(< 0.05 to < 0.05)      | 41.1<br>(18.2 to 68.6)                            | 21.0<br>(1.5 to 44.1)                               |
| Non-melanoma skin cancer                           | < 0.05<br>(< 0.05 to < 0.05)         | < 0.05<br>(< 0.05 to < 0.05)       | < 0.05<br>(< 0.05 to < 0.05)      | -33.0<br>(-53.3 to 6.2)                           | -44.8<br>(-61.5 to -10.0)                           |
| Non-melanoma skin cancer (squamous-cell carcinoma) | < 0.05<br>(< 0.05 to < 0.05)         | < 0.05<br>(< 0.05 to < 0.05)       | < 0.05<br>(< 0.05 to < 0.05)      | -34.2<br>(-55.0 to 5.5)                           | -45.7<br>(-62.5 to -10.6)                           |
| Non-melanoma skin cancer (basal-cell carcinoma)    | < 0.05<br>(< 0.05 to < 0.05)         | < 0.05<br>(< 0.05 to < 0.05)       | < 0.05<br>(< 0.05 to < 0.05)      | 22.1<br>(2.4 to 40.4)                             | 1.4<br>(-12.6 to 15.4)                              |
| Breast cancer                                      | 0.1<br>(0.1 to 0.2)                  | < 0.05<br>(< 0.05 to < 0.05)       | < 0.05<br>(< 0.05 to < 0.05)      | 37.2<br>(18.0 to 59.6)                            | 14.6<br>(-0.4 to 32.0)                              |
| Cervical cancer                                    | 0.1<br>(0.1 to 0.1)                  | < 0.05<br>(< 0.05 to < 0.05)       | < 0.05<br>(< 0.05 to < 0.05)      | 17.2<br>(-3.8 to 41.3)                            | -1.8<br>(-18.5 to 17.0)                             |
| Uterine cancer                                     | < 0.05<br>(< 0.05 to 0.1)            | < 0.05<br>(< 0.05 to < 0.05)       | < 0.05<br>(< 0.05 to < 0.05)      | 65.7<br>(36.1 to 103.1)                           | 31.6<br>(8.9 to 61.1)                               |
| Ovarian cancer                                     | < 0.05<br>(< 0.05 to < 0.05)         | < 0.05<br>(< 0.05 to < 0.05)       | < 0.05<br>(< 0.05 to < 0.05)      | 74.2<br>(27.1 to 136.3)                           | 47.1<br>(6.1 to 100.4)                              |
| Prostate cancer                                    | 0.2<br>(0.2 to 0.3)                  | 0.1<br>(0.1 to 0.1)                | < 0.05<br>(< 0.05 to < 0.05)      | 43.0<br>(25.6 to 61.8)                            | 22.9<br>(8.3 to 39.6)                               |
| Testicular cancer                                  | < 0.05<br>(< 0.05 to < 0.05)         | < 0.05<br>(< 0.05 to < 0.05)       | < 0.05<br>(< 0.05 to < 0.05)      | -30.5<br>(-41.1 to -17.3)                         | -33.4<br>(-43.0 to -21.5)                           |
| Kidney cancer                                      | < 0.05<br>(< 0.05 to < 0.05)         | < 0.05<br>(< 0.05 to < 0.05)       | < 0.05<br>(< 0.05 to < 0.05)      | 32.6<br>(16.2 to 52.8)                            | 14.9<br>(1.4 to 32.0)                               |
| Bladder cancer                                     | < 0.05<br>(< 0.05 to < 0.05)         | < 0.05<br>(< 0.05 to < 0.05)       | < 0.05<br>(< 0.05 to < 0.05)      | 35.3<br>(19.7 to 53.0)                            | 13.5<br>(0.4 to 28.8)                               |
| Brain and nervous system cancer                    | < 0.05<br>(< 0.05 to < 0.05)         | < 0.05<br>(< 0.05 to < 0.05)       | < 0.05<br>(< 0.05 to < 0.05)      | 22.8<br>(13.6 to 34.2)                            | 8.0<br>(-0.3 to 17.9)                               |
| Thyroid cancer                                     | < 0.05<br>(< 0.05 to < 0.05)         | < 0.05<br>(< 0.05 to < 0.05)       | < 0.05<br>(< 0.05 to < 0.05)      | 39.9<br>(15.1 to 68.8)                            | 19.5<br>(-0.4 to 43.2)                              |
| Mesothelioma                                       | < 0.05<br>(< 0.05 to < 0.05)         | < 0.05<br>(< 0.05 to < 0.05)       | < 0.05<br>(< 0.05 to < 0.05)      | 2.7<br>(-5.0 to 16.2)                             | -13.8<br>(-20.3 to -2.8)                            |
| Hodgkin lymphoma                                   | < 0.05<br>(< 0.05 to < 0.05)         | < 0.05<br>(< 0.05 to < 0.05)       | < 0.05<br>(< 0.05 to < 0.05)      | -10.7<br>(-20.9 to 20.2)                          | -19.1<br>(-27.9 to 8.2)                             |
| Non-Hodgkin's lymphoma                             | < 0.05<br>(< 0.05 to < 0.05)         | < 0.05<br>(< 0.05 to < 0.05)       | < 0.05<br>(< 0.05 to < 0.05)      | 16.7<br>(2.8 to 34.0)                             | 1.3<br>(-10.5 to 16.8)                              |
| Multiple myeloma                                   | < 0.05<br>(< 0.05 to < 0.05)         | < 0.05<br>(< 0.05 to < 0.05)       | < 0.05<br>(< 0.05 to < 0.05)      | 30.4<br>(8.9 to 57.7)                             | 5.9<br>(-13.1 to 29.5)                              |
| Leukaemia                                          | < 0.05<br>(< 0.05 to < 0.05)         | < 0.05<br>(< 0.05 to < 0.05)       | < 0.05<br>(< 0.05 to < 0.05)      | 18.3<br>(8.0 to 29.2)                             | 6.6<br>(-3.0 to 17.4)                               |
| Acute lymphoid leukaemia                           | < 0.05<br>(< 0.05 to < 0.05)         | < 0.05<br>(< 0.05 to < 0.05)       | < 0.05<br>(< 0.05 to < 0.05)      | -9.8<br>(-22.3 to 5.4)                            | -5.7<br>(-17.9 to 9.5)                              |
| Chronic lymphoid leukaemia                         | < 0.05<br>(< 0.05 to < 0.05)         | < 0.05<br>(< 0.05 to < 0.05)       | < 0.05<br>(< 0.05 to < 0.05)      | 19.9<br>(-3.1 to 51.6)                            | -0.1<br>(-20.4 to 27.0)                             |
| Acute myeloid leukaemia                            | < 0.05<br>(< 0.05 to < 0.05)         | < 0.05<br>(< 0.05 to < 0.05)       | < 0.05<br>(< 0.05 to < 0.05)      | 50.3<br>(35.2 to 66.7)                            | 43.4<br>(29.7 to 58.7)                              |
| Chronic myeloid leukaemia                          | < 0.05<br>(< 0.05 to < 0.05)         | < 0.05<br>(< 0.05 to < 0.05)       | < 0.05<br>(< 0.05 to < 0.05)      | 33.0<br>(13.5 to 56.5)                            | 16.1<br>(-1.6 to 35.7)                              |
| Other leukaemia                                    | < 0.05<br>(< 0.05 to < 0.05)         | < 0.05<br>(< 0.05 to < 0.05)       | < 0.05<br>(< 0.05 to < 0.05)      | 16.7<br>(3.0 to 31.2)                             | 5.7<br>(-7.6 to 19.6)                               |
| Other neoplasms                                    | < 0.05<br>(< 0.05 to < 0.05)         | < 0.05<br>(< 0.05 to < 0.05)       | < 0.05<br>(< 0.05 to < 0.05)      | 43.1<br>(25.1 to 62.6)                            | 26.0<br>(9.8 to 43.6)                               |
| <b>Cardiovascular diseases</b>                     | <b>7.6</b><br><b>(7.4 to 8.0)</b>    | <b>0.7†</b><br><b>(0.7 to 0.8)</b> | <b>0.4</b><br><b>(0.3 to 0.6)</b> | <b>14.3</b><br><b>(11.1 to 17.8)</b>              | <b>0.4</b><br><b>(-2.4 to 3.6)</b>                  |
| Rheumatic heart disease                            | 1.0<br>(0.9 to 1.1)                  | < 0.05<br>(< 0.05 to < 0.05)       | < 0.05<br>(< 0.05 to 0.1)         | 9.0<br>(-0.6 to 18.3)                             | 3.9<br>(-5.0 to 12.5)                               |
| Ischaemic heart disease                            | 2.3<br>(2.2 to 2.4)                  | 0.3<br>(0.3 to 0.3)                | 0.1<br>(0.1 to 0.1)               | 19.3<br>(13.7 to 25.0)                            | 1.1<br>(-3.1 to 5.6)                                |
| Cerebrovascular disease                            | 1.0<br>(1.0 to 1.1)                  | 0.1†<br>(0.1 to 0.2)               | 0.1<br>(0.1 to 0.1)               | 15.9<br>(8.5 to 23.4)                             | -0.3<br>(-6.8 to 6.3)                               |
| Ischaemic stroke                                   | 0.8<br>(0.8 to 0.9)                  | 0.1†<br>(0.1 to 0.1)               | 0.1<br>(0.1 to 0.1)               | 16.1<br>(6.7 to 25.5)                             | -0.5<br>(-8.6 to 7.5)                               |
| Hemorrhagic stroke                                 | 0.2<br>(0.2 to 0.3)                  | 0.1†<br>(< 0.05 to 0.1)            | < 0.05<br>(< 0.05 to < 0.05)      | 15.5<br>(3.9 to 28.1)                             | 0.4<br>(-9.7 to 11.7)                               |
| Hypertensive heart disease                         | 0.3<br>(0.3 to 0.4)                  | --                                 | < 0.05<br>(< 0.05 to < 0.05)      | 16.1<br>(5.9 to 26.6)                             | -0.7<br>(-9.0 to 8.0)                               |
| Cardiomyopathy and myocarditis                     | < 0.05<br>(< 0.05 to 0.1)            | < 0.05†<br>(< 0.05 to < 0.05)      | < 0.05<br>(< 0.05 to < 0.05)      | 10.2<br>(-0.9 to 22.2)                            | 1.2<br>(-8.5 to 12.2)                               |
| Myocarditis                                        | < 0.05<br>(< 0.05 to < 0.05)         | < 0.05<br>(< 0.05 to < 0.05)       | < 0.05<br>(< 0.05 to < 0.05)      | 5.4<br>(-2.9 to 15.2)                             | 1.2<br>(-7.3 to 10.8)                               |
| Alcoholic cardiomyopathy                           | < 0.05<br>(< 0.05 to < 0.05)         | --                                 | < 0.05<br>(< 0.05 to < 0.05)      | 22.0<br>(-4.6 to 57.7)                            | 1.1<br>(-20.7 to 30.2)                              |
| Other cardiomyopathy                               | < 0.05<br>(< 0.05 to < 0.05)         | --                                 | < 0.05<br>(< 0.05 to < 0.05)      | 9.7<br>(-7.3 to 29.6)                             | 1.2<br>(-12.6 to 19.4)                              |
| Atrial fibrillation and flutter                    | 0.7<br>(0.6 to 0.8)                  | 0.1<br>(< 0.05 to 0.1)             | 0.1<br>(< 0.05 to 0.1)            | 17.6<br>(10.2 to 25.6)                            | 0.8<br>(-5.4 to 7.3)                                |
| Peripheral vascular disease                        | 1.6<br>(1.4 to 1.9)                  | 0.2<br>(0.1 to 0.2)                | < 0.05<br>(< 0.05 to < 0.05)      | 15.9<br>(6.5 to 25.3)                             | -1.8<br>(-8.9 to 4.9)                               |
| Endocarditis                                       | < 0.05<br>(< 0.05 to < 0.05)         | < 0.05<br>(< 0.05 to < 0.05)       | < 0.05<br>(< 0.05 to < 0.05)      | 9.6<br>(-3.5 to 24.6)                             | -0.1<br>(-12.7 to 15.0)                             |
| Other cardiovascular and circulatory diseases      | 1.7<br>(1.4 to 1.9)                  | --                                 | 0.1<br>(0.1 to 0.1)               | 8.1<br>(0.7 to 17.4)                              | -0.8<br>(-7.6 to 6.3)                               |
| <b>Chronic respiratory diseases</b>                | <b>11.6</b><br><b>(11.0 to 12.2)</b> | <b>1.9†</b><br><b>(1.8 to 2.1)</b> | <b>0.4</b><br><b>(0.3 to 0.6)</b> | <b>1.6</b><br><b>(-3.6 to 6.7)</b>                | <b>3.6</b><br><b>(-1.6 to 8.3)</b>                  |
| Chronic obstructive pulmonary disease              | 2.7<br>(2.5 to 3.0)                  | 0.2<br>(0.2 to 0.2)                | < 0.05<br>(< 0.05 to 0.1)         | 16.2<br>(-1.2 to 36.0)                            | -0.5<br>(-15.3 to 16.6)                             |
| Pneumoconiosis                                     | < 0.05<br>(< 0.05 to < 0.05)         | < 0.05<br>(< 0.05 to < 0.05)       | < 0.05<br>(< 0.05 to < 0.05)      | 17.2<br>(3.6 to 32.1)                             | 0.3<br>(-11.8 to 13.1)                              |
| Silicosis                                          | < 0.05<br>(< 0.05 to < 0.05)         | < 0.05<br>(< 0.05 to < 0.05)       | < 0.05<br>(< 0.05 to < 0.05)      | 27.0<br>(21.1 to 33.1)                            | 5.7<br>(1.1 to 11.1)                                |



| Cause                                                          | Prevalence in thousands (95% UI) | Incidence in thousands (95% UI)               | YLDs in thousands (95% UI)                    |                                                   |                                                     |
|----------------------------------------------------------------|----------------------------------|-----------------------------------------------|-----------------------------------------------|---------------------------------------------------|-----------------------------------------------------|
|                                                                | 2016 counts                      | 2016 counts                                   | 2016 counts                                   | Percentage change in counts between 2006 and 2016 | Percentage change in age-standardised rates between |
| Asbestosis                                                     | < 0.05<br>(< 0.05 to < 0.05)     | < 0.05<br>(< 0.05 to < 0.05)                  | < 0.05<br>(< 0.05 to < 0.05)                  | 15.0<br>(-6.5 to 41.6)                            | 1.3<br>(-18.5 to 24.8)                              |
| Coal workers pneumoconiosis                                    | --                               | --                                            | --                                            | --                                                | --                                                  |
| Other pneumoconiosis                                           | < 0.05<br>(< 0.05 to < 0.05)     | < 0.05<br>(< 0.05 to < 0.05)                  | < 0.05<br>(< 0.05 to < 0.05)                  | 14.4<br>(-7.4 to 43.0)                            | -2.7<br>(-20.8 to 21.9)                             |
| Asthma                                                         | 9.1<br>(8.3 to 9.8)              | 1.8<br>(1.6 to 1.9)                           | 0.4<br>(0.2 to 0.5)                           | -0.5<br>(-5.4 to 4.5)                             | 3.8<br>(-1.2 to 9.0)                                |
| Interstitial lung disease and pulmonary sarcoidosis            | < 0.05<br>(< 0.05 to < 0.05)     | < 0.05<br>(< 0.05 to < 0.05)                  | < 0.05<br>(< 0.05 to < 0.05)                  | 17.5<br>(7.1 to 29.1)                             | 6.5<br>(-3.9 to 18.5)                               |
| Other chronic respiratory diseases                             | --                               | --                                            | < 0.05<br>(< 0.05 to < 0.05)                  | 30.2<br>(2.2 to 68.8)                             | 37.1<br>(8.5 to 75.0)                               |
| <b>Cirrhosis and other chronic liver diseases</b>              | <b>0.7<br/>(0.7 to 0.7)</b>      | <b>&lt; 0.05<br/>(&lt; 0.05 to &lt; 0.05)</b> | <b>&lt; 0.05<br/>(&lt; 0.05 to &lt; 0.05)</b> | <b>17.5<br/>(6.1 to 31.5)</b>                     | <b>6.2<br/>(-3.4 to 17.1)</b>                       |
| Cirrhosis and other chronic liver diseases due to hepatitis B  | 0.1<br>(0.1 to 0.1)              | < 0.05<br>(< 0.05 to < 0.05)                  | < 0.05<br>(< 0.05 to < 0.05)                  | 23.0<br>(-5.4 to 58.1)                            | 4.2<br>(-18.3 to 31.7)                              |
| Cirrhosis and other chronic liver diseases due to hepatitis C  | 0.2<br>(0.2 to 0.2)              | < 0.05<br>(< 0.05 to < 0.05)                  | < 0.05<br>(< 0.05 to < 0.05)                  | 25.1<br>(2.2 to 51.9)                             | 6.2<br>(-12.6 to 26.4)                              |
| Cirrhosis and other chronic liver diseases due to alcohol use  | 0.2<br>(0.2 to 0.3)              | < 0.05<br>(< 0.05 to < 0.05)                  | < 0.05<br>(< 0.05 to < 0.05)                  | 26.8<br>(4.7 to 52.6)                             | 6.6<br>(-10.5 to 26.6)                              |
| Cirrhosis and other chronic liver diseases due to other causes | 0.2<br>(0.1 to 0.2)              | < 0.05<br>(< 0.05 to < 0.05)                  | < 0.05<br>(< 0.05 to < 0.05)                  | 3.9<br>(-15.8 to 29.4)                            | 6.4<br>(-12.9 to 31.2)                              |
| <b>Digestive diseases</b>                                      | <b>3.7<br/>(3.4 to 3.9)</b>      | <b>3.0†<br/>(2.8 to 3.1)</b>                  | <b>0.1<br/>(0.1 to 0.2)</b>                   | <b>14.6<br/>(4.7 to 26.1)</b>                     | <b>5.6<br/>(-2.7 to 15.0)</b>                       |
| Peptic ulcer disease                                           | 1.3<br>(1.1 to 1.4)              | 0.1<br>(0.1 to 0.1)                           | < 0.05<br>(< 0.05 to < 0.05)                  | 18.4<br>(-5.1 to 49.6)                            | 5.5<br>(-13.4 to 30.5)                              |
| Gastritis and duodenitis                                       | 1.4<br>(1.2 to 1.5)              | 0.8<br>(0.7 to 0.9)                           | < 0.05<br>(< 0.05 to < 0.05)                  | 34.3<br>(10.6 to 65.5)                            | 18.9<br>(-0.5 to 43.4)                              |
| Appendicitis                                                   | < 0.05<br>(< 0.05 to < 0.05)     | 0.2<br>(0.2 to 0.2)                           | < 0.05<br>(< 0.05 to < 0.05)                  | -5.8<br>(-32.5 to 35.9)                           | -1.4<br>(-28.4 to 37.3)                             |
| Paralytic ileus and intestinal obstruction                     | < 0.05<br>(< 0.05 to < 0.05)     | < 0.05<br>(< 0.05 to < 0.05)                  | < 0.05<br>(< 0.05 to < 0.05)                  | 9.7<br>(5.5 to 13.8)                              | 5.9<br>(2.7 to 9.3)                                 |
| Inguinal, femoral, and abdominal hernia                        | 1.0<br>(0.9 to 1.1)              | 0.7<br>(0.6 to 0.8)                           | 0.1<br>(< 0.05 to 0.1)                        | 7.6<br>(-2.2 to 18.2)                             | 0.9<br>(-7.2 to 10.0)                               |
| Inflammatory bowel disease                                     | < 0.05<br>(< 0.05 to < 0.05)     | < 0.05<br>(< 0.05 to < 0.05)                  | < 0.05<br>(< 0.05 to < 0.05)                  | 1.6<br>(-1.7 to 4.9)                              | -9.2<br>(-11.8 to -6.6)                             |
| Vascular intestinal disorders                                  | < 0.05<br>(< 0.05 to < 0.05)     | < 0.05<br>(< 0.05 to < 0.05)                  | < 0.05<br>(< 0.05 to < 0.05)                  | 15.0<br>(7.7 to 22.9)                             | 10.1<br>(5.0 to 15.3)                               |
| Gallbladder and biliary diseases                               | 0.2<br>(0.1 to 0.2)              | 1.0<br>(0.9 to 1.2)                           | < 0.05<br>(< 0.05 to < 0.05)                  | 24.1<br>(2.5 to 50.5)                             | 8.6<br>(-10.2 to 30.3)                              |
| Pancreatitis                                                   | < 0.05<br>(< 0.05 to < 0.05)     | < 0.05<br>(< 0.05 to 0.1)                     | < 0.05<br>(< 0.05 to < 0.05)                  | 27.7<br>(22.9 to 33.1)                            | 14.4<br>(10.8 to 18.1)                              |
| Other digestive diseases                                       | --                               | --                                            | < 0.05<br>(< 0.05 to < 0.05)                  | 16.8<br>(7.5 to 28.2)                             | 9.9<br>(2.2 to 19.5)                                |
| <b>Neurological disorders</b>                                  | <b>43.5<br/>(41.7 to 45.6)</b>   | <b>20.6<br/>(17.7 to 23.7)</b>                | <b>1.1<br/>(0.7 to 1.6)</b>                   | <b>5.4<br/>(-12.6 to 28.5)</b>                    | <b>0.6<br/>(-16.0 to 22.0)</b>                      |
| Alzheimer's disease and other dementias                        | 0.5<br>(0.4 to 0.5)              | 0.1<br>(0.1 to 0.1)                           | 0.1<br>(< 0.05 to 0.1)                        | 11.0<br>(6.0 to 16.4)                             | -1.2<br>(-5.4 to 3.5)                               |
| Parkinson's disease                                            | 0.1<br>(< 0.05 to 0.1)           | < 0.05<br>(< 0.05 to < 0.05)                  | < 0.05<br>(< 0.05 to < 0.05)                  | 22.4<br>(7.0 to 40.7)                             | 5.1<br>(-7.8 to 19.9)                               |
| Epilepsy                                                       | 0.4<br>(0.1 to 0.8)              | < 0.05<br>(< 0.05 to 0.1)                     | 0.1<br>(< 0.05 to 0.3)                        | 4.7<br>(-78.5 to 425.8)                           | 3.5<br>(-78.6 to 427.4)                             |
| Multiple sclerosis                                             | < 0.05<br>(< 0.05 to < 0.05)     | < 0.05<br>(< 0.05 to < 0.05)                  | < 0.05<br>(< 0.05 to < 0.05)                  | 20.3<br>(16.1 to 25.4)                            | 8.2<br>(4.3 to 12.8)                                |
| Motor neuron disease                                           | < 0.05<br>(< 0.05 to < 0.05)     | < 0.05<br>(< 0.05 to < 0.05)                  | < 0.05<br>(< 0.05 to < 0.05)                  | 8.3<br>(3.9 to 13.6)                              | 2.0<br>(-1.6 to 5.7)                                |
| Migraine                                                       | 15.9<br>(15.0 to 16.9)           | 1.8<br>(1.7 to 1.9)                           | 0.7<br>(0.5 to 1.0)                           | 4.5<br>(0.5 to 8.4)                               | -0.1<br>(-3.6 to 3.5)                               |
| Tension-type headache                                          | 33.5<br>(30.1 to 37.2)           | 18.7<br>(15.8 to 21.7)                        | 0.1<br>(0.1 to 0.2)                           | 5.1<br>(-0.2 to 10.8)                             | -0.9<br>(-5.3 to 3.9)                               |
| Other neurological disorders                                   | < 0.05<br>(< 0.05 to < 0.05)     | < 0.05<br>(< 0.05 to < 0.05)                  | < 0.05<br>(< 0.05 to 0.1)                     | 22.0<br>(-68.8 to 393.2)                          | 22.7<br>(-68.0 to 368.1)                            |
| <b>Mental and substance use disorders</b>                      | <b>17.6<br/>(17.1 to 18.1)</b>   | <b>6.6†<br/>(6.2 to 7.1)</b>                  | <b>2.3<br/>(1.7 to 3.0)</b>                   | <b>4.2<br/>(2.0 to 6.4)</b>                       | <b>0.2<br/>(-1.8 to 2.1)</b>                        |
| Schizophrenia                                                  | 0.2<br>(0.2 to 0.2)              | < 0.05<br>(< 0.05 to < 0.05)                  | 0.1<br>(0.1 to 0.2)                           | 10.1<br>(-0.2 to 21.2)                            | 0.5<br>(-8.6 to 10.3)                               |
| Alcohol use disorders                                          | 2.3<br>(2.0 to 2.6)              | 1.1<br>(1.0 to 1.3)                           | 0.2<br>(0.2 to 0.3)                           | 2.4<br>(-7.7 to 13.6)                             | -2.5<br>(-11.8 to 7.7)                              |
| Drug use disorders                                             | 0.8<br>(0.7 to 0.9)              | 0.1<br>(0.1 to 0.1)                           | 0.2<br>(0.1 to 0.2)                           | 4.9<br>(-4.1 to 14.2)                             | 1.5<br>(-6.8 to 10.0)                               |
| Opioid use disorders                                           | 0.3<br>(0.2 to 0.3)              | < 0.05<br>(< 0.05 to < 0.05)                  | 0.1<br>(0.1 to 0.2)                           | 6.8<br>(-4.6 to 18.9)                             | 2.3<br>(-7.8 to 13.3)                               |
| Cocaine use disorders                                          | 0.1<br>(0.1 to 0.1)              | < 0.05<br>(< 0.05 to < 0.05)                  | < 0.05<br>(< 0.05 to < 0.05)                  | 2.2<br>(-16.0 to 23.7)                            | 0.1<br>(-17.1 to 20.4)                              |
| Amphetamine use disorders                                      | < 0.05<br>(< 0.05 to < 0.05)     | < 0.05<br>(< 0.05 to < 0.05)                  | < 0.05<br>(< 0.05 to < 0.05)                  | -0.1<br>(-25.2 to 34.6)                           | 1.2<br>(-23.0 to 34.0)                              |
| Cannabis use disorders                                         | 0.3<br>(0.3 to 0.4)              | 0.1<br>(< 0.05 to 0.1)                        | < 0.05<br>(< 0.05 to < 0.05)                  | -7.3<br>(-22.4 to 11.2)                           | -4.0<br>(-19.5 to 14.8)                             |
| Other drug use disorders                                       | < 0.05<br>(< 0.05 to 0.1)        | < 0.05<br>(< 0.05 to < 0.05)                  | < 0.05<br>(< 0.05 to < 0.05)                  | 3.5<br>(-16.6 to 30.7)                            | 0.7<br>(-18.7 to 26.5)                              |
| Depressive disorders                                           | 3.7<br>(3.5 to 4.0)              | 4.2<br>(3.7 to 4.6)                           | 0.6<br>(0.4 to 0.9)                           | 8.7<br>(3.6 to 14.0)                              | 0.9<br>(-3.4 to 5.7)                                |
| Major depressive disorder                                      | 2.6<br>(2.3 to 2.9)              | 3.9<br>(3.5 to 4.4)                           | 0.5<br>(0.4 to 0.7)                           | 8.6<br>(2.4 to 14.9)                              | 1.2<br>(-4.1 to 6.7)                                |
| Dysthymia                                                      | 1.2<br>(1.0 to 1.3)              | 0.2<br>(0.2 to 0.2)                           | 0.1<br>(0.1 to 0.2)                           | 9.5<br>(4.8 to 14.4)                              | -0.1<br>(-3.5 to 3.9)                               |
| Bipolar disorder                                               | 1.0<br>(0.8 to 1.1)              | 0.1<br>(0.1 to 0.1)                           | 0.2<br>(0.1 to 0.3)                           | 2.6<br>(-3.0 to 8.8)                              | -0.2<br>(-5.6 to 5.2)                               |
| Anxiety disorders                                              | 4.6<br>(4.2 to 5.0)              | 0.7<br>(0.6 to 0.7)                           | 0.4<br>(0.3 to 0.6)                           | 3.1<br>(-0.5 to 6.8)                              | 0.0<br>(-3.4 to 3.2)                                |
| Eating disorders                                               | 0.2<br>(0.1 to 0.2)              | 0.1<br>(0.1 to 0.1)                           | < 0.05<br>(< 0.05 to 0.1)                     | 1.9<br>(-10.8 to 14.8)                            | 6.4<br>(-6.7 to 19.9)                               |
| Anorexia nervosa                                               | < 0.05<br>(< 0.05 to < 0.05)     | < 0.05<br>(< 0.05 to < 0.05)                  | < 0.05<br>(< 0.05 to < 0.05)                  | -1.9<br>(-23.8 to 26.7)                           | 5.4<br>(-17.9 to 36.3)                              |
| Bulimia nervosa                                                | 0.1<br>(0.1 to 0.2)              | 0.1<br>(0.1 to 0.1)                           | < 0.05<br>(< 0.05 to < 0.05)                  | 2.9<br>(-11.6 to 19.5)                            | 6.7<br>(-8.1 to 23.7)                               |
| Autistic spectrum disorders                                    | 1.0<br>(0.8 to 1.1)              | < 0.05<br>(< 0.05 to < 0.05)                  | 0.1<br>(0.1 to 0.2)                           | -0.6<br>(-5.1 to 4.6)                             | -0.0<br>(-4.5 to 4.9)                               |
| Autism                                                         | 0.3<br>(0.3 to 0.4)              | < 0.05<br>(< 0.05 to < 0.05)                  | 0.1<br>(< 0.05 to 0.1)                        | -0.4<br>(-7.9 to 8.5)                             | 0.1<br>(-7.2 to 8.9)                                |
| Asperger syndrome and other autistic spectrum disorders        | 0.6<br>(0.5 to 0.8)              | < 0.05<br>(< 0.05 to < 0.05)                  | 0.1<br>(< 0.05 to 0.1)                        | -0.9<br>(-5.3 to 4.0)                             | -0.2<br>(-4.4 to 4.7)                               |



| Cause                                                      | Prevalence in thousands (95% UI)     | Incidence in thousands (95% UI)          | YLDs in thousands (95% UI)        |                                                   |                                                     |
|------------------------------------------------------------|--------------------------------------|------------------------------------------|-----------------------------------|---------------------------------------------------|-----------------------------------------------------|
|                                                            | 2016 counts                          | 2016 counts                              | 2016 counts                       | Percentage change in counts between 2006 and 2016 | Percentage change in age-standardised rates between |
| Attention-deficit/hyperactivity disorder                   | 2.1<br>(1.9 to 2.3)                  | 0.1<br>(0.1 to 0.1)                      | < 0.05<br>(< 0.05 to < 0.05)      | -5.8<br>(-11.2 to -0.4)                           | -0.1<br>(-5.7 to 5.6)                               |
| Conduct disorder                                           | 0.7<br>(0.6 to 0.9)                  | 0.2<br>(0.2 to 0.3)                      | 0.1<br>(0.1 to 0.1)               | -12.4<br>(-18.4 to -6.0)                          | 0.0<br>(-6.9 to 7.4)                                |
| Idiopathic developmental intellectual disability           | 0.6<br>(0.2 to 1.0)                  | --                                       | < 0.05<br>(< 0.05 to < 0.05)      | -3.1<br>(-11.3 to 4.9)                            | -2.4<br>(-10.4 to 5.5)                              |
| Other mental and substance use disorders                   | 2.1<br>(1.9 to 2.4)                  | 0.1<br>(0.1 to 0.1)                      | 0.2<br>(0.1 to 0.2)               | 8.0<br>(2.5 to 13.6)                              | -0.1<br>(-4.8 to 4.6)                               |
| <b>Diabetes, urogenital, blood, and endocrine diseases</b> | <b>46.3</b><br><b>(45.2 to 47.5)</b> | <b>12.8†</b><br><b>(12.0 to 13.7)</b>    | <b>1.4</b><br><b>(1.0 to 1.8)</b> | <b>15.0</b><br><b>(9.6 to 21.5)</b>               | <b>-2.1</b><br><b>(-6.8 to 3.0)</b>                 |
| Diabetes mellitus                                          | 10.6<br>(9.7 to 11.8)                | 0.7<br>(0.6 to 0.8)                      | 0.9<br>(0.7 to 1.3)               | 18.0<br>(10.4 to 27.1)                            | -3.2<br>(-9.4 to 4.0)                               |
| Acute glomerulonephritis                                   | < 0.05<br>(< 0.05 to < 0.05)         | < 0.05<br>(< 0.05 to < 0.05)             | < 0.05<br>(< 0.05 to < 0.05)      | 2.9<br>(-2.6 to 8.2)                              | -0.8<br>(-5.2 to 3.2)                               |
| Chronic kidney disease                                     | 4.3<br>(3.9 to 4.8)                  | 0.3<br>(0.3 to 0.4)                      | 0.1<br>(0.1 to 0.2)               | 19.3<br>(9.5 to 30.5)                             | 3.4<br>(-5.0 to 12.5)                               |
| Chronic kidney disease due to diabetes mellitus            | 1.6<br>(1.4 to 1.9)                  | 0.1<br>(0.1 to 0.1)                      | < 0.05<br>(< 0.05 to 0.1)         | 26.8<br>(13.2 to 42.5)                            | 5.9<br>(-5.3 to 18.1)                               |
| Chronic kidney disease due to hypertension                 | 0.9<br>(0.8 to 1.1)                  | 0.1<br>(0.1 to 0.1)                      | < 0.05<br>(< 0.05 to < 0.05)      | 15.9<br>(2.1 to 32.4)                             | -0.8<br>(-13.1 to 12.7)                             |
| Chronic kidney disease due to glomerulonephritis           | 0.9<br>(0.8 to 1.0)                  | < 0.05<br>(< 0.05 to 0.1)                | < 0.05<br>(< 0.05 to 0.1)         | 16.0<br>(2.5 to 30.9)                             | 3.6<br>(-7.4 to 15.5)                               |
| Chronic kidney disease due to other causes                 | 0.9<br>(0.7 to 1.1)                  | 0.1<br>(0.1 to 0.1)                      | < 0.05<br>(< 0.05 to < 0.05)      | 15.1<br>(2.5 to 30.3)                             | 2.3<br>(-8.0 to 14.4)                               |
| Urinary diseases and male infertility                      | 1.9<br>(1.7 to 2.2)                  | 7.7†<br>(6.9 to 8.5)                     | < 0.05<br>(< 0.05 to 0.1)         | 19.0<br>(11.6 to 27.5)                            | -0.4<br>(-6.0 to 6.1)                               |
| Interstitial nephritis and urinary tract infections        | 0.1<br>(0.1 to 0.1)                  | 7.1<br>(6.3 to 8.0)                      | < 0.05<br>(< 0.05 to < 0.05)      | 4.1<br>(-8.7 to 18.9)                             | 1.3<br>(-10.7 to 15.7)                              |
| Urolithiasis                                               | < 0.05<br>(< 0.05 to < 0.05)         | 0.4<br>(0.4 to 0.5)                      | < 0.05<br>(< 0.05 to < 0.05)      | 12.5<br>(7.6 to 17.5)                             | 1.7<br>(-2.1 to 5.5)                                |
| Benign prostatic hyperplasia                               | 1.1<br>(0.9 to 1.3)                  | 0.1<br>(0.1 to 0.2)                      | < 0.05<br>(< 0.05 to 0.1)         | 27.5<br>(17.8 to 39.1)                            | 0.7<br>(-6.1 to 8.7)                                |
| Male infertility                                           | 0.6<br>(0.4 to 0.7)                  | --                                       | < 0.05<br>(< 0.05 to < 0.05)      | -7.2<br>(-13.4 to -0.1)                           | -5.3<br>(-11.6 to 1.7)                              |
| Other urinary diseases                                     | --                                   | --                                       | < 0.05<br>(< 0.05 to < 0.05)      | -13.7<br>(-22.9 to -3.6)                          | -16.1<br>(-24.6 to -6.7)                            |
| Gynecological diseases                                     | 12.4<br>(11.8 to 13.0)               | 3.8†<br>(3.6 to 4.0)                     | 0.1<br>(0.1 to 0.2)               | 2.3<br>(-2.6 to 7.8)                              | -1.7<br>(-6.2 to 3.2)                               |
| Uterine fibroids                                           | 1.0<br>(0.8 to 1.1)                  | 0.1<br>(0.1 to 0.1)                      | < 0.05<br>(< 0.05 to < 0.05)      | 12.0<br>(-3.0 to 26.8)                            | -0.4<br>(-13.0 to 12.2)                             |
| Polycystic ovarian syndrome                                | < 0.05<br>(< 0.05 to < 0.05)         | 0.1<br>(0.1 to 0.1)                      | < 0.05<br>(< 0.05 to < 0.05)      | 0.2<br>(-30.1 to 38.7)                            | 2.0<br>(-28.9 to 41.1)                              |
| Female infertility                                         | 1.2<br>(0.8 to 1.7)                  | --                                       | < 0.05<br>(< 0.05 to < 0.05)      | 3.6<br>(-4.0 to 12.7)                             | 5.5<br>(-2.0 to 14.7)                               |
| Endometriosis                                              | < 0.05<br>(< 0.05 to < 0.05)         | < 0.05<br>(< 0.05 to 0.1)                | < 0.05<br>(< 0.05 to < 0.05)      | 3.7<br>(-22.1 to 37.6)                            | 1.2<br>(-24.0 to 35.3)                              |
| Genital prolapse                                           | 3.6<br>(3.2 to 4.1)                  | 0.2<br>(0.2 to 0.3)                      | < 0.05<br>(< 0.05 to < 0.05)      | 9.4<br>(1.4 to 17.9)                              | -9.5<br>(-15.9 to -2.6)                             |
| Premenstrual syndrome                                      | 7.1<br>(6.7 to 7.5)                  | 2.5<br>(2.4 to 2.7)                      | 0.1<br>(< 0.05 to 0.1)            | -1.4<br>(-8.4 to 6.2)                             | -0.7<br>(-7.5 to 6.9)                               |
| Other gynecological diseases                               | 1.1<br>(0.9 to 1.2)                  | 0.8<br>(0.7 to 1.0)                      | < 0.05<br>(< 0.05 to < 0.05)      | 1.9<br>(-7.3 to 13.1)                             | -2.4<br>(-11.2 to 8.1)                              |
| Hemoglobinopathies and hemolytic anaemias                  | 27.3<br>(25.7 to 28.7)               | --                                       | 0.1<br>(< 0.05 to 0.1)            | -2.4<br>(-15.2 to 11.4)                           | -1.9<br>(-14.2 to 11.9)                             |
| Thalassemias                                               | < 0.05<br>(< 0.05 to < 0.05)         | --                                       | < 0.05<br>(< 0.05 to < 0.05)      | -11.9<br>(-28.1 to 6.7)                           | -3.0<br>(-20.8 to 18.0)                             |
| Thalassaemias trait                                        | 0.2<br>(0.1 to 0.2)                  | --                                       | < 0.05<br>(< 0.05 to < 0.05)      | 5.5<br>(-17.7 to 32.6)                            | 4.6<br>(-17.1 to 30.3)                              |
| Sickle cell disorders                                      | 0.1<br>(< 0.05 to 0.1)               | --                                       | < 0.05<br>(< 0.05 to < 0.05)      | 3.4<br>(-10.9 to 19.2)                            | 11.3<br>(-4.3 to 28.5)                              |
| Sickle cell trait                                          | 10.5<br>(9.2 to 11.7)                | --                                       | < 0.05<br>(< 0.05 to 0.1)         | 0.3<br>(-15.5 to 19.0)                            | 0.8<br>(-14.5 to 19.4)                              |
| G6PD deficiency                                            | 5.6<br>(4.9 to 6.3)                  | --                                       | < 0.05<br>(< 0.05 to < 0.05)      | 8.4<br>(-20.3 to 42.1)                            | 10.8<br>(-17.6 to 45.5)                             |
| G6PD trait                                                 | 12.2<br>(11.4 to 13.1)               | --                                       | < 0.05<br>(< 0.05 to < 0.05)      | 13.2<br>(-5.6 to 37.0)                            | 11.6<br>(-6.9 to 34.0)                              |
| Other hemoglobinopathies and hemolytic anaemias            | 1.0<br>(0.9 to 1.2)                  | --                                       | < 0.05<br>(< 0.05 to < 0.05)      | -9.5<br>(-23.6 to 6.3)                            | -10.1<br>(-22.8 to 4.5)                             |
| Endocrine, metabolic, blood, and immune disorders          | 1.9<br>(1.8 to 2.1)                  | 0.3<br>(0.2 to 0.3)                      | 0.1<br>(< 0.05 to 0.1)            | 8.2<br>(-0.2 to 16.3)                             | 0.1<br>(-6.9 to 7.3)                                |
| <b>Musculoskeletal disorders</b>                           | <b>17.6</b><br><b>(16.7 to 18.5)</b> | <b>8.8</b><br><b>(7.9 to 9.8)</b>        | <b>1.9</b><br><b>(1.4 to 2.5)</b> | <b>12.8</b><br><b>(9.4 to 15.9)</b>               | <b>-0.3</b><br><b>(-2.8 to 2.1)</b>                 |
| Rheumatoid arthritis                                       | 0.4<br>(0.3 to 0.4)                  | < 0.05<br>(< 0.05 to < 0.05)             | 0.1<br>(0.1 to 0.1)               | 21.8<br>(12.7 to 32.5)                            | 5.2<br>(-1.9 to 13.8)                               |
| Osteoarthritis                                             | 4.2<br>(4.0 to 4.5)                  | 0.2<br>(0.2 to 0.2)                      | 0.3<br>(0.2 to 0.4)               | 27.1<br>(22.4 to 31.9)                            | 4.2<br>(0.6 to 7.8)                                 |
| Low back and neck pain                                     | 8.9<br>(8.3 to 9.6)                  | 3.5<br>(3.1 to 3.9)                      | 1.0<br>(0.7 to 1.3)               | 12.6<br>(8.9 to 16.4)                             | 0.4<br>(-2.3 to 3.4)                                |
| Low back pain                                              | 5.5<br>(4.8 to 6.2)                  | 2.6<br>(2.2 to 3.0)                      | 0.6<br>(0.4 to 0.8)               | 11.5<br>(6.2 to 17.6)                             | 0.7<br>(-3.5 to 5.2)                                |
| Neck pain                                                  | 3.9<br>(3.4 to 4.6)                  | 0.9<br>(0.8 to 1.0)                      | 0.4<br>(0.3 to 0.6)               | 14.3<br>(10.2 to 18.4)                            | -0.1<br>(-2.2 to 2.1)                               |
| Gout                                                       | 0.3<br>(0.3 to 0.4)                  | 0.1<br>(0.1 to 0.1)                      | < 0.05<br>(< 0.05 to < 0.05)      | 17.1<br>(-0.7 to 37.8)                            | -0.1<br>(-14.8 to 16.7)                             |
| Other musculoskeletal disorders                            | 5.9<br>(5.1 to 6.8)                  | 5.0<br>(4.2 to 6.0)                      | 0.5<br>(0.3 to 0.7)               | 5.5<br>(-3.0 to 13.6)                             | -4.9<br>(-12.0 to 2.0)                              |
| <b>Other non-communicable diseases</b>                     | <b>83.1</b><br><b>(81.9 to 84.3)</b> | <b>256.1†</b><br><b>(242.2 to 271.1)</b> | <b>2.2</b><br><b>(1.5 to 3.2)</b> | <b>4.9</b><br><b>(3.5 to 6.1)</b>                 | <b>-1.0</b><br><b>(-2.0 to -0.0)</b>                |
| Congenital anomalies                                       | 0.9<br>(0.8 to 1.1)                  | --                                       | 0.1<br>(0.1 to 0.1)               | -2.2<br>(-8.3 to 3.9)                             | -1.2<br>(-7.3 to 4.8)                               |
| Neural tube defects                                        | < 0.05<br>(< 0.05 to < 0.05)         | --                                       | < 0.05<br>(< 0.05 to < 0.05)      | -0.1<br>(-14.2 to 14.8)                           | -0.9<br>(-13.8 to 13.4)                             |
| Congenital heart anomalies                                 | 0.2<br>(0.2 to 0.2)                  | --                                       | < 0.05<br>(< 0.05 to < 0.05)      | 0.1<br>(-11.3 to 12.4)                            | 3.8<br>(-7.7 to 16.1)                               |
| Orofacial clefts                                           | 0.1<br>(0.1 to 0.1)                  | --                                       | < 0.05<br>(< 0.05 to < 0.05)      | -4.1<br>(-15.1 to 7.5)                            | -4.4<br>(-15.3 to 7.2)                              |
| Down's syndrome                                            | 0.1<br>(< 0.05 to 0.1)               | --                                       | < 0.05<br>(< 0.05 to < 0.05)      | 3.3<br>(-4.6 to 11.3)                             | 4.8<br>(-3.1 to 12.9)                               |
| Turner syndrome                                            | < 0.05<br>(< 0.05 to < 0.05)         | --                                       | < 0.05<br>(< 0.05 to < 0.05)      | -0.1<br>(-37.6 to 51.5)                           | 4.4<br>(-34.2 to 58.2)                              |
| Klinefelter syndrome                                       | < 0.05<br>(< 0.05 to < 0.05)         | --                                       | < 0.05<br>(< 0.05 to < 0.05)      | -3.7<br>(-28.9 to 32.5)                           | 0.8<br>(-25.2 to 37.2)                              |

| Cause                                         | Prevalence in thousands (95% UI)     | Incidence in thousands (95% UI)    | YLDs in thousands (95% UI)        |                                                   |                                                     |
|-----------------------------------------------|--------------------------------------|------------------------------------|-----------------------------------|---------------------------------------------------|-----------------------------------------------------|
|                                               | 2016 counts                          | 2016 counts                        | 2016 counts                       | Percentage change in counts between 2006 and 2016 | Percentage change in age-standardised rates between |
| Other chromosomal abnormalities               | 0.1<br>(0.1 to 0.1)                  | --                                 | < 0.05<br>(< 0.05 to < 0.05)      | -9.3<br>(-22.8 to 6.7)                            | 1.5<br>(-13.9 to 19.5)                              |
| Congenital musculoskeletal and limb anomalies | 0.1<br>(0.1 to 0.1)                  | --                                 | < 0.05<br>(< 0.05 to < 0.05)      | 1.4<br>(-8.0 to 12.2)                             | -0.4<br>(-9.4 to 9.5)                               |
| Urogenital congenital anomalies               | 0.1<br>(0.1 to 0.1)                  | --                                 | < 0.05<br>(< 0.05 to < 0.05)      | -9.5<br>(-21.3 to 3.8)                            | 0.6<br>(-12.2 to 14.7)                              |
| Digestive congenital anomalies                | 0.1<br>(0.1 to 0.1)                  | --                                 | < 0.05<br>(< 0.05 to < 0.05)      | 2.3<br>(-14.7 to 23.1)                            | 2.0<br>(-14.3 to 21.9)                              |
| Other congenital anomalies                    | 0.4<br>(0.2 to 0.6)                  | --                                 | < 0.05<br>(< 0.05 to 0.1)         | -3.3<br>(-14.4 to 8.3)                            | -3.9<br>(-14.9 to 7.4)                              |
| Skin and subcutaneous diseases                | 35.7<br>(34.9 to 36.7)               | 83.9<br>(78.9 to 89.1)             | 0.9<br>(0.6 to 1.2)               | -2.0<br>(-4.1 to -0.1)                            | 0.5<br>(-1.3 to 2.3)                                |
| Dermatitis                                    | 5.4<br>(5.0 to 5.8)                  | 5.8<br>(5.4 to 6.3)                | 0.2<br>(0.1 to 0.3)               | -4.0<br>(-7.5 to -0.7)                            | -0.0<br>(-3.3 to 3.3)                               |
| Psoriasis                                     | 1.0<br>(0.9 to 1.0)                  | 0.1<br>(0.1 to 0.1)                | 0.1<br>(0.1 to 0.1)               | 9.9<br>(1.3 to 18.8)                              | 4.0<br>(-3.7 to 12.1)                               |
| Cellulitis                                    | < 0.05<br>(< 0.05 to < 0.05)         | 0.8<br>(0.7 to 0.8)                | < 0.05<br>(< 0.05 to < 0.05)      | 1.4<br>(-18.4 to 28.4)                            | 1.0<br>(-18.1 to 24.4)                              |
| Pyoderma                                      | 0.3<br>(0.3 to 0.3)                  | 7.5<br>(7.2 to 7.8)                | < 0.05<br>(< 0.05 to < 0.05)      | 11.7<br>(4.6 to 19.2)                             | 0.5<br>(-5.3 to 6.6)                                |
| Scabies                                       | 2.1<br>(1.9 to 2.4)                  | 6.5<br>(5.6 to 7.4)                | 0.1<br>(< 0.05 to 0.1)            | -8.0<br>(-11.6 to -4.0)                           | -4.6<br>(-8.3 to -1.0)                              |
| Fungal skin diseases                          | 11.6<br>(10.4 to 12.8)               | 40.6<br>(36.0 to 45.9)             | 0.1<br>(< 0.05 to 0.1)            | 3.8<br>(1.7 to 6.0)                               | -0.0<br>(-0.9 to 0.9)                               |
| Viral skin diseases                           | 3.1<br>(2.9 to 3.2)                  | 4.5<br>(4.3 to 4.8)                | 0.1<br>(0.1 to 0.1)               | -2.9<br>(-6.0 to 0.3)                             | -0.1<br>(-3.2 to 3.1)                               |
| Acne vulgaris                                 | 8.9<br>(8.0 to 10.0)                 | 6.1<br>(5.0 to 7.6)                | 0.2<br>(0.1 to 0.3)               | -6.4<br>(-10.9 to -1.6)                           | 1.4<br>(-3.6 to 6.5)                                |
| Alopecia areata                               | 0.2<br>(0.2 to 0.2)                  | 0.3<br>(0.3 to 0.4)                | < 0.05<br>(< 0.05 to < 0.05)      | 2.7<br>(-8.5 to 15.1)                             | -0.4<br>(-10.9 to 11.1)                             |
| Pruritus                                      | 1.0<br>(0.9 to 1.1)                  | 0.8<br>(0.7 to 0.9)                | < 0.05<br>(< 0.05 to < 0.05)      | 7.1<br>(0.6 to 13.6)                              | 0.8<br>(-4.3 to 6.4)                                |
| Urticaria                                     | 1.0<br>(0.9 to 1.1)                  | 1.7<br>(1.5 to 2.0)                | 0.1<br>(< 0.05 to 0.1)            | -2.8<br>(-8.6 to 3.6)                             | 0.0<br>(-5.7 to 5.6)                                |
| Decubitus ulcer                               | 0.1<br>(0.1 to 0.1)                  | 0.2<br>(0.2 to 0.2)                | < 0.05<br>(< 0.05 to < 0.05)      | 9.0<br>(-2.6 to 22.7)                             | -3.5<br>(-13.8 to 8.5)                              |
| Other skin and subcutaneous diseases          | 7.7<br>(7.5 to 7.9)                  | 9.0<br>(8.7 to 9.2)                | < 0.05<br>(< 0.05 to 0.1)         | 11.4<br>(8.7 to 14.2)                             | 1.8<br>(-0.5 to 4.1)                                |
| Sense organ diseases                          | 27.0<br>(26.4 to 27.6)               | 10.5†<br>(9.8 to 11.2)             | 0.9<br>(0.6 to 1.3)               | 10.0<br>(8.0 to 12.0)                             | -2.5<br>(-3.9 to -1.0)                              |
| Glaucoma                                      | 0.1<br>(0.1 to 0.1)                  | --                                 | < 0.05<br>(< 0.05 to < 0.05)      | 19.2<br>(7.5 to 32.3)                             | -1.0<br>(-10.3 to 9.3)                              |
| Cataract                                      | 1.0<br>(0.8 to 1.1)                  | --                                 | 0.1<br>(0.1 to 0.1)               | 9.9<br>(4.9 to 15.1)                              | -3.9<br>(-7.9 to 0.5)                               |
| Macular degeneration                          | < 0.05<br>(< 0.05 to < 0.05)         | --                                 | < 0.05<br>(< 0.05 to < 0.05)      | 21.3<br>(3.5 to 44.1)                             | 1.6<br>(-13.0 to 19.5)                              |
| Refraction and accommodation disorders        | 12.7<br>(12.2 to 13.2)               | --                                 | 0.2<br>(0.1 to 0.3)               | 3.7<br>(0.5 to 6.9)                               | -5.8<br>(-8.6 to -2.9)                              |
| Age-related and other hearing loss            | 18.2<br>(17.2 to 19.3)               | --                                 | 0.5<br>(0.4 to 0.7)               | 11.5<br>(7.8 to 14.8)                             | -1.8<br>(-3.9 to 0.3)                               |
| Other vision loss                             | 0.2<br>(0.2 to 0.3)                  | --                                 | < 0.05<br>(< 0.05 to < 0.05)      | 13.1<br>(3.7 to 24.1)                             | -1.0<br>(-8.2 to 8.0)                               |
| Other sense organ diseases                    | 3.1<br>(2.8 to 3.3)                  | 10.5<br>(9.8 to 11.2)              | 0.1<br>(0.1 to 0.1)               | 12.8<br>(8.2 to 17.6)                             | 0.4<br>(-3.3 to 4.1)                                |
| Oral disorders                                | 60.9<br>(58.9 to 63.0)               | 161.7†<br>(149.0 to 175.1)         | 0.4<br>(0.2 to 0.6)               | 12.8<br>(10.6 to 15.3)                            | -0.3<br>(-2.0 to 1.4)                               |
| Caries of deciduous teeth                     | 7.7<br>(6.5 to 8.9)                  | 25.6<br>(18.2 to 34.3)             | < 0.05<br>(< 0.05 to < 0.05)      | -11.3<br>(-18.9 to -2.9)                          | -0.6<br>(-9.0 to 8.7)                               |
| Caries of permanent teeth                     | 41.6<br>(39.3 to 43.9)               | 133.6<br>(123.5 to 143.8)          | < 0.05<br>(< 0.05 to 0.1)         | 1.1<br>(-2.1 to 4.3)                              | -1.3<br>(-4.1 to 1.5)                               |
| Periodontal disease                           | 17.5<br>(14.9 to 20.4)               | 2.0<br>(1.7 to 2.4)                | 0.1<br>(< 0.05 to 0.2)            | 13.1<br>(9.4 to 17.1)                             | -0.7<br>(-3.5 to 2.3)                               |
| Edentulism and severe tooth loss              | 5.6<br>(4.9 to 6.3)                  | 0.5<br>(0.4 to 0.6)                | 0.1<br>(0.1 to 0.2)               | 20.2<br>(16.2 to 24.2)                            | 0.1<br>(-2.9 to 3.3)                                |
| Other oral disorders                          | 2.0<br>(1.9 to 2.1)                  | --                                 | 0.1<br>(< 0.05 to 0.1)            | 5.0<br>(1.5 to 8.9)                               | 0.0<br>(-3.2 to 3.3)                                |
| <b>Injuries</b>                               | <b>18.2</b><br><b>(17.1 to 19.8)</b> | <b>7.8†</b><br><b>(7.4 to 8.3)</b> | <b>0.7</b><br><b>(0.5 to 1.0)</b> | <b>19.6</b><br><b>(17.5 to 21.7)</b>              | <b>9.7</b><br><b>(8.0 to 11.3)</b>                  |
| <b>Transport injuries</b>                     | <b>1.7</b><br><b>(1.6 to 1.8)</b>    | <b>0.6</b><br><b>(0.5 to 0.7)</b>  | <b>0.1</b><br><b>(0.1 to 0.1)</b> | <b>29.2</b><br><b>(26.2 to 32.3)</b>              | <b>17.3</b><br><b>(15.0 to 19.6)</b>                |
| Road injuries                                 | 1.6<br>(1.5 to 1.7)                  | 0.6<br>(0.5 to 0.6)                | 0.1<br>(0.1 to 0.1)               | 31.4<br>(28.3 to 34.6)                            | 19.2<br>(16.7 to 21.5)                              |
| Pedestrian road injuries                      | 0.2<br>(0.2 to 0.3)                  | 0.1<br>(< 0.05 to 0.1)             | < 0.05<br>(< 0.05 to < 0.05)      | 28.8<br>(25.8 to 31.9)                            | 16.7<br>(14.5 to 19.0)                              |
| Cyclist road injuries                         | 0.4<br>(0.4 to 0.5)                  | 0.2<br>(0.1 to 0.2)                | < 0.05<br>(< 0.05 to < 0.05)      | 31.9<br>(28.6 to 35.4)                            | 21.0<br>(18.3 to 23.7)                              |
| Motorcyclist road injuries                    | 0.3<br>(0.3 to 0.4)                  | 0.1<br>(0.1 to 0.1)                | < 0.05<br>(< 0.05 to < 0.05)      | 32.7<br>(29.5 to 36.0)                            | 20.1<br>(17.7 to 22.6)                              |
| Motor vehicle road injuries                   | 0.4<br>(0.4 to 0.5)                  | 0.2<br>(0.1 to 0.2)                | < 0.05<br>(< 0.05 to < 0.05)      | 33.2<br>(29.9 to 36.6)                            | 20.2<br>(17.5 to 22.8)                              |
| Other road injuries                           | 0.2<br>(0.2 to 0.2)                  | 0.1<br>(0.1 to 0.1)                | < 0.05<br>(< 0.05 to < 0.05)      | 26.7<br>(24.0 to 29.7)                            | 14.3<br>(11.9 to 16.6)                              |
| Other transport injuries                      | 0.1<br>(0.1 to 0.1)                  | < 0.05<br>(< 0.05 to < 0.05)       | < 0.05<br>(< 0.05 to < 0.05)      | 6.0<br>(3.1 to 8.8)                               | -1.9<br>(-4.2 to 0.5)                               |
| <b>Unintentional injuries</b>                 | <b>15.5</b><br><b>(14.3 to 16.9)</b> | <b>6.8</b><br><b>(6.4 to 7.2)</b>  | <b>0.6</b><br><b>(0.4 to 0.8)</b> | <b>19.1</b><br><b>(16.8 to 21.3)</b>              | <b>8.8</b><br><b>(7.0 to 10.5)</b>                  |
| Falls                                         | 6.6<br>(5.8 to 7.6)                  | 3.0<br>(2.7 to 3.4)                | 0.3<br>(0.2 to 0.4)               | 27.9<br>(25.5 to 30.2)                            | 13.9<br>(12.1 to 15.8)                              |
| Drowning                                      | 0.1<br>(0.1 to 0.1)                  | < 0.05<br>(< 0.05 to < 0.05)       | < 0.05<br>(< 0.05 to < 0.05)      | 10.6<br>(7.8 to 13.8)                             | -0.5<br>(-3.1 to 2.1)                               |
| Fire, heat, and hot substances                | 1.6<br>(1.3 to 2.0)                  | 0.2<br>(0.2 to 0.2)                | < 0.05<br>(< 0.05 to 0.1)         | 12.4<br>(7.4 to 17.3)                             | 6.2<br>(2.0 to 10.5)                                |
| Poisonings                                    | < 0.05<br>(< 0.05 to 0.1)            | 0.1<br>(< 0.05 to 0.1)             | < 0.05<br>(< 0.05 to < 0.05)      | 24.7<br>(14.1 to 35.8)                            | 20.7<br>(11.2 to 31.2)                              |
| Exposure to mechanical forces                 | 2.9<br>(2.5 to 3.5)                  | 1.1<br>(0.9 to 1.2)                | 0.1<br>(< 0.05 to 0.1)            | 14.3<br>(11.9 to 16.9)                            | 4.1<br>(2.1 to 6.2)                                 |
| Unintentional firearm injuries                | 0.2<br>(0.2 to 0.3)                  | 0.1<br>(< 0.05 to 0.1)             | < 0.05<br>(< 0.05 to < 0.05)      | -1.4<br>(-3.9 to 1.2)                             | -11.6<br>(-13.5 to -9.4)                            |
| Unintentional suffocation                     | 0.1<br>(0.1 to 0.1)                  | < 0.05<br>(< 0.05 to < 0.05)       | < 0.05<br>(< 0.05 to < 0.05)      | 4.6<br>(1.8 to 7.5)                               | 1.2<br>(-1.4 to 3.9)                                |
| Other exposure to mechanical forces           | 2.6<br>(2.2 to 3.2)                  | 1.0<br>(0.9 to 1.1)                | 0.1<br>(< 0.05 to 0.1)            | 18.0<br>(15.5 to 20.6)                            | 7.4<br>(5.2 to 9.6)                                 |

| Cause                                                                               | Prevalence in thousands (95% UI)        | Incidence in thousands (95% UI)                      | YLDs in thousands (95% UI)                          |                                                   |                                                     |
|-------------------------------------------------------------------------------------|-----------------------------------------|------------------------------------------------------|-----------------------------------------------------|---------------------------------------------------|-----------------------------------------------------|
|                                                                                     | 2016 counts                             | 2016 counts                                          | 2016 counts                                         | Percentage change in counts between 2006 and 2016 | Percentage change in age-standardised rates between |
| Adverse effects of medical treatment                                                | < 0.05<br>(< 0.05 to 0.1)               | 0.5<br>(0.5 to 0.6)                                  | < 0.05<br>(< 0.05 to < 0.05)                        | 11.1<br>(5.6 to 16.5)                             | 7.9<br>(2.5 to 13.1)                                |
| Animal contact                                                                      | 0.4<br>(0.3 to 0.4)                     | 0.4<br>(0.4 to 0.5)                                  | < 0.05<br>(< 0.05 to < 0.05)                        | 1.7<br>(-4.3 to 7.9)                              | -3.2<br>(-8.6 to 2.1)                               |
| Venomous animal contact                                                             | 0.2<br>(0.1 to 0.2)                     | 0.2<br>(0.2 to 0.2)                                  | < 0.05<br>(< 0.05 to < 0.05)                        | 3.2<br>(-4.7 to 11.9)                             | -0.6<br>(-8.0 to 7.0)                               |
| Non-venomous animal contact                                                         | 0.2<br>(0.2 to 0.2)                     | 0.2<br>(0.2 to 0.3)                                  | < 0.05<br>(< 0.05 to < 0.05)                        | -2.8<br>(-5.8 to 0.1)                             | -10.2<br>(-12.7 to -7.7)                            |
| Foreign body                                                                        | 0.8<br>(0.6 to 0.9)                     | 0.6<br>(0.5 to 0.7)                                  | < 0.05<br>(< 0.05 to < 0.05)                        | 4.9<br>(2.0 to 7.7)                               | 0.2<br>(-2.2 to 2.5)                                |
| Pulmonary aspiration and foreign body in airway                                     | 0.5<br>(0.4 to 0.7)                     | 0.2<br>(0.2 to 0.2)                                  | < 0.05<br>(< 0.05 to < 0.05)                        | 3.9<br>(0.8 to 7.1)                               | 0.1<br>(-2.7 to 2.8)                                |
| Foreign body in eyes                                                                | 0.1<br>(< 0.05 to 0.1)                  | 0.3<br>(0.3 to 0.4)                                  | < 0.05<br>(< 0.05 to < 0.05)                        | 8.1<br>(3.9 to 12.8)                              | -0.3<br>(-3.1 to 2.6)                               |
| Foreign body in other body part                                                     | 0.2<br>(0.1 to 0.2)                     | 0.1<br>(0.1 to 0.1)                                  | < 0.05<br>(< 0.05 to < 0.05)                        | 6.5<br>(3.3 to 9.8)                               | 1.0<br>(-1.7 to 3.8)                                |
| Environmental heat and cold exposure                                                | 1.2<br>(1.0 to 1.4)                     | 0.3<br>(0.3 to 0.4)                                  | < 0.05<br>(< 0.05 to 0.1)                           | 6.4<br>(4.3 to 8.6)                               | -1.4<br>(-3.1 to 0.4)                               |
| Other unintentional injuries                                                        | 1.8<br>(1.4 to 2.3)                     | 0.6<br>(0.5 to 0.7)                                  | 0.1<br>(< 0.05 to 0.1)                              | 16.3<br>(14.1 to 18.7)                            | 10.0<br>(8.2 to 11.9)                               |
| <b>Self-harm and interpersonal violence</b>                                         | <b>3.6</b><br><b>(3.3 to 4.0)</b>       | <b>0.5†</b><br><b>(0.4 to 0.6)</b>                   | <b>0.1</b><br><b>(&lt; 0.05 to 0.1)</b>             | <b>10.2</b><br><b>(7.0 to 13.5)</b>               | <b>5.3</b><br><b>(2.9 to 7.7)</b>                   |
| Self-harm                                                                           | 0.1<br>(0.1 to 0.1)                     | < 0.05<br>(< 0.05 to < 0.05)                         | < 0.05<br>(< 0.05 to < 0.05)                        | 19.8<br>(16.4 to 23.1)                            | 6.8<br>(4.0 to 9.6)                                 |
| Self-harm by firearm                                                                | < 0.05<br>(< 0.05 to < 0.05)            | < 0.05<br>(< 0.05 to < 0.05)                         | < 0.05<br>(< 0.05 to < 0.05)                        | -1.1<br>(-4.2 to 2.2)                             | -10.3<br>(-12.8 to -7.6)                            |
| Self-harm by other specified means                                                  | 0.1<br>(0.1 to 0.1)                     | < 0.05<br>(< 0.05 to < 0.05)                         | < 0.05<br>(< 0.05 to < 0.05)                        | 21.3<br>(17.7 to 24.8)                            | 8.0<br>(5.1 to 10.8)                                |
| Interpersonal violence                                                              | 3.5<br>(3.2 to 3.9)                     | 0.5†<br>(0.4 to 0.5)                                 | 0.1<br>(< 0.05 to 0.1)                              | 9.6<br>(6.4 to 13.0)                              | 5.2<br>(2.8 to 7.7)                                 |
| Assault by firearm                                                                  | 0.1<br>(0.1 to 0.1)                     | < 0.05<br>(< 0.05 to < 0.05)                         | < 0.05<br>(< 0.05 to < 0.05)                        | 31.0<br>(26.9 to 35.7)                            | 19.4<br>(16.1 to 23.1)                              |
| Assault by sharp object                                                             | 0.5<br>(0.4 to 0.6)                     | 0.2<br>(0.2 to 0.2)                                  | < 0.05<br>(< 0.05 to < 0.05)                        | 26.2<br>(23.0 to 29.3)                            | 15.5<br>(12.9 to 18.1)                              |
| Sexual violence                                                                     | 2.6<br>(2.3 to 3.0)                     | --                                                   | < 0.05<br>(< 0.05 to < 0.05)                        | -8.4<br>(-11.9 to -4.9)                           | -6.5<br>(-9.7 to -2.9)                              |
| Assault by other means                                                              | 0.4<br>(0.4 to 0.5)                     | 0.2<br>(0.2 to 0.3)                                  | < 0.05<br>(< 0.05 to < 0.05)                        | 22.2<br>(19.7 to 25.0)                            | 11.2<br>(9.1 to 13.4)                               |
| <b>Forces of nature, conflict and terrorism, and executions and police conflict</b> | <b>0.1</b><br><b>(&lt; 0.05 to 0.1)</b> | <b>&lt; 0.05†</b><br><b>(&lt; 0.05 to &lt; 0.05)</b> | <b>&lt; 0.05</b><br><b>(&lt; 0.05 to &lt; 0.05)</b> | <b>82.1</b><br><b>(32.1 to 92.8)</b>              | <b>79.0</b><br><b>(31.8 to 88.8)</b>                |
| Exposure to forces of nature                                                        | 0.1<br>(< 0.05 to 0.1)                  | --                                                   | < 0.05<br>(< 0.05 to < 0.05)                        | 129.4<br>(121.8 to 139.6)                         | 127.8<br>(120.9 to 137.8)                           |
| Conflict and terrorism                                                              | --                                      | --                                                   | --                                                  | --                                                | --                                                  |
| Executions and police conflict                                                      | < 0.05<br>(< 0.05 to < 0.05)            | < 0.05<br>(< 0.05 to < 0.05)                         | < 0.05<br>(< 0.05 to < 0.05)                        | 9.7<br>(-15.9 to 21.2)                            | 4.6<br>(-17.6 to 14.7)                              |
| <b>Impairments</b>                                                                  | --                                      | --                                                   | --                                                  | --                                                | --                                                  |
| Anaemia                                                                             | 29.9<br>(26.3 to 33.4)                  | --                                                   | 0.8<br>(0.5 to 1.2)                                 | -4.8<br>(-16.1 to 8.1)                            | -6.0<br>(-16.6 to 6.3)                              |
| Developmental intellectual disability                                               | 1.9<br>(1.4 to 2.4)                     | --                                                   | 0.3<br>(0.2 to 0.5)                                 | -2.0<br>(-10.7 to 9.1)                            | -0.1<br>(-8.7 to 10.8)                              |
| Epilepsy                                                                            | 0.9<br>(0.5 to 1.4)                     | --                                                   | 0.3<br>(0.2 to 0.6)                                 | -0.3<br>(-44.3 to 76.2)                           | 1.0<br>(-44.2 to 80.8)                              |
| Guillain-Barre syndrome                                                             | < 0.05<br>(< 0.05 to < 0.05)            | --                                                   | < 0.05<br>(< 0.05 to < 0.05)                        | 79.0<br>(38.4 to 171.5)                           | 68.3<br>(31.1 to 147.1)                             |
| Hearing loss                                                                        | 19.7<br>(18.8 to 20.7)                  | --                                                   | 0.6<br>(0.4 to 0.8)                                 | 8.8<br>(5.5 to 11.7)                              | -2.3<br>(-4.1 to -0.3)                              |
| Heart failure                                                                       | 0.7<br>(0.6 to 0.8)                     | --                                                   | 0.1<br>(< 0.05 to 0.1)                              | 15.9<br>(7.6 to 26.5)                             | 0.7<br>(-6.5 to 9.8)                                |
| Infertility                                                                         | 2.1<br>(1.7 to 2.8)                     | --                                                   | < 0.05<br>(< 0.05 to < 0.05)                        | -0.3<br>(-5.5 to 5.5)                             | 1.6<br>(-3.4 to 7.4)                                |
| Pelvic inflammatory disease                                                         | < 0.05<br>(< 0.05 to < 0.05)            | --                                                   | < 0.05<br>(< 0.05 to < 0.05)                        | 1.7<br>(-18.7 to 27.2)                            | -2.9<br>(-22.0 to 20.3)                             |
| Vision loss                                                                         | 14.7<br>(14.1 to 15.4)                  | --                                                   | 0.5<br>(0.3 to 0.7)                                 | 3.2<br>(-3.1 to 9.2)                              | -3.5<br>(-8.1 to 2.5)                               |

We did not calculate incidence for the nine impairments, certain NTDs, and causes with only birth prevalence. Blank cells mean that no estimate is available.

† Incidence for aggregate causes represents the sum of the incidence of the causes below the aggregate.

‡ Incidence estimates for stroke represent first-ever stroke only.

^ Incidence of HIV/AIDS represents new infections of HIV only and does not include new infections of Tuberculosis in HIV positive cases.



SR Table 14: Prevalence, incidence, and YLDs for 2016, percentage change of YLD counts and percentage change of age-standardised YLD rates between 2006 and 2016 by cause and impairments, for all ages, Samoa.

| Cause                                                                                | Prevalence in thousands (95% UI) | Incidence in thousands (95% UI)         | YLDs in thousands (95% UI)          |                                                   |                                                     |
|--------------------------------------------------------------------------------------|----------------------------------|-----------------------------------------|-------------------------------------|---------------------------------------------------|-----------------------------------------------------|
|                                                                                      | 2016 counts                      | 2016 counts                             | 2016 counts                         | Percentage change in counts between 2006 and 2016 | Percentage change in age-standardised rates between |
| <b>All causes</b>                                                                    | <b>189.6</b><br>(188.4 to 190.7) | <b>1,286.7†</b><br>(1,214.2 to 1,366.6) | <b>18.2</b><br>(13.5 to 23.7)       | <b>12.2</b><br>(9.8 to 14.5)                      | <b>-0.1</b><br>(-1.9 to 1.6)                        |
| <b>Communicable, maternal, neonatal, and nutritional disorders</b>                   | <b>140.3</b><br>(134.4 to 146.2) | <b>788.8†</b><br>(724.5 to 858.7)       | <b>2.3</b><br>(1.7 to 3.1)          | <b>-0.7</b><br>(-8.8 to 7.4)                      | <b>-8.6</b><br>(-16.8 to -1.0)                      |
| <b>HIV/AIDS and tuberculosis</b>                                                     | <b>53.9</b><br>(50.0 to 56.8)    | <b>0.1†</b><br>(0.1 to 0.2)             | <b>&lt; 0.05</b><br>(< 0.05 to 0.1) | <b>17.7</b><br>(-11.5 to 89.1)                    | <b>3.9</b><br>(-21.5 to 63.2)                       |
| Tuberculosis                                                                         | 51.1<br>(47.8 to 54.7)           | 0.1†<br>(< 0.05 to 0.1)                 | < 0.05<br>(< 0.05 to < 0.05)        | -2.7<br>(-17.4 to 13.8)                           | -14.4<br>(-25.6 to -1.4)                            |
| Drug-susceptible tuberculosis                                                        | 0.1<br>(0.1 to 0.1)              | 0.1<br>(< 0.05 to 0.1)                  | < 0.05<br>(< 0.05 to < 0.05)        | -2.7<br>(-17.4 to 14.0)                           | -14.4<br>(-25.8 to -1.3)                            |
| Multidrug-resistant tuberculosis without extensive drug resistance                   | < 0.05<br>(< 0.05 to < 0.05)     | < 0.05<br>(< 0.05 to < 0.05)            | < 0.05<br>(< 0.05 to < 0.05)        | -3.8<br>(-97.7 to 3,628.1)                        | -16.4<br>(-98.0 to 3,140.7)                         |
| Extensively drug-resistant tuberculosis                                              | < 0.05<br>(< 0.05 to < 0.05)     | < 0.05<br>(< 0.05 to < 0.05)            | < 0.05<br>(< 0.05 to < 0.05)        | 216.7<br>(-92.3 to 12,178.3)                      | 175.3<br>(-93.2 to 10,572.0)                        |
| Latent tuberculosis infection                                                        | 51.0<br>(47.7 to 54.6)           | --                                      | --                                  | --                                                | --                                                  |
| HIV/AIDS                                                                             | 0.1<br>(< 0.05 to 0.6)           | < 0.05^<br>(< 0.05 to 0.1)              | < 0.05<br>(< 0.05 to 0.1)           | 85.3<br>(-14.7 to 484.5)                          | 69.8<br>(-23.6 to 473.2)                            |
| Drug-susceptible HIV/AIDS - Tuberculosis                                             | < 0.05<br>(< 0.05 to < 0.05)     | < 0.05<br>(< 0.05 to < 0.05)            | < 0.05<br>(< 0.05 to < 0.05)        | 29.7<br>(21.5 to 38.8)                            | 19.2<br>(11.6 to 27.4)                              |
| Multidrug-resistant HIV/AIDS - Tuberculosis without extensive drug resistance        | < 0.05<br>(< 0.05 to < 0.05)     | < 0.05<br>(< 0.05 to < 0.05)            | < 0.05<br>(< 0.05 to < 0.05)        | 23.4<br>(-97.0 to 4,853.6)                        | 13.3<br>(-97.2 to 4,445.7)                          |
| Extensively drug-resistant HIV/AIDS - Tuberculosis                                   | < 0.05<br>(< 0.05 to < 0.05)     | < 0.05<br>(< 0.05 to < 0.05)            | < 0.05<br>(< 0.05 to < 0.05)        | 306.3<br>(-90.1 to 16,223.9)                      | 273.1<br>(-90.9 to 14,878.3)                        |
| HIV/AIDS resulting in other diseases                                                 | 0.1<br>(< 0.05 to 0.6)           | < 0.05<br>(< 0.05 to 0.1)               | < 0.05<br>(< 0.05 to 0.1)           | 93.4<br>(-23.4 to 903.0)                          | 76.8<br>(-32.6 to 870.1)                            |
| <b>Diarrhoea, lower respiratory infections, and other common infectious diseases</b> | <b>13.5</b><br>(12.8 to 14.3)    | <b>707.5†</b><br>(647.5 to 772.5)       | <b>0.8</b><br>(0.6 to 1.1)          | <b>14.4</b><br>(11.0 to 18.3)                     | <b>6.2</b><br>(3.2 to 9.6)                          |
| Diarrhoeal diseases                                                                  | 3.1<br>(2.9 to 3.4)              | 209.8<br>(194.5 to 225.9)               | 0.4<br>(0.2 to 0.5)                 | 24.3<br>(17.5 to 31.9)                            | 14.7<br>(8.8 to 21.0)                               |
| Intestinal infectious diseases                                                       | < 0.05<br>(< 0.05 to < 0.05)     | 0.3†<br>(0.2 to 0.3)                    | < 0.05<br>(< 0.05 to < 0.05)        | -15.2<br>(-30.5 to 3.6)                           | -21.4<br>(-33.8 to -7.2)                            |
| Typhoid fever                                                                        | < 0.05<br>(< 0.05 to < 0.05)     | 0.2<br>(0.2 to 0.3)                     | < 0.05<br>(< 0.05 to < 0.05)        | -14.9<br>(-31.8 to 6.2)                           | -21.2<br>(-34.8 to -5.4)                            |
| Paratyphoid fever                                                                    | < 0.05<br>(< 0.05 to < 0.05)     | 0.1<br>(0.1 to 0.1)                     | < 0.05<br>(< 0.05 to < 0.05)        | -12.2<br>(-28.0 to 6.0)                           | -18.7<br>(-31.5 to -5.2)                            |
| Other intestinal infectious diseases                                                 | --                               | --                                      | < 0.05<br>(< 0.05 to < 0.05)        | -41.9<br>(-54.3 to -25.7)                         | -41.6<br>(-51.5 to -29.9)                           |
| Lower respiratory infections                                                         | 0.4<br>(0.4 to 0.5)              | 17.2<br>(15.4 to 19.3)                  | < 0.05<br>(< 0.05 to < 0.05)        | 22.8<br>(10.4 to 36.0)                            | 10.8<br>(1.2 to 21.0)                               |
| Upper respiratory infections                                                         | 6.1<br>(5.4 to 7.0)              | 460.7<br>(402.1 to 524.9)               | 0.1<br>(0.1 to 0.2)                 | 6.5<br>(1.0 to 12.5)                              | -0.1<br>(-5.2 to 5.3)                               |
| Otitis media                                                                         | 2.8<br>(2.5 to 3.1)              | 9.9<br>(7.7 to 12.7)                    | 0.1<br>(0.1 to 0.1)                 | 3.6<br>(-3.6 to 12.1)                             | -3.3<br>(-9.7 to 4.1)                               |
| Meningitis                                                                           | 0.7<br>(0.6 to 0.8)              | 0.1<br>(0.1 to 0.1)                     | 0.1<br>(< 0.05 to 0.1)              | 8.5<br>(-0.4 to 18.1)                             | 0.7<br>(-6.5 to 9.0)                                |
| Pneumococcal meningitis                                                              | 0.5<br>(0.4 to 0.6)              | < 0.05<br>(< 0.05 to 0.1)               | < 0.05<br>(< 0.05 to 0.1)           | 11.7<br>(-1.6 to 27.1)                            | 3.5<br>(-7.4 to 16.8)                               |
| H influenzae type B meningitis                                                       | 0.1<br>(0.1 to 0.1)              | < 0.05<br>(< 0.05 to < 0.05)            | < 0.05<br>(< 0.05 to < 0.05)        | -3.5<br>(-8.7 to 1.4)                             | -10.0<br>(-14.9 to -5.3)                            |
| Meningococcal infection                                                              | 0.1<br>(< 0.05 to 0.1)           | < 0.05<br>(< 0.05 to < 0.05)            | < 0.05<br>(< 0.05 to < 0.05)        | 8.8<br>(3.7 to 14.2)                              | 0.8<br>(-3.5 to 5.7)                                |
| Other meningitis                                                                     | 0.1<br>(0.1 to 0.1)              | < 0.05<br>(< 0.05 to < 0.05)            | < 0.05<br>(< 0.05 to < 0.05)        | 9.4<br>(2.3 to 17.0)                              | 1.4<br>(-3.6 to 6.6)                                |
| Encephalitis                                                                         | 0.6<br>(0.4 to 0.9)              | 0.3<br>(0.2 to 0.3)                     | 0.1<br>(< 0.05 to 0.1)              | 6.5<br>(-5.8 to 19.4)                             | -2.0<br>(-12.5 to 8.7)                              |
| Diphtheria                                                                           | < 0.05<br>(< 0.05 to < 0.05)     | < 0.05<br>(< 0.05 to < 0.05)            | < 0.05<br>(< 0.05 to < 0.05)        | -65.4<br>(-80.8 to -37.7)                         | -66.8<br>(-81.6 to -42.0)                           |
| Whooping cough                                                                       | 0.2<br>(0.2 to 0.3)              | 1.6<br>(1.2 to 2.0)                     | < 0.05<br>(< 0.05 to < 0.05)        | -17.9<br>(-26.0 to -8.0)                          | -16.3<br>(-24.7 to -6.5)                            |
| Tetanus                                                                              | < 0.05<br>(< 0.05 to < 0.05)     | < 0.05<br>(< 0.05 to < 0.05)            | < 0.05<br>(< 0.05 to < 0.05)        | -23.5<br>(-57.9 to 8.7)                           | -40.6<br>(-69.6 to 2.7)                             |
| Measles                                                                              | 0.1<br>(< 0.05 to 0.1)           | 2.4<br>(0.8 to 5.3)                     | < 0.05<br>(< 0.05 to < 0.05)        | 315.1<br>(141.6 to 689.5)                         | 317.6<br>(144.8 to 683.0)                           |
| Varicella and herpes zoster                                                          | 0.2<br>(0.2 to 0.2)              | 5.3<br>(5.1 to 5.7)                     | < 0.05<br>(< 0.05 to < 0.05)        | 13.6<br>(0.8 to 28.2)                             | -0.0<br>(-9.9 to 11.1)                              |
| <b>Neglected tropical diseases and malaria</b>                                       | <b>9.8</b><br>(8.5 to 11.4)      | <b>3.0†</b><br>(2.1 to 4.1)             | <b>0.1</b><br>(0.1 to 0.2)          | <b>-44.2</b><br>(-58.6 to -18.4)                  | <b>-53.0</b><br>(-64.7 to -29.9)                    |
| Malaria                                                                              | --                               | --                                      | --                                  | --                                                | --                                                  |
| Chagas disease                                                                       | --                               | --                                      | --                                  | --                                                | --                                                  |
| Leishmaniasis                                                                        | --                               | --                                      | --                                  | --                                                | --                                                  |
| Visceral leishmaniasis                                                               | --                               | --                                      | --                                  | --                                                | --                                                  |
| Cutaneous and mucocutaneous leishmaniasis                                            | --                               | --                                      | --                                  | --                                                | --                                                  |
| African trypanosomiasis                                                              | --                               | --                                      | --                                  | --                                                | --                                                  |
| Schistosomiasis                                                                      | --                               | --                                      | --                                  | --                                                | --                                                  |
| Cysticercosis                                                                        | --                               | --                                      | --                                  | --                                                | --                                                  |
| Cystic echinococcosis                                                                | --                               | --                                      | --                                  | --                                                | --                                                  |
| Lymphatic filariasis                                                                 | 0.9<br>(0.6 to 1.6)              | 0.4<br>(0.4 to 0.4)                     | 0.1<br>(< 0.05 to 0.1)              | -68.1<br>(-76.9 to -62.6)                         | -71.0<br>(-78.8 to -66.3)                           |
| Onchocerciasis                                                                       | --                               | --                                      | --                                  | --                                                | --                                                  |
| Trachoma                                                                             | --                               | --                                      | --                                  | --                                                | --                                                  |
| Dengue                                                                               | 0.2<br>(0.1 to 0.3)              | 2.6<br>(1.8 to 3.8)                     | < 0.05<br>(< 0.05 to < 0.05)        | 244.0<br>(153.2 to 812.7)                         | 217.4<br>(137.6 to 718.9)                           |
| Yellow fever                                                                         | --                               | --                                      | --                                  | --                                                | --                                                  |
| Rabies                                                                               | < 0.05<br>(< 0.05 to < 0.05)     | < 0.05<br>(< 0.05 to < 0.05)            | < 0.05<br>(< 0.05 to < 0.05)        | 4.2<br>(-39.8 to 105.1)                           | -16.9<br>(-53.2 to 65.4)                            |
| Intestinal nematode infections                                                       | 7.2<br>(6.1 to 8.9)              | --                                      | < 0.05<br>(< 0.05 to < 0.05)        | 15.2<br>(-25.0 to 75.1)                           | 5.9<br>(-33.8 to 70.3)                              |
| Ascariasis                                                                           | 0.1<br>(0.1 to 0.2)              | --                                      | --                                  | --                                                | --                                                  |



| Cause                                                                   | Prevalence in thousands (95% UI)        | Incidence in thousands (95% UI)          | YLDs in thousands (95% UI)                          |                                                   |                                                     |
|-------------------------------------------------------------------------|-----------------------------------------|------------------------------------------|-----------------------------------------------------|---------------------------------------------------|-----------------------------------------------------|
|                                                                         | 2016 counts                             | 2016 counts                              | 2016 counts                                         | Percentage change in counts between 2006 and 2016 | Percentage change in age-standardised rates between |
| Trichuriasis                                                            | 3.1<br>(2.4 to 4.2)                     | --                                       | < 0.05<br>(< 0.05 to < 0.05)                        | 2.6<br>(-78.3 to 463.8)                           | -5.9<br>(-82.1 to 415.2)                            |
| Hookworm disease                                                        | 3.9<br>(2.9 to 5.1)                     | --                                       | < 0.05<br>(< 0.05 to < 0.05)                        | 15.2<br>(-24.9 to 75.0)                           | 5.9<br>(-33.8 to 70.4)                              |
| Food-borne trematodiasis                                                | --                                      | --                                       | --                                                  | --                                                | --                                                  |
| Leprosy                                                                 | 0.1<br>(< 0.05 to 0.1)                  | < 0.05<br>(< 0.05 to < 0.05)             | < 0.05<br>(< 0.05 to < 0.05)                        | -11.7<br>(-26.5 to 9.3)                           | -22.1<br>(-33.6 to -4.6)                            |
| Ebola virus disease                                                     | --                                      | --                                       | --                                                  | --                                                | --                                                  |
| Zika virus disease                                                      | --                                      | --                                       | --                                                  | --                                                | --                                                  |
| Guinea worm disease                                                     | --                                      | --                                       | --                                                  | --                                                | --                                                  |
| Other neglected tropical diseases                                       | 1.6<br>(1.4 to 1.8)                     | --                                       | < 0.05<br>(< 0.05 to 0.1)                           | -8.0<br>(-23.6 to 11.5)                           | -10.3<br>(-24.0 to 6.0)                             |
| <b>Maternal disorders</b>                                               | <b>0.2</b><br><b>(0.1 to 0.2)</b>       | <b>4.1†</b><br><b>(3.4 to 5.0)</b>       | <b>&lt; 0.05</b><br><b>(&lt; 0.05 to &lt; 0.05)</b> | <b>-5.2</b><br><b>(-27.5 to 23.9)</b>             | <b>-5.9</b><br><b>(-27.7 to 22.7)</b>               |
| Maternal haemorrhage                                                    | 0.1<br>(0.1 to 0.1)                     | 0.6<br>(0.4 to 0.7)                      | < 0.05<br>(< 0.05 to < 0.05)                        | -4.6<br>(-37.9 to 50.4)                           | -4.9<br>(-38.7 to 50.2)                             |
| Maternal sepsis and other pregnancy related infections                  | < 0.05<br>(< 0.05 to < 0.05)            | 0.2<br>(0.2 to 0.3)                      | < 0.05<br>(< 0.05 to < 0.05)                        | -3.9<br>(-58.0 to 108.9)                          | -6.2<br>(-58.6 to 108.0)                            |
| Maternal hypertensive disorders                                         | < 0.05<br>(< 0.05 to 0.1)               | 0.2<br>(0.1 to 0.2)                      | < 0.05<br>(< 0.05 to < 0.05)                        | 1.2<br>(-41.7 to 80.4)                            | 0.9<br>(-40.5 to 77.0)                              |
| Maternal obstructed labour and uterine rupture                          | < 0.05<br>(< 0.05 to < 0.05)            | 0.4<br>(0.3 to 0.5)                      | < 0.05<br>(< 0.05 to < 0.05)                        | -3.7<br>(-66.8 to 144.0)                          | -4.6<br>(-67.2 to 136.1)                            |
| Maternal abortion, miscarriage, and ectopic pregnancy                   | < 0.05<br>(< 0.05 to < 0.05)            | 2.7<br>(2.1 to 3.5)                      | < 0.05<br>(< 0.05 to < 0.05)                        | -9.3<br>(-50.7 to 63.5)                           | -9.9<br>(-50.9 to 63.2)                             |
| Other maternal disorders                                                | --                                      | --                                       | < 0.05<br>(< 0.05 to < 0.05)                        | -9.2<br>(-30.4 to 18.8)                           | -10.3<br>(-31.2 to 17.1)                            |
| <b>Neonatal disorders</b>                                               | <b>3.0</b><br><b>(2.6 to 3.7)</b>       | <b>0.4</b><br><b>--</b>                  | <b>0.4</b><br><b>(0.3 to 0.6)</b>                   | <b>10.7</b><br><b>(-9.7 to 39.6)</b>              | <b>4.3</b><br><b>(-14.4 to 30.7)</b>                |
| Neonatal preterm birth complications                                    | 2.8<br>(2.2 to 3.6)                     | --                                       | 0.3<br>(0.2 to 0.4)                                 | 9.6<br>(-14.8 to 45.8)                            | 2.8<br>(-19.7 to 35.8)                              |
| Neonatal encephalopathy due to birth asphyxia and trauma                | 0.1<br>(0.1 to 0.2)                     | --                                       | < 0.05<br>(< 0.05 to 0.1)                           | 58.4<br>(4.2 to 365.9)                            | 48.8<br>(-1.1 to 338.8)                             |
| Neonatal sepsis and other neonatal infections                           | 0.1<br>(< 0.05 to 0.2)                  | --                                       | < 0.05<br>(< 0.05 to 0.1)                           | 3.1<br>(-17.9 to 35.6)                            | -2.7<br>(-21.3 to 29.7)                             |
| Hemolytic disease and other neonatal jaundice                           | < 0.05<br>(< 0.05 to < 0.05)            | --                                       | < 0.05<br>(< 0.05 to < 0.05)                        | 6.6<br>(-1.4 to 15.5)                             | -0.5<br>(-7.9 to 7.7)                               |
| Other neonatal disorders                                                | --                                      | --                                       | < 0.05<br>(< 0.05 to < 0.05)                        | 1.9<br>(-20.7 to 33.0)                            | 3.6<br>(-19.3 to 35.1)                              |
| <b>Nutritional deficiencies</b>                                         | <b>74.5</b><br><b>(64.1 to 86.4)</b>    | <b>57.2†</b><br><b>(35.9 to 85.8)</b>    | <b>0.9</b><br><b>(0.6 to 1.3)</b>                   | <b>-5.5</b><br><b>(-15.9 to 5.4)</b>              | <b>-11.8</b><br><b>(-19.7 to -3.4)</b>              |
| Protein-energy malnutrition                                             | 1.5<br>(1.1 to 2.0)                     | 0.5<br>(0.4 to 0.6)                      | 0.1<br>(0.1 to 0.1)                                 | 16.6<br>(-29.0 to 85.3)                           | 18.7<br>(-27.8 to 87.8)                             |
| Iodine deficiency                                                       | 0.1<br>(0.1 to 0.1)                     | < 0.05<br>(< 0.05 to < 0.05)             | < 0.05<br>(< 0.05 to < 0.05)                        | -8.0<br>(-17.2 to 2.4)                            | -18.4<br>(-26.7 to -9.1)                            |
| Vitamin A deficiency                                                    | 49.2<br>(35.8 to 65.2)                  | 56.7<br>(35.5 to 85.2)                   | < 0.05<br>(< 0.05 to < 0.05)                        | 1.7<br>(-17.1 to 23.1)                            | -3.8<br>(-19.6 to 14.6)                             |
| Iron-deficiency anaemia                                                 | 32.7<br>(29.9 to 35.6)                  | --                                       | 0.8<br>(0.5 to 1.2)                                 | -7.7<br>(-17.4 to 2.5)                            | -13.7<br>(-21.3 to -6.1)                            |
| Other nutritional deficiencies                                          | --                                      | --                                       | < 0.05<br>(< 0.05 to < 0.05)                        | 16.5<br>(-30.5 to 87.5)                           | 18.4<br>(-29.1 to 90.0)                             |
| <b>Other communicable, maternal, neonatal, and nutritional diseases</b> | <b>53.2</b><br><b>(49.5 to 56.7)</b>    | <b>16.9</b><br><b>(15.3 to 18.4)</b>     | <b>0.1</b><br><b>(0.1 to 0.1)</b>                   | <b>2.7</b><br><b>(-4.3 to 9.7)</b>                | <b>-3.0</b><br><b>(-8.2 to 2.2)</b>                 |
| Sexually transmitted diseases excluding HIV                             | 35.4<br>(32.8 to 37.8)                  | 14.4<br>(13.0 to 15.9)                   | 0.1<br>(< 0.05 to 0.1)                              | 3.9<br>(-2.4 to 9.7)                              | -2.4<br>(-8.4 to 2.8)                               |
| Syphilis                                                                | 2.9<br>(2.2 to 3.6)                     | 1.7<br>(1.3 to 2.2)                      | < 0.05<br>(< 0.05 to < 0.05)                        | 13.4<br>(1.5 to 28.9)                             | -2.6<br>(-14.0 to 11.0)                             |
| Chlamydial infection                                                    | 4.8<br>(3.8 to 5.9)                     | 3.9<br>(3.0 to 5.0)                      | < 0.05<br>(< 0.05 to < 0.05)                        | 4.2<br>(-7.2 to 15.7)                             | -1.4<br>(-12.2 to 9.3)                              |
| Gonococcal infection                                                    | 0.5<br>(0.4 to 0.6)                     | 1.1<br>(0.8 to 1.4)                      | < 0.05<br>(< 0.05 to < 0.05)                        | 1.6<br>(-16.9 to 22.1)                            | -3.0<br>(-19.3 to 15.9)                             |
| Trichomoniasis                                                          | 4.7<br>(3.9 to 5.5)                     | 4.1<br>(3.4 to 5.0)                      | < 0.05<br>(< 0.05 to < 0.05)                        | 7.4<br>(-0.4 to 15.3)                             | -0.4<br>(-6.9 to 6.4)                               |
| Genital herpes                                                          | 25.4<br>(21.8 to 29.4)                  | 2.1<br>(1.7 to 2.5)                      | < 0.05<br>(< 0.05 to < 0.05)                        | 10.9<br>(1.5 to 20.6)                             | 0.0<br>(-7.8 to 7.5)                                |
| Other sexually transmitted diseases                                     | 1.4<br>(1.2 to 1.6)                     | 1.5<br>(1.2 to 1.7)                      | < 0.05<br>(< 0.05 to < 0.05)                        | -0.1<br>(-9.8 to 10.1)                            | -3.9<br>(-13.5 to 6.5)                              |
| Hepatitis                                                               | 21.4<br>(17.7 to 25.8)                  | 2.5<br>(2.1 to 2.9)                      | < 0.05<br>(< 0.05 to < 0.05)                        | 4.2<br>(-13.8 to 26.6)                            | -5.2<br>(-21.3 to 14.8)                             |
| Acute hepatitis A                                                       | 0.1<br>(< 0.05 to 0.1)                  | 0.7<br>(0.5 to 0.8)                      | < 0.05<br>(< 0.05 to < 0.05)                        | 4.7<br>(-30.8 to 60.0)                            | -3.8<br>(-33.5 to 38.9)                             |
| Hepatitis B                                                             | 17.0<br>(13.5 to 21.4)                  | 1.5<br>(1.2 to 2.0)                      | < 0.05<br>(< 0.05 to < 0.05)                        | 4.0<br>(-19.7 to 33.0)                            | -6.4<br>(-27.9 to 20.5)                             |
| Hepatitis C                                                             | 4.3<br>(3.8 to 4.8)                     | 0.2<br>(0.2 to 0.2)                      | < 0.05<br>(< 0.05 to < 0.05)                        | 1.0<br>(-21.5 to 29.8)                            | 0.5<br>(-19.4 to 25.4)                              |
| Acute hepatitis E                                                       | < 0.05<br>(< 0.05 to < 0.05)            | 0.1<br>(0.1 to 0.1)                      | < 0.05<br>(< 0.05 to < 0.05)                        | 8.5<br>(-2.8 to 22.2)                             | -2.1<br>(-13.3 to 11.0)                             |
| Other infectious diseases                                               | 1.3<br>(1.1 to 1.4)                     | < 0.05<br>(< 0.05 to < 0.05)             | < 0.05<br>(< 0.05 to < 0.05)                        | 0.6<br>(-14.8 to 17.4)                            | -4.3<br>(-17.0 to 9.0)                              |
| <b>Non-communicable diseases</b>                                        | <b>171.3</b><br><b>(169.7 to 172.8)</b> | <b>486.1†</b><br><b>(454.7 to 518.5)</b> | <b>15.0</b><br><b>(11.1 to 19.6)</b>                | <b>13.8</b><br><b>(11.5 to 16.1)</b>              | <b>0.4</b><br><b>(-1.3 to 2.0)</b>                  |
| <b>Neoplasms</b>                                                        | <b>0.3</b><br><b>(0.3 to 0.3)</b>       | <b>0.1</b><br><b>(0.1 to 0.2)</b>        | <b>&lt; 0.05</b><br><b>(&lt; 0.05 to 0.1)</b>       | <b>21.1</b><br><b>(13.8 to 28.5)</b>              | <b>1.4</b><br><b>(-5.1 to 7.3)</b>                  |
| Lip and oral cavity cancer                                              | < 0.05<br>(< 0.05 to < 0.05)            | < 0.05<br>(< 0.05 to < 0.05)             | < 0.05<br>(< 0.05 to < 0.05)                        | 18.6<br>(3.4 to 33.5)                             | -1.4<br>(-14.1 to 11.6)                             |
| Nasopharynx cancer                                                      | < 0.05<br>(< 0.05 to < 0.05)            | < 0.05<br>(< 0.05 to < 0.05)             | < 0.05<br>(< 0.05 to < 0.05)                        | 10.6<br>(-10.2 to 33.0)                           | -4.3<br>(-21.2 to 14.0)                             |
| Other pharynx cancer                                                    | < 0.05<br>(< 0.05 to < 0.05)            | < 0.05<br>(< 0.05 to < 0.05)             | < 0.05<br>(< 0.05 to < 0.05)                        | 28.1<br>(13.4 to 45.2)                            | 5.7<br>(-6.9 to 20.4)                               |
| Oesophageal cancer                                                      | < 0.05<br>(< 0.05 to < 0.05)            | < 0.05<br>(< 0.05 to < 0.05)             | < 0.05<br>(< 0.05 to < 0.05)                        | 19.4<br>(8.7 to 31.7)                             | -3.9<br>(-13.5 to 7.0)                              |
| Stomach cancer                                                          | < 0.05<br>(< 0.05 to < 0.05)            | < 0.05<br>(< 0.05 to < 0.05)             | < 0.05<br>(< 0.05 to < 0.05)                        | 14.7<br>(0.7 to 30.5)                             | -6.0<br>(-18.4 to 8.3)                              |
| Colon and rectum cancer                                                 | < 0.05<br>(< 0.05 to < 0.05)            | < 0.05<br>(< 0.05 to < 0.05)             | < 0.05<br>(< 0.05 to < 0.05)                        | 23.7<br>(5.5 to 44.5)                             | 1.6<br>(-13.6 to 19.0)                              |
| Liver cancer                                                            | < 0.05<br>(< 0.05 to < 0.05)            | < 0.05<br>(< 0.05 to < 0.05)             | < 0.05<br>(< 0.05 to < 0.05)                        | 16.3<br>(2.0 to 33.5)                             | -2.5<br>(-13.7 to 11.7)                             |
| Liver cancer due to hepatitis B                                         | < 0.05<br>(< 0.05 to < 0.05)            | < 0.05<br>(< 0.05 to < 0.05)             | < 0.05<br>(< 0.05 to < 0.05)                        | 15.4<br>(1.1 to 32.8)                             | -2.3<br>(-14.1 to 11.8)                             |

| Cause                                              | Prevalence in thousands (95% UI)     | Incidence in thousands (95% UI)    | YLDs in thousands (95% UI)        |                                                   |                                                     |
|----------------------------------------------------|--------------------------------------|------------------------------------|-----------------------------------|---------------------------------------------------|-----------------------------------------------------|
|                                                    | 2016 counts                          | 2016 counts                        | 2016 counts                       | Percentage change in counts between 2006 and 2016 | Percentage change in age-standardised rates between |
| Liver cancer due to hepatitis C                    | < 0.05<br>(< 0.05 to < 0.05)         | < 0.05<br>(< 0.05 to < 0.05)       | < 0.05<br>(< 0.05 to < 0.05)      | 21.4<br>(6.0 to 39.1)                             | -1.9<br>(-14.1 to 11.8)                             |
| Liver cancer due to alcohol use                    | < 0.05<br>(< 0.05 to < 0.05)         | < 0.05<br>(< 0.05 to < 0.05)       | < 0.05<br>(< 0.05 to < 0.05)      | 17.1<br>(1.2 to 35.7)                             | -4.0<br>(-16.4 to 11.5)                             |
| Liver cancer due to other causes                   | < 0.05<br>(< 0.05 to < 0.05)         | < 0.05<br>(< 0.05 to < 0.05)       | < 0.05<br>(< 0.05 to < 0.05)      | 15.0<br>(-1.0 to 34.6)                            | -2.9<br>(-16.4 to 12.9)                             |
| Gallbladder and biliary tract cancer               | < 0.05<br>(< 0.05 to < 0.05)         | < 0.05<br>(< 0.05 to < 0.05)       | < 0.05<br>(< 0.05 to < 0.05)      | 21.6<br>(12.3 to 32.0)                            | -1.6<br>(-9.0 to 6.8)                               |
| Pancreatic cancer                                  | < 0.05<br>(< 0.05 to < 0.05)         | < 0.05<br>(< 0.05 to < 0.05)       | < 0.05<br>(< 0.05 to < 0.05)      | 23.5<br>(13.3 to 35.8)                            | 0.3<br>(-8.2 to 10.5)                               |
| Larynx cancer                                      | < 0.05<br>(< 0.05 to < 0.05)         | < 0.05<br>(< 0.05 to < 0.05)       | < 0.05<br>(< 0.05 to < 0.05)      | 21.7<br>(10.8 to 33.2)                            | -1.3<br>(-10.7 to 8.2)                              |
| Tracheal, bronchus, and lung cancer                | < 0.05<br>(< 0.05 to < 0.05)         | < 0.05<br>(< 0.05 to < 0.05)       | < 0.05<br>(< 0.05 to < 0.05)      | 13.9<br>(-5.7 to 39.0)                            | -7.0<br>(-24.3 to 14.9)                             |
| Malignant skin melanoma                            | < 0.05<br>(< 0.05 to < 0.05)         | < 0.05<br>(< 0.05 to < 0.05)       | < 0.05<br>(< 0.05 to < 0.05)      | 27.6<br>(1.9 to 54.6)                             | 3.8<br>(-16.7 to 25.6)                              |
| Non-melanoma skin cancer                           | < 0.05<br>(< 0.05 to < 0.05)         | < 0.05<br>(< 0.05 to < 0.05)       | < 0.05<br>(< 0.05 to < 0.05)      | -26.6<br>(-82.3 to 67.5)                          | -41.0<br>(-86.3 to 38.9)                            |
| Non-melanoma skin cancer (squamous-cell carcinoma) | < 0.05<br>(< 0.05 to < 0.05)         | < 0.05<br>(< 0.05 to < 0.05)       | < 0.05<br>(< 0.05 to < 0.05)      | -26.9<br>(-82.5 to 68.2)                          | -41.2<br>(-86.5 to 39.2)                            |
| Non-melanoma skin cancer (basal-cell carcinoma)    | < 0.05<br>(< 0.05 to < 0.05)         | < 0.05<br>(< 0.05 to < 0.05)       | < 0.05<br>(< 0.05 to < 0.05)      | 12.9<br>(1.7 to 25.3)                             | 0.5<br>(-8.6 to 10.9)                               |
| Breast cancer                                      | 0.1<br>(0.1 to 0.1)                  | < 0.05<br>(< 0.05 to < 0.05)       | < 0.05<br>(< 0.05 to < 0.05)      | 28.4<br>(7.1 to 52.8)                             | 7.8<br>(-8.8 to 26.4)                               |
| Cervical cancer                                    | < 0.05<br>(< 0.05 to 0.1)            | < 0.05<br>(< 0.05 to < 0.05)       | < 0.05<br>(< 0.05 to < 0.05)      | 10.9<br>(-18.3 to 46.9)                           | -2.7<br>(-27.8 to 27.7)                             |
| Uterine cancer                                     | < 0.05<br>(< 0.05 to < 0.05)         | < 0.05<br>(< 0.05 to < 0.05)       | < 0.05<br>(< 0.05 to < 0.05)      | 33.2<br>(3.8 to 65.0)                             | 8.5<br>(-13.9 to 34.9)                              |
| Ovarian cancer                                     | < 0.05<br>(< 0.05 to < 0.05)         | < 0.05<br>(< 0.05 to < 0.05)       | < 0.05<br>(< 0.05 to < 0.05)      | 24.2<br>(-8.6 to 69.0)                            | 6.2<br>(-20.4 to 43.1)                              |
| Prostate cancer                                    | < 0.05<br>(< 0.05 to < 0.05)         | < 0.05<br>(< 0.05 to < 0.05)       | < 0.05<br>(< 0.05 to < 0.05)      | 29.1<br>(8.2 to 53.5)                             | 3.2<br>(-13.8 to 23.3)                              |
| Testicular cancer                                  | < 0.05<br>(< 0.05 to < 0.05)         | < 0.05<br>(< 0.05 to < 0.05)       | < 0.05<br>(< 0.05 to < 0.05)      | 17.5<br>(-6.7 to 44.3)                            | 2.2<br>(-19.3 to 26.4)                              |
| Kidney cancer                                      | < 0.05<br>(< 0.05 to < 0.05)         | < 0.05<br>(< 0.05 to < 0.05)       | < 0.05<br>(< 0.05 to < 0.05)      | 22.6<br>(5.5 to 42.8)                             | 4.4<br>(-10.6 to 21.8)                              |
| Bladder cancer                                     | < 0.05<br>(< 0.05 to < 0.05)         | < 0.05<br>(< 0.05 to < 0.05)       | < 0.05<br>(< 0.05 to < 0.05)      | 29.9<br>(15.6 to 47.5)                            | 5.5<br>(-6.2 to 20.1)                               |
| Brain and nervous system cancer                    | < 0.05<br>(< 0.05 to < 0.05)         | < 0.05<br>(< 0.05 to < 0.05)       | < 0.05<br>(< 0.05 to < 0.05)      | 19.0<br>(-4.2 to 43.4)                            | 7.0<br>(-8.8 to 25.8)                               |
| Thyroid cancer                                     | < 0.05<br>(< 0.05 to < 0.05)         | < 0.05<br>(< 0.05 to < 0.05)       | < 0.05<br>(< 0.05 to < 0.05)      | 35.3<br>(10.6 to 65.5)                            | 13.7<br>(-6.0 to 38.3)                              |
| Mesothelioma                                       | < 0.05<br>(< 0.05 to < 0.05)         | < 0.05<br>(< 0.05 to < 0.05)       | < 0.05<br>(< 0.05 to < 0.05)      | 25.8<br>(13.1 to 41.7)                            | 4.6<br>(-7.0 to 18.8)                               |
| Hodgkin lymphoma                                   | < 0.05<br>(< 0.05 to < 0.05)         | < 0.05<br>(< 0.05 to < 0.05)       | < 0.05<br>(< 0.05 to < 0.05)      | 12.8<br>(-0.1 to 28.3)                            | -6.1<br>(-16.8 to 5.4)                              |
| Non-Hodgkin's lymphoma                             | < 0.05<br>(< 0.05 to < 0.05)         | < 0.05<br>(< 0.05 to < 0.05)       | < 0.05<br>(< 0.05 to < 0.05)      | 22.2<br>(9.3 to 38.0)                             | 2.2<br>(-8.9 to 15.2)                               |
| Multiple myeloma                                   | < 0.05<br>(< 0.05 to < 0.05)         | < 0.05<br>(< 0.05 to < 0.05)       | < 0.05<br>(< 0.05 to < 0.05)      | 27.4<br>(11.5 to 45.4)                            | 3.6<br>(-9.8 to 18.4)                               |
| Leukaemia                                          | < 0.05<br>(< 0.05 to < 0.05)         | < 0.05<br>(< 0.05 to < 0.05)       | < 0.05<br>(< 0.05 to < 0.05)      | 7.3<br>(-2.4 to 16.6)                             | -5.2<br>(-13.2 to 3.0)                              |
| Acute lymphoid leukaemia                           | < 0.05<br>(< 0.05 to < 0.05)         | < 0.05<br>(< 0.05 to < 0.05)       | < 0.05<br>(< 0.05 to < 0.05)      | 4.1<br>(-14.1 to 26.0)                            | -4.0<br>(-17.1 to 12.3)                             |
| Chronic lymphoid leukaemia                         | < 0.05<br>(< 0.05 to < 0.05)         | < 0.05<br>(< 0.05 to < 0.05)       | < 0.05<br>(< 0.05 to < 0.05)      | 26.6<br>(1.2 to 60.0)                             | -1.3<br>(-20.9 to 24.0)                             |
| Acute myeloid leukaemia                            | < 0.05<br>(< 0.05 to < 0.05)         | < 0.05<br>(< 0.05 to < 0.05)       | < 0.05<br>(< 0.05 to < 0.05)      | 11.6<br>(-1.7 to 25.7)                            | 0.1<br>(-9.0 to 10.3)                               |
| Chronic myeloid leukaemia                          | < 0.05<br>(< 0.05 to < 0.05)         | < 0.05<br>(< 0.05 to < 0.05)       | < 0.05<br>(< 0.05 to < 0.05)      | 10.6<br>(-7.1 to 28.0)                            | -6.1<br>(-21.4 to 9.0)                              |
| Other leukaemia                                    | < 0.05<br>(< 0.05 to < 0.05)         | < 0.05<br>(< 0.05 to < 0.05)       | < 0.05<br>(< 0.05 to < 0.05)      | 2.2<br>(-12.0 to 16.1)                            | -8.7<br>(-21.1 to 4.2)                              |
| Other neoplasms                                    | < 0.05<br>(< 0.05 to < 0.05)         | < 0.05<br>(< 0.05 to < 0.05)       | < 0.05<br>(< 0.05 to < 0.05)      | 16.8<br>(3.2 to 32.3)                             | -0.5<br>(-12.8 to 14.3)                             |
| <b>Cardiovascular diseases</b>                     | <b>10.7</b><br><b>(10.3 to 11.1)</b> | <b>1.0†</b><br><b>(1.0 to 1.0)</b> | <b>0.7</b><br><b>(0.6 to 1.0)</b> | <b>17.4</b><br><b>(13.6 to 21.7)</b>              | <b>-1.2</b><br><b>(-4.5 to 2.2)</b>                 |
| Rheumatic heart disease                            | 3.2<br>(2.8 to 3.5)                  | 0.1<br>(0.1 to 0.1)                | 0.1<br>(0.1 to 0.2)               | 12.4<br>(2.9 to 22.2)                             | 2.2<br>(-6.6 to 10.9)                               |
| Ischaemic heart disease                            | 2.3<br>(2.2 to 2.4)                  | 0.3<br>(0.3 to 0.3)                | 0.1<br>(0.1 to 0.1)               | 18.8<br>(13.2 to 24.9)                            | -1.7<br>(-5.8 to 3.0)                               |
| Cerebrovascular disease                            | 1.4<br>(1.3 to 1.5)                  | 0.2‡<br>(0.2 to 0.2)               | 0.3<br>(0.2 to 0.4)               | 19.3<br>(11.0 to 27.7)                            | -2.4<br>(-9.0 to 4.7)                               |
| Ischaemic stroke                                   | 1.2<br>(1.0 to 1.3)                  | 0.1‡<br>(0.1 to 0.2)               | 0.2<br>(0.2 to 0.3)               | 19.7<br>(9.6 to 29.7)                             | -2.6<br>(-11.0 to 5.9)                              |
| Hemorrhagic stroke                                 | 0.4<br>(0.3 to 0.4)                  | 0.1‡<br>(0.1 to 0.1)               | 0.1<br>(< 0.05 to 0.1)            | 17.9<br>(7.3 to 30.4)                             | -1.5<br>(-10.4 to 8.7)                              |
| Hypertensive heart disease                         | 0.3<br>(0.3 to 0.4)                  | --                                 | < 0.05<br>(< 0.05 to < 0.05)      | 24.1<br>(12.6 to 36.6)                            | 0.3<br>(-8.6 to 9.6)                                |
| Cardiomyopathy and myocarditis                     | 0.1<br>(0.1 to 0.1)                  | 0.1†<br>(< 0.05 to 0.1)            | < 0.05<br>(< 0.05 to < 0.05)      | 15.0<br>(3.6 to 27.9)                             | 0.4<br>(-9.8 to 11.6)                               |
| Myocarditis                                        | < 0.05<br>(< 0.05 to 0.1)            | 0.1<br>(< 0.05 to 0.1)             | < 0.05<br>(< 0.05 to < 0.05)      | 13.3<br>(1.5 to 26.7)                             | 0.1<br>(-12.6 to 13.3)                              |
| Alcoholic cardiomyopathy                           | < 0.05<br>(< 0.05 to < 0.05)         | --                                 | < 0.05<br>(< 0.05 to < 0.05)      | 23.3<br>(11.9 to 35.4)                            | 0.3<br>(-9.8 to 10.9)                               |
| Other cardiomyopathy                               | 0.1<br>(0.1 to 0.1)                  | --                                 | < 0.05<br>(< 0.05 to < 0.05)      | 15.3<br>(-0.7 to 34.5)                            | 0.6<br>(-13.1 to 16.7)                              |
| Atrial fibrillation and flutter                    | 0.7<br>(0.6 to 0.8)                  | 0.1<br>(< 0.05 to 0.1)             | 0.1<br>(< 0.05 to 0.1)            | 22.2<br>(13.8 to 31.0)                            | -0.8<br>(-7.0 to 5.6)                               |
| Peripheral vascular disease                        | 2.0<br>(1.7 to 2.3)                  | 0.2<br>(0.2 to 0.2)                | < 0.05<br>(< 0.05 to < 0.05)      | 20.5<br>(11.0 to 30.2)                            | -4.1<br>(-10.8 to 3.9)                              |
| Endocarditis                                       | < 0.05<br>(< 0.05 to < 0.05)         | < 0.05<br>(< 0.05 to 0.1)          | < 0.05<br>(< 0.05 to < 0.05)      | 19.1<br>(7.4 to 32.2)                             | -0.5<br>(-11.8 to 13.2)                             |
| Other cardiovascular and circulatory diseases      | 1.8<br>(1.5 to 2.0)                  | --                                 | 0.1<br>(0.1 to 0.1)               | 14.6<br>(4.6 to 24.2)                             | -1.4<br>(-8.8 to 6.7)                               |
| <b>Chronic respiratory diseases</b>                | <b>19.0</b><br><b>(18.2 to 19.9)</b> | <b>4.4†</b><br><b>(4.1 to 4.7)</b> | <b>1.0</b><br><b>(0.8 to 1.3)</b> | <b>37.2</b><br><b>(31.4 to 43.6)</b>              | <b>19.1</b><br><b>(13.6 to 24.9)</b>                |
| Chronic obstructive pulmonary disease              | 5.0<br>(4.8 to 5.2)                  | 0.4<br>(0.4 to 0.4)                | 0.4<br>(0.3 to 0.4)               | 20.1<br>(13.0 to 28.0)                            | 1.3<br>(-4.5 to 7.6)                                |
| Pneumoconiosis                                     | < 0.05<br>(< 0.05 to < 0.05)         | < 0.05<br>(< 0.05 to < 0.05)       | < 0.05<br>(< 0.05 to < 0.05)      | 19.2<br>(-2.4 to 41.9)                            | -4.0<br>(-21.8 to 15.5)                             |
| Silicosis                                          | < 0.05<br>(< 0.05 to < 0.05)         | < 0.05<br>(< 0.05 to < 0.05)       | < 0.05<br>(< 0.05 to < 0.05)      | 18.7<br>(-15.3 to 61.2)                           | -4.2<br>(-32.6 to 30.2)                             |

| Cause                                                          | Prevalence in thousands (95% UI)     | Incidence in thousands (95% UI)                     | YLDs in thousands (95% UI)                    |                                                   |                                                     |
|----------------------------------------------------------------|--------------------------------------|-----------------------------------------------------|-----------------------------------------------|---------------------------------------------------|-----------------------------------------------------|
|                                                                | 2016 counts                          | 2016 counts                                         | 2016 counts                                   | Percentage change in counts between 2006 and 2016 | Percentage change in age-standardised rates between |
| Asbestosis                                                     | < 0.05<br>(< 0.05 to < 0.05)         | < 0.05<br>(< 0.05 to < 0.05)                        | < 0.05<br>(< 0.05 to < 0.05)                  | 19.4<br>(12.1 to 28.0)                            | -3.5<br>(-9.7 to 3.4)                               |
| Coal workers pneumoconiosis                                    | --                                   | --                                                  | --                                            | --                                                | --                                                  |
| Other pneumoconiosis                                           | < 0.05<br>(< 0.05 to < 0.05)         | < 0.05<br>(< 0.05 to < 0.05)                        | < 0.05<br>(< 0.05 to < 0.05)                  | 20.5<br>(0.1 to 48.5)                             | -3.7<br>(-21.0 to 21.1)                             |
| Asthma                                                         | 14.7<br>(13.6 to 16.0)               | 4.0<br>(3.7 to 4.4)                                 | 0.6<br>(0.4 to 0.8)                           | 52.0<br>(43.6 to 60.3)                            | 42.3<br>(35.2 to 49.8)                              |
| Interstitial lung disease and pulmonary sarcoidosis            | 0.1<br>(0.1 to 0.2)                  | < 0.05<br>(< 0.05 to < 0.05)                        | < 0.05<br>(< 0.05 to < 0.05)                  | 18.8<br>(7.1 to 31.9)                             | -1.4<br>(-11.6 to 10.1)                             |
| Other chronic respiratory diseases                             | --                                   | --                                                  | < 0.05<br>(< 0.05 to < 0.05)                  | 43.5<br>(19.3 to 72.8)                            | 33.4<br>(15.1 to 53.0)                              |
| <b>Cirrhosis and other chronic liver diseases</b>              | <b>0.9</b><br><b>(0.9 to 1.0)</b>    | <b>&lt; 0.05</b><br><b>(&lt; 0.05 to &lt; 0.05)</b> | <b>&lt; 0.05</b><br><b>(&lt; 0.05 to 0.1)</b> | <b>14.7</b><br><b>(2.1 to 27.8)</b>               | <b>2.3</b><br><b>(-6.5 to 11.8)</b>                 |
| Cirrhosis and other chronic liver diseases due to hepatitis B  | 0.3<br>(0.3 to 0.4)                  | < 0.05<br>(< 0.05 to < 0.05)                        | < 0.05<br>(< 0.05 to < 0.05)                  | 18.9<br>(1.3 to 39.3)                             | 2.2<br>(-11.9 to 18.0)                              |
| Cirrhosis and other chronic liver diseases due to hepatitis C  | 0.1<br>(0.1 to 0.1)                  | < 0.05<br>(< 0.05 to < 0.05)                        | < 0.05<br>(< 0.05 to < 0.05)                  | 19.4<br>(-5.0 to 52.2)                            | 2.5<br>(-17.9 to 29.1)                              |
| Cirrhosis and other chronic liver diseases due to alcohol use  | 0.1<br>(0.1 to 0.1)                  | < 0.05<br>(< 0.05 to < 0.05)                        | < 0.05<br>(< 0.05 to < 0.05)                  | 20.7<br>(-4.4 to 51.6)                            | 1.9<br>(-18.4 to 26.8)                              |
| Cirrhosis and other chronic liver diseases due to other causes | 0.3<br>(0.3 to 0.4)                  | < 0.05<br>(< 0.05 to < 0.05)                        | < 0.05<br>(< 0.05 to < 0.05)                  | 11.4<br>(-6.4 to 31.6)                            | 2.4<br>(-12.5 to 18.2)                              |
| <b>Digestive diseases</b>                                      | <b>2.9</b><br><b>(2.7 to 3.0)</b>    | <b>3.4†</b><br><b>(3.2 to 3.6)</b>                  | <b>0.1</b><br><b>(0.1 to 0.1)</b>             | <b>21.5</b><br><b>(12.2 to 31.8)</b>              | <b>6.8</b><br><b>(-0.1 to 14.5)</b>                 |
| Peptic ulcer disease                                           | 0.8<br>(0.8 to 0.9)                  | 0.3<br>(0.3 to 0.4)                                 | < 0.05<br>(< 0.05 to < 0.05)                  | 26.2<br>(12.4 to 41.2)                            | 10.7<br>(-0.1 to 22.4)                              |
| Gastritis and duodenitis                                       | 1.4<br>(1.2 to 1.6)                  | 1.2<br>(1.1 to 1.4)                                 | < 0.05<br>(< 0.05 to < 0.05)                  | 28.0<br>(15.0 to 43.4)                            | 11.5<br>(0.7 to 23.4)                               |
| Appendicitis                                                   | < 0.05<br>(< 0.05 to < 0.05)         | 0.6<br>(0.6 to 0.7)                                 | < 0.05<br>(< 0.05 to < 0.05)                  | 9.0<br>(-19.2 to 45.9)                            | 0.1<br>(-23.2 to 29.6)                              |
| Paralytic ileus and intestinal obstruction                     | < 0.05<br>(< 0.05 to < 0.05)         | < 0.05<br>(< 0.05 to 0.1)                           | < 0.05<br>(< 0.05 to < 0.05)                  | 11.9<br>(8.2 to 15.8)                             | -0.8<br>(-4.2 to 2.7)                               |
| Inguinal, femoral, and abdominal hernia                        | 0.4<br>(0.4 to 0.5)                  | 0.3<br>(0.3 to 0.4)                                 | < 0.05<br>(< 0.05 to < 0.05)                  | 21.7<br>(3.8 to 43.1)                             | 5.9<br>(-7.7 to 22.1)                               |
| Inflammatory bowel disease                                     | < 0.05<br>(< 0.05 to < 0.05)         | 0.1<br>(0.1 to 0.1)                                 | < 0.05<br>(< 0.05 to < 0.05)                  | 3.0<br>(-12.8 to 23.1)                            | -11.1<br>(-24.9 to 7.8)                             |
| Vascular intestinal disorders                                  | < 0.05<br>(< 0.05 to < 0.05)         | < 0.05<br>(< 0.05 to < 0.05)                        | < 0.05<br>(< 0.05 to < 0.05)                  | 15.1<br>(9.8 to 20.9)                             | 2.2<br>(-1.6 to 6.6)                                |
| Gallbladder and biliary diseases                               | 0.2<br>(0.2 to 0.3)                  | 0.7<br>(0.6 to 0.8)                                 | < 0.05<br>(< 0.05 to < 0.05)                  | 13.1<br>(-9.8 to 39.1)                            | -0.1<br>(-20.0 to 23.8)                             |
| Pancreatitis                                                   | < 0.05<br>(< 0.05 to < 0.05)         | < 0.05<br>(< 0.05 to < 0.05)                        | < 0.05<br>(< 0.05 to < 0.05)                  | 14.3<br>(10.0 to 18.3)                            | -0.1<br>(-3.4 to 3.2)                               |
| Other digestive diseases                                       | --                                   | --                                                  | < 0.05<br>(< 0.05 to < 0.05)                  | 26.7<br>(15.0 to 39.4)                            | 11.6<br>(4.1 to 19.9)                               |
| <b>Neurological disorders</b>                                  | <b>53.8</b><br><b>(51.4 to 56.3)</b> | <b>24.6</b><br><b>(21.1 to 28.5)</b>                | <b>1.3</b><br><b>(0.9 to 1.8)</b>             | <b>11.0</b><br><b>(-9.9 to 33.2)</b>              | <b>0.0</b><br><b>(-15.8 to 16.0)</b>                |
| Alzheimer's disease and other dementias                        | 0.8<br>(0.7 to 0.9)                  | 0.1<br>(0.1 to 0.2)                                 | 0.1<br>(0.1 to 0.1)                           | 28.6<br>(22.3 to 35.1)                            | -0.4<br>(-5.0 to 4.3)                               |
| Parkinson's disease                                            | 0.1<br>(0.1 to 0.1)                  | < 0.05<br>(< 0.05 to < 0.05)                        | < 0.05<br>(< 0.05 to < 0.05)                  | 28.7<br>(12.4 to 47.1)                            | 3.9<br>(-9.1 to 17.6)                               |
| Epilepsy                                                       | 0.6<br>(0.2 to 0.9)                  | 0.1<br>(< 0.05 to 0.1)                              | 0.2<br>(0.1 to 0.4)                           | 8.0<br>(-70.4 to 233.4)                           | -1.0<br>(-73.2 to 210.0)                            |
| Multiple sclerosis                                             | < 0.05<br>(< 0.05 to < 0.05)         | < 0.05<br>(< 0.05 to < 0.05)                        | < 0.05<br>(< 0.05 to < 0.05)                  | 20.7<br>(16.0 to 25.2)                            | 8.8<br>(4.8 to 12.7)                                |
| Motor neuron disease                                           | < 0.05<br>(< 0.05 to < 0.05)         | < 0.05<br>(< 0.05 to < 0.05)                        | < 0.05<br>(< 0.05 to < 0.05)                  | 13.2<br>(8.6 to 18.0)                             | 2.6<br>(-0.8 to 6.2)                                |
| Migraine                                                       | 19.0<br>(17.9 to 20.1)               | 2.3<br>(2.2 to 2.4)                                 | 0.8<br>(0.5 to 1.1)                           | 8.7<br>(4.2 to 13.2)                              | -0.4<br>(-4.2 to 3.5)                               |
| Tension-type headache                                          | 39.8<br>(35.5 to 45.1)               | 22.1<br>(18.6 to 26.0)                              | 0.1<br>(0.1 to 0.2)                           | 9.0<br>(3.4 to 15.2)                              | -0.5<br>(-5.5 to 4.8)                               |
| Other neurological disorders                                   | < 0.05<br>(< 0.05 to < 0.05)         | < 0.05<br>(< 0.05 to < 0.05)                        | < 0.05<br>(< 0.05 to 0.1)                     | 32.2<br>(-58.5 to 263.2)                          | 18.5<br>(-59.8 to 199.3)                            |
| <b>Mental and substance use disorders</b>                      | <b>23.4</b><br><b>(22.5 to 24.3)</b> | <b>7.7†</b><br><b>(7.2 to 8.3)</b>                  | <b>3.0</b><br><b>(2.2 to 3.9)</b>             | <b>9.7</b><br><b>(7.2 to 12.0)</b>                | <b>-0.4</b><br><b>(-2.5 to 1.5)</b>                 |
| Schizophrenia                                                  | 0.5<br>(0.4 to 0.6)                  | < 0.05<br>(< 0.05 to < 0.05)                        | 0.3<br>(0.2 to 0.4)                           | 8.1<br>(-0.8 to 17.1)                             | -0.4<br>(-8.2 to 7.3)                               |
| Alcohol use disorders                                          | 1.4<br>(1.2 to 1.6)                  | 0.8<br>(0.7 to 0.9)                                 | 0.1<br>(0.1 to 0.2)                           | 10.6<br>(1.3 to 20.6)                             | 1.8<br>(-6.6 to 10.2)                               |
| Drug use disorders                                             | 1.3<br>(1.2 to 1.5)                  | 0.2<br>(0.2 to 0.2)                                 | 0.2<br>(0.1 to 0.3)                           | 11.0<br>(0.9 to 21.7)                             | 2.8<br>(-6.4 to 12.1)                               |
| Opioid use disorders                                           | 0.3<br>(0.2 to 0.4)                  | < 0.05<br>(< 0.05 to 0.1)                           | 0.1<br>(0.1 to 0.2)                           | 10.1<br>(-1.9 to 23.6)                            | 2.9<br>(-7.6 to 14.5)                               |
| Cocaine use disorders                                          | < 0.05<br>(< 0.05 to < 0.05)         | < 0.05<br>(< 0.05 to < 0.05)                        | < 0.05<br>(< 0.05 to < 0.05)                  | 13.2<br>(6.5 to 20.8)                             | 2.7<br>(-3.0 to 8.7)                                |
| Amphetamine use disorders                                      | 0.1<br>(0.1 to 0.2)                  | < 0.05<br>(< 0.05 to < 0.05)                        | < 0.05<br>(< 0.05 to < 0.05)                  | 18.9<br>(-10.9 to 63.2)                           | 7.3<br>(-19.2 to 44.6)                              |
| Cannabis use disorders                                         | 0.8<br>(0.7 to 1.0)                  | 0.1<br>(0.1 to 0.2)                                 | < 0.05<br>(< 0.05 to < 0.05)                  | 6.8<br>(-11.7 to 28.5)                            | -2.9<br>(-18.7 to 14.9)                             |
| Other drug use disorders                                       | 0.1<br>(0.1 to 0.1)                  | < 0.05<br>(< 0.05 to < 0.05)                        | < 0.05<br>(< 0.05 to < 0.05)                  | 15.6<br>(-9.5 to 46.8)                            | 5.2<br>(-15.9 to 31.1)                              |
| Depressive disorders                                           | 5.2<br>(4.8 to 5.6)                  | 4.5<br>(4.1 to 5.1)                                 | 0.8<br>(0.6 to 1.1)                           | 10.3<br>(5.8 to 15.5)                             | -2.1<br>(-5.8 to 2.0)                               |
| Major depressive disorder                                      | 2.7<br>(2.4 to 3.1)                  | 4.2<br>(3.7 to 4.7)                                 | 0.6<br>(0.4 to 0.8)                           | 8.7<br>(2.5 to 15.6)                              | -3.1<br>(-8.1 to 2.4)                               |
| Dysthymia                                                      | 2.5<br>(2.2 to 2.9)                  | 0.4<br>(0.4 to 0.5)                                 | 0.2<br>(0.2 to 0.4)                           | 14.4<br>(10.6 to 18.5)                            | 0.1<br>(-2.7 to 3.1)                                |
| Bipolar disorder                                               | 0.8<br>(0.7 to 0.9)                  | 0.1<br>(0.1 to 0.1)                                 | 0.2<br>(0.1 to 0.2)                           | 11.1<br>(2.5 to 19.8)                             | 0.1<br>(-7.3 to 7.6)                                |
| Anxiety disorders                                              | 6.0<br>(5.5 to 6.7)                  | 1.1<br>(1.0 to 1.2)                                 | 0.6<br>(0.4 to 0.8)                           | 10.5<br>(3.8 to 17.8)                             | 0.2<br>(-5.5 to 6.5)                                |
| Eating disorders                                               | 0.2<br>(0.1 to 0.2)                  | 0.1<br>(0.1 to 0.2)                                 | < 0.05<br>(< 0.05 to < 0.05)                  | 9.9<br>(-4.8 to 28.3)                             | 3.9<br>(-9.1 to 20.6)                               |
| Anorexia nervosa                                               | 0.1<br>(< 0.05 to 0.1)               | < 0.05<br>(< 0.05 to < 0.05)                        | < 0.05<br>(< 0.05 to < 0.05)                  | 13.5<br>(-14.3 to 47.8)                           | 4.4<br>(-19.8 to 36.3)                              |
| Bulimia nervosa                                                | 0.1<br>(0.1 to 0.1)                  | 0.1<br>(0.1 to 0.1)                                 | < 0.05<br>(< 0.05 to < 0.05)                  | 8.1<br>(-9.0 to 29.6)                             | 3.6<br>(-12.3 to 23.8)                              |
| Autistic spectrum disorders                                    | 1.7<br>(1.5 to 1.9)                  | < 0.05<br>(< 0.05 to < 0.05)                        | 0.2<br>(0.2 to 0.3)                           | 7.7<br>(2.0 to 13.2)                              | -0.0<br>(-4.9 to 4.8)                               |
| Autism                                                         | 0.5<br>(0.4 to 0.6)                  | < 0.05<br>(< 0.05 to < 0.05)                        | 0.1<br>(0.1 to 0.2)                           | 8.0<br>(-1.7 to 18.4)                             | 0.1<br>(-8.3 to 9.1)                                |
| Asperger syndrome and other autistic spectrum disorders        | 1.2<br>(1.0 to 1.4)                  | < 0.05<br>(< 0.05 to < 0.05)                        | 0.1<br>(0.1 to 0.2)                           | 7.4<br>(2.0 to 12.9)                              | -0.2<br>(-4.8 to 4.6)                               |



| Cause                                                      | Prevalence in thousands (95% UI)        | Incidence in thousands (95% UI)          | YLDs in thousands (95% UI)        |                                                   |                                                     |
|------------------------------------------------------------|-----------------------------------------|------------------------------------------|-----------------------------------|---------------------------------------------------|-----------------------------------------------------|
|                                                            | 2016 counts                             | 2016 counts                              | 2016 counts                       | Percentage change in counts between 2006 and 2016 | Percentage change in age-standardised rates between |
| Attention-deficit/hyperactivity disorder                   | 1.7<br>(1.5 to 1.9)                     | 0.1<br>(0.1 to 0.1)                      | < 0.05<br>(< 0.05 to < 0.05)      | 7.4<br>(-2.1 to 18.1)                             | -0.1<br>(-8.3 to 9.1)                               |
| Conduct disorder                                           | 1.8<br>(1.5 to 2.2)                     | 0.7<br>(0.5 to 0.8)                      | 0.2<br>(0.1 to 0.3)               | 8.0<br>(0.7 to 15.5)                              | -0.1<br>(-7.1 to 6.7)                               |
| Idiopathic developmental intellectual disability           | 1.6<br>(0.7 to 2.4)                     | --                                       | 0.1<br>(< 0.05 to 0.1)            | 4.1<br>(-5.7 to 13.6)                             | -3.8<br>(-12.5 to 4.3)                              |
| Other mental and substance use disorders                   | 3.0<br>(2.6 to 3.4)                     | 0.1<br>(0.1 to 0.1)                      | 0.2<br>(0.1 to 0.3)               | 10.4<br>(4.4 to 16.5)                             | 0.1<br>(-5.1 to 5.2)                                |
| <b>Diabetes, urogenital, blood, and endocrine diseases</b> | <b>71.5</b><br><b>(69.5 to 73.6)</b>    | <b>18.9†</b><br><b>(17.6 to 20.6)</b>    | <b>2.2</b><br><b>(1.6 to 3.1)</b> | <b>17.1</b><br><b>(12.7 to 21.5)</b>              | <b>0.1</b><br><b>(-3.3 to 4.0)</b>                  |
| Diabetes mellitus                                          | 22.5<br>(20.5 to 24.7)                  | 1.6<br>(1.4 to 1.7)                      | 1.5<br>(1.0 to 2.1)               | 18.7<br>(12.5 to 25.1)                            | 0.0<br>(-4.9 to 5.3)                                |
| Acute glomerulonephritis                                   | < 0.05<br>(< 0.05 to < 0.05)            | < 0.05<br>(< 0.05 to 0.1)                | < 0.05<br>(< 0.05 to < 0.05)      | 12.2<br>(7.3 to 17.4)                             | 0.2<br>(-3.9 to 4.4)                                |
| Chronic kidney disease                                     | 6.1<br>(5.5 to 6.7)                     | 0.5<br>(0.4 to 0.5)                      | 0.3<br>(0.2 to 0.3)               | 26.2<br>(18.3 to 34.5)                            | 6.0<br>(-0.3 to 12.8)                               |
| Chronic kidney disease due to diabetes mellitus            | 3.5<br>(3.0 to 3.9)                     | 0.3<br>(0.2 to 0.3)                      | 0.1<br>(0.1 to 0.2)               | 26.7<br>(16.4 to 38.1)                            | 6.7<br>(-1.3 to 15.5)                               |
| Chronic kidney disease due to hypertension                 | 1.1<br>(0.9 to 1.2)                     | < 0.05<br>(< 0.05 to 0.1)                | 0.1<br>(< 0.05 to 0.1)            | 26.1<br>(12.0 to 42.2)                            | 2.7<br>(-9.0 to 15.1)                               |
| Chronic kidney disease due to glomerulonephritis           | 1.0<br>(0.8 to 1.2)                     | 0.1<br>(0.1 to 0.1)                      | < 0.05<br>(< 0.05 to < 0.05)      | 23.7<br>(9.7 to 41.6)                             | 10.3<br>(-1.8 to 24.4)                              |
| Chronic kidney disease due to other causes                 | 0.5<br>(0.5 to 0.7)                     | < 0.05<br>(< 0.05 to 0.1)                | < 0.05<br>(< 0.05 to < 0.05)      | 26.2<br>(13.9 to 40.3)                            | 8.7<br>(-1.8 to 21.0)                               |
| Urinary diseases and male infertility                      | 2.4<br>(2.1 to 2.7)                     | 9.7†<br>(8.6 to 11.4)                    | 0.1<br>(< 0.05 to 0.1)            | 15.2<br>(8.5 to 22.9)                             | -3.2<br>(-8.7 to 2.6)                               |
| Interstitial nephritis and urinary tract infections        | 0.2<br>(0.1 to 0.2)                     | 8.7<br>(7.5 to 10.3)                     | < 0.05<br>(< 0.05 to < 0.05)      | 3.3<br>(-11.6 to 22.5)                            | -4.2<br>(-17.1 to 11.0)                             |
| Urolithiasis                                               | < 0.05<br>(< 0.05 to < 0.05)            | 0.9<br>(0.8 to 1.0)                      | < 0.05<br>(< 0.05 to < 0.05)      | 15.3<br>(5.7 to 25.8)                             | -0.1<br>(-9.9 to 10.6)                              |
| Benign prostatic hyperplasia                               | 1.2<br>(1.0 to 1.3)                     | 0.2<br>(0.1 to 0.2)                      | < 0.05<br>(< 0.05 to 0.1)         | 23.5<br>(14.1 to 32.8)                            | -2.4<br>(-9.2 to 4.9)                               |
| Male infertility                                           | 0.9<br>(0.7 to 1.2)                     | --                                       | < 0.05<br>(< 0.05 to < 0.05)      | -0.0<br>(-7.5 to 7.1)                             | -2.4<br>(-8.8 to 4.3)                               |
| Other urinary diseases                                     | --                                      | --                                       | < 0.05<br>(< 0.05 to < 0.05)      | -14.1<br>(-24.2 to -1.4)                          | -19.2<br>(-27.2 to -10.1)                           |
| Gynecological diseases                                     | 18.7<br>(17.7 to 19.6)                  | 6.6†<br>(6.2 to 7.1)                     | 0.2<br>(0.1 to 0.3)               | 6.0<br>(1.2 to 11.0)                              | -2.2<br>(-6.2 to 2.2)                               |
| Uterine fibroids                                           | 2.1<br>(1.8 to 2.4)                     | 0.2<br>(0.2 to 0.3)                      | < 0.05<br>(< 0.05 to 0.1)         | 1.2<br>(-8.6 to 10.8)                             | -8.6<br>(-17.2 to -0.3)                             |
| Polycystic ovarian syndrome                                | 0.1<br>(0.1 to 0.2)                     | 0.1<br>(0.1 to 0.1)                      | < 0.05<br>(< 0.05 to < 0.05)      | 0.6<br>(-12.8 to 15.8)                            | 0.2<br>(-12.7 to 14.5)                              |
| Female infertility                                         | 0.8<br>(0.4 to 1.5)                     | --                                       | < 0.05<br>(< 0.05 to < 0.05)      | 11.8<br>(-5.6 to 37.5)                            | 8.3<br>(-9.0 to 35.5)                               |
| Endometriosis                                              | < 0.05<br>(< 0.05 to 0.1)               | 0.2<br>(0.2 to 0.3)                      | < 0.05<br>(< 0.05 to < 0.05)      | 8.5<br>(-18.2 to 42.7)                            | 0.1<br>(-24.2 to 31.5)                              |
| Genital prolapse                                           | 5.6<br>(4.8 to 6.5)                     | 0.4<br>(0.3 to 0.4)                      | < 0.05<br>(< 0.05 to < 0.05)      | 13.5<br>(2.5 to 23.4)                             | -7.7<br>(-17.1 to 1.1)                              |
| Premenstrual syndrome                                      | 10.2<br>(9.5 to 10.9)                   | 3.8<br>(3.5 to 4.2)                      | 0.1<br>(0.1 to 0.1)               | 8.8<br>(0.3 to 18.2)                              | 1.4<br>(-6.5 to 9.6)                                |
| Other gynecological diseases                               | 2.1<br>(1.9 to 2.4)                     | 1.9<br>(1.6 to 2.2)                      | 0.1<br>(< 0.05 to 0.1)            | 2.7<br>(-4.8 to 10.5)                             | -1.8<br>(-8.8 to 5.5)                               |
| Hemoglobinopathies and hemolytic anaemias                  | 38.1<br>(35.9 to 40.5)                  | --                                       | 0.1<br>(< 0.05 to 0.1)            | 1.9<br>(-12.0 to 16.2)                            | -6.0<br>(-17.3 to 5.4)                              |
| Thalassemias                                               | < 0.05<br>(< 0.05 to < 0.05)            | --                                       | < 0.05<br>(< 0.05 to < 0.05)      | 50.2<br>(14.0 to 97.6)                            | 46.1<br>(12.1 to 90.4)                              |
| Thalassaemia trait                                         | 2.8<br>(1.3 to 5.7)                     | --                                       | < 0.05<br>(< 0.05 to 0.1)         | 9.4<br>(-10.2 to 34.6)                            | 2.4<br>(-15.8 to 24.3)                              |
| Sickle cell disorders                                      | < 0.05<br>(< 0.05 to < 0.05)            | --                                       | < 0.05<br>(< 0.05 to < 0.05)      | 11.7<br>(-5.0 to 22.2)                            | 6.8<br>(-8.8 to 15.3)                               |
| Sickle cell trait                                          | 0.2<br>(0.2 to 0.3)                     | --                                       | < 0.05<br>(< 0.05 to < 0.05)      | 10.8<br>(-14.3 to 43.4)                           | 10.2<br>(-10.5 to 34.6)                             |
| G6PD deficiency                                            | 8.6<br>(7.5 to 9.9)                     | --                                       | < 0.05<br>(< 0.05 to < 0.05)      | 26.3<br>(6.6 to 46.4)                             | 13.3<br>(-0.5 to 27.9)                              |
| G6PD trait                                                 | 26.0<br>(25.1 to 27.1)                  | --                                       | < 0.05<br>(< 0.05 to < 0.05)      | 33.6<br>(14.0 to 56.6)                            | 22.2<br>(7.2 to 40.4)                               |
| Other hemoglobinopathies and hemolytic anaemias            | 1.7<br>(1.5 to 1.9)                     | --                                       | < 0.05<br>(< 0.05 to < 0.05)      | -6.0<br>(-19.1 to 8.8)                            | -14.3<br>(-24.4 to -4.6)                            |
| Endocrine, metabolic, blood, and immune disorders          | 4.0<br>(3.6 to 4.3)                     | 0.5<br>(0.5 to 0.6)                      | 0.1<br>(0.1 to 0.2)               | 10.7<br>(4.1 to 17.6)                             | -3.5<br>(-8.3 to 1.4)                               |
| <b>Musculoskeletal disorders</b>                           | <b>27.4</b><br><b>(26.3 to 28.6)</b>    | <b>13.1</b><br><b>(12.0 to 14.3)</b>     | <b>2.9</b><br><b>(2.1 to 3.8)</b> | <b>12.6</b><br><b>(9.7 to 15.6)</b>               | <b>-1.9</b><br><b>(-4.1 to 0.4)</b>                 |
| Rheumatoid arthritis                                       | 0.2<br>(0.2 to 0.3)                     | < 0.05<br>(< 0.05 to < 0.05)             | 0.1<br>(< 0.05 to 0.1)            | 18.9<br>(7.5 to 31.5)                             | 3.1<br>(-6.1 to 13.2)                               |
| Osteoarthritis                                             | 7.8<br>(7.3 to 8.4)                     | 0.4<br>(0.4 to 0.4)                      | 0.5<br>(0.3 to 0.7)               | 19.9<br>(15.6 to 24.5)                            | -1.3<br>(-4.9 to 2.1)                               |
| Low back and neck pain                                     | 15.2<br>(14.2 to 16.4)                  | 6.4<br>(5.7 to 7.1)                      | 1.8<br>(1.2 to 2.3)               | 12.5<br>(8.7 to 16.6)                             | -1.2<br>(-4.2 to 2.0)                               |
| Low back pain                                              | 10.5<br>(9.3 to 11.8)                   | 5.1<br>(4.4 to 5.8)                      | 1.2<br>(0.8 to 1.6)               | 11.7<br>(6.4 to 17.5)                             | -1.8<br>(-6.1 to 2.7)                               |
| Neck pain                                                  | 5.7<br>(4.9 to 6.6)                     | 1.3<br>(1.1 to 1.5)                      | 0.6<br>(0.4 to 0.8)               | 14.2<br>(10.8 to 17.6)                            | 0.0<br>(-2.2 to 2.3)                                |
| Gout                                                       | 0.6<br>(0.6 to 0.7)                     | 0.1<br>(0.1 to 0.1)                      | < 0.05<br>(< 0.05 to < 0.05)      | 18.7<br>(2.5 to 37.5)                             | 0.0<br>(-12.9 to 14.6)                              |
| Other musculoskeletal disorders                            | 7.3<br>(6.3 to 8.4)                     | 6.2<br>(5.2 to 7.3)                      | 0.6<br>(0.4 to 0.9)               | 7.2<br>(-0.4 to 15.3)                             | -4.8<br>(-10.9 to 1.8)                              |
| <b>Other non-communicable diseases</b>                     | <b>138.8</b><br><b>(135.8 to 141.7)</b> | <b>412.7†</b><br><b>(381.4 to 444.0)</b> | <b>3.6</b><br><b>(2.5 to 5.1)</b> | <b>11.2</b><br><b>(9.6 to 12.7)</b>               | <b>-0.9</b><br><b>(-2.0 to 0.2)</b>                 |
| Congenital anomalies                                       | 2.1<br>(1.8 to 2.4)                     | --                                       | 0.2<br>(0.2 to 0.3)               | 8.9<br>(1.5 to 16.4)                              | 1.1<br>(-5.5 to 7.8)                                |
| Neural tube defects                                        | 0.1<br>(0.1 to 0.1)                     | --                                       | < 0.05<br>(< 0.05 to < 0.05)      | 11.8<br>(-4.3 to 29.4)                            | 3.5<br>(-10.3 to 18.4)                              |
| Congenital heart anomalies                                 | 0.6<br>(0.5 to 0.6)                     | --                                       | < 0.05<br>(< 0.05 to < 0.05)      | 13.3<br>(0.4 to 27.9)                             | 6.4<br>(-5.2 to 19.1)                               |
| Orofacial clefts                                           | 0.1<br>(0.1 to 0.1)                     | --                                       | < 0.05<br>(< 0.05 to < 0.05)      | 5.0<br>(-6.3 to 17.8)                             | -2.5<br>(-12.9 to 9.4)                              |
| Down's syndrome                                            | < 0.05<br>(< 0.05 to 0.1)               | --                                       | < 0.05<br>(< 0.05 to < 0.05)      | 7.5<br>(-0.1 to 17.4)                             | 1.1<br>(-6.0 to 10.5)                               |
| Turner syndrome                                            | < 0.05<br>(< 0.05 to < 0.05)            | --                                       | < 0.05<br>(< 0.05 to < 0.05)      | 12.1<br>(-30.8 to 77.6)                           | 5.8<br>(-30.6 to 60.6)                              |
| Klinefelter syndrome                                       | 0.1<br>(< 0.05 to 0.1)                  | --                                       | < 0.05<br>(< 0.05 to < 0.05)      | 8.2<br>(-21.3 to 50.1)                            | 2.6<br>(-24.1 to 41.6)                              |



| Cause                                         | Prevalence in thousands (95% UI)     | Incidence in thousands (95% UI)       | YLDs in thousands (95% UI)        |                                                   |                                                     |
|-----------------------------------------------|--------------------------------------|---------------------------------------|-----------------------------------|---------------------------------------------------|-----------------------------------------------------|
|                                               | 2016 counts                          | 2016 counts                           | 2016 counts                       | Percentage change in counts between 2006 and 2016 | Percentage change in age-standardised rates between |
| Other chromosomal abnormalities               | 0.1<br>(0.1 to 0.1)                  | --                                    | < 0.05<br>(< 0.05 to < 0.05)      | 4.1<br>(-17.7 to 30.1)                            | 0.2<br>(-20.1 to 23.7)                              |
| Congenital musculoskeletal and limb anomalies | 0.2<br>(0.2 to 0.2)                  | --                                    | < 0.05<br>(< 0.05 to < 0.05)      | 18.0<br>(5.5 to 32.1)                             | 9.1<br>(-1.2 to 21.1)                               |
| Urogenital congenital anomalies               | 0.2<br>(0.2 to 0.2)                  | --                                    | < 0.05<br>(< 0.05 to < 0.05)      | 5.4<br>(-3.3 to 15.6)                             | -0.2<br>(-8.0 to 8.7)                               |
| Digestive congenital anomalies                | 0.3<br>(0.2 to 0.3)                  | --                                    | < 0.05<br>(< 0.05 to < 0.05)      | 10.9<br>(-5.5 to 29.6)                            | 2.6<br>(-11.0 to 18.4)                              |
| Other congenital anomalies                    | 0.9<br>(0.6 to 1.3)                  | --                                    | 0.1<br>(0.1 to 0.2)               | 6.1<br>(-5.9 to 19.5)                             | -1.9<br>(-12.5 to 9.5)                              |
| Skin and subcutaneous diseases                | 61.5<br>(59.8 to 63.4)               | 133.2<br>(126.2 to 141.0)             | 1.6<br>(1.1 to 2.3)               | 8.3<br>(6.0 to 10.4)                              | 0.1<br>(-1.7 to 1.9)                                |
| Dermatitis                                    | 9.5<br>(8.8 to 10.3)                 | 10.1<br>(9.4 to 10.8)                 | 0.4<br>(0.2 to 0.6)               | 6.2<br>(2.3 to 10.3)                              | -0.1<br>(-3.4 to 3.4)                               |
| Psoriasis                                     | 1.0<br>(0.9 to 1.0)                  | 0.1<br>(0.1 to 0.2)                   | 0.1<br>(0.1 to 0.1)               | 15.4<br>(4.3 to 28.3)                             | 4.6<br>(-4.5 to 14.5)                               |
| Cellulitis                                    | 0.1<br>(0.1 to 0.1)                  | 1.0<br>(1.0 to 1.1)                   | < 0.05<br>(< 0.05 to < 0.05)      | 10.7<br>(-3.9 to 26.7)                            | 0.0<br>(-13.6 to 14.6)                              |
| Pyoderma                                      | 0.3<br>(0.3 to 0.3)                  | 5.6<br>(5.4 to 5.8)                   | < 0.05<br>(< 0.05 to < 0.05)      | 13.2<br>(3.3 to 24.8)                             | -0.6<br>(-7.8 to 7.5)                               |
| Scabies                                       | 8.0<br>(7.0 to 9.2)                  | 25.3<br>(21.7 to 29.3)                | 0.2<br>(0.1 to 0.3)               | 3.2<br>(-0.9 to 6.9)                              | -4.4<br>(-7.8 to -1.3)                              |
| Fungal skin diseases                          | 15.5<br>(14.0 to 17.3)               | 52.9<br>(47.4 to 59.2)                | 0.1<br>(< 0.05 to 0.2)            | 10.1<br>(8.4 to 12.1)                             | -0.1<br>(-1.2 to 1.1)                               |
| Viral skin diseases                           | 5.8<br>(5.4 to 6.2)                  | 8.1<br>(7.6 to 8.7)                   | 0.2<br>(0.1 to 0.3)               | 7.8<br>(4.1 to 11.5)                              | 0.1<br>(-3.0 to 3.1)                                |
| Acne vulgaris                                 | 18.0<br>(16.0 to 20.3)               | 13.1<br>(10.6 to 16.5)                | 0.5<br>(0.3 to 0.7)               | 11.2<br>(5.2 to 16.6)                             | 1.7<br>(-3.4 to 6.3)                                |
| Alopecia areata                               | 0.3<br>(0.3 to 0.3)                  | 0.6<br>(0.6 to 0.6)                   | < 0.05<br>(< 0.05 to < 0.05)      | 7.5<br>(-4.0 to 21.5)                             | 0.1<br>(-9.9 to 12.0)                               |
| Pruritus                                      | 1.5<br>(1.3 to 1.7)                  | 1.2<br>(1.1 to 1.4)                   | < 0.05<br>(< 0.05 to < 0.05)      | 11.0<br>(4.8 to 17.9)                             | 0.5<br>(-4.2 to 5.9)                                |
| Urticaria                                     | 1.9<br>(1.7 to 2.3)                  | 3.5<br>(3.0 to 4.0)                   | 0.1<br>(0.1 to 0.2)               | 5.3<br>(-1.1 to 12.2)                             | 0.2<br>(-5.4 to 5.8)                                |
| Decubitus ulcer                               | < 0.05<br>(< 0.05 to < 0.05)         | 0.1<br>(0.1 to 0.1)                   | < 0.05<br>(< 0.05 to < 0.05)      | 20.6<br>(6.6 to 36.2)                             | -2.2<br>(-14.9 to 12.3)                             |
| Other skin and subcutaneous diseases          | 10.2<br>(9.9 to 10.5)                | 11.6<br>(11.2 to 11.9)                | 0.1<br>(< 0.05 to 0.1)            | 13.5<br>(10.5 to 16.6)                            | 0.7<br>(-1.6 to 3.0)                                |
| Sense organ diseases                          | 38.8<br>(37.8 to 39.8)               | 18.7+<br>(17.4 to 20.1)               | 1.5<br>(1.1 to 2.1)               | 14.2<br>(11.6 to 16.8)                            | -1.9<br>(-3.6 to -0.2)                              |
| Glaucoma                                      | 0.1<br>(0.1 to 0.1)                  | --                                    | < 0.05<br>(< 0.05 to < 0.05)      | 27.2<br>(10.2 to 47.4)                            | 1.4<br>(-11.7 to 16.3)                              |
| Cataract                                      | 1.3<br>(1.1 to 1.5)                  | --                                    | 0.1<br>(< 0.05 to 0.1)            | 19.9<br>(12.6 to 27.3)                            | -3.3<br>(-8.6 to 2.1)                               |
| Macular degeneration                          | 0.1<br>(0.1 to 0.1)                  | --                                    | < 0.05<br>(< 0.05 to < 0.05)      | 27.2<br>(10.6 to 44.4)                            | 2.1<br>(-11.0 to 15.3)                              |
| Refraction and accommodation disorders        | 20.3<br>(19.5 to 21.2)               | --                                    | 0.4<br>(0.2 to 0.6)               | 12.3<br>(9.2 to 15.7)                             | -2.5<br>(-5.3 to 0.1)                               |
| Age-related and other hearing loss            | 24.4<br>(23.1 to 25.9)               | --                                    | 0.9<br>(0.6 to 1.2)               | 13.9<br>(10.0 to 18.0)                            | -2.0<br>(-4.4 to 0.4)                               |
| Other vision loss                             | 0.6<br>(0.5 to 0.7)                  | --                                    | < 0.05<br>(< 0.05 to 0.1)         | 19.8<br>(10.9 to 29.1)                            | 0.7<br>(-6.3 to 8.1)                                |
| Other sense organ diseases                    | 4.4<br>(4.0 to 4.7)                  | 18.7<br>(17.4 to 20.1)                | 0.1<br>(0.1 to 0.2)               | 15.7<br>(10.7 to 21.1)                            | 0.6<br>(-3.2 to 4.6)                                |
| Oral disorders                                | 97.6<br>(91.9 to 101.5)              | 260.8+<br>(231.3 to 292.6)            | 0.3<br>(0.2 to 0.4)               | 14.5<br>(11.9 to 17.1)                            | 0.1<br>(-2.1 to 2.0)                                |
| Caries of deciduous teeth                     | 13.0<br>(8.9 to 16.5)                | 57.8<br>(34.6 to 81.2)                | < 0.05<br>(< 0.05 to < 0.05)      | 3.8<br>(-9.6 to 18.7)                             | -0.4<br>(-13.4 to 13.7)                             |
| Caries of permanent teeth                     | 80.3<br>(74.8 to 85.5)               | 202.5<br>(184.8 to 221.4)             | < 0.05<br>(< 0.05 to 0.1)         | 9.2<br>(5.7 to 12.7)                              | -0.4<br>(-3.5 to 2.2)                               |
| Periodontal disease                           | 2.3<br>(1.9 to 2.8)                  | 0.3<br>(0.2 to 0.3)                   | < 0.05<br>(< 0.05 to < 0.05)      | 19.6<br>(14.0 to 24.8)                            | 0.9<br>(-3.6 to 5.2)                                |
| Edentulism and severe tooth loss              | 3.6<br>(3.1 to 4.1)                  | 0.3<br>(0.2 to 0.3)                   | 0.1<br>(0.1 to 0.1)               | 21.2<br>(16.3 to 25.8)                            | 0.1<br>(-3.5 to 4.0)                                |
| Other oral disorders                          | 3.1<br>(3.0 to 3.3)                  | --                                    | 0.1<br>(0.1 to 0.1)               | 10.4<br>(6.5 to 14.5)                             | 0.0<br>(-3.1 to 3.4)                                |
| <b>Injuries</b>                               | <b>22.5</b><br><b>(21.3 to 23.8)</b> | <b>11.8+</b><br><b>(11.2 to 12.4)</b> | <b>0.9</b><br><b>(0.6 to 1.3)</b> | <b>24.6</b><br><b>(21.4 to 28.3)</b>              | <b>11.7</b><br><b>(9.1 to 14.8)</b>                 |
| <b>Transport injuries</b>                     | <b>4.1</b><br><b>(3.8 to 4.4)</b>    | <b>1.5</b><br><b>(1.3 to 1.7)</b>     | <b>0.2</b><br><b>(0.1 to 0.3)</b> | <b>32.2</b><br><b>(29.1 to 35.8)</b>              | <b>18.5</b><br><b>(16.1 to 21.3)</b>                |
| Road injuries                                 | 2.5<br>(2.4 to 2.7)                  | 1.0<br>(0.9 to 1.2)                   | 0.1<br>(0.1 to 0.2)               | 52.3<br>(49.2 to 55.9)                            | 34.3<br>(31.7 to 37.1)                              |
| Pedestrian road injuries                      | 0.4<br>(0.4 to 0.5)                  | 0.1<br>(0.1 to 0.2)                   | < 0.05<br>(< 0.05 to < 0.05)      | 55.7<br>(52.4 to 59.3)                            | 35.9<br>(33.2 to 38.7)                              |
| Cyclist road injuries                         | 0.4<br>(0.3 to 0.4)                  | 0.2<br>(0.1 to 0.2)                   | < 0.05<br>(< 0.05 to < 0.05)      | 58.0<br>(54.4 to 61.9)                            | 39.3<br>(36.5 to 42.4)                              |
| Motorcyclist road injuries                    | 0.6<br>(0.5 to 0.7)                  | 0.2<br>(0.1 to 0.2)                   | < 0.05<br>(< 0.05 to < 0.05)      | 53.2<br>(49.7 to 57.0)                            | 35.9<br>(33.1 to 38.9)                              |
| Motor vehicle road injuries                   | 0.8<br>(0.7 to 0.9)                  | 0.4<br>(0.3 to 0.5)                   | < 0.05<br>(< 0.05 to 0.1)         | 46.8<br>(43.6 to 50.6)                            | 29.7<br>(27.1 to 32.7)                              |
| Other road injuries                           | 0.4<br>(0.3 to 0.4)                  | 0.2<br>(0.1 to 0.2)                   | < 0.05<br>(< 0.05 to < 0.05)      | 55.2<br>(52.0 to 58.8)                            | 37.1<br>(34.5 to 40.0)                              |
| Other transport injuries                      | 1.5<br>(1.3 to 1.8)                  | 0.5<br>(0.4 to 0.5)                   | 0.1<br>(0.1 to 0.1)               | 8.6<br>(5.2 to 12.3)                              | -2.6<br>(-5.3 to 0.1)                               |
| <b>Unintentional injuries</b>                 | <b>15.9</b><br><b>(14.9 to 17.0)</b> | <b>9.2</b><br><b>(8.6 to 9.8)</b>     | <b>0.5</b><br><b>(0.4 to 0.8)</b> | <b>20.6</b><br><b>(17.9 to 23.4)</b>              | <b>8.1</b><br><b>(6.2 to 10.2)</b>                  |
| Falls                                         | 3.8<br>(3.3 to 4.3)                  | 2.0<br>(1.7 to 2.4)                   | 0.1<br>(0.1 to 0.2)               | 38.4<br>(35.4 to 41.7)                            | 22.7<br>(20.4 to 25.1)                              |
| Drowning                                      | 0.2<br>(0.1 to 0.2)                  | < 0.05<br>(< 0.05 to < 0.05)          | < 0.05<br>(< 0.05 to < 0.05)      | 10.9<br>(7.5 to 14.5)                             | -2.3<br>(-5.2 to 0.6)                               |
| Fire, heat, and hot substances                | 1.7<br>(1.4 to 2.1)                  | 0.3<br>(0.2 to 0.3)                   | < 0.05<br>(< 0.05 to 0.1)         | 15.8<br>(10.6 to 21.7)                            | 3.7<br>(-0.6 to 8.5)                                |
| Poisonings                                    | 0.1<br>(0.1 to 0.1)                  | 0.1<br>(0.1 to 0.1)                   | < 0.05<br>(< 0.05 to < 0.05)      | 36.7<br>(25.6 to 50.1)                            | 24.0<br>(15.3 to 33.6)                              |
| Exposure to mechanical forces                 | 3.0<br>(2.6 to 3.6)                  | 1.4<br>(1.2 to 1.7)                   | 0.1<br>(< 0.05 to 0.1)            | 32.5<br>(29.3 to 35.8)                            | 17.6<br>(15.1 to 20.1)                              |
| Unintentional firearm injuries                | 0.1<br>(0.1 to 0.2)                  | < 0.05<br>(< 0.05 to 0.1)             | < 0.05<br>(< 0.05 to < 0.05)      | 21.5<br>(18.2 to 24.7)                            | 8.2<br>(5.6 to 10.8)                                |
| Unintentional suffocation                     | 0.2<br>(0.1 to 0.2)                  | 0.1<br>(< 0.05 to 0.1)                | < 0.05<br>(< 0.05 to < 0.05)      | 16.1<br>(12.7 to 19.9)                            | 5.0<br>(2.4 to 7.7)                                 |
| Other exposure to mechanical forces           | 2.7<br>(2.3 to 3.3)                  | 1.3<br>(1.1 to 1.6)                   | 0.1<br>(< 0.05 to 0.1)            | 35.6<br>(32.3 to 38.9)                            | 19.9<br>(17.2 to 22.3)                              |

| Cause                                                                               | Prevalence in thousands (95% UI)  | Incidence in thousands (95% UI)                      | YLDs in thousands (95% UI)                    |                                                   |                                                     |
|-------------------------------------------------------------------------------------|-----------------------------------|------------------------------------------------------|-----------------------------------------------|---------------------------------------------------|-----------------------------------------------------|
|                                                                                     | 2016 counts                       | 2016 counts                                          | 2016 counts                                   | Percentage change in counts between 2006 and 2016 | Percentage change in age-standardised rates between |
| Adverse effects of medical treatment                                                | 0.1<br>(0.1 to 0.1)               | 1.3<br>(1.1 to 1.5)                                  | < 0.05<br>(< 0.05 to < 0.05)                  | 5.9<br>(0.5 to 13.1)                              | -1.6<br>(-5.7 to 3.8)                               |
| Animal contact                                                                      | 1.0<br>(0.9 to 1.2)               | 1.4<br>(1.2 to 1.7)                                  | < 0.05<br>(< 0.05 to < 0.05)                  | 11.7<br>(5.1 to 18.9)                             | 1.0<br>(-4.3 to 6.3)                                |
| Venomous animal contact                                                             | 0.4<br>(0.3 to 0.5)               | 0.6<br>(0.5 to 0.8)                                  | < 0.05<br>(< 0.05 to < 0.05)                  | 14.1<br>(4.9 to 24.6)                             | 3.8<br>(-3.6 to 11.5)                               |
| Non-venomous animal contact                                                         | 0.6<br>(0.5 to 0.7)               | 0.8<br>(0.6 to 1.0)                                  | < 0.05<br>(< 0.05 to < 0.05)                  | 6.0<br>(2.0 to 9.4)                               | -5.1<br>(-8.2 to -2.3)                              |
| Foreign body                                                                        | 1.1<br>(0.9 to 1.3)               | 0.7<br>(0.6 to 0.8)                                  | < 0.05<br>(< 0.05 to 0.1)                     | 5.9<br>(2.2 to 9.4)                               | -4.4<br>(-6.9 to -1.8)                              |
| Pulmonary aspiration and foreign body in airway                                     | 0.7<br>(0.6 to 1.0)               | 0.4<br>(0.3 to 0.4)                                  | < 0.05<br>(< 0.05 to < 0.05)                  | 4.6<br>(0.9 to 8.3)                               | -5.4<br>(-8.0 to -2.9)                              |
| Foreign body in eyes                                                                | < 0.05<br>(< 0.05 to < 0.05)      | 0.2<br>(0.1 to 0.2)                                  | < 0.05<br>(< 0.05 to < 0.05)                  | 10.9<br>(7.2 to 15.4)                             | 0.6<br>(-2.1 to 3.6)                                |
| Foreign body in other body part                                                     | 0.4<br>(0.3 to 0.4)               | 0.2<br>(0.1 to 0.2)                                  | < 0.05<br>(< 0.05 to < 0.05)                  | 9.2<br>(4.7 to 13.4)                              | -1.8<br>(-5.0 to 1.3)                               |
| Environmental heat and cold exposure                                                | 1.9<br>(1.7 to 2.3)               | 0.7<br>(0.5 to 0.8)                                  | 0.1<br>(< 0.05 to 0.1)                        | 10.5<br>(7.9 to 13.4)                             | -1.0<br>(-3.0 to 1.3)                               |
| Other unintentional injuries                                                        | 3.1<br>(2.5 to 3.7)               | 1.4<br>(1.1 to 1.6)                                  | 0.1<br>(0.1 to 0.1)                           | 12.3<br>(10.1 to 14.9)                            | 0.5<br>(-1.1 to 2.6)                                |
| <b>Self-harm and interpersonal violence</b>                                         | <b>6.3</b><br><b>(5.7 to 7.1)</b> | <b>1.1†</b><br><b>(0.9 to 1.3)</b>                   | <b>0.1</b><br><b>(0.1 to 0.2)</b>             | <b>10.3</b><br><b>(7.8 to 13.0)</b>               | <b>-0.5</b><br><b>(-2.5 to 1.6)</b>                 |
| Self-harm                                                                           | 0.2<br>(0.2 to 0.3)               | 0.1<br>(0.1 to 0.1)                                  | < 0.05<br>(< 0.05 to < 0.05)                  | 6.7<br>(3.3 to 10.2)                              | -6.0<br>(-8.7 to -3.3)                              |
| Self-harm by firearm                                                                | < 0.05<br>(< 0.05 to < 0.05)      | < 0.05<br>(< 0.05 to < 0.05)                         | < 0.05<br>(< 0.05 to < 0.05)                  | 8.5<br>(4.7 to 12.8)                              | -4.1<br>(-7.2 to -0.6)                              |
| Self-harm by other specified means                                                  | 0.2<br>(0.2 to 0.2)               | 0.1<br>(0.1 to 0.1)                                  | < 0.05<br>(< 0.05 to < 0.05)                  | 6.6<br>(3.2 to 10.2)                              | -6.0<br>(-8.8 to -3.3)                              |
| Interpersonal violence                                                              | 6.1<br>(5.5 to 6.8)               | 1.0†<br>(0.8 to 1.1)                                 | 0.1<br>(0.1 to 0.1)                           | 10.7<br>(8.0 to 13.6)                             | 0.1<br>(-2.0 to 2.4)                                |
| Assault by firearm                                                                  | < 0.05<br>(< 0.05 to < 0.05)      | < 0.05<br>(< 0.05 to < 0.05)                         | < 0.05<br>(< 0.05 to < 0.05)                  | 6.8<br>(3.3 to 10.6)                              | -5.6<br>(-8.4 to -2.6)                              |
| Assault by sharp object                                                             | 0.3<br>(0.3 to 0.4)               | 0.1<br>(0.1 to 0.2)                                  | < 0.05<br>(< 0.05 to < 0.05)                  | 6.2<br>(2.9 to 9.5)                               | -5.7<br>(-8.4 to -3.1)                              |
| Sexual violence                                                                     | 4.4<br>(3.8 to 5.1)               | --                                                   | < 0.05<br>(< 0.05 to 0.1)                     | 1.6<br>(-3.0 to 7.1)                              | -6.2<br>(-10.0 to -2.0)                             |
| Assault by other means                                                              | 1.4<br>(1.1 to 1.7)               | 0.8<br>(0.7 to 1.0)                                  | 0.1<br>(< 0.05 to 0.1)                        | 19.3<br>(16.6 to 22.2)                            | 5.2<br>(3.1 to 7.6)                                 |
| <b>Forces of nature, conflict and terrorism, and executions and police conflict</b> | <b>0.6</b><br><b>(0.4 to 0.9)</b> | <b>&lt; 0.05†</b><br><b>(&lt; 0.05 to &lt; 0.05)</b> | <b>&lt; 0.05</b><br><b>(&lt; 0.05 to 0.1)</b> | <b>1,165.0</b><br><b>(1,099.6 to 1,237.2)</b>     | <b>975.6</b><br><b>(920.4 to 1,035.4)</b>           |
| Exposure to forces of nature                                                        | 0.6<br>(0.4 to 0.9)               | --                                                   | < 0.05<br>(< 0.05 to 0.1)                     | 1,396.2<br>(1,317.5 to 1,495.4)                   | 1,153.0<br>(1,087.9 to 1,230.9)                     |
| Conflict and terrorism                                                              | --                                | --                                                   | --                                            | --                                                | --                                                  |
| Executions and police conflict                                                      | < 0.05<br>(< 0.05 to < 0.05)      | < 0.05<br>(< 0.05 to < 0.05)                         | < 0.05<br>(< 0.05 to < 0.05)                  | 22.2<br>(16.5 to 26.7)                            | 15.5<br>(10.5 to 19.2)                              |
| <b>Impairments</b>                                                                  | --                                | --                                                   | --                                            | --                                                | --                                                  |
| Anaemia                                                                             | 45.2<br>(41.3 to 49.4)            | --                                                   | 1.2<br>(0.8 to 1.8)                           | -0.7<br>(-9.9 to 9.4)                             | -6.8<br>(-13.6 to 0.7)                              |
| Developmental intellectual disability                                               | 3.8<br>(2.9 to 4.6)               | --                                                   | 0.4<br>(0.3 to 0.5)                           | 6.2<br>(1.1 to 11.4)                              | -1.4<br>(-5.7 to 3.3)                               |
| Epilepsy                                                                            | 1.0<br>(0.6 to 1.4)               | --                                                   | 0.4<br>(0.2 to 0.6)                           | 7.7<br>(-42.1 to 86.1)                            | -0.4<br>(-47.6 to 77.2)                             |
| Guillain-Barre syndrome                                                             | < 0.05<br>(< 0.05 to < 0.05)      | --                                                   | < 0.05<br>(< 0.05 to < 0.05)                  | 10.3<br>(8.1 to 13.1)                             | -0.0<br>(-0.1 to 0.0)                               |
| Hearing loss                                                                        | 27.6<br>(26.4 to 29.1)            | --                                                   | 1.1<br>(0.8 to 1.5)                           | 12.1<br>(8.9 to 15.2)                             | -2.2<br>(-4.3 to -0.2)                              |
| Heart failure                                                                       | 0.9<br>(0.8 to 1.0)               | --                                                   | 0.1<br>(0.1 to 0.1)                           | 21.8<br>(13.3 to 30.5)                            | -1.5<br>(-8.3 to 6.0)                               |
| Infertility                                                                         | 3.6<br>(2.8 to 4.6)               | --                                                   | < 0.05<br>(< 0.05 to < 0.05)                  | 2.6<br>(-2.5 to 8.0)                              | 1.2<br>(-3.5 to 6.3)                                |
| Pelvic inflammatory disease                                                         | 0.1<br>(0.1 to 0.1)               | --                                                   | < 0.05<br>(< 0.05 to < 0.05)                  | -1.7<br>(-14.5 to 13.2)                           | -7.2<br>(-19.2 to 7.5)                              |
| Vision loss                                                                         | 23.1<br>(22.1 to 24.1)            | --                                                   | 0.6<br>(0.4 to 0.8)                           | 13.1<br>(10.0 to 16.1)                            | -2.0<br>(-4.2 to 0.1)                               |

We did not calculate incidence for the nine impairments, certain NTDs, and causes with only birth prevalence. Blank cells mean that no estimate is available.

† Incidence for aggregate causes represents the sum of the incidence of the causes below the aggregate.

‡ Incidence estimates for stroke represent first-ever stroke only.

^ Incidence of HIV/AIDS represents new infections of HIV only and does not include new infections of Tuberculosis in HIV positive cases.

SR Table 14: Prevalence, incidence, and YLDs for 2016, percentage change of YLD counts and percentage change of age-standardised YLD rates between 2006 and 2016 by cause and impairments, for all ages, Sao Tome and Principe.

| Cause                                                                                | Prevalence in thousands (95% UI)     | Incidence in thousands (95% UI)         | YLDs in thousands (95% UI)           |                                                   |                                                     |
|--------------------------------------------------------------------------------------|--------------------------------------|-----------------------------------------|--------------------------------------|---------------------------------------------------|-----------------------------------------------------|
|                                                                                      | 2016 counts                          | 2016 counts                             | 2016 counts                          | Percentage change in counts between 2006 and 2016 | Percentage change in age-standardised rates between |
| <b>All causes</b>                                                                    | <b>194.4</b><br>(193.7 to 194.9)     | <b>1,157.6†</b><br>(1,089.0 to 1,234.4) | <b>17.5</b><br>(12.9 to 23.0)        | <b>23.3</b><br>(18.8 to 27.5)                     | <b>-2.1</b><br>(-5.2 to 0.6)                        |
| <b>Communicable, maternal, neonatal, and nutritional disorders</b>                   | <b>174.2</b><br>(170.2 to 178.1)     | <b>687.4†</b><br>(628.4 to 749.2)       | <b>4.1</b><br>(2.9 to 5.9)           | <b>15.1</b><br>(4.9 to 22.5)                      | <b>-9.5</b><br>(-21.8 to -3.4)                      |
| <b>HIV/AIDS and tuberculosis</b>                                                     | <b>54.3</b><br>(46.9 to 60.7)        | <b>0.2†</b><br>(0.1 to 0.2)             | <b>0.1</b><br>( $< 0.05$ to 0.2)     | <b>-37.5</b><br>(-65.6 to 19.0)                   | <b>-51.6</b><br>(-74.8 to -3.6)                     |
| Tuberculosis                                                                         | 49.1<br>(42.3 to 56.9)               | 0.1†<br>(0.1 to 0.2)                    | $< 0.05$<br>( $< 0.05$ to $< 0.05$ ) | -1.9<br>(-17.5 to 16.0)                           | -22.1<br>(-31.9 to -11.5)                           |
| Drug-susceptible tuberculosis                                                        | 0.1<br>(0.1 to 0.1)                  | 0.1<br>(0.1 to 0.2)                     | $< 0.05$<br>( $< 0.05$ to $< 0.05$ ) | -1.7<br>(-17.8 to 16.3)                           | -22.0<br>(-31.9 to -10.9)                           |
| Multidrug-resistant tuberculosis without extensive drug resistance                   | $< 0.05$<br>( $< 0.05$ to $< 0.05$ ) | $< 0.05$<br>( $< 0.05$ to $< 0.05$ )    | $< 0.05$<br>( $< 0.05$ to $< 0.05$ ) | -11.0<br>(-69.6 to 191.2)                         | -29.2<br>(-76.2 to 130.5)                           |
| Extensively drug-resistant tuberculosis                                              | $< 0.05$<br>( $< 0.05$ to $< 0.05$ ) | $< 0.05$<br>( $< 0.05$ to $< 0.05$ )    | $< 0.05$<br>( $< 0.05$ to $< 0.05$ ) | 171.2<br>(-7.5 to 787.4)                          | 115.7<br>(-27.5 to 602.8)                           |
| Latent tuberculosis infection                                                        | 49.1<br>(42.2 to 56.8)               | --                                      | --                                   | --                                                | --                                                  |
| HIV/AIDS                                                                             | 0.6<br>(0.1 to 1.8)                  | $< 0.05^{\wedge}$<br>( $< 0.05$ to 0.1) | 0.1<br>( $< 0.05$ to 0.2)            | -45.9<br>(-71.7 to 31.4)                          | -59.1<br>(-79.8 to 15.2)                            |
| Drug-susceptible HIV/AIDS - Tuberculosis                                             | $< 0.05$<br>( $< 0.05$ to $< 0.05$ ) | $< 0.05$<br>( $< 0.05$ to $< 0.05$ )    | $< 0.05$<br>( $< 0.05$ to $< 0.05$ ) | -49.7<br>(-60.1 to -37.0)                         | -57.2<br>(-65.7 to -46.9)                           |
| Multidrug-resistant HIV/AIDS - Tuberculosis without extensive drug resistance        | $< 0.05$<br>( $< 0.05$ to $< 0.05$ ) | $< 0.05$<br>( $< 0.05$ to $< 0.05$ )    | $< 0.05$<br>( $< 0.05$ to $< 0.05$ ) | -55.5<br>(-85.2 to 44.1)                          | -62.3<br>(-87.5 to 21.9)                            |
| Extensively drug-resistant HIV/AIDS - Tuberculosis                                   | $< 0.05$<br>( $< 0.05$ to $< 0.05$ ) | $< 0.05$<br>( $< 0.05$ to $< 0.05$ )    | $< 0.05$<br>( $< 0.05$ to $< 0.05$ ) | 35.6<br>(-54.9 to 338.9)                          | 14.8<br>(-61.8 to 271.3)                            |
| HIV/AIDS resulting in other diseases                                                 | 0.6<br>(0.1 to 1.8)                  | $< 0.05$<br>( $< 0.05$ to 0.1)          | 0.1<br>( $< 0.05$ to 0.2)            | -45.7<br>(-72.2 to 70.4)                          | -59.2<br>(-80.4 to 52.7)                            |
| <b>Diarrhoea, lower respiratory infections, and other common infectious diseases</b> | <b>13.3</b><br>(12.7 to 14.1)        | <b>629.3†</b><br>(571.4 to 688.3)       | <b>0.8</b><br>(0.5 to 1.0)           | <b>15.6</b><br>(11.5 to 19.5)                     | <b>-6.3</b><br>(-9.0 to -3.6)                       |
| Diarrhoeal diseases                                                                  | 2.7<br>(2.5 to 2.9)                  | 180.6<br>(165.7 to 196.1)               | 0.3<br>(0.2 to 0.4)                  | 10.1<br>(3.9 to 17.0)                             | -9.3<br>(-13.4 to -4.5)                             |
| Intestinal infectious diseases                                                       | $< 0.05$<br>( $< 0.05$ to $< 0.05$ ) | 0.3†<br>(0.2 to 0.4)                    | $< 0.05$<br>( $< 0.05$ to $< 0.05$ ) | -6.4<br>(-23.4 to 15.0)                           | -25.1<br>(-36.2 to -11.4)                           |
| Typhoid fever                                                                        | $< 0.05$<br>( $< 0.05$ to $< 0.05$ ) | 0.2<br>(0.1 to 0.3)                     | $< 0.05$<br>( $< 0.05$ to $< 0.05$ ) | -6.4<br>(-24.6 to 16.7)                           | -25.1<br>(-37.0 to -10.3)                           |
| Paratyphoid fever                                                                    | $< 0.05$<br>( $< 0.05$ to $< 0.05$ ) | 0.1<br>( $< 0.05$ to 0.1)               | $< 0.05$<br>( $< 0.05$ to $< 0.05$ ) | 1.5<br>(-22.2 to 31.0)                            | -19.4<br>(-35.6 to -0.3)                            |
| Other intestinal infectious diseases                                                 | --                                   | --                                      | $< 0.05$<br>( $< 0.05$ to $< 0.05$ ) | -36.1<br>(-51.8 to -14.4)                         | -46.0<br>(-55.9 to -34.1)                           |
| Lower respiratory infections                                                         | 0.3<br>(0.3 to 0.3)                  | 12.4<br>(11.3 to 13.7)                  | $< 0.05$<br>( $< 0.05$ to $< 0.05$ ) | 7.9<br>(-4.7 to 21.7)                             | -8.4<br>(-16.9 to 0.6)                              |
| Upper respiratory infections                                                         | 5.5<br>(4.8 to 6.2)                  | 411.4<br>(356.3 to 468.5)               | 0.1<br>(0.1 to 0.2)                  | 24.8<br>(17.9 to 32.4)                            | -0.2<br>(-5.2 to 5.6)                               |
| Otitis media                                                                         | 4.3<br>(3.8 to 4.8)                  | 18.2<br>(14.1 to 23.1)                  | 0.1<br>(0.1 to 0.2)                  | 15.9<br>(7.4 to 24.8)                             | -6.9<br>(-13.6 to -0.6)                             |
| Meningitis                                                                           | 0.7<br>(0.6 to 0.8)                  | 0.2<br>(0.1 to 0.2)                     | 0.1<br>(0.1 to 0.1)                  | 27.1<br>(17.2 to 37.1)                            | -0.2<br>(-6.9 to 6.6)                               |
| Pneumococcal meningitis                                                              | 0.2<br>(0.2 to 0.2)                  | $< 0.05$<br>( $< 0.05$ to $< 0.05$ )    | $< 0.05$<br>( $< 0.05$ to $< 0.05$ ) | 18.7<br>(0.6 to 40.7)                             | -7.8<br>(-20.8 to 6.2)                              |
| H influenzae type B meningitis                                                       | 0.1<br>(0.1 to 0.1)                  | $< 0.05$<br>( $< 0.05$ to $< 0.05$ )    | $< 0.05$<br>( $< 0.05$ to $< 0.05$ ) | 10.4<br>(0.0 to 19.6)                             | -13.1<br>(-21.5 to -5.9)                            |
| Meningococcal infection                                                              | 0.1<br>(0.1 to 0.2)                  | $< 0.05$<br>( $< 0.05$ to 0.1)          | $< 0.05$<br>( $< 0.05$ to $< 0.05$ ) | 24.0<br>(8.2 to 42.1)                             | -3.0<br>(-15.4 to 9.3)                              |
| Other meningitis                                                                     | 0.2<br>(0.2 to 0.3)                  | 0.1<br>(0.1 to 0.1)                     | $< 0.05$<br>( $< 0.05$ to $< 0.05$ ) | 69.8<br>(52.0 to 91.9)                            | 35.7<br>(21.9 to 52.6)                              |
| Encephalitis                                                                         | 0.5<br>(0.3 to 0.7)                  | 0.2<br>(0.2 to 0.3)                     | 0.1<br>( $< 0.05$ to 0.1)            | 20.5<br>(5.9 to 37.3)                             | -6.0<br>(-16.2 to 5.2)                              |
| Diphtheria                                                                           | $< 0.05$<br>( $< 0.05$ to $< 0.05$ ) | $< 0.05$<br>( $< 0.05$ to $< 0.05$ )    | $< 0.05$<br>( $< 0.05$ to $< 0.05$ ) | -36.8<br>(-72.8 to 61.5)                          | -44.0<br>(-71.5 to 17.4)                            |
| Whooping cough                                                                       | 0.1<br>( $< 0.05$ to 0.1)            | 0.4<br>(0.3 to 0.5)                     | $< 0.05$<br>( $< 0.05$ to $< 0.05$ ) | -13.6<br>(-31.7 to 7.0)                           | -28.6<br>(-43.4 to -11.6)                           |
| Tetanus                                                                              | $< 0.05$<br>( $< 0.05$ to $< 0.05$ ) | $< 0.05$<br>( $< 0.05$ to $< 0.05$ )    | $< 0.05$<br>( $< 0.05$ to $< 0.05$ ) | -18.4<br>(-44.5 to 14.8)                          | -37.2<br>(-55.7 to -11.7)                           |
| Measles                                                                              | $< 0.05$<br>( $< 0.05$ to $< 0.05$ ) | 0.2<br>(0.1 to 0.4)                     | $< 0.05$<br>( $< 0.05$ to $< 0.05$ ) | -80.5<br>(-87.0 to -70.4)                         | -84.0<br>(-89.3 to -75.8)                           |
| Varicella and herpes zoster                                                          | 0.2<br>(0.2 to 0.2)                  | 5.4<br>(5.0 to 5.8)                     | $< 0.05$<br>( $< 0.05$ to $< 0.05$ ) | 25.8<br>(7.3 to 45.8)                             | 0.1<br>(-11.0 to 12.1)                              |
| <b>Neglected tropical diseases and malaria</b>                                       | <b>127.0</b><br>(115.5 to 138.3)     | <b>12.9†</b><br>(5.3 to 16.5)           | <b>1.2</b><br>(0.7 to 1.9)           | <b>13.3</b><br>(0.7 to 24.5)                      | <b>-11.3</b><br>(-21.0 to -2.4)                     |
| Malaria                                                                              | 0.9<br>(0.8 to 1.0)                  | 2.1<br>(2.1 to 2.1)                     | 0.1<br>(0.1 to 0.2)                  | -17.0<br>(-37.6 to 3.7)                           | -31.5<br>(-47.7 to -16.3)                           |
| Chagas disease                                                                       | --                                   | --                                      | --                                   | --                                                | --                                                  |
| Leishmaniasis                                                                        | --                                   | --                                      | --                                   | --                                                | --                                                  |
| Visceral leishmaniasis                                                               | --                                   | --                                      | --                                   | --                                                | --                                                  |
| Cutaneous and mucocutaneous leishmaniasis                                            | --                                   | --                                      | --                                   | --                                                | --                                                  |
| African trypanosomiasis                                                              | --                                   | --                                      | --                                   | --                                                | --                                                  |
| Schistosomiasis                                                                      | 20.7<br>( $< 0.05$ to 30.2)          | 9.4<br>(1.8 to 12.8)                    | 0.1<br>( $< 0.05$ to 0.3)            | -10.2<br>(-100.0 to -4.6)                         | -29.1<br>(-100.0 to -24.9)                          |
| Cysticercosis                                                                        | 0.1<br>(0.1 to 0.2)                  | --                                      | $< 0.05$<br>( $< 0.05$ to $< 0.05$ ) | -41.6<br>(-69.0 to -14.2)                         | -52.4<br>(-73.7 to -31.5)                           |
| Cystic echinococcosis                                                                | --                                   | --                                      | --                                   | --                                                | --                                                  |
| Lymphatic filariasis                                                                 | 10.1<br>(6.7 to 14.9)                | 1.4<br>(1.0 to 1.8)                     | 0.5<br>(0.2 to 1.1)                  | 33.5<br>(29.6 to 37.1)                            | 1.3<br>(-1.3 to 3.4)                                |
| Onchocerciasis                                                                       | --                                   | --                                      | --                                   | --                                                | --                                                  |
| Trachoma                                                                             | --                                   | --                                      | --                                   | --                                                | --                                                  |
| Dengue                                                                               | --                                   | --                                      | --                                   | --                                                | --                                                  |
| Yellow fever                                                                         | $< 0.05$<br>( $< 0.05$ to $< 0.05$ ) | $< 0.05$<br>( $< 0.05$ to $< 0.05$ )    | $< 0.05$<br>( $< 0.05$ to $< 0.05$ ) | -30.1<br>(-48.1 to -7.2)                          | -44.1<br>(-56.9 to -29.2)                           |
| Rabies                                                                               | $< 0.05$<br>( $< 0.05$ to $< 0.05$ ) | $< 0.05$<br>( $< 0.05$ to $< 0.05$ )    | $< 0.05$<br>( $< 0.05$ to $< 0.05$ ) | -14.1<br>(-56.3 to 69.5)                          | -30.9<br>(-58.5 to 25.1)                            |
| Intestinal nematode infections                                                       | 114.2<br>(102.2 to 127.5)            | --                                      | 0.3<br>(0.1 to 0.4)                  | 24.8<br>(-8.6 to 69.7)                            | -0.1<br>(-30.6 to 45.0)                             |
| Ascariasis                                                                           | 64.6<br>(50.7 to 82.8)               | --                                      | 0.1<br>( $< 0.05$ to 0.2)            | 25.7<br>(-24.9 to 110.6)                          | 0.9<br>(-45.0 to 83.6)                              |



| Cause                                                                   | Prevalence in thousands (95% UI)        | Incidence in thousands (95% UI)          | YLDs in thousands (95% UI)                                                                 |                                                   |                                                     |
|-------------------------------------------------------------------------|-----------------------------------------|------------------------------------------|--------------------------------------------------------------------------------------------|---------------------------------------------------|-----------------------------------------------------|
|                                                                         | 2016 counts                             | 2016 counts                              | 2016 counts                                                                                | Percentage change in counts between 2006 and 2016 | Percentage change in age-standardised rates between |
| Trichuriasis                                                            | 53.7<br>(42.0 to 68.4)                  | --                                       | 0.1<br>( $< 0.05$ to 0.1)                                                                  | 23.5<br>(-36.0 to 153.2)                          | -1.7<br>(-57.0 to 126.0)                            |
| Hookworm disease                                                        | 31.3<br>(23.8 to 41.0)                  | --                                       | 0.1<br>(0.1 to 0.2)                                                                        | 24.7<br>(-17.5 to 94.1)                           | -0.3<br>(-39.5 to 69.6)                             |
| Food-borne trematodiasis                                                | --                                      | --                                       | --                                                                                         | --                                                | --                                                  |
| Leprosy                                                                 | $< 0.05$<br>( $< 0.05$ to $< 0.05$ )    | $< 0.05$<br>( $< 0.05$ to $< 0.05$ )     | $< 0.05$<br>( $< 0.05$ to $< 0.05$ )                                                       | --                                                | --                                                  |
| Ebola virus disease                                                     | --                                      | --                                       | --                                                                                         | --                                                | --                                                  |
| Zika virus disease                                                      | --                                      | --                                       | --                                                                                         | --                                                | --                                                  |
| Guinea worm disease                                                     | --                                      | --                                       | --                                                                                         | --                                                | --                                                  |
| Other neglected tropical diseases                                       | 2.9<br>(2.7 to 3.1)                     | --                                       | 0.1<br>(0.1 to 0.1)                                                                        | 24.9<br>(9.4 to 41.5)                             | 0.7<br>(-10.8 to 13.7)                              |
| <b>Maternal disorders</b>                                               | <b>0.6</b><br><b>(0.4 to 0.7)</b>       | <b>4.1†</b><br><b>(3.6 to 4.6)</b>       | <b><math>&lt; 0.05</math></b><br><b>(<math>&lt; 0.05</math> to 0.1)</b>                    | <b>5.1</b><br><b>(-21.2 to 42.4)</b>              | <b>-17.4</b><br><b>(-37.6 to 11.3)</b>              |
| Maternal haemorrhage                                                    | 0.1<br>( $< 0.05$ to 0.1)               | 0.5<br>(0.4 to 0.7)                      | $< 0.05$<br>( $< 0.05$ to $< 0.05$ )                                                       | 18.1<br>(-19.1 to 80.2)                           | -3.8<br>(-33.8 to 45.7)                             |
| Maternal sepsis and other pregnancy related infections                  | 0.1<br>(0.1 to 0.1)                     | 0.5<br>(0.4 to 0.7)                      | $< 0.05$<br>( $< 0.05$ to $< 0.05$ )                                                       | 18.4<br>(-40.7 to 139.4)                          | -4.0<br>(-51.2 to 86.9)                             |
| Maternal hypertensive disorders                                         | 0.4<br>(0.2 to 0.5)                     | 1.6<br>(1.3 to 1.9)                      | $< 0.05$<br>( $< 0.05$ to $< 0.05$ )                                                       | 16.4<br>(-28.0 to 92.4)                           | -5.5<br>(-41.9 to 56.4)                             |
| Maternal obstructed labour and uterine rupture                          | $< 0.05$<br>( $< 0.05$ to $< 0.05$ )    | 0.3<br>(0.2 to 0.4)                      | $< 0.05$<br>( $< 0.05$ to $< 0.05$ )                                                       | -19.6<br>(-42.6 to 11.0)                          | -39.6<br>(-55.9 to -17.9)                           |
| Maternal abortion, miscarriage, and ectopic pregnancy                   | $< 0.05$<br>( $< 0.05$ to $< 0.05$ )    | 1.2<br>(0.9 to 1.5)                      | $< 0.05$<br>( $< 0.05$ to $< 0.05$ )                                                       | 15.4<br>(-38.7 to 127.7)                          | -7.6<br>(-51.1 to 78.0)                             |
| Other maternal disorders                                                | --                                      | --                                       | $< 0.05$<br>( $< 0.05$ to $< 0.05$ )                                                       | 0.0<br>(-24.9 to 35.3)                            | -21.3<br>(-40.5 to 6.0)                             |
| <b>Neonatal disorders</b>                                               | <b>2.8</b><br><b>(2.3 to 3.4)</b>       | --                                       | <b>0.5</b><br><b>(0.3 to 0.9)</b>                                                          | <b>31.1</b><br><b>(5.2 to 60.0)</b>               | <b>7.5</b><br><b>(-14.2 to 31.9)</b>                |
| Neonatal preterm birth complications                                    | 1.8<br>(1.4 to 2.4)                     | --                                       | 0.1<br>(0.1 to 0.2)                                                                        | -10.2<br>(-29.8 to 16.3)                          | -27.2<br>(-42.5 to -7.2)                            |
| Neonatal encephalopathy due to birth asphyxia and trauma                | 0.7<br>(0.4 to 1.4)                     | --                                       | 0.1<br>( $< 0.05$ to 0.3)                                                                  | 68.7<br>(-19.5 to 275.8)                          | 37.2<br>(-34.7 to 202.6)                            |
| Neonatal sepsis and other neonatal infections                           | 0.5<br>(0.2 to 1.2)                     | --                                       | 0.2<br>(0.1 to 0.6)                                                                        | 67.8<br>(29.7 to 179.2)                           | 38.3<br>(5.9 to 143.6)                              |
| Hemolytic disease and other neonatal jaundice                           | $< 0.05$<br>( $< 0.05$ to $< 0.05$ )    | --                                       | $< 0.05$<br>( $< 0.05$ to $< 0.05$ )                                                       | 22.0<br>(4.4 to 43.2)                             | -3.8<br>(-14.8 to 8.5)                              |
| Other neonatal disorders                                                | --                                      | --                                       | $< 0.05$<br>( $< 0.05$ to 0.1)                                                             | 19.1<br>(-2.8 to 43.6)                            | -1.7<br>(-19.9 to 18.8)                             |
| <b>Nutritional deficiencies</b>                                         | <b>59.1</b><br><b>(55.6 to 63.3)</b>    | <b>15.5†</b><br><b>(10.7 to 23.2)</b>    | <b>1.5</b><br><b>(1.0 to 2.1)</b>                                                          | <b>16.7</b><br><b>(7.6 to 27.2)</b>               | <b>-6.8</b><br><b>(-12.5 to -0.6)</b>               |
| Protein-energy malnutrition                                             | 1.9<br>(1.5 to 2.3)                     | 1.2<br>(1.0 to 1.5)                      | 0.1<br>( $< 0.05$ to 0.1)                                                                  | -28.9<br>(-50.6 to 1.9)                           | -41.5<br>(-59.4 to -16.0)                           |
| Iodine deficiency                                                       | 2.7<br>(2.0 to 3.5)                     | 0.1<br>(0.1 to 0.1)                      | 0.1<br>( $< 0.05$ to 0.1)                                                                  | 23.2<br>(7.8 to 42.8)                             | -2.5<br>(-13.0 to 11.4)                             |
| Vitamin A deficiency                                                    | 16.1<br>(10.8 to 23.4)                  | 14.1<br>(9.3 to 21.9)                    | $< 0.05$<br>( $< 0.05$ to $< 0.05$ )                                                       | 21.4<br>(-8.6 to 60.1)                            | -3.0<br>(-25.6 to 24.0)                             |
| Iron-deficiency anaemia                                                 | 47.2<br>(44.6 to 50.2)                  | --                                       | 1.3<br>(0.8 to 1.9)                                                                        | 20.4<br>(10.7 to 31.6)                            | -5.2<br>(-11.4 to 1.9)                              |
| Other nutritional deficiencies                                          | --                                      | --                                       | $< 0.05$<br>( $< 0.05$ to $< 0.05$ )                                                       | -29.9<br>(-52.3 to 1.9)                           | -42.4<br>(-60.8 to -16.0)                           |
| <b>Other communicable, maternal, neonatal, and nutritional diseases</b> | <b>60.7</b><br><b>(56.1 to 65.9)</b>    | <b>25.5</b><br><b>(21.8 to 30.4)</b>     | <b>0.1</b><br><b>(0.1 to 0.2)</b>                                                          | <b>28.5</b><br><b>(20.3 to 37.4)</b>              | <b>0.2</b><br><b>(-5.4 to 5.8)</b>                  |
| Sexually transmitted diseases excluding HIV                             | 33.4<br>(31.1 to 36.0)                  | 20.0<br>(16.8 to 23.6)                   | 0.1<br>( $< 0.05$ to 0.1)                                                                  | 30.4<br>(20.8 to 40.7)                            | 1.1<br>(-5.4 to 8.0)                                |
| Syphilis                                                                | 1.8<br>(1.5 to 2.2)                     | 1.3<br>(1.0 to 1.6)                      | $< 0.05$<br>( $< 0.05$ to $< 0.05$ )                                                       | 35.0<br>(18.6 to 55.1)                            | 4.6<br>(-9.2 to 21.7)                               |
| Chlamydial infection                                                    | 1.9<br>(1.2 to 2.7)                     | 1.8<br>(1.3 to 2.6)                      | $< 0.05$<br>( $< 0.05$ to $< 0.05$ )                                                       | 28.9<br>(10.0 to 51.7)                            | 0.8<br>(-13.5 to 17.3)                              |
| Gonococcal infection                                                    | 1.9<br>(1.2 to 2.7)                     | 6.5<br>(3.8 to 9.9)                      | $< 0.05$<br>( $< 0.05$ to $< 0.05$ )                                                       | 31.9<br>(15.7 to 53.4)                            | 2.7<br>(-9.5 to 17.9)                               |
| Trichomoniasis                                                          | 6.8<br>(5.5 to 8.1)                     | 6.2<br>(5.0 to 7.6)                      | $< 0.05$<br>( $< 0.05$ to $< 0.05$ )                                                       | 26.4<br>(18.4 to 35.4)                            | -1.2<br>(-7.3 to 4.9)                               |
| Genital herpes                                                          | 24.3<br>(21.1 to 28.4)                  | 2.5<br>(2.1 to 3.0)                      | $< 0.05$<br>( $< 0.05$ to $< 0.05$ )                                                       | 29.7<br>(17.6 to 42.8)                            | 0.1<br>(-7.5 to 8.5)                                |
| Other sexually transmitted diseases                                     | 1.0<br>(0.7 to 1.3)                     | 1.7<br>(1.4 to 2.0)                      | $< 0.05$<br>( $< 0.05$ to $< 0.05$ )                                                       | 31.3<br>(16.4 to 48.0)                            | 0.5<br>(-10.2 to 12.6)                              |
| Hepatitis                                                               | 31.3<br>(25.2 to 38.8)                  | 5.6<br>(3.7 to 8.2)                      | $< 0.05$<br>( $< 0.05$ to $< 0.05$ )                                                       | -19.9<br>(-38.6 to 2.5)                           | -30.6<br>(-44.7 to -13.2)                           |
| Acute hepatitis A                                                       | 0.1<br>( $< 0.05$ to 0.3)               | 1.4<br>(0.1 to 3.9)                      | $< 0.05$<br>( $< 0.05$ to $< 0.05$ )                                                       | -24.2<br>(-81.9 to 306.4)                         | -32.6<br>(-79.0 to 156.8)                           |
| Hepatitis B                                                             | 25.2<br>(18.9 to 32.6)                  | 3.6<br>(2.6 to 4.9)                      | $< 0.05$<br>( $< 0.05$ to $< 0.05$ )                                                       | -18.9<br>(-37.5 to 5.6)                           | -29.7<br>(-45.0 to -11.1)                           |
| Hepatitis C                                                             | 6.0<br>(5.3 to 6.8)                     | 0.4<br>(0.4 to 0.5)                      | $< 0.05$<br>( $< 0.05$ to $< 0.05$ )                                                       | 13.8<br>(-39.7 to 99.0)                           | -11.2<br>(-42.4 to 31.5)                            |
| Acute hepatitis E                                                       | $< 0.05$<br>( $< 0.05$ to $< 0.05$ )    | 0.2<br>(0.2 to 0.3)                      | $< 0.05$<br>( $< 0.05$ to $< 0.05$ )                                                       | -37.5<br>(-55.9 to -11.9)                         | -42.5<br>(-56.1 to -26.2)                           |
| Other infectious diseases                                               | 2.1<br>(1.9 to 2.2)                     | $< 0.05$<br>( $< 0.05$ to $< 0.05$ )     | 0.1<br>( $< 0.05$ to 0.1)                                                                  | 32.9<br>(17.2 to 50.9)                            | 5.0<br>(-6.2 to 18.2)                               |
| <b>Non-communicable diseases</b>                                        | <b>174.8</b><br><b>(173.0 to 176.5)</b> | <b>454.4†</b><br><b>(414.5 to 496.0)</b> | <b>12.4</b><br><b>(9.2 to 16.2)</b>                                                        | <b>25.8</b><br><b>(20.5 to 31.4)</b>              | <b>-0.5</b><br><b>(-3.4 to 2.7)</b>                 |
| <b>Neoplasms</b>                                                        | <b>0.2</b><br><b>(0.2 to 0.3)</b>       | <b>0.1</b><br><b>(0.1 to 0.1)</b>        | <b><math>&lt; 0.05</math></b><br><b>(<math>&lt; 0.05</math> to <math>&lt; 0.05</math>)</b> | <b>17.9</b><br><b>(10.1 to 26.8)</b>              | <b>-3.1</b><br><b>(-8.6 to 3.3)</b>                 |
| Lip and oral cavity cancer                                              | $< 0.05$<br>( $< 0.05$ to $< 0.05$ )    | $< 0.05$<br>( $< 0.05$ to $< 0.05$ )     | $< 0.05$<br>( $< 0.05$ to $< 0.05$ )                                                       | 20.8<br>(6.7 to 37.0)                             | 0.0<br>(-12.0 to 13.8)                              |
| Nasopharynx cancer                                                      | $< 0.05$<br>( $< 0.05$ to $< 0.05$ )    | $< 0.05$<br>( $< 0.05$ to $< 0.05$ )     | $< 0.05$<br>( $< 0.05$ to $< 0.05$ )                                                       | 30.5<br>(16.7 to 47.4)                            | -2.7<br>(-12.5 to 8.6)                              |
| Other pharynx cancer                                                    | $< 0.05$<br>( $< 0.05$ to $< 0.05$ )    | $< 0.05$<br>( $< 0.05$ to $< 0.05$ )     | $< 0.05$<br>( $< 0.05$ to $< 0.05$ )                                                       | 11.0<br>(-2.3 to 25.4)                            | -8.0<br>(-19.3 to 4.0)                              |
| Oesophageal cancer                                                      | $< 0.05$<br>( $< 0.05$ to $< 0.05$ )    | $< 0.05$<br>( $< 0.05$ to $< 0.05$ )     | $< 0.05$<br>( $< 0.05$ to $< 0.05$ )                                                       | 30.7<br>(13.9 to 49.1)                            | 9.3<br>(-5.3 to 26.7)                               |
| Stomach cancer                                                          | $< 0.05$<br>( $< 0.05$ to $< 0.05$ )    | $< 0.05$<br>( $< 0.05$ to $< 0.05$ )     | $< 0.05$<br>( $< 0.05$ to $< 0.05$ )                                                       | 0.2<br>(-13.7 to 16.3)                            | -12.7<br>(-25.2 to 1.8)                             |
| Colon and rectum cancer                                                 | $< 0.05$<br>( $< 0.05$ to $< 0.05$ )    | $< 0.05$<br>( $< 0.05$ to $< 0.05$ )     | $< 0.05$<br>( $< 0.05$ to $< 0.05$ )                                                       | 16.4<br>(-1.2 to 35.0)                            | 2.6<br>(-13.0 to 19.7)                              |
| Liver cancer                                                            | $< 0.05$<br>( $< 0.05$ to $< 0.05$ )    | $< 0.05$<br>( $< 0.05$ to $< 0.05$ )     | $< 0.05$<br>( $< 0.05$ to $< 0.05$ )                                                       | 15.4<br>(1.9 to 29.9)                             | -3.3<br>(-14.2 to 9.3)                              |
| Liver cancer due to hepatitis B                                         | $< 0.05$<br>( $< 0.05$ to $< 0.05$ )    | $< 0.05$<br>( $< 0.05$ to $< 0.05$ )     | $< 0.05$<br>( $< 0.05$ to $< 0.05$ )                                                       | 19.3<br>(5.1 to 35.5)                             | -1.5<br>(-13.0 to 11.4)                             |



| Cause                                              | Prevalence in thousands (95% UI)     | Incidence in thousands (95% UI)    | YLDs in thousands (95% UI)        |                                                   |                                                     |
|----------------------------------------------------|--------------------------------------|------------------------------------|-----------------------------------|---------------------------------------------------|-----------------------------------------------------|
|                                                    | 2016 counts                          | 2016 counts                        | 2016 counts                       | Percentage change in counts between 2006 and 2016 | Percentage change in age-standardised rates between |
| Liver cancer due to hepatitis C                    | < 0.05<br>(< 0.05 to < 0.05)         | < 0.05<br>(< 0.05 to < 0.05)       | < 0.05<br>(< 0.05 to < 0.05)      | 10.8<br>(-5.7 to 31.0)                            | -1.9<br>(-15.6 to 14.1)                             |
| Liver cancer due to alcohol use                    | < 0.05<br>(< 0.05 to < 0.05)         | < 0.05<br>(< 0.05 to < 0.05)       | < 0.05<br>(< 0.05 to < 0.05)      | 1.1<br>(-12.0 to 15.9)                            | -12.5<br>(-23.8 to 0.3)                             |
| Liver cancer due to other causes                   | < 0.05<br>(< 0.05 to < 0.05)         | < 0.05<br>(< 0.05 to < 0.05)       | < 0.05<br>(< 0.05 to < 0.05)      | 20.7<br>(6.0 to 37.3)                             | 1.1<br>(-10.7 to 14.6)                              |
| Gallbladder and biliary tract cancer               | < 0.05<br>(< 0.05 to < 0.05)         | < 0.05<br>(< 0.05 to < 0.05)       | < 0.05<br>(< 0.05 to < 0.05)      | 2.4<br>(-8.3 to 13.5)                             | -10.0<br>(-18.1 to -0.6)                            |
| Pancreatic cancer                                  | < 0.05<br>(< 0.05 to < 0.05)         | < 0.05<br>(< 0.05 to < 0.05)       | < 0.05<br>(< 0.05 to < 0.05)      | 15.8<br>(5.5 to 26.6)                             | 3.1<br>(-5.7 to 12.5)                               |
| Larynx cancer                                      | < 0.05<br>(< 0.05 to < 0.05)         | < 0.05<br>(< 0.05 to < 0.05)       | < 0.05<br>(< 0.05 to < 0.05)      | 13.0<br>(-2.1 to 30.5)                            | -4.0<br>(-17.7 to 11.0)                             |
| Tracheal, bronchus, and lung cancer                | < 0.05<br>(< 0.05 to < 0.05)         | < 0.05<br>(< 0.05 to < 0.05)       | < 0.05<br>(< 0.05 to < 0.05)      | 16.4<br>(-3.8 to 39.8)                            | 5.2<br>(-13.7 to 28.4)                              |
| Malignant skin melanoma                            | < 0.05<br>(< 0.05 to < 0.05)         | < 0.05<br>(< 0.05 to < 0.05)       | < 0.05<br>(< 0.05 to < 0.05)      | 30.0<br>(13.5 to 44.0)                            | 4.6<br>(-8.0 to 15.5)                               |
| Non-melanoma skin cancer                           | < 0.05<br>(< 0.05 to < 0.05)         | < 0.05<br>(< 0.05 to < 0.05)       | < 0.05<br>(< 0.05 to < 0.05)      | 11.9<br>(-38.0 to 58.7)                           | -4.4<br>(-50.3 to 38.6)                             |
| Non-melanoma skin cancer (squamous-cell carcinoma) | < 0.05<br>(< 0.05 to < 0.05)         | < 0.05<br>(< 0.05 to < 0.05)       | < 0.05<br>(< 0.05 to < 0.05)      | 9.7<br>(-43.3 to 60.8)                            | -5.1<br>(-53.5 to 41.7)                             |
| Non-melanoma skin cancer (basal-cell carcinoma)    | < 0.05<br>(< 0.05 to < 0.05)         | < 0.05<br>(< 0.05 to < 0.05)       | < 0.05<br>(< 0.05 to < 0.05)      | 32.6<br>(10.7 to 55.1)                            | 4.2<br>(-5.4 to 15.0)                               |
| Breast cancer                                      | < 0.05<br>(< 0.05 to < 0.05)         | < 0.05<br>(< 0.05 to < 0.05)       | < 0.05<br>(< 0.05 to < 0.05)      | 34.4<br>(6.1 to 72.6)                             | 0.1<br>(-21.0 to 27.4)                              |
| Cervical cancer                                    | 0.1<br>(< 0.05 to 0.1)               | < 0.05<br>(< 0.05 to < 0.05)       | < 0.05<br>(< 0.05 to < 0.05)      | 22.0<br>(-2.6 to 52.7)                            | -12.8<br>(-29.4 to 8.8)                             |
| Uterine cancer                                     | < 0.05<br>(< 0.05 to < 0.05)         | < 0.05<br>(< 0.05 to < 0.05)       | < 0.05<br>(< 0.05 to < 0.05)      | 8.0<br>(-16.4 to 40.4)                            | -3.0<br>(-24.3 to 24.7)                             |
| Ovarian cancer                                     | < 0.05<br>(< 0.05 to < 0.05)         | < 0.05<br>(< 0.05 to < 0.05)       | < 0.05<br>(< 0.05 to < 0.05)      | 36.4<br>(10.7 to 69.3)                            | 5.4<br>(-18.1 to 35.7)                              |
| Prostate cancer                                    | < 0.05<br>(< 0.05 to < 0.05)         | < 0.05<br>(< 0.05 to < 0.05)       | < 0.05<br>(< 0.05 to < 0.05)      | 2.2<br>(-17.4 to 24.6)                            | -1.2<br>(-18.3 to 18.7)                             |
| Testicular cancer                                  | < 0.05<br>(< 0.05 to < 0.05)         | < 0.05<br>(< 0.05 to < 0.05)       | < 0.05<br>(< 0.05 to < 0.05)      | 12.3<br>(-9.4 to 44.6)                            | -9.7<br>(-28.0 to 16.4)                             |
| Kidney cancer                                      | < 0.05<br>(< 0.05 to < 0.05)         | < 0.05<br>(< 0.05 to < 0.05)       | < 0.05<br>(< 0.05 to < 0.05)      | 34.0<br>(-12.2 to 102.5)                          | 10.2<br>(-11.5 to 36.6)                             |
| Bladder cancer                                     | < 0.05<br>(< 0.05 to < 0.05)         | < 0.05<br>(< 0.05 to < 0.05)       | < 0.05<br>(< 0.05 to < 0.05)      | 19.4<br>(1.6 to 39.2)                             | 3.0<br>(-11.4 to 18.5)                              |
| Brain and nervous system cancer                    | < 0.05<br>(< 0.05 to < 0.05)         | < 0.05<br>(< 0.05 to < 0.05)       | < 0.05<br>(< 0.05 to < 0.05)      | 29.7<br>(19.3 to 42.2)                            | 3.7<br>(-5.7 to 13.7)                               |
| Thyroid cancer                                     | < 0.05<br>(< 0.05 to < 0.05)         | < 0.05<br>(< 0.05 to < 0.05)       | < 0.05<br>(< 0.05 to < 0.05)      | 21.5<br>(5.0 to 37.9)                             | -5.8<br>(-17.5 to 6.0)                              |
| Mesothelioma                                       | < 0.05<br>(< 0.05 to < 0.05)         | < 0.05<br>(< 0.05 to < 0.05)       | < 0.05<br>(< 0.05 to < 0.05)      | 11.6<br>(-1.2 to 26.9)                            | -13.1<br>(-22.8 to -1.6)                            |
| Hodgkin lymphoma                                   | < 0.05<br>(< 0.05 to < 0.05)         | < 0.05<br>(< 0.05 to < 0.05)       | < 0.05<br>(< 0.05 to < 0.05)      | 1.4<br>(-7.3 to 12.9)                             | -17.7<br>(-25.8 to -8.8)                            |
| Non-Hodgkin's lymphoma                             | < 0.05<br>(< 0.05 to < 0.05)         | < 0.05<br>(< 0.05 to < 0.05)       | < 0.05<br>(< 0.05 to < 0.05)      | 21.8<br>(8.8 to 35.9)                             | -1.8<br>(-10.9 to 9.0)                              |
| Multiple myeloma                                   | < 0.05<br>(< 0.05 to < 0.05)         | < 0.05<br>(< 0.05 to < 0.05)       | < 0.05<br>(< 0.05 to < 0.05)      | 20.6<br>(8.7 to 31.6)                             | 2.0<br>(-7.9 to 12.4)                               |
| Leukaemia                                          | < 0.05<br>(< 0.05 to < 0.05)         | < 0.05<br>(< 0.05 to < 0.05)       | < 0.05<br>(< 0.05 to < 0.05)      | 13.2<br>(1.5 to 28.6)                             | -7.1<br>(-15.3 to 3.5)                              |
| Acute lymphoid leukaemia                           | < 0.05<br>(< 0.05 to < 0.05)         | < 0.05<br>(< 0.05 to < 0.05)       | < 0.05<br>(< 0.05 to < 0.05)      | 14.0<br>(-6.1 to 40.0)                            | -7.6<br>(-20.3 to 7.1)                              |
| Chronic lymphoid leukaemia                         | < 0.05<br>(< 0.05 to < 0.05)         | < 0.05<br>(< 0.05 to < 0.05)       | < 0.05<br>(< 0.05 to < 0.05)      | 2.9<br>(-13.1 to 24.0)                            | -7.1<br>(-23.0 to 12.8)                             |
| Acute myeloid leukaemia                            | < 0.05<br>(< 0.05 to < 0.05)         | < 0.05<br>(< 0.05 to < 0.05)       | < 0.05<br>(< 0.05 to < 0.05)      | 22.7<br>(4.5 to 46.0)                             | 1.0<br>(-8.9 to 11.9)                               |
| Chronic myeloid leukaemia                          | < 0.05<br>(< 0.05 to < 0.05)         | < 0.05<br>(< 0.05 to < 0.05)       | < 0.05<br>(< 0.05 to < 0.05)      | 20.9<br>(1.3 to 42.1)                             | -9.5<br>(-23.2 to 5.0)                              |
| Other leukaemia                                    | < 0.05<br>(< 0.05 to < 0.05)         | < 0.05<br>(< 0.05 to < 0.05)       | < 0.05<br>(< 0.05 to < 0.05)      | 3.7<br>(-13.6 to 29.7)                            | -12.7<br>(-25.9 to 3.9)                             |
| Other neoplasms                                    | 0.1<br>(< 0.05 to 0.1)               | < 0.05<br>(< 0.05 to < 0.05)       | < 0.05<br>(< 0.05 to < 0.05)      | 15.7<br>(-7.5 to 45.5)                            | -1.6<br>(-14.7 to 14.7)                             |
| <b>Cardiovascular diseases</b>                     | <b>10.2</b><br><b>(9.6 to 10.9)</b>  | <b>0.7†</b><br><b>(0.7 to 0.8)</b> | <b>0.6</b><br><b>(0.4 to 0.8)</b> | <b>19.3</b><br><b>(14.4 to 24.9)</b>              | <b>-0.6</b><br><b>(-4.1 to 3.6)</b>                 |
| Rheumatic heart disease                            | 1.6<br>(1.4 to 1.8)                  | 0.1<br>(0.1 to 0.1)                | 0.1<br>(< 0.05 to 0.1)            | 25.1<br>(14.0 to 36.1)                            | -2.4<br>(-10.5 to 6.0)                              |
| Ischaemic heart disease                            | 2.0<br>(1.9 to 2.1)                  | 0.3<br>(0.2 to 0.3)                | 0.1<br>(0.1 to 0.1)               | 18.2<br>(11.3 to 25.5)                            | -3.5<br>(-7.9 to 1.5)                               |
| Cerebrovascular disease                            | 0.8<br>(0.7 to 0.8)                  | 0.1‡<br>(0.1 to 0.1)               | 0.1<br>(0.1 to 0.1)               | 13.1<br>(5.1 to 21.6)                             | -2.5<br>(-9.6 to 5.2)                               |
| Ischaemic stroke                                   | 0.7<br>(0.6 to 0.7)                  | 0.1‡<br>(0.1 to 0.1)               | 0.1<br>(0.1 to 0.1)               | 12.8<br>(3.8 to 22.8)                             | -2.2<br>(-10.5 to 6.4)                              |
| Hemorrhagic stroke                                 | 0.2<br>(0.1 to 0.2)                  | < 0.05‡<br>(< 0.05 to < 0.05)      | < 0.05<br>(< 0.05 to < 0.05)      | 14.7<br>(2.4 to 29.5)                             | -3.5<br>(-14.7 to 9.9)                              |
| Hypertensive heart disease                         | 0.2<br>(0.1 to 0.2)                  | --                                 | < 0.05<br>(< 0.05 to < 0.05)      | 11.5<br>(-1.2 to 27.0)                            | -3.9<br>(-13.1 to 7.2)                              |
| Cardiomyopathy and myocarditis                     | 0.1<br>(0.1 to 0.1)                  | < 0.05†<br>(< 0.05 to 0.1)         | < 0.05<br>(< 0.05 to < 0.05)      | 30.2<br>(15.6 to 47.6)                            | 1.4<br>(-10.8 to 16.4)                              |
| Myocarditis                                        | < 0.05<br>(< 0.05 to < 0.05)         | < 0.05<br>(< 0.05 to 0.1)          | < 0.05<br>(< 0.05 to < 0.05)      | 32.1<br>(21.6 to 45.7)                            | 3.4<br>(-7.9 to 17.1)                               |
| Alcoholic cardiomyopathy                           | < 0.05<br>(< 0.05 to < 0.05)         | --                                 | < 0.05<br>(< 0.05 to < 0.05)      | 42.9<br>(7.4 to 88.2)                             | 3.7<br>(-21.5 to 35.5)                              |
| Other cardiomyopathy                               | 0.1<br>(0.1 to 0.1)                  | --                                 | < 0.05<br>(< 0.05 to < 0.05)      | 26.8<br>(8.3 to 48.8)                             | 0.4<br>(-13.9 to 17.8)                              |
| Atrial fibrillation and flutter                    | 0.4<br>(0.4 to 0.5)                  | < 0.05<br>(< 0.05 to < 0.05)       | < 0.05<br>(< 0.05 to < 0.05)      | 11.2<br>(2.3 to 20.6)                             | 0.2<br>(-6.7 to 7.3)                                |
| Peripheral vascular disease                        | 1.5<br>(1.3 to 1.7)                  | 0.1<br>(0.1 to 0.2)                | < 0.05<br>(< 0.05 to < 0.05)      | 1.6<br>(-7.2 to 11.8)                             | -2.5<br>(-9.3 to 5.4)                               |
| Endocarditis                                       | < 0.05<br>(< 0.05 to < 0.05)         | < 0.05<br>(< 0.05 to < 0.05)       | < 0.05<br>(< 0.05 to < 0.05)      | 16.2<br>(2.6 to 31.8)                             | 3.1<br>(-11.6 to 20.7)                              |
| Other cardiovascular and circulatory diseases      | 4.9<br>(4.1 to 5.9)                  | --                                 | 0.3<br>(0.2 to 0.4)               | 22.8<br>(12.7 to 34.3)                            | 2.8<br>(-5.1 to 11.4)                               |
| <b>Chronic respiratory diseases</b>                | <b>11.2</b><br><b>(10.7 to 11.8)</b> | <b>2.3†</b><br><b>(2.1 to 2.5)</b> | <b>0.5</b><br><b>(0.4 to 0.7)</b> | <b>23.8</b><br><b>(18.7 to 29.4)</b>              | <b>-1.7</b><br><b>(-5.3 to 2.5)</b>                 |
| Chronic obstructive pulmonary disease              | 2.3<br>(2.2 to 2.4)                  | 0.2<br>(0.2 to 0.2)                | 0.2<br>(0.1 to 0.2)               | 18.6<br>(10.1 to 27.6)                            | -4.5<br>(-10.9 to 2.6)                              |
| Pneumoconiosis                                     | < 0.05<br>(< 0.05 to < 0.05)         | < 0.05<br>(< 0.05 to < 0.05)       | < 0.05<br>(< 0.05 to < 0.05)      | 28.2<br>(20.5 to 36.6)                            | -0.0<br>(-5.3 to 5.9)                               |
| Silicosis                                          | < 0.05<br>(< 0.05 to < 0.05)         | < 0.05<br>(< 0.05 to < 0.05)       | < 0.05<br>(< 0.05 to < 0.05)      | 42.7<br>(29.6 to 54.3)                            | 2.1<br>(-5.1 to 8.6)                                |

| Cause                                                          | Prevalence in thousands (95% UI)  | Incidence in thousands (95% UI)   | YLDs in thousands (95% UI)        |                                                                     |                                                                      |
|----------------------------------------------------------------|-----------------------------------|-----------------------------------|-----------------------------------|---------------------------------------------------------------------|----------------------------------------------------------------------|
|                                                                | 2016 counts<br>(< 0.05 to < 0.05) | 2016 counts<br>(< 0.05 to < 0.05) | 2016 counts<br>(< 0.05 to < 0.05) | Percentage change in counts between 2006 and 2016<br>(19.2 to 39.1) | Percentage change in age-standardised rates between<br>(-4.5 to 7.6) |
| Asbestosis                                                     | < 0.05<br>(< 0.05 to < 0.05)      | < 0.05<br>(< 0.05 to < 0.05)      | < 0.05<br>(< 0.05 to < 0.05)      | 28.5<br>(19.2 to 39.1)                                              | 1.4<br>(-4.5 to 7.6)                                                 |
| Coal workers pneumoconiosis                                    | --                                | --                                | --                                | --                                                                  | --                                                                   |
| Other pneumoconiosis                                           | < 0.05<br>(< 0.05 to < 0.05)      | < 0.05<br>(< 0.05 to < 0.05)      | < 0.05<br>(< 0.05 to < 0.05)      | 25.8<br>(13.5 to 39.2)                                              | -1.5<br>(-11.4 to 10.1)                                              |
| Asthma                                                         | 9.0<br>(8.2 to 9.8)               | 2.1<br>(1.9 to 2.3)               | 0.4<br>(0.2 to 0.5)               | 24.8<br>(18.5 to 31.8)                                              | 0.1<br>(-4.1 to 4.9)                                                 |
| Interstitial lung disease and pulmonary sarcoidosis            | < 0.05<br>(< 0.05 to < 0.05)      | < 0.05<br>(< 0.05 to < 0.05)      | < 0.05<br>(< 0.05 to < 0.05)      | 19.4<br>(12.6 to 26.6)                                              | -2.9<br>(-9.5 to 4.3)                                                |
| Other chronic respiratory diseases                             | --                                | --                                | < 0.05<br>(< 0.05 to < 0.05)      | 64.7<br>(29.1 to 113.8)                                             | 27.8<br>(8.5 to 52.6)                                                |
| <b>Cirrhosis and other chronic liver diseases</b>              | <b>0.6<br/>(0.6 to 0.6)</b>       | <b>0.1<br/>(0.1 to 0.1)</b>       | <b>0.1<br/>(&lt; 0.05 to 0.1)</b> | <b>21.5<br/>(9.5 to 34.3)</b>                                       | <b>-2.6<br/>(-10.1 to 4.5)</b>                                       |
| Cirrhosis and other chronic liver diseases due to hepatitis B  | 0.2<br>(0.2 to 0.2)               | < 0.05<br>(< 0.05 to < 0.05)      | < 0.05<br>(< 0.05 to < 0.05)      | 25.8<br>(9.3 to 44.2)                                               | -1.4<br>(-11.8 to 9.4)                                               |
| Cirrhosis and other chronic liver diseases due to hepatitis C  | 0.1<br>(< 0.05 to 0.1)            | < 0.05<br>(< 0.05 to < 0.05)      | < 0.05<br>(< 0.05 to < 0.05)      | 34.8<br>(8.1 to 67.7)                                               | 3.2<br>(-13.9 to 23.6)                                               |
| Cirrhosis and other chronic liver diseases due to alcohol use  | 0.1<br>(0.1 to 0.1)               | < 0.05<br>(< 0.05 to < 0.05)      | < 0.05<br>(< 0.05 to < 0.05)      | 26.6<br>(6.0 to 48.9)                                               | -4.0<br>(-16.9 to 10.4)                                              |
| Cirrhosis and other chronic liver diseases due to other causes | 0.2<br>(0.2 to 0.2)               | < 0.05<br>(< 0.05 to < 0.05)      | < 0.05<br>(< 0.05 to < 0.05)      | 15.5<br>(-3.6 to 39.4)                                              | -5.3<br>(-19.2 to 10.1)                                              |
| <b>Digestive diseases</b>                                      | <b>2.7<br/>(2.4 to 2.9)</b>       | <b>2.8†<br/>(2.6 to 2.9)</b>      | <b>0.1<br/>(0.1 to 0.1)</b>       | <b>23.4<br/>(12.8 to 34.7)</b>                                      | <b>-2.4<br/>(-8.5 to 3.7)</b>                                        |
| Peptic ulcer disease                                           | 0.5<br>(0.4 to 0.5)               | 0.2<br>(0.2 to 0.3)               | < 0.05<br>(< 0.05 to < 0.05)      | 30.0<br>(15.0 to 47.3)                                              | 0.9<br>(-8.4 to 12.1)                                                |
| Gastritis and duodenitis                                       | 0.9<br>(0.8 to 1.0)               | 0.9<br>(0.8 to 1.0)               | < 0.05<br>(< 0.05 to < 0.05)      | 38.0<br>(22.4 to 56.4)                                              | 9.4<br>(-0.7 to 20.3)                                                |
| Appendicitis                                                   | < 0.05<br>(< 0.05 to < 0.05)      | 0.7<br>(0.6 to 0.7)               | < 0.05<br>(< 0.05 to < 0.05)      | 29.7<br>(-6.1 to 84.0)                                              | 5.8<br>(-16.7 to 34.4)                                               |
| Paralytic ileus and intestinal obstruction                     | < 0.05<br>(< 0.05 to < 0.05)      | 0.1<br>(0.1 to 0.1)               | < 0.05<br>(< 0.05 to < 0.05)      | 21.3<br>(13.7 to 29.4)                                              | -2.7<br>(-11.7 to 7.9)                                               |
| Inguinal, femoral, and abdominal hernia                        | 1.3<br>(1.0 to 1.6)               | 0.3<br>(0.3 to 0.4)               | < 0.05<br>(< 0.05 to 0.1)         | 17.0<br>(1.8 to 33.3)                                               | -7.9<br>(-16.4 to 1.6)                                               |
| Inflammatory bowel disease                                     | < 0.05<br>(< 0.05 to < 0.05)      | 0.1<br>(0.1 to 0.1)               | < 0.05<br>(< 0.05 to < 0.05)      | 37.3<br>(33.2 to 41.4)                                              | 6.1<br>(3.2 to 9.2)                                                  |
| Vascular intestinal disorders                                  | < 0.05<br>(< 0.05 to < 0.05)      | < 0.05<br>(< 0.05 to < 0.05)      | < 0.05<br>(< 0.05 to < 0.05)      | 22.4<br>(15.5 to 29.3)                                              | -1.0<br>(-4.9 to 3.5)                                                |
| Gallbladder and biliary diseases                               | 0.1<br>(0.1 to 0.1)               | 0.5<br>(0.4 to 0.5)               | < 0.05<br>(< 0.05 to < 0.05)      | 25.0<br>(10.2 to 41.8)                                              | -3.8<br>(-18.5 to 13.1)                                              |
| Pancreatitis                                                   | < 0.05<br>(< 0.05 to < 0.05)      | < 0.05<br>(< 0.05 to < 0.05)      | < 0.05<br>(< 0.05 to < 0.05)      | 32.1<br>(26.4 to 38.2)                                              | 1.4<br>(-2.7 to 5.2)                                                 |
| Other digestive diseases                                       | --                                | --                                | < 0.05<br>(< 0.05 to < 0.05)      | 24.4<br>(10.1 to 40.5)                                              | 1.0<br>(-6.1 to 8.5)                                                 |
| <b>Neurological disorders</b>                                  | <b>60.8<br/>(58.0 to 64.0)</b>    | <b>31.0<br/>(26.2 to 36.4)</b>    | <b>1.6<br/>(1.0 to 2.3)</b>       | <b>32.8<br/>(-6.0 to 83.9)</b>                                      | <b>3.4<br/>(-22.0 to 34.6)</b>                                       |
| Alzheimer's disease and other dementias                        | 0.3<br>(0.2 to 0.3)               | < 0.05<br>(< 0.05 to 0.1)         | < 0.05<br>(< 0.05 to 0.1)         | 8.2<br>(1.5 to 15.1)                                                | -0.7<br>(-5.7 to 4.4)                                                |
| Parkinson's disease                                            | < 0.05<br>(< 0.05 to < 0.05)      | < 0.05<br>(< 0.05 to < 0.05)      | < 0.05<br>(< 0.05 to < 0.05)      | 14.6<br>(-0.9 to 33.2)                                              | 5.5<br>(-8.0 to 21.3)                                                |
| Epilepsy                                                       | 1.1<br>(0.3 to 1.7)               | 0.1<br>(< 0.05 to 0.2)            | 0.4<br>(0.1 to 0.8)               | 38.8<br>(-64.5 to 546.4)                                            | 11.9<br>(-71.2 to 415.3)                                             |
| Multiple sclerosis                                             | < 0.05<br>(< 0.05 to < 0.05)      | < 0.05<br>(< 0.05 to < 0.05)      | < 0.05<br>(< 0.05 to < 0.05)      | 45.0<br>(39.7 to 50.8)                                              | 8.5<br>(4.7 to 12.4)                                                 |
| Motor neuron disease                                           | < 0.05<br>(< 0.05 to < 0.05)      | < 0.05<br>(< 0.05 to < 0.05)      | < 0.05<br>(< 0.05 to < 0.05)      | 29.4<br>(23.5 to 35.5)                                              | 3.0<br>(-0.2 to 6.3)                                                 |
| Migraine                                                       | 21.8<br>(20.4 to 23.2)            | 2.8<br>(2.6 to 3.0)               | 0.9<br>(0.6 to 1.3)               | 29.2<br>(23.9 to 34.8)                                              | -0.0<br>(-3.5 to 3.7)                                                |
| Tension-type headache                                          | 46.4<br>(41.2 to 52.4)            | 28.0<br>(23.2 to 33.5)            | 0.1<br>(0.1 to 0.2)               | 29.7<br>(22.9 to 36.8)                                              | 0.3<br>(-4.6 to 5.4)                                                 |
| Other neurological disorders                                   | < 0.05<br>(< 0.05 to < 0.05)      | < 0.05<br>(< 0.05 to < 0.05)      | 0.1<br>(< 0.05 to 0.2)            | 72.2<br>(-55.3 to 655.7)                                            | 33.9<br>(-62.4 to 420.6)                                             |
| <b>Mental and substance use disorders</b>                      | <b>25.3<br/>(24.0 to 26.5)</b>    | <b>8.9†<br/>(8.2 to 9.6)</b>      | <b>3.0<br/>(2.2 to 4.0)</b>       | <b>27.5<br/>(24.6 to 30.4)</b>                                      | <b>0.4<br/>(-1.8 to 2.5)</b>                                         |
| Schizophrenia                                                  | 0.3<br>(0.2 to 0.3)               | < 0.05<br>(< 0.05 to < 0.05)      | 0.2<br>(0.1 to 0.2)               | 35.1<br>(21.6 to 49.6)                                              | 0.9<br>(-8.3 to 9.9)                                                 |
| Alcohol use disorders                                          | 2.0<br>(1.7 to 2.3)               | 1.1<br>(0.9 to 1.3)               | 0.2<br>(0.1 to 0.3)               | 30.3<br>(19.5 to 40.8)                                              | 2.6<br>(-5.0 to 9.8)                                                 |
| Drug use disorders                                             | 0.7<br>(0.6 to 0.8)               | 0.1<br>(0.1 to 0.1)               | 0.2<br>(0.1 to 0.2)               | 32.7<br>(19.3 to 48.3)                                              | 5.0<br>(-4.1 to 15.8)                                                |
| Opioid use disorders                                           | 0.4<br>(0.3 to 0.5)               | 0.1<br>(< 0.05 to 0.1)            | 0.2<br>(0.1 to 0.2)               | 33.5<br>(18.0 to 51.8)                                              | 5.5<br>(-5.1 to 17.7)                                                |
| Cocaine use disorders                                          | < 0.05<br>(< 0.05 to < 0.05)      | < 0.05<br>(< 0.05 to < 0.05)      | < 0.05<br>(< 0.05 to < 0.05)      | 27.6<br>(20.3 to 35.2)                                              | 2.3<br>(-3.0 to 7.8)                                                 |
| Amphetamine use disorders                                      | < 0.05<br>(< 0.05 to < 0.05)      | < 0.05<br>(< 0.05 to < 0.05)      | < 0.05<br>(< 0.05 to < 0.05)      | 22.9<br>(11.8 to 35.3)                                              | 2.1<br>(-7.0 to 11.9)                                                |
| Cannabis use disorders                                         | 0.3<br>(0.2 to 0.3)               | 0.1<br>(< 0.05 to 0.1)            | < 0.05<br>(< 0.05 to < 0.05)      | 22.9<br>(-3.2 to 55.7)                                              | 0.1<br>(-19.9 to 23.4)                                               |
| Other drug use disorders                                       | 0.1<br>(< 0.05 to 0.1)            | < 0.05<br>(< 0.05 to < 0.05)      | < 0.05<br>(< 0.05 to < 0.05)      | 31.1<br>(11.0 to 54.0)                                              | 2.3<br>(-12.0 to 18.7)                                               |
| Depressive disorders                                           | 5.0<br>(4.6 to 5.4)               | 5.3<br>(4.7 to 6.0)               | 0.8<br>(0.6 to 1.1)               | 27.7<br>(21.6 to 33.8)                                              | 0.2<br>(-4.0 to 4.4)                                                 |
| Major depressive disorder                                      | 3.2<br>(2.8 to 3.6)               | 5.0<br>(4.4 to 5.7)               | 0.7<br>(0.4 to 0.9)               | 27.2<br>(20.2 to 34.9)                                              | 0.2<br>(-5.2 to 5.5)                                                 |
| Dysthymia                                                      | 1.9<br>(1.6 to 2.2)               | 0.3<br>(0.3 to 0.4)               | 0.2<br>(0.1 to 0.3)               | 29.1<br>(23.2 to 34.8)                                              | 0.1<br>(-3.4 to 3.6)                                                 |
| Bipolar disorder                                               | 1.1<br>(0.9 to 1.2)               | 0.1<br>(0.1 to 0.1)               | 0.2<br>(0.1 to 0.3)               | 27.5<br>(18.9 to 36.9)                                              | 0.3<br>(-5.7 to 6.4)                                                 |
| Anxiety disorders                                              | 5.2<br>(4.7 to 5.8)               | 1.0<br>(0.9 to 1.1)               | 0.5<br>(0.4 to 0.7)               | 27.1<br>(17.4 to 37.1)                                              | 0.2<br>(-6.1 to 7.1)                                                 |
| Eating disorders                                               | 0.2<br>(0.1 to 0.2)               | 0.1<br>(0.1 to 0.2)               | < 0.05<br>(< 0.05 to 0.1)         | 35.6<br>(16.3 to 57.2)                                              | 10.0<br>(-5.6 to 27.0)                                               |
| Anorexia nervosa                                               | < 0.05<br>(< 0.05 to 0.1)         | < 0.05<br>(< 0.05 to < 0.05)      | < 0.05<br>(< 0.05 to < 0.05)      | 30.8<br>(-0.8 to 75.4)                                              | 7.8<br>(-18.2 to 43.7)                                               |
| Bulimia nervosa                                                | 0.1<br>(0.1 to 0.2)               | 0.1<br>(0.1 to 0.2)               | < 0.05<br>(< 0.05 to < 0.05)      | 37.6<br>(14.0 to 65.3)                                              | 10.8<br>(-7.7 to 32.3)                                               |
| Autistic spectrum disorders                                    | 1.7<br>(1.5 to 1.9)               | < 0.05<br>(< 0.05 to < 0.05)      | 0.2<br>(0.2 to 0.3)               | 25.4<br>(18.3 to 33.1)                                              | 0.1<br>(-4.8 to 5.3)                                                 |
| Autism                                                         | 0.5<br>(0.4 to 0.5)               | < 0.05<br>(< 0.05 to < 0.05)      | 0.1<br>(0.1 to 0.2)               | 25.4<br>(13.2 to 38.5)                                              | 0.0<br>(-8.2 to 8.8)                                                 |
| Asperger syndrome and other autistic spectrum disorders        | 1.2<br>(1.0 to 1.4)               | < 0.05<br>(< 0.05 to < 0.05)      | 0.1<br>(0.1 to 0.2)               | 25.5<br>(19.0 to 32.8)                                              | 0.2<br>(-4.2 to 5.1)                                                 |

| Cause                                                      | Prevalence in thousands (95% UI)        | Incidence in thousands (95% UI)          | YLDs in thousands (95% UI)        |                                                   |                                                     |
|------------------------------------------------------------|-----------------------------------------|------------------------------------------|-----------------------------------|---------------------------------------------------|-----------------------------------------------------|
|                                                            | 2016 counts                             | 2016 counts                              | 2016 counts                       | Percentage change in counts between 2006 and 2016 | Percentage change in age-standardised rates between |
| Attention-deficit/hyperactivity disorder                   | 2.7<br>(2.4 to 3.0)                     | 0.2<br>(0.1 to 0.2)                      | < 0.05<br>(< 0.05 to 0.1)         | 25.0<br>(16.3 to 35.4)                            | 0.3<br>(-6.5 to 7.9)                                |
| Conduct disorder                                           | 2.0<br>(1.6 to 2.4)                     | 0.7<br>(0.6 to 0.9)                      | 0.2<br>(0.1 to 0.4)               | 23.8<br>(16.1 to 32.6)                            | 0.3<br>(-5.9 to 7.3)                                |
| Idiopathic developmental intellectual disability           | 3.8<br>(2.4 to 5.4)                     | --                                       | 0.1<br>(0.1 to 0.3)               | 15.3<br>(5.9 to 23.3)                             | -8.2<br>(-15.4 to -1.9)                             |
| Other mental and substance use disorders                   | 2.6<br>(2.3 to 3.1)                     | 0.1<br>(0.1 to 0.1)                      | 0.2<br>(0.1 to 0.3)               | 30.1<br>(23.2 to 38.1)                            | 0.4<br>(-4.2 to 5.3)                                |
| <b>Diabetes, urogenital, blood, and endocrine diseases</b> | <b>89.5</b><br><b>(86.0 to 92.8)</b>    | <b>21.8†</b><br><b>(20.2 to 24.0)</b>    | <b>1.0</b><br><b>(0.8 to 1.4)</b> | <b>25.4</b><br><b>(21.6 to 29.4)</b>              | <b>-1.0</b><br><b>(-3.7 to 1.8)</b>                 |
| Diabetes mellitus                                          | 3.1<br>(2.7 to 3.4)                     | 0.2<br>(0.2 to 0.2)                      | 0.2<br>(0.1 to 0.3)               | 32.3<br>(25.3 to 39.6)                            | 3.2<br>(-2.7 to 8.9)                                |
| Acute glomerulonephritis                                   | < 0.05<br>(< 0.05 to < 0.05)            | < 0.05<br>(< 0.05 to < 0.05)             | < 0.05<br>(< 0.05 to < 0.05)      | 25.5<br>(20.5 to 30.5)                            | 0.2<br>(-3.2 to 3.7)                                |
| Chronic kidney disease                                     | 12.3<br>(11.2 to 13.6)                  | 0.9<br>(0.8 to 1.1)                      | 0.3<br>(0.2 to 0.4)               | 21.2<br>(13.7 to 29.5)                            | -2.0<br>(-7.0 to 3.3)                               |
| Chronic kidney disease due to diabetes mellitus            | 3.7<br>(3.2 to 4.4)                     | 0.3<br>(0.2 to 0.3)                      | 0.1<br>(0.1 to 0.1)               | 23.4<br>(12.0 to 35.4)                            | -1.4<br>(-8.4 to 6.1)                               |
| Chronic kidney disease due to hypertension                 | 2.7<br>(2.3 to 3.1)                     | 0.2<br>(0.2 to 0.3)                      | < 0.05<br>(< 0.05 to 0.1)         | 16.0<br>(4.3 to 29.2)                             | -1.6<br>(-12.0 to 8.1)                              |
| Chronic kidney disease due to glomerulonephritis           | 2.5<br>(2.1 to 2.8)                     | 0.1<br>(0.1 to 0.2)                      | 0.1<br>(0.1 to 0.1)               | 22.5<br>(10.3 to 36.0)                            | -2.2<br>(-9.9 to 6.7)                               |
| Chronic kidney disease due to other causes                 | 3.4<br>(2.9 to 4.0)                     | 0.3<br>(0.2 to 0.3)                      | 0.1<br>(0.1 to 0.1)               | 20.8<br>(9.7 to 33.6)                             | -2.8<br>(-9.8 to 5.1)                               |
| Urinary diseases and male infertility                      | 2.6<br>(2.3 to 3.0)                     | 12.7†<br>(11.2 to 14.8)                  | 0.1<br>(< 0.05 to 0.1)            | 21.0<br>(12.3 to 29.5)                            | -2.8<br>(-8.9 to 3.5)                               |
| Interstitial nephritis and urinary tract infections        | 0.2<br>(0.2 to 0.3)                     | 11.6<br>(10.1 to 13.7)                   | < 0.05<br>(< 0.05 to < 0.05)      | 19.0<br>(3.1 to 37.5)                             | -4.0<br>(-15.7 to 8.5)                              |
| Urolithiasis                                               | < 0.05<br>(< 0.05 to < 0.05)            | 0.9<br>(0.8 to 1.1)                      | < 0.05<br>(< 0.05 to < 0.05)      | 32.3<br>(23.8 to 41.8)                            | 1.5<br>(-6.2 to 9.3)                                |
| Benign prostatic hyperplasia                               | 1.4<br>(1.2 to 1.7)                     | 0.2<br>(0.2 to 0.2)                      | < 0.05<br>(< 0.05 to 0.1)         | 21.7<br>(11.0 to 33.1)                            | -2.5<br>(-9.6 to 4.9)                               |
| Male infertility                                           | 0.8<br>(0.6 to 1.1)                     | --                                       | < 0.05<br>(< 0.05 to < 0.05)      | 34.5<br>(12.4 to 60.2)                            | 3.4<br>(-13.7 to 23.5)                              |
| Other urinary diseases                                     | --                                      | --                                       | < 0.05<br>(< 0.05 to < 0.05)      | -0.2<br>(-11.6 to 12.0)                           | -18.8<br>(-26.4 to -11.0)                           |
| Gynecological diseases                                     | 20.3<br>(19.3 to 21.4)                  | 7.8†<br>(7.2 to 8.4)                     | 0.2<br>(0.2 to 0.3)               | 28.5<br>(23.3 to 33.8)                            | -3.2<br>(-6.8 to 0.4)                               |
| Uterine fibroids                                           | 1.4<br>(1.2 to 1.6)                     | 0.2<br>(0.1 to 0.2)                      | < 0.05<br>(< 0.05 to < 0.05)      | 40.6<br>(30.2 to 52.0)                            | -3.1<br>(-9.9 to 4.8)                               |
| Polycystic ovarian syndrome                                | 0.2<br>(0.1 to 0.2)                     | 0.5<br>(0.3 to 0.6)                      | < 0.05<br>(< 0.05 to < 0.05)      | 36.1<br>(18.3 to 57.0)                            | 1.7<br>(-11.1 to 16.2)                              |
| Female infertility                                         | 0.1<br>(0.1 to 0.1)                     | --                                       | < 0.05<br>(< 0.05 to < 0.05)      | 59.0<br>(16.0 to 107.0)                           | 19.1<br>(-10.8 to 53.5)                             |
| Endometriosis                                              | < 0.05<br>(< 0.05 to < 0.05)            | 0.1<br>(0.1 to 0.2)                      | < 0.05<br>(< 0.05 to < 0.05)      | 25.7<br>(-10.5 to 73.0)                           | -1.0<br>(-26.8 to 31.9)                             |
| Genital prolapse                                           | 9.7<br>(8.5 to 10.9)                    | 0.9<br>(0.8 to 1.1)                      | < 0.05<br>(< 0.05 to 0.1)         | 26.6<br>(19.2 to 35.0)                            | -3.1<br>(-9.2 to 3.6)                               |
| Premenstrual syndrome                                      | 9.1<br>(8.5 to 9.8)                     | 3.5<br>(3.2 to 3.8)                      | 0.1<br>(< 0.05 to 0.1)            | 24.8<br>(15.1 to 35.1)                            | -3.9<br>(-11.0 to 3.9)                              |
| Other gynecological diseases                               | 2.9<br>(2.5 to 3.3)                     | 2.6<br>(2.1 to 3.2)                      | 0.1<br>(0.1 to 0.1)               | 29.2<br>(20.6 to 38.3)                            | -2.9<br>(-9.4 to 3.9)                               |
| Hemoglobinopathies and hemolytic anaemias                  | 69.2<br>(65.0 to 73.0)                  | --                                       | 0.2<br>(0.1 to 0.2)               | 23.1<br>(12.8 to 34.4)                            | -1.4<br>(-8.3 to 6.4)                               |
| Thalassemias                                               | < 0.05<br>(< 0.05 to < 0.05)            | --                                       | < 0.05<br>(< 0.05 to < 0.05)      | 31.9<br>(1.4 to 80.2)                             | 8.6<br>(-16.3 to 48.3)                              |
| Thalassaemias trait                                        | 3.5<br>(1.5 to 6.6)                     | --                                       | < 0.05<br>(< 0.05 to 0.1)         | 31.6<br>(16.5 to 53.1)                            | 5.5<br>(-6.0 to 22.0)                               |
| Sickle cell disorders                                      | 0.1<br>(0.1 to 0.2)                     | --                                       | < 0.05<br>(< 0.05 to < 0.05)      | 24.3<br>(8.0 to 43.9)                             | 2.4<br>(-10.3 to 17.9)                              |
| Sickle cell trait                                          | 20.2<br>(18.1 to 22.6)                  | --                                       | 0.1<br>(< 0.05 to 0.1)            | 24.8<br>(11.8 to 38.8)                            | 0.0<br>(-8.8 to 9.6)                                |
| G6PD deficiency                                            | 18.1<br>(15.2 to 21.1)                  | --                                       | < 0.05<br>(< 0.05 to < 0.05)      | 9.5<br>(-9.3 to 35.5)                             | -5.3<br>(-17.2 to 10.4)                             |
| G6PD trait                                                 | 33.8<br>(31.7 to 36.0)                  | --                                       | < 0.05<br>(< 0.05 to < 0.05)      | 33.2<br>(17.2 to 54.4)                            | 6.8<br>(-3.0 to 18.6)                               |
| Other hemoglobinopathies and hemolytic anaemias            | 2.0<br>(1.9 to 2.1)                     | --                                       | < 0.05<br>(< 0.05 to 0.1)         | 14.0<br>(1.2 to 29.9)                             | -10.6<br>(-18.8 to -1.0)                            |
| Endocrine, metabolic, blood, and immune disorders          | 2.5<br>(2.3 to 2.6)                     | 0.1<br>(0.1 to 0.2)                      | 0.1<br>(< 0.05 to 0.1)            | 23.4<br>(13.0 to 35.4)                            | -1.7<br>(-8.1 to 4.9)                               |
| <b>Musculoskeletal disorders</b>                           | <b>18.3</b><br><b>(17.3 to 19.2)</b>    | <b>8.5</b><br><b>(7.6 to 9.4)</b>        | <b>2.0</b><br><b>(1.4 to 2.6)</b> | <b>28.7</b><br><b>(24.6 to 32.7)</b>              | <b>-0.7</b><br><b>(-3.3 to 1.8)</b>                 |
| Rheumatoid arthritis                                       | 0.2<br>(0.2 to 0.2)                     | < 0.05<br>(< 0.05 to < 0.05)             | < 0.05<br>(< 0.05 to 0.1)         | 33.1<br>(19.2 to 48.5)                            | 4.0<br>(-5.5 to 14.7)                               |
| Osteoarthritis                                             | 3.3<br>(3.1 to 3.5)                     | 0.2<br>(0.2 to 0.2)                      | 0.2<br>(0.1 to 0.3)               | 30.6<br>(25.6 to 35.5)                            | 3.0<br>(-0.9 to 6.9)                                |
| Low back and neck pain                                     | 12.8<br>(11.9 to 13.7)                  | 5.7<br>(5.1 to 6.4)                      | 1.5<br>(1.0 to 1.9)               | 28.5<br>(23.6 to 33.6)                            | -1.3<br>(-4.4 to 1.8)                               |
| Low back pain                                              | 9.5<br>(8.4 to 10.7)                    | 4.8<br>(4.2 to 5.4)                      | 1.1<br>(0.8 to 1.4)               | 26.6<br>(20.4 to 33.3)                            | -1.8<br>(-5.8 to 2.3)                               |
| Neck pain                                                  | 3.9<br>(3.4 to 4.5)                     | 1.0<br>(0.8 to 1.1)                      | 0.4<br>(0.3 to 0.6)               | 34.2<br>(29.5 to 38.7)                            | -0.0<br>(-2.3 to 2.3)                               |
| Gout                                                       | 0.4<br>(0.4 to 0.5)                     | 0.1<br>(0.1 to 0.1)                      | < 0.05<br>(< 0.05 to < 0.05)      | 27.1<br>(9.8 to 46.7)                             | -0.6<br>(-12.2 to 13.5)                             |
| Other musculoskeletal disorders                            | 3.1<br>(2.4 to 3.9)                     | 2.5<br>(1.9 to 3.1)                      | 0.3<br>(0.2 to 0.4)               | 27.5<br>(14.7 to 41.5)                            | -2.3<br>(-11.5 to 7.3)                              |
| <b>Other non-communicable diseases</b>                     | <b>134.5</b><br><b>(130.5 to 138.0)</b> | <b>378.2†</b><br><b>(339.5 to 418.1)</b> | <b>3.4</b><br><b>(2.3 to 4.9)</b> | <b>21.7</b><br><b>(19.6 to 23.6)</b>              | <b>-2.0</b><br><b>(-3.2 to -0.8)</b>                |
| Congenital anomalies                                       | 1.9<br>(1.6 to 2.2)                     | --                                       | 0.3<br>(0.2 to 0.4)               | 21.1<br>(12.4 to 29.8)                            | -3.2<br>(-9.8 to 3.4)                               |
| Neural tube defects                                        | 0.3<br>(0.2 to 0.3)                     | --                                       | 0.1<br>(0.1 to 0.1)               | 23.1<br>(7.5 to 39.5)                             | -1.7<br>(-12.7 to 10.3)                             |
| Congenital heart anomalies                                 | 0.4<br>(0.3 to 0.5)                     | --                                       | < 0.05<br>(< 0.05 to < 0.05)      | 22.4<br>(7.0 to 40.2)                             | 0.8<br>(-11.8 to 14.0)                              |
| Orofacial clefts                                           | 0.1<br>(< 0.05 to 0.1)                  | --                                       | < 0.05<br>(< 0.05 to < 0.05)      | 14.2<br>(0.9 to 28.1)                             | -8.5<br>(-19.3 to 2.9)                              |
| Down's syndrome                                            | < 0.05<br>(< 0.05 to < 0.05)            | --                                       | < 0.05<br>(< 0.05 to < 0.05)      | 28.0<br>(19.0 to 38.2)                            | 2.9<br>(-4.1 to 11.4)                               |
| Turner syndrome                                            | 0.1<br>(0.1 to 0.1)                     | --                                       | < 0.05<br>(< 0.05 to < 0.05)      | 14.7<br>(-24.4 to 66.2)                           | -6.6<br>(-34.1 to 30.5)                             |
| Klinefelter syndrome                                       | 0.1<br>(0.1 to 0.1)                     | --                                       | < 0.05<br>(< 0.05 to < 0.05)      | 25.6<br>(-4.0 to 67.8)                            | 1.7<br>(-22.5 to 33.0)                              |



| Cause                                         | Prevalence in thousands (95% UI)     | Incidence in thousands (95% UI)       | YLDs in thousands (95% UI)        |                                                   |                                                     |
|-----------------------------------------------|--------------------------------------|---------------------------------------|-----------------------------------|---------------------------------------------------|-----------------------------------------------------|
|                                               | 2016 counts                          | 2016 counts                           | 2016 counts                       | Percentage change in counts between 2006 and 2016 | Percentage change in age-standardised rates between |
| Other chromosomal abnormalities               | < 0.05<br>(< 0.05 to < 0.05)         | --                                    | < 0.05<br>(< 0.05 to < 0.05)      | 23.8<br>(-12.8 to 71.7)                           | 1.8<br>(-26.4 to 38.6)                              |
| Congenital musculoskeletal and limb anomalies | 0.2<br>(0.2 to 0.2)                  | --                                    | < 0.05<br>(< 0.05 to < 0.05)      | 24.9<br>(7.6 to 46.5)                             | -0.4<br>(-12.0 to 13.5)                             |
| Urogenital congenital anomalies               | 0.1<br>(0.1 to 0.1)                  | --                                    | < 0.05<br>(< 0.05 to < 0.05)      | 20.8<br>(10.5 to 31.4)                            | -1.6<br>(-9.0 to 6.4)                               |
| Digestive congenital anomalies                | 0.2<br>(0.2 to 0.2)                  | --                                    | < 0.05<br>(< 0.05 to < 0.05)      | 24.6<br>(2.3 to 50.9)                             | -0.2<br>(-15.0 to 17.6)                             |
| Other congenital anomalies                    | 0.8<br>(0.5 to 1.2)                  | --                                    | 0.1<br>(0.1 to 0.2)               | 18.5<br>(7.4 to 31.1)                             | -5.5<br>(-13.8 to 4.0)                              |
| Skin and subcutaneous diseases                | 67.2<br>(64.7 to 70.1)               | 159.4<br>(146.3 to 174.7)             | 1.6<br>(1.0 to 2.3)               | 25.5<br>(22.9 to 28.4)                            | 1.6<br>(-0.1 to 3.5)                                |
| Dermatitis                                    | 9.2<br>(7.7 to 11.0)                 | 8.5<br>(7.5 to 9.9)                   | 0.4<br>(0.2 to 0.6)               | 24.3<br>(19.5 to 29.8)                            | 0.1<br>(-3.2 to 3.9)                                |
| Psoriasis                                     | 1.1<br>(1.0 to 1.1)                  | 0.2<br>(0.1 to 0.2)                   | 0.1<br>(0.1 to 0.1)               | 36.0<br>(22.8 to 52.3)                            | 6.9<br>(-1.4 to 17.0)                               |
| Cellulitis                                    | 0.1<br>(0.1 to 0.1)                  | 1.2<br>(1.1 to 1.3)                   | < 0.05<br>(< 0.05 to < 0.05)      | 26.1<br>(1.6 to 58.0)                             | 1.3<br>(-17.0 to 24.1)                              |
| Pyoderma                                      | 1.1<br>(1.0 to 1.2)                  | 21.6<br>(20.5 to 22.7)                | < 0.05<br>(< 0.05 to < 0.05)      | 26.2<br>(17.9 to 34.1)                            | 1.4<br>(-3.9 to 6.8)                                |
| Scabies                                       | 3.3<br>(2.7 to 4.2)                  | 10.3<br>(8.2 to 13.1)                 | 0.1<br>(< 0.05 to 0.1)            | 19.7<br>(12.9 to 27.2)                            | -3.4<br>(-8.3 to 1.7)                               |
| Fungal skin diseases                          | 28.3<br>(23.8 to 33.3)               | 80.5<br>(68.2 to 94.8)                | 0.2<br>(0.1 to 0.4)               | 24.1<br>(22.3 to 25.9)                            | 0.2<br>(-0.7 to 1.1)                                |
| Viral skin diseases                           | 5.8<br>(5.5 to 6.1)                  | 8.0<br>(7.6 to 8.5)                   | 0.2<br>(0.1 to 0.3)               | 24.3<br>(20.1 to 29.2)                            | 0.0<br>(-3.0 to 3.3)                                |
| Acne vulgaris                                 | 18.6<br>(16.1 to 21.3)               | 13.6<br>(10.6 to 17.9)                | 0.5<br>(0.3 to 0.7)               | 26.4<br>(20.3 to 32.5)                            | 3.5<br>(-1.2 to 8.2)                                |
| Alopecia areata                               | 0.3<br>(0.3 to 0.3)                  | 0.6<br>(0.5 to 0.6)                   | < 0.05<br>(< 0.05 to < 0.05)      | 28.0<br>(11.9 to 45.2)                            | 0.4<br>(-10.3 to 11.7)                              |
| Pruritus                                      | 1.4<br>(1.2 to 1.6)                  | 1.1<br>(1.0 to 1.3)                   | < 0.05<br>(< 0.05 to < 0.05)      | 27.4<br>(19.6 to 36.0)                            | 1.0<br>(-4.0 to 6.5)                                |
| Urticaria                                     | 2.0<br>(1.7 to 2.4)                  | 3.6<br>(3.1 to 4.2)                   | 0.1<br>(0.1 to 0.2)               | 24.0<br>(16.1 to 32.7)                            | -0.0<br>(-5.7 to 6.2)                               |
| Decubitus ulcer                               | < 0.05<br>(< 0.05 to < 0.05)         | 0.1<br>(0.1 to 0.1)                   | < 0.05<br>(< 0.05 to < 0.05)      | 26.5<br>(14.2 to 39.7)                            | 5.5<br>(-7.9 to 21.4)                               |
| Other skin and subcutaneous diseases          | 9.0<br>(8.7 to 9.3)                  | 10.2<br>(9.9 to 10.5)                 | < 0.05<br>(< 0.05 to 0.1)         | 29.2<br>(25.4 to 33.4)                            | 3.9<br>(1.4 to 6.6)                                 |
| Sense organ diseases                          | 32.9<br>(31.6 to 34.2)               | 17.8+<br>(16.5 to 19.2)               | 1.2<br>(0.9 to 1.7)               | 15.5<br>(12.0 to 18.9)                            | -4.3<br>(-6.2 to -2.4)                              |
| Glaucoma                                      | 0.1<br>(< 0.05 to 0.1)               | --                                    | < 0.05<br>(< 0.05 to < 0.05)      | 7.8<br>(-5.4 to 24.2)                             | 0.6<br>(-11.2 to 14.1)                              |
| Cataract                                      | 1.5<br>(1.3 to 1.7)                  | --                                    | 0.1<br>(0.1 to 0.2)               | 6.8<br>(-0.2 to 14.5)                             | -4.7<br>(-10.0 to 0.5)                              |
| Macular degeneration                          | 0.1<br>(0.1 to 0.1)                  | --                                    | < 0.05<br>(< 0.05 to < 0.05)      | 9.3<br>(-4.1 to 24.3)                             | 3.0<br>(-8.7 to 15.5)                               |
| Refraction and accommodation disorders        | 16.4<br>(14.8 to 18.1)               | --                                    | 0.3<br>(0.2 to 0.5)               | 15.0<br>(9.3 to 20.9)                             | -8.1<br>(-12.8 to -3.2)                             |
| Age-related and other hearing loss            | 19.1<br>(17.8 to 20.5)               | --                                    | 0.6<br>(0.4 to 0.9)               | 15.9<br>(10.6 to 20.9)                            | -3.8<br>(-6.3 to -1.3)                              |
| Other vision loss                             | 0.6<br>(0.5 to 0.7)                  | --                                    | 0.1<br>(< 0.05 to 0.1)            | 23.6<br>(13.1 to 36.3)                            | -1.0<br>(-8.0 to 6.7)                               |
| Other sense organ diseases                    | 3.5<br>(3.2 to 3.8)                  | 17.8<br>(16.5 to 19.2)                | 0.1<br>(0.1 to 0.2)               | 25.0<br>(18.5 to 32.0)                            | 1.1<br>(-3.1 to 5.1)                                |
| Oral disorders                                | 88.4<br>(81.3 to 94.6)               | 201.0+<br>(165.3 to 239.5)            | 0.3<br>(0.2 to 0.6)               | 29.4<br>(25.9 to 32.8)                            | -0.0<br>(-2.3 to 2.1)                               |
| Caries of deciduous teeth                     | 22.1<br>(17.2 to 27.3)               | 72.8<br>(48.3 to 101.1)               | < 0.05<br>(< 0.05 to < 0.05)      | 20.2<br>(6.3 to 34.0)                             | -1.7<br>(-13.0 to 9.7)                              |
| Caries of permanent teeth                     | 48.4<br>(41.2 to 56.0)               | 125.8<br>(101.4 to 152.9)             | < 0.05<br>(< 0.05 to 0.1)         | 21.4<br>(14.7 to 28.1)                            | -4.0<br>(-8.5 to 0.8)                               |
| Periodontal disease                           | 19.7<br>(14.5 to 24.7)               | 2.3<br>(1.7 to 3.0)                   | 0.1<br>(< 0.05 to 0.3)            | 33.9<br>(27.1 to 39.9)                            | 0.0<br>(-4.4 to 4.0)                                |
| Edentulism and severe tooth loss              | 2.8<br>(2.3 to 3.2)                  | 0.2<br>(0.1 to 0.2)                   | 0.1<br>(0.1 to 0.1)               | 27.8<br>(21.3 to 34.7)                            | 0.7<br>(-3.2 to 4.9)                                |
| Other oral disorders                          | 2.9<br>(2.8 to 3.1)                  | --                                    | 0.1<br>(0.1 to 0.1)               | 27.9<br>(22.7 to 33.1)                            | 0.1<br>(-3.1 to 3.5)                                |
| <b>Injuries</b>                               | <b>24.6</b><br><b>(22.9 to 26.4)</b> | <b>15.9+</b><br><b>(15.0 to 16.9)</b> | <b>1.0</b><br><b>(0.7 to 1.4)</b> | <b>28.5</b><br><b>(25.7 to 31.1)</b>              | <b>0.9</b><br><b>(-0.8 to 2.5)</b>                  |
| <b>Transport injuries</b>                     | <b>2.7</b><br><b>(2.5 to 2.9)</b>    | <b>1.3</b><br><b>(1.2 to 1.5)</b>     | <b>0.2</b><br><b>(0.1 to 0.2)</b> | <b>31.4</b><br><b>(28.4 to 34.4)</b>              | <b>2.5</b><br><b>(0.6 to 4.5)</b>                   |
| Road injuries                                 | 2.2<br>(2.1 to 2.4)                  | 1.1<br>(1.0 to 1.3)                   | 0.1<br>(0.1 to 0.2)               | 31.8<br>(28.9 to 34.7)                            | 2.5<br>(0.6 to 4.3)                                 |
| Pedestrian road injuries                      | 0.5<br>(0.5 to 0.6)                  | 0.2<br>(0.2 to 0.2)                   | < 0.05<br>(< 0.05 to < 0.05)      | 29.4<br>(26.4 to 32.5)                            | 0.4<br>(-1.6 to 2.3)                                |
| Cyclist road injuries                         | 0.4<br>(0.3 to 0.4)                  | 0.2<br>(0.2 to 0.3)                   | < 0.05<br>(< 0.05 to < 0.05)      | 32.8<br>(29.5 to 35.8)                            | 3.8<br>(1.7 to 5.7)                                 |
| Motorcyclist road injuries                    | 0.4<br>(0.3 to 0.4)                  | 0.1<br>(0.1 to 0.2)                   | < 0.05<br>(< 0.05 to < 0.05)      | 26.8<br>(23.6 to 29.6)                            | -2.1<br>(-4.1 to -0.2)                              |
| Motor vehicle road injuries                   | 0.7<br>(0.6 to 0.8)                  | 0.4<br>(0.4 to 0.5)                   | < 0.05<br>(< 0.05 to 0.1)         | 32.8<br>(29.6 to 36.0)                            | 3.0<br>(1.0 to 5.0)                                 |
| Other road injuries                           | 0.3<br>(0.2 to 0.3)                  | 0.2<br>(0.1 to 0.2)                   | < 0.05<br>(< 0.05 to < 0.05)      | 40.8<br>(37.7 to 44.1)                            | 10.5<br>(8.3 to 12.5)                               |
| Other transport injuries                      | 0.5<br>(0.4 to 0.6)                  | 0.2<br>(0.1 to 0.2)                   | < 0.05<br>(< 0.05 to < 0.05)      | 29.5<br>(25.3 to 33.8)                            | 2.8<br>(0.2 to 5.4)                                 |
| <b>Unintentional injuries</b>                 | <b>20.8</b><br><b>(19.1 to 22.6)</b> | <b>13.8</b><br><b>(12.9 to 14.7)</b>  | <b>0.8</b><br><b>(0.5 to 1.1)</b> | <b>29.1</b><br><b>(26.1 to 31.9)</b>              | <b>1.4</b><br><b>(-0.4 to 3.1)</b>                  |
| Falls                                         | 8.4<br>(7.3 to 9.5)                  | 5.4<br>(4.8 to 6.2)                   | 0.4<br>(0.3 to 0.5)               | 25.9<br>(23.3 to 28.6)                            | -0.6<br>(-2.3 to 1.0)                               |
| Drowning                                      | 0.1<br>(0.1 to 0.1)                  | < 0.05<br>(< 0.05 to < 0.05)          | < 0.05<br>(< 0.05 to < 0.05)      | 30.4<br>(26.5 to 34.6)                            | 2.8<br>(-0.0 to 5.6)                                |
| Fire, heat, and hot substances                | 2.0<br>(1.6 to 2.5)                  | 0.4<br>(0.3 to 0.5)                   | 0.1<br>(< 0.05 to 0.1)            | 43.1<br>(34.7 to 50.7)                            | 11.5<br>(6.0 to 16.4)                               |
| Poisonings                                    | 0.1<br>(0.1 to 0.1)                  | 0.1<br>(0.1 to 0.2)                   | < 0.05<br>(< 0.05 to < 0.05)      | 38.2<br>(26.6 to 51.3)                            | 8.8<br>(1.4 to 16.8)                                |
| Exposure to mechanical forces                 | 3.5<br>(2.9 to 4.2)                  | 1.9<br>(1.6 to 2.2)                   | 0.1<br>(0.1 to 0.1)               | 27.8<br>(24.3 to 31.1)                            | -0.1<br>(-2.4 to 1.9)                               |
| Unintentional firearm injuries                | 0.2<br>(0.2 to 0.3)                  | 0.1<br>(0.1 to 0.1)                   | < 0.05<br>(< 0.05 to < 0.05)      | 20.6<br>(17.2 to 23.8)                            | -6.6<br>(-8.7 to -4.5)                              |
| Unintentional suffocation                     | 0.3<br>(0.2 to 0.4)                  | 0.1<br>(0.1 to 0.1)                   | < 0.05<br>(< 0.05 to < 0.05)      | 25.8<br>(21.0 to 30.2)                            | -0.8<br>(-3.5 to 1.8)                               |
| Other exposure to mechanical forces           | 2.9<br>(2.4 to 3.6)                  | 1.7<br>(1.4 to 2.0)                   | 0.1<br>(< 0.05 to 0.1)            | 29.2<br>(25.5 to 32.7)                            | 1.1<br>(-1.4 to 3.2)                                |



| Cause                                                                               | Prevalence in thousands (95% UI)                    | Incidence in thousands (95% UI)                      | YLDs in thousands (95% UI)                          |                                                   |                                                     |
|-------------------------------------------------------------------------------------|-----------------------------------------------------|------------------------------------------------------|-----------------------------------------------------|---------------------------------------------------|-----------------------------------------------------|
|                                                                                     | 2016 counts                                         | 2016 counts                                          | 2016 counts                                         | Percentage change in counts between 2006 and 2016 | Percentage change in age-standardised rates between |
| Adverse effects of medical treatment                                                | 0.1<br>(0.1 to 0.1)                                 | 0.9<br>(0.8 to 1.1)                                  | < 0.05<br>(< 0.05 to < 0.05)                        | 26.3<br>(19.0 to 33.5)                            | 2.1<br>(-1.9 to 6.4)                                |
| Animal contact                                                                      | 1.1<br>(1.0 to 1.3)                                 | 1.9<br>(1.5 to 2.3)                                  | < 0.05<br>(< 0.05 to 0.1)                           | 28.6<br>(21.4 to 35.9)                            | 0.8<br>(-3.5 to 5.3)                                |
| Venomous animal contact                                                             | 0.5<br>(0.4 to 0.6)                                 | 0.8<br>(0.6 to 1.0)                                  | < 0.05<br>(< 0.05 to < 0.05)                        | 31.2<br>(21.5 to 41.0)                            | 3.4<br>(-2.9 to 9.5)                                |
| Non-venomous animal contact                                                         | 0.7<br>(0.5 to 0.8)                                 | 1.1<br>(0.8 to 1.3)                                  | < 0.05<br>(< 0.05 to < 0.05)                        | 22.4<br>(18.1 to 26.6)                            | -4.1<br>(-7.3 to -1.2)                              |
| Foreign body                                                                        | 1.5<br>(1.2 to 1.8)                                 | 1.2<br>(1.1 to 1.4)                                  | 0.1<br>(< 0.05 to 0.1)                              | 26.7<br>(22.3 to 31.2)                            | 0.3<br>(-2.2 to 2.8)                                |
| Pulmonary aspiration and foreign body in airway                                     | 0.9<br>(0.7 to 1.2)                                 | 0.5<br>(0.4 to 0.6)                                  | < 0.05<br>(< 0.05 to 0.1)                           | 24.2<br>(19.5 to 28.8)                            | -1.4<br>(-4.0 to 1.1)                               |
| Foreign body in eyes                                                                | 0.1<br>(< 0.05 to 0.1)                              | 0.4<br>(0.3 to 0.5)                                  | < 0.05<br>(< 0.05 to < 0.05)                        | 31.8<br>(25.7 to 37.9)                            | 4.0<br>(1.1 to 7.4)                                 |
| Foreign body in other body part                                                     | 0.6<br>(0.4 to 0.7)                                 | 0.3<br>(0.2 to 0.4)                                  | < 0.05<br>(< 0.05 to < 0.05)                        | 32.0<br>(26.7 to 37.5)                            | 3.9<br>(0.6 to 7.1)                                 |
| Environmental heat and cold exposure                                                | 1.0<br>(0.9 to 1.2)                                 | 0.4<br>(0.3 to 0.5)                                  | < 0.05<br>(< 0.05 to 0.1)                           | 29.4<br>(25.9 to 32.7)                            | 3.1<br>(1.0 to 5.2)                                 |
| Other unintentional injuries                                                        | 3.0<br>(2.3 to 3.9)                                 | 1.5<br>(1.2 to 1.9)                                  | 0.1<br>(0.1 to 0.1)                                 | 37.0<br>(33.5 to 40.3)                            | 7.8<br>(5.7 to 9.7)                                 |
| <b>Self-harm and interpersonal violence</b>                                         | <b>5.9</b><br><b>(5.2 to 6.6)</b>                   | <b>0.8†</b><br><b>(0.6 to 0.9)</b>                   | <b>0.1</b><br><b>(0.1 to 0.1)</b>                   | <b>18.6</b><br><b>(15.4 to 21.6)</b>              | <b>-7.3</b><br><b>(-9.1 to -5.4)</b>                |
| Self-harm                                                                           | 0.1<br>(0.1 to 0.1)                                 | 0.1<br>(< 0.05 to 0.1)                               | < 0.05<br>(< 0.05 to < 0.05)                        | 32.5<br>(28.2 to 36.7)                            | 3.5<br>(0.8 to 6.1)                                 |
| Self-harm by firearm                                                                | < 0.05<br>(< 0.05 to < 0.05)                        | < 0.05<br>(< 0.05 to < 0.05)                         | < 0.05<br>(< 0.05 to < 0.05)                        | 27.4<br>(23.0 to 31.5)                            | -1.2<br>(-4.1 to 1.4)                               |
| Self-harm by other specified means                                                  | 0.1<br>(0.1 to 0.1)                                 | < 0.05<br>(< 0.05 to 0.1)                            | < 0.05<br>(< 0.05 to < 0.05)                        | 32.8<br>(28.4 to 37.1)                            | 3.8<br>(1.0 to 6.5)                                 |
| Interpersonal violence                                                              | 5.8<br>(5.1 to 6.5)                                 | 0.7†<br>(0.6 to 0.8)                                 | 0.1<br>(0.1 to 0.1)                                 | 17.8<br>(14.6 to 20.9)                            | -8.0<br>(-9.9 to -6.1)                              |
| Assault by firearm                                                                  | 0.1<br>(0.1 to 0.1)                                 | < 0.05<br>(< 0.05 to < 0.05)                         | < 0.05<br>(< 0.05 to < 0.05)                        | 25.8<br>(21.0 to 30.0)                            | -4.3<br>(-7.0 to -1.7)                              |
| Assault by sharp object                                                             | 0.5<br>(0.4 to 0.5)                                 | 0.3<br>(0.2 to 0.4)                                  | < 0.05<br>(< 0.05 to < 0.05)                        | 26.4<br>(22.7 to 29.7)                            | -3.4<br>(-5.7 to -1.3)                              |
| Sexual violence                                                                     | 4.8<br>(4.2 to 5.5)                                 | --                                                   | < 0.05<br>(< 0.05 to 0.1)                           | 13.1<br>(7.7 to 18.4)                             | -10.6<br>(-14.2 to -6.8)                            |
| Assault by other means                                                              | 0.5<br>(0.4 to 0.6)                                 | 0.4<br>(0.3 to 0.5)                                  | < 0.05<br>(< 0.05 to < 0.05)                        | 20.4<br>(17.3 to 23.2)                            | -8.2<br>(-10.1 to -6.5)                             |
| <b>Forces of nature, conflict and terrorism, and executions and police conflict</b> | <b>&lt; 0.05</b><br><b>(&lt; 0.05 to &lt; 0.05)</b> | <b>&lt; 0.05†</b><br><b>(&lt; 0.05 to &lt; 0.05)</b> | <b>&lt; 0.05</b><br><b>(&lt; 0.05 to &lt; 0.05)</b> | <b>36.2</b><br><b>(21.7 to 45.8)</b>              | <b>16.2</b><br><b>(7.0 to 22.4)</b>                 |
| Exposure to forces of nature                                                        | --                                                  | --                                                   | --                                                  | --                                                | --                                                  |
| Conflict and terrorism                                                              | --                                                  | --                                                   | --                                                  | --                                                | --                                                  |
| Executions and police conflict                                                      | < 0.05<br>(< 0.05 to < 0.05)                        | < 0.05<br>(< 0.05 to < 0.05)                         | < 0.05<br>(< 0.05 to < 0.05)                        | 36.2<br>(21.7 to 45.8)                            | 16.2<br>(7.0 to 22.4)                               |
| <b>Impairments</b>                                                                  | --                                                  | --                                                   | --                                                  | --                                                | --                                                  |
| Anaemia                                                                             | 70.3<br>(66.4 to 74.9)                              | --                                                   | 2.1<br>(1.4 to 3.0)                                 | 14.4<br>(-4.6 to 26.3)                            | -10.2<br>(-29.4 to -1.0)                            |
| Developmental intellectual disability                                               | 6.7<br>(5.2 to 8.3)                                 | --                                                   | 0.8<br>(0.5 to 1.1)                                 | 28.9<br>(19.2 to 42.5)                            | 2.6<br>(-4.7 to 13.3)                               |
| Epilepsy                                                                            | 2.1<br>(1.3 to 3.0)                                 | --                                                   | 0.8<br>(0.4 to 1.2)                                 | 32.5<br>(-27.1 to 134.8)                          | 4.0<br>(-44.0 to 90.7)                              |
| Guillain-Barre syndrome                                                             | < 0.05<br>(< 0.05 to < 0.05)                        | --                                                   | < 0.05<br>(< 0.05 to < 0.05)                        | 25.6<br>(22.8 to 28.2)                            | 0.1<br>(-0.0 to 0.3)                                |
| Hearing loss                                                                        | 23.3<br>(22.0 to 24.8)                              | --                                                   | 0.8<br>(0.6 to 1.2)                                 | 15.4<br>(11.2 to 19.2)                            | -4.6<br>(-6.9 to -2.5)                              |
| Heart failure                                                                       | 0.6<br>(0.5 to 0.6)                                 | --                                                   | 0.1<br>(< 0.05 to 0.1)                              | 7.1<br>(-2.4 to 17.2)                             | -3.2<br>(-10.9 to 5.1)                              |
| Infertility                                                                         | 2.4<br>(1.8 to 3.2)                                 | --                                                   | < 0.05<br>(< 0.05 to < 0.05)                        | 45.5<br>(23.0 to 71.4)                            | 11.3<br>(-6.4 to 31.0)                              |
| Pelvic inflammatory disease                                                         | 0.2<br>(0.1 to 0.2)                                 | --                                                   | < 0.05<br>(< 0.05 to < 0.05)                        | 24.6<br>(6.5 to 44.5)                             | -5.0<br>(-18.1 to 8.7)                              |
| Vision loss                                                                         | 19.7<br>(18.0 to 21.5)                              | --                                                   | 0.8<br>(0.5 to 1.1)                                 | 22.9<br>(14.8 to 35.4)                            | -2.0<br>(-6.5 to 4.6)                               |

We did not calculate incidence for the nine impairments, certain NTDs, and causes with only birth prevalence. Blank cells mean that no estimate is available.

† Incidence for aggregate causes represents the sum of the incidence of the causes below the aggregate.

‡ Incidence estimates for stroke represent first-ever stroke only.

^ Incidence of HIV/AIDS represents new infections of HIV only and does not include new infections of Tuberculosis in HIV positive cases.

SR Table 14: Prevalence, incidence, and YLDs for 2016, percentage change of YLD counts and percentage change of age-standardised YLD rates between 2006 and 2016 by cause and impairments, for all ages, Saudi Arabia.

| Cause                                                                                | Prevalence in thousands (95% UI)          | Incidence in thousands (95% UI)               | YLDs in thousands (95% UI)             |                                                   |                                                     |
|--------------------------------------------------------------------------------------|-------------------------------------------|-----------------------------------------------|----------------------------------------|---------------------------------------------------|-----------------------------------------------------|
|                                                                                      | 2016 counts                               | 2016 counts                                   | 2016 counts                            | Percentage change in counts between 2006 and 2016 | Percentage change in age-standardised rates between |
| <b>All causes</b>                                                                    | <b>30,487.0</b><br>(30,444.9 to 30,522.0) | <b>185,245.9†</b><br>(174,547.4 to 196,965.6) | <b>3,326.0</b><br>(2,467.5 to 4,326.9) | <b>31.9</b><br>(29.7 to 33.5)                     | <b>-1.9</b><br>(-2.9 to -1.1)                       |
| <b>Communicable, maternal, neonatal, and nutritional disorders</b>                   | <b>19,946.4</b><br>(19,723.8 to 20,150.7) | <b>108,671.0†</b><br>(99,040.4 to 119,642.0)  | <b>351.6</b><br>(247.4 to 487.6)       | <b>1.0</b><br>(-4.2 to 5.7)                       | <b>-12.4</b><br>(-16.5 to -8.3)                     |
| <b>HIV/AIDS and tuberculosis</b>                                                     | <b>10,504.3</b><br>(9,872.0 to 10,869.6)  | <b>12.1†</b><br>(10.8 to 14.0)                | <b>2.8</b><br>(1.6 to 4.8)             | <b>17.2</b><br>(-4.1 to 54.9)                     | <b>-13.3</b><br>(-26.9 to 12.2)                     |
| Tuberculosis                                                                         | 10,056.5<br>(9,553.2 to 10,536.3)         | 11.6†<br>(10.5 to 12.9)                       | 2.1<br>(1.4 to 2.9)                    | 2.2<br>(-8.0 to 13.8)                             | -22.6<br>(-29.0 to -15.2)                           |
| Drug-susceptible tuberculosis                                                        | 6.6<br>(5.7 to 7.6)                       | 11.2<br>(10.1 to 12.6)                        | 2.0<br>(1.3 to 2.8)                    | 1.8<br>(-9.7 to 14.0)                             | -22.9<br>(-29.9 to -15.3)                           |
| Multidrug-resistant tuberculosis without extensive drug resistance                   | 0.2<br>(0.1 to 0.5)                       | 0.3<br>(0.1 to 0.7)                           | 0.1<br>(< 0.05 to 0.2)                 | 13.8<br>(-55.4 to 182.6)                          | -14.3<br>(-65.5 to 114.4)                           |
| Extensively drug-resistant tuberculosis                                              | < 0.05<br>(< 0.05 to < 0.05)              | < 0.05<br>(< 0.05 to < 0.05)                  | < 0.05<br>(< 0.05 to < 0.05)           | 158.4<br>(1.4 to 542.0)                           | 94.6<br>(-21.7 to 386.7)                            |
| Latent tuberculosis infection                                                        | 10,049.8<br>(9,547.0 to 10,529.7)         | --                                            | --                                     | --                                                | --                                                  |
| HIV/AIDS                                                                             | 4.7<br>(0.6 to 16.6)                      | 0.6^<br>(< 0.05 to 2.1)                       | 0.7<br>(0.1 to 2.7)                    | 99.9<br>(-1.2 to 241.8)                           | 44.5<br>(-31.8 to 161.4)                            |
| Drug-susceptible HIV/AIDS - Tuberculosis                                             | 0.2<br>(0.1 to 0.3)                       | 0.4<br>(0.2 to 0.6)                           | 0.1<br>(< 0.05 to 0.1)                 | 23.0<br>(15.6 to 31.1)                            | -6.3<br>(-12.0 to -0.1)                             |
| Multidrug-resistant HIV/AIDS - Tuberculosis without extensive drug resistance        | < 0.05<br>(< 0.05 to < 0.05)              | < 0.05<br>(< 0.05 to < 0.05)                  | < 0.05<br>(< 0.05 to < 0.05)           | 36.9<br>(-45.9 to 243.6)                          | 4.2<br>(-58.8 to 159.6)                             |
| Extensively drug-resistant HIV/AIDS - Tuberculosis                                   | < 0.05<br>(< 0.05 to < 0.05)              | < 0.05<br>(< 0.05 to < 0.05)                  | < 0.05<br>(< 0.05 to < 0.05)           | 210.9<br>(22.9 to 680.5)                          | 136.7<br>(-6.3 to 489.6)                            |
| HIV/AIDS resulting in other diseases                                                 | 4.5<br>(0.3 to 16.4)                      | 0.6<br>(< 0.05 to 2.1)                        | 0.7<br>(< 0.05 to 2.6)                 | 117.8<br>(-27.2 to 356.9)                         | 55.6<br>(-50.6 to 254.5)                            |
| <b>Diarrhoea, lower respiratory infections, and other common infectious diseases</b> | <b>1,746.6</b><br>(1,685.9 to 1,801.6)    | <b>101,920.8†</b><br>(92,039.7 to 112,736.4)  | <b>78.0</b><br>(53.4 to 109.1)         | <b>13.0</b><br>(10.9 to 15.1)                     | <b>-1.4</b><br>(-2.7 to -0.1)                       |
| Diarrhoeal diseases                                                                  | 241.4<br>(225.0 to 260.4)                 | 16,123.4<br>(14,978.2 to 17,414.0)            | 27.4<br>(18.8 to 37.7)                 | 7.6<br>(4.0 to 11.0)                              | -1.3<br>(-3.7 to 1.1)                               |
| Intestinal infectious diseases                                                       | 0.7<br>(0.6 to 0.8)                       | 13.0†<br>(11.7 to 14.5)                       | 0.1<br>(0.1 to 0.2)                    | -14.6<br>(-26.4 to -0.2)                          | -26.3<br>(-35.8 to -15.6)                           |
| Typhoid fever                                                                        | 0.7<br>(0.6 to 0.8)                       | 10.6<br>(9.4 to 11.8)                         | 0.1<br>(0.1 to 0.1)                    | -14.5<br>(-27.4 to 0.9)                           | -26.2<br>(-36.3 to -14.5)                           |
| Paratyphoid fever                                                                    | 0.1<br>(0.1 to 0.1)                       | 2.4<br>(2.1 to 2.8)                           | < 0.05<br>(< 0.05 to < 0.05)           | -7.0<br>(-22.4 to 10.4)                           | -21.9<br>(-33.8 to -9.3)                            |
| Other intestinal infectious diseases                                                 | --                                        | --                                            | < 0.05<br>(< 0.05 to < 0.05)           | -47.6<br>(-57.6 to -35.1)                         | -43.7<br>(-52.2 to -33.5)                           |
| Lower respiratory infections                                                         | 35.1<br>(32.4 to 38.1)                    | 1,523.2<br>(1,397.7 to 1,659.5)               | 2.1<br>(1.4 to 3.0)                    | 19.2<br>(13.3 to 25.6)                            | -6.8<br>(-10.5 to -2.7)                             |
| Upper respiratory infections                                                         | 1,078.5<br>(954.9 to 1,216.7)             | 81,311.4<br>(71,612.8 to 92,416.5)            | 26.9<br>(15.8 to 41.4)                 | 15.8<br>(12.5 to 19.3)                            | -0.1<br>(-2.0 to 1.9)                               |
| Otitis media                                                                         | 360.2<br>(322.6 to 397.7)                 | 2,280.7<br>(1,834.1 to 2,848.7)               | 9.7<br>(6.0 to 14.6)                   | -0.2<br>(-4.3 to 4.5)                             | -7.1<br>(-10.8 to -3.5)                             |
| Meningitis                                                                           | 39.9<br>(35.2 to 45.5)                    | 7.5<br>(6.2 to 8.9)                           | 4.7<br>(3.3 to 6.2)                    | 37.4<br>(34.6 to 40.2)                            | 6.8<br>(4.7 to 8.8)                                 |
| Pneumococcal meningitis                                                              | 14.9<br>(12.6 to 17.8)                    | 1.1<br>(0.8 to 1.4)                           | 1.7<br>(1.2 to 2.3)                    | 34.8<br>(29.3 to 40.7)                            | 3.1<br>(-0.9 to 7.3)                                |
| H influenzae type B meningitis                                                       | 10.5<br>(8.3 to 13.0)                     | 2.5<br>(1.9 to 3.1)                           | 1.2<br>(0.8 to 1.7)                    | 34.5<br>(31.5 to 38.0)                            | 6.4<br>(3.9 to 8.9)                                 |
| Meningococcal infection                                                              | 4.5<br>(3.7 to 5.5)                       | 1.0<br>(0.8 to 1.4)                           | 0.7<br>(0.4 to 0.9)                    | 44.3<br>(40.2 to 48.2)                            | 9.1<br>(6.6 to 11.8)                                |
| Other meningitis                                                                     | 10.0<br>(8.0 to 12.2)                     | 2.9<br>(2.4 to 3.6)                           | 1.1<br>(0.8 to 1.5)                    | 41.0<br>(37.6 to 45.1)                            | 12.1<br>(9.3 to 15.7)                               |
| Encephalitis                                                                         | 53.3<br>(38.6 to 74.1)                    | 34.0<br>(29.9 to 38.6)                        | 6.0<br>(4.3 to 8.0)                    | 36.9<br>(28.2 to 46.1)                            | 1.4<br>(-4.1 to 7.1)                                |
| Diphtheria                                                                           | < 0.05<br>(< 0.05 to < 0.05)              | < 0.05<br>(< 0.05 to < 0.05)                  | < 0.05<br>(< 0.05 to < 0.05)           | -37.5<br>(-52.4 to -18.6)                         | -44.6<br>(-57.0 to -29.5)                           |
| Whooping cough                                                                       | 1.2<br>(0.9 to 1.6)                       | 8.9<br>(6.7 to 11.8)                          | 0.1<br>(< 0.05 to 0.1)                 | -58.7<br>(-65.8 to -51.2)                         | -45.5<br>(-54.6 to -35.7)                           |
| Tetanus                                                                              | < 0.05<br>(< 0.05 to < 0.05)              | < 0.05<br>(< 0.05 to < 0.05)                  | < 0.05<br>(< 0.05 to < 0.05)           | 4.9<br>(-10.5 to 19.1)                            | -7.3<br>(-19.4 to 5.0)                              |
| Measles                                                                              | 0.2<br>(0.1 to 0.5)                       | 8.1<br>(2.8 to 18.8)                          | < 0.05<br>(< 0.05 to < 0.05)           | -59.8<br>(-66.4 to -53.0)                         | -49.2<br>(-57.5 to -40.5)                           |
| Varicella and herpes zoster                                                          | 26.8<br>(24.7 to 29.2)                    | 610.6<br>(585.5 to 635.8)                     | 1.0<br>(0.6 to 1.5)                    | 34.9<br>(25.1 to 45.6)                            | 0.2<br>(-4.9 to 5.7)                                |
| <b>Neglected tropical diseases and malaria</b>                                       | <b>2,962.7</b><br>(2,620.3 to 3,200.9)    | <b>62.3†</b><br>(39.2 to 94.9)                | <b>8.9</b><br>(5.6 to 13.6)            | <b>-7.9</b><br>(-16.6 to 1.7)                     | <b>-13.5</b><br>(-22.5 to -4.6)                     |
| Malaria                                                                              | 1.2<br>(1.0 to 1.5)                       | --                                            | 0.3<br>(0.2 to 0.5)                    | 25.4<br>(20.5 to 31.3)                            | 0.5<br>(-3.5 to 4.8)                                |
| Chagas disease                                                                       | --                                        | --                                            | --                                     | --                                                | --                                                  |
| Leishmaniasis                                                                        | 4.9<br>(3.1 to 7.6)                       | 7.7<br>(3.3 to 14.3)                          | 0.2<br>(0.1 to 0.5)                    | -43.0<br>(-79.4 to 42.5)                          | -55.6<br>(-84.0 to 10.2)                            |
| Visceral leishmaniasis                                                               | < 0.05<br>(< 0.05 to < 0.05)              | < 0.05<br>(< 0.05 to < 0.05)                  | < 0.05<br>(< 0.05 to < 0.05)           | -46.7<br>(-78.6 to 17.7)                          | -62.5<br>(-86.6 to 5.4)                             |
| Cutaneous and mucocutaneous leishmaniasis                                            | 3.9<br>(1.6 to 7.2)                       | 7.7<br>(3.3 to 14.3)                          | 0.2<br>(0.1 to 0.5)                    | -43.0<br>(-79.4 to 42.7)                          | -55.6<br>(-84.0 to 10.8)                            |
| African trypanosomiasis                                                              | --                                        | --                                            | --                                     | --                                                | --                                                  |
| Schistosomiasis                                                                      | 26.4<br>(15.8 to 43.5)                    | 5.8<br>(5.1 to 6.6)                           | 0.2<br>(0.1 to 0.6)                    | 18.6<br>(1.9 to 36.7)                             | -9.6<br>(-22.7 to 1.4)                              |
| Cysticercosis                                                                        | --                                        | --                                            | --                                     | --                                                | --                                                  |
| Cystic echinococcosis                                                                | 2.4<br>(1.1 to 5.9)                       | 0.5<br>(0.2 to 1.3)                           | 0.2<br>(0.1 to 0.6)                    | -41.0<br>(-79.6 to 87.7)                          | -56.5<br>(-83.5 to 31.9)                            |
| Lymphatic filariasis                                                                 | --                                        | --                                            | --                                     | --                                                | --                                                  |
| Onchocerciasis                                                                       | --                                        | --                                            | --                                     | --                                                | --                                                  |
| Trachoma                                                                             | --                                        | --                                            | --                                     | --                                                | --                                                  |
| Dengue                                                                               | 2.9<br>(1.4 to 5.1)                       | 48.2<br>(26.2 to 79.3)                        | 0.5<br>(0.2 to 0.9)                    | 142.1<br>(80.2 to 464.8)                          | 97.6<br>(49.0 to 356.5)                             |
| Yellow fever                                                                         | --                                        | --                                            | --                                     | --                                                | --                                                  |
| Rabies                                                                               | < 0.05<br>(< 0.05 to < 0.05)              | < 0.05<br>(< 0.05 to < 0.05)                  | < 0.05<br>(< 0.05 to < 0.05)           | -12.9<br>(-57.1 to 48.1)                          | -27.9<br>(-68.0 to 33.5)                            |
| Intestinal nematode infections                                                       | 2,776.1<br>(2,375.4 to 3,018.4)           | --                                            | 2.1<br>(1.2 to 3.5)                    | 24.2<br>(-5.0 to 63.9)                            | 2.7<br>(-22.4 to 37.3)                              |
| Ascariasis                                                                           | 1,422.4<br>(1,253.5 to 1,607.9)           | --                                            | 0.2<br>(0.1 to 0.3)                    | 24.9<br>(-35.6 to 153.5)                          | 0.6<br>(-48.6 to 112.8)                             |

| Cause                                                                   | Prevalence in thousands (95% UI)                 | Incidence in thousands (95% UI)                   | YLDs in thousands (95% UI)                    |                                                   |                                                     |
|-------------------------------------------------------------------------|--------------------------------------------------|---------------------------------------------------|-----------------------------------------------|---------------------------------------------------|-----------------------------------------------------|
|                                                                         | 2016 counts                                      | 2016 counts                                       | 2016 counts                                   | Percentage change in counts between 2006 and 2016 | Percentage change in age-standardised rates between |
| Trichuriasis                                                            | 291.7<br>(254.1 to 331.7)                        | --                                                | < 0.05<br>(< 0.05 to < 0.05)                  | 27.8<br>(-77.2 to 519.2)                          | -0.4<br>(-81.7 to 419.6)                            |
| Hookworm disease                                                        | 776.2<br>(693.4 to 864.8)                        | --                                                | 1.9<br>(1.1 to 3.2)                           | 24.2<br>(-6.5 to 66.2)                            | 2.9<br>(-23.2 to 39.1)                              |
| Food-borne trematodiasis                                                | --                                               | --                                                | --                                            | --                                                | --                                                  |
| Leprosy                                                                 | 0.2<br>(0.1 to 0.2)                              | < 0.05<br>(< 0.05 to < 0.05)                      | < 0.05<br>(< 0.05 to < 0.05)                  | -9.0<br>(-12.7 to -5.2)                           | -36.5<br>(-39.9 to -32.7)                           |
| Ebola virus disease                                                     | --                                               | --                                                | --                                            | --                                                | --                                                  |
| Zika virus disease                                                      | --                                               | --                                                | --                                            | --                                                | --                                                  |
| Guinea worm disease                                                     | --                                               | --                                                | --                                            | --                                                | --                                                  |
| Other neglected tropical diseases                                       | 227.8<br>(209.9 to 244.5)                        | --                                                | 5.3<br>(3.3 to 8.2)                           | -18.4<br>(-24.3 to -12.6)                         | -16.1<br>(-22.0 to -10.9)                           |
| <b>Maternal disorders</b>                                               | <b>13.7</b><br><b>(12.2 to 15.5)</b>             | <b>247.9†</b><br><b>(216.9 to 285.2)</b>          | <b>1.0</b><br><b>(0.6 to 1.4)</b>             | <b>-29.9</b><br><b>(-46.5 to -9.2)</b>            | <b>-44.1</b><br><b>(-57.2 to -27.5)</b>             |
| Maternal haemorrhage                                                    | 3.8<br>(2.9 to 4.8)                              | 29.7<br>(22.7 to 38.5)                            | 0.2<br>(0.1 to 0.3)                           | -32.3<br>(-49.8 to -9.6)                          | -44.4<br>(-58.9 to -26.5)                           |
| Maternal sepsis and other pregnancy related infections                  | 6.2<br>(3.8 to 9.4)                              | 59.5<br>(44.8 to 80.8)                            | 0.2<br>(0.1 to 0.5)                           | -30.5<br>(-66.2 to 44.4)                          | -44.1<br>(-73.3 to 16.2)                            |
| Maternal hypertensive disorders                                         | 4.3<br>(2.8 to 6.0)                              | 28.0<br>(23.9 to 32.5)                            | 0.2<br>(0.1 to 0.4)                           | -25.1<br>(-51.7 to 15.2)                          | -42.2<br>(-62.9 to -10.1)                           |
| Maternal obstructed labour and uterine rupture                          | 0.3<br>(0.2 to 0.6)                              | 24.8<br>(18.2 to 34.6)                            | 0.1<br>(0.1 to 0.2)                           | -29.8<br>(-62.9 to 33.0)                          | -43.0<br>(-69.6 to 8.2)                             |
| Maternal abortion, miscarriage, and ectopic pregnancy                   | 0.9<br>(0.6 to 1.2)                              | 105.8<br>(81.7 to 136.0)                          | 0.1<br>(0.1 to 0.1)                           | -28.4<br>(-58.1 to 16.3)                          | -44.0<br>(-67.3 to -8.6)                            |
| Other maternal disorders                                                | --                                               | --                                                | 0.1<br>(0.1 to 0.2)                           | -33.5<br>(-49.2 to -13.9)                         | -46.9<br>(-59.5 to -31.3)                           |
| <b>Neonatal disorders</b>                                               | <b>311.6</b><br><b>(269.8 to 377.7)</b>          | --                                                | <b>78.2</b><br><b>(46.5 to 145.9)</b>         | <b>-3.1</b><br><b>(-15.0 to 19.2)</b>             | <b>-15.7</b><br><b>(-26.2 to 4.1)</b>               |
| Neonatal preterm birth complications                                    | 187.5<br>(146.8 to 238.5)                        | --                                                | 23.9<br>(14.6 to 38.6)                        | 14.1<br>(-10.8 to 51.9)                           | -3.6<br>(-24.5 to 28.4)                             |
| Neonatal encephalopathy due to birth asphyxia and trauma                | 51.4<br>(34.8 to 74.4)                           | --                                                | 8.6<br>(4.4 to 15.0)                          | 93.3<br>(40.1 to 266.0)                           | 62.6<br>(17.3 to 212.7)                             |
| Neonatal sepsis and other neonatal infections                           | 94.4<br>(38.1 to 224.9)                          | --                                                | 41.5<br>(14.8 to 110.8)                       | -17.2<br>(-23.4 to 9.3)                           | -28.3<br>(-34.0 to -1.5)                            |
| Hemolytic disease and other neonatal jaundice                           | 8.1<br>(7.3 to 9.0)                              | --                                                | 2.2<br>(1.6 to 2.8)                           | 34.6<br>(24.2 to 47.3)                            | 11.6<br>(3.4 to 21.1)                               |
| Other neonatal disorders                                                | --                                               | --                                                | 2.1<br>(1.2 to 3.9)                           | -42.9<br>(-49.0 to -31.3)                         | -23.5<br>(-31.7 to -8.0)                            |
| <b>Nutritional deficiencies</b>                                         | <b>6,999.4</b><br><b>(6,758.2 to 7,169.2)</b>    | <b>1,160.0†</b><br><b>(968.6 to 1,409.5)</b>      | <b>149.8</b><br><b>(97.8 to 222.2)</b>        | <b>-5.3</b><br><b>(-9.4 to -0.8)</b>              | <b>-16.7</b><br><b>(-19.7 to -13.7)</b>             |
| Protein-energy malnutrition                                             | 128.1<br>(111.9 to 146.1)                        | 68.0<br>(60.0 to 77.2)                            | 4.7<br>(3.0 to 6.9)                           | -40.3<br>(-47.9 to -31.5)                         | -20.0<br>(-30.2 to -8.3)                            |
| Iodine deficiency                                                       | 600.4<br>(532.6 to 674.8)                        | 14.5<br>(12.9 to 16.1)                            | 14.2<br>(9.4 to 20.1)                         | 41.1<br>(33.9 to 51.0)                            | 5.3<br>(0.7 to 11.4)                                |
| Vitamin A deficiency                                                    | 1,241.2<br>(1,028.0 to 1,519.1)                  | 1,077.5<br>(886.0 to 1,327.0)                     | --                                            | --                                                | --                                                  |
| Iron-deficiency anaemia                                                 | 5,586.2<br>(5,252.4 to 5,921.3)                  | --                                                | 130.7<br>(84.5 to 195.8)                      | -6.6<br>(-11.1 to -1.8)                           | -18.4<br>(-21.7 to -15.2)                           |
| Other nutritional deficiencies                                          | --                                               | --                                                | 0.2<br>(0.1 to 0.2)                           | -40.3<br>(-48.1 to -31.2)                         | -20.3<br>(-30.8 to -8.3)                            |
| <b>Other communicable, maternal, neonatal, and nutritional diseases</b> | <b>6,303.1</b><br><b>(6,135.9 to 6,497.3)</b>    | <b>5,267.9</b><br><b>(4,427.5 to 6,150.4)</b>     | <b>32.7</b><br><b>(20.1 to 52.5)</b>          | <b>24.2</b><br><b>(18.5 to 29.8)</b>              | <b>-2.5</b><br><b>(-5.8 to 0.4)</b>                 |
| Sexually transmitted diseases excluding HIV                             | 4,986.4<br>(4,809.1 to 5,182.0)                  | 5,139.7<br>(4,302.3 to 6,011.5)                   | 27.8<br>(16.6 to 45.0)                        | 32.0<br>(25.0 to 39.1)                            | -0.3<br>(-4.1 to 3.4)                               |
| Syphilis                                                                | 112.9<br>(84.3 to 147.4)                         | 84.2<br>(58.7 to 114.0)                           | 0.3<br>(0.2 to 0.5)                           | 60.2<br>(49.9 to 70.2)                            | 4.9<br>(-0.1 to 10.4)                               |
| Chlamydial infection                                                    | 417.7<br>(334.5 to 511.8)                        | 302.4<br>(243.4 to 372.0)                         | 2.6<br>(1.5 to 4.4)                           | 23.9<br>(16.2 to 32.6)                            | 1.8<br>(-4.4 to 8.3)                                |
| Gonococcal infection                                                    | 1,077.0<br>(878.7 to 1,316.4)                    | 3,874.9<br>(3,039.1 to 4,729.2)                   | 15.0<br>(8.8 to 24.8)                         | 32.7<br>(23.8 to 41.7)                            | -0.8<br>(-5.4 to 3.8)                               |
| Trichomoniasis                                                          | 647.3<br>(553.5 to 750.0)                        | 549.2<br>(467.8 to 639.1)                         | 0.6<br>(0.2 to 1.2)                           | 38.1<br>(31.9 to 44.6)                            | 1.9<br>(-2.0 to 5.8)                                |
| Genital herpes                                                          | 2,998.9<br>(2,573.5 to 3,482.0)                  | 207.8<br>(176.2 to 245.7)                         | 0.8<br>(0.2 to 1.7)                           | 41.0<br>(34.4 to 45.7)                            | -0.3<br>(-2.7 to 2.3)                               |
| Other sexually transmitted diseases                                     | 161.0<br>(138.0 to 176.6)                        | 121.1<br>(101.5 to 144.3)                         | 8.5<br>(5.2 to 13.6)                          | 31.3<br>(24.5 to 38.1)                            | -0.6<br>(-4.7 to 3.4)                               |
| Hepatitis                                                               | 1,437.1<br>(1,182.5 to 1,762.5)                  | 128.1<br>(104.6 to 154.1)                         | 0.2<br>(0.1 to 0.3)                           | 1.8<br>(-15.8 to 23.6)                            | -26.7<br>(-39.5 to -10.7)                           |
| Acute hepatitis A                                                       | 1.1<br>(0.6 to 1.7)                              | 14.4<br>(7.6 to 22.4)                             | < 0.05<br>(< 0.05 to 0.1)                     | -12.7<br>(-59.8 to 95.5)                          | -31.5<br>(-70.0 to 52.7)                            |
| Hepatitis B                                                             | 1,232.3<br>(980.9 to 1,550.9)                    | 100.2<br>(78.9 to 126.6)                          | 0.1<br>(0.1 to 0.2)                           | 8.8<br>(-10.9 to 33.1)                            | -25.6<br>(-40.4 to -7.4)                            |
| Hepatitis C                                                             | 203.1<br>(177.4 to 230.3)                        | 5.3<br>(4.6 to 6.0)                               | < 0.05<br>(< 0.05 to < 0.05)                  | -12.0<br>(-14.9 to -8.5)                          | -18.9<br>(-20.6 to -17.5)                           |
| Acute hepatitis E                                                       | 0.6<br>(0.5 to 0.7)                              | 8.3<br>(7.1 to 9.7)                               | < 0.05<br>(< 0.05 to < 0.05)                  | -11.0<br>(-19.4 to -1.8)                          | -27.9<br>(-35.3 to -19.6)                           |
| Other infectious diseases                                               | 183.5<br>(170.3 to 195.9)                        | < 0.05<br>(< 0.05 to 0.1)                         | 4.6<br>(2.9 to 7.1)                           | -7.5<br>(-13.0 to -2.5)                           | -10.2<br>(-15.2 to -5.2)                            |
| <b>Non-communicable diseases</b>                                        | <b>29,151.4</b><br><b>(29,080.5 to 29,223.0)</b> | <b>73,995.1†</b><br><b>(70,241.1 to 78,320.7)</b> | <b>2,779.1</b><br><b>(2,032.4 to 3,599.8)</b> | <b>36.4</b><br><b>(35.1 to 37.7)</b>              | <b>-0.9</b><br><b>(-1.5 to -0.2)</b>                |
| <b>Neoplasms</b>                                                        | <b>59.6</b><br><b>(56.7 to 62.4)</b>             | <b>22.8</b><br><b>(21.0 to 24.5)</b>              | <b>7.5</b><br><b>(5.4 to 9.9)</b>             | <b>108.8</b><br><b>(90.2 to 125.8)</b>            | <b>26.6</b><br><b>(16.4 to 35.8)</b>                |
| Lip and oral cavity cancer                                              | 1.4<br>(1.3 to 1.4)                              | 0.4<br>(0.4 to 0.4)                               | 0.1<br>(0.1 to 0.2)                           | 56.6<br>(43.0 to 71.5)                            | -0.1<br>(-9.0 to 9.9)                               |
| Nasopharynx cancer                                                      | 0.6<br>(0.5 to 0.7)                              | 0.2<br>(0.2 to 0.2)                               | 0.1<br>(0.1 to 0.1)                           | 40.9<br>(20.2 to 71.1)                            | -11.1<br>(-23.3 to 6.8)                             |
| Other pharynx cancer                                                    | 0.4<br>(0.4 to 0.5)                              | 0.1<br>(0.1 to 0.2)                               | 0.1<br>(< 0.05 to 0.1)                        | 70.7<br>(45.0 to 96.8)                            | 3.0<br>(-13.0 to 20.6)                              |
| Oesophageal cancer                                                      | 0.2<br>(0.2 to 0.2)                              | 0.2<br>(0.2 to 0.3)                               | 0.1<br>(< 0.05 to 0.1)                        | 30.0<br>(21.9 to 39.7)                            | -16.2<br>(-21.9 to -10.4)                           |
| Stomach cancer                                                          | 0.8<br>(0.8 to 0.9)                              | 0.6<br>(0.5 to 0.6)                               | 0.1<br>(0.1 to 0.2)                           | 28.7<br>(18.9 to 41.4)                            | -17.4<br>(-24.1 to -9.9)                            |
| Colon and rectum cancer                                                 | 8.4<br>(6.7 to 9.3)                              | 2.4<br>(1.9 to 2.7)                               | 0.8<br>(0.6 to 1.1)                           | 139.1<br>(87.5 to 171.3)                          | 44.0<br>(13.5 to 63.5)                              |
| Liver cancer                                                            | 0.6<br>(0.5 to 0.6)                              | 1.4<br>(1.3 to 1.6)                               | 0.3<br>(0.2 to 0.4)                           | 42.4<br>(27.7 to 58.2)                            | -6.2<br>(-15.8 to 4.0)                              |
| Liver cancer due to hepatitis B                                         | 0.3<br>(0.2 to 0.4)                              | 0.4<br>(0.3 to 0.5)                               | 0.1<br>(0.1 to 0.1)                           | 46.0<br>(27.0 to 64.6)                            | -6.6<br>(-17.6 to 3.8)                              |



| Cause                                              | Prevalence in thousands (95% UI)              | Incidence in thousands (95% UI)          | YLDs in thousands (95% UI)            |                                                   |                                                     |
|----------------------------------------------------|-----------------------------------------------|------------------------------------------|---------------------------------------|---------------------------------------------------|-----------------------------------------------------|
|                                                    | 2016 counts                                   | 2016 counts                              | 2016 counts                           | Percentage change in counts between 2006 and 2016 | Percentage change in age-standardised rates between |
| Liver cancer due to hepatitis C                    | 0.3<br>(0.3 to 0.4)                           | 0.5<br>(0.4 to 0.6)                      | 0.1<br>(0.1 to 0.1)                   | 35.5<br>(16.0 to 52.3)                            | -8.0<br>(-21.3 to 3.5)                              |
| Liver cancer due to alcohol use                    | 0.1<br>(< 0.05 to 0.1)                        | 0.1<br>(0.1 to 0.1)                      | < 0.05<br>(< 0.05 to < 0.05)          | 47.5<br>(32.6 to 65.5)                            | -3.5<br>(-12.6 to 6.7)                              |
| Liver cancer due to other causes                   | 0.3<br>(0.3 to 0.4)                           | 0.5<br>(0.4 to 0.5)                      | 0.1<br>(0.1 to 0.1)                   | 45.5<br>(30.9 to 63.7)                            | -4.2<br>(-14.2 to 9.0)                              |
| Gallbladder and biliary tract cancer               | 0.2<br>(0.1 to 0.2)                           | 0.2<br>(0.2 to 0.3)                      | 0.1<br>(< 0.05 to 0.1)                | 32.7<br>(16.8 to 51.9)                            | -12.7<br>(-23.5 to 0.5)                             |
| Pancreatic cancer                                  | 0.5<br>(0.5 to 0.5)                           | 0.7<br>(0.7 to 0.7)                      | 0.1<br>(0.1 to 0.2)                   | 68.4<br>(59.6 to 78.5)                            | 6.6<br>(0.4 to 13.8)                                |
| Larynx cancer                                      | 0.7<br>(0.6 to 0.7)                           | 0.2<br>(0.2 to 0.2)                      | 0.1<br>(0.1 to 0.1)                   | 105.4<br>(85.9 to 128.9)                          | 22.8<br>(11.7 to 34.7)                              |
| Tracheal, bronchus, and lung cancer                | 1.3<br>(1.1 to 1.4)                           | 1.2<br>(1.1 to 1.3)                      | 0.3<br>(0.2 to 0.4)                   | 59.3<br>(41.3 to 76.1)                            | 6.2<br>(-6.6 to 18.9)                               |
| Malignant skin melanoma                            | 0.7<br>(0.5 to 0.9)                           | 0.1<br>(0.1 to 0.2)                      | 0.1<br>(< 0.05 to 0.1)                | 243.6<br>(166.9 to 326.7)                         | 109.2<br>(63.7 to 160.9)                            |
| Non-melanoma skin cancer                           | 0.1<br>(0.1 to 0.2)                           | 0.8<br>(0.5 to 1.3)                      | < 0.05<br>(< 0.05 to < 0.05)          | 30.9<br>(-9.1 to 60.3)                            | -22.7<br>(-53.5 to -4.2)                            |
| Non-melanoma skin cancer (squamous-cell carcinoma) | 0.1<br>(0.1 to 0.1)                           | 0.1<br>(0.1 to 0.2)                      | < 0.05<br>(< 0.05 to < 0.05)          | 27.6<br>(-13.8 to 59.6)                           | -24.7<br>(-56.5 to -4.7)                            |
| Non-melanoma skin cancer (basal-cell carcinoma)    | 0.1<br>(< 0.05 to 0.1)                        | 0.7<br>(0.4 to 1.1)                      | < 0.05<br>(< 0.05 to < 0.05)          | 55.4<br>(34.5 to 76.4)                            | -1.0<br>(-6.4 to 3.6)                               |
| Breast cancer                                      | 16.2<br>(11.5 to 20.5)                        | 3.4<br>(2.4 to 4.3)                      | 1.4<br>(0.8 to 2.0)                   | 133.9<br>(69.6 to 182.5)                          | 36.5<br>(-0.3 to 63.5)                              |
| Cervical cancer                                    | 1.0<br>(0.8 to 1.5)                           | 0.3<br>(0.2 to 0.4)                      | 0.1<br>(0.1 to 0.2)                   | 22.0<br>(-1.7 to 67.7)                            | -25.9<br>(-40.2 to 1.1)                             |
| Uterine cancer                                     | 2.1<br>(1.8 to 2.5)                           | 0.4<br>(0.4 to 0.5)                      | 0.2<br>(0.1 to 0.2)                   | 185.2<br>(144.1 to 246.6)                         | 59.3<br>(35.7 to 92.2)                              |
| Ovarian cancer                                     | 1.3<br>(1.2 to 1.5)                           | 0.4<br>(0.4 to 0.5)                      | 0.2<br>(0.1 to 0.3)                   | 79.8<br>(58.7 to 101.0)                           | 10.3<br>(-3.9 to 25.6)                              |
| Prostate cancer                                    | 5.7<br>(4.4 to 7.2)                           | 1.4<br>(1.1 to 1.7)                      | 0.5<br>(0.4 to 0.8)                   | 178.6<br>(120.9 to 230.2)                         | 64.5<br>(33.5 to 93.2)                              |
| Testicular cancer                                  | 0.9<br>(0.8 to 1.1)                           | 0.2<br>(0.1 to 0.2)                      | 0.1<br>(< 0.05 to 0.1)                | 264.8<br>(191.6 to 356.1)                         | 176.0<br>(123.1 to 242.1)                           |
| Kidney cancer                                      | 2.3<br>(2.0 to 2.6)                           | 0.6<br>(0.6 to 0.8)                      | 0.2<br>(0.1 to 0.3)                   | 91.8<br>(68.6 to 125.2)                           | 29.0<br>(13.9 to 52.1)                              |
| Bladder cancer                                     | 3.4<br>(2.8 to 3.7)                           | 0.8<br>(0.7 to 0.9)                      | 0.3<br>(0.2 to 0.4)                   | 130.4<br>(95.0 to 154.2)                          | 37.9<br>(18.2 to 51.6)                              |
| Brain and nervous system cancer                    | 2.0<br>(1.7 to 2.6)                           | 1.0<br>(0.8 to 1.3)                      | 0.3<br>(0.2 to 0.4)                   | 70.9<br>(44.6 to 129.9)                           | 18.6<br>(-2.1 to 65.7)                              |
| Thyroid cancer                                     | 9.7<br>(4.0 to 13.2)                          | 1.8<br>(0.8 to 2.5)                      | 0.6<br>(0.2 to 1.0)                   | 344.7<br>(255.6 to 483.0)                         | 145.6<br>(100.3 to 212.4)                           |
| Mesothelioma                                       | < 0.05<br>(< 0.05 to < 0.05)                  | < 0.05<br>(< 0.05 to < 0.05)             | < 0.05<br>(< 0.05 to < 0.05)          | 60.5<br>(32.9 to 82.5)                            | -2.7<br>(-19.2 to 11.2)                             |
| Hodgkin lymphoma                                   | 1.1<br>(0.2 to 2.0)                           | 0.3<br>(0.1 to 0.4)                      | 0.1<br>(< 0.05 to 0.2)                | 208.1<br>(125.4 to 293.2)                         | 118.5<br>(41.5 to 183.5)                            |
| Non-Hodgkin's lymphoma                             | 4.1<br>(2.7 to 4.9)                           | 1.2<br>(0.8 to 1.5)                      | 0.4<br>(0.2 to 0.6)                   | 159.7<br>(131.8 to 197.6)                         | 63.7<br>(47.4 to 87.2)                              |
| Multiple myeloma                                   | 0.5<br>(0.4 to 0.7)                           | 0.3<br>(0.2 to 0.3)                      | 0.1<br>(0.1 to 0.2)                   | 152.7<br>(114.8 to 210.7)                         | 48.0<br>(27.5 to 81.4)                              |
| Leukaemia                                          | 3.8<br>(3.0 to 4.5)                           | 1.0<br>(0.9 to 1.2)                      | 0.5<br>(0.3 to 0.7)                   | 40.6<br>(22.4 to 60.4)                            | -1.8<br>(-15.1 to 15.7)                             |
| Acute lymphoid leukaemia                           | 0.7<br>(0.4 to 0.9)                           | 0.2<br>(0.1 to 0.2)                      | 0.1<br>(< 0.05 to 0.1)                | 66.4<br>(20.7 to 110.6)                           | 37.7<br>(1.3 to 70.0)                               |
| Chronic lymphoid leukaemia                         | 0.4<br>(0.4 to 0.5)                           | 0.1<br>(0.1 to 0.1)                      | 0.1<br>(< 0.05 to 0.1)                | 81.0<br>(54.5 to 115.6)                           | 18.1<br>(0.7 to 42.0)                               |
| Acute myeloid leukaemia                            | 0.3<br>(0.3 to 0.4)                           | 0.2<br>(0.2 to 0.2)                      | 0.1<br>(< 0.05 to 0.1)                | 57.0<br>(38.2 to 80.8)                            | 22.2<br>(7.8 to 42.5)                               |
| Chronic myeloid leukaemia                          | 0.3<br>(0.2 to 0.4)                           | 0.1<br>(0.1 to 0.1)                      | < 0.05<br>(< 0.05 to 0.1)             | 52.7<br>(25.9 to 92.7)                            | -0.8<br>(-18.1 to 26.9)                             |
| Other leukaemia                                    | 2.1<br>(1.6 to 2.6)                           | 0.5<br>(0.4 to 0.6)                      | 0.2<br>(0.2 to 0.4)                   | 24.5<br>(0.9 to 48.6)                             | -11.9<br>(-28.0 to 8.6)                             |
| Other neoplasms                                    | 3.0<br>(2.5 to 3.2)                           | 1.0<br>(0.8 to 1.0)                      | 0.3<br>(0.2 to 0.4)                   | 95.9<br>(80.6 to 115.9)                           | 29.9<br>(19.4 to 45.5)                              |
| <b>Cardiovascular diseases</b>                     | <b>1,597.4</b><br><b>(1,560.2 to 1,630.8)</b> | <b>170.8†</b><br><b>(160.6 to 181.2)</b> | <b>96.6</b><br><b>(69.7 to 126.6)</b> | <b>50.1</b><br><b>(46.9 to 53.5)</b>              | <b>-3.0</b><br><b>(-5.1 to -0.9)</b>                |
| Rheumatic heart disease                            | 1.9<br>(1.7 to 2.2)                           | 0.3<br>(0.3 to 0.4)                      | 0.1<br>(0.1 to 0.2)                   | 42.9<br>(35.7 to 50.5)                            | -5.7<br>(-12.3 to 1.1)                              |
| Ischaemic heart disease                            | 717.1<br>(680.8 to 754.3)                     | 92.4<br>(84.1 to 102.1)                  | 29.7<br>(20.6 to 40.6)                | 59.6<br>(56.0 to 63.1)                            | 1.4<br>(-0.2 to 3.0)                                |
| Cerebrovascular disease                            | 196.9<br>(188.6 to 204.9)                     | 26.2‡<br>(23.8 to 28.7)                  | 29.6<br>(21.2 to 37.6)                | 45.4<br>(37.5 to 52.8)                            | -7.7<br>(-12.7 to -2.7)                             |
| Ischaemic stroke                                   | 172.2<br>(155.5 to 188.7)                     | 19.9‡<br>(17.6 to 22.4)                  | 24.9<br>(17.7 to 31.6)                | 45.0<br>(36.0 to 53.8)                            | -7.7<br>(-13.5 to -2.0)                             |
| Hemorrhagic stroke                                 | 33.1<br>(30.1 to 36.7)                        | 6.3‡<br>(5.6 to 7.1)                     | 4.8<br>(3.4 to 6.1)                   | 47.3<br>(37.3 to 57.5)                            | -7.8<br>(-13.5 to -2.0)                             |
| Hypertensive heart disease                         | 20.1<br>(17.3 to 23.3)                        | --                                       | 1.6<br>(1.1 to 2.3)                   | 55.9<br>(46.8 to 66.7)                            | -4.6<br>(-9.2 to 0.6)                               |
| Cardiomyopathy and myocarditis                     | 25.2<br>(23.3 to 26.9)                        | 11.2†<br>(9.7 to 12.8)                   | 2.5<br>(1.7 to 3.5)                   | 36.3<br>(28.5 to 44.2)                            | -1.1<br>(-5.2 to 3.0)                               |
| Myocarditis                                        | 7.3<br>(6.5 to 8.1)                           | 11.2<br>(9.7 to 12.8)                    | 0.5<br>(0.4 to 0.8)                   | 25.6<br>(17.9 to 32.9)                            | -0.9<br>(-5.7 to 3.7)                               |
| Alcoholic cardiomyopathy                           | 2.3<br>(1.9 to 2.7)                           | --                                       | 0.2<br>(0.1 to 0.3)                   | 55.9<br>(45.0 to 68.0)                            | -2.4<br>(-10.3 to 6.5)                              |
| Other cardiomyopathy                               | 20.7<br>(18.1 to 23.6)                        | --                                       | 1.7<br>(1.2 to 2.4)                   | 38.1<br>(27.6 to 48.7)                            | -0.9<br>(-6.2 to 4.0)                               |
| Atrial fibrillation and flutter                    | 77.8<br>(68.4 to 88.0)                        | 6.9<br>(6.0 to 8.0)                      | 6.1<br>(4.2 to 8.6)                   | 54.5<br>(47.8 to 61.6)                            | 0.8<br>(-1.8 to 3.6)                                |
| Peripheral vascular disease                        | 275.9<br>(237.2 to 322.8)                     | 29.2<br>(25.1 to 34.2)                   | 0.9<br>(0.4 to 1.6)                   | 45.2<br>(39.4 to 51.3)                            | -4.5<br>(-7.0 to -2.0)                              |
| Endocarditis                                       | 2.1<br>(1.9 to 2.4)                           | 4.5<br>(4.0 to 5.0)                      | 0.2<br>(0.1 to 0.2)                   | 39.5<br>(33.0 to 46.3)                            | -1.7<br>(-7.3 to 4.4)                               |
| Other cardiovascular and circulatory diseases      | 494.4<br>(424.0 to 576.2)                     | --                                       | 25.9<br>(17.3 to 37.0)                | 45.8<br>(39.8 to 52.0)                            | -1.7<br>(-4.4 to 1.1)                               |
| <b>Chronic respiratory diseases</b>                | <b>1,928.6</b><br><b>(1,874.3 to 1,985.0)</b> | <b>361.4†</b><br><b>(340.0 to 384.1)</b> | <b>80.2</b><br><b>(58.4 to 106.2)</b> | <b>37.0</b><br><b>(32.9 to 41.4)</b>              | <b>2.4</b><br><b>(-0.7 to 5.2)</b>                  |
| Chronic obstructive pulmonary disease              | 548.5<br>(524.3 to 576.2)                     | 36.0<br>(34.2 to 37.8)                   | 21.8<br>(18.1 to 25.3)                | 57.0<br>(44.9 to 68.1)                            | 0.6<br>(-6.7 to 7.7)                                |
| Pneumoconiosis                                     | 2.1<br>(1.9 to 2.2)                           | 0.1<br>(0.1 to 0.2)                      | 0.3<br>(0.2 to 0.5)                   | 66.8<br>(63.2 to 70.6)                            | 4.9<br>(3.3 to 6.7)                                 |
| Silicosis                                          | 0.4<br>(0.4 to 0.5)                           | < 0.05<br>(< 0.05 to < 0.05)             | 0.1<br>(< 0.05 to 0.1)                | 56.8<br>(51.9 to 62.1)                            | 4.7<br>(2.6 to 6.7)                                 |

| Cause                                                          | Prevalence in thousands (95% UI)           | Incidence in thousands (95% UI)          | YLDs in thousands (95% UI)        |                                                   |                                                     |
|----------------------------------------------------------------|--------------------------------------------|------------------------------------------|-----------------------------------|---------------------------------------------------|-----------------------------------------------------|
|                                                                | 2016 counts                                | 2016 counts                              | 2016 counts                       | Percentage change in counts between 2006 and 2016 | Percentage change in age-standardised rates between |
| Asbestosis                                                     | 0.5<br>(0.4 to 0.5)                        | < 0.05<br>(< 0.05 to < 0.05)             | 0.1<br>(< 0.05 to 0.1)            | 65.3<br>(58.8 to 71.2)                            | 4.3<br>(2.1 to 6.4)                                 |
| Coal workers pneumoconiosis                                    | 0.4<br>(0.3 to 0.4)                        | < 0.05<br>(< 0.05 to < 0.05)             | 0.1<br>(< 0.05 to 0.1)            | 73.2<br>(68.4 to 78.2)                            | 3.4<br>(1.3 to 5.7)                                 |
| Other pneumoconiosis                                           | 0.8<br>(0.7 to 1.0)                        | 0.1<br>(< 0.05 to 0.1)                   | 0.1<br>(0.1 to 0.2)               | 70.6<br>(63.1 to 79.0)                            | 6.2<br>(2.5 to 10.5)                                |
| Asthma                                                         | 1,410.3<br>(1,311.5 to 1,516.6)            | 324.1<br>(303.2 to 346.9)                | 55.2<br>(36.4 to 79.2)            | 29.2<br>(26.0 to 32.5)                            | 2.5<br>(0.4 to 4.5)                                 |
| Interstitial lung disease and pulmonary sarcoidosis            | 9.7<br>(8.8 to 10.7)                       | 1.1<br>(1.0 to 1.2)                      | 1.1<br>(0.7 to 1.5)               | 55.0<br>(49.7 to 60.5)                            | 5.8<br>(1.1 to 10.4)                                |
| Other chronic respiratory diseases                             | --                                         | --                                       | 1.8<br>(1.5 to 2.1)               | 69.0<br>(53.7 to 85.4)                            | 35.5<br>(24.0 to 47.4)                              |
| <b>Cirrhosis and other chronic liver diseases</b>              | <b>135.1<br/>(127.8 to 143.4)</b>          | <b>4.2<br/>(4.0 to 4.5)</b>              | <b>5.6<br/>(3.9 to 7.7)</b>       | <b>37.5<br/>(31.1 to 44.8)</b>                    | <b>2.7<br/>(-0.9 to 6.4)</b>                        |
| Cirrhosis and other chronic liver diseases due to hepatitis B  | 25.3<br>(22.5 to 28.5)                     | 0.8<br>(0.7 to 0.9)                      | 0.9<br>(0.6 to 1.2)               | 58.2<br>(41.9 to 75.7)                            | 2.3<br>(-5.1 to 9.8)                                |
| Cirrhosis and other chronic liver diseases due to hepatitis C  | 53.0<br>(48.2 to 58.5)                     | 1.7<br>(1.5 to 1.8)                      | 1.8<br>(1.2 to 2.5)               | 57.1<br>(44.6 to 71.2)                            | 2.6<br>(-3.4 to 8.7)                                |
| Cirrhosis and other chronic liver diseases due to alcohol use  | 9.0<br>(8.1 to 10.1)                       | 0.3<br>(0.3 to 0.3)                      | 0.3<br>(0.2 to 0.4)               | 62.9<br>(48.5 to 78.5)                            | 2.9<br>(-6.3 to 13.0)                               |
| Cirrhosis and other chronic liver diseases due to other causes | 47.8<br>(43.4 to 52.7)                     | 1.4<br>(1.3 to 1.6)                      | 2.6<br>(1.8 to 3.7)               | 20.1<br>(12.2 to 29.4)                            | 2.9<br>(-2.9 to 9.2)                                |
| <b>Digestive diseases</b>                                      | <b>892.2<br/>(864.6 to 922.0)</b>          | <b>828.6†<br/>(771.2 to 892.3)</b>       | <b>26.9<br/>(19.0 to 36.4)</b>    | <b>45.3<br/>(38.6 to 52.8)</b>                    | <b>3.2<br/>(-0.2 to 6.7)</b>                        |
| Peptic ulcer disease                                           | 282.8<br>(251.8 to 321.3)                  | 26.7<br>(22.9 to 31.0)                   | 5.9<br>(3.8 to 9.1)               | 64.2<br>(51.6 to 77.4)                            | 8.2<br>(2.3 to 14.3)                                |
| Gastritis and duodenitis                                       | 318.5<br>(277.0 to 361.8)                  | 315.3<br>(276.4 to 364.0)                | 5.3<br>(3.5 to 7.8)               | 58.9<br>(48.4 to 69.7)                            | 8.3<br>(3.1 to 13.5)                                |
| Appendicitis                                                   | 4.1<br>(3.8 to 4.5)                        | 108.3<br>(99.7 to 117.6)                 | 1.3<br>(0.8 to 1.8)               | 20.8<br>(5.5 to 37.6)                             | 0.8<br>(-10.4 to 13.7)                              |
| Paralytic ileus and intestinal obstruction                     | 0.4<br>(0.3 to 0.4)                        | 9.5<br>(8.2 to 10.9)                     | 0.1<br>(0.1 to 0.2)               | 39.1<br>(34.0 to 45.1)                            | 4.1<br>(2.5 to 5.8)                                 |
| Inguinal, femoral, and abdominal hernia                        | 249.3<br>(220.9 to 284.0)                  | 197.5<br>(169.1 to 229.7)                | 10.2<br>(6.8 to 14.5)             | 32.7<br>(23.8 to 42.3)                            | -2.7<br>(-7.4 to 2.2)                               |
| Inflammatory bowel disease                                     | 8.1<br>(7.3 to 8.9)                        | 10.6<br>(9.8 to 11.5)                    | 1.2<br>(0.8 to 1.7)               | 49.0<br>(33.3 to 66.6)                            | 4.8<br>(-4.6 to 14.8)                               |
| Vascular intestinal disorders                                  | 0.2<br>(0.2 to 0.2)                        | 1.1<br>(1.0 to 1.3)                      | 0.1<br>(< 0.05 to 0.1)            | 40.1<br>(31.3 to 49.3)                            | 7.8<br>(5.4 to 10.3)                                |
| Gallbladder and biliary diseases                               | 54.6<br>(47.4 to 62.8)                     | 152.2<br>(128.8 to 176.2)                | 0.8<br>(0.5 to 1.1)               | 56.5<br>(42.6 to 72.5)                            | 0.5<br>(-7.4 to 9.3)                                |
| Pancreatitis                                                   | 0.8<br>(0.7 to 1.0)                        | 7.5<br>(6.5 to 8.6)                      | 0.1<br>(0.1 to 0.2)               | 51.8<br>(45.8 to 57.6)                            | 2.5<br>(0.6 to 4.3)                                 |
| Other digestive diseases                                       | --                                         | --                                       | 2.0<br>(1.4 to 2.6)               | 45.2<br>(38.2 to 53.2)                            | 7.5<br>(4.0 to 11.0)                                |
| <b>Neurological disorders</b>                                  | <b>12,340.2<br/>(12,044.5 to 12,628.3)</b> | <b>5,731.3<br/>(4,873.9 to 6,625.6)</b>  | <b>367.3<br/>(248.4 to 494.8)</b> | <b>34.1<br/>(27.4 to 41.6)</b>                    | <b>1.2<br/>(-3.2 to 6.0)</b>                        |
| Alzheimer's disease and other dementias                        | 91.2<br>(77.7 to 107.3)                    | 15.7<br>(13.3 to 18.6)                   | 12.7<br>(8.8 to 16.8)             | 40.1<br>(36.3 to 43.9)                            | 0.1<br>(-1.5 to 1.7)                                |
| Parkinson's disease                                            | 12.8<br>(10.2 to 15.9)                     | 1.6<br>(1.3 to 2.0)                      | 1.5<br>(1.0 to 2.1)               | 85.7<br>(72.6 to 99.0)                            | 19.0<br>(13.6 to 24.9)                              |
| Epilepsy                                                       | 101.8<br>(72.6 to 131.2)                   | 13.3<br>(9.5 to 17.2)                    | 30.3<br>(17.9 to 45.7)            | 17.0<br>(-27.0 to 85.9)                           | -0.7<br>(-37.4 to 56.6)                             |
| Multiple sclerosis                                             | 10.8<br>(9.6 to 12.3)                      | 0.4<br>(0.4 to 0.5)                      | 2.9<br>(2.0 to 3.8)               | 72.1<br>(60.4 to 85.7)                            | 17.6<br>(10.3 to 25.3)                              |
| Motor neuron disease                                           | 0.8<br>(0.7 to 1.0)                        | 0.1<br>(0.1 to 0.1)                      | 0.2<br>(0.1 to 0.2)               | 39.1<br>(33.8 to 45.5)                            | 5.8<br>(3.8 to 7.6)                                 |
| Migraine                                                       | 5,797.3<br>(5,544.2 to 6,045.2)            | 650.8<br>(617.6 to 684.8)                | 267.1<br>(172.6 to 373.3)         | 34.3<br>(31.9 to 37.0)                            | 0.5<br>(-0.8 to 1.9)                                |
| Tension-type headache                                          | 8,683.7<br>(7,709.9 to 9,724.8)            | 5,049.2<br>(4,195.1 to 5,959.9)          | 44.9<br>(28.5 to 65.9)            | 40.0<br>(34.6 to 45.6)                            | 2.5<br>(-0.0 to 4.9)                                |
| Other neurological disorders                                   | 0.1<br>(0.1 to 0.2)                        | 0.2<br>(0.2 to 0.4)                      | 7.8<br>(4.9 to 11.4)              | 43.1<br>(-5.3 to 113.8)                           | 20.4<br>(-17.0 to 72.8)                             |
| <b>Mental and substance use disorders</b>                      | <b>4,889.9<br/>(4,812.0 to 4,958.8)</b>    | <b>1,860.6†<br/>(1,709.7 to 2,031.7)</b> | <b>708.5<br/>(513.8 to 915.1)</b> | <b>33.1<br/>(31.6 to 34.8)</b>                    | <b>2.0<br/>(1.1 to 2.8)</b>                         |
| Schizophrenia                                                  | 67.7<br>(58.7 to 77.6)                     | 4.3<br>(3.8 to 5.0)                      | 43.4<br>(31.7 to 54.3)            | 44.4<br>(37.7 to 51.8)                            | 1.0<br>(-3.1 to 5.0)                                |
| Alcohol use disorders                                          | 201.1<br>(170.4 to 235.9)                  | 109.6<br>(92.3 to 127.0)                 | 20.1<br>(13.6 to 28.5)            | 36.3<br>(29.4 to 43.7)                            | 4.2<br>(0.1 to 8.7)                                 |
| Drug use disorders                                             | 284.9<br>(270.7 to 298.9)                  | 32.4<br>(29.2 to 36.0)                   | 92.7<br>(64.7 to 122.5)           | 41.1<br>(35.4 to 47.1)                            | 8.9<br>(5.2 to 12.6)                                |
| Opioid use disorders                                           | 207.0<br>(176.7 to 241.3)                  | 19.0<br>(16.3 to 22.3)                   | 86.0<br>(59.2 to 114.6)           | 42.1<br>(36.2 to 48.7)                            | 9.4<br>(5.5 to 13.5)                                |
| Cocaine use disorders                                          | 13.3<br>(11.4 to 15.5)                     | 1.3<br>(1.1 to 1.5)                      | 1.8<br>(1.1 to 2.7)               | 29.4<br>(12.2 to 49.3)                            | 2.1<br>(-10.3 to 16.0)                              |
| Amphetamine use disorders                                      | 2.9<br>(2.0 to 3.9)                        | 0.5<br>(0.3 to 0.7)                      | 0.4<br>(0.2 to 0.7)               | 25.8<br>(20.0 to 33.0)                            | 2.4<br>(-1.0 to 6.4)                                |
| Cannabis use disorders                                         | 53.6<br>(45.2 to 64.1)                     | 9.1<br>(7.7 to 10.8)                     | 1.6<br>(1.0 to 2.3)               | 20.5<br>(9.9 to 31.4)                             | -0.2<br>(-8.4 to 8.6)                               |
| Other drug use disorders                                       | 13.3<br>(11.6 to 15.1)                     | 2.5<br>(2.2 to 2.8)                      | 2.9<br>(1.9 to 4.0)               | 35.5<br>(23.4 to 49.5)                            | 3.8<br>(-4.8 to 13.2)                               |
| Depressive disorders                                           | 1,098.9<br>(1,061.7 to 1,142.1)            | 1,291.8<br>(1,142.1 to 1,454.5)          | 194.6<br>(133.5 to 264.9)         | 38.5<br>(34.6 to 42.6)                            | 1.5<br>(-0.6 to 3.5)                                |
| Major depressive disorder                                      | 800.3<br>(707.1 to 905.2)                  | 1,233.8<br>(1,083.4 to 1,399.2)          | 164.2<br>(111.9 to 225.8)         | 38.2<br>(33.5 to 42.9)                            | 1.9<br>(-0.6 to 4.3)                                |
| Dysthymia                                                      | 316.0<br>(274.2 to 366.2)                  | 58.0<br>(50.4 to 67.2)                   | 30.4<br>(20.6 to 43.7)            | 40.4<br>(36.2 to 45.1)                            | -0.3<br>(-1.8 to 1.3)                               |
| Bipolar disorder                                               | 275.0<br>(235.7 to 320.9)                  | 21.9<br>(18.9 to 25.5)                   | 56.2<br>(34.7 to 84.2)            | 31.2<br>(27.1 to 35.2)                            | 0.1<br>(-2.3 to 2.3)                                |
| Anxiety disorders                                              | 1,551.7<br>(1,443.1 to 1,669.0)            | 236.3<br>(219.8 to 255.1)                | 150.0<br>(105.1 to 202.3)         | 29.4<br>(27.1 to 31.9)                            | 0.1<br>(-1.2 to 1.4)                                |
| Eating disorders                                               | 84.6<br>(72.4 to 98.1)                     | 38.5<br>(28.2 to 51.6)                   | 16.7<br>(10.4 to 24.3)            | 33.7<br>(27.6 to 40.0)                            | 14.5<br>(9.1 to 19.6)                               |
| Anorexia nervosa                                               | 11.3<br>(8.3 to 15.1)                      | 4.5<br>(3.4 to 6.0)                      | 2.4<br>(1.5 to 3.6)               | 27.1<br>(15.8 to 40.0)                            | 12.7<br>(3.0 to 23.3)                               |
| Bulimia nervosa                                                | 68.1<br>(51.2 to 89.5)                     | 34.0<br>(23.7 to 46.8)                   | 14.3<br>(8.7 to 21.3)             | 34.9<br>(28.1 to 42.2)                            | 14.8<br>(9.0 to 20.4)                               |
| Autistic spectrum disorders                                    | 321.1<br>(301.7 to 341.5)                  | 2.0<br>(1.4 to 2.9)                      | 46.2<br>(31.2 to 64.8)            | 21.7<br>(19.1 to 24.4)                            | 0.5<br>(-1.6 to 2.4)                                |
| Autism                                                         | 91.9<br>(78.5 to 107.9)                    | 0.2<br>(0.1 to 0.3)                      | 23.3<br>(15.1 to 33.7)            | 22.9<br>(18.6 to 27.6)                            | 0.5<br>(-2.8 to 3.8)                                |
| Asperger syndrome and other autistic spectrum disorders        | 228.4<br>(189.2 to 274.9)                  | 1.8<br>(1.2 to 2.6)                      | 22.9<br>(15.1 to 33.1)            | 20.4<br>(17.9 to 23.2)                            | 0.4<br>(-1.4 to 2.4)                                |



| Cause                                                      | Prevalence in thousands (95% UI)                 | Incidence in thousands (95% UI)                   | YLDs in thousands (95% UI)              |                                                   |                                                     |
|------------------------------------------------------------|--------------------------------------------------|---------------------------------------------------|-----------------------------------------|---------------------------------------------------|-----------------------------------------------------|
|                                                            | 2016 counts                                      | 2016 counts                                       | 2016 counts                             | Percentage change in counts between 2006 and 2016 | Percentage change in age-standardised rates between |
| Attention-deficit/hyperactivity disorder                   | 367.0<br>(330.4 to 406.7)                        | 14.1<br>(12.3 to 16.3)                            | 4.4<br>(2.6 to 7.0)                     | 17.7<br>(14.1 to 21.4)                            | -0.2<br>(-2.9 to 2.8)                               |
| Conduct disorder                                           | 257.3<br>(218.2 to 297.4)                        | 90.6<br>(73.2 to 107.2)                           | 31.3<br>(19.4 to 47.5)                  | 6.5<br>(3.5 to 9.1)                               | 0.2<br>(-2.6 to 2.6)                                |
| Idiopathic developmental intellectual disability           | 252.0<br>(123.0 to 377.4)                        | --                                                | 9.6<br>(3.7 to 17.6)                    | 22.8<br>(18.4 to 30.2)                            | -1.8<br>(-5.0 to 2.4)                               |
| Other mental and substance use disorders                   | 582.0<br>(503.0 to 677.8)                        | 19.1<br>(16.7 to 21.8)                            | 43.4<br>(29.5 to 62.2)                  | 39.4<br>(35.7 to 43.3)                            | 0.3<br>(-1.8 to 2.6)                                |
| <b>Diabetes, urogenital, blood, and endocrine diseases</b> | <b>16,027.6</b><br><b>(15,947.3 to 16,116.7)</b> | <b>3,578.4†</b><br><b>(3,359.9 to 3,806.7)</b>    | <b>294.1</b><br><b>(210.5 to 405.2)</b> | <b>41.9</b><br><b>(38.1 to 45.9)</b>              | <b>-4.6</b><br><b>(-6.9 to -2.3)</b>                |
| Diabetes mellitus                                          | 1,664.1<br>(1,479.8 to 1,856.4)                  | 109.6<br>(96.9 to 124.2)                          | 133.2<br>(91.2 to 189.3)                | 64.2<br>(56.6 to 71.9)                            | -0.9<br>(-5.4 to 3.6)                               |
| Acute glomerulonephritis                                   | 0.3<br>(0.3 to 0.4)                              | 4.6<br>(3.9 to 5.3)                               | < 0.05<br>(< 0.05 to < 0.05)            | 28.7<br>(23.8 to 34.0)                            | 0.5<br>(-1.3 to 2.5)                                |
| Chronic kidney disease                                     | 1,173.3<br>(1,064.7 to 1,301.5)                  | 93.9<br>(83.3 to 106.0)                           | 41.0<br>(30.5 to 52.8)                  | 33.1<br>(26.9 to 39.2)                            | -13.9<br>(-16.8 to -10.5)                           |
| Chronic kidney disease due to diabetes mellitus            | 548.4<br>(476.6 to 634.2)                        | 43.8<br>(36.9 to 51.8)                            | 17.9<br>(13.2 to 23.5)                  | 38.4<br>(30.4 to 46.5)                            | -15.2<br>(-19.3 to -11.0)                           |
| Chronic kidney disease due to hypertension                 | 162.0<br>(138.5 to 185.7)                        | 13.0<br>(10.5 to 15.7)                            | 5.4<br>(3.8 to 7.1)                     | 34.9<br>(25.2 to 45.9)                            | -12.9<br>(-18.9 to -6.8)                            |
| Chronic kidney disease due to glomerulonephritis           | 155.0<br>(133.2 to 179.1)                        | 11.8<br>(9.6 to 14.4)                             | 6.4<br>(4.4 to 8.7)                     | 27.0<br>(18.4 to 36.5)                            | -10.2<br>(-14.8 to -5.3)                            |
| Chronic kidney disease due to other causes                 | 307.9<br>(255.8 to 362.4)                        | 25.4<br>(20.9 to 30.1)                            | 11.3<br>(8.1 to 15.1)                   | 27.9<br>(19.8 to 36.1)                            | -14.1<br>(-18.1 to -9.7)                            |
| Urinary diseases and male infertility                      | 838.3<br>(761.2 to 925.8)                        | 1,914.5†<br>(1,732.5 to 2,117.0)                  | 22.4<br>(14.3 to 33.1)                  | 79.5<br>(68.9 to 89.7)                            | 5.3<br>(0.6 to 9.5)                                 |
| Interstitial nephritis and urinary tract infections        | 27.9<br>(24.4 to 31.6)                           | 1,455.1<br>(1,285.4 to 1,644.9)                   | 0.9<br>(0.6 to 1.4)                     | 23.4<br>(14.6 to 32.5)                            | -2.0<br>(-7.9 to 4.2)                               |
| Urolithiasis                                               | 14.5<br>(12.6 to 16.8)                           | 383.2<br>(332.3 to 444.4)                         | 1.1<br>(0.7 to 1.5)                     | 44.7<br>(29.7 to 61.8)                            | 1.7<br>(-7.8 to 11.8)                               |
| Benign prostatic hyperplasia                               | 555.2<br>(458.0 to 657.5)                        | 76.2<br>(62.9 to 90.6)                            | 18.4<br>(11.4 to 27.3)                  | 101.3<br>(88.9 to 112.2)                          | 7.3<br>(1.9 to 12.0)                                |
| Male infertility                                           | 212.9<br>(170.7 to 268.9)                        | --                                                | 1.3<br>(0.5 to 2.6)                     | 9.3<br>(3.3 to 15.3)                              | -14.6<br>(-19.1 to -10.3)                           |
| Other urinary diseases                                     | --                                               | --                                                | 0.8<br>(0.5 to 1.1)                     | 9.8<br>(2.4 to 18.2)                              | -16.1<br>(-21.1 to -10.7)                           |
| Gynecological diseases                                     | 3,091.8<br>(3,029.0 to 3,164.1)                  | 1,391.7†<br>(1,292.0 to 1,503.8)                  | 44.5<br>(30.4 to 63.7)                  | 33.8<br>(30.7 to 37.3)                            | -5.3<br>(-8.2 to -2.5)                              |
| Uterine fibroids                                           | 278.9<br>(243.7 to 316.3)                        | 35.4<br>(30.5 to 40.8)                            | 5.9<br>(3.6 to 9.2)                     | 45.9<br>(37.9 to 53.2)                            | -10.4<br>(-15.3 to -5.8)                            |
| Polycystic ovarian syndrome                                | 27.9<br>(20.7 to 35.7)                           | 37.5<br>(26.5 to 50.3)                            | 0.2<br>(0.1 to 0.5)                     | 41.7<br>(32.5 to 52.0)                            | 10.2<br>(3.4 to 17.3)                               |
| Female infertility                                         | 116.7<br>(59.4 to 205.9)                         | --                                                | 0.7<br>(0.2 to 1.6)                     | 54.3<br>(27.2 to 89.8)                            | 26.5<br>(9.7 to 49.0)                               |
| Endometriosis                                              | 5.2<br>(4.4 to 6.1)                              | 19.0<br>(15.6 to 23.2)                            | 0.5<br>(0.3 to 0.7)                     | 29.4<br>(17.2 to 44.1)                            | 2.7<br>(-6.9 to 14.0)                               |
| Genital prolapse                                           | 655.0<br>(568.7 to 738.8)                        | 55.7<br>(47.8 to 64.7)                            | 2.0<br>(1.0 to 3.7)                     | -2.5<br>(-6.1 to 1.3)                             | -39.6<br>(-41.8 to -37.6)                           |
| Premenstrual syndrome                                      | 1,885.1<br>(1,782.9 to 1,986.5)                  | 712.9<br>(667.2 to 753.6)                         | 15.6<br>(9.7 to 24.2)                   | 30.8<br>(26.8 to 35.1)                            | -0.2<br>(-3.1 to 2.8)                               |
| Other gynecological diseases                               | 581.4<br>(502.5 to 665.7)                        | 531.3<br>(439.8 to 635.8)                         | 19.5<br>(13.0 to 27.4)                  | 37.5<br>(32.7 to 42.7)                            | 0.8<br>(-2.1 to 3.9)                                |
| Hemoglobinopathies and hemolytic anaemias                  | 12,495.0<br>(12,425.5 to 12,557.1)               | --                                                | 38.9<br>(25.9 to 55.9)                  | 1.8<br>(-1.9 to 5.9)                              | -11.9<br>(-14.7 to -8.8)                            |
| Thalassemias                                               | 0.8<br>(0.8 to 0.9)                              | --                                                | 0.1<br>(< 0.05 to 0.1)                  | -14.2<br>(-23.4 to -4.9)                          | 4.2<br>(-7.2 to 15.4)                               |
| Thalassaemia trait                                         | 1,253.8<br>(1,215.7 to 1,291.4)                  | --                                                | 13.0<br>(8.4 to 19.4)                   | 7.7<br>(2.0 to 13.8)                              | -7.8<br>(-12.0 to -3.8)                             |
| Sickle cell disorders                                      | 107.5<br>(102.7 to 112.6)                        | --                                                | 9.5<br>(6.9 to 12.7)                    | 6.8<br>(2.5 to 11.6)                              | -6.5<br>(-10.0 to -3.1)                             |
| Sickle cell trait                                          | 4,892.1<br>(4,847.8 to 4,950.3)                  | --                                                | 11.3<br>(7.2 to 17.0)                   | -1.3<br>(-6.9 to 4.7)                             | -11.2<br>(-15.7 to -7.0)                            |
| G6PD deficiency                                            | 3,531.0<br>(3,434.5 to 3,631.6)                  | --                                                | 0.1<br>(0.1 to 0.2)                     | 11.6<br>(0.2 to 24.2)                             | -1.4<br>(-10.0 to 7.9)                              |
| G6PD trait                                                 | 4,754.1<br>(4,686.6 to 4,828.2)                  | --                                                | < 0.05<br>(< 0.05 to < 0.05)            | 18.7<br>(8.3 to 30.2)                             | -0.3<br>(-6.9 to 6.8)                               |
| Other hemoglobinopathies and hemolytic anaemias            | 247.4<br>(231.3 to 263.4)                        | --                                                | 4.9<br>(3.2 to 7.2)                     | -12.5<br>(-16.8 to -8.1)                          | -27.0<br>(-30.1 to -24.1)                           |
| Endocrine, metabolic, blood, and immune disorders          | 477.8<br>(446.6 to 509.8)                        | 64.2<br>(57.1 to 71.6)                            | 14.0<br>(9.4 to 19.7)                   | 23.7<br>(18.0 to 29.6)                            | -2.9<br>(-5.5 to -0.3)                              |
| <b>Musculoskeletal disorders</b>                           | <b>5,571.1</b><br><b>(5,423.3 to 5,725.3)</b>    | <b>2,959.8</b><br><b>(2,629.6 to 3,298.3)</b>     | <b>629.9</b><br><b>(452.8 to 822.8)</b> | <b>48.2</b><br><b>(45.2 to 51.4)</b>              | <b>-0.4</b><br><b>(-1.4 to 0.5)</b>                 |
| Rheumatoid arthritis                                       | 84.8<br>(74.5 to 96.9)                           | 5.5<br>(4.9 to 6.3)                               | 20.0<br>(13.6 to 27.0)                  | 57.1<br>(50.7 to 64.0)                            | 2.7<br>(-0.1 to 5.8)                                |
| Osteoarthritis                                             | 1,088.0<br>(1,016.8 to 1,160.5)                  | 70.3<br>(64.7 to 76.1)                            | 67.5<br>(47.5 to 91.8)                  | 71.2<br>(68.1 to 74.2)                            | 2.4<br>(0.9 to 3.9)                                 |
| Low back and neck pain                                     | 3,462.7<br>(3,322.0 to 3,595.9)                  | 1,500.6<br>(1,325.7 to 1,696.0)                   | 407.5<br>(285.8 to 538.6)               | 47.0<br>(43.0 to 51.0)                            | -1.1<br>(-2.4 to 0.1)                               |
| Low back pain                                              | 2,373.3<br>(2,092.2 to 2,733.3)                  | 1,175.4<br>(1,009.6 to 1,375.6)                   | 269.3<br>(189.6 to 356.8)               | 45.2<br>(40.0 to 50.5)                            | -1.1<br>(-3.0 to 0.6)                               |
| Neck pain                                                  | 1,381.9<br>(1,178.0 to 1,599.3)                  | 325.2<br>(279.6 to 387.1)                         | 138.2<br>(91.5 to 197.9)                | 50.5<br>(46.2 to 54.7)                            | -1.1<br>(-2.1 to -0.1)                              |
| Gout                                                       | 99.9<br>(87.3 to 113.8)                          | 20.8<br>(18.0 to 23.7)                            | 3.2<br>(2.1 to 4.4)                     | 62.0<br>(49.4 to 76.4)                            | 2.1<br>(-3.7 to 8.0)                                |
| Other musculoskeletal disorders                            | 1,532.5<br>(1,255.6 to 1,844.2)                  | 1,362.7<br>(1,090.2 to 1,660.2)                   | 131.6<br>(88.8 to 190.1)                | 40.7<br>(33.9 to 48.2)                            | -1.0<br>(-4.1 to 1.9)                               |
| <b>Other non-communicable diseases</b>                     | <b>21,944.2</b><br><b>(21,729.3 to 22,151.5)</b> | <b>58,477.2†</b><br><b>(54,792.1 to 62,702.0)</b> | <b>562.6</b><br><b>(386.6 to 792.6)</b> | <b>24.8</b><br><b>(23.3 to 26.2)</b>              | <b>-3.6</b><br><b>(-4.3 to -2.8)</b>                |
| Congenital anomalies                                       | 379.5<br>(360.8 to 397.9)                        | --                                                | 47.3<br>(34.6 to 62.5)                  | 9.6<br>(5.7 to 13.3)                              | -4.3<br>(-8.0 to -1.0)                              |
| Neural tube defects                                        | 36.7<br>(32.7 to 41.6)                           | --                                                | 11.1<br>(7.8 to 14.9)                   | 18.8<br>(11.2 to 26.3)                            | -1.2<br>(-7.4 to 4.6)                               |
| Congenital heart anomalies                                 | 90.1<br>(79.8 to 101.3)                          | --                                                | 4.4<br>(1.9 to 7.5)                     | 11.9<br>(6.5 to 16.8)                             | 0.1<br>(-3.9 to 3.9)                                |
| Orofacial clefts                                           | 16.1<br>(14.0 to 18.2)                           | --                                                | 0.2<br>(0.1 to 0.2)                     | 1.1<br>(-9.2 to 12.4)                             | -14.9<br>(-23.4 to -5.2)                            |
| Down's syndrome                                            | 10.7<br>(9.3 to 12.4)                            | --                                                | 1.0<br>(0.6 to 1.4)                     | 11.9<br>(8.4 to 15.5)                             | -3.4<br>(-6.2 to -0.2)                              |
| Turner syndrome                                            | 9.0<br>(7.9 to 10.3)                             | --                                                | 0.2<br>(0.1 to 0.3)                     | 10.2<br>(-6.4 to 28.5)                            | -5.8<br>(-19.2 to 9.5)                              |
| Klinefelter syndrome                                       | 13.9<br>(12.0 to 16.1)                           | --                                                | 0.1<br>(< 0.05 to 0.2)                  | 17.7<br>(4.9 to 31.4)                             | -0.2<br>(-10.5 to 11.1)                             |



| Cause                                         | Prevalence in thousands (95% UI)              | Incidence in thousands (95% UI)                | YLDs in thousands (95% UI)              |                                                   |                                                     |
|-----------------------------------------------|-----------------------------------------------|------------------------------------------------|-----------------------------------------|---------------------------------------------------|-----------------------------------------------------|
|                                               | 2016 counts                                   | 2016 counts                                    | 2016 counts                             | Percentage change in counts between 2006 and 2016 | Percentage change in age-standardised rates between |
| Other chromosomal abnormalities               | 72.8<br>(61.2 to 86.5)                        | --                                             | 6.9<br>(4.7 to 9.7)                     | 1.5<br>(-4.1 to 7.2)                              | 5.6<br>(0.0 to 11.7)                                |
| Congenital musculoskeletal and limb anomalies | 48.6<br>(44.3 to 53.7)                        | --                                             | 7.3<br>(5.0 to 10.3)                    | 22.5<br>(15.8 to 29.6)                            | 1.8<br>(-3.4 to 7.1)                                |
| Urogenital congenital anomalies               | 29.2<br>(25.7 to 33.0)                        | --                                             | 0.9<br>(0.6 to 1.4)                     | -1.2<br>(-6.4 to 3.9)                             | -2.1<br>(-6.8 to 2.7)                               |
| Digestive congenital anomalies                | 25.1<br>(22.1 to 28.1)                        | --                                             | 1.1<br>(0.7 to 1.6)                     | 8.9<br>(0.0 to 18.4)                              | -8.6<br>(-15.2 to -1.4)                             |
| Other congenital anomalies                    | 103.1<br>(68.2 to 150.5)                      | --                                             | 14.2<br>(9.6 to 20.6)                   | 2.0<br>(-4.2 to 9.3)                              | -13.8<br>(-19.2 to -7.4)                            |
| Skin and subcutaneous diseases                | 9,283.9<br>(9,185.1 to 9,380.3)               | 18,215.2<br>(17,467.6 to 19,064.2)             | 244.6<br>(164.2 to 350.0)               | 20.8<br>(19.4 to 22.3)                            | 4.2<br>(3.3 to 5.3)                                 |
| Dermatitis                                    | 1,650.9<br>(1,583.3 to 1,723.7)               | 2,170.1<br>(2,011.6 to 2,329.2)                | 63.2<br>(37.2 to 103.3)                 | 16.4<br>(14.0 to 19.1)                            | 2.3<br>(0.7 to 4.0)                                 |
| Psoriasis                                     | 262.7<br>(251.7 to 274.2)                     | 36.3<br>(34.9 to 37.7)                         | 22.9<br>(16.4 to 30.0)                  | 57.0<br>(50.5 to 63.9)                            | 18.4<br>(14.3 to 22.4)                              |
| Cellulitis                                    | 15.2<br>(14.1 to 16.4)                        | 324.2<br>(301.4 to 347.4)                      | 0.8<br>(0.6 to 1.2)                     | 23.8<br>(11.5 to 38.3)                            | 1.0<br>(-7.4 to 10.4)                               |
| Pyoderma                                      | 68.4<br>(66.4 to 70.4)                        | 1,558.0<br>(1,508.1 to 1,606.8)                | 0.4<br>(0.1 to 0.8)                     | 26.6<br>(22.0 to 31.1)                            | 0.6<br>(-2.4 to 3.5)                                |
| Scabies                                       | 340.4<br>(297.4 to 390.4)                     | 1,036.5<br>(897.9 to 1,188.7)                  | 8.8<br>(5.0 to 13.9)                    | 8.7<br>(5.7 to 11.8)                              | -4.4<br>(-5.9 to -2.6)                              |
| Fungal skin diseases                          | 1,899.2<br>(1,710.7 to 2,110.9)               | 6,464.2<br>(5,780.5 to 7,183.8)                | 10.7<br>(4.2 to 22.2)                   | 22.9<br>(19.8 to 26.2)                            | 0.3<br>(-0.3 to 0.8)                                |
| Viral skin diseases                           | 822.4<br>(792.8 to 856.0)                     | 1,190.3<br>(1,144.4 to 1,240.9)                | 25.2<br>(15.5 to 37.2)                  | 15.1<br>(13.4 to 17.0)                            | -0.1<br>(-1.4 to 1.3)                               |
| Acne vulgaris                                 | 2,911.6<br>(2,692.4 to 3,129.5)               | 2,028.9<br>(1,734.0 to 2,374.8)                | 74.9<br>(50.7 to 108.1)                 | 19.3<br>(16.6 to 21.9)                            | 6.8<br>(4.5 to 8.9)                                 |
| Alopecia areata                               | 63.9<br>(61.0 to 67.0)                        | 112.9<br>(107.5 to 118.1)                      | 2.1<br>(1.3 to 3.1)                     | 28.4<br>(22.1 to 34.9)                            | 0.0<br>(-4.4 to 4.5)                                |
| Pruritus                                      | 286.3<br>(250.3 to 326.2)                     | 225.6<br>(199.5 to 256.7)                      | 3.1<br>(1.4 to 5.6)                     | 31.5<br>(26.2 to 36.9)                            | 1.3<br>(-0.8 to 3.2)                                |
| Urticaria                                     | 309.9<br>(269.8 to 358.4)                     | 548.7<br>(479.5 to 634.7)                      | 18.7<br>(11.8 to 26.9)                  | 8.1<br>(4.1 to 12.6)                              | 0.1<br>(-2.1 to 2.2)                                |
| Decubitus ulcer                               | 12.0<br>(10.9 to 13.2)                        | 43.7<br>(39.5 to 48.5)                         | 1.9<br>(1.3 to 2.5)                     | 45.5<br>(37.8 to 53.1)                            | 2.7<br>(-2.3 to 7.7)                                |
| Other skin and subcutaneous diseases          | 2,162.0<br>(2,099.0 to 2,222.4)               | 2,476.0<br>(2,399.0 to 2,552.2)                | 11.9<br>(5.7 to 21.9)                   | 40.0<br>(38.2 to 41.9)                            | 4.5<br>(3.5 to 5.4)                                 |
| Sense organ diseases                          | 5,947.6<br>(5,855.6 to 6,046.2)               | 2,821.4†<br>(2,648.3 to 3,007.6)               | 201.4<br>(139.5 to 280.1)               | 26.9<br>(24.5 to 29.0)                            | -10.0<br>(-11.1 to -8.8)                            |
| Glaucoma                                      | 18.4<br>(15.4 to 21.8)                        | --                                             | 1.6<br>(1.1 to 2.1)                     | 55.2<br>(47.0 to 64.1)                            | -4.2<br>(-8.1 to 0.0)                               |
| Cataract                                      | 236.5<br>(211.9 to 262.8)                     | --                                             | 16.7<br>(11.9 to 22.7)                  | 41.6<br>(37.4 to 45.8)                            | -8.7<br>(-10.4 to -7.0)                             |
| Macular degeneration                          | 21.6<br>(17.7 to 26.0)                        | --                                             | 1.3<br>(0.9 to 1.8)                     | 59.3<br>(51.0 to 67.9)                            | 1.2<br>(-2.9 to 5.4)                                |
| Refraction and accommodation disorders        | 2,787.1<br>(2,655.1 to 2,929.5)               | --                                             | 58.0<br>(37.0 to 89.0)                  | 13.2<br>(11.0 to 15.9)                            | -17.0<br>(-18.7 to -15.0)                           |
| Age-related and other hearing loss            | 3,354.3<br>(3,137.4 to 3,601.2)               | --                                             | 92.0<br>(63.1 to 130.1)                 | 28.5<br>(21.7 to 34.9)                            | -9.7<br>(-12.8 to -6.9)                             |
| Other vision loss                             | 147.9<br>(126.6 to 171.5)                     | --                                             | 9.8<br>(6.7 to 13.5)                    | 38.7<br>(31.9 to 45.8)                            | -3.7<br>(-6.5 to -0.5)                              |
| Other sense organ diseases                    | 709.5<br>(659.8 to 758.2)                     | 2,821.4<br>(2,648.3 to 3,007.6)                | 22.0<br>(13.9 to 33.1)                  | 45.1<br>(41.7 to 48.6)                            | 2.4<br>(0.8 to 4.0)                                 |
| Oral disorders                                | 15,166.9<br>(14,662.4 to 15,526.9)            | 37,440.6†<br>(33,932.0 to 41,379.5)            | 69.4<br>(42.0 to 106.7)                 | 49.2<br>(46.4 to 52.1)                            | 0.5<br>(-0.3 to 1.4)                                |
| Caries of deciduous teeth                     | 2,286.8<br>(1,853.2 to 2,706.0)               | 8,112.1<br>(5,671.0 to 11,305.7)               | 0.5<br>(0.2 to 1.1)                     | -3.6<br>(-10.1 to 3.1)                            | 0.5<br>(-4.3 to 5.3)                                |
| Caries of permanent teeth                     | 10,961.6<br>(10,304.9 to 11,610.6)            | 28,977.4<br>(26,559.5 to 31,464.5)             | 6.5<br>(2.9 to 12.3)                    | 26.2<br>(23.7 to 29.0)                            | -2.3<br>(-3.6 to -1.0)                              |
| Periodontal disease                           | 2,064.2<br>(1,625.7 to 2,622.2)               | 256.0<br>(196.4 to 332.6)                      | 13.5<br>(5.2 to 29.4)                   | 58.3<br>(50.6 to 64.5)                            | 0.3<br>(-2.1 to 2.6)                                |
| Edentulism and severe tooth loss              | 1,158.7<br>(1,003.8 to 1,324.7)               | 95.0<br>(81.4 to 109.2)                        | 32.3<br>(21.3 to 45.8)                  | 62.4<br>(58.5 to 66.4)                            | 1.2<br>(-0.1 to 2.5)                                |
| Other oral disorders                          | 563.3<br>(537.4 to 590.4)                     | --                                             | 16.5<br>(10.3 to 24.7)                  | 33.4<br>(31.0 to 35.9)                            | -0.1<br>(-1.4 to 1.3)                               |
| <b>Injuries</b>                               | <b>5,732.8</b><br><b>(5,363.2 to 6,110.5)</b> | <b>2,579.8†</b><br><b>(2,438.1 to 2,732.4)</b> | <b>195.3</b><br><b>(130.0 to 281.2)</b> | <b>43.6</b><br><b>(41.9 to 45.2)</b>              | <b>2.0</b><br><b>(1.0 to 3.1)</b>                   |
| <b>Transport injuries</b>                     | <b>968.3</b><br><b>(889.5 to 1,049.5)</b>     | <b>368.1</b><br><b>(327.6 to 411.1)</b>        | <b>47.7</b><br><b>(31.4 to 68.2)</b>    | <b>41.6</b><br><b>(39.8 to 43.4)</b>              | <b>-1.8</b><br><b>(-2.7 to -1.0)</b>                |
| Road injuries                                 | 768.0<br>(704.5 to 832.8)                     | 323.0<br>(282.5 to 365.2)                      | 38.5<br>(25.4 to 55.1)                  | 40.7<br>(38.8 to 42.6)                            | -4.0<br>(-4.9 to -3.1)                              |
| Pedestrian road injuries                      | 121.8<br>(106.6 to 139.1)                     | 35.4<br>(28.8 to 42.5)                         | 5.8<br>(3.8 to 8.3)                     | 34.9<br>(33.2 to 36.5)                            | -8.9<br>(-9.7 to -8.1)                              |
| Cyclist road injuries                         | 114.1<br>(95.5 to 136.8)                      | 47.7<br>(37.4 to 59.3)                         | 5.2<br>(3.4 to 7.7)                     | 44.1<br>(42.1 to 46.1)                            | 0.3<br>(-0.7 to 1.1)                                |
| Motorcyclist road injuries                    | 96.4<br>(82.1 to 118.2)                       | 23.6<br>(18.4 to 29.7)                         | 4.4<br>(2.9 to 6.5)                     | 41.7<br>(39.7 to 43.9)                            | -0.5<br>(-1.4 to 0.5)                               |
| Motor vehicle road injuries                   | 370.7<br>(310.1 to 427.0)                     | 183.8<br>(158.2 to 211.2)                      | 20.1<br>(13.6 to 28.2)                  | 39.4<br>(37.3 to 41.4)                            | -5.5<br>(-6.5 to -4.7)                              |
| Other road injuries                           | 65.0<br>(53.7 to 77.2)                        | 32.6<br>(24.8 to 42.4)                         | 2.9<br>(1.9 to 4.4)                     | 56.0<br>(53.7 to 58.4)                            | 7.5<br>(6.5 to 8.5)                                 |
| Other transport injuries                      | 200.2<br>(165.8 to 241.4)                     | 45.1<br>(37.5 to 55.2)                         | 9.2<br>(6.0 to 13.3)                    | 45.6<br>(43.2 to 48.1)                            | 9.5<br>(8.3 to 10.6)                                |
| <b>Unintentional injuries</b>                 | <b>4,567.4</b><br><b>(4,213.0 to 4,904.5)</b> | <b>2,134.2</b><br><b>(2,002.8 to 2,283.6)</b>  | <b>136.5</b><br><b>(90.3 to 197.2)</b>  | <b>44.6</b><br><b>(43.0 to 46.1)</b>              | <b>2.9</b><br><b>(2.0 to 3.8)</b>                   |
| Falls                                         | 1,445.9<br>(1,254.4 to 1,639.1)               | 693.4<br>(606.7 to 794.8)                      | 52.9<br>(36.0 to 75.0)                  | 42.7<br>(41.1 to 44.4)                            | -1.2<br>(-2.1 to -0.4)                              |
| Drowning                                      | 11.3<br>(9.9 to 13.0)                         | 2.3<br>(2.0 to 2.7)                            | 0.5<br>(0.3 to 0.7)                     | 20.8<br>(19.0 to 22.6)                            | -13.5<br>(-14.5 to -12.5)                           |
| Fire, heat, and hot substances                | 400.4<br>(339.8 to 483.1)                     | 54.0<br>(44.6 to 62.9)                         | 9.6<br>(6.1 to 14.9)                    | 45.5<br>(42.7 to 48.0)                            | 2.6<br>(0.9 to 4.3)                                 |
| Poisonings                                    | 18.7<br>(15.8 to 22.1)                        | 29.4<br>(23.4 to 36.4)                         | 1.6<br>(1.0 to 2.3)                     | 48.0<br>(42.7 to 53.7)                            | 13.2<br>(9.3 to 16.8)                               |
| Exposure to mechanical forces                 | 777.1<br>(665.1 to 948.3)                     | 343.0<br>(291.5 to 391.9)                      | 17.1<br>(11.1 to 25.2)                  | 35.5<br>(34.0 to 37.1)                            | -6.2<br>(-7.1 to -5.2)                              |
| Unintentional firearm injuries                | 31.9<br>(25.9 to 39.3)                        | 8.8<br>(6.2 to 11.8)                           | 1.2<br>(0.8 to 1.8)                     | 54.2<br>(51.7 to 56.8)                            | 6.2<br>(5.1 to 7.2)                                 |
| Unintentional suffocation                     | 23.1<br>(18.5 to 28.7)                        | 4.9<br>(3.4 to 6.9)                            | 0.7<br>(0.5 to 1.1)                     | 30.7<br>(28.6 to 33.2)                            | -1.4<br>(-2.4 to -0.4)                              |
| Other exposure to mechanical forces           | 722.1<br>(609.8 to 888.8)                     | 329.3<br>(279.2 to 376.2)                      | 15.2<br>(9.8 to 22.4)                   | 34.5<br>(32.9 to 36.1)                            | -7.2<br>(-8.2 to -6.3)                              |

| Cause                                                                               | Prevalence in thousands (95% UI)        | Incidence in thousands (95% UI)       | YLDs in thousands (95% UI)          |                                                   |                                                     |
|-------------------------------------------------------------------------------------|-----------------------------------------|---------------------------------------|-------------------------------------|---------------------------------------------------|-----------------------------------------------------|
|                                                                                     | 2016 counts                             | 2016 counts                           | 2016 counts                         | Percentage change in counts between 2006 and 2016 | Percentage change in age-standardised rates between |
| Adverse effects of medical treatment                                                | 10.4<br>(8.2 to 12.9)                   | 135.6<br>(118.3 to 153.0)             | 1.4<br>(0.9 to 2.1)                 | 14.5<br>(10.0 to 18.8)                            | -2.8<br>(-5.7 to 0.5)                               |
| Animal contact                                                                      | 155.9<br>(136.8 to 182.1)               | 190.8<br>(152.6 to 229.1)             | 4.8<br>(3.2 to 6.9)                 | 36.3<br>(32.5 to 40.4)                            | 3.6<br>(1.0 to 6.2)                                 |
| Venomous animal contact                                                             | 72.2<br>(59.3 to 86.4)                  | 86.7<br>(65.2 to 111.4)               | 3.7<br>(2.4 to 5.2)                 | 37.4<br>(32.5 to 42.9)                            | 6.4<br>(2.9 to 9.9)                                 |
| Non-venomous animal contact                                                         | 83.6<br>(68.9 to 104.5)                 | 104.1<br>(80.5 to 128.7)              | 1.2<br>(0.7 to 1.9)                 | 33.0<br>(29.4 to 36.0)                            | -3.4<br>(-4.8 to -2.2)                              |
| Foreign body                                                                        | 270.7<br>(228.2 to 326.1)               | 188.6<br>(161.1 to 222.6)             | 7.8<br>(4.9 to 11.7)                | 39.3<br>(37.1 to 41.3)                            | 3.3<br>(2.2 to 4.3)                                 |
| Pulmonary aspiration and foreign body in airway                                     | 63.6<br>(48.9 to 81.5)                  | 22.1<br>(17.9 to 27.9)                | 2.3<br>(1.4 to 3.5)                 | 35.1<br>(33.0 to 37.3)                            | 3.7<br>(2.5 to 4.7)                                 |
| Foreign body in eyes                                                                | 17.2<br>(9.7 to 25.8)                   | 90.0<br>(69.3 to 121.2)               | 1.0<br>(0.5 to 1.6)                 | 34.0<br>(27.7 to 42.4)                            | 2.8<br>(1.4 to 4.3)                                 |
| Foreign body in other body part                                                     | 189.9<br>(155.6 to 242.8)               | 76.5<br>(63.8 to 90.4)                | 4.5<br>(2.9 to 6.8)                 | 42.7<br>(40.4 to 44.7)                            | 3.2<br>(1.9 to 4.5)                                 |
| Environmental heat and cold exposure                                                | 353.8<br>(294.5 to 419.4)               | 98.0<br>(80.2 to 118.9)               | 11.4<br>(7.4 to 16.6)               | 45.2<br>(43.2 to 47.3)                            | 5.1<br>(4.1 to 6.0)                                 |
| Other unintentional injuries                                                        | 1,123.2<br>(881.5 to 1,402.4)           | 399.1<br>(321.1 to 483.4)             | 29.5<br>(19.2 to 43.6)              | 59.3<br>(57.0 to 61.6)                            | 18.5<br>(17.4 to 19.6)                              |
| <b>Self-harm and interpersonal violence</b>                                         | <b>707.4</b><br><b>(631.0 to 790.4)</b> | <b>76.8†</b><br><b>(63.8 to 91.7)</b> | <b>10.3</b><br><b>(7.1 to 14.4)</b> | <b>31.9</b><br><b>(25.9 to 37.7)</b>              | <b>2.9</b><br><b>(-0.5 to 6.3)</b>                  |
| Self-harm                                                                           | 29.2<br>(24.9 to 33.8)                  | 11.2<br>(9.3 to 13.2)                 | 1.2<br>(0.8 to 1.8)                 | 58.2<br>(54.9 to 61.8)                            | 13.4<br>(11.7 to 15.2)                              |
| Self-harm by firearm                                                                | 1.8<br>(1.4 to 2.1)                     | 0.3<br>(0.2 to 0.6)                   | 0.1<br>(< 0.05 to 0.1)              | 53.2<br>(50.1 to 56.5)                            | 14.7<br>(13.1 to 16.2)                              |
| Self-harm by other specified means                                                  | 27.4<br>(23.0 to 32.1)                  | 10.8<br>(9.0 to 12.9)                 | 1.1<br>(0.7 to 1.7)                 | 58.4<br>(55.1 to 62.1)                            | 13.4<br>(11.6 to 15.2)                              |
| Interpersonal violence                                                              | 678.3<br>(599.9 to 760.2)               | 65.6†<br>(52.8 to 80.3)               | 9.1<br>(6.2 to 12.7)                | 29.0<br>(23.0 to 35.2)                            | 1.6<br>(-1.9 to 5.2)                                |
| Assault by firearm                                                                  | 8.3<br>(7.1 to 9.6)                     | 2.7<br>(1.8 to 3.8)                   | 0.4<br>(0.2 to 0.5)                 | 80.8<br>(76.5 to 84.7)                            | 30.5<br>(28.9 to 32.2)                              |
| Assault by sharp object                                                             | 44.1<br>(35.4 to 53.1)                  | 17.2<br>(12.5 to 23.1)                | 1.2<br>(0.8 to 1.7)                 | 70.9<br>(66.9 to 74.4)                            | 25.5<br>(24.2 to 26.8)                              |
| Sexual violence                                                                     | 544.4<br>(470.5 to 624.1)               | --                                    | 4.5<br>(3.0 to 6.4)                 | 1.8<br>(-0.9 to 4.7)                              | -17.3<br>(-18.6 to -16.1)                           |
| Assault by other means                                                              | 81.5<br>(68.6 to 98.2)                  | 45.7<br>(36.1 to 57.0)                | 3.1<br>(2.1 to 4.6)                 | 74.5<br>(72.0 to 77.3)                            | 25.8<br>(24.5 to 27.1)                              |
| <b>Forces of nature, conflict and terrorism, and executions and police conflict</b> | <b>34.1</b><br><b>(21.8 to 50.6)</b>    | <b>0.8†</b><br><b>(0.6 to 1.1)</b>    | <b>0.8</b><br><b>(0.2 to 2.2)</b>   | <b>577.4</b><br><b>(537.1 to 604.2)</b>           | <b>441.8</b><br><b>(414.0 to 464.8)</b>             |
| Exposure to forces of nature                                                        | 0.8<br>(0.5 to 1.3)                     | --                                    | < 0.05<br>(< 0.05 to 0.1)           | 137.8<br>(124.9 to 216.0)                         | 81.1<br>(71.4 to 137.0)                             |
| Conflict and terrorism                                                              | 31.2<br>(19.5 to 47.6)                  | --                                    | 0.7<br>(0.2 to 2.0)                 | 876.0<br>(804.7 to 1,019.2)                       | 698.7<br>(643.8 to 815.7)                           |
| Executions and police conflict                                                      | 2.1<br>(1.3 to 3.5)                     | 0.8<br>(0.6 to 1.1)                   | < 0.05<br>(< 0.05 to 0.1)           | 48.3<br>(36.5 to 53.3)                            | 18.7<br>(13.6 to 21.7)                              |
| <b>Impairments</b>                                                                  | --                                      | --                                    | --                                  | --                                                | --                                                  |
| Anaemia                                                                             | 8,830.1<br>(8,325.7 to 9,354.2)         | --                                    | 228.5<br>(152.6 to 333.2)           | 2.1<br>(-2.5 to 7.2)                              | -13.8<br>(-16.6 to -10.8)                           |
| Developmental intellectual disability                                               | 676.7<br>(525.4 to 847.9)               | --                                    | 98.3<br>(64.5 to 169.2)             | 1.2<br>(-8.9 to 16.1)                             | -14.1<br>(-22.5 to -1.2)                            |
| Epilepsy                                                                            | 220.4<br>(156.6 to 349.9)               | --                                    | 80.9<br>(49.2 to 143.0)             | -1.7<br>(-16.4 to 28.5)                           | -15.7<br>(-28.8 to 10.3)                            |
| Guillain-Barre syndrome                                                             | 0.3<br>(0.2 to 0.4)                     | --                                    | 0.1<br>(0.1 to 0.1)                 | 29.5<br>(22.6 to 37.2)                            | 0.2<br>(-0.1 to 0.6)                                |
| Hearing loss                                                                        | 3,698.1<br>(3,476.7 to 3,941.5)         | --                                    | 109.2<br>(75.4 to 152.3)            | 22.1<br>(16.3 to 28.0)                            | -10.5<br>(-13.4 to -7.8)                            |
| Heart failure                                                                       | 172.2<br>(153.8 to 192.6)               | --                                    | 16.6<br>(11.9 to 22.1)              | 52.8<br>(47.3 to 58.3)                            | 0.1<br>(-2.7 to 3.0)                                |
| Infertility                                                                         | 591.6<br>(471.9 to 745.3)               | --                                    | 3.6<br>(1.5 to 7.1)                 | 30.7<br>(24.7 to 36.5)                            | 1.3<br>(-2.1 to 4.7)                                |
| Pelvic inflammatory disease                                                         | 12.1<br>(10.2 to 14.5)                  | --                                    | 1.6<br>(1.1 to 2.2)                 | 30.0<br>(19.8 to 41.0)                            | -2.5<br>(-9.1 to 4.9)                               |
| Vision loss                                                                         | 3,359.7<br>(3,185.1 to 3,544.5)         | --                                    | 130.3<br>(88.6 to 202.6)            | 7.9<br>(-3.3 to 19.6)                             | -16.0<br>(-20.8 to -10.6)                           |

We did not calculate incidence for the nine impairments, certain NTDs, and causes with only birth prevalence. Blank cells mean that no estimate is available.

† Incidence for aggregate causes represents the sum of the incidence of the causes below the aggregate.

‡ Incidence estimates for stroke represent first-ever stroke only.

^ Incidence of HIV/AIDS represents new infections of HIV only and does not include new infections of Tuberculosis in HIV positive cases.

SR Table 14: Prevalence, incidence, and YLDs for 2016, percentage change of YLD counts and percentage change of age-standardised YLD rates between 2006 and 2016 by cause and impairments, for all ages, Senegal.

| Cause                                                                                | Prevalence in thousands (95% UI)          | Incidence in thousands (95% UI)             | YLDs in thousands (95% UI)             |                                                   |                                                     |
|--------------------------------------------------------------------------------------|-------------------------------------------|---------------------------------------------|----------------------------------------|---------------------------------------------------|-----------------------------------------------------|
|                                                                                      | 2016 counts                               | 2016 counts                                 | 2016 counts                            | Percentage change in counts between 2006 and 2016 | Percentage change in age-standardised rates between |
| <b>All causes</b>                                                                    | <b>15,053.0</b><br>(15,011.9 to 15,096.0) | <b>95,103.6†</b><br>(89,760.6 to 100,843.0) | <b>1,408.2</b><br>(1,031.4 to 1,851.7) | <b>29.9</b><br>(25.9 to 34.4)                     | <b>-2.7</b><br>(-5.1 to -0.1)                       |
| <b>Communicable, maternal, neonatal, and nutritional disorders</b>                   | <b>12,300.9</b><br>(12,066.3 to 12,543.9) | <b>57,883.9†</b><br>(53,504.7 to 62,820.8)  | <b>372.1</b><br>(258.5 to 517.3)       | <b>15.2</b><br>(9.6 to 21.5)                      | <b>-15.2</b><br>(-19.8 to -10.3)                    |
| <b>HIV/AIDS and tuberculosis</b>                                                     | <b>3,749.3</b><br>(3,250.0 to 4,192.2)    | <b>23.6†</b><br>(19.7 to 28.3)              | <b>10.2</b><br>(6.9 to 14.5)           | <b>2.2</b><br>(-14.3 to 20.7)                     | <b>-25.2</b><br>(-37.5 to -10.8)                    |
| Tuberculosis                                                                         | 3,391.1<br>(2,954.5 to 3,917.5)           | 20.6†<br>(16.9 to 25.2)                     | 4.1<br>(2.6 to 5.7)                    | 9.1<br>(-4.2 to 24.7)                             | -19.3<br>(-27.8 to -9.8)                            |
| Drug-susceptible tuberculosis                                                        | 13.1<br>(10.7 to 16.0)                    | 20.4<br>(16.7 to 24.9)                      | 4.0<br>(2.6 to 5.7)                    | 9.1<br>(-4.2 to 24.6)                             | -19.3<br>(-27.8 to -9.5)                            |
| Multidrug-resistant tuberculosis without extensive drug resistance                   | 0.1<br>(0.1 to 0.2)                       | 0.2<br>(0.1 to 0.4)                         | < 0.05<br>(< 0.05 to 0.1)              | 4.1<br>(-61.3 to 207.8)                           | -23.2<br>(-71.3 to 122.4)                           |
| Extensively drug-resistant tuberculosis                                              | < 0.05<br>(< 0.05 to < 0.05)              | < 0.05<br>(< 0.05 to < 0.05)                | < 0.05<br>(< 0.05 to < 0.05)           | 217.3<br>(18.0 to 838.3)                          | 134.2<br>(-12.7 to 577.8)                           |
| Latent tuberculosis infection                                                        | 3,377.9<br>(2,941.3 to 3,906.1)           | --                                          | --                                     | --                                                | --                                                  |
| HIV/AIDS                                                                             | 52.1<br>(42.2 to 63.9)                    | 3.0^<br>(1.9 to 4.3)                        | 6.2<br>(3.9 to 9.4)                    | -1.8<br>(-23.4 to 28.9)                           | -28.9<br>(-44.6 to -5.3)                            |
| Drug-susceptible HIV/AIDS - Tuberculosis                                             | 1.2<br>(0.7 to 1.9)                       | 1.8<br>(1.1 to 2.9)                         | 0.5<br>(0.2 to 0.8)                    | -20.1<br>(-38.5 to 3.1)                           | -38.0<br>(-51.3 to -20.4)                           |
| Multidrug-resistant HIV/AIDS - Tuberculosis without extensive drug resistance        | < 0.05<br>(< 0.05 to < 0.05)              | < 0.05<br>(< 0.05 to < 0.05)                | < 0.05<br>(< 0.05 to < 0.05)           | -23.9<br>(-72.3 to 124.9)                         | -41.0<br>(-78.5 to 74.2)                            |
| Extensively drug-resistant HIV/AIDS - Tuberculosis                                   | < 0.05<br>(< 0.05 to < 0.05)              | < 0.05<br>(< 0.05 to < 0.05)                | < 0.05<br>(< 0.05 to < 0.05)           | 131.8<br>(-15.7 to 585.0)                         | 79.7<br>(-34.7 to 430.6)                            |
| HIV/AIDS resulting in other diseases                                                 | 50.9<br>(41.2 to 62.6)                    | 3.0<br>(1.9 to 4.3)                         | 5.7<br>(3.6 to 8.9)                    | 0.0<br>(-23.9 to 37.8)                            | -28.0<br>(-45.2 to -0.6)                            |
| <b>Diarrhoea, lower respiratory infections, and other common infectious diseases</b> | <b>1,116.5</b><br>(1,068.5 to 1,174.4)    | <b>51,007.8†</b><br>(46,623.2 to 55,865.1)  | <b>63.6</b><br>(44.5 to 86.1)          | <b>24.0</b><br>(20.0 to 28.1)                     | <b>-7.3</b><br>(-10.1 to -4.8)                      |
| Diarrhoeal diseases                                                                  | 236.4<br>(222.1 to 250.9)                 | 15,785.9<br>(14,855.0 to 16,815.4)          | 26.7<br>(18.4 to 36.5)                 | 17.4<br>(11.5 to 23.7)                            | -11.6<br>(-15.4 to -7.5)                            |
| Intestinal infectious diseases                                                       | 1.6<br>(1.1 to 2.5)                       | 28.6†<br>(18.4 to 42.9)                     | 0.3<br>(0.1 to 0.4)                    | 0.2<br>(-22.3 to 34.0)                            | -25.5<br>(-39.2 to -6.8)                            |
| Typhoid fever                                                                        | 1.6<br>(1.0 to 2.4)                       | 24.7<br>(15.9 to 36.9)                      | 0.2<br>(0.1 to 0.4)                    | 0.5<br>(-23.0 to 36.1)                            | -25.4<br>(-39.7 to -5.7)                            |
| Paratyphoid fever                                                                    | 0.2<br>(0.1 to 0.3)                       | 4.0<br>(2.4 to 6.4)                         | < 0.05<br>(< 0.05 to < 0.05)           | 7.3<br>(-18.5 to 39.8)                            | -20.8<br>(-36.1 to -0.4)                            |
| Other intestinal infectious diseases                                                 | --                                        | --                                          | < 0.05<br>(< 0.05 to < 0.05)           | -30.2<br>(-47.1 to -6.9)                          | -46.3<br>(-56.0 to -35.0)                           |
| Lower respiratory infections                                                         | 20.8<br>(19.2 to 22.5)                    | 902.3<br>(831.7 to 982.5)                   | 1.3<br>(0.8 to 1.8)                    | 25.3<br>(9.6 to 42.1)                             | -4.5<br>(-14.0 to 5.9)                              |
| Upper respiratory infections                                                         | 431.9<br>(377.9 to 490.6)                 | 32,352.1<br>(28,146.9 to 37,017.9)          | 10.8<br>(6.4 to 17.1)                  | 35.6<br>(27.9 to 44.8)                            | 0.6<br>(-4.6 to 6.9)                                |
| Otitis media                                                                         | 348.6<br>(309.9 to 388.6)                 | 1,410.5<br>(1,092.8 to 1,811.2)             | 11.4<br>(7.0 to 17.2)                  | 29.8<br>(21.0 to 38.7)                            | -2.9<br>(-9.4 to 3.6)                               |
| Meningitis                                                                           | 102.9<br>(86.2 to 121.1)                  | 28.1<br>(24.2 to 33.4)                      | 8.6<br>(6.0 to 11.3)                   | 22.6<br>(13.6 to 31.9)                            | -9.5<br>(-15.4 to -3.1)                             |
| Pneumococcal meningitis                                                              | 37.2<br>(30.1 to 46.5)                    | 5.4<br>(4.2 to 7.0)                         | 3.3<br>(2.2 to 4.4)                    | 1.0<br>(-12.3 to 16.9)                            | -26.3<br>(-35.4 to -15.3)                           |
| H influenzae type B meningitis                                                       | 25.2<br>(18.0 to 34.2)                    | 8.3<br>(6.2 to 10.9)                        | 1.9<br>(1.3 to 2.5)                    | 15.0<br>(0.5 to 29.9)                             | -14.6<br>(-24.7 to -4.6)                            |
| Meningococcal infection                                                              | 11.4<br>(8.7 to 15.0)                     | 3.3<br>(2.4 to 4.5)                         | 1.5<br>(1.0 to 2.1)                    | 39.1<br>(26.1 to 54.1)                            | 2.2<br>(-7.6 to 13.4)                               |
| Other meningitis                                                                     | 29.1<br>(20.2 to 39.2)                    | 11.1<br>(8.8 to 13.9)                       | 1.9<br>(1.3 to 2.7)                    | 82.3<br>(62.5 to 104.2)                           | 38.6<br>(24.2 to 54.6)                              |
| Encephalitis                                                                         | 34.7<br>(22.8 to 51.0)                    | 16.6<br>(14.4 to 19.1)                      | 3.9<br>(2.7 to 5.2)                    | 33.8<br>(17.8 to 51.6)                            | -1.0<br>(-11.0 to 10.2)                             |
| Diphtheria                                                                           | < 0.05<br>(< 0.05 to < 0.05)              | < 0.05<br>(< 0.05 to < 0.05)                | < 0.05<br>(< 0.05 to < 0.05)           | -46.6<br>(-78.0 to 32.0)                          | -55.6<br>(-78.1 to -6.9)                            |
| Whooping cough                                                                       | 5.0<br>(3.9 to 6.3)                       | 36.2<br>(28.2 to 46.0)                      | 0.2<br>(0.1 to 0.4)                    | -9.9<br>(-28.0 to 11.8)                           | -32.4<br>(-46.3 to -16.0)                           |
| Tetanus                                                                              | 0.3<br>(0.2 to 0.3)                       | 0.4<br>(0.2 to 0.8)                         | < 0.05<br>(< 0.05 to < 0.05)           | -14.1<br>(-42.9 to 13.8)                          | -32.1<br>(-47.9 to -17.6)                           |
| Measles                                                                              | 0.7<br>(0.2 to 1.5)                       | 25.2<br>(8.9 to 55.2)                       | 0.1<br>(< 0.05 to 0.2)                 | 0.4<br>(-57.8 to 129.3)                           | -25.6<br>(-68.3 to 70.6)                            |
| Varicella and herpes zoster                                                          | 14.2<br>(13.2 to 15.2)                    | 422.0<br>(393.5 to 451.8)                   | 0.4<br>(0.2 to 0.7)                    | 35.5<br>(16.5 to 59.4)                            | 0.5<br>(-10.0 to 13.0)                              |
| <b>Neglected tropical diseases and malaria</b>                                       | <b>4,371.6</b><br>(4,034.8 to 4,658.9)    | <b>2,137.8†</b><br>(1,830.3 to 2,556.3)     | <b>57.9</b><br>(36.5 to 95.3)          | <b>-16.8</b><br>(-29.6 to 3.4)                    | <b>-40.5</b><br>(-50.7 to -24.2)                    |
| Malaria                                                                              | 344.6<br>(285.5 to 427.2)                 | 934.7<br>(673.0 to 1,292.1)                 | 12.7<br>(9.8 to 15.8)                  | -10.8<br>(-22.5 to 2.7)                           | -33.1<br>(-41.4 to -23.6)                           |
| Chagas disease                                                                       | --                                        | --                                          | --                                     | --                                                | --                                                  |
| Leishmaniasis                                                                        | 0.4<br>(0.3 to 0.5)                       | 0.1<br>(< 0.05 to 0.1)                      | < 0.05<br>(< 0.05 to < 0.05)           | 21.2<br>(-3.8 to 60.9)                            | -11.7<br>(-32.3 to 22.0)                            |
| Visceral leishmaniasis                                                               | < 0.05<br>(< 0.05 to < 0.05)              | < 0.05<br>(< 0.05 to 0.1)                   | < 0.05<br>(< 0.05 to < 0.05)           | -6.0<br>(-60.4 to 126.1)                          | -31.2<br>(-73.2 to 80.0)                            |
| Cutaneous and mucocutaneous leishmaniasis                                            | 0.4<br>(0.3 to 0.5)                       | 0.1<br>(< 0.05 to 0.1)                      | < 0.05<br>(< 0.05 to < 0.05)           | 21.9<br>(-3.7 to 62.7)                            | -11.0<br>(-32.9 to 24.9)                            |
| African trypanosomiasis                                                              | --                                        | --                                          | --                                     | --                                                | --                                                  |
| Schistosomiasis                                                                      | 2,233.5<br>(1,875.7 to 2,502.9)           | 1,030.3<br>(880.9 to 1,151.2)               | 18.5<br>(9.3 to 34.3)                  | -49.0<br>(-50.6 to -46.8)                         | -62.5<br>(-63.6 to -61.0)                           |
| Cysticercosis                                                                        | 0.5<br>(0.3 to 0.6)                       | --                                          | 0.1<br>(< 0.05 to 0.1)                 | 47.1<br>(13.0 to 82.7)                            | 6.9<br>(-19.3 to 35.6)                              |
| Cystic echinococcosis                                                                | 6.3<br>(1.6 to 22.4)                      | 1.4<br>(0.3 to 4.6)                         | 0.6<br>(0.1 to 2.2)                    | -15.8<br>(-87.2 to 434.3)                         | -38.2<br>(-90.5 to 261.0)                           |
| Lymphatic filariasis                                                                 | 173.2<br>(88.5 to 342.6)                  | 28.7<br>(22.2 to 36.4)                      | 12.4<br>(2.6 to 34.5)                  | 69.7<br>(20.6 to 104.1)                           | 23.2<br>(-12.6 to 47.8)                             |
| Onchocerciasis                                                                       | --                                        | --                                          | --                                     | --                                                | --                                                  |
| Trachoma                                                                             | 8.0<br>(5.1 to 11.7)                      | --                                          | 0.7<br>(0.4 to 1.2)                    | -17.5<br>(-35.7 to 5.4)                           | -36.4<br>(-53.4 to -12.7)                           |
| Dengue                                                                               | 8.5<br>(4.7 to 14.1)                      | 141.6<br>(88.9 to 209.3)                    | 1.4<br>(0.6 to 2.6)                    | 196.4<br>(116.9 to 591.2)                         | 121.5<br>(64.5 to 391.9)                            |
| Yellow fever                                                                         | < 0.05<br>(< 0.05 to 0.1)                 | 0.9<br>(0.3 to 2.3)                         | < 0.05<br>(< 0.05 to < 0.05)           | -17.7<br>(-38.1 to 8.2)                           | -38.8<br>(-51.5 to -22.8)                           |
| Rabies                                                                               | < 0.05<br>(< 0.05 to < 0.05)              | 0.1<br>(< 0.05 to 0.3)                      | < 0.05<br>(< 0.05 to < 0.05)           | 7.8<br>(-46.4 to 91.4)                            | -15.6<br>(-48.8 to 34.8)                            |
| Intestinal nematode infections                                                       | 1,887.8<br>(1,639.6 to 2,170.5)           | --                                          | 1.6<br>(0.9 to 2.6)                    | 35.6<br>(13.1 to 61.9)                            | 1.9<br>(-16.0 to 24.8)                              |
| Ascariasis                                                                           | 396.6<br>(315.1 to 507.4)                 | --                                          | < 0.05<br>(< 0.05 to 0.1)              | 31.5<br>(-15.9 to 114.5)                          | -2.3<br>(-43.6 to 73.0)                             |



| Cause                                                                   | Prevalence in thousands (95% UI)           | Incidence in thousands (95% UI)             | YLDs in thousands (95% UI)          |                                                                       |                                                                        |
|-------------------------------------------------------------------------|--------------------------------------------|---------------------------------------------|-------------------------------------|-----------------------------------------------------------------------|------------------------------------------------------------------------|
|                                                                         | 2016 counts<br>(779.8 to 1,373.8)          | 2016 counts                                 | 2016 counts<br>(0.1 to 0.2)         | Percentage change in counts between 2006 and 2016<br>(-12.7 to 113.7) | Percentage change in age-standardised rates between<br>(-38.7 to 66.3) |
| Trichuriasis                                                            | 1,048.8<br>(779.8 to 1,373.8)              | --                                          | 0.1<br>(0.1 to 0.2)                 | 33.7<br>(-12.7 to 113.7)                                              | -0.0<br>(-38.7 to 66.3)                                                |
| Hookworm disease                                                        | 539.7<br>(422.8 to 688.7)                  | --                                          | 1.4<br>(0.8 to 2.3)                 | 35.9<br>(12.7 to 64.5)                                                | 2.1<br>(-17.2 to 27.6)                                                 |
| Food-borne trematodiasis                                                | --                                         | --                                          | --                                  | --                                                                    | --                                                                     |
| Leprosy                                                                 | 1.4<br>(1.3 to 1.6)                        | 0.1<br>(0.1 to 0.1)                         | 0.1<br>(0.1 to 0.1)                 | -2.3<br>(-19.3 to 20.1)                                               | -24.8<br>(-36.3 to -10.5)                                              |
| Ebola virus disease                                                     | --                                         | --                                          | --                                  | --                                                                    | --                                                                     |
| Zika virus disease                                                      | --                                         | --                                          | --                                  | --                                                                    | --                                                                     |
| Guinea worm disease                                                     | --                                         | --                                          | --                                  | --                                                                    | --                                                                     |
| Other neglected tropical diseases                                       | 293.4<br>(282.3 to 304.3)                  | --                                          | 10.0<br>(6.5 to 14.5)               | 15.6<br>(6.7 to 25.8)                                                 | -12.6<br>(-18.9 to -5.4)                                               |
| <b>Maternal disorders</b>                                               | <b>48.3<br/>(37.4 to 63.4)</b>             | <b>364.0†<br/>(330.9 to 397.2)</b>          | <b>3.3<br/>(2.1 to 4.9)</b>         | <b>10.8<br/>(-16.3 to 48.0)</b>                                       | <b>-20.0<br/>(-38.9 to 6.5)</b>                                        |
| Maternal haemorrhage                                                    | 5.2<br>(4.0 to 6.8)                        | 41.7<br>(27.4 to 60.7)                      | 0.2<br>(0.1 to 0.4)                 | 29.1<br>(-9.7 to 85.5)                                                | -3.9<br>(-32.8 to 40.0)                                                |
| Maternal sepsis and other pregnancy related infections                  | 6.3<br>(4.7 to 8.3)                        | 38.2<br>(29.0 to 51.2)                      | 0.2<br>(0.1 to 0.3)                 | 26.5<br>(-34.7 to 153.7)                                              | -5.4<br>(-50.5 to 85.1)                                                |
| Maternal hypertensive disorders                                         | 35.5<br>(23.3 to 48.2)                     | 159.2<br>(141.8 to 173.8)                   | 1.7<br>(0.9 to 2.8)                 | 28.0<br>(-19.6 to 108.3)                                              | -5.1<br>(-40.2 to 53.6)                                                |
| Maternal obstructed labour and uterine rupture                          | 1.7<br>(1.4 to 2.1)                        | 12.5<br>(9.0 to 16.9)                       | 0.6<br>(0.3 to 0.8)                 | -26.2<br>(-45.2 to 0.2)                                               | -47.5<br>(-60.9 to -30.4)                                              |
| Maternal abortion, miscarriage, and ectopic pregnancy                   | 0.9<br>(0.6 to 1.2)                        | 112.5<br>(94.5 to 133.7)                    | 0.1<br>(0.1 to 0.2)                 | 46.2<br>(-21.3 to 188.5)                                              | 6.9<br>(-42.3 to 106.7)                                                |
| Other maternal disorders                                                | --                                         | --                                          | 0.5<br>(0.3 to 0.8)                 | 5.2<br>(-20.3 to 40.8)                                                | -23.8<br>(-41.7 to 1.3)                                                |
| <b>Neonatal disorders</b>                                               | <b>227.8<br/>(184.9 to 278.8)</b>          | <b>--</b>                                   | <b>36.4<br/>(19.6 to 63.6)</b>      | <b>54.1<br/>(17.0 to 95.8)</b>                                        | <b>17.0<br/>(-13.4 to 51.3)</b>                                        |
| Neonatal preterm birth complications                                    | 144.3<br>(108.0 to 200.1)                  | --                                          | 9.8<br>(6.4 to 14.8)                | 15.6<br>(-11.2 to 46.5)                                               | -12.6<br>(-32.4 to 10.6)                                               |
| Neonatal encephalopathy due to birth asphyxia and trauma                | 64.9<br>(29.2 to 117.6)                    | --                                          | 8.1<br>(1.0 to 22.9)                | 143.2<br>(-1.1 to 356.1)                                              | 85.0<br>(-30.2 to 261.3)                                               |
| Neonatal sepsis and other neonatal infections                           | 36.6<br>(12.9 to 79.4)                     | --                                          | 14.7<br>(4.2 to 35.6)               | 63.3<br>(-2.0 to 152.6)                                               | 23.9<br>(-29.1 to 103.4)                                               |
| Hemolytic disease and other neonatal jaundice                           | 3.2<br>(2.7 to 3.8)                        | --                                          | 1.1<br>(0.8 to 1.4)                 | 33.6<br>(15.0 to 55.4)                                                | -0.7<br>(-11.7 to 12.3)                                                |
| Other neonatal disorders                                                | --                                         | --                                          | 2.8<br>(1.7 to 4.6)                 | 36.4<br>(11.3 to 65.6)                                                | 1.9<br>(-16.9 to 24.1)                                                 |
| <b>Nutritional deficiencies</b>                                         | <b>6,241.0<br/>(5,878.9 to 6,743.5)</b>    | <b>1,822.1†<br/>(1,232.3 to 2,876.1)</b>    | <b>186.4<br/>(123.2 to 269.0)</b>   | <b>20.7<br/>(15.4 to 26.5)</b>                                        | <b>-7.2<br/>(-10.4 to -3.7)</b>                                        |
| Protein-energy malnutrition                                             | 196.7<br>(167.8 to 230.9)                  | 137.2<br>(118.2 to 160.3)                   | 4.7<br>(2.9 to 6.8)                 | -2.4<br>(-27.2 to 28.7)                                               | -27.1<br>(-46.0 to -3.3)                                               |
| Iodine deficiency                                                       | 250.7<br>(221.1 to 287.2)                  | 9.7<br>(8.6 to 11.1)                        | 7.1<br>(4.7 to 10.1)                | 10.7<br>(-0.6 to 22.5)                                                | -17.2<br>(-24.3 to -9.6)                                               |
| Vitamin A deficiency                                                    | 1,799.1<br>(1,204.3 to 2,669.1)            | 1,675.2<br>(1,094.5 to 2,726.0)             | 1.1<br>(0.6 to 1.9)                 | 34.7<br>(2.9 to 83.8)                                                 | -0.3<br>(-21.3 to 30.2)                                                |
| Iron-deficiency anaemia                                                 | 5,226.3<br>(5,081.8 to 5,368.3)            | --                                          | 173.3<br>(113.7 to 254.1)           | 21.9<br>(16.2 to 28.3)                                                | -6.1<br>(-9.7 to -2.5)                                                 |
| Other nutritional deficiencies                                          | --                                         | --                                          | 0.2<br>(0.1 to 0.2)                 | -2.5<br>(-28.7 to 30.4)                                               | -27.3<br>(-46.9 to -1.7)                                               |
| <b>Other communicable, maternal, neonatal, and nutritional diseases</b> | <b>5,061.2<br/>(4,658.8 to 5,531.5)</b>    | <b>2,528.5<br/>(2,167.0 to 2,964.7)</b>     | <b>14.3<br/>(9.3 to 21.1)</b>       | <b>29.9<br/>(22.6 to 37.8)</b>                                        | <b>-3.4<br/>(-8.2 to 2.0)</b>                                          |
| Sexually transmitted diseases excluding HIV                             | 2,635.4<br>(2,475.6 to 2,830.1)            | 1,588.5<br>(1,428.0 to 1,774.2)             | 5.9<br>(3.8 to 9.3)                 | 37.1<br>(27.1 to 47.7)                                                | -1.0<br>(-7.3 to 6.2)                                                  |
| Syphilis                                                                | 421.8<br>(319.5 to 548.1)                  | 307.4<br>(221.7 to 424.6)                   | 0.4<br>(0.2 to 0.5)                 | 38.3<br>(18.5 to 61.3)                                                | 0.6<br>(-13.0 to 16.5)                                                 |
| Chlamydial infection                                                    | 149.2<br>(123.6 to 180.3)                  | 138.9<br>(116.4 to 163.9)                   | 1.1<br>(0.7 to 1.6)                 | 36.4<br>(19.7 to 57.1)                                                | -1.6<br>(-13.8 to 13.0)                                                |
| Gonococcal infection                                                    | 93.0<br>(77.9 to 112.5)                    | 314.4<br>(253.0 to 389.9)                   | 0.9<br>(0.6 to 1.4)                 | 39.8<br>(9.0 to 75.7)                                                 | 1.2<br>(-19.6 to 25.0)                                                 |
| Trichomoniasis                                                          | 542.8<br>(443.7 to 654.5)                  | 500.4<br>(402.8 to 616.3)                   | 0.8<br>(0.3 to 1.6)                 | 35.6<br>(27.0 to 45.9)                                                | -0.4<br>(-6.3 to 5.6)                                                  |
| Genital herpes                                                          | 1,646.1<br>(1,435.8 to 1,920.3)            | 165.9<br>(142.0 to 198.2)                   | 0.4<br>(0.1 to 1.0)                 | 40.0<br>(26.1 to 53.7)                                                | 1.6<br>(-6.5 to 10.3)                                                  |
| Other sexually transmitted diseases                                     | 126.9<br>(115.6 to 139.3)                  | 161.4<br>(133.9 to 195.5)                   | 2.3<br>(1.6 to 3.4)                 | 36.2<br>(21.9 to 51.4)                                                | -2.7<br>(-12.3 to 7.7)                                                 |
| Hepatitis                                                               | 2,783.9<br>(2,211.0 to 3,481.0)            | 940.0<br>(639.1 to 1,328.9)                 | 1.0<br>(0.6 to 1.6)                 | 3.8<br>(-21.9 to 37.9)                                                | -16.7<br>(-34.4 to 4.4)                                                |
| Acute hepatitis A                                                       | 16.1<br>(2.1 to 40.6)                      | 209.8<br>(27.4 to 527.1)                    | 0.1<br>(< 0.05 to 0.3)              | -3.9<br>(-80.3 to 394.6)                                              | -21.0<br>(-77.6 to 213.7)                                              |
| Hepatitis B                                                             | 2,264.6<br>(1,707.7 to 2,959.3)            | 633.9<br>(443.8 to 889.5)                   | 0.7<br>(0.4 to 1.2)                 | 4.9<br>(-19.0 to 32.4)                                                | -16.2<br>(-33.6 to 3.4)                                                |
| Hepatitis C                                                             | 499.0<br>(442.5 to 562.9)                  | 42.5<br>(38.1 to 47.1)                      | < 0.05<br>(< 0.05 to 0.1)           | 24.5<br>(-10.5 to 76.7)                                               | -6.7<br>(-24.7 to 16.6)                                                |
| Acute hepatitis E                                                       | 4.2<br>(3.3 to 5.3)                        | 53.9<br>(43.1 to 69.0)                      | 0.1<br>(0.1 to 0.2)                 | 1.6<br>(-27.1 to 41.5)                                                | -17.6<br>(-36.9 to 7.5)                                                |
| Other infectious diseases                                               | 217.2<br>(209.4 to 224.7)                  | < 0.05<br>(< 0.05 to < 0.05)                | 7.4<br>(4.9 to 11.0)                | 29.0<br>(19.0 to 40.3)                                                | -3.3<br>(-9.9 to 4.3)                                                  |
| <b>Non-communicable diseases</b>                                        | <b>13,732.2<br/>(13,611.7 to 13,864.6)</b> | <b>36,122.4†<br/>(32,902.1 to 39,354.9)</b> | <b>963.8<br/>(710.3 to 1,247.8)</b> | <b>36.2<br/>(30.4 to 42.1)</b>                                        | <b>0.9<br/>(-2.3 to 4.0)</b>                                           |
| <b>Neoplasms</b>                                                        | <b>11.4<br/>(10.2 to 12.7)</b>             | <b>7.9<br/>(7.3 to 8.4)</b>                 | <b>2.5<br/>(1.8 to 3.2)</b>         | <b>37.5<br/>(28.7 to 46.5)</b>                                        | <b>3.2<br/>(-2.9 to 9.3)</b>                                           |
| Lip and oral cavity cancer                                              | 0.4<br>(0.4 to 0.5)                        | 0.1<br>(0.1 to 0.1)                         | < 0.05<br>(< 0.05 to 0.1)           | 43.2<br>(26.1 to 61.6)                                                | 5.4<br>(-7.5 to 19.2)                                                  |
| Nasopharynx cancer                                                      | 0.1<br>(0.1 to 0.1)                        | < 0.05<br>(< 0.05 to < 0.05)                | < 0.05<br>(< 0.05 to < 0.05)        | 48.6<br>(27.8 to 73.6)                                                | 4.8<br>(-7.6 to 19.9)                                                  |
| Other pharynx cancer                                                    | 0.1<br>(0.1 to 0.1)                        | < 0.05<br>(< 0.05 to < 0.05)                | < 0.05<br>(< 0.05 to < 0.05)        | 39.6<br>(26.5 to 54.0)                                                | 4.9<br>(-4.3 to 14.8)                                                  |
| Oesophageal cancer                                                      | 0.2<br>(0.2 to 0.2)                        | 0.2<br>(0.2 to 0.2)                         | < 0.05<br>(< 0.05 to 0.1)           | 52.6<br>(33.3 to 74.7)                                                | 14.7<br>(-0.6 to 34.3)                                                 |
| Stomach cancer                                                          | 0.8<br>(0.8 to 0.9)                        | 0.6<br>(0.5 to 0.6)                         | 0.1<br>(0.1 to 0.2)                 | 32.3<br>(15.7 to 53.1)                                                | 0.3<br>(-13.6 to 17.4)                                                 |
| Colon and rectum cancer                                                 | 0.9<br>(0.8 to 1.0)                        | 0.4<br>(0.3 to 0.4)                         | 0.1<br>(0.1 to 0.2)                 | 39.4<br>(22.7 to 59.2)                                                | 4.3<br>(-9.8 to 21.6)                                                  |
| Liver cancer                                                            | 0.6<br>(0.5 to 0.7)                        | 1.0<br>(0.8 to 1.1)                         | 0.2<br>(0.1 to 0.3)                 | 22.6<br>(7.8 to 38.7)                                                 | -8.7<br>(-19.2 to 2.9)                                                 |
| Liver cancer due to hepatitis B                                         | 0.6<br>(0.5 to 0.7)                        | 0.6<br>(0.5 to 0.7)                         | 0.1<br>(0.1 to 0.2)                 | 23.1<br>(8.2 to 39.6)                                                 | -8.7<br>(-20.1 to 3.3)                                                 |

| Cause                                              | Prevalence in thousands (95% UI)        | Incidence in thousands (95% UI)          | YLDs in thousands (95% UI)           |                                                   |                                                     |
|----------------------------------------------------|-----------------------------------------|------------------------------------------|--------------------------------------|---------------------------------------------------|-----------------------------------------------------|
|                                                    | 2016 counts                             | 2016 counts                              | 2016 counts                          | Percentage change in counts between 2006 and 2016 | Percentage change in age-standardised rates between |
| Liver cancer due to hepatitis C                    | < 0.05<br>(< 0.05 to < 0.05)            | < 0.05<br>(< 0.05 to < 0.05)             | < 0.05<br>(< 0.05 to < 0.05)         | 24.6<br>(9.0 to 43.4)                             | -5.1<br>(-17.3 to 9.4)                              |
| Liver cancer due to alcohol use                    | 0.1<br>(0.1 to 0.1)                     | 0.1<br>(0.1 to 0.1)                      | < 0.05<br>(< 0.05 to < 0.05)         | 19.1<br>(4.2 to 37.5)                             | -10.5<br>(-21.9 to 2.6)                             |
| Liver cancer due to other causes                   | 0.2<br>(0.2 to 0.3)                     | 0.2<br>(0.2 to 0.3)                      | 0.1<br>(< 0.05 to 0.1)               | 22.5<br>(7.1 to 40.6)                             | -8.8<br>(-20.0 to 3.7)                              |
| Gallbladder and biliary tract cancer               | 0.1<br>(< 0.05 to 0.1)                  | 0.1<br>(0.1 to 0.1)                      | < 0.05<br>(< 0.05 to < 0.05)         | 23.2<br>(11.9 to 35.5)                            | -6.0<br>(-14.1 to 2.7)                              |
| Pancreatic cancer                                  | 0.2<br>(0.2 to 0.2)                     | 0.2<br>(0.2 to 0.3)                      | 0.1<br>(< 0.05 to 0.1)               | 40.4<br>(29.0 to 53.4)                            | 6.9<br>(-1.8 to 16.8)                               |
| Larynx cancer                                      | 0.2<br>(0.1 to 0.2)                     | 0.1<br>(< 0.05 to 0.1)                   | < 0.05<br>(< 0.05 to < 0.05)         | 32.3<br>(14.5 to 51.8)                            | -0.0<br>(-12.8 to 14.6)                             |
| Tracheal, bronchus, and lung cancer                | 0.5<br>(0.5 to 0.5)                     | 0.5<br>(0.4 to 0.5)                      | 0.1<br>(0.1 to 0.1)                  | 58.2<br>(31.0 to 91.9)                            | 21.0<br>(-1.0 to 47.5)                              |
| Malignant skin melanoma                            | 0.1<br>(0.1 to 0.1)                     | < 0.05<br>(< 0.05 to < 0.05)             | < 0.05<br>(< 0.05 to < 0.05)         | 30.7<br>(17.5 to 44.8)                            | -2.5<br>(-12.8 to 7.9)                              |
| Non-melanoma skin cancer                           | 0.1<br>(0.1 to 0.1)                     | 0.5<br>(0.3 to 0.8)                      | < 0.05<br>(< 0.05 to < 0.05)         | 12.3<br>(-46.6 to 62.2)                           | -18.9<br>(-66.2 to 26.2)                            |
| Non-melanoma skin cancer (squamous-cell carcinoma) | 0.1<br>(< 0.05 to 0.1)                  | 0.1<br>(0.1 to 0.1)                      | < 0.05<br>(< 0.05 to < 0.05)         | 8.5<br>(-53.0 to 68.3)                            | -20.9<br>(-69.4 to 30.6)                            |
| Non-melanoma skin cancer (basal-cell carcinoma)    | 0.1<br>(< 0.05 to 0.1)                  | 0.4<br>(0.2 to 0.7)                      | < 0.05<br>(< 0.05 to < 0.05)         | 38.1<br>(21.4 to 56.9)                            | 1.1<br>(-10.1 to 14.1)                              |
| Breast cancer                                      | 2.8<br>(2.4 to 3.3)                     | 0.7<br>(0.6 to 0.8)                      | 0.3<br>(0.2 to 0.4)                  | 48.8<br>(16.7 to 88.1)                            | 8.6<br>(-14.4 to 36.1)                              |
| Cervical cancer                                    | 4.5<br>(2.7 to 5.5)                     | 1.3<br>(0.8 to 1.6)                      | 0.5<br>(0.3 to 0.6)                  | 37.2<br>(7.9 to 71.5)                             | -0.9<br>(-22.1 to 23.4)                             |
| Uterine cancer                                     | 0.5<br>(0.3 to 0.6)                     | 0.1<br>(0.1 to 0.1)                      | < 0.05<br>(< 0.05 to 0.1)            | 41.3<br>(11.8 to 76.7)                            | 8.2<br>(-13.7 to 33.3)                              |
| Ovarian cancer                                     | 0.4<br>(0.4 to 0.5)                     | 0.1<br>(0.1 to 0.2)                      | 0.1<br>(< 0.05 to 0.1)               | 47.6<br>(26.5 to 68.5)                            | 8.4<br>(-6.6 to 24.1)                               |
| Prostate cancer                                    | 1.4<br>(0.9 to 1.7)                     | 0.5<br>(0.3 to 0.5)                      | 0.2<br>(0.1 to 0.3)                  | 42.4<br>(7.2 to 83.9)                             | 10.5<br>(-15.2 to 38.2)                             |
| Testicular cancer                                  | < 0.05<br>(< 0.05 to 0.1)               | < 0.05<br>(< 0.05 to < 0.05)             | < 0.05<br>(< 0.05 to < 0.05)         | 22.0<br>(-0.3 to 49.6)                            | -11.3<br>(-28.3 to 9.5)                             |
| Kidney cancer                                      | 0.6<br>(0.5 to 0.8)                     | 0.2<br>(0.1 to 0.2)                      | 0.1<br>(< 0.05 to 0.1)               | 41.7<br>(9.0 to 83.2)                             | 6.9<br>(-8.3 to 24.6)                               |
| Bladder cancer                                     | 0.4<br>(0.4 to 0.5)                     | 0.1<br>(0.1 to 0.1)                      | 0.1<br>(< 0.05 to 0.1)               | 28.3<br>(14.9 to 43.5)                            | -3.4<br>(-13.8 to 8.5)                              |
| Brain and nervous system cancer                    | 0.4<br>(0.3 to 0.5)                     | 0.2<br>(0.1 to 0.2)                      | 0.1<br>(< 0.05 to 0.1)               | 40.0<br>(29.5 to 55.8)                            | 4.3<br>(-2.7 to 13.3)                               |
| Thyroid cancer                                     | 0.1<br>(0.1 to 0.1)                     | < 0.05<br>(< 0.05 to < 0.05)             | < 0.05<br>(< 0.05 to < 0.05)         | 24.0<br>(9.0 to 40.5)                             | -9.1<br>(-19.2 to 1.8)                              |
| Mesothelioma                                       | < 0.05<br>(< 0.05 to < 0.05)            | < 0.05<br>(< 0.05 to < 0.05)             | < 0.05<br>(< 0.05 to < 0.05)         | 28.9<br>(15.4 to 45.9)                            | -6.2<br>(-14.8 to 4.5)                              |
| Hodgkin lymphoma                                   | 0.1<br>(0.1 to 0.1)                     | < 0.05<br>(< 0.05 to < 0.05)             | < 0.05<br>(< 0.05 to < 0.05)         | 13.6<br>(1.8 to 28.0)                             | -11.5<br>(-18.3 to -2.0)                            |
| Non-Hodgkin's lymphoma                             | 0.7<br>(0.6 to 0.9)                     | 0.2<br>(0.2 to 0.3)                      | 0.1<br>(0.1 to 0.1)                  | 30.8<br>(16.5 to 47.7)                            | -1.8<br>(-11.0 to 7.5)                              |
| Multiple myeloma                                   | 0.1<br>(0.1 to 0.1)                     | 0.1<br>(0.1 to 0.1)                      | < 0.05<br>(< 0.05 to < 0.05)         | 31.6<br>(18.7 to 43.2)                            | -0.1<br>(-9.8 to 9.4)                               |
| Leukaemia                                          | 0.9<br>(0.7 to 1.0)                     | 0.3<br>(0.2 to 0.3)                      | 0.1<br>(0.1 to 0.2)                  | 29.5<br>(14.4 to 46.9)                            | -1.5<br>(-10.0 to 7.8)                              |
| Acute lymphoid leukaemia                           | 0.2<br>(0.1 to 0.2)                     | < 0.05<br>(< 0.05 to 0.1)                | < 0.05<br>(< 0.05 to < 0.05)         | 23.8<br>(-2.9 to 57.1)                            | -5.7<br>(-20.4 to 12.0)                             |
| Chronic lymphoid leukaemia                         | 0.1<br>(0.1 to 0.1)                     | < 0.05<br>(< 0.05 to < 0.05)             | < 0.05<br>(< 0.05 to < 0.05)         | 32.9<br>(11.3 to 58.2)                            | 2.2<br>(-14.2 to 22.5)                              |
| Acute myeloid leukaemia                            | 0.2<br>(0.1 to 0.3)                     | 0.1<br>(0.1 to 0.1)                      | < 0.05<br>(< 0.05 to < 0.05)         | 31.6<br>(7.5 to 62.3)                             | 1.0<br>(-10.7 to 14.6)                              |
| Chronic myeloid leukaemia                          | 0.1<br>(0.1 to 0.1)                     | < 0.05<br>(< 0.05 to < 0.05)             | < 0.05<br>(< 0.05 to < 0.05)         | 32.5<br>(12.0 to 58.0)                            | -4.8<br>(-17.3 to 10.1)                             |
| Other leukaemia                                    | 0.3<br>(0.2 to 0.4)                     | 0.1<br>(< 0.05 to 0.1)                   | < 0.05<br>(< 0.05 to 0.1)            | 29.1<br>(12.7 to 49.6)                            | -2.5<br>(-13.4 to 10.1)                             |
| Other neoplasms                                    | 1.3<br>(1.1 to 1.6)                     | 0.4<br>(0.4 to 0.5)                      | 0.1<br>(0.1 to 0.2)                  | 29.8<br>(6.5 to 56.9)                             | -1.0<br>(-13.2 to 11.7)                             |
| <b>Cardiovascular diseases</b>                     | <b>609.2</b><br><b>(581.8 to 638.2)</b> | <b>54.2†</b><br><b>(51.9 to 56.5)</b>    | <b>35.3</b><br><b>(25.5 to 46.9)</b> | <b>37.9</b><br><b>(32.4 to 43.3)</b>              | <b>2.2</b><br><b>(-1.4 to 5.8)</b>                  |
| Rheumatic heart disease                            | 132.6<br>(117.4 to 149.3)               | 5.9<br>(5.2 to 6.6)                      | 6.5<br>(4.1 to 9.3)                  | 39.7<br>(27.6 to 51.9)                            | 1.3<br>(-6.7 to 9.6)                                |
| Ischaemic heart disease                            | 149.3<br>(140.8 to 157.6)               | 20.8<br>(19.5 to 22.3)                   | 6.3<br>(4.3 to 8.8)                  | 35.1<br>(28.2 to 43.0)                            | -0.7<br>(-5.0 to 4.1)                               |
| Cerebrovascular disease                            | 53.3<br>(49.6 to 56.9)                  | 9.0‡<br>(8.2 to 9.7)                     | 7.9<br>(5.7 to 10.0)                 | 36.2<br>(26.4 to 46.4)                            | 2.6<br>(-4.6 to 10.2)                               |
| Ischaemic stroke                                   | 45.3<br>(41.0 to 50.4)                  | 5.9‡<br>(5.2 to 6.6)                     | 6.3<br>(4.6 to 8.1)                  | 36.6<br>(25.2 to 48.4)                            | 2.7<br>(-5.8 to 11.8)                               |
| Hemorrhagic stroke                                 | 11.1<br>(10.0 to 12.3)                  | 3.1‡<br>(2.8 to 3.4)                     | 1.5<br>(1.1 to 2.0)                  | 34.7<br>(20.3 to 51.2)                            | 2.0<br>(-10.0 to 15.1)                              |
| Hypertensive heart disease                         | 13.6<br>(11.2 to 16.5)                  | --                                       | 1.1<br>(0.7 to 1.6)                  | 37.7<br>(21.1 to 55.1)                            | 1.3<br>(-9.6 to 13.3)                               |
| Cardiomyopathy and myocarditis                     | 8.8<br>(7.6 to 10.0)                    | 3.5†<br>(3.0 to 4.0)                     | 0.8<br>(0.6 to 1.2)                  | 41.6<br>(25.5 to 59.0)                            | 4.2<br>(-9.1 to 17.9)                               |
| Myocarditis                                        | 2.5<br>(2.2 to 2.9)                     | 3.5<br>(3.0 to 4.0)                      | 0.2<br>(0.1 to 0.3)                  | 41.5<br>(25.4 to 59.9)                            | 4.1<br>(-9.3 to 20.6)                               |
| Alcoholic cardiomyopathy                           | 0.9<br>(0.7 to 1.1)                     | --                                       | 0.1<br>(< 0.05 to 0.1)               | 42.5<br>(8.2 to 87.5)                             | 3.1<br>(-20.4 to 34.9)                              |
| Other cardiomyopathy                               | 6.8<br>(5.7 to 8.1)                     | --                                       | 0.6<br>(0.4 to 0.8)                  | 41.5<br>(21.3 to 64.0)                            | 4.3<br>(-10.9 to 19.7)                              |
| Atrial fibrillation and flutter                    | 28.0<br>(24.5 to 31.9)                  | 2.5<br>(2.1 to 2.9)                      | 2.2<br>(1.5 to 3.1)                  | 33.1<br>(22.9 to 43.8)                            | 0.2<br>(-6.8 to 6.8)                                |
| Peripheral vascular disease                        | 103.4<br>(89.3 to 119.7)                | 10.2<br>(8.8 to 11.9)                    | 0.5<br>(0.2 to 1.0)                  | 27.8<br>(18.7 to 38.3)                            | -1.1<br>(-7.9 to 6.2)                               |
| Endocarditis                                       | 0.7<br>(0.6 to 0.8)                     | 2.3<br>(2.1 to 2.6)                      | 0.1<br>(< 0.05 to 0.1)               | 39.5<br>(23.0 to 56.5)                            | 2.8<br>(-13.1 to 21.0)                              |
| Other cardiovascular and circulatory diseases      | 187.8<br>(152.9 to 230.0)               | --                                       | 9.9<br>(6.4 to 14.2)                 | 41.2<br>(28.9 to 55.7)                            | 5.9<br>(-2.6 to 15.8)                               |
| <b>Chronic respiratory diseases</b>                | <b>727.0</b><br><b>(685.4 to 770.4)</b> | <b>155.1†</b><br><b>(143.0 to 169.2)</b> | <b>34.0</b><br><b>(25.4 to 44.9)</b> | <b>36.1</b><br><b>(30.0 to 42.4)</b>              | <b>1.1</b><br><b>(-3.2 to 5.4)</b>                  |
| Chronic obstructive pulmonary disease              | 150.3<br>(144.0 to 157.1)               | 10.9<br>(10.4 to 11.3)                   | 10.0<br>(8.6 to 11.3)                | 35.0<br>(24.7 to 46.5)                            | 0.1<br>(-7.2 to 7.7)                                |
| Pneumoconiosis                                     | 0.1<br>(0.1 to 0.1)                     | < 0.05<br>(< 0.05 to < 0.05)             | < 0.05<br>(< 0.05 to < 0.05)         | 38.6<br>(31.4 to 46.8)                            | 1.1<br>(-3.9 to 7.5)                                |
| Silicosis                                          | < 0.05<br>(< 0.05 to < 0.05)            | < 0.05<br>(< 0.05 to < 0.05)             | < 0.05<br>(< 0.05 to < 0.05)         | 43.8<br>(29.7 to 59.1)                            | 1.0<br>(-6.9 to 9.7)                                |



| Cause                                                          | Prevalence in thousands (95% UI)        | Incidence in thousands (95% UI)         | YLDs in thousands (95% UI)        |                                                   |                                                     |
|----------------------------------------------------------------|-----------------------------------------|-----------------------------------------|-----------------------------------|---------------------------------------------------|-----------------------------------------------------|
|                                                                | 2016 counts                             | 2016 counts                             | 2016 counts                       | Percentage change in counts between 2006 and 2016 | Percentage change in age-standardised rates between |
| Asbestosis                                                     | 0.1<br>(< 0.05 to 0.1)                  | < 0.05<br>(< 0.05 to < 0.05)            | < 0.05<br>(< 0.05 to < 0.05)      | 38.5<br>(29.1 to 49.5)                            | 1.1<br>(-4.7 to 7.3)                                |
| Coal workers pneumoconiosis                                    | --                                      | --                                      | --                                | --                                                | --                                                  |
| Other pneumoconiosis                                           | 0.1<br>(< 0.05 to 0.1)                  | < 0.05<br>(< 0.05 to < 0.05)            | < 0.05<br>(< 0.05 to < 0.05)      | 38.0<br>(27.1 to 52.5)                            | 1.2<br>(-7.2 to 13.1)                               |
| Asthma                                                         | 577.1<br>(529.3 to 633.4)               | 144.2<br>(131.7 to 158.6)               | 22.7<br>(15.0 to 33.0)            | 34.9<br>(27.7 to 42.5)                            | 0.9<br>(-3.6 to 5.5)                                |
| Interstitial lung disease and pulmonary sarcoidosis            | 1.1<br>(0.9 to 1.2)                     | 0.1<br>(0.1 to 0.1)                     | 0.1<br>(0.1 to 0.2)               | 35.0<br>(30.7 to 39.0)                            | -1.2<br>(-6.8 to 4.1)                               |
| Other chronic respiratory diseases                             | --                                      | --                                      | 1.1<br>(0.9 to 1.4)               | 80.7<br>(37.9 to 136.1)                           | 33.5<br>(10.4 to 61.4)                              |
| <b>Cirrhosis and other chronic liver diseases</b>              | <b>35.8<br/>(33.9 to 37.6)</b>          | <b>3.4<br/>(3.2 to 3.6)</b>             | <b>3.3<br/>(2.3 to 4.6)</b>       | <b>35.6<br/>(20.9 to 50.1)</b>                    | <b>0.9<br/>(-6.8 to 8.6)</b>                        |
| Cirrhosis and other chronic liver diseases due to hepatitis B  | 13.4<br>(11.7 to 15.0)                  | 1.3<br>(1.2 to 1.4)                     | 1.0<br>(0.7 to 1.4)               | 37.0<br>(17.9 to 59.9)                            | 0.7<br>(-11.8 to 13.8)                              |
| Cirrhosis and other chronic liver diseases due to hepatitis C  | 4.6<br>(3.5 to 6.0)                     | 0.5<br>(0.4 to 0.6)                     | 0.3<br>(0.2 to 0.5)               | 37.2<br>(10.3 to 71.0)                            | 0.3<br>(-16.6 to 21.4)                              |
| Cirrhosis and other chronic liver diseases due to alcohol use  | 5.4<br>(4.7 to 6.1)                     | 0.6<br>(0.6 to 0.7)                     | 0.4<br>(0.2 to 0.5)               | 40.8<br>(14.3 to 71.7)                            | 1.8<br>(-15.6 to 21.6)                              |
| Cirrhosis and other chronic liver diseases due to other causes | 12.4<br>(11.4 to 13.4)                  | 1.0<br>(1.0 to 1.1)                     | 1.6<br>(1.1 to 2.3)               | 33.2<br>(9.2 to 60.0)                             | 0.9<br>(-15.1 to 19.1)                              |
| <b>Digestive diseases</b>                                      | <b>218.5<br/>(200.4 to 239.0)</b>       | <b>202.6†<br/>(192.2 to 213.7)</b>      | <b>6.8<br/>(4.8 to 9.2)</b>       | <b>36.0<br/>(25.0 to 48.5)</b>                    | <b>-0.2<br/>(-6.1 to 6.4)</b>                       |
| Peptic ulcer disease                                           | 36.0<br>(32.8 to 39.6)                  | 18.3<br>(16.2 to 20.5)                  | 0.7<br>(0.5 to 1.0)               | 35.4<br>(21.0 to 51.4)                            | 1.2<br>(-7.3 to 10.6)                               |
| Gastritis and duodenitis                                       | 69.5<br>(60.7 to 78.5)                  | 68.3<br>(60.6 to 76.9)                  | 1.0<br>(0.6 to 1.4)               | 46.5<br>(31.4 to 63.1)                            | 9.7<br>(1.0 to 19.7)                                |
| Appendicitis                                                   | 1.7<br>(1.6 to 1.8)                     | 44.6<br>(41.1 to 48.4)                  | 0.5<br>(0.3 to 0.8)               | 31.9<br>(-3.8 to 79.7)                            | -1.9<br>(-22.4 to 21.2)                             |
| Paralytic ileus and intestinal obstruction                     | 0.3<br>(0.2 to 0.3)                     | 7.9<br>(7.1 to 8.8)                     | 0.1<br>(0.1 to 0.1)               | 32.4<br>(26.6 to 38.3)                            | -2.8<br>(-10.0 to 5.4)                              |
| Inguinal, femoral, and abdominal hernia                        | 108.7<br>(88.1 to 135.3)                | 21.9<br>(19.3 to 24.9)                  | 3.6<br>(2.4 to 5.0)               | 33.5<br>(16.4 to 53.7)                            | -3.3<br>(-12.5 to 6.8)                              |
| Inflammatory bowel disease                                     | 0.8<br>(0.8 to 0.9)                     | 5.2<br>(4.9 to 5.4)                     | 0.1<br>(0.1 to 0.2)               | 27.9<br>(23.9 to 32.3)                            | -6.6<br>(-9.6 to -3.4)                              |
| Vascular intestinal disorders                                  | 0.1<br>(0.1 to 0.1)                     | 0.5<br>(0.4 to 0.6)                     | < 0.05<br>(< 0.05 to < 0.05)      | 37.9<br>(30.6 to 45.9)                            | 3.7<br>(-0.4 to 8.5)                                |
| Gallbladder and biliary diseases                               | 7.1<br>(6.2 to 8.0)                     | 33.0<br>(28.5 to 37.9)                  | 0.2<br>(0.1 to 0.3)               | 39.0<br>(24.1 to 54.6)                            | 1.1<br>(-11.6 to 16.6)                              |
| Pancreatitis                                                   | 0.3<br>(0.3 to 0.3)                     | 2.9<br>(2.6 to 3.2)                     | < 0.05<br>(< 0.05 to 0.1)         | 41.3<br>(35.5 to 46.9)                            | 2.1<br>(-2.1 to 6.0)                                |
| Other digestive diseases                                       | --                                      | --                                      | 0.6<br>(0.4 to 0.9)               | 39.9<br>(24.4 to 56.3)                            | 3.6<br>(-3.1 to 10.5)                               |
| <b>Neurological disorders</b>                                  | <b>4,874.8<br/>(4,649.6 to 5,113.8)</b> | <b>2,511.3<br/>(2,111.3 to 2,940.7)</b> | <b>121.1<br/>(75.0 to 172.3)</b>  | <b>34.7<br/>(-3.3 to 88.6)</b>                    | <b>-0.5<br/>(-24.6 to 31.0)</b>                     |
| Alzheimer's disease and other dementias                        | 15.9<br>(13.4 to 18.9)                  | 2.7<br>(2.3 to 3.3)                     | 2.2<br>(1.6 to 3.0)               | 31.4<br>(23.9 to 39.6)                            | -2.0<br>(-6.7 to 3.0)                               |
| Parkinson's disease                                            | 1.7<br>(1.3 to 2.1)                     | 0.2<br>(0.2 to 0.3)                     | 0.2<br>(0.1 to 0.3)               | 37.9<br>(17.7 to 63.7)                            | 4.1<br>(-10.3 to 21.4)                              |
| Epilepsy                                                       | 74.9<br>(19.1 to 127.4)                 | 10.6<br>(2.8 to 18.2)                   | 28.8<br>(7.1 to 55.9)             | 27.1<br>(-72.4 to 407.9)                          | -5.1<br>(-79.2 to 287.3)                            |
| Multiple sclerosis                                             | 0.6<br>(0.5 to 0.7)                     | < 0.05<br>(< 0.05 to < 0.05)            | 0.2<br>(0.1 to 0.2)               | 47.7<br>(43.6 to 52.1)                            | 6.4<br>(3.5 to 9.6)                                 |
| Motor neuron disease                                           | 0.2<br>(0.1 to 0.2)                     | < 0.05<br>(< 0.05 to < 0.05)            | < 0.05<br>(< 0.05 to < 0.05)      | 37.0<br>(31.2 to 43.3)                            | 2.0<br>(-1.2 to 5.2)                                |
| Migraine                                                       | 1,729.5<br>(1,624.4 to 1,831.7)         | 218.0<br>(204.8 to 232.8)               | 71.6<br>(45.5 to 102.0)           | 35.9<br>(29.7 to 41.9)                            | 0.1<br>(-3.5 to 3.9)                                |
| Tension-type headache                                          | 3,758.8<br>(3,366.6 to 4,202.7)         | 2,279.6<br>(1,882.6 to 2,706.0)         | 11.2<br>(7.0 to 17.0)             | 37.0<br>(30.5 to 45.2)                            | 0.7<br>(-3.8 to 5.9)                                |
| Other neurological disorders                                   | < 0.05<br>(< 0.05 to 0.1)               | 0.1<br>(< 0.05 to 0.1)                  | 6.8<br>(1.8 to 13.1)              | 56.6<br>(-64.6 to 502.4)                          | 14.2<br>(-72.4 to 313.8)                            |
| <b>Mental and substance use disorders</b>                      | <b>1,999.9<br/>(1,903.1 to 2,096.4)</b> | <b>714.8†<br/>(664.1 to 773.1)</b>      | <b>240.1<br/>(174.6 to 311.5)</b> | <b>37.0<br/>(33.8 to 40.3)</b>                    | <b>1.7<br/>(-0.8 to 4.0)</b>                        |
| Schizophrenia                                                  | 21.0<br>(18.2 to 24.0)                  | 1.9<br>(1.6 to 2.1)                     | 13.5<br>(9.9 to 17.2)             | 40.9<br>(27.5 to 55.2)                            | 0.6<br>(-7.9 to 9.9)                                |
| Alcohol use disorders                                          | 148.8<br>(124.3 to 174.6)               | 82.5<br>(68.5 to 96.3)                  | 14.9<br>(10.2 to 21.2)            | 39.7<br>(28.2 to 52.2)                            | 2.3<br>(-5.4 to 10.0)                               |
| Drug use disorders                                             | 60.0<br>(53.7 to 66.4)                  | 10.1<br>(9.0 to 11.3)                   | 16.3<br>(11.1 to 22.1)            | 47.4<br>(32.5 to 63.2)                            | 7.2<br>(-2.2 to 17.2)                               |
| Opioid use disorders                                           | 34.8<br>(28.6 to 43.0)                  | 4.5<br>(3.7 to 5.4)                     | 14.5<br>(9.7 to 19.9)             | 48.6<br>(32.4 to 66.2)                            | 7.9<br>(-2.4 to 19.2)                               |
| Cocaine use disorders                                          | 1.8<br>(1.5 to 2.1)                     | 0.2<br>(0.2 to 0.3)                     | 0.3<br>(0.2 to 0.4)               | 37.8<br>(30.4 to 45.3)                            | 2.2<br>(-2.9 to 7.4)                                |
| Amphetamine use disorders                                      | 1.0<br>(0.6 to 1.3)                     | 0.2<br>(0.1 to 0.2)                     | 0.1<br>(0.1 to 0.2)               | 36.6<br>(25.7 to 50.4)                            | 3.1<br>(-4.9 to 13.5)                               |
| Cannabis use disorders                                         | 20.8<br>(17.2 to 25.0)                  | 4.3<br>(3.5 to 5.2)                     | 0.6<br>(0.4 to 0.9)               | 35.0<br>(7.8 to 70.1)                             | 0.9<br>(-17.0 to 23.5)                              |
| Other drug use disorders                                       | 4.3<br>(3.8 to 5.0)                     | 0.9<br>(0.8 to 1.1)                     | 0.7<br>(0.5 to 1.0)               | 41.0<br>(19.2 to 66.7)                            | 2.7<br>(-11.7 to 20.2)                              |
| Depressive disorders                                           | 405.5<br>(377.9 to 435.7)               | 440.4<br>(392.1 to 492.6)               | 68.5<br>(46.9 to 93.9)            | 39.8<br>(33.0 to 46.8)                            | 3.1<br>(-1.6 to 8.0)                                |
| Major depressive disorder                                      | 264.6<br>(233.7 to 298.1)               | 413.6<br>(364.5 to 467.3)               | 54.2<br>(36.8 to 74.8)            | 40.6<br>(32.1 to 49.1)                            | 3.9<br>(-2.2 to 9.7)                                |
| Dysthymia                                                      | 147.8<br>(127.6 to 171.5)               | 26.8<br>(23.4 to 30.9)                  | 14.3<br>(9.5 to 21.0)             | 36.9<br>(31.4 to 42.5)                            | 0.4<br>(-2.9 to 3.8)                                |
| Bipolar disorder                                               | 80.6<br>(67.9 to 94.8)                  | 8.9<br>(7.5 to 10.6)                    | 16.6<br>(10.2 to 24.3)            | 35.1<br>(25.5 to 45.7)                            | 0.3<br>(-6.0 to 6.5)                                |
| Anxiety disorders                                              | 410.0<br>(368.8 to 455.2)               | 77.9<br>(70.6 to 86.3)                  | 39.9<br>(27.5 to 54.8)            | 34.5<br>(25.1 to 46.0)                            | 0.3<br>(-6.0 to 7.2)                                |
| Eating disorders                                               | 13.2<br>(10.4 to 16.5)                  | 10.1<br>(7.4 to 13.6)                   | 2.7<br>(1.7 to 3.9)               | 39.0<br>(19.6 to 61.4)                            | 4.2<br>(-10.3 to 20.4)                              |
| Anorexia nervosa                                               | 3.6<br>(2.6 to 4.9)                     | 1.7<br>(1.2 to 2.2)                     | 0.8<br>(0.4 to 1.2)               | 33.6<br>(-1.0 to 81.0)                            | 2.2<br>(-23.9 to 36.5)                              |
| Bulimia nervosa                                                | 9.1<br>(6.7 to 12.2)                    | 8.5<br>(5.8 to 11.9)                    | 1.9<br>(1.1 to 3.0)               | 41.2<br>(17.6 to 69.2)                            | 4.9<br>(-12.7 to 26.4)                              |
| Autistic spectrum disorders                                    | 127.1<br>(113.7 to 144.3)               | 1.7<br>(1.2 to 2.3)                     | 18.1<br>(12.1 to 25.6)            | 34.8<br>(27.8 to 42.5)                            | 0.3<br>(-4.1 to 5.2)                                |
| Autism                                                         | 34.3<br>(29.5 to 40.1)                  | 0.2<br>(0.1 to 0.4)                     | 8.8<br>(5.6 to 12.8)              | 34.8<br>(22.5 to 49.4)                            | 0.4<br>(-7.4 to 9.5)                                |
| Asperger syndrome and other autistic spectrum disorders        | 92.8<br>(76.4 to 112.6)                 | 1.4<br>(0.9 to 2.1)                     | 9.3<br>(6.0 to 13.7)              | 34.9<br>(27.6 to 42.0)                            | 0.3<br>(-4.4 to 4.8)                                |



| Cause                                                      | Prevalence in thousands (95% UI)                 | Incidence in thousands (95% UI)                   | YLDs in thousands (95% UI)              |                                                   |                                                     |
|------------------------------------------------------------|--------------------------------------------------|---------------------------------------------------|-----------------------------------------|---------------------------------------------------|-----------------------------------------------------|
|                                                            | 2016 counts                                      | 2016 counts                                       | 2016 counts                             | Percentage change in counts between 2006 and 2016 | Percentage change in age-standardised rates between |
| Attention-deficit/hyperactivity disorder                   | 210.3<br>(188.2 to 235.4)                        | 13.9<br>(12.1 to 16.2)                            | 2.5<br>(1.5 to 4.0)                     | 33.3<br>(23.8 to 44.1)                            | 0.6<br>(-5.6 to 7.8)                                |
| Conduct disorder                                           | 156.1<br>(127.9 to 186.4)                        | 57.0<br>(45.3 to 68.8)                            | 18.8<br>(11.5 to 29.0)                  | 29.1<br>(21.0 to 37.7)                            | 0.1<br>(-6.1 to 6.9)                                |
| Idiopathic developmental intellectual disability           | 322.5<br>(190.6 to 457.2)                        | --                                                | 12.9<br>(5.7 to 22.9)                   | 27.9<br>(18.3 to 37.4)                            | -4.3<br>(-11.0 to 2.6)                              |
| Other mental and substance use disorders                   | 205.5<br>(179.8 to 238.2)                        | 10.5<br>(9.2 to 12.1)                             | 15.4<br>(10.5 to 22.1)                  | 38.3<br>(30.2 to 46.5)                            | 0.2<br>(-4.6 to 5.1)                                |
| <b>Diabetes, urogenital, blood, and endocrine diseases</b> | <b>7,258.8</b><br><b>(7,119.5 to 7,395.8)</b>    | <b>1,664.0†</b><br><b>(1,550.0 to 1,781.8)</b>    | <b>93.5</b><br><b>(66.6 to 127.1)</b>   | <b>35.5</b><br><b>(31.9 to 39.3)</b>              | <b>1.0</b><br><b>(-1.6 to 3.7)</b>                  |
| Diabetes mellitus                                          | 325.5<br>(291.5 to 362.0)                        | 22.1<br>(20.0 to 24.5)                            | 22.8<br>(15.6 to 31.6)                  | 42.2<br>(34.1 to 51.5)                            | 4.8<br>(-1.5 to 11.5)                               |
| Acute glomerulonephritis                                   | 0.1<br>(0.1 to 0.1)                              | 1.9<br>(1.6 to 2.2)                               | < 0.05<br>(< 0.05 to < 0.05)            | 34.7<br>(27.2 to 40.6)                            | 0.3<br>(-4.3 to 4.9)                                |
| Chronic kidney disease                                     | 746.9<br>(670.1 to 829.5)                        | 57.2<br>(50.4 to 63.9)                            | 20.6<br>(14.9 to 26.9)                  | 41.2<br>(32.9 to 50.0)                            | 2.8<br>(-2.5 to 8.9)                                |
| Chronic kidney disease due to diabetes mellitus            | 230.4<br>(195.0 to 269.2)                        | 16.3<br>(13.5 to 19.6)                            | 6.0<br>(4.3 to 8.0)                     | 42.8<br>(30.8 to 56.7)                            | 3.3<br>(-4.5 to 11.8)                               |
| Chronic kidney disease due to hypertension                 | 161.0<br>(138.0 to 183.8)                        | 15.1<br>(12.6 to 17.8)                            | 3.5<br>(2.4 to 4.7)                     | 39.7<br>(26.1 to 55.3)                            | 2.4<br>(-7.2 to 12.6)                               |
| Chronic kidney disease due to glomerulonephritis           | 151.7<br>(130.8 to 173.3)                        | 9.0<br>(7.1 to 11.0)                              | 5.3<br>(3.7 to 7.2)                     | 41.2<br>(27.3 to 56.2)                            | 2.9<br>(-5.9 to 12.4)                               |
| Chronic kidney disease due to other causes                 | 203.8<br>(171.0 to 240.3)                        | 16.8<br>(14.0 to 19.8)                            | 5.8<br>(4.1 to 7.9)                     | 40.5<br>(28.7 to 54.3)                            | 2.5<br>(-4.7 to 10.8)                               |
| Urinary diseases and male infertility                      | 251.6<br>(231.8 to 272.4)                        | 951.0†<br>(851.4 to 1,059.3)                      | 5.4<br>(3.5 to 8.0)                     | 25.8<br>(18.7 to 32.9)                            | -4.4<br>(-9.9 to 1.3)                               |
| Interstitial nephritis and urinary tract infections        | 16.5<br>(14.6 to 18.6)                           | 864.0<br>(766.9 to 969.0)                         | 0.6<br>(0.3 to 0.8)                     | 29.2<br>(11.1 to 49.7)                            | -3.3<br>(-14.7 to 9.4)                              |
| Urolithiasis                                               | 2.7<br>(2.4 to 3.1)                              | 72.5<br>(64.0 to 82.8)                            | 0.2<br>(0.1 to 0.3)                     | 39.7<br>(30.7 to 49.7)                            | 1.4<br>(-6.2 to 9.5)                                |
| Benign prostatic hyperplasia                               | 111.7<br>(94.2 to 130.2)                         | 14.6<br>(12.2 to 17.2)                            | 3.7<br>(2.3 to 5.3)                     | 28.0<br>(18.4 to 37.9)                            | -3.4<br>(-9.9 to 3.5)                               |
| Male infertility                                           | 115.1<br>(103.6 to 128.3)                        | --                                                | 0.7<br>(0.3 to 1.4)                     | 17.2<br>(6.4 to 28.1)                             | -12.8<br>(-20.4 to -5.2)                            |
| Other urinary diseases                                     | --                                               | --                                                | 0.3<br>(0.2 to 0.4)                     | 7.8<br>(-4.3 to 20.5)                             | -18.4<br>(-25.7 to -10.5)                           |
| Gynecological diseases                                     | 1,643.5<br>(1,568.3 to 1,721.9)                  | 621.4†<br>(574.3 to 673.5)                        | 20.6<br>(13.9 to 29.4)                  | 36.3<br>(30.8 to 41.9)                            | -2.1<br>(-5.6 to 1.5)                               |
| Uterine fibroids                                           | 112.0<br>(98.6 to 126.3)                         | 14.1<br>(12.2 to 16.3)                            | 3.0<br>(1.9 to 4.4)                     | 38.5<br>(29.7 to 46.9)                            | -4.6<br>(-10.8 to 1.4)                              |
| Polycystic ovarian syndrome                                | 14.0<br>(10.5 to 18.1)                           | 34.2<br>(24.9 to 46.7)                            | 0.1<br>(0.1 to 0.2)                     | 37.9<br>(20.6 to 59.3)                            | -2.3<br>(-14.4 to 12.1)                             |
| Female infertility                                         | 11.3<br>(9.2 to 16.3)                            | --                                                | 0.1<br>(< 0.05 to 0.1)                  | -35.9<br>(-52.7 to -10.4)                         | -45.7<br>(-58.3 to -29.3)                           |
| Endometriosis                                              | 3.0<br>(2.5 to 3.6)                              | 12.1<br>(9.7 to 15.2)                             | 0.3<br>(0.2 to 0.4)                     | 33.9<br>(-2.7 to 81.8)                            | -1.8<br>(-25.9 to 30.5)                             |
| Genital prolapse                                           | 772.5<br>(679.7 to 865.8)                        | 72.7<br>(60.8 to 86.8)                            | 2.4<br>(1.2 to 4.4)                     | 34.0<br>(27.0 to 42.2)                            | -1.3<br>(-6.7 to 5.5)                               |
| Premenstrual syndrome                                      | 727.2<br>(665.5 to 785.4)                        | 275.4<br>(252.0 to 299.9)                         | 6.1<br>(3.8 to 9.3)                     | 34.5<br>(21.7 to 48.7)                            | -1.8<br>(-10.5 to 7.5)                              |
| Other gynecological diseases                               | 253.4<br>(220.1 to 290.5)                        | 212.8<br>(173.4 to 256.8)                         | 8.7<br>(5.7 to 12.4)                    | 38.7<br>(31.0 to 47.3)                            | -0.9<br>(-6.3 to 4.8)                               |
| Hemoglobinopathies and hemolytic anaemias                  | 5,681.7<br>(5,518.6 to 5,840.1)                  | --                                                | 16.3<br>(10.9 to 23.7)                  | 29.4<br>(21.7 to 37.7)                            | -2.1<br>(-6.9 to 3.2)                               |
| Thalassemias                                               | < 0.05<br>(< 0.05 to < 0.05)                     | --                                                | < 0.05<br>(< 0.05 to < 0.05)            | 38.2<br>(20.5 to 71.6)                            | 2.8<br>(-10.2 to 27.5)                              |
| Thalassaemias trait                                        | 100.3<br>(89.0 to 112.5)                         | --                                                | 1.5<br>(1.0 to 2.2)                     | 39.2<br>(24.5 to 61.4)                            | 6.6<br>(-4.0 to 22.6)                               |
| Sickle cell disorders                                      | 14.9<br>(11.9 to 17.5)                           | --                                                | 1.3<br>(0.8 to 1.8)                     | 41.4<br>(20.1 to 68.9)                            | 7.5<br>(-7.4 to 27.4)                               |
| Sickle cell trait                                          | 1,941.4<br>(1,741.6 to 2,101.0)                  | --                                                | 7.1<br>(4.7 to 10.5)                    | 31.7<br>(21.8 to 43.1)                            | -0.6<br>(-7.2 to 7.2)                               |
| G6PD deficiency                                            | 1,438.8<br>(1,332.2 to 1,557.9)                  | --                                                | 0.1<br>(0.1 to 0.2)                     | 32.5<br>(4.6 to 68.6)                             | -7.2<br>(-21.8 to 10.9)                             |
| G6PD trait                                                 | 2,763.5<br>(2,671.8 to 2,863.2)                  | --                                                | < 0.05<br>(< 0.05 to < 0.05)            | 54.4<br>(42.6 to 66.2)                            | 17.1<br>(9.9 to 24.7)                               |
| Other hemoglobinopathies and hemolytic anaemias            | 232.3<br>(224.5 to 239.5)                        | --                                                | 6.4<br>(4.2 to 9.3)                     | 22.8<br>(13.2 to 33.2)                            | -6.7<br>(-12.2 to -0.8)                             |
| Endocrine, metabolic, blood, and immune disorders          | 248.4<br>(240.6 to 255.8)                        | 10.4<br>(9.3 to 11.5)                             | 7.8<br>(5.2 to 11.2)                    | 22.1<br>(14.0 to 30.8)                            | -5.2<br>(-9.9 to 0.0)                               |
| <b>Musculoskeletal disorders</b>                           | <b>1,450.0</b><br><b>(1,364.1 to 1,527.8)</b>    | <b>693.9</b><br><b>(625.7 to 762.5)</b>           | <b>159.0</b><br><b>(113.2 to 208.3)</b> | <b>43.1</b><br><b>(37.5 to 50.0)</b>              | <b>3.5</b><br><b>(-0.1 to 7.4)</b>                  |
| Rheumatoid arthritis                                       | 14.2<br>(12.5 to 16.1)                           | 1.0<br>(0.8 to 1.1)                               | 3.4<br>(2.3 to 4.6)                     | 41.0<br>(25.4 to 57.8)                            | 3.6<br>(-5.8 to 14.1)                               |
| Osteoarthritis                                             | 234.7<br>(219.8 to 250.5)                        | 13.6<br>(12.6 to 14.7)                            | 14.4<br>(10.1 to 19.7)                  | 39.4<br>(34.4 to 45.1)                            | 2.5<br>(-0.8 to 6.5)                                |
| Low back and neck pain                                     | 1,013.3<br>(938.6 to 1,088.2)                    | 454.6<br>(407.7 to 507.7)                         | 116.3<br>(81.6 to 154.0)                | 44.8<br>(37.5 to 53.2)                            | 4.4<br>(-0.1 to 9.7)                                |
| Low back pain                                              | 762.2<br>(673.3 to 868.1)                        | 381.4<br>(335.0 to 434.6)                         | 86.1<br>(60.4 to 114.2)                 | 46.6<br>(36.8 to 58.3)                            | 6.0<br>(-0.2 to 13.2)                               |
| Neck pain                                                  | 301.9<br>(260.8 to 347.4)                        | 73.2<br>(63.0 to 85.8)                            | 30.2<br>(20.1 to 42.9)                  | 39.8<br>(35.8 to 43.8)                            | 0.5<br>(-1.9 to 2.7)                                |
| Gout                                                       | 30.0<br>(26.6 to 34.0)                           | 6.2<br>(5.4 to 7.0)                               | 1.0<br>(0.7 to 1.3)                     | 36.9<br>(18.5 to 58.2)                            | -0.5<br>(-12.3 to 13.4)                             |
| Other musculoskeletal disorders                            | 276.2<br>(219.5 to 335.6)                        | 218.4<br>(170.6 to 270.3)                         | 23.9<br>(15.5 to 34.5)                  | 37.7<br>(24.9 to 51.3)                            | -0.8<br>(-10.1 to 8.1)                              |
| <b>Other non-communicable diseases</b>                     | <b>10,603.3</b><br><b>(10,290.9 to 10,917.5)</b> | <b>30,115.2†</b><br><b>(27,015.6 to 33,269.5)</b> | <b>268.2</b><br><b>(181.7 to 378.7)</b> | <b>32.6</b><br><b>(30.5 to 34.5)</b>              | <b>-1.2</b><br><b>(-2.5 to -0.1)</b>                |
| Congenital anomalies                                       | 161.3<br>(139.9 to 188.6)                        | --                                                | 24.3<br>(17.2 to 32.6)                  | 29.8<br>(21.2 to 38.7)                            | -3.6<br>(-9.4 to 2.6)                               |
| Neural tube defects                                        | 23.0<br>(20.5 to 25.7)                           | --                                                | 6.9<br>(4.8 to 9.3)                     | 27.3<br>(12.8 to 43.8)                            | -5.2<br>(-15.3 to 5.4)                              |
| Congenital heart anomalies                                 | 35.6<br>(29.5 to 43.0)                           | --                                                | 1.8<br>(0.8 to 3.0)                     | 37.0<br>(19.9 to 56.6)                            | 2.7<br>(-9.8 to 17.3)                               |
| Orofacial clefts                                           | 4.2<br>(3.7 to 4.8)                              | --                                                | 0.1<br>(< 0.05 to 0.1)                  | 27.0<br>(12.8 to 42.1)                            | -5.3<br>(-15.7 to 6.6)                              |
| Down's syndrome                                            | 2.6<br>(2.2 to 3.1)                              | --                                                | 0.2<br>(0.1 to 0.3)                     | 36.9<br>(27.9 to 47.2)                            | 2.2<br>(-4.4 to 9.7)                                |
| Turner syndrome                                            | 8.4<br>(7.1 to 9.9)                              | --                                                | 0.1<br>(0.1 to 0.2)                     | 26.2<br>(-11.5 to 79.3)                           | -4.8<br>(-31.9 to 31.4)                             |
| Klinefelter syndrome                                       | 8.7<br>(7.2 to 10.4)                             | --                                                | < 0.05<br>(< 0.05 to 0.1)               | 34.9<br>(2.5 to 79.9)                             | 0.7<br>(-22.7 to 32.0)                              |

| Cause                                         | Prevalence in thousands (95% UI)              | Incidence in thousands (95% UI)                | YLDs in thousands (95% UI)            |                                                   |                                                                   |
|-----------------------------------------------|-----------------------------------------------|------------------------------------------------|---------------------------------------|---------------------------------------------------|-------------------------------------------------------------------|
|                                               | 2016 counts<br>(95% UI)                       | 2016 counts<br>(95% UI)                        | 2016 counts<br>(95% UI)               | Percentage change in counts between 2006 and 2016 | Percentage change in age-standardised rates between 2006 and 2016 |
| Other chromosomal abnormalities               | 3.4<br>(2.9 to 4.0)                           | --                                             | 0.6<br>(0.4 to 0.9)                   | 35.6<br>(-1.0 to 91.5)                            | 1.7<br>(-24.3 to 41.0)                                            |
| Congenital musculoskeletal and limb anomalies | 15.5<br>(13.4 to 17.6)                        | --                                             | 2.3<br>(1.5 to 3.2)                   | 35.1<br>(18.3 to 56.4)                            | 0.6<br>(-10.7 to 14.4)                                            |
| Urogenital congenital anomalies               | 11.0<br>(9.6 to 12.5)                         | --                                             | 0.2<br>(0.1 to 0.4)                   | 31.9<br>(20.3 to 44.2)                            | -1.0<br>(-8.8 to 7.5)                                             |
| Digestive congenital anomalies                | 15.7<br>(13.8 to 17.6)                        | --                                             | 0.7<br>(0.4 to 1.0)                   | 34.6<br>(12.5 to 60.8)                            | 0.1<br>(-14.3 to 16.2)                                            |
| Other congenital anomalies                    | 69.0<br>(45.7 to 104.7)                       | --                                             | 11.3<br>(7.2 to 17.2)                 | 28.6<br>(16.9 to 40.4)                            | -4.7<br>(-12.8 to 4.1)                                            |
| Skin and subcutaneous diseases                | 5,181.6<br>(4,976.4 to 5,409.7)               | 12,249.0<br>(11,221.8 to 13,430.4)             | 120.6<br>(78.7 to 178.6)              | 34.3<br>(31.3 to 37.2)                            | 1.2<br>(-0.6 to 3.1)                                              |
| Dermatitis                                    | 722.8<br>(600.0 to 863.1)                     | 665.0<br>(580.8 to 772.5)                      | 28.9<br>(16.1 to 48.5)                | 34.5<br>(28.9 to 40.3)                            | 0.2<br>(-3.6 to 4.3)                                              |
| Psoriasis                                     | 76.5<br>(71.9 to 81.8)                        | 12.0<br>(11.4 to 12.8)                         | 6.7<br>(4.8 to 8.9)                   | 41.4<br>(25.6 to 58.9)                            | 4.4<br>(-4.7 to 14.8)                                             |
| Cellulitis                                    | 5.4<br>(5.0 to 5.9)                           | 93.8<br>(86.7 to 101.5)                        | 0.3<br>(0.2 to 0.5)                   | 34.4<br>(8.6 to 64.2)                             | 0.7<br>(-17.6 to 21.4)                                            |
| Pyoderma                                      | 85.2<br>(81.0 to 89.7)                        | 1,673.2<br>(1,595.1 to 1,758.0)                | 0.5<br>(0.2 to 1.0)                   | 35.7<br>(27.0 to 45.2)                            | 0.8<br>(-4.3 to 6.9)                                              |
| Scabies                                       | 256.8<br>(203.6 to 326.2)                     | 795.9<br>(631.2 to 1,015.6)                    | 6.6<br>(3.6 to 11.2)                  | 29.3<br>(22.1 to 37.6)                            | -3.3<br>(-8.2 to 1.7)                                             |
| Fungal skin diseases                          | 2,197.7<br>(1,842.4 to 2,591.4)               | 6,195.4<br>(5,217.4 to 7,293.9)                | 12.5<br>(4.9 to 26.8)                 | 34.7<br>(32.9 to 36.5)                            | 0.3<br>(-0.6 to 1.1)                                              |
| Viral skin diseases                           | 455.5<br>(431.1 to 481.5)                     | 630.6<br>(595.1 to 672.6)                      | 14.0<br>(8.6 to 20.7)                 | 33.8<br>(28.7 to 38.6)                            | 0.3<br>(-2.9 to 3.5)                                              |
| Acne vulgaris                                 | 1,388.5<br>(1,200.1 to 1,609.3)               | 1,003.4<br>(782.4 to 1,338.4)                  | 35.8<br>(23.4 to 51.8)                | 33.4<br>(26.8 to 40.2)                            | 3.2<br>(-1.5 to 8.0)                                              |
| Alopecia areata                               | 25.4<br>(23.7 to 27.0)                        | 45.3<br>(42.4 to 48.2)                         | 0.8<br>(0.5 to 1.2)                   | 36.9<br>(20.6 to 55.3)                            | 0.2<br>(-9.9 to 11.8)                                             |
| Pruritus                                      | 107.2<br>(94.0 to 121.6)                      | 87.1<br>(77.2 to 98.9)                         | 1.2<br>(0.5 to 2.1)                   | 36.7<br>(28.7 to 45.8)                            | 0.8<br>(-4.5 to 6.1)                                              |
| Urticaria                                     | 156.1<br>(132.7 to 184.1)                     | 281.5<br>(238.1 to 330.2)                      | 9.4<br>(6.0 to 13.8)                  | 35.0<br>(26.4 to 44.7)                            | 0.1<br>(-5.7 to 6.3)                                              |
| Decubitus ulcer                               | 1.2<br>(1.0 to 1.3)                           | 4.2<br>(3.8 to 4.7)                            | 0.2<br>(0.1 to 0.3)                   | 38.2<br>(27.0 to 50.4)                            | 4.0<br>(-9.1 to 18.4)                                             |
| Other skin and subcutaneous diseases          | 675.7<br>(654.4 to 697.7)                     | 761.5<br>(735.9 to 787.4)                      | 3.7<br>(1.8 to 6.8)                   | 37.0<br>(32.8 to 40.9)                            | 1.6<br>(-0.9 to 3.9)                                              |
| Sense organ diseases                          | 2,561.1<br>(2,487.9 to 2,638.7)               | 1,369.5†<br>(1,268.4 to 1,478.6)               | 95.5<br>(66.7 to 132.4)               | 30.3<br>(26.9 to 33.6)                            | -2.5<br>(-4.4 to -0.7)                                            |
| Glaucoma                                      | 4.2<br>(3.4 to 5.2)                           | --                                             | 0.5<br>(0.3 to 0.7)                   | 30.1<br>(14.2 to 47.6)                            | 1.1<br>(-10.9 to 13.9)                                            |
| Cataract                                      | 114.3<br>(99.4 to 130.4)                      | --                                             | 10.3<br>(7.0 to 15.0)                 | 30.8<br>(23.9 to 38.4)                            | -1.4<br>(-6.7 to 4.3)                                             |
| Macular degeneration                          | 5.0<br>(3.7 to 6.7)                           | --                                             | 0.4<br>(0.2 to 0.7)                   | 33.2<br>(15.4 to 53.5)                            | 3.5<br>(-9.2 to 17.9)                                             |
| Refraction and accommodation disorders        | 1,290.2<br>(1,235.2 to 1,343.4)               | --                                             | 23.4<br>(14.3 to 36.9)                | 26.9<br>(22.6 to 31.6)                            | -5.7<br>(-8.6 to -2.5)                                            |
| Age-related and other hearing loss            | 1,476.6<br>(1,378.4 to 1,584.5)               | --                                             | 48.5<br>(33.8 to 68.6)                | 30.6<br>(24.7 to 36.0)                            | -2.4<br>(-5.0 to 0.1)                                             |
| Other vision loss                             | 43.2<br>(37.6 to 49.7)                        | --                                             | 4.3<br>(2.8 to 6.1)                   | 33.7<br>(22.6 to 45.4)                            | -0.5<br>(-7.5 to 6.7)                                             |
| Other sense organ diseases                    | 267.4<br>(247.5 to 287.9)                     | 1,369.5<br>(1,268.4 to 1,478.6)                | 8.1<br>(5.1 to 12.3)                  | 36.3<br>(29.7 to 43.1)                            | 1.0<br>(-2.6 to 4.7)                                              |
| Oral disorders                                | 7,138.7<br>(6,526.8 to 7,655.1)               | 16,496.8†<br>(13,574.1 to 19,553.8)            | 27.8<br>(15.9 to 45.6)                | 36.1<br>(32.3 to 39.7)                            | -0.6<br>(-3.0 to 1.6)                                             |
| Caries of deciduous teeth                     | 1,762.5<br>(1,366.4 to 2,199.5)               | 5,742.0<br>(3,822.5 to 8,031.2)                | 0.4<br>(0.2 to 0.8)                   | 35.7<br>(21.2 to 53.0)                            | -0.3<br>(-11.1 to 12.7)                                           |
| Caries of permanent teeth                     | 4,011.7<br>(3,427.9 to 4,644.4)               | 10,556.3<br>(8,604.5 to 12,816.3)              | 2.4<br>(1.0 to 4.7)                   | 31.3<br>(23.7 to 38.7)                            | -1.9<br>(-6.5 to 2.8)                                             |
| Periodontal disease                           | 1,492.4<br>(1,084.0 to 1,880.0)               | 180.9<br>(132.2 to 233.1)                      | 9.8<br>(3.7 to 21.2)                  | 40.1<br>(33.6 to 46.7)                            | 0.2<br>(-4.0 to 4.3)                                              |
| Edentulism and severe tooth loss              | 298.7<br>(259.4 to 339.1)                     | 17.6<br>(15.2 to 20.2)                         | 8.4<br>(5.5 to 11.8)                  | 33.3<br>(26.1 to 40.9)                            | -1.6<br>(-5.8 to 2.5)                                             |
| Other oral disorders                          | 229.7<br>(219.0 to 241.9)                     | --                                             | 6.8<br>(4.2 to 10.2)                  | 35.9<br>(30.4 to 41.0)                            | 0.2<br>(-3.1 to 3.5)                                              |
| <b>Injuries</b>                               | <b>1,695.5</b><br><b>(1,589.8 to 1,812.5)</b> | <b>1,097.3†</b><br><b>(1,035.9 to 1,162.5)</b> | <b>72.3</b><br><b>(49.1 to 102.0)</b> | <b>35.4</b><br><b>(32.9 to 37.8)</b>              | <b>0.7</b><br><b>(-0.8 to 2.1)</b>                                |
| <b>Transport injuries</b>                     | <b>196.7</b><br><b>(182.6 to 211.0)</b>       | <b>96.5</b><br><b>(85.5 to 109.2)</b>          | <b>11.9</b><br><b>(7.9 to 17.1)</b>   | <b>37.8</b><br><b>(34.9 to 40.7)</b>              | <b>1.8</b><br><b>(-0.0 to 3.5)</b>                                |
| Road injuries                                 | 154.9<br>(145.1 to 165.8)                     | 81.7<br>(71.7 to 93.7)                         | 9.3<br>(6.1 to 13.3)                  | 37.4<br>(34.5 to 40.2)                            | 1.4<br>(-0.4 to 3.2)                                              |
| Pedestrian road injuries                      | 36.3<br>(32.2 to 41.2)                        | 13.9<br>(11.2 to 16.9)                         | 2.2<br>(1.5 to 3.1)                   | 34.0<br>(31.1 to 36.9)                            | -0.6<br>(-2.4 to 1.3)                                             |
| Cyclist road injuries                         | 26.4<br>(22.2 to 31.3)                        | 15.6<br>(12.0 to 19.6)                         | 1.5<br>(1.0 to 2.1)                   | 41.9<br>(38.6 to 45.1)                            | 5.0<br>(3.1 to 6.9)                                               |
| Motorcyclist road injuries                    | 24.3<br>(20.8 to 28.9)                        | 8.7<br>(7.0 to 10.9)                           | 1.4<br>(0.9 to 2.0)                   | 34.6<br>(31.7 to 37.6)                            | -1.5<br>(-3.4 to 0.4)                                             |
| Motor vehicle road injuries                   | 50.3<br>(43.0 to 57.1)                        | 31.7<br>(26.5 to 37.3)                         | 3.2<br>(2.2 to 4.6)                   | 37.2<br>(34.1 to 40.2)                            | 1.3<br>(-0.7 to 3.3)                                              |
| Other road injuries                           | 17.6<br>(15.2 to 20.7)                        | 11.9<br>(9.1 to 15.3)                          | 1.0<br>(0.6 to 1.4)                   | 43.9<br>(40.9 to 47.0)                            | 6.1<br>(4.0 to 7.9)                                               |
| Other transport injuries                      | 41.8<br>(34.8 to 50.9)                        | 14.8<br>(12.0 to 18.6)                         | 2.7<br>(1.8 to 3.8)                   | 39.3<br>(35.1 to 43.9)                            | 3.3<br>(0.9 to 5.6)                                               |
| <b>Unintentional injuries</b>                 | <b>1,443.1</b><br><b>(1,336.3 to 1,557.8)</b> | <b>972.1</b><br><b>(912.6 to 1,038.0)</b>      | <b>55.0</b><br><b>(37.1 to 77.8)</b>  | <b>35.6</b><br><b>(32.9 to 38.2)</b>              | <b>0.8</b><br><b>(-0.8 to 2.3)</b>                                |
| Falls                                         | 499.2<br>(432.1 to 566.1)                     | 322.8<br>(281.0 to 376.0)                      | 22.2<br>(15.6 to 30.6)                | 36.6<br>(34.0 to 39.2)                            | 1.6<br>(-0.1 to 3.2)                                              |
| Drowning                                      | 6.3<br>(5.3 to 7.4)                           | 1.9<br>(1.6 to 2.2)                            | 0.4<br>(0.3 to 0.6)                   | 30.0<br>(25.9 to 34.1)                            | -2.5<br>(-4.8 to -0.4)                                            |
| Fire, heat, and hot substances                | 150.0<br>(126.0 to 183.5)                     | 29.6<br>(23.5 to 35.9)                         | 4.7<br>(3.2 to 6.5)                   | 32.5<br>(25.7 to 39.8)                            | -1.3<br>(-5.5 to 2.6)                                             |
| Poisonings                                    | 5.1<br>(4.0 to 6.2)                           | 9.5<br>(7.3 to 12.0)                           | 0.5<br>(0.3 to 0.8)                   | 41.5<br>(29.2 to 56.1)                            | 5.0<br>(-2.1 to 13.2)                                             |
| Exposure to mechanical forces                 | 254.6<br>(218.0 to 306.4)                     | 144.3<br>(121.6 to 168.7)                      | 7.0<br>(4.6 to 10.3)                  | 35.7<br>(32.2 to 39.1)                            | 0.1<br>(-2.0 to 2.0)                                              |
| Unintentional firearm injuries                | 14.0<br>(11.6 to 17.2)                        | 5.4<br>(3.9 to 7.1)                            | 0.7<br>(0.4 to 1.0)                   | 41.8<br>(37.6 to 45.6)                            | 3.6<br>(1.0 to 5.8)                                               |
| Unintentional suffocation                     | 22.0<br>(15.7 to 29.6)                        | 7.5<br>(5.1 to 10.8)                           | 0.8<br>(0.5 to 1.2)                   | 36.2<br>(31.7 to 41.1)                            | 0.9<br>(-1.6 to 3.4)                                              |
| Other exposure to mechanical forces           | 218.5<br>(183.2 to 267.5)                     | 131.3<br>(111.3 to 153.5)                      | 5.6<br>(3.7 to 8.1)                   | 35.0<br>(31.4 to 38.5)                            | -0.4<br>(-2.5 to 1.6)                                             |

| Cause                                                                               | Prevalence in thousands (95% UI)        | Incidence in thousands (95% UI)       | YLDs in thousands (95% UI)        |                                                   |                                                     |
|-------------------------------------------------------------------------------------|-----------------------------------------|---------------------------------------|-----------------------------------|---------------------------------------------------|-----------------------------------------------------|
|                                                                                     | 2016 counts                             | 2016 counts                           | 2016 counts                       | Percentage change in counts between 2006 and 2016 | Percentage change in age-standardised rates between |
| Adverse effects of medical treatment                                                | 5.7<br>(4.4 to 7.0)                     | 73.8<br>(63.8 to 85.4)                | 0.8<br>(0.5 to 1.1)               | 28.0<br>(21.3 to 36.2)                            | -3.6<br>(-7.7 to 1.0)                               |
| Animal contact                                                                      | 84.5<br>(74.2 to 98.9)                  | 143.4<br>(119.6 to 168.2)             | 3.1<br>(2.0 to 4.3)               | 33.5<br>(26.6 to 41.1)                            | -1.9<br>(-5.7 to 2.3)                               |
| Venomous animal contact                                                             | 34.4<br>(28.7 to 41.6)                  | 61.2<br>(48.5 to 76.8)                | 2.1<br>(1.4 to 3.0)               | 33.0<br>(23.6 to 43.4)                            | -2.1<br>(-7.2 to 3.6)                               |
| Non-venomous animal contact                                                         | 50.1<br>(41.8 to 61.6)                  | 82.2<br>(67.0 to 98.6)                | 1.0<br>(0.6 to 1.4)               | 34.6<br>(29.7 to 39.2)                            | -1.5<br>(-4.5 to 1.4)                               |
| Foreign body                                                                        | 108.6<br>(87.8 to 129.7)                | 88.4<br>(76.8 to 101.3)               | 4.9<br>(3.2 to 7.2)               | 32.7<br>(28.1 to 37.2)                            | -1.2<br>(-3.6 to 1.0)                               |
| Pulmonary aspiration and foreign body in airway                                     | 62.8<br>(46.6 to 83.9)                  | 34.9<br>(28.6 to 43.0)                | 3.2<br>(2.0 to 4.7)               | 28.2<br>(23.6 to 32.9)                            | -3.9<br>(-6.3 to -1.5)                              |
| Foreign body in eyes                                                                | 5.3<br>(2.7 to 8.2)                     | 30.0<br>(22.8 to 39.8)                | 0.3<br>(0.1 to 0.5)               | 40.0<br>(35.1 to 44.8)                            | 2.7<br>(0.1 to 5.5)                                 |
| Foreign body in other body part                                                     | 40.6<br>(31.9 to 52.8)                  | 23.5<br>(18.8 to 29.0)                | 1.4<br>(1.0 to 2.1)               | 42.0<br>(36.0 to 47.7)                            | 4.5<br>(1.3 to 7.4)                                 |
| Environmental heat and cold exposure                                                | 115.6<br>(97.1 to 137.3)                | 47.1<br>(38.5 to 57.5)                | 5.0<br>(3.3 to 7.2)               | 40.3<br>(37.1 to 43.6)                            | 3.4<br>(1.5 to 5.2)                                 |
| Other unintentional injuries                                                        | 213.6<br>(168.4 to 275.5)               | 111.4<br>(92.5 to 133.6)              | 6.5<br>(4.2 to 9.4)               | 35.0<br>(32.1 to 38.0)                            | 0.9<br>(-0.8 to 2.4)                                |
| <b>Self-harm and interpersonal violence</b>                                         | <b>394.1</b><br><b>(345.3 to 450.0)</b> | <b>28.5†</b><br><b>(24.0 to 33.6)</b> | <b>4.9</b><br><b>(3.4 to 6.8)</b> | <b>32.2</b><br><b>(27.7 to 36.3)</b>              | <b>-1.1</b><br><b>(-3.7 to 1.3)</b>                 |
| Self-harm                                                                           | 8.6<br>(7.5 to 9.7)                     | 5.5<br>(4.7 to 6.5)                   | 0.5<br>(0.3 to 0.7)               | 36.8<br>(32.9 to 40.5)                            | 0.1<br>(-2.2 to 2.1)                                |
| Self-harm by firearm                                                                | 0.6<br>(0.6 to 0.7)                     | 0.3<br>(0.2 to 0.5)                   | < 0.05<br>(< 0.05 to < 0.05)      | 30.7<br>(26.2 to 35.0)                            | -4.5<br>(-7.5 to -1.6)                              |
| Self-harm by other specified means                                                  | 8.0<br>(6.8 to 9.1)                     | 5.2<br>(4.4 to 6.1)                   | 0.5<br>(0.3 to 0.7)               | 37.2<br>(33.2 to 41.0)                            | 0.4<br>(-1.9 to 2.6)                                |
| Interpersonal violence                                                              | 385.5<br>(337.4 to 441.4)               | 23.0†<br>(18.5 to 28.0)               | 4.4<br>(3.0 to 6.2)               | 31.7<br>(27.0 to 36.1)                            | -1.3<br>(-4.2 to 1.4)                               |
| Assault by firearm                                                                  | 1.4<br>(1.2 to 1.7)                     | 0.7<br>(0.5 to 0.9)                   | 0.1<br>(< 0.05 to 0.1)            | 45.0<br>(40.3 to 50.2)                            | 5.5<br>(2.6 to 8.5)                                 |
| Assault by sharp object                                                             | 12.3<br>(10.0 to 14.8)                  | 7.0<br>(5.2 to 9.5)                   | 0.4<br>(0.3 to 0.6)               | 45.8<br>(41.8 to 49.5)                            | 6.2<br>(3.9 to 8.5)                                 |
| Sexual violence                                                                     | 352.1<br>(304.2 to 406.7)               | --                                    | 3.0<br>(2.0 to 4.3)               | 25.1<br>(18.9 to 30.9)                            | -6.5<br>(-10.5 to -2.4)                             |
| Assault by other means                                                              | 19.7<br>(16.9 to 23.4)                  | 15.3<br>(12.0 to 19.0)                | 0.9<br>(0.6 to 1.3)               | 50.7<br>(47.2 to 54.3)                            | 9.6<br>(7.5 to 11.8)                                |
| <b>Forces of nature, conflict and terrorism, and executions and police conflict</b> | <b>13.7</b><br><b>(7.7 to 22.7)</b>     | <b>0.2†</b><br><b>(0.1 to 0.4)</b>    | <b>0.4</b><br><b>(0.1 to 1.3)</b> | <b>-6.9</b><br><b>(-10.6 to -3.5)</b>             | <b>-16.6</b><br><b>(-19.4 to -13.6)</b>             |
| Exposure to forces of nature                                                        | 0.8<br>(0.2 to 1.6)                     | --                                    | < 0.05<br>(< 0.05 to 0.1)         | -13.2<br>(-16.5 to -1.0)                          | -22.6<br>(-25.1 to -12.4)                           |
| Conflict and terrorism                                                              | 12.3<br>(6.8 to 20.6)                   | --                                    | 0.4<br>(0.1 to 1.2)               | -7.9<br>(-11.8 to -4.2)                           | -17.0<br>(-19.9 to -14.1)                           |
| Executions and police conflict                                                      | 0.6<br>(0.3 to 1.3)                     | 0.2<br>(0.1 to 0.4)                   | < 0.05<br>(< 0.05 to 0.1)         | 37.7<br>(21.6 to 57.5)                            | 9.1<br>(-8.2 to 29.7)                               |
| <b>Impairments</b>                                                                  | --                                      | --                                    | --                                | --                                                | --                                                  |
| Anaemia                                                                             | 7,241.6<br>(7,044.3 to 7,448.9)         | --                                    | 249.8<br>(165.2 to 357.9)         | 18.0<br>(12.7 to 23.6)                            | -10.0<br>(-13.4 to -6.7)                            |
| Developmental intellectual disability                                               | 565.1<br>(432.6 to 698.0)               | --                                    | 59.6<br>(42.2 to 85.1)            | 37.9<br>(26.3 to 50.5)                            | 2.5<br>(-5.4 to 11.7)                               |
| Epilepsy                                                                            | 143.2<br>(76.7 to 211.5)                | --                                    | 56.6<br>(28.7 to 89.2)            | 38.1<br>(-30.4 to 159.2)                          | 2.5<br>(-51.5 to 108.9)                             |
| Guillain-Barre syndrome                                                             | 0.1<br>(0.1 to 0.1)                     | --                                    | < 0.05<br>(< 0.05 to < 0.05)      | 34.7<br>(33.3 to 36.5)                            | 0.0<br>(-0.0 to 0.1)                                |
| Hearing loss                                                                        | 1,835.6<br>(1,734.5 to 1,946.3)         | --                                    | 67.9<br>(47.3 to 92.6)            | 29.1<br>(24.8 to 33.2)                            | -3.1<br>(-5.3 to -1.0)                              |
| Heart failure                                                                       | 40.7<br>(36.4 to 45.8)                  | --                                    | 3.8<br>(2.7 to 5.2)               | 31.9<br>(22.1 to 41.3)                            | -1.9<br>(-9.5 to 6.2)                               |
| Infertility                                                                         | 325.1<br>(298.1 to 355.2)               | --                                    | 1.9<br>(0.8 to 4.0)               | 21.1<br>(12.0 to 30.2)                            | -11.7<br>(-18.6 to -4.8)                            |
| Pelvic inflammatory disease                                                         | 16.1<br>(13.4 to 19.2)                  | --                                    | 2.1<br>(1.4 to 3.0)               | 37.6<br>(19.4 to 58.2)                            | -1.1<br>(-13.7 to 13.1)                             |
| Vision loss                                                                         | 1,549.4<br>(1,483.7 to 1,616.5)         | --                                    | 57.2<br>(40.2 to 80.2)            | 34.5<br>(25.3 to 45.4)                            | -2.1<br>(-6.2 to 2.8)                               |

We did not calculate incidence for the nine impairments, certain NTDs, and causes with only birth prevalence. Blank cells mean that no estimate is available.

† Incidence for aggregate causes represents the sum of the incidence of the causes below the aggregate.

‡ Incidence estimates for stroke represent first-ever stroke only.

^ Incidence of HIV/AIDS represents new infections of HIV only and does not include new infections of Tuberculosis in HIV positive cases.



SR Table 14: Prevalence, incidence, and YLDs for 2016, percentage change of YLD counts and percentage change of age-standardised YLD rates between 2006 and 2016 by cause and impairments, for all ages, Serbia.

| Cause                                                                                | Prevalence in thousands (95% UI)       | Incidence in thousands (95% UI)            | YLDs in thousands (95% UI)           |                                                   |                                                     |
|--------------------------------------------------------------------------------------|----------------------------------------|--------------------------------------------|--------------------------------------|---------------------------------------------------|-----------------------------------------------------|
|                                                                                      | 2016 counts                            | 2016 counts                                | 2016 counts                          | Percentage change in counts between 2006 and 2016 | Percentage change in age-standardised rates between |
| <b>All causes</b>                                                                    | <b>8,420.6</b><br>(8,391.5 to 8,451.1) | <b>43,815.6†</b><br>(41,935.7 to 45,725.0) | <b>1,165.9</b><br>(871.8 to 1,508.4) | <b>2.2</b><br>(0.4 to 4.0)                        | <b>-0.1</b><br>(-2.0 to 1.9)                        |
| <b>Communicable, maternal, neonatal, and nutritional disorders</b>                   | <b>4,101.4</b><br>(3,970.8 to 4,230.9) | <b>16,322.4†</b><br>(14,958.9 to 17,875.3) | <b>51.0</b><br>(36.2 to 70.6)        | <b>-12.5</b><br>(-17.1 to -6.9)                   | <b>-4.4</b><br>(-10.1 to 1.9)                       |
| <b>HIV/AIDS and tuberculosis</b>                                                     | <b>2,082.0</b><br>(1,909.7 to 2,203.4) | <b>1.8†</b><br>(1.6 to 2.0)                | <b>0.4</b><br>(0.3 to 0.6)           | <b>-18.0</b><br>(-31.4 to -0.5)                   | <b>-16.6</b><br>(-29.9 to 1.2)                      |
| Tuberculosis                                                                         | 1,958.0<br>(1,812.9 to 2,113.7)        | 1.8†<br>(1.6 to 2.0)                       | 0.3<br>(0.2 to 0.5)                  | -25.0<br>(-40.5 to -4.7)                          | -23.4<br>(-38.8 to -3.1)                            |
| Drug-susceptible tuberculosis                                                        | 1.1<br>(1.0 to 1.2)                    | 1.8<br>(1.5 to 2.0)                        | 0.3<br>(0.2 to 0.5)                  | -25.2<br>(-41.0 to -4.7)                          | -23.6<br>(-39.1 to -3.6)                            |
| Multidrug-resistant tuberculosis without extensive drug resistance                   | < 0.05<br>(< 0.05 to < 0.05)           | < 0.05<br>(< 0.05 to < 0.05)               | < 0.05<br>(< 0.05 to < 0.05)         | 4.9<br>(-70.0 to 221.7)                           | 6.3<br>(-69.5 to 227.0)                             |
| Extensively drug-resistant tuberculosis                                              | < 0.05<br>(< 0.05 to < 0.05)           | < 0.05<br>(< 0.05 to < 0.05)               | < 0.05<br>(< 0.05 to < 0.05)         | 223.2<br>(-7.6 to 892.3)                          | 227.7<br>(-6.0 to 908.2)                            |
| Latent tuberculosis infection                                                        | 1,956.9<br>(1,811.7 to 2,112.4)        | --                                         | --                                   | --                                                | --                                                  |
| HIV/AIDS                                                                             | 0.9<br>(0.7 to 1.5)                    | < 0.05^<br>(< 0.05 to 0.1)                 | 0.1<br>(0.1 to 0.2)                  | 12.5<br>(-6.4 to 39.7)                            | 10.4<br>(-7.0 to 37.4)                              |
| Drug-susceptible HIV/AIDS - Tuberculosis                                             | 0.1<br>(< 0.05 to 0.1)                 | 0.1<br>(0.1 to 0.2)                        | < 0.05<br>(< 0.05 to 0.1)            | -40.7<br>(-44.7 to -35.9)                         | -42.0<br>(-45.9 to -37.2)                           |
| Multidrug-resistant HIV/AIDS - Tuberculosis without extensive drug resistance        | < 0.05<br>(< 0.05 to < 0.05)           | < 0.05<br>(< 0.05 to < 0.05)               | < 0.05<br>(< 0.05 to < 0.05)         | -15.5<br>(-76.4 to 169.7)                         | -17.3<br>(-76.9 to 164.1)                           |
| Extensively drug-resistant HIV/AIDS - Tuberculosis                                   | < 0.05<br>(< 0.05 to < 0.05)           | < 0.05<br>(< 0.05 to < 0.05)               | < 0.05<br>(< 0.05 to < 0.05)         | 160.4<br>(-27.2 to 731.9)                         | 154.9<br>(-28.8 to 714.6)                           |
| HIV/AIDS resulting in other diseases                                                 | 0.9<br>(0.6 to 1.4)                    | < 0.05<br>(< 0.05 to 0.1)                  | 0.1<br>(< 0.05 to 0.1)               | 68.4<br>(13.1 to 309.1)                           | 66.1<br>(13.5 to 292.8)                             |
| <b>Diarrhoea, lower respiratory infections, and other common infectious diseases</b> | <b>303.9</b><br>(287.7 to 322.7)       | <b>15,573.4†</b><br>(14,208.5 to 17,069.2) | <b>13.8</b><br>(9.6 to 19.2)         | <b>-4.2</b><br>(-7.5 to -0.6)                     | <b>4.4</b><br>(0.4 to 8.6)                          |
| Diarrhoeal diseases                                                                  | 46.0<br>(43.6 to 48.4)                 | 3,002.8<br>(2,841.9 to 3,159.4)            | 5.2<br>(3.6 to 7.1)                  | 4.3<br>(-2.5 to 11.4)                             | 16.4<br>(8.1 to 25.6)                               |
| Intestinal infectious diseases                                                       | < 0.05<br>(< 0.05 to < 0.05)           | 0.1†<br>(0.1 to 0.1)                       | < 0.05<br>(< 0.05 to < 0.05)         | -11.3<br>(-23.3 to 2.7)                           | -13.2<br>(-25.1 to 0.6)                             |
| Typhoid fever                                                                        | < 0.05<br>(< 0.05 to < 0.05)           | < 0.05<br>(< 0.05 to < 0.05)               | < 0.05<br>(< 0.05 to < 0.05)         | -4.8<br>(-21.0 to 15.7)                           | -5.3<br>(-21.3 to 14.7)                             |
| Paratyphoid fever                                                                    | < 0.05<br>(< 0.05 to < 0.05)           | 0.1<br>(< 0.05 to 0.1)                     | < 0.05<br>(< 0.05 to < 0.05)         | -15.2<br>(-29.8 to 1.3)                           | -17.0<br>(-30.6 to -0.9)                            |
| Other intestinal infectious diseases                                                 | --                                     | --                                         | < 0.05<br>(< 0.05 to < 0.05)         | -34.3<br>(-49.9 to -14.9)                         | -38.8<br>(-56.3 to -12.8)                           |
| Lower respiratory infections                                                         | 6.2<br>(5.8 to 6.8)                    | 291.2<br>(268.1 to 316.4)                  | 0.4<br>(0.2 to 0.5)                  | 5.5<br>(-6.3 to 19.1)                             | 3.8<br>(-8.1 to 18.2)                               |
| Upper respiratory infections                                                         | 159.2<br>(141.3 to 178.8)              | 11,807.1<br>(10,437.6 to 13,298.6)         | 3.9<br>(2.3 to 6.1)                  | -6.7<br>(-11.8 to -1.6)                           | -0.5<br>(-5.9 to 4.8)                               |
| Otitis media                                                                         | 89.3<br>(80.2 to 98.5)                 | 349.7<br>(289.1 to 424.2)                  | 2.6<br>(1.6 to 3.8)                  | -15.9<br>(-22.0 to -9.2)                          | -7.2<br>(-14.2 to 0.2)                              |
| Meningitis                                                                           | 6.6<br>(5.8 to 7.5)                    | 0.7<br>(0.6 to 0.8)                        | 0.8<br>(0.6 to 1.1)                  | -5.8<br>(-7.9 to -3.6)                            | -1.8<br>(-4.0 to 0.5)                               |
| Pneumococcal meningitis                                                              | 3.2<br>(2.6 to 3.9)                    | 0.2<br>(0.1 to 0.2)                        | 0.4<br>(0.2 to 0.5)                  | -5.7<br>(-8.8 to -2.2)                            | -1.9<br>(-5.4 to 1.8)                               |
| H influenzae type B meningitis                                                       | 0.6<br>(0.5 to 0.7)                    | < 0.05<br>(< 0.05 to < 0.05)               | 0.1<br>(0.1 to 0.2)                  | -11.2<br>(-16.5 to -6.8)                          | -6.7<br>(-12.5 to -2.1)                             |
| Meningococcal infection                                                              | 1.1<br>(0.8 to 1.4)                    | 0.2<br>(0.1 to 0.2)                        | 0.1<br>(0.1 to 0.2)                  | -7.3<br>(-10.9 to -3.2)                           | -3.5<br>(-7.6 to 1.0)                               |
| Other meningitis                                                                     | 1.7<br>(1.4 to 2.1)                    | 0.3<br>(0.3 to 0.4)                        | 0.2<br>(0.1 to 0.3)                  | -1.2<br>(-4.8 to 2.4)                             | 2.9<br>(-0.7 to 6.7)                                |
| Encephalitis                                                                         | 5.3<br>(4.0 to 7.1)                    | 2.3<br>(2.2 to 2.4)                        | 0.7<br>(0.5 to 0.9)                  | -3.8<br>(-14.9 to 7.7)                            | -1.9<br>(-12.3 to 9.5)                              |
| Diphtheria                                                                           | < 0.05<br>(< 0.05 to < 0.05)           | < 0.05<br>(< 0.05 to < 0.05)               | < 0.05<br>(< 0.05 to < 0.05)         | -22.6<br>(-57.6 to 40.2)                          | -16.7<br>(-51.2 to 45.2)                            |
| Whooping cough                                                                       | 0.4<br>(0.3 to 0.5)                    | 2.7<br>(2.1 to 3.5)                        | < 0.05<br>(< 0.05 to < 0.05)         | -28.7<br>(-48.0 to -4.0)                          | -17.7<br>(-40.2 to 11.0)                            |
| Tetanus                                                                              | < 0.05<br>(< 0.05 to < 0.05)           | < 0.05<br>(< 0.05 to < 0.05)               | < 0.05<br>(< 0.05 to < 0.05)         | -44.7<br>(-56.5 to -17.2)                         | -35.7<br>(-47.6 to -10.1)                           |
| Measles                                                                              | < 0.05<br>(< 0.05 to < 0.05)           | 0.4<br>(0.3 to 0.4)                        | < 0.05<br>(< 0.05 to < 0.05)         | 11,880.4<br>(5,182.7 to 3.8e+77)                  | 13,872.6<br>(6,061.2 to 6.1e+77)                    |
| Varicella and herpes zoster                                                          | 7.0<br>(6.2 to 7.7)                    | 116.4<br>(111.4 to 121.4)                  | 0.3<br>(0.2 to 0.4)                  | 2.4<br>(-9.9 to 15.6)                             | -0.5<br>(-12.2 to 12.6)                             |
| <b>Neglected tropical diseases and malaria</b>                                       | <b>3.0</b><br>(1.8 to 8.5)             | <b>0.2†</b><br>(< 0.05 to 0.7)             | <b>0.3</b><br>(0.1 to 0.7)           | <b>-60.1</b><br>(-81.4 to -17.3)                  | <b>-60.9</b><br>(-82.1 to -9.8)                     |
| Malaria                                                                              | --                                     | --                                         | --                                   | --                                                | --                                                  |
| Chagas disease                                                                       | --                                     | --                                         | --                                   | --                                                | --                                                  |
| Leishmaniasis                                                                        | < 0.05<br>(< 0.05 to < 0.05)           | < 0.05<br>(< 0.05 to < 0.05)               | < 0.05<br>(< 0.05 to < 0.05)         | -54.5<br>(-98.0 to 258.5)                         | -58.6<br>(-97.8 to 188.5)                           |
| Visceral leishmaniasis                                                               | < 0.05<br>(< 0.05 to < 0.05)           | < 0.05<br>(< 0.05 to < 0.05)               | < 0.05<br>(< 0.05 to < 0.05)         | -54.5<br>(-98.0 to 258.5)                         | -58.6<br>(-97.8 to 188.5)                           |
| Cutaneous and mucocutaneous leishmaniasis                                            | --                                     | --                                         | --                                   | --                                                | --                                                  |
| African trypanosomiasis                                                              | --                                     | --                                         | --                                   | --                                                | --                                                  |
| Schistosomiasis                                                                      | --                                     | --                                         | --                                   | --                                                | --                                                  |
| Cysticercosis                                                                        | 1.7<br>(1.0 to 2.7)                    | --                                         | 0.2<br>(0.1 to 0.5)                  | -63.2<br>(-80.3 to -42.6)                         | -64.7<br>(-80.9 to -45.1)                           |
| Cystic echinococcosis                                                                | 0.9<br>(0.2 to 3.6)                    | 0.2<br>(< 0.05 to 0.7)                     | 0.1<br>(< 0.05 to 0.4)               | -47.6<br>(-94.2 to 378.3)                         | -47.4<br>(-93.8 to 360.6)                           |
| Lymphatic filariasis                                                                 | --                                     | --                                         | --                                   | --                                                | --                                                  |
| Onchocerciasis                                                                       | --                                     | --                                         | --                                   | --                                                | --                                                  |
| Trachoma                                                                             | --                                     | --                                         | --                                   | --                                                | --                                                  |
| Dengue                                                                               | --                                     | --                                         | --                                   | --                                                | --                                                  |
| Yellow fever                                                                         | --                                     | --                                         | --                                   | --                                                | --                                                  |
| Rabies                                                                               | < 0.05<br>(< 0.05 to < 0.05)           | < 0.05<br>(< 0.05 to < 0.05)               | < 0.05<br>(< 0.05 to < 0.05)         | -17.2<br>(-35.9 to 16.6)                          | -20.5<br>(-37.6 to 9.2)                             |
| Intestinal nematode infections                                                       | --                                     | --                                         | --                                   | --                                                | --                                                  |
| Ascariasis                                                                           | --                                     | --                                         | --                                   | --                                                | --                                                  |

| Cause                                                                   | Prevalence in thousands (95% UI)              | Incidence in thousands (95% UI)                   | YLDs in thousands (95% UI)                |                                                   |                                                     |
|-------------------------------------------------------------------------|-----------------------------------------------|---------------------------------------------------|-------------------------------------------|---------------------------------------------------|-----------------------------------------------------|
|                                                                         | 2016 counts                                   | 2016 counts                                       | 2016 counts                               | Percentage change in counts between 2006 and 2016 | Percentage change in age-standardised rates between |
| Trichuriasis                                                            | --                                            | --                                                | --                                        | --                                                | --                                                  |
| Hookworm disease                                                        | --                                            | --                                                | --                                        | --                                                | --                                                  |
| Food-borne trematodiasis                                                | --                                            | --                                                | --                                        | --                                                | --                                                  |
| Leprosy                                                                 | --                                            | --                                                | --                                        | --                                                | --                                                  |
| Ebola virus disease                                                     | --                                            | --                                                | --                                        | --                                                | --                                                  |
| Zika virus disease                                                      | --                                            | --                                                | --                                        | --                                                | --                                                  |
| Guinea worm disease                                                     | --                                            | --                                                | --                                        | --                                                | --                                                  |
| Other neglected tropical diseases                                       | --                                            | --                                                | < 0.05<br>(< 0.05 to < 0.05)              | --                                                | --                                                  |
| <b>Maternal disorders</b>                                               | <b>6.3</b><br><b>(4.9 to 7.9)</b>             | <b>85.7†</b><br><b>(76.9 to 96.9)</b>             | <b>0.3</b><br><b>(0.2 to 0.5)</b>         | <b>-8.0</b><br><b>(-30.4 to 19.5)</b>             | <b>-0.0</b><br><b>(-24.2 to 29.4)</b>               |
| Maternal haemorrhage                                                    | 3.3<br>(2.2 to 4.6)                           | 14.6<br>(12.8 to 17.7)                            | 0.1<br>(0.1 to 0.2)                       | 3.4<br>(-33.3 to 58.7)                            | 12.4<br>(-27.7 to 72.2)                             |
| Maternal sepsis and other pregnancy related infections                  | 1.3<br>(1.0 to 1.7)                           | 8.3<br>(7.5 to 9.2)                               | < 0.05<br>(< 0.05 to 0.1)                 | -21.4<br>(-64.2 to 70.6)                          | -13.8<br>(-60.9 to 87.8)                            |
| Maternal hypertensive disorders                                         | 1.5<br>(1.0 to 2.0)                           | 6.0<br>(5.2 to 6.7)                               | 0.1<br>(< 0.05 to 0.1)                    | -9.2<br>(-48.1 to 58.2)                           | -1.4<br>(-43.6 to 72.2)                             |
| Maternal obstructed labour and uterine rupture                          | < 0.05<br>(< 0.05 to 0.1)                     | 2.6<br>(1.5 to 4.1)                               | < 0.05<br>(< 0.05 to < 0.05)              | -10.4<br>(-53.8 to 68.5)                          | -2.7<br>(-49.8 to 83.5)                             |
| Maternal abortion, miscarriage, and ectopic pregnancy                   | 0.4<br>(0.3 to 0.6)                           | 54.2<br>(46.3 to 65.7)                            | < 0.05<br>(< 0.05 to 0.1)                 | -9.4<br>(-53.5 to 75.2)                           | -2.4<br>(-50.0 to 90.7)                             |
| Other maternal disorders                                                | --                                            | --                                                | < 0.05<br>(< 0.05 to 0.1)                 | -13.9<br>(-34.8 to 11.0)                          | -6.4<br>(-29.1 to 20.8)                             |
| <b>Neonatal disorders</b>                                               | <b>71.0</b><br><b>(59.8 to 84.1)</b>          | <b>12.4</b><br><b>--</b>                          | <b>12.4</b><br><b>(8.4 to 17.2)</b>       | <b>-13.8</b><br><b>(-24.0 to -0.5)</b>            | <b>-7.6</b><br><b>(-19.0 to 6.4)</b>                |
| Neonatal preterm birth complications                                    | 51.8<br>(41.6 to 66.8)                        | --                                                | 5.5<br>(3.7 to 7.8)                       | -14.9<br>(-31.7 to 3.2)                           | -8.6<br>(-26.4 to 11.3)                             |
| Neonatal encephalopathy due to birth asphyxia and trauma                | 22.7<br>(13.6 to 33.7)                        | --                                                | 4.0<br>(1.7 to 7.0)                       | 2.2<br>(-18.7 to 65.6)                            | 8.9<br>(-13.1 to 75.5)                              |
| Neonatal sepsis and other neonatal infections                           | 5.9<br>(2.8 to 12.4)                          | --                                                | 2.4<br>(1.0 to 5.6)                       | -29.3<br>(-40.4 to -17.0)                         | -24.1<br>(-36.4 to -10.1)                           |
| Hemolytic disease and other neonatal jaundice                           | 0.8<br>(0.7 to 1.0)                           | --                                                | 0.3<br>(0.2 to 0.3)                       | -8.6<br>(-15.5 to -0.2)                           | -2.7<br>(-10.0 to 6.3)                              |
| Other neonatal disorders                                                | --                                            | --                                                | 0.2<br>(0.1 to 0.3)                       | -23.6<br>(-36.6 to -7.1)                          | -11.4<br>(-26.4 to 7.6)                             |
| <b>Nutritional deficiencies</b>                                         | <b>1,287.5</b><br><b>(1,148.3 to 1,382.5)</b> | <b>36.8†</b><br><b>(28.2 to 45.1)</b>             | <b>20.8</b><br><b>(13.0 to 30.9)</b>      | <b>-15.6</b><br><b>(-24.8 to -4.9)</b>            | <b>-6.5</b><br><b>(-17.7 to 5.4)</b>                |
| Protein-energy malnutrition                                             | 17.7<br>(13.6 to 23.2)                        | 6.2<br>(4.6 to 8.4)                               | 0.7<br>(0.4 to 1.1)                       | -20.4<br>(-44.5 to 15.6)                          | -8.1<br>(-35.4 to 33.5)                             |
| Iodine deficiency                                                       | 42.2<br>(36.6 to 48.5)                        | 0.7<br>(0.6 to 0.8)                               | 1.1<br>(0.7 to 1.5)                       | -0.1<br>(-12.7 to 13.7)                           | 1.5<br>(-11.5 to 15.4)                              |
| Vitamin A deficiency                                                    | 35.9<br>(26.5 to 44.7)                        | 30.0<br>(21.3 to 38.0)                            | --                                        | --                                                | --                                                  |
| Iron-deficiency anaemia                                                 | 1,134.2<br>(1,015.2 to 1,256.6)               | --                                                | 19.0<br>(11.7 to 28.7)                    | -16.2<br>(-26.1 to -4.8)                          | -6.7<br>(-19.0 to 5.8)                              |
| Other nutritional deficiencies                                          | --                                            | --                                                | < 0.05<br>(< 0.05 to < 0.05)              | -21.5<br>(-46.5 to 17.3)                          | -9.1<br>(-38.0 to 35.2)                             |
| <b>Other communicable, maternal, neonatal, and nutritional diseases</b> | <b>1,509.9</b><br><b>(1,416.5 to 1,615.6)</b> | <b>624.5</b><br><b>(530.0 to 734.2)</b>           | <b>2.9</b><br><b>(1.8 to 4.7)</b>         | <b>-6.5</b><br><b>(-11.6 to -1.1)</b>             | <b>-0.6</b><br><b>(-6.9 to 6.3)</b>                 |
| Sexually transmitted diseases excluding HIV                             | 1,151.5<br>(1,064.1 to 1,258.2)               | 606.4<br>(512.2 to 716.0)                         | 2.2<br>(1.3 to 3.6)                       | -5.9<br>(-11.2 to -0.1)                           | -2.5<br>(-8.0 to 3.8)                               |
| Syphilis                                                                | 3.7<br>(3.1 to 4.2)                           | 0.9<br>(0.7 to 1.3)                               | 0.4<br>(0.2 to 0.5)                       | 6.4<br>(-8.5 to 25.7)                             | -0.8<br>(-13.9 to 15.9)                             |
| Chlamydial infection                                                    | 92.4<br>(61.4 to 135.5)                       | 69.7<br>(47.0 to 104.8)                           | 0.4<br>(0.2 to 0.7)                       | -8.9<br>(-19.9 to 3.5)                            | -2.6<br>(-14.5 to 10.7)                             |
| Gonococcal infection                                                    | 91.0<br>(68.4 to 118.8)                       | 312.4<br>(228.2 to 419.5)                         | 0.4<br>(0.2 to 0.6)                       | -9.3<br>(-20.7 to 2.2)                            | -1.3<br>(-14.1 to 11.4)                             |
| Trichomoniasis                                                          | 192.0<br>(167.7 to 219.3)                     | 160.6<br>(139.1 to 184.7)                         | 0.2<br>(0.1 to 0.5)                       | -5.0<br>(-11.0 to 1.5)                            | -1.2<br>(-7.8 to 5.9)                               |
| Genital herpes                                                          | 799.0<br>(681.6 to 947.6)                     | 32.5<br>(27.4 to 39.4)                            | 0.2<br>(0.1 to 0.5)                       | 0.7<br>(-6.2 to 7.5)                              | -0.5<br>(-7.1 to 6.7)                               |
| Other sexually transmitted diseases                                     | 32.5<br>(25.5 to 41.1)                        | 30.1<br>(25.9 to 35.3)                            | 0.6<br>(0.4 to 1.0)                       | -10.0<br>(-19.8 to 0.4)                           | -4.7<br>(-14.9 to 6.3)                              |
| Hepatitis                                                               | 390.7<br>(340.4 to 450.1)                     | 18.1<br>(15.0 to 21.6)                            | < 0.05<br>(< 0.05 to < 0.05)              | -38.9<br>(-51.9 to -23.9)                         | -34.2<br>(-49.7 to -14.7)                           |
| Acute hepatitis A                                                       | 0.4<br>(0.2 to 0.5)                           | 4.9<br>(2.8 to 6.5)                               | < 0.05<br>(< 0.05 to < 0.05)              | -39.8<br>(-63.0 to 1.3)                           | -34.9<br>(-62.5 to 15.4)                            |
| Hepatitis B                                                             | 237.8<br>(191.0 to 295.7)                     | 11.4<br>(8.9 to 14.4)                             | < 0.05<br>(< 0.05 to < 0.05)              | -40.4<br>(-50.0 to -30.1)                         | -39.0<br>(-48.9 to -28.4)                           |
| Hepatitis C                                                             | 152.5<br>(136.7 to 168.9)                     | 1.4<br>(1.2 to 1.6)                               | < 0.05<br>(< 0.05 to < 0.05)              | -19.7<br>(-21.0 to -18.6)                         | -5.5<br>(-6.9 to -4.5)                              |
| Acute hepatitis E                                                       | < 0.05<br>(< 0.05 to < 0.05)                  | 0.5<br>(0.4 to 0.6)                               | < 0.05<br>(< 0.05 to < 0.05)              | -39.3<br>(-43.9 to -34.6)                         | -36.9<br>(-42.2 to -31.0)                           |
| Other infectious diseases                                               | 38.3<br>(34.2 to 42.8)                        | < 0.05<br>(< 0.05 to < 0.05)                      | 0.7<br>(0.4 to 1.1)                       | -7.4<br>(-20.0 to 6.9)                            | 5.2<br>(-10.5 to 23.3)                              |
| <b>Non-communicable diseases</b>                                        | <b>8,164.2</b><br><b>(8,121.9 to 8,208.2)</b> | <b>26,179.1†</b><br><b>(24,766.0 to 27,503.7)</b> | <b>973.6</b><br><b>(723.4 to 1,254.1)</b> | <b>2.2</b><br><b>(0.2 to 4.3)</b>                 | <b>-0.6</b><br><b>(-2.7 to 1.8)</b>                 |
| <b>Neoplasms</b>                                                        | <b>107.1</b><br><b>(102.3 to 112.5)</b>       | <b>41.1</b><br><b>(38.5 to 44.6)</b>              | <b>12.1</b><br><b>(8.9 to 15.7)</b>       | <b>9.3</b><br><b>(2.5 to 16.4)</b>                | <b>2.4</b><br><b>(-3.6 to 8.7)</b>                  |
| Lip and oral cavity cancer                                              | 2.0<br>(1.8 to 2.2)                           | 0.6<br>(0.5 to 0.6)                               | 0.2<br>(0.1 to 0.3)                       | 2.7<br>(-14.7 to 20.2)                            | -5.0<br>(-19.9 to 10.3)                             |
| Nasopharynx cancer                                                      | 0.2<br>(0.2 to 0.2)                           | 0.1<br>(< 0.05 to 0.1)                            | < 0.05<br>(< 0.05 to < 0.05)              | -3.1<br>(-16.7 to 13.1)                           | -3.0<br>(-18.3 to 13.9)                             |
| Other pharynx cancer                                                    | 1.2<br>(1.0 to 1.4)                           | 0.4<br>(0.3 to 0.4)                               | 0.1<br>(0.1 to 0.2)                       | 10.6<br>(-8.2 to 35.0)                            | 5.2<br>(-12.3 to 27.9)                              |
| Oesophageal cancer                                                      | 0.4<br>(0.4 to 0.5)                           | 0.4<br>(0.3 to 0.4)                               | 0.1<br>(0.1 to 0.1)                       | 2.1<br>(-9.3 to 16.1)                             | -4.8<br>(-14.9 to 7.5)                              |
| Stomach cancer                                                          | 2.1<br>(1.9 to 2.5)                           | 1.3<br>(1.2 to 1.5)                               | 0.3<br>(0.2 to 0.5)                       | -13.0<br>(-28.4 to 5.9)                           | -19.3<br>(-33.2 to -3.0)                            |
| Colon and rectum cancer                                                 | 17.8<br>(16.4 to 19.6)                        | 5.2<br>(4.8 to 5.8)                               | 1.7<br>(1.3 to 2.3)                       | 10.5<br>(-4.9 to 28.2)                            | 1.2<br>(-12.2 to 16.8)                              |
| Liver cancer                                                            | 0.3<br>(0.3 to 0.4)                           | 0.9<br>(0.8 to 1.0)                               | 0.2<br>(0.1 to 0.3)                       | 3.5<br>(-9.5 to 17.5)                             | -5.2<br>(-16.4 to 7.4)                              |
| Liver cancer due to hepatitis B                                         | 0.2<br>(0.1 to 0.3)                           | 0.2<br>(0.1 to 0.3)                               | < 0.05<br>(< 0.05 to 0.1)                 | 3.9<br>(-9.9 to 18.9)                             | -4.1<br>(-15.8 to 9.8)                              |

| Cause                                              | Prevalence in thousands (95% UI)              | Incidence in thousands (95% UI)          | YLDs in thousands (95% UI)            |                                                   |                                                     |
|----------------------------------------------------|-----------------------------------------------|------------------------------------------|---------------------------------------|---------------------------------------------------|-----------------------------------------------------|
|                                                    | 2016 counts                                   | 2016 counts                              | 2016 counts                           | Percentage change in counts between 2006 and 2016 | Percentage change in age-standardised rates between |
| Liver cancer due to hepatitis C                    | 0.3<br>(0.2 to 0.3)                           | 0.3<br>(0.2 to 0.3)                      | 0.1<br>( $< 0.05$ to 0.1)             | 3.1<br>(-10.9 to 18.8)                            | -6.6<br>(-19.0 to 7.2)                              |
| Liver cancer due to alcohol use                    | 0.2<br>(0.2 to 0.3)                           | 0.2<br>(0.2 to 0.3)                      | 0.1<br>( $< 0.05$ to 0.1)             | 5.5<br>(-9.3 to 23.8)                             | -3.4<br>(-16.1 to 11.9)                             |
| Liver cancer due to other causes                   | 0.1<br>(0.1 to 0.2)                           | 0.1<br>(0.1 to 0.2)                      | $< 0.05$<br>( $< 0.05$ to $< 0.05$ )  | 0.4<br>(-14.3 to 16.5)                            | -7.5<br>(-20.5 to 7.0)                              |
| Gallbladder and biliary tract cancer               | 0.3<br>(0.3 to 0.3)                           | 0.4<br>(0.4 to 0.5)                      | 0.1<br>(0.1 to 0.1)                   | -3.8<br>(-13.9 to 8.6)                            | -13.8<br>(-22.7 to -3.5)                            |
| Pancreatic cancer                                  | 1.0<br>(0.9 to 1.1)                           | 1.3<br>(1.2 to 1.4)                      | 0.2<br>(0.2 to 0.3)                   | 10.5<br>(-8.4 to 33.4)                            | 0.1<br>(-15.0 to 18.5)                              |
| Larynx cancer                                      | 2.4<br>(2.1 to 2.7)                           | 0.7<br>(0.6 to 0.8)                      | 0.3<br>(0.2 to 0.4)                   | -7.1<br>(-29.2 to 22.6)                           | -12.4<br>(-32.5 to 14.8)                            |
| Tracheal, bronchus, and lung cancer                | 7.1<br>(6.5 to 7.8)                           | 5.8<br>(5.3 to 6.3)                      | 1.3<br>(0.9 to 1.7)                   | 0.2<br>(-15.5 to 19.4)                            | -6.9<br>(-21.4 to 10.2)                             |
| Malignant skin melanoma                            | 3.6<br>(2.8 to 4.1)                           | 0.8<br>(0.6 to 0.9)                      | 0.2<br>(0.2 to 0.4)                   | 29.9<br>(9.4 to 53.6)                             | 23.3<br>(3.7 to 44.7)                               |
| Non-melanoma skin cancer                           | 2.2<br>(1.2 to 4.7)                           | 4.5<br>(2.6 to 7.3)                      | 0.1<br>( $< 0.05$ to 0.2)             | 242.8<br>(89.7 to 844.2)                          | 189.9<br>(62.8 to 694.3)                            |
| Non-melanoma skin cancer (squamous-cell carcinoma) | 1.6<br>(0.8 to 4.4)                           | 1.6<br>(0.9 to 4.0)                      | 0.1<br>( $< 0.05$ to 0.2)             | 255.8<br>(87.9 to 925.2)                          | 199.2<br>(59.9 to 754.0)                            |
| Non-melanoma skin cancer (basal-cell carcinoma)    | 0.4<br>(0.2 to 0.8)                           | 2.9<br>(1.5 to 5.0)                      | $< 0.05$<br>( $< 0.05$ to $< 0.05$ )  | 110.8<br>(-1.4 to 272.9)                          | 92.7<br>(-4.0 to 223.9)                             |
| Breast cancer                                      | 22.1<br>(19.2 to 25.8)                        | 4.7<br>(4.1 to 5.5)                      | 2.0<br>(1.4 to 2.7)                   | 5.4<br>(-9.5 to 24.0)                             | -0.9<br>(-14.7 to 15.8)                             |
| Cervical cancer                                    | 4.6<br>(3.6 to 5.4)                           | 1.2<br>(1.0 to 1.4)                      | 0.4<br>(0.3 to 0.6)                   | -12.9<br>(-30.3 to 7.8)                           | -14.5<br>(-31.2 to 6.2)                             |
| Uterine cancer                                     | 6.6<br>(5.7 to 7.7)                           | 1.4<br>(1.2 to 1.6)                      | 0.5<br>(0.3 to 0.7)                   | 28.3<br>(1.7 to 61.9)                             | 21.1<br>(-2.4 to 49.7)                              |
| Ovarian cancer                                     | 2.0<br>(1.8 to 2.3)                           | 0.7<br>(0.6 to 0.8)                      | 0.3<br>(0.2 to 0.4)                   | 8.8<br>(-21.3 to 49.7)                            | 3.7<br>(-23.4 to 39.1)                              |
| Prostate cancer                                    | 11.6<br>(8.8 to 15.6)                         | 3.0<br>(2.4 to 3.9)                      | 1.2<br>(0.8 to 1.6)                   | 24.5<br>(-1.9 to 54.5)                            | 10.3<br>(-12.9 to 36.0)                             |
| Testicular cancer                                  | 2.1<br>(1.6 to 2.6)                           | 0.4<br>(0.3 to 0.5)                      | 0.1<br>(0.1 to 0.2)                   | 42.8<br>(1.8 to 95.9)                             | 53.4<br>(9.6 to 113.1)                              |
| Kidney cancer                                      | 3.6<br>(3.1 to 4.0)                           | 1.0<br>(0.9 to 1.1)                      | 0.3<br>(0.2 to 0.5)                   | 11.8<br>(-3.6 to 30.0)                            | 5.8<br>(-8.3 to 22.4)                               |
| Bladder cancer                                     | 6.7<br>(6.0 to 7.3)                           | 1.6<br>(1.5 to 1.8)                      | 0.6<br>(0.4 to 0.8)                   | 14.3<br>(-2.3 to 33.9)                            | 4.0<br>(-10.6 to 21.1)                              |
| Brain and nervous system cancer                    | 2.0<br>(1.6 to 2.4)                           | 0.9<br>(0.8 to 1.1)                      | 0.3<br>(0.2 to 0.4)                   | 1.0<br>(-12.9 to 16.6)                            | -0.3<br>(-13.6 to 14.8)                             |
| Thyroid cancer                                     | 2.2<br>(1.8 to 2.5)                           | 0.4<br>(0.3 to 0.5)                      | 0.1<br>(0.1 to 0.2)                   | 18.1<br>(-4.4 to 48.1)                            | 16.7<br>(-6.5 to 47.5)                              |
| Mesothelioma                                       | 0.1<br>(0.1 to 0.1)                           | $< 0.05$<br>( $< 0.05$ to 0.1)           | $< 0.05$<br>( $< 0.05$ to $< 0.05$ )  | 4.9<br>(-7.7 to 17.5)                             | -1.0<br>(-12.7 to 10.2)                             |
| Hodgkin lymphoma                                   | 0.9<br>(0.5 to 1.3)                           | 0.2<br>(0.1 to 0.3)                      | 0.1<br>( $< 0.05$ to 0.1)             | 11.7<br>(-13.4 to 44.1)                           | 20.4<br>(-11.5 to 62.5)                             |
| Non-Hodgkin's lymphoma                             | 2.5<br>(2.0 to 2.9)                           | 0.7<br>(0.6 to 0.8)                      | 0.2<br>(0.2 to 0.3)                   | 35.8<br>(16.0 to 56.9)                            | 28.8<br>(10.3 to 47.5)                              |
| Multiple myeloma                                   | 0.3<br>(0.2 to 0.4)                           | 0.2<br>(0.1 to 0.2)                      | 0.1<br>(0.1 to 0.1)                   | 11.9<br>(-0.5 to 24.9)                            | 3.2<br>(-8.7 to 14.8)                               |
| Leukaemia                                          | 2.5<br>(2.0 to 2.8)                           | 0.8<br>(0.6 to 0.8)                      | 0.3<br>(0.2 to 0.5)                   | 3.0<br>(-10.0 to 19.0)                            | -2.4<br>(-14.0 to 10.5)                             |
| Acute lymphoid leukaemia                           | 0.2<br>(0.2 to 0.3)                           | 0.1<br>( $< 0.05$ to 0.1)                | $< 0.05$<br>( $< 0.05$ to $< 0.05$ )  | -0.9<br>(-14.5 to 16.9)                           | 6.3<br>(-11.3 to 32.4)                              |
| Chronic lymphoid leukaemia                         | 1.5<br>(1.2 to 1.7)                           | 0.3<br>(0.3 to 0.4)                      | 0.2<br>(0.1 to 0.2)                   | 5.1<br>(-15.9 to 32.1)                            | -3.5<br>(-21.1 to 18.2)                             |
| Acute myeloid leukaemia                            | 0.3<br>(0.2 to 0.4)                           | 0.2<br>(0.2 to 0.3)                      | 0.1<br>( $< 0.05$ to 0.1)             | 4.6<br>(-6.2 to 16.5)                             | 2.4<br>(-8.8 to 15.0)                               |
| Chronic myeloid leukaemia                          | 0.1<br>(0.1 to 0.2)                           | $< 0.05$<br>( $< 0.05$ to 0.1)           | $< 0.05$<br>( $< 0.05$ to $< 0.05$ )  | -8.7<br>(-23.6 to 8.9)                            | -10.5<br>(-24.7 to 7.1)                             |
| Other leukaemia                                    | 0.3<br>(0.2 to 0.4)                           | 0.1<br>(0.1 to 0.1)                      | $< 0.05$<br>( $< 0.05$ to 0.1)        | -0.1<br>(-16.8 to 20.3)                           | -9.4<br>(-22.4 to 7.8)                              |
| Other neoplasms                                    | 5.5<br>(4.4 to 6.2)                           | 1.6<br>(1.3 to 1.7)                      | 0.5<br>(0.3 to 0.6)                   | 28.3<br>(10.6 to 46.6)                            | 26.6<br>(10.6 to 44.6)                              |
| <b>Cardiovascular diseases</b>                     | <b>1,066.6</b><br><b>(1,027.8 to 1,102.5)</b> | <b>128.0†</b><br><b>(122.5 to 133.9)</b> | <b>91.6</b><br><b>(66.4 to 118.4)</b> | <b>7.0</b><br><b>(1.3 to 11.9)</b>                | <b>-3.6</b><br><b>(-8.3 to 0.4)</b>                 |
| Rheumatic heart disease                            | 0.7<br>(0.6 to 0.8)                           | 0.2<br>(0.2 to 0.2)                      | 0.1<br>( $< 0.05$ to 0.1)             | -2.5<br>(-18.5 to 14.6)                           | -9.1<br>(-22.2 to 5.0)                              |
| Ischaemic heart disease                            | 423.2<br>(395.4 to 451.8)                     | 49.9<br>(46.3 to 53.7)                   | 21.6<br>(14.9 to 29.3)                | 6.4<br>(2.1 to 10.5)                              | -2.6<br>(-6.3 to 1.1)                               |
| Cerebrovascular disease                            | 219.5<br>(201.2 to 233.4)                     | 39.4‡<br>(37.5 to 41.1)                  | 43.6<br>(31.1 to 55.9)                | 7.3<br>(-4.1 to 16.0)                             | -4.1<br>(-13.7 to 3.2)                              |
| Ischaemic stroke                                   | 197.8<br>(170.8 to 218.1)                     | 31.9‡<br>(30.0 to 33.6)                  | 38.0<br>(27.1 to 48.9)                | 9.4<br>(-4.1 to 19.1)                             | -2.6<br>(-13.6 to 5.6)                              |
| Hemorrhagic stroke                                 | 29.4<br>(26.3 to 33.0)                        | 7.5‡<br>(7.2 to 7.8)                     | 5.6<br>(3.9 to 7.2)                   | -5.2<br>(-16.2 to 7.1)                            | -12.2<br>(-21.4 to -1.7)                            |
| Hypertensive heart disease                         | 29.1<br>(23.9 to 35.3)                        | --                                       | 2.3<br>(1.6 to 3.2)                   | 8.1<br>(-3.2 to 19.7)                             | -5.4<br>(-14.6 to 4.0)                              |
| Cardiomyopathy and myocarditis                     | 74.3<br>(65.2 to 84.2)                        | 4.2†<br>(3.7 to 4.8)                     | 5.8<br>(4.0 to 8.1)                   | 7.7<br>(-1.3 to 17.0)                             | -5.4<br>(-12.5 to 2.2)                              |
| Myocarditis                                        | 4.5<br>(4.0 to 5.0)                           | 4.2<br>(3.7 to 4.8)                      | 0.3<br>(0.2 to 0.5)                   | -6.2<br>(-19.5 to 9.9)                            | -4.5<br>(-17.9 to 11.6)                             |
| Alcoholic cardiomyopathy                           | 11.6<br>(9.6 to 13.7)                         | --                                       | 0.9<br>(0.6 to 1.3)                   | 3.1<br>(-8.9 to 17.4)                             | -5.6<br>(-16.6 to 7.1)                              |
| Other cardiomyopathy                               | 58.0<br>(48.6 to 68.2)                        | --                                       | 4.5<br>(3.1 to 6.4)                   | 9.9<br>(0.1 to 19.7)                              | -5.4<br>(-12.9 to 2.5)                              |
| Atrial fibrillation and flutter                    | 101.7<br>(88.3 to 118.0)                      | 8.3<br>(7.0 to 9.8)                      | 7.8<br>(5.3 to 11.0)                  | 15.0<br>(8.4 to 22.4)                             | 0.9<br>(-4.6 to 7.4)                                |
| Peripheral vascular disease                        | 274.1<br>(238.7 to 319.7)                     | 24.9<br>(21.4 to 29.2)                   | 1.2<br>(0.6 to 2.3)                   | 9.6<br>(0.4 to 20.4)                              | -6.1<br>(-13.5 to 1.8)                              |
| Endocarditis                                       | 0.3<br>(0.3 to 0.4)                           | 1.1<br>(1.0 to 1.2)                      | $< 0.05$<br>( $< 0.05$ to $< 0.05$ )  | 1.6<br>(-4.8 to 9.5)                              | -3.8<br>(-8.9 to 2.5)                               |
| Other cardiovascular and circulatory diseases      | 181.2<br>(152.9 to 214.9)                     | --                                       | 9.2<br>(6.3 to 13.2)                  | 0.6<br>(-6.9 to 9.5)                              | -5.3<br>(-12.0 to 2.4)                              |
| <b>Chronic respiratory diseases</b>                | <b>790.5</b><br><b>(768.6 to 815.1)</b>       | <b>101.8†</b><br><b>(96.6 to 107.2)</b>  | <b>30.0</b><br><b>(22.5 to 38.5)</b>  | <b>-3.8</b><br><b>(-8.6 to 1.1)</b>               | <b>-3.5</b><br><b>(-7.8 to 0.8)</b>                 |
| Chronic obstructive pulmonary disease              | 349.9<br>(332.4 to 367.7)                     | 20.4<br>(19.4 to 21.5)                   | 10.7<br>(8.6 to 12.8)                 | 0.6<br>(-10.4 to 12.6)                            | -6.5<br>(-16.4 to 4.1)                              |
| Pneumoconiosis                                     | 1.6<br>(1.4 to 1.8)                           | 0.1<br>(0.1 to 0.1)                      | 0.2<br>(0.1 to 0.3)                   | 20.0<br>(0.8 to 42.5)                             | 9.6<br>(-7.1 to 28.2)                               |
| Silicosis                                          | 0.2<br>(0.2 to 0.3)                           | $< 0.05$<br>( $< 0.05$ to $< 0.05$ )     | $< 0.05$<br>( $< 0.05$ to 0.1)        | 24.4<br>(17.5 to 32.2)                            | 12.3<br>(6.4 to 19.1)                               |



| Cause                                                          | Prevalence in thousands (95% UI)              | Incidence in thousands (95% UI)               | YLDs in thousands (95% UI)              |                                                   |                                                     |
|----------------------------------------------------------------|-----------------------------------------------|-----------------------------------------------|-----------------------------------------|---------------------------------------------------|-----------------------------------------------------|
|                                                                | 2016 counts                                   | 2016 counts                                   | 2016 counts                             | Percentage change in counts between 2006 and 2016 | Percentage change in age-standardised rates between |
| Asbestosis                                                     | 0.1<br>(0.1 to 0.1)                           | < 0.05<br>(< 0.05 to < 0.05)                  | < 0.05<br>(< 0.05 to < 0.05)            | 10.3<br>(2.9 to 18.1)                             | 1.7<br>(-5.3 to 9.0)                                |
| Coal workers pneumoconiosis                                    | 0.6<br>(0.5 to 0.7)                           | < 0.05<br>(< 0.05 to < 0.05)                  | 0.1<br>(0.1 to 0.1)                     | 19.9<br>(-16.5 to 70.1)                           | 11.5<br>(-21.5 to 56.6)                             |
| Other pneumoconiosis                                           | 0.7<br>(0.6 to 0.8)                           | < 0.05<br>(< 0.05 to < 0.05)                  | 0.1<br>(0.1 to 0.1)                     | 20.2<br>(-12.0 to 59.4)                           | 8.4<br>(-18.0 to 39.5)                              |
| Asthma                                                         | 466.2<br>(439.4 to 496.0)                     | 80.9<br>(75.9 to 86.2)                        | 17.9<br>(11.9 to 25.4)                  | -7.2<br>(-11.7 to -3.2)                           | -3.0<br>(-7.9 to 1.7)                               |
| Interstitial lung disease and pulmonary sarcoidosis            | 8.1<br>(7.4 to 8.9)                           | 0.4<br>(0.3 to 0.4)                           | 0.8<br>(0.6 to 1.2)                     | 3.9<br>(-10.1 to 19.9)                            | -0.2<br>(-12.4 to 13.7)                             |
| Other chronic respiratory diseases                             | --                                            | --                                            | 0.4<br>(0.3 to 0.5)                     | 19.2<br>(8.1 to 30.4)                             | 28.1<br>(16.1 to 40.6)                              |
| <b>Cirrhosis and other chronic liver diseases</b>              | <b>61.5</b><br><b>(58.5 to 64.5)</b>          | <b>1.8</b><br><b>(1.7 to 1.9)</b>             | <b>1.6</b><br><b>(1.1 to 2.1)</b>       | <b>9.3</b><br><b>(-2.6 to 21.3)</b>               | <b>8.6</b><br><b>(-3.4 to 21.5)</b>                 |
| Cirrhosis and other chronic liver diseases due to hepatitis B  | 9.3<br>(7.9 to 11.1)                          | 0.3<br>(0.2 to 0.4)                           | 0.2<br>(0.1 to 0.3)                     | 11.6<br>(-15.5 to 45.8)                           | 8.4<br>(-18.1 to 41.9)                              |
| Cirrhosis and other chronic liver diseases due to hepatitis C  | 16.1<br>(12.1 to 20.6)                        | 0.5<br>(0.4 to 0.6)                           | 0.4<br>(0.2 to 0.6)                     | 11.0<br>(-10.7 to 36.8)                           | 7.6<br>(-12.8 to 33.8)                              |
| Cirrhosis and other chronic liver diseases due to alcohol use  | 20.6<br>(16.8 to 24.5)                        | 0.7<br>(0.5 to 0.8)                           | 0.5<br>(0.3 to 0.7)                     | 13.9<br>(-7.3 to 37.7)                            | 9.5<br>(-10.8 to 33.1)                              |
| Cirrhosis and other chronic liver diseases due to other causes | 15.5<br>(13.7 to 17.4)                        | 0.4<br>(0.3 to 0.4)                           | 0.5<br>(0.3 to 0.7)                     | 2.9<br>(-14.6 to 25.2)                            | 8.5<br>(-10.9 to 32.9)                              |
| <b>Digestive diseases</b>                                      | <b>384.7</b><br><b>(358.6 to 410.7)</b>       | <b>481.7†</b><br><b>(448.6 to 513.6)</b>      | <b>17.1</b><br><b>(12.0 to 22.9)</b>    | <b>17.3</b><br><b>(8.9 to 27.0)</b>               | <b>11.3</b><br><b>(4.2 to 20.0)</b>                 |
| Peptic ulcer disease                                           | 141.1<br>(126.2 to 159.0)                     | 13.8<br>(12.6 to 15.1)                        | 3.2<br>(1.9 to 4.9)                     | 54.5<br>(27.3 to 86.3)                            | 42.5<br>(16.2 to 72.3)                              |
| Gastritis and duodenitis                                       | 115.5<br>(100.2 to 131.3)                     | 83.2<br>(74.9 to 92.0)                        | 2.7<br>(1.6 to 4.0)                     | 46.7<br>(23.6 to 72.8)                            | 31.0<br>(11.7 to 53.7)                              |
| Appendicitis                                                   | 0.5<br>(0.5 to 0.5)                           | 13.1<br>(12.1 to 14.1)                        | 0.2<br>(0.1 to 0.2)                     | -9.3<br>(-32.8 to 22.9)                           | -1.0<br>(-30.2 to 41.7)                             |
| Paralytic ileus and intestinal obstruction                     | 0.2<br>(0.2 to 0.2)                           | 5.4<br>(4.9 to 5.9)                           | 0.1<br>(< 0.05 to 0.1)                  | 9.7<br>(-6.9 to 28.5)                             | 2.3<br>(-10.1 to 16.2)                              |
| Inguinal, femoral, and abdominal hernia                        | 87.5<br>(80.9 to 94.9)                        | 208.3<br>(182.9 to 234.2)                     | 6.3<br>(4.3 to 8.7)                     | 1.7<br>(-5.2 to 9.6)                              | -0.1<br>(-7.3 to 7.9)                               |
| Inflammatory bowel disease                                     | 17.3<br>(16.2 to 18.7)                        | 6.0<br>(5.8 to 6.2)                           | 2.4<br>(1.6 to 3.4)                     | 3.7<br>(-5.2 to 13.1)                             | 2.5<br>(-6.5 to 11.8)                               |
| Vascular intestinal disorders                                  | 0.2<br>(0.2 to 0.2)                           | 1.3<br>(1.1 to 1.4)                           | 0.1<br>(< 0.05 to 0.1)                  | 3.9<br>(-14.0 to 22.4)                            | -1.8<br>(-15.0 to 11.5)                             |
| Gallbladder and biliary diseases                               | 33.6<br>(30.1 to 37.4)                        | 139.2<br>(123.2 to 157.3)                     | 0.6<br>(0.4 to 0.9)                     | 13.4<br>(-5.5 to 35.6)                            | 8.0<br>(-8.8 to 27.4)                               |
| Pancreatitis                                                   | 1.3<br>(1.2 to 1.4)                           | 11.4<br>(10.4 to 12.5)                        | 0.2<br>(0.1 to 0.2)                     | 20.8<br>(4.5 to 41.4)                             | 14.4<br>(2.0 to 30.5)                               |
| Other digestive diseases                                       | --                                            | --                                            | 1.4<br>(1.0 to 1.9)                     | 22.0<br>(13.6 to 31.7)                            | 13.6<br>(6.1 to 22.4)                               |
| <b>Neurological disorders</b>                                  | <b>3,259.9</b><br><b>(3,142.0 to 3,417.4)</b> | <b>1,351.7</b><br><b>(1,174.6 to 1,550.4)</b> | <b>104.1</b><br><b>(69.6 to 142.2)</b>  | <b>-0.2</b><br><b>(-14.4 to 18.3)</b>             | <b>0.0</b><br><b>(-15.6 to 20.7)</b>                |
| Alzheimer's disease and other dementias                        | 77.0<br>(64.2 to 92.0)                        | 13.2<br>(11.0 to 16.1)                        | 11.2<br>(7.7 to 15.0)                   | 23.8<br>(15.6 to 32.2)                            | -1.1<br>(-5.9 to 4.1)                               |
| Parkinson's disease                                            | 16.7<br>(12.9 to 20.9)                        | 1.9<br>(1.5 to 2.5)                           | 1.9<br>(1.2 to 2.7)                     | 17.4<br>(4.7 to 31.0)                             | 3.4<br>(-7.1 to 14.5)                               |
| Epilepsy                                                       | 34.0<br>(8.2 to 64.3)                         | 4.3<br>(1.0 to 8.0)                           | 9.1<br>(1.9 to 22.6)                    | -0.5<br>(-82.5 to 467.9)                          | 2.8<br>(-81.9 to 493.7)                             |
| Multiple sclerosis                                             | 5.3<br>(4.8 to 5.9)                           | 0.2<br>(0.1 to 0.2)                           | 1.4<br>(1.0 to 1.8)                     | 8.7<br>(-7.9 to 28.0)                             | 8.1<br>(-8.9 to 27.2)                               |
| Motor neuron disease                                           | 0.3<br>(0.3 to 0.3)                           | 0.1<br>(< 0.05 to 0.1)                        | 0.1<br>(< 0.05 to 0.1)                  | 4.6<br>(0.9 to 8.8)                               | 4.4<br>(0.7 to 8.4)                                 |
| Migraine                                                       | 1,430.9<br>(1,351.9 to 1,517.2)               | 143.1<br>(133.4 to 154.4)                     | 66.8<br>(43.5 to 92.7)                  | -3.7<br>(-6.9 to -0.6)                            | -0.8<br>(-4.0 to 2.3)                               |
| Tension-type headache                                          | 2,246.5<br>(2,015.1 to 2,496.8)               | 1,188.8<br>(1,011.3 to 1,388.9)               | 11.8<br>(7.4 to 17.4)                   | -3.0<br>(-7.5 to 2.4)                             | -1.4<br>(-5.8 to 3.7)                               |
| Other neurological disorders                                   | < 0.05<br>(< 0.05 to 0.1)                     | 0.1<br>(< 0.05 to 0.1)                        | 1.9<br>(0.8 to 4.2)                     | 12.1<br>(-64.8 to 252.5)                          | 22.7<br>(-66.7 to 334.1)                            |
| <b>Mental and substance use disorders</b>                      | <b>1,257.5</b><br><b>(1,214.4 to 1,297.4)</b> | <b>481.9†</b><br><b>(451.6 to 518.4)</b>      | <b>165.0</b><br><b>(120.5 to 214.2)</b> | <b>-3.0</b><br><b>(-5.1 to -0.9)</b>              | <b>-0.6</b><br><b>(-2.6 to 1.5)</b>                 |
| Schizophrenia                                                  | 21.9<br>(18.3 to 25.9)                        | 1.1<br>(0.9 to 1.3)                           | 13.9<br>(10.0 to 17.7)                  | -0.6<br>(-8.4 to 8.1)                             | 0.7<br>(-7.6 to 9.3)                                |
| Alcohol use disorders                                          | 163.5<br>(145.0 to 182.7)                     | 85.9<br>(75.1 to 97.1)                        | 16.2<br>(11.3 to 22.5)                  | 0.2<br>(-7.1 to 8.6)                              | 4.1<br>(-3.5 to 12.7)                               |
| Drug use disorders                                             | 39.0<br>(35.7 to 42.2)                        | 6.0<br>(5.5 to 6.6)                           | 8.1<br>(5.8 to 10.7)                    | 0.0<br>(-9.2 to 10.6)                             | 4.6<br>(-5.0 to 15.7)                               |
| Opioid use disorders                                           | 14.7<br>(12.5 to 17.4)                        | 2.0<br>(1.8 to 2.4)                           | 6.1<br>(4.2 to 8.1)                     | -0.2<br>(-11.9 to 12.1)                           | 3.5<br>(-8.2 to 16.7)                               |
| Cocaine use disorders                                          | 2.4<br>(2.0 to 2.8)                           | 0.2<br>(0.2 to 0.3)                           | 0.3<br>(0.2 to 0.5)                     | 1.9<br>(-22.3 to 31.8)                            | 6.8<br>(-20.7 to 42.9)                              |
| Amphetamine use disorders                                      | 2.1<br>(1.2 to 3.5)                           | 0.2<br>(0.2 to 0.4)                           | 0.3<br>(0.1 to 0.5)                     | 15.2<br>(-18.0 to 65.6)                           | 27.8<br>(-11.5 to 84.5)                             |
| Cannabis use disorders                                         | 16.2<br>(14.1 to 18.8)                        | 2.6<br>(2.2 to 3.1)                           | 0.5<br>(0.3 to 0.7)                     | -14.7<br>(-28.0 to 0.4)                           | -6.7<br>(-22.3 to 10.6)                             |
| Other drug use disorders                                       | 5.3<br>(4.7 to 5.9)                           | 0.9<br>(0.8 to 1.0)                           | 1.0<br>(0.6 to 1.4)                     | 5.8<br>(-10.3 to 25.3)                            | 11.2<br>(-6.4 to 33.9)                              |
| Depressive disorders                                           | 292.0<br>(274.1 to 310.0)                     | 312.5<br>(283.5 to 344.7)                     | 48.2<br>(33.4 to 64.9)                  | -3.2<br>(-8.2 to 2.0)                             | -4.5<br>(-9.0 to 0.1)                               |
| Major depressive disorder                                      | 194.2<br>(176.8 to 214.3)                     | 294.8<br>(265.9 to 326.8)                     | 38.5<br>(26.6 to 51.9)                  | -4.2<br>(-10.3 to 2.1)                            | -5.5<br>(-11.2 to 0.2)                              |
| Dysthymia                                                      | 102.9<br>(90.2 to 117.6)                      | 17.7<br>(15.5 to 20.1)                        | 9.7<br>(6.6 to 14.1)                    | 0.9<br>(-2.8 to 5.1)                              | -0.2<br>(-3.7 to 3.7)                               |
| Bipolar disorder                                               | 59.7<br>(51.8 to 68.4)                        | 4.3<br>(3.7 to 4.9)                           | 12.1<br>(7.5 to 17.7)                   | -3.3<br>(-9.1 to 2.9)                             | 0.0<br>(-6.1 to 6.2)                                |
| Anxiety disorders                                              | 319.6<br>(292.7 to 350.2)                     | 46.0<br>(42.6 to 49.7)                        | 30.3<br>(21.2 to 40.9)                  | -2.8<br>(-8.5 to 2.7)                             | -0.2<br>(-6.1 to 5.7)                               |
| Eating disorders                                               | 8.7<br>(7.0 to 10.5)                          | 4.3<br>(3.2 to 5.7)                           | 1.8<br>(1.1 to 2.6)                     | 0.6<br>(-11.6 to 14.9)                            | 10.6<br>(-3.1 to 27.1)                              |
| Anorexia nervosa                                               | 1.8<br>(1.3 to 2.4)                           | 0.7<br>(0.5 to 1.0)                           | 0.4<br>(0.2 to 0.6)                     | -3.9<br>(-25.8 to 22.9)                           | 8.2<br>(-16.3 to 38.6)                              |
| Bulimia nervosa                                                | 6.5<br>(4.9 to 8.7)                           | 3.6<br>(2.5 to 4.9)                           | 1.4<br>(0.8 to 2.1)                     | 1.9<br>(-13.3 to 18.5)                            | 11.3<br>(-5.2 to 30.4)                              |
| Autistic spectrum disorders                                    | 72.3<br>(64.6 to 81.0)                        | 0.3<br>(0.2 to 0.4)                           | 10.7<br>(7.2 to 15.0)                   | -5.3<br>(-9.3 to -0.9)                            | 0.2<br>(-4.3 to 5.1)                                |
| Autism                                                         | 23.5<br>(20.1 to 27.5)                        | < 0.05<br>(< 0.05 to 0.1)                     | 5.9<br>(3.8 to 8.5)                     | -5.0<br>(-11.6 to 2.5)                            | 0.2<br>(-7.0 to 8.5)                                |
| Asperger syndrome and other autistic spectrum disorders        | 48.8<br>(40.6 to 58.4)                        | 0.3<br>(0.2 to 0.4)                           | 4.8<br>(3.1 to 7.1)                     | -5.6<br>(-9.7 to -1.1)                            | 0.2<br>(-4.4 to 5.2)                                |

| Cause                                                      | Prevalence in thousands (95% UI)              | Incidence in thousands (95% UI)                 | YLDs in thousands (95% UI)              |                                                   |                                                     |
|------------------------------------------------------------|-----------------------------------------------|-------------------------------------------------|-----------------------------------------|---------------------------------------------------|-----------------------------------------------------|
|                                                            | 2016 counts                                   | 2016 counts                                     | 2016 counts                             | Percentage change in counts between 2006 and 2016 | Percentage change in age-standardised rates between |
| Attention-deficit/hyperactivity disorder                   | 55.4<br>(50.1 to 61.7)                        | 1.9<br>(1.6 to 2.2)                             | 0.7<br>(0.4 to 1.1)                     | -11.1<br>(-17.5 to -3.8)                          | 0.1<br>(-7.5 to 8.1)                                |
| Conduct disorder                                           | 46.8<br>(38.7 to 55.6)                        | 15.2<br>(12.1 to 18.2)                          | 5.7<br>(3.5 to 8.8)                     | -15.5<br>(-20.8 to -10.0)                         | 0.2<br>(-6.2 to 6.8)                                |
| Idiopathic developmental intellectual disability           | 79.7<br>(41.8 to 117.0)                       | --                                              | 3.2<br>(1.4 to 5.6)                     | -11.7<br>(-17.4 to -6.0)                          | -6.8<br>(-13.0 to -0.9)                             |
| Other mental and substance use disorders                   | 194.2<br>(172.5 to 222.6)                     | 4.6<br>(4.1 to 5.2)                             | 14.2<br>(9.8 to 20.3)                   | -0.2<br>(-4.8 to 4.6)                             | 0.1<br>(-4.7 to 5.1)                                |
| <b>Diabetes, urogenital, blood, and endocrine diseases</b> | <b>2,854.8</b><br><b>(2,781.4 to 2,934.2)</b> | <b>1,001.6†</b><br><b>(951.3 to 1,057.0)</b>    | <b>91.2</b><br><b>(64.2 to 122.9)</b>   | <b>8.0</b><br><b>(3.2 to 13.0)</b>                | <b>2.0</b><br><b>(-2.2 to 6.1)</b>                  |
| Diabetes mellitus                                          | 547.5<br>(489.9 to 611.8)                     | 27.5<br>(24.3 to 30.8)                          | 48.0<br>(33.2 to 65.9)                  | 9.4<br>(0.5 to 18.1)                              | 1.8<br>(-6.3 to 9.6)                                |
| Acute glomerulonephritis                                   | 0.2<br>(0.1 to 0.2)                           | 2.3<br>(2.1 to 2.6)                             | < 0.05<br>(< 0.05 to < 0.05)            | -2.9<br>(-7.3 to 1.5)                             | 0.0<br>(-4.4 to 4.3)                                |
| Chronic kidney disease                                     | 311.7<br>(276.7 to 347.2)                     | 22.3<br>(19.2 to 25.4)                          | 11.7<br>(8.6 to 15.0)                   | 23.9<br>(14.0 to 34.9)                            | 10.2<br>(2.6 to 18.9)                               |
| Chronic kidney disease due to diabetes mellitus            | 91.1<br>(80.4 to 101.9)                       | 6.9<br>(5.8 to 7.9)                             | 3.5<br>(2.6 to 4.5)                     | 24.4<br>(9.4 to 40.6)                             | 12.6<br>(-0.7 to 26.4)                              |
| Chronic kidney disease due to hypertension                 | 67.5<br>(57.7 to 76.8)                        | 4.6<br>(4.0 to 5.2)                             | 2.5<br>(1.7 to 3.2)                     | 48.1<br>(28.2 to 71.9)                            | 21.3<br>(6.0 to 38.8)                               |
| Chronic kidney disease due to glomerulonephritis           | 62.9<br>(55.3 to 70.6)                        | 4.3<br>(3.5 to 5.3)                             | 2.4<br>(1.8 to 3.1)                     | 10.1<br>(-3.7 to 25.7)                            | 2.4<br>(-9.6 to 16.0)                               |
| Chronic kidney disease due to other causes                 | 90.3<br>(79.3 to 101.0)                       | 6.5<br>(5.6 to 7.4)                             | 3.4<br>(2.5 to 4.3)                     | 19.9<br>(5.8 to 37.3)                             | 7.5<br>(-4.0 to 21.6)                               |
| Urinary diseases and male infertility                      | 271.7<br>(244.0 to 301.9)                     | 585.1†<br>(539.8 to 636.8)                      | 8.2<br>(5.4 to 11.8)                    | 5.4<br>(-0.6 to 10.8)                             | -1.9<br>(-7.1 to 2.8)                               |
| Interstitial nephritis and urinary tract infections        | 7.8<br>(6.9 to 8.7)                           | 402.4<br>(359.4 to 450.4)                       | 0.3<br>(0.1 to 0.4)                     | -5.4<br>(-17.6 to 9.5)                            | 0.3<br>(-13.1 to 15.3)                              |
| Urolithiasis                                               | 5.9<br>(5.4 to 6.4)                           | 154.1<br>(142.6 to 166.8)                       | 0.4<br>(0.3 to 0.6)                     | 1.9<br>(-14.7 to 21.6)                            | -0.6<br>(-15.6 to 16.3)                             |
| Benign prostatic hyperplasia                               | 224.2<br>(190.4 to 262.6)                     | 28.6<br>(23.5 to 34.7)                          | 7.2<br>(4.7 to 10.5)                    | 7.3<br>(0.5 to 13.8)                              | -1.2<br>(-7.2 to 4.6)                               |
| Male infertility                                           | 24.7<br>(18.7 to 32.8)                        | --                                              | 0.1<br>(0.1 to 0.3)                     | -7.4<br>(-14.9 to 1.2)                            | -2.1<br>(-10.3 to 6.9)                              |
| Other urinary diseases                                     | --                                            | --                                              | 0.2<br>(0.1 to 0.3)                     | -18.7<br>(-28.2 to -8.6)                          | -17.8<br>(-26.5 to -8.6)                            |
| Gynecological diseases                                     | 913.5<br>(878.8 to 958.4)                     | 320.6†<br>(301.5 to 343.8)                      | 10.5<br>(7.1 to 15.0)                   | -5.8<br>(-9.7 to -1.6)                            | -1.0<br>(-5.1 to 3.4)                               |
| Uterine fibroids                                           | 85.3<br>(75.5 to 96.8)                        | 8.1<br>(7.1 to 9.4)                             | 1.2<br>(0.7 to 1.9)                     | -1.1<br>(-11.9 to 12.6)                           | 0.6<br>(-10.2 to 14.8)                              |
| Polycystic ovarian syndrome                                | 8.3<br>(6.2 to 10.9)                          | 3.9<br>(2.8 to 5.2)                             | 0.1<br>(< 0.05 to 0.1)                  | -5.3<br>(-15.0 to 5.2)                            | -1.0<br>(-11.1 to 10.1)                             |
| Female infertility                                         | 8.0<br>(2.8 to 18.7)                          | --                                              | < 0.05<br>(< 0.05 to 0.1)               | -2.1<br>(-27.6 to 35.2)                           | 6.8<br>(-21.1 to 47.8)                              |
| Endometriosis                                              | 3.6<br>(2.9 to 4.2)                           | 13.2<br>(10.5 to 16.0)                          | 0.3<br>(0.2 to 0.5)                     | -10.0<br>(-29.5 to 13.4)                          | -1.5<br>(-23.0 to 23.8)                             |
| Genital prolapse                                           | 250.2<br>(215.4 to 285.1)                     | 9.8<br>(8.4 to 11.2)                            | 0.8<br>(0.4 to 1.4)                     | 5.7<br>(-4.9 to 18.0)                             | -0.5<br>(-9.9 to 10.3)                              |
| Premenstrual syndrome                                      | 525.4<br>(495.9 to 557.0)                     | 181.5<br>(168.4 to 195.5)                       | 4.4<br>(2.7 to 6.8)                     | -6.8<br>(-12.8 to -0.2)                           | -1.3<br>(-7.5 to 5.7)                               |
| Other gynecological diseases                               | 110.0<br>(99.5 to 126.4)                      | 104.1<br>(92.2 to 124.5)                        | 3.7<br>(2.4 to 5.4)                     | -7.6<br>(-13.7 to -0.4)                           | -1.2<br>(-8.0 to 5.9)                               |
| Hemoglobinopathies and hemolytic anaemias                  | 1,126.3<br>(1,049.2 to 1,199.6)               | --                                              | 3.6<br>(2.1 to 5.4)                     | 6.0<br>(-7.8 to 22.3)                             | 3.2<br>(-10.0 to 19.6)                              |
| Thalassemias                                               | < 0.05<br>(< 0.05 to < 0.05)                  | --                                              | < 0.05<br>(< 0.05 to < 0.05)            | -20.1<br>(-34.3 to -1.6)                          | -6.1<br>(-23.2 to 17.2)                             |
| Thalassaemias trait                                        | 107.4<br>(76.0 to 145.7)                      | --                                              | 2.0<br>(1.1 to 3.2)                     | 15.4<br>(-3.4 to 39.7)                            | 8.8<br>(-8.8 to 31.1)                               |
| Sickle cell disorders                                      | 0.1<br>(0.1 to 0.1)                           | --                                              | < 0.05<br>(< 0.05 to < 0.05)            | -6.8<br>(-13.4 to 0.2)                            | 4.0<br>(-4.5 to 12.5)                               |
| Sickle cell trait                                          | 116.8<br>(113.4 to 120.4)                     | --                                              | 0.4<br>(0.2 to 0.6)                     | -0.8<br>(-18.6 to 23.4)                           | -4.0<br>(-20.9 to 18.7)                             |
| G6PD deficiency                                            | 165.9<br>(143.0 to 191.5)                     | --                                              | < 0.05<br>(< 0.05 to < 0.05)            | -2.8<br>(-22.1 to 19.0)                           | 2.2<br>(-21.1 to 31.2)                              |
| G6PD trait                                                 | 685.3<br>(622.2 to 752.9)                     | --                                              | < 0.05<br>(< 0.05 to < 0.05)            | 30.5<br>(-1.9 to 69.6)                            | 32.2<br>(-2.2 to 74.4)                              |
| Other hemoglobinopathies and hemolytic anaemias            | 78.2<br>(70.1 to 85.9)                        | --                                              | 1.1<br>(0.7 to 1.7)                     | -4.9<br>(-17.7 to 10.2)                           | -2.2<br>(-16.4 to 13.1)                             |
| Endocrine, metabolic, blood, and immune disorders          | 289.2<br>(265.6 to 313.5)                     | 43.7<br>(38.7 to 49.2)                          | 9.2<br>(6.1 to 12.7)                    | 4.6<br>(-1.1 to 10.3)                             | 1.7<br>(-3.5 to 6.9)                                |
| <b>Musculoskeletal disorders</b>                           | <b>2,050.7</b><br><b>(1,955.4 to 2,161.8)</b> | <b>880.5</b><br><b>(779.4 to 990.0)</b>         | <b>239.9</b><br><b>(174.0 to 314.1)</b> | <b>2.6</b><br><b>(-0.1 to 5.6)</b>                | <b>-1.2</b><br><b>(-3.5 to 1.3)</b>                 |
| Rheumatoid arthritis                                       | 41.6<br>(37.3 to 46.9)                        | 2.0<br>(1.7 to 2.2)                             | 9.6<br>(6.6 to 12.7)                    | 10.5<br>(2.0 to 19.3)                             | 4.1<br>(-3.7 to 11.9)                               |
| Osteoarthritis                                             | 597.0<br>(559.0 to 636.8)                     | 25.2<br>(23.3 to 27.2)                          | 36.1<br>(25.7 to 48.8)                  | 13.5<br>(9.8 to 17.5)                             | 4.6<br>(1.2 to 8.3)                                 |
| Low back and neck pain                                     | 1,547.5<br>(1,445.6 to 1,666.0)               | 753.6<br>(659.7 to 857.1)                       | 184.3<br>(130.7 to 242.1)               | 0.9<br>(-2.5 to 4.6)                              | -1.9<br>(-4.9 to 1.1)                               |
| Low back pain                                              | 1,289.2<br>(1,147.1 to 1,439.7)               | 666.5<br>(572.2 to 771.5)                       | 143.8<br>(102.8 to 189.1)               | 0.6<br>(-3.7 to 5.3)                              | -2.5<br>(-6.1 to 1.4)                               |
| Neck pain                                                  | 413.7<br>(356.9 to 480.2)                     | 87.0<br>(75.5 to 101.9)                         | 40.6<br>(27.8 to 57.2)                  | 2.2<br>(-0.5 to 5.4)                              | -0.1<br>(-2.1 to 2.1)                               |
| Gout                                                       | 46.3<br>(40.7 to 52.4)                        | 9.0<br>(7.8 to 10.3)                            | 1.4<br>(1.0 to 2.0)                     | 7.5<br>(-6.8 to 25.1)                             | 0.5<br>(-13.0 to 16.7)                              |
| Other musculoskeletal disorders                            | 100.5<br>(78.7 to 130.1)                      | 90.7<br>(67.8 to 125.1)                         | 8.5<br>(5.3 to 12.5)                    | -8.8<br>(-21.5 to 4.7)                            | -9.1<br>(-22.3 to 5.0)                              |
| <b>Other non-communicable diseases</b>                     | <b>6,944.5</b><br><b>(6,822.5 to 7,066.6)</b> | <b>2,170.9†</b><br><b>(2,027.3 to 23,108.3)</b> | <b>221.0</b><br><b>(153.6 to 309.9)</b> | <b>2.2</b><br><b>(0.9 to 3.5)</b>                 | <b>-0.7</b><br><b>(-1.9 to 0.5)</b>                 |
| Congenital anomalies                                       | 129.6<br>(120.2 to 138.9)                     | --                                              | 15.7<br>(11.5 to 20.4)                  | -4.8<br>(-9.3 to 0.1)                             | 0.3<br>(-4.4 to 5.4)                                |
| Neural tube defects                                        | 13.0<br>(11.7 to 14.4)                        | --                                              | 3.8<br>(2.7 to 5.1)                     | -5.0<br>(-14.0 to 5.3)                            | -0.8<br>(-10.2 to 9.6)                              |
| Congenital heart anomalies                                 | 30.4<br>(27.2 to 34.3)                        | --                                              | 1.6<br>(0.7 to 2.7)                     | -2.4<br>(-11.5 to 6.7)                            | 3.6<br>(-7.0 to 13.7)                               |
| Orofacial clefts                                           | 2.6<br>(2.3 to 3.0)                           | --                                              | < 0.05<br>(< 0.05 to < 0.05)            | -8.7<br>(-18.9 to 2.5)                            | -4.6<br>(-15.0 to 6.7)                              |
| Down's syndrome                                            | 6.2<br>(5.5 to 6.9)                           | --                                              | 0.6<br>(0.4 to 0.8)                     | -6.8<br>(-16.5 to 3.6)                            | -0.3<br>(-11.4 to 11.4)                             |
| Turner syndrome                                            | 6.7<br>(5.8 to 7.7)                           | --                                              | 0.1<br>(0.1 to 0.2)                     | -8.2<br>(-27.3 to 16.3)                           | -0.5<br>(-21.1 to 27.0)                             |
| Klinefelter syndrome                                       | 6.9<br>(5.8 to 8.0)                           | --                                              | < 0.05<br>(< 0.05 to 0.1)               | -5.9<br>(-23.1 to 12.7)                           | 3.2<br>(-15.2 to 23.5)                              |



| Cause                                         | Prevalence in thousands (95% UI)              | Incidence in thousands (95% UI)                | YLDs in thousands (95% UI)             |                                                   |                                                     |
|-----------------------------------------------|-----------------------------------------------|------------------------------------------------|----------------------------------------|---------------------------------------------------|-----------------------------------------------------|
|                                               | 2016 counts                                   | 2016 counts                                    | 2016 counts                            | Percentage change in counts between 2006 and 2016 | Percentage change in age-standardised rates between |
| Other chromosomal abnormalities               | 7.4<br>(6.4 to 8.6)                           | --                                             | 0.9<br>(0.6 to 1.3)                    | -13.8<br>(-26.9 to 0.9)                           | 2.3<br>(-12.9 to 20.3)                              |
| Congenital musculoskeletal and limb anomalies | 25.2<br>(22.9 to 27.7)                        | --                                             | 3.4<br>(2.3 to 4.7)                    | -4.0<br>(-12.4 to 5.4)                            | -0.8<br>(-9.3 to 8.8)                               |
| Urogenital congenital anomalies               | 13.6<br>(12.1 to 15.1)                        | --                                             | 0.3<br>(0.1 to 0.4)                    | -7.3<br>(-14.2 to -0.7)                           | 1.8<br>(-5.8 to 9.3)                                |
| Digestive congenital anomalies                | 16.8<br>(14.9 to 18.8)                        | --                                             | 0.8<br>(0.5 to 1.1)                    | -4.4<br>(-15.4 to 8.4)                            | -0.2<br>(-12.2 to 13.6)                             |
| Other congenital anomalies                    | 25.2<br>(15.9 to 37.8)                        | --                                             | 4.2<br>(2.8 to 5.9)                    | -3.5<br>(-11.3 to 5.0)                            | 0.2<br>(-8.0 to 9.3)                                |
| Skin and subcutaneous diseases                | 2,624.2<br>(2,551.8 to 2,695.7)               | 6,604.4<br>(6,157.4 to 7,050.7)                | 55.9<br>(37.7 to 81.7)                 | -4.6<br>(-6.5 to -2.7)                            | 1.1<br>(-0.8 to 3.1)                                |
| Dermatitis                                    | 286.8<br>(269.9 to 305.8)                     | 410.7<br>(376.1 to 448.5)                      | 10.3<br>(6.3 to 16.2)                  | -5.6<br>(-9.8 to -1.4)                            | 0.6<br>(-4.1 to 5.3)                                |
| Psoriasis                                     | 95.2<br>(90.3 to 99.8)                        | 12.4<br>(11.8 to 13.0)                         | 8.1<br>(5.9 to 10.6)                   | 2.4<br>(-4.6 to 9.6)                              | 3.5<br>(-3.5 to 10.9)                               |
| Cellulitis                                    | 3.8<br>(3.5 to 4.0)                           | 73.6<br>(69.4 to 78.0)                         | 0.2<br>(0.1 to 0.3)                    | -0.7<br>(-19.2 to 22.1)                           | 1.5<br>(-17.4 to 25.6)                              |
| Pyoderma                                      | 36.2<br>(35.0 to 37.4)                        | 836.8<br>(804.0 to 870.5)                      | 0.2<br>(0.1 to 0.4)                    | 4.6<br>(-1.0 to 11.0)                             | 0.6<br>(-4.8 to 6.5)                                |
| Scabies                                       | 62.1<br>(55.0 to 70.1)                        | 187.7<br>(165.6 to 212.5)                      | 1.6<br>(0.9 to 2.5)                    | -9.4<br>(-13.3 to -5.3)                           | -2.1<br>(-6.2 to 2.5)                               |
| Fungal skin diseases                          | 866.0<br>(771.7 to 963.2)                     | 3,270.2<br>(2,860.8 to 3,723.0)                | 4.8<br>(1.9 to 9.9)                    | 2.3<br>(0.6 to 4.0)                               | 0.0<br>(-1.1 to 1.1)                                |
| Viral skin diseases                           | 198.2<br>(190.3 to 206.8)                     | 298.4<br>(286.1 to 311.3)                      | 6.0<br>(3.7 to 8.8)                    | -7.7<br>(-10.5 to -4.5)                           | -0.2<br>(-3.3 to 3.2)                               |
| Acne vulgaris                                 | 541.0<br>(489.0 to 601.4)                     | 349.4<br>(293.2 to 424.9)                      | 14.0<br>(9.3 to 20.2)                  | -10.5<br>(-14.5 to -6.3)                          | 1.3<br>(-3.3 to 6.2)                                |
| Alopecia areata                               | 16.8<br>(16.1 to 17.4)                        | 29.4<br>(28.3 to 30.6)                         | 0.5<br>(0.4 to 0.8)                    | -4.1<br>(-13.9 to 6.8)                            | -0.2<br>(-10.2 to 10.8)                             |
| Pruritus                                      | 92.9<br>(81.8 to 105.5)                       | 73.1<br>(64.9 to 82.8)                         | 1.0<br>(0.5 to 1.8)                    | 1.5<br>(-3.8 to 7.5)                              | 1.2<br>(-4.0 to 6.7)                                |
| Urticaria                                     | 76.1<br>(67.6 to 85.5)                        | 134.6<br>(118.9 to 152.8)                      | 4.5<br>(2.9 to 6.5)                    | -7.7<br>(-12.3 to -2.9)                           | 0.0<br>(-4.5 to 4.8)                                |
| Decubitus ulcer                               | 3.2<br>(2.8 to 3.6)                           | 11.3<br>(9.9 to 12.9)                          | 0.5<br>(0.3 to 0.7)                    | 14.6<br>(-4.2 to 36.1)                            | 3.5<br>(-10.8 to 19.3)                              |
| Other skin and subcutaneous diseases          | 774.3<br>(751.4 to 798.8)                     | 916.8<br>(884.8 to 950.4)                      | 4.2<br>(2.0 to 7.6)                    | 6.8<br>(4.4 to 9.3)                               | 4.1<br>(1.8 to 6.4)                                 |
| Sense organ diseases                          | 3,005.9<br>(2,913.5 to 3,106.8)               | 950.4†<br>(899.4 to 1,006.2)                   | 112.5<br>(78.0 to 158.7)               | 5.7<br>(3.2 to 8.0)                               | -2.3<br>(-4.4 to -0.2)                              |
| Glaucoma                                      | 9.6<br>(7.8 to 11.7)                          | --                                             | 0.7<br>(0.5 to 0.9)                    | 14.8<br>(1.1 to 32.4)                             | 0.1<br>(-11.8 to 15.3)                              |
| Cataract                                      | 168.3<br>(140.5 to 197.1)                     | --                                             | 7.8<br>(5.4 to 11.0)                   | 10.7<br>(4.8 to 17.4)                             | -4.6<br>(-9.2 to 0.6)                               |
| Macular degeneration                          | 5.8<br>(4.5 to 7.2)                           | --                                             | 0.3<br>(0.2 to 0.4)                    | 18.3<br>(1.5 to 38.9)                             | 2.0<br>(-11.9 to 19.3)                              |
| Refraction and accommodation disorders        | 1,398.2<br>(1,202.3 to 1,638.3)               | --                                             | 23.4<br>(14.1 to 37.2)                 | 1.5<br>(-6.2 to 9.7)                              | -3.0<br>(-9.8 to 4.0)                               |
| Age-related and other hearing loss            | 2,310.5<br>(2,219.3 to 2,408.6)               | --                                             | 66.1<br>(46.5 to 92.0)                 | 6.2<br>(3.6 to 8.8)                               | -2.5<br>(-4.8 to -0.3)                              |
| Other vision loss                             | 60.0<br>(51.7 to 69.6)                        | --                                             | 3.2<br>(2.2 to 4.5)                    | 9.9<br>(2.1 to 18.5)                              | 0.2<br>(-6.3 to 7.5)                                |
| Other sense organ diseases                    | 359.9<br>(331.3 to 390.2)                     | 950.4<br>(899.4 to 1,006.2)                    | 11.1<br>(7.0 to 16.7)                  | 6.3<br>(2.5 to 10.5)                              | 0.4<br>(-3.4 to 4.2)                                |
| Oral disorders                                | 5,239.6<br>(5,044.8 to 5,436.9)               | 14,154.2†<br>(12,868.9 to 15,465.6)            | 37.0<br>(23.4 to 54.6)                 | 6.1<br>(3.8 to 8.9)                               | 0.1<br>(-1.8 to 2.2)                                |
| Caries of deciduous teeth                     | 455.9<br>(389.9 to 529.4)                     | 1,784.6<br>(1,412.4 to 2,255.1)                | 0.1<br>( $< 0.05$ to 0.2)              | -21.9<br>(-30.3 to -13.5)                         | -5.6<br>(-15.7 to 4.5)                              |
| Caries of permanent teeth                     | 3,894.0<br>(3,583.7 to 4,222.3)               | 12,176.9<br>(10,883.3 to 13,356.9)             | 2.3<br>(1.0 to 4.4)                    | -5.5<br>(-9.4 to -1.9)                            | -3.2<br>(-7.1 to 0.4)                               |
| Periodontal disease                           | 1,010.4<br>(833.6 to 1,205.3)                 | 128.1<br>(97.5 to 157.8)                       | 6.5<br>(2.6 to 13.5)                   | 3.4<br>(-0.3 to 7.1)                              | -0.3<br>(-3.4 to 3.1)                               |
| Edentulism and severe tooth loss              | 844.3<br>(736.3 to 955.5)                     | 64.7<br>(54.4 to 76.9)                         | 23.0<br>(15.0 to 32.2)                 | 10.5<br>(7.0 to 14.1)                             | 0.9<br>(-2.1 to 4.2)                                |
| Other oral disorders                          | 175.8<br>(168.6 to 183.3)                     | --                                             | 5.1<br>(3.2 to 7.6)                    | -2.1<br>(-5.0 to 0.6)                             | -0.0<br>(-3.1 to 3.1)                               |
| <b>Injuries</b>                               | <b>4,132.7</b><br><b>(3,836.3 to 4,522.0)</b> | <b>1,314.2†</b><br><b>(1,222.3 to 1,412.0)</b> | <b>141.2</b><br><b>(95.3 to 199.9)</b> | <b>8.9</b><br><b>(5.9 to 11.6)</b>                | <b>5.3</b><br><b>(2.2 to 7.8)</b>                   |
| <b>Transport injuries</b>                     | <b>507.8</b><br><b>(468.0 to 550.3)</b>       | <b>129.2</b><br><b>(117.0 to 142.8)</b>        | <b>24.0</b><br><b>(15.9 to 34.6)</b>   | <b>11.5</b><br><b>(9.1 to 13.5)</b>               | <b>9.1</b><br><b>(6.9 to 11.1)</b>                  |
| Road injuries                                 | 486.5<br>(447.5 to 527.6)                     | 125.6<br>(113.5 to 139.1)                      | 23.1<br>(15.3 to 33.2)                 | 12.1<br>(9.7 to 14.1)                             | 9.7<br>(7.4 to 11.6)                                |
| Pedestrian road injuries                      | 89.9<br>(78.2 to 104.2)                       | 17.1<br>(14.6 to 20.1)                         | 4.1<br>(2.7 to 6.0)                    | 6.7<br>(4.2 to 8.8)                               | 4.0<br>(1.5 to 6.0)                                 |
| Cyclist road injuries                         | 130.8<br>(109.7 to 153.7)                     | 37.3<br>(31.4 to 43.3)                         | 5.8<br>(3.9 to 8.4)                    | 12.2<br>(9.6 to 14.5)                             | 9.6<br>(7.2 to 11.8)                                |
| Motorcyclist road injuries                    | 62.1<br>(52.4 to 77.2)                        | 10.1<br>(8.2 to 12.3)                          | 2.8<br>(1.8 to 4.0)                    | 6.5<br>(4.1 to 8.7)                               | 4.8<br>(2.4 to 6.9)                                 |
| Motor vehicle road injuries                   | 186.9<br>(155.0 to 217.4)                     | 55.9<br>(49.0 to 63.1)                         | 9.6<br>(6.5 to 13.6)                   | 17.0<br>(14.7 to 19.0)                            | 14.8<br>(12.5 to 16.7)                              |
| Other road injuries                           | 16.7<br>(14.4 to 19.6)                        | 5.3<br>(4.1 to 6.8)                            | 0.7<br>(0.5 to 1.1)                    | 2.7<br>(0.5 to 4.7)                               | -0.1<br>(-2.3 to 1.8)                               |
| Other transport injuries                      | 21.4<br>(18.3 to 24.7)                        | 3.6<br>(3.1 to 4.0)                            | 0.9<br>(0.6 to 1.3)                    | -1.0<br>(-4.0 to 1.8)                             | -2.1<br>(-5.0 to 0.6)                               |
| <b>Unintentional injuries</b>                 | <b>3,291.0</b><br><b>(3,024.2 to 3,656.7)</b> | <b>1,140.5</b><br><b>(1,052.6 to 1,239.8)</b>  | <b>107.3</b><br><b>(73.6 to 149.6)</b> | <b>10.7</b><br><b>(8.1 to 13.0)</b>               | <b>7.0</b><br><b>(4.3 to 9.2)</b>                   |
| Falls                                         | 1,999.1<br>(1,769.9 to 2,305.1)               | 743.6<br>(662.4 to 840.4)                      | 76.0<br>(53.4 to 103.3)                | 12.1<br>(9.5 to 14.4)                             | 7.1<br>(4.5 to 9.3)                                 |
| Drowning                                      | 3.6<br>(3.2 to 4.1)                           | 0.5<br>(0.4 to 0.5)                            | 0.1<br>(0.1 to 0.2)                    | -3.4<br>(-7.8 to 0.2)                             | -4.3<br>(-8.7 to -0.8)                              |
| Fire, heat, and hot substances                | 157.7<br>(135.6 to 187.1)                     | 14.5<br>(12.2 to 16.7)                         | 3.5<br>(2.2 to 5.4)                    | 6.4<br>(1.1 to 10.2)                              | 5.7<br>(0.2 to 9.6)                                 |
| Poisonings                                    | 7.8<br>(6.5 to 9.2)                           | 7.4<br>(5.8 to 9.0)                            | 0.6<br>(0.4 to 0.9)                    | 33.3<br>(24.2 to 43.1)                            | 36.4<br>(26.8 to 46.9)                              |
| Exposure to mechanical forces                 | 709.4<br>(605.5 to 875.2)                     | 205.0<br>(179.8 to 233.3)                      | 15.2<br>(9.9 to 22.2)                  | 7.1<br>(4.2 to 9.5)                               | 5.3<br>(2.6 to 7.6)                                 |
| Unintentional firearm injuries                | 7.1<br>(5.9 to 8.4)                           | 1.3<br>(0.9 to 1.7)                            | 0.3<br>(0.2 to 0.4)                    | -8.7<br>(-11.0 to -6.7)                           | -9.9<br>(-12.3 to -8.0)                             |
| Unintentional suffocation                     | 7.5<br>(6.0 to 9.1)                           | 1.0<br>(0.7 to 1.3)                            | 0.2<br>(0.1 to 0.4)                    | -1.2<br>(-4.3 to 1.6)                             | -0.4<br>(-3.9 to 2.4)                               |
| Other exposure to mechanical forces           | 694.9<br>(590.3 to 860.8)                     | 202.8<br>(177.9 to 230.9)                      | 14.7<br>(9.6 to 21.4)                  | 7.5<br>(4.7 to 10.0)                              | 5.7<br>(3.0 to 8.0)                                 |



| Cause                                                                               | Prevalence in thousands (95% UI)        | Incidence in thousands (95% UI)       | YLDs in thousands (95% UI)         |                                                   |                                                     |
|-------------------------------------------------------------------------------------|-----------------------------------------|---------------------------------------|------------------------------------|---------------------------------------------------|-----------------------------------------------------|
|                                                                                     | 2016 counts                             | 2016 counts                           | 2016 counts                        | Percentage change in counts between 2006 and 2016 | Percentage change in age-standardised rates between |
| Adverse effects of medical treatment                                                | 1.8<br>(1.4 to 2.2)                     | 23.8<br>(21.0 to 26.8)                | 0.2<br>(0.1 to 0.4)                | 7.4<br>(2.3 to 12.4)                              | 3.7<br>(-0.4 to 8.3)                                |
| Animal contact                                                                      | 39.8<br>(35.0 to 46.3)                  | 34.1<br>(28.4 to 41.3)                | 1.1<br>(0.7 to 1.6)                | -12.2<br>(-16.3 to -8.0)                          | -10.8<br>(-15.4 to -6.0)                            |
| Venomous animal contact                                                             | 14.3<br>(12.0 to 17.4)                  | 13.2<br>(10.1 to 16.9)                | 0.7<br>(0.5 to 1.1)                | -9.9<br>(-15.9 to -3.6)                           | -7.4<br>(-13.8 to -0.5)                             |
| Non-venomous animal contact                                                         | 25.5<br>(21.6 to 31.3)                  | 20.9<br>(16.9 to 25.6)                | 0.4<br>(0.2 to 0.6)                | -16.7<br>(-19.6 to -14.2)                         | -17.9<br>(-20.9 to -15.6)                           |
| Foreign body                                                                        | 69.9<br>(59.8 to 80.0)                  | 42.8<br>(36.6 to 50.7)                | 2.2<br>(1.4 to 3.4)                | -0.8<br>(-4.0 to 2.0)                             | -1.2<br>(-4.7 to 1.7)                               |
| Pulmonary aspiration and foreign body in airway                                     | 36.3<br>(29.1 to 45.0)                  | 9.4<br>(8.1 to 11.1)                  | 1.3<br>(0.8 to 1.9)                | -0.5<br>(-3.9 to 2.7)                             | -0.9<br>(-4.4 to 2.2)                               |
| Foreign body in eyes                                                                | 5.8<br>(3.7 to 8.1)                     | 25.4<br>(19.7 to 33.1)                | 0.3<br>(0.2 to 0.5)                | 6.0<br>(2.7 to 10.3)                              | 6.1<br>(3.0 to 10.0)                                |
| Foreign body in other body part                                                     | 27.8<br>(23.3 to 34.3)                  | 8.0<br>(6.7 to 9.4)                   | 0.7<br>(0.4 to 1.0)                | -4.2<br>(-8.2 to -0.4)                            | -5.1<br>(-9.3 to -1.4)                              |
| Environmental heat and cold exposure                                                | 74.0<br>(63.1 to 88.0)                  | 13.5<br>(11.3 to 15.9)                | 2.3<br>(1.5 to 3.4)                | 5.5<br>(2.2 to 8.4)                               | 4.6<br>(1.4 to 7.3)                                 |
| Other unintentional injuries                                                        | 227.9<br>(185.2 to 275.8)               | 55.4<br>(47.3 to 64.2)                | 6.0<br>(3.9 to 8.8)                | 16.6<br>(14.0 to 18.8)                            | 16.6<br>(13.8 to 18.9)                              |
| <b>Self-harm and interpersonal violence</b>                                         | <b>248.9</b><br><b>(228.1 to 270.1)</b> | <b>44.4†</b><br><b>(39.6 to 49.8)</b> | <b>5.3</b><br><b>(3.5 to 7.5)</b>  | <b>-4.2</b><br><b>(-6.1 to -2.4)</b>              | <b>-3.9</b><br><b>(-5.7 to -2.2)</b>                |
| Self-harm                                                                           | 24.9<br>(21.1 to 28.7)                  | 9.1<br>(8.0 to 10.4)                  | 0.9<br>(0.6 to 1.4)                | -2.0<br>(-5.1 to 1.1)                             | -4.4<br>(-7.4 to -1.5)                              |
| Self-harm by firearm                                                                | 0.8<br>(0.7 to 0.9)                     | 0.2<br>(0.1 to 0.4)                   | < 0.05<br>(< 0.05 to < 0.05)       | -32.7<br>(-35.4 to -30.2)                         | -32.6<br>(-35.0 to -30.3)                           |
| Self-harm by other specified means                                                  | 24.1<br>(20.2 to 27.9)                  | 8.9<br>(7.8 to 10.1)                  | 0.9<br>(0.6 to 1.3)                | -0.8<br>(-4.0 to 2.5)                             | -3.2<br>(-6.4 to -0.3)                              |
| Interpersonal violence                                                              | 224.1<br>(203.8 to 245.5)               | 35.2†<br>(30.6 to 40.8)               | 4.3<br>(3.0 to 6.1)                | -4.6<br>(-6.5 to -3.0)                            | -3.8<br>(-5.7 to -2.2)                              |
| Assault by firearm                                                                  | 2.1<br>(1.9 to 2.5)                     | 0.5<br>(0.3 to 0.6)                   | 0.1<br>(0.1 to 0.1)                | -13.4<br>(-15.7 to -11.1)                         | -13.7<br>(-16.0 to -11.4)                           |
| Assault by sharp object                                                             | 16.7<br>(13.8 to 19.9)                  | 4.1<br>(3.1 to 5.4)                   | 0.4<br>(0.3 to 0.6)                | -1.9<br>(-4.8 to 0.9)                             | -2.1<br>(-5.0 to 0.6)                               |
| Sexual violence                                                                     | 121.9<br>(107.9 to 138.0)               | --                                    | 1.0<br>(0.7 to 1.4)                | -10.5<br>(-13.9 to -7.4)                          | -4.7<br>(-8.3 to -1.2)                              |
| Assault by other means                                                              | 83.4<br>(69.0 to 101.4)                 | 30.7<br>(26.4 to 35.5)                | 2.9<br>(1.9 to 4.2)                | -2.6<br>(-4.7 to -0.7)                            | -3.4<br>(-5.5 to -1.5)                              |
| <b>Forces of nature, conflict and terrorism, and executions and police conflict</b> | <b>206.8</b><br><b>(117.3 to 327.6)</b> | <b>0.1†</b><br><b>(0.1 to 0.2)</b>    | <b>4.7</b><br><b>(1.3 to 11.8)</b> | <b>-18.4</b><br><b>(-24.3 to -13.7)</b>           | <b>-23.8</b><br><b>(-29.7 to -18.9)</b>             |
| Exposure to forces of nature                                                        | 1.4<br>(0.7 to 2.4)                     | --                                    | < 0.05<br>(< 0.05 to 0.1)          | -15.2<br>(-51.6 to 9.2)                           | -18.8<br>(-56.0 to 6.8)                             |
| Conflict and terrorism                                                              | 204.8<br>(115.4 to 325.7)               | --                                    | 4.6<br>(1.3 to 11.6)               | -18.5<br>(-24.3 to -13.9)                         | -23.9<br>(-29.7 to -19.0)                           |
| Executions and police conflict                                                      | 0.5<br>(0.3 to 0.8)                     | 0.1<br>(0.1 to 0.2)                   | < 0.05<br>(< 0.05 to < 0.05)       | 13.2<br>(5.3 to 18.5)                             | 15.8<br>(9.2 to 20.9)                               |
| <b>Impairments</b>                                                                  | --                                      | --                                    | --                                 | --                                                | --                                                  |
| Anaemia                                                                             | 1,843.9<br>(1,642.3 to 2,028.1)         | --                                    | 39.1<br>(25.4 to 56.5)             | 0.9<br>(-9.8 to 13.3)                             | 1.1<br>(-9.7 to 13.2)                               |
| Developmental intellectual disability                                               | 176.8<br>(140.6 to 214.2)               | --                                    | 19.1<br>(14.1 to 24.7)             | -11.2<br>(-15.1 to -7.1)                          | -5.7<br>(-10.0 to -1.3)                             |
| Epilepsy                                                                            | 52.0<br>(24.7 to 83.5)                  | --                                    | 15.4<br>(7.2 to 29.3)              | -10.5<br>(-61.5 to 110.2)                         | -6.7<br>(-59.2 to 114.3)                            |
| Guillain-Barre syndrome                                                             | 0.1<br>(0.1 to 0.1)                     | --                                    | < 0.05<br>(< 0.05 to < 0.05)       | 0.2<br>(-2.6 to 3.0)                              | 0.0<br>(0.0 to 0.1)                                 |
| Hearing loss                                                                        | 2,406.7<br>(2,316.3 to 2,499.9)         | --                                    | 70.8<br>(49.7 to 97.2)             | 4.6<br>(2.3 to 7.0)                               | -3.0<br>(-5.2 to -1.2)                              |
| Heart failure                                                                       | 183.9<br>(159.1 to 210.9)               | --                                    | 17.0<br>(12.3 to 22.4)             | 7.2<br>(-0.4 to 15.2)                             | -5.7<br>(-11.8 to 0.8)                              |
| Infertility                                                                         | 92.2<br>(72.3 to 118.9)                 | --                                    | 0.6<br>(0.3 to 1.2)                | -5.3<br>(-11.5 to 1.0)                            | -0.3<br>(-6.8 to 6.4)                               |
| Pelvic inflammatory disease                                                         | 3.1<br>(2.7 to 3.6)                     | --                                    | 0.4<br>(0.3 to 0.6)                | -14.7<br>(-28.6 to 1.5)                           | -10.4<br>(-25.6 to 6.7)                             |
| Vision loss                                                                         | 1,660.1<br>(1,453.0 to 1,904.1)         | --                                    | 38.8<br>(26.4 to 56.9)             | 1.7<br>(-3.7 to 7.4)                              | -4.8<br>(-9.5 to 0.0)                               |

We did not calculate incidence for the nine impairments, certain NTDs, and causes with only birth prevalence. Blank cells mean that no estimate is available.

† Incidence for aggregate causes represents the sum of the incidence of the causes below the aggregate.

‡ Incidence estimates for stroke represent first-ever stroke only.

^ Incidence of HIV/AIDS represents new infections of HIV only and does not include new infections of Tuberculosis in HIV positive cases.

SR Table 14: Prevalence, incidence, and YLDs for 2016, percentage change of YLD counts and percentage change of age-standardised YLD rates between 2006 and 2016 by cause and impairments, for all ages, Seychelles.

| Cause                                                                                | Prevalence in thousands (95% UI)            | Incidence in thousands (95% UI)                  | YLDs in thousands (95% UI)                      |                                                   |                                                     |
|--------------------------------------------------------------------------------------|---------------------------------------------|--------------------------------------------------|-------------------------------------------------|---------------------------------------------------|-----------------------------------------------------|
|                                                                                      | 2016 counts                                 | 2016 counts                                      | 2016 counts                                     | Percentage change in counts between 2006 and 2016 | Percentage change in age-standardised rates between |
| <b>All causes</b>                                                                    | <b>94.7</b><br>(94.4 to 95.1)               | <b>536.3†</b><br>(506.1 to 570.2)                | <b>9.8</b><br>(7.3 to 12.7)                     | <b>14.2</b><br>(11.4 to 17.2)                     | <b>-0.2</b><br>(-2.5 to 2.1)                        |
| <b>Communicable, maternal, neonatal, and nutritional disorders</b>                   | <b>79.3</b><br>(76.7 to 82.1)               | <b>297.3†</b><br>(271.2 to 325.4)                | <b>1.0</b><br>(0.7 to 1.4)                      | <b>5.6</b><br>(-5.6 to 17.5)                      | <b>-1.6</b><br>(-12.0 to 9.7)                       |
| <b>HIV/AIDS and tuberculosis</b>                                                     | <b>35.5</b><br>(30.0 to 40.6)               | <b>&lt; 0.05†</b><br>( <b>&lt; 0.05 to 0.1</b> ) | <b>&lt; 0.05</b><br>( <b>&lt; 0.05 to 0.1</b> ) | <b>34.1</b><br>(12.3 to 55.9)                     | <b>17.2</b><br>(-1.5 to 37.1)                       |
| Tuberculosis                                                                         | 31.7<br>(26.2 to 37.9)                      | < 0.05†<br>( <b>&lt; 0.05 to &lt; 0.05</b> )     | < 0.05<br>( <b>&lt; 0.05 to &lt; 0.05</b> )     | 1.2<br>(-14.8 to 19.4)                            | -12.6<br>(-24.5 to 1.9)                             |
| Drug-susceptible tuberculosis                                                        | 0.1<br>( <b>&lt; 0.05 to 0.1</b> )          | < 0.05<br>( <b>&lt; 0.05 to &lt; 0.05</b> )      | < 0.05<br>( <b>&lt; 0.05 to &lt; 0.05</b> )     | 1.2<br>(-14.8 to 19.4)                            | -12.6<br>(-24.6 to 2.0)                             |
| Multidrug-resistant tuberculosis without extensive drug resistance                   | < 0.05<br>( <b>&lt; 0.05 to &lt; 0.05</b> ) | < 0.05<br>( <b>&lt; 0.05 to &lt; 0.05</b> )      | < 0.05<br>( <b>&lt; 0.05 to &lt; 0.05</b> )     | -10.4<br>(-89.7 to 598.6)                         | -22.9<br>(-91.2 to 461.4)                           |
| Extensively drug-resistant tuberculosis                                              | < 0.05<br>( <b>&lt; 0.05 to &lt; 0.05</b> ) | < 0.05<br>( <b>&lt; 0.05 to &lt; 0.05</b> )      | < 0.05<br>( <b>&lt; 0.05 to &lt; 0.05</b> )     | 195.0<br>(-66.0 to 2,200.1)                       | 153.6<br>(-71.2 to 1,748.3)                         |
| Latent tuberculosis infection                                                        | 31.7<br>(26.1 to 37.8)                      | --                                               | --                                              | --                                                | --                                                  |
| HIV/AIDS                                                                             | 0.1<br>(0.1 to 0.2)                         | < 0.05^<br>( <b>&lt; 0.05 to &lt; 0.05</b> )     | < 0.05<br>( <b>&lt; 0.05 to &lt; 0.05</b> )     | 88.4<br>(63.0 to 118.9)                           | 72.3<br>(50.2 to 101.0)                             |
| Drug-susceptible HIV/AIDS - Tuberculosis                                             | < 0.05<br>( <b>&lt; 0.05 to &lt; 0.05</b> ) | < 0.05<br>( <b>&lt; 0.05 to &lt; 0.05</b> )      | < 0.05<br>( <b>&lt; 0.05 to &lt; 0.05</b> )     | 37.4<br>(12.3 to 71.5)                            | 32.2<br>(6.4 to 65.5)                               |
| Multidrug-resistant HIV/AIDS - Tuberculosis without extensive drug resistance        | < 0.05<br>( <b>&lt; 0.05 to &lt; 0.05</b> ) | < 0.05<br>( <b>&lt; 0.05 to &lt; 0.05</b> )      | < 0.05<br>( <b>&lt; 0.05 to &lt; 0.05</b> )     | 20.8<br>(-86.1 to 841.2)                          | 16.1<br>(-86.6 to 806.7)                            |
| Extensively drug-resistant HIV/AIDS - Tuberculosis                                   | < 0.05<br>( <b>&lt; 0.05 to &lt; 0.05</b> ) | < 0.05<br>( <b>&lt; 0.05 to &lt; 0.05</b> )      | < 0.05<br>( <b>&lt; 0.05 to &lt; 0.05</b> )     | 297.8<br>(-54.2 to 2,999.7)                       | 282.3<br>(-55.9 to 2,885.3)                         |
| HIV/AIDS resulting in other diseases                                                 | 0.1<br>(0.1 to 0.2)                         | < 0.05<br>( <b>&lt; 0.05 to &lt; 0.05</b> )      | < 0.05<br>( <b>&lt; 0.05 to &lt; 0.05</b> )     | 95.7<br>(68.1 to 142.8)                           | 77.9<br>(53.1 to 119.0)                             |
| <b>Diarrhoea, lower respiratory infections, and other common infectious diseases</b> | <b>5.0</b><br>(4.7 to 5.3)                  | <b>284.9†</b><br>(259.4 to 312.4)                | <b>0.3</b><br>(0.2 to 0.4)                      | <b>7.7</b><br>(4.2 to 11.4)                       | <b>0.5</b><br>(-2.5 to 3.6)                         |
| Diarrhoeal diseases                                                                  | 0.9<br>(0.9 to 1.0)                         | 62.8<br>(58.7 to 67.3)                           | 0.1<br>(0.1 to 0.1)                             | 10.3<br>(4.1 to 17.3)                             | 2.9<br>(-2.5 to 8.8)                                |
| Intestinal infectious diseases                                                       | < 0.05<br>( <b>&lt; 0.05 to &lt; 0.05</b> ) | < 0.05†<br>( <b>&lt; 0.05 to &lt; 0.05</b> )     | < 0.05<br>( <b>&lt; 0.05 to &lt; 0.05</b> )     | -19.4<br>(-31.2 to -5.8)                          | -22.3<br>(-33.3 to -9.7)                            |
| Typhoid fever                                                                        | < 0.05<br>( <b>&lt; 0.05 to &lt; 0.05</b> ) | < 0.05<br>( <b>&lt; 0.05 to &lt; 0.05</b> )      | < 0.05<br>( <b>&lt; 0.05 to &lt; 0.05</b> )     | -19.4<br>(-32.0 to -4.8)                          | -22.2<br>(-34.1 to -8.6)                            |
| Paratyphoid fever                                                                    | < 0.05<br>( <b>&lt; 0.05 to &lt; 0.05</b> ) | < 0.05<br>( <b>&lt; 0.05 to &lt; 0.05</b> )      | < 0.05<br>( <b>&lt; 0.05 to &lt; 0.05</b> )     | -13.7<br>(-27.0 to 1.9)                           | -17.8<br>(-30.5 to -2.4)                            |
| Other intestinal infectious diseases                                                 | --                                          | --                                               | < 0.05<br>( <b>&lt; 0.05 to &lt; 0.05</b> )     | -40.7<br>(-52.2 to -27.0)                         | -43.3<br>(-54.0 to -31.0)                           |
| Lower respiratory infections                                                         | 0.1<br>(0.1 to 0.1)                         | 5.6<br>(5.2 to 6.1)                              | < 0.05<br>( <b>&lt; 0.05 to &lt; 0.05</b> )     | 12.4<br>(1.8 to 24.2)                             | -3.5<br>(-12.2 to 6.2)                              |
| Upper respiratory infections                                                         | 2.8<br>(2.5 to 3.2)                         | 210.6<br>(185.7 to 239.0)                        | 0.1<br>( <b>&lt; 0.05 to 0.1</b> )              | 5.8<br>(-0.1 to 12.1)                             | 0.1<br>(-4.7 to 5.7)                                |
| Otitis media                                                                         | 0.8<br>(0.8 to 0.9)                         | 3.7<br>(3.0 to 4.6)                              | < 0.05<br>( <b>&lt; 0.05 to &lt; 0.05</b> )     | 0.8<br>(-7.6 to 9.6)                              | -6.1<br>(-13.6 to 1.6)                              |
| Meningitis                                                                           | 0.2<br>(0.2 to 0.2)                         | < 0.05<br>( <b>&lt; 0.05 to &lt; 0.05</b> )      | < 0.05<br>( <b>&lt; 0.05 to &lt; 0.05</b> )     | -0.2<br>(-7.4 to 7.3)                             | -5.7<br>(-12.3 to 1.2)                              |
| Pneumococcal meningitis                                                              | 0.1<br>(0.1 to 0.1)                         | < 0.05<br>( <b>&lt; 0.05 to &lt; 0.05</b> )      | < 0.05<br>( <b>&lt; 0.05 to &lt; 0.05</b> )     | -0.0<br>(-13.3 to 15.0)                           | -5.5<br>(-17.4 to 7.8)                              |
| H influenzae type B meningitis                                                       | < 0.05<br>( <b>&lt; 0.05 to &lt; 0.05</b> ) | < 0.05<br>( <b>&lt; 0.05 to &lt; 0.05</b> )      | < 0.05<br>( <b>&lt; 0.05 to &lt; 0.05</b> )     | -14.0<br>(-21.4 to -7.3)                          | -18.2<br>(-25.4 to -11.6)                           |
| Meningococcal infection                                                              | < 0.05<br>( <b>&lt; 0.05 to &lt; 0.05</b> ) | < 0.05<br>( <b>&lt; 0.05 to &lt; 0.05</b> )      | < 0.05<br>( <b>&lt; 0.05 to &lt; 0.05</b> )     | 1.0<br>(-4.2 to 6.6)                              | -5.5<br>(-10.2 to -0.6)                             |
| Other meningitis                                                                     | 0.1<br>(0.1 to 0.1)                         | < 0.05<br>( <b>&lt; 0.05 to &lt; 0.05</b> )      | < 0.05<br>( <b>&lt; 0.05 to &lt; 0.05</b> )     | 10.0<br>(4.4 to 16.7)                             | 3.8<br>(-1.3 to 9.9)                                |
| Encephalitis                                                                         | 0.2<br>(0.1 to 0.3)                         | 0.1<br>(0.1 to 0.1)                              | < 0.05<br>( <b>&lt; 0.05 to &lt; 0.05</b> )     | 14.3<br>(1.6 to 28.8)                             | 6.1<br>(-5.5 to 19.5)                               |
| Diphtheria                                                                           | < 0.05<br>( <b>&lt; 0.05 to &lt; 0.05</b> ) | < 0.05<br>( <b>&lt; 0.05 to &lt; 0.05</b> )      | < 0.05<br>( <b>&lt; 0.05 to &lt; 0.05</b> )     | -0.9<br>(-46.3 to 81.7)                           | -13.2<br>(-52.7 to 51.4)                            |
| Whooping cough                                                                       | < 0.05<br>( <b>&lt; 0.05 to &lt; 0.05</b> ) | < 0.05<br>( <b>&lt; 0.05 to &lt; 0.05</b> )      | < 0.05<br>( <b>&lt; 0.05 to &lt; 0.05</b> )     | -28.2<br>(-53.7 to 6.9)                           | -30.0<br>(-55.8 to 4.3)                             |
| Tetanus                                                                              | < 0.05<br>( <b>&lt; 0.05 to &lt; 0.05</b> ) | < 0.05<br>( <b>&lt; 0.05 to &lt; 0.05</b> )      | < 0.05<br>( <b>&lt; 0.05 to &lt; 0.05</b> )     | -11.4<br>(-23.9 to 0.8)                           | -20.4<br>(-32.3 to -8.9)                            |
| Measles                                                                              | < 0.05<br>( <b>&lt; 0.05 to &lt; 0.05</b> ) | < 0.05<br>( <b>&lt; 0.05 to &lt; 0.05</b> )      | < 0.05<br>( <b>&lt; 0.05 to &lt; 0.05</b> )     | -46.6<br>(-53.3 to -39.7)                         | -49.3<br>(-55.6 to -42.8)                           |
| Varicella and herpes zoster                                                          | 0.1<br>(0.1 to 0.1)                         | 2.0<br>(1.9 to 2.1)                              | < 0.05<br>( <b>&lt; 0.05 to &lt; 0.05</b> )     | 19.1<br>(6.7 to 33.4)                             | -0.1<br>(-9.8 to 10.9)                              |
| <b>Neglected tropical diseases and malaria</b>                                       | <b>55.0</b><br>(48.8 to 62.2)               | <b>2.4†</b><br>(1.5 to 3.6)                      | <b>0.2</b><br>(0.1 to 0.3)                      | <b>14.4</b><br>(-26.9 to 74.9)                    | <b>6.2</b><br>(-31.7 to 61.0)                       |
| Malaria                                                                              | --                                          | --                                               | --                                              | --                                                | --                                                  |
| Chagas disease                                                                       | --                                          | --                                               | --                                              | --                                                | --                                                  |
| Leishmaniasis                                                                        | --                                          | --                                               | --                                              | --                                                | --                                                  |
| Visceral leishmaniasis                                                               | --                                          | --                                               | --                                              | --                                                | --                                                  |
| Cutaneous and mucocutaneous leishmaniasis                                            | --                                          | --                                               | --                                              | --                                                | --                                                  |
| African trypanosomiasis                                                              | --                                          | --                                               | --                                              | --                                                | --                                                  |
| Schistosomiasis                                                                      | --                                          | --                                               | --                                              | --                                                | --                                                  |
| Cysticercosis                                                                        | --                                          | --                                               | --                                              | --                                                | --                                                  |
| Cystic echinococcosis                                                                | --                                          | --                                               | --                                              | --                                                | --                                                  |
| Lymphatic filariasis                                                                 | --                                          | --                                               | --                                              | --                                                | --                                                  |
| Onchocerciasis                                                                       | --                                          | --                                               | --                                              | --                                                | --                                                  |
| Trachoma                                                                             | --                                          | --                                               | --                                              | --                                                | --                                                  |
| Dengue                                                                               | 0.1<br>(0.1 to 0.2)                         | 2.4<br>(1.5 to 3.6)                              | < 0.05<br>( <b>&lt; 0.05 to &lt; 0.05</b> )     | 103.0<br>(58.6 to 356.3)                          | 90.1<br>(49.5 to 327.6)                             |
| Yellow fever                                                                         | --                                          | --                                               | --                                              | --                                                | --                                                  |
| Rabies                                                                               | < 0.05<br>( <b>&lt; 0.05 to &lt; 0.05</b> ) | < 0.05<br>( <b>&lt; 0.05 to &lt; 0.05</b> )      | < 0.05<br>( <b>&lt; 0.05 to &lt; 0.05</b> )     | -23.8<br>(-45.7 to 4.4)                           | -36.4<br>(-55.7 to -12.0)                           |
| Intestinal nematode infections                                                       | 54.7<br>(48.4 to 61.9)                      | --                                               | 0.1<br>(0.1 to 0.3)                             | 7.7<br>(-34.8 to 78.5)                            | -0.2<br>(-39.0 to 62.4)                             |
| Ascariasis                                                                           | 17.0<br>(12.1 to 24.0)                      | --                                               | < 0.05<br>( <b>&lt; 0.05 to &lt; 0.05</b> )     | 7.3<br>(-54.4 to 153.3)                           | -0.4<br>(-56.3 to 127.1)                            |

| Cause                                                                   | Prevalence in thousands (95% UI)     | Incidence in thousands (95% UI)          | YLDs in thousands (95% UI)                                                                 |                                                   |                                                     |
|-------------------------------------------------------------------------|--------------------------------------|------------------------------------------|--------------------------------------------------------------------------------------------|---------------------------------------------------|-----------------------------------------------------|
|                                                                         | 2016 counts                          | 2016 counts                              | 2016 counts                                                                                | Percentage change in counts between 2006 and 2016 | Percentage change in age-standardised rates between |
| Trichuriasis                                                            | 34.8<br>(26.0 to 45.5)               | --                                       | 0.1<br>( $< 0.05$ to 0.1)                                                                  | 8.3<br>(-56.1 to 144.9)                           | 0.7<br>(-58.3 to 125.5)                             |
| Hookworm disease                                                        | 18.3<br>(13.3 to 24.7)               | --                                       | 0.1<br>( $< 0.05$ to 0.1)                                                                  | 7.2<br>(-37.2 to 86.5)                            | -1.0<br>(-41.5 to 70.6)                             |
| Food-borne trematodiasis                                                | --                                   | --                                       | --                                                                                         | --                                                | --                                                  |
| Leprosy                                                                 | $< 0.05$<br>( $< 0.05$ to $< 0.05$ ) | $< 0.05$<br>( $< 0.05$ to $< 0.05$ )     | $< 0.05$<br>( $< 0.05$ to $< 0.05$ )                                                       | 15.4<br>(-19.1 to 95.1)                           | -6.4<br>(-34.6 to 60.3)                             |
| Ebola virus disease                                                     | --                                   | --                                       | --                                                                                         | --                                                | --                                                  |
| Zika virus disease                                                      | --                                   | --                                       | --                                                                                         | --                                                | --                                                  |
| Guinea worm disease                                                     | --                                   | --                                       | --                                                                                         | --                                                | --                                                  |
| Other neglected tropical diseases                                       | 0.5<br>(0.4 to 0.6)                  | --                                       | $< 0.05$<br>( $< 0.05$ to $< 0.05$ )                                                       | 1.7<br>(-22.9 to 37.8)                            | -5.6<br>(-28.9 to 28.9)                             |
| <b>Maternal disorders</b>                                               | <b>0.1</b><br><b>(0.1 to 0.1)</b>    | <b>1.5†</b><br><b>(1.3 to 1.8)</b>       | <b><math>&lt; 0.05</math></b><br><b>(<math>&lt; 0.05</math> to <math>&lt; 0.05</math>)</b> | <b>-9.9</b><br><b>(-32.8 to 24.2)</b>             | <b>-3.0</b><br><b>(-27.9 to 33.7)</b>               |
| Maternal haemorrhage                                                    | $< 0.05$<br>( $< 0.05$ to $< 0.05$ ) | 0.1<br>(0.1 to 0.2)                      | $< 0.05$<br>( $< 0.05$ to $< 0.05$ )                                                       | -4.8<br>(-35.5 to 40.5)                           | 1.6<br>(-31.2 to 49.8)                              |
| Maternal sepsis and other pregnancy related infections                  | $< 0.05$<br>( $< 0.05$ to $< 0.05$ ) | 0.2<br>(0.1 to 0.2)                      | $< 0.05$<br>( $< 0.05$ to $< 0.05$ )                                                       | -7.6<br>(-59.5 to 112.6)                          | 0.8<br>(-55.7 to 131.4)                             |
| Maternal hypertensive disorders                                         | 0.1<br>( $< 0.05$ to 0.1)            | 0.3<br>(0.2 to 0.4)                      | $< 0.05$<br>( $< 0.05$ to $< 0.05$ )                                                       | -10.3<br>(-45.5 to 48.4)                          | -3.4<br>(-41.3 to 60.8)                             |
| Maternal obstructed labour and uterine rupture                          | $< 0.05$<br>( $< 0.05$ to $< 0.05$ ) | 0.1<br>(0.1 to 0.1)                      | $< 0.05$<br>( $< 0.05$ to $< 0.05$ )                                                       | -6.6<br>(-63.3 to 144.1)                          | 1.2<br>(-61.6 to 165.6)                             |
| Maternal abortion, miscarriage, and ectopic pregnancy                   | $< 0.05$<br>( $< 0.05$ to $< 0.05$ ) | 0.8<br>(0.6 to 1.1)                      | $< 0.05$<br>( $< 0.05$ to $< 0.05$ )                                                       | -11.5<br>(-52.1 to 69.8)                          | -5.2<br>(-49.1 to 80.9)                             |
| Other maternal disorders                                                | --                                   | --                                       | $< 0.05$<br>( $< 0.05$ to $< 0.05$ )                                                       | -14.3<br>(-36.1 to 18.4)                          | -7.4<br>(-31.4 to 27.4)                             |
| <b>Neonatal disorders</b>                                               | <b>1.2</b><br><b>(1.0 to 1.4)</b>    | --                                       | <b>0.2</b><br><b>(0.1 to 0.3)</b>                                                          | <b>13.5</b><br><b>(-8.1 to 42.9)</b>              | <b>9.5</b><br><b>(-11.5 to 37.7)</b>                |
| Neonatal preterm birth complications                                    | 1.1<br>(0.9 to 1.4)                  | --                                       | 0.1<br>(0.1 to 0.2)                                                                        | 16.1<br>(-9.8 to 51.2)                            | 12.2<br>(-13.1 to 46.2)                             |
| Neonatal encephalopathy due to birth asphyxia and trauma                | $< 0.05$<br>( $< 0.05$ to $< 0.05$ ) | --                                       | $< 0.05$<br>( $< 0.05$ to $< 0.05$ )                                                       | -5.0<br>(-33.7 to 68.1)                           | -8.9<br>(-35.8 to 61.3)                             |
| Neonatal sepsis and other neonatal infections                           | 0.1<br>( $< 0.05$ to 0.1)            | --                                       | $< 0.05$<br>( $< 0.05$ to 0.1)                                                             | 4.3<br>(-17.6 to 31.3)                            | -0.1<br>(-20.4 to 26.1)                             |
| Hemolytic disease and other neonatal jaundice                           | $< 0.05$<br>( $< 0.05$ to $< 0.05$ ) | --                                       | $< 0.05$<br>( $< 0.05$ to $< 0.05$ )                                                       | 1.2<br>(-6.9 to 11.5)                             | -3.6<br>(-11.3 to 6.3)                              |
| Other neonatal disorders                                                | --                                   | --                                       | $< 0.05$<br>( $< 0.05$ to $< 0.05$ )                                                       | 15.4<br>(-10.8 to 49.8)                           | 8.8<br>(-15.8 to 41.1)                              |
| <b>Nutritional deficiencies</b>                                         | <b>15.3</b><br><b>(13.4 to 16.9)</b> | <b>2.0†</b><br><b>(1.3 to 2.9)</b>       | <b>0.3</b><br><b>(0.2 to 0.4)</b>                                                          | <b>-7.1</b><br><b>(-24.4 to 17.2)</b>             | <b>-14.5</b><br><b>(-30.1 to 6.7)</b>               |
| Protein-energy malnutrition                                             | 0.7<br>(0.5 to 1.0)                  | 0.3<br>(0.2 to 0.5)                      | $< 0.05$<br>( $< 0.05$ to 0.1)                                                             | 1.7<br>(-57.9 to 138.9)                           | -4.0<br>(-60.4 to 124.4)                            |
| Iodine deficiency                                                       | 0.6<br>(0.5 to 0.7)                  | $< 0.05$<br>( $< 0.05$ to $< 0.05$ )     | $< 0.05$<br>( $< 0.05$ to $< 0.05$ )                                                       | 7.5<br>(-4.7 to 21.2)                             | -5.5<br>(-16.0 to 5.8)                              |
| Vitamin A deficiency                                                    | 2.0<br>(1.2 to 3.0)                  | 1.7<br>(1.0 to 2.6)                      | $< 0.05$<br>( $< 0.05$ to $< 0.05$ )                                                       | 1.3<br>(-18.0 to 27.2)                            | -6.4<br>(-24.4 to 17.6)                             |
| Iron-deficiency anaemia                                                 | 11.8<br>(10.0 to 13.6)               | --                                       | 0.2<br>(0.1 to 0.3)                                                                        | -9.6<br>(-25.6 to 11.2)                           | -17.1<br>(-30.9 to 0.6)                             |
| Other nutritional deficiencies                                          | --                                   | --                                       | $< 0.05$<br>( $< 0.05$ to $< 0.05$ )                                                       | 2.1<br>(-59.5 to 147.5)                           | -4.2<br>(-61.3 to 129.9)                            |
| <b>Other communicable, maternal, neonatal, and nutritional diseases</b> | <b>22.2</b><br><b>(20.7 to 23.8)</b> | <b>6.3</b><br><b>(5.8 to 6.9)</b>        | <b><math>&lt; 0.05</math></b><br><b>(<math>&lt; 0.05</math> to 0.1)</b>                    | <b>1.9</b><br><b>(-4.7 to 9.0)</b>                | <b>-3.0</b><br><b>(-9.3 to 3.7)</b>                 |
| Sexually transmitted diseases excluding HIV                             | 16.1<br>(14.8 to 17.6)               | 5.0<br>(4.5 to 5.4)                      | $< 0.05$<br>( $< 0.05$ to $< 0.05$ )                                                       | 1.2<br>(-5.9 to 8.7)                              | -2.7<br>(-9.8 to 3.5)                               |
| Syphilis                                                                | 0.2<br>(0.2 to 0.2)                  | 0.1<br>(0.1 to 0.1)                      | $< 0.05$<br>( $< 0.05$ to $< 0.05$ )                                                       | 30.0<br>(16.1 to 48.0)                            | 3.0<br>(-8.9 to 17.3)                               |
| Chlamydial infection                                                    | 1.6<br>(1.2 to 2.0)                  | 1.3<br>(1.0 to 1.6)                      | $< 0.05$<br>( $< 0.05$ to $< 0.05$ )                                                       | -3.6<br>(-14.3 to 8.3)                            | -1.4<br>(-12.6 to 10.2)                             |
| Gonococcal infection                                                    | 0.2<br>(0.2 to 0.3)                  | 0.5<br>(0.4 to 0.6)                      | $< 0.05$<br>( $< 0.05$ to $< 0.05$ )                                                       | -5.5<br>(-22.4 to 15.2)                           | -5.9<br>(-22.6 to 14.3)                             |
| Trichomoniasis                                                          | 1.7<br>(1.5 to 2.0)                  | 1.5<br>(1.2 to 1.7)                      | $< 0.05$<br>( $< 0.05$ to $< 0.05$ )                                                       | 3.9<br>(-4.5 to 12.9)                             | -2.1<br>(-9.3 to 5.2)                               |
| Genital herpes                                                          | 12.7<br>(10.8 to 14.7)               | 0.7<br>(0.6 to 0.8)                      | $< 0.05$<br>( $< 0.05$ to $< 0.05$ )                                                       | 13.6<br>(4.9 to 21.4)                             | -0.0<br>(-6.9 to 6.7)                               |
| Other sexually transmitted diseases                                     | 0.7<br>(0.6 to 0.9)                  | 1.0<br>(0.8 to 1.2)                      | $< 0.05$<br>( $< 0.05$ to $< 0.05$ )                                                       | -1.5<br>(-11.2 to 9.5)                            | -5.0<br>(-15.1 to 4.7)                              |
| Hepatitis                                                               | 7.4<br>(6.4 to 8.6)                  | 1.4<br>(1.2 to 1.6)                      | $< 0.05$<br>( $< 0.05$ to $< 0.05$ )                                                       | 15.8<br>(-5.5 to 40.1)                            | 4.5<br>(-13.1 to 25.9)                              |
| Acute hepatitis A                                                       | $< 0.05$<br>( $< 0.05$ to $< 0.05$ ) | 0.5<br>(0.4 to 0.6)                      | $< 0.05$<br>( $< 0.05$ to $< 0.05$ )                                                       | 13.0<br>(-20.3 to 61.8)                           | 7.4<br>(-24.5 to 48.8)                              |
| Hepatitis B                                                             | 4.6<br>(3.7 to 5.8)                  | 0.7<br>(0.6 to 1.0)                      | $< 0.05$<br>( $< 0.05$ to $< 0.05$ )                                                       | 17.3<br>(-12.5 to 53.4)                           | 2.2<br>(-21.8 to 31.4)                              |
| Hepatitis C                                                             | 2.7<br>(2.4 to 3.0)                  | 0.1<br>(0.1 to 0.1)                      | $< 0.05$<br>( $< 0.05$ to $< 0.05$ )                                                       | 15.8<br>(-28.7 to 89.2)                           | 4.5<br>(-36.2 to 70.4)                              |
| Acute hepatitis E                                                       | $< 0.05$<br>( $< 0.05$ to $< 0.05$ ) | $< 0.05$<br>( $< 0.05$ to 0.1)           | $< 0.05$<br>( $< 0.05$ to $< 0.05$ )                                                       | 19.2<br>(6.0 to 33.5)                             | 10.0<br>(1.2 to 18.8)                               |
| Other infectious diseases                                               | 0.4<br>(0.3 to 0.5)                  | $< 0.05$<br>( $< 0.05$ to $< 0.05$ )     | $< 0.05$<br>( $< 0.05$ to $< 0.05$ )                                                       | 1.7<br>(-16.4 to 26.2)                            | -5.6<br>(-22.8 to 17.2)                             |
| <b>Non-communicable diseases</b>                                        | <b>86.9</b><br><b>(86.0 to 87.6)</b> | <b>233.3†</b><br><b>(216.9 to 250.7)</b> | <b>8.2</b><br><b>(6.1 to 10.6)</b>                                                         | <b>14.6</b><br><b>(11.8 to 17.6)</b>              | <b>-0.5</b><br><b>(-2.8 to 1.8)</b>                 |
| <b>Neoplasms</b>                                                        | <b>0.7</b><br><b>(0.7 to 0.7)</b>    | <b>0.2</b><br><b>(0.2 to 0.3)</b>        | <b>0.1</b><br><b>(0.1 to 0.1)</b>                                                          | <b>35.2</b><br><b>(28.0 to 42.7)</b>              | <b>5.8</b><br><b>(0.1 to 11.5)</b>                  |
| Lip and oral cavity cancer                                              | $< 0.05$<br>( $< 0.05$ to 0.1)       | $< 0.05$<br>( $< 0.05$ to $< 0.05$ )     | $< 0.05$<br>( $< 0.05$ to $< 0.05$ )                                                       | 26.7<br>(7.2 to 49.5)                             | -2.7<br>(-18.2 to 15.4)                             |
| Nasopharynx cancer                                                      | $< 0.05$<br>( $< 0.05$ to $< 0.05$ ) | $< 0.05$<br>( $< 0.05$ to $< 0.05$ )     | $< 0.05$<br>( $< 0.05$ to $< 0.05$ )                                                       | 17.3<br>(-1.3 to 38.4)                            | -4.7<br>(-18.4 to 10.2)                             |
| Other pharynx cancer                                                    | $< 0.05$<br>( $< 0.05$ to $< 0.05$ ) | $< 0.05$<br>( $< 0.05$ to $< 0.05$ )     | $< 0.05$<br>( $< 0.05$ to $< 0.05$ )                                                       | 54.9<br>(21.4 to 96.8)                            | 13.5<br>(-13.1 to 46.9)                             |
| Oesophageal cancer                                                      | $< 0.05$<br>( $< 0.05$ to $< 0.05$ ) | $< 0.05$<br>( $< 0.05$ to $< 0.05$ )     | $< 0.05$<br>( $< 0.05$ to $< 0.05$ )                                                       | 24.1<br>(2.6 to 51.1)                             | -8.1<br>(-26.6 to 14.8)                             |
| Stomach cancer                                                          | $< 0.05$<br>( $< 0.05$ to $< 0.05$ ) | $< 0.05$<br>( $< 0.05$ to $< 0.05$ )     | $< 0.05$<br>( $< 0.05$ to $< 0.05$ )                                                       | 15.6<br>(1.5 to 31.1)                             | -10.8<br>(-23.1 to 2.8)                             |
| Colon and rectum cancer                                                 | 0.1<br>(0.1 to 0.1)                  | $< 0.05$<br>( $< 0.05$ to $< 0.05$ )     | $< 0.05$<br>( $< 0.05$ to $< 0.05$ )                                                       | 48.0<br>(31.3 to 66.8)                            | 14.3<br>(1.6 to 29.3)                               |
| Liver cancer                                                            | $< 0.05$<br>( $< 0.05$ to $< 0.05$ ) | $< 0.05$<br>( $< 0.05$ to $< 0.05$ )     | $< 0.05$<br>( $< 0.05$ to $< 0.05$ )                                                       | 39.0<br>(23.4 to 56.8)                            | 6.1<br>(-5.7 to 19.7)                               |
| Liver cancer due to hepatitis B                                         | $< 0.05$<br>( $< 0.05$ to $< 0.05$ ) | $< 0.05$<br>( $< 0.05$ to $< 0.05$ )     | $< 0.05$<br>( $< 0.05$ to $< 0.05$ )                                                       | 38.3<br>(20.6 to 57.5)                            | 5.5<br>(-7.7 to 20.1)                               |



| Cause                                              | Prevalence in thousands (95% UI)  | Incidence in thousands (95% UI)    | YLDs in thousands (95% UI)        |                                                   |                                                     |
|----------------------------------------------------|-----------------------------------|------------------------------------|-----------------------------------|---------------------------------------------------|-----------------------------------------------------|
|                                                    | 2016 counts                       | 2016 counts                        | 2016 counts                       | Percentage change in counts between 2006 and 2016 | Percentage change in age-standardised rates between |
| Liver cancer due to hepatitis C                    | < 0.05<br>(< 0.05 to < 0.05)      | < 0.05<br>(< 0.05 to < 0.05)       | < 0.05<br>(< 0.05 to < 0.05)      | 36.0<br>(18.7 to 57.9)                            | 5.1<br>(-7.1 to 20.5)                               |
| Liver cancer due to alcohol use                    | < 0.05<br>(< 0.05 to < 0.05)      | < 0.05<br>(< 0.05 to < 0.05)       | < 0.05<br>(< 0.05 to < 0.05)      | 39.1<br>(19.6 to 63.1)                            | 4.3<br>(-9.6 to 21.7)                               |
| Liver cancer due to other causes                   | < 0.05<br>(< 0.05 to < 0.05)      | < 0.05<br>(< 0.05 to < 0.05)       | < 0.05<br>(< 0.05 to < 0.05)      | 43.9<br>(21.7 to 70.4)                            | 10.2<br>(-5.9 to 28.9)                              |
| Gallbladder and biliary tract cancer               | < 0.05<br>(< 0.05 to < 0.05)      | < 0.05<br>(< 0.05 to < 0.05)       | < 0.05<br>(< 0.05 to < 0.05)      | 25.9<br>(16.2 to 35.9)                            | -2.6<br>(-10.0 to 5.1)                              |
| Pancreatic cancer                                  | < 0.05<br>(< 0.05 to < 0.05)      | < 0.05<br>(< 0.05 to < 0.05)       | < 0.05<br>(< 0.05 to < 0.05)      | 31.9<br>(19.1 to 45.2)                            | 1.0<br>(-8.7 to 11.6)                               |
| Larynx cancer                                      | < 0.05<br>(< 0.05 to < 0.05)      | < 0.05<br>(< 0.05 to < 0.05)       | < 0.05<br>(< 0.05 to < 0.05)      | 28.9<br>(1.7 to 57.0)                             | -5.1<br>(-24.1 to 18.5)                             |
| Tracheal, bronchus, and lung cancer                | < 0.05<br>(< 0.05 to < 0.05)      | < 0.05<br>(< 0.05 to < 0.05)       | < 0.05<br>(< 0.05 to < 0.05)      | 9.5<br>(-10.2 to 32.3)                            | -17.1<br>(-32.2 to 1.1)                             |
| Malignant skin melanoma                            | < 0.05<br>(< 0.05 to < 0.05)      | < 0.05<br>(< 0.05 to < 0.05)       | < 0.05<br>(< 0.05 to < 0.05)      | 0.9<br>(-15.9 to 40.0)                            | -19.5<br>(-33.4 to 12.3)                            |
| Non-melanoma skin cancer                           | < 0.05<br>(< 0.05 to < 0.05)      | < 0.05<br>(< 0.05 to < 0.05)       | < 0.05<br>(< 0.05 to < 0.05)      | -39.7<br>(-74.5 to 75.6)                          | -54.1<br>(-80.4 to 40.2)                            |
| Non-melanoma skin cancer (squamous-cell carcinoma) | < 0.05<br>(< 0.05 to < 0.05)      | < 0.05<br>(< 0.05 to < 0.05)       | < 0.05<br>(< 0.05 to < 0.05)      | -41.6<br>(-75.2 to 79.5)                          | -55.5<br>(-81.0 to 43.2)                            |
| Non-melanoma skin cancer (basal-cell carcinoma)    | < 0.05<br>(< 0.05 to < 0.05)      | < 0.05<br>(< 0.05 to < 0.05)       | < 0.05<br>(< 0.05 to < 0.05)      | 25.6<br>(4.6 to 48.3)                             | -0.1<br>(-10.8 to 13.6)                             |
| Breast cancer                                      | 0.1<br>(0.1 to 0.2)               | < 0.05<br>(< 0.05 to < 0.05)       | < 0.05<br>(< 0.05 to < 0.05)      | 41.4<br>(18.9 to 70.8)                            | 7.4<br>(-8.5 to 28.4)                               |
| Cervical cancer                                    | 0.1<br>(0.1 to 0.1)               | < 0.05<br>(< 0.05 to < 0.05)       | < 0.05<br>(< 0.05 to < 0.05)      | 19.2<br>(-2.0 to 48.5)                            | -6.0<br>(-22.1 to 15.7)                             |
| Uterine cancer                                     | < 0.05<br>(< 0.05 to < 0.05)      | < 0.05<br>(< 0.05 to < 0.05)       | < 0.05<br>(< 0.05 to < 0.05)      | 41.8<br>(15.6 to 74.5)                            | 2.3<br>(-14.8 to 26.2)                              |
| Ovarian cancer                                     | < 0.05<br>(< 0.05 to < 0.05)      | < 0.05<br>(< 0.05 to < 0.05)       | < 0.05<br>(< 0.05 to < 0.05)      | 44.5<br>(9.1 to 94.9)                             | 8.8<br>(-16.4 to 46.2)                              |
| Prostate cancer                                    | 0.2<br>(0.1 to 0.2)               | < 0.05<br>(< 0.05 to 0.1)          | < 0.05<br>(< 0.05 to < 0.05)      | 48.7<br>(26.8 to 72.8)                            | 20.0<br>(2.4 to 39.8)                               |
| Testicular cancer                                  | < 0.05<br>(< 0.05 to < 0.05)      | < 0.05<br>(< 0.05 to < 0.05)       | < 0.05<br>(< 0.05 to < 0.05)      | 34.9<br>(12.8 to 60.5)                            | 25.4<br>(5.9 to 48.5)                               |
| Kidney cancer                                      | < 0.05<br>(< 0.05 to < 0.05)      | < 0.05<br>(< 0.05 to < 0.05)       | < 0.05<br>(< 0.05 to < 0.05)      | 38.4<br>(19.6 to 58.6)                            | 6.7<br>(-7.3 to 21.5)                               |
| Bladder cancer                                     | < 0.05<br>(< 0.05 to < 0.05)      | < 0.05<br>(< 0.05 to < 0.05)       | < 0.05<br>(< 0.05 to < 0.05)      | 28.6<br>(12.7 to 46.4)                            | -0.5<br>(-13.4 to 13.9)                             |
| Brain and nervous system cancer                    | < 0.05<br>(< 0.05 to < 0.05)      | < 0.05<br>(< 0.05 to < 0.05)       | < 0.05<br>(< 0.05 to < 0.05)      | 22.1<br>(8.4 to 36.0)                             | 0.0<br>(-11.5 to 11.1)                              |
| Thyroid cancer                                     | < 0.05<br>(< 0.05 to < 0.05)      | < 0.05<br>(< 0.05 to < 0.05)       | < 0.05<br>(< 0.05 to < 0.05)      | 50.1<br>(15.7 to 94.1)                            | 15.6<br>(-8.8 to 46.0)                              |
| Mesothelioma                                       | < 0.05<br>(< 0.05 to < 0.05)      | < 0.05<br>(< 0.05 to < 0.05)       | < 0.05<br>(< 0.05 to < 0.05)      | 25.7<br>(11.0 to 41.1)                            | -2.6<br>(-14.1 to 8.8)                              |
| Hodgkin lymphoma                                   | < 0.05<br>(< 0.05 to < 0.05)      | < 0.05<br>(< 0.05 to < 0.05)       | < 0.05<br>(< 0.05 to < 0.05)      | 24.2<br>(6.0 to 47.6)                             | 2.6<br>(-12.4 to 21.4)                              |
| Non-Hodgkin's lymphoma                             | < 0.05<br>(< 0.05 to < 0.05)      | < 0.05<br>(< 0.05 to < 0.05)       | < 0.05<br>(< 0.05 to < 0.05)      | 39.1<br>(24.4 to 55.7)                            | 10.8<br>(-0.4 to 23.8)                              |
| Multiple myeloma                                   | < 0.05<br>(< 0.05 to < 0.05)      | < 0.05<br>(< 0.05 to < 0.05)       | < 0.05<br>(< 0.05 to < 0.05)      | 53.0<br>(40.0 to 67.3)                            | 15.1<br>(5.2 to 26.1)                               |
| Leukaemia                                          | < 0.05<br>(< 0.05 to < 0.05)      | < 0.05<br>(< 0.05 to < 0.05)       | < 0.05<br>(< 0.05 to < 0.05)      | 14.5<br>(4.4 to 25.2)                             | -4.0<br>(-12.7 to 5.9)                              |
| Acute lymphoid leukaemia                           | < 0.05<br>(< 0.05 to < 0.05)      | < 0.05<br>(< 0.05 to < 0.05)       | < 0.05<br>(< 0.05 to < 0.05)      | 18.7<br>(3.9 to 35.6)                             | 0.9<br>(-11.7 to 14.8)                              |
| Chronic lymphoid leukaemia                         | < 0.05<br>(< 0.05 to < 0.05)      | < 0.05<br>(< 0.05 to < 0.05)       | < 0.05<br>(< 0.05 to < 0.05)      | 21.2<br>(4.4 to 40.5)                             | -1.6<br>(-14.5 to 14.5)                             |
| Acute myeloid leukaemia                            | < 0.05<br>(< 0.05 to < 0.05)      | < 0.05<br>(< 0.05 to < 0.05)       | < 0.05<br>(< 0.05 to < 0.05)      | 16.4<br>(4.4 to 30.7)                             | -0.2<br>(-10.0 to 11.8)                             |
| Chronic myeloid leukaemia                          | < 0.05<br>(< 0.05 to < 0.05)      | < 0.05<br>(< 0.05 to < 0.05)       | < 0.05<br>(< 0.05 to < 0.05)      | 6.8<br>(-9.3 to 25.5)                             | -13.3<br>(-25.5 to 1.2)                             |
| Other leukaemia                                    | < 0.05<br>(< 0.05 to < 0.05)      | < 0.05<br>(< 0.05 to < 0.05)       | < 0.05<br>(< 0.05 to < 0.05)      | 11.7<br>(-2.5 to 28.6)                            | -6.6<br>(-18.6 to 9.1)                              |
| Other neoplasms                                    | < 0.05<br>(< 0.05 to < 0.05)      | < 0.05<br>(< 0.05 to < 0.05)       | < 0.05<br>(< 0.05 to < 0.05)      | 19.0<br>(4.4 to 37.1)                             | -5.7<br>(-17.2 to 9.8)                              |
| <b>Cardiovascular diseases</b>                     | <b>5.2</b><br><b>(5.0 to 5.4)</b> | <b>0.6†</b><br><b>(0.6 to 0.6)</b> | <b>0.4</b><br><b>(0.3 to 0.5)</b> | <b>21.6</b><br><b>(16.4 to 26.8)</b>              | <b>-2.9</b><br><b>(-7.1 to 0.9)</b>                 |
| Rheumatic heart disease                            | < 0.05<br>(< 0.05 to < 0.05)      | < 0.05<br>(< 0.05 to < 0.05)       | < 0.05<br>(< 0.05 to < 0.05)      | 11.5<br>(2.0 to 22.0)                             | -6.6<br>(-15.0 to 1.6)                              |
| Ischaemic heart disease                            | 2.1<br>(1.9 to 2.2)               | 0.2<br>(0.2 to 0.3)                | 0.1<br>(0.1 to 0.1)               | 26.2<br>(20.0 to 32.9)                            | -0.6<br>(-4.8 to 3.9)                               |
| Cerebrovascular disease                            | 0.8<br>(0.7 to 0.8)               | 0.1‡<br>(0.1 to 0.1)               | 0.2<br>(0.1 to 0.2)               | 19.8<br>(10.1 to 28.9)                            | -6.0<br>(-13.7 to 1.4)                              |
| Ischaemic stroke                                   | 0.6<br>(0.6 to 0.7)               | 0.1‡<br>(0.1 to 0.1)               | 0.1<br>(0.1 to 0.2)               | 19.9<br>(7.8 to 31.6)                             | -6.1<br>(-15.3 to 2.9)                              |
| Hemorrhagic stroke                                 | 0.2<br>(0.2 to 0.2)               | < 0.05‡<br>(< 0.05 to < 0.05)      | < 0.05<br>(< 0.05 to < 0.05)      | 19.5<br>(7.9 to 32.7)                             | -5.5<br>(-14.2 to 4.5)                              |
| Hypertensive heart disease                         | 0.5<br>(0.4 to 0.6)               | --                                 | < 0.05<br>(< 0.05 to 0.1)         | 26.6<br>(16.9 to 37.9)                            | -0.8<br>(-7.8 to 6.9)                               |
| Cardiomyopathy and myocarditis                     | 0.1<br>(0.1 to 0.1)               | < 0.05†<br>(< 0.05 to < 0.05)      | < 0.05<br>(< 0.05 to < 0.05)      | 13.8<br>(1.2 to 28.2)                             | 0.3<br>(-9.9 to 11.3)                               |
| Myocarditis                                        | < 0.05<br>(< 0.05 to < 0.05)      | < 0.05<br>(< 0.05 to < 0.05)       | < 0.05<br>(< 0.05 to < 0.05)      | 0.8<br>(-17.2 to 21.6)                            | -0.7<br>(-16.6 to 17.8)                             |
| Alcoholic cardiomyopathy                           | < 0.05<br>(< 0.05 to < 0.05)      | --                                 | < 0.05<br>(< 0.05 to < 0.05)      | 28.0<br>(2.1 to 60.4)                             | 0.6<br>(-18.1 to 24.3)                              |
| Other cardiomyopathy                               | < 0.05<br>(< 0.05 to < 0.05)      | --                                 | < 0.05<br>(< 0.05 to < 0.05)      | 12.2<br>(-4.2 to 31.5)                            | 0.7<br>(-12.8 to 16.3)                              |
| Atrial fibrillation and flutter                    | 0.5<br>(0.5 to 0.6)               | < 0.05<br>(< 0.05 to < 0.05)       | < 0.05<br>(< 0.05 to 0.1)         | 23.6<br>(15.6 to 32.2)                            | -0.0<br>(-6.0 to 6.2)                               |
| Peripheral vascular disease                        | 1.4<br>(1.2 to 1.6)               | 0.1<br>(0.1 to 0.1)                | < 0.05<br>(< 0.05 to < 0.05)      | 19.2<br>(8.6 to 30.0)                             | -4.9<br>(-12.0 to 2.3)                              |
| Endocarditis                                       | < 0.05<br>(< 0.05 to < 0.05)      | < 0.05<br>(< 0.05 to < 0.05)       | < 0.05<br>(< 0.05 to < 0.05)      | 12.2<br>(4.6 to 20.5)                             | 0.5<br>(-6.5 to 8.3)                                |
| Other cardiovascular and circulatory diseases      | 0.6<br>(0.5 to 0.7)               | --                                 | < 0.05<br>(< 0.05 to < 0.05)      | 12.8<br>(2.7 to 24.0)                             | 0.5<br>(-7.4 to 9.8)                                |
| <b>Chronic respiratory diseases</b>                | <b>7.7</b><br><b>(7.5 to 8.0)</b> | <b>1.7†</b><br><b>(1.6 to 1.8)</b> | <b>0.5</b><br><b>(0.4 to 0.6)</b> | <b>23.9</b><br><b>(19.6 to 29.1)</b>              | <b>2.7</b><br><b>(-0.6 to 6.5)</b>                  |
| Chronic obstructive pulmonary disease              | 3.1<br>(3.0 to 3.2)               | 0.2<br>(0.2 to 0.2)                | 0.3<br>(0.3 to 0.3)               | 30.6<br>(24.1 to 38.1)                            | 2.2<br>(-3.0 to 8.0)                                |
| Pneumoconiosis                                     | < 0.05<br>(< 0.05 to < 0.05)      | < 0.05<br>(< 0.05 to < 0.05)       | < 0.05<br>(< 0.05 to < 0.05)      | 37.9<br>(9.4 to 71.3)                             | 3.6<br>(-19.5 to 32.3)                              |
| Silicosis                                          | < 0.05<br>(< 0.05 to < 0.05)      | < 0.05<br>(< 0.05 to < 0.05)       | < 0.05<br>(< 0.05 to < 0.05)      | 39.4<br>(3.9 to 83.3)                             | 4.0<br>(-23.9 to 42.0)                              |

| Cause                                                          | Prevalence in thousands (95% UI)  | Incidence in thousands (95% UI)               | YLDs in thousands (95% UI)                    |                                                                             |                                                                             |
|----------------------------------------------------------------|-----------------------------------|-----------------------------------------------|-----------------------------------------------|-----------------------------------------------------------------------------|-----------------------------------------------------------------------------|
|                                                                | 2016 counts<br>(< 0.05 to < 0.05) | 2016 counts<br>(< 0.05 to < 0.05)             | 2016 counts<br>(< 0.05 to < 0.05)             | Percentage change in counts between 2006 and 2016<br>35.6<br>(26.8 to 44.2) | Percentage change in age-standardised rates between<br>1.4<br>(-4.9 to 7.3) |
| Asbestosis                                                     | < 0.05<br>(< 0.05 to < 0.05)      | < 0.05<br>(< 0.05 to < 0.05)                  | < 0.05<br>(< 0.05 to < 0.05)                  | 35.6<br>(26.8 to 44.2)                                                      | 1.4<br>(-4.9 to 7.3)                                                        |
| Coal workers pneumoconiosis                                    | --                                | --                                            | --                                            | --                                                                          | --                                                                          |
| Other pneumoconiosis                                           | < 0.05<br>(< 0.05 to < 0.05)      | < 0.05<br>(< 0.05 to < 0.05)                  | < 0.05<br>(< 0.05 to < 0.05)                  | 24.4<br>(11.0 to 39.7)                                                      | 3.0<br>(-7.9 to 16.2)                                                       |
| Asthma                                                         | 4.9<br>(4.6 to 5.2)               | 1.4<br>(1.4 to 1.5)                           | 0.2<br>(0.1 to 0.3)                           | 13.2<br>(8.2 to 18.9)                                                       | 2.2<br>(-2.1 to 6.8)                                                        |
| Interstitial lung disease and pulmonary sarcoidosis            | 0.1<br>(0.1 to 0.1)               | < 0.05<br>(< 0.05 to < 0.05)                  | < 0.05<br>(< 0.05 to < 0.05)                  | 21.7<br>(8.3 to 36.7)                                                       | -1.9<br>(-12.9 to 10.0)                                                     |
| Other chronic respiratory diseases                             | --                                | --                                            | < 0.05<br>(< 0.05 to < 0.05)                  | 47.6<br>(30.8 to 67.4)                                                      | 34.5<br>(18.4 to 53.7)                                                      |
| <b>Cirrhosis and other chronic liver diseases</b>              | <b>0.5<br/>(0.5 to 0.5)</b>       | <b>&lt; 0.05<br/>(&lt; 0.05 to &lt; 0.05)</b> | <b>&lt; 0.05<br/>(&lt; 0.05 to &lt; 0.05)</b> | <b>20.1<br/>(8.6 to 33.1)</b>                                               | <b>-0.3<br/>(-9.0 to 9.7)</b>                                               |
| Cirrhosis and other chronic liver diseases due to hepatitis B  | 0.2<br>(0.1 to 0.2)               | < 0.05<br>(< 0.05 to < 0.05)                  | < 0.05<br>(< 0.05 to < 0.05)                  | 27.8<br>(5.2 to 54.1)                                                       | 0.9<br>(-15.0 to 18.4)                                                      |
| Cirrhosis and other chronic liver diseases due to hepatitis C  | 0.1<br>(0.1 to 0.1)               | < 0.05<br>(< 0.05 to < 0.05)                  | < 0.05<br>(< 0.05 to < 0.05)                  | 32.2<br>(2.8 to 69.8)                                                       | 3.6<br>(-17.6 to 29.1)                                                      |
| Cirrhosis and other chronic liver diseases due to alcohol use  | 0.1<br>(0.1 to 0.1)               | < 0.05<br>(< 0.05 to < 0.05)                  | < 0.05<br>(< 0.05 to < 0.05)                  | 24.3<br>(0.1 to 55.0)                                                       | -4.5<br>(-20.2 to 16.0)                                                     |
| Cirrhosis and other chronic liver diseases due to other causes | 0.1<br>(0.1 to 0.2)               | < 0.05<br>(< 0.05 to < 0.05)                  | < 0.05<br>(< 0.05 to < 0.05)                  | 10.4<br>(-8.3 to 31.1)                                                      | -0.6<br>(-16.5 to 17.2)                                                     |
| <b>Digestive diseases</b>                                      | <b>1.3<br/>(1.2 to 1.4)</b>       | <b>1.6†<br/>(1.5 to 1.7)</b>                  | <b>&lt; 0.05<br/>(&lt; 0.05 to 0.1)</b>       | <b>30.6<br/>(13.5 to 48.5)</b>                                              | <b>9.2<br/>(-3.2 to 23.3)</b>                                               |
| Peptic ulcer disease                                           | 0.5<br>(0.4 to 0.6)               | 0.2<br>(0.2 to 0.2)                           | < 0.05<br>(< 0.05 to < 0.05)                  | 35.0<br>(7.0 to 67.6)                                                       | 12.9<br>(-9.3 to 38.0)                                                      |
| Gastritis and duodenitis                                       | 0.7<br>(0.6 to 0.8)               | 0.6<br>(0.5 to 0.7)                           | < 0.05<br>(< 0.05 to < 0.05)                  | 39.9<br>(13.1 to 72.8)                                                      | 17.9<br>(-3.7 to 44.5)                                                      |
| Appendicitis                                                   | < 0.05<br>(< 0.05 to < 0.05)      | 0.2<br>(0.2 to 0.2)                           | < 0.05<br>(< 0.05 to < 0.05)                  | -3.5<br>(-14.2 to 9.1)                                                      | -12.2<br>(-23.6 to 0.5)                                                     |
| Paralytic ileus and intestinal obstruction                     | < 0.05<br>(< 0.05 to < 0.05)      | 0.1<br>(0.1 to 0.1)                           | < 0.05<br>(< 0.05 to < 0.05)                  | 12.4<br>(0.7 to 25.2)                                                       | -8.3<br>(-18.7 to 2.9)                                                      |
| Inguinal, femoral, and abdominal hernia                        | 0.1<br>(0.1 to 0.1)               | 0.2<br>(0.2 to 0.2)                           | < 0.05<br>(< 0.05 to < 0.05)                  | 34.8<br>(13.7 to 58.2)                                                      | 8.3<br>(-7.2 to 25.9)                                                       |
| Inflammatory bowel disease                                     | < 0.05<br>(< 0.05 to < 0.05)      | < 0.05<br>(< 0.05 to 0.1)                     | < 0.05<br>(< 0.05 to < 0.05)                  | 13.3<br>(-7.2 to 37.0)                                                      | -5.1<br>(-20.4 to 13.9)                                                     |
| Vascular intestinal disorders                                  | < 0.05<br>(< 0.05 to < 0.05)      | < 0.05<br>(< 0.05 to < 0.05)                  | < 0.05<br>(< 0.05 to < 0.05)                  | 21.7<br>(15.7 to 28.4)                                                      | 4.2<br>(0.1 to 8.7)                                                         |
| Gallbladder and biliary diseases                               | 0.1<br>(0.1 to 0.1)               | 0.2<br>(0.2 to 0.3)                           | < 0.05<br>(< 0.05 to < 0.05)                  | 29.7<br>(15.9 to 44.4)                                                      | 1.7<br>(-8.5 to 12.3)                                                       |
| Pancreatitis                                                   | < 0.05<br>(< 0.05 to < 0.05)      | < 0.05<br>(< 0.05 to < 0.05)                  | < 0.05<br>(< 0.05 to < 0.05)                  | 17.3<br>(12.1 to 23.2)                                                      | -2.7<br>(-6.2 to 1.1)                                                       |
| Other digestive diseases                                       | --                                | --                                            | < 0.05<br>(< 0.05 to < 0.05)                  | 37.3<br>(20.9 to 54.8)                                                      | 14.2<br>(1.4 to 28.7)                                                       |
| <b>Neurological disorders</b>                                  | <b>33.8<br/>(32.3 to 35.5)</b>    | <b>15.1<br/>(12.9 to 17.5)</b>                | <b>0.9<br/>(0.6 to 1.2)</b>                   | <b>10.0<br/>(-10.0 to 35.9)</b>                                             | <b>0.2<br/>(-18.3 to 23.3)</b>                                              |
| Alzheimer's disease and other dementias                        | 0.7<br>(0.6 to 0.8)               | 0.1<br>(0.1 to 0.1)                           | 0.1<br>(0.1 to 0.1)                           | 20.1<br>(14.8 to 26.1)                                                      | -0.3<br>(-4.6 to 4.2)                                                       |
| Parkinson's disease                                            | 0.1<br>(0.1 to 0.1)               | < 0.05<br>(< 0.05 to < 0.05)                  | < 0.05<br>(< 0.05 to < 0.05)                  | 31.1<br>(16.3 to 48.6)                                                      | 6.2<br>(-5.2 to 18.9)                                                       |
| Epilepsy                                                       | 0.4<br>(0.2 to 0.7)               | 0.1<br>(< 0.05 to 0.1)                        | 0.1<br>(< 0.05 to 0.3)                        | 8.5<br>(-70.5 to 299.7)                                                     | -0.1<br>(-72.5 to 268.8)                                                    |
| Multiple sclerosis                                             | < 0.05<br>(< 0.05 to < 0.05)      | < 0.05<br>(< 0.05 to < 0.05)                  | < 0.05<br>(< 0.05 to < 0.05)                  | 21.6<br>(14.4 to 27.4)                                                      | 4.3<br>(-2.9 to 8.8)                                                        |
| Motor neuron disease                                           | < 0.05<br>(< 0.05 to < 0.05)      | < 0.05<br>(< 0.05 to < 0.05)                  | < 0.05<br>(< 0.05 to < 0.05)                  | 17.1<br>(11.8 to 22.5)                                                      | 3.4<br>(-0.1 to 6.6)                                                        |
| Migraine                                                       | 12.5<br>(11.8 to 13.3)            | 1.3<br>(1.2 to 1.4)                           | 0.5<br>(0.3 to 0.7)                           | 7.7<br>(3.8 to 11.8)                                                        | -0.6<br>(-4.0 to 2.9)                                                       |
| Tension-type headache                                          | 25.0<br>(22.2 to 28.1)            | 13.7<br>(11.4 to 16.1)                        | 0.1<br>(< 0.05 to 0.1)                        | 8.8<br>(3.1 to 15.2)                                                        | -0.5<br>(-5.4 to 4.8)                                                       |
| Other neurological disorders                                   | < 0.05<br>(< 0.05 to < 0.05)      | < 0.05<br>(< 0.05 to < 0.05)                  | < 0.05<br>(< 0.05 to 0.1)                     | 29.6<br>(-56.8 to 303.3)                                                    | 19.2<br>(-59.9 to 254.7)                                                    |
| <b>Mental and substance use disorders</b>                      | <b>12.6<br/>(12.2 to 13.1)</b>    | <b>3.8†<br/>(3.5 to 4.0)</b>                  | <b>1.7<br/>(1.2 to 2.2)</b>                   | <b>8.5<br/>(6.2 to 11.3)</b>                                                | <b>-0.2<br/>(-2.3 to 1.9)</b>                                               |
| Schizophrenia                                                  | 0.3<br>(0.3 to 0.3)               | < 0.05<br>(< 0.05 to < 0.05)                  | 0.2<br>(0.1 to 0.2)                           | 13.0<br>(3.6 to 22.8)                                                       | 1.3<br>(-6.6 to 9.4)                                                        |
| Alcohol use disorders                                          | 0.8<br>(0.7 to 0.9)               | 0.4<br>(0.4 to 0.5)                           | 0.1<br>(0.1 to 0.1)                           | 5.4<br>(-3.7 to 16.4)                                                       | -1.5<br>(-9.8 to 8.1)                                                       |
| Drug use disorders                                             | 0.9<br>(0.8 to 1.0)               | 0.1<br>(0.1 to 0.1)                           | 0.1<br>(0.1 to 0.2)                           | 3.2<br>(-5.1 to 12.2)                                                       | 1.7<br>(-6.2 to 9.8)                                                        |
| Opioid use disorders                                           | 0.2<br>(0.2 to 0.3)               | < 0.05<br>(< 0.05 to < 0.05)                  | 0.1<br>(0.1 to 0.1)                           | 6.8<br>(-3.8 to 18.9)                                                       | 1.5<br>(-7.8 to 11.9)                                                       |
| Cocaine use disorders                                          | < 0.05<br>(< 0.05 to < 0.05)      | < 0.05<br>(< 0.05 to < 0.05)                  | < 0.05<br>(< 0.05 to < 0.05)                  | 10.3<br>(4.0 to 17.1)                                                       | 4.4<br>(-1.2 to 10.3)                                                       |
| Amphetamine use disorders                                      | 0.1<br>(0.1 to 0.2)               | < 0.05<br>(< 0.05 to < 0.05)                  | < 0.05<br>(< 0.05 to < 0.05)                  | -3.8<br>(-23.0 to 20.6)                                                     | 6.2<br>(-15.2 to 32.8)                                                      |
| Cannabis use disorders                                         | 0.5<br>(0.4 to 0.6)               | 0.1<br>(< 0.05 to 0.1)                        | < 0.05<br>(< 0.05 to < 0.05)                  | -10.3<br>(-22.0 to 3.5)                                                     | -5.4<br>(-17.3 to 9.2)                                                      |
| Other drug use disorders                                       | < 0.05<br>(< 0.05 to 0.1)         | < 0.05<br>(< 0.05 to < 0.05)                  | < 0.05<br>(< 0.05 to < 0.05)                  | 1.6<br>(-19.0 to 26.2)                                                      | 5.3<br>(-16.7 to 31.5)                                                      |
| Depressive disorders                                           | 3.0<br>(2.8 to 3.2)               | 2.3<br>(2.0 to 2.5)                           | 0.4<br>(0.3 to 0.6)                           | 13.0<br>(7.7 to 17.9)                                                       | -1.4<br>(-5.4 to 2.4)                                                       |
| Major depressive disorder                                      | 1.3<br>(1.2 to 1.5)               | 2.0<br>(1.8 to 2.3)                           | 0.3<br>(0.2 to 0.4)                           | 9.4<br>(1.9 to 16.6)                                                        | -1.9<br>(-7.9 to 4.2)                                                       |
| Dysthymia                                                      | 1.7<br>(1.5 to 1.9)               | 0.2<br>(0.2 to 0.3)                           | 0.2<br>(0.1 to 0.2)                           | 19.8<br>(15.4 to 24.1)                                                      | -0.4<br>(-3.0 to 2.2)                                                       |
| Bipolar disorder                                               | 0.5<br>(0.5 to 0.6)               | < 0.05<br>(< 0.05 to 0.1)                     | 0.1<br>(0.1 to 0.2)                           | 8.2<br>(0.2 to 15.8)                                                        | -0.1<br>(-6.9 to 6.5)                                                       |
| Anxiety disorders                                              | 3.4<br>(3.1 to 3.9)               | 0.5<br>(0.5 to 0.6)                           | 0.3<br>(0.2 to 0.5)                           | 9.6<br>(2.8 to 17.1)                                                        | -0.1<br>(-6.2 to 6.2)                                                       |
| Eating disorders                                               | 0.1<br>(0.1 to 0.2)               | 0.1<br>(< 0.05 to 0.1)                        | < 0.05<br>(< 0.05 to < 0.05)                  | 2.5<br>(-8.9 to 15.3)                                                       | 9.1<br>(-2.8 to 23.2)                                                       |
| Anorexia nervosa                                               | < 0.05<br>(< 0.05 to < 0.05)      | < 0.05<br>(< 0.05 to < 0.05)                  | < 0.05<br>(< 0.05 to < 0.05)                  | -0.3<br>(-18.5 to 23.9)                                                     | 8.6<br>(-11.5 to 35.8)                                                      |
| Bulimia nervosa                                                | 0.1<br>(0.1 to 0.1)               | 0.1<br>(< 0.05 to 0.1)                        | < 0.05<br>(< 0.05 to < 0.05)                  | 3.6<br>(-10.1 to 19.8)                                                      | 9.3<br>(-5.2 to 26.7)                                                       |
| Autistic spectrum disorders                                    | 0.8<br>(0.7 to 0.9)               | < 0.05<br>(< 0.05 to < 0.05)                  | 0.1<br>(0.1 to 0.2)                           | 6.4<br>(1.3 to 11.8)                                                        | 0.5<br>(-4.2 to 5.5)                                                        |
| Autism                                                         | 0.2<br>(0.2 to 0.3)               | < 0.05<br>(< 0.05 to < 0.05)                  | 0.1<br>(< 0.05 to 0.1)                        | 6.3<br>(-1.9 to 15.8)                                                       | 0.5<br>(-7.1 to 9.3)                                                        |
| Asperger syndrome and other autistic spectrum disorders        | 0.6<br>(0.5 to 0.7)               | < 0.05<br>(< 0.05 to < 0.05)                  | 0.1<br>(< 0.05 to 0.1)                        | 6.5<br>(1.4 to 11.6)                                                        | 0.5<br>(-4.2 to 5.4)                                                        |

| Cause                                                      | Prevalence in thousands (95% UI)     | Incidence in thousands (95% UI)          | YLDs in thousands (95% UI)        |                                                   |                                                     |
|------------------------------------------------------------|--------------------------------------|------------------------------------------|-----------------------------------|---------------------------------------------------|-----------------------------------------------------|
|                                                            | 2016 counts                          | 2016 counts                              | 2016 counts                       | Percentage change in counts between 2006 and 2016 | Percentage change in age-standardised rates between |
| Attention-deficit/hyperactivity disorder                   | 0.5<br>(0.4 to 0.6)                  | < 0.05<br>(< 0.05 to < 0.05)             | < 0.05<br>(< 0.05 to < 0.05)      | -1.2<br>(-10.7 to 9.5)                            | 0.1<br>(-9.4 to 11.0)                               |
| Conduct disorder                                           | 0.6<br>(0.5 to 0.7)                  | 0.2<br>(0.2 to 0.2)                      | 0.1<br>(< 0.05 to 0.1)            | -7.3<br>(-13.7 to -1.1)                           | -0.1<br>(-6.8 to 6.6)                               |
| Idiopathic developmental intellectual disability           | 0.6<br>(0.2 to 1.1)                  | --                                       | < 0.05<br>(< 0.05 to 0.1)         | -8.7<br>(-18.5 to 0.1)                            | -11.7<br>(-20.7 to -3.1)                            |
| Other mental and substance use disorders                   | 1.9<br>(1.7 to 2.2)                  | 0.1<br>(< 0.05 to 0.1)                   | 0.1<br>(0.1 to 0.2)               | 12.1<br>(7.1 to 17.7)                             | 0.2<br>(-4.0 to 4.8)                                |
| <b>Diabetes, urogenital, blood, and endocrine diseases</b> | <b>38.6</b><br><b>(36.2 to 40.9)</b> | <b>9.6†</b><br><b>(8.9 to 10.6)</b>      | <b>0.8</b><br><b>(0.6 to 1.2)</b> | <b>22.8</b><br><b>(16.1 to 29.4)</b>              | <b>0.9</b><br><b>(-4.1 to 6.2)</b>                  |
| Diabetes mellitus                                          | 6.5<br>(5.9 to 7.3)                  | 0.3<br>(0.3 to 0.4)                      | 0.5<br>(0.3 to 0.7)               | 29.6<br>(21.2 to 39.4)                            | 1.9<br>(-4.8 to 9.5)                                |
| Acute glomerulonephritis                                   | < 0.05<br>(< 0.05 to < 0.05)         | < 0.05<br>(< 0.05 to < 0.05)             | < 0.05<br>(< 0.05 to < 0.05)      | 9.9<br>(3.9 to 17.1)                              | -0.9<br>(-5.7 to 4.0)                               |
| Chronic kidney disease                                     | 2.7<br>(2.5 to 3.0)                  | 0.2<br>(0.2 to 0.2)                      | 0.1<br>(0.1 to 0.1)               | 26.2<br>(15.0 to 38.5)                            | 4.0<br>(-4.8 to 13.4)                               |
| Chronic kidney disease due to diabetes mellitus            | 1.7<br>(1.5 to 1.9)                  | 0.1<br>(0.1 to 0.1)                      | 0.1<br>(< 0.05 to 0.1)            | 25.8<br>(12.9 to 40.6)                            | 1.3<br>(-8.8 to 13.6)                               |
| Chronic kidney disease due to hypertension                 | 0.5<br>(0.4 to 0.5)                  | < 0.05<br>(< 0.05 to < 0.05)             | < 0.05<br>(< 0.05 to < 0.05)      | 31.5<br>(15.3 to 50.4)                            | 7.7<br>(-6.0 to 22.7)                               |
| Chronic kidney disease due to glomerulonephritis           | 0.4<br>(0.4 to 0.5)                  | < 0.05<br>(< 0.05 to 0.1)                | < 0.05<br>(< 0.05 to < 0.05)      | 14.1<br>(1.5 to 28.5)                             | 8.1<br>(-2.0 to 19.5)                               |
| Chronic kidney disease due to other causes                 | 0.2<br>(0.1 to 0.2)                  | < 0.05<br>(< 0.05 to < 0.05)             | < 0.05<br>(< 0.05 to < 0.05)      | 23.0<br>(11.8 to 36.1)                            | 8.6<br>(-0.1 to 18.5)                               |
| Urinary diseases and male infertility                      | 1.1<br>(1.0 to 1.2)                  | 5.8†<br>(5.2 to 6.8)                     | < 0.05<br>(< 0.05 to < 0.05)      | 25.2<br>(16.7 to 34.4)                            | -0.5<br>(-6.3 to 5.6)                               |
| Interstitial nephritis and urinary tract infections        | 0.1<br>(0.1 to 0.1)                  | 5.3<br>(4.6 to 6.3)                      | < 0.05<br>(< 0.05 to < 0.05)      | 8.6<br>(-8.1 to 30.8)                             | -2.4<br>(-16.2 to 17.0)                             |
| Urolithiasis                                               | < 0.05<br>(< 0.05 to < 0.05)         | 0.4<br>(0.4 to 0.5)                      | < 0.05<br>(< 0.05 to < 0.05)      | 27.8<br>(12.4 to 45.9)                            | 1.5<br>(-13.5 to 18.8)                              |
| Benign prostatic hyperplasia                               | 0.6<br>(0.5 to 0.7)                  | 0.1<br>(0.1 to 0.1)                      | < 0.05<br>(< 0.05 to < 0.05)      | 36.1<br>(25.6 to 47.9)                            | 1.3<br>(-6.3 to 9.3)                                |
| Male infertility                                           | 0.3<br>(0.3 to 0.4)                  | --                                       | < 0.05<br>(< 0.05 to < 0.05)      | -3.3<br>(-11.1 to 5.7)                            | -1.1<br>(-8.8 to 7.2)                               |
| Other urinary diseases                                     | --                                   | --                                       | < 0.05<br>(< 0.05 to < 0.05)      | -6.9<br>(-18.8 to 7.6)                            | -18.0<br>(-28.0 to -5.0)                            |
| Gynecological diseases                                     | 9.9<br>(9.4 to 10.3)                 | 3.0†<br>(2.8 to 3.2)                     | 0.1<br>(0.1 to 0.1)               | 3.6<br>(-2.1 to 9.7)                              | -3.5<br>(-8.2 to 1.8)                               |
| Uterine fibroids                                           | 1.6<br>(1.4 to 1.8)                  | 0.2<br>(0.1 to 0.2)                      | < 0.05<br>(< 0.05 to < 0.05)      | 15.0<br>(-1.6 to 35.8)                            | -4.4<br>(-16.9 to 11.4)                             |
| Polycystic ovarian syndrome                                | 0.1<br>(0.1 to 0.1)                  | 0.1<br>(< 0.05 to 0.1)                   | < 0.05<br>(< 0.05 to < 0.05)      | -4.1<br>(-16.9 to 9.8)                            | -2.8<br>(-15.7 to 11.0)                             |
| Female infertility                                         | 0.1<br>(0.1 to 0.3)                  | --                                       | < 0.05<br>(< 0.05 to < 0.05)      | -2.9<br>(-25.3 to 28.7)                           | 3.3<br>(-21.6 to 35.0)                              |
| Endometriosis                                              | < 0.05<br>(< 0.05 to < 0.05)         | 0.1<br>(0.1 to 0.1)                      | < 0.05<br>(< 0.05 to < 0.05)      | 1.7<br>(-25.5 to 36.4)                            | -1.1<br>(-27.5 to 33.5)                             |
| Genital prolapse                                           | 2.6<br>(2.2 to 3.0)                  | 0.2<br>(0.1 to 0.2)                      | < 0.05<br>(< 0.05 to < 0.05)      | 27.9<br>(14.5 to 41.4)                            | -5.0<br>(-15.4 to 5.2)                              |
| Premenstrual syndrome                                      | 5.8<br>(5.4 to 6.2)                  | 2.0<br>(1.9 to 2.2)                      | < 0.05<br>(< 0.05 to 0.1)         | -1.2<br>(-7.8 to 6.2)                             | -2.1<br>(-8.6 to 5.2)                               |
| Other gynecological diseases                               | 0.7<br>(0.6 to 0.8)                  | 0.5<br>(0.5 to 0.6)                      | < 0.05<br>(< 0.05 to < 0.05)      | -1.0<br>(-11.1 to 10.6)                           | -5.4<br>(-15.2 to 5.3)                              |
| Hemoglobinopathies and hemolytic anaemias                  | 25.0<br>(22.1 to 27.9)               | --                                       | 0.1<br>(< 0.05 to 0.2)            | 13.1<br>(-9.2 to 40.9)                            | 1.0<br>(-19.5 to 25.3)                              |
| Thalassemias                                               | < 0.05<br>(< 0.05 to < 0.05)         | --                                       | < 0.05<br>(< 0.05 to < 0.05)      | 13.4<br>(-20.0 to 65.3)                           | 8.6<br>(-23.4 to 60.2)                              |
| Thalassaemias trait                                        | 6.9<br>(3.6 to 11.4)                 | --                                       | 0.1<br>(< 0.05 to 0.2)            | 15.3<br>(-8.5 to 46.0)                            | 4.0<br>(-17.9 to 30.9)                              |
| Sickle cell disorders                                      | < 0.05<br>(< 0.05 to < 0.05)         | --                                       | < 0.05<br>(< 0.05 to < 0.05)      | 12.8<br>(-6.8 to 37.2)                            | 9.5<br>(-10.2 to 34.3)                              |
| Sickle cell trait                                          | 0.3<br>(0.2 to 0.3)                  | --                                       | < 0.05<br>(< 0.05 to < 0.05)      | 11.5<br>(-30.2 to 86.0)                           | 2.1<br>(-37.6 to 74.8)                              |
| G6PD deficiency                                            | 5.5<br>(4.6 to 6.6)                  | --                                       | < 0.05<br>(< 0.05 to < 0.05)      | -0.7<br>(-28.8 to 36.6)                           | -16.0<br>(-40.8 to 15.1)                            |
| G6PD trait                                                 | 13.3<br>(12.3 to 14.4)               | --                                       | < 0.05<br>(< 0.05 to < 0.05)      | 2.5<br>(-22.3 to 35.3)                            | -4.6<br>(-26.7 to 23.9)                             |
| Other hemoglobinopathies and hemolytic anaemias            | 0.7<br>(0.6 to 0.8)                  | --                                       | < 0.05<br>(< 0.05 to < 0.05)      | -0.4<br>(-17.3 to 18.4)                           | -15.8<br>(-29.7 to -0.0)                            |
| Endocrine, metabolic, blood, and immune disorders          | 1.6<br>(1.4 to 1.8)                  | 0.2<br>(0.2 to 0.3)                      | < 0.05<br>(< 0.05 to 0.1)         | 17.8<br>(9.4 to 26.4)                             | -4.8<br>(-11.2 to 1.9)                              |
| <b>Musculoskeletal disorders</b>                           | <b>16.5</b><br><b>(15.8 to 17.3)</b> | <b>8.3</b><br><b>(7.4 to 9.2)</b>        | <b>1.8</b><br><b>(1.3 to 2.3)</b> | <b>19.8</b><br><b>(16.1 to 23.8)</b>              | <b>-0.5</b><br><b>(-3.0 to 2.4)</b>                 |
| Rheumatoid arthritis                                       | 0.1<br>(0.1 to 0.2)                  | < 0.05<br>(< 0.05 to < 0.05)             | < 0.05<br>(< 0.05 to < 0.05)      | 29.4<br>(16.3 to 42.5)                            | 4.2<br>(-5.1 to 13.5)                               |
| Osteoarthritis                                             | 4.2<br>(3.9 to 4.5)                  | 0.2<br>(0.2 to 0.2)                      | 0.3<br>(0.2 to 0.4)               | 34.1<br>(29.0 to 39.8)                            | 1.0<br>(-2.8 to 5.0)                                |
| Low back and neck pain                                     | 9.6<br>(8.9 to 10.4)                 | 4.1<br>(3.6 to 4.6)                      | 1.1<br>(0.8 to 1.5)               | 18.6<br>(13.7 to 24.2)                            | -0.5<br>(-3.5 to 3.4)                               |
| Low back pain                                              | 6.8<br>(6.0 to 7.8)                  | 3.3<br>(2.9 to 3.9)                      | 0.8<br>(0.6 to 1.0)               | 17.7<br>(11.2 to 25.1)                            | -0.6<br>(-4.8 to 4.5)                               |
| Neck pain                                                  | 3.3<br>(2.8 to 3.9)                  | 0.8<br>(0.7 to 0.9)                      | 0.3<br>(0.2 to 0.5)               | 20.9<br>(16.1 to 25.8)                            | -0.1<br>(-2.4 to 2.2)                               |
| Gout                                                       | 0.5<br>(0.4 to 0.5)                  | 0.1<br>(0.1 to 0.1)                      | < 0.05<br>(< 0.05 to < 0.05)      | 29.9<br>(12.2 to 52.5)                            | 1.4<br>(-11.2 to 17.2)                              |
| Other musculoskeletal disorders                            | 4.3<br>(3.6 to 5.0)                  | 3.9<br>(3.2 to 4.6)                      | 0.4<br>(0.2 to 0.5)               | 13.4<br>(3.9 to 23.9)                             | -2.1<br>(-9.8 to 5.5)                               |
| <b>Other non-communicable diseases</b>                     | <b>67.3</b><br><b>(65.5 to 69.0)</b> | <b>192.5†</b><br><b>(175.6 to 209.6)</b> | <b>2.0</b><br><b>(1.4 to 2.8)</b> | <b>10.2</b><br><b>(8.4 to 12.2)</b>               | <b>-2.4</b><br><b>(-3.8 to -1.1)</b>                |
| Congenital anomalies                                       | 0.7<br>(0.6 to 0.8)                  | --                                       | 0.1<br>(0.1 to 0.1)               | 7.8<br>(1.2 to 14.7)                              | -0.1<br>(-6.3 to 5.8)                               |
| Neural tube defects                                        | 0.1<br>(0.1 to 0.1)                  | --                                       | < 0.05<br>(< 0.05 to < 0.05)      | 7.2<br>(-6.0 to 22.0)                             | -0.7<br>(-12.2 to 13.0)                             |
| Congenital heart anomalies                                 | 0.2<br>(0.2 to 0.2)                  | --                                       | < 0.05<br>(< 0.05 to < 0.05)      | 11.9<br>(-0.1 to 25.6)                            | 4.9<br>(-6.2 to 17.3)                               |
| Orofacial clefts                                           | < 0.05<br>(< 0.05 to 0.1)            | --                                       | < 0.05<br>(< 0.05 to < 0.05)      | 16.1<br>(3.1 to 30.0)                             | 7.7<br>(-4.2 to 20.7)                               |
| Down's syndrome                                            | < 0.05<br>(< 0.05 to < 0.05)         | --                                       | < 0.05<br>(< 0.05 to < 0.05)      | 7.6<br>(-0.3 to 15.6)                             | 3.0<br>(-4.6 to 10.6)                               |
| Turner syndrome                                            | < 0.05<br>(< 0.05 to < 0.05)         | --                                       | < 0.05<br>(< 0.05 to < 0.05)      | 5.7<br>(-8.0 to 21.0)                             | 4.7<br>(-8.3 to 19.8)                               |
| Klinefelter syndrome                                       | < 0.05<br>(< 0.05 to < 0.05)         | --                                       | < 0.05<br>(< 0.05 to < 0.05)      | -0.6<br>(-26.2 to 34.1)                           | 2.2<br>(-25.1 to 38.8)                              |



| Cause                                         | Prevalence in thousands (95% UI)     | Incidence in thousands (95% UI)    | YLDs in thousands (95% UI)        |                                                                     |                                                                      |
|-----------------------------------------------|--------------------------------------|------------------------------------|-----------------------------------|---------------------------------------------------------------------|----------------------------------------------------------------------|
|                                               | 2016 counts<br>(0.1 to 0.1)          | 2016 counts<br>(0.1 to 0.1)        | 2016 counts<br>(0.1 to 0.1)       | Percentage change in counts between 2006 and 2016<br>(-4.8 to 10.6) | Percentage change in age-standardised rates between<br>(-7.0 to 8.0) |
| Other chromosomal abnormalities               | < 0.05<br>(< 0.05 to < 0.05)         | --                                 | < 0.05<br>(< 0.05 to < 0.05)      | 2.2<br>(-17.2 to 25.6)                                              | 0.8<br>(-18.2 to 23.1)                                               |
| Congenital musculoskeletal and limb anomalies | 0.1<br>(0.1 to 0.1)                  | --                                 | < 0.05<br>(< 0.05 to < 0.05)      | 14.5<br>(2.5 to 28.3)                                               | 6.0<br>(-4.7 to 18.8)                                                |
| Urogenital congenital anomalies               | 0.1<br>(0.1 to 0.1)                  | --                                 | < 0.05<br>(< 0.05 to < 0.05)      | 2.5<br>(-4.8 to 10.6)                                               | 0.0<br>(-7.0 to 8.0)                                                 |
| Digestive congenital anomalies                | 0.1<br>(0.1 to 0.1)                  | --                                 | < 0.05<br>(< 0.05 to < 0.05)      | 8.0<br>(-6.8 to 24.9)                                               | 0.2<br>(-13.0 to 15.3)                                               |
| Other congenital anomalies                    | 0.3<br>(0.2 to 0.5)                  | --                                 | < 0.05<br>(< 0.05 to 0.1)         | 5.6<br>(-4.6 to 17.1)                                               | -3.3<br>(-12.6 to 7.0)                                               |
| Skin and subcutaneous diseases                | 32.9<br>(31.9 to 34.0)               | 75.1<br>(70.3 to 80.5)             | 0.8<br>(0.5 to 1.1)               | 3.9<br>(1.8 to 6.0)                                                 | 0.5<br>(-1.2 to 2.2)                                                 |
| Dermatitis                                    | 4.4<br>(4.0 to 4.8)                  | 5.7<br>(5.3 to 6.1)                | 0.2<br>(0.1 to 0.3)               | 7.5<br>(3.7 to 11.7)                                                | 0.1<br>(-3.2 to 3.6)                                                 |
| Psoriasis                                     | 0.8<br>(0.7 to 0.8)                  | 0.1<br>(0.1 to 0.1)                | 0.1<br>(< 0.05 to 0.1)            | 16.6<br>(7.7 to 26.3)                                               | 4.3<br>(-3.3 to 12.4)                                                |
| Cellulitis                                    | < 0.05<br>(< 0.05 to < 0.05)         | 0.9<br>(0.8 to 0.9)                | < 0.05<br>(< 0.05 to < 0.05)      | 10.8<br>(-12.1 to 37.0)                                             | 2.1<br>(-18.0 to 24.9)                                               |
| Pyoderma                                      | 0.1<br>(0.1 to 0.1)                  | 2.1<br>(2.0 to 2.1)                | < 0.05<br>(< 0.05 to < 0.05)      | 21.1<br>(9.5 to 33.1)                                               | 1.0<br>(-7.8 to 10.1)                                                |
| Scabies                                       | 3.2<br>(2.5 to 4.2)                  | 10.0<br>(7.9 to 13.3)              | 0.1<br>(< 0.05 to 0.1)            | -2.1<br>(-8.7 to 5.0)                                               | -5.4<br>(-10.7 to 0.1)                                               |
| Fungal skin diseases                          | 10.7<br>(9.6 to 11.9)                | 35.9<br>(31.8 to 40.2)             | 0.1<br>(< 0.05 to 0.1)            | 11.8<br>(9.2 to 14.6)                                               | 0.1<br>(-0.8 to 1.0)                                                 |
| Viral skin diseases                           | 2.6<br>(2.4 to 2.9)                  | 3.7<br>(3.3 to 4.1)                | 0.1<br>(< 0.05 to 0.1)            | 4.4<br>(0.6 to 8.1)                                                 | -0.2<br>(-3.1 to 2.9)                                                |
| Acne vulgaris                                 | 8.2<br>(7.4 to 9.1)                  | 5.7<br>(4.6 to 7.3)                | 0.2<br>(0.1 to 0.3)               | -5.5<br>(-9.4 to -1.6)                                              | 2.1<br>(-2.0 to 6.3)                                                 |
| Alopecia areata                               | 0.2<br>(0.2 to 0.2)                  | 0.3<br>(0.3 to 0.3)                | < 0.05<br>(< 0.05 to < 0.05)      | 6.2<br>(-4.2 to 19.0)                                               | -0.1<br>(-9.7 to 11.6)                                               |
| Pruritus                                      | 0.9<br>(0.8 to 1.0)                  | 0.7<br>(0.6 to 0.8)                | < 0.05<br>(< 0.05 to < 0.05)      | 14.5<br>(7.6 to 21.3)                                               | 0.6<br>(-4.3 to 5.6)                                                 |
| Urticaria                                     | 0.8<br>(0.7 to 0.9)                  | 1.4<br>(1.2 to 1.6)                | < 0.05<br>(< 0.05 to 0.1)         | 6.6<br>(0.2 to 14.0)                                                | -0.2<br>(-5.9 to 5.9)                                                |
| Decubitus ulcer                               | < 0.05<br>(< 0.05 to < 0.05)         | < 0.05<br>(< 0.05 to < 0.05)       | < 0.05<br>(< 0.05 to < 0.05)      | 28.2<br>(10.5 to 48.5)                                              | 4.0<br>(-10.6 to 21.4)                                               |
| Other skin and subcutaneous diseases          | 7.4<br>(7.2 to 7.6)                  | 8.6<br>(8.3 to 8.9)                | < 0.05<br>(< 0.05 to 0.1)         | 21.1<br>(18.3 to 24.2)                                              | 3.4<br>(1.1 to 5.7)                                                  |
| Sense organ diseases                          | 21.5<br>(20.7 to 22.3)               | 9.4†<br>(8.8 to 10.0)              | 0.9<br>(0.7 to 1.3)               | 13.9<br>(10.7 to 17.1)                                              | -5.3<br>(-7.6 to -3.2)                                               |
| Glaucoma                                      | < 0.05<br>(< 0.05 to 0.1)            | --                                 | < 0.05<br>(< 0.05 to < 0.05)      | 30.8<br>(14.6 to 51.0)                                              | -0.7<br>(-12.0 to 14.0)                                              |
| Cataract                                      | 1.4<br>(1.1 to 1.7)                  | --                                 | 0.1<br>(0.1 to 0.1)               | 13.8<br>(7.3 to 22.2)                                               | -6.0<br>(-11.0 to -0.4)                                              |
| Macular degeneration                          | < 0.05<br>(< 0.05 to < 0.05)         | --                                 | < 0.05<br>(< 0.05 to < 0.05)      | 30.2<br>(9.2 to 55.6)                                               | 0.5<br>(-15.5 to 19.4)                                               |
| Refraction and accommodation disorders        | 9.3<br>(8.2 to 10.5)                 | --                                 | 0.2<br>(0.1 to 0.3)               | 9.5<br>(2.7 to 16.6)                                                | -8.5<br>(-13.8 to -3.3)                                              |
| Age-related and other hearing loss            | 14.1<br>(13.2 to 15.0)               | --                                 | 0.5<br>(0.4 to 0.7)               | 13.7<br>(8.4 to 18.6)                                               | -5.1<br>(-8.4 to -2.0)                                               |
| Other vision loss                             | 0.5<br>(0.4 to 0.5)                  | --                                 | < 0.05<br>(< 0.05 to 0.1)         | 22.3<br>(13.1 to 32.7)                                              | -1.8<br>(-8.7 to 5.5)                                                |
| Other sense organ diseases                    | 2.8<br>(2.6 to 3.0)                  | 9.4<br>(8.8 to 10.0)               | 0.1<br>(0.1 to 0.1)               | 20.6<br>(15.7 to 25.9)                                              | 0.2<br>(-3.3 to 4.1)                                                 |
| Oral disorders                                | 42.9<br>(39.6 to 45.8)               | 108.0†<br>(91.8 to 124.6)          | 0.2<br>(0.1 to 0.3)               | 21.8<br>(17.4 to 25.7)                                              | 0.1<br>(-2.3 to 2.5)                                                 |
| Caries of deciduous teeth                     | 5.4<br>(4.1 to 6.8)                  | 21.9<br>(14.3 to 30.0)             | < 0.05<br>(< 0.05 to < 0.05)      | 11.5<br>(-1.4 to 25.6)                                              | -0.4<br>(-11.9 to 12.0)                                              |
| Caries of permanent teeth                     | 28.1<br>(24.6 to 32.0)               | 84.8<br>(69.8 to 99.1)             | < 0.05<br>(< 0.05 to < 0.05)      | 4.3<br>(-1.5 to 9.9)                                                | -2.6<br>(-6.9 to 1.8)                                                |
| Periodontal disease                           | 9.0<br>(6.3 to 12.7)                 | 1.1<br>(0.8 to 1.5)                | 0.1<br>(< 0.05 to 0.1)            | 30.6<br>(18.4 to 39.9)                                              | 0.3<br>(-5.1 to 6.2)                                                 |
| Edentulism and severe tooth loss              | 2.8<br>(2.3 to 3.4)                  | 0.2<br>(0.2 to 0.3)                | 0.1<br>(0.1 to 0.1)               | 28.7<br>(21.8 to 36.0)                                              | 0.6<br>(-3.3 to 4.7)                                                 |
| Other oral disorders                          | 1.8<br>(1.7 to 1.9)                  | --                                 | 0.1<br>(< 0.05 to 0.1)            | 10.6<br>(7.0 to 14.5)                                               | -0.0<br>(-2.9 to 3.2)                                                |
| <b>Injuries</b>                               | <b>15.3</b><br><b>(14.5 to 16.0)</b> | <b>5.8†</b><br><b>(5.5 to 6.0)</b> | <b>0.6</b><br><b>(0.4 to 0.8)</b> | <b>25.5</b><br><b>(22.6 to 28.0)</b>                                | <b>7.5</b><br><b>(5.3 to 9.3)</b>                                    |
| <b>Transport injuries</b>                     | <b>3.4</b><br><b>(3.1 to 3.6)</b>    | <b>1.1</b><br><b>(1.0 to 1.2)</b>  | <b>0.2</b><br><b>(0.1 to 0.2)</b> | <b>38.7</b><br><b>(35.4 to 41.9)</b>                                | <b>16.5</b><br><b>(13.9 to 18.9)</b>                                 |
| Road injuries                                 | 2.4<br>(2.2 to 2.6)                  | 0.8<br>(0.7 to 0.9)                | 0.1<br>(0.1 to 0.2)               | 55.4<br>(51.9 to 58.8)                                              | 28.3<br>(25.7 to 30.7)                                               |
| Pedestrian road injuries                      | 0.3<br>(0.3 to 0.4)                  | 0.1<br>(0.1 to 0.1)                | < 0.05<br>(< 0.05 to < 0.05)      | 54.3<br>(50.8 to 57.6)                                              | 26.0<br>(23.3 to 28.5)                                               |
| Cyclist road injuries                         | 0.4<br>(0.3 to 0.4)                  | 0.1<br>(0.1 to 0.2)                | < 0.05<br>(< 0.05 to < 0.05)      | 64.3<br>(60.3 to 68.3)                                              | 34.8<br>(32.0 to 37.4)                                               |
| Motorcyclist road injuries                    | 0.7<br>(0.6 to 0.8)                  | 0.1<br>(0.1 to 0.2)                | < 0.05<br>(< 0.05 to < 0.05)      | 53.5<br>(49.7 to 57.2)                                              | 28.4<br>(25.5 to 31.0)                                               |
| Motor vehicle road injuries                   | 0.7<br>(0.6 to 0.8)                  | 0.3<br>(0.3 to 0.4)                | < 0.05<br>(< 0.05 to 0.1)         | 49.6<br>(46.1 to 53.0)                                              | 23.0<br>(20.5 to 25.3)                                               |
| Other road injuries                           | 0.3<br>(0.3 to 0.4)                  | 0.1<br>(0.1 to 0.2)                | < 0.05<br>(< 0.05 to < 0.05)      | 67.5<br>(63.5 to 71.4)                                              | 38.7<br>(35.8 to 41.3)                                               |
| Other transport injuries                      | 1.0<br>(0.8 to 1.2)                  | 0.2<br>(0.2 to 0.3)                | < 0.05<br>(< 0.05 to 0.1)         | 9.6<br>(6.5 to 12.5)                                                | -4.7<br>(-7.4 to -2.2)                                               |
| <b>Unintentional injuries</b>                 | <b>10.0</b><br><b>(9.4 to 10.7)</b>  | <b>3.9</b><br><b>(3.6 to 4.1)</b>  | <b>0.3</b><br><b>(0.2 to 0.5)</b> | <b>23.1</b><br><b>(20.4 to 25.5)</b>                                | <b>6.3</b><br><b>(4.1 to 8.0)</b>                                    |
| Falls                                         | 2.9<br>(2.6 to 3.2)                  | 1.2<br>(1.1 to 1.4)                | 0.1<br>(0.1 to 0.2)               | 41.5<br>(38.2 to 44.3)                                              | 19.5<br>(16.9 to 21.8)                                               |
| Drowning                                      | 0.2<br>(0.1 to 0.2)                  | < 0.05<br>(< 0.05 to < 0.05)       | < 0.05<br>(< 0.05 to < 0.05)      | 6.3<br>(2.3 to 9.8)                                                 | -9.2<br>(-12.5 to -6.5)                                              |
| Fire, heat, and hot substances                | 1.5<br>(1.3 to 1.8)                  | 0.2<br>(0.1 to 0.2)                | < 0.05<br>(< 0.05 to 0.1)         | -2.0<br>(-6.1 to 1.4)                                               | -15.4<br>(-18.8 to -12.6)                                            |
| Poisonings                                    | < 0.05<br>(< 0.05 to < 0.05)         | < 0.05<br>(< 0.05 to 0.1)          | < 0.05<br>(< 0.05 to < 0.05)      | 24.8<br>(15.6 to 35.0)                                              | 12.2<br>(4.5 to 21.1)                                                |
| Exposure to mechanical forces                 | 1.7<br>(1.5 to 2.1)                  | 0.6<br>(0.5 to 0.7)                | < 0.05<br>(< 0.05 to 0.1)         | 39.2<br>(35.3 to 42.7)                                              | 18.0<br>(15.0 to 20.6)                                               |
| Unintentional firearm injuries                | 0.1<br>(0.1 to 0.1)                  | < 0.05<br>(< 0.05 to < 0.05)       | < 0.05<br>(< 0.05 to < 0.05)      | 14.8<br>(11.6 to 18.0)                                              | -2.5<br>(-5.0 to -0.4)                                               |
| Unintentional suffocation                     | 0.1<br>(0.1 to 0.1)                  | < 0.05<br>(< 0.05 to < 0.05)       | < 0.05<br>(< 0.05 to < 0.05)      | 18.8<br>(15.6 to 21.8)                                              | 5.0<br>(2.5 to 7.2)                                                  |
| Other exposure to mechanical forces           | 1.5<br>(1.3 to 1.9)                  | 0.6<br>(0.5 to 0.7)                | < 0.05<br>(< 0.05 to < 0.05)      | 44.7<br>(40.7 to 48.2)                                              | 22.1<br>(19.0 to 24.7)                                               |

| Cause                                                                               | Prevalence in thousands (95% UI)  | Incidence in thousands (95% UI)                      | YLDs in thousands (95% UI)                          |                                                   |                                                     |
|-------------------------------------------------------------------------------------|-----------------------------------|------------------------------------------------------|-----------------------------------------------------|---------------------------------------------------|-----------------------------------------------------|
|                                                                                     | 2016 counts                       | 2016 counts                                          | 2016 counts                                         | Percentage change in counts between 2006 and 2016 | Percentage change in age-standardised rates between |
| Adverse effects of medical treatment                                                | < 0.05<br>(< 0.05 to < 0.05)      | 0.3<br>(0.3 to 0.4)                                  | < 0.05<br>(< 0.05 to < 0.05)                        | 15.8<br>(10.8 to 21.4)                            | 4.3<br>(-0.4 to 8.5)                                |
| Animal contact                                                                      | 0.3<br>(0.2 to 0.3)               | 0.3<br>(0.2 to 0.3)                                  | < 0.05<br>(< 0.05 to < 0.05)                        | 13.1<br>(6.9 to 19.7)                             | 1.3<br>(-4.0 to 6.7)                                |
| Venomous animal contact                                                             | 0.1<br>(0.1 to 0.1)               | 0.1<br>(0.1 to 0.1)                                  | < 0.05<br>(< 0.05 to < 0.05)                        | 16.7<br>(7.1 to 27.4)                             | 6.1<br>(-2.1 to 15.1)                               |
| Non-venomous animal contact                                                         | 0.2<br>(0.1 to 0.2)               | 0.2<br>(0.1 to 0.2)                                  | < 0.05<br>(< 0.05 to < 0.05)                        | 7.2<br>(3.0 to 10.8)                              | -6.6<br>(-9.9 to -3.9)                              |
| Foreign body                                                                        | 0.7<br>(0.6 to 0.8)               | 0.3<br>(0.3 to 0.4)                                  | < 0.05<br>(< 0.05 to < 0.05)                        | 8.5<br>(4.9 to 12.0)                              | -2.8<br>(-5.9 to -0.1)                              |
| Pulmonary aspiration and foreign body in airway                                     | 0.5<br>(0.4 to 0.7)               | 0.2<br>(0.1 to 0.2)                                  | < 0.05<br>(< 0.05 to < 0.05)                        | 7.1<br>(3.4 to 10.6)                              | -3.2<br>(-6.5 to -0.2)                              |
| Foreign body in eyes                                                                | < 0.05<br>(< 0.05 to < 0.05)      | 0.1<br>(0.1 to 0.1)                                  | < 0.05<br>(< 0.05 to < 0.05)                        | 15.0<br>(9.5 to 21.2)                             | 1.0<br>(-2.1 to 4.4)                                |
| Foreign body in other body part                                                     | 0.2<br>(0.2 to 0.2)               | 0.1<br>(0.1 to 0.1)                                  | < 0.05<br>(< 0.05 to < 0.05)                        | 12.6<br>(8.2 to 16.5)                             | -2.1<br>(-5.9 to 0.9)                               |
| Environmental heat and cold exposure                                                | 0.7<br>(0.6 to 0.9)               | 0.2<br>(0.1 to 0.2)                                  | < 0.05<br>(< 0.05 to < 0.05)                        | 14.1<br>(11.0 to 16.9)                            | -0.2<br>(-2.6 to 1.9)                               |
| Other unintentional injuries                                                        | 2.0<br>(1.6 to 2.4)               | 0.6<br>(0.5 to 0.8)                                  | 0.1<br>(< 0.05 to 0.1)                              | 18.4<br>(16.0 to 20.5)                            | 3.2<br>(1.2 to 4.9)                                 |
| <b>Self-harm and interpersonal violence</b>                                         | <b>3.1</b><br><b>(2.8 to 3.5)</b> | <b>0.8†</b><br><b>(0.7 to 0.9)</b>                   | <b>0.1</b><br><b>(0.1 to 0.1)</b>                   | <b>13.3</b><br><b>(10.7 to 16.0)</b>              | <b>-2.9</b><br><b>(-4.7 to -1.2)</b>                |
| Self-harm                                                                           | 0.1<br>(0.1 to 0.1)               | 0.1<br>(< 0.05 to 0.1)                               | < 0.05<br>(< 0.05 to < 0.05)                        | 9.1<br>(5.4 to 12.5)                              | -7.0<br>(-9.7 to -4.4)                              |
| Self-harm by firearm                                                                | < 0.05<br>(< 0.05 to < 0.05)      | < 0.05<br>(< 0.05 to < 0.05)                         | < 0.05<br>(< 0.05 to < 0.05)                        | 9.8<br>(5.6 to 13.4)                              | -0.3<br>(-4.0 to 2.9)                               |
| Self-harm by other specified means                                                  | 0.1<br>(0.1 to 0.1)               | < 0.05<br>(< 0.05 to 0.1)                            | < 0.05<br>(< 0.05 to < 0.05)                        | 9.1<br>(5.4 to 12.5)                              | -7.2<br>(-9.9 to -4.6)                              |
| Interpersonal violence                                                              | 3.0<br>(2.7 to 3.3)               | 0.8†<br>(0.7 to 0.9)                                 | 0.1<br>(< 0.05 to 0.1)                              | 13.7<br>(10.9 to 16.3)                            | -2.5<br>(-4.3 to -0.8)                              |
| Assault by firearm                                                                  | < 0.05<br>(< 0.05 to < 0.05)      | < 0.05<br>(< 0.05 to < 0.05)                         | < 0.05<br>(< 0.05 to < 0.05)                        | 13.6<br>(10.0 to 17.3)                            | -3.6<br>(-6.4 to -1.1)                              |
| Assault by sharp object                                                             | 0.4<br>(0.3 to 0.4)               | 0.1<br>(0.1 to 0.2)                                  | < 0.05<br>(< 0.05 to < 0.05)                        | 9.0<br>(4.8 to 12.8)                              | -7.0<br>(-9.9 to -4.5)                              |
| Sexual violence                                                                     | 1.4<br>(1.2 to 1.6)               | --                                                   | < 0.05<br>(< 0.05 to < 0.05)                        | -5.3<br>(-9.0 to -1.1)                            | -6.0<br>(-9.3 to -2.0)                              |
| Assault by other means                                                              | 1.2<br>(1.0 to 1.5)               | 0.6<br>(0.5 to 0.7)                                  | < 0.05<br>(< 0.05 to 0.1)                           | 20.8<br>(17.6 to 23.5)                            | -0.5<br>(-2.7 to 1.6)                               |
| <b>Forces of nature, conflict and terrorism, and executions and police conflict</b> | <b>0.2</b><br><b>(0.1 to 0.3)</b> | <b>&lt; 0.05†</b><br><b>(&lt; 0.05 to &lt; 0.05)</b> | <b>&lt; 0.05</b><br><b>(&lt; 0.05 to &lt; 0.05)</b> | <b>-16.4</b><br><b>(-19.7 to -12.5)</b>           | <b>-27.8</b><br><b>(-30.2 to -24.2)</b>             |
| Exposure to forces of nature                                                        | < 0.05<br>(< 0.05 to < 0.05)      | --                                                   | < 0.05<br>(< 0.05 to < 0.05)                        | -22.6<br>(-25.0 to -19.9)                         | -33.5<br>(-35.5 to -31.2)                           |
| Conflict and terrorism                                                              | 0.1<br>(< 0.05 to 0.2)            | --                                                   | < 0.05<br>(< 0.05 to < 0.05)                        | -22.9<br>(-25.9 to -20.5)                         | -34.0<br>(-36.4 to -32.0)                           |
| Executions and police conflict                                                      | 0.1<br>(< 0.05 to 0.1)            | < 0.05<br>(< 0.05 to < 0.05)                         | < 0.05<br>(< 0.05 to < 0.05)                        | 5.8<br>(-5.8 to 15.0)                             | -5.1<br>(-14.5 to 3.5)                              |
| <b>Impairments</b>                                                                  | --                                | --                                                   | --                                                  | --                                                | --                                                  |
| Anaemia                                                                             | 20.8<br>(17.1 to 25.2)            | --                                                   | 0.5<br>(0.3 to 0.7)                                 | 4.4<br>(-12.3 to 25.6)                            | -6.4<br>(-20.6 to 11.1)                             |
| Developmental intellectual disability                                               | 1.5<br>(1.1 to 2.0)               | --                                                   | 0.2<br>(0.1 to 0.2)                                 | -0.2<br>(-5.5 to 5.4)                             | -4.7<br>(-9.4 to 0.5)                               |
| Epilepsy                                                                            | 0.7<br>(0.4 to 0.9)               | --                                                   | 0.2<br>(0.1 to 0.4)                                 | 6.6<br>(-48.5 to 117.3)                           | -0.1<br>(-52.0 to 108.2)                            |
| Guillain-Barre syndrome                                                             | < 0.05<br>(< 0.05 to < 0.05)      | --                                                   | < 0.05<br>(< 0.05 to < 0.05)                        | 13.5<br>(8.2 to 20.8)                             | 0.1<br>(-0.0 to 0.3)                                |
| Hearing loss                                                                        | 15.0<br>(14.2 to 16.0)            | --                                                   | 0.6<br>(0.4 to 0.8)                                 | 12.2<br>(7.3 to 16.6)                             | -5.3<br>(-8.3 to -2.4)                              |
| Heart failure                                                                       | 0.7<br>(0.7 to 0.8)               | --                                                   | 0.1<br>(< 0.05 to 0.1)                              | 23.9<br>(15.7 to 33.1)                            | -0.8<br>(-6.7 to 5.6)                               |
| Infertility                                                                         | 1.4<br>(1.1 to 1.9)               | --                                                   | < 0.05<br>(< 0.05 to < 0.05)                        | -2.7<br>(-8.2 to 3.3)                             | -1.4<br>(-6.7 to 4.5)                               |
| Pelvic inflammatory disease                                                         | 0.1<br>(0.1 to 0.1)               | --                                                   | < 0.05<br>(< 0.05 to < 0.05)                        | -0.0<br>(-13.2 to 15.6)                           | -7.5<br>(-19.0 to 5.9)                              |
| Vision loss                                                                         | 11.5<br>(10.3 to 12.8)            | --                                                   | 0.4<br>(0.3 to 0.5)                                 | 11.8<br>(7.3 to 16.6)                             | -6.0<br>(-9.4 to -2.6)                              |

We did not calculate incidence for the nine impairments, certain NTDs, and causes with only birth prevalence. Blank cells mean that no estimate is available.

† Incidence for aggregate causes represents the sum of the incidence of the causes below the aggregate.

‡ Incidence estimates for stroke represent first-ever stroke only.

^ Incidence of HIV/AIDS represents new infections of HIV only and does not include new infections of Tuberculosis in HIV positive cases.

SR Table 14: Prevalence, incidence, and YLDs for 2016, percentage change of YLD counts and percentage change of age-standardised YLD rates between 2006 and 2016 by cause and impairments, for all ages, Sierra Leone.

| Cause                                                                                | Prevalence in thousands (95% UI)       | Incidence in thousands (95% UI)            | YLDs in thousands (95% UI)       |                                                   |                                                     |
|--------------------------------------------------------------------------------------|----------------------------------------|--------------------------------------------|----------------------------------|---------------------------------------------------|-----------------------------------------------------|
|                                                                                      | 2016 counts                            | 2016 counts                                | 2016 counts                      | Percentage change in counts between 2006 and 2016 | Percentage change in age-standardised rates between |
| <b>All causes</b>                                                                    | <b>6,528.4</b><br>(6,515.0 to 6,540.4) | <b>38,847.4†</b><br>(36,747.6 to 41,174.7) | <b>628.4</b><br>(462.3 to 825.1) | <b>20.8</b><br>(16.6 to 25.1)                     | <b>-6.3</b><br>(-9.2 to -3.2)                       |
| <b>Communicable, maternal, neonatal, and nutritional disorders</b>                   | <b>5,793.6</b><br>(5,702.5 to 5,870.3) | <b>23,506.5†</b><br>(21,655.4 to 25,413.0) | <b>176.3</b><br>(122.9 to 243.6) | <b>3.4</b><br>(-3.9 to 12.2)                      | <b>-23.7</b><br>(-31.1 to -14.8)                    |
| <b>HIV/AIDS and tuberculosis</b>                                                     | <b>2,002.7</b><br>(1,746.1 to 2,242.8) | <b>15.0†</b><br>(12.2 to 18.4)             | <b>8.5</b><br>(5.8 to 12.1)      | <b>6.6</b><br>(-16.5 to 34.0)                     | <b>-19.9</b><br>(-37.2 to 0.2)                      |
| Tuberculosis                                                                         | 1,806.5<br>(1,563.9 to 2,096.5)        | 12.2†<br>(10.0 to 14.8)                    | 2.2<br>(1.4 to 3.1)              | -1.6<br>(-13.4 to 10.9)                           | -24.6<br>(-32.1 to -17.3)                           |
| Drug-susceptible tuberculosis                                                        | 7.2<br>(5.9 to 8.8)                    | 12.0<br>(9.9 to 14.6)                      | 2.2<br>(1.4 to 3.1)              | -1.6<br>(-13.5 to 11.1)                           | -24.6<br>(-32.2 to -17.2)                           |
| Multidrug-resistant tuberculosis without extensive drug resistance                   | 0.1<br>(< 0.05 to 0.2)                 | 0.1<br>(< 0.05 to 0.4)                     | < 0.05<br>(< 0.05 to 0.1)        | -3.7<br>(-69.4 to 188.5)                          | -26.5<br>(-76.6 to 119.6)                           |
| Extensively drug-resistant tuberculosis                                              | < 0.05<br>(< 0.05 to < 0.05)           | < 0.05<br>(< 0.05 to < 0.05)               | < 0.05<br>(< 0.05 to < 0.05)     | 193.5<br>(-6.7 to 778.9)                          | 124.0<br>(-28.7 to 569.4)                           |
| Latent tuberculosis infection                                                        | 1,799.3<br>(1,556.8 to 2,089.7)        | --                                         | --                               | --                                                | --                                                  |
| HIV/AIDS                                                                             | 52.7<br>(43.8 to 62.4)                 | 2.9^<br>(1.2 to 4.9)                       | 6.3<br>(4.2 to 9.3)              | 9.9<br>(-20.8 to 49.9)                            | -17.8<br>(-40.8 to 13.8)                            |
| Drug-susceptible HIV/AIDS - Tuberculosis                                             | 0.8<br>(0.4 to 1.2)                    | 1.3<br>(0.7 to 2.1)                        | 0.3<br>(0.1 to 0.5)              | -13.9<br>(-32.0 to 10.9)                          | -29.7<br>(-43.7 to -11.2)                           |
| Multidrug-resistant HIV/AIDS - Tuberculosis without extensive drug resistance        | < 0.05<br>(< 0.05 to < 0.05)           | < 0.05<br>(< 0.05 to 0.1)                  | < 0.05<br>(< 0.05 to < 0.05)     | -16.6<br>(-73.1 to 150.5)                         | -32.2<br>(-78.2 to 103.3)                           |
| Extensively drug-resistant HIV/AIDS - Tuberculosis                                   | < 0.05<br>(< 0.05 to < 0.05)           | < 0.05<br>(< 0.05 to < 0.05)               | < 0.05<br>(< 0.05 to < 0.05)     | 154.3<br>(-17.9 to 663.6)                         | 106.4<br>(-33.4 to 519.7)                           |
| HIV/AIDS resulting in other diseases                                                 | 51.9<br>(42.9 to 61.8)                 | 2.9<br>(1.2 to 4.9)                        | 6.0<br>(3.9 to 9.0)              | 11.4<br>(-20.9 to 56.4)                           | -17.1<br>(-40.8 to 17.5)                            |
| <b>Diarrhoea, lower respiratory infections, and other common infectious diseases</b> | <b>432.9</b><br>(413.3 to 455.5)       | <b>18,781.2†</b><br>(17,315.5 to 20,384.9) | <b>25.5</b><br>(17.9 to 34.4)    | <b>17.1</b><br>(13.1 to 20.9)                     | <b>-9.1</b><br>(-11.7 to -6.6)                      |
| Diarrhoeal diseases                                                                  | 97.1<br>(89.7 to 105.0)                | 6,477.2<br>(5,986.1 to 7,041.2)            | 11.0<br>(7.5 to 15.2)            | 11.7<br>(5.3 to 18.5)                             | -13.2<br>(-17.4 to -9.1)                            |
| Intestinal infectious diseases                                                       | 0.9<br>(0.6 to 1.3)                    | 16.9†<br>(10.9 to 24.9)                    | 0.1<br>(0.1 to 0.2)              | -12.4<br>(-32.7 to 12.6)                          | -32.5<br>(-45.0 to -16.7)                           |
| Typhoid fever                                                                        | 0.8<br>(0.5 to 1.2)                    | 12.8<br>(8.2 to 19.4)                      | 0.1<br>(0.1 to 0.2)              | -12.6<br>(-34.7 to 15.9)                          | -32.6<br>(-46.3 to -15.9)                           |
| Paratyphoid fever                                                                    | 0.2<br>(0.1 to 0.3)                    | 4.0<br>(2.3 to 6.8)                        | < 0.05<br>(< 0.05 to < 0.05)     | -5.4<br>(-26.4 to 20.6)                           | -27.4<br>(-41.6 to -10.3)                           |
| Other intestinal infectious diseases                                                 | --                                     | --                                         | < 0.05<br>(< 0.05 to < 0.05)     | -37.0<br>(-52.1 to -15.1)                         | -50.7<br>(-59.2 to -40.4)                           |
| Lower respiratory infections                                                         | 10.5<br>(9.7 to 11.4)                  | 443.0<br>(404.0 to 488.5)                  | 0.6<br>(0.4 to 0.9)              | 4.2<br>(-7.7 to 16.9)                             | -13.7<br>(-20.9 to -5.8)                            |
| Upper respiratory infections                                                         | 148.0<br>(129.3 to 168.0)              | 11,033.8<br>(9,613.9 to 12,582.7)          | 3.7<br>(2.2 to 5.8)              | 26.0<br>(16.6 to 35.6)                            | -1.9<br>(-9.0 to 5.0)                               |
| Otitis media                                                                         | 153.9<br>(137.7 to 171.2)              | 587.0<br>(455.8 to 751.5)                  | 5.0<br>(3.1 to 7.5)              | 20.0<br>(11.8 to 28.6)                            | -7.2<br>(-13.1 to -1.1)                             |
| Meningitis                                                                           | 29.2<br>(24.5 to 34.9)                 | 7.6<br>(6.5 to 9.0)                        | 2.9<br>(2.1 to 3.9)              | 25.8<br>(17.3 to 34.1)                            | -3.7<br>(-10.0 to 2.4)                              |
| Pneumococcal meningitis                                                              | 7.8<br>(6.6 to 9.5)                    | 0.8<br>(0.6 to 1.0)                        | 1.0<br>(0.7 to 1.4)              | 15.2<br>(-1.2 to 34.5)                            | -13.1<br>(-24.7 to 0.7)                             |
| H influenzae type B meningitis                                                       | 3.9<br>(2.8 to 5.5)                    | 0.8<br>(0.4 to 1.4)                        | 0.5<br>(0.3 to 0.7)              | 5.4<br>(-9.2 to 19.9)                             | -19.9<br>(-30.7 to -9.3)                            |
| Meningococcal infection                                                              | 6.4<br>(4.5 to 9.0)                    | 2.1<br>(1.5 to 3.0)                        | 0.7<br>(0.5 to 1.0)              | 24.2<br>(15.7 to 33.5)                            | -5.3<br>(-12.4 to 1.9)                              |
| Other meningitis                                                                     | 11.1<br>(7.5 to 15.1)                  | 3.9<br>(3.1 to 4.9)                        | 0.7<br>(0.5 to 1.0)              | 72.5<br>(54.9 to 96.2)                            | 35.2<br>(21.6 to 54.0)                              |
| Encephalitis                                                                         | 15.9<br>(10.1 to 24.0)                 | 6.9<br>(6.0 to 7.9)                        | 1.7<br>(1.2 to 2.3)              | 28.9<br>(13.8 to 47.9)                            | -0.3<br>(-10.4 to 12.2)                             |
| Diphtheria                                                                           | < 0.05<br>(< 0.05 to < 0.05)           | < 0.05<br>(< 0.05 to < 0.05)               | < 0.05<br>(< 0.05 to < 0.05)     | -63.3<br>(-85.3 to -1.8)                          | -71.4<br>(-87.0 to -33.4)                           |
| Whooping cough                                                                       | 3.4<br>(2.7 to 4.3)                    | 25.0<br>(19.5 to 31.4)                     | 0.2<br>(0.1 to 0.3)              | -18.0<br>(-30.6 to -4.8)                          | -37.6<br>(-47.6 to -27.5)                           |
| Tetanus                                                                              | 0.1<br>(0.1 to 0.1)                    | 0.2<br>(0.1 to 0.3)                        | < 0.05<br>(< 0.05 to < 0.05)     | -33.2<br>(-60.1 to -4.3)                          | -44.7<br>(-62.0 to -25.6)                           |
| Measles                                                                              | 0.1<br>(0.1 to 0.4)                    | 5.5<br>(1.9 to 12.8)                       | < 0.05<br>(< 0.05 to < 0.05)     | -53.1<br>(-72.3 to -11.7)                         | -64.8<br>(-79.3 to -33.9)                           |
| Varicella and herpes zoster                                                          | 6.0<br>(5.6 to 6.5)                    | 178.2<br>(167.3 to 189.7)                  | 0.2<br>(0.1 to 0.3)              | 29.4<br>(11.3 to 51.7)                            | 0.5<br>(-10.2 to 12.5)                              |
| <b>Neglected tropical diseases and malaria</b>                                       | <b>3,670.3</b><br>(3,489.9 to 3,851.3) | <b>2,460.0†</b><br>(1,669.6 to 3,602.9)    | <b>54.7</b><br>(34.9 to 83.3)    | <b>-21.9</b><br>(-35.5 to -2.1)                   | <b>-40.8</b><br>(-53.1 to -22.4)                    |
| Malaria                                                                              | 1,953.6<br>(1,711.9 to 2,201.7)        | 2,278.9<br>(1,501.5 to 3,423.1)            | 20.8<br>(14.7 to 28.8)           | -1.7<br>(-10.0 to 7.0)                            | -24.1<br>(-30.3 to -17.5)                           |
| Chagas disease                                                                       | --                                     | --                                         | --                               | --                                                | --                                                  |
| Leishmaniasis                                                                        | --                                     | --                                         | --                               | --                                                | --                                                  |
| Visceral leishmaniasis                                                               | --                                     | --                                         | --                               | --                                                | --                                                  |
| Cutaneous and mucocutaneous leishmaniasis                                            | --                                     | --                                         | --                               | --                                                | --                                                  |
| African trypanosomiasis                                                              | --                                     | --                                         | --                               | --                                                | --                                                  |
| Schistosomiasis                                                                      | 36.6<br>(26.6 to 52.3)                 | 17.6<br>(13.6 to 23.6)                     | 0.4<br>(0.2 to 0.7)              | -85.1<br>(-87.3 to -81.0)                         | -88.7<br>(-90.3 to -85.5)                           |
| Cysticercosis                                                                        | 1.9<br>(1.5 to 2.4)                    | --                                         | 0.4<br>(0.2 to 0.6)              | 40.4<br>(11.0 to 75.8)                            | 8.3<br>(-11.3 to 30.7)                              |
| Cystic echinococcosis                                                                | 3.7<br>(0.9 to 13.8)                   | 0.8<br>(0.2 to 2.7)                        | 0.3<br>(0.1 to 1.2)              | -35.3<br>(-89.4 to 289.5)                         | -50.4<br>(-91.2 to 179.5)                           |
| Lymphatic filariasis                                                                 | 77.6<br>(49.6 to 134.3)                | 25.8<br>(23.2 to 28.5)                     | 5.4<br>(1.9 to 12.7)             | -38.2<br>(-71.7 to -7.7)                          | -51.0<br>(-77.0 to -26.0)                           |
| Onchocerciasis                                                                       | 229.2<br>(114.3 to 396.0)              | 55.2<br>(19.4 to 132.8)                    | 17.9<br>(5.4 to 38.1)            | -27.0<br>(-60.7 to 24.7)                          | -40.9<br>(-66.0 to -1.6)                            |
| Trachoma                                                                             | --                                     | --                                         | --                               | --                                                | --                                                  |
| Dengue                                                                               | 4.8<br>(2.8 to 7.7)                    | 80.1<br>(53.6 to 112.9)                    | 0.8<br>(0.4 to 1.4)              | 187.5<br>(109.2 to 549.2)                         | 122.9<br>(67.0 to 398.7)                            |
| Yellow fever                                                                         | < 0.05<br>(< 0.05 to 0.1)              | 1.5<br>(0.4 to 4.1)                        | < 0.05<br>(< 0.05 to < 0.05)     | -32.3<br>(-51.0 to -8.0)                          | -47.7<br>(-60.4 to -32.5)                           |
| Rabies                                                                               | < 0.05<br>(< 0.05 to < 0.05)           | < 0.05<br>(< 0.05 to 0.1)                  | < 0.05<br>(< 0.05 to < 0.05)     | -40.2<br>(-69.2 to 18.3)                          | -53.0<br>(-71.3 to -22.0)                           |
| Intestinal nematode infections                                                       | 2,230.7<br>(2,062.4 to 2,417.7)        | --                                         | 4.7<br>(2.8 to 7.5)              | -47.3<br>(-54.0 to -40.4)                         | -60.2<br>(-66.2 to -53.7)                           |
| Ascariasis                                                                           | 840.6<br>(693.6 to 1,005.2)            | --                                         | 0.6<br>(0.3 to 1.0)              | -40.2<br>(-52.5 to -26.0)                         | -55.1<br>(-65.8 to -41.9)                           |



| Cause                                                                   | Prevalence in thousands (95% UI)              | Incidence in thousands (95% UI)                   | YLDs in thousands (95% UI)              |                                                   |                                                     |
|-------------------------------------------------------------------------|-----------------------------------------------|---------------------------------------------------|-----------------------------------------|---------------------------------------------------|-----------------------------------------------------|
|                                                                         | 2016 counts                                   | 2016 counts                                       | 2016 counts                             | Percentage change in counts between 2006 and 2016 | Percentage change in age-standardised rates between |
| Trichuriasis                                                            | 768.4<br>(629.2 to 946.5)                     | --                                                | 0.4<br>(0.2 to 0.6)                     | -45.6<br>(-59.4 to -26.3)                         | -58.6<br>(-71.0 to -40.3)                           |
| Hookworm disease                                                        | 959.9<br>(821.6 to 1,138.2)                   | --                                                | 3.8<br>(2.2 to 6.0)                     | -48.4<br>(-55.8 to -40.2)                         | -61.0<br>(-67.4 to -53.3)                           |
| Food-borne trematodiasis                                                | --                                            | --                                                | --                                      | --                                                | --                                                  |
| Leprosy                                                                 | 0.9<br>(0.8 to 1.0)                           | 0.1<br>(0.1 to 0.1)                               | 0.1<br>(< 0.05 to 0.1)                  | -1.2<br>(-19.9 to 20.9)                           | -20.8<br>(-32.5 to -7.6)                            |
| Ebola virus disease                                                     | 0.4<br>(< 0.05 to 2.7)                        | < 0.05<br>(< 0.05 to < 0.05)                      | 0.1<br>(< 0.05 to 0.6)                  | --                                                | --                                                  |
| Zika virus disease                                                      | --                                            | --                                                | --                                      | --                                                | --                                                  |
| Guinea worm disease                                                     | --                                            | --                                                | --                                      | --                                                | --                                                  |
| Other neglected tropical diseases                                       | 107.5<br>(103.9 to 110.9)                     | --                                                | 3.8<br>(2.5 to 5.5)                     | 30.8<br>(22.4 to 40.6)                            | -0.7<br>(-6.9 to 6.4)                               |
| <b>Maternal disorders</b>                                               | <b>23.2</b><br><b>(18.6 to 29.2)</b>          | <b>150.9†</b><br><b>(131.7 to 171.4)</b>          | <b>2.8</b><br><b>(1.9 to 3.9)</b>       | <b>-14.0</b><br><b>(-27.2 to 1.8)</b>             | <b>-36.5</b><br><b>(-46.0 to -25.4)</b>             |
| Maternal haemorrhage                                                    | 2.1<br>(1.6 to 2.8)                           | 18.4<br>(11.8 to 27.0)                            | 0.1<br>(0.1 to 0.2)                     | 15.2<br>(-22.5 to 66.3)                           | -12.4<br>(-41.0 to 25.4)                            |
| Maternal sepsis and other pregnancy related infections                  | 3.1<br>(2.4 to 4.1)                           | 18.0<br>(13.4 to 24.2)                            | 0.1<br>(< 0.05 to 0.1)                  | 21.7<br>(-40.7 to 131.3)                          | -8.0<br>(-53.6 to 72.0)                             |
| Maternal hypertensive disorders                                         | 13.3<br>(8.3 to 18.7)                         | 57.8<br>(46.8 to 67.6)                            | 0.6<br>(0.3 to 1.0)                     | 23.8<br>(-22.3 to 100.9)                          | -6.9<br>(-41.2 to 50.7)                             |
| Maternal obstructed labour and uterine rupture                          | 4.8<br>(3.9 to 5.6)                           | 10.3<br>(7.2 to 13.9)                             | 1.5<br>(1.0 to 2.2)                     | -25.2<br>(-37.1 to -12.2)                         | -44.1<br>(-52.6 to -34.8)                           |
| Maternal abortion, miscarriage, and ectopic pregnancy                   | 0.4<br>(0.2 to 0.6)                           | 46.5<br>(33.8 to 62.6)                            | < 0.05<br>(< 0.05 to 0.1)               | 17.7<br>(-43.6 to 129.3)                          | -12.6<br>(-56.0 to 66.2)                            |
| Other maternal disorders                                                | --                                            | --                                                | 0.4<br>(0.3 to 0.6)                     | -17.9<br>(-30.5 to -3.1)                          | -39.4<br>(-48.5 to -28.7)                           |
| <b>Neonatal disorders</b>                                               | <b>84.3</b><br><b>(66.0 to 106.2)</b>         | --                                                | <b>8.2</b><br><b>(4.7 to 14.3)</b>      | <b>61.9</b><br><b>(18.5 to 117.4)</b>             | <b>27.8</b><br><b>(-8.6 to 75.3)</b>                |
| Neonatal preterm birth complications                                    | 53.9<br>(37.5 to 80.1)                        | --                                                | 2.4<br>(1.6 to 3.4)                     | 33.4<br>(-2.2 to 81.9)                            | 4.1<br>(-25.6 to 45.5)                              |
| Neonatal encephalopathy due to birth asphyxia and trauma                | 27.0<br>(14.4 to 50.0)                        | --                                                | 1.8<br>(0.5 to 6.4)                     | 73.5<br>(-27.6 to 212.8)                          | 37.6<br>(-46.8 to 157.2)                            |
| Neonatal sepsis and other neonatal infections                           | 7.5<br>(3.0 to 17.6)                          | --                                                | 2.7<br>(0.7 to 7.3)                     | 110.4<br>(11.1 to 317.9)                          | 75.1<br>(-11.9 to 277.0)                            |
| Hemolytic disease and other neonatal jaundice                           | 1.4<br>(1.2 to 1.6)                           | --                                                | 0.5<br>(0.4 to 0.6)                     | 25.1<br>(10.6 to 42.2)                            | -2.4<br>(-12.9 to 9.9)                              |
| Other neonatal disorders                                                | --                                            | --                                                | 0.8<br>(0.5 to 1.2)                     | 42.0<br>(9.9 to 80.1)                             | 9.2<br>(-16.1 to 39.6)                              |
| <b>Nutritional deficiencies</b>                                         | <b>2,363.3</b><br><b>(2,225.6 to 2,567.5)</b> | <b>726.8†</b><br><b>(510.6 to 1,066.4)</b>        | <b>70.4</b><br><b>(47.1 to 100.5)</b>   | <b>22.3</b><br><b>(17.7 to 27.4)</b>              | <b>-8.4</b><br><b>(-11.6 to -5.2)</b>               |
| Protein-energy malnutrition                                             | 88.3<br>(75.0 to 104.7)                       | 63.3<br>(54.0 to 73.6)                            | 4.2<br>(2.5 to 6.3)                     | 9.8<br>(-18.7 to 48.6)                            | -18.0<br>(-39.8 to 11.6)                            |
| Iodine deficiency                                                       | 102.1<br>(77.4 to 130.4)                      | 3.9<br>(3.0 to 5.0)                               | 3.1<br>(2.0 to 4.6)                     | -9.6<br>(-20.1 to 2.2)                            | -29.7<br>(-36.9 to -21.7)                           |
| Vitamin A deficiency                                                    | 721.1<br>(508.6 to 1,040.6)                   | 659.6<br>(445.5 to 999.0)                         | 0.4<br>(0.2 to 0.6)                     | 20.3<br>(-11.3 to 57.0)                           | -6.3<br>(-29.3 to 19.4)                             |
| Iron-deficiency anaemia                                                 | 1,876.0<br>(1,823.6 to 1,926.8)               | --                                                | 62.6<br>(41.9 to 90.6)                  | 25.5<br>(20.9 to 30.6)                            | -6.0<br>(-9.2 to -2.8)                              |
| Other nutritional deficiencies                                          | --                                            | --                                                | 0.1<br>(0.1 to 0.2)                     | 9.3<br>(-19.9 to 49.3)                            | -18.5<br>(-40.6 to 11.9)                            |
| <b>Other communicable, maternal, neonatal, and nutritional diseases</b> | <b>2,207.3</b><br><b>(2,039.2 to 2,403.2)</b> | <b>1,372.6</b><br><b>(1,075.6 to 1,798.6)</b>     | <b>6.2</b><br><b>(4.0 to 9.2)</b>       | <b>29.3</b><br><b>(22.9 to 36.2)</b>              | <b>-3.2</b><br><b>(-7.7 to 1.2)</b>                 |
| Sexually transmitted diseases excluding HIV                             | 1,145.5<br>(1,068.9 to 1,236.0)               | 691.0<br>(583.5 to 822.2)                         | 2.8<br>(1.7 to 4.5)                     | 25.9<br>(18.4 to 34.5)                            | -4.8<br>(-10.0 to 1.2)                              |
| Syphilis                                                                | 56.8<br>(41.9 to 75.7)                        | 39.6<br>(27.4 to 53.8)                            | 0.1<br>(0.1 to 0.2)                     | 35.1<br>(18.5 to 55.4)                            | 4.4<br>(-9.6 to 20.8)                               |
| Chlamydial infection                                                    | 72.3<br>(49.2 to 101.7)                       | 63.9<br>(45.7 to 89.0)                            | 0.5<br>(0.3 to 0.8)                     | 23.7<br>(8.9 to 42.2)                             | -7.7<br>(-18.6 to 5.1)                              |
| Gonococcal infection                                                    | 66.8<br>(43.4 to 99.3)                        | 225.1<br>(131.7 to 348.0)                         | 0.6<br>(0.3 to 1.0)                     | 29.1<br>(13.5 to 47.6)                            | -1.9<br>(-12.8 to 11.3)                             |
| Trichomoniasis                                                          | 231.8<br>(190.5 to 277.7)                     | 213.6<br>(171.8 to 262.2)                         | 0.3<br>(0.1 to 0.7)                     | 29.9<br>(21.2 to 38.7)                            | -0.6<br>(-6.9 to 5.7)                               |
| Genital herpes                                                          | 823.7<br>(715.8 to 954.8)                     | 85.7<br>(72.9 to 102.4)                           | 0.2<br>(0.1 to 0.5)                     | 31.0<br>(18.9 to 44.0)                            | 0.3<br>(-7.8 to 8.4)                                |
| Other sexually transmitted diseases                                     | 49.4<br>(45.7 to 53.6)                        | 63.1<br>(52.1 to 76.5)                            | 1.0<br>(0.7 to 1.6)                     | 22.1<br>(11.0 to 35.4)                            | -9.1<br>(-17.3 to 0.7)                              |
| Hepatitis                                                               | 1,226.9<br>(991.2 to 1,513.3)                 | 681.6<br>(416.6 to 1,093.8)                       | 0.7<br>(0.4 to 1.0)                     | 4.8<br>(-18.9 to 36.9)                            | -15.7<br>(-31.8 to 5.8)                             |
| Acute hepatitis A                                                       | 17.1<br>(1.5 to 47.9)                         | 221.7<br>(19.8 to 622.0)                          | 0.1<br>(< 0.05 to 0.2)                  | 7.1<br>(-78.1 to 370.4)                           | -13.8<br>(-76.2 to 206.8)                           |
| Hepatitis B                                                             | 978.4<br>(745.3 to 1,265.0)                   | 390.1<br>(274.6 to 550.6)                         | 0.5<br>(0.2 to 0.8)                     | 3.4<br>(-16.6 to 30.6)                            | -16.5<br>(-32.3 to 2.2)                             |
| Hepatitis C                                                             | 227.7<br>(199.9 to 256.4)                     | 21.1<br>(19.1 to 23.1)                            | < 0.05<br>(< 0.05 to < 0.05)            | 22.8<br>(-15.0 to 81.7)                           | -5.5<br>(-25.9 to 22.0)                             |
| Acute hepatitis E                                                       | 3.8<br>(3.0 to 4.7)                           | 48.7<br>(39.1 to 60.8)                            | 0.1<br>(< 0.05 to 0.1)                  | 6.2<br>(-17.6 to 42.0)                            | -14.3<br>(-31.7 to 11.2)                            |
| Other infectious diseases                                               | 79.7<br>(77.2 to 82.1)                        | < 0.05<br>(< 0.05 to < 0.05)                      | 2.8<br>(1.9 to 4.0)                     | 40.8<br>(31.5 to 51.3)                            | 5.1<br>(-1.0 to 12.3)                               |
| <b>Non-communicable diseases</b>                                        | <b>5,965.4</b><br><b>(5,916.5 to 6,006.9)</b> | <b>14,890.6†</b><br><b>(13,866.4 to 16,032.6)</b> | <b>418.2</b><br><b>(308.7 to 551.4)</b> | <b>30.1</b><br><b>(25.4 to 35.3)</b>              | <b>0.4</b><br><b>(-2.2 to 3.1)</b>                  |
| <b>Neoplasms</b>                                                        | <b>5.4</b><br><b>(4.7 to 6.1)</b>             | <b>3.8</b><br><b>(3.3 to 4.1)</b>                 | <b>1.2</b><br><b>(0.8 to 1.6)</b>       | <b>28.0</b><br><b>(20.1 to 36.2)</b>              | <b>1.7</b><br><b>(-3.6 to 7.7)</b>                  |
| Lip and oral cavity cancer                                              | 0.2<br>(0.2 to 0.2)                           | 0.1<br>(0.1 to 0.1)                               | < 0.05<br>(< 0.05 to < 0.05)            | 33.6<br>(16.2 to 55.1)                            | 4.5<br>(-8.2 to 19.7)                               |
| Nasopharynx cancer                                                      | < 0.05<br>(< 0.05 to < 0.05)                  | < 0.05<br>(< 0.05 to < 0.05)                      | < 0.05<br>(< 0.05 to < 0.05)            | 31.8<br>(13.7 to 56.4)                            | 0.2<br>(-12.0 to 15.6)                              |
| Other pharynx cancer                                                    | < 0.05<br>(< 0.05 to 0.1)                     | < 0.05<br>(< 0.05 to < 0.05)                      | < 0.05<br>(< 0.05 to < 0.05)            | 21.6<br>(8.4 to 37.0)                             | -2.1<br>(-11.7 to 9.1)                              |
| Oesophageal cancer                                                      | 0.1<br>(0.1 to 0.1)                           | 0.1<br>(0.1 to 0.1)                               | < 0.05<br>(< 0.05 to < 0.05)            | 40.8<br>(25.0 to 62.0)                            | 12.5<br>(-1.7 to 30.8)                              |
| Stomach cancer                                                          | 0.4<br>(0.4 to 0.5)                           | 0.3<br>(0.3 to 0.3)                               | 0.1<br>(0.1 to 0.1)                     | 14.6<br>(-1.4 to 33.0)                            | -7.0<br>(-19.8 to 8.9)                              |
| Colon and rectum cancer                                                 | 0.5<br>(0.4 to 0.5)                           | 0.2<br>(0.1 to 0.2)                               | 0.1<br>(< 0.05 to 0.1)                  | 36.3<br>(17.1 to 58.7)                            | 7.7<br>(-8.8 to 27.5)                               |
| Liver cancer                                                            | 0.3<br>(0.2 to 0.4)                           | 0.5<br>(0.4 to 0.6)                               | 0.1<br>(0.1 to 0.1)                     | 12.2<br>(-2.2 to 28.6)                            | -11.1<br>(-21.9 to 1.7)                             |
| Liver cancer due to hepatitis B                                         | 0.3<br>(0.2 to 0.3)                           | 0.3<br>(0.2 to 0.3)                               | 0.1<br>(< 0.05 to 0.1)                  | 13.6<br>(-1.1 to 31.5)                            | -10.1<br>(-21.8 to 3.9)                             |

| Cause                                              | Prevalence in thousands (95% UI)        | Incidence in thousands (95% UI)       | YLDs in thousands (95% UI)           |                                                   |                                                     |
|----------------------------------------------------|-----------------------------------------|---------------------------------------|--------------------------------------|---------------------------------------------------|-----------------------------------------------------|
|                                                    | 2016 counts                             | 2016 counts                           | 2016 counts                          | Percentage change in counts between 2006 and 2016 | Percentage change in age-standardised rates between |
| Liver cancer due to hepatitis C                    | < 0.05<br>(< 0.05 to < 0.05)            | < 0.05<br>(< 0.05 to < 0.05)          | < 0.05<br>(< 0.05 to < 0.05)         | 15.7<br>(-0.9 to 35.8)                            | -7.2<br>(-18.7 to 8.0)                              |
| Liver cancer due to alcohol use                    | 0.1<br>(0.1 to 0.1)                     | 0.1<br>(0.1 to 0.1)                   | < 0.05<br>(< 0.05 to < 0.05)         | -0.3<br>(-15.2 to 16.7)                           | -20.6<br>(-31.8 to -7.3)                            |
| Liver cancer due to other causes                   | 0.1<br>(0.1 to 0.1)                     | 0.1<br>(0.1 to 0.1)                   | < 0.05<br>(< 0.05 to < 0.05)         | 19.4<br>(3.1 to 38.7)                             | -5.3<br>(-17.2 to 8.9)                              |
| Gallbladder and biliary tract cancer               | < 0.05<br>(< 0.05 to < 0.05)            | < 0.05<br>(< 0.05 to 0.1)             | < 0.05<br>(< 0.05 to < 0.05)         | 12.5<br>(-1.1 to 26.1)                            | -10.1<br>(-19.3 to 0.2)                             |
| Pancreatic cancer                                  | 0.1<br>(0.1 to 0.1)                     | 0.1<br>(0.1 to 0.1)                   | < 0.05<br>(< 0.05 to < 0.05)         | 40.2<br>(26.8 to 54.5)                            | 10.5<br>(0.1 to 21.4)                               |
| Larynx cancer                                      | 0.1<br>(0.1 to 0.1)                     | < 0.05<br>(< 0.05 to < 0.05)          | < 0.05<br>(< 0.05 to < 0.05)         | 16.4<br>(-1.8 to 37.9)                            | -5.2<br>(-18.9 to 10.5)                             |
| Tracheal, bronchus, and lung cancer                | 0.2<br>(0.2 to 0.2)                     | 0.2<br>(0.2 to 0.2)                   | < 0.05<br>(< 0.05 to 0.1)            | 31.6<br>(7.9 to 59.3)                             | 5.5<br>(-15.0 to 29.6)                              |
| Malignant skin melanoma                            | < 0.05<br>(< 0.05 to < 0.05)            | < 0.05<br>(< 0.05 to < 0.05)          | < 0.05<br>(< 0.05 to < 0.05)         | 23.0<br>(9.3 to 44.8)                             | -3.6<br>(-14.3 to 10.9)                             |
| Non-melanoma skin cancer                           | < 0.05<br>(< 0.05 to < 0.05)            | 0.2<br>(0.1 to 0.2)                   | < 0.05<br>(< 0.05 to < 0.05)         | 29.5<br>(-20.3 to 73.0)                           | -5.5<br>(-47.1 to 33.1)                             |
| Non-melanoma skin cancer (squamous-cell carcinoma) | < 0.05<br>(< 0.05 to < 0.05)            | < 0.05<br>(< 0.05 to 0.1)             | < 0.05<br>(< 0.05 to < 0.05)         | 29.0<br>(-24.8 to 79.6)                           | -6.2<br>(-49.7 to 35.8)                             |
| Non-melanoma skin cancer (basal-cell carcinoma)    | < 0.05<br>(< 0.05 to < 0.05)            | 0.1<br>(0.1 to 0.2)                   | < 0.05<br>(< 0.05 to < 0.05)         | 33.3<br>(20.9 to 49.2)                            | 3.1<br>(-8.3 to 16.6)                               |
| Breast cancer                                      | 1.5<br>(1.1 to 1.9)                     | 0.4<br>(0.3 to 0.5)                   | 0.2<br>(0.1 to 0.2)                  | 40.4<br>(9.9 to 80.7)                             | 9.7<br>(-13.0 to 39.3)                              |
| Cervical cancer                                    | 2.2<br>(1.2 to 2.8)                     | 0.6<br>(0.3 to 0.8)                   | 0.2<br>(0.1 to 0.3)                  | 21.7<br>(-6.6 to 54.0)                            | -5.2<br>(-26.4 to 19.4)                             |
| Uterine cancer                                     | 0.2<br>(0.1 to 0.2)                     | < 0.05<br>(< 0.05 to 0.1)             | < 0.05<br>(< 0.05 to < 0.05)         | 32.1<br>(3.2 to 66.2)                             | 6.0<br>(-16.0 to 31.2)                              |
| Ovarian cancer                                     | 0.2<br>(0.1 to 0.3)                     | 0.1<br>(0.1 to 0.1)                   | < 0.05<br>(< 0.05 to < 0.05)         | 36.9<br>(16.1 to 59.0)                            | 6.4<br>(-10.1 to 25.0)                              |
| Prostate cancer                                    | 0.6<br>(0.4 to 0.8)                     | 0.2<br>(0.1 to 0.2)                   | 0.1<br>(0.1 to 0.1)                  | 50.9<br>(12.9 to 100.3)                           | 15.8<br>(-9.9 to 45.8)                              |
| Testicular cancer                                  | < 0.05<br>(< 0.05 to < 0.05)            | < 0.05<br>(< 0.05 to < 0.05)          | < 0.05<br>(< 0.05 to < 0.05)         | 7.2<br>(-12.6 to 32.2)                            | -16.4<br>(-32.3 to 3.4)                             |
| Kidney cancer                                      | 0.3<br>(0.2 to 0.4)                     | 0.1<br>(0.1 to 0.1)                   | < 0.05<br>(< 0.05 to < 0.05)         | 43.1<br>(4.8 to 94.1)                             | 13.0<br>(-4.8 to 34.5)                              |
| Bladder cancer                                     | 0.2<br>(0.2 to 0.2)                     | 0.1<br>(0.1 to 0.1)                   | < 0.05<br>(< 0.05 to < 0.05)         | 25.5<br>(10.4 to 42.0)                            | -0.9<br>(-13.0 to 11.9)                             |
| Brain and nervous system cancer                    | 0.2<br>(0.1 to 0.3)                     | 0.1<br>(0.1 to 0.1)                   | < 0.05<br>(< 0.05 to < 0.05)         | 39.2<br>(27.5 to 55.9)                            | 8.9<br>(-1.8 to 21.5)                               |
| Thyroid cancer                                     | 0.1<br>(< 0.05 to 0.1)                  | < 0.05<br>(< 0.05 to < 0.05)          | < 0.05<br>(< 0.05 to < 0.05)         | 19.5<br>(5.9 to 35.8)                             | -8.6<br>(-18.0 to 2.8)                              |
| Mesothelioma                                       | < 0.05<br>(< 0.05 to < 0.05)            | < 0.05<br>(< 0.05 to < 0.05)          | < 0.05<br>(< 0.05 to < 0.05)         | 14.6<br>(-1.1 to 32.5)                            | -11.3<br>(-21.7 to 0.4)                             |
| Hodgkin lymphoma                                   | < 0.05<br>(< 0.05 to 0.1)               | < 0.05<br>(< 0.05 to < 0.05)          | < 0.05<br>(< 0.05 to < 0.05)         | -2.4<br>(-14.0 to 12.0)                           | -20.5<br>(-27.2 to -11.8)                           |
| Non-Hodgkin's lymphoma                             | 0.4<br>(0.3 to 0.4)                     | 0.1<br>(0.1 to 0.1)                   | < 0.05<br>(< 0.05 to 0.1)            | 25.6<br>(11.4 to 42.2)                            | -1.5<br>(-11.5 to 9.1)                              |
| Multiple myeloma                                   | < 0.05<br>(< 0.05 to 0.1)               | < 0.05<br>(< 0.05 to < 0.05)          | < 0.05<br>(< 0.05 to < 0.05)         | 28.4<br>(13.3 to 42.5)                            | 2.2<br>(-10.1 to 14.2)                              |
| Leukaemia                                          | 0.4<br>(0.3 to 0.6)                     | 0.1<br>(0.1 to 0.2)                   | 0.1<br>(< 0.05 to 0.1)               | 20.2<br>(7.1 to 37.0)                             | -4.7<br>(-11.7 to 4.0)                              |
| Acute lymphoid leukaemia                           | 0.1<br>(0.1 to 0.1)                     | < 0.05<br>(< 0.05 to < 0.05)          | < 0.05<br>(< 0.05 to < 0.05)         | 15.2<br>(-7.4 to 48.9)                            | -6.9<br>(-20.9 to 12.1)                             |
| Chronic lymphoid leukaemia                         | 0.1<br>(< 0.05 to 0.1)                  | < 0.05<br>(< 0.05 to < 0.05)          | < 0.05<br>(< 0.05 to < 0.05)         | 29.8<br>(8.1 to 55.9)                             | 2.5<br>(-14.5 to 21.9)                              |
| Acute myeloid leukaemia                            | 0.1<br>(0.1 to 0.1)                     | < 0.05<br>(< 0.05 to 0.1)             | < 0.05<br>(< 0.05 to < 0.05)         | 31.3<br>(10.2 to 59.3)                            | 3.2<br>(-8.3 to 18.9)                               |
| Chronic myeloid leukaemia                          | 0.1<br>(< 0.05 to 0.1)                  | < 0.05<br>(< 0.05 to < 0.05)          | < 0.05<br>(< 0.05 to < 0.05)         | 12.9<br>(-2.3 to 35.0)                            | -12.9<br>(-23.0 to 1.5)                             |
| Other leukaemia                                    | 0.1<br>(0.1 to 0.2)                     | < 0.05<br>(< 0.05 to < 0.05)          | < 0.05<br>(< 0.05 to < 0.05)         | 15.4<br>(0.2 to 35.0)                             | -7.9<br>(-18.0 to 3.7)                              |
| Other neoplasms                                    | 0.6<br>(0.5 to 0.8)                     | 0.2<br>(0.2 to 0.3)                   | 0.1<br>(< 0.05 to 0.1)               | 25.4<br>(5.6 to 49.4)                             | -1.4<br>(-13.0 to 11.4)                             |
| <b>Cardiovascular diseases</b>                     | <b>309.4</b><br><b>(291.5 to 327.6)</b> | <b>23.3†</b><br><b>(22.2 to 24.5)</b> | <b>17.8</b><br><b>(12.6 to 23.6)</b> | <b>31.9</b><br><b>(26.5 to 37.3)</b>              | <b>1.5</b><br><b>(-2.3 to 5.1)</b>                  |
| Rheumatic heart disease                            | 51.9<br>(46.2 to 58.0)                  | 2.3<br>(2.0 to 2.5)                   | 2.5<br>(1.6 to 3.7)                  | 27.5<br>(17.1 to 39.0)                            | -2.0<br>(-9.4 to 5.9)                               |
| Ischaemic heart disease                            | 67.7<br>(62.7 to 72.8)                  | 9.2<br>(8.6 to 10.0)                  | 2.9<br>(1.9 to 4.1)                  | 29.1<br>(21.8 to 36.9)                            | 0.3<br>(-4.2 to 5.2)                                |
| Cerebrovascular disease                            | 22.7<br>(21.1 to 24.2)                  | 3.9‡<br>(3.5 to 4.2)                  | 3.2<br>(2.3 to 4.1)                  | 30.5<br>(20.6 to 40.2)                            | 2.9<br>(-4.7 to 10.3)                               |
| Ischaemic stroke                                   | 19.1<br>(17.2 to 21.1)                  | 2.5‡<br>(2.2 to 2.8)                  | 2.6<br>(1.8 to 3.3)                  | 31.9<br>(20.1 to 44.6)                            | 3.4<br>(-5.4 to 12.3)                               |
| Hemorrhagic stroke                                 | 4.8<br>(4.3 to 5.4)                     | 1.4‡<br>(1.3 to 1.6)                  | 0.7<br>(0.5 to 0.8)                  | 25.4<br>(10.9 to 42.5)                            | 0.5<br>(-10.5 to 12.9)                              |
| Hypertensive heart disease                         | 4.7<br>(3.8 to 5.7)                     | --                                    | 0.4<br>(0.2 to 0.5)                  | 26.4<br>(11.3 to 42.8)                            | -5.8<br>(-15.0 to 4.5)                              |
| Cardiomyopathy and myocarditis                     | 2.9<br>(2.5 to 3.4)                     | 1.4†<br>(1.3 to 1.7)                  | 0.3<br>(0.2 to 0.4)                  | 26.9<br>(12.6 to 43.2)                            | -2.5<br>(-13.8 to 9.4)                              |
| Myocarditis                                        | 0.8<br>(0.7 to 1.0)                     | 1.4<br>(1.3 to 1.7)                   | 0.1<br>(< 0.05 to 0.1)               | 29.1<br>(16.8 to 42.0)                            | -0.9<br>(-12.8 to 12.4)                             |
| Alcoholic cardiomyopathy                           | 0.6<br>(0.4 to 0.7)                     | --                                    | < 0.05<br>(< 0.05 to 0.1)            | 27.4<br>(-3.5 to 67.7)                            | -0.7<br>(-23.6 to 28.3)                             |
| Other cardiomyopathy                               | 2.1<br>(1.7 to 2.5)                     | --                                    | 0.2<br>(0.1 to 0.2)                  | 26.0<br>(7.8 to 46.5)                             | -3.2<br>(-16.0 to 11.2)                             |
| Atrial fibrillation and flutter                    | 11.5<br>(10.0 to 13.2)                  | 1.1<br>(0.9 to 1.3)                   | 0.9<br>(0.6 to 1.3)                  | 32.8<br>(20.9 to 44.2)                            | 1.3<br>(-5.1 to 7.4)                                |
| Peripheral vascular disease                        | 43.5<br>(37.4 to 50.7)                  | 4.4<br>(3.7 to 5.2)                   | 0.2<br>(0.1 to 0.4)                  | 26.7<br>(15.4 to 38.7)                            | -1.7<br>(-9.3 to 6.4)                               |
| Endocarditis                                       | 0.4<br>(0.3 to 0.5)                     | 1.0<br>(0.9 to 1.1)                   | < 0.05<br>(< 0.05 to < 0.05)         | 38.9<br>(21.8 to 59.1)                            | 1.9<br>(-12.8 to 19.2)                              |
| Other cardiovascular and circulatory diseases      | 137.8<br>(113.4 to 167.0)               | --                                    | 7.3<br>(4.8 to 10.5)                 | 35.8<br>(24.3 to 47.8)                            | 3.1<br>(-4.9 to 11.5)                               |
| <b>Chronic respiratory diseases</b>                | <b>381.4</b><br><b>(358.8 to 404.9)</b> | <b>77.2†</b><br><b>(71.1 to 84.4)</b> | <b>17.5</b><br><b>(13.0 to 23.3)</b> | <b>32.2</b><br><b>(26.6 to 38.3)</b>              | <b>3.1</b><br><b>(-0.8 to 7.1)</b>                  |
| Chronic obstructive pulmonary disease              | 67.0<br>(64.3 to 70.0)                  | 4.8<br>(4.6 to 5.0)                   | 4.5<br>(3.9 to 5.1)                  | 29.7<br>(20.2 to 39.3)                            | 2.0<br>(-4.9 to 9.7)                                |
| Pneumoconiosis                                     | 0.1<br>(< 0.05 to 0.1)                  | < 0.05<br>(< 0.05 to < 0.05)          | < 0.05<br>(< 0.05 to < 0.05)         | 31.8<br>(25.0 to 40.0)                            | 2.8<br>(-2.5 to 8.7)                                |
| Silicosis                                          | < 0.05<br>(< 0.05 to < 0.05)            | < 0.05<br>(< 0.05 to < 0.05)          | < 0.05<br>(< 0.05 to < 0.05)         | 32.7<br>(23.1 to 43.9)                            | 1.4<br>(-4.6 to 8.3)                                |

| Cause                                                          | Prevalence in thousands (95% UI)        | Incidence in thousands (95% UI)               | YLDs in thousands (95% UI)        |                                                                     |                                                                      |
|----------------------------------------------------------------|-----------------------------------------|-----------------------------------------------|-----------------------------------|---------------------------------------------------------------------|----------------------------------------------------------------------|
|                                                                | 2016 counts<br>(< 0.05 to < 0.05)       | 2016 counts<br>(< 0.05 to < 0.05)             | 2016 counts<br>(< 0.05 to < 0.05) | Percentage change in counts between 2006 and 2016<br>(21.4 to 42.5) | Percentage change in age-standardised rates between<br>(-4.0 to 7.8) |
| Asbestosis                                                     | < 0.05<br>(< 0.05 to < 0.05)            | < 0.05<br>(< 0.05 to < 0.05)                  | < 0.05<br>(< 0.05 to < 0.05)      | 31.5<br>(21.4 to 42.5)                                              | 1.8<br>(-4.0 to 7.8)                                                 |
| Coal workers pneumoconiosis                                    | --                                      | --                                            | --                                | --                                                                  | --                                                                   |
| Other pneumoconiosis                                           | < 0.05<br>(< 0.05 to < 0.05)            | < 0.05<br>(< 0.05 to < 0.05)                  | < 0.05<br>(< 0.05 to < 0.05)      | 31.9<br>(19.6 to 45.9)                                              | 4.0<br>(-6.7 to 16.2)                                                |
| Asthma                                                         | 315.9<br>(288.8 to 345.7)               | 72.4<br>(66.2 to 79.5)                        | 12.4<br>(8.2 to 18.0)             | 31.9<br>(25.0 to 39.5)                                              | 3.0<br>(-1.5 to 7.4)                                                 |
| Interstitial lung disease and pulmonary sarcoidosis            | 0.4<br>(0.4 to 0.5)                     | < 0.05<br>(< 0.05 to < 0.05)                  | < 0.05<br>(< 0.05 to 0.1)         | 30.6<br>(26.5 to 34.2)                                              | -0.1<br>(-4.4 to 4.1)                                                |
| Other chronic respiratory diseases                             | --                                      | --                                            | 0.5<br>(0.4 to 0.7)               | 71.6<br>(31.9 to 118.4)                                             | 33.1<br>(11.0 to 57.8)                                               |
| <b>Cirrhosis and other chronic liver diseases</b>              | <b>15.5<br/>(14.7 to 16.3)</b>          | <b>1.6<br/>(1.5 to 1.6)</b>                   | <b>1.4<br/>(1.0 to 2.0)</b>       | <b>25.3<br/>(11.5 to 40.2)</b>                                      | <b>-2.7<br/>(-10.2 to 6.1)</b>                                       |
| Cirrhosis and other chronic liver diseases due to hepatitis B  | 5.5<br>(4.7 to 6.3)                     | 0.6<br>(0.5 to 0.6)                           | 0.4<br>(0.3 to 0.6)               | 25.7<br>(6.8 to 47.3)                                               | -2.7<br>(-13.6 to 10.3)                                              |
| Cirrhosis and other chronic liver diseases due to hepatitis C  | 2.0<br>(1.4 to 2.9)                     | 0.2<br>(0.2 to 0.3)                           | 0.1<br>(0.1 to 0.2)               | 30.4<br>(4.1 to 62.6)                                               | 1.4<br>(-17.3 to 22.7)                                               |
| Cirrhosis and other chronic liver diseases due to alcohol use  | 2.6<br>(2.2 to 3.0)                     | 0.3<br>(0.3 to 0.4)                           | 0.2<br>(0.1 to 0.3)               | 23.0<br>(-0.3 to 49.3)                                              | -5.1<br>(-19.9 to 11.1)                                              |
| Cirrhosis and other chronic liver diseases due to other causes | 5.4<br>(4.9 to 5.9)                     | 0.5<br>(0.4 to 0.5)                           | 0.7<br>(0.5 to 1.0)               | 24.8<br>(2.0 to 50.6)                                               | -2.8<br>(-17.7 to 14.5)                                              |
| <b>Digestive diseases</b>                                      | <b>101.9<br/>(93.1 to 111.8)</b>        | <b>101.1<sup>†</sup><br/>(96.2 to 106.4)</b>  | <b>3.3<br/>(2.3 to 4.5)</b>       | <b>25.6<br/>(16.3 to 35.6)</b>                                      | <b>-2.3<br/>(-7.5 to 3.4)</b>                                        |
| Peptic ulcer disease                                           | 17.5<br>(16.0 to 19.0)                  | 8.9<br>(8.0 to 9.9)                           | 0.3<br>(0.2 to 0.5)               | 23.1<br>(9.9 to 36.2)                                               | -2.3<br>(-10.1 to 6.1)                                               |
| Gastritis and duodenitis                                       | 29.9<br>(26.0 to 33.8)                  | 32.1<br>(28.5 to 36.1)                        | 0.4<br>(0.3 to 0.6)               | 32.8<br>(19.2 to 46.8)                                              | 6.0<br>(-2.1 to 15.0)                                                |
| Appendicitis                                                   | 1.2<br>(1.1 to 1.2)                     | 30.7<br>(28.2 to 33.2)                        | 0.4<br>(0.2 to 0.5)               | 26.4<br>(-6.7 to 74.9)                                              | -1.4<br>(-20.8 to 24.1)                                              |
| Paralytic ileus and intestinal obstruction                     | 0.1<br>(0.1 to 0.1)                     | 3.2<br>(2.8 to 3.5)                           | < 0.05<br>(< 0.05 to 0.1)         | 32.5<br>(28.0 to 37.4)                                              | 2.5<br>(-4.9 to 10.3)                                                |
| Inguinal, femoral, and abdominal hernia                        | 52.6<br>(42.9 to 64.8)                  | 8.5<br>(7.5 to 9.7)                           | 1.7<br>(1.2 to 2.4)               | 22.7<br>(8.7 to 38.7)                                               | -5.7<br>(-13.6 to 3.5)                                               |
| Inflammatory bowel disease                                     | 0.3<br>(0.3 to 0.3)                     | 2.2<br>(2.1 to 2.3)                           | < 0.05<br>(< 0.05 to 0.1)         | 34.6<br>(30.8 to 38.4)                                              | 5.7<br>(2.6 to 8.7)                                                  |
| Vascular intestinal disorders                                  | < 0.05<br>(< 0.05 to < 0.05)            | 0.2<br>(0.2 to 0.2)                           | < 0.05<br>(< 0.05 to < 0.05)      | 34.0<br>(27.1 to 41.4)                                              | 3.7<br>(-0.2 to 8.2)                                                 |
| Gallbladder and biliary diseases                               | 3.0<br>(2.6 to 3.4)                     | 14.1<br>(12.1 to 16.1)                        | 0.1<br>(0.1 to 0.1)               | 33.8<br>(20.3 to 47.6)                                              | 3.3<br>(-7.9 to 15.4)                                                |
| Pancreatitis                                                   | 0.1<br>(0.1 to 0.1)                     | 1.2<br>(1.1 to 1.4)                           | < 0.05<br>(< 0.05 to < 0.05)      | 37.4<br>(31.9 to 42.6)                                              | 6.4<br>(2.1 to 10.1)                                                 |
| Other digestive diseases                                       | --                                      | --                                            | 0.3<br>(0.2 to 0.4)               | 30.5<br>(18.1 to 44.8)                                              | 1.5<br>(-4.5 to 7.8)                                                 |
| <b>Neurological disorders</b>                                  | <b>2,099.3<br/>(2,003.5 to 2,196.3)</b> | <b>1,085.5<br/>(915.5 to 1,265.1)</b>         | <b>45.7<br/>(28.7 to 66.6)</b>    | <b>30.6<br/>(-5.3 to 83.8)</b>                                      | <b>0.3<br/>(-22.5 to 31.8)</b>                                       |
| Alzheimer's disease and other dementias                        | 5.6<br>(4.7 to 6.6)                     | 1.0<br>(0.8 to 1.2)                           | 0.8<br>(0.5 to 1.0)               | 35.4<br>(26.3 to 44.6)                                              | -1.2<br>(-5.9 to 3.5)                                                |
| Parkinson's disease                                            | 0.6<br>(0.5 to 0.8)                     | 0.1<br>(0.1 to 0.1)                           | 0.1<br>(< 0.05 to 0.1)            | 43.1<br>(19.0 to 70.7)                                              | 7.8<br>(-6.4 to 25.0)                                                |
| Epilepsy                                                       | 18.0<br>(3.0 to 42.5)                   | 2.6<br>(0.4 to 6.0)                           | 7.2<br>(1.1 to 18.7)              | 25.7<br>(-83.7 to 928.2)                                            | -2.4<br>(-87.4 to 698.3)                                             |
| Multiple sclerosis                                             | 0.2<br>(0.2 to 0.2)                     | < 0.05<br>(< 0.05 to < 0.05)                  | 0.1<br>(< 0.05 to 0.1)            | 44.1<br>(39.7 to 49.0)                                              | 10.6<br>(7.1 to 14.0)                                                |
| Motor neuron disease                                           | 0.1<br>(0.1 to 0.1)                     | < 0.05<br>(< 0.05 to < 0.05)                  | < 0.05<br>(< 0.05 to < 0.05)      | 32.6<br>(27.2 to 38.1)                                              | 3.3<br>(-0.0 to 6.5)                                                 |
| Migraine                                                       | 751.2<br>(703.3 to 796.8)               | 94.4<br>(88.4 to 100.7)                       | 31.0<br>(19.8 to 44.1)            | 30.5<br>(24.9 to 35.9)                                              | 0.4<br>(-3.3 to 4.1)                                                 |
| Tension-type headache                                          | 1,628.8<br>(1,441.5 to 1,824.2)         | 987.4<br>(819.8 to 1,169.5)                   | 4.9<br>(3.1 to 7.3)               | 30.7<br>(24.2 to 38.4)                                              | 0.5<br>(-4.3 to 5.5)                                                 |
| Other neurological disorders                                   | < 0.05<br>(< 0.05 to < 0.05)            | < 0.05<br>(< 0.05 to < 0.05)                  | 1.7<br>(0.3 to 4.5)               | 54.5<br>(-77.1 to 980.9)                                            | 16.9<br>(-80.2 to 590.2)                                             |
| <b>Mental and substance use disorders</b>                      | <b>900.3<br/>(853.7 to 942.9)</b>       | <b>333.4<sup>†</sup><br/>(308.0 to 362.4)</b> | <b>107.9<br/>(78.2 to 140.2)</b>  | <b>30.2<br/>(27.1 to 33.5)</b>                                      | <b>0.7<br/>(-1.6 to 3.1)</b>                                         |
| Schizophrenia                                                  | 8.9<br>(7.8 to 10.2)                    | 0.8<br>(0.7 to 0.9)                           | 5.7<br>(4.1 to 7.2)               | 33.8<br>(20.7 to 48.8)                                              | 2.0<br>(-7.3 to 12.4)                                                |
| Alcohol use disorders                                          | 65.6<br>(55.4 to 76.4)                  | 36.1<br>(30.4 to 42.2)                        | 6.5<br>(4.4 to 9.1)               | 33.5<br>(23.1 to 44.7)                                              | 2.1<br>(-5.5 to 9.6)                                                 |
| Drug use disorders                                             | 25.7<br>(22.6 to 28.7)                  | 4.4<br>(3.9 to 4.9)                           | 6.9<br>(4.7 to 9.4)               | 43.2<br>(28.1 to 59.4)                                              | 9.1<br>(-0.9 to 19.8)                                                |
| Opioid use disorders                                           | 14.8<br>(12.2 to 18.0)                  | 1.9<br>(1.6 to 2.3)                           | 6.2<br>(4.1 to 8.5)               | 44.7<br>(28.1 to 63.2)                                              | 10.0<br>(-1.4 to 22.2)                                               |
| Cocaine use disorders                                          | 0.8<br>(0.6 to 0.9)                     | 0.1<br>(0.1 to 0.1)                           | 0.1<br>(0.1 to 0.2)               | 32.5<br>(26.4 to 39.9)                                              | 2.7<br>(-1.9 to 8.0)                                                 |
| Amphetamine use disorders                                      | 0.4<br>(0.3 to 0.6)                     | 0.1<br>(< 0.05 to 0.1)                        | 0.1<br>(< 0.05 to 0.1)            | 31.6<br>(19.4 to 44.2)                                              | 2.5<br>(-6.2 to 12.1)                                                |
| Cannabis use disorders                                         | 9.0<br>(7.5 to 10.8)                    | 1.9<br>(1.5 to 2.3)                           | 0.3<br>(0.2 to 0.4)               | 29.6<br>(1.7 to 66.2)                                               | 0.2<br>(-18.7 to 24.8)                                               |
| Other drug use disorders                                       | 1.9<br>(1.6 to 2.1)                     | 0.4<br>(0.4 to 0.5)                           | 0.3<br>(0.2 to 0.4)               | 34.8<br>(12.9 to 60.5)                                              | 3.1<br>(-12.4 to 21.0)                                               |
| Depressive disorders                                           | 191.0<br>(177.9 to 207.9)               | 215.1<br>(190.6 to 242.6)                     | 33.0<br>(22.5 to 44.9)            | 30.4<br>(24.2 to 36.9)                                              | 0.7<br>(-4.0 to 5.3)                                                 |
| Major depressive disorder                                      | 130.7<br>(116.0 to 147.3)               | 203.4<br>(179.4 to 231.6)                     | 26.8<br>(18.3 to 37.0)            | 30.4<br>(22.6 to 38.2)                                              | 0.8<br>(-5.1 to 6.5)                                                 |
| Dysthymia                                                      | 64.2<br>(55.3 to 74.5)                  | 11.7<br>(10.2 to 13.5)                        | 6.2<br>(4.1 to 8.9)               | 30.5<br>(25.2 to 36.2)                                              | 0.5<br>(-2.8 to 4.0)                                                 |
| Bipolar disorder                                               | 34.6<br>(29.3 to 41.0)                  | 3.9<br>(3.3 to 4.7)                           | 7.1<br>(4.4 to 10.5)              | 30.6<br>(21.2 to 40.1)                                              | 0.7<br>(-5.5 to 6.9)                                                 |
| Anxiety disorders                                              | 177.9<br>(159.9 to 199.2)               | 33.6<br>(30.7 to 37.1)                        | 17.3<br>(12.0 to 23.6)            | 29.8<br>(20.6 to 39.5)                                              | 0.6<br>(-6.0 to 7.4)                                                 |
| Eating disorders                                               | 5.0<br>(4.0 to 6.1)                     | 4.1<br>(3.0 to 5.6)                           | 1.0<br>(0.7 to 1.5)               | 43.9<br>(20.9 to 70.7)                                              | 10.6<br>(-6.4 to 30.7)                                               |
| Anorexia nervosa                                               | 1.4<br>(1.0 to 1.9)                     | 0.7<br>(0.5 to 0.9)                           | 0.3<br>(0.2 to 0.5)               | 39.4<br>(1.4 to 93.1)                                               | 8.6<br>(-20.7 to 49.0)                                               |
| Bulimia nervosa                                                | 3.5<br>(2.6 to 4.7)                     | 3.5<br>(2.4 to 4.9)                           | 0.7<br>(0.4 to 1.1)               | 45.8<br>(19.7 to 78.1)                                              | 11.3<br>(-8.0 to 35.0)                                               |
| Autistic spectrum disorders                                    | 54.3<br>(48.3 to 61.5)                  | 0.7<br>(0.5 to 1.0)                           | 7.7<br>(5.1 to 10.8)              | 30.5<br>(22.8 to 38.2)                                              | 0.8<br>(-4.4 to 6.0)                                                 |
| Autism                                                         | 14.3<br>(12.3 to 16.6)                  | 0.1<br>(0.1 to 0.2)                           | 3.7<br>(2.4 to 5.4)               | 30.5<br>(17.4 to 44.2)                                              | 0.9<br>(-8.0 to 10.0)                                                |
| Asperger syndrome and other autistic spectrum disorders        | 39.9<br>(33.0 to 48.4)                  | 0.6<br>(0.4 to 0.8)                           | 4.0<br>(2.6 to 5.9)               | 30.5<br>(23.4 to 37.7)                                              | 0.8<br>(-4.3 to 5.7)                                                 |



| Cause                                                      | Prevalence in thousands (95% UI)              | Incidence in thousands (95% UI)                   | YLDs in thousands (95% UI)             |                                                   |                                                     |
|------------------------------------------------------------|-----------------------------------------------|---------------------------------------------------|----------------------------------------|---------------------------------------------------|-----------------------------------------------------|
|                                                            | 2016 counts                                   | 2016 counts                                       | 2016 counts                            | Percentage change in counts between 2006 and 2016 | Percentage change in age-standardised rates between |
| Attention-deficit/hyperactivity disorder                   | 90.5<br>(81.1 to 101.2)                       | 5.7<br>(5.0 to 6.7)                               | 1.1<br>(0.7 to 1.7)                    | 28.8<br>(19.0 to 38.9)                            | 0.5<br>(-6.5 to 7.8)                                |
| Conduct disorder                                           | 67.3<br>(55.2 to 80.4)                        | 24.3<br>(19.3 to 29.3)                            | 8.1<br>(5.0 to 12.5)                   | 27.8<br>(19.3 to 37.0)                            | 0.7<br>(-5.9 to 7.9)                                |
| Idiopathic developmental intellectual disability           | 164.7<br>(102.2 to 229.2)                     | --                                                | 6.8<br>(3.3 to 11.6)                   | 14.2<br>(5.9 to 21.4)                             | -11.6<br>(-17.6 to -6.3)                            |
| Other mental and substance use disorders                   | 89.9<br>(78.6 to 104.2)                       | 4.5<br>(4.0 to 5.2)                               | 6.7<br>(4.6 to 9.7)                    | 31.9<br>(24.1 to 39.3)                            | 0.8<br>(-4.0 to 5.6)                                |
| <b>Diabetes, urogenital, blood, and endocrine diseases</b> | <b>3,646.6</b><br><b>(3,550.5 to 3,745.4)</b> | <b>706.8†</b><br><b>(660.6 to 756.1)</b>          | <b>44.7</b><br><b>(31.5 to 61.6)</b>   | <b>30.9</b><br><b>(27.2 to 34.5)</b>              | <b>1.6</b><br><b>(-0.9 to 4.0)</b>                  |
| Diabetes mellitus                                          | 119.3<br>(106.8 to 132.8)                     | 8.1<br>(7.3 to 8.9)                               | 8.3<br>(5.6 to 11.6)                   | 39.1<br>(31.0 to 47.6)                            | 8.5<br>(1.6 to 15.0)                                |
| Acute glomerulonephritis                                   | 0.1<br>( $< 0.05$ to 0.1)                     | 0.8<br>(0.7 to 1.0)                               | $< 0.05$<br>( $< 0.05$ to $< 0.05$ )   | 30.1<br>(24.7 to 35.1)                            | 0.6<br>(-3.0 to 3.6)                                |
| Chronic kidney disease                                     | 325.3<br>(293.2 to 362.1)                     | 25.1<br>(22.1 to 28.2)                            | 8.6<br>(6.3 to 11.2)                   | 33.0<br>(25.3 to 41.7)                            | 2.3<br>(-2.7 to 7.8)                                |
| Chronic kidney disease due to diabetes mellitus            | 100.4<br>(85.0 to 118.1)                      | 7.1<br>(5.9 to 8.6)                               | 2.6<br>(1.8 to 3.4)                    | 35.4<br>(24.2 to 47.8)                            | 3.7<br>(-3.7 to 11.3)                               |
| Chronic kidney disease due to hypertension                 | 70.1<br>(59.8 to 80.2)                        | 6.7<br>(5.6 to 7.9)                               | 1.4<br>(1.0 to 1.9)                    | 35.1<br>(22.3 to 50.0)                            | 2.6<br>(-6.1 to 11.8)                               |
| Chronic kidney disease due to glomerulonephritis           | 65.2<br>(55.9 to 74.3)                        | 3.8<br>(3.0 to 4.7)                               | 2.2<br>(1.6 to 3.0)                    | 30.7<br>(17.4 to 45.5)                            | 0.9<br>(-7.1 to 10.0)                               |
| Chronic kidney disease due to other causes                 | 89.6<br>(74.4 to 106.0)                       | 7.5<br>(6.2 to 8.8)                               | 2.4<br>(1.7 to 3.3)                    | 31.6<br>(19.7 to 44.1)                            | 1.4<br>(-6.0 to 9.5)                                |
| Urinary diseases and male infertility                      | 108.8<br>(100.5 to 118.1)                     | 405.9†<br>(365.0 to 448.0)                        | 2.4<br>(1.6 to 3.5)                    | 20.5<br>(12.2 to 30.0)                            | -2.5<br>(-8.8 to 4.7)                               |
| Interstitial nephritis and urinary tract infections        | 7.0<br>(6.3 to 7.9)                           | 367.1<br>(326.2 to 409.5)                         | 0.2<br>(0.1 to 0.4)                    | 27.7<br>(10.9 to 47.7)                            | -0.9<br>(-12.7 to 12.1)                             |
| Urolithiasis                                               | 1.2<br>(1.1 to 1.4)                           | 31.8<br>(28.1 to 36.4)                            | 0.1<br>(0.1 to 0.1)                    | 32.6<br>(24.2 to 41.9)                            | 2.1<br>(-5.2 to 10.2)                               |
| Benign prostatic hyperplasia                               | 53.3<br>(44.7 to 61.9)                        | 7.0<br>(5.8 to 8.2)                               | 1.7<br>(1.1 to 2.6)                    | 24.2<br>(13.5 to 37.6)                            | -0.2<br>(-7.8 to 8.3)                               |
| Male infertility                                           | 45.0<br>(40.8 to 49.9)                        | --                                                | 0.2<br>(0.1 to 0.5)                    | -2.0<br>(-10.0 to 5.9)                            | -27.5<br>(-32.8 to -21.8)                           |
| Other urinary diseases                                     | --                                            | --                                                | 0.1<br>(0.1 to 0.2)                    | 5.5<br>(-5.5 to 18.3)                             | -17.0<br>(-24.1 to -9.4)                            |
| Gynecological diseases                                     | 676.6<br>(642.8 to 710.3)                     | 262.5†<br>(242.9 to 283.7)                        | 8.3<br>(5.6 to 11.8)                   | 27.9<br>(22.2 to 33.6)                            | -3.3<br>(-6.9 to 0.4)                               |
| Uterine fibroids                                           | 47.2<br>(41.6 to 53.2)                        | 6.0<br>(5.1 to 6.9)                               | 1.1<br>(0.7 to 1.7)                    | 22.8<br>(13.9 to 31.4)                            | -7.6<br>(-14.1 to -1.1)                             |
| Polycystic ovarian syndrome                                | 5.9<br>(4.4 to 7.7)                           | 14.1<br>(10.1 to 18.6)                            | 0.1<br>( $< 0.05$ to 0.1)              | 29.9<br>(13.1 to 50.0)                            | -3.8<br>(-16.3 to 10.7)                             |
| Female infertility                                         | 6.0<br>(3.9 to 8.7)                           | --                                                | $< 0.05$<br>( $< 0.05$ to 0.1)         | -6.4<br>(-38.5 to 45.9)                           | -29.7<br>(-50.9 to 1.5)                             |
| Endometriosis                                              | 1.3<br>(1.1 to 1.6)                           | 5.3<br>(4.3 to 6.7)                               | 0.1<br>(0.1 to 0.2)                    | 30.6<br>(-3.6 to 79.2)                            | -0.5<br>(-25.1 to 31.9)                             |
| Genital prolapse                                           | 310.5<br>(273.4 to 349.8)                     | 30.1<br>(25.2 to 36.0)                            | 1.0<br>(0.5 to 1.8)                    | 20.4<br>(13.3 to 27.8)                            | -5.2<br>(-10.9 to 1.5)                              |
| Premenstrual syndrome                                      | 305.7<br>(280.1 to 331.6)                     | 116.5<br>(105.6 to 127.4)                         | 2.6<br>(1.6 to 3.9)                    | 27.6<br>(15.2 to 40.9)                            | -2.8<br>(-10.7 to 6.7)                              |
| Other gynecological diseases                               | 102.0<br>(87.9 to 117.5)                      | 90.5<br>(73.8 to 109.1)                           | 3.5<br>(2.3 to 5.0)                    | 32.4<br>(23.6 to 41.2)                            | -0.7<br>(-6.9 to 5.8)                               |
| Hemoglobinopathies and hemolytic anaemias                  | 3,086.4<br>(2,974.5 to 3,198.8)               | --                                                | 14.1<br>(9.4 to 20.5)                  | 29.2<br>(22.5 to 36.3)                            | -1.2<br>(-5.7 to 3.4)                               |
| Thalassemias                                               | 0.1<br>( $< 0.05$ to 0.2)                     | --                                                | $< 0.05$<br>( $< 0.05$ to $< 0.05$ )   | 34.9<br>(16.3 to 58.3)                            | 2.3<br>(-12.1 to 20.0)                              |
| Thalassaemias trait                                        | 124.0<br>(50.4 to 230.5)                      | --                                                | 2.0<br>(0.7 to 4.0)                    | 29.0<br>(17.6 to 40.9)                            | 1.2<br>(-6.5 to 9.1)                                |
| Sickle cell disorders                                      | 33.4<br>(29.2 to 37.9)                        | --                                                | 2.8<br>(1.9 to 3.9)                    | 32.2<br>(16.8 to 49.8)                            | 3.3<br>(-8.8 to 16.7)                               |
| Sickle cell trait                                          | 1,836.2<br>(1,735.9 to 1,944.6)               | --                                                | 6.9<br>(4.6 to 10.2)                   | 30.2<br>(22.9 to 38.7)                            | 0.2<br>(-5.1 to 5.9)                                |
| G6PD deficiency                                            | 539.1<br>(450.5 to 629.3)                     | --                                                | $< 0.05$<br>( $< 0.05$ to 0.1)         | 15.7<br>(-5.8 to 43.2)                            | -19.4<br>(-29.6 to -6.8)                            |
| G6PD trait                                                 | 1,093.9<br>(1,022.7 to 1,166.0)               | --                                                | $< 0.05$<br>( $< 0.05$ to $< 0.05$ )   | 36.3<br>(27.0 to 46.6)                            | 5.6<br>(-1.0 to 12.8)                               |
| Other hemoglobinopathies and hemolytic anaemias            | 86.3<br>(83.6 to 88.8)                        | --                                                | 2.4<br>(1.6 to 3.5)                    | 23.4<br>(13.9 to 33.9)                            | -9.2<br>(-14.3 to -3.8)                             |
| Endocrine, metabolic, blood, and immune disorders          | 92.5<br>(89.8 to 95.2)                        | 4.4<br>(3.9 to 4.9)                               | 3.0<br>(2.0 to 4.2)                    | 29.7<br>(22.7 to 37.8)                            | -0.6<br>(-4.9 to 4.3)                               |
| <b>Musculoskeletal disorders</b>                           | <b>643.6</b><br><b>(607.0 to 674.6)</b>       | <b>315.4</b><br><b>(284.9 to 350.3)</b>           | <b>70.8</b><br><b>(50.3 to 93.2)</b>   | <b>31.0</b><br><b>(26.9 to 35.0)</b>              | <b>0.7</b><br><b>(-1.9 to 3.4)</b>                  |
| Rheumatoid arthritis                                       | 6.1<br>(5.3 to 6.9)                           | 0.4<br>(0.4 to 0.5)                               | 1.4<br>(1.0 to 2.0)                    | 34.2<br>(19.2 to 51.2)                            | 4.3<br>(-5.1 to 15.4)                               |
| Osteoarthritis                                             | 100.0<br>(93.2 to 107.0)                      | 6.0<br>(5.5 to 6.5)                               | 6.2<br>(4.3 to 8.4)                    | 35.4<br>(30.3 to 40.6)                            | 5.6<br>(2.0 to 9.2)                                 |
| Low back and neck pain                                     | 461.6<br>(430.1 to 494.8)                     | 207.3<br>(185.3 to 233.3)                         | 53.0<br>(37.5 to 70.2)                 | 29.1<br>(24.6 to 33.7)                            | -0.6<br>(-3.8 to 2.6)                               |
| Low back pain                                              | 353.8<br>(313.8 to 402.5)                     | 175.5<br>(153.8 to 200.7)                         | 39.9<br>(28.2 to 52.9)                 | 28.6<br>(22.8 to 34.2)                            | -1.0<br>(-5.1 to 3.1)                               |
| Neck pain                                                  | 130.8<br>(112.9 to 150.8)                     | 31.8<br>(27.2 to 37.3)                            | 13.1<br>(8.7 to 18.5)                  | 30.9<br>(27.2 to 34.6)                            | 0.5<br>(-1.8 to 2.7)                                |
| Gout                                                       | 13.4<br>(11.9 to 15.2)                        | 2.8<br>(2.4 to 3.1)                               | 0.4<br>(0.3 to 0.6)                    | 29.7<br>(11.0 to 51.6)                            | 0.5<br>(-12.0 to 14.7)                              |
| Other musculoskeletal disorders                            | 113.4<br>(87.0 to 139.4)                      | 99.0<br>(77.9 to 121.9)                           | 9.8<br>(6.0 to 14.2)                   | 38.6<br>(25.5 to 54.7)                            | 3.8<br>(-5.2 to 14.6)                               |
| <b>Other non-communicable diseases</b>                     | <b>4,443.8</b><br><b>(4,337.9 to 4,550.8)</b> | <b>12,242.6†</b><br><b>(11,209.0 to 13,354.4)</b> | <b>107.8</b><br><b>(72.3 to 153.8)</b> | <b>28.6</b><br><b>(26.3 to 30.8)</b>              | <b>-1.1</b><br><b>(-3.3 to 0.9)</b>                 |
| Congenital anomalies                                       | 66.2<br>(59.0 to 75.4)                        | --                                                | 9.9<br>(7.1 to 13.0)                   | 25.7<br>(17.8 to 33.8)                            | -3.1<br>(-8.8 to 2.6)                               |
| Neural tube defects                                        | 10.3<br>(9.0 to 11.5)                         | --                                                | 3.1<br>(2.1 to 4.2)                    | 24.6<br>(11.1 to 39.7)                            | -3.7<br>(-13.4 to 6.9)                              |
| Congenital heart anomalies                                 | 17.9<br>(14.8 to 21.5)                        | --                                                | 0.9<br>(0.4 to 1.5)                    | 29.2<br>(13.0 to 48.5)                            | 0.1<br>(-12.1 to 14.5)                              |
| Orofacial clefts                                           | 1.9<br>(1.6 to 2.1)                           | --                                                | $< 0.05$<br>( $< 0.05$ to 0.1)         | 22.2<br>(8.4 to 37.7)                             | -5.9<br>(-16.7 to 6.4)                              |
| Down's syndrome                                            | 1.1<br>(0.9 to 1.3)                           | --                                                | 0.1<br>(0.1 to 0.1)                    | 30.0<br>(20.0 to 40.2)                            | 0.4<br>(-7.3 to 8.2)                                |
| Turner syndrome                                            | 4.0<br>(3.4 to 4.7)                           | --                                                | 0.1<br>( $< 0.05$ to 0.1)              | 20.7<br>(-15.5 to 72.3)                           | -5.5<br>(-33.0 to 31.1)                             |
| Klinefelter syndrome                                       | 3.8<br>(3.2 to 4.5)                           | --                                                | $< 0.05$<br>( $< 0.05$ to $< 0.05$ )   | 28.2<br>(0.4 to 68.3)                             | -1.0<br>(-22.9 to 29.5)                             |

| Cause                                         | Prevalence in thousands (95% UI)        | Incidence in thousands (95% UI)          | YLDs in thousands (95% UI)           |                                                   |                                                     |
|-----------------------------------------------|-----------------------------------------|------------------------------------------|--------------------------------------|---------------------------------------------------|-----------------------------------------------------|
|                                               | 2016 counts                             | 2016 counts                              | 2016 counts                          | Percentage change in counts between 2006 and 2016 | Percentage change in age-standardised rates between |
| Other chromosomal abnormalities               | 1.2<br>(1.0 to 1.4)                     | --                                       | 0.2<br>(0.1 to 0.4)                  | 31.4<br>(-7.8 to 86.6)                            | 0.5<br>(-29.4 to 42.6)                              |
| Congenital musculoskeletal and limb anomalies | 6.7<br>(5.8 to 7.6)                     | --                                       | 1.0<br>(0.6 to 1.4)                  | 30.3<br>(13.0 to 49.3)                            | 1.1<br>(-10.2 to 13.7)                              |
| Urogenital congenital anomalies               | 5.0<br>(4.3 to 5.7)                     | --                                       | 0.1<br>(0.1 to 0.2)                  | 27.4<br>(14.5 to 41.6)                            | -1.7<br>(-10.8 to 8.3)                              |
| Digestive congenital anomalies                | 6.9<br>(6.1 to 7.7)                     | --                                       | 0.3<br>(0.2 to 0.4)                  | 33.3<br>(9.6 to 61.5)                             | 3.0<br>(-12.2 to 21.5)                              |
| Other congenital anomalies                    | 23.8<br>(15.9 to 36.3)                  | --                                       | 4.1<br>(2.8 to 5.8)                  | 23.8<br>(14.0 to 34.6)                            | -4.8<br>(-12.0 to 3.6)                              |
| Skin and subcutaneous diseases                | 2,198.4<br>(2,119.9 to 2,291.6)         | 5,191.5<br>(4,756.1 to 5,687.1)          | 51.3<br>(33.5 to 75.3)               | 31.9<br>(29.2 to 34.7)                            | 2.2<br>(0.4 to 4.2)                                 |
| Dermatitis                                    | 307.1<br>(255.4 to 366.5)               | 286.8<br>(250.1 to 333.1)                | 12.2<br>(6.8 to 20.6)                | 30.3<br>(25.0 to 35.9)                            | 0.5<br>(-3.1 to 4.1)                                |
| Psoriasis                                     | 33.0<br>(31.1 to 35.1)                  | 5.2<br>(4.9 to 5.5)                      | 2.9<br>(2.0 to 3.9)                  | 41.2<br>(26.1 to 59.6)                            | 9.0<br>(-0.5 to 20.5)                               |
| Cellulitis                                    | 2.3<br>(2.1 to 2.5)                     | 40.1<br>(36.9 to 43.2)                   | 0.1<br>(0.1 to 0.2)                  | 30.0<br>(6.2 to 61.2)                             | 0.8<br>(-18.1 to 23.4)                              |
| Pyoderma                                      | 35.6<br>(33.9 to 37.4)                  | 701.7<br>(667.6 to 734.6)                | 0.2<br>(0.1 to 0.4)                  | 31.5<br>(23.1 to 40.0)                            | 1.6<br>(-3.8 to 7.0)                                |
| Scabies                                       | 120.1<br>(95.9 to 153.7)                | 371.8<br>(294.8 to 473.0)                | 3.1<br>(1.7 to 5.2)                  | 25.4<br>(19.3 to 31.9)                            | -3.1<br>(-7.2 to 1.2)                               |
| Fungal skin diseases                          | 930.1<br>(781.1 to 1,097.9)             | 2,607.6<br>(2,189.3 to 3,073.0)          | 5.3<br>(2.1 to 11.5)                 | 29.9<br>(28.4 to 31.5)                            | 0.4<br>(-0.5 to 1.3)                                |
| Viral skin diseases                           | 194.3<br>(184.0 to 205.6)               | 269.8<br>(254.8 to 287.9)                | 6.0<br>(3.7 to 8.9)                  | 29.2<br>(24.6 to 34.4)                            | 0.3<br>(-3.2 to 3.9)                                |
| Acne vulgaris                                 | 588.3<br>(507.6 to 681.7)               | 424.6<br>(329.9 to 564.4)                | 15.1<br>(9.9 to 21.8)                | 34.8<br>(27.9 to 41.7)                            | 5.2<br>(0.0 to 10.4)                                |
| Alopecia areata                               | 11.0<br>(10.3 to 11.7)                  | 19.6<br>(18.4 to 20.9)                   | 0.4<br>(0.2 to 0.5)                  | 31.2<br>(15.9 to 48.6)                            | 0.3<br>(-10.0 to 12.1)                              |
| Pruritus                                      | 45.2<br>(39.5 to 51.4)                  | 36.8<br>(32.5 to 41.6)                   | 0.5<br>(0.2 to 0.9)                  | 32.2<br>(24.0 to 40.9)                            | 1.6<br>(-3.5 to 7.0)                                |
| Urticaria                                     | 65.9<br>(56.1 to 77.6)                  | 118.9<br>(100.8 to 139.4)                | 4.0<br>(2.5 to 5.7)                  | 31.4<br>(22.9 to 40.6)                            | 0.5<br>(-5.4 to 6.7)                                |
| Decubitus ulcer                               | 0.5<br>(0.4 to 0.5)                     | 1.7<br>(1.5 to 1.8)                      | 0.1<br>(0.1 to 0.1)                  | 34.0<br>(24.4 to 43.9)                            | 6.0<br>(-7.7 to 21.2)                               |
| Other skin and subcutaneous diseases          | 273.8<br>(265.2 to 282.7)               | 306.9<br>(297.1 to 316.9)                | 1.5<br>(0.7 to 2.8)                  | 35.2<br>(30.9 to 39.5)                            | 4.3<br>(1.7 to 6.8)                                 |
| Sense organ diseases                          | 1,106.2<br>(1,062.6 to 1,159.5)         | 580.3†<br>(539.1 to 626.1)               | 35.5<br>(24.6 to 49.8)               | 24.4<br>(19.4 to 29.1)                            | -3.3<br>(-7.4 to 0.6)                               |
| Glaucoma                                      | 1.6<br>(1.2 to 2.0)                     | --                                       | 0.2<br>(0.1 to 0.3)                  | 34.0<br>(5.6 to 67.3)                             | 4.1<br>(-15.3 to 26.0)                              |
| Cataract                                      | 37.5<br>(30.9 to 44.2)                  | --                                       | 3.6<br>(2.4 to 5.0)                  | 33.3<br>(14.2 to 54.0)                            | -1.1<br>(-13.2 to 11.2)                             |
| Macular degeneration                          | 1.6<br>(1.2 to 2.2)                     | --                                       | 0.1<br>(0.1 to 0.2)                  | 33.5<br>(5.9 to 64.2)                             | 4.0<br>(-14.2 to 23.1)                              |
| Refraction and accommodation disorders        | 593.6<br>(536.6 to 667.2)               | --                                       | 9.7<br>(5.8 to 15.5)                 | 18.5<br>(10.8 to 27.2)                            | -7.9<br>(-14.3 to -0.5)                             |
| Age-related and other hearing loss            | 595.0<br>(551.8 to 638.0)               | --                                       | 16.8<br>(11.6 to 23.5)               | 23.5<br>(18.8 to 27.8)                            | -3.7<br>(-6.1 to -1.5)                              |
| Other vision loss                             | 15.9<br>(13.7 to 18.1)                  | --                                       | 1.6<br>(1.1 to 2.2)                  | 35.7<br>(16.9 to 56.4)                            | 5.2<br>(-9.6 to 20.2)                               |
| Other sense organ diseases                    | 113.9<br>(105.5 to 122.3)               | 580.3<br>(539.1 to 626.1)                | 3.5<br>(2.1 to 5.2)                  | 31.7<br>(25.2 to 39.2)                            | 1.7<br>(-1.9 to 5.7)                                |
| Oral disorders                                | 2,851.4<br>(2,654.1 to 3,010.8)         | 6,470.7†<br>(5,560.7 to 7,499.9)         | 11.0<br>(6.2 to 18.7)                | 30.1<br>(27.0 to 33.4)                            | 0.3<br>(-1.8 to 2.5)                                |
| Caries of deciduous teeth                     | 491.1<br>(342.1 to 619.6)               | 1,817.5<br>(1,027.0 to 2,722.7)          | 0.1<br>( $< 0.05$ to 0.2)            | 28.1<br>(10.5 to 46.7)                            | -1.4<br>(-14.4 to 12.8)                             |
| Caries of permanent teeth                     | 1,816.6<br>(1,660.7 to 1,979.9)         | 4,568.5<br>(4,065.9 to 5,121.3)          | 1.1<br>(0.5 to 2.0)                  | 23.9<br>(19.1 to 29.5)                            | -4.1<br>(-7.5 to -0.5)                              |
| Periodontal disease                           | 663.8<br>(491.6 to 847.4)               | 79.0<br>(58.0 to 102.0)                  | 4.4<br>(1.7 to 9.5)                  | 31.1<br>(25.1 to 37.1)                            | 0.4<br>(-3.7 to 4.6)                                |
| Edentulism and severe tooth loss              | 90.6<br>(76.3 to 106.8)                 | 5.7<br>(4.8 to 6.7)                      | 2.5<br>(1.6 to 3.7)                  | 31.8<br>(24.9 to 38.2)                            | 1.3<br>(-2.7 to 5.4)                                |
| Other oral disorders                          | 99.5<br>(94.9 to 104.8)                 | --                                       | 2.9<br>(1.8 to 4.4)                  | 29.7<br>(25.1 to 34.8)                            | 0.3<br>(-2.8 to 3.5)                                |
| <b>Injuries</b>                               | <b>824.6</b><br><b>(752.8 to 917.8)</b> | <b>450.3†</b><br><b>(426.0 to 477.7)</b> | <b>34.0</b><br><b>(21.5 to 49.8)</b> | <b>18.6</b><br><b>(13.2 to 24.4)</b>              | <b>-4.9</b><br><b>(-7.5 to -2.4)</b>                |
| <b>Transport injuries</b>                     | <b>75.6</b><br><b>(70.1 to 81.5)</b>    | <b>36.6</b><br><b>(32.6 to 41.0)</b>     | <b>4.7</b><br><b>(3.0 to 6.8)</b>    | <b>29.4</b><br><b>(25.1 to 33.6)</b>              | <b>0.9</b><br><b>(-1.2 to 2.9)</b>                  |
| Road injuries                                 | 58.9<br>(54.9 to 63.1)                  | 30.8<br>(27.1 to 35.3)                   | 3.6<br>(2.3 to 5.2)                  | 29.0<br>(25.0 to 32.6)                            | 0.9<br>(-1.1 to 2.9)                                |
| Pedestrian road injuries                      | 9.4<br>(8.3 to 10.8)                    | 3.5<br>(2.8 to 4.4)                      | 0.6<br>(0.4 to 0.9)                  | 30.4<br>(26.4 to 34.4)                            | 2.2<br>(-0.0 to 4.3)                                |
| Cyclist road injuries                         | 10.4<br>(8.7 to 12.3)                   | 6.0<br>(4.6 to 7.6)                      | 0.6<br>(0.4 to 0.9)                  | 36.4<br>(31.7 to 41.0)                            | 6.7<br>(4.3 to 9.2)                                 |
| Motorcyclist road injuries                    | 12.1<br>(10.4 to 14.4)                  | 4.3<br>(3.5 to 5.3)                      | 0.7<br>(0.5 to 1.0)                  | 18.9<br>(15.3 to 22.2)                            | -7.3<br>(-9.1 to -5.5)                              |
| Motor vehicle road injuries                   | 20.3<br>(17.5 to 23.0)                  | 12.6<br>(10.6 to 14.7)                   | 1.3<br>(0.9 to 1.9)                  | 28.9<br>(25.2 to 32.4)                            | 1.3<br>(-0.7 to 3.4)                                |
| Other road injuries                           | 6.7<br>(5.8 to 7.9)                     | 4.5<br>(3.4 to 5.7)                      | 0.4<br>(0.2 to 0.6)                  | 37.5<br>(33.8 to 41.3)                            | 7.3<br>(5.2 to 9.4)                                 |
| Other transport injuries                      | 16.7<br>(13.7 to 20.6)                  | 5.8<br>(4.7 to 7.3)                      | 1.1<br>(0.7 to 1.6)                  | 30.6<br>(23.0 to 38.4)                            | 0.7<br>(-2.5 to 4.0)                                |
| <b>Unintentional injuries</b>                 | <b>605.7</b><br><b>(559.4 to 652.1)</b> | <b>401.8</b><br><b>(377.9 to 427.6)</b>  | <b>23.3</b><br><b>(15.7 to 32.8)</b> | <b>25.1</b><br><b>(20.2 to 29.9)</b>              | <b>-2.9</b><br><b>(-5.1 to -0.8)</b>                |
| Falls                                         | 214.2<br>(185.4 to 242.4)               | 136.5<br>(119.2 to 159.8)                | 9.6<br>(6.6 to 13.3)                 | 27.4<br>(21.8 to 32.9)                            | -1.2<br>(-3.5 to 1.2)                               |
| Drowning                                      | 2.5<br>(2.1 to 3.0)                     | 0.7<br>(0.6 to 0.9)                      | 0.2<br>(0.1 to 0.2)                  | 16.6<br>(9.4 to 23.6)                             | -8.9<br>(-12.2 to -5.7)                             |
| Fire, heat, and hot substances                | 64.0<br>(53.6 to 79.1)                  | 12.3<br>(10.0 to 14.9)                   | 2.0<br>(1.3 to 2.8)                  | 23.1<br>(14.2 to 32.4)                            | -4.9<br>(-9.8 to 0.1)                               |
| Poisonings                                    | 2.0<br>(1.6 to 2.4)                     | 3.6<br>(2.8 to 4.6)                      | 0.2<br>(0.1 to 0.3)                  | 35.1<br>(23.3 to 47.5)                            | 3.9<br>(-3.3 to 11.5)                               |
| Exposure to mechanical forces                 | 102.7<br>(87.9 to 124.4)                | 56.5<br>(48.0 to 66.0)                   | 2.9<br>(1.8 to 4.2)                  | 25.5<br>(20.8 to 30.0)                            | -3.4<br>(-5.8 to -1.2)                              |
| Unintentional firearm injuries                | 5.5<br>(4.6 to 6.8)                     | 2.1<br>(1.5 to 2.7)                      | 0.3<br>(0.2 to 0.4)                  | 24.0<br>(19.3 to 28.5)                            | -4.3<br>(-6.9 to -1.9)                              |
| Unintentional suffocation                     | 9.5<br>(6.7 to 12.9)                    | 3.1<br>(2.1 to 4.4)                      | 0.3<br>(0.2 to 0.5)                  | 30.9<br>(21.4 to 41.0)                            | 0.7<br>(-4.0 to 5.4)                                |
| Other exposure to mechanical forces           | 87.7<br>(73.7 to 108.4)                 | 51.3<br>(43.6 to 59.4)                   | 2.3<br>(1.5 to 3.3)                  | 24.9<br>(20.6 to 29.2)                            | -3.7<br>(-6.1 to -1.6)                              |

| Cause                                                                               | Prevalence in thousands (95% UI)        | Incidence in thousands (95% UI)      | YLDs in thousands (95% UI)        |                                                   |                                                     |
|-------------------------------------------------------------------------------------|-----------------------------------------|--------------------------------------|-----------------------------------|---------------------------------------------------|-----------------------------------------------------|
|                                                                                     | 2016 counts                             | 2016 counts                          | 2016 counts                       | Percentage change in counts between 2006 and 2016 | Percentage change in age-standardised rates between |
| Adverse effects of medical treatment                                                | 2.3<br>(1.8 to 2.9)                     | 30.5<br>(26.2 to 35.0)               | 0.3<br>(0.2 to 0.5)               | 20.9<br>(14.5 to 29.5)                            | -7.3<br>(-11.0 to -3.0)                             |
| Animal contact                                                                      | 36.8<br>(32.3 to 42.7)                  | 61.8<br>(51.7 to 72.2)               | 1.3<br>(0.9 to 1.9)               | 21.1<br>(15.1 to 27.4)                            | -7.2<br>(-10.4 to -3.7)                             |
| Venomous animal contact                                                             | 14.2<br>(11.8 to 17.1)                  | 25.7<br>(20.2 to 32.1)               | 0.9<br>(0.6 to 1.3)               | 22.0<br>(13.3 to 31.1)                            | -6.5<br>(-11.4 to -1.4)                             |
| Non-venomous animal contact                                                         | 22.5<br>(18.9 to 27.4)                  | 36.1<br>(29.3 to 43.5)               | 0.4<br>(0.3 to 0.7)               | 19.3<br>(14.6 to 23.8)                            | -8.4<br>(-11.5 to -5.5)                             |
| Foreign body                                                                        | 46.8<br>(37.6 to 56.5)                  | 37.0<br>(32.2 to 42.5)               | 2.2<br>(1.4 to 3.3)               | 23.3<br>(16.1 to 30.4)                            | -4.1<br>(-7.8 to -0.8)                              |
| Pulmonary aspiration and foreign body in airway                                     | 28.4<br>(20.8 to 38.6)                  | 15.3<br>(12.6 to 19.0)               | 1.5<br>(0.9 to 2.2)               | 20.4<br>(12.9 to 27.9)                            | -6.2<br>(-9.7 to -2.8)                              |
| Foreign body in eyes                                                                | 2.2<br>(1.2 to 3.4)                     | 12.5<br>(9.6 to 16.8)                | 0.1<br>(0.1 to 0.2)               | 37.7<br>(33.1 to 42.9)                            | 5.7<br>(3.0 to 8.8)                                 |
| Foreign body in other body part                                                     | 16.2<br>(12.7 to 21.2)                  | 9.1<br>(7.3 to 11.0)                 | 0.6<br>(0.4 to 0.9)               | 27.8<br>(20.0 to 35.8)                            | -0.7<br>(-4.8 to 3.5)                               |
| Environmental heat and cold exposure                                                | 47.1<br>(39.6 to 55.4)                  | 18.8<br>(15.4 to 22.8)               | 2.1<br>(1.3 to 3.0)               | 24.5<br>(18.9 to 29.6)                            | -4.5<br>(-7.0 to -2.3)                              |
| Other unintentional injuries                                                        | 87.3<br>(69.1 to 111.9)                 | 44.0<br>(37.2 to 52.2)               | 2.6<br>(1.7 to 3.8)               | 22.4<br>(17.7 to 27.1)                            | -3.9<br>(-6.0 to -1.9)                              |
| <b>Self-harm and interpersonal violence</b>                                         | <b>185.3</b><br><b>(166.8 to 205.3)</b> | <b>11.8†</b><br><b>(9.9 to 13.8)</b> | <b>2.3</b><br><b>(1.6 to 3.1)</b> | <b>21.1</b><br><b>(14.4 to 27.2)</b>              | <b>-4.9</b><br><b>(-9.0 to -1.2)</b>                |
| Self-harm                                                                           | 3.3<br>(2.8 to 3.7)                     | 2.0<br>(1.7 to 2.4)                  | 0.2<br>(0.1 to 0.3)               | 37.1<br>(33.1 to 41.2)                            | 5.5<br>(3.2 to 7.9)                                 |
| Self-harm by firearm                                                                | 0.2<br>(0.2 to 0.3)                     | 0.1<br>(0.1 to 0.2)                  | < 0.05<br>(< 0.05 to < 0.05)      | 18.3<br>(13.9 to 23.4)                            | -9.7<br>(-12.3 to -6.5)                             |
| Self-harm by other specified means                                                  | 3.1<br>(2.6 to 3.5)                     | 1.9<br>(1.6 to 2.3)                  | 0.2<br>(0.1 to 0.3)               | 38.3<br>(34.2 to 42.6)                            | 6.6<br>(4.3 to 9.2)                                 |
| Interpersonal violence                                                              | 182.1<br>(163.4 to 202.2)               | 9.7†<br>(7.9 to 11.7)                | 2.1<br>(1.4 to 2.9)               | 19.9<br>(12.8 to 26.3)                            | -6.3<br>(-10.6 to -2.1)                             |
| Assault by firearm                                                                  | 0.6<br>(0.5 to 0.7)                     | 0.2<br>(0.2 to 0.4)                  | < 0.05<br>(< 0.05 to < 0.05)      | 27.8<br>(22.2 to 33.7)                            | -2.2<br>(-5.3 to 1.1)                               |
| Assault by sharp object                                                             | 5.4<br>(4.4 to 6.5)                     | 3.0<br>(2.3 to 4.1)                  | 0.2<br>(0.1 to 0.3)               | 32.8<br>(26.9 to 37.8)                            | 2.1<br>(-1.0 to 4.9)                                |
| Sexual violence                                                                     | 167.7<br>(149.0 to 188.0)               | --                                   | 1.5<br>(1.0 to 2.1)               | 14.1<br>(5.2 to 22.3)                             | -11.6<br>(-17.4 to -6.2)                            |
| Assault by other means                                                              | 8.4<br>(7.1 to 10.0)                    | 6.4<br>(5.1 to 7.9)                  | 0.4<br>(0.2 to 0.6)               | 39.5<br>(34.5 to 44.1)                            | 6.7<br>(4.2 to 9.3)                                 |
| <b>Forces of nature, conflict and terrorism, and executions and police conflict</b> | <b>125.8</b><br><b>(72.3 to 204.3)</b>  | <b>0.1†</b><br><b>(0.1 to 0.1)</b>   | <b>3.8</b><br><b>(1.2 to 7.9)</b> | <b>-17.6</b><br><b>(-26.7 to -10.6)</b>           | <b>-21.8</b><br><b>(-28.6 to -17.2)</b>             |
| Exposure to forces of nature                                                        | 0.7<br>(0.3 to 1.2)                     | --                                   | < 0.05<br>(< 0.05 to 0.1)         | 101.5<br>(92.5 to 118.9)                          | 53.4<br>(47.7 to 65.9)                              |
| Conflict and terrorism                                                              | 124.9<br>(71.5 to 203.4)                | --                                   | 3.7<br>(1.2 to 7.8)               | -18.0<br>(-27.0 to -11.1)                         | -22.2<br>(-28.9 to -17.6)                           |
| Executions and police conflict                                                      | 0.2<br>(0.1 to 0.6)                     | 0.1<br>(0.1 to 0.1)                  | < 0.05<br>(< 0.05 to < 0.05)      | 26.8<br>(7.4 to 45.6)                             | 1.8<br>(-18.1 to 22.7)                              |
| <b>Impairments</b>                                                                  | --                                      | --                                   | --                                | --                                                | --                                                  |
| Anaemia                                                                             | 3,237.4<br>(3,129.5 to 3,353.4)         | --                                   | 117.5<br>(79.2 to 168.1)          | 17.8<br>(13.1 to 22.8)                            | -10.2<br>(-13.8 to -6.8)                            |
| Developmental intellectual disability                                               | 260.5<br>(199.1 to 324.5)               | --                                   | 23.2<br>(16.7 to 31.4)            | 27.2<br>(18.9 to 41.8)                            | -2.1<br>(-7.7 to 7.8)                               |
| Epilepsy                                                                            | 38.7<br>(21.0 to 65.0)                  | --                                   | 15.1<br>(7.5 to 27.1)             | 37.9<br>(-41.6 to 241.1)                          | 6.2<br>(-57.6 to 170.7)                             |
| Guillain-Barre syndrome                                                             | < 0.05<br>(< 0.05 to 0.1)               | --                                   | < 0.05<br>(< 0.05 to < 0.05)      | 29.5<br>(28.4 to 30.7)                            | 0.0<br>(-0.0 to 0.1)                                |
| Hearing loss                                                                        | 745.0<br>(701.2 to 790.0)               | --                                   | 24.2<br>(16.7 to 33.4)            | 21.6<br>(18.0 to 25.4)                            | -4.6<br>(-6.8 to -2.5)                              |
| Heart failure                                                                       | 15.5<br>(13.8 to 17.5)                  | --                                   | 1.6<br>(1.1 to 2.2)               | 26.1<br>(16.4 to 36.1)                            | -4.4<br>(-12.2 to 3.3)                              |
| Infertility                                                                         | 129.4<br>(120.8 to 139.9)               | --                                   | 0.7<br>(0.3 to 1.5)               | 4.1<br>(-2.2 to 11.7)                             | -24.0<br>(-28.3 to -18.6)                           |
| Pelvic inflammatory disease                                                         | 6.3<br>(5.3 to 7.6)                     | --                                   | 0.8<br>(0.5 to 1.2)               | 25.6<br>(8.7 to 45.5)                             | -5.5<br>(-17.6 to 8.8)                              |
| Vision loss                                                                         | 702.7<br>(644.5 to 775.6)               | --                                   | 21.7<br>(15.3 to 30.3)            | 25.4<br>(18.0 to 36.9)                            | -4.5<br>(-8.2 to 0.2)                               |

We did not calculate incidence for the nine impairments, certain NTDs, and causes with only birth prevalence. Blank cells mean that no estimate is available.

† Incidence for aggregate causes represents the sum of the incidence of the causes below the aggregate.

‡ Incidence estimates for stroke represent first-ever stroke only.

^ Incidence of HIV/AIDS represents new infections of HIV only and does not include new infections of Tuberculosis in HIV positive cases.



SR Table 14: Prevalence, incidence, and YLDs for 2016, percentage change of YLD counts and percentage change of age-standardised YLD rates between 2006 and 2016 by cause and impairments, for all ages, Singapore.

| Cause                                                                                | Prevalence in thousands (95% UI)       | Incidence in thousands (95% UI)            | YLDs in thousands (95% UI)       |                                                   |                                                     |
|--------------------------------------------------------------------------------------|----------------------------------------|--------------------------------------------|----------------------------------|---------------------------------------------------|-----------------------------------------------------|
|                                                                                      | 2016 counts                            | 2016 counts                                | 2016 counts                      | Percentage change in counts between 2006 and 2016 | Percentage change in age-standardised rates between |
| <b>All causes</b>                                                                    | <b>3,623.1</b><br>(3,606.9 to 3,638.9) | <b>21,611.7†</b><br>(20,253.4 to 23,114.8) | <b>419.0</b><br>(311.1 to 542.5) | <b>17.1</b><br>(15.5 to 18.6)                     | <b>0.1</b><br>(-1.3 to 1.4)                         |
| <b>Communicable, maternal, neonatal, and nutritional disorders</b>                   | <b>1,356.8</b><br>(1,310.1 to 1,406.7) | <b>12,561.8†</b><br>(11,245.5 to 14,000.4) | <b>19.3</b><br>(13.4 to 26.7)    | <b>3.3</b><br>(-2.3 to 9.3)                       | <b>-2.5</b><br>(-7.7 to 3.4)                        |
| <b>HIV/AIDS and tuberculosis</b>                                                     | <b>338.9</b><br>(305.6 to 367.7)       | <b>2.0†</b><br>(1.6 to 2.3)                | <b>1.3</b><br>(0.7 to 2.3)       | <b>33.9</b><br>(11.9 to 52.0)                     | <b>18.8</b><br>(-1.7 to 35.7)                       |
| Tuberculosis                                                                         | 309.0<br>(276.5 to 346.3)              | 1.5†<br>(1.3 to 1.8)                       | 0.2<br>(0.1 to 0.3)              | -1.5<br>(-21.7 to 26.6)                           | -17.3<br>(-33.8 to 5.5)                             |
| Drug-susceptible tuberculosis                                                        | 0.7<br>(0.6 to 0.8)                    | 1.5<br>(1.3 to 1.7)                        | 0.2<br>(0.1 to 0.3)              | -1.9<br>(-22.0 to 26.3)                           | -17.6<br>(-33.9 to 5.0)                             |
| Multidrug-resistant tuberculosis without extensive drug resistance                   | < 0.05<br>(< 0.05 to < 0.05)           | < 0.05<br>(< 0.05 to < 0.05)               | < 0.05<br>(< 0.05 to < 0.05)     | 74.5<br>(13.7 to 175.1)                           | 45.7<br>(-5.0 to 127.4)                             |
| Extensively drug-resistant tuberculosis                                              | < 0.05<br>(< 0.05 to < 0.05)           | < 0.05<br>(< 0.05 to < 0.05)               | < 0.05<br>(< 0.05 to < 0.05)     | 275.4<br>(144.5 to 491.6)                         | 213.4<br>(104.4 to 388.9)                           |
| Latent tuberculosis infection                                                        | 308.2<br>(275.7 to 345.5)              | --                                         | --                               | --                                                | --                                                  |
| HIV/AIDS                                                                             | 12.3<br>(5.6 to 21.1)                  | 0.4 <sup>A</sup><br>(0.2 to 0.8)           | 1.1<br>(0.5 to 2.0)              | 44.4<br>(19.0 to 64.8)                            | 30.7<br>(5.9 to 49.4)                               |
| Drug-susceptible HIV/AIDS - Tuberculosis                                             | < 0.05<br>(< 0.05 to < 0.05)           | 0.1<br>(< 0.05 to 0.1)                     | < 0.05<br>(< 0.05 to < 0.05)     | -25.7<br>(-32.0 to -19.4)                         | -32.9<br>(-38.5 to -27.1)                           |
| Multidrug-resistant HIV/AIDS - Tuberculosis without extensive drug resistance        | < 0.05<br>(< 0.05 to < 0.05)           | < 0.05<br>(< 0.05 to < 0.05)               | < 0.05<br>(< 0.05 to < 0.05)     | 31.1<br>(-15.8 to 105.4)                          | 18.5<br>(-23.9 to 85.7)                             |
| Extensively drug-resistant HIV/AIDS - Tuberculosis                                   | < 0.05<br>(< 0.05 to < 0.05)           | < 0.05<br>(< 0.05 to < 0.05)               | < 0.05<br>(< 0.05 to < 0.05)     | 182.0<br>(80.9 to 341.9)                          | 154.8<br>(63.6 to 299.4)                            |
| HIV/AIDS resulting in other diseases                                                 | 12.3<br>(5.5 to 21.1)                  | 0.4<br>(0.2 to 0.8)                        | 1.1<br>(0.5 to 2.0)              | 45.6<br>(19.6 to 66.6)                            | 31.9<br>(6.3 to 51.3)                               |
| <b>Diarrhoea, lower respiratory infections, and other common infectious diseases</b> | <b>191.5</b><br>(176.8 to 205.3)       | <b>12,219.7†</b><br>(10,893.5 to 13,629.3) | <b>5.7</b><br>(3.6 to 8.4)       | <b>5.9</b><br>(1.5 to 11.4)                       | <b>-0.8</b><br>(-4.4 to 3.3)                        |
| Diarrhoeal diseases                                                                  | 2.7<br>(2.5 to 2.9)                    | 180.4<br>(168.3 to 194.0)                  | 0.3<br>(0.2 to 0.4)              | 21.3<br>(5.8 to 39.4)                             | 14.6<br>(-0.1 to 30.7)                              |
| Intestinal infectious diseases                                                       | < 0.05<br>(< 0.05 to < 0.05)           | < 0.05†<br>(< 0.05 to 0.1)                 | < 0.05<br>(< 0.05 to < 0.05)     | 13.2<br>(-2.2 to 30.3)                            | -1.9<br>(-14.8 to 11.7)                             |
| Typhoid fever                                                                        | < 0.05<br>(< 0.05 to < 0.05)           | < 0.05<br>(< 0.05 to < 0.05)               | < 0.05<br>(< 0.05 to < 0.05)     | 28.8<br>(7.6 to 54.4)                             | 13.3<br>(-4.3 to 34.9)                              |
| Paratyphoid fever                                                                    | < 0.05<br>(< 0.05 to < 0.05)           | < 0.05<br>(< 0.05 to < 0.05)               | < 0.05<br>(< 0.05 to < 0.05)     | -5.6<br>(-20.9 to 13.3)                           | -18.6<br>(-30.3 to -3.6)                            |
| Other intestinal infectious diseases                                                 | --                                     | --                                         | < 0.05<br>(< 0.05 to < 0.05)     | -24.6<br>(-43.4 to -1.1)                          | -32.8<br>(-53.3 to -6.6)                            |
| Lower respiratory infections                                                         | 4.8<br>(4.5 to 5.2)                    | 202.2<br>(186.4 to 218.9)                  | 0.3<br>(0.2 to 0.4)              | 11.7<br>(-0.4 to 24.5)                            | -4.5<br>(-14.9 to 6.4)                              |
| Upper respiratory infections                                                         | 154.0<br>(137.5 to 171.7)              | 11,683.0<br>(10,364.5 to 13,083.7)         | 3.8<br>(2.3 to 6.0)              | 5.4<br>(-0.1 to 10.9)                             | 0.0<br>(-4.4 to 4.8)                                |
| Otitis media                                                                         | 23.4<br>(20.8 to 26.1)                 | 80.4<br>(68.0 to 95.7)                     | 0.7<br>(0.4 to 1.0)              | -4.5<br>(-13.3 to 4.7)                            | -8.5<br>(-17.1 to -0.1)                             |
| Meningitis                                                                           | 0.3<br>(0.2 to 1.6)                    | < 0.05<br>(< 0.05 to < 0.05)               | < 0.05<br>(< 0.05 to 0.2)        | 61.1<br>(-7.0 to 738.7)                           | 28.2<br>(-16.3 to 445.4)                            |
| Pneumococcal meningitis                                                              | 0.1<br>(0.1 to 0.1)                    | < 0.05<br>(< 0.05 to < 0.05)               | < 0.05<br>(< 0.05 to < 0.05)     | -2.4<br>(-9.0 to 4.3)                             | -11.6<br>(-17.2 to -5.6)                            |
| H influenzae type B meningitis                                                       | < 0.05<br>(< 0.05 to < 0.05)           | < 0.05<br>(< 0.05 to < 0.05)               | < 0.05<br>(< 0.05 to < 0.05)     | -12.2<br>(-22.7 to -3.0)                          | -21.7<br>(-31.3 to -13.3)                           |
| Meningococcal infection                                                              | 0.1<br>(< 0.05 to 1.4)                 | < 0.05<br>(< 0.05 to < 0.05)               | < 0.05<br>(< 0.05 to 0.2)        | 523.2<br>(-5.0 to 3,453.0)                        | 328.0<br>(-15.4 to 1,880.2)                         |
| Other meningitis                                                                     | 0.1<br>(< 0.05 to 0.1)                 | < 0.05<br>(< 0.05 to < 0.05)               | < 0.05<br>(< 0.05 to < 0.05)     | 3.5<br>(-4.1 to 11.4)                             | -6.9<br>(-13.9 to 0.0)                              |
| Encephalitis                                                                         | 2.3<br>(1.6 to 3.2)                    | 1.7<br>(1.5 to 1.9)                        | 0.3<br>(0.2 to 0.4)              | 6.8<br>(-2.8 to 16.3)                             | -5.2<br>(-12.4 to 2.3)                              |
| Diphtheria                                                                           | < 0.05<br>(< 0.05 to < 0.05)           | < 0.05<br>(< 0.05 to < 0.05)               | < 0.05<br>(< 0.05 to < 0.05)     | -20.8<br>(-60.2 to 59.5)                          | -27.6<br>(-59.4 to 32.8)                            |
| Whooping cough                                                                       | 0.1<br>(0.1 to 0.1)                    | 0.8<br>(0.6 to 1.1)                        | < 0.05<br>(< 0.05 to < 0.05)     | -27.6<br>(-48.6 to 2.2)                           | -24.2<br>(-46.5 to 7.9)                             |
| Tetanus                                                                              | < 0.05<br>(< 0.05 to < 0.05)           | < 0.05<br>(< 0.05 to < 0.05)               | < 0.05<br>(< 0.05 to < 0.05)     | -19.1<br>(-38.2 to -2.0)                          | -25.5<br>(-42.5 to -10.3)                           |
| Measles                                                                              | < 0.05<br>(< 0.05 to < 0.05)           | < 0.05<br>(< 0.05 to < 0.05)               | < 0.05<br>(< 0.05 to < 0.05)     | -78.4<br>(-93.3 to -58.7)                         | -77.2<br>(-93.0 to -56.6)                           |
| Varicella and herpes zoster                                                          | 5.0<br>(4.5 to 5.6)                    | 71.1<br>(67.3 to 74.9)                     | 0.2<br>(0.1 to 0.4)              | 19.4<br>(6.6 to 35.3)                             | -0.2<br>(-10.6 to 12.3)                             |
| <b>Neglected tropical diseases and malaria</b>                                       | <b>6.8</b><br>(4.7 to 9.9)             | <b>106.4†</b><br>(71.6 to 154.7)           | <b>1.0</b><br>(0.5 to 1.8)       | <b>102.7</b><br>(58.9 to 361.9)                   | <b>86.6</b><br>(45.5 to 323.4)                      |
| Malaria                                                                              | --                                     | --                                         | --                               | --                                                | --                                                  |
| Chagas disease                                                                       | --                                     | --                                         | --                               | --                                                | --                                                  |
| Leishmaniasis                                                                        | --                                     | --                                         | --                               | --                                                | --                                                  |
| Visceral leishmaniasis                                                               | --                                     | --                                         | --                               | --                                                | --                                                  |
| Cutaneous and mucocutaneous leishmaniasis                                            | --                                     | --                                         | --                               | --                                                | --                                                  |
| African trypanosomiasis                                                              | --                                     | --                                         | --                               | --                                                | --                                                  |
| Schistosomiasis                                                                      | --                                     | --                                         | --                               | --                                                | --                                                  |
| Cysticercosis                                                                        | --                                     | --                                         | --                               | --                                                | --                                                  |
| Cystic echinococcosis                                                                | --                                     | --                                         | --                               | --                                                | --                                                  |
| Lymphatic filariasis                                                                 | --                                     | --                                         | --                               | --                                                | --                                                  |
| Onchocerciasis                                                                       | --                                     | --                                         | --                               | --                                                | --                                                  |
| Trachoma                                                                             | --                                     | --                                         | --                               | --                                                | --                                                  |
| Dengue                                                                               | 6.1<br>(3.6 to 9.9)                    | 102.3<br>(68.1 to 144.9)                   | 1.0<br>(0.5 to 1.8)              | 102.3<br>(58.1 to 363.9)                          | 85.9<br>(44.7 to 325.0)                             |
| Yellow fever                                                                         | --                                     | --                                         | --                               | --                                                | --                                                  |
| Rabies                                                                               | < 0.05<br>(< 0.05 to < 0.05)           | < 0.05<br>(< 0.05 to < 0.05)               | < 0.05<br>(< 0.05 to < 0.05)     | -3.7<br>(-28.2 to 31.3)                           | -18.8<br>(-38.4 to 7.9)                             |
| Intestinal nematode infections                                                       | --                                     | --                                         | --                               | --                                                | --                                                  |
| Ascariasis                                                                           | --                                     | --                                         | --                               | --                                                | --                                                  |

| Cause                                                                   | Prevalence in thousands (95% UI)              | Incidence in thousands (95% UI)                | YLDs in thousands (95% UI)              |                                                   |                                                     |
|-------------------------------------------------------------------------|-----------------------------------------------|------------------------------------------------|-----------------------------------------|---------------------------------------------------|-----------------------------------------------------|
|                                                                         | 2016 counts                                   | 2016 counts                                    | 2016 counts                             | Percentage change in counts between 2006 and 2016 | Percentage change in age-standardised rates between |
| Trichuriasis                                                            | --                                            | --                                             | --                                      | --                                                | --                                                  |
| Hookworm disease                                                        | --                                            | --                                             | --                                      | --                                                | --                                                  |
| Food-borne trematodiasis                                                | --                                            | --                                             | --                                      | --                                                | --                                                  |
| Leprosy                                                                 | < 0.05<br>(< 0.05 to 0.1)                     | < 0.05<br>(< 0.05 to < 0.05)                   | < 0.05<br>(< 0.05 to < 0.05)            | -10.9<br>(-22.9 to 31.9)                          | -31.3<br>(-41.7 to 5.3)                             |
| Ebola virus disease                                                     | --                                            | --                                             | --                                      | --                                                | --                                                  |
| Zika virus disease                                                      | 0.1<br>(< 0.05 to 0.3)                        | 4.1<br>(1.0 to 19.8)                           | < 0.05<br>(< 0.05 to < 0.05)            | --                                                | --                                                  |
| Guinea worm disease                                                     | --                                            | --                                             | --                                      | --                                                | --                                                  |
| Other neglected tropical diseases                                       | --                                            | --                                             | < 0.05<br>(< 0.05 to < 0.05)            | --                                                | --                                                  |
| <b>Maternal disorders</b>                                               | <b>1.9</b><br><b>(1.4 to 2.5)</b>             | <b>45.9†</b><br><b>(34.5 to 58.5)</b>          | <b>0.1</b><br><b>(0.1 to 0.2)</b>       | <b>-0.3</b><br><b>(-28.9 to 38.3)</b>             | <b>-4.0</b><br><b>(-31.7 to 32.9)</b>               |
| Maternal haemorrhage                                                    | 0.2<br>(0.1 to 0.3)                           | 0.6<br>(0.4 to 0.9)                            | < 0.05<br>(< 0.05 to < 0.05)            | 0.8<br>(-36.7 to 55.8)                            | -2.9<br>(-39.4 to 50.8)                             |
| Maternal sepsis and other pregnancy related infections                  | 0.6<br>(0.5 to 0.8)                           | 1.7<br>(1.2 to 2.4)                            | < 0.05<br>(< 0.05 to < 0.05)            | -3.6<br>(-50.3 to 89.4)                           | -7.5<br>(-55.0 to 88.1)                             |
| Maternal hypertensive disorders                                         | 0.8<br>(0.5 to 1.1)                           | 3.2<br>(2.4 to 4.3)                            | < 0.05<br>(< 0.05 to 0.1)               | 14.1<br>(-34.4 to 106.5)                          | 10.2<br>(-36.0 to 99.8)                             |
| Maternal obstructed labour and uterine rupture                          | < 0.05<br>(< 0.05 to < 0.05)                  | 0.8<br>(0.5 to 1.1)                            | < 0.05<br>(< 0.05 to < 0.05)            | -4.5<br>(-48.4 to 80.0)                           | -7.7<br>(-50.2 to 75.5)                             |
| Maternal abortion, miscarriage, and ectopic pregnancy                   | 0.3<br>(0.2 to 0.5)                           | 39.6<br>(28.4 to 52.1)                         | < 0.05<br>(< 0.05 to 0.1)               | -9.5<br>(-52.4 to 64.7)                           | -12.9<br>(-53.4 to 59.7)                            |
| Other maternal disorders                                                | --                                            | --                                             | < 0.05<br>(< 0.05 to < 0.05)            | -4.9<br>(-32.2 to 31.9)                           | -8.6<br>(-35.1 to 26.5)                             |
| <b>Neonatal disorders</b>                                               | <b>22.0</b><br><b>(18.4 to 27.7)</b>          | --                                             | <b>3.8</b><br><b>(2.6 to 5.2)</b>       | <b>1.2</b><br><b>(-11.0 to 13.6)</b>              | <b>-3.7</b><br><b>(-15.6 to 8.2)</b>                |
| Neonatal preterm birth complications                                    | 19.6<br>(14.9 to 25.6)                        | --                                             | 2.1<br>(1.4 to 3.1)                     | -2.6<br>(-21.1 to 18.2)                           | -7.3<br>(-25.3 to 12.1)                             |
| Neonatal encephalopathy due to birth asphyxia and trauma                | 4.5<br>(3.1 to 6.3)                           | --                                             | 0.9<br>(0.6 to 1.4)                     | -0.4<br>(-14.6 to 16.7)                           | -5.8<br>(-18.9 to 9.7)                              |
| Neonatal sepsis and other neonatal infections                           | 1.5<br>(0.7 to 3.2)                           | --                                             | 0.6<br>(0.3 to 1.4)                     | 20.3<br>(1.3 to 42.1)                             | 13.9<br>(-5.3 to 34.7)                              |
| Hemolytic disease and other neonatal jaundice                           | 0.2<br>(0.2 to 0.3)                           | --                                             | 0.1<br>(< 0.05 to 0.1)                  | -1.4<br>(-9.6 to 7.7)                             | -7.0<br>(-14.8 to 1.5)                              |
| Other neonatal disorders                                                | --                                            | --                                             | < 0.05<br>(< 0.05 to 0.1)               | -4.3<br>(-24.5 to 17.4)                           | -1.3<br>(-22.1 to 20.9)                             |
| <b>Nutritional deficiencies</b>                                         | <b>370.2</b><br><b>(337.7 to 395.3)</b>       | <b>13.5†</b><br><b>(10.8 to 16.6)</b>          | <b>6.6</b><br><b>(4.2 to 9.9)</b>       | <b>-8.4</b><br><b>(-17.7 to 2.4)</b>              | <b>-11.3</b><br><b>(-20.5 to -0.3)</b>              |
| Protein-energy malnutrition                                             | 6.1<br>(4.4 to 8.5)                           | 4.3<br>(3.1 to 5.9)                            | 0.1<br>(0.1 to 0.2)                     | -7.2<br>(-40.5 to 42.3)                           | -4.3<br>(-38.6 to 47.0)                             |
| Iodine deficiency                                                       | 23.5<br>(20.8 to 26.9)                        | 0.4<br>(0.3 to 0.4)                            | 0.6<br>(0.4 to 0.8)                     | 16.6<br>(3.5 to 31.9)                             | 3.4<br>(-8.6 to 18.0)                               |
| Vitamin A deficiency                                                    | 10.7<br>(7.8 to 13.9)                         | 8.8<br>(6.4 to 11.7)                           | --                                      | --                                                | --                                                  |
| Iron-deficiency anaemia                                                 | 320.8<br>(288.4 to 352.9)                     | --                                             | 5.9<br>(3.7 to 9.0)                     | -10.3<br>(-20.7 to 1.1)                           | -12.6<br>(-22.7 to -0.3)                            |
| Other nutritional deficiencies                                          | --                                            | --                                             | < 0.05<br>(< 0.05 to < 0.05)            | -7.2<br>(-41.2 to 43.7)                           | -4.6<br>(-39.5 to 47.6)                             |
| <b>Other communicable, maternal, neonatal, and nutritional diseases</b> | <b>687.6</b><br><b>(638.7 to 738.6)</b>       | <b>174.4</b><br><b>(154.6 to 198.1)</b>        | <b>0.7</b><br><b>(0.4 to 1.2)</b>       | <b>2.4</b><br><b>(-4.4 to 9.0)</b>                | <b>-3.0</b><br><b>(-10.4 to 4.4)</b>                |
| Sexually transmitted diseases excluding HIV                             | 524.7<br>(483.1 to 571.5)                     | 166.3<br>(146.7 to 190.2)                      | 0.5<br>(0.2 to 0.9)                     | 8.9<br>(0.7 to 17.5)                              | 1.7<br>(-5.4 to 9.7)                                |
| Syphilis                                                                | 4.6<br>(2.1 to 9.6)                           | 4.2<br>(2.0 to 8.2)                            | < 0.05<br>(< 0.05 to < 0.05)            | 19.8<br>(2.4 to 36.1)                             | -3.4<br>(-15.9 to 9.5)                              |
| Chlamydial infection                                                    | 58.1<br>(46.0 to 72.0)                        | 42.4<br>(33.3 to 53.2)                         | 0.1<br>(0.1 to 0.2)                     | -0.5<br>(-14.5 to 16.3)                           | -4.9<br>(-18.0 to 10.5)                             |
| Gonococcal infection                                                    | 9.2<br>(5.9 to 13.7)                          | 31.0<br>(19.1 to 49.2)                         | < 0.05<br>(< 0.05 to 0.1)               | 38.8<br>(6.4 to 71.4)                             | 35.1<br>(1.3 to 71.3)                               |
| Trichomoniasis                                                          | 84.8<br>(73.6 to 97.2)                        | 70.8<br>(60.8 to 81.6)                         | 0.1<br>(< 0.05 to 0.2)                  | 7.8<br>(0.1 to 16.1)                              | -0.7<br>(-7.7 to 7.4)                               |
| Genital herpes                                                          | 389.6<br>(333.7 to 455.6)                     | 16.7<br>(14.2 to 20.0)                         | 0.1<br>(< 0.05 to 0.2)                  | 14.5<br>(7.4 to 22.1)                             | 0.3<br>(-5.7 to 6.9)                                |
| Other sexually transmitted diseases                                     | 2.2<br>(1.9 to 2.5)                           | 1.1<br>(0.9 to 1.4)                            | 0.1<br>(< 0.05 to 0.1)                  | 5.8<br>(-5.2 to 18.2)                             | 2.4<br>(-8.0 to 14.2)                               |
| Hepatitis                                                               | 188.1<br>(163.6 to 219.8)                     | 8.1<br>(7.0 to 9.6)                            | < 0.05<br>(< 0.05 to < 0.05)            | -60.7<br>(-66.1 to -54.9)                         | -65.3<br>(-70.3 to -60.2)                           |
| Acute hepatitis A                                                       | 0.1<br>(0.1 to 0.2)                           | 1.7<br>(1.2 to 2.3)                            | < 0.05<br>(< 0.05 to < 0.05)            | -60.1<br>(-70.0 to -47.1)                         | -65.5<br>(-74.2 to -53.6)                           |
| Hepatitis B                                                             | 121.3<br>(98.1 to 151.9)                      | 5.6<br>(4.5 to 7.0)                            | < 0.05<br>(< 0.05 to < 0.05)            | -63.7<br>(-69.9 to -56.9)                         | -69.8<br>(-74.7 to -64.3)                           |
| Hepatitis C                                                             | 66.7<br>(59.7 to 73.9)                        | 0.7<br>(0.6 to 0.7)                            | < 0.05<br>(< 0.05 to < 0.05)            | -29.7<br>(-32.9 to -26.6)                         | -21.2<br>(-24.7 to -18.2)                           |
| Acute hepatitis E                                                       | < 0.05<br>(< 0.05 to < 0.05)                  | 0.2<br>(0.2 to 0.3)                            | < 0.05<br>(< 0.05 to < 0.05)            | -57.8<br>(-60.6 to -54.6)                         | -66.7<br>(-68.8 to -64.4)                           |
| Other infectious diseases                                               | 8.0<br>(7.0 to 9.2)                           | < 0.05<br>(< 0.05 to < 0.05)                   | 0.2<br>(0.1 to 0.4)                     | -3.5<br>(-14.8 to 8.5)                            | -4.6<br>(-17.6 to 9.8)                              |
| <b>Non-communicable diseases</b>                                        | <b>3,496.3</b><br><b>(3,477.2 to 3,513.6)</b> | <b>8,648.2†</b><br><b>(8,304.5 to 9,030.7)</b> | <b>361.9</b><br><b>(268.1 to 465.8)</b> | <b>17.1</b><br><b>(15.3 to 18.7)</b>              | <b>-0.2</b><br><b>(-1.8 to 1.3)</b>                 |
| <b>Neoplasms</b>                                                        | <b>42.5</b><br><b>(40.6 to 44.2)</b>          | <b>13.5</b><br><b>(13.1 to 14.1)</b>           | <b>4.5</b><br><b>(3.3 to 5.9)</b>       | <b>46.8</b><br><b>(39.7 to 54.9)</b>              | <b>12.2</b><br><b>(6.5 to 18.2)</b>                 |
| Lip and oral cavity cancer                                              | 0.6<br>(0.5 to 0.6)                           | 0.1<br>(0.1 to 0.2)                            | 0.1<br>(< 0.05 to 0.1)                  | 29.3<br>(14.0 to 45.8)                            | -2.5<br>(-13.2 to 9.9)                              |
| Nasopharynx cancer                                                      | 0.7<br>(0.5 to 1.0)                           | 0.2<br>(0.2 to 0.3)                            | 0.1<br>(0.1 to 0.1)                     | -13.7<br>(-35.1 to 14.8)                          | -25.3<br>(-41.9 to -2.6)                            |
| Other pharynx cancer                                                    | 0.2<br>(0.2 to 0.2)                           | 0.1<br>(0.1 to 0.1)                            | < 0.05<br>(< 0.05 to < 0.05)            | 45.5<br>(23.7 to 70.8)                            | 11.7<br>(-5.7 to 30.7)                              |
| Oesophageal cancer                                                      | 0.2<br>(0.2 to 0.3)                           | 0.1<br>(0.1 to 0.2)                            | < 0.05<br>(< 0.05 to 0.1)               | 53.5<br>(27.2 to 87.8)                            | 9.0<br>(-12.0 to 34.0)                              |
| Stomach cancer                                                          | 1.8<br>(1.7 to 2.0)                           | 0.8<br>(0.7 to 0.8)                            | 0.2<br>(0.1 to 0.3)                     | 39.8<br>(21.8 to 61.0)                            | 0.4<br>(-13.2 to 16.6)                              |
| Colon and rectum cancer                                                 | 9.9<br>(9.2 to 10.9)                          | 2.5<br>(2.3 to 2.7)                            | 0.9<br>(0.6 to 1.2)                     | 44.4<br>(29.5 to 61.4)                            | 5.0<br>(-5.5 to 16.6)                               |
| Liver cancer                                                            | 1.1<br>(0.9 to 1.4)                           | 0.8<br>(0.7 to 0.9)                            | 0.2<br>(0.1 to 0.3)                     | 92.0<br>(60.0 to 130.7)                           | 38.4<br>(14.9 to 67.4)                              |
| Liver cancer due to hepatitis B                                         | 0.7<br>(0.6 to 0.9)                           | 0.4<br>(0.4 to 0.5)                            | 0.1<br>(0.1 to 0.1)                     | 87.6<br>(51.1 to 133.8)                           | 38.4<br>(10.2 to 74.8)                              |

| Cause                                              | Prevalence in thousands (95% UI)        | Incidence in thousands (95% UI)       | YLDs in thousands (95% UI)           |                                                   |                                                     |
|----------------------------------------------------|-----------------------------------------|---------------------------------------|--------------------------------------|---------------------------------------------------|-----------------------------------------------------|
|                                                    | 2016 counts                             | 2016 counts                           | 2016 counts                          | Percentage change in counts between 2006 and 2016 | Percentage change in age-standardised rates between |
| Liver cancer due to hepatitis C                    | 0.4<br>(0.3 to 0.5)                     | 0.2<br>(0.2 to 0.3)                   | 0.1<br>( $< 0.05$ to 0.1)            | 100.6<br>(64.6 to 145.1)                          | 38.6<br>(12.8 to 71.6)                              |
| Liver cancer due to alcohol use                    | $< 0.05$<br>( $< 0.05$ to 0.1)          | $< 0.05$<br>( $< 0.05$ to $< 0.05$ )  | $< 0.05$<br>( $< 0.05$ to $< 0.05$ ) | 86.9<br>(53.2 to 128.9)                           | 37.2<br>(12.6 to 68.4)                              |
| Liver cancer due to other causes                   | 0.2<br>(0.1 to 0.3)                     | 0.1<br>(0.1 to 0.1)                   | $< 0.05$<br>( $< 0.05$ to $< 0.05$ ) | 93.1<br>(56.8 to 134.0)                           | 38.1<br>(12.2 to 68.5)                              |
| Gallbladder and biliary tract cancer               | 0.1<br>(0.1 to 0.1)                     | 0.1<br>(0.1 to 0.2)                   | $< 0.05$<br>( $< 0.05$ to $< 0.05$ ) | 13.0<br>(4.3 to 25.2)                             | -20.5<br>(-26.3 to -13.3)                           |
| Pancreatic cancer                                  | 0.4<br>(0.3 to 0.4)                     | 0.4<br>(0.3 to 0.4)                   | 0.1<br>(0.1 to 0.1)                  | 59.7<br>(37.1 to 85.5)                            | 13.1<br>(-3.3 to 31.8)                              |
| Larynx cancer                                      | 0.4<br>(0.4 to 0.5)                     | 0.1<br>(0.1 to 0.1)                   | $< 0.05$<br>( $< 0.05$ to 0.1)       | 21.5<br>(1.5 to 47.2)                             | -11.5<br>(-27.9 to 8.6)                             |
| Tracheal, bronchus, and lung cancer                | 3.0<br>(2.7 to 3.2)                     | 1.7<br>(1.6 to 1.8)                   | 0.4<br>(0.3 to 0.6)                  | 57.5<br>(36.7 to 80.4)                            | 12.5<br>(-3.1 to 30.3)                              |
| Malignant skin melanoma                            | 0.4<br>(0.3 to 0.5)                     | 0.1<br>(0.1 to 0.1)                   | $< 0.05$<br>( $< 0.05$ to $< 0.05$ ) | 80.0<br>(45.3 to 116.2)                           | 44.2<br>(17.2 to 72.5)                              |
| Non-melanoma skin cancer                           | 0.1<br>(0.1 to 0.1)                     | 0.2<br>(0.2 to 0.2)                   | $< 0.05$<br>( $< 0.05$ to $< 0.05$ ) | 39.8<br>(24.2 to 57.0)                            | -4.4<br>(-15.0 to 6.3)                              |
| Non-melanoma skin cancer (squamous-cell carcinoma) | 0.1<br>( $< 0.05$ to 0.1)               | 0.1<br>(0.1 to 0.1)                   | $< 0.05$<br>( $< 0.05$ to $< 0.05$ ) | 39.3<br>(22.4 to 57.6)                            | -5.0<br>(-16.9 to 6.8)                              |
| Non-melanoma skin cancer (basal-cell carcinoma)    | $< 0.05$<br>( $< 0.05$ to $< 0.05$ )    | 0.1<br>(0.1 to 0.2)                   | $< 0.05$<br>( $< 0.05$ to $< 0.05$ ) | 45.2<br>(30.9 to 62.4)                            | 3.4<br>(-6.2 to 13.2)                               |
| Breast cancer                                      | 10.0<br>(9.1 to 11.1)                   | 2.0<br>(1.8 to 2.2)                   | 0.9<br>(0.6 to 1.2)                  | 34.7<br>(17.9 to 52.9)                            | 9.2<br>(-3.8 to 23.0)                               |
| Cervical cancer                                    | 0.9<br>(0.8 to 1.1)                     | 0.2<br>(0.2 to 0.3)                   | 0.1<br>(0.1 to 0.1)                  | -1.7<br>(-19.2 to 19.5)                           | -19.5<br>(-33.3 to -2.4)                            |
| Uterine cancer                                     | 2.1<br>(1.6 to 2.6)                     | 0.4<br>(0.3 to 0.6)                   | 0.2<br>(0.1 to 0.2)                  | 73.0<br>(31.7 to 129.1)                           | 35.4<br>(3.7 to 75.2)                               |
| Ovarian cancer                                     | 0.8<br>(0.7 to 1.0)                     | 0.2<br>(0.2 to 0.3)                   | 0.1<br>(0.1 to 0.2)                  | 19.4<br>(-12.0 to 59.2)                           | -3.1<br>(-27.5 to 28.9)                             |
| Prostate cancer                                    | 3.7<br>(2.7 to 4.4)                     | 0.8<br>(0.6 to 1.0)                   | 0.3<br>(0.2 to 0.4)                  | 80.1<br>(45.1 to 117.8)                           | 26.5<br>(2.3 to 52.7)                               |
| Testicular cancer                                  | 0.1<br>(0.1 to 0.2)                     | $< 0.05$<br>( $< 0.05$ to $< 0.05$ )  | $< 0.05$<br>( $< 0.05$ to $< 0.05$ ) | 17.0<br>(-17.5 to 68.2)                           | 8.6<br>(-26.3 to 61.8)                              |
| Kidney cancer                                      | 1.0<br>(0.9 to 1.1)                     | 0.3<br>(0.2 to 0.3)                   | 0.1<br>(0.1 to 0.1)                  | 54.6<br>(33.3 to 77.3)                            | 19.4<br>(3.4 to 36.9)                               |
| Bladder cancer                                     | 1.1<br>(1.0 to 1.2)                     | 0.2<br>(0.2 to 0.3)                   | 0.1<br>(0.1 to 0.1)                  | 49.3<br>(28.9 to 72.2)                            | 5.8<br>(-8.8 to 23.2)                               |
| Brain and nervous system cancer                    | 0.6<br>(0.5 to 0.8)                     | 0.2<br>(0.2 to 0.3)                   | 0.1<br>( $< 0.05$ to 0.1)            | 69.6<br>(35.2 to 105.4)                           | 42.7<br>(12.9 to 74.0)                              |
| Thyroid cancer                                     | 1.4<br>(1.3 to 1.7)                     | 0.3<br>(0.2 to 0.3)                   | 0.1<br>(0.1 to 0.1)                  | 51.1<br>(25.5 to 85.3)                            | 25.0<br>(5.2 to 50.6)                               |
| Mesothelioma                                       | $< 0.05$<br>( $< 0.05$ to $< 0.05$ )    | $< 0.05$<br>( $< 0.05$ to $< 0.05$ )  | $< 0.05$<br>( $< 0.05$ to $< 0.05$ ) | 26.9<br>(4.3 to 43.3)                             | -6.2<br>(-23.1 to 6.8)                              |
| Hodgkin lymphoma                                   | 0.2<br>(0.1 to 0.2)                     | $< 0.05$<br>( $< 0.05$ to $< 0.05$ )  | $< 0.05$<br>( $< 0.05$ to $< 0.05$ ) | 34.5<br>(16.1 to 55.5)                            | 17.5<br>(0.9 to 37.2)                               |
| Non-Hodgkin's lymphoma                             | 1.9<br>(1.7 to 2.1)                     | 0.5<br>(0.4 to 0.5)                   | 0.2<br>(0.1 to 0.2)                  | 81.2<br>(56.7 to 108.2)                           | 40.6<br>(21.2 to 61.4)                              |
| Multiple myeloma                                   | 0.3<br>(0.2 to 0.4)                     | 0.1<br>(0.1 to 0.1)                   | $< 0.05$<br>( $< 0.05$ to 0.1)       | 66.1<br>(40.4 to 95.3)                            | 20.9<br>(1.4 to 41.9)                               |
| Leukaemia                                          | 1.1<br>(1.0 to 1.3)                     | 0.4<br>(0.3 to 0.4)                   | 0.1<br>(0.1 to 0.2)                  | 49.6<br>(26.0 to 75.2)                            | 25.5<br>(1.8 to 54.3)                               |
| Acute lymphoid leukaemia                           | 0.4<br>(0.3 to 0.5)                     | 0.1<br>(0.1 to 0.1)                   | $< 0.05$<br>( $< 0.05$ to 0.1)       | 74.0<br>(22.9 to 138.5)                           | 73.0<br>(9.2 to 164.0)                              |
| Chronic lymphoid leukaemia                         | 0.1<br>(0.1 to 0.2)                     | $< 0.05$<br>( $< 0.05$ to $< 0.05$ )  | $< 0.05$<br>( $< 0.05$ to $< 0.05$ ) | 98.5<br>(59.6 to 145.6)                           | 45.5<br>(16.5 to 82.7)                              |
| Acute myeloid leukaemia                            | 0.2<br>(0.2 to 0.2)                     | 0.1<br>(0.1 to 0.1)                   | $< 0.05$<br>( $< 0.05$ to $< 0.05$ ) | 87.0<br>(51.6 to 123.7)                           | 40.3<br>(10.4 to 71.5)                              |
| Chronic myeloid leukaemia                          | 0.1<br>(0.1 to 0.1)                     | $< 0.05$<br>( $< 0.05$ to $< 0.05$ )  | $< 0.05$<br>( $< 0.05$ to $< 0.05$ ) | 28.1<br>(4.7 to 56.6)                             | 4.2<br>(-14.6 to 26.1)                              |
| Other leukaemia                                    | 0.4<br>(0.3 to 0.4)                     | 0.1<br>(0.1 to 0.1)                   | $< 0.05$<br>( $< 0.05$ to 0.1)       | 9.1<br>(-11.0 to 36.7)                            | -17.9<br>(-33.2 to 3.4)                             |
| Other neoplasms                                    | 2.0<br>(1.8 to 2.2)                     | 0.5<br>(0.5 to 0.6)                   | 0.1<br>(0.1 to 0.2)                  | 89.1<br>(63.9 to 115.6)                           | 54.3<br>(32.5 to 74.9)                              |
| <b>Cardiovascular diseases</b>                     | <b>282.6</b><br><b>(272.1 to 292.8)</b> | <b>27.6†</b><br><b>(26.1 to 29.1)</b> | <b>20.8</b><br><b>(15.2 to 27.1)</b> | <b>30.0</b><br><b>(24.8 to 35.1)</b>              | <b>-7.4</b><br><b>(-11.0 to -4.0)</b>               |
| Rheumatic heart disease                            | 0.4<br>(0.3 to 0.5)                     | 0.1<br>(0.1 to 0.1)                   | $< 0.05$<br>( $< 0.05$ to $< 0.05$ ) | 17.5<br>(6.9 to 28.9)                             | -4.3<br>(-13.6 to 6.0)                              |
| Ischaemic heart disease                            | 94.9<br>(89.7 to 100.0)                 | 10.0<br>(9.1 to 11.1)                 | 4.9<br>(3.4 to 6.6)                  | 30.0<br>(24.0 to 36.4)                            | -6.0<br>(-10.4 to -1.6)                             |
| Cerebrovascular disease                            | 46.1<br>(42.9 to 49.3)                  | 5.9†<br>(5.4 to 6.5)                  | 8.6<br>(6.1 to 10.9)                 | 27.3<br>(17.9 to 36.3)                            | -10.5<br>(-16.9 to -4.0)                            |
| Ischaemic stroke                                   | 36.7<br>(32.6 to 40.7)                  | 4.2†<br>(3.7 to 4.7)                  | 6.6<br>(4.6 to 8.5)                  | 22.6<br>(11.2 to 33.7)                            | -14.8<br>(-22.6 to -7.1)                            |
| Hemorrhagic stroke                                 | 11.5<br>(10.3 to 12.7)                  | 1.7†<br>(1.6 to 1.9)                  | 2.0<br>(1.4 to 2.6)                  | 45.2<br>(30.8 to 60.8)                            | 7.1<br>(-3.3 to 18.4)                               |
| Hypertensive heart disease                         | 20.6<br>(17.7 to 24.0)                  | --                                    | 1.7<br>(1.1 to 2.3)                  | 36.3<br>(24.8 to 49.0)                            | -7.0<br>(-14.8 to 1.0)                              |
| Cardiomyopathy and myocarditis                     | 6.5<br>(5.8 to 7.3)                     | 1.3†<br>(1.2 to 1.5)                  | 0.6<br>(0.4 to 0.8)                  | 15.4<br>(3.7 to 27.6)                             | -6.5<br>(-15.4 to 3.3)                              |
| Myocarditis                                        | 2.2<br>(1.9 to 2.5)                     | 1.3<br>(1.2 to 1.5)                   | 0.2<br>(0.1 to 0.2)                  | 2.9<br>(-14.1 to 22.9)                            | -6.6<br>(-21.8 to 11.5)                             |
| Alcoholic cardiomyopathy                           | 0.5<br>(0.4 to 0.6)                     | --                                    | $< 0.05$<br>( $< 0.05$ to 0.1)       | 16.3<br>(-11.9 to 51.4)                           | -6.2<br>(-27.7 to 19.8)                             |
| Other cardiomyopathy                               | 4.4<br>(3.7 to 5.1)                     | --                                    | 0.4<br>(0.2 to 0.5)                  | 22.4<br>(7.8 to 38.2)                             | -6.4<br>(-17.1 to 5.0)                              |
| Atrial fibrillation and flutter                    | 34.1<br>(29.7 to 39.0)                  | 2.7<br>(2.3 to 3.1)                   | 2.7<br>(1.8 to 3.8)                  | 45.8<br>(36.3 to 55.8)                            | 1.2<br>(-4.9 to 8.1)                                |
| Peripheral vascular disease                        | 82.5<br>(71.8 to 93.9)                  | 6.9<br>(5.9 to 8.0)                   | 0.3<br>(0.1 to 0.5)                  | 35.3<br>(26.1 to 46.2)                            | -10.2<br>(-15.6 to -3.8)                            |
| Endocarditis                                       | 0.5<br>(0.4 to 0.5)                     | 0.7<br>(0.6 to 0.8)                   | $< 0.05$<br>( $< 0.05$ to 0.1)       | 34.5<br>(13.9 to 59.6)                            | -6.2<br>(-20.7 to 12.3)                             |
| Other cardiovascular and circulatory diseases      | 40.2<br>(34.0 to 47.4)                  | --                                    | 2.1<br>(1.4 to 3.0)                  | 23.1<br>(12.2 to 34.4)                            | -7.5<br>(-14.8 to 0.6)                              |
| <b>Chronic respiratory diseases</b>                | <b>299.3</b><br><b>(289.1 to 310.9)</b> | <b>36.2†</b><br><b>(34.2 to 38.2)</b> | <b>14.9</b><br><b>(11.3 to 19.0)</b> | <b>16.0</b><br><b>(11.2 to 21.6)</b>              | <b>-2.2</b><br><b>(-5.9 to 1.7)</b>                 |
| Chronic obstructive pulmonary disease              | 91.0<br>(87.2 to 95.0)                  | 6.1<br>(5.8 to 6.3)                   | 6.1<br>(5.3 to 6.9)                  | 28.8<br>(19.6 to 38.7)                            | -4.0<br>(-10.7 to 3.4)                              |
| Pneumoconiosis                                     | 0.1<br>(0.1 to 0.1)                     | $< 0.05$<br>( $< 0.05$ to $< 0.05$ )  | $< 0.05$<br>( $< 0.05$ to $< 0.05$ ) | 44.1<br>(37.1 to 51.3)                            | 5.7<br>(0.6 to 11.1)                                |
| Silicosis                                          | $< 0.05$<br>( $< 0.05$ to $< 0.05$ )    | $< 0.05$<br>( $< 0.05$ to $< 0.05$ )  | $< 0.05$<br>( $< 0.05$ to $< 0.05$ ) | 49.3<br>(40.4 to 58.7)                            | 9.7<br>(3.1 to 16.9)                                |



| Cause                                                          | Prevalence in thousands (95% UI)        | Incidence in thousands (95% UI)    | YLDs in thousands (95% UI)        |                                                                     |                                                                       |
|----------------------------------------------------------------|-----------------------------------------|------------------------------------|-----------------------------------|---------------------------------------------------------------------|-----------------------------------------------------------------------|
|                                                                | 2016 counts<br>(< 0.05 to < 0.05)       | 2016 counts<br>(< 0.05 to < 0.05)  | 2016 counts<br>(< 0.05 to < 0.05) | Percentage change in counts between 2006 and 2016<br>(19.6 to 48.5) | Percentage change in age-standardised rates between<br>(-9.5 to 10.8) |
| Asbestosis                                                     | < 0.05<br>(< 0.05 to < 0.05)            | < 0.05<br>(< 0.05 to < 0.05)       | < 0.05<br>(< 0.05 to < 0.05)      | 32.3<br>(19.6 to 48.5)                                              | -0.1<br>(-9.5 to 10.8)                                                |
| Coal workers pneumoconiosis                                    | --                                      | --                                 | --                                | --                                                                  | --                                                                    |
| Other pneumoconiosis                                           | < 0.05<br>(< 0.05 to < 0.05)            | < 0.05<br>(< 0.05 to < 0.05)       | < 0.05<br>(< 0.05 to < 0.05)      | 36.8<br>(23.0 to 51.5)                                              | -3.2<br>(-13.3 to 7.8)                                                |
| Asthma                                                         | 215.3<br>(201.8 to 230.1)               | 29.9<br>(27.9 to 31.9)             | 8.4<br>(5.5 to 12.0)              | 7.3<br>(2.5 to 12.1)                                                | -1.9<br>(-6.0 to 2.4)                                                 |
| Interstitial lung disease and pulmonary sarcoidosis            | 1.9<br>(1.7 to 2.2)                     | 0.2<br>(0.2 to 0.2)                | 0.2<br>(0.1 to 0.3)               | 36.5<br>(23.7 to 50.6)                                              | 4.4<br>(-5.8 to 15.2)                                                 |
| Other chronic respiratory diseases                             | --                                      | --                                 | 0.2<br>(0.1 to 0.2)               | 43.9<br>(31.2 to 58.5)                                              | 32.1<br>(18.4 to 47.3)                                                |
| <b>Cirrhosis and other chronic liver diseases</b>              | <b>31.0<br/>(29.1 to 32.8)</b>          | <b>0.5<br/>(0.5 to 0.5)</b>        | <b>0.6<br/>(0.4 to 0.9)</b>       | <b>31.0<br/>(17.0 to 47.3)</b>                                      | <b>11.9<br/>(0.0 to 25.3)</b>                                         |
| Cirrhosis and other chronic liver diseases due to hepatitis B  | 17.7<br>(16.2 to 19.4)                  | 0.3<br>(0.2 to 0.3)                | 0.4<br>(0.2 to 0.5)               | 35.1<br>(14.6 to 60.5)                                              | 13.2<br>(-3.0 to 33.2)                                                |
| Cirrhosis and other chronic liver diseases due to hepatitis C  | 5.0<br>(4.2 to 6.0)                     | 0.1<br>(0.1 to 0.1)                | 0.1<br>(0.1 to 0.1)               | 32.6<br>(-1.2 to 82.1)                                              | 13.0<br>(-14.2 to 50.3)                                               |
| Cirrhosis and other chronic liver diseases due to alcohol use  | 2.8<br>(2.3 to 3.4)                     | < 0.05<br>(< 0.05 to 0.1)          | 0.1<br>(< 0.05 to 0.1)            | 34.6<br>(-3.3 to 85.0)                                              | 12.8<br>(-17.3 to 50.4)                                               |
| Cirrhosis and other chronic liver diseases due to other causes | 5.4<br>(4.7 to 6.2)                     | 0.1<br>(0.1 to 0.1)                | 0.1<br>(0.1 to 0.2)               | 19.8<br>(-6.2 to 53.4)                                              | 8.9<br>(-14.1 to 38.4)                                                |
| <b>Digestive diseases</b>                                      | <b>272.3<br/>(246.2 to 296.9)</b>       | <b>98.9†<br/>(92.2 to 105.5)</b>   | <b>3.2<br/>(2.2 to 4.4)</b>       | <b>28.2<br/>(17.7 to 38.4)</b>                                      | <b>7.1<br/>(-0.9 to 15.3)</b>                                         |
| Peptic ulcer disease                                           | 26.4<br>(23.8 to 29.4)                  | 3.8<br>(3.4 to 4.3)                | 0.4<br>(0.2 to 0.6)               | 31.7<br>(15.2 to 50.5)                                              | 7.7<br>(-5.5 to 23.1)                                                 |
| Gastritis and duodenitis                                       | 221.0<br>(189.9 to 257.5)               | 29.2<br>(25.6 to 33.4)             | 1.3<br>(0.8 to 2.1)               | 35.6<br>(19.2 to 52.8)                                              | 13.7<br>(0.9 to 27.8)                                                 |
| Appendicitis                                                   | 0.2<br>(0.2 to 0.2)                     | 5.9<br>(5.5 to 6.4)                | 0.1<br>(< 0.05 to 0.1)            | 8.1<br>(-11.4 to 32.1)                                              | 1.5<br>(-19.3 to 28.5)                                                |
| Paralytic ileus and intestinal obstruction                     | 0.1<br>(0.1 to 0.1)                     | 1.9<br>(1.7 to 2.1)                | < 0.05<br>(< 0.05 to < 0.05)      | 37.3<br>(31.1 to 44.4)                                              | 10.7<br>(6.9 to 14.8)                                                 |
| Inguinal, femoral, and abdominal hernia                        | 16.2<br>(14.5 to 18.2)                  | 31.2<br>(27.1 to 35.3)             | 0.7<br>(0.5 to 1.0)               | 16.9<br>(1.8 to 33.4)                                               | -3.0<br>(-14.5 to 9.7)                                                |
| Inflammatory bowel disease                                     | 1.2<br>(1.1 to 1.3)                     | 1.0<br>(1.0 to 1.0)                | 0.2<br>(0.1 to 0.3)               | 15.4<br>(-7.1 to 43.6)                                              | 2.9<br>(-16.4 to 26.4)                                                |
| Vascular intestinal disorders                                  | 0.1<br>(0.1 to 0.1)                     | 0.6<br>(0.5 to 0.6)                | < 0.05<br>(< 0.05 to 0.1)         | 57.8<br>(27.6 to 96.7)                                              | 19.8<br>(-4.3 to 50.0)                                                |
| Gallbladder and biliary diseases                               | 7.2<br>(6.3 to 8.1)                     | 24.6<br>(21.2 to 28.3)             | 0.1<br>(0.1 to 0.2)               | 23.4<br>(1.8 to 48.3)                                               | 1.0<br>(-15.8 to 20.1)                                                |
| Pancreatitis                                                   | 0.1<br>(0.1 to 0.1)                     | 0.7<br>(0.6 to 0.8)                | < 0.05<br>(< 0.05 to < 0.05)      | 29.1<br>(23.3 to 35.1)                                              | 2.6<br>(-1.3 to 6.2)                                                  |
| Other digestive diseases                                       | --                                      | --                                 | 0.3<br>(0.2 to 0.4)               | 38.1<br>(27.6 to 48.9)                                              | 12.2<br>(3.5 to 21.1)                                                 |
| <b>Neurological disorders</b>                                  | <b>1,371.2<br/>(1,314.4 to 1,438.3)</b> | <b>590.5<br/>(504.4 to 686.8)</b>  | <b>37.3<br/>(25.1 to 50.9)</b>    | <b>14.6<br/>(3.8 to 27.0)</b>                                       | <b>-0.4<br/>(-11.9 to 11.2)</b>                                       |
| Alzheimer's disease and other dementias                        | 37.9<br>(31.7 to 44.6)                  | 7.0<br>(5.7 to 8.3)                | 5.8<br>(4.0 to 7.8)               | 82.1<br>(66.8 to 99.1)                                              | 7.4<br>(-1.6 to 17.4)                                                 |
| Parkinson's disease                                            | 4.2<br>(3.3 to 5.2)                     | 0.5<br>(0.4 to 0.6)                | 0.5<br>(0.3 to 0.7)               | 52.2<br>(33.9 to 72.6)                                              | 3.3<br>(-8.6 to 16.4)                                                 |
| Epilepsy                                                       | 8.6<br>(2.2 to 15.2)                    | 1.0<br>(0.3 to 1.8)                | 2.0<br>(0.4 to 4.5)               | 1.3<br>(-79.8 to 363.4)                                             | -7.4<br>(-81.8 to 329.8)                                              |
| Multiple sclerosis                                             | 0.5<br>(0.4 to 0.5)                     | < 0.05<br>(< 0.05 to < 0.05)       | 0.1<br>(0.1 to 0.2)               | 23.4<br>(18.5 to 28.0)                                              | 8.5<br>(4.2 to 12.6)                                                  |
| Motor neuron disease                                           | 0.2<br>(0.2 to 0.3)                     | < 0.05<br>(< 0.05 to < 0.05)       | 0.1<br>(< 0.05 to 0.1)            | 20.9<br>(16.5 to 25.5)                                              | 2.9<br>(-0.8 to 6.5)                                                  |
| Migraine                                                       | 577.5<br>(549.7 to 604.5)               | 53.3<br>(50.7 to 56.2)             | 24.6<br>(15.9 to 34.6)            | 6.5<br>(2.8 to 10.2)                                                | -1.4<br>(-4.9 to 2.1)                                                 |
| Tension-type headache                                          | 966.2<br>(866.2 to 1,077.7)             | 528.6<br>(444.1 to 622.8)          | 3.6<br>(2.3 to 5.4)               | 9.6<br>(4.2 to 16.8)                                                | -0.2<br>(-5.0 to 5.8)                                                 |
| Other neurological disorders                                   | < 0.05<br>(< 0.05 to < 0.05)            | < 0.05<br>(< 0.05 to < 0.05)       | 0.5<br>(0.2 to 1.0)               | 20.8<br>(-55.8 to 227.4)                                            | 12.4<br>(-63.6 to 222.5)                                              |
| <b>Mental and substance use disorders</b>                      | <b>543.1<br/>(526.7 to 562.0)</b>       | <b>200.5†<br/>(186.4 to 214.7)</b> | <b>80.2<br/>(58.1 to 104.2)</b>   | <b>9.1<br/>(6.7 to 11.6)</b>                                        | <b>-0.8<br/>(-2.8 to 1.5)</b>                                         |
| Schizophrenia                                                  | 12.3<br>(10.8 to 13.9)                  | 0.6<br>(0.5 to 0.7)                | 8.0<br>(5.8 to 10.0)              | 10.3<br>(1.9 to 19.4)                                               | -0.1<br>(-7.7 to 8.1)                                                 |
| Alcohol use disorders                                          | 18.5<br>(15.9 to 21.1)                  | 10.4<br>(9.0 to 12.0)              | 1.9<br>(1.2 to 2.6)               | 10.6<br>(-0.0 to 22.3)                                              | 2.2<br>(-7.5 to 12.9)                                                 |
| Drug use disorders                                             | 37.7<br>(34.9 to 40.7)                  | 4.4<br>(3.9 to 4.8)                | 7.7<br>(5.4 to 10.3)              | 11.9<br>(3.1 to 21.9)                                               | 3.4<br>(-4.7 to 12.7)                                                 |
| Opioid use disorders                                           | 11.1<br>(9.0 to 13.7)                   | 1.2<br>(1.0 to 1.5)                | 4.7<br>(3.1 to 6.4)               | 12.8<br>(1.5 to 26.5)                                               | 4.5<br>(-5.8 to 17.1)                                                 |
| Cocaine use disorders                                          | 6.3<br>(5.5 to 7.2)                     | 0.3<br>(0.3 to 0.4)                | 0.9<br>(0.5 to 1.3)               | 11.2<br>(-7.1 to 33.8)                                              | 1.4<br>(-15.3 to 22.2)                                                |
| Amphetamine use disorders                                      | 4.0<br>(2.7 to 5.4)                     | 0.4<br>(0.2 to 0.5)                | 0.5<br>(0.3 to 0.9)               | 10.7<br>(-11.2 to 38.9)                                             | 3.0<br>(-18.4 to 30.6)                                                |
| Cannabis use disorders                                         | 14.0<br>(11.7 to 16.7)                  | 2.0<br>(1.6 to 2.3)                | 0.4<br>(0.2 to 0.6)               | 7.6<br>(-6.0 to 24.8)                                               | -0.1<br>(-13.3 to 15.5)                                               |
| Other drug use disorders                                       | 3.0<br>(2.7 to 3.4)                     | 0.5<br>(0.4 to 0.5)                | 1.2<br>(0.8 to 1.8)               | 11.1<br>(-9.5 to 38.6)                                              | 2.5<br>(-17.4 to 27.5)                                                |
| Depressive disorders                                           | 148.4<br>(139.8 to 158.6)               | 148.9<br>(135.8 to 162.7)          | 24.5<br>(17.0 to 33.1)            | 9.1<br>(3.6 to 14.9)                                                | -3.8<br>(-8.6 to 0.9)                                                 |
| Major depressive disorder                                      | 91.5<br>(83.5 to 100.6)                 | 139.4<br>(126.3 to 153.4)          | 18.8<br>(13.0 to 25.6)            | 7.2<br>(0.5 to 14.2)                                                | -5.3<br>(-11.2 to 0.4)                                                |
| Dysthymia                                                      | 59.0<br>(51.8 to 67.9)                  | 9.5<br>(8.2 to 10.8)               | 5.7<br>(3.8 to 8.3)               | 15.6<br>(7.8 to 24.7)                                               | 1.7<br>(-5.1 to 8.5)                                                  |
| Bipolar disorder                                               | 29.3<br>(25.7 to 33.6)                  | 2.2<br>(1.9 to 2.5)                | 6.0<br>(3.7 to 9.0)               | 10.8<br>(4.8 to 17.3)                                               | 0.1<br>(-5.5 to 5.7)                                                  |
| Anxiety disorders                                              | 146.3<br>(132.8 to 161.0)               | 21.4<br>(19.9 to 23.3)             | 14.2<br>(9.9 to 19.4)             | 8.9<br>(4.9 to 12.6)                                                | 0.1<br>(-3.4 to 3.4)                                                  |
| Eating disorders                                               | 11.7<br>(9.3 to 14.2)                   | 3.5<br>(2.7 to 4.6)                | 2.4<br>(1.6 to 3.5)               | 16.6<br>(5.5 to 28.3)                                               | 13.3<br>(2.9 to 24.1)                                                 |
| Anorexia nervosa                                               | 2.9<br>(2.2 to 4.0)                     | 0.7<br>(0.5 to 0.8)                | 0.6<br>(0.4 to 1.0)               | 17.4<br>(-3.1 to 39.8)                                              | 12.8<br>(-6.5 to 34.8)                                                |
| Bulimia nervosa                                                | 8.4<br>(6.3 to 11.0)                    | 2.9<br>(2.0 to 3.9)                | 1.8<br>(1.1 to 2.7)               | 16.4<br>(3.2 to 31.1)                                               | 13.5<br>(0.8 to 27.0)                                                 |
| Autistic spectrum disorders                                    | 33.2<br>(29.7 to 36.7)                  | 0.1<br>(0.1 to 0.2)                | 5.3<br>(3.6 to 7.6)               | 7.1<br>(2.0 to 12.3)                                                | -0.1<br>(-4.8 to 4.5)                                                 |
| Autism                                                         | 13.2<br>(11.3 to 15.4)                  | < 0.05<br>(< 0.05 to < 0.05)       | 3.4<br>(2.1 to 4.9)               | 7.5<br>(0.1 to 15.8)                                                | -0.1<br>(-6.9 to 7.2)                                                 |
| Asperger syndrome and other autistic spectrum disorders        | 20.0<br>(16.7 to 23.9)                  | 0.1<br>(0.1 to 0.1)                | 2.0<br>(1.3 to 2.9)               | 6.3<br>(1.2 to 11.9)                                                | -0.2<br>(-4.9 to 5.1)                                                 |

| Cause                                                      | Prevalence in thousands (95% UI)              | Incidence in thousands (95% UI)                | YLDs in thousands (95% UI)            |                                                   |                                                     |
|------------------------------------------------------------|-----------------------------------------------|------------------------------------------------|---------------------------------------|---------------------------------------------------|-----------------------------------------------------|
|                                                            | 2016 counts                                   | 2016 counts                                    | 2016 counts                           | Percentage change in counts between 2006 and 2016 | Percentage change in age-standardised rates between |
| Attention-deficit/hyperactivity disorder                   | 17.9<br>(16.0 to 19.9)                        | 0.7<br>(0.6 to 0.8)                            | 0.2<br>(0.1 to 0.4)                   | -1.2<br>(-11.2 to 9.2)                            | -0.1<br>(-10.2 to 11.0)                             |
| Conduct disorder                                           | 18.9<br>(15.3 to 22.6)                        | 6.0<br>(4.7 to 7.4)                            | 2.3<br>(1.4 to 3.5)                   | -5.0<br>(-11.4 to 2.4)                            | -0.3<br>(-6.9 to 7.1)                               |
| Idiopathic developmental intellectual disability           | 14.9<br>(6.0 to 24.3)                         | --                                             | 0.8<br>(0.3 to 1.4)                   | -22.6<br>(-33.0 to -13.5)                         | -28.1<br>(-38.1 to -19.8)                           |
| Other mental and substance use disorders                   | 93.0<br>(80.9 to 107.6)                       | 2.2<br>(2.0 to 2.6)                            | 6.9<br>(4.8 to 9.9)                   | 12.6<br>(7.6 to 17.7)                             | 0.0<br>(-4.4 to 4.4)                                |
| <b>Diabetes, urogenital, blood, and endocrine diseases</b> | <b>1,106.6</b><br><b>(1,080.0 to 1,132.1)</b> | <b>395.9†</b><br><b>(373.5 to 422.2)</b>       | <b>31.2</b><br><b>(22.3 to 42.3)</b>  | <b>19.2</b><br><b>(13.9 to 24.3)</b>              | <b>-2.8</b><br><b>(-6.6 to 1.2)</b>                 |
| Diabetes mellitus                                          | 226.1<br>(201.4 to 252.0)                     | 10.5<br>(9.3 to 12.0)                          | 14.7<br>(9.8 to 20.6)                 | 14.3<br>(5.1 to 23.6)                             | -7.9<br>(-15.3 to -0.9)                             |
| Acute glomerulonephritis                                   | < 0.05<br>(< 0.05 to < 0.05)                  | 0.6<br>(0.6 to 0.7)                            | < 0.05<br>(< 0.05 to < 0.05)          | 16.0<br>(10.7 to 21.4)                            | 0.1<br>(-3.8 to 4.2)                                |
| Chronic kidney disease                                     | 139.6<br>(125.4 to 153.5)                     | 11.5<br>(10.0 to 12.9)                         | 6.1<br>(4.6 to 7.7)                   | 47.1<br>(37.7 to 57.6)                            | 9.8<br>(3.1 to 17.5)                                |
| Chronic kidney disease due to diabetes mellitus            | 99.8<br>(89.3 to 110.1)                       | 8.4<br>(7.3 to 9.5)                            | 4.3<br>(3.3 to 5.4)                   | 59.4<br>(46.6 to 73.3)                            | 19.6<br>(10.6 to 29.5)                              |
| Chronic kidney disease due to hypertension                 | 16.8<br>(14.8 to 18.7)                        | 1.4<br>(1.3 to 1.6)                            | 0.5<br>(0.4 to 0.7)                   | 100.2<br>(74.0 to 131.7)                          | 28.8<br>(12.2 to 49.6)                              |
| Chronic kidney disease due to glomerulonephritis           | 15.4<br>(13.6 to 17.2)                        | 1.0<br>(0.8 to 1.2)                            | 0.9<br>(0.7 to 1.2)                   | -0.3<br>(-11.6 to 13.1)                           | -21.8<br>(-30.0 to -12.3)                           |
| Chronic kidney disease due to other causes                 | 7.6<br>(6.5 to 8.8)                           | 0.6<br>(0.5 to 0.7)                            | 0.4<br>(0.2 to 0.5)                   | 31.4<br>(13.8 to 54.7)                            | -1.6<br>(-14.9 to 15.7)                             |
| Urinary diseases and male infertility                      | 92.3<br>(81.5 to 102.5)                       | 224.8†<br>(204.3 to 249.0)                     | 2.9<br>(1.9 to 4.2)                   | 29.9<br>(22.2 to 38.3)                            | -1.3<br>(-6.7 to 5.0)                               |
| Interstitial nephritis and urinary tract infections        | 3.2<br>(2.8 to 3.6)                           | 166.8<br>(147.8 to 189.5)                      | 0.1<br>(0.1 to 0.2)                   | 9.0<br>(-8.0 to 28.0)                             | -0.8<br>(-16.1 to 15.9)                             |
| Urolithiasis                                               | 1.8<br>(1.6 to 2.1)                           | 48.4<br>(42.4 to 55.2)                         | 0.1<br>(0.1 to 0.2)                   | 16.1<br>(-2.3 to 35.2)                            | 0.4<br>(-14.2 to 15.8)                              |
| Benign prostatic hyperplasia                               | 78.2<br>(66.8 to 90.9)                        | 9.5<br>(8.0 to 11.3)                           | 2.6<br>(1.7 to 3.8)                   | 34.3<br>(25.6 to 44.1)                            | -0.6<br>(-6.4 to 6.8)                               |
| Male infertility                                           | 6.0<br>(4.2 to 8.4)                           | --                                             | < 0.05<br>(< 0.05 to 0.1)             | -7.8<br>(-18.3 to 5.5)                            | -5.0<br>(-16.0 to 8.5)                              |
| Other urinary diseases                                     | --                                            | --                                             | 0.1<br>(0.1 to 0.1)                   | -6.8<br>(-17.4 to 4.3)                            | -16.4<br>(-25.0 to -7.2)                            |
| Gynecological diseases                                     | 435.9<br>(412.7 to 456.7)                     | 137.2†<br>(127.6 to 147.9)                     | 4.8<br>(3.3 to 7.0)                   | 3.5<br>(-1.8 to 8.4)                              | -1.4<br>(-6.1 to 3.5)                               |
| Uterine fibroids                                           | 45.5<br>(36.2 to 55.4)                        | 4.2<br>(3.3 to 5.3)                            | 0.6<br>(0.3 to 1.1)                   | 2.7<br>(-7.6 to 12.6)                             | -3.7<br>(-13.1 to 5.6)                              |
| Polycystic ovarian syndrome                                | 16.2<br>(12.3 to 21.1)                        | 3.0<br>(2.1 to 4.0)                            | 0.1<br>(0.1 to 0.3)                   | 1.7<br>(-5.1 to 8.6)                              | 0.4<br>(-5.9 to 7.4)                                |
| Female infertility                                         | 11.2<br>(5.5 to 18.2)                         | --                                             | 0.1<br>(< 0.05 to 0.1)                | 1.3<br>(-15.8 to 19.8)                            | 5.5<br>(-15.4 to 26.1)                              |
| Endometriosis                                              | 1.9<br>(1.6 to 2.3)                           | 5.4<br>(4.3 to 6.8)                            | 0.2<br>(0.1 to 0.3)                   | 5.1<br>(-18.0 to 35.7)                            | 0.3<br>(-22.0 to 31.6)                              |
| Genital prolapse                                           | 118.6<br>(101.7 to 136.4)                     | 6.1<br>(5.2 to 7.2)                            | 0.4<br>(0.2 to 0.7)                   | 18.3<br>(7.1 to 29.6)                             | -7.4<br>(-16.1 to 1.2)                              |
| Premenstrual syndrome                                      | 244.3<br>(226.1 to 263.8)                     | 82.1<br>(74.5 to 91.0)                         | 2.0<br>(1.3 to 3.1)                   | 2.0<br>(-5.8 to 10.2)                             | -1.0<br>(-8.2 to 7.0)                               |
| Other gynecological diseases                               | 42.7<br>(36.8 to 49.1)                        | 36.3<br>(30.1 to 43.0)                         | 1.4<br>(0.9 to 2.0)                   | 2.6<br>(-6.1 to 11.9)                             | -0.4<br>(-9.1 to 8.9)                               |
| Hemoglobinopathies and hemolytic anaemias                  | 352.0<br>(343.6 to 359.5)                     | --                                             | 0.8<br>(0.5 to 1.1)                   | 11.2<br>(-0.7 to 25.5)                            | -0.2<br>(-11.7 to 12.8)                             |
| Thalassemias                                               | 0.1<br>(< 0.05 to 0.1)                        | --                                             | < 0.05<br>(< 0.05 to < 0.05)          | 8.8<br>(-6.5 to 27.0)                             | 21.6<br>(1.9 to 43.7)                               |
| Thalassaemia trait                                         | 37.0<br>(33.4 to 40.9)                        | --                                             | 0.5<br>(0.3 to 0.7)                   | 17.8<br>(3.8 to 34.4)                             | 5.8<br>(-7.0 to 21.6)                               |
| Sickle cell disorders                                      | < 0.05<br>(< 0.05 to < 0.05)                  | --                                             | < 0.05<br>(< 0.05 to < 0.05)          | 22.4<br>(12.5 to 34.7)                            | 15.0<br>(4.7 to 27.1)                               |
| Sickle cell trait                                          | 35.4<br>(34.1 to 36.9)                        | --                                             | 0.1<br>(< 0.05 to 0.1)                | 35.3<br>(10.1 to 68.3)                            | 24.5<br>(-1.0 to 57.0)                              |
| G6PD deficiency                                            | 49.1<br>(46.5 to 52.3)                        | --                                             | < 0.05<br>(< 0.05 to < 0.05)          | 11.0<br>(-15.8 to 46.6)                           | -5.7<br>(-31.4 to 27.7)                             |
| G6PD trait                                                 | 226.2<br>(220.9 to 232.0)                     | --                                             | < 0.05<br>(< 0.05 to < 0.05)          | 8.2<br>(-9.0 to 29.0)                             | -0.5<br>(-16.5 to 18.6)                             |
| Other hemoglobinopathies and hemolytic anaemias            | 12.0<br>(10.5 to 13.5)                        | --                                             | 0.2<br>(0.1 to 0.3)                   | -8.9<br>(-21.6 to 5.6)                            | -18.3<br>(-30.5 to -4.9)                            |
| Endocrine, metabolic, blood, and immune disorders          | 59.6<br>(54.6 to 65.2)                        | 11.3<br>(10.2 to 12.6)                         | 1.9<br>(1.3 to 2.6)                   | 19.5<br>(11.5 to 27.3)                            | -2.8<br>(-9.2 to 3.4)                               |
| <b>Musculoskeletal disorders</b>                           | <b>863.7</b><br><b>(822.9 to 909.2)</b>       | <b>471.7</b><br><b>(424.9 to 525.5)</b>        | <b>87.9</b><br><b>(63.6 to 114.4)</b> | <b>20.8</b><br><b>(17.0 to 24.9)</b>              | <b>3.1</b><br><b>(-0.1 to 6.4)</b>                  |
| Rheumatoid arthritis                                       | 14.5<br>(12.9 to 16.4)                        | 0.7<br>(0.6 to 0.8)                            | 3.5<br>(2.4 to 4.6)                   | 24.7<br>(14.8 to 35.3)                            | 3.1<br>(-4.6 to 11.5)                               |
| Osteoarthritis                                             | 240.3<br>(225.0 to 256.7)                     | 11.7<br>(10.8 to 12.6)                         | 8.5<br>(5.6 to 12.5)                  | 32.4<br>(27.6 to 37.4)                            | 1.4<br>(-2.4 to 4.9)                                |
| Low back and neck pain                                     | 484.4<br>(450.4 to 520.6)                     | 211.4<br>(186.8 to 238.6)                      | 56.8<br>(39.6 to 75.2)                | 21.9<br>(16.9 to 26.9)                            | 5.1<br>(1.2 to 8.7)                                 |
| Low back pain                                              | 366.0<br>(322.6 to 416.0)                     | 180.2<br>(155.3 to 207.7)                      | 41.9<br>(29.4 to 55.5)                | 23.8<br>(17.3 to 30.8)                            | 6.9<br>(1.9 to 12.0)                                |
| Neck pain                                                  | 148.8<br>(127.7 to 173.2)                     | 31.2<br>(27.1 to 37.0)                         | 14.9<br>(10.1 to 21.4)                | 16.9<br>(12.8 to 21.0)                            | 0.0<br>(-2.5 to 2.4)                                |
| Gout                                                       | 33.3<br>(29.3 to 37.9)                        | 5.9<br>(5.1 to 6.7)                            | 1.1<br>(0.7 to 1.5)                   | 24.4<br>(9.6 to 42.4)                             | 0.3<br>(-10.9 to 13.3)                              |
| Other musculoskeletal disorders                            | 208.2<br>(170.2 to 252.6)                     | 242.1<br>(202.4 to 288.2)                      | 18.1<br>(11.9 to 25.9)                | 12.0<br>(2.1 to 23.7)                             | -1.7<br>(-10.2 to 6.9)                              |
| <b>Other non-communicable diseases</b>                     | <b>2,680.2</b><br><b>(2,643.2 to 2,719.0)</b> | <b>6,813.0†</b><br><b>(6,473.4 to 7,192.0)</b> | <b>81.2</b><br><b>(55.6 to 115.1)</b> | <b>17.4</b><br><b>(15.8 to 18.9)</b>              | <b>-0.6</b><br><b>(-1.7 to 0.6)</b>                 |
| Congenital anomalies                                       | 30.9<br>(28.6 to 33.6)                        | --                                             | 3.3<br>(2.4 to 4.4)                   | 4.6<br>(-0.9 to 10.5)                             | -2.3<br>(-7.3 to 3.1)                               |
| Neural tube defects                                        | 0.7<br>(0.6 to 0.8)                           | --                                             | 0.2<br>(0.1 to 0.3)                   | 0.1<br>(-6.4 to 7.0)                              | -8.0<br>(-13.9 to -1.6)                             |
| Congenital heart anomalies                                 | 7.9<br>(6.9 to 9.0)                           | --                                             | 0.4<br>(0.2 to 0.8)                   | 7.4<br>(-4.0 to 19.6)                             | -0.7<br>(-11.4 to 11.0)                             |
| Orofacial clefts                                           | 1.8<br>(1.6 to 2.0)                           | --                                             | < 0.05<br>(< 0.05 to < 0.05)          | 4.4<br>(-7.6 to 17.3)                             | -3.2<br>(-14.4 to 8.8)                              |
| Down's syndrome                                            | 0.8<br>(0.7 to 1.0)                           | --                                             | 0.1<br>(< 0.05 to 0.1)                | -4.2<br>(-13.6 to 3.8)                            | -4.1<br>(-13.7 to 3.6)                              |
| Turner syndrome                                            | 1.7<br>(1.4 to 1.9)                           | --                                             | < 0.05<br>(< 0.05 to < 0.05)          | 0.4<br>(-26.1 to 42.6)                            | -2.8<br>(-29.1 to 35.9)                             |
| Klinefelter syndrome                                       | 2.2<br>(1.9 to 2.6)                           | --                                             | < 0.05<br>(< 0.05 to < 0.05)          | -1.1<br>(-20.7 to 22.8)                           | -3.2<br>(-22.2 to 19.4)                             |



| Cause                                         | Prevalence in thousands (95% UI)              | Incidence in thousands (95% UI)          | YLDs in thousands (95% UI)           |                                                   |                                                     |
|-----------------------------------------------|-----------------------------------------------|------------------------------------------|--------------------------------------|---------------------------------------------------|-----------------------------------------------------|
|                                               | 2016 counts                                   | 2016 counts                              | 2016 counts                          | Percentage change in counts between 2006 and 2016 | Percentage change in age-standardised rates between |
| Other chromosomal abnormalities               | 2.4<br>(2.0 to 2.8)                           | --                                       | 0.2<br>(0.2 to 0.4)                  | -6.2<br>(-19.6 to 11.4)                           | -0.5<br>(-15.6 to 18.9)                             |
| Congenital musculoskeletal and limb anomalies | 8.4<br>(7.6 to 9.2)                           | --                                       | 1.2<br>(0.8 to 1.7)                  | 9.8<br>(-1.1 to 21.6)                             | 0.2<br>(-9.6 to 10.7)                               |
| Urogenital congenital anomalies               | 3.6<br>(3.2 to 4.0)                           | --                                       | 0.1<br>(0.1 to 0.1)                  | -4.6<br>(-16.0 to 6.0)                            | -3.7<br>(-16.6 to 8.7)                              |
| Digestive congenital anomalies                | 3.2<br>(2.8 to 3.6)                           | --                                       | 0.1<br>(0.1 to 0.2)                  | 5.4<br>(-11.7 to 26.1)                            | -2.4<br>(-18.1 to 17.0)                             |
| Other congenital anomalies                    | 6.4<br>(3.9 to 9.9)                           | --                                       | 0.8<br>(0.5 to 1.3)                  | 3.0<br>(-8.1 to 15.8)                             | -5.3<br>(-15.8 to 6.0)                              |
| Skin and subcutaneous diseases                | 1,368.8<br>(1,340.9 to 1,398.0)               | 2,814.0<br>(2,664.1 to 2,978.7)          | 33.2<br>(22.3 to 47.7)               | 8.4<br>(6.1 to 10.5)                              | 1.1<br>(-0.8 to 3.1)                                |
| Dermatitis                                    | 204.3<br>(193.3 to 216.5)                     | 290.8<br>(268.2 to 315.6)                | 7.3<br>(4.4 to 11.5)                 | 5.0<br>(0.8 to 9.0)                               | -0.0<br>(-4.0 to 4.0)                               |
| Psoriasis                                     | 47.9<br>(45.6 to 50.4)                        | 4.9<br>(4.6 to 5.1)                      | 4.2<br>(2.9 to 5.5)                  | 18.5<br>(10.8 to 26.9)                            | 5.1<br>(-2.1 to 12.6)                               |
| Cellulitis                                    | 2.5<br>(2.4 to 2.7)                           | 58.1<br>(54.6 to 61.8)                   | 0.1<br>(0.1 to 0.2)                  | 14.8<br>(-5.2 to 38.2)                            | 0.1<br>(-17.2 to 20.8)                              |
| Pyoderma                                      | 8.8<br>(8.5 to 9.2)                           | 206.3<br>(198.3 to 214.8)                | < 0.05<br>(< 0.05 to 0.1)            | 14.6<br>(5.3 to 24.2)                             | 0.5<br>(-7.3 to 8.7)                                |
| Scabies                                       | 8.4<br>(7.3 to 9.5)                           | 25.1<br>(22.0 to 28.4)                   | 0.2<br>(0.1 to 0.3)                  | 5.4<br>(-2.2 to 13.8)                             | -0.0<br>(-7.2 to 7.8)                               |
| Fungal skin diseases                          | 267.2<br>(238.1 to 297.0)                     | 1,029.7<br>(904.3 to 1,171.6)            | 1.5<br>(0.6 to 3.2)                  | 21.7<br>(18.8 to 24.6)                            | -0.0<br>(-1.4 to 1.1)                               |
| Viral skin diseases                           | 104.1<br>(100.1 to 108.7)                     | 142.8<br>(135.9 to 149.7)                | 3.2<br>(2.0 to 4.7)                  | 2.5<br>(-0.3 to 5.8)                              | 0.1<br>(-2.6 to 3.1)                                |
| Acne vulgaris                                 | 434.8<br>(404.7 to 465.5)                     | 332.1<br>(272.4 to 415.4)                | 11.2<br>(7.6 to 16.5)                | 3.6<br>(0.2 to 7.3)                               | 0.7<br>(-2.8 to 4.3)                                |
| Alopecia areata                               | 14.2<br>(13.7 to 14.7)                        | 25.0<br>(24.1 to 25.9)                   | 0.5<br>(0.3 to 0.7)                  | 8.4<br>(0.1 to 17.2)                              | -0.1<br>(-7.9 to 8.1)                               |
| Pruritus                                      | 37.8<br>(33.2 to 42.9)                        | 29.6<br>(26.2 to 33.8)                   | 0.4<br>(0.2 to 0.7)                  | 16.0<br>(9.1 to 22.9)                             | 1.1<br>(-4.2 to 6.4)                                |
| Urticaria                                     | 27.7<br>(24.5 to 31.2)                        | 48.9<br>(43.3 to 55.5)                   | 1.7<br>(1.1 to 2.4)                  | 4.8<br>(-1.7 to 11.8)                             | 0.1<br>(-5.8 to 6.4)                                |
| Decubitus ulcer                               | 1.7<br>(1.5 to 1.9)                           | 6.0<br>(5.3 to 6.8)                      | 0.3<br>(0.2 to 0.4)                  | 54.9<br>(37.4 to 73.3)                            | 7.2<br>(-4.9 to 20.2)                               |
| Other skin and subcutaneous diseases          | 480.3<br>(467.1 to 493.8)                     | 614.6<br>(593.6 to 635.8)                | 2.6<br>(1.3 to 4.8)                  | 26.2<br>(23.6 to 29.0)                            | 5.3<br>(3.2 to 7.6)                                 |
| Sense organ diseases                          | 930.9<br>(905.4 to 955.8)                     | 394.9†<br>(372.6 to 418.1)               | 31.6<br>(21.8 to 44.3)               | 27.3<br>(24.9 to 30.2)                            | -2.8<br>(-4.8 to -0.8)                              |
| Glaucoma                                      | 5.0<br>(4.3 to 5.8)                           | --                                       | 0.5<br>(0.4 to 0.7)                  | 48.4<br>(32.7 to 66.2)                            | 0.0<br>(-10.3 to 11.2)                              |
| Cataract                                      | 23.9<br>(20.6 to 27.9)                        | --                                       | 1.6<br>(1.2 to 2.3)                  | 49.8<br>(40.4 to 60.8)                            | 0.2<br>(-5.8 to 6.5)                                |
| Macular degeneration                          | 3.3<br>(2.8 to 3.9)                           | --                                       | 0.3<br>(0.2 to 0.4)                  | 55.6<br>(38.0 to 76.2)                            | 0.8<br>(-10.1 to 13.5)                              |
| Refraction and accommodation disorders        | 377.5<br>(358.8 to 397.3)                     | --                                       | 7.4<br>(4.7 to 11.5)                 | 14.7<br>(11.0 to 18.7)                            | -3.7<br>(-6.8 to -0.5)                              |
| Age-related and other hearing loss            | 624.5<br>(589.3 to 659.7)                     | --                                       | 15.3<br>(10.3 to 22.2)               | 31.0<br>(25.9 to 36.0)                            | -4.5<br>(-8.2 to -1.2)                              |
| Other vision loss                             | 24.2<br>(21.8 to 26.9)                        | --                                       | 2.0<br>(1.4 to 2.7)                  | 30.8<br>(22.4 to 40.2)                            | 2.0<br>(-4.0 to 8.7)                                |
| Other sense organ diseases                    | 140.7<br>(129.6 to 151.7)                     | 394.9<br>(372.6 to 418.1)                | 4.4<br>(2.8 to 6.7)                  | 25.7<br>(20.7 to 30.6)                            | 1.1<br>(-2.4 to 4.8)                                |
| Oral disorders                                | 1,510.3<br>(1,452.0 to 1,567.2)               | 3,604.1†<br>(3,317.6 to 3,917.3)         | 13.1<br>(8.2 to 19.6)                | 23.6<br>(20.6 to 26.9)                            | 0.1<br>(-1.7 to 2.0)                                |
| Caries of deciduous teeth                     | 144.4<br>(119.5 to 168.3)                     | 659.9<br>(482.2 to 861.9)                | 0.1<br>(< 0.05 to 0.1)               | 18.4<br>(-0.9 to 38.4)                            | 37.2<br>(15.2 to 59.8)                              |
| Caries of permanent teeth                     | 886.4<br>(829.7 to 944.0)                     | 2,882.8<br>(2,654.3 to 3,118.3)          | 0.9<br>(0.4 to 1.7)                  | 2.4<br>(-1.6 to 6.6)                              | -7.1<br>(-10.4 to -3.6)                             |
| Periodontal disease                           | 359.1<br>(296.4 to 430.9)                     | 40.9<br>(32.0 to 51.0)                   | 2.4<br>(0.9 to 4.9)                  | 20.4<br>(14.8 to 26.3)                            | 0.7<br>(-3.1 to 4.6)                                |
| Edentulism and severe tooth loss              | 267.9<br>(233.9 to 299.8)                     | 20.5<br>(17.3 to 23.9)                   | 7.5<br>(4.9 to 10.6)                 | 32.6<br>(28.7 to 37.0)                            | 0.4<br>(-2.3 to 3.3)                                |
| Other oral disorders                          | 79.1<br>(75.6 to 82.9)                        | --                                       | 2.3<br>(1.4 to 3.5)                  | 11.0<br>(7.5 to 14.8)                             | 0.1<br>(-2.9 to 3.4)                                |
| <b>Injuries</b>                               | <b>1,238.1</b><br><b>(1,160.0 to 1,335.8)</b> | <b>401.6†</b><br><b>(378.5 to 426.8)</b> | <b>37.9</b><br><b>(25.1 to 54.5)</b> | <b>26.5</b><br><b>(24.8 to 28.4)</b>              | <b>5.5</b><br><b>(4.3 to 6.9)</b>                   |
| <b>Transport injuries</b>                     | <b>164.1</b><br><b>(151.3 to 176.2)</b>       | <b>43.7</b><br><b>(39.7 to 48.0)</b>     | <b>7.3</b><br><b>(4.8 to 10.6)</b>   | <b>27.3</b><br><b>(24.9 to 29.8)</b>              | <b>5.7</b><br><b>(3.8 to 7.6)</b>                   |
| Road injuries                                 | 128.5<br>(118.8 to 138.4)                     | 38.3<br>(34.5 to 42.4)                   | 6.0<br>(3.9 to 8.8)                  | 26.6<br>(24.2 to 29.2)                            | 4.9<br>(2.9 to 7.0)                                 |
| Pedestrian road injuries                      | 23.7<br>(20.9 to 27.0)                        | 5.0<br>(4.2 to 6.0)                      | 1.2<br>(0.8 to 1.8)                  | 42.2<br>(39.6 to 45.2)                            | 13.6<br>(11.6 to 15.7)                              |
| Cyclist road injuries                         | 34.8<br>(29.1 to 41.2)                        | 13.8<br>(11.7 to 16.1)                   | 1.5<br>(1.0 to 2.2)                  | 32.0<br>(29.6 to 34.8)                            | 7.5<br>(5.6 to 9.6)                                 |
| Motorcyclist road injuries                    | 32.2<br>(26.9 to 37.9)                        | 6.0<br>(5.0 to 7.2)                      | 1.6<br>(1.0 to 2.2)                  | 10.2<br>(7.6 to 13.0)                             | -6.1<br>(-8.4 to -3.9)                              |
| Motor vehicle road injuries                   | 31.8<br>(26.9 to 36.9)                        | 11.3<br>(9.6 to 13.2)                    | 1.6<br>(1.0 to 2.2)                  | 28.4<br>(25.8 to 31.3)                            | 7.8<br>(5.6 to 10.1)                                |
| Other road injuries                           | 6.1<br>(5.3 to 7.1)                           | 2.1<br>(1.7 to 2.6)                      | 0.2<br>(0.1 to 0.3)                  | 35.2<br>(32.3 to 38.4)                            | 12.3<br>(10.1 to 14.6)                              |
| Other transport injuries                      | 35.6<br>(29.3 to 41.8)                        | 5.4<br>(4.7 to 6.3)                      | 1.3<br>(0.8 to 1.9)                  | 30.4<br>(28.4 to 32.9)                            | 9.4<br>(7.8 to 11.2)                                |
| <b>Unintentional injuries</b>                 | <b>1,021.1</b><br><b>(944.4 to 1,120.5)</b>   | <b>333.0</b><br><b>(310.3 to 359.0)</b>  | <b>28.5</b><br><b>(18.9 to 41.5)</b> | <b>27.6</b><br><b>(25.9 to 29.4)</b>              | <b>6.3</b><br><b>(5.0 to 7.7)</b>                   |
| Falls                                         | 472.7<br>(410.9 to 544.6)                     | 160.1<br>(141.5 to 180.6)                | 16.4<br>(11.1 to 23.1)               | 27.8<br>(25.6 to 29.9)                            | 4.8<br>(3.1 to 6.4)                                 |
| Drowning                                      | 4.8<br>(4.3 to 5.4)                           | 0.8<br>(0.7 to 1.0)                      | 0.2<br>(0.1 to 0.3)                  | 59.7<br>(53.2 to 67.2)                            | 25.7<br>(20.6 to 30.9)                              |
| Fire, heat, and hot substances                | 119.1<br>(100.9 to 143.0)                     | 6.6<br>(5.4 to 7.8)                      | 2.1<br>(1.2 to 3.4)                  | 26.9<br>(23.4 to 30.2)                            | 10.3<br>(7.4 to 12.9)                               |
| Poisonings                                    | 5.5<br>(4.6 to 6.7)                           | 6.5<br>(5.2 to 8.0)                      | 0.4<br>(0.3 to 0.6)                  | 19.7<br>(10.3 to 30.2)                            | 7.7<br>(-0.7 to 17.2)                               |
| Exposure to mechanical forces                 | 211.8<br>(177.1 to 270.0)                     | 54.7<br>(45.8 to 64.5)                   | 3.9<br>(2.4 to 6.0)                  | 34.3<br>(32.1 to 36.7)                            | 14.9<br>(13.3 to 16.4)                              |
| Unintentional firearm injuries                | 7.7<br>(6.2 to 9.8)                           | 0.7<br>(0.5 to 1.0)                      | 0.1<br>(0.1 to 0.2)                  | 22.6<br>(20.4 to 24.9)                            | 6.1<br>(4.3 to 8.0)                                 |
| Unintentional suffocation                     | 2.3<br>(1.8 to 3.0)                           | 0.3<br>(0.2 to 0.4)                      | 0.1<br>(< 0.05 to 0.1)               | 23.3<br>(20.9 to 25.7)                            | 8.2<br>(5.9 to 10.4)                                |
| Other exposure to mechanical forces           | 201.7<br>(166.9 to 259.9)                     | 53.7<br>(45.0 to 63.4)                   | 3.7<br>(2.3 to 5.7)                  | 34.9<br>(32.7 to 37.3)                            | 15.3<br>(13.6 to 16.9)                              |



| Cause                                                                               | Prevalence in thousands (95% UI) | Incidence in thousands (95% UI) | YLDs in thousands (95% UI)        |                                                   |                                                     |
|-------------------------------------------------------------------------------------|----------------------------------|---------------------------------|-----------------------------------|---------------------------------------------------|-----------------------------------------------------|
|                                                                                     | 2016 counts                      | 2016 counts                     | 2016 counts                       | Percentage change in counts between 2006 and 2016 | Percentage change in age-standardised rates between |
| Adverse effects of medical treatment                                                | 1.5<br>(1.2 to 1.9)              | 19.8<br>(17.0 to 22.9)          | 0.2<br>(0.1 to 0.3)               | 21.1<br>(16.7 to 26.1)                            | 4.1<br>(1.3 to 7.7)                                 |
| Animal contact                                                                      | 22.4<br>(19.6 to 26.2)           | 12.5<br>(10.1 to 15.3)          | 0.4<br>(0.3 to 0.7)               | 6.6<br>(2.3 to 11.2)                              | -7.2<br>(-11.0 to -3.1)                             |
| Venomous animal contact                                                             | 3.7<br>(3.1 to 4.3)              | 4.0<br>(2.9 to 5.3)             | 0.2<br>(0.1 to 0.3)               | 4.8<br>(-3.5 to 14.1)                             | -5.8<br>(-13.2 to 2.6)                              |
| Non-venomous animal contact                                                         | 18.7<br>(16.0 to 22.4)           | 8.6<br>(6.8 to 10.6)            | 0.2<br>(0.1 to 0.4)               | 8.1<br>(6.1 to 10.2)                              | -8.4<br>(-10.0 to -7.0)                             |
| Foreign body                                                                        | 34.3<br>(28.7 to 41.7)           | 20.1<br>(17.4 to 23.5)          | 1.0<br>(0.6 to 1.4)               | 17.6<br>(15.6 to 19.9)                            | 1.0<br>(-0.6 to 2.6)                                |
| Pulmonary aspiration and foreign body in airway                                     | 4.9<br>(3.9 to 6.1)              | 4.8<br>(4.2 to 5.6)             | 0.1<br>(0.1 to 0.2)               | 28.1<br>(25.0 to 31.6)                            | 4.7<br>(2.9 to 6.7)                                 |
| Foreign body in eyes                                                                | 2.4<br>(1.6 to 3.3)              | 10.0<br>(7.7 to 13.2)           | 0.2<br>(0.1 to 0.3)               | 16.2<br>(12.1 to 21.5)                            | 1.9<br>(-1.1 to 5.2)                                |
| Foreign body in other body part                                                     | 27.0<br>(22.0 to 34.2)           | 5.3<br>(4.4 to 6.2)             | 0.7<br>(0.4 to 1.0)               | 16.2<br>(14.0 to 18.5)                            | 0.1<br>(-1.6 to 2.0)                                |
| Environmental heat and cold exposure                                                | 32.5<br>(28.5 to 36.9)           | 6.8<br>(5.6 to 8.1)             | 1.1<br>(0.7 to 1.7)               | 27.7<br>(23.4 to 32.3)                            | 4.7<br>(1.4 to 7.9)                                 |
| Other unintentional injuries                                                        | 116.6<br>(95.9 to 139.6)         | 45.1<br>(37.2 to 53.9)          | 2.8<br>(1.8 to 4.3)               | 26.0<br>(24.2 to 27.9)                            | 5.7<br>(4.4 to 7.0)                                 |
| <b>Self-harm and interpersonal violence</b>                                         | <b>97.2<br/>(88.8 to 106.0)</b>  | <b>24.7†<br/>(22.5 to 27.2)</b> | <b>1.8<br/>(1.2 to 2.5)</b>       | <b>12.9<br/>(10.4 to 15.4)</b>                    | <b>-2.0<br/>(-4.1 to -0.1)</b>                      |
| Self-harm                                                                           | 15.7<br>(13.1 to 18.4)           | 16.7<br>(15.1 to 18.8)          | 0.6<br>(0.4 to 0.9)               | 12.8<br>(7.5 to 17.9)                             | -7.9<br>(-12.0 to -3.5)                             |
| Self-harm by firearm                                                                | 0.1<br>(0.1 to 0.2)              | < 0.05<br>(< 0.05 to < 0.05)    | < 0.05<br>(< 0.05 to < 0.05)      | 18.7<br>(16.1 to 21.4)                            | 4.6<br>(2.4 to 6.9)                                 |
| Self-harm by other specified means                                                  | 15.6<br>(13.0 to 18.3)           | 16.7<br>(15.1 to 18.7)          | 0.6<br>(0.4 to 0.9)               | 12.7<br>(7.5 to 17.9)                             | -8.0<br>(-12.0 to -3.5)                             |
| Interpersonal violence                                                              | 81.5<br>(73.5 to 89.9)           | 8.0‡<br>(6.6 to 9.7)            | 1.2<br>(0.8 to 1.6)               | 13.0<br>(10.0 to 15.7)                            | 1.0<br>(-1.7 to 3.3)                                |
| Assault by firearm                                                                  | 1.8<br>(1.5 to 2.2)              | 0.2<br>(0.2 to 0.3)             | < 0.05<br>(< 0.05 to 0.1)         | 25.2<br>(22.9 to 27.8)                            | 8.8<br>(6.7 to 10.8)                                |
| Assault by sharp object                                                             | 5.6<br>(4.5 to 6.7)              | 1.5<br>(1.1 to 2.0)             | 0.1<br>(0.1 to 0.2)               | 19.4<br>(17.2 to 21.7)                            | 3.8<br>(2.0 to 5.6)                                 |
| Sexual violence                                                                     | 54.4<br>(47.5 to 62.4)           | --                              | 0.5<br>(0.3 to 0.6)               | 1.6<br>(-2.8 to 6.3)                              | -4.2<br>(-8.2 to 0.4)                               |
| Assault by other means                                                              | 19.7<br>(16.2 to 24.0)           | 6.3<br>(5.1 to 7.7)             | 0.6<br>(0.4 to 0.8)               | 21.9<br>(19.8 to 24.2)                            | 5.6<br>(3.8 to 7.4)                                 |
| <b>Forces of nature, conflict and terrorism, and executions and police conflict</b> | <b>10.0<br/>(2.5 to 16.6)</b>    | <b>0.2†<br/>(0.1 to 0.3)</b>    | <b>0.2<br/>(&lt; 0.05 to 0.7)</b> | <b>-8.3<br/>(-27.3 to -5.0)</b>                   | <b>-21.9<br/>(-35.7 to -19.2)</b>                   |
| Exposure to forces of nature                                                        | 2.1<br>(0.4 to 4.4)              | --                              | < 0.05<br>(< 0.05 to 0.1)         | -9.8<br>(-12.0 to -7.5)                           | -26.7<br>(-28.5 to -24.8)                           |
| Conflict and terrorism                                                              | --                               | --                              | --                                | --                                                | --                                                  |
| Executions and police conflict                                                      | 7.9<br>(0.5 to 13.6)             | 0.2<br>(0.1 to 0.3)             | 0.2<br>(< 0.05 to 0.5)            | -8.0<br>(-35.5 to -4.0)                           | -20.6<br>(-39.8 to -17.2)                           |
| <b>Impairments</b>                                                                  | --                               | --                              | --                                | --                                                | --                                                  |
| Anaemia                                                                             | 584.7<br>(529.7 to 635.9)        | --                              | 13.2<br>(8.6 to 19.4)             | 8.6<br>(-1.3 to 20.0)                             | -3.8<br>(-12.6 to 5.7)                              |
| Developmental intellectual disability                                               | 44.0<br>(34.6 to 54.2)           | --                              | 6.2<br>(4.6 to 8.2)               | -3.2<br>(-8.3 to 3.1)                             | -8.9<br>(-13.7 to -3.3)                             |
| Epilepsy                                                                            | 13.1<br>(6.6 to 19.9)            | --                              | 3.8<br>(1.9 to 6.4)               | -2.4<br>(-55.1 to 103.0)                          | -9.4<br>(-58.8 to 90.3)                             |
| Guillain-Barre syndrome                                                             | < 0.05<br>(< 0.05 to < 0.05)     | --                              | < 0.05<br>(< 0.05 to < 0.05)      | 17.8<br>(12.0 to 25.8)                            | 1.7<br>(0.4 to 9.4)                                 |
| Hearing loss                                                                        | 650.1<br>(614.3 to 684.9)        | --                              | 16.6<br>(11.2 to 23.7)            | 27.7<br>(22.9 to 32.1)                            | -5.0<br>(-8.4 to -1.8)                              |
| Heart failure                                                                       | 63.8<br>(55.9 to 72.5)           | --                              | 6.5<br>(4.8 to 8.3)               | 34.0<br>(26.1 to 42.6)                            | -7.2<br>(-12.9 to -1.7)                             |
| Infertility                                                                         | 27.6<br>(20.0 to 36.7)           | --                              | 0.2<br>(0.1 to 0.4)               | -0.3<br>(-8.9 to 8.8)                             | 0.3<br>(-8.5 to 9.5)                                |
| Pelvic inflammatory disease                                                         | 0.1<br>(0.1 to 0.1)              | --                              | < 0.05<br>(< 0.05 to < 0.05)      | -0.4<br>(-8.2 to 8.1)                             | -3.6<br>(-10.8 to 4.8)                              |
| Vision loss                                                                         | 441.6<br>(419.6 to 464.3)        | --                              | 13.2<br>(9.2 to 18.6)             | 21.4<br>(18.0 to 25.0)                            | -2.1<br>(-4.5 to 0.5)                               |

We did not calculate incidence for the nine impairments, certain NTDs, and causes with only birth prevalence. Blank cells mean that no estimate is available.

† Incidence for aggregate causes represents the sum of the incidence of the causes below the aggregate.

‡ Incidence estimates for stroke represent first-ever stroke only.

^ Incidence of HIV/AIDS represents new infections of HIV only and does not include new infections of Tuberculosis in HIV positive cases.

SR Table 14: Prevalence, incidence, and YLDs for 2016, percentage change of YLD counts and percentage change of age-standardised YLD rates between 2006 and 2016 by cause and impairments, for all ages, Slovakia.

| Cause                                                                                | Prevalence in thousands (95% UI)       | Incidence in thousands (95% UI)            | YLDs in thousands (95% UI)          |                                                   |                                                     |
|--------------------------------------------------------------------------------------|----------------------------------------|--------------------------------------------|-------------------------------------|---------------------------------------------------|-----------------------------------------------------|
|                                                                                      | 2016 counts                            | 2016 counts                                | 2016 counts                         | Percentage change in counts between 2006 and 2016 | Percentage change in age-standardised rates between |
| <b>All causes</b>                                                                    | <b>5,194.0</b><br>(5,173.7 to 5,217.5) | <b>27,502.9†</b><br>(26,249.3 to 28,743.8) | <b>701.9</b><br>(525.2 to 908.4)    | <b>7.7</b><br>(5.7 to 9.6)                        | <b>-0.6</b><br>(-2.5 to 1.3)                        |
| <b>Communicable, maternal, neonatal, and nutritional disorders</b>                   | <b>2,423.3</b><br>(2,347.4 to 2,506.1) | <b>10,939.6†</b><br>(10,062.9 to 11,916.1) | <b>30.2</b><br>(21.3 to 41.0)       | <b>-6.1</b><br>(-11.3 to -0.2)                    | <b>-5.9</b><br>(-11.5 to 0.4)                       |
| <b>HIV/AIDS and tuberculosis</b>                                                     | <b>1,210.9</b><br>(1,110.8 to 1,288.9) | <b>0.5†</b><br>(0.4 to 0.5)                | <b>0.1</b><br>(0.1 to 0.2)          | <b>-13.0</b><br>(-27.3 to 4.6)                    | <b>-18.1</b><br>(-30.1 to -3.6)                     |
| Tuberculosis                                                                         | 1,138.1<br>(1,049.5 to 1,241.6)        | 0.4†<br>(0.4 to 0.5)                       | 0.1<br>(0.1 to 0.2)                 | -20.9<br>(-34.6 to -3.9)                          | -25.5<br>(-37.3 to -12.1)                           |
| Drug-susceptible tuberculosis                                                        | 0.4<br>(0.3 to 0.4)                    | 0.4<br>(0.4 to 0.5)                        | 0.1<br>(0.1 to 0.2)                 | -20.8<br>(-34.5 to -3.7)                          | -25.3<br>(-37.2 to -11.6)                           |
| Multidrug-resistant tuberculosis without extensive drug resistance                   | < 0.05<br>(< 0.05 to < 0.05)           | < 0.05<br>(< 0.05 to < 0.05)               | < 0.05<br>(< 0.05 to < 0.05)        | -43.0<br>(-90.8 to 117.2)                         | -46.6<br>(-91.4 to 102.0)                           |
| Extensively drug-resistant tuberculosis                                              | < 0.05<br>(< 0.05 to < 0.05)           | < 0.05<br>(< 0.05 to < 0.05)               | < 0.05<br>(< 0.05 to < 0.05)        | 75.6<br>(-71.7 to 569.1)                          | 64.6<br>(-73.6 to 522.5)                            |
| Latent tuberculosis infection                                                        | 1,137.8<br>(1,049.2 to 1,241.2)        | --                                         | --                                  | --                                                | --                                                  |
| HIV/AIDS                                                                             | 0.2<br>(0.1 to 0.4)                    | < 0.05^<br>(< 0.05 to < 0.05)              | < 0.05<br>(< 0.05 to < 0.05)        | 61.7<br>(30.7 to 104.3)                           | 53.6<br>(24.9 to 91.6)                              |
| Drug-susceptible HIV/AIDS - Tuberculosis                                             | < 0.05<br>(< 0.05 to < 0.05)           | < 0.05<br>(< 0.05 to < 0.05)               | < 0.05<br>(< 0.05 to < 0.05)        | -25.3<br>(-30.6 to -16.4)                         | -28.6<br>(-33.6 to -20.2)                           |
| Multidrug-resistant HIV/AIDS - Tuberculosis without extensive drug resistance        | < 0.05<br>(< 0.05 to < 0.05)           | < 0.05<br>(< 0.05 to < 0.05)               | < 0.05<br>(< 0.05 to < 0.05)        | -45.1<br>(-91.1 to 108.7)                         | -47.5<br>(-91.5 to 99.5)                            |
| Extensively drug-resistant HIV/AIDS - Tuberculosis                                   | < 0.05<br>(< 0.05 to < 0.05)           | < 0.05<br>(< 0.05 to < 0.05)               | < 0.05<br>(< 0.05 to < 0.05)        | 69.4<br>(-72.5 to 543.1)                          | 61.8<br>(-73.7 to 514.9)                            |
| HIV/AIDS resulting in other diseases                                                 | 0.2<br>(0.1 to 0.4)                    | < 0.05<br>(< 0.05 to < 0.05)               | < 0.05<br>(< 0.05 to < 0.05)        | 64.1<br>(31.9 to 108.2)                           | 55.9<br>(26.2 to 96.7)                              |
| <b>Diarrhoea, lower respiratory infections, and other common infectious diseases</b> | <b>193.4</b><br>(183.4 to 204.8)       | <b>10,426.4†</b><br>(9,566.4 to 11,379.4)  | <b>9.5</b><br>(6.6 to 13.2)         | <b>-4.9</b><br>(-8.5 to -1.4)                     | <b>-8.7</b><br>(-13.0 to -4.5)                      |
| Diarrhoeal diseases                                                                  | 38.0<br>(35.0 to 41.2)                 | 2,469.0<br>(2,280.7 to 2,680.6)            | 4.3<br>(2.9 to 5.8)                 | -7.1<br>(-13.7 to -0.3)                           | -13.4<br>(-20.4 to -6.2)                            |
| Intestinal infectious diseases                                                       | < 0.05<br>(< 0.05 to < 0.05)           | < 0.05†<br>(< 0.05 to < 0.05)              | < 0.05<br>(< 0.05 to < 0.05)        | 10.1<br>(-6.1 to 27.6)                            | 1.3<br>(-12.6 to 17.2)                              |
| Typhoid fever                                                                        | < 0.05<br>(< 0.05 to < 0.05)           | < 0.05<br>(< 0.05 to < 0.05)               | < 0.05<br>(< 0.05 to < 0.05)        | 17.6<br>(-2.1 to 42.0)                            | 10.6<br>(-7.9 to 32.5)                              |
| Paratyphoid fever                                                                    | < 0.05<br>(< 0.05 to < 0.05)           | < 0.05<br>(< 0.05 to < 0.05)               | < 0.05<br>(< 0.05 to < 0.05)        | 5.8<br>(-13.2 to 26.9)                            | -3.0<br>(-18.9 to 15.5)                             |
| Other intestinal infectious diseases                                                 | --                                     | --                                         | < 0.05<br>(< 0.05 to < 0.05)        | -17.7<br>(-36.3 to 3.2)                           | -28.8<br>(-47.4 to -4.9)                            |
| Lower respiratory infections                                                         | 5.4<br>(5.0 to 5.8)                    | 238.5<br>(220.8 to 259.3)                  | 0.3<br>(0.2 to 0.5)                 | 13.5<br>(1.8 to 26.8)                             | -0.9<br>(-12.1 to 11.3)                             |
| Upper respiratory infections                                                         | 100.0<br>(89.0 to 112.7)               | 7,414.7<br>(6,571.7 to 8,370.9)            | 2.5<br>(1.4 to 3.8)                 | -1.4<br>(-6.7 to 4.2)                             | -0.4<br>(-5.4 to 4.9)                               |
| Otitis media                                                                         | 48.4<br>(43.6 to 53.4)                 | 225.9<br>(186.2 to 275.7)                  | 1.3<br>(0.8 to 2.0)                 | -10.7<br>(-18.1 to -3.4)                          | -8.1<br>(-15.7 to -1.4)                             |
| Meningitis                                                                           | 4.3<br>(3.8 to 4.8)                    | 0.7<br>(0.6 to 0.8)                        | 0.5<br>(0.4 to 0.7)                 | -5.3<br>(-8.0 to -2.7)                            | -5.8<br>(-8.4 to -3.3)                              |
| Pneumococcal meningitis                                                              | 1.6<br>(1.4 to 1.9)                    | 0.1<br>(0.1 to 0.1)                        | 0.2<br>(0.1 to 0.3)                 | -9.6<br>(-14.3 to -5.5)                           | -10.4<br>(-15.1 to -6.2)                            |
| H influenzae type B meningitis                                                       | 0.4<br>(0.3 to 0.5)                    | < 0.05<br>(< 0.05 to < 0.05)               | 0.1<br>(< 0.05 to 0.1)              | -2.9<br>(-7.0 to 1.2)                             | -2.1<br>(-6.2 to 2.2)                               |
| Meningococcal infection                                                              | 0.7<br>(0.6 to 1.0)                    | 0.2<br>(0.1 to 0.2)                        | 0.1<br>(0.1 to 0.1)                 | -5.4<br>(-9.8 to -1.1)                            | -6.3<br>(-10.8 to -1.9)                             |
| Other meningitis                                                                     | 1.5<br>(1.2 to 1.9)                    | 0.4<br>(0.4 to 0.5)                        | 0.1<br>(0.1 to 0.2)                 | 0.5<br>(-3.8 to 5.2)                              | -0.2<br>(-4.5 to 4.4)                               |
| Encephalitis                                                                         | 3.4<br>(2.5 to 4.6)                    | 1.5<br>(1.4 to 1.5)                        | 0.4<br>(0.3 to 0.6)                 | 1.8<br>(-10.6 to 16.6)                            | -1.6<br>(-12.7 to 12.0)                             |
| Diphtheria                                                                           | < 0.05<br>(< 0.05 to < 0.05)           | < 0.05<br>(< 0.05 to < 0.05)               | < 0.05<br>(< 0.05 to < 0.05)        | -20.9<br>(-59.7 to 54.7)                          | -21.5<br>(-56.1 to 44.2)                            |
| Whooping cough                                                                       | 0.1<br>(0.1 to 0.1)                    | 0.8<br>(0.6 to 1.1)                        | < 0.05<br>(< 0.05 to < 0.05)        | -3.5<br>(-41.0 to 54.7)                           | -10.3<br>(-45.2 to 43.9)                            |
| Tetanus                                                                              | < 0.05<br>(< 0.05 to < 0.05)           | < 0.05<br>(< 0.05 to < 0.05)               | < 0.05<br>(< 0.05 to < 0.05)        | -7.0<br>(-16.8 to 3.2)                            | -5.8<br>(-15.0 to 3.5)                              |
| Measles                                                                              | < 0.05<br>(0.0 to < 0.05)              | < 0.05<br>(0.0 to < 0.05)                  | < 0.05<br>(0.0 to < 0.05)           | --                                                | --                                                  |
| Varicella and herpes zoster                                                          | 4.2<br>(3.8 to 4.7)                    | 75.3<br>(72.5 to 78.3)                     | 0.2<br>(0.1 to 0.3)                 | 9.9<br>(-4.0 to 24.7)                             | -0.3<br>(-12.7 to 13.5)                             |
| <b>Neglected tropical diseases and malaria</b>                                       | <b>0.3</b><br>(< 0.05 to 0.7)          | <b>&lt; 0.05†</b><br>(< 0.05 to 0.1)       | <b>&lt; 0.05</b><br>(< 0.05 to 0.1) | <b>-13.1</b><br>(-93.4 to 326.2)                  | <b>-21.6</b><br>(-93.0 to 287.8)                    |
| Malaria                                                                              | --                                     | --                                         | --                                  | --                                                | --                                                  |
| Chagas disease                                                                       | --                                     | --                                         | --                                  | --                                                | --                                                  |
| Leishmaniasis                                                                        | --                                     | --                                         | --                                  | --                                                | --                                                  |
| Visceral leishmaniasis                                                               | --                                     | --                                         | --                                  | --                                                | --                                                  |
| Cutaneous and mucocutaneous leishmaniasis                                            | --                                     | --                                         | --                                  | --                                                | --                                                  |
| African trypanosomiasis                                                              | --                                     | --                                         | --                                  | --                                                | --                                                  |
| Schistosomiasis                                                                      | --                                     | --                                         | --                                  | --                                                | --                                                  |
| Cysticercosis                                                                        | 0.2<br>(< 0.05 to 0.6)                 | --                                         | < 0.05<br>(< 0.05 to 0.1)           | 6.2<br>(-100.0 to 1,343.7)                        | -4.3<br>(-100.0 to 1,206.6)                         |
| Cystic echinococcosis                                                                | 0.1<br>(< 0.05 to 0.3)                 | < 0.05<br>(< 0.05 to 0.1)                  | < 0.05<br>(< 0.05 to < 0.05)        | -51.1<br>(-95.8 to 323.8)                         | -53.6<br>(-95.4 to 281.4)                           |
| Lymphatic filariasis                                                                 | --                                     | --                                         | --                                  | --                                                | --                                                  |
| Onchocerciasis                                                                       | --                                     | --                                         | --                                  | --                                                | --                                                  |
| Trachoma                                                                             | --                                     | --                                         | --                                  | --                                                | --                                                  |
| Dengue                                                                               | --                                     | --                                         | --                                  | --                                                | --                                                  |
| Yellow fever                                                                         | --                                     | --                                         | --                                  | --                                                | --                                                  |
| Rabies                                                                               | < 0.05<br>(< 0.05 to < 0.05)           | < 0.05<br>(< 0.05 to < 0.05)               | < 0.05<br>(< 0.05 to < 0.05)        | -6.0<br>(-30.3 to 27.8)                           | -9.6<br>(-36.1 to 33.3)                             |
| Intestinal nematode infections                                                       | --                                     | --                                         | --                                  | --                                                | --                                                  |
| Ascariasis                                                                           | --                                     | --                                         | --                                  | --                                                | --                                                  |

| Cause                                                                   | Prevalence in thousands (95% UI)              | Incidence in thousands (95% UI)                   | YLDs in thousands (95% UI)              |                                                   |                                                     |
|-------------------------------------------------------------------------|-----------------------------------------------|---------------------------------------------------|-----------------------------------------|---------------------------------------------------|-----------------------------------------------------|
|                                                                         | 2016 counts                                   | 2016 counts                                       | 2016 counts                             | Percentage change in counts between 2006 and 2016 | Percentage change in age-standardised rates between |
| Trichuriasis                                                            | --                                            | --                                                | --                                      | --                                                | --                                                  |
| Hookworm disease                                                        | --                                            | --                                                | --                                      | --                                                | --                                                  |
| Food-borne trematodiasis                                                | --                                            | --                                                | --                                      | --                                                | --                                                  |
| Leprosy                                                                 | --                                            | --                                                | --                                      | --                                                | --                                                  |
| Ebola virus disease                                                     | --                                            | --                                                | --                                      | --                                                | --                                                  |
| Zika virus disease                                                      | --                                            | --                                                | --                                      | --                                                | --                                                  |
| Guinea worm disease                                                     | --                                            | --                                                | --                                      | --                                                | --                                                  |
| Other neglected tropical diseases                                       | --                                            | --                                                | < 0.05<br>(< 0.05 to < 0.05)            | --                                                | --                                                  |
| <b>Maternal disorders</b>                                               | <b>3.6</b><br><b>(2.9 to 4.4)</b>             | <b>70.5†</b><br><b>(63.2 to 81.5)</b>             | <b>0.2</b><br><b>(0.1 to 0.3)</b>       | <b>-5.9</b><br><b>(-30.0 to 24.4)</b>             | <b>-1.8</b><br><b>(-26.9 to 29.4)</b>               |
| Maternal haemorrhage                                                    | 1.5<br>(1.1 to 1.9)                           | 9.5<br>(8.3 to 10.8)                              | 0.1<br>(< 0.05 to 0.1)                  | -16.3<br>(-44.3 to 27.0)                          | -11.5<br>(-40.5 to 33.4)                            |
| Maternal sepsis and other pregnancy related infections                  | 0.6<br>(0.5 to 0.7)                           | 2.8<br>(2.4 to 3.3)                               | < 0.05<br>(< 0.05 to < 0.05)            | -9.5<br>(-62.1 to 108.1)                          | -0.4<br>(-59.2 to 133.7)                            |
| Maternal hypertensive disorders                                         | 1.3<br>(0.8 to 1.7)                           | 5.1<br>(4.5 to 5.7)                               | 0.1<br>(< 0.05 to 0.1)                  | 14.8<br>(-32.3 to 101.5)                          | 19.0<br>(-29.5 to 109.7)                            |
| Maternal obstructed labour and uterine rupture                          | < 0.05<br>(< 0.05 to < 0.05)                  | 0.6<br>(0.5 to 0.7)                               | < 0.05<br>(< 0.05 to < 0.05)            | 11.6<br>(-40.7 to 108.3)                          | 15.7<br>(-38.8 to 116.7)                            |
| Maternal abortion, miscarriage, and ectopic pregnancy                   | 0.4<br>(0.3 to 0.6)                           | 52.5<br>(45.6 to 63.4)                            | < 0.05<br>(< 0.05 to 0.1)               | -9.4<br>(-54.5 to 76.7)                           | -7.9<br>(-53.2 to 74.3)                             |
| Other maternal disorders                                                | --                                            | --                                                | < 0.05<br>(< 0.05 to < 0.05)            | -11.8<br>(-34.4 to 16.7)                          | -7.5<br>(-31.2 to 22.7)                             |
| <b>Neonatal disorders</b>                                               | <b>50.4</b><br><b>(41.9 to 59.4)</b>          | --                                                | <b>8.7</b><br><b>(5.8 to 12.3)</b>      | <b>1.9</b><br><b>(-10.0 to 21.5)</b>              | <b>3.6</b><br><b>(-8.6 to 23.4)</b>                 |
| Neonatal preterm birth complications                                    | 28.9<br>(23.0 to 38.2)                        | --                                                | 3.0<br>(2.0 to 4.3)                     | -7.9<br>(-28.0 to 15.6)                           | -5.4<br>(-26.1 to 19.2)                             |
| Neonatal encephalopathy due to birth asphyxia and trauma                | 24.8<br>(16.3 to 36.5)                        | --                                                | 4.4<br>(2.2 to 7.2)                     | 9.0<br>(-11.4 to 76.5)                            | 10.7<br>(-10.1 to 81.1)                             |
| Neonatal sepsis and other neonatal infections                           | 2.5<br>(1.2 to 5.2)                           | --                                                | 1.1<br>(0.4 to 2.4)                     | 4.7<br>(-13.0 to 26.5)                            | 5.3<br>(-13.4 to 29.7)                              |
| Hemolytic disease and other neonatal jaundice                           | 0.5<br>(0.4 to 0.6)                           | --                                                | 0.1<br>(0.1 to 0.2)                     | -5.3<br>(-12.5 to 2.7)                            | -4.1<br>(-11.4 to 4.2)                              |
| Other neonatal disorders                                                | --                                            | --                                                | 0.1<br>(0.1 to 0.2)                     | 12.7<br>(-8.9 to 38.4)                            | 1.3<br>(-18.0 to 24.4)                              |
| <b>Nutritional deficiencies</b>                                         | <b>655.3</b><br><b>(582.4 to 711.5)</b>       | <b>23.1†</b><br><b>(18.3 to 28.8)</b>             | <b>9.7</b><br><b>(6.1 to 15.0)</b>      | <b>-13.7</b><br><b>(-24.5 to -1.6)</b>            | <b>-10.2</b><br><b>(-22.2 to 3.8)</b>               |
| Protein-energy malnutrition                                             | 10.2<br>(6.3 to 16.1)                         | 4.5<br>(2.8 to 7.1)                               | 0.4<br>(0.2 to 0.7)                     | -7.5<br>(-45.6 to 52.5)                           | -16.3<br>(-50.6 to 37.4)                            |
| Iodine deficiency                                                       | 54.4<br>(39.6 to 74.2)                        | 0.7<br>(0.6 to 1.0)                               | 1.4<br>(0.8 to 2.1)                     | 3.7<br>(-8.3 to 16.9)                             | 1.3<br>(-10.8 to 14.5)                              |
| Vitamin A deficiency                                                    | 21.4<br>(16.4 to 26.9)                        | 17.9<br>(13.5 to 22.9)                            | --                                      | --                                                | --                                                  |
| Iron-deficiency anaemia                                                 | 546.5<br>(478.7 to 619.0)                     | --                                                | 7.9<br>(4.7 to 12.5)                    | -16.5<br>(-28.7 to -1.9)                          | -11.0<br>(-24.9 to 6.3)                             |
| Other nutritional deficiencies                                          | --                                            | --                                                | < 0.05<br>(< 0.05 to < 0.05)            | -8.5<br>(-47.9 to 52.4)                           | -17.5<br>(-53.0 to 38.1)                            |
| <b>Other communicable, maternal, neonatal, and nutritional diseases</b> | <b>942.0</b><br><b>(881.1 to 1,009.9)</b>     | <b>419.2</b><br><b>(357.9 to 494.2)</b>           | <b>1.8</b><br><b>(1.1 to 2.9)</b>       | <b>-2.3</b><br><b>(-8.6 to 4.3)</b>               | <b>-2.2</b><br><b>(-9.3 to 4.7)</b>                 |
| Sexually transmitted diseases excluding HIV                             | 739.3<br>(685.0 to 805.2)                     | 405.0<br>(344.4 to 479.6)                         | 1.4<br>(0.9 to 2.4)                     | -2.6<br>(-9.5 to 4.3)                             | -3.6<br>(-10.8 to 2.8)                              |
| Syphilis                                                                | 5.0<br>(4.2 to 6.1)                           | 2.9<br>(2.0 to 3.9)                               | 0.2<br>(0.2 to 0.3)                     | 5.4<br>(-11.2 to 26.1)                            | -8.2<br>(-22.3 to 9.1)                              |
| Chlamydial infection                                                    | 64.5<br>(42.5 to 96.6)                        | 47.8<br>(31.6 to 72.8)                            | 0.3<br>(0.2 to 0.5)                     | -5.4<br>(-19.0 to 9.2)                            | -4.1<br>(-17.1 to 10.4)                             |
| Gonococcal infection                                                    | 60.8<br>(45.8 to 80.0)                        | 207.0<br>(151.5 to 280.5)                         | 0.2<br>(0.1 to 0.4)                     | -8.2<br>(-21.0 to 5.6)                            | -0.8<br>(-14.8 to 14.0)                             |
| Trichomoniasis                                                          | 126.6<br>(109.7 to 146.1)                     | 105.6<br>(90.9 to 122.3)                          | 0.1<br>(0.1 to 0.3)                     | -0.3<br>(-7.2 to 7.2)                             | -1.1<br>(-7.4 to 6.5)                               |
| Genital herpes                                                          | 500.9<br>(427.4 to 594.8)                     | 21.6<br>(17.8 to 26.3)                            | 0.1<br>(< 0.05 to 0.3)                  | 7.5<br>(-0.3 to 15.6)                             | -0.4<br>(-7.2 to 7.5)                               |
| Other sexually transmitted diseases                                     | 22.9<br>(17.8 to 28.8)                        | 20.0<br>(17.1 to 23.6)                            | 0.4<br>(0.3 to 0.7)                     | -4.7<br>(-16.9 to 7.2)                            | -4.4<br>(-17.0 to 7.3)                              |
| Hepatitis                                                               | 223.7<br>(192.8 to 260.1)                     | 14.2<br>(11.3 to 16.6)                            | < 0.05<br>(< 0.05 to < 0.05)            | -15.7<br>(-26.2 to -3.4)                          | -20.3<br>(-30.6 to -7.8)                            |
| Acute hepatitis A                                                       | 0.5<br>(0.3 to 0.6)                           | 6.2<br>(3.7 to 7.7)                               | < 0.05<br>(< 0.05 to < 0.05)            | -19.8<br>(-37.6 to 4.3)                           | -21.3<br>(-40.3 to 4.1)                             |
| Hepatitis B                                                             | 132.0<br>(104.8 to 166.4)                     | 6.7<br>(5.2 to 8.4)                               | < 0.05<br>(< 0.05 to < 0.05)            | -15.2<br>(-30.0 to 2.6)                           | -23.9<br>(-36.6 to -9.9)                            |
| Hepatitis C                                                             | 91.2<br>(81.8 to 100.9)                       | 1.0<br>(0.9 to 1.2)                               | < 0.05<br>(< 0.05 to < 0.05)            | 5.9<br>(4.4 to 7.1)                               | -2.6<br>(-3.4 to -1.8)                              |
| Acute hepatitis E                                                       | < 0.05<br>(< 0.05 to < 0.05)                  | 0.3<br>(0.2 to 0.4)                               | < 0.05<br>(< 0.05 to < 0.05)            | -11.5<br>(-21.0 to -2.7)                          | -18.0<br>(-23.6 to -12.1)                           |
| Other infectious diseases                                               | 19.4<br>(16.8 to 22.0)                        | < 0.05<br>(< 0.05 to < 0.05)                      | 0.4<br>(0.2 to 0.6)                     | -0.5<br>(-15.5 to 16.6)                           | 2.7<br>(-15.0 to 23.8)                              |
| <b>Non-communicable diseases</b>                                        | <b>5,020.0</b><br><b>(4,993.2 to 5,049.9)</b> | <b>15,555.1†</b><br><b>(14,654.6 to 16,425.9)</b> | <b>574.0</b><br><b>(427.2 to 739.0)</b> | <b>7.2</b><br><b>(4.8 to 9.5)</b>                 | <b>-1.1</b><br><b>(-3.6 to 1.1)</b>                 |
| <b>Neoplasms</b>                                                        | <b>88.2</b><br><b>(85.1 to 91.4)</b>          | <b>29.1</b><br><b>(26.4 to 31.5)</b>              | <b>8.9</b><br><b>(6.5 to 11.8)</b>      | <b>27.8</b><br><b>(19.6 to 37.5)</b>              | <b>8.2</b><br><b>(1.2 to 16.4)</b>                  |
| Lip and oral cavity cancer                                              | 1.5<br>(1.3 to 1.7)                           | 0.5<br>(0.4 to 0.5)                               | 0.2<br>(0.1 to 0.2)                     | -1.2<br>(-22.8 to 29.1)                           | -15.2<br>(-32.4 to 9.2)                             |
| Nasopharynx cancer                                                      | 0.2<br>(0.1 to 0.2)                           | 0.1<br>(< 0.05 to 0.1)                            | < 0.05<br>(< 0.05 to < 0.05)            | -15.0<br>(-36.0 to 13.3)                          | -21.5<br>(-40.8 to 4.9)                             |
| Other pharynx cancer                                                    | 1.4<br>(1.1 to 1.7)                           | 0.5<br>(0.4 to 0.6)                               | 0.2<br>(0.1 to 0.2)                     | 15.6<br>(-17.2 to 56.8)                           | -0.4<br>(-27.8 to 33.9)                             |
| Oesophageal cancer                                                      | 0.4<br>(0.3 to 0.5)                           | 0.3<br>(0.3 to 0.4)                               | 0.1<br>(0.1 to 0.1)                     | 1.1<br>(-25.0 to 33.3)                            | -14.9<br>(-36.6 to 12.1)                            |
| Stomach cancer                                                          | 2.5<br>(2.0 to 3.0)                           | 1.2<br>(1.0 to 1.4)                               | 0.3<br>(0.2 to 0.4)                     | 20.8<br>(-2.8 to 50.6)                            | 0.0<br>(-18.7 to 23.8)                              |
| Colon and rectum cancer                                                 | 16.4<br>(14.7 to 18.5)                        | 4.5<br>(4.0 to 5.0)                               | 1.5<br>(1.1 to 2.0)                     | 26.4<br>(10.4 to 45.1)                            | 3.9<br>(-8.6 to 19.4)                               |
| Liver cancer                                                            | 0.2<br>(0.2 to 0.3)                           | 0.5<br>(0.4 to 0.5)                               | 0.1<br>(0.1 to 0.1)                     | 29.8<br>(10.3 to 52.3)                            | 6.9<br>(-9.2 to 24.9)                               |
| Liver cancer due to hepatitis B                                         | 0.1<br>(0.1 to 0.2)                           | 0.1<br>(0.1 to 0.2)                               | < 0.05<br>(< 0.05 to < 0.05)            | 30.7<br>(11.4 to 55.0)                            | 8.4<br>(-7.5 to 28.5)                               |



| Cause                                              | Prevalence in thousands (95% UI)        | Incidence in thousands (95% UI)       | YLDs in thousands (95% UI)           |                                                   |                                                     |
|----------------------------------------------------|-----------------------------------------|---------------------------------------|--------------------------------------|---------------------------------------------------|-----------------------------------------------------|
|                                                    | 2016 counts                             | 2016 counts                           | 2016 counts                          | Percentage change in counts between 2006 and 2016 | Percentage change in age-standardised rates between |
| Liver cancer due to hepatitis C                    | 0.1<br>(0.1 to 0.2)                     | 0.1<br>(0.1 to 0.1)                   | < 0.05<br>(< 0.05 to < 0.05)         | 31.1<br>(7.2 to 57.9)                             | 6.9<br>(-12.2 to 28.3)                              |
| Liver cancer due to alcohol use                    | 0.2<br>(0.1 to 0.2)                     | 0.1<br>(0.1 to 0.2)                   | < 0.05<br>(< 0.05 to < 0.05)         | 26.2<br>(4.2 to 50.0)                             | 3.6<br>(-14.6 to 22.6)                              |
| Liver cancer due to other causes                   | 0.1<br>(0.1 to 0.1)                     | 0.1<br>(0.1 to 0.1)                   | < 0.05<br>(< 0.05 to < 0.05)         | 34.1<br>(11.5 to 62.5)                            | 11.1<br>(-7.3 to 34.8)                              |
| Gallbladder and biliary tract cancer               | 0.7<br>(0.5 to 1.0)                     | 0.6<br>(0.4 to 0.7)                   | 0.1<br>(0.1 to 0.2)                  | 27.0<br>(-6.9 to 74.0)                            | 3.1<br>(-24.1 to 39.6)                              |
| Pancreatic cancer                                  | 1.0<br>(0.8 to 1.1)                     | 0.9<br>(0.8 to 1.0)                   | 0.2<br>(0.1 to 0.3)                  | 23.3<br>(0.9 to 48.5)                             | 1.6<br>(-17.0 to 22.9)                              |
| Larynx cancer                                      | 1.0<br>(0.8 to 1.1)                     | 0.3<br>(0.2 to 0.3)                   | 0.1<br>(0.1 to 0.2)                  | -1.2<br>(-24.1 to 29.4)                           | -17.0<br>(-35.7 to 8.5)                             |
| Tracheal, bronchus, and lung cancer                | 4.6<br>(4.0 to 5.4)                     | 3.0<br>(2.6 to 3.4)                   | 0.7<br>(0.5 to 0.9)                  | 23.8<br>(2.4 to 50.2)                             | 1.9<br>(-15.3 to 23.2)                              |
| Malignant skin melanoma                            | 4.1<br>(2.8 to 4.8)                     | 0.9<br>(0.6 to 1.0)                   | 0.3<br>(0.2 to 0.4)                  | 45.4<br>(21.2 to 71.7)                            | 26.0<br>(5.3 to 47.8)                               |
| Non-melanoma skin cancer                           | 0.8<br>(0.6 to 1.3)                     | 2.4<br>(1.4 to 3.6)                   | < 0.05<br>(< 0.05 to 0.1)            | 42.5<br>(-10.1 to 165.1)                          | 16.5<br>(-25.9 to 114.4)                            |
| Non-melanoma skin cancer (squamous-cell carcinoma) | 0.6<br>(0.4 to 1.2)                     | 0.5<br>(0.3 to 1.0)                   | < 0.05<br>(< 0.05 to 0.1)            | 38.2<br>(-17.9 to 170.5)                          | 12.8<br>(-32.7 to 119.9)                            |
| Non-melanoma skin cancer (basal-cell carcinoma)    | 0.3<br>(0.1 to 0.5)                     | 1.9<br>(1.0 to 3.0)                   | < 0.05<br>(< 0.05 to < 0.05)         | 104.8<br>(24.3 to 208.9)                          | 71.6<br>(6.3 to 158.2)                              |
| Breast cancer                                      | 12.7<br>(10.5 to 14.8)                  | 2.7<br>(2.2 to 3.1)                   | 1.1<br>(0.8 to 1.5)                  | 18.4<br>(1.2 to 39.4)                             | 1.0<br>(-13.7 to 18.7)                              |
| Cervical cancer                                    | 2.4<br>(1.5 to 3.0)                     | 0.6<br>(0.4 to 0.7)                   | 0.2<br>(0.1 to 0.3)                  | 1.2<br>(-18.2 to 27.1)                            | -9.2<br>(-27.5 to 14.0)                             |
| Uterine cancer                                     | 5.3<br>(4.5 to 6.4)                     | 1.1<br>(1.0 to 1.4)                   | 0.4<br>(0.3 to 0.6)                  | 29.0<br>(4.7 to 60.0)                             | 8.1<br>(-12.0 to 34.0)                              |
| Ovarian cancer                                     | 1.8<br>(1.5 to 2.0)                     | 0.6<br>(0.5 to 0.6)                   | 0.2<br>(0.2 to 0.3)                  | 15.3<br>(-15.6 to 50.9)                           | -0.0<br>(-25.8 to 29.3)                             |
| Prostate cancer                                    | 8.9<br>(5.0 to 12.0)                    | 2.1<br>(1.3 to 2.8)                   | 0.8<br>(0.4 to 1.2)                  | 48.9<br>(16.2 to 83.3)                            | 19.3<br>(-6.5 to 47.3)                              |
| Testicular cancer                                  | 1.7<br>(1.3 to 2.0)                     | 0.3<br>(0.2 to 0.4)                   | 0.1<br>(0.1 to 0.2)                  | 16.6<br>(-12.9 to 54.5)                           | 18.7<br>(-13.0 to 58.9)                             |
| Kidney cancer                                      | 5.3<br>(4.2 to 5.9)                     | 1.3<br>(1.0 to 1.5)                   | 0.4<br>(0.3 to 0.6)                  | 22.9<br>(4.9 to 43.9)                             | 4.5<br>(-10.7 to 21.7)                              |
| Bladder cancer                                     | 4.0<br>(3.6 to 4.4)                     | 1.0<br>(0.9 to 1.1)                   | 0.4<br>(0.2 to 0.5)                  | 31.8<br>(13.9 to 52.1)                            | 7.9<br>(-6.4 to 24.4)                               |
| Brain and nervous system cancer                    | 1.0<br>(0.8 to 1.1)                     | 0.5<br>(0.4 to 0.5)                   | 0.1<br>(0.1 to 0.2)                  | 20.5<br>(8.5 to 34.8)                             | 8.1<br>(-3.2 to 21.6)                               |
| Thyroid cancer                                     | 1.6<br>(1.4 to 1.9)                     | 0.3<br>(0.3 to 0.4)                   | 0.1<br>(0.1 to 0.1)                  | 32.7<br>(7.2 to 65.1)                             | 15.5<br>(-6.4 to 43.4)                              |
| Mesothelioma                                       | < 0.05<br>(< 0.05 to < 0.05)            | < 0.05<br>(< 0.05 to < 0.05)          | < 0.05<br>(< 0.05 to < 0.05)         | 16.8<br>(1.7 to 32.6)                             | -0.1<br>(-13.3 to 13.2)                             |
| Hodgkin lymphoma                                   | 0.8<br>(0.6 to 1.1)                     | 0.2<br>(0.1 to 0.2)                   | 0.1<br>(< 0.05 to 0.1)               | 18.9<br>(-9.1 to 53.3)                            | 19.6<br>(-10.5 to 59.1)                             |
| Non-Hodgkin's lymphoma                             | 3.5<br>(2.6 to 4.0)                     | 0.9<br>(0.7 to 1.0)                   | 0.3<br>(0.2 to 0.4)                  | 73.4<br>(45.8 to 100.8)                           | 48.6<br>(25.2 to 71.1)                              |
| Multiple myeloma                                   | 1.1<br>(0.7 to 1.3)                     | 0.3<br>(0.2 to 0.4)                   | 0.2<br>(0.1 to 0.3)                  | 42.4<br>(8.5 to 88.5)                             | 18.4<br>(-9.9 to 55.8)                              |
| Leukaemia                                          | 3.9<br>(3.2 to 4.5)                     | 1.1<br>(0.9 to 1.2)                   | 0.5<br>(0.3 to 0.7)                  | 67.0<br>(39.8 to 97.8)                            | 45.4<br>(22.2 to 72.5)                              |
| Acute lymphoid leukaemia                           | 0.6<br>(0.5 to 0.8)                     | 0.1<br>(0.1 to 0.2)                   | 0.1<br>(< 0.05 to 0.1)               | 87.0<br>(42.7 to 146.5)                           | 88.5<br>(33.2 to 167.0)                             |
| Chronic lymphoid leukaemia                         | 2.5<br>(2.0 to 2.8)                     | 0.6<br>(0.5 to 0.6)                   | 0.3<br>(0.2 to 0.4)                  | 67.3<br>(32.7 to 113.0)                           | 37.2<br>(10.1 to 73.9)                              |
| Acute myeloid leukaemia                            | 0.4<br>(0.3 to 0.5)                     | 0.3<br>(0.2 to 0.3)                   | 0.1<br>(< 0.05 to 0.1)               | 56.2<br>(30.9 to 81.8)                            | 32.6<br>(10.3 to 56.0)                              |
| Chronic myeloid leukaemia                          | 0.1<br>(0.1 to 0.1)                     | < 0.05<br>(< 0.05 to 0.1)             | < 0.05<br>(< 0.05 to < 0.05)         | 16.1<br>(-4.3 to 42.7)                            | 4.0<br>(-14.5 to 27.6)                              |
| Other leukaemia                                    | 0.3<br>(0.2 to 0.4)                     | 0.1<br>(< 0.05 to 0.1)                | < 0.05<br>(< 0.05 to 0.1)            | 84.2<br>(15.9 to 129.9)                           | 50.5<br>(-3.1 to 88.8)                              |
| Other neoplasms                                    | 2.8<br>(2.4 to 3.2)                     | 0.8<br>(0.7 to 0.9)                   | 0.2<br>(0.2 to 0.3)                  | 47.7<br>(24.3 to 74.4)                            | 31.8<br>(11.3 to 54.5)                              |
| <b>Cardiovascular diseases</b>                     | <b>673.2</b><br><b>(642.2 to 704.8)</b> | <b>71.7†</b><br><b>(68.5 to 75.3)</b> | <b>55.4</b><br><b>(40.2 to 72.0)</b> | <b>15.8</b><br><b>(9.4 to 21.4)</b>               | <b>-2.5</b><br><b>(-8.2 to 2.0)</b>                 |
| Rheumatic heart disease                            | 0.8<br>(0.7 to 0.9)                     | 0.2<br>(0.2 to 0.2)                   | 0.1<br>(< 0.05 to 0.1)               | -4.5<br>(-24.2 to 18.3)                           | -18.0<br>(-34.1 to 0.6)                             |
| Ischaemic heart disease                            | 245.9<br>(229.3 to 262.1)               | 29.6<br>(27.6 to 31.5)                | 14.8<br>(10.5 to 20.0)               | 15.7<br>(11.2 to 20.8)                            | -2.5<br>(-6.2 to 1.6)                               |
| Cerebrovascular disease                            | 102.6<br>(94.5 to 111.2)                | 20.6‡<br>(18.7 to 22.7)               | 20.2<br>(14.1 to 25.9)               | 15.1<br>(-1.6 to 26.2)                            | -4.2<br>(-18.2 to 5.0)                              |
| Ischaemic stroke                                   | 90.7<br>(81.0 to 102.7)                 | 16.5‡<br>(14.6 to 18.5)               | 17.3<br>(12.1 to 22.5)               | 14.7<br>(-4.3 to 27.9)                            | -5.0<br>(-20.8 to 5.7)                              |
| Hemorrhagic stroke                                 | 15.3<br>(13.5 to 17.3)                  | 4.1‡<br>(3.7 to 4.4)                  | 2.9<br>(2.0 to 3.7)                  | 17.5<br>(5.0 to 31.7)                             | 0.2<br>(-10.2 to 11.7)                              |
| Hypertensive heart disease                         | 21.8<br>(18.5 to 25.7)                  | --                                    | 1.7<br>(1.2 to 2.4)                  | 19.1<br>(6.8 to 32.9)                             | -1.5<br>(-11.8 to 9.5)                              |
| Cardiomyopathy and myocarditis                     | 12.4<br>(10.9 to 13.8)                  | 3.0†<br>(2.7 to 3.4)                  | 1.0<br>(0.7 to 1.5)                  | 13.8<br>(2.9 to 25.9)                             | 1.8<br>(-7.4 to 12.5)                               |
| Myocarditis                                        | 3.2<br>(2.8 to 3.6)                     | 3.0<br>(2.7 to 3.4)                   | 0.2<br>(0.2 to 0.3)                  | 7.9<br>(-5.8 to 23.9)                             | 0.6<br>(-11.5 to 13.9)                              |
| Alcoholic cardiomyopathy                           | 1.5<br>(1.2 to 1.7)                     | --                                    | 0.1<br>(0.1 to 0.2)                  | 21.4<br>(-4.8 to 54.7)                            | 5.7<br>(-15.6 to 33.0)                              |
| Other cardiomyopathy                               | 8.4<br>(7.3 to 9.7)                     | --                                    | 0.7<br>(0.5 to 1.0)                  | 14.8<br>(1.2 to 29.3)                             | 1.7<br>(-10.0 to 14.1)                              |
| Atrial fibrillation and flutter                    | 55.1<br>(47.9 to 63.8)                  | 4.6<br>(3.9 to 5.4)                   | 4.2<br>(2.9 to 5.9)                  | 22.2<br>(14.3 to 29.7)                            | 0.6<br>(-5.7 to 6.6)                                |
| Peripheral vascular disease                        | 142.8<br>(123.9 to 165.0)               | 12.9<br>(11.1 to 15.1)                | 0.6<br>(0.3 to 1.1)                  | 16.6<br>(7.9 to 26.0)                             | -7.2<br>(-14.1 to 0.3)                              |
| Endocarditis                                       | 0.4<br>(0.3 to 0.4)                     | 0.9<br>(0.8 to 1.0)                   | < 0.05<br>(< 0.05 to < 0.05)         | 12.3<br>(-2.9 to 30.5)                            | -1.5<br>(-13.9 to 12.9)                             |
| Other cardiovascular and circulatory diseases      | 246.6<br>(214.1 to 285.2)               | --                                    | 12.6<br>(8.7 to 17.7)                | 15.0<br>(6.1 to 25.1)                             | -0.9<br>(-8.4 to 7.2)                               |
| <b>Chronic respiratory diseases</b>                | <b>380.9</b><br><b>(367.8 to 394.6)</b> | <b>51.7†</b><br><b>(49.1 to 54.6)</b> | <b>14.5</b><br><b>(10.9 to 18.3)</b> | <b>10.1</b><br><b>(4.2 to 16.5)</b>               | <b>1.9</b><br><b>(-2.9 to 7.0)</b>                  |
| Chronic obstructive pulmonary disease              | 181.6<br>(172.3 to 191.1)               | 10.7<br>(10.1 to 11.3)                | 5.5<br>(4.4 to 6.6)                  | 16.2<br>(3.3 to 29.6)                             | -0.6<br>(-11.2 to 10.6)                             |
| Pneumoconiosis                                     | 1.3<br>(1.2 to 1.4)                     | 0.1<br>(0.1 to 0.1)                   | 0.2<br>(0.1 to 0.3)                  | 10.0<br>(-10.4 to 33.6)                           | -9.4<br>(-25.4 to 9.5)                              |
| Silicosis                                          | 0.6<br>(0.6 to 0.7)                     | < 0.05<br>(< 0.05 to < 0.05)          | 0.1<br>(0.1 to 0.1)                  | 2.3<br>(-26.5 to 43.5)                            | -17.2<br>(-40.0 to 14.3)                            |

| Cause                                                          | Prevalence in thousands (95% UI)        | Incidence in thousands (95% UI)    | YLDs in thousands (95% UI)       |                                                   |                                                     |
|----------------------------------------------------------------|-----------------------------------------|------------------------------------|----------------------------------|---------------------------------------------------|-----------------------------------------------------|
|                                                                | 2016 counts                             | 2016 counts                        | 2016 counts                      | Percentage change in counts between 2006 and 2016 | Percentage change in age-standardised rates between |
| Asbestosis                                                     | 0.2<br>(0.2 to 0.2)                     | < 0.05<br>(< 0.05 to < 0.05)       | < 0.05<br>(< 0.05 to < 0.05)     | 14.3<br>(6.3 to 22.6)                             | -2.8<br>(-9.5 to 4.1)                               |
| Coal workers pneumoconiosis                                    | --                                      | --                                 | --                               | --                                                | --                                                  |
| Other pneumoconiosis                                           | 0.5<br>(0.4 to 0.6)                     | < 0.05<br>(< 0.05 to < 0.05)       | 0.1<br>(< 0.05 to 0.1)           | 18.7<br>(-13.2 to 61.1)                           | -1.5<br>(-27.7 to 32.7)                             |
| Asthma                                                         | 206.3<br>(193.3 to 221.1)               | 40.7<br>(38.1 to 43.5)             | 8.0<br>(5.3 to 11.2)             | 5.5<br>(0.7 to 10.6)                              | 2.7<br>(-2.0 to 7.6)                                |
| Interstitial lung disease and pulmonary sarcoidosis            | 5.7<br>(5.1 to 6.2)                     | 0.3<br>(0.2 to 0.3)                | 0.6<br>(0.4 to 0.8)              | 12.7<br>(-1.2 to 30.0)                            | 1.5<br>(-9.9 to 15.8)                               |
| Other chronic respiratory diseases                             | --                                      | --                                 | 0.2<br>(0.2 to 0.3)              | 30.3<br>(19.4 to 43.2)                            | 32.2<br>(21.6 to 43.6)                              |
| <b>Cirrhosis and other chronic liver diseases</b>              | <b>69.7<br/>(66.4 to 73.5)</b>          | <b>2.1<br/>(2.0 to 2.2)</b>        | <b>1.8<br/>(1.2 to 2.5)</b>      | <b>9.8<br/>(1.3 to 19.2)</b>                      | <b>0.8<br/>(-7.3 to 9.0)</b>                        |
| Cirrhosis and other chronic liver diseases due to hepatitis B  | 11.4<br>(9.5 to 13.5)                   | 0.4<br>(0.3 to 0.5)                | 0.3<br>(0.2 to 0.4)              | 13.6<br>(-7.0 to 39.4)                            | 1.5<br>(-16.4 to 23.1)                              |
| Cirrhosis and other chronic liver diseases due to hepatitis C  | 16.8<br>(12.3 to 22.2)                  | 0.5<br>(0.4 to 0.7)                | 0.4<br>(0.3 to 0.6)              | 14.8<br>(-3.4 to 37.6)                            | 2.3<br>(-13.6 to 22.4)                              |
| Cirrhosis and other chronic liver diseases due to alcohol use  | 23.3<br>(18.9 to 27.9)                  | 0.8<br>(0.6 to 0.9)                | 0.6<br>(0.4 to 0.8)              | 13.4<br>(-2.4 to 31.1)                            | -0.3<br>(-14.0 to 14.8)                             |
| Cirrhosis and other chronic liver diseases due to other causes | 18.1<br>(16.0 to 20.4)                  | 0.4<br>(0.4 to 0.5)                | 0.5<br>(0.4 to 0.8)              | 0.9<br>(-12.7 to 16.6)                            | 0.5<br>(-13.2 to 16.4)                              |
| <b>Digestive diseases</b>                                      | <b>305.4<br/>(284.3 to 332.6)</b>       | <b>354.6†<br/>(336.3 to 374.2)</b> | <b>11.7<br/>(8.4 to 15.9)</b>    | <b>17.1<br/>(7.3 to 28.0)</b>                     | <b>2.1<br/>(-6.3 to 11.2)</b>                       |
| Peptic ulcer disease                                           | 118.9<br>(105.6 to 135.3)               | 8.3<br>(7.5 to 9.1)                | 2.5<br>(1.5 to 3.8)              | 32.6<br>(6.8 to 65.4)                             | 17.8<br>(-4.4 to 45.5)                              |
| Gastritis and duodenitis                                       | 106.5<br>(92.2 to 121.5)                | 75.4<br>(68.1 to 82.6)             | 2.2<br>(1.4 to 3.2)              | 17.9<br>(-1.3 to 42.3)                            | -4.8<br>(-20.7 to 14.9)                             |
| Appendicitis                                                   | 0.3<br>(0.3 to 0.3)                     | 8.0<br>(7.4 to 8.6)                | 0.1<br>(0.1 to 0.1)              | -8.7<br>(-29.8 to 17.8)                           | -0.5<br>(-29.4 to 38.3)                             |
| Paralytic ileus and intestinal obstruction                     | 0.1<br>(0.1 to 0.1)                     | 3.9<br>(3.6 to 4.1)                | < 0.05<br>(< 0.05 to 0.1)        | 13.2<br>(-4.2 to 31.9)                            | -0.4<br>(-13.5 to 13.7)                             |
| Inguinal, femoral, and abdominal hernia                        | 51.1<br>(46.8 to 55.5)                  | 139.4<br>(123.5 to 156.5)          | 3.5<br>(2.4 to 4.9)              | 14.2<br>(4.8 to 25.0)                             | 0.6<br>(-7.4 to 10.1)                               |
| Inflammatory bowel disease                                     | 12.7<br>(12.0 to 13.6)                  | 3.9<br>(3.7 to 4.0)                | 1.8<br>(1.2 to 2.5)              | 5.2<br>(-3.5 to 15.3)                             | -2.2<br>(-10.6 to 7.2)                              |
| Vascular intestinal disorders                                  | 0.1<br>(0.1 to 0.1)                     | 0.6<br>(0.5 to 0.6)                | < 0.05<br>(< 0.05 to < 0.05)     | 23.8<br>(17.1 to 30.2)                            | 8.5<br>(3.6 to 13.4)                                |
| Gallbladder and biliary diseases                               | 25.9<br>(23.2 to 28.9)                  | 104.0<br>(99.7 to 109.3)           | 0.5<br>(0.3 to 0.7)              | 14.3<br>(-3.2 to 36.2)                            | 0.2<br>(-14.9 to 19.6)                              |
| Pancreatitis                                                   | 1.3<br>(1.2 to 1.4)                     | 11.2<br>(10.3 to 12.3)             | 0.1<br>(0.1 to 0.2)              | 10.9<br>(-9.9 to 35.9)                            | -1.7<br>(-18.1 to 18.4)                             |
| Other digestive diseases                                       | --                                      | --                                 | 0.9<br>(0.7 to 1.3)              | 21.6<br>(12.2 to 32.5)                            | 2.7<br>(-5.5 to 11.7)                               |
| <b>Neurological disorders</b>                                  | <b>2,017.7<br/>(1,939.0 to 2,111.4)</b> | <b>838.8<br/>(725.5 to 975.5)</b>  | <b>64.7<br/>(43.8 to 89.2)</b>   | <b>2.9<br/>(-11.9 to 19.8)</b>                    | <b>-1.1<br/>(-17.0 to 17.5)</b>                     |
| Alzheimer's disease and other dementias                        | 39.6<br>(33.1 to 47.2)                  | 6.8<br>(5.7 to 8.2)                | 5.7<br>(4.0 to 7.7)              | 25.1<br>(18.2 to 32.0)                            | -0.2<br>(-4.9 to 5.2)                               |
| Parkinson's disease                                            | 9.5<br>(7.4 to 12.0)                    | 1.1<br>(0.9 to 1.4)                | 1.1<br>(0.7 to 1.6)              | 25.9<br>(13.4 to 39.5)                            | 4.0<br>(-6.3 to 15.0)                               |
| Epilepsy                                                       | 20.2<br>(4.7 to 38.6)                   | 1.9<br>(0.4 to 3.7)                | 5.2<br>(0.9 to 12.6)             | -6.2<br>(-84.9 to 471.7)                          | -7.5<br>(-85.1 to 476.4)                            |
| Multiple sclerosis                                             | 3.4<br>(3.0 to 3.8)                     | 0.1<br>(0.1 to 0.1)                | 0.9<br>(0.6 to 1.2)              | 22.9<br>(3.7 to 47.4)                             | 14.0<br>(-3.6 to 37.0)                              |
| Motor neuron disease                                           | 0.2<br>(0.2 to 0.2)                     | < 0.05<br>(< 0.05 to < 0.05)       | < 0.05<br>(< 0.05 to 0.1)        | 11.6<br>(7.1 to 16.6)                             | 4.9<br>(0.9 to 9.2)                                 |
| Migraine                                                       | 908.1<br>(855.3 to 963.3)               | 91.2<br>(84.7 to 98.3)             | 42.9<br>(28.0 to 60.5)           | 0.8<br>(-2.5 to 4.3)                              | -0.9<br>(-4.1 to 2.6)                               |
| Tension-type headache                                          | 1,380.4<br>(1,231.4 to 1,537.9)         | 737.5<br>(624.3 to 871.0)          | 7.7<br>(4.8 to 11.5)             | 2.5<br>(-2.5 to 8.2)                              | -1.4<br>(-6.3 to 3.7)                               |
| Other neurological disorders                                   | < 0.05<br>(< 0.05 to < 0.05)            | < 0.05<br>(< 0.05 to 0.1)          | 1.1<br>(0.4 to 2.3)              | 8.3<br>(-67.1 to 271.2)                           | 12.4<br>(-68.5 to 326.0)                            |
| <b>Mental and substance use disorders</b>                      | <b>792.8<br/>(766.2 to 817.5)</b>       | <b>282.9†<br/>(264.1 to 303.5)</b> | <b>103.8<br/>(75.5 to 134.5)</b> | <b>1.2<br/>(-1.2 to 3.9)</b>                      | <b>0.1<br/>(-2.3 to 2.5)</b>                        |
| Schizophrenia                                                  | 14.7<br>(12.2 to 17.5)                  | 0.7<br>(0.6 to 0.9)                | 9.3<br>(6.7 to 12.0)             | 7.2<br>(-2.2 to 17.6)                             | 1.1<br>(-7.9 to 11.1)                               |
| Alcohol use disorders                                          | 130.2<br>(115.0 to 147.1)               | 66.5<br>(57.8 to 76.1)             | 13.0<br>(8.9 to 18.1)            | 5.3<br>(-3.5 to 14.3)                             | 4.7<br>(-4.0 to 13.6)                               |
| Drug use disorders                                             | 35.9<br>(33.0 to 38.7)                  | 4.5<br>(4.0 to 4.9)                | 6.3<br>(4.5 to 8.4)              | 3.6<br>(-10.1 to 19.2)                            | 6.7<br>(-8.0 to 23.7)                               |
| Opioid use disorders                                           | 8.6<br>(7.2 to 10.2)                    | 1.2<br>(1.1 to 1.4)                | 3.5<br>(2.4 to 4.8)              | 22.2<br>(0.3 to 51.0)                             | 21.2<br>(-1.7 to 51.1)                              |
| Cocaine use disorders                                          | 3.1<br>(2.7 to 3.5)                     | 0.2<br>(0.2 to 0.3)                | 0.4<br>(0.2 to 0.6)              | -3.9<br>(-25.0 to 27.1)                           | -0.8<br>(-23.4 to 31.6)                             |
| Amphetamine use disorders                                      | 5.7<br>(4.0 to 7.7)                     | 0.4<br>(0.3 to 0.5)                | 0.8<br>(0.4 to 1.2)              | -22.9<br>(-47.0 to 10.2)                          | -12.1<br>(-41.1 to 29.1)                            |
| Cannabis use disorders                                         | 15.9<br>(13.4 to 18.8)                  | 2.0<br>(1.7 to 2.4)                | 0.5<br>(0.3 to 0.7)              | -12.3<br>(-27.7 to 3.0)                           | -1.7<br>(-20.1 to 17.6)                             |
| Other drug use disorders                                       | 3.5<br>(3.1 to 3.9)                     | 0.6<br>(0.5 to 0.7)                | 1.1<br>(0.7 to 1.7)              | -9.5<br>(-30.2 to 17.4)                           | -4.4<br>(-27.1 to 26.4)                             |
| Depressive disorders                                           | 162.2<br>(151.7 to 173.4)               | 164.8<br>(149.1 to 181.0)          | 26.2<br>(18.1 to 35.5)           | 1.3<br>(-3.9 to 6.4)                              | -4.2<br>(-8.6 to 0.7)                               |
| Major depressive disorder                                      | 100.9<br>(91.1 to 111.0)                | 153.8<br>(137.9 to 169.5)          | 20.2<br>(13.8 to 27.5)           | -0.3<br>(-6.2 to 6.4)                             | -5.2<br>(-10.7 to 0.8)                              |
| Dysthymia                                                      | 63.6<br>(55.8 to 73.0)                  | 11.0<br>(9.6 to 12.6)              | 6.0<br>(4.0 to 8.7)              | 6.7<br>(2.1 to 11.4)                              | -0.4<br>(-4.4 to 3.7)                               |
| Bipolar disorder                                               | 38.3<br>(33.2 to 44.3)                  | 2.6<br>(2.2 to 2.9)                | 7.8<br>(4.9 to 11.5)             | -0.1<br>(-6.0 to 6.3)                             | 0.1<br>(-6.0 to 6.2)                                |
| Anxiety disorders                                              | 198.2<br>(180.1 to 217.5)               | 28.7<br>(26.5 to 31.1)             | 18.9<br>(13.1 to 25.3)           | 0.8<br>(-5.8 to 7.9)                              | -0.3<br>(-6.4 to 6.5)                               |
| Eating disorders                                               | 7.1<br>(5.8 to 8.5)                     | 2.9<br>(2.2 to 3.7)                | 1.4<br>(0.9 to 2.2)              | 4.7<br>(-8.0 to 20.5)                             | 14.1<br>(1.2 to 29.7)                               |
| Anorexia nervosa                                               | 1.4<br>(1.0 to 1.9)                     | 0.5<br>(0.4 to 0.6)                | 0.3<br>(0.2 to 0.5)              | -4.3<br>(-26.0 to 21.8)                           | 11.9<br>(-12.9 to 40.7)                             |
| Bulimia nervosa                                                | 5.5<br>(4.1 to 7.3)                     | 2.4<br>(1.7 to 3.2)                | 1.2<br>(0.7 to 1.8)              | 7.3<br>(-7.7 to 25.8)                             | 14.7<br>(0.3 to 33.1)                               |
| Autistic spectrum disorders                                    | 45.1<br>(40.3 to 50.4)                  | 0.2<br>(0.1 to 0.3)                | 6.7<br>(4.5 to 9.4)              | -0.4<br>(-5.1 to 4.6)                             | 0.5<br>(-4.3 to 5.6)                                |
| Autism                                                         | 14.7<br>(12.5 to 17.0)                  | < 0.05<br>(< 0.05 to < 0.05)       | 3.7<br>(2.3 to 5.3)              | -0.3<br>(-7.8 to 7.3)                             | 0.4<br>(-7.5 to 8.2)                                |
| Asperger syndrome and other autistic spectrum disorders        | 30.4<br>(25.3 to 36.5)                  | 0.2<br>(0.1 to 0.2)                | 3.0<br>(1.9 to 4.5)              | -0.5<br>(-5.4 to 4.2)                             | 0.6<br>(-4.0 to 5.5)                                |



| Cause                                                      | Prevalence in thousands (95% UI)              | Incidence in thousands (95% UI)                   | YLDs in thousands (95% UI)              |                                                   |                                                     |
|------------------------------------------------------------|-----------------------------------------------|---------------------------------------------------|-----------------------------------------|---------------------------------------------------|-----------------------------------------------------|
|                                                            | 2016 counts                                   | 2016 counts                                       | 2016 counts                             | Percentage change in counts between 2006 and 2016 | Percentage change in age-standardised rates between |
| Attention-deficit/hyperactivity disorder                   | 34.1<br>(30.9 to 37.9)                        | 1.2<br>(1.0 to 1.4)                               | 0.4<br>(0.2 to 0.7)                     | -10.8<br>(-18.4 to -2.5)                          | 0.1<br>(-8.2 to 9.4)                                |
| Conduct disorder                                           | 24.7<br>(20.4 to 29.1)                        | 8.2<br>(6.5 to 9.8)                               | 3.0<br>(1.8 to 4.6)                     | -23.6<br>(-28.4 to -18.4)                         | 0.1<br>(-5.9 to 6.7)                                |
| Idiopathic developmental intellectual disability           | 42.1<br>(21.9 to 63.0)                        | --                                                | 1.8<br>(0.8 to 3.1)                     | -11.4<br>(-18.0 to -4.8)                          | -9.4<br>(-16.6 to -2.7)                             |
| Other mental and substance use disorders                   | 123.2<br>(109.2 to 141.5)                     | 2.8<br>(2.5 to 3.1)                               | 9.1<br>(6.2 to 13.0)                    | 5.8<br>(1.3 to 10.6)                              | 0.3<br>(-4.0 to 5.1)                                |
| <b>Diabetes, urogenital, blood, and endocrine diseases</b> | <b>1,743.1</b><br><b>(1,706.2 to 1,791.9)</b> | <b>752.2†</b><br><b>(717.7 to 791.3)</b>          | <b>47.5</b><br><b>(33.6 to 64.5)</b>    | <b>11.3</b><br><b>(6.4 to 16.0)</b>               | <b>-0.7</b><br><b>(-4.7 to 3.1)</b>                 |
| Diabetes mellitus                                          | 229.7<br>(204.3 to 259.8)                     | 11.8<br>(10.5 to 13.5)                            | 20.0<br>(13.9 to 27.6)                  | 16.3<br>(5.6 to 27.1)                             | -0.5<br>(-9.4 to 8.8)                               |
| Acute glomerulonephritis                                   | 0.1<br>(0.1 to 0.1)                           | 1.4<br>(1.2 to 1.6)                               | < 0.05<br>(< 0.05 to < 0.05)            | -1.8<br>(-6.9 to 4.2)                             | -3.4<br>(-8.2 to 1.8)                               |
| Chronic kidney disease                                     | 198.3<br>(178.5 to 219.9)                     | 14.4<br>(12.6 to 16.3)                            | 6.8<br>(5.0 to 8.8)                     | 38.4<br>(27.4 to 51.6)                            | 17.5<br>(8.3 to 28.4)                               |
| Chronic kidney disease due to diabetes mellitus            | 97.3<br>(86.3 to 109.5)                       | 7.2<br>(6.1 to 8.3)                               | 3.2<br>(2.4 to 4.2)                     | 35.8<br>(21.8 to 53.4)                            | 15.2<br>(3.5 to 29.3)                               |
| Chronic kidney disease due to hypertension                 | 23.3<br>(19.9 to 27.3)                        | 2.0<br>(1.6 to 2.5)                               | 0.7<br>(0.5 to 0.9)                     | 52.8<br>(32.1 to 76.6)                            | 22.0<br>(5.9 to 39.8)                               |
| Chronic kidney disease due to glomerulonephritis           | 23.4<br>(19.1 to 27.9)                        | 1.2<br>(1.0 to 1.5)                               | 1.0<br>(0.7 to 1.4)                     | 22.2<br>(-4.8 to 42.5)                            | 7.7<br>(-15.1 to 24.0)                              |
| Chronic kidney disease due to other causes                 | 54.4<br>(48.3 to 60.9)                        | 3.9<br>(3.4 to 4.5)                               | 1.9<br>(1.4 to 2.5)                     | 48.4<br>(32.1 to 67.5)                            | 26.2<br>(13.1 to 41.4)                              |
| Urinary diseases and male infertility                      | 161.9<br>(150.5 to 175.1)                     | 437.3†<br>(406.3 to 473.3)                        | 5.0<br>(3.3 to 7.0)                     | 9.7<br>(4.1 to 15.7)                              | -5.0<br>(-9.7 to 0.1)                               |
| Interstitial nephritis and urinary tract infections        | 6.0<br>(5.5 to 6.7)                           | 312.8<br>(283.0 to 346.2)                         | 0.2<br>(0.1 to 0.3)                     | 1.0<br>(-11.4 to 14.7)                            | 1.3<br>(-11.1 to 15.5)                              |
| Urolithiasis                                               | 4.1<br>(3.7 to 4.6)                           | 108.1<br>(97.8 to 120.2)                          | 0.3<br>(0.2 to 0.4)                     | 5.1<br>(-12.7 to 26.1)                            | -4.9<br>(-19.8 to 13.0)                             |
| Benign prostatic hyperplasia                               | 131.5<br>(119.5 to 143.6)                     | 16.4<br>(14.1 to 18.9)                            | 4.2<br>(2.8 to 6.1)                     | 12.3<br>(5.7 to 19.4)                             | -4.4<br>(-9.9 to 1.6)                               |
| Male infertility                                           | 17.4<br>(13.0 to 23.4)                        | --                                                | 0.1<br>(< 0.05 to 0.2)                  | -11.1<br>(-19.5 to -2.2)                          | -12.0<br>(-20.3 to -3.8)                            |
| Other urinary diseases                                     | --                                            | --                                                | 0.2<br>(0.1 to 0.2)                     | -14.3<br>(-24.3 to -3.9)                          | -19.0<br>(-28.2 to -10.2)                           |
| Gynecological diseases                                     | 673.6<br>(650.0 to 698.4)                     | 260.3†<br>(243.1 to 275.5)                        | 8.4<br>(5.8 to 12.0)                    | -8.2<br>(-13.5 to -2.5)                           | -5.8<br>(-11.0 to 0.1)                              |
| Uterine fibroids                                           | 84.6<br>(76.5 to 92.0)                        | 8.3<br>(7.2 to 9.3)                               | 0.8<br>(0.5 to 1.5)                     | -6.5<br>(-16.6 to 2.2)                            | -11.5<br>(-22.0 to -2.4)                            |
| Polycystic ovarian syndrome                                | 5.8<br>(4.4 to 7.6)                           | 2.7<br>(1.9 to 3.7)                               | 0.1<br>(< 0.05 to 0.1)                  | 3.0<br>(-10.2 to 18.2)                            | -0.3<br>(-12.4 to 14.0)                             |
| Female infertility                                         | 5.6<br>(2.0 to 13.3)                          | --                                                | < 0.05<br>(< 0.05 to 0.1)               | 22.2<br>(-9.4 to 98.4)                            | 30.2<br>(-3.8 to 102.4)                             |
| Endometriosis                                              | 1.9<br>(1.6 to 2.2)                           | 7.3<br>(6.1 to 8.7)                               | 0.2<br>(0.1 to 0.3)                     | -6.8<br>(-30.2 to 22.4)                           | 2.7<br>(-23.0 to 34.4)                              |
| Genital prolapse                                           | 201.0<br>(179.5 to 226.2)                     | 8.4<br>(7.4 to 9.6)                               | 0.6<br>(0.3 to 1.1)                     | 19.8<br>(6.6 to 33.5)                             | 3.1<br>(-8.2 to 14.6)                               |
| Premenstrual syndrome                                      | 342.9<br>(323.7 to 362.6)                     | 117.5<br>(109.4 to 126.3)                         | 2.9<br>(1.8 to 4.4)                     | -6.2<br>(-12.8 to 0.7)                            | -1.4<br>(-8.4 to 5.8)                               |
| Other gynecological diseases                               | 110.5<br>(98.6 to 119.6)                      | 116.2<br>(101.1 to 127.6)                         | 3.9<br>(2.5 to 5.4)                     | -13.6<br>(-22.5 to -4.3)                          | -9.5<br>(-19.2 to 0.4)                              |
| Hemoglobinopathies and hemolytic anaemias                  | 664.6<br>(617.5 to 710.1)                     | --                                                | 1.8<br>(1.1 to 2.9)                     | 0.4<br>(-14.2 to 19.6)                            | -8.9<br>(-22.2 to 6.5)                              |
| Thalassemias                                               | < 0.05<br>(< 0.05 to < 0.05)                  | --                                                | < 0.05<br>(< 0.05 to < 0.05)            | -3.3<br>(-26.4 to 20.7)                           | -5.5<br>(-27.7 to 20.6)                             |
| Thalassaemias trait                                        | 64.7<br>(45.4 to 88.3)                        | --                                                | 1.1<br>(0.6 to 1.8)                     | 6.4<br>(-13.0 to 32.7)                            | -7.1<br>(-23.0 to 14.9)                             |
| Sickle cell disorders                                      | < 0.05<br>(< 0.05 to < 0.05)                  | --                                                | < 0.05<br>(< 0.05 to < 0.05)            | 10.9<br>(0.7 to 20.6)                             | 22.2<br>(9.2 to 34.2)                               |
| Sickle cell trait                                          | 68.2<br>(66.4 to 70.4)                        | --                                                | 0.2<br>(0.1 to 0.4)                     | 3.5<br>(-17.5 to 31.2)                            | -11.2<br>(-29.2 to 11.4)                            |
| G6PD deficiency                                            | 96.5<br>(83.2 to 112.0)                       | --                                                | < 0.05<br>(< 0.05 to < 0.05)            | 8.1<br>(-15.5 to 37.7)                            | -1.0<br>(-26.4 to 30.6)                             |
| G6PD trait                                                 | 414.1<br>(373.4 to 452.0)                     | --                                                | < 0.05<br>(< 0.05 to < 0.05)            | 22.4<br>(-9.4 to 70.2)                            | 8.2<br>(-18.1 to 47.5)                              |
| Other hemoglobinopathies and hemolytic anaemias            | 36.0<br>(31.7 to 40.4)                        | --                                                | 0.5<br>(0.3 to 0.7)                     | -12.8<br>(-26.1 to 2.9)                           | -11.9<br>(-26.4 to 4.9)                             |
| Endocrine, metabolic, blood, and immune disorders          | 167.8<br>(154.4 to 180.9)                     | 27.1<br>(24.2 to 30.1)                            | 5.4<br>(3.7 to 7.5)                     | 9.0<br>(1.8 to 16.2)                              | -2.0<br>(-7.9 to 3.8)                               |
| <b>Musculoskeletal disorders</b>                           | <b>1,249.6</b><br><b>(1,183.8 to 1,310.1)</b> | <b>539.5</b><br><b>(475.7 to 609.7)</b>           | <b>147.3</b><br><b>(105.7 to 192.0)</b> | <b>7.3</b><br><b>(2.9 to 11.6)</b>                | <b>-3.3</b><br><b>(-7.4 to 0.4)</b>                 |
| Rheumatoid arthritis                                       | 22.5<br>(20.0 to 25.3)                        | 1.1<br>(1.0 to 1.3)                               | 5.2<br>(3.5 to 6.8)                     | 18.1<br>(9.9 to 27.8)                             | 3.1<br>(-4.0 to 11.1)                               |
| Osteoarthritis                                             | 320.2<br>(299.4 to 341.9)                     | 14.4<br>(13.4 to 15.6)                            | 19.5<br>(13.7 to 26.4)                  | 18.3<br>(14.0 to 22.9)                            | 0.2<br>(-3.3 to 4.0)                                |
| Low back and neck pain                                     | 980.3<br>(914.1 to 1,045.0)                   | 474.3<br>(411.5 to 541.2)                         | 117.3<br>(82.8 to 154.2)                | 5.4<br>(-0.2 to 10.7)                             | -4.1<br>(-9.1 to 0.6)                               |
| Low back pain                                              | 822.3<br>(731.6 to 926.7)                     | 420.1<br>(358.9 to 486.4)                         | 92.3<br>(65.0 to 121.2)                 | 4.3<br>(-2.8 to 10.7)                             | -5.1<br>(-11.4 to 0.9)                              |
| Neck pain                                                  | 254.4<br>(218.8 to 295.3)                     | 54.1<br>(46.9 to 63.8)                            | 25.1<br>(17.2 to 35.4)                  | 9.7<br>(6.4 to 12.9)                              | -0.2<br>(-2.4 to 2.0)                               |
| Gout                                                       | 26.6<br>(23.3 to 30.3)                        | 5.2<br>(4.5 to 6.0)                               | 0.8<br>(0.6 to 1.2)                     | 17.1<br>(1.5 to 35.8)                             | 1.1<br>(-11.9 to 17.1)                              |
| Other musculoskeletal disorders                            | 53.1<br>(41.7 to 68.1)                        | 44.5<br>(34.7 to 57.1)                            | 4.5<br>(2.9 to 6.8)                     | 3.8<br>(-9.8 to 18.4)                             | -3.1<br>(-15.8 to 11.1)                             |
| <b>Other non-communicable diseases</b>                     | <b>4,115.4</b><br><b>(4,035.1 to 4,194.8)</b> | <b>12,632.3†</b><br><b>(11,719.2 to 13,495.8)</b> | <b>118.4</b><br><b>(81.5 to 166.6)</b>  | <b>6.9</b><br><b>(5.5 to 8.2)</b>                 | <b>-0.6</b><br><b>(-1.8 to 0.5)</b>                 |
| Congenital anomalies                                       | 60.5<br>(55.9 to 66.1)                        | --                                                | 7.4<br>(5.4 to 9.7)                     | 0.3<br>(-4.7 to 6.1)                              | -0.5<br>(-5.5 to 5.1)                               |
| Neural tube defects                                        | 6.8<br>(6.1 to 7.6)                           | --                                                | 2.0<br>(1.4 to 2.7)                     | 1.1<br>(-10.5 to 14.1)                            | 0.3<br>(-11.0 to 13.8)                              |
| Congenital heart anomalies                                 | 15.4<br>(13.6 to 17.3)                        | --                                                | 0.8<br>(0.3 to 1.4)                     | 7.1<br>(-3.4 to 17.4)                             | 6.6<br>(-3.7 to 16.9)                               |
| Orofacial clefts                                           | 4.3<br>(3.8 to 4.8)                           | --                                                | < 0.05<br>(< 0.05 to 0.1)               | -4.3<br>(-15.4 to 8.4)                            | -5.5<br>(-16.6 to 7.1)                              |
| Down's syndrome                                            | 1.9<br>(1.7 to 2.1)                           | --                                                | 0.2<br>(0.1 to 0.2)                     | -3.8<br>(-14.0 to 9.2)                            | -3.4<br>(-13.6 to 8.9)                              |
| Turner syndrome                                            | 3.5<br>(3.0 to 3.9)                           | --                                                | 0.1<br>(< 0.05 to 0.1)                  | -9.9<br>(-30.3 to 16.5)                           | -6.3<br>(-27.0 to 20.3)                             |
| Klinefelter syndrome                                       | 2.9<br>(2.5 to 3.3)                           | --                                                | < 0.05<br>(< 0.05 to < 0.05)            | -8.0<br>(-26.8 to 12.8)                           | -2.5<br>(-21.9 to 20.8)                             |



| Cause                                         | Prevalence in thousands (95% UI)              | Incidence in thousands (95% UI)              | YLDs in thousands (95% UI)            |                                                   |                                                     |
|-----------------------------------------------|-----------------------------------------------|----------------------------------------------|---------------------------------------|---------------------------------------------------|-----------------------------------------------------|
|                                               | 2016 counts                                   | 2016 counts                                  | 2016 counts                           | Percentage change in counts between 2006 and 2016 | Percentage change in age-standardised rates between |
| Other chromosomal abnormalities               | 3.9<br>(3.5 to 4.4)                           | --                                           | 0.6<br>(0.4 to 0.8)                   | -9.2<br>(-23.4 to 7.4)                            | -4.7<br>(-20.4 to 12.9)                             |
| Congenital musculoskeletal and limb anomalies | 7.8<br>(7.1 to 8.6)                           | --                                           | 1.1<br>(0.7 to 1.5)                   | -4.6<br>(-14.0 to 5.9)                            | -6.4<br>(-15.8 to 3.7)                              |
| Urogenital congenital anomalies               | 8.7<br>(7.8 to 9.7)                           | --                                           | 0.2<br>(0.1 to 0.3)                   | -2.8<br>(-11.5 to 7.2)                            | -0.5<br>(-10.7 to 11.1)                             |
| Digestive congenital anomalies                | 6.1<br>(5.4 to 6.8)                           | --                                           | 0.3<br>(0.2 to 0.4)                   | 0.0<br>(-14.8 to 16.8)                            | -1.0<br>(-15.9 to 16.1)                             |
| Other congenital anomalies                    | 14.2<br>(8.8 to 21.5)                         | --                                           | 2.1<br>(1.5 to 3.1)                   | 3.7<br>(-4.2 to 11.9)                             | 1.7<br>(-6.0 to 10.0)                               |
| Skin and subcutaneous diseases                | 1,644.8<br>(1,600.4 to 1,687.4)               | 4,226.2<br>(3,988.3 to 4,482.7)              | 36.1<br>(24.5 to 52.3)                | -1.8<br>(-3.9 to 0.4)                             | 1.4<br>(-0.6 to 3.5)                                |
| Dermatitis                                    | 188.2<br>(169.1 to 210.4)                     | 258.0<br>(236.2 to 281.7)                    | 6.9<br>(4.1 to 11.0)                  | -0.1<br>(-4.0 to 3.9)                             | 0.0<br>(-3.7 to 3.8)                                |
| Psoriasis                                     | 66.9<br>(63.5 to 70.4)                        | 8.3<br>(7.9 to 8.8)                          | 5.7<br>(4.1 to 7.5)                   | 9.0<br>(2.4 to 16.2)                              | 4.1<br>(-2.8 to 11.4)                               |
| Cellulitis                                    | 2.5<br>(2.3 to 2.6)                           | 51.7<br>(48.6 to 54.9)                       | 0.1<br>(0.1 to 0.2)                   | 3.4<br>(-16.7 to 27.6)                            | 0.8<br>(-18.7 to 25.8)                              |
| Pyoderma                                      | 27.1<br>(26.3 to 28.2)                        | 741.1<br>(714.1 to 769.6)                    | 0.1<br>(0.1 to 0.3)                   | 12.5<br>(6.8 to 18.2)                             | 0.4<br>(-4.8 to 5.5)                                |
| Scabies                                       | 34.6<br>(30.6 to 39.3)                        | 105.0<br>(92.9 to 118.5)                     | 0.9<br>(0.5 to 1.4)                   | -5.3<br>(-10.2 to 0.3)                            | -0.8<br>(-5.8 to 4.6)                               |
| Fungal skin diseases                          | 509.3<br>(455.2 to 565.4)                     | 1,904.7<br>(1,680.6 to 2,156.3)              | 2.8<br>(1.1 to 5.9)                   | 7.9<br>(5.7 to 10.0)                              | 0.0<br>(-1.0 to 1.2)                                |
| Viral skin diseases                           | 121.5<br>(116.7 to 126.6)                     | 183.2<br>(175.2 to 191.2)                    | 3.7<br>(2.3 to 5.5)                   | -3.6<br>(-6.8 to -0.7)                            | -0.3<br>(-3.5 to 2.9)                               |
| Acne vulgaris                                 | 347.1<br>(316.8 to 380.5)                     | 212.9<br>(179.9 to 252.1)                    | 8.9<br>(6.0 to 12.8)                  | -15.4<br>(-19.4 to -10.8)                         | 2.4<br>(-2.2 to 7.7)                                |
| Alopecia areata                               | 10.9<br>(10.5 to 11.3)                        | 19.1<br>(18.4 to 19.9)                       | 0.4<br>(0.2 to 0.5)                   | 1.0<br>(-9.3 to 11.7)                             | -0.2<br>(-10.3 to 10.6)                             |
| Pruritus                                      | 58.2<br>(51.4 to 66.1)                        | 45.6<br>(40.5 to 52.2)                       | 0.6<br>(0.3 to 1.1)                   | 8.7<br>(3.0 to 14.8)                              | 1.5<br>(-3.5 to 7.0)                                |
| Urticaria                                     | 47.9<br>(42.5 to 54.0)                        | 85.0<br>(75.2 to 96.7)                       | 2.9<br>(1.9 to 4.1)                   | 0.5<br>(-4.7 to 6.2)                              | -0.2<br>(-5.0 to 5.2)                               |
| Decubitus ulcer                               | 2.4<br>(2.2 to 2.7)                           | 8.9<br>(7.9 to 9.9)                          | 0.4<br>(0.3 to 0.5)                   | 17.2<br>(-1.0 to 36.6)                            | 1.7<br>(-12.7 to 16.6)                              |
| Other skin and subcutaneous diseases          | 505.8<br>(490.6 to 521.2)                     | 602.7<br>(581.5 to 624.6)                    | 2.7<br>(1.3 to 5.0)                   | 14.9<br>(12.3 to 17.7)                            | 5.0<br>(2.6 to 7.3)                                 |
| Sense organ diseases                          | 1,599.1<br>(1,567.3 to 1,635.9)               | 580.1†<br>(547.1 to 615.7)                   | 56.8<br>(39.3 to 79.8)                | 11.8<br>(9.9 to 13.7)                             | -3.0<br>(-4.6 to -1.4)                              |
| Glaucoma                                      | 5.2<br>(4.2 to 6.4)                           | --                                           | 0.4<br>(0.2 to 0.5)                   | 23.6<br>(8.8 to 38.9)                             | -0.8<br>(-12.4 to 11.6)                             |
| Cataract                                      | 86.7<br>(73.1 to 100.9)                       | --                                           | 4.0<br>(2.8 to 5.7)                   | 17.8<br>(11.4 to 24.8)                            | -3.8<br>(-8.9 to 1.7)                               |
| Macular degeneration                          | 3.2<br>(2.5 to 4.1)                           | --                                           | 0.2<br>(0.1 to 0.2)                   | 27.2<br>(11.5 to 46.7)                            | 1.9<br>(-10.5 to 16.9)                              |
| Refraction and accommodation disorders        | 470.0<br>(444.4 to 495.8)                     | --                                           | 10.1<br>(6.5 to 15.3)                 | 7.1<br>(3.5 to 11.0)                              | -3.5<br>(-6.4 to -0.6)                              |
| Age-related and other hearing loss            | 1,314.3<br>(1,256.4 to 1,376.4)               | --                                           | 33.8<br>(23.4 to 47.6)                | 11.8<br>(8.8 to 14.8)                             | -3.5<br>(-6.0 to -1.2)                              |
| Other vision loss                             | 34.4<br>(29.6 to 39.8)                        | --                                           | 1.8<br>(1.3 to 2.5)                   | 16.7<br>(8.9 to 24.6)                             | -0.8<br>(-7.3 to 5.7)                               |
| Other sense organ diseases                    | 213.6<br>(196.8 to 230.7)                     | 580.1<br>(547.1 to 615.7)                    | 6.6<br>(4.2 to 10.0)                  | 13.7<br>(9.4 to 18.5)                             | 0.5<br>(-3.3 to 4.3)                                |
| Oral disorders                                | 2,997.3<br>(2,835.0 to 3,130.0)               | 7,826.0†<br>(6,972.2 to 8,643.1)             | 18.1<br>(11.1 to 27.9)                | 14.1<br>(11.4 to 17.2)                            | 0.9<br>(-1.0 to 3.1)                                |
| Caries of deciduous teeth                     | 275.2<br>(233.8 to 320.6)                     | 1,133.6<br>(898.9 to 1,429.6)                | 0.1<br>( $< 0.05$ to 0.1)             | 5.2<br>(-5.2 to 17.2)                             | -1.0<br>(-10.4 to 10.1)                             |
| Caries of permanent teeth                     | 2,159.2<br>(1,962.4 to 2,371.7)               | 6,587.9<br>(5,753.6 to 7,345.1)              | 1.3<br>(0.6 to 2.5)                   | -4.2<br>(-8.3 to 0.2)                             | -5.0<br>(-9.0 to -0.7)                              |
| Periodontal disease                           | 650.2<br>(535.4 to 780.1)                     | 77.6<br>(60.6 to 96.4)                       | 4.2<br>(1.7 to 8.7)                   | 12.3<br>(8.2 to 16.9)                             | -0.2<br>(-3.3 to 3.4)                               |
| Edentulism and severe tooth loss              | 343.3<br>(299.9 to 388.0)                     | 26.9<br>(22.8 to 31.3)                       | 9.4<br>(6.2 to 13.3)                  | 22.8<br>(18.4 to 27.2)                            | 3.1<br>(-0.3 to 6.6)                                |
| Other oral disorders                          | 110.2<br>(105.4 to 115.0)                     | --                                           | 3.2<br>(2.0 to 4.8)                   | 3.0<br>(-0.1 to 6.3)                              | -0.1<br>(-3.0 to 3.1)                               |
| <b>Injuries</b>                               | <b>2,750.5</b><br><b>(2,562.6 to 3,010.4)</b> | <b>1,008.3†</b><br><b>(934.6 to 1,078.5)</b> | <b>97.7</b><br><b>(67.2 to 135.5)</b> | <b>16.7</b><br><b>(15.1 to 18.4)</b>              | <b>5.9</b><br><b>(4.4 to 7.1)</b>                   |
| <b>Transport injuries</b>                     | <b>320.5</b><br><b>(296.1 to 347.2)</b>       | <b>84.2</b><br><b>(76.0 to 93.8)</b>         | <b>15.3</b><br><b>(10.1 to 22.1)</b>  | <b>9.0</b><br><b>(7.4 to 10.8)</b>                | <b>0.1</b><br><b>(-1.3 to 1.7)</b>                  |
| Road injuries                                 | 306.7<br>(282.6 to 332.4)                     | 81.9<br>(73.6 to 91.3)                       | 14.7<br>(9.7 to 21.2)                 | 9.0<br>(7.4 to 10.8)                              | 0.1<br>(-1.4 to 1.6)                                |
| Pedestrian road injuries                      | 60.5<br>(52.3 to 70.4)                        | 11.6<br>(9.9 to 13.7)                        | 2.8<br>(1.8 to 4.1)                   | 4.7<br>(2.9 to 6.4)                               | -3.8<br>(-5.5 to -2.2)                              |
| Cyclist road injuries                         | 82.2<br>(68.8 to 96.8)                        | 23.8<br>(20.0 to 27.9)                       | 3.7<br>(2.4 to 5.4)                   | 4.0<br>(2.3 to 5.7)                               | -4.1<br>(-5.7 to -2.6)                              |
| Motorcyclist road injuries                    | 33.3<br>(28.1 to 41.0)                        | 5.6<br>(4.5 to 7.0)                          | 1.5<br>(1.0 to 2.2)                   | 11.3<br>(9.4 to 13.3)                             | 2.3<br>(0.6 to 4.0)                                 |
| Motor vehicle road injuries                   | 120.7<br>(101.2 to 139.8)                     | 37.6<br>(32.7 to 42.9)                       | 6.3<br>(4.2 to 8.9)                   | 13.2<br>(11.4 to 15.1)                            | 3.6<br>(2.0 to 5.3)                                 |
| Other road injuries                           | 10.0<br>(8.6 to 11.8)                         | 3.2<br>(2.5 to 4.1)                          | 0.4<br>(0.3 to 0.6)                   | 19.2<br>(17.2 to 21.3)                            | 9.3<br>(7.6 to 11.1)                                |
| Other transport injuries                      | 13.8<br>(11.8 to 16.0)                        | 2.4<br>(2.1 to 2.7)                          | 0.6<br>(0.4 to 0.9)                   | 8.7<br>(6.6 to 10.6)                              | 0.9<br>(-1.0 to 2.5)                                |
| <b>Unintentional injuries</b>                 | <b>2,356.6</b><br><b>(2,168.4 to 2,600.0)</b> | <b>898.1</b><br><b>(826.8 to 969.0)</b>      | <b>79.4</b><br><b>(54.5 to 110.3)</b> | <b>18.9</b><br><b>(17.3 to 20.6)</b>              | <b>7.4</b><br><b>(5.9 to 8.7)</b>                   |
| Falls                                         | 1,490.8<br>(1,330.8 to 1,690.3)               | 622.7<br>(558.3 to 689.0)                    | 58.2<br>(40.9 to 79.8)                | 19.5<br>(17.8 to 21.2)                            | 6.8<br>(5.3 to 8.2)                                 |
| Drowning                                      | 2.6<br>(2.3 to 2.9)                           | 0.3<br>(0.3 to 0.4)                          | 0.1<br>(0.1 to 0.2)                   | 6.0<br>(3.1 to 8.7)                               | -1.3<br>(-3.9 to 1.0)                               |
| Fire, heat, and hot substances                | 98.9<br>(85.8 to 116.1)                       | 9.3<br>(7.8 to 10.7)                         | 2.2<br>(1.4 to 3.4)                   | 17.3<br>(13.8 to 20.4)                            | 9.8<br>(6.7 to 12.8)                                |
| Poisonings                                    | 4.9<br>(4.2 to 5.9)                           | 4.8<br>(3.8 to 5.9)                          | 0.4<br>(0.2 to 0.6)                   | 36.2<br>(26.8 to 46.0)                            | 33.1<br>(23.8 to 44.1)                              |
| Exposure to mechanical forces                 | 496.0<br>(425.4 to 607.8)                     | 152.9<br>(134.1 to 172.3)                    | 10.7<br>(7.0 to 15.6)                 | 17.8<br>(15.9 to 19.7)                            | 8.3<br>(6.6 to 10.0)                                |
| Unintentional firearm injuries                | 4.9<br>(4.1 to 5.9)                           | 1.0<br>(0.7 to 1.2)                          | 0.2<br>(0.1 to 0.3)                   | 9.8<br>(7.7 to 11.9)                              | 0.7<br>(-1.2 to 2.5)                                |
| Unintentional suffocation                     | 5.2<br>(4.2 to 6.5)                           | 0.7<br>(0.5 to 1.0)                          | 0.2<br>(0.1 to 0.2)                   | 4.8<br>(2.8 to 6.8)                               | -0.6<br>(-2.7 to 1.4)                               |
| Other exposure to mechanical forces           | 485.9<br>(414.6 to 597.4)                     | 151.3<br>(132.6 to 170.3)                    | 10.3<br>(6.8 to 15.1)                 | 18.2<br>(16.2 to 20.1)                            | 8.7<br>(6.9 to 10.3)                                |

| Cause                                                                               | Prevalence in thousands (95% UI)        | Incidence in thousands (95% UI)       | YLDs in thousands (95% UI)                    |                                                   |                                                     |
|-------------------------------------------------------------------------------------|-----------------------------------------|---------------------------------------|-----------------------------------------------|---------------------------------------------------|-----------------------------------------------------|
|                                                                                     | 2016 counts                             | 2016 counts                           | 2016 counts                                   | Percentage change in counts between 2006 and 2016 | Percentage change in age-standardised rates between |
| Adverse effects of medical treatment                                                | 1.2<br>(0.9 to 1.4)                     | 15.0<br>(13.3 to 17.0)                | 0.1<br>(0.1 to 0.2)                           | 24.0<br>(18.4 to 29.7)                            | 8.9<br>(5.0 to 13.3)                                |
| Animal contact                                                                      | 20.3<br>(17.8 to 23.7)                  | 17.8<br>(14.7 to 21.6)                | 0.6<br>(0.4 to 0.8)                           | -8.8<br>(-13.4 to -4.0)                           | -12.0<br>(-16.6 to -7.2)                            |
| Venomous animal contact                                                             | 8.0<br>(6.7 to 9.7)                     | 7.3<br>(5.5 to 9.2)                   | 0.4<br>(0.3 to 0.6)                           | -7.2<br>(-13.7 to 0.3)                            | -9.0<br>(-15.3 to -1.7)                             |
| Non-venomous animal contact                                                         | 12.3<br>(10.4 to 15.3)                  | 10.5<br>(8.6 to 13.0)                 | 0.2<br>(0.1 to 0.3)                           | -12.5<br>(-14.6 to -10.6)                         | -18.9<br>(-20.9 to -17.2)                           |
| Foreign body                                                                        | 46.1<br>(39.2 to 53.2)                  | 26.9<br>(23.3 to 31.7)                | 1.5<br>(0.9 to 2.2)                           | 7.0<br>(5.0 to 8.9)                               | 0.6<br>(-1.6 to 2.6)                                |
| Pulmonary aspiration and foreign body in airway                                     | 26.3<br>(20.9 to 33.0)                  | 7.4<br>(6.5 to 8.5)                   | 0.9<br>(0.6 to 1.4)                           | 4.5<br>(2.2 to 6.5)                               | -1.6<br>(-4.1 to 0.7)                               |
| Foreign body in eyes                                                                | 3.2<br>(2.0 to 4.6)                     | 14.6<br>(11.4 to 19.0)                | 0.2<br>(0.1 to 0.3)                           | 12.0<br>(7.6 to 16.4)                             | 5.5<br>(2.6 to 8.4)                                 |
| Foreign body in other body part                                                     | 16.6<br>(13.9 to 20.4)                  | 4.9<br>(4.1 to 5.8)                   | 0.4<br>(0.2 to 0.6)                           | 11.1<br>(8.5 to 13.3)                             | 3.8<br>(1.4 to 5.9)                                 |
| Environmental heat and cold exposure                                                | 49.2<br>(42.3 to 58.2)                  | 10.0<br>(8.6 to 11.4)                 | 1.6<br>(1.0 to 2.3)                           | 10.1<br>(8.3 to 12.0)                             | 2.1<br>(0.4 to 3.7)                                 |
| Other unintentional injuries                                                        | 146.6<br>(119.1 to 176.4)               | 38.4<br>(32.9 to 44.0)                | 3.9<br>(2.5 to 5.8)                           | 28.3<br>(26.6 to 30.0)                            | 19.7<br>(18.0 to 21.5)                              |
| <b>Self-harm and interpersonal violence</b>                                         | <b>142.5</b><br><b>(130.9 to 155.2)</b> | <b>25.9†</b><br><b>(22.7 to 29.1)</b> | <b>3.0</b><br><b>(2.0 to 4.3)</b>             | <b>3.5</b><br><b>(1.5 to 5.2)</b>                 | <b>-1.6</b><br><b>(-3.2 to -0.2)</b>                |
| Self-harm                                                                           | 13.5<br>(11.4 to 15.6)                  | 4.7<br>(4.1 to 5.3)                   | 0.5<br>(0.3 to 0.8)                           | 10.1<br>(7.0 to 12.9)                             | 1.7<br>(-1.1 to 4.3)                                |
| Self-harm by firearm                                                                | 0.4<br>(0.3 to 0.4)                     | 0.1<br>(< 0.05 to 0.1)                | < 0.05<br>(< 0.05 to < 0.05)                  | -16.0<br>(-18.7 to -13.5)                         | -19.9<br>(-22.6 to -17.6)                           |
| Self-harm by other specified means                                                  | 13.2<br>(11.1 to 15.2)                  | 4.6<br>(4.0 to 5.3)                   | 0.5<br>(0.3 to 0.7)                           | 10.8<br>(7.7 to 13.7)                             | 2.3<br>(-0.6 to 5.0)                                |
| Interpersonal violence                                                              | 129.0<br>(117.5 to 141.8)               | 21.2†<br>(18.1 to 24.5)               | 2.5<br>(1.7 to 3.6)                           | 2.2<br>(0.2 to 4.0)                               | -2.2<br>(-3.8 to -0.8)                              |
| Assault by firearm                                                                  | 1.0<br>(0.8 to 1.1)                     | 0.2<br>(0.1 to 0.3)                   | < 0.05<br>(< 0.05 to 0.1)                     | 5.9<br>(3.4 to 8.4)                               | 0.1<br>(-2.3 to 2.4)                                |
| Assault by sharp object                                                             | 9.3<br>(7.5 to 11.1)                    | 2.3<br>(1.8 to 3.1)                   | 0.2<br>(0.1 to 0.3)                           | 8.0<br>(5.4 to 10.5)                              | 1.9<br>(-0.4 to 4.0)                                |
| Sexual violence                                                                     | 70.2<br>(61.9 to 79.5)                  | --                                    | 0.6<br>(0.4 to 0.8)                           | -9.4<br>(-12.7 to -5.5)                           | -5.4<br>(-8.8 to -2.0)                              |
| Assault by other means                                                              | 48.5<br>(40.5 to 58.3)                  | 18.6<br>(15.9 to 21.5)                | 1.7<br>(1.1 to 2.5)                           | 5.8<br>(4.1 to 7.5)                               | -1.4<br>(-3.0 to 0.1)                               |
| <b>Forces of nature, conflict and terrorism, and executions and police conflict</b> | <b>1.2</b><br><b>(0.7 to 1.8)</b>       | <b>0.1†</b><br><b>(0.1 to 0.1)</b>    | <b>&lt; 0.05</b><br><b>(&lt; 0.05 to 0.1)</b> | <b>22.2</b><br><b>(17.2 to 33.2)</b>              | <b>15.4</b><br><b>(10.7 to 25.9)</b>                |
| Exposure to forces of nature                                                        | 0.9<br>(0.4 to 1.4)                     | --                                    | < 0.05<br>(< 0.05 to 0.1)                     | 22.3<br>(16.0 to 40.8)                            | 13.8<br>(7.7 to 30.7)                               |
| Conflict and terrorism                                                              | --                                      | --                                    | --                                            | --                                                | --                                                  |
| Executions and police conflict                                                      | 0.3<br>(0.2 to 0.5)                     | 0.1<br>(0.1 to 0.1)                   | < 0.05<br>(< 0.05 to < 0.05)                  | 22.1<br>(13.8 to 26.7)                            | 20.5<br>(13.8 to 24.9)                              |
| <b>Impairments</b>                                                                  | --                                      | --                                    | --                                            | --                                                | --                                                  |
| Anaemia                                                                             | 998.3<br>(882.1 to 1,115.4)             | --                                    | 20.1<br>(13.1 to 29.7)                        | 1.6<br>(-10.6 to 14.9)                            | -4.6<br>(-16.0 to 8.7)                              |
| Developmental intellectual disability                                               | 96.0<br>(75.5 to 115.7)                 | --                                    | 10.8<br>(8.0 to 14.1)                         | -4.4<br>(-8.3 to 0.0)                             | -3.4<br>(-7.7 to 1.1)                               |
| Epilepsy                                                                            | 30.8<br>(14.4 to 49.8)                  | --                                    | 8.9<br>(4.1 to 16.6)                          | -5.0<br>(-62.4 to 139.6)                          | -5.3<br>(-62.4 to 137.6)                            |
| Guillain-Barre syndrome                                                             | 0.1<br>(< 0.05 to 0.1)                  | --                                    | < 0.05<br>(< 0.05 to < 0.05)                  | 6.6<br>(2.2 to 10.8)                              | 0.1<br>(0.0 to 0.2)                                 |
| Hearing loss                                                                        | 1,365.1<br>(1,308.5 to 1,424.6)         | --                                    | 36.1<br>(24.9 to 50.8)                        | 10.2<br>(7.4 to 13.0)                             | -3.9<br>(-6.2 to -1.8)                              |
| Heart failure                                                                       | 122.9<br>(108.0 to 139.0)               | --                                    | 11.1<br>(8.0 to 14.6)                         | 17.2<br>(9.3 to 24.9)                             | -2.8<br>(-9.1 to 3.5)                               |
| Infertility                                                                         | 63.1<br>(48.9 to 82.6)                  | --                                    | 0.4<br>(0.2 to 0.8)                           | -0.2<br>(-7.7 to 7.3)                             | -1.0<br>(-7.7 to 5.8)                               |
| Pelvic inflammatory disease                                                         | 2.1<br>(1.8 to 2.4)                     | --                                    | 0.3<br>(0.2 to 0.4)                           | -10.9<br>(-27.3 to 8.3)                           | -12.0<br>(-28.7 to 6.9)                             |
| Vision loss                                                                         | 609.6<br>(572.8 to 646.8)               | --                                    | 18.4<br>(12.7 to 26.2)                        | 10.1<br>(7.2 to 12.8)                             | -2.6<br>(-4.9 to -0.2)                              |

We did not calculate incidence for the nine impairments, certain NTDs, and causes with only birth prevalence. Blank cells mean that no estimate is available.

† Incidence for aggregate causes represents the sum of the incidence of the causes below the aggregate.

‡ Incidence estimates for stroke represent first-ever stroke only.

^ Incidence of HIV/AIDS represents new infections of HIV only and does not include new infections of Tuberculosis in HIV positive cases.

SR Table 14: Prevalence, incidence, and YLDs for 2016, percentage change of YLD counts and percentage change of age-standardised YLD rates between 2006 and 2016 by cause and impairments, for all ages, Slovenia.

| Cause                                                                                | Prevalence in thousands (95% UI)       | Incidence in thousands (95% UI)            | YLDs in thousands (95% UI)          |                                                   |                                                     |
|--------------------------------------------------------------------------------------|----------------------------------------|--------------------------------------------|-------------------------------------|---------------------------------------------------|-----------------------------------------------------|
|                                                                                      | 2016 counts                            | 2016 counts                                | 2016 counts                         | Percentage change in counts between 2006 and 2016 | Percentage change in age-standardised rates between |
| <b>All causes</b>                                                                    | <b>1,966.0</b><br>(1,959.2 to 1,973.4) | <b>10,744.6†</b><br>(10,343.8 to 11,174.5) | <b>295.6</b><br>(221.6 to 381.8)    | <b>7.8</b><br>(6.3 to 9.2)                        | <b>-1.7</b><br>(-3.2 to -0.3)                       |
| <b>Communicable, maternal, neonatal, and nutritional disorders</b>                   | <b>904.6</b><br>(874.8 to 935.4)       | <b>4,033.2†</b><br>(3,711.6 to 4,373.2)    | <b>10.8</b><br>(7.7 to 14.8)        | <b>0.1</b><br>(-5.2 to 6.2)                       | <b>-3.1</b><br>(-8.5 to 3.0)                        |
| <b>HIV/AIDS and tuberculosis</b>                                                     | <b>441.5</b><br>(405.4 to 469.7)       | <b>0.2†</b><br>(0.1 to 0.2)                | <b>0.1</b><br>(< 0.05 to 0.1)       | <b>-11.8</b><br>(-24.8 to 2.9)                    | <b>-17.3</b><br>(-27.3 to -6.1)                     |
| Tuberculosis                                                                         | 415.2<br>(384.8 to 449.1)              | 0.2†<br>(0.1 to 0.2)                       | < 0.05<br>(< 0.05 to 0.1)           | -19.1<br>(-31.4 to -4.0)                          | -24.6<br>(-33.6 to -14.3)                           |
| Drug-susceptible tuberculosis                                                        | 0.1<br>(0.1 to 0.2)                    | 0.2<br>(0.1 to 0.2)                        | < 0.05<br>(< 0.05 to 0.1)           | -18.8<br>(-31.2 to -3.6)                          | -24.4<br>(-33.3 to -14.0)                           |
| Multidrug-resistant tuberculosis without extensive drug resistance                   | < 0.05<br>(< 0.05 to < 0.05)           | < 0.05<br>(< 0.05 to < 0.05)               | < 0.05<br>(< 0.05 to < 0.05)        | -80.6<br>(-97.2 to -18.3)                         | -82.0<br>(-97.4 to -23.7)                           |
| Extensively drug-resistant tuberculosis                                              | < 0.05<br>(< 0.05 to < 0.05)           | < 0.05<br>(< 0.05 to < 0.05)               | < 0.05<br>(< 0.05 to < 0.05)        | -40.1<br>(-91.4 to 151.4)                         | -44.6<br>(-92.0 to 135.2)                           |
| Latent tuberculosis infection                                                        | 415.1<br>(384.6 to 448.9)              | --                                         | --                                  | --                                                | --                                                  |
| HIV/AIDS                                                                             | 0.1<br>(0.1 to 0.2)                    | < 0.05^<br>(< 0.05 to < 0.05)              | < 0.05<br>(< 0.05 to < 0.05)        | 17.8<br>(-7.5 to 48.8)                            | 12.8<br>(-11.2 to 40.5)                             |
| Drug-susceptible HIV/AIDS - Tuberculosis                                             | < 0.05<br>(< 0.05 to < 0.05)           | < 0.05<br>(< 0.05 to < 0.05)               | < 0.05<br>(< 0.05 to < 0.05)        | -39.8<br>(-44.8 to -34.7)                         | -42.3<br>(-47.1 to -37.4)                           |
| Multidrug-resistant HIV/AIDS - Tuberculosis without extensive drug resistance        | < 0.05<br>(< 0.05 to < 0.05)           | < 0.05<br>(< 0.05 to < 0.05)               | < 0.05<br>(< 0.05 to < 0.05)        | -85.5<br>(-97.9 to -38.7)                         | -86.0<br>(-98.0 to -41.2)                           |
| Extensively drug-resistant HIV/AIDS - Tuberculosis                                   | < 0.05<br>(< 0.05 to < 0.05)           | < 0.05<br>(< 0.05 to < 0.05)               | < 0.05<br>(< 0.05 to < 0.05)        | -55.2<br>(-93.4 to 88.9)                          | -57.0<br>(-93.7 to 81.4)                            |
| HIV/AIDS resulting in other diseases                                                 | 0.1<br>(0.1 to 0.2)                    | < 0.05<br>(< 0.05 to < 0.05)               | < 0.05<br>(< 0.05 to < 0.05)        | 22.0<br>(-4.8 to 55.8)                            | 16.8<br>(-8.9 to 46.9)                              |
| <b>Diarrhoea, lower respiratory infections, and other common infectious diseases</b> | <b>72.8</b><br>(69.2 to 77.4)          | <b>3,867.2†</b><br>(3,540.8 to 4,209.2)    | <b>3.6</b><br>(2.5 to 4.9)          | <b>5.4</b><br>(2.1 to 8.9)                        | <b>-0.5</b><br>(-4.3 to 3.2)                        |
| Diarrhoeal diseases                                                                  | 14.3<br>(13.2 to 15.4)                 | 929.5<br>(861.9 to 1,005.0)                | 1.6<br>(1.1 to 2.2)                 | 11.9<br>(5.7 to 18.0)                             | 0.8<br>(-5.5 to 7.3)                                |
| Intestinal infectious diseases                                                       | < 0.05<br>(< 0.05 to < 0.05)           | < 0.05†<br>(< 0.05 to < 0.05)              | < 0.05<br>(< 0.05 to < 0.05)        | 22.9<br>(8.4 to 41.5)                             | 10.8<br>(-2.6 to 26.9)                              |
| Typhoid fever                                                                        | < 0.05<br>(< 0.05 to < 0.05)           | < 0.05<br>(< 0.05 to < 0.05)               | < 0.05<br>(< 0.05 to < 0.05)        | 37.0<br>(15.1 to 63.9)                            | 27.3<br>(7.0 to 51.0)                               |
| Paratyphoid fever                                                                    | < 0.05<br>(< 0.05 to < 0.05)           | < 0.05<br>(< 0.05 to < 0.05)               | < 0.05<br>(< 0.05 to < 0.05)        | 13.5<br>(-4.3 to 36.1)                            | 2.5<br>(-13.0 to 20.3)                              |
| Other intestinal infectious diseases                                                 | --                                     | --                                         | < 0.05<br>(< 0.05 to < 0.05)        | -11.0<br>(-30.3 to 12.3)                          | -35.3<br>(-52.9 to -8.8)                            |
| Lower respiratory infections                                                         | 1.9<br>(1.8 to 2.1)                    | 84.7<br>(78.5 to 92.4)                     | 0.1<br>(0.1 to 0.2)                 | 21.7<br>(8.7 to 36.9)                             | 6.5<br>(-6.1 to 21.6)                               |
| Upper respiratory infections                                                         | 37.0<br>(32.8 to 41.4)                 | 2,741.2<br>(2,423.1 to 3,081.4)            | 0.9<br>(0.5 to 1.4)                 | 0.6<br>(-4.9 to 5.8)                              | -0.2<br>(-5.6 to 4.9)                               |
| Otitis media                                                                         | 17.8<br>(16.0 to 19.6)                 | 82.5<br>(67.8 to 99.9)                     | 0.5<br>(0.3 to 0.7)                 | -0.3<br>(-7.8 to 7.4)                             | -3.2<br>(-10.3 to 4.2)                              |
| Meningitis                                                                           | 1.6<br>(1.4 to 1.8)                    | 0.3<br>(0.2 to 0.3)                        | 0.2<br>(0.1 to 0.2)                 | -3.1<br>(-5.9 to -0.5)                            | -3.5<br>(-6.4 to -1.0)                              |
| Pneumococcal meningitis                                                              | 0.6<br>(0.5 to 0.7)                    | < 0.05<br>(< 0.05 to < 0.05)               | 0.1<br>(0.1 to 0.1)                 | -10.7<br>(-16.3 to -5.8)                          | -11.2<br>(-16.7 to -6.3)                            |
| H influenzae type B meningitis                                                       | 0.1<br>(0.1 to 0.2)                    | < 0.05<br>(< 0.05 to < 0.05)               | < 0.05<br>(< 0.05 to < 0.05)        | -0.2<br>(-4.1 to 3.6)                             | 1.2<br>(-2.7 to 5.3)                                |
| Meningococcal infection                                                              | 0.3<br>(0.2 to 0.4)                    | 0.1<br>(< 0.05 to 0.1)                     | < 0.05<br>(< 0.05 to < 0.05)        | -1.2<br>(-5.3 to 2.9)                             | -1.9<br>(-6.0 to 2.2)                               |
| Other meningitis                                                                     | 0.6<br>(0.4 to 0.7)                    | 0.2<br>(0.1 to 0.2)                        | 0.1<br>(< 0.05 to 0.1)              | 7.1<br>(2.5 to 12.6)                              | 6.1<br>(1.8 to 10.9)                                |
| Encephalitis                                                                         | 2.5<br>(1.6 to 3.8)                    | 1.7<br>(1.6 to 1.8)                        | 0.2<br>(0.1 to 0.3)                 | -6.3<br>(-17.9 to 6.0)                            | -9.2<br>(-20.3 to 2.7)                              |
| Diphtheria                                                                           | < 0.05<br>(< 0.05 to < 0.05)           | < 0.05<br>(< 0.05 to < 0.05)               | < 0.05<br>(< 0.05 to < 0.05)        | -39.1<br>(-68.8 to 20.1)                          | -40.6<br>(-67.4 to 9.3)                             |
| Whooping cough                                                                       | 0.1<br>(0.1 to 0.1)                    | 0.6<br>(0.5 to 0.8)                        | < 0.05<br>(< 0.05 to < 0.05)        | -18.1<br>(-41.9 to 12.6)                          | -27.8<br>(-48.9 to -0.2)                            |
| Tetanus                                                                              | < 0.05<br>(< 0.05 to < 0.05)           | < 0.05<br>(< 0.05 to < 0.05)               | < 0.05<br>(< 0.05 to < 0.05)        | 0.4<br>(-14.3 to 14.2)                            | -5.5<br>(-19.4 to 4.6)                              |
| Measles                                                                              | < 0.05<br>(< 0.05 to < 0.05)           | < 0.05<br>(< 0.05 to < 0.05)               | < 0.05<br>(< 0.05 to < 0.05)        | --                                                | --                                                  |
| Varicella and herpes zoster                                                          | 1.5<br>(1.4 to 1.6)                    | 26.8<br>(25.9 to 27.7)                     | 0.1<br>(< 0.05 to 0.1)              | 21.3<br>(3.4 to 42.3)                             | 8.6<br>(-6.9 to 26.5)                               |
| <b>Neglected tropical diseases and malaria</b>                                       | <b>0.6</b><br>(0.2 to 1.0)             | <b>&lt; 0.05†</b><br>(< 0.05 to < 0.05)    | <b>&lt; 0.05</b><br>(< 0.05 to 0.1) | <b>-11.9</b><br>(-94.7 to 163.0)                  | <b>-18.0</b><br>(-92.5 to 139.2)                    |
| Malaria                                                                              | --                                     | --                                         | --                                  | --                                                | --                                                  |
| Chagas disease                                                                       | --                                     | --                                         | --                                  | --                                                | --                                                  |
| Leishmaniasis                                                                        | --                                     | --                                         | --                                  | --                                                | --                                                  |
| Visceral leishmaniasis                                                               | --                                     | --                                         | --                                  | --                                                | --                                                  |
| Cutaneous and mucocutaneous leishmaniasis                                            | --                                     | --                                         | --                                  | --                                                | --                                                  |
| African trypanosomiasis                                                              | --                                     | --                                         | --                                  | --                                                | --                                                  |
| Schistosomiasis                                                                      | --                                     | --                                         | --                                  | --                                                | --                                                  |
| Cysticercosis                                                                        | 0.4<br>(< 0.05 to 0.9)                 | --                                         | < 0.05<br>(< 0.05 to 0.1)           | -6.0<br>(-100.0 to 213.0)                         | -13.7<br>(-100.0 to 180.6)                          |
| Cystic echinococcosis                                                                | < 0.05<br>(< 0.05 to 0.2)              | < 0.05<br>(< 0.05 to < 0.05)               | < 0.05<br>(< 0.05 to < 0.05)        | -48.8<br>(-94.9 to 398.1)                         | -51.2<br>(-95.2 to 389.3)                           |
| Lymphatic filariasis                                                                 | --                                     | --                                         | --                                  | --                                                | --                                                  |
| Onchocerciasis                                                                       | --                                     | --                                         | --                                  | --                                                | --                                                  |
| Trachoma                                                                             | --                                     | --                                         | --                                  | --                                                | --                                                  |
| Dengue                                                                               | --                                     | --                                         | --                                  | --                                                | --                                                  |
| Yellow fever                                                                         | --                                     | --                                         | --                                  | --                                                | --                                                  |
| Rabies                                                                               | < 0.05<br>(< 0.05 to < 0.05)           | < 0.05<br>(< 0.05 to < 0.05)               | < 0.05<br>(< 0.05 to < 0.05)        | -6.5<br>(-28.9 to 24.8)                           | -22.3<br>(-40.4 to 1.1)                             |
| Intestinal nematode infections                                                       | --                                     | --                                         | --                                  | --                                                | --                                                  |
| Ascariasis                                                                           | --                                     | --                                         | --                                  | --                                                | --                                                  |



| Cause                                                                   | Prevalence in thousands (95% UI)              | Incidence in thousands (95% UI)                | YLDs in thousands (95% UI)              |                                                   |                                                     |
|-------------------------------------------------------------------------|-----------------------------------------------|------------------------------------------------|-----------------------------------------|---------------------------------------------------|-----------------------------------------------------|
|                                                                         | 2016 counts                                   | 2016 counts                                    | 2016 counts                             | Percentage change in counts between 2006 and 2016 | Percentage change in age-standardised rates between |
| Trichuriasis                                                            | --                                            | --                                             | --                                      | --                                                | --                                                  |
| Hookworm disease                                                        | --                                            | --                                             | --                                      | --                                                | --                                                  |
| Food-borne trematodiasis                                                | --                                            | --                                             | --                                      | --                                                | --                                                  |
| Leprosy                                                                 | --                                            | --                                             | --                                      | --                                                | --                                                  |
| Ebola virus disease                                                     | --                                            | --                                             | --                                      | --                                                | --                                                  |
| Zika virus disease                                                      | < 0.05<br>(< 0.05 to < 0.05)                  | < 0.05<br>(< 0.05 to < 0.05)                   | < 0.05<br>(< 0.05 to < 0.05)            | --                                                | --                                                  |
| Guinea worm disease                                                     | --                                            | --                                             | --                                      | --                                                | --                                                  |
| Other neglected tropical diseases                                       | --                                            | --                                             | < 0.05<br>(< 0.05 to < 0.05)            | --                                                | --                                                  |
| <b>Maternal disorders</b>                                               | <b>1.6</b><br><b>(1.3 to 2.1)</b>             | <b>17.9†</b><br><b>(16.0 to 20.7)</b>          | <b>0.1</b><br><b>(0.1 to 0.1)</b>       | <b>0.2</b><br><b>(-26.3 to 36.2)</b>              | <b>7.9</b><br><b>(-20.5 to 46.5)</b>                |
| Maternal haemorrhage                                                    | 0.7<br>(0.5 to 1.1)                           | 2.0<br>(1.6 to 2.6)                            | < 0.05<br>(< 0.05 to < 0.05)            | 10.7<br>(-26.2 to 66.8)                           | 19.2<br>(-20.6 to 77.2)                             |
| Maternal sepsis and other pregnancy related infections                  | 0.3<br>(0.2 to 0.4)                           | 1.6<br>(1.4 to 1.9)                            | < 0.05<br>(< 0.05 to < 0.05)            | -10.2<br>(-57.5 to 94.2)                          | -0.5<br>(-53.3 to 116.7)                            |
| Maternal hypertensive disorders                                         | 0.6<br>(0.4 to 0.8)                           | 2.4<br>(2.0 to 2.7)                            | < 0.05<br>(< 0.05 to < 0.05)            | -6.7<br>(-46.0 to 65.5)                           | 0.6<br>(-42.1 to 77.4)                              |
| Maternal obstructed labour and uterine rupture                          | < 0.05<br>(< 0.05 to < 0.05)                  | 2.3<br>(1.6 to 2.8)                            | < 0.05<br>(< 0.05 to < 0.05)            | 26.3<br>(-58.3 to 314.2)                          | 35.6<br>(-55.1 to 330.0)                            |
| Maternal abortion, miscarriage, and ectopic pregnancy                   | 0.1<br>(0.1 to 0.1)                           | 9.7<br>(7.8 to 12.3)                           | < 0.05<br>(< 0.05 to < 0.05)            | -1.1<br>(-54.7 to 110.4)                          | 4.1<br>(-53.1 to 128.8)                             |
| Other maternal disorders                                                | --                                            | --                                             | < 0.05<br>(< 0.05 to < 0.05)            | -5.3<br>(-30.2 to 28.3)                           | 2.4<br>(-24.6 to 39.5)                              |
| <b>Neonatal disorders</b>                                               | <b>13.9</b><br><b>(11.8 to 16.2)</b>          | --                                             | <b>2.5</b><br><b>(1.7 to 3.4)</b>       | <b>1.0</b><br><b>(-13.0 to 17.9)</b>              | <b>1.9</b><br><b>(-12.7 to 19.5)</b>                |
| Neonatal preterm birth complications                                    | 12.0<br>(9.5 to 15.7)                         | --                                             | 1.3<br>(0.9 to 2.0)                     | 0.5<br>(-23.0 to 30.0)                            | 3.1<br>(-21.5 to 34.7)                              |
| Neonatal encephalopathy due to birth asphyxia and trauma                | 2.3<br>(1.6 to 3.3)                           | --                                             | 0.5<br>(0.3 to 0.7)                     | -5.4<br>(-23.7 to 20.5)                           | -5.9<br>(-23.5 to 20.9)                             |
| Neonatal sepsis and other neonatal infections                           | 1.4<br>(0.7 to 3.0)                           | --                                             | 0.6<br>(0.2 to 1.3)                     | 7.0<br>(-7.8 to 26.0)                             | 6.1<br>(-8.4 to 24.7)                               |
| Hemolytic disease and other neonatal jaundice                           | 0.1<br>(0.1 to 0.2)                           | --                                             | < 0.05<br>(< 0.05 to 0.1)               | -1.1<br>(-9.2 to 6.9)                             | 0.2<br>(-7.9 to 8.6)                                |
| Other neonatal disorders                                                | --                                            | --                                             | < 0.05<br>(< 0.05 to 0.1)               | 17.8<br>(-5.2 to 47.7)                            | -0.1<br>(-19.6 to 25.4)                             |
| <b>Nutritional deficiencies</b>                                         | <b>249.9</b><br><b>(227.8 to 269.2)</b>       | <b>11.0†</b><br><b>(9.0 to 13.7)</b>           | <b>3.9</b><br><b>(2.5 to 5.8)</b>       | <b>-3.5</b><br><b>(-14.1 to 7.8)</b>              | <b>-7.8</b><br><b>(-18.4 to 4.3)</b>                |
| Protein-energy malnutrition                                             | 3.9<br>(2.4 to 6.1)                           | 1.7<br>(1.0 to 2.6)                            | 0.2<br>(0.1 to 0.3)                     | -1.1<br>(-39.6 to 61.6)                           | -15.1<br>(-48.3 to 39.8)                            |
| Iodine deficiency                                                       | 21.0<br>(15.4 to 28.6)                        | 0.3<br>(0.2 to 0.4)                            | 0.5<br>(0.3 to 0.8)                     | 1.8<br>(-8.3 to 14.6)                             | -0.7<br>(-10.4 to 12.8)                             |
| Vitamin A deficiency                                                    | 10.9<br>(8.6 to 13.8)                         | 9.1<br>(7.1 to 11.5)                           | --                                      | --                                                | --                                                  |
| Iron-deficiency anaemia                                                 | 208.3<br>(186.8 to 231.2)                     | --                                             | 3.2<br>(2.0 to 4.9)                     | -4.5<br>(-16.3 to 9.3)                            | -8.1<br>(-20.5 to 6.7)                              |
| Other nutritional deficiencies                                          | --                                            | --                                             | < 0.05<br>(< 0.05 to < 0.05)            | -1.9<br>(-42.3 to 65.0)                           | -16.4<br>(-50.6 to 40.6)                            |
| <b>Other communicable, maternal, neonatal, and nutritional diseases</b> | <b>353.3</b><br><b>(329.6 to 379.2)</b>       | <b>136.9</b><br><b>(118.6 to 159.5)</b>        | <b>0.7</b><br><b>(0.5 to 1.0)</b>       | <b>-4.8</b><br><b>(-10.5 to 1.4)</b>              | <b>-4.1</b><br><b>(-10.7 to 2.0)</b>                |
| Sexually transmitted diseases excluding HIV                             | 273.3<br>(253.0 to 298.8)                     | 133.9<br>(115.7 to 156.7)                      | 0.6<br>(0.4 to 0.8)                     | -6.2<br>(-12.9 to 0.5)                            | -4.9<br>(-12.0 to 1.3)                              |
| Syphilis                                                                | 1.9<br>(1.7 to 2.2)                           | 0.6<br>(0.4 to 0.8)                            | 0.1<br>(0.1 to 0.2)                     | 8.2<br>(-9.1 to 29.3)                             | -6.9<br>(-21.8 to 11.0)                             |
| Chlamydial infection                                                    | 16.4<br>(13.0 to 20.7)                        | 14.0<br>(11.2 to 17.4)                         | 0.1<br>(< 0.05 to 0.1)                  | -13.9<br>(-24.2 to -2.2)                          | -6.0<br>(-17.3 to 6.6)                              |
| Gonococcal infection                                                    | 18.9<br>(14.2 to 24.9)                        | 65.9<br>(48.3 to 87.2)                         | 0.1<br>(< 0.05 to 0.1)                  | -13.8<br>(-24.8 to -1.6)                          | -1.8<br>(-14.6 to 11.7)                             |
| Trichomoniasis                                                          | 45.3<br>(39.6 to 51.9)                        | 37.5<br>(32.7 to 43.5)                         | < 0.05<br>(< 0.05 to 0.1)               | -4.9<br>(-11.7 to 2.3)                            | -2.0<br>(-9.1 to 5.4)                               |
| Genital herpes                                                          | 197.2<br>(168.2 to 234.2)                     | 7.0<br>(5.8 to 8.5)                            | < 0.05<br>(< 0.05 to 0.1)               | 5.2<br>(-2.4 to 13.1)                             | -0.5<br>(-7.8 to 7.2)                               |
| Other sexually transmitted diseases                                     | 5.7<br>(4.3 to 7.5)                           | 8.9<br>(7.7 to 10.4)                           | 0.1<br>(0.1 to 0.2)                     | -13.0<br>(-23.7 to -0.8)                          | -6.7<br>(-18.6 to 5.9)                              |
| Hepatitis                                                               | 88.6<br>(77.5 to 101.9)                       | 3.0<br>(2.6 to 3.5)                            | < 0.05<br>(< 0.05 to < 0.05)            | -39.1<br>(-46.4 to -30.6)                         | -38.5<br>(-47.7 to -28.5)                           |
| Acute hepatitis A                                                       | < 0.05<br>(< 0.05 to 0.1)                     | 0.6<br>(0.4 to 0.7)                            | < 0.05<br>(< 0.05 to < 0.05)            | -42.9<br>(-55.3 to -25.7)                         | -41.0<br>(-56.4 to -20.4)                           |
| Hepatitis B                                                             | 50.6<br>(40.7 to 62.9)                        | 2.0<br>(1.6 to 2.5)                            | < 0.05<br>(< 0.05 to < 0.05)            | -43.4<br>(-52.5 to -33.7)                         | -47.6<br>(-55.6 to -38.7)                           |
| Hepatitis C                                                             | 38.0<br>(34.1 to 42.3)                        | 0.3<br>(0.3 to 0.4)                            | < 0.05<br>(< 0.05 to < 0.05)            | 5.1<br>(2.5 to 7.5)                               | -4.0<br>(-5.1 to -3.0)                              |
| Acute hepatitis E                                                       | < 0.05<br>(< 0.05 to < 0.05)                  | 0.1<br>(0.1 to 0.1)                            | < 0.05<br>(< 0.05 to < 0.05)            | -34.6<br>(-41.4 to -25.0)                         | -40.6<br>(-44.3 to -36.2)                           |
| Other infectious diseases                                               | 7.4<br>(6.5 to 8.3)                           | < 0.05<br>(< 0.05 to < 0.05)                   | 0.1<br>(0.1 to 0.2)                     | 2.7<br>(-12.0 to 19.4)                            | -0.5<br>(-16.1 to 17.6)                             |
| <b>Non-communicable diseases</b>                                        | <b>1,904.9</b><br><b>(1,896.2 to 1,914.0)</b> | <b>6,190.5†</b><br><b>(5,940.5 to 6,452.0)</b> | <b>234.5</b><br><b>(175.4 to 301.0)</b> | <b>7.3</b><br><b>(5.6 to 9.1)</b>                 | <b>-1.7</b><br><b>(-3.6 to 0.2)</b>                 |
| <b>Neoplasms</b>                                                        | <b>35.9</b><br><b>(34.1 to 37.5)</b>          | <b>11.9</b><br><b>(10.8 to 12.6)</b>           | <b>3.6</b><br><b>(2.6 to 4.7)</b>       | <b>13.5</b><br><b>(6.8 to 21.4)</b>               | <b>-5.0</b><br><b>(-10.9 to 1.7)</b>                |
| Lip and oral cavity cancer                                              | 0.6<br>(0.5 to 0.8)                           | 0.2<br>(0.1 to 0.2)                            | 0.1<br>(< 0.05 to 0.1)                  | -1.5<br>(-21.8 to 24.1)                           | -16.9<br>(-34.8 to 5.4)                             |
| Nasopharynx cancer                                                      | < 0.05<br>(< 0.05 to < 0.05)                  | < 0.05<br>(< 0.05 to < 0.05)                   | < 0.05<br>(< 0.05 to < 0.05)            | -20.0<br>(-30.7 to -6.1)                          | -29.1<br>(-39.2 to -16.0)                           |
| Other pharynx cancer                                                    | 0.7<br>(0.6 to 0.8)                           | 0.2<br>(0.2 to 0.2)                            | 0.1<br>(< 0.05 to 0.1)                  | 26.4<br>(-6.0 to 69.0)                            | 10.3<br>(-17.3 to 46.5)                             |
| Oesophageal cancer                                                      | 0.1<br>(0.1 to 0.1)                           | 0.1<br>(0.1 to 0.1)                            | < 0.05<br>(< 0.05 to < 0.05)            | 5.1<br>(-16.9 to 29.9)                            | -13.0<br>(-31.2 to 6.9)                             |
| Stomach cancer                                                          | 1.0<br>(0.8 to 1.2)                           | 0.5<br>(0.4 to 0.6)                            | 0.1<br>(0.1 to 0.2)                     | 2.4<br>(-18.3 to 28.2)                            | -16.9<br>(-33.7 to 3.6)                             |
| Colon and rectum cancer                                                 | 5.9<br>(5.4 to 6.7)                           | 1.6<br>(1.5 to 1.8)                            | 0.5<br>(0.4 to 0.7)                     | 13.0<br>(0.8 to 30.0)                             | -8.3<br>(-18.2 to 5.7)                              |
| Liver cancer                                                            | 0.1<br>(0.1 to 0.1)                           | 0.2<br>(0.2 to 0.3)                            | < 0.05<br>(< 0.05 to 0.1)               | 42.9<br>(16.5 to 73.9)                            | 16.9<br>(-4.9 to 42.3)                              |
| Liver cancer due to hepatitis B                                         | 0.1<br>(< 0.05 to 0.1)                        | 0.1<br>(< 0.05 to 0.1)                         | < 0.05<br>(< 0.05 to < 0.05)            | 42.5<br>(15.4 to 76.8)                            | 17.8<br>(-4.8 to 45.6)                              |

| Cause                                              | Prevalence in thousands (95% UI)        | Incidence in thousands (95% UI)       | YLDs in thousands (95% UI)           |                                                   |                                                     |
|----------------------------------------------------|-----------------------------------------|---------------------------------------|--------------------------------------|---------------------------------------------------|-----------------------------------------------------|
|                                                    | 2016 counts                             | 2016 counts                           | 2016 counts                          | Percentage change in counts between 2006 and 2016 | Percentage change in age-standardised rates between |
| Liver cancer due to hepatitis C                    | 0.1<br>( $< 0.05$ to 0.1)               | 0.1<br>( $< 0.05$ to 0.1)             | $< 0.05$<br>( $< 0.05$ to $< 0.05$ ) | 48.1<br>(19.7 to 83.9)                            | 18.6<br>(-4.6 to 46.1)                              |
| Liver cancer due to alcohol use                    | 0.1<br>(0.1 to 0.1)                     | 0.1<br>(0.1 to 0.1)                   | $< 0.05$<br>( $< 0.05$ to $< 0.05$ ) | 36.2<br>(9.1 to 68.2)                             | 11.5<br>(-9.9 to 36.9)                              |
| Liver cancer due to other causes                   | $< 0.05$<br>( $< 0.05$ to 0.1)          | $< 0.05$<br>( $< 0.05$ to $< 0.05$ )  | $< 0.05$<br>( $< 0.05$ to $< 0.05$ ) | 48.5<br>(18.9 to 85.8)                            | 22.6<br>(-2.2 to 54.9)                              |
| Gallbladder and biliary tract cancer               | 0.2<br>(0.1 to 0.3)                     | 0.2<br>(0.1 to 0.2)                   | $< 0.05$<br>( $< 0.05$ to 0.1)       | 9.4<br>(-17.8 to 49.6)                            | -14.7<br>(-35.4 to 16.1)                            |
| Pancreatic cancer                                  | 0.3<br>(0.3 to 0.4)                     | 0.4<br>(0.3 to 0.4)                   | 0.1<br>( $< 0.05$ to 0.1)            | 18.2<br>(-5.0 to 45.1)                            | -5.2<br>(-23.1 to 14.6)                             |
| Larynx cancer                                      | 0.3<br>(0.3 to 0.4)                     | 0.1<br>(0.1 to 0.1)                   | $< 0.05$<br>( $< 0.05$ to 0.1)       | -2.6<br>(-17.3 to 14.6)                           | -17.9<br>(-30.2 to -4.2)                            |
| Tracheal, bronchus, and lung cancer                | 1.6<br>(1.4 to 1.8)                     | 1.2<br>(1.1 to 1.3)                   | 0.3<br>(0.2 to 0.3)                  | -7.0<br>(-20.7 to 10.0)                           | -22.4<br>(-34.3 to -7.7)                            |
| Malignant skin melanoma                            | 2.4<br>(1.6 to 2.8)                     | 0.5<br>(0.3 to 0.6)                   | 0.1<br>(0.1 to 0.2)                  | 31.2<br>(8.4 to 52.1)                             | 15.5<br>(-4.7 to 33.8)                              |
| Non-melanoma skin cancer                           | 0.4<br>(0.3 to 0.4)                     | 1.1<br>(1.0 to 1.2)                   | $< 0.05$<br>( $< 0.05$ to $< 0.05$ ) | 36.6<br>(21.6 to 53.0)                            | 10.1<br>(-1.5 to 22.3)                              |
| Non-melanoma skin cancer (squamous-cell carcinoma) | 0.3<br>(0.3 to 0.3)                     | 0.3<br>(0.3 to 0.3)                   | $< 0.05$<br>( $< 0.05$ to $< 0.05$ ) | 38.0<br>(21.7 to 55.8)                            | 11.0<br>(-1.4 to 24.5)                              |
| Non-melanoma skin cancer (basal-cell carcinoma)    | 0.1<br>(0.1 to 0.2)                     | 0.8<br>(0.7 to 0.9)                   | $< 0.05$<br>( $< 0.05$ to $< 0.05$ ) | 21.8<br>(-10.3 to 70.0)                           | 0.1<br>(-25.0 to 36.6)                              |
| Breast cancer                                      | 5.4<br>(4.9 to 6.1)                     | 1.1<br>(1.0 to 1.3)                   | 0.5<br>(0.3 to 0.6)                  | -1.6<br>(-14.3 to 13.2)                           | -16.0<br>(-26.9 to -2.5)                            |
| Cervical cancer                                    | 0.7<br>(0.6 to 0.8)                     | 0.2<br>(0.1 to 0.2)                   | 0.1<br>( $< 0.05$ to 0.1)            | -13.2<br>(-26.7 to 3.5)                           | -21.9<br>(-34.3 to -6.2)                            |
| Uterine cancer                                     | 1.8<br>(1.6 to 2.2)                     | 0.4<br>(0.3 to 0.5)                   | 0.1<br>(0.1 to 0.2)                  | 15.9<br>(-5.4 to 43.2)                            | -2.6<br>(-20.8 to 20.2)                             |
| Ovarian cancer                                     | 0.6<br>(0.5 to 0.7)                     | 0.2<br>(0.1 to 0.2)                   | 0.1<br>(0.1 to 0.1)                  | 0.7<br>(-26.3 to 34.1)                            | -12.6<br>(-35.8 to 15.9)                            |
| Prostate cancer                                    | 4.8<br>(3.2 to 6.0)                     | 1.2<br>(0.8 to 1.4)                   | 0.4<br>(0.3 to 0.6)                  | 24.3<br>(1.0 to 56.9)                             | 1.1<br>(-18.1 to 29.1)                              |
| Testicular cancer                                  | 0.5<br>(0.4 to 0.7)                     | 0.1<br>(0.1 to 0.1)                   | $< 0.05$<br>( $< 0.05$ to 0.1)       | 3.0<br>(-26.2 to 46.4)                            | 8.1<br>(-22.7 to 54.3)                              |
| Kidney cancer                                      | 1.4<br>(1.2 to 1.5)                     | 0.4<br>(0.3 to 0.4)                   | 0.1<br>(0.1 to 0.2)                  | 19.9<br>(-0.5 to 40.0)                            | 1.7<br>(-15.2 to 18.8)                              |
| Bladder cancer                                     | 1.1<br>(1.0 to 1.2)                     | 0.3<br>(0.3 to 0.3)                   | 0.1<br>(0.1 to 0.1)                  | 11.1<br>(-4.2 to 27.7)                            | -11.7<br>(-23.5 to 1.4)                             |
| Brain and nervous system cancer                    | 0.4<br>(0.2 to 0.4)                     | 0.2<br>(0.1 to 0.2)                   | 0.1<br>( $< 0.05$ to 0.1)            | 15.7<br>(-7.7 to 33.4)                            | 3.0<br>(-18.7 to 19.5)                              |
| Thyroid cancer                                     | 0.5<br>(0.5 to 0.6)                     | 0.1<br>(0.1 to 0.1)                   | $< 0.05$<br>( $< 0.05$ to $< 0.05$ ) | 3.2<br>(-14.8 to 26.7)                            | -8.8<br>(-25.2 to 12.2)                             |
| Mesothelioma                                       | 0.1<br>( $< 0.05$ to 0.1)               | $< 0.05$<br>( $< 0.05$ to $< 0.05$ )  | $< 0.05$<br>( $< 0.05$ to $< 0.05$ ) | 17.4<br>(2.3 to 29.4)                             | -1.8<br>(-14.6 to 8.3)                              |
| Hodgkin lymphoma                                   | 0.2<br>(0.1 to 0.2)                     | $< 0.05$<br>( $< 0.05$ to $< 0.05$ )  | $< 0.05$<br>( $< 0.05$ to $< 0.05$ ) | -14.2<br>(-32.0 to 7.3)                           | -13.6<br>(-34.6 to 12.9)                            |
| Non-Hodgkin's lymphoma                             | 2.3<br>(1.4 to 2.6)                     | 0.6<br>(0.4 to 0.7)                   | 0.2<br>(0.1 to 0.2)                  | 58.3<br>(24.7 to 85.9)                            | 30.8<br>(4.4 to 52.2)                               |
| Multiple myeloma                                   | 0.3<br>(0.1 to 0.4)                     | 0.1<br>(0.1 to 0.1)                   | 0.1<br>( $< 0.05$ to 0.1)            | 21.7<br>(-10.3 to 59.0)                           | 0.2<br>(-26.2 to 30.7)                              |
| Leukaemia                                          | 1.8<br>(1.6 to 2.0)                     | 0.5<br>(0.4 to 0.5)                   | 0.2<br>(0.1 to 0.3)                  | 49.3<br>(27.3 to 74.3)                            | 20.1<br>(1.4 to 41.1)                               |
| Acute lymphoid leukaemia                           | 0.2<br>(0.2 to 0.2)                     | 0.1<br>( $< 0.05$ to 0.1)             | $< 0.05$<br>( $< 0.05$ to $< 0.05$ ) | 69.0<br>(30.9 to 116.4)                           | 36.7<br>(-2.2 to 93.9)                              |
| Chronic lymphoid leukaemia                         | 1.1<br>(0.8 to 1.3)                     | 0.2<br>(0.2 to 0.3)                   | 0.1<br>(0.1 to 0.2)                  | 63.3<br>(28.9 to 105.8)                           | 31.2<br>(2.7 to 65.8)                               |
| Acute myeloid leukaemia                            | 0.1<br>(0.1 to 0.1)                     | 0.1<br>(0.1 to 0.1)                   | $< 0.05$<br>( $< 0.05$ to $< 0.05$ ) | 43.5<br>(21.2 to 67.9)                            | 18.7<br>(-0.1 to 38.9)                              |
| Chronic myeloid leukaemia                          | 0.1<br>(0.1 to 0.1)                     | $< 0.05$<br>( $< 0.05$ to $< 0.05$ )  | $< 0.05$<br>( $< 0.05$ to $< 0.05$ ) | 12.2<br>(-5.9 to 33.0)                            | -6.2<br>(-20.8 to 10.6)                             |
| Other leukaemia                                    | 0.3<br>(0.2 to 0.4)                     | 0.1<br>(0.1 to 0.1)                   | $< 0.05$<br>( $< 0.05$ to 0.1)       | 21.0<br>(-4.9 to 54.7)                            | -9.6<br>(-28.4 to 13.7)                             |
| Other neoplasms                                    | 1.7<br>(1.5 to 2.0)                     | 0.5<br>(0.4 to 0.5)                   | 0.1<br>(0.1 to 0.2)                  | 26.8<br>(6.4 to 49.1)                             | 7.8<br>(-10.8 to 24.9)                              |
| <b>Cardiovascular diseases</b>                     | <b>272.0</b><br><b>(262.4 to 281.1)</b> | <b>26.6†</b><br><b>(25.5 to 27.7)</b> | <b>21.4</b><br><b>(15.8 to 27.5)</b> | <b>18.0</b><br><b>(13.5 to 22.9)</b>              | <b>-2.5</b><br><b>(-6.0 to 1.2)</b>                 |
| Rheumatic heart disease                            | 0.3<br>(0.2 to 0.3)                     | 0.1<br>(0.1 to 0.1)                   | $< 0.05$<br>( $< 0.05$ to $< 0.05$ ) | 13.7<br>(-9.9 to 43.6)                            | -3.8<br>(-22.9 to 19.5)                             |
| Ischaemic heart disease                            | 101.5<br>(96.1 to 107.2)                | 11.1<br>(10.6 to 11.8)                | 5.5<br>(3.8 to 7.3)                  | 15.9<br>(11.0 to 20.9)                            | -2.5<br>(-6.5 to 1.7)                               |
| Cerebrovascular disease                            | 38.7<br>(35.9 to 41.3)                  | 6.2‡<br>(5.8 to 6.6)                  | 7.7<br>(5.3 to 9.7)                  | 14.6<br>(4.9 to 24.2)                             | -7.3<br>(-14.8 to -0.1)                             |
| Ischaemic stroke                                   | 33.7<br>(29.7 to 37.6)                  | 4.7‡<br>(4.3 to 5.1)                  | 6.5<br>(4.5 to 8.3)                  | 14.2<br>(2.6 to 25.4)                             | -8.2<br>(-17.2 to 0.5)                              |
| Hemorrhagic stroke                                 | 6.3<br>(5.6 to 7.0)                     | 1.5‡<br>(1.4 to 1.6)                  | 1.2<br>(0.8 to 1.5)                  | 16.5<br>(4.6 to 30.0)                             | -2.5<br>(-12.5 to 8.2)                              |
| Hypertensive heart disease                         | 14.6<br>(12.4 to 17.2)                  | --                                    | 1.1<br>(0.8 to 1.6)                  | 23.7<br>(12.8 to 37.2)                            | -0.8<br>(-9.6 to 9.8)                               |
| Cardiomyopathy and myocarditis                     | 14.4<br>(12.8 to 16.1)                  | 0.9†<br>(0.8 to 1.1)                  | 1.1<br>(0.8 to 1.6)                  | 28.7<br>(17.2 to 41.9)                            | 5.5<br>(-3.5 to 15.4)                               |
| Myocarditis                                        | 0.8<br>(0.7 to 0.9)                     | 0.9<br>(0.8 to 1.1)                   | 0.1<br>( $< 0.05$ to 0.1)            | 8.9<br>(-6.7 to 25.5)                             | 3.8<br>(-11.5 to 19.3)                              |
| Alcoholic cardiomyopathy                           | 1.6<br>(1.3 to 1.8)                     | --                                    | 0.1<br>(0.1 to 0.2)                  | 28.6<br>(8.6 to 51.3)                             | 11.8<br>(-6.1 to 32.1)                              |
| Other cardiomyopathy                               | 12.0<br>(10.0 to 14.2)                  | --                                    | 0.9<br>(0.6 to 1.3)                  | 30.2<br>(17.5 to 44.2)                            | 4.8<br>(-5.1 to 15.4)                               |
| Atrial fibrillation and flutter                    | 27.4<br>(23.9 to 31.9)                  | 2.1<br>(1.8 to 2.5)                   | 2.1<br>(1.4 to 2.9)                  | 26.4<br>(18.9 to 33.8)                            | 0.9<br>(-5.2 to 6.9)                                |
| Peripheral vascular disease                        | 66.0<br>(57.5 to 76.3)                  | 5.8<br>(5.0 to 6.8)                   | 0.3<br>(0.1 to 0.5)                  | 15.4<br>(6.1 to 25.5)                             | -10.0<br>(-16.2 to -3.1)                            |
| Endocarditis                                       | 0.1<br>(0.1 to 0.2)                     | 0.3<br>(0.3 to 0.3)                   | $< 0.05$<br>( $< 0.05$ to $< 0.05$ ) | 17.1<br>(2.2 to 32.4)                             | 2.4<br>(-8.9 to 13.8)                               |
| Other cardiovascular and circulatory diseases      | 74.3<br>(63.8 to 85.3)                  | --                                    | 3.7<br>(2.6 to 5.2)                  | 19.7<br>(10.1 to 31.0)                            | 3.6<br>(-4.5 to 12.7)                               |
| <b>Chronic respiratory diseases</b>                | <b>157.6</b><br><b>(152.5 to 162.8)</b> | <b>20.9†</b><br><b>(19.9 to 22.1)</b> | <b>5.9</b><br><b>(4.5 to 7.4)</b>    | <b>7.6</b><br><b>(1.8 to 13.6)</b>                | <b>-1.3</b><br><b>(-6.0 to 3.5)</b>                 |
| Chronic obstructive pulmonary disease              | 80.7<br>(76.8 to 85.2)                  | 4.8<br>(4.6 to 5.1)                   | 2.4<br>(2.0 to 2.9)                  | 6.1<br>(-5.7 to 18.8)                             | -9.1<br>(-18.7 to 1.6)                              |
| Pneumoconiosis                                     | 0.4<br>(0.4 to 0.5)                     | $< 0.05$<br>( $< 0.05$ to $< 0.05$ )  | 0.1<br>( $< 0.05$ to 0.1)            | 14.9<br>(-6.5 to 42.0)                            | -2.7<br>(-20.6 to 20.1)                             |
| Silicosis                                          | 0.1<br>(0.1 to 0.1)                     | $< 0.05$<br>( $< 0.05$ to $< 0.05$ )  | $< 0.05$<br>( $< 0.05$ to $< 0.05$ ) | -9.0<br>(-16.4 to -1.4)                           | -22.4<br>(-28.5 to -15.8)                           |

| Cause                                                          | Prevalence in thousands (95% UI)        | Incidence in thousands (95% UI)          | YLDs in thousands (95% UI)           |                                                   |                                                     |
|----------------------------------------------------------------|-----------------------------------------|------------------------------------------|--------------------------------------|---------------------------------------------------|-----------------------------------------------------|
|                                                                | 2016 counts                             | 2016 counts                              | 2016 counts                          | Percentage change in counts between 2006 and 2016 | Percentage change in age-standardised rates between |
| Asbestosis                                                     | 0.2<br>(0.2 to 0.3)                     | < 0.05<br>(< 0.05 to < 0.05)             | < 0.05<br>(< 0.05 to 0.1)            | 17.7<br>(-18.6 to 65.2)                           | 0.5<br>(-30.0 to 40.4)                              |
| Coal workers pneumoconiosis                                    | --                                      | --                                       | --                                   | --                                                | --                                                  |
| Other pneumoconiosis                                           | 0.1<br>(0.1 to 0.1)                     | < 0.05<br>(< 0.05 to < 0.05)             | < 0.05<br>(< 0.05 to < 0.05)         | 28.0<br>(-4.6 to 76.5)                            | 6.0<br>(-20.7 to 44.9)                              |
| Asthma                                                         | 80.5<br>(75.6 to 86.2)                  | 16.0<br>(15.0 to 17.1)                   | 3.1<br>(2.0 to 4.3)                  | 7.5<br>(2.5 to 12.6)                              | 2.4<br>(-2.7 to 7.3)                                |
| Interstitial lung disease and pulmonary sarcoidosis            | 2.6<br>(2.4 to 2.8)                     | 0.1<br>(0.1 to 0.1)                      | 0.3<br>(0.2 to 0.4)                  | 15.4<br>(0.5 to 31.8)                             | 0.9<br>(-11.3 to 14.0)                              |
| Other chronic respiratory diseases                             | --                                      | --                                       | 0.1<br>(0.1 to 0.1)                  | 28.4<br>(17.3 to 39.4)                            | 26.3<br>(15.8 to 37.5)                              |
| <b>Cirrhosis and other chronic liver diseases</b>              | <b>27.8</b><br><b>(26.4 to 29.2)</b>    | <b>0.7</b><br><b>(0.7 to 0.8)</b>        | <b>0.6</b><br><b>(0.4 to 0.9)</b>    | <b>5.0</b><br><b>(-3.4 to 13.9)</b>               | <b>-3.8</b><br><b>(-11.9 to 5.2)</b>                |
| Cirrhosis and other chronic liver diseases due to hepatitis B  | 4.7<br>(3.9 to 5.6)                     | 0.1<br>(0.1 to 0.2)                      | 0.1<br>(0.1 to 0.1)                  | 7.9<br>(-10.9 to 31.8)                            | -2.5<br>(-19.1 to 19.2)                             |
| Cirrhosis and other chronic liver diseases due to hepatitis C  | 6.9<br>(5.1 to 8.9)                     | 0.2<br>(0.1 to 0.2)                      | 0.1<br>(0.1 to 0.2)                  | 8.0<br>(-9.0 to 28.5)                             | -2.7<br>(-17.8 to 15.7)                             |
| Cirrhosis and other chronic liver diseases due to alcohol use  | 9.6<br>(7.9 to 11.4)                    | 0.3<br>(0.2 to 0.3)                      | 0.2<br>(0.1 to 0.3)                  | 6.0<br>(-9.0 to 22.7)                             | -5.5<br>(-18.7 to 9.0)                              |
| Cirrhosis and other chronic liver diseases due to other causes | 6.6<br>(5.8 to 7.5)                     | 0.1<br>(0.1 to 0.2)                      | 0.2<br>(0.1 to 0.2)                  | -0.2<br>(-14.5 to 16.0)                           | -3.6<br>(-17.7 to 13.7)                             |
| <b>Digestive diseases</b>                                      | <b>114.5</b><br><b>(106.3 to 123.3)</b> | <b>133.2†</b><br><b>(126.2 to 140.3)</b> | <b>5.0</b><br><b>(3.6 to 6.7)</b>    | <b>10.1</b><br><b>(1.3 to 19.5)</b>               | <b>-0.6</b><br><b>(-8.4 to 7.5)</b>                 |
| Peptic ulcer disease                                           | 44.7<br>(39.4 to 51.7)                  | 2.9<br>(2.6 to 3.2)                      | 1.0<br>(0.6 to 1.5)                  | 10.3<br>(-9.5 to 35.8)                            | 1.2<br>(-18.2 to 26.2)                              |
| Gastritis and duodenitis                                       | 36.9<br>(32.4 to 42.2)                  | 23.7<br>(21.5 to 26.0)                   | 0.8<br>(0.5 to 1.2)                  | 10.1<br>(-7.8 to 31.4)                            | -1.9<br>(-17.4 to 15.9)                             |
| Appendicitis                                                   | 0.1<br>(0.1 to 0.1)                     | 2.5<br>(2.4 to 2.7)                      | < 0.05<br>(< 0.05 to < 0.05)         | -2.1<br>(-19.5 to 19.5)                           | 0.8<br>(-23.6 to 31.4)                              |
| Paralytic ileus and intestinal obstruction                     | < 0.05<br>(< 0.05 to < 0.05)            | 1.0<br>(0.9 to 1.1)                      | < 0.05<br>(< 0.05 to < 0.05)         | 21.6<br>(9.9 to 34.5)                             | 2.1<br>(-5.1 to 10.2)                               |
| Inguinal, femoral, and abdominal hernia                        | 23.2<br>(21.9 to 24.4)                  | 59.1<br>(52.9 to 65.1)                   | 1.6<br>(1.1 to 2.2)                  | 13.0<br>(5.9 to 20.9)                             | 0.5<br>(-6.4 to 8.0)                                |
| Inflammatory bowel disease                                     | 6.1<br>(5.8 to 6.5)                     | 1.5<br>(1.4 to 1.5)                      | 0.9<br>(0.6 to 1.2)                  | 1.1<br>(-7.0 to 9.3)                              | -5.3<br>(-12.8 to 2.8)                              |
| Vascular intestinal disorders                                  | 0.1<br>(0.1 to 0.1)                     | 0.4<br>(0.3 to 0.4)                      | < 0.05<br>(< 0.05 to < 0.05)         | 15.0<br>(-11.5 to 47.0)                           | -3.3<br>(-20.7 to 17.3)                             |
| Gallbladder and biliary diseases                               | 7.3<br>(6.5 to 8.1)                     | 39.0<br>(36.8 to 42.0)                   | 0.2<br>(0.1 to 0.2)                  | 14.7<br>(-1.4 to 34.7)                            | 2.3<br>(-12.6 to 21.1)                              |
| Pancreatitis                                                   | 0.3<br>(0.3 to 0.4)                     | 3.0<br>(2.8 to 3.3)                      | < 0.05<br>(< 0.05 to 0.1)            | 15.7<br>(-2.5 to 36.5)                            | 2.4<br>(-10.6 to 16.9)                              |
| Other digestive diseases                                       | --                                      | --                                       | 0.4<br>(0.3 to 0.5)                  | 17.8<br>(9.0 to 26.8)                             | 3.2<br>(-4.0 to 11.2)                               |
| <b>Neurological disorders</b>                                  | <b>745.5</b><br><b>(718.1 to 779.5)</b> | <b>300.4</b><br><b>(260.5 to 343.7)</b>  | <b>24.6</b><br><b>(16.9 to 33.3)</b> | <b>3.9</b><br><b>(-8.1 to 18.6)</b>               | <b>-0.8</b><br><b>(-14.1 to 15.3)</b>               |
| Alzheimer's disease and other dementias                        | 21.7<br>(18.1 to 26.2)                  | 3.7<br>(3.1 to 4.5)                      | 3.1<br>(2.2 to 4.2)                  | 39.2<br>(31.1 to 48.0)                            | -0.6<br>(-5.3 to 4.6)                               |
| Parkinson's disease                                            | 4.8<br>(3.7 to 6.0)                     | 0.5<br>(0.4 to 0.7)                      | 0.5<br>(0.3 to 0.8)                  | 30.2<br>(17.5 to 44.1)                            | 4.4<br>(-5.4 to 15.7)                               |
| Epilepsy                                                       | 6.8<br>(1.5 to 12.8)                    | 0.7<br>(0.1 to 1.3)                      | 1.6<br>(0.3 to 3.9)                  | -1.5<br>(-83.9 to 584.7)                          | -4.9<br>(-84.5 to 549.6)                            |
| Multiple sclerosis                                             | 1.5<br>(1.3 to 1.7)                     | < 0.05<br>(< 0.05 to < 0.05)             | 0.4<br>(0.3 to 0.5)                  | 16.1<br>(-0.6 to 36.5)                            | 9.9<br>(-6.1 to 29.6)                               |
| Motor neuron disease                                           | 0.1<br>(0.1 to 0.1)                     | < 0.05<br>(< 0.05 to < 0.05)             | < 0.05<br>(< 0.05 to < 0.05)         | 4.8<br>(0.4 to 9.4)                               | -2.7<br>(-7.0 to 1.6)                               |
| Migraine                                                       | 332.2<br>(313.4 to 351.8)               | 32.9<br>(30.5 to 35.4)                   | 15.7<br>(10.3 to 22.0)               | -1.0<br>(-4.0 to 2.2)                             | -1.0<br>(-4.2 to 2.2)                               |
| Tension-type headache                                          | 501.9<br>(449.8 to 558.4)               | 262.5<br>(222.8 to 305.6)                | 2.8<br>(1.8 to 4.2)                  | 0.0<br>(-5.4 to 5.4)                              | -1.7<br>(-6.8 to 3.6)                               |
| Other neurological disorders                                   | < 0.05<br>(< 0.05 to < 0.05)            | < 0.05<br>(< 0.05 to < 0.05)             | 0.4<br>(0.1 to 0.8)                  | 14.3<br>(-60.1 to 252.2)                          | 15.5<br>(-66.2 to 326.2)                            |
| <b>Mental and substance use disorders</b>                      | <b>308.5</b><br><b>(298.5 to 318.5)</b> | <b>126.8†</b><br><b>(118.0 to 136.7)</b> | <b>41.7</b><br><b>(30.4 to 53.5)</b> | <b>-0.6</b><br><b>(-3.1 to 2.1)</b>               | <b>-1.9</b><br><b>(-4.3 to 0.5)</b>                 |
| Schizophrenia                                                  | 5.6<br>(4.7 to 6.6)                     | 0.2<br>(0.2 to 0.3)                      | 3.5<br>(2.5 to 4.4)                  | 2.6<br>(-6.1 to 12.3)                             | 0.5<br>(-8.4 to 10.3)                               |
| Alcohol use disorders                                          | 44.8<br>(40.5 to 49.8)                  | 22.2<br>(19.6 to 24.8)                   | 4.4<br>(3.0 to 6.0)                  | 3.7<br>(-4.7 to 12.6)                             | 3.9<br>(-4.6 to 12.3)                               |
| Drug use disorders                                             | 14.2<br>(13.3 to 15.2)                  | 1.7<br>(1.5 to 1.8)                      | 2.6<br>(1.9 to 3.4)                  | 0.8<br>(-7.6 to 12.8)                             | 6.5<br>(-2.8 to 18.5)                               |
| Opioid use disorders                                           | 3.9<br>(3.2 to 4.6)                     | 0.5<br>(0.4 to 0.6)                      | 1.6<br>(1.1 to 2.1)                  | 7.9<br>(-4.8 to 26.4)                             | 12.2<br>(-1.6 to 32.2)                              |
| Cocaine use disorders                                          | 2.2<br>(2.0 to 2.5)                     | 0.1<br>(0.1 to 0.1)                      | 0.3<br>(0.2 to 0.4)                  | -5.3<br>(-20.6 to 13.1)                           | 0.2<br>(-17.2 to 20.2)                              |
| Amphetamine use disorders                                      | 1.0<br>(0.8 to 1.3)                     | 0.1<br>(0.1 to 0.1)                      | 0.1<br>(0.1 to 0.2)                  | -12.6<br>(-32.4 to 14.3)                          | 3.1<br>(-21.8 to 37.1)                              |
| Cannabis use disorders                                         | 6.1<br>(5.4 to 6.9)                     | 0.7<br>(0.6 to 0.8)                      | 0.2<br>(0.1 to 0.3)                  | -18.7<br>(-30.1 to -6.6)                          | -9.0<br>(-22.1 to 5.4)                              |
| Other drug use disorders                                       | 1.4<br>(1.2 to 1.5)                     | 0.2<br>(0.2 to 0.2)                      | 0.4<br>(0.3 to 0.6)                  | -3.9<br>(-22.5 to 18.6)                           | 2.5<br>(-19.0 to 28.6)                              |
| Depressive disorders                                           | 77.6<br>(72.0 to 82.4)                  | 85.8<br>(77.7 to 95.2)                   | 13.0<br>(9.0 to 17.7)                | -3.7<br>(-9.2 to 1.9)                             | -9.6<br>(-14.6 to -4.7)                             |
| Major depressive disorder                                      | 54.3<br>(49.4 to 60.0)                  | 81.6<br>(73.5 to 91.1)                   | 10.7<br>(7.4 to 14.6)                | -5.5<br>(-11.7 to 1.3)                            | -11.4<br>(-17.0 to -5.7)                            |
| Dysthymia                                                      | 24.9<br>(21.9 to 28.4)                  | 4.2<br>(3.7 to 4.8)                      | 2.3<br>(1.6 to 3.3)                  | 5.2<br>(1.2 to 9.6)                               | -0.4<br>(-4.0 to 3.6)                               |
| Bipolar disorder                                               | 14.2<br>(12.3 to 16.2)                  | 0.9<br>(0.8 to 1.1)                      | 2.8<br>(1.8 to 4.2)                  | -1.7<br>(-7.2 to 4.1)                             | 0.0<br>(-5.7 to 6.0)                                |
| Anxiety disorders                                              | 74.8<br>(68.1 to 81.6)                  | 10.6<br>(9.8 to 11.5)                    | 7.0<br>(4.9 to 9.5)                  | 0.8<br>(-5.9 to 7.4)                              | -0.5<br>(-6.6 to 6.0)                               |
| Eating disorders                                               | 2.4<br>(2.0 to 2.9)                     | 0.9<br>(0.7 to 1.2)                      | 0.5<br>(0.3 to 0.7)                  | -6.9<br>(-18.4 to 6.5)                            | 5.4<br>(-7.1 to 19.8)                               |
| Anorexia nervosa                                               | 0.5<br>(0.3 to 0.6)                     | 0.2<br>(0.1 to 0.2)                      | 0.1<br>(0.1 to 0.1)                  | -11.5<br>(-30.5 to 12.2)                          | 4.4<br>(-17.9 to 32.5)                              |
| Bulimia nervosa                                                | 1.8<br>(1.4 to 2.5)                     | 0.8<br>(0.6 to 1.1)                      | 0.4<br>(0.2 to 0.6)                  | -5.7<br>(-19.0 to 9.5)                            | 5.7<br>(-9.5 to 22.7)                               |
| Autistic spectrum disorders                                    | 17.1<br>(15.3 to 19.0)                  | 0.1<br>(< 0.05 to 0.1)                   | 2.5<br>(1.7 to 3.6)                  | 1.4<br>(-3.1 to 6.2)                              | 0.7<br>(-3.9 to 5.4)                                |
| Autism                                                         | 5.6<br>(4.8 to 6.6)                     | < 0.05<br>(< 0.05 to < 0.05)             | 1.4<br>(0.9 to 2.0)                  | 1.3<br>(-6.2 to 8.9)                              | 0.5<br>(-7.0 to 8.2)                                |
| Asperger syndrome and other autistic spectrum disorders        | 11.4<br>(9.5 to 13.7)                   | 0.1<br>(< 0.05 to 0.1)                   | 1.1<br>(0.7 to 1.7)                  | 1.6<br>(-2.7 to 6.1)                              | 1.0<br>(-3.3 to 5.7)                                |



| Cause                                                      | Prevalence in thousands (95% UI)        | Incidence in thousands (95% UI)          | YLDs in thousands (95% UI)     |                                                   |                                                     |
|------------------------------------------------------------|-----------------------------------------|------------------------------------------|--------------------------------|---------------------------------------------------|-----------------------------------------------------|
|                                                            | 2016 counts                             | 2016 counts                              | 2016 counts                    | Percentage change in counts between 2006 and 2016 | Percentage change in age-standardised rates between |
| Attention-deficit/hyperactivity disorder                   | 11.8<br>(10.7 to 13.1)                  | 0.4<br>(0.4 to 0.5)                      | 0.1<br>(0.1 to 0.2)            | -7.0<br>(-14.0 to 0.5)                            | 0.3<br>(-7.5 to 8.5)                                |
| Conduct disorder                                           | 8.6<br>(7.1 to 10.2)                    | 3.0<br>(2.4 to 3.6)                      | 1.1<br>(0.7 to 1.6)            | -11.1<br>(-16.9 to -4.7)                          | 0.1<br>(-6.1 to 6.8)                                |
| Idiopathic developmental intellectual disability           | 14.7<br>(7.0 to 22.0)                   | --                                       | 0.6<br>(0.2 to 1.1)            | -3.1<br>(-10.6 to 5.2)                            | -0.8<br>(-7.5 to 7.6)                               |
| Other mental and substance use disorders                   | 47.5<br>(42.2 to 54.4)                  | 0.9<br>(0.8 to 1.1)                      | 3.5<br>(2.4 to 4.9)            | 3.7<br>(-0.8 to 8.4)                              | 0.5<br>(-4.1 to 5.5)                                |
| <b>Diabetes, urogenital, blood, and endocrine diseases</b> | <b>675.6<br/>(657.7 to 696.6)</b>       | <b>260.6†<br/>(248.0 to 274.2)</b>       | <b>19.4<br/>(13.9 to 26.0)</b> | <b>4.7<br/>(0.2 to 9.2)</b>                       | <b>-6.2<br/>(-10.0 to -2.3)</b>                     |
| Diabetes mellitus                                          | 102.5<br>(91.5 to 117.1)                | 4.9<br>(4.4 to 5.7)                      | 8.9<br>(6.3 to 12.3)           | 3.3<br>(-5.6 to 12.5)                             | -10.7<br>(-18.2 to -2.6)                            |
| Acute glomerulonephritis                                   | < 0.05<br>(< 0.05 to < 0.05)            | 0.5<br>(0.5 to 0.6)                      | < 0.05<br>(< 0.05 to < 0.05)   | 0.3<br>(-4.6 to 5.6)                              | -1.3<br>(-5.8 to 3.2)                               |
| Chronic kidney disease                                     | 78.2<br>(69.9 to 86.3)                  | 5.4<br>(4.7 to 6.1)                      | 2.6<br>(1.9 to 3.4)            | 9.1<br>(1.1 to 17.8)                              | -9.3<br>(-16.0 to -2.4)                             |
| Chronic kidney disease due to diabetes mellitus            | 25.0<br>(22.1 to 27.7)                  | 1.8<br>(1.5 to 2.0)                      | 0.8<br>(0.6 to 1.1)            | 3.3<br>(-6.7 to 13.7)                             | -12.4<br>(-21.0 to -3.5)                            |
| Chronic kidney disease due to hypertension                 | 13.0<br>(11.4 to 14.7)                  | 1.2<br>(1.1 to 1.4)                      | 0.3<br>(0.2 to 0.4)            | 38.3<br>(21.2 to 57.2)                            | 1.6<br>(-10.4 to 15.2)                              |
| Chronic kidney disease due to glomerulonephritis           | 15.1<br>(13.4 to 16.8)                  | 0.7<br>(0.6 to 0.8)                      | 0.6<br>(0.5 to 0.8)            | -9.5<br>(-18.7 to 0.6)                            | -21.2<br>(-28.6 to -13.3)                           |
| Chronic kidney disease due to other causes                 | 25.1<br>(22.1 to 27.9)                  | 1.7<br>(1.5 to 2.0)                      | 0.8<br>(0.6 to 1.1)            | 24.4<br>(12.2 to 37.4)                            | 3.0<br>(-6.5 to 13.5)                               |
| Urinary diseases and male infertility                      | 52.4<br>(47.9 to 57.6)                  | 148.0†<br>(136.5 to 160.3)               | 1.6<br>(1.1 to 2.3)            | 20.8<br>(14.1 to 28.4)                            | 3.6<br>(-2.1 to 9.9)                                |
| Interstitial nephritis and urinary tract infections        | 2.1<br>(1.9 to 2.3)                     | 108.1<br>(97.5 to 119.5)                 | 0.1<br>(< 0.05 to 0.1)         | 1.2<br>(-10.5 to 14.6)                            | 0.9<br>(-11.2 to 15.2)                              |
| Urolithiasis                                               | 1.3<br>(1.2 to 1.5)                     | 34.2<br>(30.4 to 38.5)                   | 0.1<br>(0.1 to 0.1)            | 11.4<br>(-7.8 to 34.2)                            | 2.7<br>(-13.4 to 21.6)                              |
| Benign prostatic hyperplasia                               | 44.2<br>(39.1 to 50.4)                  | 5.6<br>(4.9 to 6.6)                      | 1.4<br>(0.9 to 2.0)            | 25.3<br>(17.3 to 34.0)                            | 6.0<br>(-0.9 to 13.1)                               |
| Male infertility                                           | 3.5<br>(2.5 to 4.9)                     | --                                       | < 0.05<br>(< 0.05 to < 0.05)   | -18.9<br>(-27.4 to -8.9)                          | -13.7<br>(-22.7 to -3.1)                            |
| Other urinary diseases                                     | --                                      | --                                       | 0.1<br>(< 0.05 to 0.1)         | -12.4<br>(-22.2 to -1.6)                          | -16.5<br>(-25.2 to -6.5)                            |
| Gynecological diseases                                     | 261.1<br>(248.0 to 280.4)               | 89.7†<br>(84.5 to 95.0)                  | 3.0<br>(2.1 to 4.3)            | -9.6<br>(-14.8 to -3.5)                           | -4.4<br>(-9.8 to 1.4)                               |
| Uterine fibroids                                           | 25.6<br>(23.1 to 28.7)                  | 2.3<br>(2.0 to 2.6)                      | 0.3<br>(0.1 to 0.5)            | -7.1<br>(-18.2 to 2.9)                            | -8.2<br>(-19.0 to 2.1)                              |
| Polycystic ovarian syndrome                                | 1.8<br>(1.4 to 2.4)                     | 1.0<br>(0.7 to 1.3)                      | < 0.05<br>(< 0.05 to < 0.05)   | -7.8<br>(-20.3 to 4.9)                            | -1.0<br>(-14.0 to 12.8)                             |
| Female infertility                                         | 1.9<br>(0.5 to 5.7)                     | --                                       | < 0.05<br>(< 0.05 to < 0.05)   | -17.2<br>(-64.3 to 58.5)                          | -11.6<br>(-64.1 to 101.3)                           |
| Endometriosis                                              | 1.2<br>(1.0 to 1.4)                     | 4.0<br>(3.0 to 5.2)                      | 0.1<br>(0.1 to 0.2)            | -14.9<br>(-32.4 to 6.1)                           | -0.8<br>(-20.9 to 23.6)                             |
| Genital prolapse                                           | 102.5<br>(89.8 to 116.3)                | 4.0<br>(3.5 to 4.7)                      | 0.3<br>(0.1 to 0.6)            | 24.7<br>(12.2 to 39.6)                            | 7.1<br>(-3.3 to 19.1)                               |
| Premenstrual syndrome                                      | 118.5<br>(112.2 to 125.4)               | 39.7<br>(37.1 to 42.6)                   | 1.0<br>(0.6 to 1.5)            | -9.2<br>(-15.5 to -2.4)                           | -0.9<br>(-7.9 to 6.4)                               |
| Other gynecological diseases                               | 37.2<br>(33.4 to 40.9)                  | 38.7<br>(34.3 to 43.5)                   | 1.3<br>(0.9 to 1.8)            | -15.4<br>(-23.3 to -5.8)                          | -8.2<br>(-16.5 to 1.8)                              |
| Hemoglobinopathies and hemolytic anaemias                  | 252.9<br>(234.3 to 271.0)               | --                                       | 0.8<br>(0.5 to 1.3)            | 7.0<br>(-7.9 to 24.9)                             | -1.9<br>(-15.6 to 14.8)                             |
| Thalassemias                                               | < 0.05<br>(< 0.05 to < 0.05)            | --                                       | < 0.05<br>(< 0.05 to < 0.05)   | 8.0<br>(-16.0 to 30.3)                            | -3.0<br>(-24.5 to 18.6)                             |
| Thalassaemias trait                                        | 23.2<br>(16.1 to 31.6)                  | --                                       | 0.5<br>(0.2 to 0.8)            | 6.5<br>(-14.3 to 30.0)                            | -1.8<br>(-20.8 to 19.2)                             |
| Sickle cell disorders                                      | < 0.05<br>(< 0.05 to < 0.05)            | --                                       | < 0.05<br>(< 0.05 to < 0.05)   | -1.1<br>(-7.9 to 6.2)                             | 6.5<br>(-1.5 to 15.3)                               |
| Sickle cell trait                                          | 25.0<br>(24.3 to 25.8)                  | --                                       | 0.1<br>(0.1 to 0.2)            | -0.6<br>(-18.4 to 21.9)                           | -9.0<br>(-26.2 to 12.4)                             |
| G6PD deficiency                                            | 38.3<br>(32.9 to 44.5)                  | --                                       | < 0.05<br>(< 0.05 to < 0.05)   | -10.3<br>(-25.2 to 8.4)                           | -18.2<br>(-35.2 to 2.9)                             |
| G6PD trait                                                 | 156.7<br>(141.9 to 172.4)               | --                                       | < 0.05<br>(< 0.05 to < 0.05)   | 4.0<br>(-19.5 to 35.1)                            | -0.4<br>(-23.8 to 30.8)                             |
| Other hemoglobinopathies and hemolytic anaemias            | 15.4<br>(13.8 to 17.1)                  | --                                       | 0.2<br>(0.1 to 0.3)            | 12.5<br>(-2.0 to 30.6)                            | 2.6<br>(-12.9 to 22.5)                              |
| Endocrine, metabolic, blood, and immune disorders          | 76.2<br>(70.2 to 82.5)                  | 12.2<br>(11.0 to 13.6)                   | 2.5<br>(1.7 to 3.3)            | 16.8<br>(11.0 to 22.8)                            | 1.8<br>(-3.1 to 6.8)                                |
| <b>Musculoskeletal disorders</b>                           | <b>509.7<br/>(486.4 to 535.1)</b>       | <b>218.1<br/>(193.0 to 245.9)</b>        | <b>59.9<br/>(43.3 to 78.0)</b> | <b>8.9<br/>(5.6 to 12.1)</b>                      | <b>-1.2<br/>(-4.2 to 1.5)</b>                       |
| Rheumatoid arthritis                                       | 11.5<br>(10.2 to 12.9)                  | 0.6<br>(0.5 to 0.6)                      | 2.6<br>(1.8 to 3.4)            | 13.5<br>(3.8 to 24.6)                             | -0.8<br>(-8.9 to 8.5)                               |
| Osteoarthritis                                             | 140.1<br>(131.4 to 149.4)               | 5.8<br>(5.4 to 6.3)                      | 8.4<br>(6.0 to 11.3)           | 17.9<br>(13.8 to 21.7)                            | 0.2<br>(-3.3 to 3.6)                                |
| Low back and neck pain                                     | 393.9<br>(365.1 to 423.2)               | 191.9<br>(167.2 to 218.6)                | 46.8<br>(33.1 to 61.4)         | 7.2<br>(3.0 to 11.2)                              | -1.5<br>(-5.2 to 1.7)                               |
| Low back pain                                              | 331.7<br>(295.2 to 372.0)               | 170.4<br>(145.6 to 196.4)                | 36.8<br>(26.0 to 48.8)         | 7.0<br>(1.7 to 12.1)                              | -1.9<br>(-6.6 to 2.3)                               |
| Neck pain                                                  | 103.0<br>(88.9 to 119.4)                | 21.6<br>(18.7 to 25.4)                   | 10.1<br>(6.9 to 14.1)          | 8.1<br>(5.4 to 11.0)                              | -0.1<br>(-2.1 to 1.9)                               |
| Gout                                                       | 11.7<br>(10.3 to 13.2)                  | 2.3<br>(1.9 to 2.6)                      | 0.4<br>(0.2 to 0.5)            | 17.2<br>(0.6 to 36.0)                             | 2.2<br>(-11.9 to 18.2)                              |
| Other musculoskeletal disorders                            | 21.3<br>(17.9 to 26.3)                  | 17.6<br>(14.7 to 21.5)                   | 1.8<br>(1.2 to 2.5)            | 6.8<br>(-4.6 to 18.2)                             | 0.2<br>(-11.0 to 12.1)                              |
| <b>Other non-communicable diseases</b>                     | <b>1,611.9<br/>(1,591.2 to 1,632.3)</b> | <b>5,091.2†<br/>(4,845.2 to 5,350.4)</b> | <b>52.3<br/>(36.2 to 74.2)</b> | <b>10.3<br/>(9.0 to 11.7)</b>                     | <b>-0.6<br/>(-1.8 to 0.6)</b>                       |
| Congenital anomalies                                       | 25.6<br>(23.8 to 27.5)                  | --                                       | 3.2<br>(2.4 to 4.2)            | -2.1<br>(-7.0 to 2.9)                             | -5.2<br>(-10.1 to -0.2)                             |
| Neural tube defects                                        | 3.0<br>(2.6 to 3.3)                     | --                                       | 0.9<br>(0.6 to 1.2)            | -6.7<br>(-17.0 to 3.4)                            | -8.8<br>(-18.9 to 1.5)                              |
| Congenital heart anomalies                                 | 4.8<br>(4.3 to 5.4)                     | --                                       | 0.2<br>(0.1 to 0.4)            | 0.4<br>(-8.9 to 11.6)                             | -2.4<br>(-11.7 to 8.5)                              |
| Orofacial clefts                                           | 0.8<br>(0.7 to 1.0)                     | --                                       | < 0.05<br>(< 0.05 to < 0.05)   | -3.1<br>(-13.7 to 9.5)                            | -6.2<br>(-16.5 to 6.0)                              |
| Down's syndrome                                            | 1.1<br>(1.0 to 1.3)                     | --                                       | 0.1<br>(0.1 to 0.2)            | -8.9<br>(-17.5 to 0.4)                            | -8.2<br>(-17.0 to 1.8)                              |
| Turner syndrome                                            | 0.7<br>(0.6 to 0.8)                     | --                                       | < 0.05<br>(< 0.05 to < 0.05)   | -15.9<br>(-37.8 to 13.2)                          | -13.4<br>(-35.8 to 18.0)                            |
| Klinefelter syndrome                                       | 1.5<br>(1.3 to 1.8)                     | --                                       | < 0.05<br>(< 0.05 to < 0.05)   | -18.5<br>(-31.9 to -2.7)                          | -11.3<br>(-25.5 to 5.3)                             |

| Cause                                         | Prevalence in thousands (95% UI)              | Incidence in thousands (95% UI)          | YLDs in thousands (95% UI)           |                                                   |                                                     |
|-----------------------------------------------|-----------------------------------------------|------------------------------------------|--------------------------------------|---------------------------------------------------|-----------------------------------------------------|
|                                               | 2016 counts                                   | 2016 counts                              | 2016 counts                          | Percentage change in counts between 2006 and 2016 | Percentage change in age-standardised rates between |
| Other chromosomal abnormalities               | 2.5<br>(2.1 to 2.8)                           | --                                       | 0.3<br>(0.2 to 0.4)                  | -11.4<br>(-22.9 to 2.6)                           | -13.2<br>(-24.3 to 0.9)                             |
| Congenital musculoskeletal and limb anomalies | 4.7<br>(4.3 to 5.2)                           | --                                       | 0.6<br>(0.4 to 0.9)                  | 1.1<br>(-8.0 to 10.9)                             | -1.7<br>(-10.9 to 7.7)                              |
| Urogenital congenital anomalies               | 3.7<br>(3.3 to 4.1)                           | --                                       | 0.1<br>(< 0.05 to 0.1)               | 5.5<br>(-3.8 to 15.5)                             | 2.3<br>(-7.8 to 14.1)                               |
| Digestive congenital anomalies                | 2.7<br>(2.4 to 3.0)                           | --                                       | 0.1<br>(0.1 to 0.2)                  | 3.3<br>(-9.9 to 17.7)                             | 0.8<br>(-12.2 to 15.4)                              |
| Other congenital anomalies                    | 5.3<br>(3.4 to 8.1)                           | --                                       | 0.8<br>(0.6 to 1.1)                  | 3.6<br>(-4.4 to 12.4)                             | -0.4<br>(-8.0 to 8.2)                               |
| Skin and subcutaneous diseases                | 633.4<br>(617.3 to 649.8)                     | 1,738.1<br>(1,626.7 to 1,849.0)          | 13.1<br>(8.8 to 19.0)                | 1.7<br>(-0.4 to 3.7)                              | 1.3<br>(-0.7 to 3.5)                                |
| Dermatitis                                    | 66.5<br>(61.9 to 71.8)                        | 98.1<br>(89.5 to 107.6)                  | 2.4<br>(1.4 to 3.8)                  | 4.7<br>(-0.1 to 10.1)                             | 1.1<br>(-4.1 to 6.8)                                |
| Psoriasis                                     | 25.9<br>(24.7 to 27.3)                        | 3.2<br>(3.0 to 3.3)                      | 2.2<br>(1.6 to 2.9)                  | 7.1<br>(0.9 to 14.2)                              | 2.6<br>(-3.8 to 9.8)                                |
| Cellulitis                                    | 0.8<br>(0.8 to 0.9)                           | 16.7<br>(15.7 to 17.8)                   | < 0.05<br>(< 0.05 to 0.1)            | 6.8<br>(-12.5 to 32.5)                            | 1.4<br>(-19.1 to 27.6)                              |
| Pyoderma                                      | 11.2<br>(10.8 to 11.6)                        | 301.4<br>(290.7 to 312.6)                | 0.1<br>(< 0.05 to 0.1)               | 13.1<br>(7.9 to 19.1)                             | -0.0<br>(-4.9 to 5.5)                               |
| Scabies                                       | 12.3<br>(11.0 to 13.9)                        | 37.6<br>(33.3 to 42.4)                   | 0.3<br>(0.2 to 0.5)                  | -0.6<br>(-5.8 to 4.8)                             | 0.7<br>(-4.0 to 5.7)                                |
| Fungal skin diseases                          | 215.5<br>(192.2 to 239.6)                     | 831.3<br>(723.1 to 945.1)                | 1.2<br>(0.5 to 2.4)                  | 12.6<br>(10.7 to 14.8)                            | 0.1<br>(-0.9 to 1.2)                                |
| Viral skin diseases                           | 44.4<br>(42.8 to 46.2)                        | 66.9<br>(64.2 to 69.9)                   | 1.3<br>(0.8 to 2.0)                  | -0.3<br>(-3.5 to 3.1)                             | -0.3<br>(-3.4 to 3.1)                               |
| Acne vulgaris                                 | 109.9<br>(99.7 to 120.8)                      | 69.0<br>(58.6 to 81.7)                   | 2.8<br>(1.9 to 4.1)                  | -12.1<br>(-16.2 to -7.7)                          | 2.2<br>(-2.9 to 7.3)                                |
| Alopecia areata                               | 4.0<br>(3.8 to 4.1)                           | 6.9<br>(6.7 to 7.2)                      | 0.1<br>(0.1 to 0.2)                  | -1.4<br>(-11.2 to 8.7)                            | -0.2<br>(-9.8 to 10.2)                              |
| Pruritus                                      | 23.2<br>(20.5 to 26.4)                        | 18.2<br>(16.0 to 20.8)                   | 0.2<br>(0.1 to 0.5)                  | 7.9<br>(2.3 to 13.7)                              | 0.4<br>(-4.7 to 5.4)                                |
| Urticaria                                     | 17.8<br>(15.8 to 19.9)                        | 31.5<br>(27.9 to 35.7)                   | 1.1<br>(0.7 to 1.5)                  | 4.0<br>(-1.4 to 9.8)                              | 0.1<br>(-4.8 to 5.5)                                |
| Decubitus ulcer                               | 1.3<br>(1.1 to 1.5)                           | 4.7<br>(4.1 to 5.3)                      | 0.2<br>(0.1 to 0.3)                  | 27.9<br>(9.5 to 51.0)                             | 2.4<br>(-11.1 to 19.0)                              |
| Other skin and subcutaneous diseases          | 209.8<br>(203.8 to 215.9)                     | 252.6<br>(244.1 to 261.5)                | 1.1<br>(0.5 to 2.0)                  | 11.8<br>(9.5 to 14.6)                             | 1.8<br>(-0.3 to 4.2)                                |
| Sense organ diseases                          | 684.0<br>(670.6 to 700.1)                     | 233.6†<br>(221.0 to 248.0)               | 24.5<br>(17.0 to 34.4)               | 16.2<br>(14.0 to 18.7)                            | -1.4<br>(-3.2 to 0.4)                               |
| Glaucoma                                      | 2.5<br>(2.0 to 3.0)                           | --                                       | 0.2<br>(0.1 to 0.2)                  | 24.8<br>(9.4 to 42.8)                             | -0.3<br>(-12.6 to 13.9)                             |
| Cataract                                      | 43.0<br>(36.5 to 50.0)                        | --                                       | 2.0<br>(1.4 to 2.8)                  | 23.6<br>(16.8 to 30.7)                            | -3.7<br>(-8.9 to 1.5)                               |
| Macular degeneration                          | 1.5<br>(1.2 to 1.9)                           | --                                       | 0.1<br>(0.1 to 0.1)                  | 28.5<br>(10.6 to 49.6)                            | 1.3<br>(-13.2 to 17.8)                              |
| Refraction and accommodation disorders        | 209.7<br>(198.9 to 220.7)                     | --                                       | 4.3<br>(2.8 to 6.6)                  | 8.6<br>(4.9 to 12.7)                              | -3.2<br>(-6.3 to 0.1)                               |
| Age-related and other hearing loss            | 570.2<br>(546.8 to 594.5)                     | --                                       | 14.3<br>(10.0 to 20.1)               | 18.0<br>(14.5 to 21.7)                            | -0.8<br>(-3.7 to 2.1)                               |
| Other vision loss                             | 15.4<br>(13.3 to 17.7)                        | --                                       | 0.8<br>(0.6 to 1.1)                  | 18.2<br>(10.4 to 26.8)                            | -1.0<br>(-7.2 to 5.8)                               |
| Other sense organ diseases                    | 90.7<br>(83.2 to 98.1)                        | 233.6<br>(221.0 to 248.0)                | 2.8<br>(1.8 to 4.2)                  | 13.6<br>(9.7 to 17.7)                             | 0.2<br>(-3.4 to 3.8)                                |
| Oral disorders                                | 1,212.3<br>(1,178.2 to 1,245.4)               | 3,119.4†<br>(2,903.8 to 3,347.3)         | 11.6<br>(7.2 to 17.4)                | 12.7<br>(10.3 to 15.5)                            | -0.3<br>(-2.1 to 1.4)                               |
| Caries of deciduous teeth                     | 79.4<br>(66.2 to 92.6)                        | 344.7<br>(246.6 to 448.9)                | < 0.05<br>(< 0.05 to 0.1)            | 17.9<br>(8.0 to 28.2)                             | -0.6<br>(-9.1 to 8.1)                               |
| Caries of permanent teeth                     | 792.6<br>(750.5 to 839.4)                     | 2,704.6<br>(2,510.4 to 2,900.5)          | 0.8<br>(0.3 to 1.4)                  | -1.1<br>(-4.0 to 1.9)                             | -3.0<br>(-6.0 to -0.1)                              |
| Periodontal disease                           | 397.6<br>(345.6 to 455.4)                     | 50.7<br>(43.5 to 57.9)                   | 2.6<br>(1.0 to 5.3)                  | 8.2<br>(5.2 to 11.7)                              | 0.3<br>(-2.5 to 3.3)                                |
| Edentulism and severe tooth loss              | 258.9<br>(227.8 to 290.4)                     | 19.4<br>(16.4 to 23.0)                   | 7.0<br>(4.6 to 9.9)                  | 18.4<br>(14.4 to 22.3)                            | -0.1<br>(-3.2 to 2.8)                               |
| Other oral disorders                          | 41.7<br>(40.0 to 43.5)                        | --                                       | 1.2<br>(0.7 to 1.8)                  | 2.1<br>(-0.9 to 5.3)                              | -0.1<br>(-3.2 to 2.9)                               |
| <b>Injuries</b>                               | <b>1,358.8</b><br><b>(1,267.9 to 1,478.2)</b> | <b>520.9†</b><br><b>(478.9 to 568.9)</b> | <b>50.4</b><br><b>(34.9 to 68.9)</b> | <b>11.9</b><br><b>(10.1 to 14.1)</b>              | <b>-1.4</b><br><b>(-2.6 to 0.1)</b>                 |
| <b>Transport injuries</b>                     | <b>146.5</b><br><b>(135.2 to 158.1)</b>       | <b>34.1</b><br><b>(30.7 to 37.5)</b>     | <b>6.9</b><br><b>(4.6 to 10.0)</b>   | <b>-14.3</b><br><b>(-15.9 to -12.8)</b>           | <b>-20.9</b><br><b>(-22.5 to -19.3)</b>             |
| Road injuries                                 | 141.0<br>(129.8 to 152.3)                     | 33.2<br>(29.8 to 36.6)                   | 6.7<br>(4.5 to 9.6)                  | -15.0<br>(-16.5 to -13.4)                         | -21.5<br>(-23.1 to -20.0)                           |
| Pedestrian road injuries                      | 21.4<br>(18.5 to 24.6)                        | 3.7<br>(3.1 to 4.4)                      | 1.0<br>(0.6 to 1.4)                  | 3.3<br>(1.6 to 5.1)                               | -4.7<br>(-6.8 to -2.8)                              |
| Cyclist road injuries                         | 40.8<br>(34.6 to 47.9)                        | 10.5<br>(8.9 to 12.2)                    | 1.8<br>(1.2 to 2.6)                  | -11.8<br>(-13.2 to -10.2)                         | -18.6<br>(-20.3 to -17.0)                           |
| Motorcyclist road injuries                    | 19.3<br>(16.3 to 23.4)                        | 2.8<br>(2.3 to 3.4)                      | 0.9<br>(0.6 to 1.3)                  | -21.4<br>(-22.9 to -19.9)                         | -27.3<br>(-28.8 to -25.8)                           |
| Motor vehicle road injuries                   | 55.0<br>(45.8 to 63.8)                        | 14.8<br>(12.9 to 16.8)                   | 2.8<br>(1.9 to 4.0)                  | -20.7<br>(-22.3 to -19.2)                         | -26.9<br>(-28.4 to -25.4)                           |
| Other road injuries                           | 4.5<br>(3.9 to 5.3)                           | 1.3<br>(1.0 to 1.6)                      | 0.2<br>(0.1 to 0.3)                  | 3.4<br>(1.9 to 5.2)                               | -4.4<br>(-6.0 to -2.9)                              |
| Other transport injuries                      | 5.5<br>(4.7 to 6.3)                           | 0.9<br>(0.8 to 1.0)                      | 0.2<br>(0.2 to 0.4)                  | 8.9<br>(7.0 to 10.6)                              | 1.5<br>(-0.6 to 3.5)                                |
| <b>Unintentional injuries</b>                 | <b>1,181.9</b><br><b>(1,094.3 to 1,295.5)</b> | <b>477.5</b><br><b>(436.4 to 525.7)</b>  | <b>42.2</b><br><b>(29.5 to 57.8)</b> | <b>18.2</b><br><b>(16.3 to 20.6)</b>              | <b>3.2</b><br><b>(1.9 to 4.8)</b>                   |
| Falls                                         | 824.7<br>(745.0 to 917.7)                     | 370.3<br>(329.8 to 418.9)                | 33.6<br>(23.9 to 46.0)               | 19.7<br>(17.6 to 22.4)                            | 2.8<br>(1.2 to 4.7)                                 |
| Drowning                                      | 1.1<br>(1.0 to 1.3)                           | 0.1<br>(0.1 to 0.1)                      | < 0.05<br>(< 0.05 to 0.1)            | 16.6<br>(13.9 to 19.4)                            | 8.6<br>(6.2 to 11.0)                                |
| Fire, heat, and hot substances                | 41.2<br>(36.0 to 47.4)                        | 3.7<br>(3.3 to 4.2)                      | 0.9<br>(0.6 to 1.4)                  | 16.0<br>(13.7 to 18.5)                            | 7.4<br>(4.8 to 9.9)                                 |
| Poisonings                                    | 1.7<br>(1.4 to 2.0)                           | 1.6<br>(1.2 to 1.9)                      | 0.1<br>(0.1 to 0.2)                  | 60.8<br>(51.6 to 69.7)                            | 56.1<br>(46.3 to 65.6)                              |
| Exposure to mechanical forces                 | 208.8<br>(178.4 to 257.5)                     | 56.2<br>(48.9 to 64.1)                   | 4.5<br>(2.9 to 6.5)                  | 1.3<br>(-0.2 to 2.7)                              | -6.0<br>(-7.5 to -4.4)                              |
| Unintentional firearm injuries                | 1.4<br>(1.2 to 1.6)                           | 0.2<br>(0.2 to 0.3)                      | 0.1<br>(< 0.05 to 0.1)               | 19.6<br>(17.8 to 21.5)                            | 10.1<br>(8.1 to 12.0)                               |
| Unintentional suffocation                     | 3.0<br>(2.4 to 3.6)                           | 0.4<br>(0.3 to 0.5)                      | 0.1<br>(0.1 to 0.1)                  | 17.2<br>(15.4 to 19.2)                            | 9.7<br>(7.8 to 11.6)                                |
| Other exposure to mechanical forces           | 204.5<br>(174.2 to 253.0)                     | 55.6<br>(48.2 to 63.3)                   | 4.3<br>(2.8 to 6.3)                  | 0.8<br>(-0.6 to 2.2)                              | -6.5<br>(-8.0 to -4.9)                              |

| Cause                                                                               | Prevalence in thousands (95% UI)     | Incidence in thousands (95% UI)                      | YLDs in thousands (95% UI)                    |                                                   |                                                     |
|-------------------------------------------------------------------------------------|--------------------------------------|------------------------------------------------------|-----------------------------------------------|---------------------------------------------------|-----------------------------------------------------|
|                                                                                     | 2016 counts                          | 2016 counts                                          | 2016 counts                                   | Percentage change in counts between 2006 and 2016 | Percentage change in age-standardised rates between |
| Adverse effects of medical treatment                                                | 0.8<br>(0.6 to 1.0)                  | 10.2<br>(9.2 to 11.3)                                | 0.1<br>(0.1 to 0.1)                           | 25.9<br>(19.9 to 32.1)                            | 4.5<br>(0.1 to 9.2)                                 |
| Animal contact                                                                      | 9.1<br>(8.1 to 10.7)                 | 7.7<br>(6.5 to 9.1)                                  | 0.2<br>(0.2 to 0.4)                           | 13.3<br>(8.7 to 17.9)                             | 8.0<br>(2.8 to 12.9)                                |
| Venomous animal contact                                                             | 3.7<br>(3.1 to 4.5)                  | 3.2<br>(2.5 to 3.9)                                  | 0.2<br>(0.1 to 0.3)                           | 13.9<br>(7.2 to 20.3)                             | 10.5<br>(3.4 to 17.3)                               |
| Non-venomous animal contact                                                         | 5.4<br>(4.7 to 6.6)                  | 4.5<br>(3.7 to 5.5)                                  | 0.1<br>(< 0.05 to 0.1)                        | 12.1<br>(9.9 to 14.4)                             | 1.7<br>(-0.3 to 3.7)                                |
| Foreign body                                                                        | 17.6<br>(15.3 to 19.8)               | 10.3<br>(9.0 to 12.0)                                | 0.6<br>(0.4 to 0.8)                           | 18.0<br>(16.1 to 19.9)                            | 8.2<br>(6.4 to 10.0)                                |
| Pulmonary aspiration and foreign body in airway                                     | 9.2<br>(7.5 to 11.1)                 | 2.6<br>(2.3 to 3.1)                                  | 0.3<br>(0.2 to 0.5)                           | 20.1<br>(18.2 to 22.0)                            | 10.1<br>(8.0 to 12.0)                               |
| Foreign body in eyes                                                                | 1.3<br>(0.8 to 1.8)                  | 5.6<br>(4.4 to 7.2)                                  | 0.1<br>(< 0.05 to 0.1)                        | 5.5<br>(1.6 to 9.2)                               | -1.4<br>(-4.1 to 1.6)                               |
| Foreign body in other body part                                                     | 7.1<br>(6.1 to 8.5)                  | 2.1<br>(1.9 to 2.4)                                  | 0.2<br>(0.1 to 0.2)                           | 20.3<br>(18.7 to 22.0)                            | 9.5<br>(7.9 to 11.0)                                |
| Environmental heat and cold exposure                                                | 18.2<br>(15.6 to 21.6)               | 3.4<br>(2.9 to 3.9)                                  | 0.6<br>(0.4 to 0.8)                           | 23.2<br>(21.5 to 25.0)                            | 12.8<br>(11.3 to 14.4)                              |
| Other unintentional injuries                                                        | 58.6<br>(47.9 to 70.1)               | 14.1<br>(11.8 to 16.6)                               | 1.6<br>(1.0 to 2.3)                           | 44.7<br>(42.7 to 46.6)                            | 34.9<br>(32.7 to 37.2)                              |
| <b>Self-harm and interpersonal violence</b>                                         | <b>53.4</b><br><b>(49.1 to 58.0)</b> | <b>9.2†</b><br><b>(8.2 to 10.3)</b>                  | <b>1.2</b><br><b>(0.8 to 1.7)</b>             | <b>0.3</b><br><b>(-1.2 to 1.8)</b>                | <b>-4.2</b><br><b>(-5.6 to -2.8)</b>                |
| Self-harm                                                                           | 7.8<br>(6.6 to 9.0)                  | 2.7<br>(2.4 to 3.0)                                  | 0.3<br>(0.2 to 0.4)                           | -4.4<br>(-6.1 to -2.7)                            | -12.4<br>(-14.2 to -10.6)                           |
| Self-harm by firearm                                                                | 0.2<br>(0.1 to 0.2)                  | < 0.05<br>(< 0.05 to 0.1)                            | < 0.05<br>(< 0.05 to < 0.05)                  | -7.0<br>(-9.8 to -4.0)                            | -13.6<br>(-16.0 to -11.3)                           |
| Self-harm by other specified means                                                  | 7.6<br>(6.4 to 8.8)                  | 2.6<br>(2.3 to 3.0)                                  | 0.3<br>(0.2 to 0.4)                           | -4.3<br>(-6.1 to -2.6)                            | -12.4<br>(-14.2 to -10.5)                           |
| Interpersonal violence                                                              | 45.6<br>(41.6 to 50.0)               | 6.6‡<br>(5.6 to 7.6)                                 | 0.9<br>(0.6 to 1.3)                           | 1.9<br>(-0.0 to 3.7)                              | -1.6<br>(-3.5 to 0.1)                               |
| Assault by firearm                                                                  | 0.4<br>(0.4 to 0.5)                  | 0.1<br>(0.1 to 0.1)                                  | < 0.05<br>(< 0.05 to < 0.05)                  | -2.1<br>(-4.0 to -0.2)                            | -7.4<br>(-9.7 to -5.3)                              |
| Assault by sharp object                                                             | 3.7<br>(3.0 to 4.4)                  | 0.8<br>(0.6 to 1.0)                                  | 0.1<br>(0.1 to 0.1)                           | 20.2<br>(17.8 to 22.3)                            | 14.2<br>(11.7 to 16.4)                              |
| Sexual violence                                                                     | 23.8<br>(21.1 to 26.7)               | --                                                   | 0.2<br>(0.1 to 0.3)                           | -8.3<br>(-11.7 to -4.6)                           | -4.3<br>(-8.1 to -0.5)                              |
| Assault by other means                                                              | 17.8<br>(14.8 to 21.4)               | 5.7<br>(4.8 to 6.6)                                  | 0.6<br>(0.4 to 0.9)                           | 3.3<br>(1.5 to 5.0)                               | -2.4<br>(-4.1 to -0.6)                              |
| <b>Forces of nature, conflict and terrorism, and executions and police conflict</b> | <b>0.8</b><br><b>(0.4 to 1.3)</b>    | <b>&lt; 0.05†</b><br><b>(&lt; 0.05 to &lt; 0.05)</b> | <b>&lt; 0.05</b><br><b>(&lt; 0.05 to 0.1)</b> | <b>21.8</b><br><b>(16.6 to 44.5)</b>              | <b>11.4</b><br><b>(6.0 to 35.7)</b>                 |
| Exposure to forces of nature                                                        | 0.3<br>(0.1 to 0.6)                  | --                                                   | < 0.05<br>(< 0.05 to < 0.05)                  | 68.4<br>(60.8 to 104.6)                           | 60.9<br>(53.1 to 101.4)                             |
| Conflict and terrorism                                                              | 0.4<br>(0.1 to 0.8)                  | --                                                   | < 0.05<br>(< 0.05 to < 0.05)                  | -7.1<br>(-9.4 to -4.5)                            | -20.6<br>(-22.8 to -18.4)                           |
| Executions and police conflict                                                      | 0.1<br>(0.1 to 0.2)                  | < 0.05<br>(< 0.05 to < 0.05)                         | < 0.05<br>(< 0.05 to < 0.05)                  | 30.7<br>(22.7 to 34.4)                            | 25.5<br>(17.8 to 29.4)                              |
| <b>Impairments</b>                                                                  | --                                   | --                                                   | --                                            | --                                                | --                                                  |
| Anaemia                                                                             | 386.5<br>(342.6 to 430.8)            | --                                                   | 8.0<br>(5.2 to 11.8)                          | 3.1<br>(-7.8 to 16.2)                             | -6.0<br>(-15.7 to 7.4)                              |
| Developmental intellectual disability                                               | 35.0<br>(27.6 to 42.5)               | --                                                   | 4.0<br>(2.9 to 5.2)                           | -1.3<br>(-4.9 to 3.0)                             | -2.2<br>(-6.1 to 2.3)                               |
| Epilepsy                                                                            | 10.5<br>(5.0 to 16.8)                | --                                                   | 2.8<br>(1.4 to 5.4)                           | -0.4<br>(-56.9 to 147.6)                          | -1.9<br>(-57.2 to 139.2)                            |
| Guillain-Barre syndrome                                                             | < 0.05<br>(< 0.05 to < 0.05)         | --                                                   | < 0.05<br>(< 0.05 to < 0.05)                  | 8.6<br>(5.2 to 12.2)                              | 0.2<br>(0.1 to 0.4)                                 |
| Hearing loss                                                                        | 589.1<br>(565.4 to 612.4)            | --                                                   | 15.2<br>(10.6 to 21.3)                        | 16.7<br>(13.5 to 20.2)                            | -1.1<br>(-3.7 to 1.5)                               |
| Heart failure                                                                       | 53.1<br>(46.5 to 60.4)               | --                                                   | 4.9<br>(3.6 to 6.2)                           | 22.6<br>(14.2 to 31.6)                            | -0.9<br>(-7.5 to 6.4)                               |
| Infertility                                                                         | 15.6<br>(11.7 to 21.4)               | --                                                   | 0.1<br>(< 0.05 to 0.2)                        | -10.6<br>(-25.8 to 0.7)                           | -4.3<br>(-23.8 to 12.8)                             |
| Pelvic inflammatory disease                                                         | 0.9<br>(0.8 to 1.0)                  | --                                                   | 0.1<br>(0.1 to 0.2)                           | -17.0<br>(-30.1 to -1.2)                          | -13.1<br>(-26.6 to 3.9)                             |
| Vision loss                                                                         | 276.4<br>(260.7 to 291.6)            | --                                                   | 8.1<br>(5.7 to 11.6)                          | 12.7<br>(9.9 to 16.0)                             | -2.3<br>(-4.7 to 0.5)                               |

We did not calculate incidence for the nine impairments, certain NTDs, and causes with only birth prevalence. Blank cells mean that no estimate is available.

† Incidence for aggregate causes represents the sum of the incidence of the causes below the aggregate.

‡ Incidence estimates for stroke represent first-ever stroke only.

^ Incidence of HIV/AIDS represents new infections of HIV only and does not include new infections of Tuberculosis in HIV positive cases.



SR Table 14: Prevalence, incidence, and YLDs for 2016, percentage change of YLD counts and percentage change of age-standardised YLD rates between 2006 and 2016 by cause and impairments, for all ages, Solomon Islands.

| Cause                                                                                | Prevalence in thousands (95% UI) | Incidence in thousands (95% UI)         | YLDs in thousands (95% UI)    |                                                   |                                                     |
|--------------------------------------------------------------------------------------|----------------------------------|-----------------------------------------|-------------------------------|---------------------------------------------------|-----------------------------------------------------|
|                                                                                      | 2016 counts                      | 2016 counts                             | 2016 counts                   | Percentage change in counts between 2006 and 2016 | Percentage change in age-standardised rates between |
| <b>All causes</b>                                                                    | <b>585.8</b><br>(584.1 to 587.5) | <b>4,203.9†</b><br>(3,977.5 to 4,453.7) | <b>56.4</b><br>(41.8 to 73.7) | <b>26.5</b><br>(23.4 to 29.4)                     | <b>-0.0</b><br>(-1.7 to 1.6)                        |
| <b>Communicable, maternal, neonatal, and nutritional disorders</b>                   | <b>522.4</b><br>(511.8 to 532.9) | <b>2,594.3†</b><br>(2,394.2 to 2,818.8) | <b>10.5</b><br>(7.4 to 14.6)  | <b>10.6</b><br>(2.3 to 19.7)                      | <b>-9.3</b><br>(-15.2 to -2.6)                      |
| <b>HIV/AIDS and tuberculosis</b>                                                     | <b>148.7</b><br>(137.6 to 157.1) | <b>0.5†</b><br>(0.4 to 0.8)             | <b>0.2</b><br>(0.1 to 0.4)    | <b>19.1</b><br>(-1.7 to 69.9)                     | <b>-9.0</b><br>(-22.8 to 23.0)                      |
| Tuberculosis                                                                         | 140.4<br>(131.0 to 150.5)        | 0.5†<br>(0.4 to 0.5)                    | 0.2<br>(0.1 to 0.2)           | 7.7<br>(-4.7 to 20.7)                             | -16.8<br>(-24.4 to -8.9)                            |
| Drug-susceptible tuberculosis                                                        | 0.6<br>(0.5 to 0.6)              | 0.5<br>(0.4 to 0.5)                     | 0.2<br>(0.1 to 0.2)           | 8.1<br>(-5.3 to 25.4)                             | -16.4<br>(-25.8 to -5.3)                            |
| Multidrug-resistant tuberculosis without extensive drug resistance                   | < 0.05<br>(< 0.05 to < 0.05)     | < 0.05<br>(< 0.05 to < 0.05)            | < 0.05<br>(< 0.05 to < 0.05)  | -24.1<br>(-97.5 to 2,727.5)                       | -41.0<br>(-98.1 to 2,037.4)                         |
| Extensively drug-resistant tuberculosis                                              | < 0.05<br>(< 0.05 to < 0.05)     | < 0.05<br>(< 0.05 to < 0.05)            | < 0.05<br>(< 0.05 to < 0.05)  | 149.0<br>(-92.0 to 8,919.2)                       | 92.6<br>(-93.8 to 6,774.5)                          |
| Latent tuberculosis infection                                                        | 139.9<br>(130.5 to 149.9)        | --                                      | --                            | --                                                | --                                                  |
| HIV/AIDS                                                                             | 0.3<br>(< 0.05 to 1.7)           | 0.1 <sup>a</sup><br>(< 0.05 to 0.3)     | < 0.05<br>(< 0.05 to 0.2)     | 98.3<br>(-0.6 to 396.2)                           | 52.4<br>(-24.7 to 288.4)                            |
| Drug-susceptible HIV/AIDS - Tuberculosis                                             | < 0.05<br>(< 0.05 to < 0.05)     | < 0.05<br>(< 0.05 to < 0.05)            | < 0.05<br>(< 0.05 to < 0.05)  | 37.9<br>(25.4 to 58.9)                            | 7.3<br>(-2.4 to 23.7)                               |
| Multidrug-resistant HIV/AIDS - Tuberculosis without extensive drug resistance        | < 0.05<br>(< 0.05 to < 0.05)     | < 0.05<br>(< 0.05 to < 0.05)            | < 0.05<br>(< 0.05 to < 0.05)  | -4.4<br>(-96.9 to 3,468.2)                        | -25.6<br>(-97.6 to 2,677.1)                         |
| Extensively drug-resistant HIV/AIDS - Tuberculosis                                   | < 0.05<br>(< 0.05 to < 0.05)     | < 0.05<br>(< 0.05 to < 0.05)            | < 0.05<br>(< 0.05 to < 0.05)  | 214.7<br>(-89.9 to 11,660.9)                      | 144.9<br>(-92.1 to 9,052.2)                         |
| HIV/AIDS resulting in other diseases                                                 | 0.3<br>(< 0.05 to 1.6)           | 0.1<br>(< 0.05 to 0.3)                  | < 0.05<br>(< 0.05 to 0.2)     | 120.1<br>(-11.1 to 882.6)                         | 67.3<br>(-35.2 to 709.1)                            |
| <b>Diarrhoea, lower respiratory infections, and other common infectious diseases</b> | <b>42.8</b><br>(40.8 to 45.1)    | <b>2,206.8†</b><br>(2,018.1 to 2,412.4) | <b>2.5</b><br>(1.8 to 3.4)    | <b>21.5</b><br>(17.7 to 25.3)                     | <b>-0.2</b><br>(-2.9 to 2.6)                        |
| Diarrhoeal diseases                                                                  | 10.6<br>(9.9 to 11.4)            | 706.9<br>(657.5 to 759.6)               | 1.2<br>(0.8 to 1.6)           | 27.0<br>(20.8 to 33.5)                            | 3.5<br>(-1.0 to 8.3)                                |
| Intestinal infectious diseases                                                       | 0.1<br>(< 0.05 to 0.1)           | 1.1†<br>(0.9 to 1.4)                    | < 0.05<br>(< 0.05 to < 0.05)  | -11.4<br>(-31.6 to 12.8)                          | -27.6<br>(-41.3 to -12.4)                           |
| Typhoid fever                                                                        | 0.1<br>(< 0.05 to 0.1)           | 0.9<br>(0.7 to 1.1)                     | < 0.05<br>(< 0.05 to < 0.05)  | -11.1<br>(-33.1 to 15.4)                          | -27.5<br>(-42.2 to -10.4)                           |
| Paratyphoid fever                                                                    | < 0.05<br>(< 0.05 to < 0.05)     | 0.2<br>(0.2 to 0.3)                     | < 0.05<br>(< 0.05 to < 0.05)  | -8.0<br>(-23.9 to 10.4)                           | -25.2<br>(-36.4 to -12.7)                           |
| Other intestinal infectious diseases                                                 | --                               | --                                      | < 0.05<br>(< 0.05 to < 0.05)  | -41.9<br>(-54.7 to -24.9)                         | -46.1<br>(-55.0 to -35.6)                           |
| Lower respiratory infections                                                         | 1.1<br>(1.0 to 1.2)              | 45.7<br>(41.3 to 51.3)                  | 0.1<br>(< 0.05 to 0.1)        | 37.0<br>(23.2 to 53.0)                            | 10.8<br>(1.0 to 21.0)                               |
| Upper respiratory infections                                                         | 18.7<br>(16.4 to 21.3)           | 1,402.9<br>(1,223.6 to 1,607.0)         | 0.5<br>(0.3 to 0.7)           | 21.6<br>(15.1 to 28.3)                            | 0.0<br>(-5.1 to 5.0)                                |
| Otitis media                                                                         | 10.0<br>(8.9 to 11.1)            | 30.3<br>(23.7 to 38.8)                  | 0.3<br>(0.2 to 0.5)           | 14.6<br>(6.7 to 23.4)                             | -5.3<br>(-11.1 to 1.8)                              |
| Meningitis                                                                           | 2.0<br>(1.7 to 2.4)              | 0.3<br>(0.3 to 0.4)                     | 0.2<br>(0.1 to 0.3)           | 16.3<br>(7.4 to 25.5)                             | -6.0<br>(-12.5 to 0.8)                              |
| Pneumococcal meningitis                                                              | 1.2<br>(1.0 to 1.4)              | 0.1<br>(0.1 to 0.1)                     | 0.1<br>(0.1 to 0.2)           | 10.2<br>(-3.4 to 25.6)                            | -11.2<br>(-21.4 to -0.2)                            |
| H influenzae type B meningitis                                                       | 0.2<br>(0.2 to 0.3)              | < 0.05<br>(< 0.05 to 0.1)               | < 0.05<br>(< 0.05 to < 0.05)  | 1.6<br>(-6.3 to 9.5)                              | -18.1<br>(-25.0 to -11.2)                           |
| Meningococcal infection                                                              | 0.2<br>(0.1 to 0.3)              | 0.1<br>(< 0.05 to 0.1)                  | < 0.05<br>(< 0.05 to < 0.05)  | 22.5<br>(16.4 to 29.1)                            | -1.5<br>(-6.4 to 3.9)                               |
| Other meningitis                                                                     | 0.5<br>(0.3 to 0.6)              | 0.1<br>(0.1 to 0.1)                     | < 0.05<br>(< 0.05 to 0.1)     | 58.5<br>(41.5 to 75.8)                            | 29.6<br>(16.5 to 44.2)                              |
| Encephalitis                                                                         | 2.1<br>(1.3 to 3.1)              | 0.8<br>(0.7 to 1.0)                     | 0.2<br>(0.1 to 0.3)           | 19.8<br>(7.5 to 35.2)                             | -4.0<br>(-13.4 to 6.9)                              |
| Diphtheria                                                                           | < 0.05<br>(< 0.05 to < 0.05)     | < 0.05<br>(< 0.05 to < 0.05)            | < 0.05<br>(< 0.05 to < 0.05)  | -17.7<br>(-51.8 to 41.5)                          | -36.9<br>(-62.8 to 8.6)                             |
| Whooping cough                                                                       | 0.2<br>(0.2 to 0.3)              | 1.7<br>(1.3 to 2.1)                     | < 0.05<br>(< 0.05 to < 0.05)  | -20.8<br>(-34.4 to -5.3)                          | -26.3<br>(-38.7 to -11.9)                           |
| Tetanus                                                                              | < 0.05<br>(< 0.05 to < 0.05)     | < 0.05<br>(< 0.05 to < 0.05)            | < 0.05<br>(< 0.05 to < 0.05)  | -8.2<br>(-30.1 to 14.7)                           | -36.5<br>(-52.9 to -10.8)                           |
| Measles                                                                              | < 0.05<br>(< 0.05 to < 0.05)     | 0.7<br>(0.2 to 1.5)                     | < 0.05<br>(< 0.05 to < 0.05)  | -90.4<br>(-94.1 to -85.3)                         | -91.2<br>(-94.7 to -86.5)                           |
| Varicella and herpes zoster                                                          | 0.7<br>(0.6 to 0.7)              | 16.6<br>(15.8 to 17.5)                  | < 0.05<br>(< 0.05 to < 0.05)  | 28.0<br>(12.3 to 46.2)                            | 0.1<br>(-9.5 to 11.1)                               |
| <b>Neglected tropical diseases and malaria</b>                                       | <b>289.0</b><br>(260.0 to 324.7) | <b>57.0†</b><br>(55.1 to 59.3)          | <b>1.5</b><br>(0.9 to 2.4)    | <b>-18.5</b><br>(-36.6 to 4.5)                    | <b>-29.2</b><br>(-45.6 to -7.2)                     |
| Malaria                                                                              | 7.7<br>(6.3 to 9.6)              | 51.8<br>(51.8 to 51.8)                  | 0.2<br>(0.1 to 0.2)           | -78.7<br>(-82.9 to -72.7)                         | -81.1<br>(-84.3 to -76.4)                           |
| Chagas disease                                                                       | --                               | --                                      | --                            | --                                                | --                                                  |
| Leishmaniasis                                                                        | --                               | --                                      | --                            | --                                                | --                                                  |
| Visceral leishmaniasis                                                               | --                               | --                                      | --                            | --                                                | --                                                  |
| Cutaneous and mucocutaneous leishmaniasis                                            | --                               | --                                      | --                            | --                                                | --                                                  |
| African trypanosomiasis                                                              | --                               | --                                      | --                            | --                                                | --                                                  |
| Schistosomiasis                                                                      | --                               | --                                      | --                            | --                                                | --                                                  |
| Cysticercosis                                                                        | --                               | --                                      | --                            | --                                                | --                                                  |
| Cystic echinococcosis                                                                | --                               | --                                      | --                            | --                                                | --                                                  |
| Lymphatic filariasis                                                                 | --                               | --                                      | --                            | --                                                | --                                                  |
| Onchocerciasis                                                                       | --                               | --                                      | --                            | --                                                | --                                                  |
| Trachoma                                                                             | 0.8<br>(0.4 to 1.2)              | --                                      | < 0.05<br>(< 0.05 to 0.1)     | 19.5<br>(-12.5 to 60.1)                           | -12.3<br>(-37.5 to 21.9)                            |
| Dengue                                                                               | 0.3<br>(0.2 to 0.5)              | 5.2<br>(3.3 to 7.5)                     | 0.1<br>(< 0.05 to 0.1)        | 262.5<br>(157.4 to 728.3)                         | 193.3<br>(115.5 to 576.1)                           |
| Yellow fever                                                                         | --                               | --                                      | --                            | --                                                | --                                                  |
| Rabies                                                                               | < 0.05<br>(< 0.05 to < 0.05)     | < 0.05<br>(< 0.05 to < 0.05)            | < 0.05<br>(< 0.05 to < 0.05)  | -14.2<br>(-48.1 to 45.1)                          | -39.3<br>(-61.9 to 2.6)                             |
| Intestinal nematode infections                                                       | 280.6<br>(250.9 to 316.8)        | --                                      | 1.0<br>(0.6 to 1.8)           | 25.4<br>(-14.2 to 77.5)                           | 1.3<br>(-34.3 to 52.0)                              |
| Ascariasis                                                                           | 17.1<br>(12.6 to 22.5)           | --                                      | < 0.05<br>(< 0.05 to < 0.05)  | 22.2<br>(-55.5 to 255.9)                          | 0.5<br>(-66.2 to 221.6)                             |

| Cause                                                                   | Prevalence in thousands (95% UI)        | Incidence in thousands (95% UI)                | YLDs in thousands (95% UI)                                              |                                                   |                                                     |
|-------------------------------------------------------------------------|-----------------------------------------|------------------------------------------------|-------------------------------------------------------------------------|---------------------------------------------------|-----------------------------------------------------|
|                                                                         | 2016 counts                             | 2016 counts                                    | 2016 counts                                                             | Percentage change in counts between 2006 and 2016 | Percentage change in age-standardised rates between |
| Trichuriasis                                                            | 130.2<br>(103.4 to 166.2)               | --                                             | 0.1<br>( $< 0.05$ to 0.2)                                               | 25.0<br>(-41.5 to 170.5)                          | 1.9<br>(-57.9 to 158.6)                             |
| Hookworm disease                                                        | 192.3<br>(162.1 to 230.1)               | --                                             | 0.9<br>(0.5 to 1.6)                                                     | 25.4<br>(-17.0 to 83.3)                           | 1.3<br>(-36.7 to 55.8)                              |
| Food-borne trematodiasis                                                | --                                      | --                                             | --                                                                      | --                                                | --                                                  |
| Leprosy                                                                 | $< 0.05$<br>( $< 0.05$ to $< 0.05$ )    | $< 0.05$<br>( $< 0.05$ to $< 0.05$ )           | $< 0.05$<br>( $< 0.05$ to $< 0.05$ )                                    | 34.3<br>(-14.3 to 169.0)                          | -0.7<br>(-34.8 to 106.0)                            |
| Ebola virus disease                                                     | --                                      | --                                             | --                                                                      | --                                                | --                                                  |
| Zika virus disease                                                      | --                                      | --                                             | --                                                                      | --                                                | --                                                  |
| Guinea worm disease                                                     | --                                      | --                                             | --                                                                      | --                                                | --                                                  |
| Other neglected tropical diseases                                       | 7.4<br>(6.4 to 8.3)                     | --                                             | 0.2<br>(0.1 to 0.3)                                                     | 16.9<br>(-3.8 to 42.2)                            | -0.4<br>(-16.5 to 17.5)                             |
| <b>Maternal disorders</b>                                               | <b>0.5</b><br><b>(0.4 to 0.6)</b>       | <b>10.0†</b><br><b>(8.6 to 11.5)</b>           | <b><math>&lt; 0.05</math></b><br><b>(<math>&lt; 0.05</math> to 0.1)</b> | <b>7.9</b><br><b>(-16.5 to 38.6)</b>              | <b>-9.6</b><br><b>(-30.2 to 15.6)</b>               |
| Maternal haemorrhage                                                    | 0.2<br>(0.2 to 0.3)                     | 1.8<br>(1.4 to 2.3)                            | $< 0.05$<br>( $< 0.05$ to $< 0.05$ )                                    | 3.5<br>(-32.9 to 57.0)                            | -12.7<br>(-43.0 to 32.0)                            |
| Maternal sepsis and other pregnancy related infections                  | 0.1<br>( $< 0.05$ to 0.1)               | 0.8<br>(0.6 to 1.0)                            | $< 0.05$<br>( $< 0.05$ to $< 0.05$ )                                    | 3.5<br>(-54.7 to 144.6)                           | -13.6<br>(-62.3 to 103.2)                           |
| Maternal hypertensive disorders                                         | 0.2<br>(0.1 to 0.3)                     | 0.8<br>(0.6 to 1.0)                            | $< 0.05$<br>( $< 0.05$ to $< 0.05$ )                                    | 26.9<br>(-26.2 to 122.7)                          | 5.7<br>(-38.1 to 84.0)                              |
| Maternal obstructed labour and uterine rupture                          | $< 0.05$<br>( $< 0.05$ to $< 0.05$ )    | 1.2<br>(0.9 to 1.6)                            | $< 0.05$<br>( $< 0.05$ to $< 0.05$ )                                    | 3.8<br>(-56.4 to 148.6)                           | -12.5<br>(-63.7 to 111.8)                           |
| Maternal abortion, miscarriage, and ectopic pregnancy                   | $< 0.05$<br>( $< 0.05$ to 0.1)          | 5.5<br>(4.3 to 6.9)                            | $< 0.05$<br>( $< 0.05$ to $< 0.05$ )                                    | 2.7<br>(-45.9 to 87.5)                            | -15.1<br>(-54.5 to 48.8)                            |
| Other maternal disorders                                                | --                                      | --                                             | $< 0.05$<br>( $< 0.05$ to $< 0.05$ )                                    | 2.6<br>(-20.7 to 32.0)                            | -14.1<br>(-33.5 to 9.9)                             |
| <b>Neonatal disorders</b>                                               | <b>10.5</b><br><b>(8.9 to 13.8)</b>     | <b>1.2</b><br><b>--</b>                        | <b>1.2</b><br><b>(0.9 to 1.7)</b>                                       | <b>20.0</b><br><b>(-0.2 to 41.6)</b>              | <b>0.5</b><br><b>(-16.0 to 17.9)</b>                |
| Neonatal preterm birth complications                                    | 9.8<br>(7.9 to 13.6)                    | --                                             | 0.9<br>(0.6 to 1.3)                                                     | 19.1<br>(-5.9 to 46.4)                            | -0.8<br>(-21.4 to 21.3)                             |
| Neonatal encephalopathy due to birth asphyxia and trauma                | 0.6<br>(0.2 to 1.1)                     | --                                             | 0.1<br>( $< 0.05$ to 0.2)                                               | 28.7<br>(-12.1 to 119.7)                          | 7.4<br>(-26.1 to 86.4)                              |
| Neonatal sepsis and other neonatal infections                           | 0.2<br>(0.1 to 0.5)                     | --                                             | 0.1<br>( $< 0.05$ to 0.2)                                               | 32.0<br>(-4.7 to 122.7)                           | 11.0<br>(-19.3 to 99.3)                             |
| Hemolytic disease and other neonatal jaundice                           | 0.2<br>(0.1 to 0.2)                     | --                                             | 0.1<br>( $< 0.05$ to 0.1)                                               | 16.8<br>(-0.7 to 37.0)                            | -3.7<br>(-15.6 to 10.2)                             |
| Other neonatal disorders                                                | --                                      | --                                             | $< 0.05$<br>( $< 0.05$ to 0.1)                                          | 3.9<br>(-15.3 to 25.4)                            | -3.4<br>(-21.3 to 16.6)                             |
| <b>Nutritional deficiencies</b>                                         | <b>292.1</b><br><b>(261.5 to 323.8)</b> | <b>246.6†</b><br><b>(170.5 to 344.5)</b>       | <b>4.6</b><br><b>(3.0 to 6.8)</b>                                       | <b>14.6</b><br><b>(1.1 to 29.0)</b>               | <b>-7.6</b><br><b>(-16.2 to 1.5)</b>                |
| Protein-energy malnutrition                                             | 6.7<br>(4.9 to 9.3)                     | 2.2<br>(1.6 to 3.0)                            | 0.4<br>(0.2 to 0.6)                                                     | 5.1<br>(-35.9 to 71.0)                            | -2.1<br>(-40.4 to 59.3)                             |
| Iodine deficiency                                                       | 0.2<br>(0.2 to 0.3)                     | $< 0.05$<br>( $< 0.05$ to $< 0.05$ )           | $< 0.05$<br>( $< 0.05$ to $< 0.05$ )                                    | 14.9<br>(3.5 to 27.4)                             | -11.1<br>(-19.7 to -1.3)                            |
| Vitamin A deficiency                                                    | 191.9<br>(150.0 to 241.3)               | 244.4<br>(168.0 to 341.5)                      | $< 0.05$<br>( $< 0.05$ to $< 0.05$ )                                    | 14.4<br>(-6.2 to 39.7)                            | -4.3<br>(-20.0 to 13.8)                             |
| Iron-deficiency anaemia                                                 | 149.2<br>(133.3 to 164.8)               | --                                             | 4.2<br>(2.6 to 6.2)                                                     | 15.6<br>(1.6 to 29.5)                             | -7.9<br>(-17.1 to 1.0)                              |
| Other nutritional deficiencies                                          | --                                      | --                                             | $< 0.05$<br>( $< 0.05$ to $< 0.05$ )                                    | 4.6<br>(-37.2 to 74.0)                            | -2.8<br>(-41.8 to 62.1)                             |
| <b>Other communicable, maternal, neonatal, and nutritional diseases</b> | <b>188.3</b><br><b>(173.7 to 203.7)</b> | <b>73.3</b><br><b>(67.0 to 80.3)</b>           | <b>0.4</b><br><b>(0.2 to 0.6)</b>                                       | <b>24.2</b><br><b>(14.7 to 35.0)</b>              | <b>-1.7</b><br><b>(-7.8 to 4.4)</b>                 |
| Sexually transmitted diseases excluding HIV                             | 115.8<br>(107.5 to 123.3)               | 57.2<br>(51.9 to 63.2)                         | 0.2<br>(0.1 to 0.3)                                                     | 24.2<br>(16.3 to 31.7)                            | -3.5<br>(-9.3 to 2.0)                               |
| Syphilis                                                                | 32.5<br>(27.9 to 37.3)                  | 22.4<br>(18.6 to 26.9)                         | $< 0.05$<br>( $< 0.05$ to $< 0.05$ )                                    | 28.2<br>(18.2 to 40.7)                            | -3.6<br>(-12.1 to 6.8)                              |
| Chlamydial infection                                                    | 8.2<br>(6.3 to 10.6)                    | 7.0<br>(5.4 to 9.1)                            | $< 0.05$<br>( $< 0.05$ to 0.1)                                          | 20.8<br>(6.5 to 35.9)                             | -4.0<br>(-15.7 to 7.5)                              |
| Gonococcal infection                                                    | 1.0<br>(0.8 to 1.2)                     | 2.2<br>(1.7 to 2.9)                            | $< 0.05$<br>( $< 0.05$ to $< 0.05$ )                                    | 22.3<br>(-0.7 to 51.8)                            | -3.6<br>(-20.9 to 17.0)                             |
| Trichomoniasis                                                          | 14.8<br>(12.1 to 17.8)                  | 13.2<br>(10.6 to 16.1)                         | $< 0.05$<br>( $< 0.05$ to $< 0.05$ )                                    | 26.8<br>(17.7 to 36.0)                            | 0.8<br>(-5.7 to 7.3)                                |
| Genital herpes                                                          | 73.3<br>(62.8 to 85.0)                  | 6.7<br>(5.7 to 8.0)                            | $< 0.05$<br>( $< 0.05$ to $< 0.05$ )                                    | 28.7<br>(17.1 to 40.0)                            | -0.1<br>(-7.8 to 7.4)                               |
| Other sexually transmitted diseases                                     | 5.1<br>(4.4 to 5.7)                     | 5.6<br>(4.7 to 6.7)                            | 0.1<br>(0.1 to 0.1)                                                     | 23.5<br>(10.7 to 37.0)                            | -5.2<br>(-14.5 to 5.0)                              |
| Hepatitis                                                               | 85.2<br>(66.1 to 107.5)                 | 16.1<br>(13.1 to 19.4)                         | $< 0.05$<br>( $< 0.05$ to $< 0.05$ )                                    | 16.2<br>(-5.1 to 41.9)                            | -9.4<br>(-24.8 to 8.9)                              |
| Acute hepatitis A                                                       | 0.4<br>(0.3 to 0.5)                     | 5.5<br>(3.8 to 6.7)                            | $< 0.05$<br>( $< 0.05$ to $< 0.05$ )                                    | 21.2<br>(-20.2 to 80.0)                           | -4.0<br>(-32.6 to 34.6)                             |
| Hepatitis B                                                             | 78.1<br>(59.0 to 99.9)                  | 9.6<br>(7.0 to 12.9)                           | $< 0.05$<br>( $< 0.05$ to $< 0.05$ )                                    | 13.6<br>(-12.3 to 48.1)                           | -12.0<br>(-31.5 to 13.3)                            |
| Hepatitis C                                                             | 6.6<br>(5.9 to 7.4)                     | 0.4<br>(0.4 to 0.4)                            | $< 0.05$<br>( $< 0.05$ to $< 0.05$ )                                    | 14.8<br>(13.3 to 16.1)                            | -1.6<br>(-2.0 to -1.3)                              |
| Acute hepatitis E                                                       | $< 0.05$<br>( $< 0.05$ to 0.1)          | 0.6<br>(0.5 to 0.7)                            | $< 0.05$<br>( $< 0.05$ to $< 0.05$ )                                    | 16.3<br>(-16.3 to 56.1)                           | -7.2<br>(-26.3 to 14.7)                             |
| Other infectious diseases                                               | 5.8<br>(5.0 to 6.5)                     | $< 0.05$<br>( $< 0.05$ to $< 0.05$ )           | 0.2<br>(0.1 to 0.2)                                                     | 25.3<br>(6.5 to 49.1)                             | 3.2<br>(-9.6 to 18.7)                               |
| <b>Non-communicable diseases</b>                                        | <b>525.4</b><br><b>(520.3 to 529.7)</b> | <b>1,573.9†</b><br><b>(1,477.9 to 1,669.1)</b> | <b>43.2</b><br><b>(31.9 to 56.2)</b>                                    | <b>30.3</b><br><b>(27.5 to 32.9)</b>              | <b>1.2</b><br><b>(-0.4 to 2.8)</b>                  |
| <b>Neoplasms</b>                                                        | <b>0.7</b><br><b>(0.6 to 0.7)</b>       | <b>0.5</b><br><b>(0.4 to 0.5)</b>              | <b>0.1</b><br><b>(0.1 to 0.2)</b>                                       | <b>34.7</b><br><b>(27.3 to 43.1)</b>              | <b>0.5</b><br><b>(-4.2 to 6.1)</b>                  |
| Lip and oral cavity cancer                                              | $< 0.05$<br>( $< 0.05$ to $< 0.05$ )    | $< 0.05$<br>( $< 0.05$ to $< 0.05$ )           | $< 0.05$<br>( $< 0.05$ to $< 0.05$ )                                    | 43.5<br>(27.3 to 65.2)                            | 6.5<br>(-5.5 to 21.0)                               |
| Nasopharynx cancer                                                      | $< 0.05$<br>( $< 0.05$ to $< 0.05$ )    | $< 0.05$<br>( $< 0.05$ to $< 0.05$ )           | $< 0.05$<br>( $< 0.05$ to $< 0.05$ )                                    | 33.5<br>(10.9 to 63.5)                            | -2.5<br>(-17.1 to 16.9)                             |
| Other pharynx cancer                                                    | $< 0.05$<br>( $< 0.05$ to $< 0.05$ )    | $< 0.05$<br>( $< 0.05$ to $< 0.05$ )           | $< 0.05$<br>( $< 0.05$ to $< 0.05$ )                                    | 37.9<br>(22.0 to 58.6)                            | 1.9<br>(-9.8 to 17.6)                               |
| Oesophageal cancer                                                      | $< 0.05$<br>( $< 0.05$ to $< 0.05$ )    | $< 0.05$<br>( $< 0.05$ to $< 0.05$ )           | $< 0.05$<br>( $< 0.05$ to $< 0.05$ )                                    | 27.8<br>(15.1 to 42.8)                            | -5.2<br>(-14.0 to 5.6)                              |
| Stomach cancer                                                          | $< 0.05$<br>( $< 0.05$ to 0.1)          | $< 0.05$<br>( $< 0.05$ to $< 0.05$ )           | $< 0.05$<br>( $< 0.05$ to $< 0.05$ )                                    | 20.5<br>(6.0 to 37.0)                             | -10.3<br>(-21.9 to 3.9)                             |
| Colon and rectum cancer                                                 | 0.1<br>( $< 0.05$ to 0.1)               | $< 0.05$<br>( $< 0.05$ to $< 0.05$ )           | $< 0.05$<br>( $< 0.05$ to $< 0.05$ )                                    | 41.1<br>(23.7 to 62.3)                            | 4.9<br>(-9.8 to 22.2)                               |
| Liver cancer                                                            | $< 0.05$<br>( $< 0.05$ to $< 0.05$ )    | $< 0.05$<br>( $< 0.05$ to 0.1)                 | $< 0.05$<br>( $< 0.05$ to $< 0.05$ )                                    | 34.7<br>(17.5 to 54.6)                            | -0.1<br>(-13.0 to 14.3)                             |
| Liver cancer due to hepatitis B                                         | $< 0.05$<br>( $< 0.05$ to $< 0.05$ )    | $< 0.05$<br>( $< 0.05$ to $< 0.05$ )           | $< 0.05$<br>( $< 0.05$ to $< 0.05$ )                                    | 34.8<br>(16.7 to 56.4)                            | 0.1<br>(-13.1 to 15.2)                              |

| Cause                                              | Prevalence in thousands (95% UI)     | Incidence in thousands (95% UI)       | YLDs in thousands (95% UI)        |                                                   |                                                     |
|----------------------------------------------------|--------------------------------------|---------------------------------------|-----------------------------------|---------------------------------------------------|-----------------------------------------------------|
|                                                    | 2016 counts                          | 2016 counts                           | 2016 counts                       | Percentage change in counts between 2006 and 2016 | Percentage change in age-standardised rates between |
| Liver cancer due to hepatitis C                    | < 0.05<br>(< 0.05 to < 0.05)         | < 0.05<br>(< 0.05 to < 0.05)          | < 0.05<br>(< 0.05 to < 0.05)      | 36.8<br>(18.5 to 58.3)                            | 0.7<br>(-12.7 to 15.8)                              |
| Liver cancer due to alcohol use                    | < 0.05<br>(< 0.05 to < 0.05)         | < 0.05<br>(< 0.05 to < 0.05)          | < 0.05<br>(< 0.05 to < 0.05)      | 39.1<br>(20.0 to 62.2)                            | 2.0<br>(-12.1 to 18.5)                              |
| Liver cancer due to other causes                   | < 0.05<br>(< 0.05 to < 0.05)         | < 0.05<br>(< 0.05 to < 0.05)          | < 0.05<br>(< 0.05 to < 0.05)      | 32.3<br>(13.8 to 53.4)                            | -1.5<br>(-15.1 to 14.1)                             |
| Gallbladder and biliary tract cancer               | < 0.05<br>(< 0.05 to < 0.05)         | < 0.05<br>(< 0.05 to < 0.05)          | < 0.05<br>(< 0.05 to < 0.05)      | 31.1<br>(21.1 to 42.9)                            | -4.5<br>(-11.5 to 3.5)                              |
| Pancreatic cancer                                  | < 0.05<br>(< 0.05 to < 0.05)         | < 0.05<br>(< 0.05 to < 0.05)          | < 0.05<br>(< 0.05 to < 0.05)      | 43.3<br>(32.3 to 55.6)                            | 5.3<br>(-3.2 to 14.5)                               |
| Larynx cancer                                      | < 0.05<br>(< 0.05 to < 0.05)         | < 0.05<br>(< 0.05 to < 0.05)          | < 0.05<br>(< 0.05 to < 0.05)      | 35.0<br>(21.5 to 50.8)                            | -1.1<br>(-12.5 to 12.6)                             |
| Tracheal, bronchus, and lung cancer                | 0.1<br>(< 0.05 to 0.1)               | 0.1<br>(< 0.05 to 0.1)                | < 0.05<br>(< 0.05 to < 0.05)      | 34.7<br>(9.6 to 62.9)                             | -0.8<br>(-19.2 to 19.3)                             |
| Malignant skin melanoma                            | < 0.05<br>(< 0.05 to < 0.05)         | < 0.05<br>(< 0.05 to < 0.05)          | < 0.05<br>(< 0.05 to < 0.05)      | 39.3<br>(23.5 to 62.0)                            | 3.1<br>(-8.6 to 19.4)                               |
| Non-melanoma skin cancer                           | < 0.05<br>(< 0.05 to < 0.05)         | < 0.05<br>(< 0.05 to < 0.05)          | < 0.05<br>(< 0.05 to < 0.05)      | 4.0<br>(-50.0 to 105.4)                           | -26.6<br>(-65.1 to 46.2)                            |
| Non-melanoma skin cancer (squamous-cell carcinoma) | < 0.05<br>(< 0.05 to < 0.05)         | < 0.05<br>(< 0.05 to < 0.05)          | < 0.05<br>(< 0.05 to < 0.05)      | 3.8<br>(-50.3 to 105.9)                           | -26.7<br>(-65.3 to 46.4)                            |
| Non-melanoma skin cancer (basal-cell carcinoma)    | < 0.05<br>(< 0.05 to < 0.05)         | < 0.05<br>(< 0.05 to < 0.05)          | < 0.05<br>(< 0.05 to < 0.05)      | 29.6<br>(12.0 to 52.0)                            | -0.1<br>(-11.1 to 12.1)                             |
| Breast cancer                                      | 0.2<br>(0.1 to 0.4)                  | 0.1<br>(< 0.05 to 0.1)                | < 0.05<br>(< 0.05 to < 0.05)      | 49.4<br>(19.4 to 88.6)                            | 9.5<br>(-10.7 to 35.5)                              |
| Cervical cancer                                    | 0.2<br>(0.1 to 0.3)                  | 0.1<br>(< 0.05 to 0.1)                | < 0.05<br>(< 0.05 to < 0.05)      | 28.5<br>(0.8 to 70.0)                             | -6.6<br>(-25.1 to 20.3)                             |
| Uterine cancer                                     | 0.1<br>(< 0.05 to 0.1)               | < 0.05<br>(< 0.05 to < 0.05)          | < 0.05<br>(< 0.05 to < 0.05)      | 39.5<br>(11.8 to 76.9)                            | 2.4<br>(-18.6 to 31.4)                              |
| Ovarian cancer                                     | < 0.05<br>(< 0.05 to < 0.05)         | < 0.05<br>(< 0.05 to < 0.05)          | < 0.05<br>(< 0.05 to < 0.05)      | 49.0<br>(15.6 to 89.7)                            | 10.5<br>(-18.8 to 49.8)                             |
| Prostate cancer                                    | 0.1<br>(< 0.05 to 0.1)               | < 0.05<br>(< 0.05 to < 0.05)          | < 0.05<br>(< 0.05 to < 0.05)      | 43.6<br>(17.0 to 76.9)                            | 2.3<br>(-14.2 to 23.2)                              |
| Testicular cancer                                  | < 0.05<br>(< 0.05 to < 0.05)         | < 0.05<br>(< 0.05 to < 0.05)          | < 0.05<br>(< 0.05 to < 0.05)      | 22.0<br>(-3.7 to 54.0)                            | -4.2<br>(-22.6 to 17.7)                             |
| Kidney cancer                                      | < 0.05<br>(< 0.05 to < 0.05)         | < 0.05<br>(< 0.05 to < 0.05)          | < 0.05<br>(< 0.05 to < 0.05)      | 44.3<br>(24.1 to 67.7)                            | 10.0<br>(-4.7 to 26.7)                              |
| Bladder cancer                                     | < 0.05<br>(< 0.05 to < 0.05)         | < 0.05<br>(< 0.05 to < 0.05)          | < 0.05<br>(< 0.05 to < 0.05)      | 49.7<br>(34.8 to 68.1)                            | 8.0<br>(-3.1 to 21.6)                               |
| Brain and nervous system cancer                    | < 0.05<br>(< 0.05 to < 0.05)         | < 0.05<br>(< 0.05 to < 0.05)          | < 0.05<br>(< 0.05 to < 0.05)      | 29.6<br>(16.6 to 43.0)                            | 2.4<br>(-7.0 to 15.3)                               |
| Thyroid cancer                                     | < 0.05<br>(< 0.05 to < 0.05)         | < 0.05<br>(< 0.05 to < 0.05)          | < 0.05<br>(< 0.05 to < 0.05)      | 44.8<br>(22.7 to 71.4)                            | 3.5<br>(-12.7 to 22.5)                              |
| Mesothelioma                                       | < 0.05<br>(< 0.05 to < 0.05)         | < 0.05<br>(< 0.05 to < 0.05)          | < 0.05<br>(< 0.05 to < 0.05)      | 34.7<br>(19.0 to 53.2)                            | -0.8<br>(-12.7 to 14.0)                             |
| Hodgkin lymphoma                                   | < 0.05<br>(< 0.05 to < 0.05)         | < 0.05<br>(< 0.05 to < 0.05)          | < 0.05<br>(< 0.05 to < 0.05)      | 5.3<br>(-6.2 to 19.7)                             | -16.9<br>(-25.8 to -7.2)                            |
| Non-Hodgkin's lymphoma                             | < 0.05<br>(< 0.05 to < 0.05)         | < 0.05<br>(< 0.05 to < 0.05)          | < 0.05<br>(< 0.05 to < 0.05)      | 33.4<br>(22.0 to 47.6)                            | 3.0<br>(-6.5 to 15.4)                               |
| Multiple myeloma                                   | < 0.05<br>(< 0.05 to < 0.05)         | < 0.05<br>(< 0.05 to < 0.05)          | < 0.05<br>(< 0.05 to < 0.05)      | 45.0<br>(32.2 to 63.6)                            | 7.0<br>(-4.2 to 21.5)                               |
| Leukaemia                                          | 0.1<br>(0.1 to 0.1)                  | < 0.05<br>(< 0.05 to < 0.05)          | < 0.05<br>(< 0.05 to < 0.05)      | 14.8<br>(4.1 to 29.4)                             | -6.1<br>(-13.8 to 3.2)                              |
| Acute lymphoid leukaemia                           | < 0.05<br>(< 0.05 to < 0.05)         | < 0.05<br>(< 0.05 to < 0.05)          | < 0.05<br>(< 0.05 to < 0.05)      | 10.7<br>(-11.8 to 40.3)                           | -4.3<br>(-19.1 to 14.3)                             |
| Chronic lymphoid leukaemia                         | < 0.05<br>(< 0.05 to < 0.05)         | < 0.05<br>(< 0.05 to < 0.05)          | < 0.05<br>(< 0.05 to < 0.05)      | 38.8<br>(14.6 to 71.4)                            | 1.6<br>(-21.7 to 32.2)                              |
| Acute myeloid leukaemia                            | < 0.05<br>(< 0.05 to < 0.05)         | < 0.05<br>(< 0.05 to < 0.05)          | < 0.05<br>(< 0.05 to < 0.05)      | 24.9<br>(8.5 to 45.9)                             | 3.5<br>(-7.7 to 16.3)                               |
| Chronic myeloid leukaemia                          | < 0.05<br>(< 0.05 to < 0.05)         | < 0.05<br>(< 0.05 to < 0.05)          | < 0.05<br>(< 0.05 to < 0.05)      | 15.4<br>(-2.0 to 36.5)                            | -9.8<br>(-22.6 to 4.5)                              |
| Other leukaemia                                    | < 0.05<br>(< 0.05 to 0.1)            | < 0.05<br>(< 0.05 to < 0.05)          | < 0.05<br>(< 0.05 to < 0.05)      | 9.4<br>(-4.1 to 29.3)                             | -9.8<br>(-21.7 to 5.2)                              |
| Other neoplasms                                    | 0.1<br>(0.1 to 0.1)                  | < 0.05<br>(< 0.05 to < 0.05)          | < 0.05<br>(< 0.05 to < 0.05)      | 27.8<br>(13.0 to 44.8)                            | 0.5<br>(-10.6 to 12.5)                              |
| <b>Cardiovascular diseases</b>                     | <b>27.2</b><br><b>(26.1 to 28.4)</b> | <b>2.6†</b><br><b>(2.5 to 2.7)</b>    | <b>1.9</b><br><b>(1.4 to 2.4)</b> | <b>26.0</b><br><b>(21.6 to 31.1)</b>              | <b>-3.4</b><br><b>(-6.6 to -0.0)</b>                |
| Rheumatic heart disease                            | 10.8<br>(9.7 to 12.1)                | 0.4<br>(0.4 to 0.5)                   | 0.5<br>(0.3 to 0.7)               | 14.5<br>(6.1 to 25.1)                             | -10.2<br>(-16.8 to -2.1)                            |
| Ischaemic heart disease                            | 5.3<br>(5.0 to 5.6)                  | 0.8<br>(0.7 to 0.8)                   | 0.2<br>(0.2 to 0.3)               | 37.9<br>(30.3 to 45.7)                            | 2.4<br>(-1.9 to 7.3)                                |
| Cerebrovascular disease                            | 3.6<br>(3.3 to 3.8)                  | 0.6‡<br>(0.6 to 0.7)                  | 0.7<br>(0.5 to 0.9)               | 27.4<br>(19.5 to 35.7)                            | -4.6<br>(-10.5 to 1.2)                              |
| Ischaemic stroke                                   | 2.9<br>(2.6 to 3.2)                  | 0.4‡<br>(0.3 to 0.4)                  | 0.5<br>(0.4 to 0.7)               | 30.0<br>(20.4 to 40.1)                            | -3.1<br>(-10.5 to 3.9)                              |
| Hemorrhagic stroke                                 | 0.9<br>(0.8 to 1.0)                  | 0.3‡<br>(0.2 to 0.3)                  | 0.2<br>(0.1 to 0.2)               | 19.7<br>(7.8 to 31.9)                             | -9.8<br>(-18.1 to -1.1)                             |
| Hypertensive heart disease                         | 0.5<br>(0.5 to 0.6)                  | --                                    | < 0.05<br>(< 0.05 to 0.1)         | 39.1<br>(23.9 to 55.9)                            | 1.2<br>(-8.2 to 11.7)                               |
| Cardiomyopathy and myocarditis                     | 0.2<br>(0.1 to 0.2)                  | 0.1†<br>(0.1 to 0.1)                  | < 0.05<br>(< 0.05 to < 0.05)      | 29.6<br>(17.6 to 42.8)                            | 2.7<br>(-6.4 to 12.6)                               |
| Myocarditis                                        | 0.1<br>(0.1 to 0.1)                  | 0.1<br>(0.1 to 0.1)                   | < 0.05<br>(< 0.05 to < 0.05)      | 29.1<br>(18.4 to 40.5)                            | 2.4<br>(-8.2 to 13.3)                               |
| Alcoholic cardiomyopathy                           | < 0.05<br>(< 0.05 to < 0.05)         | --                                    | < 0.05<br>(< 0.05 to < 0.05)      | 40.1<br>(27.1 to 55.4)                            | 3.5<br>(-7.9 to 17.7)                               |
| Other cardiomyopathy                               | 0.1<br>(0.1 to 0.1)                  | --                                    | < 0.05<br>(< 0.05 to < 0.05)      | 29.2<br>(9.8 to 50.7)                             | 2.9<br>(-11.9 to 19.2)                              |
| Atrial fibrillation and flutter                    | 1.3<br>(1.2 to 1.5)                  | 0.1<br>(0.1 to 0.1)                   | 0.1<br>(0.1 to 0.1)               | 37.4<br>(26.3 to 48.7)                            | 0.2<br>(-6.2 to 7.2)                                |
| Peripheral vascular disease                        | 4.0<br>(3.5 to 4.6)                  | 0.4<br>(0.4 to 0.5)                   | < 0.05<br>(< 0.05 to < 0.05)      | 33.5<br>(23.0 to 44.4)                            | -2.0<br>(-9.1 to 5.8)                               |
| Endocarditis                                       | < 0.05<br>(< 0.05 to < 0.05)         | 0.1<br>(0.1 to 0.1)                   | < 0.05<br>(< 0.05 to < 0.05)      | 31.4<br>(22.4 to 42.4)                            | 2.5<br>(-9.4 to 17.0)                               |
| Other cardiovascular and circulatory diseases      | 3.7<br>(3.2 to 4.4)                  | --                                    | 0.2<br>(0.1 to 0.3)               | 31.1<br>(19.5 to 43.8)                            | 2.0<br>(-5.4 to 10.1)                               |
| <b>Chronic respiratory diseases</b>                | <b>62.6</b><br><b>(59.9 to 65.5)</b> | <b>14.4†</b><br><b>(13.4 to 15.5)</b> | <b>3.2</b><br><b>(2.5 to 4.1)</b> | <b>48.9</b><br><b>(42.8 to 55.3)</b>              | <b>14.3</b><br><b>(9.9 to 19.0)</b>                 |
| Chronic obstructive pulmonary disease              | 14.8<br>(14.3 to 15.4)               | 1.2<br>(1.1 to 1.2)                   | 1.1<br>(1.0 to 1.2)               | 35.0<br>(27.5 to 43.5)                            | 1.7<br>(-3.8 to 7.6)                                |
| Pneumoconiosis                                     | < 0.05<br>(< 0.05 to < 0.05)         | < 0.05<br>(< 0.05 to < 0.05)          | < 0.05<br>(< 0.05 to < 0.05)      | 31.6<br>(9.5 to 57.4)                             | -3.6<br>(-20.2 to 15.7)                             |
| Silicosis                                          | < 0.05<br>(< 0.05 to < 0.05)         | < 0.05<br>(< 0.05 to < 0.05)          | < 0.05<br>(< 0.05 to < 0.05)      | 32.2<br>(-3.5 to 79.5)                            | -3.2<br>(-30.3 to 31.6)                             |



| Cause                                                          | Prevalence in thousands (95% UI)  | Incidence in thousands (95% UI)   | YLDs in thousands (95% UI)        |                                                                     |                                                                      |
|----------------------------------------------------------------|-----------------------------------|-----------------------------------|-----------------------------------|---------------------------------------------------------------------|----------------------------------------------------------------------|
|                                                                | 2016 counts<br>(< 0.05 to < 0.05) | 2016 counts<br>(< 0.05 to < 0.05) | 2016 counts<br>(< 0.05 to < 0.05) | Percentage change in counts between 2006 and 2016<br>(22.6 to 39.2) | Percentage change in age-standardised rates between<br>(-9.6 to 3.2) |
| Asbestosis                                                     | < 0.05<br>(< 0.05 to < 0.05)      | < 0.05<br>(< 0.05 to < 0.05)      | < 0.05<br>(< 0.05 to < 0.05)      | 30.8<br>(22.6 to 39.2)                                              | -3.3<br>(-9.6 to 3.2)                                                |
| Coal workers pneumoconiosis                                    | --                                | --                                | --                                | --                                                                  | --                                                                   |
| Other pneumoconiosis                                           | < 0.05<br>(< 0.05 to < 0.05)      | < 0.05<br>(< 0.05 to < 0.05)      | < 0.05<br>(< 0.05 to < 0.05)      | 30.6<br>(19.1 to 41.7)                                              | -4.8<br>(-12.8 to 3.1)                                               |
| Asthma                                                         | 50.2<br>(46.5 to 54.1)            | 13.2<br>(12.2 to 14.3)            | 2.0<br>(1.3 to 2.8)               | 57.2<br>(49.2 to 65.7)                                              | 28.5<br>(22.7 to 34.6)                                               |
| Interstitial lung disease and pulmonary sarcoidosis            | 0.3<br>(0.3 to 0.4)               | < 0.05<br>(< 0.05 to < 0.05)      | < 0.05<br>(< 0.05 to < 0.05)      | 34.8<br>(21.2 to 50.9)                                              | 0.7<br>(-9.0 to 12.6)                                                |
| Other chronic respiratory diseases                             | --                                | --                                | 0.1<br>(0.1 to 0.1)               | 68.2<br>(46.6 to 94.0)                                              | 34.1<br>(20.7 to 49.8)                                               |
| <b>Cirrhosis and other chronic liver diseases</b>              | <b>2.3<br/>(2.2 to 2.5)</b>       | <b>0.1<br/>(0.1 to 0.1)</b>       | <b>0.1<br/>(0.1 to 0.2)</b>       | <b>29.6<br/>(14.8 to 48.1)</b>                                      | <b>2.6<br/>(-7.0 to 13.4)</b>                                        |
| Cirrhosis and other chronic liver diseases due to hepatitis B  | 0.9<br>(0.9 to 1.0)               | 0.1<br>(0.1 to 0.1)               | < 0.05<br>(< 0.05 to < 0.05)      | 35.3<br>(14.3 to 61.1)                                              | 2.3<br>(-11.2 to 19.1)                                               |
| Cirrhosis and other chronic liver diseases due to hepatitis C  | 0.3<br>(0.2 to 0.3)               | < 0.05<br>(< 0.05 to < 0.05)      | < 0.05<br>(< 0.05 to < 0.05)      | 36.1<br>(8.4 to 71.2)                                               | 1.3<br>(-20.5 to 28.0)                                               |
| Cirrhosis and other chronic liver diseases due to alcohol use  | 0.2<br>(0.2 to 0.2)               | < 0.05<br>(< 0.05 to < 0.05)      | < 0.05<br>(< 0.05 to < 0.05)      | 40.6<br>(5.4 to 86.0)                                               | 3.0<br>(-20.5 to 33.9)                                               |
| Cirrhosis and other chronic liver diseases due to other causes | 0.9<br>(0.8 to 1.0)               | < 0.05<br>(< 0.05 to < 0.05)      | 0.1<br>(< 0.05 to 0.1)            | 25.6<br>(5.2 to 51.9)                                               | 3.1<br>(-11.4 to 21.3)                                               |
| <b>Digestive diseases</b>                                      | <b>8.3<br/>(7.9 to 8.8)</b>       | <b>9.3†<br/>(8.8 to 9.9)</b>      | <b>0.3<br/>(0.2 to 0.4)</b>       | <b>37.7<br/>(26.9 to 49.1)</b>                                      | <b>6.2<br/>(-0.7 to 13.8)</b>                                        |
| Peptic ulcer disease                                           | 2.6<br>(2.4 to 2.9)               | 1.1<br>(1.0 to 1.2)               | 0.1<br>(< 0.05 to 0.1)            | 45.6<br>(28.4 to 64.5)                                              | 10.0<br>(-1.6 to 23.2)                                               |
| Gastritis and duodenitis                                       | 3.5<br>(3.1 to 3.9)               | 3.2<br>(2.8 to 3.6)               | 0.1<br>(< 0.05 to 0.1)            | 51.6<br>(35.0 to 71.3)                                              | 16.9<br>(5.5 to 30.1)                                                |
| Appendicitis                                                   | 0.1<br>(0.1 to 0.1)               | 1.8<br>(1.7 to 1.9)               | < 0.05<br>(< 0.05 to < 0.05)      | 27.6<br>(-9.6 to 79.0)                                              | -0.9<br>(-23.9 to 28.8)                                              |
| Paralytic ileus and intestinal obstruction                     | < 0.05<br>(< 0.05 to < 0.05)      | 0.1<br>(0.1 to 0.1)               | < 0.05<br>(< 0.05 to < 0.05)      | 25.9<br>(21.7 to 30.2)                                              | -0.5<br>(-4.5 to 3.2)                                                |
| Inguinal, femoral, and abdominal hernia                        | 1.7<br>(1.4 to 1.9)               | 0.7<br>(0.6 to 0.7)               | 0.1<br>(0.1 to 0.1)               | 29.6<br>(12.9 to 50.4)                                              | -0.1<br>(-9.8 to 11.2)                                               |
| Inflammatory bowel disease                                     | < 0.05<br>(< 0.05 to < 0.05)      | 0.4<br>(0.3 to 0.4)               | < 0.05<br>(< 0.05 to < 0.05)      | 16.4<br>(6.1 to 27.9)                                               | -11.9<br>(-22.4 to 0.0)                                              |
| Vascular intestinal disorders                                  | < 0.05<br>(< 0.05 to < 0.05)      | < 0.05<br>(< 0.05 to < 0.05)      | < 0.05<br>(< 0.05 to < 0.05)      | 29.4<br>(22.8 to 36.5)                                              | 5.5<br>(1.6 to 9.7)                                                  |
| Gallbladder and biliary diseases                               | 0.7<br>(0.7 to 0.8)               | 2.0<br>(1.8 to 2.3)               | < 0.05<br>(< 0.05 to < 0.05)      | 33.1<br>(5.4 to 68.4)                                               | -0.0<br>(-18.9 to 24.7)                                              |
| Pancreatitis                                                   | < 0.05<br>(< 0.05 to < 0.05)      | 0.1<br>(0.1 to 0.1)               | < 0.05<br>(< 0.05 to < 0.05)      | 32.5<br>(28.2 to 37.9)                                              | 1.5<br>(-1.9 to 5.1)                                                 |
| Other digestive diseases                                       | --                                | --                                | < 0.05<br>(< 0.05 to < 0.05)      | 40.3<br>(26.5 to 55.8)                                              | 10.7<br>(3.4 to 18.7)                                                |
| <b>Neurological disorders</b>                                  | <b>170.9<br/>(163.1 to 179.2)</b> | <b>80.8<br/>(68.1 to 94.8)</b>    | <b>3.8<br/>(2.5 to 5.3)</b>       | <b>28.9<br/>(3.0 to 59.7)</b>                                       | <b>0.7<br/>(-15.6 to 18.7)</b>                                       |
| Alzheimer's disease and other dementias                        | 1.3<br>(1.1 to 1.5)               | 0.2<br>(0.2 to 0.3)               | 0.2<br>(0.1 to 0.2)               | 38.8<br>(31.6 to 46.0)                                              | -0.7<br>(-5.3 to 3.9)                                                |
| Parkinson's disease                                            | 0.1<br>(0.1 to 0.1)               | < 0.05<br>(< 0.05 to < 0.05)      | < 0.05<br>(< 0.05 to < 0.05)      | 45.3<br>(25.5 to 69.9)                                              | 5.6<br>(-7.4 to 20.8)                                                |
| Epilepsy                                                       | 1.6<br>(0.5 to 2.5)               | 0.2<br>(0.1 to 0.4)               | 0.7<br>(0.2 to 1.2)               | 27.9<br>(-63.6 to 385.9)                                            | 3.0<br>(-71.4 to 283.2)                                              |
| Multiple sclerosis                                             | < 0.05<br>(< 0.05 to < 0.05)      | < 0.05<br>(< 0.05 to < 0.05)      | < 0.05<br>(< 0.05 to < 0.05)      | 45.5<br>(40.4 to 51.3)                                              | 12.2<br>(8.4 to 16.3)                                                |
| Motor neuron disease                                           | < 0.05<br>(< 0.05 to < 0.05)      | < 0.05<br>(< 0.05 to < 0.05)      | < 0.05<br>(< 0.05 to < 0.05)      | 30.0<br>(24.0 to 36.1)                                              | 4.0<br>(0.3 to 7.7)                                                  |
| Migraine                                                       | 59.3<br>(55.7 to 62.9)            | 7.3<br>(6.9 to 7.8)               | 2.4<br>(1.5 to 3.4)               | 27.2<br>(22.0 to 32.6)                                              | -0.3<br>(-4.0 to 3.5)                                                |
| Tension-type headache                                          | 129.3<br>(114.2 to 146.7)         | 73.0<br>(60.6 to 86.9)            | 0.4<br>(0.2 to 0.6)               | 27.0<br>(20.3 to 34.1)                                              | -0.8<br>(-5.6 to 4.3)                                                |
| Other neurological disorders                                   | < 0.05<br>(< 0.05 to < 0.05)      | < 0.05<br>(< 0.05 to < 0.05)      | 0.2<br>(< 0.05 to 0.3)            | 56.2<br>(-48.9 to 418.2)                                            | 22.7<br>(-55.1 to 249.4)                                             |
| <b>Mental and substance use disorders</b>                      | <b>72.1<br/>(69.2 to 74.8)</b>    | <b>24.2†<br/>(22.4 to 26.1)</b>   | <b>9.0<br/>(6.5 to 11.7)</b>      | <b>26.4<br/>(23.6 to 29.3)</b>                                      | <b>-0.3<br/>(-2.4 to 1.7)</b>                                        |
| Schizophrenia                                                  | 1.3<br>(1.1 to 1.5)               | 0.1<br>(0.1 to 0.1)               | 0.8<br>(0.6 to 1.1)               | 28.3<br>(17.7 to 39.5)                                              | -0.2<br>(-7.5 to 7.7)                                                |
| Alcohol use disorders                                          | 4.4<br>(3.8 to 5.1)               | 2.4<br>(2.1 to 2.8)               | 0.4<br>(0.3 to 0.6)               | 28.2<br>(17.6 to 40.0)                                              | 0.8<br>(-7.0 to 9.4)                                                 |
| Drug use disorders                                             | 4.1<br>(3.7 to 4.6)               | 0.7<br>(0.6 to 0.8)               | 0.6<br>(0.4 to 0.8)               | 28.3<br>(17.3 to 41.4)                                              | 3.6<br>(-4.6 to 13.5)                                                |
| Opioid use disorders                                           | 0.9<br>(0.7 to 1.1)               | 0.1<br>(0.1 to 0.1)               | 0.4<br>(0.2 to 0.5)               | 28.2<br>(13.1 to 46.9)                                              | 3.5<br>(-7.8 to 17.1)                                                |
| Cocaine use disorders                                          | 0.1<br>(0.1 to 0.1)               | < 0.05<br>(< 0.05 to < 0.05)      | < 0.05<br>(< 0.05 to < 0.05)      | 29.4<br>(21.9 to 38.7)                                              | 2.8<br>(-2.6 to 9.2)                                                 |
| Amphetamine use disorders                                      | 0.4<br>(0.3 to 0.6)               | < 0.05<br>(< 0.05 to 0.1)         | 0.1<br>(< 0.05 to 0.1)            | 31.0<br>(-3.3 to 69.9)                                              | 7.5<br>(-20.6 to 39.0)                                               |
| Cannabis use disorders                                         | 2.6<br>(2.1 to 3.3)               | 0.4<br>(0.4 to 0.6)               | 0.1<br>(< 0.05 to 0.1)            | 24.5<br>(9.3 to 41.4)                                               | 0.3<br>(-11.4 to 13.3)                                               |
| Other drug use disorders                                       | 0.2<br>(0.2 to 0.2)               | < 0.05<br>(< 0.05 to < 0.05)      | 0.1<br>(< 0.05 to 0.1)            | 31.5<br>(2.4 to 71.2)                                               | 6.1<br>(-14.5 to 33.7)                                               |
| Depressive disorders                                           | 15.3<br>(14.3 to 16.5)            | 14.3<br>(12.6 to 16.1)            | 2.4<br>(1.7 to 3.3)               | 26.3<br>(20.6 to 32.0)                                              | -1.4<br>(-5.1 to 2.4)                                                |
| Major depressive disorder                                      | 8.7<br>(7.7 to 9.9)               | 13.2<br>(11.5 to 15.0)            | 1.8<br>(1.2 to 2.5)               | 24.6<br>(17.2 to 32.0)                                              | -2.1<br>(-7.1 to 3.1)                                                |
| Dysthymia                                                      | 6.8<br>(5.9 to 7.8)               | 1.1<br>(1.0 to 1.3)               | 0.7<br>(0.4 to 0.9)               | 31.3<br>(26.8 to 36.0)                                              | 0.2<br>(-2.5 to 2.9)                                                 |
| Bipolar disorder                                               | 2.2<br>(1.9 to 2.6)               | 0.2<br>(0.2 to 0.3)               | 0.5<br>(0.3 to 0.7)               | 27.8<br>(17.8 to 39.6)                                              | -0.1<br>(-6.9 to 7.4)                                                |
| Anxiety disorders                                              | 18.0<br>(16.2 to 20.0)            | 3.2<br>(3.0 to 3.5)               | 1.7<br>(1.2 to 2.4)               | 27.4<br>(19.7 to 36.7)                                              | 0.2<br>(-5.5 to 6.6)                                                 |
| Eating disorders                                               | 0.4<br>(0.3 to 0.5)               | 0.3<br>(0.2 to 0.5)               | 0.1<br>(0.1 to 0.1)               | 31.2<br>(9.8 to 53.8)                                               | 6.7<br>(-10.8 to 26.1)                                               |
| Anorexia nervosa                                               | 0.1<br>(0.1 to 0.2)               | 0.1<br>(< 0.05 to 0.1)            | < 0.05<br>(< 0.05 to < 0.05)      | 29.8<br>(-3.6 to 75.9)                                              | 5.5<br>(-21.4 to 40.1)                                               |
| Bulimia nervosa                                                | 0.2<br>(0.2 to 0.3)               | 0.3<br>(0.2 to 0.4)               | 0.1<br>(< 0.05 to 0.1)            | 31.9<br>(5.2 to 65.1)                                               | 7.3<br>(-14.0 to 33.0)                                               |
| Autistic spectrum disorders                                    | 5.0<br>(4.5 to 5.7)               | 0.1<br>(< 0.05 to 0.1)            | 0.7<br>(0.5 to 1.0)               | 22.8<br>(16.3 to 29.4)                                              | -0.3<br>(-4.8 to 4.6)                                                |
| Autism                                                         | 1.4<br>(1.2 to 1.6)               | < 0.05<br>(< 0.05 to < 0.05)      | 0.4<br>(0.2 to 0.5)               | 22.6<br>(12.2 to 34.3)                                              | -0.4<br>(-8.0 to 8.2)                                                |
| Asperger syndrome and other autistic spectrum disorders        | 3.6<br>(2.9 to 4.3)               | < 0.05<br>(< 0.05 to 0.1)         | 0.4<br>(0.2 to 0.5)               | 23.0<br>(16.5 to 29.7)                                              | -0.2<br>(-4.9 to 4.3)                                                |

| Cause                                                      | Prevalence in thousands (95% UI)  | Incidence in thousands (95% UI)          | YLDs in thousands (95% UI)    |                                                   |                                                     |
|------------------------------------------------------------|-----------------------------------|------------------------------------------|-------------------------------|---------------------------------------------------|-----------------------------------------------------|
|                                                            | 2016 counts                       | 2016 counts                              | 2016 counts                   | Percentage change in counts between 2006 and 2016 | Percentage change in age-standardised rates between |
| Attention-deficit/hyperactivity disorder                   | 5.4<br>(4.7 to 6.0)               | 0.3<br>(0.3 to 0.4)                      | 0.1<br>(< 0.05 to 0.1)        | 23.4<br>(13.3 to 35.0)                            | -0.2<br>(-8.2 to 8.2)                               |
| Conduct disorder                                           | 5.7<br>(4.6 to 6.8)               | 2.0<br>(1.6 to 2.5)                      | 0.7<br>(0.4 to 1.1)           | 24.2<br>(16.0 to 32.9)                            | 0.1<br>(-6.5 to 7.0)                                |
| Idiopathic developmental intellectual disability           | 7.0<br>(3.5 to 10.5)              | --                                       | 0.3<br>(0.1 to 0.5)           | 16.6<br>(7.5 to 26.9)                             | -6.5<br>(-13.7 to 1.4)                              |
| Other mental and substance use disorders                   | 8.7<br>(7.6 to 10.1)              | 0.4<br>(0.4 to 0.5)                      | 0.7<br>(0.5 to 0.9)           | 28.6<br>(21.7 to 35.7)                            | -0.1<br>(-4.5 to 4.3)                               |
| <b>Diabetes, urogenital, blood, and endocrine diseases</b> | <b>232.4<br/>(226.9 to 238.8)</b> | <b>58.0†<br/>(54.1 to 62.7)</b>          | <b>6.3<br/>(4.5 to 8.7)</b>   | <b>40.2<br/>(35.2 to 45.5)</b>                    | <b>6.0<br/>(2.5 to 9.7)</b>                         |
| Diabetes mellitus                                          | 61.0<br>(55.4 to 67.0)            | 4.9<br>(4.4 to 5.5)                      | 4.1<br>(2.8 to 5.8)           | 47.1<br>(39.8 to 55.2)                            | 9.2<br>(4.0 to 14.7)                                |
| Acute glomerulonephritis                                   | < 0.05<br>(< 0.05 to < 0.05)      | 0.1<br>(0.1 to 0.1)                      | < 0.05<br>(< 0.05 to < 0.05)  | 25.9<br>(19.5 to 31.9)                            | -1.2<br>(-6.0 to 3.5)                               |
| Chronic kidney disease                                     | 15.5<br>(14.0 to 17.1)            | 1.3<br>(1.2 to 1.4)                      | 0.8<br>(0.6 to 1.0)           | 41.3<br>(32.8 to 50.6)                            | 5.2<br>(-0.8 to 11.7)                               |
| Chronic kidney disease due to diabetes mellitus            | 8.8<br>(7.7 to 9.9)               | 0.7<br>(0.6 to 0.8)                      | 0.4<br>(0.3 to 0.5)           | 44.0<br>(32.6 to 56.9)                            | 6.0<br>(-1.9 to 14.6)                               |
| Chronic kidney disease due to hypertension                 | 2.5<br>(2.2 to 2.9)               | 0.1<br>(0.1 to 0.2)                      | 0.2<br>(0.1 to 0.2)           | 41.0<br>(24.7 to 60.5)                            | 2.9<br>(-8.3 to 15.2)                               |
| Chronic kidney disease due to glomerulonephritis           | 2.6<br>(2.3 to 3.1)               | 0.3<br>(0.2 to 0.3)                      | 0.1<br>(0.1 to 0.1)           | 34.4<br>(17.2 to 54.4)                            | 6.5<br>(-5.1 to 18.8)                               |
| Chronic kidney disease due to other causes                 | 1.6<br>(1.3 to 1.9)               | 0.1<br>(0.1 to 0.2)                      | 0.1<br>(0.1 to 0.1)           | 36.4<br>(23.3 to 51.2)                            | 6.5<br>(-3.2 to 17.8)                               |
| Urinary diseases and male infertility                      | 6.6<br>(5.8 to 7.5)               | 29.2†<br>(25.7 to 33.4)                  | 0.1<br>(0.1 to 0.2)           | 27.0<br>(19.5 to 34.1)                            | -4.1<br>(-9.5 to 1.4)                               |
| Interstitial nephritis and urinary tract infections        | 0.5<br>(0.4 to 0.6)               | 26.4<br>(22.9 to 30.6)                   | < 0.05<br>(< 0.05 to < 0.05)  | 21.3<br>(1.7 to 41.9)                             | -1.8<br>(-15.7 to 13.7)                             |
| Urolithiasis                                               | 0.1<br>(0.1 to 0.1)               | 2.4<br>(2.1 to 2.7)                      | < 0.05<br>(< 0.05 to < 0.05)  | 32.7<br>(23.1 to 43.1)                            | -0.2<br>(-10.0 to 11.1)                             |
| Benign prostatic hyperplasia                               | 2.7<br>(2.2 to 3.1)               | 0.4<br>(0.3 to 0.5)                      | 0.1<br>(0.1 to 0.1)           | 31.6<br>(21.2 to 41.8)                            | -4.0<br>(-10.7 to 2.9)                              |
| Male infertility                                           | 2.9<br>(2.3 to 3.7)               | --                                       | < 0.05<br>(< 0.05 to < 0.05)  | 25.8<br>(17.7 to 34.8)                            | -1.0<br>(-6.9 to 5.4)                               |
| Other urinary diseases                                     | --                                | --                                       | < 0.05<br>(< 0.05 to < 0.05)  | 0.4<br>(-12.5 to 14.5)                            | -17.8<br>(-26.8 to -8.3)                            |
| Gynecological diseases                                     | 53.6<br>(50.8 to 56.4)            | 21.2†<br>(19.7 to 22.8)                  | 0.7<br>(0.5 to 1.0)           | 25.4<br>(18.8 to 31.8)                            | -4.0<br>(-8.5 to 0.7)                               |
| Uterine fibroids                                           | 6.0<br>(5.3 to 6.9)               | 0.8<br>(0.7 to 0.9)                      | 0.1<br>(0.1 to 0.2)           | 34.6<br>(19.2 to 51.0)                            | -3.1<br>(-13.7 to 8.6)                              |
| Polycystic ovarian syndrome                                | 0.5<br>(0.4 to 0.7)               | 0.3<br>(0.2 to 0.4)                      | < 0.05<br>(< 0.05 to < 0.05)  | 31.3<br>(14.3 to 49.3)                            | 2.0<br>(-11.1 to 15.6)                              |
| Female infertility                                         | 2.8<br>(1.3 to 5.3)               | --                                       | < 0.05<br>(< 0.05 to < 0.05)  | -4.1<br>(-24.4 to 16.0)                           | -23.2<br>(-40.5 to -7.3)                            |
| Endometriosis                                              | 0.1<br>(0.1 to 0.2)               | 0.7<br>(0.6 to 0.9)                      | < 0.05<br>(< 0.05 to < 0.05)  | 28.7<br>(-1.2 to 69.3)                            | 0.4<br>(-22.8 to 30.6)                              |
| Genital prolapse                                           | 11.6<br>(10.1 to 13.3)            | 1.0<br>(0.8 to 1.1)                      | < 0.05<br>(< 0.05 to 0.1)     | 17.7<br>(7.8 to 28.6)                             | -12.2<br>(-20.1 to -3.4)                            |
| Premenstrual syndrome                                      | 31.8<br>(29.2 to 34.5)            | 12.1<br>(11.0 to 13.2)                   | 0.3<br>(0.2 to 0.4)           | 23.7<br>(12.2 to 34.7)                            | -3.2<br>(-12.0 to 5.3)                              |
| Other gynecological diseases                               | 7.8<br>(6.9 to 8.9)               | 6.3<br>(5.3 to 7.6)                      | 0.3<br>(0.2 to 0.4)           | 26.3<br>(15.9 to 36.9)                            | -2.1<br>(-9.7 to 5.4)                               |
| Hemoglobinopathies and hemolytic anaemias                  | 143.5<br>(137.5 to 150.7)         | --                                       | 0.3<br>(0.1 to 0.5)           | 15.0<br>(-1.8 to 34.7)                            | -8.8<br>(-20.6 to 2.4)                              |
| Thalassemias                                               | < 0.05<br>(< 0.05 to < 0.05)      | --                                       | < 0.05<br>(< 0.05 to < 0.05)  | 15.7<br>(-5.1 to 44.3)                            | 3.4<br>(-15.1 to 28.2)                              |
| Thalassaemias trait                                        | 9.1<br>(4.3 to 17.9)              | --                                       | 0.1<br>(< 0.05 to 0.2)        | 11.8<br>(-20.2 to 41.2)                           | -6.7<br>(-34.1 to 16.6)                             |
| Sickle cell disorders                                      | < 0.05<br>(< 0.05 to < 0.05)      | --                                       | < 0.05<br>(< 0.05 to < 0.05)  | 18.6<br>(-20.5 to 33.7)                           | 2.6<br>(-31.8 to 14.7)                              |
| Sickle cell trait                                          | 0.7<br>(0.6 to 0.9)               | --                                       | < 0.05<br>(< 0.05 to < 0.05)  | 11.3<br>(-9.5 to 32.0)                            | -8.2<br>(-22.8 to 5.1)                              |
| G6PD deficiency                                            | 49.7<br>(46.3 to 53.2)            | --                                       | < 0.05<br>(< 0.05 to < 0.05)  | 5.5<br>(-21.7 to 38.8)                            | -18.4<br>(-35.3 to 2.3)                             |
| G6PD trait                                                 | 82.7<br>(80.0 to 85.7)            | --                                       | < 0.05<br>(< 0.05 to < 0.05)  | 36.3<br>(11.4 to 65.8)                            | 13.3<br>(-4.0 to 33.9)                              |
| Other hemoglobinopathies and hemolytic anaemias            | 7.3<br>(6.6 to 8.2)               | --                                       | 0.1<br>(0.1 to 0.2)           | 17.6<br>(0.4 to 37.2)                             | -10.2<br>(-20.4 to 0.2)                             |
| Endocrine, metabolic, blood, and immune disorders          | 12.1<br>(11.2 to 13.1)            | 1.3<br>(1.2 to 1.5)                      | 0.4<br>(0.2 to 0.5)           | 25.7<br>(15.7 to 35.7)                            | -1.7<br>(-6.9 to 3.6)                               |
| <b>Musculoskeletal disorders</b>                           | <b>74.2<br/>(70.5 to 77.4)</b>    | <b>37.8<br/>(34.3 to 41.6)</b>           | <b>8.0<br/>(5.8 to 10.4)</b>  | <b>30.2<br/>(26.3 to 34.0)</b>                    | <b>-1.0<br/>(-3.4 to 1.4)</b>                       |
| Rheumatoid arthritis                                       | 0.6<br>(0.6 to 0.7)               | < 0.05<br>(< 0.05 to < 0.05)             | 0.1<br>(0.1 to 0.2)           | 36.9<br>(21.8 to 53.0)                            | 4.2<br>(-5.7 to 14.3)                               |
| Osteoarthritis                                             | 14.4<br>(13.5 to 15.4)            | 0.8<br>(0.8 to 0.9)                      | 0.9<br>(0.6 to 1.2)           | 38.9<br>(33.2 to 44.6)                            | 1.4<br>(-2.5 to 5.4)                                |
| Low back and neck pain                                     | 42.7<br>(39.6 to 45.8)            | 18.0<br>(16.1 to 20.2)                   | 4.9<br>(3.4 to 6.4)           | 31.1<br>(26.5 to 35.6)                            | -0.7<br>(-3.6 to 2.2)                               |
| Low back pain                                              | 29.8<br>(26.4 to 33.9)            | 14.4<br>(12.6 to 16.4)                   | 3.4<br>(2.4 to 4.5)           | 29.7<br>(23.7 to 35.8)                            | -1.0<br>(-5.1 to 3.3)                               |
| Neck pain                                                  | 15.4<br>(13.2 to 17.7)            | 3.6<br>(3.1 to 4.3)                      | 1.5<br>(1.0 to 2.2)           | 34.1<br>(30.4 to 37.9)                            | 0.0<br>(-2.2 to 2.2)                                |
| Gout                                                       | 1.6<br>(1.4 to 1.7)               | 0.3<br>(0.3 to 0.4)                      | < 0.05<br>(< 0.05 to 0.1)     | 34.0<br>(16.4 to 55.8)                            | -0.9<br>(-12.9 to 12.5)                             |
| Other musculoskeletal disorders                            | 23.3<br>(19.8 to 27.0)            | 18.6<br>(15.7 to 22.0)                   | 2.0<br>(1.4 to 2.8)           | 24.3<br>(15.4 to 34.5)                            | -4.0<br>(-10.2 to 2.9)                              |
| <b>Other non-communicable diseases</b>                     | <b>429.7<br/>(420.4 to 438.3)</b> | <b>1,346.2†<br/>(1,252.5 to 1,439.7)</b> | <b>10.5<br/>(7.1 to 14.6)</b> | <b>24.4<br/>(22.7 to 26.0)</b>                    | <b>-1.5<br/>(-2.6 to -0.5)</b>                      |
| Congenital anomalies                                       | 7.4<br>(6.5 to 8.5)               | --                                       | 0.8<br>(0.6 to 1.1)           | 20.6<br>(12.4 to 29.5)                            | -1.2<br>(-8.0 to 6.3)                               |
| Neural tube defects                                        | 0.3<br>(0.3 to 0.4)               | --                                       | 0.1<br>(0.1 to 0.1)           | 26.9<br>(9.8 to 46.1)                             | 3.4<br>(-9.3 to 18.0)                               |
| Congenital heart anomalies                                 | 2.2<br>(1.9 to 2.5)               | --                                       | 0.1<br>(< 0.05 to 0.2)        | 23.9<br>(7.4 to 40.8)                             | 5.7<br>(-6.9 to 19.2)                               |
| Orofacial clefts                                           | 0.3<br>(0.3 to 0.4)               | --                                       | < 0.05<br>(< 0.05 to < 0.05)  | 15.4<br>(3.0 to 30.6)                             | -5.5<br>(-15.7 to 6.7)                              |
| Down's syndrome                                            | 0.2<br>(0.1 to 0.2)               | --                                       | < 0.05<br>(< 0.05 to < 0.05)  | 30.4<br>(20.1 to 40.9)                            | 7.7<br>(-0.8 to 16.3)                               |
| Turner syndrome                                            | 0.2<br>(0.2 to 0.2)               | --                                       | < 0.05<br>(< 0.05 to < 0.05)  | 25.1<br>(-17.2 to 94.3)                           | 4.7<br>(-28.1 to 59.0)                              |
| Klinefelter syndrome                                       | 0.2<br>(0.2 to 0.2)               | --                                       | < 0.05<br>(< 0.05 to < 0.05)  | 24.6<br>(-9.6 to 69.8)                            | 3.5<br>(-24.0 to 37.6)                              |

| Cause                                         | Prevalence in thousands (95% UI)     | Incidence in thousands (95% UI)       | YLDs in thousands (95% UI)        |                                                   |                                                     |
|-----------------------------------------------|--------------------------------------|---------------------------------------|-----------------------------------|---------------------------------------------------|-----------------------------------------------------|
|                                               | 2016 counts                          | 2016 counts                           | 2016 counts                       | Percentage change in counts between 2006 and 2016 | Percentage change in age-standardised rates between |
| Other chromosomal abnormalities               | 0.3<br>(0.2 to 0.3)                  | --                                    | < 0.05<br>(< 0.05 to < 0.05)      | 19.6<br>(-5.2 to 48.8)                            | 3.6<br>(-17.1 to 27.7)                              |
| Congenital musculoskeletal and limb anomalies | 0.6<br>(0.5 to 0.6)                  | --                                    | 0.1<br>(0.1 to 0.1)               | 35.6<br>(20.5 to 52.2)                            | 11.2<br>(0.5 to 22.7)                               |
| Urogenital congenital anomalies               | 0.7<br>(0.6 to 0.7)                  | --                                    | < 0.05<br>(< 0.05 to < 0.05)      | 17.7<br>(6.7 to 29.1)                             | -0.4<br>(-9.4 to 8.4)                               |
| Digestive congenital anomalies                | 0.9<br>(0.8 to 1.0)                  | --                                    | < 0.05<br>(< 0.05 to 0.1)         | 31.0<br>(12.3 to 51.4)                            | 6.9<br>(-7.1 to 22.6)                               |
| Other congenital anomalies                    | 3.0<br>(2.1 to 4.3)                  | --                                    | 0.4<br>(0.3 to 0.7)               | 15.5<br>(3.3 to 28.8)                             | -6.1<br>(-16.0 to 4.9)                              |
| Skin and subcutaneous diseases                | 180.1<br>(174.7 to 186.1)            | 390.6<br>(370.2 to 413.9)             | 4.8<br>(3.2 to 7.0)               | 23.9<br>(21.5 to 26.6)                            | 0.9<br>(-0.9 to 2.8)                                |
| Dermatitis                                    | 28.6<br>(26.4 to 31.1)               | 30.5<br>(28.3 to 32.8)                | 1.1<br>(0.7 to 1.8)               | 20.2<br>(15.6 to 25.3)                            | 0.1<br>(-3.2 to 3.6)                                |
| Psoriasis                                     | 2.5<br>(2.4 to 2.6)                  | 0.4<br>(0.4 to 0.4)                   | 0.2<br>(0.1 to 0.3)               | 35.4<br>(20.7 to 51.4)                            | 6.9<br>(-2.9 to 17.7)                               |
| Cellulitis                                    | 0.2<br>(0.2 to 0.2)                  | 2.8<br>(2.6 to 3.0)                   | < 0.05<br>(< 0.05 to < 0.05)      | 25.0<br>(10.4 to 42.0)                            | 1.2<br>(-11.6 to 15.4)                              |
| Pyoderma                                      | 0.7<br>(0.7 to 0.7)                  | 14.3<br>(13.9 to 14.9)                | < 0.05<br>(< 0.05 to < 0.05)      | 27.4<br>(14.7 to 40.3)                            | -0.5<br>(-8.3 to 7.0)                               |
| Scabies                                       | 28.9<br>(25.4 to 33.0)               | 90.9<br>(78.4 to 105.3)               | 0.7<br>(0.4 to 1.2)               | 20.2<br>(15.4 to 25.8)                            | -2.8<br>(-6.2 to 0.8)                               |
| Fungal skin diseases                          | 43.8<br>(39.4 to 49.0)               | 145.9<br>(130.7 to 163.3)             | 0.2<br>(0.1 to 0.5)               | 24.3<br>(22.5 to 26.4)                            | -0.1<br>(-1.0 to 1.0)                               |
| Viral skin diseases                           | 17.8<br>(16.7 to 18.9)               | 24.9<br>(23.3 to 26.8)                | 0.6<br>(0.3 to 0.8)               | 22.6<br>(18.7 to 26.6)                            | 0.1<br>(-2.7 to 3.1)                                |
| Acne vulgaris                                 | 51.9<br>(45.8 to 59.0)               | 37.9<br>(30.3 to 49.3)                | 1.3<br>(0.9 to 2.0)               | 28.8<br>(22.1 to 35.1)                            | 3.4<br>(-1.5 to 8.4)                                |
| Alopecia areata                               | 1.0<br>(1.0 to 1.1)                  | 1.8<br>(1.7 to 1.9)                   | < 0.05<br>(< 0.05 to < 0.05)      | 25.2<br>(10.9 to 40.2)                            | 0.2<br>(-9.5 to 11.0)                               |
| Pruritus                                      | 4.2<br>(3.7 to 4.7)                  | 3.4<br>(3.1 to 3.9)                   | < 0.05<br>(< 0.05 to 0.1)         | 26.5<br>(18.7 to 34.1)                            | 0.6<br>(-4.7 to 5.8)                                |
| Urticaria                                     | 5.9<br>(5.0 to 6.9)                  | 10.5<br>(9.0 to 12.2)                 | 0.4<br>(0.2 to 0.5)               | 18.6<br>(11.8 to 26.2)                            | 0.1<br>(-5.5 to 6.1)                                |
| Decubitus ulcer                               | 0.1<br>(0.1 to 0.1)                  | 0.2<br>(0.2 to 0.2)                   | < 0.05<br>(< 0.05 to < 0.05)      | 35.7<br>(21.8 to 50.8)                            | 0.8<br>(-12.4 to 16.1)                              |
| Other skin and subcutaneous diseases          | 24.4<br>(23.6 to 25.2)               | 27.1<br>(26.2 to 28.0)                | 0.1<br>(0.1 to 0.2)               | 29.4<br>(25.6 to 33.4)                            | 1.7<br>(-0.8 to 4.3)                                |
| Sense organ diseases                          | 107.4<br>(104.6 to 110.3)            | 53.2†<br>(49.3 to 57.2)               | 4.1<br>(2.9 to 5.7)               | 25.1<br>(22.1 to 28.0)                            | -3.2<br>(-4.9 to -1.6)                              |
| Glaucoma                                      | 0.1<br>(0.1 to 0.2)                  | --                                    | < 0.05<br>(< 0.05 to < 0.05)      | 37.5<br>(16.4 to 60.8)                            | 2.0<br>(-12.4 to 18.4)                              |
| Cataract                                      | 2.2<br>(1.9 to 2.5)                  | --                                    | 0.1<br>(0.1 to 0.2)               | 33.8<br>(25.5 to 42.8)                            | -2.5<br>(-8.8 to 4.2)                               |
| Macular degeneration                          | 0.1<br>(0.1 to 0.2)                  | --                                    | < 0.05<br>(< 0.05 to < 0.05)      | 40.9<br>(20.5 to 62.9)                            | 4.0<br>(-10.3 to 19.1)                              |
| Refraction and accommodation disorders        | 60.8<br>(58.4 to 63.3)               | --                                    | 1.1<br>(0.7 to 1.7)               | 23.0<br>(19.4 to 26.8)                            | -4.3<br>(-6.9 to -1.7)                              |
| Age-related and other hearing loss            | 59.9<br>(56.3 to 63.9)               | --                                    | 2.5<br>(1.7 to 3.4)               | 24.5<br>(20.3 to 29.0)                            | -3.5<br>(-5.7 to -1.5)                              |
| Other vision loss                             | 1.4<br>(1.2 to 1.6)                  | --                                    | 0.1<br>(0.1 to 0.1)               | 33.9<br>(22.4 to 46.4)                            | 0.9<br>(-6.1 to 8.7)                                |
| Other sense organ diseases                    | 11.2<br>(10.3 to 12.1)               | 53.2<br>(49.3 to 57.2)                | 0.3<br>(0.2 to 0.5)               | 30.6<br>(24.4 to 37.6)                            | 0.8<br>(-2.9 to 4.9)                                |
| Oral disorders                                | 322.7<br>(307.6 to 334.5)            | 902.4†<br>(813.4 to 990.2)            | 0.7<br>(0.4 to 1.1)               | 29.5<br>(26.7 to 32.5)                            | -0.1<br>(-2.0 to 2.0)                               |
| Caries of deciduous teeth                     | 40.5<br>(27.4 to 51.0)               | 170.8<br>(99.0 to 242.1)              | < 0.05<br>(< 0.05 to < 0.05)      | 16.2<br>(1.0 to 32.8)                             | -0.1<br>(-13.2 to 13.5)                             |
| Caries of permanent teeth                     | 276.2<br>(259.4 to 290.7)            | 730.3<br>(674.4 to 784.9)             | 0.2<br>(0.1 to 0.3)               | 24.7<br>(20.8 to 28.7)                            | -1.4<br>(-4.1 to 1.4)                               |
| Periodontal disease                           | 5.7<br>(4.7 to 6.9)                  | 0.7<br>(0.5 to 0.8)                   | < 0.05<br>(< 0.05 to 0.1)         | 36.0<br>(30.4 to 42.3)                            | 0.6<br>(-3.4 to 4.5)                                |
| Edentulism and severe tooth loss              | 7.9<br>(6.8 to 9.0)                  | 0.7<br>(0.6 to 0.8)                   | 0.2<br>(0.1 to 0.3)               | 35.5<br>(30.0 to 40.9)                            | 0.2<br>(-3.2 to 4.0)                                |
| Other oral disorders                          | 9.3<br>(8.9 to 9.8)                  | --                                    | 0.3<br>(0.2 to 0.4)               | 27.6<br>(22.7 to 32.5)                            | 0.1<br>(-3.0 to 3.3)                                |
| <b>Injuries</b>                               | <b>62.1</b><br><b>(58.9 to 65.5)</b> | <b>35.8†</b><br><b>(33.9 to 37.7)</b> | <b>2.7</b><br><b>(1.9 to 3.9)</b> | <b>39.6</b><br><b>(36.5 to 42.8)</b>              | <b>9.0</b><br><b>(6.9 to 11.0)</b>                  |
| <b>Transport injuries</b>                     | <b>10.8</b><br><b>(9.9 to 11.8)</b>  | <b>4.5</b><br><b>(4.0 to 5.1)</b>     | <b>0.7</b><br><b>(0.4 to 0.9)</b> | <b>54.4</b><br><b>(50.3 to 58.6)</b>              | <b>20.7</b><br><b>(18.0 to 23.4)</b>                |
| Road injuries                                 | 6.8<br>(6.3 to 7.4)                  | 3.2<br>(2.8 to 3.8)                   | 0.4<br>(0.3 to 0.6)               | 79.5<br>(75.7 to 83.5)                            | 37.0<br>(34.3 to 39.5)                              |
| Pedestrian road injuries                      | 1.3<br>(1.1 to 1.5)                  | 0.5<br>(0.3 to 0.6)                   | 0.1<br>(0.1 to 0.1)               | 81.0<br>(76.8 to 85.2)                            | 37.1<br>(34.2 to 39.8)                              |
| Cyclist road injuries                         | 0.8<br>(0.7 to 1.0)                  | 0.5<br>(0.3 to 0.6)                   | < 0.05<br>(< 0.05 to 0.1)         | 87.2<br>(82.8 to 91.8)                            | 43.6<br>(40.7 to 46.4)                              |
| Motorcyclist road injuries                    | 1.6<br>(1.4 to 2.0)                  | 0.5<br>(0.4 to 0.7)                   | 0.1<br>(0.1 to 0.1)               | 81.8<br>(77.8 to 86.3)                            | 38.4<br>(35.7 to 41.3)                              |
| Motor vehicle road injuries                   | 2.2<br>(1.9 to 2.6)                  | 1.3<br>(1.0 to 1.5)                   | 0.1<br>(0.1 to 0.2)               | 75.0<br>(70.9 to 79.1)                            | 33.9<br>(31.1 to 36.5)                              |
| Other road injuries                           | 0.9<br>(0.7 to 1.0)                  | 0.5<br>(0.4 to 0.7)                   | < 0.05<br>(< 0.05 to 0.1)         | 79.3<br>(75.1 to 83.4)                            | 37.9<br>(35.2 to 40.6)                              |
| Other transport injuries                      | 4.0<br>(3.3 to 4.8)                  | 1.2<br>(1.1 to 1.5)                   | 0.2<br>(0.2 to 0.4)               | 26.1<br>(21.7 to 30.6)                            | -1.2<br>(-3.9 to 1.6)                               |
| <b>Unintentional injuries</b>                 | <b>44.5</b><br><b>(41.7 to 47.4)</b> | <b>27.6</b><br><b>(25.9 to 29.3)</b>  | <b>1.7</b><br><b>(1.1 to 2.3)</b> | <b>36.5</b><br><b>(33.3 to 39.4)</b>              | <b>6.1</b><br><b>(4.0 to 7.9)</b>                   |
| Falls                                         | 9.8<br>(8.5 to 11.2)                 | 5.5<br>(4.7 to 6.6)                   | 0.4<br>(0.3 to 0.6)               | 59.0<br>(55.2 to 62.6)                            | 23.5<br>(21.2 to 25.7)                              |
| Drowning                                      | 0.5<br>(0.4 to 0.6)                  | 0.1<br>(0.1 to 0.1)                   | < 0.05<br>(< 0.05 to < 0.05)      | 25.5<br>(21.1 to 30.1)                            | -4.9<br>(-8.0 to -1.8)                              |
| Fire, heat, and hot substances                | 4.7<br>(4.0 to 5.6)                  | 0.8<br>(0.6 to 0.9)                   | 0.1<br>(0.1 to 0.2)               | 35.7<br>(28.4 to 42.8)                            | 4.1<br>(-0.7 to 8.8)                                |
| Poisonings                                    | 0.1<br>(0.1 to 0.2)                  | 0.3<br>(0.2 to 0.3)                   | < 0.05<br>(< 0.05 to < 0.05)      | 53.6<br>(41.5 to 66.7)                            | 19.4<br>(11.9 to 28.2)                              |
| Exposure to mechanical forces                 | 7.7<br>(6.6 to 9.3)                  | 4.0<br>(3.4 to 4.7)                   | 0.2<br>(0.1 to 0.3)               | 53.1<br>(49.2 to 56.9)                            | 16.9<br>(14.2 to 19.4)                              |
| Unintentional firearm injuries                | 0.3<br>(0.3 to 0.4)                  | 0.1<br>(0.1 to 0.2)                   | < 0.05<br>(< 0.05 to < 0.05)      | 38.2<br>(34.4 to 42.0)                            | 6.5<br>(3.9 to 8.9)                                 |
| Unintentional suffocation                     | 0.5<br>(0.4 to 0.6)                  | 0.1<br>(0.1 to 0.2)                   | < 0.05<br>(< 0.05 to < 0.05)      | 36.7<br>(32.5 to 40.8)                            | 7.6<br>(4.9 to 10.2)                                |
| Other exposure to mechanical forces           | 6.9<br>(5.8 to 8.5)                  | 3.8<br>(3.2 to 4.4)                   | 0.2<br>(0.1 to 0.3)               | 56.4<br>(52.2 to 60.4)                            | 18.6<br>(15.9 to 21.2)                              |



| Cause                                                                               | Prevalence in thousands (95% UI)     | Incidence in thousands (95% UI)                      | YLDs in thousands (95% UI)                    |                                                   |                                                     |
|-------------------------------------------------------------------------------------|--------------------------------------|------------------------------------------------------|-----------------------------------------------|---------------------------------------------------|-----------------------------------------------------|
|                                                                                     | 2016 counts                          | 2016 counts                                          | 2016 counts                                   | Percentage change in counts between 2006 and 2016 | Percentage change in age-standardised rates between |
| Adverse effects of medical treatment                                                | 0.3<br>(0.2 to 0.4)                  | 3.7<br>(3.2 to 4.2)                                  | < 0.05<br>(< 0.05 to 0.1)                     | 13.9<br>(8.1 to 20.1)                             | -5.3<br>(-9.1 to -1.6)                              |
| Animal contact                                                                      | 3.1<br>(2.7 to 3.7)                  | 4.6<br>(3.8 to 5.5)                                  | 0.1<br>(0.1 to 0.2)                           | 26.0<br>(18.7 to 33.0)                            | -0.1<br>(-4.9 to 4.4)                               |
| Venomous animal contact                                                             | 1.1<br>(0.9 to 1.4)                  | 1.9<br>(1.4 to 2.4)                                  | 0.1<br>(< 0.05 to 0.1)                        | 30.2<br>(19.7 to 40.9)                            | 3.7<br>(-3.3 to 11.0)                               |
| Non-venomous animal contact                                                         | 1.9<br>(1.6 to 2.5)                  | 2.7<br>(2.2 to 3.4)                                  | < 0.05<br>(< 0.05 to 0.1)                     | 18.1<br>(13.0 to 22.7)                            | -6.7<br>(-10.2 to -3.5)                             |
| Foreign body                                                                        | 2.9<br>(2.4 to 3.4)                  | 1.9<br>(1.7 to 2.2)                                  | 0.1<br>(0.1 to 0.2)                           | 23.1<br>(18.4 to 27.7)                            | -3.0<br>(-5.5 to -0.4)                              |
| Pulmonary aspiration and foreign body in airway                                     | 1.9<br>(1.5 to 2.5)                  | 1.0<br>(0.8 to 1.2)                                  | 0.1<br>(0.1 to 0.1)                           | 22.4<br>(17.8 to 27.1)                            | -3.5<br>(-6.1 to -0.8)                              |
| Foreign body in eyes                                                                | 0.1<br>(< 0.05 to 0.1)               | 0.5<br>(0.4 to 0.7)                                  | < 0.05<br>(< 0.05 to < 0.05)                  | 26.8<br>(21.6 to 32.4)                            | -0.3<br>(-3.4 to 3.1)                               |
| Foreign body in other body part                                                     | 0.9<br>(0.7 to 1.1)                  | 0.5<br>(0.4 to 0.6)                                  | < 0.05<br>(< 0.05 to < 0.05)                  | 24.4<br>(18.6 to 30.0)                            | -1.8<br>(-5.2 to 1.6)                               |
| Environmental heat and cold exposure                                                | 6.3<br>(5.3 to 7.4)                  | 2.3<br>(1.9 to 2.8)                                  | 0.3<br>(0.2 to 0.4)                           | 22.9<br>(19.6 to 26.2)                            | -5.3<br>(-7.4 to -3.2)                              |
| Other unintentional injuries                                                        | 9.1<br>(7.4 to 11.1)                 | 4.4<br>(3.7 to 5.2)                                  | 0.3<br>(0.2 to 0.4)                           | 27.7<br>(24.9 to 30.4)                            | -1.2<br>(-3.0 to 0.6)                               |
| <b>Self-harm and interpersonal violence</b>                                         | <b>22.7</b><br><b>(20.3 to 25.3)</b> | <b>3.7†</b><br><b>(3.1 to 4.4)</b>                   | <b>0.4</b><br><b>(0.3 to 0.6)</b>             | <b>28.1</b><br><b>(24.8 to 31.6)</b>              | <b>0.8</b><br><b>(-1.4 to 2.9)</b>                  |
| Self-harm                                                                           | 0.6<br>(0.5 to 0.7)                  | 0.3<br>(0.3 to 0.4)                                  | < 0.05<br>(< 0.05 to < 0.05)                  | 28.1<br>(23.9 to 32.6)                            | -3.0<br>(-5.7 to -0.4)                              |
| Self-harm by firearm                                                                | < 0.05<br>(< 0.05 to < 0.05)         | < 0.05<br>(< 0.05 to < 0.05)                         | < 0.05<br>(< 0.05 to < 0.05)                  | 20.6<br>(15.9 to 25.4)                            | -9.8<br>(-12.8 to -6.7)                             |
| Self-harm by other specified means                                                  | 0.6<br>(0.5 to 0.7)                  | 0.3<br>(0.3 to 0.4)                                  | < 0.05<br>(< 0.05 to < 0.05)                  | 28.5<br>(24.2 to 33.1)                            | -2.7<br>(-5.4 to 0.0)                               |
| Interpersonal violence                                                              | 22.1<br>(19.7 to 24.7)               | 3.4†<br>(2.8 to 4.0)                                 | 0.4<br>(0.2 to 0.5)                           | 28.1<br>(24.5 to 31.9)                            | 1.1<br>(-1.1 to 3.3)                                |
| Assault by firearm                                                                  | 0.1<br>(0.1 to 0.1)                  | < 0.05<br>(< 0.05 to < 0.05)                         | < 0.05<br>(< 0.05 to < 0.05)                  | 24.1<br>(19.7 to 28.5)                            | -5.0<br>(-8.0 to -2.1)                              |
| Assault by sharp object                                                             | 0.9<br>(0.8 to 1.1)                  | 0.5<br>(0.3 to 0.6)                                  | < 0.05<br>(< 0.05 to < 0.05)                  | 26.3<br>(21.8 to 30.7)                            | -3.5<br>(-6.4 to -0.7)                              |
| Sexual violence                                                                     | 17.0<br>(14.8 to 19.6)               | --                                                   | 0.1<br>(0.1 to 0.2)                           | 15.4<br>(10.2 to 20.8)                            | -7.4<br>(-11.1 to -3.9)                             |
| Assault by other means                                                              | 4.1<br>(3.4 to 5.1)                  | 2.9<br>(2.4 to 3.4)                                  | 0.2<br>(0.1 to 0.2)                           | 42.1<br>(38.6 to 45.5)                            | 8.0<br>(5.6 to 10.1)                                |
| <b>Forces of nature, conflict and terrorism, and executions and police conflict</b> | <b>1.1</b><br><b>(0.7 to 1.7)</b>    | <b>&lt; 0.05†</b><br><b>(&lt; 0.05 to &lt; 0.05)</b> | <b>&lt; 0.05</b><br><b>(&lt; 0.05 to 0.1)</b> | <b>90.0</b><br><b>(83.4 to 97.8)</b>              | <b>39.7</b><br><b>(34.9 to 45.5)</b>                |
| Exposure to forces of nature                                                        | 1.1<br>(0.7 to 1.7)                  | --                                                   | < 0.05<br>(< 0.05 to 0.1)                     | 92.1<br>(85.5 to 100.5)                           | 40.5<br>(35.6 to 46.6)                              |
| Conflict and terrorism                                                              | --                                   | --                                                   | --                                            | --                                                | --                                                  |
| Executions and police conflict                                                      | < 0.05<br>(< 0.05 to 0.1)            | < 0.05<br>(< 0.05 to < 0.05)                         | < 0.05<br>(< 0.05 to < 0.05)                  | 38.4<br>(31.5 to 44.2)                            | 14.9<br>(9.8 to 19.0)                               |
| <b>Impairments</b>                                                                  | --                                   | --                                                   | --                                            | --                                                | --                                                  |
| Anaemia                                                                             | 208.2<br>(186.0 to 229.8)            | --                                                   | 6.2<br>(4.0 to 9.1)                           | 7.9<br>(-4.6 to 21.0)                             | -11.1<br>(-19.1 to -2.8)                            |
| Developmental intellectual disability                                               | 14.7<br>(11.4 to 18.0)               | --                                                   | 1.5<br>(1.1 to 1.9)                           | 19.7<br>(14.4 to 25.8)                            | -2.9<br>(-6.8 to 1.8)                               |
| Epilepsy                                                                            | 3.2<br>(2.0 to 4.1)                  | --                                                   | 1.3<br>(0.7 to 1.9)                           | 23.6<br>(-29.6 to 108.9)                          | 0.7<br>(-44.3 to 77.4)                              |
| Guillain-Barre syndrome                                                             | < 0.05<br>(< 0.05 to < 0.05)         | --                                                   | < 0.05<br>(< 0.05 to < 0.05)                  | 25.2<br>(22.9 to 28.0)                            | -0.1<br>(-0.2 to -0.0)                              |
| Hearing loss                                                                        | 71.6<br>(68.0 to 75.4)               | --                                                   | 3.2<br>(2.2 to 4.3)                           | 21.8<br>(18.6 to 25.1)                            | -4.1<br>(-5.9 to -2.5)                              |
| Heart failure                                                                       | 1.6<br>(1.4 to 1.8)                  | --                                                   | 0.2<br>(0.1 to 0.2)                           | 38.2<br>(27.9 to 49.2)                            | 1.4<br>(-6.2 to 9.7)                                |
| Infertility                                                                         | 12.6<br>(9.9 to 16.3)                | --                                                   | 0.1<br>(< 0.05 to 0.1)                        | 20.1<br>(13.5 to 27.4)                            | -6.4<br>(-11.2 to -1.2)                             |
| Pelvic inflammatory disease                                                         | 0.5<br>(0.4 to 0.6)                  | --                                                   | 0.1<br>(< 0.05 to 0.1)                        | 20.4<br>(4.3 to 38.9)                             | -7.4<br>(-18.9 to 6.0)                              |
| Vision loss                                                                         | 67.5<br>(64.8 to 70.5)               | --                                                   | 1.6<br>(1.1 to 2.4)                           | 24.4<br>(21.0 to 28.2)                            | -3.5<br>(-5.6 to -1.2)                              |

We did not calculate incidence for the nine impairments, certain NTDs, and causes with only birth prevalence. Blank cells mean that no estimate is available.

† Incidence for aggregate causes represents the sum of the incidence of the causes below the aggregate.

‡ Incidence estimates for stroke represent first-ever stroke only.

^ Incidence of HIV/AIDS represents new infections of HIV only and does not include new infections of Tuberculosis in HIV positive cases.

SR Table 14: Prevalence, incidence, and YLDs for 2016, percentage change of YLD counts and percentage change of age-standardised YLD rates between 2006 and 2016 by cause and impairments, for all ages, Somalia.

| Cause                                                                                | Prevalence in thousands (95% UI)          | Incidence in thousands (95% UI)            | YLDs in thousands (95% UI)         |                                                   |                                                     |
|--------------------------------------------------------------------------------------|-------------------------------------------|--------------------------------------------|------------------------------------|---------------------------------------------------|-----------------------------------------------------|
|                                                                                      | 2016 counts                               | 2016 counts                                | 2016 counts                        | Percentage change in counts between 2006 and 2016 | Percentage change in age-standardised rates between |
| <b>All causes</b>                                                                    | <b>10,236.8</b><br>(10,212.8 to 10,262.0) | <b>77,908.3†</b><br>(73,613.4 to 83,155.7) | <b>955.6</b><br>(704.2 to 1,256.7) | <b>25.7</b><br>(22.1 to 29.8)                     | <b>-1.6</b><br>(-3.5 to 0.6)                        |
| <b>Communicable, maternal, neonatal, and nutritional disorders</b>                   | <b>9,288.2</b><br>(9,146.2 to 9,444.5)    | <b>48,644.5†</b><br>(44,818.1 to 52,925.7) | <b>239.5</b><br>(168.6 to 331.7)   | <b>18.0</b><br>(11.3 to 25.1)                     | <b>-8.5</b><br>(-13.1 to -3.6)                      |
| <b>HIV/AIDS and tuberculosis</b>                                                     | <b>1,715.1</b><br>(1,509.1 to 1,887.8)    | <b>32.9†</b><br>(27.7 to 40.1)             | <b>11.2</b><br>(6.6 to 19.2)       | <b>10.3</b><br>(-12.1 to 37.5)                    | <b>-13.2</b><br>(-29.6 to 7.9)                      |
| Tuberculosis                                                                         | 1,559.3<br>(1,375.1 to 1,770.4)           | 30.1†<br>(25.2 to 36.1)                    | 5.7<br>(3.7 to 8.0)                | 23.9<br>(11.6 to 36.8)                            | -2.9<br>(-10.9 to 5.4)                              |
| Drug-susceptible tuberculosis                                                        | 17.6<br>(14.4 to 21.3)                    | 28.4<br>(23.6 to 34.0)                     | 5.4<br>(3.5 to 7.6)                | 23.6<br>(8.1 to 40.2)                             | -3.1<br>(-13.8 to 8.1)                              |
| Multidrug-resistant tuberculosis without extensive drug resistance                   | 1.0<br>(0.4 to 2.0)                       | 1.7<br>(0.7 to 3.1)                        | 0.3<br>(0.1 to 0.6)                | 27.0<br>(-57.9 to 296.2)                          | -0.4<br>(-66.9 to 208.2)                            |
| Extensively drug-resistant tuberculosis                                              | < 0.05<br>(< 0.05 to < 0.05)              | < 0.05<br>(< 0.05 to < 0.05)               | < 0.05<br>(< 0.05 to < 0.05)       | 287.3<br>(32.8 to 1,054.7)                        | 204.0<br>(3.6 to 815.9)                             |
| Latent tuberculosis infection                                                        | 1,540.7<br>(1,355.6 to 1,752.4)           | --                                         | --                                 | --                                                | --                                                  |
| HIV/AIDS                                                                             | 34.2<br>(15.5 to 71.7)                    | 2.9^<br>(0.9 to 7.0)                       | 5.5<br>(1.9 to 12.5)               | -0.8<br>(-32.9 to 50.3)                           | -21.9<br>(-47.0 to 18.7)                            |
| Drug-susceptible HIV/AIDS - Tuberculosis                                             | 0.9<br>(0.5 to 1.5)                       | 1.5<br>(0.9 to 2.4)                        | 0.4<br>(0.2 to 0.7)                | 7.4<br>(-16.3 to 42.2)                            | -14.2<br>(-33.2 to 12.9)                            |
| Multidrug-resistant HIV/AIDS - Tuberculosis without extensive drug resistance        | 0.1<br>(< 0.05 to 0.1)                    | 0.1<br>(< 0.05 to 0.2)                     | < 0.05<br>(< 0.05 to 0.1)          | 8.4<br>(-63.3 to 224.7)                           | -13.5<br>(-70.8 to 158.7)                           |
| Extensively drug-resistant HIV/AIDS - Tuberculosis                                   | < 0.05<br>(< 0.05 to < 0.05)              | < 0.05<br>(< 0.05 to < 0.05)               | < 0.05<br>(< 0.05 to < 0.05)       | 230.5<br>(11.8 to 889.1)                          | 163.6<br>(-10.9 to 688.0)                           |
| HIV/AIDS resulting in other diseases                                                 | 33.2<br>(14.3 to 70.8)                    | 2.9<br>(0.9 to 7.0)                        | 5.1<br>(1.6 to 12.1)               | -1.4<br>(-34.9 to 53.9)                           | -22.4<br>(-49.3 to 21.9)                            |
| <b>Diarrhoea, lower respiratory infections, and other common infectious diseases</b> | <b>824.4</b><br>(785.4 to 867.1)          | <b>38,773.5†</b><br>(35,213.1 to 42,620.8) | <b>48.1</b><br>(34.2 to 65.1)      | <b>24.0</b><br>(19.5 to 28.4)                     | <b>-1.9</b><br>(-4.8 to 1.1)                        |
| Diarrhoeal diseases                                                                  | 178.5<br>(167.4 to 189.5)                 | 11,953.6<br>(11,208.7 to 12,710.0)         | 20.1<br>(14.0 to 27.7)             | 23.3<br>(15.8 to 31.5)                            | -1.9<br>(-6.8 to 3.2)                               |
| Intestinal infectious diseases                                                       | 1.4<br>(1.0 to 1.9)                       | 22.6†<br>(16.1 to 31.9)                    | 0.2<br>(0.1 to 0.3)                | 7.5<br>(-20.0 to 45.1)                            | -16.5<br>(-33.0 to 6.4)                             |
| Typhoid fever                                                                        | 1.3<br>(0.9 to 1.9)                       | 20.7<br>(14.8 to 29.3)                     | 0.2<br>(0.1 to 0.3)                | 8.5<br>(-19.8 to 49.1)                            | -15.8<br>(-33.0 to 8.0)                             |
| Paratyphoid fever                                                                    | 0.1<br>(< 0.05 to 0.1)                    | 1.8<br>(1.1 to 2.8)                        | < 0.05<br>(< 0.05 to < 0.05)       | 18.9<br>(-14.1 to 63.6)                           | -7.8<br>(-29.1 to 19.5)                             |
| Other intestinal infectious diseases                                                 | --                                        | --                                         | < 0.05<br>(< 0.05 to < 0.05)       | -43.2<br>(-60.7 to -17.3)                         | -50.2<br>(-62.7 to -33.3)                           |
| Lower respiratory infections                                                         | 15.1<br>(13.8 to 16.5)                    | 653.5<br>(591.5 to 719.0)                  | 0.9<br>(0.6 to 1.3)                | 8.5<br>(-4.4 to 22.5)                             | -10.1<br>(-18.9 to -0.9)                            |
| Upper respiratory infections                                                         | 331.1<br>(286.2 to 379.0)                 | 24,873.2<br>(21,393.2 to 28,653.8)         | 8.3<br>(4.9 to 13.0)               | 27.3<br>(20.4 to 34.6)                            | -0.4<br>(-5.6 to 4.9)                               |
| Otitis media                                                                         | 233.8<br>(207.4 to 260.3)                 | 861.1<br>(678.6 to 1,098.9)                | 8.1<br>(5.1 to 12.1)               | 25.5<br>(16.4 to 34.7)                            | -1.4<br>(-7.6 to 5.3)                               |
| Meningitis                                                                           | 70.9<br>(59.1 to 85.1)                    | 11.3<br>(9.8 to 13.3)                      | 6.3<br>(4.5 to 8.2)                | 30.4<br>(21.7 to 40.2)                            | 1.2<br>(-5.0 to 8.6)                                |
| Pneumococcal meningitis                                                              | 31.7<br>(25.2 to 40.2)                    | 3.6<br>(2.9 to 4.5)                        | 2.7<br>(1.8 to 3.6)                | 39.5<br>(22.5 to 58.1)                            | 8.5<br>(-3.4 to 21.8)                               |
| H influenzae type B meningitis                                                       | 18.5<br>(13.2 to 25.6)                    | 3.4<br>(2.5 to 4.6)                        | 1.6<br>(1.1 to 2.1)                | 21.1<br>(7.0 to 35.7)                             | -6.0<br>(-15.4 to 3.6)                              |
| Meningococcal infection                                                              | 4.8<br>(3.2 to 6.7)                       | 1.2<br>(0.8 to 1.6)                        | 0.5<br>(0.3 to 0.6)                | 34.6<br>(26.1 to 44.0)                            | 5.7<br>(-1.4 to 13.8)                               |
| Other meningitis                                                                     | 15.9<br>(11.5 to 21.4)                    | 3.0<br>(2.2 to 4.1)                        | 1.6<br>(1.1 to 2.1)                | 25.0<br>(13.2 to 37.8)                            | -4.4<br>(-12.7 to 4.7)                              |
| Encephalitis                                                                         | 32.4<br>(20.0 to 50.1)                    | 11.2<br>(9.6 to 13.0)                      | 3.3<br>(2.3 to 4.3)                | 27.8<br>(12.8 to 45.8)                            | -0.4<br>(-11.1 to 11.9)                             |
| Diphtheria                                                                           | < 0.05<br>(< 0.05 to < 0.05)              | 0.2<br>(0.1 to 0.3)                        | < 0.05<br>(< 0.05 to < 0.05)       | -41.8<br>(-74.6 to 39.9)                          | -52.0<br>(-77.0 to 4.7)                             |
| Whooping cough                                                                       | 11.8<br>(9.0 to 15.0)                     | 86.5<br>(65.4 to 109.3)                    | 0.6<br>(0.3 to 0.9)                | 7.8<br>(-2.0 to 20.5)                             | -11.6<br>(-19.8 to -1.3)                            |
| Tetanus                                                                              | 0.4<br>(0.2 to 0.7)                       | 3.9<br>(1.4 to 10.0)                       | < 0.05<br>(< 0.05 to 0.1)          | -31.6<br>(-52.1 to 5.8)                           | -45.6<br>(-61.6 to -17.3)                           |
| Measles                                                                              | 0.7<br>(0.2 to 1.5)                       | 24.2<br>(8.3 to 54.1)                      | 0.1<br>(< 0.05 to 0.1)             | -80.5<br>(-89.0 to -69.3)                         | -84.2<br>(-91.2 to -74.8)                           |
| Varicella and herpes zoster                                                          | 9.4<br>(8.8 to 10.1)                      | 272.3<br>(257.4 to 289.3)                  | 0.3<br>(0.2 to 0.4)                | 28.1<br>(9.2 to 50.4)                             | 0.4<br>(-11.3 to 13.5)                              |
| <b>Neglected tropical diseases and malaria</b>                                       | <b>5,531.0</b><br>(5,224.3 to 5,863.3)    | <b>1,201.6†</b><br>(881.0 to 1,736.5)      | <b>39.9</b><br>(25.2 to 60.7)      | <b>13.4</b><br>(-1.3 to 26.8)                     | <b>-10.3</b><br>(-22.0 to 1.0)                      |
| Malaria                                                                              | 222.4<br>(176.3 to 280.8)                 | 579.8<br>(286.7 to 1,101.9)                | 6.1<br>(4.5 to 7.8)                | -18.4<br>(-31.3 to -3.5)                          | -37.4<br>(-46.3 to -26.6)                           |
| Chagas disease                                                                       | --                                        | --                                         | --                                 | --                                                | --                                                  |
| Leishmaniasis                                                                        | 0.8<br>(0.7 to 1.0)                       | 3.0<br>(2.5 to 3.5)                        | 0.1<br>(< 0.05 to 0.1)             | 96.9<br>(42.1 to 177.5)                           | 58.4<br>(10.3 to 139.2)                             |
| Visceral leishmaniasis                                                               | 0.7<br>(0.6 to 0.9)                       | 3.0<br>(2.5 to 3.5)                        | 0.1<br>(< 0.05 to 0.1)             | 96.9<br>(42.1 to 177.5)                           | 58.4<br>(10.3 to 139.2)                             |
| Cutaneous and mucocutaneous leishmaniasis                                            | --                                        | --                                         | --                                 | --                                                | --                                                  |
| African trypanosomiasis                                                              | --                                        | --                                         | --                                 | --                                                | --                                                  |
| Schistosomiasis                                                                      | 1,540.0<br>(1,291.0 to 1,837.7)           | 565.1<br>(490.4 to 658.5)                  | 12.3<br>(6.2 to 22.6)              | 22.5<br>(15.8 to 31.4)                            | -4.3<br>(-9.4 to 2.0)                               |
| Cysticercosis                                                                        | --                                        | --                                         | --                                 | --                                                | --                                                  |
| Cystic echinococcosis                                                                | 19.1<br>(5.9 to 56.7)                     | 4.0<br>(1.2 to 12.0)                       | 1.8<br>(0.5 to 5.4)                | -6.3<br>(-83.5 to 358.6)                          | -26.9<br>(-84.8 to 251.7)                           |
| Lymphatic filariasis                                                                 | --                                        | --                                         | --                                 | --                                                | --                                                  |
| Onchocerciasis                                                                       | --                                        | --                                         | --                                 | --                                                | --                                                  |
| Trachoma                                                                             | 10.6<br>(6.6 to 15.9)                     | --                                         | 0.9<br>(0.5 to 1.4)                | 2.0<br>(-15.7 to 24.1)                            | -18.0<br>(-34.9 to 5.1)                             |
| Dengue                                                                               | 2.9<br>(1.3 to 5.5)                       | 49.0<br>(22.9 to 88.2)                     | 0.5<br>(0.2 to 1.1)                | 173.3<br>(86.0 to 539.1)                          | 109.5<br>(50.6 to 376.6)                            |
| Yellow fever                                                                         | < 0.05<br>(< 0.05 to < 0.05)              | 0.5<br>(0.1 to 1.3)                        | < 0.05<br>(< 0.05 to < 0.05)       | -24.7<br>(-48.5 to 5.6)                           | -41.4<br>(-55.4 to -23.1)                           |
| Rabies                                                                               | < 0.05<br>(< 0.05 to < 0.05)              | 0.2<br>(0.1 to 0.7)                        | < 0.05<br>(< 0.05 to < 0.05)       | -4.1<br>(-48.0 to 74.2)                           | -23.7<br>(-51.6 to 15.0)                            |
| Intestinal nematode infections                                                       | 4,528.3<br>(4,143.0 to 4,955.3)           | --                                         | 13.7<br>(8.2 to 21.6)              | 27.3<br>(13.3 to 42.6)                            | 1.3<br>(-11.0 to 16.1)                              |
| Ascariasis                                                                           | 688.4<br>(553.3 to 846.9)                 | --                                         | 0.1<br>(0.1 to 0.2)                | 28.1<br>(-3.6 to 69.9)                            | 0.7<br>(-24.9 to 38.1)                              |

| Cause                                                                   | Prevalence in thousands (95% UI)              | Incidence in thousands (95% UI)                   | YLDs in thousands (95% UI)              |                                                   |                                                     |
|-------------------------------------------------------------------------|-----------------------------------------------|---------------------------------------------------|-----------------------------------------|---------------------------------------------------|-----------------------------------------------------|
|                                                                         | 2016 counts                                   | 2016 counts                                       | 2016 counts                             | Percentage change in counts between 2006 and 2016 | Percentage change in age-standardised rates between |
| Trichuriasis                                                            | 2,549.5<br>(2,142.7 to 3,035.2)               | --                                                | 2.7<br>(1.5 to 4.6)                     | 27.5<br>(9.6 to 48.9)                             | 0.0<br>(-16.0 to 19.8)                              |
| Hookworm disease                                                        | 2,215.3<br>(1,881.9 to 2,598.5)               | --                                                | 10.9<br>(6.6 to 17.0)                   | 27.2<br>(11.0 to 45.6)                            | 1.5<br>(-12.5 to 18.4)                              |
| Food-borne trematodiasis                                                | --                                            | --                                                | --                                      | --                                                | --                                                  |
| Leprosy                                                                 | 0.3<br>(0.3 to 0.4)                           | < 0.05<br>(< 0.05 to 0.1)                         | < 0.05<br>(< 0.05 to < 0.05)            | 70.1<br>(32.5 to 118.6)                           | 29.7<br>(-1.7 to 72.0)                              |
| Ebola virus disease                                                     | --                                            | --                                                | --                                      | --                                                | --                                                  |
| Zika virus disease                                                      | --                                            | --                                                | --                                      | --                                                | --                                                  |
| Guinea worm disease                                                     | --                                            | --                                                | --                                      | --                                                | --                                                  |
| Other neglected tropical diseases                                       | 120.9<br>(107.2 to 135.3)                     | --                                                | 4.6<br>(2.9 to 6.7)                     | 16.4<br>(-0.8 to 35.0)                            | -6.2<br>(-18.6 to 7.3)                              |
| <b>Maternal disorders</b>                                               | <b>32.4</b><br><b>(26.3 to 39.5)</b>          | <b>350.5†</b><br><b>(259.9 to 484.8)</b>          | <b>4.6</b><br><b>(3.0 to 6.5)</b>       | <b>-6.8</b><br><b>(-20.8 to 9.8)</b>              | <b>-29.8</b><br><b>(-40.1 to -17.6)</b>             |
| Maternal haemorrhage                                                    | 3.0<br>(2.2 to 4.0)                           | 27.2<br>(17.6 to 40.9)                            | 0.1<br>(0.1 to 0.2)                     | 32.4<br>(-15.4 to 111.5)                          | -1.3<br>(-36.2 to 55.1)                             |
| Maternal sepsis and other pregnancy related infections                  | 4.1<br>(3.4 to 5.0)                           | 14.1<br>(10.7 to 19.3)                            | 0.1<br>(< 0.05 to 0.1)                  | 20.5<br>(-37.9 to 130.9)                          | -10.0<br>(-51.7 to 63.5)                            |
| Maternal hypertensive disorders                                         | 16.5<br>(10.6 to 22.8)                        | 77.8<br>(66.1 to 89.3)                            | 0.8<br>(0.4 to 1.3)                     | 22.6<br>(-23.9 to 96.9)                           | -9.1<br>(-43.6 to 47.4)                             |
| Maternal obstructed labour and uterine rupture                          | 8.2<br>(6.0 to 11.1)                          | 22.6<br>(16.3 to 31.0)                            | 2.7<br>(1.6 to 4.0)                     | -15.1<br>(-29.2 to 2.1)                           | -34.8<br>(-45.0 to -20.9)                           |
| Maternal abortion, miscarriage, and ectopic pregnancy                   | 1.7<br>(0.9 to 3.0)                           | 209.0<br>(118.9 to 343.0)                         | 0.2<br>(0.1 to 0.4)                     | 21.7<br>(-30.3 to 109.9)                          | -10.2<br>(-48.2 to 53.6)                            |
| Other maternal disorders                                                | --                                            | --                                                | 0.7<br>(0.5 to 1.0)                     | -10.8<br>(-24.0 to 5.2)                           | -33.0<br>(-42.5 to -21.3)                           |
| <b>Neonatal disorders</b>                                               | <b>151.6</b><br><b>(117.0 to 196.0)</b>       | --                                                | <b>18.7</b><br><b>(8.8 to 34.1)</b>     | <b>86.0</b><br><b>(31.0 to 146.9)</b>             | <b>46.2</b><br><b>(1.9 to 93.8)</b>                 |
| Neonatal preterm birth complications                                    | 85.0<br>(60.9 to 120.5)                       | --                                                | 4.5<br>(2.9 to 6.9)                     | 41.5<br>(7.1 to 82.2)                             | 10.7<br>(-17.4 to 44.7)                             |
| Neonatal encephalopathy due to birth asphyxia and trauma                | 63.9<br>(29.7 to 113.1)                       | --                                                | 7.7<br>(1.1 to 20.2)                    | 134.9<br>(-1.4 to 282.0)                          | 83.2<br>(-25.3 to 203.0)                            |
| Neonatal sepsis and other neonatal infections                           | 11.1<br>(2.6 to 29.7)                         | --                                                | 4.2<br>(0.5 to 13.1)                    | 115.4<br>(25.6 to 248.2)                          | 74.1<br>(-0.3 to 188.0)                             |
| Hemolytic disease and other neonatal jaundice                           | 2.7<br>(2.3 to 3.1)                           | --                                                | 1.0<br>(0.7 to 1.2)                     | 26.0<br>(12.6 to 40.6)                            | -0.7<br>(-10.6 to 10.1)                             |
| Other neonatal disorders                                                | --                                            | --                                                | 1.3<br>(0.7 to 2.2)                     | 53.6<br>(18.4 to 91.5)                            | 27.0<br>(-2.9 to 58.8)                              |
| <b>Nutritional deficiencies</b>                                         | <b>5,816.8</b><br><b>(5,360.2 to 6,287.4)</b> | <b>6,040.6†</b><br><b>(4,649.5 to 7,587.3)</b>    | <b>105.4</b><br><b>(70.0 to 151.8)</b>  | <b>11.4</b><br><b>(2.4 to 20.4)</b>               | <b>-14.2</b><br><b>(-19.7 to -8.5)</b>              |
| Protein-energy malnutrition                                             | 196.0<br>(137.9 to 273.3)                     | 148.2<br>(106.4 to 203.0)                         | 7.1<br>(4.2 to 11.1)                    | 15.1<br>(-14.5 to 52.5)                           | -5.6<br>(-30.2 to 25.3)                             |
| Iodine deficiency                                                       | 511.8<br>(406.1 to 626.1)                     | 20.6<br>(16.3 to 25.2)                            | 14.7<br>(9.7 to 21.1)                   | -21.1<br>(-27.4 to -14.4)                         | -39.3<br>(-43.6 to -34.5)                           |
| Vitamin A deficiency                                                    | 4,226.6<br>(3,566.1 to 5,033.7)               | 5,871.9<br>(4,428.3 to 7,442.8)                   | 0.6<br>(0.3 to 1.0)                     | 15.0<br>(-9.5 to 44.8)                            | -8.9<br>(-27.1 to 11.4)                             |
| Iron-deficiency anaemia                                                 | 2,224.6<br>(2,011.1 to 2,443.3)               | --                                                | 82.8<br>(54.1 to 121.0)                 | 19.7<br>(7.9 to 32.3)                             | -6.2<br>(-13.4 to 1.7)                              |
| Other nutritional deficiencies                                          | --                                            | --                                                | 0.2<br>(0.1 to 0.4)                     | 14.8<br>(-16.5 to 53.8)                           | -5.7<br>(-31.7 to 26.6)                             |
| <b>Other communicable, maternal, neonatal, and nutritional diseases</b> | <b>3,401.4</b><br><b>(3,194.4 to 3,610.3)</b> | <b>2,245.4</b><br><b>(1,929.7 to 2,653.6)</b>     | <b>11.6</b><br><b>(7.5 to 17.4)</b>     | <b>25.9</b><br><b>(18.3 to 33.5)</b>              | <b>-2.3</b><br><b>(-7.2 to 2.7)</b>                 |
| Sexually transmitted diseases excluding HIV                             | 2,574.3<br>(2,393.3 to 2,736.3)               | 1,490.9<br>(1,337.2 to 1,642.8)                   | 7.3<br>(4.5 to 11.5)                    | 27.7<br>(20.4 to 35.6)                            | -1.8<br>(-7.0 to 3.8)                               |
| Syphilis                                                                | 167.3<br>(138.3 to 197.7)                     | 118.6<br>(94.9 to 147.8)                          | 0.4<br>(0.3 to 0.6)                     | 18.6<br>(-1.1 to 41.1)                            | -5.4<br>(-21.2 to 12.2)                             |
| Chlamydial infection                                                    | 262.7<br>(208.1 to 327.6)                     | 205.7<br>(164.5 to 254.4)                         | 2.0<br>(1.2 to 3.3)                     | 27.3<br>(13.7 to 40.6)                            | -3.2<br>(-13.1 to 6.6)                              |
| Gonococcal infection                                                    | 120.0<br>(93.7 to 150.5)                      | 394.7<br>(305.4 to 498.9)                         | 1.4<br>(0.8 to 2.3)                     | 28.8<br>(14.5 to 46.0)                            | -0.6<br>(-11.0 to 11.8)                             |
| Trichomoniasis                                                          | 457.1<br>(375.7 to 548.4)                     | 437.5<br>(347.1 to 546.9)                         | 0.6<br>(0.2 to 1.3)                     | 30.7<br>(23.3 to 39.2)                            | 0.0<br>(-5.3 to 6.0)                                |
| Genital herpes                                                          | 1,952.3<br>(1,669.8 to 2,299.5)               | 231.3<br>(189.0 to 285.6)                         | 0.5<br>(0.2 to 1.2)                     | 29.0<br>(18.5 to 41.3)                            | -0.1<br>(-6.8 to 7.9)                               |
| Other sexually transmitted diseases                                     | 77.6<br>(61.4 to 98.6)                        | 103.0<br>(86.2 to 124.4)                          | 2.3<br>(1.5 to 3.5)                     | 28.1<br>(18.4 to 38.9)                            | -1.3<br>(-8.7 to 6.5)                               |
| Hepatitis                                                               | 1,062.2<br>(851.0 to 1,309.5)                 | 754.4<br>(492.5 to 1,125.2)                       | 0.8<br>(0.5 to 1.3)                     | 7.7<br>(-17.5 to 42.1)                            | -12.7<br>(-28.4 to 6.9)                             |
| Acute hepatitis A                                                       | 18.0<br>(2.6 to 43.1)                         | 234.5<br>(33.6 to 560.3)                          | 0.2<br>(< 0.05 to 0.3)                  | 10.9<br>(-71.7 to 308.7)                          | -11.3<br>(-67.2 to 155.5)                           |
| Hepatitis B                                                             | 884.4<br>(674.0 to 1,127.3)                   | 468.9<br>(344.9 to 637.3)                         | 0.6<br>(0.3 to 1.0)                     | 6.5<br>(-12.4 to 30.9)                            | -13.3<br>(-29.0 to 3.7)                             |
| Hepatitis C                                                             | 157.2<br>(138.3 to 177.3)                     | 17.3<br>(15.8 to 18.9)                            | < 0.05<br>(< 0.05 to < 0.05)            | 19.3<br>(3.5 to 36.5)                             | -3.1<br>(-16.1 to 10.7)                             |
| Acute hepatitis E                                                       | 2.6<br>(2.1 to 3.4)                           | 33.7<br>(27.0 to 44.1)                            | 0.1<br>(< 0.05 to 0.1)                  | 7.7<br>(-22.3 to 49.1)                            | -12.0<br>(-30.2 to 10.5)                            |
| Other infectious diseases                                               | 89.6<br>(79.9 to 100.0)                       | < 0.05<br>(< 0.05 to < 0.05)                      | 3.5<br>(2.2 to 5.1)                     | 27.1<br>(10.1 to 45.3)                            | 0.9<br>(-10.9 to 13.1)                              |
| <b>Non-communicable diseases</b>                                        | <b>9,277.1</b><br><b>(9,180.7 to 9,387.9)</b> | <b>28,489.0†</b><br><b>(25,827.6 to 30,980.8)</b> | <b>650.3</b><br><b>(477.9 to 848.1)</b> | <b>28.7</b><br><b>(24.1 to 33.8)</b>              | <b>0.2</b><br><b>(-2.4 to 3.0)</b>                  |
| <b>Neoplasms</b>                                                        | <b>16.2</b><br><b>(12.6 to 24.0)</b>          | <b>7.5</b><br><b>(6.2 to 8.5)</b>                 | <b>2.6</b><br><b>(1.7 to 3.5)</b>       | <b>21.9</b><br><b>(10.5 to 31.1)</b>              | <b>-1.5</b><br><b>(-10.0 to 5.2)</b>                |
| Lip and oral cavity cancer                                              | 0.4<br>(0.4 to 0.5)                           | 0.1<br>(0.1 to 0.2)                               | 0.1<br>(< 0.05 to 0.1)                  | 28.0<br>(14.0 to 44.8)                            | 2.6<br>(-9.0 to 16.1)                               |
| Nasopharynx cancer                                                      | 0.3<br>(0.2 to 0.4)                           | 0.1<br>(0.1 to 0.1)                               | < 0.05<br>(< 0.05 to 0.1)               | 14.6<br>(-3.2 to 35.9)                            | -9.3<br>(-23.1 to 8.1)                              |
| Other pharynx cancer                                                    | 0.1<br>(0.1 to 0.1)                           | < 0.05<br>(< 0.05 to 0.1)                         | < 0.05<br>(< 0.05 to < 0.05)            | 18.2<br>(7.5 to 31.3)                             | -4.8<br>(-13.4 to 4.9)                              |
| Oesophageal cancer                                                      | 0.3<br>(0.3 to 0.4)                           | 0.3<br>(0.3 to 0.4)                               | 0.1<br>(0.1 to 0.1)                     | 14.3<br>(-10.3 to 46.1)                           | -7.4<br>(-26.8 to 18.8)                             |
| Stomach cancer                                                          | 0.5<br>(0.4 to 0.6)                           | 0.3<br>(0.3 to 0.4)                               | 0.1<br>(0.1 to 0.1)                     | 11.1<br>(-4.6 to 29.2)                            | -10.4<br>(-23.9 to 6.0)                             |
| Colon and rectum cancer                                                 | 1.0<br>(0.9 to 1.1)                           | 0.4<br>(0.4 to 0.4)                               | 0.1<br>(0.1 to 0.2)                     | 25.4<br>(8.5 to 46.3)                             | 1.6<br>(-12.9 to 18.8)                              |
| Liver cancer                                                            | 0.1<br>(0.1 to 0.2)                           | 0.3<br>(0.3 to 0.4)                               | 0.1<br>(< 0.05 to 0.1)                  | 23.3<br>(9.2 to 38.4)                             | -1.2<br>(-11.7 to 10.3)                             |
| Liver cancer due to hepatitis B                                         | 0.1<br>(0.1 to 0.1)                           | 0.1<br>(0.1 to 0.1)                               | < 0.05<br>(< 0.05 to < 0.05)            | 21.8<br>(6.8 to 38.4)                             | -2.6<br>(-14.4 to 10.1)                             |



| Cause                                              | Prevalence in thousands (95% UI)        | Incidence in thousands (95% UI)          | YLDs in thousands (95% UI)           |                                                   |                                                     |
|----------------------------------------------------|-----------------------------------------|------------------------------------------|--------------------------------------|---------------------------------------------------|-----------------------------------------------------|
|                                                    | 2016 counts                             | 2016 counts                              | 2016 counts                          | Percentage change in counts between 2006 and 2016 | Percentage change in age-standardised rates between |
| Liver cancer due to hepatitis C                    | 0.1<br>(0.1 to 0.1)                     | 0.1<br>(0.1 to 0.2)                      | < 0.05<br>(< 0.05 to < 0.05)         | 23.8<br>(8.6 to 40.2)                             | -0.5<br>(-11.8 to 12.3)                             |
| Liver cancer due to alcohol use                    | < 0.05<br>(< 0.05 to < 0.05)            | < 0.05<br>(< 0.05 to < 0.05)             | < 0.05<br>(< 0.05 to < 0.05)         | 26.9<br>(10.4 to 45.1)                            | 2.2<br>(-11.3 to 16.4)                              |
| Liver cancer due to other causes                   | 0.1<br>(0.1 to 0.1)                     | 0.1<br>(0.1 to 0.1)                      | < 0.05<br>(< 0.05 to < 0.05)         | 23.4<br>(9.2 to 38.9)                             | -1.8<br>(-12.9 to 10.3)                             |
| Gallbladder and biliary tract cancer               | < 0.05<br>(< 0.05 to < 0.05)            | < 0.05<br>(< 0.05 to 0.1)                | < 0.05<br>(< 0.05 to < 0.05)         | 16.1<br>(6.6 to 28.7)                             | -6.3<br>(-13.5 to 2.8)                              |
| Pancreatic cancer                                  | 0.1<br>(0.1 to 0.1)                     | 0.1<br>(0.1 to 0.1)                      | < 0.05<br>(< 0.05 to < 0.05)         | 26.5<br>(16.5 to 36.9)                            | 1.4<br>(-6.7 to 9.8)                                |
| Larynx cancer                                      | 0.1<br>(0.1 to 0.2)                     | 0.1<br>(< 0.05 to 0.1)                   | < 0.05<br>(< 0.05 to < 0.05)         | 19.3<br>(4.8 to 37.2)                             | -3.7<br>(-15.2 to 9.5)                              |
| Tracheal, bronchus, and lung cancer                | 0.2<br>(0.2 to 0.2)                     | 0.2<br>(0.2 to 0.2)                      | < 0.05<br>(< 0.05 to 0.1)            | 26.1<br>(3.0 to 53.8)                             | 1.8<br>(-17.8 to 25.8)                              |
| Malignant skin melanoma                            | 0.1<br>(0.1 to 0.2)                     | < 0.05<br>(< 0.05 to 0.1)                | < 0.05<br>(< 0.05 to < 0.05)         | 27.8<br>(9.1 to 49.2)                             | 2.6<br>(-12.3 to 20.4)                              |
| Non-melanoma skin cancer                           | < 0.05<br>(< 0.05 to 0.1)               | 0.3<br>(0.2 to 0.4)                      | < 0.05<br>(< 0.05 to < 0.05)         | 34.3<br>(6.1 to 65.7)                             | 6.1<br>(-15.5 to 32.2)                              |
| Non-melanoma skin cancer (squamous-cell carcinoma) | < 0.05<br>(< 0.05 to < 0.05)            | 0.1<br>(0.1 to 0.1)                      | < 0.05<br>(< 0.05 to < 0.05)         | 34.0<br>(0.1 to 73.1)                             | 5.8<br>(-20.0 to 36.8)                              |
| Non-melanoma skin cancer (basal-cell carcinoma)    | < 0.05<br>(< 0.05 to 0.1)               | 0.2<br>(0.1 to 0.3)                      | < 0.05<br>(< 0.05 to < 0.05)         | 35.6<br>(19.9 to 55.6)                            | 8.1<br>(-3.3 to 22.2)                               |
| Breast cancer                                      | 2.5<br>(1.6 to 3.7)                     | 0.6<br>(0.4 to 1.0)                      | 0.3<br>(0.2 to 0.5)                  | 27.7<br>(0.3 to 58.7)                             | 2.7<br>(-17.9 to 24.3)                              |
| Cervical cancer                                    | 6.1<br>(3.3 to 9.0)                     | 1.8<br>(1.0 to 2.6)                      | 0.6<br>(0.3 to 1.1)                  | 14.9<br>(-8.7 to 41.8)                            | -7.7<br>(-26.7 to 12.2)                             |
| Uterine cancer                                     | 0.5<br>(0.3 to 0.7)                     | 0.1<br>(0.1 to 0.2)                      | 0.1<br>(< 0.05 to 0.1)               | 20.7<br>(-1.9 to 50.9)                            | -2.9<br>(-21.9 to 19.6)                             |
| Ovarian cancer                                     | 0.6<br>(0.4 to 0.7)                     | 0.2<br>(0.1 to 0.2)                      | 0.1<br>(0.1 to 0.1)                  | 33.5<br>(-3.5 to 82.1)                            | 6.7<br>(-24.2 to 48.5)                              |
| Prostate cancer                                    | 1.7<br>(0.6 to 2.3)                     | 0.6<br>(0.2 to 0.8)                      | 0.3<br>(0.1 to 0.4)                  | 32.9<br>(5.9 to 64.5)                             | 6.7<br>(-12.8 to 27.2)                              |
| Testicular cancer                                  | < 0.05<br>(< 0.05 to 0.1)               | < 0.05<br>(< 0.05 to < 0.05)             | < 0.05<br>(< 0.05 to < 0.05)         | 20.2<br>(-3.3 to 47.9)                            | -4.9<br>(-23.9 to 17.9)                             |
| Kidney cancer                                      | 0.4<br>(0.3 to 0.5)                     | 0.1<br>(0.1 to 0.1)                      | < 0.05<br>(< 0.05 to < 0.05)         | 30.4<br>(-4.5 to 80.5)                            | 6.6<br>(-10.3 to 26.7)                              |
| Bladder cancer                                     | 0.3<br>(0.2 to 0.3)                     | 0.1<br>(0.1 to 0.1)                      | < 0.05<br>(< 0.05 to 0.1)            | 24.7<br>(10.4 to 39.8)                            | 0.2<br>(-10.9 to 12.3)                              |
| Brain and nervous system cancer                    | 0.3<br>(0.2 to 0.3)                     | 0.1<br>(0.1 to 0.1)                      | < 0.05<br>(< 0.05 to 0.1)            | 30.5<br>(19.5 to 44.3)                            | 5.3<br>(-4.6 to 18.3)                               |
| Thyroid cancer                                     | 0.4<br>(0.2 to 0.5)                     | 0.1<br>(< 0.05 to 0.1)                   | < 0.05<br>(< 0.05 to 0.1)            | 19.2<br>(-2.8 to 43.8)                            | -4.7<br>(-20.9 to 14.3)                             |
| Mesothelioma                                       | < 0.05<br>(< 0.05 to < 0.05)            | < 0.05<br>(< 0.05 to < 0.05)             | < 0.05<br>(< 0.05 to < 0.05)         | 18.1<br>(6.3 to 31.7)                             | -4.8<br>(-14.6 to 6.1)                              |
| Hodgkin lymphoma                                   | 0.3<br>(0.1 to 0.4)                     | 0.1<br>(< 0.05 to 0.1)                   | < 0.05<br>(< 0.05 to 0.1)            | 15.5<br>(2.1 to 35.3)                             | -6.7<br>(-14.7 to 4.3)                              |
| Non-Hodgkin's lymphoma                             | 1.2<br>(0.7 to 1.5)                     | 0.4<br>(0.2 to 0.5)                      | 0.1<br>(0.1 to 0.2)                  | 27.3<br>(6.2 to 51.8)                             | 2.1<br>(-9.5 to 13.7)                               |
| Multiple myeloma                                   | 0.1<br>(0.1 to 0.1)                     | 0.1<br>(< 0.05 to 0.1)                   | < 0.05<br>(< 0.05 to < 0.05)         | 28.3<br>(17.2 to 43.9)                            | 2.9<br>(-6.3 to 15.4)                               |
| Leukaemia                                          | 0.6<br>(0.5 to 0.8)                     | 0.2<br>(0.1 to 0.2)                      | 0.1<br>(0.1 to 0.1)                  | 17.9<br>(6.8 to 30.0)                             | -5.2<br>(-14.2 to 4.3)                              |
| Acute lymphoid leukaemia                           | 0.1<br>(0.1 to 0.2)                     | < 0.05<br>(< 0.05 to 0.1)                | < 0.05<br>(< 0.05 to < 0.05)         | 23.1<br>(3.9 to 51.8)                             | -0.8<br>(-14.1 to 16.7)                             |
| Chronic lymphoid leukaemia                         | 0.1<br>(0.1 to 0.1)                     | < 0.05<br>(< 0.05 to < 0.05)             | < 0.05<br>(< 0.05 to < 0.05)         | 23.8<br>(4.2 to 54.2)                             | -1.3<br>(-17.4 to 23.9)                             |
| Acute myeloid leukaemia                            | < 0.05<br>(< 0.05 to 0.1)               | < 0.05<br>(< 0.05 to < 0.05)             | < 0.05<br>(< 0.05 to < 0.05)         | 29.6<br>(12.1 to 53.0)                            | 4.5<br>(-8.0 to 19.1)                               |
| Chronic myeloid leukaemia                          | 0.1<br>(0.1 to 0.1)                     | < 0.05<br>(< 0.05 to < 0.05)             | < 0.05<br>(< 0.05 to < 0.05)         | 19.4<br>(2.3 to 42.1)                             | -5.8<br>(-18.8 to 11.8)                             |
| Other leukaemia                                    | 0.3<br>(0.2 to 0.4)                     | 0.1<br>(< 0.05 to 0.1)                   | < 0.05<br>(< 0.05 to 0.1)            | 11.5<br>(-3.2 to 26.1)                            | -9.3<br>(-21.3 to 4.6)                              |
| Other neoplasms                                    | 1.9<br>(1.7 to 2.2)                     | 0.7<br>(0.6 to 0.8)                      | 0.2<br>(0.1 to 0.3)                  | 20.0<br>(5.4 to 37.6)                             | -4.4<br>(-16.1 to 9.5)                              |
| <b>Cardiovascular diseases</b>                     | <b>475.4</b><br><b>(436.9 to 515.9)</b> | <b>38.9†</b><br><b>(37.2 to 40.7)</b>    | <b>25.8</b><br><b>(18.2 to 35.5)</b> | <b>29.9</b><br><b>(24.7 to 35.6)</b>              | <b>0.4</b><br><b>(-2.9 to 3.9)</b>                  |
| Rheumatic heart disease                            | 129.9<br>(114.7 to 146.3)               | 6.0<br>(5.2 to 6.7)                      | 6.2<br>(3.9 to 9.1)                  | 36.6<br>(25.1 to 48.2)                            | 5.0<br>(-3.3 to 13.3)                               |
| Ischaemic heart disease                            | 101.3<br>(94.1 to 109.0)                | 15.2<br>(14.1 to 16.3)                   | 4.7<br>(3.1 to 6.5)                  | 21.9<br>(15.4 to 28.5)                            | -2.8<br>(-7.0 to 1.6)                               |
| Cerebrovascular disease                            | 27.0<br>(25.2 to 29.2)                  | 5.8‡<br>(5.3 to 6.3)                     | 3.9<br>(2.8 to 4.9)                  | 24.3<br>(13.9 to 34.9)                            | -1.4<br>(-9.1 to 6.6)                               |
| Ischaemic stroke                                   | 23.6<br>(21.3 to 26.2)                  | 3.7‡<br>(3.2 to 4.2)                     | 3.2<br>(2.3 to 4.1)                  | 26.2<br>(14.0 to 38.5)                            | -0.2<br>(-8.9 to 9.1)                               |
| Hemorrhagic stroke                                 | 4.8<br>(4.3 to 5.3)                     | 2.1‡<br>(1.9 to 2.3)                     | 0.7<br>(0.5 to 0.9)                  | 15.8<br>(1.2 to 31.8)                             | -7.2<br>(-18.5 to 6.0)                              |
| Hypertensive heart disease                         | 6.5<br>(5.1 to 8.2)                     | --                                       | 0.5<br>(0.4 to 0.7)                  | 23.0<br>(10.1 to 37.0)                            | -1.5<br>(-10.4 to 8.1)                              |
| Cardiomyopathy and myocarditis                     | 4.8<br>(3.7 to 5.9)                     | 2.2†<br>(2.0 to 2.6)                     | 0.4<br>(0.3 to 0.7)                  | 27.1<br>(14.2 to 42.9)                            | 1.0<br>(-11.3 to 17.0)                              |
| Myocarditis                                        | 1.3<br>(1.1 to 1.5)                     | 2.2<br>(2.0 to 2.6)                      | 0.1<br>(0.1 to 0.1)                  | 27.5<br>(19.3 to 35.9)                            | 0.5<br>(-8.2 to 9.9)                                |
| Alcoholic cardiomyopathy                           | 0.4<br>(0.3 to 0.6)                     | --                                       | < 0.05<br>(< 0.05 to 0.1)            | 27.2<br>(1.4 to 62.2)                             | 1.9<br>(-19.1 to 32.3)                              |
| Other cardiomyopathy                               | 3.8<br>(2.7 to 5.1)                     | --                                       | 0.3<br>(0.2 to 0.5)                  | 27.0<br>(10.4 to 47.2)                            | 1.0<br>(-13.0 to 20.1)                              |
| Atrial fibrillation and flutter                    | 17.1<br>(14.8 to 19.6)                  | 1.5<br>(1.3 to 1.8)                      | 1.3<br>(0.9 to 1.9)                  | 25.0<br>(14.9 to 35.9)                            | 0.2<br>(-7.0 to 6.7)                                |
| Peripheral vascular disease                        | 66.5<br>(57.7 to 77.0)                  | 6.9<br>(5.9 to 8.1)                      | 0.4<br>(0.2 to 0.7)                  | 24.0<br>(14.2 to 33.5)                            | -0.8<br>(-8.0 to 6.2)                               |
| Endocarditis                                       | 0.4<br>(0.3 to 0.5)                     | 1.4<br>(1.2 to 1.5)                      | < 0.05<br>(< 0.05 to < 0.05)         | 33.5<br>(22.7 to 44.7)                            | 0.7<br>(-11.3 to 14.2)                              |
| Other cardiovascular and circulatory diseases      | 157.3<br>(108.7 to 212.8)               | --                                       | 8.4<br>(4.9 to 13.3)                 | 34.5<br>(21.5 to 48.9)                            | 2.6<br>(-7.4 to 14.8)                               |
| <b>Chronic respiratory diseases</b>                | <b>680.1</b><br><b>(636.4 to 732.9)</b> | <b>133.9†</b><br><b>(122.5 to 146.9)</b> | <b>31.2</b><br><b>(22.5 to 42.2)</b> | <b>31.8</b><br><b>(25.9 to 39.3)</b>              | <b>2.7</b><br><b>(-1.4 to 7.0)</b>                  |
| Chronic obstructive pulmonary disease              | 85.9<br>(82.0 to 89.7)                  | 6.4<br>(6.2 to 6.7)                      | 6.7<br>(5.8 to 7.5)                  | 26.4<br>(16.9 to 36.8)                            | 0.6<br>(-5.7 to 7.8)                                |
| Pneumoconiosis                                     | 0.1<br>(0.1 to 0.1)                     | < 0.05<br>(< 0.05 to < 0.05)             | < 0.05<br>(< 0.05 to < 0.05)         | 26.5<br>(18.6 to 33.9)                            | 1.1<br>(-5.0 to 7.3)                                |
| Silicosis                                          | < 0.05<br>(< 0.05 to < 0.05)            | < 0.05<br>(< 0.05 to < 0.05)             | < 0.05<br>(< 0.05 to < 0.05)         | 24.7<br>(14.3 to 35.3)                            | -0.4<br>(-7.3 to 6.9)                               |

| Cause                                                          | Prevalence in thousands (95% UI)        | Incidence in thousands (95% UI)         | YLDs in thousands (95% UI)        |                                                   |                                                     |
|----------------------------------------------------------------|-----------------------------------------|-----------------------------------------|-----------------------------------|---------------------------------------------------|-----------------------------------------------------|
|                                                                | 2016 counts                             | 2016 counts                             | 2016 counts                       | Percentage change in counts between 2006 and 2016 | Percentage change in age-standardised rates between |
| Asbestosis                                                     | < 0.05<br>(< 0.05 to < 0.05)            | < 0.05<br>(< 0.05 to < 0.05)            | < 0.05<br>(< 0.05 to < 0.05)      | 26.4<br>(17.7 to 35.4)                            | 0.6<br>(-4.9 to 6.2)                                |
| Coal workers pneumoconiosis                                    | --                                      | --                                      | --                                | --                                                | --                                                  |
| Other pneumoconiosis                                           | 0.1<br>(< 0.05 to 0.1)                  | < 0.05<br>(< 0.05 to < 0.05)            | < 0.05<br>(< 0.05 to < 0.05)      | 26.7<br>(15.3 to 38.4)                            | 1.6<br>(-8.3 to 11.8)                               |
| Asthma                                                         | 593.8<br>(537.8 to 656.1)               | 127.4<br>(116.1 to 140.5)               | 23.4<br>(15.3 to 34.1)            | 32.2<br>(24.9 to 41.2)                            | 3.2<br>(-1.8 to 9.0)                                |
| Interstitial lung disease and pulmonary sarcoidosis            | 0.7<br>(0.6 to 0.8)                     | 0.1<br>(0.1 to 0.1)                     | 0.1<br>(0.1 to 0.1)               | 27.0<br>(23.4 to 30.6)                            | -1.1<br>(-5.3 to 3.0)                               |
| Other chronic respiratory diseases                             | --                                      | --                                      | 1.0<br>(0.7 to 1.2)               | 70.6<br>(24.8 to 133.9)                           | 33.4<br>(7.3 to 65.0)                               |
| <b>Cirrhosis and other chronic liver diseases</b>              | <b>20.4<br/>(19.3 to 21.4)</b>          | <b>2.2<br/>(2.1 to 2.3)</b>             | <b>1.8<br/>(1.2 to 2.5)</b>       | <b>29.0<br/>(14.4 to 45.4)</b>                    | <b>1.0<br/>(-8.2 to 10.4)</b>                       |
| Cirrhosis and other chronic liver diseases due to hepatitis B  | 6.1<br>(5.2 to 7.0)                     | 0.8<br>(0.6 to 0.9)                     | 0.4<br>(0.3 to 0.6)               | 27.2<br>(6.0 to 51.7)                             | 0.5<br>(-13.6 to 16.8)                              |
| Cirrhosis and other chronic liver diseases due to hepatitis C  | 1.7<br>(1.2 to 2.5)                     | 0.2<br>(0.1 to 0.3)                     | 0.1<br>(0.1 to 0.2)               | 26.8<br>(1.0 to 59.9)                             | 0.0<br>(-20.8 to 27.9)                              |
| Cirrhosis and other chronic liver diseases due to alcohol use  | 4.0<br>(3.5 to 4.5)                     | 0.6<br>(0.5 to 0.6)                     | 0.3<br>(0.2 to 0.4)               | 27.7<br>(6.9 to 55.0)                             | 1.7<br>(-12.9 to 20.9)                              |
| Cirrhosis and other chronic liver diseases due to other causes | 8.5<br>(7.9 to 9.2)                     | 0.7<br>(0.6 to 0.7)                     | 1.0<br>(0.7 to 1.4)               | 30.4<br>(7.8 to 57.7)                             | 1.2<br>(-13.6 to 18.9)                              |
| <b>Digestive diseases</b>                                      | <b>174.1<br/>(160.9 to 188.2)</b>       | <b>150.8†<br/>(143.6 to 158.5)</b>      | <b>6.5<br/>(4.5 to 8.8)</b>       | <b>29.6<br/>(19.9 to 41.0)</b>                    | <b>4.0<br/>(-1.8 to 10.4)</b>                       |
| Peptic ulcer disease                                           | 23.9<br>(21.9 to 26.3)                  | 13.2<br>(11.8 to 14.7)                  | 0.6<br>(0.4 to 0.9)               | 41.8<br>(25.2 to 61.9)                            | 10.9<br>(-1.0 to 24.4)                              |
| Gastritis and duodenitis                                       | 53.5<br>(46.7 to 60.2)                  | 45.9<br>(41.4 to 51.2)                  | 0.9<br>(0.6 to 1.3)               | 41.0<br>(24.2 to 62.0)                            | 15.8<br>(4.3 to 29.6)                               |
| Appendicitis                                                   | 1.7<br>(1.6 to 1.9)                     | 45.9<br>(42.2 to 49.7)                  | 0.5<br>(0.3 to 0.8)               | 21.4<br>(-13.5 to 70.9)                           | -6.9<br>(-27.3 to 21.0)                             |
| Paralytic ileus and intestinal obstruction                     | 0.2<br>(0.2 to 0.2)                     | 6.5<br>(5.9 to 7.2)                     | 0.1<br>(< 0.05 to 0.1)            | 28.3<br>(21.4 to 35.3)                            | 1.0<br>(-9.4 to 12.0)                               |
| Inguinal, femoral, and abdominal hernia                        | 93.3<br>(78.1 to 111.0)                 | 10.0<br>(8.9 to 11.3)                   | 3.5<br>(2.4 to 4.9)               | 26.0<br>(12.7 to 41.1)                            | 0.5<br>(-8.0 to 8.8)                                |
| Inflammatory bowel disease                                     | 0.4<br>(0.4 to 0.4)                     | 3.5<br>(3.4 to 3.7)                     | 0.1<br>(< 0.05 to 0.1)            | 27.2<br>(24.3 to 30.3)                            | -2.4<br>(-4.7 to -0.1)                              |
| Vascular intestinal disorders                                  | 0.1<br>(< 0.05 to 0.1)                  | 0.3<br>(0.3 to 0.4)                     | < 0.05<br>(< 0.05 to < 0.05)      | 26.2<br>(20.0 to 32.1)                            | -0.3<br>(-4.3 to 3.6)                               |
| Gallbladder and biliary diseases                               | 5.4<br>(4.8 to 6.1)                     | 24.4<br>(21.1 to 27.9)                  | 0.1<br>(0.1 to 0.2)               | 26.5<br>(8.7 to 47.0)                             | 0.4<br>(-15.7 to 18.9)                              |
| Pancreatitis                                                   | 0.1<br>(0.1 to 0.1)                     | 1.1<br>(1.0 to 1.3)                     | < 0.05<br>(< 0.05 to < 0.05)      | 30.8<br>(26.1 to 36.2)                            | 2.9<br>(-0.5 to 6.6)                                |
| Other digestive diseases                                       | --                                      | --                                      | 0.6<br>(0.4 to 0.8)               | 32.6<br>(20.1 to 46.5)                            | 7.4<br>(0.9 to 14.6)                                |
| <b>Neurological disorders</b>                                  | <b>2,987.9<br/>(2,828.9 to 3,157.2)</b> | <b>1,419.0<br/>(1,204.6 to 1,664.1)</b> | <b>66.1<br/>(41.5 to 97.2)</b>    | <b>31.9<br/>(-7.7 to 88.3)</b>                    | <b>1.2<br/>(-22.8 to 33.3)</b>                      |
| Alzheimer's disease and other dementias                        | 13.0<br>(10.8 to 15.5)                  | 2.3<br>(1.9 to 2.8)                     | 1.8<br>(1.3 to 2.4)               | 23.5<br>(16.6 to 30.3)                            | -1.5<br>(-6.2 to 3.2)                               |
| Parkinson's disease                                            | 1.1<br>(0.9 to 1.4)                     | 0.1<br>(0.1 to 0.2)                     | 0.1<br>(0.1 to 0.2)               | 32.1<br>(12.0 to 54.5)                            | 5.7<br>(-8.9 to 21.0)                               |
| Epilepsy                                                       | 28.1<br>(4.8 to 60.9)                   | 4.0<br>(0.7 to 8.8)                     | 11.9<br>(1.9 to 28.1)             | 36.9<br>(-80.4 to 99.2)                           | 5.2<br>(-85.0 to 718.4)                             |
| Multiple sclerosis                                             | 0.3<br>(0.2 to 0.3)                     | < 0.05<br>(< 0.05 to < 0.05)            | 0.1<br>(0.1 to 0.1)               | 35.7<br>(30.8 to 41.1)                            | 7.2<br>(3.3 to 11.3)                                |
| Motor neuron disease                                           | 0.1<br>(0.1 to 0.1)                     | < 0.05<br>(< 0.05 to < 0.05)            | < 0.05<br>(< 0.05 to < 0.05)      | 30.3<br>(25.5 to 36.4)                            | 2.2<br>(-0.8 to 5.6)                                |
| Migraine                                                       | 989.7<br>(924.5 to 1,051.4)             | 133.2<br>(124.3 to 142.1)               | 42.1<br>(27.1 to 59.5)            | 29.5<br>(24.0 to 35.3)                            | -0.0<br>(-3.8 to 3.8)                               |
| Tension-type headache                                          | 2,277.7<br>(2,009.5 to 2,584.8)         | 1,279.3<br>(1,067.5 to 1,517.2)         | 7.2<br>(4.5 to 10.8)              | 28.3<br>(21.7 to 35.8)                            | -0.6<br>(-5.3 to 4.7)                               |
| Other neurological disorders                                   | < 0.05<br>(< 0.05 to < 0.05)            | < 0.05<br>(< 0.05 to 0.1)               | 2.9<br>(0.5 to 6.8)               | 69.2<br>(-73.4 to 1,076.9)                        | 26.4<br>(-75.8 to 586.5)                            |
| <b>Mental and substance use disorders</b>                      | <b>1,567.2<br/>(1,471.4 to 1,656.4)</b> | <b>562.4†<br/>(520.9 to 611.0)</b>      | <b>178.8<br/>(128.5 to 235.0)</b> | <b>29.6<br/>(26.6 to 32.6)</b>                    | <b>-0.0<br/>(-2.1 to 2.2)</b>                       |
| Schizophrenia                                                  | 12.2<br>(10.6 to 13.8)                  | 1.2<br>(1.0 to 1.4)                     | 7.9<br>(5.5 to 10.0)              | 27.9<br>(15.5 to 41.9)                            | 0.3<br>(-8.5 to 10.2)                               |
| Alcohol use disorders                                          | 122.7<br>(102.4 to 143.2)               | 66.0<br>(55.4 to 76.8)                  | 12.3<br>(8.4 to 17.4)             | 33.5<br>(23.2 to 44.3)                            | 2.1<br>(-5.3 to 9.8)                                |
| Drug use disorders                                             | 42.2<br>(37.3 to 47.2)                  | 7.8<br>(6.7 to 9.1)                     | 8.5<br>(5.8 to 11.7)              | 35.2<br>(22.1 to 48.9)                            | 3.7<br>(-5.7 to 13.5)                               |
| Opioid use disorders                                           | 17.0<br>(13.5 to 21.9)                  | 2.5<br>(2.0 to 3.1)                     | 7.1<br>(4.7 to 10.2)              | 35.5<br>(19.8 to 51.8)                            | 4.1<br>(-6.7 to 15.2)                               |
| Cocaine use disorders                                          | 1.2<br>(1.0 to 1.4)                     | 0.2<br>(0.1 to 0.2)                     | 0.2<br>(0.1 to 0.3)               | 33.9<br>(26.2 to 42.2)                            | 2.7<br>(-2.7 to 8.5)                                |
| Amphetamine use disorders                                      | 0.6<br>(0.4 to 0.9)                     | 0.1<br>(0.1 to 0.2)                     | 0.1<br>(< 0.05 to 0.1)            | 36.2<br>(25.6 to 49.0)                            | 2.6<br>(-5.2 to 12.4)                               |
| Cannabis use disorders                                         | 22.1<br>(17.4 to 27.9)                  | 4.5<br>(3.5 to 5.7)                     | 0.6<br>(0.4 to 1.0)               | 33.7<br>(9.9 to 61.5)                             | 0.1<br>(-16.3 to 18.1)                              |
| Other drug use disorders                                       | 2.6<br>(2.3 to 3.0)                     | 0.6<br>(0.5 to 0.7)                     | 0.5<br>(0.3 to 0.7)               | 33.0<br>(13.2 to 58.2)                            | 2.6<br>(-12.4 to 20.8)                              |
| Depressive disorders                                           | 310.9<br>(289.2 to 333.0)               | 357.8<br>(317.1 to 403.8)               | 54.1<br>(37.1 to 73.7)            | 28.4<br>(22.5 to 34.0)                            | -0.6<br>(-5.0 to 3.7)                               |
| Major depressive disorder                                      | 217.1<br>(191.9 to 245.5)               | 339.5<br>(298.9 to 384.6)               | 44.5<br>(30.3 to 60.6)            | 28.2<br>(21.3 to 35.2)                            | -0.8<br>(-6.0 to 4.4)                               |
| Dysthymia                                                      | 99.4<br>(85.8 to 114.5)                 | 18.3<br>(16.0 to 21.2)                  | 9.6<br>(6.4 to 14.1)              | 28.8<br>(23.6 to 34.2)                            | 0.2<br>(-3.0 to 3.6)                                |
| Bipolar disorder                                               | 53.4<br>(45.1 to 63.0)                  | 6.5<br>(5.5 to 7.7)                     | 11.0<br>(6.7 to 16.5)             | 31.0<br>(22.0 to 40.8)                            | 0.1<br>(-6.2 to 6.5)                                |
| Anxiety disorders                                              | 311.0<br>(275.9 to 350.1)               | 56.4<br>(50.5 to 63.2)                  | 30.2<br>(20.5 to 41.9)            | 30.0<br>(21.0 to 39.8)                            | 0.1<br>(-5.8 to 6.9)                                |
| Eating disorders                                               | 6.0<br>(4.7 to 7.4)                     | 5.8<br>(4.2 to 7.8)                     | 1.2<br>(0.8 to 1.8)               | 35.9<br>(13.0 to 64.6)                            | 2.4<br>(-14.0 to 22.0)                              |
| Anorexia nervosa                                               | 1.8<br>(1.3 to 2.4)                     | 0.9<br>(0.7 to 1.2)                     | 0.4<br>(0.2 to 0.6)               | 35.8<br>(-4.0 to 94.1)                            | 1.6<br>(-26.9 to 41.6)                              |
| Bulimia nervosa                                                | 3.9<br>(2.9 to 5.4)                     | 4.9<br>(3.3 to 7.0)                     | 0.8<br>(0.5 to 1.3)               | 36.0<br>(9.1 to 69.9)                             | 2.7<br>(-17.5 to 27.8)                              |
| Autistic spectrum disorders                                    | 87.8<br>(78.6 to 99.5)                  | 1.0<br>(0.7 to 1.4)                     | 12.6<br>(8.4 to 17.7)             | 29.1<br>(22.4 to 36.1)                            | 0.3<br>(-4.1 to 5.5)                                |
| Autism                                                         | 24.4<br>(21.1 to 28.2)                  | 0.1<br>(0.1 to 0.2)                     | 6.2<br>(4.0 to 9.1)               | 29.3<br>(17.5 to 43.1)                            | 0.4<br>(-8.0 to 10.1)                               |
| Asperger syndrome and other autistic spectrum disorders        | 63.4<br>(52.5 to 76.7)                  | 0.9<br>(0.6 to 1.3)                     | 6.4<br>(4.1 to 9.4)               | 28.8<br>(21.8 to 35.8)                            | 0.3<br>(-4.2 to 4.9)                                |



| Cause                                                      | Prevalence in thousands (95% UI)              | Incidence in thousands (95% UI)                   | YLDs in thousands (95% UI)              |                                                   |                                                     |
|------------------------------------------------------------|-----------------------------------------------|---------------------------------------------------|-----------------------------------------|---------------------------------------------------|-----------------------------------------------------|
|                                                            | 2016 counts                                   | 2016 counts                                       | 2016 counts                             | Percentage change in counts between 2006 and 2016 | Percentage change in age-standardised rates between |
| Attention-deficit/hyperactivity disorder                   | 146.6<br>(130.7 to 165.5)                     | 9.2<br>(7.9 to 10.7)                              | 1.8<br>(1.0 to 2.8)                     | 30.5<br>(20.8 to 40.3)                            | 0.4<br>(-6.4 to 7.4)                                |
| Conduct disorder                                           | 117.5<br>(95.2 to 139.2)                      | 43.2<br>(33.6 to 52.8)                            | 14.2<br>(8.5 to 21.7)                   | 31.8<br>(24.3 to 40.1)                            | 0.2<br>(-5.4 to 6.5)                                |
| Idiopathic developmental intellectual disability           | 366.1<br>(238.7 to 499.0)                     | --                                                | 14.9<br>(7.3 to 25.5)                   | 25.4<br>(16.7 to 33.2)                            | -3.0<br>(-9.3 to 2.7)                               |
| Other mental and substance use disorders                   | 136.6<br>(119.3 to 158.3)                     | 7.4<br>(6.5 to 8.6)                               | 10.2<br>(7.0 to 14.7)                   | 28.7<br>(22.0 to 35.9)                            | 0.1<br>(-4.5 to 4.8)                                |
| <b>Diabetes, urogenital, blood, and endocrine diseases</b> | <b>3,992.8</b><br><b>(3,866.8 to 4,122.8)</b> | <b>924.6†</b><br><b>(867.2 to 987.2)</b>          | <b>56.4</b><br><b>(40.0 to 75.9)</b>    | <b>29.0</b><br><b>(24.7 to 33.2)</b>              | <b>2.7</b><br><b>(-0.6 to 6.0)</b>                  |
| Diabetes mellitus                                          | 193.5<br>(174.5 to 214.9)                     | 14.1<br>(12.8 to 15.6)                            | 18.1<br>(12.6 to 24.8)                  | 30.7<br>(22.8 to 38.2)                            | 4.3<br>(-1.8 to 10.4)                               |
| Acute glomerulonephritis                                   | 0.1<br>(0.1 to 0.1)                           | 1.3<br>(1.1 to 1.6)                               | < 0.05<br>(< 0.05 to < 0.05)            | 27.9<br>(22.1 to 34.4)                            | -0.3<br>(-4.2 to 4.0)                               |
| Chronic kidney disease                                     | 381.2<br>(341.2 to 423.3)                     | 29.3<br>(25.9 to 32.9)                            | 11.9<br>(8.5 to 15.6)                   | 34.3<br>(26.1 to 42.9)                            | 5.3<br>(-0.7 to 11.4)                               |
| Chronic kidney disease due to diabetes mellitus            | 117.6<br>(99.1 to 138.1)                      | 8.4<br>(6.8 to 10.1)                              | 3.5<br>(2.4 to 4.6)                     | 32.7<br>(21.4 to 44.3)                            | 5.4<br>(-3.0 to 14.0)                               |
| Chronic kidney disease due to hypertension                 | 77.6<br>(66.6 to 88.8)                        | 7.8<br>(6.5 to 9.1)                               | 1.9<br>(1.2 to 2.6)                     | 31.6<br>(18.3 to 46.1)                            | 3.1<br>(-6.4 to 13.6)                               |
| Chronic kidney disease due to glomerulonephritis           | 80.2<br>(68.7 to 92.2)                        | 4.5<br>(3.6 to 5.5)                               | 3.1<br>(2.2 to 4.3)                     | 35.8<br>(23.1 to 49.2)                            | 6.7<br>(-1.8 to 16.0)                               |
| Chronic kidney disease due to other causes                 | 105.9<br>(88.5 to 124.8)                      | 8.7<br>(7.3 to 10.2)                              | 3.4<br>(2.4 to 4.6)                     | 36.2<br>(24.9 to 49.0)                            | 5.7<br>(-1.6 to 13.4)                               |
| Urinary diseases and male infertility                      | 137.9<br>(121.0 to 154.7)                     | 483.0†<br>(431.4 to 542.0)                        | 3.6<br>(2.4 to 5.2)                     | 24.6<br>(16.9 to 34.7)                            | -0.2<br>(-6.4 to 7.4)                               |
| Interstitial nephritis and urinary tract infections        | 8.1<br>(7.0 to 9.1)                           | 422.7<br>(370.9 to 479.4)                         | 0.3<br>(0.2 to 0.4)                     | 31.6<br>(10.3 to 55.4)                            | 1.9<br>(-12.5 to 18.8)                              |
| Urolithiasis                                               | 1.9<br>(1.6 to 2.1)                           | 49.2<br>(43.6 to 56.6)                            | 0.1<br>(0.1 to 0.2)                     | 28.9<br>(20.5 to 39.1)                            | 1.8<br>(-5.8 to 10.3)                               |
| Benign prostatic hyperplasia                               | 87.3<br>(74.4 to 102.4)                       | 11.1<br>(9.3 to 13.2)                             | 2.9<br>(1.8 to 4.2)                     | 24.4<br>(14.7 to 36.4)                            | 0.0<br>(-6.9 to 8.3)                                |
| Male infertility                                           | 34.6<br>(24.8 to 48.2)                        | --                                                | 0.2<br>(0.1 to 0.4)                     | 32.3<br>(21.7 to 44.6)                            | 2.6<br>(-5.8 to 12.2)                               |
| Other urinary diseases                                     | --                                            | --                                                | 0.1<br>(0.1 to 0.2)                     | 6.7<br>(-5.8 to 20.3)                             | -15.2<br>(-23.0 to -6.5)                            |
| Gynecological diseases                                     | 1,043.9<br>(989.6 to 1,098.4)                 | 389.9†<br>(361.4 to 418.4)                        | 12.1<br>(8.2 to 17.4)                   | 27.0<br>(20.8 to 33.1)                            | -1.6<br>(-5.8 to 2.6)                               |
| Uterine fibroids                                           | 70.0<br>(61.6 to 78.8)                        | 8.6<br>(7.5 to 9.9)                               | 1.6<br>(1.0 to 2.4)                     | 23.3<br>(11.0 to 37.2)                            | -1.7<br>(-11.5 to 9.3)                              |
| Polycystic ovarian syndrome                                | 8.8<br>(6.5 to 11.4)                          | 21.1<br>(15.0 to 27.9)                            | 0.1<br>(< 0.05 to 0.1)                  | 28.2<br>(11.2 to 47.1)                            | -0.6<br>(-13.2 to 13.6)                             |
| Female infertility                                         | 12.4<br>(5.1 to 31.5)                         | --                                                | 0.1<br>(< 0.05 to 0.2)                  | 21.3<br>(-13.9 to 67.4)                           | -7.7<br>(-32.5 to 23.6)                             |
| Endometriosis                                              | 2.0<br>(1.7 to 2.4)                           | 8.5<br>(6.8 to 10.8)                              | 0.2<br>(0.1 to 0.3)                     | 31.0<br>(-4.6 to 80.4)                            | -0.3<br>(-23.8 to 32.4)                             |
| Genital prolapse                                           | 448.9<br>(394.5 to 502.9)                     | 40.4<br>(34.0 to 47.4)                            | 1.4<br>(0.7 to 2.6)                     | 19.7<br>(12.4 to 28.4)                            | -4.3<br>(-10.6 to 3.4)                              |
| Premenstrual syndrome                                      | 519.9<br>(472.6 to 562.4)                     | 203.4<br>(183.8 to 222.9)                         | 4.3<br>(2.6 to 6.6)                     | 28.2<br>(16.9 to 40.1)                            | -1.5<br>(-9.9 to 7.0)                               |
| Other gynecological diseases                               | 126.6<br>(110.0 to 144.6)                     | 108.0<br>(89.0 to 128.9)                          | 4.5<br>(3.0 to 6.3)                     | 29.6<br>(18.9 to 39.5)                            | 0.0<br>(-7.3 to 7.4)                                |
| Hemoglobinopathies and hemolytic anaemias                  | 2,939.8<br>(2,798.3 to 3,090.0)               | --                                                | 6.8<br>(4.4 to 9.8)                     | 26.2<br>(12.0 to 43.2)                            | 1.6<br>(-7.4 to 12.1)                               |
| Thalassemias                                               | < 0.05<br>(< 0.05 to < 0.05)                  | --                                                | < 0.05<br>(< 0.05 to < 0.05)            | 32.3<br>(6.4 to 68.1)                             | 7.7<br>(-13.0 to 36.5)                              |
| Thalassaemias trait                                        | 59.7<br>(20.5 to 113.5)                       | --                                                | 1.0<br>(0.2 to 2.1)                     | 33.6<br>(7.7 to 57.4)                             | 10.2<br>(-9.9 to 27.0)                              |
| Sickle cell disorders                                      | 1.3<br>(1.0 to 1.7)                           | --                                                | 0.1<br>(0.1 to 0.2)                     | 39.0<br>(4.2 to 85.0)                             | 10.2<br>(-15.1 to 41.3)                             |
| Sickle cell trait                                          | 568.0<br>(495.6 to 647.5)                     | --                                                | 2.6<br>(1.7 to 3.8)                     | 27.3<br>(12.0 to 46.8)                            | 6.7<br>(-4.0 to 20.0)                               |
| G6PD deficiency                                            | 754.9<br>(646.9 to 873.1)                     | --                                                | 0.1<br>(< 0.05 to 0.1)                  | -1.9<br>(-23.6 to 25.7)                           | -17.7<br>(-31.0 to -2.4)                            |
| G6PD trait                                                 | 1,709.8<br>(1,625.4 to 1,796.0)               | --                                                | < 0.05<br>(< 0.05 to < 0.05)            | 17.4<br>(-0.6 to 40.5)                            | -1.9<br>(-14.7 to 14.2)                             |
| Other hemoglobinopathies and hemolytic anaemias            | 95.1<br>(85.3 to 104.9)                       | --                                                | 3.0<br>(1.9 to 4.4)                     | 23.1<br>(5.6 to 43.4)                             | -5.1<br>(-14.6 to 6.0)                              |
| Endocrine, metabolic, blood, and immune disorders          | 114.5<br>(105.4 to 124.1)                     | 7.0<br>(6.2 to 7.8)                               | 4.0<br>(2.6 to 5.7)                     | 21.8<br>(10.0 to 34.7)                            | -2.3<br>(-9.4 to 5.3)                               |
| <b>Musculoskeletal disorders</b>                           | <b>848.5</b><br><b>(801.9 to 893.1)</b>       | <b>412.1</b><br><b>(370.8 to 457.0)</b>           | <b>92.4</b><br><b>(66.1 to 121.4)</b>   | <b>27.3</b><br><b>(23.6 to 31.4)</b>              | <b>0.3</b><br><b>(-2.4 to 2.9)</b>                  |
| Rheumatoid arthritis                                       | 12.1<br>(10.7 to 13.7)                        | 0.8<br>(0.7 to 0.9)                               | 2.9<br>(1.9 to 3.9)                     | 26.1<br>(13.8 to 39.8)                            | -0.4<br>(-9.2 to 9.3)                               |
| Osteoarthritis                                             | 150.5<br>(140.6 to 160.7)                     | 8.6<br>(8.0 to 9.2)                               | 9.2<br>(6.5 to 12.5)                    | 25.7<br>(20.4 to 31.0)                            | 1.0<br>(-2.7 to 4.8)                                |
| Low back and neck pain                                     | 581.5<br>(543.0 to 624.5)                     | 268.2<br>(239.2 to 300.2)                         | 66.8<br>(46.9 to 87.6)                  | 27.1<br>(22.8 to 31.6)                            | 0.2<br>(-2.9 to 3.7)                                |
| Low back pain                                              | 446.0<br>(395.9 to 503.3)                     | 226.2<br>(197.6 to 258.3)                         | 50.3<br>(35.6 to 66.2)                  | 27.5<br>(21.8 to 33.2)                            | 0.3<br>(-4.0 to 4.7)                                |
| Neck pain                                                  | 164.7<br>(142.5 to 190.5)                     | 42.1<br>(36.4 to 48.8)                            | 16.5<br>(11.1 to 23.3)                  | 26.2<br>(22.3 to 29.8)                            | 0.1<br>(-2.4 to 2.5)                                |
| Gout                                                       | 20.5<br>(18.1 to 23.3)                        | 4.2<br>(3.8 to 4.8)                               | 0.7<br>(0.4 to 0.9)                     | 25.9<br>(8.8 to 44.2)                             | 0.4<br>(-11.5 to 12.9)                              |
| Other musculoskeletal disorders                            | 147.8<br>(107.9 to 188.4)                     | 130.2<br>(99.3 to 167.3)                          | 12.8<br>(7.7 to 19.5)                   | 30.0<br>(15.6 to 45.8)                            | 0.2<br>(-10.8 to 11.2)                              |
| <b>Other non-communicable diseases</b>                     | <b>7,468.9</b><br><b>(7,239.6 to 7,709.8)</b> | <b>24,837.5†</b><br><b>(22,234.6 to 27,300.8)</b> | <b>188.8</b><br><b>(128.0 to 268.8)</b> | <b>26.8</b><br><b>(24.8 to 28.9)</b>              | <b>-1.4</b><br><b>(-2.7 to -0.1)</b>                |
| Congenital anomalies                                       | 118.4<br>(95.1 to 152.0)                      | --                                                | 16.2<br>(10.6 to 24.2)                  | 27.6<br>(18.2 to 37.4)                            | -0.2<br>(-7.4 to 7.5)                               |
| Neural tube defects                                        | 11.7<br>(10.3 to 13.1)                        | --                                                | 3.5<br>(2.4 to 4.7)                     | 29.5<br>(13.4 to 47.1)                            | 1.2<br>(-10.0 to 13.5)                              |
| Congenital heart anomalies                                 | 12.0<br>(9.8 to 14.3)                         | --                                                | 0.6<br>(0.3 to 1.0)                     | 26.8<br>(8.0 to 48.4)                             | 1.5<br>(-12.0 to 17.4)                              |
| Orofacial clefts                                           | 2.6<br>(2.3 to 3.0)                           | --                                                | < 0.05<br>(< 0.05 to 0.1)               | 25.3<br>(11.7 to 40.4)                            | -1.9<br>(-12.6 to 9.8)                              |
| Down's syndrome                                            | 1.9<br>(1.6 to 2.2)                           | --                                                | 0.2<br>(0.1 to 0.2)                     | 30.1<br>(20.8 to 39.9)                            | 1.2<br>(-6.0 to 9.0)                                |
| Turner syndrome                                            | 7.6<br>(6.5 to 9.0)                           | --                                                | 0.1<br>(0.1 to 0.2)                     | 27.8<br>(-6.8 to 72.8)                            | -0.7<br>(-25.4 to 32.3)                             |
| Klinefelter syndrome                                       | 6.3<br>(5.4 to 7.5)                           | --                                                | < 0.05<br>(< 0.05 to 0.1)               | 26.6<br>(-5.2 to 64.6)                            | -2.6<br>(-25.8 to 24.7)                             |



| Cause                                         | Prevalence in thousands (95% UI)              | Incidence in thousands (95% UI)          | YLDs in thousands (95% UI)           |                                                   |                                                     |
|-----------------------------------------------|-----------------------------------------------|------------------------------------------|--------------------------------------|---------------------------------------------------|-----------------------------------------------------|
|                                               | 2016 counts                                   | 2016 counts                              | 2016 counts                          | Percentage change in counts between 2006 and 2016 | Percentage change in age-standardised rates between |
| Other chromosomal abnormalities               | 1.7<br>(1.4 to 2.0)                           | --                                       | 0.3<br>(0.2 to 0.5)                  | 22.4<br>(-8.1 to 61.2)                            | -1.4<br>(-27.0 to 31.3)                             |
| Congenital musculoskeletal and limb anomalies | 12.5<br>(10.9 to 14.1)                        | --                                       | 1.8<br>(1.2 to 2.6)                  | 29.3<br>(13.7 to 47.5)                            | 0.2<br>(-10.5 to 11.7)                              |
| Urogenital congenital anomalies               | 11.6<br>(10.2 to 13.2)                        | --                                       | 0.3<br>(0.2 to 0.5)                  | 27.9<br>(17.2 to 38.4)                            | 0.1<br>(-7.7 to 8.0)                                |
| Digestive congenital anomalies                | 5.2<br>(4.5 to 5.8)                           | --                                       | 0.2<br>(0.1 to 0.3)                  | 30.3<br>(-0.7 to 73.0)                            | 1.9<br>(-18.3 to 28.4)                              |
| Other congenital anomalies                    | 65.0<br>(36.5 to 109.9)                       | --                                       | 9.1<br>(4.9 to 15.7)                 | 26.7<br>(12.7 to 42.2)                            | -1.0<br>(-11.7 to 11.5)                             |
| Skin and subcutaneous diseases                | 3,616.2<br>(3,453.5 to 3,818.3)               | 8,657.5<br>(7,931.9 to 9,547.1)          | 89.8<br>(57.8 to 131.9)              | 30.7<br>(27.8 to 33.9)                            | 1.0<br>(-0.8 to 2.9)                                |
| Dermatitis                                    | 598.9<br>(463.0 to 741.5)                     | 445.3<br>(390.0 to 511.9)                | 24.4<br>(13.6 to 42.2)               | 27.4<br>(22.9 to 32.2)                            | 0.1<br>(-2.9 to 3.5)                                |
| Psoriasis                                     | 46.5<br>(44.4 to 48.8)                        | 7.5<br>(7.2 to 7.9)                      | 4.1<br>(2.9 to 5.4)                  | 34.5<br>(20.3 to 50.8)                            | 4.7<br>(-4.1 to 15.0)                               |
| Cellulitis                                    | 3.7<br>(3.4 to 4.1)                           | 64.8<br>(59.7 to 70.2)                   | 0.2<br>(0.1 to 0.3)                  | 29.9<br>(0.4 to 63.1)                             | 1.7<br>(-19.6 to 25.8)                              |
| Pyoderma                                      | 67.0<br>(63.4 to 70.9)                        | 1,286.9<br>(1,223.3 to 1,358.2)          | 0.4<br>(0.1 to 0.8)                  | 27.7<br>(19.6 to 35.8)                            | 1.4<br>(-3.7 to 6.6)                                |
| Scabies                                       | 250.7<br>(214.4 to 293.8)                     | 769.4<br>(652.1 to 905.3)                | 6.5<br>(3.6 to 10.5)                 | 24.1<br>(18.4 to 29.9)                            | -3.6<br>(-7.1 to 0.2)                               |
| Fungal skin diseases                          | 1,463.1<br>(1,193.8 to 1,788.8)               | 4,158.4<br>(3,449.4 to 4,983.4)          | 8.3<br>(3.3 to 17.6)                 | 27.1<br>(25.6 to 28.8)                            | 0.1<br>(-0.7 to 0.9)                                |
| Viral skin diseases                           | 360.7<br>(312.9 to 415.9)                     | 476.2<br>(406.0 to 549.5)                | 11.1<br>(6.9 to 16.6)                | 28.7<br>(24.5 to 32.7)                            | 0.1<br>(-2.7 to 3.0)                                |
| Acne vulgaris                                 | 986.2<br>(839.1 to 1,148.2)                   | 759.2<br>(571.8 to 1,022.5)              | 25.4<br>(16.7 to 37.2)               | 39.3<br>(31.5 to 48.9)                            | 3.8<br>(-1.6 to 10.0)                               |
| Alopecia areata                               | 16.5<br>(15.4 to 17.5)                        | 29.5<br>(27.4 to 31.4)                   | 0.5<br>(0.3 to 0.8)                  | 29.5<br>(14.2 to 46.7)                            | 0.1<br>(-11.1 to 11.9)                              |
| Pruritus                                      | 67.9<br>(59.6 to 76.6)                        | 55.2<br>(49.1 to 62.2)                   | 0.7<br>(0.3 to 1.3)                  | 27.5<br>(20.4 to 35.5)                            | 0.1<br>(-4.7 to 5.1)                                |
| Urticaria                                     | 98.8<br>(84.3 to 116.6)                       | 176.4<br>(151.0 to 207.7)                | 6.0<br>(3.8 to 8.7)                  | 26.4<br>(18.6 to 35.3)                            | 0.1<br>(-5.2 to 6.5)                                |
| Decubitus ulcer                               | 0.9<br>(0.8 to 1.0)                           | 3.3<br>(2.9 to 3.6)                      | 0.1<br>(0.1 to 0.2)                  | 26.1<br>(15.1 to 37.5)                            | 0.7<br>(-12.2 to 14.9)                              |
| Other skin and subcutaneous diseases          | 381.8<br>(370.0 to 394.1)                     | 425.4<br>(411.5 to 439.3)                | 2.1<br>(1.0 to 3.9)                  | 27.9<br>(23.8 to 31.9)                            | 0.4<br>(-2.0 to 2.9)                                |
| Sense organ diseases                          | 1,843.8<br>(1,755.1 to 1,942.6)               | 899.7†<br>(836.6 to 969.3)               | 68.5<br>(47.4 to 96.4)               | 21.7<br>(17.5 to 25.8)                            | -3.3<br>(-5.5 to -1.1)                              |
| Glaucoma                                      | 3.8<br>(3.0 to 4.9)                           | --                                       | 0.4<br>(0.2 to 0.6)                  | 25.3<br>(9.8 to 43.6)                             | 0.5<br>(-11.1 to 14.0)                              |
| Cataract                                      | 53.0<br>(42.5 to 64.5)                        | --                                       | 4.3<br>(2.9 to 6.1)                  | 18.1<br>(10.6 to 25.9)                            | -5.0<br>(-10.9 to 1.4)                              |
| Macular degeneration                          | 7.2<br>(5.1 to 9.9)                           | --                                       | 0.5<br>(0.3 to 0.7)                  | 25.8<br>(12.2 to 41.9)                            | 0.6<br>(-9.8 to 13.0)                               |
| Refraction and accommodation disorders        | 1,001.3<br>(894.5 to 1,128.1)                 | --                                       | 16.6<br>(9.8 to 26.2)                | 18.2<br>(11.8 to 25.5)                            | -6.7<br>(-12.0 to -0.9)                             |
| Age-related and other hearing loss            | 1,024.8<br>(945.7 to 1,108.9)                 | --                                       | 39.1<br>(26.7 to 55.4)               | 22.8<br>(16.3 to 28.6)                            | -2.4<br>(-5.3 to 0.2)                               |
| Other vision loss                             | 28.2<br>(23.7 to 33.0)                        | --                                       | 2.1<br>(1.4 to 3.0)                  | 21.2<br>(11.1 to 31.9)                            | -2.1<br>(-8.8 to 5.7)                               |
| Other sense organ diseases                    | 177.6<br>(164.2 to 190.5)                     | 899.7<br>(836.6 to 969.3)                | 5.4<br>(3.4 to 8.2)                  | 27.8<br>(21.5 to 34.4)                            | 0.7<br>(-3.0 to 4.5)                                |
| Oral disorders                                | 5,266.3<br>(4,799.9 to 5,680.3)               | 15,280.3†<br>(12,877.0 to 17,753.7)      | 14.3<br>(7.9 to 24.2)                | 27.0<br>(23.4 to 30.4)                            | -0.0<br>(-2.6 to 2.4)                               |
| Caries of deciduous teeth                     | 1,245.1<br>(973.9 to 1,550.3)                 | 4,962.6<br>(3,459.1 to 6,745.3)          | 0.3<br>(0.1 to 0.6)                  | 22.5<br>(8.4 to 36.7)                             | -0.6<br>(-11.6 to 10.3)                             |
| Caries of permanent teeth                     | 3,474.9<br>(2,926.6 to 4,016.8)               | 10,226.7<br>(8,397.9 to 11,939.0)        | 2.0<br>(0.9 to 4.0)                  | 29.3<br>(22.5 to 36.0)                            | -0.2<br>(-4.7 to 4.2)                               |
| Periodontal disease                           | 698.9<br>(430.0 to 1,013.6)                   | 84.4<br>(53.6 to 124.2)                  | 4.6<br>(1.6 to 10.4)                 | 24.9<br>(17.2 to 32.1)                            | -0.3<br>(-6.0 to 5.2)                               |
| Edentulism and severe tooth loss              | 97.9<br>(83.9 to 112.9)                       | 6.6<br>(5.6 to 7.6)                      | 2.7<br>(1.8 to 3.9)                  | 25.8<br>(19.6 to 32.4)                            | 0.2<br>(-3.9 to 4.3)                                |
| Other oral disorders                          | 157.4<br>(149.9 to 165.7)                     | --                                       | 4.6<br>(2.8 to 7.0)                  | 29.1<br>(23.7 to 34.5)                            | 0.1<br>(-3.1 to 3.6)                                |
| <b>Injuries</b>                               | <b>1,552.1</b><br><b>(1,385.6 to 1,778.1)</b> | <b>774.8†</b><br><b>(730.8 to 822.9)</b> | <b>65.8</b><br><b>(40.4 to 99.8)</b> | <b>26.5</b><br><b>(23.1 to 30.1)</b>              | <b>0.2</b><br><b>(-2.6 to 3.0)</b>                  |
| <b>Transport injuries</b>                     | <b>121.8</b><br><b>(113.2 to 130.7)</b>       | <b>60.4</b><br><b>(52.8 to 69.0)</b>     | <b>7.8</b><br><b>(4.9 to 11.6)</b>   | <b>28.7</b><br><b>(25.3 to 32.2)</b>              | <b>1.4</b><br><b>(-1.1 to 4.1)</b>                  |
| Road injuries                                 | 101.5<br>(94.6 to 109.2)                      | 53.8<br>(46.4 to 62.6)                   | 6.4<br>(4.0 to 9.5)                  | 28.1<br>(24.8 to 31.4)                            | 1.2<br>(-1.3 to 3.8)                                |
| Pedestrian road injuries                      | 36.7<br>(32.2 to 41.7)                        | 14.8<br>(11.9 to 18.1)                   | 2.3<br>(1.5 to 3.5)                  | 24.6<br>(21.2 to 28.0)                            | -1.3<br>(-4.1 to 1.5)                               |
| Cyclist road injuries                         | 19.7<br>(16.5 to 23.4)                        | 12.3<br>(9.6 to 15.5)                    | 1.1<br>(0.7 to 1.7)                  | 35.1<br>(31.5 to 38.8)                            | 6.5<br>(4.1 to 9.0)                                 |
| Motorcyclist road injuries                    | 11.3<br>(9.6 to 13.4)                         | 4.2<br>(3.3 to 5.4)                      | 0.7<br>(0.4 to 1.0)                  | 21.4<br>(18.2 to 24.9)                            | -4.6<br>(-7.0 to -2.0)                              |
| Motor vehicle road injuries                   | 25.8<br>(22.1 to 29.4)                        | 16.6<br>(13.5 to 20.2)                   | 1.7<br>(1.1 to 2.5)                  | 30.4<br>(27.0 to 33.9)                            | 3.3<br>(0.9 to 5.9)                                 |
| Other road injuries                           | 8.2<br>(6.9 to 9.7)                           | 5.8<br>(4.3 to 7.8)                      | 0.5<br>(0.3 to 0.7)                  | 31.6<br>(28.1 to 35.2)                            | 3.2<br>(0.8 to 5.8)                                 |
| Other transport injuries                      | 20.2<br>(16.9 to 24.5)                        | 6.6<br>(5.4 to 8.2)                      | 1.4<br>(0.8 to 2.1)                  | 31.5<br>(26.8 to 35.8)                            | 2.6<br>(-0.3 to 5.6)                                |
| <b>Unintentional injuries</b>                 | <b>1,011.6</b><br><b>(937.1 to 1,098.5)</b>   | <b>668.4</b><br><b>(623.8 to 713.1)</b>  | <b>40.7</b><br><b>(26.8 to 57.1)</b> | <b>24.4</b><br><b>(21.2 to 27.6)</b>              | <b>-2.4</b><br><b>(-4.6 to -0.1)</b>                |
| Falls                                         | 364.0<br>(314.6 to 413.4)                     | 235.3<br>(201.4 to 275.5)                | 17.1<br>(11.4 to 23.7)               | 27.0<br>(23.9 to 30.3)                            | -0.2<br>(-2.5 to 2.1)                               |
| Drowning                                      | 3.8<br>(3.3 to 4.4)                           | 1.1<br>(0.9 to 1.3)                      | 0.3<br>(0.1 to 0.4)                  | 20.2<br>(15.8 to 24.7)                            | -4.5<br>(-7.4 to -1.3)                              |
| Fire, heat, and hot substances                | 155.9<br>(129.6 to 193.1)                     | 31.0<br>(25.2 to 37.1)                   | 5.0<br>(3.4 to 7.0)                  | 15.9<br>(9.8 to 22.2)                             | -9.4<br>(-13.5 to -5.3)                             |
| Poisonings                                    | 3.1<br>(2.5 to 3.8)                           | 5.7<br>(4.5 to 7.1)                      | 0.3<br>(0.2 to 0.5)                  | 15.8<br>(6.2 to 25.4)                             | -10.1<br>(-16.2 to -3.5)                            |
| Exposure to mechanical forces                 | 144.5<br>(123.4 to 175.0)                     | 80.0<br>(66.9 to 94.1)                   | 4.3<br>(2.7 to 6.5)                  | 27.5<br>(23.8 to 31.0)                            | -0.2<br>(-2.9 to 2.3)                               |
| Unintentional firearm injuries                | 6.8<br>(5.5 to 8.3)                           | 2.6<br>(1.8 to 3.6)                      | 0.3<br>(0.2 to 0.5)                  | 25.8<br>(21.9 to 29.6)                            | -1.6<br>(-4.0 to 1.2)                               |
| Unintentional suffocation                     | 12.2<br>(8.8 to 16.3)                         | 3.7<br>(2.6 to 5.3)                      | 0.4<br>(0.2 to 0.7)                  | 30.6<br>(25.4 to 35.5)                            | 1.8<br>(-1.7 to 5.0)                                |
| Other exposure to mechanical forces           | 125.5<br>(105.1 to 155.8)                     | 73.7<br>(61.7 to 87.0)                   | 3.5<br>(2.2 to 5.2)                  | 27.3<br>(23.5 to 30.9)                            | -0.2<br>(-2.9 to 2.2)                               |

| Cause                                                                               | Prevalence in thousands (95% UI)        | Incidence in thousands (95% UI)       | YLDs in thousands (95% UI)          |                                                   |                                                     |
|-------------------------------------------------------------------------------------|-----------------------------------------|---------------------------------------|-------------------------------------|---------------------------------------------------|-----------------------------------------------------|
|                                                                                     | 2016 counts                             | 2016 counts                           | 2016 counts                         | Percentage change in counts between 2006 and 2016 | Percentage change in age-standardised rates between |
| Adverse effects of medical treatment                                                | 4.1<br>(3.2 to 5.1)                     | 53.8<br>(46.5 to 61.5)                | 0.6<br>(0.3 to 0.8)                 | 9.9<br>(4.6 to 15.2)                              | -12.3<br>(-15.1 to -9.4)                            |
| Animal contact                                                                      | 72.3<br>(63.9 to 83.9)                  | 122.9<br>(104.7 to 141.7)             | 2.6<br>(1.7 to 3.6)                 | 25.2<br>(19.4 to 31.0)                            | -2.6<br>(-6.0 to 0.9)                               |
| Venomous animal contact                                                             | 24.2<br>(20.3 to 29.4)                  | 47.4<br>(37.4 to 58.8)                | 1.6<br>(1.0 to 2.3)                 | 24.3<br>(15.7 to 32.9)                            | -3.8<br>(-9.0 to 1.9)                               |
| Non-venomous animal contact                                                         | 48.2<br>(40.8 to 57.8)                  | 75.4<br>(61.9 to 89.9)                | 1.0<br>(0.7 to 1.5)                 | 26.6<br>(22.0 to 31.0)                            | -1.0<br>(-4.0 to 2.1)                               |
| Foreign body                                                                        | 71.2<br>(57.6 to 84.8)                  | 52.8<br>(45.8 to 61.1)                | 3.4<br>(2.1 to 5.3)                 | 17.1<br>(13.0 to 21.7)                            | -7.8<br>(-10.5 to -5.1)                             |
| Pulmonary aspiration and foreign body in airway                                     | 36.3<br>(26.6 to 49.9)                  | 17.2<br>(13.9 to 21.2)                | 2.0<br>(1.2 to 3.1)                 | 18.1<br>(13.3 to 23.1)                            | -6.7<br>(-9.5 to -4.0)                              |
| Foreign body in eyes                                                                | 3.3<br>(1.7 to 5.1)                     | 18.4<br>(13.9 to 24.9)                | 0.2<br>(0.1 to 0.3)                 | 29.1<br>(23.4 to 34.9)                            | 1.0<br>(-2.0 to 4.2)                                |
| Foreign body in other body part                                                     | 31.6<br>(25.0 to 41.1)                  | 17.2<br>(14.0 to 20.9)                | 1.2<br>(0.8 to 1.9)                 | 14.1<br>(9.3 to 19.0)                             | -10.5<br>(-13.7 to -7.5)                            |
| Environmental heat and cold exposure                                                | 74.7<br>(61.5 to 90.6)                  | 28.9<br>(23.4 to 36.1)                | 3.4<br>(2.1 to 5.2)                 | 28.0<br>(24.1 to 31.7)                            | -1.4<br>(-4.1 to 1.1)                               |
| Other unintentional injuries                                                        | 118.0<br>(93.0 to 151.8)                | 56.9<br>(47.4 to 68.2)                | 3.7<br>(2.4 to 5.5)                 | 28.4<br>(24.5 to 32.0)                            | -0.7<br>(-3.3 to 1.7)                               |
| <b>Self-harm and interpersonal violence</b>                                         | <b>470.2</b><br><b>(417.0 to 526.6)</b> | <b>45.4†</b><br><b>(38.2 to 53.5)</b> | <b>6.7</b><br><b>(4.7 to 9.2)</b>   | <b>24.4</b><br><b>(20.7 to 28.3)</b>              | <b>-2.4</b><br><b>(-5.1 to 0.2)</b>                 |
| Self-harm                                                                           | 4.7<br>(4.1 to 5.3)                     | 3.1<br>(2.5 to 3.6)                   | 0.3<br>(0.2 to 0.5)                 | 33.8<br>(29.6 to 37.8)                            | 5.3<br>(2.4 to 8.1)                                 |
| Self-harm by firearm                                                                | 0.6<br>(0.5 to 0.7)                     | 0.3<br>(0.2 to 0.4)                   | < 0.05<br>(< 0.05 to < 0.05)        | 25.4<br>(21.3 to 29.3)                            | -0.6<br>(-3.9 to 2.6)                               |
| Self-harm by other specified means                                                  | 4.2<br>(3.6 to 4.8)                     | 2.8<br>(2.3 to 3.3)                   | 0.3<br>(0.2 to 0.4)                 | 34.7<br>(30.2 to 39.0)                            | 6.1<br>(3.0 to 9.0)                                 |
| Interpersonal violence                                                              | 465.5<br>(411.9 to 521.7)               | 42.3†<br>(35.1 to 50.4)               | 6.4<br>(4.5 to 8.8)                 | 24.1<br>(20.2 to 27.9)                            | -2.9<br>(-5.6 to -0.2)                              |
| Assault by firearm                                                                  | 1.9<br>(1.6 to 2.2)                     | 0.8<br>(0.6 to 1.1)                   | 0.1<br>(0.1 to 0.2)                 | 20.9<br>(16.6 to 25.4)                            | -5.0<br>(-8.0 to -2.0)                              |
| Assault by sharp object                                                             | 15.5<br>(12.7 to 18.5)                  | 8.5<br>(6.4 to 11.2)                  | 0.6<br>(0.4 to 0.9)                 | 33.2<br>(29.0 to 37.5)                            | 4.6<br>(1.8 to 7.5)                                 |
| Sexual violence                                                                     | 405.2<br>(352.6 to 465.9)               | --                                    | 3.8<br>(2.5 to 5.4)                 | 19.7<br>(14.7 to 25.1)                            | -8.5<br>(-11.9 to -4.9)                             |
| Assault by other means                                                              | 42.9<br>(36.4 to 51.8)                  | 33.0<br>(27.6 to 39.6)                | 2.0<br>(1.3 to 3.0)                 | 30.5<br>(27.2 to 34.3)                            | 2.8<br>(0.4 to 5.5)                                 |
| <b>Forces of nature, conflict and terrorism, and executions and police conflict</b> | <b>353.8</b><br><b>(206.4 to 564.2)</b> | <b>0.7†</b><br><b>(0.3 to 1.5)</b>    | <b>10.6</b><br><b>(3.6 to 21.8)</b> | <b>35.2</b><br><b>(28.8 to 43.8)</b>              | <b>13.2</b><br><b>(8.6 to 20.2)</b>                 |
| Exposure to forces of nature                                                        | 6.5<br>(3.6 to 10.3)                    | --                                    | 0.3<br>(0.1 to 0.7)                 | -17.2<br>(-27.6 to -12.8)                         | -21.5<br>(-29.6 to -18.2)                           |
| Conflict and terrorism                                                              | 345.4<br>(200.4 to 555.7)               | --                                    | 10.2<br>(3.5 to 21.0)               | 37.8<br>(30.9 to 46.8)                            | 14.8<br>(10.0 to 22.0)                              |
| Executions and police conflict                                                      | 1.9<br>(0.8 to 4.2)                     | 0.7<br>(0.3 to 1.5)                   | 0.1<br>(< 0.05 to 0.2)              | 18.6<br>(-9.3 to 45.0)                            | 1.4<br>(-17.0 to 17.4)                              |
| <b>Impairments</b>                                                                  | --                                      | --                                    | --                                  | --                                                | --                                                  |
| Anaemia                                                                             | 3,371.7<br>(3,082.3 to 3,684.8)         | --                                    | 130.2<br>(85.6 to 188.0)            | 18.1<br>(7.7 to 29.8)                             | -5.9<br>(-12.3 to 1.4)                              |
| Developmental intellectual disability                                               | 524.2<br>(395.1 to 656.5)               | --                                    | 44.0<br>(31.3 to 60.8)              | 35.4<br>(26.3 to 49.3)                            | 4.5<br>(-2.0 to 13.9)                               |
| Epilepsy                                                                            | 60.2<br>(30.1 to 100.4)                 | --                                    | 25.0<br>(11.7 to 43.7)              | 56.8<br>(-38.3 to 275.8)                          | 19.3<br>(-55.6 to 212.2)                            |
| Guillain-Barre syndrome                                                             | 0.1<br>(< 0.05 to 0.1)                  | --                                    | < 0.05<br>(< 0.05 to < 0.05)        | 27.6<br>(26.4 to 28.9)                            | 0.0<br>(0.0 to 0.0)                                 |
| Hearing loss                                                                        | 1,289.9<br>(1,215.7 to 1,369.5)         | --                                    | 54.9<br>(38.1 to 74.9)              | 23.4<br>(19.3 to 27.7)                            | -2.4<br>(-4.7 to -0.3)                              |
| Heart failure                                                                       | 24.3<br>(21.5 to 27.8)                  | --                                    | 2.6<br>(1.9 to 3.5)                 | 24.8<br>(16.9 to 33.6)                            | -0.2<br>(-6.5 to 6.9)                               |
| Infertility                                                                         | 171.7<br>(131.9 to 229.3)               | --                                    | 1.0<br>(0.4 to 2.1)                 | 26.5<br>(18.4 to 34.8)                            | -2.0<br>(-8.5 to 4.3)                               |
| Pelvic inflammatory disease                                                         | 10.2<br>(8.7 to 12.2)                   | --                                    | 1.3<br>(0.9 to 1.9)                 | 30.8<br>(13.5 to 50.6)                            | 1.1<br>(-12.0 to 16.6)                              |
| Vision loss                                                                         | 1,155.4<br>(1,042.0 to 1,281.6)         | --                                    | 31.9<br>(21.9 to 45.2)              | 25.9<br>(17.7 to 40.3)                            | -3.3<br>(-7.6 to 3.0)                               |

We did not calculate incidence for the nine impairments, certain NTDs, and causes with only birth prevalence. Blank cells mean that no estimate is available.

† Incidence for aggregate causes represents the sum of the incidence of the causes below the aggregate.

‡ Incidence estimates for stroke represent first-ever stroke only.

^ Incidence of HIV/AIDS represents new infections of HIV only and does not include new infections of Tuberculosis in HIV positive cases.

SR Table 14: Prevalence, incidence, and YLDs for 2016, percentage change of YLD counts and percentage change of age-standardised YLD rates between 2006 and 2016 by cause and impairments, for all ages, South Africa.

| Cause                                                                                | Prevalence in thousands (95% UI)          | Incidence in thousands (95% UI)               | YLDs in thousands (95% UI)             |                                                   |                                                     |
|--------------------------------------------------------------------------------------|-------------------------------------------|-----------------------------------------------|----------------------------------------|---------------------------------------------------|-----------------------------------------------------|
|                                                                                      | 2016 counts                               | 2016 counts                                   | 2016 counts                            | Percentage change in counts between 2006 and 2016 | Percentage change in age-standardised rates between |
| <b>All causes</b>                                                                    | <b>51,909.1</b><br>(51,857.6 to 51,958.2) | <b>349,126.0†</b><br>(331,820.3 to 367,886.9) | <b>6,245.3</b><br>(4,664.9 to 8,088.6) | <b>8.1</b><br>(3.8 to 10.9)                       | <b>-3.6</b><br>(-7.4 to -1.0)                       |
| <b>Communicable, maternal, neonatal, and nutritional disorders</b>                   | <b>47,763.9</b><br>(47,481.1 to 48,061.5) | <b>222,453.9†</b><br>(207,450.0 to 239,440.5) | <b>1,500.6</b><br>(1,101.5 to 1,979.5) | <b>-1.4</b><br>(-13.6 to 8.7)                     | <b>-11.0</b><br>(-22.8 to -0.5)                     |
| <b>HIV/AIDS and tuberculosis</b>                                                     | <b>25,654.3</b><br>(24,749.4 to 26,283.1) | <b>514.8†</b><br>(432.9 to 607.5)             | <b>773.0</b><br>(546.9 to 1,022.4)     | <b>-9.0</b><br>(-25.5 to 9.6)                     | <b>-19.7</b><br>(-34.7 to -1.6)                     |
| Tuberculosis                                                                         | 22,336.6<br>(20,919.3 to 23,829.5)        | 249.0†<br>(192.8 to 316.3)                    | 50.9<br>(32.6 to 74.2)                 | -11.3<br>(-17.6 to -4.6)                          | -21.4<br>(-27.1 to -14.7)                           |
| Drug-susceptible tuberculosis                                                        | 160.3<br>(124.2 to 204.7)                 | 243.7<br>(188.7 to 310.1)                     | 49.7<br>(32.0 to 72.8)                 | -11.1<br>(-17.6 to -4.2)                          | -21.2<br>(-27.1 to -14.5)                           |
| Multidrug-resistant tuberculosis without extensive drug resistance                   | 3.5<br>(1.9 to 6.1)                       | 5.3<br>(2.9 to 9.2)                           | 1.1<br>(0.5 to 2.1)                    | -18.3<br>(-53.1 to 38.8)                          | -27.5<br>(-57.6 to 22.3)                            |
| Extensively drug-resistant tuberculosis                                              | < 0.05<br>(< 0.05 to < 0.05)              | < 0.05<br>(< 0.05 to 0.1)                     | < 0.05<br>(< 0.05 to < 0.05)           | 144.9<br>(46.8 to 306.2)                          | 116.4<br>(29.7 to 260.3)                            |
| Latent tuberculosis infection                                                        | 22,172.8<br>(20,754.4 to 23,645.6)        | --                                            | --                                     | --                                                | --                                                  |
| HIV/AIDS                                                                             | 6,321.4<br>(5,934.2 to 6,733.2)           | 265.8^<br>(209.1 to 334.5)                    | 722.2<br>(510.2 to 957.3)              | -8.8<br>(-26.1 to 11.4)                           | -19.6<br>(-35.4 to -0.2)                            |
| Drug-susceptible HIV/AIDS - Tuberculosis                                             | 163.1<br>(125.8 to 203.4)                 | 241.3<br>(186.6 to 303.7)                     | 61.2<br>(38.0 to 88.4)                 | -37.7<br>(-42.2 to -32.9)                         | -43.4<br>(-47.4 to -39.4)                           |
| Multidrug-resistant HIV/AIDS - Tuberculosis without extensive drug resistance        | 4.1<br>(2.2 to 7.6)                       | 6.1<br>(3.4 to 10.8)                          | 1.6<br>(0.8 to 3.0)                    | -41.8<br>(-67.4 to -1.6)                          | -47.2<br>(-70.2 to -11.0)                           |
| Extensively drug-resistant HIV/AIDS - Tuberculosis                                   | < 0.05<br>(< 0.05 to < 0.05)              | < 0.05<br>(< 0.05 to 0.1)                     | < 0.05<br>(< 0.05 to < 0.05)           | 72.8<br>(-2.5 to 189.7)                           | 56.3<br>(-11.5 to 160.6)                            |
| HIV/AIDS resulting in other diseases                                                 | 6,154.2<br>(5,759.7 to 6,569.6)           | 265.8<br>(209.1 to 334.5)                     | 659.4<br>(459.9 to 880.0)              | -4.5<br>(-25.0 to 21.1)                           | -16.3<br>(-34.7 to 8.2)                             |
| <b>Diarrhoea, lower respiratory infections, and other common infectious diseases</b> | <b>3,508.7</b><br>(3,418.1 to 3,596.5)    | <b>197,685.1†</b><br>(182,577.7 to 214,695.0) | <b>191.1</b><br>(132.7 to 258.9)       | <b>16.8</b><br>(14.4 to 19.4)                     | <b>9.4</b><br>(7.3 to 11.5)                         |
| Diarrhoeal diseases                                                                  | 902.0<br>(868.8 to 935.0)                 | 59,915.8<br>(57,817.2 to 62,220.8)            | 100.6<br>(69.4 to 136.2)               | 31.6<br>(28.2 to 35.2)                            | 21.2<br>(18.3 to 24.2)                              |
| Intestinal infectious diseases                                                       | 0.1<br>(0.1 to 0.1)                       | 1.2†<br>(1.1 to 1.4)                          | < 0.05<br>(< 0.05 to < 0.05)           | 0.4<br>(-14.0 to 17.5)                            | -2.9<br>(-16.3 to 12.5)                             |
| Typhoid fever                                                                        | 0.1<br>(0.1 to 0.1)                       | 1.2<br>(1.1 to 1.3)                           | < 0.05<br>(< 0.05 to < 0.05)           | 2.2<br>(-13.0 to 19.5)                            | -1.1<br>(-15.3 to 15.0)                             |
| Paratyphoid fever                                                                    | < 0.05<br>(< 0.05 to < 0.05)              | 0.1<br>(0.1 to 0.1)                           | < 0.05<br>(< 0.05 to < 0.05)           | 4.2<br>(-13.1 to 25.4)                            | -0.0<br>(-15.5 to 18.5)                             |
| Other intestinal infectious diseases                                                 | --                                        | --                                            | < 0.05<br>(< 0.05 to < 0.05)           | -30.9<br>(-53.1 to 2.8)                           | -33.5<br>(-53.9 to -2.9)                            |
| Lower respiratory infections                                                         | 94.7<br>(89.0 to 100.9)                   | 3,993.8<br>(3,709.9 to 4,303.6)               | 5.7<br>(3.8 to 8.1)                    | 7.3<br>(2.5 to 12.3)                              | -1.0<br>(-5.1 to 3.2)                               |
| Upper respiratory infections                                                         | 1,715.0<br>(1,519.1 to 1,932.8)           | 129,042.7<br>(113,843.7 to 145,951.1)         | 42.5<br>(25.0 to 66.5)                 | 5.4<br>(2.5 to 8.3)                               | -0.8<br>(-3.2 to 1.6)                               |
| Otitis media                                                                         | 773.4<br>(693.8 to 857.6)                 | 3,437.7<br>(2,757.1 to 4,247.8)               | 21.9<br>(13.6 to 33.0)                 | -2.1<br>(-5.8 to 1.6)                             | -4.4<br>(-7.9 to -1.1)                              |
| Meningitis                                                                           | 94.1<br>(80.8 to 108.4)                   | 19.0<br>(16.7 to 21.7)                        | 10.1<br>(7.0 to 13.3)                  | 1.5<br>(-1.7 to 5.4)                              | -5.0<br>(-8.3 to -1.3)                              |
| Pneumococcal meningitis                                                              | 40.2<br>(33.2 to 47.9)                    | 4.0<br>(3.3 to 4.8)                           | 4.2<br>(2.9 to 5.5)                    | -15.3<br>(-20.7 to -9.1)                          | -20.5<br>(-25.8 to -14.5)                           |
| H influenzae type B meningitis                                                       | 11.1<br>(9.1 to 13.5)                     | 1.8<br>(1.4 to 2.3)                           | 1.7<br>(1.1 to 2.3)                    | 13.7<br>(8.2 to 19.1)                             | 5.9<br>(0.7 to 11.1)                                |
| Meningococcal infection                                                              | 8.4<br>(6.4 to 10.8)                      | 2.6<br>(2.0 to 3.2)                           | 1.0<br>(0.7 to 1.4)                    | 7.2<br>(3.0 to 11.2)                              | -0.1<br>(-4.2 to 3.7)                               |
| Other meningitis                                                                     | 34.3<br>(26.3 to 42.9)                    | 10.7<br>(9.3 to 12.2)                         | 3.3<br>(2.2 to 4.4)                    | 24.0<br>(20.4 to 27.7)                            | 16.1<br>(12.9 to 19.6)                              |
| Encephalitis                                                                         | 78.5<br>(50.2 to 118.2)                   | 46.7<br>(41.1 to 52.9)                        | 7.7<br>(5.5 to 10.2)                   | 18.6<br>(12.1 to 25.8)                            | 8.4<br>(3.1 to 14.1)                                |
| Diphtheria                                                                           | < 0.05<br>(< 0.05 to < 0.05)              | < 0.05<br>(< 0.05 to < 0.05)                  | < 0.05<br>(< 0.05 to < 0.05)           | -65.6<br>(-74.5 to -53.7)                         | -66.9<br>(-75.4 to -56.0)                           |
| Whooping cough                                                                       | 14.2<br>(11.1 to 17.9)                    | 103.9<br>(81.1 to 130.7)                      | 0.7<br>(0.4 to 1.1)                    | -19.7<br>(-26.4 to -12.7)                         | -21.9<br>(-28.6 to -15.1)                           |
| Tetanus                                                                              | < 0.05<br>(< 0.05 to < 0.05)              | < 0.05<br>(< 0.05 to < 0.05)                  | < 0.05<br>(< 0.05 to < 0.05)           | -31.5<br>(-40.8 to -22.3)                         | -41.0<br>(-49.6 to -32.5)                           |
| Measles                                                                              | 1.5<br>(0.5 to 3.2)                       | 53.1<br>(18.7 to 118.2)                       | 0.1<br>(< 0.05 to 0.3)                 | -55.1<br>(-69.6 to -33.0)                         | -56.0<br>(-70.3 to -34.2)                           |
| Varicella and herpes zoster                                                          | 47.2<br>(43.7 to 50.9)                    | 1,071.2<br>(1,041.6 to 1,101.6)               | 1.7<br>(1.1 to 2.7)                    | 13.0<br>(6.5 to 19.6)                             | 0.0<br>(-4.8 to 5.0)                                |
| <b>Neglected tropical diseases and malaria</b>                                       | <b>31,157.2</b><br>(29,904.7 to 32,418.6) | <b>1,980.1†</b><br>(1,498.5 to 2,466.2)       | <b>156.4</b><br>(97.6 to 251.2)        | <b>2.3</b><br>(-4.1 to 8.6)                       | <b>-6.8</b><br>(-12.6 to -1.0)                      |
| Malaria                                                                              | 28.6<br>(17.6 to 44.7)                    | 248.1<br>(75.5 to 483.0)                      | 5.0<br>(3.7 to 6.4)                    | -6.3<br>(-14.0 to 2.1)                            | -8.6<br>(-16.2 to -0.6)                             |
| Chagas disease                                                                       | --                                        | --                                            | --                                     | --                                                | --                                                  |
| Leishmaniasis                                                                        | --                                        | --                                            | --                                     | --                                                | --                                                  |
| Visceral leishmaniasis                                                               | --                                        | --                                            | --                                     | --                                                | --                                                  |
| Cutaneous and mucocutaneous leishmaniasis                                            | --                                        | --                                            | --                                     | --                                                | --                                                  |
| African trypanosomiasis                                                              | --                                        | --                                            | --                                     | --                                                | --                                                  |
| Schistosomiasis                                                                      | 5,295.4<br>(3,760.4 to 6,918.9)           | 1,731.0<br>(1,294.7 to 2,175.3)               | 45.1<br>(19.5 to 91.0)                 | 3.2<br>(-0.2 to 6.3)                              | -8.3<br>(-11.1 to -5.6)                             |
| Cysticercosis                                                                        | 154.5<br>(130.4 to 178.9)                 | --                                            | 25.8<br>(16.8 to 36.5)                 | 10.3<br>(-3.2 to 23.1)                            | -4.8<br>(-16.1 to 6.0)                              |
| Cystic echinococcosis                                                                | 4.3<br>(2.1 to 9.5)                       | 0.9<br>(0.4 to 1.9)                           | 0.4<br>(0.2 to 0.9)                    | -46.8<br>(-82.8 to 52.5)                          | -52.4<br>(-84.4 to 37.7)                            |
| Lymphatic filariasis                                                                 | --                                        | --                                            | --                                     | --                                                | --                                                  |
| Onchocerciasis                                                                       | --                                        | --                                            | --                                     | --                                                | --                                                  |
| Trachoma                                                                             | --                                        | --                                            | --                                     | --                                                | --                                                  |
| Dengue                                                                               | --                                        | --                                            | --                                     | --                                                | --                                                  |
| Yellow fever                                                                         | --                                        | --                                            | --                                     | --                                                | --                                                  |
| Rabies                                                                               | < 0.05<br>(< 0.05 to < 0.05)              | < 0.05<br>(< 0.05 to < 0.05)                  | < 0.05<br>(< 0.05 to < 0.05)           | -19.2<br>(-45.9 to 21.2)                          | -20.5<br>(-46.2 to 16.0)                            |
| Intestinal nematode infections                                                       | 29,165.5<br>(27,738.5 to 30,496.3)        | --                                            | 72.2<br>(40.9 to 118.2)                | 1.4<br>(-10.1 to 14.0)                            | -5.8<br>(-16.8 to 6.1)                              |
| Ascariasis                                                                           | 8,086.3<br>(6,167.5 to 10,474.2)          | --                                            | 4.1<br>(2.2 to 6.9)                    | -1.4<br>(-17.7 to 18.4)                           | -6.3<br>(-22.4 to 12.7)                             |



| Cause                                                                   | Prevalence in thousands (95% UI)                 | Incidence in thousands (95% UI)                      | YLDs in thousands (95% UI)                    |                                                   |                                                     |
|-------------------------------------------------------------------------|--------------------------------------------------|------------------------------------------------------|-----------------------------------------------|---------------------------------------------------|-----------------------------------------------------|
|                                                                         | 2016 counts                                      | 2016 counts                                          | 2016 counts                                   | Percentage change in counts between 2006 and 2016 | Percentage change in age-standardised rates between |
| Trichuriasis                                                            | 18,315.2<br>(15,302.9 to 22,053.3)               | --                                                   | 21.1<br>(9.9 to 40.5)                         | 4.0<br>(-19.2 to 31.9)                            | -1.8<br>(-24.2 to 25.7)                             |
| Hookworm disease                                                        | 11,962.6<br>(9,470.3 to 15,230.9)                | --                                                   | 47.0<br>(28.1 to 74.2)                        | 0.5<br>(-13.3 to 16.8)                            | -7.5<br>(-20.2 to 7.8)                              |
| Food-borne trematodiasis                                                | --                                               | --                                                   | --                                            | --                                                | --                                                  |
| Leprosy                                                                 | 1.7<br>(1.4 to 2.0)                              | < 0.05<br>(< 0.05 to < 0.05)                         | 0.1<br>(0.1 to 0.2)                           | -25.3<br>(-32.8 to -16.6)                         | -33.5<br>(-40.1 to -25.5)                           |
| Ebola virus disease                                                     | --                                               | --                                                   | --                                            | --                                                | --                                                  |
| Zika virus disease                                                      | --                                               | --                                                   | --                                            | --                                                | --                                                  |
| Guinea worm disease                                                     | --                                               | --                                                   | --                                            | --                                                | --                                                  |
| Other neglected tropical diseases                                       | 275.7<br>(252.4 to 301.1)                        | --                                                   | 7.8<br>(4.8 to 11.7)                          | -7.4<br>(-12.8 to -1.8)                           | -6.7<br>(-12.2 to -1.2)                             |
| <b>Maternal disorders</b>                                               | <b>102.8</b><br><b>(92.1 to 114.5)</b>           | <b>986.7†</b><br><b>(847.6 to 1,174.0)</b>           | <b>9.2</b><br><b>(6.3 to 12.8)</b>            | <b>-21.4</b><br><b>(-34.0 to -5.0)</b>            | <b>-32.1</b><br><b>(-42.3 to -18.9)</b>             |
| Maternal haemorrhage                                                    | 18.2<br>(15.1 to 21.9)                           | 71.6<br>(55.2 to 91.8)                               | 0.6<br>(0.4 to 0.8)                           | 9.3<br>(-14.9 to 38.5)                            | -5.2<br>(-25.5 to 19.6)                             |
| Maternal sepsis and other pregnancy related infections                  | 13.7<br>(11.0 to 16.9)                           | 61.9<br>(47.0 to 84.1)                               | 0.3<br>(0.1 to 0.5)                           | 0.8<br>(-45.3 to 90.0)                            | -10.7<br>(-51.1 to 65.3)                            |
| Maternal hypertensive disorders                                         | 59.5<br>(38.4 to 82.4)                           | 287.0<br>(244.6 to 326.2)                            | 2.9<br>(1.6 to 4.7)                           | 3.8<br>(-34.4 to 65.2)                            | -9.2<br>(-42.4 to 44.0)                             |
| Maternal obstructed labour and uterine rupture                          | 11.0<br>(9.0 to 13.4)                            | 37.8<br>(28.1 to 50.6)                               | 3.5<br>(2.2 to 5.0)                           | -38.1<br>(-44.7 to -30.7)                         | -45.5<br>(-51.4 to -39.1)                           |
| Maternal abortion, miscarriage, and ectopic pregnancy                   | 4.3<br>(2.7 to 6.4)                              | 528.5<br>(402.5 to 705.7)                            | 0.5<br>(0.2 to 0.8)                           | -2.0<br>(-43.1 to 62.4)                           | -14.2<br>(-50.0 to 43.0)                            |
| Other maternal disorders                                                | --                                               | --                                                   | 1.4<br>(1.0 to 2.0)                           | -24.8<br>(-36.7 to -9.1)                          | -35.1<br>(-44.9 to -22.5)                           |
| <b>Neonatal disorders</b>                                               | <b>511.7</b><br><b>(460.7 to 573.3)</b>          | --                                                   | <b>87.8</b><br><b>(54.6 to 137.9)</b>         | <b>46.7</b><br><b>(23.7 to 74.1)</b>              | <b>42.5</b><br><b>(20.1 to 68.9)</b>                |
| Neonatal preterm birth complications                                    | 421.5<br>(332.4 to 535.1)                        | --                                                   | 47.8<br>(30.8 to 73.6)                        | 47.0<br>(16.2 to 83.8)                            | 42.3<br>(12.8 to 78.4)                              |
| Neonatal encephalopathy due to birth asphyxia and trauma                | 68.5<br>(40.9 to 116.2)                          | --                                                   | 7.1<br>(1.7 to 20.7)                          | 67.5<br>(19.7 to 170.2)                           | 61.3<br>(13.2 to 158.2)                             |
| Neonatal sepsis and other neonatal infections                           | 60.7<br>(16.6 to 146.3)                          | --                                                   | 23.6<br>(4.6 to 64.1)                         | 49.9<br>(11.4 to 128.4)                           | 46.8<br>(9.3 to 122.7)                              |
| Hemolytic disease and other neonatal jaundice                           | 14.0<br>(12.3 to 15.8)                           | --                                                   | 4.5<br>(3.4 to 5.7)                           | 23.7<br>(13.8 to 34.3)                            | 20.4<br>(10.9 to 30.9)                              |
| Other neonatal disorders                                                | --                                               | --                                                   | 4.7<br>(3.0 to 7.4)                           | 29.2<br>(10.2 to 52.9)                            | 25.3<br>(6.8 to 48.4)                               |
| <b>Nutritional deficiencies</b>                                         | <b>13,508.6</b><br><b>(13,080.0 to 13,993.5)</b> | <b>7,842.7†</b><br><b>(6,598.4 to 9,659.3)</b>       | <b>224.8</b><br><b>(151.9 to 316.4)</b>       | <b>-3.0</b><br><b>(-5.9 to 0.2)</b>               | <b>-8.0</b><br><b>(-10.6 to -5.2)</b>               |
| Protein-energy malnutrition                                             | 271.7<br>(245.1 to 301.9)                        | 204.5<br>(187.2 to 223.8)                            | 15.4<br>(9.8 to 22.6)                         | -11.0<br>(-29.7 to 13.8)                          | -13.8<br>(-32.1 to 10.3)                            |
| Iodine deficiency                                                       | 2,293.2<br>(2,036.9 to 2,545.0)                  | 49.0<br>(43.8 to 54.3)                               | 58.7<br>(39.3 to 83.8)                        | 2.6<br>(-0.7 to 6.3)                              | -7.4<br>(-10.3 to -4.4)                             |
| Vitamin A deficiency                                                    | 7,278.3<br>(6,303.6 to 8,640.5)                  | 7,589.1<br>(6,355.8 to 9,395.6)                      | 2.0<br>(1.2 to 3.1)                           | 9.5<br>(1.5 to 18.7)                              | 3.4<br>(-4.0 to 11.3)                               |
| Iron-deficiency anaemia                                                 | 5,291.1<br>(5,029.1 to 5,585.2)                  | --                                                   | 148.1<br>(96.5 to 217.2)                      | -4.3<br>(-7.6 to -0.7)                            | -7.7<br>(-10.7 to -4.6)                             |
| Other nutritional deficiencies                                          | --                                               | --                                                   | 0.5<br>(0.3 to 0.8)                           | -11.4<br>(-30.6 to 13.9)                          | -14.1<br>(-32.8 to 10.3)                            |
| <b>Other communicable, maternal, neonatal, and nutritional diseases</b> | <b>21,045.5</b><br><b>(20,529.7 to 21,525.1)</b> | <b>13,444.6</b><br><b>(12,228.5 to 14,840.6)</b>     | <b>58.5</b><br><b>(36.5 to 91.2)</b>          | <b>9.7</b><br><b>(7.3 to 12.0)</b>                | <b>-2.1</b><br><b>(-4.0 to -0.1)</b>                |
| Sexually transmitted diseases excluding HIV                             | 17,917.2<br>(17,369.0 to 18,439.4)               | 13,001.3<br>(11,793.0 to 14,401.3)                   | 51.3<br>(31.3 to 80.8)                        | 11.7<br>(9.2 to 14.3)                             | -1.7<br>(-3.7 to 0.5)                               |
| Syphilis                                                                | 1,701.9<br>(1,275.1 to 2,224.4)                  | 1,223.2<br>(854.8 to 1,695.7)                        | 2.4<br>(1.7 to 3.2)                           | 13.5<br>(6.8 to 20.3)                             | -4.1<br>(-10.1 to 1.9)                              |
| Chlamydial infection                                                    | 2,241.9<br>(1,807.2 to 2,705.9)                  | 1,794.9<br>(1,434.8 to 2,233.4)                      | 12.4<br>(7.2 to 19.7)                         | 12.5<br>(7.2 to 17.9)                             | -1.0<br>(-5.2 to 3.6)                               |
| Gonococcal infection                                                    | 1,642.9<br>(1,381.3 to 1,959.6)                  | 5,235.5<br>(4,213.1 to 6,341.1)                      | 12.7<br>(7.1 to 20.6)                         | 12.6<br>(7.8 to 17.6)                             | -0.5<br>(-4.7 to 3.6)                               |
| Trichomoniasis                                                          | 3,137.9<br>(2,719.9 to 3,555.2)                  | 3,000.1<br>(2,527.6 to 3,505.4)                      | 4.8<br>(1.9 to 10.2)                          | 9.6<br>(7.0 to 12.1)                              | -3.6<br>(-5.6 to -1.6)                              |
| Genital herpes                                                          | 13,061.1<br>(11,602.4 to 14,714.3)               | 1,147.4<br>(986.6 to 1,348.2)                        | 3.4<br>(1.1 to 7.7)                           | 10.7<br>(4.9 to 15.6)                             | -3.7<br>(-8.2 to 0.3)                               |
| Other sexually transmitted diseases                                     | 450.3<br>(356.8 to 566.3)                        | 600.2<br>(505.8 to 712.0)                            | 15.6<br>(9.9 to 23.8)                         | 11.0<br>(7.7 to 14.6)                             | -1.4<br>(-4.3 to 1.5)                               |
| Hepatitis                                                               | 4,830.2<br>(4,000.8 to 5,881.4)                  | 443.2<br>(347.3 to 563.9)                            | 0.5<br>(0.3 to 0.8)                           | -32.0<br>(-45.8 to -15.9)                         | -36.0<br>(-47.3 to -22.2)                           |
| Acute hepatitis A                                                       | 4.0<br>(1.0 to 8.4)                              | 51.4<br>(12.7 to 109.5)                              | 0.1<br>(< 0.05 to 0.1)                        | -33.7<br>(-80.6 to 159.6)                         | -34.7<br>(-79.0 to 122.4)                           |
| Hepatitis B                                                             | 4,211.5<br>(3,385.9 to 5,278.3)                  | 357.4<br>(275.6 to 464.4)                            | 0.4<br>(0.2 to 0.6)                           | -32.7<br>(-46.6 to -18.0)                         | -37.3<br>(-48.9 to -24.7)                           |
| Hepatitis C                                                             | 613.3<br>(544.2 to 685.3)                        | 16.7<br>(14.6 to 18.9)                               | < 0.05<br>(< 0.05 to < 0.05)                  | -6.2<br>(-8.3 to -4.4)                            | -12.5<br>(-14.5 to -10.6)                           |
| Acute hepatitis E                                                       | 1.4<br>(1.3 to 1.5)                              | 17.8<br>(16.4 to 19.4)                               | < 0.05<br>(< 0.05 to < 0.05)                  | -28.7<br>(-35.2 to -20.6)                         | -29.8<br>(-35.5 to -22.9)                           |
| Other infectious diseases                                               | 198.1<br>(183.2 to 215.1)                        | 0.1<br>(< 0.05 to 0.1)                               | 6.7<br>(4.2 to 10.0)                          | -0.1<br>(-4.6 to 5.0)                             | -1.1<br>(-5.4 to 3.7)                               |
| <b>Non-communicable diseases</b>                                        | <b>47,076.4</b><br><b>(46,943.6 to 47,204.5)</b> | <b>122,801.7†</b><br><b>(116,617.6 to 129,284.3)</b> | <b>4,417.0</b><br><b>(3,264.9 to 5,702.0)</b> | <b>11.7</b><br><b>(10.0 to 13.3)</b>              | <b>-1.0</b><br><b>(-2.2 to 0.3)</b>                 |
| <b>Neoplasms</b>                                                        | <b>208.3</b><br><b>(203.5 to 213.9)</b>          | <b>95.4</b><br><b>(87.6 to 104.7)</b>                | <b>26.6</b><br><b>(19.5 to 34.4)</b>          | <b>21.0</b><br><b>(9.0 to 29.3)</b>               | <b>2.1</b><br><b>(-7.8 to 9.1)</b>                  |
| Lip and oral cavity cancer                                              | 7.3<br>(6.8 to 7.9)                              | 2.1<br>(1.9 to 2.2)                                  | 0.8<br>(0.6 to 1.0)                           | 8.1<br>(-2.8 to 20.6)                             | -9.4<br>(-18.6 to 1.2)                              |
| Nasopharynx cancer                                                      | 0.9<br>(0.8 to 0.9)                              | 0.3<br>(0.2 to 0.3)                                  | 0.1<br>(0.1 to 0.1)                           | 3.4<br>(-6.2 to 16.8)                             | -11.1<br>(-19.2 to 0.4)                             |
| Other pharynx cancer                                                    | 1.0<br>(0.9 to 1.1)                              | 0.3<br>(0.3 to 0.4)                                  | 0.1<br>(0.1 to 0.2)                           | 24.2<br>(10.8 to 41.3)                            | 2.1<br>(-8.6 to 15.9)                               |
| Oesophageal cancer                                                      | 4.4<br>(4.2 to 4.8)                              | 4.1<br>(3.9 to 4.4)                                  | 1.0<br>(0.7 to 1.3)                           | -9.5<br>(-18.7 to 2.4)                            | -24.9<br>(-32.5 to -15.8)                           |
| Stomach cancer                                                          | 2.8<br>(2.7 to 2.8)                              | 1.8<br>(1.8 to 1.9)                                  | 0.5<br>(0.3 to 0.6)                           | -4.0<br>(-8.9 to 1.7)                             | -20.0<br>(-24.4 to -15.0)                           |
| Colon and rectum cancer                                                 | 17.1<br>(16.0 to 18.6)                           | 5.2<br>(4.9 to 5.7)                                  | 1.8<br>(1.3 to 2.4)                           | 32.3<br>(20.1 to 48.8)                            | 9.2<br>(-1.3 to 22.6)                               |
| Liver cancer                                                            | 1.0<br>(0.8 to 1.1)                              | 2.3<br>(2.2 to 2.6)                                  | 0.5<br>(0.4 to 0.7)                           | 7.9<br>(0.7 to 15.5)                              | -9.3<br>(-15.1 to -3.0)                             |
| Liver cancer due to hepatitis B                                         | 0.9<br>(0.8 to 1.1)                              | 1.0<br>(0.8 to 1.1)                                  | 0.2<br>(0.1 to 0.3)                           | 7.0<br>(-0.8 to 14.7)                             | -9.5<br>(-15.4 to -3.1)                             |

| Cause                                              | Prevalence in thousands (95% UI)              | Incidence in thousands (95% UI)          | YLDs in thousands (95% UI)              |                                                   |                                                     |
|----------------------------------------------------|-----------------------------------------------|------------------------------------------|-----------------------------------------|---------------------------------------------------|-----------------------------------------------------|
|                                                    | 2016 counts                                   | 2016 counts                              | 2016 counts                             | Percentage change in counts between 2006 and 2016 | Percentage change in age-standardised rates between |
| Liver cancer due to hepatitis C                    | 0.4<br>(0.3 to 0.4)                           | 0.4<br>(0.3 to 0.5)                      | 0.1<br>(0.1 to 0.1)                     | 7.8<br>(-1.2 to 17.2)                             | -10.8<br>(-18.5 to -3.0)                            |
| Liver cancer due to alcohol use                    | 0.5<br>(0.4 to 0.5)                           | 0.5<br>(0.4 to 0.6)                      | 0.1<br>(0.1 to 0.1)                     | 11.3<br>(4.1 to 18.9)                             | -7.1<br>(-13.3 to -0.8)                             |
| Liver cancer due to other causes                   | 0.5<br>(0.4 to 0.5)                           | 0.5<br>(0.4 to 0.6)                      | 0.1<br>(0.1 to 0.1)                     | 6.5<br>(-1.5 to 13.5)                             | -9.7<br>(-15.9 to -4.2)                             |
| Gallbladder and biliary tract cancer               | 0.3<br>(0.3 to 0.4)                           | 0.4<br>(0.4 to 0.5)                      | 0.1<br>(0.1 to 0.1)                     | 15.5<br>(-1.0 to 28.4)                            | -4.9<br>(-18.2 to 6.2)                              |
| Pancreatic cancer                                  | 1.5<br>(1.4 to 1.5)                           | 2.0<br>(1.9 to 2.1)                      | 0.4<br>(0.3 to 0.5)                     | 23.8<br>(15.5 to 31.9)                            | 2.3<br>(-5.5 to 9.8)                                |
| Larynx cancer                                      | 3.3<br>(3.2 to 3.7)                           | 1.0<br>(1.0 to 1.1)                      | 0.4<br>(0.3 to 0.5)                     | 13.7<br>(5.0 to 27.9)                             | -5.9<br>(-13.4 to 6.1)                              |
| Tracheal, bronchus, and lung cancer                | 7.8<br>(6.9 to 8.4)                           | 7.0<br>(6.3 to 7.5)                      | 1.6<br>(1.1 to 2.1)                     | 24.5<br>(10.6 to 39.1)                            | 5.1<br>(-6.8 to 16.9)                               |
| Malignant skin melanoma                            | 4.4<br>(3.4 to 4.8)                           | 1.0<br>(0.8 to 1.1)                      | 0.3<br>(0.2 to 0.5)                     | 40.2<br>(21.1 to 56.8)                            | 17.7<br>(1.6 to 30.6)                               |
| Non-melanoma skin cancer                           | 9.3<br>(6.1 to 14.8)                          | 19.0<br>(12.2 to 28.2)                   | 0.3<br>(0.2 to 0.7)                     | -18.6<br>(-44.7 to 43.8)                          | -34.0<br>(-54.7 to 19.8)                            |
| Non-melanoma skin cancer (squamous-cell carcinoma) | 7.2<br>(3.8 to 14.0)                          | 6.8<br>(3.8 to 12.5)                     | 0.3<br>(0.1 to 0.7)                     | -19.6<br>(-45.4 to 44.8)                          | -34.7<br>(-55.4 to 21.0)                            |
| Non-melanoma skin cancer (basal-cell carcinoma)    | 1.2<br>(0.6 to 2.1)                           | 12.1<br>(6.5 to 19.0)                    | < 0.05<br>(< 0.05 to < 0.05)            | 22.5<br>(9.0 to 37.6)                             | 0.2<br>(-11.6 to 13.1)                              |
| Breast cancer                                      | 49.7<br>(43.6 to 52.9)                        | 10.8<br>(9.5 to 11.4)                    | 4.4<br>(3.1 to 5.8)                     | 32.1<br>(16.2 to 43.3)                            | 9.8<br>(-2.2 to 19.1)                               |
| Cervical cancer                                    | 41.8<br>(33.1 to 45.8)                        | 10.9<br>(8.8 to 12.0)                    | 3.8<br>(2.6 to 5.1)                     | 2.7<br>(-16.1 to 18.0)                            | -12.1<br>(-26.4 to 0.2)                             |
| Uterine cancer                                     | 6.7<br>(6.1 to 7.2)                           | 1.4<br>(1.3 to 1.6)                      | 0.5<br>(0.4 to 0.7)                     | 45.0<br>(30.7 to 62.0)                            | 18.4<br>(6.2 to 33.2)                               |
| Ovarian cancer                                     | 4.7<br>(4.5 to 4.9)                           | 1.6<br>(1.5 to 1.6)                      | 0.7<br>(0.5 to 0.9)                     | 19.3<br>(3.2 to 34.1)                             | 1.4<br>(-11.6 to 14.7)                              |
| Prostate cancer                                    | 37.8<br>(29.4 to 47.8)                        | 9.7<br>(7.8 to 12.0)                     | 4.0<br>(2.7 to 5.4)                     | 46.6<br>(18.2 to 61.1)                            | 19.7<br>(-2.9 to 31.9)                              |
| Testicular cancer                                  | 1.0<br>(1.0 to 1.1)                           | 0.2<br>(0.2 to 0.2)                      | 0.1<br>(0.1 to 0.1)                     | 34.6<br>(23.0 to 48.4)                            | 13.3<br>(4.2 to 24.3)                               |
| Kidney cancer                                      | 5.7<br>(5.2 to 6.1)                           | 1.5<br>(1.4 to 1.6)                      | 0.5<br>(0.4 to 0.7)                     | 24.8<br>(9.4 to 39.1)                             | 9.9<br>(-2.7 to 21.5)                               |
| Bladder cancer                                     | 7.8<br>(7.0 to 8.5)                           | 2.0<br>(1.8 to 2.2)                      | 0.8<br>(0.6 to 1.0)                     | 32.7<br>(17.8 to 47.4)                            | 10.2<br>(-2.8 to 22.7)                              |
| Brain and nervous system cancer                    | 2.1<br>(1.7 to 2.3)                           | 1.0<br>(0.8 to 1.1)                      | 0.3<br>(0.2 to 0.4)                     | 25.0<br>(15.6 to 33.0)                            | 9.4<br>(2.0 to 16.0)                                |
| Thyroid cancer                                     | 3.9<br>(3.7 to 4.2)                           | 0.8<br>(0.7 to 0.8)                      | 0.3<br>(0.2 to 0.4)                     | 40.1<br>(26.0 to 56.7)                            | 17.4<br>(5.8 to 30.6)                               |
| Mesothelioma                                       | 0.5<br>(0.5 to 0.6)                           | 0.4<br>(0.3 to 0.4)                      | 0.1<br>(0.1 to 0.1)                     | 9.7<br>(-2.9 to 21.0)                             | -8.4<br>(-18.8 to 0.3)                              |
| Hodgkin lymphoma                                   | 1.1<br>(0.7 to 1.2)                           | 0.3<br>(0.2 to 0.3)                      | 0.1<br>(0.1 to 0.2)                     | 22.2<br>(-7.1 to 41.8)                            | 5.3<br>(-17.9 to 20.8)                              |
| Non-Hodgkin's lymphoma                             | 3.7<br>(3.0 to 4.0)                           | 1.2<br>(1.0 to 1.3)                      | 0.4<br>(0.3 to 0.5)                     | 34.5<br>(24.0 to 43.1)                            | 13.3<br>(4.2 to 21.2)                               |
| Multiple myeloma                                   | 1.3<br>(0.9 to 1.4)                           | 0.7<br>(0.5 to 0.8)                      | 0.3<br>(0.2 to 0.4)                     | 33.9<br>(17.9 to 48.8)                            | 9.9<br>(-3.5 to 23.1)                               |
| Leukaemia                                          | 7.4<br>(5.3 to 8.5)                           | 2.1<br>(1.7 to 2.3)                      | 1.0<br>(0.6 to 1.3)                     | 15.2<br>(-8.0 to 28.2)                            | -0.1<br>(-18.8 to 10.7)                             |
| Acute lymphoid leukaemia                           | 1.0<br>(0.8 to 1.3)                           | 0.3<br>(0.2 to 0.4)                      | 0.1<br>(0.1 to 0.2)                     | 22.3<br>(-4.6 to 44.6)                            | 16.2<br>(-7.3 to 34.6)                              |
| Chronic lymphoid leukaemia                         | 0.8<br>(0.5 to 1.0)                           | 0.2<br>(0.1 to 0.2)                      | 0.1<br>(0.1 to 0.2)                     | 21.7<br>(-6.0 to 39.0)                            | 1.8<br>(-20.2 to 15.6)                              |
| Acute myeloid leukaemia                            | 0.8<br>(0.6 to 1.1)                           | 0.5<br>(0.4 to 0.7)                      | 0.1<br>(0.1 to 0.2)                     | 23.1<br>(1.9 to 37.9)                             | 9.7<br>(-7.1 to 21.1)                               |
| Chronic myeloid leukaemia                          | 0.6<br>(0.4 to 0.7)                           | 0.2<br>(0.1 to 0.3)                      | 0.1<br>(< 0.05 to 0.1)                  | -5.3<br>(-22.5 to 18.0)                           | -17.2<br>(-30.3 to -0.6)                            |
| Other leukaemia                                    | 4.2<br>(2.6 to 5.2)                           | 1.0<br>(0.6 to 1.2)                      | 0.5<br>(0.3 to 0.7)                     | 13.8<br>(-13.4 to 28.9)                           | -2.7<br>(-24.1 to 10.7)                             |
| Other neoplasms                                    | 13.4<br>(12.6 to 14.0)                        | 4.2<br>(4.0 to 4.4)                      | 1.2<br>(0.9 to 1.7)                     | 16.8<br>(4.5 to 26.2)                             | 3.0<br>(-6.5 to 10.5)                               |
| <b>Cardiovascular diseases</b>                     | <b>2,997.7</b><br><b>(2,939.0 to 3,056.8)</b> | <b>283.4†</b><br><b>(269.3 to 298.2)</b> | <b>165.0</b><br><b>(120.8 to 212.9)</b> | <b>16.7</b><br><b>(14.3 to 19.2)</b>              | <b>-1.6</b><br><b>(-3.6 to 0.4)</b>                 |
| Rheumatic heart disease                            | 636.2<br>(572.2 to 703.9)                     | 18.6<br>(16.8 to 20.6)                   | 31.3<br>(19.9 to 45.0)                  | 15.3<br>(9.2 to 21.3)                             | 2.5<br>(-2.6 to 7.9)                                |
| Ischaemic heart disease                            | 767.3<br>(727.8 to 804.4)                     | 102.3<br>(94.7 to 111.5)                 | 31.5<br>(21.7 to 43.0)                  | 20.3<br>(17.9 to 22.7)                            | 0.2<br>(-1.5 to 2.0)                                |
| Cerebrovascular disease                            | 303.7<br>(291.0 to 315.8)                     | 48.3‡<br>(44.2 to 52.3)                  | 44.9<br>(32.5 to 56.4)                  | 13.0<br>(6.8 to 18.9)                             | -7.0<br>(-12.2 to -1.7)                             |
| Ischaemic stroke                                   | 266.4<br>(240.3 to 292.2)                     | 33.2‡<br>(29.7 to 36.9)                  | 37.7<br>(27.3 to 47.5)                  | 14.5<br>(7.4 to 21.6)                             | -5.8<br>(-12.0 to 0.4)                              |
| Hemorrhagic stroke                                 | 49.9<br>(45.4 to 54.9)                        | 15.1‡<br>(13.7 to 16.5)                  | 7.1<br>(5.2 to 9.0)                     | 5.3<br>(-1.2 to 11.9)                             | -12.9<br>(-18.6 to -7.1)                            |
| Hypertensive heart disease                         | 42.5<br>(33.4 to 52.6)                        | --                                       | 3.4<br>(2.2 to 4.8)                     | 18.7<br>(11.4 to 26.6)                            | -2.8<br>(-8.5 to 3.4)                               |
| Cardiomyopathy and myocarditis                     | 65.9<br>(60.1 to 70.9)                        | 15.1†<br>(13.3 to 17.1)                  | 5.6<br>(3.9 to 8.0)                     | 21.2<br>(15.0 to 28.1)                            | 0.8<br>(-4.3 to 6.2)                                |
| Myocarditis                                        | 7.7<br>(6.9 to 8.5)                           | 15.1<br>(13.3 to 17.1)                   | 0.5<br>(0.4 to 0.8)                     | 17.5<br>(13.9 to 20.9)                            | 4.1<br>(0.6 to 7.6)                                 |
| Alcoholic cardiomyopathy                           | 8.2<br>(6.7 to 10.0)                          | --                                       | 0.7<br>(0.5 to 1.0)                     | 22.9<br>(11.9 to 34.6)                            | -0.0<br>(-8.6 to 9.0)                               |
| Other cardiomyopathy                               | 54.2<br>(45.4 to 64.2)                        | --                                       | 4.4<br>(3.0 to 6.2)                     | 21.4<br>(14.5 to 28.4)                            | 0.6<br>(-5.0 to 6.4)                                |
| Atrial fibrillation and flutter                    | 185.7<br>(163.5 to 212.5)                     | 15.6<br>(13.4 to 18.1)                   | 14.4<br>(9.7 to 20.1)                   | 19.9<br>(16.8 to 23.2)                            | -0.7<br>(-3.1 to 1.9)                               |
| Peripheral vascular disease                        | 823.6<br>(718.8 to 952.8)                     | 76.8<br>(66.3 to 89.4)                   | 4.0<br>(1.9 to 7.3)                     | 14.5<br>(11.1 to 18.1)                            | -5.6<br>(-8.4 to -2.9)                              |
| Endocarditis                                       | 3.8<br>(3.2 to 4.3)                           | 6.8<br>(6.0 to 7.6)                      | 0.3<br>(0.2 to 0.4)                     | 17.1<br>(9.8 to 25.2)                             | -0.2<br>(-6.8 to 7.2)                               |
| Other cardiovascular and circulatory diseases      | 573.4<br>(491.3 to 661.3)                     | --                                       | 29.6<br>(20.6 to 41.4)                  | 18.2<br>(12.4 to 24.7)                            | 2.9<br>(-1.4 to 7.6)                                |
| <b>Chronic respiratory diseases</b>                | <b>4,893.7</b><br><b>(4,732.9 to 5,052.9)</b> | <b>824.6†</b><br><b>(778.8 to 873.7)</b> | <b>264.5</b><br><b>(205.9 to 330.5)</b> | <b>5.6</b><br><b>(2.9 to 9.0)</b>                 | <b>-5.2</b><br><b>(-7.7 to -2.4)</b>                |
| Chronic obstructive pulmonary disease              | 1,343.5<br>(1,295.0 to 1,392.4)               | 95.5<br>(91.8 to 98.9)                   | 112.5<br>(98.6 to 123.6)                | 11.6<br>(6.5 to 17.9)                             | -6.7<br>(-10.9 to -1.3)                             |
| Pneumoconiosis                                     | 2.3<br>(2.1 to 2.5)                           | 0.3<br>(0.3 to 0.3)                      | 0.4<br>(0.2 to 0.5)                     | 12.2<br>(10.1 to 14.2)                            | -6.8<br>(-8.6 to -5.2)                              |
| Silicosis                                          | 0.1<br>(0.1 to 0.1)                           | < 0.05<br>(< 0.05 to < 0.05)             | < 0.05<br>(< 0.05 to < 0.05)            | 13.5<br>(10.6 to 16.4)                            | -4.1<br>(-6.2 to -2.0)                              |



| Cause                                                          | Prevalence in thousands (95% UI)                 | Incidence in thousands (95% UI)                | YLDs in thousands (95% UI)                  |                                                   |                                                     |
|----------------------------------------------------------------|--------------------------------------------------|------------------------------------------------|---------------------------------------------|---------------------------------------------------|-----------------------------------------------------|
|                                                                | 2016 counts                                      | 2016 counts                                    | 2016 counts                                 | Percentage change in counts between 2006 and 2016 | Percentage change in age-standardised rates between |
| Asbestosis                                                     | 0.9<br>(0.8 to 1.0)                              | 0.1<br>(0.1 to 0.2)                            | 0.1<br>(0.1 to 0.2)                         | 12.3<br>(9.7 to 15.1)                             | -6.7<br>(-9.0 to -4.4)                              |
| Coal workers pneumoconiosis                                    | 0.7<br>(0.6 to 0.7)                              | < 0.05<br>(< 0.05 to < 0.05)                   | 0.1<br>(0.1 to 0.1)                         | 12.6<br>(10.2 to 15.3)                            | -6.1<br>(-8.3 to -3.6)                              |
| Other pneumoconiosis                                           | 0.7<br>(0.6 to 0.8)                              | 0.1<br>(0.1 to 0.1)                            | 0.1<br>(0.1 to 0.2)                         | 11.4<br>(6.2 to 16.5)                             | -7.9<br>(-12.4 to -3.7)                             |
| Asthma                                                         | 3,692.4<br>(3,459.3 to 3,956.5)                  | 726.9<br>(682.3 to 774.6)                      | 144.0<br>(95.0 to 204.7)                    | 0.3<br>(-1.9 to 2.4)                              | -4.8<br>(-6.7 to -2.9)                              |
| Interstitial lung disease and pulmonary sarcoidosis            | 12.5<br>(11.4 to 13.7)                           | 1.9<br>(1.8 to 2.0)                            | 1.4<br>(0.9 to 2.0)                         | 15.8<br>(11.0 to 20.9)                            | -1.7<br>(-6.4 to 3.4)                               |
| Other chronic respiratory diseases                             | --                                               | --                                             | 6.4<br>(5.5 to 7.1)                         | 33.8<br>(24.9 to 43.3)                            | 25.4<br>(18.1 to 34.0)                              |
| <b>Cirrhosis and other chronic liver diseases</b>              | <b>82.2</b><br><b>(77.9 to 87.0)</b>             | <b>6.7</b><br><b>(6.4 to 7.0)</b>              | <b>6.6</b><br><b>(4.5 to 9.2)</b>           | <b>4.1</b><br><b>(-0.9 to 9.2)</b>                | <b>-7.0</b><br><b>(-11.2 to -2.9)</b>               |
| Cirrhosis and other chronic liver diseases due to hepatitis B  | 20.4<br>(18.6 to 22.1)                           | 1.8<br>(1.6 to 1.9)                            | 1.4<br>(0.9 to 1.9)                         | 9.4<br>(-0.7 to 20.0)                             | -7.5<br>(-15.3 to 0.1)                              |
| Cirrhosis and other chronic liver diseases due to hepatitis C  | 8.6<br>(7.8 to 9.4)                              | 0.7<br>(0.7 to 0.8)                            | 0.6<br>(0.4 to 0.8)                         | 12.9<br>(3.3 to 23.3)                             | -4.5<br>(-13.1 to 5.4)                              |
| Cirrhosis and other chronic liver diseases due to alcohol use  | 24.1<br>(22.3 to 26.0)                           | 2.3<br>(2.2 to 2.5)                            | 1.6<br>(1.1 to 2.2)                         | 5.5<br>(-2.9 to 14.2)                             | -11.7<br>(-17.9 to -5.2)                            |
| Cirrhosis and other chronic liver diseases due to other causes | 29.2<br>(26.8 to 31.9)                           | 1.8<br>(1.7 to 2.0)                            | 3.1<br>(2.1 to 4.4)                         | -0.3<br>(-8.7 to 8.0)                             | -4.0<br>(-11.1 to 3.5)                              |
| <b>Digestive diseases</b>                                      | <b>802.3</b><br><b>(778.5 to 824.1)</b>          | <b>1,153.0†</b><br><b>(1,092.1 to 1,218.7)</b> | <b>22.7</b><br><b>(16.2 to 30.6)</b>        | <b>15.4</b><br><b>(11.8 to 19.2)</b>              | <b>0.8</b><br><b>(-1.9 to 3.6)</b>                  |
| Peptic ulcer disease                                           | 172.3<br>(158.7 to 188.1)                        | 47.6<br>(42.9 to 52.9)                         | 3.4<br>(2.2 to 4.9)                         | 19.6<br>(14.3 to 26.0)                            | -0.3<br>(-4.2 to 4.3)                               |
| Gastritis and duodenitis                                       | 332.4<br>(296.7 to 369.7)                        | 452.6<br>(409.8 to 506.9)                      | 4.9<br>(3.2 to 6.9)                         | 26.6<br>(21.3 to 31.9)                            | 8.7<br>(4.8 to 12.9)                                |
| Appendicitis                                                   | 7.5<br>(6.9 to 8.1)                              | 197.2<br>(182.1 to 213.2)                      | 2.3<br>(1.5 to 3.2)                         | 5.8<br>(-7.6 to 20.6)                             | -0.4<br>(-11.4 to 11.8)                             |
| Paralytic ileus and intestinal obstruction                     | 0.8<br>(0.7 to 0.9)                              | 23.1<br>(20.7 to 25.7)                         | 0.3<br>(0.2 to 0.4)                         | 14.2<br>(11.3 to 17.0)                            | 1.7<br>(-1.1 to 4.6)                                |
| Inguinal, femoral, and abdominal hernia                        | 262.3<br>(222.9 to 303.2)                        | 170.2<br>(148.8 to 192.1)                      | 7.6<br>(5.2 to 10.7)                        | 9.4<br>(3.2 to 16.1)                              | -4.1<br>(-9.0 to 0.9)                               |
| Inflammatory bowel disease                                     | 7.2<br>(6.6 to 7.9)                              | 21.7<br>(19.9 to 23.7)                         | 1.1<br>(0.7 to 1.5)                         | 26.1<br>(19.4 to 33.2)                            | 9.8<br>(3.2 to 17.0)                                |
| Vascular intestinal disorders                                  | 0.3<br>(0.3 to 0.4)                              | 2.3<br>(2.0 to 2.6)                            | 0.1<br>(0.1 to 0.1)                         | 14.0<br>(10.8 to 17.7)                            | 1.5<br>(-0.9 to 3.9)                                |
| Gallbladder and biliary diseases                               | 46.6<br>(41.4 to 52.1)                           | 229.5<br>(199.6 to 260.9)                      | 1.2<br>(0.8 to 1.7)                         | 9.8<br>(1.6 to 18.1)                              | -4.6<br>(-12.0 to 2.9)                              |
| Pancreatitis                                                   | 1.0<br>(0.9 to 1.1)                              | 8.9<br>(7.8 to 10.0)                           | 0.1<br>(0.1 to 0.2)                         | 13.5<br>(11.2 to 16.1)                            | -1.5<br>(-3.3 to 0.5)                               |
| Other digestive diseases                                       | --                                               | --                                             | 1.8<br>(1.3 to 2.4)                         | 18.7<br>(14.5 to 22.9)                            | 4.6<br>(1.7 to 7.5)                                 |
| <b>Neurological disorders</b>                                  | <b>17,641.5</b><br><b>(17,156.5 to 18,259.0)</b> | <b>8,497.8</b><br><b>(7,200.1 to 9,940.4)</b>  | <b>469.0</b><br><b>(321.2 to 629.7)</b>     | <b>12.7</b><br><b>(-1.1 to 28.0)</b>              | <b>1.1</b><br><b>(-10.9 to 13.8)</b>                |
| Alzheimer's disease and other dementias                        | 167.4<br>(140.6 to 200.6)                        | 28.9<br>(24.0 to 34.7)                         | 24.2<br>(16.8 to 32.2)                      | 23.4<br>(20.7 to 26.2)                            | -0.4<br>(-2.3 to 1.5)                               |
| Parkinson's disease                                            | 17.3<br>(13.7 to 21.4)                           | 2.1<br>(1.7 to 2.7)                            | 2.0<br>(1.3 to 2.8)                         | 27.5<br>(20.9 to 34.0)                            | 5.3<br>(-0.1 to 10.7)                               |
| Epilepsy                                                       | 294.7<br>(203.2 to 388.1)                        | 26.5<br>(18.4 to 34.8)                         | 101.9<br>(60.6 to 153.8)                    | 9.8<br>(-33.8 to 82.7)                            | 1.1<br>(-39.2 to 67.0)                              |
| Multiple sclerosis                                             | 6.9<br>(6.1 to 7.8)                              | 0.3<br>(0.3 to 0.4)                            | 1.9<br>(1.3 to 2.6)                         | 26.1<br>(21.5 to 30.9)                            | 9.0<br>(4.7 to 13.5)                                |
| Motor neuron disease                                           | 0.8<br>(0.7 to 1.0)                              | 0.2<br>(0.1 to 0.2)                            | 0.2<br>(0.1 to 0.2)                         | 16.0<br>(13.2 to 18.7)                            | 5.1<br>(3.2 to 6.8)                                 |
| Migraine                                                       | 6,276.5<br>(5,991.8 to 6,543.6)                  | 724.5<br>(692.8 to 759.8)                      | 270.8<br>(176.3 to 376.8)                   | 11.7<br>(10.0 to 13.7)                            | 0.0<br>(-1.4 to 1.6)                                |
| Tension-type headache                                          | 13,305.5<br>(11,836.0 to 15,008.7)               | 7,714.9<br>(6,439.5 to 9,176.4)                | 46.8<br>(29.8 to 68.6)                      | 12.4<br>(9.7 to 15.3)                             | -0.1<br>(-2.2 to 2.0)                               |
| Other neurological disorders                                   | 0.1<br>(0.1 to 0.2)                              | 0.3<br>(0.2 to 0.4)                            | 21.2<br>(12.7 to 31.5)                      | 30.4<br>(-20.1 to 111.0)                          | 22.4<br>(-24.2 to 95.2)                             |
| <b>Mental and substance use disorders</b>                      | <b>8,277.7</b><br><b>(8,132.0 to 8,417.4)</b>    | <b>3,363.2†</b><br><b>(3,142.3 to 3,619.4)</b> | <b>1,092.0</b><br><b>(793.8 to 1,415.1)</b> | <b>5.8</b><br><b>(4.0 to 7.5)</b>                 | <b>-4.9</b><br><b>(-6.3 to -3.6)</b>                |
| Schizophrenia                                                  | 102.7<br>(90.0 to 116.4)                         | 7.9<br>(7.0 to 9.0)                            | 64.8<br>(47.5 to 81.0)                      | 17.7<br>(13.3 to 22.8)                            | 1.4<br>(-2.2 to 5.3)                                |
| Alcohol use disorders                                          | 836.5<br>(716.2 to 963.0)                        | 434.4<br>(369.9 to 500.3)                      | 82.9<br>(57.2 to 115.1)                     | 19.6<br>(14.3 to 25.1)                            | 1.1<br>(-3.5 to 5.8)                                |
| Drug use disorders                                             | 383.5<br>(365.8 to 401.6)                        | 54.1<br>(48.9 to 60.3)                         | 101.7<br>(71.9 to 134.3)                    | -23.1<br>(-28.5 to -16.6)                         | -31.8<br>(-36.1 to -26.4)                           |
| Opioid use disorders                                           | 213.5<br>(183.5 to 249.9)                        | 24.3<br>(20.8 to 28.7)                         | 88.0<br>(60.3 to 117.1)                     | -26.7<br>(-32.4 to -19.8)                         | -34.8<br>(-39.6 to -29.0)                           |
| Cocaine use disorders                                          | 10.9<br>(9.3 to 12.8)                            | 1.3<br>(1.1 to 1.5)                            | 1.6<br>(1.0 to 2.3)                         | 13.2<br>(6.2 to 20.2)                             | -0.7<br>(-6.0 to 4.6)                               |
| Amphetamine use disorders                                      | 23.4<br>(16.6 to 31.4)                           | 2.6<br>(1.9 to 3.5)                            | 3.1<br>(1.7 to 5.0)                         | 5.8<br>(-8.1 to 22.7)                             | -5.7<br>(-17.3 to 8.2)                              |
| Cannabis use disorders                                         | 128.1<br>(106.2 to 154.0)                        | 21.5<br>(17.6 to 26.5)                         | 3.7<br>(2.3 to 5.6)                         | 14.5<br>(2.5 to 27.8)                             | 0.8<br>(-9.2 to 11.5)                               |
| Other drug use disorders                                       | 21.9<br>(19.5 to 24.4)                           | 4.3<br>(3.9 to 4.9)                            | 5.4<br>(3.6 to 7.6)                         | 12.3<br>(2.0 to 23.1)                             | -1.0<br>(-9.2 to 7.5)                               |
| Depressive disorders                                           | 2,037.8<br>(1,964.5 to 2,111.6)                  | 2,261.6<br>(2,040.9 to 2,509.7)                | 347.2<br>(240.3 to 472.0)                   | 12.9<br>(10.6 to 15.6)                            | -1.2<br>(-3.1 to 0.8)                               |
| Major depressive disorder                                      | 1,392.4<br>(1,258.7 to 1,548.5)                  | 2,144.2<br>(1,923.4 to 2,384.5)                | 281.8<br>(195.4 to 381.7)                   | 12.4<br>(9.4 to 15.6)                             | -1.5<br>(-3.9 to 1.0)                               |
| Dysthymia                                                      | 686.5<br>(596.3 to 792.8)                        | 117.4<br>(102.7 to 134.5)                      | 65.4<br>(43.8 to 95.1)                      | 15.3<br>(13.4 to 17.2)                            | 0.1<br>(-1.3 to 1.3)                                |
| Bipolar disorder                                               | 332.5<br>(285.4 to 385.6)                        | 32.2<br>(28.1 to 37.4)                         | 67.3<br>(41.4 to 98.7)                      | 12.7<br>(9.5 to 16.0)                             | 0.3<br>(-2.1 to 2.9)                                |
| Anxiety disorders                                              | 1,993.6<br>(1,854.2 to 2,151.1)                  | 319.4<br>(296.3 to 344.7)                      | 191.0<br>(136.0 to 260.0)                   | 5.1<br>(-0.2 to 10.5)                             | -4.2<br>(-8.8 to 0.4)                               |
| Eating disorders                                               | 81.8<br>(71.5 to 92.9)                           | 49.6<br>(36.5 to 66.2)                         | 16.6<br>(10.6 to 24.3)                      | 15.2<br>(8.7 to 22.1)                             | 5.7<br>(0.1 to 11.6)                                |
| Anorexia nervosa                                               | 20.1<br>(14.6 to 27.2)                           | 7.6<br>(5.6 to 10.2)                           | 4.2<br>(2.5 to 6.6)                         | 11.2<br>(0.4 to 22.9)                             | 4.4<br>(-5.7 to 14.7)                               |
| Bulimia nervosa                                                | 59.1<br>(44.2 to 79.1)                           | 42.0<br>(29.3 to 58.3)                         | 12.3<br>(7.5 to 18.6)                       | 16.6<br>(9.2 to 25.3)                             | 6.1<br>(-0.3 to 13.4)                               |
| Autistic spectrum disorders                                    | 443.9<br>(418.7 to 468.9)                        | 3.7<br>(2.5 to 5.1)                            | 63.3<br>(42.6 to 89.1)                      | 6.4<br>(4.1 to 8.8)                               | 0.3<br>(-1.7 to 2.3)                                |
| Autism                                                         | 123.6<br>(107.5 to 143.7)                        | 0.5<br>(0.2 to 0.8)                            | 31.4<br>(20.0 to 45.6)                      | 5.7<br>(1.3 to 9.9)                               | 0.3<br>(-3.6 to 4.2)                                |
| Asperger syndrome and other autistic spectrum disorders        | 320.3<br>(263.2 to 381.6)                        | 3.2<br>(2.1 to 4.6)                            | 31.9<br>(20.8 to 46.2)                      | 7.2<br>(5.1 to 9.5)                               | 0.3<br>(-1.5 to 2.2)                                |



| Cause                                                      | Prevalence in thousands (95% UI)                 | Incidence in thousands (95% UI)                    | YLDs in thousands (95% UI)                  |                                                                   |                                                                      |
|------------------------------------------------------------|--------------------------------------------------|----------------------------------------------------|---------------------------------------------|-------------------------------------------------------------------|----------------------------------------------------------------------|
|                                                            | 2016 counts<br>(588.7 to 699.1)                  | 2016 counts<br>(24.5 to 31.0)                      | 2016 counts<br>(4.6 to 12.0)                | Percentage change in counts between 2006 and 2016<br>(0.0 to 6.0) | Percentage change in age-standardised rates between<br>(-2.7 to 3.0) |
| Attention-deficit/hyperactivity disorder                   | 640.3<br>(588.7 to 699.1)                        | 27.5<br>(24.5 to 31.0)                             | 7.7<br>(4.6 to 12.0)                        | 3.0<br>(0.0 to 6.0)                                               | 0.2<br>(-2.7 to 3.0)                                                 |
| Conduct disorder                                           | 415.6<br>(353.4 to 481.1)                        | 136.6<br>(111.5 to 161.8)                          | 50.2<br>(31.0 to 75.9)                      | -7.0<br>(-9.3 to -4.7)                                            | -0.1<br>(-2.6 to 2.3)                                                |
| Idiopathic developmental intellectual disability           | 864.6<br>(534.8 to 1,200.5)                      | --                                                 | 32.2<br>(15.2 to 57.0)                      | -2.5<br>(-7.8 to 0.6)                                             | -9.2<br>(-14.3 to -6.2)                                              |
| Other mental and substance use disorders                   | 910.9<br>(785.5 to 1,061.6)                      | 36.4<br>(31.6 to 41.8)                             | 67.1<br>(45.7 to 95.8)                      | 15.9<br>(13.3 to 18.7)                                            | 0.2<br>(-1.8 to 2.3)                                                 |
| <b>Diabetes, urogenital, blood, and endocrine diseases</b> | <b>20,828.4</b><br><b>(20,698.1 to 20,957.7)</b> | <b>6,127.0†</b><br><b>(5,779.0 to 6,526.9)</b>     | <b>457.3</b><br><b>(326.8 to 620.8)</b>     | <b>21.4</b><br><b>(19.0 to 23.8)</b>                              | <b>3.5</b><br><b>(1.4 to 5.7)</b>                                    |
| Diabetes mellitus                                          | 2,938.1<br>(2,639.3 to 3,232.1)                  | 204.1<br>(185.2 to 225.1)                          | 239.9<br>(165.4 to 332.4)                   | 29.6<br>(25.1 to 33.9)                                            | 8.6<br>(4.7 to 12.4)                                                 |
| Acute glomerulonephritis                                   | 0.6<br>(0.5 to 0.7)                              | 8.7<br>(7.5 to 9.9)                                | < 0.05<br>(< 0.05 to < 0.05)                | 8.3<br>(5.6 to 11.2)                                              | -1.7<br>(-3.8 to 0.6)                                                |
| Chronic kidney disease                                     | 3,336.3<br>(3,016.9 to 3,687.2)                  | 250.7<br>(220.6 to 282.0)                          | 83.0<br>(61.9 to 106.5)                     | 15.0<br>(11.9 to 18.4)                                            | -2.9<br>(-5.3 to -0.2)                                               |
| Chronic kidney disease due to diabetes mellitus            | 1,086.0<br>(926.6 to 1,258.1)                    | 79.8<br>(66.5 to 95.6)                             | 25.5<br>(18.6 to 33.2)                      | 17.0<br>(12.2 to 22.3)                                            | -1.8<br>(-5.4 to 2.2)                                                |
| Chronic kidney disease due to hypertension                 | 683.6<br>(592.8 to 779.6)                        | 58.9<br>(49.0 to 69.7)                             | 14.4<br>(10.1 to 19.0)                      | 17.0<br>(11.8 to 22.5)                                            | -3.3<br>(-7.5 to 0.9)                                                |
| Chronic kidney disease due to glomerulonephritis           | 680.5<br>(587.6 to 771.0)                        | 42.7<br>(34.3 to 51.8)                             | 20.5<br>(14.8 to 27.3)                      | 12.9<br>(7.7 to 18.2)                                             | -3.1<br>(-6.8 to 0.8)                                                |
| Chronic kidney disease due to other causes                 | 886.2<br>(745.8 to 1,046.6)                      | 69.4<br>(57.7 to 81.7)                             | 22.7<br>(16.4 to 30.0)                      | 13.3<br>(8.4 to 18.2)                                             | -3.6<br>(-7.3 to -0.0)                                               |
| Urinary diseases and male infertility                      | 837.4<br>(763.7 to 910.7)                        | 3,021.6†<br>(2,717.7 to 3,375.1)                   | 23.9<br>(15.7 to 34.1)                      | 17.6<br>(14.2 to 20.6)                                            | -2.8<br>(-5.4 to -0.5)                                               |
| Interstitial nephritis and urinary tract infections        | 49.3<br>(43.5 to 56.1)                           | 2,578.9<br>(2,281.3 to 2,924.2)                    | 1.6<br>(1.0 to 2.5)                         | 6.2<br>(-0.5 to 13.5)                                             | -3.4<br>(-9.2 to 2.8)                                                |
| Urolithiasis                                               | 13.9<br>(12.2 to 15.8)                           | 367.0<br>(322.3 to 420.6)                          | 1.1<br>(0.7 to 1.5)                         | 17.0<br>(13.2 to 21.0)                                            | 1.2<br>(-2.2 to 4.7)                                                 |
| Benign prostatic hyperplasia                               | 595.8<br>(507.0 to 684.4)                        | 75.7<br>(63.9 to 89.0)                             | 19.3<br>(12.2 to 28.1)                      | 20.9<br>(16.8 to 24.5)                                            | -2.3<br>(-5.3 to 0.3)                                                |
| Male infertility                                           | 150.9<br>(117.7 to 196.1)                        | --                                                 | 0.9<br>(0.4 to 1.8)                         | 12.3<br>(5.6 to 19.9)                                             | 0.2<br>(-5.8 to 6.8)                                                 |
| Other urinary diseases                                     | --                                               | --                                                 | 1.0<br>(0.7 to 1.4)                         | -9.0<br>(-13.1 to -4.5)                                           | -17.9<br>(-21.4 to -14.4)                                            |
| Gynecological diseases                                     | 6,891.6<br>(6,709.7 to 7,105.5)                  | 2,531.5†<br>(2,361.1 to 2,741.7)                   | 77.1<br>(52.7 to 109.8)                     | 13.4<br>(11.3 to 15.5)                                            | -1.0<br>(-2.7 to 0.6)                                                |
| Uterine fibroids                                           | 564.8<br>(495.9 to 635.8)                        | 62.3<br>(54.3 to 71.2)                             | 7.1<br>(4.1 to 11.9)                        | 16.6<br>(12.8 to 20.0)                                            | -0.1<br>(-2.9 to 2.6)                                                |
| Polycystic ovarian syndrome                                | 57.4<br>(42.7 to 74.7)                           | 90.2<br>(64.0 to 120.5)                            | 0.5<br>(0.2 to 1.0)                         | 10.0<br>(4.2 to 16.0)                                             | -1.0<br>(-6.1 to 4.3)                                                |
| Female infertility                                         | 45.1<br>(28.0 to 106.7)                          | --                                                 | 0.3<br>(0.1 to 0.7)                         | 16.9<br>(-2.0 to 49.8)                                            | 3.7<br>(-11.2 to 30.7)                                               |
| Endometriosis                                              | 12.4<br>(10.4 to 14.6)                           | 45.7<br>(37.8 to 56.6)                             | 1.2<br>(0.7 to 1.7)                         | 12.8<br>(-0.3 to 27.6)                                            | 0.0<br>(-11.0 to 12.6)                                               |
| Genital prolapse                                           | 2,912.5<br>(2,561.3 to 3,290.2)                  | 210.7<br>(180.2 to 248.5)                          | 9.0<br>(4.4 to 16.5)                        | 16.5<br>(12.9 to 20.7)                                            | -3.8<br>(-6.9 to -0.2)                                               |
| Premenstrual syndrome                                      | 3,318.0<br>(3,145.8 to 3,476.5)                  | 1,197.1<br>(1,132.0 to 1,263.2)                    | 27.4<br>(17.0 to 42.1)                      | 11.7<br>(8.1 to 15.3)                                             | -0.5<br>(-3.5 to 2.6)                                                |
| Other gynecological diseases                               | 912.0<br>(773.8 to 1,075.3)                      | 925.5<br>(760.0 to 1,118.7)                        | 31.6<br>(20.8 to 45.3)                      | 13.5<br>(10.3 to 16.7)                                            | -0.6<br>(-3.1 to 2.0)                                                |
| Hemoglobinopathies and hemolytic anaemias                  | 12,222.3<br>(12,131.7 to 12,312.3)               | --                                                 | 10.0<br>(6.5 to 14.6)                       | 2.2<br>(-1.5 to 6.5)                                              | -3.8<br>(-7.0 to -0.5)                                               |
| Thalassemias                                               | < 0.05<br>(< 0.05 to < 0.05)                     | --                                                 | < 0.05<br>(< 0.05 to < 0.05)                | 1.5<br>(-4.8 to 8.6)                                              | 0.6<br>(-5.6 to 7.5)                                                 |
| Thalassaemias trait                                        | 225.8<br>(217.6 to 232.8)                        | --                                                 | 3.1<br>(2.0 to 4.5)                         | 13.6<br>(7.7 to 19.6)                                             | 3.9<br>(-1.0 to 8.9)                                                 |
| Sickle cell disorders                                      | 0.1<br>(0.1 to 0.1)                              | --                                                 | < 0.05<br>(< 0.05 to < 0.05)                | -0.1<br>(-5.2 to 5.3)                                             | -1.5<br>(-6.6 to 3.9)                                                |
| Sickle cell trait                                          | 735.6<br>(692.1 to 784.6)                        | --                                                 | 1.8<br>(1.2 to 2.8)                         | 9.8<br>(2.9 to 17.2)                                              | 4.4<br>(-1.8 to 11.0)                                                |
| G6PD deficiency                                            | 3,475.4<br>(3,354.8 to 3,622.4)                  | --                                                 | 0.2<br>(0.1 to 0.3)                         | 3.7<br>(-3.6 to 11.5)                                             | -3.1<br>(-9.3 to 3.3)                                                |
| G6PD trait                                                 | 8,149.1<br>(8,037.4 to 8,274.4)                  | --                                                 | < 0.05<br>(< 0.05 to < 0.05)                | 9.2<br>(4.8 to 14.5)                                              | -0.4<br>(-3.9 to 3.7)                                                |
| Other hemoglobinopathies and hemolytic anaemias            | 191.1<br>(181.2 to 202.6)                        | --                                                 | 4.8<br>(3.1 to 7.0)                         | -6.3<br>(-11.1 to -1.1)                                           | -10.2<br>(-14.2 to -6.1)                                             |
| Endocrine, metabolic, blood, and immune disorders          | 704.2<br>(652.5 to 761.1)                        | 110.5<br>(98.0 to 123.3)                           | 23.4<br>(15.8 to 32.6)                      | 11.1<br>(7.7 to 14.5)                                             | -0.1<br>(-2.7 to 2.5)                                                |
| <b>Musculoskeletal disorders</b>                           | <b>7,114.0</b><br><b>(6,937.5 to 7,290.4)</b>    | <b>3,440.6</b><br><b>(3,127.1 to 3,780.6)</b>      | <b>773.0</b><br><b>(558.8 to 1,003.4)</b>   | <b>19.1</b><br><b>(17.4 to 20.7)</b>                              | <b>1.9</b><br><b>(0.7 to 2.9)</b>                                    |
| Rheumatoid arthritis                                       | 152.8<br>(136.3 to 171.3)                        | 9.4<br>(8.5 to 10.4)                               | 35.6<br>(24.6 to 46.9)                      | 6.2<br>(2.3 to 9.9)                                               | -10.6<br>(-14.0 to -7.6)                                             |
| Osteoarthritis                                             | 1,737.0<br>(1,627.8 to 1,848.6)                  | 94.8<br>(87.7 to 101.7)                            | 105.7<br>(74.4 to 143.3)                    | 25.8<br>(23.9 to 27.6)                                            | 4.1<br>(2.7 to 5.5)                                                  |
| Low back and neck pain                                     | 4,383.2<br>(4,186.0 to 4,580.4)                  | 1,962.4<br>(1,750.1 to 2,197.6)                    | 500.2<br>(354.5 to 663.2)                   | 20.5<br>(18.4 to 22.5)                                            | 3.6<br>(2.1 to 5.0)                                                  |
| Low back pain                                              | 3,201.1<br>(2,835.4 to 3,624.6)                  | 1,601.9<br>(1,401.1 to 1,830.7)                    | 357.2<br>(253.3 to 467.8)                   | 21.8<br>(18.9 to 24.4)                                            | 5.1<br>(3.1 to 6.9)                                                  |
| Neck pain                                                  | 1,448.6<br>(1,250.7 to 1,670.4)                  | 360.5<br>(312.5 to 425.3)                          | 143.0<br>(96.8 to 203.5)                    | 17.6<br>(15.8 to 19.3)                                            | 0.1<br>(-0.9 to 1.0)                                                 |
| Gout                                                       | 168.8<br>(150.6 to 189.6)                        | 34.7<br>(30.4 to 39.2)                             | 5.3<br>(3.6 to 7.2)                         | 19.0<br>(12.7 to 25.6)                                            | -0.4<br>(-5.3 to 4.7)                                                |
| Other musculoskeletal disorders                            | 1,489.5<br>(1,241.2 to 1,767.8)                  | 1,339.3<br>(1,105.0 to 1,608.1)                    | 126.2<br>(85.1 to 180.2)                    | 12.6<br>(7.2 to 17.7)                                             | -2.8<br>(-6.9 to 1.4)                                                |
| <b>Other non-communicable diseases</b>                     | <b>36,652.9</b><br><b>(36,370.4 to 36,928.8)</b> | <b>99,009.9†</b><br><b>(93,027.4 to 104,949.7)</b> | <b>1,140.3</b><br><b>(783.5 to 1,600.2)</b> | <b>9.3</b><br><b>(8.3 to 10.2)</b>                                | <b>-1.1</b><br><b>(-1.8 to -0.4)</b>                                 |
| Congenital anomalies                                       | 652.5<br>(598.1 to 704.0)                        | --                                                 | 95.7<br>(66.0 to 132.8)                     | 6.1<br>(1.9 to 10.2)                                              | -1.1<br>(-5.0 to 2.8)                                                |
| Neural tube defects                                        | 54.3<br>(48.6 to 61.3)                           | --                                                 | 16.3<br>(11.5 to 21.9)                      | 7.1<br>(0.4 to 14.2)                                              | -0.6<br>(-6.8 to 5.6)                                                |
| Congenital heart anomalies                                 | 53.4<br>(46.3 to 61.5)                           | --                                                 | 2.6<br>(1.2 to 4.5)                         | 4.9<br>(-1.8 to 11.6)                                             | 2.1<br>(-4.0 to 8.3)                                                 |
| Orofacial clefts                                           | 14.2<br>(12.4 to 16.1)                           | --                                                 | 0.2<br>(0.1 to 0.3)                         | -5.4<br>(-15.1 to 5.5)                                            | -11.9<br>(-21.1 to -1.8)                                             |
| Down's syndrome                                            | 11.2<br>(9.7 to 13.0)                            | --                                                 | 1.0<br>(0.7 to 1.4)                         | 4.5<br>(1.3 to 7.7)                                               | 0.2<br>(-2.8 to 3.2)                                                 |
| Turner syndrome                                            | 23.2<br>(19.9 to 26.5)                           | --                                                 | 0.4<br>(0.2 to 0.7)                         | -3.0<br>(-17.0 to 11.2)                                           | -7.5<br>(-20.4 to 5.1)                                               |
| Klinefelter syndrome                                       | 27.1<br>(23.1 to 31.2)                           | --                                                 | 0.1<br>(0.1 to 0.3)                         | 8.8<br>(-1.8 to 21.3)                                             | -0.0<br>(-9.5 to 10.7)                                               |

| Cause                                         | Prevalence in thousands (95% UI)              | Incidence in thousands (95% UI)                | YLDs in thousands (95% UI)              |                                                   |                                                     |
|-----------------------------------------------|-----------------------------------------------|------------------------------------------------|-----------------------------------------|---------------------------------------------------|-----------------------------------------------------|
|                                               | 2016 counts                                   | 2016 counts                                    | 2016 counts                             | Percentage change in counts between 2006 and 2016 | Percentage change in age-standardised rates between |
| Other chromosomal abnormalities               | 6.3<br>(5.3 to 7.4)                           | --                                             | 1.2<br>(0.8 to 1.6)                     | 1.3<br>(-11.2 to 15.8)                            | 1.1<br>(-11.7 to 15.7)                              |
| Congenital musculoskeletal and limb anomalies | 65.4<br>(58.2 to 73.3)                        | --                                             | 9.5<br>(6.3 to 13.1)                    | 12.4<br>(6.0 to 19.0)                             | 4.2<br>(-1.4 to 10.1)                               |
| Urogenital congenital anomalies               | 33.1<br>(29.6 to 37.0)                        | --                                             | 0.8<br>(0.5 to 1.3)                     | 0.2<br>(-2.8 to 3.6)                              | -0.0<br>(-2.9 to 3.2)                               |
| Digestive congenital anomalies                | 40.1<br>(35.5 to 45.0)                        | --                                             | 1.8<br>(1.2 to 2.5)                     | 7.5<br>(-2.1 to 18.0)                             | 0.1<br>(-8.3 to 9.0)                                |
| Other congenital anomalies                    | 425.6<br>(316.9 to 570.8)                     | --                                             | 61.8<br>(40.0 to 91.4)                  | 5.2<br>(-0.7 to 11.1)                             | -2.1<br>(-7.6 to 3.1)                               |
| Skin and subcutaneous diseases                | 18,534.2<br>(18,287.0 to 18,782.0)            | 42,302.6<br>(40,069.2 to 44,791.1)             | 452.2<br>(303.1 to 651.4)               | 6.0<br>(4.6 to 7.3)                               | 1.3<br>(0.2 to 2.4)                                 |
| Dermatitis                                    | 2,897.4<br>(2,748.7 to 3,049.7)               | 2,677.6<br>(2,470.3 to 2,890.4)                | 114.9<br>(67.8 to 188.6)                | 2.9<br>(-0.4 to 6.2)                              | -0.2<br>(-3.4 to 2.7)                               |
| Psoriasis                                     | 471.1<br>(453.8 to 488.9)                     | 62.6<br>(60.5 to 64.8)                         | 40.7<br>(29.4 to 53.4)                  | 17.7<br>(13.8 to 21.4)                            | 5.6<br>(2.6 to 8.6)                                 |
| Cellulitis                                    | 23.2<br>(21.7 to 24.9)                        | 410.9<br>(384.5 to 437.9)                      | 1.3<br>(0.8 to 1.9)                     | 11.4<br>(1.6 to 22.3)                             | 1.3<br>(-6.5 to 10.3)                               |
| Pyoderma                                      | 254.3<br>(246.3 to 261.9)                     | 5,234.2<br>(5,081.0 to 5,390.8)                | 1.4<br>(0.6 to 3.0)                     | 6.4<br>(3.8 to 9.1)                               | 1.5<br>(-0.7 to 3.8)                                |
| Scabies                                       | 717.1<br>(626.4 to 825.7)                     | 2,196.2<br>(1,889.9 to 2,520.0)                | 18.4<br>(10.3 to 29.2)                  | 1.1<br>(-1.2 to 3.6)                              | -4.1<br>(-5.8 to -2.5)                              |
| Fungal skin diseases                          | 6,439.2<br>(5,789.2 to 7,151.9)               | 20,188.3<br>(18,014.5 to 22,613.4)             | 36.1<br>(14.3 to 74.4)                  | 7.0<br>(5.7 to 8.4)                               | 0.0<br>(-0.3 to 0.4)                                |
| Viral skin diseases                           | 1,380.7<br>(1,317.7 to 1,447.7)               | 2,015.8<br>(1,921.6 to 2,120.9)                | 42.1<br>(26.3 to 62.2)                  | 4.3<br>(2.7 to 5.9)                               | -0.0<br>(-1.3 to 1.3)                               |
| Acne vulgaris                                 | 5,413.5<br>(4,948.6 to 5,870.5)               | 3,743.5<br>(3,138.9 to 4,530.8)                | 138.8<br>(94.0 to 199.8)                | 4.9<br>(3.0 to 7.1)                               | 3.4<br>(1.7 to 5.2)                                 |
| Alopecia areata                               | 100.2<br>(96.2 to 103.9)                      | 178.0<br>(170.8 to 185.2)                      | 3.3<br>(2.1 to 4.9)                     | 12.2<br>(7.3 to 17.6)                             | 0.0<br>(-4.1 to 4.4)                                |
| Pruritus                                      | 474.0<br>(416.8 to 533.1)                     | 376.1<br>(336.0 to 423.6)                      | 5.0<br>(2.3 to 9.1)                     | 12.0<br>(9.0 to 14.8)                             | 0.5<br>(-1.5 to 2.5)                                |
| Urticaria                                     | 472.4<br>(411.5 to 543.6)                     | 844.3<br>(739.8 to 974.8)                      | 28.3<br>(18.1 to 40.7)                  | 5.0<br>(2.5 to 8.1)                               | 0.0<br>(-2.3 to 2.4)                                |
| Decubitus ulcer                               | 11.6<br>(10.5 to 12.8)                        | 42.4<br>(38.1 to 47.1)                         | 1.8<br>(1.3 to 2.5)                     | 4.6<br>(-1.2 to 10.4)                             | -10.8<br>(-16.3 to -5.3)                            |
| Other skin and subcutaneous diseases          | 3,663.6<br>(3,568.1 to 3,757.2)               | 4,332.9<br>(4,209.0 to 4,459.1)                | 20.0<br>(9.6 to 36.4)                   | 15.9<br>(14.8 to 17.1)                            | 2.0<br>(1.2 to 2.9)                                 |
| Sense organ diseases                          | 12,895.5<br>(12,764.7 to 13,050.4)            | 4,897.8†<br>(4,594.3 to 5,214.9)               | 462.4<br>(323.3 to 641.5)               | 12.1<br>(10.3 to 13.6)                            | -2.9<br>(-4.1 to -1.7)                              |
| Glaucoma                                      | 38.0<br>(30.8 to 45.6)                        | --                                             | 2.7<br>(1.8 to 3.8)                     | 25.7<br>(20.0 to 31.8)                            | 4.0<br>(-0.5 to 8.8)                                |
| Cataract                                      | 201.7<br>(174.4 to 230.6)                     | --                                             | 16.1<br>(11.4 to 22.2)                  | 19.4<br>(16.1 to 22.5)                            | -0.6<br>(-2.9 to 1.8)                               |
| Macular degeneration                          | 21.8<br>(17.2 to 27.2)                        | --                                             | 1.4<br>(0.9 to 2.0)                     | 28.2<br>(21.6 to 35.6)                            | 6.2<br>(0.9 to 12.2)                                |
| Refraction and accommodation disorders        | 6,702.2<br>(6,465.1 to 6,939.5)               | --                                             | 100.9<br>(59.4 to 165.2)                | 11.8<br>(10.3 to 13.5)                            | -2.1<br>(-3.4 to -0.7)                              |
| Age-related and other hearing loss            | 8,352.5<br>(7,956.6 to 8,770.1)               | --                                             | 285.5<br>(201.4 to 394.3)               | 10.6<br>(7.9 to 13.2)                             | -4.0<br>(-6.0 to -2.3)                              |
| Other vision loss                             | 234.2<br>(197.4 to 275.2)                     | --                                             | 15.8<br>(11.0 to 21.7)                  | 18.3<br>(13.9 to 22.8)                            | 0.3<br>(-3.2 to 3.9)                                |
| Other sense organ diseases                    | 1,302.8<br>(1,210.7 to 1,392.4)               | 4,897.8<br>(4,594.3 to 5,214.9)                | 40.0<br>(25.3 to 60.8)                  | 16.6<br>(14.7 to 18.6)                            | 0.9<br>(-0.6 to 2.5)                                |
| Oral disorders                                | 20,632.4<br>(19,972.1 to 21,187.1)            | 51,809.5†<br>(46,326.6 to 57,322.9)            | 130.0<br>(84.7 to 186.9)                | 14.9<br>(13.5 to 16.4)                            | -0.8<br>(-1.8 to 0.3)                               |
| Caries of deciduous teeth                     | 2,757.5<br>(2,089.6 to 3,307.3)               | 11,319.4<br>(6,866.1 to 15,867.4)              | 0.7<br>(0.3 to 1.3)                     | -4.5<br>(-9.4 to 1.0)                             | -2.3<br>(-7.2 to 2.9)                               |
| Caries of permanent teeth                     | 14,377.7<br>(13,357.7 to 15,379.2)            | 40,163.3<br>(36,489.4 to 43,936.8)             | 8.4<br>(3.7 to 15.9)                    | 8.0<br>(6.0 to 10.1)                              | -1.7<br>(-3.1 to -0.1)                              |
| Periodontal disease                           | 1,371.3<br>(1,130.0 to 1,635.8)               | 161.3<br>(131.4 to 195.1)                      | 8.9<br>(3.5 to 18.3)                    | 19.1<br>(16.7 to 21.2)                            | 0.2<br>(-1.4 to 1.9)                                |
| Edentulism and severe tooth loss              | 3,035.9<br>(2,634.9 to 3,454.1)               | 165.5<br>(142.1 to 190.0)                      | 84.7<br>(55.2 to 121.2)                 | 16.5<br>(14.5 to 18.7)                            | -1.1<br>(-2.5 to 0.4)                               |
| Other oral disorders                          | 940.6<br>(897.7 to 986.5)                     | --                                             | 27.4<br>(17.0 to 41.1)                  | 11.6<br>(10.0 to 13.2)                            | 0.0<br>(-1.2 to 1.2)                                |
| <b>Injuries</b>                               | <b>8,416.9</b><br><b>(7,997.3 to 8,906.4)</b> | <b>3,870.4†</b><br><b>(3,689.0 to 4,065.7)</b> | <b>327.7</b><br><b>(221.2 to 466.5)</b> | <b>8.9</b><br><b>(7.4 to 10.2)</b>                | <b>-4.5</b><br><b>(-5.5 to -3.5)</b>                |
| <b>Transport injuries</b>                     | <b>1,501.7</b><br><b>(1,385.8 to 1,625.7)</b> | <b>595.8</b><br><b>(532.7 to 663.9)</b>        | <b>82.2</b><br><b>(55.2 to 116.4)</b>   | <b>3.9</b><br><b>(2.7 to 5.0)</b>                 | <b>-9.9</b><br><b>(-10.8 to -9.0)</b>               |
| Road injuries                                 | 1,288.4<br>(1,182.2 to 1,399.4)               | 542.9<br>(479.3 to 611.8)                      | 70.1<br>(47.4 to 99.4)                  | 2.3<br>(1.2 to 3.4)                               | -11.4<br>(-12.2 to -10.5)                           |
| Pedestrian road injuries                      | 296.2<br>(256.4 to 341.8)                     | 87.0<br>(73.0 to 102.2)                        | 16.1<br>(10.7 to 22.9)                  | -1.9<br>(-3.5 to -0.4)                            | -15.0<br>(-16.1 to -13.9)                           |
| Cyclist road injuries                         | 157.8<br>(131.9 to 188.3)                     | 68.9<br>(53.4 to 85.8)                         | 7.8<br>(5.1 to 11.3)                    | 24.3<br>(22.4 to 26.1)                            | 8.1<br>(6.7 to 9.6)                                 |
| Motorcyclist road injuries                    | 116.5<br>(97.6 to 141.4)                      | 31.2<br>(24.4 to 39.3)                         | 5.9<br>(3.9 to 8.6)                     | 10.1<br>(8.4 to 11.9)                             | -3.1<br>(-4.5 to -1.7)                              |
| Motor vehicle road injuries                   | 627.3<br>(525.6 to 722.3)                     | 308.8<br>(264.7 to 356.4)                      | 35.9<br>(24.5 to 49.8)                  | -2.6<br>(-3.6 to -1.5)                            | -15.7<br>(-16.6 to -14.8)                           |
| Other road injuries                           | 90.6<br>(77.5 to 107.1)                       | 47.0<br>(36.2 to 60.0)                         | 4.4<br>(2.9 to 6.5)                     | 21.5<br>(19.9 to 23.1)                            | 4.6<br>(3.3 to 5.8)                                 |
| Other transport injuries                      | 213.3<br>(179.3 to 255.5)                     | 53.0<br>(45.1 to 62.8)                         | 12.1<br>(8.1 to 17.1)                   | 14.0<br>(11.8 to 15.9)                            | 0.4<br>(-1.4 to 1.9)                                |
| <b>Unintentional injuries</b>                 | <b>5,789.7</b><br><b>(5,388.2 to 6,266.1)</b> | <b>2,722.0</b><br><b>(2,561.7 to 2,891.0)</b>  | <b>192.8</b><br><b>(129.1 to 275.3)</b> | <b>14.2</b><br><b>(12.7 to 15.5)</b>              | <b>0.4</b><br><b>(-0.7 to 1.5)</b>                  |
| Falls                                         | 1,459.5<br>(1,262.4 to 1,669.3)               | 685.1<br>(587.0 to 808.1)                      | 60.1<br>(41.2 to 83.8)                  | 21.4<br>(19.6 to 23.1)                            | 3.8<br>(2.2 to 5.1)                                 |
| Drowning                                      | 23.6<br>(20.6 to 27.1)                        | 5.0<br>(4.4 to 5.6)                            | 1.3<br>(0.9 to 1.9)                     | 1.7<br>(-0.4 to 3.6)                              | -11.9<br>(-13.5 to -10.5)                           |
| Fire, heat, and hot substances                | 840.4<br>(719.5 to 1,000.5)                   | 115.4<br>(98.7 to 131.2)                       | 22.0<br>(15.0 to 32.1)                  | 1.6<br>(-0.2 to 3.6)                              | -10.3<br>(-11.9 to -8.4)                            |
| Poisonings                                    | 21.9<br>(17.9 to 26.3)                        | 29.5<br>(23.9 to 36.2)                         | 2.1<br>(1.4 to 3.2)                     | 28.1<br>(23.5 to 32.9)                            | 15.2<br>(11.1 to 19.1)                              |
| Exposure to mechanical forces                 | 1,205.4<br>(1,019.7 to 1,479.0)               | 493.0<br>(422.7 to 564.2)                      | 30.1<br>(19.8 to 44.1)                  | 4.2<br>(2.5 to 5.8)                               | -7.6<br>(-9.0 to -6.4)                              |
| Unintentional firearm injuries                | 39.6<br>(32.4 to 49.1)                        | 11.3<br>(8.1 to 15.7)                          | 1.7<br>(1.1 to 2.5)                     | 12.0<br>(10.1 to 13.8)                            | -1.4<br>(-2.8 to -0.1)                              |
| Unintentional suffocation                     | 97.7<br>(75.2 to 124.0)                       | 22.3<br>(17.0 to 28.9)                         | 3.4<br>(2.2 to 5.2)                     | 3.8<br>(2.1 to 5.4)                               | -7.3<br>(-8.6 to -6.1)                              |
| Other exposure to mechanical forces           | 1,068.0<br>(888.8 to 1,331.3)                 | 459.4<br>(395.6 to 526.7)                      | 25.0<br>(16.6 to 36.4)                  | 3.8<br>(2.0 to 5.4)                               | -8.1<br>(-9.5 to -6.8)                              |

| Cause                                                                               | Prevalence in thousands (95% UI)              | Incidence in thousands (95% UI)          | YLDs in thousands (95% UI)           |                                                   |                                                     |
|-------------------------------------------------------------------------------------|-----------------------------------------------|------------------------------------------|--------------------------------------|---------------------------------------------------|-----------------------------------------------------|
|                                                                                     | 2016 counts                                   | 2016 counts                              | 2016 counts                          | Percentage change in counts between 2006 and 2016 | Percentage change in age-standardised rates between |
| Adverse effects of medical treatment                                                | 19.8<br>(15.6 to 25.0)                        | 259.5<br>(221.7 to 300.6)                | 2.6<br>(1.6 to 4.0)                  | 15.8<br>(11.0 to 21.4)                            | 2.0<br>(-2.3 to 7.3)                                |
| Animal contact                                                                      | 341.7<br>(294.7 to 403.3)                     | 412.9<br>(346.6 to 483.8)                | 11.1<br>(7.4 to 15.6)                | 18.5<br>(15.6 to 21.6)                            | 5.3<br>(3.0 to 7.8)                                 |
| Venomous animal contact                                                             | 114.8<br>(93.1 to 139.0)                      | 156.2<br>(121.8 to 200.8)                | 7.2<br>(4.8 to 10.3)                 | 23.5<br>(19.1 to 27.9)                            | 11.3<br>(7.8 to 14.9)                               |
| Non-venomous animal contact                                                         | 226.9<br>(186.2 to 287.5)                     | 256.7<br>(211.3 to 308.1)                | 3.9<br>(2.5 to 5.9)                  | 10.2<br>(6.9 to 13.1)                             | -3.6<br>(-6.3 to -1.2)                              |
| Foreign body                                                                        | 511.6<br>(417.6 to 606.2)                     | 291.1<br>(253.8 to 336.5)                | 19.7<br>(12.7 to 28.9)               | 10.2<br>(7.8 to 12.5)                             | -0.1<br>(-2.1 to 1.7)                               |
| Pulmonary aspiration and foreign body in airway                                     | 237.2<br>(179.6 to 314.6)                     | 86.0<br>(73.3 to 102.5)                  | 10.7<br>(6.9 to 15.9)                | 5.1<br>(3.0 to 7.0)                               | -4.6<br>(-6.3 to -3.1)                              |
| Foreign body in eyes                                                                | 21.5<br>(12.1 to 32.2)                        | 111.7<br>(85.5 to 149.0)                 | 1.2<br>(0.6 to 2.0)                  | 13.6<br>(11.1 to 16.4)                            | 2.0<br>(0.7 to 3.2)                                 |
| Foreign body in other body part                                                     | 252.9<br>(194.8 to 329.5)                     | 93.4<br>(76.6 to 113.9)                  | 7.8<br>(5.0 to 11.5)                 | 17.5<br>(14.3 to 20.3)                            | 6.7<br>(4.0 to 8.9)                                 |
| Environmental heat and cold exposure                                                | 550.1<br>(447.8 to 705.3)                     | 144.5<br>(117.7 to 174.6)                | 20.7<br>(13.6 to 30.1)               | 18.9<br>(16.9 to 20.7)                            | 5.3<br>(3.6 to 6.9)                                 |
| Other unintentional injuries                                                        | 815.6<br>(628.1 to 1,053.5)                   | 286.1<br>(234.0 to 349.9)                | 23.0<br>(14.9 to 33.6)               | 22.1<br>(20.5 to 23.5)                            | 8.5<br>(7.1 to 9.8)                                 |
| <b>Self-harm and interpersonal violence</b>                                         | <b>2,222.9</b><br><b>(2,021.7 to 2,436.7)</b> | <b>552.0†</b><br><b>(480.4 to 629.7)</b> | <b>48.5</b><br><b>(33.3 to 67.7)</b> | <b>1.5</b><br><b>(0.4 to 2.5)</b>                 | <b>-10.6</b><br><b>(-11.5 to -9.8)</b>              |
| Self-harm                                                                           | 68.8<br>(58.6 to 79.7)                        | 36.9<br>(31.3 to 43.2)                   | 3.3<br>(2.2 to 4.9)                  | 1.8<br>(0.0 to 3.6)                               | -13.6<br>(-15.0 to -12.3)                           |
| Self-harm by firearm                                                                | 3.2<br>(2.8 to 3.6)                           | 1.3<br>(0.8 to 1.9)                      | 0.1<br>(0.1 to 0.2)                  | 5.2<br>(3.1 to 7.3)                               | -11.3<br>(-12.8 to -9.7)                            |
| Self-harm by other specified means                                                  | 65.6<br>(55.3 to 76.4)                        | 35.6<br>(29.9 to 41.7)                   | 3.2<br>(2.1 to 4.7)                  | 1.7<br>(-0.1 to 3.5)                              | -13.7<br>(-15.1 to -12.4)                           |
| Interpersonal violence                                                              | 2,154.1<br>(1,952.3 to 2,369.4)               | 515.0†<br>(442.7 to 592.1)               | 45.1<br>(31.2 to 62.6)               | 1.4<br>(0.4 to 2.5)                               | -10.4<br>(-11.2 to -9.5)                            |
| Assault by firearm                                                                  | 20.8<br>(17.8 to 24.5)                        | 7.9<br>(6.0 to 10.6)                     | 1.0<br>(0.7 to 1.5)                  | -14.7<br>(-16.2 to -13.2)                         | -26.5<br>(-27.6 to -25.4)                           |
| Assault by sharp object                                                             | 365.8<br>(301.9 to 438.5)                     | 179.3<br>(144.1 to 216.7)                | 11.8<br>(7.9 to 17.0)                | 3.1<br>(1.4 to 4.8)                               | -10.9<br>(-12.2 to -9.8)                            |
| Sexual violence                                                                     | 1,248.0<br>(1,079.4 to 1,435.4)               | --                                       | 10.6<br>(7.0 to 15.0)                | 1.2<br>(-0.7 to 3.1)                              | -7.0<br>(-8.2 to -5.7)                              |
| Assault by other means                                                              | 519.4<br>(438.8 to 622.0)                     | 327.8<br>(279.7 to 379.2)                | 21.7<br>(14.6 to 31.0)               | 1.6<br>(0.4 to 2.9)                               | -10.5<br>(-11.4 to -9.5)                            |
| <b>Forces of nature, conflict and terrorism, and executions and police conflict</b> | <b>150.6</b><br><b>(87.1 to 240.4)</b>        | <b>0.6†</b><br><b>(0.4 to 0.8)</b>       | <b>4.3</b><br><b>(1.1 to 11.8)</b>   | <b>-19.1</b><br><b>(-25.2 to -16.5)</b>           | <b>-22.3</b><br><b>(-27.5 to -19.9)</b>             |
| Exposure to forces of nature                                                        | 14.6<br>(7.0 to 25.3)                         | --                                       | 0.5<br>(0.1 to 1.4)                  | 2.7<br>(-34.9 to 18.4)                            | -3.9<br>(-36.9 to 9.4)                              |
| Conflict and terrorism                                                              | 133.3<br>(73.4 to 220.0)                      | --                                       | 3.7<br>(0.9 to 10.3)                 | -21.8<br>(-25.0 to -19.6)                         | -24.5<br>(-27.3 to -22.5)                           |
| Executions and police conflict                                                      | 2.6<br>(1.3 to 4.8)                           | 0.6<br>(0.4 to 0.8)                      | 0.1<br>(< 0.05 to 0.2)               | -2.4<br>(-7.6 to 7.1)                             | -10.7<br>(-15.5 to -0.5)                            |
| <b>Impairments</b>                                                                  | --                                            | --                                       | --                                   | --                                                | --                                                  |
| Anaemia                                                                             | 15,752.8<br>(15,124.9 to 16,400.5)            | --                                       | 1,000.7<br>(723.4 to 1,313.3)        | -6.2<br>(-21.1 to 7.9)                            | -15.9<br>(-29.7 to -2.1)                            |
| Developmental intellectual disability                                               | 1,385.1<br>(1,048.9 to 1,720.2)               | --                                       | 141.2<br>(100.9 to 194.0)            | 11.3<br>(5.4 to 20.6)                             | 5.3<br>(-0.3 to 14.4)                               |
| Epilepsy                                                                            | 575.7<br>(468.0 to 700.8)                     | --                                       | 178.2<br>(124.5 to 246.9)            | 17.4<br>(-12.8 to 57.9)                           | 7.7<br>(-20.3 to 45.0)                              |
| Guillain-Barre syndrome                                                             | 0.4<br>(0.3 to 0.5)                           | --                                       | 0.1<br>(0.1 to 0.2)                  | 9.0<br>(6.0 to 11.9)                              | 0.0<br>(-0.1 to 0.1)                                |
| Hearing loss                                                                        | 9,382.3<br>(9,000.1 to 9,798.9)               | --                                       | 361.1<br>(256.4 to 488.9)            | 8.7<br>(6.5 to 10.7)                              | -4.1<br>(-5.7 to -2.6)                              |
| Heart failure                                                                       | 271.3<br>(240.7 to 303.2)                     | --                                       | 29.1<br>(20.8 to 38.1)               | 18.6<br>(14.6 to 23.1)                            | -2.1<br>(-5.6 to 1.6)                               |
| Infertility                                                                         | 900.6<br>(702.2 to 1,162.0)                   | --                                       | 5.4<br>(2.3 to 10.7)                 | 11.4<br>(6.6 to 16.2)                             | -0.1<br>(-4.3 to 4.6)                               |
| Pelvic inflammatory disease                                                         | 59.8<br>(50.6 to 71.1)                        | --                                       | 7.7<br>(5.1 to 10.9)                 | 8.8<br>(3.1 to 15.2)                              | -4.0<br>(-8.9 to 1.3)                               |
| Vision loss                                                                         | 7,397.6<br>(7,130.9 to 7,670.7)               | --                                       | 169.4<br>(114.8 to 247.8)            | 17.6<br>(13.8 to 24.3)                            | 2.4<br>(-0.6 to 8.1)                                |

We did not calculate incidence for the nine impairments, certain NTDs, and causes with only birth prevalence. Blank cells mean that no estimate is available.

† Incidence for aggregate causes represents the sum of the incidence of the causes below the aggregate.

‡ Incidence estimates for stroke represent first-ever stroke only.

^ Incidence of HIV/AIDS represents new infections of HIV only and does not include new infections of Tuberculosis in HIV positive cases.



SR Table 14: Prevalence, incidence, and YLDs for 2016, percentage change of YLD counts and percentage change of age-standardised YLD rates between 2006 and 2016 by cause and impairments, for all ages, South Korea.

| Cause                                                                                | Prevalence in thousands (95% UI)          | Incidence in thousands (95% UI)               | YLDs in thousands (95% UI)             |                                                   |                                                     |
|--------------------------------------------------------------------------------------|-------------------------------------------|-----------------------------------------------|----------------------------------------|---------------------------------------------------|-----------------------------------------------------|
|                                                                                      | 2016 counts                               | 2016 counts                                   | 2016 counts                            | Percentage change in counts between 2006 and 2016 | Percentage change in age-standardised rates between |
| <b>All causes</b>                                                                    | <b>47,316.5</b><br>(47,147.2 to 47,494.5) | <b>280,717.5†</b><br>(263,108.7 to 299,095.8) | <b>5,997.3</b><br>(4,483.6 to 7,769.2) | <b>15.3</b><br>(13.8 to 16.9)                     | <b>-1.2</b><br>(-2.4 to 0.1)                        |
| <b>Communicable, maternal, neonatal, and nutritional disorders</b>                   | <b>21,336.6</b><br>(20,670.5 to 22,055.2) | <b>155,792.5†</b><br>(139,321.4 to 174,932.8) | <b>295.8</b><br>(207.7 to 408.2)       | <b>-4.0</b><br>(-7.8 to -0.3)                     | <b>-5.9</b><br>(-9.9 to -1.8)                       |
| <b>HIV/AIDS and tuberculosis</b>                                                     | <b>5,991.1</b><br>(5,404.7 to 6,495.8)    | <b>44.1†</b><br>(39.0 to 49.6)                | <b>12.5</b><br>(8.1 to 18.2)           | <b>0.4</b><br>(-12.7 to 16.4)                     | <b>-17.3</b><br>(-28.2 to -4.6)                     |
| Tuberculosis                                                                         | 5,551.1<br>(4,990.3 to 6,191.8)           | 42.8†<br>(38.1 to 48.3)                       | 8.6<br>(5.7 to 12.1)                   | -14.1<br>(-25.7 to -0.7)                          | -30.1<br>(-39.4 to -20.0)                           |
| Drug-susceptible tuberculosis                                                        | 28.5<br>(24.9 to 33.2)                    | 42.1<br>(37.5 to 47.4)                        | 8.5<br>(5.6 to 11.9)                   | -13.8<br>(-25.5 to -0.7)                          | -29.9<br>(-39.4 to -19.2)                           |
| Multidrug-resistant tuberculosis without extensive drug resistance                   | 0.4<br>(0.3 to 0.7)                       | 0.6<br>(0.4 to 1.0)                           | 0.1<br>(0.1 to 0.2)                    | -30.7<br>(-55.6 to 8.1)                           | -44.1<br>(-64.1 to -12.8)                           |
| Extensively drug-resistant tuberculosis                                              | 0.1<br>(< 0.05 to 0.1)                    | 0.1<br>(< 0.05 to 0.1)                        | < 0.05<br>(< 0.05 to < 0.05)           | 49.1<br>(-4.6 to 132.5)                           | 20.1<br>(-22.9 to 87.6)                             |
| Latent tuberculosis infection                                                        | 5,522.1<br>(4,960.0 to 6,165.8)           | --                                            | --                                     | --                                                | --                                                  |
| HIV/AIDS                                                                             | 38.0<br>(17.0 to 77.4)                    | 1.2^<br>(0.2 to 2.6)                          | 3.9<br>(1.7 to 7.9)                    | 60.1<br>(28.1 to 103.9)                           | 39.7<br>(7.8 to 81.2)                               |
| Drug-susceptible HIV/AIDS - Tuberculosis                                             | 0.4<br>(0.2 to 0.8)                       | 0.7<br>(0.4 to 1.1)                           | 0.2<br>(0.1 to 0.3)                    | -14.1<br>(-20.2 to -7.5)                          | -24.7<br>(-30.0 to -18.9)                           |
| Multidrug-resistant HIV/AIDS - Tuberculosis without extensive drug resistance        | < 0.05<br>(< 0.05 to < 0.05)              | < 0.05<br>(< 0.05 to < 0.05)                  | < 0.05<br>(< 0.05 to < 0.05)           | -32.0<br>(-56.4 to 6.5)                           | -40.4<br>(-61.7 to -6.7)                            |
| Extensively drug-resistant HIV/AIDS - Tuberculosis                                   | < 0.05<br>(< 0.05 to < 0.05)              | < 0.05<br>(< 0.05 to < 0.05)                  | < 0.05<br>(< 0.05 to < 0.05)           | 46.2<br>(-6.2 to 128.9)                           | 28.2<br>(-17.7 to 100.7)                            |
| HIV/AIDS resulting in other diseases                                                 | 37.5<br>(16.6 to 76.9)                    | 1.2<br>(0.2 to 2.6)                           | 3.7<br>(1.5 to 7.8)                    | 67.5<br>(30.7 to 120.7)                           | 46.1<br>(9.6 to 96.1)                               |
| <b>Diarrhoea, lower respiratory infections, and other common infectious diseases</b> | <b>2,438.1</b><br>(2,259.8 to 2,613.2)    | <b>152,508.5†</b><br>(135,940.3 to 171,474.1) | <b>72.1</b><br>(46.4 to 107.2)         | <b>1.8</b><br>(-2.1 to 7.1)                       | <b>-1.2</b><br>(-4.8 to 3.3)                        |
| Diarrhoeal diseases                                                                  | 28.3<br>(26.3 to 30.4)                    | 1,880.6<br>(1,750.1 to 2,027.4)               | 3.2<br>(2.1 to 4.4)                    | 16.6<br>(1.8 to 33.8)                             | 12.7<br>(-1.7 to 29.4)                              |
| Intestinal infectious diseases                                                       | < 0.05<br>(< 0.05 to < 0.05)              | 0.2†<br>(0.2 to 0.3)                          | < 0.05<br>(< 0.05 to < 0.05)           | -40.1<br>(-50.1 to -27.6)                         | -48.0<br>(-56.9 to -38.0)                           |
| Typhoid fever                                                                        | < 0.05<br>(< 0.05 to < 0.05)              | 0.1<br>(< 0.05 to 0.1)                        | < 0.05<br>(< 0.05 to < 0.05)           | -59.0<br>(-67.1 to -49.2)                         | -63.8<br>(-71.1 to -55.4)                           |
| Paratyphoid fever                                                                    | < 0.05<br>(< 0.05 to < 0.05)              | 0.2<br>(0.1 to 0.2)                           | < 0.05<br>(< 0.05 to < 0.05)           | 28.7<br>(2.3 to 60.9)                             | 9.4<br>(-11.2 to 34.6)                              |
| Other intestinal infectious diseases                                                 | --                                        | --                                            | < 0.05<br>(< 0.05 to < 0.05)           | -47.8<br>(-60.7 to -30.7)                         | -50.6<br>(-64.9 to -29.9)                           |
| Lower respiratory infections                                                         | 36.9<br>(33.6 to 40.4)                    | 1,682.4<br>(1,534.6 to 1,837.5)               | 2.2<br>(1.4 to 3.2)                    | 15.7<br>(3.4 to 30.8)                             | 5.9<br>(-6.4 to 19.6)                               |
| Upper respiratory infections                                                         | 1,937.5<br>(1,724.8 to 2,173.5)           | 146,895.5<br>(130,209.6 to 165,775.8)         | 48.0<br>(28.4 to 74.1)                 | 1.4<br>(-4.0 to 7.2)                              | 0.2<br>(-4.8 to 5.2)                                |
| Otitis media                                                                         | 343.4<br>(305.9 to 382.6)                 | 978.3<br>(829.3 to 1,157.0)                   | 10.3<br>(6.6 to 15.4)                  | -6.2<br>(-13.8 to 2.1)                            | -7.0<br>(-15.0 to 1.8)                              |
| Meningitis                                                                           | 3.6<br>(2.2 to 17.5)                      | 0.4<br>(0.3 to 0.4)                           | 0.5<br>(0.2 to 2.5)                    | 33.1<br>(-16.9 to 563.2)                          | 13.8<br>(-24.2 to 404.9)                            |
| Pneumococcal meningitis                                                              | 1.0<br>(0.9 to 1.2)                       | < 0.05<br>(< 0.05 to 0.1)                     | 0.1<br>(0.1 to 0.2)                    | -18.4<br>(-27.5 to -9.8)                          | -25.0<br>(-32.8 to -17.7)                           |
| H influenzae type B meningitis                                                       | 0.3<br>(0.2 to 0.4)                       | < 0.05<br>(< 0.05 to < 0.05)                  | 0.1<br>(< 0.05 to 0.1)                 | -18.5<br>(-28.7 to -9.1)                          | -27.2<br>(-36.9 to -18.7)                           |
| Meningococcal infection                                                              | 1.3<br>(0.2 to 14.8)                      | < 0.05<br>(< 0.05 to < 0.05)                  | 0.2<br>(< 0.05 to 2.2)                 | 400.4<br>(-4.8 to 4,273.2)                        | 298.3<br>(-14.6 to 3,025.3)                         |
| Other meningitis                                                                     | 1.0<br>(0.7 to 1.3)                       | 0.3<br>(0.2 to 0.3)                           | 0.1<br>(0.1 to 0.1)                    | -1.4<br>(-9.7 to 8.2)                             | -9.7<br>(-17.1 to -0.7)                             |
| Encephalitis                                                                         | 34.9<br>(23.4 to 50.8)                    | 21.9<br>(19.6 to 24.4)                        | 3.7<br>(2.5 to 5.0)                    | 5.2<br>(-3.4 to 15.4)                             | -6.7<br>(-13.1 to 0.8)                              |
| Diphtheria                                                                           | < 0.05<br>(< 0.05 to < 0.05)              | < 0.05<br>(< 0.05 to < 0.05)                  | < 0.05<br>(< 0.05 to < 0.05)           | -26.9<br>(-66.8 to 50.1)                          | -35.2<br>(-67.4 to 24.5)                            |
| Whooping cough                                                                       | 0.7<br>(0.5 to 0.9)                       | 4.7<br>(3.5 to 6.4)                           | < 0.05<br>(< 0.05 to 0.1)              | -71.5<br>(-82.6 to -56.0)                         | -69.4<br>(-81.2 to -52.9)                           |
| Tetanus                                                                              | < 0.05<br>(< 0.05 to < 0.05)              | < 0.05<br>(< 0.05 to < 0.05)                  | < 0.05<br>(< 0.05 to < 0.05)           | -12.7<br>(-29.2 to 4.2)                           | -18.8<br>(-33.1 to -3.3)                            |
| Measles                                                                              | < 0.05<br>(< 0.05 to < 0.05)              | < 0.05<br>(< 0.05 to < 0.05)                  | < 0.05<br>(< 0.05 to < 0.05)           | -44.6<br>(-88.7 to 80.2)                          | -39.7<br>(-87.7 to 96.2)                            |
| Varicella and herpes zoster                                                          | 84.6<br>(76.4 to 93.5)                    | 1,044.4<br>(984.4 to 1,103.5)                 | 4.1<br>(2.5 to 6.3)                    | 8.5<br>(-4.0 to 21.4)                             | -9.2<br>(-19.5 to 1.6)                              |
| <b>Neglected tropical diseases and malaria</b>                                       | <b>1,718.4</b><br>(1,597.8 to 1,858.6)    | <b>68.5†</b><br>(60.7 to 77.9)                | <b>41.1</b><br>(24.8 to 63.5)          | <b>6.2</b><br>(-0.2 to 12.6)                      | <b>-1.8</b><br>(-7.4 to 3.9)                        |
| Malaria                                                                              | < 0.05<br>(< 0.05 to < 0.05)              | 0.2<br>(0.2 to 0.2)                           | < 0.05<br>(< 0.05 to < 0.05)           | -85.1<br>(-85.1 to -85.1)                         | -83.1<br>(-83.2 to -83.0)                           |
| Chagas disease                                                                       | --                                        | --                                            | --                                     | --                                                | --                                                  |
| Leishmaniasis                                                                        | --                                        | --                                            | --                                     | --                                                | --                                                  |
| Visceral leishmaniasis                                                               | --                                        | --                                            | --                                     | --                                                | --                                                  |
| Cutaneous and mucocutaneous leishmaniasis                                            | --                                        | --                                            | --                                     | --                                                | --                                                  |
| African trypanosomiasis                                                              | --                                        | --                                            | --                                     | --                                                | --                                                  |
| Schistosomiasis                                                                      | --                                        | --                                            | --                                     | --                                                | --                                                  |
| Cysticercosis                                                                        | 1.9<br>(0.4 to 3.7)                       | --                                            | 0.2<br>(< 0.05 to 0.6)                 | 2.6<br>(-78.0 to 367.3)                           | -15.4<br>(-82.1 to 281.4)                           |
| Cystic echinococcosis                                                                | 0.1<br>(< 0.05 to 0.7)                    | < 0.05<br>(< 0.05 to 0.1)                     | < 0.05<br>(< 0.05 to 0.1)              | -47.6<br>(-97.1 to 639.3)                         | -53.6<br>(-97.4 to 503.9)                           |
| Lymphatic filariasis                                                                 | 117.1<br>(44.5 to 243.1)                  | --                                            | 13.4<br>(4.6 to 30.9)                  | 11.8<br>(2.6 to 20.9)                             | 0.9<br>(-7.6 to 9.8)                                |
| Onchocerciasis                                                                       | --                                        | --                                            | --                                     | --                                                | --                                                  |
| Trachoma                                                                             | --                                        | --                                            | --                                     | --                                                | --                                                  |
| Dengue                                                                               | --                                        | --                                            | --                                     | --                                                | --                                                  |
| Yellow fever                                                                         | --                                        | --                                            | --                                     | --                                                | --                                                  |
| Rabies                                                                               | < 0.05<br>(< 0.05 to < 0.05)              | < 0.05<br>(< 0.05 to < 0.05)                  | < 0.05<br>(< 0.05 to < 0.05)           | -35.1<br>(-60.7 to 34.0)                          | -46.8<br>(-65.3 to -14.1)                           |
| Intestinal nematode infections                                                       | 259.2<br>(192.9 to 342.7)                 | --                                            | 0.2<br>(0.1 to 0.3)                    | 14.5<br>(-33.4 to 99.2)                           | 3.4<br>(-38.9 to 78.7)                              |
| Ascariasis                                                                           | 28.8<br>(19.0 to 41.6)                    | --                                            | --                                     | --                                                | --                                                  |

| Cause                                                                   | Prevalence in thousands (95% UI)                 | Incidence in thousands (95% UI)                      | YLDs in thousands (95% UI)                    |                                                   |                                                     |
|-------------------------------------------------------------------------|--------------------------------------------------|------------------------------------------------------|-----------------------------------------------|---------------------------------------------------|-----------------------------------------------------|
|                                                                         | 2016 counts<br>(112.9 to 268.3)                  | 2016 counts                                          | 2016 counts                                   | Percentage change in counts between 2006 and 2016 | Percentage change in age-standardised rates between |
| Trichuriasis                                                            | 175.8<br>(112.9 to 268.3)                        | --                                                   | < 0.05<br>(< 0.05 to < 0.05)                  | 17.5<br>(-97.0 to 4,106.0)                        | 7.6<br>(-96.8 to 3,254.6)                           |
| Hookworm disease                                                        | 47.1<br>(31.8 to 67.9)                           | --                                                   | 0.2<br>(0.1 to 0.3)                           | 14.5<br>(-33.4 to 99.2)                           | 3.4<br>(-38.9 to 78.7)                              |
| Food-borne trematodiasis                                                | 1,254.3<br>(1,126.6 to 1,393.0)                  | 68.2<br>(60.4 to 77.6)                               | 24.7<br>(16.0 to 35.0)                        | 6.2<br>(-2.0 to 14.8)                             | -2.3<br>(-9.5 to 5.2)                               |
| Leprosy                                                                 | 0.5<br>(0.4 to 0.8)                              | < 0.05<br>(< 0.05 to < 0.05)                         | < 0.05<br>(< 0.05 to 0.1)                     | -15.0<br>(-18.3 to -10.1)                         | -37.1<br>(-40.5 to -32.3)                           |
| Ebola virus disease                                                     | --                                               | --                                                   | --                                            | --                                                | --                                                  |
| Zika virus disease                                                      | --                                               | --                                                   | --                                            | --                                                | --                                                  |
| Guinea worm disease                                                     | --                                               | --                                                   | --                                            | --                                                | --                                                  |
| Other neglected tropical diseases                                       | 144.3<br>(131.9 to 157.4)                        | --                                                   | 2.6<br>(1.6 to 4.1)                           | -15.0<br>(-27.1 to -0.1)                          | -4.8<br>(-20.2 to 14.8)                             |
| <b>Maternal disorders</b>                                               | <b>22.9</b><br><b>(18.3 to 28.4)</b>             | <b>476.8†</b><br><b>(352.6 to 627.5)</b>             | <b>1.2</b><br><b>(0.7 to 1.9)</b>             | <b>-9.3</b><br><b>(-36.5 to 27.0)</b>             | <b>-5.2</b><br><b>(-33.8 to 34.1)</b>               |
| Maternal haemorrhage                                                    | 3.4<br>(2.4 to 4.6)                              | 7.5<br>(5.1 to 11.0)                                 | 0.1<br>(< 0.05 to 0.1)                        | -8.4<br>(-44.6 to 49.1)                           | -5.9<br>(-43.4 to 54.0)                             |
| Maternal sepsis and other pregnancy related infections                  | 7.9<br>(6.6 to 9.3)                              | 19.0<br>(13.5 to 26.8)                               | 0.1<br>(< 0.05 to 0.2)                        | -6.2<br>(-54.8 to 98.8)                           | -4.6<br>(-54.4 to 107.4)                            |
| Maternal hypertensive disorders                                         | 9.4<br>(5.6 to 14.3)                             | 38.4<br>(27.4 to 53.4)                               | 0.5<br>(0.2 to 0.8)                           | -5.2<br>(-46.1 to 74.3)                           | -0.2<br>(-43.2 to 83.2)                             |
| Maternal obstructed labour and uterine rupture                          | 0.1<br>(0.1 to 0.2)                              | 8.9<br>(5.8 to 12.7)                                 | < 0.05<br>(< 0.05 to 0.1)                     | -6.9<br>(-50.1 to 81.2)                           | -2.3<br>(-47.2 to 90.4)                             |
| Maternal abortion, miscarriage, and ectopic pregnancy                   | 3.3<br>(1.9 to 5.0)                              | 403.0<br>(280.8 to 553.9)                            | 0.4<br>(0.2 to 0.7)                           | -12.8<br>(-57.6 to 75.2)                          | -8.7<br>(-55.5 to 83.1)                             |
| Other maternal disorders                                                | --                                               | --                                                   | 0.2<br>(0.1 to 0.3)                           | -14.2<br>(-39.9 to 20.7)                          | -10.4<br>(-37.4 to 27.1)                            |
| <b>Neonatal disorders</b>                                               | <b>310.9</b><br><b>(258.1 to 395.8)</b>          | --                                                   | <b>53.9</b><br><b>(37.9 to 75.0)</b>          | <b>-5.8</b><br><b>(-16.7 to 6.9)</b>              | <b>-6.7</b><br><b>(-18.1 to 6.1)</b>                |
| Neonatal preterm birth complications                                    | 268.0<br>(205.5 to 361.6)                        | --                                                   | 26.8<br>(17.7 to 38.5)                        | -11.7<br>(-29.8 to 8.8)                           | -12.1<br>(-30.4 to 8.6)                             |
| Neonatal encephalopathy due to birth asphyxia and trauma                | 61.4<br>(43.9 to 85.9)                           | --                                                   | 12.4<br>(7.4 to 19.4)                         | -0.0<br>(-15.6 to 28.4)                           | -1.7<br>(-17.2 to 25.9)                             |
| Neonatal sepsis and other neonatal infections                           | 32.9<br>(15.4 to 67.7)                           | --                                                   | 13.3<br>(5.4 to 29.7)                         | 2.8<br>(-14.0 to 24.4)                            | 1.2<br>(-15.5 to 22.8)                              |
| Hemolytic disease and other neonatal jaundice                           | 2.3<br>(1.9 to 2.7)                              | --                                                   | 0.7<br>(0.5 to 0.9)                           | -5.1<br>(-14.3 to 4.0)                            | -7.5<br>(-16.3 to 1.3)                              |
| Other neonatal disorders                                                | --                                               | --                                                   | 0.7<br>(0.5 to 1.1)                           | -12.0<br>(-29.5 to 7.9)                           | -7.3<br>(-25.5 to 13.6)                             |
| <b>Nutritional deficiencies</b>                                         | <b>5,106.6</b><br><b>(4,850.5 to 5,307.2)</b>    | <b>105.2†</b><br><b>(80.5 to 132.7)</b>              | <b>105.1</b><br><b>(69.9 to 154.6)</b>        | <b>-10.6</b><br><b>(-16.6 to -4.8)</b>            | <b>-8.9</b><br><b>(-15.6 to -1.8)</b>               |
| Protein-energy malnutrition                                             | 32.1<br>(24.0 to 42.0)                           | 22.0<br>(16.5 to 28.4)                               | 2.0<br>(1.1 to 3.0)                           | -7.9<br>(-35.7 to 30.2)                           | -3.1<br>(-32.2 to 36.6)                             |
| Iodine deficiency                                                       | 381.7<br>(336.9 to 433.2)                        | 5.2<br>(4.7 to 5.8)                                  | 9.7<br>(6.4 to 13.7)                          | 9.3<br>(-2.3 to 21.6)                             | -1.1<br>(-11.9 to 10.2)                             |
| Vitamin A deficiency                                                    | 93.2<br>(66.4 to 124.2)                          | 78.1<br>(55.1 to 105.8)                              | --                                            | --                                                | --                                                  |
| Iron-deficiency anaemia                                                 | 4,599.6<br>(4,348.6 to 4,865.6)                  | --                                                   | 93.4<br>(61.4 to 138.4)                       | -12.3<br>(-18.8 to -6.3)                          | -9.7<br>(-17.2 to -1.9)                             |
| Other nutritional deficiencies                                          | --                                               | --                                                   | 0.1<br>(< 0.05 to 0.1)                        | -7.9<br>(-36.4 to 31.0)                           | -3.3<br>(-33.1 to 37.2)                             |
| <b>Other communicable, maternal, neonatal, and nutritional diseases</b> | <b>10,950.7</b><br><b>(10,256.7 to 11,786.3)</b> | <b>2,589.4</b><br><b>(2,352.7 to 2,839.5)</b>        | <b>9.7</b><br><b>(5.3 to 17.1)</b>            | <b>-1.3</b><br><b>(-7.3 to 4.7)</b>               | <b>-0.8</b><br><b>(-7.5 to 6.9)</b>                 |
| Sexually transmitted diseases excluding HIV                             | 8,480.2<br>(7,814.7 to 9,270.7)                  | 2,363.6<br>(2,127.4 to 2,608.6)                      | 6.2<br>(3.0 to 12.1)                          | 2.6<br>(-5.6 to 11.5)                             | 0.3<br>(-7.1 to 9.2)                                |
| Syphilis                                                                | 240.7<br>(182.3 to 315.5)                        | 247.5<br>(175.6 to 339.8)                            | 0.1<br>(0.1 to 0.2)                           | 16.6<br>(0.8 to 34.5)                             | -1.5<br>(-14.0 to 12.4)                             |
| Chlamydial infection                                                    | 756.6<br>(604.4 to 934.4)                        | 548.3<br>(431.6 to 683.0)                            | 1.6<br>(0.8 to 3.0)                           | -8.5<br>(-21.5 to 8.9)                            | -5.0<br>(-18.3 to 11.8)                             |
| Gonococcal infection                                                    | 112.8<br>(86.4 to 148.9)                         | 376.5<br>(281.6 to 514.2)                            | 0.6<br>(0.3 to 1.0)                           | 25.4<br>(-9.3 to 75.6)                            | 32.5<br>(-6.8 to 90.3)                              |
| Trichomoniasis                                                          | 1,095.5<br>(956.5 to 1,249.2)                    | 911.8<br>(789.7 to 1,040.8)                          | 1.1<br>(0.4 to 2.4)                           | 1.8<br>(-5.3 to 10.2)                             | -3.1<br>(-9.9 to 4.3)                               |
| Genital herpes                                                          | 6,660.2<br>(5,695.2 to 7,767.8)                  | 265.7<br>(225.1 to 314.8)                            | 1.7<br>(0.5 to 3.9)                           | 11.6<br>(1.8 to 21.1)                             | -2.3<br>(-10.7 to 6.6)                              |
| Other sexually transmitted diseases                                     | 27.6<br>(24.0 to 30.2)                           | 13.7<br>(11.3 to 16.4)                               | 1.1<br>(0.6 to 1.9)                           | -2.2<br>(-13.2 to 11.2)                           | 1.8<br>(-9.6 to 15.3)                               |
| Hepatitis                                                               | 2,992.0<br>(2,584.6 to 3,469.0)                  | 225.8<br>(195.1 to 257.4)                            | 0.3<br>(0.2 to 0.4)                           | -17.3<br>(-26.2 to -8.2)                          | -28.6<br>(-36.4 to -21.1)                           |
| Acute hepatitis A                                                       | 6.8<br>(5.2 to 8.0)                              | 89.0<br>(67.9 to 103.4)                              | 0.1<br>(0.1 to 0.2)                           | -17.8<br>(-30.2 to -2.0)                          | -28.1<br>(-39.6 to -14.5)                           |
| Hepatitis B                                                             | 2,223.7<br>(1,836.5 to 2,686.2)                  | 121.4<br>(96.2 to 151.4)                             | 0.1<br>(0.1 to 0.2)                           | -19.3<br>(-33.5 to -4.5)                          | -31.3<br>(-41.9 to -18.7)                           |
| Hepatitis C                                                             | 761.0<br>(683.6 to 838.2)                        | 9.0<br>(8.1 to 10.1)                                 | < 0.05<br>(< 0.05 to < 0.05)                  | -5.5<br>(-6.7 to -4.4)                            | -6.8<br>(-8.6 to -5.1)                              |
| Acute hepatitis E                                                       | 0.5<br>(0.4 to 0.6)                              | 6.4<br>(4.6 to 8.4)                                  | < 0.05<br>(< 0.05 to < 0.05)                  | 3.9<br>(-11.4 to 21.3)                            | -23.2<br>(-32.3 to -13.2)                           |
| Other infectious diseases                                               | 123.9<br>(115.0 to 133.6)                        | 0.1<br>(< 0.05 to 0.1)                               | 3.2<br>(2.0 to 5.0)                           | -6.6<br>(-15.1 to 3.7)                            | -0.1<br>(-11.4 to 14.1)                             |
| <b>Non-communicable diseases</b>                                        | <b>45,671.1</b><br><b>(45,451.2 to 45,894.7)</b> | <b>119,446.2†</b><br><b>(114,714.9 to 124,589.2)</b> | <b>5,207.4</b><br><b>(3,906.4 to 6,722.1)</b> | <b>16.6</b><br><b>(14.8 to 18.3)</b>              | <b>-0.4</b><br><b>(-1.8 to 1.1)</b>                 |
| <b>Neoplasms</b>                                                        | <b>613.4</b><br><b>(589.6 to 634.8)</b>          | <b>219.0</b><br><b>(205.3 to 229.9)</b>              | <b>68.0</b><br><b>(50.2 to 89.0)</b>          | <b>54.7</b><br><b>(46.8 to 63.9)</b>              | <b>12.3</b><br><b>(6.1 to 18.7)</b>                 |
| Lip and oral cavity cancer                                              | 7.2<br>(6.5 to 7.9)                              | 1.9<br>(1.7 to 2.1)                                  | 0.7<br>(0.5 to 1.0)                           | 36.2<br>(17.3 to 55.6)                            | -2.2<br>(-15.6 to 11.6)                             |
| Nasopharynx cancer                                                      | 1.2<br>(0.9 to 1.5)                              | 0.4<br>(0.3 to 0.4)                                  | 0.1<br>(0.1 to 0.2)                           | 6.8<br>(-14.5 to 35.3)                            | -14.3<br>(-31.4 to 7.9)                             |
| Other pharynx cancer                                                    | 3.2<br>(2.7 to 3.7)                              | 1.0<br>(0.8 to 1.1)                                  | 0.4<br>(0.2 to 0.5)                           | 56.4<br>(26.9 to 94.0)                            | 11.4<br>(-9.8 to 37.8)                              |
| Oesophageal cancer                                                      | 4.6<br>(4.1 to 5.2)                              | 3.0<br>(2.7 to 3.4)                                  | 0.8<br>(0.5 to 1.1)                           | 51.2<br>(15.2 to 95.5)                            | 3.8<br>(-21.4 to 35.0)                              |
| Stomach cancer                                                          | 70.2<br>(64.1 to 76.4)                           | 31.2<br>(28.7 to 33.7)                               | 8.3<br>(6.1 to 11.0)                          | 37.6<br>(17.8 to 59.3)                            | -2.9<br>(-16.3 to 12.1)                             |
| Colon and rectum cancer                                                 | 124.4<br>(113.6 to 137.1)                        | 31.4<br>(28.7 to 34.5)                               | 11.1<br>(7.9 to 14.7)                         | 65.2<br>(44.5 to 88.2)                            | 14.5<br>(0.6 to 29.6)                               |
| Liver cancer                                                            | 34.9<br>(27.7 to 43.7)                           | 24.1<br>(20.8 to 28.2)                               | 5.6<br>(3.9 to 7.7)                           | 73.2<br>(42.4 to 108.1)                           | 24.6<br>(3.5 to 49.4)                               |
| Liver cancer due to hepatitis B                                         | 22.9<br>(17.9 to 29.0)                           | 13.6<br>(11.4 to 16.2)                               | 3.1<br>(2.1 to 4.4)                           | 69.0<br>(35.2 to 114.2)                           | 24.6<br>(0.1 to 56.2)                               |

| Cause                                              | Prevalence in thousands (95% UI)              | Incidence in thousands (95% UI)          | YLDs in thousands (95% UI)              |                                                   |                                                     |
|----------------------------------------------------|-----------------------------------------------|------------------------------------------|-----------------------------------------|---------------------------------------------------|-----------------------------------------------------|
|                                                    | 2016 counts                                   | 2016 counts                              | 2016 counts                             | Percentage change in counts between 2006 and 2016 | Percentage change in age-standardised rates between |
| Liver cancer due to hepatitis C                    | 8.0<br>(6.2 to 10.4)                          | 4.8<br>(3.9 to 6.0)                      | 1.1<br>(0.7 to 1.6)                     | 87.4<br>(51.0 to 129.0)                           | 27.3<br>(2.6 to 54.5)                               |
| Liver cancer due to alcohol use                    | 4.6<br>(3.3 to 6.2)                           | 2.7<br>(2.1 to 3.6)                      | 0.7<br>(0.4 to 1.0)                     | 59.0<br>(29.1 to 97.4)                            | 13.9<br>(-7.5 to 41.3)                              |
| Liver cancer due to other causes                   | 5.1<br>(3.9 to 6.6)                           | 3.0<br>(2.4 to 3.7)                      | 0.7<br>(0.5 to 1.0)                     | 87.3<br>(52.9 to 128.3)                           | 31.4<br>(7.1 to 60.2)                               |
| Gallbladder and biliary tract cancer               | 5.8<br>(4.7 to 6.7)                           | 6.2<br>(5.1 to 7.1)                      | 1.3<br>(0.9 to 1.8)                     | 37.4<br>(13.7 to 65.7)                            | -9.3<br>(-25.4 to 9.7)                              |
| Pancreatic cancer                                  | 6.7<br>(5.7 to 7.6)                           | 6.8<br>(6.2 to 7.4)                      | 1.4<br>(1.0 to 1.9)                     | 65.1<br>(37.5 to 95.7)                            | 11.1<br>(-7.8 to 31.9)                              |
| Larynx cancer                                      | 7.2<br>(6.4 to 8.1)                           | 1.9<br>(1.7 to 2.1)                      | 0.8<br>(0.5 to 1.1)                     | 21.8<br>(-2.4 to 52.5)                            | -15.4<br>(-32.4 to 5.6)                             |
| Tracheal, bronchus, and lung cancer                | 48.3<br>(43.1 to 54.0)                        | 29.9<br>(27.4 to 32.7)                   | 7.1<br>(5.1 to 9.2)                     | 67.5<br>(44.9 to 94.5)                            | 13.0<br>(-2.3 to 30.4)                              |
| Malignant skin melanoma                            | 5.5<br>(4.0 to 6.2)                           | 1.1<br>(0.8 to 1.3)                      | 0.4<br>(0.2 to 0.5)                     | 71.2<br>(36.9 to 107.2)                           | 30.7<br>(7.1 to 55.5)                               |
| Non-melanoma skin cancer                           | 0.5<br>(0.4 to 0.7)                           | 2.1<br>(1.9 to 2.3)                      | < 0.05<br>( $< 0.05$ to $< 0.05$ )      | 80.3<br>(54.3 to 113.7)                           | 17.9<br>(1.1 to 39.6)                               |
| Non-melanoma skin cancer (squamous-cell carcinoma) | 0.5<br>(0.4 to 0.7)                           | 0.8<br>(0.7 to 1.0)                      | < 0.05<br>( $< 0.05$ to $< 0.05$ )      | 81.2<br>(52.1 to 117.4)                           | 18.1<br>(-1.0 to 42.0)                              |
| Non-melanoma skin cancer (basal-cell carcinoma)    | 0.2<br>(0.1 to 0.3)                           | 1.3<br>(1.1 to 1.4)                      | < 0.05<br>( $< 0.05$ to $< 0.05$ )      | 70.0<br>(56.0 to 89.6)                            | 15.5<br>(6.5 to 28.2)                               |
| Breast cancer                                      | 85.3<br>(72.2 to 99.8)                        | 16.1<br>(11.6 to 19.5)                   | 7.7<br>(5.2 to 11.0)                    | 38.8<br>(18.9 to 64.8)                            | 7.0<br>(-8.0 to 26.1)                               |
| Cervical cancer                                    | 15.0<br>(11.4 to 18.7)                        | 3.7<br>(2.8 to 4.6)                      | 1.4<br>(0.9 to 2.0)                     | -0.3<br>(-19.7 to 22.6)                           | -18.8<br>(-34.5 to -0.1)                            |
| Uterine cancer                                     | 13.5<br>(10.6 to 17.4)                        | 2.8<br>(2.2 to 3.6)                      | 1.0<br>(0.7 to 1.6)                     | 59.9<br>(21.7 to 109.3)                           | 19.9<br>(-7.1 to 56.7)                              |
| Ovarian cancer                                     | 7.9<br>(6.6 to 9.1)                           | 2.4<br>(2.0 to 2.7)                      | 1.1<br>(0.7 to 1.6)                     | 36.0<br>(5.4 to 73.4)                             | 6.1<br>(-17.6 to 33.5)                              |
| Prostate cancer                                    | 46.8<br>(28.2 to 58.5)                        | 10.9<br>(7.1 to 13.3)                    | 4.1<br>(2.3 to 5.9)                     | 102.5<br>(58.0 to 148.5)                          | 33.3<br>(5.2 to 62.6)                               |
| Testicular cancer                                  | 1.6<br>(1.4 to 1.9)                           | 0.3<br>(0.3 to 0.4)                      | 0.1<br>(0.1 to 0.2)                     | 18.9<br>(-17.9 to 70.0)                           | 18.8<br>(-19.6 to 73.5)                             |
| Kidney cancer                                      | 13.1<br>(11.4 to 14.3)                        | 3.6<br>(3.2 to 3.9)                      | 1.2<br>(0.8 to 1.6)                     | 47.3<br>(27.6 to 69.4)                            | 8.7<br>(-5.5 to 24.3)                               |
| Bladder cancer                                     | 21.9<br>(19.9 to 24.2)                        | 5.2<br>(4.7 to 5.7)                      | 1.9<br>(1.4 to 2.6)                     | 54.9<br>(32.6 to 79.4)                            | 3.3<br>(-11.5 to 19.0)                              |
| Brain and nervous system cancer                    | 9.7<br>(7.8 to 12.4)                          | 3.6<br>(3.0 to 4.6)                      | 1.2<br>(0.8 to 1.7)                     | 62.2<br>(33.2 to 93.8)                            | 31.5<br>(7.6 to 56.8)                               |
| Thyroid cancer                                     | 50.9<br>(27.3 to 61.4)                        | 9.6<br>(5.2 to 11.5)                     | 3.1<br>(1.6 to 4.6)                     | 38.3<br>(15.0 to 68.5)                            | 16.7<br>(-2.9 to 39.6)                              |
| Mesothelioma                                       | 0.2<br>(0.2 to 0.3)                           | 0.2<br>(0.1 to 0.2)                      | 0.1<br>( $< 0.05$ to 0.1)               | 61.0<br>(36.4 to 80.9)                            | 14.0<br>(-3.0 to 28.2)                              |
| Hodgkin lymphoma                                   | 1.9<br>(1.2 to 2.3)                           | 0.4<br>(0.2 to 0.5)                      | 0.2<br>(0.1 to 0.2)                     | 54.5<br>(32.6 to 81.4)                            | 38.5<br>(18.2 to 62.5)                              |
| Non-Hodgkin's lymphoma                             | 22.8<br>(19.6 to 25.3)                        | 5.8<br>(5.0 to 6.4)                      | 1.9<br>(1.3 to 2.5)                     | 83.4<br>(60.7 to 109.4)                           | 38.0<br>(21.8 to 56.8)                              |
| Multiple myeloma                                   | 4.2<br>(3.0 to 4.8)                           | 1.5<br>(1.1 to 1.7)                      | 0.8<br>(0.5 to 1.1)                     | 74.9<br>(43.0 to 114.3)                           | 22.5<br>(-1.0 to 51.2)                              |
| Leukaemia                                          | 15.0<br>(11.8 to 18.2)                        | 4.5<br>(3.7 to 5.5)                      | 1.9<br>(1.3 to 2.8)                     | 60.4<br>(33.2 to 90.0)                            | 32.6<br>(2.6 to 64.7)                               |
| Acute lymphoid leukaemia                           | 4.7<br>(2.9 to 6.3)                           | 1.2<br>(0.7 to 1.5)                      | 0.6<br>(0.3 to 0.9)                     | 70.2<br>(11.2 to 136.6)                           | 69.4<br>(-2.4 to 170.6)                             |
| Chronic lymphoid leukaemia                         | 2.2<br>(1.4 to 3.0)                           | 0.5<br>(0.3 to 0.7)                      | 0.3<br>(0.1 to 0.4)                     | 93.4<br>(48.1 to 142.1)                           | 38.1<br>(6.0 to 74.2)                               |
| Acute myeloid leukaemia                            | 2.1<br>(1.6 to 3.0)                           | 1.4<br>(1.1 to 2.0)                      | 0.4<br>(0.3 to 0.6)                     | 60.4<br>(33.1 to 90.4)                            | 23.3<br>(-3.9 to 51.3)                              |
| Chronic myeloid leukaemia                          | 1.3<br>(0.8 to 1.7)                           | 0.4<br>(0.3 to 0.6)                      | 0.1<br>(0.1 to 0.2)                     | 30.4<br>(5.6 to 62.2)                             | 6.6<br>(-13.3 to 31.4)                              |
| Other leukaemia                                    | 4.8<br>(3.7 to 6.3)                           | 1.1<br>(0.8 to 1.4)                      | 0.6<br>(0.4 to 0.8)                     | 49.1<br>(19.5 to 81.6)                            | 4.6<br>(-16.3 to 27.7)                              |
| Other neoplasms                                    | 28.6<br>(25.8 to 31.2)                        | 7.5<br>(6.8 to 8.2)                      | 2.2<br>(1.6 to 3.0)                     | 83.2<br>(60.4 to 109.4)                           | 41.5<br>(24.6 to 60.9)                              |
| <b>Cardiovascular diseases</b>                     | <b>3,553.3</b><br><b>(3,412.0 to 3,707.4)</b> | <b>339.2†</b><br><b>(320.7 to 359.2)</b> | <b>269.6</b><br><b>(197.7 to 348.4)</b> | <b>31.7</b><br><b>(26.0 to 37.3)</b>              | <b>-9.1</b><br><b>(-12.9 to -5.2)</b>               |
| Rheumatic heart disease                            | 5.0<br>(4.4 to 5.6)                           | 1.2<br>(1.0 to 1.3)                      | 0.4<br>(0.3 to 0.6)                     | 32.8<br>(15.6 to 53.6)                            | 1.7<br>(-11.3 to 17.4)                              |
| Ischaemic heart disease                            | 820.2<br>(769.1 to 873.1)                     | 92.6<br>(84.9 to 101.6)                  | 41.1<br>(28.9 to 55.6)                  | 27.6<br>(21.2 to 34.1)                            | -10.6<br>(-15.0 to -6.2)                            |
| Cerebrovascular disease                            | 759.4<br>(714.1 to 806.8)                     | 89.0‡<br>(81.3 to 97.1)                  | 137.1<br>(98.1 to 174.6)                | 30.4<br>(21.4 to 39.5)                            | -10.7<br>(-16.8 to -4.5)                            |
| Ischaemic stroke                                   | 604.2<br>(549.2 to 674.2)                     | 61.7‡<br>(54.3 to 69.2)                  | 105.4<br>(74.8 to 134.3)                | 30.3<br>(19.2 to 41.8)                            | -11.7<br>(-19.1 to -3.9)                            |
| Hemorrhagic stroke                                 | 185.4<br>(163.4 to 207.7)                     | 27.3‡<br>(24.2 to 30.4)                  | 31.8<br>(22.8 to 41.1)                  | 30.6<br>(16.6 to 46.5)                            | -7.5<br>(-17.0 to 3.4)                              |
| Hypertensive heart disease                         | 221.8<br>(188.1 to 261.4)                     | --                                       | 17.7<br>(12.1 to 24.7)                  | 43.0<br>(30.1 to 56.6)                            | -7.7<br>(-15.1 to 0.9)                              |
| Cardiomyopathy and myocarditis                     | 56.1<br>(48.7 to 63.2)                        | 16.3†<br>(14.1 to 18.8)                  | 5.2<br>(3.4 to 7.4)                     | 17.7<br>(4.3 to 32.7)                             | -7.2<br>(-16.7 to 4.0)                              |
| Myocarditis                                        | 15.7<br>(13.9 to 17.7)                        | 16.3<br>(14.1 to 18.8)                   | 1.2<br>(0.8 to 1.7)                     | 5.1<br>(-12.5 to 24.4)                            | -7.4<br>(-21.1 to 8.3)                              |
| Alcoholic cardiomyopathy                           | 5.1<br>(4.2 to 6.2)                           | --                                       | 0.4<br>(0.3 to 0.6)                     | 26.4<br>(3.6 to 55.4)                             | -6.0<br>(-23.2 to 15.7)                             |
| Other cardiomyopathy                               | 43.0<br>(36.5 to 51.0)                        | --                                       | 3.5<br>(2.3 to 5.0)                     | 21.7<br>(5.1 to 40.8)                             | -7.2<br>(-19.5 to 6.3)                              |
| Atrial fibrillation and flutter                    | 420.6<br>(368.4 to 481.3)                     | 34.8<br>(29.8 to 40.6)                   | 33.0<br>(22.2 to 46.4)                  | 51.4<br>(41.3 to 63.8)                            | 0.5<br>(-6.1 to 8.5)                                |
| Peripheral vascular disease                        | 1,128.7<br>(987.1 to 1,297.4)                 | 97.3<br>(83.6 to 114.0)                  | 3.8<br>(1.8 to 7.0)                     | 38.3<br>(27.2 to 50.3)                            | -10.8<br>(-17.4 to -3.9)                            |
| Endocarditis                                       | 10.4<br>(8.7 to 12.5)                         | 8.1<br>(7.2 to 8.9)                      | 0.8<br>(0.6 to 1.2)                     | 35.2<br>(12.5 to 60.1)                            | -9.3<br>(-24.4 to 7.4)                              |
| Other cardiovascular and circulatory diseases      | 588.2<br>(497.2 to 696.5)                     | --                                       | 30.5<br>(20.4 to 44.3)                  | 21.4<br>(11.6 to 32.2)                            | -9.5<br>(-16.3 to -1.8)                             |
| <b>Chronic respiratory diseases</b>                | <b>4,471.9</b><br><b>(4,319.0 to 4,618.1)</b> | <b>518.3†</b><br><b>(493.1 to 545.8)</b> | <b>236.7</b><br><b>(185.2 to 294.1)</b> | <b>16.9</b><br><b>(11.6 to 22.5)</b>              | <b>-2.9</b><br><b>(-6.9 to 1.1)</b>                 |
| Chronic obstructive pulmonary disease              | 1,828.7<br>(1,746.5 to 1,911.5)               | 119.1<br>(113.0 to 125.2)                | 120.3<br>(103.5 to 135.0)               | 28.7<br>(19.2 to 38.7)                            | -5.7<br>(-12.5 to 1.7)                              |
| Pneumoconiosis                                     | 0.9<br>(0.8 to 1.0)                           | 0.2<br>(0.2 to 0.3)                      | 0.1<br>(0.1 to 0.2)                     | 34.0<br>(25.1 to 43.1)                            | -5.0<br>(-11.2 to 1.4)                              |
| Silicosis                                          | 0.5<br>(0.4 to 0.6)                           | 0.2<br>(0.1 to 0.2)                      | 0.1<br>(0.1 to 0.1)                     | 46.0<br>(36.3 to 55.9)                            | 4.1<br>(-3.0 to 11.1)                               |



| Cause                                                          | Prevalence in thousands (95% UI)           | Incidence in thousands (95% UI)          | YLDs in thousands (95% UI)            |                                                   |                                                     |
|----------------------------------------------------------------|--------------------------------------------|------------------------------------------|---------------------------------------|---------------------------------------------------|-----------------------------------------------------|
|                                                                | 2016 counts                                | 2016 counts                              | 2016 counts                           | Percentage change in counts between 2006 and 2016 | Percentage change in age-standardised rates between |
| Asbestosis                                                     | 0.1<br>(0.1 to 0.2)                        | < 0.05<br>(< 0.05 to < 0.05)             | < 0.05<br>(< 0.05 to < 0.05)          | 38.3<br>(25.2 to 54.0)                            | -0.5<br>(-8.8 to 10.6)                              |
| Coal workers pneumoconiosis                                    | --                                         | --                                       | --                                    | --                                                | --                                                  |
| Other pneumoconiosis                                           | 0.3<br>(0.2 to 0.3)                        | 0.1<br>(< 0.05 to 0.1)                   | < 0.05<br>(< 0.05 to 0.1)             | 15.1<br>(-1.1 to 33.1)                            | -19.5<br>(-30.5 to -7.2)                            |
| Asthma                                                         | 2,824.2<br>(2,654.7 to 3,015.0)            | 396.0<br>(371.7 to 422.0)                | 109.5<br>(72.2 to 155.1)              | 5.3<br>(0.8 to 10.0)                              | -1.4<br>(-5.5 to 2.9)                               |
| Interstitial lung disease and pulmonary sarcoidosis            | 27.7<br>(24.9 to 30.7)                     | 3.0<br>(2.8 to 3.3)                      | 3.1<br>(2.0 to 4.4)                   | 43.7<br>(28.0 to 60.6)                            | 5.7<br>(-5.5 to 17.7)                               |
| Other chronic respiratory diseases                             | --                                         | --                                       | 3.7<br>(3.1 to 4.3)                   | 32.5<br>(18.2 to 49.0)                            | 27.9<br>(9.7 to 48.8)                               |
| <b>Cirrhosis and other chronic liver diseases</b>              | <b>646.1<br/>(608.7 to 687.4)</b>          | <b>13.6<br/>(12.8 to 14.4)</b>           | <b>11.9<br/>(8.3 to 16.6)</b>         | <b>17.3<br/>(6.9 to 29.3)</b>                     | <b>-3.6<br/>(-12.1 to 5.7)</b>                      |
| Cirrhosis and other chronic liver diseases due to hepatitis B  | 282.5<br>(248.9 to 316.7)                  | 6.0<br>(5.4 to 6.8)                      | 5.0<br>(3.4 to 7.3)                   | 18.4<br>(1.4 to 36.6)                             | -4.7<br>(-17.7 to 9.2)                              |
| Cirrhosis and other chronic liver diseases due to hepatitis C  | 67.5<br>(56.6 to 81.1)                     | 1.4<br>(1.1 to 1.6)                      | 1.2<br>(0.8 to 1.8)                   | 21.3<br>(-8.1 to 56.0)                            | -1.6<br>(-24.5 to 26.2)                             |
| Cirrhosis and other chronic liver diseases due to alcohol use  | 225.2<br>(198.1 to 255.0)                  | 4.8<br>(4.2 to 5.4)                      | 4.0<br>(2.6 to 5.6)                   | 18.9<br>(0.7 to 41.1)                             | -6.5<br>(-19.6 to 10.4)                             |
| Cirrhosis and other chronic liver diseases due to other causes | 71.0<br>(62.3 to 80.6)                     | 1.4<br>(1.2 to 1.5)                      | 1.7<br>(1.1 to 2.5)                   | 8.5<br>(-12.8 to 33.8)                            | 2.5<br>(-18.7 to 29.1)                              |
| <b>Digestive diseases</b>                                      | <b>3,961.9<br/>(3,612.9 to 4,313.6)</b>    | <b>1,318.1†<br/>(1,230.4 to 1,406.5)</b> | <b>54.9<br/>(38.4 to 76.6)</b>        | <b>32.1<br/>(23.7 to 41.3)</b>                    | <b>5.8<br/>(-1.1 to 12.6)</b>                       |
| Peptic ulcer disease                                           | 360.9<br>(328.6 to 398.7)                  | 59.2<br>(52.4 to 66.7)                   | 7.7<br>(4.9 to 11.6)                  | 47.3<br>(32.1 to 63.7)                            | 16.0<br>(5.2 to 28.1)                               |
| Gastritis and duodenitis                                       | 3,281.3<br>(2,802.4 to 3,788.7)            | 393.4<br>(344.8 to 448.9)                | 26.6<br>(17.0 to 39.4)                | 40.8<br>(28.5 to 54.0)                            | 10.9<br>(1.8 to 20.7)                               |
| Appendicitis                                                   | 3.0<br>(2.8 to 3.2)                        | 78.1<br>(72.4 to 84.5)                   | 1.0<br>(0.6 to 1.3)                   | 2.4<br>(-19.8 to 30.2)                            | 2.5<br>(-22.8 to 35.9)                              |
| Paralytic ileus and intestinal obstruction                     | 1.0<br>(0.9 to 1.1)                        | 26.7<br>(23.8 to 30.0)                   | 0.3<br>(0.2 to 0.4)                   | 41.6<br>(35.0 to 48.6)                            | 10.0<br>(5.6 to 14.8)                               |
| Inguinal, femoral, and abdominal hernia                        | 227.3<br>(201.3 to 257.9)                  | 393.2<br>(339.8 to 446.8)                | 10.4<br>(7.0 to 14.7)                 | 10.8<br>(-3.1 to 28.6)                            | -9.4<br>(-20.7 to 4.1)                              |
| Inflammatory bowel disease                                     | 15.3<br>(14.2 to 16.6)                     | 11.1<br>(10.7 to 11.5)                   | 2.3<br>(1.5 to 3.2)                   | 11.4<br>(-8.1 to 37.5)                            | -1.1<br>(-17.8 to 20.6)                             |
| Vascular intestinal disorders                                  | 1.4<br>(1.2 to 1.6)                        | 7.0<br>(6.0 to 8.0)                      | 0.4<br>(0.3 to 0.6)                   | 52.0<br>(25.4 to 81.8)                            | 13.2<br>(-6.6 to 35.2)                              |
| Gallbladder and biliary diseases                               | 99.4<br>(88.0 to 111.6)                    | 338.5<br>(294.5 to 384.0)                | 1.9<br>(1.2 to 2.7)                   | 27.9<br>(4.7 to 54.4)                             | 0.4<br>(-17.3 to 21.9)                              |
| Pancreatitis                                                   | 1.2<br>(1.1 to 1.4)                        | 10.9<br>(9.6 to 12.2)                    | 0.2<br>(0.1 to 0.2)                   | 25.2<br>(19.3 to 31.4)                            | -3.7<br>(-7.9 to 0.6)                               |
| Other digestive diseases                                       | --                                         | --                                       | 4.4<br>(3.1 to 6.0)                   | 40.8<br>(31.9 to 50.3)                            | 9.4<br>(2.4 to 16.7)                                |
| <b>Neurological disorders</b>                                  | <b>20,135.1<br/>(19,347.8 to 21,069.5)</b> | <b>8,605.0<br/>(7,352.5 to 9,930.7)</b>  | <b>548.5<br/>(372.6 to 741.7)</b>     | <b>11.9<br/>(2.4 to 23.4)</b>                     | <b>-2.0<br/>(-11.1 to 9.1)</b>                      |
| Alzheimer's disease and other dementias                        | 646.3<br>(558.4 to 744.3)                  | 117.8<br>(99.5 to 139.4)                 | 95.8<br>(66.7 to 126.7)               | 68.6<br>(60.1 to 77.4)                            | -3.5<br>(-7.8 to 1.3)                               |
| Parkinson's disease                                            | 55.5<br>(43.5 to 68.5)                     | 6.7<br>(5.2 to 8.5)                      | 6.5<br>(4.1 to 9.1)                   | 61.1<br>(41.2 to 83.4)                            | 5.2<br>(-7.6 to 19.1)                               |
| Epilepsy                                                       | 107.8<br>(26.9 to 188.5)                   | 12.6<br>(2.9 to 22.5)                    | 26.1<br>(5.3 to 60.4)                 | -3.0<br>(-80.4 to 346.4)                          | -9.5<br>(-81.4 to 329.2)                            |
| Multiple sclerosis                                             | 19.8<br>(17.4 to 22.5)                     | 0.5<br>(0.4 to 0.5)                      | 5.4<br>(3.6 to 7.2)                   | 26.9<br>(9.0 to 48.3)                             | 9.4<br>(-5.4 to 27.6)                               |
| Motor neuron disease                                           | 3.4<br>(3.0 to 3.9)                        | 0.5<br>(0.4 to 0.6)                      | 0.7<br>(0.5 to 1.0)                   | 25.4<br>(20.4 to 30.8)                            | 6.1<br>(2.3 to 9.7)                                 |
| Migraine                                                       | 8,624.8<br>(8,242.8 to 9,009.9)            | 736.3<br>(698.3 to 775.4)                | 356.5<br>(226.0 to 498.5)             | 3.3<br>(0.1 to 6.9)                               | -1.8<br>(-4.8 to 1.7)                               |
| Tension-type headache                                          | 14,476.2<br>(13,005.9 to 16,000.9)         | 7,730.3<br>(6,492.8 to 9,059.1)          | 50.1<br>(31.8 to 74.2)                | 7.7<br>(2.6 to 13.3)                              | 0.2<br>(-4.4 to 4.9)                                |
| Other neurological disorders                                   | 0.2<br>(0.1 to 0.2)                        | 0.3<br>(0.2 to 0.4)                      | 7.5<br>(3.8 to 13.2)                  | 18.2<br>(-46.5 to 187.1)                          | 8.7<br>(-57.8 to 189.3)                             |
| <b>Mental and substance use disorders</b>                      | <b>7,914.2<br/>(7,694.7 to 8,140.3)</b>    | <b>3,392.9†<br/>(3,173.4 to 3,642.2)</b> | <b>1,163.1<br/>(844.9 to 1,510.1)</b> | <b>8.8<br/>(6.2 to 11.5)</b>                      | <b>1.7<br/>(-0.6 to 4.1)</b>                        |
| Schizophrenia                                                  | 160.7<br>(141.7 to 181.5)                  | 7.9<br>(7.0 to 8.9)                      | 102.9<br>(75.7 to 128.5)              | 10.9<br>(2.4 to 20.0)                             | 0.4<br>(-7.4 to 8.4)                                |
| Alcohol use disorders                                          | 1,066.2<br>(932.8 to 1,213.6)              | 404.9<br>(347.3 to 471.1)                | 106.9<br>(71.7 to 149.1)              | -0.5<br>(-7.8 to 7.9)                             | -2.7<br>(-10.2 to 5.6)                              |
| Drug use disorders                                             | 484.8<br>(445.4 to 524.8)                  | 54.6<br>(49.2 to 60.2)                   | 99.2<br>(70.1 to 131.5)               | 5.3<br>(-3.5 to 14.6)                             | 4.0<br>(-5.2 to 13.2)                               |
| Opioid use disorders                                           | 145.6<br>(118.8 to 178.3)                  | 15.8<br>(13.1 to 18.9)                   | 60.4<br>(40.1 to 84.2)                | 7.3<br>(-3.9 to 19.5)                             | 5.2<br>(-5.7 to 17.6)                               |
| Cocaine use disorders                                          | 82.5<br>(72.0 to 94.1)                     | 4.2<br>(3.5 to 4.9)                      | 11.2<br>(6.9 to 16.3)                 | 4.4<br>(-13.5 to 24.7)                            | 1.6<br>(-16.0 to 20.8)                              |
| Amphetamine use disorders                                      | 50.1<br>(35.5 to 68.3)                     | 4.2<br>(3.1 to 5.7)                      | 6.6<br>(3.7 to 10.7)                  | -0.9<br>(-21.3 to 26.1)                           | 3.4<br>(-18.0 to 32.5)                              |
| Cannabis use disorders                                         | 178.0<br>(148.8 to 211.6)                  | 24.1<br>(20.1 to 28.8)                   | 5.2<br>(3.1 to 7.7)                   | -2.9<br>(-15.2 to 11.8)                           | 0.4<br>(-12.6 to 15.5)                              |
| Other drug use disorders                                       | 38.6<br>(33.7 to 43.8)                     | 6.2<br>(5.5 to 6.9)                      | 15.8<br>(10.5 to 22.4)                | 4.2<br>(-16.2 to 31.1)                            | 2.8<br>(-17.4 to 30.2)                              |
| Depressive disorders                                           | 2,149.9<br>(2,029.6 to 2,275.0)            | 2,485.2<br>(2,279.0 to 2,733.7)          | 379.9<br>(262.2 to 514.2)             | 15.8<br>(9.8 to 21.9)                             | 3.5<br>(-1.6 to 8.9)                                |
| Major depressive disorder                                      | 1,583.9<br>(1,456.5 to 1,736.9)            | 2,380.6<br>(2,177.0 to 2,624.8)          | 322.4<br>(221.2 to 437.5)             | 17.1<br>(9.8 to 24.3)                             | 4.6<br>(-1.6 to 10.9)                               |
| Dysthymia                                                      | 599.5<br>(527.2 to 685.0)                  | 104.7<br>(91.6 to 120.3)                 | 57.6<br>(38.7 to 84.0)                | 9.3<br>(1.2 to 18.2)                              | -2.8<br>(-9.9 to 4.6)                               |
| Bipolar disorder                                               | 303.6<br>(264.7 to 348.9)                  | 23.5<br>(20.6 to 26.8)                   | 61.7<br>(38.1 to 91.8)                | 8.1<br>(1.2 to 16.1)                              | -0.0<br>(-6.3 to 6.8)                               |
| Anxiety disorders                                              | 2,054.7<br>(1,923.0 to 2,197.7)            | 278.6<br>(259.6 to 298.0)                | 197.4<br>(139.9 to 267.0)             | 11.8<br>(4.5 to 18.7)                             | 4.4<br>(-2.4 to 11.2)                               |
| Eating disorders                                               | 112.7<br>(93.7 to 139.1)                   | 37.4<br>(28.0 to 48.7)                   | 23.3<br>(14.9 to 34.2)                | 2.1<br>(-7.8 to 13.6)                             | 10.9<br>(0.2 to 23.2)                               |
| Anorexia nervosa                                               | 27.6<br>(20.1 to 37.0)                     | 6.8<br>(5.1 to 9.1)                      | 5.9<br>(3.6 to 8.9)                   | 1.3<br>(-16.3 to 23.3)                            | 11.0<br>(-7.9 to 34.5)                              |
| Bulimia nervosa                                                | 82.6<br>(63.0 to 108.9)                    | 30.6<br>(21.4 to 42.0)                   | 17.4<br>(10.8 to 25.9)                | 2.4<br>(-9.8 to 15.0)                             | 10.9<br>(-1.9 to 25.0)                              |
| Autistic spectrum disorders                                    | 405.6<br>(365.4 to 453.9)                  | 1.4<br>(0.9 to 1.9)                      | 63.3<br>(43.0 to 89.5)                | 3.4<br>(-1.5 to 8.8)                              | 0.4<br>(-4.3 to 5.9)                                |
| Autism                                                         | 150.5<br>(129.0 to 176.2)                  | 0.1<br>(0.1 to 0.3)                      | 38.0<br>(24.7 to 55.0)                | 4.0<br>(-3.7 to 12.4)                             | 0.5<br>(-7.2 to 8.8)                                |
| Asperger syndrome and other autistic spectrum disorders        | 254.1<br>(215.3 to 305.6)                  | 1.2<br>(0.8 to 1.7)                      | 25.3<br>(16.5 to 36.7)                | 2.5<br>(-2.2 to 7.7)                              | 0.4<br>(-4.2 to 5.3)                                |

| Cause                                                      | Prevalence in thousands (95% UI)                 | Incidence in thousands (95% UI)                   | YLDs in thousands (95% UI)                  |                                                   |                                                     |
|------------------------------------------------------------|--------------------------------------------------|---------------------------------------------------|---------------------------------------------|---------------------------------------------------|-----------------------------------------------------|
|                                                            | 2016 counts                                      | 2016 counts                                       | 2016 counts                                 | Percentage change in counts between 2006 and 2016 | Percentage change in age-standardised rates between |
| Attention-deficit/hyperactivity disorder                   | 216.9<br>(197.9 to 240.3)                        | 7.8<br>(6.7 to 8.9)                               | 2.6<br>(1.6 to 4.1)                         | -9.9<br>(-19.4 to 0.6)                            | -0.1<br>(-11.1 to 11.8)                             |
| Conduct disorder                                           | 203.4<br>(169.2 to 238.4)                        | 63.4<br>(50.6 to 76.8)                            | 24.8<br>(15.1 to 37.0)                      | -17.4<br>(-22.9 to -11.1)                         | -0.5<br>(-7.1 to 6.9)                               |
| Idiopathic developmental intellectual disability           | 200.8<br>(82.8 to 320.2)                         | --                                                | 10.2<br>(4.5 to 18.2)                       | -30.6<br>(-40.0 to -22.8)                         | -32.5<br>(-42.0 to -24.8)                           |
| Other mental and substance use disorders                   | 1,226.2<br>(1,067.5 to 1,418.9)                  | 28.3<br>(25.1 to 32.1)                            | 91.0<br>(62.7 to 130.3)                     | 11.7<br>(7.2 to 16.8)                             | 0.4<br>(-4.1 to 5.2)                                |
| <b>Diabetes, urogenital, blood, and endocrine diseases</b> | <b>14,441.5</b><br><b>(14,054.6 to 14,897.8)</b> | <b>5,031.5†</b><br><b>(4,756.6 to 5,338.1)</b>    | <b>512.9</b><br><b>(366.1 to 690.3)</b>     | <b>26.2</b><br><b>(20.9 to 32.3)</b>              | <b>-0.6</b><br><b>(-4.5 to 3.6)</b>                 |
| Diabetes mellitus                                          | 3,988.1<br>(3,659.9 to 4,333.9)                  | 209.8<br>(189.4 to 233.3)                         | 295.1<br>(203.5 to 407.6)                   | 27.2<br>(18.6 to 36.4)                            | -2.9<br>(-9.4 to 3.5)                               |
| Acute glomerulonephritis                                   | 0.6<br>(0.5 to 0.6)                              | 8.2<br>(7.1 to 9.3)                               | < 0.05<br>(< 0.05 to < 0.05)                | 15.5<br>(9.7 to 21.5)                             | 0.4<br>(-3.7 to 4.6)                                |
| Chronic kidney disease                                     | 1,563.1<br>(1,410.9 to 1,712.5)                  | 131.5<br>(115.0 to 146.2)                         | 74.0<br>(56.4 to 91.7)                      | 51.4<br>(41.1 to 61.6)                            | 8.7<br>(1.4 to 15.6)                                |
| Chronic kidney disease due to diabetes mellitus            | 1,097.0<br>(988.5 to 1,211.7)                    | 94.8<br>(82.9 to 106.0)                           | 51.2<br>(39.0 to 62.9)                      | 57.0<br>(44.4 to 69.7)                            | 13.8<br>(4.7 to 22.7)                               |
| Chronic kidney disease due to hypertension                 | 208.1<br>(177.9 to 241.1)                        | 7.9<br>(7.0 to 8.7)                               | 10.8<br>(7.9 to 13.9)                       | 81.8<br>(58.6 to 107.4)                           | 13.3<br>(-0.3 to 29.0)                              |
| Chronic kidney disease due to glomerulonephritis           | 140.0<br>(123.1 to 156.1)                        | 19.2<br>(15.6 to 23.3)                            | 5.7<br>(4.2 to 7.4)                         | -9.1<br>(-18.6 to 1.1)                            | -27.3<br>(-34.2 to -19.6)                           |
| Chronic kidney disease due to other causes                 | 118.1<br>(105.8 to 129.8)                        | 9.7<br>(8.5 to 10.8)                              | 6.2<br>(4.7 to 7.9)                         | 56.7<br>(39.4 to 74.8)                            | 16.6<br>(4.5 to 29.2)                               |
| Urinary diseases and male infertility                      | 1,262.4<br>(1,118.8 to 1,417.3)                  | 2,780.4†<br>(2,534.5 to 3,067.4)                  | 39.9<br>(25.5 to 58.0)                      | 39.5<br>(30.3 to 48.5)                            | 2.1<br>(-4.2 to 8.6)                                |
| Interstitial nephritis and urinary tract infections        | 38.1<br>(33.4 to 43.1)                           | 1,983.5<br>(1,742.8 to 2,237.1)                   | 1.3<br>(0.8 to 2.0)                         | 5.7<br>(-9.6 to 23.4)                             | 1.4<br>(-13.0 to 17.7)                              |
| Urolithiasis                                               | 25.2<br>(22.1 to 28.8)                           | 664.3<br>(582.9 to 759.8)                         | 1.9<br>(1.2 to 2.7)                         | 17.9<br>(-0.0 to 37.7)                            | 0.8<br>(-13.1 to 16.4)                              |
| Benign prostatic hyperplasia                               | 1,074.5<br>(920.5 to 1,257.6)                    | 132.6<br>(111.1 to 157.6)                         | 35.2<br>(22.3 to 51.9)                      | 46.0<br>(35.6 to 56.9)                            | 3.2<br>(-4.1 to 11.0)                               |
| Male infertility                                           | 80.8<br>(56.0 to 113.9)                          | --                                                | 0.5<br>(0.2 to 1.0)                         | -11.7<br>(-22.4 to -0.1)                          | -7.4<br>(-18.2 to 4.9)                              |
| Other urinary diseases                                     | --                                               | --                                                | 1.1<br>(0.7 to 1.5)                         | -8.2<br>(-18.3 to 3.0)                            | -15.5<br>(-24.2 to -6.4)                            |
| Gynecological diseases                                     | 5,671.2<br>(5,381.4 to 5,979.5)                  | 1,753.4†<br>(1,646.0 to 1,875.8)                  | 62.1<br>(42.0 to 90.3)                      | 0.1<br>(-4.4 to 4.8)                              | -2.2<br>(-6.3 to 2.1)                               |
| Uterine fibroids                                           | 380.5<br>(333.5 to 434.3)                        | 36.7<br>(31.9 to 42.3)                            | 6.9<br>(4.1 to 11.1)                        | 4.8<br>(-4.6 to 13.7)                             | -5.7<br>(-14.0 to 2.1)                              |
| Polycystic ovarian syndrome                                | 213.9<br>(160.0 to 283.0)                        | 38.2<br>(28.1 to 51.9)                            | 1.9<br>(0.8 to 3.7)                         | -7.6<br>(-13.2 to -1.6)                           | -1.1<br>(-7.0 to 5.4)                               |
| Female infertility                                         | 136.9<br>(67.3 to 231.2)                         | --                                                | 0.7<br>(0.2 to 1.7)                         | 2.8<br>(-16.7 to 25.1)                            | 6.1<br>(-17.3 to 28.0)                              |
| Endometriosis                                              | 23.0<br>(18.9 to 27.1)                           | 64.2<br>(51.6 to 80.7)                            | 2.2<br>(1.4 to 3.2)                         | -5.2<br>(-26.3 to 22.1)                           | -0.3<br>(-22.9 to 28.1)                             |
| Genital prolapse                                           | 1,624.5<br>(1,390.5 to 1,882.5)                  | 77.7<br>(65.6 to 91.6)                            | 5.1<br>(2.4 to 9.2)                         | 29.4<br>(19.2 to 42.2)                            | -3.8<br>(-11.3 to 5.8)                              |
| Premenstrual syndrome                                      | 3,303.2<br>(3,100.5 to 3,576.1)                  | 1,092.5<br>(1,015.5 to 1,181.0)                   | 27.5<br>(16.9 to 43.0)                      | -2.5<br>(-9.2 to 5.4)                             | -1.5<br>(-8.3 to 6.3)                               |
| Other gynecological diseases                               | 530.2<br>(457.8 to 607.1)                        | 444.2<br>(368.6 to 524.8)                         | 17.8<br>(11.8 to 25.2)                      | -2.5<br>(-10.4 to 6.7)                            | -2.5<br>(-10.5 to 7.0)                              |
| Hemoglobinopathies and hemolytic anaemias                  | 3,815.5<br>(3,508.8 to 4,160.9)                  | --                                                | 16.5<br>(8.4 to 28.0)                       | 14.8<br>(-3.0 to 26.2)                            | 2.9<br>(-12.2 to 13.9)                              |
| Thalassemias                                               | 0.6<br>(0.4 to 0.9)                              | --                                                | < 0.05<br>(< 0.05 to 0.1)                   | -9.6<br>(-30.0 to 19.6)                           | 7.6<br>(-19.2 to 47.6)                              |
| Thalassaemia trait                                         | 611.3<br>(281.3 to 1,073.3)                      | --                                                | 11.2<br>(4.5 to 21.2)                       | 22.9<br>(-4.4 to 43.2)                            | 7.1<br>(-17.2 to 25.7)                              |
| Sickle cell disorders                                      | 0.3<br>(0.2 to 0.3)                              | --                                                | < 0.05<br>(< 0.05 to 0.1)                   | 20.2<br>(12.0 to 29.2)                            | 28.0<br>(18.4 to 38.7)                              |
| Sickle cell trait                                          | 507.3<br>(488.8 to 528.7)                        | --                                                | 1.8<br>(1.1 to 2.7)                         | 36.8<br>(17.9 to 60.1)                            | 25.3<br>(6.5 to 47.8)                               |
| G6PD deficiency                                            | 221.2<br>(196.4 to 249.1)                        | --                                                | 0.1<br>(< 0.05 to 0.1)                      | 12.8<br>(1.0 to 25.5)                             | -1.9<br>(-13.0 to 10.4)                             |
| G6PD trait                                                 | 2,322.9<br>(2,261.3 to 2,385.9)                  | --                                                | < 0.05<br>(< 0.05 to < 0.05)                | 15.1<br>(4.9 to 25.4)                             | 4.9<br>(-4.9 to 15.9)                               |
| Other hemoglobinopathies and hemolytic anaemias            | 204.8<br>(193.1 to 217.7)                        | --                                                | 3.4<br>(2.2 to 5.1)                         | -11.6<br>(-20.4 to -1.4)                          | -14.6<br>(-23.9 to -4.4)                            |
| Endocrine, metabolic, blood, and immune disorders          | 792.6<br>(726.3 to 865.1)                        | 148.2<br>(132.3 to 164.9)                         | 25.3<br>(17.1 to 35.4)                      | 23.7<br>(15.8 to 32.1)                            | -0.7<br>(-6.6 to 5.6)                               |
| <b>Musculoskeletal disorders</b>                           | <b>12,283.0</b><br><b>(11,707.0 to 12,853.6)</b> | <b>6,709.4</b><br><b>(6,071.8 to 7,483.7)</b>     | <b>1,280.4</b><br><b>(931.1 to 1,677.3)</b> | <b>17.8</b><br><b>(13.9 to 21.8)</b>              | <b>-0.4</b><br><b>(-3.4 to 2.6)</b>                 |
| Rheumatoid arthritis                                       | 200.7<br>(179.6 to 226.7)                        | 9.6<br>(8.5 to 10.8)                              | 47.3<br>(32.5 to 63.2)                      | 24.4<br>(15.3 to 36.1)                            | -0.6<br>(-7.8 to 8.6)                               |
| Osteoarthritis                                             | 3,347.9<br>(3,127.2 to 3,570.3)                  | 157.7<br>(145.8 to 170.3)                         | 118.0<br>(77.2 to 172.3)                    | 37.1<br>(31.4 to 42.9)                            | -0.2<br>(-4.3 to 3.9)                               |
| Low back and neck pain                                     | 7,200.1<br>(6,713.7 to 7,735.7)                  | 3,180.4<br>(2,815.6 to 3,612.1)                   | 849.3<br>(601.5 to 1,120.7)                 | 14.1<br>(9.0 to 19.1)                             | -2.6<br>(-6.3 to 1.2)                               |
| Low back pain                                              | 5,716.5<br>(5,116.2 to 6,494.7)                  | 2,767.6<br>(2,406.5 to 3,191.2)                   | 650.4<br>(461.5 to 864.0)                   | 12.4<br>(6.4 to 18.3)                             | -3.0<br>(-7.7 to 1.6)                               |
| Neck pain                                                  | 1,996.0<br>(1,716.0 to 2,315.3)                  | 412.8<br>(359.5 to 489.2)                         | 198.9<br>(134.9 to 284.4)                   | 19.9<br>(13.0 to 27.0)                            | -1.0<br>(-6.3 to 4.0)                               |
| Gout                                                       | 437.3<br>(384.7 to 495.5)                        | 78.2<br>(67.3 to 90.2)                            | 13.8<br>(9.4 to 19.3)                       | 31.8<br>(16.3 to 50.0)                            | 2.2<br>(-9.5 to 16.0)                               |
| Other musculoskeletal disorders                            | 2,937.0<br>(2,440.2 to 3,522.9)                  | 3,283.6<br>(2,764.3 to 3,956.0)                   | 252.0<br>(168.9 to 360.9)                   | 21.5<br>(11.3 to 32.4)                            | 7.0<br>(-1.3 to 16.1)                               |
| <b>Other non-communicable diseases</b>                     | <b>35,291.2</b><br><b>(34,856.6 to 35,752.4)</b> | <b>93,299.1†</b><br><b>(88,664.0 to 98,345.1)</b> | <b>1,061.4</b><br><b>(727.0 to 1,505.0)</b> | <b>16.5</b><br><b>(14.8 to 18.3)</b>              | <b>-0.1</b><br><b>(-1.4 to 1.0)</b>                 |
| Congenital anomalies                                       | 367.3<br>(339.8 to 399.0)                        | --                                                | 41.4<br>(29.9 to 54.5)                      | 0.6<br>(-4.2 to 5.6)                              | -1.9<br>(-6.4 to 3.1)                               |
| Neural tube defects                                        | 14.7<br>(13.0 to 16.7)                           | --                                                | 4.6<br>(3.2 to 6.2)                         | 3.0<br>(-5.4 to 12.7)                             | -2.6<br>(-10.7 to 6.1)                              |
| Congenital heart anomalies                                 | 133.2<br>(117.3 to 150.2)                        | --                                                | 7.2<br>(3.0 to 12.3)                        | -1.6<br>(-10.7 to 9.4)                            | -3.6<br>(-12.7 to 6.5)                              |
| Orofacial clefts                                           | 21.7<br>(18.8 to 24.8)                           | --                                                | 0.2<br>(0.1 to 0.3)                         | 0.4<br>(-11.7 to 14.1)                            | -4.4<br>(-15.9 to 8.5)                              |
| Down's syndrome                                            | 14.1<br>(11.9 to 16.6)                           | --                                                | 1.2<br>(0.8 to 1.8)                         | -5.8<br>(-12.6 to 2.2)                            | 3.1<br>(-4.7 to 12.4)                               |
| Turner syndrome                                            | 20.1<br>(17.1 to 23.3)                           | --                                                | 0.4<br>(0.2 to 0.6)                         | -10.8<br>(-34.4 to 24.3)                          | -7.7<br>(-32.8 to 28.4)                             |
| Klinefelter syndrome                                       | 31.8<br>(27.2 to 36.9)                           | --                                                | 0.2<br>(0.1 to 0.4)                         | -2.0<br>(-21.3 to 20.5)                           | 4.9<br>(-16.3 to 28.4)                              |



| Cause                                         | Prevalence in thousands (95% UI)                 | Incidence in thousands (95% UI)                           | YLDs in thousands (95% UI)              |                                                   |                                                     |
|-----------------------------------------------|--------------------------------------------------|-----------------------------------------------------------|-----------------------------------------|---------------------------------------------------|-----------------------------------------------------|
|                                               | 2016 counts                                      | 2016 counts                                               | 2016 counts                             | Percentage change in counts between 2006 and 2016 | Percentage change in age-standardised rates between |
| Other chromosomal abnormalities               | 25.6<br>(21.5 to 30.4)                           | --                                                        | 2.8<br>(1.9 to 3.9)                     | -10.2<br>(-24.3 to 6.3)                           | 4.3<br>(-12.4 to 24.9)                              |
| Congenital musculoskeletal and limb anomalies | 67.6<br>(61.7 to 73.8)                           | --                                                        | 9.8<br>(6.7 to 13.7)                    | 5.8<br>(-4.3 to 17.3)                             | -0.9<br>(-10.6 to 10.1)                             |
| Urogenital congenital anomalies               | 28.9<br>(25.6 to 32.5)                           | --                                                        | 0.7<br>(0.4 to 1.1)                     | -8.0<br>(-14.4 to -0.8)                           | 0.3<br>(-6.8 to 8.2)                                |
| Digestive congenital anomalies                | 43.7<br>(38.5 to 49.1)                           | --                                                        | 1.9<br>(1.2 to 2.7)                     | 2.1<br>(-15.2 to 20.5)                            | -2.6<br>(-19.4 to 15.4)                             |
| Other congenital anomalies                    | 83.7<br>(57.9 to 123.5)                          | --                                                        | 12.5<br>(8.6 to 17.5)                   | 1.1<br>(-9.1 to 11.0)                             | -3.8<br>(-13.2 to 5.6)                              |
| Skin and subcutaneous diseases                | 17,159.7<br>(16,799.3 to 17,524.9)               | 35,286.1<br>(33,418.2 to 37,485.1)                        | 415.4<br>(284.2 to 597.5)               | 3.1<br>(0.9 to 5.2)                               | 2.1<br>(0.1 to 4.2)                                 |
| Dermatitis                                    | 2,720.0<br>(2,580.4 to 2,870.1)                  | 3,774.6<br>(3,479.1 to 4,100.9)                           | 96.5<br>(58.4 to 153.5)                 | 3.9<br>(-0.2 to 8.0)                              | 3.2<br>(-1.2 to 7.5)                                |
| Psoriasis                                     | 624.0<br>(593.4 to 655.9)                        | 63.0<br>(59.9 to 66.1)                                    | 54.0<br>(38.2 to 70.9)                  | 17.5<br>(9.7 to 25.2)                             | 5.1<br>(-1.8 to 12.3)                               |
| Cellulitis                                    | 30.9<br>(29.0 to 33.1)                           | 722.6<br>(676.0 to 769.7)                                 | 1.7<br>(1.1 to 2.6)                     | 11.1<br>(-8.8 to 34.9)                            | 0.4<br>(-17.2 to 23.5)                              |
| Pyoderma                                      | 114.7<br>(110.5 to 119.4)                        | 2,701.5<br>(2,601.9 to 2,818.1)                           | 0.6<br>(0.3 to 1.4)                     | 14.2<br>(6.2 to 23.5)                             | 0.8<br>(-6.5 to 8.7)                                |
| Scabies                                       | 104.4<br>(91.7 to 118.6)                         | 313.1<br>(273.8 to 353.6)                                 | 2.7<br>(1.5 to 4.2)                     | -1.2<br>(-8.1 to 7.4)                             | -0.2<br>(-7.1 to 7.9)                               |
| Fungal skin diseases                          | 3,500.0<br>(3,104.5 to 3,911.8)                  | 13,400.5<br>(11,671.6 to 15,318.5)                        | 19.4<br>(7.8 to 41.5)                   | 21.7<br>(18.4 to 25.2)                            | 0.1<br>(-1.1 to 1.4)                                |
| Viral skin diseases                           | 1,284.4<br>(1,235.2 to 1,339.0)                  | 1,776.8<br>(1,690.3 to 1,859.8)                           | 39.3<br>(24.5 to 57.9)                  | -3.3<br>(-6.0 to -0.2)                            | -0.0<br>(-2.7 to 3.1)                               |
| Acne vulgaris                                 | 5,225.0<br>(4,853.4 to 5,581.8)                  | 3,808.7<br>(3,157.8 to 4,688.4)                           | 134.4<br>(90.1 to 194.5)                | -7.3<br>(-11.0 to -3.6)                           | 1.4<br>(-2.5 to 5.2)                                |
| Alopecia areata                               | 183.5<br>(177.2 to 189.8)                        | 323.0<br>(311.7 to 334.3)                                 | 6.0<br>(3.8 to 9.1)                     | 4.6<br>(-3.1 to 13.3)                             | 0.0<br>(-7.6 to 8.4)                                |
| Pruritus                                      | 480.9<br>(422.9 to 547.6)                        | 378.9<br>(335.4 to 432.7)                                 | 5.1<br>(2.4 to 9.5)                     | 15.0<br>(8.3 to 22.1)                             | 0.5<br>(-4.9 to 5.6)                                |
| Urticaria                                     | 347.3<br>(306.8 to 390.8)                        | 612.9<br>(543.7 to 692.8)                                 | 20.7<br>(13.4 to 29.4)                  | 0.9<br>(-5.1 to 7.2)                              | -0.2<br>(-5.8 to 5.5)                               |
| Decubitus ulcer                               | 20.4<br>(18.1 to 22.8)                           | 74.6<br>(66.0 to 84.2)                                    | 3.2<br>(2.2 to 4.4)                     | 45.9<br>(28.3 to 66.2)                            | -1.5<br>(-12.2 to 11.0)                             |
| Other skin and subcutaneous diseases          | 5,821.3<br>(5,662.1 to 5,989.9)                  | 7,336.0<br>(7,078.0 to 7,584.0)                           | 31.8<br>(15.3 to 58.2)                  | 27.6<br>(24.8 to 30.3)                            | 5.1<br>(3.0 to 7.3)                                 |
| Sense organ diseases                          | 12,535.4<br>(12,250.2 to 12,832.5)               | 5,140.7 <sup>†</sup><br>(4,845.6 to 5,469.6)              | 426.6<br>(292.4 to 596.0)               | 30.7<br>(27.9 to 33.7)                            | -2.9<br>(-5.0 to -0.8)                              |
| Glaucoma                                      | 52.2<br>(43.3 to 61.0)                           | --                                                        | 4.3<br>(2.9 to 6.0)                     | 55.7<br>(35.3 to 76.4)                            | 1.0<br>(-12.0 to 13.5)                              |
| Cataract                                      | 299.3<br>(252.6 to 354.4)                        | --                                                        | 17.4<br>(12.1 to 24.2)                  | 54.5<br>(44.0 to 66.5)                            | -2.3<br>(-8.5 to 4.6)                               |
| Macular degeneration                          | 36.8<br>(29.9 to 44.8)                           | --                                                        | 2.6<br>(1.8 to 3.6)                     | 61.9<br>(40.4 to 87.4)                            | 1.8<br>(-10.8 to 16.2)                              |
| Refraction and accommodation disorders        | 4,993.9<br>(4,717.4 to 5,273.6)                  | --                                                        | 94.9<br>(59.5 to 150.1)                 | 16.0<br>(12.2 to 20.0)                            | -2.6<br>(-5.6 to 0.4)                               |
| Age-related and other hearing loss            | 8,642.0<br>(8,217.9 to 9,117.4)                  | --                                                        | 229.4<br>(155.8 to 323.8)               | 35.7<br>(30.4 to 40.4)                            | -4.7<br>(-8.4 to -1.4)                              |
| Other vision loss                             | 268.2<br>(237.8 to 301.6)                        | --                                                        | 17.9<br>(12.5 to 24.4)                  | 37.9<br>(26.7 to 49.3)                            | 3.2<br>(-4.7 to 11.0)                               |
| Other sense organ diseases                    | 1,913.1<br>(1,763.7 to 2,064.8)                  | 5,140.7<br>(4,845.6 to 5,469.6)                           | 60.1<br>(37.5 to 90.4)                  | 28.4<br>(23.7 to 33.6)                            | 1.0<br>(-2.7 to 4.8)                                |
| Oral disorders                                | 21,199.4<br>(20,437.2 to 21,878.0)               | 52,872.3 <sup>†</sup><br>(48,725.2 to 57,131.3)           | 177.9<br>(111.8 to 265.1)               | 26.7<br>(23.3 to 30.5)                            | 0.1<br>(-1.9 to 2.0)                                |
| Caries of deciduous teeth                     | 1,699.9<br>(1,340.2 to 2,018.9)                  | 7,441.9<br>(5,428.3 to 9,909.7)                           | 0.7<br>(0.3 to 1.3)                     | -17.8<br>(-25.4 to -9.4)                          | -1.1<br>(-9.8 to 8.6)                               |
| Caries of permanent teeth                     | 13,541.1<br>(12,748.0 to 14,385.0)               | 44,602.2<br>(41,122.7 to 48,253.2)                        | 13.2<br>(5.8 to 25.3)                   | 3.1<br>(-0.9 to 6.9)                              | -3.6<br>(-7.7 to 0.6)                               |
| Periodontal disease                           | 4,780.9<br>(3,949.7 to 5,702.9)                  | 540.3<br>(423.5 to 674.3)                                 | 31.3<br>(12.3 to 64.2)                  | 24.9<br>(18.8 to 30.4)                            | 0.7<br>(-2.8 to 4.3)                                |
| Edentulism and severe tooth loss              | 3,705.6<br>(3,241.0 to 4,173.4)                  | 288.0<br>(243.4 to 338.1)                                 | 102.7<br>(67.4 to 145.2)                | 38.5<br>(33.4 to 43.3)                            | 0.7<br>(-2.5 to 3.8)                                |
| Other oral disorders                          | 1,028.7<br>(982.7 to 1,077.2)                    | --                                                        | 30.0<br>(18.6 to 45.7)                  | 9.0<br>(5.7 to 12.4)                              | -0.1<br>(-3.0 to 3.0)                               |
| <b>Injuries</b>                               | <b>15,766.5</b><br><b>(14,770.9 to 16,881.0)</b> | <b>5,478.7<sup>†</sup></b><br><b>(5,205.8 to 5,776.9)</b> | <b>494.2</b><br><b>(327.9 to 705.3)</b> | <b>15.7</b><br><b>(14.0 to 17.4)</b>              | <b>-5.4</b><br><b>(-6.7 to -4.2)</b>                |
| <b>Transport injuries</b>                     | <b>2,448.3</b><br><b>(2,282.4 to 2,616.7)</b>    | <b>765.6</b><br><b>(705.2 to 835.1)</b>                   | <b>111.4</b><br><b>(72.7 to 162.9)</b>  | <b>8.2</b><br><b>(6.4 to 10.2)</b>                | <b>-13.8</b><br><b>(-15.2 to -12.3)</b>             |
| Road injuries                                 | 2,007.7<br>(1,882.9 to 2,154.7)                  | 694.8<br>(636.3 to 766.4)                                 | 95.5<br>(62.6 to 138.7)                 | 9.6<br>(7.7 to 11.8)                              | -13.0<br>(-14.6 to -11.4)                           |
| Pedestrian road injuries                      | 427.0<br>(377.9 to 488.1)                        | 119.6<br>(102.0 to 139.8)                                 | 22.2<br>(14.6 to 32.3)                  | 7.9<br>(5.9 to 10.2)                              | -18.8<br>(-20.2 to -17.3)                           |
| Cyclist road injuries                         | 507.3<br>(428.5 to 597.5)                        | 219.1<br>(188.5 to 253.0)                                 | 21.9<br>(14.1 to 32.1)                  | 21.7<br>(19.4 to 24.2)                            | -3.1<br>(-4.7 to -1.2)                              |
| Motorcyclist road injuries                    | 454.7<br>(386.2 to 518.7)                        | 102.0<br>(86.6 to 123.1)                                  | 22.1<br>(14.6 to 31.8)                  | 3.7<br>(1.5 to 6.1)                               | -14.4<br>(-16.5 to -12.5)                           |
| Motor vehicle road injuries                   | 541.5<br>(455.8 to 618.6)                        | 226.6<br>(196.4 to 256.9)                                 | 26.4<br>(17.5 to 38.3)                  | 7.1<br>(5.1 to 9.2)                               | -14.5<br>(-16.1 to -12.8)                           |
| Other road injuries                           | 77.2<br>(66.8 to 89.3)                           | 27.4<br>(21.5 to 34.4)                                    | 2.9<br>(1.9 to 4.3)                     | 11.7<br>(9.4 to 14.3)                             | -10.0<br>(-11.8 to -8.2)                            |
| Other transport injuries                      | 440.6<br>(364.4 to 515.0)                        | 70.9<br>(62.9 to 80.2)                                    | 15.9<br>(10.2 to 23.3)                  | 0.5<br>(-1.0 to 2.1)                              | -17.8<br>(-19.1 to -16.4)                           |
| <b>Unintentional injuries</b>                 | <b>12,557.7</b><br><b>(11,606.0 to 13,676.9)</b> | <b>4,240.6</b><br><b>(3,975.7 to 4,528.7)</b>             | <b>354.5</b><br><b>(235.5 to 511.9)</b> | <b>18.3</b><br><b>(16.6 to 20.2)</b>              | <b>-3.0</b><br><b>(-4.3 to -1.6)</b>                |
| Falls                                         | 6,079.1<br>(5,313.1 to 6,884.7)                  | 2,141.4<br>(1,916.3 to 2,386.5)                           | 214.0<br>(147.0 to 300.7)               | 16.3<br>(14.1 to 18.4)                            | -6.6<br>(-8.1 to -5.1)                              |
| Drowning                                      | 37.8<br>(34.0 to 42.2)                           | 7.4<br>(6.4 to 8.6)                                       | 1.7<br>(1.1 to 2.5)                     | 24.6<br>(19.2 to 30.1)                            | -4.4<br>(-8.5 to -0.5)                              |
| Fire, heat, and hot substances                | 1,395.9<br>(1,190.8 to 1,655.9)                  | 75.4<br>(63.0 to 88.0)                                    | 24.1<br>(13.5 to 40.3)                  | 17.1<br>(13.9 to 20.9)                            | 1.4<br>(-1.4 to 4.8)                                |
| Poisonings                                    | 67.2<br>(55.6 to 81.3)                           | 76.1<br>(62.2 to 92.0)                                    | 5.0<br>(3.2 to 7.1)                     | 22.0<br>(13.1 to 31.8)                            | 12.0<br>(3.0 to 21.5)                               |
| Exposure to mechanical forces                 | 2,563.4<br>(2,158.6 to 3,251.4)                  | 658.9<br>(564.8 to 757.9)                                 | 46.6<br>(29.1 to 71.9)                  | 26.2<br>(23.7 to 28.7)                            | 6.5<br>(5.0 to 8.0)                                 |
| Unintentional firearm injuries                | 97.4<br>(79.2 to 122.8)                          | 8.8<br>(6.1 to 12.5)                                      | 1.5<br>(0.8 to 2.4)                     | 24.4<br>(20.9 to 27.3)                            | 7.0<br>(4.8 to 8.8)                                 |
| Unintentional suffocation                     | 32.5<br>(24.6 to 41.9)                           | 3.7<br>(2.4 to 5.6)                                       | 0.7<br>(0.4 to 1.2)                     | 9.5<br>(6.2 to 13.0)                              | -3.1<br>(-5.3 to -0.8)                              |
| Other exposure to mechanical forces           | 2,433.5<br>(2,027.4 to 3,118.8)                  | 646.4<br>(555.6 to 745.4)                                 | 44.4<br>(27.7 to 68.4)                  | 26.6<br>(24.1 to 29.0)                            | 6.7<br>(5.2 to 8.2)                                 |



| Cause                                                                               | Prevalence in thousands (95% UI)              | Incidence in thousands (95% UI)          | YLDs in thousands (95% UI)           |                                                   |                                                     |
|-------------------------------------------------------------------------------------|-----------------------------------------------|------------------------------------------|--------------------------------------|---------------------------------------------------|-----------------------------------------------------|
|                                                                                     | 2016 counts                                   | 2016 counts                              | 2016 counts                          | Percentage change in counts between 2006 and 2016 | Percentage change in age-standardised rates between |
| Adverse effects of medical treatment                                                | 20.0<br>(15.7 to 24.6)                        | 261.1<br>(225.8 to 298.3)                | 2.7<br>(1.7 to 4.0)                  | 22.4<br>(16.6 to 29.3)                            | 4.5<br>(0.8 to 8.5)                                 |
| Animal contact                                                                      | 353.7<br>(307.7 to 415.7)                     | 192.0<br>(156.5 to 230.6)                | 6.9<br>(4.3 to 10.3)                 | 8.1<br>(3.4 to 12.2)                              | -5.8<br>(-9.8 to -1.8)                              |
| Venomous animal contact                                                             | 52.3<br>(44.4 to 61.2)                        | 58.1<br>(42.6 to 76.0)                   | 3.0<br>(1.9 to 4.3)                  | 2.8<br>(-5.0 to 10.9)                             | -5.5<br>(-13.2 to 2.5)                              |
| Non-venomous animal contact                                                         | 301.4<br>(258.3 to 360.8)                     | 134.0<br>(107.6 to 162.7)                | 3.9<br>(2.2 to 6.4)                  | 12.6<br>(10.1 to 14.7)                            | -6.0<br>(-7.8 to -4.5)                              |
| Foreign body                                                                        | 438.6<br>(366.8 to 531.5)                     | 254.1<br>(223.6 to 294.5)                | 12.2<br>(7.7 to 18.3)                | 19.1<br>(16.6 to 21.7)                            | 1.9<br>(0.3 to 3.5)                                 |
| Pulmonary aspiration and foreign body in airway                                     | 63.4<br>(50.2 to 78.6)                        | 67.8<br>(60.2 to 77.1)                   | 1.7<br>(1.1 to 2.5)                  | 25.2<br>(21.9 to 29.6)                            | 0.6<br>(-1.2 to 2.5)                                |
| Foreign body in eyes                                                                | 28.7<br>(19.1 to 39.5)                        | 116.8<br>(90.6 to 155.9)                 | 2.0<br>(1.2 to 3.1)                  | 13.4<br>(7.8 to 20.2)                             | 0.4<br>(-2.3 to 3.7)                                |
| Foreign body in other body part                                                     | 346.4<br>(283.5 to 436.4)                     | 69.4<br>(58.6 to 82.0)                   | 8.6<br>(5.2 to 13.0)                 | 19.4<br>(17.0 to 21.9)                            | 2.6<br>(0.7 to 4.2)                                 |
| Environmental heat and cold exposure                                                | 217.2<br>(192.0 to 245.9)                     | 46.8<br>(39.8 to 54.8)                   | 7.5<br>(4.9 to 11.2)                 | 26.1<br>(21.6 to 30.4)                            | 0.6<br>(-2.8 to 4.0)                                |
| Other unintentional injuries                                                        | 1,385.0<br>(1,140.3 to 1,654.8)               | 527.3<br>(440.0 to 618.3)                | 33.8<br>(21.6 to 50.9)               | 21.6<br>(19.6 to 23.5)                            | 1.1<br>(-0.2 to 2.4)                                |
| <b>Self-harm and interpersonal violence</b>                                         | <b>1,369.0</b><br><b>(1,246.1 to 1,488.9)</b> | <b>470.9†</b><br><b>(429.4 to 516.2)</b> | <b>26.6</b><br><b>(17.9 to 38.1)</b> | <b>16.9</b><br><b>(13.5 to 19.8)</b>              | <b>1.0</b><br><b>(-1.2 to 3.1)</b>                  |
| Self-harm                                                                           | 316.6<br>(260.7 to 375.8)                     | 359.5<br>(322.9 to 402.1)                | 11.4<br>(7.3 to 16.5)                | 36.2<br>(30.9 to 41.3)                            | 8.5<br>(4.5 to 12.5)                                |
| Self-harm by firearm                                                                | 1.6<br>(1.2 to 2.0)                           | 0.1<br>(0.1 to 0.2)                      | < 0.05<br>(< 0.05 to < 0.05)         | 18.8<br>(15.7 to 21.9)                            | 7.0<br>(4.5 to 9.6)                                 |
| Self-harm by other specified means                                                  | 315.0<br>(259.3 to 374.2)                     | 359.4<br>(322.8 to 401.9)                | 11.4<br>(7.3 to 16.4)                | 36.2<br>(30.9 to 41.3)                            | 8.5<br>(4.5 to 12.5)                                |
| Interpersonal violence                                                              | 1,052.4<br>(952.4 to 1,161.5)                 | 111.4†<br>(94.4 to 129.9)                | 15.2<br>(10.2 to 21.6)               | 5.5<br>(2.8 to 7.9)                               | -3.4<br>(-5.5 to -1.3)                              |
| Assault by firearm                                                                  | 21.7<br>(17.8 to 26.2)                        | 2.7<br>(1.9 to 3.6)                      | 0.5<br>(0.3 to 0.8)                  | 27.2<br>(24.4 to 30.0)                            | 10.7<br>(8.5 to 12.8)                               |
| Assault by sharp object                                                             | 73.3<br>(59.7 to 87.2)                        | 18.7<br>(14.0 to 24.7)                   | 1.4<br>(0.8 to 2.1)                  | 11.3<br>(9.0 to 13.5)                             | -3.7<br>(-5.4 to -2.0)                              |
| Sexual violence                                                                     | 687.4<br>(600.8 to 793.1)                     | --                                       | 5.7<br>(3.8 to 8.2)                  | -6.5<br>(-10.5 to -2.6)                           | -4.4<br>(-8.4 to -0.1)                              |
| Assault by other means                                                              | 270.1<br>(225.2 to 324.7)                     | 90.0<br>(76.1 to 105.7)                  | 7.7<br>(5.0 to 11.5)                 | 14.1<br>(12.0 to 16.1)                            | -3.2<br>(-4.9 to -1.7)                              |
| <b>Forces of nature, conflict and terrorism, and executions and police conflict</b> | <b>78.8</b><br><b>(19.2 to 155.8)</b>         | <b>1.6†</b><br><b>(1.1 to 2.3)</b>       | <b>1.7</b><br><b>(0.2 to 5.0)</b>    | <b>-3.3</b><br><b>(-24.8 to 1.4)</b>              | <b>-18.6</b><br><b>(-37.6 to -14.3)</b>             |
| Exposure to forces of nature                                                        | 70.4<br>(12.0 to 145.3)                       | --                                       | 1.5<br>(0.2 to 4.5)                  | -8.0<br>(-32.1 to -3.3)                           | -23.8<br>(-45.6 to -19.6)                           |
| Conflict and terrorism                                                              | 1.7<br>(0.2 to 3.6)                           | --                                       | < 0.05<br>(< 0.05 to 0.1)            | --                                                | --                                                  |
| Executions and police conflict                                                      | 6.7<br>(3.8 to 10.8)                          | 1.6<br>(1.1 to 2.3)                      | 0.2<br>(< 0.05 to 0.4)               | 30.4<br>(21.4 to 34.4)                            | 20.8<br>(15.5 to 23.8)                              |
| <b>Impairments</b>                                                                  | --                                            | --                                       | --                                   | --                                                | --                                                  |
| Anaemia                                                                             | 8,806.3<br>(8,238.3 to 9,417.0)               | --                                       | 205.3<br>(139.7 to 296.7)            | 5.6<br>(-0.7 to 12.1)                             | -4.1<br>(-10.3 to 2.6)                              |
| Developmental intellectual disability                                               | 618.4<br>(493.4 to 745.6)                     | --                                       | 84.2<br>(62.4 to 111.5)              | -9.6<br>(-14.6 to -4.0)                           | -11.0<br>(-16.0 to -5.4)                            |
| Epilepsy                                                                            | 181.9<br>(97.1 to 271.0)                      | --                                       | 53.9<br>(28.4 to 92.1)               | -8.1<br>(-51.4 to 86.7)                           | -12.1<br>(-55.0 to 79.4)                            |
| Guillain-Barre syndrome                                                             | 0.4<br>(0.3 to 0.6)                           | --                                       | 0.1<br>(0.1 to 0.2)                  | 16.3<br>(10.6 to 22.6)                            | 0.2<br>(0.1 to 0.4)                                 |
| Hearing loss                                                                        | 9,018.3<br>(8,591.8 to 9,488.6)               | --                                       | 247.5<br>(168.8 to 346.9)            | 31.6<br>(26.4 to 35.8)                            | -5.0<br>(-8.5 to -2.0)                              |
| Heart failure                                                                       | 634.3<br>(550.8 to 731.8)                     | --                                       | 75.4<br>(54.6 to 96.0)               | 40.0<br>(30.6 to 49.3)                            | -7.5<br>(-13.2 to -1.8)                             |
| Infertility                                                                         | 350.1<br>(252.6 to 470.3)                     | --                                       | 2.5<br>(1.1 to 4.9)                  | -4.9<br>(-14.0 to 3.5)                            | -0.8<br>(-11.0 to 8.1)                              |
| Pelvic inflammatory disease                                                         | 1.5<br>(1.2 to 1.8)                           | --                                       | 0.2<br>(0.1 to 0.3)                  | -5.7<br>(-13.3 to 2.1)                            | -4.2<br>(-11.7 to 4.1)                              |
| Vision loss                                                                         | 5,775.8<br>(5,475.2 to 6,087.3)               | --                                       | 158.1<br>(110.4 to 227.2)            | 20.9<br>(17.1 to 24.9)                            | -1.8<br>(-4.8 to 1.1)                               |

We did not calculate incidence for the nine impairments, certain NTDs, and causes with only birth prevalence. Blank cells mean that no estimate is available.

† Incidence for aggregate causes represents the sum of the incidence of the causes below the aggregate.

‡ Incidence estimates for stroke represent first-ever stroke only.

^ Incidence of HIV/AIDS represents new infections of HIV only and does not include new infections of Tuberculosis in HIV positive cases.

SR Table 14: Prevalence, incidence, and YLDs for 2016, percentage change of YLD counts and percentage change of age-standardised YLD rates between 2006 and 2016 by cause and impairments, for all ages, South Sudan.

| Cause                                                                                | Prevalence in thousands (95% UI)          | Incidence in thousands (95% UI)               | YLDs in thousands (95% UI)             |                                                   |                                                     |
|--------------------------------------------------------------------------------------|-------------------------------------------|-----------------------------------------------|----------------------------------------|---------------------------------------------------|-----------------------------------------------------|
|                                                                                      | 2016 counts                               | 2016 counts                                   | 2016 counts                            | Percentage change in counts between 2006 and 2016 | Percentage change in age-standardised rates between |
| <b>All causes</b>                                                                    | <b>13,291.3</b><br>(13,245.5 to 13,337.4) | <b>108,767.3†</b><br>(102,927.4 to 115,565.0) | <b>1,370.0</b><br>(1,006.3 to 1,801.6) | <b>42.0</b><br>(37.7 to 46.5)                     | <b>-7.2</b><br>(-9.2 to -4.9)                       |
| <b>Communicable, maternal, neonatal, and nutritional disorders</b>                   | <b>11,683.4</b><br>(11,424.0 to 11,928.0) | <b>72,015.6†</b><br>(66,802.6 to 77,841.4)    | <b>464.3</b><br>(325.3 to 632.0)       | <b>21.2</b><br>(14.7 to 28.8)                     | <b>-23.8</b><br>(-27.3 to -19.7)                    |
| <b>HIV/AIDS and tuberculosis</b>                                                     | <b>3,361.6</b><br>(2,972.4 to 3,703.1)    | <b>34.0†</b><br>(25.0 to 47.9)                | <b>28.5</b><br>(13.7 to 56.3)          | <b>21.9</b><br>(2.3 to 65.6)                      | <b>-23.2</b><br>(-36.4 to 6.2)                      |
| Tuberculosis                                                                         | 3,025.1<br>(2,636.1 to 3,417.3)           | 21.2†<br>(17.4 to 26.2)                       | 5.7<br>(3.7 to 8.1)                    | 65.8<br>(47.2 to 88.7)                            | 6.3<br>(-3.7 to 17.6)                               |
| Drug-susceptible tuberculosis                                                        | 18.3<br>(14.8 to 22.6)                    | 20.8<br>(17.0 to 25.7)                        | 5.6<br>(3.6 to 7.9)                    | 65.5<br>(46.6 to 89.5)                            | 6.2<br>(-4.0 to 17.8)                               |
| Multidrug-resistant tuberculosis without extensive drug resistance                   | 0.4<br>(0.1 to 1.0)                       | 0.4<br>(0.1 to 1.1)                           | 0.1<br>(< 0.05 to 0.3)                 | 79.5<br>(-41.4 to 438.9)                          | 14.2<br>(-62.8 to 242.3)                            |
| Extensively drug-resistant tuberculosis                                              | < 0.05<br>(< 0.05 to < 0.05)              | < 0.05<br>(< 0.05 to < 0.05)                  | < 0.05<br>(< 0.05 to < 0.05)           | 451.0<br>(82.3 to 1,546.2)                        | 252.8<br>(16.5 to 943.1)                            |
| Latent tuberculosis infection                                                        | 3,006.3<br>(2,618.8 to 3,400.3)           | --                                            | --                                     | --                                                | --                                                  |
| HIV/AIDS                                                                             | 158.1<br>(79.5 to 306.3)                  | 12.8^<br>(5.1 to 25.7)                        | 22.8<br>(9.1 to 49.6)                  | 14.4<br>(-7.7 to 68.6)                            | -28.4<br>(-43.3 to 5.7)                             |
| Drug-susceptible HIV/AIDS - Tuberculosis                                             | 2.6<br>(1.5 to 4.2)                       | 3.0<br>(1.7 to 4.9)                           | 1.0<br>(0.5 to 1.8)                    | 31.8<br>(9.0 to 60.3)                             | -14.1<br>(-29.5 to 4.5)                             |
| Multidrug-resistant HIV/AIDS - Tuberculosis without extensive drug resistance        | 0.1<br>(< 0.05 to 0.2)                    | 0.1<br>(< 0.05 to 0.2)                        | < 0.05<br>(< 0.05 to 0.1)              | 43.8<br>(-52.2 to 334.0)                          | -6.4<br>(-68.9 to 182.6)                            |
| Extensively drug-resistant HIV/AIDS - Tuberculosis                                   | < 0.05<br>(< 0.05 to < 0.05)              | < 0.05<br>(< 0.05 to < 0.05)                  | < 0.05<br>(< 0.05 to < 0.05)           | 338.1<br>(45.7 to 1,221.3)                        | 185.2<br>(-5.2 to 760.4)                            |
| HIV/AIDS resulting in other diseases                                                 | 155.4<br>(77.0 to 302.9)                  | 12.8<br>(5.1 to 25.7)                         | 21.8<br>(8.0 to 48.3)                  | 13.7<br>(-9.4 to 72.2)                            | -28.9<br>(-44.6 to 7.4)                             |
| <b>Diarrhoea, lower respiratory infections, and other common infectious diseases</b> | <b>1,180.2</b><br>(1,129.9 to 1,239.3)    | <b>59,754.7†</b><br>(54,801.2 to 64,979.8)    | <b>74.9</b><br>(53.0 to 101.0)         | <b>51.6</b><br>(46.3 to 57.3)                     | <b>0.5</b><br>(-2.2 to 3.1)                         |
| Diarrhoeal diseases                                                                  | 353.5<br>(324.5 to 385.6)                 | 23,402.4<br>(21,514.6 to 25,512.7)            | 39.7<br>(27.2 to 55.1)                 | 48.0<br>(39.7 to 57.1)                            | -0.7<br>(-5.1 to 3.6)                               |
| Intestinal infectious diseases                                                       | 1.1<br>(0.8 to 1.5)                       | 18.7†<br>(13.2 to 25.7)                       | 0.2<br>(0.1 to 0.3)                    | 52.1<br>(21.1 to 89.5)                            | 1.8<br>(-15.7 to 24.4)                              |
| Typhoid fever                                                                        | 1.1<br>(0.8 to 1.5)                       | 17.1<br>(12.1 to 23.7)                        | 0.2<br>(0.1 to 0.3)                    | 54.5<br>(21.9 to 95.4)                            | 2.7<br>(-15.3 to 25.9)                              |
| Paratyphoid fever                                                                    | 0.1<br>(< 0.05 to 0.1)                    | 1.5<br>(1.0 to 2.3)                           | < 0.05<br>(< 0.05 to < 0.05)           | 70.1<br>(24.2 to 132.7)                           | 12.7<br>(-14.1 to 46.2)                             |
| Other intestinal infectious diseases                                                 | --                                        | --                                            | < 0.05<br>(< 0.05 to < 0.05)           | -15.0<br>(-41.2 to 24.1)                          | -39.8<br>(-53.9 to -20.5)                           |
| Lower respiratory infections                                                         | 23.6<br>(21.1 to 26.6)                    | 1,006.7<br>(893.8 to 1,143.9)                 | 1.4<br>(0.9 to 2.1)                    | 37.3<br>(18.3 to 56.6)                            | -6.8<br>(-15.7 to 2.7)                              |
| Upper respiratory infections                                                         | 439.9<br>(381.8 to 502.2)                 | 33,064.8<br>(28,522.8 to 37,954.2)            | 11.0<br>(6.4 to 17.3)                  | 53.4<br>(45.1 to 62.5)                            | 0.1<br>(-5.1 to 5.7)                                |
| Otitis media                                                                         | 251.0<br>(222.3 to 281.9)                 | 1,397.9<br>(1,072.1 to 1,825.8)               | 7.8<br>(4.8 to 11.7)                   | 52.9<br>(41.0 to 65.2)                            | 0.3<br>(-6.8 to 8.0)                                |
| Meningitis                                                                           | 132.3<br>(108.7 to 159.1)                 | 40.0<br>(34.4 to 47.5)                        | 9.6<br>(6.8 to 12.6)                   | 61.2<br>(50.1 to 72.5)                            | 4.8<br>(-1.6 to 11.0)                               |
| Pneumococcal meningitis                                                              | 70.6<br>(54.9 to 89.8)                    | 14.5<br>(11.4 to 18.4)                        | 4.5<br>(3.1 to 6.0)                    | 67.6<br>(49.3 to 87.5)                            | 9.1<br>(-1.5 to 19.4)                               |
| H influenzae type B meningitis                                                       | 34.2<br>(24.2 to 47.1)                    | 14.7<br>(10.8 to 19.7)                        | 2.4<br>(1.6 to 3.3)                    | 45.8<br>(26.4 to 65.1)                            | -5.8<br>(-16.1 to 4.0)                              |
| Meningococcal infection                                                              | 14.0<br>(9.1 to 20.2)                     | 7.8<br>(5.5 to 10.6)                          | 0.9<br>(0.6 to 1.3)                    | 71.0<br>(58.1 to 87.6)                            | 12.3<br>(3.6 to 23.2)                               |
| Other meningitis                                                                     | 13.5<br>(10.9 to 16.7)                    | 3.0<br>(2.0 to 4.5)                           | 1.8<br>(1.3 to 2.5)                    | 64.0<br>(47.3 to 86.3)                            | 4.4<br>(-5.7 to 16.4)                               |
| Encephalitis                                                                         | 29.5<br>(19.2 to 43.9)                    | 15.7<br>(13.6 to 17.9)                        | 3.2<br>(2.3 to 4.2)                    | 65.3<br>(45.8 to 85.6)                            | 7.2<br>(-4.7 to 19.0)                               |
| Diphtheria                                                                           | < 0.05<br>(< 0.05 to < 0.05)              | 0.2<br>(0.1 to 0.4)                           | < 0.05<br>(< 0.05 to < 0.05)           | -42.9<br>(-78.6 to 72.2)                          | -61.0<br>(-81.8 to -8.7)                            |
| Whooping cough                                                                       | 24.1<br>(18.3 to 30.5)                    | 176.1<br>(133.4 to 222.5)                     | 1.2<br>(0.7 to 1.9)                    | 36.5<br>(24.7 to 50.5)                            | -12.6<br>(-20.5 to -3.5)                            |
| Tetanus                                                                              | 0.4<br>(0.3 to 0.8)                       | 4.2<br>(1.6 to 10.6)                          | < 0.05<br>(< 0.05 to 0.1)              | -14.5<br>(-44.6 to 44.9)                          | -42.7<br>(-63.4 to -5.5)                            |
| Measles                                                                              | 5.0<br>(1.7 to 11.1)                      | 183.9<br>(63.0 to 405.5)                      | 0.5<br>(0.1 to 1.1)                    | 207.2<br>(103.1 to 412.2)                         | 96.9<br>(31.3 to 225.1)                             |
| Varicella and herpes zoster                                                          | 13.7<br>(12.8 to 14.8)                    | 444.2<br>(407.2 to 482.3)                     | 0.4<br>(0.2 to 0.6)                    | 53.4<br>(35.0 to 75.1)                            | 0.0<br>(-10.3 to 11.6)                              |
| <b>Neglected tropical diseases and malaria</b>                                       | <b>5,122.5</b><br>(4,685.9 to 5,531.4)    | <b>3,468.7†</b><br>(2,251.7 to 5,094.1)       | <b>128.6</b><br>(82.0 to 191.4)        | <b>-0.8</b><br>(-8.3 to 7.7)                      | <b>-36.2</b><br>(-41.0 to -30.9)                    |
| Malaria                                                                              | 1,001.2<br>(767.7 to 1,326.8)             | 2,266.2<br>(1,124.8 to 3,719.4)               | 15.5<br>(10.6 to 22.1)                 | 6.2<br>(-9.9 to 24.3)                             | -28.6<br>(-38.0 to -18.7)                           |
| Chagas disease                                                                       | --                                        | --                                            | --                                     | --                                                | --                                                  |
| Leishmaniasis                                                                        | 8.8<br>(6.7 to 10.7)                      | 27.6<br>(21.6 to 34.0)                        | 0.5<br>(0.3 to 0.7)                    | 54.8<br>(14.9 to 108.2)                           | -5.3<br>(-33.4 to 29.9)                             |
| Visceral leishmaniasis                                                               | 6.9<br>(5.4 to 8.5)                       | 27.6<br>(21.6 to 34.0)                        | 0.5<br>(0.3 to 0.7)                    | 54.8<br>(14.9 to 108.2)                           | -5.3<br>(-33.4 to 29.9)                             |
| Cutaneous and mucocutaneous leishmaniasis                                            | --                                        | --                                            | --                                     | --                                                | --                                                  |
| African trypanosomiasis                                                              | 0.1<br>(0.1 to 0.2)                       | 0.1<br>(0.1 to 0.1)                           | < 0.05<br>(< 0.05 to 0.1)              | -92.2<br>(-94.9 to -88.5)                         | -94.8<br>(-97.0 to -90.9)                           |
| Schistosomiasis                                                                      | 1,969.3<br>(1,642.0 to 2,339.4)           | 742.7<br>(641.0 to 859.4)                     | 15.1<br>(7.4 to 28.8)                  | 57.2<br>(49.0 to 65.7)                            | 1.2<br>(-3.7 to 6.5)                                |
| Cysticercosis                                                                        | 1.0<br>(0.8 to 1.2)                       | --                                            | 0.2<br>(0.1 to 0.3)                    | 55.7<br>(7.8 to 123.5)                            | -1.2<br>(-27.6 to 34.7)                             |
| Cystic echinococcosis                                                                | 21.7<br>(6.0 to 66.2)                     | 4.6<br>(1.3 to 13.6)                          | 2.0<br>(0.5 to 6.3)                    | 31.8<br>(-74.2 to 542.9)                          | -14.4<br>(-83.0 to 338.8)                           |
| Lymphatic filariasis                                                                 | 31.7<br>(12.1 to 74.7)                    | 1.9<br>(1.4 to 2.4)                           | 2.7<br>(0.4 to 8.4)                    | 32.0<br>(15.4 to 49.1)                            | -14.6<br>(-23.7 to -5.2)                            |
| Onchocerciasis                                                                       | 1,343.9<br>(862.3 to 2,226.2)             | 369.0<br>(181.2 to 652.1)                     | 78.5<br>(42.5 to 131.7)                | -14.1<br>(-22.7 to -6.4)                          | -43.4<br>(-48.6 to -38.5)                           |
| Trachoma                                                                             | 10.2<br>(7.2 to 13.7)                     | --                                            | 0.8<br>(0.5 to 1.2)                    | -8.9<br>(-26.2 to 11.1)                           | -42.6<br>(-55.8 to -24.9)                           |
| Dengue                                                                               | 3.1<br>(1.2 to 6.2)                       | 51.2<br>(21.4 to 99.3)                        | 0.5<br>(0.2 to 1.2)                    | 215.7<br>(127.8 to 652.5)                         | 104.0<br>(52.5 to 380.2)                            |
| Yellow fever                                                                         | 0.1<br>(< 0.05 to 0.3)                    | 4.5<br>(1.1 to 11.4)                          | < 0.05<br>(< 0.05 to < 0.05)           | -13.0<br>(-52.9 to 67.8)                          | -42.6<br>(-67.1 to -0.1)                            |
| Rabies                                                                               | < 0.05<br>(< 0.05 to < 0.05)              | 0.2<br>(0.1 to 0.6)                           | < 0.05<br>(< 0.05 to < 0.05)           | -1.5<br>(-41.3 to 75.3)                           | -33.0<br>(-56.7 to 8.7)                             |
| Intestinal nematode infections                                                       | 1,753.9<br>(1,487.7 to 2,092.9)           | --                                            | 4.2<br>(2.5 to 6.7)                    | 57.5<br>(31.0 to 88.0)                            | 4.3<br>(-13.6 to 25.9)                              |
| Ascariasis                                                                           | 182.1<br>(135.9 to 242.7)                 | --                                            | < 0.05<br>(< 0.05 to < 0.05)           | 50.3<br>(19.1 to 88.0)                            | -0.5<br>(-23.9 to 28.1)                             |

| Cause                                                                   | Prevalence in thousands (95% UI)                 | Incidence in thousands (95% UI)                   | YLDs in thousands (95% UI)                |                                                   |                                                     |
|-------------------------------------------------------------------------|--------------------------------------------------|---------------------------------------------------|-------------------------------------------|---------------------------------------------------|-----------------------------------------------------|
|                                                                         | 2016 counts                                      | 2016 counts                                       | 2016 counts                               | Percentage change in counts between 2006 and 2016 | Percentage change in age-standardised rates between |
| Trichuriasis                                                            | 361.3<br>(263.6 to 514.6)                        | --                                                | < 0.05<br>(< 0.05 to < 0.05)              | 48.1<br>(1.7 to 116.9)                            | -1.4<br>(-37.9 to 54.3)                             |
| Hookworm disease                                                        | 1,233.2<br>(949.6 to 1,608.8)                    | --                                                | 4.2<br>(2.5 to 6.7)                       | 57.5<br>(30.9 to 88.2)                            | 4.3<br>(-13.6 to 26.0)                              |
| Food-borne trematodiasis                                                | --                                               | --                                                | --                                        | --                                                | --                                                  |
| Leprosy                                                                 | 8.0<br>(7.5 to 8.4)                              | 0.8<br>(0.7 to 0.8)                               | 0.5<br>(0.3 to 0.7)                       | 50.6<br>(34.4 to 68.3)                            | -5.0<br>(-12.7 to 4.0)                              |
| Ebola virus disease                                                     | --                                               | --                                                | --                                        | --                                                | --                                                  |
| Zika virus disease                                                      | --                                               | --                                                | --                                        | --                                                | --                                                  |
| Guinea worm disease                                                     | < 0.05<br>(< 0.05 to < 0.05)                     | < 0.05<br>(< 0.05 to < 0.05)                      | < 0.05<br>(< 0.05 to < 0.05)              | -99.9<br>(-100.0 to -99.7)                        | -99.9<br>(-100.0 to -99.8)                          |
| Other neglected tropical diseases                                       | 220.8<br>(194.0 to 252.0)                        | --                                                | 8.1<br>(4.9 to 11.8)                      | 46.4<br>(22.4 to 74.5)                            | -5.2<br>(-20.5 to 10.9)                             |
| <b>Maternal disorders</b>                                               | <b>49.3</b><br><b>(42.1 to 58.4)</b>             | <b>819.5†</b><br><b>(558.4 to 1,160.3)</b>        | <b>7.2</b><br><b>(4.9 to 10.2)</b>        | <b>29.0</b><br><b>(12.2 to 49.9)</b>              | <b>-19.4</b><br><b>(-29.8 to -6.8)</b>              |
| Maternal haemorrhage                                                    | 7.5<br>(5.3 to 10.4)                             | 64.1<br>(42.3 to 96.0)                            | 0.4<br>(0.2 to 0.6)                       | 67.0<br>(10.0 to 152.3)                           | 4.6<br>(-30.7 to 56.6)                              |
| Maternal sepsis and other pregnancy related infections                  | 6.9<br>(5.5 to 8.7)                              | 30.5<br>(22.8 to 42.0)                            | 0.1<br>(0.1 to 0.3)                       | 47.2<br>(-26.8 to 178.6)                          | -7.5<br>(-53.2 to 68.5)                             |
| Maternal hypertensive disorders                                         | 18.1<br>(11.2 to 25.8)                           | 74.7<br>(56.0 to 96.1)                            | 0.9<br>(0.5 to 1.4)                       | 39.1<br>(-12.4 to 132.1)                          | -12.2<br>(-44.5 to 45.9)                            |
| Maternal obstructed labour and uterine rupture                          | 13.2<br>(9.8 to 17.5)                            | 49.5<br>(34.5 to 68.3)                            | 4.2<br>(2.6 to 6.4)                       | 21.9<br>(2.4 to 45.1)                             | -23.3<br>(-35.0 to -9.6)                            |
| Maternal abortion, miscarriage, and ectopic pregnancy                   | 4.9<br>(2.5 to 8.4)                              | 600.7<br>(341.6 to 938.4)                         | 0.5<br>(0.2 to 1.0)                       | 71.4<br>(4.0 to 192.1)                            | 6.7<br>(-35.5 to 80.6)                              |
| Other maternal disorders                                                | --                                               | --                                                | 1.1<br>(0.8 to 1.6)                       | 23.1<br>(7.3 to 42.9)                             | -23.2<br>(-33.1 to -11.2)                           |
| <b>Neonatal disorders</b>                                               | <b>177.5</b><br><b>(140.5 to 220.7)</b>          | --                                                | <b>19.6</b><br><b>(10.4 to 37.9)</b>      | <b>39.1</b><br><b>(8.5 to 75.4)</b>               | <b>-10.0</b><br><b>(-31.1 to 15.2)</b>              |
| Neonatal preterm birth complications                                    | 102.8<br>(76.1 to 138.6)                         | --                                                | 5.4<br>(3.5 to 8.1)                       | 62.1<br>(24.4 to 109.6)                           | 6.5<br>(-19.1 to 39.2)                              |
| Neonatal encephalopathy due to birth asphyxia and trauma                | 74.1<br>(39.1 to 129.2)                          | --                                                | 6.3<br>(1.2 to 20.2)                      | 36.6<br>(-17.6 to 92.3)                           | -11.0<br>(-48.8 to 33.9)                            |
| Neonatal sepsis and other neonatal infections                           | 13.8<br>(4.7 to 34.6)                            | --                                                | 5.0<br>(0.9 to 15.2)                      | 20.2<br>(-35.5 to 114.9)                          | -26.0<br>(-66.9 to 42.1)                            |
| Hemolytic disease and other neonatal jaundice                           | 2.2<br>(1.9 to 2.6)                              | --                                                | 0.7<br>(0.6 to 1.0)                       | 54.5<br>(41.2 to 68.4)                            | 0.4<br>(-7.3 to 9.1)                                |
| Other neonatal disorders                                                | --                                               | --                                                | 2.2<br>(1.2 to 3.9)                       | 42.9<br>(15.4 to 75.4)                            | -9.2<br>(-26.9 to 12.8)                             |
| <b>Nutritional deficiencies</b>                                         | <b>6,965.9</b><br><b>(6,354.9 to 7,636.3)</b>    | <b>4,373.4†</b><br><b>(2,739.1 to 6,422.1)</b>    | <b>189.6</b><br><b>(124.2 to 269.0)</b>   | <b>25.9</b><br><b>(14.3 to 37.8)</b>              | <b>-19.9</b><br><b>(-25.8 to -14.1)</b>             |
| Protein-energy malnutrition                                             | 541.1<br>(413.2 to 692.4)                        | 426.1<br>(330.4 to 535.4)                         | 26.0<br>(16.1 to 38.1)                    | -0.8<br>(-24.1 to 28.2)                           | -37.5<br>(-52.5 to -19.0)                           |
| Iodine deficiency                                                       | 1,384.7<br>(1,123.9 to 1,665.6)                  | 53.9<br>(43.7 to 64.8)                            | 36.3<br>(24.2 to 53.1)                    | 2.5<br>(-6.5 to 11.5)                             | -33.9<br>(-39.5 to -28.3)                           |
| Vitamin A deficiency                                                    | 3,353.5<br>(2,302.0 to 4,562.8)                  | 3,893.4<br>(2,279.7 to 5,913.4)                   | 1.2<br>(0.7 to 2.1)                       | 51.4<br>(24.2 to 88.8)                            | 1.6<br>(-14.5 to 22.9)                              |
| Iron-deficiency anaemia                                                 | 3,663.7<br>(3,281.7 to 4,050.4)                  | --                                                | 125.2<br>(79.4 to 180.4)                  | 43.4<br>(25.2 to 63.3)                            | -8.6<br>(-18.6 to 1.1)                              |
| Other nutritional deficiencies                                          | --                                               | --                                                | 0.9<br>(0.5 to 1.3)                       | -2.2<br>(-26.0 to 27.3)                           | -38.3<br>(-53.4 to -18.8)                           |
| <b>Other communicable, maternal, neonatal, and nutritional diseases</b> | <b>4,723.7</b><br><b>(4,473.7 to 5,003.9)</b>    | <b>3,565.2</b><br><b>(2,878.8 to 4,436.8)</b>     | <b>15.9</b><br><b>(9.9 to 25.1)</b>       | <b>54.9</b><br><b>(44.5 to 66.9)</b>              | <b>-1.5</b><br><b>(-6.9 to 4.2)</b>                 |
| Sexually transmitted diseases excluding HIV                             | 3,563.8<br>(3,330.0 to 3,787.5)                  | 2,692.5<br>(2,161.6 to 3,334.5)                   | 9.3<br>(5.4 to 15.8)                      | 53.6<br>(43.6 to 63.5)                            | -2.1<br>(-8.3 to 4.1)                               |
| Syphilis                                                                | 835.9<br>(631.3 to 1,056.6)                      | 636.8<br>(448.9 to 858.9)                         | 0.7<br>(0.5 to 1.0)                       | 42.5<br>(20.0 to 65.8)                            | -7.6<br>(-21.9 to 7.3)                              |
| Chlamydial infection                                                    | 174.1<br>(131.0 to 222.9)                        | 154.1<br>(121.5 to 198.7)                         | 1.1<br>(0.7 to 1.9)                       | 54.6<br>(35.8 to 77.0)                            | -1.6<br>(-13.2 to 12.7)                             |
| Gonococcal infection                                                    | 273.3<br>(152.5 to 443.9)                        | 952.8<br>(497.8 to 1,613.4)                       | 3.1<br>(1.3 to 6.4)                       | 54.9<br>(35.9 to 74.8)                            | -1.4<br>(-13.4 to 10.4)                             |
| Trichomoniasis                                                          | 569.6<br>(465.4 to 686.8)                        | 541.3<br>(430.6 to 684.0)                         | 0.8<br>(0.3 to 1.7)                       | 57.2<br>(47.9 to 66.2)                            | -0.3<br>(-5.5 to 4.9)                               |
| Genital herpes                                                          | 2,483.4<br>(2,127.3 to 2,911.5)                  | 273.8<br>(225.9 to 335.5)                         | 0.7<br>(0.2 to 1.5)                       | 56.8<br>(44.0 to 70.3)                            | 0.2<br>(-7.0 to 7.7)                                |
| Other sexually transmitted diseases                                     | 99.2<br>(77.5 to 125.1)                          | 133.7<br>(110.8 to 160.9)                         | 3.0<br>(1.8 to 4.8)                       | 52.9<br>(40.1 to 65.7)                            | -2.3<br>(-10.2 to 5.6)                              |
| Hepatitis                                                               | 1,487.3<br>(1,185.0 to 1,854.7)                  | 872.7<br>(491.3 to 1,539.8)                       | 0.7<br>(0.4 to 1.2)                       | 38.1<br>(5.0 to 82.4)                             | -4.7<br>(-22.1 to 15.7)                             |
| Acute hepatitis A                                                       | 26.6<br>(1.8 to 76.1)                            | 346.3<br>(23.9 to 989.7)                          | 0.1<br>(< 0.05 to 0.3)                    | 40.0<br>(-70.0 to 573.0)                          | -2.5<br>(-66.3 to 213.9)                            |
| Hepatitis B                                                             | 1,244.5<br>(934.8 to 1,605.6)                    | 470.9<br>(342.4 to 641.4)                         | 0.5<br>(0.3 to 0.9)                       | 36.2<br>(10.1 to 67.6)                            | -5.8<br>(-22.2 to 14.1)                             |
| Hepatitis C                                                             | 213.7<br>(187.3 to 240.5)                        | 22.3<br>(20.0 to 24.7)                            | < 0.05<br>(< 0.05 to < 0.05)              | 58.6<br>(26.8 to 99.4)                            | 5.5<br>(-3.7 to 15.9)                               |
| Acute hepatitis E                                                       | 2.6<br>(2.1 to 3.2)                              | 33.2<br>(27.2 to 41.7)                            | < 0.05<br>(< 0.05 to 0.1)                 | 48.8<br>(5.3 to 105.7)                            | 0.9<br>(-20.2 to 27.1)                              |
| Other infectious diseases                                               | 161.6<br>(142.9 to 182.8)                        | < 0.05<br>(< 0.05 to < 0.05)                      | 5.9<br>(3.6 to 8.5)                       | 59.6<br>(35.6 to 88.7)                            | 1.4<br>(-13.2 to 17.2)                              |
| <b>Non-communicable diseases</b>                                        | <b>11,951.6</b><br><b>(11,793.3 to 12,121.1)</b> | <b>35,633.0†</b><br><b>(32,465.9 to 38,590.6)</b> | <b>818.1</b><br><b>(600.4 to 1,065.7)</b> | <b>56.1</b><br><b>(50.6 to 62.0)</b>              | <b>0.9</b><br><b>(-1.6 to 3.6)</b>                  |
| <b>Neoplasms</b>                                                        | <b>20.7</b><br><b>(16.0 to 31.4)</b>             | <b>8.3</b><br><b>(6.3 to 11.2)</b>                | <b>2.8</b><br><b>(1.7 to 4.2)</b>         | <b>55.5</b><br><b>(40.8 to 66.0)</b>              | <b>1.3</b><br><b>(-8.1 to 7.7)</b>                  |
| Lip and oral cavity cancer                                              | 0.5<br>(0.4 to 0.6)                              | 0.2<br>(0.1 to 0.2)                               | 0.1<br>(< 0.05 to 0.1)                    | 60.7<br>(42.0 to 85.7)                            | 4.4<br>(-8.5 to 20.9)                               |
| Nasopharynx cancer                                                      | 0.4<br>(0.3 to 0.6)                              | 0.1<br>(0.1 to 0.2)                               | 0.1<br>(< 0.05 to 0.1)                    | 46.2<br>(25.3 to 73.0)                            | -5.1<br>(-18.6 to 12.5)                             |
| Other pharynx cancer                                                    | 0.1<br>(0.1 to 0.2)                              | 0.1<br>(< 0.05 to 0.1)                            | < 0.05<br>(< 0.05 to < 0.05)              | 49.6<br>(33.8 to 66.9)                            | -1.7<br>(-11.9 to 9.6)                              |
| Oesophageal cancer                                                      | 0.4<br>(0.4 to 0.5)                              | 0.4<br>(0.4 to 0.5)                               | 0.1<br>(0.1 to 0.1)                       | 50.5<br>(21.3 to 89.7)                            | -2.7<br>(-21.4 to 21.1)                             |
| Stomach cancer                                                          | 0.5<br>(0.4 to 0.6)                              | 0.4<br>(0.3 to 0.4)                               | 0.1<br>(0.1 to 0.1)                       | 44.5<br>(27.9 to 65.7)                            | -6.0<br>(-18.1 to 9.6)                              |
| Colon and rectum cancer                                                 | 1.0<br>(0.8 to 1.4)                              | 0.4<br>(0.3 to 0.5)                               | 0.1<br>(0.1 to 0.2)                       | 65.0<br>(41.6 to 96.4)                            | 6.1<br>(-9.5 to 26.9)                               |
| Liver cancer                                                            | 0.2<br>(0.1 to 0.2)                              | 0.4<br>(0.3 to 0.5)                               | 0.1<br>(0.1 to 0.1)                       | 55.8<br>(38.5 to 75.0)                            | 0.7<br>(-10.7 to 12.7)                              |
| Liver cancer due to hepatitis B                                         | 0.1<br>(0.1 to 0.2)                              | 0.1<br>(0.1 to 0.2)                               | < 0.05<br>(< 0.05 to < 0.05)              | 54.8<br>(35.5 to 77.1)                            | 0.5<br>(-11.8 to 14.3)                              |



| Cause                                              | Prevalence in thousands (95% UI)        | Incidence in thousands (95% UI)          | YLDs in thousands (95% UI)           |                                                   |                                                     |
|----------------------------------------------------|-----------------------------------------|------------------------------------------|--------------------------------------|---------------------------------------------------|-----------------------------------------------------|
|                                                    | 2016 counts                             | 2016 counts                              | 2016 counts                          | Percentage change in counts between 2006 and 2016 | Percentage change in age-standardised rates between |
| Liver cancer due to hepatitis C                    | 0.1<br>(0.1 to 0.1)                     | 0.1<br>(0.1 to 0.2)                      | < 0.05<br>(< 0.05 to < 0.05)         | 56.7<br>(36.8 to 78.3)                            | 0.8<br>(-11.7 to 14.3)                              |
| Liver cancer due to alcohol use                    | < 0.05<br>(< 0.05 to 0.1)               | < 0.05<br>(< 0.05 to 0.1)                | < 0.05<br>(< 0.05 to < 0.05)         | 60.1<br>(39.9 to 84.6)                            | 3.8<br>(-9.1 to 18.9)                               |
| Liver cancer due to other causes                   | 0.1<br>(0.1 to 0.1)                     | 0.1<br>(0.1 to 0.1)                      | < 0.05<br>(< 0.05 to < 0.05)         | 54.5<br>(37.6 to 74.6)                            | -0.5<br>(-11.9 to 12.4)                             |
| Gallbladder and biliary tract cancer               | < 0.05<br>(< 0.05 to 0.1)               | 0.1<br>(< 0.05 to 0.1)                   | < 0.05<br>(< 0.05 to < 0.05)         | 48.8<br>(35.3 to 62.6)                            | -3.6<br>(-11.7 to 5.0)                              |
| Pancreatic cancer                                  | 0.1<br>(0.1 to 0.1)                     | 0.2<br>(0.1 to 0.2)                      | < 0.05<br>(< 0.05 to < 0.05)         | 58.8<br>(45.5 to 75.2)                            | 2.2<br>(-6.3 to 12.5)                               |
| Larynx cancer                                      | 0.2<br>(0.1 to 0.2)                     | 0.1<br>(< 0.05 to 0.1)                   | < 0.05<br>(< 0.05 to < 0.05)         | 54.8<br>(36.6 to 75.4)                            | 0.9<br>(-10.8 to 13.9)                              |
| Tracheal, bronchus, and lung cancer                | 0.2<br>(0.2 to 0.3)                     | 0.2<br>(0.2 to 0.3)                      | 0.1<br>(< 0.05 to 0.1)               | 58.9<br>(32.4 to 88.9)                            | 2.3<br>(-15.6 to 22.6)                              |
| Malignant skin melanoma                            | 0.2<br>(0.1 to 0.2)                     | 0.1<br>(< 0.05 to 0.1)                   | < 0.05<br>(< 0.05 to < 0.05)         | 58.5<br>(35.6 to 87.0)                            | 2.9<br>(-11.7 to 21.3)                              |
| Non-melanoma skin cancer                           | < 0.05<br>(< 0.05 to 0.1)               | 0.3<br>(0.2 to 0.5)                      | < 0.05<br>(< 0.05 to < 0.05)         | 68.3<br>(36.4 to 105.8)                           | 5.4<br>(-18.1 to 29.6)                              |
| Non-melanoma skin cancer (squamous-cell carcinoma) | < 0.05<br>(< 0.05 to 0.1)               | 0.1<br>(0.1 to 0.1)                      | < 0.05<br>(< 0.05 to < 0.05)         | 69.1<br>(31.5 to 116.6)                           | 5.1<br>(-20.9 to 35.5)                              |
| Non-melanoma skin cancer (basal-cell carcinoma)    | < 0.05<br>(< 0.05 to 0.1)               | 0.3<br>(0.1 to 0.4)                      | < 0.05<br>(< 0.05 to < 0.05)         | 64.8<br>(45.4 to 83.4)                            | 6.8<br>(-4.4 to 17.0)                               |
| Breast cancer                                      | 1.8<br>(1.2 to 2.4)                     | 0.5<br>(0.3 to 0.6)                      | 0.2<br>(0.1 to 0.3)                  | 60.9<br>(29.2 to 101.9)                           | 4.2<br>(-15.3 to 30.4)                              |
| Cervical cancer                                    | 6.3<br>(3.4 to 13.9)                    | 1.9<br>(1.0 to 4.0)                      | 0.7<br>(0.3 to 1.6)                  | 49.1<br>(18.4 to 89.9)                            | -3.1<br>(-21.9 to 20.8)                             |
| Uterine cancer                                     | 0.5<br>(0.4 to 0.7)                     | 0.1<br>(0.1 to 0.2)                      | < 0.05<br>(< 0.05 to 0.1)            | 59.2<br>(28.7 to 103.7)                           | 3.5<br>(-16.1 to 31.2)                              |
| Ovarian cancer                                     | 0.6<br>(0.4 to 0.7)                     | 0.2<br>(0.1 to 0.3)                      | 0.1<br>(0.1 to 0.1)                  | 62.1<br>(21.5 to 125.0)                           | 4.2<br>(-23.2 to 45.9)                              |
| Prostate cancer                                    | 2.0<br>(0.7 to 2.9)                     | 0.7<br>(0.3 to 0.9)                      | 0.3<br>(0.1 to 0.5)                  | 70.2<br>(36.9 to 110.9)                           | 8.3<br>(-10.7 to 30.4)                              |
| Testicular cancer                                  | < 0.05<br>(< 0.05 to 0.1)               | < 0.05<br>(< 0.05 to < 0.05)             | < 0.05<br>(< 0.05 to < 0.05)         | 53.7<br>(25.4 to 91.7)                            | -1.2<br>(-20.1 to 24.2)                             |
| Kidney cancer                                      | 0.5<br>(0.3 to 0.8)                     | 0.1<br>(0.1 to 0.2)                      | < 0.05<br>(< 0.05 to 0.1)            | 64.3<br>(7.0 to 159.9)                            | 8.6<br>(-9.0 to 32.2)                               |
| Bladder cancer                                     | 0.3<br>(0.2 to 0.4)                     | 0.1<br>(0.1 to 0.1)                      | < 0.05<br>(< 0.05 to 0.1)            | 60.0<br>(42.9 to 79.1)                            | 2.0<br>(-9.0 to 14.4)                               |
| Brain and nervous system cancer                    | 0.3<br>(0.2 to 0.5)                     | 0.1<br>(0.1 to 0.2)                      | < 0.05<br>(< 0.05 to 0.1)            | 59.2<br>(44.1 to 85.4)                            | 5.1<br>(-4.6 to 26.4)                               |
| Thyroid cancer                                     | 0.4<br>(0.2 to 0.5)                     | 0.1<br>(< 0.05 to 0.1)                   | < 0.05<br>(< 0.05 to < 0.05)         | 54.4<br>(26.7 to 88.2)                            | -0.6<br>(-17.9 to 19.8)                             |
| Mesothelioma                                       | < 0.05<br>(< 0.05 to < 0.05)            | < 0.05<br>(< 0.05 to < 0.05)             | < 0.05<br>(< 0.05 to < 0.05)         | 56.3<br>(40.1 to 76.2)                            | 2.1<br>(-8.8 to 15.0)                               |
| Hodgkin lymphoma                                   | 0.3<br>(0.1 to 0.4)                     | 0.1<br>(< 0.05 to 0.1)                   | < 0.05<br>(< 0.05 to 0.1)            | 52.2<br>(30.9 to 81.2)                            | 2.2<br>(-8.0 to 16.2)                               |
| Non-Hodgkin's lymphoma                             | 1.7<br>(1.0 to 2.2)                     | 0.5<br>(0.3 to 0.7)                      | 0.2<br>(0.1 to 0.2)                  | 56.0<br>(29.6 to 89.1)                            | 3.2<br>(-8.2 to 16.9)                               |
| Multiple myeloma                                   | 0.1<br>(0.1 to 0.2)                     | 0.1<br>(< 0.05 to 0.1)                   | < 0.05<br>(< 0.05 to 0.1)            | 58.9<br>(43.4 to 85.8)                            | 5.0<br>(-5.4 to 23.1)                               |
| Leukaemia                                          | 0.8<br>(0.5 to 1.1)                     | 0.2<br>(0.1 to 0.3)                      | 0.1<br>(0.1 to 0.1)                  | 46.9<br>(32.6 to 61.3)                            | -3.3<br>(-13.0 to 5.9)                              |
| Acute lymphoid leukaemia                           | 0.2<br>(0.1 to 0.2)                     | 0.1<br>(< 0.05 to 0.1)                   | < 0.05<br>(< 0.05 to < 0.05)         | 49.0<br>(24.2 to 81.8)                            | -0.0<br>(-13.2 to 16.5)                             |
| Chronic lymphoid leukaemia                         | 0.1<br>(0.1 to 0.1)                     | < 0.05<br>(< 0.05 to < 0.05)             | < 0.05<br>(< 0.05 to < 0.05)         | 55.1<br>(29.4 to 87.6)                            | 0.8<br>(-15.7 to 21.9)                              |
| Acute myeloid leukaemia                            | 0.1<br>(< 0.05 to 0.1)                  | < 0.05<br>(< 0.05 to 0.1)                | < 0.05<br>(< 0.05 to < 0.05)         | 58.0<br>(33.7 to 84.0)                            | 4.6<br>(-8.9 to 19.6)                               |
| Chronic myeloid leukaemia                          | 0.1<br>(< 0.05 to 0.1)                  | < 0.05<br>(< 0.05 to < 0.05)             | < 0.05<br>(< 0.05 to < 0.05)         | 52.7<br>(29.0 to 84.0)                            | -1.0<br>(-15.8 to 17.5)                             |
| Other leukaemia                                    | 0.4<br>(0.2 to 0.6)                     | 0.1<br>(< 0.05 to 0.1)                   | < 0.05<br>(< 0.05 to 0.1)            | 40.4<br>(23.0 to 59.8)                            | -7.5<br>(-19.3 to 7.0)                              |
| Other neoplasms                                    | 2.3<br>(1.4 to 2.9)                     | 0.8<br>(0.5 to 1.0)                      | 0.2<br>(0.1 to 0.3)                  | 49.4<br>(31.2 to 75.9)                            | -3.2<br>(-14.5 to 14.2)                             |
| <b>Cardiovascular diseases</b>                     | <b>597.1</b><br><b>(552.6 to 639.4)</b> | <b>47.1†</b><br><b>(45.0 to 49.3)</b>    | <b>32.7</b><br><b>(23.4 to 44.1)</b> | <b>61.4</b><br><b>(55.1 to 69.5)</b>              | <b>1.9</b><br><b>(-1.6 to 6.2)</b>                  |
| Rheumatic heart disease                            | 149.6<br>(131.8 to 168.3)               | 6.8<br>(5.9 to 7.7)                      | 7.1<br>(4.5 to 10.3)                 | 74.0<br>(59.7 to 94.4)                            | 11.4<br>(2.4 to 22.6)                               |
| Ischaemic heart disease                            | 129.4<br>(120.5 to 138.7)               | 17.3<br>(16.1 to 18.6)                   | 6.0<br>(4.1 to 8.2)                  | 54.2<br>(45.9 to 62.5)                            | -1.3<br>(-5.8 to 3.0)                               |
| Cerebrovascular disease                            | 37.3<br>(34.7 to 39.8)                  | 7.2‡<br>(6.6 to 7.9)                     | 5.3<br>(3.8 to 6.6)                  | 58.7<br>(47.1 to 70.7)                            | 0.5<br>(-6.7 to 8.0)                                |
| Ischaemic stroke                                   | 32.8<br>(29.6 to 36.2)                  | 4.7‡<br>(4.2 to 5.4)                     | 4.4<br>(3.1 to 5.6)                  | 59.4<br>(45.8 to 73.8)                            | 0.5<br>(-7.6 to 9.2)                                |
| Hemorrhagic stroke                                 | 6.3<br>(5.6 to 7.0)                     | 2.5‡<br>(2.2 to 2.8)                     | 0.9<br>(0.6 to 1.1)                  | 55.5<br>(36.3 to 74.8)                            | 0.3<br>(-13.0 to 14.6)                              |
| Hypertensive heart disease                         | 9.3<br>(7.4 to 11.7)                    | --                                       | 0.8<br>(0.5 to 1.1)                  | 56.4<br>(40.1 to 75.8)                            | -1.3<br>(-10.3 to 9.8)                              |
| Cardiomyopathy and myocarditis                     | 6.4<br>(5.0 to 7.8)                     | 2.9†<br>(2.6 to 3.3)                     | 0.6<br>(0.4 to 0.9)                  | 54.2<br>(38.9 to 73.5)                            | -0.1<br>(-11.9 to 14.5)                             |
| Myocarditis                                        | 1.9<br>(1.6 to 2.3)                     | 2.9<br>(2.6 to 3.3)                      | 0.1<br>(0.1 to 0.2)                  | 52.7<br>(40.7 to 65.6)                            | -0.5<br>(-12.1 to 11.6)                             |
| Alcoholic cardiomyopathy                           | 0.5<br>(0.3 to 0.8)                     | --                                       | < 0.05<br>(< 0.05 to 0.1)            | 55.0<br>(19.5 to 105.6)                           | 0.5<br>(-23.9 to 35.3)                              |
| Other cardiomyopathy                               | 5.0<br>(3.6 to 6.9)                     | --                                       | 0.4<br>(0.2 to 0.7)                  | 54.6<br>(34.8 to 79.5)                            | -0.1<br>(-14.0 to 18.5)                             |
| Atrial fibrillation and flutter                    | 23.4<br>(20.3 to 26.8)                  | 2.0<br>(1.8 to 2.4)                      | 1.8<br>(1.2 to 2.5)                  | 59.9<br>(47.6 to 74.1)                            | 0.7<br>(-5.6 to 7.5)                                |
| Peripheral vascular disease                        | 92.0<br>(78.8 to 106.5)                 | 9.0<br>(7.7 to 10.6)                     | 0.5<br>(0.2 to 0.9)                  | 59.6<br>(46.2 to 72.0)                            | 1.6<br>(-5.7 to 8.7)                                |
| Endocarditis                                       | 0.6<br>(0.4 to 0.8)                     | 1.9<br>(1.6 to 2.1)                      | < 0.05<br>(< 0.05 to 0.1)            | 63.4<br>(49.1 to 79.9)                            | 1.0<br>(-13.0 to 17.2)                              |
| Other cardiovascular and circulatory diseases      | 201.2<br>(139.6 to 270.0)               | --                                       | 10.6<br>(6.3 to 16.1)                | 60.5<br>(45.3 to 77.9)                            | 2.4<br>(-7.9 to 13.9)                               |
| <b>Chronic respiratory diseases</b>                | <b>875.7</b><br><b>(821.9 to 930.9)</b> | <b>192.8†</b><br><b>(176.5 to 210.3)</b> | <b>40.3</b><br><b>(29.6 to 54.2)</b> | <b>53.5</b><br><b>(47.4 to 61.2)</b>              | <b>0.9</b><br><b>(-2.6 to 4.8)</b>                  |
| Chronic obstructive pulmonary disease              | 123.4<br>(117.9 to 128.8)               | 8.8<br>(8.5 to 9.2)                      | 9.5<br>(8.2 to 10.5)                 | 55.6<br>(45.2 to 68.3)                            | 0.6<br>(-6.0 to 7.9)                                |
| Pneumoconiosis                                     | 0.1<br>(0.1 to 0.1)                     | < 0.05<br>(< 0.05 to < 0.05)             | < 0.05<br>(< 0.05 to < 0.05)         | 56.5<br>(47.8 to 65.8)                            | 1.2<br>(-4.4 to 7.6)                                |
| Silicosis                                          | < 0.05<br>(< 0.05 to < 0.05)            | < 0.05<br>(< 0.05 to < 0.05)             | < 0.05<br>(< 0.05 to < 0.05)         | 56.3<br>(43.8 to 70.7)                            | 0.2<br>(-6.0 to 7.6)                                |

| Cause                                                          | Prevalence in thousands (95% UI)        | Incidence in thousands (95% UI)         | YLDs in thousands (95% UI)        |                                                   |                                                     |
|----------------------------------------------------------------|-----------------------------------------|-----------------------------------------|-----------------------------------|---------------------------------------------------|-----------------------------------------------------|
|                                                                | 2016 counts                             | 2016 counts                             | 2016 counts                       | Percentage change in counts between 2006 and 2016 | Percentage change in age-standardised rates between |
| Asbestosis                                                     | 0.1<br>(< 0.05 to 0.1)                  | < 0.05<br>(< 0.05 to < 0.05)            | < 0.05<br>(< 0.05 to < 0.05)      | 56.3<br>(44.3 to 67.6)                            | 0.9<br>(-5.1 to 6.6)                                |
| Coal workers pneumoconiosis                                    | --                                      | --                                      | --                                | --                                                | --                                                  |
| Other pneumoconiosis                                           | 0.1<br>(0.1 to 0.1)                     | < 0.05<br>(< 0.05 to < 0.05)            | < 0.05<br>(< 0.05 to < 0.05)      | 56.6<br>(42.7 to 73.2)                            | 1.6<br>(-8.1 to 13.8)                               |
| Asthma                                                         | 754.2<br>(694.4 to 825.8)               | 183.8<br>(167.5 to 201.3)               | 29.6<br>(19.5 to 43.1)            | 51.4<br>(44.1 to 60.4)                            | 0.2<br>(-3.7 to 4.5)                                |
| Interstitial lung disease and pulmonary sarcoidosis            | 0.9<br>(0.8 to 1.0)                     | 0.1<br>(0.1 to 0.1)                     | 0.1<br>(0.1 to 0.1)               | 55.4<br>(50.9 to 59.9)                            | -0.8<br>(-5.3 to 3.8)                               |
| Other chronic respiratory diseases                             | --                                      | --                                      | 1.2<br>(0.9 to 1.4)               | 103.2<br>(60.0 to 158.8)                          | 34.3<br>(12.9 to 61.1)                              |
| <b>Cirrhosis and other chronic liver diseases</b>              | <b>24.7<br/>(23.4 to 26.0)</b>          | <b>2.6<br/>(2.4 to 2.7)</b>             | <b>2.1<br/>(1.5 to 3.0)</b>       | <b>58.8<br/>(39.1 to 79.2)</b>                    | <b>3.5<br/>(-5.6 to 13.0)</b>                       |
| Cirrhosis and other chronic liver diseases due to hepatitis B  | 6.3<br>(5.2 to 7.4)                     | 0.7<br>(0.6 to 0.8)                     | 0.4<br>(0.3 to 0.6)               | 60.8<br>(33.9 to 93.1)                            | 3.8<br>(-11.1 to 21.0)                              |
| Cirrhosis and other chronic liver diseases due to hepatitis C  | 4.7<br>(3.2 to 6.4)                     | 0.5<br>(0.4 to 0.7)                     | 0.3<br>(0.2 to 0.5)               | 61.6<br>(30.9 to 102.1)                           | 4.1<br>(-13.6 to 25.5)                              |
| Cirrhosis and other chronic liver diseases due to alcohol use  | 4.2<br>(3.6 to 4.9)                     | 0.5<br>(0.4 to 0.6)                     | 0.3<br>(0.2 to 0.4)               | 60.0<br>(28.2 to 102.0)                           | 3.1<br>(-14.5 to 24.2)                              |
| Cirrhosis and other chronic liver diseases due to other causes | 9.5<br>(8.6 to 10.3)                    | 0.9<br>(0.8 to 0.9)                     | 1.1<br>(0.7 to 1.6)               | 56.9<br>(25.2 to 94.2)                            | 3.3<br>(-15.0 to 23.4)                              |
| <b>Digestive diseases</b>                                      | <b>188.4<br/>(174.8 to 203.7)</b>       | <b>184.1†<br/>(175.4 to 193.8)</b>      | <b>6.4<br/>(4.5 to 8.8)</b>       | <b>64.3<br/>(49.9 to 80.0)</b>                    | <b>7.6<br/>(0.7 to 14.5)</b>                        |
| Peptic ulcer disease                                           | 30.1<br>(27.5 to 33.1)                  | 15.3<br>(13.7 to 16.9)                  | 0.7<br>(0.5 to 1.0)               | 79.0<br>(56.6 to 104.7)                           | 14.1<br>(1.8 to 28.7)                               |
| Gastritis and duodenitis                                       | 70.7<br>(61.7 to 80.4)                  | 57.5<br>(51.8 to 64.5)                  | 1.0<br>(0.7 to 1.5)               | 79.3<br>(55.2 to 106.3)                           | 17.0<br>(2.7 to 33.2)                               |
| Appendicitis                                                   | 1.7<br>(1.5 to 1.8)                     | 43.8<br>(40.4 to 47.6)                  | 0.5<br>(0.3 to 0.7)               | 51.8<br>(9.5 to 109.2)                            | -1.7<br>(-22.8 to 25.7)                             |
| Paralytic ileus and intestinal obstruction                     | 0.3<br>(0.3 to 0.3)                     | 8.5<br>(7.7 to 9.4)                     | 0.1<br>(0.1 to 0.1)               | 58.5<br>(50.6 to 67.3)                            | 2.3<br>(-7.7 to 14.2)                               |
| Inguinal, femoral, and abdominal hernia                        | 83.5<br>(68.5 to 99.8)                  | 21.2<br>(18.8 to 24.0)                  | 3.2<br>(2.1 to 4.5)               | 60.2<br>(39.8 to 82.5)                            | 4.3<br>(-5.5 to 14.9)                               |
| Inflammatory bowel disease                                     | 0.5<br>(0.5 to 0.6)                     | 4.3<br>(4.1 to 4.5)                     | 0.1<br>(0.1 to 0.1)               | 38.0<br>(33.6 to 42.8)                            | -14.5<br>(-17.3 to -11.4)                           |
| Vascular intestinal disorders                                  | 0.1<br>(0.1 to 0.1)                     | 0.4<br>(0.4 to 0.5)                     | < 0.05<br>(< 0.05 to < 0.05)      | 60.2<br>(52.3 to 69.1)                            | 4.2<br>(-0.0 to 8.0)                                |
| Gallbladder and biliary diseases                               | 7.1<br>(6.3 to 8.0)                     | 31.5<br>(27.2 to 35.9)                  | 0.2<br>(0.1 to 0.3)               | 57.4<br>(36.6 to 82.3)                            | 1.6<br>(-14.4 to 22.9)                              |
| Pancreatitis                                                   | 0.2<br>(0.1 to 0.2)                     | 1.6<br>(1.4 to 1.8)                     | < 0.05<br>(< 0.05 to < 0.05)      | 60.0<br>(55.0 to 65.7)                            | 3.0<br>(0.1 to 6.2)                                 |
| Other digestive diseases                                       | --                                      | --                                      | 0.6<br>(0.4 to 0.8)               | 67.2<br>(47.8 to 89.3)                            | 11.5<br>(4.0 to 18.8)                               |
| <b>Neurological disorders</b>                                  | <b>3,733.7<br/>(3,545.6 to 3,943.4)</b> | <b>1,766.0<br/>(1,502.5 to 2,048.7)</b> | <b>81.1<br/>(50.8 to 118.7)</b>   | <b>58.5<br/>(12.6 to 125.6)</b>                   | <b>1.4<br/>(-21.8 to 32.6)</b>                      |
| Alzheimer's disease and other dementias                        | 18.2<br>(15.2 to 21.6)                  | 3.2<br>(2.6 to 3.8)                     | 2.5<br>(1.8 to 3.4)               | 68.5<br>(59.1 to 78.6)                            | -0.7<br>(-5.3 to 4.5)                               |
| Parkinson's disease                                            | 1.4<br>(1.1 to 1.8)                     | 0.2<br>(0.1 to 0.2)                     | 0.2<br>(0.1 to 0.2)               | 75.2<br>(49.7 to 105.7)                           | 7.9<br>(-6.2 to 23.8)                               |
| Epilepsy                                                       | 35.5<br>(6.0 to 80.8)                   | 5.7<br>(1.0 to 13.0)                    | 14.4<br>(2.3 to 35.4)             | 61.5<br>(-71.5 to 1,037.7)                        | 4.2<br>(-81.8 to 625.4)                             |
| Multiple sclerosis                                             | 0.3<br>(0.3 to 0.4)                     | < 0.05<br>(< 0.05 to < 0.05)            | 0.1<br>(0.1 to 0.1)               | 67.0<br>(61.0 to 72.8)                            | 7.2<br>(3.5 to 10.7)                                |
| Motor neuron disease                                           | 0.1<br>(0.1 to 0.1)                     | < 0.05<br>(< 0.05 to < 0.05)            | < 0.05<br>(< 0.05 to < 0.05)      | 55.8<br>(49.0 to 62.9)                            | 1.6<br>(-1.5 to 4.8)                                |
| Migraine                                                       | 1,220.5<br>(1,141.2 to 1,300.2)         | 158.0<br>(147.4 to 168.3)               | 51.5<br>(33.0 to 73.0)            | 55.8<br>(49.1 to 62.7)                            | 0.5<br>(-3.5 to 4.5)                                |
| Tension-type headache                                          | 2,871.0<br>(2,559.6 to 3,236.7)         | 1,598.9<br>(1,338.5 to 1,877.9)         | 8.9<br>(5.5 to 13.3)              | 54.2<br>(46.2 to 62.8)                            | -0.4<br>(-5.2 to 4.7)                               |
| Other neurological disorders                                   | < 0.05<br>(< 0.05 to < 0.05)            | 0.1<br>(< 0.05 to 0.1)                  | 3.6<br>(0.7 to 8.6)               | 99.3<br>(-61.2 to 1,130.5)                        | 25.3<br>(-72.3 to 528.6)                            |
| <b>Mental and substance use disorders</b>                      | <b>1,780.2<br/>(1,678.6 to 1,866.3)</b> | <b>681.0†<br/>(629.4 to 740.6)</b>      | <b>212.4<br/>(154.1 to 277.6)</b> | <b>56.0<br/>(52.6 to 59.6)</b>                    | <b>0.8<br/>(-1.5 to 3.0)</b>                        |
| Schizophrenia                                                  | 17.1<br>(14.9 to 19.4)                  | 1.5<br>(1.3 to 1.7)                     | 10.9<br>(7.8 to 13.6)             | 57.1<br>(40.7 to 73.9)                            | 0.7<br>(-8.5 to 11.0)                               |
| Alcohol use disorders                                          | 155.2<br>(130.2 to 182.8)               | 82.7<br>(68.9 to 96.6)                  | 15.4<br>(10.5 to 21.6)            | 62.1<br>(49.3 to 76.4)                            | 2.9<br>(-5.1 to 10.8)                               |
| Drug use disorders                                             | 52.8<br>(45.9 to 59.8)                  | 9.5<br>(8.1 to 10.9)                    | 10.7<br>(7.3 to 14.7)             | 64.3<br>(48.3 to 83.7)                            | 4.2<br>(-5.1 to 15.3)                               |
| Opioid use disorders                                           | 21.9<br>(17.4 to 28.0)                  | 3.1<br>(2.5 to 3.8)                     | 9.0<br>(6.0 to 12.8)              | 65.1<br>(46.1 to 88.2)                            | 4.6<br>(-6.3 to 18.3)                               |
| Cocaine use disorders                                          | 1.5<br>(1.2 to 1.8)                     | 0.2<br>(0.2 to 0.3)                     | 0.2<br>(0.1 to 0.3)               | 61.2<br>(53.3 to 69.9)                            | 2.8<br>(-2.0 to 8.0)                                |
| Amphetamine use disorders                                      | 0.8<br>(0.5 to 1.1)                     | 0.1<br>(0.1 to 0.2)                     | 0.1<br>(0.1 to 0.2)               | 61.9<br>(46.2 to 76.3)                            | 1.9<br>(-7.5 to 10.4)                               |
| Cannabis use disorders                                         | 27.2<br>(21.7 to 34.1)                  | 5.3<br>(4.2 to 6.7)                     | 0.8<br>(0.5 to 1.2)               | 59.0<br>(29.9 to 92.3)                            | 0.1<br>(-16.8 to 19.0)                              |
| Other drug use disorders                                       | 3.5<br>(3.0 to 3.9)                     | 0.7<br>(0.7 to 0.8)                     | 0.6<br>(0.4 to 0.8)               | 61.6<br>(36.8 to 92.2)                            | 2.7<br>(-12.5 to 20.7)                              |
| Depressive disorders                                           | 383.1<br>(356.5 to 413.6)               | 434.8<br>(385.3 to 490.9)               | 65.6<br>(45.0 to 89.0)            | 55.9<br>(48.6 to 63.0)                            | 0.3<br>(-4.3 to 4.8)                                |
| Major depressive disorder                                      | 264.1<br>(234.2 to 297.7)               | 412.1<br>(361.8 to 467.9)               | 53.6<br>(36.5 to 73.1)            | 55.7<br>(47.1 to 64.4)                            | 0.2<br>(-5.3 to 5.6)                                |
| Dysthymia                                                      | 125.1<br>(108.2 to 144.2)               | 22.6<br>(19.8 to 26.1)                  | 12.0<br>(8.0 to 17.5)             | 56.6<br>(50.3 to 63.2)                            | 0.6<br>(-2.7 to 4.1)                                |
| Bipolar disorder                                               | 66.4<br>(56.3 to 78.5)                  | 7.6<br>(6.4 to 9.0)                     | 13.5<br>(8.5 to 19.9)             | 57.2<br>(45.9 to 68.7)                            | 0.7<br>(-5.8 to 7.1)                                |
| Anxiety disorders                                              | 375.5<br>(334.2 to 422.0)               | 67.5<br>(60.3 to 75.4)                  | 36.2<br>(25.0 to 49.8)            | 55.1<br>(44.7 to 67.8)                            | 0.6<br>(-5.8 to 8.1)                                |
| Eating disorders                                               | 11.3<br>(9.3 to 13.8)                   | 8.7<br>(6.3 to 11.7)                    | 2.3<br>(1.4 to 3.4)               | 56.8<br>(34.5 to 84.1)                            | 0.6<br>(-13.5 to 18.4)                              |
| Anorexia nervosa                                               | 3.1<br>(2.2 to 4.2)                     | 1.4<br>(1.0 to 1.9)                     | 0.7<br>(0.4 to 1.0)               | 54.9<br>(15.2 to 111.1)                           | -0.3<br>(-25.4 to 35.1)                             |
| Bulimia nervosa                                                | 7.9<br>(5.8 to 10.7)                    | 7.3<br>(4.9 to 10.2)                    | 1.6<br>(1.0 to 2.5)               | 57.5<br>(30.7 to 90.8)                            | 0.9<br>(-16.4 to 22.7)                              |
| Autistic spectrum disorders                                    | 112.7<br>(100.3 to 128.6)               | 1.7<br>(1.2 to 2.3)                     | 16.0<br>(10.8 to 22.6)            | 54.0<br>(46.4 to 62.1)                            | 0.6<br>(-3.9 to 5.3)                                |
| Autism                                                         | 30.7<br>(26.5 to 35.7)                  | 0.2<br>(0.1 to 0.4)                     | 7.8<br>(5.0 to 11.5)              | 53.8<br>(40.7 to 68.2)                            | 0.6<br>(-7.8 to 9.3)                                |
| Asperger syndrome and other autistic spectrum disorders        | 81.7<br>(66.9 to 99.4)                  | 1.4<br>(0.9 to 2.1)                     | 8.2<br>(5.4 to 12.1)              | 54.1<br>(46.7 to 62.8)                            | 0.6<br>(-3.9 to 5.5)                                |



| Cause                                                      | Prevalence in thousands (95% UI)              | Incidence in thousands (95% UI)                   | YLDs in thousands (95% UI)              |                                                   |                                                     |
|------------------------------------------------------------|-----------------------------------------------|---------------------------------------------------|-----------------------------------------|---------------------------------------------------|-----------------------------------------------------|
|                                                            | 2016 counts                                   | 2016 counts                                       | 2016 counts                             | Percentage change in counts between 2006 and 2016 | Percentage change in age-standardised rates between |
| Attention-deficit/hyperactivity disorder                   | 170.1<br>(152.2 to 191.3)                     | 12.0<br>(10.4 to 14.1)                            | 2.0<br>(1.2 to 3.2)                     | 52.1<br>(41.6 to 63.7)                            | 0.4<br>(-6.1 to 7.6)                                |
| Conduct disorder                                           | 128.8<br>(104.6 to 152.2)                     | 46.3<br>(36.1 to 56.6)                            | 15.5<br>(9.6 to 23.7)                   | 49.9<br>(39.6 to 60.5)                            | 0.7<br>(-6.4 to 7.8)                                |
| Idiopathic developmental intellectual disability           | 286.2<br>(167.3 to 407.4)                     | --                                                | 11.4<br>(5.1 to 19.9)                   | 52.1<br>(41.8 to 62.4)                            | -1.2<br>(-7.4 to 5.1)                               |
| Other mental and substance use disorders                   | 173.9<br>(152.1 to 201.6)                     | 8.8<br>(7.7 to 10.2)                              | 12.9<br>(8.8 to 18.6)                   | 57.7<br>(48.5 to 66.6)                            | 0.8<br>(-4.1 to 5.4)                                |
| <b>Diabetes, urogenital, blood, and endocrine diseases</b> | <b>5,475.7</b><br><b>(5,178.6 to 5,876.3)</b> | <b>1,193.2†</b><br><b>(1,119.3 to 1,269.8)</b>    | <b>75.1</b><br><b>(52.9 to 102.6)</b>   | <b>60.8</b><br><b>(54.1 to 67.0)</b>              | <b>4.0</b><br><b>(0.6 to 7.3)</b>                   |
| Diabetes mellitus                                          | 251.7<br>(226.2 to 278.7)                     | 17.6<br>(15.9 to 19.4)                            | 23.4<br>(16.1 to 32.5)                  | 62.9<br>(54.0 to 71.5)                            | 4.9<br>(-0.8 to 10.7)                               |
| Acute glomerulonephritis                                   | 0.1<br>(0.1 to 0.1)                           | 1.7<br>(1.4 to 1.9)                               | < 0.05<br>(< 0.05 to < 0.05)            | 53.7<br>(46.6 to 61.1)                            | 0.1<br>(-3.5 to 4.3)                                |
| Chronic kidney disease                                     | 461.8<br>(413.0 to 511.6)                     | 34.9<br>(30.9 to 39.1)                            | 14.2<br>(10.3 to 18.6)                  | 76.7<br>(64.5 to 90.5)                            | 11.1<br>(3.9 to 19.5)                               |
| Chronic kidney disease due to diabetes mellitus            | 146.3<br>(122.9 to 171.3)                     | 10.3<br>(8.5 to 12.4)                             | 4.4<br>(3.0 to 5.9)                     | 80.4<br>(62.6 to 99.2)                            | 13.9<br>(4.0 to 24.4)                               |
| Chronic kidney disease due to hypertension                 | 93.9<br>(80.2 to 108.0)                       | 9.0<br>(7.5 to 10.6)                              | 2.3<br>(1.5 to 3.1)                     | 73.1<br>(55.6 to 95.1)                            | 7.4<br>(-2.8 to 20.1)                               |
| Chronic kidney disease due to glomerulonephritis           | 95.5<br>(82.4 to 110.0)                       | 5.4<br>(4.3 to 6.6)                               | 3.6<br>(2.6 to 5.0)                     | 77.9<br>(60.0 to 97.6)                            | 12.1<br>(2.1 to 23.6)                               |
| Chronic kidney disease due to other causes                 | 126.1<br>(105.6 to 147.4)                     | 10.2<br>(8.5 to 11.9)                             | 3.9<br>(2.8 to 5.3)                     | 73.8<br>(58.9 to 91.3)                            | 9.7<br>(1.3 to 19.9)                                |
| Urinary diseases and male infertility                      | 180.5<br>(158.6 to 203.3)                     | 608.0†<br>(544.8 to 676.2)                        | 4.7<br>(3.0 to 6.9)                     | 54.3<br>(42.3 to 66.2)                            | 0.4<br>(-6.8 to 7.4)                                |
| Interstitial nephritis and urinary tract infections        | 10.1<br>(8.9 to 11.4)                         | 529.4<br>(465.0 to 596.8)                         | 0.3<br>(0.2 to 0.5)                     | 57.9<br>(30.8 to 87.1)                            | 1.9<br>(-13.8 to 19.5)                              |
| Urolithiasis                                               | 2.4<br>(2.1 to 2.8)                           | 63.8<br>(56.4 to 73.2)                            | 0.2<br>(0.1 to 0.3)                     | 57.6<br>(45.4 to 71.0)                            | 1.7<br>(-7.2 to 11.6)                               |
| Benign prostatic hyperplasia                               | 115.5<br>(97.2 to 134.1)                      | 14.8<br>(12.4 to 17.3)                            | 3.7<br>(2.4 to 5.5)                     | 55.1<br>(40.5 to 69.0)                            | 0.7<br>(-7.2 to 8.7)                                |
| Male infertility                                           | 44.8<br>(31.9 to 62.3)                        | --                                                | 0.3<br>(0.1 to 0.6)                     | 61.1<br>(47.3 to 75.9)                            | 3.2<br>(-5.2 to 12.6)                               |
| Other urinary diseases                                     | --                                            | --                                                | 0.2<br>(0.1 to 0.3)                     | 28.2<br>(12.0 to 45.7)                            | -15.2<br>(-24.0 to -6.0)                            |
| Gynecological diseases                                     | 1,494.0<br>(1,426.2 to 1,569.9)               | 521.8†<br>(487.8 to 558.2)                        | 16.0<br>(10.8 to 22.8)                  | 55.5<br>(48.7 to 63.0)                            | -1.2<br>(-5.1 to 3.2)                               |
| Uterine fibroids                                           | 89.9<br>(79.1 to 101.2)                       | 11.1<br>(9.6 to 12.7)                             | 2.0<br>(1.2 to 3.1)                     | 51.9<br>(33.7 to 72.4)                            | -2.9<br>(-14.8 to 10.6)                             |
| Polycystic ovarian syndrome                                | 11.0<br>(8.2 to 14.3)                         | 26.9<br>(19.4 to 36.4)                            | 0.1<br>(< 0.05 to 0.2)                  | 54.8<br>(35.2 to 76.4)                            | -0.8<br>(-13.1 to 12.4)                             |
| Female infertility                                         | 15.6<br>(6.5 to 37.9)                         | --                                                | 0.1<br>(< 0.05 to 0.3)                  | 43.6<br>(-3.2 to 94.9)                            | -9.8<br>(-36.4 to 20.7)                             |
| Endometriosis                                              | 2.5<br>(2.0 to 3.0)                           | 10.0<br>(8.2 to 12.8)                             | 0.2<br>(0.1 to 0.4)                     | 58.0<br>(16.9 to 113.0)                           | -0.3<br>(-24.5 to 31.5)                             |
| Genital prolapse                                           | 771.7<br>(688.7 to 850.1)                     | 76.9<br>(64.5 to 91.4)                            | 2.4<br>(1.2 to 4.3)                     | 54.8<br>(47.0 to 63.2)                            | -0.4<br>(-5.6 to 4.9)                               |
| Premenstrual syndrome                                      | 678.1<br>(622.6 to 730.5)                     | 260.1<br>(237.7 to 283.1)                         | 5.6<br>(3.5 to 8.8)                     | 55.7<br>(44.0 to 69.0)                            | -1.4<br>(-8.7 to 6.5)                               |
| Other gynecological diseases                               | 160.7<br>(138.8 to 184.1)                     | 136.8<br>(112.7 to 163.4)                         | 5.6<br>(3.7 to 7.9)                     | 57.2<br>(44.2 to 70.3)                            | -0.5<br>(-7.9 to 7.0)                               |
| Hemoglobinopathies and hemolytic anaemias                  | 4,067.7<br>(3,719.1 to 4,526.6)               | --                                                | 10.8<br>(6.5 to 17.0)                   | 55.9<br>(31.5 to 80.5)                            | -0.1<br>(-13.6 to 12.7)                             |
| Thalassemias                                               | < 0.05<br>(< 0.05 to < 0.05)                  | --                                                | < 0.05<br>(< 0.05 to < 0.05)            | 56.8<br>(11.4 to 106.7)                           | 0.9<br>(-29.0 to 32.8)                              |
| Thalassaemias trait                                        | 63.6<br>(21.4 to 117.2)                       | --                                                | 1.0<br>(0.2 to 2.1)                     | 62.0<br>(17.6 to 101.1)                           | 7.9<br>(-22.4 to 31.9)                              |
| Sickle cell disorders                                      | 3.3<br>(1.0 to 7.9)                           | --                                                | 0.2<br>(0.1 to 0.6)                     | 57.1<br>(13.3 to 117.7)                           | 3.0<br>(-24.0 to 39.6)                              |
| Sickle cell trait                                          | 1,088.2<br>(564.1 to 1,782.6)                 | --                                                | 4.7<br>(2.2 to 9.0)                     | 63.6<br>(33.8 to 95.5)                            | 8.1<br>(-10.5 to 28.0)                              |
| G6PD deficiency                                            | 974.1<br>(835.0 to 1,127.9)                   | --                                                | 0.1<br>(0.1 to 0.1)                     | 42.0<br>(0.9 to 108.2)                            | -5.9<br>(-25.1 to 19.7)                             |
| G6PD trait                                                 | 2,205.8<br>(2,103.4 to 2,319.7)               | --                                                | < 0.05<br>(< 0.05 to < 0.05)            | 59.5<br>(28.2 to 95.3)                            | 4.6<br>(-13.3 to 24.9)                              |
| Other hemoglobinopathies and hemolytic anaemias            | 166.7<br>(148.0 to 185.1)                     | --                                                | 4.7<br>(3.0 to 6.8)                     | 48.0<br>(22.9 to 74.2)                            | -8.9<br>(-21.4 to 3.6)                              |
| Endocrine, metabolic, blood, and immune disorders          | 186.0<br>(170.4 to 203.6)                     | 9.2<br>(8.2 to 10.3)                              | 6.1<br>(4.0 to 8.7)                     | 48.5<br>(29.7 to 67.6)                            | -2.6<br>(-11.2 to 5.7)                              |
| <b>Musculoskeletal disorders</b>                           | <b>1,096.8</b><br><b>(1,035.4 to 1,157.2)</b> | <b>526.3</b><br><b>(472.5 to 584.7)</b>           | <b>118.6</b><br><b>(85.2 to 156.8)</b>  | <b>57.6</b><br><b>(53.1 to 62.5)</b>              | <b>1.1</b><br><b>(-1.5 to 3.8)</b>                  |
| Rheumatoid arthritis                                       | 15.9<br>(14.1 to 17.9)                        | 1.1<br>(1.0 to 1.2)                               | 3.8<br>(2.6 to 5.1)                     | 56.4<br>(40.4 to 74.0)                            | 1.0<br>(-7.6 to 10.0)                               |
| Osteoarthritis                                             | 201.2<br>(188.1 to 214.7)                     | 11.3<br>(10.5 to 12.2)                            | 12.2<br>(8.6 to 16.5)                   | 57.0<br>(50.6 to 63.5)                            | 1.6<br>(-2.4 to 5.6)                                |
| Low back and neck pain                                     | 760.6<br>(705.3 to 816.5)                     | 350.2<br>(312.4 to 392.4)                         | 86.7<br>(61.8 to 114.3)                 | 56.3<br>(50.7 to 62.0)                            | 0.5<br>(-2.7 to 3.8)                                |
| Low back pain                                              | 588.3<br>(523.5 to 667.2)                     | 296.3<br>(258.8 to 337.4)                         | 65.7<br>(46.2 to 87.1)                  | 56.1<br>(49.1 to 63.8)                            | 0.4<br>(-3.8 to 5.0)                                |
| Neck pain                                                  | 212.3<br>(183.4 to 245.8)                     | 53.9<br>(46.6 to 62.8)                            | 21.0<br>(14.2 to 29.7)                  | 56.8<br>(52.1 to 62.0)                            | 0.7<br>(-1.9 to 3.1)                                |
| Gout                                                       | 26.9<br>(23.9 to 30.3)                        | 5.6<br>(4.9 to 6.3)                               | 0.8<br>(0.6 to 1.2)                     | 57.0<br>(33.8 to 80.2)                            | 1.3<br>(-11.4 to 15.4)                              |
| Other musculoskeletal disorders                            | 174.8<br>(126.5 to 226.6)                     | 158.1<br>(118.6 to 203.5)                         | 15.1<br>(8.6 to 23.4)                   | 66.6<br>(49.7 to 87.5)                            | 4.8<br>(-5.5 to 16.9)                               |
| <b>Other non-communicable diseases</b>                     | <b>9,528.5</b><br><b>(9,231.5 to 9,816.1)</b> | <b>31,031.7†</b><br><b>(27,898.4 to 33,990.4)</b> | <b>246.6</b><br><b>(167.7 to 352.5)</b> | <b>52.8</b><br><b>(50.5 to 55.1)</b>              | <b>-0.8</b><br><b>(-2.2 to 0.5)</b>                 |
| Congenital anomalies                                       | 164.5<br>(128.2 to 215.2)                     | --                                                | 22.4<br>(14.3 to 33.7)                  | 52.8<br>(40.9 to 63.7)                            | -0.7<br>(-7.7 to 6.1)                               |
| Neural tube defects                                        | 15.3<br>(13.6 to 17.1)                        | --                                                | 4.6<br>(3.1 to 6.2)                     | 56.7<br>(38.2 to 76.6)                            | 1.9<br>(-8.8 to 13.0)                               |
| Congenital heart anomalies                                 | 14.8<br>(12.0 to 17.8)                        | --                                                | 0.7<br>(0.3 to 1.2)                     | 59.6<br>(35.5 to 88.7)                            | 3.2<br>(-10.8 to 19.5)                              |
| Orofacial clefts                                           | 3.5<br>(3.0 to 4.0)                           | --                                                | 0.1<br>(< 0.05 to 0.1)                  | 52.7<br>(35.4 to 72.7)                            | -1.0<br>(-12.3 to 11.9)                             |
| Down's syndrome                                            | 2.3<br>(1.9 to 2.8)                           | --                                                | 0.2<br>(0.1 to 0.3)                     | 55.4<br>(45.0 to 67.3)                            | 1.1<br>(-5.8 to 8.8)                                |
| Turner syndrome                                            | 9.0<br>(7.6 to 10.5)                          | --                                                | 0.1<br>(0.1 to 0.2)                     | 56.8<br>(12.9 to 126.2)                           | 1.3<br>(-26.4 to 43.5)                              |
| Klinefelter syndrome                                       | 8.1<br>(6.8 to 9.6)                           | --                                                | < 0.05<br>(< 0.05 to 0.1)               | 52.9<br>(16.4 to 99.9)                            | -1.8<br>(-25.1 to 27.0)                             |



| Cause                                         | Prevalence in thousands (95% UI)              | Incidence in thousands (95% UI)                | YLDs in thousands (95% UI)            |                                                   |                                                     |
|-----------------------------------------------|-----------------------------------------------|------------------------------------------------|---------------------------------------|---------------------------------------------------|-----------------------------------------------------|
|                                               | 2016 counts                                   | 2016 counts                                    | 2016 counts                           | Percentage change in counts between 2006 and 2016 | Percentage change in age-standardised rates between |
| Other chromosomal abnormalities               | 2.4<br>(2.0 to 2.8)                           | --                                             | 0.5<br>(0.3 to 0.8)                   | 51.2<br>(5.3 to 118.7)                            | -2.8<br>(-30.2 to 36.5)                             |
| Congenital musculoskeletal and limb anomalies | 14.6<br>(12.8 to 16.4)                        | --                                             | 2.1<br>(1.4 to 3.0)                   | 53.7<br>(35.4 to 75.2)                            | -0.1<br>(-11.1 to 11.8)                             |
| Urogenital congenital anomalies               | 15.2<br>(13.3 to 17.4)                        | --                                             | 0.4<br>(0.2 to 0.6)                   | 52.5<br>(40.6 to 66.7)                            | -0.3<br>(-7.3 to 7.6)                               |
| Digestive congenital anomalies                | 6.8<br>(5.9 to 7.6)                           | --                                             | 0.3<br>(0.2 to 0.5)                   | 58.8<br>(22.2 to 106.0)                           | 3.1<br>(-16.2 to 27.5)                              |
| Other congenital anomalies                    | 97.2<br>(55.9 to 163.4)                       | --                                             | 13.4<br>(7.1 to 22.9)                 | 50.8<br>(35.7 to 66.3)                            | -1.9<br>(-11.3 to 8.2)                              |
| Skin and subcutaneous diseases                | 4,657.0<br>(4,433.9 to 4,921.7)               | 11,579.1<br>(10,636.6 to 12,781.8)             | 112.2<br>(72.5 to 165.1)              | 54.8<br>(52.1 to 58.2)                            | 1.3<br>(-0.3 to 3.2)                                |
| Dermatitis                                    | 775.5<br>(600.3 to 962.6)                     | 577.4<br>(506.4 to 663.8)                      | 31.6<br>(17.5 to 53.9)                | 52.5<br>(46.7 to 58.4)                            | 0.4<br>(-2.8 to 3.7)                                |
| Psoriasis                                     | 53.3<br>(50.9 to 55.9)                        | 9.1<br>(8.7 to 9.5)                            | 4.7<br>(3.2 to 6.2)                   | 63.1<br>(45.9 to 83.7)                            | 5.9<br>(-3.0 to 15.7)                               |
| Cellulitis                                    | 4.9<br>(4.5 to 5.4)                           | 85.0<br>(78.3 to 91.8)                         | 0.3<br>(0.2 to 0.4)                   | 54.7<br>(17.1 to 95.9)                            | 0.9<br>(-19.7 to 24.0)                              |
| Pyoderma                                      | 95.7<br>(90.9 to 100.7)                       | 1,837.8<br>(1,752.1 to 1,928.4)                | 0.5<br>(0.2 to 1.1)                   | 54.3<br>(45.6 to 64.2)                            | 1.3<br>(-3.6 to 6.2)                                |
| Scabies                                       | 324.4<br>(276.3 to 376.2)                     | 1,005.7<br>(859.5 to 1,176.7)                  | 8.4<br>(4.7 to 13.6)                  | 47.9<br>(41.0 to 54.6)                            | -3.7<br>(-7.6 to 0.4)                               |
| Fungal skin diseases                          | 1,898.1<br>(1,558.3 to 2,308.3)               | 5,538.8<br>(4,608.7 to 6,660.1)                | 10.7<br>(4.3 to 22.7)                 | 53.0<br>(51.0 to 55.1)                            | 0.5<br>(-0.4 to 1.4)                                |
| Viral skin diseases                           | 446.5<br>(391.2 to 511.2)                     | 590.8<br>(509.0 to 678.1)                      | 13.7<br>(8.5 to 20.3)                 | 52.7<br>(47.5 to 58.1)                            | 0.4<br>(-2.5 to 3.5)                                |
| Acne vulgaris                                 | 1,106.6<br>(944.1 to 1,284.5)                 | 833.2<br>(626.9 to 1,113.8)                    | 28.4<br>(18.7 to 41.7)                | 60.2<br>(52.0 to 69.4)                            | 4.3<br>(-0.8 to 9.8)                                |
| Alopecia areata                               | 20.9<br>(19.4 to 22.2)                        | 37.2<br>(34.7 to 39.6)                         | 0.7<br>(0.4 to 1.0)                   | 56.7<br>(37.9 to 76.8)                            | 0.6<br>(-9.7 to 11.8)                               |
| Pruritus                                      | 94.4<br>(82.8 to 106.5)                       | 77.6<br>(69.0 to 87.4)                         | 1.0<br>(0.5 to 1.8)                   | 55.1<br>(46.0 to 65.2)                            | 0.6<br>(-4.4 to 6.1)                                |
| Urticaria                                     | 144.8<br>(122.1 to 171.8)                     | 265.2<br>(222.3 to 314.4)                      | 8.7<br>(5.5 to 12.8)                  | 54.4<br>(45.1 to 64.2)                            | 0.4<br>(-5.0 to 6.1)                                |
| Decubitus ulcer                               | 1.2<br>(1.1 to 1.4)                           | 4.5<br>(4.0 to 5.0)                            | 0.2<br>(0.1 to 0.3)                   | 57.5<br>(42.1 to 73.4)                            | 0.1<br>(-12.9 to 14.3)                              |
| Other skin and subcutaneous diseases          | 627.9<br>(609.4 to 648.4)                     | 716.7<br>(693.7 to 740.6)                      | 3.5<br>(1.7 to 6.3)                   | 54.7<br>(50.2 to 59.4)                            | 0.1<br>(-2.4 to 2.5)                                |
| Sense organ diseases                          | 2,642.1<br>(2,517.1 to 2,782.5)               | 1,197.9†<br>(1,111.9 to 1,291.9)               | 94.1<br>(64.7 to 133.2)               | 49.9<br>(45.1 to 55.0)                            | -2.3<br>(-4.5 to 0.1)                               |
| Glaucoma                                      | 3.4<br>(2.7 to 4.2)                           | --                                             | 0.3<br>(0.2 to 0.5)                   | 71.9<br>(48.6 to 96.7)                            | 10.8<br>(-2.8 to 25.2)                              |
| Cataract                                      | 98.3<br>(82.5 to 114.6)                       | --                                             | 7.1<br>(5.0 to 9.8)                   | 59.6<br>(49.2 to 70.7)                            | -0.5<br>(-6.4 to 6.0)                               |
| Macular degeneration                          | 7.5<br>(5.4 to 10.1)                          | --                                             | 0.5<br>(0.3 to 0.7)                   | 63.3<br>(44.6 to 85.8)                            | 6.3<br>(-4.5 to 19.3)                               |
| Refraction and accommodation disorders        | 1,556.3<br>(1,397.5 to 1,754.8)               | --                                             | 26.3<br>(16.0 to 41.9)                | 43.3<br>(34.3 to 52.6)                            | -6.7<br>(-12.7 to -0.4)                             |
| Age-related and other hearing loss            | 1,389.4<br>(1,287.5 to 1,497.2)               | --                                             | 51.0<br>(34.3 to 73.0)                | 50.4<br>(43.7 to 57.3)                            | -1.9<br>(-4.6 to 0.7)                               |
| Other vision loss                             | 32.2<br>(27.6 to 37.4)                        | --                                             | 2.0<br>(1.4 to 2.8)                   | 66.1<br>(51.1 to 81.6)                            | 7.7<br>(-0.8 to 17.0)                               |
| Other sense organ diseases                    | 228.5<br>(211.7 to 245.3)                     | 1,197.9<br>(1,111.9 to 1,291.9)                | 6.9<br>(4.3 to 10.6)                  | 57.1<br>(49.1 to 65.4)                            | 1.5<br>(-2.5 to 5.5)                                |
| Oral disorders                                | 6,410.5<br>(5,848.0 to 6,981.9)               | 18,254.7†<br>(15,223.3 to 21,064.4)            | 17.8<br>(9.9 to 30.2)                 | 55.5<br>(51.7 to 59.2)                            | 0.5<br>(-1.9 to 2.9)                                |
| Caries of deciduous teeth                     | 1,794.2<br>(1,399.8 to 2,191.3)               | 6,586.3<br>(4,808.1 to 8,608.9)                | 0.4<br>(0.2 to 0.8)                   | 49.6<br>(33.6 to 67.2)                            | -1.1<br>(-12.4 to 10.6)                             |
| Caries of permanent teeth                     | 3,768.5<br>(3,210.1 to 4,349.1)               | 11,550.1<br>(9,471.9 to 13,606.2)              | 2.2<br>(1.0 to 4.2)                   | 55.0<br>(45.5 to 65.7)                            | 0.6<br>(-4.7 to 6.0)                                |
| Periodontal disease                           | 911.7<br>(557.7 to 1,289.5)                   | 109.5<br>(69.9 to 158.9)                       | 5.9<br>(2.1 to 13.6)                  | 56.1<br>(48.1 to 65.0)                            | 0.5<br>(-4.6 to 5.7)                                |
| Edentulism and severe tooth loss              | 131.4<br>(112.2 to 151.4)                     | 8.8<br>(7.4 to 10.1)                           | 3.6<br>(2.3 to 5.2)                   | 56.6<br>(48.7 to 64.8)                            | 0.6<br>(-3.8 to 4.8)                                |
| Other oral disorders                          | 191.3<br>(182.6 to 201.2)                     | --                                             | 5.6<br>(3.4 to 8.3)                   | 54.8<br>(49.0 to 60.6)                            | 0.5<br>(-2.6 to 3.6)                                |
| <b>Injuries</b>                               | <b>2,089.6</b><br><b>(1,885.8 to 2,370.8)</b> | <b>1,118.7†</b><br><b>(1,054.7 to 1,187.0)</b> | <b>87.6</b><br><b>(55.6 to 131.4)</b> | <b>52.9</b><br><b>(48.6 to 56.6)</b>              | <b>0.3</b><br><b>(-1.3 to 1.9)</b>                  |
| <b>Transport injuries</b>                     | <b>172.6</b><br><b>(160.2 to 185.5)</b>       | <b>84.9</b><br><b>(73.8 to 96.6)</b>           | <b>10.7</b><br><b>(6.8 to 15.7)</b>   | <b>66.8</b><br><b>(63.0 to 70.5)</b>              | <b>6.8</b><br><b>(5.1 to 8.6)</b>                   |
| Road injuries                                 | 146.2<br>(135.8 to 157.5)                     | 74.8<br>(64.3 to 87.0)                         | 8.9<br>(5.7 to 13.1)                  | 67.2<br>(63.8 to 70.8)                            | 6.9<br>(5.1 to 8.8)                                 |
| Pedestrian road injuries                      | 52.1<br>(45.6 to 59.5)                        | 20.2<br>(16.3 to 24.8)                         | 3.2<br>(2.0 to 4.7)                   | 67.1<br>(63.4 to 70.8)                            | 6.8<br>(4.8 to 8.9)                                 |
| Cyclist road injuries                         | 27.5<br>(23.2 to 32.6)                        | 16.4<br>(12.8 to 20.8)                         | 1.6<br>(1.0 to 2.3)                   | 70.9<br>(66.8 to 74.9)                            | 9.9<br>(8.0 to 11.8)                                |
| Motorcyclist road injuries                    | 15.4<br>(13.1 to 18.2)                        | 5.6<br>(4.4 to 7.2)                            | 0.9<br>(0.6 to 1.4)                   | 56.1<br>(52.8 to 59.4)                            | -0.8<br>(-2.6 to 1.0)                               |
| Motor vehicle road injuries                   | 40.5<br>(34.7 to 46.1)                        | 25.4<br>(20.7 to 30.6)                         | 2.6<br>(1.7 to 3.8)                   | 70.4<br>(66.9 to 73.9)                            | 8.6<br>(6.8 to 10.6)                                |
| Other road injuries                           | 10.6<br>(9.0 to 12.6)                         | 7.2<br>(5.4 to 9.5)                            | 0.6<br>(0.4 to 0.9)                   | 63.3<br>(59.5 to 67.1)                            | 4.9<br>(3.0 to 6.9)                                 |
| Other transport injuries                      | 26.4<br>(22.2 to 31.9)                        | 10.0<br>(8.2 to 12.7)                          | 1.8<br>(1.1 to 2.6)                   | 64.5<br>(57.9 to 71.4)                            | 6.4<br>(3.9 to 9.0)                                 |
| <b>Unintentional injuries</b>                 | <b>1,413.7</b><br><b>(1,308.0 to 1,545.9)</b> | <b>972.4</b><br><b>(909.3 to 1,038.5)</b>      | <b>55.5</b><br><b>(37.2 to 78.0)</b>  | <b>55.9</b><br><b>(51.9 to 59.8)</b>              | <b>-0.2</b><br><b>(-1.6 to 1.3)</b>                 |
| Falls                                         | 510.1<br>(440.7 to 581.7)                     | 336.7<br>(293.2 to 391.1)                      | 23.6<br>(16.1 to 32.9)                | 58.4<br>(54.4 to 62.1)                            | 1.2<br>(-0.3 to 2.8)                                |
| Drowning                                      | 4.9<br>(4.2 to 5.6)                           | 1.5<br>(1.3 to 1.8)                            | 0.3<br>(0.2 to 0.5)                   | 64.1<br>(57.5 to 70.4)                            | 4.7<br>(2.1 to 7.4)                                 |
| Fire, heat, and hot substances                | 216.2<br>(178.8 to 266.2)                     | 46.1<br>(37.7 to 55.1)                         | 6.8<br>(4.5 to 9.5)                   | 47.0<br>(39.8 to 54.9)                            | -5.4<br>(-8.6 to -2.1)                              |
| Poisonings                                    | 4.6<br>(3.7 to 5.5)                           | 9.8<br>(7.7 to 12.0)                           | 0.5<br>(0.3 to 0.7)                   | 38.6<br>(27.8 to 50.2)                            | -10.3<br>(-15.7 to -4.7)                            |
| Exposure to mechanical forces                 | 235.8<br>(202.1 to 285.4)                     | 137.9<br>(116.1 to 161.2)                      | 6.8<br>(4.3 to 10.2)                  | 54.3<br>(50.4 to 58.2)                            | -1.3<br>(-3.1 to 0.6)                               |
| Unintentional firearm injuries                | 11.2<br>(9.2 to 13.9)                         | 4.2<br>(3.0 to 5.6)                            | 0.6<br>(0.3 to 0.8)                   | 51.6<br>(47.1 to 55.6)                            | -3.3<br>(-5.4 to -1.3)                              |
| Unintentional suffocation                     | 16.5<br>(11.9 to 22.1)                        | 7.0<br>(4.7 to 10.1)                           | 0.6<br>(0.3 to 1.0)                   | 58.2<br>(50.5 to 66.1)                            | 2.5<br>(-0.7 to 5.5)                                |
| Other exposure to mechanical forces           | 208.1<br>(174.6 to 257.2)                     | 126.7<br>(106.3 to 147.6)                      | 5.6<br>(3.6 to 8.3)                   | 54.2<br>(50.3 to 58.2)                            | -1.4<br>(-3.3 to 0.6)                               |

| Cause                                                                               | Prevalence in thousands (95% UI)        | Incidence in thousands (95% UI)       | YLDs in thousands (95% UI)          |                                                   |                                                     |
|-------------------------------------------------------------------------------------|-----------------------------------------|---------------------------------------|-------------------------------------|---------------------------------------------------|-----------------------------------------------------|
|                                                                                     | 2016 counts                             | 2016 counts                           | 2016 counts                         | Percentage change in counts between 2006 and 2016 | Percentage change in age-standardised rates between |
| Adverse effects of medical treatment                                                | 6.6<br>(5.0 to 8.3)                     | 86.2<br>(73.5 to 100.0)               | 0.9<br>(0.5 to 1.3)                 | 38.1<br>(31.4 to 47.3)                            | -14.5<br>(-17.0 to -11.1)                           |
| Animal contact                                                                      | 72.8<br>(64.5 to 84.0)                  | 128.1<br>(109.3 to 148.1)             | 2.6<br>(1.7 to 3.7)                 | 59.8<br>(52.5 to 67.0)                            | 2.4<br>(-0.9 to 5.6)                                |
| Venomous animal contact                                                             | 28.6<br>(24.2 to 34.5)                  | 54.1<br>(43.3 to 66.5)                | 1.7<br>(1.1 to 2.5)                 | 59.3<br>(49.7 to 69.9)                            | 2.2<br>(-2.5 to 7.1)                                |
| Non-venomous animal contact                                                         | 44.2<br>(37.5 to 53.2)                  | 74.0<br>(61.2 to 88.1)                | 0.9<br>(0.6 to 1.3)                 | 60.8<br>(56.1 to 65.7)                            | 2.6<br>(0.0 to 5.2)                                 |
| Foreign body                                                                        | 94.2<br>(76.4 to 112.1)                 | 83.4<br>(72.7 to 95.9)                | 4.4<br>(2.7 to 6.7)                 | 54.6<br>(47.9 to 61.7)                            | -1.1<br>(-3.6 to 1.6)                               |
| Pulmonary aspiration and foreign body in airway                                     | 47.5<br>(34.7 to 64.7)                  | 31.9<br>(25.2 to 40.9)                | 2.5<br>(1.5 to 4.0)                 | 66.5<br>(58.8 to 74.2)                            | 6.4<br>(3.5 to 9.3)                                 |
| Foreign body in eyes                                                                | 4.3<br>(2.2 to 6.6)                     | 24.2<br>(18.4 to 31.9)                | 0.2<br>(0.1 to 0.4)                 | 52.4<br>(47.0 to 58.2)                            | -1.3<br>(-3.9 to 1.7)                               |
| Foreign body in other body part                                                     | 42.5<br>(33.8 to 54.8)                  | 27.3<br>(22.2 to 33.6)                | 1.6<br>(1.0 to 2.5)                 | 39.3<br>(32.8 to 46.4)                            | -10.2<br>(-12.8 to -7.3)                            |
| Environmental heat and cold exposure                                                | 96.8<br>(80.4 to 116.7)                 | 42.6<br>(34.1 to 52.1)                | 4.3<br>(2.8 to 6.4)                 | 53.9<br>(48.7 to 59.0)                            | -1.9<br>(-3.7 to -0.1)                              |
| Other unintentional injuries                                                        | 171.8<br>(136.0 to 220.4)               | 100.1<br>(82.2 to 122.7)              | 5.4<br>(3.5 to 7.8)                 | 64.8<br>(59.9 to 69.4)                            | 4.7<br>(2.9 to 6.4)                                 |
| <b>Self-harm and interpersonal violence</b>                                         | <b>617.0</b><br><b>(548.1 to 693.0)</b> | <b>60.8†</b><br><b>(51.2 to 71.6)</b> | <b>8.8</b><br><b>(6.1 to 12.1)</b>  | <b>50.7</b><br><b>(46.6 to 55.1)</b>              | <b>-1.5</b><br><b>(-3.9 to 0.9)</b>                 |
| Self-harm                                                                           | 7.0<br>(6.1 to 7.9)                     | 4.3<br>(3.6 to 5.1)                   | 0.4<br>(0.2 to 0.6)                 | 73.0<br>(69.2 to 77.0)                            | 11.0<br>(8.5 to 13.5)                               |
| Self-harm by firearm                                                                | 0.7<br>(0.6 to 0.8)                     | 0.3<br>(0.2 to 0.5)                   | < 0.05<br>(< 0.05 to < 0.05)        | 65.2<br>(60.4 to 70.4)                            | 4.9<br>(2.0 to 8.1)                                 |
| Self-harm by other specified means                                                  | 6.4<br>(5.5 to 7.2)                     | 4.0<br>(3.3 to 4.8)                   | 0.4<br>(0.2 to 0.6)                 | 73.7<br>(69.6 to 77.9)                            | 11.5<br>(8.9 to 14.2)                               |
| Interpersonal violence                                                              | 610.0<br>(541.2 to 685.6)               | 56.5†<br>(47.1 to 66.9)               | 8.3<br>(5.8 to 11.5)                | 49.7<br>(45.6 to 54.2)                            | -2.4<br>(-4.8 to 0.1)                               |
| Assault by firearm                                                                  | 2.8<br>(2.4 to 3.2)                     | 1.2<br>(0.9 to 1.7)                   | 0.1<br>(0.1 to 0.2)                 | 52.1<br>(47.2 to 57.0)                            | -3.1<br>(-5.6 to -0.6)                              |
| Assault by sharp object                                                             | 19.9<br>(16.3 to 23.7)                  | 10.9<br>(8.3 to 14.3)                 | 0.7<br>(0.5 to 1.1)                 | 66.8<br>(62.1 to 71.6)                            | 7.9<br>(5.6 to 10.2)                                |
| Sexual violence                                                                     | 530.1<br>(461.3 to 606.7)               | --                                    | 4.9<br>(3.2 to 7.1)                 | 40.8<br>(35.3 to 46.8)                            | -9.3<br>(-12.5 to -6.0)                             |
| Assault by other means                                                              | 57.2<br>(48.3 to 69.2)                  | 44.3<br>(36.8 to 52.8)                | 2.6<br>(1.7 to 3.8)                 | 64.5<br>(60.7 to 68.2)                            | 5.4<br>(3.5 to 7.3)                                 |
| <b>Forces of nature, conflict and terrorism, and executions and police conflict</b> | <b>416.4</b><br><b>(238.5 to 668.4)</b> | <b>0.7†</b><br><b>(0.3 to 1.9)</b>    | <b>12.6</b><br><b>(4.4 to 25.9)</b> | <b>33.5</b><br><b>(23.4 to 41.6)</b>              | <b>-2.0</b><br><b>(-7.2 to 1.8)</b>                 |
| Exposure to forces of nature                                                        | 0.9<br>(0.4 to 1.5)                     | --                                    | < 0.05<br>(< 0.05 to 0.1)           | 87.2<br>(69.6 to 177.7)                           | 29.8<br>(18.7 to 90.6)                              |
| Conflict and terrorism                                                              | 413.7<br>(236.4 to 666.8)               | --                                    | 12.5<br>(4.4 to 25.5)               | 33.3<br>(23.3 to 41.5)                            | -2.1<br>(-7.4 to 1.7)                               |
| Executions and police conflict                                                      | 1.8<br>(0.7 to 4.4)                     | 0.7<br>(0.3 to 1.9)                   | 0.1<br>(< 0.05 to 0.2)              | 49.7<br>(7.5 to 93.3)                             | 6.1<br>(-13.7 to 25.4)                              |
| <b>Impairments</b>                                                                  | --                                      | --                                    | --                                  | --                                                | --                                                  |
| Anaemia                                                                             | 5,508.0<br>(4,971.4 to 6,093.4)         | --                                    | 209.3<br>(135.3 to 295.0)           | 39.6<br>(23.7 to 56.4)                            | -10.3<br>(-19.2 to -1.4)                            |
| Developmental intellectual disability                                               | 477.8<br>(360.2 to 596.4)               | --                                    | 43.6<br>(31.0 to 60.4)              | 48.2<br>(36.3 to 58.9)                            | -2.9<br>(-9.8 to 3.2)                               |
| Epilepsy                                                                            | 70.4<br>(35.7 to 122.0)                 | --                                    | 27.8<br>(13.0 to 52.0)              | 48.9<br>(-34.2 to 238.6)                          | -2.6<br>(-60.1 to 143.7)                            |
| Guillain-Barre syndrome                                                             | 0.1<br>(0.1 to 0.1)                     | --                                    | < 0.05<br>(< 0.05 to < 0.05)        | 53.1<br>(51.6 to 54.9)                            | 0.0<br>(-0.0 to 0.1)                                |
| Hearing loss                                                                        | 1,691.1<br>(1,594.2 to 1,794.6)         | --                                    | 70.6<br>(48.6 to 96.4)              | 50.6<br>(45.9 to 55.2)                            | -1.9<br>(-3.9 to 0.1)                               |
| Heart failure                                                                       | 34.1<br>(30.1 to 38.6)                  | --                                    | 3.8<br>(2.7 to 4.9)                 | 60.2<br>(48.0 to 73.0)                            | 0.0<br>(-7.6 to 8.0)                                |
| Infertility                                                                         | 219.3<br>(168.9 to 293.4)               | --                                    | 1.3<br>(0.5 to 2.6)                 | 52.0<br>(41.4 to 62.2)                            | -3.1<br>(-10.1 to 3.6)                              |
| Pelvic inflammatory disease                                                         | 13.2<br>(11.2 to 15.9)                  | --                                    | 1.7<br>(1.1 to 2.5)                 | 51.8<br>(32.4 to 72.4)                            | -3.2<br>(-15.3 to 9.9)                              |
| Vision loss                                                                         | 1,923.5<br>(1,758.8 to 2,125.9)         | --                                    | 54.8<br>(37.6 to 77.5)              | 40.7<br>(32.6 to 48.3)                            | -9.1<br>(-12.8 to -5.6)                             |

We did not calculate incidence for the nine impairments, certain NTDs, and causes with only birth prevalence. Blank cells mean that no estimate is available.

† Incidence for aggregate causes represents the sum of the incidence of the causes below the aggregate.

‡ Incidence estimates for stroke represent first-ever stroke only.

^ Incidence of HIV/AIDS represents new infections of HIV only and does not include new infections of Tuberculosis in HIV positive cases.

SR Table 14: Prevalence, incidence, and YLDs for 2016, percentage change of YLD counts and percentage change of age-standardised YLD rates between 2006 and 2016 by cause and impairments, for all ages, Spain.

| Cause                                                                                | Prevalence in thousands (95% UI)          | Incidence in thousands (95% UI)               | YLDs in thousands (95% UI)             |                                                   |                                                     |
|--------------------------------------------------------------------------------------|-------------------------------------------|-----------------------------------------------|----------------------------------------|---------------------------------------------------|-----------------------------------------------------|
|                                                                                      | 2016 counts                               | 2016 counts                                   | 2016 counts                            | Percentage change in counts between 2006 and 2016 | Percentage change in age-standardised rates between |
| <b>All causes</b>                                                                    | <b>43,902.7</b><br>(43,703.2 to 44,099.1) | <b>324,957.6†</b><br>(307,454.2 to 343,635.5) | <b>5,708.6</b><br>(4,241.7 to 7,390.7) | <b>8.0</b><br>(6.5 to 9.4)                        | <b>-0.8</b><br>(-2.2 to 0.6)                        |
| <b>Communicable, maternal, neonatal, and nutritional disorders</b>                   | <b>13,766.3</b><br>(13,114.5 to 14,436.0) | <b>169,797.6†</b><br>(152,707.4 to 187,298.1) | <b>216.8</b><br>(151.2 to 299.8)       | <b>3.0</b><br>(-2.5 to 9.1)                       | <b>-1.0</b><br>(-7.0 to 5.5)                        |
| <b>HIV/AIDS and tuberculosis</b>                                                     | <b>3,053.8</b><br>(2,618.8 to 3,481.1)    | <b>9.8†</b><br>(6.8 to 13.0)                  | <b>29.1</b><br>(14.3 to 51.3)          | <b>9.4</b><br>(-1.4 to 19.1)                      | <b>-3.8</b><br>(-13.0 to 5.0)                       |
| Tuberculosis                                                                         | 2,560.2<br>(2,073.5 to 3,057.4)           | 3.9†<br>(2.9 to 5.1)                          | 0.9<br>(0.5 to 1.3)                    | -28.2<br>(-42.6 to -8.9)                          | -30.9<br>(-43.6 to -13.9)                           |
| Drug-susceptible tuberculosis                                                        | 2.6<br>(1.9 to 3.5)                       | 3.8<br>(2.9 to 5.0)                           | 0.9<br>(0.5 to 1.3)                    | -28.3<br>(-42.7 to -8.7)                          | -30.9<br>(-43.6 to -13.7)                           |
| Multidrug-resistant tuberculosis without extensive drug resistance                   | < 0.05<br>(< 0.05 to < 0.05)              | < 0.05<br>(< 0.05 to 0.1)                     | < 0.05<br>(< 0.05 to < 0.05)           | -29.9<br>(-56.5 to 10.4)                          | -32.0<br>(-57.2 to 6.0)                             |
| Extensively drug-resistant tuberculosis                                              | < 0.05<br>(< 0.05 to < 0.05)              | < 0.05<br>(< 0.05 to < 0.05)                  | < 0.05<br>(< 0.05 to < 0.05)           | 50.8<br>(-6.5 to 137.4)                           | 46.2<br>(-7.9 to 128.0)                             |
| Latent tuberculosis infection                                                        | 2,557.6<br>(2,071.3 to 3,054.9)           | --                                            | --                                     | --                                                | --                                                  |
| HIV/AIDS                                                                             | 332.7<br>(173.3 to 545.4)                 | 5.9 <sup>a</sup><br>(3.2 to 9.0)              | 28.2<br>(13.7 to 50.3)                 | 11.2<br>(0.7 to 21.7)                             | -2.4<br>(-11.5 to 7.0)                              |
| Drug-susceptible HIV/AIDS - Tuberculosis                                             | 0.2<br>(0.1 to 0.4)                       | 0.4<br>(0.2 to 0.6)                           | 0.1<br>(< 0.05 to 0.2)                 | -54.4<br>(-60.0 to -48.5)                         | -59.8<br>(-64.7 to -54.6)                           |
| Multidrug-resistant HIV/AIDS - Tuberculosis without extensive drug resistance        | < 0.05<br>(< 0.05 to < 0.05)              | < 0.05<br>(< 0.05 to < 0.05)                  | < 0.05<br>(< 0.05 to < 0.05)           | -52.8<br>(-70.9 to -25.5)                         | -58.3<br>(-74.3 to -34.3)                           |
| Extensively drug-resistant HIV/AIDS - Tuberculosis                                   | < 0.05<br>(< 0.05 to < 0.05)              | < 0.05<br>(< 0.05 to < 0.05)                  | < 0.05<br>(< 0.05 to < 0.05)           | 1.6<br>(-37.4 to 60.4)                            | -10.4<br>(-44.7 to 41.5)                            |
| HIV/AIDS resulting in other diseases                                                 | 332.4<br>(173.2 to 545.0)                 | 5.9<br>(3.2 to 9.0)                           | 28.1<br>(13.6 to 50.1)                 | 11.8<br>(1.2 to 22.3)                             | -1.9<br>(-11.1 to 7.5)                              |
| <b>Diarrhoea, lower respiratory infections, and other common infectious diseases</b> | <b>2,669.6</b><br>(2,477.9 to 2,851.4)    | <b>167,840.8†</b><br>(150,473.5 to 185,566.9) | <b>79.6</b><br>(51.6 to 117.9)         | <b>4.9</b><br>(1.1 to 8.6)                        | <b>0.6</b><br>(-2.9 to 3.8)                         |
| Diarrhoeal diseases                                                                  | 79.4<br>(73.7 to 85.7)                    | 5,316.6<br>(4,922.8 to 5,771.5)               | 8.9<br>(6.0 to 12.3)                   | 12.4<br>(3.7 to 22.1)                             | 5.3<br>(-3.9 to 15.1)                               |
| Intestinal infectious diseases                                                       | < 0.05<br>(< 0.05 to < 0.05)              | 0.4†<br>(0.3 to 0.5)                          | < 0.05<br>(< 0.05 to < 0.05)           | 2.7<br>(-12.9 to 21.5)                            | -6.2<br>(-20.6 to 10.7)                             |
| Typhoid fever                                                                        | < 0.05<br>(< 0.05 to < 0.05)              | 0.1<br>(0.1 to 0.2)                           | < 0.05<br>(< 0.05 to < 0.05)           | 10.8<br>(-8.5 to 35.7)                            | 4.2<br>(-13.8 to 27.1)                              |
| Paratyphoid fever                                                                    | < 0.05<br>(< 0.05 to < 0.05)              | 0.2<br>(0.2 to 0.3)                           | < 0.05<br>(< 0.05 to < 0.05)           | -7.2<br>(-23.0 to 12.3)                           | -15.6<br>(-29.4 to 1.9)                             |
| Other intestinal infectious diseases                                                 | --                                        | --                                            | < 0.05<br>(< 0.05 to < 0.05)           | -33.8<br>(-52.4 to -10.6)                         | -45.3<br>(-63.5 to -18.9)                           |
| Lower respiratory infections                                                         | 19.3<br>(17.8 to 20.7)                    | 914.3<br>(843.0 to 993.0)                     | 1.1<br>(0.8 to 1.6)                    | 20.0<br>(4.2 to 38.6)                             | 1.4<br>(-11.7 to 17.3)                              |
| Upper respiratory infections                                                         | 2,075.7<br>(1,858.5 to 2,295.9)           | 158,617.6<br>(141,262.5 to 176,090.8)         | 51.5<br>(30.9 to 79.9)                 | 3.4<br>(-1.5 to 8.8)                              | 0.3<br>(-4.0 to 4.7)                                |
| Otitis media                                                                         | 466.5<br>(416.8 to 518.8)                 | 2,291.4<br>(1,897.2 to 2,762.9)               | 12.2<br>(7.6 to 18.4)                  | 4.7<br>(-2.8 to 12.8)                             | -0.5<br>(-7.5 to 6.9)                               |
| Meningitis                                                                           | 6.2<br>(5.3 to 7.5)                       | 1.1<br>(1.0 to 1.2)                           | 0.9<br>(0.6 to 1.2)                    | 1.1<br>(-3.9 to 22.4)                             | -4.8<br>(-8.3 to 3.3)                               |
| Pneumococcal meningitis                                                              | 1.2<br>(1.0 to 1.4)                       | < 0.05<br>(< 0.05 to < 0.05)                  | 0.2<br>(0.1 to 0.3)                    | -8.0<br>(-14.3 to -2.0)                           | -12.8<br>(-18.6 to -7.1)                            |
| H influenzae type B meningitis                                                       | 0.5<br>(0.4 to 0.7)                       | < 0.05<br>(< 0.05 to < 0.05)                  | 0.1<br>(0.1 to 0.2)                    | 1.8<br>(-2.9 to 7.1)                              | -2.7<br>(-7.2 to 2.1)                               |
| Meningococcal infection                                                              | 1.6<br>(1.1 to 2.5)                       | 0.4<br>(0.4 to 0.5)                           | 0.2<br>(0.1 to 0.4)                    | 2.9<br>(-13.0 to 99.5)                            | -10.1<br>(-19.4 to 25.2)                            |
| Other meningitis                                                                     | 3.0<br>(2.4 to 3.7)                       | 0.6<br>(0.5 to 0.7)                           | 0.4<br>(0.3 to 0.6)                    | 5.0<br>(0.7 to 9.3)                               | 1.2<br>(-2.9 to 5.3)                                |
| Encephalitis                                                                         | 22.1<br>(14.6 to 32.2)                    | 14.5<br>(12.9 to 16.1)                        | 2.7<br>(1.8 to 3.6)                    | 5.5<br>(2.3 to 8.8)                               | -1.3<br>(-4.4 to 1.8)                               |
| Diphtheria                                                                           | < 0.05<br>(< 0.05 to < 0.05)              | < 0.05<br>(< 0.05 to < 0.05)                  | < 0.05<br>(< 0.05 to < 0.05)           | -21.5<br>(-60.2 to 54.8)                          | -31.5<br>(-62.2 to 21.6)                            |
| Whooping cough                                                                       | 1.2<br>(0.9 to 1.6)                       | 8.8<br>(6.7 to 11.5)                          | 0.1<br>(< 0.05 to 0.1)                 | -32.1<br>(-55.0 to -4.0)                          | -29.4<br>(-53.8 to 0.9)                             |
| Tetanus                                                                              | < 0.05<br>(< 0.05 to < 0.05)              | < 0.05<br>(< 0.05 to < 0.05)                  | < 0.05<br>(< 0.05 to < 0.05)           | -45.1<br>(-57.8 to -26.3)                         | -51.1<br>(-62.5 to -35.1)                           |
| Measles                                                                              | < 0.05<br>(< 0.05 to < 0.05)              | 0.1<br>(0.1 to 0.1)                           | < 0.05<br>(< 0.05 to < 0.05)           | 201.2<br>(105.4 to 390.3)                         | 203.7<br>(107.0 to 394.3)                           |
| Varicella and herpes zoster                                                          | 48.1<br>(43.4 to 53.2)                    | 676.1<br>(645.7 to 709.2)                     | 2.2<br>(1.3 to 3.3)                    | 9.4<br>(-4.5 to 24.3)                             | -3.8<br>(-16.2 to 9.9)                              |
| <b>Neglected tropical diseases and malaria</b>                                       | <b>160.0</b><br>(130.7 to 195.0)          | <b>11.2†</b><br>(8.2 to 14.3)                 | <b>3.8</b><br>(1.6 to 7.9)             | <b>9.0</b><br>(-22.0 to 42.8)                     | <b>-4.3</b><br>(-33.9 to 29.8)                      |
| Malaria                                                                              | --                                        | --                                            | --                                     | --                                                | --                                                  |
| Chagas disease                                                                       | 51.6<br>(43.3 to 60.6)                    | --                                            | 0.6<br>(0.4 to 0.8)                    | 60.1<br>(46.8 to 74.4)                            | 46.7<br>(34.2 to 59.9)                              |
| Leishmaniasis                                                                        | < 0.05<br>(< 0.05 to 0.1)                 | 0.2<br>(0.2 to 0.2)                           | < 0.05<br>(< 0.05 to < 0.05)           | -20.9<br>(-33.4 to -3.9)                          | -26.9<br>(-42.5 to -4.6)                            |
| Visceral leishmaniasis                                                               | < 0.05<br>(< 0.05 to < 0.05)              | 0.2<br>(0.1 to 0.2)                           | < 0.05<br>(< 0.05 to < 0.05)           | -27.7<br>(-34.6 to -19.2)                         | -36.5<br>(-44.9 to -26.2)                           |
| Cutaneous and mucocutaneous leishmaniasis                                            | < 0.05<br>(< 0.05 to < 0.05)              | < 0.05<br>(< 0.05 to < 0.05)                  | < 0.05<br>(< 0.05 to < 0.05)           | 64.7<br>(-55.3 to 750.9)                          | 55.2<br>(-57.2 to 712.8)                            |
| African trypanosomiasis                                                              | --                                        | --                                            | --                                     | --                                                | --                                                  |
| Schistosomiasis                                                                      | --                                        | --                                            | --                                     | --                                                | --                                                  |
| Cysticercosis                                                                        | 2.1<br>(0.5 to 4.3)                       | --                                            | 0.2<br>(< 0.05 to 0.6)                 | -34.0<br>(-84.8 to 208.4)                         | -41.7<br>(-86.4 to 177.2)                           |
| Cystic echinococcosis                                                                | 2.0<br>(0.4 to 8.4)                       | 0.4<br>(0.1 to 1.7)                           | 0.2<br>(< 0.05 to 0.7)                 | -41.6<br>(-94.2 to 378.2)                         | -45.2<br>(-93.7 to 342.3)                           |
| Lymphatic filariasis                                                                 | --                                        | --                                            | --                                     | --                                                | --                                                  |
| Onchocerciasis                                                                       | --                                        | --                                            | --                                     | --                                                | --                                                  |
| Trachoma                                                                             | --                                        | --                                            | --                                     | --                                                | --                                                  |
| Dengue                                                                               | --                                        | --                                            | --                                     | --                                                | --                                                  |
| Yellow fever                                                                         | --                                        | --                                            | --                                     | --                                                | --                                                  |
| Rabies                                                                               | < 0.05<br>(< 0.05 to < 0.05)              | < 0.05<br>(< 0.05 to < 0.05)                  | < 0.05<br>(< 0.05 to < 0.05)           | 14.3<br>(-7.9 to 49.7)                            | -10.5<br>(-27.0 to 13.9)                            |
| Intestinal nematode infections                                                       | --                                        | --                                            | --                                     | --                                                | --                                                  |
| Ascariasis                                                                           | --                                        | --                                            | --                                     | --                                                | --                                                  |



| Cause                                                                   | Prevalence in thousands (95% UI)                 | Incidence in thousands (95% UI)                      | YLDs in thousands (95% UI)                    |                                                   |                                                     |
|-------------------------------------------------------------------------|--------------------------------------------------|------------------------------------------------------|-----------------------------------------------|---------------------------------------------------|-----------------------------------------------------|
|                                                                         | 2016 counts                                      | 2016 counts                                          | 2016 counts                                   | Percentage change in counts between 2006 and 2016 | Percentage change in age-standardised rates between |
| Trichuriasis                                                            | --                                               | --                                                   | --                                            | --                                                | --                                                  |
| Hookworm disease                                                        | --                                               | --                                                   | --                                            | --                                                | --                                                  |
| Food-borne trematodiasis                                                | 111.6<br>(78.1 to 149.9)                         | 10.6<br>(7.6 to 13.6)                                | 2.8<br>(0.6 to 6.6)                           | 15.3<br>(-3.4 to 38.7)                            | 0.8<br>(-16.2 to 21.3)                              |
| Leprosy                                                                 | < 0.05<br>(< 0.05 to < 0.05)                     | < 0.05<br>(< 0.05 to < 0.05)                         | < 0.05<br>(< 0.05 to < 0.05)                  | 4.9<br>(2.6 to 7.6)                               | -10.5<br>(-12.3 to -8.6)                            |
| Ebola virus disease                                                     | --                                               | --                                                   | --                                            | --                                                | --                                                  |
| Zika virus disease                                                      | < 0.05<br>(< 0.05 to < 0.05)                     | < 0.05<br>(< 0.05 to < 0.05)                         | < 0.05<br>(< 0.05 to < 0.05)                  | --                                                | --                                                  |
| Guinea worm disease                                                     | --                                               | --                                                   | --                                            | --                                                | --                                                  |
| Other neglected tropical diseases                                       | --                                               | --                                                   | < 0.05<br>(< 0.05 to < 0.05)                  | --                                                | --                                                  |
| <b>Maternal disorders</b>                                               | <b>41.4</b><br><b>(31.3 to 51.9)</b>             | <b>565.2†</b><br><b>(388.6 to 774.2)</b>             | <b>2.4</b><br><b>(1.5 to 3.6)</b>             | <b>-5.4</b><br><b>(-33.2 to 34.6)</b>             | <b>8.6</b><br><b>(-23.2 to 54.9)</b>                |
| Maternal haemorrhage                                                    | 4.5<br>(2.6 to 7.4)                              | 35.0<br>(25.3 to 48.4)                               | 0.2<br>(0.1 to 0.3)                           | -16.9<br>(-47.7 to 29.5)                          | -6.4<br>(-41.6 to 42.7)                             |
| Maternal sepsis and other pregnancy related infections                  | 7.1<br>(5.6 to 9.0)                              | 32.8<br>(24.4 to 44.7)                               | 0.1<br>(0.1 to 0.3)                           | -13.0<br>(-58.4 to 90.3)                          | -0.7<br>(-53.2 to 119.2)                            |
| Maternal hypertensive disorders                                         | 27.6<br>(18.0 to 37.5)                           | 110.4<br>(97.7 to 120.0)                             | 1.3<br>(0.7 to 2.1)                           | -7.1<br>(-43.8 to 56.5)                           | 7.3<br>(-34.8 to 80.8)                              |
| Maternal obstructed labour and uterine rupture                          | 0.3<br>(0.1 to 0.5)                              | 19.4<br>(12.6 to 27.9)                               | 0.1<br>(< 0.05 to 0.2)                        | -9.8<br>(-51.8 to 66.7)                           | 3.4<br>(-44.8 to 93.8)                              |
| Maternal abortion, miscarriage, and ectopic pregnancy                   | 3.0<br>(1.4 to 5.1)                              | 367.7<br>(195.2 to 573.8)                            | 0.3<br>(0.1 to 0.6)                           | 27.0<br>(-31.6 to 155.9)                          | 44.4<br>(-21.8 to 181.5)                            |
| Other maternal disorders                                                | --                                               | --                                                   | 0.4<br>(0.2 to 0.5)                           | -9.8<br>(-36.2 to 28.4)                           | 3.5<br>(-26.6 to 47.8)                              |
| <b>Neonatal disorders</b>                                               | <b>281.8</b><br><b>(239.0 to 352.2)</b>          | --                                                   | <b>52.3</b><br><b>(35.9 to 75.0)</b>          | <b>4.0</b><br><b>(-8.8 to 19.0)</b>               | <b>1.8</b><br><b>(-10.9 to 17.9)</b>                |
| Neonatal preterm birth complications                                    | 253.4<br>(202.7 to 331.3)                        | --                                                   | 29.7<br>(20.2 to 42.1)                        | 4.6<br>(-16.6 to 30.5)                            | 3.2<br>(-17.9 to 28.8)                              |
| Neonatal encephalopathy due to birth asphyxia and trauma                | 35.3<br>(23.9 to 50.3)                           | --                                                   | 8.0<br>(4.7 to 12.8)                          | 19.1<br>(0.9 to 41.4)                             | 16.3<br>(-1.1 to 39.1)                              |
| Neonatal sepsis and other neonatal infections                           | 36.1<br>(16.7 to 76.8)                           | --                                                   | 12.7<br>(5.0 to 29.5)                         | -4.4<br>(-18.5 to 11.4)                           | -7.5<br>(-21.2 to 7.2)                              |
| Hemolytic disease and other neonatal jaundice                           | 3.0<br>(2.6 to 3.5)                              | --                                                   | 1.0<br>(0.7 to 1.3)                           | 1.0<br>(-7.2 to 8.5)                              | -1.0<br>(-8.7 to 6.5)                               |
| Other neonatal disorders                                                | --                                               | --                                                   | 0.8<br>(0.5 to 1.2)                           | -4.8<br>(-21.6 to 16.8)                           | -2.0<br>(-19.4 to 20.2)                             |
| <b>Nutritional deficiencies</b>                                         | <b>2,976.2</b><br><b>(2,489.7 to 3,422.9)</b>    | <b>192.8†</b><br><b>(151.3 to 239.0)</b>             | <b>43.4</b><br><b>(27.4 to 66.8)</b>          | <b>-3.7</b><br><b>(-21.2 to 19.1)</b>             | <b>-5.2</b><br><b>(-23.6 to 18.4)</b>               |
| Protein-energy malnutrition                                             | 29.0<br>(28.3 to 29.7)                           | 18.1<br>(17.7 to 18.5)                               | 2.5<br>(1.6 to 3.5)                           | -5.2<br>(-15.6 to 6.9)                            | -2.5<br>(-13.2 to 9.9)                              |
| Iodine deficiency                                                       | 612.8<br>(466.0 to 787.5)                        | 7.8<br>(6.1 to 9.8)                                  | 15.5<br>(9.8 to 23.6)                         | 2.4<br>(-7.2 to 15.2)                             | -2.6<br>(-12.3 to 9.8)                              |
| Vitamin A deficiency                                                    | 205.3<br>(155.4 to 260.2)                        | 166.9<br>(125.0 to 213.7)                            | --                                            | --                                                | --                                                  |
| Iron-deficiency anaemia                                                 | 1,961.2<br>(1,525.5 to 2,492.4)                  | --                                                   | 25.4<br>(14.2 to 41.8)                        | -6.9<br>(-33.4 to 31.7)                           | -6.8<br>(-33.8 to 33.1)                             |
| Other nutritional deficiencies                                          | --                                               | --                                                   | 0.1<br>(0.1 to 0.1)                           | -5.2<br>(-16.0 to 7.4)                            | -2.7<br>(-13.9 to 10.2)                             |
| <b>Other communicable, maternal, neonatal, and nutritional diseases</b> | <b>6,815.8</b><br><b>(6,370.3 to 7,344.3)</b>    | <b>1,177.8</b><br><b>(1,030.1 to 1,379.9)</b>        | <b>6.2</b><br><b>(3.5 to 10.3)</b>            | <b>-5.8</b><br><b>(-14.4 to 2.6)</b>              | <b>-4.0</b><br><b>(-14.0 to 7.1)</b>                |
| Sexually transmitted diseases excluding HIV                             | 5,744.7<br>(5,285.6 to 6,299.3)                  | 1,037.1<br>(890.1 to 1,239.2)                        | 4.0<br>(2.1 to 7.2)                           | -5.8<br>(-19.2 to 3.9)                            | -4.6<br>(-18.9 to 6.2)                              |
| Syphilis                                                                | 32.5<br>(20.8 to 50.2)                           | 28.8<br>(16.1 to 46.1)                               | 0.5<br>(0.4 to 0.7)                           | 16.5<br>(2.6 to 32.1)                             | -0.4<br>(-12.4 to 13.7)                             |
| Chlamydial infection                                                    | 155.9<br>(110.0 to 211.9)                        | 105.6<br>(72.9 to 147.2)                             | 0.7<br>(0.4 to 1.3)                           | -15.7<br>(-31.3 to 4.5)                           | -0.6<br>(-20.6 to 24.9)                             |
| Gonococcal infection                                                    | 35.2<br>(19.1 to 86.2)                           | 80.2<br>(19.7 to 282.1)                              | 0.2<br>(0.1 to 0.3)                           | -47.2<br>(-76.4 to 5.8)                           | -43.5<br>(-76.3 to 13.4)                            |
| Trichomoniasis                                                          | 788.8<br>(669.2 to 925.9)                        | 649.2<br>(549.8 to 764.1)                            | 0.7<br>(0.3 to 1.6)                           | -0.2<br>(-8.7 to 9.4)                             | 1.0<br>(-7.7 to 10.0)                               |
| Genital herpes                                                          | 4,818.0<br>(4,153.3 to 5,646.7)                  | 156.1<br>(132.4 to 186.1)                            | 1.2<br>(0.4 to 2.8)                           | 7.2<br>(-1.2 to 15.6)                             | 0.5<br>(-6.9 to 8.6)                                |
| Other sexually transmitted diseases                                     | 45.1<br>(40.0 to 51.8)                           | 17.1<br>(11.0 to 24.7)                               | 0.6<br>(0.3 to 1.1)                           | -15.2<br>(-32.9 to 0.7)                           | -7.2<br>(-26.3 to 10.2)                             |
| Hepatitis                                                               | 1,241.0<br>(1,114.2 to 1,369.5)                  | 140.6<br>(124.1 to 158.7)                            | 0.3<br>(0.2 to 0.4)                           | -47.9<br>(-56.1 to -38.8)                         | -51.9<br>(-60.3 to -42.1)                           |
| Acute hepatitis A                                                       | 4.9<br>(4.2 to 5.4)                              | 63.1<br>(55.1 to 70.2)                               | 0.2<br>(0.1 to 0.2)                           | -53.2<br>(-64.1 to -38.8)                         | -55.6<br>(-66.6 to -39.8)                           |
| Hepatitis B                                                             | 424.0<br>(333.1 to 528.4)                        | 56.3<br>(42.2 to 73.3)                               | 0.1<br>(0.1 to 0.2)                           | -40.0<br>(-50.2 to -26.9)                         | -47.2<br>(-55.9 to -36.7)                           |
| Hepatitis C                                                             | 811.5<br>(729.0 to 895.1)                        | 13.2<br>(11.9 to 14.8)                               | < 0.05<br>(< 0.05 to < 0.05)                  | -33.8<br>(-36.4 to -31.4)                         | -26.3<br>(-29.7 to -23.3)                           |
| Acute hepatitis E                                                       | 0.6<br>(0.4 to 0.8)                              | 8.0<br>(5.5 to 10.7)                                 | < 0.05<br>(< 0.05 to < 0.05)                  | -44.2<br>(-49.8 to -36.5)                         | -53.8<br>(-56.7 to -50.4)                           |
| Other infectious diseases                                               | 58.8<br>(44.6 to 79.1)                           | 0.1<br>(< 0.05 to 0.1)                               | 1.9<br>(1.1 to 3.0)                           | 7.6<br>(-6.7 to 28.7)                             | 8.3<br>(-11.0 to 38.5)                              |
| <b>Non-communicable diseases</b>                                        | <b>42,966.5</b><br><b>(42,756.6 to 43,151.5)</b> | <b>150,641.4†</b><br><b>(146,699.6 to 154,876.7)</b> | <b>5,023.9</b><br><b>(3,734.3 to 6,487.9)</b> | <b>9.2</b><br><b>(7.5 to 10.9)</b>                | <b>0.3</b><br><b>(-1.3 to 1.9)</b>                  |
| <b>Neoplasms</b>                                                        | <b>713.1</b><br><b>(691.2 to 738.8)</b>          | <b>249.6</b><br><b>(237.6 to 265.3)</b>              | <b>76.8</b><br><b>(56.8 to 100.0)</b>         | <b>17.6</b><br><b>(12.5 to 23.2)</b>              | <b>-2.4</b><br><b>(-6.9 to 2.4)</b>                 |
| Lip and oral cavity cancer                                              | 12.2<br>(10.7 to 13.8)                           | 3.2<br>(2.9 to 3.6)                                  | 1.2<br>(0.8 to 1.6)                           | 6.0<br>(-10.5 to 25.7)                            | -13.5<br>(-27.2 to 2.8)                             |
| Nasopharynx cancer                                                      | 2.1<br>(1.7 to 2.5)                              | 0.6<br>(0.5 to 0.7)                                  | 0.2<br>(0.2 to 0.3)                           | -9.1<br>(-24.7 to 11.2)                           | -22.7<br>(-36.8 to -5.3)                            |
| Other pharynx cancer                                                    | 5.5<br>(5.0 to 6.0)                              | 1.6<br>(1.5 to 1.8)                                  | 0.6<br>(0.4 to 0.8)                           | 18.9<br>(2.8 to 37.0)                             | -1.6<br>(-15.1 to 14.5)                             |
| Oesophageal cancer                                                      | 2.7<br>(2.3 to 3.1)                              | 2.1<br>(1.9 to 2.4)                                  | 0.6<br>(0.4 to 0.8)                           | 7.8<br>(-12.7 to 31.2)                            | -11.8<br>(-27.5 to 5.7)                             |
| Stomach cancer                                                          | 21.9<br>(19.1 to 25.5)                           | 10.4<br>(9.5 to 11.7)                                | 2.7<br>(2.0 to 3.6)                           | 12.7<br>(-5.2 to 33.4)                            | -8.1<br>(-22.3 to 7.5)                              |
| Colon and rectum cancer                                                 | 139.8<br>(127.9 to 154.3)                        | 36.0<br>(33.2 to 39.6)                               | 12.7<br>(9.1 to 16.7)                         | 19.1<br>(6.4 to 34.2)                             | -2.5<br>(-13.5 to 10.6)                             |
| Liver cancer                                                            | 4.6<br>(3.5 to 6.0)                              | 5.9<br>(5.1 to 6.8)                                  | 1.3<br>(0.9 to 1.9)                           | 21.5<br>(0.2 to 47.5)                             | 1.8<br>(-15.9 to 23.8)                              |
| Liver cancer due to hepatitis B                                         | 0.7<br>(0.4 to 0.9)                              | 0.5<br>(0.4 to 0.7)                                  | 0.1<br>(0.1 to 0.2)                           | 19.3<br>(-4.3 to 47.1)                            | 1.3<br>(-18.9 to 24.7)                              |

| Cause                                              | Prevalence in thousands (95% UI)              | Incidence in thousands (95% UI)          | YLDs in thousands (95% UI)              |                                                   |                                                     |
|----------------------------------------------------|-----------------------------------------------|------------------------------------------|-----------------------------------------|---------------------------------------------------|-----------------------------------------------------|
|                                                    | 2016 counts                                   | 2016 counts                              | 2016 counts                             | Percentage change in counts between 2006 and 2016 | Percentage change in age-standardised rates between |
| Liver cancer due to hepatitis C                    | 3.6<br>(2.6 to 5.1)                           | 2.8<br>(2.2 to 3.6)                      | 0.6<br>(0.4 to 0.9)                     | 19.2<br>(-3.5 to 47.2)                            | -1.3<br>(-19.2 to 20.4)                             |
| Liver cancer due to alcohol use                    | 2.6<br>(1.6 to 3.7)                           | 2.0<br>(1.3 to 2.6)                      | 0.5<br>(0.3 to 0.7)                     | 26.0<br>(1.8 to 57.3)                             | 6.5<br>(-14.9 to 32.6)                              |
| Liver cancer due to other causes                   | 0.7<br>(0.5 to 0.9)                           | 0.5<br>(0.4 to 0.7)                      | 0.1<br>(0.1 to 0.2)                     | 19.7<br>(-4.1 to 48.2)                            | 0.6<br>(-19.8 to 24.2)                              |
| Gallbladder and biliary tract cancer               | 2.5<br>(1.7 to 4.6)                           | 2.3<br>(1.9 to 3.3)                      | 0.5<br>(0.3 to 0.9)                     | 4.8<br>(-24.1 to 56.8)                            | -15.9<br>(-40.4 to 18.0)                            |
| Pancreatic cancer                                  | 5.5<br>(4.8 to 6.6)                           | 6.5<br>(5.9 to 7.1)                      | 1.3<br>(0.9 to 1.7)                     | 22.0<br>(1.9 to 44.6)                             | -0.5<br>(-15.0 to 15.1)                             |
| Larynx cancer                                      | 12.4<br>(10.8 to 14.2)                        | 3.3<br>(2.9 to 3.8)                      | 1.3<br>(0.9 to 1.8)                     | -2.9<br>(-24.6 to 23.1)                           | -19.7<br>(-38.5 to 1.6)                             |
| Tracheal, bronchus, and lung cancer                | 37.1<br>(31.9 to 43.5)                        | 25.2<br>(22.9 to 28.1)                   | 6.0<br>(4.3 to 7.7)                     | 9.7<br>(-8.5 to 30.8)                             | -8.9<br>(-24.6 to 9.8)                              |
| Malignant skin melanoma                            | 26.4<br>(21.0 to 29.9)                        | 5.5<br>(4.4 to 6.2)                      | 1.8<br>(1.2 to 2.5)                     | 25.6<br>(10.2 to 43.6)                            | 7.2<br>(-6.9 to 22.7)                               |
| Non-melanoma skin cancer                           | 11.9<br>(8.4 to 16.0)                         | 28.0<br>(19.4 to 39.7)                   | 0.4<br>(0.2 to 0.8)                     | 25.2<br>(-17.8 to 94.1)                           | -5.2<br>(-37.2 to 47.5)                             |
| Non-melanoma skin cancer (squamous-cell carcinoma) | 9.1<br>(5.9 to 14.2)                          | 8.4<br>(5.6 to 12.8)                     | 0.4<br>(0.2 to 0.7)                     | 26.9<br>(-19.8 to 100.7)                          | -4.5<br>(-38.2 to 51.9)                             |
| Non-melanoma skin cancer (basal-cell carcinoma)    | 2.8<br>(1.6 to 5.0)                           | 19.6<br>(11.7 to 29.9)                   | < 0.05<br>(< 0.05 to 0.1)               | 5.8<br>(-39.0 to 69.6)                            | -13.6<br>(-47.6 to 36.3)                            |
| Breast cancer                                      | 122.5<br>(115.9 to 130.6)                     | 23.8<br>(21.9 to 26.0)                   | 11.9<br>(8.4 to 16.3)                   | 16.0<br>(5.9 to 27.6)                             | -4.2<br>(-13.0 to 5.6)                              |
| Cervical cancer                                    | 7.0<br>(6.0 to 8.3)                           | 1.8<br>(1.6 to 2.1)                      | 0.7<br>(0.5 to 0.9)                     | -2.8<br>(-20.0 to 16.2)                           | -16.6<br>(-32.1 to 1.1)                             |
| Uterine cancer                                     | 34.9<br>(30.5 to 40.3)                        | 7.4<br>(6.5 to 8.5)                      | 2.6<br>(1.8 to 3.6)                     | 31.4<br>(7.5 to 58.7)                             | 9.6<br>(-11.2 to 33.5)                              |
| Ovarian cancer                                     | 8.8<br>(7.3 to 10.4)                          | 2.9<br>(2.4 to 3.3)                      | 1.2<br>(0.8 to 1.7)                     | 6.3<br>(-20.4 to 43.5)                            | -10.3<br>(-34.6 to 23.1)                            |
| Prostate cancer                                    | 89.2<br>(73.4 to 141.1)                       | 24.2<br>(21.0 to 34.9)                   | 8.9<br>(6.2 to 13.6)                    | 16.4<br>(0.2 to 35.4)                             | -4.4<br>(-18.9 to 12.8)                             |
| Testicular cancer                                  | 3.1<br>(2.5 to 4.0)                           | 0.6<br>(0.5 to 0.8)                      | 0.2<br>(0.1 to 0.3)                     | -1.7<br>(-32.5 to 41.9)                           | 2.7<br>(-29.3 to 49.2)                              |
| Kidney cancer                                      | 18.6<br>(16.3 to 20.7)                        | 5.0<br>(4.5 to 5.5)                      | 1.7<br>(1.2 to 2.2)                     | 18.6<br>(0.8 to 38.5)                             | 0.5<br>(-14.9 to 17.3)                              |
| Bladder cancer                                     | 57.4<br>(52.2 to 63.2)                        | 13.7<br>(12.5 to 14.9)                   | 5.1<br>(3.7 to 6.7)                     | 16.4<br>(1.5 to 32.1)                             | -5.7<br>(-17.7 to 7.9)                              |
| Brain and nervous system cancer                    | 12.7<br>(9.0 to 16.9)                         | 5.0<br>(3.7 to 6.5)                      | 1.6<br>(1.0 to 2.4)                     | 30.4<br>(2.1 to 64.8)                             | 12.8<br>(-10.2 to 38.6)                             |
| Thyroid cancer                                     | 11.8<br>(10.6 to 13.5)                        | 2.2<br>(2.0 to 2.6)                      | 0.8<br>(0.5 to 1.1)                     | 19.5<br>(-3.1 to 47.2)                            | 4.3<br>(-15.2 to 30.1)                              |
| Mesothelioma                                       | 0.9<br>(0.8 to 1.3)                           | 0.6<br>(0.5 to 0.8)                      | 0.2<br>(0.1 to 0.3)                     | 19.4<br>(4.5 to 32.1)                             | -0.0<br>(-12.5 to 10.8)                             |
| Hodgkin lymphoma                                   | 4.7<br>(4.0 to 5.6)                           | 1.1<br>(0.9 to 1.2)                      | 0.4<br>(0.3 to 0.6)                     | -5.2<br>(-22.8 to 15.2)                           | -7.7<br>(-25.7 to 14.0)                             |
| Non-Hodgkin's lymphoma                             | 29.8<br>(25.4 to 39.7)                        | 7.6<br>(6.5 to 10.1)                     | 2.4<br>(1.7 to 3.5)                     | 27.2<br>(7.5 to 47.4)                             | 6.2<br>(-11.1 to 23.2)                              |
| Multiple myeloma                                   | 8.6<br>(7.0 to 11.0)                          | 3.0<br>(2.5 to 3.8)                      | 1.5<br>(1.0 to 2.0)                     | 21.9<br>(-4.6 to 53.7)                            | 2.2<br>(-21.1 to 30.1)                              |
| Leukaemia                                          | 26.0<br>(22.9 to 29.4)                        | 7.3<br>(6.6 to 8.2)                      | 3.3<br>(2.3 to 4.4)                     | 23.6<br>(7.2 to 41.1)                             | 2.9<br>(-10.7 to 18.0)                              |
| Acute lymphoid leukaemia                           | 2.7<br>(2.1 to 3.4)                           | 0.7<br>(0.5 to 0.8)                      | 0.3<br>(0.2 to 0.5)                     | 25.8<br>(-2.9 to 60.2)                            | 22.4<br>(-13.0 to 69.3)                             |
| Chronic lymphoid leukaemia                         | 10.9<br>(9.2 to 12.8)                         | 2.5<br>(2.1 to 2.9)                      | 1.3<br>(0.9 to 1.8)                     | 23.9<br>(-1.3 to 53.9)                            | 0.1<br>(-20.2 to 24.4)                              |
| Acute myeloid leukaemia                            | 2.6<br>(2.1 to 3.1)                           | 1.8<br>(1.5 to 2.0)                      | 0.5<br>(0.3 to 0.7)                     | 34.8<br>(15.4 to 56.5)                            | 11.8<br>(-6.5 to 30.8)                              |
| Chronic myeloid leukaemia                          | 1.8<br>(1.5 to 2.0)                           | 0.6<br>(0.5 to 0.7)                      | 0.2<br>(0.1 to 0.3)                     | -7.4<br>(-21.4 to 9.6)                            | -25.0<br>(-36.4 to -12.0)                           |
| Other leukaemia                                    | 8.1<br>(6.8 to 9.4)                           | 1.8<br>(1.6 to 2.1)                      | 1.0<br>(0.7 to 1.3)                     | 26.1<br>(1.8 to 58.0)                             | -1.3<br>(-18.7 to 20.1)                             |
| Other neoplasms                                    | 48.7<br>(39.0 to 59.4)                        | 12.8<br>(10.5 to 15.4)                   | 3.7<br>(2.5 to 5.2)                     | 40.6<br>(16.9 to 69.7)                            | 17.7<br>(-1.0 to 39.6)                              |
| <b>Cardiovascular diseases</b>                     | <b>5,317.9</b><br><b>(5,087.9 to 5,568.0)</b> | <b>529.5†</b><br><b>(500.8 to 560.4)</b> | <b>322.4</b><br><b>(233.4 to 426.9)</b> | <b>10.6</b><br><b>(6.0 to 15.1)</b>               | <b>-7.2</b><br><b>(-10.9 to -3.5)</b>               |
| Rheumatic heart disease                            | 5.4<br>(4.9 to 6.0)                           | 2.8<br>(2.7 to 3.0)                      | 0.5<br>(0.3 to 0.7)                     | -2.5<br>(-21.7 to 19.7)                           | -16.4<br>(-31.6 to 0.9)                             |
| Ischaemic heart disease                            | 1,430.6<br>(1,345.4 to 1,534.8)               | 175.7<br>(161.6 to 190.1)                | 66.7<br>(46.7 to 90.0)                  | 13.1<br>(7.9 to 19.0)                             | -5.3<br>(-9.7 to -0.6)                              |
| Cerebrovascular disease                            | 548.3<br>(506.3 to 596.5)                     | 101.8‡<br>(93.6 to 110.5)                | 89.5<br>(62.4 to 114.7)                 | 13.2<br>(4.2 to 24.1)                             | -6.1<br>(-13.3 to 2.6)                              |
| Ischaemic stroke                                   | 426.0<br>(377.7 to 491.7)                     | 67.7‡<br>(60.1 to 75.7)                  | 67.2<br>(46.2 to 88.2)                  | 9.9<br>(-0.7 to 22.8)                             | -9.2<br>(-17.6 to 1.3)                              |
| Hemorrhagic stroke                                 | 144.8<br>(128.1 to 163.8)                     | 34.1‡<br>(30.9 to 37.5)                  | 22.3<br>(15.8 to 28.9)                  | 24.4<br>(11.5 to 38.8)                            | 3.8<br>(-6.7 to 15.3)                               |
| Hypertensive heart disease                         | 128.4<br>(106.9 to 153.5)                     | --                                       | 10.2<br>(6.9 to 14.4)                   | 14.4<br>(1.6 to 27.6)                             | -7.2<br>(-17.2 to 3.4)                              |
| Cardiomyopathy and myocarditis                     | 118.5<br>(103.8 to 132.8)                     | 26.2†<br>(22.3 to 31.0)                  | 9.5<br>(6.4 to 13.5)                    | 12.3<br>(0.8 to 24.5)                             | -4.8<br>(-13.4 to 5.5)                              |
| Myocarditis                                        | 11.1<br>(9.9 to 12.5)                         | 26.2<br>(22.3 to 31.0)                   | 0.7<br>(0.5 to 1.0)                     | 0.6<br>(-10.5 to 12.3)                            | -4.9<br>(-13.6 to 4.7)                              |
| Alcoholic cardiomyopathy                           | 10.4<br>(8.5 to 12.7)                         | --                                       | 0.9<br>(0.6 to 1.3)                     | 15.0<br>(-11.9 to 51.5)                           | -3.2<br>(-26.8 to 27.5)                             |
| Other cardiomyopathy                               | 97.7<br>(82.1 to 116.5)                       | --                                       | 7.9<br>(5.2 to 11.2)                    | 13.3<br>(0.6 to 26.7)                             | -4.9<br>(-14.8 to 6.8)                              |
| Atrial fibrillation and flutter                    | 721.4<br>(625.6 to 837.2)                     | 55.9<br>(47.2 to 65.7)                   | 56.5<br>(38.7 to 78.3)                  | 10.0<br>(1.0 to 18.1)                             | -9.8<br>(-17.4 to -2.5)                             |
| Peripheral vascular disease                        | 1,883.2<br>(1,642.8 to 2,138.9)               | 153.0<br>(131.4 to 178.0)                | 6.9<br>(3.1 to 12.6)                    | 8.6<br>(0.7 to 17.5)                              | -10.6<br>(-16.6 to -4.0)                            |
| Endocarditis                                       | 12.7<br>(10.7 to 15.1)                        | 14.0<br>(12.7 to 15.3)                   | 1.0<br>(0.7 to 1.5)                     | 7.3<br>(-10.4 to 27.9)                            | -8.7<br>(-23.0 to 6.4)                              |
| Other cardiovascular and circulatory diseases      | 1,573.9<br>(1,339.7 to 1,844.5)               | --                                       | 81.8<br>(55.4 to 116.0)                 | 6.0<br>(-3.3 to 14.9)                             | -8.2<br>(-15.4 to -0.7)                             |
| <b>Chronic respiratory diseases</b>                | <b>5,730.1</b><br><b>(5,449.0 to 6,067.7)</b> | <b>447.8†</b><br><b>(424.6 to 473.3)</b> | <b>156.7</b><br><b>(115.9 to 205.8)</b> | <b>2.9</b><br><b>(-2.8 to 8.6)</b>                | <b>-4.0</b><br><b>(-8.7 to 0.7)</b>                 |
| Chronic obstructive pulmonary disease              | 2,946.2<br>(2,684.8 to 3,274.8)               | 180.5<br>(165.1 to 202.4)                | 35.2<br>(27.4 to 45.8)                  | -3.0<br>(-20.4 to 16.1)                           | -17.1<br>(-32.1 to -0.6)                            |
| Pneumoconiosis                                     | 0.6<br>(0.5 to 0.7)                           | 0.2<br>(0.2 to 0.3)                      | 0.1<br>(0.1 to 0.1)                     | -16.2<br>(-23.9 to -8.5)                          | -30.1<br>(-37.4 to -23.3)                           |
| Silicosis                                          | 0.5<br>(0.4 to 0.6)                           | 0.2<br>(0.2 to 0.3)                      | 0.1<br>(0.1 to 0.1)                     | -19.3<br>(-27.6 to -10.6)                         | -32.8<br>(-40.5 to -25.5)                           |



| Cause                                                          | Prevalence in thousands (95% UI)                 | Incidence in thousands (95% UI)                | YLDs in thousands (95% UI)                  |                                                   |                                                     |
|----------------------------------------------------------------|--------------------------------------------------|------------------------------------------------|---------------------------------------------|---------------------------------------------------|-----------------------------------------------------|
|                                                                | 2016 counts                                      | 2016 counts                                    | 2016 counts                                 | Percentage change in counts between 2006 and 2016 | Percentage change in age-standardised rates between |
| Asbestosis                                                     | 0.1<br>( $< 0.05$ to 0.1)                        | $< 0.05$<br>( $< 0.05$ to $< 0.05$ )           | $< 0.05$<br>( $< 0.05$ to $< 0.05$ )        | 17.8<br>(3.2 to 35.4)                             | 0.3<br>(-12.3 to 15.5)                              |
| Coal workers pneumoconiosis                                    | $< 0.05$<br>( $< 0.05$ to $< 0.05$ )             | $< 0.05$<br>( $< 0.05$ to $< 0.05$ )           | $< 0.05$<br>( $< 0.05$ to $< 0.05$ )        | 10.2<br>(-2.7 to 29.4)                            | -6.7<br>(-18.8 to 9.6)                              |
| Other pneumoconiosis                                           | $< 0.05$<br>( $< 0.05$ to $< 0.05$ )             | $< 0.05$<br>( $< 0.05$ to $< 0.05$ )           | $< 0.05$<br>( $< 0.05$ to $< 0.05$ )        | 1.5<br>(-11.0 to 33.1)                            | -16.9<br>(-25.6 to 0.6)                             |
| Asthma                                                         | 2,985.8<br>(2,815.3 to 3,187.6)                  | 262.1<br>(245.8 to 279.9)                      | 115.9<br>(76.5 to 164.5)                    | 4.0<br>(0.0 to 8.0)                               | -1.3<br>(-5.4 to 2.9)                               |
| Interstitial lung disease and pulmonary sarcoidosis            | 39.4<br>(35.4 to 43.6)                           | 5.0<br>(4.6 to 5.4)                            | 4.2<br>(2.8 to 6.1)                         | 23.4<br>(10.3 to 39.3)                            | 2.3<br>(-8.1 to 14.8)                               |
| Other chronic respiratory diseases                             | --                                               | --                                             | 1.2<br>(0.9 to 1.5)                         | 19.2<br>(0.5 to 39.8)                             | 15.3<br>(-2.6 to 34.1)                              |
| <b>Cirrhosis and other chronic liver diseases</b>              | <b>514.8</b><br><b>(490.3 to 539.0)</b>          | <b>10.9</b><br><b>(10.5 to 11.3)</b>           | <b>11.7</b><br><b>(8.1 to 16.4)</b>         | <b>12.5</b><br><b>(3.8 to 22.9)</b>               | <b>0.8</b><br><b>(-7.8 to 10.6)</b>                 |
| Cirrhosis and other chronic liver diseases due to hepatitis B  | 46.5<br>(39.4 to 54.2)                           | 1.0<br>(0.9 to 1.2)                            | 1.1<br>(0.7 to 1.5)                         | 11.3<br>(-11.9 to 44.1)                           | 0.8<br>(-19.8 to 30.0)                              |
| Cirrhosis and other chronic liver diseases due to hepatitis C  | 153.3<br>(131.7 to 175.1)                        | 3.0<br>(2.6 to 3.4)                            | 3.3<br>(2.2 to 4.7)                         | 11.6<br>(-5.3 to 31.8)                            | 0.8<br>(-15.8 to 20.2)                              |
| Cirrhosis and other chronic liver diseases due to alcohol use  | 288.6<br>(263.7 to 314.8)                        | 6.2<br>(5.7 to 6.7)                            | 6.2<br>(4.2 to 8.6)                         | 13.8<br>(0.4 to 28.3)                             | -0.6<br>(-13.1 to 13.7)                             |
| Cirrhosis and other chronic liver diseases due to other causes | 26.4<br>(22.3 to 31.3)                           | 0.7<br>(0.6 to 0.8)                            | 1.2<br>(0.8 to 1.8)                         | 9.5<br>(-10.7 to 34.1)                            | 4.3<br>(-18.2 to 32.7)                              |
| <b>Digestive diseases</b>                                      | <b>1,056.3</b><br><b>(980.6 to 1,127.9)</b>      | <b>1,467.4†</b><br><b>(1,368.1 to 1,571.2)</b> | <b>35.6</b><br><b>(25.2 to 47.8)</b>        | <b>13.3</b><br><b>(5.1 to 22.6)</b>               | <b>0.7</b><br><b>(-7.0 to 9.0)</b>                  |
| Peptic ulcer disease                                           | 232.3<br>(201.8 to 269.4)                        | 52.8<br>(46.9 to 59.4)                         | 2.3<br>(1.4 to 3.8)                         | 15.8<br>(-17.7 to 64.2)                           | 1.1<br>(-28.6 to 42.3)                              |
| Gastritis and duodenitis                                       | 434.6<br>(372.0 to 507.7)                        | 304.4<br>(266.1 to 348.5)                      | 3.3<br>(1.9 to 5.1)                         | 31.8<br>(-0.7 to 73.5)                            | 11.6<br>(-16.0 to 49.2)                             |
| Appendicitis                                                   | 2.0<br>(1.8 to 2.1)                              | 51.3<br>(47.6 to 55.2)                         | 0.6<br>(0.4 to 0.9)                         | -0.8<br>(-15.6 to 17.3)                           | 1.4<br>(-20.3 to 29.6)                              |
| Paralytic ileus and intestinal obstruction                     | 1.1<br>(0.9 to 1.2)                              | 29.9<br>(26.9 to 33.1)                         | 0.3<br>(0.2 to 0.5)                         | 21.3<br>(10.4 to 34.7)                            | 4.7<br>(-1.0 to 11.0)                               |
| Inguinal, femoral, and abdominal hernia                        | 301.8<br>(272.1 to 333.4)                        | 621.4<br>(538.9 to 704.6)                      | 19.3<br>(13.0 to 26.9)                      | 11.5<br>(0.8 to 22.7)                             | -0.7<br>(-10.1 to 9.6)                              |
| Inflammatory bowel disease                                     | 24.8<br>(23.4 to 26.3)                           | 11.8<br>(11.5 to 12.0)                         | 3.6<br>(2.4 to 5.0)                         | 5.0<br>(-13.7 to 25.4)                            | -1.7<br>(-19.3 to 17.1)                             |
| Vascular intestinal disorders                                  | 3.1<br>(2.7 to 3.4)                              | 12.9<br>(11.6 to 14.5)                         | 0.9<br>(0.6 to 1.2)                         | 23.2<br>(-3.6 to 58.1)                            | 2.1<br>(-18.3 to 27.1)                              |
| Gallbladder and biliary diseases                               | 82.1<br>(72.9 to 92.5)                           | 353.4<br>(309.4 to 402.6)                      | 2.0<br>(1.3 to 2.8)                         | 12.5<br>(-7.3 to 35.1)                            | -0.4<br>(-18.5 to 19.8)                             |
| Pancreatitis                                                   | 3.3<br>(3.0 to 3.7)                              | 29.6<br>(26.8 to 32.5)                         | 0.4<br>(0.3 to 0.6)                         | -0.4<br>(-8.7 to 5.8)                             | -12.3<br>(-19.2 to -7.6)                            |
| Other digestive diseases                                       | --                                               | --                                             | 2.9<br>(2.1 to 3.9)                         | 20.3<br>(11.8 to 29.5)                            | 5.1<br>(-3.1 to 13.9)                               |
| <b>Neurological disorders</b>                                  | <b>18,819.1</b><br><b>(18,205.6 to 19,620.9)</b> | <b>6,910.2</b><br><b>(6,031.8 to 7,921.8)</b>  | <b>644.4</b><br><b>(440.2 to 867.5)</b>     | <b>5.0</b><br><b>(-3.4 to 13.9)</b>               | <b>-2.6</b><br><b>(-11.7 to 6.7)</b>                |
| Alzheimer's disease and other dementias                        | 830.9<br>(712.2 to 952.3)                        | 161.0<br>(135.1 to 187.8)                      | 128.7<br>(89.6 to 171.7)                    | 22.4<br>(12.9 to 32.2)                            | -8.5<br>(-15.4 to -1.8)                             |
| Parkinson's disease                                            | 93.0<br>(73.0 to 116.7)                          | 11.0<br>(8.7 to 14.1)                          | 10.8<br>(6.8 to 15.3)                       | 13.2<br>(-0.2 to 27.5)                            | -6.2<br>(-17.7 to 5.5)                              |
| Epilepsy                                                       | 105.5<br>(26.2 to 187.0)                         | 9.2<br>(2.3 to 16.4)                           | 23.4<br>(5.2 to 57.0)                       | -23.7<br>(-87.1 to 304.3)                         | -28.2<br>(-88.1 to 292.5)                           |
| Multiple sclerosis                                             | 43.9<br>(39.8 to 48.1)                           | 0.9<br>(0.8 to 1.0)                            | 11.3<br>(7.9 to 14.9)                       | 14.2<br>(-2.8 to 32.9)                            | 4.5<br>(-10.7 to 21.2)                              |
| Motor neuron disease                                           | 6.4<br>(5.9 to 7.0)                              | 1.1<br>(1.0 to 1.2)                            | 1.4<br>(1.0 to 1.8)                         | 17.2<br>(12.3 to 22.3)                            | 4.8<br>(0.7 to 9.3)                                 |
| Migraine                                                       | 9,449.9<br>(9,072.6 to 9,842.3)                  | 753.3<br>(714.6 to 792.4)                      | 405.5<br>(261.0 to 570.7)                   | 2.3<br>(-0.9 to 5.3)                              | 0.0<br>(-3.0 to 3.3)                                |
| Tension-type headache                                          | 11,981.4<br>(10,665.5 to 13,301.3)               | 5,973.4<br>(5,094.6 to 6,979.3)                | 56.2<br>(35.2 to 83.1)                      | 4.8<br>(-0.6 to 10.7)                             | 0.3<br>(-4.4 to 5.4)                                |
| Other neurological disorders                                   | 0.2<br>(0.1 to 0.2)                              | 0.3<br>(0.2 to 0.4)                            | 7.0<br>(3.9 to 12.4)                        | 2.2<br>(-53.7 to 127.5)                           | -6.7<br>(-63.8 to 143.0)                            |
| <b>Mental and substance use disorders</b>                      | <b>8,055.8</b><br><b>(7,799.5 to 8,303.1)</b>    | <b>2,648.9†</b><br><b>(2,485.2 to 2,838.0)</b> | <b>1,101.4</b><br><b>(799.0 to 1,425.9)</b> | <b>4.1</b><br><b>(1.7 to 6.5)</b>                 | <b>1.9</b><br><b>(-0.3 to 4.0)</b>                  |
| Schizophrenia                                                  | 153.5<br>(145.8 to 160.3)                        | 6.1<br>(5.5 to 6.7)                            | 98.0<br>(74.4 to 117.7)                     | 6.1<br>(-1.8 to 13.7)                             | 0.4<br>(-6.7 to 7.9)                                |
| Alcohol use disorders                                          | 369.5<br>(319.8 to 418.7)                        | 174.7<br>(150.6 to 200.3)                      | 37.1<br>(25.1 to 51.9)                      | -1.9<br>(-11.2 to 9.0)                            | 5.5<br>(-4.5 to 17.2)                               |
| Drug use disorders                                             | 506.4<br>(485.6 to 528.1)                        | 50.1<br>(47.1 to 53.2)                         | 81.1<br>(56.8 to 106.0)                     | -14.9<br>(-23.7 to -3.5)                          | -8.2<br>(-17.3 to 2.6)                              |
| Opioid use disorders                                           | 82.2<br>(73.0 to 103.4)                          | 8.7<br>(7.7 to 10.4)                           | 34.0<br>(23.4 to 48.1)                      | -29.1<br>(-40.9 to -9.7)                          | -24.7<br>(-35.7 to -6.4)                            |
| Cocaine use disorders                                          | 126.5<br>(118.5 to 135.2)                        | 5.5<br>(4.9 to 6.2)                            | 17.2<br>(10.7 to 24.6)                      | 6.7<br>(-6.8 to 21.4)                             | 12.7<br>(-2.1 to 28.7)                              |
| Amphetamine use disorders                                      | 34.4<br>(29.5 to 40.1)                           | 3.5<br>(2.8 to 4.2)                            | 4.6<br>(2.7 to 7.1)                         | -11.8<br>(-30.8 to 11.8)                          | -0.4<br>(-23.4 to 28.3)                             |
| Cannabis use disorders                                         | 231.6<br>(220.0 to 243.5)                        | 26.3<br>(23.8 to 29.0)                         | 6.8<br>(4.4 to 9.9)                         | -12.4<br>(-21.7 to -1.8)                          | -1.8<br>(-12.5 to 10.1)                             |
| Other drug use disorders                                       | 41.6<br>(37.2 to 46.2)                           | 6.2<br>(5.6 to 6.9)                            | 18.6<br>(11.9 to 26.0)                      | 1.5<br>(-18.3 to 25.1)                            | 7.3<br>(-14.3 to 33.5)                              |
| Depressive disorders                                           | 1,883.7<br>(1,789.9 to 2,010.8)                  | 1,929.2<br>(1,769.0 to 2,112.0)                | 313.1<br>(216.6 to 427.9)                   | 9.4<br>(4.3 to 14.8)                              | 4.4<br>(0.0 to 9.1)                                 |
| Major depressive disorder                                      | 1,203.4<br>(1,106.5 to 1,312.3)                  | 1,827.1<br>(1,666.9 to 2,008.9)                | 244.3<br>(166.4 to 331.4)                   | 8.6<br>(2.8 to 15.0)                              | 3.8<br>(-1.4 to 9.2)                                |
| Dysthymia                                                      | 719.0<br>(623.6 to 827.6)                        | 102.1<br>(89.4 to 116.9)                       | 68.8<br>(46.4 to 100.2)                     | 12.3<br>(4.2 to 21.6)                             | 6.3<br>(-1.3 to 14.6)                               |
| Bipolar disorder                                               | 457.5<br>(399.6 to 531.3)                        | 27.1<br>(23.8 to 30.9)                         | 93.0<br>(57.8 to 136.4)                     | 1.5<br>(-3.7 to 6.7)                              | 0.2<br>(-4.7 to 5.4)                                |
| Anxiety disorders                                              | 2,527.5<br>(2,330.5 to 2,748.0)                  | 300.8<br>(279.8 to 324.5)                      | 241.9<br>(170.1 to 326.8)                   | 10.4<br>(3.6 to 17.4)                             | 5.8<br>(-0.6 to 12.2)                               |
| Eating disorders                                               | 183.1<br>(151.4 to 223.9)                        | 48.9<br>(37.6 to 62.1)                         | 37.2<br>(23.8 to 53.8)                      | -10.1<br>(-18.4 to -1.7)                          | 3.5<br>(-5.2 to 12.6)                               |
| Anorexia nervosa                                               | 33.7<br>(25.7 to 43.7)                           | 8.2<br>(6.2 to 10.6)                           | 7.2<br>(4.3 to 10.7)                        | -12.5<br>(-25.2 to 2.9)                           | 3.2<br>(-11.8 to 21.3)                              |
| Bulimia nervosa                                                | 143.1<br>(108.4 to 183.6)                        | 40.7<br>(29.4 to 54.2)                         | 30.1<br>(18.5 to 44.6)                      | -9.5<br>(-19.0 to 1.1)                            | 3.6<br>(-6.3 to 14.1)                               |
| Autistic spectrum disorders                                    | 341.8<br>(303.8 to 377.7)                        | 1.4<br>(1.0 to 2.0)                            | 55.6<br>(37.5 to 78.6)                      | 3.2<br>(-2.2 to 8.9)                              | -0.1<br>(-5.2 to 5.4)                               |
| Autism                                                         | 141.2<br>(120.6 to 165.2)                        | 0.1<br>(0.1 to 0.3)                            | 35.6<br>(23.3 to 51.8)                      | 3.7<br>(-3.8 to 12.1)                             | 0.1<br>(-7.1 to 8.4)                                |
| Asperger syndrome and other autistic spectrum disorders        | 201.7<br>(167.5 to 241.5)                        | 1.3<br>(0.8 to 1.8)                            | 20.0<br>(12.9 to 29.1)                      | 2.5<br>(-2.9 to 8.1)                              | -0.3<br>(-5.6 to 5.4)                               |



| Cause                                                      | Prevalence in thousands (95% UI)                 | Incidence in thousands (95% UI)                      | YLDs in thousands (95% UI)                  |                                                   |                                                     |
|------------------------------------------------------------|--------------------------------------------------|------------------------------------------------------|---------------------------------------------|---------------------------------------------------|-----------------------------------------------------|
|                                                            | 2016 counts                                      | 2016 counts                                          | 2016 counts                                 | Percentage change in counts between 2006 and 2016 | Percentage change in age-standardised rates between |
| Attention-deficit/hyperactivity disorder                   | 453.3<br>(413.2 to 503.8)                        | 18.8<br>(16.8 to 21.6)                               | 5.5<br>(3.3 to 8.8)                         | -1.3<br>(-7.5 to 5.4)                             | -0.2<br>(-6.6 to 6.6)                               |
| Conduct disorder                                           | 208.8<br>(157.3 to 265.8)                        | 70.2<br>(51.9 to 87.6)                               | 25.4<br>(15.1 to 39.5)                      | 4.6<br>(-2.4 to 11.8)                             | 0.0<br>(-6.2 to 6.6)                                |
| Idiopathic developmental intellectual disability           | 614.9<br>(378.0 to 854.7)                        | --                                                   | 30.1<br>(16.3 to 48.0)                      | -1.1<br>(-8.4 to 5.6)                             | -2.4<br>(-9.8 to 4.4)                               |
| Other mental and substance use disorders                   | 1,126.8<br>(984.6 to 1,304.3)                    | 21.6<br>(19.2 to 24.3)                               | 83.4<br>(58.0 to 118.8)                     | 4.4<br>(-0.1 to 9.5)                              | 0.0<br>(-4.4 to 5.0)                                |
| <b>Diabetes, urogenital, blood, and endocrine diseases</b> | <b>14,508.2</b><br><b>(14,081.8 to 14,980.9)</b> | <b>4,451.9†</b><br><b>(4,204.9 to 4,718.8)</b>       | <b>382.0</b><br><b>(272.1 to 514.2)</b>     | <b>9.0</b><br><b>(3.6 to 14.0)</b>                | <b>-5.1</b><br><b>(-9.5 to -1.0)</b>                |
| Diabetes mellitus                                          | 2,254.9<br>(2,026.5 to 2,537.6)                  | 118.1<br>(105.3 to 133.3)                            | 165.9<br>(112.7 to 229.6)                   | 4.7<br>(-5.2 to 15.1)                             | -10.8<br>(-19.2 to -2.1)                            |
| Acute glomerulonephritis                                   | 0.5<br>(0.5 to 0.6)                              | 7.9<br>(6.8 to 8.9)                                  | < 0.05<br>(< 0.05 to < 0.05)                | 5.8<br>(0.8 to 10.6)                              | 0.2<br>(-3.7 to 4.5)                                |
| Chronic kidney disease                                     | 2,836.3<br>(2,558.0 to 3,134.1)                  | 240.8<br>(211.7 to 273.9)                            | 71.6<br>(53.7 to 90.0)                      | 14.5<br>(4.7 to 24.8)                             | -4.0<br>(-11.4 to 3.6)                              |
| Chronic kidney disease due to diabetes mellitus            | 896.0<br>(799.8 to 1,005.7)                      | 81.8<br>(70.8 to 93.4)                               | 23.1<br>(17.6 to 29.3)                      | 13.8<br>(0.6 to 28.7)                             | -4.2<br>(-14.9 to 7.9)                              |
| Chronic kidney disease due to hypertension                 | 551.9<br>(489.7 to 617.4)                        | 45.4<br>(40.0 to 51.9)                               | 11.7<br>(8.4 to 15.3)                       | 21.2<br>(4.5 to 39.4)                             | -5.8<br>(-18.4 to 8.1)                              |
| Chronic kidney disease due to glomerulonephritis           | 523.8<br>(463.7 to 582.5)                        | 40.7<br>(33.0 to 49.7)                               | 15.0<br>(11.1 to 19.3)                      | -1.4<br>(-13.3 to 12.2)                           | -13.6<br>(-23.5 to -1.8)                            |
| Chronic kidney disease due to other causes                 | 864.6<br>(773.8 to 965.0)                        | 73.0<br>(64.0 to 83.7)                               | 21.9<br>(16.1 to 27.9)                      | 25.5<br>(10.4 to 41.5)                            | 5.7<br>(-6.1 to 18.4)                               |
| Urinary diseases and male infertility                      | 1,380.2<br>(1,237.6 to 1,539.2)                  | 2,365.2†<br>(2,128.6 to 2,610.4)                     | 43.5<br>(28.5 to 62.9)                      | 20.1<br>(12.2 to 27.6)                            | 1.7<br>(-4.8 to 8.3)                                |
| Interstitial nephritis and urinary tract infections        | 32.4<br>(28.1 to 37.1)                           | 1,682.8<br>(1,458.8 to 1,927.5)                      | 1.1<br>(0.7 to 1.6)                         | -4.5<br>(-19.2 to 13.2)                           | 1.9<br>(-13.9 to 19.2)                              |
| Urolithiasis                                               | 20.7<br>(18.2 to 23.6)                           | 545.0<br>(479.5 to 620.9)                            | 1.5<br>(1.0 to 2.2)                         | 10.6<br>(-5.9 to 30.9)                            | 1.1<br>(-12.8 to 17.7)                              |
| Benign prostatic hyperplasia                               | 1,201.7<br>(1,030.7 to 1,415.2)                  | 137.4<br>(115.6 to 162.7)                            | 39.5<br>(25.5 to 57.6)                      | 23.0<br>(14.1 to 31.8)                            | 2.5<br>(-4.9 to 10.0)                               |
| Male infertility                                           | 79.3<br>(59.7 to 106.6)                          | --                                                   | 0.5<br>(0.2 to 1.0)                         | -9.8<br>(-19.4 to 0.9)                            | -4.4<br>(-13.1 to 6.0)                              |
| Other urinary diseases                                     | --                                               | --                                                   | 0.9<br>(0.6 to 1.2)                         | -14.6<br>(-24.0 to -4.2)                          | -14.6<br>(-23.7 to -4.7)                            |
| Gynecological diseases                                     | 5,915.2<br>(5,587.1 to 6,286.2)                  | 1,456.1†<br>(1,372.7 to 1,550.9)                     | 51.5<br>(34.7 to 75.7)                      | 0.3<br>(-5.1 to 5.0)                              | -0.1<br>(-5.3 to 4.8)                               |
| Uterine fibroids                                           | 649.0<br>(566.0 to 742.4)                        | 57.9<br>(48.6 to 68.9)                               | 6.3<br>(3.3 to 11.2)                        | 10.0<br>(-4.6 to 26.2)                            | -2.0<br>(-14.7 to 12.9)                             |
| Polycystic ovarian syndrome                                | 14.0<br>(10.3 to 18.5)                           | 48.8<br>(33.6 to 67.0)                               | 0.1<br>(0.1 to 0.2)                         | -8.5<br>(-26.5 to 15.9)                           | 1.0<br>(-18.9 to 28.6)                              |
| Female infertility                                         | 114.1<br>(69.0 to 171.6)                         | --                                                   | 0.7<br>(0.2 to 1.4)                         | 2.9<br>(-9.9 to 18.0)                             | 6.4<br>(-5.1 to 20.2)                               |
| Endometriosis                                              | 23.5<br>(19.3 to 28.5)                           | 56.7<br>(43.4 to 74.1)                               | 2.2<br>(1.4 to 3.2)                         | -14.4<br>(-30.0 to 6.6)                           | 0.8<br>(-17.2 to 23.3)                              |
| Genital prolapse                                           | 2,854.0<br>(2,440.5 to 3,301.5)                  | 128.2<br>(107.5 to 152.1)                            | 8.9<br>(4.3 to 16.0)                        | 16.8<br>(5.5 to 27.4)                             | -0.8<br>(-10.0 to 8.5)                              |
| Premenstrual syndrome                                      | 2,434.6<br>(2,306.3 to 2,580.2)                  | 804.3<br>(752.9 to 858.9)                            | 20.3<br>(12.6 to 31.0)                      | -3.8<br>(-11.5 to 3.6)                            | 0.1<br>(-7.8 to 7.8)                                |
| Other gynecological diseases                               | 390.1<br>(331.5 to 452.4)                        | 360.3<br>(298.9 to 424.9)                            | 13.1<br>(8.7 to 18.8)                       | -3.9<br>(-13.3 to 7.1)                            | 0.0<br>(-9.1 to 10.6)                               |
| Hemoglobinopathies and hemolytic anaemias                  | 4,415.1<br>(4,177.5 to 4,744.4)                  | --                                                   | 4.0<br>(2.4 to 6.4)                         | 6.6<br>(-15.8 to 39.2)                            | -4.7<br>(-28.4 to 27.2)                             |
| Thalassemias                                               | 0.1<br>(0.1 to 0.2)                              | --                                                   | < 0.05<br>(< 0.05 to < 0.05)                | 13.7<br>(-23.6 to 62.2)                           | 10.3<br>(-27.7 to 59.7)                             |
| Thalassaemias trait                                        | 167.2<br>(132.1 to 207.7)                        | --                                                   | 1.2<br>(0.7 to 2.0)                         | 19.6<br>(-18.7 to 97.9)                           | 3.7<br>(-30.1 to 73.0)                              |
| Sickle cell disorders                                      | 0.3<br>(0.1 to 0.6)                              | --                                                   | < 0.05<br>(< 0.05 to 0.1)                   | -3.0<br>(-24.6 to 24.8)                           | -2.4<br>(-22.8 to 23.6)                             |
| Sickle cell trait                                          | 672.5<br>(397.3 to 1,042.2)                      | --                                                   | 1.1<br>(0.5 to 2.1)                         | -4.4<br>(-39.5 to 42.5)                           | -13.4<br>(-44.1 to 28.9)                            |
| G6PD deficiency                                            | 386.9<br>(368.3 to 407.2)                        | --                                                   | 0.1<br>(0.1 to 0.2)                         | 16.4<br>(-25.4 to 78.5)                           | 0.4<br>(-33.8 to 52.7)                              |
| G6PD trait                                                 | 3,208.8<br>(3,079.1 to 3,357.3)                  | --                                                   | < 0.05<br>(< 0.05 to < 0.05)                | 26.5<br>(-40.5 to 163.3)                          | 10.2<br>(-44.7 to 121.5)                            |
| Other hemoglobinopathies and hemolytic anaemias            | 83.4<br>(69.7 to 98.9)                           | --                                                   | 1.6<br>(1.0 to 2.3)                         | 5.2<br>(-11.5 to 25.8)                            | -3.9<br>(-24.6 to 23.2)                             |
| Endocrine, metabolic, blood, and immune disorders          | 1,330.7<br>(1,197.5 to 1,475.6)                  | 263.8<br>(235.3 to 294.8)                            | 45.4<br>(30.2 to 62.7)                      | 18.8<br>(12.5 to 25.8)                            | 1.6<br>(-3.6 to 7.5)                                |
| <b>Musculoskeletal disorders</b>                           | <b>11,790.0</b><br><b>(11,304.6 to 12,327.8)</b> | <b>5,848.0</b><br><b>(5,287.2 to 6,465.7)</b>        | <b>1,218.7</b><br><b>(887.2 to 1,587.9)</b> | <b>14.1</b><br><b>(9.6 to 18.5)</b>               | <b>3.8</b><br><b>(0.1 to 7.6)</b>                   |
| Rheumatoid arthritis                                       | 244.7<br>(219.9 to 273.2)                        | 11.5<br>(10.2 to 12.9)                               | 57.2<br>(38.9 to 75.8)                      | 8.8<br>(1.0 to 16.9)                              | -4.2<br>(-10.9 to 3.2)                              |
| Osteoarthritis                                             | 3,793.8<br>(3,578.1 to 4,016.3)                  | 166.8<br>(156.2 to 178.3)                            | 132.9<br>(87.6 to 191.5)                    | 16.1<br>(11.8 to 20.1)                            | -2.2<br>(-6.0 to 1.2)                               |
| Low back and neck pain                                     | 7,240.7<br>(6,738.9 to 7,734.2)                  | 3,176.3<br>(2,793.2 to 3,600.5)                      | 856.6<br>(596.0 to 1,127.8)                 | 12.1<br>(6.7 to 17.5)                             | 2.8<br>(-2.0 to 7.8)                                |
| Low back pain                                              | 5,158.5<br>(4,542.4 to 5,848.5)                  | 2,677.3<br>(2,313.1 to 3,115.7)                      | 585.4<br>(411.3 to 774.0)                   | 11.2<br>(3.4 to 18.4)                             | 2.8<br>(-3.4 to 8.8)                                |
| Neck pain                                                  | 2,726.4<br>(2,359.8 to 3,127.7)                  | 499.0<br>(435.2 to 583.3)                            | 271.2<br>(183.2 to 385.0)                   | 14.0<br>(7.2 to 21.8)                             | 2.9<br>(-2.6 to 9.5)                                |
| Gout                                                       | 527.1<br>(468.4 to 594.5)                        | 84.2<br>(73.4 to 97.3)                               | 16.6<br>(11.1 to 22.8)                      | 18.0<br>(5.5 to 31.6)                             | 1.2<br>(-10.1 to 13.3)                              |
| Other musculoskeletal disorders                            | 1,815.8<br>(1,427.3 to 2,260.8)                  | 2,409.3<br>(2,023.0 to 2,883.7)                      | 155.4<br>(101.4 to 224.2)                   | 26.4<br>(12.8 to 42.8)                            | 17.3<br>(5.8 to 31.4)                               |
| <b>Other non-communicable diseases</b>                     | <b>36,121.8</b><br><b>(35,685.6 to 36,593.5)</b> | <b>128,077.1†</b><br><b>(124,280.9 to 132,151.1)</b> | <b>1,074.2</b><br><b>(749.7 to 1,507.7)</b> | <b>12.1</b><br><b>(10.7 to 13.7)</b>              | <b>1.1</b><br><b>(0.0 to 2.3)</b>                   |
| Congenital anomalies                                       | 343.4<br>(315.1 to 371.6)                        | --                                                   | 43.0<br>(30.0 to 59.3)                      | 9.8<br>(4.1 to 15.9)                              | 4.6<br>(-1.0 to 10.2)                               |
| Neural tube defects                                        | 13.8<br>(12.3 to 15.7)                           | --                                                   | 4.3<br>(3.0 to 5.8)                         | 22.7<br>(9.1 to 39.9)                             | 17.2<br>(4.2 to 33.1)                               |
| Congenital heart anomalies                                 | 83.0<br>(74.7 to 91.9)                           | --                                                   | 4.5<br>(1.9 to 7.8)                         | 7.1<br>(-3.6 to 20.9)                             | 2.5<br>(-8.4 to 15.2)                               |
| Orofacial clefts                                           | 14.4<br>(12.5 to 16.5)                           | --                                                   | 0.1<br>(0.1 to 0.2)                         | 0.1<br>(-12.6 to 14.4)                            | -4.4<br>(-16.5 to 9.0)                              |
| Down's syndrome                                            | 17.9<br>(15.4 to 20.3)                           | --                                                   | 1.7<br>(1.2 to 2.4)                         | -3.3<br>(-13.2 to 7.0)                            | -4.4<br>(-14.1 to 6.0)                              |
| Turner syndrome                                            | 9.0<br>(7.7 to 10.4)                             | --                                                   | 0.2<br>(0.1 to 0.3)                         | 4.7<br>(-28.7 to 51.4)                            | 6.7<br>(-29.1 to 60.1)                              |
| Klinefelter syndrome                                       | 21.8<br>(18.9 to 25.1)                           | --                                                   | 0.1<br>(0.1 to 0.3)                         | -8.3<br>(-28.3 to 14.5)                           | 2.6<br>(-18.9 to 29.1)                              |

| Cause                                         | Prevalence in thousands (95% UI)                 | Incidence in thousands (95% UI)                | YLDs in thousands (95% UI)              |                                                   |                                                     |
|-----------------------------------------------|--------------------------------------------------|------------------------------------------------|-----------------------------------------|---------------------------------------------------|-----------------------------------------------------|
|                                               | 2016 counts                                      | 2016 counts                                    | 2016 counts                             | Percentage change in counts between 2006 and 2016 | Percentage change in age-standardised rates between |
| Other chromosomal abnormalities               | 45.6<br>(38.4 to 54.2)                           | --                                             | 4.2<br>(2.8 to 6.0)                     | 4.2<br>(-9.8 to 19.2)                             | 1.0<br>(-12.5 to 15.5)                              |
| Congenital musculoskeletal and limb anomalies | 98.3<br>(90.7 to 106.2)                          | --                                             | 13.5<br>(9.1 to 18.6)                   | 16.0<br>(5.5 to 28.2)                             | 10.3<br>(0.2 to 21.9)                               |
| Urogenital congenital anomalies               | 33.1<br>(30.0 to 36.4)                           | --                                             | 0.8<br>(0.5 to 1.3)                     | 0.6<br>(-8.4 to 10.5)                             | -4.5<br>(-14.4 to 6.2)                              |
| Digestive congenital anomalies                | 52.7<br>(47.4 to 58.2)                           | --                                             | 2.3<br>(1.5 to 3.4)                     | 1.2<br>(-13.1 to 17.2)                            | -3.0<br>(-17.5 to 12.9)                             |
| Other congenital anomalies                    | 68.5<br>(27.9 to 121.5)                          | --                                             | 11.2<br>(5.2 to 20.6)                   | 7.3<br>(-3.4 to 22.4)                             | 2.0<br>(-7.5 to 15.8)                               |
| Skin and subcutaneous diseases                | 15,552.7<br>(15,217.9 to 15,901.0)               | 37,858.1<br>(35,561.3 to 40,383.5)             | 361.2<br>(247.2 to 520.4)               | 4.3<br>(2.4 to 6.3)                               | 1.3<br>(-0.5 to 3.1)                                |
| Dermatitis                                    | 1,918.7<br>(1,792.0 to 2,057.8)                  | 3,263.5<br>(2,810.6 to 3,825.2)                | 64.4<br>(39.1 to 100.3)                 | 6.3<br>(2.4 to 10.0)                              | 1.2<br>(-2.7 to 5.0)                                |
| Psoriasis                                     | 867.3<br>(828.4 to 907.3)                        | 76.6<br>(73.3 to 80.1)                         | 74.7<br>(53.4 to 98.2)                  | 9.8<br>(4.5 to 16.1)                              | 2.5<br>(-2.9 to 8.5)                                |
| Cellulitis                                    | 21.8<br>(20.5 to 23.2)                           | 407.9<br>(381.9 to 436.2)                      | 1.2<br>(0.8 to 1.7)                     | 8.3<br>(-9.5 to 30.0)                             | 0.4<br>(-17.4 to 21.4)                              |
| Pyoderma                                      | 205.1<br>(198.4 to 211.8)                        | 5,536.3<br>(5,340.4 to 5,714.8)                | 1.1<br>(0.5 to 2.4)                     | 10.9<br>(5.3 to 17.0)                             | 0.6<br>(-5.1 to 6.4)                                |
| Scabies                                       | 39.5<br>(29.2 to 54.2)                           | 118.7<br>(87.9 to 162.3)                       | 1.0<br>(0.5 to 1.8)                     | -1.2<br>(-13.0 to 11.8)                           | -0.2<br>(-11.7 to 12.1)                             |
| Fungal skin diseases                          | 3,793.8<br>(3,370.1 to 4,252.4)                  | 15,180.3<br>(13,139.4 to 17,370.4)             | 20.9<br>(8.3 to 43.7)                   | 13.9<br>(11.6 to 16.3)                            | 0.1<br>(-1.2 to 1.5)                                |
| Viral skin diseases                           | 1,270.5<br>(1,093.9 to 1,474.5)                  | 1,696.4<br>(1,448.4 to 1,973.6)                | 38.7<br>(24.0 to 58.3)                  | 3.3<br>(-1.0 to 7.9)                              | 0.1<br>(-2.6 to 3.0)                                |
| Acne vulgaris                                 | 3,713.5<br>(3,406.8 to 4,034.6)                  | 2,792.6<br>(2,250.6 to 3,610.5)                | 95.5<br>(63.9 to 137.1)                 | -5.2<br>(-9.0 to -1.5)                            | 1.4<br>(-2.2 to 5.4)                                |
| Alopecia areata                               | 142.1<br>(137.3 to 147.2)                        | 249.1<br>(240.7 to 257.7)                      | 4.6<br>(3.0 to 6.9)                     | -0.9<br>(-8.6 to 7.8)                             | -0.1<br>(-7.9 to 8.3)                               |
| Pruritus                                      | 454.3<br>(400.6 to 518.6)                        | 357.4<br>(315.3 to 410.1)                      | 4.8<br>(2.2 to 8.9)                     | 8.3<br>(2.1 to 14.9)                              | 0.1<br>(-5.5 to 5.6)                                |
| Urticaria                                     | 278.5<br>(245.7 to 312.9)                        | 492.4<br>(434.8 to 553.0)                      | 16.6<br>(10.7 to 23.6)                  | 3.4<br>(-3.1 to 10.5)                             | 0.5<br>(-5.6 to 6.9)                                |
| Decubitus ulcer                               | 37.3<br>(33.0 to 42.1)                           | 137.3<br>(120.0 to 156.2)                      | 5.7<br>(4.0 to 7.8)                     | 21.4<br>(8.0 to 36.8)                             | -2.0<br>(-12.0 to 8.5)                              |
| Other skin and subcutaneous diseases          | 5,856.8<br>(5,692.5 to 6,016.9)                  | 7,549.7<br>(7,277.5 to 7,818.4)                | 31.9<br>(15.5 to 58.0)                  | 14.2<br>(11.8 to 16.5)                            | 2.2<br>(-0.1 to 4.2)                                |
| Sense organ diseases                          | 14,559.2<br>(13,749.3 to 15,364.1)               | 5,100.8†<br>(4,808.7 to 5,408.3)               | 494.6<br>(348.6 to 701.7)               | 17.2<br>(14.9 to 19.8)                            | -0.3<br>(-2.2 to 1.6)                               |
| Glaucoma                                      | 30.7<br>(25.2 to 36.8)                           | --                                             | 3.2<br>(2.0 to 4.7)                     | 21.8<br>(3.9 to 41.3)                             | 0.6<br>(-14.8 to 18.4)                              |
| Cataract                                      | 249.0<br>(199.2 to 310.5)                        | --                                             | 21.6<br>(14.8 to 30.5)                  | 23.2<br>(13.1 to 34.0)                            | -3.1<br>(-11.0 to 5.2)                              |
| Macular degeneration                          | 66.8<br>(53.9 to 81.4)                           | --                                             | 7.1<br>(4.6 to 10.2)                    | 28.2<br>(13.7 to 43.9)                            | 0.9<br>(-10.6 to 13.4)                              |
| Refraction and accommodation disorders        | 4,584.8<br>(4,405.3 to 4,779.5)                  | --                                             | 73.4<br>(44.5 to 119.7)                 | 9.5<br>(6.2 to 13.2)                              | -2.7<br>(-5.7 to 0.6)                               |
| Age-related and other hearing loss            | 11,721.0<br>(10,337.7 to 13,168.5)               | --                                             | 316.2<br>(218.5 to 455.0)               | 19.1<br>(15.5 to 22.7)                            | 0.2<br>(-2.6 to 3.0)                                |
| Other vision loss                             | 135.5<br>(117.6 to 154.2)                        | --                                             | 11.3<br>(7.6 to 15.5)                   | 17.1<br>(7.3 to 28.5)                             | 0.6<br>(-8.6 to 10.9)                               |
| Other sense organ diseases                    | 1,972.5<br>(1,813.2 to 2,125.4)                  | 5,100.8<br>(4,808.7 to 5,408.3)                | 61.8<br>(38.7 to 93.2)                  | 14.6<br>(10.4 to 18.7)                            | 0.9<br>(-2.8 to 4.7)                                |
| Oral disorders                                | 26,365.3<br>(25,652.5 to 27,101.5)               | 85,118.3†<br>(82,332.4 to 88,118.4)            | 175.3<br>(112.6 to 257.6)               | 16.2<br>(12.7 to 20.8)                            | 3.0<br>(0.4 to 6.4)                                 |
| Caries of deciduous teeth                     | 1,519.5<br>(1,136.2 to 1,866.1)                  | 4,501.5<br>(2,596.5 to 6,926.6)                | 0.6<br>(0.2 to 1.2)                     | 34.4<br>(14.7 to 65.1)                            | 16.8<br>(-0.2 to 43.2)                              |
| Caries of permanent teeth                     | 22,503.6<br>(21,642.3 to 23,328.0)               | 80,171.5<br>(78,272.4 to 81,943.0)             | 22.0<br>(9.6 to 42.1)                   | 3.6<br>(1.2 to 6.0)                               | 0.1<br>(-2.1 to 2.5)                                |
| Periodontal disease                           | 1,651.3<br>(1,309.0 to 2,044.4)                  | 152.9<br>(117.6 to 195.5)                      | 10.8<br>(4.1 to 22.9)                   | 15.3<br>(8.6 to 22.3)                             | 0.8<br>(-4.5 to 6.5)                                |
| Edentulism and severe tooth loss              | 4,149.4<br>(3,639.7 to 4,694.7)                  | 292.4<br>(247.2 to 346.0)                      | 114.7<br>(74.9 to 161.8)                | 22.2<br>(16.7 to 28.7)                            | 5.0<br>(0.6 to 10.5)                                |
| Other oral disorders                          | 936.3<br>(896.3 to 980.4)                        | --                                             | 27.3<br>(16.8 to 41.5)                  | 5.0<br>(1.9 to 8.5)                               | 0.1<br>(-2.8 to 3.2)                                |
| <b>Injuries</b>                               | <b>15,032.2</b><br><b>(14,053.4 to 16,153.7)</b> | <b>4,518.7†</b><br><b>(4,263.1 to 4,800.5)</b> | <b>467.9</b><br><b>(312.6 to 665.5)</b> | <b>-2.0</b><br><b>(-3.6 to -0.5)</b>              | <b>-12.0</b><br><b>(-13.7 to -10.5)</b>             |
| <b>Transport injuries</b>                     | <b>2,219.8</b><br><b>(2,066.9 to 2,388.3)</b>    | <b>475.9</b><br><b>(430.2 to 523.8)</b>        | <b>99.7</b><br><b>(65.2 to 143.8)</b>   | <b>-18.9</b><br><b>(-20.4 to -17.3)</b>           | <b>-26.5</b><br><b>(-28.2 to -24.9)</b>             |
| Road injuries                                 | 1,996.6<br>(1,856.7 to 2,152.7)                  | 447.4<br>(402.7 to 496.5)                      | 91.8<br>(60.2 to 131.9)                 | -20.7<br>(-22.2 to -19.2)                         | -28.2<br>(-29.8 to -26.6)                           |
| Pedestrian road injuries                      | 312.5<br>(272.7 to 361.4)                        | 45.9<br>(37.6 to 55.8)                         | 15.8<br>(10.2 to 22.9)                  | -14.3<br>(-16.1 to -12.7)                         | -22.0<br>(-24.0 to -20.1)                           |
| Cyclist road injuries                         | 575.7<br>(482.2 to 681.8)                        | 162.1<br>(135.2 to 189.7)                      | 24.3<br>(15.8 to 35.2)                  | -5.2<br>(-6.9 to -3.4)                            | -14.6<br>(-16.2 to -12.9)                           |
| Motorcyclist road injuries                    | 401.6<br>(340.8 to 476.7)                        | 55.4<br>(45.4 to 68.1)                         | 19.1<br>(12.6 to 27.4)                  | -25.4<br>(-27.1 to -23.6)                         | -32.4<br>(-34.1 to -30.7)                           |
| Motor vehicle road injuries                   | 568.2<br>(478.6 to 654.1)                        | 153.8<br>(132.4 to 176.6)                      | 27.5<br>(18.3 to 39.3)                  | -32.3<br>(-33.8 to -30.9)                         | -38.7<br>(-40.2 to -37.3)                           |
| Other road injuries                           | 138.6<br>(116.6 to 164.4)                        | 30.2<br>(23.6 to 38.5)                         | 5.2<br>(3.3 to 7.5)                     | -6.0<br>(-8.1 to -3.9)                            | -14.1<br>(-16.1 to -12.0)                           |
| Other transport injuries                      | 223.2<br>(183.2 to 265.0)                        | 28.5<br>(24.6 to 33.0)                         | 7.9<br>(5.0 to 11.6)                    | 10.7<br>(8.9 to 12.5)                             | -0.2<br>(-2.1 to 1.6)                               |
| <b>Unintentional injuries</b>                 | <b>12,308.0</b><br><b>(11,383.1 to 13,367.8)</b> | <b>3,876.4</b><br><b>(3,629.7 to 4,166.7)</b>  | <b>349.5</b><br><b>(233.7 to 503.9)</b> | <b>3.6</b><br><b>(1.8 to 5.4)</b>                 | <b>-7.6</b><br><b>(-9.4 to -5.8)</b>                |
| Falls                                         | 6,105.5<br>(5,344.6 to 6,902.5)                  | 1,963.7<br>(1,754.8 to 2,193.2)                | 215.4<br>(147.3 to 299.1)               | -2.8<br>(-4.7 to -0.6)                            | -14.2<br>(-16.0 to -12.3)                           |
| Drowning                                      | 21.6<br>(19.0 to 24.1)                           | 2.1<br>(1.8 to 2.4)                            | 1.0<br>(0.7 to 1.4)                     | 12.5<br>(6.8 to 18.8)                             | 3.1<br>(-2.5 to 9.3)                                |
| Fire, heat, and hot substances                | 1,242.2<br>(1,063.3 to 1,476.1)                  | 60.5<br>(49.8 to 70.5)                         | 21.3<br>(11.9 to 35.7)                  | 10.5<br>(7.7 to 13.9)                             | 1.6<br>(-1.1 to 4.7)                                |
| Poisonings                                    | 47.1<br>(38.7 to 58.7)                           | 38.7<br>(31.2 to 46.5)                         | 4.1<br>(2.6 to 5.8)                     | 9.9<br>(0.0 to 20.1)                              | 5.0<br>(-5.1 to 15.8)                               |
| Exposure to mechanical forces                 | 2,606.2<br>(2,175.3 to 3,312.6)                  | 570.2<br>(483.7 to 661.6)                      | 46.9<br>(29.4 to 72.6)                  | 15.8<br>(13.7 to 18.0)                            | 5.6<br>(3.8 to 7.6)                                 |
| Unintentional firearm injuries                | 85.0<br>(69.1 to 106.3)                          | 7.1<br>(4.9 to 9.8)                            | 1.3<br>(0.7 to 2.1)                     | 14.2<br>(11.7 to 16.6)                            | 3.7<br>(1.3 to 5.9)                                 |
| Unintentional suffocation                     | 30.7<br>(25.6 to 36.9)                           | 4.8<br>(3.2 to 7.1)                            | 0.8<br>(0.5 to 1.2)                     | 19.9<br>(18.0 to 22.1)                            | 7.7<br>(5.6 to 9.7)                                 |
| Other exposure to mechanical forces           | 2,490.5<br>(2,060.7 to 3,192.1)                  | 558.3<br>(474.1 to 648.7)                      | 44.9<br>(28.2 to 69.3)                  | 15.7<br>(13.7 to 18.0)                            | 5.6<br>(3.7 to 7.6)                                 |

| Cause                                                                               | Prevalence in thousands (95% UI)            | Incidence in thousands (95% UI)          | YLDs in thousands (95% UI)           |                                                   |                                                     |
|-------------------------------------------------------------------------------------|---------------------------------------------|------------------------------------------|--------------------------------------|---------------------------------------------------|-----------------------------------------------------|
|                                                                                     | 2016 counts                                 | 2016 counts                              | 2016 counts                          | Percentage change in counts between 2006 and 2016 | Percentage change in age-standardised rates between |
| Adverse effects of medical treatment                                                | 18.6<br>(14.9 to 22.9)                      | 243.6<br>(215.7 to 275.7)                | 2.5<br>(1.6 to 3.7)                  | 13.0<br>(7.7 to 18.6)                             | -1.1<br>(-4.8 to 2.5)                               |
| Animal contact                                                                      | 193.0<br>(170.1 to 223.5)                   | 100.2<br>(81.4 to 123.0)                 | 3.5<br>(2.2 to 5.4)                  | 7.7<br>(3.6 to 11.5)                              | -1.6<br>(-5.6 to 2.4)                               |
| Venomous animal contact                                                             | 27.5<br>(23.6 to 31.9)                      | 30.6<br>(22.3 to 40.4)                   | 1.4<br>(0.9 to 2.0)                  | 3.8<br>(-5.0 to 12.6)                             | -1.7<br>(-10.3 to 7.4)                              |
| Non-venomous animal contact                                                         | 165.5<br>(143.2 to 194.1)                   | 69.7<br>(55.9 to 86.0)                   | 2.1<br>(1.2 to 3.5)                  | 10.3<br>(8.2 to 12.6)                             | -1.5<br>(-3.5 to 0.4)                               |
| Foreign body                                                                        | 303.1<br>(263.6 to 355.1)                   | 237.3<br>(211.4 to 273.1)                | 8.9<br>(5.7 to 13.3)                 | 18.9<br>(16.6 to 21.4)                            | 5.9<br>(4.1 to 7.9)                                 |
| Pulmonary aspiration and foreign body in airway                                     | 66.8<br>(54.5 to 79.3)                      | 95.7<br>(86.4 to 106.7)                  | 1.9<br>(1.2 to 2.8)                  | 34.0<br>(30.4 to 38.8)                            | 9.8<br>(7.4 to 12.0)                                |
| Foreign body in eyes                                                                | 26.2<br>(17.8 to 35.7)                      | 100.8<br>(78.5 to 133.0)                 | 1.8<br>(1.1 to 2.8)                  | 15.1<br>(10.1 to 20.5)                            | 7.0<br>(3.9 to 10.5)                                |
| Foreign body in other body part                                                     | 210.2<br>(175.5 to 259.7)                   | 40.9<br>(33.8 to 48.8)                   | 5.2<br>(3.2 to 7.8)                  | 15.6<br>(13.4 to 17.8)                            | 4.4<br>(2.3 to 6.5)                                 |
| Environmental heat and cold exposure                                                | 146.8<br>(130.7 to 165.0)                   | 32.5<br>(27.4 to 38.5)                   | 5.2<br>(3.4 to 7.7)                  | 19.8<br>(15.2 to 24.8)                            | 4.0<br>(-0.3 to 8.5)                                |
| Other unintentional injuries                                                        | 1,623.7<br>(1,366.8 to 1,916.2)             | 627.4<br>(531.2 to 737.8)                | 40.7<br>(26.2 to 60.9)               | 19.8<br>(18.1 to 21.5)                            | 6.2<br>(4.6 to 7.8)                                 |
| <b>Self-harm and interpersonal violence</b>                                         | <b>1,040.0</b><br><b>(949.9 to 1,126.3)</b> | <b>164.9†</b><br><b>(146.5 to 184.1)</b> | <b>18.2</b><br><b>(12.1 to 26.1)</b> | <b>9.3</b><br><b>(6.5 to 11.8)</b>                | <b>3.0</b><br><b>(0.8 to 5.2)</b>                   |
| Self-harm                                                                           | 93.5<br>(76.9 to 110.8)                     | 68.4<br>(60.1 to 78.2)                   | 3.7<br>(2.3 to 5.5)                  | 6.0<br>(0.2 to 11.6)                              | -2.6<br>(-8.0 to 2.9)                               |
| Self-harm by firearm                                                                | 1.1<br>(0.9 to 1.3)                         | 0.1<br>(0.1 to 0.2)                      | < 0.05<br>(< 0.05 to < 0.05)         | 13.3<br>(10.6 to 16.1)                            | 5.0<br>(2.2 to 7.5)                                 |
| Self-harm by other specified means                                                  | 92.5<br>(76.0 to 109.9)                     | 68.3<br>(60.0 to 78.1)                   | 3.7<br>(2.3 to 5.4)                  | 6.0<br>(0.2 to 11.6)                              | -2.6<br>(-8.1 to 2.9)                               |
| Interpersonal violence                                                              | 946.4<br>(864.5 to 1,034.0)                 | 96.5†<br>(79.5 to 114.8)                 | 14.5<br>(9.7 to 20.7)                | 10.1<br>(7.2 to 12.8)                             | 4.3<br>(2.0 to 6.6)                                 |
| Assault by firearm                                                                  | 26.2<br>(21.4 to 31.8)                      | 2.9<br>(2.1 to 3.9)                      | 0.6<br>(0.4 to 0.9)                  | 23.6<br>(21.1 to 26.2)                            | 12.9<br>(10.6 to 15.2)                              |
| Assault by sharp object                                                             | 73.2<br>(59.0 to 88.2)                      | 16.6<br>(12.1 to 22.2)                   | 1.3<br>(0.8 to 2.1)                  | 14.8<br>(12.5 to 17.4)                            | 5.5<br>(3.2 to 7.9)                                 |
| Sexual violence                                                                     | 559.0<br>(495.3 to 628.9)                   | --                                       | 4.5<br>(3.0 to 6.4)                  | -4.9<br>(-9.0 to -0.5)                            | -1.9<br>(-5.8 to 2.4)                               |
| Assault by other means                                                              | 288.0<br>(235.5 to 356.8)                   | 77.0<br>(63.5 to 92.7)                   | 8.1<br>(5.2 to 12.2)                 | 18.9<br>(16.7 to 21.1)                            | 9.3<br>(7.1 to 11.4)                                |
| <b>Forces of nature, conflict and terrorism, and executions and police conflict</b> | <b>23.4</b><br><b>(12.6 to 36.6)</b>        | <b>1.4†</b><br><b>(1.0 to 2.0)</b>       | <b>0.5</b><br><b>(0.1 to 1.5)</b>    | <b>0.5</b><br><b>(-1.7 to 3.1)</b>                | <b>-12.0</b><br><b>(-14.0 to -8.8)</b>              |
| Exposure to forces of nature                                                        | 5.5<br>(2.2 to 9.5)                         | --                                       | 0.1<br>(< 0.05 to 0.3)               | -10.6<br>(-12.5 to -8.5)                          | -24.2<br>(-26.1 to -22.2)                           |
| Conflict and terrorism                                                              | 12.2<br>(5.2 to 22.0)                       | --                                       | 0.2<br>(< 0.05 to 0.8)               | -6.4<br>(-9.0 to -3.7)                            | -20.6<br>(-22.9 to -18.2)                           |
| Executions and police conflict                                                      | 5.7<br>(3.2 to 9.2)                         | 1.4<br>(1.0 to 2.0)                      | 0.1<br>(< 0.05 to 0.4)               | 31.0<br>(23.0 to 34.4)                            | 21.9<br>(15.0 to 25.2)                              |
| <b>Impairments</b>                                                                  | --                                          | --                                       | --                                   | --                                                | --                                                  |
| Anaemia                                                                             | 4,474.3<br>(3,710.8 to 5,322.4)             | --                                       | 112.7<br>(75.0 to 163.2)             | 6.4<br>(-8.2 to 24.7)                             | -5.5<br>(-20.1 to 13.5)                             |
| Developmental intellectual disability                                               | 1,027.4<br>(788.4 to 1,265.2)               | --                                       | 108.5<br>(80.4 to 142.7)             | 2.0<br>(-2.0 to 6.3)                              | -0.6<br>(-4.6 to 3.6)                               |
| Epilepsy                                                                            | 192.8<br>(108.6 to 279.0)                   | --                                       | 55.9<br>(31.2 to 93.2)               | -10.9<br>(-54.4 to 75.2)                          | -13.8<br>(-54.9 to 65.6)                            |
| Guillain-Barre syndrome                                                             | 0.5<br>(0.4 to 0.6)                         | --                                       | 0.1<br>(0.1 to 0.2)                  | 10.6<br>(6.7 to 13.8)                             | 0.1<br>(-0.0 to 0.1)                                |
| Hearing loss                                                                        | 12,121.5<br>(10,742.9 to 13,560.3)          | --                                       | 334.9<br>(232.0 to 478.3)            | 18.0<br>(14.8 to 21.4)                            | -0.1<br>(-2.5 to 2.5)                               |
| Heart failure                                                                       | 746.3<br>(647.9 to 852.7)                   | --                                       | 80.2<br>(62.3 to 101.8)              | 14.4<br>(5.8 to 22.9)                             | -5.6<br>(-12.6 to 0.9)                              |
| Infertility                                                                         | 300.1<br>(232.2 to 390.1)                   | --                                       | 2.0<br>(0.9 to 3.9)                  | -3.5<br>(-10.8 to 3.2)                            | 2.0<br>(-4.7 to 8.8)                                |
| Pelvic inflammatory disease                                                         | 2.0<br>(1.3 to 2.8)                         | --                                       | 0.3<br>(0.1 to 0.4)                  | -8.2<br>(-26.1 to 13.1)                           | -1.4<br>(-16.9 to 17.4)                             |
| Vision loss                                                                         | 5,152.0<br>(4,948.6 to 5,364.1)             | --                                       | 134.8<br>(95.0 to 192.6)             | 11.9<br>(8.8 to 15.1)                             | -2.4<br>(-5.3 to 0.5)                               |

We did not calculate incidence for the nine impairments, certain NTDs, and causes with only birth prevalence. Blank cells mean that no estimate is available.

† Incidence for aggregate causes represents the sum of the incidence of the causes below the aggregate.

‡ Incidence estimates for stroke represent first-ever stroke only.

^ Incidence of HIV/AIDS represents new infections of HIV only and does not include new infections of Tuberculosis in HIV positive cases.



SR Table 14: Prevalence, incidence, and YLDs for 2016, percentage change of YLD counts and percentage change of age-standardised YLD rates between 2006 and 2016 by cause and impairments, for all ages, Sri Lanka.

| Cause                                                                                | Prevalence in thousands (95% UI)          | Incidence in thousands (95% UI)               | YLDs in thousands (95% UI)             |                                                   |                                                     |
|--------------------------------------------------------------------------------------|-------------------------------------------|-----------------------------------------------|----------------------------------------|---------------------------------------------------|-----------------------------------------------------|
|                                                                                      | 2016 counts                               | 2016 counts                                   | 2016 counts                            | Percentage change in counts between 2006 and 2016 | Percentage change in age-standardised rates between |
| <b>All causes</b>                                                                    | <b>19,788.2</b><br>(19,724.1 to 19,869.4) | <b>112,523.9†</b><br>(106,132.9 to 119,538.0) | <b>2,171.1</b><br>(1,622.1 to 2,795.0) | <b>10.8</b><br>(8.4 to 13.3)                      | <b>-1.8</b><br>(-3.7 to 0.4)                        |
| <b>Communicable, maternal, neonatal, and nutritional disorders</b>                   | <b>12,392.8</b><br>(11,987.5 to 12,777.1) | <b>61,676.8†</b><br>(56,165.1 to 67,522.8)    | <b>189.7</b><br>(135.1 to 256.7)       | <b>-13.0</b><br>(-19.0 to -7.1)                   | <b>-15.7</b><br>(-21.7 to -10.0)                    |
| <b>HIV/AIDS and tuberculosis</b>                                                     | <b>4,259.0</b><br>(3,664.5 to 4,713.4)    | <b>8.8†</b><br>(7.3 to 10.6)                  | <b>5.3</b><br>(3.5 to 7.5)             | <b>-10.2</b><br>(-21.6 to 2.2)                    | <b>-23.7</b><br>(-32.5 to -13.5)                    |
| Tuberculosis                                                                         | 3,877.5<br>(3,326.1 to 4,415.8)           | 8.6†<br>(7.1 to 10.3)                         | 5.0<br>(3.3 to 7.1)                    | -11.4<br>(-22.8 to 1.2)                           | -24.9<br>(-34.2 to -15.2)                           |
| Drug-susceptible tuberculosis                                                        | 16.8<br>(13.6 to 21.0)                    | 8.6<br>(7.1 to 10.3)                          | 5.0<br>(3.3 to 7.1)                    | -11.3<br>(-22.7 to 1.0)                           | -24.9<br>(-34.2 to -14.8)                           |
| Multidrug-resistant tuberculosis without extensive drug resistance                   | < 0.05<br>(< 0.05 to 0.2)                 | < 0.05<br>(< 0.05 to 0.1)                     | < 0.05<br>(< 0.05 to 0.1)              | -25.6<br>(-90.2 to 330.7)                         | -37.4<br>(-91.7 to 266.1)                           |
| Extensively drug-resistant tuberculosis                                              | < 0.05<br>(< 0.05 to < 0.05)              | < 0.05<br>(< 0.05 to < 0.05)                  | < 0.05<br>(< 0.05 to < 0.05)           | 144.9<br>(-67.8 to 1,317.9)                       | 106.0<br>(-72.8 to 1,105.0)                         |
| Latent tuberculosis infection                                                        | 3,860.6<br>(3,307.8 to 4,400.4)           | --                                            | --                                     | --                                                | --                                                  |
| HIV/AIDS                                                                             | 1.9<br>(1.2 to 3.1)                       | 0.2^<br>(0.1 to 0.4)                          | 0.3<br>(0.1 to 0.6)                    | 20.0<br>(-9.2 to 55.4)                            | 13.3<br>(-14.2 to 48.6)                             |
| Drug-susceptible HIV/AIDS - Tuberculosis                                             | 0.1<br>(< 0.05 to 0.1)                    | < 0.05<br>(< 0.05 to 0.1)                     | < 0.05<br>(< 0.05 to 0.1)              | -35.9<br>(-41.5 to -30.3)                         | -38.5<br>(-43.9 to -33.2)                           |
| Multidrug-resistant HIV/AIDS - Tuberculosis without extensive drug resistance        | < 0.05<br>(< 0.05 to < 0.05)              | < 0.05<br>(< 0.05 to < 0.05)                  | < 0.05<br>(< 0.05 to < 0.05)           | -45.9<br>(-92.8 to 211.9)                         | -48.2<br>(-93.1 to 199.0)                           |
| Extensively drug-resistant HIV/AIDS - Tuberculosis                                   | < 0.05<br>(< 0.05 to < 0.05)              | < 0.05<br>(< 0.05 to < 0.05)                  | < 0.05<br>(< 0.05 to < 0.05)           | 78.0<br>(-76.2 to 926.5)                          | 70.6<br>(-77.2 to 884.1)                            |
| HIV/AIDS resulting in other diseases                                                 | 1.8<br>(1.1 to 3.1)                       | 0.2<br>(0.1 to 0.4)                           | 0.2<br>(0.1 to 0.6)                    | 38.1<br>(-2.8 to 124.2)                           | 29.9<br>(-7.4 to 115.3)                             |
| <b>Diarrhoea, lower respiratory infections, and other common infectious diseases</b> | <b>1,085.1</b><br>(1,026.8 to 1,146.8)    | <b>58,887.3†</b><br>(53,424.3 to 64,618.7)    | <b>55.6</b><br>(38.9 to 76.0)          | <b>1.9</b><br>(-1.2 to 5.2)                       | <b>-1.9</b><br>(-4.9 to 1.3)                        |
| Diarrhoeal diseases                                                                  | 182.0<br>(170.1 to 194.4)                 | 12,358.4<br>(11,515.8 to 13,178.3)            | 20.4<br>(14.0 to 28.1)                 | 7.6<br>(1.1 to 14.1)                              | 3.3<br>(-2.6 to 9.5)                                |
| Intestinal infectious diseases                                                       | 2.1<br>(1.7 to 2.6)                       | 39.9†<br>(32.4 to 50.2)                       | 0.3<br>(0.2 to 0.5)                    | -22.9<br>(-36.7 to -4.8)                          | -25.5<br>(-39.0 to -8.0)                            |
| Typhoid fever                                                                        | 2.0<br>(1.6 to 2.6)                       | 31.6<br>(25.6 to 40.3)                        | 0.3<br>(0.2 to 0.5)                    | -22.8<br>(-37.8 to -3.2)                          | -25.4<br>(-40.0 to -6.6)                            |
| Paratyphoid fever                                                                    | 0.4<br>(0.3 to 0.5)                       | 8.3<br>(6.7 to 10.2)                          | < 0.05<br>(< 0.05 to < 0.05)           | -18.4<br>(-31.3 to -3.5)                          | -21.2<br>(-33.8 to -6.7)                            |
| Other intestinal infectious diseases                                                 | --                                        | --                                            | < 0.05<br>(< 0.05 to < 0.05)           | -46.9<br>(-56.2 to -35.7)                         | -45.1<br>(-54.3 to -34.2)                           |
| Lower respiratory infections                                                         | 27.8<br>(25.6 to 30.1)                    | 1,154.9<br>(1,060.3 to 1,264.3)               | 1.7<br>(1.1 to 2.4)                    | 28.1<br>(14.4 to 42.6)                            | 12.9<br>(0.9 to 25.5)                               |
| Upper respiratory infections                                                         | 589.2<br>(520.6 to 664.6)                 | 44,135.7<br>(38,825.4 to 50,049.6)            | 14.7<br>(8.7 to 23.0)                  | 2.1<br>(-3.3 to 7.5)                              | -0.2<br>(-5.4 to 5.0)                               |
| Otitis media                                                                         | 207.1<br>(185.6 to 229.0)                 | 748.0<br>(605.2 to 926.0)                     | 6.1<br>(3.8 to 9.2)                    | -10.9<br>(-17.7 to -3.2)                          | -12.0<br>(-18.5 to -4.5)                            |
| Meningitis                                                                           | 54.8<br>(45.7 to 64.3)                    | 8.1<br>(6.8 to 9.4)                           | 5.1<br>(3.5 to 6.8)                    | -1.1<br>(-8.5 to 6.5)                             | -5.0<br>(-11.9 to 2.3)                              |
| Pneumococcal meningitis                                                              | 31.1<br>(24.9 to 38.7)                    | 2.8<br>(2.2 to 3.4)                           | 2.6<br>(1.8 to 3.5)                    | 0.8<br>(-12.3 to 15.2)                            | -3.4<br>(-15.8 to 10.3)                             |
| H influenzae type B meningitis                                                       | 6.5<br>(5.2 to 8.1)                       | 0.8<br>(0.6 to 1.1)                           | 0.9<br>(0.6 to 1.2)                    | -19.7<br>(-26.6 to -11.5)                         | -22.3<br>(-29.1 to -13.9)                           |
| Meningococcal infection                                                              | 2.8<br>(2.0 to 3.9)                       | 0.9<br>(0.7 to 1.1)                           | 0.2<br>(0.2 to 0.3)                    | -1.2<br>(-8.1 to 6.7)                             | -6.1<br>(-12.5 to 1.4)                              |
| Other meningitis                                                                     | 14.4<br>(10.8 to 18.6)                    | 3.6<br>(3.0 to 4.3)                           | 1.4<br>(0.9 to 1.9)                    | 11.4<br>(4.8 to 19.0)                             | 7.1<br>(0.9 to 14.4)                                |
| Encephalitis                                                                         | 57.3<br>(38.5 to 83.9)                    | 26.3<br>(23.6 to 29.6)                        | 6.2<br>(4.3 to 8.2)                    | -4.7<br>(-15.6 to 7.0)                            | -10.3<br>(-20.4 to 0.6)                             |
| Diphtheria                                                                           | < 0.05<br>(< 0.05 to < 0.05)              | < 0.05<br>(< 0.05 to < 0.05)                  | < 0.05<br>(< 0.05 to < 0.05)           | -34.3<br>(-63.3 to 20.7)                          | -36.9<br>(-64.7 to 15.6)                            |
| Whooping cough                                                                       | 0.1<br>(0.1 to 0.1)                       | 0.8<br>(0.5 to 1.1)                           | < 0.05<br>(< 0.05 to < 0.05)           | -68.1<br>(-81.1 to -45.2)                         | -61.3<br>(-77.7 to -32.7)                           |
| Tetanus                                                                              | 0.1<br>(0.1 to 0.1)                       | < 0.05<br>(< 0.05 to 0.1)                     | < 0.05<br>(< 0.05 to < 0.05)           | -6.7<br>(-20.8 to 4.9)                            | -12.6<br>(-25.9 to -1.9)                            |
| Measles                                                                              | 0.1<br>(< 0.05 to 0.1)                    | 1.9<br>(0.6 to 4.5)                           | < 0.05<br>(< 0.05 to < 0.05)           | 23.6<br>(-14.3 to 73.2)                           | 43.8<br>(-0.3 to 101.5)                             |
| Varicella and herpes zoster                                                          | 25.5<br>(23.1 to 28.2)                    | 413.3<br>(397.4 to 429.4)                     | 1.1<br>(0.7 to 1.7)                    | 16.7<br>(4.3 to 30.2)                             | 0.0<br>(-9.9 to 11.1)                               |
| <b>Neglected tropical diseases and malaria</b>                                       | <b>3,494.5</b><br>(3,024.8 to 4,019.5)    | <b>409.4†</b><br>(256.2 to 610.9)             | <b>13.2</b><br>(8.1 to 20.4)           | <b>-40.1</b><br>(-58.4 to -16.6)                  | <b>-42.6</b><br>(-60.4 to -20.0)                    |
| Malaria                                                                              | 0.6<br>(0.5 to 0.7)                       | < 0.05<br>(0.0 to < 0.05)                     | 0.2<br>(0.1 to 0.2)                    | -2.7<br>(-11.3 to 6.1)                            | -5.9<br>(-14.1 to 2.7)                              |
| Chagas disease                                                                       | --                                        | --                                            | --                                     | --                                                | --                                                  |
| Leishmaniasis                                                                        | 1.3<br>(0.1 to 3.8)                       | 2.5<br>(0.2 to 7.5)                           | 0.1<br>(< 0.05 to 0.3)                 | 202.1<br>(-78.2 to 1,187.3)                       | 178.7<br>(-79.5 to 1,095.0)                         |
| Visceral leishmaniasis                                                               | < 0.05<br>(< 0.05 to < 0.05)              | < 0.05<br>(< 0.05 to < 0.05)                  | < 0.05<br>(< 0.05 to < 0.05)           | -71.5<br>(-99.6 to 116.3)                         | -77.1<br>(-99.6 to 89.6)                            |
| Cutaneous and mucocutaneous leishmaniasis                                            | 1.3<br>(0.1 to 3.8)                       | 2.5<br>(0.2 to 7.5)                           | 0.1<br>(< 0.05 to 0.3)                 | 202.5<br>(-78.3 to 1,195.6)                       | 179.1<br>(-79.5 to 1,099.8)                         |
| African trypanosomiasis                                                              | --                                        | --                                            | --                                     | --                                                | --                                                  |
| Schistosomiasis                                                                      | --                                        | --                                            | --                                     | --                                                | --                                                  |
| Cysticercosis                                                                        | --                                        | --                                            | --                                     | --                                                | --                                                  |
| Cystic echinococcosis                                                                | --                                        | --                                            | --                                     | --                                                | --                                                  |
| Lymphatic filariasis                                                                 | 16.3<br>(5.4 to 40.9)                     | --                                            | 1.8<br>(0.5 to 4.9)                    | -80.9<br>(-84.3 to -77.4)                         | -82.7<br>(-85.9 to -79.7)                           |
| Onchocerciasis                                                                       | --                                        | --                                            | --                                     | --                                                | --                                                  |
| Trachoma                                                                             | --                                        | --                                            | --                                     | --                                                | --                                                  |
| Dengue                                                                               | 24.3<br>(13.4 to 40.6)                    | 406.3<br>(251.9 to 606.1)                     | 4.0<br>(1.8 to 7.4)                    | -16.0<br>(-33.7 to 90.4)                          | -20.1<br>(-36.8 to 81.1)                            |
| Yellow fever                                                                         | --                                        | --                                            | --                                     | --                                                | --                                                  |
| Rabies                                                                               | < 0.05<br>(< 0.05 to < 0.05)              | < 0.05<br>(< 0.05 to 0.1)                     | < 0.05<br>(< 0.05 to < 0.05)           | -31.7<br>(-58.7 to 8.2)                           | -40.8<br>(-63.8 to -7.2)                            |
| Intestinal nematode infections                                                       | 3,374.6<br>(2,910.1 to 3,903.3)           | --                                            | 5.0<br>(2.9 to 8.4)                    | 0.8<br>(-18.3 to 23.1)                            | -4.3<br>(-22.1 to 16.6)                             |
| Ascariasis                                                                           | 1,195.0<br>(895.6 to 1,586.9)             | --                                            | 0.6<br>(0.3 to 1.1)                    | -0.9<br>(-32.7 to 38.3)                           | -5.1<br>(-35.1 to 32.4)                             |

| Cause                                                                   | Prevalence in thousands (95% UI)           | Incidence in thousands (95% UI)             | YLDs in thousands (95% UI)              |                                                   |                                                     |
|-------------------------------------------------------------------------|--------------------------------------------|---------------------------------------------|-----------------------------------------|---------------------------------------------------|-----------------------------------------------------|
|                                                                         | 2016 counts                                | 2016 counts                                 | 2016 counts                             | Percentage change in counts between 2006 and 2016 | Percentage change in age-standardised rates between |
| Trichuriasis                                                            | 1,249.3<br>(928.9 to 1,730.4)              | --                                          | 0.5<br>(0.2 to 0.8)                     | 6.2<br>(-33.6 to 74.0)                            | 0.7<br>(-36.4 to 63.3)                              |
| Hookworm disease                                                        | 1,174.6<br>(902.4 to 1,525.9)              | --                                          | 4.0<br>(2.3 to 6.7)                     | 0.4<br>(-21.5 to 27.7)                            | -4.8<br>(-25.5 to 20.7)                             |
| Food-borne trematodiasis                                                | --                                         | --                                          | --                                      | --                                                | --                                                  |
| Leprosy                                                                 | 3.1<br>(2.9 to 3.3)                        | 0.5<br>(0.5 to 0.5)                         | 0.2<br>(0.1 to 0.3)                     | 26.2<br>(-0.4 to 58.3)                            | 3.3<br>(-16.8 to 28.2)                              |
| Ebola virus disease                                                     | --                                         | --                                          | --                                      | --                                                | --                                                  |
| Zika virus disease                                                      | --                                         | --                                          | --                                      | --                                                | --                                                  |
| Guinea worm disease                                                     | --                                         | --                                          | --                                      | --                                                | --                                                  |
| Other neglected tropical diseases                                       | 103.5<br>(93.9 to 117.2)                   | --                                          | 2.0<br>(1.2 to 3.1)                     | -19.5<br>(-32.5 to -2.3)                          | -16.8<br>(-31.1 to 2.1)                             |
| <b>Maternal disorders</b>                                               | <b>10.4<br/>(7.8 to 13.5)</b>              | <b>208.6†<br/>(178.2 to 245.6)</b>          | <b>0.8<br/>(0.5 to 1.2)</b>             | <b>-3.9<br/>(-30.2 to 31.8)</b>                   | <b>1.1<br/>(-26.8 to 37.8)</b>                      |
| Maternal haemorrhage                                                    | 3.4<br>(2.5 to 4.7)                        | 26.6<br>(19.7 to 35.3)                      | 0.1<br>(0.1 to 0.2)                     | -27.1<br>(-52.4 to 10.2)                          | -23.5<br>(-50.0 to 15.6)                            |
| Maternal sepsis and other pregnancy related infections                  | 2.2<br>(1.1 to 3.9)                        | 26.7<br>(19.4 to 37.1)                      | 0.1<br>(< 0.05 to 0.2)                  | -28.3<br>(-69.8 to 68.7)                          | -23.6<br>(-67.7 to 79.8)                            |
| Maternal hypertensive disorders                                         | 4.9<br>(2.6 to 7.7)                        | 34.3<br>(26.6 to 44.8)                      | 0.3<br>(0.1 to 0.5)                     | 107.0<br>(20.6 to 252.0)                          | 116.6<br>(26.1 to 268.4)                            |
| Maternal obstructed labour and uterine rupture                          | 0.3<br>(0.1 to 0.4)                        | 18.7<br>(13.2 to 25.6)                      | 0.1<br>(< 0.05 to 0.2)                  | -24.5<br>(-75.0 to 115.0)                         | -19.8<br>(-74.1 to 130.5)                           |
| Maternal abortion, miscarriage, and ectopic pregnancy                   | 0.8<br>(0.5 to 1.3)                        | 102.3<br>(76.8 to 136.7)                    | 0.1<br>(< 0.05 to 0.2)                  | -26.3<br>(-62.9 to 43.7)                          | -23.4<br>(-61.1 to 49.2)                            |
| Other maternal disorders                                                | --                                         | --                                          | 0.1<br>(0.1 to 0.2)                     | -9.3<br>(-34.0 to 23.6)                           | -4.5<br>(-30.9 to 30.2)                             |
| <b>Neonatal disorders</b>                                               | <b>238.7<br/>(200.4 to 292.1)</b>          | --                                          | <b>35.7<br/>(24.6 to 50.7)</b>          | <b>-6.1<br/>(-21.1 to 13.7)</b>                   | <b>-6.7<br/>(-21.6 to 13.0)</b>                     |
| Neonatal preterm birth complications                                    | 224.6<br>(176.8 to 290.8)                  | --                                          | 26.6<br>(17.5 to 38.4)                  | -6.2<br>(-24.5 to 18.8)                           | -7.2<br>(-25.6 to 18.0)                             |
| Neonatal encephalopathy due to birth asphyxia and trauma                | 11.0<br>(6.4 to 17.3)                      | --                                          | 2.3<br>(1.1 to 4.3)                     | 29.7<br>(-4.8 to 148.4)                           | 27.5<br>(-6.3 to 141.6)                             |
| Neonatal sepsis and other neonatal infections                           | 12.8<br>(5.6 to 30.7)                      | --                                          | 5.4<br>(1.9 to 14.1)                    | -12.4<br>(-27.8 to 17.0)                          | -13.5<br>(-28.7 to 16.0)                            |
| Hemolytic disease and other neonatal jaundice                           | 1.8<br>(1.5 to 2.1)                        | --                                          | 0.6<br>(0.4 to 0.7)                     | -0.5<br>(-9.0 to 7.5)                             | -2.4<br>(-10.9 to 5.3)                              |
| Other neonatal disorders                                                | --                                         | --                                          | 0.9<br>(0.6 to 1.3)                     | -26.3<br>(-41.9 to -6.9)                          | -11.7<br>(-30.3 to 11.6)                            |
| <b>Nutritional deficiencies</b>                                         | <b>4,157.9<br/>(3,974.2 to 4,375.1)</b>    | <b>1,162.3†<br/>(975.1 to 1,403.8)</b>      | <b>70.7<br/>(46.4 to 102.1)</b>         | <b>-19.4<br/>(-26.6 to -11.7)</b>                 | <b>-21.6<br/>(-29.1 to -13.5)</b>                   |
| Protein-energy malnutrition                                             | 328.8<br>(256.1 to 411.4)                  | 151.9<br>(120.8 to 187.9)                   | 7.0<br>(3.6 to 12.2)                    | -32.1<br>(-63.3 to 23.6)                          | -18.3<br>(-55.8 to 47.0)                            |
| Iodine deficiency                                                       | 150.3<br>(134.2 to 168.6)                  | 3.8<br>(3.5 to 4.3)                         | 3.8<br>(2.5 to 5.4)                     | -2.4<br>(-13.7 to 10.5)                           | -12.1<br>(-22.2 to -1.2)                            |
| Vitamin A deficiency                                                    | 1,118.8<br>(941.3 to 1,371.3)              | 1,006.6<br>(824.9 to 1,253.5)               | 0.4<br>(0.2 to 0.7)                     | -13.5<br>(-28.8 to 6.3)                           | -14.3<br>(-29.9 to 5.0)                             |
| Iron-deficiency anaemia                                                 | 2,942.3<br>(2,789.4 to 3,123.1)            | --                                          | 59.2<br>(38.9 to 87.7)                  | -18.5<br>(-24.6 to -12.2)                         | -22.6<br>(-28.7 to -16.0)                           |
| Other nutritional deficiencies                                          | --                                         | --                                          | 0.2<br>(0.1 to 0.4)                     | -32.0<br>(-64.0 to 28.6)                          | -18.8<br>(-56.7 to 52.2)                            |
| <b>Other communicable, maternal, neonatal, and nutritional diseases</b> | <b>4,319.2<br/>(3,993.1 to 4,657.1)</b>    | <b>1,000.4<br/>(915.1 to 1,096.9)</b>       | <b>8.2<br/>(5.2 to 12.6)</b>            | <b>-2.9<br/>(-9.1 to 3.3)</b>                     | <b>-5.1<br/>(-11.4 to 1.1)</b>                      |
| Sexually transmitted diseases excluding HIV                             | 3,350.3<br>(3,050.7 to 3,654.7)            | 954.0<br>(869.0 to 1,050.3)                 | 6.3<br>(4.1 to 9.8)                     | 1.0<br>(-6.2 to 8.5)                              | -1.9<br>(-9.0 to 5.2)                               |
| Syphilis                                                                | 10.5<br>(9.1 to 12.0)                      | 4.8<br>(3.9 to 5.7)                         | 0.5<br>(0.4 to 0.7)                     | 26.5<br>(11.0 to 44.5)                            | 1.9<br>(-11.4 to 16.3)                              |
| Chlamydial infection                                                    | 286.2<br>(217.8 to 363.0)                  | 239.4<br>(188.0 to 303.8)                   | 1.7<br>(1.1 to 2.7)                     | -5.5<br>(-17.2 to 6.5)                            | -2.5<br>(-14.5 to 9.5)                              |
| Gonococcal infection                                                    | 22.1<br>(18.4 to 26.7)                     | 52.3<br>(42.6 to 65.1)                      | 0.2<br>(0.1 to 0.3)                     | -2.2<br>(-22.7 to 21.0)                           | -2.8<br>(-22.9 to 20.5)                             |
| Trichomoniasis                                                          | 390.6<br>(338.8 to 445.7)                  | 327.5<br>(282.8 to 375.5)                   | 0.4<br>(0.2 to 0.9)                     | 6.8<br>(-1.1 to 15.9)                             | 3.5<br>(-3.9 to 11.3)                               |
| Genital herpes                                                          | 2,691.3<br>(2,333.7 to 3,142.3)            | 144.1<br>(123.3 to 170.6)                   | 0.7<br>(0.2 to 1.6)                     | 11.0<br>(2.6 to 19.9)                             | 0.5<br>(-6.9 to 8.4)                                |
| Other sexually transmitted diseases                                     | 127.8<br>(102.0 to 161.1)                  | 185.9<br>(158.8 to 221.6)                   | 2.7<br>(1.8 to 4.0)                     | -1.4<br>(-12.3 to 10.2)                           | -3.6<br>(-14.5 to 7.7)                              |
| Hepatitis                                                               | 1,150.6<br>(985.0 to 1,345.7)              | 46.4<br>(39.1 to 55.7)                      | < 0.05<br>(< 0.05 to < 0.05)            | -29.4<br>(-39.3 to -18.1)                         | -33.1<br>(-42.6 to -22.6)                           |
| Acute hepatitis A                                                       | 0.4<br>(0.2 to 0.6)                        | 4.9<br>(3.3 to 7.2)                         | < 0.05<br>(< 0.05 to < 0.05)            | -37.1<br>(-57.1 to -9.1)                          | -39.9<br>(-58.6 to -13.8)                           |
| Hepatitis B                                                             | 784.7<br>(633.4 to 977.5)                  | 34.6<br>(27.3 to 43.3)                      | < 0.05<br>(< 0.05 to < 0.05)            | -29.1<br>(-40.8 to -15.5)                         | -37.7<br>(-47.2 to -26.5)                           |
| Hepatitis C                                                             | 365.5<br>(326.6 to 407.7)                  | 5.9<br>(5.0 to 6.9)                         | < 0.05<br>(< 0.05 to < 0.05)            | -16.3<br>(-42.8 to 20.0)                          | -0.5<br>(-32.5 to 44.4)                             |
| Acute hepatitis E                                                       | 0.1<br>(0.1 to 0.1)                        | 1.0<br>(0.8 to 1.3)                         | < 0.05<br>(< 0.05 to < 0.05)            | -30.2<br>(-37.4 to -23.0)                         | -35.9<br>(-40.9 to -31.0)                           |
| Other infectious diseases                                               | 85.3<br>(78.7 to 94.5)                     | < 0.05<br>(< 0.05 to < 0.05)                | 1.8<br>(1.1 to 2.9)                     | -13.7<br>(-25.0 to -0.4)                          | -13.4<br>(-25.4 to 1.4)                             |
| <b>Non-communicable diseases</b>                                        | <b>18,624.4<br/>(18,512.2 to 18,758.0)</b> | <b>49,584.9†<br/>(46,082.6 to 53,287.1)</b> | <b>1,831.2<br/>(1,350.7 to 2,359.0)</b> | <b>13.6<br/>(10.9 to 16.4)</b>                    | <b>-0.2<br/>(-2.6 to 2.2)</b>                       |
| <b>Neoplasms</b>                                                        | <b>49.3<br/>(46.3 to 52.4)</b>             | <b>21.6<br/>(20.5 to 22.7)</b>              | <b>7.4<br/>(5.4 to 9.7)</b>             | <b>34.9<br/>(26.8 to 43.2)</b>                    | <b>5.5<br/>(-0.6 to 11.7)</b>                       |
| Lip and oral cavity cancer                                              | 7.0<br>(6.2 to 7.7)                        | 1.9<br>(1.7 to 2.1)                         | 0.7<br>(0.5 to 1.0)                     | 37.0<br>(16.0 to 58.6)                            | 4.2<br>(-11.6 to 20.7)                              |
| Nasopharynx cancer                                                      | 1.1<br>(0.9 to 1.2)                        | 0.3<br>(0.3 to 0.4)                         | 0.1<br>(0.1 to 0.2)                     | 26.4<br>(3.8 to 52.5)                             | 0.7<br>(-17.1 to 20.9)                              |
| Other pharynx cancer                                                    | 1.2<br>(1.0 to 1.4)                        | 0.5<br>(0.4 to 0.5)                         | 0.2<br>(0.1 to 0.2)                     | 39.9<br>(12.8 to 67.5)                            | 4.6<br>(-15.8 to 24.2)                              |
| Oesophageal cancer                                                      | 1.1<br>(1.0 to 1.2)                        | 0.9<br>(0.9 to 1.0)                         | 0.2<br>(0.2 to 0.3)                     | 19.3<br>(4.5 to 36.2)                             | -9.5<br>(-21.5 to 4.6)                              |
| Stomach cancer                                                          | 1.4<br>(1.3 to 1.5)                        | 0.9<br>(0.9 to 1.0)                         | 0.2<br>(0.2 to 0.3)                     | 9.6<br>(-3.5 to 24.9)                             | -16.5<br>(-27.1 to -4.1)                            |
| Colon and rectum cancer                                                 | 4.8<br>(4.2 to 5.4)                        | 1.4<br>(1.3 to 1.6)                         | 0.5<br>(0.4 to 0.7)                     | 55.2<br>(31.3 to 81.0)                            | 17.0<br>(-1.8 to 37.5)                              |
| Liver cancer                                                            | 0.2<br>(0.2 to 0.3)                        | 0.6<br>(0.6 to 0.7)                         | 0.1<br>(0.1 to 0.2)                     | 46.9<br>(28.1 to 66.9)                            | 10.5<br>(-3.5 to 25.1)                              |
| Liver cancer due to hepatitis B                                         | 0.2<br>(0.2 to 0.3)                        | 0.3<br>(0.2 to 0.3)                         | 0.1<br>(< 0.05 to 0.1)                  | 44.0<br>(24.4 to 63.8)                            | 10.0<br>(-3.7 to 24.8)                              |

| Cause                                              | Prevalence in thousands (95% UI)              | Incidence in thousands (95% UI)          | YLDs in thousands (95% UI)             |                                                   |                                                     |
|----------------------------------------------------|-----------------------------------------------|------------------------------------------|----------------------------------------|---------------------------------------------------|-----------------------------------------------------|
|                                                    | 2016 counts                                   | 2016 counts                              | 2016 counts                            | Percentage change in counts between 2006 and 2016 | Percentage change in age-standardised rates between |
| Liver cancer due to hepatitis C                    | 0.1<br>(0.1 to 0.2)                           | 0.1<br>(0.1 to 0.2)                      | < 0.05<br>(< 0.05 to < 0.05)           | 49.2<br>(28.4 to 72.9)                            | 10.1<br>(-4.7 to 26.9)                              |
| Liver cancer due to alcohol use                    | 0.1<br>(0.1 to 0.1)                           | 0.1<br>(0.1 to 0.1)                      | < 0.05<br>(< 0.05 to < 0.05)           | 74.4<br>(47.2 to 105.7)                           | 27.9<br>(8.3 to 50.0)                               |
| Liver cancer due to other causes                   | 0.1<br>(0.1 to 0.2)                           | 0.1<br>(0.1 to 0.2)                      | < 0.05<br>(< 0.05 to < 0.05)           | 36.1<br>(14.9 to 60.4)                            | 3.0<br>(-12.5 to 21.6)                              |
| Gallbladder and biliary tract cancer               | 0.3<br>(0.2 to 0.4)                           | 0.4<br>(0.3 to 0.5)                      | 0.1<br>(0.1 to 0.1)                    | 4.9<br>(-10.2 to 21.6)                            | -22.1<br>(-33.4 to -9.2)                            |
| Pancreatic cancer                                  | 0.4<br>(0.4 to 0.5)                           | 0.6<br>(0.5 to 0.6)                      | 0.1<br>(0.1 to 0.2)                    | 39.7<br>(29.1 to 50.7)                            | 4.3<br>(-3.4 to 12.5)                               |
| Larynx cancer                                      | 0.7<br>(0.7 to 0.8)                           | 0.2<br>(0.2 to 0.2)                      | 0.1<br>(0.1 to 0.1)                    | 42.8<br>(23.9 to 66.2)                            | 7.5<br>(-6.2 to 25.1)                               |
| Tracheal, bronchus, and lung cancer                | 1.6<br>(1.4 to 1.7)                           | 1.4<br>(1.2 to 1.5)                      | 0.3<br>(0.2 to 0.5)                    | 18.3<br>(-5.1 to 46.2)                            | -10.2<br>(-28.0 to 10.2)                            |
| Malignant skin melanoma                            | 0.3<br>(0.2 to 0.3)                           | 0.1<br>(0.1 to 0.1)                      | < 0.05<br>(< 0.05 to < 0.05)           | 55.5<br>(32.4 to 77.5)                            | 26.3<br>(6.0 to 44.7)                               |
| Non-melanoma skin cancer                           | 0.1<br>(0.1 to 0.1)                           | 0.5<br>(0.4 to 0.5)                      | < 0.05<br>(< 0.05 to < 0.05)           | 53.4<br>(26.7 to 83.6)                            | 18.3<br>(-1.2 to 42.1)                              |
| Non-melanoma skin cancer (squamous-cell carcinoma) | 0.1<br>(0.1 to 0.1)                           | 0.3<br>(0.3 to 0.4)                      | < 0.05<br>(< 0.05 to < 0.05)           | 55.1<br>(27.3 to 87.5)                            | 19.5<br>(-1.4 to 45.0)                              |
| Non-melanoma skin cancer (basal-cell carcinoma)    | < 0.05<br>(< 0.05 to < 0.05)                  | 0.1<br>(0.1 to 0.2)                      | < 0.05<br>(< 0.05 to < 0.05)           | 24.5<br>(11.5 to 41.2)                            | -1.9<br>(-12.4 to 9.7)                              |
| Breast cancer                                      | 12.1<br>(9.3 to 14.7)                         | 2.6<br>(2.0 to 3.1)                      | 1.2<br>(0.8 to 1.7)                    | 49.1<br>(17.6 to 83.6)                            | 20.9<br>(-3.8 to 47.9)                              |
| Cervical cancer                                    | 3.1<br>(2.1 to 4.0)                           | 0.8<br>(0.6 to 1.0)                      | 0.3<br>(0.2 to 0.4)                    | 9.7<br>(-10.3 to 36.5)                            | -10.2<br>(-25.9 to 11.1)                            |
| Uterine cancer                                     | 2.0<br>(1.8 to 2.4)                           | 0.4<br>(0.4 to 0.5)                      | 0.2<br>(0.1 to 0.2)                    | 64.0<br>(30.3 to 108.9)                           | 24.9<br>(-0.4 to 57.0)                              |
| Ovarian cancer                                     | 2.0<br>(1.7 to 2.3)                           | 0.6<br>(0.5 to 0.7)                      | 0.3<br>(0.2 to 0.4)                    | 41.8<br>(16.7 to 70.6)                            | 16.8<br>(-3.8 to 42.2)                              |
| Prostate cancer                                    | 4.5<br>(3.6 to 6.2)                           | 1.2<br>(1.0 to 1.6)                      | 0.5<br>(0.3 to 0.7)                    | 68.3<br>(31.0 to 113.4)                           | 19.5<br>(-5.9 to 49.7)                              |
| Testicular cancer                                  | 0.4<br>(0.4 to 0.5)                           | 0.1<br>(0.1 to 0.1)                      | < 0.05<br>(< 0.05 to < 0.05)           | 28.1<br>(5.8 to 55.1)                             | 20.2<br>(-0.4 to 45.2)                              |
| Kidney cancer                                      | 4.4<br>(3.8 to 4.9)                           | 1.2<br>(1.0 to 1.3)                      | 0.4<br>(0.3 to 0.5)                    | 19.0<br>(1.4 to 40.9)                             | -6.8<br>(-20.1 to 10.5)                             |
| Bladder cancer                                     | 2.0<br>(1.8 to 2.2)                           | 0.5<br>(0.5 to 0.6)                      | 0.2<br>(0.1 to 0.3)                    | 57.2<br>(32.0 to 79.6)                            | 16.6<br>(-2.0 to 34.1)                              |
| Brain and nervous system cancer                    | 1.1<br>(0.8 to 1.3)                           | 0.5<br>(0.4 to 0.7)                      | 0.2<br>(0.1 to 0.2)                    | 35.3<br>(20.2 to 60.1)                            | 13.3<br>(0.6 to 32.7)                               |
| Thyroid cancer                                     | 2.3<br>(1.9 to 2.7)                           | 0.4<br>(0.4 to 0.5)                      | 0.1<br>(0.1 to 0.2)                    | 76.2<br>(35.4 to 129.1)                           | 40.6<br>(9.7 to 80.9)                               |
| Mesothelioma                                       | 0.1<br>(0.1 to 0.2)                           | 0.1<br>(0.1 to 0.1)                      | < 0.05<br>(< 0.05 to < 0.05)           | 27.7<br>(8.6 to 47.5)                             | 2.7<br>(-11.7 to 18.1)                              |
| Hodgkin lymphoma                                   | 0.5<br>(0.4 to 0.7)                           | 0.1<br>(0.1 to 0.2)                      | 0.1<br>(< 0.05 to 0.1)                 | 13.0<br>(-7.2 to 38.8)                            | -7.4<br>(-23.8 to 14.6)                             |
| Non-Hodgkin's lymphoma                             | 1.7<br>(1.4 to 1.9)                           | 0.6<br>(0.5 to 0.7)                      | 0.2<br>(0.1 to 0.2)                    | 47.5<br>(31.7 to 66.8)                            | 17.3<br>(4.6 to 31.3)                               |
| Multiple myeloma                                   | 0.4<br>(0.3 to 0.4)                           | 0.2<br>(0.2 to 0.2)                      | 0.1<br>(0.1 to 0.1)                    | 55.6<br>(37.8 to 73.5)                            | 17.9<br>(4.9 to 31.4)                               |
| Leukaemia                                          | 4.0<br>(3.4 to 4.8)                           | 1.2<br>(1.1 to 1.4)                      | 0.5<br>(0.4 to 0.8)                    | 12.0<br>(1.4 to 26.9)                             | -6.7<br>(-15.7 to 6.1)                              |
| Acute lymphoid leukaemia                           | 1.3<br>(1.1 to 1.6)                           | 0.4<br>(0.3 to 0.5)                      | 0.2<br>(0.1 to 0.2)                    | 16.4<br>(2.1 to 32.5)                             | -6.0<br>(-17.9 to 7.2)                              |
| Chronic lymphoid leukaemia                         | 0.2<br>(0.2 to 0.3)                           | 0.1<br>(< 0.05 to 0.1)                   | < 0.05<br>(< 0.05 to < 0.05)           | 11.4<br>(-8.8 to 35.4)                            | -5.4<br>(-21.1 to 14.6)                             |
| Acute myeloid leukaemia                            | 0.5<br>(0.4 to 0.6)                           | 0.3<br>(0.3 to 0.4)                      | 0.1<br>(0.1 to 0.1)                    | 23.6<br>(10.1 to 38.6)                            | 8.0<br>(-4.1 to 21.6)                               |
| Chronic myeloid leukaemia                          | 0.2<br>(0.2 to 0.3)                           | 0.1<br>(0.1 to 0.1)                      | < 0.05<br>(< 0.05 to < 0.05)           | -5.1<br>(-21.1 to 13.5)                           | -16.9<br>(-29.7 to -0.3)                            |
| Other leukaemia                                    | 1.8<br>(1.1 to 2.3)                           | 0.4<br>(0.2 to 0.5)                      | 0.2<br>(0.1 to 0.3)                    | 7.3<br>(-11.8 to 32.1)                            | -10.7<br>(-27.1 to 10.3)                            |
| Other neoplasms                                    | 3.6<br>(3.3 to 3.9)                           | 1.2<br>(1.1 to 1.3)                      | 0.4<br>(0.2 to 0.5)                    | 21.5<br>(7.1 to 38.8)                             | -1.6<br>(-13.3 to 13.3)                             |
| <b>Cardiovascular diseases</b>                     | <b>1,233.6</b><br><b>(1,186.6 to 1,281.5)</b> | <b>138.1†</b><br><b>(131.3 to 145.3)</b> | <b>86.7</b><br><b>(63.7 to 113.1)</b>  | <b>27.6</b><br><b>(22.8 to 32.8)</b>              | <b>-0.8</b><br><b>(-4.4 to 2.9)</b>                 |
| Rheumatic heart disease                            | 1.6<br>(1.4 to 1.7)                           | 0.5<br>(0.5 to 0.5)                      | 0.1<br>(0.1 to 0.2)                    | 23.0<br>(10.1 to 36.5)                            | -1.4<br>(-11.8 to 10.2)                             |
| Ischaemic heart disease                            | 506.6<br>(477.1 to 534.1)                     | 62.3<br>(57.3 to 67.6)                   | 23.5<br>(16.1 to 32.2)                 | 26.5<br>(20.9 to 32.1)                            | -0.8<br>(-4.9 to 3.3)                               |
| Cerebrovascular disease                            | 177.1<br>(164.9 to 188.6)                     | 27.4‡<br>(25.0 to 29.9)                  | 36.5<br>(25.7 to 46.8)                 | 29.7<br>(20.5 to 39.8)                            | -1.2<br>(-7.9 to 6.0)                               |
| Ischaemic stroke                                   | 149.2<br>(132.8 to 165.3)                     | 19.2‡<br>(16.9 to 21.5)                  | 29.6<br>(20.6 to 38.3)                 | 30.1<br>(19.8 to 41.7)                            | -1.5<br>(-9.2 to 7.1)                               |
| Hemorrhagic stroke                                 | 34.7<br>(31.1 to 38.7)                        | 8.3‡<br>(7.4 to 9.2)                     | 6.8<br>(4.9 to 8.9)                    | 28.0<br>(14.1 to 44.6)                            | 0.1<br>(-10.1 to 12.2)                              |
| Hypertensive heart disease                         | 33.7<br>(28.8 to 39.3)                        | --                                       | 2.7<br>(1.9 to 3.8)                    | 29.4<br>(15.8 to 44.2)                            | 0.8<br>(-8.8 to 11.1)                               |
| Cardiomyopathy and myocarditis                     | 27.6<br>(24.9 to 30.7)                        | 4.1†<br>(3.6 to 4.7)                     | 2.5<br>(1.7 to 3.5)                    | 22.5<br>(9.8 to 37.4)                             | 3.4<br>(-6.9 to 14.8)                               |
| Myocarditis                                        | 6.5<br>(5.7 to 7.4)                           | 4.1<br>(3.6 to 4.7)                      | 0.5<br>(0.3 to 0.7)                    | 11.7<br>(-7.0 to 33.8)                            | 2.9<br>(-13.8 to 22.5)                              |
| Alcoholic cardiomyopathy                           | 3.3<br>(2.7 to 3.9)                           | --                                       | 0.3<br>(0.2 to 0.4)                    | 29.8<br>(1.7 to 62.4)                             | 3.5<br>(-18.1 to 27.8)                              |
| Other cardiomyopathy                               | 20.5<br>(17.6 to 23.9)                        | --                                       | 1.7<br>(1.1 to 2.4)                    | 25.1<br>(9.6 to 43.5)                             | 3.6<br>(-7.8 to 17.5)                               |
| Atrial fibrillation and flutter                    | 117.8<br>(102.1 to 135.2)                     | 10.1<br>(8.6 to 11.9)                    | 9.2<br>(6.1 to 12.9)                   | 34.1<br>(25.3 to 43.8)                            | 0.1<br>(-5.9 to 6.5)                                |
| Peripheral vascular disease                        | 319.8<br>(278.7 to 369.3)                     | 29.3<br>(25.3 to 34.4)                   | 1.5<br>(0.7 to 2.8)                    | 30.5<br>(19.9 to 41.8)                            | -6.3<br>(-13.2 to 1.2)                              |
| Endocarditis                                       | 1.4<br>(1.2 to 1.6)                           | 4.3<br>(4.0 to 4.8)                      | 0.1<br>(0.1 to 0.1)                    | 20.4<br>(10.1 to 31.4)                            | 0.1<br>(-10.1 to 10.9)                              |
| Other cardiovascular and circulatory diseases      | 202.2<br>(173.8 to 236.9)                     | --                                       | 10.6<br>(7.2 to 15.1)                  | 18.8<br>(9.2 to 29.4)                             | -0.5<br>(-8.2 to 7.6)                               |
| <b>Chronic respiratory diseases</b>                | <b>1,738.6</b><br><b>(1,678.7 to 1,798.8)</b> | <b>383.1†</b><br><b>(361.8 to 405.8)</b> | <b>113.6</b><br><b>(92.6 to 136.4)</b> | <b>24.6</b><br><b>(20.0 to 29.9)</b>              | <b>4.4</b><br><b>(1.1 to 8.1)</b>                   |
| Chronic obstructive pulmonary disease              | 639.5<br>(610.0 to 668.6)                     | 47.6<br>(45.1 to 50.1)                   | 63.5<br>(55.6 to 69.5)                 | 34.4<br>(27.7 to 41.8)                            | 5.7<br>(0.7 to 11.5)                                |
| Pneumoconiosis                                     | 2.2<br>(2.0 to 2.5)                           | 0.2<br>(0.2 to 0.2)                      | 0.3<br>(0.2 to 0.5)                    | 33.1<br>(2.6 to 77.2)                             | -0.5<br>(-22.3 to 31.1)                             |
| Silicosis                                          | 1.8<br>(1.5 to 2.1)                           | 0.2<br>(0.1 to 0.2)                      | 0.2<br>(0.1 to 0.4)                    | 33.6<br>(-4.3 to 91.6)                            | -0.1<br>(-26.8 to 41.0)                             |



| Cause                                                          | Prevalence in thousands (95% UI)              | Incidence in thousands (95% UI)               | YLDs in thousands (95% UI)              |                                                   |                                                     |
|----------------------------------------------------------------|-----------------------------------------------|-----------------------------------------------|-----------------------------------------|---------------------------------------------------|-----------------------------------------------------|
|                                                                | 2016 counts                                   | 2016 counts                                   | 2016 counts                             | Percentage change in counts between 2006 and 2016 | Percentage change in age-standardised rates between |
| Asbestosis                                                     | 0.3<br>(0.3 to 0.4)                           | < 0.05<br>(< 0.05 to < 0.05)                  | < 0.05<br>(< 0.05 to 0.1)               | 29.8<br>(21.9 to 37.3)                            | -1.9<br>(-7.7 to 3.6)                               |
| Coal workers pneumoconiosis                                    | --                                            | --                                            | --                                      | --                                                | --                                                  |
| Other pneumoconiosis                                           | 0.1<br>(0.1 to 0.2)                           | < 0.05<br>(< 0.05 to < 0.05)                  | < 0.05<br>(< 0.05 to < 0.05)            | 34.8<br>(21.4 to 50.2)                            | -1.2<br>(-11.6 to 9.8)                              |
| Asthma                                                         | 1,165.9<br>(1,095.4 to 1,238.8)               | 333.9<br>(312.8 to 355.9)                     | 45.4<br>(30.2 to 65.3)                  | 11.8<br>(7.5 to 16.8)                             | 1.3<br>(-2.5 to 5.9)                                |
| Interstitial lung disease and pulmonary sarcoidosis            | 17.7<br>(15.7 to 20.0)                        | 1.5<br>(1.3 to 1.7)                           | 1.8<br>(1.2 to 2.6)                     | 33.9<br>(17.4 to 53.2)                            | 2.1<br>(-9.5 to 15.2)                               |
| Other chronic respiratory diseases                             | --                                            | --                                            | 2.6<br>(2.2 to 3.0)                     | 47.8<br>(29.9 to 69.3)                            | 37.1<br>(20.2 to 56.9)                              |
| <b>Cirrhosis and other chronic liver diseases</b>              | <b>119.0</b><br><b>(112.4 to 126.1)</b>       | <b>5.6</b><br><b>(5.3 to 5.9)</b>             | <b>3.7</b><br><b>(2.5 to 5.2)</b>       | <b>13.7</b><br><b>(2.9 to 26.3)</b>               | <b>-2.8</b><br><b>(-11.5 to 7.2)</b>                |
| Cirrhosis and other chronic liver diseases due to hepatitis B  | 38.3<br>(33.1 to 43.9)                        | 1.9<br>(1.6 to 2.2)                           | 1.0<br>(0.7 to 1.5)                     | 15.8<br>(-3.0 to 38.0)                            | -5.3<br>(-20.1 to 11.8)                             |
| Cirrhosis and other chronic liver diseases due to hepatitis C  | 21.9<br>(18.1 to 26.5)                        | 1.0<br>(0.9 to 1.2)                           | 0.6<br>(0.4 to 0.8)                     | 10.8<br>(-13.0 to 42.0)                           | -8.8<br>(-27.0 to 15.8)                             |
| Cirrhosis and other chronic liver diseases due to alcohol use  | 23.8<br>(19.9 to 28.5)                        | 1.2<br>(1.0 to 1.4)                           | 0.7<br>(0.4 to 0.9)                     | 23.9<br>(-0.8 to 57.7)                            | -0.2<br>(-18.9 to 25.9)                             |
| Cirrhosis and other chronic liver diseases due to other causes | 35.1<br>(31.6 to 38.9)                        | 1.5<br>(1.3 to 1.6)                           | 1.4<br>(1.0 to 2.1)                     | 9.4<br>(-7.0 to 31.9)                             | 0.3<br>(-14.6 to 20.4)                              |
| <b>Digestive diseases</b>                                      | <b>289.3</b><br><b>(269.9 to 309.1)</b>       | <b>321.6†</b><br><b>(302.6 to 342.2)</b>      | <b>7.5</b><br><b>(5.2 to 10.4)</b>      | <b>35.4</b><br><b>(25.8 to 45.0)</b>              | <b>14.0</b><br><b>(6.2 to 21.8)</b>                 |
| Peptic ulcer disease                                           | 77.2<br>(69.8 to 85.2)                        | 34.6<br>(30.5 to 39.3)                        | 1.7<br>(1.1 to 2.5)                     | 59.0<br>(42.0 to 77.2)                            | 36.0<br>(22.6 to 50.8)                              |
| Gastritis and duodenitis                                       | 175.5<br>(154.2 to 198.0)                     | 145.5<br>(129.5 to 162.9)                     | 2.5<br>(1.6 to 3.6)                     | 49.7<br>(36.5 to 64.4)                            | 21.7<br>(11.2 to 33.0)                              |
| Appendicitis                                                   | 1.3<br>(1.2 to 1.4)                           | 34.3<br>(32.0 to 36.8)                        | 0.4<br>(0.3 to 0.6)                     | 4.7<br>(-1.2 to 11.1)                             | -3.4<br>(-9.9 to 3.4)                               |
| Paralytic ileus and intestinal obstruction                     | 0.2<br>(0.2 to 0.2)                           | 5.1<br>(4.5 to 5.7)                           | 0.1<br>(< 0.05 to 0.1)                  | 11.1<br>(6.5 to 16.3)                             | -4.0<br>(-7.7 to 0.2)                               |
| Inguinal, femoral, and abdominal hernia                        | 31.1<br>(26.2 to 36.4)                        | 39.1<br>(33.8 to 44.4)                        | 1.4<br>(0.9 to 2.0)                     | 12.5<br>(-6.8 to 32.9)                            | -5.9<br>(-21.0 to 10.6)                             |
| Inflammatory bowel disease                                     | 2.6<br>(2.4 to 2.8)                           | 6.6<br>(6.4 to 6.8)                           | 0.4<br>(0.3 to 0.6)                     | 16.8<br>(1.0 to 34.6)                             | 1.5<br>(-11.7 to 16.2)                              |
| Vascular intestinal disorders                                  | 0.1<br>(0.1 to 0.2)                           | 1.0<br>(0.8 to 1.1)                           | < 0.05<br>(< 0.05 to 0.1)               | 22.0<br>(15.2 to 29.0)                            | 6.4<br>(1.4 to 11.4)                                |
| Gallbladder and biliary diseases                               | 14.2<br>(12.2 to 16.4)                        | 49.4<br>(42.5 to 57.3)                        | 0.3<br>(0.2 to 0.5)                     | 29.9<br>(16.4 to 45.9)                            | 9.2<br>(-1.4 to 22.1)                               |
| Pancreatitis                                                   | 0.7<br>(0.6 to 0.7)                           | 6.0<br>(5.3 to 6.7)                           | 0.1<br>(0.1 to 0.1)                     | 32.0<br>(27.1 to 37.6)                            | 12.8<br>(9.4 to 16.9)                               |
| Other digestive diseases                                       | --                                            | --                                            | 0.6<br>(0.4 to 0.8)                     | 40.2<br>(29.8 to 51.1)                            | 16.8<br>(8.6 to 25.1)                               |
| <b>Neurological disorders</b>                                  | <b>7,277.7</b><br><b>(6,977.0 to 7,632.0)</b> | <b>3,274.0</b><br><b>(2,806.3 to 3,809.2)</b> | <b>194.8</b><br><b>(126.3 to 267.2)</b> | <b>9.0</b><br><b>(-11.2 to 32.7)</b>              | <b>0.5</b><br><b>(-18.2 to 22.0)</b>                |
| Alzheimer's disease and other dementias                        | 127.3<br>(107.9 to 149.9)                     | 21.3<br>(17.9 to 25.4)                        | 18.2<br>(12.7 to 24.3)                  | 36.6<br>(30.8 to 42.8)                            | 1.2<br>(-3.0 to 5.9)                                |
| Parkinson's disease                                            | 17.8<br>(14.3 to 21.9)                        | 1.9<br>(1.5 to 2.4)                           | 2.1<br>(1.3 to 2.9)                     | 44.9<br>(28.2 to 64.5)                            | 8.8<br>(-2.8 to 21.9)                               |
| Epilepsy                                                       | 124.2<br>(54.6 to 164.2)                      | 13.9<br>(6.2 to 18.9)                         | 38.8<br>(14.5 to 67.4)                  | 4.2<br>(-62.8 to 172.5)                           | -2.2<br>(-64.9 to 159.0)                            |
| Multiple sclerosis                                             | 0.7<br>(0.6 to 0.8)                           | < 0.05<br>(< 0.05 to < 0.05)                  | 0.2<br>(0.1 to 0.3)                     | 30.1<br>(25.6 to 34.8)                            | 15.6<br>(11.8 to 19.7)                              |
| Motor neuron disease                                           | 0.6<br>(0.5 to 0.7)                           | 0.1<br>(0.1 to 0.1)                           | 0.1<br>(0.1 to 0.2)                     | 17.2<br>(12.4 to 21.8)                            | 4.5<br>(0.9 to 7.9)                                 |
| Migraine                                                       | 2,685.2<br>(2,516.3 to 2,854.3)               | 272.3<br>(256.1 to 290.1)                     | 110.7<br>(70.4 to 157.3)                | 6.2<br>(2.1 to 10.5)                              | 0.1<br>(-3.7 to 4.0)                                |
| Tension-type headache                                          | 5,407.2<br>(4,836.2 to 6,039.0)               | 2,964.4<br>(2,499.2 to 3,496.9)               | 16.7<br>(10.4 to 25.1)                  | 6.8<br>(1.5 to 13.3)                              | -0.3<br>(-5.0 to 5.4)                               |
| Other neurological disorders                                   | 0.1<br>(< 0.05 to 0.1)                        | 0.1<br>(0.1 to 0.1)                           | 8.1<br>(3.4 to 13.6)                    | 21.8<br>(-51.1 to 186.1)                          | 18.2<br>(-53.2 to 175.3)                            |
| <b>Mental and substance use disorders</b>                      | <b>2,788.8</b><br><b>(2,682.9 to 2,902.8)</b> | <b>948.5†</b><br><b>(887.1 to 1,018.5)</b>    | <b>376.2</b><br><b>(273.2 to 489.1)</b> | <b>6.4</b><br><b>(3.9 to 8.9)</b>                 | <b>-0.5</b><br><b>(-2.8 to 1.7)</b>                 |
| Schizophrenia                                                  | 60.2<br>(53.0 to 68.5)                        | 3.2<br>(2.8 to 3.7)                           | 38.9<br>(27.9 to 49.3)                  | 9.8<br>(0.6 to 19.4)                              | 2.3<br>(-6.1 to 10.7)                               |
| Alcohol use disorders                                          | 162.4<br>(143.0 to 184.1)                     | 86.6<br>(75.4 to 98.7)                        | 16.2<br>(11.0 to 22.4)                  | 3.8<br>(-5.6 to 13.3)                             | -1.2<br>(-9.6 to 8.0)                               |
| Drug use disorders                                             | 144.7<br>(131.3 to 159.3)                     | 20.5<br>(17.9 to 23.5)                        | 25.2<br>(17.9 to 33.8)                  | 5.1<br>(-3.9 to 15.5)                             | 4.9<br>(-4.2 to 15.1)                               |
| Opioid use disorders                                           | 38.8<br>(31.7 to 47.2)                        | 4.8<br>(4.0 to 5.8)                           | 16.2<br>(10.8 to 22.2)                  | 8.4<br>(-4.2 to 22.1)                             | 5.1<br>(-6.8 to 17.9)                               |
| Cocaine use disorders                                          | 3.1<br>(2.6 to 3.7)                           | 0.3<br>(0.3 to 0.4)                           | 0.5<br>(0.3 to 0.7)                     | 8.2<br>(2.1 to 14.3)                              | 3.9<br>(-1.7 to 9.5)                                |
| Amphetamine use disorders                                      | 23.4<br>(15.1 to 33.6)                        | 2.5<br>(1.6 to 3.7)                           | 3.1<br>(1.6 to 5.3)                     | -1.6<br>(-21.6 to 24.1)                           | 6.7<br>(-15.2 to 34.0)                              |
| Cannabis use disorders                                         | 76.2<br>(61.9 to 93.7)                        | 11.2<br>(8.9 to 13.8)                         | 2.2<br>(1.3 to 3.3)                     | -4.6<br>(-16.8 to 8.4)                            | -0.9<br>(-13.7 to 12.7)                             |
| Other drug use disorders                                       | 8.5<br>(7.5 to 9.5)                           | 1.6<br>(1.4 to 1.8)                           | 3.2<br>(2.0 to 4.9)                     | 2.9<br>(-19.3 to 30.9)                            | 6.6<br>(-16.7 to 35.5)                              |
| Depressive disorders                                           | 752.3<br>(703.2 to 806.5)                     | 635.1<br>(577.7 to 699.7)                     | 115.4<br>(79.7 to 157.6)                | 7.1<br>(2.1 to 12.2)                              | -2.6<br>(-6.6 to 1.8)                               |
| Major depressive disorder                                      | 389.2<br>(352.6 to 428.3)                     | 580.7<br>(523.2 to 644.7)                     | 79.8<br>(54.5 to 107.1)                 | 3.4<br>(-2.9 to 10.0)                             | -3.9<br>(-9.4 to 2.3)                               |
| Dysthymia                                                      | 373.4<br>(325.8 to 428.7)                     | 54.4<br>(47.4 to 62.1)                        | 35.6<br>(23.8 to 51.2)                  | 16.5<br>(12.5 to 20.8)                            | 0.6<br>(-2.4 to 3.7)                                |
| Bipolar disorder                                               | 116.2<br>(100.5 to 133.4)                     | 9.7<br>(8.4 to 11.2)                          | 23.8<br>(14.8 to 35.0)                  | 7.0<br>(-0.1 to 14.5)                             | 0.4<br>(-6.5 to 7.2)                                |
| Anxiety disorders                                              | 750.0<br>(666.2 to 840.5)                     | 115.3<br>(102.2 to 129.1)                     | 72.2<br>(49.9 to 98.0)                  | 8.9<br>(1.8 to 16.2)                              | 0.8<br>(-5.6 to 7.4)                                |
| Eating disorders                                               | 21.1<br>(17.4 to 25.4)                        | 12.3<br>(9.2 to 16.4)                         | 4.4<br>(2.8 to 6.4)                     | 16.7<br>(1.9 to 33.9)                             | 20.6<br>(5.7 to 38.5)                               |
| Anorexia nervosa                                               | 6.3<br>(4.6 to 8.4)                           | 2.6<br>(1.9 to 3.5)                           | 1.4<br>(0.8 to 2.1)                     | 13.7<br>(-11.8 to 47.0)                           | 19.0<br>(-7.8 to 52.8)                              |
| Bulimia nervosa                                                | 14.3<br>(10.8 to 18.9)                        | 9.7<br>(6.7 to 13.7)                          | 3.0<br>(1.8 to 4.7)                     | 18.0<br>(-0.0 to 41.0)                            | 21.3<br>(2.7 to 44.2)                               |
| Autistic spectrum disorders                                    | 165.4<br>(148.5 to 186.3)                     | 1.1<br>(0.7 to 1.5)                           | 24.1<br>(16.2 to 33.9)                  | 2.8<br>(-2.0 to 8.1)                              | -0.9<br>(-5.5 to 4.3)                               |
| Autism                                                         | 49.4<br>(42.3 to 57.9)                        | 0.1<br>(0.1 to 0.2)                           | 12.6<br>(8.1 to 18.2)                   | 3.1<br>(-5.1 to 12.3)                             | -0.8<br>(-8.4 to 8.0)                               |
| Asperger syndrome and other autistic spectrum disorders        | 115.2<br>(95.5 to 138.5)                      | 1.0<br>(0.6 to 1.4)                           | 11.5<br>(7.5 to 17.0)                   | 2.4<br>(-2.7 to 7.5)                              | -1.0<br>(-6.0 to 3.8)                               |

| Cause                                                      | Prevalence in thousands (95% UI)                 | Incidence in thousands (95% UI)                   | YLDs in thousands (95% UI)              |                                                   |                                                     |
|------------------------------------------------------------|--------------------------------------------------|---------------------------------------------------|-----------------------------------------|---------------------------------------------------|-----------------------------------------------------|
|                                                            | 2016 counts                                      | 2016 counts                                       | 2016 counts                             | Percentage change in counts between 2006 and 2016 | Percentage change in age-standardised rates between |
| Attention-deficit/hyperactivity disorder                   | 98.4<br>(78.2 to 123.3)                          | 4.6<br>(3.4 to 6.0)                               | 1.2<br>(0.7 to 1.9)                     | -0.2<br>(-10.4 to 11.4)                           | -0.5<br>(-10.7 to 10.8)                             |
| Conduct disorder                                           | 139.4<br>(113.5 to 165.4)                        | 48.1<br>(38.1 to 58.3)                            | 17.0<br>(10.4 to 26.2)                  | 1.0<br>(-5.2 to 8.4)                              | -0.1<br>(-6.4 to 7.2)                               |
| Idiopathic developmental intellectual disability           | 179.6<br>(76.8 to 291.1)                         | --                                                | 7.8<br>(3.4 to 14.2)                    | -17.4<br>(-26.9 to -8.7)                          | -19.6<br>(-28.8 to -11.4)                           |
| Other mental and substance use disorders                   | 403.4<br>(356.5 to 464.9)                        | 12.0<br>(10.7 to 13.5)                            | 30.0<br>(20.8 to 43.0)                  | 8.7<br>(3.4 to 14.0)                              | -0.3<br>(-5.1 to 4.7)                               |
| <b>Diabetes, urogenital, blood, and endocrine diseases</b> | <b>8,353.9</b><br><b>(8,212.0 to 8,535.4)</b>    | <b>1,968.2†</b><br><b>(1,843.7 to 2,096.7)</b>    | <b>201.5</b><br><b>(142.5 to 272.7)</b> | <b>28.6</b><br><b>(22.2 to 35.6)</b>              | <b>7.3</b><br><b>(2.2 to 12.4)</b>                  |
| Diabetes mellitus                                          | 1,701.8<br>(1,542.6 to 1,885.8)                  | 100.1<br>(91.2 to 110.3)                          | 133.4<br>(91.4 to 184.8)                | 40.1<br>(30.2 to 50.9)                            | 14.2<br>(6.3 to 22.3)                               |
| Acute glomerulonephritis                                   | 0.3<br>(0.2 to 0.3)                              | 4.1<br>(3.6 to 4.6)                               | < 0.05<br>(< 0.05 to < 0.05)            | 11.3<br>(6.4 to 16.5)                             | 0.6<br>(-3.7 to 4.9)                                |
| Chronic kidney disease                                     | 584.5<br>(529.4 to 646.5)                        | 41.0<br>(36.5 to 45.8)                            | 20.7<br>(15.5 to 26.6)                  | 22.0<br>(12.6 to 31.7)                            | -1.8<br>(-9.2 to 5.7)                               |
| Chronic kidney disease due to diabetes mellitus            | 354.6<br>(313.5 to 398.2)                        | 25.0<br>(21.5 to 28.6)                            | 12.2<br>(9.2 to 15.9)                   | 20.3<br>(8.6 to 32.8)                             | -3.3<br>(-12.4 to 6.4)                              |
| Chronic kidney disease due to hypertension                 | 100.3<br>(86.2 to 115.8)                         | 2.5<br>(2.1 to 3.0)                               | 5.7<br>(4.1 to 7.6)                     | 28.8<br>(13.4 to 46.3)                            | -1.1<br>(-12.0 to 11.1)                             |
| Chronic kidney disease due to glomerulonephritis           | 96.8<br>(82.1 to 113.6)                          | 10.9<br>(9.0 to 13.1)                             | 1.4<br>(1.0 to 1.9)                     | 14.8<br>(6.0 to 24.6)                             | 5.7<br>(-1.5 to 14.0)                               |
| Chronic kidney disease due to other causes                 | 32.9<br>(26.9 to 39.7)                           | 2.6<br>(2.1 to 3.1)                               | 1.4<br>(1.0 to 1.9)                     | 18.0<br>(8.9 to 27.7)                             | 1.5<br>(-5.8 to 9.6)                                |
| Urinary diseases and male infertility                      | 244.2<br>(218.5 to 270.4)                        | 1,111.8†<br>(997.6 to 1,234.6)                    | 6.8<br>(4.4 to 9.7)                     | 19.2<br>(12.3 to 27.1)                            | -5.7<br>(-10.9 to 0.1)                              |
| Interstitial nephritis and urinary tract infections        | 19.2<br>(17.0 to 21.5)                           | 1,003.6<br>(890.8 to 1,124.5)                     | 0.6<br>(0.4 to 1.0)                     | 10.0<br>(-4.8 to 28.5)                            | 2.1<br>(-11.7 to 18.9)                              |
| Urolithiasis                                               | 3.3<br>(2.9 to 3.8)                              | 87.4<br>(76.3 to 100.2)                           | 0.2<br>(0.2 to 0.4)                     | 21.9<br>(10.3 to 33.4)                            | 0.8<br>(-9.7 to 10.8)                               |
| Benign prostatic hyperplasia                               | 161.2<br>(136.6 to 189.1)                        | 20.8<br>(17.2 to 24.9)                            | 5.2<br>(3.3 to 7.6)                     | 25.0<br>(16.1 to 35.1)                            | -6.0<br>(-12.5 to 0.9)                              |
| Male infertility                                           | 51.1<br>(40.2 to 65.7)                           | --                                                | 0.3<br>(0.1 to 0.6)                     | -10.1<br>(-17.4 to -1.9)                          | -8.6<br>(-15.9 to -0.1)                             |
| Other urinary diseases                                     | --                                               | --                                                | 0.3<br>(0.2 to 0.5)                     | -8.5<br>(-19.3 to 3.9)                            | -15.8<br>(-25.9 to -4.7)                            |
| Gynecological diseases                                     | 2,131.3<br>(2,039.3 to 2,216.0)                  | 660.1†<br>(623.5 to 700.3)                        | 22.8<br>(15.2 to 33.3)                  | -0.6<br>(-5.0 to 3.6)                             | -4.5<br>(-8.7 to -0.0)                              |
| Uterine fibroids                                           | 335.8<br>(295.3 to 383.5)                        | 34.1<br>(29.0 to 40.2)                            | 5.0<br>(2.9 to 8.2)                     | -0.6<br>(-9.1 to 7.0)                             | -10.1<br>(-17.4 to -3.3)                            |
| Polycystic ovarian syndrome                                | 17.4<br>(13.2 to 22.2)                           | 15.1<br>(10.8 to 20.3)                            | 0.1<br>(0.1 to 0.3)                     | 3.2<br>(-10.7 to 19.9)                            | 3.0<br>(-10.9 to 19.4)                              |
| Female infertility                                         | 19.2<br>(8.4 to 40.9)                            | --                                                | 0.1<br>(< 0.05 to 0.3)                  | 5.6<br>(-18.2 to 53.1)                            | 13.2<br>(-13.0 to 61.6)                             |
| Endometriosis                                              | 2.0<br>(1.7 to 2.4)                              | 15.6<br>(12.8 to 19.2)                            | 0.2<br>(0.1 to 0.3)                     | 2.2<br>(-25.1 to 36.6)                            | 2.4<br>(-25.1 to 36.5)                              |
| Genital prolapse                                           | 518.8<br>(447.0 to 596.7)                        | 27.7<br>(23.6 to 32.2)                            | 1.6<br>(0.8 to 3.0)                     | 1.5<br>(-7.1 to 12.9)                             | -18.5<br>(-25.8 to -9.7)                            |
| Premenstrual syndrome                                      | 1,285.9<br>(1,212.0 to 1,356.8)                  | 454.2<br>(422.1 to 486.5)                         | 10.8<br>(6.7 to 16.7)                   | 0.8<br>(-6.7 to 8.3)                              | 1.2<br>(-6.1 to 8.9)                                |
| Other gynecological diseases                               | 160.0<br>(141.1 to 178.6)                        | 113.3<br>(93.9 to 133.0)                          | 5.0<br>(3.3 to 7.1)                     | -4.3<br>(-13.7 to 5.4)                            | -6.4<br>(-15.7 to 2.8)                              |
| Hemoglobinopathies and hemolytic anaemias                  | 5,206.8<br>(5,076.8 to 5,373.9)                  | --                                                | 7.7<br>(5.0 to 11.3)                    | 7.9<br>(-0.1 to 16.6)                             | -3.2<br>(-10.5 to 4.6)                              |
| Thalassemias                                               | 1.6<br>(0.5 to 3.9)                              | --                                                | 0.1<br>(< 0.05 to 0.2)                  | -13.1<br>(-37.9 to 23.1)                          | -2.3<br>(-30.4 to 38.6)                             |
| Thalassaemia trait                                         | 461.5<br>(421.9 to 502.0)                        | --                                                | 4.7<br>(3.0 to 7.0)                     | 16.7<br>(6.5 to 28.1)                             | 8.6<br>(-1.1 to 19.1)                               |
| Sickle cell disorders                                      | < 0.05<br>(< 0.05 to < 0.05)                     | --                                                | < 0.05<br>(< 0.05 to < 0.05)            | 4.6<br>(-11.3 to 25.4)                            | 11.6<br>(-6.1 to 35.2)                              |
| Sickle cell trait                                          | 63.2<br>(57.8 to 69.5)                           | --                                                | 0.1<br>(0.1 to 0.2)                     | 12.9<br>(-13.9 to 48.0)                           | 8.7<br>(-16.6 to 43.1)                              |
| G6PD deficiency                                            | 1,791.5<br>(1,656.2 to 1,966.9)                  | --                                                | 0.1<br>(< 0.05 to 0.1)                  | 17.0<br>(-4.7 to 44.6)                            | 10.9<br>(-10.7 to 38.4)                             |
| G6PD trait                                                 | 2,963.1<br>(2,919.1 to 3,009.8)                  | --                                                | < 0.05<br>(< 0.05 to < 0.05)            | 8.8<br>(-0.7 to 19.9)                             | 4.5<br>(-4.8 to 16.2)                               |
| Other hemoglobinopathies and hemolytic anaemias            | 157.6<br>(149.5 to 166.1)                        | --                                                | 2.7<br>(1.8 to 4.0)                     | -4.5<br>(-12.1 to 3.9)                            | -19.1<br>(-25.7 to -11.9)                           |
| Endocrine, metabolic, blood, and immune disorders          | 343.3<br>(317.4 to 371.0)                        | 51.2<br>(45.4 to 57.5)                            | 10.1<br>(6.8 to 14.0)                   | 15.5<br>(8.0 to 23.5)                             | -4.0<br>(-9.5 to 2.1)                               |
| <b>Musculoskeletal disorders</b>                           | <b>3,395.6</b><br><b>(3,217.8 to 3,589.6)</b>    | <b>1,796.6</b><br><b>(1,615.8 to 1,995.0)</b>     | <b>369.9</b><br><b>(266.1 to 483.9)</b> | <b>16.7</b><br><b>(12.8 to 20.8)</b>              | <b>0.1</b><br><b>(-3.0 to 3.3)</b>                  |
| Rheumatoid arthritis                                       | 27.1<br>(24.0 to 30.7)                           | 1.5<br>(1.3 to 1.6)                               | 6.4<br>(4.3 to 8.7)                     | 27.6<br>(13.3 to 43.5)                            | 7.3<br>(-4.0 to 20.3)                               |
| Osteoarthritis                                             | 767.1<br>(718.1 to 818.1)                        | 36.6<br>(34.0 to 39.3)                            | 47.2<br>(33.3 to 63.9)                  | 31.5<br>(26.6 to 36.9)                            | 3.1<br>(-0.6 to 7.2)                                |
| Low back and neck pain                                     | 2,105.4<br>(1,958.9 to 2,281.9)                  | 909.9<br>(807.0 to 1,027.7)                       | 245.0<br>(172.3 to 323.9)               | 16.6<br>(11.9 to 21.6)                            | 0.6<br>(-3.1 to 4.5)                                |
| Low back pain                                              | 1,538.0<br>(1,350.2 to 1,749.9)                  | 749.8<br>(650.7 to 866.6)                         | 174.2<br>(121.5 to 229.7)               | 16.9<br>(10.3 to 23.5)                            | 0.7<br>(-4.5 to 6.2)                                |
| Neck pain                                                  | 709.3<br>(611.8 to 821.9)                        | 160.1<br>(139.0 to 189.7)                         | 70.8<br>(47.7 to 101.8)                 | 16.0<br>(12.4 to 19.5)                            | 0.2<br>(-2.1 to 2.5)                                |
| Gout                                                       | 99.6<br>(87.7 to 113.2)                          | 19.6<br>(17.0 to 22.4)                            | 3.1<br>(2.1 to 4.4)                     | 21.9<br>(6.2 to 41.8)                             | -2.0<br>(-14.2 to 13.0)                             |
| Other musculoskeletal disorders                            | 791.3<br>(620.8 to 965.1)                        | 829.1<br>(682.9 to 1,001.3)                       | 68.1<br>(42.7 to 100.1)                 | 7.5<br>(-2.1 to 17.3)                             | -4.2<br>(-12.4 to 4.2)                              |
| <b>Other non-communicable diseases</b>                     | <b>14,606.4</b><br><b>(14,227.0 to 14,984.8)</b> | <b>40,727.6†</b><br><b>(37,203.2 to 44,350.1)</b> | <b>469.8</b><br><b>(325.0 to 658.2)</b> | <b>8.7</b><br><b>(7.2 to 10.2)</b>                | <b>-4.4</b><br><b>(-5.6 to -3.2)</b>                |
| Congenital anomalies                                       | 184.6<br>(163.8 to 209.4)                        | --                                                | 25.3<br>(18.1 to 33.8)                  | 0.3<br>(-5.5 to 6.6)                              | -3.6<br>(-9.2 to 2.5)                               |
| Neural tube defects                                        | 19.4<br>(17.2 to 22.0)                           | --                                                | 5.8<br>(4.0 to 7.8)                     | 11.0<br>(-2.7 to 26.1)                            | 5.8<br>(-7.4 to 19.8)                               |
| Congenital heart anomalies                                 | 41.0<br>(35.9 to 46.8)                           | --                                                | 1.9<br>(0.8 to 3.2)                     | 6.6<br>(-6.1 to 19.2)                             | 4.5<br>(-7.3 to 16.6)                               |
| Orofacial clefts                                           | 13.4<br>(11.8 to 15.0)                           | --                                                | 0.1<br>(0.1 to 0.2)                     | -6.3<br>(-16.6 to 5.2)                            | -10.0<br>(-20.0 to 0.8)                             |
| Down's syndrome                                            | 5.5<br>(4.6 to 6.4)                              | --                                                | 0.5<br>(0.3 to 0.7)                     | 3.3<br>(-4.5 to 11.3)                             | 2.7<br>(-5.1 to 10.8)                               |
| Turner syndrome                                            | 2.9<br>(2.5 to 3.3)                              | --                                                | 0.1<br>(< 0.05 to 0.1)                  | -1.4<br>(-15.8 to 14.5)                           | -1.5<br>(-15.5 to 14.6)                             |
| Klinefelter syndrome                                       | 4.4<br>(3.7 to 5.1)                              | --                                                | < 0.05<br>(< 0.05 to < 0.05)            | -5.9<br>(-30.8 to 26.7)                           | -1.9<br>(-27.6 to 31.9)                             |



| Cause                                         | Prevalence in thousands (95% UI)              | Incidence in thousands (95% UI)                | YLDs in thousands (95% UI)             |                                                   |                                                     |
|-----------------------------------------------|-----------------------------------------------|------------------------------------------------|----------------------------------------|---------------------------------------------------|-----------------------------------------------------|
|                                               | 2016 counts                                   | 2016 counts                                    | 2016 counts                            | Percentage change in counts between 2006 and 2016 | Percentage change in age-standardised rates between |
| Other chromosomal abnormalities               | 5.0<br>(4.2 to 6.1)                           | --                                             | 0.6<br>(0.4 to 0.8)                    | -4.3<br>(-23.0 to 19.0)                           | 1.6<br>(-18.7 to 27.1)                              |
| Congenital musculoskeletal and limb anomalies | 20.6<br>(18.9 to 22.7)                        | --                                             | 3.1<br>(2.1 to 4.2)                    | 13.4<br>(1.1 to 27.6)                             | 8.7<br>(-3.3 to 22.0)                               |
| Urogenital congenital anomalies               | 14.6<br>(12.9 to 16.4)                        | --                                             | 0.4<br>(0.2 to 0.6)                    | -0.2<br>(-9.0 to 9.2)                             | 2.3<br>(-6.6 to 12.1)                               |
| Digestive congenital anomalies                | 24.6<br>(21.7 to 27.9)                        | --                                             | 1.1<br>(0.7 to 1.7)                    | 5.5<br>(-9.1 to 21.7)                             | 1.1<br>(-12.6 to 16.7)                              |
| Other congenital anomalies                    | 80.9<br>(59.4 to 112.9)                       | --                                             | 11.8<br>(7.9 to 17.1)                  | -7.9<br>(-15.5 to 0.3)                            | -12.2<br>(-19.5 to -4.3)                            |
| Skin and subcutaneous diseases                | 7,164.8<br>(6,954.6 to 7,392.8)               | 16,429.0<br>(15,409.9 to 17,599.3)             | 166.0<br>(111.1 to 243.1)              | 4.5<br>(2.5 to 6.5)                               | 1.3<br>(-0.4 to 3.4)                                |
| Dermatitis                                    | 955.0<br>(897.9 to 1,017.4)                   | 1,188.1<br>(1,107.3 to 1,276.3)                | 36.0<br>(21.3 to 58.4)                 | 3.3<br>(-1.0 to 8.0)                              | 0.2<br>(-3.7 to 4.7)                                |
| Psoriasis                                     | 161.0<br>(154.6 to 167.3)                     | 21.6<br>(20.7 to 22.5)                         | 14.0<br>(10.1 to 18.5)                 | 22.1<br>(12.2 to 32.8)                            | 11.3<br>(2.3 to 21.0)                               |
| Cellulitis                                    | 8.8<br>(8.2 to 9.5)                           | 189.5<br>(177.9 to 202.3)                      | 0.5<br>(0.3 to 0.7)                    | 8.2<br>(-12.4 to 35.0)                            | 1.9<br>(-17.6 to 26.4)                              |
| Pyoderma                                      | 23.4<br>(22.6 to 24.3)                        | 462.2<br>(444.7 to 479.1)                      | 0.1<br>(0.1 to 0.3)                    | 19.1<br>(7.8 to 31.3)                             | 1.3<br>(-7.9 to 11.1)                               |
| Scabies                                       | 593.0<br>(511.6 to 689.9)                     | 1,873.9<br>(1,598.5 to 2,163.4)                | 15.3<br>(8.5 to 24.5)                  | -6.7<br>(-11.2 to -2.7)                           | -7.8<br>(-12.0 to -4.1)                             |
| Fungal skin diseases                          | 2,575.4<br>(2,314.1 to 2,870.6)               | 8,380.5<br>(7,446.0 to 9,425.4)                | 14.4<br>(5.7 to 30.4)                  | 10.8<br>(8.7 to 13.0)                             | 0.0<br>(-0.9 to 0.9)                                |
| Viral skin diseases                           | 567.2<br>(536.9 to 597.6)                     | 813.0<br>(775.1 to 853.7)                      | 17.4<br>(10.8 to 25.8)                 | 3.9<br>(0.5 to 7.2)                               | 0.5<br>(-2.6 to 3.7)                                |
| Acne vulgaris                                 | 1,802.5<br>(1,627.7 to 1,984.8)               | 1,283.9<br>(1,051.1 to 1,584.9)                | 46.6<br>(31.2 to 68.2)                 | 1.0<br>(-3.8 to 5.5)                              | 2.9<br>(-2.0 to 7.5)                                |
| Alopecia areata                               | 39.1<br>(37.8 to 40.5)                        | 68.9<br>(66.7 to 71.4)                         | 1.3<br>(0.8 to 2.0)                    | 4.3<br>(-6.2 to 15.1)                             | 0.2<br>(-9.8 to 10.7)                               |
| Pruritus                                      | 190.4<br>(167.5 to 214.4)                     | 150.5<br>(134.6 to 169.9)                      | 2.0<br>(0.9 to 3.7)                    | 13.0<br>(6.8 to 19.5)                             | 1.9<br>(-3.4 to 7.2)                                |
| Urticaria                                     | 164.3<br>(144.1 to 188.8)                     | 290.5<br>(255.7 to 333.2)                      | 9.9<br>(6.3 to 14.3)                   | 0.4<br>(-5.5 to 6.4)                              | 0.2<br>(-5.4 to 6.2)                                |
| Decubitus ulcer                               | 2.3<br>(2.0 to 2.6)                           | 8.5<br>(7.3 to 9.8)                            | 0.4<br>(0.2 to 0.5)                    | 39.0<br>(18.9 to 62.8)                            | 8.0<br>(-9.0 to 28.8)                               |
| Other skin and subcutaneous diseases          | 1,464.2<br>(1,418.9 to 1,508.4)               | 1,697.7<br>(1,640.2 to 1,754.9)                | 8.0<br>(3.9 to 14.5)                   | 23.1<br>(20.1 to 26.3)                            | 7.3<br>(4.7 to 9.9)                                 |
| Sense organ diseases                          | 5,098.1<br>(4,993.4 to 5,203.6)               | 2,036.4†<br>(1,918.5 to 2,168.6)               | 230.6<br>(163.3 to 318.9)              | 11.3<br>(9.0 to 13.6)                             | -8.9<br>(-10.6 to -7.3)                             |
| Glaucoma                                      | 10.3<br>(8.1 to 12.7)                         | --                                             | 0.9<br>(0.6 to 1.3)                    | 41.1<br>(22.0 to 62.7)                            | 1.2<br>(-11.8 to 15.7)                              |
| Cataract                                      | 363.2<br>(283.2 to 451.9)                     | --                                             | 20.0<br>(13.7 to 29.0)                 | 27.1<br>(18.5 to 36.2)                            | -5.7<br>(-11.5 to 0.3)                              |
| Macular degeneration                          | 6.0<br>(4.2 to 8.1)                           | --                                             | 0.4<br>(0.2 to 0.5)                    | 43.4<br>(19.9 to 71.5)                            | 3.0<br>(-13.1 to 22.7)                              |
| Refraction and accommodation disorders        | 2,418.6<br>(2,293.5 to 2,544.8)               | --                                             | 46.5<br>(29.3 to 73.0)                 | 2.6<br>(-1.0 to 7.2)                              | -13.8<br>(-16.5 to -10.7)                           |
| Age-related and other hearing loss            | 3,375.3<br>(3,213.8 to 3,561.8)               | --                                             | 136.9<br>(98.3 to 184.8)               | 10.3<br>(6.4 to 14.2)                             | -9.4<br>(-12.1 to -6.8)                             |
| Other vision loss                             | 99.4<br>(81.8 to 117.1)                       | --                                             | 6.1<br>(4.2 to 8.5)                    | 24.1<br>(14.2 to 34.8)                            | -1.3<br>(-8.4 to 5.7)                               |
| Other sense organ diseases                    | 636.9<br>(586.6 to 687.9)                     | 2,036.4<br>(1,918.5 to 2,168.6)                | 19.8<br>(12.4 to 30.0)                 | 21.6<br>(16.5 to 26.7)                            | 1.4<br>(-2.5 to 5.3)                                |
| Oral disorders                                | 9,245.6<br>(8,584.1 to 9,816.1)               | 22,262.2†<br>(18,956.5 to 25,812.9)            | 47.9<br>(28.4 to 77.5)                 | 17.5<br>(14.0 to 21.1)                            | -0.7<br>(-3.2 to 1.8)                               |
| Caries of deciduous teeth                     | 1,019.5<br>(862.0 to 1,186.4)                 | 4,482.5<br>(3,190.8 to 5,913.5)                | 0.4<br>(0.2 to 0.7)                    | -1.1<br>(-11.4 to 11.7)                           | 0.6<br>(-9.8 to 14.1)                               |
| Caries of permanent teeth                     | 6,285.4<br>(5,477.7 to 7,113.1)               | 17,490.2<br>(14,447.4 to 20,531.8)             | 6.2<br>(2.7 to 12.1)                   | 2.3<br>(-2.9 to 7.8)                              | -4.2<br>(-8.9 to 0.7)                               |
| Periodontal disease                           | 2,027.6<br>(1,459.6 to 2,776.1)               | 243.0<br>(170.6 to 322.8)                      | 13.2<br>(4.8 to 28.8)                  | 22.4<br>(13.3 to 31.7)                            | 0.2<br>(-5.7 to 6.1)                                |
| Edentulism and severe tooth loss              | 605.3<br>(524.9 to 686.1)                     | 46.5<br>(39.3 to 54.6)                         | 16.7<br>(10.9 to 23.9)                 | 28.1<br>(21.6 to 34.4)                            | -0.8<br>(-5.9 to 3.9)                               |
| Other oral disorders                          | 388.6<br>(372.6 to 404.8)                     | --                                             | 11.4<br>(7.0 to 17.2)                  | 8.7<br>(5.3 to 12.5)                              | 0.3<br>(-2.7 to 3.7)                                |
| <b>Injuries</b>                               | <b>4,665.1</b><br><b>(4,005.0 to 5,424.5)</b> | <b>1,262.2†</b><br><b>(1,206.5 to 1,320.1)</b> | <b>150.2</b><br><b>(89.8 to 235.0)</b> | <b>15.0</b><br><b>(11.0 to 18.7)</b>              | <b>1.6</b><br><b>(-2.1 to 4.9)</b>                  |
| <b>Transport injuries</b>                     | <b>654.3</b><br><b>(609.2 to 705.7)</b>       | <b>195.6</b><br><b>(177.6 to 213.6)</b>        | <b>32.1</b><br><b>(21.2 to 47.0)</b>   | <b>36.2</b><br><b>(31.4 to 40.8)</b>              | <b>17.4</b><br><b>(13.4 to 21.3)</b>                |
| Road injuries                                 | 444.3<br>(415.5 to 477.8)                     | 150.5<br>(133.9 to 167.9)                      | 22.3<br>(14.7 to 32.7)                 | 65.7<br>(60.7 to 70.5)                            | 40.6<br>(36.1 to 44.6)                              |
| Pedestrian road injuries                      | 67.7<br>(60.3 to 77.0)                        | 19.2<br>(16.1 to 22.9)                         | 3.4<br>(2.2 to 4.9)                    | 68.3<br>(62.7 to 73.9)                            | 38.8<br>(34.0 to 43.6)                              |
| Cyclist road injuries                         | 70.6<br>(59.9 to 82.6)                        | 27.1<br>(21.6 to 32.8)                         | 3.4<br>(2.2 to 5.0)                    | 65.7<br>(60.5 to 70.7)                            | 40.2<br>(35.5 to 44.2)                              |
| Motorcyclist road injuries                    | 138.6<br>(119.5 to 167.1)                     | 31.7<br>(26.3 to 37.9)                         | 6.7<br>(4.3 to 9.7)                    | 57.3<br>(52.0 to 62.1)                            | 35.3<br>(30.8 to 39.3)                              |
| Motor vehicle road injuries                   | 108.6<br>(91.7 to 124.1)                      | 46.0<br>(38.6 to 53.3)                         | 6.1<br>(4.0 to 8.8)                    | 72.2<br>(66.9 to 77.3)                            | 46.1<br>(41.5 to 50.1)                              |
| Other road injuries                           | 58.8<br>(50.1 to 69.8)                        | 26.4<br>(21.1 to 32.4)                         | 2.8<br>(1.8 to 4.1)                    | 70.3<br>(65.0 to 75.2)                            | 45.1<br>(40.6 to 49.2)                              |
| Other transport injuries                      | 210.0<br>(178.9 to 246.6)                     | 45.1<br>(40.2 to 51.5)                         | 9.8<br>(6.5 to 14.3)                   | -3.0<br>(-7.2 to 1.1)                             | -13.8<br>(-17.3 to -10.2)                           |
| <b>Unintentional injuries</b>                 | <b>2,301.1</b><br><b>(2,161.9 to 2,441.0)</b> | <b>902.9</b><br><b>(854.2 to 953.1)</b>        | <b>71.6</b><br><b>(46.3 to 103.6)</b>  | <b>11.0</b><br><b>(7.1 to 14.0)</b>               | <b>-2.8</b><br><b>(-6.2 to 0.1)</b>                 |
| Falls                                         | 731.4<br>(651.5 to 810.7)                     | 307.9<br>(278.5 to 342.6)                      | 28.4<br>(18.9 to 40.0)                 | 22.5<br>(18.5 to 26.0)                            | 4.9<br>(1.4 to 7.9)                                 |
| Drowning                                      | 20.7<br>(18.2 to 23.6)                        | 3.5<br>(3.1 to 4.0)                            | 0.9<br>(0.6 to 1.4)                    | -3.3<br>(-8.6 to 1.7)                             | -15.9<br>(-20.5 to -11.6)                           |
| Fire, heat, and hot substances                | 297.1<br>(255.2 to 350.6)                     | 30.1<br>(25.6 to 34.6)                         | 7.0<br>(4.3 to 10.5)                   | -4.4<br>(-11.1 to 1.3)                            | -14.5<br>(-20.4 to -9.4)                            |
| Poisonings                                    | 6.4<br>(5.5 to 7.3)                           | 9.4<br>(7.4 to 11.6)                           | 0.5<br>(0.3 to 0.7)                    | 13.1<br>(4.1 to 22.4)                             | 4.0<br>(-4.3 to 12.5)                               |
| Exposure to mechanical forces                 | 372.3<br>(323.3 to 445.6)                     | 136.2<br>(118.2 to 154.0)                      | 8.6<br>(5.4 to 12.8)                   | 24.1<br>(19.0 to 28.8)                            | 7.4<br>(2.8 to 11.3)                                |
| Unintentional firearm injuries                | 16.2<br>(13.3 to 19.8)                        | 3.5<br>(2.5 to 4.7)                            | 0.6<br>(0.4 to 0.9)                    | -4.5<br>(-8.1 to -1.0)                            | -15.5<br>(-18.7 to -12.7)                           |
| Unintentional suffocation                     | 20.1<br>(15.9 to 25.2)                        | 3.6<br>(2.6 to 4.8)                            | 0.6<br>(0.4 to 1.0)                    | 14.6<br>(10.4 to 18.5)                            | 3.8<br>(-0.3 to 7.5)                                |
| Other exposure to mechanical forces           | 336.0<br>(287.6 to 406.9)                     | 129.2<br>(111.5 to 146.7)                      | 7.3<br>(4.6 to 11.0)                   | 28.2<br>(22.8 to 32.9)                            | 10.2<br>(5.3 to 14.2)                               |



| Cause                                                                               | Prevalence in thousands (95% UI)            | Incidence in thousands (95% UI)          | YLDs in thousands (95% UI)           |                                                   |                                                     |
|-------------------------------------------------------------------------------------|---------------------------------------------|------------------------------------------|--------------------------------------|---------------------------------------------------|-----------------------------------------------------|
|                                                                                     | 2016 counts                                 | 2016 counts                              | 2016 counts                          | Percentage change in counts between 2006 and 2016 | Percentage change in age-standardised rates between |
| Adverse effects of medical treatment                                                | 5.7<br>(4.5 to 7.0)                         | 73.9<br>(64.6 to 84.0)                   | 0.8<br>(0.5 to 1.1)                  | 2.5<br>(-2.4 to 7.8)                              | -2.9<br>(-7.8 to 2.2)                               |
| Animal contact                                                                      | 78.8<br>(69.5 to 91.4)                      | 89.7<br>(76.7 to 104.0)                  | 2.0<br>(1.3 to 2.9)                  | 2.1<br>(-3.4 to 7.5)                              | -7.6<br>(-12.3 to -2.6)                             |
| Venomous animal contact                                                             | 24.0<br>(20.4 to 27.9)                      | 33.4<br>(26.4 to 41.8)                   | 1.2<br>(0.8 to 1.8)                  | 6.6<br>(-2.3 to 16.0)                             | -1.6<br>(-9.7 to 6.9)                               |
| Non-venomous animal contact                                                         | 54.8<br>(46.7 to 66.5)                      | 56.3<br>(46.8 to 66.6)                   | 0.8<br>(0.5 to 1.3)                  | -4.0<br>(-9.0 to 0.3)                             | -15.2<br>(-19.3 to -11.7)                           |
| Foreign body                                                                        | 112.3<br>(92.9 to 131.3)                    | 55.4<br>(49.0 to 63.4)                   | 3.8<br>(2.3 to 5.9)                  | 8.2<br>(2.8 to 13.3)                              | -2.3<br>(-6.9 to 1.9)                               |
| Pulmonary aspiration and foreign body in airway                                     | 67.2<br>(51.2 to 87.6)                      | 20.7<br>(17.2 to 25.5)                   | 2.5<br>(1.5 to 3.9)                  | 10.3<br>(4.7 to 15.7)                             | 0.5<br>(-4.3 to 5.1)                                |
| Foreign body in eyes                                                                | 3.9<br>(2.4 to 5.6)                         | 18.8<br>(14.3 to 25.2)                   | 0.2<br>(0.1 to 0.4)                  | 11.5<br>(6.3 to 16.9)                             | 0.4<br>(-3.0 to 3.7)                                |
| Foreign body in other body part                                                     | 41.1<br>(33.8 to 50.4)                      | 15.9<br>(13.3 to 18.9)                   | 1.1<br>(0.6 to 1.6)                  | 3.0<br>(-3.6 to 8.8)                              | -8.7<br>(-14.5 to -3.8)                             |
| Environmental heat and cold exposure                                                | 212.9<br>(179.7 to 249.0)                   | 50.0<br>(41.0 to 60.7)                   | 7.1<br>(4.4 to 10.5)                 | -4.5<br>(-8.8 to -0.6)                            | -15.4<br>(-19.4 to -12.0)                           |
| Other unintentional injuries                                                        | 463.6<br>(378.8 to 566.2)                   | 146.8<br>(125.5 to 170.8)                | 12.7<br>(8.0 to 18.7)                | 4.0<br>(0.8 to 6.8)                               | -7.7<br>(-10.9 to -4.9)                             |
| <b>Self-harm and interpersonal violence</b>                                         | <b>667.3</b><br><b>(612.4 to 733.6)</b>     | <b>159.9†</b><br><b>(138.9 to 182.6)</b> | <b>15.3</b><br><b>(10.2 to 22.0)</b> | <b>-0.4</b><br><b>(-3.7 to 2.8)</b>               | <b>-11.4</b><br><b>(-14.0 to -8.9)</b>              |
| Self-harm                                                                           | 50.0<br>(42.5 to 58.1)                      | 22.4<br>(19.6 to 25.4)                   | 2.0<br>(1.2 to 3.0)                  | -11.0<br>(-15.4 to -6.9)                          | -23.6<br>(-27.5 to -20.2)                           |
| Self-harm by firearm                                                                | 0.9<br>(0.7 to 1.1)                         | 0.2<br>(0.1 to 0.3)                      | < 0.05<br>(< 0.05 to < 0.05)         | 2.6<br>(-3.0 to 7.4)                              | -6.9<br>(-12.0 to -2.4)                             |
| Self-harm by other specified means                                                  | 49.2<br>(41.6 to 57.3)                      | 22.2<br>(19.5 to 25.2)                   | 1.9<br>(1.2 to 2.9)                  | -11.2<br>(-15.6 to -7.0)                          | -23.8<br>(-27.7 to -20.4)                           |
| Interpersonal violence                                                              | 617.2<br>(563.6 to 686.3)                   | 137.5†<br>(116.9 to 159.8)               | 13.3<br>(8.9 to 19.0)                | 1.4<br>(-2.0 to 4.6)                              | -9.2<br>(-11.7 to -6.7)                             |
| Assault by firearm                                                                  | 5.9<br>(5.1 to 7.0)                         | 1.6<br>(1.2 to 2.1)                      | 0.2<br>(0.1 to 0.4)                  | -1.1<br>(-4.9 to 3.1)                             | -12.7<br>(-16.0 to -9.3)                            |
| Assault by sharp object                                                             | 75.2<br>(61.7 to 89.5)                      | 25.4<br>(19.6 to 32.3)                   | 2.0<br>(1.3 to 3.0)                  | -10.4<br>(-14.6 to -6.5)                          | -20.2<br>(-23.6 to -17.2)                           |
| Sexual violence                                                                     | 313.7<br>(274.6 to 356.7)                   | --                                       | 2.6<br>(1.7 to 3.6)                  | -9.1<br>(-12.6 to -5.3)                           | -10.7<br>(-13.6 to -7.2)                            |
| Assault by other means                                                              | 222.4<br>(186.0 to 275.1)                   | 110.5<br>(93.3 to 129.0)                 | 8.5<br>(5.6 to 12.4)                 | 8.7<br>(4.7 to 12.0)                              | -5.5<br>(-8.9 to -2.5)                              |
| <b>Forces of nature, conflict and terrorism, and executions and police conflict</b> | <b>1,356.2</b><br><b>(735.4 to 2,092.6)</b> | <b>3.9†</b><br><b>(2.1 to 5.8)</b>       | <b>31.2</b><br><b>(10.6 to 65.6)</b> | <b>14.9</b><br><b>(8.4 to 23.1)</b>               | <b>5.5</b><br><b>(-0.6 to 13.5)</b>                 |
| Exposure to forces of nature                                                        | 206.8<br>(92.6 to 350.9)                    | 3.2<br>(1.5 to 5.0)                      | 6.0<br>(1.7 to 14.2)                 | -21.3<br>(-26.3 to -17.2)                         | -27.4<br>(-31.8 to -23.9)                           |
| Conflict and terrorism                                                              | 1,140.6<br>(589.0 to 1,831.9)               | --                                       | 25.0<br>(8.8 to 51.5)                | 29.5<br>(22.1 to 37.8)                            | 18.9<br>(12.0 to 27.2)                              |
| Executions and police conflict                                                      | 8.8<br>(1.6 to 14.7)                        | 0.7<br>(0.4 to 0.9)                      | 0.2<br>(< 0.05 to 0.5)               | -16.1<br>(-23.2 to -7.5)                          | -20.9<br>(-27.7 to -13.8)                           |
| <b>Impairments</b>                                                                  | --                                          | --                                       | --                                   | --                                                | --                                                  |
| Anaemia                                                                             | 4,246.0<br>(4,025.3 to 4,489.4)             | --                                       | 98.2<br>(65.9 to 141.9)              | -9.1<br>(-14.8 to -2.9)                           | -16.1<br>(-21.7 to -9.7)                            |
| Developmental intellectual disability                                               | 388.0<br>(284.9 to 506.0)                   | --                                       | 42.9<br>(30.5 to 57.4)               | -8.6<br>(-13.7 to -3.0)                           | -11.2<br>(-16.1 to -5.9)                            |
| Epilepsy                                                                            | 171.7<br>(101.3 to 215.7)                   | --                                       | 56.2<br>(29.9 to 86.8)               | -1.5<br>(-46.6 to 80.3)                           | -6.1<br>(-49.3 to 71.7)                             |
| Guillain-Barre syndrome                                                             | 0.1<br>(0.1 to 0.2)                         | --                                       | < 0.05<br>(< 0.05 to 0.1)            | 10.6<br>(6.9 to 14.8)                             | -0.2<br>(-0.3 to -0.1)                              |
| Hearing loss                                                                        | 3,631.4<br>(3,465.4 to 3,812.6)             | --                                       | 152.2<br>(108.7 to 206.3)            | 7.5<br>(4.1 to 11.2)                              | -10.1<br>(-12.4 to -7.7)                            |
| Heart failure                                                                       | 149.2<br>(131.2 to 169.5)                   | --                                       | 16.9<br>(12.3 to 22.4)               | 31.2<br>(21.6 to 40.5)                            | 0.6<br>(-6.7 to 7.6)                                |
| Infertility                                                                         | 240.5<br>(186.8 to 312.9)                   | --                                       | 1.4<br>(0.6 to 2.9)                  | 1.2<br>(-4.4 to 7.0)                              | 1.9<br>(-3.5 to 7.5)                                |
| Pelvic inflammatory disease                                                         | 16.9<br>(14.3 to 20.0)                      | --                                       | 2.2<br>(1.5 to 3.2)                  | -3.1<br>(-16.8 to 11.4)                           | -7.5<br>(-20.2 to 6.3)                              |
| Vision loss                                                                         | 2,968.1<br>(2,813.4 to 3,119.2)             | --                                       | 84.1<br>(58.2 to 122.0)              | 8.4<br>(4.3 to 12.8)                              | -10.1<br>(-12.8 to -7.0)                            |

We did not calculate incidence for the nine impairments, certain NTDs, and causes with only birth prevalence. Blank cells mean that no estimate is available.

† Incidence for aggregate causes represents the sum of the incidence of the causes below the aggregate.

‡ Incidence estimates for stroke represent first-ever stroke only.

^ Incidence of HIV/AIDS represents new infections of HIV only and does not include new infections of Tuberculosis in HIV positive cases.

SR Table 14: Prevalence, incidence, and YLDs for 2016, percentage change of YLD counts and percentage change of age-standardised YLD rates between 2006 and 2016 by cause and impairments, for all ages, Sudan.

| Cause                                                                                | Prevalence in thousands (95% UI)          | Incidence in thousands (95% UI)               | YLDs in thousands (95% UI)             |                                                   |                                                     |
|--------------------------------------------------------------------------------------|-------------------------------------------|-----------------------------------------------|----------------------------------------|---------------------------------------------------|-----------------------------------------------------|
|                                                                                      | 2016 counts                               | 2016 counts                                   | 2016 counts                            | Percentage change in counts between 2006 and 2016 | Percentage change in age-standardised rates between |
| <b>All causes</b>                                                                    | <b>38,599.7</b><br>(38,490.5 to 38,694.4) | <b>265,763.1†</b><br>(250,083.5 to 283,498.0) | <b>4,285.0</b><br>(3,163.9 to 5,580.4) | <b>25.1</b><br>(22.8 to 27.8)                     | <b>-2.0</b><br>(-3.3 to -0.4)                       |
| <b>Communicable, maternal, neonatal, and nutritional disorders</b>                   | <b>33,864.4</b><br>(33,145.1 to 34,486.9) | <b>159,091.3†</b><br>(145,182.4 to 174,739.0) | <b>827.5</b><br>(573.6 to 1,165.3)     | <b>8.2</b><br>(2.5 to 13.7)                       | <b>-10.2</b><br>(-14.4 to -6.1)                     |
| <b>HIV/AIDS and tuberculosis</b>                                                     | <b>23,445.2</b><br>(21,092.7 to 25,424.2) | <b>44.0†</b><br>(37.2 to 52.1)                | <b>12.4</b><br>(8.0 to 18.6)           | <b>3.0</b><br>(-9.7 to 18.2)                      | <b>-22.4</b><br>(-31.8 to -10.9)                    |
| Tuberculosis                                                                         | 21,730.1<br>(19,388.9 to 24,169.3)        | 40.8†<br>(34.3 to 48.5)                       | 6.1<br>(3.9 to 8.7)                    | 5.4<br>(-10.8 to 25.1)                            | -19.1<br>(-29.4 to -5.8)                            |
| Drug-susceptible tuberculosis                                                        | 19.6<br>(16.2 to 23.7)                    | 40.0<br>(33.5 to 47.8)                        | 6.0<br>(3.9 to 8.5)                    | 4.7<br>(-12.0 to 24.9)                            | -19.6<br>(-30.4 to -6.5)                            |
| Multidrug-resistant tuberculosis without extensive drug resistance                   | 0.4<br>(< 0.05 to 1.6)                    | 0.7<br>(0.1 to 3.3)                           | 0.1<br>(< 0.05 to 0.5)                 | 54.6<br>(-79.3 to 915.9)                          | 18.4<br>(-84.1 to 681.1)                            |
| Extensively drug-resistant tuberculosis                                              | < 0.05<br>(< 0.05 to 0.1)                 | < 0.05<br>(< 0.05 to 0.1)                     | < 0.05<br>(< 0.05 to < 0.05)           | 251.1<br>(-52.9 to 2,206.8)                       | 168.8<br>(-63.9 to 1,674.2)                         |
| Latent tuberculosis infection                                                        | 21,710.1<br>(19,368.2 to 24,149.0)        | --                                            | --                                     | --                                                | --                                                  |
| HIV/AIDS                                                                             | 43.1<br>(33.5 to 55.2)                    | 3.2^<br>(2.0 to 5.0)                          | 6.3<br>(3.8 to 10.5)                   | 0.8<br>(-15.7 to 24.8)                            | -25.3<br>(-38.2 to -5.6)                            |
| Drug-susceptible HIV/AIDS - Tuberculosis                                             | 1.3<br>(0.8 to 2.1)                       | 2.7<br>(1.6 to 4.4)                           | 0.6<br>(0.3 to 1.0)                    | -8.5<br>(-24.5 to 10.1)                           | -29.4<br>(-41.6 to -14.6)                           |
| Multidrug-resistant HIV/AIDS - Tuberculosis without extensive drug resistance        | < 0.05<br>(< 0.05 to 0.1)                 | 0.1<br>(< 0.05 to 0.3)                        | < 0.05<br>(< 0.05 to 0.1)              | 32.8<br>(-82.4 to 773.2)                          | 2.4<br>(-86.5 to 573.2)                             |
| Extensively drug-resistant HIV/AIDS - Tuberculosis                                   | < 0.05<br>(< 0.05 to < 0.05)              | < 0.05<br>(< 0.05 to < 0.05)                  | < 0.05<br>(< 0.05 to < 0.05)           | 201.7<br>(-60.1 to 1,882.4)                       | 132.6<br>(-69.3 to 1,428.1)                         |
| HIV/AIDS resulting in other diseases                                                 | 41.8<br>(32.2 to 54.0)                    | 3.2<br>(2.0 to 5.0)                           | 5.7<br>(3.4 to 9.8)                    | 1.7<br>(-16.2 to 31.8)                            | -25.0<br>(-39.0 to -1.7)                            |
| <b>Diarrhoea, lower respiratory infections, and other common infectious diseases</b> | <b>2,702.8</b><br>(2,556.1 to 2,859.5)    | <b>143,942.7†</b><br>(129,574.7 to 159,066.6) | <b>145.0</b><br>(101.0 to 198.9)       | <b>2.5</b><br>(-1.5 to 6.2)                       | <b>-11.4</b><br>(-14.3 to -8.6)                     |
| Diarrhoeal diseases                                                                  | 573.8<br>(526.9 to 622.4)                 | 36,985.8<br>(33,881.8 to 40,074.4)            | 64.9<br>(44.4 to 90.1)                 | -10.4<br>(-16.4 to -3.9)                          | -18.7<br>(-23.5 to -13.5)                           |
| Intestinal infectious diseases                                                       | 1.2<br>(1.0 to 1.4)                       | 22.5†<br>(19.2 to 26.5)                       | 0.2<br>(0.1 to 0.3)                    | -31.5<br>(-42.5 to -17.9)                         | -44.8<br>(-52.1 to -36.4)                           |
| Typhoid fever                                                                        | 1.2<br>(1.0 to 1.4)                       | 18.5<br>(15.7 to 22.0)                        | 0.2<br>(0.1 to 0.3)                    | -31.4<br>(-43.1 to -16.8)                         | -44.7<br>(-52.7 to -35.8)                           |
| Paratyphoid fever                                                                    | 0.2<br>(0.1 to 0.2)                       | 4.0<br>(3.3 to 4.8)                           | < 0.05<br>(< 0.05 to < 0.05)           | -27.1<br>(-40.1 to -11.3)                         | -41.7<br>(-50.3 to -31.7)                           |
| Other intestinal infectious diseases                                                 | --                                        | --                                            | < 0.05<br>(< 0.05 to < 0.05)           | -55.5<br>(-65.4 to -42.6)                         | -57.6<br>(-64.3 to -49.8)                           |
| Lower respiratory infections                                                         | 43.6<br>(39.0 to 48.3)                    | 1,911.4<br>(1,710.5 to 2,127.3)               | 2.6<br>(1.7 to 3.7)                    | 22.2<br>(7.0 to 40.6)                             | -0.5<br>(-9.8 to 10.8)                              |
| Upper respiratory infections                                                         | 1,333.9<br>(1,160.8 to 1,527.4)           | 100,490.6<br>(87,100.1 to 115,514.9)          | 33.1<br>(19.7 to 51.5)                 | 21.0<br>(14.7 to 27.9)                            | -0.6<br>(-5.5 to 5.0)                               |
| Otitis media                                                                         | 688.8<br>(615.8 to 765.9)                 | 3,385.1<br>(2,675.3 to 4,262.7)               | 21.7<br>(13.5 to 32.3)                 | 9.9<br>(2.6 to 18.3)                              | -7.7<br>(-13.5 to -1.3)                             |
| Meningitis                                                                           | 108.0<br>(90.9 to 128.0)                  | 22.3<br>(19.0 to 26.9)                        | 10.2<br>(7.1 to 13.3)                  | 17.4<br>(11.8 to 23.1)                            | -6.2<br>(-10.6 to -1.6)                             |
| Pneumococcal meningitis                                                              | 32.8<br>(26.5 to 40.8)                    | 3.1<br>(2.2 to 4.0)                           | 3.5<br>(2.4 to 4.7)                    | 4.6<br>(-4.2 to 14.1)                             | -17.2<br>(-24.2 to -9.3)                            |
| H influenzae type B meningitis                                                       | 25.1<br>(17.7 to 34.8)                    | 5.4<br>(3.2 to 7.8)                           | 2.5<br>(1.7 to 3.4)                    | 6.4<br>(-4.2 to 16.2)                             | -14.6<br>(-23.2 to -7.0)                            |
| Meningococcal infection                                                              | 27.2<br>(18.6 to 38.6)                    | 8.2<br>(6.2 to 10.9)                          | 2.1<br>(1.4 to 2.8)                    | 20.3<br>(11.2 to 31.2)                            | -3.5<br>(-10.8 to 4.7)                              |
| Other meningitis                                                                     | 22.9<br>(16.3 to 32.0)                    | 5.6<br>(3.8 to 7.9)                           | 2.1<br>(1.4 to 2.9)                    | 68.1<br>(48.8 to 92.8)                            | 36.3<br>(20.4 to 57.1)                              |
| Encephalitis                                                                         | 96.2<br>(65.6 to 138.8)                   | 44.2<br>(38.2 to 51.2)                        | 10.4<br>(7.3 to 13.5)                  | 23.1<br>(9.2 to 38.3)                             | -4.7<br>(-14.5 to 6.1)                              |
| Diphtheria                                                                           | < 0.05<br>(< 0.05 to < 0.05)              | 0.1<br>(< 0.05 to 0.1)                        | < 0.05<br>(< 0.05 to < 0.05)           | -69.1<br>(-86.6 to -28.3)                         | -71.4<br>(-86.6 to -39.0)                           |
| Whooping cough                                                                       | 14.4<br>(11.2 to 18.1)                    | 104.9<br>(81.8 to 131.7)                      | 0.7<br>(0.4 to 1.1)                    | -41.1<br>(-50.2 to -30.7)                         | -39.8<br>(-49.0 to -29.4)                           |
| Tetanus                                                                              | 0.1<br>(0.1 to 0.1)                       | 0.1<br>(< 0.05 to 0.1)                        | < 0.05<br>(< 0.05 to < 0.05)           | -20.7<br>(-44.6 to 10.9)                          | -42.5<br>(-58.9 to -14.9)                           |
| Measles                                                                              | 0.2<br>(0.1 to 0.4)                       | 6.7<br>(2.3 to 15.6)                          | < 0.05<br>(< 0.05 to < 0.05)           | -92.8<br>(-95.6 to -87.5)                         | -92.8<br>(-95.6 to -87.6)                           |
| Varicella and herpes zoster                                                          | 35.5<br>(33.2 to 38.0)                    | 969.2<br>(927.2 to 1,013.9)                   | 1.1<br>(0.7 to 1.8)                    | 28.3<br>(9.5 to 47.6)                             | 0.2<br>(-11.1 to 11.9)                              |
| <b>Neglected tropical diseases and malaria</b>                                       | <b>7,139.0</b><br>(6,272.4 to 8,165.5)    | <b>1,848.1†</b><br>(1,452.8 to 2,303.2)       | <b>62.3</b><br>(40.0 to 93.4)          | <b>-2.2</b><br>(-25.2 to 21.0)                    | <b>-22.5</b><br>(-40.2 to -3.4)                     |
| Malaria                                                                              | 400.8<br>(310.7 to 516.0)                 | 1,262.4<br>(854.7 to 1,691.1)                 | 4.6<br>(3.0 to 7.0)                    | -33.2<br>(-44.6 to -19.1)                         | -44.5<br>(-53.0 to -34.5)                           |
| Chagas disease                                                                       | --                                        | --                                            | --                                     | --                                                | --                                                  |
| Leishmaniasis                                                                        | 63.3<br>(47.0 to 86.3)                    | 19.8<br>(16.6 to 24.1)                        | 3.6<br>(2.0 to 6.2)                    | 7.8<br>(-5.2 to 31.8)                             | -19.0<br>(-26.9 to -3.9)                            |
| Visceral leishmaniasis                                                               | 4.2<br>(3.6 to 4.8)                       | 16.7<br>(14.5 to 19.2)                        | 0.3<br>(0.2 to 0.4)                    | -14.2<br>(-31.1 to 4.0)                           | -36.9<br>(-50.1 to -22.6)                           |
| Cutaneous and mucocutaneous leishmaniasis                                            | 53.3<br>(35.8 to 81.6)                    | 3.1<br>(0.8 to 6.7)                           | 3.4<br>(1.8 to 5.9)                    | 10.2<br>(-4.8 to 39.6)                            | -16.6<br>(-25.9 to 4.4)                             |
| African trypanosomiasis                                                              | --                                        | --                                            | --                                     | --                                                | --                                                  |
| Schistosomiasis                                                                      | 1,014.3<br>(970.0 to 1,070.0)             | 336.2<br>(322.5 to 351.3)                     | 7.2<br>(3.5 to 13.7)                   | -17.9<br>(-22.1 to -14.2)                         | -38.3<br>(-41.4 to -35.8)                           |
| Cysticercosis                                                                        | --                                        | --                                            | --                                     | --                                                | --                                                  |
| Cystic echinococcosis                                                                | 58.3<br>(16.8 to 189.8)                   | 12.3<br>(3.6 to 41.4)                         | 5.4<br>(1.4 to 17.9)                   | -36.1<br>(-87.4 to 267.2)                         | -50.4<br>(-88.9 to 141.2)                           |
| Lymphatic filariasis                                                                 | 44.6<br>(25.6 to 78.0)                    | 5.5<br>(3.8 to 7.8)                           | 2.7<br>(0.7 to 6.9)                    | 30.8<br>(9.1 to 54.5)                             | -1.2<br>(-16.5 to 14.6)                             |
| Onchocerciasis                                                                       | --                                        | --                                            | --                                     | --                                                | --                                                  |
| Trachoma                                                                             | 59.6<br>(36.6 to 90.2)                    | --                                            | 4.0<br>(2.5 to 6.1)                    | 5.2<br>(-13.7 to 29.1)                            | -23.2<br>(-41.0 to -1.8)                            |
| Dengue                                                                               | 12.2<br>(5.5 to 22.4)                     | 203.8<br>(99.8 to 358.1)                      | 2.0<br>(0.7 to 4.3)                    | 174.8<br>(83.5 to 515.6)                          | 117.6<br>(55.1 to 387.5)                            |
| Yellow fever                                                                         | 0.2<br>(0.1 to 0.6)                       | 7.8<br>(2.0 to 21.6)                          | < 0.05<br>(< 0.05 to < 0.05)           | -44.5<br>(-67.9 to -6.4)                          | -55.6<br>(-72.1 to -30.5)                           |
| Rabies                                                                               | < 0.05<br>(< 0.05 to < 0.05)              | < 0.05<br>(< 0.05 to < 0.05)                  | < 0.05<br>(< 0.05 to < 0.05)           | -27.0<br>(-62.7 to 50.4)                          | -42.0<br>(-73.3 to 27.7)                            |
| Intestinal nematode infections                                                       | 5,299.2<br>(4,329.8 to 6,370.0)           | --                                            | 11.6<br>(7.0 to 18.5)                  | 27.6<br>(7.5 to 48.5)                             | 2.6<br>(-13.1 to 20.7)                              |
| Ascariasis                                                                           | 543.9<br>(402.1 to 740.1)                 | --                                            | < 0.05<br>(< 0.05 to < 0.05)           | 20.0<br>(-4.8 to 50.6)                            | -0.1<br>(-23.5 to 29.1)                             |

| Cause                                                                   | Prevalence in thousands (95% UI)           | Incidence in thousands (95% UI)               | YLDs in thousands (95% UI)              |                                                                      |                                                     |
|-------------------------------------------------------------------------|--------------------------------------------|-----------------------------------------------|-----------------------------------------|----------------------------------------------------------------------|-----------------------------------------------------|
|                                                                         | 2016 counts<br>(778.7 to 1,562.2)          | 2016 counts                                   | 2016 counts<br>(6.9 to 18.4)            | Percentage change in counts between 2006 and 2016<br>(-18.3 to 78.9) | Percentage change in age-standardised rates between |
| Trichuriasis                                                            | 1,081.7<br>(778.7 to 1,562.2)              | --                                            | < 0.05<br>(< 0.05 to < 0.05)            | 21.7<br>(-18.3 to 78.9)                                              | -1.1<br>(-37.5 to 54.4)                             |
| Hookworm disease                                                        | 3,769.9<br>(2,833.5 to 4,992.6)            | --                                            | 11.6<br>(6.9 to 18.4)                   | 27.6<br>(7.5 to 48.6)                                                | 2.6<br>(-13.2 to 20.8)                              |
| Food-borne trematodiasis                                                | --                                         | --                                            | --                                      | --                                                                   | --                                                  |
| Leprosy                                                                 | 2.2<br>(2.0 to 2.4)                        | 0.2<br>(0.2 to 0.2)                           | 0.1<br>(0.1 to 0.2)                     | 36.4<br>(7.1 to 75.2)                                                | -1.7<br>(-22.0 to 27.1)                             |
| Ebola virus disease                                                     | --                                         | --                                            | --                                      | --                                                                   | --                                                  |
| Zika virus disease                                                      | --                                         | --                                            | --                                      | --                                                                   | --                                                  |
| Guinea worm disease                                                     | --                                         | --                                            | --                                      | --                                                                   | --                                                  |
| Other neglected tropical diseases                                       | 685.1<br>(648.5 to 721.8)                  | --                                            | 21.0<br>(13.6 to 30.8)                  | 2.8<br>(-7.1 to 13.1)                                                | -9.5<br>(-17.4 to -1.3)                             |
| <b>Maternal disorders</b>                                               | <b>76.5<br/>(59.1 to 96.0)</b>             | <b>686.8†<br/>(600.6 to 788.0)</b>            | <b>9.0<br/>(5.9 to 13.1)</b>            | <b>-3.5<br/>(-24.3 to 21.7)</b>                                      | <b>-25.4<br/>(-41.0 to -6.6)</b>                    |
| Maternal haemorrhage                                                    | 5.8<br>(4.3 to 7.6)                        | 29.8<br>(21.7 to 40.6)                        | 0.2<br>(0.1 to 0.4)                     | 2.9<br>(-25.1 to 42.7)                                               | -19.6<br>(-41.3 to 11.1)                            |
| Maternal sepsis and other pregnancy related infections                  | 11.3<br>(6.6 to 17.6)                      | 114.3<br>(85.1 to 156.5)                      | 0.5<br>(0.2 to 0.9)                     | -6.0<br>(-57.0 to 95.8)                                              | -26.5<br>(-65.5 to 51.6)                            |
| Maternal hypertensive disorders                                         | 48.1<br>(30.7 to 66.4)                     | 210.7<br>(173.5 to 246.8)                     | 2.3<br>(1.2 to 3.7)                     | -19.3<br>(-51.5 to 33.9)                                             | -37.2<br>(-62.4 to 4.1)                             |
| Maternal obstructed labour and uterine rupture                          | 13.6<br>(9.7 to 18.4)                      | 50.4<br>(37.6 to 66.8)                        | 4.4<br>(2.5 to 6.8)                     | 8.6<br>(-17.8 to 44.6)                                               | -17.6<br>(-37.0 to 8.6)                             |
| Maternal abortion, miscarriage, and ectopic pregnancy                   | 2.3<br>(1.5 to 3.4)                        | 281.7<br>(214.5 to 369.9)                     | 0.2<br>(0.1 to 0.4)                     | 8.2<br>(-42.4 to 106.9)                                              | -17.3<br>(-55.4 to 55.7)                            |
| Other maternal disorders                                                | --                                         | --                                            | 1.4<br>(0.9 to 2.0)                     | -8.1<br>(-27.9 to 15.8)                                              | -29.0<br>(-43.8 to -11.0)                           |
| <b>Neonatal disorders</b>                                               | <b>417.1<br/>(322.5 to 587.2)</b>          | <b>--</b>                                     | <b>79.7<br/>(48.3 to 165.9)</b>         | <b>36.4<br/>(14.0 to 66.7)</b>                                       | <b>15.6<br/>(-3.5 to 41.6)</b>                      |
| Neonatal preterm birth complications                                    | 309.2<br>(230.9 to 432.0)                  | --                                            | 33.2<br>(21.1 to 51.3)                  | 38.3<br>(7.8 to 77.5)                                                | 14.9<br>(-10.8 to 48.0)                             |
| Neonatal encephalopathy due to birth asphyxia and trauma                | 56.1<br>(24.3 to 102.1)                    | --                                            | 5.2<br>(0.9 to 16.9)                    | 31.4<br>(-28.8 to 154.1)                                             | 10.2<br>(-39.4 to 119.0)                            |
| Neonatal sepsis and other neonatal infections                           | 66.9<br>(14.7 to 247.3)                    | --                                            | 28.5<br>(4.8 to 108.5)                  | 49.1<br>(-13.0 to 196.8)                                             | 28.2<br>(-25.1 to 188.6)                            |
| Hemolytic disease and other neonatal jaundice                           | 29.5<br>(25.5 to 33.8)                     | --                                            | 9.4<br>(7.0 to 12.2)                    | 18.0<br>(0.0 to 36.5)                                                | -3.4<br>(-16.7 to 11.2)                             |
| Other neonatal disorders                                                | --                                         | --                                            | 3.4<br>(2.0 to 7.3)                     | 1.2<br>(-18.6 to 28.1)                                               | 4.6<br>(-15.7 to 32.4)                              |
| <b>Nutritional deficiencies</b>                                         | <b>17,883.2<br/>(16,719.6 to 19,417.6)</b> | <b>6,512.9†<br/>(4,192.6 to 10,586.8)</b>     | <b>477.5<br/>(322.1 to 688.5)</b>       | <b>7.2<br/>(0.7 to 13.7)</b>                                         | <b>-10.8<br/>(-15.4 to -6.1)</b>                    |
| Protein-energy malnutrition                                             | 600.2<br>(486.5 to 726.8)                  | 350.0<br>(286.6 to 420.4)                     | 20.1<br>(12.3 to 30.3)                  | -28.8<br>(-48.0 to -1.6)                                             | -26.6<br>(-46.4 to 1.4)                             |
| Iodine deficiency                                                       | 449.4<br>(377.3 to 531.0)                  | 15.8<br>(13.3 to 18.4)                        | 12.4<br>(7.6 to 18.3)                   | -8.9<br>(-19.3 to 2.5)                                               | -29.4<br>(-36.9 to -21.6)                           |
| Vitamin A deficiency                                                    | 6,207.7<br>(4,254.8 to 9,429.4)            | 6,147.1<br>(3,816.6 to 10,222.6)              | 4.1<br>(2.3 to 6.8)                     | 10.7<br>(-7.9 to 30.8)                                               | -5.8<br>(-20.6 to 10.2)                             |
| Iron-deficiency anaemia                                                 | 14,333.3<br>(13,664.9 to 14,981.1)         | --                                            | 440.2<br>(296.3 to 640.4)               | 10.3<br>(3.4 to 17.1)                                                | -9.2<br>(-13.9 to -4.3)                             |
| Other nutritional deficiencies                                          | --                                         | --                                            | 0.7<br>(0.4 to 1.0)                     | -28.9<br>(-48.8 to -0.4)                                             | -26.8<br>(-47.3 to 2.6)                             |
| <b>Other communicable, maternal, neonatal, and nutritional diseases</b> | <b>9,690.5<br/>(8,996.9 to 10,464.5)</b>   | <b>6,056.7<br/>(5,233.9 to 7,014.9)</b>       | <b>41.8<br/>(26.6 to 63.0)</b>          | <b>22.5<br/>(15.6 to 29.6)</b>                                       | <b>-1.9<br/>(-6.8 to 3.5)</b>                       |
| Sexually transmitted diseases excluding HIV                             | 5,754.9<br>(5,373.3 to 6,154.3)            | 5,335.3<br>(4,580.7 to 6,172.1)               | 24.5<br>(15.0 to 39.4)                  | 31.7<br>(22.7 to 41.5)                                               | 0.2<br>(-6.6 to 7.6)                                |
| Syphilis                                                                | 697.7<br>(516.1 to 915.7)                  | 487.0<br>(343.3 to 665.9)                     | 0.4<br>(0.3 to 0.7)                     | 32.6<br>(20.0 to 47.4)                                               | -0.4<br>(-9.6 to 10.2)                              |
| Chlamydial infection                                                    | 483.2<br>(378.4 to 605.7)                  | 375.6<br>(294.8 to 475.7)                     | 2.7<br>(1.6 to 4.4)                     | 28.4<br>(11.2 to 48.0)                                               | -1.0<br>(-13.8 to 13.0)                             |
| Gonococcal infection                                                    | 946.5<br>(759.6 to 1,170.5)                | 3,377.1<br>(2,648.0 to 4,187.2)               | 11.7<br>(6.9 to 19.3)                   | 33.1<br>(20.4 to 47.4)                                               | 1.3<br>(-8.1 to 12.0)                               |
| Trichomoniasis                                                          | 675.8<br>(572.8 to 783.4)                  | 583.9<br>(495.2 to 680.9)                     | 0.9<br>(0.3 to 1.7)                     | 28.4<br>(17.9 to 38.7)                                               | -2.0<br>(-9.2 to 4.9)                               |
| Genital herpes                                                          | 3,327.1<br>(2,819.9 to 3,908.3)            | 304.4<br>(255.7 to 363.2)                     | 0.9<br>(0.3 to 2.0)                     | 33.0<br>(23.3 to 43.7)                                               | 0.1<br>(-5.7 to 6.7)                                |
| Other sexually transmitted diseases                                     | 212.3<br>(195.7 to 228.8)                  | 207.4<br>(159.3 to 261.8)                     | 7.9<br>(5.0 to 12.3)                    | 30.8<br>(21.2 to 42.2)                                               | -0.6<br>(-8.0 to 7.5)                               |
| Hepatitis                                                               | 4,137.4<br>(3,176.9 to 5,236.6)            | 721.4<br>(381.9 to 1,188.6)                   | 0.5<br>(0.3 to 0.8)                     | -12.1<br>(-37.9 to 25.9)                                             | -25.1<br>(-41.9 to -2.6)                            |
| Acute hepatitis A                                                       | 28.3<br>(3.8 to 63.6)                      | 367.9<br>(49.5 to 826.4)                      | 0.1<br>(< 0.05 to 0.3)                  | -9.3<br>(-74.0 to 202.7)                                             | -19.9<br>(-70.8 to 117.1)                           |
| Hepatitis B                                                             | 3,649.0<br>(2,686.2 to 4,727.9)            | 308.6<br>(222.1 to 422.8)                     | 0.3<br>(0.2 to 0.5)                     | -14.2<br>(-30.6 to 6.0)                                              | -27.6<br>(-42.0 to -10.7)                           |
| Hepatitis C                                                             | 458.0<br>(405.8 to 518.1)                  | 18.0<br>(15.7 to 20.6)                        | < 0.05<br>(< 0.05 to < 0.05)            | 0.4<br>(-0.4 to 1.4)                                                 | -7.2<br>(-8.0 to -6.3)                              |
| Acute hepatitis E                                                       | 2.1<br>(1.7 to 2.6)                        | 26.8<br>(21.5 to 33.2)                        | < 0.05<br>(< 0.05 to < 0.05)            | -8.4<br>(-17.9 to 2.4)                                               | -22.8<br>(-30.2 to -14.5)                           |
| Other infectious diseases                                               | 554.7<br>(527.2 to 582.7)                  | 0.1<br>(< 0.05 to 0.1)                        | 16.8<br>(11.0 to 24.4)                  | 12.3<br>(3.0 to 22.6)                                                | -4.4<br>(-11.5 to 3.4)                              |
| <b>Non-communicable diseases</b>                                        | <b>35,319.7<br/>(35,050.0 to 35,570.7)</b> | <b>104,064.4†<br/>(96,617.1 to 111,748.1)</b> | <b>3,240.8<br/>(2,375.7 to 4,222.1)</b> | <b>29.8<br/>(27.1 to 32.8)</b>                                       | <b>-0.6<br/>(-2.1 to 1.1)</b>                       |
| <b>Neoplasms</b>                                                        | <b>33.9<br/>(27.9 to 40.1)</b>             | <b>21.6<br/>(18.5 to 24.4)</b>                | <b>7.0<br/>(4.8 to 9.4)</b>             | <b>35.3<br/>(26.2 to 44.2)</b>                                       | <b>0.1<br/>(-6.0 to 6.3)</b>                        |
| Lip and oral cavity cancer                                              | 1.1<br>(0.9 to 1.3)                        | 0.3<br>(0.3 to 0.4)                           | 0.1<br>(0.1 to 0.2)                     | 41.2<br>(23.6 to 59.4)                                               | 2.4<br>(-10.8 to 15.8)                              |
| Nasopharynx cancer                                                      | 0.5<br>(0.4 to 0.7)                        | 0.2<br>(0.1 to 0.2)                           | 0.1<br>(< 0.05 to 0.1)                  | 20.6<br>(4.8 to 40.5)                                                | -12.3<br>(-22.5 to 0.2)                             |
| Other pharynx cancer                                                    | 0.2<br>(0.1 to 0.3)                        | 0.1<br>(0.1 to 0.1)                           | < 0.05<br>(< 0.05 to < 0.05)            | 30.2<br>(12.8 to 54.9)                                               | -5.0<br>(-17.8 to 13.0)                             |
| Oesophageal cancer                                                      | 0.4<br>(0.3 to 0.4)                        | 0.3<br>(0.3 to 0.4)                           | 0.1<br>(0.1 to 0.1)                     | 17.3<br>(6.0 to 29.7)                                                | -14.0<br>(-22.6 to -4.2)                            |
| Stomach cancer                                                          | 1.9<br>(1.7 to 2.2)                        | 1.3<br>(1.2 to 1.5)                           | 0.3<br>(0.2 to 0.5)                     | 13.3<br>(1.8 to 27.6)                                                | -16.6<br>(-26.7 to -4.2)                            |
| Colon and rectum cancer                                                 | 4.7<br>(3.8 to 5.8)                        | 1.7<br>(1.3 to 2.0)                           | 0.6<br>(0.4 to 0.8)                     | 44.2<br>(18.9 to 71.5)                                               | 5.4<br>(-14.0 to 26.1)                              |
| Liver cancer                                                            | 0.8<br>(0.4 to 1.1)                        | 1.8<br>(0.9 to 2.3)                           | 0.4<br>(0.2 to 0.6)                     | 35.1<br>(16.5 to 55.7)                                               | -1.3<br>(-14.7 to 13.7)                             |
| Liver cancer due to hepatitis B                                         | 0.7<br>(0.3 to 1.0)                        | 0.8<br>(0.4 to 1.2)                           | 0.2<br>(0.1 to 0.3)                     | 34.9<br>(14.6 to 56.4)                                               | -1.5<br>(-15.9 to 14.7)                             |



| Cause                                              | Prevalence in thousands (95% UI)              | Incidence in thousands (95% UI)          | YLDs in thousands (95% UI)             |                                                   |                                                     |
|----------------------------------------------------|-----------------------------------------------|------------------------------------------|----------------------------------------|---------------------------------------------------|-----------------------------------------------------|
|                                                    | 2016 counts                                   | 2016 counts                              | 2016 counts                            | Percentage change in counts between 2006 and 2016 | Percentage change in age-standardised rates between |
| Liver cancer due to hepatitis C                    | 0.3<br>(0.1 to 0.4)                           | 0.3<br>(0.2 to 0.5)                      | 0.1<br>( $< 0.05$ to 0.1)              | 35.7<br>(14.3 to 58.2)                            | -1.8<br>(-16.4 to 14.4)                             |
| Liver cancer due to alcohol use                    | 0.1<br>(0.1 to 0.3)                           | 0.2<br>(0.1 to 0.3)                      | $< 0.05$<br>( $< 0.05$ to 0.1)         | 36.4<br>(13.6 to 66.0)                            | -1.6<br>(-18.0 to 20.5)                             |
| Liver cancer due to other causes                   | 0.4<br>(0.1 to 0.6)                           | 0.4<br>(0.2 to 0.7)                      | 0.1<br>( $< 0.05$ to 0.2)              | 34.7<br>(12.5 to 58.5)                            | -0.5<br>(-16.1 to 17.6)                             |
| Gallbladder and biliary tract cancer               | 0.2<br>(0.1 to 0.2)                           | 0.3<br>(0.2 to 0.3)                      | 0.1<br>( $< 0.05$ to 0.1)              | 23.0<br>(9.4 to 41.8)                             | -10.3<br>(-20.2 to 2.7)                             |
| Pancreatic cancer                                  | 0.4<br>(0.3 to 0.4)                           | 0.5<br>(0.5 to 0.6)                      | 0.1<br>(0.1 to 0.1)                    | 47.8<br>(36.2 to 60.2)                            | 7.0<br>(-1.3 to 16.0)                               |
| Larynx cancer                                      | 0.6<br>(0.5 to 0.8)                           | 0.2<br>(0.2 to 0.3)                      | 0.1<br>(0.1 to 0.1)                    | 30.7<br>(15.2 to 47.5)                            | -5.2<br>(-16.3 to 7.3)                              |
| Tracheal, bronchus, and lung cancer                | 2.0<br>(1.5 to 2.6)                           | 1.8<br>(1.4 to 2.3)                      | 0.4<br>(0.3 to 0.6)                    | 28.9<br>(7.7 to 57.2)                             | -6.2<br>(-22.1 to 14.6)                             |
| Malignant skin melanoma                            | 0.2<br>(0.2 to 0.4)                           | 0.1<br>( $< 0.05$ to 0.1)                | $< 0.05$<br>( $< 0.05$ to $< 0.05$ )   | 57.6<br>(33.7 to 87.9)                            | 13.3<br>(-2.2 to 33.6)                              |
| Non-melanoma skin cancer                           | 0.2<br>(0.1 to 0.4)                           | 1.2<br>(0.7 to 1.8)                      | $< 0.05$<br>( $< 0.05$ to $< 0.05$ )   | 37.8<br>(3.1 to 85.2)                             | -4.4<br>(-29.9 to 32.9)                             |
| Non-melanoma skin cancer (squamous-cell carcinoma) | 0.2<br>(0.1 to 0.3)                           | 0.2<br>(0.2 to 0.4)                      | $< 0.05$<br>( $< 0.05$ to $< 0.05$ )   | 36.3<br>(-3.8 to 93.8)                            | -5.8<br>(-34.0 to 36.6)                             |
| Non-melanoma skin cancer (basal-cell carcinoma)    | 0.1<br>(0.1 to 0.2)                           | 0.9<br>(0.5 to 1.6)                      | $< 0.05$<br>( $< 0.05$ to $< 0.05$ )   | 48.6<br>(34.1 to 65.9)                            | 8.4<br>(-2.3 to 21.1)                               |
| Breast cancer                                      | 15.6<br>(9.7 to 23.2)                         | 3.6<br>(2.2 to 5.3)                      | 1.5<br>(0.8 to 2.4)                    | 54.4<br>(19.5 to 100.4)                           | 11.2<br>(-13.3 to 41.5)                             |
| Cervical cancer                                    | 2.7<br>(1.4 to 3.6)                           | 0.8<br>(0.4 to 1.0)                      | 0.3<br>(0.1 to 0.4)                    | 14.8<br>(-8.0 to 46.9)                            | -16.5<br>(-31.6 to 3.5)                             |
| Uterine cancer                                     | 1.4<br>(1.1 to 1.7)                           | 0.3<br>(0.2 to 0.4)                      | 0.1<br>(0.1 to 0.2)                    | 45.7<br>(17.7 to 86.8)                            | 3.2<br>(-16.0 to 31.0)                              |
| Ovarian cancer                                     | 1.2<br>(1.0 to 1.7)                           | 0.4<br>(0.3 to 0.6)                      | 0.2<br>(0.1 to 0.3)                    | 52.7<br>(27.4 to 84.0)                            | 9.4<br>(-12.1 to 35.2)                              |
| Prostate cancer                                    | 2.6<br>(2.0 to 3.3)                           | 0.8<br>(0.7 to 1.0)                      | 0.4<br>(0.2 to 0.5)                    | 56.8<br>(25.6 to 98.1)                            | 9.3<br>(-10.4 to 34.9)                              |
| Testicular cancer                                  | 0.2<br>(0.2 to 0.3)                           | 0.1<br>( $< 0.05$ to 0.1)                | $< 0.05$<br>( $< 0.05$ to $< 0.05$ )   | 38.0<br>(10.0 to 70.8)                            | 3.2<br>(-15.0 to 24.0)                              |
| Kidney cancer                                      | 1.6<br>(1.3 to 2.1)                           | 0.4<br>(0.4 to 0.5)                      | 0.1<br>(0.1 to 0.2)                    | 47.4<br>(23.5 to 70.1)                            | 15.6<br>(-0.6 to 33.8)                              |
| Bladder cancer                                     | 1.9<br>(1.6 to 2.3)                           | 0.6<br>(0.5 to 0.7)                      | 0.2<br>(0.1 to 0.3)                    | 50.6<br>(29.2 to 73.8)                            | 7.5<br>(-8.8 to 25.2)                               |
| Brain and nervous system cancer                    | 1.9<br>(1.5 to 2.5)                           | 0.8<br>(0.7 to 1.0)                      | 0.3<br>(0.2 to 0.4)                    | 38.3<br>(19.1 to 74.7)                            | 7.8<br>(-7.0 to 40.9)                               |
| Thyroid cancer                                     | 1.1<br>(0.8 to 1.4)                           | 0.2<br>(0.2 to 0.3)                      | 0.1<br>(0.1 to 0.1)                    | 52.0<br>(25.3 to 85.1)                            | 2.2<br>(-15.4 to 25.2)                              |
| Mesothelioma                                       | 0.1<br>( $< 0.05$ to 0.1)                     | $< 0.05$<br>( $< 0.05$ to 0.1)           | $< 0.05$<br>( $< 0.05$ to $< 0.05$ )   | 36.4<br>(18.4 to 56.5)                            | -1.0<br>(-14.1 to 13.1)                             |
| Hodgkin lymphoma                                   | 0.6<br>(0.5 to 1.0)                           | 0.2<br>(0.2 to 0.4)                      | 0.1<br>(0.1 to 0.1)                    | 4.0<br>(-7.1 to 16.5)                             | -21.0<br>(-28.0 to -13.4)                           |
| Non-Hodgkin's lymphoma                             | 1.8<br>(1.6 to 2.3)                           | 0.7<br>(0.6 to 0.9)                      | 0.2<br>(0.1 to 0.3)                    | 35.1<br>(20.7 to 50.3)                            | 1.6<br>(-10.3 to 15.0)                              |
| Multiple myeloma                                   | 0.3<br>(0.2 to 0.4)                           | 0.2<br>(0.1 to 0.2)                      | 0.1<br>(0.1 to 0.1)                    | 43.4<br>(24.5 to 67.5)                            | 4.0<br>(-9.4 to 22.0)                               |
| Leukaemia                                          | 6.9<br>(5.0 to 9.3)                           | 1.8<br>(1.3 to 2.3)                      | 0.8<br>(0.5 to 1.2)                    | 13.3<br>(-1.2 to 34.1)                            | -10.1<br>(-21.2 to 4.7)                             |
| Acute lymphoid leukaemia                           | 0.9<br>(0.6 to 1.6)                           | 0.2<br>(0.1 to 0.4)                      | 0.1<br>(0.1 to 0.2)                    | 13.9<br>(-12.1 to 48.7)                           | -3.5<br>(-21.9 to 18.9)                             |
| Chronic lymphoid leukaemia                         | 0.6<br>(0.4 to 0.8)                           | 0.1<br>(0.1 to 0.2)                      | 0.1<br>( $< 0.05$ to 0.1)              | 36.0<br>(12.2 to 68.4)                            | 0.4<br>(-15.8 to 23.1)                              |
| Acute myeloid leukaemia                            | 0.5<br>(0.3 to 0.9)                           | 0.2<br>(0.2 to 0.4)                      | 0.1<br>( $< 0.05$ to 0.1)              | 34.1<br>(10.1 to 61.6)                            | 9.1<br>(-7.5 to 26.1)                               |
| Chronic myeloid leukaemia                          | 0.5<br>(0.3 to 0.6)                           | 0.2<br>(0.1 to 0.2)                      | 0.1<br>( $< 0.05$ to 0.1)              | 19.6<br>(-1.5 to 47.8)                            | -10.6<br>(-25.7 to 9.8)                             |
| Other leukaemia                                    | 4.5<br>(3.1 to 6.1)                           | 1.0<br>(0.7 to 1.3)                      | 0.5<br>(0.3 to 0.8)                    | 7.9<br>(-8.4 to 31.3)                             | -13.8<br>(-26.4 to 3.9)                             |
| Other neoplasms                                    | 2.8<br>(2.3 to 3.9)                           | 1.0<br>(0.8 to 1.2)                      | 0.3<br>(0.2 to 0.4)                    | 27.3<br>(13.9 to 43.3)                            | -1.5<br>(-12.2 to 12.0)                             |
| <b>Cardiovascular diseases</b>                     | <b>1,684.1</b><br><b>(1,621.3 to 1,746.6)</b> | <b>204.2†</b><br><b>(194.0 to 214.3)</b> | <b>99.1</b><br><b>(72.2 to 128.8)</b>  | <b>32.2</b><br><b>(27.5 to 37.4)</b>              | <b>-1.9</b><br><b>(-5.4 to 1.7)</b>                 |
| Rheumatic heart disease                            | 133.3<br>(117.5 to 151.2)                     | 5.5<br>(4.9 to 6.2)                      | 6.4<br>(4.0 to 9.2)                    | 12.4<br>(1.3 to 24.2)                             | -13.6<br>(-21.2 to -5.3)                            |
| Ischaemic heart disease                            | 765.2<br>(720.0 to 809.3)                     | 111.1<br>(102.8 to 120.0)                | 28.6<br>(19.6 to 39.3)                 | 38.5<br>(32.0 to 44.9)                            | 1.5<br>(-2.4 to 5.6)                                |
| Cerebrovascular disease                            | 206.8<br>(193.4 to 221.5)                     | 32.8‡<br>(30.0 to 35.6)                  | 31.4<br>(22.3 to 40.1)                 | 31.2<br>(21.9 to 41.0)                            | -3.4<br>(-10.4 to 3.5)                              |
| Ischaemic stroke                                   | 181.4<br>(163.8 to 200.8)                     | 23.8‡<br>(21.2 to 26.6)                  | 26.3<br>(18.7 to 33.5)                 | 30.9<br>(20.1 to 42.5)                            | -3.9<br>(-11.8 to 4.3)                              |
| Hemorrhagic stroke                                 | 34.8<br>(31.2 to 38.7)                        | 9.0‡<br>(8.1 to 9.9)                     | 5.1<br>(3.6 to 6.6)                    | 32.5<br>(17.8 to 49.4)                            | -0.4<br>(-11.2 to 11.9)                             |
| Hypertensive heart disease                         | 29.5<br>(25.0 to 34.9)                        | --                                       | 2.4<br>(1.6 to 3.3)                    | 39.3<br>(22.4 to 58.4)                            | 0.3<br>(-10.6 to 12.6)                              |
| Cardiomyopathy and myocarditis                     | 13.0<br>(11.5 to 14.5)                        | 12.5†<br>(10.7 to 14.4)                  | 1.5<br>(1.0 to 2.1)                    | 30.4<br>(15.8 to 47.1)                            | 0.5<br>(-10.1 to 12.1)                              |
| Myocarditis                                        | 6.9<br>(6.1 to 7.8)                           | 12.5<br>(10.7 to 14.4)                   | 0.5<br>(0.3 to 0.7)                    | 28.2<br>(20.1 to 36.9)                            | 0.8<br>(-6.5 to 9.2)                                |
| Alcoholic cardiomyopathy                           | 1.5<br>(1.3 to 1.8)                           | --                                       | 0.1<br>(0.1 to 0.2)                    | 38.3<br>(12.6 to 71.1)                            | 0.4<br>(-19.9 to 27.8)                              |
| Other cardiomyopathy                               | 10.1<br>(8.6 to 11.7)                         | --                                       | 0.9<br>(0.6 to 1.3)                    | 30.6<br>(7.9 to 58.7)                             | 0.4<br>(-15.0 to 18.0)                              |
| Atrial fibrillation and flutter                    | 85.8<br>(74.8 to 98.2)                        | 7.6<br>(6.6 to 8.9)                      | 6.6<br>(4.5 to 9.3)                    | 38.5<br>(27.9 to 49.2)                            | 0.1<br>(-6.4 to 6.7)                                |
| Peripheral vascular disease                        | 283.1<br>(243.5 to 330.1)                     | 29.6<br>(25.5 to 34.6)                   | 1.4<br>(0.6 to 2.6)                    | 33.1<br>(22.2 to 45.1)                            | -3.7<br>(-11.1 to 5.0)                              |
| Endocarditis                                       | 1.5<br>(1.3 to 1.7)                           | 5.2<br>(4.6 to 5.8)                      | 0.1<br>(0.1 to 0.2)                    | 29.3<br>(15.6 to 43.5)                            | -3.1<br>(-18.9 to 14.5)                             |
| Other cardiovascular and circulatory diseases      | 400.1<br>(340.4 to 468.2)                     | --                                       | 20.9<br>(14.3 to 29.4)                 | 30.1<br>(20.7 to 40.4)                            | -3.3<br>(-10.0 to 4.2)                              |
| <b>Chronic respiratory diseases</b>                | <b>3,392.3</b><br><b>(3,214.1 to 3,583.3)</b> | <b>604.8†</b><br><b>(562.1 to 652.7)</b> | <b>140.0</b><br><b>(98.9 to 191.6)</b> | <b>33.3</b><br><b>(27.0 to 39.9)</b>              | <b>4.5</b><br><b>(0.3 to 8.8)</b>                   |
| Chronic obstructive pulmonary disease              | 636.4<br>(608.7 to 664.7)                     | 43.3<br>(41.3 to 45.1)                   | 26.3<br>(21.6 to 31.0)                 | 34.1<br>(23.3 to 46.4)                            | -0.8<br>(-8.3 to 8.3)                               |
| Pneumoconiosis                                     | 1.4<br>(1.3 to 1.6)                           | 0.1<br>(0.1 to 0.1)                      | 0.2<br>(0.1 to 0.3)                    | 40.5<br>(34.4 to 47.4)                            | 3.4<br>(-1.1 to 8.5)                                |
| Silicosis                                          | 0.3<br>(0.3 to 0.4)                           | $< 0.05$<br>( $< 0.05$ to $< 0.05$ )     | 0.1<br>( $< 0.05$ to 0.1)              | 37.7<br>(30.4 to 46.6)                            | 2.4<br>(-2.3 to 8.2)                                |

| Cause                                                          | Prevalence in thousands (95% UI)           | Incidence in thousands (95% UI)                     | YLDs in thousands (95% UI)          |                                                   |                                                     |
|----------------------------------------------------------------|--------------------------------------------|-----------------------------------------------------|-------------------------------------|---------------------------------------------------|-----------------------------------------------------|
|                                                                | 2016 counts                                | 2016 counts                                         | 2016 counts                         | Percentage change in counts between 2006 and 2016 | Percentage change in age-standardised rates between |
| Asbestosis                                                     | 0.4<br>(0.3 to 0.4)                        | < 0.05<br>(< 0.05 to < 0.05)                        | 0.1<br>(< 0.05 to 0.1)              | 37.9<br>(31.2 to 45.0)                            | 0.7<br>(-3.7 to 5.2)                                |
| Coal workers pneumoconiosis                                    | --                                         | --                                                  | --                                  | --                                                | --                                                  |
| Other pneumoconiosis                                           | 0.7<br>(0.6 to 0.8)                        | 0.1<br>(< 0.05 to 0.1)                              | 0.1<br>(0.1 to 0.2)                 | 43.2<br>(31.8 to 56.9)                            | 5.4<br>(-3.8 to 14.9)                               |
| Asthma                                                         | 2,816.3<br>(2,587.1 to 3,069.4)            | 560.7<br>(517.3 to 607.6)                           | 109.9<br>(72.6 to 158.9)            | 32.4<br>(25.7 to 39.9)                            | 6.4<br>(1.7 to 11.4)                                |
| Interstitial lung disease and pulmonary sarcoidosis            | 7.7<br>(6.9 to 8.5)                        | 0.8<br>(0.7 to 0.9)                                 | 0.8<br>(0.6 to 1.2)                 | 38.9<br>(27.3 to 50.2)                            | 3.1<br>(-7.4 to 14.6)                               |
| Other chronic respiratory diseases                             | --                                         | --                                                  | 2.7<br>(2.1 to 3.4)                 | 67.3<br>(34.7 to 105.6)                           | 31.7<br>(12.8 to 53.4)                              |
| <b>Cirrhosis and other chronic liver diseases</b>              | <b>134.5<br/>(126.5 to 143.2)</b>          | <b>7.4<br/>(6.9 to 7.8)</b>                         | <b>6.8<br/>(4.7 to 9.5)</b>         | <b>29.4<br/>(14.8 to 46.4)</b>                    | <b>1.3<br/>(-6.7 to 10.4)</b>                       |
| Cirrhosis and other chronic liver diseases due to hepatitis B  | 51.2<br>(44.3 to 58.7)                     | 3.1<br>(2.7 to 3.6)                                 | 1.9<br>(1.3 to 2.8)                 | 38.2<br>(19.9 to 61.1)                            | 1.9<br>(-9.5 to 15.5)                               |
| Cirrhosis and other chronic liver diseases due to hepatitis C  | 25.7<br>(19.2 to 34.7)                     | 1.5<br>(1.1 to 2.0)                                 | 1.0<br>(0.6 to 1.5)                 | 35.9<br>(10.4 to 68.2)                            | 0.2<br>(-15.9 to 21.2)                              |
| Cirrhosis and other chronic liver diseases due to alcohol use  | 7.9<br>(6.7 to 9.1)                        | 0.5<br>(0.4 to 0.6)                                 | 0.3<br>(0.2 to 0.4)                 | 39.1<br>(11.2 to 74.3)                            | 1.7<br>(-19.0 to 29.0)                              |
| Cirrhosis and other chronic liver diseases due to other causes | 49.7<br>(44.9 to 54.6)                     | 2.2<br>(2.0 to 2.4)                                 | 3.6<br>(2.4 to 5.2)                 | 22.8<br>(1.0 to 50.4)                             | 1.3<br>(-13.0 to 19.3)                              |
| <b>Digestive diseases</b>                                      | <b>1,125.6<br/>(1,067.0 to 1,199.6)</b>    | <b>749.7<sup>†</sup><br/>(704.9 to 800.1)</b>       | <b>40.2<br/>(28.4 to 54.6)</b>      | <b>28.7<br/>(20.8 to 37.6)</b>                    | <b>0.2<br/>(-5.0 to 5.8)</b>                        |
| Peptic ulcer disease                                           | 278.6<br>(252.8 to 309.2)                  | 32.0<br>(28.5 to 36.0)                              | 7.0<br>(4.6 to 10.3)                | 42.2<br>(28.4 to 56.6)                            | 6.7<br>(-2.6 to 16.4)                               |
| Gastritis and duodenitis                                       | 326.9<br>(287.7 to 369.0)                  | 319.5<br>(282.4 to 362.2)                           | 6.3<br>(4.2 to 9.0)                 | 42.7<br>(30.0 to 56.3)                            | 9.9<br>(1.0 to 18.8)                                |
| Appendicitis                                                   | 5.1<br>(4.6 to 5.6)                        | 134.3<br>(121.9 to 148.0)                           | 1.6<br>(1.0 to 2.3)                 | 24.7<br>(-11.1 to 80.2)                           | -2.0<br>(-26.4 to 34.5)                             |
| Paralytic ileus and intestinal obstruction                     | 0.4<br>(0.3 to 0.5)                        | 10.6<br>(9.2 to 12.2)                               | 0.1<br>(0.1 to 0.2)                 | 32.2<br>(27.4 to 36.9)                            | 4.9<br>(1.4 to 8.4)                                 |
| Inguinal, femoral, and abdominal hernia                        | 498.8<br>(439.2 to 565.3)                  | 91.0<br>(80.0 to 103.3)                             | 20.7<br>(13.8 to 28.8)              | 20.8<br>(10.1 to 33.2)                            | -6.0<br>(-13.0 to 2.2)                              |
| Inflammatory bowel disease                                     | 3.4<br>(2.5 to 4.4)                        | 23.8<br>(17.3 to 31.5)                              | 0.5<br>(0.3 to 0.8)                 | 42.0<br>(33.3 to 52.7)                            | 8.6<br>(2.0 to 16.4)                                |
| Vascular intestinal disorders                                  | 0.2<br>(0.2 to 0.3)                        | 1.3<br>(1.1 to 1.5)                                 | 0.1<br>(< 0.05 to 0.1)              | 29.2<br>(23.3 to 35.5)                            | 2.5<br>(-1.5 to 6.5)                                |
| Gallbladder and biliary diseases                               | 51.2<br>(44.6 to 58.3)                     | 130.2<br>(111.7 to 150.7)                           | 0.7<br>(0.5 to 1.0)                 | 41.1<br>(20.6 to 67.0)                            | 5.0<br>(-12.3 to 27.6)                              |
| Pancreatitis                                                   | 0.8<br>(0.7 to 0.9)                        | 7.1<br>(6.2 to 8.0)                                 | 0.1<br>(0.1 to 0.1)                 | 41.5<br>(37.5 to 46.5)                            | 7.0<br>(3.8 to 10.8)                                |
| Other digestive diseases                                       | --                                         | --                                                  | 3.2<br>(2.2 to 4.4)                 | 28.9<br>(19.6 to 39.4)                            | 4.1<br>(-1.6 to 10.3)                               |
| <b>Neurological disorders</b>                                  | <b>15,200.2<br/>(14,547.6 to 15,984.2)</b> | <b>7,831.2<br/>(6,620.4 to 9,200.0)</b>             | <b>389.6<br/>(257.1 to 542.8)</b>   | <b>32.5<br/>(12.0 to 56.3)</b>                    | <b>1.5<br/>(-10.7 to 15.0)</b>                      |
| Alzheimer's disease and other dementias                        | 99.4<br>(83.5 to 118.2)                    | 16.7<br>(13.9 to 20.0)                              | 13.7<br>(9.5 to 18.2)               | 39.1<br>(31.5 to 45.8)                            | -0.5<br>(-5.5 to 3.9)                               |
| Parkinson's disease                                            | 11.8<br>(9.3 to 14.6)                      | 1.5<br>(1.2 to 1.8)                                 | 1.4<br>(0.9 to 1.9)                 | 58.3<br>(38.0 to 81.5)                            | 13.9<br>(1.1 to 28.4)                               |
| Epilepsy                                                       | 100.9<br>(25.3 to 177.3)                   | 13.7<br>(3.5 to 24.0)                               | 40.7<br>(9.5 to 80.4)               | 31.3<br>(-72.3 to 578.0)                          | 6.9<br>(-76.9 to 445.4)                             |
| Multiple sclerosis                                             | 6.3<br>(5.6 to 7.2)                        | 0.3<br>(0.3 to 0.4)                                 | 1.7<br>(1.2 to 2.4)                 | 47.4<br>(24.9 to 75.2)                            | 10.5<br>(-5.9 to 30.4)                              |
| Motor neuron disease                                           | 0.6<br>(0.5 to 0.7)                        | 0.1<br>(0.1 to 0.1)                                 | 0.1<br>(0.1 to 0.2)                 | 31.1<br>(24.7 to 37.4)                            | 3.4<br>(-0.2 to 6.9)                                |
| Migraine                                                       | 6,119.6<br>(5,731.9 to 6,502.6)            | 749.1<br>(695.5 to 804.5)                           | 273.6<br>(176.3 to 381.3)           | 31.2<br>(26.4 to 36.6)                            | 0.3<br>(-3.0 to 3.8)                                |
| Tension-type headache                                          | 11,733.2<br>(10,534.2 to 13,096.2)         | 7,049.5<br>(5,857.1 to 8,446.9)                     | 48.0<br>(30.5 to 71.7)              | 32.9<br>(26.3 to 40.2)                            | 1.2<br>(-3.5 to 6.2)                                |
| Other neurological disorders                                   | 0.1<br>(0.1 to 0.2)                        | 0.3<br>(0.2 to 0.4)                                 | 10.5<br>(3.0 to 20.0)               | 59.6<br>(-59.0 to 577.3)                          | 27.0<br>(-60.8 to 314.7)                            |
| <b>Mental and substance use disorders</b>                      | <b>6,251.0<br/>(5,963.3 to 6,551.7)</b>    | <b>2,369.5<sup>†</sup><br/>(2,155.8 to 2,602.1)</b> | <b>818.6<br/>(595.2 to 1,062.8)</b> | <b>29.9<br/>(27.2 to 32.8)</b>                    | <b>0.3<br/>(-1.8 to 2.3)</b>                        |
| Schizophrenia                                                  | 53.5<br>(46.2 to 61.3)                     | 4.4<br>(3.8 to 5.0)                                 | 33.8<br>(24.8 to 42.8)              | 35.1<br>(21.9 to 48.7)                            | 1.3<br>(-7.6 to 10.8)                               |
| Alcohol use disorders                                          | 214.0<br>(178.9 to 250.4)                  | 120.4<br>(100.5 to 140.6)                           | 21.3<br>(14.4 to 30.0)              | 33.0<br>(19.4 to 47.9)                            | 1.9<br>(-7.4 to 12.2)                               |
| Drug use disorders                                             | 294.3<br>(261.1 to 330.7)                  | 40.5<br>(35.7 to 46.2)                              | 91.9<br>(62.8 to 124.4)             | 37.7<br>(25.7 to 50.4)                            | 5.9<br>(-2.7 to 14.7)                               |
| Opioid use disorders                                           | 205.5<br>(165.0 to 253.9)                  | 23.1<br>(19.1 to 28.4)                              | 84.6<br>(56.9 to 115.5)             | 38.1<br>(25.1 to 52.7)                            | 6.2<br>(-2.9 to 16.1)                               |
| Cocaine use disorders                                          | 15.1<br>(12.7 to 17.9)                     | 1.8<br>(1.5 to 2.2)                                 | 2.1<br>(1.2 to 3.2)                 | 33.2<br>(0.4 to 84.8)                             | 2.7<br>(-19.8 to 34.5)                              |
| Amphetamine use disorders                                      | 2.8<br>(2.0 to 3.8)                        | 0.5<br>(0.4 to 0.7)                                 | 0.4<br>(0.2 to 0.6)                 | 32.1<br>(20.2 to 43.6)                            | 2.9<br>(-5.7 to 11.7)                               |
| Cannabis use disorders                                         | 63.4<br>(50.3 to 79.3)                     | 12.4<br>(9.9 to 15.3)                               | 1.9<br>(1.1 to 2.8)                 | 29.4<br>(7.5 to 56.1)                             | 0.2<br>(-16.1 to 18.6)                              |
| Other drug use disorders                                       | 13.0<br>(11.3 to 14.7)                     | 2.7<br>(2.4 to 3.1)                                 | 3.0<br>(2.0 to 4.2)                 | 35.6<br>(9.8 to 69.6)                             | 4.0<br>(-14.1 to 26.2)                              |
| Depressive disorders                                           | 1,324.4<br>(1,235.5 to 1,439.3)            | 1,638.0<br>(1,430.2 to 1,856.5)                     | 237.9<br>(164.1 to 325.1)           | 30.3<br>(24.3 to 36.9)                            | -0.7<br>(-5.0 to 3.9)                               |
| Major depressive disorder                                      | 1,009.3<br>(882.0 to 1,150.5)              | 1,574.1<br>(1,359.9 to 1,800.0)                     | 205.8<br>(140.5 to 282.5)           | 29.9<br>(22.9 to 37.6)                            | -0.9<br>(-5.9 to 4.7)                               |
| Dysthymia                                                      | 335.9<br>(292.4 to 385.6)                  | 63.9<br>(55.7 to 73.2)                              | 32.1<br>(21.6 to 47.1)              | 32.9<br>(27.2 to 38.8)                            | 0.1<br>(-3.4 to 3.6)                                |
| Bipolar disorder                                               | 287.0<br>(243.6 to 338.9)                  | 30.8<br>(25.9 to 36.8)                              | 58.5<br>(36.1 to 86.1)              | 31.2<br>(22.9 to 40.2)                            | 0.3<br>(-5.0 to 6.4)                                |
| Anxiety disorders                                              | 1,876.2<br>(1,649.0 to 2,137.9)            | 294.2<br>(257.3 to 333.4)                           | 180.3<br>(123.1 to 245.9)           | 29.8<br>(25.0 to 34.8)                            | 0.1<br>(-3.1 to 3.5)                                |
| Eating disorders                                               | 52.9<br>(42.6 to 66.3)                     | 34.4<br>(24.9 to 46.3)                              | 10.4<br>(6.5 to 15.5)               | 43.7<br>(24.9 to 65.1)                            | 12.0<br>(-2.6 to 29.0)                              |
| Anorexia nervosa                                               | 9.2<br>(6.7 to 12.1)                       | 4.5<br>(3.2 to 6.0)                                 | 1.9<br>(1.1 to 3.1)                 | 39.6<br>(3.3 to 88.9)                             | 9.6<br>(-18.0 to 48.7)                              |
| Bulimia nervosa                                                | 40.5<br>(30.0 to 54.4)                     | 29.9<br>(20.4 to 41.8)                              | 8.4<br>(5.0 to 13.1)                | 44.7<br>(22.5 to 69.2)                            | 12.5<br>(-5.0 to 31.3)                              |
| Autistic spectrum disorders                                    | 356.9<br>(320.0 to 407.1)                  | 3.1<br>(2.1 to 4.5)                                 | 50.3<br>(33.7 to 70.4)              | 24.8<br>(18.9 to 31.6)                            | 0.5<br>(-4.1 to 5.4)                                |
| Autism                                                         | 95.2<br>(81.5 to 110.9)                    | 0.4<br>(0.2 to 0.6)                                 | 24.2<br>(15.4 to 35.5)              | 25.7<br>(14.7 to 37.5)                            | 0.8<br>(-7.7 to 9.8)                                |
| Asperger syndrome and other autistic spectrum disorders        | 262.4<br>(219.7 to 314.8)                  | 2.8<br>(1.8 to 4.1)                                 | 26.1<br>(17.1 to 38.2)              | 24.0<br>(18.3 to 31.1)                            | 0.2<br>(-4.0 to 4.9)                                |



| Cause                                                      | Prevalence in thousands (95% UI)                 | Incidence in thousands (95% UI)                   | YLDs in thousands (95% UI)                |                                                   |                                                     |
|------------------------------------------------------------|--------------------------------------------------|---------------------------------------------------|-------------------------------------------|---------------------------------------------------|-----------------------------------------------------|
|                                                            | 2016 counts                                      | 2016 counts                                       | 2016 counts                               | Percentage change in counts between 2006 and 2016 | Percentage change in age-standardised rates between |
| Attention-deficit/hyperactivity disorder                   | 483.5<br>(390.6 to 594.0)                        | 24.3<br>(19.3 to 30.5)                            | 5.8<br>(3.3 to 9.3)                       | 26.1<br>(16.8 to 35.6)                            | 0.3<br>(-6.7 to 8.0)                                |
| Conduct disorder                                           | 430.6<br>(347.9 to 510.5)                        | 151.1<br>(119.9 to 183.2)                         | 51.8<br>(31.1 to 78.2)                    | 24.5<br>(16.9 to 32.9)                            | 0.3<br>(-5.6 to 6.8)                                |
| Idiopathic developmental intellectual disability           | 892.1<br>(535.3 to 1,295.8)                      | --                                                | 33.3<br>(14.9 to 60.0)                    | 11.8<br>(1.5 to 21.6)                             | -11.8<br>(-19.5 to -4.6)                            |
| Other mental and substance use disorders                   | 586.0<br>(513.1 to 679.4)                        | 28.4<br>(24.9 to 32.7)                            | 43.3<br>(29.8 to 61.6)                    | 33.0<br>(25.7 to 41.3)                            | 0.3<br>(-4.3 to 5.4)                                |
| <b>Diabetes, urogenital, blood, and endocrine diseases</b> | <b>16,181.0</b><br><b>(15,898.6 to 16,475.0)</b> | <b>4,068.1†</b><br><b>(3,798.3 to 4,348.1)</b>    | <b>347.1</b><br><b>(248.7 to 472.3)</b>   | <b>29.0</b><br><b>(25.1 to 33.5)</b>              | <b>-0.7</b><br><b>(-3.6 to 2.5)</b>                 |
| Diabetes mellitus                                          | 1,448.5<br>(1,296.5 to 1,608.5)                  | 94.6<br>(84.6 to 105.3)                           | 118.7<br>(82.2 to 167.0)                  | 43.5<br>(35.0 to 51.9)                            | 5.7<br>(-0.8 to 12.2)                               |
| Acute glomerulonephritis                                   | 0.4<br>(0.3 to 0.4)                              | 5.2<br>(4.4 to 6.0)                               | < 0.05<br>(< 0.05 to < 0.05)              | 27.6<br>(21.5 to 33.3)                            | 0.5<br>(-3.2 to 4.2)                                |
| Chronic kidney disease                                     | 1,413.6<br>(1,282.4 to 1,561.2)                  | 107.5<br>(96.0 to 120.8)                          | 51.2<br>(37.5 to 66.0)                    | 29.2<br>(22.0 to 37.2)                            | -3.7<br>(-8.7 to 1.5)                               |
| Chronic kidney disease due to diabetes mellitus            | 572.5<br>(490.3 to 672.0)                        | 41.9<br>(34.5 to 50.6)                            | 19.9<br>(14.4 to 26.0)                    | 33.0<br>(22.5 to 43.8)                            | -2.5<br>(-9.2 to 4.3)                               |
| Chronic kidney disease due to hypertension                 | 214.3<br>(182.5 to 248.8)                        | 18.5<br>(15.1 to 22.6)                            | 7.0<br>(5.0 to 9.3)                       | 31.7<br>(18.7 to 45.3)                            | -3.4<br>(-11.9 to 5.8)                              |
| Chronic kidney disease due to glomerulonephritis           | 213.2<br>(181.9 to 247.1)                        | 13.7<br>(11.1 to 16.8)                            | 9.0<br>(6.2 to 12.3)                      | 24.1<br>(10.8 to 39.6)                            | -4.8<br>(-13.5 to 5.2)                              |
| Chronic kidney disease due to other causes                 | 413.6<br>(347.8 to 484.1)                        | 33.4<br>(27.9 to 39.0)                            | 15.3<br>(11.1 to 20.6)                    | 26.6<br>(14.6 to 38.9)                            | -5.2<br>(-12.8 to 2.5)                              |
| Urinary diseases and male infertility                      | 882.9<br>(774.5 to 993.2)                        | 2,090.5†<br>(1,876.7 to 2,343.6)                  | 18.7<br>(12.2 to 27.4)                    | 24.8<br>(11.9 to 36.5)                            | -9.2<br>(-18.7 to -0.4)                             |
| Interstitial nephritis and urinary tract infections        | 32.4<br>(28.2 to 37.0)                           | 1,695.7<br>(1,487.9 to 1,936.0)                   | 1.1<br>(0.7 to 1.7)                       | 28.2<br>(6.1 to 52.9)                             | 2.1<br>(-13.5 to 18.1)                              |
| Urolithiasis                                               | 13.0<br>(11.4 to 14.9)                           | 343.8<br>(302.0 to 397.1)                         | 1.0<br>(0.6 to 1.4)                       | 33.6<br>(14.7 to 56.3)                            | 1.0<br>(-14.1 to 19.2)                              |
| Benign prostatic hyperplasia                               | 422.7<br>(359.1 to 507.4)                        | 51.0<br>(42.9 to 60.2)                            | 13.8<br>(8.7 to 20.4)                     | 24.1<br>(7.1 to 39.9)                             | -10.4<br>(-21.5 to 0.1)                             |
| Male infertility                                           | 373.4<br>(296.6 to 465.2)                        | --                                                | 2.1<br>(0.9 to 4.4)                       | 31.8<br>(25.2 to 39.7)                            | 0.6<br>(-4.9 to 6.6)                                |
| Other urinary diseases                                     | --                                               | --                                                | 0.8<br>(0.5 to 1.1)                       | 6.9<br>(-5.6 to 20.2)                             | -15.2<br>(-24.5 to -4.8)                            |
| Gynecological diseases                                     | 4,116.9<br>(3,883.5 to 4,320.9)                  | 1,706.5†<br>(1,567.0 to 1,850.8)                  | 58.9<br>(39.7 to 84.0)                    | 29.1<br>(23.6 to 34.2)                            | -3.4<br>(-7.0 to 0.3)                               |
| Uterine fibroids                                           | 311.9<br>(274.5 to 351.7)                        | 38.5<br>(33.2 to 44.4)                            | 8.6<br>(5.6 to 13.0)                      | 36.7<br>(25.5 to 47.0)                            | -0.8<br>(-8.8 to 6.9)                               |
| Polycystic ovarian syndrome                                | 31.7<br>(23.6 to 41.4)                           | 35.1<br>(25.3 to 45.1)                            | 0.3<br>(0.1 to 0.5)                       | 31.4<br>(12.2 to 53.2)                            | -0.1<br>(-14.2 to 15.2)                             |
| Female infertility                                         | 329.8<br>(190.1 to 527.9)                        | --                                                | 1.8<br>(0.6 to 4.0)                       | 31.4<br>(15.1 to 51.8)                            | 0.2<br>(-13.0 to 17.3)                              |
| Endometriosis                                              | 7.0<br>(5.8 to 8.5)                              | 27.3<br>(21.9 to 34.3)                            | 0.7<br>(0.4 to 1.0)                       | 29.8<br>(-2.7 to 74.3)                            | -0.2<br>(-23.5 to 31.7)                             |
| Genital prolapse                                           | 1,015.7<br>(882.8 to 1,153.5)                    | 83.1<br>(71.2 to 96.2)                            | 3.1<br>(1.5 to 5.7)                       | 7.3<br>(0.5 to 14.8)                              | -21.1<br>(-26.0 to -15.2)                           |
| Premenstrual syndrome                                      | 2,333.6<br>(2,137.1 to 2,526.2)                  | 903.6<br>(821.7 to 993.3)                         | 19.3<br>(12.0 to 29.3)                    | 29.0<br>(19.1 to 40.2)                            | -2.0<br>(-9.4 to 6.3)                               |
| Other gynecological diseases                               | 730.7<br>(637.8 to 835.4)                        | 618.8<br>(509.6 to 745.5)                         | 25.1<br>(16.8 to 35.5)                    | 29.8<br>(21.9 to 38.5)                            | -1.4<br>(-7.1 to 4.9)                               |
| Hemoglobinopathies and hemolytic anaemias                  | 11,034.2<br>(10,723.5 to 11,365.1)               | --                                                | 74.3<br>(49.4 to 106.8)                   | 15.1<br>(7.3 to 23.0)                             | -5.2<br>(-10.6 to 0.7)                              |
| Thalassemias                                               | 3.6<br>(3.2 to 4.0)                              | --                                                | 0.3<br>(0.2 to 0.4)                       | 1.2<br>(-20.9 to 34.5)                            | -1.6<br>(-24.4 to 31.9)                             |
| Thalassaemias trait                                        | 2,748.7<br>(2,585.5 to 2,912.4)                  | --                                                | 41.6<br>(27.8 to 60.1)                    | 14.8<br>(5.8 to 24.2)                             | -4.9<br>(-11.6 to 2.3)                              |
| Sickle cell disorders                                      | 16.1<br>(13.7 to 19.0)                           | --                                                | 1.5<br>(1.0 to 2.1)                       | 30.6<br>(10.6 to 55.6)                            | 9.9<br>(-5.7 to 29.1)                               |
| Sickle cell trait                                          | 3,412.9<br>(3,219.1 to 3,657.3)                  | --                                                | 12.0<br>(7.8 to 17.6)                     | 16.0<br>(5.5 to 27.2)                             | -2.6<br>(-10.4 to 5.3)                              |
| G6PD deficiency                                            | 1,066.3<br>(963.0 to 1,189.3)                    | --                                                | 0.1<br>(0.1 to 0.2)                       | 26.4<br>(12.4 to 42.8)                            | 3.8<br>(-5.9 to 15.2)                               |
| G6PD trait                                                 | 4,389.4<br>(4,158.1 to 4,621.9)                  | --                                                | < 0.05<br>(< 0.05 to < 0.05)              | 23.7<br>(8.3 to 40.6)                             | 1.1<br>(-9.6 to 12.0)                               |
| Other hemoglobinopathies and hemolytic anaemias            | 775.0<br>(736.3 to 811.5)                        | --                                                | 18.8<br>(12.6 to 27.1)                    | 14.2<br>(3.3 to 26.3)                             | -8.2<br>(-15.2 to -0.1)                             |
| Endocrine, metabolic, blood, and immune disorders          | 848.1<br>(810.9 to 887.0)                        | 63.9<br>(57.5 to 71.0)                            | 25.4<br>(17.1 to 35.7)                    | 17.1<br>(9.7 to 24.5)                             | -3.3<br>(-7.7 to 1.2)                               |
| <b>Musculoskeletal disorders</b>                           | <b>5,738.9</b><br><b>(5,458.8 to 6,010.4)</b>    | <b>3,212.0</b><br><b>(2,911.6 to 3,565.3)</b>     | <b>652.8</b><br><b>(470.9 to 857.7)</b>   | <b>33.9</b><br><b>(30.1 to 38.0)</b>              | <b>-0.0</b><br><b>(-2.4 to 2.4)</b>                 |
| Rheumatoid arthritis                                       | 91.2<br>(81.1 to 102.7)                          | 6.0<br>(5.4 to 6.8)                               | 21.2<br>(14.4 to 28.4)                    | 40.9<br>(30.2 to 53.6)                            | 5.1<br>(-2.4 to 13.3)                               |
| Osteoarthritis                                             | 851.5<br>(795.9 to 911.7)                        | 48.7<br>(44.9 to 52.7)                            | 51.9<br>(37.1 to 70.3)                    | 41.5<br>(36.2 to 47.5)                            | 2.4<br>(-1.3 to 6.4)                                |
| Low back and neck pain                                     | 3,694.2<br>(3,438.2 to 3,959.8)                  | 1,591.0<br>(1,416.3 to 1,781.0)                   | 429.7<br>(304.3 to 567.2)                 | 33.4<br>(28.8 to 38.4)                            | -0.4<br>(-3.5 to 2.9)                               |
| Low back pain                                              | 2,658.0<br>(2,340.8 to 3,020.1)                  | 1,295.8<br>(1,126.9 to 1,486.4)                   | 297.0<br>(208.7 to 395.4)                 | 32.5<br>(26.3 to 40.2)                            | -0.6<br>(-4.9 to 4.1)                               |
| Neck pain                                                  | 1,343.0<br>(1,161.2 to 1,543.8)                  | 295.2<br>(254.4 to 346.8)                         | 132.7<br>(89.4 to 185.9)                  | 35.3<br>(32.1 to 38.2)                            | 0.2<br>(-1.6 to 2.0)                                |
| Gout                                                       | 82.2<br>(72.9 to 92.9)                           | 17.3<br>(15.1 to 19.7)                            | 2.6<br>(1.8 to 3.6)                       | 37.3<br>(17.9 to 60.0)                            | 0.1<br>(-11.9 to 14.1)                              |
| Other musculoskeletal disorders                            | 1,733.5<br>(1,448.8 to 2,036.1)                  | 1,549.0<br>(1,285.5 to 1,863.6)                   | 147.5<br>(97.5 to 209.8)                  | 31.8<br>(22.8 to 42.4)                            | -1.0<br>(-7.1 to 6.2)                               |
| <b>Other non-communicable diseases</b>                     | <b>27,634.5</b><br><b>(26,872.4 to 28,333.1)</b> | <b>84,995.8†</b><br><b>(77,738.2 to 92,547.2)</b> | <b>739.5</b><br><b>(512.8 to 1,029.7)</b> | <b>24.4</b><br><b>(22.5 to 26.3)</b>              | <b>-3.3</b><br><b>(-4.5 to -2.1)</b>                |
| Congenital anomalies                                       | 665.7<br>(605.6 to 745.7)                        | --                                                | 89.3<br>(63.8 to 120.4)                   | 16.6<br>(10.3 to 22.9)                            | -3.4<br>(-8.5 to 2.1)                               |
| Neural tube defects                                        | 75.4<br>(66.9 to 84.2)                           | --                                                | 22.4<br>(15.5 to 30.3)                    | 21.3<br>(8.3 to 36.3)                             | -1.7<br>(-11.9 to 9.4)                              |
| Congenital heart anomalies                                 | 129.8<br>(111.3 to 152.4)                        | --                                                | 6.0<br>(2.6 to 10.3)                      | 12.6<br>(-0.1 to 27.1)                            | 0.8<br>(-10.1 to 12.2)                              |
| Orofacial clefts                                           | 18.5<br>(16.2 to 21.2)                           | --                                                | 0.3<br>(0.2 to 0.5)                       | 12.8<br>(-0.7 to 26.5)                            | -7.5<br>(-18.4 to 3.8)                              |
| Down's syndrome                                            | 18.2<br>(15.6 to 21.4)                           | --                                                | 1.6<br>(1.1 to 2.3)                       | 24.0<br>(15.0 to 34.4)                            | 2.6<br>(-4.6 to 10.7)                               |
| Turner syndrome                                            | 21.1<br>(17.9 to 24.7)                           | --                                                | 0.4<br>(0.2 to 0.6)                       | 14.6<br>(-18.7 to 62.5)                           | -5.9<br>(-31.9 to 29.0)                             |
| Klinefelter syndrome                                       | 21.2<br>(17.7 to 24.9)                           | --                                                | 0.1<br>(0.1 to 0.2)                       | 21.4<br>(-7.8 to 55.8)                            | -1.7<br>(-24.0 to 24.7)                             |



| Cause                                         | Prevalence in thousands (95% UI)              | Incidence in thousands (95% UI)                | YLDs in thousands (95% UI)              |                                                   |                                                     |
|-----------------------------------------------|-----------------------------------------------|------------------------------------------------|-----------------------------------------|---------------------------------------------------|-----------------------------------------------------|
|                                               | 2016 counts                                   | 2016 counts                                    | 2016 counts                             | Percentage change in counts between 2006 and 2016 | Percentage change in age-standardised rates between |
| Other chromosomal abnormalities               | 129.8<br>(106.9 to 155.8)                     | --                                             | 12.0<br>(7.9 to 16.8)                   | 12.5<br>(-0.4 to 26.2)                            | -1.6<br>(-12.6 to 10.6)                             |
| Congenital musculoskeletal and limb anomalies | 79.5<br>(71.7 to 87.7)                        | --                                             | 11.9<br>(8.0 to 16.8)                   | 24.8<br>(12.3 to 39.0)                            | 1.3<br>(-7.7 to 11.5)                               |
| Urogenital congenital anomalies               | 48.0<br>(41.6 to 55.2)                        | --                                             | 1.6<br>(0.9 to 2.5)                     | 16.7<br>(1.7 to 33.2)                             | -0.2<br>(-12.5 to 12.8)                             |
| Digestive congenital anomalies                | 51.2<br>(45.2 to 57.3)                        | --                                             | 2.1<br>(1.4 to 3.0)                     | 24.8<br>(5.5 to 50.1)                             | 1.5<br>(-12.6 to 18.7)                              |
| Other congenital anomalies                    | 173.8<br>(106.3 to 269.9)                     | --                                             | 31.0<br>(19.2 to 47.3)                  | 12.4<br>(2.9 to 23.6)                             | -7.9<br>(-15.8 to 1.4)                              |
| Skin and subcutaneous diseases                | 10,964.4<br>(10,631.8 to 11,346.7)            | 21,565.0<br>(20,496.2 to 22,923.6)             | 293.7<br>(196.2 to 421.2)               | 27.7<br>(24.7 to 31.3)                            | 2.9<br>(0.8 to 5.4)                                 |
| Dermatitis                                    | 1,849.4<br>(1,700.5 to 2,003.2)               | 2,350.1<br>(2,151.6 to 2,556.8)                | 70.5<br>(41.5 to 115.0)                 | 23.5<br>(16.4 to 32.4)                            | 1.4<br>(-3.4 to 7.1)                                |
| Psoriasis                                     | 216.0<br>(203.8 to 230.2)                     | 33.8<br>(31.9 to 35.9)                         | 18.7<br>(13.1 to 24.7)                  | 44.5<br>(29.2 to 60.4)                            | 11.8<br>(2.2 to 22.4)                               |
| Cellulitis                                    | 18.4<br>(16.9 to 20.0)                        | 377.0<br>(350.2 to 407.3)                      | 1.0<br>(0.7 to 1.5)                     | 26.9<br>(-2.0 to 63.9)                            | 1.6<br>(-17.7 to 24.9)                              |
| Pyoderma                                      | 79.0<br>(76.0 to 82.0)                        | 1,763.5<br>(1,693.0 to 1,830.7)                | 0.4<br>(0.2 to 0.9)                     | 25.8<br>(15.5 to 37.1)                            | 1.0<br>(-6.0 to 8.1)                                |
| Scabies                                       | 550.7<br>(463.5 to 661.1)                     | 1,673.8<br>(1,404.4 to 2,002.7)                | 14.2<br>(7.9 to 23.1)                   | 16.2<br>(10.7 to 22.0)                            | -4.6<br>(-8.6 to -0.7)                              |
| Fungal skin diseases                          | 2,300.3<br>(2,057.8 to 2,577.7)               | 7,765.8<br>(6,932.1 to 8,639.3)                | 12.9<br>(5.2 to 26.8)                   | 24.4<br>(22.1 to 26.8)                            | 0.1<br>(-1.1 to 1.3)                                |
| Viral skin diseases                           | 1,178.9<br>(1,115.2 to 1,245.2)               | 1,669.3<br>(1,573.5 to 1,774.1)                | 36.0<br>(22.3 to 53.9)                  | 23.0<br>(18.9 to 27.3)                            | 0.1<br>(-3.1 to 3.3)                                |
| Acne vulgaris                                 | 3,838.2<br>(3,351.8 to 4,392.7)               | 2,812.4<br>(2,223.1 to 3,755.7)                | 98.4<br>(64.3 to 142.7)                 | 34.7<br>(27.9 to 42.2)                            | 5.7<br>(0.5 to 11.1)                                |
| Alopecia areata                               | 69.4<br>(64.8 to 73.9)                        | 123.7<br>(115.5 to 131.8)                      | 2.3<br>(1.4 to 3.4)                     | 28.7<br>(13.7 to 45.1)                            | -0.0<br>(-10.0 to 11.1)                             |
| Pruritus                                      | 285.2<br>(249.8 to 322.3)                     | 230.7<br>(205.4 to 261.0)                      | 3.0<br>(1.4 to 5.4)                     | 28.8<br>(20.8 to 36.3)                            | 1.6<br>(-3.3 to 6.3)                                |
| Urticaria                                     | 420.2<br>(359.7 to 491.9)                     | 747.6<br>(643.5 to 877.4)                      | 25.2<br>(16.0 to 36.2)                  | 16.7<br>(9.5 to 23.9)                             | 0.2<br>(-5.1 to 5.7)                                |
| Decubitus ulcer                               | 7.2<br>(6.5 to 8.0)                           | 26.3<br>(23.6 to 29.2)                         | 1.2<br>(0.8 to 1.6)                     | 36.2<br>(24.8 to 49.8)                            | 4.2<br>(-7.7 to 18.4)                               |
| Other skin and subcutaneous diseases          | 1,784.3<br>(1,728.3 to 1,840.4)               | 1,991.0<br>(1,925.2 to 2,053.7)                | 9.8<br>(4.7 to 17.8)                    | 34.4<br>(30.7 to 38.2)                            | 4.5<br>(2.2 to 7.0)                                 |
| Sense organ diseases                          | 7,226.8<br>(6,977.0 to 7,496.7)               | 3,477.3†<br>(3,228.1 to 3,718.5)               | 280.2<br>(194.7 to 390.4)               | 21.2<br>(18.0 to 24.3)                            | -7.3<br>(-9.2 to -5.4)                              |
| Glaucoma                                      | 29.5<br>(23.5 to 36.4)                        | --                                             | 2.7<br>(1.7 to 3.9)                     | 38.5<br>(24.9 to 54.1)                            | 0.5<br>(-8.9 to 11.5)                               |
| Cataract                                      | 345.6<br>(292.2 to 406.0)                     | --                                             | 24.5<br>(16.9 to 34.5)                  | 28.7<br>(22.0 to 35.5)                            | -6.6<br>(-11.6 to -1.5)                             |
| Macular degeneration                          | 30.5<br>(22.9 to 40.6)                        | --                                             | 2.0<br>(1.3 to 3.0)                     | 42.8<br>(28.9 to 58.8)                            | 3.3<br>(-6.1 to 14.3)                               |
| Refraction and accommodation disorders        | 4,444.4<br>(4,089.3 to 4,850.9)               | --                                             | 85.4<br>(52.8 to 132.9)                 | 12.5<br>(7.7 to 17.5)                             | -13.5<br>(-17.3 to -9.5)                            |
| Age-related and other hearing loss            | 3,455.1<br>(3,213.9 to 3,715.9)               | --                                             | 130.0<br>(88.9 to 179.9)                | 22.9<br>(16.7 to 28.4)                            | -6.2<br>(-8.9 to -3.5)                              |
| Other vision loss                             | 176.6<br>(151.4 to 207.7)                     | --                                             | 12.6<br>(8.5 to 17.3)                   | 27.0<br>(15.8 to 37.3)                            | -2.7<br>(-9.8 to 3.9)                               |
| Other sense organ diseases                    | 755.5<br>(698.4 to 812.1)                     | 3,477.3<br>(3,228.1 to 3,718.5)                | 22.9<br>(14.4 to 34.4)                  | 33.9<br>(27.6 to 40.6)                            | 1.8<br>(-2.1 to 5.4)                                |
| Oral disorders                                | 20,476.6<br>(19,193.5 to 21,528.8)            | 59,953.6†<br>(52,785.2 to 67,284.7)            | 76.2<br>(45.9 to 118.8)                 | 34.2<br>(31.6 to 36.9)                            | 0.5<br>(-1.2 to 2.3)                                |
| Caries of deciduous teeth                     | 3,014.2<br>(2,303.8 to 3,694.7)               | 13,307.0<br>(8,745.1 to 18,202.5)              | 0.7<br>(0.3 to 1.4)                     | 8.6<br>(-3.9 to 22.4)                             | -1.5<br>(-12.5 to 10.7)                             |
| Caries of permanent teeth                     | 15,528.2<br>(13,975.6 to 17,225.9)            | 46,194.6<br>(40,295.5 to 52,009.2)             | 9.1<br>(3.9 to 17.7)                    | 26.2<br>(20.7 to 31.9)                            | -2.2<br>(-5.9 to 1.5)                               |
| Periodontal disease                           | 2,916.6<br>(2,421.6 to 3,490.0)               | 366.0<br>(295.7 to 446.4)                      | 18.9<br>(7.5 to 39.9)                   | 36.5<br>(32.0 to 41.5)                            | 0.4<br>(-2.6 to 3.7)                                |
| Edentulism and severe tooth loss              | 1,052.3<br>(900.4 to 1,215.9)                 | 86.0<br>(72.0 to 100.7)                        | 28.9<br>(18.9 to 41.2)                  | 38.8<br>(34.4 to 43.6)                            | 1.1<br>(-1.7 to 4.1)                                |
| Other oral disorders                          | 633.7<br>(605.2 to 665.7)                     | --                                             | 18.5<br>(11.4 to 27.9)                  | 30.3<br>(25.5 to 35.2)                            | 0.2<br>(-3.0 to 3.4)                                |
| <b>Injuries</b>                               | <b>5,638.4</b><br><b>(5,052.1 to 6,396.0)</b> | <b>2,607.4†</b><br><b>(2,450.2 to 2,781.0)</b> | <b>216.6</b><br><b>(137.9 to 320.6)</b> | <b>33.3</b><br><b>(29.0 to 37.7)</b>              | <b>3.2</b><br><b>(0.9 to 5.4)</b>                   |
| <b>Transport injuries</b>                     | <b>719.4</b><br><b>(661.3 to 780.8)</b>       | <b>308.9</b><br><b>(276.3 to 345.6)</b>        | <b>41.8</b><br><b>(27.3 to 59.8)</b>    | <b>34.1</b><br><b>(30.2 to 38.3)</b>              | <b>1.9</b><br><b>(-0.3 to 4.1)</b>                  |
| Road injuries                                 | 502.0<br>(466.2 to 542.2)                     | 246.7<br>(216.1 to 283.7)                      | 28.9<br>(18.9 to 41.1)                  | 39.2<br>(35.6 to 43.1)                            | 4.0<br>(1.8 to 6.1)                                 |
| Pedestrian road injuries                      | 84.2<br>(73.6 to 96.4)                        | 29.8<br>(24.0 to 36.5)                         | 4.9<br>(3.1 to 7.0)                     | 39.3<br>(35.7 to 42.9)                            | 3.2<br>(1.1 to 5.2)                                 |
| Cyclist road injuries                         | 89.9<br>(73.7 to 106.2)                       | 49.9<br>(39.2 to 62.7)                         | 4.8<br>(3.1 to 6.8)                     | 42.7<br>(38.2 to 47.1)                            | 8.2<br>(5.6 to 10.6)                                |
| Motorcyclist road injuries                    | 106.5<br>(89.7 to 129.6)                      | 35.6<br>(29.1 to 44.5)                         | 5.9<br>(3.8 to 8.5)                     | 32.7<br>(28.6 to 37.0)                            | -0.1<br>(-2.6 to 2.2)                               |
| Motor vehicle road injuries                   | 181.1<br>(156.8 to 205.4)                     | 106.0<br>(89.2 to 123.6)                       | 11.3<br>(7.5 to 16.0)                   | 42.4<br>(38.7 to 46.3)                            | 5.7<br>(3.7 to 7.7)                                 |
| Other road injuries                           | 40.3<br>(34.0 to 47.5)                        | 25.4<br>(19.5 to 32.6)                         | 2.1<br>(1.4 to 3.1)                     | 33.5<br>(30.1 to 37.1)                            | -0.4<br>(-2.5 to 1.6)                               |
| Other transport injuries                      | 217.3<br>(178.9 to 265.6)                     | 62.3<br>(52.8 to 75.3)                         | 12.9<br>(8.4 to 18.7)                   | 24.1<br>(19.3 to 29.2)                            | -3.1<br>(-5.8 to -0.3)                              |
| <b>Unintentional injuries</b>                 | <b>3,952.9</b><br><b>(3,632.9 to 4,272.1)</b> | <b>2,218.8</b><br><b>(2,071.7 to 2,389.2)</b>  | <b>140.7</b><br><b>(93.1 to 198.3)</b>  | <b>36.0</b><br><b>(31.9 to 39.8)</b>              | <b>4.2</b><br><b>(2.1 to 6.3)</b>                   |
| Falls                                         | 1,373.8<br>(1,162.5 to 1,575.4)               | 732.2<br>(621.2 to 869.0)                      | 55.9<br>(37.8 to 78.2)                  | 38.1<br>(33.5 to 42.4)                            | 4.8<br>(2.6 to 7.0)                                 |
| Drowning                                      | 10.2<br>(8.7 to 12.0)                         | 2.5<br>(2.2 to 3.0)                            | 0.6<br>(0.4 to 0.9)                     | 18.6<br>(12.5 to 24.7)                            | -8.4<br>(-12.3 to -4.8)                             |
| Fire, heat, and hot substances                | 359.2<br>(301.8 to 435.0)                     | 59.3<br>(48.9 to 70.8)                         | 10.6<br>(7.0 to 14.9)                   | 29.9<br>(23.1 to 36.2)                            | -0.7<br>(-5.0 to 3.5)                               |
| Poisonings                                    | 17.6<br>(14.6 to 21.1)                        | 30.5<br>(24.0 to 37.9)                         | 1.7<br>(1.1 to 2.5)                     | 37.8<br>(26.8 to 51.3)                            | 7.8<br>(0.2 to 16.2)                                |
| Exposure to mechanical forces                 | 594.7<br>(508.0 to 729.0)                     | 305.6<br>(255.6 to 356.3)                      | 16.0<br>(10.2 to 23.5)                  | 40.0<br>(35.9 to 43.8)                            | 5.7<br>(3.3 to 7.9)                                 |
| Unintentional firearm injuries                | 24.3<br>(19.8 to 29.8)                        | 8.2<br>(5.7 to 11.7)                           | 1.1<br>(0.7 to 1.7)                     | 50.3<br>(45.8 to 55.0)                            | 13.7<br>(10.9 to 16.4)                              |
| Unintentional suffocation                     | 26.6<br>(20.2 to 34.2)                        | 6.8<br>(4.7 to 9.7)                            | 1.0<br>(0.6 to 1.5)                     | 33.5<br>(26.9 to 40.4)                            | 4.7<br>(1.2 to 8.2)                                 |
| Other exposure to mechanical forces           | 543.8<br>(458.6 to 677.0)                     | 290.6<br>(241.6 to 337.8)                      | 13.9<br>(9.0 to 20.3)                   | 39.7<br>(35.8 to 43.6)                            | 5.1<br>(2.7 to 7.4)                                 |

| Cause                                                                               | Prevalence in thousands (95% UI)          | Incidence in thousands (95% UI)       | YLDs in thousands (95% UI)          |                                                   |                                                     |
|-------------------------------------------------------------------------------------|-------------------------------------------|---------------------------------------|-------------------------------------|---------------------------------------------------|-----------------------------------------------------|
|                                                                                     | 2016 counts                               | 2016 counts                           | 2016 counts                         | Percentage change in counts between 2006 and 2016 | Percentage change in age-standardised rates between |
| Adverse effects of medical treatment                                                | 9.7<br>(7.6 to 12.1)                      | 126.8<br>(108.9 to 144.7)             | 1.3<br>(0.8 to 1.9)                 | 14.0<br>(8.2 to 20.1)                             | -3.7<br>(-7.3 to 0.3)                               |
| Animal contact                                                                      | 199.8<br>(173.5 to 235.1)                 | 299.4<br>(239.8 to 357.9)             | 6.7<br>(4.4 to 9.5)                 | 35.4<br>(28.8 to 43.3)                            | 3.4<br>(-1.0 to 7.9)                                |
| Venomous animal contact                                                             | 73.2<br>(60.2 to 88.0)                    | 120.2<br>(90.2 to 156.7)              | 4.5<br>(2.9 to 6.4)                 | 40.2<br>(30.1 to 52.0)                            | 8.1<br>(1.2 to 15.4)                                |
| Non-venomous animal contact                                                         | 126.7<br>(103.6 to 157.4)                 | 179.2<br>(140.1 to 221.7)             | 2.3<br>(1.4 to 3.3)                 | 26.9<br>(21.9 to 31.6)                            | -3.8<br>(-7.2 to -0.7)                              |
| Foreign body                                                                        | 253.3<br>(210.6 to 304.9)                 | 193.8<br>(166.2 to 228.0)             | 10.0<br>(6.3 to 14.8)               | 32.4<br>(26.2 to 38.2)                            | 3.8<br>(0.6 to 7.0)                                 |
| Pulmonary aspiration and foreign body in airway                                     | 78.7<br>(58.0 to 106.0)                   | 32.1<br>(25.9 to 39.9)                | 3.7<br>(2.3 to 5.7)                 | 21.5<br>(15.4 to 28.0)                            | -3.2<br>(-6.5 to 0.3)                               |
| Foreign body in eyes                                                                | 15.3<br>(8.1 to 23.3)                     | 84.0<br>(64.2 to 113.8)               | 0.9<br>(0.4 to 1.5)                 | 27.9<br>(23.3 to 33.3)                            | 0.4<br>(-2.1 to 3.2)                                |
| Foreign body in other body part                                                     | 159.2<br>(128.8 to 206.5)                 | 77.7<br>(63.7 to 92.9)                | 5.4<br>(3.4 to 7.9)                 | 42.0<br>(35.2 to 48.6)                            | 9.4<br>(5.9 to 13.0)                                |
| Environmental heat and cold exposure                                                | 376.6<br>(314.0 to 448.0)                 | 131.2<br>(105.8 to 161.8)             | 15.4<br>(9.8 to 22.3)               | 32.9<br>(28.6 to 37.4)                            | 1.5<br>(-0.9 to 3.8)                                |
| Other unintentional injuries                                                        | 757.9<br>(607.1 to 932.6)                 | 337.4<br>(283.5 to 402.9)             | 22.6<br>(14.8 to 32.5)              | 37.2<br>(33.1 to 40.9)                            | 7.1<br>(5.1 to 9.1)                                 |
| <b>Self-harm and interpersonal violence</b>                                         | <b>956.1</b><br><b>(837.9 to 1,087.1)</b> | <b>72.7†</b><br><b>(60.6 to 87.3)</b> | <b>12.4</b><br><b>(8.5 to 16.9)</b> | <b>23.5</b><br><b>(18.9 to 27.8)</b>              | <b>-2.6</b><br><b>(-5.9 to 0.4)</b>                 |
| Self-harm                                                                           | 22.3<br>(18.8 to 25.9)                    | 11.2<br>(9.1 to 13.5)                 | 1.2<br>(0.8 to 1.8)                 | 41.5<br>(36.9 to 46.7)                            | 6.4<br>(3.4 to 9.6)                                 |
| Self-harm by firearm                                                                | 1.0<br>(0.8 to 1.3)                       | 0.3<br>(0.1 to 0.5)                   | < 0.05<br>(< 0.05 to 0.1)           | 27.4<br>(21.4 to 33.6)                            | -3.4<br>(-6.9 to 0.2)                               |
| Self-harm by other specified means                                                  | 21.2<br>(17.8 to 24.9)                    | 10.9<br>(8.8 to 13.2)                 | 1.2<br>(0.7 to 1.7)                 | 42.1<br>(37.5 to 47.4)                            | 6.7<br>(3.8 to 9.9)                                 |
| Interpersonal violence                                                              | 933.9<br>(816.4 to 1,064.8)               | 61.5†<br>(49.7 to 75.3)               | 11.2<br>(7.6 to 15.4)               | 21.8<br>(17.2 to 26.4)                            | -3.7<br>(-7.0 to -0.4)                              |
| Assault by firearm                                                                  | 3.1<br>(2.7 to 3.7)                       | 1.2<br>(0.9 to 1.8)                   | 0.2<br>(0.1 to 0.2)                 | 55.5<br>(49.9 to 61.6)                            | 19.9<br>(16.5 to 23.4)                              |
| Assault by sharp object                                                             | 31.8<br>(25.6 to 38.3)                    | 15.9<br>(11.5 to 21.2)                | 1.1<br>(0.7 to 1.5)                 | 46.6<br>(41.4 to 51.8)                            | 13.2<br>(10.1 to 16.0)                              |
| Sexual violence                                                                     | 835.5<br>(717.5 to 967.8)                 | --                                    | 7.2<br>(4.7 to 10.2)                | 10.5<br>(5.8 to 15.3)                             | -14.1<br>(-17.3 to -10.8)                           |
| Assault by other means                                                              | 63.5<br>(53.5 to 75.7)                    | 44.3<br>(35.6 to 54.8)                | 2.8<br>(1.8 to 4.0)                 | 50.5<br>(46.5 to 54.6)                            | 15.1<br>(12.5 to 17.3)                              |
| <b>Forces of nature, conflict and terrorism, and executions and police conflict</b> | <b>845.5</b><br><b>(405.2 to 1,538.6)</b> | <b>7.0†</b><br><b>(2.9 to 11.5)</b>   | <b>21.7</b><br><b>(5.9 to 50.5)</b> | <b>21.2</b><br><b>(12.6 to 32.1)</b>              | <b>1.9</b><br><b>(-3.5 to 11.0)</b>                 |
| Exposure to forces of nature                                                        | 2.6<br>(1.0 to 4.7)                       | 5.8<br>(1.8 to 10.2)                  | 0.2<br>(0.1 to 0.3)                 | 269.5<br>(137.0 to 942.9)                         | 159.5<br>(78.6 to 562.6)                            |
| Conflict and terrorism                                                              | 840.1<br>(400.2 to 1,533.8)               | --                                    | 21.4<br>(5.8 to 50.0)               | 20.6<br>(12.1 to 30.9)                            | 1.5<br>(-4.0 to 10.1)                               |
| Executions and police conflict                                                      | 2.7<br>(1.6 to 5.0)                       | 1.2<br>(0.8 to 1.7)                   | 0.1<br>(< 0.05 to 0.2)              | 33.9<br>(25.1 to 42.3)                            | 7.6<br>(-1.1 to 17.1)                               |
| <b>Impairments</b>                                                                  | --                                        | --                                    | --                                  | --                                                | --                                                  |
| Anaemia                                                                             | 20,335.2<br>(19,456.2 to 21,233.9)        | --                                    | 651.0<br>(440.8 to 934.7)           | 11.9<br>(5.6 to 18.3)                             | -8.0<br>(-12.4 to -3.4)                             |
| Developmental intellectual disability                                               | 1,528.5<br>(1,170.0 to 1,932.0)           | --                                    | 143.9<br>(99.0 to 226.4)            | 21.8<br>(12.7 to 36.5)                            | -1.0<br>(-8.5 to 11.5)                              |
| Epilepsy                                                                            | 217.8<br>(115.9 to 386.8)                 | --                                    | 90.2<br>(43.4 to 169.7)             | 36.1<br>(-31.1 to 159.0)                          | 12.0<br>(-43.9 to 119.4)                            |
| Guillain-Barre syndrome                                                             | 0.3<br>(0.3 to 0.5)                       | --                                    | 0.1<br>(0.1 to 0.1)                 | 27.1<br>(24.6 to 29.5)                            | 0.0<br>(-0.0 to 0.0)                                |
| Hearing loss                                                                        | 4,149.1<br>(3,913.1 to 4,402.6)           | --                                    | 171.1<br>(120.5 to 230.4)           | 18.9<br>(14.6 to 22.9)                            | -7.1<br>(-9.4 to -5.0)                              |
| Heart failure                                                                       | 161.5<br>(142.3 to 183.6)                 | --                                    | 16.3<br>(12.0 to 21.2)              | 41.2<br>(31.5 to 51.3)                            | 3.2<br>(-3.6 to 10.5)                               |
| Infertility                                                                         | 1,046.6<br>(827.1 to 1,337.1)             | --                                    | 6.1<br>(2.5 to 12.2)                | 31.2<br>(24.4 to 38.4)                            | -0.2<br>(-5.6 to 5.5)                               |
| Pelvic inflammatory disease                                                         | 20.5<br>(15.9 to 25.9)                    | --                                    | 2.7<br>(1.7 to 4.0)                 | 24.1<br>(5.7 to 46.4)                             | -5.4<br>(-18.9 to 9.9)                              |
| Vision loss                                                                         | 5,352.4<br>(4,929.6 to 5,839.8)           | --                                    | 170.8<br>(114.5 to 256.9)           | 21.7<br>(14.7 to 33.6)                            | -7.4<br>(-11.5 to -0.4)                             |

We did not calculate incidence for the nine impairments, certain NTDs, and causes with only birth prevalence. Blank cells mean that no estimate is available.

† Incidence for aggregate causes represents the sum of the incidence of the causes below the aggregate.

‡ Incidence estimates for stroke represent first-ever stroke only.

^ Incidence of HIV/AIDS represents new infections of HIV only and does not include new infections of Tuberculosis in HIV positive cases.

SR Table 14: Prevalence, incidence, and YLDs for 2016, percentage change of YLD counts and percentage change of age-standardised YLD rates between 2006 and 2016 by cause and impairments, for all ages, Suriname.

| Cause                                                                                | Prevalence in thousands (95% UI) | Incidence in thousands (95% UI)         | YLDs in thousands (95% UI)    |                                                   |                                                     |
|--------------------------------------------------------------------------------------|----------------------------------|-----------------------------------------|-------------------------------|---------------------------------------------------|-----------------------------------------------------|
|                                                                                      | 2016 counts                      | 2016 counts                             | 2016 counts                   | Percentage change in counts between 2006 and 2016 | Percentage change in age-standardised rates between |
| <b>All causes</b>                                                                    | <b>527.8</b><br>(526.0 to 529.3) | <b>3,396.9†</b><br>(3,212.0 to 3,590.5) | <b>59.1</b><br>(44.1 to 76.7) | <b>15.4</b><br>(12.8 to 18.0)                     | <b>0.2</b><br>(-1.8 to 2.3)                         |
| <b>Communicable, maternal, neonatal, and nutritional disorders</b>                   | <b>355.7</b><br>(347.2 to 364.4) | <b>1,972.3†</b><br>(1,802.9 to 2,146.8) | <b>6.9</b><br>(4.8 to 9.8)    | <b>-0.7</b><br>(-8.0 to 8.2)                      | <b>-5.5</b><br>(-12.1 to 3.1)                       |
| <b>HIV/AIDS and tuberculosis</b>                                                     | <b>132.9</b><br>(119.5 to 144.4) | <b>0.4†</b><br>(0.3 to 0.5)             | <b>0.3</b><br>(0.2 to 0.6)    | <b>-7.5</b><br>(-29.4 to 29.7)                    | <b>-18.1</b><br>(-37.3 to 15.8)                     |
| Tuberculosis                                                                         | 121.9<br>(109.8 to 136.1)        | 0.1†<br>(0.1 to 0.2)                    | < 0.05<br>(< 0.05 to < 0.05)  | -6.9<br>(-30.6 to 26.4)                           | -18.2<br>(-38.3 to 9.8)                             |
| Drug-susceptible tuberculosis                                                        | 0.1<br>(< 0.05 to 0.1)           | 0.1<br>(0.1 to 0.2)                     | < 0.05<br>(< 0.05 to < 0.05)  | -6.7<br>(-30.7 to 26.7)                           | -18.0<br>(-38.5 to 9.8)                             |
| Multidrug-resistant tuberculosis without extensive drug resistance                   | < 0.05<br>(< 0.05 to < 0.05)     | < 0.05<br>(< 0.05 to < 0.05)            | < 0.05<br>(< 0.05 to < 0.05)  | -34.1<br>(-89.2 to 293.3)                         | -42.5<br>(-90.5 to 243.9)                           |
| Extensively drug-resistant tuberculosis                                              | < 0.05<br>(< 0.05 to < 0.05)     | < 0.05<br>(< 0.05 to < 0.05)            | < 0.05<br>(< 0.05 to < 0.05)  | 75.5<br>(-71.4 to 947.6)                          | 53.2<br>(-74.6 to 817.3)                            |
| Latent tuberculosis infection                                                        | 121.9<br>(109.8 to 136.1)        | --                                      | --                            | --                                                | --                                                  |
| HIV/AIDS                                                                             | 3.3<br>(2.5 to 4.6)              | 0.2^<br>(0.2 to 0.3)                    | 0.3<br>(0.2 to 0.6)           | -7.6<br>(-30.2 to 33.8)                           | -18.1<br>(-38.1 to 19.1)                            |
| Drug-susceptible HIV/AIDS - Tuberculosis                                             | < 0.05<br>(< 0.05 to < 0.05)     | < 0.05<br>(< 0.05 to 0.1)               | < 0.05<br>(< 0.05 to < 0.05)  | -44.5<br>(-55.0 to -32.0)                         | -50.1<br>(-59.3 to -39.1)                           |
| Multidrug-resistant HIV/AIDS - Tuberculosis without extensive drug resistance        | < 0.05<br>(< 0.05 to < 0.05)     | < 0.05<br>(< 0.05 to < 0.05)            | < 0.05<br>(< 0.05 to < 0.05)  | -60.6<br>(-93.6 to 135.8)                         | -64.5<br>(-94.2 to 112.3)                           |
| Extensively drug-resistant HIV/AIDS - Tuberculosis                                   | < 0.05<br>(< 0.05 to < 0.05)     | < 0.05<br>(< 0.05 to < 0.05)            | < 0.05<br>(< 0.05 to < 0.05)  | 5.0<br>(-83.0 to 528.7)                           | -5.5<br>(-84.7 to 465.8)                            |
| HIV/AIDS resulting in other diseases                                                 | 3.3<br>(2.4 to 4.6)              | 0.2<br>(0.2 to 0.3)                     | 0.3<br>(0.2 to 0.6)           | -6.2<br>(-29.8 to 38.4)                           | -16.9<br>(-37.8 to 24.2)                            |
| <b>Diarrhoea, lower respiratory infections, and other common infectious diseases</b> | <b>31.4</b><br>(29.7 to 33.1)    | <b>1,829.2†</b><br>(1,663.1 to 1,999.6) | <b>1.5</b><br>(1.0 to 2.0)    | <b>7.7</b><br>(4.2 to 11.5)                       | <b>3.1</b><br>(-0.2 to 6.8)                         |
| Diarrhoeal diseases                                                                  | 6.3<br>(5.9 to 6.7)              | 412.9<br>(386.2 to 441.0)               | 0.7<br>(0.5 to 1.0)           | 14.0<br>(7.6 to 20.5)                             | 9.8<br>(3.7 to 16.1)                                |
| Intestinal infectious diseases                                                       | < 0.05<br>(< 0.05 to < 0.05)     | < 0.05†<br>(< 0.05 to < 0.05)           | < 0.05<br>(< 0.05 to < 0.05)  | 8.3<br>(-5.7 to 23.4)                             | -7.1<br>(-18.4 to 5.0)                              |
| Typhoid fever                                                                        | < 0.05<br>(< 0.05 to < 0.05)     | < 0.05<br>(< 0.05 to < 0.05)            | < 0.05<br>(< 0.05 to < 0.05)  | 11.2<br>(-4.5 to 28.7)                            | -5.7<br>(-18.4 to 8.3)                              |
| Paratyphoid fever                                                                    | < 0.05<br>(< 0.05 to < 0.05)     | < 0.05<br>(< 0.05 to < 0.05)            | < 0.05<br>(< 0.05 to < 0.05)  | 10.3<br>(-8.6 to 34.9)                            | -5.9<br>(-21.4 to 14.6)                             |
| Other intestinal infectious diseases                                                 | --                               | --                                      | < 0.05<br>(< 0.05 to < 0.05)  | -37.7<br>(-55.1 to -9.6)                          | -32.9<br>(-49.0 to -8.8)                            |
| Lower respiratory infections                                                         | 0.6<br>(0.5 to 0.6)              | 26.3<br>(24.1 to 28.7)                  | < 0.05<br>(< 0.05 to 0.1)     | 21.9<br>(7.9 to 36.2)                             | 12.3<br>(1.0 to 24.2)                               |
| Upper respiratory infections                                                         | 17.9<br>(15.8 to 20.1)           | 1,346.8<br>(1,186.7 to 1,523.5)         | 0.5<br>(0.3 to 0.7)           | 5.4<br>(-0.1 to 11.0)                             | -0.1<br>(-4.9 to 5.3)                               |
| Otitis media                                                                         | 6.8<br>(6.1 to 7.5)              | 31.9<br>(25.8 to 39.6)                  | 0.2<br>(0.1 to 0.3)           | -5.7<br>(-13.4 to 1.6)                            | -7.7<br>(-14.8 to -0.7)                             |
| Meningitis                                                                           | 0.4<br>(0.4 to 0.5)              | 0.1<br>(0.1 to 0.1)                     | < 0.05<br>(< 0.05 to 0.1)     | 1.9<br>(-1.2 to 4.8)                              | -7.2<br>(-10.0 to -4.5)                             |
| Pneumococcal meningitis                                                              | 0.2<br>(0.2 to 0.2)              | < 0.05<br>(< 0.05 to < 0.05)            | < 0.05<br>(< 0.05 to < 0.05)  | -3.6<br>(-8.8 to 1.5)                             | -12.8<br>(-17.6 to -8.3)                            |
| H influenzae type B meningitis                                                       | 0.1<br>(< 0.05 to 0.1)           | < 0.05<br>(< 0.05 to < 0.05)            | < 0.05<br>(< 0.05 to < 0.05)  | -4.0<br>(-9.8 to 2.2)                             | -11.1<br>(-16.5 to -5.5)                            |
| Meningococcal infection                                                              | < 0.05<br>(< 0.05 to < 0.05)     | < 0.05<br>(< 0.05 to < 0.05)            | < 0.05<br>(< 0.05 to < 0.05)  | 3.6<br>(-1.3 to 8.1)                              | -6.8<br>(-11.0 to -2.9)                             |
| Other meningitis                                                                     | 0.2<br>(0.1 to 0.2)              | 0.1<br>(< 0.05 to 0.1)                  | < 0.05<br>(< 0.05 to < 0.05)  | 14.8<br>(10.0 to 20.0)                            | 5.2<br>(0.8 to 9.9)                                 |
| Encephalitis                                                                         | 0.3<br>(0.2 to 0.5)              | 0.2<br>(0.1 to 0.2)                     | < 0.05<br>(< 0.05 to 0.1)     | 5.4<br>(-10.8 to 24.3)                            | -5.5<br>(-19.9 to 10.4)                             |
| Diphtheria                                                                           | < 0.05<br>(< 0.05 to < 0.05)     | < 0.05<br>(< 0.05 to < 0.05)            | < 0.05<br>(< 0.05 to < 0.05)  | -34.2<br>(-64.6 to 21.9)                          | -35.4<br>(-65.5 to 21.5)                            |
| Whooping cough                                                                       | < 0.05<br>(< 0.05 to 0.1)        | 0.3<br>(0.3 to 0.4)                     | < 0.05<br>(< 0.05 to < 0.05)  | -58.4<br>(-69.0 to -45.6)                         | -50.7<br>(-63.1 to -35.9)                           |
| Tetanus                                                                              | < 0.05<br>(< 0.05 to < 0.05)     | < 0.05<br>(< 0.05 to < 0.05)            | < 0.05<br>(< 0.05 to < 0.05)  | -46.2<br>(-61.4 to -25.8)                         | -56.1<br>(-68.5 to -38.9)                           |
| Measles                                                                              | < 0.05<br>(0.0 to < 0.05)        | < 0.05<br>(0.0 to < 0.05)               | < 0.05<br>(0.0 to < 0.05)     | --                                                | --                                                  |
| Varicella and herpes zoster                                                          | 0.5<br>(0.5 to 0.6)              | 10.7<br>(10.5 to 11.1)                  | < 0.05<br>(< 0.05 to < 0.05)  | 17.6<br>(3.4 to 33.8)                             | 0.1<br>(-11.2 to 12.5)                              |
| <b>Neglected tropical diseases and malaria</b>                                       | <b>119.4</b><br>(111.0 to 129.8) | <b>65.7†</b><br>(47.1 to 107.3)         | <b>0.9</b><br>(0.5 to 1.5)    | <b>2.9</b><br>(-8.6 to 16.4)                      | <b>-8.3</b><br>(-17.9 to 2.8)                       |
| Malaria                                                                              | < 0.05<br>(< 0.05 to 0.1)        | 0.5<br>(0.3 to 0.8)                     | < 0.05<br>(< 0.05 to < 0.05)  | -89.8<br>(-93.4 to -84.0)                         | -90.1<br>(-93.4 to -84.7)                           |
| Chagas disease                                                                       | < 0.05<br>(< 0.05 to < 0.05)     | < 0.05<br>(< 0.05 to < 0.05)            | < 0.05<br>(< 0.05 to < 0.05)  | 2.2<br>(-11.6 to 21.3)                            | -20.9<br>(-31.4 to -6.4)                            |
| Leishmaniasis                                                                        | 0.5<br>(0.4 to 0.5)              | 0.8<br>(0.6 to 1.0)                     | < 0.05<br>(< 0.05 to < 0.05)  | 14.4<br>(-17.5 to 61.0)                           | 4.3<br>(-24.8 to 44.5)                              |
| Visceral leishmaniasis                                                               | --                               | --                                      | --                            | --                                                | --                                                  |
| Cutaneous and mucocutaneous leishmaniasis                                            | 0.4<br>(0.3 to 0.5)              | 0.8<br>(0.6 to 1.0)                     | < 0.05<br>(< 0.05 to < 0.05)  | 14.4<br>(-17.5 to 61.0)                           | 4.3<br>(-24.8 to 44.5)                              |
| African trypanosomiasis                                                              | --                               | --                                      | --                            | --                                                | --                                                  |
| Schistosomiasis                                                                      | 72.9<br>(60.6 to 87.8)           | 21.2<br>(18.1 to 24.9)                  | 0.5<br>(0.2 to 1.0)           | 17.1<br>(6.3 to 28.3)                             | -2.3<br>(-11.1 to 6.8)                              |
| Cysticercosis                                                                        | --                               | --                                      | --                            | --                                                | --                                                  |
| Cystic echinococcosis                                                                | --                               | --                                      | --                            | --                                                | --                                                  |
| Lymphatic filariasis                                                                 | --                               | --                                      | --                            | --                                                | --                                                  |
| Onchocerciasis                                                                       | --                               | --                                      | --                            | --                                                | --                                                  |
| Trachoma                                                                             | --                               | --                                      | --                            | --                                                | --                                                  |
| Dengue                                                                               | 0.6<br>(0.3 to 1.0)              | 10.0<br>(6.2 to 14.8)                   | 0.1<br>(< 0.05 to 0.2)        | -27.1<br>(-42.4 to 72.3)                          | -32.8<br>(-47.0 to 58.0)                            |
| Yellow fever                                                                         | < 0.05<br>(< 0.05 to < 0.05)     | < 0.05<br>(< 0.05 to < 0.05)            | < 0.05<br>(< 0.05 to < 0.05)  | -41.4<br>(-57.3 to -18.6)                         | -45.8<br>(-60.2 to -24.9)                           |
| Rabies                                                                               | < 0.05<br>(< 0.05 to < 0.05)     | < 0.05<br>(< 0.05 to < 0.05)            | < 0.05<br>(< 0.05 to < 0.05)  | 51.4<br>(-31.0 to 195.6)                          | 37.8<br>(-41.0 to 149.0)                            |
| Intestinal nematode infections                                                       | 49.8<br>(44.3 to 56.3)           | --                                      | 0.1<br>(0.1 to 0.2)           | 9.8<br>(-22.4 to 57.1)                            | 1.3<br>(-28.8 to 45.8)                              |
| Ascariasis                                                                           | 10.2<br>(8.5 to 12.1)            | --                                      | < 0.05<br>(< 0.05 to < 0.05)  | 14.8<br>(-63.7 to 269.4)                          | 4.2<br>(-67.6 to 249.9)                             |



| Cause                                                                   | Prevalence in thousands (95% UI)  | Incidence in thousands (95% UI)          | YLDs in thousands (95% UI)              |                                                   |                                                     |
|-------------------------------------------------------------------------|-----------------------------------|------------------------------------------|-----------------------------------------|---------------------------------------------------|-----------------------------------------------------|
|                                                                         | 2016 counts                       | 2016 counts                              | 2016 counts                             | Percentage change in counts between 2006 and 2016 | Percentage change in age-standardised rates between |
| Trichuriasis                                                            | 2.5<br>(2.1 to 3.0)               | --                                       | < 0.05<br>(< 0.05 to < 0.05)            | 1.4<br>(-86.8 to 659.6)                           | -10.1<br>(-88.5 to 578.2)                           |
| Hookworm disease                                                        | 37.8<br>(32.4 to 43.7)            | --                                       | 0.1<br>(0.1 to 0.2)                     | 9.8<br>(-22.2 to 57.3)                            | 1.3<br>(-28.7 to 45.9)                              |
| Food-borne trematodiasis                                                | --                                | --                                       | --                                      | --                                                | --                                                  |
| Leprosy                                                                 | 0.1<br>(0.1 to 0.2)               | < 0.05<br>(< 0.05 to < 0.05)             | < 0.05<br>(< 0.05 to < 0.05)            | -12.0<br>(-26.2 to 10.4)                          | -29.1<br>(-39.8 to -11.9)                           |
| Ebola virus disease                                                     | --                                | --                                       | --                                      | --                                                | --                                                  |
| Zika virus disease                                                      | 0.6<br>(0.3 to 1.2)               | 33.3<br>(15.9 to 74.8)                   | < 0.05<br>(< 0.05 to < 0.05)            | --                                                | --                                                  |
| Guinea worm disease                                                     | --                                | --                                       | --                                      | --                                                | --                                                  |
| Other neglected tropical diseases                                       | 4.0<br>(3.4 to 4.7)               | --                                       | 0.1<br>(0.1 to 0.1)                     | -13.7<br>(-30.9 to 9.2)                           | -7.4<br>(-25.4 to 16.6)                             |
| <b>Maternal disorders</b>                                               | <b>0.7<br/>(0.6 to 0.9)</b>       | <b>15.3†<br/>(12.6 to 18.2)</b>          | <b>&lt; 0.05<br/>(&lt; 0.05 to 0.1)</b> | <b>-11.9<br/>(-34.2 to 18.1)</b>                  | <b>-17.2<br/>(-38.4 to 10.8)</b>                    |
| Maternal haemorrhage                                                    | 0.1<br>(< 0.05 to 0.1)            | 0.6<br>(0.4 to 0.7)                      | < 0.05<br>(< 0.05 to < 0.05)            | -15.4<br>(-42.9 to 28.0)                          | -20.8<br>(-46.7 to 20.0)                            |
| Maternal sepsis and other pregnancy related infections                  | 0.2<br>(0.1 to 0.3)               | 1.3<br>(1.0 to 1.7)                      | < 0.05<br>(< 0.05 to < 0.05)            | -15.2<br>(-58.9 to 77.4)                          | -20.4<br>(-61.0 to 66.1)                            |
| Maternal hypertensive disorders                                         | 0.4<br>(0.3 to 0.6)               | 1.8<br>(1.4 to 2.2)                      | < 0.05<br>(< 0.05 to < 0.05)            | -4.8<br>(-41.0 to 58.8)                           | -10.5<br>(-44.8 to 49.6)                            |
| Maternal obstructed labour and uterine rupture                          | < 0.05<br>(< 0.05 to < 0.05)      | 0.5<br>(0.3 to 0.6)                      | < 0.05<br>(< 0.05 to < 0.05)            | -16.2<br>(-55.4 to 67.9)                          | -21.1<br>(-58.2 to 62.7)                            |
| Maternal abortion, miscarriage, and ectopic pregnancy                   | 0.1<br>(0.1 to 0.1)               | 11.2<br>(8.5 to 14.0)                    | < 0.05<br>(< 0.05 to < 0.05)            | -17.3<br>(-53.8 to 46.4)                          | -22.4<br>(-56.5 to 36.5)                            |
| Other maternal disorders                                                | --                                | --                                       | < 0.05<br>(< 0.05 to < 0.05)            | -16.3<br>(-37.4 to 12.2)                          | -21.1<br>(-41.2 to 5.8)                             |
| <b>Neonatal disorders</b>                                               | <b>9.8<br/>(7.7 to 12.8)</b>      | <b>--</b>                                | <b>1.8<br/>(1.0 to 3.4)</b>             | <b>18.0<br/>(-3.0 to 40.4)</b>                    | <b>14.3<br/>(-5.8 to 36.5)</b>                      |
| Neonatal preterm birth complications                                    | 7.5<br>(5.7 to 10.7)              | --                                       | 0.7<br>(0.4 to 1.0)                     | 0.5<br>(-19.8 to 22.3)                            | -3.9<br>(-23.3 to 17.5)                             |
| Neonatal encephalopathy due to birth asphyxia and trauma                | 0.4<br>(0.2 to 0.7)               | --                                       | < 0.05<br>(< 0.05 to 0.1)               | 24.8<br>(-21.4 to 148.7)                          | 19.4<br>(-24.9 to 141.9)                            |
| Neonatal sepsis and other neonatal infections                           | 2.1<br>(0.6 to 5.1)               | --                                       | 0.9<br>(0.2 to 2.5)                     | 40.8<br>(5.3 to 118.0)                            | 36.1<br>(2.7 to 126.8)                              |
| Hemolytic disease and other neonatal jaundice                           | 0.3<br>(0.3 to 0.3)               | --                                       | 0.1<br>(0.1 to 0.1)                     | 2.3<br>(-13.6 to 20.6)                            | -3.7<br>(-18.2 to 12.9)                             |
| Other neonatal disorders                                                | --                                | --                                       | 0.1<br>(< 0.05 to 0.1)                  | -8.7<br>(-25.9 to 8.3)                            | 9.5<br>(-11.2 to 29.7)                              |
| <b>Nutritional deficiencies</b>                                         | <b>103.2<br/>(91.8 to 111.8)</b>  | <b>14.9†<br/>(9.6 to 22.3)</b>           | <b>2.1<br/>(1.4 to 3.2)</b>             | <b>-16.4<br/>(-27.0 to -3.9)</b>                  | <b>-18.4<br/>(-28.5 to -7.0)</b>                    |
| Protein-energy malnutrition                                             | 2.0<br>(1.5 to 2.6)               | 1.0<br>(0.8 to 1.3)                      | 0.1<br>(< 0.05 to 0.1)                  | -30.8<br>(-50.9 to -2.7)                          | -17.0<br>(-41.0 to 16.6)                            |
| Iodine deficiency                                                       | 2.0<br>(1.7 to 2.3)               | 0.1<br>(< 0.05 to 0.1)                   | < 0.05<br>(< 0.05 to 0.1)               | 8.4<br>(-7.0 to 27.1)                             | -6.0<br>(-19.0 to 9.0)                              |
| Vitamin A deficiency                                                    | 16.8<br>(10.5 to 25.4)            | 13.9<br>(8.6 to 21.3)                    | < 0.05<br>(< 0.05 to < 0.05)            | 3.0<br>(-13.1 to 24.1)                            | -0.4<br>(-15.8 to 18.7)                             |
| Iron-deficiency anaemia                                                 | 84.6<br>(74.2 to 95.9)            | --                                       | 2.0<br>(1.2 to 3.0)                     | -16.6<br>(-27.8 to -3.2)                          | -18.9<br>(-29.7 to -7.1)                            |
| Other nutritional deficiencies                                          | --                                | --                                       | < 0.05<br>(< 0.05 to < 0.05)            | -31.6<br>(-52.3 to -2.5)                          | -18.1<br>(-42.7 to 16.7)                            |
| <b>Other communicable, maternal, neonatal, and nutritional diseases</b> | <b>141.4<br/>(131.5 to 152.0)</b> | <b>46.9<br/>(36.9 to 61.5)</b>           | <b>0.3<br/>(0.1 to 0.4)</b>             | <b>5.8<br/>(-3.3 to 15.1)</b>                     | <b>-0.1<br/>(-8.2 to 8.5)</b>                       |
| Sexually transmitted diseases excluding HIV                             | 124.7<br>(114.4 to 135.7)         | 43.1<br>(33.2 to 57.6)                   | 0.2<br>(0.1 to 0.3)                     | 12.3<br>(2.4 to 22.0)                             | 1.6<br>(-7.2 to 11.0)                               |
| Syphilis                                                                | 2.1<br>(1.6 to 2.7)               | 1.5<br>(1.0 to 2.0)                      | < 0.05<br>(< 0.05 to < 0.05)            | 25.7<br>(11.3 to 42.6)                            | -0.8<br>(-12.5 to 13.2)                             |
| Chlamydial infection                                                    | 5.0<br>(3.8 to 6.2)               | 3.8<br>(2.9 to 4.7)                      | < 0.05<br>(< 0.05 to < 0.05)            | 8.9<br>(-8.6 to 28.4)                             | 0.1<br>(-16.0 to 17.6)                              |
| Gonococcal infection                                                    | 4.1<br>(1.7 to 7.9)               | 14.2<br>(5.1 to 27.8)                    | < 0.05<br>(< 0.05 to 0.1)               | 11.3<br>(-9.3 to 31.2)                            | 4.6<br>(-15.3 to 23.6)                              |
| Trichomoniasis                                                          | 18.4<br>(15.9 to 21.2)            | 15.9<br>(13.6 to 18.5)                   | < 0.05<br>(< 0.05 to < 0.05)            | 13.5<br>(6.5 to 21.9)                             | 0.8<br>(-5.1 to 7.9)                                |
| Genital herpes                                                          | 103.1<br>(88.5 to 119.4)          | 6.8<br>(5.7 to 8.2)                      | < 0.05<br>(< 0.05 to 0.1)               | 17.3<br>(9.1 to 23.9)                             | 0.4<br>(-5.5 to 5.9)                                |
| Other sexually transmitted diseases                                     | 1.1<br>(1.0 to 1.2)               | 1.0<br>(0.8 to 1.1)                      | < 0.05<br>(< 0.05 to 0.1)               | 8.8<br>(-3.8 to 22.0)                             | 1.0<br>(-10.7 to 13.4)                              |
| Hepatitis                                                               | 20.5<br>(18.2 to 23.2)            | 3.8<br>(2.4 to 6.0)                      | < 0.05<br>(< 0.05 to < 0.05)            | -20.2<br>(-39.0 to 5.0)                           | -28.2<br>(-44.3 to -7.5)                            |
| Acute hepatitis A                                                       | 0.1<br>(< 0.05 to 0.3)            | 1.6<br>(0.4 to 3.8)                      | < 0.05<br>(< 0.05 to < 0.05)            | -21.7<br>(-68.4 to 102.0)                         | -27.4<br>(-69.4 to 80.6)                            |
| Hepatitis B                                                             | 8.9<br>(7.0 to 11.2)              | 1.5<br>(1.2 to 2.0)                      | < 0.05<br>(< 0.05 to < 0.05)            | -20.3<br>(-35.4 to -1.9)                          | -30.7<br>(-43.1 to -15.8)                           |
| Hepatitis C                                                             | 11.5<br>(10.2 to 12.8)            | 0.3<br>(0.3 to 0.4)                      | < 0.05<br>(< 0.05 to < 0.05)            | -13.8<br>(-29.4 to 5.5)                           | -10.5<br>(-26.6 to 9.1)                             |
| Acute hepatitis E                                                       | < 0.05<br>(< 0.05 to < 0.05)      | 0.3<br>(0.2 to 0.3)                      | < 0.05<br>(< 0.05 to < 0.05)            | -20.1<br>(-27.4 to -11.9)                         | -28.3<br>(-33.6 to -22.6)                           |
| Other infectious diseases                                               | 3.1<br>(2.7 to 3.7)               | < 0.05<br>(< 0.05 to < 0.05)             | 0.1<br>(< 0.05 to 0.1)                  | -4.6<br>(-21.1 to 15.8)                           | -1.6<br>(-18.5 to 19.5)                             |
| <b>Non-communicable diseases</b>                                        | <b>502.6<br/>(500.1 to 505.0)</b> | <b>1,386.7†<br/>(1,324.7 to 1,461.5)</b> | <b>48.8<br/>(36.0 to 63.6)</b>          | <b>17.4<br/>(14.6 to 20.2)</b>                    | <b>0.6<br/>(-1.7 to 2.8)</b>                        |
| <b>Neoplasms</b>                                                        | <b>2.3<br/>(2.2 to 2.5)</b>       | <b>0.9<br/>(0.9 to 1.0)</b>              | <b>0.3<br/>(0.2 to 0.4)</b>             | <b>45.3<br/>(37.9 to 53.0)</b>                    | <b>13.5<br/>(8.0 to 19.2)</b>                       |
| Lip and oral cavity cancer                                              | < 0.05<br>(< 0.05 to 0.1)         | < 0.05<br>(< 0.05 to < 0.05)             | < 0.05<br>(< 0.05 to < 0.05)            | 34.1<br>(18.8 to 52.0)                            | 2.9<br>(-8.6 to 15.8)                               |
| Nasopharynx cancer                                                      | < 0.05<br>(< 0.05 to < 0.05)      | < 0.05<br>(< 0.05 to < 0.05)             | < 0.05<br>(< 0.05 to < 0.05)            | 30.2<br>(14.7 to 49.1)                            | 8.4<br>(-4.4 to 23.1)                               |
| Other pharynx cancer                                                    | < 0.05<br>(< 0.05 to < 0.05)      | < 0.05<br>(< 0.05 to < 0.05)             | < 0.05<br>(< 0.05 to < 0.05)            | 40.2<br>(20.2 to 60.1)                            | 4.7<br>(-9.7 to 18.8)                               |
| Oesophageal cancer                                                      | < 0.05<br>(< 0.05 to < 0.05)      | < 0.05<br>(< 0.05 to < 0.05)             | < 0.05<br>(< 0.05 to < 0.05)            | 19.8<br>(8.2 to 32.3)                             | -9.6<br>(-18.0 to -0.4)                             |
| Stomach cancer                                                          | < 0.05<br>(< 0.05 to 0.1)         | < 0.05<br>(< 0.05 to < 0.05)             | < 0.05<br>(< 0.05 to < 0.05)            | 23.0<br>(6.2 to 42.0)                             | -6.8<br>(-20.0 to 9.2)                              |
| Colon and rectum cancer                                                 | 0.4<br>(0.4 to 0.4)               | 0.1<br>(0.1 to 0.1)                      | < 0.05<br>(< 0.05 to 0.1)               | 74.0<br>(52.5 to 97.8)                            | 32.2<br>(16.2 to 49.7)                              |
| Liver cancer                                                            | < 0.05<br>(< 0.05 to < 0.05)      | < 0.05<br>(< 0.05 to < 0.05)             | < 0.05<br>(< 0.05 to < 0.05)            | 31.1<br>(16.4 to 47.1)                            | 1.0<br>(-10.2 to 13.0)                              |
| Liver cancer due to hepatitis B                                         | < 0.05<br>(< 0.05 to < 0.05)      | < 0.05<br>(< 0.05 to < 0.05)             | < 0.05<br>(< 0.05 to < 0.05)            | 29.7<br>(14.3 to 46.6)                            | 1.3<br>(-10.4 to 14.4)                              |

| Cause                                              | Prevalence in thousands (95% UI)     | Incidence in thousands (95% UI)      | YLDs in thousands (95% UI)        |                                                   |                                                     |
|----------------------------------------------------|--------------------------------------|--------------------------------------|-----------------------------------|---------------------------------------------------|-----------------------------------------------------|
|                                                    | 2016 counts                          | 2016 counts                          | 2016 counts                       | Percentage change in counts between 2006 and 2016 | Percentage change in age-standardised rates between |
| Liver cancer due to hepatitis C                    | < 0.05<br>(< 0.05 to < 0.05)         | < 0.05<br>(< 0.05 to < 0.05)         | < 0.05<br>(< 0.05 to < 0.05)      | 32.4<br>(15.9 to 50.0)                            | 0.2<br>(-12.1 to 13.9)                              |
| Liver cancer due to alcohol use                    | < 0.05<br>(< 0.05 to < 0.05)         | < 0.05<br>(< 0.05 to < 0.05)         | < 0.05<br>(< 0.05 to < 0.05)      | 36.3<br>(19.1 to 54.7)                            | 3.3<br>(-9.6 to 17.2)                               |
| Liver cancer due to other causes                   | < 0.05<br>(< 0.05 to < 0.05)         | < 0.05<br>(< 0.05 to < 0.05)         | < 0.05<br>(< 0.05 to < 0.05)      | 26.6<br>(11.4 to 45.0)                            | -0.6<br>(-12.2 to 13.5)                             |
| Gallbladder and biliary tract cancer               | < 0.05<br>(< 0.05 to < 0.05)         | < 0.05<br>(< 0.05 to < 0.05)         | < 0.05<br>(< 0.05 to < 0.05)      | 24.7<br>(15.5 to 36.8)                            | -5.4<br>(-12.2 to 3.9)                              |
| Pancreatic cancer                                  | < 0.05<br>(< 0.05 to < 0.05)         | < 0.05<br>(< 0.05 to < 0.05)         | < 0.05<br>(< 0.05 to < 0.05)      | 39.2<br>(27.4 to 52.4)                            | 5.6<br>(-4.5 to 17.1)                               |
| Larynx cancer                                      | < 0.05<br>(< 0.05 to < 0.05)         | < 0.05<br>(< 0.05 to < 0.05)         | < 0.05<br>(< 0.05 to < 0.05)      | 41.0<br>(23.0 to 61.6)                            | 6.3<br>(-6.9 to 21.6)                               |
| Tracheal, bronchus, and lung cancer                | 0.1<br>(0.1 to 0.1)                  | 0.1<br>(0.1 to 0.1)                  | < 0.05<br>(< 0.05 to < 0.05)      | 34.0<br>(9.9 to 59.6)                             | 2.5<br>(-15.0 to 22.7)                              |
| Malignant skin melanoma                            | < 0.05<br>(< 0.05 to < 0.05)         | < 0.05<br>(< 0.05 to < 0.05)         | < 0.05<br>(< 0.05 to < 0.05)      | 61.3<br>(41.5 to 83.0)                            | 25.3<br>(8.9 to 43.0)                               |
| Non-melanoma skin cancer                           | < 0.05<br>(< 0.05 to < 0.05)         | < 0.05<br>(< 0.05 to 0.1)            | < 0.05<br>(< 0.05 to < 0.05)      | 14.9<br>(-28.5 to 64.2)                           | -15.7<br>(-50.4 to 24.0)                            |
| Non-melanoma skin cancer (squamous-cell carcinoma) | < 0.05<br>(< 0.05 to < 0.05)         | < 0.05<br>(< 0.05 to < 0.05)         | < 0.05<br>(< 0.05 to < 0.05)      | 13.6<br>(-31.9 to 68.5)                           | -16.8<br>(-52.4 to 26.8)                            |
| Non-melanoma skin cancer (basal-cell carcinoma)    | < 0.05<br>(< 0.05 to < 0.05)         | < 0.05<br>(< 0.05 to 0.1)            | < 0.05<br>(< 0.05 to < 0.05)      | 32.2<br>(16.8 to 48.8)                            | 1.7<br>(-9.6 to 14.3)                               |
| Breast cancer                                      | 0.5<br>(0.4 to 0.5)                  | 0.1<br>(0.1 to 0.1)                  | < 0.05<br>(< 0.05 to 0.1)         | 52.2<br>(24.9 to 81.6)                            | 18.0<br>(-1.1 to 39.3)                              |
| Cervical cancer                                    | 0.3<br>(0.2 to 0.4)                  | 0.1<br>(0.1 to 0.1)                  | < 0.05<br>(< 0.05 to < 0.05)      | 17.6<br>(-8.8 to 49.8)                            | -6.0<br>(-25.2 to 17.7)                             |
| Uterine cancer                                     | 0.1<br>(0.1 to 0.1)                  | < 0.05<br>(< 0.05 to < 0.05)         | < 0.05<br>(< 0.05 to < 0.05)      | 79.8<br>(45.8 to 125.2)                           | 33.9<br>(9.5 to 66.9)                               |
| Ovarian cancer                                     | 0.1<br>(0.1 to 0.1)                  | < 0.05<br>(< 0.05 to < 0.05)         | < 0.05<br>(< 0.05 to < 0.05)      | 33.0<br>(2.2 to 73.9)                             | 3.2<br>(-20.6 to 34.1)                              |
| Prostate cancer                                    | 0.5<br>(0.4 to 0.6)                  | 0.1<br>(0.1 to 0.2)                  | 0.1<br>(< 0.05 to 0.1)            | 57.7<br>(35.9 to 82.0)                            | 17.7<br>(2.3 to 35.0)                               |
| Testicular cancer                                  | < 0.05<br>(< 0.05 to < 0.05)         | < 0.05<br>(< 0.05 to < 0.05)         | < 0.05<br>(< 0.05 to < 0.05)      | 15.8<br>(-18.1 to 54.1)                           | -0.4<br>(-29.0 to 30.9)                             |
| Kidney cancer                                      | 0.1<br>(0.1 to 0.1)                  | < 0.05<br>(< 0.05 to < 0.05)         | < 0.05<br>(< 0.05 to < 0.05)      | 45.8<br>(24.8 to 68.0)                            | 20.7<br>(3.9 to 38.2)                               |
| Bladder cancer                                     | 0.1<br>(< 0.05 to 0.1)               | < 0.05<br>(< 0.05 to < 0.05)         | < 0.05<br>(< 0.05 to < 0.05)      | 49.4<br>(30.8 to 69.7)                            | 12.8<br>(-1.6 to 28.5)                              |
| Brain and nervous system cancer                    | 0.1<br>(< 0.05 to 0.1)               | < 0.05<br>(< 0.05 to < 0.05)         | < 0.05<br>(< 0.05 to < 0.05)      | 17.8<br>(0.0 to 42.7)                             | 0.5<br>(-13.0 to 21.2)                              |
| Thyroid cancer                                     | 0.1<br>(0.1 to 0.1)                  | < 0.05<br>(< 0.05 to < 0.05)         | < 0.05<br>(< 0.05 to < 0.05)      | 139.9<br>(82.2 to 206.4)                          | 87.9<br>(44.2 to 134.7)                             |
| Mesothelioma                                       | < 0.05<br>(< 0.05 to < 0.05)         | < 0.05<br>(< 0.05 to < 0.05)         | < 0.05<br>(< 0.05 to < 0.05)      | 24.4<br>(11.7 to 38.5)                            | -4.0<br>(-13.6 to 6.1)                              |
| Hodgkin lymphoma                                   | < 0.05<br>(< 0.05 to < 0.05)         | < 0.05<br>(< 0.05 to < 0.05)         | < 0.05<br>(< 0.05 to < 0.05)      | 23.2<br>(7.4 to 39.4)                             | 3.5<br>(-10.4 to 17.0)                              |
| Non-Hodgkin's lymphoma                             | 0.1<br>(0.1 to 0.1)                  | < 0.05<br>(< 0.05 to < 0.05)         | < 0.05<br>(< 0.05 to < 0.05)      | 33.9<br>(17.8 to 53.1)                            | 8.6<br>(-3.4 to 23.7)                               |
| Multiple myeloma                                   | < 0.05<br>(< 0.05 to < 0.05)         | < 0.05<br>(< 0.05 to < 0.05)         | < 0.05<br>(< 0.05 to < 0.05)      | 65.3<br>(34.4 to 102.7)                           | 24.9<br>(-0.2 to 55.3)                              |
| Leukaemia                                          | 0.1<br>(0.1 to 0.1)                  | < 0.05<br>(< 0.05 to < 0.05)         | < 0.05<br>(< 0.05 to < 0.05)      | 18.2<br>(8.2 to 28.7)                             | 1.2<br>(-7.4 to 10.5)                               |
| Acute lymphoid leukaemia                           | < 0.05<br>(< 0.05 to < 0.05)         | < 0.05<br>(< 0.05 to < 0.05)         | < 0.05<br>(< 0.05 to < 0.05)      | 17.3<br>(-3.6 to 46.5)                            | 17.8<br>(-2.7 to 45.8)                              |
| Chronic lymphoid leukaemia                         | < 0.05<br>(< 0.05 to < 0.05)         | < 0.05<br>(< 0.05 to < 0.05)         | < 0.05<br>(< 0.05 to < 0.05)      | 83.7<br>(57.6 to 112.7)                           | 42.3<br>(21.8 to 64.7)                              |
| Acute myeloid leukaemia                            | < 0.05<br>(< 0.05 to < 0.05)         | < 0.05<br>(< 0.05 to < 0.05)         | < 0.05<br>(< 0.05 to < 0.05)      | 26.2<br>(11.4 to 43.7)                            | 13.7<br>(0.6 to 28.8)                               |
| Chronic myeloid leukaemia                          | < 0.05<br>(< 0.05 to < 0.05)         | < 0.05<br>(< 0.05 to < 0.05)         | < 0.05<br>(< 0.05 to < 0.05)      | 41.0<br>(21.3 to 64.2)                            | 11.4<br>(-4.2 to 29.8)                              |
| Other leukaemia                                    | 0.1<br>(0.1 to 0.1)                  | < 0.05<br>(< 0.05 to < 0.05)         | < 0.05<br>(< 0.05 to < 0.05)      | 5.5<br>(-6.3 to 18.0)                             | -10.9<br>(-21.6 to 0.1)                             |
| Other neoplasms                                    | 0.2<br>(0.2 to 0.2)                  | 0.1<br>(0.1 to 0.1)                  | < 0.05<br>(< 0.05 to < 0.05)      | 65.8<br>(42.6 to 94.2)                            | 37.2<br>(17.9 to 60.7)                              |
| <b>Cardiovascular diseases</b>                     | <b>35.4</b><br><b>(34.2 to 36.6)</b> | <b>3.6†</b><br><b>(3.4 to 3.8)</b>   | <b>2.0</b><br><b>(1.4 to 2.6)</b> | <b>26.3</b><br><b>(22.5 to 30.0)</b>              | <b>-0.1</b><br><b>(-3.0 to 3.0)</b>                 |
| Rheumatic heart disease                            | 4.8<br>(4.3 to 5.3)                  | 0.1<br>(0.1 to 0.1)                  | 0.2<br>(0.1 to 0.3)               | 18.9<br>(9.4 to 30.2)                             | 4.2<br>(-4.0 to 14.3)                               |
| Ischaemic heart disease                            | 11.7<br>(11.1 to 12.3)               | 1.5<br>(1.4 to 1.6)                  | 0.5<br>(0.4 to 0.7)               | 31.0<br>(25.3 to 37.2)                            | 2.2<br>(-1.8 to 6.6)                                |
| Cerebrovascular disease                            | 5.4<br>(5.1 to 5.8)                  | 0.8‡<br>(0.7 to 0.8)                 | 0.5<br>(0.4 to 0.7)               | 23.8<br>(15.9 to 32.9)                            | -4.4<br>(-10.4 to 2.4)                              |
| Ischaemic stroke                                   | 4.3<br>(3.9 to 4.7)                  | 0.5‡<br>(0.4 to 0.5)                 | 0.4<br>(0.3 to 0.5)               | 26.0<br>(16.1 to 37.0)                            | -3.2<br>(-11.0 to 5.1)                              |
| Hemorrhagic stroke                                 | 1.4<br>(1.3 to 1.6)                  | 0.3‡<br>(0.3 to 0.3)                 | 0.1<br>(0.1 to 0.2)               | 17.3<br>(5.9 to 29.4)                             | -8.1<br>(-16.9 to 1.7)                              |
| Hypertensive heart disease                         | 1.4<br>(1.2 to 1.6)                  | --                                   | 0.1<br>(0.1 to 0.1)               | 32.0<br>(20.4 to 45.6)                            | 0.9<br>(-7.6 to 10.7)                               |
| Cardiomyopathy and myocarditis                     | 0.4<br>(0.3 to 0.4)                  | 0.1†<br>(0.1 to 0.1)                 | < 0.05<br>(< 0.05 to 0.1)         | 23.7<br>(9.6 to 41.0)                             | 2.3<br>(-8.8 to 15.2)                               |
| Myocarditis                                        | 0.1<br>(0.1 to 0.1)                  | 0.1<br>(0.1 to 0.1)                  | < 0.05<br>(< 0.05 to < 0.05)      | 19.2<br>(6.1 to 34.4)                             | 2.2<br>(-11.1 to 17.3)                              |
| Alcoholic cardiomyopathy                           | < 0.05<br>(< 0.05 to < 0.05)         | --                                   | < 0.05<br>(< 0.05 to < 0.05)      | 32.5<br>(13.8 to 54.0)                            | 1.8<br>(-13.2 to 20.0)                              |
| Other cardiomyopathy                               | 0.3<br>(0.2 to 0.3)                  | --                                   | < 0.05<br>(< 0.05 to < 0.05)      | 24.5<br>(5.6 to 48.6)                             | 2.3<br>(-12.2 to 19.7)                              |
| Atrial fibrillation and flutter                    | 3.1<br>(2.7 to 3.5)                  | 0.2<br>(0.2 to 0.3)                  | 0.2<br>(0.2 to 0.3)               | 31.3<br>(22.8 to 41.2)                            | 0.7<br>(-5.4 to 7.4)                                |
| Peripheral vascular disease                        | 8.0<br>(6.9 to 9.3)                  | 0.8<br>(0.7 to 0.9)                  | < 0.05<br>(< 0.05 to 0.1)         | 26.9<br>(17.1 to 37.5)                            | -3.6<br>(-10.7 to 4.4)                              |
| Endocarditis                                       | < 0.05<br>(< 0.05 to < 0.05)         | 0.1<br>(0.1 to 0.1)                  | < 0.05<br>(< 0.05 to < 0.05)      | 27.2<br>(13.1 to 43.9)                            | 2.5<br>(-11.1 to 18.5)                              |
| Other cardiovascular and circulatory diseases      | 5.4<br>(4.6 to 6.3)                  | --                                   | 0.3<br>(0.2 to 0.4)               | 22.9<br>(12.6 to 33.9)                            | 1.7<br>(-6.3 to 10.7)                               |
| <b>Chronic respiratory diseases</b>                | <b>62.9</b><br><b>(59.6 to 66.5)</b> | <b>10.1†</b><br><b>(9.3 to 10.9)</b> | <b>2.2</b><br><b>(1.6 to 3.0)</b> | <b>14.3</b><br><b>(9.0 to 20.4)</b>               | <b>5.8</b><br><b>(1.0 to 10.8)</b>                  |
| Chronic obstructive pulmonary disease              | 16.3<br>(15.1 to 17.9)               | 1.1<br>(1.0 to 1.1)                  | 0.3<br>(0.2 to 0.4)               | 30.1<br>(12.0 to 50.2)                            | 2.9<br>(-10.9 to 18.8)                              |
| Pneumoconiosis                                     | < 0.05<br>(< 0.05 to < 0.05)         | < 0.05<br>(< 0.05 to < 0.05)         | < 0.05<br>(< 0.05 to < 0.05)      | 23.2<br>(10.0 to 38.6)                            | -5.2<br>(-16.7 to 8.5)                              |
| Silicosis                                          | < 0.05<br>(< 0.05 to < 0.05)         | < 0.05<br>(< 0.05 to < 0.05)         | < 0.05<br>(< 0.05 to < 0.05)      | 32.1<br>(26.2 to 38.4)                            | 3.9<br>(-0.7 to 9.3)                                |

| Cause                                                          | Prevalence in thousands (95% UI)  | Incidence in thousands (95% UI)   | YLDs in thousands (95% UI)        |                                                                    |                                                                        |
|----------------------------------------------------------------|-----------------------------------|-----------------------------------|-----------------------------------|--------------------------------------------------------------------|------------------------------------------------------------------------|
|                                                                | 2016 counts<br>(< 0.05 to < 0.05) | 2016 counts<br>(< 0.05 to < 0.05) | 2016 counts<br>(< 0.05 to < 0.05) | Percentage change in counts between 2006 and 2016<br>(4.9 to 48.4) | Percentage change in age-standardised rates between<br>(-21.8 to 17.6) |
| Asbestosis                                                     | < 0.05<br>(< 0.05 to < 0.05)      | < 0.05<br>(< 0.05 to < 0.05)      | < 0.05<br>(< 0.05 to < 0.05)      | 24.7<br>(4.9 to 48.4)                                              | -4.6<br>(-21.8 to 17.6)                                                |
| Coal workers pneumoconiosis                                    | --                                | --                                | --                                | --                                                                 | --                                                                     |
| Other pneumoconiosis                                           | < 0.05<br>(< 0.05 to < 0.05)      | < 0.05<br>(< 0.05 to < 0.05)      | < 0.05<br>(< 0.05 to < 0.05)      | 17.8<br>(-5.5 to 47.5)                                             | -9.4<br>(-28.9 to 16.2)                                                |
| Asthma                                                         | 47.7<br>(44.1 to 51.6)            | 9.0<br>(8.3 to 9.8)               | 1.9<br>(1.2 to 2.7)               | 11.8<br>(6.7 to 18.6)                                              | 6.0<br>(1.1 to 12.0)                                                   |
| Interstitial lung disease and pulmonary sarcoidosis            | 0.2<br>(0.2 to 0.2)               | < 0.05<br>(< 0.05 to < 0.05)      | < 0.05<br>(< 0.05 to < 0.05)      | 31.1<br>(20.2 to 43.1)                                             | 4.9<br>(-4.8 to 16.0)                                                  |
| Other chronic respiratory diseases                             | --                                | --                                | < 0.05<br>(< 0.05 to < 0.05)      | 49.4<br>(14.6 to 88.6)                                             | 40.2<br>(8.6 to 76.2)                                                  |
| <b>Cirrhosis and other chronic liver diseases</b>              | <b>3.9<br/>(3.6 to 4.1)</b>       | <b>0.1<br/>(0.1 to 0.1)</b>       | <b>0.1<br/>(0.1 to 0.1)</b>       | <b>27.3<br/>(15.2 to 42.5)</b>                                     | <b>5.6<br/>(-3.7 to 16.3)</b>                                          |
| Cirrhosis and other chronic liver diseases due to hepatitis B  | 0.4<br>(0.3 to 0.5)               | < 0.05<br>(< 0.05 to < 0.05)      | < 0.05<br>(< 0.05 to < 0.05)      | 34.6<br>(3.5 to 70.6)                                              | 5.4<br>(-16.9 to 32.4)                                                 |
| Cirrhosis and other chronic liver diseases due to hepatitis C  | 1.2<br>(1.0 to 1.3)               | < 0.05<br>(< 0.05 to < 0.05)      | < 0.05<br>(< 0.05 to < 0.05)      | 32.5<br>(10.3 to 59.8)                                             | 4.2<br>(-11.9 to 23.1)                                                 |
| Cirrhosis and other chronic liver diseases due to alcohol use  | 1.4<br>(1.3 to 1.6)               | < 0.05<br>(< 0.05 to < 0.05)      | < 0.05<br>(< 0.05 to < 0.05)      | 38.5<br>(17.2 to 62.8)                                             | 7.4<br>(-8.1 to 24.9)                                                  |
| Cirrhosis and other chronic liver diseases due to other causes | 0.9<br>(0.8 to 1.0)               | < 0.05<br>(< 0.05 to < 0.05)      | < 0.05<br>(< 0.05 to < 0.05)      | 13.0<br>(-7.8 to 39.9)                                             | 5.2<br>(-12.8 to 27.5)                                                 |
| <b>Digestive diseases</b>                                      | <b>19.2<br/>(17.5 to 20.6)</b>    | <b>15.1†<br/>(14.1 to 16.2)</b>   | <b>0.8<br/>(0.5 to 1.0)</b>       | <b>33.2<br/>(18.5 to 50.8)</b>                                     | <b>13.4<br/>(1.8 to 26.3)</b>                                          |
| Peptic ulcer disease                                           | 7.6<br>(6.7 to 8.8)               | 0.7<br>(0.6 to 0.7)               | 0.2<br>(0.1 to 0.3)               | 76.3<br>(41.7 to 120.6)                                            | 40.4<br>(15.9 to 73.0)                                                 |
| Gastritis and duodenitis                                       | 6.6<br>(5.6 to 7.6)               | 3.1<br>(2.8 to 3.4)               | 0.1<br>(0.1 to 0.2)               | 86.6<br>(51.6 to 128.0)                                            | 49.9<br>(24.9 to 80.4)                                                 |
| Appendicitis                                                   | < 0.05<br>(< 0.05 to 0.1)         | 1.3<br>(1.2 to 1.4)               | < 0.05<br>(< 0.05 to < 0.05)      | 7.4<br>(-19.5 to 42.4)                                             | -0.1<br>(-23.5 to 30.2)                                                |
| Paralytic ileus and intestinal obstruction                     | < 0.05<br>(< 0.05 to < 0.05)      | 0.3<br>(0.3 to 0.3)               | < 0.05<br>(< 0.05 to < 0.05)      | 11.2<br>(5.8 to 17.4)                                              | -0.7<br>(-7.9 to 6.1)                                                  |
| Inguinal, femoral, and abdominal hernia                        | 4.5<br>(4.0 to 5.0)               | 3.9<br>(3.4 to 4.4)               | 0.3<br>(0.2 to 0.4)               | 4.5<br>(-5.1 to 15.1)                                              | -7.6<br>(-15.4 to 1.0)                                                 |
| Inflammatory bowel disease                                     | < 0.05<br>(< 0.05 to < 0.05)      | 0.1<br>(0.1 to 0.1)               | < 0.05<br>(< 0.05 to < 0.05)      | 35.7<br>(31.5 to 39.9)                                             | 13.3<br>(9.8 to 16.8)                                                  |
| Vascular intestinal disorders                                  | < 0.05<br>(< 0.05 to < 0.05)      | < 0.05<br>(< 0.05 to < 0.05)      | < 0.05<br>(< 0.05 to < 0.05)      | 21.0<br>(12.7 to 30.0)                                             | 9.9<br>(4.6 to 15.9)                                                   |
| Gallbladder and biliary diseases                               | 0.9<br>(0.8 to 1.0)               | 5.6<br>(4.9 to 6.5)               | < 0.05<br>(< 0.05 to < 0.05)      | 34.5<br>(10.2 to 62.1)                                             | 9.7<br>(-9.2 to 32.2)                                                  |
| Pancreatitis                                                   | < 0.05<br>(< 0.05 to < 0.05)      | 0.2<br>(0.2 to 0.3)               | < 0.05<br>(< 0.05 to < 0.05)      | 35.9<br>(31.1 to 41.3)                                             | 13.2<br>(9.4 to 17.1)                                                  |
| Other digestive diseases                                       | --                                | --                                | 0.1<br>(< 0.05 to 0.1)            | 30.4<br>(16.4 to 47.0)                                             | 15.0<br>(4.0 to 27.4)                                                  |
| <b>Neurological disorders</b>                                  | <b>211.7<br/>(202.6 to 221.7)</b> | <b>100.8<br/>(86.8 to 116.0)</b>  | <b>5.4<br/>(3.6 to 7.4)</b>       | <b>12.9<br/>(-7.3 to 36.8)</b>                                     | <b>-1.3<br/>(-18.6 to 18.7)</b>                                        |
| Alzheimer's disease and other dementias                        | 2.1<br>(1.8 to 2.5)               | 0.4<br>(0.3 to 0.4)               | 0.3<br>(0.2 to 0.4)               | 36.3<br>(29.2 to 43.7)                                             | -0.4<br>(-4.9 to 4.1)                                                  |
| Parkinson's disease                                            | 0.3<br>(0.2 to 0.4)               | < 0.05<br>(< 0.05 to < 0.05)      | < 0.05<br>(< 0.05 to < 0.05)      | 39.6<br>(21.6 to 63.2)                                             | 6.3<br>(-6.3 to 23.0)                                                  |
| Epilepsy                                                       | 1.9<br>(0.4 to 3.7)               | 0.2<br>(< 0.05 to 0.4)            | 0.6<br>(0.1 to 1.4)               | -1.6<br>(-83.9 to 385.4)                                           | -10.5<br>(-85.2 to 342.1)                                              |
| Multiple sclerosis                                             | < 0.05<br>(< 0.05 to < 0.05)      | < 0.05<br>(< 0.05 to < 0.05)      | < 0.05<br>(< 0.05 to < 0.05)      | 32.7<br>(28.1 to 38.4)                                             | 12.1<br>(8.2 to 16.9)                                                  |
| Motor neuron disease                                           | < 0.05<br>(< 0.05 to < 0.05)      | < 0.05<br>(< 0.05 to < 0.05)      | < 0.05<br>(< 0.05 to < 0.05)      | 19.7<br>(14.8 to 24.5)                                             | 5.0<br>(1.5 to 8.3)                                                    |
| Migraine                                                       | 78.2<br>(73.8 to 83.0)            | 8.8<br>(8.3 to 9.5)               | 3.6<br>(2.4 to 5.1)               | 13.5<br>(9.5 to 17.6)                                              | -0.1<br>(-3.5 to 3.2)                                                  |
| Tension-type headache                                          | 163.0<br>(146.6 to 182.1)         | 91.3<br>(77.3 to 106.8)           | 0.7<br>(0.4 to 1.0)               | 13.7<br>(8.1 to 19.6)                                              | -0.7<br>(-5.4 to 4.2)                                                  |
| Other neurological disorders                                   | < 0.05<br>(< 0.05 to < 0.05)      | < 0.05<br>(< 0.05 to < 0.05)      | 0.1<br>(< 0.05 to 0.3)            | 16.0<br>(-74.9 to 362.3)                                           | 7.2<br>(-75.9 to 307.5)                                                |
| <b>Mental and substance use disorders</b>                      | <b>90.2<br/>(87.3 to 93.0)</b>    | <b>42.3†<br/>(39.1 to 45.7)</b>   | <b>12.4<br/>(8.9 to 16.2)</b>     | <b>13.4<br/>(10.7 to 16.2)</b>                                     | <b>0.1<br/>(-2.3 to 2.5)</b>                                           |
| Schizophrenia                                                  | 1.0<br>(0.9 to 1.1)               | 0.1<br>(0.1 to 0.1)               | 0.7<br>(0.5 to 0.8)               | 18.0<br>(7.2 to 29.5)                                              | 1.0<br>(-8.0 to 10.4)                                                  |
| Alcohol use disorders                                          | 9.0<br>(7.9 to 10.2)              | 4.6<br>(4.0 to 5.3)               | 0.9<br>(0.6 to 1.2)               | 14.1<br>(4.6 to 24.9)                                              | 1.1<br>(-7.0 to 10.1)                                                  |
| Drug use disorders                                             | 3.6<br>(3.3 to 3.9)               | 0.5<br>(0.4 to 0.6)               | 0.8<br>(0.6 to 1.0)               | 13.5<br>(3.8 to 24.4)                                              | 1.0<br>(-7.5 to 10.2)                                                  |
| Opioid use disorders                                           | 1.3<br>(1.1 to 1.6)               | 0.2<br>(0.1 to 0.2)               | 0.6<br>(0.4 to 0.8)               | 14.1<br>(1.9 to 27.3)                                              | 0.8<br>(-9.3 to 11.5)                                                  |
| Cocaine use disorders                                          | 0.6<br>(0.6 to 0.7)               | < 0.05<br>(< 0.05 to < 0.05)      | 0.1<br>(0.1 to 0.1)               | 11.1<br>(-10.0 to 33.5)                                            | 0.3<br>(-18.1 to 20.0)                                                 |
| Amphetamine use disorders                                      | 0.1<br>(< 0.05 to 0.1)            | < 0.05<br>(< 0.05 to < 0.05)      | < 0.05<br>(< 0.05 to < 0.05)      | 7.9<br>(-26.2 to 59.0)                                             | -0.8<br>(-31.5 to 45.2)                                                |
| Cannabis use disorders                                         | 1.4<br>(1.2 to 1.7)               | 0.2<br>(0.2 to 0.3)               | < 0.05<br>(< 0.05 to 0.1)         | 10.6<br>(-8.1 to 33.9)                                             | 3.2<br>(-13.7 to 25.1)                                                 |
| Other drug use disorders                                       | 0.2<br>(0.2 to 0.3)               | < 0.05<br>(< 0.05 to < 0.05)      | 0.1<br>(0.1 to 0.1)               | 13.9<br>(-9.7 to 44.4)                                             | 2.1<br>(-18.6 to 28.1)                                                 |
| Depressive disorders                                           | 24.9<br>(23.4 to 26.6)            | 30.8<br>(27.6 to 34.1)            | 4.6<br>(3.1 to 6.2)               | 14.9<br>(8.8 to 21.5)                                              | -0.8<br>(-5.7 to 4.6)                                                  |
| Major depressive disorder                                      | 19.7<br>(17.8 to 21.8)            | 29.7<br>(26.5 to 33.1)            | 4.0<br>(2.7 to 5.5)               | 14.5<br>(7.7 to 21.8)                                              | -0.9<br>(-6.3 to 5.1)                                                  |
| Dysthymia                                                      | 5.7<br>(4.9 to 6.5)               | 1.0<br>(0.9 to 1.2)               | 0.5<br>(0.4 to 0.8)               | 18.0<br>(13.1 to 22.9)                                             | 0.1<br>(-3.8 to 3.8)                                                   |
| Bipolar disorder                                               | 4.7<br>(4.1 to 5.6)               | 0.4<br>(0.3 to 0.5)               | 1.0<br>(0.6 to 1.4)               | 12.4<br>(6.1 to 19.0)                                              | 0.1<br>(-5.2 to 5.7)                                                   |
| Anxiety disorders                                              | 22.6<br>(20.5 to 24.9)            | 3.4<br>(3.1 to 3.7)               | 2.2<br>(1.5 to 2.9)               | 13.0<br>(9.4 to 17.0)                                              | 0.1<br>(-2.9 to 3.7)                                                   |
| Eating disorders                                               | 1.0<br>(0.8 to 1.3)               | 0.5<br>(0.3 to 0.6)               | 0.2<br>(0.1 to 0.3)               | 20.0<br>(6.5 to 34.8)                                              | 13.6<br>(1.3 to 27.7)                                                  |
| Anorexia nervosa                                               | 0.2<br>(0.1 to 0.2)               | 0.1<br>(0.1 to 0.1)               | < 0.05<br>(< 0.05 to 0.1)         | 16.7<br>(-8.5 to 45.5)                                             | 11.4<br>(-12.3 to 38.5)                                                |
| Bulimia nervosa                                                | 0.8<br>(0.6 to 1.0)               | 0.4<br>(0.3 to 0.6)               | 0.2<br>(0.1 to 0.2)               | 20.8<br>(5.2 to 38.9)                                              | 14.2<br>(-0.5 to 31.3)                                                 |
| Autistic spectrum disorders                                    | 4.7<br>(4.2 to 5.2)               | < 0.05<br>(< 0.05 to < 0.05)      | 0.7<br>(0.5 to 1.0)               | 8.0<br>(2.6 to 13.4)                                               | 0.2<br>(-4.6 to 5.0)                                                   |
| Autism                                                         | 1.5<br>(1.3 to 1.7)               | < 0.05<br>(< 0.05 to < 0.05)      | 0.4<br>(0.2 to 0.6)               | 8.5<br>(-0.3 to 17.8)                                              | 0.3<br>(-7.5 to 8.7)                                                   |
| Asperger syndrome and other autistic spectrum disorders        | 3.2<br>(2.6 to 3.8)               | < 0.05<br>(< 0.05 to < 0.05)      | 0.3<br>(0.2 to 0.5)               | 7.4<br>(2.4 to 12.8)                                               | 0.0<br>(-4.6 to 4.7)                                                   |



| Cause                                                      | Prevalence in thousands (95% UI)        | Incidence in thousands (95% UI)                | YLDs in thousands (95% UI)           |                                                   |                                                     |
|------------------------------------------------------------|-----------------------------------------|------------------------------------------------|--------------------------------------|---------------------------------------------------|-----------------------------------------------------|
|                                                            | 2016 counts                             | 2016 counts                                    | 2016 counts                          | Percentage change in counts between 2006 and 2016 | Percentage change in age-standardised rates between |
| Attention-deficit/hyperactivity disorder                   | 10.4<br>(9.4 to 11.6)                   | 0.5<br>(0.4 to 0.5)                            | 0.1<br>(0.1 to 0.2)                  | 5.6<br>(0.0 to 11.5)                              | -0.1<br>(-5.3 to 5.5)                               |
| Conduct disorder                                           | 3.7<br>(3.0 to 4.5)                     | 1.3<br>(1.0 to 1.6)                            | 0.5<br>(0.3 to 0.7)                  | 3.4<br>(-3.0 to 10.4)                             | 0.1<br>(-6.0 to 6.8)                                |
| Idiopathic developmental intellectual disability           | 2.8<br>(1.1 to 4.5)                     | --                                             | 0.1<br>( $< 0.05$ to 0.2)            | 0.8<br>(-7.4 to 9.0)                              | -7.9<br>(-15.2 to -0.8)                             |
| Other mental and substance use disorders                   | 10.2<br>(9.0 to 11.8)                   | 0.3<br>(0.3 to 0.4)                            | 0.8<br>(0.5 to 1.1)                  | 16.3<br>(10.3 to 22.6)                            | -0.1<br>(-5.0 to 5.0)                               |
| <b>Diabetes, urogenital, blood, and endocrine diseases</b> | <b>227.3</b><br><b>(223.0 to 231.5)</b> | <b>63.0†</b><br><b>(58.7 to 67.5)</b>          | <b>5.8</b><br><b>(4.0 to 7.7)</b>    | <b>29.6</b><br><b>(23.0 to 35.9)</b>              | <b>5.0</b><br><b>(-0.1 to 10.0)</b>                 |
| Diabetes mellitus                                          | 42.3<br>(38.1 to 47.0)                  | 2.6<br>(2.3 to 2.8)                            | 3.7<br>(2.6 to 5.1)                  | 40.4<br>(30.3 to 50.8)                            | 9.7<br>(2.1 to 17.4)                                |
| Acute glomerulonephritis                                   | $< 0.05$<br>( $< 0.05$ to $< 0.05$ )    | 0.1<br>(0.1 to 0.1)                            | $< 0.05$<br>( $< 0.05$ to $< 0.05$ ) | 11.7<br>(6.1 to 17.6)                             | -1.3<br>(-5.9 to 3.5)                               |
| Chronic kidney disease                                     | 21.2<br>(19.3 to 23.3)                  | 1.7<br>(1.5 to 1.9)                            | 0.7<br>(0.5 to 0.8)                  | 29.0<br>(18.9 to 40.2)                            | 2.2<br>(-5.4 to 10.4)                               |
| Chronic kidney disease due to diabetes mellitus            | 7.9<br>(6.8 to 9.2)                     | 0.6<br>(0.5 to 0.8)                            | 0.2<br>(0.2 to 0.3)                  | 33.8<br>(19.9 to 49.9)                            | 3.9<br>(-6.4 to 15.4)                               |
| Chronic kidney disease due to hypertension                 | 4.3<br>(3.6 to 4.9)                     | 0.5<br>(0.4 to 0.6)                            | 0.1<br>(0.1 to 0.1)                  | 36.5<br>(20.4 to 55.9)                            | 1.4<br>(-10.4 to 14.9)                              |
| Chronic kidney disease due to glomerulonephritis           | 4.5<br>(3.9 to 5.2)                     | 0.2<br>(0.2 to 0.2)                            | 0.2<br>(0.1 to 0.3)                  | 25.0<br>(11.6 to 40.1)                            | 2.4<br>(-7.2 to 13.5)                               |
| Chronic kidney disease due to other causes                 | 4.5<br>(3.7 to 5.3)                     | 0.4<br>(0.3 to 0.4)                            | 0.1<br>(0.1 to 0.2)                  | 23.9<br>(11.2 to 38.3)                            | -0.3<br>(-9.8 to 9.9)                               |
| Urinary diseases and male infertility                      | 9.0<br>(8.0 to 10.0)                    | 38.6†<br>(34.5 to 43.1)                        | 0.2<br>(0.1 to 0.3)                  | 24.9<br>(17.1 to 33.7)                            | -2.5<br>(-8.2 to 3.4)                               |
| Interstitial nephritis and urinary tract infections        | 0.7<br>(0.6 to 0.8)                     | 35.7<br>(31.7 to 40.2)                         | $< 0.05$<br>( $< 0.05$ to $< 0.05$ ) | 12.8<br>(-0.7 to 28.7)                            | 1.6<br>(-10.0 to 16.4)                              |
| Urolithiasis                                               | 0.1<br>(0.1 to 0.1)                     | 2.2<br>(1.9 to 2.5)                            | $< 0.05$<br>( $< 0.05$ to $< 0.05$ ) | 20.4<br>(14.8 to 26.5)                            | 1.1<br>(-3.2 to 5.8)                                |
| Benign prostatic hyperplasia                               | 5.0<br>(4.2 to 5.8)                     | 0.7<br>(0.6 to 0.8)                            | 0.2<br>(0.1 to 0.2)                  | 32.5<br>(22.0 to 43.4)                            | -2.4<br>(-9.0 to 5.0)                               |
| Male infertility                                           | 2.7<br>(2.1 to 3.5)                     | --                                             | $< 0.05$<br>( $< 0.05$ to $< 0.05$ ) | 5.2<br>(-2.0 to 12.9)                             | -0.3<br>(-7.0 to 7.1)                               |
| Other urinary diseases                                     | --                                      | --                                             | $< 0.05$<br>( $< 0.05$ to $< 0.05$ ) | -7.3<br>(-16.7 to 2.8)                            | -16.1<br>(-24.4 to -6.8)                            |
| Gynecological diseases                                     | 62.3<br>(58.9 to 65.3)                  | 19.0†<br>(17.9 to 20.2)                        | 0.6<br>(0.4 to 0.9)                  | 5.5<br>(0.6 to 10.8)                              | -6.9<br>(-11.2 to -2.1)                             |
| Uterine fibroids                                           | 4.9<br>(4.2 to 5.6)                     | 0.5<br>(0.4 to 0.6)                            | 0.1<br>( $< 0.05$ to 0.1)            | -8.3<br>(-21.2 to 5.4)                            | -22.1<br>(-32.6 to -11.0)                           |
| Polycystic ovarian syndrome                                | 0.1<br>( $< 0.05$ to 0.1)               | 0.4<br>(0.3 to 0.5)                            | $< 0.05$<br>( $< 0.05$ to $< 0.05$ ) | 5.6<br>(-25.4 to 47.0)                            | 2.0<br>(-27.8 to 43.0)                              |
| Female infertility                                         | 5.8<br>(4.1 to 8.1)                     | --                                             | $< 0.05$<br>( $< 0.05$ to 0.1)       | 5.9<br>(-1.7 to 14.6)                             | 0.5<br>(-6.9 to 8.3)                                |
| Endometriosis                                              | $< 0.05$<br>( $< 0.05$ to 0.1)          | 0.2<br>(0.2 to 0.2)                            | $< 0.05$<br>( $< 0.05$ to $< 0.05$ ) | 13.3<br>(-14.3 to 49.9)                           | -0.1<br>(-25.0 to 32.9)                             |
| Genital prolapse                                           | 19.2<br>(16.6 to 21.8)                  | 1.2<br>(1.0 to 1.4)                            | 0.1<br>( $< 0.05$ to 0.1)            | 4.2<br>(-3.8 to 12.4)                             | -18.8<br>(-25.1 to -12.5)                           |
| Premenstrual syndrome                                      | 35.0<br>(33.1 to 36.9)                  | 12.6<br>(11.7 to 13.4)                         | 0.3<br>(0.2 to 0.4)                  | 8.5<br>(1.1 to 16.5)                              | -0.6<br>(-7.3 to 6.7)                               |
| Other gynecological diseases                               | 5.1<br>(4.4 to 5.8)                     | 4.2<br>(3.5 to 5.0)                            | 0.2<br>(0.1 to 0.2)                  | 8.0<br>(-2.8 to 19.2)                             | -4.7<br>(-13.8 to 4.4)                              |
| Hemoglobinopathies and hemolytic anaemias                  | 140.0<br>(136.1 to 144.0)               | --                                             | 0.3<br>(0.2 to 0.4)                  | -1.4<br>(-14.5 to 14.4)                           | -6.5<br>(-18.3 to 7.9)                              |
| Thalassemias                                               | $< 0.05$<br>( $< 0.05$ to $< 0.05$ )    | --                                             | $< 0.05$<br>( $< 0.05$ to $< 0.05$ ) | -19.2<br>(-36.5 to 2.2)                           | -6.4<br>(-26.3 to 18.4)                             |
| Thalassaemias trait                                        | 0.9<br>(0.6 to 1.2)                     | --                                             | $< 0.05$<br>( $< 0.05$ to $< 0.05$ ) | 13.7<br>(-64.0 to 67.7)                           | 5.3<br>(-66.8 to 57.3)                              |
| Sickle cell disorders                                      | 0.3<br>(0.2 to 0.4)                     | --                                             | $< 0.05$<br>( $< 0.05$ to $< 0.05$ ) | 5.1<br>(-10.4 to 23.8)                            | 4.2<br>(-10.6 to 22.6)                              |
| Sickle cell trait                                          | 51.1<br>(45.1 to 57.6)                  | --                                             | 0.2<br>(0.1 to 0.3)                  | -0.1<br>(-17.5 to 20.2)                           | -5.1<br>(-20.8 to 13.0)                             |
| G6PD deficiency                                            | 31.5<br>(30.4 to 32.7)                  | --                                             | $< 0.05$<br>( $< 0.05$ to $< 0.05$ ) | 6.9<br>(-30.2 to 73.2)                            | 6.2<br>(-28.9 to 65.5)                              |
| G6PD trait                                                 | 64.3<br>(63.3 to 65.4)                  | --                                             | $< 0.05$<br>( $< 0.05$ to $< 0.05$ ) | 37.2<br>(11.8 to 66.9)                            | 23.9<br>(2.3 to 49.7)                               |
| Other hemoglobinopathies and hemolytic anaemias            | 4.3<br>(3.7 to 4.9)                     | --                                             | 0.1<br>( $< 0.05$ to 0.1)            | -7.7<br>(-22.3 to 10.6)                           | -13.4<br>(-25.9 to 2.0)                             |
| Endocrine, metabolic, blood, and immune disorders          | 7.8<br>(7.2 to 8.4)                     | 1.1<br>(1.0 to 1.2)                            | 0.2<br>(0.1 to 0.3)                  | 10.1<br>(0.9 to 19.5)                             | -2.5<br>(-9.4 to 4.7)                               |
| <b>Musculoskeletal disorders</b>                           | <b>85.1</b><br><b>(81.1 to 89.0)</b>    | <b>43.5</b><br><b>(39.4 to 48.2)</b>           | <b>9.1</b><br><b>(6.6 to 11.9)</b>   | <b>20.9</b><br><b>(17.3 to 24.5)</b>              | <b>-0.0</b><br><b>(-2.5 to 2.5)</b>                 |
| Rheumatoid arthritis                                       | 1.8<br>(1.6 to 2.0)                     | 0.1<br>(0.1 to 0.1)                            | 0.4<br>(0.3 to 0.6)                  | 31.4<br>(20.3 to 42.8)                            | 6.1<br>(-1.9 to 14.6)                               |
| Osteoarthritis                                             | 19.2<br>(18.0 to 20.5)                  | 1.0<br>(0.9 to 1.1)                            | 1.2<br>(0.8 to 1.6)                  | 38.5<br>(33.5 to 43.7)                            | 6.5<br>(2.8 to 10.2)                                |
| Low back and neck pain                                     | 43.0<br>(40.1 to 46.2)                  | 16.7<br>(15.0 to 18.6)                         | 4.9<br>(3.5 to 6.4)                  | 20.4<br>(16.4 to 24.7)                            | -0.1<br>(-2.9 to 2.7)                               |
| Low back pain                                              | 26.2<br>(23.1 to 29.8)                  | 12.5<br>(10.9 to 14.3)                         | 3.0<br>(2.1 to 3.9)                  | 19.2<br>(13.4 to 25.6)                            | -0.1<br>(-4.4 to 4.4)                               |
| Neck pain                                                  | 19.1<br>(16.3 to 22.1)                  | 4.3<br>(3.7 to 5.0)                            | 1.9<br>(1.3 to 2.7)                  | 22.4<br>(18.3 to 26.5)                            | -0.0<br>(-2.2 to 2.2)                               |
| Gout                                                       | 1.6<br>(1.4 to 1.8)                     | 0.3<br>(0.3 to 0.4)                            | $< 0.05$<br>( $< 0.05$ to 0.1)       | 24.8<br>(5.9 to 47.1)                             | -0.2<br>(-14.4 to 17.0)                             |
| Other musculoskeletal disorders                            | 30.1<br>(26.2 to 34.8)                  | 25.3<br>(21.6 to 30.0)                         | 2.6<br>(1.7 to 3.6)                  | 13.6<br>(4.8 to 23.3)                             | -3.9<br>(-10.7 to 3.7)                              |
| <b>Other non-communicable diseases</b>                     | <b>396.2</b><br><b>(390.1 to 402.2)</b> | <b>1,107.3†</b><br><b>(1,046.5 to 1,179.4)</b> | <b>10.8</b><br><b>(7.3 to 15.4)</b>  | <b>13.5</b><br><b>(11.9 to 14.8)</b>              | <b>-1.6</b><br><b>(-2.5 to -0.6)</b>                |
| Congenital anomalies                                       | 4.5<br>(3.8 to 5.2)                     | --                                             | 0.5<br>(0.4 to 0.7)                  | 2.6<br>(-3.5 to 9.2)                              | -3.1<br>(-9.0 to 3.1)                               |
| Neural tube defects                                        | 0.2<br>(0.2 to 0.2)                     | --                                             | 0.1<br>( $< 0.05$ to 0.1)            | 5.5<br>(-8.6 to 23.9)                             | -2.7<br>(-15.4 to 13.3)                             |
| Congenital heart anomalies                                 | 1.0<br>(0.9 to 1.1)                     | --                                             | $< 0.05$<br>( $< 0.05$ to 0.1)       | 6.2<br>(-5.9 to 19.3)                             | 4.5<br>(-7.0 to 16.9)                               |
| Orofacial clefts                                           | 0.3<br>(0.3 to 0.4)                     | --                                             | $< 0.05$<br>( $< 0.05$ to $< 0.05$ ) | 3.4<br>(-7.5 to 15.2)                             | -3.6<br>(-13.7 to 7.5)                              |
| Down's syndrome                                            | 0.3<br>(0.2 to 0.3)                     | --                                             | $< 0.05$<br>( $< 0.05$ to $< 0.05$ ) | 11.8<br>(3.1 to 21.8)                             | 5.4<br>(-3.1 to 14.7)                               |
| Turner syndrome                                            | 0.1<br>(0.1 to 0.1)                     | --                                             | $< 0.05$<br>( $< 0.05$ to $< 0.05$ ) | 2.7<br>(-31.5 to 60.6)                            | -1.0<br>(-33.9 to 50.4)                             |
| Klinefelter syndrome                                       | 0.1<br>(0.1 to 0.2)                     | --                                             | $< 0.05$<br>( $< 0.05$ to $< 0.05$ ) | 2.1<br>(-24.3 to 38.3)                            | -1.5<br>(-26.9 to 33.5)                             |

| Cause                                         | Prevalence in thousands (95% UI)     | Incidence in thousands (95% UI)       | YLDs in thousands (95% UI)        |                                                   |                                                     |
|-----------------------------------------------|--------------------------------------|---------------------------------------|-----------------------------------|---------------------------------------------------|-----------------------------------------------------|
|                                               | 2016 counts                          | 2016 counts                           | 2016 counts                       | Percentage change in counts between 2006 and 2016 | Percentage change in age-standardised rates between |
| Other chromosomal abnormalities               | 0.3<br>(0.3 to 0.4)                  | --                                    | < 0.05<br>(< 0.05 to < 0.05)      | -3.7<br>(-19.2 to 14.2)                           | 2.8<br>(-13.8 to 22.1)                              |
| Congenital musculoskeletal and limb anomalies | 0.4<br>(0.4 to 0.4)                  | --                                    | 0.1<br>(< 0.05 to 0.1)            | 12.6<br>(1.8 to 23.9)                             | 2.4<br>(-7.2 to 12.3)                               |
| Urogenital congenital anomalies               | 0.5<br>(0.5 to 0.6)                  | --                                    | < 0.05<br>(< 0.05 to < 0.05)      | -1.8<br>(-14.5 to 12.0)                           | 1.5<br>(-11.6 to 15.9)                              |
| Digestive congenital anomalies                | 0.6<br>(0.5 to 0.7)                  | --                                    | < 0.05<br>(< 0.05 to < 0.05)      | 8.8<br>(-7.7 to 29.0)                             | 1.1<br>(-14.1 to 19.2)                              |
| Other congenital anomalies                    | 1.9<br>(1.2 to 2.8)                  | --                                    | 0.2<br>(0.1 to 0.4)               | -1.2<br>(-12.4 to 10.1)                           | -8.3<br>(-18.7 to 1.9)                              |
| Skin and subcutaneous diseases                | 180.0<br>(175.0 to 184.8)            | 415.6<br>(391.7 to 440.5)             | 4.4<br>(3.0 to 6.4)               | 8.0<br>(5.8 to 10.1)                              | 1.4<br>(-0.3 to 3.1)                                |
| Dermatitis                                    | 27.0<br>(25.1 to 29.0)               | 28.7<br>(26.5 to 30.8)                | 1.1<br>(0.6 to 1.7)               | 2.4<br>(-1.0 to 6.1)                              | 0.0<br>(-3.1 to 3.1)                                |
| Psoriasis                                     | 4.9<br>(4.7 to 5.2)                  | 0.7<br>(0.7 to 0.7)                   | 0.4<br>(0.3 to 0.6)               | 22.1<br>(13.0 to 31.6)                            | 6.9<br>(-0.7 to 14.8)                               |
| Cellulitis                                    | 0.2<br>(0.2 to 0.2)                  | 3.8<br>(3.6 to 4.1)                   | < 0.05<br>(< 0.05 to < 0.05)      | 9.4<br>(-13.5 to 38.5)                            | 1.6<br>(-18.2 to 27.7)                              |
| Pyoderma                                      | 1.5<br>(1.4 to 1.5)                  | 35.6<br>(34.2 to 37.0)                | < 0.05<br>(< 0.05 to < 0.05)      | 18.5<br>(10.7 to 26.9)                            | 0.4<br>(-5.4 to 7.1)                                |
| Scabies                                       | 11.3<br>(9.9 to 13.0)                | 34.6<br>(30.1 to 39.9)                | 0.3<br>(0.2 to 0.5)               | -0.3<br>(-4.3 to 4.0)                             | -4.7<br>(-8.1 to -1.2)                              |
| Fungal skin diseases                          | 56.3<br>(50.7 to 62.1)               | 196.0<br>(173.9 to 221.3)             | 0.3<br>(0.1 to 0.7)               | 12.4<br>(10.5 to 14.3)                            | -0.0<br>(-0.9 to 0.9)                               |
| Viral skin diseases                           | 15.2<br>(14.5 to 16.0)               | 22.6<br>(21.4 to 23.9)                | 0.5<br>(0.3 to 0.7)               | 6.2<br>(2.9 to 9.8)                               | 0.1<br>(-3.0 to 3.3)                                |
| Acne vulgaris                                 | 46.4<br>(41.6 to 51.6)               | 32.1<br>(26.4 to 39.4)                | 1.2<br>(0.8 to 1.7)               | 8.9<br>(4.0 to 13.6)                              | 3.3<br>(-1.3 to 7.9)                                |
| Alopecia areata                               | 1.0<br>(0.9 to 1.0)                  | 1.7<br>(1.6 to 1.8)                   | < 0.05<br>(< 0.05 to < 0.05)      | 11.7<br>(-0.2 to 24.6)                            | 0.3<br>(-10.1 to 11.6)                              |
| Pruritus                                      | 4.8<br>(4.3 to 5.5)                  | 3.8<br>(3.4 to 4.3)                   | 0.1<br>(< 0.05 to 0.1)            | 15.8<br>(9.6 to 22.4)                             | 1.8<br>(-3.3 to 7.1)                                |
| Urticaria                                     | 4.9<br>(4.3 to 5.6)                  | 8.7<br>(7.7 to 10.0)                  | 0.3<br>(0.2 to 0.4)               | 1.5<br>(-4.4 to 7.6)                              | 0.1<br>(-5.2 to 5.8)                                |
| Decubitus ulcer                               | 0.3<br>(0.2 to 0.3)                  | 0.9<br>(0.8 to 1.1)                   | < 0.05<br>(< 0.05 to 0.1)         | 26.6<br>(11.8 to 42.6)                            | 0.2<br>(-11.2 to 12.4)                              |
| Other skin and subcutaneous diseases          | 39.5<br>(38.4 to 40.7)               | 46.3<br>(44.9 to 47.8)                | 0.2<br>(0.1 to 0.4)               | 22.3<br>(19.3 to 25.4)                            | 4.3<br>(1.9 to 6.6)                                 |
| Sense organ diseases                          | 128.1<br>(125.4 to 131.2)            | 51.6†<br>(48.4 to 55.1)               | 4.2<br>(2.9 to 5.9)               | 18.0<br>(16.0 to 20.2)                            | -4.3<br>(-5.8 to -2.9)                              |
| Glaucoma                                      | 0.5<br>(0.4 to 0.6)                  | --                                    | 0.1<br>(< 0.05 to 0.1)            | 29.4<br>(16.8 to 43.4)                            | -1.9<br>(-10.9 to 7.9)                              |
| Cataract                                      | 4.5<br>(4.0 to 5.0)                  | --                                    | 0.4<br>(0.2 to 0.5)               | 26.3<br>(20.8 to 32.6)                            | -4.0<br>(-7.9 to 0.2)                               |
| Macular degeneration                          | 0.1<br>(0.1 to 0.2)                  | --                                    | < 0.05<br>(< 0.05 to < 0.05)      | 34.7<br>(13.8 to 60.0)                            | 1.2<br>(-13.9 to 18.5)                              |
| Refraction and accommodation disorders        | 59.1<br>(56.7 to 61.7)               | --                                    | 0.9<br>(0.5 to 1.4)               | 8.4<br>(5.3 to 11.6)                              | -8.8<br>(-11.3 to -6.1)                             |
| Age-related and other hearing loss            | 86.1<br>(81.5 to 91.4)               | --                                    | 2.4<br>(1.6 to 3.3)               | 19.5<br>(15.9 to 22.9)                            | -4.0<br>(-6.3 to -1.9)                              |
| Other vision loss                             | 1.2<br>(1.1 to 1.4)                  | --                                    | 0.1<br>(0.1 to 0.2)               | 22.4<br>(11.3 to 34.2)                            | -1.2<br>(-9.1 to 7.3)                               |
| Other sense organ diseases                    | 14.8<br>(13.6 to 15.9)               | 51.6<br>(48.4 to 55.1)                | 0.5<br>(0.3 to 0.7)               | 22.1<br>(17.2 to 27.1)                            | 0.8<br>(-2.6 to 4.6)                                |
| Oral disorders                                | 269.3<br>(258.9 to 280.4)            | 640.1†<br>(584.8 to 702.4)            | 1.7<br>(1.0 to 2.6)               | 21.9<br>(19.4 to 24.8)                            | -0.4<br>(-2.1 to 1.4)                               |
| Caries of deciduous teeth                     | 48.5<br>(42.0 to 56.6)               | 153.7<br>(115.8 to 205.9)             | < 0.05<br>(< 0.05 to < 0.05)      | -19.2<br>(-28.4 to -9.4)                          | -11.0<br>(-21.0 to -0.4)                            |
| Caries of permanent teeth                     | 146.9<br>(137.5 to 157.0)            | 474.0<br>(434.2 to 516.7)             | 0.1<br>(< 0.05 to 0.2)            | 6.1<br>(2.4 to 10.2)                              | -6.0<br>(-9.3 to -2.4)                              |
| Periodontal disease                           | 84.8<br>(72.1 to 99.3)               | 9.9<br>(8.2 to 11.8)                  | 0.6<br>(0.2 to 1.2)               | 19.9<br>(16.0 to 24.1)                            | -0.8<br>(-3.6 to 2.3)                               |
| Edentulism and severe tooth loss              | 26.6<br>(23.2 to 29.9)               | 2.4<br>(2.0 to 2.8)                   | 0.7<br>(0.5 to 1.0)               | 30.3<br>(26.2 to 34.5)                            | 0.5<br>(-2.5 to 3.5)                                |
| Other oral disorders                          | 9.9<br>(9.4 to 10.3)                 | --                                    | 0.3<br>(0.2 to 0.4)               | 14.0<br>(10.1 to 18.3)                            | -0.0<br>(-3.1 to 3.2)                               |
| <b>Injuries</b>                               | <b>84.8</b><br><b>(79.9 to 91.4)</b> | <b>37.9†</b><br><b>(36.0 to 40.1)</b> | <b>3.4</b><br><b>(2.3 to 4.8)</b> | <b>25.7</b><br><b>(22.8 to 28.4)</b>              | <b>6.8</b><br><b>(4.5 to 8.9)</b>                   |
| <b>Transport injuries</b>                     | <b>12.0</b><br><b>(11.1 to 12.9)</b> | <b>4.3</b><br><b>(3.9 to 4.9)</b>     | <b>0.7</b><br><b>(0.4 to 0.9)</b> | <b>36.9</b><br><b>(33.0 to 40.6)</b>              | <b>15.3</b><br><b>(12.5 to 18.0)</b>                |
| Road injuries                                 | 11.5<br>(10.7 to 12.4)               | 4.2<br>(3.8 to 4.8)                   | 0.6<br>(0.4 to 0.9)               | 38.5<br>(34.6 to 42.2)                            | 16.6<br>(13.7 to 19.2)                              |
| Pedestrian road injuries                      | 1.3<br>(1.1 to 1.5)                  | 0.3<br>(0.3 to 0.4)                   | 0.1<br>(< 0.05 to 0.1)            | 35.5<br>(31.5 to 39.4)                            | 13.8<br>(11.0 to 16.6)                              |
| Cyclist road injuries                         | 2.9<br>(2.4 to 3.4)                  | 1.2<br>(1.0 to 1.4)                   | 0.1<br>(0.1 to 0.2)               | 43.6<br>(39.2 to 47.6)                            | 21.9<br>(18.7 to 25.0)                              |
| Motorcyclist road injuries                    | 2.7<br>(2.3 to 3.3)                  | 0.7<br>(0.5 to 0.8)                   | 0.1<br>(0.1 to 0.2)               | 37.1<br>(33.2 to 41.1)                            | 15.4<br>(12.3 to 18.3)                              |
| Motor vehicle road injuries                   | 3.7<br>(3.1 to 4.2)                  | 1.6<br>(1.4 to 1.9)                   | 0.2<br>(0.1 to 0.3)               | 36.9<br>(32.9 to 40.5)                            | 14.8<br>(11.9 to 17.6)                              |
| Other road injuries                           | 1.0<br>(0.8 to 1.2)                  | 0.5<br>(0.4 to 0.6)                   | < 0.05<br>(< 0.05 to 0.1)         | 39.4<br>(35.5 to 43.1)                            | 16.9<br>(13.9 to 19.7)                              |
| Other transport injuries                      | 0.5<br>(0.4 to 0.6)                  | 0.1<br>(0.1 to 0.1)                   | < 0.05<br>(< 0.05 to < 0.05)      | 10.2<br>(7.0 to 13.6)                             | -5.9<br>(-8.6 to -3.1)                              |
| <b>Unintentional injuries</b>                 | <b>68.1</b><br><b>(63.2 to 74.3)</b> | <b>31.6</b><br><b>(29.7 to 33.8)</b>  | <b>2.5</b><br><b>(1.7 to 3.5)</b> | <b>24.8</b><br><b>(22.0 to 27.6)</b>              | <b>5.8</b><br><b>(3.5 to 8.0)</b>                   |
| Falls                                         | 26.6<br>(23.2 to 30.4)               | 12.5<br>(10.9 to 14.3)                | 1.1<br>(0.8 to 1.6)               | 32.3<br>(29.3 to 35.2)                            | 8.5<br>(6.2 to 10.9)                                |
| Drowning                                      | 0.3<br>(0.3 to 0.3)                  | 0.1<br>(0.1 to 0.1)                   | < 0.05<br>(< 0.05 to < 0.05)      | 10.4<br>(6.5 to 14.1)                             | -8.2<br>(-11.4 to -5.4)                             |
| Fire, heat, and hot substances                | 7.4<br>(6.2 to 9.2)                  | 0.9<br>(0.8 to 1.1)                   | 0.2<br>(0.1 to 0.3)               | 17.2<br>(11.1 to 22.7)                            | 2.3<br>(-2.4 to 6.6)                                |
| Poisonings                                    | 0.2<br>(0.1 to 0.2)                  | 0.2<br>(0.2 to 0.3)                   | < 0.05<br>(< 0.05 to < 0.05)      | 39.3<br>(28.2 to 51.3)                            | 23.2<br>(14.1 to 33.1)                              |
| Exposure to mechanical forces                 | 11.8<br>(10.1 to 14.2)               | 4.4<br>(3.8 to 5.0)                   | 0.3<br>(0.2 to 0.4)               | 26.6<br>(22.9 to 30.0)                            | 7.5<br>(4.7 to 10.3)                                |
| Unintentional firearm injuries                | 0.8<br>(0.7 to 1.1)                  | 0.2<br>(0.2 to 0.3)                   | < 0.05<br>(< 0.05 to 0.1)         | 16.4<br>(13.0 to 19.6)                            | -2.0<br>(-4.6 to 0.5)                               |
| Unintentional suffocation                     | 0.4<br>(0.3 to 0.6)                  | 0.1<br>(0.1 to 0.1)                   | < 0.05<br>(< 0.05 to < 0.05)      | 16.4<br>(12.8 to 19.8)                            | 4.6<br>(1.5 to 7.4)                                 |
| Other exposure to mechanical forces           | 10.5<br>(8.8 to 12.8)                | 4.2<br>(3.6 to 4.7)                   | 0.2<br>(0.2 to 0.4)               | 28.9<br>(25.0 to 32.3)                            | 9.3<br>(6.3 to 12.0)                                |

| Cause                                                                               | Prevalence in thousands (95% UI)     | Incidence in thousands (95% UI)                      | YLDs in thousands (95% UI)                    |                                                   |                                                     |
|-------------------------------------------------------------------------------------|--------------------------------------|------------------------------------------------------|-----------------------------------------------|---------------------------------------------------|-----------------------------------------------------|
|                                                                                     | 2016 counts                          | 2016 counts                                          | 2016 counts                                   | Percentage change in counts between 2006 and 2016 | Percentage change in age-standardised rates between |
| Adverse effects of medical treatment                                                | 0.3<br>(0.2 to 0.4)                  | 3.9<br>(3.5 to 4.2)                                  | < 0.05<br>(< 0.05 to 0.1)                     | 9.7<br>(5.0 to 14.5)                              | 0.7<br>(-3.1 to 4.6)                                |
| Animal contact                                                                      | 1.7<br>(1.5 to 2.0)                  | 2.0<br>(1.7 to 2.4)                                  | 0.1<br>(< 0.05 to 0.1)                        | 5.7<br>(-0.4 to 11.9)                             | -7.4<br>(-12.4 to -2.2)                             |
| Venomous animal contact                                                             | 1.0<br>(0.8 to 1.1)                  | 1.1<br>(0.9 to 1.3)                                  | < 0.05<br>(< 0.05 to 0.1)                     | 7.9<br>(0.2 to 16.0)                              | -4.8<br>(-11.1 to 1.8)                              |
| Non-venomous animal contact                                                         | 0.8<br>(0.6 to 1.0)                  | 1.0<br>(0.8 to 1.2)                                  | < 0.05<br>(< 0.05 to < 0.05)                  | -2.3<br>(-6.4 to 1.3)                             | -16.1<br>(-19.4 to -13.3)                           |
| Foreign body                                                                        | 3.6<br>(3.0 to 4.3)                  | 2.8<br>(2.4 to 3.2)                                  | 0.1<br>(0.1 to 0.2)                           | 8.9<br>(5.5 to 12.3)                              | -3.9<br>(-6.6 to -1.3)                              |
| Pulmonary aspiration and foreign body in airway                                     | 2.3<br>(1.8 to 3.0)                  | 0.8<br>(0.7 to 0.9)                                  | 0.1<br>(0.1 to 0.1)                           | 7.6<br>(3.8 to 11.4)                              | -4.4<br>(-7.3 to -1.5)                              |
| Foreign body in eyes                                                                | 0.3<br>(0.2 to 0.5)                  | 1.6<br>(1.2 to 2.0)                                  | < 0.05<br>(< 0.05 to < 0.05)                  | 17.8<br>(13.8 to 22.4)                            | 0.6<br>(-1.9 to 3.1)                                |
| Foreign body in other body part                                                     | 1.0<br>(0.8 to 1.3)                  | 0.4<br>(0.3 to 0.5)                                  | < 0.05<br>(< 0.05 to < 0.05)                  | 8.6<br>(4.4 to 12.8)                              | -4.9<br>(-8.2 to -1.6)                              |
| Environmental heat and cold exposure                                                | 7.1<br>(6.0 to 8.3)                  | 1.9<br>(1.6 to 2.2)                                  | 0.3<br>(0.2 to 0.4)                           | 16.5<br>(13.5 to 19.7)                            | 0.4<br>(-2.1 to 2.9)                                |
| Other unintentional injuries                                                        | 9.2<br>(7.1 to 11.8)                 | 2.9<br>(2.4 to 3.5)                                  | 0.3<br>(0.2 to 0.4)                           | 26.4<br>(23.5 to 29.3)                            | 11.5<br>(9.2 to 13.7)                               |
| <b>Self-harm and interpersonal violence</b>                                         | <b>16.4</b><br><b>(14.8 to 18.1)</b> | <b>1.9†</b><br><b>(1.7 to 2.2)</b>                   | <b>0.3</b><br><b>(0.2 to 0.4)</b>             | <b>14.1</b><br><b>(10.4 to 17.6)</b>              | <b>0.4</b><br><b>(-2.0 to 2.7)</b>                  |
| Self-harm                                                                           | 1.0<br>(0.8 to 1.2)                  | 0.5<br>(0.4 to 0.6)                                  | < 0.05<br>(< 0.05 to 0.1)                     | 24.0<br>(20.0 to 28.3)                            | 2.1<br>(-1.0 to 5.2)                                |
| Self-harm by firearm                                                                | < 0.05<br>(< 0.05 to 0.1)            | < 0.05<br>(< 0.05 to < 0.05)                         | < 0.05<br>(< 0.05 to < 0.05)                  | -4.6<br>(-8.4 to -0.6)                            | -20.8<br>(-23.8 to -17.8)                           |
| Self-harm by other specified means                                                  | 1.0<br>(0.8 to 1.1)                  | 0.5<br>(0.4 to 0.5)                                  | < 0.05<br>(< 0.05 to 0.1)                     | 25.6<br>(21.4 to 29.9)                            | 3.3<br>(0.1 to 6.5)                                 |
| Interpersonal violence                                                              | 15.3<br>(13.7 to 17.1)               | 1.4†<br>(1.2 to 1.7)                                 | 0.2<br>(0.1 to 0.3)                           | 12.1<br>(8.2 to 15.9)                             | -0.0<br>(-2.7 to 2.6)                               |
| Assault by firearm                                                                  | 0.2<br>(0.1 to 0.2)                  | 0.1<br>(< 0.05 to 0.1)                               | < 0.05<br>(< 0.05 to < 0.05)                  | 37.9<br>(33.4 to 42.5)                            | 17.7<br>(14.3 to 21.2)                              |
| Assault by sharp object                                                             | 1.2<br>(1.0 to 1.5)                  | 0.5<br>(0.4 to 0.6)                                  | < 0.05<br>(< 0.05 to 0.1)                     | 31.7<br>(27.6 to 35.7)                            | 13.1<br>(10.1 to 16.2)                              |
| Sexual violence                                                                     | 12.4<br>(10.8 to 14.1)               | --                                                   | 0.1<br>(0.1 to 0.1)                           | -1.8<br>(-5.9 to 2.4)                             | -9.3<br>(-12.5 to -5.6)                             |
| Assault by other means                                                              | 1.6<br>(1.4 to 1.8)                  | 0.9<br>(0.8 to 1.0)                                  | 0.1<br>(< 0.05 to 0.1)                        | 26.1<br>(23.1 to 28.9)                            | 6.7<br>(4.3 to 8.9)                                 |
| <b>Forces of nature, conflict and terrorism, and executions and police conflict</b> | <b>0.7</b><br><b>(0.1 to 1.4)</b>    | <b>&lt; 0.05†</b><br><b>(&lt; 0.05 to &lt; 0.05)</b> | <b>&lt; 0.05</b><br><b>(&lt; 0.05 to 0.1)</b> | <b>-19.0</b><br><b>(-22.5 to -15.2)</b>           | <b>-28.2</b><br><b>(-31.1 to -24.6)</b>             |
| Exposure to forces of nature                                                        | < 0.05<br>(< 0.05 to < 0.05)         | --                                                   | < 0.05<br>(< 0.05 to < 0.05)                  | -5.8<br>(-9.2 to -1.7)                            | -18.1<br>(-21.0 to -14.2)                           |
| Conflict and terrorism                                                              | 0.6<br>(0.1 to 1.4)                  | --                                                   | < 0.05<br>(< 0.05 to 0.1)                     | -20.4<br>(-24.2 to -17.2)                         | -29.5<br>(-32.5 to -26.6)                           |
| Executions and police conflict                                                      | < 0.05<br>(< 0.05 to < 0.05)         | < 0.05<br>(< 0.05 to < 0.05)                         | < 0.05<br>(< 0.05 to < 0.05)                  | 29.0<br>(11.2 to 38.3)                            | 15.7<br>(0.5 to 23.5)                               |
| <b>Impairments</b>                                                                  | --                                   | --                                                   | --                                            | --                                                | --                                                  |
| Anaemia                                                                             | 145.2<br>(127.9 to 164.0)            | --                                                   | 3.9<br>(2.6 to 5.7)                           | -4.9<br>(-15.1 to 6.8)                            | -11.0<br>(-20.2 to -0.6)                            |
| Developmental intellectual disability                                               | 9.2<br>(7.0 to 12.3)                 | --                                                   | 1.7<br>(0.9 to 3.2)                           | 21.0<br>(4.7 to 43.1)                             | 14.3<br>(-1.4 to 35.7)                              |
| Epilepsy                                                                            | 4.4<br>(2.1 to 7.5)                  | --                                                   | 1.7<br>(0.7 to 3.3)                           | 16.2<br>(-41.9 to 102.0)                          | 8.6<br>(-47.1 to 92.0)                              |
| Guillain-Barre syndrome                                                             | < 0.05<br>(< 0.05 to < 0.05)         | --                                                   | < 0.05<br>(< 0.05 to < 0.05)                  | 102.6<br>(53.4 to 225.5)                          | 75.9<br>(34.0 to 175.2)                             |
| Hearing loss                                                                        | 93.1<br>(88.5 to 98.3)               | --                                                   | 2.7<br>(1.9 to 3.8)                           | 15.6<br>(12.2 to 18.6)                            | -4.8<br>(-6.8 to -2.9)                              |
| Heart failure                                                                       | 3.2<br>(2.8 to 3.8)                  | --                                                   | 0.3<br>(0.2 to 0.4)                           | 32.6<br>(23.4 to 44.0)                            | 2.2<br>(-4.9 to 10.6)                               |
| Infertility                                                                         | 10.4<br>(8.2 to 13.5)                | --                                                   | 0.1<br>(< 0.05 to 0.1)                        | 5.7<br>(0.2 to 11.9)                              | 0.2<br>(-4.8 to 5.8)                                |
| Pelvic inflammatory disease                                                         | 0.1<br>(0.1 to 0.1)                  | --                                                   | < 0.05<br>(< 0.05 to < 0.05)                  | 6.1<br>(-12.8 to 29.5)                            | -5.9<br>(-22.3 to 13.8)                             |
| Vision loss                                                                         | 68.7<br>(65.8 to 72.3)               | --                                                   | 2.3<br>(1.5 to 3.8)                           | 21.7<br>(11.5 to 37.1)                            | 3.8<br>(-5.0 to 19.8)                               |

We did not calculate incidence for the nine impairments, certain NTDs, and causes with only birth prevalence. Blank cells mean that no estimate is available.

† Incidence for aggregate causes represents the sum of the incidence of the causes below the aggregate.

‡ Incidence estimates for stroke represent first-ever stroke only.

^ Incidence of HIV/AIDS represents new infections of HIV only and does not include new infections of Tuberculosis in HIV positive cases.



SR Table 14: Prevalence, incidence, and YLDs for 2016, percentage change of YLD counts and percentage change of age-standardised YLD rates between 2006 and 2016 by cause and impairments, for all ages, Swaziland.

| Cause                                                                                | Prevalence in thousands (95% UI)       | Incidence in thousands (95% UI)         | YLDs in thousands (95% UI)       |                                                   |                                                     |
|--------------------------------------------------------------------------------------|----------------------------------------|-----------------------------------------|----------------------------------|---------------------------------------------------|-----------------------------------------------------|
|                                                                                      | 2016 counts                            | 2016 counts                             | 2016 counts                      | Percentage change in counts between 2006 and 2016 | Percentage change in age-standardised rates between |
| <b>All causes</b>                                                                    | <b>1,319.7</b><br>(1,316.9 to 1,322.4) | <b>8,820.7†</b><br>(8,345.6 to 9,367.7) | <b>142.5</b><br>(105.9 to 184.8) | <b>13.0</b><br>(4.5 to 19.2)                      | <b>-8.1</b><br>(-16.3 to -2.2)                      |
| <b>Communicable, maternal, neonatal, and nutritional disorders</b>                   | <b>1,226.4</b><br>(1,212.5 to 1,241.3) | <b>5,287.9†</b><br>(4,849.9 to 5,777.5) | <b>41.0</b><br>(29.2 to 54.5)    | <b>-3.2</b><br>(-22.8 to 13.9)                    | <b>-26.1</b><br>(-45.1 to -7.7)                     |
| <b>HIV/AIDS and tuberculosis</b>                                                     | <b>484.0</b><br>(451.3 to 522.1)       | <b>16.6†</b><br>(13.5 to 20.5)          | <b>21.7</b><br>(15.4 to 29.0)    | <b>-15.3</b><br>(-39.9 to 12.6)                   | <b>-35.1</b><br>(-55.9 to -9.5)                     |
| Tuberculosis                                                                         | 338.6<br>(287.2 to 399.6)              | 9.2†<br>(6.5 to 12.5)                   | 1.0<br>(0.6 to 1.5)              | 12.9<br>(-11.9 to 42.8)                           | -13.2<br>(-32.4 to 7.4)                             |
| Drug-susceptible tuberculosis                                                        | 3.1<br>(2.2 to 4.3)                    | 8.6<br>(6.0 to 11.8)                    | 1.0<br>(0.6 to 1.4)              | 11.0<br>(-15.4 to 43.4)                           | -14.7<br>(-34.3 to 6.7)                             |
| Multidrug-resistant tuberculosis without extensive drug resistance                   | 0.2<br>(0.1 to 0.5)                    | 0.7<br>(0.2 to 1.5)                     | 0.1<br>(< 0.05 to 0.2)           | 42.9<br>(-62.0 to 353.2)                          | 10.7<br>(-70.8 to 247.5)                            |
| Extensively drug-resistant tuberculosis                                              | < 0.05<br>(< 0.05 to < 0.05)           | < 0.05<br>(< 0.05 to < 0.05)            | < 0.05<br>(< 0.05 to < 0.05)     | 335.2<br>(26.4 to 1,233.3)                        | 232.3<br>(-5.9 to 912.6)                            |
| Latent tuberculosis infection                                                        | 335.2<br>(284.1 to 396.4)              | --                                      | --                               | --                                                | --                                                  |
| HIV/AIDS                                                                             | 233.5<br>(221.3 to 247.4)              | 7.4 <sup>A</sup><br>(6.0 to 9.3)        | 20.7<br>(14.7 to 27.6)           | -16.4<br>(-41.3 to 12.3)                          | -35.6<br>(-56.7 to -9.3)                            |
| Drug-susceptible HIV/AIDS - Tuberculosis                                             | 3.8<br>(2.8 to 4.9)                    | 10.3<br>(7.7 to 13.3)                   | 1.4<br>(0.9 to 2.1)              | -31.3<br>(-42.6 to -19.8)                         | -45.0<br>(-53.2 to -35.7)                           |
| Multidrug-resistant HIV/AIDS - Tuberculosis without extensive drug resistance        | 0.3<br>(0.1 to 0.7)                    | 0.9<br>(0.3 to 2.0)                     | 0.1<br>(< 0.05 to 0.3)           | -11.4<br>(-74.8 to 164.1)                         | -29.4<br>(-80.1 to 112.8)                           |
| Extensively drug-resistant HIV/AIDS - Tuberculosis                                   | < 0.05<br>(< 0.05 to < 0.05)           | < 0.05<br>(< 0.05 to < 0.05)            | < 0.05<br>(< 0.05 to < 0.05)     | 167.5<br>(-22.3 to 701.3)                         | 113.1<br>(-37.8 to 541.2)                           |
| HIV/AIDS resulting in other diseases                                                 | 229.4<br>(217.1 to 243.3)              | 7.4<br>(6.0 to 9.3)                     | 19.1<br>(13.6 to 25.8)           | -15.0<br>(-42.0 to 17.2)                          | -34.9<br>(-57.5 to -5.3)                            |
| <b>Diarrhoea, lower respiratory infections, and other common infectious diseases</b> | <b>86.7</b><br>(82.5 to 92.4)          | <b>4,592.9†</b><br>(4,149.1 to 5,058.0) | <b>4.5</b><br>(3.2 to 6.2)       | <b>8.7</b><br>(4.8 to 12.7)                       | <b>-8.1</b><br>(-10.9 to -5.3)                      |
| Diarrhoeal diseases                                                                  | 18.6<br>(17.2 to 20.1)                 | 1,223.5<br>(1,131.0 to 1,325.1)         | 2.1<br>(1.4 to 2.9)              | 2.4<br>(-3.3 to 8.9)                              | -13.8<br>(-17.9 to -9.3)                            |
| Intestinal infectious diseases                                                       | < 0.05<br>(< 0.05 to < 0.05)           | < 0.05†<br>(< 0.05 to 0.1)              | < 0.05<br>(< 0.05 to < 0.05)     | 4.1<br>(-13.5 to 24.3)                            | -11.0<br>(-23.7 to 3.1)                             |
| Typhoid fever                                                                        | < 0.05<br>(< 0.05 to < 0.05)           | < 0.05<br>(< 0.05 to 0.1)               | < 0.05<br>(< 0.05 to < 0.05)     | 6.1<br>(-12.8 to 27.1)                            | -9.4<br>(-23.2 to 5.5)                              |
| Paratyphoid fever                                                                    | < 0.05<br>(< 0.05 to < 0.05)           | < 0.05<br>(< 0.05 to < 0.05)            | < 0.05<br>(< 0.05 to < 0.05)     | 8.7<br>(-11.4 to 33.3)                            | -8.7<br>(-22.5 to 8.1)                              |
| Other intestinal infectious diseases                                                 | --                                     | --                                      | < 0.05<br>(< 0.05 to < 0.05)     | -25.0<br>(-50.7 to 14.8)                          | -38.6<br>(-58.0 to -9.8)                            |
| Lower respiratory infections                                                         | 1.9<br>(1.8 to 2.1)                    | 83.4<br>(75.4 to 92.0)                  | 0.1<br>(0.1 to 0.2)              | 4.8<br>(-6.9 to 19.9)                             | -11.5<br>(-20.0 to -2.1)                            |
| Upper respiratory infections                                                         | 41.7<br>(36.3 to 47.5)                 | 3,131.7<br>(2,706.0 to 3,586.7)         | 1.0<br>(0.6 to 1.6)              | 19.8<br>(13.2 to 27.2)                            | 0.9<br>(-3.9 to 6.5)                                |
| Otitis media                                                                         | 23.3<br>(20.7 to 26.1)                 | 114.8<br>(89.6 to 147.4)                | 0.7<br>(0.4 to 1.0)              | 11.8<br>(4.0 to 20.0)                             | -3.0<br>(-9.8 to 3.4)                               |
| Meningitis                                                                           | 3.2<br>(2.8 to 3.8)                    | 0.9<br>(0.8 to 1.1)                     | 0.4<br>(0.2 to 0.5)              | 11.4<br>(3.2 to 20.2)                             | -5.7<br>(-11.7 to 1.1)                              |
| Pneumococcal meningitis                                                              | 1.3<br>(1.1 to 1.6)                    | 0.1<br>(0.1 to 0.2)                     | 0.2<br>(0.1 to 0.2)              | -4.6<br>(-18.4 to 12.0)                           | -20.0<br>(-30.0 to -7.5)                            |
| H influenzae type B meningitis                                                       | 0.4<br>(0.3 to 0.4)                    | 0.1<br>(0.1 to 0.1)                     | 0.1<br>(< 0.05 to 0.1)           | -1.4<br>(-10.7 to 7.9)                            | -16.7<br>(-25.0 to -8.1)                            |
| Meningococcal infection                                                              | 0.3<br>(0.2 to 0.3)                    | 0.1<br>(0.1 to 0.1)                     | < 0.05<br>(< 0.05 to < 0.05)     | 12.9<br>(6.9 to 18.7)                             | -4.6<br>(-9.8 to 0.2)                               |
| Other meningitis                                                                     | 1.3<br>(1.0 to 1.7)                    | 0.6<br>(0.5 to 0.7)                     | 0.1<br>(0.1 to 0.1)              | 57.9<br>(42.9 to 74.6)                            | 35.4<br>(23.3 to 49.0)                              |
| Encephalitis                                                                         | 1.9<br>(1.3 to 2.9)                    | 1.2<br>(1.1 to 1.4)                     | 0.2<br>(0.1 to 0.3)              | 22.7<br>(6.8 to 40.2)                             | 2.9<br>(-7.9 to 15.1)                               |
| Diphtheria                                                                           | < 0.05<br>(< 0.05 to < 0.05)           | < 0.05<br>(< 0.05 to < 0.05)            | < 0.05<br>(< 0.05 to < 0.05)     | -57.1<br>(-79.2 to -9.0)                          | -63.3<br>(-81.4 to -25.3)                           |
| Whooping cough                                                                       | 0.2<br>(0.2 to 0.3)                    | 1.6<br>(1.2 to 2.0)                     | < 0.05<br>(< 0.05 to < 0.05)     | -51.7<br>(-63.5 to -38.4)                         | -61.3<br>(-70.7 to -50.8)                           |
| Tetanus                                                                              | < 0.05<br>(< 0.05 to < 0.05)           | < 0.05<br>(< 0.05 to < 0.05)            | < 0.05<br>(< 0.05 to < 0.05)     | -32.5<br>(-54.7 to 4.3)                           | -49.1<br>(-65.2 to -15.9)                           |
| Measles                                                                              | < 0.05<br>(< 0.05 to 0.1)              | 0.9<br>(0.3 to 2.0)                     | < 0.05<br>(< 0.05 to < 0.05)     | -42.8<br>(-67.3 to 19.2)                          | -54.1<br>(-73.7 to -5.5)                            |
| Varicella and herpes zoster                                                          | 1.2<br>(1.1 to 1.3)                    | 34.9<br>(32.7 to 37.1)                  | < 0.05<br>(< 0.05 to 0.1)        | 19.7<br>(3.3 to 39.3)                             | -0.2<br>(-10.5 to 12.2)                             |
| <b>Neglected tropical diseases and malaria</b>                                       | <b>917.6</b><br>(864.8 to 978.0)       | <b>27.6†</b><br>(20.4 to 35.8)          | <b>5.2</b><br>(3.4 to 8.1)       | <b>16.4</b><br>(7.3 to 24.8)                      | <b>-4.1</b><br>(-13.1 to 3.3)                       |
| Malaria                                                                              | 0.6<br>(0.6 to 0.7)                    | 0.4<br>(0.4 to 0.4)                     | 0.2<br>(0.1 to 0.2)              | 8.0<br>(-7.4 to 25.8)                             | -4.8<br>(-16.6 to 9.7)                              |
| Chagas disease                                                                       | --                                     | --                                      | --                               | --                                                | --                                                  |
| Leishmaniasis                                                                        | --                                     | --                                      | --                               | --                                                | --                                                  |
| Visceral leishmaniasis                                                               | --                                     | --                                      | --                               | --                                                | --                                                  |
| Cutaneous and mucocutaneous leishmaniasis                                            | --                                     | --                                      | --                               | --                                                | --                                                  |
| African trypanosomiasis                                                              | --                                     | --                                      | --                               | --                                                | --                                                  |
| Schistosomiasis                                                                      | 75.3<br>(51.5 to 101.8)                | 27.1<br>(20.0 to 35.4)                  | 0.5<br>(0.2 to 1.1)              | 18.8<br>(12.2 to 25.6)                            | -4.8<br>(-9.5 to 0.0)                               |
| Cysticercosis                                                                        | 3.3<br>(2.0 to 4.4)                    | --                                      | 0.6<br>(0.3 to 1.0)              | 8.9<br>(-33.2 to 46.0)                            | -14.5<br>(-45.9 to 9.8)                             |
| Cystic echinococcosis                                                                | 0.2<br>(< 0.05 to 0.7)                 | < 0.05<br>(< 0.05 to 0.1)               | < 0.05<br>(< 0.05 to 0.1)        | -36.0<br>(-91.9 to 439.9)                         | -47.5<br>(-93.7 to 319.3)                           |
| Lymphatic filariasis                                                                 | --                                     | --                                      | --                               | --                                                | --                                                  |
| Onchocerciasis                                                                       | --                                     | --                                      | --                               | --                                                | --                                                  |
| Trachoma                                                                             | --                                     | --                                      | --                               | --                                                | --                                                  |
| Dengue                                                                               | --                                     | --                                      | --                               | --                                                | --                                                  |
| Yellow fever                                                                         | --                                     | --                                      | --                               | --                                                | --                                                  |
| Rabies                                                                               | < 0.05<br>(< 0.05 to < 0.05)           | < 0.05<br>(< 0.05 to < 0.05)            | < 0.05<br>(< 0.05 to < 0.05)     | -50.9<br>(-79.2 to 18.6)                          | -54.5<br>(-77.7 to -3.6)                            |
| Intestinal nematode infections                                                       | 889.7<br>(831.0 to 954.9)              | --                                      | 3.6<br>(2.1 to 5.9)              | 17.8<br>(9.2 to 28.4)                             | -0.9<br>(-9.3 to 9.0)                               |
| Ascariasis                                                                           | 277.6<br>(213.4 to 363.2)              | --                                      | 0.2<br>(0.1 to 0.3)              | 14.3<br>(2.3 to 27.4)                             | -1.8<br>(-13.6 to 11.1)                             |

| Cause                                                                   | Prevalence in thousands (95% UI)              | Incidence in thousands (95% UI)                | YLDs in thousands (95% UI)            |                                                   |                                                     |
|-------------------------------------------------------------------------|-----------------------------------------------|------------------------------------------------|---------------------------------------|---------------------------------------------------|-----------------------------------------------------|
|                                                                         | 2016 counts                                   | 2016 counts                                    | 2016 counts                           | Percentage change in counts between 2006 and 2016 | Percentage change in age-standardised rates between |
| Trichuriasis                                                            | 458.9<br>(392.2 to 537.3)                     | --                                             | 0.7<br>(0.3 to 1.2)                   | 12.7<br>(-9.1 to 38.8)                            | -2.5<br>(-24.9 to 25.2)                             |
| Hookworm disease                                                        | 552.5<br>(463.6 to 649.9)                     | --                                             | 2.7<br>(1.6 to 4.3)                   | 19.4<br>(8.9 to 31.3)                             | -0.4<br>(-9.8 to 9.9)                               |
| Food-borne trematodiasis                                                | --                                            | --                                             | --                                    | --                                                | --                                                  |
| Leprosy                                                                 | < 0.05<br>(< 0.05 to < 0.05)                  | < 0.05<br>(< 0.05 to < 0.05)                   | < 0.05<br>(< 0.05 to < 0.05)          | 16.9<br>(11.3 to 23.6)                            | -5.7<br>(-8.9 to -1.6)                              |
| Ebola virus disease                                                     | --                                            | --                                             | --                                    | --                                                | --                                                  |
| Zika virus disease                                                      | --                                            | --                                             | --                                    | --                                                | --                                                  |
| Guinea worm disease                                                     | --                                            | --                                             | --                                    | --                                                | --                                                  |
| Other neglected tropical diseases                                       | 11.1<br>(10.1 to 12.2)                        | --                                             | 0.3<br>(0.2 to 0.5)                   | 21.6<br>(3.1 to 41.9)                             | 2.5<br>(-12.4 to 18.7)                              |
| <b>Maternal disorders</b>                                               | <b>2.9</b><br><b>(2.3 to 3.8)</b>             | <b>28.9†</b><br><b>(24.6 to 34.0)</b>          | <b>0.2</b><br><b>(0.2 to 0.4)</b>     | <b>1.0</b><br><b>(-19.8 to 27.3)</b>              | <b>-27.0</b><br><b>(-41.7 to -10.0)</b>             |
| Maternal haemorrhage                                                    | 0.5<br>(0.3 to 0.6)                           | 3.2<br>(2.3 to 4.3)                            | < 0.05<br>(< 0.05 to < 0.05)          | 10.5<br>(-20.7 to 60.4)                           | -15.1<br>(-38.8 to 21.6)                            |
| Maternal sepsis and other pregnancy related infections                  | 0.4<br>(0.3 to 0.6)                           | 2.3<br>(1.7 to 3.3)                            | < 0.05<br>(< 0.05 to < 0.05)          | 11.2<br>(-46.5 to 126.0)                          | -13.3<br>(-56.5 to 68.6)                            |
| Maternal hypertensive disorders                                         | 1.8<br>(1.1 to 2.6)                           | 8.0<br>(6.2 to 10.0)                           | 0.1<br>(< 0.05 to 0.1)                | 26.5<br>(-21.2 to 109.7)                          | -7.0<br>(-41.7 to 53.1)                             |
| Maternal obstructed labour and uterine rupture                          | 0.2<br>(0.2 to 0.3)                           | 1.4<br>(1.0 to 1.9)                            | 0.1<br>(< 0.05 to 0.1)                | -18.9<br>(-37.9 to 3.1)                           | -40.2<br>(-53.8 to -24.8)                           |
| Maternal abortion, miscarriage, and ectopic pregnancy                   | 0.1<br>(0.1 to 0.2)                           | 13.9<br>(10.5 to 18.4)                         | < 0.05<br>(< 0.05 to < 0.05)          | 12.4<br>(-43.3 to 111.0)                          | -17.5<br>(-58.1 to 49.6)                            |
| Other maternal disorders                                                | --                                            | --                                             | < 0.05<br>(< 0.05 to 0.1)             | -4.1<br>(-24.2 to 20.7)                           | -30.2<br>(-44.2 to -14.2)                           |
| <b>Neonatal disorders</b>                                               | <b>14.4</b><br><b>(12.2 to 17.0)</b>          | --                                             | <b>2.0</b><br><b>(1.3 to 3.1)</b>     | <b>58.5</b><br><b>(28.0 to 93.5)</b>              | <b>35.6</b><br><b>(9.0 to 67.2)</b>                 |
| Neonatal preterm birth complications                                    | 12.1<br>(9.2 to 16.3)                         | --                                             | 1.0<br>(0.7 to 1.5)                   | 36.7<br>(8.0 to 71.3)                             | 16.5<br>(-7.5 to 45.2)                              |
| Neonatal encephalopathy due to birth asphyxia and trauma                | 2.1<br>(1.0 to 3.5)                           | --                                             | 0.2<br>(< 0.05 to 0.6)                | 102.5<br>(-16.8 to 271.1)                         | 80.8<br>(-26.9 to 225.1)                            |
| Neonatal sepsis and other neonatal infections                           | 1.3<br>(0.4 to 3.0)                           | --                                             | 0.5<br>(0.1 to 1.3)                   | 159.1<br>(55.4 to 394.8)                          | 136.7<br>(36.1 to 365.8)                            |
| Hemolytic disease and other neonatal jaundice                           | 0.4<br>(0.4 to 0.5)                           | --                                             | 0.1<br>(0.1 to 0.2)                   | 5.0<br>(-11.9 to 23.6)                            | -8.1<br>(-20.8 to 5.7)                              |
| Other neonatal disorders                                                | --                                            | --                                             | 0.2<br>(0.1 to 0.2)                   | 50.4<br>(22.9 to 81.9)                            | 18.8<br>(-3.1 to 44.0)                              |
| <b>Nutritional deficiencies</b>                                         | <b>471.8</b><br><b>(428.2 to 530.7)</b>       | <b>377.6†</b><br><b>(277.4 to 523.2)</b>       | <b>6.2</b><br><b>(4.1 to 8.9)</b>     | <b>8.5</b><br><b>(-1.0 to 19.0)</b>               | <b>-12.8</b><br><b>(-19.1 to -6.2)</b>              |
| Protein-energy malnutrition                                             | 3.9<br>(2.9 to 5.1)                           | 2.1<br>(1.6 to 2.8)                            | 0.2<br>(0.1 to 0.4)                   | 12.3<br>(-32.6 to 98.8)                           | -11.6<br>(-47.1 to 57.3)                            |
| Iodine deficiency                                                       | 38.3<br>(32.1 to 45.2)                        | 1.3<br>(1.1 to 1.5)                            | 1.0<br>(0.7 to 1.5)                   | -0.4<br>(-9.4 to 8.6)                             | -16.7<br>(-23.7 to -9.8)                            |
| Vitamin A deficiency                                                    | 323.6<br>(259.0 to 409.6)                     | 374.2<br>(274.1 to 519.6)                      | 0.1<br>(< 0.05 to 0.1)                | 19.8<br>(-2.4 to 47.0)                            | 0.4<br>(-16.6 to 20.6)                              |
| Iron-deficiency anaemia                                                 | 164.9<br>(153.5 to 177.6)                     | --                                             | 4.9<br>(3.1 to 7.2)                   | 10.3<br>(-1.1 to 22.7)                            | -11.7<br>(-19.7 to -2.8)                            |
| Other nutritional deficiencies                                          | --                                            | --                                             | < 0.05<br>(< 0.05 to < 0.05)          | 11.7<br>(-35.6 to 103.5)                          | -12.3<br>(-49.6 to 59.8)                            |
| <b>Other communicable, maternal, neonatal, and nutritional diseases</b> | <b>449.4</b><br><b>(424.1 to 473.2)</b>       | <b>244.3</b><br><b>(219.6 to 273.9)</b>        | <b>1.0</b><br><b>(0.7 to 1.6)</b>     | <b>27.2</b><br><b>(19.5 to 34.5)</b>              | <b>-0.6</b><br><b>(-5.8 to 4.4)</b>                 |
| Sexually transmitted diseases excluding HIV                             | 341.7<br>(320.4 to 363.7)                     | 227.2<br>(202.7 to 256.6)                      | 0.8<br>(0.5 to 1.2)                   | 29.1<br>(20.9 to 37.6)                            | -0.9<br>(-6.6 to 4.5)                               |
| Syphilis                                                                | 40.9<br>(33.7 to 50.5)                        | 28.9<br>(23.0 to 37.3)                         | < 0.05<br>(< 0.05 to 0.1)             | 18.6<br>(2.9 to 35.1)                             | -5.3<br>(-18.6 to 9.4)                              |
| Chlamydial infection                                                    | 22.4<br>(16.1 to 29.6)                        | 20.7<br>(15.7 to 27.2)                         | 0.1<br>(0.1 to 0.2)                   | 32.5<br>(13.0 to 52.8)                            | -1.5<br>(-15.3 to 12.5)                             |
| Gonococcal infection                                                    | 24.2<br>(19.2 to 30.8)                        | 83.8<br>(63.8 to 108.1)                        | 0.2<br>(0.1 to 0.4)                   | 32.2<br>(17.8 to 49.7)                            | 3.0<br>(-6.6 to 14.1)                               |
| Trichomoniasis                                                          | 53.4<br>(44.4 to 62.9)                        | 49.9<br>(40.7 to 59.7)                         | 0.1<br>(< 0.05 to 0.2)                | 25.3<br>(17.5 to 34.0)                            | -3.2<br>(-8.2 to 2.3)                               |
| Genital herpes                                                          | 257.1<br>(221.2 to 299.6)                     | 30.3<br>(25.2 to 36.9)                         | 0.1<br>(< 0.05 to 0.1)                | 26.0<br>(13.8 to 37.3)                            | -0.7<br>(-8.2 to 5.8)                               |
| Other sexually transmitted diseases                                     | 6.2<br>(4.9 to 7.9)                           | 13.6<br>(11.2 to 16.6)                         | 0.2<br>(0.2 to 0.4)                   | 29.0<br>(16.1 to 41.6)                            | -1.9<br>(-10.8 to 7.6)                              |
| Hepatitis                                                               | 146.0<br>(119.3 to 173.7)                     | 17.1<br>(11.8 to 24.9)                         | < 0.05<br>(< 0.05 to < 0.05)          | -12.8<br>(-32.2 to 11.3)                          | -27.2<br>(-40.4 to -12.0)                           |
| Acute hepatitis A                                                       | 0.3<br>(< 0.05 to 0.9)                        | 4.4<br>(0.4 to 12.2)                           | < 0.05<br>(< 0.05 to < 0.05)          | -23.0<br>(-80.6 to 225.7)                         | -31.3<br>(-74.6 to 107.4)                           |
| Hepatitis B                                                             | 109.2<br>(82.9 to 137.5)                      | 10.3<br>(7.7 to 13.5)                          | < 0.05<br>(< 0.05 to < 0.05)          | -14.5<br>(-31.0 to 5.0)                           | -28.2<br>(-42.9 to -11.4)                           |
| Hepatitis C                                                             | 36.5<br>(31.9 to 41.4)                        | 1.9<br>(1.7 to 2.3)                            | < 0.05<br>(< 0.05 to < 0.05)          | 20.5<br>(-44.4 to 167.0)                          | -8.5<br>(-51.0 to 70.2)                             |
| Acute hepatitis E                                                       | < 0.05<br>(< 0.05 to < 0.05)                  | 0.5<br>(0.4 to 0.6)                            | < 0.05<br>(< 0.05 to < 0.05)          | -19.2<br>(-26.8 to -11.7)                         | -26.1<br>(-33.1 to -17.2)                           |
| Other infectious diseases                                               | 7.7<br>(7.1 to 8.4)                           | < 0.05<br>(< 0.05 to < 0.05)                   | 0.3<br>(0.2 to 0.4)                   | 24.7<br>(8.7 to 43.4)                             | 4.5<br>(-7.5 to 18.8)                               |
| <b>Non-communicable diseases</b>                                        | <b>1,193.9</b><br><b>(1,184.5 to 1,203.7)</b> | <b>3,430.3†</b><br><b>(3,221.8 to 3,654.2)</b> | <b>94.4</b><br><b>(69.7 to 122.3)</b> | <b>21.0</b><br><b>(16.2 to 26.0)</b>              | <b>-0.5</b><br><b>(-3.4 to 2.7)</b>                 |
| <b>Neoplasms</b>                                                        | <b>2.2</b><br><b>(2.0 to 2.5)</b>             | <b>1.1</b><br><b>(1.0 to 1.2)</b>              | <b>0.3</b><br><b>(0.2 to 0.5)</b>     | <b>6.7</b><br><b>(-6.1 to 28.4)</b>               | <b>-13.0</b><br><b>(-21.9 to 2.0)</b>               |
| Lip and oral cavity cancer                                              | 0.1<br>(0.1 to 0.1)                           | < 0.05<br>(< 0.05 to < 0.05)                   | < 0.05<br>(< 0.05 to < 0.05)          | 7.7<br>(-17.1 to 42.2)                            | -12.4<br>(-31.1 to 14.8)                            |
| Nasopharynx cancer                                                      | < 0.05<br>(< 0.05 to < 0.05)                  | < 0.05<br>(< 0.05 to < 0.05)                   | < 0.05<br>(< 0.05 to < 0.05)          | 3.4<br>(-15.4 to 32.7)                            | -16.8<br>(-31.4 to 5.2)                             |
| Other pharynx cancer                                                    | < 0.05<br>(< 0.05 to < 0.05)                  | < 0.05<br>(< 0.05 to < 0.05)                   | < 0.05<br>(< 0.05 to < 0.05)          | 3.0<br>(-14.0 to 32.4)                            | -15.1<br>(-28.8 to 8.4)                             |
| Oesophageal cancer                                                      | 0.1<br>(0.1 to 0.1)                           | 0.1<br>(0.1 to 0.1)                            | < 0.05<br>(< 0.05 to < 0.05)          | -5.7<br>(-25.8 to 21.1)                           | -22.4<br>(-37.7 to -1.4)                            |
| Stomach cancer                                                          | < 0.05<br>(< 0.05 to 0.1)                     | < 0.05<br>(< 0.05 to < 0.05)                   | < 0.05<br>(< 0.05 to < 0.05)          | -10.7<br>(-23.0 to 3.7)                           | -26.9<br>(-37.3 to -14.9)                           |
| Colon and rectum cancer                                                 | 0.2<br>(0.1 to 0.2)                           | 0.1<br>(< 0.05 to 0.1)                         | < 0.05<br>(< 0.05 to < 0.05)          | 11.9<br>(-10.1 to 52.3)                           | -10.0<br>(-26.4 to 20.2)                            |
| Liver cancer                                                            | < 0.05<br>(< 0.05 to < 0.05)                  | < 0.05<br>(< 0.05 to 0.1)                      | < 0.05<br>(< 0.05 to < 0.05)          | 11.2<br>(-9.1 to 33.5)                            | -11.2<br>(-25.8 to 6.0)                             |
| Liver cancer due to hepatitis B                                         | < 0.05<br>(< 0.05 to < 0.05)                  | < 0.05<br>(< 0.05 to < 0.05)                   | < 0.05<br>(< 0.05 to < 0.05)          | 11.8<br>(-9.3 to 35.2)                            | -10.7<br>(-26.0 to 7.0)                             |

| Cause                                              | Prevalence in thousands (95% UI)        | Incidence in thousands (95% UI)       | YLDs in thousands (95% UI)        |                                                   |                                                     |
|----------------------------------------------------|-----------------------------------------|---------------------------------------|-----------------------------------|---------------------------------------------------|-----------------------------------------------------|
|                                                    | 2016 counts                             | 2016 counts                           | 2016 counts                       | Percentage change in counts between 2006 and 2016 | Percentage change in age-standardised rates between |
| Liver cancer due to hepatitis C                    | < 0.05<br>(< 0.05 to < 0.05)            | < 0.05<br>(< 0.05 to < 0.05)          | < 0.05<br>(< 0.05 to < 0.05)      | 11.7<br>(-8.6 to 35.6)                            | -10.7<br>(-26.2 to 7.5)                             |
| Liver cancer due to alcohol use                    | < 0.05<br>(< 0.05 to < 0.05)            | < 0.05<br>(< 0.05 to < 0.05)          | < 0.05<br>(< 0.05 to < 0.05)      | 0.4<br>(-18.7 to 23.6)                            | -18.9<br>(-33.8 to -1.1)                            |
| Liver cancer due to other causes                   | < 0.05<br>(< 0.05 to < 0.05)            | < 0.05<br>(< 0.05 to < 0.05)          | < 0.05<br>(< 0.05 to < 0.05)      | 17.3<br>(-3.6 to 40.9)                            | -6.2<br>(-21.3 to 12.7)                             |
| Gallbladder and biliary tract cancer               | < 0.05<br>(< 0.05 to < 0.05)            | < 0.05<br>(< 0.05 to < 0.05)          | < 0.05<br>(< 0.05 to < 0.05)      | 0.5<br>(-13.4 to 23.5)                            | -20.2<br>(-30.5 to -3.0)                            |
| Pancreatic cancer                                  | < 0.05<br>(< 0.05 to < 0.05)            | < 0.05<br>(< 0.05 to < 0.05)          | < 0.05<br>(< 0.05 to < 0.05)      | 19.4<br>(4.1 to 35.5)                             | -4.9<br>(-17.0 to 8.2)                              |
| Larynx cancer                                      | < 0.05<br>(< 0.05 to 0.1)               | < 0.05<br>(< 0.05 to < 0.05)          | < 0.05<br>(< 0.05 to < 0.05)      | -2.2<br>(-19.8 to 23.9)                           | -19.2<br>(-34.0 to 2.5)                             |
| Tracheal, bronchus, and lung cancer                | 0.1<br>(0.1 to 0.1)                     | 0.1<br>(0.1 to 0.1)                   | < 0.05<br>(< 0.05 to < 0.05)      | 2.1<br>(-19.1 to 31.1)                            | -16.5<br>(-32.6 to 5.2)                             |
| Malignant skin melanoma                            | < 0.05<br>(< 0.05 to < 0.05)            | < 0.05<br>(< 0.05 to < 0.05)          | < 0.05<br>(< 0.05 to < 0.05)      | 29.6<br>(0.5 to 60.3)                             | 1.8<br>(-19.2 to 25.1)                              |
| Non-melanoma skin cancer                           | < 0.05<br>(< 0.05 to < 0.05)            | 0.1<br>(0.1 to 0.1)                   | < 0.05<br>(< 0.05 to < 0.05)      | 37.7<br>(6.0 to 84.3)                             | 6.5<br>(-21.6 to 45.2)                              |
| Non-melanoma skin cancer (squamous-cell carcinoma) | < 0.05<br>(< 0.05 to < 0.05)            | < 0.05<br>(< 0.05 to < 0.05)          | < 0.05<br>(< 0.05 to < 0.05)      | 39.2<br>(4.1 to 91.2)                             | 7.2<br>(-22.7 to 50.6)                              |
| Non-melanoma skin cancer (basal-cell carcinoma)    | < 0.05<br>(< 0.05 to < 0.05)            | 0.1<br>(< 0.05 to 0.1)                | < 0.05<br>(< 0.05 to < 0.05)      | 24.4<br>(9.8 to 42.0)                             | -0.8<br>(-15.2 to 15.5)                             |
| Breast cancer                                      | 0.4<br>(0.3 to 0.5)                     | 0.1<br>(0.1 to 0.1)                   | < 0.05<br>(< 0.05 to 0.1)         | 6.6<br>(-22.1 to 56.4)                            | -12.8<br>(-34.0 to 23.6)                            |
| Cervical cancer                                    | 0.6<br>(0.3 to 1.0)                     | 0.2<br>(0.1 to 0.3)                   | 0.1<br>(< 0.05 to 0.1)            | -11.4<br>(-34.0 to 36.5)                          | -28.2<br>(-44.9 to 5.4)                             |
| Uterine cancer                                     | 0.1<br>(< 0.05 to 0.1)                  | < 0.05<br>(< 0.05 to < 0.05)          | < 0.05<br>(< 0.05 to < 0.05)      | 8.4<br>(-17.4 to 59.0)                            | -14.1<br>(-34.4 to 25.6)                            |
| Ovarian cancer                                     | 0.1<br>(0.1 to 0.1)                     | < 0.05<br>(< 0.05 to < 0.05)          | < 0.05<br>(< 0.05 to < 0.05)      | 25.2<br>(-16.7 to 67.2)                           | -1.3<br>(-32.2 to 36.3)                             |
| Prostate cancer                                    | 0.3<br>(0.2 to 0.4)                     | 0.1<br>(0.1 to 0.1)                   | < 0.05<br>(< 0.05 to 0.1)         | 44.1<br>(13.6 to 78.2)                            | 11.2<br>(-10.4 to 34.5)                             |
| Testicular cancer                                  | < 0.05<br>(< 0.05 to < 0.05)            | < 0.05<br>(< 0.05 to < 0.05)          | < 0.05<br>(< 0.05 to < 0.05)      | 15.8<br>(-21.9 to 43.5)                           | -12.1<br>(-39.9 to 9.2)                             |
| Kidney cancer                                      | 0.1<br>(0.1 to 0.1)                     | < 0.05<br>(< 0.05 to < 0.05)          | < 0.05<br>(< 0.05 to < 0.05)      | 17.3<br>(-21.6 to 65.8)                           | -1.7<br>(-24.4 to 22.5)                             |
| Bladder cancer                                     | 0.1<br>(0.1 to 0.1)                     | < 0.05<br>(< 0.05 to < 0.05)          | < 0.05<br>(< 0.05 to < 0.05)      | 18.9<br>(-1.2 to 45.8)                            | -4.9<br>(-20.1 to 16.0)                             |
| Brain and nervous system cancer                    | < 0.05<br>(< 0.05 to < 0.05)            | < 0.05<br>(< 0.05 to < 0.05)          | < 0.05<br>(< 0.05 to < 0.05)      | 15.5<br>(-3.9 to 33.2)                            | -2.8<br>(-14.3 to 8.6)                              |
| Thyroid cancer                                     | < 0.05<br>(< 0.05 to < 0.05)            | < 0.05<br>(< 0.05 to < 0.05)          | < 0.05<br>(< 0.05 to < 0.05)      | 11.0<br>(-15.6 to 60.7)                           | -14.0<br>(-33.8 to 21.9)                            |
| Mesothelioma                                       | < 0.05<br>(< 0.05 to < 0.05)            | < 0.05<br>(< 0.05 to < 0.05)          | < 0.05<br>(< 0.05 to < 0.05)      | 4.7<br>(-12.4 to 27.9)                            | -14.6<br>(-28.1 to 2.5)                             |
| Hodgkin lymphoma                                   | < 0.05<br>(< 0.05 to < 0.05)            | < 0.05<br>(< 0.05 to < 0.05)          | < 0.05<br>(< 0.05 to < 0.05)      | -10.1<br>(-20.4 to 4.8)                           | -28.0<br>(-34.3 to -19.2)                           |
| Non-Hodgkin's lymphoma                             | < 0.05<br>(< 0.05 to < 0.05)            | < 0.05<br>(< 0.05 to < 0.05)          | < 0.05<br>(< 0.05 to < 0.05)      | 19.2<br>(-0.7 to 36.3)                            | -4.4<br>(-18.4 to 8.9)                              |
| Multiple myeloma                                   | < 0.05<br>(< 0.05 to < 0.05)            | < 0.05<br>(< 0.05 to < 0.05)          | < 0.05<br>(< 0.05 to < 0.05)      | 12.1<br>(-7.4 to 36.8)                            | -9.0<br>(-25.4 to 10.7)                             |
| Leukaemia                                          | 0.1<br>(0.1 to 0.1)                     | < 0.05<br>(< 0.05 to < 0.05)          | < 0.05<br>(< 0.05 to < 0.05)      | -0.0<br>(-20.5 to 25.7)                           | -17.9<br>(-32.4 to 0.8)                             |
| Acute lymphoid leukaemia                           | < 0.05<br>(< 0.05 to < 0.05)            | < 0.05<br>(< 0.05 to < 0.05)          | < 0.05<br>(< 0.05 to < 0.05)      | 3.7<br>(-31.1 to 42.9)                            | -8.0<br>(-33.4 to 16.9)                             |
| Chronic lymphoid leukaemia                         | < 0.05<br>(< 0.05 to < 0.05)            | < 0.05<br>(< 0.05 to < 0.05)          | < 0.05<br>(< 0.05 to < 0.05)      | 10.1<br>(-14.8 to 40.6)                           | -13.5<br>(-31.6 to 9.1)                             |
| Acute myeloid leukaemia                            | < 0.05<br>(< 0.05 to < 0.05)            | < 0.05<br>(< 0.05 to < 0.05)          | < 0.05<br>(< 0.05 to < 0.05)      | 15.6<br>(-10.3 to 43.5)                           | -2.6<br>(-19.4 to 14.1)                             |
| Chronic myeloid leukaemia                          | < 0.05<br>(< 0.05 to < 0.05)            | < 0.05<br>(< 0.05 to < 0.05)          | < 0.05<br>(< 0.05 to < 0.05)      | -0.1<br>(-21.6 to 28.7)                           | -21.2<br>(-35.8 to -0.5)                            |
| Other leukaemia                                    | 0.1<br>(< 0.05 to 0.1)                  | < 0.05<br>(< 0.05 to < 0.05)          | < 0.05<br>(< 0.05 to < 0.05)      | -6.3<br>(-29.6 to 24.8)                           | -22.1<br>(-39.3 to 2.5)                             |
| Other neoplasms                                    | 0.2<br>(0.1 to 0.2)                     | 0.1<br>(< 0.05 to 0.1)                | < 0.05<br>(< 0.05 to < 0.05)      | 18.3<br>(-14.2 to 44.6)                           | -6.5<br>(-25.8 to 9.6)                              |
| <b>Cardiovascular diseases</b>                     | <b>52.2</b><br><b>(50.0 to 54.6)</b>    | <b>5.2†</b><br><b>(4.9 to 5.5)</b>    | <b>2.9</b><br><b>(2.1 to 3.7)</b> | <b>24.1</b><br><b>(19.5 to 28.5)</b>              | <b>-1.0</b><br><b>(-4.2 to 2.2)</b>                 |
| Rheumatic heart disease                            | 14.9<br>(13.3 to 16.9)                  | 0.6<br>(0.6 to 0.7)                   | 0.7<br>(0.5 to 1.1)               | 19.2<br>(9.5 to 30.8)                             | -2.6<br>(-9.9 to 6.2)                               |
| Ischaemic heart disease                            | 14.4<br>(13.6 to 15.1)                  | 1.9<br>(1.8 to 2.1)                   | 0.6<br>(0.4 to 0.9)               | 26.3<br>(20.1 to 32.5)                            | 0.5<br>(-3.8 to 4.7)                                |
| Cerebrovascular disease                            | 5.0<br>(4.7 to 5.3)                     | 0.8‡<br>(0.8 to 0.9)                  | 0.7<br>(0.5 to 0.9)               | 25.1<br>(16.1 to 35.6)                            | -2.3<br>(-9.3 to 5.9)                               |
| Ischaemic stroke                                   | 4.4<br>(4.0 to 4.9)                     | 0.6‡<br>(0.5 to 0.6)                  | 0.6<br>(0.4 to 0.8)               | 26.2<br>(15.2 to 38.2)                            | -1.6<br>(-9.9 to 8.3)                               |
| Hemorrhagic stroke                                 | 0.8<br>(0.7 to 0.9)                     | 0.3‡<br>(0.2 to 0.3)                  | 0.1<br>(0.1 to 0.1)               | 19.6<br>(5.5 to 34.9)                             | -6.0<br>(-17.6 to 6.7)                              |
| Hypertensive heart disease                         | 0.5<br>(0.4 to 0.7)                     | --                                    | < 0.05<br>(< 0.05 to 0.1)         | 20.1<br>(5.9 to 36.6)                             | -5.6<br>(-15.6 to 5.8)                              |
| Cardiomyopathy and myocarditis                     | 0.9<br>(0.8 to 1.0)                     | 0.3†<br>(0.3 to 0.4)                  | 0.1<br>(0.1 to 0.1)               | 23.6<br>(11.9 to 35.7)                            | -0.1<br>(-10.2 to 11.1)                             |
| Myocarditis                                        | 0.2<br>(0.2 to 0.2)                     | 0.3<br>(0.3 to 0.4)                   | < 0.05<br>(< 0.05 to < 0.05)      | 22.7<br>(15.3 to 30.0)                            | 1.8<br>(-5.7 to 9.8)                                |
| Alcoholic cardiomyopathy                           | 0.1<br>(0.1 to 0.1)                     | --                                    | < 0.05<br>(< 0.05 to < 0.05)      | 23.5<br>(-3.6 to 56.7)                            | -0.1<br>(-21.9 to 26.0)                             |
| Other cardiomyopathy                               | 0.8<br>(0.6 to 0.9)                     | --                                    | 0.1<br>(< 0.05 to 0.1)            | 23.8<br>(10.7 to 39.1)                            | -0.3<br>(-11.6 to 12.7)                             |
| Atrial fibrillation and flutter                    | 2.7<br>(2.3 to 3.1)                     | 0.2<br>(0.2 to 0.3)                   | 0.2<br>(0.1 to 0.3)               | 28.8<br>(19.0 to 38.7)                            | 0.4<br>(-6.0 to 7.0)                                |
| Peripheral vascular disease                        | 12.0<br>(10.4 to 13.9)                  | 1.1<br>(1.0 to 1.3)                   | 0.1<br>(< 0.05 to 0.1)            | 25.4<br>(14.6 to 38.8)                            | -3.8<br>(-11.7 to 5.1)                              |
| Endocarditis                                       | < 0.05<br>(< 0.05 to 0.1)               | 0.1<br>(0.1 to 0.2)                   | < 0.05<br>(< 0.05 to < 0.05)      | 30.9<br>(20.0 to 42.5)                            | -0.3<br>(-12.9 to 14.7)                             |
| Other cardiovascular and circulatory diseases      | 7.4<br>(5.8 to 9.2)                     | --                                    | 0.4<br>(0.2 to 0.6)               | 25.9<br>(12.0 to 41.3)                            | 1.9<br>(-5.8 to 11.1)                               |
| <b>Chronic respiratory diseases</b>                | <b>134.4</b><br><b>(127.1 to 142.5)</b> | <b>24.2†</b><br><b>(22.3 to 26.2)</b> | <b>6.3</b><br><b>(4.6 to 8.5)</b> | <b>14.5</b><br><b>(9.8 to 19.5)</b>               | <b>-3.0</b><br><b>(-6.3 to 0.3)</b>                 |
| Chronic obstructive pulmonary disease              | 21.7<br>(20.7 to 22.7)                  | 1.6<br>(1.6 to 1.7)                   | 1.7<br>(1.4 to 1.9)               | 17.4<br>(10.3 to 25.0)                            | -4.9<br>(-10.4 to 1.0)                              |
| Pneumoconiosis                                     | < 0.05<br>(< 0.05 to < 0.05)            | < 0.05<br>(< 0.05 to < 0.05)          | < 0.05<br>(< 0.05 to < 0.05)      | 20.1<br>(13.3 to 26.4)                            | -3.7<br>(-8.8 to 1.5)                               |
| Silicosis                                          | < 0.05<br>(< 0.05 to < 0.05)            | < 0.05<br>(< 0.05 to < 0.05)          | < 0.05<br>(< 0.05 to < 0.05)      | 21.5<br>(13.8 to 29.3)                            | -1.6<br>(-5.9 to 3.2)                               |



| Cause                                                          | Prevalence in thousands (95% UI)  | Incidence in thousands (95% UI)   | YLDs in thousands (95% UI)        |                                                                     |                                                                      |
|----------------------------------------------------------------|-----------------------------------|-----------------------------------|-----------------------------------|---------------------------------------------------------------------|----------------------------------------------------------------------|
|                                                                | 2016 counts<br>(< 0.05 to < 0.05) | 2016 counts<br>(< 0.05 to < 0.05) | 2016 counts<br>(< 0.05 to < 0.05) | Percentage change in counts between 2006 and 2016<br>(16.6 to 30.6) | Percentage change in age-standardised rates between<br>(-8.2 to 2.6) |
| Asbestosis                                                     | < 0.05<br>(< 0.05 to < 0.05)      | < 0.05<br>(< 0.05 to < 0.05)      | < 0.05<br>(< 0.05 to < 0.05)      | 23.4<br>(16.6 to 30.6)                                              | -2.8<br>(-8.2 to 2.6)                                                |
| Coal workers pneumoconiosis                                    | --                                | --                                | --                                | --                                                                  | --                                                                   |
| Other pneumoconiosis                                           | < 0.05<br>(< 0.05 to < 0.05)      | < 0.05<br>(< 0.05 to < 0.05)      | < 0.05<br>(< 0.05 to < 0.05)      | 17.2<br>(5.6 to 28.4)                                               | -4.6<br>(-13.4 to 4.9)                                               |
| Asthma                                                         | 115.2<br>(106.1 to 125.1)         | 22.5<br>(20.6 to 24.6)            | 4.5<br>(3.0 to 6.5)               | 12.7<br>(6.9 to 18.7)                                               | -2.2<br>(-6.4 to 2.0)                                                |
| Interstitial lung disease and pulmonary sarcoidosis            | 0.2<br>(0.2 to 0.2)               | < 0.05<br>(< 0.05 to < 0.05)      | < 0.05<br>(< 0.05 to < 0.05)      | 23.2<br>(12.9 to 35.5)                                              | -1.3<br>(-12.1 to 11.6)                                              |
| Other chronic respiratory diseases                             | --                                | --                                | 0.1<br>(0.1 to 0.2)               | 48.2<br>(24.0 to 78.7)                                              | 28.7<br>(13.7 to 46.9)                                               |
| <b>Cirrhosis and other chronic liver diseases</b>              | <b>1.6<br/>(1.5 to 1.7)</b>       | <b>0.2<br/>(0.1 to 0.2)</b>       | <b>0.1<br/>(0.1 to 0.2)</b>       | <b>19.6<br/>(3.9 to 37.7)</b>                                       | <b>-0.7<br/>(-10.9 to 11.1)</b>                                      |
| Cirrhosis and other chronic liver diseases due to hepatitis B  | 0.4<br>(0.3 to 0.4)               | < 0.05<br>(< 0.05 to < 0.05)      | < 0.05<br>(< 0.05 to < 0.05)      | 31.0<br>(1.9 to 66.7)                                               | 2.6<br>(-16.0 to 27.4)                                               |
| Cirrhosis and other chronic liver diseases due to hepatitis C  | 0.2<br>(0.2 to 0.2)               | < 0.05<br>(< 0.05 to < 0.05)      | < 0.05<br>(< 0.05 to < 0.05)      | 42.3<br>(18.2 to 72.6)                                              | 11.9<br>(-12.2 to 42.0)                                              |
| Cirrhosis and other chronic liver diseases due to alcohol use  | 0.4<br>(0.3 to 0.4)               | < 0.05<br>(< 0.05 to < 0.05)      | < 0.05<br>(< 0.05 to < 0.05)      | 13.7<br>(-8.3 to 41.5)                                              | -9.9<br>(-25.4 to 9.1)                                               |
| Cirrhosis and other chronic liver diseases due to other causes | 0.7<br>(0.7 to 0.8)               | 0.1<br>(< 0.05 to 0.1)            | 0.1<br>(0.1 to 0.1)               | 15.3<br>(-7.9 to 46.0)                                              | 0.8<br>(-17.1 to 23.9)                                               |
| <b>Digestive diseases</b>                                      | <b>17.1<br/>(16.0 to 18.3)</b>    | <b>21.6†<br/>(20.5 to 22.8)</b>   | <b>0.5<br/>(0.3 to 0.7)</b>       | <b>22.7<br/>(12.7 to 34.8)</b>                                      | <b>-1.3<br/>(-7.2 to 5.3)</b>                                        |
| Peptic ulcer disease                                           | 3.3<br>(3.0 to 3.6)               | 1.1<br>(1.0 to 1.2)               | 0.1<br>(< 0.05 to 0.1)            | 21.5<br>(7.1 to 36.8)                                               | -6.2<br>(-15.3 to 2.9)                                               |
| Gastritis and duodenitis                                       | 6.5<br>(5.7 to 7.3)               | 7.8<br>(7.0 to 8.8)               | 0.1<br>(0.1 to 0.1)               | 32.0<br>(16.8 to 47.0)                                              | 3.7<br>(-5.1 to 12.6)                                                |
| Appendicitis                                                   | 0.2<br>(0.2 to 0.2)               | 4.8<br>(4.4 to 5.3)               | 0.1<br>(< 0.05 to 0.1)            | 14.2<br>(-22.6 to 66.9)                                             | -1.1<br>(-26.8 to 31.4)                                              |
| Paralytic ileus and intestinal obstruction                     | < 0.05<br>(< 0.05 to < 0.05)      | 0.5<br>(0.5 to 0.6)               | < 0.05<br>(< 0.05 to < 0.05)      | 24.4<br>(19.5 to 29.4)                                              | 2.7<br>(-3.8 to 9.6)                                                 |
| Inguinal, femoral, and abdominal hernia                        | 6.8<br>(5.7 to 8.1)               | 2.8<br>(2.5 to 3.2)               | 0.2<br>(0.1 to 0.3)               | 20.7<br>(3.3 to 43.1)                                               | -2.8<br>(-13.7 to 9.8)                                               |
| Inflammatory bowel disease                                     | 0.1<br>(0.1 to 0.1)               | 0.5<br>(0.5 to 0.5)               | < 0.05<br>(< 0.05 to < 0.05)      | 27.9<br>(24.4 to 31.5)                                              | 7.2<br>(4.4 to 10.2)                                                 |
| Vascular intestinal disorders                                  | < 0.05<br>(< 0.05 to < 0.05)      | < 0.05<br>(< 0.05 to < 0.05)      | < 0.05<br>(< 0.05 to < 0.05)      | 26.9<br>(19.8 to 33.8)                                              | 4.4<br>(0.5 to 9.0)                                                  |
| Gallbladder and biliary diseases                               | 0.9<br>(0.8 to 1.0)               | 3.8<br>(3.3 to 4.3)               | < 0.05<br>(< 0.05 to < 0.05)      | 22.3<br>(3.7 to 46.9)                                               | -2.4<br>(-19.2 to 19.4)                                              |
| Pancreatitis                                                   | < 0.05<br>(< 0.05 to < 0.05)      | 0.2<br>(0.1 to 0.2)               | < 0.05<br>(< 0.05 to < 0.05)      | 27.7<br>(22.8 to 33.0)                                              | 1.9<br>(-1.3 to 5.3)                                                 |
| Other digestive diseases                                       | --                                | --                                | < 0.05<br>(< 0.05 to 0.1)         | 27.3<br>(14.2 to 43.1)                                              | 2.6<br>(-3.9 to 10.2)                                                |
| <b>Neurological disorders</b>                                  | <b>393.9<br/>(375.1 to 415.2)</b> | <b>191.1<br/>(161.0 to 226.0)</b> | <b>10.3<br/>(6.3 to 15.0)</b>     | <b>19.7<br/>(-17.7 to 69.8)</b>                                     | <b>-1.2<br/>(-28.1 to 33.9)</b>                                      |
| Alzheimer's disease and other dementias                        | 2.0<br>(1.7 to 2.4)               | 0.3<br>(0.3 to 0.4)               | 0.3<br>(0.2 to 0.4)               | 29.8<br>(22.7 to 37.6)                                              | -1.0<br>(-5.5 to 4.0)                                                |
| Parkinson's disease                                            | 0.2<br>(0.2 to 0.3)               | < 0.05<br>(< 0.05 to < 0.05)      | < 0.05<br>(< 0.05 to < 0.05)      | 37.3<br>(17.1 to 58.8)                                              | 6.2<br>(-7.0 to 21.6)                                                |
| Epilepsy                                                       | 6.6<br>(1.6 to 11.4)              | 0.7<br>(0.2 to 1.2)               | 2.6<br>(0.6 to 5.0)               | 12.6<br>(-76.4 to 378.1)                                            | -5.5<br>(-80.5 to 295.3)                                             |
| Multiple sclerosis                                             | 0.1<br>(0.1 to 0.1)               | < 0.05<br>(< 0.05 to < 0.05)      | < 0.05<br>(< 0.05 to < 0.05)      | 34.6<br>(28.4 to 41.9)                                              | 8.1<br>(2.5 to 15.1)                                                 |
| Motor neuron disease                                           | < 0.05<br>(< 0.05 to < 0.05)      | < 0.05<br>(< 0.05 to < 0.05)      | < 0.05<br>(< 0.05 to < 0.05)      | 22.9<br>(17.6 to 28.7)                                              | 2.6<br>(-0.5 to 6.3)                                                 |
| Migraine                                                       | 140.2<br>(131.8 to 148.7)         | 17.7<br>(16.7 to 18.9)            | 5.9<br>(3.8 to 8.4)               | 21.0<br>(16.0 to 26.5)                                              | -0.6<br>(-4.0 to 3.3)                                                |
| Tension-type headache                                          | 296.4<br>(260.4 to 338.4)         | 172.3<br>(142.3 to 207.3)         | 1.0<br>(0.6 to 1.4)               | 21.9<br>(14.6 to 29.6)                                              | -0.5<br>(-5.4 to 5.0)                                                |
| Other neurological disorders                                   | < 0.05<br>(< 0.05 to < 0.05)      | < 0.05<br>(< 0.05 to < 0.05)      | 0.6<br>(0.1 to 1.1)               | 32.9<br>(-69.8 to 406.9)                                            | 13.2<br>(-71.6 to 295.0)                                             |
| <b>Mental and substance use disorders</b>                      | <b>194.0<br/>(186.3 to 201.4)</b> | <b>80.3†<br/>(74.0 to 87.4)</b>   | <b>25.1<br/>(18.3 to 32.3)</b>    | <b>22.9<br/>(19.5 to 26.4)</b>                                      | <b>0.8<br/>(-1.5 to 3.4)</b>                                         |
| Schizophrenia                                                  | 1.9<br>(1.6 to 2.1)               | 0.2<br>(0.1 to 0.2)               | 1.2<br>(0.8 to 1.5)               | 30.7<br>(17.1 to 44.9)                                              | 1.2<br>(-8.0 to 10.8)                                                |
| Alcohol use disorders                                          | 19.1<br>(16.0 to 22.4)            | 9.9<br>(8.3 to 11.6)              | 1.9<br>(1.3 to 2.6)               | 29.1<br>(18.2 to 41.7)                                              | -1.7<br>(-9.2 to 6.0)                                                |
| Drug use disorders                                             | 8.9<br>(8.0 to 9.8)               | 1.3<br>(1.2 to 1.5)               | 2.4<br>(1.7 to 3.3)               | 34.9<br>(21.4 to 50.7)                                              | -0.9<br>(-10.1 to 9.7)                                               |
| Opioid use disorders                                           | 5.4<br>(4.5 to 6.5)               | 0.6<br>(0.5 to 0.8)               | 2.2<br>(1.5 to 3.0)               | 35.1<br>(20.0 to 52.1)                                              | -1.2<br>(-11.1 to 10.2)                                              |
| Cocaine use disorders                                          | 0.2<br>(0.2 to 0.3)               | < 0.05<br>(< 0.05 to < 0.05)      | < 0.05<br>(< 0.05 to < 0.05)      | 31.3<br>(24.1 to 39.3)                                              | 2.1<br>(-2.5 to 7.1)                                                 |
| Amphetamine use disorders                                      | 0.2<br>(0.1 to 0.2)               | < 0.05<br>(< 0.05 to < 0.05)      | < 0.05<br>(< 0.05 to < 0.05)      | 32.9<br>(-18.0 to 126.1)                                            | 3.1<br>(-32.9 to 61.8)                                               |
| Cannabis use disorders                                         | 3.0<br>(2.5 to 3.7)               | 0.5<br>(0.4 to 0.7)               | 0.1<br>(0.1 to 0.1)               | 30.9<br>(5.5 to 60.2)                                               | 1.9<br>(-15.5 to 21.1)                                               |
| Other drug use disorders                                       | 0.4<br>(0.4 to 0.5)               | 0.1<br>(0.1 to 0.1)               | 0.1<br>(0.1 to 0.1)               | 33.2<br>(10.1 to 61.6)                                              | 2.1<br>(-12.6 to 20.1)                                               |
| Depressive disorders                                           | 45.3<br>(42.5 to 49.2)            | 52.7<br>(46.8 to 59.6)            | 7.9<br>(5.5 to 10.8)              | 27.2<br>(19.9 to 34.6)                                              | 2.7<br>(-1.9 to 7.8)                                                 |
| Major depressive disorder                                      | 32.7<br>(29.1 to 37.1)            | 50.3<br>(44.3 to 57.2)            | 6.6<br>(4.6 to 9.0)               | 27.7<br>(19.1 to 37.1)                                              | 3.3<br>(-2.4 to 9.4)                                                 |
| Dysthymia                                                      | 13.5<br>(11.6 to 15.7)            | 2.4<br>(2.1 to 2.8)               | 1.3<br>(0.9 to 1.9)               | 24.7<br>(18.9 to 30.2)                                              | -0.1<br>(-3.3 to 3.2)                                                |
| Bipolar disorder                                               | 7.1<br>(6.0 to 8.4)               | 0.8<br>(0.7 to 1.0)               | 1.4<br>(0.9 to 2.2)               | 21.7<br>(12.6 to 31.5)                                              | 0.3<br>(-5.5 to 6.9)                                                 |
| Anxiety disorders                                              | 42.9<br>(38.4 to 48.0)            | 7.6<br>(6.9 to 8.4)               | 4.1<br>(2.9 to 5.6)               | 17.7<br>(9.4 to 27.2)                                               | -0.3<br>(-6.8 to 6.6)                                                |
| Eating disorders                                               | 1.8<br>(1.5 to 2.2)               | 1.2<br>(0.8 to 1.6)               | 0.4<br>(0.2 to 0.5)               | 28.1<br>(11.3 to 47.0)                                              | 3.0<br>(-9.9 to 17.3)                                                |
| Anorexia nervosa                                               | 0.5<br>(0.3 to 0.7)               | 0.2<br>(0.1 to 0.3)               | 0.1<br>(0.1 to 0.2)               | 19.6<br>(-7.8 to 55.1)                                              | 1.5<br>(-20.8 to 30.6)                                               |
| Bulimia nervosa                                                | 1.3<br>(0.9 to 1.8)               | 1.0<br>(0.7 to 1.4)               | 0.3<br>(0.2 to 0.4)               | 31.6<br>(10.8 to 55.0)                                              | 3.5<br>(-11.5 to 21.2)                                               |
| Autistic spectrum disorders                                    | 11.4<br>(10.1 to 12.8)            | 0.1<br>(0.1 to 0.2)               | 1.7<br>(1.1 to 2.3)               | 17.8<br>(10.9 to 25.1)                                              | 1.0<br>(-4.0 to 6.7)                                                 |
| Autism                                                         | 3.3<br>(2.9 to 3.9)               | < 0.05<br>(< 0.05 to < 0.05)      | 0.8<br>(0.5 to 1.2)               | 16.5<br>(5.1 to 28.8)                                               | 0.8<br>(-8.2 to 10.6)                                                |
| Asperger syndrome and other autistic spectrum disorders        | 8.1<br>(6.7 to 9.8)               | 0.1<br>(0.1 to 0.2)               | 0.8<br>(0.5 to 1.2)               | 19.1<br>(12.4 to 26.0)                                              | 1.1<br>(-3.5 to 6.2)                                                 |

| Cause                                                      | Prevalence in thousands (95% UI)  | Incidence in thousands (95% UI)          | YLDs in thousands (95% UI)     |                                                   |                                                     |
|------------------------------------------------------------|-----------------------------------|------------------------------------------|--------------------------------|---------------------------------------------------|-----------------------------------------------------|
|                                                            | 2016 counts                       | 2016 counts                              | 2016 counts                    | Percentage change in counts between 2006 and 2016 | Percentage change in age-standardised rates between |
| Attention-deficit/hyperactivity disorder                   | 17.6<br>(15.8 to 19.8)            | 1.0<br>(0.9 to 1.2)                      | 0.2<br>(0.1 to 0.3)            | 12.8<br>(4.3 to 21.7)                             | 0.5<br>(-6.5 to 7.9)                                |
| Conduct disorder                                           | 13.0<br>(10.7 to 15.4)            | 4.5<br>(3.6 to 5.4)                      | 1.6<br>(1.0 to 2.4)            | 0.2<br>(-5.9 to 7.5)                              | -0.1<br>(-6.2 to 6.9)                               |
| Idiopathic developmental intellectual disability           | 23.7<br>(14.6 to 32.9)            | --                                       | 0.9<br>(0.4 to 1.6)            | 12.2<br>(4.4 to 19.9)                             | -4.1<br>(-10.3 to 1.8)                              |
| Other mental and substance use disorders                   | 19.1<br>(16.7 to 22.2)            | 1.0<br>(0.9 to 1.2)                      | 1.4<br>(1.0 to 2.0)            | 30.2<br>(22.2 to 38.1)                            | 0.8<br>(-4.3 to 6.0)                                |
| <b>Diabetes, urogenital, blood, and endocrine diseases</b> | <b>498.9<br/>(487.6 to 514.1)</b> | <b>132.7†<br/>(123.9 to 142.6)</b>       | <b>9.9<br/>(7.1 to 13.3)</b>   | <b>25.1<br/>(21.4 to 29.0)</b>                    | <b>0.4<br/>(-2.8 to 3.4)</b>                        |
| Diabetes mellitus                                          | 68.5<br>(61.9 to 75.5)            | 5.2<br>(4.8 to 5.8)                      | 5.4<br>(3.7 to 7.3)            | 28.1<br>(21.6 to 33.9)                            | 3.3<br>(-1.8 to 7.9)                                |
| Acute glomerulonephritis                                   | < 0.05<br>(< 0.05 to < 0.05)      | 0.2<br>(0.2 to 0.2)                      | < 0.05<br>(< 0.05 to < 0.05)   | 17.1<br>(9.7 to 24.4)                             | -2.2<br>(-7.3 to 2.9)                               |
| Chronic kidney disease                                     | 64.7<br>(58.2 to 71.5)            | 5.1<br>(4.5 to 5.8)                      | 1.8<br>(1.3 to 2.3)            | 23.7<br>(16.1 to 31.6)                            | -3.5<br>(-9.0 to 2.0)                               |
| Chronic kidney disease due to diabetes mellitus            | 20.7<br>(17.5 to 24.2)            | 1.6<br>(1.3 to 1.9)                      | 0.5<br>(0.4 to 0.7)            | 22.9<br>(12.0 to 34.2)                            | -2.8<br>(-10.2 to 5.0)                              |
| Chronic kidney disease due to hypertension                 | 13.3<br>(11.4 to 15.2)            | 1.3<br>(1.1 to 1.6)                      | 0.3<br>(0.2 to 0.4)            | 23.2<br>(12.2 to 35.0)                            | -4.1<br>(-11.5 to 3.9)                              |
| Chronic kidney disease due to glomerulonephritis           | 13.1<br>(11.2 to 15.0)            | 0.8<br>(0.6 to 1.0)                      | 0.5<br>(0.3 to 0.7)            | 25.3<br>(13.0 to 38.4)                            | -3.0<br>(-10.5 to 5.1)                              |
| Chronic kidney disease due to other causes                 | 17.6<br>(14.6 to 20.6)            | 1.5<br>(1.2 to 1.7)                      | 0.5<br>(0.4 to 0.7)            | 23.4<br>(11.4 to 37.2)                            | -4.1<br>(-11.2 to 4.1)                              |
| Urinary diseases and male infertility                      | 13.2<br>(11.7 to 14.8)            | 66.3†<br>(58.6 to 75.0)                  | 0.4<br>(0.3 to 0.6)            | 20.8<br>(12.3 to 29.4)                            | -2.1<br>(-8.9 to 4.4)                               |
| Interstitial nephritis and urinary tract infections        | 1.1<br>(1.0 to 1.3)               | 58.4<br>(51.0 to 67.3)                   | < 0.05<br>(< 0.05 to 0.1)      | 24.3<br>(4.2 to 49.3)                             | -0.4<br>(-14.5 to 16.5)                             |
| Urolithiasis                                               | 0.2<br>(0.2 to 0.3)               | 6.7<br>(5.9 to 7.7)                      | < 0.05<br>(< 0.05 to < 0.05)   | 27.1<br>(18.1 to 35.7)                            | 1.1<br>(-6.2 to 9.3)                                |
| Benign prostatic hyperplasia                               | 9.6<br>(8.1 to 11.2)              | 1.2<br>(1.0 to 1.4)                      | 0.3<br>(0.2 to 0.5)            | 20.2<br>(10.0 to 30.3)                            | -2.1<br>(-9.7 to 5.5)                               |
| Male infertility                                           | 1.9<br>(1.4 to 2.5)               | --                                       | < 0.05<br>(< 0.05 to < 0.05)   | 69.4<br>(34.5 to 105.1)                           | 26.2<br>(0.9 to 54.7)                               |
| Other urinary diseases                                     | --                                | --                                       | < 0.05<br>(< 0.05 to < 0.05)   | 4.1<br>(-8.0 to 18.4)                             | -16.3<br>(-23.7 to -7.7)                            |
| Gynecological diseases                                     | 141.7<br>(134.3 to 148.9)         | 54.0†<br>(49.7 to 58.6)                  | 1.5<br>(1.0 to 2.2)            | 21.3<br>(15.4 to 27.6)                            | -5.4<br>(-9.2 to -1.5)                              |
| Uterine fibroids                                           | 9.0<br>(8.0 to 10.1)              | 1.1<br>(1.0 to 1.3)                      | 0.1<br>(0.1 to 0.2)            | 7.9<br>(-2.1 to 16.5)                             | -12.4<br>(-19.8 to -6.7)                            |
| Polycystic ovarian syndrome                                | 1.1<br>(0.8 to 1.5)               | 1.7<br>(1.3 to 2.3)                      | < 0.05<br>(< 0.05 to < 0.05)   | 28.0<br>(10.5 to 46.5)                            | -3.8<br>(-15.9 to 9.3)                              |
| Female infertility                                         | 0.5<br>(0.4 to 0.6)               | --                                       | < 0.05<br>(< 0.05 to < 0.05)   | 44.0<br>(10.4 to 86.1)                            | 5.7<br>(-18.7 to 38.9)                              |
| Endometriosis                                              | 0.3<br>(0.2 to 0.3)               | 1.1<br>(0.9 to 1.4)                      | < 0.05<br>(< 0.05 to < 0.05)   | 26.8<br>(-12.0 to 82.8)                           | -2.7<br>(-26.9 to 31.2)                             |
| Genital prolapse                                           | 61.4<br>(54.3 to 69.1)            | 4.9<br>(4.2 to 5.8)                      | 0.2<br>(0.1 to 0.4)            | 16.9<br>(9.7 to 25.0)                             | -4.2<br>(-10.6 to 2.6)                              |
| Premenstrual syndrome                                      | 69.7<br>(64.4 to 74.8)            | 26.4<br>(24.2 to 28.6)                   | 0.6<br>(0.4 to 0.9)            | 19.9<br>(9.6 to 31.7)                             | -4.9<br>(-12.4 to 3.6)                              |
| Other gynecological diseases                               | 18.1<br>(15.2 to 21.3)            | 18.7<br>(15.2 to 22.6)                   | 0.6<br>(0.4 to 0.9)            | 26.0<br>(16.1 to 36.3)                            | -5.0<br>(-11.1 to 1.8)                              |
| Hemoglobinopathies and hemolytic anaemias                  | 327.6<br>(315.5 to 343.0)         | --                                       | 0.4<br>(0.2 to 0.6)            | 19.5<br>(7.4 to 34.3)                             | -1.9<br>(-9.8 to 7.0)                               |
| Thalassemias                                               | < 0.05<br>(< 0.05 to < 0.05)      | --                                       | < 0.05<br>(< 0.05 to < 0.05)   | 20.9<br>(-3.2 to 40.1)                            | -1.3<br>(-20.2 to 14.0)                             |
| Thalassaemias trait                                        | 5.9<br>(5.5 to 6.4)               | --                                       | 0.1<br>(< 0.05 to 0.1)         | 25.6<br>(9.1 to 45.6)                             | 1.2<br>(-10.8 to 14.1)                              |
| Sickle cell disorders                                      | < 0.05<br>(< 0.05 to 0.1)         | --                                       | < 0.05<br>(< 0.05 to < 0.05)   | 18.0<br>(-4.5 to 45.4)                            | 1.3<br>(-17.3 to 23.1)                              |
| Sickle cell trait                                          | 37.9<br>(22.8 to 61.2)            | --                                       | 0.1<br>(0.1 to 0.2)            | 26.0<br>(10.1 to 45.5)                            | 5.0<br>(-6.5 to 19.6)                               |
| G6PD deficiency                                            | 90.4<br>(85.5 to 95.9)            | --                                       | < 0.05<br>(< 0.05 to < 0.05)   | 12.9<br>(-2.7 to 34.6)                            | -4.6<br>(-14.0 to 8.0)                              |
| G6PD trait                                                 | 206.5<br>(201.8 to 211.8)         | --                                       | < 0.05<br>(< 0.05 to < 0.05)   | 20.9<br>(8.8 to 35.2)                             | -1.9<br>(-9.2 to 6.2)                               |
| Other hemoglobinopathies and hemolytic anaemias            | 6.2<br>(5.7 to 6.7)               | --                                       | 0.2<br>(0.1 to 0.3)            | 13.4<br>(-2.8 to 34.6)                            | -7.8<br>(-18.6 to 5.6)                              |
| Endocrine, metabolic, blood, and immune disorders          | 14.4<br>(13.4 to 15.5)            | 1.8<br>(1.6 to 2.1)                      | 0.5<br>(0.3 to 0.7)            | 19.4<br>(10.1 to 30.4)                            | -2.1<br>(-8.0 to 4.7)                               |
| <b>Musculoskeletal disorders</b>                           | <b>129.0<br/>(121.3 to 135.2)</b> | <b>63.1<br/>(56.5 to 70.0)</b>           | <b>13.9<br/>(10.0 to 18.1)</b> | <b>25.8<br/>(21.1 to 30.7)</b>                    | <b>0.7<br/>(-2.3 to 3.9)</b>                        |
| Rheumatoid arthritis                                       | 2.9<br>(2.6 to 3.2)               | 0.2<br>(0.2 to 0.2)                      | 0.7<br>(0.5 to 0.9)            | 26.1<br>(15.9 to 37.2)                            | 2.8<br>(-4.5 to 11.2)                               |
| Osteoarthritis                                             | 26.4<br>(24.6 to 28.1)            | 1.4<br>(1.3 to 1.6)                      | 1.6<br>(1.1 to 2.2)            | 25.1<br>(20.5 to 29.9)                            | 1.6<br>(-1.9 to 5.3)                                |
| Low back and neck pain                                     | 78.6<br>(72.5 to 84.3)            | 35.6<br>(31.9 to 39.7)                   | 8.8<br>(6.2 to 11.6)           | 26.0<br>(20.4 to 32.2)                            | 1.1<br>(-2.9 to 5.5)                                |
| Low back pain                                              | 58.6<br>(52.0 to 66.3)            | 29.6<br>(25.9 to 33.6)                   | 6.5<br>(4.6 to 8.6)            | 27.0<br>(19.5 to 35.8)                            | 1.6<br>(-3.9 to 7.4)                                |
| Neck pain                                                  | 24.0<br>(20.8 to 27.6)            | 6.0<br>(5.2 to 7.0)                      | 2.4<br>(1.6 to 3.3)            | 23.4<br>(19.0 to 28.1)                            | 0.1<br>(-2.4 to 2.6)                                |
| Gout                                                       | 2.8<br>(2.5 to 3.1)               | 0.6<br>(0.5 to 0.7)                      | 0.1<br>(0.1 to 0.1)            | 26.3<br>(8.7 to 47.4)                             | 0.4<br>(-12.4 to 14.8)                              |
| Other musculoskeletal disorders                            | 31.8<br>(25.8 to 37.9)            | 25.3<br>(20.2 to 31.0)                   | 2.7<br>(1.8 to 3.9)            | 25.4<br>(13.9 to 37.0)                            | -2.1<br>(-10.5 to 6.0)                              |
| <b>Other non-communicable diseases</b>                     | <b>980.5<br/>(961.5 to 998.6)</b> | <b>2,910.9†<br/>(2,710.7 to 3,132.1)</b> | <b>25.0<br/>(17.1 to 35.1)</b> | <b>17.1<br/>(15.5 to 19.0)</b>                    | <b>-1.5<br/>(-2.6 to -0.2)</b>                      |
| Congenital anomalies                                       | 14.2<br>(11.7 to 17.3)            | --                                       | 2.1<br>(1.4 to 3.1)            | 14.8<br>(7.3 to 23.4)                             | -3.1<br>(-9.5 to 3.6)                               |
| Neural tube defects                                        | 1.5<br>(1.4 to 1.7)               | --                                       | 0.5<br>(0.3 to 0.6)            | 17.1<br>(3.3 to 32.0)                             | -1.4<br>(-11.5 to 10.1)                             |
| Congenital heart anomalies                                 | 1.8<br>(1.5 to 2.1)               | --                                       | 0.1<br>(< 0.05 to 0.1)         | 20.5<br>(2.8 to 40.2)                             | 3.0<br>(-11.3 to 18.1)                              |
| Orofacial clefts                                           | 0.4<br>(0.4 to 0.5)               | --                                       | < 0.05<br>(< 0.05 to < 0.05)   | 10.1<br>(-2.3 to 24.3)                            | -7.6<br>(-18.0 to 4.4)                              |
| Down's syndrome                                            | 0.3<br>(0.2 to 0.4)               | --                                       | < 0.05<br>(< 0.05 to < 0.05)   | 18.0<br>(9.2 to 26.5)                             | -0.1<br>(-7.4 to 7.0)                               |
| Turner syndrome                                            | 0.9<br>(0.8 to 1.1)               | --                                       | < 0.05<br>(< 0.05 to < 0.05)   | 7.6<br>(-25.0 to 48.6)                            | -8.0<br>(-34.8 to 26.2)                             |
| Klinefelter syndrome                                       | 0.9<br>(0.7 to 1.0)               | --                                       | < 0.05<br>(< 0.05 to < 0.05)   | 26.9<br>(-5.3 to 64.8)                            | 1.8<br>(-21.8 to 31.0)                              |

| Cause                                         | Prevalence in thousands (95% UI)        | Incidence in thousands (95% UI)         | YLDs in thousands (95% UI)         |                                                   |                                                     |
|-----------------------------------------------|-----------------------------------------|-----------------------------------------|------------------------------------|---------------------------------------------------|-----------------------------------------------------|
|                                               | 2016 counts                             | 2016 counts                             | 2016 counts                        | Percentage change in counts between 2006 and 2016 | Percentage change in age-standardised rates between |
| Other chromosomal abnormalities               | 0.2<br>(0.2 to 0.3)                     | --                                      | < 0.05<br>(< 0.05 to 0.1)          | 18.7<br>(-15.3 to 66.2)                           | -0.2<br>(-27.4 to 37.5)                             |
| Congenital musculoskeletal and limb anomalies | 1.6<br>(1.4 to 1.8)                     | --                                      | 0.2<br>(0.1 to 0.3)                | 19.6<br>(4.6 to 36.9)                             | 1.7<br>(-9.3 to 14.5)                               |
| Urogenital congenital anomalies               | 1.1<br>(1.0 to 1.2)                     | --                                      | < 0.05<br>(< 0.05 to < 0.05)       | 13.8<br>(4.7 to 24.1)                             | -0.5<br>(-7.9 to 7.8)                               |
| Digestive congenital anomalies                | 1.1<br>(1.0 to 1.3)                     | --                                      | 0.1<br>(< 0.05 to 0.1)             | 20.6<br>(-1.4 to 47.9)                            | 1.5<br>(-15.1 to 21.6)                              |
| Other congenital anomalies                    | 7.1<br>(4.0 to 11.5)                    | --                                      | 1.1<br>(0.6 to 1.9)                | 12.4<br>(1.0 to 24.1)                             | -5.2<br>(-14.6 to 4.2)                              |
| Skin and subcutaneous diseases                | 471.1<br>(456.4 to 485.9)               | 1,025.5<br>(967.0 to 1,093.5)           | 12.1<br>(7.9 to 17.6)              | 15.4<br>(13.0 to 18.0)                            | 1.0<br>(-0.8 to 3.0)                                |
| Dermatitis                                    | 85.8<br>(78.1 to 93.6)                  | 60.8<br>(55.7 to 66.4)                  | 3.5<br>(2.0 to 5.8)                | 15.7<br>(11.5 to 20.2)                            | 0.1<br>(-2.8 to 3.4)                                |
| Psoriasis                                     | 8.8<br>(8.3 to 9.2)                     | 1.3<br>(1.2 to 1.4)                     | 0.8<br>(0.5 to 1.0)                | 27.5<br>(15.3 to 41.2)                            | 5.8<br>(-2.0 to 14.7)                               |
| Cellulitis                                    | 0.5<br>(0.5 to 0.6)                     | 8.8<br>(8.1 to 9.4)                     | < 0.05<br>(< 0.05 to < 0.05)       | 21.0<br>(-5.1 to 56.9)                            | 2.4<br>(-16.9 to 25.4)                              |
| Pyoderma                                      | 7.1<br>(6.8 to 7.4)                     | 141.6<br>(136.0 to 147.8)               | < 0.05<br>(< 0.05 to 0.1)          | 17.9<br>(10.3 to 25.6)                            | 1.2<br>(-4.2 to 6.5)                                |
| Scabies                                       | 22.6<br>(19.4 to 26.4)                  | 69.2<br>(59.0 to 81.2)                  | 0.6<br>(0.3 to 0.9)                | 11.9<br>(6.4 to 17.8)                             | -4.5<br>(-8.5 to -0.5)                              |
| Fungal skin diseases                          | 163.1<br>(145.0 to 185.9)               | 465.4<br>(413.2 to 527.0)               | 0.9<br>(0.4 to 1.9)                | 17.3<br>(15.1 to 19.7)                            | 0.1<br>(-0.8 to 1.0)                                |
| Viral skin diseases                           | 38.4<br>(35.6 to 41.2)                  | 54.1<br>(50.1 to 58.8)                  | 1.2<br>(0.7 to 1.7)                | 14.8<br>(10.4 to 19.4)                            | -0.3<br>(-3.5 to 2.8)                               |
| Acne vulgaris                                 | 142.5<br>(126.8 to 159.4)               | 104.4<br>(83.2 to 132.5)                | 3.6<br>(2.4 to 5.4)                | 11.0<br>(5.8 to 17.0)                             | 2.5<br>(-2.1 to 7.5)                                |
| Alopecia areata                               | 2.3<br>(2.2 to 2.4)                     | 4.0<br>(3.9 to 4.2)                     | 0.1<br>(< 0.05 to 0.1)             | 26.9<br>(11.2 to 44.4)                            | -0.1<br>(-10.8 to 11.2)                             |
| Pruritus                                      | 9.8<br>(8.6 to 11.0)                    | 7.9<br>(7.1 to 8.9)                     | 0.1<br>(< 0.05 to 0.2)             | 21.9<br>(14.6 to 29.8)                            | 0.1<br>(-5.0 to 5.3)                                |
| Urticaria                                     | 13.1<br>(11.1 to 15.4)                  | 23.6<br>(20.1 to 27.6)                  | 0.8<br>(0.5 to 1.2)                | 19.8<br>(12.6 to 28.0)                            | 0.1<br>(-5.2 to 5.9)                                |
| Decubitus ulcer                               | 0.2<br>(0.2 to 0.2)                     | 0.7<br>(0.6 to 0.7)                     | < 0.05<br>(< 0.05 to < 0.05)       | 22.4<br>(7.5 to 39.5)                             | -1.0<br>(-14.7 to 14.8)                             |
| Other skin and subcutaneous diseases          | 72.6<br>(70.3 to 74.8)                  | 83.7<br>(81.0 to 86.5)                  | 0.4<br>(0.2 to 0.7)                | 23.7<br>(20.3 to 27.2)                            | 1.3<br>(-0.8 to 3.5)                                |
| Sense organ diseases                          | 254.4<br>(247.9 to 261.6)               | 121.4†<br>(112.5 to 130.9)              | 8.6<br>(6.0 to 12.1)               | 18.8<br>(15.1 to 22.6)                            | -3.0<br>(-4.7 to -0.8)                              |
| Glaucoma                                      | 0.6<br>(0.5 to 0.8)                     | --                                      | 0.1<br>(< 0.05 to 0.1)             | 31.9<br>(16.1 to 50.0)                            | 2.0<br>(-9.0 to 14.1)                               |
| Cataract                                      | 3.4<br>(2.8 to 4.0)                     | --                                      | 0.4<br>(0.2 to 0.5)                | 23.0<br>(14.0 to 32.5)                            | -3.1<br>(-10.3 to 4.4)                              |
| Macular degeneration                          | 0.4<br>(0.3 to 0.4)                     | --                                      | < 0.05<br>(< 0.05 to < 0.05)       | 34.9<br>(17.1 to 56.7)                            | 3.9<br>(-8.4 to 18.8)                               |
| Refraction and accommodation disorders        | 150.1<br>(144.6 to 156.3)               | --                                      | 2.2<br>(1.3 to 3.6)                | 14.8<br>(11.3 to 18.7)                            | -5.3<br>(-7.9 to -2.3)                              |
| Age-related and other hearing loss            | 136.3<br>(127.2 to 146.9)               | --                                      | 4.9<br>(3.3 to 6.8)                | 18.9<br>(12.7 to 25.0)                            | -3.0<br>(-5.8 to -0.1)                              |
| Other vision loss                             | 4.6<br>(4.0 to 5.2)                     | --                                      | 0.3<br>(0.2 to 0.5)                | 24.0<br>(14.4 to 33.5)                            | 0.9<br>(-5.6 to 7.2)                                |
| Other sense organ diseases                    | 25.1<br>(23.1 to 26.9)                  | 121.4<br>(112.5 to 130.9)               | 0.8<br>(0.5 to 1.1)                | 24.7<br>(18.8 to 31.2)                            | 0.9<br>(-2.9 to 4.7)                                |
| Oral disorders                                | 684.1<br>(647.7 to 713.7)               | 1,764.0†<br>(1,575.7 to 1,964.3)        | 2.3<br>(1.4 to 3.3)                | 22.7<br>(18.9 to 27.0)                            | -1.3<br>(-4.2 to 1.6)                               |
| Caries of deciduous teeth                     | 143.4<br>(119.4 to 165.9)               | 504.3<br>(359.4 to 670.1)               | < 0.05<br>(< 0.05 to 0.1)          | 18.6<br>(6.2 to 32.3)                             | 0.5<br>(-9.7 to 12.0)                               |
| Caries of permanent teeth                     | 503.0<br>(461.5 to 537.4)               | 1,254.7<br>(1,127.7 to 1,382.2)         | 0.3<br>(0.1 to 0.6)                | 17.5<br>(13.0 to 22.3)                            | -0.2<br>(-3.3 to 2.9)                               |
| Periodontal disease                           | 21.7<br>(18.1 to 26.0)                  | 2.5<br>(2.0 to 3.1)                     | 0.1<br>(0.1 to 0.3)                | 26.8<br>(21.1 to 32.5)                            | 0.8<br>(-3.1 to 4.4)                                |
| Edentulism and severe tooth loss              | 43.2<br>(37.6 to 48.8)                  | 2.5<br>(2.1 to 2.8)                     | 1.2<br>(0.8 to 1.7)                | 24.5<br>(17.4 to 32.5)                            | -2.2<br>(-6.5 to 2.6)                               |
| Other oral disorders                          | 20.5<br>(19.5 to 21.6)                  | --                                      | 0.6<br>(0.4 to 0.9)                | 21.2<br>(16.4 to 25.9)                            | -0.1<br>(-3.0 to 3.3)                               |
| <b>Injuries</b>                               | <b>169.1</b><br><b>(159.6 to 180.3)</b> | <b>102.5†</b><br><b>(97.1 to 108.5)</b> | <b>7.1</b><br><b>(4.8 to 10.1)</b> | <b>23.6</b><br><b>(21.2 to 26.0)</b>              | <b>3.1</b><br><b>(1.6 to 4.8)</b>                   |
| <b>Transport injuries</b>                     | <b>32.1</b><br><b>(29.4 to 34.9)</b>    | <b>16.2</b><br><b>(14.3 to 18.5)</b>    | <b>1.9</b><br><b>(1.2 to 2.7)</b>  | <b>28.0</b><br><b>(25.1 to 30.9)</b>              | <b>6.2</b><br><b>(4.4 to 8.4)</b>                   |
| Road injuries                                 | 28.2<br>(25.7 to 30.8)                  | 14.9<br>(12.9 to 17.2)                  | 1.6<br>(1.1 to 2.3)                | 28.3<br>(25.4 to 31.3)                            | 6.3<br>(4.4 to 8.5)                                 |
| Pedestrian road injuries                      | 7.3<br>(6.1 to 8.7)                     | 2.7<br>(2.2 to 3.3)                     | 0.4<br>(0.3 to 0.6)                | 19.0<br>(16.2 to 21.8)                            | 1.0<br>(-0.8 to 3.0)                                |
| Cyclist road injuries                         | 3.0<br>(2.4 to 3.6)                     | 1.7<br>(1.3 to 2.2)                     | 0.1<br>(0.1 to 0.2)                | 38.9<br>(35.3 to 42.8)                            | 16.0<br>(13.7 to 18.6)                              |
| Motorcyclist road injuries                    | 2.5<br>(2.0 to 3.0)                     | 0.9<br>(0.7 to 1.1)                     | 0.1<br>(0.1 to 0.2)                | 36.6<br>(33.3 to 40.3)                            | 10.8<br>(8.7 to 13.2)                               |
| Motor vehicle road injuries                   | 13.8<br>(11.6 to 15.9)                  | 8.5<br>(7.2 to 10.1)                    | 0.8<br>(0.6 to 1.2)                | 29.8<br>(26.7 to 33.1)                            | 6.6<br>(4.5 to 8.9)                                 |
| Other road injuries                           | 1.7<br>(1.4 to 2.0)                     | 1.1<br>(0.8 to 1.4)                     | 0.1<br>(0.1 to 0.1)                | 34.8<br>(31.6 to 38.3)                            | 10.4<br>(8.4 to 12.7)                               |
| Other transport injuries                      | 4.0<br>(3.3 to 4.8)                     | 1.3<br>(1.1 to 1.6)                     | 0.2<br>(0.2 to 0.4)                | 25.9<br>(21.7 to 30.3)                            | 5.3<br>(2.6 to 7.9)                                 |
| <b>Unintentional injuries</b>                 | <b>123.0</b><br><b>(113.9 to 134.6)</b> | <b>76.5</b><br><b>(71.5 to 81.5)</b>    | <b>4.3</b><br><b>(2.9 to 6.1)</b>  | <b>22.0</b><br><b>(19.2 to 24.6)</b>              | <b>1.7</b><br><b>(0.1 to 3.3)</b>                   |
| Falls                                         | 27.4<br>(23.5 to 31.6)                  | 16.6<br>(14.0 to 20.0)                  | 1.2<br>(0.8 to 1.7)                | 30.7<br>(28.1 to 33.5)                            | 7.1<br>(5.4 to 8.8)                                 |
| Drowning                                      | 0.6<br>(0.5 to 0.6)                     | 0.2<br>(0.1 to 0.2)                     | < 0.05<br>(< 0.05 to < 0.05)       | 14.1<br>(10.5 to 17.8)                            | -4.5<br>(-6.8 to -2.0)                              |
| Fire, heat, and hot substances                | 20.7<br>(17.4 to 25.1)                  | 3.9<br>(3.2 to 4.5)                     | 0.6<br>(0.4 to 0.9)                | 24.1<br>(18.0 to 31.1)                            | 5.3<br>(1.4 to 10.7)                                |
| Poisonings                                    | 0.6<br>(0.5 to 0.7)                     | 1.1<br>(0.8 to 1.3)                     | 0.1<br>(< 0.05 to 0.1)             | 14.2<br>(4.7 to 24.3)                             | -4.4<br>(-10.8 to 2.5)                              |
| Exposure to mechanical forces                 | 30.1<br>(25.3 to 37.0)                  | 16.3<br>(13.6 to 19.0)                  | 0.8<br>(0.5 to 1.2)                | 15.4<br>(12.3 to 18.4)                            | -3.9<br>(-5.8 to -1.9)                              |
| Unintentional firearm injuries                | 0.9<br>(0.7 to 1.1)                     | 0.3<br>(0.2 to 0.5)                     | < 0.05<br>(< 0.05 to 0.1)          | 26.8<br>(23.3 to 30.6)                            | 3.4<br>(1.1 to 5.9)                                 |
| Unintentional suffocation                     | 2.1<br>(1.6 to 2.7)                     | 0.7<br>(0.5 to 0.9)                     | 0.1<br>(< 0.05 to 0.1)             | 20.4<br>(16.8 to 23.9)                            | 0.6<br>(-1.7 to 3.0)                                |
| Other exposure to mechanical forces           | 27.1<br>(22.3 to 34.0)                  | 15.3<br>(12.7 to 17.8)                  | 0.7<br>(0.5 to 1.0)                | 14.2<br>(10.9 to 17.4)                            | -4.7<br>(-6.8 to -2.7)                              |



| Cause                                                                               | Prevalence in thousands (95% UI)     | Incidence in thousands (95% UI)                      | YLDs in thousands (95% UI)                          |                                                   |                                                     |
|-------------------------------------------------------------------------------------|--------------------------------------|------------------------------------------------------|-----------------------------------------------------|---------------------------------------------------|-----------------------------------------------------|
|                                                                                     | 2016 counts                          | 2016 counts                                          | 2016 counts                                         | Percentage change in counts between 2006 and 2016 | Percentage change in age-standardised rates between |
| Adverse effects of medical treatment                                                | 0.5<br>(0.4 to 0.7)                  | 6.8<br>(5.8 to 8.0)                                  | 0.1<br>(< 0.05 to 0.1)                              | 21.7<br>(15.0 to 29.8)                            | -3.8<br>(-8.1 to 0.9)                               |
| Animal contact                                                                      | 8.0<br>(6.9 to 9.4)                  | 13.0<br>(11.0 to 15.2)                               | 0.3<br>(0.2 to 0.4)                                 | 15.4<br>(9.7 to 21.0)                             | -5.5<br>(-9.1 to -2.2)                              |
| Venomous animal contact                                                             | 2.5<br>(2.0 to 3.0)                  | 4.8<br>(3.8 to 6.0)                                  | 0.2<br>(0.1 to 0.2)                                 | 17.8<br>(9.4 to 26.4)                             | -2.7<br>(-8.2 to 3.1)                               |
| Non-venomous animal contact                                                         | 5.5<br>(4.6 to 6.7)                  | 8.2<br>(6.8 to 9.8)                                  | 0.1<br>(0.1 to 0.2)                                 | 12.0<br>(7.3 to 16.2)                             | -8.9<br>(-12.3 to -6.1)                             |
| Foreign body                                                                        | 9.5<br>(7.6 to 11.3)                 | 7.0<br>(6.1 to 8.2)                                  | 0.4<br>(0.3 to 0.6)                                 | 16.5<br>(12.2 to 20.7)                            | -1.5<br>(-4.4 to 1.1)                               |
| Pulmonary aspiration and foreign body in airway                                     | 4.9<br>(3.6 to 6.6)                  | 2.5<br>(2.1 to 3.1)                                  | 0.2<br>(0.2 to 0.4)                                 | 14.3<br>(10.2 to 18.5)                            | -3.0<br>(-5.7 to -0.4)                              |
| Foreign body in eyes                                                                | 0.4<br>(0.2 to 0.6)                  | 2.2<br>(1.7 to 3.0)                                  | < 0.05<br>(< 0.05 to < 0.05)                        | 23.8<br>(18.3 to 29.3)                            | 2.0<br>(-0.7 to 4.7)                                |
| Foreign body in other body part                                                     | 4.2<br>(3.2 to 5.5)                  | 2.3<br>(1.8 to 2.8)                                  | 0.1<br>(0.1 to 0.2)                                 | 19.2<br>(14.1 to 24.1)                            | 0.4<br>(-3.1 to 3.6)                                |
| Environmental heat and cold exposure                                                | 9.3<br>(7.7 to 11.5)                 | 3.5<br>(2.9 to 4.2)                                  | 0.4<br>(0.3 to 0.6)                                 | 21.9<br>(18.8 to 25.1)                            | 1.5<br>(-0.4 to 3.3)                                |
| Other unintentional injuries                                                        | 16.4<br>(12.8 to 20.9)               | 8.1<br>(6.7 to 10.0)                                 | 0.5<br>(0.3 to 0.7)                                 | 21.8<br>(19.3 to 24.4)                            | 1.2<br>(-0.3 to 2.8)                                |
| <b>Self-harm and interpersonal violence</b>                                         | <b>49.1</b><br><b>(43.7 to 55.2)</b> | <b>9.8†</b><br><b>(8.3 to 11.5)</b>                  | <b>0.9</b><br><b>(0.6 to 1.2)</b>                   | <b>23.3</b><br><b>(20.2 to 26.5)</b>              | <b>3.1</b><br><b>(1.1 to 5.1)</b>                   |
| Self-harm                                                                           | 1.4<br>(1.2 to 1.7)                  | 1.0<br>(0.8 to 1.2)                                  | 0.1<br>(0.1 to 0.1)                                 | 29.5<br>(25.9 to 33.5)                            | 3.4<br>(1.0 to 6.1)                                 |
| Self-harm by firearm                                                                | 0.1<br>(0.1 to 0.1)                  | < 0.05<br>(< 0.05 to 0.1)                            | < 0.05<br>(< 0.05 to < 0.05)                        | 27.1<br>(22.0 to 32.6)                            | 2.8<br>(-0.6 to 6.5)                                |
| Self-harm by other specified means                                                  | 1.4<br>(1.2 to 1.6)                  | 0.9<br>(0.8 to 1.1)                                  | 0.1<br>(< 0.05 to 0.1)                              | 29.7<br>(26.0 to 33.6)                            | 3.4<br>(1.0 to 6.1)                                 |
| Interpersonal violence                                                              | 47.6<br>(42.3 to 53.7)               | 8.8†<br>(7.4 to 10.6)                                | 0.8<br>(0.6 to 1.1)                                 | 22.7<br>(19.5 to 26.0)                            | 3.1<br>(1.0 to 5.2)                                 |
| Assault by firearm                                                                  | 0.2<br>(0.2 to 0.3)                  | 0.1<br>(0.1 to 0.2)                                  | < 0.05<br>(< 0.05 to < 0.05)                        | 35.1<br>(30.1 to 40.7)                            | 10.0<br>(7.1 to 13.4)                               |
| Assault by sharp object                                                             | 5.0<br>(4.0 to 6.0)                  | 3.1<br>(2.4 to 4.0)                                  | 0.2<br>(0.1 to 0.3)                                 | 33.9<br>(29.6 to 38.3)                            | 9.1<br>(6.7 to 11.8)                                |
| Sexual violence                                                                     | 35.3<br>(30.1 to 41.1)               | --                                                   | 0.3<br>(0.2 to 0.4)                                 | 9.3<br>(4.2 to 15.0)                              | -9.6<br>(-13.1 to -6.1)                             |
| Assault by other means                                                              | 7.1<br>(6.0 to 8.6)                  | 5.7<br>(4.6 to 6.8)                                  | 0.3<br>(0.2 to 0.5)                                 | 32.1<br>(28.8 to 36.0)                            | 10.0<br>(7.7 to 12.9)                               |
| <b>Forces of nature, conflict and terrorism, and executions and police conflict</b> | <b>0.2</b><br><b>(0.1 to 0.3)</b>    | <b>&lt; 0.05†</b><br><b>(&lt; 0.05 to &lt; 0.05)</b> | <b>&lt; 0.05</b><br><b>(&lt; 0.05 to &lt; 0.05)</b> | <b>-15.3</b><br><b>(-18.6 to -10.1)</b>           | <b>-24.5</b><br><b>(-27.4 to -19.8)</b>             |
| Exposure to forces of nature                                                        | 0.1<br>(0.1 to 0.2)                  | --                                                   | < 0.05<br>(< 0.05 to < 0.05)                        | -20.6<br>(-23.7 to -16.3)                         | -27.5<br>(-30.4 to -22.9)                           |
| Conflict and terrorism                                                              | --                                   | --                                                   | --                                                  | --                                                | --                                                  |
| Executions and police conflict                                                      | 0.1<br>(< 0.05 to 0.1)               | < 0.05<br>(< 0.05 to < 0.05)                         | < 0.05<br>(< 0.05 to < 0.05)                        | 6.4<br>(-1.1 to 14.4)                             | -8.4<br>(-15.1 to -0.9)                             |
| <b>Impairments</b>                                                                  | --                                   | --                                                   | --                                                  | --                                                | --                                                  |
| Anaemia                                                                             | 509.6<br>(488.5 to 532.7)            | --                                                   | 29.0<br>(20.5 to 38.8)                              | -9.4<br>(-32.1 to 13.1)                           | -30.7<br>(-51.0 to -8.9)                            |
| Developmental intellectual disability                                               | 38.0<br>(29.1 to 47.2)               | --                                                   | 3.7<br>(2.7 to 5.1)                                 | 24.9<br>(15.5 to 40.3)                            | 6.0<br>(-1.3 to 18.1)                               |
| Epilepsy                                                                            | 12.7<br>(7.5 to 17.8)                | --                                                   | 4.3<br>(2.2 to 7.1)                                 | 22.7<br>(-46.0 to 162.9)                          | -0.6<br>(-56.1 to 111.9)                            |
| Guillain-Barre syndrome                                                             | < 0.05<br>(< 0.05 to < 0.05)         | --                                                   | < 0.05<br>(< 0.05 to < 0.05)                        | 18.1<br>(14.0 to 23.1)                            | 0.1<br>(-0.1 to 0.3)                                |
| Hearing loss                                                                        | 161.1<br>(152.2 to 171.4)            | --                                                   | 6.4<br>(4.5 to 8.8)                                 | 16.5<br>(12.0 to 21.0)                            | -3.6<br>(-6.0 to -1.1)                              |
| Heart failure                                                                       | 3.8<br>(3.3 to 4.2)                  | --                                                   | 0.4<br>(0.3 to 0.5)                                 | 21.5<br>(12.6 to 31.7)                            | -5.7<br>(-13.2 to 2.5)                              |
| Infertility                                                                         | 12.0<br>(9.4 to 15.5)                | --                                                   | 0.1<br>(< 0.05 to 0.1)                              | 41.6<br>(20.2 to 64.7)                            | 6.5<br>(-9.0 to 25.5)                               |
| Pelvic inflammatory disease                                                         | 1.4<br>(1.1 to 1.6)                  | --                                                   | 0.2<br>(0.1 to 0.2)                                 | 22.9<br>(4.2 to 42.5)                             | -8.1<br>(-20.7 to 5.9)                              |
| Vision loss                                                                         | 164.2<br>(158.4 to 170.6)            | --                                                   | 3.7<br>(2.5 to 5.5)                                 | 24.9<br>(17.7 to 38.1)                            | -0.5<br>(-4.2 to 5.5)                               |

We did not calculate incidence for the nine impairments, certain NTDs, and causes with only birth prevalence. Blank cells mean that no estimate is available.

† Incidence for aggregate causes represents the sum of the incidence of the causes below the aggregate.

‡ Incidence estimates for stroke represent first-ever stroke only.

^ Incidence of HIV/AIDS represents new infections of HIV only and does not include new infections of Tuberculosis in HIV positive cases.

SR Table 14: Prevalence, incidence, and YLDs for 2016, percentage change of YLD counts and percentage change of age-standardised YLD rates between 2006 and 2016 by cause and impairments, for all ages, Sweden.

| Cause                                                                                | Prevalence in thousands (95% UI)       | Incidence in thousands (95% UI)            | YLDs in thousands (95% UI)             |                                                   |                                                     |
|--------------------------------------------------------------------------------------|----------------------------------------|--------------------------------------------|----------------------------------------|---------------------------------------------------|-----------------------------------------------------|
|                                                                                      | 2016 counts                            | 2016 counts                                | 2016 counts                            | Percentage change in counts between 2006 and 2016 | Percentage change in age-standardised rates between |
| <b>All causes</b>                                                                    | <b>9,269.7</b><br>(9,239.2 to 9,295.9) | <b>64,417.8†</b><br>(60,272.1 to 68,985.7) | <b>1,310.4</b><br>(980.0 to 1,690.4)   | <b>10.4</b><br>(9.2 to 11.5)                      | <b>0.4</b><br>(-0.6 to 1.5)                         |
| <b>Communicable, maternal, neonatal, and nutritional disorders</b>                   | <b>3,308.9</b><br>(3,197.1 to 3,421.0) | <b>39,590.0†</b><br>(35,566.2 to 43,917.6) | <b>39.1</b><br>(28.1 to 52.9)          | <b>9.2</b><br>(4.8 to 14.4)                       | <b>-0.5</b><br>(-4.7 to 4.5)                        |
| <b>HIV/AIDS and tuberculosis</b>                                                     | <b>1,250.1</b><br>(1,126.9 to 1,356.5) | <b>1.2†</b><br>(0.8 to 1.5)                | <b>0.9</b><br>(0.5 to 1.6)             | <b>28.5</b><br>(9.0 to 45.8)                      | <b>16.6</b><br>(-3.2 to 33.1)                       |
| Tuberculosis                                                                         | 1,152.4<br>(1,027.6 to 1,285.6)        | 0.7†<br>(0.5 to 0.8)                       | 0.1<br>(0.1 to 0.2)                    | 1.5<br>(-5.2 to 8.2)                              | -2.4<br>(-9.0 to 4.2)                               |
| Drug-susceptible tuberculosis                                                        | 0.4<br>(0.3 to 0.4)                    | 0.6<br>(0.5 to 0.8)                        | 0.1<br>(0.1 to 0.2)                    | 0.4<br>(-6.1 to 7.2)                              | -3.4<br>(-10.0 to 3.5)                              |
| Multidrug-resistant tuberculosis without extensive drug resistance                   | < 0.05<br>(< 0.05 to < 0.05)           | < 0.05<br>(< 0.05 to < 0.05)               | < 0.05<br>(< 0.05 to < 0.05)           | 44.5<br>(1.5 to 100.5)                            | 39.0<br>(-2.1 to 93.5)                              |
| Extensively drug-resistant tuberculosis                                              | < 0.05<br>(< 0.05 to < 0.05)           | < 0.05<br>(< 0.05 to < 0.05)               | < 0.05<br>(< 0.05 to < 0.05)           | 210.7<br>(118.3 to 331.6)                         | 199.0<br>(110.5 to 316.2)                           |
| Latent tuberculosis infection                                                        | 1,152.0<br>(1,027.2 to 1,285.3)        | --                                         | --                                     | --                                                | --                                                  |
| HIV/AIDS                                                                             | 9.3<br>(4.8 to 15.1)                   | 0.5 <sup>^</sup><br>(0.2 to 0.8)           | 0.8<br>(0.4 to 1.4)                    | 33.9<br>(11.0 to 54.5)                            | 20.7<br>(-3.3 to 40.5)                              |
| Drug-susceptible HIV/AIDS - Tuberculosis                                             | < 0.05<br>(< 0.05 to < 0.05)           | < 0.05<br>(< 0.05 to < 0.05)               | < 0.05<br>(< 0.05 to < 0.05)           | -21.5<br>(-27.2 to -15.1)                         | -29.5<br>(-34.6 to -23.8)                           |
| Multidrug-resistant HIV/AIDS - Tuberculosis without extensive drug resistance        | < 0.05<br>(< 0.05 to < 0.05)           | < 0.05<br>(< 0.05 to < 0.05)               | < 0.05<br>(< 0.05 to < 0.05)           | 12.9<br>(-19.3 to 55.9)                           | 1.3<br>(-27.7 to 40.1)                              |
| Extensively drug-resistant HIV/AIDS - Tuberculosis                                   | < 0.05<br>(< 0.05 to < 0.05)           | < 0.05<br>(< 0.05 to < 0.05)               | < 0.05<br>(< 0.05 to < 0.05)           | 142.8<br>(73.5 to 235.6)                          | 117.9<br>(55.6 to 201.6)                            |
| HIV/AIDS resulting in other diseases                                                 | 9.3<br>(4.8 to 15.1)                   | 0.5<br>(0.2 to 0.8)                        | 0.8<br>(0.4 to 1.4)                    | 34.5<br>(11.3 to 55.3)                            | 21.2<br>(-3.2 to 41.4)                              |
| <b>Diarrhoea, lower respiratory infections, and other common infectious diseases</b> | <b>599.7</b><br>(565.2 to 633.7)       | <b>39,153.8†</b><br>(35,143.7 to 43,483.5) | <b>18.7</b><br>(12.3 to 27.2)          | <b>8.4</b><br>(5.5 to 11.4)                       | <b>-1.5</b><br>(-4.3 to 1.2)                        |
| Diarrhoeal diseases                                                                  | 28.5<br>(26.6 to 30.6)                 | 1,910.1<br>(1,778.5 to 2,052.2)            | 3.2<br>(2.2 to 4.4)                    | 13.1<br>(6.8 to 19.8)                             | -2.6<br>(-8.5 to 4.3)                               |
| Intestinal infectious diseases                                                       | < 0.05<br>(< 0.05 to < 0.05)           | < 0.05†<br>(< 0.05 to 0.1)                 | < 0.05<br>(< 0.05 to < 0.05)           | 20.2<br>(-4.3 to 53.1)                            | 10.1<br>(-12.5 to 38.5)                             |
| Typhoid fever                                                                        | < 0.05<br>(< 0.05 to < 0.05)           | < 0.05<br>(< 0.05 to < 0.05)               | < 0.05<br>(< 0.05 to < 0.05)           | 26.8<br>(0.0 to 63.2)                             | 19.1<br>(-8.5 to 54.8)                              |
| Paratyphoid fever                                                                    | < 0.05<br>(< 0.05 to < 0.05)           | < 0.05<br>(< 0.05 to 0.1)                  | < 0.05<br>(< 0.05 to < 0.05)           | 18.6<br>(-9.5 to 60.3)                            | 7.7<br>(-17.1 to 42.2)                              |
| Other intestinal infectious diseases                                                 | --                                     | --                                         | < 0.05<br>(< 0.05 to < 0.05)           | -24.3<br>(-45.8 to 0.2)                           | -41.2<br>(-60.8 to -18.2)                           |
| Lower respiratory infections                                                         | 5.8<br>(5.4 to 6.3)                    | 259.2<br>(237.7 to 282.3)                  | 0.3<br>(0.2 to 0.5)                    | 2.3<br>(-8.0 to 14.1)                             | -9.0<br>(-18.8 to 1.5)                              |
| Upper respiratory infections                                                         | 474.8<br>(424.7 to 527.9)              | 36,442.2<br>(32,456.0 to 40,735.3)         | 11.7<br>(7.0 to 18.1)                  | 8.7<br>(4.4 to 13.1)                              | -0.1<br>(-3.8 to 3.5)                               |
| Otitis media                                                                         | 83.0<br>(74.3 to 91.0)                 | 386.6<br>(317.8 to 475.1)                  | 2.3<br>(1.4 to 3.4)                    | 5.5<br>(-1.2 to 12.8)                             | -3.3<br>(-9.8 to 3.4)                               |
| Meningitis                                                                           | 1.6<br>(1.3 to 1.9)                    | 0.3<br>(0.2 to 0.4)                        | 0.2<br>(0.1 to 0.3)                    | -0.8<br>(-5.8 to 15.4)                            | -10.2<br>(-13.6 to -3.9)                            |
| Pneumococcal meningitis                                                              | 0.4<br>(0.3 to 0.4)                    | < 0.05<br>(< 0.05 to < 0.05)               | < 0.05<br>(< 0.05 to 0.1)              | -11.6<br>(-17.9 to -6.3)                          | -19.4<br>(-25.1 to -14.5)                           |
| H influenzae type B meningitis                                                       | 0.2<br>(0.1 to 0.2)                    | < 0.05<br>(< 0.05 to < 0.05)               | < 0.05<br>(< 0.05 to < 0.05)           | 4.5<br>(0.7 to 8.2)                               | -4.3<br>(-8.2 to -0.7)                              |
| Meningococcal infection                                                              | 0.3<br>(0.2 to 0.5)                    | 0.1<br>(0.1 to 0.1)                        | < 0.05<br>(< 0.05 to 0.1)              | 7.3<br>(-7.4 to 105.0)                            | -7.6<br>(-16.1 to 26.5)                             |
| Other meningitis                                                                     | 0.8<br>(0.6 to 1.0)                    | 0.2<br>(0.2 to 0.2)                        | 0.1<br>(0.1 to 0.1)                    | 0.6<br>(-3.1 to 4.1)                              | -7.6<br>(-11.1 to -4.4)                             |
| Encephalitis                                                                         | 5.7<br>(3.6 to 8.7)                    | 4.1<br>(3.7 to 4.5)                        | 0.6<br>(0.4 to 0.8)                    | -6.0<br>(-10.1 to -1.6)                           | -15.3<br>(-18.9 to -11.6)                           |
| Diphtheria                                                                           | < 0.05<br>(< 0.05 to < 0.05)           | < 0.05<br>(< 0.05 to < 0.05)               | < 0.05<br>(< 0.05 to < 0.05)           | -12.3<br>(-46.1 to 46.0)                          | -17.8<br>(-47.8 to 30.4)                            |
| Whooping cough                                                                       | 0.3<br>(0.2 to 0.3)                    | 1.9<br>(1.4 to 2.5)                        | < 0.05<br>(< 0.05 to < 0.05)           | 0.5<br>(-28.8 to 41.4)                            | -11.1<br>(-37.4 to 26.0)                            |
| Tetanus                                                                              | < 0.05<br>(< 0.05 to < 0.05)           | < 0.05<br>(< 0.05 to < 0.05)               | < 0.05<br>(< 0.05 to < 0.05)           | -23.8<br>(-36.9 to -10.5)                         | -27.9<br>(-40.2 to -16.4)                           |
| Measles                                                                              | < 0.05<br>(< 0.05 to < 0.05)           | < 0.05<br>(< 0.05 to < 0.05)               | < 0.05<br>(< 0.05 to < 0.05)           | 96.5<br>(-3.4 to 438.8)                           | 72.8<br>(-15.0 to 373.9)                            |
| Varicella and herpes zoster                                                          | 9.1<br>(8.2 to 10.1)                   | 149.3<br>(144.2 to 154.7)                  | 0.4<br>(0.2 to 0.6)                    | 20.4<br>(6.6 to 35.8)                             | 10.9<br>(-1.8 to 24.5)                              |
| <b>Neglected tropical diseases and malaria</b>                                       | <b>2.4</b><br>(2.0 to 2.8)             | <b>&lt; 0.05†</b><br>(< 0.05 to < 0.05)    | <b>&lt; 0.05</b><br>(< 0.05 to < 0.05) | <b>-1.6</b><br>(-43.2 to 52.6)                    | <b>-10.2</b><br>(-49.5 to 51.4)                     |
| Malaria                                                                              | --                                     | --                                         | --                                     | --                                                | --                                                  |
| Chagas disease                                                                       | 2.2<br>(1.8 to 2.6)                    | --                                         | < 0.05<br>(< 0.05 to < 0.05)           | 5.7<br>(-6.5 to 18.5)                             | -2.7<br>(-13.3 to 8.6)                              |
| Leishmaniasis                                                                        | --                                     | --                                         | --                                     | --                                                | --                                                  |
| Visceral leishmaniasis                                                               | --                                     | --                                         | --                                     | --                                                | --                                                  |
| Cutaneous and mucocutaneous leishmaniasis                                            | --                                     | --                                         | --                                     | --                                                | --                                                  |
| African trypanosomiasis                                                              | --                                     | --                                         | --                                     | --                                                | --                                                  |
| Schistosomiasis                                                                      | --                                     | --                                         | --                                     | --                                                | --                                                  |
| Cysticercosis                                                                        | --                                     | --                                         | --                                     | --                                                | --                                                  |
| Cystic echinococcosis                                                                | < 0.05<br>(< 0.05 to 0.1)              | < 0.05<br>(< 0.05 to < 0.05)               | < 0.05<br>(< 0.05 to < 0.05)           | -33.9<br>(-95.4 to 744.8)                         | -39.3<br>(-96.0 to 658.7)                           |
| Lymphatic filariasis                                                                 | --                                     | --                                         | --                                     | --                                                | --                                                  |
| Onchocerciasis                                                                       | --                                     | --                                         | --                                     | --                                                | --                                                  |
| Trachoma                                                                             | --                                     | --                                         | --                                     | --                                                | --                                                  |
| Dengue                                                                               | --                                     | --                                         | --                                     | --                                                | --                                                  |
| Yellow fever                                                                         | --                                     | --                                         | --                                     | --                                                | --                                                  |
| Rabies                                                                               | < 0.05<br>(< 0.05 to < 0.05)           | < 0.05<br>(< 0.05 to < 0.05)               | < 0.05<br>(< 0.05 to < 0.05)           | 22.7<br>(0.3 to 49.4)                             | 2.1<br>(-17.7 to 24.9)                              |
| Intestinal nematode infections                                                       | --                                     | --                                         | --                                     | --                                                | --                                                  |
| Ascariasis                                                                           | --                                     | --                                         | --                                     | --                                                | --                                                  |

| Cause                                                                   | Prevalence in thousands (95% UI)              | Incidence in thousands (95% UI)                   | YLDs in thousands (95% UI)                  |                                                   |                                                     |
|-------------------------------------------------------------------------|-----------------------------------------------|---------------------------------------------------|---------------------------------------------|---------------------------------------------------|-----------------------------------------------------|
|                                                                         | 2016 counts                                   | 2016 counts                                       | 2016 counts                                 | Percentage change in counts between 2006 and 2016 | Percentage change in age-standardised rates between |
| Trichuriasis                                                            | --                                            | --                                                | --                                          | --                                                | --                                                  |
| Hookworm disease                                                        | --                                            | --                                                | --                                          | --                                                | --                                                  |
| Food-borne trematodiasis                                                | --                                            | --                                                | --                                          | --                                                | --                                                  |
| Leprosy                                                                 | --                                            | --                                                | --                                          | --                                                | --                                                  |
| Ebola virus disease                                                     | --                                            | --                                                | --                                          | --                                                | --                                                  |
| Zika virus disease                                                      | --                                            | --                                                | --                                          | --                                                | --                                                  |
| Guinea worm disease                                                     | --                                            | --                                                | --                                          | --                                                | --                                                  |
| Other neglected tropical diseases                                       | --                                            | --                                                | < 0.05<br>(< 0.05 to < 0.05)                | --                                                | --                                                  |
| <b>Maternal disorders</b>                                               | <b>6.0</b><br><b>(4.9 to 7.1)</b>             | <b>87.9†</b><br><b>(74.5 to 104.0)</b>            | <b>0.3</b><br><b>(0.2 to 0.5)</b>           | <b>14.5</b><br><b>(-15.5 to 54.1)</b>             | <b>3.3</b><br><b>(-24.4 to 38.7)</b>                |
| Maternal haemorrhage                                                    | 0.7<br>(0.5 to 1.0)                           | 4.9<br>(3.6 to 6.7)                               | < 0.05<br>(< 0.05 to < 0.05)                | -3.9<br>(-36.4 to 43.1)                           | -11.9<br>(-41.9 to 30.6)                            |
| Maternal sepsis and other pregnancy related infections                  | 2.6<br>(2.0 to 3.4)                           | 15.3<br>(12.6 to 18.6)                            | 0.1<br>(< 0.05 to 0.1)                      | 17.5<br>(-41.2 to 136.6)                          | 5.2<br>(-48.0 to 116.4)                             |
| Maternal hypertensive disorders                                         | 2.5<br>(1.6 to 3.5)                           | 10.3<br>(8.3 to 12.6)                             | 0.1<br>(0.1 to 0.2)                         | 25.7<br>(-24.8 to 122.9)                          | 13.3<br>(-32.2 to 100.4)                            |
| Maternal obstructed labour and uterine rupture                          | 0.1<br>(< 0.05 to 0.1)                        | 4.7<br>(3.3 to 6.5)                               | < 0.05<br>(< 0.05 to < 0.05)                | -5.9<br>(-49.3 to 70.8)                           | -14.0<br>(-53.7 to 55.5)                            |
| Maternal abortion, miscarriage, and ectopic pregnancy                   | 0.4<br>(0.3 to 0.6)                           | 52.7<br>(40.0 to 68.5)                            | < 0.05<br>(< 0.05 to 0.1)                   | 12.5<br>(-36.8 to 104.6)                          | 1.3<br>(-43.5 to 85.2)                              |
| Other maternal disorders                                                | --                                            | --                                                | < 0.05<br>(< 0.05 to 0.1)                   | 9.8<br>(-19.1 to 47.9)                            | -1.2<br>(-27.8 to 32.8)                             |
| <b>Neonatal disorders</b>                                               | <b>67.4</b><br><b>(57.9 to 78.1)</b>          | <b>11.7</b><br><b>--</b>                          | <b>8.2 to 16.4</b><br><b>(8.2 to 16.4)</b>  | <b>11.1</b><br><b>(-2.2 to 26.5)</b>              | <b>2.5</b><br><b>(-9.7 to 17.2)</b>                 |
| Neonatal preterm birth complications                                    | 55.4<br>(43.4 to 72.7)                        | --                                                | 5.6<br>(3.6 to 8.4)                         | 10.2<br>(-15.0 to 39.8)                           | 2.0<br>(-21.8 to 29.9)                              |
| Neonatal encephalopathy due to birth asphyxia and trauma                | 14.9<br>(10.5 to 20.7)                        | --                                                | 2.8<br>(1.7 to 4.3)                         | 16.1<br>(-3.1 to 30.6)                            | 7.7<br>(-9.8 to 21.5)                               |
| Neonatal sepsis and other neonatal infections                           | 6.9<br>(3.4 to 14.9)                          | --                                                | 2.8<br>(1.2 to 6.5)                         | 8.3<br>(-4.3 to 22.2)                             | -0.4<br>(-12.5 to 13.5)                             |
| Hemolytic disease and other neonatal jaundice                           | 0.7<br>(0.6 to 0.8)                           | --                                                | 0.2<br>(0.1 to 0.3)                         | 5.8<br>(-1.2 to 13.2)                             | -2.1<br>(-8.5 to 4.8)                               |
| Other neonatal disorders                                                | --                                            | --                                                | 0.2<br>(0.1 to 0.3)                         | 14.4<br>(-5.2 to 37.4)                            | 0.6<br>(-16.7 to 20.9)                              |
| <b>Nutritional deficiencies</b>                                         | <b>487.1</b><br><b>(452.4 to 520.8)</b>       | <b>76.7†</b><br><b>(61.9 to 94.5)</b>             | <b>6.1</b><br><b>(4.0 to 9.1)</b>           | <b>6.8</b><br><b>(-0.9 to 15.3)</b>               | <b>-3.5</b><br><b>(-12.1 to 5.4)</b>                |
| Protein-energy malnutrition                                             | 5.6<br>(5.5 to 5.7)                           | 3.8<br>(3.7 to 3.8)                               | 0.6<br>(0.4 to 0.9)                         | 13.3<br>(2.2 to 24.6)                             | -0.3<br>(-10.1 to 9.7)                              |
| Iodine deficiency                                                       | 112.1<br>(99.2 to 128.6)                      | 1.6<br>(1.4 to 1.8)                               | 2.8<br>(1.9 to 4.0)                         | 8.1<br>(0.2 to 17.1)                              | -0.3<br>(-8.2 to 8.5)                               |
| Vitamin A deficiency                                                    | 87.4<br>(68.5 to 108.7)                       | 71.4<br>(56.5 to 89.3)                            | --                                          | --                                                | --                                                  |
| Iron-deficiency anaemia                                                 | 281.9<br>(244.1 to 327.6)                     | --                                                | 2.6<br>(1.5 to 4.4)                         | 4.0<br>(-10.1 to 20.6)                            | -7.0<br>(-22.1 to 11.4)                             |
| Other nutritional deficiencies                                          | --                                            | --                                                | < 0.05<br>(< 0.05 to < 0.05)                | 13.1<br>(1.6 to 24.7)                             | -0.6<br>(-10.8 to 9.7)                              |
| <b>Other communicable, maternal, neonatal, and nutritional diseases</b> | <b>1,507.5</b><br><b>(1,413.9 to 1,620.6)</b> | <b>270.4</b><br><b>(248.3 to 295.6)</b>           | <b>1.4</b><br><b>(0.8 to 2.3)</b>           | <b>3.5</b><br><b>(-1.7 to 9.6)</b>                | <b>-5.4</b><br><b>(-10.7 to 0.8)</b>                |
| Sexually transmitted diseases excluding HIV                             | 1,330.6<br>(1,243.4 to 1,441.8)               | 255.0<br>(233.0 to 280.4)                         | 1.0<br>(0.6 to 1.7)                         | 0.9<br>(-6.2 to 8.5)                              | -8.6<br>(-15.2 to -0.9)                             |
| Syphilis                                                                | 3.3<br>(2.6 to 4.2)                           | 2.7<br>(1.9 to 3.6)                               | 0.1<br>(0.1 to 0.1)                         | 19.5<br>(7.6 to 35.3)                             | 4.9<br>(-5.2 to 18.6)                               |
| Chlamydial infection                                                    | 58.9<br>(50.2 to 69.2)                        | 38.0<br>(31.2 to 46.1)                            | 0.1<br>(0.1 to 0.3)                         | 6.7<br>(-5.8 to 20.9)                             | -4.7<br>(-16.0 to 8.4)                              |
| Gonococcal infection                                                    | 6.8<br>(4.7 to 10.0)                          | 15.8<br>(8.6 to 27.3)                             | < 0.05<br>(< 0.05 to 0.1)                   | -50.7<br>(-61.1 to -34.6)                         | -56.6<br>(-66.3 to -41.6)                           |
| Trichomoniasis                                                          | 152.5<br>(133.3 to 173.5)                     | 126.3<br>(109.6 to 145.1)                         | 0.1<br>(< 0.05 to 0.3)                      | 9.6<br>(2.0 to 17.7)                              | 0.9<br>(-6.1 to 8.5)                                |
| Genital herpes                                                          | 1,127.9<br>(986.5 to 1,298.5)                 | 44.9<br>(38.5 to 53.4)                            | 0.3<br>(0.1 to 0.6)                         | 10.9<br>(4.5 to 18.8)                             | 1.9<br>(-4.4 to 9.5)                                |
| Other sexually transmitted diseases                                     | 11.0<br>(9.6 to 12.3)                         | 27.4<br>(25.8 to 29.1)                            | 0.3<br>(0.2 to 0.5)                         | -5.2<br>(-18.7 to 12.6)                           | -10.5<br>(-23.4 to 5.9)                             |
| Hepatitis                                                               | 214.6<br>(188.4 to 246.4)                     | 15.4<br>(13.5 to 17.5)                            | < 0.05<br>(< 0.05 to < 0.05)                | -3.9<br>(-15.4 to 9.1)                            | -11.6<br>(-23.7 to 2.8)                             |
| Acute hepatitis A                                                       | 0.5<br>(0.4 to 0.6)                           | 6.7<br>(5.7 to 7.5)                               | < 0.05<br>(< 0.05 to < 0.05)                | -3.8<br>(-18.8 to 15.7)                           | -10.8<br>(-26.9 to 11.7)                            |
| Hepatitis B                                                             | 113.0<br>(89.8 to 142.9)                      | 7.1<br>(5.6 to 8.9)                               | < 0.05<br>(< 0.05 to < 0.05)                | -6.0<br>(-21.4 to 11.7)                           | -15.1<br>(-29.2 to 0.5)                             |
| Hepatitis C                                                             | 101.1<br>(89.9 to 112.9)                      | 1.1<br>(1.0 to 1.3)                               | < 0.05<br>(< 0.05 to < 0.05)                | 6.3<br>(4.9 to 7.6)                               | -3.8<br>(-4.6 to -3.1)                              |
| Acute hepatitis E                                                       | < 0.05<br>(< 0.05 to < 0.05)                  | 0.5<br>(0.4 to 0.6)                               | < 0.05<br>(< 0.05 to < 0.05)                | -0.3<br>(-5.5 to 5.4)                             | -10.4<br>(-15.1 to -5.1)                            |
| Other infectious diseases                                               | 9.2<br>(7.5 to 11.5)                          | < 0.05<br>(< 0.05 to < 0.05)                      | 0.4<br>(0.2 to 0.6)                         | 12.3<br>(4.6 to 20.7)                             | 3.5<br>(-6.1 to 13.9)                               |
| <b>Non-communicable diseases</b>                                        | <b>9,049.6</b><br><b>(9,012.4 to 9,080.6)</b> | <b>23,727.8†</b><br><b>(22,804.6 to 24,774.6)</b> | <b>1,168.2</b><br><b>(867.2 to 1,506.1)</b> | <b>10.2</b><br><b>(9.0 to 11.6)</b>               | <b>0.3</b><br><b>(-0.8 to 1.6)</b>                  |
| <b>Neoplasms</b>                                                        | <b>203.1</b><br><b>(195.0 to 215.7)</b>       | <b>63.8</b><br><b>(60.2 to 67.0)</b>              | <b>19.9</b><br><b>(14.7 to 25.8)</b>        | <b>12.8</b><br><b>(8.2 to 18.4)</b>               | <b>-2.7</b><br><b>(-6.8 to 2.2)</b>                 |
| Lip and oral cavity cancer                                              | 1.9<br>(1.7 to 2.0)                           | 0.5<br>(0.5 to 0.5)                               | 0.2<br>(0.1 to 0.2)                         | 15.0<br>(2.8 to 28.2)                             | -0.3<br>(-10.1 to 10.4)                             |
| Nasopharynx cancer                                                      | 0.2<br>(0.2 to 0.3)                           | 0.1<br>(0.1 to 0.1)                               | < 0.05<br>(< 0.05 to < 0.05)                | 12.7<br>(1.7 to 25.7)                             | -0.5<br>(-9.7 to 10.1)                              |
| Other pharynx cancer                                                    | 1.0<br>(0.9 to 1.1)                           | 0.3<br>(0.2 to 0.3)                               | 0.1<br>(0.1 to 0.1)                         | 20.0<br>(6.7 to 35.4)                             | 4.1<br>(-7.5 to 17.0)                               |
| Oesophageal cancer                                                      | 0.6<br>(0.6 to 0.7)                           | 0.5<br>(0.5 to 0.6)                               | 0.1<br>(0.1 to 0.2)                         | 6.8<br>(-10.7 to 26.4)                            | -8.4<br>(-22.8 to 8.1)                              |
| Stomach cancer                                                          | 2.3<br>(2.1 to 2.5)                           | 1.2<br>(1.1 to 1.3)                               | 0.3<br>(0.2 to 0.4)                         | 4.2<br>(-8.4 to 20.1)                             | -9.6<br>(-20.4 to 3.5)                              |
| Colon and rectum cancer                                                 | 28.4<br>(26.6 to 30.5)                        | 7.5<br>(7.0 to 8.0)                               | 2.6<br>(1.9 to 3.4)                         | 12.2<br>(3.1 to 22.3)                             | -3.7<br>(-11.9 to 5.4)                              |
| Liver cancer                                                            | 0.5<br>(0.5 to 0.6)                           | 0.7<br>(0.7 to 0.8)                               | 0.2<br>(0.1 to 0.2)                         | 28.5<br>(17.2 to 40.8)                            | 12.3<br>(2.1 to 23.2)                               |
| Liver cancer due to hepatitis B                                         | < 0.05<br>(< 0.05 to 0.1)                     | < 0.05<br>(< 0.05 to 0.1)                         | < 0.05<br>(< 0.05 to < 0.05)                | 30.3<br>(14.6 to 44.9)                            | 14.2<br>(1.1 to 28.1)                               |



| Cause                                              | Prevalence in thousands (95% UI)              | Incidence in thousands (95% UI)          | YLDs in thousands (95% UI)            |                                                   |                                                     |
|----------------------------------------------------|-----------------------------------------------|------------------------------------------|---------------------------------------|---------------------------------------------------|-----------------------------------------------------|
|                                                    | 2016 counts                                   | 2016 counts                              | 2016 counts                           | Percentage change in counts between 2006 and 2016 | Percentage change in age-standardised rates between |
| Liver cancer due to hepatitis C                    | 0.1<br>(0.1 to 0.1)                           | 0.1<br>(0.1 to 0.1)                      | < 0.05<br>(< 0.05 to < 0.05)          | 27.8<br>(15.9 to 41.2)                            | 11.9<br>(1.5 to 24.0)                               |
| Liver cancer due to alcohol use                    | 0.2<br>(0.2 to 0.3)                           | 0.2<br>(0.2 to 0.2)                      | < 0.05<br>(< 0.05 to 0.1)             | 28.4<br>(16.3 to 43.5)                            | 11.6<br>(0.8 to 24.9)                               |
| Liver cancer due to other causes                   | 0.5<br>(0.4 to 0.5)                           | 0.4<br>(0.4 to 0.5)                      | 0.1<br>(0.1 to 0.1)                   | 28.5<br>(16.5 to 43.0)                            | 12.5<br>(1.7 to 25.0)                               |
| Gallbladder and biliary tract cancer               | 0.4<br>(0.4 to 0.5)                           | 0.5<br>(0.5 to 0.6)                      | 0.1<br>(0.1 to 0.2)                   | 4.4<br>(-5.8 to 15.5)                             | -11.1<br>(-18.7 to -2.6)                            |
| Pancreatic cancer                                  | 1.2<br>(1.1 to 1.2)                           | 1.6<br>(1.5 to 1.7)                      | 0.3<br>(0.2 to 0.4)                   | 25.1<br>(9.6 to 43.8)                             | 6.0<br>(-6.4 to 20.7)                               |
| Larynx cancer                                      | 1.0<br>(0.8 to 1.1)                           | 0.2<br>(0.2 to 0.3)                      | 0.1<br>(0.1 to 0.1)                   | 4.5<br>(-9.6 to 21.1)                             | -9.8<br>(-21.8 to 3.9)                              |
| Tracheal, bronchus, and lung cancer                | 5.8<br>(5.4 to 6.3)                           | 4.1<br>(3.9 to 4.4)                      | 1.0<br>(0.7 to 1.2)                   | 10.9<br>(-3.6 to 26.0)                            | -7.2<br>(-19.7 to 5.6)                              |
| Malignant skin melanoma                            | 16.4<br>(12.9 to 18.3)                        | 3.4<br>(2.7 to 3.7)                      | 1.1<br>(0.7 to 1.4)                   | 22.3<br>(10.9 to 36.2)                            | 7.8<br>(-1.9 to 19.2)                               |
| Non-melanoma skin cancer                           | 3.2<br>(2.0 to 4.9)                           | 6.3<br>(5.2 to 8.5)                      | 0.1<br>(0.1 to 0.2)                   | -45.2<br>(-62.0 to -3.4)                          | -51.3<br>(-67.0 to -16.4)                           |
| Non-melanoma skin cancer (squamous-cell carcinoma) | 2.6<br>(1.4 to 4.8)                           | 2.3<br>(1.4 to 4.4)                      | 0.1<br>(0.1 to 0.2)                   | -46.1<br>(-63.0 to -3.8)                          | -52.1<br>(-67.6 to -16.9)                           |
| Non-melanoma skin cancer (basal-cell carcinoma)    | 0.3<br>(0.2 to 0.5)                           | 4.0<br>(3.5 to 4.5)                      | < 0.05<br>(< 0.05 to < 0.05)          | 25.8<br>(-3.5 to 66.1)                            | 8.6<br>(-15.5 to 41.5)                              |
| Breast cancer                                      | 36.9<br>(33.8 to 42.7)                        | 7.5<br>(6.9 to 8.8)                      | 3.4<br>(2.4 to 4.5)                   | 6.0<br>(-4.2 to 21.6)                             | -6.7<br>(-15.6 to 6.9)                              |
| Cervical cancer                                    | 2.2<br>(2.0 to 2.5)                           | 0.6<br>(0.5 to 0.6)                      | 0.2<br>(0.1 to 0.3)                   | 0.9<br>(-12.8 to 16.4)                            | -6.8<br>(-20.8 to 10.1)                             |
| Uterine cancer                                     | 8.6<br>(7.7 to 9.7)                           | 1.8<br>(1.6 to 2.1)                      | 0.6<br>(0.5 to 0.9)                   | 16.3<br>(-0.9 to 35.8)                            | 1.0<br>(-14.0 to 18.7)                              |
| Ovarian cancer                                     | 3.1<br>(2.5 to 3.9)                           | 1.0<br>(0.8 to 1.3)                      | 0.5<br>(0.3 to 0.6)                   | 6.5<br>(-21.8 to 43.9)                            | -7.4<br>(-32.4 to 25.4)                             |
| Prostate cancer                                    | 51.9<br>(38.4 to 59.9)                        | 12.8<br>(10.0 to 14.4)                   | 4.5<br>(3.0 to 6.0)                   | 17.3<br>(3.7 to 38.2)                             | -1.9<br>(-13.7 to 16.9)                             |
| Testicular cancer                                  | 1.7<br>(1.4 to 1.9)                           | 0.3<br>(0.3 to 0.4)                      | 0.1<br>(0.1 to 0.2)                   | 14.0<br>(-8.3 to 39.6)                            | 4.2<br>(-17.1 to 29.3)                              |
| Kidney cancer                                      | 3.5<br>(3.2 to 3.8)                           | 1.1<br>(1.0 to 1.2)                      | 0.4<br>(0.2 to 0.5)                   | 6.4<br>(-5.8 to 20.7)                             | -7.8<br>(-18.3 to 5.0)                              |
| Bladder cancer                                     | 9.1<br>(8.4 to 9.8)                           | 2.2<br>(2.0 to 2.4)                      | 0.8<br>(0.6 to 1.1)                   | 9.6<br>(-1.3 to 22.5)                             | -6.7<br>(-16.7 to 4.5)                              |
| Brain and nervous system cancer                    | 4.2<br>(3.5 to 5.0)                           | 1.6<br>(1.3 to 1.9)                      | 0.5<br>(0.4 to 0.7)                   | 10.9<br>(-5.8 to 32.8)                            | 0.0<br>(-14.3 to 19.1)                              |
| Thyroid cancer                                     | 2.1<br>(2.0 to 2.3)                           | 0.4<br>(0.4 to 0.5)                      | 0.1<br>(0.1 to 0.2)                   | 15.3<br>(-0.4 to 32.2)                            | 2.8<br>(-11.4 to 18.3)                              |
| Mesothelioma                                       | 0.3<br>(0.3 to 0.4)                           | 0.2<br>(0.2 to 0.2)                      | 0.1<br>(< 0.05 to 0.1)                | 20.0<br>(8.7 to 31.6)                             | 0.4<br>(-9.2 to 10.5)                               |
| Hodgkin lymphoma                                   | 1.0<br>(0.9 to 1.2)                           | 0.2<br>(0.2 to 0.3)                      | 0.1<br>(0.1 to 0.1)                   | 17.7<br>(0.6 to 39.3)                             | 7.6<br>(-9.8 to 30.4)                               |
| Non-Hodgkin's lymphoma                             | 8.0<br>(7.2 to 9.0)                           | 2.0<br>(1.8 to 2.3)                      | 0.6<br>(0.5 to 0.9)                   | 22.4<br>(8.9 to 38.6)                             | 5.9<br>(-5.6 to 19.6)                               |
| Multiple myeloma                                   | 2.0<br>(1.4 to 2.3)                           | 0.7<br>(0.5 to 0.8)                      | 0.4<br>(0.2 to 0.5)                   | 16.7<br>(-4.1 to 43.1)                            | 0.2<br>(-17.3 to 23.0)                              |
| Leukaemia                                          | 4.7<br>(4.3 to 5.1)                           | 1.4<br>(1.3 to 1.5)                      | 0.6<br>(0.4 to 0.8)                   | 22.7<br>(10.9 to 36.8)                            | 5.8<br>(-4.2 to 17.9)                               |
| Acute lymphoid leukaemia                           | 0.5<br>(0.4 to 0.6)                           | 0.1<br>(0.1 to 0.1)                      | 0.1<br>(< 0.05 to 0.1)                | 35.7<br>(9.2 to 67.9)                             | 23.7<br>(-5.0 to 59.7)                              |
| Chronic lymphoid leukaemia                         | 2.5<br>(2.1 to 2.7)                           | 0.6<br>(0.5 to 0.6)                      | 0.3<br>(0.2 to 0.4)                   | 25.1<br>(6.5 to 46.9)                             | 4.8<br>(-10.1 to 22.5)                              |
| Acute myeloid leukaemia                            | 0.6<br>(0.5 to 0.6)                           | 0.4<br>(0.4 to 0.4)                      | 0.1<br>(0.1 to 0.1)                   | 15.6<br>(3.3 to 28.4)                             | -0.5<br>(-11.2 to 11.1)                             |
| Chronic myeloid leukaemia                          | 0.2<br>(0.2 to 0.2)                           | 0.1<br>(0.1 to 0.1)                      | < 0.05<br>(< 0.05 to < 0.05)          | -4.8<br>(-18.4 to 10.6)                           | -19.6<br>(-30.0 to -7.9)                            |
| Other leukaemia                                    | 1.0<br>(0.8 to 1.1)                           | 0.2<br>(0.2 to 0.3)                      | 0.1<br>(0.1 to 0.2)                   | 25.6<br>(6.2 to 48.0)                             | 5.1<br>(-9.1 to 21.1)                               |
| Other neoplasms                                    | 10.9<br>(9.4 to 12.5)                         | 2.9<br>(2.5 to 3.3)                      | 0.8<br>(0.6 to 1.1)                   | 22.0<br>(4.8 to 40.1)                             | 5.3<br>(-8.6 to 20.2)                               |
| <b>Cardiovascular diseases</b>                     | <b>1,337.2</b><br><b>(1,298.5 to 1,376.3)</b> | <b>142.2†</b><br><b>(135.6 to 149.6)</b> | <b>91.3</b><br><b>(66.7 to 119.2)</b> | <b>13.5</b><br><b>(9.8 to 17.6)</b>               | <b>0.8</b><br><b>(-2.3 to 4.4)</b>                  |
| Rheumatic heart disease                            | 0.8<br>(0.7 to 0.9)                           | 0.4<br>(0.3 to 0.4)                      | 0.1<br>(< 0.05 to 0.1)                | 12.6<br>(-2.8 to 29.5)                            | 0.3<br>(-10.2 to 11.8)                              |
| Ischaemic heart disease                            | 441.7<br>(426.8 to 456.1)                     | 49.9<br>(48.2 to 51.8)                   | 24.1<br>(17.1 to 32.3)                | 15.9<br>(11.5 to 20.6)                            | 2.1<br>(-1.6 to 6.0)                                |
| Cerebrovascular disease                            | 165.2<br>(154.5 to 174.2)                     | 24.8‡<br>(22.7 to 27.0)                  | 26.1<br>(18.4 to 33.3)                | 3.4<br>(-4.2 to 12.8)                             | -6.3<br>(-12.8 to 1.1)                              |
| Ischaemic stroke                                   | 137.6<br>(120.8 to 154.0)                     | 17.4‡<br>(15.3 to 19.4)                  | 21.0<br>(14.8 to 27.2)                | 0.3<br>(-8.3 to 11.0)                             | -9.0<br>(-16.5 to 0.2)                              |
| Hemorrhagic stroke                                 | 34.3<br>(30.2 to 38.6)                        | 7.5‡<br>(6.6 to 8.3)                     | 5.1<br>(3.8 to 6.6)                   | 18.1<br>(6.6 to 30.9)                             | 5.6<br>(-4.5 to 16.6)                               |
| Hypertensive heart disease                         | 19.4<br>(16.1 to 23.2)                        | --                                       | 1.5<br>(1.0 to 2.1)                   | 14.1<br>(2.8 to 26.7)                             | 3.5<br>(-6.3 to 14.7)                               |
| Cardiomyopathy and myocarditis                     | 23.5<br>(21.2 to 26.2)                        | 8.0†<br>(7.1 to 8.9)                     | 1.9<br>(1.3 to 2.8)                   | 20.9<br>(11.1 to 32.3)                            | 8.0<br>(-0.8 to 18.0)                               |
| Myocarditis                                        | 5.4<br>(4.8 to 5.9)                           | 8.0<br>(7.1 to 8.9)                      | 0.4<br>(0.3 to 0.5)                   | 16.4<br>(3.1 to 32.7)                             | 4.2<br>(-7.2 to 18.3)                               |
| Alcoholic cardiomyopathy                           | 5.3<br>(4.4 to 6.4)                           | --                                       | 0.4<br>(0.3 to 0.6)                   | 34.1<br>(13.5 to 59.2)                            | 18.9<br>(0.3 to 42.0)                               |
| Other cardiomyopathy                               | 14.0<br>(11.8 to 16.4)                        | --                                       | 1.1<br>(0.8 to 1.6)                   | 17.9<br>(6.1 to 30.6)                             | 5.6<br>(-4.9 to 17.7)                               |
| Atrial fibrillation and flutter                    | 223.7<br>(205.5 to 244.8)                     | 18.4<br>(16.6 to 20.6)                   | 17.4<br>(11.9 to 23.7)                | 18.0<br>(12.5 to 23.6)                            | 2.6<br>(-2.2 to 7.7)                                |
| Peripheral vascular disease                        | 464.5<br>(408.2 to 530.0)                     | 38.3<br>(32.8 to 45.1)                   | 1.9<br>(0.9 to 3.6)                   | 9.6<br>(3.5 to 16.1)                              | -5.8<br>(-10.9 to -0.7)                             |
| Endocarditis                                       | 1.5<br>(1.3 to 1.8)                           | 2.5<br>(2.3 to 2.8)                      | 0.1<br>(0.1 to 0.2)                   | 13.4<br>(-4.1 to 34.9)                            | 2.7<br>(-11.5 to 19.6)                              |
| Other cardiovascular and circulatory diseases      | 354.4<br>(300.7 to 414.8)                     | --                                       | 18.2<br>(12.3 to 25.7)                | 22.5<br>(14.2 to 31.6)                            | 8.1<br>(1.3 to 15.4)                                |
| <b>Chronic respiratory diseases</b>                | <b>1,368.0</b><br><b>(1,335.7 to 1,402.6)</b> | <b>111.6†</b><br><b>(107.5 to 116.2)</b> | <b>57.8</b><br><b>(44.5 to 72.8)</b>  | <b>14.3</b><br><b>(9.2 to 19.7)</b>               | <b>5.8</b><br><b>(1.3 to 10.2)</b>                  |
| Chronic obstructive pulmonary disease              | 666.4<br>(642.5 to 689.4)                     | 36.6<br>(34.8 to 38.3)                   | 25.7<br>(21.2 to 30.2)                | 12.5<br>(2.9 to 22.5)                             | -0.3<br>(-8.6 to 8.6)                               |
| Pneumoconiosis                                     | 0.2<br>(0.1 to 0.2)                           | < 0.05<br>(< 0.05 to < 0.05)             | < 0.05<br>(< 0.05 to < 0.05)          | -3.9<br>(-9.3 to 1.6)                             | -18.8<br>(-23.1 to -14.6)                           |
| Silicosis                                          | 0.1<br>(0.1 to 0.1)                           | < 0.05<br>(< 0.05 to < 0.05)             | < 0.05<br>(< 0.05 to < 0.05)          | 22.7<br>(15.2 to 30.7)                            | 0.3<br>(-5.5 to 6.3)                                |

| Cause                                                          | Prevalence in thousands (95% UI)              | Incidence in thousands (95% UI)               | YLDs in thousands (95% UI)              |                                                   |                                                     |
|----------------------------------------------------------------|-----------------------------------------------|-----------------------------------------------|-----------------------------------------|---------------------------------------------------|-----------------------------------------------------|
|                                                                | 2016 counts                                   | 2016 counts                                   | 2016 counts                             | Percentage change in counts between 2006 and 2016 | Percentage change in age-standardised rates between |
| Asbestosis                                                     | 0.1<br>(0.1 to 0.1)                           | < 0.05<br>(< 0.05 to < 0.05)                  | < 0.05<br>(< 0.05 to < 0.05)            | -12.3<br>(-19.7 to -4.2)                          | -25.6<br>(-31.7 to -18.3)                           |
| Coal workers pneumoconiosis                                    | < 0.05<br>(< 0.05 to < 0.05)                  | < 0.05<br>(< 0.05 to < 0.05)                  | < 0.05<br>(< 0.05 to < 0.05)            | -16.7<br>(-32.8 to 3.4)                           | -27.5<br>(-42.6 to -9.4)                            |
| Other pneumoconiosis                                           | < 0.05<br>(< 0.05 to < 0.05)                  | < 0.05<br>(< 0.05 to < 0.05)                  | < 0.05<br>(< 0.05 to < 0.05)            | -32.4<br>(-42.1 to -22.9)                         | -39.7<br>(-47.3 to -31.7)                           |
| Asthma                                                         | 788.8<br>(741.2 to 841.0)                     | 74.1<br>(70.2 to 78.4)                        | 30.5<br>(20.3 to 43.2)                  | 15.4<br>(10.7 to 20.8)                            | 8.9<br>(4.3 to 14.1)                                |
| Interstitial lung disease and pulmonary sarcoidosis            | 7.5<br>(6.7 to 8.4)                           | 0.9<br>(0.8 to 1.0)                           | 0.8<br>(0.5 to 1.2)                     | 12.5<br>(0.7 to 25.7)                             | -1.5<br>(-10.6 to 8.5)                              |
| Other chronic respiratory diseases                             | --                                            | --                                            | 0.8<br>(0.7 to 0.9)                     | 43.4<br>(27.2 to 59.9)                            | 35.5<br>(17.7 to 54.9)                              |
| <b>Cirrhosis and other chronic liver diseases</b>              | <b>73.4</b><br><b>(69.2 to 77.3)</b>          | <b>1.4</b><br><b>(1.3 to 1.4)</b>             | <b>1.6</b><br><b>(1.1 to 2.2)</b>       | <b>18.8</b><br><b>(8.7 to 28.8)</b>               | <b>7.0</b><br><b>(-2.4 to 16.9)</b>                 |
| Cirrhosis and other chronic liver diseases due to hepatitis B  | 7.9<br>(7.0 to 9.0)                           | 0.1<br>(0.1 to 0.2)                           | 0.2<br>(0.1 to 0.2)                     | 20.0<br>(-4.0 to 53.7)                            | 8.2<br>(-13.3 to 37.0)                              |
| Cirrhosis and other chronic liver diseases due to hepatitis C  | 9.7<br>(7.9 to 11.9)                          | 0.2<br>(0.1 to 0.2)                           | 0.2<br>(0.1 to 0.3)                     | 21.1<br>(-4.0 to 51.5)                            | 9.8<br>(-12.7 to 36.7)                              |
| Cirrhosis and other chronic liver diseases due to alcohol use  | 35.1<br>(32.6 to 38.0)                        | 0.7<br>(0.6 to 0.7)                           | 0.7<br>(0.5 to 1.0)                     | 20.9<br>(5.2 to 38.4)                             | 9.5<br>(-5.1 to 26.7)                               |
| Cirrhosis and other chronic liver diseases due to other causes | 20.6<br>(18.7 to 22.6)                        | 0.4<br>(0.4 to 0.4)                           | 0.6<br>(0.4 to 0.8)                     | 15.3<br>(-0.4 to 33.0)                            | 4.0<br>(-11.2 to 21.4)                              |
| <b>Digestive diseases</b>                                      | <b>240.8</b><br><b>(231.7 to 250.2)</b>       | <b>313.9†</b><br><b>(293.2 to 334.8)</b>      | <b>6.9</b><br><b>(5.0 to 9.2)</b>       | <b>4.2</b><br><b>(-1.1 to 9.6)</b>                | <b>-6.0</b><br><b>(-11.3 to -0.5)</b>               |
| Peptic ulcer disease                                           | 64.1<br>(58.5 to 70.6)                        | 18.9<br>(17.1 to 20.9)                        | 0.5<br>(0.3 to 0.7)                     | 7.0<br>(-6.4 to 23.5)                             | -1.6<br>(-15.7 to 16.6)                             |
| Gastritis and duodenitis                                       | 74.3<br>(65.1 to 84.2)                        | 58.1<br>(51.0 to 66.2)                        | 0.4<br>(0.3 to 0.7)                     | 17.1<br>(3.9 to 33.0)                             | 4.1<br>(-7.8 to 19.4)                               |
| Appendicitis                                                   | 0.6<br>(0.6 to 0.6)                           | 15.4<br>(14.3 to 16.7)                        | 0.2<br>(0.1 to 0.3)                     | 3.8<br>(-17.7 to 29.4)                            | -1.9<br>(-25.0 to 27.4)                             |
| Paralytic ileus and intestinal obstruction                     | 0.2<br>(0.2 to 0.3)                           | 6.7<br>(6.1 to 7.5)                           | 0.1<br>(0.1 to 0.1)                     | 5.0<br>(-0.2 to 10.7)                             | -6.7<br>(-9.7 to -3.5)                              |
| Inguinal, femoral, and abdominal hernia                        | 44.6<br>(40.4 to 49.2)                        | 118.5<br>(102.5 to 132.8)                     | 3.0<br>(2.1 to 4.2)                     | 8.0<br>(-1.4 to 17.7)                             | -2.3<br>(-11.0 to 7.0)                              |
| Inflammatory bowel disease                                     | 10.8<br>(9.8 to 11.7)                         | 3.0<br>(2.7 to 3.2)                           | 1.6<br>(1.1 to 2.2)                     | -7.6<br>(-16.4 to 1.9)                            | -15.8<br>(-23.8 to -6.9)                            |
| Vascular intestinal disorders                                  | 0.3<br>(0.3 to 0.4)                           | 1.4<br>(1.2 to 1.6)                           | 0.1<br>(0.1 to 0.1)                     | 22.3<br>(-4.9 to 57.6)                            | 7.5<br>(-12.3 to 31.9)                              |
| Gallbladder and biliary diseases                               | 53.4<br>(50.5 to 56.2)                        | 84.6<br>(74.0 to 95.8)                        | 0.4<br>(0.3 to 0.6)                     | 2.1<br>(-13.2 to 20.0)                            | -8.4<br>(-22.1 to 7.5)                              |
| Pancreatitis                                                   | 0.8<br>(0.7 to 0.9)                           | 7.2<br>(6.4 to 8.0)                           | 0.1<br>(0.1 to 0.1)                     | 8.6<br>(4.5 to 13.0)                              | -3.4<br>(-6.2 to -0.4)                              |
| Other digestive diseases                                       | --                                            | --                                            | 0.6<br>(0.4 to 0.7)                     | 7.9<br>(2.4 to 13.6)                              | -3.8<br>(-9.6 to 2.0)                               |
| <b>Neurological disorders</b>                                  | <b>3,530.8</b><br><b>(3,410.0 to 3,670.9)</b> | <b>1,476.9</b><br><b>(1,263.8 to 1,712.8)</b> | <b>112.2</b><br><b>(77.7 to 150.6)</b>  | <b>6.1</b><br><b>(-0.9 to 13.8)</b>               | <b>-1.3</b><br><b>(-8.7 to 7.0)</b>                 |
| Alzheimer's disease and other dementias                        | 142.7<br>(121.2 to 169.4)                     | 27.8<br>(23.1 to 33.6)                        | 21.6<br>(15.0 to 28.8)                  | 6.9<br>(2.8 to 11.3)                              | -3.7<br>(-7.5 to -0.2)                              |
| Parkinson's disease                                            | 19.8<br>(15.5 to 24.6)                        | 2.4<br>(1.9 to 3.0)                           | 2.3<br>(1.4 to 3.2)                     | -12.7<br>(-19.7 to -5.0)                          | -23.6<br>(-29.8 to -16.7)                           |
| Epilepsy                                                       | 22.0<br>(8.7 to 35.7)                         | 1.9<br>(0.8 to 3.0)                           | 5.0<br>(1.4 to 10.8)                    | 5.0<br>(-73.7 to 309.6)                           | -4.2<br>(-75.9 to 277.2)                            |
| Multiple sclerosis                                             | 20.3<br>(18.6 to 21.9)                        | 0.5<br>(0.4 to 0.5)                           | 5.2<br>(3.7 to 6.6)                     | 12.5<br>(3.3 to 22.2)                             | 3.1<br>(-5.8 to 12.7)                               |
| Motor neuron disease                                           | 2.1<br>(1.9 to 2.4)                           | 0.4<br>(0.4 to 0.4)                           | 0.5<br>(0.3 to 0.6)                     | 17.0<br>(11.3 to 22.8)                            | 5.4<br>(0.6 to 9.9)                                 |
| Migraine                                                       | 1,487.4<br>(1,431.5 to 1,543.2)               | 137.8<br>(132.2 to 143.3)                     | 65.3<br>(42.4 to 90.8)                  | 5.8<br>(3.1 to 8.6)                               | -1.0<br>(-3.4 to 1.8)                               |
| Tension-type headache                                          | 2,422.7<br>(2,155.6 to 2,715.0)               | 1,306.1<br>(1,095.5 to 1,542.0)               | 10.6<br>(6.7 to 15.2)                   | 7.1<br>(3.3 to 11.1)                              | -0.1<br>(-3.6 to 3.8)                               |
| Other neurological disorders                                   | < 0.05<br>(< 0.05 to 0.1)                     | 0.1<br>(0.1 to 0.1)                           | 1.8<br>(1.1 to 2.8)                     | 19.1<br>(-29.3 to 105.6)                          | 13.4<br>(-39.6 to 118.0)                            |
| <b>Mental and substance use disorders</b>                      | <b>1,697.1</b><br><b>(1,660.8 to 1,737.7)</b> | <b>723.3†</b><br><b>(677.3 to 773.5)</b>      | <b>250.2</b><br><b>(181.4 to 324.0)</b> | <b>7.9</b><br><b>(5.8 to 9.8)</b>                 | <b>0.1</b><br><b>(-1.8 to 1.9)</b>                  |
| Schizophrenia                                                  | 31.3<br>(28.4 to 34.3)                        | 1.4<br>(1.2 to 1.5)                           | 19.7<br>(14.9 to 24.2)                  | 7.8<br>(1.3 to 14.7)                              | -0.5<br>(-6.6 to 6.0)                               |
| Alcohol use disorders                                          | 146.8<br>(128.4 to 166.3)                     | 56.7<br>(48.2 to 64.6)                        | 14.6<br>(10.0 to 20.1)                  | 2.9<br>(-5.0 to 10.7)                             | -5.8<br>(-12.8 to 1.4)                              |
| Drug use disorders                                             | 73.6<br>(69.1 to 78.3)                        | 9.2<br>(8.5 to 10.0)                          | 16.8<br>(12.2 to 21.7)                  | 24.0<br>(15.7 to 32.4)                            | 13.4<br>(5.4 to 21.6)                               |
| Opioid use disorders                                           | 26.6<br>(23.9 to 29.8)                        | 3.0<br>(2.7 to 3.5)                           | 10.9<br>(7.8 to 14.3)                   | 21.6<br>(10.9 to 31.5)                            | 9.7<br>(0.5 to 19.2)                                |
| Cocaine use disorders                                          | 3.5<br>(3.0 to 3.9)                           | 0.3<br>(0.2 to 0.3)                           | 0.5<br>(0.3 to 0.7)                     | 13.2<br>(-6.4 to 37.4)                            | 4.9<br>(-16.3 to 32.3)                              |
| Amphetamine use disorders                                      | 15.1<br>(11.0 to 20.6)                        | 1.1<br>(0.8 to 1.5)                           | 2.0<br>(1.1 to 3.2)                     | 40.1<br>(17.5 to 63.4)                            | 30.4<br>(9.1 to 52.9)                               |
| Cannabis use disorders                                         | 19.8<br>(16.4 to 23.9)                        | 3.2<br>(2.7 to 3.8)                           | 0.6<br>(0.4 to 0.9)                     | 25.4<br>(8.4 to 46.0)                             | 16.7<br>(-0.5 to 38.2)                              |
| Other drug use disorders                                       | 11.1<br>(10.2 to 12.1)                        | 1.6<br>(1.4 to 1.7)                           | 2.8<br>(1.9 to 4.0)                     | 24.9<br>(8.4 to 43.9)                             | 16.4<br>(0.3 to 35.2)                               |
| Depressive disorders                                           | 502.1<br>(478.7 to 526.7)                     | 546.9<br>(502.1 to 594.6)                     | 85.5<br>(59.1 to 115.7)                 | 6.4<br>(2.6 to 10.6)                              | -1.9<br>(-5.5 to 2.2)                               |
| Major depressive disorder                                      | 344.1<br>(318.1 to 372.5)                     | 523.3<br>(479.2 to 570.4)                     | 69.4<br>(47.8 to 94.5)                  | 5.8<br>(1.1 to 11.2)                              | -2.3<br>(-6.6 to 2.7)                               |
| Dysthymia                                                      | 169.4<br>(148.8 to 193.7)                     | 23.6<br>(20.9 to 27.0)                        | 16.1<br>(10.8 to 23.3)                  | 9.1<br>(6.4 to 11.9)                              | -0.0<br>(-2.7 to 2.5)                               |
| Bipolar disorder                                               | 97.2<br>(85.4 to 111.7)                       | 5.8<br>(5.1 to 6.6)                           | 19.6<br>(12.3 to 29.0)                  | 7.6<br>(3.5 to 11.6)                              | -0.0<br>(-3.9 to 4.2)                               |
| Anxiety disorders                                              | 504.3<br>(472.1 to 539.7)                     | 64.3<br>(60.2 to 68.6)                        | 47.9<br>(33.7 to 64.7)                  | 7.2<br>(2.5 to 11.9)                              | -0.1<br>(-4.7 to 4.4)                               |
| Eating disorders                                               | 33.4<br>(28.5 to 39.1)                        | 13.3<br>(10.0 to 17.7)                        | 6.9<br>(4.5 to 9.8)                     | 12.2<br>(3.4 to 22.2)                             | 6.1<br>(-2.0 to 15.5)                               |
| Anorexia nervosa                                               | 9.2<br>(6.7 to 12.2)                          | 1.7<br>(1.2 to 2.2)                           | 1.9<br>(1.2 to 2.9)                     | 16.2<br>(1.9 to 31.5)                             | 8.7<br>(-4.6 to 23.3)                               |
| Bulimia nervosa                                                | 23.6<br>(18.1 to 30.8)                        | 11.7<br>(8.3 to 15.9)                         | 5.0<br>(3.1 to 7.4)                     | 10.8<br>(-0.3 to 22.7)                            | 5.1<br>(-4.5 to 15.8)                               |
| Autistic spectrum disorders                                    | 91.0<br>(84.0 to 98.6)                        | 0.5<br>(0.3 to 0.6)                           | 13.9<br>(9.4 to 19.6)                   | 11.4<br>(7.2 to 16.2)                             | 2.6<br>(-1.4 to 7.2)                                |
| Autism                                                         | 32.6<br>(27.8 to 37.9)                        | < 0.05<br>(< 0.05 to 0.1)                     | 8.2<br>(5.2 to 11.9)                    | 13.8<br>(6.9 to 21.6)                             | 4.8<br>(-1.7 to 12.2)                               |
| Asperger syndrome and other autistic spectrum disorders        | 57.9<br>(49.6 to 66.9)                        | 0.4<br>(0.3 to 0.6)                           | 5.7<br>(3.8 to 8.2)                     | 8.1<br>(4.3 to 12.2)                              | -0.2<br>(-4.0 to 3.8)                               |



| Cause                                                      | Prevalence in thousands (95% UI)              | Incidence in thousands (95% UI)                   | YLDs in thousands (95% UI)              |                                                   |                                                     |
|------------------------------------------------------------|-----------------------------------------------|---------------------------------------------------|-----------------------------------------|---------------------------------------------------|-----------------------------------------------------|
|                                                            | 2016 counts                                   | 2016 counts                                       | 2016 counts                             | Percentage change in counts between 2006 and 2016 | Percentage change in age-standardised rates between |
| Attention-deficit/hyperactivity disorder                   | 63.6<br>(58.0 to 70.0)                        | 2.8<br>(2.5 to 3.2)                               | 0.8<br>(0.5 to 1.2)                     | 5.2<br>(-1.7 to 12.0)                             | 0.1<br>(-6.3 to 6.6)                                |
| Conduct disorder                                           | 51.8<br>(42.2 to 62.2)                        | 17.3<br>(13.7 to 21.0)                            | 6.3<br>(3.9 to 9.6)                     | -3.8<br>(-9.0 to 1.7)                             | 0.1<br>(-4.7 to 5.3)                                |
| Idiopathic developmental intellectual disability           | 42.1<br>(16.9 to 67.3)                        | --                                                | 2.1<br>(0.9 to 3.6)                     | 3.6<br>(-4.3 to 11.1)                             | -3.7<br>(-11.0 to 3.0)                              |
| Other mental and substance use disorders                   | 220.0<br>(194.2 to 252.1)                     | 5.2<br>(4.6 to 5.8)                               | 16.1<br>(10.9 to 22.9)                  | 9.5<br>(5.6 to 13.6)                              | 0.1<br>(-3.8 to 4.2)                                |
| <b>Diabetes, urogenital, blood, and endocrine diseases</b> | <b>3,306.0</b><br><b>(3,239.3 to 3,371.8)</b> | <b>912.3†</b><br><b>(858.2 to 968.5)</b>          | <b>89.8</b><br><b>(63.7 to 120.6)</b>   | <b>14.3</b><br><b>(9.3 to 19.7)</b>               | <b>0.9</b><br><b>(-3.2 to 5.4)</b>                  |
| Diabetes mellitus                                          | 707.3<br>(639.5 to 779.7)                     | 35.7<br>(31.9 to 40.5)                            | 53.8<br>(36.8 to 74.5)                  | 15.8<br>(7.5 to 24.6)                             | 1.2<br>(-5.6 to 8.7)                                |
| Acute glomerulonephritis                                   | 0.1<br>(0.1 to 0.1)                           | 1.8<br>(1.5 to 2.0)                               | < 0.05<br>(< 0.05 to < 0.05)            | 4.4<br>(-0.5 to 9.7)                              | -5.3<br>(-9.6 to -1.1)                              |
| Chronic kidney disease                                     | 343.7<br>(302.6 to 381.7)                     | 30.3<br>(25.9 to 35.1)                            | 9.0<br>(6.8 to 11.4)                    | 11.1<br>(3.8 to 19.2)                             | -0.4<br>(-6.4 to 6.2)                               |
| Chronic kidney disease due to diabetes mellitus            | 116.0<br>(94.2 to 138.4)                      | 10.7<br>(8.5 to 13.1)                             | 3.1<br>(2.2 to 4.0)                     | 13.8<br>(2.3 to 26.4)                             | -0.2<br>(-10.0 to 11.1)                             |
| Chronic kidney disease due to hypertension                 | 62.7<br>(51.6 to 74.1)                        | 6.6<br>(5.1 to 8.4)                               | 1.0<br>(0.7 to 1.3)                     | -6.5<br>(-18.2 to 6.9)                            | -16.7<br>(-26.6 to -5.4)                            |
| Chronic kidney disease due to glomerulonephritis           | 55.9<br>(46.0 to 66.3)                        | 3.5<br>(2.7 to 4.6)                               | 2.1<br>(1.5 to 2.8)                     | 8.6<br>(-3.2 to 21.4)                             | -0.9<br>(-11.2 to 10.1)                             |
| Chronic kidney disease due to other causes                 | 109.1<br>(88.3 to 131.0)                      | 9.5<br>(7.5 to 11.8)                              | 2.8<br>(2.0 to 3.7)                     | 17.5<br>(4.8 to 30.4)                             | 5.4<br>(-5.1 to 16.5)                               |
| Urinary diseases and male infertility                      | 280.4<br>(252.1 to 313.4)                     | 528.0†<br>(475.9 to 583.1)                        | 8.4<br>(5.4 to 12.3)                    | 6.9<br>(2.0 to 12.5)                              | -6.2<br>(-10.6 to -1.4)                             |
| Interstitial nephritis and urinary tract infections        | 7.6<br>(6.6 to 8.6)                           | 397.1<br>(346.0 to 449.6)                         | 0.2<br>(0.1 to 0.4)                     | 4.0<br>(-8.7 to 16.3)                             | -2.8<br>(-15.0 to 9.5)                              |
| Urolithiasis                                               | 3.9<br>(3.4 to 4.4)                           | 102.6<br>(90.2 to 116.8)                          | 0.3<br>(0.2 to 0.4)                     | 17.0<br>(2.0 to 34.3)                             | 6.8<br>(-5.0 to 19.0)                               |
| Benign prostatic hyperplasia                               | 232.1<br>(197.6 to 270.8)                     | 28.3<br>(23.3 to 34.0)                            | 7.5<br>(4.8 to 11.1)                    | 7.4<br>(1.7 to 13.6)                              | -6.6<br>(-11.8 to -0.9)                             |
| Male infertility                                           | 27.2<br>(20.4 to 35.8)                        | --                                                | 0.2<br>(0.1 to 0.3)                     | -5.1<br>(-12.3 to 1.9)                            | -8.7<br>(-14.8 to -2.5)                             |
| Other urinary diseases                                     | --                                            | --                                                | 0.2<br>(0.1 to 0.3)                     | -6.6<br>(-14.7 to 1.3)                            | -14.4<br>(-21.6 to -7.1)                            |
| Gynecological diseases                                     | 1,316.7<br>(1,236.2 to 1,409.3)               | 263.8†<br>(250.7 to 277.4)                        | 9.2<br>(6.1 to 13.9)                    | 13.4<br>(9.0 to 18.3)                             | 5.2<br>(1.0 to 10.0)                                |
| Uterine fibroids                                           | 82.2<br>(72.4 to 94.0)                        | 7.3<br>(6.3 to 8.5)                               | 0.7<br>(0.4 to 1.3)                     | 6.6<br>(0.7 to 12.5)                              | -0.2<br>(-6.1 to 5.8)                               |
| Polycystic ovarian syndrome                                | 0.7<br>(0.5 to 1.0)                           | 7.0<br>(5.0 to 9.4)                               | < 0.05<br>(< 0.05 to < 0.05)            | 4.8<br>(-22.2 to 41.4)                            | -0.6<br>(-25.7 to 33.0)                             |
| Female infertility                                         | 44.2<br>(30.1 to 64.0)                        | --                                                | 0.3<br>(0.1 to 0.5)                     | 11.8<br>(4.0 to 20.7)                             | 7.9<br>(0.9 to 15.5)                                |
| Endometriosis                                              | 5.6<br>(4.5 to 6.7)                           | 16.2<br>(12.8 to 20.7)                            | 0.5<br>(0.3 to 0.8)                     | -0.1<br>(-15.5 to 18.2)                           | -8.6<br>(-22.9 to 7.9)                              |
| Genital prolapse                                           | 759.0<br>(657.4 to 881.3)                     | 31.9<br>(26.9 to 38.5)                            | 2.3<br>(1.1 to 4.3)                     | 5.6<br>(-2.7 to 13.7)                             | -5.0<br>(-12.3 to 2.1)                              |
| Premenstrual syndrome                                      | 486.3<br>(462.2 to 509.8)                     | 162.9<br>(153.9 to 172.2)                         | 4.0<br>(2.5 to 6.3)                     | 7.3<br>(1.1 to 13.8)                              | -0.4<br>(-6.2 to 5.5)                               |
| Other gynecological diseases                               | 41.0<br>(35.1 to 47.7)                        | 38.3<br>(31.8 to 45.4)                            | 1.4<br>(0.9 to 2.0)                     | 83.1<br>(58.5 to 110.6)                           | 67.7<br>(45.0 to 94.6)                              |
| Hemoglobinopathies and hemolytic anaemias                  | 1,255.7<br>(1,231.7 to 1,287.7)               | --                                                | 0.9<br>(0.6 to 1.4)                     | 13.8<br>(-0.4 to 28.6)                            | 3.4<br>(-9.1 to 18.8)                               |
| Thalassemias                                               | 0.1<br>(0.1 to 0.1)                           | --                                                | < 0.05<br>(< 0.05 to < 0.05)            | 17.8<br>(0.3 to 36.4)                             | 6.0<br>(-11.9 to 25.4)                              |
| Thalassaemias trait                                        | 118.3<br>(114.0 to 123.4)                     | --                                                | 0.4<br>(0.3 to 0.7)                     | 21.3<br>(5.0 to 42.1)                             | 5.9<br>(-9.9 to 26.4)                               |
| Sickle cell disorders                                      | 0.1<br>(0.1 to 0.1)                           | --                                                | < 0.05<br>(< 0.05 to < 0.05)            | 19.8<br>(15.0 to 24.7)                            | 10.7<br>(4.7 to 16.2)                               |
| Sickle cell trait                                          | 174.8<br>(169.9 to 178.8)                     | --                                                | 0.1<br>(0.1 to 0.2)                     | 26.4<br>(5.4 to 53.7)                             | 10.5<br>(-9.9 to 37.2)                              |
| G6PD deficiency                                            | 149.6<br>(140.7 to 160.8)                     | --                                                | < 0.05<br>(< 0.05 to < 0.05)            | 28.2<br>(7.0 to 53.1)                             | 18.2<br>(-2.7 to 42.9)                              |
| G6PD trait                                                 | 835.1<br>(812.3 to 863.9)                     | --                                                | < 0.05<br>(< 0.05 to < 0.05)            | 20.5<br>(-6.2 to 49.6)                            | 4.9<br>(-23.9 to 35.5)                              |
| Other hemoglobinopathies and hemolytic anaemias            | 16.6<br>(14.9 to 18.7)                        | --                                                | 0.3<br>(0.2 to 0.5)                     | -0.4<br>(-20.9 to 23.7)                           | -6.6<br>(-22.4 to 10.8)                             |
| Endocrine, metabolic, blood, and immune disorders          | 248.1<br>(224.8 to 274.8)                     | 52.7<br>(47.3 to 59.1)                            | 8.4<br>(5.7 to 11.6)                    | 17.4<br>(11.7 to 22.9)                            | 0.8<br>(-3.9 to 5.5)                                |
| <b>Musculoskeletal disorders</b>                           | <b>2,767.6</b><br><b>(2,681.7 to 2,858.3)</b> | <b>1,346.7</b><br><b>(1,226.2 to 1,481.3)</b>     | <b>309.9</b><br><b>(224.8 to 403.1)</b> | <b>10.8</b><br><b>(7.8 to 13.7)</b>               | <b>0.1</b><br><b>(-2.6 to 2.8)</b>                  |
| Rheumatoid arthritis                                       | 43.8<br>(40.9 to 47.3)                        | 2.1<br>(2.0 to 2.3)                               | 10.1<br>(7.1 to 13.3)                   | 10.8<br>(4.8 to 17.1)                             | -0.1<br>(-5.8 to 5.8)                               |
| Osteoarthritis                                             | 685.9<br>(644.6 to 730.0)                     | 29.1<br>(27.0 to 31.4)                            | 23.8<br>(15.8 to 34.3)                  | 14.7<br>(11.7 to 18.0)                            | 1.6<br>(-1.2 to 4.7)                                |
| Low back and neck pain                                     | 1,982.8<br>(1,890.1 to 2,077.0)               | 811.1<br>(724.5 to 903.3)                         | 240.5<br>(171.7 to 315.8)               | 10.6<br>(6.8 to 14.1)                             | 0.2<br>(-3.1 to 3.3)                                |
| Low back pain                                              | 1,321.5<br>(1,189.5 to 1,472.9)               | 662.3<br>(577.6 to 756.8)                         | 148.2<br>(105.5 to 195.6)               | 10.9<br>(5.0 to 16.0)                             | 0.9<br>(-4.6 to 5.8)                                |
| Neck pain                                                  | 936.7<br>(849.5 to 1,035.9)                   | 148.8<br>(131.5 to 170.9)                         | 92.3<br>(63.5 to 126.1)                 | 10.1<br>(6.3 to 14.1)                             | -1.1<br>(-4.2 to 2.2)                               |
| Gout                                                       | 96.6<br>(85.5 to 108.6)                       | 16.4<br>(14.3 to 18.8)                            | 3.0<br>(2.0 to 4.0)                     | 11.6<br>(1.1 to 22.7)                             | -0.7<br>(-10.3 to 10.4)                             |
| Other musculoskeletal disorders                            | 383.6<br>(305.5 to 475.3)                     | 487.9<br>(412.2 to 585.5)                         | 32.4<br>(21.2 to 46.8)                  | 9.3<br>(0.1 to 19.0)                              | -0.9<br>(-8.3 to 7.1)                               |
| <b>Other non-communicable diseases</b>                     | <b>7,461.0</b><br><b>(7,375.1 to 7,543.2)</b> | <b>18,635.8†</b><br><b>(17,701.7 to 19,656.5)</b> | <b>228.6</b><br><b>(155.5 to 323.4)</b> | <b>10.5</b><br><b>(9.2 to 11.8)</b>               | <b>0.5</b><br><b>(-0.6 to 1.5)</b>                  |
| Congenital anomalies                                       | 114.9<br>(104.3 to 129.7)                     | --                                                | 11.4<br>(8.3 to 15.1)                   | 6.7<br>(2.6 to 11.1)                              | -2.8<br>(-6.9 to 1.3)                               |
| Neural tube defects                                        | 4.4<br>(3.9 to 4.9)                           | --                                                | 1.3<br>(0.9 to 1.8)                     | -0.0<br>(-12.1 to 13.0)                           | -8.1<br>(-19.5 to 4.8)                              |
| Congenital heart anomalies                                 | 26.5<br>(23.5 to 29.9)                        | --                                                | 1.4<br>(0.6 to 2.5)                     | 15.1<br>(6.5 to 25.0)                             | 4.9<br>(-3.3 to 14.3)                               |
| Orofacial clefts                                           | 7.0<br>(6.2 to 7.9)                           | --                                                | 0.1<br>(< 0.05 to 0.1)                  | 9.9<br>(-1.0 to 21.1)                             | 0.8<br>(-9.2 to 11.1)                               |
| Down's syndrome                                            | 5.4<br>(4.7 to 6.2)                           | --                                                | 0.5<br>(0.3 to 0.7)                     | 30.6<br>(20.3 to 43.9)                            | 22.6<br>(12.5 to 35.3)                              |
| Turner syndrome                                            | 6.0<br>(5.2 to 7.0)                           | --                                                | 0.1<br>(< 0.05 to 0.2)                  | 1.5<br>(-16.2 to 23.7)                            | -5.5<br>(-23.2 to 16.0)                             |
| Klinefelter syndrome                                       | 4.7<br>(4.0 to 5.5)                           | --                                                | < 0.05<br>(< 0.05 to 0.1)               | 10.2<br>(-8.2 to 31.9)                            | -0.2<br>(-17.2 to 18.8)                             |



| Cause                                         | Prevalence in thousands (95% UI)              | Incidence in thousands (95% UI)                | YLDs in thousands (95% UI)             |                                                   |                                                     |
|-----------------------------------------------|-----------------------------------------------|------------------------------------------------|----------------------------------------|---------------------------------------------------|-----------------------------------------------------|
|                                               | 2016 counts                                   | 2016 counts                                    | 2016 counts                            | Percentage change in counts between 2006 and 2016 | Percentage change in age-standardised rates between |
| Other chromosomal abnormalities               | 17.4<br>(14.8 to 20.5)                        | --                                             | 1.7<br>(1.2 to 2.4)                    | -14.4<br>(-22.5 to -5.6)                          | -19.2<br>(-26.8 to -10.8)                           |
| Congenital musculoskeletal and limb anomalies | 17.9<br>(16.4 to 19.4)                        | --                                             | 2.6<br>(1.7 to 3.5)                    | 16.2<br>(8.7 to 25.1)                             | 6.3<br>(-0.8 to 14.5)                               |
| Urogenital congenital anomalies               | 13.2<br>(11.7 to 14.8)                        | --                                             | 0.4<br>(0.2 to 0.6)                    | 16.1<br>(5.7 to 27.2)                             | 5.7<br>(-5.0 to 17.5)                               |
| Digestive congenital anomalies                | 13.4<br>(11.8 to 15.2)                        | --                                             | 0.6<br>(0.4 to 0.8)                    | 6.3<br>(-6.0 to 18.7)                             | -2.3<br>(-14.0 to 9.3)                              |
| Other congenital anomalies                    | 21.6<br>(12.7 to 34.6)                        | --                                             | 2.8<br>(1.8 to 4.3)                    | 9.6<br>(0.2 to 20.5)                              | 0.5<br>(-8.3 to 10.5)                               |
| Skin and subcutaneous diseases                | 3,742.3<br>(3,689.5 to 3,799.7)               | 8,435.9<br>(7,984.3 to 8,935.2)                | 99.4<br>(66.4 to 142.1)                | 7.8<br>(6.3 to 9.3)                               | 0.7<br>(-0.7 to 2.1)                                |
| Dermatitis                                    | 873.1<br>(847.7 to 900.6)                     | 816.9<br>(750.6 to 886.5)                      | 33.1<br>(19.7 to 53.4)                 | 9.5<br>(7.0 to 11.9)                              | -0.0<br>(-2.5 to 2.3)                               |
| Psoriasis                                     | 176.9<br>(170.5 to 183.3)                     | 16.1<br>(15.6 to 16.7)                         | 15.1<br>(10.8 to 19.7)                 | 10.8<br>(6.2 to 16.2)                             | 1.3<br>(-3.1 to 6.4)                                |
| Cellulitis                                    | 3.5<br>(3.3 to 3.7)                           | 56.2<br>(52.7 to 59.8)                         | 0.2<br>(0.1 to 0.3)                    | 11.6<br>(-0.5 to 25.3)                            | 0.8<br>(-9.9 to 12.1)                               |
| Pyoderma                                      | 48.2<br>(46.8 to 49.7)                        | 1,305.6<br>(1,263.9 to 1,349.5)                | 0.3<br>(0.1 to 0.6)                    | 10.5<br>(6.3 to 15.0)                             | 0.0<br>(-4.4 to 4.3)                                |
| Scabies                                       | 8.8<br>(7.8 to 10.1)                          | 26.6<br>(23.3 to 30.6)                         | 0.2<br>(0.1 to 0.4)                    | 7.9<br>(-1.0 to 17.9)                             | -0.2<br>(-8.7 to 9.3)                               |
| Fungal skin diseases                          | 809.5<br>(719.7 to 909.8)                     | 3,195.0<br>(2,780.0 to 3,676.7)                | 4.4<br>(1.8 to 9.1)                    | 11.2<br>(10.1 to 12.5)                            | 0.0<br>(-1.0 to 1.0)                                |
| Viral skin diseases                           | 275.1<br>(252.5 to 296.4)                     | 375.3<br>(343.5 to 409.0)                      | 8.4<br>(5.2 to 12.2)                   | 8.5<br>(5.8 to 11.2)                              | -0.1<br>(-2.4 to 2.2)                               |
| Acne vulgaris                                 | 921.9<br>(862.2 to 975.8)                     | 702.6<br>(583.4 to 848.5)                      | 23.7<br>(15.9 to 34.1)                 | 1.1<br>(-2.2 to 4.2)                              | 1.4<br>(-1.9 to 4.3)                                |
| Alopecia areata                               | 29.6<br>(28.6 to 30.7)                        | 52.1<br>(50.4 to 53.9)                         | 1.0<br>(0.6 to 1.5)                    | 8.3<br>(1.4 to 15.7)                              | -0.1<br>(-7.0 to 7.0)                               |
| Pruritus                                      | 101.9<br>(90.6 to 116.0)                      | 80.0<br>(71.0 to 91.2)                         | 1.1<br>(0.5 to 2.0)                    | 10.4<br>(5.7 to 15.6)                             | 0.1<br>(-4.1 to 4.5)                                |
| Urticaria                                     | 71.2<br>(63.2 to 80.1)                        | 126.3<br>(112.1 to 142.2)                      | 4.2<br>(2.7 to 5.9)                    | 9.2<br>(3.7 to 14.6)                              | -0.1<br>(-4.8 to 4.6)                               |
| Decubitus ulcer                               | 6.1<br>(5.4 to 6.9)                           | 22.4<br>(19.7 to 25.6)                         | 0.9<br>(0.7 to 1.3)                    | 5.9<br>(-5.3 to 18.8)                             | -3.9<br>(-12.9 to 5.9)                              |
| Other skin and subcutaneous diseases          | 1,271.8<br>(1,237.1 to 1,305.8)               | 1,660.9<br>(1,599.9 to 1,721.4)                | 6.9<br>(3.3 to 12.5)                   | 14.5<br>(12.6 to 16.3)                            | 3.0<br>(1.3 to 4.7)                                 |
| Sense organ diseases                          | 2,493.1<br>(2,446.3 to 2,547.0)               | 1,093.5†<br>(1,033.8 to 1,159.6)               | 77.4<br>(53.6 to 107.4)                | 13.1<br>(9.9 to 16.2)                             | 0.4<br>(-2.0 to 2.7)                                |
| Glaucoma                                      | 4.1<br>(3.4 to 4.9)                           | --                                             | 0.5<br>(0.3 to 0.7)                    | 13.7<br>(-0.6 to 31.0)                            | -1.2<br>(-14.7 to 14.5)                             |
| Cataract                                      | 28.6<br>(24.7 to 33.2)                        | --                                             | 2.9<br>(2.0 to 4.0)                    | 9.0<br>(2.3 to 16.5)                              | -3.1<br>(-9.5 to 4.1)                               |
| Macular degeneration                          | 7.6<br>(6.4 to 8.8)                           | --                                             | 0.9<br>(0.6 to 1.2)                    | 13.4<br>(1.9 to 24.7)                             | -0.3<br>(-11.0 to 10.2)                             |
| Refraction and accommodation disorders        | 479.8<br>(461.0 to 500.0)                     | --                                             | 7.5<br>(4.5 to 12.1)                   | 10.1<br>(7.0 to 13.2)                             | -0.3<br>(-3.2 to 2.7)                               |
| Age-related and other hearing loss            | 2,111.7<br>(2,024.6 to 2,195.7)               | --                                             | 51.1<br>(34.9 to 72.8)                 | 14.0<br>(9.1 to 18.9)                             | 0.8<br>(-3.0 to 4.7)                                |
| Other vision loss                             | 16.7<br>(14.3 to 19.2)                        | --                                             | 1.7<br>(1.1 to 2.3)                    | 10.4<br>(1.5 to 19.7)                             | -0.8<br>(-9.6 to 8.4)                               |
| Other sense organ diseases                    | 413.9<br>(382.6 to 443.3)                     | 1,093.5<br>(1,033.8 to 1,159.6)                | 12.8<br>(8.1 to 19.4)                  | 12.8<br>(9.4 to 16.2)                             | 0.5<br>(-2.5 to 3.8)                                |
| Oral disorders                                | 5,148.6<br>(4,984.7 to 5,294.5)               | 9,106.4†<br>(8,338.1 to 9,904.5)               | 40.4<br>(23.9 to 64.5)                 | 13.5<br>(10.9 to 17.3)                            | 1.5<br>(-0.3 to 4.1)                                |
| Caries of deciduous teeth                     | 345.0<br>(247.8 to 422.9)                     | 1,124.2<br>(608.5 to 1,638.4)                  | 0.1<br>(0.1 to 0.3)                    | 78.9<br>(50.5 to 114.8)                           | 47.4<br>(23.8 to 76.9)                              |
| Caries of permanent teeth                     | 3,347.3<br>(3,159.2 to 3,546.1)               | 7,730.5<br>(7,136.5 to 8,360.7)                | 3.2<br>(1.4 to 6.2)                    | 8.1<br>(5.5 to 10.8)                              | 0.2<br>(-2.1 to 2.9)                                |
| Periodontal disease                           | 1,751.7<br>(1,475.0 to 2,055.6)               | 197.6<br>(161.8 to 238.0)                      | 11.4<br>(4.5 to 23.5)                  | 7.9<br>(5.0 to 10.8)                              | -1.0<br>(-3.6 to 1.7)                               |
| Edentulism and severe tooth loss              | 730.1<br>(564.6 to 935.1)                     | 54.1<br>(39.0 to 73.7)                         | 20.0<br>(12.4 to 29.2)                 | 19.2<br>(14.3 to 25.8)                            | 3.8<br>(-0.1 to 9.1)                                |
| Other oral disorders                          | 194.0<br>(185.5 to 202.7)                     | --                                             | 5.6<br>(3.5 to 8.5)                    | 8.7<br>(6.1 to 11.3)                              | -0.0<br>(-2.5 to 2.5)                               |
| <b>Injuries</b>                               | <b>3,330.9</b><br><b>(3,105.6 to 3,596.2)</b> | <b>1,100.1†</b><br><b>(1,032.7 to 1,173.0)</b> | <b>103.1</b><br><b>(69.2 to 146.1)</b> | <b>12.4</b><br><b>(11.2 to 13.6)</b>              | <b>1.7</b><br><b>(0.6 to 3.0)</b>                   |
| <b>Transport injuries</b>                     | <b>369.9</b><br><b>(343.3 to 398.9)</b>       | <b>81.4</b><br><b>(74.0 to 90.3)</b>           | <b>16.3</b><br><b>(10.7 to 23.6)</b>   | <b>2.5</b><br><b>(1.1 to 4.0)</b>                 | <b>-6.7</b><br><b>(-8.1 to -5.3)</b>                |
| Road injuries                                 | 319.5<br>(296.4 to 345.8)                     | 74.8<br>(67.6 to 83.9)                         | 14.6<br>(9.6 to 21.1)                  | 2.5<br>(1.2 to 4.1)                               | -6.5<br>(-8.0 to -5.0)                              |
| Pedestrian road injuries                      | 47.4<br>(41.4 to 55.3)                        | 6.9<br>(5.6 to 8.6)                            | 2.4<br>(1.6 to 3.5)                    | 17.6<br>(16.0 to 19.2)                            | 8.3<br>(6.6 to 10.0)                                |
| Cyclist road injuries                         | 96.7<br>(80.8 to 115.5)                       | 28.1<br>(23.6 to 32.9)                         | 4.1<br>(2.6 to 5.9)                    | 6.2<br>(4.9 to 7.6)                               | -3.3<br>(-4.6 to -1.8)                              |
| Motorcyclist road injuries                    | 61.8<br>(52.0 to 73.2)                        | 8.9<br>(7.1 to 10.9)                           | 2.9<br>(1.9 to 4.2)                    | 3.2<br>(1.5 to 4.9)                               | -6.4<br>(-8.1 to -4.7)                              |
| Motor vehicle road injuries                   | 89.5<br>(75.8 to 103.9)                       | 25.2<br>(21.7 to 29.3)                         | 4.3<br>(2.9 to 6.2)                    | -8.1<br>(-9.5 to -6.6)                            | -16.1<br>(-17.7 to -14.5)                           |
| Other road injuries                           | 24.1<br>(20.4 to 28.4)                        | 5.7<br>(4.5 to 7.2)                            | 0.9<br>(0.6 to 1.3)                    | 6.8<br>(5.0 to 8.6)                               | -2.6<br>(-4.4 to -0.7)                              |
| Other transport injuries                      | 50.4<br>(41.6 to 59.6)                        | 6.6<br>(5.8 to 7.7)                            | 1.8<br>(1.1 to 2.6)                    | 2.1<br>(0.8 to 3.3)                               | -8.3<br>(-9.6 to -7.0)                              |
| <b>Unintentional injuries</b>                 | <b>2,826.8</b><br><b>(2,607.2 to 3,077.7)</b> | <b>965.5</b><br><b>(897.9 to 1,039.3)</b>      | <b>81.6</b><br><b>(54.8 to 117.0)</b>  | <b>14.7</b><br><b>(13.5 to 16.0)</b>              | <b>3.7</b><br><b>(2.6 to 5.0)</b>                   |
| Falls                                         | 1,437.2<br>(1,247.9 to 1,631.0)               | 515.1<br>(458.8 to 578.1)                      | 50.9<br>(35.1 to 70.5)                 | 16.8<br>(15.2 to 18.4)                            | 6.0<br>(4.5 to 7.4)                                 |
| Drowning                                      | 5.9<br>(5.2 to 6.7)                           | 0.6<br>(0.5 to 0.7)                            | 0.3<br>(0.2 to 0.4)                    | 9.2<br>(4.7 to 13.6)                              | 0.2<br>(-4.6 to 4.7)                                |
| Fire, heat, and hot substances                | 274.3<br>(233.6 to 322.1)                     | 14.8<br>(12.3 to 17.3)                         | 4.7<br>(2.6 to 7.9)                    | 6.2<br>(3.3 to 8.9)                               | -3.5<br>(-6.3 to -0.7)                              |
| Poisonings                                    | 17.6<br>(13.9 to 22.3)                        | 13.2<br>(10.9 to 15.8)                         | 1.6<br>(1.1 to 2.3)                    | -2.7<br>(-8.6 to 3.5)                             | -10.8<br>(-16.4 to -4.3)                            |
| Exposure to mechanical forces                 | 556.1<br>(467.3 to 706.2)                     | 132.9<br>(113.1 to 154.5)                      | 10.0<br>(6.3 to 15.3)                  | 16.7<br>(15.6 to 18.0)                            | 6.2<br>(5.1 to 7.5)                                 |
| Unintentional firearm injuries                | 18.3<br>(15.1 to 22.8)                        | 1.7<br>(1.2 to 2.4)                            | 0.3<br>(0.1 to 0.5)                    | 12.1<br>(10.6 to 13.6)                            | 1.4<br>(0.0 to 2.9)                                 |
| Unintentional suffocation                     | 8.0<br>(6.7 to 9.4)                           | 1.7<br>(1.2 to 2.3)                            | 0.2<br>(0.1 to 0.3)                    | 14.1<br>(12.7 to 15.6)                            | 3.6<br>(2.2 to 5.1)                                 |
| Other exposure to mechanical forces           | 529.8<br>(440.8 to 678.2)                     | 129.6<br>(110.2 to 150.5)                      | 9.5<br>(6.0 to 14.6)                   | 16.9<br>(15.8 to 18.3)                            | 6.4<br>(5.3 to 7.7)                                 |

| Cause                                                                               | Prevalence in thousands (95% UI)        | Incidence in thousands (95% UI)       | YLDs in thousands (95% UI)                    |                                                   |                                                     |
|-------------------------------------------------------------------------------------|-----------------------------------------|---------------------------------------|-----------------------------------------------|---------------------------------------------------|-----------------------------------------------------|
|                                                                                     | 2016 counts                             | 2016 counts                           | 2016 counts                                   | Percentage change in counts between 2006 and 2016 | Percentage change in age-standardised rates between |
| Adverse effects of medical treatment                                                | 4.6<br>(3.6 to 5.6)                     | 59.7<br>(53.4 to 67.0)                | 0.6<br>(0.4 to 0.9)                           | 14.2<br>(10.4 to 18.4)                            | 1.8<br>(-1.1 to 4.9)                                |
| Animal contact                                                                      | 48.8<br>(42.6 to 56.6)                  | 25.1<br>(20.6 to 30.6)                | 1.0<br>(0.6 to 1.4)                           | -10.8<br>(-14.4 to -7.7)                          | -20.6<br>(-24.1 to -17.5)                           |
| Venomous animal contact                                                             | 7.6<br>(6.4 to 8.7)                     | 7.7<br>(5.6 to 10.1)                  | 0.4<br>(0.3 to 0.6)                           | -18.5<br>(-23.4 to -12.8)                         | -26.2<br>(-30.9 to -21.1)                           |
| Non-venomous animal contact                                                         | 41.2<br>(35.2 to 48.6)                  | 17.4<br>(14.2 to 21.4)                | 0.5<br>(0.3 to 0.9)                           | -3.6<br>(-5.2 to -1.9)                            | -14.5<br>(-16.2 to -12.8)                           |
| Foreign body                                                                        | 66.7<br>(57.8 to 78.8)                  | 48.9<br>(42.5 to 56.9)                | 2.0<br>(1.2 to 2.9)                           | 12.2<br>(10.9 to 13.6)                            | 1.8<br>(0.4 to 3.1)                                 |
| Pulmonary aspiration and foreign body in airway                                     | 10.6<br>(8.7 to 12.7)                   | 12.4<br>(11.1 to 14.1)                | 0.3<br>(0.2 to 0.4)                           | 11.3<br>(9.4 to 13.0)                             | 1.4<br>(-0.3 to 2.9)                                |
| Foreign body in eyes                                                                | 6.7<br>(4.6 to 9.2)                     | 26.4<br>(20.6 to 34.4)                | 0.5<br>(0.3 to 0.7)                           | 13.3<br>(10.6 to 16.1)                            | 3.1<br>(0.5 to 5.6)                                 |
| Foreign body in other body part                                                     | 49.3<br>(41.3 to 61.0)                  | 10.1<br>(8.4 to 11.9)                 | 1.2<br>(0.8 to 1.8)                           | 12.0<br>(10.6 to 13.4)                            | 1.3<br>(-0.1 to 2.7)                                |
| Environmental heat and cold exposure                                                | 42.3<br>(37.5 to 48.3)                  | 10.0<br>(8.7 to 11.4)                 | 1.5<br>(1.0 to 2.1)                           | 2.9<br>(-0.1 to 5.8)                              | -8.5<br>(-11.5 to -5.6)                             |
| Other unintentional injuries                                                        | 373.4<br>(310.9 to 442.4)               | 145.2<br>(123.3 to 168.1)             | 9.2<br>(5.9 to 13.7)                          | 15.8<br>(14.6 to 16.9)                            | 3.9<br>(2.8 to 5.0)                                 |
| <b>Self-harm and interpersonal violence</b>                                         | <b>282.3</b><br><b>(257.1 to 306.5)</b> | <b>52.7†</b><br><b>(47.3 to 58.5)</b> | <b>5.1</b><br><b>(3.5 to 7.3)</b>             | <b>10.1</b><br><b>(8.1 to 11.7)</b>               | <b>0.7</b><br><b>(-1.2 to 2.3)</b>                  |
| Self-harm                                                                           | 36.6<br>(29.8 to 43.9)                  | 26.4<br>(23.2 to 30.0)                | 1.4<br>(0.9 to 2.1)                           | 10.5<br>(6.9 to 14.6)                             | 0.9<br>(-2.8 to 4.9)                                |
| Self-harm by firearm                                                                | 0.3<br>(0.3 to 0.4)                     | < 0.05<br>(< 0.05 to 0.1)             | < 0.05<br>(< 0.05 to < 0.05)                  | 6.3<br>(4.3 to 8.2)                               | -1.4<br>(-3.4 to 0.7)                               |
| Self-harm by other specified means                                                  | 36.3<br>(29.5 to 43.5)                  | 26.4<br>(23.2 to 29.9)                | 1.4<br>(0.9 to 2.1)                           | 10.5<br>(6.9 to 14.6)                             | 0.9<br>(-2.8 to 5.0)                                |
| Interpersonal violence                                                              | 245.7<br>(223.0 to 269.5)               | 26.3‡<br>(22.2 to 30.8)               | 3.7<br>(2.5 to 5.3)                           | 9.9<br>(7.8 to 11.6)                              | 0.6<br>(-1.5 to 2.4)                                |
| Assault by firearm                                                                  | 6.1<br>(5.1 to 7.4)                     | 0.8<br>(0.5 to 1.0)                   | 0.1<br>(0.1 to 0.2)                           | 24.9<br>(23.2 to 26.6)                            | 13.6<br>(11.8 to 15.4)                              |
| Assault by sharp object                                                             | 18.3<br>(14.8 to 22.0)                  | 4.5<br>(3.3 to 5.9)                   | 0.3<br>(0.2 to 0.5)                           | 12.8<br>(11.3 to 14.3)                            | 3.1<br>(1.6 to 4.6)                                 |
| Sexual violence                                                                     | 149.9<br>(132.3 to 171.1)               | --                                    | 1.2<br>(0.8 to 1.7)                           | 3.4<br>(0.0 to 6.7)                               | -3.8<br>(-7.2 to -0.6)                              |
| Assault by other means                                                              | 71.4<br>(58.6 to 87.7)                  | 21.1<br>(17.7 to 25.0)                | 2.0<br>(1.3 to 3.0)                           | 12.8<br>(11.4 to 14.4)                            | 3.2<br>(1.8 to 4.8)                                 |
| <b>Forces of nature, conflict and terrorism, and executions and police conflict</b> | <b>1.7</b><br><b>(1.1 to 2.6)</b>       | <b>0.4†</b><br><b>(0.3 to 0.7)</b>    | <b>&lt; 0.05</b><br><b>(&lt; 0.05 to 0.1)</b> | <b>27.5</b><br><b>(24.3 to 34.7)</b>              | <b>13.1</b><br><b>(9.8 to 20.4)</b>                 |
| Exposure to forces of nature                                                        | 0.5<br>(0.2 to 0.7)                     | --                                    | < 0.05<br>(< 0.05 to < 0.05)                  | -7.0<br>(-9.1 to -4.3)                            | -20.2<br>(-22.2 to -17.6)                           |
| Conflict and terrorism                                                              | --                                      | --                                    | --                                            | --                                                | --                                                  |
| Executions and police conflict                                                      | 1.3<br>(0.7 to 2.1)                     | 0.4<br>(0.3 to 0.7)                   | < 0.05<br>(< 0.05 to 0.1)                     | 43.8<br>(37.7 to 51.6)                            | 27.6<br>(22.4 to 34.9)                              |
| <b>Impairments</b>                                                                  | --                                      | --                                    | --                                            | --                                                | --                                                  |
| Anaemia                                                                             | 603.9<br>(543.3 to 676.2)               | --                                    | 9.9<br>(7.0 to 14.2)                          | 13.6<br>(4.5 to 25.3)                             | 1.2<br>(-8.7 to 12.7)                               |
| Developmental intellectual disability                                               | 140.7<br>(113.9 to 168.1)               | --                                    | 18.7<br>(13.9 to 24.9)                        | 6.8<br>(3.1 to 10.7)                              | -2.0<br>(-5.5 to 1.6)                               |
| Epilepsy                                                                            | 37.1<br>(22.6 to 52.0)                  | --                                    | 10.6<br>(6.0 to 17.2)                         | 6.3<br>(-41.5 to 99.8)                            | -2.5<br>(-45.3 to 79.5)                             |
| Guillain-Barre syndrome                                                             | 0.1<br>(0.1 to 0.1)                     | --                                    | < 0.05<br>(< 0.05 to < 0.05)                  | 9.6<br>(3.5 to 16.2)                              | -3.6<br>(-8.1 to 1.3)                               |
| Hearing loss                                                                        | 2,195.6<br>(2,108.0 to 2,279.6)         | --                                    | 55.0<br>(37.9 to 77.5)                        | 13.3<br>(8.9 to 17.8)                             | 0.2<br>(-3.1 to 3.6)                                |
| Heart failure                                                                       | 207.0<br>(179.3 to 237.8)               | --                                    | 23.0<br>(17.0 to 29.1)                        | 19.7<br>(11.9 to 27.8)                            | 5.4<br>(-1.3 to 12.4)                               |
| Infertility                                                                         | 95.7<br>(73.9 to 123.5)                 | --                                    | 0.7<br>(0.3 to 1.3)                           | 4.7<br>(-0.7 to 10.3)                             | -0.4<br>(-5.6 to 4.5)                               |
| Pelvic inflammatory disease                                                         | 1.9<br>(1.8 to 2.1)                     | --                                    | 0.2<br>(0.2 to 0.4)                           | -2.9<br>(-20.7 to 18.6)                           | -7.0<br>(-24.1 to 13.9)                             |
| Vision loss                                                                         | 551.7<br>(529.5 to 574.1)               | --                                    | 17.1<br>(12.4 to 23.5)                        | 10.1<br>(6.8 to 13.3)                             | -0.5<br>(-3.9 to 3.2)                               |

We did not calculate incidence for the nine impairments, certain NTDs, and causes with only birth prevalence. Blank cells mean that no estimate is available.

† Incidence for aggregate causes represents the sum of the incidence of the causes below the aggregate.

‡ Incidence estimates for stroke represent first-ever stroke only.

^ Incidence of HIV/AIDS represents new infections of HIV only and does not include new infections of Tuberculosis in HIV positive cases.

SR Table 14: Prevalence, incidence, and YLDs for 2016, percentage change of YLD counts and percentage change of age-standardised YLD rates between 2006 and 2016 by cause and impairments, for all ages, Switzerland.

| Cause                                                                                | Prevalence in thousands (95% UI)       | Incidence in thousands (95% UI)            | YLDs in thousands (95% UI)             |                                                   |                                                     |
|--------------------------------------------------------------------------------------|----------------------------------------|--------------------------------------------|----------------------------------------|---------------------------------------------------|-----------------------------------------------------|
|                                                                                      | 2016 counts                            | 2016 counts                                | 2016 counts                            | Percentage change in counts between 2006 and 2016 | Percentage change in age-standardised rates between |
| <b>All causes</b>                                                                    | <b>7,955.7</b><br>(7,903.7 to 7,996.8) | <b>55,161.4†</b><br>(51,765.6 to 58,913.0) | <b>1,098.7</b><br>(821.8 to 1,414.9)   | <b>10.2</b><br>(8.5 to 12.0)                      | <b>-4.7</b><br>(-6.2 to -3.2)                       |
| <b>Communicable, maternal, neonatal, and nutritional disorders</b>                   | <b>3,112.0</b><br>(2,969.5 to 3,252.5) | <b>31,461.6†</b><br>(28,316.5 to 34,863.7) | <b>51.6</b><br>(36.8 to 70.0)          | <b>7.0</b><br>(1.5 to 13.5)                       | <b>-3.6</b><br>(-8.6 to 2.6)                        |
| <b>HIV/AIDS and tuberculosis</b>                                                     | <b>871.5</b><br>(723.1 to 1,009.9)     | <b>1.2†</b><br>(0.8 to 1.7)                | <b>2.1</b><br>(1.0 to 3.8)             | <b>23.6</b><br>(6.6 to 38.0)                      | <b>5.4</b><br>(-9.5 to 17.7)                        |
| Tuberculosis                                                                         | 765.9<br>(613.5 to 934.2)              | 0.5†<br>(0.4 to 0.6)                       | 0.1<br>(0.1 to 0.2)                    | -0.8<br>(-12.8 to 12.2)                           | -10.3<br>(-21.3 to 2.6)                             |
| Drug-susceptible tuberculosis                                                        | 0.4<br>(0.3 to 0.5)                    | 0.5<br>(0.4 to 0.6)                        | 0.1<br>(0.1 to 0.2)                    | -1.7<br>(-13.5 to 11.3)                           | -11.2<br>(-22.2 to 2.0)                             |
| Multidrug-resistant tuberculosis without extensive drug resistance                   | < 0.05<br>(< 0.05 to < 0.05)           | < 0.05<br>(< 0.05 to < 0.05)               | < 0.05<br>(< 0.05 to < 0.05)           | 47.6<br>(1.0 to 120.5)                            | 33.4<br>(-10.0 to 99.5)                             |
| Extensively drug-resistant tuberculosis                                              | < 0.05<br>(< 0.05 to < 0.05)           | < 0.05<br>(< 0.05 to < 0.05)               | < 0.05<br>(< 0.05 to < 0.05)           | 217.6<br>(117.4 to 373.7)                         | 186.8<br>(93.8 to 329.1)                            |
| Latent tuberculosis infection                                                        | 765.6<br>(613.0 to 933.8)              | --                                         | --                                     | --                                                | --                                                  |
| HIV/AIDS                                                                             | 23.8<br>(11.5 to 38.5)                 | 0.8^<br>(0.2 to 1.2)                       | 2.0<br>(0.9 to 3.6)                    | 25.6<br>(7.5 to 41.1)                             | 6.8<br>(-9.8 to 20.0)                               |
| Drug-susceptible HIV/AIDS - Tuberculosis                                             | < 0.05<br>(< 0.05 to < 0.05)           | < 0.05<br>(< 0.05 to < 0.05)               | < 0.05<br>(< 0.05 to < 0.05)           | -30.6<br>(-37.8 to -22.6)                         | -41.0<br>(-47.1 to -34.2)                           |
| Multidrug-resistant HIV/AIDS - Tuberculosis without extensive drug resistance        | < 0.05<br>(< 0.05 to < 0.05)           | < 0.05<br>(< 0.05 to < 0.05)               | < 0.05<br>(< 0.05 to < 0.05)           | 5.0<br>(-29.1 to 56.4)                            | -10.8<br>(-39.8 to 32.8)                            |
| Extensively drug-resistant HIV/AIDS - Tuberculosis                                   | < 0.05<br>(< 0.05 to < 0.05)           | < 0.05<br>(< 0.05 to < 0.05)               | < 0.05<br>(< 0.05 to < 0.05)           | 125.7<br>(52.5 to 236.7)                          | 91.7<br>(29.6 to 185.9)                             |
| HIV/AIDS resulting in other diseases                                                 | 23.8<br>(11.4 to 38.5)                 | 0.8<br>(0.2 to 1.2)                        | 2.0<br>(0.9 to 3.6)                    | 26.0<br>(7.9 to 41.7)                             | 7.1<br>(-9.5 to 20.3)                               |
| <b>Diarrhoea, lower respiratory infections, and other common infectious diseases</b> | <b>488.4</b><br>(453.4 to 522.4)       | <b>31,070.9†</b><br>(27,940.5 to 34,461.2) | <b>15.1</b><br>(9.8 to 22.0)           | <b>10.6</b><br>(6.6 to 14.5)                      | <b>-1.0</b><br>(-4.2 to 2.4)                        |
| Diarrhoeal diseases                                                                  | 23.3<br>(21.8 to 24.9)                 | 1,536.9<br>(1,436.6 to 1,652.2)            | 2.6<br>(1.8 to 3.6)                    | 10.2<br>(2.7 to 18.6)                             | -3.1<br>(-10.6 to 5.1)                              |
| Intestinal infectious diseases                                                       | < 0.05<br>(< 0.05 to < 0.05)           | < 0.05†<br>(< 0.05 to < 0.05)              | < 0.05<br>(< 0.05 to < 0.05)           | 7.8<br>(-8.2 to 28.1)                             | -5.5<br>(-18.8 to 11.0)                             |
| Typhoid fever                                                                        | < 0.05<br>(< 0.05 to < 0.05)           | < 0.05<br>(< 0.05 to < 0.05)               | < 0.05<br>(< 0.05 to < 0.05)           | 12.5<br>(-5.5 to 35.6)                            | 0.2<br>(-15.7 to 20.4)                              |
| Paratyphoid fever                                                                    | < 0.05<br>(< 0.05 to < 0.05)           | < 0.05<br>(< 0.05 to < 0.05)               | < 0.05<br>(< 0.05 to < 0.05)           | -8.6<br>(-25.3 to 13.4)                           | -18.6<br>(-32.7 to -0.6)                            |
| Other intestinal infectious diseases                                                 | --                                     | --                                         | < 0.05<br>(< 0.05 to < 0.05)           | -14.1<br>(-36.2 to 15.7)                          | -29.9<br>(-51.5 to 4.5)                             |
| Lower respiratory infections                                                         | 3.6<br>(3.4 to 3.9)                    | 169.1<br>(155.2 to 182.6)                  | 0.2<br>(0.1 to 0.3)                    | 26.4<br>(10.6 to 44.5)                            | 8.0<br>(-5.0 to 22.8)                               |
| Upper respiratory infections                                                         | 375.9<br>(337.2 to 418.7)              | 28,747.2<br>(25,647.9 to 32,229.6)         | 9.3<br>(5.6 to 14.3)                   | 10.8<br>(5.4 to 16.0)                             | 0.2<br>(-4.5 to 4.7)                                |
| Otitis media                                                                         | 80.2<br>(69.0 to 94.3)                 | 488.6<br>(339.8 to 753.2)                  | 2.0<br>(1.3 to 3.1)                    | 7.2<br>(0.1 to 14.9)                              | -3.1<br>(-9.4 to 3.6)                               |
| Meningitis                                                                           | 1.4<br>(1.2 to 1.7)                    | 0.3<br>(0.3 to 0.4)                        | 0.1<br>(0.1 to 0.2)                    | 7.0<br>(1.9 to 19.7)                              | -5.0<br>(-9.0 to 1.5)                               |
| Pneumococcal meningitis                                                              | 0.4<br>(0.3 to 0.4)                    | < 0.05<br>(< 0.05 to < 0.05)               | < 0.05<br>(< 0.05 to < 0.05)           | -3.7<br>(-10.5 to 2.1)                            | -14.4<br>(-20.3 to -9.2)                            |
| H influenzae type B meningitis                                                       | 0.1<br>(0.1 to 0.2)                    | < 0.05<br>(< 0.05 to < 0.05)               | < 0.05<br>(< 0.05 to < 0.05)           | 7.4<br>(1.1 to 14.2)                              | -4.4<br>(-10.5 to 2.4)                              |
| Meningococcal infection                                                              | 0.2<br>(0.2 to 0.4)                    | 0.1<br>(0.1 to 0.1)                        | < 0.05<br>(< 0.05 to < 0.05)           | 15.2<br>(0.7 to 91.2)                             | -2.2<br>(-11.4 to 29.1)                             |
| Other meningitis                                                                     | 0.7<br>(0.6 to 0.9)                    | 0.2<br>(0.2 to 0.2)                        | 0.1<br>(< 0.05 to 0.1)                 | 10.1<br>(5.0 to 14.6)                             | -1.0<br>(-5.8 to 3.2)                               |
| Encephalitis                                                                         | 3.4<br>(2.4 to 4.8)                    | 2.7<br>(2.6 to 2.8)                        | 0.4<br>(0.3 to 0.5)                    | 14.2<br>(10.9 to 17.7)                            | 0.6<br>(-2.4 to 3.4)                                |
| Diphtheria                                                                           | < 0.05<br>(< 0.05 to < 0.05)           | < 0.05<br>(< 0.05 to < 0.05)               | < 0.05<br>(< 0.05 to < 0.05)           | -24.4<br>(-62.8 to 45.6)                          | -35.5<br>(-65.1 to 13.7)                            |
| Whooping cough                                                                       | 0.4<br>(0.3 to 0.5)                    | 2.6<br>(2.0 to 3.4)                        | < 0.05<br>(< 0.05 to < 0.05)           | -24.8<br>(-43.9 to 1.0)                           | -34.1<br>(-51.1 to -11.1)                           |
| Tetanus                                                                              | < 0.05<br>(< 0.05 to < 0.05)           | < 0.05<br>(< 0.05 to < 0.05)               | < 0.05<br>(< 0.05 to < 0.05)           | -45.8<br>(-60.3 to -24.6)                         | -50.0<br>(-62.4 to -33.6)                           |
| Measles                                                                              | < 0.05<br>(< 0.05 to < 0.05)           | < 0.05<br>(< 0.05 to < 0.05)               | < 0.05<br>(< 0.05 to < 0.05)           | -43.6<br>(-65.0 to -14.6)                         | -50.1<br>(-69.0 to -24.3)                           |
| Varicella and herpes zoster                                                          | 8.5<br>(7.7 to 9.5)                    | 123.5<br>(118.4 to 128.8)                  | 0.4<br>(0.2 to 0.6)                    | 16.4<br>(3.6 to 28.4)                             | 0.2<br>(-11.2 to 11.6)                              |
| <b>Neglected tropical diseases and malaria</b>                                       | <b>2.8</b><br>(2.4 to 3.1)             | <b>&lt; 0.05†</b><br>(< 0.05 to < 0.05)    | <b>&lt; 0.05</b><br>(< 0.05 to < 0.05) | <b>30.4</b><br>(3.3 to 49.1)                      | <b>12.8</b><br>(-12.3 to 31.1)                      |
| Malaria                                                                              | --                                     | --                                         | --                                     | --                                                | --                                                  |
| Chagas disease                                                                       | 2.5<br>(2.1 to 3.0)                    | --                                         | < 0.05<br>(< 0.05 to < 0.05)           | 33.4<br>(22.7 to 43.3)                            | 15.8<br>(7.1 to 24.2)                               |
| Leishmaniasis                                                                        | --                                     | --                                         | --                                     | --                                                | --                                                  |
| Visceral leishmaniasis                                                               | --                                     | --                                         | --                                     | --                                                | --                                                  |
| Cutaneous and mucocutaneous leishmaniasis                                            | --                                     | --                                         | --                                     | --                                                | --                                                  |
| African trypanosomiasis                                                              | --                                     | --                                         | --                                     | --                                                | --                                                  |
| Schistosomiasis                                                                      | --                                     | --                                         | --                                     | --                                                | --                                                  |
| Cysticercosis                                                                        | --                                     | --                                         | --                                     | --                                                | --                                                  |
| Cystic echinococcosis                                                                | < 0.05<br>(< 0.05 to < 0.05)           | < 0.05<br>(< 0.05 to < 0.05)               | < 0.05<br>(< 0.05 to < 0.05)           | -29.4<br>(-96.2 to 915.1)                         | -38.0<br>(-96.4 to 835.9)                           |
| Lymphatic filariasis                                                                 | --                                     | --                                         | --                                     | --                                                | --                                                  |
| Onchocerciasis                                                                       | --                                     | --                                         | --                                     | --                                                | --                                                  |
| Trachoma                                                                             | --                                     | --                                         | --                                     | --                                                | --                                                  |
| Dengue                                                                               | --                                     | --                                         | --                                     | --                                                | --                                                  |
| Yellow fever                                                                         | --                                     | --                                         | --                                     | --                                                | --                                                  |
| Rabies                                                                               | < 0.05<br>(< 0.05 to < 0.05)           | < 0.05<br>(< 0.05 to < 0.05)               | < 0.05<br>(< 0.05 to < 0.05)           | 3.3<br>(-22.2 to 38.4)                            | -19.9<br>(-38.8 to 5.7)                             |
| Intestinal nematode infections                                                       | --                                     | --                                         | --                                     | --                                                | --                                                  |
| Ascariasis                                                                           | --                                     | --                                         | --                                     | --                                                | --                                                  |



| Cause                                                                   | Prevalence in thousands (95% UI)              | Incidence in thousands (95% UI)                   | YLDs in thousands (95% UI)                |                                                   |                                                     |
|-------------------------------------------------------------------------|-----------------------------------------------|---------------------------------------------------|-------------------------------------------|---------------------------------------------------|-----------------------------------------------------|
|                                                                         | 2016 counts                                   | 2016 counts                                       | 2016 counts                               | Percentage change in counts between 2006 and 2016 | Percentage change in age-standardised rates between |
| Trichuriasis                                                            | --                                            | --                                                | --                                        | --                                                | --                                                  |
| Hookworm disease                                                        | --                                            | --                                                | --                                        | --                                                | --                                                  |
| Food-borne trematodiasis                                                | --                                            | --                                                | --                                        | --                                                | --                                                  |
| Leprosy                                                                 | < 0.05<br>(< 0.05 to < 0.05)                  | --                                                | < 0.05<br>(< 0.05 to < 0.05)              | -18.3<br>(-25.7 to -11.1)                         | -34.1<br>(-40.0 to -28.2)                           |
| Ebola virus disease                                                     | --                                            | --                                                | --                                        | --                                                | --                                                  |
| Zika virus disease                                                      | --                                            | --                                                | --                                        | --                                                | --                                                  |
| Guinea worm disease                                                     | --                                            | --                                                | --                                        | --                                                | --                                                  |
| Other neglected tropical diseases                                       | --                                            | --                                                | < 0.05<br>(< 0.05 to < 0.05)              | --                                                | --                                                  |
| <b>Maternal disorders</b>                                               | <b>4.3</b><br><b>(3.4 to 5.3)</b>             | <b>74.2†</b><br><b>(67.7 to 83.1)</b>             | <b>0.3</b><br><b>(0.2 to 0.4)</b>         | <b>33.0</b><br><b>(-3.4 to 82.0)</b>              | <b>17.1</b><br><b>(-14.8 to 59.9)</b>               |
| Maternal haemorrhage                                                    | 0.7<br>(0.6 to 0.9)                           | 8.0<br>(6.6 to 9.1)                               | < 0.05<br>(< 0.05 to 0.1)                 | 55.8<br>(-0.7 to 141.3)                           | 35.7<br>(-14.6 to 112.0)                            |
| Maternal sepsis and other pregnancy related infections                  | 1.4<br>(1.2 to 1.8)                           | 6.8<br>(6.1 to 7.5)                               | < 0.05<br>(< 0.05 to 0.1)                 | 8.7<br>(-48.6 to 120.2)                           | -5.5<br>(-56.1 to 96.3)                             |
| Maternal hypertensive disorders                                         | 1.9<br>(1.3 to 2.6)                           | 7.9<br>(7.0 to 8.8)                               | 0.1<br>(< 0.05 to 0.1)                    | 40.5<br>(-17.0 to 152.1)                          | 23.7<br>(-27.2 to 123.1)                            |
| Maternal obstructed labour and uterine rupture                          | 0.2<br>(0.1 to 0.3)                           | 15.0<br>(11.0 to 17.0)                            | 0.1<br>(< 0.05 to 0.1)                    | 55.2<br>(-46.8 to 309.4)                          | 36.6<br>(-53.1 to 268.3)                            |
| Maternal abortion, miscarriage, and ectopic pregnancy                   | 0.3<br>(0.2 to 0.4)                           | 36.6<br>(31.3 to 45.6)                            | < 0.05<br>(< 0.05 to 0.1)                 | 2.0<br>(-48.9 to 118.4)                           | -8.7<br>(-54.3 to 94.2)                             |
| Other maternal disorders                                                | --                                            | --                                                | < 0.05<br>(< 0.05 to 0.1)                 | 26.3<br>(-8.2 to 72.3)                            | 10.9<br>(-19.1 to 51.2)                             |
| <b>Neonatal disorders</b>                                               | <b>109.3</b><br><b>(90.5 to 128.0)</b>        | --                                                | <b>19.5</b><br><b>(13.4 to 26.9)</b>      | <b>8.4</b><br><b>(-2.4 to 24.2)</b>               | <b>-2.1</b><br><b>(-11.7 to 12.0)</b>               |
| Neonatal preterm birth complications                                    | 50.7<br>(41.3 to 64.1)                        | --                                                | 5.2<br>(3.5 to 7.6)                       | 4.9<br>(-13.4 to 26.5)                            | -4.6<br>(-20.6 to 15.8)                             |
| Neonatal encephalopathy due to birth asphyxia and trauma                | 63.3<br>(44.7 to 88.4)                        | --                                                | 11.1<br>(6.9 to 17.4)                     | 15.1<br>(-2.1 to 50.8)                            | 3.9<br>(-11.9 to 34.2)                              |
| Neonatal sepsis and other neonatal infections                           | 6.4<br>(3.2 to 13.0)                          | --                                                | 2.7<br>(1.1 to 5.8)                       | -7.8<br>(-25.9 to 10.5)                           | -17.2<br>(-33.5 to -1.1)                            |
| Hemolytic disease and other neonatal jaundice                           | 0.6<br>(0.5 to 0.7)                           | --                                                | 0.2<br>(0.1 to 0.2)                       | 10.2<br>(2.1 to 19.1)                             | -0.1<br>(-7.6 to 8.0)                               |
| Other neonatal disorders                                                | --                                            | --                                                | 0.3<br>(0.2 to 0.5)                       | 8.6<br>(-7.8 to 30.0)                             | -5.4<br>(-19.7 to 13.2)                             |
| <b>Nutritional deficiencies</b>                                         | <b>875.9</b><br><b>(800.7 to 936.3)</b>       | <b>36.2†</b><br><b>(28.2 to 45.9)</b>             | <b>13.1</b><br><b>(8.3 to 19.8)</b>       | <b>-0.9</b><br><b>(-11.4 to 10.9)</b>             | <b>-9.4</b><br><b>(-19.1 to 3.0)</b>                |
| Protein-energy malnutrition                                             | 3.9<br>(3.8 to 4.0)                           | 2.5<br>(2.4 to 2.5)                               | 0.4<br>(0.3 to 0.6)                       | 14.1<br>(0.3 to 29.4)                             | -0.5<br>(-12.6 to 12.7)                             |
| Iodine deficiency                                                       | 63.5<br>(54.4 to 74.6)                        | 0.8<br>(0.7 to 1.0)                               | 1.6<br>(1.1 to 2.3)                       | 10.9<br>(-2.0 to 25.1)                            | -2.0<br>(-13.9 to 10.6)                             |
| Vitamin A deficiency                                                    | 40.0<br>(30.5 to 50.9)                        | 32.9<br>(24.9 to 42.6)                            | --                                        | --                                                | --                                                  |
| Iron-deficiency anaemia                                                 | 756.1<br>(686.8 to 828.0)                     | --                                                | 11.0<br>(6.8 to 16.9)                     | -2.9<br>(-14.9 to 10.9)                           | -10.7<br>(-22.1 to 3.4)                             |
| Other nutritional deficiencies                                          | --                                            | --                                                | < 0.05<br>(< 0.05 to < 0.05)              | 13.8<br>(-0.3 to 29.5)                            | -0.8<br>(-13.1 to 12.9)                             |
| <b>Other communicable, maternal, neonatal, and nutritional diseases</b> | <b>1,462.6</b><br><b>(1,331.0 to 1,592.2)</b> | <b>279.0</b><br><b>(247.1 to 325.0)</b>           | <b>1.4</b><br><b>(0.8 to 2.4)</b>         | <b>4.1</b><br><b>(-1.7 to 10.7)</b>               | <b>-6.7</b><br><b>(-13.2 to 1.7)</b>                |
| Sexually transmitted diseases excluding HIV                             | 1,259.4<br>(1,149.9 to 1,388.4)               | 216.0<br>(186.3 to 262.0)                         | 0.8<br>(0.5 to 1.6)                       | 2.3<br>(-5.8 to 9.1)                              | -8.9<br>(-16.8 to -1.8)                             |
| Syphilis                                                                | 7.1<br>(5.4 to 9.2)                           | 6.7<br>(4.5 to 9.1)                               | 0.1<br>(0.1 to 0.1)                       | 20.8<br>(6.0 to 38.7)                             | 1.6<br>(-10.8 to 17.3)                              |
| Chlamydial infection                                                    | 25.8<br>(18.8 to 34.0)                        | 19.8<br>(14.7 to 26.5)                            | 0.1<br>(0.1 to 0.2)                       | -1.5<br>(-21.6 to 18.4)                           | -9.3<br>(-28.0 to 10.0)                             |
| Gonococcal infection                                                    | 8.5<br>(4.2 to 20.3)                          | 22.0<br>(6.6 to 65.6)                             | 0.1<br>(< 0.05 to 0.1)                    | -11.7<br>(-29.8 to 7.7)                           | -18.1<br>(-35.1 to 0.3)                             |
| Trichomoniasis                                                          | 144.8<br>(123.1 to 169.8)                     | 119.5<br>(101.3 to 140.9)                         | 0.1<br>(< 0.05 to 0.3)                    | 11.1<br>(0.7 to 22.0)                             | -0.8<br>(-9.6 to 9.0)                               |
| Genital herpes                                                          | 1,093.0<br>(931.3 to 1,274.8)                 | 39.7<br>(33.6 to 47.4)                            | 0.3<br>(0.1 to 0.6)                       | 10.3<br>(1.2 to 20.4)                             | -3.6<br>(-12.1 to 5.8)                              |
| Other sexually transmitted diseases                                     | 8.9<br>(7.5 to 10.4)                          | 8.3<br>(6.7 to 10.1)                              | 0.2<br>(0.1 to 0.3)                       | -13.5<br>(-28.5 to 2.5)                           | -19.1<br>(-33.2 to -3.9)                            |
| Hepatitis                                                               | 247.6<br>(220.5 to 278.8)                     | 63.0<br>(52.1 to 77.1)                            | 0.1<br>(0.1 to 0.2)                       | -0.1<br>(-19.1 to 21.9)                           | -16.6<br>(-32.6 to 3.1)                             |
| Acute hepatitis A                                                       | 1.7<br>(1.2 to 2.5)                           | 21.7<br>(15.1 to 31.9)                            | < 0.05<br>(< 0.05 to 0.1)                 | -3.9<br>(-36.4 to 47.9)                           | -20.4<br>(-48.2 to 23.5)                            |
| Hepatitis B                                                             | 107.2<br>(84.8 to 134.5)                      | 32.0<br>(23.3 to 41.5)                            | 0.1<br>(< 0.05 to 0.1)                    | 1.1<br>(-20.7 to 28.6)                            | -14.7<br>(-32.7 to 7.7)                             |
| Hepatitis C                                                             | 138.4<br>(123.8 to 153.4)                     | 5.2<br>(4.7 to 5.8)                               | < 0.05<br>(< 0.05 to < 0.05)              | 8.2<br>(6.3 to 9.9)                               | -6.6<br>(-7.8 to -5.5)                              |
| Acute hepatitis E                                                       | 0.3<br>(0.2 to 0.5)                           | 4.1<br>(2.6 to 5.9)                               | < 0.05<br>(< 0.05 to < 0.05)              | 5.3<br>(-15.8 to 28.6)                            | -14.8<br>(-27.6 to -0.6)                            |
| Other infectious diseases                                               | 15.7<br>(13.8 to 18.6)                        | < 0.05<br>(< 0.05 to < 0.05)                      | 0.5<br>(0.3 to 0.7)                       | 9.1<br>(-3.0 to 24.3)                             | -1.3<br>(-15.2 to 17.2)                             |
| <b>Non-communicable diseases</b>                                        | <b>7,772.0</b><br><b>(7,705.0 to 7,826.0)</b> | <b>22,767.0†</b><br><b>(21,299.0 to 24,195.7)</b> | <b>962.0</b><br><b>(715.2 to 1,240.7)</b> | <b>11.6</b><br><b>(9.6 to 13.6)</b>               | <b>-3.6</b><br><b>(-5.4 to -1.9)</b>                |
| <b>Neoplasms</b>                                                        | <b>167.9</b><br><b>(160.7 to 174.5)</b>       | <b>54.4</b><br><b>(51.1 to 57.0)</b>              | <b>16.1</b><br><b>(11.9 to 21.2)</b>      | <b>18.8</b><br><b>(13.2 to 24.8)</b>              | <b>-2.9</b><br><b>(-7.6 to 2.3)</b>                 |
| Lip and oral cavity cancer                                              | 2.8<br>(2.5 to 3.1)                           | 0.7<br>(0.6 to 0.8)                               | 0.3<br>(0.2 to 0.4)                       | 18.8<br>(-1.0 to 41.7)                            | -2.7<br>(-18.6 to 15.8)                             |
| Nasopharynx cancer                                                      | 0.2<br>(0.2 to 0.3)                           | 0.1<br>(0.1 to 0.1)                               | < 0.05<br>(< 0.05 to < 0.05)              | -0.9<br>(-14.3 to 17.3)                           | -16.8<br>(-28.2 to -1.8)                            |
| Other pharynx cancer                                                    | 1.3<br>(1.2 to 1.4)                           | 0.4<br>(0.3 to 0.4)                               | 0.1<br>(0.1 to 0.2)                       | 24.0<br>(5.7 to 44.4)                             | 2.2<br>(-12.9 to 19.7)                              |
| Oesophageal cancer                                                      | 1.1<br>(0.9 to 1.3)                           | 0.7<br>(0.6 to 0.7)                               | 0.2<br>(0.1 to 0.2)                       | 26.0<br>(-0.8 to 59.5)                            | 2.8<br>(-19.7 to 30.2)                              |
| Stomach cancer                                                          | 2.6<br>(2.3 to 2.9)                           | 1.1<br>(1.0 to 1.2)                               | 0.3<br>(0.2 to 0.4)                       | 14.4<br>(-4.1 to 37.3)                            | -7.2<br>(-21.6 to 11.5)                             |
| Colon and rectum cancer                                                 | 21.7<br>(20.1 to 24.3)                        | 5.4<br>(5.0 to 6.0)                               | 1.9<br>(1.4 to 2.5)                       | 11.2<br>(-0.1 to 26.1)                            | -10.0<br>(-19.6 to 2.2)                             |
| Liver cancer                                                            | 1.1<br>(0.8 to 1.4)                           | 1.0<br>(0.9 to 1.1)                               | 0.2<br>(0.2 to 0.3)                       | 38.8<br>(16.6 to 64.3)                            | 13.1<br>(-5.2 to 34.1)                              |
| Liver cancer due to hepatitis B                                         | 0.2<br>(0.2 to 0.4)                           | 0.1<br>(0.1 to 0.2)                               | < 0.05<br>(< 0.05 to 0.1)                 | 40.2<br>(15.5 to 69.6)                            | 15.4<br>(-5.4 to 39.4)                              |

| Cause                                              | Prevalence in thousands (95% UI)              | Incidence in thousands (95% UI)       | YLDs in thousands (95% UI)           |                                                   |                                                     |
|----------------------------------------------------|-----------------------------------------------|---------------------------------------|--------------------------------------|---------------------------------------------------|-----------------------------------------------------|
|                                                    | 2016 counts                                   | 2016 counts                           | 2016 counts                          | Percentage change in counts between 2006 and 2016 | Percentage change in age-standardised rates between |
| Liver cancer due to hepatitis C                    | 0.6<br>(0.4 to 0.7)                           | 0.3<br>(0.2 to 0.4)                   | 0.1<br>(0.1 to 0.1)                  | 44.1<br>(17.9 to 73.0)                            | 16.8<br>(-4.5 to 40.8)                              |
| Liver cancer due to alcohol use                    | 0.6<br>(0.5 to 0.8)                           | 0.4<br>(0.3 to 0.4)                   | 0.1<br>(0.1 to 0.1)                  | 30.7<br>(6.6 to 58.8)                             | 6.3<br>(-13.7 to 30.3)                              |
| Liver cancer due to other causes                   | 0.3<br>(0.2 to 0.4)                           | 0.2<br>(0.1 to 0.2)                   | < 0.05<br>(< 0.05 to 0.1)            | 46.0<br>(16.4 to 81.4)                            | 19.4<br>(-4.7 to 46.8)                              |
| Gallbladder and biliary tract cancer               | 0.3<br>(0.2 to 0.5)                           | 0.3<br>(0.2 to 0.4)                   | 0.1<br>(< 0.05 to 0.1)               | 1.1<br>(-26.8 to 36.1)                            | -18.5<br>(-39.4 to 6.6)                             |
| Pancreatic cancer                                  | 1.4<br>(1.2 to 1.6)                           | 1.4<br>(1.3 to 1.6)                   | 0.3<br>(0.2 to 0.4)                  | 28.6<br>(7.1 to 54.5)                             | 3.9<br>(-12.8 to 24.1)                              |
| Larynx cancer                                      | 1.1<br>(0.9 to 1.2)                           | 0.3<br>(0.2 to 0.3)                   | 0.1<br>(0.1 to 0.2)                  | 10.6<br>(-6.0 to 32.8)                            | -9.6<br>(-23.4 to 9.1)                              |
| Tracheal, bronchus, and lung cancer                | 6.6<br>(5.7 to 7.7)                           | 4.2<br>(3.8 to 4.7)                   | 1.0<br>(0.7 to 1.3)                  | 15.3<br>(-3.4 to 39.1)                            | -6.6<br>(-22.0 to 12.5)                             |
| Malignant skin melanoma                            | 13.7<br>(10.7 to 15.5)                        | 2.8<br>(2.1 to 3.1)                   | 0.9<br>(0.6 to 1.2)                  | 34.5<br>(16.4 to 52.4)                            | 11.8<br>(-3.1 to 27.4)                              |
| Non-melanoma skin cancer                           | 2.9<br>(2.5 to 3.4)                           | 7.7<br>(6.9 to 8.6)                   | 0.1<br>(0.1 to 0.2)                  | 30.4<br>(7.5 to 58.7)                             | 3.4<br>(-15.2 to 24.0)                              |
| Non-melanoma skin cancer (squamous-cell carcinoma) | 2.3<br>(1.9 to 2.8)                           | 2.2<br>(1.9 to 2.6)                   | 0.1<br>(0.1 to 0.1)                  | 31.2<br>(6.0 to 60.7)                             | 3.7<br>(-15.9 to 26.3)                              |
| Non-melanoma skin cancer (basal-cell carcinoma)    | 0.7<br>(0.6 to 1.1)                           | 5.5<br>(4.8 to 6.4)                   | < 0.05<br>(< 0.05 to < 0.05)         | 21.5<br>(-8.5 to 61.9)                            | -0.8<br>(-25.5 to 30.9)                             |
| Breast cancer                                      | 29.3<br>(27.1 to 32.6)                        | 6.0<br>(5.5 to 6.6)                   | 2.7<br>(1.9 to 3.6)                  | 12.5<br>(2.1 to 24.5)                             | -7.0<br>(-15.8 to 3.0)                              |
| Cervical cancer                                    | 1.0<br>(0.8 to 1.2)                           | 0.2<br>(0.2 to 0.3)                   | 0.1<br>(0.1 to 0.1)                  | -6.5<br>(-24.5 to 14.6)                           | -20.0<br>(-36.0 to -0.1)                            |
| Uterine cancer                                     | 5.2<br>(4.4 to 6.0)                           | 1.1<br>(0.9 to 1.3)                   | 0.4<br>(0.3 to 0.5)                  | 14.4<br>(-7.8 to 42.7)                            | -6.0<br>(-24.8 to 17.7)                             |
| Ovarian cancer                                     | 2.1<br>(1.7 to 2.5)                           | 0.7<br>(0.6 to 0.8)                   | 0.3<br>(0.2 to 0.4)                  | 3.3<br>(-22.1 to 35.7)                            | -15.0<br>(-35.7 to 11.9)                            |
| Prostate cancer                                    | 35.5<br>(27.8 to 42.8)                        | 8.5<br>(7.0 to 10.0)                  | 3.0<br>(2.0 to 4.1)                  | 26.4<br>(7.7 to 49.5)                             | 1.6<br>(-13.8 to 20.8)                              |
| Testicular cancer                                  | 1.3<br>(1.1 to 1.6)                           | 0.2<br>(0.2 to 0.3)                   | 0.1<br>(0.1 to 0.1)                  | -6.3<br>(-30.4 to 25.6)                           | -16.2<br>(-38.5 to 14.2)                            |
| Kidney cancer                                      | 4.2<br>(3.7 to 4.8)                           | 1.1<br>(1.0 to 1.2)                   | 0.4<br>(0.2 to 0.5)                  | 20.2<br>(2.2 to 40.8)                             | -1.6<br>(-16.2 to 15.9)                             |
| Bladder cancer                                     | 6.3<br>(5.6 to 6.9)                           | 1.5<br>(1.4 to 1.6)                   | 0.6<br>(0.4 to 0.8)                  | 23.2<br>(7.0 to 41.8)                             | -1.0<br>(-14.2 to 14.3)                             |
| Brain and nervous system cancer                    | 2.5<br>(1.7 to 3.1)                           | 0.9<br>(0.7 to 1.2)                   | 0.3<br>(0.2 to 0.4)                  | 27.5<br>(-0.5 to 59.9)                            | 7.8<br>(-14.1 to 33.5)                              |
| Thyroid cancer                                     | 2.9<br>(2.6 to 3.3)                           | 0.6<br>(0.5 to 0.6)                   | 0.2<br>(0.1 to 0.3)                  | 21.9<br>(3.4 to 44.4)                             | 3.0<br>(-13.1 to 21.9)                              |
| Mesothelioma                                       | 0.4<br>(0.3 to 0.4)                           | 0.2<br>(0.2 to 0.2)                   | 0.1<br>(< 0.05 to 0.1)               | 23.1<br>(4.0 to 43.8)                             | -0.3<br>(-15.2 to 15.7)                             |
| Hodgkin lymphoma                                   | 1.0<br>(0.9 to 1.2)                           | 0.2<br>(0.2 to 0.3)                   | 0.1<br>(0.1 to 0.1)                  | 10.7<br>(-9.3 to 36.3)                            | -4.6<br>(-23.3 to 20.8)                             |
| Non-Hodgkin's lymphoma                             | 7.4<br>(6.3 to 8.4)                           | 1.8<br>(1.6 to 2.1)                   | 0.6<br>(0.4 to 0.8)                  | 33.5<br>(13.4 to 53.2)                            | 10.4<br>(-6.5 to 26.0)                              |
| Multiple myeloma                                   | 1.9<br>(1.4 to 2.4)                           | 0.6<br>(0.5 to 0.8)                   | 0.3<br>(0.2 to 0.5)                  | 31.0<br>(4.2 to 65.9)                             | 6.9<br>(-15.2 to 34.5)                              |
| Leukaemia                                          | 4.9<br>(4.5 to 5.4)                           | 1.5<br>(1.3 to 1.6)                   | 0.6<br>(0.5 to 0.8)                  | 14.8<br>(0.5 to 30.3)                             | -6.1<br>(-19.0 to 8.4)                              |
| Acute lymphoid leukaemia                           | 0.6<br>(0.5 to 0.7)                           | 0.1<br>(0.1 to 0.2)                   | 0.1<br>(< 0.05 to 0.1)               | 13.9<br>(-15.2 to 51.3)                           | -0.7<br>(-32.4 to 47.3)                             |
| Chronic lymphoid leukaemia                         | 2.7<br>(2.4 to 3.1)                           | 0.6<br>(0.5 to 0.7)                   | 0.3<br>(0.2 to 0.4)                  | 16.7<br>(-4.5 to 42.7)                            | -6.3<br>(-23.3 to 15.4)                             |
| Acute myeloid leukaemia                            | 0.6<br>(0.5 to 0.7)                           | 0.4<br>(0.3 to 0.5)                   | 0.1<br>(0.1 to 0.1)                  | 15.5<br>(0.7 to 31.0)                             | -6.3<br>(-18.1 to 6.2)                              |
| Chronic myeloid leukaemia                          | 0.4<br>(0.4 to 0.5)                           | 0.1<br>(0.1 to 0.2)                   | 0.1<br>(< 0.05 to 0.1)               | -8.7<br>(-22.2 to 6.5)                            | -24.9<br>(-36.2 to -12.4)                           |
| Other leukaemia                                    | 0.6<br>(0.5 to 0.7)                           | 0.1<br>(0.1 to 0.2)                   | 0.1<br>(0.1 to 0.1)                  | 29.1<br>(4.4 to 58.1)                             | 1.3<br>(-17.6 to 22.5)                              |
| Other neoplasms                                    | 12.9<br>(10.8 to 14.4)                        | 3.2<br>(2.7 to 3.6)                   | 0.9<br>(0.6 to 1.3)                  | 16.2<br>(-0.9 to 32.4)                            | -4.2<br>(-18.0 to 9.1)                              |
| <b>Cardiovascular diseases</b>                     | <b>950.6</b><br><b>(913.4 to 987.2)</b>       | <b>91.4†</b><br><b>(86.9 to 96.8)</b> | <b>61.0</b><br><b>(44.7 to 79.1)</b> | <b>20.6</b><br><b>(15.8 to 25.2)</b>              | <b>-0.5</b><br><b>(-4.4 to 3.3)</b>                 |
| Rheumatic heart disease                            | 0.7<br>(0.6 to 0.8)                           | 0.3<br>(0.3 to 0.3)                   | 0.1<br>(< 0.05 to 0.1)               | 7.4<br>(-9.6 to 26.5)                             | -9.4<br>(-21.7 to 3.5)                              |
| Ischaemic heart disease                            | 244.2<br>(227.5 to 263.3)                     | 29.4<br>(27.3 to 31.8)                | 12.6<br>(8.8 to 17.1)                | 20.3<br>(14.3 to 26.1)                            | -1.4<br>(-6.2 to 3.6)                               |
| Cerebrovascular disease                            | 134.8<br>(124.2 to 144.1)                     | 19.8‡<br>(18.2 to 21.3)               | 21.5<br>(15.4 to 27.2)               | 18.4<br>(8.7 to 28.0)                             | -1.4<br>(-9.1 to 6.2)                               |
| Ischaemic stroke                                   | 109.0<br>(95.3 to 120.1)                      | 13.2‡<br>(11.8 to 14.7)               | 16.8<br>(11.7 to 21.5)               | 13.5<br>(2.9 to 25.1)                             | -5.6<br>(-14.5 to 3.2)                              |
| Hemorrhagic stroke                                 | 31.4<br>(27.6 to 35.6)                        | 6.5‡<br>(5.8 to 7.2)                  | 4.7<br>(3.4 to 6.1)                  | 39.9<br>(25.2 to 57.2)                            | 15.9<br>(4.1 to 30.3)                               |
| Hypertensive heart disease                         | 25.3<br>(21.4 to 30.0)                        | --                                    | 2.0<br>(1.4 to 2.8)                  | 21.4<br>(10.4 to 33.5)                            | -1.6<br>(-11.0 to 8.8)                              |
| Cardiomyopathy and myocarditis                     | 13.6<br>(12.1 to 15.5)                        | 2.6†<br>(2.3 to 3.0)                  | 1.2<br>(0.8 to 1.7)                  | 18.9<br>(7.6 to 32.6)                             | -1.3<br>(-10.5 to 10.1)                             |
| Myocarditis                                        | 2.1<br>(1.9 to 2.3)                           | 2.6<br>(2.3 to 3.0)                   | 0.2<br>(0.1 to 0.2)                  | 8.5<br>(-5.2 to 25.0)                             | -4.5<br>(-16.6 to 9.3)                              |
| Alcoholic cardiomyopathy                           | 4.8<br>(4.0 to 5.6)                           | --                                    | 0.4<br>(0.2 to 0.6)                  | 27.5<br>(5.7 to 53.7)                             | 5.7<br>(-12.2 to 28.2)                              |
| Other cardiomyopathy                               | 7.9<br>(6.7 to 9.3)                           | --                                    | 0.6<br>(0.4 to 0.9)                  | 16.7<br>(2.7 to 34.2)                             | -4.2<br>(-15.7 to 10.9)                             |
| Atrial fibrillation and flutter                    | 104.9<br>(97.2 to 114.5)                      | 8.3<br>(7.6 to 9.1)                   | 8.2<br>(5.6 to 11.1)                 | 39.5<br>(29.3 to 50.9)                            | 14.0<br>(5.6 to 23.6)                               |
| Peripheral vascular disease                        | 358.1<br>(313.9 to 406.7)                     | 28.7<br>(24.8 to 33.6)                | 1.3<br>(0.6 to 2.4)                  | 13.8<br>(6.0 to 22.1)                             | -8.1<br>(-14.5 to -1.4)                             |
| Endocarditis                                       | 1.9<br>(1.7 to 2.2)                           | 2.4<br>(2.2 to 2.6)                   | 0.1<br>(0.1 to 0.2)                  | 16.4<br>(-2.8 to 40.1)                            | -4.7<br>(-19.7 to 13.9)                             |
| Other cardiovascular and circulatory diseases      | 273.0<br>(237.2 to 311.6)                     | --                                    | 14.1<br>(9.7 to 19.7)                | 15.8<br>(6.3 to 25.4)                             | -3.9<br>(-11.5 to 4.2)                              |
| <b>Chronic respiratory diseases</b>                | <b>1,107.1</b><br><b>(1,074.1 to 1,142.3)</b> | <b>85.0†</b><br><b>(81.3 to 88.9)</b> | <b>39.9</b><br><b>(30.0 to 50.8)</b> | <b>9.3</b><br><b>(2.4 to 16.8)</b>                | <b>-4.3</b><br><b>(-9.3 to 0.8)</b>                 |
| Chronic obstructive pulmonary disease              | 594.6<br>(565.8 to 624.1)                     | 35.3<br>(33.1 to 37.4)                | 16.5<br>(12.8 to 20.2)               | 9.7<br>(-5.8 to 26.5)                             | -9.0<br>(-21.7 to 4.4)                              |
| Pneumoconiosis                                     | 0.2<br>(0.2 to 0.2)                           | < 0.05<br>(< 0.05 to < 0.05)          | < 0.05<br>(< 0.05 to < 0.05)         | 2.7<br>(-3.9 to 8.7)                              | -16.3<br>(-21.5 to -11.4)                           |
| Silicosis                                          | 0.1<br>(0.1 to 0.1)                           | < 0.05<br>(< 0.05 to < 0.05)          | < 0.05<br>(< 0.05 to < 0.05)         | 6.1<br>(-1.8 to 14.7)                             | -13.3<br>(-19.7 to -6.0)                            |

| Cause                                                          | Prevalence in thousands (95% UI)        | Incidence in thousands (95% UI)               | YLDs in thousands (95% UI)        |                                                   |                                                     |
|----------------------------------------------------------------|-----------------------------------------|-----------------------------------------------|-----------------------------------|---------------------------------------------------|-----------------------------------------------------|
|                                                                | 2016 counts                             | 2016 counts                                   | 2016 counts                       | Percentage change in counts between 2006 and 2016 | Percentage change in age-standardised rates between |
| Asbestosis                                                     | < 0.05<br>(< 0.05 to < 0.05)            | < 0.05<br>(< 0.05 to < 0.05)                  | < 0.05<br>(< 0.05 to < 0.05)      | 5.8<br>(-4.7 to 18.4)                             | -14.1<br>(-22.9 to -3.3)                            |
| Coal workers pneumoconiosis                                    | --                                      | --                                            | --                                | --                                                | --                                                  |
| Other pneumoconiosis                                           | < 0.05<br>(< 0.05 to 0.1)               | < 0.05<br>(< 0.05 to < 0.05)                  | < 0.05<br>(< 0.05 to < 0.05)      | -6.1<br>(-18.6 to 5.4)                            | -24.1<br>(-34.0 to -14.6)                           |
| Asthma                                                         | 574.1<br>(539.0 to 610.9)               | 49.1<br>(46.0 to 52.4)                        | 22.2<br>(14.7 to 31.9)            | 8.4<br>(4.4 to 12.5)                              | -2.5<br>(-6.2 to 1.4)                               |
| Interstitial lung disease and pulmonary sarcoidosis            | 5.4<br>(5.0 to 6.0)                     | 0.6<br>(0.6 to 0.7)                           | 0.6<br>(0.4 to 0.8)               | 21.5<br>(6.7 to 37.6)                             | -0.4<br>(-11.1 to 11.7)                             |
| Other chronic respiratory diseases                             | --                                      | --                                            | 0.5<br>(0.4 to 0.6)               | 31.7<br>(11.8 to 52.4)                            | 21.7<br>(0.8 to 46.6)                               |
| <b>Cirrhosis and other chronic liver diseases</b>              | <b>70.4<br/>(66.8 to 73.8)</b>          | <b>1.4<br/>(1.3 to 1.4)</b>                   | <b>1.5<br/>(1.0 to 2.0)</b>       | <b>24.5<br/>(12.9 to 37.8)</b>                    | <b>7.0<br/>(-3.7 to 18.5)</b>                       |
| Cirrhosis and other chronic liver diseases due to hepatitis B  | 9.6<br>(7.7 to 11.9)                    | 0.2<br>(0.1 to 0.2)                           | 0.2<br>(0.1 to 0.3)               | 26.9<br>(-2.1 to 62.8)                            | 8.8<br>(-16.0 to 37.8)                              |
| Cirrhosis and other chronic liver diseases due to hepatitis C  | 21.8<br>(17.1 to 27.7)                  | 0.4<br>(0.3 to 0.5)                           | 0.4<br>(0.3 to 0.6)               | 26.9<br>(4.0 to 55.4)                             | 8.5<br>(-12.0 to 33.8)                              |
| Cirrhosis and other chronic liver diseases due to alcohol use  | 33.0<br>(28.3 to 37.9)                  | 0.7<br>(0.6 to 0.7)                           | 0.7<br>(0.4 to 0.9)               | 24.9<br>(5.7 to 47.1)                             | 6.2<br>(-10.7 to 25.7)                              |
| Cirrhosis and other chronic liver diseases due to other causes | 5.9<br>(4.7 to 7.7)                     | 0.1<br>(0.1 to 0.1)                           | 0.2<br>(0.1 to 0.3)               | 16.4<br>(-9.7 to 48.4)                            | 5.7<br>(-20.2 to 40.8)                              |
| <b>Digestive diseases</b>                                      | <b>185.4<br/>(177.3 to 194.4)</b>       | <b>276.2<sup>†</sup><br/>(256.0 to 296.3)</b> | <b>8.5<br/>(6.0 to 11.6)</b>      | <b>8.3<br/>(1.9 to 15.0)</b>                      | <b>-6.4<br/>(-12.0 to -0.3)</b>                     |
| Peptic ulcer disease                                           | 49.9<br>(45.7 to 54.4)                  | 9.9<br>(8.8 to 11.1)                          | 0.4<br>(0.3 to 0.7)               | -1.8<br>(-14.3 to 12.0)                           | -14.9<br>(-26.9 to -2.5)                            |
| Gastritis and duodenitis                                       | 48.1<br>(43.0 to 54.3)                  | 40.0<br>(35.6 to 45.0)                        | 0.4<br>(0.3 to 0.7)               | 15.6<br>(0.7 to 31.5)                             | -0.4<br>(-13.4 to 13.3)                             |
| Appendicitis                                                   | 0.4<br>(0.4 to 0.4)                     | 10.1<br>(9.4 to 10.9)                         | 0.1<br>(0.1 to 0.2)               | 7.6<br>(-14.0 to 31.7)                            | -0.5<br>(-25.7 to 30.2)                             |
| Paralytic ileus and intestinal obstruction                     | 0.2<br>(0.2 to 0.2)                     | 5.7<br>(5.2 to 6.3)                           | 0.1<br>(< 0.05 to 0.1)            | 13.6<br>(-3.8 to 31.1)                            | -3.3<br>(-14.0 to 6.7)                              |
| Inguinal, femoral, and abdominal hernia                        | 67.2<br>(61.0 to 73.8)                  | 124.1<br>(106.1 to 141.3)                     | 4.7<br>(3.2 to 6.5)               | 11.2<br>(1.0 to 21.4)                             | -4.1<br>(-12.7 to 5.2)                              |
| Inflammatory bowel disease                                     | 10.9<br>(10.3 to 11.6)                  | 2.5<br>(2.5 to 2.6)                           | 1.6<br>(1.1 to 2.2)               | -1.6<br>(-12.9 to 10.2)                           | -13.7<br>(-23.8 to -2.7)                            |
| Vascular intestinal disorders                                  | 0.4<br>(0.3 to 0.4)                     | 1.6<br>(1.4 to 1.9)                           | 0.1<br>(0.1 to 0.2)               | 32.9<br>(3.9 to 69.1)                             | 9.3<br>(-10.4 to 33.2)                              |
| Gallbladder and biliary diseases                               | 13.8<br>(12.6 to 14.9)                  | 76.5<br>(66.7 to 84.5)                        | 0.4<br>(0.2 to 0.5)               | 9.9<br>(-10.9 to 33.7)                            | -6.6<br>(-23.4 to 12.8)                             |
| Pancreatitis                                                   | 0.7<br>(0.6 to 0.7)                     | 5.7<br>(5.2 to 6.4)                           | 0.1<br>(0.1 to 0.1)               | -1.2<br>(-7.5 to 5.3)                             | -15.3<br>(-21.0 to -9.6)                            |
| Other digestive diseases                                       | --                                      | --                                            | 0.7<br>(0.5 to 0.9)               | 14.3<br>(7.5 to 21.1)                             | -1.5<br>(-7.9 to 5.0)                               |
| <b>Neurological disorders</b>                                  | <b>3,057.3<br/>(2,953.8 to 3,181.7)</b> | <b>1,103.1<br/>(960.0 to 1,266.5)</b>         | <b>108.5<br/>(73.8 to 146.5)</b>  | <b>12.9<br/>(4.2 to 22.5)</b>                     | <b>-0.6<br/>(-9.1 to 9.2)</b>                       |
| Alzheimer's disease and other dementias                        | 115.5<br>(97.9 to 138.1)                | 22.6<br>(18.4 to 27.6)                        | 17.6<br>(12.1 to 23.6)            | 23.0<br>(16.7 to 29.6)                            | -3.0<br>(-7.9 to 2.2)                               |
| Parkinson's disease                                            | 15.0<br>(11.8 to 18.8)                  | 1.8<br>(1.4 to 2.3)                           | 1.7<br>(1.1 to 2.4)               | 28.2<br>(16.8 to 40.6)                            | 3.9<br>(-5.6 to 14.7)                               |
| Epilepsy                                                       | 19.8<br>(4.6 to 35.4)                   | 2.0<br>(0.5 to 3.6)                           | 4.4<br>(0.8 to 10.6)              | 4.3<br>(-82.6 to 457.1)                           | -8.2<br>(-84.5 to 384.4)                            |
| Multiple sclerosis                                             | 14.0<br>(12.6 to 15.5)                  | 0.3<br>(0.3 to 0.3)                           | 3.6<br>(2.5 to 4.7)               | 16.7<br>(3.8 to 32.2)                             | 2.4<br>(-9.7 to 15.9)                               |
| Motor neuron disease                                           | 1.4<br>(1.3 to 1.6)                     | 0.2<br>(0.2 to 0.2)                           | 0.3<br>(0.2 to 0.4)               | 24.0<br>(18.6 to 29.8)                            | 5.4<br>(1.1 to 9.8)                                 |
| Migraine                                                       | 1,610.8<br>(1,540.5 to 1,682.5)         | 137.3<br>(128.4 to 146.6)                     | 69.8<br>(45.3 to 98.0)            | 10.6<br>(7.0 to 14.2)                             | -0.3<br>(-3.6 to 3.1)                               |
| Tension-type headache                                          | 1,832.2<br>(1,633.4 to 2,053.3)         | 938.8<br>(798.3 to 1,100.5)                   | 9.7<br>(6.2 to 14.7)              | 12.1<br>(6.2 to 18.2)                             | 0.4<br>(-4.6 to 5.8)                                |
| Other neurological disorders                                   | < 0.05<br>(< 0.05 to < 0.05)            | 0.1<br>(< 0.05 to 0.1)                        | 1.4<br>(0.8 to 2.4)               | 22.9<br>(-34.7 to 145.1)                          | 11.1<br>(-50.1 to 154.0)                            |
| <b>Mental and substance use disorders</b>                      | <b>1,397.2<br/>(1,346.6 to 1,445.2)</b> | <b>471.7<sup>†</sup><br/>(441.2 to 505.4)</b> | <b>197.0<br/>(142.6 to 255.3)</b> | <b>9.4<br/>(7.2 to 11.6)</b>                      | <b>-2.3<br/>(-4.3 to -0.3)</b>                      |
| Schizophrenia                                                  | 25.4<br>(21.0 to 30.3)                  | 1.1<br>(0.9 to 1.4)                           | 16.1<br>(11.5 to 20.8)            | 14.2<br>(5.1 to 23.4)                             | 1.0<br>(-7.2 to 9.0)                                |
| Alcohol use disorders                                          | 104.5<br>(90.8 to 118.4)                | 42.1<br>(36.3 to 48.3)                        | 10.4<br>(7.1 to 14.6)             | 9.3<br>(-1.0 to 20.4)                             | -2.6<br>(-11.5 to 6.8)                              |
| Drug use disorders                                             | 78.2<br>(72.8 to 83.4)                  | 9.5<br>(8.6 to 10.5)                          | 14.0<br>(10.2 to 18.2)            | -0.5<br>(-9.1 to 8.5)                             | -11.6<br>(-19.5 to -3.1)                            |
| Opioid use disorders                                           | 21.3<br>(18.2 to 24.8)                  | 2.7<br>(2.3 to 3.1)                           | 8.8<br>(6.2 to 11.6)              | -4.8<br>(-15.7 to 7.4)                            | -16.6<br>(-26.5 to -5.3)                            |
| Cocaine use disorders                                          | 8.1<br>(7.0 to 9.4)                     | 0.5<br>(0.4 to 0.6)                           | 1.1<br>(0.7 to 1.6)               | 7.6<br>(-11.5 to 29.2)                            | -3.8<br>(-21.9 to 18.4)                             |
| Amphetamine use disorders                                      | 6.0<br>(4.3 to 8.2)                     | 0.6<br>(0.4 to 0.8)                           | 0.8<br>(0.4 to 1.3)               | 9.9<br>(-14.3 to 40.9)                            | -0.2<br>(-23.0 to 31.2)                             |
| Cannabis use disorders                                         | 34.8<br>(29.2 to 40.9)                  | 4.4<br>(3.7 to 5.4)                           | 1.0<br>(0.6 to 1.5)               | 2.0<br>(-13.2 to 18.6)                            | -7.4<br>(-22.2 to 9.3)                              |
| Other drug use disorders                                       | 10.2<br>(9.3 to 11.1)                   | 1.4<br>(1.2 to 1.5)                           | 2.3<br>(1.5 to 3.3)               | 9.9<br>(-7.6 to 30.2)                             | -1.1<br>(-17.6 to 18.5)                             |
| Depressive disorders                                           | 352.1<br>(332.1 to 374.7)               | 332.9<br>(302.9 to 363.9)                     | 56.1<br>(38.6 to 75.5)            | 7.0<br>(2.0 to 12.6)                              | -5.7<br>(-10.0 to -0.8)                             |
| Major depressive disorder                                      | 205.7<br>(187.1 to 225.6)               | 312.6<br>(283.6 to 344.0)                     | 41.6<br>(28.5 to 56.3)            | 4.8<br>(-1.8 to 11.7)                             | -7.4<br>(-13.0 to -1.3)                             |
| Dysthymia                                                      | 152.2<br>(133.4 to 175.7)               | 20.3<br>(17.8 to 23.3)                        | 14.5<br>(9.6 to 21.1)             | 14.1<br>(10.8 to 17.3)                            | -0.0<br>(-3.2 to 2.9)                               |
| Bipolar disorder                                               | 98.0<br>(65.5 to 139.6)                 | 5.9<br>(4.1 to 8.1)                           | 19.8<br>(10.8 to 32.8)            | 12.9<br>(8.0 to 18.2)                             | 0.3<br>(-3.8 to 4.7)                                |
| Anxiety disorders                                              | 441.3<br>(389.9 to 497.5)               | 54.6<br>(47.6 to 62.1)                        | 42.1<br>(29.0 to 57.7)            | 11.6<br>(7.4 to 15.8)                             | 0.2<br>(-3.2 to 3.8)                                |
| Eating disorders                                               | 30.4<br>(25.4 to 36.8)                  | 7.0<br>(5.3 to 9.0)                           | 6.4<br>(4.1 to 9.0)               | 12.4<br>(4.1 to 22.3)                             | 4.8<br>(-3.2 to 13.5)                               |
| Anorexia nervosa                                               | 9.9<br>(7.6 to 12.8)                    | 1.5<br>(1.1 to 1.9)                           | 2.1<br>(1.3 to 3.1)               | 10.7<br>(-3.7 to 27.1)                            | 2.6<br>(-10.6 to 18.0)                              |
| Bulimia nervosa                                                | 20.3<br>(15.5 to 26.8)                  | 5.5<br>(4.0 to 7.5)                           | 4.3<br>(2.6 to 6.4)               | 13.2<br>(2.1 to 26.4)                             | 6.0<br>(-3.7 to 17.9)                               |
| Autistic spectrum disorders                                    | 62.4<br>(56.0 to 70.8)                  | 0.3<br>(0.2 to 0.4)                           | 10.0<br>(6.8 to 14.2)             | 12.0<br>(6.5 to 17.9)                             | 0.7<br>(-4.4 to 6.1)                                |
| Autism                                                         | 24.9<br>(21.2 to 29.2)                  | < 0.05<br>(< 0.05 to < 0.05)                  | 6.2<br>(4.1 to 9.1)               | 12.1<br>(4.0 to 20.9)                             | 0.6<br>(-7.4 to 8.5)                                |
| Asperger syndrome and other autistic spectrum disorders        | 37.6<br>(31.1 to 45.2)                  | 0.2<br>(0.1 to 0.3)                           | 3.7<br>(2.4 to 5.4)               | 11.8<br>(6.3 to 17.5)                             | 0.7<br>(-4.2 to 6.2)                                |



| Cause                                                      | Prevalence in thousands (95% UI)              | Incidence in thousands (95% UI)                   | YLDs in thousands (95% UI)              |                                                   |                                                     |
|------------------------------------------------------------|-----------------------------------------------|---------------------------------------------------|-----------------------------------------|---------------------------------------------------|-----------------------------------------------------|
|                                                            | 2016 counts                                   | 2016 counts                                       | 2016 counts                             | Percentage change in counts between 2006 and 2016 | Percentage change in age-standardised rates between |
| Attention-deficit/hyperactivity disorder                   | 47.5<br>(41.0 to 55.0)                        | 2.0<br>(1.7 to 2.4)                               | 0.6<br>(0.3 to 0.9)                     | 5.8<br>(-6.4 to 18.3)                             | 0.3<br>(-11.2 to 12.9)                              |
| Conduct disorder                                           | 38.1<br>(28.9 to 48.0)                        | 12.0<br>(8.9 to 14.9)                             | 4.6<br>(2.8 to 7.2)                     | -1.4<br>(-8.0 to 5.0)                             | 0.5<br>(-6.0 to 6.9)                                |
| Idiopathic developmental intellectual disability           | 42.4<br>(16.7 to 72.4)                        | --                                                | 2.2<br>(0.9 to 3.9)                     | 7.9<br>(-0.7 to 18.6)                             | -2.6<br>(-10.8 to 7.0)                              |
| Other mental and substance use disorders                   | 202.6<br>(176.6 to 234.1)                     | 4.3<br>(3.9 to 4.9)                               | 14.9<br>(10.3 to 21.1)                  | 14.7<br>(9.7 to 19.8)                             | 0.7<br>(-3.9 to 5.4)                                |
| <b>Diabetes, urogenital, blood, and endocrine diseases</b> | <b>3,173.9</b><br><b>(2,880.9 to 3,500.1)</b> | <b>800.6†</b><br><b>(761.1 to 847.0)</b>          | <b>66.4</b><br><b>(47.5 to 90.2)</b>    | <b>16.1</b><br><b>(11.9 to 20.3)</b>              | <b>-1.9</b><br><b>(-5.5 to 1.5)</b>                 |
| Diabetes mellitus                                          | 367.2<br>(329.4 to 409.8)                     | 19.8<br>(17.5 to 22.4)                            | 24.9<br>(16.9 to 34.1)                  | 16.3<br>(7.5 to 26.1)                             | -3.0<br>(-10.2 to 5.2)                              |
| Acute glomerulonephritis                                   | 0.1<br>(0.1 to 0.1)                           | 1.2<br>(1.1 to 1.4)                               | < 0.05<br>(< 0.05 to < 0.05)            | 3.5<br>(-3.1 to 9.9)                              | -8.9<br>(-14.6 to -2.9)                             |
| Chronic kidney disease                                     | 441.9<br>(394.5 to 486.7)                     | 38.5<br>(33.2 to 43.8)                            | 10.3<br>(7.7 to 13.3)                   | 22.5<br>(13.9 to 31.2)                            | 1.9<br>(-4.9 to 9.2)                                |
| Chronic kidney disease due to diabetes mellitus            | 163.9<br>(142.4 to 188.3)                     | 15.3<br>(12.8 to 17.9)                            | 3.9<br>(2.8 to 5.1)                     | 24.4<br>(6.8 to 43.3)                             | 4.3<br>(-10.0 to 21.1)                              |
| Chronic kidney disease due to hypertension                 | 82.1<br>(70.6 to 94.4)                        | 5.4<br>(4.3 to 6.8)                               | 2.0<br>(1.4 to 2.6)                     | 39.8<br>(20.9 to 64.6)                            | 11.8<br>(-3.6 to 30.9)                              |
| Chronic kidney disease due to glomerulonephritis           | 77.6<br>(65.8 to 89.0)                        | 7.6<br>(6.0 to 9.4)                               | 1.7<br>(1.2 to 2.2)                     | 10.5<br>(-15.7 to 32.4)                           | -6.2<br>(-24.7 to 10.2)                             |
| Chronic kidney disease due to other causes                 | 118.4<br>(100.7 to 138.0)                     | 10.2<br>(8.6 to 12.2)                             | 2.8<br>(2.1 to 3.6)                     | 17.4<br>(1.5 to 36.2)                             | -0.7<br>(-13.4 to 14.8)                             |
| Urinary diseases and male infertility                      | 343.0<br>(320.4 to 364.8)                     | 436.0†<br>(397.5 to 481.4)                        | 10.9<br>(7.2 to 15.5)                   | 15.9<br>(9.1 to 22.3)                             | -4.4<br>(-10.1 to 0.8)                              |
| Interstitial nephritis and urinary tract infections        | 5.4<br>(4.7 to 6.3)                           | 282.6<br>(246.3 to 324.9)                         | 0.2<br>(0.1 to 0.3)                     | 15.0<br>(-3.5 to 35.8)                            | 2.9<br>(-12.8 to 21.7)                              |
| Urolithiasis                                               | 4.5<br>(4.0 to 4.9)                           | 118.4<br>(106.7 to 128.9)                         | 0.3<br>(0.2 to 0.5)                     | 10.7<br>(-9.0 to 33.0)                            | -5.3<br>(-20.8 to 12.7)                             |
| Benign prostatic hyperplasia                               | 309.7<br>(280.5 to 333.6)                     | 35.0<br>(30.1 to 39.8)                            | 10.1<br>(6.7 to 14.3)                   | 16.8<br>(9.2 to 23.9)                             | -4.2<br>(-10.6 to 1.7)                              |
| Male infertility                                           | 19.9<br>(14.2 to 27.6)                        | --                                                | 0.1<br>(< 0.05 to 0.2)                  | -2.8<br>(-12.9 to 7.9)                            | -4.6<br>(-13.5 to 4.7)                              |
| Other urinary diseases                                     | --                                            | --                                                | 0.2<br>(0.1 to 0.2)                     | -6.1<br>(-17.5 to 7.7)                            | -17.5<br>(-26.7 to -6.1)                            |
| Gynecological diseases                                     | 1,034.2<br>(976.7 to 1,095.0)                 | 265.0†<br>(252.2 to 279.6)                        | 9.8<br>(6.6 to 14.2)                    | 6.9<br>(1.5 to 12.0)                              | -4.1<br>(-9.0 to 0.5)                               |
| Uterine fibroids                                           | 90.5<br>(83.4 to 97.9)                        | 8.0<br>(7.0 to 8.9)                               | 1.2<br>(0.6 to 2.0)                     | 6.7<br>(-3.0 to 16.9)                             | -4.1<br>(-12.6 to 4.7)                              |
| Polycystic ovarian syndrome                                | 2.4<br>(1.8 to 3.1)                           | 8.1<br>(5.6 to 11.2)                              | < 0.05<br>(< 0.05 to < 0.05)            | 3.3<br>(-17.4 to 31.1)                            | -0.5<br>(-20.7 to 25.6)                             |
| Female infertility                                         | 33.6<br>(20.9 to 51.2)                        | --                                                | 0.2<br>(0.1 to 0.4)                     | 6.3<br>(-4.8 to 18.6)                             | 5.2<br>(-4.8 to 16.6)                               |
| Endometriosis                                              | 6.4<br>(5.3 to 7.4)                           | 13.2<br>(10.4 to 16.9)                            | 0.6<br>(0.4 to 0.9)                     | 3.9<br>(-13.6 to 25.0)                            | -4.8<br>(-21.1 to 14.4)                             |
| Genital prolapse                                           | 499.5<br>(441.2 to 562.3)                     | 22.8<br>(19.8 to 26.4)                            | 1.6<br>(0.8 to 2.8)                     | 21.6<br>(12.0 to 34.0)                            | 1.2<br>(-6.8 to 11.2)                               |
| Premenstrual syndrome                                      | 406.7<br>(384.0 to 430.7)                     | 136.8<br>(128.3 to 145.3)                         | 3.4<br>(2.1 to 5.1)                     | 8.8<br>(0.8 to 17.2)                              | -0.6<br>(-8.2 to 7.2)                               |
| Other gynecological diseases                               | 93.8<br>(84.1 to 104.0)                       | 76.1<br>(66.4 to 87.0)                            | 2.9<br>(2.0 to 4.1)                     | -0.8<br>(-10.8 to 10.6)                           | -10.1<br>(-19.1 to 0.4)                             |
| Hemoglobinopathies and hemolytic anaemias                  | 1,618.7<br>(1,232.4 to 2,031.2)               | --                                                | 3.7<br>(1.3 to 7.7)                     | 9.5<br>(-9.1 to 27.5)                             | -2.8<br>(-20.7 to 14.9)                             |
| Thalassemias                                               | 0.7<br>(0.1 to 2.5)                           | --                                                | < 0.05<br>(< 0.05 to 0.1)               | 17.9<br>(-24.1 to 72.2)                           | 7.9<br>(-30.8 to 58.9)                              |
| Thalassaemias trait                                        | 613.1<br>(179.0 to 1,321.1)                   | --                                                | 3.1<br>(0.8 to 6.9)                     | 10.9<br>(-13.0 to 33.3)                           | -1.6<br>(-23.6 to 20.4)                             |
| Sickle cell disorders                                      | < 0.05<br>(< 0.05 to 0.1)                     | --                                                | < 0.05<br>(< 0.05 to < 0.05)            | 6.1<br>(-10.6 to 37.8)                            | -2.3<br>(-17.1 to 24.0)                             |
| Sickle cell trait                                          | 112.9<br>(68.2 to 173.8)                      | --                                                | 0.1<br>(0.1 to 0.2)                     | 6.2<br>(-15.4 to 32.0)                            | -5.6<br>(-25.4 to 19.9)                             |
| G6PD deficiency                                            | 151.3<br>(125.9 to 179.2)                     | --                                                | < 0.05<br>(< 0.05 to < 0.05)            | 11.5<br>(-6.0 to 35.5)                            | 1.0<br>(-21.2 to 36.1)                              |
| G6PD trait                                                 | 780.9<br>(719.6 to 847.0)                     | --                                                | < 0.05<br>(< 0.05 to < 0.05)            | 5.6<br>(-12.2 to 26.2)                            | -6.2<br>(-23.6 to 16.4)                             |
| Other hemoglobinopathies and hemolytic anaemias            | 26.7<br>(24.2 to 29.4)                        | --                                                | 0.5<br>(0.3 to 0.7)                     | 1.0<br>(-11.9 to 16.4)                            | -11.5<br>(-24.0 to 4.5)                             |
| Endocrine, metabolic, blood, and immune disorders          | 206.8<br>(191.0 to 224.2)                     | 40.0<br>(35.8 to 44.4)                            | 6.8<br>(4.6 to 9.2)                     | 25.6<br>(16.9 to 35.5)                            | 5.7<br>(-1.6 to 13.8)                               |
| <b>Musculoskeletal disorders</b>                           | <b>2,353.5</b><br><b>(2,250.1 to 2,459.7)</b> | <b>1,150.8</b><br><b>(1,040.9 to 1,269.6)</b>     | <b>260.0</b><br><b>(190.0 to 337.9)</b> | <b>7.2</b><br><b>(1.6 to 13.0)</b>                | <b>-9.7</b><br><b>(-14.7 to -4.5)</b>               |
| Rheumatoid arthritis                                       | 42.4<br>(37.8 to 47.2)                        | 2.1<br>(1.8 to 2.3)                               | 9.8<br>(6.7 to 13.0)                    | 16.2<br>(7.7 to 25.5)                             | -1.2<br>(-8.4 to 6.9)                               |
| Osteoarthritis                                             | 614.6<br>(559.9 to 680.4)                     | 27.1<br>(24.3 to 30.4)                            | 21.4<br>(13.9 to 30.9)                  | 24.2<br>(19.9 to 28.2)                            | 3.1<br>(-0.4 to 6.4)                                |
| Low back and neck pain                                     | 1,626.0<br>(1,527.4 to 1,734.4)               | 696.7<br>(613.5 to 786.7)                         | 196.5<br>(139.5 to 258.4)               | 1.9<br>(-4.8 to 8.8)                              | -14.3<br>(-20.1 to -8.4)                            |
| Low back pain                                              | 1,244.2<br>(1,106.8 to 1,387.4)               | 599.1<br>(515.0 to 689.1)                         | 140.4<br>(99.2 to 185.7)                | -2.8<br>(-11.3 to 6.7)                            | -18.7<br>(-26.0 to -11.0)                           |
| Neck pain                                                  | 566.4<br>(488.5 to 648.6)                     | 97.6<br>(85.1 to 114.2)                           | 56.1<br>(38.0 to 78.9)                  | 15.8<br>(13.4 to 18.2)                            | 0.1<br>(-1.8 to 1.9)                                |
| Gout                                                       | 95.9<br>(84.7 to 109.5)                       | 15.2<br>(13.2 to 17.4)                            | 3.0<br>(2.0 to 4.1)                     | 20.6<br>(8.5 to 34.8)                             | 1.8<br>(-8.8 to 14.4)                               |
| Other musculoskeletal disorders                            | 344.4<br>(276.5 to 426.6)                     | 409.7<br>(341.8 to 492.2)                         | 29.2<br>(19.2 to 42.6)                  | 36.0<br>(20.4 to 54.1)                            | 18.5<br>(6.1 to 32.6)                               |
| <b>Other non-communicable diseases</b>                     | <b>6,442.4</b><br><b>(6,295.7 to 6,574.6)</b> | <b>18,732.6†</b><br><b>(17,241.5 to 20,151.7)</b> | <b>203.2</b><br><b>(139.7 to 287.4)</b> | <b>15.2</b><br><b>(14.0 to 16.6)</b>              | <b>0.0</b><br><b>(-1.0 to 1.1)</b>                  |
| Congenital anomalies                                       | 101.4<br>(96.2 to 107.0)                      | --                                                | 10.2<br>(7.3 to 13.6)                   | 12.3<br>(6.9 to 18.3)                             | 0.3<br>(-4.6 to 5.5)                                |
| Neural tube defects                                        | 3.9<br>(3.5 to 4.3)                           | --                                                | 1.1<br>(0.8 to 1.5)                     | -0.9<br>(-15.0 to 14.8)                           | -11.4<br>(-24.8 to 4.0)                             |
| Congenital heart anomalies                                 | 25.2<br>(22.6 to 28.2)                        | --                                                | 1.4<br>(0.6 to 2.3)                     | 22.5<br>(11.0 to 36.1)                            | 8.4<br>(-2.1 to 20.4)                               |
| Orofacial clefts                                           | 4.8<br>(4.2 to 5.4)                           | --                                                | < 0.05<br>(< 0.05 to 0.1)               | 11.5<br>(-1.0 to 26.9)                            | -0.7<br>(-11.8 to 12.8)                             |
| Down's syndrome                                            | 2.3<br>(2.0 to 2.6)                           | --                                                | 0.2<br>(0.1 to 0.3)                     | -2.6<br>(-10.6 to 5.5)                            | -10.3<br>(-17.4 to -2.7)                            |
| Turner syndrome                                            | 2.4<br>(2.1 to 2.7)                           | --                                                | < 0.05<br>(< 0.05 to 0.1)               | 10.5<br>(-19.5 to 53.8)                           | 1.0<br>(-26.6 to 43.2)                              |
| Klinefelter syndrome                                       | 11.2<br>(9.6 to 12.8)                         | --                                                | 0.1<br>(< 0.05 to 0.1)                  | 16.0<br>(-1.5 to 37.2)                            | 6.8<br>(-9.3 to 26.4)                               |

| Cause                                         | Prevalence in thousands (95% UI)              | Incidence in thousands (95% UI)          | YLDs in thousands (95% UI)            |                                                   |                                                     |
|-----------------------------------------------|-----------------------------------------------|------------------------------------------|---------------------------------------|---------------------------------------------------|-----------------------------------------------------|
|                                               | 2016 counts                                   | 2016 counts                              | 2016 counts                           | Percentage change in counts between 2006 and 2016 | Percentage change in age-standardised rates between |
| Other chromosomal abnormalities               | 6.0<br>(5.2 to 6.9)                           | --                                       | 0.7<br>(0.5 to 1.0)                   | 3.1<br>(-13.4 to 21.1)                            | -2.3<br>(-18.1 to 15.0)                             |
| Congenital musculoskeletal and limb anomalies | 27.1<br>(25.0 to 29.3)                        | --                                       | 3.7<br>(2.5 to 5.1)                   | 16.9<br>(6.9 to 26.7)                             | 3.8<br>(-5.2 to 13.3)                               |
| Urogenital congenital anomalies               | 13.6<br>(12.2 to 15.1)                        | --                                       | 0.3<br>(0.1 to 0.5)                   | 3.7<br>(-4.7 to 13.0)                             | -5.8<br>(-13.9 to 2.7)                              |
| Digestive congenital anomalies                | 14.2<br>(12.8 to 15.8)                        | --                                       | 0.6<br>(0.4 to 0.9)                   | 6.3<br>(-6.3 to 20.4)                             | -4.9<br>(-16.5 to 7.8)                              |
| Other congenital anomalies                    | 11.2<br>(4.4 to 20.8)                         | --                                       | 2.0<br>(1.1 to 3.5)                   | 14.7<br>(4.8 to 27.6)                             | 1.8<br>(-6.9 to 12.1)                               |
| Skin and subcutaneous diseases                | 3,018.0<br>(2,944.3 to 3,089.4)               | 6,992.0<br>(6,602.1 to 7,414.7)          | 76.8<br>(52.5 to 109.7)               | 11.5<br>(9.7 to 13.3)                             | 1.0<br>(-0.6 to 2.7)                                |
| Dermatitis                                    | 519.2<br>(457.4 to 591.0)                     | 609.5<br>(527.3 to 709.2)                | 19.2<br>(11.3 to 30.9)                | 10.7<br>(8.1 to 13.8)                             | 0.2<br>(-2.4 to 2.8)                                |
| Psoriasis                                     | 178.5<br>(168.0 to 190.6)                     | 15.5<br>(14.5 to 16.6)                   | 15.3<br>(10.9 to 20.1)                | 16.9<br>(11.2 to 23.1)                            | 2.6<br>(-2.7 to 8.4)                                |
| Cellulitis                                    | 3.5<br>(3.3 to 3.7)                           | 60.5<br>(56.8 to 64.2)                   | 0.2<br>(0.1 to 0.3)                   | 15.2<br>(-4.9 to 40.4)                            | -0.1<br>(-19.9 to 22.5)                             |
| Pyoderma                                      | 41.3<br>(40.1 to 42.6)                        | 1,174.7<br>(1,134.9 to 1,212.9)          | 0.2<br>(0.1 to 0.5)                   | 16.6<br>(11.0 to 22.3)                            | 0.5<br>(-4.4 to 5.9)                                |
| Scabies                                       | 7.3<br>(5.4 to 10.0)                          | 21.9<br>(16.1 to 29.9)                   | 0.2<br>(0.1 to 0.3)                   | 9.5<br>(-2.5 to 22.7)                             | 0.3<br>(-10.6 to 12.2)                              |
| Fungal skin diseases                          | 656.2<br>(582.7 to 735.5)                     | 2,595.3<br>(2,252.9 to 2,972.7)          | 3.6<br>(1.4 to 7.6)                   | 17.7<br>(16.3 to 19.2)                            | 0.3<br>(-0.9 to 1.4)                                |
| Viral skin diseases                           | 229.9<br>(198.2 to 266.2)                     | 308.0<br>(263.2 to 357.0)                | 7.0<br>(4.3 to 10.5)                  | 9.4<br>(6.2 to 13.0)                              | -0.0<br>(-2.7 to 2.8)                               |
| Acne vulgaris                                 | 767.0<br>(708.8 to 830.1)                     | 562.0<br>(462.2 to 695.0)                | 19.7<br>(13.2 to 28.5)                | 5.1<br>(1.5 to 8.7)                               | 1.0<br>(-2.5 to 4.4)                                |
| Alopecia areata                               | 25.9<br>(25.0 to 26.8)                        | 45.5<br>(43.9 to 47.0)                   | 0.8<br>(0.5 to 1.3)                   | 11.9<br>(3.8 to 21.3)                             | 0.3<br>(-6.9 to 9.0)                                |
| Pruritus                                      | 82.1<br>(72.5 to 92.9)                        | 64.5<br>(56.9 to 73.5)                   | 0.9<br>(0.4 to 1.6)                   | 14.9<br>(8.9 to 21.4)                             | 0.1<br>(-5.0 to 5.7)                                |
| Urticaria                                     | 52.1<br>(46.0 to 58.8)                        | 92.1<br>(81.7 to 103.6)                  | 3.1<br>(2.0 to 4.4)                   | 11.8<br>(4.8 to 19.0)                             | -0.1<br>(-6.0 to 6.2)                               |
| Decubitus ulcer                               | 4.9<br>(4.3 to 5.5)                           | 17.9<br>(15.7 to 20.2)                   | 0.8<br>(0.5 to 1.0)                   | 21.9<br>(6.4 to 37.8)                             | 1.6<br>(-9.5 to 13.5)                               |
| Other skin and subcutaneous diseases          | 1,095.6<br>(1,063.6 to 1,127.2)               | 1,424.7<br>(1,371.8 to 1,477.2)          | 5.9<br>(2.9 to 10.8)                  | 20.5<br>(18.0 to 22.9)                            | 3.2<br>(1.1 to 5.3)                                 |
| Sense organ diseases                          | 2,395.3<br>(2,248.4 to 2,534.2)               | 908.5†<br>(856.7 to 963.2)               | 72.9<br>(50.0 to 105.2)               | 18.7<br>(15.8 to 21.4)                            | -1.1<br>(-3.3 to 1.1)                               |
| Glaucoma                                      | 5.3<br>(4.0 to 7.0)                           | --                                       | 0.5<br>(0.3 to 0.8)                   | 23.8<br>(6.1 to 44.5)                             | 0.3<br>(-14.6 to 18.3)                              |
| Cataract                                      | 42.6<br>(30.7 to 58.2)                        | --                                       | 3.4<br>(2.2 to 5.0)                   | 19.4<br>(9.7 to 30.1)                             | -3.6<br>(-11.5 to 5.1)                              |
| Macular degeneration                          | 10.4<br>(7.6 to 14.0)                         | --                                       | 0.9<br>(0.6 to 1.4)                   | 26.3<br>(12.0 to 43.3)                            | 1.3<br>(-11.2 to 15.2)                              |
| Refraction and accommodation disorders        | 531.5<br>(482.7 to 589.3)                     | --                                       | 10.8<br>(6.6 to 17.2)                 | 12.4<br>(7.8 to 16.7)                             | -3.2<br>(-7.5 to 1.0)                               |
| Age-related and other hearing loss            | 2,000.3<br>(1,771.5 to 2,243.4)               | --                                       | 44.5<br>(29.8 to 66.3)                | 19.9<br>(15.7 to 24.2)                            | -0.7<br>(-4.2 to 2.5)                               |
| Other vision loss                             | 25.1<br>(19.5 to 31.6)                        | --                                       | 1.9<br>(1.2 to 2.7)                   | 18.7<br>(8.1 to 31.8)                             | -0.5<br>(-9.8 to 10.4)                              |
| Other sense organ diseases                    | 348.6<br>(320.2 to 377.7)                     | 908.5<br>(856.7 to 963.2)                | 10.9<br>(6.8 to 16.4)                 | 19.1<br>(15.1 to 23.5)                            | 0.7<br>(-2.8 to 4.7)                                |
| Oral disorders                                | 4,635.4<br>(4,390.0 to 4,869.0)               | 10,832.1†<br>(9,393.2 to 12,210.2)       | 43.3<br>(27.0 to 65.4)                | 17.3<br>(14.9 to 19.8)                            | -0.7<br>(-2.7 to 1.1)                               |
| Caries of deciduous teeth                     | 288.7<br>(204.8 to 378.8)                     | 1,124.7<br>(678.9 to 1,608.3)            | 0.1<br>( $< 0.05$ to 0.2)             | 8.0<br>(-1.8 to 20.3)                             | -0.4<br>(-9.1 to 10.8)                              |
| Caries of permanent teeth                     | 3,050.4<br>(2,738.9 to 3,377.1)               | 9,473.5<br>(8,014.3 to 10,737.9)         | 3.0<br>(1.3 to 5.9)                   | 11.2<br>(6.6 to 16.1)                             | -1.0<br>(-5.1 to 3.3)                               |
| Periodontal disease                           | 1,372.6<br>(983.7 to 1,768.1)                 | 161.9<br>(119.9 to 206.9)                | 9.0<br>(3.3 to 19.7)                  | 15.1<br>(9.8 to 21.2)                             | -0.2<br>(-5.0 to 4.6)                               |
| Edentulism and severe tooth loss              | 955.9<br>(842.6 to 1,073.0)                   | 72.0<br>(60.2 to 85.7)                   | 26.3<br>(17.3 to 37.3)                | 19.6<br>(16.3 to 23.3)                            | -1.1<br>(-3.8 to 1.8)                               |
| Other oral disorders                          | 168.4<br>(161.1 to 176.3)                     | --                                       | 4.9<br>(3.0 to 7.4)                   | 13.0<br>(9.5 to 16.3)                             | 0.2<br>(-2.8 to 3.3)                                |
| <b>Injuries</b>                               | <b>2,688.7</b><br><b>(2,521.3 to 2,882.8)</b> | <b>932.8†</b><br><b>(882.3 to 993.9)</b> | <b>85.1</b><br><b>(57.7 to 120.5)</b> | <b>-1.9</b><br><b>(-3.6 to -0.2)</b>              | <b>-16.5</b><br><b>(-18.2 to -14.9)</b>             |
| <b>Transport injuries</b>                     | <b>312.1</b><br><b>(290.3 to 334.8)</b>       | <b>70.6</b><br><b>(64.7 to 77.3)</b>     | <b>14.0</b><br><b>(9.2 to 20.1)</b>   | <b>-10.6</b><br><b>(-12.1 to -9.2)</b>            | <b>-23.5</b><br><b>(-24.9 to -22.2)</b>             |
| Road injuries                                 | 277.2<br>(258.5 to 297.9)                     | 65.9<br>(60.1 to 72.5)                   | 12.7<br>(8.4 to 18.4)                 | -13.6<br>(-15.1 to -12.2)                         | -26.1<br>(-27.5 to -24.8)                           |
| Pedestrian road injuries                      | 39.4<br>(34.6 to 45.4)                        | 6.1<br>(5.0 to 7.5)                      | 2.0<br>(1.3 to 2.9)                   | -5.7<br>(-7.4 to -4.1)                            | -19.8<br>(-21.4 to -18.3)                           |
| Cyclist road injuries                         | 80.3<br>(67.5 to 94.3)                        | 24.1<br>(20.4 to 27.9)                   | 3.4<br>(2.2 to 4.9)                   | -15.3<br>(-16.8 to -14.0)                         | -28.0<br>(-29.3 to -26.7)                           |
| Motorcyclist road injuries                    | 61.3<br>(52.1 to 71.7)                        | 9.3<br>(7.7 to 11.2)                     | 2.9<br>(1.9 to 4.2)                   | -16.6<br>(-18.4 to -15.0)                         | -28.5<br>(-30.0 to -26.9)                           |
| Motor vehicle road injuries                   | 72.3<br>(61.4 to 82.9)                        | 20.9<br>(17.8 to 24.0)                   | 3.5<br>(2.3 to 5.0)                   | -11.4<br>(-13.0 to -9.7)                          | -24.1<br>(-25.6 to -22.5)                           |
| Other road injuries                           | 23.8<br>(20.0 to 28.2)                        | 5.4<br>(4.4 to 6.7)                      | 0.9<br>(0.6 to 1.3)                   | -20.5<br>(-22.3 to -18.8)                         | -30.6<br>(-32.4 to -28.8)                           |
| Other transport injuries                      | 35.0<br>(28.9 to 41.3)                        | 4.7<br>(4.1 to 5.4)                      | 1.2<br>(0.8 to 1.8)                   | 38.6<br>(36.2 to 40.8)                            | 20.6<br>(18.2 to 22.6)                              |
| <b>Unintentional injuries</b>                 | <b>2,266.4</b><br><b>(2,101.5 to 2,454.3)</b> | <b>818.9</b><br><b>(767.7 to 882.6)</b>  | <b>67.1</b><br><b>(45.7 to 95.1)</b>  | <b>-0.3</b><br><b>(-2.3 to 1.6)</b>               | <b>-15.5</b><br><b>(-17.6 to -13.6)</b>             |
| Falls                                         | 1,195.4<br>(1,066.4 to 1,325.8)               | 482.7<br>(442.7 to 539.8)                | 44.4<br>(31.2 to 61.0)                | -8.6<br>(-10.5 to -6.7)                           | -24.3<br>(-26.1 to -22.7)                           |
| Drowning                                      | 2.5<br>(2.2 to 2.7)                           | 0.2<br>(0.2 to 0.3)                      | 0.1<br>(0.1 to 0.2)                   | 23.3<br>(16.9 to 29.8)                            | 6.4<br>(-0.1 to 12.6)                               |
| Fire, heat, and hot substances                | 165.3<br>(139.6 to 193.3)                     | 8.4<br>(7.4 to 9.3)                      | 2.8<br>(1.6 to 4.8)                   | 22.4<br>(19.0 to 26.3)                            | 8.3<br>(4.8 to 11.9)                                |
| Poisonings                                    | 9.4<br>(7.4 to 12.1)                          | 6.4<br>(5.2 to 7.6)                      | 0.9<br>(0.6 to 1.3)                   | 34.0<br>(24.2 to 45.2)                            | 19.3<br>(9.6 to 30.8)                               |
| Exposure to mechanical forces                 | 548.4<br>(459.0 to 700.9)                     | 123.8<br>(105.5 to 144.5)                | 9.8<br>(6.2 to 15.1)                  | 5.4<br>(3.7 to 7.0)                               | -8.3<br>(-9.9 to -6.8)                              |
| Unintentional firearm injuries                | 13.1<br>(10.7 to 16.3)                        | 1.1<br>(0.8 to 1.6)                      | 0.2<br>(0.1 to 0.3)                   | 37.1<br>(34.1 to 40.1)                            | 18.5<br>(15.8 to 21.4)                              |
| Unintentional suffocation                     | 4.6<br>(3.7 to 5.7)                           | 0.7<br>(0.4 to 1.0)                      | 0.1<br>(0.1 to 0.2)                   | 20.0<br>(17.9 to 22.3)                            | 4.1<br>(1.8 to 6.3)                                 |
| Other exposure to mechanical forces           | 530.8<br>(440.8 to 682.2)                     | 122.0<br>(104.1 to 142.7)                | 9.5<br>(6.0 to 14.6)                  | 4.8<br>(3.1 to 6.4)                               | -8.8<br>(-10.4 to -7.3)                             |

| Cause                                                                               | Prevalence in thousands (95% UI)        | Incidence in thousands (95% UI)       | YLDs in thousands (95% UI)              |                                                   |                                                     |
|-------------------------------------------------------------------------------------|-----------------------------------------|---------------------------------------|-----------------------------------------|---------------------------------------------------|-----------------------------------------------------|
|                                                                                     | 2016 counts                             | 2016 counts                           | 2016 counts                             | Percentage change in counts between 2006 and 2016 | Percentage change in age-standardised rates between |
| Adverse effects of medical treatment                                                | 3.1<br>(2.5 to 3.9)                     | 40.8<br>(35.6 to 46.0)                | 0.4<br>(0.3 to 0.6)                     | 25.3<br>(18.8 to 32.2)                            | 10.8<br>(5.7 to 16.8)                               |
| Animal contact                                                                      | 40.8<br>(35.7 to 47.2)                  | 21.6<br>(17.4 to 26.2)                | 0.7<br>(0.5 to 1.1)                     | 2.6<br>(-1.5 to 6.0)                              | -11.1<br>(-15.1 to -7.6)                            |
| Venomous animal contact                                                             | 5.7<br>(4.9 to 6.6)                     | 6.5<br>(4.7 to 8.6)                   | 0.3<br>(0.2 to 0.4)                     | 3.7<br>(-4.4 to 11.9)                             | -8.8<br>(-16.4 to -1.3)                             |
| Non-venomous animal contact                                                         | 35.1<br>(30.3 to 41.6)                  | 15.2<br>(12.0 to 18.7)                | 0.5<br>(0.3 to 0.8)                     | 1.8<br>(-0.8 to 4.1)                              | -12.8<br>(-15.3 to -10.7)                           |
| Foreign body                                                                        | 43.1<br>(37.4 to 50.5)                  | 36.2<br>(31.1 to 43.2)                | 1.3<br>(0.8 to 1.9)                     | 44.2<br>(41.1 to 47.1)                            | 24.6<br>(21.9 to 27.2)                              |
| Pulmonary aspiration and foreign body in airway                                     | 7.6<br>(6.1 to 9.1)                     | 8.3<br>(7.4 to 9.5)                   | 0.2<br>(0.1 to 0.3)                     | 34.5<br>(31.6 to 37.6)                            | 14.4<br>(12.0 to 16.9)                              |
| Foreign body in eyes                                                                | 5.6<br>(3.8 to 7.6)                     | 21.9<br>(17.0 to 28.7)                | 0.4<br>(0.2 to 0.6)                     | 34.2<br>(29.9 to 39.2)                            | 17.1<br>(13.7 to 20.8)                              |
| Foreign body in other body part                                                     | 29.9<br>(25.0 to 36.8)                  | 5.9<br>(4.9 to 7.1)                   | 0.7<br>(0.5 to 1.1)                     | 53.2<br>(50.5 to 55.7)                            | 32.7<br>(30.1 to 35.2)                              |
| Environmental heat and cold exposure                                                | 19.4<br>(17.3 to 21.9)                  | 4.2<br>(3.5 to 5.0)                   | 0.7<br>(0.4 to 1.0)                     | 41.8<br>(35.7 to 48.0)                            | 19.6<br>(14.4 to 25.0)                              |
| Other unintentional injuries                                                        | 239.2<br>(200.8 to 282.6)               | 94.6<br>(80.0 to 109.8)               | 5.9<br>(3.8 to 8.9)                     | 50.6<br>(48.4 to 52.8)                            | 28.8<br>(26.9 to 30.8)                              |
| <b>Self-harm and interpersonal violence</b>                                         | <b>199.7</b><br><b>(182.7 to 216.4)</b> | <b>43.1†</b><br><b>(38.6 to 48.1)</b> | <b>3.9</b><br><b>(2.6 to 5.5)</b>       | <b>5.7</b><br><b>(3.2 to 7.9)</b>                 | <b>-6.8</b><br><b>(-9.1 to -4.7)</b>                |
| Self-harm                                                                           | 32.4<br>(26.4 to 38.8)                  | 24.8<br>(21.9 to 28.2)                | 1.3<br>(0.8 to 1.9)                     | 0.1<br>(-4.6 to 5.0)                              | -13.6<br>(-18.1 to -8.9)                            |
| Self-harm by firearm                                                                | 0.3<br>(0.2 to 0.3)                     | < 0.05<br>(< 0.05 to 0.1)             | < 0.05<br>(< 0.05 to < 0.05)            | -3.6<br>(-6.2 to -1.0)                            | -17.3<br>(-19.6 to -15.0)                           |
| Self-harm by other specified means                                                  | 32.1<br>(26.2 to 38.5)                  | 24.8<br>(21.9 to 28.2)                | 1.3<br>(0.8 to 1.8)                     | 0.1<br>(-4.6 to 5.1)                              | -13.6<br>(-18.1 to -8.9)                            |
| Interpersonal violence                                                              | 167.3<br>(152.2 to 183.4)               | 18.3‡<br>(15.0 to 22.1)               | 2.6<br>(1.7 to 3.7)                     | 8.7<br>(6.7 to 10.5)                              | -3.5<br>(-5.6 to -1.5)                              |
| Assault by firearm                                                                  | 5.1<br>(4.3 to 6.2)                     | 0.6<br>(0.4 to 0.8)                   | 0.1<br>(0.1 to 0.2)                     | 22.2<br>(19.9 to 24.7)                            | 6.0<br>(3.8 to 8.4)                                 |
| Assault by sharp object                                                             | 13.3<br>(10.8 to 16.0)                  | 3.2<br>(2.3 to 4.3)                   | 0.2<br>(0.1 to 0.4)                     | 16.2<br>(13.8 to 18.7)                            | 1.0<br>(-1.4 to 3.5)                                |
| Sexual violence                                                                     | 97.7<br>(85.4 to 111.4)                 | --                                    | 0.8<br>(0.5 to 1.1)                     | 5.5<br>(1.5 to 9.5)                               | -3.1<br>(-7.2 to 1.3)                               |
| Assault by other means                                                              | 51.1<br>(42.2 to 63.4)                  | 14.5<br>(11.9 to 17.6)                | 1.4<br>(0.9 to 2.1)                     | 8.4<br>(6.6 to 10.4)                              | -5.2<br>(-6.9 to -3.4)                              |
| <b>Forces of nature, conflict and terrorism, and executions and police conflict</b> | <b>8.2</b><br><b>(3.9 to 13.2)</b>      | <b>0.3†</b><br><b>(0.2 to 0.4)</b>    | <b>0.2</b><br><b>(&lt; 0.05 to 0.5)</b> | <b>36.3</b><br><b>(-10.9 to 53.1)</b>             | <b>11.6</b><br><b>(-28.7 to 27.0)</b>               |
| Exposure to forces of nature                                                        | 7.2<br>(3.0 to 12.2)                    | --                                    | 0.2<br>(< 0.05 to 0.5)                  | 34.7<br>(-16.6 to 53.3)                           | 9.7<br>(-34.2 to 27.1)                              |
| Conflict and terrorism                                                              | --                                      | --                                    | --                                      | --                                                | --                                                  |
| Executions and police conflict                                                      | 1.0<br>(0.6 to 1.6)                     | 0.3<br>(0.2 to 0.4)                   | < 0.05<br>(< 0.05 to 0.1)               | 47.9<br>(35.6 to 53.3)                            | 25.5<br>(16.9 to 30.0)                              |
| <b>Impairments</b>                                                                  | --                                      | --                                    | --                                      | --                                                | --                                                  |
| Anaemia                                                                             | 1,350.9<br>(1,154.4 to 1,635.7)         | --                                    | 25.7<br>(17.1 to 37.4)                  | 6.4<br>(-3.4 to 17.3)                             | -6.6<br>(-15.9 to 5.3)                              |
| Developmental intellectual disability                                               | 123.0<br>(93.6 to 157.6)                | --                                    | 16.9<br>(12.3 to 22.2)                  | 6.8<br>(1.5 to 12.6)                              | -4.0<br>(-8.9 to 1.0)                               |
| Epilepsy                                                                            | 36.4<br>(20.1 to 52.8)                  | --                                    | 12.0<br>(7.0 to 19.3)                   | 3.5<br>(-40.0 to 81.3)                            | -7.8<br>(-44.6 to 54.6)                             |
| Guillain-Barre syndrome                                                             | 0.1<br>(0.1 to 0.1)                     | --                                    | < 0.05<br>(< 0.05 to < 0.05)            | 15.6<br>(13.1 to 17.7)                            | 0.2<br>(0.1 to 0.3)                                 |
| Hearing loss                                                                        | 2,064.3<br>(1,834.0 to 2,306.9)         | --                                    | 47.4<br>(31.6 to 70.8)                  | 19.1<br>(15.1 to 23.2)                            | -1.0<br>(-4.1 to 2.1)                               |
| Heart failure                                                                       | 139.9<br>(124.2 to 158.0)               | --                                    | 16.1<br>(12.2 to 20.2)                  | 22.1<br>(13.0 to 30.4)                            | -1.1<br>(-8.6 to 5.8)                               |
| Infertility                                                                         | 80.2<br>(61.9 to 105.5)                 | --                                    | 0.6<br>(0.3 to 1.1)                     | 4.5<br>(-2.1 to 11.2)                             | 0.6<br>(-5.0 to 6.4)                                |
| Pelvic inflammatory disease                                                         | 0.9<br>(0.8 to 1.1)                     | --                                    | 0.1<br>(0.1 to 0.2)                     | -27.6<br>(-42.5 to -8.0)                          | -33.1<br>(-47.3 to -15.0)                           |
| Vision loss                                                                         | 627.5<br>(564.0 to 701.3)               | --                                    | 21.6<br>(15.5 to 30.2)                  | 12.3<br>(7.6 to 17.1)                             | -4.7<br>(-8.7 to -0.4)                              |

We did not calculate incidence for the nine impairments, certain NTDs, and causes with only birth prevalence. Blank cells mean that no estimate is available.

† Incidence for aggregate causes represents the sum of the incidence of the causes below the aggregate.

‡ Incidence estimates for stroke represent first-ever stroke only.

^ Incidence of HIV/AIDS represents new infections of HIV only and does not include new infections of Tuberculosis in HIV positive cases.



SR Table 14: Prevalence, incidence, and YLDs for 2016, percentage change of YLD counts and percentage change of age-standardised YLD rates between 2006 and 2016 by cause and impairments, for all ages, Syria.

| Cause                                                                                | Prevalence in thousands (95% UI)          | Incidence in thousands (95% UI)               | YLDs in thousands (95% UI)             |                                                   |                                                     |
|--------------------------------------------------------------------------------------|-------------------------------------------|-----------------------------------------------|----------------------------------------|---------------------------------------------------|-----------------------------------------------------|
|                                                                                      | 2016 counts                               | 2016 counts                                   | 2016 counts                            | Percentage change in counts between 2006 and 2016 | Percentage change in age-standardised rates between |
| <b>All causes</b>                                                                    | <b>17,560.8</b><br>(17,473.1 to 17,654.4) | <b>112,974.9†</b><br>(106,148.0 to 120,191.7) | <b>1,863.2</b><br>(1,380.6 to 2,408.3) | <b>5.4</b><br>(1.8 to 9.6)                        | <b>1.4</b><br>(-1.3 to 4.7)                         |
| <b>Communicable, maternal, neonatal, and nutritional disorders</b>                   | <b>12,744.6</b><br>(12,112.1 to 13,390.0) | <b>62,960.5†</b><br>(56,884.6 to 69,396.9)    | <b>212.6</b><br>(144.5 to 299.8)       | <b>-13.4</b><br>(-23.5 to -2.1)                   | <b>-6.2</b><br>(-15.6 to 5.3)                       |
| <b>HIV/AIDS and tuberculosis</b>                                                     | <b>5,874.9</b><br>(4,345.5 to 7,327.8)    | <b>3.7†</b><br>(2.5 to 5.4)                   | <b>0.7</b><br>(0.4 to 1.1)             | <b>9.9</b><br>(-21.1 to 61.1)                     | <b>8.9</b><br>(-19.5 to 54.6)                       |
| Tuberculosis                                                                         | 4,961.1<br>(3,503.8 to 6,568.2)           | 3.6†<br>(2.5 to 5.3)                          | 0.5<br>(0.3 to 0.8)                    | -11.8<br>(-36.3 to 23.1)                          | -11.0<br>(-33.4 to 18.9)                            |
| Drug-susceptible tuberculosis                                                        | 1.5<br>(1.0 to 2.2)                       | 3.4<br>(2.2 to 5.0)                           | 0.5<br>(0.2 to 0.8)                    | -12.6<br>(-41.4 to 29.3)                          | -11.8<br>(-40.2 to 22.2)                            |
| Multidrug-resistant tuberculosis without extensive drug resistance                   | 0.1<br>(< 0.05 to 0.4)                    | 0.2<br>(< 0.05 to 0.9)                        | < 0.05<br>(< 0.05 to 0.1)              | -2.9<br>(-85.7 to 302.2)                          | -2.8<br>(-85.9 to 301.7)                            |
| Extensively drug-resistant tuberculosis                                              | < 0.05<br>(< 0.05 to < 0.05)              | < 0.05<br>(< 0.05 to < 0.05)                  | < 0.05<br>(< 0.05 to < 0.05)           | 120.5<br>(-67.5 to 813.4)                         | 120.7<br>(-68.0 to 813.0)                           |
| Latent tuberculosis infection                                                        | 4,959.5<br>(3,502.4 to 6,566.9)           | --                                            | --                                     | --                                                | --                                                  |
| HIV/AIDS                                                                             | 1.8<br>(0.7 to 4.8)                       | 0.1 <sup>a</sup><br>(< 0.05 to 0.1)           | 0.2<br>(0.1 to 0.4)                    | 308.3<br>(89.3 to 833.8)                          | 287.9<br>(85.4 to 783.8)                            |
| Drug-susceptible HIV/AIDS - Tuberculosis                                             | < 0.05<br>(< 0.05 to < 0.05)              | < 0.05<br>(< 0.05 to < 0.05)                  | < 0.05<br>(< 0.05 to < 0.05)           | -9.2<br>(-31.4 to 8.3)                            | -8.1<br>(-30.6 to 10.0)                             |
| Multidrug-resistant HIV/AIDS - Tuberculosis without extensive drug resistance        | < 0.05<br>(< 0.05 to < 0.05)              | < 0.05<br>(< 0.05 to < 0.05)                  | < 0.05<br>(< 0.05 to < 0.05)           | -0.0<br>(-85.7 to 316.4)                          | 1.2<br>(-85.5 to 321.7)                             |
| Extensively drug-resistant HIV/AIDS - Tuberculosis                                   | < 0.05<br>(< 0.05 to < 0.05)              | < 0.05<br>(< 0.05 to < 0.05)                  | < 0.05<br>(< 0.05 to < 0.05)           | 127.0<br>(-67.6 to 845.9)                         | 129.8<br>(-67.2 to 858.1)                           |
| HIV/AIDS resulting in other diseases                                                 | 1.8<br>(0.7 to 4.7)                       | 0.1<br>(< 0.05 to 0.1)                        | 0.2<br>(0.1 to 0.4)                    | 346.6<br>(101.7 to 980.5)                         | 320.8<br>(94.1 to 878.1)                            |
| <b>Diarrhoea, lower respiratory infections, and other common infectious diseases</b> | <b>1,120.5</b><br>(1,058.2 to 1,192.3)    | <b>58,925.0†</b><br>(52,737.6 to 65,385.2)    | <b>53.3</b><br>(37.4 to 73.7)          | <b>-6.1</b><br>(-9.3 to -2.4)                     | <b>0.8</b><br>(-2.3 to 4.3)                         |
| Diarrhoeal diseases                                                                  | 156.3<br>(144.2 to 171.2)                 | 10,363.9<br>(9,496.9 to 11,345.5)             | 17.7<br>(12.2 to 24.7)                 | -7.1<br>(-13.8 to 0.6)                            | 4.5<br>(-2.2 to 12.1)                               |
| Intestinal infectious diseases                                                       | 0.5<br>(0.4 to 0.6)                       | 8.7 <sup>†</sup><br>(7.5 to 10.3)             | 0.1<br>(< 0.05 to 0.1)                 | -25.3<br>(-37.3 to -11.9)                         | -23.7<br>(-33.9 to -12.4)                           |
| Typhoid fever                                                                        | 0.5<br>(0.4 to 0.6)                       | 7.2<br>(6.1 to 8.5)                           | 0.1<br>(< 0.05 to 0.1)                 | -25.2<br>(-38.0 to -10.8)                         | -23.6<br>(-34.4 to -11.4)                           |
| Paratyphoid fever                                                                    | 0.1<br>(0.1 to 0.1)                       | 1.6<br>(1.3 to 1.9)                           | < 0.05<br>(< 0.05 to < 0.05)           | -20.5<br>(-34.5 to -3.5)                          | -19.5<br>(-31.8 to -5.3)                            |
| Other intestinal infectious diseases                                                 | --                                        | --                                            | < 0.05<br>(< 0.05 to < 0.05)           | -54.2<br>(-64.0 to -42.3)                         | -41.9<br>(-51.3 to -31.1)                           |
| Lower respiratory infections                                                         | 22.9<br>(20.5 to 25.6)                    | 1,002.1<br>(889.5 to 1,124.8)                 | 1.4<br>(0.9 to 2.0)                    | -1.5<br>(-14.1 to 12.0)                           | 6.3<br>(-4.8 to 17.9)                               |
| Upper respiratory infections                                                         | 605.5<br>(530.0 to 688.6)                 | 45,580.3<br>(39,713.0 to 52,170.5)            | 15.1<br>(9.0 to 23.8)                  | -6.0<br>(-11.1 to -0.8)                           | -0.6<br>(-5.7 to 4.2)                               |
| Otitis media                                                                         | 296.6<br>(265.4 to 330.1)                 | 1,468.5<br>(1,163.3 to 1,839.3)               | 9.1<br>(5.8 to 13.6)                   | -10.8<br>(-16.9 to -3.4)                          | -3.8<br>(-10.3 to 3.5)                              |
| Meningitis                                                                           | 36.6<br>(31.8 to 42.2)                    | 5.2<br>(4.4 to 6.2)                           | 3.9<br>(2.7 to 5.2)                    | -1.3<br>(-7.9 to 5.5)                             | 0.3<br>(-5.7 to 6.2)                                |
| Pneumococcal meningitis                                                              | 15.8<br>(12.9 to 19.4)                    | 1.3<br>(1.0 to 1.7)                           | 1.6<br>(1.1 to 2.2)                    | -1.5<br>(-16.1 to 14.2)                           | -0.5<br>(-13.5 to 12.8)                             |
| H influenzae type B meningitis                                                       | 7.9<br>(6.0 to 10.5)                      | 1.2<br>(0.8 to 1.8)                           | 1.0<br>(0.7 to 1.3)                    | -1.2<br>(-6.8 to 4.2)                             | 1.7<br>(-3.8 to 7.3)                                |
| Meningococcal infection                                                              | 6.3<br>(4.7 to 8.6)                       | 1.4<br>(1.1 to 1.9)                           | 0.7<br>(0.4 to 0.9)                    | -3.4<br>(-8.4 to 1.9)                             | -2.0<br>(-7.0 to 3.2)                               |
| Other meningitis                                                                     | 6.5<br>(4.9 to 8.5)                       | 1.2<br>(0.8 to 1.7)                           | 0.7<br>(0.5 to 1.0)                    | 0.8<br>(-4.9 to 7.1)                              | 2.5<br>(-2.8 to 8.3)                                |
| Encephalitis                                                                         | 47.7<br>(33.0 to 68.6)                    | 21.0<br>(18.1 to 24.2)                        | 5.1<br>(3.6 to 6.7)                    | 0.8<br>(-10.5 to 14.1)                            | -1.4<br>(-11.2 to 9.8)                              |
| Diphtheria                                                                           | < 0.05<br>(< 0.05 to < 0.05)              | < 0.05<br>(< 0.05 to < 0.05)                  | < 0.05<br>(< 0.05 to < 0.05)           | 24.3<br>(-35.2 to 147.5)                          | 41.9<br>(-21.1 to 167.8)                            |
| Whooping cough                                                                       | 7.9<br>(6.1 to 9.9)                       | 57.4<br>(44.5 to 72.0)                        | 0.4<br>(0.2 to 0.6)                    | 23.0<br>(2.4 to 49.7)                             | 74.2<br>(46.7 to 109.6)                             |
| Tetanus                                                                              | < 0.05<br>(< 0.05 to < 0.05)              | < 0.05<br>(< 0.05 to < 0.05)                  | < 0.05<br>(< 0.05 to < 0.05)           | -4.8<br>(-14.0 to 5.6)                            | 0.6<br>(-9.3 to 12.3)                               |
| Measles                                                                              | 0.3<br>(0.1 to 0.6)                       | 9.6<br>(3.4 to 21.9)                          | < 0.05<br>(< 0.05 to 0.1)              | -77.6<br>(-85.4 to -63.0)                         | -70.2<br>(-80.6 to -50.8)                           |
| Varicella and herpes zoster                                                          | 16.2<br>(15.1 to 17.4)                    | 408.4<br>(389.6 to 429.4)                     | 0.6<br>(0.3 to 0.9)                    | 4.9<br>(-9.5 to 23.2)                             | 0.1<br>(-10.5 to 13.3)                              |
| <b>Neglected tropical diseases and malaria</b>                                       | <b>5,184.8</b><br>(4,608.6 to 5,911.4)    | <b>275.7†</b><br>(186.6 to 404.1)             | <b>28.7</b><br>(18.0 to 44.4)          | <b>84.0</b><br>(30.8 to 154.6)                    | <b>86.8</b><br>(29.7 to 160.0)                      |
| Malaria                                                                              | 0.2<br>(0.1 to 0.2)                       | < 0.05<br>(0.0 to < 0.05)                     | 0.1<br>(< 0.05 to 0.1)                 | -1.6<br>(-10.3 to 8.0)                            | -2.0<br>(-10.5 to 7.7)                              |
| Chagas disease                                                                       | --                                        | --                                            | --                                     | --                                                | --                                                  |
| Leishmaniasis                                                                        | 302.4<br>(247.7 to 371.1)                 | 135.8<br>(47.9 to 264.2)                      | 17.9<br>(10.9 to 27.3)                 | 458.1<br>(255.4 to 874.5)                         | 473.8<br>(266.2 to 908.0)                           |
| Visceral leishmaniasis                                                               | < 0.05<br>(< 0.05 to < 0.05)              | < 0.05<br>(< 0.05 to < 0.05)                  | < 0.05<br>(< 0.05 to < 0.05)           | 47.2<br>(6.1 to 100.5)                            | 24.2<br>(-18.0 to 90.2)                             |
| Cutaneous and mucocutaneous leishmaniasis                                            | 277.7<br>(211.5 to 366.0)                 | 135.8<br>(47.9 to 264.2)                      | 17.9<br>(10.9 to 27.3)                 | 458.1<br>(255.4 to 874.6)                         | 473.9<br>(266.3 to 908.4)                           |
| African trypanosomiasis                                                              | --                                        | --                                            | --                                     | --                                                | --                                                  |
| Schistosomiasis                                                                      | 382.4<br>(344.7 to 420.9)                 | 137.7<br>(124.3 to 151.0)                     | 2.4<br>(1.1 to 4.9)                    | 4.1<br>(-3.3 to 12.7)                             | -1.8<br>(-9.1 to 6.6)                               |
| Cysticercosis                                                                        | --                                        | --                                            | --                                     | --                                                | --                                                  |
| Cystic echinococcosis                                                                | 10.0<br>(2.4 to 35.9)                     | 2.1<br>(0.5 to 7.7)                           | 0.9<br>(0.2 to 3.4)                    | -39.5<br>(-90.7 to 262.9)                         | -41.2<br>(-90.7 to 232.6)                           |
| Lymphatic filariasis                                                                 | --                                        | --                                            | --                                     | --                                                | --                                                  |
| Onchocerciasis                                                                       | --                                        | --                                            | --                                     | --                                                | --                                                  |
| Trachoma                                                                             | --                                        | --                                            | --                                     | --                                                | --                                                  |
| Dengue                                                                               | --                                        | --                                            | --                                     | --                                                | --                                                  |
| Yellow fever                                                                         | --                                        | --                                            | --                                     | --                                                | --                                                  |
| Rabies                                                                               | < 0.05<br>(< 0.05 to < 0.05)              | < 0.05<br>(< 0.05 to < 0.05)                  | < 0.05<br>(< 0.05 to < 0.05)           | -10.9<br>(-69.2 to 131.8)                         | -17.7<br>(-74.3 to 144.0)                           |
| Intestinal nematode infections                                                       | 4,626.5<br>(4,024.2 to 5,365.8)           | --                                            | 3.8<br>(1.8 to 8.0)                    | -0.7<br>(-51.4 to 105.1)                          | 0.9<br>(-53.7 to 121.9)                             |
| Ascariasis                                                                           | 3,558.2<br>(2,979.2 to 4,268.8)           | --                                            | 3.1<br>(1.3 to 6.8)                    | -2.4<br>(-59.2 to 138.1)                          | -0.9<br>(-62.4 to 154.1)                            |

| Cause                                                                   | Prevalence in thousands (95% UI)                 | Incidence in thousands (95% UI)                   | YLDs in thousands (95% UI)                    |                                                   |                                                     |
|-------------------------------------------------------------------------|--------------------------------------------------|---------------------------------------------------|-----------------------------------------------|---------------------------------------------------|-----------------------------------------------------|
|                                                                         | 2016 counts                                      | 2016 counts                                       | 2016 counts                                   | Percentage change in counts between 2006 and 2016 | Percentage change in age-standardised rates between |
| Trichuriasis                                                            | 1,022.7<br>(840.4 to 1,253.3)                    | --                                                | 0.1<br>( $< 0.05$ to 0.2)                     | -0.3<br>(-77.8 to 358.1)                          | -0.8<br>(-80.1 to 409.2)                            |
| Hookworm disease                                                        | 304.1<br>(259.0 to 357.1)                        | --                                                | 0.7<br>(0.4 to 1.2)                           | 7.3<br>(-30.4 to 63.5)                            | 9.9<br>(-32.6 to 73.2)                              |
| Food-borne trematodiasis                                                | --                                               | --                                                | --                                            | --                                                | --                                                  |
| Leprosy                                                                 | $< 0.05$<br>( $< 0.05$ to $< 0.05$ )             | $< 0.05$<br>( $< 0.05$ to $< 0.05$ )              | $< 0.05$<br>( $< 0.05$ to $< 0.05$ )          | 10.7<br>(-18.6 to 95.9)                           | -7.2<br>(-31.7 to 68.1)                             |
| Ebola virus disease                                                     | --                                               | --                                                | --                                            | --                                                | --                                                  |
| Zika virus disease                                                      | --                                               | --                                                | --                                            | --                                                | --                                                  |
| Guinea worm disease                                                     | --                                               | --                                                | --                                            | --                                                | --                                                  |
| Other neglected tropical diseases                                       | 146.2<br>(114.5 to 182.7)                        | --                                                | 3.6<br>(1.9 to 6.0)                           | -22.2<br>(-45.3 to 8.7)                           | -7.0<br>(-33.0 to 27.7)                             |
| <b>Maternal disorders</b>                                               | <b>10.5</b><br><b>(8.2 to 13.1)</b>              | <b>144.8†</b><br><b>(125.9 to 165.5)</b>          | <b>0.7</b><br><b>(0.4 to 1.0)</b>             | <b>-26.6</b><br><b>(-46.5 to -1.0)</b>            | <b>-20.6</b><br><b>(-41.8 to 7.4)</b>               |
| Maternal haemorrhage                                                    | 3.4<br>(2.3 to 4.8)                              | 18.2<br>(11.9 to 26.6)                            | 0.1<br>(0.1 to 0.2)                           | -29.2<br>(-54.3 to 10.2)                          | -24.2<br>(-50.6 to 15.9)                            |
| Maternal sepsis and other pregnancy related infections                  | 3.8<br>(2.3 to 5.9)                              | 37.8<br>(27.6 to 51.3)                            | 0.2<br>(0.1 to 0.3)                           | -39.8<br>(-72.1 to 36.0)                          | -34.0<br>(-69.2 to 48.2)                            |
| Maternal hypertensive disorders                                         | 3.6<br>(2.3 to 5.3)                              | 21.6<br>(16.9 to 27.1)                            | 0.2<br>(0.1 to 0.3)                           | 17.4<br>(-31.6 to 116.9)                          | 25.5<br>(-26.6 to 133.5)                            |
| Maternal obstructed labour and uterine rupture                          | 0.2<br>(0.1 to 0.4)                              | 16.5<br>(11.6 to 23.1)                            | 0.1<br>( $< 0.05$ to 0.1)                     | -38.1<br>(-69.8 to 73.4)                          | -32.0<br>(-66.7 to 83.4)                            |
| Maternal abortion, miscarriage, and ectopic pregnancy                   | 0.4<br>(0.3 to 0.6)                              | 50.7<br>(39.2 to 65.4)                            | $< 0.05$<br>( $< 0.05$ to 0.1)                | -40.3<br>(-72.3 to 26.9)                          | -36.8<br>(-71.3 to 33.8)                            |
| Other maternal disorders                                                | --                                               | --                                                | 0.1<br>(0.1 to 0.2)                           | -30.1<br>(-49.3 to -5.5)                          | -24.2<br>(-44.4 to 2.6)                             |
| <b>Neonatal disorders</b>                                               | <b>162.8</b><br><b>(130.4 to 220.7)</b>          | --                                                | <b>29.3</b><br><b>(17.6 to 57.1)</b>          | <b>-31.5</b><br><b>(-51.3 to 6.8)</b>             | <b>-27.7</b><br><b>(-48.4 to 12.6)</b>              |
| Neonatal preterm birth complications                                    | 141.9<br>(104.0 to 210.1)                        | --                                                | 19.6<br>(10.8 to 37.4)                        | 0.3<br>(-29.7 to 62.4)                            | 4.9<br>(-25.7 to 69.7)                              |
| Neonatal encephalopathy due to birth asphyxia and trauma                | 12.2<br>(6.8 to 21.0)                            | --                                                | 0.7<br>(0.2 to 3.1)                           | -74.4<br>(-91.2 to -42.9)                         | -73.5<br>(-90.4 to -42.7)                           |
| Neonatal sepsis and other neonatal infections                           | 14.5<br>(2.6 to 55.1)                            | --                                                | 5.9<br>(0.6 to 24.5)                          | -64.6<br>(-88.7 to -46.9)                         | -63.5<br>(-86.8 to -45.8)                           |
| Hemolytic disease and other neonatal jaundice                           | 6.9<br>(5.9 to 7.9)                              | --                                                | 2.1<br>(1.5 to 2.7)                           | -3.9<br>(-20.7 to 16.9)                           | -0.2<br>(-15.7 to 18.2)                             |
| Other neonatal disorders                                                | --                                               | --                                                | 1.1<br>(0.6 to 2.2)                           | -41.0<br>(-56.5 to -12.2)                         | -18.0<br>(-38.9 to 21.8)                            |
| <b>Nutritional deficiencies</b>                                         | <b>4,579.7</b><br><b>(4,070.7 to 5,205.8)</b>    | <b>1,378.6†</b><br><b>(933.1 to 2,215.8)</b>      | <b>86.0</b><br><b>(53.2 to 131.9)</b>         | <b>-24.7</b><br><b>(-38.1 to -7.5)</b>            | <b>-16.5</b><br><b>(-29.8 to -0.2)</b>              |
| Protein-energy malnutrition                                             | 172.5<br>(128.7 to 224.0)                        | 89.3<br>(68.4 to 115.0)                           | 8.9<br>(5.2 to 13.4)                          | -37.3<br>(-53.8 to -16.4)                         | -13.2<br>(-35.6 to 14.6)                            |
| Iodine deficiency                                                       | 507.7<br>(400.6 to 629.2)                        | 16.4<br>(13.0 to 20.2)                            | 12.0<br>(7.1 to 18.2)                         | 8.5<br>(-1.6 to 22.3)                             | 6.6<br>(-2.8 to 18.8)                               |
| Vitamin A deficiency                                                    | 1,459.0<br>(980.2 to 2,309.8)                    | 1,272.9<br>(830.0 to 2,112.1)                     | --                                            | --                                                | --                                                  |
| Iron-deficiency anaemia                                                 | 2,846.8<br>(2,312.4 to 3,452.2)                  | --                                                | 64.8<br>(37.4 to 104.6)                       | -26.7<br>(-44.0 to -5.5)                          | -20.8<br>(-37.1 to -1.3)                            |
| Other nutritional deficiencies                                          | --                                               | --                                                | 0.3<br>(0.2 to 0.5)                           | -36.8<br>(-53.8 to -14.6)                         | -13.5<br>(-36.7 to 16.2)                            |
| <b>Other communicable, maternal, neonatal, and nutritional diseases</b> | <b>3,316.3</b><br><b>(3,124.9 to 3,509.5)</b>    | <b>2,232.7</b><br><b>(1,865.3 to 2,624.6)</b>     | <b>13.8</b><br><b>(8.6 to 21.8)</b>           | <b>-4.8</b><br><b>(-13.2 to 4.5)</b>              | <b>-0.6</b><br><b>(-8.3 to 7.6)</b>                 |
| Sexually transmitted diseases excluding HIV                             | 2,310.4<br>(2,160.0 to 2,475.0)                  | 2,177.0<br>(1,808.2 to 2,566.7)                   | 10.7<br>(6.6 to 17.1)                         | -0.9<br>(-9.0 to 7.6)                             | 0.1<br>(-7.3 to 8.0)                                |
| Syphilis                                                                | 70.0<br>(39.2 to 121.9)                          | 55.3<br>(28.8 to 93.0)                            | 0.2<br>(0.1 to 0.2)                           | 14.1<br>(1.6 to 25.6)                             | -3.1<br>(-13.3 to 7.4)                              |
| Chlamydial infection                                                    | 165.7<br>(113.3 to 228.8)                        | 132.7<br>(93.2 to 186.7)                          | 1.0<br>(0.6 to 1.8)                           | -5.5<br>(-19.2 to 9.8)                            | -0.0<br>(-14.3 to 15.1)                             |
| Gonococcal infection                                                    | 422.1<br>(331.7 to 522.5)                        | 1,528.9<br>(1,161.3 to 1,907.5)                   | 5.4<br>(3.1 to 8.8)                           | -1.1<br>(-11.1 to 10.6)                           | 0.1<br>(-9.6 to 11.3)                               |
| Trichomoniasis                                                          | 298.7<br>(256.6 to 342.7)                        | 257.5<br>(220.3 to 297.4)                         | 0.4<br>(0.1 to 0.8)                           | -3.4<br>(-11.5 to 5.5)                            | -0.9<br>(-8.1 to 6.7)                               |
| Genital herpes                                                          | 1,457.8<br>(1,249.4 to 1,696.3)                  | 122.8<br>(104.0 to 145.8)                         | 0.4<br>(0.1 to 0.9)                           | 5.3<br>(-2.4 to 12.8)                             | 0.6<br>(-5.0 to 6.5)                                |
| Other sexually transmitted diseases                                     | 78.5<br>(62.3 to 94.1)                           | 79.7<br>(62.5 to 101.1)                           | 3.4<br>(2.1 to 5.3)                           | -0.3<br>(-8.8 to 8.6)                             | 0.3<br>(-7.8 to 8.6)                                |
| Hepatitis                                                               | 1,073.5<br>(892.2 to 1,289.5)                    | 55.7<br>(42.4 to 70.9)                            | $< 0.05$<br>( $< 0.05$ to $< 0.05$ )          | -37.8<br>(-55.3 to -14.0)                         | -27.9<br>(-43.7 to -8.0)                            |
| Acute hepatitis A                                                       | 0.7<br>(0.2 to 1.4)                              | 9.2<br>(2.2 to 18.1)                              | $< 0.05$<br>( $< 0.05$ to $< 0.05$ )          | -46.2<br>(-81.4 to 77.0)                          | -37.8<br>(-75.4 to 68.1)                            |
| Hepatitis B                                                             | 856.5<br>(681.0 to 1,065.2)                      | 40.6<br>(31.2 to 54.0)                            | $< 0.05$<br>( $< 0.05$ to $< 0.05$ )          | -35.7<br>(-45.4 to -24.3)                         | -28.8<br>(-37.9 to -18.5)                           |
| Hepatitis C                                                             | 216.3<br>(190.3 to 245.2)                        | 5.1<br>(4.2 to 6.2)                               | $< 0.05$<br>( $< 0.05$ to $< 0.05$ )          | -28.4<br>(-29.2 to -27.8)                         | -1.7<br>(-2.4 to -1.1)                              |
| Acute hepatitis E                                                       | 0.1<br>(0.1 to 0.1)                              | 0.9<br>(0.7 to 1.1)                               | $< 0.05$<br>( $< 0.05$ to $< 0.05$ )          | -33.3<br>(-41.8 to -23.6)                         | -27.4<br>(-34.6 to -20.3)                           |
| Other infectious diseases                                               | 114.8<br>(90.8 to 142.3)                         | $< 0.05$<br>( $< 0.05$ to $< 0.05$ )              | 3.0<br>(1.7 to 5.0)                           | -15.9<br>(-36.4 to 11.3)                          | -3.2<br>(-25.4 to 25.0)                             |
| <b>Non-communicable diseases</b>                                        | <b>16,309.2</b><br><b>(16,184.9 to 16,440.4)</b> | <b>48,779.7†</b><br><b>(45,457.9 to 52,034.4)</b> | <b>1,501.9</b><br><b>(1,095.8 to 1,943.9)</b> | <b>4.0</b><br><b>(1.7 to 6.2)</b>                 | <b>-1.1</b><br><b>(-2.8 to 0.6)</b>                 |
| <b>Neoplasms</b>                                                        | <b>16.2</b><br><b>(15.1 to 17.5)</b>             | <b>8.9</b><br><b>(8.3 to 9.7)</b>                 | <b>3.1</b><br><b>(2.2 to 4.0)</b>             | <b>23.0</b><br><b>(15.0 to 32.4)</b>              | <b>4.0</b><br><b>(-3.2 to 13.0)</b>                 |
| Lip and oral cavity cancer                                              | 0.4<br>(0.4 to 0.4)                              | 0.1<br>(0.1 to 0.1)                               | $< 0.05$<br>( $< 0.05$ to 0.1)                | 27.6<br>(14.6 to 40.9)                            | 6.3<br>(-5.2 to 19.5)                               |
| Nasopharynx cancer                                                      | 0.1<br>(0.1 to 0.1)                              | $< 0.05$<br>( $< 0.05$ to $< 0.05$ )              | $< 0.05$<br>( $< 0.05$ to $< 0.05$ )          | 7.4<br>(-5.3 to 23.3)                             | -3.6<br>(-13.5 to 9.1)                              |
| Other pharynx cancer                                                    | 0.1<br>(0.1 to 0.1)                              | $< 0.05$<br>( $< 0.05$ to $< 0.05$ )              | $< 0.05$<br>( $< 0.05$ to $< 0.05$ )          | 33.6<br>(17.9 to 49.0)                            | 8.6<br>(-4.2 to 21.6)                               |
| Oesophageal cancer                                                      | 0.1<br>(0.1 to 0.1)                              | 0.1<br>(0.1 to 0.1)                               | $< 0.05$<br>( $< 0.05$ to $< 0.05$ )          | 16.2<br>(5.5 to 28.3)                             | -7.1<br>(-16.0 to 2.3)                              |
| Stomach cancer                                                          | 0.5<br>(0.5 to 0.5)                              | 0.3<br>(0.3 to 0.4)                               | 0.1<br>(0.1 to 0.1)                           | 12.5<br>(1.2 to 26.0)                             | -7.6<br>(-18.3 to 5.2)                              |
| Colon and rectum cancer                                                 | 1.9<br>(1.6 to 2.1)                              | 0.6<br>(0.5 to 0.7)                               | 0.2<br>(0.2 to 0.3)                           | 42.5<br>(22.0 to 64.6)                            | 16.4<br>(-1.8 to 36.2)                              |
| Liver cancer                                                            | 0.1<br>(0.1 to 0.2)                              | 0.4<br>(0.3 to 0.4)                               | 0.1<br>(0.1 to 0.1)                           | 15.8<br>(3.7 to 27.9)                             | -5.5<br>(-15.6 to 4.0)                              |
| Liver cancer due to hepatitis B                                         | 0.1<br>(0.1 to 0.1)                              | 0.1<br>(0.1 to 0.2)                               | $< 0.05$<br>( $< 0.05$ to $< 0.05$ )          | 13.6<br>(0.7 to 27.0)                             | -6.4<br>(-16.6 to 4.4)                              |

| Cause                                              | Prevalence in thousands (95% UI)              | Incidence in thousands (95% UI)          | YLDs in thousands (95% UI)           |                                                   |                                                     |
|----------------------------------------------------|-----------------------------------------------|------------------------------------------|--------------------------------------|---------------------------------------------------|-----------------------------------------------------|
|                                                    | 2016 counts                                   | 2016 counts                              | 2016 counts                          | Percentage change in counts between 2006 and 2016 | Percentage change in age-standardised rates between |
| Liver cancer due to hepatitis C                    | 0.1<br>(0.1 to 0.1)                           | 0.1<br>(0.1 to 0.2)                      | < 0.05<br>(< 0.05 to < 0.05)         | 21.3<br>(6.3 to 35.6)                             | -2.9<br>(-15.1 to 8.6)                              |
| Liver cancer due to alcohol use                    | < 0.05<br>(< 0.05 to < 0.05)                  | < 0.05<br>(< 0.05 to < 0.05)             | < 0.05<br>(< 0.05 to < 0.05)         | 13.8<br>(-2.0 to 31.4)                            | -8.8<br>(-22.1 to 6.9)                              |
| Liver cancer due to other causes                   | 0.1<br>(0.1 to 0.1)                           | 0.1<br>(0.1 to 0.1)                      | < 0.05<br>(< 0.05 to < 0.05)         | 12.2<br>(-2.5 to 28.8)                            | -7.5<br>(-18.6 to 6.5)                              |
| Gallbladder and biliary tract cancer               | < 0.05<br>(< 0.05 to < 0.05)                  | 0.1<br>(< 0.05 to 0.1)                   | < 0.05<br>(< 0.05 to < 0.05)         | 22.0<br>(8.9 to 38.9)                             | -2.4<br>(-13.2 to 10.9)                             |
| Pancreatic cancer                                  | 0.2<br>(0.2 to 0.2)                           | 0.3<br>(0.3 to 0.3)                      | 0.1<br>(< 0.05 to 0.1)               | 33.0<br>(24.1 to 42.9)                            | 6.1<br>(-1.1 to 13.9)                               |
| Larynx cancer                                      | 0.3<br>(0.2 to 0.3)                           | 0.1<br>(0.1 to 0.1)                      | < 0.05<br>(< 0.05 to < 0.05)         | 33.5<br>(20.0 to 48.4)                            | 7.2<br>(-4.2 to 20.2)                               |
| Tracheal, bronchus, and lung cancer                | 1.0<br>(0.9 to 1.1)                           | 0.9<br>(0.8 to 1.0)                      | 0.2<br>(0.1 to 0.3)                  | 29.7<br>(6.4 to 57.3)                             | 5.6<br>(-14.7 to 29.9)                              |
| Malignant skin melanoma                            | 0.1<br>(0.1 to 0.2)                           | < 0.05<br>(< 0.05 to < 0.05)             | < 0.05<br>(< 0.05 to < 0.05)         | 56.4<br>(35.4 to 79.3)                            | 28.9<br>(11.8 to 47.5)                              |
| Non-melanoma skin cancer                           | 0.1<br>(0.1 to 0.2)                           | 0.6<br>(0.4 to 0.9)                      | < 0.05<br>(< 0.05 to < 0.05)         | 1.5<br>(-28.3 to 53.5)                            | -25.1<br>(-48.2 to 19.9)                            |
| Non-melanoma skin cancer (squamous-cell carcinoma) | 0.1<br>(0.1 to 0.2)                           | 0.1<br>(0.1 to 0.2)                      | < 0.05<br>(< 0.05 to < 0.05)         | -1.5<br>(-33.3 to 58.2)                           | -27.6<br>(-52.4 to 20.6)                            |
| Non-melanoma skin cancer (basal-cell carcinoma)    | 0.1<br>(< 0.05 to 0.1)                        | 0.5<br>(0.3 to 0.8)                      | < 0.05<br>(< 0.05 to < 0.05)         | 29.2<br>(15.5 to 43.6)                            | 6.7<br>(-1.4 to 18.0)                               |
| Breast cancer                                      | 4.8<br>(3.8 to 5.7)                           | 1.1<br>(0.8 to 1.2)                      | 0.5<br>(0.3 to 0.7)                  | 53.5<br>(17.2 to 91.8)                            | 26.8<br>(-2.7 to 57.9)                              |
| Cervical cancer                                    | 0.5<br>(0.4 to 0.7)                           | 0.1<br>(0.1 to 0.2)                      | 0.1<br>(< 0.05 to 0.1)               | 4.6<br>(-19.3 to 38.3)                            | -8.4<br>(-28.7 to 19.9)                             |
| Uterine cancer                                     | 0.5<br>(0.5 to 0.6)                           | 0.1<br>(0.1 to 0.1)                      | < 0.05<br>(< 0.05 to 0.1)            | 71.2<br>(35.0 to 112.5)                           | 36.6<br>(9.0 to 70.0)                               |
| Ovarian cancer                                     | 0.5<br>(0.5 to 0.6)                           | 0.2<br>(0.1 to 0.2)                      | 0.1<br>(0.1 to 0.1)                  | 37.2<br>(17.9 to 58.2)                            | 16.0<br>(-0.1 to 33.3)                              |
| Prostate cancer                                    | 1.9<br>(1.4 to 3.6)                           | 0.5<br>(0.4 to 1.0)                      | 0.2<br>(0.1 to 0.5)                  | 48.6<br>(18.2 to 86.5)                            | 13.4<br>(-9.3 to 42.3)                              |
| Testicular cancer                                  | 0.1<br>(< 0.05 to 0.1)                        | < 0.05<br>(< 0.05 to < 0.05)             | < 0.05<br>(< 0.05 to < 0.05)         | 57.2<br>(27.9 to 95.0)                            | 51.6<br>(26.0 to 84.5)                              |
| Kidney cancer                                      | 0.6<br>(0.5 to 0.6)                           | 0.2<br>(0.1 to 0.2)                      | 0.1<br>(< 0.05 to 0.1)               | 35.4<br>(18.2 to 54.2)                            | 17.8<br>(1.7 to 36.5)                               |
| Bladder cancer                                     | 0.9<br>(0.8 to 1.0)                           | 0.2<br>(0.2 to 0.3)                      | 0.1<br>(0.1 to 0.1)                  | 44.3<br>(24.5 to 64.5)                            | 13.7<br>(-1.8 to 30.6)                              |
| Brain and nervous system cancer                    | 1.1<br>(0.9 to 1.5)                           | 0.5<br>(0.5 to 0.7)                      | 0.2<br>(0.1 to 0.2)                  | 18.1<br>(4.7 to 39.1)                             | 6.3<br>(-7.7 to 31.4)                               |
| Thyroid cancer                                     | 0.2<br>(0.2 to 0.2)                           | < 0.05<br>(< 0.05 to < 0.05)             | < 0.05<br>(< 0.05 to < 0.05)         | 73.9<br>(55.6 to 97.0)                            | 34.4<br>(19.7 to 52.9)                              |
| Mesothelioma                                       | < 0.05<br>(< 0.05 to < 0.05)                  | < 0.05<br>(< 0.05 to < 0.05)             | < 0.05<br>(< 0.05 to < 0.05)         | 20.7<br>(6.9 to 37.2)                             | 0.2<br>(-11.6 to 14.5)                              |
| Hodgkin lymphoma                                   | < 0.05<br>(< 0.05 to < 0.05)                  | < 0.05<br>(< 0.05 to < 0.05)             | < 0.05<br>(< 0.05 to < 0.05)         | 11.8<br>(0.5 to 25.3)                             | -0.4<br>(-9.4 to 11.0)                              |
| Non-Hodgkin's lymphoma                             | 0.5<br>(0.5 to 0.6)                           | 0.2<br>(0.2 to 0.2)                      | 0.1<br>(< 0.05 to 0.1)               | 22.0<br>(8.3 to 37.2)                             | 5.7<br>(-7.5 to 21.3)                               |
| Multiple myeloma                                   | 0.1<br>(0.1 to 0.1)                           | 0.1<br>(0.1 to 0.1)                      | < 0.05<br>(< 0.05 to < 0.05)         | 34.7<br>(19.8 to 53.6)                            | 9.6<br>(-2.0 to 23.9)                               |
| Leukaemia                                          | 6.5<br>(5.7 to 7.9)                           | 1.7<br>(1.5 to 2.1)                      | 0.8<br>(0.6 to 1.1)                  | -1.1<br>(-15.4 to 18.6)                           | -12.6<br>(-26.7 to 9.8)                             |
| Acute lymphoid leukaemia                           | 0.6<br>(0.5 to 1.0)                           | 0.2<br>(0.1 to 0.2)                      | 0.1<br>(0.1 to 0.1)                  | -11.0<br>(-25.7 to 6.5)                           | -10.9<br>(-24.7 to 9.5)                             |
| Chronic lymphoid leukaemia                         | 0.7<br>(0.6 to 0.9)                           | 0.2<br>(0.1 to 0.2)                      | 0.1<br>(0.1 to 0.1)                  | 18.2<br>(-7.2 to 51.2)                            | -2.7<br>(-25.4 to 26.9)                             |
| Acute myeloid leukaemia                            | 0.4<br>(0.3 to 0.7)                           | 0.3<br>(0.2 to 0.4)                      | 0.1<br>(< 0.05 to 0.1)               | 2.8<br>(-12.2 to 20.1)                            | -4.0<br>(-18.9 to 19.0)                             |
| Chronic myeloid leukaemia                          | 0.4<br>(0.2 to 0.6)                           | 0.1<br>(0.1 to 0.2)                      | 0.1<br>(< 0.05 to 0.1)               | 1.1<br>(-18.5 to 26.8)                            | -13.8<br>(-31.9 to 9.0)                             |
| Other leukaemia                                    | 4.3<br>(3.7 to 5.2)                           | 1.0<br>(0.8 to 1.2)                      | 0.5<br>(0.4 to 0.7)                  | -3.0<br>(-20.4 to 19.9)                           | -15.2<br>(-31.8 to 9.2)                             |
| Other neoplasms                                    | 0.8<br>(0.7 to 0.9)                           | 0.3<br>(0.3 to 0.3)                      | 0.1<br>(0.1 to 0.1)                  | 16.9<br>(5.5 to 30.0)                             | 4.3<br>(-7.6 to 19.4)                               |
| <b>Cardiovascular diseases</b>                     | <b>917.9</b><br><b>(885.4 to 955.9)</b>       | <b>105.6†</b><br><b>(100.2 to 111.2)</b> | <b>53.8</b><br><b>(39.3 to 70.5)</b> | <b>12.6</b><br><b>(8.6 to 16.8)</b>               | <b>-2.0</b><br><b>(-5.2 to 1.3)</b>                 |
| Rheumatic heart disease                            | 83.4<br>(73.8 to 93.4)                        | 3.1<br>(2.8 to 3.5)                      | 4.0<br>(2.5 to 5.9)                  | -4.6<br>(-13.3 to 4.9)                            | -6.3<br>(-14.4 to 1.8)                              |
| Ischaemic heart disease                            | 393.2<br>(370.8 to 416.4)                     | 57.4<br>(52.8 to 62.2)                   | 16.3<br>(11.4 to 22.2)               | 24.6<br>(19.2 to 30.2)                            | 2.9<br>(-1.2 to 7.1)                                |
| Cerebrovascular disease                            | 95.4<br>(89.0 to 101.8)                       | 15.1‡<br>(13.8 to 16.4)                  | 14.8<br>(10.5 to 18.9)               | 8.8<br>(0.7 to 16.8)                              | -8.6<br>(-15.4 to -2.0)                             |
| Ischaemic stroke                                   | 82.3<br>(73.8 to 90.3)                        | 10.8‡<br>(9.6 to 12.2)                   | 12.1<br>(8.6 to 15.5)                | 11.1<br>(0.9 to 20.1)                             | -8.4<br>(-16.5 to -0.7)                             |
| Hemorrhagic stroke                                 | 18.3<br>(16.6 to 20.1)                        | 4.2‡<br>(3.8 to 4.6)                     | 2.7<br>(1.9 to 3.4)                  | -0.4<br>(-11.6 to 12.0)                           | -9.6<br>(-19.9 to 1.8)                              |
| Hypertensive heart disease                         | 11.5<br>(9.9 to 13.5)                         | --                                       | 0.9<br>(0.6 to 1.3)                  | 30.4<br>(14.1 to 49.0)                            | 5.6<br>(-6.1 to 19.4)                               |
| Cardiomyopathy and myocarditis                     | 9.5<br>(8.4 to 10.6)                          | 6.4†<br>(5.5 to 7.4)                     | 1.0<br>(0.7 to 1.4)                  | 6.6<br>(-6.2 to 20.2)                             | 3.4<br>(-6.9 to 14.4)                               |
| Myocarditis                                        | 4.0<br>(3.6 to 4.6)                           | 6.4<br>(5.5 to 7.4)                      | 0.3<br>(0.2 to 0.4)                  | 1.5<br>(-10.7 to 14.2)                            | 2.6<br>(-8.4 to 15.0)                               |
| Alcoholic cardiomyopathy                           | 0.6<br>(0.5 to 0.7)                           | --                                       | 0.1<br>(< 0.05 to 0.1)               | 27.4<br>(13.7 to 42.0)                            | 4.1<br>(-8.9 to 19.2)                               |
| Other cardiomyopathy                               | 7.8<br>(6.7 to 9.0)                           | --                                       | 0.7<br>(0.4 to 0.9)                  | 7.7<br>(-10.8 to 28.0)                            | 3.6<br>(-10.5 to 18.8)                              |
| Atrial fibrillation and flutter                    | 49.6<br>(43.5 to 57.0)                        | 4.3<br>(3.7 to 5.0)                      | 3.9<br>(2.6 to 5.3)                  | 23.4<br>(14.4 to 32.6)                            | -0.8<br>(-7.2 to 5.5)                               |
| Peripheral vascular disease                        | 166.0<br>(143.1 to 192.9)                     | 16.8<br>(14.4 to 19.8)                   | 0.6<br>(0.3 to 1.2)                  | 27.8<br>(17.4 to 39.1)                            | -0.1<br>(-7.6 to 8.4)                               |
| Endocarditis                                       | 0.8<br>(0.8 to 1.0)                           | 2.6<br>(2.3 to 2.9)                      | 0.1<br>(< 0.05 to 0.1)               | 16.6<br>(4.6 to 31.1)                             | 6.4<br>(-9.8 to 24.5)                               |
| Other cardiovascular and circulatory diseases      | 232.0<br>(198.6 to 269.6)                     | --                                       | 12.2<br>(8.2 to 17.6)                | 5.6<br>(-3.1 to 15.2)                             | 0.5<br>(-6.7 to 8.0)                                |
| <b>Chronic respiratory diseases</b>                | <b>1,520.9</b><br><b>(1,437.9 to 1,604.0)</b> | <b>269.2†</b><br><b>(250.5 to 289.6)</b> | <b>62.7</b><br><b>(44.6 to 85.8)</b> | <b>6.5</b><br><b>(1.8 to 11.4)</b>                | <b>3.2</b><br><b>(-0.8 to 7.7)</b>                  |
| Chronic obstructive pulmonary disease              | 299.8<br>(286.4 to 314.4)                     | 18.6<br>(17.8 to 19.4)                   | 12.0<br>(10.2 to 13.9)               | 16.8<br>(6.9 to 28.7)                             | 0.1<br>(-7.2 to 8.6)                                |
| Pneumoconiosis                                     | 0.7<br>(0.7 to 0.8)                           | 0.1<br>(< 0.05 to 0.1)                   | 0.1<br>(0.1 to 0.2)                  | 16.7<br>(12.0 to 22.1)                            | -0.7<br>(-4.8 to 4.1)                               |
| Silicosis                                          | 0.2<br>(0.1 to 0.2)                           | < 0.05<br>(< 0.05 to < 0.05)             | < 0.05<br>(< 0.05 to < 0.05)         | 10.0<br>(5.7 to 16.3)                             | -0.7<br>(-4.7 to 4.5)                               |



| Cause                                                          | Prevalence in thousands (95% UI)        | Incidence in thousands (95% UI)         | YLDs in thousands (95% UI)        |                                                   |                                                     |
|----------------------------------------------------------------|-----------------------------------------|-----------------------------------------|-----------------------------------|---------------------------------------------------|-----------------------------------------------------|
|                                                                | 2016 counts                             | 2016 counts                             | 2016 counts                       | Percentage change in counts between 2006 and 2016 | Percentage change in age-standardised rates between |
| Asbestosis                                                     | 0.2<br>(0.2 to 0.2)                     | < 0.05<br>(< 0.05 to < 0.05)            | < 0.05<br>(< 0.05 to < 0.05)      | 14.6<br>(8.5 to 21.5)                             | -5.1<br>(-9.8 to -0.0)                              |
| Coal workers pneumoconiosis                                    | --                                      | --                                      | --                                | --                                                | --                                                  |
| Other pneumoconiosis                                           | 0.4<br>(0.3 to 0.4)                     | < 0.05<br>(< 0.05 to < 0.05)            | 0.1<br>(< 0.05 to 0.1)            | 21.2<br>(12.6 to 30.7)                            | 2.1<br>(-5.2 to 10.3)                               |
| Asthma                                                         | 1,248.1<br>(1,149.9 to 1,352.4)         | 250.1<br>(231.1 to 270.3)               | 48.8<br>(32.0 to 70.5)            | 3.5<br>(-1.8 to 9.4)                              | 3.8<br>(-1.0 to 9.5)                                |
| Interstitial lung disease and pulmonary sarcoidosis            | 4.5<br>(4.0 to 4.9)                     | 0.5<br>(0.4 to 0.5)                     | 0.5<br>(0.3 to 0.7)               | 21.0<br>(10.9 to 32.2)                            | 5.0<br>(-6.2 to 17.2)                               |
| Other chronic respiratory diseases                             | --                                      | --                                      | 1.3<br>(1.0 to 1.6)               | 36.0<br>(4.7 to 72.9)                             | 35.8<br>(11.5 to 64.2)                              |
| <b>Cirrhosis and other chronic liver diseases</b>              | <b>67.5<br/>(64.0 to 71.5)</b>          | <b>2.4<br/>(2.3 to 2.5)</b>             | <b>3.2<br/>(2.2 to 4.5)</b>       | <b>7.2<br/>(-5.1 to 21.6)</b>                     | <b>5.4<br/>(-3.7 to 15.9)</b>                       |
| Cirrhosis and other chronic liver diseases due to hepatitis B  | 16.9<br>(13.9 to 20.2)                  | 0.7<br>(0.5 to 0.8)                     | 0.6<br>(0.4 to 0.9)               | 19.6<br>(-3.2 to 48.6)                            | 6.0<br>(-10.8 to 26.4)                              |
| Cirrhosis and other chronic liver diseases due to hepatitis C  | 19.3<br>(15.5 to 23.8)                  | 0.7<br>(0.6 to 0.9)                     | 0.7<br>(0.5 to 1.0)               | 21.8<br>(-2.2 to 49.7)                            | 8.0<br>(-9.3 to 28.9)                               |
| Cirrhosis and other chronic liver diseases due to alcohol use  | 4.2<br>(3.5 to 4.8)                     | 0.2<br>(0.1 to 0.2)                     | 0.1<br>(0.1 to 0.2)               | 19.9<br>(-4.9 to 48.1)                            | 3.8<br>(-19.2 to 32.9)                              |
| Cirrhosis and other chronic liver diseases due to other causes | 27.1<br>(24.5 to 29.8)                  | 0.8<br>(0.8 to 0.9)                     | 1.8<br>(1.2 to 2.5)               | -2.0<br>(-19.3 to 18.2)                           | 3.8<br>(-12.0 to 22.3)                              |
| <b>Digestive diseases</b>                                      | <b>631.5<br/>(560.4 to 698.1)</b>       | <b>374.8†<br/>(352.0 to 400.0)</b>      | <b>21.9<br/>(15.0 to 31.0)</b>    | <b>22.6<br/>(7.6 to 42.6)</b>                     | <b>14.9<br/>(1.3 to 32.2)</b>                       |
| Peptic ulcer disease                                           | 189.0<br>(149.8 to 239.1)               | 12.8<br>(11.1 to 14.7)                  | 4.9<br>(2.7 to 8.3)               | 65.7<br>(21.1 to 128.9)                           | 43.4<br>(7.5 to 91.2)                               |
| Gastritis and duodenitis                                       | 204.8<br>(172.1 to 240.9)               | 158.6<br>(140.4 to 179.6)               | 4.2<br>(2.5 to 6.9)               | 52.8<br>(15.3 to 101.3)                           | 31.9<br>(1.5 to 67.0)                               |
| Appendicitis                                                   | 2.6<br>(2.4 to 2.9)                     | 68.6<br>(62.4 to 75.4)                  | 0.8<br>(0.5 to 1.2)               | -5.6<br>(-32.8 to 30.7)                           | -3.4<br>(-27.9 to 28.8)                             |
| Paralytic ileus and intestinal obstruction                     | 0.2<br>(0.2 to 0.2)                     | 5.5<br>(4.8 to 6.2)                     | 0.1<br>(< 0.05 to 0.1)            | 0.9<br>(-3.1 to 5.0)                              | -5.5<br>(-10.9 to -0.4)                             |
| Inguinal, femoral, and abdominal hernia                        | 221.4<br>(194.8 to 249.8)               | 49.5<br>(42.6 to 56.4)                  | 9.2<br>(6.1 to 13.0)              | 3.6<br>(-6.6 to 14.1)                             | 0.3<br>(-8.5 to 9.3)                                |
| Inflammatory bowel disease                                     | 4.5<br>(3.4 to 5.8)                     | 10.4<br>(7.7 to 13.6)                   | 0.7<br>(0.4 to 1.0)               | 0.4<br>(-19.1 to 27.5)                            | -7.2<br>(-26.0 to 18.4)                             |
| Vascular intestinal disorders                                  | 0.1<br>(0.1 to 0.1)                     | 0.6<br>(0.5 to 0.7)                     | < 0.05<br>(< 0.05 to 0.1)         | 6.4<br>(0.4 to 12.9)                              | 0.2<br>(-4.6 to 5.2)                                |
| Gallbladder and biliary diseases                               | 25.1<br>(21.8 to 28.8)                  | 65.3<br>(56.2 to 74.4)                  | 0.4<br>(0.2 to 0.5)               | 19.0<br>(-3.1 to 44.0)                            | 6.9<br>(-14.9 to 30.8)                              |
| Pancreatitis                                                   | 0.4<br>(0.3 to 0.4)                     | 3.5<br>(3.1 to 4.0)                     | 0.1<br>(< 0.05 to 0.1)            | 15.0<br>(10.5 to 20.0)                            | 5.8<br>(2.3 to 9.3)                                 |
| Other digestive diseases                                       | --                                      | --                                      | 1.7<br>(1.2 to 2.3)               | 22.3<br>(7.7 to 41.2)                             | 17.7<br>(4.9 to 33.5)                               |
| <b>Neurological disorders</b>                                  | <b>7,024.9<br/>(6,749.8 to 7,348.7)</b> | <b>3,522.3<br/>(2,986.4 to 4,150.0)</b> | <b>192.5<br/>(126.6 to 263.4)</b> | <b>3.8<br/>(-9.9 to 19.9)</b>                     | <b>1.4<br/>(-9.3 to 13.7)</b>                       |
| Alzheimer's disease and other dementias                        | 68.8<br>(58.1 to 81.2)                  | 11.5<br>(9.6 to 13.7)                   | 9.7<br>(6.8 to 12.9)              | 27.2<br>(21.3 to 33.4)                            | -0.3<br>(-4.5 to 3.8)                               |
| Parkinson's disease                                            | 7.4<br>(5.9 to 9.2)                     | 0.9<br>(0.7 to 1.1)                     | 0.9<br>(0.6 to 1.2)               | 39.3<br>(22.6 to 59.7)                            | 10.3<br>(-1.6 to 24.0)                              |
| Epilepsy                                                       | 64.0<br>(20.0 to 97.8)                  | 8.3<br>(2.7 to 12.5)                    | 20.4<br>(5.6 to 41.0)             | 0.1<br>(-72.0 to 268.9)                           | 4.5<br>(-70.5 to 287.4)                             |
| Multiple sclerosis                                             | 7.0<br>(6.2 to 7.9)                     | 0.3<br>(0.3 to 0.4)                     | 1.8<br>(1.2 to 2.4)               | 17.2<br>(-1.2 to 39.2)                            | 9.5<br>(-7.1 to 28.5)                               |
| Motor neuron disease                                           | 0.4<br>(0.4 to 0.5)                     | 0.1<br>(< 0.05 to 0.1)                  | 0.1<br>(0.1 to 0.1)               | 4.2<br>(-1.2 to 9.7)                              | 2.2<br>(-1.6 to 6.0)                                |
| Migraine                                                       | 2,864.7<br>(2,678.9 to 3,057.1)         | 344.3<br>(318.5 to 371.3)               | 130.9<br>(84.7 to 183.6)          | 1.9<br>(-2.1 to 6.1)                              | 0.5<br>(-2.9 to 3.9)                                |
| Tension-type headache                                          | 5,310.9<br>(4,745.1 to 5,968.3)         | 3,156.9<br>(2,613.8 to 3,792.1)         | 23.3<br>(14.6 to 34.9)            | 4.0<br>(-1.3 to 10.6)                             | 1.2<br>(-3.3 to 6.3)                                |
| Other neurological disorders                                   | 0.1<br>(< 0.05 to 0.1)                  | 0.1<br>(0.1 to 0.2)                     | 5.5<br>(1.9 to 10.4)              | 22.6<br>(-59.0 to 265.7)                          | 24.5<br>(-52.1 to 200.4)                            |
| <b>Mental and substance use disorders</b>                      | <b>2,850.3<br/>(2,716.6 to 2,978.8)</b> | <b>1,046.2†<br/>(955.0 to 1,143.9)</b>  | <b>382.8<br/>(277.2 to 497.4)</b> | <b>1.4<br/>(-1.2 to 4.0)</b>                      | <b>0.8<br/>(-1.6 to 3.2)</b>                        |
| Schizophrenia                                                  | 27.7<br>(24.0 to 31.6)                  | 2.1<br>(1.9 to 2.4)                     | 17.6<br>(12.9 to 22.0)            | 5.4<br>(-4.7 to 16.6)                             | -0.2<br>(-9.3 to 9.0)                               |
| Alcohol use disorders                                          | 89.2<br>(74.7 to 104.0)                 | 50.8<br>(42.4 to 59.5)                  | 8.9<br>(6.0 to 12.6)              | 0.8<br>(-9.7 to 12.5)                             | 3.2<br>(-6.5 to 13.6)                               |
| Drug use disorders                                             | 146.4<br>(130.0 to 165.6)               | 19.6<br>(17.2 to 22.3)                  | 46.7<br>(32.5 to 62.7)            | 2.7<br>(-6.6 to 13.0)                             | 5.0<br>(-4.3 to 14.2)                               |
| Opioid use disorders                                           | 104.4<br>(86.1 to 128.2)                | 11.5<br>(9.6 to 14.0)                   | 43.2<br>(29.4 to 59.0)            | 3.0<br>(-7.0 to 14.0)                             | 5.3<br>(-4.8 to 14.6)                               |
| Cocaine use disorders                                          | 7.1<br>(6.0 to 8.4)                     | 0.9<br>(0.7 to 1.0)                     | 1.0<br>(0.6 to 1.5)               | 0.2<br>(-29.4 to 40.4)                            | 2.9<br>(-23.3 to 35.1)                              |
| Amphetamine use disorders                                      | 1.3<br>(0.9 to 1.7)                     | 0.2<br>(0.2 to 0.3)                     | 0.2<br>(0.1 to 0.3)               | -4.7<br>(-13.2 to 4.0)                            | 2.7<br>(-5.4 to 10.4)                               |
| Cannabis use disorders                                         | 29.4<br>(23.4 to 36.9)                  | 5.8<br>(4.6 to 7.2)                     | 0.9<br>(0.5 to 1.4)               | -6.8<br>(-25.3 to 19.5)                           | -0.6<br>(-18.4 to 23.9)                             |
| Other drug use disorders                                       | 6.3<br>(5.6 to 7.2)                     | 1.3<br>(1.1 to 1.5)                     | 1.4<br>(1.0 to 2.1)               | 1.8<br>(-19.9 to 27.9)                            | 3.6<br>(-16.6 to 26.7)                              |
| Depressive disorders                                           | 594.9<br>(550.2 to 636.6)               | 714.6<br>(629.6 to 807.6)               | 105.4<br>(72.3 to 146.4)          | 3.8<br>(-1.2 to 9.3)                              | 0.5<br>(-3.6 to 5.2)                                |
| Major depressive disorder                                      | 437.9<br>(385.4 to 496.8)               | 683.8<br>(598.0 to 776.7)               | 89.6<br>(61.1 to 125.0)           | 3.4<br>(-2.2 to 9.7)                              | 0.6<br>(-4.4 to 6.1)                                |
| Dysthymia                                                      | 164.1<br>(142.8 to 187.9)               | 30.8<br>(27.0 to 35.2)                  | 15.7<br>(10.6 to 23.3)            | 5.8<br>(0.9 to 11.0)                              | 0.4<br>(-3.2 to 4.6)                                |
| Bipolar disorder                                               | 145.4<br>(123.6 to 170.8)               | 14.3<br>(12.0 to 17.0)                  | 29.7<br>(18.2 to 44.1)            | -0.1<br>(-6.1 to 6.5)                             | -0.1<br>(-5.2 to 5.7)                               |
| Anxiety disorders                                              | 885.2<br>(777.1 to 1,003.9)             | 135.8<br>(119.4 to 154.6)               | 85.5<br>(59.0 to 116.8)           | 0.7<br>(-6.2 to 7.6)                              | 0.4<br>(-5.6 to 6.9)                                |
| Eating disorders                                               | 26.4<br>(21.6 to 32.2)                  | 16.8<br>(12.0 to 22.7)                  | 5.2<br>(3.2 to 7.8)               | -0.9<br>(-13.1 to 13.8)                           | 4.3<br>(-8.1 to 19.1)                               |
| Anorexia nervosa                                               | 4.5<br>(3.2 to 6.0)                     | 2.2<br>(1.6 to 2.9)                     | 1.0<br>(0.6 to 1.5)               | -2.5<br>(-28.5 to 33.0)                           | 3.2<br>(-23.2 to 38.3)                              |
| Bulimia nervosa                                                | 20.4<br>(15.0 to 27.3)                  | 14.6<br>(9.9 to 20.5)                   | 4.3<br>(2.5 to 6.5)               | -0.6<br>(-14.0 to 16.7)                           | 4.5<br>(-8.8 to 22.2)                               |
| Autistic spectrum disorders                                    | 169.3<br>(152.6 to 187.9)               | 1.3<br>(0.9 to 1.9)                     | 24.2<br>(16.2 to 34.1)            | -3.6<br>(-8.8 to 1.6)                             | -1.2<br>(-5.8 to 3.8)                               |
| Autism                                                         | 47.5<br>(40.6 to 55.4)                  | 0.1<br>(0.1 to 0.2)                     | 12.1<br>(7.9 to 17.5)             | -3.0<br>(-11.5 to 5.8)                            | -1.1<br>(-8.9 to 6.7)                               |
| Asperger syndrome and other autistic spectrum disorders        | 121.6<br>(101.9 to 145.7)               | 1.2<br>(0.8 to 1.8)                     | 12.2<br>(7.8 to 17.8)             | -4.3<br>(-8.9 to 1.2)                             | -1.2<br>(-5.6 to 3.6)                               |

| Cause                                                      | Prevalence in thousands (95% UI)                 | Incidence in thousands (95% UI)                   | YLDs in thousands (95% UI)              |                                                   |                                                     |
|------------------------------------------------------------|--------------------------------------------------|---------------------------------------------------|-----------------------------------------|---------------------------------------------------|-----------------------------------------------------|
|                                                            | 2016 counts                                      | 2016 counts                                       | 2016 counts                             | Percentage change in counts between 2006 and 2016 | Percentage change in age-standardised rates between |
| Attention-deficit/hyperactivity disorder                   | 221.8<br>(179.2 to 272.2)                        | 10.3<br>(8.2 to 13.0)                             | 2.7<br>(1.6 to 4.4)                     | -3.1<br>(-10.2 to 4.2)                            | -0.3<br>(-7.2 to 6.9)                               |
| Conduct disorder                                           | 197.7<br>(160.2 to 234.7)                        | 67.4<br>(53.6 to 81.5)                            | 23.9<br>(14.5 to 36.6)                  | -1.5<br>(-7.7 to 4.9)                             | -0.3<br>(-6.5 to 6.2)                               |
| Idiopathic developmental intellectual disability           | 334.9<br>(189.8 to 486.3)                        | --                                                | 11.9<br>(5.0 to 21.5)                   | -4.0<br>(-11.8 to 5.1)                            | -2.0<br>(-10.4 to 7.4)                              |
| Other mental and substance use disorders                   | 283.6<br>(248.5 to 328.4)                        | 13.1<br>(11.5 to 15.1)                            | 21.0<br>(14.4 to 30.3)                  | 3.0<br>(-3.0 to 8.7)                              | -0.8<br>(-5.5 to 4.0)                               |
| <b>Diabetes, urogenital, blood, and endocrine diseases</b> | <b>6,795.4</b><br><b>(6,683.5 to 6,898.1)</b>    | <b>2,000.6†</b><br><b>(1,868.7 to 2,152.0)</b>    | <b>145.5</b><br><b>(103.3 to 199.4)</b> | <b>9.3</b><br><b>(3.0 to 15.7)</b>                | <b>-1.1</b><br><b>(-6.0 to 3.6)</b>                 |
| Diabetes mellitus                                          | 693.9<br>(620.9 to 773.6)                        | 41.4<br>(36.9 to 46.2)                            | 61.5<br>(41.8 to 87.7)                  | 19.9<br>(11.9 to 28.0)                            | 2.8<br>(-4.5 to 10.1)                               |
| Acute glomerulonephritis                                   | 0.2<br>(0.1 to 0.2)                              | 2.5<br>(2.1 to 2.8)                               | < 0.05<br>(< 0.05 to < 0.05)            | 1.6<br>(-3.8 to 7.6)                              | -0.0<br>(-4.4 to 4.8)                               |
| Chronic kidney disease                                     | 614.3<br>(557.0 to 679.4)                        | 44.4<br>(39.5 to 49.8)                            | 21.5<br>(16.0 to 28.1)                  | 8.2<br>(-0.8 to 18.6)                             | -6.5<br>(-15.0 to 2.7)                              |
| Chronic kidney disease due to diabetes mellitus            | 268.1<br>(230.7 to 308.5)                        | 18.9<br>(15.7 to 22.6)                            | 8.8<br>(6.3 to 11.6)                    | 13.9<br>(2.3 to 28.1)                             | -6.1<br>(-15.7 to 4.1)                              |
| Chronic kidney disease due to hypertension                 | 90.0<br>(76.4 to 104.6)                          | 6.9<br>(5.6 to 8.4)                               | 3.0<br>(2.1 to 4.0)                     | 14.2<br>(0.5 to 32.4)                             | -6.7<br>(-18.6 to 7.5)                              |
| Chronic kidney disease due to glomerulonephritis           | 88.8<br>(74.8 to 103.9)                          | 5.8<br>(4.6 to 7.1)                               | 3.6<br>(2.5 to 4.9)                     | -1.5<br>(-14.8 to 13.4)                           | -5.2<br>(-16.5 to 7.7)                              |
| Chronic kidney disease due to other causes                 | 167.4<br>(140.8 to 195.9)                        | 12.8<br>(10.8 to 15.1)                            | 6.2<br>(4.4 to 8.4)                     | 4.0<br>(-7.0 to 16.9)                             | -7.6<br>(-17.2 to 3.6)                              |
| Urinary diseases and male infertility                      | 323.9<br>(286.8 to 361.4)                        | 1,065.0†<br>(953.5 to 1,201.8)                    | 9.2<br>(5.9 to 13.3)                    | 5.6<br>(-5.8 to 17.1)                             | -15.3<br>(-24.1 to -6.4)                            |
| Interstitial nephritis and urinary tract infections        | 16.5<br>(14.4 to 19.2)                           | 865.2<br>(755.7 to 998.2)                         | 0.6<br>(0.3 to 0.8)                     | -5.7<br>(-20.0 to 11.6)                           | -3.9<br>(-17.6 to 14.0)                             |
| Urolithiasis                                               | 6.5<br>(5.8 to 7.5)                              | 173.7<br>(153.0 to 199.5)                         | 0.5<br>(0.3 to 0.7)                     | 7.4<br>(-8.2 to 26.3)                             | 0.8<br>(-15.2 to 20.7)                              |
| Benign prostatic hyperplasia                               | 223.9<br>(189.3 to 267.0)                        | 26.2<br>(22.0 to 31.1)                            | 7.4<br>(4.6 to 10.8)                    | 8.3<br>(-5.3 to 22.9)                             | -16.8<br>(-26.4 to -6.6)                            |
| Male infertility                                           | 65.4<br>(51.3 to 83.8)                           | --                                                | 0.4<br>(0.2 to 0.8)                     | 2.5<br>(-13.0 to 21.7)                            | 7.3<br>(-9.6 to 27.9)                               |
| Other urinary diseases                                     | --                                               | --                                                | 0.4<br>(0.3 to 0.6)                     | -18.5<br>(-27.9 to -7.8)                          | -17.7<br>(-27.0 to -7.4)                            |
| Gynecological diseases                                     | 1,851.4<br>(1,758.3 to 1,939.3)                  | 817.2†<br>(755.9 to 884.1)                        | 23.7<br>(16.1 to 33.9)                  | -3.6<br>(-8.1 to 1.2)                             | -5.0<br>(-9.1 to -0.3)                              |
| Uterine fibroids                                           | 156.8<br>(137.8 to 177.0)                        | 18.3<br>(15.8 to 21.2)                            | 2.2<br>(1.2 to 3.6)                     | -11.0<br>(-26.9 to 4.1)                           | -18.4<br>(-32.6 to -4.9)                            |
| Polycystic ovarian syndrome                                | 14.1<br>(10.4 to 18.5)                           | 21.9<br>(15.7 to 29.1)                            | 0.1<br>(0.1 to 0.2)                     | -0.7<br>(-14.0 to 16.6)                           | 2.2<br>(-11.5 to 19.4)                              |
| Female infertility                                         | 34.7<br>(18.4 to 60.6)                           | --                                                | 0.2<br>(0.1 to 0.5)                     | 26.2<br>(-13.4 to 109.0)                          | 47.6<br>(-1.6 to 147.5)                             |
| Endometriosis                                              | 3.2<br>(2.7 to 3.8)                              | 12.8<br>(10.3 to 15.9)                            | 0.3<br>(0.2 to 0.4)                     | -5.6<br>(-27.2 to 21.2)                           | -0.0<br>(-22.3 to 25.8)                             |
| Genital prolapse                                           | 450.6<br>(391.1 to 510.8)                        | 34.0<br>(29.4 to 39.6)                            | 1.4<br>(0.7 to 2.6)                     | -11.0<br>(-17.5 to -4.0)                          | -22.6<br>(-28.3 to -16.5)                           |
| Premenstrual syndrome                                      | 1,140.8<br>(1,059.6 to 1,228.4)                  | 440.7<br>(402.6 to 480.3)                         | 9.5<br>(5.9 to 14.5)                    | -2.1<br>(-9.7 to 5.7)                             | 0.3<br>(-7.3 to 8.0)                                |
| Other gynecological diseases                               | 293.7<br>(250.1 to 343.7)                        | 289.5<br>(238.6 to 348.4)                         | 10.0<br>(6.7 to 14.4)                   | -2.6<br>(-9.6 to 4.9)                             | -2.1<br>(-8.4 to 5.0)                               |
| Hemoglobinopathies and hemolytic anaemias                  | 4,517.1<br>(4,424.9 to 4,611.8)                  | --                                                | 22.6<br>(13.8 to 35.9)                  | 4.9<br>(-18.1 to 33.9)                            | 8.5<br>(-11.6 to 33.4)                              |
| Thalassemias                                               | 1.4<br>(1.3 to 1.6)                              | --                                                | 0.1<br>(0.1 to 0.1)                     | -18.8<br>(-43.9 to 15.3)                          | 5.6<br>(-27.2 to 51.1)                              |
| Thalassaemia trait                                         | 1,207.5<br>(1,133.5 to 1,297.2)                  | --                                                | 18.0<br>(10.9 to 28.7)                  | 9.2<br>(-15.8 to 40.3)                            | 12.3<br>(-10.1 to 39.1)                             |
| Sickle cell disorders                                      | 0.6<br>(0.5 to 0.7)                              | --                                                | 0.1<br>(0.1 to 0.1)                     | 0.1<br>(-11.9 to 14.4)                            | 10.7<br>(-1.5 to 25.0)                              |
| Sickle cell trait                                          | 523.8<br>(483.5 to 564.0)                        | --                                                | 1.6<br>(0.9 to 2.7)                     | 7.4<br>(-21.4 to 45.5)                            | 15.9<br>(-10.9 to 49.6)                             |
| G6PD deficiency                                            | 639.3<br>(593.0 to 693.5)                        | --                                                | 0.1<br>(< 0.05 to 0.1)                  | 17.3<br>(-11.5 to 53.9)                           | 20.4<br>(-3.2 to 51.6)                              |
| G6PD trait                                                 | 2,422.7<br>(2,386.1 to 2,461.3)                  | --                                                | < 0.05<br>(< 0.05 to < 0.05)            | 40.7<br>(-0.8 to 98.2)                            | 39.0<br>(2.5 to 89.1)                               |
| Other hemoglobinopathies and hemolytic anaemias            | 147.2<br>(117.7 to 182.5)                        | --                                                | 2.7<br>(1.6 to 4.4)                     | -17.3<br>(-37.0 to 9.5)                           | -14.2<br>(-30.3 to 7.1)                             |
| Endocrine, metabolic, blood, and immune disorders          | 243.9<br>(218.4 to 274.2)                        | 30.1<br>(27.1 to 33.3)                            | 7.0<br>(4.6 to 10.0)                    | -2.3<br>(-13.2 to 10.1)                           | -2.6<br>(-10.1 to 5.3)                              |
| <b>Musculoskeletal disorders</b>                           | <b>2,604.9</b><br><b>(2,449.5 to 2,755.9)</b>    | <b>1,513.1</b><br><b>(1,366.7 to 1,672.5)</b>     | <b>295.2</b><br><b>(208.8 to 387.4)</b> | <b>3.8</b><br><b>(-1.7 to 8.6)</b>                | <b>-4.3</b><br><b>(-8.3 to -1.0)</b>                |
| Rheumatoid arthritis                                       | 46.9<br>(41.7 to 53.1)                           | 3.0<br>(2.6 to 3.3)                               | 11.0<br>(7.5 to 14.8)                   | 20.3<br>(10.6 to 31.1)                            | 7.4<br>(-0.2 to 15.8)                               |
| Osteoarthritis                                             | 514.7<br>(479.7 to 549.8)                        | 28.4<br>(26.2 to 30.8)                            | 31.6<br>(22.3 to 43.3)                  | 24.6<br>(19.9 to 29.5)                            | 1.1<br>(-2.4 to 4.8)                                |
| Low back and neck pain                                     | 1,694.7<br>(1,585.0 to 1,823.8)                  | 722.7<br>(645.2 to 805.5)                         | 197.3<br>(140.2 to 259.4)               | 9.1<br>(5.5 to 13.1)                              | -0.3<br>(-2.9 to 2.6)                               |
| Low back pain                                              | 1,158.5<br>(1,022.1 to 1,314.2)                  | 577.5<br>(503.0 to 660.0)                         | 130.2<br>(91.8 to 172.2)                | 7.5<br>(2.8 to 13.4)                              | -1.1<br>(-4.8 to 3.3)                               |
| Neck pain                                                  | 676.4<br>(586.2 to 777.5)                        | 145.2<br>(125.8 to 171.7)                         | 67.2<br>(45.1 to 93.9)                  | 12.3<br>(8.9 to 15.8)                             | 1.2<br>(-0.6 to 3.2)                                |
| Gout                                                       | 42.9<br>(38.0 to 48.4)                           | 8.9<br>(7.8 to 10.1)                              | 1.4<br>(0.9 to 1.9)                     | 15.3<br>(-0.8 to 34.7)                            | -3.1<br>(-15.5 to 12.1)                             |
| Other musculoskeletal disorders                            | 632.2<br>(463.9 to 814.1)                        | 750.1<br>(627.6 to 891.0)                         | 53.9<br>(31.5 to 81.4)                  | -20.5<br>(-37.8 to -5.6)                          | -21.3<br>(-36.0 to -9.0)                            |
| <b>Other non-communicable diseases</b>                     | <b>12,845.6</b><br><b>(12,482.9 to 13,167.2)</b> | <b>39,936.7†</b><br><b>(36,566.2 to 43,185.8)</b> | <b>341.2</b><br><b>(237.1 to 474.7)</b> | <b>2.2</b><br><b>(0.7 to 3.9)</b>                 | <b>-2.4</b><br><b>(-3.5 to -1.3)</b>                |
| Congenital anomalies                                       | 279.0<br>(252.8 to 312.7)                        | --                                                | 35.8<br>(25.6 to 47.8)                  | -4.9<br>(-9.6 to 0.3)                             | 0.6<br>(-4.2 to 6.2)                                |
| Neural tube defects                                        | 25.8<br>(22.8 to 29.3)                           | --                                                | 7.7<br>(5.5 to 10.4)                    | 3.9<br>(-8.8 to 17.2)                             | 7.6<br>(-4.1 to 20.4)                               |
| Congenital heart anomalies                                 | 55.0<br>(47.3 to 64.0)                           | --                                                | 2.5<br>(1.1 to 4.5)                     | -7.2<br>(-18.1 to 4.7)                            | 3.7<br>(-7.4 to 16.0)                               |
| Orofacial clefts                                           | 7.2<br>(6.3 to 8.3)                              | --                                                | 0.1<br>(0.1 to 0.1)                     | -1.6<br>(-11.8 to 9.3)                            | 3.7<br>(-7.0 to 15.7)                               |
| Down's syndrome                                            | 8.0<br>(6.9 to 9.4)                              | --                                                | 0.7<br>(0.5 to 1.0)                     | -1.2<br>(-8.9 to 6.2)                             | 5.3<br>(-2.3 to 12.9)                               |
| Turner syndrome                                            | 5.6<br>(4.8 to 6.5)                              | --                                                | 0.1<br>(< 0.05 to 0.2)                  | -9.0<br>(-40.4 to 38.0)                           | -3.2<br>(-34.5 to 43.7)                             |
| Klinefelter syndrome                                       | 8.8<br>(7.5 to 10.3)                             | --                                                | < 0.05<br>(< 0.05 to 0.1)               | -8.5<br>(-30.0 to 20.7)                           | -0.1<br>(-22.1 to 30.8)                             |



| Cause                                         | Prevalence in thousands (95% UI)              | Incidence in thousands (95% UI)                | YLDs in thousands (95% UI)             |                                                   |                                                     |
|-----------------------------------------------|-----------------------------------------------|------------------------------------------------|----------------------------------------|---------------------------------------------------|-----------------------------------------------------|
|                                               | 2016 counts                                   | 2016 counts                                    | 2016 counts                            | Percentage change in counts between 2006 and 2016 | Percentage change in age-standardised rates between |
| Other chromosomal abnormalities               | 66.3<br>(54.5 to 79.6)                        | --                                             | 6.1<br>(4.1 to 8.7)                    | -8.2<br>(-18.8 to 3.7)                            | 2.8<br>(-9.1 to 16.3)                               |
| Congenital musculoskeletal and limb anomalies | 36.5<br>(33.1 to 40.3)                        | --                                             | 5.4<br>(3.7 to 7.5)                    | -4.1<br>(-14.0 to 6.5)                            | -0.8<br>(-10.0 to 8.4)                              |
| Urogenital congenital anomalies               | 20.1<br>(17.6 to 23.2)                        | --                                             | 0.7<br>(0.4 to 1.1)                    | -10.0<br>(-21.0 to 2.7)                           | -0.5<br>(-11.9 to 12.4)                             |
| Digestive congenital anomalies                | 22.9<br>(20.1 to 25.7)                        | --                                             | 1.0<br>(0.6 to 1.4)                    | -4.3<br>(-19.1 to 13.4)                           | -0.5<br>(-14.6 to 15.5)                             |
| Other congenital anomalies                    | 68.4<br>(40.9 to 106.3)                       | --                                             | 11.4<br>(6.9 to 17.7)                  | -8.3<br>(-16.6 to 0.0)                            | -4.5<br>(-12.9 to 4.3)                              |
| Skin and subcutaneous diseases                | 5,055.7<br>(4,908.2 to 5,237.4)               | 10,188.4<br>(9,684.5 to 10,810.6)              | 130.4<br>(87.7 to 188.7)               | -0.3<br>(-2.7 to 2.0)                             | 2.7<br>(0.6 to 4.8)                                 |
| Dermatitis                                    | 662.3<br>(621.9 to 707.5)                     | 1,085.8<br>(995.0 to 1,181.2)                  | 24.1<br>(14.3 to 38.6)                 | -2.9<br>(-7.9 to 2.4)                             | 1.5<br>(-2.9 to 6.2)                                |
| Psoriasis                                     | 118.4<br>(111.7 to 126.2)                     | 17.7<br>(16.7 to 18.7)                         | 10.3<br>(7.3 to 13.6)                  | 12.3<br>(1.9 to 24.4)                             | 9.4<br>(0.7 to 19.0)                                |
| Cellulitis                                    | 8.6<br>(8.0 to 9.3)                           | 178.7<br>(166.2 to 191.8)                      | 0.5<br>(0.3 to 0.7)                    | -1.5<br>(-24.0 to 26.0)                           | 0.5<br>(-19.4 to 23.3)                              |
| Pyoderma                                      | 37.4<br>(36.0 to 38.8)                        | 841.9<br>(811.8 to 875.2)                      | 0.2<br>(0.1 to 0.4)                    | -0.2<br>(-8.3 to 8.4)                             | 0.7<br>(-6.2 to 7.9)                                |
| Scabies                                       | 227.1<br>(190.1 to 272.9)                     | 691.3<br>(577.6 to 840.9)                      | 5.9<br>(3.3 to 9.7)                    | -8.0<br>(-12.5 to -3.0)                           | -2.1<br>(-6.1 to 2.1)                               |
| Fungal skin diseases                          | 1,090.1<br>(981.0 to 1,217.1)                 | 3,721.1<br>(3,335.5 to 4,136.0)                | 6.1<br>(2.5 to 12.6)                   | -0.3<br>(-2.4 to 1.8)                             | -0.2<br>(-1.3 to 1.0)                               |
| Viral skin diseases                           | 537.2<br>(508.2 to 567.1)                     | 763.9<br>(720.5 to 811.7)                      | 16.5<br>(10.2 to 24.3)                 | -3.8<br>(-6.9 to -0.1)                            | 0.3<br>(-2.7 to 3.6)                                |
| Acne vulgaris                                 | 1,839.5<br>(1,608.8 to 2,096.7)               | 1,354.5<br>(1,074.9 to 1,769.6)                | 47.3<br>(31.5 to 68.7)                 | 2.6<br>(-2.2 to 8.0)                              | 5.0<br>(0.5 to 10.1)                                |
| Alopecia areata                               | 32.5<br>(30.4 to 34.6)                        | 57.9<br>(54.1 to 61.6)                         | 1.1<br>(0.7 to 1.6)                    | -1.1<br>(-12.1 to 12.5)                           | 0.0<br>(-9.7 to 11.4)                               |
| Pruritus                                      | 137.9<br>(121.2 to 155.7)                     | 110.6<br>(99.1 to 124.5)                       | 1.5<br>(0.7 to 2.6)                    | 2.3<br>(-3.6 to 8.6)                              | 0.8<br>(-4.1 to 6.2)                                |
| Urticaria                                     | 188.8<br>(161.9 to 220.1)                     | 333.2<br>(288.3 to 389.7)                      | 11.4<br>(7.2 to 16.6)                  | -9.5<br>(-14.7 to -3.6)                           | -0.0<br>(-5.2 to 5.3)                               |
| Decubitus ulcer                               | 3.8<br>(3.4 to 4.2)                           | 13.8<br>(12.3 to 15.6)                         | 0.6<br>(0.4 to 0.8)                    | 15.5<br>(4.3 to 27.3)                             | 4.1<br>(-8.8 to 18.0)                               |
| Other skin and subcutaneous diseases          | 907.9<br>(881.1 to 936.0)                     | 1,018.1<br>(986.0 to 1,051.5)                  | 5.0<br>(2.4 to 9.2)                    | 6.1<br>(3.0 to 9.2)                               | 1.5<br>(-0.8 to 3.9)                                |
| Sense organ diseases                          | 3,120.0<br>(3,023.6 to 3,232.6)               | 1,658.0†<br>(1,542.2 to 1,776.5)               | 136.0<br>(94.9 to 189.0)               | 4.4<br>(1.7 to 7.2)                               | -6.1<br>(-7.8 to -4.4)                              |
| Glaucoma                                      | 18.2<br>(14.4 to 22.6)                        | --                                             | 1.7<br>(1.1 to 2.4)                    | 25.3<br>(12.6 to 39.6)                            | -2.5<br>(-11.8 to 8.4)                              |
| Cataract                                      | 209.2<br>(175.8 to 247.6)                     | --                                             | 14.8<br>(10.2 to 20.8)                 | 16.4<br>(10.4 to 23.0)                            | -6.4<br>(-11.3 to -1.3)                             |
| Macular degeneration                          | 19.6<br>(14.7 to 26.2)                        | --                                             | 1.3<br>(0.8 to 1.9)                    | 30.1<br>(18.1 to 44.7)                            | 2.0<br>(-6.8 to 12.3)                               |
| Refraction and accommodation disorders        | 1,455.4<br>(1,342.1 to 1,599.7)               | --                                             | 35.5<br>(22.8 to 54.0)                 | -5.5<br>(-9.1 to -1.6)                            | -10.5<br>(-13.2 to -7.5)                            |
| Age-related and other hearing loss            | 1,784.9<br>(1,671.0 to 1,910.3)               | --                                             | 63.6<br>(44.5 to 89.6)                 | 5.5<br>(0.5 to 10.7)                              | -5.9<br>(-8.6 to -3.3)                              |
| Other vision loss                             | 98.5<br>(84.0 to 115.3)                       | --                                             | 7.3<br>(5.0 to 10.1)                   | 8.9<br>(1.0 to 16.9)                              | -1.9<br>(-7.7 to 4.3)                               |
| Other sense organ diseases                    | 385.3<br>(356.2 to 414.5)                     | 1,658.0<br>(1,542.2 to 1,776.5)                | 11.8<br>(7.4 to 17.8)                  | 10.8<br>(5.4 to 16.2)                             | 1.6<br>(-2.3 to 5.3)                                |
| Oral disorders                                | 9,692.4<br>(9,078.4 to 10,198.7)              | 28,090.3†<br>(24,952.6 to 31,089.4)            | 38.9<br>(23.5 to 60.6)                 | 11.4<br>(9.1 to 14.0)                             | 0.2<br>(-1.6 to 2.0)                                |
| Caries of deciduous teeth                     | 1,439.5<br>(1,194.0 to 1,715.2)               | 5,694.5<br>(3,957.4 to 7,527.9)                | 0.3<br>(0.1 to 0.7)                    | -13.4<br>(-23.8 to -1.6)                          | -0.0<br>(-11.6 to 13.4)                             |
| Caries of permanent teeth                     | 7,244.5<br>(6,518.7 to 8,050.7)               | 22,163.5<br>(19,446.3 to 24,671.2)             | 4.3<br>(1.8 to 8.2)                    | 0.6<br>(-3.4 to 4.7)                              | -0.9<br>(-4.1 to 2.6)                               |
| Periodontal disease                           | 1,505.2<br>(1,242.0 to 1,812.8)               | 187.2<br>(151.5 to 226.7)                      | 9.8<br>(3.9 to 20.6)                   | 13.5<br>(8.6 to 18.0)                             | -0.0<br>(-3.4 to 3.3)                               |
| Edentulism and severe tooth loss              | 566.8<br>(489.1 to 646.1)                     | 45.1<br>(37.9 to 52.3)                         | 15.7<br>(10.2 to 22.3)                 | 20.5<br>(16.4 to 24.9)                            | 0.4<br>(-2.5 to 3.5)                                |
| Other oral disorders                          | 300.9<br>(287.7 to 315.5)                     | --                                             | 8.8<br>(5.4 to 13.2)                   | 2.2<br>(-1.6 to 6.2)                              | 0.1<br>(-2.9 to 3.4)                                |
| <b>Injuries</b>                               | <b>5,839.3</b><br><b>(4,101.6 to 7,753.6)</b> | <b>1,234.8†</b><br><b>(1,149.1 to 1,331.4)</b> | <b>148.7</b><br><b>(80.5 to 239.9)</b> | <b>91.0</b><br><b>(37.3 to 154.0)</b>             | <b>65.8</b><br><b>(20.9 to 115.5)</b>               |
| <b>Transport injuries</b>                     | <b>294.7</b><br><b>(269.8 to 320.3)</b>       | <b>114.4</b><br><b>(102.6 to 127.1)</b>        | <b>14.9</b><br><b>(8.5 to 23.9)</b>    | <b>9.0</b><br><b>(-16.1 to 38.7)</b>              | <b>-0.4</b><br><b>(-22.3 to 23.8)</b>               |
| Road injuries                                 | 178.6<br>(166.7 to 191.3)                     | 82.4<br>(71.9 to 94.0)                         | 9.2<br>(5.3 to 14.8)                   | 10.8<br>(-13.0 to 39.4)                           | -0.5<br>(-21.4 to 23.2)                             |
| Pedestrian road injuries                      | 35.5<br>(31.4 to 40.7)                        | 11.9<br>(9.7 to 14.4)                          | 1.8<br>(1.0 to 2.9)                    | 8.5<br>(-16.4 to 36.9)                            | -4.2<br>(-26.0 to 18.4)                             |
| Cyclist road injuries                         | 35.2<br>(29.2 to 41.6)                        | 18.1<br>(13.9 to 22.7)                         | 1.7<br>(1.0 to 2.8)                    | 13.9<br>(-10.4 to 42.7)                           | 5.0<br>(-16.4 to 29.0)                              |
| Motorcyclist road injuries                    | 33.2<br>(27.9 to 39.0)                        | 10.3<br>(8.1 to 12.9)                          | 1.6<br>(0.9 to 2.6)                    | 12.3<br>(-13.4 to 42.6)                           | 2.9<br>(-19.9 to 28.3)                              |
| Motor vehicle road injuries                   | 53.9<br>(46.9 to 61.4)                        | 29.8<br>(25.0 to 34.9)                         | 3.1<br>(1.8 to 4.9)                    | 9.4<br>(-13.2 to 37.4)                            | -2.9<br>(-22.3 to 19.7)                             |
| Other road injuries                           | 20.8<br>(17.7 to 24.3)                        | 12.3<br>(9.6 to 15.8)                          | 1.0<br>(0.6 to 1.6)                    | 12.2<br>(-9.8 to 39.5)                            | 1.0<br>(-18.3 to 23.4)                              |
| Other transport injuries                      | 116.1<br>(97.0 to 138.6)                      | 31.9<br>(27.3 to 37.7)                         | 5.7<br>(3.2 to 9.2)                    | 6.1<br>(-20.2 to 38.0)                            | -0.3<br>(-23.1 to 25.4)                             |
| <b>Unintentional injuries</b>                 | <b>2,073.1</b><br><b>(1,898.1 to 2,246.6)</b> | <b>1,079.1</b><br><b>(994.7 to 1,171.6)</b>    | <b>64.5</b><br><b>(37.0 to 103.6)</b>  | <b>18.5</b><br><b>(-11.0 to 54.7)</b>             | <b>12.3</b><br><b>(-13.3 to 42.8)</b>               |
| Falls                                         | 653.9<br>(548.1 to 755.8)                     | 329.0<br>(271.6 to 400.2)                      | 24.0<br>(13.9 to 38.5)                 | 18.0<br>(-13.4 to 58.6)                           | 10.3<br>(-17.0 to 43.1)                             |
| Drowning                                      | 4.6<br>(3.9 to 5.4)                           | 1.1<br>(0.9 to 1.3)                            | 0.2<br>(0.1 to 0.4)                    | 17.1<br>(-15.6 to 65.9)                           | 8.5<br>(-19.6 to 49.0)                              |
| Fire, heat, and hot substances                | 210.5<br>(175.7 to 259.4)                     | 31.7<br>(24.7 to 39.2)                         | 5.2<br>(2.7 to 8.8)                    | 22.4<br>(-13.9 to 69.8)                           | 16.2<br>(-15.4 to 54.9)                             |
| Poisonings                                    | 10.4<br>(8.6 to 12.5)                         | 17.9<br>(13.8 to 22.4)                         | 0.9<br>(0.6 to 1.5)                    | 22.6<br>(-0.8 to 60.2)                            | 20.1<br>(1.8 to 46.2)                               |
| Exposure to mechanical forces                 | 317.7<br>(267.3 to 396.1)                     | 151.7<br>(123.9 to 180.4)                      | 7.3<br>(4.1 to 12.0)                   | 26.4<br>(-0.7 to 59.6)                            | 17.7<br>(-7.1 to 46.0)                              |
| Unintentional firearm injuries                | 13.6<br>(11.2 to 16.7)                        | 4.3<br>(2.9 to 6.3)                            | 0.5<br>(0.3 to 0.9)                    | 24.4<br>(-3.4 to 57.8)                            | 14.7<br>(-10.2 to 43.1)                             |
| Unintentional suffocation                     | 12.1<br>(9.4 to 15.2)                         | 2.9<br>(1.9 to 4.4)                            | 0.4<br>(0.2 to 0.8)                    | 20.8<br>(-20.1 to 73.4)                           | 16.2<br>(-20.6 to 60.0)                             |
| Other exposure to mechanical forces           | 292.0<br>(242.8 to 370.6)                     | 144.5<br>(118.3 to 172.1)                      | 6.4<br>(3.6 to 10.4)                   | 27.0<br>(0.8 to 58.6)                             | 18.0<br>(-6.4 to 45.2)                              |



| Cause                                                                               | Prevalence in thousands (95% UI)              | Incidence in thousands (95% UI)       | YLDs in thousands (95% UI)            |                                                   |                                                     |
|-------------------------------------------------------------------------------------|-----------------------------------------------|---------------------------------------|---------------------------------------|---------------------------------------------------|-----------------------------------------------------|
|                                                                                     | 2016 counts                                   | 2016 counts                           | 2016 counts                           | Percentage change in counts between 2006 and 2016 | Percentage change in age-standardised rates between |
| Adverse effects of medical treatment                                                | 4.5<br>(3.5 to 5.8)                           | 58.7<br>(49.1 to 69.8)                | 0.6<br>(0.4 to 0.9)                   | -3.4<br>(-8.7 to 1.6)                             | 1.4<br>(-3.3 to 5.6)                                |
| Animal contact                                                                      | 106.6<br>(92.5 to 124.4)                      | 148.2<br>(117.4 to 181.3)             | 3.4<br>(2.1 to 5.0)                   | 7.0<br>(-10.8 to 32.9)                            | 4.3<br>(-9.5 to 22.9)                               |
| Venomous animal contact                                                             | 41.1<br>(33.3 to 50.2)                        | 60.6<br>(45.5 to 79.8)                | 2.4<br>(1.5 to 3.6)                   | 7.6<br>(-13.1 to 40.2)                            | 6.0<br>(-9.6 to 30.6)                               |
| Non-venomous animal contact                                                         | 65.5<br>(54.0 to 82.2)                        | 87.5<br>(68.4 to 108.7)               | 1.0<br>(0.6 to 1.5)                   | 5.6<br>(-6.7 to 22.6)                             | 0.7<br>(-10.7 to 15.3)                              |
| Foreign body                                                                        | 134.6<br>(111.8 to 163.3)                     | 95.3<br>(81.5 to 111.8)               | 4.2<br>(2.3 to 7.4)                   | 12.9<br>(-15.0 to 51.5)                           | 9.1<br>(-15.9 to 41.0)                              |
| Pulmonary aspiration and foreign body in airway                                     | 37.0<br>(27.4 to 50.0)                        | 14.2<br>(11.1 to 18.2)                | 1.5<br>(0.7 to 2.6)                   | 11.3<br>(-18.2 to 52.2)                           | 8.5<br>(-17.7 to 41.0)                              |
| Foreign body in eyes                                                                | 7.6<br>(4.2 to 11.5)                          | 41.0<br>(31.5 to 54.2)                | 0.4<br>(0.2 to 0.8)                   | 3.9<br>(-6.2 to 24.6)                             | 1.5<br>(-8.8 to 19.4)                               |
| Foreign body in other body part                                                     | 89.9<br>(72.6 to 116.4)                       | 40.1<br>(32.8 to 48.6)                | 2.3<br>(1.2 to 4.2)                   | 15.8<br>(-15.0 to 57.5)                           | 11.1<br>(-16.5 to 45.5)                             |
| Environmental heat and cold exposure                                                | 133.2<br>(110.6 to 158.2)                     | 42.0<br>(33.6 to 52.7)                | 4.6<br>(2.5 to 7.6)                   | 9.4<br>(-18.8 to 44.1)                            | 3.6<br>(-20.9 to 32.2)                              |
| Other unintentional injuries                                                        | 497.1<br>(389.1 to 628.0)                     | 203.7<br>(164.6 to 249.7)             | 14.0<br>(7.7 to 22.7)                 | 23.0<br>(-8.8 to 66.0)                            | 17.9<br>(-8.7 to 53.9)                              |
| <b>Self-harm and interpersonal violence</b>                                         | <b>410.7</b><br><b>(363.4 to 461.6)</b>       | <b>39.6†</b><br><b>(33.5 to 46.0)</b> | <b>5.5</b><br><b>(3.8 to 7.8)</b>     | <b>-3.3</b><br><b>(-13.2 to 10.4)</b>             | <b>-4.2</b><br><b>(-14.3 to 9.5)</b>                |
| Self-harm                                                                           | 10.0<br>(8.6 to 11.7)                         | 4.4<br>(3.6 to 5.4)                   | 0.5<br>(0.2 to 0.7)                   | 13.6<br>(-7.9 to 39.3)                            | 6.8<br>(-12.6 to 28.2)                              |
| Self-harm by firearm                                                                | 0.8<br>(0.6 to 1.0)                           | 0.2<br>(0.1 to 0.3)                   | < 0.05<br>(< 0.05 to < 0.05)          | 11.1<br>(-15.4 to 43.7)                           | 7.0<br>(-17.3 to 35.9)                              |
| Self-harm by other specified means                                                  | 9.2<br>(7.8 to 10.9)                          | 4.2<br>(3.4 to 5.2)                   | 0.4<br>(0.2 to 0.7)                   | 13.8<br>(-7.6 to 39.7)                            | 6.8<br>(-12.4 to 27.7)                              |
| Interpersonal violence                                                              | 400.7<br>(353.5 to 451.9)                     | 35.1†<br>(29.0 to 41.3)               | 5.1<br>(3.5 to 7.1)                   | -4.6<br>(-13.7 to 8.3)                            | -5.2<br>(-14.7 to 7.5)                              |
| Assault by firearm                                                                  | 2.5<br>(2.2 to 3.0)                           | 1.0<br>(0.7 to 1.3)                   | 0.1<br>(0.1 to 0.2)                   | 10.9<br>(-15.6 to 44.3)                           | 2.0<br>(-21.2 to 30.4)                              |
| Assault by sharp object                                                             | 19.0<br>(15.4 to 22.9)                        | 9.1<br>(6.7 to 12.1)                  | 0.5<br>(0.3 to 0.9)                   | 8.0<br>(-15.5 to 38.5)                            | -0.3<br>(-21.1 to 25.2)                             |
| Sexual violence                                                                     | 341.5<br>(296.2 to 391.7)                     | --                                    | 2.9<br>(1.9 to 4.2)                   | -14.0<br>(-17.9 to -9.9)                          | -11.9<br>(-14.9 to -8.7)                            |
| Assault by other means                                                              | 37.7<br>(31.9 to 45.0)                        | 25.1<br>(20.5 to 30.1)                | 1.5<br>(0.9 to 2.4)                   | 13.5<br>(-10.8 to 41.5)                           | 4.0<br>(-17.6 to 27.7)                              |
| <b>Forces of nature, conflict and terrorism, and executions and police conflict</b> | <b>3,402.3</b><br><b>(1,745.1 to 5,367.6)</b> | <b>1.8†</b><br><b>(0.7 to 3.9)</b>    | <b>63.8</b><br><b>(30.5 to 106.6)</b> | <b>1,485.0</b><br><b>(743.6 to 4,249.5)</b>       | <b>1,074.8</b><br><b>(557.8 to 2,978.3)</b>         |
| Exposure to forces of nature                                                        | 0.6<br>(0.3 to 1.0)                           | --                                    | < 0.05<br>(< 0.05 to < 0.05)          | -43.6<br>(-65.7 to -23.9)                         | -35.2<br>(-58.8 to -15.8)                           |
| Conflict and terrorism                                                              | 3,397.2<br>(1,739.8 to 5,363.3)               | --                                    | 63.7<br>(30.5 to 106.2)               | 1,537.2<br>(769.8 to 4,449.1)                     | 1,105.0<br>(573.7 to 3,105.3)                       |
| Executions and police conflict                                                      | 4.5<br>(1.9 to 7.7)                           | 1.8<br>(0.7 to 3.9)                   | 0.1<br>(< 0.05 to 0.3)                | 2.6<br>(-18.7 to 28.5)                            | 8.3<br>(-11.3 to 32.6)                              |
| <b>Impairments</b>                                                                  | --                                            | --                                    | --                                    | --                                                | --                                                  |
| Anaemia                                                                             | 4,858.2<br>(4,016.8 to 5,822.3)               | --                                    | 124.4<br>(77.6 to 194.5)              | -14.2<br>(-31.0 to 6.7)                           | -9.5<br>(-23.8 to 7.3)                              |
| Developmental intellectual disability                                               | 600.1<br>(456.3 to 751.7)                     | --                                    | 54.1<br>(37.9 to 78.2)                | -18.9<br>(-33.8 to -8.8)                          | -15.7<br>(-31.1 to -5.5)                            |
| Epilepsy                                                                            | 102.2<br>(55.1 to 148.9)                      | --                                    | 34.7<br>(16.6 to 61.1)                | -23.9<br>(-59.3 to 44.3)                          | -20.4<br>(-57.7 to 50.5)                            |
| Guillain-Barre syndrome                                                             | 0.2<br>(0.1 to 0.2)                           | --                                    | < 0.05<br>(< 0.05 to 0.1)             | 2.0<br>(-1.2 to 5.5)                              | -0.3<br>(-0.5 to -0.1)                              |
| Hearing loss                                                                        | 2,073.8<br>(1,958.8 to 2,198.7)               | --                                    | 79.7<br>(56.0 to 108.3)               | 1.4<br>(-2.4 to 5.3)                              | -6.2<br>(-8.7 to -3.9)                              |
| Heart failure                                                                       | 108.2<br>(95.5 to 122.5)                      | --                                    | 10.3<br>(7.4 to 13.6)                 | 27.1<br>(18.9 to 35.9)                            | 4.3<br>(-2.5 to 11.2)                               |
| Infertility                                                                         | 227.0<br>(180.1 to 286.9)                     | --                                    | 1.4<br>(0.6 to 2.8)                   | 7.8<br>(-6.5 to 26.4)                             | 12.2<br>(-3.8 to 32.7)                              |
| Pelvic inflammatory disease                                                         | 8.0<br>(6.3 to 10.1)                          | --                                    | 1.0<br>(0.7 to 1.5)                   | -4.6<br>(-20.3 to 13.4)                           | -3.7<br>(-19.2 to 13.6)                             |
| Vision loss                                                                         | 1,865.7<br>(1,715.1 to 2,039.0)               | --                                    | 70.9<br>(48.7 to 100.3)               | -9.1<br>(-25.0 to -0.3)                           | -12.5<br>(-21.7 to -7.7)                            |

We did not calculate incidence for the nine impairments, certain NTDs, and causes with only birth prevalence. Blank cells mean that no estimate is available.

† Incidence for aggregate causes represents the sum of the incidence of the causes below the aggregate.

‡ Incidence estimates for stroke represent first-ever stroke only.

^ Incidence of HIV/AIDS represents new infections of HIV only and does not include new infections of Tuberculosis in HIV positive cases.

SR Table 14: Prevalence, incidence, and YLDs for 2016, percentage change of YLD counts and percentage change of age-standardised YLD rates between 2006 and 2016 by cause and impairments, for all ages, Taiwan (Province of China).

| Cause                                                                                | Prevalence in thousands (95% UI)          | Incidence in thousands (95% UI)               | YLDs in thousands (95% UI)             |                                                   |                                                     |
|--------------------------------------------------------------------------------------|-------------------------------------------|-----------------------------------------------|----------------------------------------|---------------------------------------------------|-----------------------------------------------------|
|                                                                                      | 2016 counts                               | 2016 counts                                   | 2016 counts                            | Percentage change in counts between 2006 and 2016 | Percentage change in age-standardised rates between |
| <b>All causes</b>                                                                    | <b>22,716.7</b><br>(22,657.7 to 22,777.2) | <b>110,863.0†</b><br>(105,194.7 to 117,377.7) | <b>2,671.2</b><br>(1,997.4 to 3,456.9) | <b>16.0</b><br>(14.3 to 17.9)                     | <b>-0.2</b><br>(-1.7 to 1.6)                        |
| <b>Communicable, maternal, neonatal, and nutritional disorders</b>                   | <b>16,207.9</b><br>(15,842.2 to 16,600.8) | <b>62,631.4†</b><br>(57,160.4 to 68,820.0)    | <b>131.0</b><br>(93.3 to 177.0)        | <b>-8.3</b><br>(-16.7 to 0.6)                     | <b>-9.0</b><br>(-16.5 to -0.9)                      |
| <b>HIV/AIDS and tuberculosis</b>                                                     | <b>8,253.4</b><br>(7,661.5 to 8,667.4)    | <b>7.0†</b><br>(6.3 to 7.8)                   | <b>6.4</b><br>(4.2 to 8.9)             | <b>1.2</b><br>(-11.6 to 16.0)                     | <b>-15.2</b><br>(-26.1 to -3.2)                     |
| Tuberculosis                                                                         | 7,849.3<br>(7,381.9 to 8,352.1)           | 6.6†<br>(6.0 to 7.3)                          | 5.5<br>(3.6 to 7.5)                    | -6.8<br>(-17.1 to 6.2)                            | -22.7<br>(-31.6 to -12.1)                           |
| Drug-susceptible tuberculosis                                                        | 18.1<br>(16.0 to 20.3)                    | 6.5<br>(5.9 to 7.2)                           | 5.4<br>(3.6 to 7.4)                    | -6.7<br>(-17.1 to 6.5)                            | -22.6<br>(-31.6 to -11.7)                           |
| Multidrug-resistant tuberculosis without extensive drug resistance                   | 0.3<br>(0.1 to 0.5)                       | 0.1<br>(0.1 to 0.2)                           | 0.1<br>(< 0.05 to 0.2)                 | -18.7<br>(-51.4 to 37.1)                          | -33.0<br>(-59.9 to 12.1)                            |
| Extensively drug-resistant tuberculosis                                              | < 0.05<br>(< 0.05 to < 0.05)              | < 0.05<br>(< 0.05 to < 0.05)                  | < 0.05<br>(< 0.05 to < 0.05)           | 164.0<br>(59.1 to 348.6)                          | 117.0<br>(29.4 to 263.7)                            |
| Latent tuberculosis infection                                                        | 7,830.9<br>(7,362.6 to 8,334.5)           | --                                            | --                                     | --                                                | --                                                  |
| HIV/AIDS                                                                             | 5.6<br>(2.4 to 11.6)                      | 0.4 <sup>a</sup><br>(0.1 to 0.8)              | 0.9<br>(0.4 to 1.9)                    | 114.7<br>(57.6 to 170.0)                          | 101.5<br>(47.1 to 155.5)                            |
| Drug-susceptible HIV/AIDS - Tuberculosis                                             | 0.3<br>(0.2 to 0.6)                       | 0.1<br>(0.1 to 0.2)                           | 0.1<br>(0.1 to 0.2)                    | 28.9<br>(20.6 to 39.2)                            | 23.2<br>(15.2 to 33.1)                              |
| Multidrug-resistant HIV/AIDS - Tuberculosis without extensive drug resistance        | < 0.05<br>(< 0.05 to < 0.05)              | < 0.05<br>(< 0.05 to < 0.05)                  | < 0.05<br>(< 0.05 to < 0.05)           | 9.6<br>(-33.1 to 86.2)                            | 4.7<br>(-36.1 to 77.9)                              |
| Extensively drug-resistant HIV/AIDS - Tuberculosis                                   | < 0.05<br>(< 0.05 to < 0.05)              | < 0.05<br>(< 0.05 to < 0.05)                  | < 0.05<br>(< 0.05 to < 0.05)           | 260.8<br>(120.1 to 513.5)                         | 244.7<br>(110.3 to 486.2)                           |
| HIV/AIDS resulting in other diseases                                                 | 5.3<br>(2.1 to 11.2)                      | 0.4<br>(0.1 to 0.8)                           | 0.8<br>(0.2 to 1.8)                    | 145.8<br>(71.0 to 264.8)                          | 130.1<br>(58.8 to 240.0)                            |
| <b>Diarrhoea, lower respiratory infections, and other common infectious diseases</b> | <b>1,041.9</b><br>(981.8 to 1,102.8)      | <b>59,820.4†</b><br>(54,381.7 to 66,067.8)    | <b>49.2</b><br>(33.9 to 68.2)          | <b>5.7</b><br>(2.1 to 9.5)                        | <b>2.9</b><br>(-0.4 to 6.5)                         |
| Diarrhoeal diseases                                                                  | 163.6<br>(153.3 to 173.9)                 | 11,020.5<br>(10,330.0 to 11,752.9)            | 18.3<br>(12.6 to 25.0)                 | 14.5<br>(7.9 to 21.2)                             | 9.6<br>(3.5 to 16.2)                                |
| Intestinal infectious diseases                                                       | 0.1<br>(0.1 to 0.1)                       | 2.8†<br>(2.6 to 3.2)                          | < 0.05<br>(< 0.05 to < 0.05)           | -24.2<br>(-33.7 to -13.3)                         | -20.2<br>(-31.0 to -7.7)                            |
| Typhoid fever                                                                        | 0.1<br>(0.1 to 0.1)                       | 2.1<br>(1.9 to 2.3)                           | < 0.05<br>(< 0.05 to < 0.05)           | -24.3<br>(-34.6 to -12.3)                         | -19.9<br>(-31.6 to -5.9)                            |
| Paratyphoid fever                                                                    | < 0.05<br>(< 0.05 to < 0.05)              | 0.7<br>(0.7 to 0.8)                           | < 0.05<br>(< 0.05 to < 0.05)           | -21.2<br>(-32.0 to -9.1)                          | -18.7<br>(-31.6 to -4.5)                            |
| Other intestinal infectious diseases                                                 | --                                        | --                                            | < 0.05<br>(< 0.05 to < 0.05)           | -31.1<br>(-41.8 to -18.6)                         | -41.7<br>(-53.5 to -27.0)                           |
| Lower respiratory infections                                                         | 14.9<br>(13.8 to 16.3)                    | 676.2<br>(612.7 to 747.8)                     | 0.9<br>(0.6 to 1.3)                    | 23.5<br>(8.1 to 41.6)                             | 3.1<br>(-10.3 to 18.6)                              |
| Upper respiratory infections                                                         | 630.4<br>(57.5 to 711.0)                  | 47,150.4<br>(41,526.8 to 53,336.7)            | 15.7<br>(9.3 to 24.4)                  | 0.6<br>(-5.0 to 6.5)                              | 0.5<br>(-4.4 to 5.7)                                |
| Otitis media                                                                         | 166.8<br>(148.9 to 186.1)                 | 483.0<br>(406.4 to 575.1)                     | 4.6<br>(2.9 to 7.0)                    | -10.9<br>(-18.0 to -2.9)                          | -5.7<br>(-13.5 to 2.4)                              |
| Meningitis                                                                           | 10.7<br>(9.4 to 13.3)                     | 1.2<br>(1.0 to 1.3)                           | 1.6<br>(1.1 to 2.3)                    | 3.3<br>(-1.6 to 27.6)                             | 0.2<br>(-4.0 to 17.9)                               |
| Pneumococcal meningitis                                                              | 3.4<br>(3.0 to 3.9)                       | 0.1<br>(< 0.05 to 0.1)                        | 0.6<br>(0.4 to 0.8)                    | 0.9<br>(-3.1 to 4.7)                              | -1.7<br>(-5.4 to 1.9)                               |
| H influenzae type B meningitis                                                       | 1.3<br>(1.1 to 1.5)                       | 0.1<br>(< 0.05 to 0.1)                        | 0.2<br>(0.2 to 0.4)                    | 1.7<br>(-2.5 to 6.2)                              | 0.6<br>(-3.7 to 5.4)                                |
| Meningococcal infection                                                              | 1.0<br>(0.6 to 3.2)                       | 0.1<br>(0.1 to 0.1)                           | 0.2<br>(0.1 to 0.6)                    | 30.9<br>(-1.6 to 365.0)                           | 19.7<br>(-5.2 to 263.4)                             |
| Other meningitis                                                                     | 5.0<br>(4.2 to 6.0)                       | 0.9<br>(0.8 to 1.1)                           | 0.7<br>(0.4 to 0.9)                    | 0.7<br>(-3.1 to 4.5)                              | -1.9<br>(-5.3 to 1.6)                               |
| Encephalitis                                                                         | 51.1<br>(36.5 to 71.4)                    | 18.0<br>(15.8 to 20.5)                        | 6.0<br>(4.2 to 8.0)                    | 5.9<br>(-6.2 to 18.9)                             | 1.3<br>(-10.0 to 14.1)                              |
| Diphtheria                                                                           | < 0.05<br>(< 0.05 to < 0.05)              | < 0.05<br>(< 0.05 to < 0.05)                  | < 0.05<br>(< 0.05 to < 0.05)           | -20.2<br>(-57.1 to 55.0)                          | -25.9<br>(-57.1 to 34.4)                            |
| Whooping cough                                                                       | 0.5<br>(0.4 to 0.7)                       | 4.0<br>(3.0 to 5.2)                           | < 0.05<br>(< 0.05 to < 0.05)           | -37.7<br>(-54.7 to -17.8)                         | -31.9<br>(-50.7 to -10.2)                           |
| Tetanus                                                                              | 0.1<br>(0.1 to 0.1)                       | < 0.05<br>(< 0.05 to < 0.05)                  | < 0.05<br>(< 0.05 to < 0.05)           | 2.0<br>(-9.7 to 12.8)                             | -0.8<br>(-10.8 to 9.0)                              |
| Measles                                                                              | 0.1<br>(< 0.05 to 0.3)                    | 4.4<br>(1.6 to 10.2)                          | < 0.05<br>(< 0.05 to < 0.05)           | -37.0<br>(-46.0 to -28.8)                         | -29.0<br>(-40.2 to -18.6)                           |
| Varicella and herpes zoster                                                          | 40.5<br>(35.8 to 45.8)                    | 459.9<br>(429.7 to 493.9)                     | 2.0<br>(1.2 to 3.1)                    | 17.0<br>(5.2 to 31.7)                             | -2.8<br>(-12.3 to 8.1)                              |
| <b>Neglected tropical diseases and malaria</b>                                       | <b>6,203.3</b><br>(5,503.8 to 6,934.5)    | <b>407.9†</b><br>(281.5 to 562.2)             | <b>22.4</b><br>(13.5 to 36.7)          | <b>22.6</b><br>(-19.0 to 84.1)                    | <b>17.6</b><br>(-19.1 to 69.6)                      |
| Malaria                                                                              | --                                        | --                                            | --                                     | --                                                | --                                                  |
| Chagas disease                                                                       | --                                        | --                                            | --                                     | --                                                | --                                                  |
| Leishmaniasis                                                                        | < 0.05<br>(0.0 to < 0.05)                 | < 0.05<br>(0.0 to < 0.05)                     | < 0.05<br>(0.0 to < 0.05)              | --                                                | --                                                  |
| Visceral leishmaniasis                                                               | --                                        | --                                            | --                                     | --                                                | --                                                  |
| Cutaneous and mucocutaneous leishmaniasis                                            | < 0.05<br>(0.0 to < 0.05)                 | < 0.05<br>(0.0 to < 0.05)                     | < 0.05<br>(0.0 to < 0.05)              | --                                                | --                                                  |
| African trypanosomiasis                                                              | --                                        | --                                            | --                                     | --                                                | --                                                  |
| Schistosomiasis                                                                      | --                                        | --                                            | --                                     | --                                                | --                                                  |
| Cysticercosis                                                                        | 6.3<br>(3.6 to 9.8)                       | --                                            | 0.9<br>(0.4 to 1.8)                    | 3.1<br>(-49.2 to 96.6)                            | -15.1<br>(-57.3 to 62.7)                            |
| Cystic echinococcosis                                                                | --                                        | --                                            | --                                     | --                                                | --                                                  |
| Lymphatic filariasis                                                                 | --                                        | --                                            | --                                     | --                                                | --                                                  |
| Onchocerciasis                                                                       | --                                        | --                                            | --                                     | --                                                | --                                                  |
| Trachoma                                                                             | --                                        | --                                            | --                                     | --                                                | --                                                  |
| Dengue                                                                               | 24.4<br>(14.6 to 38.5)                    | 407.9<br>(281.5 to 562.2)                     | 4.0<br>(1.9 to 7.0)                    | 208.8<br>(137.2 to 626.8)                         | 200.2<br>(130.3 to 602.1)                           |
| Yellow fever                                                                         | --                                        | --                                            | --                                     | --                                                | --                                                  |
| Rabies                                                                               | < 0.05<br>(< 0.05 to < 0.05)              | < 0.05<br>(< 0.05 to < 0.05)                  | < 0.05<br>(< 0.05 to < 0.05)           | 10.4<br>(-28.3 to 69.2)                           | 19.1<br>(-37.4 to 94.2)                             |
| Intestinal nematode infections                                                       | 6,159.8<br>(5,457.2 to 6,889.8)           | --                                            | 17.0<br>(9.3 to 31.2)                  | 10.2<br>(-32.3 to 82.5)                           | 5.8<br>(-31.4 to 66.1)                              |
| Ascariasis                                                                           | 2,266.2<br>(1,769.0 to 2,813.8)           | --                                            | 0.8<br>(0.2 to 1.9)                    | -4.5<br>(-68.0 to 207.5)                          | -9.3<br>(-65.8 to 166.6)                            |

| Cause                                                                   | Prevalence in thousands (95% UI)                 | Incidence in thousands (95% UI)                   | YLDs in thousands (95% UI)                    |                                                   |                                                     |
|-------------------------------------------------------------------------|--------------------------------------------------|---------------------------------------------------|-----------------------------------------------|---------------------------------------------------|-----------------------------------------------------|
|                                                                         | 2016 counts                                      | 2016 counts                                       | 2016 counts                                   | Percentage change in counts between 2006 and 2016 | Percentage change in age-standardised rates between |
| Trichuriasis                                                            | 899.5<br>(692.4 to 1,168.3)                      | --                                                | < 0.05<br>(< 0.05 to 0.1)                     | -4.0<br>(-83.0 to 472.4)                          | -10.1<br>(-81.7 to 382.4)                           |
| Hookworm disease                                                        | 3,667.5<br>(3,050.9 to 4,349.6)                  | --                                                | 16.1<br>(8.7 to 29.6)                         | 11.0<br>(-34.1 to 85.1)                           | 6.7<br>(-32.4 to 69.3)                              |
| Food-borne trematodiasis                                                | --                                               | --                                                | --                                            | --                                                | --                                                  |
| Leprosy                                                                 | < 0.05<br>(< 0.05 to < 0.05)                     | --                                                | < 0.05<br>(< 0.05 to < 0.05)                  | -17.8<br>(-20.7 to -14.9)                         | -35.5<br>(-38.6 to -32.5)                           |
| Ebola virus disease                                                     | --                                               | --                                                | --                                            | --                                                | --                                                  |
| Zika virus disease                                                      | --                                               | --                                                | --                                            | --                                                | --                                                  |
| Guinea worm disease                                                     | --                                               | --                                                | --                                            | --                                                | --                                                  |
| Other neglected tropical diseases                                       | 29.4<br>(26.2 to 33.2)                           | --                                                | 0.5<br>(0.3 to 0.8)                           | -21.8<br>(-39.2 to -0.4)                          | -13.6<br>(-35.9 to 13.8)                            |
| <b>Maternal disorders</b>                                               | <b>11.9</b><br><b>(8.8 to 15.1)</b>              | <b>166.2†</b><br><b>(137.6 to 202.7)</b>          | <b>0.8</b><br><b>(0.5 to 1.2)</b>             | <b>21.1</b><br><b>(-16.7 to 73.1)</b>             | <b>26.1</b><br><b>(-13.0 to 79.6)</b>               |
| Maternal haemorrhage                                                    | 3.7<br>(2.7 to 5.0)                              | 19.3<br>(14.1 to 26.4)                            | 0.1<br>(0.1 to 0.2)                           | 7.8<br>(-34.5 to 80.5)                            | 14.0<br>(-30.6 to 90.4)                             |
| Maternal sepsis and other pregnancy related infections                  | 0.4<br>(0.2 to 0.6)                              | 4.2<br>(2.9 to 6.0)                               | < 0.05<br>(< 0.05 to < 0.05)                  | -5.4<br>(-70.1 to 185.4)                          | 0.2<br>(-67.3 to 190.1)                             |
| Maternal hypertensive disorders                                         | 7.7<br>(4.8 to 11.0)                             | 32.1<br>(24.7 to 40.7)                            | 0.4<br>(0.2 to 0.7)                           | 48.4<br>(-15.1 to 161.4)                          | 53.4<br>(-12.4 to 174.3)                            |
| Maternal obstructed labour and uterine rupture                          | 0.2<br>(0.1 to 0.3)                              | 13.0<br>(8.8 to 18.7)                             | 0.1<br>(< 0.05 to 0.1)                        | -5.6<br>(-49.8 to 67.1)                           | -0.1<br>(-46.5 to 76.3)                             |
| Maternal abortion, miscarriage, and ectopic pregnancy                   | 0.8<br>(0.5 to 1.2)                              | 97.5<br>(72.5 to 134.6)                           | 0.1<br>(< 0.05 to 0.2)                        | -7.1<br>(-60.8 to 123.0)                          | -3.7<br>(-58.0 to 124.9)                            |
| Other maternal disorders                                                | --                                               | --                                                | 0.1<br>(0.1 to 0.2)                           | 15.1<br>(-20.2 to 64.4)                           | 20.3<br>(-16.3 to 70.7)                             |
| <b>Neonatal disorders</b>                                               | <b>154.8</b><br><b>(126.2 to 194.9)</b>          | --                                                | <b>24.0</b><br><b>(16.6 to 34.1)</b>          | <b>5.2</b><br><b>(-11.5 to 26.7)</b>              | <b>6.0</b><br><b>(-11.6 to 28.1)</b>                |
| Neonatal preterm birth complications                                    | 145.1<br>(112.2 to 188.8)                        | --                                                | 17.3<br>(11.0 to 25.7)                        | 3.4<br>(-19.0 to 34.9)                            | 5.1<br>(-18.3 to 36.6)                              |
| Neonatal encephalopathy due to birth asphyxia and trauma                | 12.6<br>(7.7 to 18.9)                            | --                                                | 2.3<br>(1.1 to 4.0)                           | 29.4<br>(-7.7 to 164.2)                           | 26.5<br>(-9.4 to 161.5)                             |
| Neonatal sepsis and other neonatal infections                           | 8.2<br>(3.8 to 17.2)                             | --                                                | 3.7<br>(1.4 to 8.8)                           | 2.9<br>(-16.6 to 28.3)                            | 0.8<br>(-18.5 to 25.3)                              |
| Hemolytic disease and other neonatal jaundice                           | 1.4<br>(1.2 to 1.7)                              | --                                                | 0.4<br>(0.3 to 0.5)                           | 0.6<br>(-7.2 to 9.5)                              | -0.2<br>(-8.0 to 8.3)                               |
| Other neonatal disorders                                                | --                                               | --                                                | 0.3<br>(0.2 to 0.5)                           | -3.5<br>(-26.5 to 25.8)                           | 4.5<br>(-20.2 to 36.1)                              |
| <b>Nutritional deficiencies</b>                                         | <b>1,889.8</b><br><b>(1,758.8 to 2,033.1)</b>    | <b>796.7†</b><br><b>(629.4 to 975.1)</b>          | <b>18.7</b><br><b>(12.1 to 28.0)</b>          | <b>-51.6</b><br><b>(-61.0 to -41.2)</b>           | <b>-47.0</b><br><b>(-56.5 to -36.4)</b>             |
| Protein-energy malnutrition                                             | 31.1<br>(23.2 to 40.5)                           | 14.9<br>(11.2 to 19.1)                            | 1.3<br>(0.7 to 2.1)                           | -13.5<br>(-43.7 to 29.8)                          | -6.5<br>(-38.5 to 39.9)                             |
| Iodine deficiency                                                       | 92.8<br>(50.9 to 162.4)                          | 2.3<br>(1.1 to 4.3)                               | 2.4<br>(1.2 to 4.4)                           | 18.6<br>(-2.2 to 41.1)                            | 1.3<br>(-15.1 to 19.0)                              |
| Vitamin A deficiency                                                    | 883.9<br>(719.9 to 1,063.7)                      | 779.6<br>(610.2 to 958.6)                         | --                                            | --                                                | --                                                  |
| Iron-deficiency anaemia                                                 | 931.4<br>(856.9 to 1,014.6)                      | --                                                | 15.0<br>(9.7 to 23.2)                         | -57.2<br>(-66.0 to -46.2)                         | -53.1<br>(-62.5 to -42.4)                           |
| Other nutritional deficiencies                                          | --                                               | --                                                | < 0.05<br>(< 0.05 to 0.1)                     | -13.7<br>(-45.0 to 31.7)                          | -6.6<br>(-40.1 to 42.3)                             |
| <b>Other communicable, maternal, neonatal, and nutritional diseases</b> | <b>6,473.3</b><br><b>(6,072.0 to 6,904.8)</b>    | <b>1,433.2</b><br><b>(1,324.5 to 1,554.9)</b>     | <b>9.5</b><br><b>(6.1 to 14.6)</b>            | <b>-0.6</b><br><b>(-6.7 to 6.3)</b>               | <b>-3.0</b><br><b>(-9.2 to 3.3)</b>                 |
| Sexually transmitted diseases excluding HIV                             | 3,981.8<br>(3,697.7 to 4,356.2)                  | 1,186.1<br>(1,082.6 to 1,297.9)                   | 8.3<br>(5.2 to 12.9)                          | -0.3<br>(-7.3 to 7.1)                             | -2.4<br>(-9.2 to 4.8)                               |
| Syphilis                                                                | 138.0<br>(123.0 to 153.0)                        | 73.1<br>(64.4 to 81.4)                            | 0.7<br>(0.5 to 0.9)                           | 29.9<br>(15.7 to 46.4)                            | 1.1<br>(-10.3 to 13.7)                              |
| Chlamydial infection                                                    | 362.9<br>(287.3 to 449.6)                        | 278.5<br>(224.1 to 346.0)                         | 2.3<br>(1.3 to 3.7)                           | -6.7<br>(-17.2 to 6.7)                            | -1.0<br>(-12.3 to 13.4)                             |
| Gonococcal infection                                                    | 20.8<br>(17.5 to 23.5)                           | 25.5<br>(22.5 to 29.0)                            | 0.3<br>(0.2 to 0.4)                           | 0.2<br>(-19.7 to 27.6)                            | 0.4<br>(-19.0 to 27.0)                              |
| Trichomoniasis                                                          | 537.7<br>(468.4 to 616.0)                        | 447.9<br>(388.5 to 515.5)                         | 0.6<br>(0.2 to 1.3)                           | 3.9<br>(-3.8 to 12.4)                             | 0.3<br>(-6.8 to 8.3)                                |
| Genital herpes                                                          | 2,952.8<br>(2,552.9 to 3,444.9)                  | 123.5<br>(105.6 to 147.2)                         | 0.7<br>(0.2 to 1.7)                           | 13.7<br>(5.2 to 22.1)                             | 0.3<br>(-7.2 to 8.2)                                |
| Other sexually transmitted diseases                                     | 201.5<br>(162.0 to 233.2)                        | 237.7<br>(201.3 to 281.7)                         | 3.7<br>(2.4 to 5.5)                           | -3.2<br>(-12.9 to 7.1)                            | -4.9<br>(-14.9 to 4.7)                              |
| Hepatitis                                                               | 3,092.5<br>(2,671.1 to 3,626.2)                  | 247.0<br>(204.0 to 294.6)                         | 0.4<br>(0.2 to 0.6)                           | 24.7<br>(0.8 to 56.0)                             | 1.7<br>(-16.2 to 24.5)                              |
| Acute hepatitis A                                                       | 3.8<br>(2.1 to 5.0)                              | 49.3<br>(27.0 to 65.2)                            | 0.1<br>(< 0.05 to 0.1)                        | 29.7<br>(-14.0 to 96.2)                           | 5.5<br>(-28.0 to 54.7)                              |
| Hepatitis B                                                             | 2,074.7<br>(1,666.5 to 2,578.4)                  | 173.4<br>(133.6 to 217.3)                         | 0.3<br>(0.2 to 0.5)                           | 23.6<br>(-6.3 to 63.8)                            | 0.2<br>(-22.4 to 30.9)                              |
| Hepatitis C                                                             | 1,013.4<br>(901.5 to 1,127.4)                    | 17.6<br>(15.6 to 19.5)                            | < 0.05<br>(< 0.05 to < 0.05)                  | 6.0<br>(-36.1 to 79.6)                            | 1.2<br>(-47.6 to 88.5)                              |
| Acute hepatitis E                                                       | 0.5<br>(0.3 to 0.7)                              | 6.7<br>(4.4 to 9.2)                               | < 0.05<br>(< 0.05 to < 0.05)                  | 50.6<br>(25.3 to 80.5)                            | 13.0<br>(-1.9 to 31.7)                              |
| Other infectious diseases                                               | 26.1<br>(23.6 to 28.9)                           | < 0.05<br>(< 0.05 to < 0.05)                      | 0.8<br>(0.5 to 1.2)                           | -11.1<br>(-22.9 to 1.5)                           | -8.8<br>(-23.5 to 7.7)                              |
| <b>Non-communicable diseases</b>                                        | <b>21,013.4</b><br><b>(20,915.7 to 21,120.9)</b> | <b>47,010.3†</b><br><b>(45,340.5 to 48,861.6)</b> | <b>2,392.2</b><br><b>(1,780.0 to 3,091.6)</b> | <b>16.8</b><br><b>(15.0 to 18.9)</b>              | <b>-0.2</b><br><b>(-1.8 to 1.5)</b>                 |
| <b>Neoplasms</b>                                                        | <b>319.4</b><br><b>(307.0 to 332.7)</b>          | <b>108.3</b><br><b>(95.6 to 113.7)</b>            | <b>34.4</b><br><b>(24.8 to 45.3)</b>          | <b>47.7</b><br><b>(38.8 to 55.9)</b>              | <b>13.0</b><br><b>(6.3 to 19.2)</b>                 |
| Lip and oral cavity cancer                                              | 18.4<br>(16.8 to 20.1)                           | 4.8<br>(4.4 to 5.2)                               | 1.8<br>(1.2 to 2.4)                           | 22.9<br>(0.9 to 51.5)                             | -1.2<br>(-17.8 to 21.1)                             |
| Nasopharynx cancer                                                      | 5.2<br>(4.5 to 6.1)                              | 1.4<br>(1.2 to 1.6)                               | 0.6<br>(0.4 to 0.8)                           | -7.4<br>(-22.5 to 9.7)                            | -20.9<br>(-33.4 to -6.2)                            |
| Other pharynx cancer                                                    | 5.6<br>(4.9 to 6.3)                              | 1.6<br>(1.4 to 1.8)                               | 0.6<br>(0.4 to 0.8)                           | 48.2<br>(20.6 to 78.2)                            | 15.7<br>(-5.1 to 38.7)                              |
| Oesophageal cancer                                                      | 5.8<br>(4.7 to 6.9)                              | 3.3<br>(2.9 to 3.7)                               | 0.9<br>(0.6 to 1.3)                           | 66.0<br>(28.0 to 112.9)                           | 24.4<br>(-3.9 to 58.8)                              |
| Stomach cancer                                                          | 13.7<br>(11.5 to 16.1)                           | 6.3<br>(5.5 to 7.2)                               | 1.7<br>(1.2 to 2.3)                           | 48.6<br>(21.9 to 78.4)                            | 7.9<br>(-11.9 to 30.5)                              |
| Colon and rectum cancer                                                 | 65.1<br>(58.2 to 71.6)                           | 16.5<br>(14.9 to 18.0)                            | 5.7<br>(4.1 to 7.5)                           | 59.4<br>(39.4 to 79.9)                            | 15.6<br>(1.3 to 30.7)                               |
| Liver cancer                                                            | 21.6<br>(17.5 to 26.1)                           | 14.1<br>(11.7 to 16.0)                            | 3.3<br>(2.3 to 4.6)                           | 42.3<br>(18.2 to 71.5)                            | 6.0<br>(-12.2 to 26.7)                              |
| Liver cancer due to hepatitis B                                         | 11.4<br>(8.9 to 14.1)                            | 6.4<br>(5.3 to 7.5)                               | 1.5<br>(1.0 to 2.1)                           | 38.6<br>(10.2 to 76.9)                            | 5.6<br>(-15.5 to 34.3)                              |



| Cause                                              | Prevalence in thousands (95% UI)              | Incidence in thousands (95% UI)          | YLDs in thousands (95% UI)              |                                                   |                                                     |
|----------------------------------------------------|-----------------------------------------------|------------------------------------------|-----------------------------------------|---------------------------------------------------|-----------------------------------------------------|
|                                                    | 2016 counts                                   | 2016 counts                              | 2016 counts                             | Percentage change in counts between 2006 and 2016 | Percentage change in age-standardised rates between |
| Liver cancer due to hepatitis C                    | 7.1<br>(5.4 to 8.7)                           | 4.0<br>(3.1 to 4.7)                      | 0.9<br>(0.6 to 1.3)                     | 47.2<br>(16.9 to 82.3)                            | 5.5<br>(-15.6 to 30.9)                              |
| Liver cancer due to alcohol use                    | 2.2<br>(1.4 to 2.9)                           | 1.2<br>(0.8 to 1.6)                      | 0.3<br>(0.2 to 0.5)                     | 54.7<br>(24.7 to 87.5)                            | 13.6<br>(-8.0 to 39.6)                              |
| Liver cancer due to other causes                   | 4.5<br>(3.4 to 5.7)                           | 2.5<br>(2.0 to 3.0)                      | 0.6<br>(0.4 to 0.8)                     | 38.9<br>(7.2 to 81.6)                             | 4.3<br>(-20.3 to 36.0)                              |
| Gallbladder and biliary tract cancer               | 1.0<br>(0.7 to 1.2)                           | 0.9<br>(0.6 to 1.1)                      | 0.2<br>(0.1 to 0.3)                     | 23.6<br>(11.3 to 38.6)                            | -11.4<br>(-20.4 to -1.0)                            |
| Pancreatic cancer                                  | 1.7<br>(1.6 to 1.8)                           | 2.0<br>(1.9 to 2.1)                      | 0.4<br>(0.3 to 0.6)                     | 50.5<br>(34.1 to 67.8)                            | 8.6<br>(-3.2 to 21.2)                               |
| Larynx cancer                                      | 2.8<br>(2.5 to 3.1)                           | 0.8<br>(0.7 to 0.8)                      | 0.3<br>(0.2 to 0.4)                     | 29.2<br>(11.2 to 51.6)                            | -5.3<br>(-18.1 to 10.3)                             |
| Tracheal, bronchus, and lung cancer                | 19.2<br>(16.1 to 22.4)                        | 12.4<br>(11.1 to 13.8)                   | 3.0<br>(2.1 to 3.9)                     | 39.3<br>(17.3 to 65.7)                            | 0.8<br>(-14.8 to 19.5)                              |
| Malignant skin melanoma                            | 0.9<br>(0.6 to 1.1)                           | 0.2<br>(0.1 to 0.3)                      | 0.1<br>( $< 0.05$ to 0.1)               | 35.9<br>(19.4 to 54.4)                            | 4.1<br>(-8.8 to 18.1)                               |
| Non-melanoma skin cancer                           | 0.4<br>(0.3 to 0.4)                           | 1.4<br>(1.2 to 1.5)                      | $< 0.05$<br>( $< 0.05$ to $< 0.05$ )    | 67.7<br>(45.9 to 92.0)                            | 21.4<br>(5.8 to 38.1)                               |
| Non-melanoma skin cancer (squamous-cell carcinoma) | 0.3<br>(0.3 to 0.4)                           | 0.4<br>(0.4 to 0.5)                      | $< 0.05$<br>( $< 0.05$ to $< 0.05$ )    | 69.3<br>(45.5 to 96.4)                            | 22.4<br>(5.3 to 41.2)                               |
| Non-melanoma skin cancer (basal-cell carcinoma)    | 0.1<br>(0.1 to 0.2)                           | 1.0<br>(0.8 to 1.1)                      | $< 0.05$<br>( $< 0.05$ to $< 0.05$ )    | 52.4<br>(40.6 to 65.5)                            | 11.9<br>(2.9 to 20.8)                               |
| Breast cancer                                      | 48.9<br>(30.2 to 58.8)                        | 9.8<br>(6.1 to 11.7)                     | 3.8<br>(2.3 to 5.3)                     | 45.2<br>(19.0 to 74.5)                            | 17.3<br>(-3.4 to 39.9)                              |
| Cervical cancer                                    | 8.8<br>(7.6 to 11.8)                          | 2.2<br>(1.9 to 2.9)                      | 0.8<br>(0.5 to 1.1)                     | 5.3<br>(-12.7 to 28.1)                            | -15.6<br>(-30.2 to 1.9)                             |
| Uterine cancer                                     | 11.8<br>(9.7 to 13.9)                         | 2.5<br>(2.0 to 2.9)                      | 0.9<br>(0.6 to 1.3)                     | 99.5<br>(55.5 to 155.6)                           | 56.0<br>(22.9 to 97.9)                              |
| Ovarian cancer                                     | 4.5<br>(3.6 to 5.0)                           | 1.3<br>(1.1 to 1.4)                      | 0.6<br>(0.4 to 0.9)                     | 37.8<br>(1.3 to 92.9)                             | 14.2<br>(-14.9 to 56.4)                             |
| Prostate cancer                                    | 23.0<br>(11.6 to 29.4)                        | 5.1<br>(2.7 to 6.4)                      | 2.0<br>(0.9 to 2.9)                     | 66.5<br>(38.9 to 96.6)                            | 15.8<br>(-3.6 to 37.2)                              |
| Testicular cancer                                  | 1.5<br>(1.2 to 1.9)                           | 0.3<br>(0.2 to 0.4)                      | 0.1<br>(0.1 to 0.2)                     | 56.7<br>(2.8 to 142.3)                            | 54.9<br>(-1.1 to 148.6)                             |
| Kidney cancer                                      | 7.4<br>(5.4 to 8.1)                           | 2.0<br>(1.4 to 2.1)                      | 0.7<br>(0.4 to 0.9)                     | 42.1<br>(24.7 to 62.4)                            | 7.1<br>(-5.9 to 21.5)                               |
| Bladder cancer                                     | 12.7<br>(11.7 to 13.7)                        | 3.0<br>(2.8 to 3.2)                      | 1.1<br>(0.8 to 1.5)                     | 41.1<br>(23.3 to 60.0)                            | 1.3<br>(-11.4 to 15.4)                              |
| Brain and nervous system cancer                    | 3.6<br>(2.4 to 4.4)                           | 1.3<br>(0.9 to 1.6)                      | 0.4<br>(0.3 to 0.6)                     | 61.0<br>(34.2 to 89.9)                            | 44.0<br>(16.0 to 73.2)                              |
| Thyroid cancer                                     | 11.7<br>(9.8 to 13.8)                         | 2.2<br>(1.9 to 2.6)                      | 0.7<br>(0.5 to 1.1)                     | 37.4<br>(10.5 to 71.6)                            | 13.9<br>(-7.5 to 40.9)                              |
| Mesothelioma                                       | 0.1<br>(0.1 to 0.1)                           | 0.1<br>(0.1 to 0.1)                      | $< 0.05$<br>( $< 0.05$ to $< 0.05$ )    | 41.2<br>(17.2 to 60.4)                            | 4.6<br>(-10.7 to 18.2)                              |
| Hodgkin lymphoma                                   | 1.3<br>(0.7 to 1.7)                           | 0.3<br>(0.1 to 0.4)                      | 0.1<br>(0.1 to 0.2)                     | 41.7<br>(7.4 to 82.2)                             | 27.9<br>(-4.5 to 68.4)                              |
| Non-Hodgkin's lymphoma                             | 11.6<br>(8.5 to 13.1)                         | 3.0<br>(2.1 to 3.4)                      | 1.0<br>(0.6 to 1.3)                     | 72.7<br>(54.1 to 95.4)                            | 31.2<br>(16.6 to 48.8)                              |
| Multiple myeloma                                   | 1.6<br>(0.8 to 2.0)                           | 0.6<br>(0.3 to 0.7)                      | 0.3<br>(0.1 to 0.5)                     | 64.4<br>(37.6 to 91.6)                            | 20.4<br>(1.2 to 39.8)                               |
| Leukaemia                                          | 11.1<br>(7.0 to 13.0)                         | 3.0<br>(2.0 to 3.4)                      | 1.4<br>(0.8 to 2.0)                     | 56.9<br>(13.2 to 86.0)                            | 31.3<br>(-4.5 to 60.7)                              |
| Acute lymphoid leukaemia                           | 3.3<br>(2.3 to 4.0)                           | 0.8<br>(0.6 to 1.0)                      | 0.4<br>(0.2 to 0.6)                     | 40.8<br>(2.3 to 86.9)                             | 40.4<br>(-5.5 to 106.6)                             |
| Chronic lymphoid leukaemia                         | 3.5<br>(2.4 to 4.2)                           | 0.8<br>(0.5 to 0.9)                      | 0.4<br>(0.2 to 0.6)                     | 52.2<br>(13.3 to 87.5)                            | 19.1<br>(-8.1 to 45.5)                              |
| Acute myeloid leukaemia                            | 0.8<br>(0.6 to 1.0)                           | 0.5<br>(0.4 to 0.6)                      | 0.1<br>(0.1 to 0.2)                     | 30.1<br>(2.9 to 57.7)                             | 3.5<br>(-18.9 to 29.6)                              |
| Chronic myeloid leukaemia                          | 0.3<br>(0.2 to 0.4)                           | 0.1<br>(0.1 to 0.1)                      | $< 0.05$<br>( $< 0.05$ to 0.1)          | 18.5<br>(-7.1 to 46.6)                            | -4.5<br>(-23.5 to 16.7)                             |
| Other leukaemia                                    | 3.3<br>(0.8 to 4.1)                           | 0.7<br>(0.2 to 0.9)                      | 0.4<br>(0.1 to 0.6)                     | 111.1<br>(2.1 to 168.8)                           | 53.8<br>(-17.8 to 93.0)                             |
| Other neoplasms                                    | 24.7<br>(18.2 to 27.5)                        | 6.1<br>(4.5 to 6.8)                      | 1.8<br>(1.2 to 2.5)                     | 87.1<br>(47.7 to 117.2)                           | 51.6<br>(19.0 to 76.5)                              |
| <b>Cardiovascular diseases</b>                     | <b>1,641.5</b><br><b>(1,576.2 to 1,711.8)</b> | <b>162.6†</b><br><b>(154.5 to 171.0)</b> | <b>144.3</b><br><b>(105.3 to 185.2)</b> | <b>28.9</b><br><b>(23.0 to 34.7)</b>              | <b>-5.1</b><br><b>(-9.3 to -1.2)</b>                |
| Rheumatic heart disease                            | 6.0<br>(5.2 to 6.8)                           | 0.8<br>(0.8 to 0.9)                      | 0.4<br>(0.3 to 0.6)                     | 32.6<br>(9.2 to 59.7)                             | 1.3<br>(-16.4 to 21.6)                              |
| Ischaemic heart disease                            | 376.4<br>(357.1 to 395.2)                     | 44.2<br>(40.8 to 47.5)                   | 21.6<br>(14.8 to 29.5)                  | 28.7<br>(22.7 to 35.2)                            | -4.5<br>(-8.9 to -0.0)                              |
| Cerebrovascular disease                            | 372.0<br>(343.4 to 395.7)                     | 45.1‡<br>(41.1 to 49.2)                  | 78.6<br>(55.4 to 100.0)                 | 29.6<br>(19.9 to 39.1)                            | -5.6<br>(-12.4 to 1.3)                              |
| Ischaemic stroke                                   | 309.9<br>(273.9 to 345.7)                     | 31.1‡<br>(27.4 to 35.1)                  | 63.1<br>(43.9 to 80.7)                  | 31.8<br>(20.3 to 43.9)                            | -4.6<br>(-12.7 to 4.0)                              |
| Hemorrhagic stroke                                 | 76.6<br>(68.4 to 85.2)                        | 14.0‡<br>(12.6 to 15.5)                  | 15.5<br>(11.0 to 19.9)                  | 21.2<br>(8.9 to 35.7)                             | -9.6<br>(-18.2 to 0.1)                              |
| Hypertensive heart disease                         | 100.3<br>(87.0 to 116.0)                      | --                                       | 8.1<br>(5.6 to 11.2)                    | 38.7<br>(26.3 to 51.5)                            | -2.2<br>(-10.2 to 6.1)                              |
| Cardiomyopathy and myocarditis                     | 17.8<br>(15.8 to 19.8)                        | 10.9†<br>(9.5 to 12.4)                   | 1.8<br>(1.2 to 2.6)                     | 9.6<br>(-3.0 to 23.6)                             | -3.2<br>(-13.6 to 7.9)                              |
| Myocarditis                                        | 6.5<br>(5.8 to 7.1)                           | 10.9<br>(9.5 to 12.4)                    | 0.5<br>(0.3 to 0.7)                     | 2.0<br>(-12.4 to 17.4)                            | -2.1<br>(-15.3 to 12.2)                             |
| Alcoholic cardiomyopathy                           | 2.2<br>(1.8 to 2.7)                           | --                                       | 0.2<br>(0.1 to 0.3)                     | 20.4<br>(7.3 to 35.0)                             | -3.6<br>(-13.7 to 7.1)                              |
| Other cardiomyopathy                               | 13.7<br>(11.8 to 15.9)                        | --                                       | 1.2<br>(0.8 to 1.7)                     | 11.2<br>(-5.9 to 33.1)                            | -3.7<br>(-18.1 to 13.0)                             |
| Atrial fibrillation and flutter                    | 192.6<br>(168.0 to 220.8)                     | 15.3<br>(13.2 to 17.8)                   | 15.2<br>(10.3 to 21.2)                  | 36.2<br>(27.8 to 45.0)                            | -2.8<br>(-8.7 to 3.4)                               |
| Peripheral vascular disease                        | 464.5<br>(405.4 to 536.5)                     | 39.9<br>(34.4 to 46.6)                   | 2.2<br>(1.0 to 4.0)                     | 36.8<br>(26.1 to 48.3)                            | -6.3<br>(-12.7 to 0.6)                              |
| Endocarditis                                       | 4.2<br>(3.6 to 5.0)                           | 6.3<br>(5.7 to 7.0)                      | 0.3<br>(0.2 to 0.5)                     | 29.7<br>(9.6 to 53.3)                             | -6.4<br>(-20.7 to 9.8)                              |
| Other cardiovascular and circulatory diseases      | 308.6<br>(264.2 to 363.9)                     | --                                       | 16.1<br>(11.0 to 23.0)                  | 17.2<br>(7.8 to 28.3)                             | -7.4<br>(-14.3 to 0.3)                              |
| <b>Chronic respiratory diseases</b>                | <b>2,380.1</b><br><b>(2,306.8 to 2,446.2)</b> | <b>425.2†</b><br><b>(405.6 to 445.0)</b> | <b>118.7</b><br><b>(94.7 to 143.7)</b>  | <b>22.7</b><br><b>(16.1 to 30.9)</b>              | <b>4.3</b><br><b>(-0.4 to 9.4)</b>                  |
| Chronic obstructive pulmonary disease              | 1,262.7<br>(1,201.6 to 1,321.7)               | 95.8<br>(90.4 to 101.6)                  | 63.9<br>(53.7 to 73.8)                  | 49.4<br>(36.9 to 62.6)                            | 13.3<br>(3.8 to 23.6)                               |
| Pneumoconiosis                                     | 11.0<br>(9.9 to 12.2)                         | 0.9<br>(0.8 to 1.0)                      | 1.6<br>(1.1 to 2.2)                     | 31.2<br>(12.1 to 52.2)                            | -5.9<br>(-19.4 to 9.6)                              |
| Silicosis                                          | 6.6<br>(5.7 to 7.5)                           | 0.6<br>(0.5 to 0.7)                      | 0.9<br>(0.6 to 1.4)                     | 32.1<br>(5.8 to 63.1)                             | -5.4<br>(-23.8 to 16.7)                             |

| Cause                                                          | Prevalence in thousands (95% UI)        | Incidence in thousands (95% UI)                     | YLDs in thousands (95% UI)        |                                                   |                                                     |
|----------------------------------------------------------------|-----------------------------------------|-----------------------------------------------------|-----------------------------------|---------------------------------------------------|-----------------------------------------------------|
|                                                                | 2016 counts                             | 2016 counts                                         | 2016 counts                       | Percentage change in counts between 2006 and 2016 | Percentage change in age-standardised rates between |
| Asbestosis                                                     | 0.8<br>(0.6 to 0.9)                     | 0.1<br>( $< 0.05$ to 0.1)                           | 0.1<br>(0.1 to 0.2)               | 34.3<br>(25.0 to 44.5)                            | -3.3<br>(-9.9 to 3.8)                               |
| Coal workers pneumoconiosis                                    | --                                      | --                                                  | --                                | --                                                | --                                                  |
| Other pneumoconiosis                                           | 3.7<br>(3.1 to 4.5)                     | 0.3<br>(0.2 to 0.3)                                 | 0.5<br>(0.3 to 0.8)               | 28.9<br>(-1.6 to 69.3)                            | -7.4<br>(-29.5 to 23.1)                             |
| Asthma                                                         | 1,215.1<br>(1,140.8 to 1,293.7)         | 325.8<br>(307.2 to 344.9)                           | 47.4<br>(31.4 to 67.8)            | -2.8<br>(-6.9 to 1.8)                             | -4.0<br>(-8.4 to 0.5)                               |
| Interstitial lung disease and pulmonary sarcoidosis            | 35.4<br>(31.4 to 39.6)                  | 2.8<br>(2.4 to 3.1)                                 | 3.6<br>(2.4 to 5.1)               | 42.0<br>(27.1 to 57.6)                            | 3.8<br>(-6.7 to 15.5)                               |
| Other chronic respiratory diseases                             | --                                      | --                                                  | 2.2<br>(1.9 to 2.6)               | 51.5<br>(32.6 to 72.6)                            | 51.4<br>(27.9 to 77.9)                              |
| <b>Cirrhosis and other chronic liver diseases</b>              | <b>271.6<br/>(256.5 to 286.9)</b>       | <b>7.2<br/>(6.9 to 7.5)</b>                         | <b>6.9<br/>(4.8 to 9.5)</b>       | <b>9.4<br/>(-0.3 to 19.0)</b>                     | <b>-10.3<br/>(-18.3 to -2.5)</b>                    |
| Cirrhosis and other chronic liver diseases due to hepatitis B  | 107.2<br>(96.0 to 118.9)                | 2.8<br>(2.5 to 3.1)                                 | 2.6<br>(1.8 to 3.6)               | 11.2<br>(-3.3 to 29.2)                            | -11.8<br>(-23.1 to 1.4)                             |
| Cirrhosis and other chronic liver diseases due to hepatitis C  | 66.7<br>(56.4 to 77.6)                  | 1.7<br>(1.4 to 1.9)                                 | 1.6<br>(1.1 to 2.3)               | 12.5<br>(-8.3 to 35.5)                            | -9.8<br>(-25.4 to 7.2)                              |
| Cirrhosis and other chronic liver diseases due to alcohol use  | 40.6<br>(35.7 to 46.1)                  | 1.1<br>(1.0 to 1.2)                                 | 1.0<br>(0.7 to 1.4)               | 10.3<br>(-11.6 to 38.6)                           | -13.0<br>(-29.6 to 7.5)                             |
| Cirrhosis and other chronic liver diseases due to other causes | 57.2<br>(51.1 to 63.9)                  | 1.6<br>(1.5 to 1.8)                                 | 1.7<br>(1.2 to 2.5)               | 3.6<br>(-12.5 to 22.9)                            | -7.8<br>(-22.2 to 10.0)                             |
| <b>Digestive diseases</b>                                      | <b>1,549.9<br/>(1,440.7 to 1,664.4)</b> | <b>1,077.5<sup>+</sup><br/>(1,001.2 to 1,165.7)</b> | <b>37.1<br/>(25.7 to 52.2)</b>    | <b>42.9<br/>(27.9 to 61.9)</b>                    | <b>16.9<br/>(4.4 to 31.8)</b>                       |
| Peptic ulcer disease                                           | 429.9<br>(386.4 to 479.5)               | 43.9<br>(39.8 to 48.4)                              | 8.8<br>(5.6 to 13.4)              | 50.7<br>(25.7 to 85.2)                            | 22.5<br>(1.6 to 51.0)                               |
| Gastritis and duodenitis                                       | 994.3<br>(849.4 to 1,150.8)             | 464.1<br>(403.9 to 536.7)                           | 13.8<br>(8.9 to 20.6)             | 53.6<br>(28.2 to 85.4)                            | 25.6<br>(5.7 to 50.8)                               |
| Appendicitis                                                   | 2.2<br>(2.1 to 2.4)                     | 59.2<br>(55.4 to 63.2)                              | 0.7<br>(0.5 to 1.0)               | 5.0<br>(-18.6 to 34.7)                            | -0.5<br>(-23.0 to 27.3)                             |
| Paralytic ileus and intestinal obstruction                     | 0.7<br>(0.6 to 0.7)                     | 17.7<br>(15.7 to 19.8)                              | 0.2<br>(0.1 to 0.3)               | 22.6<br>(6.7 to 41.6)                             | -1.0<br>(-13.2 to 12.3)                             |
| Inguinal, femoral, and abdominal hernia                        | 73.7<br>(66.7 to 81.1)                  | 148.2<br>(126.1 to 169.8)                           | 4.5<br>(3.0 to 6.4)               | 25.4<br>(10.1 to 43.2)                            | 7.2<br>(-5.2 to 21.2)                               |
| Inflammatory bowel disease                                     | 33.2<br>(30.8 to 36.1)                  | 13.8<br>(13.3 to 14.3)                              | 4.7<br>(3.1 to 6.5)               | 33.1<br>(18.1 to 50.6)                            | 7.3<br>(-4.2 to 20.7)                               |
| Vascular intestinal disorders                                  | 0.3<br>(0.3 to 0.4)                     | 1.9<br>(1.8 to 2.2)                                 | 0.1<br>(0.1 to 0.1)               | 18.6<br>(5.9 to 32.8)                             | -7.3<br>(-16.6 to 2.8)                              |
| Gallbladder and biliary diseases                               | 94.8<br>(83.4 to 107.2)                 | 322.6<br>(282.6 to 367.0)                           | 1.2<br>(0.8 to 1.8)               | 23.5<br>(0.2 to 47.8)                             | -3.0<br>(-20.2 to 14.7)                             |
| Pancreatitis                                                   | 0.7<br>(0.6 to 0.8)                     | 6.1<br>(5.5 to 6.8)                                 | 0.1<br>(0.1 to 0.1)               | 8.6<br>(3.9 to 13.7)                              | -13.1<br>(-16.5 to -9.6)                            |
| Other digestive diseases                                       | --                                      | --                                                  | 2.9<br>(2.0 to 4.0)               | 47.5<br>(32.5 to 66.0)                            | 17.9<br>(6.0 to 32.4)                               |
| <b>Neurological disorders</b>                                  | <b>6,340.8<br/>(6,047.0 to 6,656.2)</b> | <b>2,383.8<br/>(2,072.6 to 2,729.7)</b>             | <b>193.3<br/>(128.9 to 262.7)</b> | <b>14.2<br/>(-1.1 to 32.3)</b>                    | <b>1.2<br/>(-14.1 to 19.0)</b>                      |
| Alzheimer's disease and other dementias                        | 203.3<br>(171.8 to 238.9)               | 35.2<br>(29.5 to 42.2)                              | 30.3<br>(21.0 to 40.6)            | 52.0<br>(44.8 to 59.9)                            | -1.9<br>(-5.9 to 2.5)                               |
| Parkinson's disease                                            | 29.9<br>(23.8 to 36.7)                  | 3.4<br>(2.6 to 4.2)                                 | 3.5<br>(2.2 to 4.9)               | 29.0<br>(12.5 to 46.8)                            | -8.2<br>(-19.6 to 4.0)                              |
| Epilepsy                                                       | 73.9<br>(24.6 to 113.0)                 | 6.0<br>(2.0 to 9.3)                                 | 22.0<br>(5.7 to 41.9)             | 12.6<br>(-70.7 to 329.4)                          | 5.5<br>(-71.9 to 310.6)                             |
| Multiple sclerosis                                             | 1.5<br>(1.3 to 1.7)                     | 0.1<br>(0.1 to 0.1)                                 | 0.4<br>(0.3 to 0.6)               | 40.4<br>(29.0 to 59.5)                            | 21.5<br>(11.8 to 38.1)                              |
| Motor neuron disease                                           | 1.1<br>(1.0 to 1.2)                     | 0.2<br>(0.2 to 0.2)                                 | 0.2<br>(0.2 to 0.3)               | 1.2<br>(-5.2 to 8.4)                              | -12.9<br>(-18.2 to -7.7)                            |
| Migraine                                                       | 2,647.1<br>(2,530.9 to 2,761.8)         | 262.5<br>(249.2 to 276.5)                           | 115.0<br>(73.9 to 160.1)          | 7.4<br>(3.2 to 11.5)                              | 0.6<br>(-3.5 to 4.4)                                |
| Tension-type headache                                          | 4,122.3<br>(3,650.7 to 4,662.4)         | 2,076.3<br>(1,773.9 to 2,427.2)                     | 17.4<br>(11.1 to 26.0)            | 9.6<br>(3.4 to 16.8)                              | 0.7<br>(-4.8 to 6.7)                                |
| Other neurological disorders                                   | 0.1<br>( $< 0.05$ to 0.1)               | 0.1<br>(0.1 to 0.2)                                 | 4.4<br>(1.8 to 7.7)               | 24.9<br>(-50.7 to 240.7)                          | 23.3<br>(-57.6 to 252.0)                            |
| <b>Mental and substance use disorders</b>                      | <b>3,429.4<br/>(3,332.0 to 3,523.9)</b> | <b>1,050.2<sup>+</sup><br/>(985.6 to 1,124.8)</b>   | <b>479.6<br/>(352.0 to 618.9)</b> | <b>8.9<br/>(6.4 to 11.5)</b>                      | <b>0.7<br/>(-1.7 to 2.7)</b>                        |
| Schizophrenia                                                  | 127.6<br>(112.2 to 144.1)               | 5.3<br>(4.6 to 6.0)                                 | 82.6<br>(60.6 to 104.0)           | 7.3<br>(-0.4 to 15.0)                             | -0.9<br>(-7.9 to 6.0)                               |
| Alcohol use disorders                                          | 292.4<br>(260.2 to 328.5)               | 146.6<br>(125.4 to 166.6)                           | 29.3<br>(19.9 to 40.5)            | 10.7<br>(1.9 to 21.0)                             | 3.6<br>(-4.2 to 13.4)                               |
| Drug use disorders                                             | 194.9<br>(180.0 to 209.9)               | 24.1<br>(21.8 to 26.7)                              | 40.2<br>(28.2 to 53.1)            | 6.3<br>(-2.8 to 15.6)                             | 3.8<br>(-5.6 to 13.3)                               |
| Opioid use disorders                                           | 71.7<br>(61.0 to 84.7)                  | 7.9<br>(6.8 to 9.2)                                 | 29.9<br>(20.3 to 40.1)            | 7.5<br>(-3.8 to 18.8)                             | 2.9<br>(-8.2 to 14.5)                               |
| Cocaine use disorders                                          | 6.7<br>(5.8 to 7.7)                     | 0.6<br>(0.5 to 0.7)                                 | 0.9<br>(0.6 to 1.4)               | 10.7<br>(-16.9 to 49.5)                           | 4.0<br>(-21.9 to 39.7)                              |
| Amphetamine use disorders                                      | 20.3<br>(13.8 to 28.7)                  | 1.8<br>(1.3 to 2.6)                                 | 2.7<br>(1.5 to 4.5)               | 1.0<br>(-22.5 to 30.5)                            | 9.9<br>(-15.5 to 42.5)                              |
| Cannabis use disorders                                         | 85.7<br>(71.8 to 102.0)                 | 11.1<br>(9.2 to 13.4)                               | 2.5<br>(1.5 to 3.7)               | -4.9<br>(-16.6 to 8.8)                            | 0.2<br>(-12.5 to 14.6)                              |
| Other drug use disorders                                       | 16.3<br>(14.5 to 18.1)                  | 2.8<br>(2.5 to 3.1)                                 | 4.2<br>(2.7 to 6.0)               | 8.0<br>(-11.2 to 31.8)                            | 8.5<br>(-11.6 to 33.3)                              |
| Depressive disorders                                           | 897.5<br>(839.1 to 965.7)               | 673.0<br>(609.9 to 741.8)                           | 129.8<br>(89.5 to 176.2)          | 17.0<br>(11.9 to 22.1)                            | 0.3<br>(-3.6 to 4.4)                                |
| Major depressive disorder                                      | 396.3<br>(357.0 to 437.3)               | 601.5<br>(539.8 to 672.0)                           | 80.6<br>(54.9 to 110.0)           | 15.0<br>(7.5 to 22.8)                             | 0.2<br>(-5.9 to 6.4)                                |
| Dysthymia                                                      | 515.8<br>(448.1 to 592.1)               | 71.5<br>(61.6 to 82.2)                              | 49.2<br>(32.8 to 70.9)            | 20.5<br>(15.9 to 25.1)                            | 0.5<br>(-2.2 to 3.7)                                |
| Bipolar disorder                                               | 91.4<br>(79.8 to 104.6)                 | 7.1<br>(6.2 to 8.1)                                 | 18.7<br>(11.5 to 27.3)            | 9.9<br>(1.9 to 20.2)                              | 0.1<br>(-7.0 to 8.7)                                |
| Anxiety disorders                                              | 888.3<br>(810.1 to 971.0)               | 129.6<br>(120.3 to 140.4)                           | 85.4<br>(59.2 to 115.5)           | 8.3<br>(1.7 to 15.0)                              | 0.7<br>(-5.0 to 7.0)                                |
| Eating disorders                                               | 35.0<br>(28.6 to 41.0)                  | 15.0<br>(11.5 to 19.8)                              | 7.2<br>(4.5 to 10.5)              | 2.5<br>(-8.2 to 15.7)                             | 9.6<br>(-1.9 to 23.4)                               |
| Anorexia nervosa                                               | 9.3<br>(6.8 to 12.7)                    | 3.1<br>(2.3 to 4.1)                                 | 2.0<br>(1.2 to 3.1)               | -2.2<br>(-19.5 to 18.5)                           | 9.0<br>(-10.0 to 30.0)                              |
| Bulimia nervosa                                                | 24.4<br>(18.4 to 32.4)                  | 12.0<br>(8.5 to 16.5)                               | 5.2<br>(3.1 to 8.0)               | 4.4<br>(-9.2 to 19.6)                             | 9.9<br>(-3.9 to 25.5)                               |
| Autistic spectrum disorders                                    | 184.7<br>(166.0 to 208.4)               | 0.7<br>(0.5 to 1.0)                                 | 26.9<br>(18.2 to 38.2)            | 0.6<br>(-4.1 to 5.8)                              | -0.6<br>(-5.2 to 4.3)                               |
| Autism                                                         | 54.8<br>(46.8 to 64.3)                  | 0.1<br>( $< 0.05$ to 0.1)                           | 13.9<br>(8.9 to 20.4)             | 0.8<br>(-6.9 to 9.7)                              | -0.9<br>(-8.3 to 7.6)                               |
| Asperger syndrome and other autistic spectrum disorders        | 130.1<br>(108.5 to 154.7)               | 0.6<br>(0.4 to 0.9)                                 | 13.0<br>(8.5 to 18.9)             | 0.3<br>(-4.4 to 5.5)                              | -0.2<br>(-5.2 to 4.4)                               |



| Cause                                                      | Prevalence in thousands (95% UI)                 | Incidence in thousands (95% UI)                   | YLDs in thousands (95% UI)              |                                                   |                                                     |
|------------------------------------------------------------|--------------------------------------------------|---------------------------------------------------|-----------------------------------------|---------------------------------------------------|-----------------------------------------------------|
|                                                            | 2016 counts                                      | 2016 counts                                       | 2016 counts                             | Percentage change in counts between 2006 and 2016 | Percentage change in age-standardised rates between |
| Attention-deficit/hyperactivity disorder                   | 249.3<br>(225.1 to 277.4)                        | 6.8<br>(5.9 to 7.8)                               | 3.0<br>(1.8 to 4.8)                     | -9.5<br>(-15.5 to -3.6)                           | 0.1<br>(-6.0 to 6.9)                                |
| Conduct disorder                                           | 96.3<br>(79.3 to 113.4)                          | 29.3<br>(23.2 to 35.6)                            | 11.8<br>(7.3 to 18.0)                   | -17.4<br>(-24.6 to -9.3)                          | 1.2<br>(-7.5 to 10.3)                               |
| Idiopathic developmental intellectual disability           | 89.7<br>(36.4 to 141.9)                          | --                                                | 4.2<br>(1.8 to 7.6)                     | -6.8<br>(-15.3 to 2.3)                            | -6.5<br>(-14.9 to 2.2)                              |
| Other mental and substance use disorders                   | 543.2<br>(481.2 to 624.4)                        | 12.8<br>(11.4 to 14.3)                            | 40.5<br>(27.6 to 58.0)                  | 11.1<br>(6.4 to 16.4)                             | -0.1<br>(-4.5 to 4.5)                               |
| <b>Diabetes, urogenital, blood, and endocrine diseases</b> | <b>8,458.0</b><br><b>(8,271.9 to 8,647.6)</b>    | <b>2,927.1†</b><br><b>(2,720.3 to 3,184.9)</b>    | <b>342.2</b><br><b>(246.3 to 458.5)</b> | <b>22.4</b><br><b>(17.2 to 28.1)</b>              | <b>-1.2</b><br><b>(-5.2 to 3.1)</b>                 |
| Diabetes mellitus                                          | 2,490.4<br>(2,262.2 to 2,731.4)                  | 120.0<br>(108.4 to 131.7)                         | 192.2<br>(131.2 to 269.1)               | 25.2<br>(16.0 to 35.1)                            | -1.9<br>(-9.1 to 5.6)                               |
| Acute glomerulonephritis                                   | 0.6<br>(0.5 to 0.7)                              | 8.7<br>(7.6 to 9.9)                               | < 0.05<br>(< 0.05 to < 0.05)            | 16.0<br>(9.6 to 23.0)                             | 1.8<br>(-2.9 to 6.0)                                |
| Chronic kidney disease                                     | 1,084.7<br>(980.6 to 1,198.5)                    | 73.9<br>(63.9 to 84.1)                            | 67.2<br>(50.9 to 83.2)                  | 34.7<br>(27.9 to 41.9)                            | 2.6<br>(-2.4 to 8.0)                                |
| Chronic kidney disease due to diabetes mellitus            | 563.3<br>(492.3 to 641.5)                        | 39.6<br>(33.1 to 46.7)                            | 35.4<br>(26.6 to 44.3)                  | 33.1<br>(23.4 to 43.9)                            | 2.0<br>(-4.9 to 9.9)                                |
| Chronic kidney disease due to hypertension                 | 240.9<br>(203.4 to 280.0)                        | 4.7<br>(3.7 to 5.7)                               | 20.8<br>(15.0 to 26.7)                  | 38.6<br>(24.6 to 53.2)                            | 0.1<br>(-9.8 to 10.2)                               |
| Chronic kidney disease due to glomerulonephritis           | 189.8<br>(159.8 to 222.1)                        | 23.4<br>(18.7 to 28.5)                            | 4.8<br>(3.3 to 6.5)                     | 30.5<br>(14.5 to 49.4)                            | 10.9<br>(-1.3 to 25.1)                              |
| Chronic kidney disease due to other causes                 | 90.7<br>(73.4 to 110.6)                          | 6.2<br>(4.9 to 7.7)                               | 6.3<br>(4.5 to 8.5)                     | 34.7<br>(20.2 to 52.0)                            | 7.2<br>(-4.0 to 18.7)                               |
| Urinary diseases and male infertility                      | 605.6<br>(543.6 to 679.3)                        | 1,284.7†<br>(1,137.9 to 1,504.5)                  | 17.4<br>(11.3 to 25.3)                  | 25.9<br>(18.4 to 34.0)                            | -6.6<br>(-12.0 to -1.0)                             |
| Interstitial nephritis and urinary tract infections        | 17.7<br>(15.1 to 21.8)                           | 927.3<br>(784.8 to 1,141.4)                       | 0.6<br>(0.4 to 0.9)                     | 8.7<br>(-7.4 to 28.4)                             | -2.7<br>(-17.2 to 14.6)                             |
| Urolithiasis                                               | 11.1<br>(9.6 to 12.7)                            | 292.7<br>(255.0 to 335.8)                         | 0.8<br>(0.5 to 1.2)                     | 21.3<br>(0.1 to 47.8)                             | -2.6<br>(-18.9 to 17.2)                             |
| Benign prostatic hyperplasia                               | 462.0<br>(392.0 to 542.5)                        | 64.7<br>(53.4 to 78.1)                            | 15.1<br>(9.6 to 22.1)                   | 30.1<br>(21.2 to 39.4)                            | -6.4<br>(-12.5 to 0.1)                              |
| Male infertility                                           | 91.0<br>(66.8 to 124.2)                          | --                                                | 0.5<br>(0.2 to 1.1)                     | -12.9<br>(-20.8 to -4.4)                          | -10.1<br>(-17.7 to -2.0)                            |
| Other urinary diseases                                     | --                                               | --                                                | 0.5<br>(0.3 to 0.6)                     | -4.3<br>(-16.1 to 9.3)                            | -17.9<br>(-27.5 to -6.5)                            |
| Gynecological diseases                                     | 2,833.3<br>(2,684.4 to 2,990.6)                  | 1,357.7†<br>(1,237.7 to 1,497.9)                  | 43.6<br>(29.5 to 61.5)                  | -2.3<br>(-6.1 to 1.5)                             | -3.3<br>(-7.0 to 0.4)                               |
| Uterine fibroids                                           | 451.9<br>(393.1 to 517.6)                        | 43.5<br>(36.9 to 50.7)                            | 4.2<br>(2.2 to 7.5)                     | -16.7<br>(-30.2 to -5.2)                          | -24.2<br>(-36.1 to -14.5)                           |
| Polycystic ovarian syndrome                                | 25.7<br>(19.2 to 33.4)                           | 14.4<br>(10.0 to 19.4)                            | 0.2<br>(0.1 to 0.4)                     | -0.4<br>(-12.7 to 14.2)                           | 1.2<br>(-11.4 to 16.5)                              |
| Female infertility                                         | 90.8<br>(30.1 to 205.1)                          | --                                                | 0.5<br>(0.1 to 1.3)                     | 12.6<br>(-18.1 to 59.6)                           | 16.1<br>(-12.7 to 59.7)                             |
| Endometriosis                                              | 18.8<br>(16.0 to 22.2)                           | 50.6<br>(40.0 to 65.5)                            | 1.8<br>(1.2 to 2.5)                     | -1.4<br>(-18.1 to 19.0)                           | 0.9<br>(-15.6 to 22.0)                              |
| Genital prolapse                                           | 433.7<br>(374.2 to 502.3)                        | 21.3<br>(18.2 to 25.1)                            | 1.4<br>(0.7 to 2.5)                     | 28.6<br>(16.5 to 42.8)                            | -2.8<br>(-11.3 to 7.1)                              |
| Premenstrual syndrome                                      | 1,597.4<br>(1,509.7 to 1,683.1)                  | 546.8<br>(507.4 to 585.4)                         | 13.4<br>(8.3 to 20.7)                   | -2.2<br>(-8.7 to 4.9)                             | 0.1<br>(-6.8 to 7.4)                                |
| Other gynecological diseases                               | 620.1<br>(529.6 to 723.6)                        | 681.2<br>(565.8 to 816.6)                         | 22.2<br>(14.6 to 32.2)                  | -1.1<br>(-6.5 to 4.6)                             | -1.8<br>(-7.2 to 3.9)                               |
| Hemoglobinopathies and hemolytic anaemias                  | 3,004.1<br>(2,917.8 to 3,114.7)                  | --                                                | 7.7<br>(5.0 to 11.3)                    | 23.5<br>(4.8 to 44.1)                             | 14.6<br>(-4.2 to 35.9)                              |
| Thalassemias                                               | 0.3<br>(0.2 to 0.3)                              | --                                                | < 0.05<br>(< 0.05 to < 0.05)            | -8.1<br>(-20.2 to 4.6)                            | 12.8<br>(-3.2 to 29.2)                              |
| Thalassaemias trait                                        | 497.1<br>(478.8 to 515.5)                        | --                                                | 6.5<br>(4.2 to 9.7)                     | 29.9<br>(8.8 to 53.1)                             | 21.5<br>(0.1 to 46.6)                               |
| Sickle cell disorders                                      | < 0.05<br>(< 0.05 to < 0.05)                     | --                                                | < 0.05<br>(< 0.05 to < 0.05)            | 3.4<br>(-23.0 to 21.4)                            | 11.4<br>(-15.0 to 35.8)                             |
| Sickle cell trait                                          | 38.0<br>(28.5 to 49.8)                           | --                                                | 0.1<br>(0.1 to 0.2)                     | 35.4<br>(-3.9 to 94.7)                            | 27.2<br>(-12.9 to 89.6)                             |
| G6PD deficiency                                            | 507.3<br>(479.6 to 542.9)                        | --                                                | < 0.05<br>(< 0.05 to 0.1)               | 36.1<br>(18.3 to 55.8)                            | 29.9<br>(8.8 to 53.5)                               |
| G6PD trait                                                 | 1,997.9<br>(1,913.5 to 2,090.1)                  | --                                                | < 0.05<br>(< 0.05 to < 0.05)            | 19.8<br>(-8.7 to 57.2)                            | 2.6<br>(-27.0 to 43.9)                              |
| Other hemoglobinopathies and hemolytic anaemias            | 48.7<br>(45.1 to 52.6)                           | --                                                | 0.9<br>(0.6 to 1.3)                     | -9.5<br>(-21.3 to 3.7)                            | -23.9<br>(-34.7 to -12.7)                           |
| Endocrine, metabolic, blood, and immune disorders          | 418.0<br>(375.4 to 467.4)                        | 82.2<br>(72.2 to 93.3)                            | 14.2<br>(9.4 to 19.5)                   | 22.0<br>(13.6 to 30.4)                            | -4.8<br>(-11.4 to 1.1)                              |
| <b>Musculoskeletal disorders</b>                           | <b>5,113.6</b><br><b>(4,910.5 to 5,355.1)</b>    | <b>2,321.0</b><br><b>(2,114.0 to 2,556.6)</b>     | <b>558.1</b><br><b>(402.7 to 727.7)</b> | <b>17.8</b><br><b>(14.3 to 21.1)</b>              | <b>-1.7</b><br><b>(-4.2 to 0.7)</b>                 |
| Rheumatoid arthritis                                       | 83.9<br>(74.8 to 94.2)                           | 4.3<br>(3.8 to 4.8)                               | 19.7<br>(13.4 to 26.7)                  | 36.0<br>(25.0 to 48.5)                            | 9.0<br>(0.5 to 18.2)                                |
| Osteoarthritis                                             | 1,414.9<br>(1,317.2 to 1,516.0)                  | 63.6<br>(58.3 to 68.5)                            | 87.5<br>(61.5 to 119.7)                 | 36.3<br>(30.7 to 42.1)                            | 2.8<br>(-1.2 to 7.1)                                |
| Low back and neck pain                                     | 2,961.7<br>(2,755.3 to 3,188.7)                  | 1,087.6<br>(973.8 to 1,213.7)                     | 340.6<br>(240.6 to 453.1)               | 15.3<br>(11.0 to 19.7)                            | -1.9<br>(-5.0 to 1.0)                               |
| Low back pain                                              | 1,665.7<br>(1,468.4 to 1,887.8)                  | 794.7<br>(693.0 to 914.0)                         | 189.2<br>(133.7 to 250.9)               | 13.1<br>(6.1 to 20.1)                             | -3.7<br>(-8.7 to 1.2)                               |
| Neck pain                                                  | 1,513.7<br>(1,303.8 to 1,753.0)                  | 292.9<br>(252.0 to 345.2)                         | 151.4<br>(102.2 to 217.2)               | 18.3<br>(14.6 to 22.2)                            | 0.4<br>(-1.4 to 2.3)                                |
| Gout                                                       | 167.7<br>(148.2 to 190.1)                        | 31.8<br>(27.4 to 36.5)                            | 5.3<br>(3.6 to 7.3)                     | 26.6<br>(10.7 to 43.6)                            | -1.7<br>(-13.6 to 11.6)                             |
| Other musculoskeletal disorders                            | 1,226.2<br>(1,052.1 to 1,420.8)                  | 1,133.7<br>(956.2 to 1,340.1)                     | 104.9<br>(70.5 to 148.2)                | 9.7<br>(1.3 to 19.8)                              | -5.8<br>(-12.8 to 1.7)                              |
| <b>Other non-communicable diseases</b>                     | <b>16,056.0</b><br><b>(15,865.8 to 16,259.6)</b> | <b>36,547.4†</b><br><b>(34,986.0 to 38,314.3)</b> | <b>477.6</b><br><b>(321.0 to 687.0)</b> | <b>13.4</b><br><b>(11.5 to 15.2)</b>              | <b>-0.8</b><br><b>(-2.3 to 0.5)</b>                 |
| Congenital anomalies                                       | 241.5<br>(213.9 to 272.7)                        | --                                                | 23.4<br>(16.9 to 31.4)                  | -1.4<br>(-7.1 to 4.6)                             | -4.4<br>(-10.1 to 1.2)                              |
| Neural tube defects                                        | 8.0<br>(7.1 to 9.1)                              | --                                                | 2.4<br>(1.7 to 3.2)                     | -0.3<br>(-13.6 to 17.6)                           | -4.3<br>(-16.9 to 11.4)                             |
| Congenital heart anomalies                                 | 37.0<br>(32.5 to 42.0)                           | --                                                | 1.9<br>(0.8 to 3.2)                     | -2.4<br>(-13.0 to 8.8)                            | -5.8<br>(-15.7 to 5.2)                              |
| Orofacial clefts                                           | 12.8<br>(11.2 to 14.5)                           | --                                                | 0.1<br>(0.1 to 0.2)                     | 0.8<br>(-10.6 to 14.1)                            | -3.1<br>(-14.0 to 9.6)                              |
| Down's syndrome                                            | 3.2<br>(2.7 to 3.7)                              | --                                                | 0.3<br>(0.2 to 0.4)                     | -1.3<br>(-9.2 to 8.7)                             | 0.7<br>(-7.1 to 10.3)                               |
| Turner syndrome                                            | 3.7<br>(3.2 to 4.3)                              | --                                                | 0.1<br>(< 0.05 to 0.1)                  | 10.1<br>(-10.5 to 33.7)                           | 13.8<br>(-12.4 to 44.2)                             |
| Klinefelter syndrome                                       | 4.1<br>(3.5 to 4.8)                              | --                                                | < 0.05<br>(< 0.05 to 0.1)               | -4.4<br>(-30.2 to 33.0)                           | 3.7<br>(-25.0 to 45.7)                              |



| Cause                                         | Prevalence in thousands (95% UI)              | Incidence in thousands (95% UI)                           | YLDs in thousands (95% UI)             |                                                   |                                                     |
|-----------------------------------------------|-----------------------------------------------|-----------------------------------------------------------|----------------------------------------|---------------------------------------------------|-----------------------------------------------------|
|                                               | 2016 counts                                   | 2016 counts                                               | 2016 counts                            | Percentage change in counts between 2006 and 2016 | Percentage change in age-standardised rates between |
| Other chromosomal abnormalities               | 3.6<br>(2.9 to 4.4)                           | --                                                        | 0.4<br>(0.3 to 0.6)                    | -16.8<br>(-31.2 to 1.1)                           | 1.3<br>(-17.7 to 25.1)                              |
| Congenital musculoskeletal and limb anomalies | 27.0<br>(24.4 to 29.6)                        | --                                                        | 3.7<br>(2.4 to 5.1)                    | 4.6<br>(-6.8 to 16.6)                             | -1.3<br>(-11.4 to 9.5)                              |
| Urogenital congenital anomalies               | 11.8<br>(10.4 to 13.4)                        | --                                                        | 0.4<br>(0.2 to 0.6)                    | -16.8<br>(-28.1 to -3.9)                          | -2.8<br>(-17.7 to 14.7)                             |
| Digestive congenital anomalies                | 52.1<br>(45.6 to 58.8)                        | --                                                        | 2.3<br>(1.5 to 3.3)                    | 3.6<br>(-8.0 to 16.9)                             | 0.3<br>(-10.3 to 13.1)                              |
| Other congenital anomalies                    | 126.3<br>(95.9 to 168.0)                      | --                                                        | 12.0<br>(8.1 to 17.2)                  | -2.9<br>(-11.8 to 7.6)                            | -6.6<br>(-15.0 to 3.2)                              |
| Skin and subcutaneous diseases                | 7,087.9<br>(6,941.8 to 7,244.6)               | 15,425.4<br>(14,812.5 to 16,174.4)                        | 158.6<br>(106.0 to 232.0)              | 1.1<br>(-1.1 to 3.2)                              | 2.0<br>(-0.1 to 4.2)                                |
| Dermatitis                                    | 783.2<br>(744.3 to 824.7)                     | 1,440.7<br>(1,335.7 to 1,551.4)                           | 26.8<br>(16.4 to 42.1)                 | 0.8<br>(-3.8 to 5.4)                              | 1.2<br>(-3.3 to 5.7)                                |
| Psoriasis                                     | 128.7<br>(124.0 to 133.6)                     | 18.8<br>(18.1 to 19.6)                                    | 11.2<br>(7.9 to 14.7)                  | 15.1<br>(4.4 to 25.8)                             | 5.1<br>(-4.7 to 14.5)                               |
| Cellulitis                                    | 4.5<br>(4.2 to 4.8)                           | 67.8<br>(63.4 to 72.4)                                    | 0.3<br>(0.2 to 0.4)                    | 8.3<br>(2.4 to 15.0)                              | 0.1<br>(-4.5 to 5.4)                                |
| Pyoderma                                      | 56.2<br>(54.1 to 58.4)                        | 1,489.4<br>(1,431.7 to 1,551.5)                           | 0.3<br>(0.1 to 0.7)                    | 23.6<br>(15.3 to 32.3)                            | -0.1<br>(-6.4 to 6.8)                               |
| Scabies                                       | 588.2<br>(509.2 to 679.3)                     | 1,833.8<br>(1,574.2 to 2,125.1)                           | 15.1<br>(8.4 to 24.2)                  | -6.4<br>(-10.1 to -2.2)                           | -5.4<br>(-8.6 to -1.7)                              |
| Fungal skin diseases                          | 1,298.4<br>(1,174.4 to 1,433.6)               | 5,013.8<br>(4,486.9 to 5,552.9)                           | 7.2<br>(2.9 to 15.0)                   | 12.5<br>(9.5 to 15.7)                             | -0.0<br>(-1.4 to 1.4)                               |
| Viral skin diseases                           | 518.4<br>(498.0 to 539.0)                     | 791.3<br>(756.6 to 825.5)                                 | 15.9<br>(9.8 to 23.5)                  | -3.3<br>(-6.4 to -0.0)                            | 0.2<br>(-2.8 to 3.4)                                |
| Acne vulgaris                                 | 2,050.4<br>(1,900.5 to 2,211.6)               | 1,303.0<br>(1,120.1 to 1,534.5)                           | 53.1<br>(35.6 to 76.6)                 | -3.9<br>(-8.4 to 0.6)                             | 5.2<br>(-0.0 to 10.5)                               |
| Alopecia areata                               | 48.4<br>(46.6 to 50.1)                        | 84.9<br>(81.9 to 87.9)                                    | 1.6<br>(1.0 to 2.4)                    | 4.2<br>(-5.6 to 15.1)                             | -0.0<br>(-9.3 to 10.6)                              |
| Pruritus                                      | 253.2<br>(222.0 to 289.1)                     | 196.9<br>(173.3 to 225.8)                                 | 2.7<br>(1.2 to 5.0)                    | 13.7<br>(7.6 to 20.7)                             | 0.8<br>(-3.8 to 6.3)                                |
| Urticaria                                     | 172.0<br>(151.2 to 194.1)                     | 303.7<br>(268.0 to 343.1)                                 | 10.3<br>(6.7 to 14.6)                  | -1.8<br>(-7.2 to 4.2)                             | -0.0<br>(-5.0 to 5.3)                               |
| Decubitus ulcer                               | 8.2<br>(7.2 to 9.2)                           | 29.8<br>(25.9 to 33.8)                                    | 1.3<br>(0.9 to 1.7)                    | 30.3<br>(12.3 to 52.6)                            | -7.9<br>(-21.0 to 7.4)                              |
| Other skin and subcutaneous diseases          | 2,354.3<br>(2,281.5 to 2,427.6)               | 2,851.6<br>(2,748.4 to 2,958.8)                           | 12.9<br>(6.2 to 23.8)                  | 22.1<br>(19.3 to 25.1)                            | 3.3<br>(1.1 to 5.6)                                 |
| Sense organ diseases                          | 7,402.1<br>(7,230.8 to 7,577.1)               | 2,450.8 <sup>†</sup><br>(2,316.3 to 2,597.1)              | 238.8<br>(160.4 to 340.8)              | 22.9<br>(19.8 to 25.5)                            | -3.0<br>(-5.4 to -1.1)                              |
| Glaucoma                                      | 12.7<br>(10.6 to 15.0)                        | --                                                        | 1.3<br>(0.8 to 1.8)                    | 40.0<br>(19.3 to 63.1)                            | -2.4<br>(-16.4 to 13.4)                             |
| Cataract                                      | 111.1<br>(93.1 to 132.3)                      | --                                                        | 5.1<br>(3.5 to 7.2)                    | 27.3<br>(16.5 to 38.9)                            | -10.7<br>(-18.0 to -2.8)                            |
| Macular degeneration                          | 25.7<br>(20.4 to 31.9)                        | --                                                        | 1.0<br>(0.7 to 1.5)                    | 36.2<br>(18.6 to 54.7)                            | -5.5<br>(-17.4 to 7.0)                              |
| Refraction and accommodation disorders        | 2,456.8<br>(2,351.9 to 2,562.3)               | --                                                        | 35.8<br>(20.4 to 60.6)                 | 22.6<br>(17.5 to 27.1)                            | -2.2<br>(-5.9 to 0.8)                               |
| Age-related and other hearing loss            | 6,293.7<br>(6,022.4 to 6,581.0)               | --                                                        | 158.9<br>(107.1 to 227.4)              | 22.1<br>(17.8 to 25.8)                            | -3.6<br>(-6.8 to -1.0)                              |
| Other vision loss                             | 131.3<br>(115.1 to 148.8)                     | --                                                        | 8.4<br>(5.9 to 11.4)                   | 27.7<br>(18.2 to 37.4)                            | -4.3<br>(-11.2 to 2.7)                              |
| Other sense organ diseases                    | 899.9<br>(825.7 to 974.9)                     | 2,450.8<br>(2,316.3 to 2,597.1)                           | 28.4<br>(17.8 to 42.8)                 | 24.6<br>(20.0 to 29.7)                            | 1.0<br>(-2.6 to 5.0)                                |
| Oral disorders                                | 8,554.5<br>(8,215.2 to 8,927.2)               | 18,671.2 <sup>†</sup><br>(17,190.0 to 20,344.5)           | 56.8<br>(34.2 to 90.0)                 | 23.4<br>(19.2 to 27.5)                            | 0.2<br>(-2.8 to 3.1)                                |
| Caries of deciduous teeth                     | 746.0<br>(592.9 to 901.1)                     | 2,836.2<br>(1,968.4 to 3,782.7)                           | 0.2<br>(0.1 to 0.4)                    | -23.9<br>(-32.1 to -14.4)                         | 0.3<br>(-10.3 to 12.6)                              |
| Caries of permanent teeth                     | 4,921.1<br>(4,616.2 to 5,250.0)               | 15,461.4<br>(14,287.8 to 16,782.8)                        | 2.9<br>(1.3 to 5.5)                    | 11.1<br>(6.3 to 15.9)                             | 4.4<br>(-0.0 to 8.4)                                |
| Periodontal disease                           | 2,615.0<br>(2,166.1 to 3,103.1)               | 308.7<br>(242.5 to 377.9)                                 | 17.0<br>(6.8 to 35.7)                  | 25.9<br>(15.6 to 37.4)                            | -0.8<br>(-9.0 to 8.2)                               |
| Edentulism and severe tooth loss              | 815.1<br>(704.2 to 924.3)                     | 64.9<br>(55.1 to 75.4)                                    | 22.5<br>(14.8 to 31.8)                 | 35.8<br>(30.9 to 41.3)                            | 0.4<br>(-3.0 to 4.2)                                |
| Other oral disorders                          | 484.5<br>(463.7 to 505.1)                     | --                                                        | 14.2<br>(8.7 to 21.4)                  | 8.2<br>(4.9 to 11.8)                              | 0.1<br>(-2.8 to 3.2)                                |
| <b>Injuries</b>                               | <b>4,066.0</b><br><b>(3,868.8 to 4,269.7)</b> | <b>1,221.3<sup>†</sup></b><br><b>(1,162.0 to 1,281.5)</b> | <b>148.1</b><br><b>(98.6 to 212.9)</b> | <b>31.8</b><br><b>(29.4 to 34.1)</b>              | <b>12.6</b><br><b>(10.8 to 14.4)</b>                |
| <b>Transport injuries</b>                     | <b>1,094.0</b><br><b>(1,025.4 to 1,174.2)</b> | <b>278.8</b><br><b>(252.6 to 308.7)</b>                   | <b>52.4</b><br><b>(34.9 to 74.7)</b>   | <b>34.1</b><br><b>(31.6 to 36.7)</b>              | <b>12.7</b><br><b>(10.7 to 14.9)</b>                |
| Road injuries                                 | 858.5<br>(802.0 to 919.5)                     | 241.8<br>(216.2 to 271.3)                                 | 41.9<br>(27.9 to 59.7)                 | 39.0<br>(36.6 to 41.7)                            | 15.5<br>(13.4 to 17.6)                              |
| Pedestrian road injuries                      | 183.2<br>(162.9 to 207.1)                     | 42.6<br>(36.0 to 50.8)                                    | 8.9<br>(6.0 to 12.6)                   | 33.2<br>(30.7 to 35.8)                            | 9.0<br>(6.9 to 11.1)                                |
| Cyclist road injuries                         | 174.0<br>(148.0 to 202.5)                     | 59.8<br>(49.1 to 71.5)                                    | 8.2<br>(5.5 to 11.9)                   | 62.9<br>(59.8 to 66.4)                            | 34.1<br>(31.8 to 36.6)                              |
| Motorcyclist road injuries                    | 275.3<br>(237.8 to 329.0)                     | 57.8<br>(48.6 to 68.2)                                    | 13.0<br>(8.7 to 18.5)                  | 33.8<br>(31.3 to 36.5)                            | 11.8<br>(9.8 to 14.0)                               |
| Motor vehicle road injuries                   | 159.7<br>(134.5 to 182.5)                     | 56.9<br>(47.1 to 67.5)                                    | 8.7<br>(5.8 to 12.4)                   | 29.4<br>(26.6 to 32.0)                            | 8.5<br>(6.2 to 10.8)                                |
| Other road injuries                           | 66.2<br>(57.3 to 78.4)                        | 24.8<br>(19.2 to 31.3)                                    | 3.0<br>(2.0 to 4.5)                    | 56.7<br>(53.6 to 59.8)                            | 32.0<br>(29.6 to 34.5)                              |
| Other transport injuries                      | 235.6<br>(200.2 to 275.6)                     | 36.9<br>(32.3 to 42.0)                                    | 10.5<br>(7.0 to 14.9)                  | 17.5<br>(14.8 to 20.1)                            | 3.7<br>(1.3 to 6.0)                                 |
| <b>Unintentional injuries</b>                 | <b>2,680.6</b><br><b>(2,510.6 to 2,848.9)</b> | <b>827.1</b><br><b>(778.0 to 882.5)</b>                   | <b>82.6</b><br><b>(55.2 to 119.5)</b>  | <b>37.5</b><br><b>(34.6 to 40.3)</b>              | <b>17.5</b><br><b>(15.6 to 19.5)</b>                |
| Falls                                         | 934.6<br>(829.6 to 1,047.7)                   | 316.8<br>(283.5 to 355.6)                                 | 35.3<br>(24.3 to 49.6)                 | 64.9<br>(61.6 to 68.2)                            | 37.9<br>(35.5 to 40.4)                              |
| Drowning                                      | 23.3<br>(20.5 to 26.6)                        | 2.9<br>(2.5 to 3.3)                                       | 1.0<br>(0.7 to 1.4)                    | 22.1<br>(19.3 to 24.9)                            | 4.9<br>(2.4 to 7.1)                                 |
| Fire, heat, and hot substances                | 224.3<br>(190.4 to 270.9)                     | 17.8<br>(14.4 to 21.3)                                    | 5.1<br>(3.2 to 7.9)                    | 23.2<br>(19.1 to 27.3)                            | 9.9<br>(6.3 to 13.4)                                |
| Poisonings                                    | 10.3<br>(8.9 to 11.8)                         | 13.1<br>(10.3 to 16.3)                                    | 0.7<br>(0.5 to 1.1)                    | 31.4<br>(21.4 to 43.6)                            | 20.0<br>(11.0 to 31.0)                              |
| Exposure to mechanical forces                 | 495.5<br>(428.7 to 598.8)                     | 141.7<br>(120.0 to 166.5)                                 | 10.8<br>(7.0 to 16.0)                  | 41.8<br>(39.0 to 44.7)                            | 20.9<br>(18.9 to 23.1)                              |
| Unintentional firearm injuries                | 17.9<br>(14.9 to 21.6)                        | 2.9<br>(2.0 to 4.0)                                       | 0.6<br>(0.4 to 0.9)                    | 22.5<br>(19.9 to 25.4)                            | 7.5<br>(5.4 to 9.8)                                 |
| Unintentional suffocation                     | 44.9<br>(33.8 to 58.8)                        | 5.7<br>(4.2 to 7.5)                                       | 1.2<br>(0.7 to 1.8)                    | 10.2<br>(7.5 to 12.9)                             | 0.9<br>(-1.5 to 3.4)                                |
| Other exposure to mechanical forces           | 432.7<br>(365.8 to 534.6)                     | 133.1<br>(112.6 to 157.2)                                 | 9.0<br>(5.9 to 13.3)                   | 49.1<br>(46.4 to 52.0)                            | 26.0<br>(23.7 to 28.2)                              |

| Cause                                                                               | Prevalence in thousands (95% UI)        | Incidence in thousands (95% UI)         | YLDs in thousands (95% UI)          |                                                   |                                                     |
|-------------------------------------------------------------------------------------|-----------------------------------------|-----------------------------------------|-------------------------------------|---------------------------------------------------|-----------------------------------------------------|
|                                                                                     | 2016 counts                             | 2016 counts                             | 2016 counts                         | Percentage change in counts between 2006 and 2016 | Percentage change in age-standardised rates between |
| Adverse effects of medical treatment                                                | 5.3<br>(4.2 to 6.6)                     | 69.7<br>(60.7 to 80.0)                  | 0.7<br>(0.5 to 1.1)                 | 12.0<br>(6.8 to 17.9)                             | 0.8<br>(-4.5 to 6.5)                                |
| Animal contact                                                                      | 31.2<br>(26.8 to 38.3)                  | 26.4<br>(21.4 to 33.1)                  | 0.8<br>(0.5 to 1.2)                 | 8.7<br>(2.3 to 16.3)                              | -0.1<br>(-6.0 to 7.4)                               |
| Venomous animal contact                                                             | 9.2<br>(7.6 to 11.0)                    | 9.6<br>(7.2 to 12.8)                    | 0.5<br>(0.3 to 0.8)                 | 10.8<br>(0.7 to 22.8)                             | 4.3<br>(-5.1 to 15.6)                               |
| Non-venomous animal contact                                                         | 22.0<br>(18.3 to 28.8)                  | 16.8<br>(13.3 to 21.0)                  | 0.3<br>(0.2 to 0.5)                 | 5.3<br>(2.5 to 8.1)                               | -7.2<br>(-9.5 to -4.9)                              |
| Foreign body                                                                        | 138.1<br>(115.9 to 159.9)               | 53.7<br>(48.0 to 60.6)                  | 4.5<br>(2.8 to 6.7)                 | 9.6<br>(6.6 to 12.5)                              | -3.4<br>(-5.9 to -0.7)                              |
| Pulmonary aspiration and foreign body in airway                                     | 86.9<br>(68.6 to 109.0)                 | 23.0<br>(20.0 to 26.5)                  | 3.1<br>(1.9 to 4.7)                 | 6.6<br>(3.5 to 9.9)                               | -5.8<br>(-8.6 to -2.9)                              |
| Foreign body in eyes                                                                | 3.7<br>(2.4 to 5.3)                     | 16.8<br>(12.7 to 22.4)                  | 0.2<br>(0.1 to 0.4)                 | 15.1<br>(10.1 to 22.2)                            | 1.3<br>(-1.8 to 4.5)                                |
| Foreign body in other body part                                                     | 47.5<br>(37.6 to 59.5)                  | 13.9<br>(11.8 to 16.6)                  | 1.1<br>(0.7 to 1.7)                 | 17.5<br>(14.5 to 20.6)                            | 3.3<br>(0.6 to 5.7)                                 |
| Environmental heat and cold exposure                                                | 329.6<br>(281.0 to 388.9)               | 61.2<br>(51.1 to 72.0)                  | 10.5<br>(6.9 to 15.3)               | 18.9<br>(16.4 to 21.3)                            | 4.0<br>(2.1 to 6.0)                                 |
| Other unintentional injuries                                                        | 488.2<br>(397.0 to 594.0)               | 123.8<br>(102.7 to 145.2)               | 13.1<br>(8.5 to 19.4)               | 17.0<br>(15.0 to 18.9)                            | 1.4<br>(-0.4 to 3.3)                                |
| <b>Self-harm and interpersonal violence</b>                                         | <b>637.8</b><br><b>(583.9 to 699.5)</b> | <b>104.5†</b><br><b>(91.7 to 118.4)</b> | <b>12.3</b><br><b>(8.3 to 17.4)</b> | <b>-2.5</b><br><b>(-4.3 to -0.7)</b>              | <b>-13.1</b><br><b>(-14.6 to -11.5)</b>             |
| Self-harm                                                                           | 46.8<br>(40.3 to 53.8)                  | 20.0<br>(17.5 to 23.0)                  | 1.8<br>(1.1 to 2.6)                 | 15.8<br>(12.7 to 18.8)                            | -5.0<br>(-7.4 to -2.6)                              |
| Self-harm by firearm                                                                | 0.9<br>(0.7 to 1.1)                     | 0.1<br>(0.1 to 0.2)                     | < 0.05<br>(< 0.05 to < 0.05)        | 19.7<br>(16.1 to 23.2)                            | 8.1<br>(4.3 to 11.6)                                |
| Self-harm by other specified means                                                  | 45.9<br>(39.3 to 53.0)                  | 19.9<br>(17.4 to 22.9)                  | 1.8<br>(1.1 to 2.6)                 | 15.7<br>(12.6 to 18.7)                            | -5.2<br>(-7.6 to -2.8)                              |
| Interpersonal violence                                                              | 591.0<br>(537.3 to 651.9)               | 84.5†<br>(72.0 to 98.4)                 | 10.5<br>(7.2 to 14.7)               | -5.0<br>(-6.8 to -3.3)                            | -14.2<br>(-15.8 to -12.5)                           |
| Assault by firearm                                                                  | 4.1<br>(3.6 to 4.8)                     | 0.9<br>(0.6 to 1.2)                     | 0.2<br>(0.1 to 0.2)                 | 11.4<br>(8.3 to 14.6)                             | -2.9<br>(-5.3 to -0.3)                              |
| Assault by sharp object                                                             | 46.3<br>(37.8 to 55.1)                  | 12.2<br>(9.1 to 16.0)                   | 1.2<br>(0.7 to 1.7)                 | 1.1<br>(-1.6 to 3.8)                              | -10.9<br>(-13.2 to -8.7)                            |
| Sexual violence                                                                     | 371.5<br>(324.1 to 421.2)               | --                                      | 3.0<br>(2.0 to 4.3)                 | -7.0<br>(-10.6 to -3.1)                           | -4.8<br>(-8.3 to -1.1)                              |
| Assault by other means                                                              | 169.1<br>(143.1 to 203.8)               | 71.4<br>(60.4 to 83.8)                  | 6.2<br>(4.1 to 8.9)                 | -5.5<br>(-7.4 to -3.6)                            | -20.0<br>(-21.7 to -18.4)                           |
| <b>Forces of nature, conflict and terrorism, and executions and police conflict</b> | <b>25.2</b><br><b>(6.2 to 49.6)</b>     | <b>10.9†</b><br><b>(2.4 to 20.8)</b>    | <b>0.8</b><br><b>(0.2 to 2.1)</b>   | <b>34.6</b><br><b>(17.4 to 168.6)</b>             | <b>20.4</b><br><b>(2.4 to 162.0)</b>                |
| Exposure to forces of nature                                                        | 23.0<br>(3.7 to 47.4)                   | 10.2<br>(1.6 to 20.2)                   | 0.7<br>(0.2 to 2.0)                 | 34.4<br>(16.3 to 186.4)                           | 20.2<br>(1.3 to 181.7)                              |
| Conflict and terrorism                                                              | --                                      | --                                      | --                                  | --                                                | --                                                  |
| Executions and police conflict                                                      | 2.2<br>(1.2 to 3.3)                     | 0.7<br>(0.4 to 0.9)                     | 0.1<br>(< 0.05 to 0.1)              | 37.6<br>(29.6 to 42.7)                            | 22.9<br>(17.8 to 27.6)                              |
| <b>Impairments</b>                                                                  | --                                      | --                                      | --                                  | --                                                | --                                                  |
| Anaemia                                                                             | 3,401.3<br>(3,138.3 to 3,674.3)         | --                                      | 82.2<br>(56.9 to 115.6)             | -8.7<br>(-20.6 to 5.3)                            | -18.5<br>(-29.1 to -7.0)                            |
| Developmental intellectual disability                                               | 243.2<br>(190.0 to 294.7)               | --                                      | 30.2<br>(21.9 to 40.1)              | -2.0<br>(-6.2 to 2.7)                             | -3.1<br>(-7.5 to 1.5)                               |
| Epilepsy                                                                            | 106.4<br>(54.6 to 148.4)                | --                                      | 32.5<br>(16.1 to 53.9)              | 7.8<br>(-49.4 to 132.3)                           | 2.9<br>(-51.9 to 123.0)                             |
| Guillain-Barre syndrome                                                             | 0.2<br>(0.1 to 0.2)                     | --                                      | 0.1<br>(< 0.05 to 0.1)              | 11.3<br>(5.2 to 18.4)                             | -0.1<br>(-0.3 to -0.0)                              |
| Hearing loss                                                                        | 6,560.9<br>(6,293.1 to 6,841.1)         | --                                      | 173.7<br>(117.9 to 246.7)           | 19.0<br>(15.0 to 22.1)                            | -4.0<br>(-6.8 to -1.8)                              |
| Heart failure                                                                       | 254.4<br>(224.8 to 288.7)               | --                                      | 29.4<br>(21.0 to 38.9)              | 36.5<br>(26.9 to 46.5)                            | -3.9<br>(-10.1 to 2.6)                              |
| Infertility                                                                         | 442.4<br>(322.2 to 611.6)               | --                                      | 2.5<br>(1.0 to 5.2)                 | -0.3<br>(-8.6 to 8.4)                             | 1.9<br>(-5.5 to 9.5)                                |
| Pelvic inflammatory disease                                                         | 19.9<br>(16.8 to 23.4)                  | --                                      | 2.6<br>(1.7 to 3.6)                 | -4.7<br>(-17.9 to 11.0)                           | -10.0<br>(-22.4 to 4.8)                             |
| Vision loss                                                                         | 2,781.9<br>(2,674.2 to 2,904.8)         | --                                      | 59.0<br>(39.6 to 87.7)              | 22.2<br>(17.6 to 26.3)                            | -2.5<br>(-5.7 to 0.4)                               |

We did not calculate incidence for the nine impairments, certain NTDs, and causes with only birth prevalence. Blank cells mean that no estimate is available.

† Incidence for aggregate causes represents the sum of the incidence of the causes below the aggregate.

‡ Incidence estimates for stroke represent first-ever stroke only.

^ Incidence of HIV/AIDS represents new infections of HIV only and does not include new infections of Tuberculosis in HIV positive cases.

SR Table 14: Prevalence, incidence, and YLDs for 2016, percentage change of YLD counts and percentage change of age-standardised YLD rates between 2006 and 2016 by cause and impairments, for all ages, Tajikistan.

| Cause                                                                                | Prevalence in thousands (95% UI)       | Incidence in thousands (95% UI)            | YLDs in thousands (95% UI)       |                                                   |                                                     |
|--------------------------------------------------------------------------------------|----------------------------------------|--------------------------------------------|----------------------------------|---------------------------------------------------|-----------------------------------------------------|
|                                                                                      | 2016 counts                            | 2016 counts                                | 2016 counts                      | Percentage change in counts between 2006 and 2016 | Percentage change in age-standardised rates between |
| <b>All causes</b>                                                                    | <b>8,156.3</b><br>(8,116.9 to 8,195.4) | <b>42,071.8†</b><br>(40,430.8 to 43,950.7) | <b>733.4</b><br>(537.9 to 958.7) | <b>26.2</b><br>(22.5 to 30.1)                     | <b>-1.7</b><br>(-3.9 to 0.6)                        |
| <b>Communicable, maternal, neonatal, and nutritional disorders</b>                   | <b>4,802.1</b><br>(4,659.2 to 4,970.1) | <b>16,481.0†</b><br>(15,352.9 to 17,694.6) | <b>95.8</b><br>(67.3 to 132.9)   | <b>9.7</b><br>(2.5 to 16.6)                       | <b>-14.4</b><br>(-19.6 to -9.5)                     |
| <b>HIV/AIDS and tuberculosis</b>                                                     | <b>1,111.7</b><br>(1,021.1 to 1,185.5) | <b>6.7†</b><br>(5.8 to 7.5)                | <b>1.2</b><br>(0.8 to 1.7)       | <b>-19.3</b><br>(-33.2 to -2.2)                   | <b>-38.4</b><br>(-49.0 to -26.1)                    |
| Tuberculosis                                                                         | 1,041.9<br>(959.7 to 1,131.9)          | 6.4†<br>(5.6 to 7.3)                       | 0.9<br>(0.6 to 1.3)              | -19.2<br>(-32.8 to -2.8)                          | -37.2<br>(-46.7 to -27.7)                           |
| Drug-susceptible tuberculosis                                                        | 2.5<br>(2.1 to 2.9)                    | 5.6<br>(4.8 to 6.5)                        | 0.8<br>(0.5 to 1.1)              | -19.3<br>(-39.1 to 13.2)                          | -37.4<br>(-51.0 to -12.7)                           |
| Multidrug-resistant tuberculosis without extensive drug resistance                   | 0.3<br>(0.2 to 0.4)                    | 0.7<br>(0.4 to 1.0)                        | 0.1<br>(< 0.05 to 0.2)           | -27.8<br>(-77.9 to 253.7)                         | -43.5<br>(-82.6 to 168.7)                           |
| Extensively drug-resistant tuberculosis                                              | 0.1<br>(< 0.05 to 0.1)                 | 0.1<br>(0.1 to 0.2)                        | < 0.05<br>(< 0.05 to < 0.05)     | 118.6<br>(-31.8 to 935.2)                         | 69.6<br>(-46.9 to 693.1)                            |
| Latent tuberculosis infection                                                        | 1,039.0<br>(957.1 to 1,128.7)          | --                                         | --                               | --                                                | --                                                  |
| HIV/AIDS                                                                             | 3.4<br>(2.2 to 5.1)                    | 0.2^<br>(0.1 to 0.4)                       | 0.3<br>(0.2 to 0.6)              | -19.6<br>(-47.0 to 29.3)                          | -41.7<br>(-62.5 to -2.8)                            |
| Drug-susceptible HIV/AIDS - Tuberculosis                                             | < 0.05<br>(< 0.05 to < 0.05)           | < 0.05<br>(< 0.05 to 0.1)                  | < 0.05<br>(< 0.05 to < 0.05)     | -64.2<br>(-72.2 to -47.9)                         | -72.3<br>(-78.5 to -59.6)                           |
| Multidrug-resistant HIV/AIDS - Tuberculosis without extensive drug resistance        | < 0.05<br>(< 0.05 to < 0.05)           | < 0.05<br>(< 0.05 to < 0.05)               | < 0.05<br>(< 0.05 to < 0.05)     | -68.8<br>(-90.2 to 49.7)                          | -75.9<br>(-92.4 to 15.8)                            |
| Extensively drug-resistant HIV/AIDS - Tuberculosis                                   | < 0.05<br>(< 0.05 to < 0.05)           | < 0.05<br>(< 0.05 to < 0.05)               | < 0.05<br>(< 0.05 to < 0.05)     | -3.9<br>(-69.7 to 361.3)                          | -25.6<br>(-76.5 to 256.8)                           |
| HIV/AIDS resulting in other diseases                                                 | 3.4<br>(2.2 to 5.1)                    | 0.2<br>(0.1 to 0.4)                        | 0.3<br>(0.2 to 0.6)              | -17.3<br>(-46.3 to 38.8)                          | -40.2<br>(-62.3 to 4.5)                             |
| <b>Diarrhoea, lower respiratory infections, and other common infectious diseases</b> | <b>364.7</b><br>(348.1 to 383.0)       | <b>14,332.5†</b><br>(13,210.7 to 15,485.2) | <b>21.7</b><br>(15.0 to 29.4)    | <b>13.2</b><br>(9.0 to 17.4)                      | <b>-9.5</b><br>(-12.3 to -6.5)                      |
| Diarrhoeal diseases                                                                  | 86.7<br>(79.4 to 94.8)                 | 5,380.4<br>(4,939.0 to 5,913.6)            | 10.0<br>(6.8 to 13.7)            | 10.4<br>(2.8 to 18.2)                             | -13.5<br>(-18.8 to -8.2)                            |
| Intestinal infectious diseases                                                       | < 0.05<br>(< 0.05 to < 0.05)           | 0.1†<br>(< 0.05 to 0.1)                    | < 0.05<br>(< 0.05 to < 0.05)     | -12.4<br>(-27.1 to 5.4)                           | -33.5<br>(-43.3 to -21.7)                           |
| Typhoid fever                                                                        | < 0.05<br>(< 0.05 to < 0.05)           | < 0.05<br>(< 0.05 to 0.1)                  | < 0.05<br>(< 0.05 to < 0.05)     | -14.1<br>(-29.7 to 5.1)                           | -35.0<br>(-44.9 to -22.3)                           |
| Paratyphoid fever                                                                    | < 0.05<br>(< 0.05 to < 0.05)           | < 0.05<br>(< 0.05 to < 0.05)               | < 0.05<br>(< 0.05 to < 0.05)     | 36.5<br>(1.8 to 83.0)                             | 7.9<br>(-15.7 to 38.2)                              |
| Other intestinal infectious diseases                                                 | --                                     | --                                         | < 0.05<br>(< 0.05 to < 0.05)     | -29.6<br>(-52.0 to 2.5)                           | -49.6<br>(-62.1 to -34.0)                           |
| Lower respiratory infections                                                         | 14.9<br>(13.6 to 16.3)                 | 613.6<br>(553.7 to 681.4)                  | 0.9<br>(0.6 to 1.3)              | 15.9<br>(2.0 to 31.3)                             | -4.4<br>(-13.4 to 6.6)                              |
| Upper respiratory infections                                                         | 100.9<br>(88.0 to 114.9)               | 7,452.9<br>(6,482.0 to 8,504.2)            | 2.5<br>(1.5 to 4.0)              | 19.1<br>(10.9 to 28.3)                            | -2.7<br>(-8.4 to 3.7)                               |
| Otitis media                                                                         | 151.8<br>(135.6 to 168.5)              | 662.6<br>(522.6 to 836.5)                  | 4.9<br>(3.1 to 7.4)              | 12.4<br>(4.5 to 20.5)                             | -8.6<br>(-14.7 to -2.7)                             |
| Meningitis                                                                           | 25.9<br>(22.2 to 29.7)                 | 4.7<br>(4.1 to 5.4)                        | 2.4<br>(1.7 to 3.2)              | 16.6<br>(9.0 to 24.3)                             | -6.2<br>(-11.9 to -0.3)                             |
| Pneumococcal meningitis                                                              | 12.0<br>(9.8 to 14.7)                  | 1.3<br>(1.1 to 1.6)                        | 1.1<br>(0.7 to 1.4)              | 20.4<br>(5.2 to 36.8)                             | -3.6<br>(-15.1 to 9.1)                              |
| H influenzae type B meningitis                                                       | 3.4<br>(2.7 to 4.4)                    | 0.6<br>(0.5 to 0.8)                        | 0.4<br>(0.3 to 0.6)              | -4.0<br>(-14.1 to 6.4)                            | -22.4<br>(-30.7 to -14.1)                           |
| Meningococcal infection                                                              | 5.4<br>(3.9 to 7.1)                    | 1.5<br>(1.2 to 1.9)                        | 0.5<br>(0.3 to 0.6)              | 20.3<br>(14.4 to 26.9)                            | -3.1<br>(-7.9 to 2.2)                               |
| Other meningitis                                                                     | 5.0<br>(3.9 to 6.3)                    | 1.2<br>(1.0 to 1.4)                        | 0.5<br>(0.3 to 0.7)              | 27.3<br>(19.8 to 35.1)                            | 1.8<br>(-3.5 to 7.7)                                |
| Encephalitis                                                                         | 5.5<br>(3.8 to 7.9)                    | 2.2<br>(1.9 to 2.5)                        | 0.7<br>(0.5 to 0.9)              | 22.7<br>(11.4 to 34.9)                            | -4.8<br>(-14.4 to 5.7)                              |
| Diphtheria                                                                           | < 0.05<br>(< 0.05 to < 0.05)           | < 0.05<br>(< 0.05 to < 0.05)               | < 0.05<br>(< 0.05 to < 0.05)     | -7.2<br>(-55.9 to 93.8)                           | -30.2<br>(-64.6 to 36.7)                            |
| Whooping cough                                                                       | 1.7<br>(1.4 to 2.2)                    | 12.7<br>(9.9 to 16.2)                      | 0.1<br>(< 0.05 to 0.1)           | 12.4<br>(-9.6 to 40.8)                            | -21.7<br>(-36.9 to -1.7)                            |
| Tetanus                                                                              | < 0.05<br>(< 0.05 to < 0.05)           | < 0.05<br>(< 0.05 to < 0.05)               | < 0.05<br>(< 0.05 to < 0.05)     | 19.7<br>(5.2 to 35.4)                             | -4.4<br>(-19.6 to 8.3)                              |
| Measles                                                                              | < 0.05<br>(0.0 to < 0.05)              | < 0.05<br>(0.0 to < 0.05)                  | < 0.05<br>(0.0 to < 0.05)        | --                                                | --                                                  |
| Varicella and herpes zoster                                                          | 6.8<br>(6.3 to 7.2)                    | 203.4<br>(193.3 to 213.4)                  | 0.2<br>(0.1 to 0.3)              | 29.7<br>(9.0 to 54.6)                             | -0.1<br>(-12.8 to 15.3)                             |
| <b>Neglected tropical diseases and malaria</b>                                       | <b>1,012.2</b><br>(802.7 to 1,262.2)   | <b>1.7†</b><br>(0.6 to 4.8)                | <b>2.7</b><br>(1.5 to 4.5)       | <b>-9.8</b><br>(-56.6 to 56.5)                    | <b>-32.4</b><br>(-66.9 to 30.2)                     |
| Malaria                                                                              | 0.3<br>(0.2 to 0.4)                    | < 0.05<br>(< 0.05 to < 0.05)               | 0.1<br>(0.1 to 0.1)              | -29.2<br>(-46.6 to -9.8)                          | -41.1<br>(-55.7 to -25.5)                           |
| Chagas disease                                                                       | --                                     | --                                         | --                               | --                                                | --                                                  |
| Leishmaniasis                                                                        | 0.6<br>(0.4 to 0.7)                    | 0.4<br>(0.2 to 0.7)                        | < 0.05<br>(< 0.05 to 0.1)        | 272.6<br>(91.9 to 751.1)                          | 198.5<br>(62.5 to 522.5)                            |
| Visceral leishmaniasis                                                               | < 0.05<br>(< 0.05 to 0.1)              | 0.2<br>(0.1 to 0.3)                        | < 0.05<br>(< 0.05 to < 0.05)     | 278.7<br>(113.9 to 541.0)                         | 185.5<br>(45.3 to 445.5)                            |
| Cutaneous and mucocutaneous leishmaniasis                                            | 0.5<br>(0.3 to 0.7)                    | 0.2<br>(< 0.05 to 0.5)                     | < 0.05<br>(< 0.05 to 0.1)        | 271.9<br>(80.6 to 865.0)                          | 201.6<br>(47.5 to 703.1)                            |
| African trypanosomiasis                                                              | --                                     | --                                         | --                               | --                                                | --                                                  |
| Schistosomiasis                                                                      | --                                     | --                                         | --                               | --                                                | --                                                  |
| Cysticercosis                                                                        | --                                     | --                                         | --                               | --                                                | --                                                  |
| Cystic echinococcosis                                                                | 6.2<br>(1.5 to 22.6)                   | 1.3<br>(0.3 to 4.4)                        | 0.6<br>(0.1 to 2.0)              | -43.9<br>(-91.4 to 256.4)                         | -56.5<br>(-92.7 to 134.4)                           |
| Lymphatic filariasis                                                                 | --                                     | --                                         | --                               | --                                                | --                                                  |
| Onchocerciasis                                                                       | --                                     | --                                         | --                               | --                                                | --                                                  |
| Trachoma                                                                             | --                                     | --                                         | --                               | --                                                | --                                                  |
| Dengue                                                                               | --                                     | --                                         | --                               | --                                                | --                                                  |
| Yellow fever                                                                         | --                                     | --                                         | --                               | --                                                | --                                                  |
| Rabies                                                                               | < 0.05<br>(< 0.05 to < 0.05)           | < 0.05<br>(< 0.05 to < 0.05)               | < 0.05<br>(< 0.05 to < 0.05)     | -38.0<br>(-73.2 to 53.8)                          | -44.4<br>(-73.6 to 24.1)                            |
| Intestinal nematode infections                                                       | 965.7<br>(752.1 to 1,220.5)            | --                                         | 0.2<br>(0.1 to 0.4)              | 24.2<br>(-15.1 to 86.9)                           | 0.7<br>(-32.6 to 53.9)                              |
| Ascariasis                                                                           | 814.2<br>(614.6 to 1,097.5)            | --                                         | 0.2<br>(0.1 to 0.3)              | 21.6<br>(-20.4 to 88.7)                           | -1.2<br>(-38.4 to 59.5)                             |



| Cause                                                                   | Prevalence in thousands (95% UI)              | Incidence in thousands (95% UI)                   | YLDs in thousands (95% UI)              |                                                   |                                                     |
|-------------------------------------------------------------------------|-----------------------------------------------|---------------------------------------------------|-----------------------------------------|---------------------------------------------------|-----------------------------------------------------|
|                                                                         | 2016 counts                                   | 2016 counts                                       | 2016 counts                             | Percentage change in counts between 2006 and 2016 | Percentage change in age-standardised rates between |
| Trichuriasis                                                            | 40.2<br>(28.7 to 56.8)                        | --                                                | < 0.05<br>(< 0.05 to < 0.05)            | 20.1<br>(-72.4 to 326.8)                          | 1.2<br>(-78.7 to 297.4)                             |
| Hookworm disease                                                        | 6.2<br>(4.1 to 9.1)                           | --                                                | < 0.05<br>(< 0.05 to < 0.05)            | 45.0<br>(-12.5 to 143.0)                          | 12.3<br>(-33.2 to 87.0)                             |
| Food-borne trematodiasis                                                | --                                            | --                                                | --                                      | --                                                | --                                                  |
| Leprosy                                                                 | --                                            | --                                                | --                                      | --                                                | --                                                  |
| Ebola virus disease                                                     | --                                            | --                                                | --                                      | --                                                | --                                                  |
| Zika virus disease                                                      | --                                            | --                                                | --                                      | --                                                | --                                                  |
| Guinea worm disease                                                     | --                                            | --                                                | --                                      | --                                                | --                                                  |
| Other neglected tropical diseases                                       | 72.7<br>(63.6 to 81.3)                        | --                                                | 1.7<br>(1.1 to 2.7)                     | 8.9<br>(-10.1 to 31.1)                            | -14.9<br>(-28.5 to 0.5)                             |
| <b>Maternal disorders</b>                                               | <b>10.1</b><br><b>(7.9 to 13.1)</b>           | <b>237.0†</b><br><b>(120.0 to 406.7)</b>          | <b>0.6</b><br><b>(0.4 to 1.0)</b>       | <b>39.8</b><br><b>(1.2 to 91.5)</b>               | <b>5.9</b><br><b>(-22.7 to 44.2)</b>                |
| Maternal haemorrhage                                                    | 2.6<br>(1.9 to 3.5)                           | 15.2<br>(10.9 to 20.7)                            | 0.1<br>(0.1 to 0.2)                     | 57.6<br>(8.9 to 133.2)                            | 18.8<br>(-16.6 to 74.3)                             |
| Maternal sepsis and other pregnancy related infections                  | 5.1<br>(3.4 to 7.5)                           | 42.0<br>(30.4 to 55.1)                            | 0.2<br>(0.1 to 0.3)                     | 39.3<br>(-35.5 to 184.5)                          | 7.9<br>(-48.6 to 117.5)                             |
| Maternal hypertensive disorders                                         | 1.5<br>(0.8 to 2.2)                           | 6.2<br>(4.6 to 8.3)                               | 0.1<br>(< 0.05 to 0.1)                  | 18.8<br>(-35.6 to 117.9)                          | -11.2<br>(-51.0 to 62.5)                            |
| Maternal obstructed labour and uterine rupture                          | 0.1<br>(0.1 to 0.1)                           | 6.8<br>(4.7 to 9.6)                               | < 0.05<br>(< 0.05 to 0.1)               | 44.4<br>(-23.3 to 170.1)                          | 7.2<br>(-42.3 to 97.8)                              |
| Maternal abortion, miscarriage, and ectopic pregnancy                   | 1.4<br>(0.4 to 3.0)                           | 166.7<br>(52.5 to 337.6)                          | 0.1<br>(< 0.05 to 0.4)                  | 44.5<br>(-22.6 to 165.2)                          | 8.1<br>(-41.4 to 92.9)                              |
| Other maternal disorders                                                | --                                            | --                                                | 0.1<br>(0.1 to 0.2)                     | 32.7<br>(-3.9 to 83.0)                            | 1.2<br>(-26.2 to 37.8)                              |
| <b>Neonatal disorders</b>                                               | <b>117.3</b><br><b>(96.1 to 146.8)</b>        | --                                                | <b>15.6</b><br><b>(9.9 to 25.7)</b>     | <b>22.9</b><br><b>(3.9 to 45.9)</b>               | <b>-1.3</b><br><b>(-16.4 to 17.5)</b>               |
| Neonatal preterm birth complications                                    | 85.0<br>(65.7 to 119.0)                       | --                                                | 6.2<br>(4.2 to 8.9)                     | 15.0<br>(-11.6 to 45.0)                           | -6.5<br>(-28.5 to 17.6)                             |
| Neonatal encephalopathy due to birth asphyxia and trauma                | 32.8<br>(16.6 to 62.1)                        | --                                                | 4.0<br>(0.7 to 12.3)                    | 16.8<br>(-28.6 to 144.0)                          | -6.0<br>(-42.9 to 93.0)                             |
| Neonatal sepsis and other neonatal infections                           | 7.4<br>(2.4 to 15.7)                          | --                                                | 3.0<br>(0.7 to 7.1)                     | 52.5<br>(19.3 to 129.6)                           | 22.9<br>(-3.2 to 82.1)                              |
| Hemolytic disease and other neonatal jaundice                           | 5.4<br>(4.6 to 6.1)                           | --                                                | 1.7<br>(1.2 to 2.2)                     | 21.1<br>(3.8 to 42.8)                             | -2.3<br>(-15.1 to 13.5)                             |
| Other neonatal disorders                                                | --                                            | --                                                | 0.7<br>(0.5 to 1.1)                     | 37.5<br>(14.9 to 65.1)                            | -5.9<br>(-21.5 to 13.2)                             |
| <b>Nutritional deficiencies</b>                                         | <b>1,810.9</b><br><b>(1,697.3 to 1,920.6)</b> | <b>110.9†</b><br><b>(92.4 to 133.3)</b>           | <b>48.1</b><br><b>(31.7 to 69.7)</b>    | <b>5.8</b><br><b>(-3.9 to 16.1)</b>               | <b>-18.3</b><br><b>(-24.6 to -11.6)</b>             |
| Protein-energy malnutrition                                             | 97.6<br>(74.3 to 128.7)                       | 38.9<br>(29.8 to 51.1)                            | 5.0<br>(2.8 to 7.9)                     | 49.1<br>(-0.9 to 122.2)                           | 1.8<br>(-32.9 to 53.3)                              |
| Iodine deficiency                                                       | 127.1<br>(104.3 to 154.4)                     | 3.8<br>(3.1 to 4.5)                               | 3.4<br>(2.1 to 4.9)                     | 1.8<br>(-10.3 to 14.5)                            | -18.9<br>(-28.0 to -9.2)                            |
| Vitamin A deficiency                                                    | 82.5<br>(66.0 to 104.4)                       | 68.3<br>(52.7 to 87.4)                            | 0.5<br>(0.3 to 0.7)                     | 21.2<br>(3.8 to 40.5)                             | -2.7<br>(-15.3 to 11.4)                             |
| Iron-deficiency anaemia                                                 | 1,580.2<br>(1,447.7 to 1,703.9)               | --                                                | 39.1<br>(25.4 to 58.2)                  | 2.1<br>(-8.4 to 12.8)                             | -19.9<br>(-27.3 to -12.8)                           |
| Other nutritional deficiencies                                          | --                                            | --                                                | 0.2<br>(0.1 to 0.3)                     | 45.1<br>(-6.5 to 122.9)                           | -0.7<br>(-36.3 to 53.7)                             |
| <b>Other communicable, maternal, neonatal, and nutritional diseases</b> | <b>2,199.8</b><br><b>(2,061.9 to 2,346.1)</b> | <b>1,792.2</b><br><b>(1,364.5 to 2,151.4)</b>     | <b>5.2</b><br><b>(3.2 to 7.8)</b>       | <b>18.5</b><br><b>(10.3 to 27.4)</b>              | <b>-8.1</b><br><b>(-13.7 to -2.4)</b>               |
| Sexually transmitted diseases excluding HIV                             | 1,072.1<br>(1,001.2 to 1,150.0)               | 856.7<br>(743.4 to 1,001.7)                       | 3.3<br>(2.0 to 5.2)                     | 24.4<br>(15.4 to 33.8)                            | -5.5<br>(-11.7 to 0.7)                              |
| Syphilis                                                                | 14.1<br>(11.8 to 17.1)                        | 10.7<br>(8.2 to 13.5)                             | 0.2<br>(0.2 to 0.4)                     | 18.5<br>(0.8 to 36.2)                             | -14.4<br>(-28.6 to 1.3)                             |
| Chlamydial infection                                                    | 154.8<br>(119.2 to 195.9)                     | 130.7<br>(101.0 to 164.6)                         | 0.8<br>(0.4 to 1.3)                     | 30.9<br>(14.7 to 48.8)                            | -3.6<br>(-14.6 to 8.3)                              |
| Gonococcal infection                                                    | 122.7<br>(95.1 to 157.6)                      | 417.7<br>(310.5 to 555.7)                         | 0.8<br>(0.4 to 1.2)                     | 17.9<br>(1.4 to 37.6)                             | -4.0<br>(-16.4 to 10.3)                             |
| Trichomoniasis                                                          | 217.1<br>(183.7 to 252.4)                     | 190.2<br>(160.1 to 221.7)                         | 0.3<br>(0.1 to 0.6)                     | 32.1<br>(23.1 to 42.0)                            | -0.5<br>(-6.3 to 6.1)                               |
| Genital herpes                                                          | 632.6<br>(538.5 to 738.4)                     | 55.4<br>(46.5 to 66.4)                            | 0.2<br>(0.1 to 0.4)                     | 35.8<br>(26.6 to 45.2)                            | -0.1<br>(-5.5 to 5.7)                               |
| Other sexually transmitted diseases                                     | 33.2<br>(30.0 to 36.5)                        | 52.1<br>(43.3 to 62.7)                            | 1.1<br>(0.7 to 1.6)                     | 22.7<br>(10.6 to 36.1)                            | -5.9<br>(-14.6 to 3.9)                              |
| Hepatitis                                                               | 1,266.1<br>(1,087.0 to 1,474.9)               | 935.6<br>(532.7 to 1,264.5)                       | 0.5<br>(0.3 to 0.7)                     | 4.6<br>(-19.9 to 39.2)                            | -14.2<br>(-32.3 to 9.1)                             |
| Acute hepatitis A                                                       | 52.3<br>(21.5 to 77.5)                        | 680.1<br>(279.7 to 1,007.4)                       | 0.2<br>(0.1 to 0.4)                     | 1.1<br>(-42.1 to 86.6)                            | -14.4<br>(-48.7 to 50.5)                            |
| Hepatitis B                                                             | 756.7<br>(588.5 to 953.5)                     | 213.5<br>(157.4 to 291.5)                         | 0.2<br>(0.1 to 0.3)                     | 6.8<br>(-16.6 to 36.1)                            | -14.9<br>(-32.5 to 7.7)                             |
| Hepatitis C                                                             | 455.9<br>(404.0 to 514.8)                     | 27.5<br>(24.6 to 30.8)                            | < 0.05<br>(< 0.05 to < 0.05)            | 30.5<br>(-16.8 to 95.5)                           | -5.6<br>(-37.8 to 37.2)                             |
| Acute hepatitis E                                                       | 1.1<br>(1.0 to 1.3)                           | 14.5<br>(12.3 to 16.9)                            | < 0.05<br>(< 0.05 to < 0.05)            | -4.8<br>(-31.5 to 34.7)                           | -13.2<br>(-33.6 to 15.3)                            |
| Other infectious diseases                                               | 58.4<br>(51.6 to 64.4)                        | < 0.05<br>(< 0.05 to < 0.05)                      | 1.4<br>(0.8 to 2.1)                     | 11.0<br>(-6.9 to 30.7)                            | -12.9<br>(-25.9 to 1.1)                             |
| <b>Non-communicable diseases</b>                                        | <b>7,650.9</b><br><b>(7,587.7 to 7,718.9)</b> | <b>24,742.0†</b><br><b>(23,502.9 to 26,051.4)</b> | <b>571.9</b><br><b>(419.9 to 744.4)</b> | <b>28.8</b><br><b>(24.2 to 33.5)</b>              | <b>-0.5</b><br><b>(-3.1 to 2.4)</b>                 |
| <b>Neoplasms</b>                                                        | <b>7.7</b><br><b>(7.0 to 8.4)</b>             | <b>6.1</b><br><b>(5.3 to 7.1)</b>                 | <b>1.5</b><br><b>(1.1 to 2.0)</b>       | <b>26.1</b><br><b>(17.2 to 36.9)</b>              | <b>-8.8</b><br><b>(-15.7 to -0.8)</b>               |
| Lip and oral cavity cancer                                              | 0.4<br>(0.3 to 0.5)                           | 0.1<br>(0.1 to 0.1)                               | < 0.05<br>(< 0.05 to 0.1)               | 26.1<br>(9.2 to 47.2)                             | -10.9<br>(-23.3 to 4.5)                             |
| Nasopharynx cancer                                                      | 0.1<br>(0.1 to 0.1)                           | < 0.05<br>(< 0.05 to < 0.05)                      | < 0.05<br>(< 0.05 to < 0.05)            | 23.0<br>(-4.2 to 56.5)                            | -8.2<br>(-23.6 to 9.3)                              |
| Other pharynx cancer                                                    | 0.1<br>(0.1 to 0.1)                           | < 0.05<br>(< 0.05 to < 0.05)                      | < 0.05<br>(< 0.05 to < 0.05)            | 32.0<br>(8.0 to 58.2)                             | -10.3<br>(-26.9 to 7.7)                             |
| Oesophageal cancer                                                      | 0.4<br>(0.4 to 0.5)                           | 0.4<br>(0.3 to 0.4)                               | 0.1<br>(0.1 to 0.1)                     | 13.3<br>(-8.0 to 39.0)                            | -19.1<br>(-34.4 to -0.7)                            |
| Stomach cancer                                                          | 0.9<br>(0.9 to 1.0)                           | 0.6<br>(0.6 to 0.7)                               | 0.2<br>(0.1 to 0.2)                     | 3.8<br>(-10.7 to 20.3)                            | -25.7<br>(-37.1 to -12.5)                           |
| Colon and rectum cancer                                                 | 0.8<br>(0.7 to 0.9)                           | 0.3<br>(0.2 to 0.3)                               | 0.1<br>(0.1 to 0.1)                     | 29.8<br>(10.8 to 54.8)                            | -7.3<br>(-22.2 to 13.1)                             |
| Liver cancer                                                            | 0.1<br>(0.1 to 0.1)                           | 0.3<br>(0.2 to 0.3)                               | 0.1<br>(< 0.05 to 0.1)                  | 35.6<br>(14.3 to 57.5)                            | -2.5<br>(-18.2 to 13.2)                             |
| Liver cancer due to hepatitis B                                         | 0.1<br>(0.1 to 0.1)                           | 0.1<br>(0.1 to 0.1)                               | < 0.05<br>(< 0.05 to < 0.05)            | 38.6<br>(15.8 to 62.4)                            | -2.2<br>(-18.5 to 13.6)                             |

| Cause                                              | Prevalence in thousands (95% UI)        | Incidence in thousands (95% UI)       | YLDs in thousands (95% UI)           |                                                   |                                                     |
|----------------------------------------------------|-----------------------------------------|---------------------------------------|--------------------------------------|---------------------------------------------------|-----------------------------------------------------|
|                                                    | 2016 counts                             | 2016 counts                           | 2016 counts                          | Percentage change in counts between 2006 and 2016 | Percentage change in age-standardised rates between |
| Liver cancer due to hepatitis C                    | 0.1<br>(0.1 to 0.1)                     | 0.1<br>(0.1 to 0.1)                   | < 0.05<br>(< 0.05 to < 0.05)         | 37.4<br>(13.7 to 62.8)                            | -1.2<br>(-18.4 to 16.4)                             |
| Liver cancer due to alcohol use                    | < 0.05<br>(< 0.05 to 0.1)               | 0.1<br>(< 0.05 to 0.1)                | < 0.05<br>(< 0.05 to < 0.05)         | 28.2<br>(5.7 to 51.2)                             | -6.8<br>(-22.9 to 9.8)                              |
| Liver cancer due to other causes                   | 0.1<br>(< 0.05 to 0.1)                  | 0.1<br>(< 0.05 to 0.1)                | < 0.05<br>(< 0.05 to < 0.05)         | 35.7<br>(13.5 to 57.7)                            | -0.8<br>(-17.7 to 16.9)                             |
| Gallbladder and biliary tract cancer               | < 0.05<br>(< 0.05 to < 0.05)            | < 0.05<br>(< 0.05 to 0.1)             | < 0.05<br>(< 0.05 to < 0.05)         | 17.7<br>(0.5 to 36.3)                             | -14.6<br>(-27.2 to -1.0)                            |
| Pancreatic cancer                                  | 0.1<br>(0.1 to 0.1)                     | 0.1<br>(0.1 to 0.1)                   | < 0.05<br>(< 0.05 to < 0.05)         | 41.6<br>(27.6 to 56.6)                            | 1.7<br>(-9.0 to 12.8)                               |
| Larynx cancer                                      | 0.1<br>(0.1 to 0.1)                     | < 0.05<br>(< 0.05 to < 0.05)          | < 0.05<br>(< 0.05 to < 0.05)         | 14.7<br>(2.7 to 29.7)                             | -20.3<br>(-28.3 to -10.1)                           |
| Tracheal, bronchus, and lung cancer                | 0.3<br>(0.3 to 0.4)                     | 0.3<br>(0.3 to 0.3)                   | 0.1<br>(< 0.05 to 0.1)               | 25.2<br>(4.6 to 48.6)                             | -9.8<br>(-27.2 to 11.2)                             |
| Malignant skin melanoma                            | 0.1<br>(0.1 to 0.2)                     | < 0.05<br>(< 0.05 to < 0.05)          | < 0.05<br>(< 0.05 to < 0.05)         | 43.4<br>(18.3 to 60.5)                            | 1.3<br>(-17.8 to 14.7)                              |
| Non-melanoma skin cancer                           | 1.0<br>(0.5 to 1.5)                     | 1.7<br>(1.0 to 2.6)                   | < 0.05<br>(< 0.05 to 0.1)            | 46.4<br>(-23.0 to 123.0)                          | 17.2<br>(-42.5 to 81.4)                             |
| Non-melanoma skin cancer (squamous-cell carcinoma) | 0.8<br>(0.3 to 1.4)                     | 0.7<br>(0.2 to 1.3)                   | < 0.05<br>(< 0.05 to 0.1)            | 46.3<br>(-28.9 to 128.4)                          | 17.7<br>(-45.4 to 85.5)                             |
| Non-melanoma skin cancer (basal-cell carcinoma)    | 0.1<br>(0.1 to 0.3)                     | 1.0<br>(0.6 to 1.7)                   | < 0.05<br>(< 0.05 to < 0.05)         | 49.6<br>(10.9 to 96.5)                            | 5.0<br>(-23.4 to 45.9)                              |
| Breast cancer                                      | 1.9<br>(1.6 to 2.3)                     | 0.4<br>(0.3 to 0.5)                   | 0.2<br>(0.1 to 0.3)                  | 37.2<br>(9.5 to 72.0)                             | -5.5<br>(-23.6 to 17.7)                             |
| Cervical cancer                                    | 0.7<br>(0.5 to 0.9)                     | 0.2<br>(0.1 to 0.2)                   | 0.1<br>(< 0.05 to 0.1)               | 26.6<br>(3.7 to 61.7)                             | -12.5<br>(-27.2 to 12.2)                            |
| Uterine cancer                                     | 0.4<br>(0.3 to 0.5)                     | 0.1<br>(0.1 to 0.1)                   | < 0.05<br>(< 0.05 to < 0.05)         | 36.3<br>(5.2 to 82.6)                             | -9.9<br>(-30.1 to 19.9)                             |
| Ovarian cancer                                     | 0.4<br>(0.4 to 0.5)                     | 0.1<br>(0.1 to 0.2)                   | 0.1<br>(< 0.05 to 0.1)               | 44.1<br>(10.8 to 84.0)                            | 0.7<br>(-25.6 to 34.1)                              |
| Prostate cancer                                    | 0.4<br>(0.3 to 0.6)                     | 0.1<br>(0.1 to 0.2)                   | 0.1<br>(< 0.05 to 0.1)               | 35.3<br>(-1.6 to 81.7)                            | 7.8<br>(-20.9 to 44.0)                              |
| Testicular cancer                                  | 0.1<br>(0.1 to 0.1)                     | < 0.05<br>(< 0.05 to < 0.05)          | < 0.05<br>(< 0.05 to < 0.05)         | 9.5<br>(-20.8 to 54.5)                            | -20.8<br>(-40.8 to 8.5)                             |
| Kidney cancer                                      | 0.6<br>(0.4 to 0.8)                     | 0.2<br>(0.1 to 0.2)                   | 0.1<br>(< 0.05 to 0.1)               | 44.6<br>(17.1 to 69.8)                            | 4.4<br>(-15.5 to 22.0)                              |
| Bladder cancer                                     | 0.3<br>(0.3 to 0.4)                     | 0.1<br>(0.1 to 0.1)                   | < 0.05<br>(< 0.05 to 0.1)            | 31.8<br>(7.6 to 59.9)                             | -3.8<br>(-22.5 to 17.9)                             |
| Brain and nervous system cancer                    | 0.5<br>(0.4 to 0.6)                     | 0.2<br>(0.2 to 0.3)                   | 0.1<br>(< 0.05 to 0.1)               | 32.5<br>(13.3 to 49.2)                            | -1.5<br>(-13.8 to 10.6)                             |
| Thyroid cancer                                     | 0.1<br>(0.1 to 0.2)                     | < 0.05<br>(< 0.05 to < 0.05)          | < 0.05<br>(< 0.05 to < 0.05)         | 43.6<br>(21.3 to 71.9)                            | -1.3<br>(-18.3 to 20.6)                             |
| Mesothelioma                                       | < 0.05<br>(< 0.05 to < 0.05)            | < 0.05<br>(< 0.05 to < 0.05)          | < 0.05<br>(< 0.05 to < 0.05)         | 25.6<br>(9.2 to 47.5)                             | -12.4<br>(-23.9 to 4.3)                             |
| Hodgkin lymphoma                                   | 0.1<br>(0.1 to 0.1)                     | < 0.05<br>(< 0.05 to < 0.05)          | < 0.05<br>(< 0.05 to < 0.05)         | 1.6<br>(-8.9 to 15.2)                             | -25.0<br>(-31.3 to -17.1)                           |
| Non-Hodgkin's lymphoma                             | 0.3<br>(0.2 to 0.3)                     | 0.1<br>(0.1 to 0.1)                   | < 0.05<br>(< 0.05 to < 0.05)         | 31.8<br>(16.1 to 47.6)                            | -1.6<br>(-14.7 to 10.9)                             |
| Multiple myeloma                                   | < 0.05<br>(< 0.05 to < 0.05)            | < 0.05<br>(< 0.05 to < 0.05)          | < 0.05<br>(< 0.05 to < 0.05)         | 36.9<br>(20.5 to 52.4)                            | -3.9<br>(-16.2 to 8.0)                              |
| Leukaemia                                          | 0.9<br>(0.7 to 1.1)                     | 0.3<br>(0.2 to 0.3)                   | 0.1<br>(0.1 to 0.2)                  | 11.2<br>(-4.7 to 29.4)                            | -11.2<br>(-22.2 to 0.8)                             |
| Acute lymphoid leukaemia                           | 0.3<br>(0.2 to 0.4)                     | 0.1<br>(< 0.05 to 0.1)                | < 0.05<br>(< 0.05 to < 0.05)         | 16.2<br>(-9.2 to 52.6)                            | -2.6<br>(-21.6 to 21.9)                             |
| Chronic lymphoid leukaemia                         | 0.1<br>(0.1 to 0.2)                     | < 0.05<br>(< 0.05 to < 0.05)          | < 0.05<br>(< 0.05 to < 0.05)         | 30.4<br>(10.8 to 52.0)                            | -7.3<br>(-22.0 to 9.0)                              |
| Acute myeloid leukaemia                            | 0.1<br>(0.1 to 0.1)                     | 0.1<br>(0.1 to 0.1)                   | < 0.05<br>(< 0.05 to < 0.05)         | 28.4<br>(4.7 to 54.2)                             | 3.2<br>(-13.6 to 19.5)                              |
| Chronic myeloid leukaemia                          | < 0.05<br>(< 0.05 to < 0.05)            | < 0.05<br>(< 0.05 to < 0.05)          | < 0.05<br>(< 0.05 to < 0.05)         | 5.5<br>(-13.2 to 28.2)                            | -24.3<br>(-35.6 to -9.1)                            |
| Other leukaemia                                    | 0.4<br>(0.3 to 0.5)                     | 0.1<br>(0.1 to 0.1)                   | < 0.05<br>(< 0.05 to 0.1)            | -1.8<br>(-18.8 to 19.3)                           | -19.2<br>(-31.0 to -5.5)                            |
| Other neoplasms                                    | 1.0<br>(0.7 to 1.1)                     | 0.3<br>(0.2 to 0.4)                   | 0.1<br>(0.1 to 0.1)                  | 30.7<br>(8.4 to 51.4)                             | -2.5<br>(-18.3 to 11.7)                             |
| <b>Cardiovascular diseases</b>                     | <b>307.5</b><br><b>(295.8 to 319.6)</b> | <b>34.6†</b><br><b>(33.2 to 36.2)</b> | <b>23.4</b><br><b>(17.0 to 30.3)</b> | <b>31.2</b><br><b>(26.6 to 36.0)</b>              | <b>-2.0</b><br><b>(-5.3 to 1.4)</b>                 |
| Rheumatic heart disease                            | 69.5<br>(61.6 to 78.4)                  | 2.5<br>(2.2 to 2.9)                   | 3.4<br>(2.1 to 4.9)                  | 19.6<br>(8.6 to 32.7)                             | -6.8<br>(-15.0 to 3.0)                              |
| Ischaemic heart disease                            | 99.9<br>(94.1 to 105.9)                 | 13.0<br>(12.3 to 13.8)                | 6.2<br>(4.3 to 8.4)                  | 38.5<br>(31.7 to 45.9)                            | 2.2<br>(-2.4 to 6.8)                                |
| Cerebrovascular disease                            | 47.1<br>(44.1 to 49.9)                  | 8.8‡<br>(8.1 to 9.5)                  | 9.2<br>(6.5 to 11.7)                 | 31.5<br>(23.5 to 40.2)                            | -3.9<br>(-9.8 to 2.2)                               |
| Ischaemic stroke                                   | 38.4<br>(34.8 to 42.2)                  | 5.5‡<br>(4.9 to 6.1)                  | 7.2<br>(5.1 to 9.2)                  | 32.1<br>(21.8 to 42.3)                            | -2.5<br>(-9.7 to 5.1)                               |
| Hemorrhagic stroke                                 | 11.1<br>(10.0 to 12.4)                  | 3.3‡<br>(3.0 to 3.7)                  | 2.1<br>(1.4 to 2.7)                  | 29.6<br>(15.2 to 45.1)                            | -9.2<br>(-18.2 to 1.2)                              |
| Hypertensive heart disease                         | 12.8<br>(10.9 to 15.0)                  | --                                    | 1.0<br>(0.7 to 1.5)                  | 32.5<br>(19.3 to 47.5)                            | -2.3<br>(-10.9 to 7.5)                              |
| Cardiomyopathy and myocarditis                     | 5.5<br>(4.8 to 6.2)                     | 1.0†<br>(0.9 to 1.2)                  | 0.6<br>(0.4 to 0.8)                  | 31.8<br>(13.8 to 50.1)                            | -1.9<br>(-13.3 to 10.4)                             |
| Myocarditis                                        | 2.3<br>(2.0 to 2.7)                     | 1.0<br>(0.9 to 1.2)                   | 0.2<br>(0.1 to 0.3)                  | 28.6<br>(5.3 to 56.7)                             | -0.4<br>(-17.5 to 18.7)                             |
| Alcoholic cardiomyopathy                           | 1.4<br>(1.2 to 1.7)                     | --                                    | 0.1<br>(0.1 to 0.2)                  | 41.5<br>(9.1 to 81.4)                             | -2.9<br>(-22.3 to 22.6)                             |
| Other cardiomyopathy                               | 3.2<br>(2.7 to 3.7)                     | --                                    | 0.3<br>(0.2 to 0.4)                  | 30.2<br>(5.7 to 59.5)                             | -2.2<br>(-18.1 to 16.4)                             |
| Atrial fibrillation and flutter                    | 22.5<br>(19.7 to 25.8)                  | 2.0<br>(1.7 to 2.3)                   | 1.8<br>(1.2 to 2.5)                  | 30.5<br>(21.7 to 40.3)                            | 0.3<br>(-5.8 to 6.7)                                |
| Peripheral vascular disease                        | 62.4<br>(53.7 to 72.9)                  | 6.7<br>(5.7 to 7.9)                   | 0.3<br>(0.1 to 0.5)                  | 21.5<br>(10.0 to 35.6)                            | -7.0<br>(-12.9 to 0.0)                              |
| Endocarditis                                       | 0.1<br>(0.1 to 0.1)                     | 0.6<br>(0.6 to 0.7)                   | < 0.05<br>(< 0.05 to < 0.05)         | 33.5<br>(25.4 to 41.6)                            | -1.3<br>(-7.5 to 5.4)                               |
| Other cardiovascular and circulatory diseases      | 17.7<br>(15.0 to 20.9)                  | --                                    | 0.9<br>(0.6 to 1.3)                  | 28.7<br>(11.9 to 47.2)                            | -3.2<br>(-13.3 to 7.6)                              |
| <b>Chronic respiratory diseases</b>                | <b>481.6</b><br><b>(459.3 to 504.6)</b> | <b>79.2†</b><br><b>(74.0 to 85.1)</b> | <b>18.6</b><br><b>(13.3 to 25.3)</b> | <b>31.5</b><br><b>(25.5 to 37.9)</b>              | <b>5.5</b><br><b>(1.1 to 10.7)</b>                  |
| Chronic obstructive pulmonary disease              | 128.9<br>(122.5 to 135.3)               | 9.2<br>(8.7 to 9.6)                   | 3.4<br>(2.7 to 4.2)                  | 31.3<br>(16.2 to 48.6)                            | -5.1<br>(-16.5 to 8.0)                              |
| Pneumoconiosis                                     | 0.3<br>(0.3 to 0.4)                     | < 0.05<br>(< 0.05 to < 0.05)          | < 0.05<br>(< 0.05 to 0.1)            | 73.1<br>(44.1 to 105.8)                           | 25.8<br>(2.2 to 52.1)                               |
| Silicosis                                          | < 0.05<br>(< 0.05 to < 0.05)            | < 0.05<br>(< 0.05 to < 0.05)          | < 0.05<br>(< 0.05 to < 0.05)         | 82.6<br>(70.7 to 94.9)                            | 32.1<br>(24.7 to 39.2)                              |

| Cause                                                          | Prevalence in thousands (95% UI)        | Incidence in thousands (95% UI)               | YLDs in thousands (95% UI)       |                                                   |                                                     |
|----------------------------------------------------------------|-----------------------------------------|-----------------------------------------------|----------------------------------|---------------------------------------------------|-----------------------------------------------------|
|                                                                | 2016 counts                             | 2016 counts                                   | 2016 counts                      | Percentage change in counts between 2006 and 2016 | Percentage change in age-standardised rates between |
| Asbestosis                                                     | 0.1<br>(0.1 to 0.1)                     | < 0.05<br>(< 0.05 to < 0.05)                  | < 0.05<br>(< 0.05 to < 0.05)     | 44.3<br>(34.5 to 55.0)                            | 1.2<br>(-5.2 to 8.4)                                |
| Coal workers pneumoconiosis                                    | --                                      | --                                            | --                               | --                                                | --                                                  |
| Other pneumoconiosis                                           | 0.2<br>(0.2 to 0.2)                     | < 0.05<br>(< 0.05 to < 0.05)                  | < 0.05<br>(< 0.05 to < 0.05)     | 85.9<br>(38.5 to 143.4)                           | 35.7<br>(-1.9 to 82.0)                              |
| Asthma                                                         | 354.2<br>(326.6 to 382.8)               | 69.6<br>(64.5 to 75.6)                        | 14.0<br>(9.1 to 20.2)            | 30.7<br>(24.0 to 38.2)                            | 9.5<br>(4.5 to 14.6)                                |
| Interstitial lung disease and pulmonary sarcoidosis            | 6.4<br>(5.7 to 7.1)                     | 0.3<br>(0.3 to 0.3)                           | 0.7<br>(0.5 to 1.0)              | 32.8<br>(16.3 to 52.4)                            | 3.2<br>(-9.0 to 17.2)                               |
| Other chronic respiratory diseases                             | --                                      | --                                            | 0.5<br>(0.4 to 0.6)              | 52.2<br>(37.0 to 69.2)                            | 29.4<br>(17.4 to 43.1)                              |
| <b>Cirrhosis and other chronic liver diseases</b>              | <b>49.8<br/>(47.2 to 52.4)</b>          | <b>2.1<br/>(2.0 to 2.2)</b>                   | <b>2.3<br/>(1.6 to 3.2)</b>      | <b>32.5<br/>(19.7 to 47.6)</b>                    | <b>4.9<br/>(-3.1 to 14.0)</b>                       |
| Cirrhosis and other chronic liver diseases due to hepatitis B  | 14.0<br>(12.8 to 15.3)                  | 0.6<br>(0.5 to 0.6)                           | 0.5<br>(0.3 to 0.7)              | 46.7<br>(22.4 to 75.1)                            | 6.7<br>(-7.6 to 22.4)                               |
| Cirrhosis and other chronic liver diseases due to hepatitis C  | 9.2<br>(8.2 to 10.4)                    | 0.4<br>(0.4 to 0.4)                           | 0.3<br>(0.2 to 0.5)              | 49.3<br>(22.1 to 85.5)                            | 7.0<br>(-9.9 to 27.9)                               |
| Cirrhosis and other chronic liver diseases due to alcohol use  | 10.0<br>(9.0 to 11.1)                   | 0.5<br>(0.4 to 0.5)                           | 0.3<br>(0.2 to 0.5)              | 50.0<br>(23.8 to 85.2)                            | 5.5<br>(-9.8 to 25.3)                               |
| Cirrhosis and other chronic liver diseases due to other causes | 16.6<br>(15.4 to 17.9)                  | 0.7<br>(0.6 to 0.7)                           | 1.2<br>(0.8 to 1.7)              | 20.1<br>(2.4 to 41.4)                             | 2.6<br>(-10.9 to 18.4)                              |
| <b>Digestive diseases</b>                                      | <b>232.1<br/>(216.3 to 248.1)</b>       | <b>227.1<sup>†</sup><br/>(212.3 to 241.9)</b> | <b>9.8<br/>(6.9 to 13.3)</b>     | <b>33.6<br/>(24.4 to 44.6)</b>                    | <b>2.9<br/>(-3.0 to 9.1)</b>                        |
| Peptic ulcer disease                                           | 42.8<br>(39.0 to 47.1)                  | 9.2<br>(8.2 to 10.2)                          | 0.8<br>(0.6 to 1.2)              | 62.2<br>(42.9 to 84.3)                            | 20.3<br>(7.4 to 35.0)                               |
| Gastritis and duodenitis                                       | 93.7<br>(79.7 to 108.9)                 | 82.5<br>(72.1 to 94.1)                        | 1.3<br>(0.8 to 1.9)              | 43.8<br>(25.5 to 65.7)                            | 18.8<br>(6.7 to 33.2)                               |
| Appendicitis                                                   | 1.4<br>(1.3 to 1.6)                     | 37.2<br>(33.6 to 41.1)                        | 0.4<br>(0.3 to 0.6)              | 10.2<br>(-17.7 to 51.5)                           | -3.2<br>(-26.2 to 29.9)                             |
| Paralytic ileus and intestinal obstruction                     | 0.1<br>(0.1 to 0.1)                     | 2.2<br>(1.9 to 2.5)                           | < 0.05<br>(< 0.05 to < 0.05)     | 37.7<br>(31.9 to 44.7)                            | 5.3<br>(1.7 to 8.9)                                 |
| Inguinal, femoral, and abdominal hernia                        | 84.5<br>(74.4 to 95.9)                  | 42.8<br>(37.1 to 49.4)                        | 5.9<br>(3.9 to 8.2)              | 29.0<br>(17.2 to 42.3)                            | -2.8<br>(-9.9 to 4.9)                               |
| Inflammatory bowel disease                                     | 1.2<br>(1.1 to 1.2)                     | 4.0<br>(3.8 to 4.1)                           | 0.2<br>(0.1 to 0.2)              | 34.0<br>(14.4 to 57.3)                            | -0.4<br>(-16.5 to 19.6)                             |
| Vascular intestinal disorders                                  | 0.1<br>(< 0.05 to 0.1)                  | 0.4<br>(0.3 to 0.4)                           | < 0.05<br>(< 0.05 to < 0.05)     | 40.4<br>(32.7 to 48.3)                            | 8.4<br>(3.8 to 13.1)                                |
| Gallbladder and biliary diseases                               | 15.2<br>(13.3 to 17.2)                  | 46.8<br>(40.5 to 53.5)                        | 0.2<br>(0.1 to 0.3)              | 53.6<br>(28.1 to 86.2)                            | 10.0<br>(-9.4 to 33.0)                              |
| Pancreatitis                                                   | 0.2<br>(0.2 to 0.3)                     | 2.1<br>(1.9 to 2.4)                           | < 0.05<br>(< 0.05 to < 0.05)     | 67.0<br>(59.4 to 75.3)                            | 22.9<br>(18.3 to 27.7)                              |
| Other digestive diseases                                       | --                                      | --                                            | 0.9<br>(0.6 to 1.2)              | 37.4<br>(26.7 to 50.9)                            | 6.2<br>(-0.5 to 13.9)                               |
| <b>Neurological disorders</b>                                  | <b>3,130.5<br/>(2,996.7 to 3,278.6)</b> | <b>1,541.6<br/>(1,301.8 to 1,817.9)</b>       | <b>78.1<br/>(50.6 to 110.6)</b>  | <b>23.6<br/>(-4.1 to 60.1)</b>                    | <b>-1.8<br/>(-20.7 to 22.8)</b>                     |
| Alzheimer's disease and other dementias                        | 12.9<br>(10.8 to 15.1)                  | 2.2<br>(1.9 to 2.7)                           | 1.9<br>(1.3 to 2.5)              | 28.1<br>(21.0 to 35.3)                            | -0.6<br>(-5.3 to 4.2)                               |
| Parkinson's disease                                            | 2.9<br>(2.3 to 3.6)                     | 0.4<br>(0.3 to 0.4)                           | 0.3<br>(0.2 to 0.5)              | 33.4<br>(17.0 to 52.1)                            | 4.5<br>(-6.9 to 16.9)                               |
| Epilepsy                                                       | 32.0<br>(6.8 to 63.1)                   | 3.9<br>(0.8 to 7.5)                           | 11.1<br>(2.1 to 25.2)            | 5.5<br>(-79.2 to 421.6)                           | -12.6<br>(-82.8 to 325.1)                           |
| Multiple sclerosis                                             | 1.1<br>(1.0 to 1.3)                     | 0.1<br>(< 0.05 to 0.1)                        | 0.3<br>(0.2 to 0.4)              | 55.9<br>(39.4 to 75.5)                            | 15.6<br>(3.6 to 29.3)                               |
| Motor neuron disease                                           | 0.1<br>(0.1 to 0.2)                     | < 0.05<br>(< 0.05 to < 0.05)                  | < 0.05<br>(< 0.05 to < 0.05)     | 32.3<br>(26.1 to 38.3)                            | 4.6<br>(1.1 to 8.2)                                 |
| Migraine                                                       | 1,262.2<br>(1,184.9 to 1,339.4)         | 143.4<br>(134.0 to 153.5)                     | 53.7<br>(34.4 to 75.8)           | 26.9<br>(21.9 to 32.3)                            | -0.3<br>(-3.7 to 3.4)                               |
| Tension-type headache                                          | 2,359.2<br>(2,092.1 to 2,630.6)         | 1,391.7<br>(1,153.3 to 1,671.1)               | 8.2<br>(5.2 to 12.1)             | 28.4<br>(21.8 to 35.8)                            | -0.1<br>(-4.7 to 4.9)                               |
| Other neurological disorders                                   | < 0.05<br>(< 0.05 to < 0.05)            | 0.1<br>(< 0.05 to 0.1)                        | 2.6<br>(0.6 to 5.7)              | 26.2<br>(-70.5 to 456.7)                          | 5.2<br>(-72.8 to 313.9)                             |
| <b>Mental and substance use disorders</b>                      | <b>1,070.7<br/>(1,026.6 to 1,111.6)</b> | <b>358.6<sup>†</sup><br/>(335.0 to 385.3)</b> | <b>135.2<br/>(98.7 to 174.8)</b> | <b>27.4<br/>(24.4 to 30.8)</b>                    | <b>0.4<br/>(-1.8 to 2.8)</b>                        |
| Schizophrenia                                                  | 14.5<br>(12.6 to 16.6)                  | 1.1<br>(1.0 to 1.3)                           | 9.4<br>(6.9 to 12.0)             | 39.7<br>(26.1 to 55.0)                            | 1.3<br>(-8.1 to 11.4)                               |
| Alcohol use disorders                                          | 146.1<br>(125.8 to 166.3)               | 80.3<br>(68.5 to 92.0)                        | 14.8<br>(10.0 to 20.6)           | 39.0<br>(27.0 to 50.8)                            | 2.8<br>(-5.4 to 11.2)                               |
| Drug use disorders                                             | 59.8<br>(54.6 to 66.1)                  | 9.1<br>(8.2 to 10.1)                          | 13.0<br>(9.2 to 17.3)            | 40.5<br>(28.0 to 54.0)                            | 5.8<br>(-3.2 to 14.6)                               |
| Opioid use disorders                                           | 21.6<br>(18.3 to 25.7)                  | 3.2<br>(2.8 to 3.8)                           | 9.1<br>(6.2 to 12.2)             | 42.4<br>(25.5 to 60.1)                            | 4.9<br>(-6.7 to 16.6)                               |
| Cocaine use disorders                                          | 5.9<br>(5.1 to 6.9)                     | 0.5<br>(0.4 to 0.6)                           | 0.8<br>(0.5 to 1.2)              | 38.3<br>(7.0 to 81.2)                             | 8.7<br>(-13.8 to 36.4)                              |
| Amphetamine use disorders                                      | 6.7<br>(4.5 to 9.5)                     | 0.7<br>(0.5 to 0.9)                           | 0.9<br>(0.5 to 1.5)              | 38.4<br>(2.3 to 89.8)                             | 10.5<br>(-17.1 to 49.0)                             |
| Cannabis use disorders                                         | 22.7<br>(18.3 to 27.9)                  | 3.9<br>(3.2 to 4.7)                           | 0.7<br>(0.4 to 1.0)              | 22.0<br>(1.2 to 46.2)                             | 0.1<br>(-15.9 to 17.7)                              |
| Other drug use disorders                                       | 4.0<br>(3.6 to 4.6)                     | 0.8<br>(0.7 to 0.9)                           | 1.6<br>(1.0 to 2.2)              | 41.5<br>(12.6 to 79.8)                            | 10.1<br>(-11.5 to 37.2)                             |
| Depressive disorders                                           | 189.6<br>(176.5 to 205.1)               | 183.1<br>(163.6 to 204.2)                     | 30.5<br>(21.1 to 42.3)           | 28.5<br>(22.4 to 34.7)                            | -1.0<br>(-5.0 to 3.4)                               |
| Major depressive disorder                                      | 109.0<br>(96.5 to 122.8)                | 168.0<br>(148.8 to 189.6)                     | 22.5<br>(15.4 to 31.0)           | 26.7<br>(19.2 to 34.8)                            | -1.4<br>(-6.7 to 4.5)                               |
| Dysthymia                                                      | 82.6<br>(71.7 to 95.2)                  | 15.1<br>(13.2 to 17.3)                        | 8.0<br>(5.4 to 11.7)             | 33.7<br>(27.9 to 40.0)                            | 0.1<br>(-3.2 to 3.8)                                |
| Bipolar disorder                                               | 48.5<br>(41.4 to 57.0)                  | 4.5<br>(3.9 to 5.4)                           | 10.0<br>(6.2 to 15.0)            | 27.4<br>(18.2 to 36.5)                            | -0.1<br>(-6.0 to 5.8)                               |
| Anxiety disorders                                              | 201.8<br>(182.7 to 223.7)               | 37.3<br>(33.9 to 40.8)                        | 19.7<br>(13.7 to 26.9)           | 24.0<br>(15.6 to 34.6)                            | -0.1<br>(-6.4 to 7.0)                               |
| Eating disorders                                               | 6.6<br>(5.4 to 8.2)                     | 5.0<br>(3.6 to 6.7)                           | 1.4<br>(0.8 to 2.0)              | 37.6<br>(14.6 to 64.0)                            | 13.8<br>(-4.6 to 34.3)                              |
| Anorexia nervosa                                               | 1.6<br>(1.2 to 2.2)                     | 0.8<br>(0.6 to 1.1)                           | 0.4<br>(0.2 to 0.6)              | 26.8<br>(-8.0 to 79.5)                            | 10.3<br>(-18.8 to 52.5)                             |
| Bulimia nervosa                                                | 4.7<br>(3.5 to 6.3)                     | 4.2<br>(2.9 to 5.9)                           | 1.0<br>(0.6 to 1.5)              | 41.9<br>(15.3 to 72.9)                            | 15.1<br>(-6.4 to 39.6)                              |
| Autistic spectrum disorders                                    | 73.2<br>(65.9 to 82.4)                  | 0.7<br>(0.5 to 1.0)                           | 10.8<br>(7.2 to 15.3)            | 23.7<br>(17.2 to 30.6)                            | 0.5<br>(-4.3 to 5.6)                                |
| Autism                                                         | 21.4<br>(18.5 to 25.1)                  | 0.1<br>(< 0.05 to 0.1)                        | 5.5<br>(3.5 to 8.0)              | 23.3<br>(13.0 to 34.8)                            | 0.4<br>(-7.3 to 8.3)                                |
| Asperger syndrome and other autistic spectrum disorders        | 52.0<br>(43.3 to 62.9)                  | 0.6<br>(0.4 to 0.9)                           | 5.2<br>(3.4 to 7.7)              | 24.0<br>(17.1 to 31.1)                            | 0.7<br>(-4.3 to 5.7)                                |



| Cause                                                      | Prevalence in thousands (95% UI)              | Incidence in thousands (95% UI)                   | YLDs in thousands (95% UI)              |                                                   |                                                     |
|------------------------------------------------------------|-----------------------------------------------|---------------------------------------------------|-----------------------------------------|---------------------------------------------------|-----------------------------------------------------|
|                                                            | 2016 counts                                   | 2016 counts                                       | 2016 counts                             | Percentage change in counts between 2006 and 2016 | Percentage change in age-standardised rates between |
| Attention-deficit/hyperactivity disorder                   | 76.4<br>(68.5 to 85.5)                        | 4.2<br>(3.7 to 4.9)                               | 0.9<br>(0.5 to 1.5)                     | 14.7<br>(5.1 to 24.9)                             | 0.7<br>(-7.2 to 8.8)                                |
| Conduct disorder                                           | 78.4<br>(65.0 to 92.9)                        | 27.2<br>(21.6 to 32.5)                            | 9.6<br>(5.9 to 14.6)                    | 1.4<br>(-4.3 to 8.3)                              | 0.7<br>(-5.2 to 7.5)                                |
| Idiopathic developmental intellectual disability           | 122.6<br>(67.6 to 176.2)                      | --                                                | 4.9<br>(2.1 to 8.7)                     | 8.2<br>(-0.3 to 17.2)                             | -10.7<br>(-17.7 to -3.7)                            |
| Other mental and substance use disorders                   | 137.0<br>(120.0 to 158.8)                     | 6.0<br>(5.3 to 6.9)                               | 10.3<br>(7.1 to 14.9)                   | 35.5<br>(28.1 to 44.0)                            | 0.3<br>(-4.3 to 5.6)                                |
| <b>Diabetes, urogenital, blood, and endocrine diseases</b> | <b>2,523.8</b><br><b>(2,477.3 to 2,564.1)</b> | <b>1,299.3†</b><br><b>(1,191.0 to 1,453.7)</b>    | <b>49.3</b><br><b>(34.9 to 67.5)</b>    | <b>31.9</b><br><b>(27.2 to 37.2)</b>              | <b>-0.1</b><br><b>(-3.3 to 3.1)</b>                 |
| Diabetes mellitus                                          | 145.5<br>(129.9 to 163.6)                     | 9.6<br>(8.6 to 10.8)                              | 12.2<br>(8.3 to 17.2)                   | 47.3<br>(36.8 to 59.4)                            | 3.8<br>(-3.4 to 12.2)                               |
| Acute glomerulonephritis                                   | 0.1<br>(0.1 to 0.2)                           | 2.1<br>(1.8 to 2.5)                               | < 0.05<br>(< 0.05 to < 0.05)            | 26.4<br>(20.1 to 33.8)                            | -0.1<br>(-4.2 to 4.7)                               |
| Chronic kidney disease                                     | 274.1<br>(249.1 to 302.3)                     | 21.2<br>(18.8 to 23.9)                            | 8.8<br>(6.5 to 11.5)                    | 32.1<br>(23.2 to 41.7)                            | -0.9<br>(-6.6 to 5.4)                               |
| Chronic kidney disease due to diabetes mellitus            | 110.4<br>(94.7 to 129.2)                      | 8.2<br>(6.8 to 9.8)                               | 3.3<br>(2.4 to 4.3)                     | 36.3<br>(23.7 to 51.0)                            | -1.5<br>(-9.2 to 7.0)                               |
| Chronic kidney disease due to hypertension                 | 45.6<br>(38.9 to 52.9)                        | 5.7<br>(4.8 to 6.7)                               | 0.5<br>(0.4 to 0.7)                     | 34.3<br>(19.3 to 53.2)                            | 0.3<br>(-10.8 to 13.9)                              |
| Chronic kidney disease due to glomerulonephritis           | 40.8<br>(34.6 to 46.7)                        | 1.2<br>(0.9 to 1.5)                               | 2.4<br>(1.7 to 3.3)                     | 29.7<br>(16.4 to 44.4)                            | -0.1<br>(-8.5 to 8.3)                               |
| Chronic kidney disease due to other causes                 | 77.3<br>(65.2 to 90.8)                        | 6.2<br>(5.2 to 7.2)                               | 2.5<br>(1.8 to 3.4)                     | 28.7<br>(16.9 to 40.9)                            | -1.1<br>(-8.6 to 6.7)                               |
| Urinary diseases and male infertility                      | 120.9<br>(111.0 to 131.1)                     | 916.7†<br>(808.7 to 1,076.7)                      | 3.5<br>(2.3 to 5.0)                     | 32.8<br>(24.8 to 41.7)                            | -2.2<br>(-7.8 to 3.6)                               |
| Interstitial nephritis and urinary tract infections        | 16.0<br>(13.9 to 19.1)                        | 831.5<br>(722.8 to 990.3)                         | 0.5<br>(0.3 to 0.8)                     | 22.3<br>(7.5 to 43.9)                             | -3.4<br>(-14.3 to 13.1)                             |
| Urolithiasis                                               | 2.9<br>(2.5 to 3.2)                           | 75.7<br>(66.7 to 86.1)                            | 0.2<br>(0.1 to 0.3)                     | 40.0<br>(21.9 to 59.6)                            | 4.1<br>(-10.5 to 21.5)                              |
| Benign prostatic hyperplasia                               | 69.5<br>(59.3 to 81.5)                        | 9.5<br>(8.0 to 11.3)                              | 2.3<br>(1.4 to 3.3)                     | 40.0<br>(29.5 to 51.4)                            | -1.3<br>(-8.3 to 5.6)                               |
| Male infertility                                           | 29.3<br>(25.2 to 34.2)                        | --                                                | 0.2<br>(0.1 to 0.4)                     | 29.9<br>(8.2 to 58.7)                             | -3.6<br>(-20.3 to 17.7)                             |
| Other urinary diseases                                     | --                                            | --                                                | 0.3<br>(0.2 to 0.4)                     | 4.3<br>(-6.3 to 18.8)                             | -18.5<br>(-26.3 to -7.9)                            |
| Gynecological diseases                                     | 845.9<br>(802.0 to 889.9)                     | 335.5†<br>(311.1 to 361.2)                        | 11.2<br>(7.6 to 16.1)                   | 27.6<br>(21.7 to 33.7)                            | -2.9<br>(-6.8 to 1.2)                               |
| Uterine fibroids                                           | 99.2<br>(87.2 to 112.3)                       | 11.6<br>(10.0 to 13.5)                            | 1.7<br>(1.0 to 2.7)                     | 27.4<br>(17.0 to 36.3)                            | -6.7<br>(-13.8 to -0.2)                             |
| Polycystic ovarian syndrome                                | 8.8<br>(6.4 to 11.7)                          | 2.9<br>(2.2 to 3.7)                               | 0.1<br>(< 0.05 to 0.1)                  | 26.6<br>(8.8 to 45.0)                             | -2.1<br>(-14.9 to 11.1)                             |
| Female infertility                                         | 12.8<br>(7.4 to 19.0)                         | --                                                | 0.1<br>(< 0.05 to 0.2)                  | 9.3<br>(-28.7 to 83.7)                            | -19.7<br>(-49.9 to 38.1)                            |
| Endometriosis                                              | 4.0<br>(3.2 to 4.9)                           | 13.4<br>(10.4 to 17.0)                            | 0.4<br>(0.2 to 0.6)                     | 29.9<br>(-1.4 to 69.3)                            | -0.9<br>(-23.1 to 27.3)                             |
| Genital prolapse                                           | 206.5<br>(179.0 to 234.6)                     | 16.7<br>(14.3 to 19.7)                            | 0.7<br>(0.3 to 1.2)                     | 55.5<br>(42.5 to 71.0)                            | 5.7<br>(-3.8 to 16.7)                               |
| Premenstrual syndrome                                      | 504.6<br>(465.9 to 545.4)                     | 185.8<br>(169.3 to 202.2)                         | 4.2<br>(2.6 to 6.5)                     | 22.1<br>(12.0 to 32.9)                            | -2.8<br>(-10.8 to 5.2)                              |
| Other gynecological diseases                               | 119.7<br>(103.8 to 138.2)                     | 105.2<br>(87.0 to 126.5)                          | 4.1<br>(2.7 to 5.8)                     | 30.2<br>(21.4 to 39.9)                            | -2.9<br>(-9.2 to 3.7)                               |
| Hemoglobinopathies and hemolytic anaemias                  | 1,450.0<br>(1,418.0 to 1,475.4)               | --                                                | 10.1<br>(6.6 to 14.9)                   | 24.3<br>(10.5 to 39.4)                            | 0.0<br>(-8.9 to 9.5)                                |
| Thalassemias                                               | 0.6<br>(0.5 to 0.6)                           | --                                                | < 0.05<br>(< 0.05 to 0.1)               | 48.4<br>(2.5 to 118.2)                            | 8.6<br>(-25.6 to 60.3)                              |
| Thalassaemias trait                                        | 508.7<br>(479.2 to 536.9)                     | --                                                | 8.0<br>(5.2 to 11.6)                    | 28.9<br>(14.2 to 44.4)                            | 4.1<br>(-5.4 to 14.2)                               |
| Sickle cell disorders                                      | 0.2<br>(0.2 to 0.2)                           | --                                                | < 0.05<br>(< 0.05 to < 0.05)            | 27.9<br>(14.3 to 42.1)                            | 5.8<br>(-4.6 to 16.3)                               |
| Sickle cell trait                                          | 203.5<br>(194.6 to 212.8)                     | --                                                | 0.6<br>(0.4 to 1.0)                     | 22.3<br>(2.0 to 48.7)                             | 1.8<br>(-12.5 to 19.4)                              |
| G6PD deficiency                                            | 93.9<br>(90.7 to 97.2)                        | --                                                | < 0.05<br>(< 0.05 to < 0.05)            | 45.8<br>(22.0 to 77.5)                            | 18.5<br>(3.2 to 37.8)                               |
| G6PD trait                                                 | 665.8<br>(654.3 to 681.3)                     | --                                                | < 0.05<br>(< 0.05 to < 0.05)            | 44.9<br>(27.6 to 62.2)                            | 12.9<br>(2.0 to 24.5)                               |
| Other hemoglobinopathies and hemolytic anaemias            | 77.9<br>(69.4 to 86.9)                        | --                                                | 1.4<br>(0.9 to 2.2)                     | 3.8<br>(-12.0 to 23.4)                            | -18.9<br>(-28.9 to -6.8)                            |
| Endocrine, metabolic, blood, and immune disorders          | 122.3<br>(113.4 to 132.0)                     | 14.2<br>(12.6 to 16.0)                            | 3.5<br>(2.4 to 5.0)                     | 21.6<br>(12.3 to 31.9)                            | -4.6<br>(-10.1 to 1.6)                              |
| <b>Musculoskeletal disorders</b>                           | <b>924.8</b><br><b>(871.8 to 977.8)</b>       | <b>415.3</b><br><b>(372.8 to 459.8)</b>           | <b>105.1</b><br><b>(75.0 to 137.5)</b>  | <b>36.2</b><br><b>(31.8 to 40.5)</b>              | <b>-1.0</b><br><b>(-3.6 to 1.3)</b>                 |
| Rheumatoid arthritis                                       | 13.7<br>(12.1 to 15.6)                        | 0.9<br>(0.8 to 1.0)                               | 3.3<br>(2.2 to 4.5)                     | 49.1<br>(35.1 to 64.9)                            | 8.5<br>(-0.2 to 18.7)                               |
| Osteoarthritis                                             | 162.8<br>(152.3 to 173.5)                     | 9.6<br>(8.9 to 10.4)                              | 10.1<br>(7.1 to 13.7)                   | 48.7<br>(42.4 to 54.8)                            | 3.8<br>(-0.3 to 7.9)                                |
| Low back and neck pain                                     | 712.7<br>(662.4 to 765.7)                     | 328.3<br>(291.4 to 370.2)                         | 83.8<br>(59.2 to 110.5)                 | 34.1<br>(29.2 to 38.9)                            | -2.2<br>(-5.3 to 0.6)                               |
| Low back pain                                              | 539.5<br>(478.6 to 615.3)                     | 275.6<br>(239.1 to 317.7)                         | 61.5<br>(43.0 to 82.5)                  | 32.6<br>(26.0 to 38.9)                            | -2.9<br>(-7.0 to 0.7)                               |
| Neck pain                                                  | 221.8<br>(189.0 to 257.9)                     | 52.7<br>(45.1 to 62.1)                            | 22.3<br>(14.8 to 32.1)                  | 38.5<br>(33.6 to 44.1)                            | 0.0<br>(-2.0 to 2.1)                                |
| Gout                                                       | 20.2<br>(17.8 to 22.9)                        | 4.2<br>(3.6 to 4.7)                               | 0.7<br>(0.4 to 0.9)                     | 40.6<br>(19.3 to 65.3)                            | 0.3<br>(-13.6 to 15.1)                              |
| Other musculoskeletal disorders                            | 82.6<br>(57.5 to 112.2)                       | 72.3<br>(51.8 to 96.5)                            | 7.2<br>(4.2 to 11.5)                    | 39.3<br>(20.1 to 61.3)                            | -0.3<br>(-12.7 to 12.2)                             |
| <b>Other non-communicable diseases</b>                     | <b>6,394.0</b><br><b>(6,276.4 to 6,508.0)</b> | <b>20,778.2†</b><br><b>(19,559.3 to 22,039.7)</b> | <b>148.6</b><br><b>(101.8 to 208.5)</b> | <b>25.9</b><br><b>(24.1 to 27.6)</b>              | <b>-0.7</b><br><b>(-1.6 to 0.4)</b>                 |
| Congenital anomalies                                       | 117.6<br>(106.7 to 129.6)                     | --                                                | 14.1<br>(10.2 to 18.9)                  | 27.8<br>(20.6 to 35.4)                            | 1.7<br>(-4.0 to 7.6)                                |
| Neural tube defects                                        | 9.8<br>(8.6 to 11.1)                          | --                                                | 2.9<br>(2.0 to 4.0)                     | 25.0<br>(9.3 to 41.7)                             | -0.1<br>(-11.8 to 12.5)                             |
| Congenital heart anomalies                                 | 37.5<br>(31.9 to 43.6)                        | --                                                | 1.8<br>(0.8 to 3.1)                     | 38.0<br>(23.5 to 56.8)                            | 11.1<br>(-0.3 to 24.8)                              |
| Orofacial clefts                                           | 4.2<br>(3.7 to 4.8)                           | --                                                | 0.1<br>(< 0.05 to 0.1)                  | 18.7<br>(4.4 to 34.5)                             | -6.5<br>(-17.7 to 5.7)                              |
| Down's syndrome                                            | 8.5<br>(7.4 to 9.9)                           | --                                                | 0.8<br>(0.5 to 1.1)                     | 30.7<br>(17.5 to 48.0)                            | 5.4<br>(-4.5 to 17.9)                               |
| Turner syndrome                                            | 8.7<br>(7.3 to 10.2)                          | --                                                | 0.1<br>(0.1 to 0.3)                     | 26.9<br>(-2.1 to 64.3)                            | 4.4<br>(-19.0 to 33.6)                              |
| Klinefelter syndrome                                       | 6.8<br>(5.7 to 8.0)                           | --                                                | < 0.05<br>(< 0.05 to 0.1)               | 27.4<br>(0.6 to 58.9)                             | 0.9<br>(-19.6 to 25.0)                              |

| Cause                                         | Prevalence in thousands (95% UI)              | Incidence in thousands (95% UI)          | YLDs in thousands (95% UI)           |                                                   |                                                     |
|-----------------------------------------------|-----------------------------------------------|------------------------------------------|--------------------------------------|---------------------------------------------------|-----------------------------------------------------|
|                                               | 2016 counts                                   | 2016 counts                              | 2016 counts                          | Percentage change in counts between 2006 and 2016 | Percentage change in age-standardised rates between |
| Other chromosomal abnormalities               | 5.6<br>(4.8 to 6.6)                           | --                                       | 1.1<br>(0.7 to 1.5)                  | 33.0<br>(7.8 to 64.1)                             | 2.5<br>(-17.5 to 26.4)                              |
| Congenital musculoskeletal and limb anomalies | 8.2<br>(7.4 to 9.0)                           | --                                       | 1.2<br>(0.8 to 1.7)                  | 29.2<br>(15.5 to 45.6)                            | 3.9<br>(-6.4 to 16.0)                               |
| Urogenital congenital anomalies               | 11.2<br>(9.8 to 12.8)                         | --                                       | 0.4<br>(0.2 to 0.6)                  | 17.0<br>(1.5 to 33.0)                             | -1.6<br>(-14.1 to 11.1)                             |
| Digestive congenital anomalies                | 10.3<br>(9.0 to 11.7)                         | --                                       | 0.5<br>(0.3 to 0.7)                  | 28.2<br>(7.9 to 54.8)                             | 2.8<br>(-12.3 to 21.2)                              |
| Other congenital anomalies                    | 32.4<br>(21.9 to 47.0)                        | --                                       | 5.3<br>(3.5 to 7.6)                  | 25.6<br>(14.7 to 39.3)                            | -0.7<br>(-8.9 to 9.6)                               |
| Skin and subcutaneous diseases                | 2,207.9<br>(2,149.4 to 2,276.8)               | 4,490.6<br>(4,252.6 to 4,751.8)          | 55.6<br>(37.6 to 80.0)               | 19.9<br>(17.0 to 23.2)                            | 1.3<br>(-0.7 to 3.6)                                |
| Dermatitis                                    | 272.0<br>(241.8 to 302.3)                     | 328.9<br>(298.6 to 361.9)                | 10.4<br>(6.1 to 17.0)                | 22.3<br>(16.6 to 28.8)                            | -0.0<br>(-4.2 to 4.5)                               |
| Psoriasis                                     | 57.3<br>(54.6 to 60.0)                        | 8.8<br>(8.4 to 9.2)                      | 5.1<br>(3.6 to 6.7)                  | 32.8<br>(20.5 to 47.6)                            | 4.1<br>(-3.4 to 13.4)                               |
| Cellulitis                                    | 3.1<br>(2.8 to 3.3)                           | 53.1<br>(49.3 to 57.0)                   | 0.2<br>(0.1 to 0.3)                  | 27.3<br>(1.7 to 60.6)                             | 1.5<br>(-17.9 to 25.8)                              |
| Pyoderma                                      | 14.0<br>(13.5 to 14.5)                        | 292.8<br>(282.7 to 303.9)                | 0.1<br>(< 0.05 to 0.2)               | 32.8<br>(20.9 to 45.5)                            | 1.6<br>(-5.8 to 8.9)                                |
| Scabies                                       | 69.9<br>(60.4 to 81.0)                        | 215.6<br>(184.7 to 250.2)                | 1.8<br>(1.0 to 2.9)                  | 13.7<br>(6.8 to 20.9)                             | -5.9<br>(-10.7 to -1.3)                             |
| Fungal skin diseases                          | 615.8<br>(552.8 to 685.6)                     | 2,100.6<br>(1,886.5 to 2,336.1)          | 3.5<br>(1.4 to 7.4)                  | 25.1<br>(22.4 to 28.0)                            | 0.1<br>(-1.0 to 1.2)                                |
| Viral skin diseases                           | 235.4<br>(224.1 to 246.3)                     | 339.2<br>(323.2 to 357.4)                | 7.3<br>(4.5 to 10.7)                 | 18.4<br>(14.4 to 22.6)                            | -0.0<br>(-3.1 to 3.1)                               |
| Acne vulgaris                                 | 690.2<br>(614.3 to 779.5)                     | 471.4<br>(387.1 to 598.5)                | 17.9<br>(12.1 to 25.9)               | 11.4<br>(5.4 to 18.1)                             | 2.8<br>(-2.5 to 8.4)                                |
| Alopecia areata                               | 15.4<br>(14.8 to 16.1)                        | 27.5<br>(26.4 to 28.7)                   | 0.5<br>(0.3 to 0.8)                  | 30.5<br>(15.9 to 47.5)                            | 0.0<br>(-10.2 to 11.2)                              |
| Pruritus                                      | 63.1<br>(55.5 to 71.4)                        | 51.4<br>(45.6 to 58.1)                   | 0.7<br>(0.3 to 1.2)                  | 31.4<br>(23.4 to 39.9)                            | 1.4<br>(-3.8 to 6.6)                                |
| Urticaria                                     | 97.8<br>(83.9 to 114.4)                       | 176.5<br>(151.6 to 205.8)                | 5.9<br>(3.8 to 8.7)                  | 26.7<br>(19.2 to 34.5)                            | -0.1<br>(-5.3 to 5.1)                               |
| Decubitus ulcer                               | 1.4<br>(1.3 to 1.6)                           | 5.1<br>(4.5 to 5.7)                      | 0.2<br>(0.2 to 0.3)                  | 33.0<br>(21.5 to 45.4)                            | 3.3<br>(-10.9 to 18.4)                              |
| Other skin and subcutaneous diseases          | 376.7<br>(364.8 to 388.9)                     | 419.7<br>(406.0 to 433.8)                | 2.1<br>(1.0 to 3.8)                  | 38.3<br>(33.9 to 42.6)                            | 5.6<br>(3.1 to 8.4)                                 |
| Sense organ diseases                          | 1,683.8<br>(1,637.0 to 1,731.7)               | 768.0†<br>(713.9 to 826.0)               | 59.7<br>(40.5 to 84.2)               | 28.7<br>(25.9 to 31.2)                            | -2.3<br>(-3.7 to -1.0)                              |
| Glaucoma                                      | 4.5<br>(3.8 to 5.2)                           | --                                       | 0.5<br>(0.3 to 0.6)                  | 32.9<br>(18.3 to 48.0)                            | 0.7<br>(-8.5 to 10.9)                               |
| Cataract                                      | 54.7<br>(47.2 to 63.0)                        | --                                       | 3.0<br>(2.1 to 4.2)                  | 28.5<br>(21.3 to 36.8)                            | -2.6<br>(-7.2 to 2.2)                               |
| Macular degeneration                          | 1.6<br>(1.3 to 2.0)                           | --                                       | 0.1<br>(0.1 to 0.1)                  | 34.0<br>(15.3 to 54.8)                            | 1.2<br>(-11.2 to 15.7)                              |
| Refraction and accommodation disorders        | 999.6<br>(956.0 to 1,045.3)                   | --                                       | 17.5<br>(10.6 to 28.1)               | 26.7<br>(22.8 to 30.6)                            | -4.3<br>(-6.7 to -1.6)                              |
| Age-related and other hearing loss            | 924.9<br>(868.0 to 988.0)                     | --                                       | 31.1<br>(21.8 to 43.1)               | 28.5<br>(23.9 to 32.9)                            | -1.9<br>(-3.9 to -0.0)                              |
| Other vision loss                             | 32.9<br>(28.8 to 37.5)                        | --                                       | 2.2<br>(1.5 to 2.9)                  | 34.7<br>(24.6 to 45.6)                            | -0.5<br>(-6.8 to 6.2)                               |
| Other sense organ diseases                    | 172.2<br>(158.8 to 185.2)                     | 768.0<br>(713.9 to 826.0)                | 5.3<br>(3.3 to 8.0)                  | 33.8<br>(27.0 to 40.5)                            | 0.5<br>(-3.4 to 4.2)                                |
| Oral disorders                                | 5,121.6<br>(4,928.1 to 5,290.6)               | 15,519.6†<br>(14,346.2 to 16,787.6)      | 19.2<br>(11.8 to 29.3)               | 34.5<br>(31.5 to 37.7)                            | 0.4<br>(-1.4 to 2.2)                                |
| Caries of deciduous teeth                     | 968.7<br>(805.3 to 1,124.5)                   | 3,790.1<br>(2,919.3 to 4,818.8)          | 0.2<br>(0.1 to 0.5)                  | 27.1<br>(13.1 to 41.0)                            | 0.0<br>(-10.2 to 10.2)                              |
| Caries of permanent teeth                     | 3,887.8<br>(3,700.6 to 4,077.7)               | 11,635.1<br>(10,870.9 to 12,385.4)       | 2.3<br>(1.0 to 4.5)                  | 16.7<br>(13.0 to 20.7)                            | -3.5<br>(-6.0 to -0.8)                              |
| Periodontal disease                           | 486.2<br>(394.6 to 580.3)                     | 64.6<br>(51.3 to 80.4)                   | 3.2<br>(1.3 to 6.6)                  | 41.9<br>(36.1 to 48.3)                            | -0.4<br>(-3.9 to 3.2)                               |
| Edentulism and severe tooth loss              | 332.5<br>(289.6 to 375.2)                     | 29.8<br>(25.3 to 34.5)                   | 9.3<br>(6.1 to 13.2)                 | 40.8<br>(35.7 to 46.2)                            | 1.3<br>(-1.4 to 4.1)                                |
| Other oral disorders                          | 139.9<br>(133.1 to 146.7)                     | --                                       | 4.1<br>(2.5 to 6.2)                  | 27.7<br>(22.9 to 32.4)                            | 0.1<br>(-2.8 to 3.2)                                |
| <b>Injuries</b>                               | <b>1,792.9</b><br><b>(1,658.7 to 1,966.5)</b> | <b>848.8†</b><br><b>(789.6 to 911.9)</b> | <b>65.8</b><br><b>(44.1 to 93.2)</b> | <b>33.0</b><br><b>(26.9 to 39.3)</b>              | <b>3.1</b><br><b>(-0.0 to 6.0)</b>                  |
| <b>Transport injuries</b>                     | <b>95.2</b><br><b>(88.6 to 102.2)</b>         | <b>41.3</b><br><b>(36.6 to 46.4)</b>     | <b>5.3</b><br><b>(3.5 to 7.7)</b>    | <b>52.5</b><br><b>(47.6 to 57.2)</b>              | <b>14.0</b><br><b>(11.4 to 16.5)</b>                |
| Road injuries                                 | 81.0<br>(75.2 to 87.2)                        | 37.3<br>(32.7 to 42.5)                   | 4.5<br>(3.0 to 6.5)                  | 56.5<br>(51.6 to 61.0)                            | 16.0<br>(13.5 to 18.5)                              |
| Pedestrian road injuries                      | 17.3<br>(15.1 to 19.9)                        | 5.6<br>(4.5 to 6.8)                      | 1.0<br>(0.6 to 1.4)                  | 52.6<br>(47.5 to 58.1)                            | 14.7<br>(11.9 to 17.4)                              |
| Cyclist road injuries                         | 18.1<br>(15.2 to 21.5)                        | 9.0<br>(7.2 to 11.1)                     | 0.9<br>(0.6 to 1.4)                  | 63.5<br>(57.7 to 69.0)                            | 24.1<br>(21.0 to 26.9)                              |
| Motorcyclist road injuries                    | 10.7<br>(9.1 to 13.0)                         | 3.3<br>(2.5 to 4.1)                      | 0.6<br>(0.4 to 0.8)                  | 59.1<br>(54.0 to 64.0)                            | 17.1<br>(14.3 to 19.7)                              |
| Motor vehicle road injuries                   | 27.4<br>(23.3 to 31.6)                        | 15.0<br>(12.6 to 17.6)                   | 1.7<br>(1.1 to 2.4)                  | 58.3<br>(53.5 to 62.9)                            | 15.3<br>(12.8 to 17.8)                              |
| Other road injuries                           | 7.5<br>(6.4 to 8.8)                           | 4.4<br>(3.4 to 5.6)                      | 0.4<br>(0.2 to 0.6)                  | 39.9<br>(35.6 to 43.9)                            | 4.3<br>(2.1 to 6.5)                                 |
| Other transport injuries                      | 14.2<br>(11.9 to 17.1)                        | 4.0<br>(3.4 to 5.0)                      | 0.8<br>(0.5 to 1.2)                  | 33.3<br>(27.3 to 39.8)                            | 2.5<br>(-0.7 to 5.8)                                |
| <b>Unintentional injuries</b>                 | <b>1,481.6</b><br><b>(1,365.0 to 1,632.5)</b> | <b>774.8</b><br><b>(715.7 to 837.0)</b>  | <b>52.7</b><br><b>(36.2 to 73.8)</b> | <b>38.0</b><br><b>(33.2 to 42.5)</b>              | <b>5.2</b><br><b>(2.6 to 7.5)</b>                   |
| Falls                                         | 731.1<br>(636.0 to 847.0)                     | 399.8<br>(348.2 to 456.7)                | 29.8<br>(20.9 to 40.9)               | 36.6<br>(31.8 to 41.6)                            | 3.5<br>(1.0 to 5.8)                                 |
| Drowning                                      | 6.3<br>(5.4 to 7.4)                           | 1.5<br>(1.3 to 1.7)                      | 0.3<br>(0.2 to 0.5)                  | 8.3<br>(2.3 to 13.9)                              | -16.3<br>(-20.0 to -13.1)                           |
| Fire, heat, and hot substances                | 178.5<br>(152.7 to 213.5)                     | 28.1<br>(23.8 to 32.4)                   | 5.0<br>(3.4 to 7.1)                  | 29.5<br>(21.9 to 36.6)                            | -0.2<br>(-4.8 to 4.0)                               |
| Poisonings                                    | 4.5<br>(3.8 to 5.3)                           | 8.2<br>(6.6 to 10.1)                     | 0.4<br>(0.3 to 0.6)                  | 70.3<br>(57.7 to 83.7)                            | 35.3<br>(26.6 to 43.7)                              |
| Exposure to mechanical forces                 | 246.9<br>(209.7 to 305.6)                     | 120.2<br>(102.2 to 138.9)                | 6.2<br>(4.0 to 9.1)                  | 51.1<br>(45.4 to 56.1)                            | 14.9<br>(11.8 to 17.8)                              |
| Unintentional firearm injuries                | 6.1<br>(5.0 to 7.5)                           | 2.0<br>(1.4 to 2.7)                      | 0.3<br>(0.2 to 0.4)                  | 43.4<br>(38.1 to 48.0)                            | 7.8<br>(4.9 to 10.4)                                |
| Unintentional suffocation                     | 20.4<br>(15.7 to 26.1)                        | 5.9<br>(4.3 to 8.1)                      | 0.7<br>(0.4 to 1.1)                  | 39.5<br>(33.4 to 45.8)                            | 7.3<br>(4.2 to 10.1)                                |
| Other exposure to mechanical forces           | 220.4<br>(184.4 to 277.7)                     | 112.4<br>(95.4 to 129.9)                 | 5.3<br>(3.4 to 7.7)                  | 53.1<br>(47.7 to 58.3)                            | 16.3<br>(13.2 to 19.2)                              |

| Cause                                                                               | Prevalence in thousands (95% UI)        | Incidence in thousands (95% UI)       | YLDs in thousands (95% UI)         |                                                   |                                                     |
|-------------------------------------------------------------------------------------|-----------------------------------------|---------------------------------------|------------------------------------|---------------------------------------------------|-----------------------------------------------------|
|                                                                                     | 2016 counts                             | 2016 counts                           | 2016 counts                        | Percentage change in counts between 2006 and 2016 | Percentage change in age-standardised rates between |
| Adverse effects of medical treatment                                                | 2.1<br>(1.7 to 2.6)                     | 27.4<br>(23.6 to 31.7)                | 0.3<br>(0.2 to 0.4)                | 47.6<br>(41.0 to 55.5)                            | 7.4<br>(3.6 to 11.8)                                |
| Animal contact                                                                      | 38.2<br>(32.9 to 45.4)                  | 53.1<br>(42.8 to 64.1)                | 1.3<br>(0.9 to 1.9)                | 25.4<br>(18.9 to 32.5)                            | -1.7<br>(-6.0 to 2.7)                               |
| Venomous animal contact                                                             | 13.5<br>(11.0 to 16.6)                  | 20.4<br>(15.3 to 26.2)                | 0.9<br>(0.6 to 1.3)                | 30.4<br>(20.8 to 41.0)                            | 3.8<br>(-2.9 to 10.7)                               |
| Non-venomous animal contact                                                         | 24.7<br>(20.1 to 32.0)                  | 32.6<br>(25.7 to 40.0)                | 0.4<br>(0.3 to 0.6)                | 15.8<br>(10.6 to 20.4)                            | -10.8<br>(-14.3 to -7.8)                            |
| Foreign body                                                                        | 85.6<br>(70.2 to 100.3)                 | 60.2<br>(52.7 to 69.3)                | 3.3<br>(2.1 to 4.9)                | 31.8<br>(25.4 to 38.1)                            | 3.4<br>(-0.4 to 7.0)                                |
| Pulmonary aspiration and foreign body in airway                                     | 39.8<br>(29.8 to 53.7)                  | 17.9<br>(14.8 to 21.8)                | 1.8<br>(1.1 to 2.6)                | 25.6<br>(19.4 to 31.8)                            | -0.7<br>(-4.3 to 2.6)                               |
| Foreign body in eyes                                                                | 3.9<br>(2.1 to 6.0)                     | 21.5<br>(16.6 to 28.6)                | 0.2<br>(0.1 to 0.4)                | 34.8<br>(28.7 to 40.6)                            | 4.3<br>(1.3 to 7.7)                                 |
| Foreign body in other body part                                                     | 41.8<br>(34.2 to 53.1)                  | 20.8<br>(17.4 to 24.6)                | 1.3<br>(0.8 to 1.9)                | 40.8<br>(32.6 to 48.2)                            | 8.9<br>(4.2 to 13.4)                                |
| Environmental heat and cold exposure                                                | 63.3<br>(53.5 to 74.3)                  | 21.5<br>(17.6 to 26.3)                | 2.4<br>(1.6 to 3.6)                | 33.4<br>(28.4 to 38.7)                            | 1.3<br>(-1.4 to 4.0)                                |
| Other unintentional injuries                                                        | 125.0<br>(99.6 to 154.6)                | 54.9<br>(45.6 to 65.9)                | 3.6<br>(2.3 to 5.3)                | 57.1<br>(52.0 to 62.2)                            | 20.7<br>(18.0 to 23.2)                              |
| <b>Self-harm and interpersonal violence</b>                                         | <b>191.2</b><br><b>(172.2 to 212.0)</b> | <b>32.5†</b><br><b>(27.6 to 38.5)</b> | <b>3.3</b><br><b>(2.3 to 4.7)</b>  | <b>26.0</b><br><b>(22.5 to 29.4)</b>              | <b>-2.6</b><br><b>(-4.5 to -0.8)</b>                |
| Self-harm                                                                           | 5.5<br>(4.7 to 6.5)                     | 2.8<br>(2.3 to 3.3)                   | 0.3<br>(0.2 to 0.4)                | 42.7<br>(36.5 to 48.6)                            | 5.3<br>(1.9 to 8.6)                                 |
| Self-harm by firearm                                                                | 0.2<br>(0.2 to 0.2)                     | 0.1<br>(< 0.05 to 0.1)                | < 0.05<br>(< 0.05 to < 0.05)       | 1.5<br>(-2.7 to 6.0)                              | -29.1<br>(-31.5 to -26.4)                           |
| Self-harm by other specified means                                                  | 5.4<br>(4.5 to 6.2)                     | 2.7<br>(2.3 to 3.3)                   | 0.3<br>(0.2 to 0.4)                | 44.2<br>(38.0 to 50.4)                            | 6.8<br>(3.3 to 10.3)                                |
| Interpersonal violence                                                              | 185.7<br>(166.7 to 206.1)               | 29.7†<br>(24.9 to 35.5)               | 3.0<br>(2.1 to 4.2)                | 24.7<br>(21.0 to 28.1)                            | -3.4<br>(-5.3 to -1.5)                              |
| Assault by firearm                                                                  | 0.7<br>(0.6 to 0.8)                     | 0.2<br>(0.2 to 0.4)                   | < 0.05<br>(< 0.05 to < 0.05)       | 17.6<br>(12.8 to 22.9)                            | -13.6<br>(-16.2 to -10.9)                           |
| Assault by sharp object                                                             | 12.1<br>(9.9 to 14.5)                   | 5.7<br>(4.3 to 7.5)                   | 0.4<br>(0.2 to 0.6)                | 25.4<br>(20.4 to 30.3)                            | -6.3<br>(-9.2 to -3.4)                              |
| Sexual violence                                                                     | 137.7<br>(119.4 to 157.8)               | --                                    | 1.2<br>(0.8 to 1.7)                | 14.3<br>(8.8 to 19.9)                             | -5.1<br>(-8.9 to -1.0)                              |
| Assault by other means                                                              | 35.2<br>(29.3 to 42.6)                  | 23.7<br>(19.6 to 28.5)                | 1.5<br>(1.0 to 2.1)                | 34.2<br>(30.0 to 38.1)                            | -1.3<br>(-3.6 to 0.7)                               |
| <b>Forces of nature, conflict and terrorism, and executions and police conflict</b> | <b>162.6</b><br><b>(97.2 to 250.1)</b>  | <b>0.2†</b><br><b>(0.2 to 0.3)</b>    | <b>4.4</b><br><b>(1.2 to 10.3)</b> | <b>-13.8</b><br><b>(-22.7 to -7.1)</b>            | <b>-22.7</b><br><b>(-29.2 to -17.8)</b>             |
| Exposure to forces of nature                                                        | 14.6<br>(5.6 to 25.8)                   | --                                    | 0.5<br>(0.1 to 1.2)                | -11.8<br>(-21.9 to -7.2)                          | -23.0<br>(-29.5 to -19.7)                           |
| Conflict and terrorism                                                              | 147.5<br>(85.7 to 233.5)                | --                                    | 3.9<br>(1.1 to 9.0)                | -14.2<br>(-23.3 to -6.8)                          | -22.7<br>(-29.4 to -17.5)                           |
| Executions and police conflict                                                      | 0.5<br>(0.3 to 0.9)                     | 0.2<br>(0.2 to 0.3)                   | < 0.05<br>(< 0.05 to < 0.05)       | 33.4<br>(24.5 to 41.0)                            | 14.9<br>(8.6 to 20.2)                               |
| <b>Impairments</b>                                                                  | --                                      | --                                    | --                                 | --                                                | --                                                  |
| Anaemia                                                                             | 2,415.2<br>(2,217.1 to 2,595.7)         | --                                    | 65.2<br>(43.0 to 95.3)             | 9.9<br>(-0.5 to 20.4)                             | -12.2<br>(-19.1 to -5.5)                            |
| Developmental intellectual disability                                               | 247.3<br>(195.3 to 300.8)               | --                                    | 24.9<br>(18.0 to 33.0)             | 19.2<br>(13.5 to 25.6)                            | -3.0<br>(-7.3 to 2.1)                               |
| Epilepsy                                                                            | 51.5<br>(24.9 to 82.6)                  | --                                    | 18.8<br>(8.5 to 33.0)              | 11.8<br>(-50.7 to 170.8)                          | -8.2<br>(-60.7 to 127.7)                            |
| Guillain-Barre syndrome                                                             | 0.1<br>(0.1 to 0.1)                     | --                                    | < 0.05<br>(< 0.05 to < 0.05)       | 26.3<br>(21.0 to 32.6)                            | 0.1<br>(-0.0 to 0.2)                                |
| Hearing loss                                                                        | 1,077.5<br>(1,021.1 to 1,138.1)         | --                                    | 39.4<br>(27.4 to 53.5)             | 25.1<br>(21.4 to 28.5)                            | -2.8<br>(-4.6 to -1.0)                              |
| Heart failure                                                                       | 53.2<br>(46.7 to 60.1)                  | --                                    | 5.2<br>(3.8 to 6.8)                | 33.2<br>(23.2 to 44.4)                            | -0.2<br>(-7.0 to 7.0)                               |
| Infertility                                                                         | 100.9<br>(90.5 to 113.5)                | --                                    | 0.7<br>(0.3 to 1.3)                | 21.8<br>(5.4 to 40.7)                             | -8.3<br>(-21.0 to 7.0)                              |
| Pelvic inflammatory disease                                                         | 5.1<br>(4.3 to 6.2)                     | --                                    | 0.7<br>(0.4 to 1.0)                | 25.7<br>(7.9 to 46.5)                             | -6.4<br>(-18.8 to 7.6)                              |
| Vision loss                                                                         | 1,127.7<br>(1,077.9 to 1,178.2)         | --                                    | 28.2<br>(19.1 to 41.3)             | 28.8<br>(24.9 to 33.2)                            | -2.4<br>(-4.6 to 0.1)                               |

We did not calculate incidence for the nine impairments, certain NTDs, and causes with only birth prevalence. Blank cells mean that no estimate is available.

† Incidence for aggregate causes represents the sum of the incidence of the causes below the aggregate.

‡ Incidence estimates for stroke represent first-ever stroke only.

^ Incidence of HIV/AIDS represents new infections of HIV only and does not include new infections of Tuberculosis in HIV positive cases.



SR Table 14: Prevalence, incidence, and YLDs for 2016, percentage change of YLD counts and percentage change of age-standardised YLD rates between 2006 and 2016 by cause and impairments, for all ages, Tanzania.

| Cause                                                                                | Prevalence in thousands (95% UI)          | Incidence in thousands (95% UI)               | YLDs in thousands (95% UI)             |                                                   |                                                     |
|--------------------------------------------------------------------------------------|-------------------------------------------|-----------------------------------------------|----------------------------------------|---------------------------------------------------|-----------------------------------------------------|
|                                                                                      | 2016 counts                               | 2016 counts                                   | 2016 counts                            | Percentage change in counts between 2006 and 2016 | Percentage change in age-standardised rates between |
| <b>All causes</b>                                                                    | <b>53,197.9</b><br>(53,073.2 to 53,334.3) | <b>377,510.1†</b><br>(355,426.0 to 401,538.1) | <b>4,789.3</b><br>(3,527.0 to 6,302.2) | <b>26.4</b><br>(21.7 to 30.8)                     | <b>-7.2</b><br>(-11.0 to -4.3)                      |
| <b>Communicable, maternal, neonatal, and nutritional disorders</b>                   | <b>46,558.2</b><br>(45,968.0 to 47,173.8) | <b>237,054.9†</b><br>(215,550.4 to 258,442.7) | <b>1,276.9</b><br>(901.0 to 1,752.5)   | <b>2.0</b><br>(-7.4 to 8.7)                       | <b>-27.8</b><br>(-37.3 to -21.8)                    |
| <b>HIV/AIDS and tuberculosis</b>                                                     | <b>12,802.2</b><br>(11,998.6 to 13,480.0) | <b>164.7†</b><br>(134.8 to 202.0)             | <b>174.0</b><br>(121.1 to 234.9)       | <b>-28.5</b><br>(-49.2 to -4.8)                   | <b>-49.6</b><br>(-66.0 to -28.5)                    |
| Tuberculosis                                                                         | 11,294.2<br>(10,401.3 to 12,329.9)        | 88.1†<br>(72.5 to 106.5)                      | 18.7<br>(12.0 to 26.5)                 | 35.4<br>(18.2 to 59.9)                            | -4.8<br>(-14.8 to 9.0)                              |
| Drug-susceptible tuberculosis                                                        | 59.5<br>(47.3 to 72.8)                    | 86.9<br>(70.9 to 104.7)                       | 18.4<br>(11.8 to 26.3)                 | 35.2<br>(18.0 to 59.7)                            | -4.9<br>(-15.3 to 9.2)                              |
| Multidrug-resistant tuberculosis without extensive drug resistance                   | 0.8<br>(0.2 to 1.9)                       | 1.2<br>(0.4 to 2.7)                           | 0.3<br>(0.1 to 0.6)                    | 50.3<br>(-50.5 to 305.8)                          | 4.2<br>(-65.7 to 179.1)                             |
| Extensively drug-resistant tuberculosis                                              | < 0.05<br>(< 0.05 to < 0.05)              | < 0.05<br>(< 0.05 to < 0.05)                  | < 0.05<br>(< 0.05 to < 0.05)           | 358.1<br>(51.0 to 1,136.6)                        | 217.4<br>(4.7 to 750.1)                             |
| Latent tuberculosis infection                                                        | 11,233.9<br>(10,343.2 to 12,268.5)        | --                                            | --                                     | --                                                | --                                                  |
| HIV/AIDS                                                                             | 1,610.9<br>(1,453.5 to 1,777.9)           | 76.6^<br>(53.6 to 109.4)                      | 155.3<br>(107.5 to 211.7)              | -32.3<br>(-52.6 to -8.2)                          | -52.3<br>(-68.4 to -30.3)                           |
| Drug-susceptible HIV/AIDS - Tuberculosis                                             | 24.5<br>(16.0 to 34.9)                    | 34.1<br>(22.7 to 47.3)                        | 9.4<br>(5.2 to 15.0)                   | -30.4<br>(-42.3 to -18.6)                         | -45.4<br>(-54.3 to -36.7)                           |
| Multidrug-resistant HIV/AIDS - Tuberculosis without extensive drug resistance        | 0.4<br>(0.1 to 1.0)                       | 0.5<br>(0.2 to 1.3)                           | 0.2<br>(< 0.05 to 0.4)                 | -21.7<br>(-74.1 to 121.1)                         | -38.8<br>(-79.7 to 72.6)                            |
| Extensively drug-resistant HIV/AIDS - Tuberculosis                                   | < 0.05<br>(< 0.05 to < 0.05)              | < 0.05<br>(< 0.05 to < 0.05)                  | < 0.05<br>(< 0.05 to < 0.05)           | 138.8<br>(-21.0 to 573.6)                         | 86.5<br>(-38.2 to 426.2)                            |
| HIV/AIDS resulting in other diseases                                                 | 1,585.9<br>(1,428.8 to 1,753.7)           | 76.6<br>(53.6 to 109.4)                       | 145.8<br>(101.2 to 198.6)              | -32.4<br>(-53.1 to -6.2)                          | -52.7<br>(-69.0 to -29.4)                           |
| <b>Diarrhoea, lower respiratory infections, and other common infectious diseases</b> | <b>3,846.1</b><br>(3,657.2 to 4,069.1)    | <b>198,719.5†</b><br>(177,529.7 to 219,318.4) | <b>203.8</b><br>(143.1 to 277.9)       | <b>24.1</b><br>(19.6 to 28.2)                     | <b>-8.1</b><br>(-10.8 to -5.5)                      |
| Diarrhoeal diseases                                                                  | 675.9<br>(629.1 to 728.2)                 | 45,584.0<br>(42,321.5 to 49,246.7)            | 76.4<br>(52.4 to 104.1)                | 12.6<br>(6.0 to 19.6)                             | -15.1<br>(-19.2 to -10.8)                           |
| Intestinal infectious diseases                                                       | 4.1<br>(3.0 to 5.4)                       | 71.6†<br>(55.0 to 93.7)                       | 0.7<br>(0.4 to 1.0)                    | -4.9<br>(-23.3 to 18.9)                           | -30.5<br>(-41.2 to -17.5)                           |
| Typhoid fever                                                                        | 4.1<br>(3.0 to 5.4)                       | 64.0<br>(48.9 to 84.2)                        | 0.6<br>(0.4 to 1.0)                    | -4.0<br>(-23.6 to 21.6)                           | -30.2<br>(-41.4 to -16.6)                           |
| Paratyphoid fever                                                                    | 0.3<br>(0.2 to 0.5)                       | 7.5<br>(5.2 to 10.5)                          | < 0.05<br>(< 0.05 to < 0.05)           | 5.7<br>(-16.7 to 33.4)                            | -23.2<br>(-36.9 to -6.5)                            |
| Other intestinal infectious diseases                                                 | --                                        | --                                            | < 0.05<br>(< 0.05 to < 0.05)           | -36.4<br>(-54.2 to -10.5)                         | -49.0<br>(-60.7 to -33.5)                           |
| Lower respiratory infections                                                         | 74.2<br>(68.1 to 80.9)                    | 3,253.8<br>(2,958.1 to 3,568.2)               | 4.5<br>(3.0 to 6.4)                    | 14.3<br>(-0.0 to 29.7)                            | -12.8<br>(-21.3 to -4.0)                            |
| Upper respiratory infections                                                         | 1,897.3<br>(1,644.4 to 2,157.7)           | 142,962.1<br>(123,069.4 to 163,965.0)         | 47.4<br>(28.2 to 74.7)                 | 37.9<br>(28.9 to 48.3)                            | 1.5<br>(-4.3 to 8.4)                                |
| Otitis media                                                                         | 997.1<br>(890.6 to 1,115.2)               | 5,033.7<br>(3,902.6 to 6,449.3)               | 30.9<br>(19.2 to 46.5)                 | 24.0<br>(14.5 to 33.7)                            | -8.5<br>(-14.8 to -2.0)                             |
| Meningitis                                                                           | 256.5<br>(218.4 to 302.9)                 | 62.8<br>(54.2 to 75.6)                        | 27.8<br>(19.4 to 36.7)                 | 36.1<br>(24.9 to 48.7)                            | -0.9<br>(-8.0 to 6.3)                               |
| Pneumococcal meningitis                                                              | 87.2<br>(73.8 to 103.6)                   | 9.3<br>(7.2 to 12.4)                          | 10.7<br>(7.3 to 14.8)                  | 28.6<br>(9.3 to 49.8)                             | -7.9<br>(-19.9 to 4.7)                              |
| H influenzae type B meningitis                                                       | 43.4<br>(34.3 to 55.6)                    | 9.2<br>(6.3 to 13.4)                          | 5.9<br>(3.9 to 8.1)                    | 19.5<br>(0.7 to 42.6)                             | -12.9<br>(-24.8 to 0.9)                             |
| Meningococcal infection                                                              | 17.9<br>(13.0 to 24.4)                    | 6.3<br>(4.5 to 8.8)                           | 2.0<br>(1.4 to 2.8)                    | 39.1<br>(31.8 to 46.7)                            | 1.9<br>(-3.9 to 7.8)                                |
| Other meningitis                                                                     | 107.9<br>(79.1 to 140.9)                  | 37.9<br>(31.1 to 46.0)                        | 9.2<br>(6.3 to 12.7)                   | 60.3<br>(40.0 to 84.2)                            | 18.4<br>(6.3 to 32.6)                               |
| Encephalitis                                                                         | 126.8<br>(82.5 to 190.1)                  | 62.3<br>(54.1 to 71.6)                        | 13.8<br>(9.6 to 18.2)                  | 35.8<br>(19.3 to 55.4)                            | -0.6<br>(-11.2 to 11.3)                             |
| Diphtheria                                                                           | < 0.05<br>(< 0.05 to < 0.05)              | < 0.05<br>(< 0.05 to < 0.05)                  | < 0.05<br>(< 0.05 to < 0.05)           | -17.1<br>(-66.1 to 104.1)                         | -31.1<br>(-67.6 to 44.2)                            |
| Whooping cough                                                                       | 15.6<br>(12.2 to 19.9)                    | 114.1<br>(89.2 to 145.4)                      | 0.8<br>(0.4 to 1.2)                    | 12.1<br>(-11.2 to 40.3)                           | -11.0<br>(-29.8 to 11.9)                            |
| Tetanus                                                                              | 0.8<br>(0.7 to 0.9)                       | 1.6<br>(0.9 to 3.3)                           | < 0.05<br>(< 0.05 to < 0.05)           | -11.2<br>(-37.3 to 22.1)                          | -30.7<br>(-46.0 to -10.8)                           |
| Measles                                                                              | 1.1<br>(0.4 to 2.4)                       | 38.2<br>(12.7 to 88.4)                        | 0.1<br>(< 0.05 to 0.2)                 | -38.2<br>(-60.3 to -3.8)                          | -51.7<br>(-68.9 to -25.9)                           |
| Varicella and herpes zoster                                                          | 50.9<br>(47.5 to 54.6)                    | 1,535.3<br>(1,433.9 to 1,649.1)               | 1.5<br>(0.9 to 2.3)                    | 37.5<br>(18.0 to 60.2)                            | 0.3<br>(-10.4 to 12.8)                              |
| <b>Neglected tropical diseases and malaria</b>                                       | <b>27,450.2</b><br>(26,013.3 to 29,139.4) | <b>11,430.6†</b><br>(9,428.9 to 13,639.6)     | <b>285.1</b><br>(188.8 to 430.9)       | <b>-12.4</b><br>(-18.6 to -6.0)                   | <b>-36.6</b><br>(-41.7 to -31.6)                    |
| Malaria                                                                              | 5,013.7<br>(4,348.1 to 5,854.8)           | 6,739.5<br>(4,796.7 to 8,976.4)               | 56.6<br>(41.1 to 75.9)                 | -5.4<br>(-14.7 to 6.5)                            | -24.5<br>(-30.6 to -16.8)                           |
| Chagas disease                                                                       | --                                        | --                                            | --                                     | --                                                | --                                                  |
| Leishmaniasis                                                                        | --                                        | --                                            | --                                     | --                                                | --                                                  |
| Visceral leishmaniasis                                                               | --                                        | --                                            | --                                     | --                                                | --                                                  |
| Cutaneous and mucocutaneous leishmaniasis                                            | --                                        | --                                            | --                                     | --                                                | --                                                  |
| African trypanosomiasis                                                              | < 0.05<br>(< 0.05 to < 0.05)              | < 0.05<br>(< 0.05 to < 0.05)                  | < 0.05<br>(< 0.05 to < 0.05)           | -97.9<br>(-99.7 to -87.7)                         | -98.5<br>(-99.8 to -90.3)                           |
| Schistosomiasis                                                                      | 9,728.6<br>(8,951.4 to 10,522.2)          | 3,999.0<br>(3,673.9 to 4,352.0)               | 80.5<br>(40.2 to 150.7)                | -35.9<br>(-38.7 to -32.2)                         | -53.5<br>(-55.5 to -50.7)                           |
| Cysticercosis                                                                        | 20.0<br>(14.7 to 26.1)                    | --                                            | 3.5<br>(1.9 to 5.7)                    | 18.3<br>(-15.0 to 52.7)                           | -13.8<br>(-36.9 to 9.2)                             |
| Cystic echinococcosis                                                                | 9.9<br>(2.0 to 38.1)                      | 2.1<br>(0.4 to 8.0)                           | 0.9<br>(0.2 to 3.7)                    | -32.2<br>(-91.9 to 410.9)                         | -50.8<br>(-93.5 to 198.4)                           |
| Lymphatic filariasis                                                                 | 880.4<br>(740.6 to 1,058.8)               | 342.3<br>(296.9 to 389.9)                     | 38.0<br>(19.6 to 62.0)                 | -10.5<br>(-39.8 to 9.9)                           | -33.5<br>(-54.9 to -18.9)                           |
| Onchocerciasis                                                                       | 202.1<br>(116.9 to 314.9)                 | 50.9<br>(22.3 to 108.2)                       | 15.5<br>(5.9 to 30.7)                  | -31.8<br>(-59.6 to 4.8)                           | -48.8<br>(-69.5 to -19.6)                           |
| Trachoma                                                                             | 30.7<br>(21.8 to 41.9)                    | --                                            | 2.6<br>(1.7 to 3.8)                    | 17.6<br>(-5.7 to 47.3)                            | -18.2<br>(-38.0 to 5.5)                             |
| Dengue                                                                               | 17.6<br>(8.1 to 32.1)                     | 294.4<br>(149.4 to 505.8)                     | 2.9<br>(1.0 to 6.1)                    | 193.4<br>(95.2 to 641.9)                          | 112.9<br>(50.1 to 430.6)                            |
| Yellow fever                                                                         | < 0.05<br>(< 0.05 to 0.1)                 | 1.2<br>(0.3 to 3.1)                           | < 0.05<br>(< 0.05 to < 0.05)           | -31.8<br>(-48.8 to -8.0)                          | -50.2<br>(-61.0 to -37.7)                           |
| Rabies                                                                               | < 0.05<br>(< 0.05 to < 0.05)              | 0.5<br>(0.2 to 1.2)                           | < 0.05<br>(< 0.05 to < 0.05)           | 0.4<br>(-52.1 to 89.8)                            | -25.1<br>(-61.0 to 24.3)                            |
| Intestinal nematode infections                                                       | 18,128.5<br>(16,144.2 to 20,517.5)        | --                                            | 61.3<br>(36.4 to 96.4)                 | 35.3<br>(23.1 to 48.7)                            | -0.2<br>(-9.9 to 11.1)                              |
| Ascariasis                                                                           | 2,355.8<br>(1,839.0 to 3,027.3)           | --                                            | 0.4<br>(0.2 to 0.7)                    | 35.9<br>(3.6 to 76.9)                             | 0.1<br>(-21.8 to 29.1)                              |

| Cause                                                                   | Prevalence in thousands (95% UI)                 | Incidence in thousands (95% UI)                      | YLDs in thousands (95% UI)                    |                                                   |                                                     |
|-------------------------------------------------------------------------|--------------------------------------------------|------------------------------------------------------|-----------------------------------------------|---------------------------------------------------|-----------------------------------------------------|
|                                                                         | 2016 counts                                      | 2016 counts                                          | 2016 counts                                   | Percentage change in counts between 2006 and 2016 | Percentage change in age-standardised rates between |
| Trichuriasis                                                            | 4,543.9<br>(3,488.4 to 5,747.1)                  | --                                                   | 2.9<br>(1.5 to 4.8)                           | 37.8<br>(15.2 to 63.0)                            | 0.5<br>(-17.8 to 23.1)                              |
| Hookworm disease                                                        | 13,482.8<br>(11,230.8 to 16,336.6)               | --                                                   | 58.1<br>(34.4 to 91.0)                        | 35.1<br>(21.9 to 49.1)                            | -0.3<br>(-10.5 to 11.7)                             |
| Food-borne trematodiasis                                                | --                                               | --                                                   | --                                            | --                                                | --                                                  |
| Leprosy                                                                 | 9.0<br>(8.5 to 9.6)                              | 0.7<br>(0.7 to 0.7)                                  | 0.6<br>(0.4 to 0.8)                           | 12.2<br>(-6.1 to 34.4)                            | -16.9<br>(-28.1 to -3.7)                            |
| Ebola virus disease                                                     | --                                               | --                                                   | --                                            | --                                                | --                                                  |
| Zika virus disease                                                      | --                                               | --                                                   | --                                            | --                                                | --                                                  |
| Guinea worm disease                                                     | --                                               | --                                                   | --                                            | --                                                | --                                                  |
| Other neglected tropical diseases                                       | 745.9<br>(714.5 to 779.8)                        | --                                                   | 22.5<br>(14.7 to 33.5)                        | 6.1<br>(-4.1 to 17.2)                             | -19.3<br>(-26.9 to -11.4)                           |
| <b>Maternal disorders</b>                                               | <b>156.6</b><br><b>(126.2 to 190.6)</b>          | <b>2,378.8†</b><br><b>(1,645.1 to 3,307.6)</b>       | <b>20.9</b><br><b>(14.2 to 28.9)</b>          | <b>-1.7</b><br><b>(-16.1 to 16.1)</b>             | <b>-29.8</b><br><b>(-39.3 to -17.7)</b>             |
| Maternal haemorrhage                                                    | 12.7<br>(9.7 to 17.0)                            | 173.1<br>(115.1 to 256.5)                            | 0.8<br>(0.4 to 1.4)                           | 24.5<br>(-21.9 to 105.0)                          | -7.7<br>(-40.9 to 51.6)                             |
| Maternal sepsis and other pregnancy related infections                  | 22.2<br>(17.9 to 27.5)                           | 92.3<br>(69.8 to 128.0)                              | 0.4<br>(0.2 to 0.8)                           | 23.0<br>(-37.5 to 153.6)                          | -9.3<br>(-51.5 to 74.7)                             |
| Maternal hypertensive disorders                                         | 76.9<br>(48.8 to 110.4)                          | 326.8<br>(255.3 to 406.6)                            | 3.7<br>(1.8 to 6.1)                           | 60.1<br>(-4.2 to 179.0)                           | 18.8<br>(-29.5 to 105.2)                            |
| Maternal obstructed labour and uterine rupture                          | 34.8<br>(29.1 to 41.1)                           | 143.1<br>(101.6 to 195.5)                            | 11.3<br>(7.4 to 16.3)                         | -15.0<br>(-28.3 to 0.4)                           | -38.8<br>(-47.9 to -28.5)                           |
| Maternal abortion, miscarriage, and ectopic pregnancy                   | 13.5<br>(6.7 to 22.9)                            | 1,643.7<br>(928.2 to 2,588.3)                        | 1.5<br>(0.6 to 2.7)                           | 19.2<br>(-28.6 to 102.1)                          | -12.6<br>(-47.5 to 48.1)                            |
| Other maternal disorders                                                | --                                               | --                                                   | 3.2<br>(2.2 to 4.5)                           | -6.2<br>(-19.9 to 11.0)                           | -33.1<br>(-42.2 to -21.5)                           |
| <b>Neonatal disorders</b>                                               | <b>672.7</b><br><b>(539.6 to 828.6)</b>          | --                                                   | <b>104.0</b><br><b>(58.0 to 176.3)</b>        | <b>60.3</b><br><b>(22.9 to 97.5)</b>              | <b>26.8</b><br><b>(-3.8 to 57.3)</b>                |
| Neonatal preterm birth complications                                    | 408.5<br>(312.6 to 541.4)                        | --                                                   | 27.6<br>(17.9 to 42.2)                        | 24.7<br>(-2.0 to 59.8)                            | -5.1<br>(-25.0 to 20.3)                             |
| Neonatal encephalopathy due to birth asphyxia and trauma                | 213.7<br>(114.2 to 382.8)                        | --                                                   | 20.6<br>(3.8 to 62.0)                         | 94.2<br>(-13.4 to 230.6)                          | 54.2<br>(-32.1 to 168.1)                            |
| Neonatal sepsis and other neonatal infections                           | 110.7<br>(44.7 to 248.2)                         | --                                                   | 43.1<br>(12.9 to 109.0)                       | 92.6<br>(8.2 to 234.6)                            | 58.3<br>(-11.7 to 204.6)                            |
| Hemolytic disease and other neonatal jaundice                           | 13.4<br>(11.5 to 15.6)                           | --                                                   | 4.4<br>(3.2 to 5.8)                           | 26.6<br>(9.8 to 46.6)                             | -4.2<br>(-14.6 to 8.0)                              |
| Other neonatal disorders                                                | --                                               | --                                                   | 8.4<br>(4.9 to 13.9)                          | 32.9<br>(5.3 to 63.8)                             | 6.1<br>(-16.2 to 31.4)                              |
| <b>Nutritional deficiencies</b>                                         | <b>22,305.4</b><br><b>(21,174.3 to 23,567.9)</b> | <b>13,322.4†</b><br><b>(10,833.5 to 16,812.6)</b>    | <b>438.7</b><br><b>(289.1 to 635.2)</b>       | <b>11.7</b><br><b>(5.1 to 18.0)</b>               | <b>-15.3</b><br><b>(-19.0 to -11.8)</b>             |
| Protein-energy malnutrition                                             | 473.5<br>(367.0 to 608.4)                        | 333.0<br>(264.4 to 421.2)                            | 16.3<br>(9.9 to 24.5)                         | 8.4<br>(-20.7 to 48.5)                            | -13.8<br>(-37.2 to 18.5)                            |
| Iodine deficiency                                                       | 1,485.8<br>(1,244.6 to 1,757.1)                  | 60.0<br>(50.5 to 71.1)                               | 41.4<br>(26.8 to 59.5)                        | 18.0<br>(6.6 to 29.6)                             | -13.3<br>(-21.5 to -6.1)                            |
| Vitamin A deficiency                                                    | 11,723.7<br>(10,152.8 to 13,896.5)               | 12,929.4<br>(10,441.6 to 16,468.1)                   | 2.3<br>(1.3 to 3.6)                           | 26.2<br>(2.7 to 54.1)                             | -6.7<br>(-23.6 to 13.1)                             |
| Iron-deficiency anaemia                                                 | 12,843.8<br>(12,427.0 to 13,291.8)               | --                                                   | 378.2<br>(247.8 to 557.2)                     | 11.2<br>(4.2 to 18.0)                             | -15.6<br>(-19.7 to -11.8)                           |
| Other nutritional deficiencies                                          | --                                               | --                                                   | 0.5<br>(0.3 to 0.8)                           | 6.0<br>(-23.6 to 47.3)                            | -15.7<br>(-39.5 to 17.6)                            |
| <b>Other communicable, maternal, neonatal, and nutritional diseases</b> | <b>17,211.7</b><br><b>(16,171.3 to 18,223.8)</b> | <b>11,038.8</b><br><b>(9,297.0 to 13,683.9)</b>      | <b>50.3</b><br><b>(31.7 to 77.2)</b>          | <b>26.4</b><br><b>(17.2 to 35.0)</b>              | <b>-4.4</b><br><b>(-10.7 to 1.8)</b>                |
| Sexually transmitted diseases excluding HIV                             | 14,084.5<br>(13,128.4 to 15,095.3)               | 7,335.1<br>(6,740.7 to 7,943.9)                      | 30.0<br>(18.4 to 48.8)                        | 38.7<br>(26.9 to 50.8)                            | 0.9<br>(-7.1 to 8.8)                                |
| Syphilis                                                                | 877.0<br>(725.1 to 1,036.5)                      | 609.2<br>(491.9 to 738.9)                            | 1.8<br>(1.2 to 2.4)                           | 36.8<br>(17.0 to 58.7)                            | -1.5<br>(-16.8 to 15.6)                             |
| Chlamydial infection                                                    | 1,078.3<br>(857.6 to 1,322.7)                    | 826.4<br>(669.9 to 1,003.3)                          | 6.7<br>(3.9 to 10.6)                          | 36.5<br>(19.8 to 53.5)                            | 0.8<br>(-11.3 to 12.9)                              |
| Gonococcal infection                                                    | 610.9<br>(524.5 to 707.7)                        | 1,993.5<br>(1,707.5 to 2,330.6)                      | 5.3<br>(3.1 to 8.3)                           | 38.6<br>(7.4 to 79.4)                             | 0.8<br>(-21.1 to 28.8)                              |
| Trichomoniasis                                                          | 2,256.6<br>(1,918.9 to 2,641.5)                  | 2,130.3<br>(1,779.3 to 2,537.9)                      | 3.1<br>(1.2 to 6.5)                           | 48.5<br>(32.7 to 72.4)                            | 7.8<br>(-1.9 to 22.7)                               |
| Genital herpes                                                          | 11,236.2<br>(9,623.5 to 13,052.1)                | 1,282.0<br>(1,047.0 to 1,555.3)                      | 3.0<br>(1.0 to 6.9)                           | 28.2<br>(15.3 to 40.9)                            | -6.0<br>(-14.3 to 1.9)                              |
| Other sexually transmitted diseases                                     | 519.8<br>(428.8 to 587.6)                        | 493.7<br>(408.5 to 598.5)                            | 10.1<br>(6.5 to 15.6)                         | 41.2<br>(25.6 to 57.5)                            | 2.5<br>(-8.3 to 14.2)                               |
| Hepatitis                                                               | 3,920.9<br>(3,325.7 to 4,648.1)                  | 3,703.6<br>(2,123.6 to 6,342.8)                      | 3.4<br>(2.0 to 5.3)                           | -1.9<br>(-28.3 to 33.5)                           | -18.0<br>(-34.0 to 1.8)                             |
| Acute hepatitis A                                                       | 122.4<br>(13.6 to 319.3)                         | 1,590.8<br>(177.2 to 4,150.6)                        | 0.8<br>(0.2 to 1.6)                           | -7.4<br>(-75.4 to 306.4)                          | -22.6<br>(-71.1 to 128.1)                           |
| Hepatitis B                                                             | 3,111.8<br>(2,541.0 to 3,820.0)                  | 1,936.2<br>(1,483.1 to 2,496.2)                      | 2.4<br>(1.4 to 3.8)                           | -0.9<br>(-20.2 to 21.9)                           | -17.4<br>(-32.3 to -0.5)                            |
| Hepatitis C                                                             | 679.2<br>(597.3 to 762.2)                        | 78.4<br>(71.9 to 85.2)                               | 0.1<br>(< 0.05 to 0.1)                        | 21.5<br>(19.4 to 23.7)                            | -5.3<br>(-9.0 to -1.7)                              |
| Acute hepatitis E                                                       | 7.6<br>(6.6 to 8.7)                              | 98.2<br>(85.6 to 113.1)                              | 0.2<br>(0.1 to 0.2)                           | 2.2<br>(-24.3 to 40.4)                            | -15.4<br>(-32.7 to 4.7)                             |
| Other infectious diseases                                               | 550.0<br>(528.9 to 572.8)                        | 0.1<br>(< 0.05 to 0.1)                               | 16.9<br>(11.0 to 24.8)                        | 14.9<br>(4.4 to 26.8)                             | -13.4<br>(-20.6 to -5.9)                            |
| <b>Non-communicable diseases</b>                                        | <b>47,837.3</b><br><b>(47,455.9 to 48,220.6)</b> | <b>136,330.9†</b><br><b>(126,930.2 to 146,308.1)</b> | <b>3,246.3</b><br><b>(2,379.3 to 4,242.5)</b> | <b>38.2</b><br><b>(32.3 to 44.1)</b>              | <b>0.3</b><br><b>(-2.7 to 3.1)</b>                  |
| <b>Neoplasms</b>                                                        | <b>71.2</b><br><b>(64.8 to 78.4)</b>             | <b>31.9</b><br><b>(26.7 to 35.9)</b>                 | <b>10.7</b><br><b>(7.3 to 14.6)</b>           | <b>41.6</b><br><b>(32.9 to 51.0)</b>              | <b>1.9</b><br><b>(-4.2 to 8.3)</b>                  |
| Lip and oral cavity cancer                                              | 1.9<br>(1.7 to 2.1)                              | 0.6<br>(0.5 to 0.6)                                  | 0.2<br>(0.2 to 0.3)                           | 48.3<br>(28.4 to 69.5)                            | 5.0<br>(-11.2 to 23.4)                              |
| Nasopharynx cancer                                                      | 1.2<br>(1.0 to 1.5)                              | 0.4<br>(0.3 to 0.5)                                  | 0.1<br>(0.1 to 0.2)                           | 39.9<br>(20.4 to 63.4)                            | -0.2<br>(-13.7 to 15.1)                             |
| Other pharynx cancer                                                    | 0.6<br>(0.5 to 0.7)                              | 0.3<br>(0.2 to 0.3)                                  | 0.1<br>(0.1 to 0.1)                           | 38.0<br>(20.0 to 56.1)                            | 0.2<br>(-12.7 to 13.7)                              |
| Oesophageal cancer                                                      | 0.8<br>(0.7 to 0.9)                              | 0.8<br>(0.8 to 0.9)                                  | 0.2<br>(0.1 to 0.3)                           | 33.5<br>(12.3 to 56.7)                            | -5.7<br>(-23.2 to 12.7)                             |
| Stomach cancer                                                          | 1.8<br>(1.6 to 2.1)                              | 1.3<br>(1.1 to 1.5)                                  | 0.3<br>(0.2 to 0.5)                           | 19.7<br>(4.6 to 37.1)                             | -14.2<br>(-26.3 to 0.1)                             |
| Colon and rectum cancer                                                 | 4.0<br>(3.3 to 4.5)                              | 1.6<br>(1.3 to 1.8)                                  | 0.5<br>(0.4 to 0.7)                           | 51.9<br>(25.3 to 77.2)                            | 5.6<br>(-12.6 to 23.7)                              |
| Liver cancer                                                            | 0.6<br>(0.5 to 0.8)                              | 1.6<br>(1.3 to 2.0)                                  | 0.4<br>(0.2 to 0.5)                           | 38.6<br>(23.0 to 55.9)                            | -0.6<br>(-11.8 to 12.0)                             |
| Liver cancer due to hepatitis B                                         | 0.5<br>(0.3 to 0.7)                              | 0.5<br>(0.4 to 0.7)                                  | 0.1<br>(0.1 to 0.2)                           | 37.4<br>(20.8 to 56.9)                            | -1.1<br>(-13.0 to 12.5)                             |



| Cause                                              | Prevalence in thousands (95% UI)              | Incidence in thousands (95% UI)          | YLDs in thousands (95% UI)              |                                                   |                                                     |
|----------------------------------------------------|-----------------------------------------------|------------------------------------------|-----------------------------------------|---------------------------------------------------|-----------------------------------------------------|
|                                                    | 2016 counts                                   | 2016 counts                              | 2016 counts                             | Percentage change in counts between 2006 and 2016 | Percentage change in age-standardised rates between |
| Liver cancer due to hepatitis C                    | 0.4<br>(0.3 to 0.6)                           | 0.5<br>(0.3 to 0.6)                      | 0.1<br>(0.1 to 0.1)                     | 40.8<br>(23.3 to 60.7)                            | 0.3<br>(-12.2 to 14.5)                              |
| Liver cancer due to alcohol use                    | 0.3<br>(0.2 to 0.4)                           | 0.3<br>(0.2 to 0.4)                      | 0.1<br>( $< 0.05$ to 0.1)               | 38.8<br>(21.1 to 57.6)                            | -0.7<br>(-13.7 to 13.1)                             |
| Liver cancer due to other causes                   | 0.3<br>(0.2 to 0.4)                           | 0.4<br>(0.3 to 0.5)                      | 0.1<br>( $< 0.05$ to 0.1)               | 37.4<br>(21.3 to 55.3)                            | -1.2<br>(-13.3 to 12.8)                             |
| Gallbladder and biliary tract cancer               | 0.1<br>(0.1 to 0.2)                           | 0.2<br>(0.2 to 0.2)                      | $< 0.05$<br>( $< 0.05$ to 0.1)          | 32.4<br>(20.8 to 44.8)                            | -5.7<br>(-13.4 to 2.5)                              |
| Pancreatic cancer                                  | 0.6<br>(0.5 to 0.6)                           | 0.8<br>(0.7 to 0.8)                      | 0.2<br>(0.1 to 0.2)                     | 48.6<br>(36.1 to 61.5)                            | 5.2<br>(-4.1 to 15.1)                               |
| Larynx cancer                                      | 0.8<br>(0.7 to 1.0)                           | 0.3<br>(0.2 to 0.3)                      | 0.1<br>(0.1 to 0.2)                     | 41.5<br>(22.1 to 62.4)                            | 1.3<br>(-12.2 to 15.7)                              |
| Tracheal, bronchus, and lung cancer                | 1.3<br>(1.1 to 1.4)                           | 1.2<br>(1.1 to 1.3)                      | 0.3<br>(0.2 to 0.4)                     | 57.5<br>(27.7 to 95.6)                            | 11.1<br>(-11.6 to 41.0)                             |
| Malignant skin melanoma                            | 1.1<br>(0.8 to 1.3)                           | 0.3<br>(0.2 to 0.4)                      | 0.1<br>(0.1 to 0.1)                     | 54.1<br>(30.0 to 83.7)                            | 9.2<br>(-7.9 to 30.8)                               |
| Non-melanoma skin cancer                           | 0.2<br>(0.1 to 0.3)                           | 1.4<br>(1.0 to 2.1)                      | $< 0.05$<br>( $< 0.05$ to $< 0.05$ )    | 52.9<br>(22.5 to 92.7)                            | 4.6<br>(-18.4 to 35.7)                              |
| Non-melanoma skin cancer (squamous-cell carcinoma) | 0.2<br>(0.1 to 0.2)                           | 0.4<br>(0.3 to 0.5)                      | $< 0.05$<br>( $< 0.05$ to $< 0.05$ )    | 54.0<br>(17.6 to 101.6)                           | 4.7<br>(-21.7 to 41.3)                              |
| Non-melanoma skin cancer (basal-cell carcinoma)    | 0.1<br>(0.1 to 0.3)                           | 1.0<br>(0.6 to 1.7)                      | $< 0.05$<br>( $< 0.05$ to $< 0.05$ )    | 47.4<br>(31.9 to 61.5)                            | 4.4<br>(-7.6 to 15.6)                               |
| Breast cancer                                      | 7.6<br>(5.7 to 10.0)                          | 1.8<br>(1.4 to 2.4)                      | 0.8<br>(0.5 to 1.3)                     | 52.2<br>(13.8 to 94.2)                            | 7.9<br>(-18.8 to 37.1)                              |
| Cervical cancer                                    | 18.8<br>(11.5 to 25.8)                        | 5.3<br>(3.4 to 7.1)                      | 1.9<br>(1.1 to 2.9)                     | 28.1<br>(1.0 to 59.4)                             | -8.4<br>(-26.6 to 13.6)                             |
| Uterine cancer                                     | 2.1<br>(1.8 to 2.6)                           | 0.5<br>(0.4 to 0.6)                      | 0.2<br>(0.1 to 0.3)                     | 40.2<br>(13.7 to 71.4)                            | 0.2<br>(-18.9 to 22.3)                              |
| Ovarian cancer                                     | 3.2<br>(2.2 to 3.8)                           | 1.1<br>(0.8 to 1.3)                      | 0.5<br>(0.3 to 0.7)                     | 57.3<br>(20.6 to 105.2)                           | 11.6<br>(-17.0 to 51.5)                             |
| Prostate cancer                                    | 11.3<br>(4.1 to 15.7)                         | 3.4<br>(1.4 to 4.7)                      | 1.6<br>(0.5 to 2.6)                     | 56.5<br>(24.4 to 88.5)                            | 9.4<br>(-12.0 to 30.8)                              |
| Testicular cancer                                  | 0.1<br>(0.1 to 0.1)                           | $< 0.05$<br>( $< 0.05$ to $< 0.05$ )     | $< 0.05$<br>( $< 0.05$ to $< 0.05$ )    | 36.5<br>(9.8 to 70.4)                             | -2.2<br>(-21.9 to 21.0)                             |
| Kidney cancer                                      | 2.7<br>(1.9 to 3.6)                           | 0.6<br>(0.5 to 0.8)                      | 0.2<br>(0.1 to 0.3)                     | 44.0<br>(-0.1 to 110.3)                           | 11.0<br>(-8.0 to 33.5)                              |
| Bladder cancer                                     | 1.8<br>(1.5 to 2.1)                           | 0.6<br>(0.5 to 0.6)                      | 0.2<br>(0.1 to 0.3)                     | 50.2<br>(30.1 to 69.3)                            | 5.1<br>(-8.2 to 19.5)                               |
| Brain and nervous system cancer                    | 1.5<br>(1.3 to 1.8)                           | 0.7<br>(0.6 to 0.8)                      | 0.2<br>(0.1 to 0.3)                     | 45.1<br>(28.0 to 67.1)                            | 8.7<br>(-5.5 to 31.6)                               |
| Thyroid cancer                                     | 1.9<br>(1.0 to 2.5)                           | 0.4<br>(0.2 to 0.5)                      | 0.1<br>(0.1 to 0.2)                     | 46.0<br>(18.8 to 77.7)                            | 1.1<br>(-17.4 to 22.6)                              |
| Mesothelioma                                       | 0.1<br>(0.1 to 0.1)                           | 0.1<br>( $< 0.05$ to 0.1)                | $< 0.05$<br>( $< 0.05$ to $< 0.05$ )    | 37.6<br>(22.0 to 56.0)                            | -0.4<br>(-12.8 to 13.6)                             |
| Hodgkin lymphoma                                   | 0.7<br>(0.3 to 0.9)                           | 0.2<br>(0.1 to 0.3)                      | 0.1<br>( $< 0.05$ to 0.1)               | 19.7<br>(3.3 to 43.2)                             | -10.9<br>(-19.4 to 0.2)                             |
| Non-Hodgkin's lymphoma                             | 7.0<br>(4.4 to 8.8)                           | 2.3<br>(1.5 to 2.8)                      | 0.7<br>(0.4 to 1.1)                     | 40.9<br>(17.6 to 69.4)                            | 4.0<br>(-7.9 to 18.4)                               |
| Multiple myeloma                                   | 0.6<br>(0.4 to 0.8)                           | 0.4<br>(0.3 to 0.5)                      | 0.2<br>(0.1 to 0.2)                     | 50.4<br>(33.4 to 71.8)                            | 8.3<br>(-4.5 to 24.4)                               |
| Leukaemia                                          | 2.4<br>(1.9 to 3.0)                           | 0.7<br>(0.6 to 0.9)                      | 0.3<br>(0.2 to 0.5)                     | 28.1<br>(13.5 to 42.3)                            | -5.9<br>(-15.6 to 3.6)                              |
| Acute lymphoid leukaemia                           | 0.7<br>(0.5 to 0.9)                           | 0.2<br>(0.1 to 0.2)                      | 0.1<br>(0.1 to 0.1)                     | 27.9<br>(6.0 to 53.1)                             | -4.1<br>(-15.6 to 9.3)                              |
| Chronic lymphoid leukaemia                         | 0.3<br>(0.2 to 0.4)                           | 0.1<br>(0.1 to 0.1)                      | $< 0.05$<br>( $< 0.05$ to 0.1)          | 39.8<br>(16.1 to 66.3)                            | -0.5<br>(-17.4 to 19.0)                             |
| Acute myeloid leukaemia                            | 0.3<br>(0.2 to 0.3)                           | 0.2<br>(0.1 to 0.2)                      | $< 0.05$<br>( $< 0.05$ to 0.1)          | 40.2<br>(20.8 to 61.2)                            | 5.5<br>(-7.2 to 18.1)                               |
| Chronic myeloid leukaemia                          | 0.2<br>(0.2 to 0.3)                           | 0.1<br>(0.1 to 0.1)                      | $< 0.05$<br>( $< 0.05$ to 0.1)          | 28.0<br>(4.5 to 53.8)                             | -7.0<br>(-23.1 to 10.9)                             |
| Other leukaemia                                    | 0.9<br>(0.7 to 1.2)                           | 0.2<br>(0.1 to 0.3)                      | 0.1<br>(0.1 to 0.2)                     | 19.9<br>(-0.2 to 40.8)                            | -11.9<br>(-25.4 to 1.6)                             |
| Other neoplasms                                    | 9.0<br>(8.0 to 10.0)                          | 3.1<br>(2.8 to 3.4)                      | 0.9<br>(0.7 to 1.2)                     | 34.3<br>(18.3 to 54.3)                            | -2.1<br>(-13.5 to 13.9)                             |
| <b>Cardiovascular diseases</b>                     | <b>2,288.3</b><br><b>(2,105.7 to 2,481.6)</b> | <b>185.0†</b><br><b>(177.2 to 193.1)</b> | <b>121.6</b><br><b>(85.4 to 166.3)</b>  | <b>46.3</b><br><b>(39.7 to 53.6)</b>              | <b>2.5</b><br><b>(-1.9 to 7.0)</b>                  |
| Rheumatic heart disease                            | 625.2<br>(551.7 to 704.6)                     | 28.3<br>(24.8 to 31.9)                   | 29.8<br>(18.7 to 44.0)                  | 59.9<br>(47.4 to 82.5)                            | 15.1<br>(6.2 to 29.0)                               |
| Ischaemic heart disease                            | 450.5<br>(425.9 to 474.5)                     | 66.8<br>(62.3 to 71.4)                   | 20.3<br>(13.7 to 28.1)                  | 47.8<br>(39.8 to 55.8)                            | 4.9<br>(-0.2 to 9.8)                                |
| Cerebrovascular disease                            | 99.8<br>(91.9 to 108.2)                       | 26.6‡<br>(24.3 to 28.9)                  | 14.7<br>(10.4 to 18.8)                  | 27.8<br>(14.4 to 42.9)                            | -10.1<br>(-20.1 to 1.2)                             |
| Ischaemic stroke                                   | 86.3<br>(75.9 to 98.8)                        | 17.8‡<br>(15.6 to 20.0)                  | 11.9<br>(8.4 to 15.3)                   | 25.2<br>(10.0 to 42.9)                            | -12.3<br>(-23.5 to 0.5)                             |
| Hemorrhagic stroke                                 | 19.9<br>(17.8 to 22.3)                        | 8.8‡<br>(7.8 to 9.8)                     | 2.8<br>(2.0 to 3.6)                     | 40.4<br>(22.6 to 60.7)                            | 1.2<br>(-12.8 to 17.8)                              |
| Hypertensive heart disease                         | 38.2<br>(30.4 to 47.9)                        | --                                       | 3.1<br>(2.0 to 4.5)                     | 42.7<br>(27.1 to 61.4)                            | -0.6<br>(-10.4 to 11.6)                             |
| Cardiomyopathy and myocarditis                     | 26.2<br>(20.1 to 32.0)                        | 11.9†<br>(10.4 to 13.5)                  | 2.5<br>(1.5 to 3.8)                     | 41.8<br>(26.8 to 59.6)                            | 2.4<br>(-10.0 to 17.4)                              |
| Myocarditis                                        | 6.6<br>(5.5 to 7.7)                           | 11.9<br>(10.4 to 13.5)                   | 0.5<br>(0.3 to 0.7)                     | 40.7<br>(32.2 to 50.1)                            | 2.5<br>(-5.7 to 11.6)                               |
| Alcoholic cardiomyopathy                           | 3.1<br>(1.9 to 4.4)                           | --                                       | 0.3<br>(0.1 to 0.4)                     | 43.4<br>(8.8 to 90.5)                             | 3.2<br>(-22.5 to 37.3)                              |
| Other cardiomyopathy                               | 20.7<br>(15.0 to 28.1)                        | --                                       | 1.7<br>(1.0 to 2.7)                     | 41.9<br>(23.9 to 64.0)                            | 2.2<br>(-12.2 to 19.3)                              |
| Atrial fibrillation and flutter                    | 93.9<br>(81.8 to 107.4)                       | 8.0<br>(6.8 to 9.3)                      | 7.4<br>(4.9 to 10.3)                    | 45.6<br>(34.1 to 57.1)                            | 1.0<br>(-5.3 to 8.3)                                |
| Peripheral vascular disease                        | 357.4<br>(310.3 to 414.8)                     | 35.2<br>(30.3 to 41.1)                   | 1.8<br>(0.8 to 3.3)                     | 43.1<br>(32.2 to 54.4)                            | -0.4<br>(-7.2 to 6.6)                               |
| Endocarditis                                       | 2.4<br>(1.9 to 3.1)                           | 8.2<br>(7.2 to 9.2)                      | 0.2<br>(0.1 to 0.3)                     | 44.3<br>(30.7 to 58.6)                            | 2.2<br>(-12.3 to 19.8)                              |
| Other cardiovascular and circulatory diseases      | 787.4<br>(555.6 to 1,069.9)                   | --                                       | 41.9<br>(24.6 to 64.2)                  | 44.9<br>(31.1 to 62.9)                            | 3.5<br>(-7.9 to 17.0)                               |
| <b>Chronic respiratory diseases</b>                | <b>4,511.7</b><br><b>(4,219.2 to 4,830.3)</b> | <b>881.6†</b><br><b>(803.8 to 969.3)</b> | <b>203.1</b><br><b>(144.2 to 274.2)</b> | <b>48.5</b><br><b>(41.5 to 55.8)</b>              | <b>7.7</b><br><b>(3.4 to 12.1)</b>                  |
| Chronic obstructive pulmonary disease              | 496.3<br>(475.8 to 519.2)                     | 35.1<br>(33.7 to 36.5)                   | 38.6<br>(33.4 to 42.9)                  | 45.9<br>(35.1 to 57.1)                            | 4.9<br>(-1.3 to 12.2)                               |
| Pneumoconiosis                                     | 0.5<br>(0.5 to 0.6)                           | 0.1<br>(0.1 to 0.1)                      | 0.1<br>(0.1 to 0.1)                     | 41.8<br>(34.6 to 50.1)                            | 2.1<br>(-3.3 to 7.9)                                |
| Silicosis                                          | $< 0.05$<br>( $< 0.05$ to $< 0.05$ )          | $< 0.05$<br>( $< 0.05$ to $< 0.05$ )     | $< 0.05$<br>( $< 0.05$ to $< 0.05$ )    | 41.4<br>(28.8 to 53.9)                            | 1.5<br>(-5.7 to 8.5)                                |



| Cause                                                          | Prevalence in thousands (95% UI)                 | Incidence in thousands (95% UI)                | YLDs in thousands (95% UI)                |                                                   |                                                     |
|----------------------------------------------------------------|--------------------------------------------------|------------------------------------------------|-------------------------------------------|---------------------------------------------------|-----------------------------------------------------|
|                                                                | 2016 counts                                      | 2016 counts                                    | 2016 counts                               | Percentage change in counts between 2006 and 2016 | Percentage change in age-standardised rates between |
| Asbestosis                                                     | 0.2<br>(0.2 to 0.3)                              | < 0.05<br>(< 0.05 to < 0.05)                   | < 0.05<br>(< 0.05 to < 0.05)              | 41.0<br>(31.6 to 51.4)                            | 1.0<br>(-4.5 to 7.1)                                |
| Coal workers pneumoconiosis                                    | --                                               | --                                             | --                                        | --                                                | --                                                  |
| Other pneumoconiosis                                           | 0.3<br>(0.2 to 0.3)                              | < 0.05<br>(< 0.05 to < 0.05)                   | < 0.05<br>(< 0.05 to 0.1)                 | 42.6<br>(30.4 to 56.2)                            | 2.9<br>(-5.9 to 14.2)                               |
| Asthma                                                         | 4,022.2<br>(3,648.6 to 4,428.4)                  | 846.1<br>(768.6 to 933.7)                      | 158.9<br>(102.3 to 229.7)                 | 48.1<br>(40.1 to 56.1)                            | 8.6<br>(3.6 to 13.9)                                |
| Interstitial lung disease and pulmonary sarcoidosis            | 3.8<br>(3.3 to 4.3)                              | 0.4<br>(0.3 to 0.4)                            | 0.4<br>(0.3 to 0.6)                       | 41.5<br>(37.0 to 46.0)                            | 1.1<br>(-3.6 to 6.2)                                |
| Other chronic respiratory diseases                             | --                                               | --                                             | 5.0<br>(3.9 to 6.4)                       | 91.5<br>(46.6 to 152.3)                           | 38.2<br>(14.5 to 67.8)                              |
| <b>Cirrhosis and other chronic liver diseases</b>              | <b>113.2</b><br><b>(107.5 to 119.4)</b>          | <b>10.5</b><br><b>(10.0 to 11.0)</b>           | <b>9.1</b><br><b>(6.1 to 12.6)</b>        | <b>37.3</b><br><b>(20.9 to 56.5)</b>              | <b>-0.1</b><br><b>(-8.5 to 9.4)</b>                 |
| Cirrhosis and other chronic liver diseases due to hepatitis B  | 26.1<br>(21.0 to 31.1)                           | 2.6<br>(2.1 to 3.1)                            | 1.6<br>(1.0 to 2.3)                       | 39.5<br>(16.6 to 70.2)                            | 0.4<br>(-14.2 to 17.4)                              |
| Cirrhosis and other chronic liver diseases due to hepatitis C  | 18.1<br>(11.9 to 27.6)                           | 1.9<br>(1.2 to 2.7)                            | 1.1<br>(0.6 to 1.8)                       | 41.4<br>(14.4 to 75.7)                            | 1.5<br>(-15.6 to 22.9)                              |
| Cirrhosis and other chronic liver diseases due to alcohol use  | 24.9<br>(21.0 to 28.6)                           | 2.8<br>(2.4 to 3.2)                            | 1.5<br>(1.0 to 2.1)                       | 38.7<br>(15.9 to 66.2)                            | -1.1<br>(-15.6 to 15.3)                             |
| Cirrhosis and other chronic liver diseases due to other causes | 44.1<br>(40.3 to 47.9)                           | 3.3<br>(3.0 to 3.5)                            | 4.9<br>(3.2 to 7.0)                       | 35.2<br>(10.2 to 66.8)                            | -0.6<br>(-16.2 to 18.4)                             |
| <b>Digestive diseases</b>                                      | <b>1,060.5</b><br><b>(978.4 to 1,141.9)</b>      | <b>720.7†</b><br><b>(686.4 to 757.2)</b>       | <b>26.6</b><br><b>(18.8 to 36.2)</b>      | <b>31.1</b><br><b>(21.4 to 41.5)</b>              | <b>-2.9</b><br><b>(-8.2 to 2.8)</b>                 |
| Peptic ulcer disease                                           | 102.0<br>(93.3 to 111.4)                         | 57.4<br>(51.2 to 64.1)                         | 2.1<br>(1.3 to 3.0)                       | 43.0<br>(28.7 to 58.8)                            | 3.7<br>(-4.5 to 12.6)                               |
| Gastritis and duodenitis                                       | 623.1<br>(544.1 to 703.8)                        | 236.3<br>(212.8 to 262.2)                      | 6.1<br>(3.9 to 8.7)                       | 34.3<br>(21.9 to 47.0)                            | 0.5<br>(-6.9 to 7.9)                                |
| Appendicitis                                                   | 6.2<br>(5.8 to 6.8)                              | 165.6<br>(152.1 to 179.4)                      | 1.9<br>(1.2 to 2.8)                       | 32.7<br>(-3.1 to 86.1)                            | -3.6<br>(-24.3 to 24.4)                             |
| Paralytic ileus and intestinal obstruction                     | 1.2<br>(1.1 to 1.3)                              | 34.2<br>(31.1 to 37.6)                         | 0.4<br>(0.2 to 0.5)                       | 37.3<br>(28.8 to 46.8)                            | -0.5<br>(-12.2 to 13.0)                             |
| Inguinal, femoral, and abdominal hernia                        | 325.5<br>(267.9 to 390.9)                        | 77.2<br>(68.7 to 87.5)                         | 12.3<br>(8.3 to 17.6)                     | 26.2<br>(10.6 to 43.6)                            | -7.6<br>(-16.1 to 2.0)                              |
| Inflammatory bowel disease                                     | 3.2<br>(3.0 to 3.5)                              | 17.7<br>(17.0 to 18.5)                         | 0.5<br>(0.3 to 0.7)                       | 35.0<br>(31.1 to 38.8)                            | -1.9<br>(-5.0 to 1.1)                               |
| Vascular intestinal disorders                                  | 0.3<br>(0.2 to 0.3)                              | 1.7<br>(1.5 to 2.0)                            | 0.1<br>(0.1 to 0.1)                       | 40.3<br>(33.1 to 47.8)                            | 3.0<br>(-1.1 to 7.7)                                |
| Gallbladder and biliary diseases                               | 28.0<br>(24.6 to 31.5)                           | 124.3<br>(108.0 to 141.9)                      | 0.7<br>(0.5 to 1.0)                       | 42.0<br>(22.8 to 62.9)                            | 2.5<br>(-14.0 to 21.8)                              |
| Pancreatitis                                                   | 0.7<br>(0.6 to 0.8)                              | 6.3<br>(5.5 to 7.2)                            | 0.1<br>(0.1 to 0.1)                       | 44.1<br>(39.2 to 50.0)                            | 4.9<br>(1.6 to 8.7)                                 |
| Other digestive diseases                                       | --                                               | --                                             | 2.4<br>(1.7 to 3.4)                       | 33.5<br>(19.7 to 48.1)                            | 1.0<br>(-5.0 to 7.4)                                |
| <b>Neurological disorders</b>                                  | <b>14,417.5</b><br><b>(13,678.1 to 15,238.8)</b> | <b>6,783.3</b><br><b>(5,797.8 to 7,849.0)</b>  | <b>366.9</b><br><b>(225.9 to 541.4)</b>   | <b>41.6</b><br><b>(-3.1 to 99.8)</b>              | <b>2.0</b><br><b>(-23.7 to 33.2)</b>                |
| Alzheimer's disease and other dementias                        | 74.8<br>(63.7 to 87.5)                           | 13.0<br>(11.0 to 15.3)                         | 10.7<br>(7.4 to 14.2)                     | 52.8<br>(44.6 to 61.6)                            | -1.0<br>(-5.4 to 3.8)                               |
| Parkinson's disease                                            | 7.4<br>(6.0 to 9.1)                              | 1.0<br>(0.8 to 1.2)                            | 0.9<br>(0.6 to 1.2)                       | 60.7<br>(36.8 to 88.2)                            | 9.3<br>(-5.5 to 26.6)                               |
| Epilepsy                                                       | 246.2<br>(54.7 to 428.8)                         | 33.5<br>(7.4 to 58.8)                          | 90.7<br>(20.6 to 185.7)                   | 40.7<br>(-73.9 to 475.8)                          | 3.3<br>(-80.8 to 324.4)                             |
| Multiple sclerosis                                             | 1.7<br>(1.5 to 1.9)                              | 0.1<br>(0.1 to 0.1)                            | 0.5<br>(0.3 to 0.7)                       | 54.8<br>(49.2 to 61.1)                            | 11.3<br>(7.6 to 15.6)                               |
| Motor neuron disease                                           | 0.5<br>(0.5 to 0.6)                              | 0.1<br>(0.1 to 0.1)                            | 0.1<br>(0.1 to 0.1)                       | 40.5<br>(34.8 to 46.2)                            | 3.5<br>(0.3 to 6.6)                                 |
| Migraine                                                       | 4,763.1<br>(4,529.1 to 4,988.4)                  | 640.6<br>(608.1 to 673.3)                      | 206.2<br>(131.1 to 289.4)                 | 39.0<br>(33.1 to 45.0)                            | 1.0<br>(-2.6 to 4.6)                                |
| Tension-type headache                                          | 10,878.9<br>(9,601.4 to 12,327.4)                | 6,094.7<br>(5,125.2 to 7,192.4)                | 35.8<br>(22.5 to 53.3)                    | 38.9<br>(30.7 to 47.7)                            | 0.6<br>(-4.4 to 6.3)                                |
| Other neurological disorders                                   | 0.1<br>(0.1 to 0.2)                              | 0.3<br>(0.2 to 0.4)                            | 22.0<br>(5.4 to 44.7)                     | 73.4<br>(-64.2 to 568.8)                          | 24.0<br>(-72.0 to 332.0)                            |
| <b>Mental and substance use disorders</b>                      | <b>7,406.7</b><br><b>(7,041.5 to 7,741.9)</b>    | <b>2,788.4†</b><br><b>(2,581.9 to 3,022.7)</b> | <b>882.3</b><br><b>(637.6 to 1,156.6)</b> | <b>37.0</b><br><b>(34.1 to 40.2)</b>              | <b>-0.1</b><br><b>(-2.1 to 2.1)</b>                 |
| Schizophrenia                                                  | 68.5<br>(59.7 to 78.1)                           | 6.2<br>(5.5 to 7.1)                            | 44.2<br>(31.9 to 56.4)                    | 42.3<br>(28.7 to 59.1)                            | 2.7<br>(-6.1 to 13.2)                               |
| Alcohol use disorders                                          | 669.7<br>(570.8 to 777.6)                        | 352.9<br>(295.1 to 407.7)                      | 67.1<br>(45.6 to 93.6)                    | 39.9<br>(28.8 to 51.8)                            | 2.5<br>(-5.1 to 10.7)                               |
| Drug use disorders                                             | 220.8<br>(195.1 to 248.8)                        | 39.0<br>(33.9 to 44.8)                         | 45.0<br>(30.8 to 62.0)                    | 42.0<br>(28.3 to 56.6)                            | 4.3<br>(-4.9 to 14.6)                               |
| Opioid use disorders                                           | 90.9<br>(70.8 to 116.5)                          | 12.6<br>(10.3 to 15.5)                         | 38.0<br>(25.1 to 53.0)                    | 43.3<br>(26.9 to 60.6)                            | 5.0<br>(-5.7 to 16.9)                               |
| Cocaine use disorders                                          | 6.1<br>(5.0 to 7.4)                              | 0.9<br>(0.7 to 1.1)                            | 0.9<br>(0.5 to 1.3)                       | 39.2<br>(30.8 to 47.7)                            | 2.4<br>(-3.2 to 8.4)                                |
| Amphetamine use disorders                                      | 3.3<br>(2.2 to 4.6)                              | 0.6<br>(0.4 to 0.9)                            | 0.5<br>(0.2 to 0.8)                       | 37.1<br>(24.1 to 52.4)                            | 2.5<br>(-7.1 to 13.9)                               |
| Cannabis use disorders                                         | 112.4<br>(91.8 to 136.6)                         | 21.9<br>(17.7 to 27.1)                         | 3.3<br>(2.0 to 5.0)                       | 29.7<br>(4.7 to 59.4)                             | -2.9<br>(-20.3 to 17.8)                             |
| Other drug use disorders                                       | 14.2<br>(12.4 to 16.3)                           | 3.1<br>(2.7 to 3.6)                            | 2.4<br>(1.6 to 3.5)                       | 41.3<br>(20.1 to 67.0)                            | 3.4<br>(-11.1 to 20.1)                              |
| Depressive disorders                                           | 1,540.8<br>(1,442.6 to 1,651.2)                  | 1,736.8<br>(1,542.0 to 1,955.7)                | 265.0<br>(181.6 to 361.4)                 | 36.5<br>(30.4 to 42.9)                            | -0.9<br>(-5.4 to 3.7)                               |
| Major depressive disorder                                      | 1,049.9<br>(934.0 to 1,186.4)                    | 1,643.5<br>(1,452.7 to 1,858.6)                | 215.6<br>(146.4 to 295.2)                 | 36.1<br>(28.6 to 43.6)                            | -1.2<br>(-6.5 to 4.3)                               |
| Dysthymia                                                      | 511.8<br>(442.6 to 589.7)                        | 93.4<br>(81.7 to 107.6)                        | 49.4<br>(32.9 to 71.5)                    | 38.5<br>(33.2 to 44.4)                            | 0.5<br>(-2.5 to 3.6)                                |
| Bipolar disorder                                               | 272.6<br>(230.9 to 320.8)                        | 32.1<br>(27.2 to 38.4)                         | 56.1<br>(35.0 to 84.5)                    | 37.4<br>(27.3 to 48.2)                            | 0.5<br>(-5.7 to 6.9)                                |
| Anxiety disorders                                              | 1,573.2<br>(1,397.4 to 1,767.9)                  | 285.7<br>(255.6 to 319.4)                      | 153.2<br>(105.0 to 211.9)                 | 38.1<br>(28.9 to 48.2)                            | 0.7<br>(-5.5 to 7.1)                                |
| Eating disorders                                               | 46.2<br>(37.2 to 56.6)                           | 36.0<br>(25.9 to 48.4)                         | 9.4<br>(5.9 to 13.8)                      | 54.5<br>(32.4 to 81.0)                            | 14.2<br>(-1.7 to 32.1)                              |
| Anorexia nervosa                                               | 12.7<br>(9.1 to 17.2)                            | 6.0<br>(4.3 to 8.0)                            | 2.7<br>(1.6 to 4.3)                       | 49.6<br>(9.5 to 102.5)                            | 10.9<br>(-17.2 to 47.4)                             |
| Bulimia nervosa                                                | 31.7<br>(23.2 to 42.9)                           | 30.0<br>(19.9 to 42.5)                         | 6.7<br>(4.1 to 10.5)                      | 56.6<br>(29.8 to 87.4)                            | 15.4<br>(-3.6 to 36.5)                              |
| Autistic spectrum disorders                                    | 456.4<br>(411.1 to 513.1)                        | 6.0<br>(4.1 to 8.3)                            | 65.4<br>(44.2 to 92.5)                    | 36.8<br>(29.1 to 44.5)                            | 0.4<br>(-4.4 to 5.5)                                |
| Autism                                                         | 126.1<br>(108.7 to 146.3)                        | 0.8<br>(0.4 to 1.4)                            | 32.4<br>(20.9 to 46.7)                    | 37.3<br>(23.7 to 52.5)                            | 0.8<br>(-8.3 to 10.9)                               |
| Asperger syndrome and other autistic spectrum disorders        | 329.3<br>(271.3 to 399.9)                        | 5.1<br>(3.3 to 7.5)                            | 33.1<br>(21.8 to 49.0)                    | 36.4<br>(29.3 to 44.0)                            | 0.1<br>(-4.3 to 5.0)                                |

| Cause                                                      | Prevalence in thousands (95% UI)                 | Incidence in thousands (95% UI)                      | YLDs in thousands (95% UI)                |                                                   |                                                     |
|------------------------------------------------------------|--------------------------------------------------|------------------------------------------------------|-------------------------------------------|---------------------------------------------------|-----------------------------------------------------|
|                                                            | 2016 counts                                      | 2016 counts                                          | 2016 counts                               | Percentage change in counts between 2006 and 2016 | Percentage change in age-standardised rates between |
| Attention-deficit/hyperactivity disorder                   | 726.1<br>(648.5 to 817.3)                        | 48.9<br>(42.3 to 57.2)                               | 8.7<br>(5.1 to 13.9)                      | 37.5<br>(27.9 to 48.7)                            | 0.2<br>(-6.0 to 7.8)                                |
| Conduct disorder                                           | 562.6<br>(455.7 to 667.7)                        | 208.3<br>(161.9 to 255.0)                            | 68.0<br>(41.8 to 103.3)                   | 38.0<br>(28.8 to 47.2)                            | 0.5<br>(-6.2 to 7.3)                                |
| Idiopathic developmental intellectual disability           | 1,198.5<br>(741.4 to 1,677.3)                    | --                                                   | 46.9<br>(22.0 to 81.7)                    | 19.3<br>(10.0 to 27.1)                            | -12.9<br>(-20.1 to -7.5)                            |
| Other mental and substance use disorders                   | 710.8<br>(621.7 to 823.5)                        | 36.5<br>(32.0 to 42.1)                               | 53.2<br>(36.0 to 77.0)                    | 38.6<br>(30.6 to 46.9)                            | 0.5<br>(-4.4 to 5.4)                                |
| <b>Diabetes, urogenital, blood, and endocrine diseases</b> | <b>23,832.9</b><br><b>(23,428.0 to 24,192.9)</b> | <b>4,910.9†</b><br><b>(4,593.3 to 5,241.9)</b>       | <b>279.4</b><br><b>(197.0 to 382.1)</b>   | <b>38.0</b><br><b>(34.3 to 42.0)</b>              | <b>1.4</b><br><b>(-1.3 to 4.4)</b>                  |
| Diabetes mellitus                                          | 895.4<br>(809.6 to 989.5)                        | 63.6<br>(57.7 to 69.9)                               | 84.3<br>(58.1 to 116.3)                   | 48.7<br>(40.4 to 58.6)                            | 6.1<br>(0.3 to 13.4)                                |
| Acute glomerulonephritis                                   | 0.5<br>(0.4 to 0.5)                              | 6.9<br>(5.8 to 8.1)                                  | < 0.05<br>(< 0.05 to < 0.05)              | 37.4<br>(31.8 to 42.7)                            | 0.1<br>(-3.3 to 3.4)                                |
| Chronic kidney disease                                     | 1,705.7<br>(1,538.8 to 1,898.1)                  | 128.6<br>(114.6 to 143.0)                            | 43.5<br>(31.4 to 57.6)                    | 44.8<br>(36.8 to 53.7)                            | 2.1<br>(-3.3 to 8.2)                                |
| Chronic kidney disease due to diabetes mellitus            | 531.6<br>(445.5 to 621.4)                        | 37.4<br>(31.1 to 45.1)                               | 13.0<br>(9.2 to 17.5)                     | 44.3<br>(32.6 to 57.6)                            | 1.6<br>(-6.3 to 9.9)                                |
| Chronic kidney disease due to hypertension                 | 366.7<br>(316.2 to 417.7)                        | 33.3<br>(28.1 to 38.8)                               | 7.3<br>(5.0 to 10.1)                      | 46.1<br>(31.0 to 64.3)                            | 1.1<br>(-9.5 to 13.4)                               |
| Chronic kidney disease due to glomerulonephritis           | 339.0<br>(291.2 to 387.5)                        | 20.2<br>(16.1 to 24.9)                               | 11.1<br>(7.8 to 15.0)                     | 45.6<br>(32.2 to 60.7)                            | 4.5<br>(-4.1 to 13.2)                               |
| Chronic kidney disease due to other causes                 | 468.3<br>(391.2 to 547.6)                        | 37.7<br>(31.6 to 43.7)                               | 12.1<br>(8.6 to 16.4)                     | 44.0<br>(30.9 to 58.1)                            | 1.9<br>(-6.4 to 10.0)                               |
| Urinary diseases and male infertility                      | 633.4<br>(560.5 to 710.2)                        | 2,584.8†<br>(2,312.8 to 2,878.3)                     | 18.6<br>(12.0 to 27.1)                    | 37.9<br>(27.5 to 48.1)                            | -0.4<br>(-7.7 to 6.7)                               |
| Interstitial nephritis and urinary tract infections        | 43.2<br>(38.1 to 48.6)                           | 2,263.9<br>(1,993.4 to 2,547.8)                      | 1.4<br>(0.9 to 2.2)                       | 37.2<br>(16.1 to 62.8)                            | 1.7<br>(-12.4 to 17.6)                              |
| Urolithiasis                                               | 9.9<br>(8.8 to 11.3)                             | 262.2<br>(232.8 to 300.1)                            | 0.8<br>(0.5 to 1.1)                       | 39.9<br>(28.6 to 51.4)                            | 1.5<br>(-7.8 to 11.5)                               |
| Benign prostatic hyperplasia                               | 457.8<br>(387.8 to 532.4)                        | 58.6<br>(49.5 to 68.3)                               | 15.0<br>(9.5 to 22.0)                     | 38.6<br>(26.1 to 50.4)                            | -0.5<br>(-8.6 to 7.5)                               |
| Male infertility                                           | 104.7<br>(77.9 to 140.3)                         | --                                                   | 0.6<br>(0.2 to 1.2)                       | 70.7<br>(34.4 to 114.3)                           | 22.9<br>(-4.4 to 56.6)                              |
| Other urinary diseases                                     | --                                               | --                                                   | 0.8<br>(0.5 to 1.2)                       | 12.6<br>(-1.5 to 27.7)                            | -15.4<br>(-23.5 to -6.8)                            |
| Gynecological diseases                                     | 5,708.1<br>(5,390.1 to 6,010.6)                  | 2,089.6†<br>(1,944.8 to 2,243.5)                     | 63.9<br>(43.0 to 91.8)                    | 39.1<br>(33.0 to 45.7)                            | -0.3<br>(-3.9 to 3.8)                               |
| Uterine fibroids                                           | 360.0<br>(316.9 to 406.1)                        | 46.1<br>(39.6 to 53.1)                               | 8.0<br>(4.9 to 12.3)                      | 36.5<br>(27.1 to 47.0)                            | -4.1<br>(-10.4 to 3.0)                              |
| Polycystic ovarian syndrome                                | 49.1<br>(36.5 to 63.5)                           | 128.6<br>(92.3 to 173.1)                             | 0.4<br>(0.2 to 0.8)                       | 45.9<br>(27.0 to 66.0)                            | 4.7<br>(-8.2 to 19.6)                               |
| Female infertility                                         | 185.0<br>(63.6 to 439.7)                         | --                                                   | 1.0<br>(0.2 to 2.8)                       | 178.5<br>(11.6 to 567.2)                          | 118.6<br>(-11.8 to 449.6)                           |
| Endometriosis                                              | 10.4<br>(8.7 to 12.5)                            | 41.8<br>(33.8 to 52.6)                               | 1.0<br>(0.6 to 1.4)                       | 39.0<br>(1.8 to 94.7)                             | 2.0<br>(-23.7 to 37.4)                              |
| Genital prolapse                                           | 2,515.2<br>(2,212.6 to 2,815.1)                  | 231.7<br>(194.0 to 274.5)                            | 7.9<br>(3.8 to 14.2)                      | 32.8<br>(24.7 to 40.8)                            | -4.2<br>(-10.1 to 1.5)                              |
| Premenstrual syndrome                                      | 2,762.8<br>(2,557.4 to 2,979.3)                  | 1,070.1<br>(986.3 to 1,158.1)                        | 23.1<br>(14.3 to 35.4)                    | 40.3<br>(27.6 to 53.9)                            | 1.4<br>(-6.8 to 10.2)                               |
| Other gynecological diseases                               | 656.3<br>(569.2 to 753.4)                        | 571.3<br>(469.0 to 684.6)                            | 22.6<br>(14.9 to 32.1)                    | 38.0<br>(28.5 to 48.4)                            | -0.2<br>(-6.5 to 6.6)                               |
| Hemoglobinopathies and hemolytic anaemias                  | 18,842.6<br>(18,449.8 to 19,208.8)               | --                                                   | 49.6<br>(33.0 to 71.8)                    | 24.6<br>(15.8 to 33.5)                            | -7.4<br>(-13.1 to -1.9)                             |
| Thalassemias                                               | < 0.05<br>(< 0.05 to 0.1)                        | --                                                   | < 0.05<br>(< 0.05 to < 0.05)              | 27.6<br>(1.3 to 58.9)                             | -0.6<br>(-21.1 to 23.4)                             |
| Thalassaemias trait                                        | 261.3<br>(88.6 to 485.4)                         | --                                                   | 3.6<br>(1.0 to 7.5)                       | 33.5<br>(8.5 to 59.8)                             | 1.8<br>(-15.4 to 17.7)                              |
| Sickle cell disorders                                      | 60.8<br>(52.0 to 67.3)                           | --                                                   | 4.7<br>(3.1 to 6.7)                       | 33.9<br>(10.7 to 59.5)                            | 1.7<br>(-15.3 to 20.1)                              |
| Sickle cell trait                                          | 7,665.0<br>(7,102.2 to 7,999.8)                  | --                                                   | 26.2<br>(17.1 to 38.3)                    | 28.4<br>(18.1 to 39.1)                            | -2.2<br>(-9.2 to 5.1)                               |
| G6PD deficiency                                            | 3,897.0<br>(3,772.1 to 4,058.0)                  | --                                                   | 0.3<br>(0.2 to 0.5)                       | 7.7<br>(-5.7 to 24.5)                             | -27.4<br>(-35.5 to -17.7)                           |
| G6PD trait                                                 | 8,938.9<br>(8,818.2 to 9,080.8)                  | --                                                   | < 0.05<br>(< 0.05 to < 0.05)              | 28.1<br>(19.0 to 39.0)                            | -3.2<br>(-9.0 to 3.5)                               |
| Other hemoglobinopathies and hemolytic anaemias            | 584.4<br>(559.8 to 608.9)                        | --                                                   | 14.9<br>(9.8 to 21.9)                     | 14.8<br>(3.2 to 27.3)                             | -18.5<br>(-25.1 to -12.3)                           |
| Endocrine, metabolic, blood, and immune disorders          | 667.2<br>(644.8 to 693.7)                        | 37.6<br>(33.5 to 42.1)                               | 19.5<br>(13.1 to 28.1)                    | 18.2<br>(9.7 to 27.7)                             | -8.2<br>(-13.4 to -2.9)                             |
| <b>Musculoskeletal disorders</b>                           | <b>4,404.6</b><br><b>(4,143.4 to 4,652.6)</b>    | <b>2,099.8</b><br><b>(1,882.0 to 2,333.6)</b>        | <b>478.7</b><br><b>(343.3 to 626.7)</b>   | <b>39.4</b><br><b>(35.2 to 43.8)</b>              | <b>0.2</b><br><b>(-2.5 to 3.0)</b>                  |
| Rheumatoid arthritis                                       | 64.2<br>(56.4 to 72.5)                           | 4.3<br>(3.9 to 4.9)                                  | 15.3<br>(10.4 to 20.4)                    | 40.1<br>(26.0 to 56.3)                            | 0.7<br>(-7.5 to 10.7)                               |
| Osteoarthritis                                             | 800.5<br>(746.2 to 854.9)                        | 45.1<br>(41.7 to 48.6)                               | 49.3<br>(34.6 to 67.1)                    | 40.5<br>(35.4 to 45.6)                            | -0.1<br>(-3.5 to 3.4)                               |
| Low back and neck pain                                     | 2,925.0<br>(2,711.7 to 3,150.0)                  | 1,344.9<br>(1,205.5 to 1,499.3)                      | 335.8<br>(237.9 to 444.9)                 | 39.9<br>(34.9 to 44.9)                            | 0.5<br>(-2.8 to 3.9)                                |
| Low back pain                                              | 2,209.3<br>(1,957.1 to 2,501.2)                  | 1,124.9<br>(990.3 to 1,285.2)                        | 249.8<br>(176.4 to 333.5)                 | 39.7<br>(33.1 to 46.5)                            | 0.5<br>(-3.6 to 5.0)                                |
| Neck pain                                                  | 858.0<br>(739.9 to 993.2)                        | 220.0<br>(189.7 to 256.0)                            | 86.0<br>(57.8 to 121.8)                   | 40.4<br>(36.2 to 44.8)                            | 0.4<br>(-2.0 to 2.9)                                |
| Gout                                                       | 107.5<br>(95.2 to 120.4)                         | 22.2<br>(19.4 to 25.1)                               | 3.4<br>(2.3 to 4.9)                       | 40.5<br>(23.7 to 61.7)                            | 0.0<br>(-12.2 to 13.2)                              |
| Other musculoskeletal disorders                            | 864.3<br>(693.8 to 1,057.1)                      | 683.4<br>(524.3 to 862.1)                            | 74.9<br>(49.1 to 108.4)                   | 36.1<br>(23.8 to 51.2)                            | -1.0<br>(-9.7 to 8.8)                               |
| <b>Other non-communicable diseases</b>                     | <b>36,917.4</b><br><b>(36,033.8 to 37,737.9)</b> | <b>117,918.8†</b><br><b>(108,899.8 to 127,582.5)</b> | <b>867.8</b><br><b>(589.1 to 1,233.6)</b> | <b>34.5</b><br><b>(31.9 to 36.8)</b>              | <b>-2.3</b><br><b>(-3.8 to -0.9)</b>                |
| Congenital anomalies                                       | 429.4<br>(356.1 to 526.5)                        | --                                                   | 62.6<br>(43.3 to 85.3)                    | 28.7<br>(18.7 to 38.6)                            | -4.8<br>(-11.7 to 1.8)                              |
| Neural tube defects                                        | 61.8<br>(54.9 to 69.4)                           | --                                                   | 18.4<br>(12.7 to 25.1)                    | 33.3<br>(16.7 to 52.6)                            | -1.7<br>(-12.5 to 11.0)                             |
| Congenital heart anomalies                                 | 61.5<br>(50.8 to 73.1)                           | --                                                   | 3.0<br>(1.5 to 5.0)                       | 26.4<br>(7.7 to 46.9)                             | -2.6<br>(-15.4 to 12.4)                             |
| Orofacial clefts                                           | 7.8<br>(6.7 to 8.9)                              | --                                                   | 0.1<br>(0.1 to 0.2)                       | 27.1<br>(12.8 to 43.0)                            | -5.5<br>(-16.0 to 6.5)                              |
| Down's syndrome                                            | 9.7<br>(8.1 to 11.6)                             | --                                                   | 0.8<br>(0.6 to 1.2)                       | 36.8<br>(26.9 to 47.2)                            | 1.7<br>(-5.5 to 9.6)                                |
| Turner syndrome                                            | 30.7<br>(25.9 to 36.4)                           | --                                                   | 0.5<br>(0.2 to 0.9)                       | 28.7<br>(-11.2 to 83.5)                           | -3.3<br>(-30.6 to 34.9)                             |
| Klinefelter syndrome                                       | 33.2<br>(27.9 to 39.2)                           | --                                                   | 0.1<br>(0.1 to 0.3)                       | 33.0<br>(0.1 to 73.5)                             | -1.2<br>(-24.3 to 28.6)                             |



| Cause                                         | Prevalence in thousands (95% UI)              | Incidence in thousands (95% UI)                           | YLDs in thousands (95% UI)              |                                                   |                                                     |
|-----------------------------------------------|-----------------------------------------------|-----------------------------------------------------------|-----------------------------------------|---------------------------------------------------|-----------------------------------------------------|
|                                               | 2016 counts                                   | 2016 counts                                               | 2016 counts                             | Percentage change in counts between 2006 and 2016 | Percentage change in age-standardised rates between |
| Other chromosomal abnormalities               | 9.1<br>(7.7 to 10.8)                          | --                                                        | 1.8<br>(1.1 to 2.8)                     | 31.4<br>(-13.0 to 94.1)                           | 1.7<br>(-31.1 to 46.8)                              |
| Congenital musculoskeletal and limb anomalies | 52.6<br>(46.7 to 58.9)                        | --                                                        | 7.4<br>(4.8 to 10.6)                    | 33.0<br>(16.9 to 50.5)                            | -2.0<br>(-12.5 to 9.5)                              |
| Urogenital congenital anomalies               | 59.2<br>(51.8 to 68.0)                        | --                                                        | 1.6<br>(0.9 to 2.5)                     | 33.7<br>(22.4 to 45.7)                            | -0.2<br>(-8.2 to 7.7)                               |
| Digestive congenital anomalies                | 28.8<br>(25.4 to 32.4)                        | --                                                        | 1.3<br>(0.8 to 1.9)                     | 34.9<br>(4.1 to 73.6)                             | -0.3<br>(-19.0 to 23.3)                             |
| Other congenital anomalies                    | 195.5<br>(115.3 to 321.7)                     | --                                                        | 27.4<br>(16.4 to 43.6)                  | 24.0<br>(10.2 to 38.3)                            | -8.5<br>(-17.8 to 1.5)                              |
| Skin and subcutaneous diseases                | 18,775.7<br>(18,143.2 to 19,532.6)            | 44,976.4<br>(42,394.0 to 47,960.3)                        | 448.9<br>(296.8 to 661.6)               | 36.6<br>(32.6 to 40.1)                            | 1.0<br>(-1.4 to 3.2)                                |
| Dermatitis                                    | 2,497.1<br>(2,261.7 to 2,729.2)               | 2,208.8<br>(2,032.8 to 2,391.0)                           | 100.0<br>(57.8 to 164.0)                | 35.6<br>(28.2 to 43.6)                            | 0.0<br>(-4.9 to 4.8)                                |
| Psoriasis                                     | 285.9<br>(275.2 to 297.6)                     | 44.7<br>(42.8 to 46.7)                                    | 25.2<br>(17.8 to 33.3)                  | 50.8<br>(34.7 to 67.8)                            | 9.7<br>(1.2 to 18.7)                                |
| Cellulitis                                    | 20.0<br>(18.3 to 21.7)                        | 344.5<br>(318.4 to 372.5)                                 | 1.1<br>(0.7 to 1.7)                     | 36.2<br>(4.6 to 76.5)                             | 1.0<br>(-18.2 to 24.7)                              |
| Pyoderma                                      | 375.4<br>(355.4 to 395.6)                     | 7,171.5<br>(6,808.4 to 7,553.2)                           | 2.1<br>(0.9 to 4.5)                     | 37.6<br>(29.5 to 46.0)                            | 1.7<br>(-2.9 to 6.6)                                |
| Scabies                                       | 1,328.7<br>(1,141.3 to 1,540.8)               | 4,084.8<br>(3,500.8 to 4,760.0)                           | 34.4<br>(19.6 to 54.9)                  | 28.3<br>(21.5 to 36.0)                            | -5.9<br>(-10.0 to -1.1)                             |
| Fungal skin diseases                          | 7,414.6<br>(6,444.5 to 8,535.0)               | 20,436.8<br>(18,095.1 to 23,164.7)                        | 42.1<br>(16.4 to 89.5)                  | 37.1<br>(35.5 to 38.7)                            | 0.1<br>(-0.8 to 0.9)                                |
| Viral skin diseases                           | 1,580.6<br>(1,492.2 to 1,670.8)               | 2,215.4<br>(2,102.4 to 2,341.2)                           | 48.7<br>(29.8 to 71.6)                  | 36.9<br>(32.1 to 42.4)                            | 0.5<br>(-2.6 to 4.0)                                |
| Acne vulgaris                                 | 5,476.4<br>(4,861.5 to 6,101.8)               | 4,235.5<br>(3,364.0 to 5,396.4)                           | 141.0<br>(93.6 to 202.1)                | 36.8<br>(27.6 to 45.4)                            | 1.6<br>(-4.7 to 7.5)                                |
| Alopecia areata                               | 86.9<br>(82.9 to 90.6)                        | 155.0<br>(148.2 to 161.8)                                 | 2.9<br>(1.8 to 4.3)                     | 36.9<br>(21.1 to 54.5)                            | 0.1<br>(-10.0 to 11.2)                              |
| Pruritus                                      | 377.5<br>(331.7 to 426.4)                     | 306.3<br>(272.2 to 347.0)                                 | 4.0<br>(1.9 to 7.4)                     | 39.7<br>(31.3 to 48.2)                            | 2.0<br>(-3.2 to 7.1)                                |
| Urticaria                                     | 544.5<br>(460.8 to 642.5)                     | 981.0<br>(826.2 to 1,153.7)                               | 33.0<br>(20.7 to 48.0)                  | 34.0<br>(25.6 to 42.8)                            | 0.4<br>(-5.2 to 6.1)                                |
| Decubitus ulcer                               | 5.1<br>(4.6 to 5.7)                           | 18.7<br>(16.8 to 20.8)                                    | 0.8<br>(0.6 to 1.2)                     | 41.9<br>(26.6 to 58.9)                            | 1.6<br>(-12.9 to 18.3)                              |
| Other skin and subcutaneous diseases          | 2,449.5<br>(2,379.1 to 2,529.9)               | 2,773.4<br>(2,688.6 to 2,863.0)                           | 13.5<br>(6.5 to 24.8)                   | 44.0<br>(39.6 to 48.6)                            | 5.2<br>(2.7 to 7.7)                                 |
| Sense organ diseases                          | 8,571.9<br>(8,221.5 to 8,911.7)               | 4,927.2 <sup>†</sup><br>(4,573.4 to 5,317.9)              | 302.1<br>(210.0 to 421.2)               | 32.4<br>(28.2 to 36.4)                            | -4.4<br>(-6.5 to -2.4)                              |
| Glaucoma                                      | 21.9<br>(18.4 to 25.8)                        | --                                                        | 2.5<br>(1.6 to 3.5)                     | 45.0<br>(29.7 to 62.8)                            | 2.7<br>(-7.4 to 14.1)                               |
| Cataract                                      | 228.5<br>(202.6 to 256.3)                     | --                                                        | 19.4<br>(13.8 to 26.5)                  | 38.5<br>(30.9 to 46.6)                            | -4.5<br>(-9.3 to 0.8)                               |
| Macular degeneration                          | 32.4<br>(26.5 to 39.2)                        | --                                                        | 2.4<br>(1.7 to 3.4)                     | 45.6<br>(31.4 to 62.0)                            | 2.7<br>(-7.0 to 13.4)                               |
| Refraction and accommodation disorders        | 4,125.6<br>(3,687.0 to 4,544.3)               | --                                                        | 69.4<br>(42.4 to 108.7)                 | 25.8<br>(19.0 to 33.0)                            | -8.9<br>(-13.9 to -3.9)                             |
| Age-related and other hearing loss            | 5,089.9<br>(4,749.9 to 5,451.4)               | --                                                        | 168.0<br>(115.9 to 237.3)               | 32.3<br>(25.7 to 38.1)                            | -4.4<br>(-7.4 to -1.9)                              |
| Other vision loss                             | 139.5<br>(124.9 to 155.4)                     | --                                                        | 11.3<br>(7.9 to 15.4)                   | 39.9<br>(29.8 to 50.8)                            | 0.8<br>(-5.5 to 7.5)                                |
| Other sense organ diseases                    | 956.8<br>(885.7 to 1,033.3)                   | 4,927.2<br>(4,573.4 to 5,317.9)                           | 29.1<br>(18.4 to 43.9)                  | 40.8<br>(33.7 to 48.7)                            | 1.7<br>(-2.3 to 5.8)                                |
| Oral disorders                                | 24,103.7<br>(22,574.6 to 25,312.4)            | 68,015.1 <sup>†</sup><br>(59,488.3 to 77,345.3)           | 54.2<br>(32.8 to 82.7)                  | 37.1<br>(33.4 to 40.9)                            | -0.4<br>(-2.5 to 1.8)                               |
| Caries of deciduous teeth                     | 4,056.2<br>(2,792.7 to 5,125.5)               | 16,089.8<br>(9,523.8 to 23,834.2)                         | 1.0<br>(0.4 to 1.9)                     | 79.6<br>(34.2 to 125.0)                           | 32.2<br>(-0.8 to 66.2)                              |
| Caries of permanent teeth                     | 19,015.5<br>(17,364.5 to 20,554.8)            | 51,830.5<br>(46,422.3 to 56,959.8)                        | 11.2<br>(4.9 to 21.7)                   | 26.2<br>(19.5 to 33.4)                            | -6.5<br>(-9.9 to -3.0)                              |
| Periodontal disease                           | 567.4<br>(469.4 to 672.8)                     | 59.5<br>(48.8 to 70.9)                                    | 3.7<br>(1.5 to 7.7)                     | 38.4<br>(32.4 to 44.8)                            | -0.9<br>(-4.9 to 3.3)                               |
| Edentulism and severe tooth loss              | 529.2<br>(454.0 to 608.2)                     | 35.4<br>(30.1 to 40.9)                                    | 14.8<br>(9.6 to 21.2)                   | 41.9<br>(34.7 to 49.5)                            | 1.2<br>(-3.2 to 5.4)                                |
| Other oral disorders                          | 799.7<br>(762.4 to 842.1)                     | --                                                        | 23.5<br>(14.3 to 35.4)                  | 38.3<br>(32.9 to 43.7)                            | 0.4<br>(-2.8 to 3.5)                                |
| <b>Injuries</b>                               | <b>6,336.5</b><br><b>(5,911.8 to 6,828.8)</b> | <b>4,124.3<sup>†</sup></b><br><b>(3,887.6 to 4,386.2)</b> | <b>266.1</b><br><b>(181.6 to 374.7)</b> | <b>40.6</b><br><b>(38.0 to 43.6)</b>              | <b>2.1</b><br><b>(0.6 to 3.8)</b>                   |
| <b>Transport injuries</b>                     | <b>647.0</b><br><b>(604.5 to 692.7)</b>       | <b>319.5</b><br><b>(284.2 to 358.6)</b>                   | <b>37.5</b><br><b>(25.0 to 54.1)</b>    | <b>41.7</b><br><b>(38.7 to 44.9)</b>              | <b>2.4</b><br><b>(0.6 to 4.2)</b>                   |
| Road injuries                                 | 537.4<br>(503.2 to 574.8)                     | 281.4<br>(246.5 to 321.0)                                 | 30.9<br>(20.6 to 44.7)                  | 41.0<br>(38.0 to 44.1)                            | 1.9<br>(0.0 to 3.7)                                 |
| Pedestrian road injuries                      | 170.2<br>(150.0 to 193.7)                     | 66.4<br>(54.6 to 80.0)                                    | 9.9<br>(6.6 to 14.1)                    | 35.0<br>(32.1 to 38.0)                            | -2.4<br>(-4.2 to -0.6)                              |
| Cyclist road injuries                         | 116.4<br>(98.4 to 136.9)                      | 70.4<br>(56.6 to 86.6)                                    | 6.3<br>(4.1 to 9.1)                     | 47.3<br>(44.0 to 50.9)                            | 7.3<br>(5.3 to 9.6)                                 |
| Motorcyclist road injuries                    | 60.1<br>(51.3 to 70.9)                        | 21.7<br>(17.3 to 27.1)                                    | 3.3<br>(2.2 to 4.8)                     | 39.6<br>(36.6 to 42.7)                            | 0.1<br>(-1.8 to 2.0)                                |
| Motor vehicle road injuries                   | 144.0<br>(124.5 to 162.9)                     | 90.9<br>(75.5 to 106.8)                                   | 9.0<br>(6.0 to 13.0)                    | 43.5<br>(40.4 to 46.9)                            | 3.4<br>(1.4 to 5.4)                                 |
| Other road injuries                           | 46.6<br>(40.0 to 55.3)                        | 31.9<br>(23.9 to 41.7)                                    | 2.5<br>(1.6 to 3.6)                     | 43.0<br>(39.7 to 46.5)                            | 4.4<br>(2.4 to 6.4)                                 |
| Other transport injuries                      | 109.5<br>(91.9 to 132.6)                      | 38.2<br>(31.1 to 47.2)                                    | 6.6<br>(4.3 to 9.6)                     | 45.5<br>(40.7 to 50.7)                            | 5.8<br>(3.2 to 8.5)                                 |
| <b>Unintentional injuries</b>                 | <b>5,325.1</b><br><b>(4,903.0 to 5,825.0)</b> | <b>3,556.9</b><br><b>(3,323.5 to 3,807.9)</b>             | <b>197.1</b><br><b>(133.9 to 277.5)</b> | <b>43.0</b><br><b>(40.1 to 46.1)</b>              | <b>3.2</b><br><b>(1.7 to 4.9)</b>                   |
| Falls                                         | 2,042.5<br>(1,763.6 to 2,321.3)               | 1,328.3<br>(1,146.8 to 1,545.9)                           | 87.7<br>(61.7 to 120.7)                 | 43.1<br>(40.3 to 46.0)                            | 2.8<br>(1.0 to 4.5)                                 |
| Drowning                                      | 18.6<br>(15.9 to 21.7)                        | 5.6<br>(4.7 to 6.5)                                       | 1.1<br>(0.7 to 1.6)                     | 36.8<br>(32.6 to 41.1)                            | -1.8<br>(-4.3 to 0.4)                               |
| Fire, heat, and hot substances                | 747.7<br>(613.1 to 929.5)                     | 152.3<br>(123.3 to 187.3)                                 | 22.2<br>(15.0 to 31.7)                  | 45.1<br>(38.2 to 53.4)                            | 6.5<br>(2.3 to 11.4)                                |
| Poisonings                                    | 18.3<br>(14.3 to 22.7)                        | 34.4<br>(26.4 to 43.9)                                    | 1.9<br>(1.2 to 2.9)                     | 63.0<br>(49.7 to 78.7)                            | 17.9<br>(9.7 to 26.5)                               |
| Exposure to mechanical forces                 | 802.5<br>(684.7 to 979.6)                     | 455.8<br>(380.9 to 534.7)                                 | 21.4<br>(13.9 to 31.5)                  | 43.1<br>(39.9 to 46.7)                            | 3.1<br>(1.2 to 4.9)                                 |
| Unintentional firearm injuries                | 36.6<br>(30.1 to 45.0)                        | 13.7<br>(9.7 to 18.7)                                     | 1.7<br>(1.1 to 2.5)                     | 40.5<br>(37.0 to 44.4)                            | 2.1<br>(-0.0 to 4.5)                                |
| Unintentional suffocation                     | 67.6<br>(48.7 to 90.4)                        | 24.0<br>(16.5 to 33.9)                                    | 2.3<br>(1.4 to 3.6)                     | 48.4<br>(43.7 to 53.3)                            | 8.4<br>(5.9 to 11.0)                                |
| Other exposure to mechanical forces           | 698.2<br>(582.2 to 868.9)                     | 418.2<br>(350.6 to 490.2)                                 | 17.4<br>(11.4 to 25.6)                  | 42.8<br>(39.5 to 46.4)                            | 2.7<br>(0.8 to 4.5)                                 |



| Cause                                                                               | Prevalence in thousands (95% UI)              | Incidence in thousands (95% UI)          | YLDs in thousands (95% UI)           |                                                   |                                                     |
|-------------------------------------------------------------------------------------|-----------------------------------------------|------------------------------------------|--------------------------------------|---------------------------------------------------|-----------------------------------------------------|
|                                                                                     | 2016 counts                                   | 2016 counts                              | 2016 counts                          | Percentage change in counts between 2006 and 2016 | Percentage change in age-standardised rates between |
| Adverse effects of medical treatment                                                | 21.3<br>(16.5 to 26.8)                        | 278.8<br>(234.8 to 326.6)                | 2.8<br>(1.7 to 4.3)                  | 30.6<br>(21.6 to 39.4)                            | -0.5<br>(-5.2 to 4.5)                               |
| Animal contact                                                                      | 294.9<br>(259.9 to 344.1)                     | 503.1<br>(425.2 to 591.4)                | 10.5<br>(7.0 to 14.9)                | 33.9<br>(27.4 to 41.4)                            | -4.0<br>(-7.7 to -0.2)                              |
| Venomous animal contact                                                             | 112.7<br>(93.3 to 137.7)                      | 206.5<br>(162.7 to 256.9)                | 7.1<br>(4.7 to 10.2)                 | 37.2<br>(27.5 to 47.8)                            | -1.1<br>(-6.6 to 4.8)                               |
| Non-venomous animal contact                                                         | 182.2<br>(152.7 to 222.0)                     | 296.6<br>(242.2 to 357.7)                | 3.4<br>(2.2 to 4.9)                  | 27.5<br>(23.3 to 31.5)                            | -8.7<br>(-11.5 to -6.4)                             |
| Foreign body                                                                        | 410.3<br>(327.7 to 501.0)                     | 329.9<br>(287.4 to 380.2)                | 17.7<br>(11.4 to 26.0)               | 38.6<br>(33.9 to 43.8)                            | 2.2<br>(-0.4 to 4.7)                                |
| Pulmonary aspiration and foreign body in airway                                     | 237.4<br>(172.1 to 331.0)                     | 130.9<br>(105.7 to 164.7)                | 11.5<br>(7.2 to 17.1)                | 36.5<br>(31.2 to 42.2)                            | 0.7<br>(-2.2 to 3.5)                                |
| Foreign body in eyes                                                                | 19.2<br>(10.0 to 30.0)                        | 108.5<br>(82.0 to 145.5)                 | 1.1<br>(0.5 to 1.9)                  | 34.2<br>(29.6 to 39.0)                            | -2.3<br>(-5.3 to 0.6)                               |
| Foreign body in other body part                                                     | 153.7<br>(122.5 to 202.7)                     | 90.5<br>(72.7 to 110.1)                  | 5.2<br>(3.4 to 7.6)                  | 44.5<br>(39.2 to 50.4)                            | 6.5<br>(3.5 to 9.4)                                 |
| Environmental heat and cold exposure                                                | 287.2<br>(235.8 to 350.7)                     | 116.3<br>(93.6 to 146.6)                 | 11.7<br>(7.7 to 17.3)                | 44.3<br>(40.8 to 48.2)                            | 3.9<br>(1.9 to 5.9)                                 |
| Other unintentional injuries                                                        | 681.8<br>(528.2 to 890.2)                     | 352.4<br>(286.1 to 429.8)                | 20.0<br>(12.9 to 29.7)               | 49.8<br>(46.1 to 53.6)                            | 6.8<br>(5.0 to 8.9)                                 |
| <b>Self-harm and interpersonal violence</b>                                         | <b>2,142.2</b><br><b>(1,947.6 to 2,333.9)</b> | <b>244.7†</b><br><b>(209.0 to 284.7)</b> | <b>31.1</b><br><b>(21.7 to 43.0)</b> | <b>26.3</b><br><b>(21.6 to 30.9)</b>              | <b>-5.7</b><br><b>(-8.2 to -3.2)</b>                |
| Self-harm                                                                           | 31.4<br>(27.3 to 35.6)                        | 19.4<br>(16.7 to 22.6)                   | 1.7<br>(1.1 to 2.5)                  | 40.9<br>(37.1 to 45.0)                            | 1.1<br>(-1.2 to 3.3)                                |
| Self-harm by firearm                                                                | 2.2<br>(1.9 to 2.5)                           | 1.0<br>(0.6 to 1.5)                      | 0.1<br>(0.1 to 0.1)                  | 24.2<br>(19.8 to 28.4)                            | -13.7<br>(-16.6 to -10.5)                           |
| Self-harm by other specified means                                                  | 29.2<br>(25.1 to 33.6)                        | 18.4<br>(15.7 to 21.4)                   | 1.6<br>(1.0 to 2.3)                  | 42.0<br>(38.1 to 46.2)                            | 2.2<br>(-0.2 to 4.6)                                |
| Interpersonal violence                                                              | 2,110.8<br>(1,918.4 to 2,302.0)               | 225.2†<br>(189.8 to 266.6)               | 29.4<br>(20.5 to 40.7)               | 25.5<br>(20.8 to 30.3)                            | -6.2<br>(-8.9 to -3.5)                              |
| Assault by firearm                                                                  | 9.3<br>(8.0 to 11.0)                          | 4.1<br>(3.0 to 5.6)                      | 0.5<br>(0.3 to 0.7)                  | 48.2<br>(42.6 to 53.5)                            | 7.8<br>(4.5 to 11.1)                                |
| Assault by sharp object                                                             | 84.6<br>(68.9 to 101.3)                       | 46.1<br>(35.0 to 60.3)                   | 2.8<br>(1.9 to 4.1)                  | 43.5<br>(39.4 to 47.5)                            | 4.5<br>(2.1 to 6.8)                                 |
| Sexual violence                                                                     | 1,788.6<br>(1,601.9 to 1,979.7)               | --                                       | 16.4<br>(11.1 to 23.3)               | 14.1<br>(8.0 to 20.7)                             | -16.1<br>(-20.1 to -11.7)                           |
| Assault by other means                                                              | 228.2<br>(192.1 to 274.6)                     | 175.0<br>(147.1 to 206.5)                | 9.8<br>(6.5 to 14.1)                 | 43.4<br>(39.9 to 47.0)                            | 4.2<br>(2.1 to 6.6)                                 |
| <b>Forces of nature, conflict and terrorism, and executions and police conflict</b> | <b>10.9</b><br><b>(6.0 to 19.7)</b>           | <b>3.2†</b><br><b>(1.2 to 6.6)</b>       | <b>0.3</b><br><b>(0.1 to 1.1)</b>    | <b>19.5</b><br><b>(4.6 to 41.2)</b>               | <b>-2.4</b><br><b>(-11.4 to 6.9)</b>                |
| Exposure to forces of nature                                                        | 1.1<br>(0.6 to 1.9)                           | --                                       | < 0.05<br>(< 0.05 to 0.1)            | 12.1<br>(8.7 to 16.5)                             | -8.4<br>(-11.1 to -4.9)                             |
| Conflict and terrorism                                                              | 2.2<br>(1.1 to 3.8)                           | --                                       | 0.1<br>(< 0.05 to 0.2)               | -15.1<br>(-19.0 to -10.5)                         | -21.3<br>(-24.1 to -17.6)                           |
| Executions and police conflict                                                      | 7.5<br>(3.1 to 15.9)                          | 3.2<br>(1.2 to 6.6)                      | 0.2<br>(0.1 to 0.8)                  | 37.6<br>(10.6 to 71.8)                            | 7.2<br>(-9.6 to 22.2)                               |
| <b>Impairments</b>                                                                  | --                                            | --                                       | --                                   | --                                                | --                                                  |
| Anaemia                                                                             | 21,512.9<br>(20,822.2 to 22,285.0)            | --                                       | 756.2<br>(508.2 to 1,061.8)          | -2.4<br>(-16.6 to 8.2)                            | -30.0<br>(-44.0 to -19.3)                           |
| Developmental intellectual disability                                               | 1,916.5<br>(1,452.0 to 2,380.1)               | --                                       | 193.6<br>(135.9 to 271.5)            | 37.5<br>(24.8 to 51.6)                            | 1.3<br>(-7.0 to 11.8)                               |
| Epilepsy                                                                            | 454.5<br>(242.3 to 678.0)                     | --                                       | 170.1<br>(86.4 to 274.9)             | 48.7<br>(-30.9 to 188.7)                          | 10.2<br>(-50.1 to 124.5)                            |
| Guillain-Barre syndrome                                                             | 0.4<br>(0.3 to 0.5)                           | --                                       | 0.1<br>(0.1 to 0.2)                  | 36.9<br>(35.9 to 37.9)                            | 0.1<br>(-0.0 to 0.2)                                |
| Hearing loss                                                                        | 6,046.1<br>(5,715.7 to 6,418.3)               | --                                       | 216.4<br>(150.5 to 298.2)            | 29.4<br>(24.4 to 33.8)                            | -5.3<br>(-7.9 to -3.0)                              |
| Heart failure                                                                       | 142.0<br>(124.9 to 161.1)                     | --                                       | 16.1<br>(11.6 to 21.1)               | 48.4<br>(36.9 to 60.7)                            | 3.1<br>(-5.3 to 11.7)                               |
| Infertility                                                                         | 1,124.6<br>(864.3 to 1,476.3)                 | --                                       | 6.4<br>(2.6 to 13.0)                 | 73.3<br>(41.5 to 112.7)                           | 24.8<br>(-0.1 to 55.7)                              |
| Pelvic inflammatory disease                                                         | 49.3<br>(41.5 to 60.2)                        | --                                       | 6.4<br>(4.3 to 9.2)                  | 33.5<br>(14.0 to 57.0)                            | -3.1<br>(-16.2 to 11.8)                             |
| Vision loss                                                                         | 4,839.4<br>(4,385.6 to 5,284.2)               | --                                       | 157.6<br>(108.6 to 227.7)            | 39.2<br>(26.3 to 54.1)                            | -2.6<br>(-7.7 to 4.3)                               |

We did not calculate incidence for the nine impairments, certain NTDs, and causes with only birth prevalence. Blank cells mean that no estimate is available.

† Incidence for aggregate causes represents the sum of the incidence of the causes below the aggregate.

‡ Incidence estimates for stroke represent first-ever stroke only.

^ Incidence of HIV/AIDS represents new infections of HIV only and does not include new infections of Tuberculosis in HIV positive cases.

SR Table 14: Prevalence, incidence, and YLDs for 2016, percentage change of YLD counts and percentage change of age-standardised YLD rates between 2006 and 2016 by cause and impairments, for all ages, Thailand.

| Cause                                                                                | Prevalence in thousands (95% UI)          | Incidence in thousands (95% UI)               | YLDs in thousands (95% UI)             |                                                   |                                                     |
|--------------------------------------------------------------------------------------|-------------------------------------------|-----------------------------------------------|----------------------------------------|---------------------------------------------------|-----------------------------------------------------|
|                                                                                      | 2016 counts                               | 2016 counts                                   | 2016 counts                            | Percentage change in counts between 2006 and 2016 | Percentage change in age-standardised rates between |
| <b>All causes</b>                                                                    | <b>65,275.9</b><br>(65,078.5 to 65,485.2) | <b>344,963.1†</b><br>(327,571.8 to 365,429.5) | <b>7,661.2</b><br>(5,696.2 to 9,862.0) | <b>11.9</b><br>(10.0 to 14.1)                     | <b>-1.5</b><br>(-3.1 to 0.5)                        |
| <b>Communicable, maternal, neonatal, and nutritional disorders</b>                   | <b>46,708.4</b><br>(45,096.2 to 48,354.8) | <b>189,764.3†</b><br>(174,482.7 to 205,705.0) | <b>635.9</b><br>(447.5 to 872.7)       | <b>1.8</b><br>(-7.2 to 13.8)                      | <b>-1.7</b><br>(-8.3 to 7.7)                        |
| <b>HIV/AIDS and tuberculosis</b>                                                     | <b>25,834.7</b><br>(21,705.8 to 29,482.9) | <b>70.5†</b><br>(56.3 to 88.7)                | <b>72.1</b><br>(42.7 to 118.0)         | <b>-8.3</b><br>(-25.5 to 10.0)                    | <b>-16.1</b><br>(-29.9 to -1.1)                     |
| Tuberculosis                                                                         | 22,977.6<br>(18,795.2 to 27,334.7)        | 52.9†<br>(41.1 to 67.7)                       | 24.6<br>(15.6 to 36.8)                 | -7.3<br>(-18.8 to 5.9)                            | -24.3<br>(-32.1 to -15.3)                           |
| Drug-susceptible tuberculosis                                                        | 80.4<br>(61.2 to 107.5)                   | 51.4<br>(39.8 to 66.5)                        | 23.9<br>(15.1 to 34.8)                 | -8.6<br>(-20.6 to 5.1)                            | -25.3<br>(-33.5 to -15.7)                           |
| Multidrug-resistant tuberculosis without extensive drug resistance                   | 2.1<br>(0.7 to 5.4)                       | 1.4<br>(0.4 to 3.4)                           | 0.7<br>(0.2 to 1.8)                    | 55.1<br>(-57.1 to 364.5)                          | 25.4<br>(-65.0 to 269.5)                            |
| Extensively drug-resistant tuberculosis                                              | 0.2<br>(0.1 to 0.5)                       | 0.1<br>(< 0.05 to 0.3)                        | 0.1<br>(< 0.05 to 0.2)                 | 422.8<br>(42.6 to 1,471.2)                        | 322.4<br>(14.2 to 1,124.9)                          |
| Latent tuberculosis infection                                                        | 22,894.9<br>(18,715.2 to 27,248.2)        | --                                            | --                                     | --                                                | --                                                  |
| HIV/AIDS                                                                             | 445.7<br>(321.3 to 614.5)                 | 17.6^<br>(11.5 to 27.8)                       | 47.5<br>(24.7 to 89.3)                 | -8.8<br>(-30.6 to 20.2)                           | -11.3<br>(-31.8 to 15.0)                            |
| Drug-susceptible HIV/AIDS - Tuberculosis                                             | 12.5<br>(7.3 to 20.4)                     | 8.0<br>(4.8 to 12.8)                          | 4.9<br>(2.5 to 8.5)                    | -42.3<br>(-56.4 to -27.4)                         | -44.0<br>(-57.7 to -29.6)                           |
| Multidrug-resistant HIV/AIDS - Tuberculosis without extensive drug resistance        | 0.4<br>(0.1 to 1.0)                       | 0.3<br>(0.1 to 0.7)                           | 0.2<br>(< 0.05 to 0.5)                 | -0.5<br>(-72.0 to 194.8)                          | -3.4<br>(-72.8 to 186.1)                            |
| Extensively drug-resistant HIV/AIDS - Tuberculosis                                   | < 0.05<br>(< 0.05 to 0.1)                 | < 0.05<br>(< 0.05 to 0.1)                     | < 0.05<br>(< 0.05 to < 0.05)           | 227.6<br>(-8.1 to 870.7)                          | 218.0<br>(-10.6 to 842.0)                           |
| HIV/AIDS resulting in other diseases                                                 | 432.8<br>(308.1 to 603.1)                 | 17.6<br>(11.5 to 27.8)                        | 42.5<br>(20.7 to 82.3)                 | -2.4<br>(-29.5 to 46.1)                           | -4.9<br>(-30.8 to 38.3)                             |
| <b>Diarrhoea, lower respiratory infections, and other common infectious diseases</b> | <b>3,020.7</b><br>(2,872.6 to 3,189.6)    | <b>162,737.0†</b><br>(149,484.4 to 177,290.3) | <b>168.7</b><br>(119.1 to 228.8)       | <b>0.5</b><br>(-2.7 to 4.0)                       | <b>0.1</b><br>(-3.1 to 3.5)                         |
| Diarrhoeal diseases                                                                  | 625.7<br>(589.1 to 665.8)                 | 42,550.9<br>(39,951.6 to 45,434.2)            | 69.8<br>(48.2 to 95.5)                 | 6.0<br>(-0.5 to 12.5)                             | 4.3<br>(-2.0 to 10.6)                               |
| Intestinal infectious diseases                                                       | 9.4<br>(7.8 to 11.6)                      | 182.3†<br>(150.7 to 221.2)                    | 1.5<br>(1.0 to 2.3)                    | -22.6<br>(-36.4 to -4.8)                          | -17.4<br>(-33.7 to 3.9)                             |
| Typhoid fever                                                                        | 9.1<br>(7.4 to 11.2)                      | 143.4<br>(117.9 to 175.0)                     | 1.4<br>(0.9 to 2.1)                    | -22.7<br>(-37.5 to -3.4)                          | -17.3<br>(-34.6 to 6.2)                             |
| Paratyphoid fever                                                                    | 1.7<br>(1.4 to 2.1)                       | 38.9<br>(32.1 to 46.8)                        | 0.1<br>(0.1 to 0.2)                    | -17.2<br>(-29.5 to -3.4)                          | -13.2<br>(-26.5 to 2.5)                             |
| Other intestinal infectious diseases                                                 | --                                        | --                                            | < 0.05<br>(< 0.05 to < 0.05)           | -37.8<br>(-49.5 to -24.3)                         | -38.6<br>(-51.1 to -23.2)                           |
| Lower respiratory infections                                                         | 95.0<br>(87.4 to 103.1)                   | 3,920.4<br>(3,574.4 to 4,277.9)               | 5.6<br>(3.7 to 8.0)                    | 15.5<br>(3.0 to 29.4)                             | -2.1<br>(-11.9 to 8.6)                              |
| Upper respiratory infections                                                         | 1,516.4<br>(1,345.7 to 1,701.2)           | 112,864.0<br>(99,714.5 to 126,975.8)          | 37.7<br>(22.6 to 59.1)                 | -3.0<br>(-8.2 to 2.3)                             | -0.0<br>(-4.9 to 5.4)                               |
| Otitis media                                                                         | 583.3<br>(522.0 to 648.3)                 | 1,850.5<br>(1,529.3 to 2,266.2)               | 16.8<br>(10.6 to 25.4)                 | -14.1<br>(-20.9 to -7.1)                          | -8.5<br>(-15.7 to -1.7)                             |
| Meningitis                                                                           | 93.2<br>(83.4 to 104.2)                   | 9.3<br>(8.0 to 10.5)                          | 13.3<br>(9.2 to 17.5)                  | -0.5<br>(-6.6 to 5.9)                             | 0.1<br>(-5.6 to 5.9)                                |
| Pneumococcal meningitis                                                              | 42.5<br>(36.6 to 49.0)                    | 1.8<br>(1.5 to 2.2)                           | 6.1<br>(4.1 to 8.4)                    | 1.4<br>(-10.6 to 15.3)                            | 1.8<br>(-9.8 to 14.9)                               |
| H influenzae type B meningitis                                                       | 23.2<br>(18.5 to 28.8)                    | 3.0<br>(2.5 to 3.6)                           | 3.0<br>(2.1 to 4.0)                    | -4.1<br>(-8.2 to -0.5)                            | -1.8<br>(-5.8 to 1.9)                               |
| Meningococcal infection                                                              | 3.2<br>(2.6 to 4.2)                       | 0.4<br>(0.3 to 0.6)                           | 0.6<br>(0.4 to 0.8)                    | 2.0<br>(-4.5 to 20.7)                             | 1.3<br>(-5.0 to 25.6)                               |
| Other meningitis                                                                     | 24.4<br>(20.0 to 29.4)                    | 4.0<br>(3.4 to 4.7)                           | 3.6<br>(2.4 to 4.9)                    | -1.1<br>(-4.9 to 2.3)                             | -1.1<br>(-4.6 to 2.4)                               |
| Encephalitis                                                                         | 166.4<br>(110.4 to 245.5)                 | 73.3<br>(65.9 to 81.7)                        | 19.6<br>(13.7 to 26.3)                 | 0.5<br>(-11.4 to 12.7)                            | -2.9<br>(-14.1 to 9.6)                              |
| Diphtheria                                                                           | < 0.05<br>(< 0.05 to < 0.05)              | < 0.05<br>(< 0.05 to < 0.05)                  | < 0.05<br>(< 0.05 to < 0.05)           | -17.4<br>(-52.8 to 50.5)                          | -22.7<br>(-53.2 to 34.0)                            |
| Whooping cough                                                                       | 5.6<br>(4.4 to 7.2)                       | 41.1<br>(32.2 to 52.4)                        | 0.3<br>(0.2 to 0.5)                    | -26.1<br>(-41.5 to -6.3)                          | 4.7<br>(-16.2 to 32.2)                              |
| Tetanus                                                                              | 0.4<br>(0.4 to 0.5)                       | 0.2<br>(0.1 to 0.2)                           | < 0.05<br>(< 0.05 to < 0.05)           | -7.0<br>(-17.2 to 1.6)                            | -9.9<br>(-19.8 to -1.5)                             |
| Measles                                                                              | 0.3<br>(0.1 to 0.6)                       | 10.0<br>(3.5 to 23.3)                         | < 0.05<br>(< 0.05 to 0.1)              | -67.6<br>(-73.7 to -61.1)                         | -54.8<br>(-63.7 to -45.0)                           |
| Varicella and herpes zoster                                                          | 87.7<br>(78.4 to 97.4)                    | 1,235.0<br>(1,172.4 to 1,300.3)               | 4.0<br>(2.4 to 6.2)                    | 18.6<br>(6.1 to 31.5)                             | -0.0<br>(-9.8 to 10.1)                              |
| <b>Neglected tropical diseases and malaria</b>                                       | <b>18,202.5</b><br>(16,001.1 to 20,715.9) | <b>21,984.9†</b><br>(13,646.2 to 29,343.6)    | <b>156.9</b><br>(68.6 to 302.1)        | <b>49.2</b><br>(9.4 to 96.7)                      | <b>19.7</b><br>(-5.1 to 54.7)                       |
| Malaria                                                                              | 1.3<br>(1.1 to 1.6)                       | 4.9<br>(4.9 to 4.9)                           | 0.4<br>(0.2 to 0.5)                    | -29.3<br>(-39.9 to -19.2)                         | -29.4<br>(-40.4 to -19.0)                           |
| Chagas disease                                                                       | --                                        | --                                            | --                                     | --                                                | --                                                  |
| Leishmaniasis                                                                        | < 0.05<br>(< 0.05 to < 0.05)              | < 0.05<br>(< 0.05 to < 0.05)                  | < 0.05<br>(< 0.05 to < 0.05)           | -13.6<br>(-88.5 to 555.2)                         | -23.9<br>(-89.9 to 489.3)                           |
| Visceral leishmaniasis                                                               | < 0.05<br>(< 0.05 to < 0.05)              | < 0.05<br>(< 0.05 to < 0.05)                  | < 0.05<br>(< 0.05 to < 0.05)           | -32.1<br>(-74.3 to 72.2)                          | -47.7<br>(-79.8 to 31.1)                            |
| Cutaneous and mucocutaneous leishmaniasis                                            | < 0.05<br>(< 0.05 to < 0.05)              | < 0.05<br>(< 0.05 to < 0.05)                  | < 0.05<br>(< 0.05 to < 0.05)           | 7.6<br>(-100.0 to 73,381,163.8)                   | 6.4<br>(-100.0 to 76,733,012.8)                     |
| African trypanosomiasis                                                              | --                                        | --                                            | --                                     | --                                                | --                                                  |
| Schistosomiasis                                                                      | --                                        | --                                            | --                                     | --                                                | --                                                  |
| Cysticercosis                                                                        | 3.1<br>(2.1 to 4.5)                       | --                                            | 0.5<br>(0.2 to 0.9)                    | -27.1<br>(-53.1 to 8.5)                           | -39.4<br>(-61.1 to -11.5)                           |
| Cystic echinococcosis                                                                | 0.1<br>(< 0.05 to 0.6)                    | < 0.05<br>(< 0.05 to 0.1)                     | < 0.05<br>(< 0.05 to 0.1)              | -48.2<br>(-97.3 to 621.0)                         | -52.9<br>(-97.3 to 530.6)                           |
| Lymphatic filariasis                                                                 | 0.6<br>(0.3 to 1.3)                       | 0.1<br>(0.1 to 0.1)                           | 0.1<br>(< 0.05 to 0.2)                 | -62.1<br>(-79.8 to -47.2)                         | -66.7<br>(-82.3 to -54.0)                           |
| Onchocerciasis                                                                       | --                                        | --                                            | --                                     | --                                                | --                                                  |
| Trachoma                                                                             | --                                        | --                                            | --                                     | --                                                | --                                                  |
| Dengue                                                                               | 88.9<br>(49.9 to 146.8)                   | 1,486.4<br>(948.0 to 2,171.6)                 | 14.4<br>(6.5 to 26.5)                  | 205.1<br>(134.6 to 640.2)                         | 203.0<br>(132.7 to 640.3)                           |
| Yellow fever                                                                         | --                                        | --                                            | --                                     | --                                                | --                                                  |
| Rabies                                                                               | < 0.05<br>(< 0.05 to < 0.05)              | < 0.05<br>(< 0.05 to < 0.05)                  | < 0.05<br>(< 0.05 to < 0.05)           | 73.5<br>(-36.5 to 205.9)                          | 50.2<br>(-48.6 to 171.1)                            |
| Intestinal nematode infections                                                       | 15,013.8<br>(12,769.8 to 17,679.4)        | --                                            | 38.0<br>(19.5 to 69.7)                 | 2.3<br>(-36.6 to 69.8)                            | -1.7<br>(-37.5 to 59.1)                             |
| Ascariasis                                                                           | 3,417.9<br>(2,387.0 to 4,719.5)           | --                                            | 0.6<br>(0.3 to 1.1)                    | 0.8<br>(-43.5 to 76.3)                            | -0.2<br>(-42.2 to 69.2)                             |

| Cause                                                                   | Prevalence in thousands (95% UI)                 | Incidence in thousands (95% UI)                      | YLDs in thousands (95% UI)                    |                                                   |                                                     |
|-------------------------------------------------------------------------|--------------------------------------------------|------------------------------------------------------|-----------------------------------------------|---------------------------------------------------|-----------------------------------------------------|
|                                                                         | 2016 counts                                      | 2016 counts                                          | 2016 counts                                   | Percentage change in counts between 2006 and 2016 | Percentage change in age-standardised rates between |
| Trichuriasis                                                            | 1,960.3<br>(1,400.3 to 2,715.3)                  | --                                                   | 0.1<br>(< 0.05 to 0.2)                        | -0.9<br>(-56.8 to 130.9)                          | -5.2<br>(-57.1 to 109.4)                            |
| Hookworm disease                                                        | 10,877.8<br>(8,655.9 to 13,727.9)                | --                                                   | 37.3<br>(19.1 to 68.7)                        | 2.3<br>(-37.2 to 72.8)                            | -1.8<br>(-38.0 to 60.6)                             |
| Food-borne trematodiasis                                                | 4,142.7<br>(2,563.3 to 5,797.5)                  | 20,470.8<br>(12,224.1 to 27,832.6)                   | 100.5<br>(21.9 to 234.1)                      | 72.7<br>(34.6 to 131.7)                           | 21.1<br>(-4.0 to 63.3)                              |
| Leprosy                                                                 | 3.1<br>(2.7 to 3.5)                              | 0.1<br>(0.1 to 0.1)                                  | 0.2<br>(0.1 to 0.3)                           | -9.4<br>(-32.7 to 17.0)                           | -29.8<br>(-46.6 to -9.6)                            |
| Ebola virus disease                                                     | --                                               | --                                                   | --                                            | --                                                | --                                                  |
| Zika virus disease                                                      | 0.4<br>(0.1 to 0.9)                              | 22.7<br>(9.1 to 55.9)                                | < 0.05<br>(< 0.05 to < 0.05)                  | --                                                | --                                                  |
| Guinea worm disease                                                     | --                                               | --                                                   | --                                            | --                                                | --                                                  |
| Other neglected tropical diseases                                       | 211.7<br>(190.0 to 235.6)                        | --                                                   | 2.9<br>(1.7 to 4.8)                           | -17.8<br>(-31.6 to 0.3)                           | -7.1<br>(-23.8 to 14.8)                             |
| <b>Maternal disorders</b>                                               | <b>40.4</b><br><b>(29.2 to 53.2)</b>             | <b>670.6†</b><br><b>(578.8 to 792.1)</b>             | <b>2.7</b><br><b>(1.7 to 4.1)</b>             | <b>-12.8</b><br><b>(-37.5 to 20.4)</b>            | <b>-1.8</b><br><b>(-29.4 to 35.8)</b>               |
| Maternal haemorrhage                                                    | 5.5<br>(4.1 to 7.2)                              | 29.2<br>(21.6 to 38.4)                               | 0.2<br>(0.1 to 0.2)                           | -36.2<br>(-56.3 to -5.6)                          | -27.9<br>(-50.9 to 6.2)                             |
| Maternal sepsis and other pregnancy related infections                  | 5.0<br>(2.5 to 8.4)                              | 59.8<br>(44.8 to 81.4)                               | 0.2<br>(0.1 to 0.5)                           | -33.0<br>(-71.8 to 57.8)                          | -23.6<br>(-68.4 to 82.9)                            |
| Maternal hypertensive disorders                                         | 28.0<br>(18.1 to 38.3)                           | 162.2<br>(149.0 to 182.7)                            | 1.4<br>(0.8 to 2.3)                           | 8.4<br>(-33.4 to 75.5)                            | 21.9<br>(-25.3 to 97.7)                             |
| Maternal obstructed labour and uterine rupture                          | 0.4<br>(0.2 to 0.6)                              | 26.5<br>(19.9 to 34.2)                               | 0.1<br>(0.1 to 0.2)                           | -23.1<br>(-57.8 to 39.5)                          | -12.8<br>(-52.1 to 58.0)                            |
| Maternal abortion, miscarriage, and ectopic pregnancy                   | 3.2<br>(2.0 to 4.7)                              | 392.9<br>(300.3 to 513.7)                            | 0.4<br>(0.2 to 0.6)                           | -33.7<br>(-68.3 to 32.1)                          | -25.4<br>(-64.9 to 49.5)                            |
| Other maternal disorders                                                | --                                               | --                                                   | 0.4<br>(0.2 to 0.6)                           | -16.9<br>(-40.3 to 15.2)                          | -6.2<br>(-32.9 to 29.2)                             |
| <b>Neonatal disorders</b>                                               | <b>789.8</b><br><b>(661.8 to 963.8)</b>          | --                                                   | <b>118.4</b><br><b>(83.0 to 167.3)</b>        | <b>-6.5</b><br><b>(-21.9 to 13.2)</b>             | <b>-0.5</b><br><b>(-17.1 to 20.8)</b>               |
| Neonatal preterm birth complications                                    | 739.9<br>(585.6 to 954.7)                        | --                                                   | 88.2<br>(59.7 to 125.3)                       | -10.7<br>(-29.9 to 13.7)                          | -5.1<br>(-25.2 to 20.6)                             |
| Neonatal encephalopathy due to birth asphyxia and trauma                | 36.6<br>(20.6 to 57.6)                           | --                                                   | 8.0<br>(3.8 to 15.2)                          | 26.6<br>(-3.6 to 109.5)                           | 30.4<br>(-0.4 to 115.5)                             |
| Neonatal sepsis and other neonatal infections                           | 44.5<br>(19.7 to 101.6)                          | --                                                   | 17.9<br>(6.7 to 45.4)                         | 12.6<br>(-8.6 to 68.2)                            | 17.2<br>(-4.6 to 72.4)                              |
| Hemolytic disease and other neonatal jaundice                           | 6.8<br>(5.8 to 7.8)                              | --                                                   | 2.3<br>(1.7 to 2.9)                           | -5.5<br>(-13.2 to 3.0)                            | -1.6<br>(-9.6 to 7.6)                               |
| Other neonatal disorders                                                | --                                               | --                                                   | 2.1<br>(1.4 to 3.1)                           | -34.4<br>(-47.1 to -17.8)                         | -5.1<br>(-23.3 to 18.8)                             |
| <b>Nutritional deficiencies</b>                                         | <b>6,741.6</b><br><b>(6,317.4 to 7,113.2)</b>    | <b>308.7†</b><br><b>(258.0 to 371.8)</b>             | <b>90.1</b><br><b>(57.3 to 138.9)</b>         | <b>-20.9</b><br><b>(-28.0 to -12.3)</b>           | <b>-16.0</b><br><b>(-25.1 to -3.1)</b>              |
| Protein-energy malnutrition                                             | 223.0<br>(169.8 to 283.4)                        | 103.9<br>(81.7 to 131.3)                             | 9.4<br>(5.0 to 16.3)                          | 4.1<br>(-38.8 to 80.9)                            | 50.2<br>(-10.1 to 160.4)                            |
| Iodine deficiency                                                       | 385.2<br>(346.1 to 428.0)                        | 9.0<br>(8.1 to 10.0)                                 | 9.7<br>(6.5 to 13.9)                          | 39.4<br>(22.3 to 59.0)                            | 22.3<br>(7.9 to 38.2)                               |
| Vitamin A deficiency                                                    | 228.7<br>(180.7 to 293.9)                        | 195.8<br>(151.2 to 251.5)                            | 0.6<br>(0.4 to 0.9)                           | -6.3<br>(-20.7 to 11.6)                           | -3.6<br>(-19.3 to 16.8)                             |
| Iron-deficiency anaemia                                                 | 5,826.2<br>(5,417.1 to 6,282.1)                  | --                                                   | 70.1<br>(43.4 to 112.2)                       | -27.8<br>(-35.1 to -20.4)                         | -26.7<br>(-34.4 to -18.5)                           |
| Other nutritional deficiencies                                          | --                                               | --                                                   | 0.3<br>(0.2 to 0.6)                           | 4.9<br>(-40.7 to 85.8)                            | 51.2<br>(-14.2 to 168.6)                            |
| <b>Other communicable, maternal, neonatal, and nutritional diseases</b> | <b>18,746.8</b><br><b>(17,526.9 to 20,037.7)</b> | <b>3,992.6</b><br><b>(3,675.4 to 4,327.7)</b>        | <b>26.7</b><br><b>(17.5 to 40.7)</b>          | <b>-6.4</b><br><b>(-12.6 to 0.1)</b>              | <b>-7.4</b><br><b>(-14.0 to -1.3)</b>               |
| Sexually transmitted diseases excluding HIV                             | 13,937.0<br>(12,863.8 to 15,135.9)               | 3,595.4<br>(3,287.5 to 3,936.8)                      | 22.9<br>(15.1 to 35.0)                        | -5.1<br>(-12.2 to 1.7)                            | -6.5<br>(-13.6 to 0.0)                              |
| Syphilis                                                                | 570.3<br>(446.3 to 713.9)                        | 330.8<br>(257.9 to 427.0)                            | 2.2<br>(1.6 to 3.1)                           | 30.7<br>(13.7 to 48.4)                            | 2.3<br>(-11.1 to 16.0)                              |
| Chlamydial infection                                                    | 974.0<br>(770.5 to 1,204.9)                      | 818.5<br>(668.7 to 1,000.9)                          | 6.1<br>(3.8 to 9.5)                           | -13.1<br>(-23.4 to -0.7)                          | -7.5<br>(-19.0 to 5.9)                              |
| Gonococcal infection                                                    | 83.4<br>(68.3 to 102.7)                          | 197.6<br>(155.8 to 246.8)                            | 0.7<br>(0.5 to 1.1)                           | -11.5<br>(-30.1 to 12.9)                          | -8.8<br>(-27.9 to 15.9)                             |
| Trichomoniasis                                                          | 1,263.6<br>(1,071.2 to 1,477.6)                  | 1,050.9<br>(884.6 to 1,232.4)                        | 1.2<br>(0.5 to 2.6)                           | 2.5<br>(-5.8 to 12.1)                             | -0.5<br>(-8.2 to 8.3)                               |
| Genital herpes                                                          | 11,434.4<br>(9,853.5 to 13,281.8)                | 507.2<br>(430.0 to 603.9)                            | 2.9<br>(0.9 to 6.7)                           | 7.6<br>(-2.0 to 17.4)                             | -3.6<br>(-11.7 to 5.9)                              |
| Other sexually transmitted diseases                                     | 434.8<br>(352.3 to 537.6)                        | 690.4<br>(589.3 to 812.4)                            | 9.7<br>(6.5 to 14.0)                          | -9.2<br>(-19.7 to 1.4)                            | -8.7<br>(-18.9 to 1.4)                              |
| Hepatitis                                                               | 6,238.6<br>(5,474.0 to 7,189.0)                  | 397.2<br>(327.6 to 479.4)                            | 0.6<br>(0.4 to 1.0)                           | -19.0<br>(-34.0 to -2.5)                          | -31.9<br>(-43.7 to -18.5)                           |
| Acute hepatitis A                                                       | 4.2<br>(3.1 to 5.4)                              | 54.2<br>(40.9 to 70.7)                               | 0.1<br>(0.1 to 0.2)                           | -25.9<br>(-47.8 to 2.1)                           | -38.8<br>(-55.2 to -17.4)                           |
| Hepatitis B                                                             | 3,907.5<br>(3,231.6 to 4,773.9)                  | 292.0<br>(225.2 to 376.3)                            | 0.4<br>(0.2 to 0.7)                           | -16.4<br>(-36.4 to 7.0)                           | -32.3<br>(-47.4 to -14.9)                           |
| Hepatitis C                                                             | 2,326.0<br>(2,068.7 to 2,597.0)                  | 38.6<br>(34.2 to 43.6)                               | < 0.05<br>(< 0.05 to 0.1)                     | -24.9<br>(-60.9 to 41.1)                          | -6.5<br>(-56.1 to 88.6)                             |
| Acute hepatitis E                                                       | 1.0<br>(0.6 to 1.3)                              | 12.3<br>(8.1 to 17.0)                                | < 0.05<br>(< 0.05 to < 0.05)                  | -17.8<br>(-31.7 to -5.1)                          | -37.5<br>(-46.8 to -28.8)                           |
| Other infectious diseases                                               | 187.2<br>(169.8 to 206.4)                        | 0.1<br>(< 0.05 to 0.1)                               | 3.2<br>(1.9 to 5.1)                           | -12.5<br>(-23.0 to -0.6)                          | -7.5<br>(-20.3 to 6.5)                              |
| <b>Non-communicable diseases</b>                                        | <b>61,991.4</b><br><b>(61,688.0 to 62,317.2)</b> | <b>151,001.9†</b><br><b>(141,404.5 to 161,402.8)</b> | <b>6,552.8</b><br><b>(4,865.9 to 8,426.6)</b> | <b>12.3</b><br><b>(10.1 to 14.8)</b>              | <b>-1.8</b><br><b>(-3.6 to 0.4)</b>                 |
| <b>Neoplasms</b>                                                        | <b>294.0</b><br><b>(281.4 to 306.2)</b>          | <b>138.8</b><br><b>(128.7 to 145.2)</b>              | <b>43.1</b><br><b>(31.6 to 56.5)</b>          | <b>35.4</b><br><b>(27.6 to 44.1)</b>              | <b>1.2</b><br><b>(-4.6 to 7.7)</b>                  |
| Lip and oral cavity cancer                                              | 22.9<br>(21.0 to 24.8)                           | 6.2<br>(5.7 to 6.7)                                  | 2.3<br>(1.6 to 3.0)                           | 35.2<br>(18.7 to 54.9)                            | -4.2<br>(-16.3 to 10.2)                             |
| Nasopharynx cancer                                                      | 6.4<br>(5.6 to 7.3)                              | 1.8<br>(1.6 to 2.1)                                  | 0.8<br>(0.5 to 1.0)                           | 27.0<br>(6.7 to 52.9)                             | 3.8<br>(-11.4 to 23.1)                              |
| Other pharynx cancer                                                    | 2.5<br>(2.2 to 2.8)                              | 0.9<br>(0.8 to 1.0)                                  | 0.3<br>(0.2 to 0.4)                           | 38.1<br>(20.3 to 54.8)                            | 1.1<br>(-12.0 to 13.5)                              |
| Oesophageal cancer                                                      | 3.1<br>(2.9 to 3.3)                              | 2.7<br>(2.5 to 2.9)                                  | 0.7<br>(0.5 to 0.9)                           | 51.1<br>(38.3 to 65.6)                            | 5.5<br>(-4.1 to 15.8)                               |
| Stomach cancer                                                          | 6.7<br>(6.3 to 7.1)                              | 4.2<br>(4.0 to 4.5)                                  | 1.1<br>(0.8 to 1.5)                           | 16.0<br>(3.7 to 29.5)                             | -16.2<br>(-25.3 to -5.5)                            |
| Colon and rectum cancer                                                 | 45.5<br>(41.7 to 49.4)                           | 13.2<br>(12.1 to 14.3)                               | 4.6<br>(3.3 to 6.1)                           | 42.7<br>(22.8 to 65.0)                            | 1.2<br>(-13.3 to 17.1)                              |
| Liver cancer                                                            | 12.3<br>(10.7 to 14.2)                           | 22.1<br>(19.1 to 24.5)                               | 4.7<br>(3.2 to 6.2)                           | 35.1<br>(17.3 to 55.5)                            | -1.4<br>(-14.2 to 13.2)                             |
| Liver cancer due to hepatitis B                                         | 8.2<br>(6.6 to 10.1)                             | 8.7<br>(7.0 to 10.7)                                 | 1.8<br>(1.2 to 2.6)                           | 31.0<br>(9.7 to 58.8)                             | -2.1<br>(-18.1 to 18.9)                             |



| Cause                                              | Prevalence in thousands (95% UI)              | Incidence in thousands (95% UI)                | YLDs in thousands (95% UI)              |                                                   |                                                     |
|----------------------------------------------------|-----------------------------------------------|------------------------------------------------|-----------------------------------------|---------------------------------------------------|-----------------------------------------------------|
|                                                    | 2016 counts                                   | 2016 counts                                    | 2016 counts                             | Percentage change in counts between 2006 and 2016 | Percentage change in age-standardised rates between |
| Liver cancer due to hepatitis C                    | 2.7<br>(2.0 to 3.6)                           | 2.9<br>(2.2 to 3.8)                            | 0.6<br>(0.4 to 0.9)                     | 41.8<br>(24.6 to 61.1)                            | -0.7<br>(-13.6 to 12.9)                             |
| Liver cancer due to alcohol use                    | 6.7<br>(4.3 to 8.9)                           | 7.1<br>(4.6 to 9.5)                            | 1.5<br>(0.9 to 2.2)                     | 36.6<br>(10.5 to 67.4)                            | -2.1<br>(-20.3 to 19.2)                             |
| Liver cancer due to other causes                   | 3.3<br>(2.4 to 4.3)                           | 3.4<br>(2.5 to 4.5)                            | 0.7<br>(0.5 to 1.1)                     | 37.3<br>(16.0 to 61.7)                            | 1.0<br>(-14.1 to 19.0)                              |
| Gallbladder and biliary tract cancer               | 4.1<br>(1.6 to 5.2)                           | 5.0<br>(2.0 to 6.3)                            | 1.1<br>(0.4 to 1.7)                     | 39.6<br>(15.0 to 64.1)                            | -2.0<br>(-20.2 to 16.8)                             |
| Pancreatic cancer                                  | 2.3<br>(2.2 to 2.5)                           | 3.1<br>(2.9 to 3.2)                            | 0.6<br>(0.4 to 0.8)                     | 40.9<br>(29.2 to 54.4)                            | 0.1<br>(-8.5 to 9.8)                                |
| Larynx cancer                                      | 6.8<br>(6.2 to 7.5)                           | 2.0<br>(1.8 to 2.2)                            | 0.8<br>(0.6 to 1.1)                     | 43.1<br>(24.3 to 66.8)                            | 1.5<br>(-11.8 to 18.2)                              |
| Tracheal, bronchus, and lung cancer                | 22.2<br>(20.6 to 25.5)                        | 19.8<br>(18.4 to 22.4)                         | 4.5<br>(3.2 to 5.9)                     | 30.4<br>(9.6 to 53.6)                             | -7.0<br>(-21.3 to 9.7)                              |
| Malignant skin melanoma                            | 1.2<br>(1.0 to 2.0)                           | 0.3<br>(0.2 to 0.5)                            | 0.1<br>(0.1 to 0.2)                     | 28.0<br>(10.7 to 51.2)                            | 1.5<br>(-10.8 to 14.4)                              |
| Non-melanoma skin cancer                           | 0.5<br>(0.4 to 0.7)                           | 2.8<br>(2.5 to 3.1)                            | < 0.05<br>(< 0.05 to < 0.05)            | -8.8<br>(-32.2 to 20.4)                           | -34.0<br>(-50.9 to -12.9)                           |
| Non-melanoma skin cancer (squamous-cell carcinoma) | 0.5<br>(0.3 to 0.7)                           | 1.3<br>(1.2 to 1.5)                            | < 0.05<br>(< 0.05 to < 0.05)            | -8.8<br>(-35.1 to 22.0)                           | -34.0<br>(-52.8 to -10.8)                           |
| Non-melanoma skin cancer (basal-cell carcinoma)    | 0.2<br>(0.1 to 0.3)                           | 1.4<br>(1.2 to 1.7)                            | < 0.05<br>(< 0.05 to < 0.05)            | -8.4<br>(-18.6 to 3.1)                            | -33.2<br>(-40.5 to -25.8)                           |
| Breast cancer                                      | 67.6<br>(53.0 to 76.9)                        | 14.3<br>(11.2 to 16.2)                         | 6.1<br>(4.1 to 8.4)                     | 41.3<br>(14.0 to 74.6)                            | 10.7<br>(-9.6 to 35.4)                              |
| Cervical cancer                                    | 31.9<br>(24.5 to 37.0)                        | 8.1<br>(6.3 to 9.4)                            | 2.9<br>(1.9 to 4.0)                     | -1.0<br>(-23.2 to 29.7)                           | -19.9<br>(-37.2 to 3.7)                             |
| Uterine cancer                                     | 7.6<br>(6.7 to 8.8)                           | 1.6<br>(1.4 to 1.9)                            | 0.6<br>(0.4 to 0.9)                     | 40.8<br>(10.5 to 79.6)                            | 4.2<br>(-16.7 to 31.2)                              |
| Ovarian cancer                                     | 10.3<br>(8.9 to 12.0)                         | 3.1<br>(2.7 to 3.6)                            | 1.4<br>(1.0 to 2.1)                     | 26.4<br>(-9.7 to 73.7)                            | 1.9<br>(-26.0 to 40.8)                              |
| Prostate cancer                                    | 24.6<br>(14.9 to 29.7)                        | 6.1<br>(3.9 to 7.2)                            | 2.4<br>(1.4 to 3.4)                     | 73.7<br>(40.4 to 114.9)                           | 18.0<br>(-4.7 to 44.7)                              |
| Testicular cancer                                  | 1.0<br>(0.8 to 1.2)                           | 0.2<br>(0.2 to 0.2)                            | 0.1<br>(< 0.05 to 0.1)                  | 34.9<br>(7.7 to 71.9)                             | 34.7<br>(7.4 to 72.2)                               |
| Kidney cancer                                      | 7.5<br>(6.5 to 8.2)                           | 2.0<br>(1.8 to 2.1)                            | 0.7<br>(0.5 to 0.9)                     | 42.0<br>(22.3 to 65.4)                            | 10.9<br>(-3.8 to 28.2)                              |
| Bladder cancer                                     | 13.1<br>(12.0 to 14.3)                        | 3.2<br>(3.0 to 3.5)                            | 1.3<br>(0.9 to 1.7)                     | 46.7<br>(24.7 to 73.1)                            | 3.0<br>(-13.3 to 21.2)                              |
| Brain and nervous system cancer                    | 5.8<br>(3.5 to 7.0)                           | 2.8<br>(1.7 to 3.3)                            | 0.9<br>(0.5 to 1.3)                     | 30.5<br>(20.2 to 42.0)                            | 7.5<br>(-0.7 to 16.6)                               |
| Thyroid cancer                                     | 8.8<br>(7.3 to 18.2)                          | 1.7<br>(1.4 to 3.5)                            | 0.6<br>(0.4 to 1.1)                     | 43.3<br>(13.9 to 78.9)                            | 7.2<br>(-13.5 to 32.6)                              |
| Mesothelioma                                       | 0.5<br>(0.4 to 0.5)                           | 0.3<br>(0.3 to 0.4)                            | 0.1<br>(0.1 to 0.1)                     | 16.1<br>(-0.1 to 35.9)                            | -7.5<br>(-19.4 to 5.6)                              |
| Hodgkin lymphoma                                   | 1.4<br>(0.9 to 2.4)                           | 0.4<br>(0.3 to 0.6)                            | 0.1<br>(0.1 to 0.3)                     | 28.9<br>(2.9 to 64.7)                             | 6.2<br>(-15.4 to 37.0)                              |
| Non-Hodgkin's lymphoma                             | 5.3<br>(4.3 to 10.3)                          | 1.8<br>(1.4 to 3.5)                            | 0.6<br>(0.3 to 1.1)                     | 25.5<br>(7.9 to 46.7)                             | -2.5<br>(-16.2 to 14.4)                             |
| Multiple myeloma                                   | 1.2<br>(1.0 to 1.8)                           | 0.6<br>(0.5 to 0.9)                            | 0.3<br>(0.2 to 0.5)                     | 47.0<br>(31.0 to 63.5)                            | 7.9<br>(-3.2 to 19.0)                               |
| Leukaemia                                          | 19.6<br>(9.5 to 22.9)                         | 4.9<br>(2.4 to 5.7)                            | 2.4<br>(1.1 to 3.5)                     | 54.2<br>(2.3 to 78.9)                             | 25.3<br>(-14.4 to 45.6)                             |
| Acute lymphoid leukaemia                           | 3.6<br>(1.7 to 4.2)                           | 1.1<br>(0.5 to 1.2)                            | 0.5<br>(0.2 to 0.7)                     | 59.5<br>(12.8 to 88.0)                            | 23.2<br>(-8.8 to 45.6)                              |
| Chronic lymphoid leukaemia                         | 0.8<br>(0.5 to 0.9)                           | 0.2<br>(0.1 to 0.2)                            | 0.1<br>(0.1 to 0.1)                     | 27.0<br>(-10.3 to 64.5)                           | 14.0<br>(-19.5 to 46.3)                             |
| Acute myeloid leukaemia                            | 0.4<br>(0.2 to 0.5)                           | 0.3<br>(0.1 to 0.3)                            | 0.1<br>(< 0.05 to 0.1)                  | 43.1<br>(-3.1 to 72.7)                            | 24.3<br>(-10.6 to 48.2)                             |
| Chronic myeloid leukaemia                          | 0.5<br>(0.3 to 0.6)                           | 0.2<br>(0.1 to 0.2)                            | 0.1<br>(< 0.05 to 0.1)                  | 31.1<br>(-4.1 to 67.1)                            | 12.4<br>(-16.5 to 40.9)                             |
| Other leukaemia                                    | 14.4<br>(6.5 to 17.0)                         | 3.2<br>(1.5 to 3.8)                            | 1.7<br>(0.7 to 2.4)                     | 56.2<br>(-5.3 to 84.6)                            | 27.0<br>(-19.9 to 50.8)                             |
| Other neoplasms                                    | 11.3<br>(9.0 to 12.2)                         | 3.7<br>(3.0 to 4.0)                            | 1.1<br>(0.7 to 1.4)                     | 35.0<br>(19.6 to 52.6)                            | 7.7<br>(-4.8 to 21.4)                               |
| <b>Cardiovascular diseases</b>                     | <b>4,796.0</b><br><b>(4,584.5 to 5,029.9)</b> | <b>480.4†</b><br><b>(456.4 to 504.9)</b>       | <b>320.2</b><br><b>(230.5 to 421.4)</b> | <b>27.1</b><br><b>(21.8 to 32.7)</b>              | <b>-4.6</b><br><b>(-8.9 to -0.8)</b>                |
| Rheumatic heart disease                            | 4.0<br>(3.5 to 4.6)                           | 1.0<br>(0.9 to 1.2)                            | 0.3<br>(0.2 to 0.5)                     | 36.5<br>(27.1 to 46.5)                            | 9.7<br>(3.1 to 17.4)                                |
| Ischaemic heart disease                            | 1,726.8<br>(1,607.2 to 1,851.7)               | 197.7<br>(181.6 to 213.8)                      | 81.9<br>(56.0 to 112.4)                 | 36.4<br>(30.2 to 43.1)                            | 1.5<br>(-2.6 to 5.7)                                |
| Cerebrovascular disease                            | 576.2<br>(528.2 to 622.7)                     | 98.5‡<br>(89.7 to 107.1)                       | 118.9<br>(81.9 to 153.9)                | 21.2<br>(9.8 to 32.6)                             | -12.8<br>(-21.1 to -4.9)                            |
| Ischaemic stroke                                   | 454.6<br>(397.7 to 521.9)                     | 63.3‡<br>(55.5 to 71.3)                        | 90.7<br>(61.7 to 118.7)                 | 22.1<br>(8.5 to 36.1)                             | -12.9<br>(-22.7 to -3.2)                            |
| Hemorrhagic stroke                                 | 143.4<br>(128.6 to 158.9)                     | 35.2‡<br>(31.7 to 38.7)                        | 28.2<br>(20.1 to 36.4)                  | 18.4<br>(5.6 to 32.7)                             | -12.6<br>(-21.7 to -2.3)                            |
| Hypertensive heart disease                         | 85.5<br>(72.9 to 100.7)                       | --                                             | 7.0<br>(4.8 to 9.9)                     | 36.8<br>(17.9 to 58.4)                            | 0.9<br>(-11.5 to 14.8)                              |
| Cardiomyopathy and myocarditis                     | 19.9<br>(17.7 to 22.2)                        | 14.2†<br>(12.3 to 16.5)                        | 2.3<br>(1.5 to 3.3)                     | 17.8<br>(3.6 to 34.5)                             | 4.1<br>(-7.8 to 17.8)                               |
| Myocarditis                                        | 16.6<br>(14.5 to 18.8)                        | 14.2<br>(12.3 to 16.5)                         | 1.3<br>(0.9 to 1.9)                     | 11.1<br>(-7.2 to 34.1)                            | 3.8<br>(-12.4 to 23.7)                              |
| Alcoholic cardiomyopathy                           | 1.2<br>(1.0 to 1.5)                           | --                                             | 0.1<br>(0.1 to 0.2)                     | 34.0<br>(20.9 to 48.0)                            | 4.9<br>(-4.4 to 15.4)                               |
| Other cardiomyopathy                               | 10.4<br>(8.9 to 12.3)                         | --                                             | 0.9<br>(0.6 to 1.3)                     | 27.4<br>(12.0 to 44.2)                            | 4.5<br>(-7.9 to 17.9)                               |
| Atrial fibrillation and flutter                    | 463.7<br>(405.4 to 533.2)                     | 38.8<br>(33.4 to 45.5)                         | 36.4<br>(24.5 to 51.4)                  | 43.2<br>(34.6 to 52.5)                            | 0.3<br>(-5.5 to 6.2)                                |
| Peripheral vascular disease                        | 1,181.6<br>(1,029.9 to 1,358.9)               | 107.6<br>(93.2 to 123.8)                       | 5.7<br>(2.6 to 10.2)                    | 42.5<br>(32.2 to 53.9)                            | -4.0<br>(-10.8 to 3.3)                              |
| Endocarditis                                       | 17.8<br>(15.5 to 20.7)                        | 22.5<br>(20.6 to 24.4)                         | 1.4<br>(1.0 to 2.0)                     | 28.6<br>(10.3 to 49.6)                            | 0.9<br>(-12.8 to 16.0)                              |
| Other cardiovascular and circulatory diseases      | 1,259.9<br>(1,072.1 to 1,463.5)               | --                                             | 66.3<br>(44.2 to 94.3)                  | 18.5<br>(8.5 to 29.7)                             | 1.0<br>(-6.5 to 9.6)                                |
| <b>Chronic respiratory diseases</b>                | <b>7,074.0</b><br><b>(6,824.6 to 7,308.7)</b> | <b>1,413.6†</b><br><b>(1,342.9 to 1,493.6)</b> | <b>464.9</b><br><b>(374.9 to 560.2)</b> | <b>21.9</b><br><b>(17.1 to 27.1)</b>              | <b>1.6</b><br><b>(-1.9 to 4.9)</b>                  |
| Chronic obstructive pulmonary disease              | 2,768.6<br>(2,653.3 to 2,883.8)               | 203.0<br>(193.1 to 213.7)                      | 265.9<br>(231.4 to 294.6)               | 34.3<br>(27.5 to 41.4)                            | 0.5<br>(-4.5 to 5.3)                                |
| Pneumoconiosis                                     | 17.4<br>(15.8 to 19.3)                        | 1.4<br>(1.2 to 1.5)                            | 2.5<br>(1.7 to 3.6)                     | 42.0<br>(16.9 to 73.2)                            | 1.4<br>(-15.8 to 22.3)                              |
| Silicosis                                          | 8.2<br>(7.1 to 9.5)                           | 0.7<br>(0.6 to 0.8)                            | 1.2<br>(0.7 to 1.7)                     | 42.2<br>(6.1 to 92.8)                             | 1.9<br>(-23.7 to 38.8)                              |

| Cause                                                          | Prevalence in thousands (95% UI)           | Incidence in thousands (95% UI)           | YLDs in thousands (95% UI)            |                                                   |                                                     |
|----------------------------------------------------------------|--------------------------------------------|-------------------------------------------|---------------------------------------|---------------------------------------------------|-----------------------------------------------------|
|                                                                | 2016 counts                                | 2016 counts                               | 2016 counts                           | Percentage change in counts between 2006 and 2016 | Percentage change in age-standardised rates between |
| Asbestosis                                                     | 1.3<br>(1.1 to 1.6)                        | 0.1<br>(0.1 to 0.1)                       | 0.2<br>(0.1 to 0.3)                   | 38.2<br>(30.7 to 47.4)                            | 0.1<br>(-5.6 to 6.6)                                |
| Coal workers pneumoconiosis                                    | 7.2<br>(6.1 to 8.5)                        | 0.5<br>(0.4 to 0.6)                       | 1.0<br>(0.6 to 1.5)                   | 43.1<br>(3.9 to 98.3)                             | 1.6<br>(-27.4 to 39.4)                              |
| Other pneumoconiosis                                           | 0.6<br>(0.5 to 0.7)                        | 0.1<br>(0.1 to 0.1)                       | 0.1<br>(0.1 to 0.1)                   | 36.1<br>(22.0 to 53.7)                            | -2.5<br>(-13.0 to 10.9)                             |
| Asthma                                                         | 4,640.3<br>(4,362.9 to 4,967.7)            | 1,203.9<br>(1,132.1 to 1,284.0)           | 180.5<br>(118.8 to 258.5)             | 6.4<br>(1.4 to 11.4)                              | 1.9<br>(-2.7 to 6.3)                                |
| Interstitial lung disease and pulmonary sarcoidosis            | 66.9<br>(59.0 to 75.7)                     | 5.3<br>(4.7 to 6.0)                       | 6.7<br>(4.5 to 9.8)                   | 37.2<br>(22.0 to 54.8)                            | -0.8<br>(-11.2 to 11.3)                             |
| Other chronic respiratory diseases                             | --                                         | --                                        | 9.2<br>(7.8 to 10.5)                  | 34.6<br>(20.6 to 49.3)                            | 30.7<br>(15.0 to 48.5)                              |
| <b>Cirrhosis and other chronic liver diseases</b>              | <b>394.8<br/>(373.8 to 417.8)</b>          | <b>18.3<br/>(17.5 to 19.1)</b>            | <b>12.2<br/>(8.5 to 16.9)</b>         | <b>16.4<br/>(4.7 to 29.7)</b>                     | <b>-1.7<br/>(-11.5 to 8.8)</b>                      |
| Cirrhosis and other chronic liver diseases due to hepatitis B  | 117.2<br>(99.0 to 137.1)                   | 5.7<br>(4.8 to 6.7)                       | 3.2<br>(2.2 to 4.7)                   | 26.1<br>(1.8 to 53.7)                             | -0.4<br>(-18.5 to 19.4)                             |
| Cirrhosis and other chronic liver diseases due to hepatitis C  | 69.6<br>(57.9 to 83.5)                     | 3.2<br>(2.7 to 3.9)                       | 1.9<br>(1.2 to 2.9)                   | 25.2<br>(-3.3 to 64.8)                            | -0.2<br>(-22.3 to 28.7)                             |
| Cirrhosis and other chronic liver diseases due to alcohol use  | 101.2<br>(87.4 to 116.9)                   | 5.0<br>(4.3 to 5.7)                       | 2.8<br>(1.8 to 4.0)                   | 24.6<br>(0.7 to 55.9)                             | -3.5<br>(-20.8 to 18.2)                             |
| Cirrhosis and other chronic liver diseases due to other causes | 106.8<br>(95.9 to 118.7)                   | 4.4<br>(3.9 to 4.9)                       | 4.2<br>(2.8 to 6.0)                   | 2.6<br>(-15.8 to 23.1)                            | -2.0<br>(-18.8 to 16.7)                             |
| <b>Digestive diseases</b>                                      | <b>948.9<br/>(886.0 to 1,011.0)</b>        | <b>1,184.4†<br/>(1,111.3 to 1,268.1)</b>  | <b>24.7<br/>(17.4 to 33.9)</b>        | <b>37.1<br/>(28.5 to 46.9)</b>                    | <b>9.6<br/>(3.2 to 16.8)</b>                        |
| Peptic ulcer disease                                           | 279.4<br>(253.9 to 308.6)                  | 117.8<br>(105.6 to 131.7)                 | 5.6<br>(3.5 to 8.3)                   | 50.1<br>(33.3 to 68.9)                            | 16.2<br>(3.8 to 29.9)                               |
| Gastritis and duodenitis                                       | 514.2<br>(451.9 to 587.3)                  | 470.2<br>(411.9 to 536.9)                 | 7.0<br>(4.5 to 10.4)                  | 53.1<br>(37.7 to 73.2)                            | 16.8<br>(5.8 to 30.6)                               |
| Appendicitis                                                   | 5.4<br>(5.1 to 5.7)                        | 143.0<br>(134.4 to 152.2)                 | 1.7<br>(1.1 to 2.4)                   | 6.7<br>(-12.1 to 29.2)                            | 0.9<br>(-18.6 to 24.8)                              |
| Paralytic ileus and intestinal obstruction                     | 0.7<br>(0.6 to 0.8)                        | 19.5<br>(17.4 to 21.8)                    | 0.2<br>(0.1 to 0.3)                   | 21.1<br>(15.7 to 26.7)                            | 0.5<br>(-3.1 to 3.8)                                |
| Inguinal, femoral, and abdominal hernia                        | 109.1<br>(92.0 to 127.7)                   | 158.7<br>(136.3 to 182.4)                 | 4.7<br>(3.1 to 6.7)                   | 25.8<br>(7.1 to 49.8)                             | 2.6<br>(-11.4 to 20.3)                              |
| Inflammatory bowel disease                                     | 9.8<br>(9.1 to 10.7)                       | 23.4<br>(22.5 to 24.2)                    | 1.5<br>(1.0 to 2.1)                   | 19.8<br>(4.1 to 38.7)                             | 0.8<br>(-12.0 to 16.4)                              |
| Vascular intestinal disorders                                  | 0.6<br>(0.6 to 0.7)                        | 4.1<br>(3.6 to 4.6)                       | 0.2<br>(0.1 to 0.3)                   | 27.4<br>(21.0 to 34.1)                            | 4.0<br>(0.0 to 8.4)                                 |
| Gallbladder and biliary diseases                               | 68.2<br>(60.3 to 76.6)                     | 222.3<br>(192.3 to 255.5)                 | 1.5<br>(1.0 to 2.1)                   | 28.4<br>(8.0 to 52.8)                             | 1.2<br>(-15.0 to 19.8)                              |
| Pancreatitis                                                   | 2.8<br>(2.5 to 3.1)                        | 25.6<br>(23.0 to 28.5)                    | 0.4<br>(0.2 to 0.5)                   | 32.0<br>(26.9 to 37.0)                            | 9.6<br>(6.2 to 13.0)                                |
| Other digestive diseases                                       | --                                         | --                                        | 2.0<br>(1.4 to 2.7)                   | 43.1<br>(34.2 to 53.2)                            | 12.0<br>(5.1 to 19.7)                               |
| <b>Neurological disorders</b>                                  | <b>25,069.9<br/>(24,004.8 to 26,387.0)</b> | <b>10,889.0<br/>(9,339.9 to 12,626.8)</b> | <b>656.5<br/>(441.6 to 901.1)</b>     | <b>10.8<br/>(-4.8 to 31.1)</b>                    | <b>1.2<br/>(-14.4 to 22.1)</b>                      |
| Alzheimer's disease and other dementias                        | 597.7<br>(505.2 to 703.5)                  | 99.9<br>(83.5 to 120.3)                   | 86.3<br>(59.4 to 115.4)               | 51.1<br>(43.1 to 59.6)                            | -1.5<br>(-6.2 to 3.2)                               |
| Parkinson's disease                                            | 76.6<br>(66.5 to 87.0)                     | 8.1<br>(6.9 to 9.3)                       | 9.0<br>(6.0 to 12.4)                  | 51.6<br>(34.2 to 70.1)                            | 8.1<br>(-3.5 to 20.2)                               |
| Epilepsy                                                       | 279.9<br>(95.2 to 405.2)                   | 30.4<br>(10.4 to 44.4)                    | 89.3<br>(24.1 to 169.4)               | 9.4<br>(-64.0 to 276.1)                           | 6.5<br>(-65.0 to 267.5)                             |
| Multiple sclerosis                                             | 3.5<br>(3.1 to 4.0)                        | 0.2<br>(0.1 to 0.2)                       | 1.0<br>(0.7 to 1.4)                   | 27.9<br>(23.5 to 33.2)                            | 11.8<br>(8.1 to 16.1)                               |
| Motor neuron disease                                           | 2.2<br>(1.9 to 2.5)                        | 0.4<br>(0.4 to 0.5)                       | 0.5<br>(0.3 to 0.6)                   | 17.7<br>(12.8 to 22.7)                            | 4.5<br>(0.9 to 8.2)                                 |
| Migraine                                                       | 9,517.2<br>(8,993.9 to 10,053.0)           | 895.0<br>(842.7 to 950.4)                 | 393.2<br>(252.2 to 555.2)             | 4.5<br>(0.4 to 8.8)                               | -0.4<br>(-4.3 to 3.6)                               |
| Tension-type headache                                          | 18,391.4<br>(16,476.0 to 20,522.5)         | 9,854.7<br>(8,316.2 to 11,602.9)          | 58.6<br>(36.9 to 87.1)                | 5.8<br>(0.4 to 13.1)                              | -0.5<br>(-5.3 to 5.1)                               |
| Other neurological disorders                                   | 0.2<br>(0.1 to 0.3)                        | 0.4<br>(0.2 to 0.5)                       | 18.8<br>(7.2 to 33.9)                 | 22.7<br>(-46.8 to 226.2)                          | 25.1<br>(-48.3 to 235.3)                            |
| <b>Mental and substance use disorders</b>                      | <b>10,011.0<br/>(9,569.4 to 10,417.4)</b>  | <b>3,058.2†<br/>(2,851.4 to 3,288.0)</b>  | <b>1,332.0<br/>(970.4 to 1,722.3)</b> | <b>3.8<br/>(1.2 to 6.4)</b>                       | <b>-1.9<br/>(-4.1 to 0.4)</b>                       |
| Schizophrenia                                                  | 221.2<br>(195.0 to 251.7)                  | 10.7<br>(9.3 to 12.2)                     | 142.8<br>(104.3 to 178.6)             | 9.9<br>(1.2 to 19.6)                              | 1.8<br>(-6.1 to 10.4)                               |
| Alcohol use disorders                                          | 609.8<br>(545.3 to 679.6)                  | 317.5<br>(276.7 to 357.0)                 | 61.0<br>(40.9 to 84.0)                | 4.7<br>(-4.5 to 16.3)                             | 0.4<br>(-8.1 to 10.9)                               |
| Drug use disorders                                             | 562.1<br>(510.1 to 620.4)                  | 68.0<br>(60.9 to 76.2)                    | 121.2<br>(85.9 to 162.6)              | -13.8<br>(-24.0 to -3.8)                          | -10.3<br>(-21.2 to 0.7)                             |
| Opioid use disorders                                           | 170.2<br>(144.8 to 200.6)                  | 18.8<br>(16.1 to 22.0)                    | 70.9<br>(48.8 to 96.4)                | -6.4<br>(-17.7 to 6.0)                            | -6.9<br>(-18.5 to 5.2)                              |
| Cocaine use disorders                                          | 11.0<br>(9.4 to 12.9)                      | 1.1<br>(0.9 to 1.3)                       | 1.6<br>(1.0 to 2.3)                   | 10.2<br>(4.1 to 16.8)                             | 6.9<br>(1.6 to 12.8)                                |
| Amphetamine use disorders                                      | 175.4<br>(124.9 to 249.6)                  | 14.4<br>(10.0 to 21.2)                    | 23.3<br>(12.7 to 38.0)                | -27.4<br>(-42.2 to -9.5)                          | -17.5<br>(-34.3 to 3.8)                             |
| Cannabis use disorders                                         | 197.8<br>(167.8 to 234.3)                  | 28.1<br>(23.7 to 33.5)                    | 5.8<br>(3.5 to 8.7)                   | -10.9<br>(-26.1 to 6.1)                           | -3.5<br>(-20.3 to 15.3)                             |
| Other drug use disorders                                       | 30.7<br>(26.9 to 34.3)                     | 5.6<br>(4.9 to 6.2)                       | 19.6<br>(11.5 to 31.5)                | -21.0<br>(-42.2 to 5.3)                           | -13.5<br>(-37.3 to 16.7)                            |
| Depressive disorders                                           | 2,571.0<br>(2,397.7 to 2,782.4)            | 2,042.7<br>(1,853.8 to 2,266.4)           | 383.4<br>(264.8 to 525.8)             | 11.4<br>(6.3 to 17.0)                             | -2.2<br>(-6.3 to 2.2)                               |
| Major depressive disorder                                      | 1,234.2<br>(1,114.0 to 1,377.2)            | 1,846.2<br>(1,655.6 to 2,070.8)           | 251.4<br>(171.1 to 340.8)             | 7.9<br>(0.9 to 15.5)                              | -3.2<br>(-9.0 to 3.2)                               |
| Dysthymia                                                      | 1,381.8<br>(1,197.4 to 1,592.4)            | 196.5<br>(170.7 to 225.5)                 | 132.0<br>(88.6 to 189.5)              | 18.7<br>(14.1 to 23.4)                            | -0.0<br>(-3.0 to 2.9)                               |
| Bipolar disorder                                               | 401.2<br>(349.3 to 462.6)                  | 31.6<br>(27.7 to 36.3)                    | 81.8<br>(50.5 to 119.5)               | 6.4<br>(-1.0 to 14.2)                             | 0.1<br>(-6.3 to 6.9)                                |
| Anxiety disorders                                              | 2,593.3<br>(2,297.3 to 2,899.3)            | 380.8<br>(338.5 to 428.8)                 | 249.3<br>(171.9 to 340.0)             | 6.9<br>(-0.3 to 14.7)                             | 0.2<br>(-6.0 to 6.6)                                |
| Eating disorders                                               | 74.9<br>(61.7 to 91.3)                     | 37.6<br>(28.4 to 49.1)                    | 15.3<br>(9.6 to 22.5)                 | 0.3<br>(-12.7 to 14.2)                            | 12.1<br>(-1.7 to 27.7)                              |
| Anorexia nervosa                                               | 20.7<br>(15.3 to 28.0)                     | 8.0<br>(6.0 to 10.6)                      | 4.4<br>(2.7 to 7.0)                   | -3.2<br>(-22.2 to 22.4)                           | 10.9<br>(-11.4 to 39.2)                             |
| Bulimia nervosa                                                | 51.3<br>(38.8 to 68.1)                     | 29.6<br>(20.6 to 40.7)                    | 10.9<br>(6.5 to 16.6)                 | 1.9<br>(-13.3 to 20.2)                            | 12.7<br>(-4.4 to 33.3)                              |
| Autistic spectrum disorders                                    | 531.5<br>(475.8 to 595.3)                  | 2.4<br>(1.6 to 3.3)                       | 77.3<br>(52.1 to 108.7)               | -1.1<br>(-5.9 to 3.8)                             | 0.1<br>(-4.6 to 5.0)                                |
| Autism                                                         | 157.3<br>(135.0 to 183.7)                  | 0.2<br>(0.1 to 0.4)                       | 39.9<br>(25.4 to 58.1)                | -1.1<br>(-9.4 to 7.5)                             | 0.1<br>(-8.2 to 8.6)                                |
| Asperger syndrome and other autistic spectrum disorders        | 374.5<br>(312.2 to 448.0)                  | 2.1<br>(1.3 to 3.1)                       | 37.4<br>(24.4 to 55.0)                | -1.1<br>(-5.8 to 3.9)                             | 0.2<br>(-4.4 to 5.0)                                |



| Cause                                                      | Prevalence in thousands (95% UI)                 | Incidence in thousands (95% UI)                      | YLDs in thousands (95% UI)                    |                                                   |                                                     |
|------------------------------------------------------------|--------------------------------------------------|------------------------------------------------------|-----------------------------------------------|---------------------------------------------------|-----------------------------------------------------|
|                                                            | 2016 counts                                      | 2016 counts                                          | 2016 counts                                   | Percentage change in counts between 2006 and 2016 | Percentage change in age-standardised rates between |
| Attention-deficit/hyperactivity disorder                   | 423.8<br>(378.8 to 480.9)                        | 14.0<br>(12.2 to 16.3)                               | 5.1<br>(3.0 to 8.4)                           | -10.2<br>(-20.5 to 1.2)                           | -0.9<br>(-12.1 to 11.4)                             |
| Conduct disorder                                           | 354.2<br>(287.8 to 418.3)                        | 116.8<br>(92.3 to 140.8)                             | 43.2<br>(26.2 to 66.4)                        | -17.1<br>(-22.4 to -11.3)                         | 0.1<br>(-6.4 to 7.1)                                |
| Idiopathic developmental intellectual disability           | 954.5<br>(533.5 to 1,368.6)                      | --                                                   | 41.0<br>(19.9 to 71.4)                        | -16.8<br>(-24.1 to -10.9)                         | -15.3<br>(-22.6 to -9.4)                            |
| Other mental and substance use disorders                   | 1,483.7<br>(1,312.7 to 1,705.8)                  | 36.2<br>(32.4 to 40.7)                               | 110.4<br>(76.2 to 158.2)                      | 10.3<br>(4.8 to 16.2)                             | 0.3<br>(-4.7 to 5.5)                                |
| <b>Diabetes, urogenital, blood, and endocrine diseases</b> | <b>27,216.3</b><br><b>(26,720.1 to 27,734.3)</b> | <b>6,832.9†</b><br><b>(6,359.7 to 7,333.3)</b>       | <b>514.9</b><br><b>(363.9 to 712.5)</b>       | <b>17.6</b><br><b>(12.8 to 23.4)</b>              | <b>-2.9</b><br><b>(-6.6 to 1.4)</b>                 |
| Diabetes mellitus                                          | 4,038.6<br>(3,631.1 to 4,502.8)                  | 201.8<br>(181.5 to 226.8)                            | 260.7<br>(175.0 to 364.3)                     | 23.6<br>(14.3 to 34.4)                            | -2.0<br>(-9.0 to 6.0)                               |
| Acute glomerulonephritis                                   | 0.9<br>(0.8 to 1.1)                              | 13.6<br>(12.0 to 15.6)                               | < 0.05<br>(< 0.05 to 0.1)                     | 9.0<br>(3.4 to 14.8)                              | 0.8<br>(-3.4 to 4.8)                                |
| Chronic kidney disease                                     | 2,693.0<br>(2,441.9 to 2,963.6)                  | 188.6<br>(167.1 to 211.3)                            | 83.0<br>(61.7 to 106.4)                       | 25.6<br>(15.4 to 37.4)                            | -2.0<br>(-9.1 to 6.4)                               |
| Chronic kidney disease due to diabetes mellitus            | 1,730.2<br>(1,546.7 to 1,930.3)                  | 123.8<br>(107.8 to 140.4)                            | 51.8<br>(38.5 to 66.5)                        | 33.5<br>(20.1 to 48.3)                            | 5.5<br>(-4.5 to 16.4)                               |
| Chronic kidney disease due to hypertension                 | 411.6<br>(357.5 to 469.8)                        | 8.7<br>(7.3 to 10.2)                                 | 22.5<br>(16.3 to 29.6)                        | 27.6<br>(12.9 to 44.2)                            | -7.6<br>(-17.8 to 4.0)                              |
| Chronic kidney disease due to glomerulonephritis           | 432.8<br>(377.0 to 503.9)                        | 47.1<br>(40.1 to 55.1)                               | 4.3<br>(3.1 to 5.8)                           | -16.4<br>(-28.8 to -1.7)                          | -21.6<br>(-32.8 to -8.6)                            |
| Chronic kidney disease due to other causes                 | 118.4<br>(97.3 to 140.2)                         | 9.0<br>(7.4 to 10.6)                                 | 4.4<br>(3.1 to 5.9)                           | -3.0<br>(-15.2 to 10.8)                           | -18.0<br>(-27.2 to -6.9)                            |
| Urinary diseases and male infertility                      | 948.8<br>(856.6 to 1,038.6)                      | 4,020.1†<br>(3,560.9 to 4,511.1)                     | 26.4<br>(17.3 to 38.0)                        | 26.2<br>(17.6 to 35.0)                            | -4.0<br>(-10.0 to 2.0)                              |
| Interstitial nephritis and urinary tract infections        | 68.0<br>(59.1 to 77.5)                           | 3,551.4<br>(3,092.4 to 4,036.3)                      | 2.2<br>(1.4 to 3.4)                           | 0.0<br>(-16.4 to 20.3)                            | -6.9<br>(-22.2 to 10.3)                             |
| Urolithiasis                                               | 14.6<br>(12.6 to 17.2)                           | 387.8<br>(334.2 to 459.1)                            | 1.1<br>(0.7 to 1.5)                           | 22.0<br>(2.7 to 41.8)                             | -3.9<br>(-19.0 to 12.7)                             |
| Benign prostatic hyperplasia                               | 632.8<br>(540.4 to 744.1)                        | 80.9<br>(68.0 to 96.4)                               | 20.7<br>(13.4 to 30.5)                        | 36.8<br>(26.6 to 47.8)                            | -2.4<br>(-9.6 to 5.0)                               |
| Male infertility                                           | 196.2<br>(156.4 to 248.8)                        | --                                                   | 1.2<br>(0.5 to 2.5)                           | -8.1<br>(-14.8 to -1.3)                           | -1.2<br>(-8.2 to 5.8)                               |
| Other urinary diseases                                     | --                                               | --                                                   | 1.1<br>(0.7 to 1.7)                           | -13.7<br>(-25.4 to -0.5)                          | -21.6<br>(-31.8 to -10.1)                           |
| Gynecological diseases                                     | 7,088.3<br>(6,785.9 to 7,391.2)                  | 2,210.8†<br>(2,096.8 to 2,334.8)                     | 70.4<br>(46.8 to 104.3)                       | -3.0<br>(-8.0 to 1.9)                             | -5.8<br>(-10.6 to -0.6)                             |
| Uterine fibroids                                           | 1,292.5<br>(1,132.1 to 1,478.6)                  | 124.7<br>(105.7 to 147.4)                            | 12.2<br>(6.3 to 22.3)                         | -1.5<br>(-10.5 to 5.4)                            | -14.3<br>(-21.7 to -8.7)                            |
| Polycystic ovarian syndrome                                | 57.2<br>(43.0 to 72.9)                           | 48.0<br>(34.3 to 64.7)                               | 0.5<br>(0.2 to 1.0)                           | -6.2<br>(-19.5 to 9.0)                            | -0.4<br>(-14.9 to 15.0)                             |
| Female infertility                                         | 67.1<br>(32.1 to 130.3)                          | --                                                   | 0.4<br>(0.1 to 1.1)                           | -6.1<br>(-24.5 to 22.8)                           | 4.5<br>(-16.3 to 35.5)                              |
| Endometriosis                                              | 7.0<br>(5.9 to 8.3)                              | 51.6<br>(42.2 to 64.7)                               | 0.7<br>(0.4 to 1.0)                           | -0.4<br>(-26.7 to 34.6)                           | -0.1<br>(-26.5 to 34.3)                             |
| Genital prolapse                                           | 1,497.6<br>(1,292.9 to 1,732.9)                  | 80.8<br>(68.5 to 94.7)                               | 4.7<br>(2.2 to 8.5)                           | 5.2<br>(-6.1 to 16.6)                             | -20.7<br>(-29.2 to -12.1)                           |
| Premenstrual syndrome                                      | 4,388.9<br>(4,167.5 to 4,616.2)                  | 1,503.2<br>(1,414.5 to 1,604.8)                      | 36.9<br>(22.3 to 56.1)                        | -4.4<br>(-11.2 to 2.9)                            | -1.8<br>(-9.0 to 5.4)                               |
| Other gynecological diseases                               | 452.8<br>(387.4 to 518.7)                        | 402.6<br>(333.2 to 472.9)                            | 15.0<br>(9.8 to 21.9)                         | -3.3<br>(-13.7 to 8.6)                            | -4.6<br>(-14.8 to 6.6)                              |
| Hemoglobinopathies and hemolytic anaemias                  | 17,003.0<br>(16,470.5 to 17,554.6)               | --                                                   | 39.1<br>(24.7 to 59.8)                        | 6.7<br>(-3.5 to 17.3)                             | 0.2<br>(-9.7 to 10.0)                               |
| Thalassemias                                               | 43.4<br>(37.6 to 49.6)                           | --                                                   | 1.7<br>(1.0 to 2.8)                           | -29.4<br>(-41.8 to -15.3)                         | -4.5<br>(-21.2 to 14.4)                             |
| Thalassaemias trait                                        | 6,497.7<br>(6,099.9 to 6,910.4)                  | --                                                   | 31.6<br>(19.7 to 48.4)                        | 10.1<br>(-1.6 to 22.4)                            | 3.5<br>(-7.6 to 14.6)                               |
| Sickle cell disorders                                      | < 0.05<br>(< 0.05 to < 0.05)                     | --                                                   | < 0.05<br>(< 0.05 to < 0.05)                  | -10.3<br>(-22.3 to 3.7)                           | 5.4<br>(-10.0 to 26.1)                              |
| Sickle cell trait                                          | 218.3<br>(197.1 to 244.8)                        | --                                                   | 0.2<br>(0.1 to 0.4)                           | 14.7<br>(-19.5 to 63.1)                           | 9.5<br>(-23.9 to 56.6)                              |
| G6PD deficiency                                            | 3,528.6<br>(3,245.2 to 3,868.7)                  | --                                                   | 0.1<br>(0.1 to 0.2)                           | 26.1<br>(11.2 to 43.5)                            | 11.1<br>(-2.4 to 26.8)                              |
| G6PD trait                                                 | 7,810.2<br>(7,490.1 to 8,177.6)                  | --                                                   | < 0.05<br>(< 0.05 to < 0.05)                  | 22.5<br>(7.8 to 39.5)                             | 15.7<br>(1.9 to 32.2)                               |
| Other hemoglobinopathies and hemolytic anaemias            | 415.0<br>(382.8 to 453.9)                        | --                                                   | 5.4<br>(3.4 to 8.3)                           | 3.6<br>(-9.2 to 16.6)                             | -14.6<br>(-24.7 to -4.1)                            |
| Endocrine, metabolic, blood, and immune disorders          | 1,148.2<br>(1,041.0 to 1,260.8)                  | 197.9<br>(174.8 to 223.1)                            | 35.3<br>(23.5 to 48.7)                        | 15.3<br>(7.8 to 24.1)                             | -8.4<br>(-14.1 to -2.1)                             |
| <b>Musculoskeletal disorders</b>                           | <b>14,757.6</b><br><b>(14,110.0 to 15,474.1)</b> | <b>8,144.4</b><br><b>(7,413.5 to 9,026.8)</b>        | <b>1,622.0</b><br><b>(1,167.0 to 2,129.2)</b> | <b>15.9</b><br><b>(12.1 to 19.6)</b>              | <b>-2.5</b><br><b>(-5.2 to 0.4)</b>                 |
| Rheumatoid arthritis                                       | 110.9<br>(98.4 to 125.7)                         | 5.9<br>(5.2 to 6.7)                                  | 26.1<br>(17.9 to 35.0)                        | 34.5<br>(21.0 to 51.0)                            | 8.2<br>(-1.9 to 19.9)                               |
| Osteoarthritis                                             | 3,072.6<br>(2,868.8 to 3,283.6)                  | 147.2<br>(135.8 to 159.0)                            | 189.8<br>(134.1 to 257.7)                     | 39.1<br>(33.4 to 44.9)                            | 3.7<br>(-0.3 to 7.8)                                |
| Low back and neck pain                                     | 7,819.0<br>(7,277.1 to 8,483.0)                  | 3,353.2<br>(2,966.7 to 3,763.7)                      | 910.9<br>(639.1 to 1,201.7)                   | 17.1<br>(13.0 to 21.6)                            | -1.1<br>(-3.8 to 2.0)                               |
| Low back pain                                              | 5,639.6<br>(5,004.7 to 6,460.3)                  | 2,750.3<br>(2,371.8 to 3,161.4)                      | 640.8<br>(446.6 to 852.9)                     | 16.3<br>(10.8 to 21.9)                            | -1.5<br>(-5.2 to 2.4)                               |
| Neck pain                                                  | 2,703.7<br>(2,314.4 to 3,146.0)                  | 602.8<br>(520.1 to 715.0)                            | 270.1<br>(182.8 to 386.0)                     | 19.0<br>(15.0 to 23.0)                            | 0.0<br>(-2.3 to 2.2)                                |
| Gout                                                       | 405.5<br>(356.6 to 460.0)                        | 78.6<br>(68.0 to 90.2)                               | 12.8<br>(8.7 to 17.7)                         | 29.9<br>(11.9 to 50.1)                            | 0.3<br>(-12.4 to 14.6)                              |
| Other musculoskeletal disorders                            | 5,627.3<br>(4,953.8 to 6,400.4)                  | 4,559.6<br>(3,910.7 to 5,363.0)                      | 482.4<br>(326.9 to 674.0)                     | 5.8<br>(-2.2 to 13.9)                             | -7.4<br>(-13.5 to -1.0)                             |
| <b>Other non-communicable diseases</b>                     | <b>47,935.8</b><br><b>(46,951.8 to 48,980.5)</b> | <b>118,841.8†</b><br><b>(109,347.4 to 128,918.8)</b> | <b>1,562.2</b><br><b>(1,083.0 to 2,193.2)</b> | <b>9.5</b><br><b>(7.5 to 11.3)</b>                | <b>-2.6</b><br><b>(-3.9 to -1.3)</b>                |
| Congenital anomalies                                       | 569.8<br>(497.0 to 658.2)                        | --                                                   | 71.7<br>(50.7 to 97.1)                        | -4.8<br>(-10.2 to 1.2)                            | -4.4<br>(-10.0 to 1.4)                              |
| Neural tube defects                                        | 39.2<br>(34.8 to 44.3)                           | --                                                   | 11.7<br>(8.1 to 15.9)                         | -4.5<br>(-16.7 to 9.7)                            | -5.9<br>(-18.0 to 7.5)                              |
| Congenital heart anomalies                                 | 126.3<br>(111.0 to 142.6)                        | --                                                   | 6.1<br>(2.7 to 10.4)                          | -0.3<br>(-11.3 to 12.4)                           | 4.6<br>(-6.9 to 17.5)                               |
| Orofacial clefts                                           | 29.3<br>(25.7 to 33.2)                           | --                                                   | 0.3<br>(0.2 to 0.5)                           | -4.9<br>(-15.3 to 7.4)                            | -5.3<br>(-15.7 to 6.9)                              |
| Down's syndrome                                            | 20.3<br>(17.2 to 23.8)                           | --                                                   | 1.9<br>(1.3 to 2.7)                           | -1.2<br>(-8.8 to 6.9)                             | 4.0<br>(-4.0 to 12.8)                               |
| Turner syndrome                                            | 9.3<br>(7.9 to 10.9)                             | --                                                   | 0.2<br>(0.1 to 0.3)                           | -3.0<br>(-16.4 to 13.8)                           | 3.1<br>(-10.1 to 21.2)                              |
| Klinefelter syndrome                                       | 12.6<br>(10.6 to 14.7)                           | --                                                   | 0.1<br>(< 0.05 to 0.1)                        | -9.6<br>(-34.5 to 25.6)                           | 1.1<br>(-26.6 to 40.0)                              |



| Cause                                         | Prevalence in thousands (95% UI)                 | Incidence in thousands (95% UI)                | YLDs in thousands (95% UI)              |                                                   |                                                     |
|-----------------------------------------------|--------------------------------------------------|------------------------------------------------|-----------------------------------------|---------------------------------------------------|-----------------------------------------------------|
|                                               | 2016 counts                                      | 2016 counts                                    | 2016 counts                             | Percentage change in counts between 2006 and 2016 | Percentage change in age-standardised rates between |
| Other chromosomal abnormalities               | 10.8<br>(8.8 to 13.1)                            | --                                             | 1.2<br>(0.8 to 1.7)                     | -21.4<br>(-35.5 to -5.0)                          | 0.9<br>(-18.5 to 24.2)                              |
| Congenital musculoskeletal and limb anomalies | 88.3<br>(80.7 to 96.5)                           | --                                             | 12.8<br>(8.8 to 17.7)                   | 9.2<br>(-2.4 to 22.0)                             | 7.8<br>(-3.8 to 20.1)                               |
| Urogenital congenital anomalies               | 33.8<br>(30.2 to 37.9)                           | --                                             | 0.6<br>(0.3 to 1.1)                     | -11.0<br>(-18.9 to -2.9)                          | 0.1<br>(-8.3 to 9.3)                                |
| Digestive congenital anomalies                | 108.5<br>(95.8 to 122.7)                         | --                                             | 4.9<br>(3.1 to 7.1)                     | 0.2<br>(-12.2 to 14.0)                            | -0.4<br>(-12.8 to 13.6)                             |
| Other congenital anomalies                    | 240.6<br>(161.8 to 349.3)                        | --                                             | 31.9<br>(19.8 to 48.9)                  | -10.2<br>(-18.3 to -1.4)                          | -11.0<br>(-18.9 to -2.5)                            |
| Skin and subcutaneous diseases                | 24,546.4<br>(23,775.0 to 25,395.2)               | 58,265.6<br>(54,262.3 to 62,908.3)             | 576.3<br>(382.1 to 854.5)               | -2.7<br>(-5.1 to -0.6)                            | 0.7<br>(-1.4 to 2.8)                                |
| Dermatitis                                    | 3,087.7<br>(2,933.6 to 3,257.4)                  | 4,117.9<br>(3,827.4 to 4,438.9)                | 114.6<br>(68.4 to 183.8)                | -4.5<br>(-8.7 to 0.2)                             | 0.0<br>(-4.1 to 4.8)                                |
| Psoriasis                                     | 575.7<br>(548.9 to 604.6)                        | 74.1<br>(70.5 to 77.4)                         | 49.9<br>(35.8 to 65.8)                  | 16.0<br>(7.2 to 26.1)                             | 6.9<br>(-1.2 to 16.1)                               |
| Cellulitis                                    | 29.1<br>(27.1 to 31.5)                           | 637.4<br>(597.4 to 680.8)                      | 1.6<br>(1.1 to 2.4)                     | 5.0<br>(-15.2 to 31.9)                            | 1.1<br>(-17.6 to 25.9)                              |
| Pyoderma                                      | 87.2<br>(84.0 to 90.6)                           | 1,706.5<br>(1,642.0 to 1,774.2)                | 0.5<br>(0.2 to 1.0)                     | 20.6<br>(9.3 to 32.5)                             | 0.1<br>(-8.6 to 9.2)                                |
| Scabies                                       | 2,970.6<br>(2,375.4 to 3,750.3)                  | 9,374.9<br>(7,367.6 to 12,090.4)               | 76.5<br>(40.8 to 124.4)                 | -13.1<br>(-21.4 to -6.5)                          | -9.5<br>(-18.1 to -3.9)                             |
| Fungal skin diseases                          | 8,003.5<br>(7,123.1 to 8,956.5)                  | 27,437.7<br>(24,142.2 to 31,106.6)             | 44.6<br>(17.6 to 95.3)                  | 10.7<br>(7.6 to 13.6)                             | 0.0<br>(-0.8 to 1.0)                                |
| Viral skin diseases                           | 1,743.3<br>(1,571.5 to 1,913.5)                  | 2,514.3<br>(2,266.3 to 2,773.7)                | 53.3<br>(33.4 to 78.7)                  | -4.2<br>(-7.6 to -0.9)                            | 0.1<br>(-3.1 to 3.1)                                |
| Acne vulgaris                                 | 6,302.3<br>(5,719.6 to 6,884.4)                  | 4,292.8<br>(3,558.0 to 5,275.1)                | 162.6<br>(108.7 to 237.3)               | -7.3<br>(-11.3 to -3.2)                           | 4.8<br>(0.5 to 9.4)                                 |
| Alopecia areata                               | 134.6<br>(130.1 to 139.7)                        | 236.5<br>(228.7 to 245.1)                      | 4.4<br>(2.8 to 6.6)                     | 1.8<br>(-8.7 to 12.6)                             | -0.1<br>(-10.3 to 10.9)                             |
| Pruritus                                      | 671.5<br>(591.0 to 763.0)                        | 526.6<br>(466.6 to 605.9)                      | 7.1<br>(3.3 to 13.1)                    | 11.9<br>(5.6 to 18.8)                             | 1.0<br>(-3.8 to 6.6)                                |
| Urticaria                                     | 484.5<br>(429.4 to 547.6)                        | 853.3<br>(755.3 to 968.7)                      | 29.1<br>(18.8 to 41.1)                  | -6.5<br>(-12.2 to 0.1)                            | -0.0<br>(-5.6 to 5.8)                               |
| Decubitus ulcer                               | 12.1<br>(10.7 to 13.5)                           | 44.4<br>(39.2 to 50.4)                         | 1.9<br>(1.3 to 2.6)                     | 52.5<br>(29.1 to 80.2)                            | 6.9<br>(-10.0 to 26.6)                              |
| Other skin and subcutaneous diseases          | 5,501.4<br>(5,332.6 to 5,677.2)                  | 6,449.2<br>(6,228.9 to 6,678.9)                | 30.1<br>(14.5 to 55.3)                  | 21.7<br>(18.7 to 24.7)                            | 4.6<br>(2.1 to 6.8)                                 |
| Sense organ diseases                          | 17,172.6<br>(16,452.7 to 17,796.7)               | 6,706.8†<br>(6,324.3 to 7,123.7)               | 733.5<br>(522.5 to 1,015.5)             | 19.9<br>(16.6 to 23.1)                            | -5.8<br>(-8.1 to -3.6)                              |
| Glaucoma                                      | 26.0<br>(21.7 to 31.2)                           | --                                             | 3.2<br>(2.0 to 4.6)                     | 46.8<br>(22.7 to 75.6)                            | 0.3<br>(-15.3 to 18.8)                              |
| Cataract                                      | 572.6<br>(499.4 to 653.7)                        | --                                             | 46.8<br>(33.6 to 63.9)                  | 40.7<br>(31.8 to 49.6)                            | -2.3<br>(-8.3 to 3.8)                               |
| Macular degeneration                          | 9.1<br>(7.5 to 10.9)                             | --                                             | 0.9<br>(0.6 to 1.3)                     | 50.9<br>(18.9 to 86.2)                            | 2.2<br>(-19.0 to 25.7)                              |
| Refraction and accommodation disorders        | 6,693.0<br>(5,735.5 to 7,813.1)                  | --                                             | 106.8<br>(64.3 to 173.4)                | 11.4<br>(3.4 to 20.9)                             | -8.9<br>(-15.0 to -1.4)                             |
| Age-related and other hearing loss            | 12,653.2<br>(12,005.5 to 13,428.3)               | --                                             | 481.2<br>(340.9 to 661.9)               | 19.0<br>(14.5 to 23.5)                            | -6.6<br>(-9.5 to -3.9)                              |
| Other vision loss                             | 220.7<br>(195.8 to 248.8)                        | --                                             | 21.2<br>(14.6 to 28.9)                  | 31.0<br>(19.5 to 44.1)                            | -1.1<br>(-9.4 to 7.7)                               |
| Other sense organ diseases                    | 2,340.4<br>(2,152.8 to 2,536.7)                  | 6,706.8<br>(6,324.3 to 7,123.7)                | 73.4<br>(46.1 to 110.5)                 | 23.9<br>(18.7 to 29.0)                            | 0.8<br>(-3.0 to 4.6)                                |
| Oral disorders                                | 28,837.0<br>(27,065.2 to 30,502.0)               | 53,869.5†<br>(45,373.9 to 62,996.4)            | 180.6<br>(106.7 to 293.2)               | 22.6<br>(19.5 to 25.9)                            | -0.3<br>(-2.1 to 1.7)                               |
| Caries of deciduous teeth                     | 2,657.6<br>(2,010.1 to 3,351.4)                  | 11,424.4<br>(7,985.6 to 15,311.6)              | 0.6<br>(0.3 to 1.3)                     | -22.2<br>(-31.1 to -12.6)                         | 0.0<br>(-11.6 to 12.4)                              |
| Caries of permanent teeth                     | 16,929.7<br>(14,498.8 to 19,427.3)               | 41,123.2<br>(33,211.0 to 49,354.4)             | 9.9<br>(4.3 to 19.4)                    | -4.8<br>(-10.6 to 1.7)                            | -8.4<br>(-13.3 to -3.1)                             |
| Periodontal disease                           | 9,078.9<br>(7,636.3 to 10,580.8)                 | 1,126.7<br>(932.3 to 1,340.1)                  | 59.2<br>(23.2 to 121.6)                 | 27.5<br>(21.7 to 32.9)                            | 0.2<br>(-3.3 to 3.3)                                |
| Edentulism and severe tooth loss              | 2,568.4<br>(2,087.2 to 3,027.9)                  | 195.1<br>(155.0 to 243.5)                      | 71.2<br>(45.1 to 102.0)                 | 35.4<br>(29.8 to 41.2)                            | 0.6<br>(-3.1 to 4.7)                                |
| Other oral disorders                          | 1,355.3<br>(1,296.9 to 1,412.0)                  | --                                             | 39.7<br>(24.5 to 59.6)                  | 7.2<br>(3.9 to 10.4)                              | -0.0<br>(-3.0 to 2.8)                               |
| <b>Injuries</b>                               | <b>12,431.1</b><br><b>(11,828.1 to 13,036.3)</b> | <b>4,197.0†</b><br><b>(4,003.6 to 4,385.4)</b> | <b>472.4</b><br><b>(316.6 to 673.5)</b> | <b>21.5</b><br><b>(18.8 to 24.0)</b>              | <b>3.9</b><br><b>(1.7 to 5.8)</b>                   |
| <b>Transport injuries</b>                     | <b>3,634.7</b><br><b>(3,373.9 to 3,953.6)</b>    | <b>1,007.9</b><br><b>(905.1 to 1,126.9)</b>    | <b>179.6</b><br><b>(120.6 to 255.0)</b> | <b>29.0</b><br><b>(25.9 to 31.9)</b>              | <b>8.9</b><br><b>(6.5 to 11.1)</b>                  |
| Road injuries                                 | 3,016.9<br>(2,784.7 to 3,313.7)                  | 901.3<br>(798.3 to 1,022.0)                    | 150.6<br>(101.2 to 213.7)               | 36.7<br>(33.4 to 39.5)                            | 14.1<br>(11.7 to 16.3)                              |
| Pedestrian road injuries                      | 320.4<br>(282.8 to 363.6)                        | 77.9<br>(64.6 to 93.8)                         | 16.0<br>(10.7 to 22.9)                  | 64.4<br>(59.7 to 68.9)                            | 35.6<br>(32.3 to 38.6)                              |
| Cyclist road injuries                         | 352.5<br>(296.5 to 414.6)                        | 127.2<br>(101.1 to 156.7)                      | 16.9<br>(11.1 to 24.4)                  | 54.8<br>(50.9 to 58.6)                            | 28.9<br>(26.2 to 31.6)                              |
| Motorcyclist road injuries                    | 1,416.0<br>(1,228.7 to 1,714.1)                  | 319.2<br>(271.4 to 371.4)                      | 68.4<br>(46.4 to 96.0)                  | 18.7<br>(15.6 to 21.5)                            | -0.6<br>(-2.9 to 1.5)                               |
| Motor vehicle road injuries                   | 670.2<br>(555.8 to 779.2)                        | 267.3<br>(222.6 to 315.8)                      | 37.3<br>(25.0 to 52.8)                  | 74.9<br>(70.0 to 79.3)                            | 45.5<br>(42.1 to 48.6)                              |
| Other road injuries                           | 257.7<br>(218.3 to 308.4)                        | 109.7<br>(86.1 to 137.6)                       | 12.1<br>(8.0 to 17.8)                   | 13.5<br>(10.7 to 15.9)                            | -5.1<br>(-7.1 to -3.2)                              |
| Other transport injuries                      | 617.9<br>(524.8 to 727.9)                        | 106.6<br>(93.8 to 120.5)                       | 29.0<br>(19.5 to 41.3)                  | 0.1<br>(-3.1 to 2.9)                              | -10.3<br>(-13.1 to -7.8)                            |
| <b>Unintentional injuries</b>                 | <b>7,289.5</b><br><b>(6,834.2 to 7,747.7)</b>    | <b>2,633.7</b><br><b>(2,494.0 to 2,783.3)</b>  | <b>232.3</b><br><b>(155.7 to 332.6)</b> | <b>20.4</b><br><b>(17.5 to 23.0)</b>              | <b>3.1</b><br><b>(0.8 to 5.2)</b>                   |
| Falls                                         | 2,239.7<br>(2,011.6 to 2,480.0)                  | 858.4<br>(770.5 to 957.2)                      | 88.5<br>(61.2 to 123.2)                 | 34.6<br>(31.4 to 37.2)                            | 10.8<br>(8.3 to 13.0)                               |
| Drowning                                      | 69.3<br>(61.0 to 78.7)                           | 10.4<br>(9.3 to 11.7)                          | 3.1<br>(2.1 to 4.5)                     | -6.1<br>(-10.2 to -2.6)                           | -18.9<br>(-22.2 to -16.2)                           |
| Fire, heat, and hot substances                | 661.4<br>(563.6 to 793.3)                        | 58.9<br>(48.3 to 68.8)                         | 15.6<br>(10.0 to 24.1)                  | 22.5<br>(16.2 to 27.7)                            | 9.8<br>(4.8 to 14.2)                                |
| Poisonings                                    | 22.2<br>(19.0 to 25.2)                           | 30.2<br>(23.8 to 37.7)                         | 1.6<br>(1.0 to 2.3)                     | 29.3<br>(19.7 to 41.4)                            | 19.2<br>(10.1 to 29.3)                              |
| Exposure to mechanical forces                 | 1,139.3<br>(983.8 to 1,364.4)                    | 358.4<br>(306.2 to 410.1)                      | 26.2<br>(17.0 to 38.1)                  | 29.7<br>(25.6 to 33.1)                            | 11.4<br>(8.2 to 14.0)                               |
| Unintentional firearm injuries                | 53.0<br>(43.8 to 63.8)                           | 10.1<br>(7.2 to 13.4)                          | 2.0<br>(1.3 to 2.9)                     | 13.8<br>(10.1 to 17.0)                            | -0.6<br>(-3.3 to 1.8)                               |
| Unintentional suffocation                     | 65.8<br>(53.0 to 82.0)                           | 9.7<br>(7.0 to 13.0)                           | 2.1<br>(1.3 to 3.1)                     | 17.5<br>(14.2 to 20.5)                            | 6.0<br>(3.0 to 8.3)                                 |
| Other exposure to mechanical forces           | 1,020.5<br>(865.9 to 1,237.5)                    | 338.7<br>(289.2 to 388.2)                      | 22.2<br>(14.5 to 32.3)                  | 32.7<br>(28.5 to 36.1)                            | 13.2<br>(10.0 to 16.0)                              |

| Cause                                                                               | Prevalence in thousands (95% UI)              | Incidence in thousands (95% UI)          | YLDs in thousands (95% UI)           |                                                   |                                                     |
|-------------------------------------------------------------------------------------|-----------------------------------------------|------------------------------------------|--------------------------------------|---------------------------------------------------|-----------------------------------------------------|
|                                                                                     | 2016 counts                                   | 2016 counts                              | 2016 counts                          | Percentage change in counts between 2006 and 2016 | Percentage change in age-standardised rates between |
| Adverse effects of medical treatment                                                | 17.5<br>(13.8 to 21.7)                        | 229.2<br>(202.6 to 258.8)                | 2.3<br>(1.5 to 3.5)                  | 3.1<br>(-1.5 to 8.6)                              | -0.9<br>(-5.5 to 3.6)                               |
| Animal contact                                                                      | 221.2<br>(194.5 to 260.2)                     | 211.2<br>(173.7 to 250.3)                | 5.7<br>(3.7 to 8.3)                  | 5.0<br>(-0.8 to 10.7)                             | -3.9<br>(-8.9 to 1.3)                               |
| Venomous animal contact                                                             | 69.8<br>(59.9 to 81.5)                        | 81.8<br>(63.0 to 104.5)                  | 3.5<br>(2.3 to 5.1)                  | 8.7<br>(-0.1 to 19.0)                             | 1.7<br>(-6.4 to 10.9)                               |
| Non-venomous animal contact                                                         | 151.3<br>(127.9 to 187.8)                     | 129.4<br>(103.7 to 157.1)                | 2.2<br>(1.4 to 3.5)                  | -0.4<br>(-5.1 to 3.5)                             | -12.1<br>(-16.0 to -9.1)                            |
| Foreign body                                                                        | 513.6<br>(433.4 to 590.8)                     | 231.7<br>(210.8 to 258.7)                | 17.6<br>(11.2 to 26.2)               | 3.2<br>(-0.5 to 6.3)                              | -9.0<br>(-12.0 to -6.3)                             |
| Pulmonary aspiration and foreign body in airway                                     | 323.9<br>(256.5 to 406.9)                     | 102.5<br>(91.2 to 115.8)                 | 12.3<br>(7.8 to 18.4)                | 3.9<br>(-0.1 to 7.2)                              | -7.6<br>(-10.8 to -4.7)                             |
| Foreign body in eyes                                                                | 13.4<br>(8.4 to 19.0)                         | 61.8<br>(47.3 to 82.9)                   | 0.8<br>(0.4 to 1.3)                  | 11.8<br>(6.5 to 18.4)                             | 0.4<br>(-2.4 to 3.5)                                |
| Foreign body in other body part                                                     | 176.3<br>(147.2 to 213.1)                     | 67.4<br>(58.8 to 78.8)                   | 4.6<br>(2.9 to 6.8)                  | 0.3<br>(-4.0 to 3.9)                              | -14.0<br>(-17.6 to -10.9)                           |
| Environmental heat and cold exposure                                                | 788.4<br>(669.8 to 920.9)                     | 156.0<br>(129.0 to 186.5)                | 26.3<br>(17.3 to 38.1)               | 13.5<br>(10.0 to 16.6)                            | 0.6<br>(-2.1 to 3.0)                                |
| Other unintentional injuries                                                        | 1,617.0<br>(1,348.8 to 1,909.3)               | 489.2<br>(426.5 to 554.9)                | 45.3<br>(30.1 to 66.0)               | 8.8<br>(6.6 to 10.6)                              | -6.2<br>(-8.0 to -4.5)                              |
| <b>Self-harm and interpersonal violence</b>                                         | <b>2,345.2</b><br><b>(2,145.6 to 2,615.2)</b> | <b>553.4†</b><br><b>(481.9 to 635.5)</b> | <b>55.9</b><br><b>(38.1 to 79.6)</b> | <b>6.0</b><br><b>(3.5 to 8.5)</b>                 | <b>-7.0</b><br><b>(-8.8 to -5.2)</b>                |
| Self-harm                                                                           | 118.8<br>(102.0 to 137.3)                     | 48.3<br>(42.2 to 55.4)                   | 4.8<br>(3.1 to 7.0)                  | 6.3<br>(2.1 to 10.4)                              | -10.4<br>(-13.5 to -7.4)                            |
| Self-harm by firearm                                                                | 3.4<br>(2.9 to 4.0)                           | 0.6<br>(0.4 to 1.0)                      | 0.1<br>(0.1 to 0.2)                  | -8.2<br>(-11.6 to -5.3)                           | -17.4<br>(-20.5 to -14.6)                           |
| Self-harm by other specified means                                                  | 115.4<br>(98.8 to 133.8)                      | 47.7<br>(41.7 to 54.7)                   | 4.7<br>(3.0 to 6.8)                  | 6.7<br>(2.5 to 10.8)                              | -10.2<br>(-13.3 to -7.2)                            |
| Interpersonal violence                                                              | 2,226.4<br>(2,030.4 to 2,502.3)               | 505.1†<br>(434.9 to 586.7)               | 51.1<br>(35.0 to 72.7)               | 6.0<br>(3.4 to 8.5)                               | -6.7<br>(-8.5 to -5.0)                              |
| Assault by firearm                                                                  | 44.6<br>(38.0 to 52.3)                        | 11.4<br>(8.4 to 15.2)                    | 1.8<br>(1.2 to 2.7)                  | -1.7<br>(-4.9 to 1.7)                             | -16.8<br>(-19.2 to -14.2)                           |
| Assault by sharp object                                                             | 281.4<br>(229.8 to 336.7)                     | 84.4<br>(65.5 to 106.6)                  | 7.4<br>(4.8 to 10.7)                 | 8.5<br>(4.5 to 12.0)                              | -4.8<br>(-7.5 to -2.2)                              |
| Sexual violence                                                                     | 1,009.1<br>(887.4 to 1,148.8)                 | --                                       | 8.1<br>(5.4 to 11.5)                 | -10.8<br>(-14.0 to -7.0)                          | -7.8<br>(-10.8 to -4.1)                             |
| Assault by other means                                                              | 891.4<br>(744.5 to 1,115.5)                   | 409.3<br>(349.1 to 478.0)                | 33.8<br>(22.7 to 48.5)               | 10.9<br>(8.2 to 13.4)                             | -6.1<br>(-8.2 to -4.3)                              |
| <b>Forces of nature, conflict and terrorism, and executions and police conflict</b> | <b>170.7</b><br><b>(95.2 to 257.8)</b>        | <b>2.0†</b><br><b>(1.2 to 2.6)</b>       | <b>4.6</b><br><b>(1.2 to 12.3)</b>   | <b>17.3</b><br><b>(9.1 to 22.5)</b>               | <b>4.7</b><br><b>(-2.6 to 9.3)</b>                  |
| Exposure to forces of nature                                                        | 78.7<br>(36.8 to 133.9)                       | --                                       | 2.4<br>(0.7 to 6.1)                  | -8.9<br>(-16.0 to -4.7)                           | -19.2<br>(-25.3 to -15.5)                           |
| Conflict and terrorism                                                              | 85.7<br>(45.6 to 137.0)                       | --                                       | 2.1<br>(0.5 to 5.8)                  | 73.7<br>(66.6 to 84.2)                            | 58.2<br>(51.2 to 68.8)                              |
| Executions and police conflict                                                      | 6.3<br>(3.5 to 9.7)                           | 2.0<br>(1.2 to 2.6)                      | 0.1<br>(0.1 to 0.4)                  | 28.4<br>(16.9 to 35.0)                            | 17.6<br>(9.1 to 23.2)                               |
| <b>Impairments</b>                                                                  | --                                            | --                                       | --                                   | --                                                | --                                                  |
| Anaemia                                                                             | 11,579.5<br>(10,745.4 to 12,434.0)            | --                                       | 248.2<br>(164.4 to 355.0)            | -6.4<br>(-15.0 to 1.9)                            | -13.4<br>(-20.8 to -6.2)                            |
| Developmental intellectual disability                                               | 1,667.2<br>(1,260.8 to 2,090.2)               | --                                       | 167.3<br>(122.7 to 219.8)            | -8.1<br>(-12.2 to -3.0)                           | -6.0<br>(-10.1 to -0.7)                             |
| Epilepsy                                                                            | 454.7<br>(269.4 to 594.5)                     | --                                       | 155.3<br>(87.1 to 243.3)             | 1.3<br>(-40.3 to 82.8)                            | 1.9<br>(-40.2 to 83.8)                              |
| Guillain-Barre syndrome                                                             | 0.5<br>(0.4 to 0.6)                           | --                                       | 0.1<br>(0.1 to 0.2)                  | 10.4<br>(4.7 to 16.9)                             | 0.6<br>(0.2 to 1.5)                                 |
| Hearing loss                                                                        | 13,383.3<br>(12,690.8 to 14,157.8)            | --                                       | 523.0<br>(370.5 to 716.6)            | 15.5<br>(11.4 to 19.4)                            | -7.2<br>(-9.9 to -4.6)                              |
| Heart failure                                                                       | 513.3<br>(449.7 to 588.4)                     | --                                       | 81.6<br>(59.9 to 106.2)              | 51.2<br>(38.3 to 63.6)                            | 5.4<br>(-3.0 to 13.5)                               |
| Infertility                                                                         | 834.0<br>(663.9 to 1,063.3)                   | --                                       | 5.2<br>(2.2 to 10.2)                 | -6.2<br>(-10.6 to -0.8)                           | -0.1<br>(-4.9 to 5.4)                               |
| Pelvic inflammatory disease                                                         | 62.6<br>(53.1 to 73.9)                        | --                                       | 8.2<br>(5.4 to 11.5)                 | -9.1<br>(-23.1 to 6.5)                            | -12.3<br>(-24.9 to 2.6)                             |
| Vision loss                                                                         | 7,673.1<br>(6,681.6 to 8,791.8)               | --                                       | 209.2<br>(147.2 to 299.0)            | 17.5<br>(11.9 to 24.1)                            | -4.7<br>(-8.9 to 0.5)                               |

We did not calculate incidence for the nine impairments, certain NTDs, and causes with only birth prevalence. Blank cells mean that no estimate is available.

† Incidence for aggregate causes represents the sum of the incidence of the causes below the aggregate.

‡ Incidence estimates for stroke represent first-ever stroke only.

^ Incidence of HIV/AIDS represents new infections of HIV only and does not include new infections of Tuberculosis in HIV positive cases.

SR Table 14: Prevalence, incidence, and YLDs for 2016, percentage change of YLD counts and percentage change of age-standardised YLD rates between 2006 and 2016 by cause and impairments, for all ages, The Bahamas.

| Cause                                                                                | Prevalence in thousands (95% UI) | Incidence in thousands (95% UI)         | YLDs in thousands (95% UI)    |                                                   |                                                     |
|--------------------------------------------------------------------------------------|----------------------------------|-----------------------------------------|-------------------------------|---------------------------------------------------|-----------------------------------------------------|
|                                                                                      | 2016 counts                      | 2016 counts                             | 2016 counts                   | Percentage change in counts between 2006 and 2016 | Percentage change in age-standardised rates between |
| <b>All causes</b>                                                                    | <b>381.2</b><br>(380.0 to 382.6) | <b>2,466.9†</b><br>(2,343.1 to 2,605.4) | <b>42.5</b><br>(31.5 to 55.3) | <b>25.5</b><br>(22.9 to 27.9)                     | <b>-0.0</b><br>(-2.0 to 1.9)                        |
| <b>Communicable, maternal, neonatal, and nutritional disorders</b>                   | <b>225.6</b><br>(218.0 to 233.0) | <b>1,358.9†</b><br>(1,248.0 to 1,478.8) | <b>4.1</b><br>(2.9 to 5.6)    | <b>16.6</b><br>(8.6 to 25.4)                      | <b>0.9</b><br>(-5.8 to 8.8)                         |
| <b>HIV/AIDS and tuberculosis</b>                                                     | <b>97.2</b><br>(87.6 to 104.9)   | <b>0.3†</b><br>(0.2 to 0.4)             | <b>0.3</b><br>(0.2 to 0.6)    | <b>4.4</b><br>(-15.9 to 34.7)                     | <b>-14.3</b><br>(-31.0 to 10.7)                     |
| Tuberculosis                                                                         | 88.9<br>(79.8 to 99.1)           | 0.1†<br>(0.1 to 0.2)                    | < 0.05<br>(< 0.05 to < 0.05)  | 14.5<br>(-15.2 to 53.7)                           | -6.0<br>(-28.9 to 23.4)                             |
| Drug-susceptible tuberculosis                                                        | 0.1<br>(< 0.05 to 0.1)           | 0.1<br>(0.1 to 0.2)                     | < 0.05<br>(< 0.05 to < 0.05)  | 13.9<br>(-16.1 to 53.9)                           | -6.5<br>(-29.9 to 24.1)                             |
| Multidrug-resistant tuberculosis without extensive drug resistance                   | < 0.05<br>(< 0.05 to < 0.05)     | < 0.05<br>(< 0.05 to < 0.05)            | < 0.05<br>(< 0.05 to < 0.05)  | 87.0<br>(-69.5 to 920.0)                          | 52.8<br>(-75.5 to 729.6)                            |
| Extensively drug-resistant tuberculosis                                              | < 0.05<br>(< 0.05 to < 0.05)     | < 0.05<br>(< 0.05 to < 0.05)            | < 0.05<br>(< 0.05 to < 0.05)  | 398.1<br>(-18.9 to 2,614.8)                       | 306.8<br>(-34.7 to 2,108.3)                         |
| Latent tuberculosis infection                                                        | 88.8<br>(79.8 to 99.1)           | --                                      | --                            | --                                                | --                                                  |
| HIV/AIDS                                                                             | 3.3<br>(2.6 to 4.4)              | 0.2^<br>(0.1 to 0.2)                    | 0.3<br>(0.2 to 0.6)           | 3.9<br>(-17.0 to 37.0)                            | -14.7<br>(-31.8 to 12.4)                            |
| Drug-susceptible HIV/AIDS - Tuberculosis                                             | < 0.05<br>(< 0.05 to < 0.05)     | < 0.05<br>(< 0.05 to 0.1)               | < 0.05<br>(< 0.05 to < 0.05)  | -11.4<br>(-28.7 to 9.2)                           | -26.9<br>(-40.6 to -10.9)                           |
| Multidrug-resistant HIV/AIDS - Tuberculosis without extensive drug resistance        | < 0.05<br>(< 0.05 to < 0.05)     | < 0.05<br>(< 0.05 to < 0.05)            | < 0.05<br>(< 0.05 to < 0.05)  | 43.7<br>(-77.1 to 654.8)                          | 18.6<br>(-81.1 to 523.0)                            |
| Extensively drug-resistant HIV/AIDS - Tuberculosis                                   | < 0.05<br>(< 0.05 to < 0.05)     | < 0.05<br>(< 0.05 to < 0.05)            | < 0.05<br>(< 0.05 to < 0.05)  | 282.5<br>(-39.1 to 1,910.6)                       | 215.6<br>(-49.8 to 1,559.5)                         |
| HIV/AIDS resulting in other diseases                                                 | 3.3<br>(2.6 to 4.4)              | 0.2<br>(0.1 to 0.2)                     | 0.3<br>(0.2 to 0.6)           | 4.2<br>(-17.1 to 39.5)                            | -14.4<br>(-31.9 to 14.2)                            |
| <b>Diarrhoea, lower respiratory infections, and other common infectious diseases</b> | <b>21.8</b><br>(20.6 to 23.0)    | <b>1,293.6†</b><br>(1,180.2 to 1,410.3) | <b>1.0</b><br>(0.7 to 1.4)    | <b>27.4</b><br>(22.8 to 32.0)                     | <b>9.3</b><br>(5.6 to 13.3)                         |
| Diarrhoeal diseases                                                                  | 4.3<br>(4.0 to 4.6)              | 289.4<br>(269.4 to 310.3)               | 0.5<br>(0.3 to 0.7)           | 41.7<br>(34.0 to 50.5)                            | 19.5<br>(13.3 to 26.5)                              |
| Intestinal infectious diseases                                                       | < 0.05<br>(< 0.05 to < 0.05)     | < 0.05†<br>(< 0.05 to < 0.05)           | < 0.05<br>(< 0.05 to < 0.05)  | 25.9<br>(9.3 to 42.9)                             | -2.3<br>(-13.9 to 10.7)                             |
| Typhoid fever                                                                        | < 0.05<br>(< 0.05 to < 0.05)     | < 0.05<br>(< 0.05 to < 0.05)            | < 0.05<br>(< 0.05 to < 0.05)  | 28.2<br>(9.5 to 48.3)                             | -0.6<br>(-13.8 to 14.3)                             |
| Paratyphoid fever                                                                    | < 0.05<br>(< 0.05 to < 0.05)     | < 0.05<br>(< 0.05 to < 0.05)            | < 0.05<br>(< 0.05 to < 0.05)  | 27.6<br>(5.4 to 57.3)                             | -1.2<br>(-17.2 to 20.3)                             |
| Other intestinal infectious diseases                                                 | --                               | --                                      | < 0.05<br>(< 0.05 to < 0.05)  | -15.5<br>(-39.3 to 17.7)                          | -30.0<br>(-48.2 to -5.3)                            |
| Lower respiratory infections                                                         | 0.5<br>(0.5 to 0.6)              | 23.4<br>(21.4 to 25.5)                  | < 0.05<br>(< 0.05 to < 0.05)  | 50.3<br>(35.2 to 66.5)                            | 18.4<br>(7.2 to 30.0)                               |
| Upper respiratory infections                                                         | 12.6<br>(11.2 to 14.2)           | 951.3<br>(842.7 to 1,075.6)             | 0.3<br>(0.2 to 0.5)           | 14.7<br>(9.1 to 21.2)                             | 0.1<br>(-4.5 to 5.4)                                |
| Otitis media                                                                         | 4.3<br>(3.9 to 4.8)              | 21.7<br>(17.5 to 26.6)                  | 0.1<br>(0.1 to 0.2)           | 14.1<br>(5.6 to 23.6)                             | 1.9<br>(-5.4 to 10.0)                               |
| Meningitis                                                                           | 0.3<br>(0.2 to 0.3)              | 0.1<br>(< 0.05 to 0.1)                  | < 0.05<br>(< 0.05 to < 0.05)  | 13.7<br>(10.3 to 16.9)                            | -2.7<br>(-5.8 to 0.2)                               |
| Pneumococcal meningitis                                                              | 0.1<br>(0.1 to 0.1)              | < 0.05<br>(< 0.05 to < 0.05)            | < 0.05<br>(< 0.05 to < 0.05)  | 3.5<br>(-2.6 to 9.3)                              | -12.0<br>(-17.4 to -6.5)                            |
| H influenzae type B meningitis                                                       | < 0.05<br>(< 0.05 to < 0.05)     | < 0.05<br>(< 0.05 to < 0.05)            | < 0.05<br>(< 0.05 to < 0.05)  | 15.3<br>(10.6 to 19.9)                            | 0.2<br>(-3.9 to 4.1)                                |
| Meningococcal infection                                                              | < 0.05<br>(< 0.05 to < 0.05)     | < 0.05<br>(< 0.05 to < 0.05)            | < 0.05<br>(< 0.05 to < 0.05)  | 17.2<br>(11.4 to 25.7)                            | -0.4<br>(-6.1 to 11.0)                              |
| Other meningitis                                                                     | 0.1<br>(0.1 to 0.1)              | < 0.05<br>(< 0.05 to < 0.05)            | < 0.05<br>(< 0.05 to < 0.05)  | 29.7<br>(23.9 to 36.8)                            | 11.1<br>(6.4 to 17.1)                               |
| Encephalitis                                                                         | 0.2<br>(0.2 to 0.3)              | 0.1<br>(0.1 to 0.1)                     | < 0.05<br>(< 0.05 to < 0.05)  | 21.0<br>(2.4 to 40.1)                             | 2.2<br>(-12.3 to 17.6)                              |
| Diphtheria                                                                           | < 0.05<br>(< 0.05 to < 0.05)     | < 0.05<br>(< 0.05 to < 0.05)            | < 0.05<br>(< 0.05 to < 0.05)  | 0.6<br>(-42.0 to 80.9)                            | -15.6<br>(-51.2 to 53.1)                            |
| Whooping cough                                                                       | < 0.05<br>(< 0.05 to < 0.05)     | 0.1<br>(0.1 to 0.2)                     | < 0.05<br>(< 0.05 to < 0.05)  | -35.9<br>(-57.1 to -4.6)                          | -43.9<br>(-62.6 to -16.0)                           |
| Tetanus                                                                              | < 0.05<br>(< 0.05 to < 0.05)     | < 0.05<br>(< 0.05 to < 0.05)            | < 0.05<br>(< 0.05 to < 0.05)  | 4.8<br>(-29.2 to 48.1)                            | -17.8<br>(-46.3 to 16.1)                            |
| Measles                                                                              | < 0.05<br>(0.0 to < 0.05)        | < 0.05<br>(0.0 to < 0.05)               | < 0.05<br>(0.0 to < 0.05)     | --                                                | --                                                  |
| Varicella and herpes zoster                                                          | 0.4<br>(0.4 to 0.4)              | 7.5<br>(7.3 to 7.7)                     | < 0.05<br>(< 0.05 to < 0.05)  | 29.4<br>(14.0 to 45.2)                            | 0.1<br>(-10.9 to 11.7)                              |
| <b>Neglected tropical diseases and malaria</b>                                       | <b>4.3</b><br>(3.8 to 4.7)       | <b>12.0†</b><br>(8.0 to 16.8)           | <b>0.2</b><br>(0.1 to 0.3)    | <b>133.6</b><br>(76.2 to 208.9)                   | <b>101.8</b><br>(53.4 to 165.7)                     |
| Malaria                                                                              | --                               | --                                      | --                            | --                                                | --                                                  |
| Chagas disease                                                                       | < 0.05<br>(< 0.05 to < 0.05)     | --                                      | < 0.05<br>(< 0.05 to < 0.05)  | 81.9<br>(16.5 to 177.5)                           | 35.7<br>(-15.0 to 104.8)                            |
| Leishmaniasis                                                                        | --                               | --                                      | --                            | --                                                | --                                                  |
| Visceral leishmaniasis                                                               | --                               | --                                      | --                            | --                                                | --                                                  |
| Cutaneous and mucocutaneous leishmaniasis                                            | --                               | --                                      | --                            | --                                                | --                                                  |
| African trypanosomiasis                                                              | --                               | --                                      | --                            | --                                                | --                                                  |
| Schistosomiasis                                                                      | --                               | --                                      | --                            | --                                                | --                                                  |
| Cysticercosis                                                                        | --                               | --                                      | --                            | --                                                | --                                                  |
| Cystic echinococcosis                                                                | --                               | --                                      | --                            | --                                                | --                                                  |
| Lymphatic filariasis                                                                 | --                               | --                                      | --                            | --                                                | --                                                  |
| Onchocerciasis                                                                       | --                               | --                                      | --                            | --                                                | --                                                  |
| Trachoma                                                                             | --                               | --                                      | --                            | --                                                | --                                                  |
| Dengue                                                                               | 0.7<br>(0.4 to 1.1)              | 11.8<br>(8.0 to 16.7)                   | 0.1<br>(0.1 to 0.2)           | 360.8<br>(260.8 to 893.9)                         | 297.1<br>(210.9 to 757.0)                           |
| Yellow fever                                                                         | --                               | --                                      | --                            | --                                                | --                                                  |
| Rabies                                                                               | < 0.05<br>(< 0.05 to < 0.05)     | < 0.05<br>(< 0.05 to < 0.05)            | < 0.05<br>(< 0.05 to < 0.05)  | 30.4<br>(-12.9 to 96.4)                           | -0.1<br>(-32.4 to 48.1)                             |
| Intestinal nematode infections                                                       | 0.9<br>(0.8 to 1.1)              | --                                      | < 0.05<br>(< 0.05 to < 0.05)  | 14.8<br>(-20.2 to 62.4)                           | -8.0<br>(-35.6 to 30.5)                             |
| Ascariasis                                                                           | 0.3<br>(0.2 to 0.4)              | --                                      | --                            | --                                                | --                                                  |



| Cause                                                                   | Prevalence in thousands (95% UI)        | Incidence in thousands (95% UI)                | YLDs in thousands (95% UI)                    |                                                   |                                                     |
|-------------------------------------------------------------------------|-----------------------------------------|------------------------------------------------|-----------------------------------------------|---------------------------------------------------|-----------------------------------------------------|
|                                                                         | 2016 counts                             | 2016 counts                                    | 2016 counts                                   | Percentage change in counts between 2006 and 2016 | Percentage change in age-standardised rates between |
| Trichuriasis                                                            | 0.3<br>(0.2 to 0.4)                     | --                                             | --                                            | --                                                | --                                                  |
| Hookworm disease                                                        | 0.3<br>(0.2 to 0.4)                     | --                                             | < 0.05<br>(< 0.05 to < 0.05)                  | 14.8<br>(-20.2 to 62.4)                           | -8.0<br>(-35.6 to 30.5)                             |
| Food-borne trematodiasis                                                | --                                      | --                                             | --                                            | --                                                | --                                                  |
| Leprosy                                                                 | --                                      | --                                             | --                                            | --                                                | --                                                  |
| Ebola virus disease                                                     | --                                      | --                                             | --                                            | --                                                | --                                                  |
| Zika virus disease                                                      | < 0.05<br>(< 0.05 to < 0.05)            | 0.1<br>(< 0.05 to 0.5)                         | < 0.05<br>(< 0.05 to < 0.05)                  | --                                                | --                                                  |
| Guinea worm disease                                                     | --                                      | --                                             | --                                            | --                                                | --                                                  |
| Other neglected tropical diseases                                       | 2.6<br>(2.1 to 3.0)                     | --                                             | 0.1<br>(< 0.05 to 0.1)                        | 15.9<br>(-5.8 to 46.3)                            | 4.0<br>(-16.1 to 33.3)                              |
| <b>Maternal disorders</b>                                               | <b>0.6</b><br><b>(0.5 to 0.7)</b>       | <b>13.3†</b><br><b>(11.4 to 14.8)</b>          | <b>&lt; 0.05</b><br><b>(&lt; 0.05 to 0.1)</b> | <b>10.6</b><br><b>(-17.4 to 50.5)</b>             | <b>-4.4</b><br><b>(-29.0 to 29.6)</b>               |
| Maternal haemorrhage                                                    | 0.1<br>(< 0.05 to 0.1)                  | 0.4<br>(0.3 to 0.5)                            | < 0.05<br>(< 0.05 to < 0.05)                  | 29.8<br>(-12.9 to 94.2)                           | 12.0<br>(-24.4 to 67.8)                             |
| Maternal sepsis and other pregnancy related infections                  | 0.1<br>(0.1 to 0.2)                     | 0.9<br>(0.7 to 1.2)                            | < 0.05<br>(< 0.05 to < 0.05)                  | 9.6<br>(-47.0 to 131.8)                           | -5.3<br>(-54.0 to 99.2)                             |
| Maternal hypertensive disorders                                         | 0.3<br>(0.2 to 0.4)                     | 1.4<br>(1.1 to 1.7)                            | < 0.05<br>(< 0.05 to < 0.05)                  | 1.6<br>(-37.1 to 69.8)                            | -12.2<br>(-45.6 to 46.9)                            |
| Maternal obstructed labour and uterine rupture                          | < 0.05<br>(< 0.05 to < 0.05)            | 0.3<br>(0.2 to 0.5)                            | < 0.05<br>(< 0.05 to < 0.05)                  | 11.0<br>(-40.4 to 106.5)                          | -4.1<br>(-48.2 to 76.8)                             |
| Maternal abortion, miscarriage, and ectopic pregnancy                   | 0.1<br>(0.1 to 0.1)                     | 10.3<br>(8.4 to 11.7)                          | < 0.05<br>(< 0.05 to < 0.05)                  | 29.0<br>(-27.0 to 129.6)                          | 11.3<br>(-37.2 to 98.0)                             |
| Other maternal disorders                                                | --                                      | --                                             | < 0.05<br>(< 0.05 to < 0.05)                  | 4.7<br>(-21.8 to 42.6)                            | -9.5<br>(-32.7 to 22.9)                             |
| <b>Neonatal disorders</b>                                               | <b>6.1</b><br><b>(5.3 to 7.4)</b>       | <b>1.0</b><br><b>(0.6 to 1.5)</b>              | <b>1.0</b><br><b>(0.6 to 1.5)</b>             | <b>9.5</b><br><b>(-5.8 to 28.8)</b>               | <b>-3.0</b><br><b>(-16.3 to 14.1)</b>               |
| Neonatal preterm birth complications                                    | 5.3<br>(4.2 to 6.8)                     | --                                             | 0.5<br>(0.3 to 0.8)                           | 16.2<br>(-8.0 to 45.8)                            | 3.5<br>(-18.3 to 29.9)                              |
| Neonatal encephalopathy due to birth asphyxia and trauma                | 0.2<br>(0.1 to 0.4)                     | --                                             | < 0.05<br>(< 0.05 to 0.1)                     | 38.4<br>(-11.6 to 145.1)                          | 21.4<br>(-22.4 to 115.4)                            |
| Neonatal sepsis and other neonatal infections                           | 0.8<br>(0.3 to 1.9)                     | --                                             | 0.4<br>(0.1 to 0.9)                           | -0.4<br>(-18.5 to 21.5)                           | -11.8<br>(-27.2 to 6.1)                             |
| Hemolytic disease and other neonatal jaundice                           | 0.1<br>(0.1 to 0.2)                     | --                                             | < 0.05<br>(< 0.05 to < 0.05)                  | 13.4<br>(-7.0 to 38.4)                            | -1.0<br>(-18.8 to 20.9)                             |
| Other neonatal disorders                                                | --                                      | --                                             | < 0.05<br>(< 0.05 to 0.1)                     | 7.2<br>(-8.5 to 29.6)                             | -7.8<br>(-21.4 to 11.4)                             |
| <b>Nutritional deficiencies</b>                                         | <b>70.4</b><br><b>(61.6 to 77.8)</b>    | <b>5.0†</b><br><b>(3.5 to 7.3)</b>             | <b>1.4</b><br><b>(0.9 to 2.1)</b>             | <b>10.8</b><br><b>(-3.5 to 28.2)</b>              | <b>-4.3</b><br><b>(-16.9 to 10.8)</b>               |
| Protein-energy malnutrition                                             | 0.8<br>(0.6 to 1.1)                     | 0.8<br>(0.6 to 1.0)                            | < 0.05<br>(< 0.05 to 0.1)                     | 12.3<br>(-20.9 to 66.7)                           | -3.3<br>(-32.0 to 43.9)                             |
| Iodine deficiency                                                       | 1.5<br>(1.3 to 1.7)                     | < 0.05<br>(< 0.05 to < 0.05)                   | < 0.05<br>(< 0.05 to 0.1)                     | 19.6<br>(2.7 to 39.0)                             | -3.6<br>(-16.6 to 11.5)                             |
| Vitamin A deficiency                                                    | 5.0<br>(3.4 to 7.8)                     | 4.1<br>(2.6 to 6.4)                            | < 0.05<br>(< 0.05 to < 0.05)                  | 13.4<br>(-5.6 to 37.1)                            | -0.5<br>(-17.7 to 19.8)                             |
| Iron-deficiency anaemia                                                 | 60.4<br>(52.6 to 69.5)                  | --                                             | 1.3<br>(0.8 to 2.0)                           | 10.5<br>(-4.6 to 30.0)                            | -4.4<br>(-17.8 to 12.2)                             |
| Other nutritional deficiencies                                          | --                                      | --                                             | < 0.05<br>(< 0.05 to < 0.05)                  | 10.6<br>(-23.1 to 67.9)                           | -4.9<br>(-34.0 to 44.1)                             |
| <b>Other communicable, maternal, neonatal, and nutritional diseases</b> | <b>110.8</b><br><b>(102.9 to 118.7)</b> | <b>34.7</b><br><b>(27.6 to 45.0)</b>           | <b>0.2</b><br><b>(0.1 to 0.3)</b>             | <b>22.4</b><br><b>(12.9 to 34.3)</b>              | <b>4.6</b><br><b>(-3.7 to 15.1)</b>                 |
| Sexually transmitted diseases excluding HIV                             | 99.5<br>(91.5 to 107.3)                 | 33.1<br>(26.0 to 43.3)                         | 0.1<br>(0.1 to 0.2)                           | 21.2<br>(10.2 to 34.4)                            | 1.7<br>(-7.0 to 13.7)                               |
| Syphilis                                                                | 3.3<br>(2.7 to 3.9)                     | 2.4<br>(1.9 to 3.0)                            | < 0.05<br>(< 0.05 to < 0.05)                  | 41.7<br>(25.1 to 60.6)                            | 2.3<br>(-10.1 to 16.8)                              |
| Chlamydial infection                                                    | 3.8<br>(3.0 to 4.8)                     | 2.8<br>(2.2 to 3.6)                            | < 0.05<br>(< 0.05 to < 0.05)                  | 18.2<br>(0.8 to 37.3)                             | 0.8<br>(-13.6 to 17.4)                              |
| Gonococcal infection                                                    | 3.0<br>(1.2 to 5.7)                     | 10.2<br>(3.6 to 20.4)                          | < 0.05<br>(< 0.05 to 0.1)                     | 19.8<br>(-3.8 to 49.7)                            | 4.8<br>(-15.5 to 31.3)                              |
| Trichomoniasis                                                          | 14.1<br>(12.1 to 16.1)                  | 12.1<br>(10.3 to 14.1)                         | < 0.05<br>(< 0.05 to < 0.05)                  | 20.3<br>(12.9 to 27.9)                            | -0.4<br>(-6.6 to 5.7)                               |
| Genital herpes                                                          | 82.0<br>(70.8 to 94.1)                  | 4.8<br>(4.1 to 5.8)                            | < 0.05<br>(< 0.05 to < 0.05)                  | 25.8<br>(15.3 to 36.4)                            | -0.2<br>(-8.2 to 8.4)                               |
| Other sexually transmitted diseases                                     | 0.9<br>(0.8 to 1.0)                     | 0.7<br>(0.6 to 0.9)                            | < 0.05<br>(< 0.05 to 0.1)                     | 16.7<br>(3.0 to 34.0)                             | 1.0<br>(-10.9 to 16.9)                              |
| Hepatitis                                                               | 14.6<br>(13.0 to 16.4)                  | 1.6<br>(1.2 to 2.0)                            | < 0.05<br>(< 0.05 to < 0.05)                  | 9.8<br>(-16.9 to 45.2)                            | -10.1<br>(-31.1 to 18.4)                            |
| Acute hepatitis A                                                       | < 0.05<br>(< 0.05 to 0.1)               | 0.4<br>(0.2 to 0.7)                            | < 0.05<br>(< 0.05 to < 0.05)                  | 7.9<br>(-60.7 to 219.9)                           | -8.9<br>(-64.6 to 155.0)                            |
| Hepatitis B                                                             | 6.0<br>(4.8 to 7.5)                     | 0.8<br>(0.7 to 1.2)                            | < 0.05<br>(< 0.05 to < 0.05)                  | 10.4<br>(-9.2 to 32.2)                            | -11.7<br>(-26.8 to 4.7)                             |
| Hepatitis C                                                             | 8.6<br>(7.7 to 9.6)                     | 0.2<br>(0.2 to 0.2)                            | < 0.05<br>(< 0.05 to < 0.05)                  | 16.5<br>(-9.3 to 49.5)                            | -2.1<br>(-24.1 to 26.9)                             |
| Acute hepatitis E                                                       | < 0.05<br>(< 0.05 to < 0.05)            | 0.1<br>(0.1 to 0.2)                            | < 0.05<br>(< 0.05 to < 0.05)                  | 6.7<br>(-1.6 to 15.4)                             | -11.0<br>(-16.8 to -5.0)                            |
| Other infectious diseases                                               | 2.1<br>(1.8 to 2.5)                     | < 0.05<br>(< 0.05 to < 0.05)                   | < 0.05<br>(< 0.05 to 0.1)                     | 26.7<br>(6.9 to 54.1)                             | 13.0<br>(-5.6 to 38.6)                              |
| <b>Non-communicable diseases</b>                                        | <b>366.0</b><br><b>(364.3 to 367.9)</b> | <b>1,081.2†</b><br><b>(1,027.1 to 1,138.3)</b> | <b>35.9</b><br><b>(26.3 to 46.6)</b>          | <b>26.0</b><br><b>(23.2 to 28.6)</b>              | <b>-0.5</b><br><b>(-2.5 to 1.5)</b>                 |
| <b>Neoplasms</b>                                                        | <b>4.2</b><br><b>(4.0 to 4.4)</b>       | <b>1.3</b><br><b>(1.3 to 1.4)</b>              | <b>0.5</b><br><b>(0.3 to 0.6)</b>             | <b>56.9</b><br><b>(48.6 to 65.6)</b>              | <b>8.4</b><br><b>(2.8 to 14.6)</b>                  |
| Lip and oral cavity cancer                                              | 0.1<br>(0.1 to 0.1)                     | < 0.05<br>(< 0.05 to < 0.05)                   | < 0.05<br>(< 0.05 to < 0.05)                  | 37.8<br>(22.4 to 57.5)                            | -4.3<br>(-15.5 to 9.4)                              |
| Nasopharynx cancer                                                      | < 0.05<br>(< 0.05 to < 0.05)            | < 0.05<br>(< 0.05 to < 0.05)                   | < 0.05<br>(< 0.05 to < 0.05)                  | 38.5<br>(24.5 to 53.2)                            | 8.3<br>(-2.3 to 19.0)                               |
| Other pharynx cancer                                                    | < 0.05<br>(< 0.05 to < 0.05)            | < 0.05<br>(< 0.05 to < 0.05)                   | < 0.05<br>(< 0.05 to < 0.05)                  | 39.3<br>(17.0 to 65.1)                            | -3.9<br>(-18.2 to 13.3)                             |
| Oesophageal cancer                                                      | < 0.05<br>(< 0.05 to < 0.05)            | < 0.05<br>(< 0.05 to < 0.05)                   | < 0.05<br>(< 0.05 to < 0.05)                  | 35.2<br>(11.9 to 64.0)                            | -9.6<br>(-25.9 to 11.5)                             |
| Stomach cancer                                                          | 0.1<br>(0.1 to 0.1)                     | < 0.05<br>(< 0.05 to < 0.05)                   | < 0.05<br>(< 0.05 to < 0.05)                  | 53.1<br>(32.0 to 77.0)                            | 2.0<br>(-13.1 to 18.3)                              |
| Colon and rectum cancer                                                 | 0.6<br>(0.5 to 0.6)                     | 0.1<br>(0.1 to 0.2)                            | 0.1<br>(< 0.05 to 0.1)                        | 64.6<br>(46.3 to 85.0)                            | 11.0<br>(-1.0 to 24.7)                              |
| Liver cancer                                                            | < 0.05<br>(< 0.05 to < 0.05)            | < 0.05<br>(< 0.05 to < 0.05)                   | < 0.05<br>(< 0.05 to < 0.05)                  | 41.9<br>(31.9 to 51.6)                            | -3.2<br>(-9.9 to 3.2)                               |
| Liver cancer due to hepatitis B                                         | < 0.05<br>(< 0.05 to < 0.05)            | < 0.05<br>(< 0.05 to < 0.05)                   | < 0.05<br>(< 0.05 to < 0.05)                  | 36.9<br>(26.5 to 47.5)                            | -2.9<br>(-9.7 to 4.5)                               |

| Cause                                              | Prevalence in thousands (95% UI)     | Incidence in thousands (95% UI)    | YLDs in thousands (95% UI)        |                                                   |                                                     |
|----------------------------------------------------|--------------------------------------|------------------------------------|-----------------------------------|---------------------------------------------------|-----------------------------------------------------|
|                                                    | 2016 counts                          | 2016 counts                        | 2016 counts                       | Percentage change in counts between 2006 and 2016 | Percentage change in age-standardised rates between |
| Liver cancer due to hepatitis C                    | < 0.05<br>(< 0.05 to < 0.05)         | < 0.05<br>(< 0.05 to < 0.05)       | < 0.05<br>(< 0.05 to < 0.05)      | 49.1<br>(36.9 to 61.6)                            | -2.0<br>(-10.3 to 6.4)                              |
| Liver cancer due to alcohol use                    | < 0.05<br>(< 0.05 to < 0.05)         | < 0.05<br>(< 0.05 to < 0.05)       | < 0.05<br>(< 0.05 to < 0.05)      | 41.9<br>(30.4 to 54.2)                            | -6.8<br>(-14.6 to 1.7)                              |
| Liver cancer due to other causes                   | < 0.05<br>(< 0.05 to < 0.05)         | < 0.05<br>(< 0.05 to < 0.05)       | < 0.05<br>(< 0.05 to < 0.05)      | 42.6<br>(30.7 to 54.8)                            | -0.7<br>(-8.7 to 8.2)                               |
| Gallbladder and biliary tract cancer               | < 0.05<br>(< 0.05 to < 0.05)         | < 0.05<br>(< 0.05 to < 0.05)       | < 0.05<br>(< 0.05 to < 0.05)      | 50.8<br>(40.4 to 61.2)                            | 0.0<br>(-6.6 to 6.9)                                |
| Pancreatic cancer                                  | < 0.05<br>(< 0.05 to < 0.05)         | < 0.05<br>(< 0.05 to < 0.05)       | < 0.05<br>(< 0.05 to < 0.05)      | 54.0<br>(41.0 to 70.2)                            | 2.0<br>(-7.5 to 13.5)                               |
| Larynx cancer                                      | 0.1<br>(0.1 to 0.1)                  | < 0.05<br>(< 0.05 to < 0.05)       | < 0.05<br>(< 0.05 to < 0.05)      | 46.3<br>(23.7 to 73.8)                            | -0.8<br>(-16.8 to 18.6)                             |
| Tracheal, bronchus, and lung cancer                | 0.1<br>(0.1 to 0.1)                  | 0.1<br>(0.1 to 0.1)                | < 0.05<br>(< 0.05 to < 0.05)      | 44.8<br>(19.1 to 75.9)                            | -2.1<br>(-19.8 to 19.6)                             |
| Malignant skin melanoma                            | 0.1<br>(0.1 to 0.1)                  | < 0.05<br>(< 0.05 to < 0.05)       | < 0.05<br>(< 0.05 to < 0.05)      | 56.2<br>(31.1 to 87.9)                            | 14.0<br>(-3.0 to 35.9)                              |
| Non-melanoma skin cancer                           | < 0.05<br>(< 0.05 to < 0.05)         | < 0.05<br>(< 0.05 to < 0.05)       | < 0.05<br>(< 0.05 to < 0.05)      | -17.4<br>(-54.4 to 79.5)                          | -46.9<br>(-70.3 to 18.7)                            |
| Non-melanoma skin cancer (squamous-cell carcinoma) | < 0.05<br>(< 0.05 to < 0.05)         | < 0.05<br>(< 0.05 to < 0.05)       | < 0.05<br>(< 0.05 to < 0.05)      | -19.1<br>(-55.8 to 81.9)                          | -48.0<br>(-71.2 to 19.6)                            |
| Non-melanoma skin cancer (basal-cell carcinoma)    | < 0.05<br>(< 0.05 to < 0.05)         | < 0.05<br>(< 0.05 to < 0.05)       | < 0.05<br>(< 0.05 to < 0.05)      | 44.0<br>(29.4 to 61.9)                            | -0.6<br>(-11.6 to 11.5)                             |
| Breast cancer                                      | 1.2<br>(1.1 to 1.3)                  | 0.2<br>(0.2 to 0.3)                | 0.1<br>(0.1 to 0.1)               | 51.6<br>(32.2 to 72.4)                            | 10.1<br>(-3.2 to 23.3)                              |
| Cervical cancer                                    | 0.2<br>(0.2 to 0.2)                  | 0.1<br>(0.1 to 0.1)                | < 0.05<br>(< 0.05 to < 0.05)      | 44.9<br>(12.7 to 78.8)                            | 7.6<br>(-15.0 to 31.4)                              |
| Uterine cancer                                     | 0.3<br>(0.3 to 0.4)                  | 0.1<br>(0.1 to 0.1)                | < 0.05<br>(< 0.05 to < 0.05)      | 126.2<br>(84.7 to 175.2)                          | 49.6<br>(23.1 to 80.6)                              |
| Ovarian cancer                                     | 0.1<br>(0.1 to 0.1)                  | < 0.05<br>(< 0.05 to < 0.05)       | < 0.05<br>(< 0.05 to < 0.05)      | 52.3<br>(13.3 to 100.3)                           | 6.2<br>(-19.2 to 38.6)                              |
| Prostate cancer                                    | 1.2<br>(1.0 to 1.3)                  | 0.3<br>(0.2 to 0.3)                | 0.1<br>(0.1 to 0.1)               | 60.2<br>(38.2 to 81.3)                            | 3.2<br>(-10.5 to 16.8)                              |
| Testicular cancer                                  | < 0.05<br>(< 0.05 to < 0.05)         | < 0.05<br>(< 0.05 to < 0.05)       | < 0.05<br>(< 0.05 to < 0.05)      | 20.2<br>(-0.3 to 42.9)                            | 0.2<br>(-16.6 to 18.7)                              |
| Kidney cancer                                      | 0.1<br>(0.1 to 0.1)                  | < 0.05<br>(< 0.05 to < 0.05)       | < 0.05<br>(< 0.05 to < 0.05)      | 54.8<br>(35.7 to 81.6)                            | 14.4<br>(1.4 to 32.5)                               |
| Bladder cancer                                     | 0.1<br>(0.1 to 0.1)                  | < 0.05<br>(< 0.05 to < 0.05)       | < 0.05<br>(< 0.05 to < 0.05)      | 50.6<br>(32.2 to 71.0)                            | 0.6<br>(-12.1 to 14.4)                              |
| Brain and nervous system cancer                    | < 0.05<br>(< 0.05 to < 0.05)         | < 0.05<br>(< 0.05 to < 0.05)       | < 0.05<br>(< 0.05 to < 0.05)      | 29.5<br>(20.6 to 40.8)                            | -1.9<br>(-8.8 to 6.5)                               |
| Thyroid cancer                                     | 0.1<br>(0.1 to 0.1)                  | < 0.05<br>(< 0.05 to < 0.05)       | < 0.05<br>(< 0.05 to < 0.05)      | 72.1<br>(40.4 to 109.7)                           | 33.9<br>(10.8 to 61.4)                              |
| Mesothelioma                                       | < 0.05<br>(< 0.05 to < 0.05)         | < 0.05<br>(< 0.05 to < 0.05)       | < 0.05<br>(< 0.05 to < 0.05)      | 35.1<br>(25.1 to 47.1)                            | -4.0<br>(-10.8 to 4.2)                              |
| Hodgkin lymphoma                                   | < 0.05<br>(< 0.05 to < 0.05)         | < 0.05<br>(< 0.05 to < 0.05)       | < 0.05<br>(< 0.05 to < 0.05)      | 39.3<br>(16.8 to 61.9)                            | 13.9<br>(-4.4 to 31.9)                              |
| Non-Hodgkin's lymphoma                             | 0.1<br>(0.1 to 0.1)                  | < 0.05<br>(< 0.05 to < 0.05)       | < 0.05<br>(< 0.05 to < 0.05)      | 42.7<br>(26.2 to 61.5)                            | 6.8<br>(-4.5 to 19.3)                               |
| Multiple myeloma                                   | < 0.05<br>(< 0.05 to < 0.1)          | < 0.05<br>(< 0.05 to < 0.05)       | < 0.05<br>(< 0.05 to < 0.05)      | 71.2<br>(30.9 to 116.6)                           | 16.0<br>(-12.6 to 47.3)                             |
| Leukaemia                                          | 0.1<br>(0.1 to 0.1)                  | < 0.05<br>(< 0.05 to < 0.05)       | < 0.05<br>(< 0.05 to < 0.05)      | 48.8<br>(36.4 to 60.3)                            | 11.1<br>(1.5 to 20.4)                               |
| Acute lymphoid leukaemia                           | < 0.05<br>(< 0.05 to < 0.05)         | < 0.05<br>(< 0.05 to < 0.05)       | < 0.05<br>(< 0.05 to < 0.05)      | 27.7<br>(3.1 to 58.6)                             | 12.6<br>(-9.5 to 40.3)                              |
| Chronic lymphoid leukaemia                         | < 0.05<br>(< 0.05 to < 0.05)         | < 0.05<br>(< 0.05 to < 0.05)       | < 0.05<br>(< 0.05 to < 0.05)      | 98.8<br>(64.5 to 133.9)                           | 35.4<br>(12.2 to 60.0)                              |
| Acute myeloid leukaemia                            | < 0.05<br>(< 0.05 to < 0.05)         | < 0.05<br>(< 0.05 to < 0.05)       | < 0.05<br>(< 0.05 to < 0.05)      | 48.4<br>(33.4 to 65.1)                            | 17.0<br>(5.4 to 29.9)                               |
| Chronic myeloid leukaemia                          | < 0.05<br>(< 0.05 to < 0.05)         | < 0.05<br>(< 0.05 to < 0.05)       | < 0.05<br>(< 0.05 to < 0.05)      | 51.5<br>(24.4 to 90.4)                            | 10.7<br>(-9.1 to 39.7)                              |
| Other leukaemia                                    | < 0.05<br>(< 0.05 to < 0.05)         | < 0.05<br>(< 0.05 to < 0.05)       | < 0.05<br>(< 0.05 to < 0.05)      | 27.4<br>(12.2 to 44.5)                            | -5.1<br>(-17.0 to 8.7)                              |
| Other neoplasms                                    | 0.4<br>(0.3 to 0.4)                  | 0.1<br>(0.1 to 0.1)                | < 0.05<br>(< 0.05 to < 0.05)      | 58.3<br>(35.5 to 87.7)                            | 19.4<br>(3.3 to 39.5)                               |
| <b>Cardiovascular diseases</b>                     | <b>24.4</b><br><b>(23.4 to 25.2)</b> | <b>2.6†</b><br><b>(2.4 to 2.7)</b> | <b>1.4</b><br><b>(1.0 to 1.8)</b> | <b>47.3</b><br><b>(42.8 to 52.2)</b>              | <b>1.0</b><br><b>(-1.9 to 4.2)</b>                  |
| Rheumatic heart disease                            | < 0.05<br>(< 0.05 to < 0.05)         | < 0.05<br>(< 0.05 to < 0.05)       | < 0.05<br>(< 0.05 to < 0.05)      | 26.3<br>(11.4 to 43.5)                            | -7.9<br>(-20.9 to 7.2)                              |
| Ischaemic heart disease                            | 8.7<br>(8.2 to 9.1)                  | 1.1<br>(1.0 to 1.2)                | 0.4<br>(0.2 to 0.5)               | 48.2<br>(41.6 to 55.2)                            | 2.2<br>(-2.0 to 6.6)                                |
| Cerebrovascular disease                            | 3.8<br>(3.5 to 4.0)                  | 0.5‡<br>(0.5 to 0.6)               | 0.4<br>(0.3 to 0.5)               | 49.4<br>(39.0 to 60.1)                            | -0.4<br>(-7.1 to 6.8)                               |
| Ischaemic stroke                                   | 3.1<br>(2.8 to 3.4)                  | 0.3‡<br>(0.3 to 0.4)               | 0.3<br>(0.2 to 0.4)               | 51.1<br>(38.1 to 64.4)                            | -0.2<br>(-8.5 to 8.9)                               |
| Hemorrhagic stroke                                 | 0.9<br>(0.8 to 1.0)                  | 0.2‡<br>(0.2 to 0.2)               | 0.1<br>(0.1 to 0.1)               | 43.7<br>(28.2 to 59.2)                            | -1.0<br>(-11.9 to 9.8)                              |
| Hypertensive heart disease                         | 1.6<br>(1.4 to 1.9)                  | --                                 | 0.1<br>(0.1 to 0.2)               | 52.0<br>(39.3 to 65.2)                            | -0.2<br>(-8.2 to 8.3)                               |
| Cardiomyopathy and myocarditis                     | 0.3<br>(0.2 to 0.3)                  | 0.1†<br>(0.1 to 0.1)               | < 0.05<br>(< 0.05 to < 0.05)      | 35.3<br>(20.3 to 52.2)                            | 1.3<br>(-9.2 to 12.7)                               |
| Myocarditis                                        | 0.1<br>(< 0.05 to 0.1)               | 0.1<br>(0.1 to 0.1)                | < 0.05<br>(< 0.05 to < 0.05)      | 24.8<br>(13.0 to 38.3)                            | 0.6<br>(-10.0 to 12.5)                              |
| Alcoholic cardiomyopathy                           | 0.1<br>(< 0.05 to 0.1)               | --                                 | < 0.05<br>(< 0.05 to < 0.05)      | 46.8<br>(14.9 to 87.1)                            | 2.3<br>(-19.9 to 28.4)                              |
| Other cardiomyopathy                               | 0.2<br>(0.2 to 0.2)                  | --                                 | < 0.05<br>(< 0.05 to < 0.05)      | 35.0<br>(15.5 to 57.2)                            | 1.3<br>(-11.8 to 15.6)                              |
| Atrial fibrillation and flutter                    | 2.5<br>(2.2 to 2.9)                  | 0.2<br>(0.2 to 0.2)                | 0.2<br>(0.1 to 0.3)               | 54.7<br>(44.8 to 64.7)                            | 1.6<br>(-4.2 to 7.6)                                |
| Peripheral vascular disease                        | 6.3<br>(5.4 to 7.3)                  | 0.6<br>(0.5 to 0.7)                | < 0.05<br>(< 0.05 to 0.1)         | 52.8<br>(41.0 to 65.2)                            | -3.6<br>(-10.7 to 4.2)                              |
| Endocarditis                                       | < 0.05<br>(< 0.05 to < 0.05)         | 0.1<br>(0.1 to 0.1)                | < 0.05<br>(< 0.05 to < 0.05)      | 44.6<br>(27.4 to 63.1)                            | 2.0<br>(-12.4 to 17.2)                              |
| Other cardiovascular and circulatory diseases      | 4.4<br>(3.8 to 5.2)                  | --                                 | 0.2<br>(0.2 to 0.3)               | 35.6<br>(24.6 to 48.1)                            | 2.5<br>(-5.1 to 11.2)                               |
| <b>Chronic respiratory diseases</b>                | <b>41.4</b><br><b>(39.5 to 43.4)</b> | <b>6.9†</b><br><b>(6.4 to 7.4)</b> | <b>1.4</b><br><b>(1.0 to 2.0)</b> | <b>18.4</b><br><b>(12.8 to 24.6)</b>              | <b>3.6</b><br><b>(-1.1 to 8.8)</b>                  |
| Chronic obstructive pulmonary disease              | 11.0<br>(10.2 to 11.9)               | 0.7<br>(0.6 to 0.7)                | 0.2<br>(0.1 to 0.2)               | 34.9<br>(13.6 to 57.3)                            | -3.3<br>(-18.0 to 12.2)                             |
| Pneumoconiosis                                     | < 0.05<br>(< 0.05 to < 0.05)         | < 0.05<br>(< 0.05 to < 0.05)       | < 0.05<br>(< 0.05 to < 0.05)      | 50.9<br>(38.8 to 64.2)                            | 0.7<br>(-8.7 to 11.2)                               |
| Silicosis                                          | < 0.05<br>(< 0.05 to < 0.05)         | < 0.05<br>(< 0.05 to < 0.05)       | < 0.05<br>(< 0.05 to < 0.05)      | 47.9<br>(41.2 to 54.3)                            | 2.0<br>(-2.7 to 6.7)                                |

| Cause                                                          | Prevalence in thousands (95% UI)        | Incidence in thousands (95% UI)       | YLDs in thousands (95% UI)              |                                                   |                                                     |
|----------------------------------------------------------------|-----------------------------------------|---------------------------------------|-----------------------------------------|---------------------------------------------------|-----------------------------------------------------|
|                                                                | 2016 counts                             | 2016 counts                           | 2016 counts                             | Percentage change in counts between 2006 and 2016 | Percentage change in age-standardised rates between |
| Asbestosis                                                     | < 0.05<br>(< 0.05 to < 0.05)            | < 0.05<br>(< 0.05 to < 0.05)          | < 0.05<br>(< 0.05 to < 0.05)            | 49.0<br>(26.7 to 76.9)                            | 0.6<br>(-17.0 to 23.6)                              |
| Coal workers pneumoconiosis                                    | --                                      | --                                    | --                                      | --                                                | --                                                  |
| Other pneumoconiosis                                           | < 0.05<br>(< 0.05 to < 0.05)            | < 0.05<br>(< 0.05 to < 0.05)          | < 0.05<br>(< 0.05 to < 0.05)            | 54.1<br>(32.5 to 77.0)                            | 0.0<br>(-15.2 to 16.4)                              |
| Asthma                                                         | 31.1<br>(28.7 to 33.7)                  | 6.2<br>(5.7 to 6.7)                   | 1.2<br>(0.8 to 1.8)                     | 15.6<br>(10.0 to 21.6)                            | 4.5<br>(-0.6 to 9.4)                                |
| Interstitial lung disease and pulmonary sarcoidosis            | 0.2<br>(0.1 to 0.2)                     | < 0.05<br>(< 0.05 to < 0.05)          | < 0.05<br>(< 0.05 to < 0.05)            | 44.0<br>(30.2 to 60.0)                            | 1.2<br>(-8.8 to 13.0)                               |
| Other chronic respiratory diseases                             | --                                      | --                                    | < 0.05<br>(< 0.05 to < 0.05)            | 45.7<br>(16.8 to 79.2)                            | 35.0<br>(7.0 to 67.7)                               |
| <b>Cirrhosis and other chronic liver diseases</b>              | <b>3.2</b><br><b>(3.0 to 3.3)</b>       | <b>0.1</b><br><b>(0.1 to 0.1)</b>     | <b>0.1</b><br><b>(&lt; 0.05 to 0.1)</b> | <b>37.3</b><br><b>(23.8 to 52.1)</b>              | <b>4.5</b><br><b>(-5.2 to 14.7)</b>                 |
| Cirrhosis and other chronic liver diseases due to hepatitis B  | 0.3<br>(0.3 to 0.4)                     | < 0.05<br>(< 0.05 to < 0.05)          | < 0.05<br>(< 0.05 to < 0.05)            | 46.4<br>(13.0 to 90.1)                            | 4.7<br>(-17.5 to 32.8)                              |
| Cirrhosis and other chronic liver diseases due to hepatitis C  | 0.9<br>(0.8 to 1.0)                     | < 0.05<br>(< 0.05 to < 0.05)          | < 0.05<br>(< 0.05 to < 0.05)            | 47.2<br>(20.5 to 81.0)                            | 6.6<br>(-11.5 to 28.2)                              |
| Cirrhosis and other chronic liver diseases due to alcohol use  | 1.2<br>(1.1 to 1.3)                     | < 0.05<br>(< 0.05 to < 0.05)          | < 0.05<br>(< 0.05 to < 0.05)            | 45.1<br>(22.7 to 69.6)                            | 3.2<br>(-11.0 to 19.1)                              |
| Cirrhosis and other chronic liver diseases due to other causes | 0.7<br>(0.6 to 0.8)                     | < 0.05<br>(< 0.05 to < 0.05)          | < 0.05<br>(< 0.05 to < 0.05)            | 21.1<br>(-1.8 to 49.0)                            | 4.3<br>(-14.5 to 27.3)                              |
| <b>Digestive diseases</b>                                      | <b>13.6</b><br><b>(12.4 to 15.0)</b>    | <b>11.5†</b><br><b>(10.7 to 12.4)</b> | <b>0.5</b><br><b>(0.3 to 0.7)</b>       | <b>59.1</b><br><b>(41.6 to 82.2)</b>              | <b>22.3</b><br><b>(9.9 to 38.5)</b>                 |
| Peptic ulcer disease                                           | 5.3<br>(4.6 to 6.2)                     | 0.4<br>(0.4 to 0.5)                   | 0.1<br>(0.1 to 0.2)                     | 93.0<br>(51.0 to 145.6)                           | 42.3<br>(12.2 to 82.6)                              |
| Gastritis and duodenitis                                       | 5.0<br>(4.4 to 5.8)                     | 2.3<br>(2.1 to 2.6)                   | 0.1<br>(0.1 to 0.2)                     | 99.8<br>(61.3 to 147.6)                           | 46.1<br>(18.9 to 80.9)                              |
| Appendicitis                                                   | < 0.05<br>(< 0.05 to < 0.05)            | 0.8<br>(0.7 to 0.9)                   | < 0.05<br>(< 0.05 to < 0.05)            | 7.3<br>(-21.5 to 47.6)                            | -2.6<br>(-30.6 to 33.4)                             |
| Paralytic ileus and intestinal obstruction                     | < 0.05<br>(< 0.05 to < 0.05)            | 0.2<br>(0.1 to 0.2)                   | < 0.05<br>(< 0.05 to < 0.05)            | 31.2<br>(26.2 to 36.5)                            | 4.4<br>(0.7 to 8.1)                                 |
| Inguinal, femoral, and abdominal hernia                        | 2.8<br>(2.5 to 3.1)                     | 3.2<br>(2.8 to 3.7)                   | 0.2<br>(0.1 to 0.3)                     | 32.9<br>(20.8 to 47.3)                            | 6.7<br>(-2.5 to 17.6)                               |
| Inflammatory bowel disease                                     | < 0.05<br>(< 0.05 to < 0.05)            | 0.1<br>(0.1 to 0.1)                   | < 0.05<br>(< 0.05 to < 0.05)            | 33.7<br>(25.0 to 43.4)                            | 0.3<br>(-7.8 to 9.0)                                |
| Vascular intestinal disorders                                  | < 0.05<br>(< 0.05 to < 0.05)            | < 0.05<br>(< 0.05 to < 0.05)          | < 0.05<br>(< 0.05 to < 0.05)            | 33.6<br>(27.4 to 41.1)                            | 3.1<br>(-1.3 to 7.8)                                |
| Gallbladder and biliary diseases                               | 0.7<br>(0.6 to 0.8)                     | 4.4<br>(3.8 to 5.0)                   | < 0.05<br>(< 0.05 to < 0.05)            | 40.4<br>(15.7 to 72.9)                            | 6.7<br>(-11.1 to 30.0)                              |
| Pancreatitis                                                   | < 0.05<br>(< 0.05 to < 0.05)            | 0.2<br>(0.2 to 0.2)                   | < 0.05<br>(< 0.05 to < 0.05)            | 44.4<br>(39.3 to 50.3)                            | 8.6<br>(5.0 to 12.7)                                |
| Other digestive diseases                                       | --                                      | --                                    | < 0.05<br>(< 0.05 to 0.1)               | 60.0<br>(43.8 to 81.0)                            | 23.5<br>(12.2 to 38.6)                              |
| <b>Neurological disorders</b>                                  | <b>154.4</b><br><b>(148.5 to 162.0)</b> | <b>71.7</b><br><b>(61.4 to 82.9)</b>  | <b>4.1</b><br><b>(2.7 to 5.6)</b>       | <b>20.9</b><br><b>(1.7 to 41.9)</b>               | <b>-1.0</b><br><b>(-17.1 to 16.3)</b>               |
| Alzheimer's disease and other dementias                        | 1.7<br>(1.4 to 2.0)                     | 0.3<br>(0.2 to 0.4)                   | 0.2<br>(0.2 to 0.3)                     | 60.7<br>(52.5 to 69.7)                            | 0.5<br>(-4.3 to 5.7)                                |
| Parkinson's disease                                            | 0.3<br>(0.2 to 0.3)                     | < 0.05<br>(< 0.05 to < 0.05)          | < 0.05<br>(< 0.05 to < 0.05)            | 59.4<br>(39.9 to 81.7)                            | 2.7<br>(-8.9 to 15.7)                               |
| Epilepsy                                                       | 1.4<br>(0.3 to 2.5)                     | 0.1<br>(< 0.05 to 0.3)                | 0.4<br>(0.1 to 0.9)                     | 10.3<br>(-80.0 to 442.9)                          | -6.6<br>(-83.0 to 350.3)                            |
| Multiple sclerosis                                             | 0.1<br>(0.1 to 0.1)                     | < 0.05<br>(< 0.05 to < 0.05)          | < 0.05<br>(< 0.05 to < 0.05)            | 32.3<br>(14.2 to 53.4)                            | 4.1<br>(-9.9 to 19.6)                               |
| Motor neuron disease                                           | < 0.05<br>(< 0.05 to < 0.05)            | < 0.05<br>(< 0.05 to < 0.05)          | < 0.05<br>(< 0.05 to < 0.05)            | 23.9<br>(18.8 to 28.9)                            | -0.7<br>(-4.6 to 3.0)                               |
| Migraine                                                       | 58.7<br>(55.3 to 62.4)                  | 6.3<br>(5.9 to 6.8)                   | 2.8<br>(1.8 to 3.9)                     | 19.4<br>(15.2 to 23.3)                            | -0.7<br>(-4.0 to 2.5)                               |
| Tension-type headache                                          | 117.5<br>(105.6 to 131.0)               | 64.9<br>(54.6 to 76.0)                | 0.5<br>(0.3 to 0.8)                     | 20.5<br>(14.6 to 26.9)                            | -1.2<br>(-5.7 to 3.8)                               |
| Other neurological disorders                                   | < 0.05<br>(< 0.05 to < 0.05)            | < 0.05<br>(< 0.05 to < 0.05)          | 0.1<br>(< 0.05 to 0.2)                  | 28.8<br>(-66.6 to 382.8)                          | 13.1<br>(-71.0 to 307.5)                            |
| <b>Mental and substance use disorders</b>                      | <b>62.0</b><br><b>(60.0 to 64.0)</b>    | <b>22.1†</b><br><b>(20.5 to 23.7)</b> | <b>8.1</b><br><b>(5.8 to 10.5)</b>      | <b>19.7</b><br><b>(17.3 to 22.1)</b>              | <b>-0.3</b><br><b>(-2.1 to 1.7)</b>                 |
| Schizophrenia                                                  | 0.9<br>(0.8 to 1.0)                     | 0.1<br>(< 0.05 to 0.1)                | 0.6<br>(0.4 to 0.7)                     | 24.1<br>(13.5 to 36.1)                            | -0.8<br>(-9.3 to 8.6)                               |
| Alcohol use disorders                                          | 7.6<br>(6.6 to 8.6)                     | 3.8<br>(3.3 to 4.3)                   | 0.8<br>(0.5 to 1.1)                     | 19.7<br>(9.1 to 31.3)                             | -1.3<br>(-9.8 to 8.3)                               |
| Drug use disorders                                             | 2.9<br>(2.6 to 3.1)                     | 0.4<br>(0.3 to 0.4)                   | 0.6<br>(0.4 to 0.8)                     | 22.8<br>(12.5 to 34.2)                            | 1.4<br>(-7.0 to 10.0)                               |
| Opioid use disorders                                           | 1.0<br>(0.8 to 1.2)                     | 0.1<br>(0.1 to 0.1)                   | 0.4<br>(0.3 to 0.6)                     | 24.8<br>(12.4 to 38.5)                            | 1.9<br>(-8.1 to 13.0)                               |
| Cocaine use disorders                                          | 0.5<br>(0.4 to 0.5)                     | < 0.05<br>(< 0.05 to < 0.05)          | 0.1<br>(< 0.05 to 0.1)                  | 21.4<br>(-2.6 to 50.3)                            | 1.9<br>(-17.8 to 24.7)                              |
| Amphetamine use disorders                                      | < 0.05<br>(< 0.05 to 0.1)               | < 0.05<br>(< 0.05 to < 0.05)          | < 0.05<br>(< 0.05 to < 0.05)            | 18.5<br>(-19.4 to 75.3)                           | 0.5<br>(-30.6 to 47.2)                              |
| Cannabis use disorders                                         | 1.2<br>(1.0 to 1.5)                     | 0.2<br>(0.1 to 0.2)                   | < 0.05<br>(< 0.05 to 0.1)               | 7.0<br>(-11.4 to 28.4)                            | -4.7<br>(-21.2 to 13.5)                             |
| Other drug use disorders                                       | 0.2<br>(0.2 to 0.2)                     | < 0.05<br>(< 0.05 to < 0.05)          | 0.1<br>(< 0.05 to 0.1)                  | 22.1<br>(-4.1 to 52.4)                            | 1.4<br>(-19.9 to 26.7)                              |
| Depressive disorders                                           | 12.6<br>(11.7 to 13.5)                  | 13.6<br>(12.2 to 15.2)                | 2.1<br>(1.5 to 2.9)                     | 24.0<br>(17.9 to 29.9)                            | -0.7<br>(-5.1 to 3.8)                               |
| Major depressive disorder                                      | 8.3<br>(7.5 to 9.3)                     | 12.8<br>(11.5 to 14.4)                | 1.7<br>(1.2 to 2.3)                     | 23.3<br>(16.0 to 30.9)                            | -0.8<br>(-6.3 to 4.8)                               |
| Dysthymia                                                      | 4.5<br>(3.9 to 5.1)                     | 0.8<br>(0.7 to 0.9)                   | 0.4<br>(0.3 to 0.6)                     | 26.9<br>(21.7 to 32.5)                            | -0.2<br>(-3.9 to 3.5)                               |
| Bipolar disorder                                               | 3.6<br>(3.1 to 4.2)                     | 0.3<br>(0.2 to 0.3)                   | 0.7<br>(0.5 to 1.1)                     | 18.6<br>(12.8 to 25.4)                            | -0.2<br>(-5.0 to 5.3)                               |
| Anxiety disorders                                              | 17.0<br>(15.4 to 18.7)                  | 2.4<br>(2.2 to 2.6)                   | 1.6<br>(1.1 to 2.2)                     | 18.7<br>(14.8 to 22.9)                            | -0.2<br>(-3.3 to 3.0)                               |
| Eating disorders                                               | 0.8<br>(0.7 to 1.1)                     | 0.3<br>(0.2 to 0.4)                   | 0.2<br>(0.1 to 0.2)                     | 8.4<br>(-2.6 to 20.7)                             | -3.0<br>(-12.6 to 8.6)                              |
| Anorexia nervosa                                               | 0.1<br>(0.1 to 0.2)                     | 0.1<br>(< 0.05 to 0.1)                | < 0.05<br>(< 0.05 to < 0.05)            | 6.0<br>(-14.8 to 31.5)                            | -2.1<br>(-21.3 to 21.4)                             |
| Bulimia nervosa                                                | 0.7<br>(0.5 to 0.9)                     | 0.3<br>(0.2 to 0.4)                   | 0.1<br>(0.1 to 0.2)                     | 9.0<br>(-4.8 to 23.2)                             | -3.2<br>(-15.1 to 9.0)                              |
| Autistic spectrum disorders                                    | 3.3<br>(3.0 to 3.6)                     | < 0.05<br>(< 0.05 to < 0.05)          | 0.5<br>(0.3 to 0.7)                     | 15.8<br>(10.6 to 21.3)                            | 0.7<br>(-3.9 to 5.5)                                |
| Autism                                                         | 1.1<br>(0.9 to 1.2)                     | < 0.05<br>(< 0.05 to < 0.05)          | 0.3<br>(0.2 to 0.4)                     | 15.9<br>(6.7 to 25.0)                             | 0.7<br>(-6.9 to 8.6)                                |
| Asperger syndrome and other autistic spectrum disorders        | 2.2<br>(1.9 to 2.7)                     | < 0.05<br>(< 0.05 to < 0.05)          | 0.2<br>(0.1 to 0.3)                     | 15.6<br>(10.1 to 21.4)                            | 0.6<br>(-4.2 to 5.4)                                |



| Cause                                                      | Prevalence in thousands (95% UI)        | Incidence in thousands (95% UI)          | YLDs in thousands (95% UI)           |                                                   |                                                     |
|------------------------------------------------------------|-----------------------------------------|------------------------------------------|--------------------------------------|---------------------------------------------------|-----------------------------------------------------|
|                                                            | 2016 counts                             | 2016 counts                              | 2016 counts                          | Percentage change in counts between 2006 and 2016 | Percentage change in age-standardised rates between |
| Attention-deficit/hyperactivity disorder                   | 6.9<br>(6.3 to 7.7)                     | 0.3<br>(0.2 to 0.3)                      | 0.1<br>( $< 0.05$ to 0.1)            | 7.6<br>(1.9 to 13.4)                              | 0.5<br>(-4.7 to 6.0)                                |
| Conduct disorder                                           | 2.1<br>(1.8 to 2.6)                     | 0.7<br>(0.6 to 0.9)                      | 0.3<br>(0.2 to 0.4)                  | -6.6<br>(-12.8 to 0.6)                            | 0.2<br>(-6.4 to 7.6)                                |
| Idiopathic developmental intellectual disability           | 1.8<br>(0.8 to 2.9)                     | --                                       | 0.1<br>( $< 0.05$ to 0.1)            | 19.9<br>(11.1 to 31.6)                            | 4.7<br>(-2.9 to 14.6)                               |
| Other mental and substance use disorders                   | 8.0<br>(7.0 to 9.2)                     | 0.2<br>(0.2 to 0.3)                      | 0.6<br>(0.4 to 0.8)                  | 25.9<br>(20.2 to 32.1)                            | 0.3<br>(-4.0 to 5.2)                                |
| <b>Diabetes, urogenital, blood, and endocrine diseases</b> | <b>171.2</b><br><b>(167.5 to 175.0)</b> | <b>47.8†</b><br><b>(44.4 to 52.9)</b>    | <b>4.2</b><br><b>(3.0 to 5.7)</b>    | <b>31.1</b><br><b>(24.1 to 37.8)</b>              | <b>-2.9</b><br><b>(-8.2 to 1.9)</b>                 |
| Diabetes mellitus                                          | 29.3<br>(26.5 to 32.6)                  | 1.6<br>(1.5 to 1.8)                      | 2.6<br>(1.8 to 3.6)                  | 32.4<br>(21.3 to 42.8)                            | -4.9<br>(-12.4 to 2.6)                              |
| Acute glomerulonephritis                                   | $< 0.05$<br>( $< 0.05$ to $< 0.05$ )    | 0.1<br>(0.1 to 0.1)                      | $< 0.05$<br>( $< 0.05$ to $< 0.05$ ) | 22.2<br>(16.6 to 28.3)                            | -0.2<br>(-3.9 to 4.1)                               |
| Chronic kidney disease                                     | 16.0<br>(14.5 to 17.7)                  | 1.2<br>(1.1 to 1.4)                      | 0.5<br>(0.3 to 0.6)                  | 40.2<br>(28.3 to 52.9)                            | -0.7<br>(-8.7 to 7.8)                               |
| Chronic kidney disease due to diabetes mellitus            | 6.1<br>(5.2 to 7.1)                     | 0.5<br>(0.4 to 0.6)                      | 0.2<br>(0.1 to 0.2)                  | 45.6<br>(29.0 to 64.0)                            | 0.7<br>(-10.1 to 12.4)                              |
| Chronic kidney disease due to hypertension                 | 3.5<br>(2.9 to 4.0)                     | 0.3<br>(0.3 to 0.4)                      | 0.1<br>( $< 0.05$ to 0.1)            | 50.1<br>(30.9 to 71.2)                            | -2.2<br>(-14.6 to 11.4)                             |
| Chronic kidney disease due to glomerulonephritis           | 3.1<br>(2.7 to 3.6)                     | 0.2<br>(0.1 to 0.2)                      | 0.1<br>(0.1 to 0.2)                  | 33.6<br>(18.7 to 49.9)                            | -0.8<br>(-10.8 to 10.4)                             |
| Chronic kidney disease due to other causes                 | 3.3<br>(2.7 to 4.0)                     | 0.3<br>(0.2 to 0.3)                      | 0.1<br>(0.1 to 0.1)                  | 35.8<br>(21.6 to 52.1)                            | -1.7<br>(-12.0 to 9.2)                              |
| Urinary diseases and male infertility                      | 7.1<br>(6.4 to 8.0)                     | 29.2†<br>(26.0 to 34.3)                  | 0.2<br>(0.1 to 0.3)                  | 42.7<br>(33.2 to 52.0)                            | -0.2<br>(-6.3 to 6.0)                               |
| Interstitial nephritis and urinary tract infections        | 0.5<br>(0.5 to 0.6)                     | 27.0<br>(23.8 to 32.1)                   | $< 0.05$<br>( $< 0.05$ to $< 0.05$ ) | 20.7<br>(5.3 to 46.6)                             | 0.6<br>(-11.6 to 21.9)                              |
| Urolithiasis                                               | 0.1<br>(0.1 to 0.1)                     | 1.7<br>(1.5 to 1.9)                      | $< 0.05$<br>( $< 0.05$ to $< 0.05$ ) | 29.8<br>(24.1 to 35.7)                            | 1.4<br>(-2.5 to 5.5)                                |
| Benign prostatic hyperplasia                               | 4.2<br>(3.5 to 4.8)                     | 0.6<br>(0.5 to 0.7)                      | 0.1<br>(0.1 to 0.2)                  | 54.0<br>(41.6 to 65.8)                            | 0.9<br>(-6.5 to 8.2)                                |
| Male infertility                                           | 2.0<br>(1.6 to 2.7)                     | --                                       | $< 0.05$<br>( $< 0.05$ to $< 0.05$ ) | 13.7<br>(5.6 to 23.4)                             | -1.2<br>(-8.1 to 6.8)                               |
| Other urinary diseases                                     | --                                      | --                                       | $< 0.05$<br>( $< 0.05$ to $< 0.05$ ) | 0.2<br>(-10.4 to 16.5)                            | -16.6<br>(-25.1 to -3.2)                            |
| Gynecological diseases                                     | 49.0<br>(46.7 to 51.1)                  | 14.5†<br>(13.7 to 15.4)                  | 0.5<br>(0.3 to 0.7)                  | 16.1<br>(10.2 to 21.9)                            | -3.1<br>(-7.9 to 1.7)                               |
| Uterine fibroids                                           | 4.0<br>(3.5 to 4.5)                     | 0.4<br>(0.3 to 0.5)                      | 0.1<br>( $< 0.05$ to 0.1)            | 14.6<br>(-1.2 to 33.2)                            | -8.0<br>(-20.1 to 6.7)                              |
| Polycystic ovarian syndrome                                | $< 0.05$<br>( $< 0.05$ to 0.1)          | 0.4<br>(0.2 to 0.5)                      | $< 0.05$<br>( $< 0.05$ to $< 0.05$ ) | 10.6<br>(-24.1 to 54.5)                           | -1.8<br>(-32.6 to 37.7)                             |
| Female infertility                                         | 4.5<br>(3.2 to 6.3)                     | --                                       | $< 0.05$<br>( $< 0.05$ to 0.1)       | 16.1<br>(7.0 to 27.1)                             | 1.0<br>(-6.9 to 9.9)                                |
| Endometriosis                                              | $< 0.05$<br>( $< 0.05$ to $< 0.05$ )    | 0.2<br>(0.1 to 0.2)                      | $< 0.05$<br>( $< 0.05$ to $< 0.05$ ) | 17.4<br>(-10.0 to 54.4)                           | -0.6<br>(-23.8 to 30.2)                             |
| Genital prolapse                                           | 15.8<br>(13.7 to 17.9)                  | 0.9<br>(0.8 to 1.1)                      | $< 0.05$<br>( $< 0.05$ to 0.1)       | 30.2<br>(20.2 to 41.0)                            | -7.0<br>(-14.3 to 0.4)                              |
| Premenstrual syndrome                                      | 26.8<br>(25.3 to 28.2)                  | 9.4<br>(8.8 to 10.0)                     | 0.2<br>(0.1 to 0.4)                  | 14.1<br>(6.4 to 22.9)                             | -1.3<br>(-8.0 to 6.5)                               |
| Other gynecological diseases                               | 4.0<br>(3.5 to 4.6)                     | 3.3<br>(2.8 to 3.9)                      | 0.1<br>(0.1 to 0.2)                  | 15.5<br>(4.9 to 27.3)                             | -3.0<br>(-11.8 to 6.8)                              |
| Hemoglobinopathies and hemolytic anaemias                  | 104.8<br>(100.2 to 109.1)               | --                                       | 0.3<br>(0.2 to 0.4)                  | 29.0<br>(12.1 to 51.0)                            | 8.7<br>(-5.4 to 27.0)                               |
| Thalassemias                                               | $< 0.05$<br>( $< 0.05$ to $< 0.05$ )    | --                                       | $< 0.05$<br>( $< 0.05$ to $< 0.05$ ) | 8.0<br>(-15.5 to 35.0)                            | -3.2<br>(-23.3 to 21.4)                             |
| Thalassaemias trait                                        | 0.6<br>(0.4 to 0.8)                     | --                                       | $< 0.05$<br>( $< 0.05$ to $< 0.05$ ) | 43.3<br>(16.9 to 81.8)                            | 18.2<br>(-3.6 to 49.8)                              |
| Sickle cell disorders                                      | 0.4<br>(0.3 to 0.5)                     | --                                       | $< 0.05$<br>( $< 0.05$ to 0.1)       | 7.7<br>(-8.8 to 25.9)                             | -0.8<br>(-16.1 to 16.5)                             |
| Sickle cell trait                                          | 52.0<br>(48.0 to 56.1)                  | --                                       | 0.2<br>(0.1 to 0.3)                  | 33.2<br>(10.2 to 62.7)                            | 11.1<br>(-7.4 to 35.4)                              |
| G6PD deficiency                                            | 16.3<br>(14.2 to 18.5)                  | --                                       | $< 0.05$<br>( $< 0.05$ to $< 0.05$ ) | 90.4<br>(35.5 to 170.8)                           | 55.5<br>(10.2 to 123.1)                             |
| G6PD trait                                                 | 42.1<br>(39.0 to 45.1)                  | --                                       | $< 0.05$<br>( $< 0.05$ to $< 0.05$ ) | 73.6<br>(36.6 to 122.7)                           | 40.2<br>(11.6 to 77.8)                              |
| Other hemoglobinopathies and hemolytic anaemias            | 3.3<br>(2.9 to 3.9)                     | --                                       | 0.1<br>( $< 0.05$ to 0.1)            | 31.0<br>(10.7 to 53.8)                            | 7.2<br>(-7.8 to 25.5)                               |
| Endocrine, metabolic, blood, and immune disorders          | 7.4<br>(6.8 to 8.0)                     | 1.1<br>(1.0 to 1.2)                      | 0.2<br>(0.1 to 0.3)                  | 32.1<br>(23.6 to 41.3)                            | -0.4<br>(-6.2 to 6.1)                               |
| <b>Musculoskeletal disorders</b>                           | <b>70.4</b><br><b>(67.2 to 73.3)</b>    | <b>36.3</b><br><b>(32.7 to 40.4)</b>     | <b>7.6</b><br><b>(5.5 to 10.0)</b>   | <b>27.8</b><br><b>(24.0 to 31.8)</b>              | <b>-2.5</b><br><b>(-5.0 to 0.2)</b>                 |
| Rheumatoid arthritis                                       | 1.7<br>(1.5 to 1.9)                     | 0.1<br>(0.1 to 0.1)                      | 0.4<br>(0.3 to 0.5)                  | 37.7<br>(27.5 to 48.6)                            | 0.7<br>(-6.5 to 8.4)                                |
| Osteoarthritis                                             | 16.0<br>(14.9 to 17.0)                  | 0.8<br>(0.8 to 0.9)                      | 1.0<br>(0.7 to 1.3)                  | 47.2<br>(41.8 to 53.1)                            | 1.8<br>(-1.6 to 5.5)                                |
| Low back and neck pain                                     | 34.2<br>(31.9 to 36.9)                  | 13.2<br>(11.9 to 14.6)                   | 3.9<br>(2.7 to 5.2)                  | 30.4<br>(26.3 to 35.1)                            | 0.4<br>(-2.4 to 3.3)                                |
| Low back pain                                              | 20.8<br>(18.2 to 23.6)                  | 9.8<br>(8.6 to 11.2)                     | 2.4<br>(1.7 to 3.1)                  | 29.9<br>(23.6 to 36.6)                            | 0.8<br>(-3.8 to 5.5)                                |
| Neck pain                                                  | 15.3<br>(13.1 to 17.8)                  | 3.4<br>(2.9 to 4.0)                      | 1.5<br>(1.0 to 2.2)                  | 31.3<br>(27.6 to 35.7)                            | -0.1<br>(-2.2 to 2.1)                               |
| Gout                                                       | 1.2<br>(1.1 to 1.4)                     | 0.2<br>(0.2 to 0.3)                      | $< 0.05$<br>( $< 0.05$ to 0.1)       | 38.2<br>(17.6 to 63.5)                            | 0.8<br>(-13.2 to 17.6)                              |
| Other musculoskeletal disorders                            | 26.7<br>(23.3 to 30.4)                  | 21.9<br>(18.7 to 25.6)                   | 2.3<br>(1.6 to 3.2)                  | 15.7<br>(7.4 to 24.4)                             | -9.2<br>(-15.2 to -2.8)                             |
| <b>Other non-communicable diseases</b>                     | <b>293.0</b><br><b>(287.9 to 297.8)</b> | <b>881.0†</b><br><b>(827.5 to 936.0)</b> | <b>8.0</b><br><b>(5.4 to 11.5)</b>   | <b>26.3</b><br><b>(24.6 to 27.9)</b>              | <b>-0.1</b><br><b>(-1.0 to 1.0)</b>                 |
| Congenital anomalies                                       | 3.0<br>(2.6 to 3.5)                     | --                                       | 0.3<br>(0.2 to 0.5)                  | 18.1<br>(11.3 to 25.1)                            | 2.4<br>(-3.4 to 8.2)                                |
| Neural tube defects                                        | 0.1<br>(0.1 to 0.1)                     | --                                       | $< 0.05$<br>( $< 0.05$ to 0.1)       | 21.4<br>(7.9 to 36.5)                             | 3.1<br>(-7.8 to 15.5)                               |
| Congenital heart anomalies                                 | 0.7<br>(0.6 to 0.8)                     | --                                       | $< 0.05$<br>( $< 0.05$ to 0.1)       | 21.1<br>(8.6 to 35.5)                             | 5.9<br>(-5.2 to 18.7)                               |
| Orofacial clefts                                           | 0.2<br>(0.2 to 0.2)                     | --                                       | $< 0.05$<br>( $< 0.05$ to $< 0.05$ ) | 7.6<br>(-3.7 to 20.4)                             | -8.1<br>(-17.8 to 2.8)                              |
| Down's syndrome                                            | 0.2<br>(0.2 to 0.2)                     | --                                       | $< 0.05$<br>( $< 0.05$ to $< 0.05$ ) | 19.2<br>(10.0 to 30.2)                            | 5.1<br>(-3.0 to 14.6)                               |
| Turner syndrome                                            | 0.1<br>(0.1 to 0.1)                     | --                                       | $< 0.05$<br>( $< 0.05$ to $< 0.05$ ) | 13.7<br>(-22.2 to 65.7)                           | 1.5<br>(-31.8 to 47.6)                              |
| Klinefelter syndrome                                       | 0.1<br>(0.1 to 0.1)                     | --                                       | $< 0.05$<br>( $< 0.05$ to $< 0.05$ ) | 15.9<br>(-16.7 to 57.1)                           | 2.2<br>(-26.3 to 39.3)                              |

| Cause                                         | Prevalence in thousands (95% UI)     | Incidence in thousands (95% UI)       | YLDs in thousands (95% UI)        |                                                   |                                                     |
|-----------------------------------------------|--------------------------------------|---------------------------------------|-----------------------------------|---------------------------------------------------|-----------------------------------------------------|
|                                               | 2016 counts                          | 2016 counts                           | 2016 counts                       | Percentage change in counts between 2006 and 2016 | Percentage change in age-standardised rates between |
| Other chromosomal abnormalities               | 0.2<br>(0.2 to 0.3)                  | --                                    | < 0.05<br>(< 0.05 to < 0.05)      | -0.1<br>(-15.2 to 16.9)                           | -3.2<br>(-17.6 to 13.6)                             |
| Congenital musculoskeletal and limb anomalies | 0.3<br>(0.3 to 0.3)                  | --                                    | < 0.05<br>(< 0.05 to 0.1)         | 20.6<br>(10.1 to 32.0)                            | 1.2<br>(-7.4 to 10.5)                               |
| Urogenital congenital anomalies               | 0.3<br>(0.3 to 0.4)                  | --                                    | < 0.05<br>(< 0.05 to < 0.05)      | 3.3<br>(-9.9 to 19.0)                             | -0.7<br>(-13.5 to 14.7)                             |
| Digestive congenital anomalies                | 0.3<br>(0.3 to 0.4)                  | --                                    | < 0.05<br>(< 0.05 to < 0.05)      | 24.4<br>(3.0 to 51.4)                             | 6.4<br>(-11.1 to 28.9)                              |
| Other congenital anomalies                    | 1.2<br>(0.8 to 1.9)                  | --                                    | 0.1<br>(0.1 to 0.2)               | 20.7<br>(8.2 to 35.4)                             | 2.9<br>(-7.9 to 15.3)                               |
| Skin and subcutaneous diseases                | 130.8<br>(127.5 to 134.2)            | 308.6<br>(290.3 to 328.5)             | 3.1<br>(2.1 to 4.5)               | 13.2<br>(11.0 to 15.4)                            | -0.3<br>(-2.1 to 1.5)                               |
| Dermatitis                                    | 18.7<br>(17.4 to 20.0)               | 21.5<br>(19.9 to 23.1)                | 0.7<br>(0.4 to 1.2)               | 12.5<br>(8.7 to 16.5)                             | -0.1<br>(-3.3 to 3.2)                               |
| Psoriasis                                     | 4.1<br>(3.9 to 4.4)                  | 0.6<br>(0.5 to 0.6)                   | 0.4<br>(0.3 to 0.5)               | 23.1<br>(14.7 to 31.6)                            | 0.3<br>(-6.6 to 7.3)                                |
| Cellulitis                                    | 0.1<br>(0.1 to 0.2)                  | 2.8<br>(2.6 to 3.0)                   | < 0.05<br>(< 0.05 to < 0.05)      | 19.1<br>(-4.0 to 48.1)                            | 0.9<br>(-18.2 to 25.3)                              |
| Pyoderma                                      | 1.1<br>(1.1 to 1.2)                  | 27.9<br>(26.7 to 29.1)                | < 0.05<br>(< 0.05 to < 0.05)      | 34.2<br>(25.8 to 42.7)                            | 1.4<br>(-4.6 to 7.6)                                |
| Scabies                                       | 6.7<br>(5.9 to 7.7)                  | 20.7<br>(18.1 to 23.7)                | 0.2<br>(0.1 to 0.3)               | 9.6<br>(5.1 to 14.3)                              | -2.7<br>(-6.5 to 1.2)                               |
| Fungal skin diseases                          | 42.1<br>(37.9 to 46.6)               | 148.7<br>(131.6 to 169.1)             | 0.2<br>(0.1 to 0.5)               | 24.1<br>(21.3 to 26.7)                            | 0.0<br>(-0.9 to 0.9)                                |
| Viral skin diseases                           | 10.7<br>(10.2 to 11.2)               | 16.0<br>(15.1 to 16.9)                | 0.3<br>(0.2 to 0.5)               | 12.3<br>(8.8 to 15.8)                             | -0.4<br>(-3.4 to 2.5)                               |
| Acne vulgaris                                 | 30.4<br>(27.6 to 33.5)               | 19.7<br>(16.5 to 23.9)                | 0.8<br>(0.5 to 1.1)               | 3.6<br>(-1.3 to 9.0)                              | 0.4<br>(-4.3 to 5.6)                                |
| Alopecia areata                               | 0.7<br>(0.7 to 0.8)                  | 1.3<br>(1.2 to 1.3)                   | < 0.05<br>(< 0.05 to < 0.05)      | 19.7<br>(7.4 to 33.2)                             | 0.0<br>(-10.0 to 11.2)                              |
| Pruritus                                      | 3.8<br>(3.3 to 4.3)                  | 3.0<br>(2.6 to 3.4)                   | < 0.05<br>(< 0.05 to 0.1)         | 24.9<br>(18.3 to 32.4)                            | -0.1<br>(-5.3 to 5.1)                               |
| Urticaria                                     | 3.5<br>(3.0 to 4.0)                  | 6.2<br>(5.4 to 7.0)                   | 0.2<br>(0.1 to 0.3)               | 14.5<br>(8.5 to 21.2)                             | -0.2<br>(-5.6 to 5.2)                               |
| Decubitus ulcer                               | 0.2<br>(0.2 to 0.3)                  | 0.9<br>(0.8 to 1.0)                   | < 0.05<br>(< 0.05 to 0.1)         | 34.5<br>(18.9 to 52.8)                            | -8.3<br>(-18.1 to 3.2)                              |
| Other skin and subcutaneous diseases          | 33.1<br>(32.1 to 34.0)               | 39.5<br>(38.2 to 40.9)                | 0.2<br>(0.1 to 0.3)               | 27.4<br>(24.6 to 30.5)                            | -1.8<br>(-3.8 to 0.3)                               |
| Sense organ diseases                          | 98.3<br>(96.0 to 100.7)              | 38.6†<br>(36.3 to 41.0)               | 3.2<br>(2.2 to 4.5)               | 38.9<br>(36.5 to 41.7)                            | 0.0<br>(-1.5 to 1.7)                                |
| Glaucoma                                      | 0.4<br>(0.4 to 0.5)                  | --                                    | < 0.05<br>(< 0.05 to 0.1)         | 55.8<br>(40.1 to 72.9)                            | -1.1<br>(-10.6 to 9.4)                              |
| Cataract                                      | 3.6<br>(3.2 to 4.1)                  | --                                    | 0.3<br>(0.2 to 0.4)               | 48.4<br>(41.8 to 55.6)                            | -3.1<br>(-6.9 to 1.3)                               |
| Macular degeneration                          | 0.1<br>(0.1 to 0.1)                  | --                                    | < 0.05<br>(< 0.05 to < 0.05)      | 57.6<br>(35.0 to 85.1)                            | -0.1<br>(-14.2 to 16.7)                             |
| Refraction and accommodation disorders        | 40.7<br>(39.0 to 42.4)               | --                                    | 0.6<br>(0.4 to 1.0)               | 26.2<br>(22.1 to 30.3)                            | -2.5<br>(-5.4 to 0.3)                               |
| Age-related and other hearing loss            | 70.0<br>(66.3 to 74.2)               | --                                    | 1.8<br>(1.2 to 2.6)               | 42.8<br>(39.1 to 46.8)                            | 1.4<br>(-0.8 to 3.9)                                |
| Other vision loss                             | 1.0<br>(0.9 to 1.1)                  | --                                    | 0.1<br>(0.1 to 0.1)               | 35.2<br>(24.1 to 47.1)                            | -1.1<br>(-8.7 to 6.8)                               |
| Other sense organ diseases                    | 12.0<br>(11.0 to 12.9)               | 38.6<br>(36.3 to 41.0)                | 0.4<br>(0.2 to 0.6)               | 35.0<br>(29.6 to 40.6)                            | -0.0<br>(-3.8 to 4.0)                               |
| Oral disorders                                | 206.5<br>(198.7 to 214.4)            | 533.8†<br>(485.6 to 586.0)            | 1.4<br>(0.8 to 2.2)               | 35.2<br>(32.2 to 39.0)                            | -0.1<br>(-1.9 to 1.7)                               |
| Caries of deciduous teeth                     | 25.6<br>(21.0 to 30.9)               | 85.9<br>(61.7 to 114.7)               | < 0.05<br>(< 0.05 to < 0.05)      | 8.5<br>(-3.0 to 21.2)                             | 0.6<br>(-10.1 to 12.6)                              |
| Caries of permanent teeth                     | 125.8<br>(116.7 to 135.3)            | 438.0<br>(393.2 to 479.7)             | 0.1<br>(< 0.05 to 0.1)            | 22.7<br>(18.1 to 27.4)                            | 3.0<br>(-0.8 to 6.6)                                |
| Periodontal disease                           | 67.4<br>(57.7 to 78.8)               | 7.8<br>(6.5 to 9.3)                   | 0.4<br>(0.2 to 0.9)               | 29.0<br>(24.9 to 33.6)                            | -0.4<br>(-3.4 to 2.9)                               |
| Edentulism and severe tooth loss              | 22.7<br>(19.8 to 25.7)               | 2.0<br>(1.7 to 2.4)                   | 0.6<br>(0.4 to 0.9)               | 48.3<br>(43.6 to 52.9)                            | -0.3<br>(-3.4 to 2.6)                               |
| Other oral disorders                          | 7.5<br>(7.2 to 7.8)                  | --                                    | 0.2<br>(0.1 to 0.3)               | 21.4<br>(17.5 to 25.9)                            | -0.1<br>(-3.3 to 3.3)                               |
| <b>Injuries</b>                               | <b>66.8</b><br><b>(62.6 to 71.9)</b> | <b>26.8†</b><br><b>(25.4 to 28.4)</b> | <b>2.5</b><br><b>(1.7 to 3.6)</b> | <b>34.2</b><br><b>(31.7 to 36.8)</b>              | <b>4.8</b><br><b>(2.9 to 6.6)</b>                   |
| <b>Transport injuries</b>                     | <b>8.7</b><br><b>(8.0 to 9.3)</b>    | <b>2.8</b><br><b>(2.5 to 3.2)</b>     | <b>0.5</b><br><b>(0.3 to 0.7)</b> | <b>30.6</b><br><b>(27.7 to 33.6)</b>              | <b>1.5</b><br><b>(-0.6 to 3.5)</b>                  |
| Road injuries                                 | 8.1<br>(7.5 to 8.7)                  | 2.7<br>(2.4 to 3.0)                   | 0.4<br>(0.3 to 0.6)               | 31.5<br>(28.6 to 34.6)                            | 2.3<br>(0.2 to 4.3)                                 |
| Pedestrian road injuries                      | 1.1<br>(0.9 to 1.2)                  | 0.3<br>(0.2 to 0.3)                   | 0.1<br>(< 0.05 to 0.1)            | 30.9<br>(28.1 to 34.1)                            | 0.9<br>(-1.1 to 3.0)                                |
| Cyclist road injuries                         | 1.8<br>(1.5 to 2.2)                  | 0.6<br>(0.5 to 0.8)                   | 0.1<br>(0.1 to 0.1)               | 46.6<br>(42.9 to 50.5)                            | 15.6<br>(13.1 to 18.2)                              |
| Motorcyclist road injuries                    | 1.8<br>(1.5 to 2.1)                  | 0.4<br>(0.3 to 0.5)                   | 0.1<br>(0.1 to 0.1)               | 32.0<br>(28.9 to 35.3)                            | 3.5<br>(1.2 to 5.8)                                 |
| Motor vehicle road injuries                   | 2.6<br>(2.2 to 3.0)                  | 1.1<br>(0.9 to 1.2)                   | 0.1<br>(0.1 to 0.2)               | 20.8<br>(18.0 to 23.6)                            | -6.3<br>(-8.4 to -4.2)                              |
| Other road injuries                           | 0.8<br>(0.7 to 0.9)                  | 0.4<br>(0.3 to 0.4)                   | < 0.05<br>(< 0.05 to 0.1)         | 46.4<br>(43.1 to 50.0)                            | 12.4<br>(10.2 to 14.7)                              |
| Other transport injuries                      | 0.6<br>(0.5 to 0.7)                  | 0.1<br>(0.1 to 0.2)                   | < 0.05<br>(< 0.05 to < 0.05)      | 19.3<br>(16.2 to 22.1)                            | -8.3<br>(-10.6 to -6.2)                             |
| <b>Unintentional injuries</b>                 | <b>53.8</b><br><b>(49.6 to 58.7)</b> | <b>22.1</b><br><b>(20.7 to 23.7)</b>  | <b>1.8</b><br><b>(1.2 to 2.6)</b> | <b>36.1</b><br><b>(33.4 to 38.9)</b>              | <b>5.7</b><br><b>(3.8 to 7.6)</b>                   |
| Falls                                         | 22.6<br>(19.7 to 25.9)               | 9.7<br>(8.5 to 11.0)                  | 0.9<br>(0.7 to 1.3)               | 45.5<br>(42.6 to 48.5)                            | 9.3<br>(7.2 to 11.4)                                |
| Drowning                                      | 0.3<br>(0.3 to 0.4)                  | 0.1<br>(0.1 to 0.1)                   | < 0.05<br>(< 0.05 to < 0.05)      | 23.0<br>(19.4 to 26.5)                            | -6.1<br>(-8.9 to -3.6)                              |
| Fire, heat, and hot substances                | 6.7<br>(5.6 to 8.1)                  | 0.8<br>(0.6 to 0.9)                   | 0.2<br>(0.1 to 0.3)               | 24.6<br>(18.6 to 29.6)                            | 0.9<br>(-3.6 to 4.6)                                |
| Poisonings                                    | 0.2<br>(0.1 to 0.2)                  | 0.2<br>(0.2 to 0.2)                   | < 0.05<br>(< 0.05 to < 0.05)      | 34.8<br>(23.2 to 46.0)                            | 12.4<br>(3.3 to 21.3)                               |
| Exposure to mechanical forces                 | 8.7<br>(7.3 to 10.7)                 | 2.9<br>(2.5 to 3.4)                   | 0.2<br>(0.1 to 0.3)               | 40.9<br>(37.5 to 43.9)                            | 11.5<br>(9.0 to 13.8)                               |
| Unintentional firearm injuries                | 0.6<br>(0.5 to 0.7)                  | 0.1<br>(0.1 to 0.2)                   | < 0.05<br>(< 0.05 to < 0.05)      | 43.8<br>(40.2 to 47.2)                            | 12.8<br>(10.0 to 15.3)                              |
| Unintentional suffocation                     | 0.3<br>(0.2 to 0.4)                  | 0.1<br>(< 0.05 to 0.1)                | < 0.05<br>(< 0.05 to < 0.05)      | 29.5<br>(25.8 to 32.8)                            | 8.1<br>(4.8 to 10.9)                                |
| Other exposure to mechanical forces           | 7.8<br>(6.5 to 9.8)                  | 2.8<br>(2.3 to 3.2)                   | 0.2<br>(0.1 to 0.2)               | 41.2<br>(37.9 to 44.3)                            | 11.6<br>(9.0 to 14.0)                               |

| Cause                                                                               | Prevalence in thousands (95% UI)     | Incidence in thousands (95% UI)                      | YLDs in thousands (95% UI)                          |                                                   |                                                     |
|-------------------------------------------------------------------------------------|--------------------------------------|------------------------------------------------------|-----------------------------------------------------|---------------------------------------------------|-----------------------------------------------------|
|                                                                                     | 2016 counts                          | 2016 counts                                          | 2016 counts                                         | Percentage change in counts between 2006 and 2016 | Percentage change in age-standardised rates between |
| Adverse effects of medical treatment                                                | 0.1<br>(0.1 to 0.2)                  | 2.0<br>(1.8 to 2.2)                                  | < 0.05<br>(< 0.05 to < 0.05)                        | 31.2<br>(24.6 to 38.7)                            | 1.7<br>(-3.4 to 7.7)                                |
| Animal contact                                                                      | 1.2<br>(1.0 to 1.3)                  | 1.2<br>(1.0 to 1.4)                                  | < 0.05<br>(< 0.05 to 0.1)                           | 19.9<br>(12.2 to 27.1)                            | -1.4<br>(-7.4 to 4.4)                               |
| Venomous animal contact                                                             | 0.6<br>(0.5 to 0.7)                  | 0.6<br>(0.5 to 0.8)                                  | < 0.05<br>(< 0.05 to < 0.05)                        | 19.9<br>(10.9 to 28.8)                            | -0.6<br>(-7.9 to 6.7)                               |
| Non-venomous animal contact                                                         | 0.5<br>(0.4 to 0.7)                  | 0.6<br>(0.5 to 0.8)                                  | < 0.05<br>(< 0.05 to < 0.05)                        | 19.9<br>(15.5 to 23.6)                            | -4.8<br>(-8.2 to -2.1)                              |
| Foreign body                                                                        | 2.7<br>(2.3 to 3.2)                  | 2.1<br>(1.8 to 2.5)                                  | 0.1<br>(0.1 to 0.2)                                 | 20.9<br>(17.7 to 24.0)                            | -3.2<br>(-5.6 to -0.9)                              |
| Pulmonary aspiration and foreign body in airway                                     | 1.7<br>(1.4 to 2.2)                  | 0.6<br>(0.6 to 0.7)                                  | 0.1<br>(< 0.05 to 0.1)                              | 19.9<br>(16.3 to 23.2)                            | -3.7<br>(-6.3 to -1.0)                              |
| Foreign body in eyes                                                                | 0.2<br>(0.1 to 0.4)                  | 1.2<br>(0.9 to 1.5)                                  | < 0.05<br>(< 0.05 to < 0.05)                        | 32.8<br>(27.3 to 38.1)                            | 2.0<br>(-0.7 to 4.5)                                |
| Foreign body in other body part                                                     | 0.8<br>(0.6 to 1.0)                  | 0.3<br>(0.2 to 0.3)                                  | < 0.05<br>(< 0.05 to < 0.05)                        | 17.3<br>(13.3 to 21.0)                            | -4.9<br>(-7.9 to -2.0)                              |
| Environmental heat and cold exposure                                                | 3.7<br>(3.2 to 4.4)                  | 0.9<br>(0.8 to 1.1)                                  | 0.1<br>(0.1 to 0.2)                                 | 19.4<br>(16.6 to 21.9)                            | -5.2<br>(-7.4 to -3.4)                              |
| Other unintentional injuries                                                        | 7.6<br>(5.9 to 9.8)                  | 2.3<br>(1.9 to 2.7)                                  | 0.2<br>(0.1 to 0.3)                                 | 29.5<br>(26.9 to 32.2)                            | 4.9<br>(3.1 to 6.7)                                 |
| <b>Self-harm and interpersonal violence</b>                                         | <b>12.3</b><br><b>(11.2 to 13.5)</b> | <b>1.9†</b><br><b>(1.6 to 2.2)</b>                   | <b>0.2</b><br><b>(0.1 to 0.3)</b>                   | <b>25.4</b><br><b>(22.5 to 28.4)</b>              | <b>2.2</b><br><b>(0.3 to 4.1)</b>                   |
| Self-harm                                                                           | 0.3<br>(0.2 to 0.3)                  | 0.1<br>(0.1 to 0.1)                                  | < 0.05<br>(< 0.05 to < 0.05)                        | 34.2<br>(29.7 to 38.4)                            | 3.2<br>(0.1 to 6.2)                                 |
| Self-harm by firearm                                                                | < 0.05<br>(< 0.05 to < 0.05)         | < 0.05<br>(< 0.05 to < 0.05)                         | < 0.05<br>(< 0.05 to < 0.05)                        | 21.5<br>(17.6 to 25.4)                            | -2.8<br>(-5.7 to -0.2)                              |
| Self-harm by other specified means                                                  | 0.2<br>(0.2 to 0.3)                  | 0.1<br>(0.1 to 0.1)                                  | < 0.05<br>(< 0.05 to < 0.05)                        | 35.0<br>(30.4 to 39.4)                            | 3.5<br>(0.4 to 6.7)                                 |
| Interpersonal violence                                                              | 12.1<br>(10.9 to 13.3)               | 1.8†<br>(1.5 to 2.0)                                 | 0.2<br>(0.1 to 0.3)                                 | 24.9<br>(22.0 to 27.9)                            | 2.1<br>(0.2 to 4.1)                                 |
| Assault by firearm                                                                  | 0.5<br>(0.4 to 0.6)                  | 0.1<br>(0.1 to 0.2)                                  | < 0.05<br>(< 0.05 to < 0.05)                        | 34.0<br>(29.7 to 38.0)                            | 5.6<br>(2.5 to 8.5)                                 |
| Assault by sharp object                                                             | 1.9<br>(1.5 to 2.2)                  | 0.8<br>(0.6 to 0.9)                                  | 0.1<br>(< 0.05 to 0.1)                              | 35.6<br>(32.0 to 38.9)                            | 7.3<br>(4.6 to 9.8)                                 |
| Sexual violence                                                                     | 8.2<br>(7.2 to 9.4)                  | --                                                   | 0.1<br>(< 0.05 to 0.1)                              | 9.1<br>(5.0 to 13.2)                              | -4.0<br>(-7.3 to -0.6)                              |
| Assault by other means                                                              | 1.5<br>(1.3 to 1.8)                  | 0.8<br>(0.7 to 1.0)                                  | 0.1<br>(< 0.05 to 0.1)                              | 33.2<br>(30.2 to 36.2)                            | 4.0<br>(1.8 to 6.1)                                 |
| <b>Forces of nature, conflict and terrorism, and executions and police conflict</b> | <b>0.2</b><br><b>(0.1 to 0.4)</b>    | <b>&lt; 0.05†</b><br><b>(&lt; 0.05 to &lt; 0.05)</b> | <b>&lt; 0.05</b><br><b>(&lt; 0.05 to &lt; 0.05)</b> | <b>141.1</b><br><b>(107.7 to 149.8)</b>           | <b>104.5</b><br><b>(76.7 to 111.5)</b>              |
| Exposure to forces of nature                                                        | 0.1<br>(< 0.05 to 0.3)               | --                                                   | < 0.05<br>(< 0.05 to < 0.05)                        | 193.4<br>(184.2 to 202.3)                         | 149.2<br>(141.6 to 157.0)                           |
| Conflict and terrorism                                                              | < 0.05<br>(< 0.05 to < 0.05)         | --                                                   | < 0.05<br>(< 0.05 to < 0.05)                        | -10.7<br>(-13.9 to -7.1)                          | -28.4<br>(-30.8 to -25.5)                           |
| Executions and police conflict                                                      | 0.1<br>(< 0.05 to 0.1)               | < 0.05<br>(< 0.05 to < 0.05)                         | < 0.05<br>(< 0.05 to < 0.05)                        | 62.3<br>(49.0 to 80.4)                            | 32.6<br>(22.3 to 47.7)                              |
| <b>Impairments</b>                                                                  | --                                   | --                                                   | --                                                  | --                                                | --                                                  |
| Anaemia                                                                             | 100.4<br>(88.4 to 113.9)             | --                                                   | 2.7<br>(1.7 to 3.9)                                 | 19.2<br>(5.2 to 35.6)                             | -1.4<br>(-13.1 to 12.1)                             |
| Developmental intellectual disability                                               | 5.7<br>(4.4 to 7.1)                  | --                                                   | 0.9<br>(0.6 to 1.5)                                 | 9.9<br>(-0.2 to 18.8)                             | -3.7<br>(-12.1 to 3.9)                              |
| Epilepsy                                                                            | 2.6<br>(1.3 to 4.0)                  | --                                                   | 0.9<br>(0.5 to 1.6)                                 | 7.1<br>(-44.4 to 99.1)                            | -7.2<br>(-52.1 to 74.2)                             |
| Guillain-Barre syndrome                                                             | < 0.05<br>(< 0.05 to < 0.05)         | --                                                   | < 0.05<br>(< 0.05 to < 0.05)                        | 23.2<br>(17.8 to 28.8)                            | 0.6<br>(0.3 to 1.7)                                 |
| Hearing loss                                                                        | 74.4<br>(70.8 to 78.4)               | --                                                   | 2.0<br>(1.4 to 2.9)                                 | 39.4<br>(36.1 to 42.7)                            | 1.4<br>(-0.7 to 3.8)                                |
| Heart failure                                                                       | 2.6<br>(2.3 to 3.0)                  | --                                                   | 0.2<br>(0.2 to 0.3)                                 | 52.2<br>(41.8 to 63.5)                            | 1.0<br>(-6.1 to 8.6)                                |
| Infertility                                                                         | 8.0<br>(6.2 to 10.3)                 | --                                                   | < 0.05<br>(< 0.05 to 0.1)                           | 14.8<br>(8.3 to 21.8)                             | 0.0<br>(-5.5 to 5.9)                                |
| Pelvic inflammatory disease                                                         | 0.1<br>(0.1 to 0.1)                  | --                                                   | < 0.05<br>(< 0.05 to < 0.05)                        | 13.5<br>(-6.3 to 36.8)                            | -5.1<br>(-21.7 to 14.3)                             |
| Vision loss                                                                         | 47.7<br>(45.6 to 49.8)               | --                                                   | 1.4<br>(1.0 to 2.1)                                 | 23.7<br>(13.8 to 31.6)                            | -4.4<br>(-9.5 to -0.5)                              |

We did not calculate incidence for the nine impairments, certain NTDs, and causes with only birth prevalence. Blank cells mean that no estimate is available.

† Incidence for aggregate causes represents the sum of the incidence of the causes below the aggregate.

‡ Incidence estimates for stroke represent first-ever stroke only.

^ Incidence of HIV/AIDS represents new infections of HIV only and does not include new infections of Tuberculosis in HIV positive cases.



SR Table 14: Prevalence, incidence, and YLDs for 2016, percentage change of YLD counts and percentage change of age-standardised YLD rates between 2006 and 2016 by cause and impairments, for all ages, The Gambia.

| Cause                                                                                | Prevalence in thousands (95% UI)       | Incidence in thousands (95% UI)            | YLDs in thousands (95% UI)       |                                                   |                                                     |
|--------------------------------------------------------------------------------------|----------------------------------------|--------------------------------------------|----------------------------------|---------------------------------------------------|-----------------------------------------------------|
|                                                                                      | 2016 counts                            | 2016 counts                                | 2016 counts                      | Percentage change in counts between 2006 and 2016 | Percentage change in age-standardised rates between |
| <b>All causes</b>                                                                    | <b>2,008.6</b><br>(2,004.8 to 2,013.0) | <b>11,565.6†</b><br>(10,969.9 to 12,196.3) | <b>195.0</b><br>(142.0 to 255.6) | <b>33.3</b><br>(30.2 to 36.6)                     | <b>-2.3</b><br>(-4.0 to -0.5)                       |
| <b>Communicable, maternal, neonatal, and nutritional disorders</b>                   | <b>1,800.9</b><br>(1,779.6 to 1,821.7) | <b>6,657.8†</b><br>(6,209.6 to 7,107.0)    | <b>61.0</b><br>(42.6 to 85.1)    | <b>25.6</b><br>(21.1 to 29.9)                     | <b>-6.9</b><br>(-10.0 to -3.7)                      |
| <b>HIV/AIDS and tuberculosis</b>                                                     | <b>647.8</b><br>(584.0 to 697.9)       | <b>3.3†</b><br>(2.6 to 4.1)                | <b>2.9</b><br>(1.8 to 4.6)       | <b>19.6</b><br>(-3.2 to 46.7)                     | <b>-12.4</b><br>(-28.5 to 8.2)                      |
| Tuberculosis                                                                         | 596.3<br>(537.4 to 658.2)              | 2.2†<br>(1.8 to 2.5)                       | 0.3<br>(0.2 to 0.5)              | 13.2<br>(-3.1 to 32.5)                            | -18.5<br>(-27.5 to -8.2)                            |
| Drug-susceptible tuberculosis                                                        | 1.0<br>(0.8 to 1.2)                    | 2.1<br>(1.8 to 2.5)                        | 0.3<br>(0.2 to 0.5)              | 13.5<br>(-3.1 to 33.3)                            | -18.3<br>(-27.6 to -7.6)                            |
| Multidrug-resistant tuberculosis without extensive drug resistance                   | < 0.05<br>(< 0.05 to < 0.05)           | < 0.05<br>(< 0.05 to 0.1)                  | < 0.05<br>(< 0.05 to < 0.05)     | -0.0<br>(-65.6 to 192.3)                          | -28.2<br>(-75.2 to 107.4)                           |
| Extensively drug-resistant tuberculosis                                              | < 0.05<br>(< 0.05 to < 0.05)           | < 0.05<br>(< 0.05 to < 0.05)               | < 0.05<br>(< 0.05 to < 0.05)     | 204.6<br>(4.8 to 790.4)                           | 118.8<br>(-24.3 to 531.8)                           |
| Latent tuberculosis infection                                                        | 595.3<br>(536.4 to 657.1)              | --                                         | --                               | --                                                | --                                                  |
| HIV/AIDS                                                                             | 20.8<br>(16.1 to 26.4)                 | 1.2^<br>(0.6 to 1.9)                       | 2.6<br>(1.6 to 4.2)              | 20.4<br>(-5.0 to 52.3)                            | -11.6<br>(-29.7 to 13.1)                            |
| Drug-susceptible HIV/AIDS - Tuberculosis                                             | 0.2<br>(0.1 to 0.3)                    | 0.4<br>(0.2 to 0.6)                        | 0.1<br>(< 0.05 to 0.1)           | 0.7<br>(-23.7 to 32.1)                            | -22.1<br>(-39.9 to -0.2)                            |
| Multidrug-resistant HIV/AIDS - Tuberculosis without extensive drug resistance        | < 0.05<br>(< 0.05 to < 0.05)           | < 0.05<br>(< 0.05 to < 0.05)               | < 0.05<br>(< 0.05 to < 0.05)     | -10.1<br>(-69.5 to 161.4)                         | -30.5<br>(-76.4 to 102.0)                           |
| Extensively drug-resistant HIV/AIDS - Tuberculosis                                   | < 0.05<br>(< 0.05 to < 0.05)           | < 0.05<br>(< 0.05 to < 0.05)               | < 0.05<br>(< 0.05 to < 0.05)     | 173.9<br>(-7.0 to 697.4)                          | 111.7<br>(-28.1 to 516.2)                           |
| HIV/AIDS resulting in other diseases                                                 | 20.7<br>(15.9 to 26.2)                 | 1.2<br>(0.6 to 1.9)                        | 2.6<br>(1.5 to 4.1)              | 21.2<br>(-4.9 to 55.8)                            | -11.2<br>(-30.3 to 15.1)                            |
| <b>Diarrhoea, lower respiratory infections, and other common infectious diseases</b> | <b>130.6</b><br>(124.8 to 136.8)       | <b>5,096.4†</b><br>(4,674.1 to 5,503.4)    | <b>7.9</b><br>(5.5 to 10.7)      | <b>23.1</b><br>(19.0 to 27.4)                     | <b>-5.8</b><br>(-8.4 to -3.1)                       |
| Diarrhoeal diseases                                                                  | 29.8<br>(27.5 to 32.3)                 | 1,997.4<br>(1,839.0 to 2,166.2)            | 3.4<br>(2.3 to 4.6)              | 13.8<br>(6.9 to 21.1)                             | -9.3<br>(-13.4 to -4.7)                             |
| Intestinal infectious diseases                                                       | 0.1<br>(0.1 to 0.2)                    | 3.1†<br>(2.0 to 4.7)                       | < 0.05<br>(< 0.05 to < 0.05)     | 11.2<br>(-10.0 to 36.7)                           | -19.2<br>(-31.4 to -4.1)                            |
| Typhoid fever                                                                        | 0.1<br>(0.1 to 0.2)                    | 2.4<br>(1.5 to 3.6)                        | < 0.05<br>(< 0.05 to < 0.05)     | 11.3<br>(-11.5 to 40.2)                           | -19.3<br>(-32.3 to -2.6)                            |
| Paratyphoid fever                                                                    | < 0.05<br>(< 0.05 to 0.1)              | 0.7<br>(0.4 to 1.3)                        | < 0.05<br>(< 0.05 to < 0.05)     | 20.9<br>(-9.1 to 57.5)                            | -12.8<br>(-30.4 to 7.7)                             |
| Other intestinal infectious diseases                                                 | --                                     | --                                         | < 0.05<br>(< 0.05 to < 0.05)     | -29.5<br>(-47.4 to -5.0)                          | -42.1<br>(-52.7 to -29.2)                           |
| Lower respiratory infections                                                         | 2.6<br>(2.4 to 2.8)                    | 111.8<br>(102.0 to 122.5)                  | 0.2<br>(0.1 to 0.2)              | 19.8<br>(4.8 to 36.4)                             | -6.5<br>(-15.2 to 3.4)                              |
| Upper respiratory infections                                                         | 36.5<br>(31.8 to 41.5)                 | 2,710.7<br>(2,345.8 to 3,101.2)            | 0.9<br>(0.5 to 1.4)              | 28.8<br>(19.3 to 38.4)                            | -2.9<br>(-8.5 to 3.1)                               |
| Otitis media                                                                         | 49.4<br>(44.0 to 55.2)                 | 197.9<br>(153.0 to 254.3)                  | 1.7<br>(1.0 to 2.4)              | 33.5<br>(25.3 to 43.1)                            | -0.5<br>(-6.3 to 6.0)                               |
| Meningitis                                                                           | 14.1<br>(11.7 to 16.9)                 | 4.2<br>(3.6 to 5.0)                        | 1.2<br>(0.8 to 1.6)              | 29.1<br>(20.7 to 38.2)                            | -5.8<br>(-11.8 to 0.4)                              |
| Pneumococcal meningitis                                                              | 4.0<br>(3.2 to 5.0)                    | 0.5<br>(0.4 to 0.7)                        | 0.4<br>(0.3 to 0.5)              | 11.9<br>(-2.8 to 30.0)                            | -19.7<br>(-29.2 to -8.2)                            |
| H influenzae type B meningitis                                                       | 2.0<br>(1.3 to 3.0)                    | 0.6<br>(0.3 to 0.9)                        | 0.2<br>(0.1 to 0.3)              | 32.5<br>(21.5 to 44.6)                            | -2.6<br>(-9.4 to 4.6)                               |
| Meningococcal infection                                                              | 5.4<br>(3.6 to 7.5)                    | 2.3<br>(1.8 to 2.8)                        | 0.4<br>(0.3 to 0.5)              | 30.1<br>(14.7 to 47.9)                            | -4.4<br>(-14.5 to 7.3)                              |
| Other meningitis                                                                     | 2.8<br>(2.0 to 3.8)                    | 0.9<br>(0.6 to 1.2)                        | 0.2<br>(0.1 to 0.3)              | 67.3<br>(49.0 to 88.4)                            | 26.6<br>(13.4 to 42.2)                              |
| Encephalitis                                                                         | 4.8<br>(3.1 to 7.1)                    | 2.2<br>(1.9 to 2.5)                        | 0.5<br>(0.4 to 0.7)              | 38.1<br>(21.7 to 56.7)                            | 0.0<br>(-10.2 to 10.0)                              |
| Diphtheria                                                                           | < 0.05<br>(< 0.05 to < 0.05)           | < 0.05<br>(< 0.05 to < 0.05)               | < 0.05<br>(< 0.05 to < 0.05)     | -31.7<br>(-73.1 to 88.6)                          | -42.1<br>(-73.1 to 27.2)                            |
| Whooping cough                                                                       | 0.8<br>(0.6 to 1.0)                    | 6.0<br>(4.6 to 7.5)                        | < 0.05<br>(< 0.05 to 0.1)        | -5.5<br>(-23.3 to 14.3)                           | -23.5<br>(-38.1 to -7.6)                            |
| Tetanus                                                                              | < 0.05<br>(< 0.05 to < 0.05)           | < 0.05<br>(< 0.05 to 0.1)                  | < 0.05<br>(< 0.05 to < 0.05)     | 3.1<br>(-23.5 to 28.8)                            | -21.2<br>(-35.3 to -8.8)                            |
| Measles                                                                              | 0.1<br>(0.1 to 0.3)                    | 5.4<br>(1.9 to 12.0)                       | < 0.05<br>(< 0.05 to < 0.05)     | 165.3<br>(31.7 to 389.8)                          | 112.5<br>(6.7 to 285.7)                             |
| Varicella and herpes zoster                                                          | 1.9<br>(1.8 to 2.0)                    | 57.8<br>(53.6 to 62.2)                     | 0.1<br>(< 0.05 to 0.1)           | 37.6<br>(18.3 to 63.0)                            | 0.2<br>(-11.1 to 12.6)                              |
| <b>Neglected tropical diseases and malaria</b>                                       | <b>880.6</b><br>(844.4 to 920.6)       | <b>437.3†</b><br>(383.4 to 535.4)          | <b>12.0</b><br>(7.3 to 20.0)     | <b>26.4</b><br>(20.1 to 34.2)                     | <b>-9.2</b><br>(-14.2 to -3.3)                      |
| Malaria                                                                              | 42.7<br>(36.5 to 49.7)                 | 106.6<br>(59.8 to 202.5)                   | 1.6<br>(1.2 to 2.0)              | 4.7<br>(-8.9 to 18.7)                             | -24.5<br>(-34.0 to -14.7)                           |
| Chagas disease                                                                       | --                                     | --                                         | --                               | --                                                | --                                                  |
| Leishmaniasis                                                                        | < 0.05<br>(< 0.05 to < 0.05)           | < 0.05<br>(< 0.05 to < 0.05)               | < 0.05<br>(< 0.05 to < 0.05)     | 182.8<br>(-0.3 to 1,895.3)                        | 108.0<br>(-26.8 to 1,384.7)                         |
| Visceral leishmaniasis                                                               | < 0.05<br>(< 0.05 to < 0.05)           | < 0.05<br>(< 0.05 to < 0.05)               | < 0.05<br>(< 0.05 to < 0.05)     | -7.5<br>(-100.0 to 286,324,016.7)                 | -35.6<br>(-100.0 to 359,767,910.2)                  |
| Cutaneous and mucocutaneous leishmaniasis                                            | < 0.05<br>(< 0.05 to < 0.05)           | < 0.05<br>(< 0.05 to < 0.05)               | < 0.05<br>(< 0.05 to < 0.05)     | 185.2<br>(-2.7 to 2,175.0)                        | 111.1<br>(-27.2 to 1,583.7)                         |
| African trypanosomiasis                                                              | --                                     | --                                         | --                               | --                                                | --                                                  |
| Schistosomiasis                                                                      | 743.2<br>(691.6 to 793.7)              | 303.3<br>(281.0 to 328.0)                  | 5.9<br>(3.0 to 11.2)             | 39.2<br>(29.5 to 50.8)                            | -0.3<br>(-7.1 to 7.2)                               |
| Cysticercosis                                                                        | 0.1<br>(< 0.05 to 0.1)                 | --                                         | < 0.05<br>(< 0.05 to < 0.05)     | 38.7<br>(-4.0 to 91.5)                            | -0.8<br>(-31.7 to 38.7)                             |
| Cystic echinococcosis                                                                | 0.7<br>(0.2 to 2.6)                    | 0.1<br>(< 0.05 to 0.5)                     | 0.1<br>(< 0.05 to 0.3)           | -3.0<br>(-86.3 to 647.0)                          | -29.2<br>(-88.0 to 391.7)                           |
| Lymphatic filariasis                                                                 | 28.1<br>(13.2 to 58.4)                 | 2.0<br>(1.6 to 2.5)                        | 2.2<br>(0.5 to 6.4)              | 16.4<br>(11.3 to 22.2)                            | -18.0<br>(-20.7 to -14.4)                           |
| Onchocerciasis                                                                       | --                                     | --                                         | --                               | --                                                | --                                                  |
| Trachoma                                                                             | 0.3<br>(0.2 to 0.5)                    | --                                         | < 0.05<br>(< 0.05 to < 0.05)     | -63.4<br>(-71.5 to -52.6)                         | -72.7<br>(-79.7 to -62.7)                           |
| Dengue                                                                               | 1.5<br>(0.9 to 2.4)                    | 24.9<br>(16.7 to 35.0)                     | 0.2<br>(0.1 to 0.4)              | 197.4<br>(117.8 to 593.6)                         | 118.4<br>(66.8 to 402.3)                            |
| Yellow fever                                                                         | < 0.05<br>(< 0.05 to < 0.05)           | 0.2<br>(0.1 to 0.6)                        | < 0.05<br>(< 0.05 to < 0.05)     | -18.8<br>(-58.4 to 45.9)                          | -41.0<br>(-65.7 to -3.2)                            |
| Rabies                                                                               | < 0.05<br>(< 0.05 to < 0.05)           | < 0.05<br>(< 0.05 to < 0.05)               | < 0.05<br>(< 0.05 to < 0.05)     | 0.0<br>(-45.2 to 94.5)                            | -22.4<br>(-50.9 to 28.4)                            |
| Intestinal nematode infections                                                       | 171.6<br>(140.5 to 208.0)              | --                                         | 0.3<br>(0.2 to 0.4)              | 39.8<br>(13.4 to 71.9)                            | 2.6<br>(-18.9 to 29.5)                              |
| Ascariasis                                                                           | 18.3<br>(13.1 to 25.5)                 | --                                         | < 0.05<br>(< 0.05 to < 0.05)     | 34.0<br>(-23.5 to 126.4)                          | -0.2<br>(-45.4 to 72.5)                             |

| Cause                                                                   | Prevalence in thousands (95% UI)              | Incidence in thousands (95% UI)                | YLDs in thousands (95% UI)             |                                                   |                                                     |
|-------------------------------------------------------------------------|-----------------------------------------------|------------------------------------------------|----------------------------------------|---------------------------------------------------|-----------------------------------------------------|
|                                                                         | 2016 counts                                   | 2016 counts                                    | 2016 counts                            | Percentage change in counts between 2006 and 2016 | Percentage change in age-standardised rates between |
| Trichuriasis                                                            | 53.3<br>(38.1 to 74.2)                        | --                                             | < 0.05<br>(< 0.05 to < 0.05)           | 35.6<br>(-17.3 to 127.7)                          | -0.9<br>(-46.7 to 83.2)                             |
| Hookworm disease                                                        | 102.7<br>(76.6 to 138.4)                      | --                                             | 0.3<br>(0.2 to 0.4)                    | 39.8<br>(13.3 to 72.1)                            | 2.6<br>(-19.0 to 29.5)                              |
| Food-borne trematodiasis                                                | --                                            | --                                             | --                                     | --                                                | --                                                  |
| Leprosy                                                                 | 0.1<br>(0.1 to 0.2)                           | < 0.05<br>(< 0.05 to < 0.05)                   | < 0.05<br>(< 0.05 to < 0.05)           | -17.8<br>(-34.2 to 5.2)                           | -35.4<br>(-45.8 to -19.4)                           |
| Ebola virus disease                                                     | --                                            | --                                             | --                                     | --                                                | --                                                  |
| Zika virus disease                                                      | --                                            | --                                             | --                                     | --                                                | --                                                  |
| Guinea worm disease                                                     | --                                            | --                                             | --                                     | --                                                | --                                                  |
| Other neglected tropical diseases                                       | 44.9<br>(43.0 to 46.4)                        | --                                             | 1.6<br>(1.1 to 2.3)                    | 19.3<br>(10.2 to 28.6)                            | -8.6<br>(-15.1 to -1.6)                             |
| <b>Maternal disorders</b>                                               | <b>6.3</b><br><b>(4.9 to 8.1)</b>             | <b>49.9†</b><br><b>(43.4 to 56.8)</b>          | <b>0.5</b><br><b>(0.3 to 0.7)</b>      | <b>12.2</b><br><b>(-13.6 to 45.4)</b>             | <b>-17.8</b><br><b>(-36.0 to 5.4)</b>               |
| Maternal haemorrhage                                                    | 0.8<br>(0.6 to 1.0)                           | 6.7<br>(5.1 to 8.8)                            | < 0.05<br>(< 0.05 to 0.1)              | 16.8<br>(-24.1 to 77.1)                           | -13.1<br>(-42.7 to 29.8)                            |
| Maternal sepsis and other pregnancy related infections                  | 1.0<br>(0.7 to 1.3)                           | 5.8<br>(4.4 to 7.8)                            | < 0.05<br>(< 0.05 to < 0.05)           | 24.9<br>(-38.9 to 148.9)                          | -7.4<br>(-54.0 to 82.3)                             |
| Maternal hypertensive disorders                                         | 4.2<br>(2.6 to 6.0)                           | 17.9<br>(14.1 to 21.5)                         | 0.2<br>(0.1 to 0.3)                    | 22.8<br>(-23.7 to 104.3)                          | -9.1<br>(-43.7 to 51.7)                             |
| Maternal obstructed labour and uterine rupture                          | 0.4<br>(0.3 to 0.5)                           | 3.3<br>(2.3 to 4.5)                            | 0.1<br>(0.1 to 0.2)                    | -2.3<br>(-26.7 to 28.9)                           | -28.7<br>(-45.9 to -6.2)                            |
| Maternal abortion, miscarriage, and ectopic pregnancy                   | 0.1<br>(0.1 to 0.2)                           | 16.1<br>(12.0 to 21.3)                         | < 0.05<br>(< 0.05 to < 0.05)           | 19.5<br>(-36.8 to 124.3)                          | -11.8<br>(-53.4 to 63.0)                            |
| Other maternal disorders                                                | --                                            | --                                             | 0.1<br>(< 0.05 to 0.1)                 | 7.0<br>(-17.5 to 38.7)                            | -21.6<br>(-38.9 to 0.6)                             |
| <b>Neonatal disorders</b>                                               | <b>36.3</b><br><b>(29.7 to 43.7)</b>          | --                                             | <b>5.9</b><br><b>(3.4 to 9.9)</b>      | <b>37.7</b><br><b>(12.5 to 72.5)</b>              | <b>5.5</b><br><b>(-14.2 to 33.0)</b>                |
| Neonatal preterm birth complications                                    | 24.4<br>(18.4 to 32.1)                        | --                                             | 2.0<br>(1.3 to 3.1)                    | 13.5<br>(-12.9 to 48.5)                           | -15.1<br>(-34.0 to 9.9)                             |
| Neonatal encephalopathy due to birth asphyxia and trauma                | 9.2<br>(4.6 to 16.4)                          | --                                             | 1.1<br>(0.2 to 3.2)                    | 82.4<br>(-5.4 to 538.4)                           | 39.6<br>(-26.6 to 418.8)                            |
| Neonatal sepsis and other neonatal infections                           | 5.5<br>(2.3 to 12.1)                          | --                                             | 2.2<br>(0.7 to 5.2)                    | 54.5<br>(10.0 to 252.5)                           | 19.2<br>(-17.0 to 247.0)                            |
| Hemolytic disease and other neonatal jaundice                           | 0.4<br>(0.3 to 0.5)                           | --                                             | 0.1<br>(0.1 to 0.2)                    | 32.6<br>(16.9 to 52.8)                            | -1.9<br>(-11.4 to 9.0)                              |
| Other neonatal disorders                                                | --                                            | --                                             | 0.5<br>(0.3 to 0.7)                    | 21.2<br>(1.3 to 48.2)                             | -1.5<br>(-17.7 to 20.7)                             |
| <b>Nutritional deficiencies</b>                                         | <b>1,118.1</b><br><b>(1,070.8 to 1,170.6)</b> | <b>771.7†</b><br><b>(620.3 to 964.8)</b>       | <b>29.6</b><br><b>(20.0 to 42.3)</b>   | <b>24.2</b><br><b>(18.6 to 30.5)</b>              | <b>-6.9</b><br><b>(-10.3 to -3.2)</b>               |
| Protein-energy malnutrition                                             | 43.5<br>(36.2 to 52.5)                        | 31.4<br>(26.5 to 37.0)                         | 1.6<br>(1.0 to 2.4)                    | 48.9<br>(6.8 to 105.2)                            | 21.1<br>(-13.8 to 67.2)                             |
| Iodine deficiency                                                       | 18.8<br>(14.2 to 24.5)                        | 0.8<br>(0.6 to 1.0)                            | 0.5<br>(0.3 to 0.8)                    | 21.2<br>(3.7 to 39.7)                             | -12.0<br>(-23.1 to -0.4)                            |
| Vitamin A deficiency                                                    | 596.4<br>(509.5 to 699.7)                     | 739.5<br>(585.8 to 932.9)                      | 0.1<br>(0.1 to 0.2)                    | 31.7<br>(1.6 to 70.0)                             | -3.3<br>(-22.9 to 20.9)                             |
| Iron-deficiency anaemia                                                 | 780.6<br>(755.5 to 802.5)                     | --                                             | 27.3<br>(18.3 to 39.6)                 | 23.0<br>(17.1 to 29.5)                            | -7.5<br>(-11.1 to -3.6)                             |
| Other nutritional deficiencies                                          | --                                            | --                                             | 0.1<br>(< 0.05 to 0.1)                 | 46.9<br>(3.8 to 104.0)                            | 19.5<br>(-16.1 to 66.9)                             |
| <b>Other communicable, maternal, neonatal, and nutritional diseases</b> | <b>633.0</b><br><b>(574.2 to 697.2)</b>       | <b>299.2</b><br><b>(255.3 to 350.9)</b>        | <b>2.0</b><br><b>(1.3 to 3.0)</b>      | <b>31.1</b><br><b>(24.1 to 38.6)</b>              | <b>-2.7</b><br><b>(-7.2 to 2.0)</b>                 |
| Sexually transmitted diseases excluding HIV                             | 329.6<br>(305.8 to 355.1)                     | 222.3<br>(189.5 to 262.3)                      | 0.8<br>(0.5 to 1.3)                    | 35.8<br>(25.9 to 45.6)                            | -1.6<br>(-8.1 to 5.2)                               |
| Syphilis                                                                | 27.7<br>(20.2 to 37.1)                        | 19.2<br>(13.2 to 26.3)                         | < 0.05<br>(< 0.05 to 0.1)              | 42.9<br>(26.5 to 62.8)                            | 2.6<br>(-11.2 to 18.6)                              |
| Chlamydial infection                                                    | 14.9<br>(12.4 to 17.7)                        | 14.6<br>(12.3 to 17.3)                         | 0.1<br>(0.1 to 0.2)                    | 34.1<br>(15.3 to 55.8)                            | -2.9<br>(-16.4 to 12.6)                             |
| Gonococcal infection                                                    | 19.6<br>(12.6 to 28.9)                        | 65.9<br>(38.8 to 101.6)                        | 0.2<br>(0.1 to 0.3)                    | 37.2<br>(19.8 to 57.0)                            | -1.2<br>(-13.1 to 12.0)                             |
| Trichomoniasis                                                          | 83.7<br>(70.6 to 96.9)                        | 79.1<br>(65.6 to 94.2)                         | 0.1<br>(< 0.05 to 0.2)                 | 36.3<br>(27.9 to 44.7)                            | 0.3<br>(-5.2 to 5.8)                                |
| Genital herpes                                                          | 221.4<br>(191.3 to 260.6)                     | 24.1<br>(20.4 to 29.2)                         | 0.1<br>(< 0.05 to 0.1)                 | 38.8<br>(24.4 to 53.2)                            | 0.5<br>(-8.4 to 9.1)                                |
| Other sexually transmitted diseases                                     | 15.2<br>(13.8 to 16.7)                        | 19.6<br>(16.1 to 23.6)                         | 0.3<br>(0.2 to 0.4)                    | 34.1<br>(19.2 to 49.5)                            | -3.4<br>(-13.7 to 7.2)                              |
| Hepatitis                                                               | 328.1<br>(249.5 to 422.9)                     | 76.8<br>(50.7 to 112.7)                        | 0.1<br>(< 0.05 to 0.1)                 | 10.8<br>(-15.5 to 44.3)                           | -13.9<br>(-30.9 to 6.7)                             |
| Acute hepatitis A                                                       | 1.4<br>(0.1 to 3.8)                           | 18.0<br>(1.9 to 49.8)                          | < 0.05<br>(< 0.05 to < 0.05)           | 8.2<br>(-79.5 to 490.5)                           | -13.7<br>(-75.2 to 228.6)                           |
| Hepatitis B                                                             | 294.9<br>(216.1 to 389.9)                     | 51.7<br>(35.5 to 72.8)                         | 0.1<br>(< 0.05 to 0.1)                 | 10.3<br>(-15.3 to 41.6)                           | -14.2<br>(-31.8 to 6.5)                             |
| Hepatitis C                                                             | 31.5<br>(27.9 to 35.2)                        | 2.5<br>(2.2 to 2.8)                            | < 0.05<br>(< 0.05 to < 0.05)           | 25.7<br>(-1.4 to 61.0)                            | -3.6<br>(-15.2 to 9.3)                              |
| Acute hepatitis E                                                       | 0.4<br>(0.3 to 0.5)                           | 4.7<br>(3.8 to 5.9)                            | < 0.05<br>(< 0.05 to < 0.05)           | 13.6<br>(-25.8 to 69.8)                           | -13.7<br>(-37.6 to 16.5)                            |
| Other infectious diseases                                               | 33.0<br>(31.6 to 34.1)                        | < 0.05<br>(< 0.05 to < 0.05)                   | 1.2<br>(0.8 to 1.7)                    | 29.4<br>(19.6 to 40.8)                            | -2.8<br>(-9.4 to 4.8)                               |
| <b>Non-communicable diseases</b>                                        | <b>1,816.0</b><br><b>(1,798.6 to 1,833.5)</b> | <b>4,765.6†</b><br><b>(4,346.8 to 5,190.8)</b> | <b>125.5</b><br><b>(92.6 to 163.7)</b> | <b>37.2</b><br><b>(32.7 to 42.0)</b>              | <b>-0.7</b><br><b>(-2.8 to 1.7)</b>                 |
| <b>Neoplasms</b>                                                        | <b>1.4</b><br><b>(1.2 to 1.5)</b>             | <b>1.0</b><br><b>(0.9 to 1.1)</b>              | <b>0.3</b><br><b>(0.2 to 0.4)</b>      | <b>36.7</b><br><b>(28.0 to 46.3)</b>              | <b>-1.1</b><br><b>(-6.5 to 4.9)</b>                 |
| Lip and oral cavity cancer                                              | < 0.05<br>(< 0.05 to 0.1)                     | < 0.05<br>(< 0.05 to < 0.05)                   | < 0.05<br>(< 0.05 to < 0.05)           | 42.9<br>(23.2 to 66.1)                            | 1.1<br>(-12.2 to 16.3)                              |
| Nasopharynx cancer                                                      | < 0.05<br>(< 0.05 to < 0.05)                  | < 0.05<br>(< 0.05 to < 0.05)                   | < 0.05<br>(< 0.05 to < 0.05)           | 35.4<br>(18.9 to 54.0)                            | -6.1<br>(-16.2 to 5.5)                              |
| Other pharynx cancer                                                    | < 0.05<br>(< 0.05 to < 0.05)                  | < 0.05<br>(< 0.05 to < 0.05)                   | < 0.05<br>(< 0.05 to < 0.05)           | 35.2<br>(21.1 to 51.3)                            | -4.0<br>(-13.0 to 6.2)                              |
| Oesophageal cancer                                                      | < 0.05<br>(< 0.05 to < 0.05)                  | < 0.05<br>(< 0.05 to < 0.05)                   | < 0.05<br>(< 0.05 to < 0.05)           | 33.2<br>(20.5 to 47.8)                            | -4.8<br>(-13.1 to 4.9)                              |
| Stomach cancer                                                          | < 0.05<br>(< 0.05 to < 0.05)                  | < 0.05<br>(< 0.05 to < 0.05)                   | < 0.05<br>(< 0.05 to < 0.05)           | 24.9<br>(12.4 to 39.9)                            | -8.7<br>(-20.1 to 4.8)                              |
| Colon and rectum cancer                                                 | 0.1<br>(0.1 to 0.1)                           | < 0.05<br>(< 0.05 to < 0.05)                   | < 0.05<br>(< 0.05 to < 0.05)           | 40.1<br>(24.0 to 57.9)                            | 1.8<br>(-11.5 to 16.9)                              |
| Liver cancer                                                            | 0.2<br>(0.2 to 0.3)                           | 0.4<br>(0.3 to 0.4)                            | 0.1<br>(0.1 to 0.1)                    | 35.6<br>(17.8 to 56.6)                            | -3.7<br>(-15.2 to 10.0)                             |
| Liver cancer due to hepatitis B                                         | 0.2<br>(0.2 to 0.2)                           | 0.2<br>(0.2 to 0.2)                            | < 0.05<br>(< 0.05 to 0.1)              | 35.2<br>(13.2 to 61.4)                            | -4.2<br>(-19.5 to 14.0)                             |

| Cause                                              | Prevalence in thousands (95% UI)        | Incidence in thousands (95% UI)       | YLDs in thousands (95% UI)        |                                                   |                                                     |
|----------------------------------------------------|-----------------------------------------|---------------------------------------|-----------------------------------|---------------------------------------------------|-----------------------------------------------------|
|                                                    | 2016 counts                             | 2016 counts                           | 2016 counts                       | Percentage change in counts between 2006 and 2016 | Percentage change in age-standardised rates between |
| Liver cancer due to hepatitis C                    | < 0.05<br>(< 0.05 to < 0.05)            | < 0.05<br>(< 0.05 to < 0.05)          | < 0.05<br>(< 0.05 to < 0.05)      | 37.6<br>(20.5 to 58.1)                            | -1.3<br>(-13.7 to 12.5)                             |
| Liver cancer due to alcohol use                    | < 0.05<br>(< 0.05 to 0.1)               | < 0.05<br>(< 0.05 to < 0.05)          | < 0.05<br>(< 0.05 to < 0.05)      | 29.7<br>(10.7 to 50.8)                            | -7.9<br>(-20.6 to 5.0)                              |
| Liver cancer due to other causes                   | 0.1<br>(0.1 to 0.1)                     | 0.1<br>(0.1 to 0.1)                   | < 0.05<br>(< 0.05 to < 0.05)      | 38.2<br>(18.9 to 59.8)                            | -1.8<br>(-13.8 to 12.4)                             |
| Gallbladder and biliary tract cancer               | < 0.05<br>(< 0.05 to < 0.05)            | < 0.05<br>(< 0.05 to < 0.05)          | < 0.05<br>(< 0.05 to < 0.05)      | 28.3<br>(17.3 to 39.4)                            | -6.8<br>(-14.9 to 1.5)                              |
| Pancreatic cancer                                  | < 0.05<br>(< 0.05 to < 0.05)            | < 0.05<br>(< 0.05 to < 0.05)          | < 0.05<br>(< 0.05 to < 0.05)      | 42.1<br>(30.0 to 54.4)                            | 2.9<br>(-5.8 to 12.0)                               |
| Larynx cancer                                      | < 0.05<br>(< 0.05 to < 0.05)            | < 0.05<br>(< 0.05 to < 0.05)          | < 0.05<br>(< 0.05 to < 0.05)      | 26.6<br>(13.3 to 40.8)                            | -8.7<br>(-18.4 to 1.9)                              |
| Tracheal, bronchus, and lung cancer                | < 0.05<br>(< 0.05 to < 0.05)            | < 0.05<br>(< 0.05 to < 0.05)          | < 0.05<br>(< 0.05 to < 0.05)      | 34.1<br>(6.5 to 69.4)                             | -2.0<br>(-23.4 to 25.3)                             |
| Malignant skin melanoma                            | < 0.05<br>(< 0.05 to < 0.05)            | < 0.05<br>(< 0.05 to < 0.05)          | < 0.05<br>(< 0.05 to < 0.05)      | 42.8<br>(26.2 to 61.6)                            | 1.6<br>(-9.8 to 13.8)                               |
| Non-melanoma skin cancer                           | < 0.05<br>(< 0.05 to < 0.05)            | < 0.05<br>(< 0.05 to 0.1)             | < 0.05<br>(< 0.05 to < 0.05)      | 60.9<br>(19.8 to 116.7)                           | 13.7<br>(-24.3 to 63.5)                             |
| Non-melanoma skin cancer (squamous-cell carcinoma) | < 0.05<br>(< 0.05 to < 0.05)            | < 0.05<br>(< 0.05 to < 0.05)          | < 0.05<br>(< 0.05 to < 0.05)      | 53.7<br>(13.3 to 113.6)                           | 10.8<br>(-27.4 to 63.2)                             |
| Non-melanoma skin cancer (basal-cell carcinoma)    | < 0.05<br>(< 0.05 to < 0.05)            | < 0.05<br>(< 0.05 to 0.1)             | < 0.05<br>(< 0.05 to < 0.05)      | 150.0<br>(95.5 to 217.9)                          | 68.0<br>(33.7 to 114.2)                             |
| Breast cancer                                      | 0.2<br>(0.2 to 0.3)                     | 0.1<br>(< 0.05 to 0.1)                | < 0.05<br>(< 0.05 to < 0.05)      | 54.2<br>(18.4 to 97.0)                            | 9.8<br>(-15.6 to 39.8)                              |
| Cervical cancer                                    | 0.5<br>(0.2 to 0.6)                     | 0.1<br>(0.1 to 0.2)                   | < 0.05<br>(< 0.05 to 0.1)         | 31.6<br>(0.2 to 72.1)                             | -5.4<br>(-26.1 to 22.2)                             |
| Uterine cancer                                     | < 0.05<br>(< 0.05 to 0.1)               | < 0.05<br>(< 0.05 to < 0.05)          | < 0.05<br>(< 0.05 to < 0.05)      | 43.6<br>(12.1 to 88.0)                            | 2.9<br>(-18.6 to 31.9)                              |
| Ovarian cancer                                     | 0.1<br>(< 0.05 to 0.1)                  | < 0.05<br>(< 0.05 to < 0.05)          | < 0.05<br>(< 0.05 to < 0.05)      | 51.4<br>(28.9 to 74.8)                            | 8.2<br>(-6.9 to 24.5)                               |
| Prostate cancer                                    | 0.1<br>(< 0.05 to 0.1)                  | < 0.05<br>(< 0.05 to < 0.05)          | < 0.05<br>(< 0.05 to < 0.05)      | 34.1<br>(-0.1 to 79.6)                            | 0.4<br>(-22.8 to 29.2)                              |
| Testicular cancer                                  | < 0.05<br>(< 0.05 to < 0.05)            | < 0.05<br>(< 0.05 to < 0.05)          | < 0.05<br>(< 0.05 to < 0.05)      | 24.7<br>(-8.6 to 56.0)                            | -11.6<br>(-35.9 to 12.7)                            |
| Kidney cancer                                      | 0.1<br>(< 0.05 to 0.1)                  | < 0.05<br>(< 0.05 to < 0.05)          | < 0.05<br>(< 0.05 to < 0.05)      | 43.2<br>(20.3 to 72.0)                            | 8.2<br>(-5.5 to 22.6)                               |
| Bladder cancer                                     | < 0.05<br>(< 0.05 to < 0.05)            | < 0.05<br>(< 0.05 to < 0.05)          | < 0.05<br>(< 0.05 to < 0.05)      | 38.5<br>(24.0 to 54.8)                            | 1.0<br>(-10.3 to 13.5)                              |
| Brain and nervous system cancer                    | < 0.05<br>(< 0.05 to < 0.05)            | < 0.05<br>(< 0.05 to < 0.05)          | < 0.05<br>(< 0.05 to < 0.05)      | 41.3<br>(27.0 to 56.1)                            | 4.3<br>(-6.0 to 16.4)                               |
| Thyroid cancer                                     | < 0.05<br>(< 0.05 to < 0.05)            | < 0.05<br>(< 0.05 to < 0.05)          | < 0.05<br>(< 0.05 to < 0.05)      | 42.0<br>(20.3 to 69.8)                            | 0.4<br>(-15.1 to 18.3)                              |
| Mesothelioma                                       | < 0.05<br>(< 0.05 to < 0.05)            | < 0.05<br>(< 0.05 to < 0.05)          | < 0.05<br>(< 0.05 to < 0.05)      | 27.1<br>(12.4 to 43.4)                            | -8.2<br>(-18.0 to 2.3)                              |
| Hodgkin lymphoma                                   | < 0.05<br>(< 0.05 to < 0.05)            | < 0.05<br>(< 0.05 to < 0.05)          | < 0.05<br>(< 0.05 to < 0.05)      | 12.9<br>(-4.4 to 31.8)                            | -16.0<br>(-25.4 to -6.1)                            |
| Non-Hodgkin's lymphoma                             | 0.1<br>(0.1 to 0.1)                     | < 0.05<br>(< 0.05 to < 0.05)          | < 0.05<br>(< 0.05 to < 0.05)      | 33.2<br>(16.2 to 53.7)                            | -1.7<br>(-11.3 to 8.6)                              |
| Multiple myeloma                                   | < 0.05<br>(< 0.05 to < 0.05)            | < 0.05<br>(< 0.05 to < 0.05)          | < 0.05<br>(< 0.05 to < 0.05)      | 43.5<br>(30.5 to 58.3)                            | 3.0<br>(-5.4 to 13.4)                               |
| Leukaemia                                          | 0.1<br>(0.1 to 0.1)                     | < 0.05<br>(< 0.05 to < 0.05)          | < 0.05<br>(< 0.05 to < 0.05)      | 29.9<br>(18.3 to 43.8)                            | -3.9<br>(-11.4 to 4.1)                              |
| Acute lymphoid leukaemia                           | < 0.05<br>(< 0.05 to < 0.05)            | < 0.05<br>(< 0.05 to < 0.05)          | < 0.05<br>(< 0.05 to < 0.05)      | 23.5<br>(2.3 to 50.8)                             | -7.6<br>(-19.0 to 5.9)                              |
| Chronic lymphoid leukaemia                         | < 0.05<br>(< 0.05 to < 0.05)            | < 0.05<br>(< 0.05 to < 0.05)          | < 0.05<br>(< 0.05 to < 0.05)      | 37.9<br>(15.9 to 65.3)                            | -0.0<br>(-17.2 to 20.8)                             |
| Acute myeloid leukaemia                            | < 0.05<br>(< 0.05 to < 0.05)            | < 0.05<br>(< 0.05 to < 0.05)          | < 0.05<br>(< 0.05 to < 0.05)      | 31.5<br>(12.7 to 57.3)                            | -0.7<br>(-9.9 to 11.3)                              |
| Chronic myeloid leukaemia                          | < 0.05<br>(< 0.05 to < 0.05)            | < 0.05<br>(< 0.05 to < 0.05)          | < 0.05<br>(< 0.05 to < 0.05)      | 28.1<br>(8.3 to 51.3)                             | -8.7<br>(-21.5 to 7.0)                              |
| Other leukaemia                                    | < 0.05<br>(< 0.05 to < 0.05)            | < 0.05<br>(< 0.05 to < 0.05)          | < 0.05<br>(< 0.05 to < 0.05)      | 30.3<br>(14.8 to 47.2)                            | -4.8<br>(-16.0 to 8.1)                              |
| Other neoplasms                                    | 0.2<br>(0.1 to 0.2)                     | 0.1<br>(< 0.05 to 0.1)                | < 0.05<br>(< 0.05 to < 0.05)      | 32.2<br>(5.7 to 64.5)                             | 0.5<br>(-11.8 to 13.7)                              |
| <b>Cardiovascular diseases</b>                     | <b>90.2</b><br><b>(84.6 to 96.0)</b>    | <b>6.5†</b><br><b>(6.2 to 6.8)</b>    | <b>5.2</b><br><b>(3.7 to 6.9)</b> | <b>41.2</b><br><b>(34.9 to 47.0)</b>              | <b>2.2</b><br><b>(-1.7 to 6.2)</b>                  |
| Rheumatic heart disease                            | 15.0<br>(13.3 to 16.9)                  | 0.7<br>(0.6 to 0.8)                   | 0.7<br>(0.5 to 1.1)               | 47.8<br>(33.9 to 63.8)                            | 5.5<br>(-3.6 to 15.9)                               |
| Ischaemic heart disease                            | 19.2<br>(17.8 to 20.7)                  | 2.6<br>(2.4 to 2.8)                   | 0.8<br>(0.6 to 1.2)               | 36.9<br>(28.7 to 45.5)                            | -1.8<br>(-6.4 to 3.2)                               |
| Cerebrovascular disease                            | 5.9<br>(5.5 to 6.3)                     | 1.0‡<br>(0.9 to 1.1)                  | 0.9<br>(0.6 to 1.1)               | 41.2<br>(31.0 to 52.5)                            | 3.0<br>(-4.5 to 10.8)                               |
| Ischaemic stroke                                   | 5.0<br>(4.5 to 5.5)                     | 0.7‡<br>(0.6 to 0.7)                  | 0.7<br>(0.5 to 0.9)               | 41.1<br>(28.9 to 54.7)                            | 2.7<br>(-5.7 to 11.7)                               |
| Hemorrhagic stroke                                 | 1.3<br>(1.1 to 1.4)                     | 0.3‡<br>(0.3 to 0.4)                  | 0.2<br>(0.1 to 0.2)               | 41.4<br>(25.0 to 59.9)                            | 4.4<br>(-8.1 to 18.8)                               |
| Hypertensive heart disease                         | 1.4<br>(1.1 to 1.7)                     | --                                    | 0.1<br>(0.1 to 0.2)               | 31.8<br>(18.4 to 47.7)                            | -4.9<br>(-13.8 to 5.4)                              |
| Cardiomyopathy and myocarditis                     | 0.9<br>(0.8 to 1.0)                     | 0.4†<br>(0.4 to 0.5)                  | 0.1<br>(0.1 to 0.1)               | 42.6<br>(27.2 to 58.7)                            | 0.7<br>(-11.3 to 13.1)                              |
| Myocarditis                                        | 0.3<br>(0.2 to 0.3)                     | 0.4<br>(0.4 to 0.5)                   | < 0.05<br>(< 0.05 to < 0.05)      | 39.7<br>(26.4 to 54.8)                            | 0.9<br>(-11.5 to 15.9)                              |
| Alcoholic cardiomyopathy                           | 0.1<br>(0.1 to 0.1)                     | --                                    | < 0.05<br>(< 0.05 to < 0.05)      | 43.5<br>(9.3 to 89.4)                             | -1.0<br>(-22.4 to 29.9)                             |
| Other cardiomyopathy                               | 0.7<br>(0.6 to 0.8)                     | --                                    | 0.1<br>(< 0.05 to 0.1)            | 43.5<br>(23.7 to 64.7)                            | 1.0<br>(-13.3 to 15.5)                              |
| Atrial fibrillation and flutter                    | 3.2<br>(2.8 to 3.7)                     | 0.3<br>(0.2 to 0.3)                   | 0.2<br>(0.2 to 0.4)               | 36.0<br>(24.7 to 47.0)                            | 0.6<br>(-5.8 to 7.0)                                |
| Peripheral vascular disease                        | 11.5<br>(9.9 to 13.4)                   | 1.2<br>(1.0 to 1.4)                   | 0.1<br>(< 0.05 to 0.1)            | 30.4<br>(21.2 to 40.5)                            | -2.1<br>(-8.5 to 5.4)                               |
| Endocarditis                                       | 0.1<br>(0.1 to 0.1)                     | 0.3<br>(0.3 to 0.3)                   | < 0.05<br>(< 0.05 to < 0.05)      | 37.8<br>(22.2 to 56.1)                            | 4.4<br>(-11.5 to 22.8)                              |
| Other cardiovascular and circulatory diseases      | 42.7<br>(35.1 to 51.4)                  | --                                    | 2.2<br>(1.5 to 3.2)               | 42.2<br>(30.4 to 54.7)                            | 4.5<br>(-3.9 to 13.8)                               |
| <b>Chronic respiratory diseases</b>                | <b>110.4</b><br><b>(103.6 to 117.3)</b> | <b>23.4†</b><br><b>(21.3 to 25.7)</b> | <b>5.0</b><br><b>(3.6 to 6.8)</b> | <b>40.6</b><br><b>(33.8 to 47.0)</b>              | <b>0.4</b><br><b>(-3.6 to 4.4)</b>                  |
| Chronic obstructive pulmonary disease              | 17.2<br>(16.5 to 18.0)                  | 1.2<br>(1.2 to 1.3)                   | 1.2<br>(1.0 to 1.3)               | 36.9<br>(26.4 to 48.0)                            | -2.2<br>(-8.8 to 4.9)                               |
| Pneumoconiosis                                     | < 0.05<br>(< 0.05 to < 0.05)            | < 0.05<br>(< 0.05 to < 0.05)          | < 0.05<br>(< 0.05 to < 0.05)      | 40.1<br>(32.5 to 48.0)                            | -0.2<br>(-5.4 to 5.8)                               |
| Silicosis                                          | < 0.05<br>(< 0.05 to < 0.05)            | < 0.05<br>(< 0.05 to < 0.05)          | < 0.05<br>(< 0.05 to < 0.05)      | 39.2<br>(26.7 to 53.1)                            | -2.2<br>(-8.9 to 5.1)                               |



| Cause                                                          | Prevalence in thousands (95% UI)  | Incidence in thousands (95% UI)    | YLDs in thousands (95% UI)        |                                                                             |                                                                              |
|----------------------------------------------------------------|-----------------------------------|------------------------------------|-----------------------------------|-----------------------------------------------------------------------------|------------------------------------------------------------------------------|
|                                                                | 2016 counts<br>(< 0.05 to < 0.05) | 2016 counts<br>(< 0.05 to < 0.05)  | 2016 counts<br>(< 0.05 to < 0.05) | Percentage change in counts between 2006 and 2016<br>39.5<br>(29.1 to 50.2) | Percentage change in age-standardised rates between<br>-0.0<br>(-5.6 to 5.8) |
| Asbestosis                                                     | < 0.05<br>(< 0.05 to < 0.05)      | < 0.05<br>(< 0.05 to < 0.05)       | < 0.05<br>(< 0.05 to < 0.05)      | 39.5<br>(29.1 to 50.2)                                                      | -0.0<br>(-5.6 to 5.8)                                                        |
| Coal workers pneumoconiosis                                    | --                                | --                                 | --                                | --                                                                          | --                                                                           |
| Other pneumoconiosis                                           | < 0.05<br>(< 0.05 to < 0.05)      | < 0.05<br>(< 0.05 to < 0.05)       | < 0.05<br>(< 0.05 to < 0.05)      | 40.9<br>(29.8 to 54.6)                                                      | -0.1<br>(-9.3 to 11.2)                                                       |
| Asthma                                                         | 92.9<br>(84.2 to 101.9)           | 22.2<br>(20.1 to 24.4)             | 3.6<br>(2.4 to 5.3)               | 40.4<br>(32.4 to 47.9)                                                      | 1.5<br>(-2.7 to 6.0)                                                         |
| Interstitial lung disease and pulmonary sarcoidosis            | 0.1<br>(0.1 to 0.1)               | < 0.05<br>(< 0.05 to < 0.05)       | < 0.05<br>(< 0.05 to < 0.05)      | 37.3<br>(33.7 to 40.8)                                                      | -2.0<br>(-6.0 to 1.9)                                                        |
| Other chronic respiratory diseases                             | --                                | --                                 | 0.1<br>(0.1 to 0.2)               | 87.9<br>(42.3 to 147.4)                                                     | 33.0<br>(9.0 to 61.6)                                                        |
| <b>Cirrhosis and other chronic liver diseases</b>              | <b>4.5<br/>(4.3 to 4.8)</b>       | <b>0.4<br/>(0.4 to 0.4)</b>        | <b>0.4<br/>(0.3 to 0.6)</b>       | <b>41.3<br/>(25.4 to 59.2)</b>                                              | <b>2.5<br/>(-5.5 to 11.0)</b>                                                |
| Cirrhosis and other chronic liver diseases due to hepatitis B  | 1.6<br>(1.4 to 1.8)               | 0.1<br>(0.1 to 0.1)                | 0.1<br>(0.1 to 0.2)               | 43.3<br>(21.8 to 69.5)                                                      | 2.7<br>(-9.1 to 16.4)                                                        |
| Cirrhosis and other chronic liver diseases due to hepatitis C  | 0.6<br>(0.4 to 0.8)               | 0.1<br>(< 0.05 to 0.1)             | < 0.05<br>(< 0.05 to 0.1)         | 42.4<br>(12.9 to 78.0)                                                      | 1.3<br>(-16.6 to 23.1)                                                       |
| Cirrhosis and other chronic liver diseases due to alcohol use  | 0.7<br>(0.6 to 0.8)               | 0.1<br>(0.1 to 0.1)                | < 0.05<br>(< 0.05 to 0.1)         | 44.5<br>(20.0 to 76.8)                                                      | 2.2<br>(-12.6 to 21.2)                                                       |
| Cirrhosis and other chronic liver diseases due to other causes | 1.7<br>(1.5 to 1.8)               | 0.1<br>(0.1 to 0.1)                | 0.2<br>(0.1 to 0.3)               | 39.5<br>(14.0 to 69.9)                                                      | 3.1<br>(-13.0 to 22.5)                                                       |
| <b>Digestive diseases</b>                                      | <b>28.2<br/>(25.3 to 31.2)</b>    | <b>26.2†<br/>(24.9 to 27.6)</b>    | <b>0.9<br/>(0.6 to 1.2)</b>       | <b>37.2<br/>(25.7 to 50.8)</b>                                              | <b>0.7<br/>(-5.5 to 7.2)</b>                                                 |
| Peptic ulcer disease                                           | 4.0<br>(3.6 to 4.4)               | 1.9<br>(1.6 to 2.1)                | 0.1<br>(< 0.05 to 0.1)            | 33.0<br>(18.1 to 48.7)                                                      | -2.1<br>(-10.9 to 7.4)                                                       |
| Gastritis and duodenitis                                       | 8.8<br>(7.7 to 10.0)              | 8.4<br>(7.4 to 9.5)                | 0.1<br>(0.1 to 0.2)               | 40.7<br>(24.0 to 59.1)                                                      | 6.2<br>(-2.6 to 16.6)                                                        |
| Appendicitis                                                   | 0.3<br>(0.3 to 0.3)               | 7.6<br>(7.0 to 8.2)                | 0.1<br>(0.1 to 0.1)               | 30.0<br>(-9.9 to 83.9)                                                      | -4.7<br>(-27.4 to 21.9)                                                      |
| Paralytic ileus and intestinal obstruction                     | < 0.05<br>(< 0.05 to < 0.05)      | 1.0<br>(0.9 to 1.1)                | < 0.05<br>(< 0.05 to < 0.05)      | 32.7<br>(27.4 to 38.0)                                                      | -3.4<br>(-12.0 to 6.0)                                                       |
| Inguinal, femoral, and abdominal hernia                        | 14.9<br>(11.8 to 18.9)            | 2.4<br>(2.2 to 2.8)                | 0.5<br>(0.3 to 0.7)               | 38.1<br>(21.2 to 59.8)                                                      | 0.3<br>(-9.4 to 11.2)                                                        |
| Inflammatory bowel disease                                     | 0.1<br>(0.1 to 0.2)               | 0.7<br>(0.6 to 0.7)                | < 0.05<br>(< 0.05 to < 0.05)      | 36.7<br>(32.8 to 40.9)                                                      | -1.7<br>(-4.7 to 1.2)                                                        |
| Vascular intestinal disorders                                  | < 0.05<br>(< 0.05 to < 0.05)      | 0.1<br>(0.1 to 0.1)                | < 0.05<br>(< 0.05 to < 0.05)      | 34.5<br>(26.3 to 43.0)                                                      | 2.1<br>(-2.0 to 6.3)                                                         |
| Gallbladder and biliary diseases                               | 0.8<br>(0.7 to 1.0)               | 3.9<br>(3.4 to 4.5)                | < 0.05<br>(< 0.05 to < 0.05)      | 41.2<br>(27.6 to 55.5)                                                      | 1.9<br>(-8.7 to 14.1)                                                        |
| Pancreatitis                                                   | < 0.05<br>(< 0.05 to < 0.05)      | 0.3<br>(0.3 to 0.4)                | < 0.05<br>(< 0.05 to < 0.05)      | 41.2<br>(36.5 to 46.3)                                                      | 0.8<br>(-3.2 to 4.5)                                                         |
| Other digestive diseases                                       | --                                | --                                 | 0.1<br>(0.1 to 0.1)               | 38.8<br>(23.8 to 56.8)                                                      | 4.7<br>(-2.2 to 12.2)                                                        |
| <b>Neurological disorders</b>                                  | <b>621.6<br/>(591.8 to 654.2)</b> | <b>323.9<br/>(274.4 to 380.1)</b>  | <b>14.5<br/>(9.1 to 20.7)</b>     | <b>38.3<br/>(5.3 to 86.2)</b>                                               | <b>0.1<br/>(-19.2 to 25.6)</b>                                               |
| Alzheimer's disease and other dementias                        | 1.7<br>(1.4 to 2.0)               | 0.3<br>(0.2 to 0.4)                | 0.2<br>(0.2 to 0.3)               | 28.4<br>(21.1 to 36.7)                                                      | -1.1<br>(-5.9 to 3.9)                                                        |
| Parkinson's disease                                            | 0.2<br>(0.1 to 0.2)               | < 0.05<br>(< 0.05 to < 0.05)       | < 0.05<br>(< 0.05 to < 0.05)      | 38.9<br>(18.0 to 62.4)                                                      | 4.5<br>(-9.3 to 21.6)                                                        |
| Epilepsy                                                       | 8.3<br>(2.4 to 13.7)              | 1.3<br>(0.4 to 2.2)                | 3.0<br>(0.8 to 6.1)               | 30.5<br>(-66.4 to 391.3)                                                    | -4.5<br>(-74.9 to 267.4)                                                     |
| Multiple sclerosis                                             | 0.1<br>(0.1 to 0.1)               | < 0.05<br>(< 0.05 to < 0.05)       | < 0.05<br>(< 0.05 to < 0.05)      | 50.9<br>(45.7 to 55.5)                                                      | 8.2<br>(4.9 to 11.3)                                                         |
| Motor neuron disease                                           | < 0.05<br>(< 0.05 to < 0.05)      | < 0.05<br>(< 0.05 to < 0.05)       | < 0.05<br>(< 0.05 to < 0.05)      | 38.4<br>(31.8 to 44.4)                                                      | 1.3<br>(-1.9 to 4.4)                                                         |
| Migraine                                                       | 221.1<br>(207.7 to 234.8)         | 28.6<br>(26.8 to 30.6)             | 9.1<br>(5.8 to 12.8)              | 39.4<br>(32.9 to 46.0)                                                      | 0.6<br>(-3.5 to 4.5)                                                         |
| Tension-type headache                                          | 481.2<br>(430.1 to 542.6)         | 293.7<br>(243.5 to 350.6)          | 1.4<br>(0.9 to 2.1)               | 40.0<br>(32.7 to 47.5)                                                      | 0.9<br>(-3.6 to 5.7)                                                         |
| Other neurological disorders                                   | < 0.05<br>(< 0.05 to < 0.05)      | < 0.05<br>(< 0.05 to < 0.05)       | 0.7<br>(0.2 to 1.5)               | 61.4<br>(-57.1 to 482.6)                                                    | 15.2<br>(-67.0 to 277.6)                                                     |
| <b>Mental and substance use disorders</b>                      | <b>270.0<br/>(256.5 to 283.1)</b> | <b>109.8†<br/>(100.8 to 120.6)</b> | <b>33.2<br/>(23.9 to 43.3)</b>    | <b>38.5<br/>(35.2 to 42.0)</b>                                              | <b>-0.1<br/>(-2.6 to 2.4)</b>                                                |
| Schizophrenia                                                  | 2.6<br>(2.2 to 3.0)               | 0.2<br>(0.2 to 0.3)                | 1.7<br>(1.2 to 2.1)               | 40.1<br>(27.0 to 54.9)                                                      | 0.1<br>(-7.9 to 9.3)                                                         |
| Alcohol use disorders                                          | 18.3<br>(15.3 to 21.6)            | 10.2<br>(8.5 to 11.9)              | 1.8<br>(1.3 to 2.6)               | 40.2<br>(29.9 to 52.7)                                                      | 1.9<br>(-5.2 to 9.7)                                                         |
| Drug use disorders                                             | 7.5<br>(6.6 to 8.4)               | 1.3<br>(1.2 to 1.5)                | 2.0<br>(1.4 to 2.7)               | 48.6<br>(33.8 to 65.4)                                                      | 8.0<br>(-1.5 to 19.0)                                                        |
| Opioid use disorders                                           | 4.3<br>(3.6 to 5.3)               | 0.6<br>(0.5 to 0.7)                | 1.8<br>(1.2 to 2.5)               | 49.9<br>(33.2 to 69.1)                                                      | 8.8<br>(-1.9 to 20.9)                                                        |
| Cocaine use disorders                                          | 0.2<br>(0.2 to 0.3)               | < 0.05<br>(< 0.05 to < 0.05)       | < 0.05<br>(< 0.05 to < 0.05)      | 39.6<br>(32.1 to 47.0)                                                      | 1.9<br>(-2.8 to 6.8)                                                         |
| Amphetamine use disorders                                      | 0.1<br>(0.1 to 0.2)               | < 0.05<br>(< 0.05 to < 0.05)       | < 0.05<br>(< 0.05 to < 0.05)      | 37.3<br>(23.6 to 50.9)                                                      | 2.3<br>(-7.1 to 11.5)                                                        |
| Cannabis use disorders                                         | 2.6<br>(2.2 to 3.2)               | 0.6<br>(0.5 to 0.7)                | 0.1<br>(< 0.05 to 0.1)            | 37.1<br>(6.4 to 73.9)                                                       | 0.7<br>(-20.3 to 24.6)                                                       |
| Other drug use disorders                                       | 0.5<br>(0.5 to 0.6)               | 0.1<br>(0.1 to 0.1)                | 0.1<br>(0.1 to 0.1)               | 40.3<br>(19.8 to 66.5)                                                      | 2.1<br>(-11.9 to 20.4)                                                       |
| Depressive disorders                                           | 62.6<br>(57.8 to 67.8)            | 74.1<br>(65.2 to 83.9)             | 11.0<br>(7.6 to 15.1)             | 36.6<br>(29.9 to 43.7)                                                      | -1.5<br>(-6.1 to 3.3)                                                        |
| Major depressive disorder                                      | 45.4<br>(40.0 to 51.8)            | 70.7<br>(61.8 to 80.7)             | 9.3<br>(6.3 to 12.8)              | 36.0<br>(28.3 to 44.4)                                                      | -1.9<br>(-7.4 to 3.9)                                                        |
| Dysthymia                                                      | 18.4<br>(15.9 to 21.4)            | 3.4<br>(3.0 to 3.9)                | 1.8<br>(1.2 to 2.6)               | 39.9<br>(34.3 to 46.6)                                                      | 0.6<br>(-2.6 to 3.9)                                                         |
| Bipolar disorder                                               | 10.4<br>(8.8 to 12.4)             | 1.2<br>(1.0 to 1.4)                | 2.1<br>(1.3 to 3.2)               | 38.9<br>(29.2 to 48.6)                                                      | 0.3<br>(-5.8 to 6.2)                                                         |
| Anxiety disorders                                              | 52.9<br>(47.6 to 58.8)            | 10.2<br>(9.3 to 11.3)              | 5.1<br>(3.5 to 7.0)               | 38.8<br>(28.5 to 49.1)                                                      | 0.2<br>(-6.2 to 6.6)                                                         |
| Eating disorders                                               | 1.5<br>(1.2 to 1.9)               | 1.3<br>(0.9 to 1.7)                | 0.3<br>(0.2 to 0.5)               | 37.8<br>(17.0 to 60.9)                                                      | 0.2<br>(-15.1 to 16.5)                                                       |
| Anorexia nervosa                                               | 0.4<br>(0.3 to 0.6)               | 0.2<br>(0.1 to 0.3)                | 0.1<br>(0.1 to 0.1)               | 37.2<br>(-0.2 to 86.3)                                                      | -0.3<br>(-26.9 to 34.1)                                                      |
| Bulimia nervosa                                                | 1.1<br>(0.8 to 1.4)               | 1.1<br>(0.7 to 1.5)                | 0.2<br>(0.1 to 0.3)               | 38.0<br>(13.0 to 68.8)                                                      | 0.4<br>(-17.3 to 22.8)                                                       |
| Autistic spectrum disorders                                    | 17.1<br>(15.2 to 19.3)            | 0.2<br>(0.2 to 0.3)                | 2.4<br>(1.6 to 3.4)               | 36.5<br>(28.5 to 44.2)                                                      | -0.4<br>(-5.5 to 4.4)                                                        |
| Autism                                                         | 4.6<br>(4.0 to 5.4)               | < 0.05<br>(< 0.05 to 0.1)          | 1.2<br>(0.8 to 1.7)               | 36.5<br>(23.2 to 50.5)                                                      | -0.5<br>(-9.4 to 8.7)                                                        |
| Asperger syndrome and other autistic spectrum disorders        | 12.3<br>(10.1 to 15.0)            | 0.2<br>(0.1 to 0.3)                | 1.2<br>(0.8 to 1.8)               | 36.4<br>(28.9 to 44.1)                                                      | -0.4<br>(-5.0 to 4.3)                                                        |

| Cause                                                      | Prevalence in thousands (95% UI)              | Incidence in thousands (95% UI)                | YLDs in thousands (95% UI)           |                                                   |                                                     |
|------------------------------------------------------------|-----------------------------------------------|------------------------------------------------|--------------------------------------|---------------------------------------------------|-----------------------------------------------------|
|                                                            | 2016 counts                                   | 2016 counts                                    | 2016 counts                          | Percentage change in counts between 2006 and 2016 | Percentage change in age-standardised rates between |
| Attention-deficit/hyperactivity disorder                   | 28.0<br>(25.0 to 31.4)                        | 1.9<br>(1.7 to 2.3)                            | 0.3<br>(0.2 to 0.5)                  | 38.6<br>(28.3 to 49.3)                            | -0.0<br>(-6.6 to 7.0)                               |
| Conduct disorder                                           | 21.3<br>(17.4 to 25.4)                        | 7.8<br>(6.2 to 9.5)                            | 2.6<br>(1.6 to 3.9)                  | 40.9<br>(31.6 to 50.5)                            | 0.5<br>(-6.1 to 7.2)                                |
| Idiopathic developmental intellectual disability           | 44.9<br>(25.7 to 63.5)                        | --                                             | 1.8<br>(0.8 to 3.2)                  | 35.3<br>(25.4 to 44.8)                            | -1.9<br>(-9.1 to 4.7)                               |
| Other mental and substance use disorders                   | 25.7<br>(22.4 to 29.8)                        | 1.4<br>(1.2 to 1.6)                            | 1.9<br>(1.3 to 2.8)                  | 39.0<br>(30.9 to 47.5)                            | -0.1<br>(-4.7 to 4.7)                               |
| <b>Diabetes, urogenital, blood, and endocrine diseases</b> | <b>922.2</b><br><b>(904.5 to 942.0)</b>       | <b>207.9†</b><br><b>(193.2 to 221.7)</b>       | <b>11.7</b><br><b>(8.3 to 16.1)</b>  | <b>35.1</b><br><b>(31.3 to 39.0)</b>              | <b>-0.5</b><br><b>(-2.8 to 1.9)</b>                 |
| Diabetes mellitus                                          | 30.8<br>(27.5 to 34.5)                        | 2.1<br>(1.9 to 2.3)                            | 2.1<br>(1.5 to 2.9)                  | 46.2<br>(38.9 to 54.3)                            | 4.3<br>(-0.9 to 10.3)                               |
| Acute glomerulonephritis                                   | < 0.05<br>(< 0.05 to < 0.05)                  | 0.2<br>(0.2 to 0.3)                            | < 0.05<br>(< 0.05 to < 0.05)         | 37.4<br>(31.6 to 42.6)                            | 0.1<br>(-3.6 to 3.5)                                |
| Chronic kidney disease                                     | 79.8<br>(71.5 to 88.7)                        | 6.3<br>(5.5 to 7.0)                            | 2.1<br>(1.6 to 2.8)                  | 39.3<br>(31.8 to 47.6)                            | 0.0<br>(-5.0 to 5.1)                                |
| Chronic kidney disease due to diabetes mellitus            | 24.9<br>(21.1 to 29.4)                        | 1.8<br>(1.5 to 2.2)                            | 0.6<br>(0.5 to 0.9)                  | 41.9<br>(30.7 to 53.8)                            | 1.3<br>(-5.9 to 8.4)                                |
| Chronic kidney disease due to hypertension                 | 17.2<br>(14.7 to 19.6)                        | 1.7<br>(1.4 to 1.9)                            | 0.4<br>(0.2 to 0.5)                  | 35.6<br>(22.4 to 50.3)                            | -1.5<br>(-11.0 to 9.0)                              |
| Chronic kidney disease due to glomerulonephritis           | 15.9<br>(13.7 to 18.0)                        | 1.0<br>(0.8 to 1.2)                            | 0.6<br>(0.4 to 0.8)                  | 39.1<br>(26.6 to 53.7)                            | 0.2<br>(-7.1 to 8.1)                                |
| Chronic kidney disease due to other causes                 | 21.8<br>(18.2 to 25.6)                        | 1.8<br>(1.5 to 2.2)                            | 0.6<br>(0.4 to 0.8)                  | 39.0<br>(27.0 to 51.7)                            | -0.4<br>(-7.4 to 6.8)                               |
| Urinary diseases and male infertility                      | 31.1<br>(28.7 to 33.8)                        | 118.9†<br>(106.7 to 131.9)                     | 0.7<br>(0.4 to 1.0)                  | 32.2<br>(24.4 to 42.0)                            | -4.6<br>(-10.2 to 2.2)                              |
| Interstitial nephritis and urinary tract infections        | 2.1<br>(1.8 to 2.3)                           | 108.0<br>(95.6 to 120.8)                       | 0.1<br>(< 0.05 to 0.1)               | 33.5<br>(14.1 to 55.7)                            | -1.9<br>(-13.6 to 10.9)                             |
| Urolithiasis                                               | 0.3<br>(0.3 to 0.4)                           | 9.1<br>(8.0 to 10.4)                           | < 0.05<br>(< 0.05 to < 0.05)         | 40.9<br>(31.6 to 50.7)                            | 1.3<br>(-6.6 to 9.8)                                |
| Benign prostatic hyperplasia                               | 14.6<br>(12.3 to 17.1)                        | 1.9<br>(1.6 to 2.2)                            | 0.5<br>(0.3 to 0.7)                  | 34.3<br>(23.9 to 47.6)                            | -4.2<br>(-10.6 to 3.6)                              |
| Male infertility                                           | 13.3<br>(11.9 to 14.9)                        | --                                             | 0.1<br>(< 0.05 to 0.1)               | 28.3<br>(7.4 to 54.7)                             | -8.8<br>(-24.3 to 10.7)                             |
| Other urinary diseases                                     | --                                            | --                                             | < 0.05<br>(< 0.05 to 0.1)            | 9.4<br>(-3.5 to 24.3)                             | -17.6<br>(-24.7 to -9.3)                            |
| Gynecological diseases                                     | 201.2<br>(192.4 to 211.2)                     | 79.1†<br>(73.0 to 85.6)                        | 2.7<br>(1.8 to 3.8)                  | 37.2<br>(31.7 to 42.3)                            | -0.5<br>(-4.1 to 2.9)                               |
| Uterine fibroids                                           | 13.5<br>(11.8 to 15.2)                        | 1.8<br>(1.5 to 2.0)                            | 0.4<br>(0.3 to 0.6)                  | 45.6<br>(36.4 to 54.9)                            | 2.9<br>(-3.4 to 9.5)                                |
| Polycystic ovarian syndrome                                | 1.8<br>(1.3 to 2.3)                           | 4.4<br>(3.1 to 6.0)                            | < 0.05<br>(< 0.05 to < 0.05)         | 36.8<br>(20.2 to 57.9)                            | -0.9<br>(-13.2 to 12.9)                             |
| Female infertility                                         | 1.4<br>(1.1 to 2.1)                           | --                                             | < 0.05<br>(< 0.05 to < 0.05)         | 10.8<br>(-50.2 to 103.2)                          | -21.4<br>(-66.8 to 32.6)                            |
| Endometriosis                                              | 0.4<br>(0.3 to 0.5)                           | 1.6<br>(1.3 to 2.0)                            | < 0.05<br>(< 0.05 to 0.1)            | 35.7<br>(-1.0 to 87.9)                            | -0.4<br>(-25.1 to 33.3)                             |
| Genital prolapse                                           | 91.9<br>(81.5 to 102.8)                       | 9.6<br>(8.1 to 11.4)                           | 0.3<br>(0.1 to 0.5)                  | 38.8<br>(30.7 to 48.1)                            | -0.9<br>(-7.4 to 6.0)                               |
| Premenstrual syndrome                                      | 91.5<br>(83.5 to 99.0)                        | 34.9<br>(31.7 to 38.2)                         | 0.8<br>(0.5 to 1.2)                  | 34.7<br>(22.2 to 47.5)                            | -1.4<br>(-9.5 to 7.4)                               |
| Other gynecological diseases                               | 33.0<br>(28.9 to 37.5)                        | 26.8<br>(21.8 to 32.3)                         | 1.2<br>(0.8 to 1.6)                  | 36.0<br>(28.1 to 44.2)                            | -1.2<br>(-6.5 to 4.1)                               |
| Hemoglobinopathies and hemolytic anaemias                  | 725.8<br>(706.8 to 748.0)                     | --                                             | 2.9<br>(1.9 to 4.3)                  | 28.2<br>(20.6 to 36.2)                            | -4.3<br>(-9.2 to 0.8)                               |
| Thalassemias                                               | < 0.05<br>(< 0.05 to 0.1)                     | --                                             | < 0.05<br>(< 0.05 to < 0.05)         | 25.0<br>(-1.3 to 63.6)                            | -0.8<br>(-21.1 to 29.6)                             |
| Thalassaemia trait                                         | 36.3<br>(15.7 to 65.8)                        | --                                             | 0.6<br>(0.2 to 1.1)                  | 28.6<br>(15.6 to 46.3)                            | -2.6<br>(-10.9 to 9.6)                              |
| Sickle cell disorders                                      | 2.5<br>(2.2 to 2.9)                           | --                                             | 0.2<br>(0.1 to 0.3)                  | 41.0<br>(21.2 to 63.5)                            | 6.7<br>(-7.8 to 23.5)                               |
| Sickle cell trait                                          | 273.6<br>(256.0 to 294.8)                     | --                                             | 1.1<br>(0.7 to 1.6)                  | 33.5<br>(23.9 to 44.1)                            | 0.2<br>(-6.0 to 7.0)                                |
| G6PD deficiency                                            | 153.3<br>(148.5 to 159.4)                     | --                                             | < 0.05<br>(< 0.05 to < 0.05)         | 60.9<br>(39.2 to 82.9)                            | 5.2<br>(-5.5 to 16.5)                               |
| G6PD trait                                                 | 327.9<br>(323.6 to 333.6)                     | --                                             | < 0.05<br>(< 0.05 to < 0.05)         | 44.3<br>(31.7 to 58.0)                            | 7.9<br>(0.5 to 15.8)                                |
| Other hemoglobinopathies and hemolytic anaemias            | 34.0<br>(32.6 to 35.2)                        | --                                             | 1.0<br>(0.7 to 1.4)                  | 20.0<br>(10.2 to 30.4)                            | -11.3<br>(-16.9 to -5.6)                            |
| Endocrine, metabolic, blood, and immune disorders          | 35.8<br>(34.6 to 36.9)                        | 1.2<br>(1.1 to 1.4)                            | 1.2<br>(0.8 to 1.7)                  | 25.0<br>(16.8 to 33.8)                            | -5.0<br>(-9.8 to 0.1)                               |
| <b>Musculoskeletal disorders</b>                           | <b>182.5</b><br><b>(172.3 to 192.2)</b>       | <b>88.7</b><br><b>(80.3 to 97.9)</b>           | <b>19.9</b><br><b>(14.4 to 26.3)</b> | <b>37.8</b><br><b>(33.5 to 42.1)</b>              | <b>-1.2</b><br><b>(-4.0 to 1.2)</b>                 |
| Rheumatoid arthritis                                       | 1.7<br>(1.5 to 2.0)                           | 0.1<br>(0.1 to 0.1)                            | 0.4<br>(0.3 to 0.6)                  | 44.3<br>(29.2 to 61.2)                            | 3.7<br>(-5.4 to 13.9)                               |
| Osteoarthritis                                             | 28.6<br>(26.8 to 30.5)                        | 1.7<br>(1.6 to 1.9)                            | 1.8<br>(1.2 to 2.4)                  | 44.3<br>(39.2 to 49.8)                            | 2.3<br>(-1.4 to 6.1)                                |
| Low back and neck pain                                     | 129.3<br>(120.3 to 139.2)                     | 58.2<br>(52.0 to 65.3)                         | 14.8<br>(10.5 to 19.5)               | 36.6<br>(31.4 to 41.8)                            | -2.3<br>(-5.5 to 0.8)                               |
| Low back pain                                              | 98.6<br>(86.6 to 112.4)                       | 49.2<br>(43.0 to 56.1)                         | 11.1<br>(7.9 to 14.7)                | 34.9<br>(28.2 to 41.8)                            | -3.4<br>(-7.7 to 0.6)                               |
| Neck pain                                                  | 36.7<br>(31.7 to 42.4)                        | 9.0<br>(7.8 to 10.6)                           | 3.7<br>(2.5 to 5.2)                  | 42.2<br>(38.1 to 46.3)                            | 1.0<br>(-1.1 to 3.4)                                |
| Gout                                                       | 3.7<br>(3.3 to 4.2)                           | 0.8<br>(0.7 to 0.9)                            | 0.1<br>(0.1 to 0.2)                  | 38.3<br>(18.5 to 62.1)                            | -1.3<br>(-13.8 to 12.8)                             |
| Other musculoskeletal disorders                            | 33.9<br>(26.9 to 41.1)                        | 27.9<br>(22.1 to 34.3)                         | 2.9<br>(1.9 to 4.2)                  | 39.5<br>(26.7 to 53.0)                            | 0.7<br>(-8.1 to 10.1)                               |
| <b>Other non-communicable diseases</b>                     | <b>1,437.6</b><br><b>(1,393.9 to 1,478.7)</b> | <b>3,977.8†</b><br><b>(3,569.2 to 4,413.1)</b> | <b>34.4</b><br><b>(23.2 to 48.9)</b> | <b>34.8</b><br><b>(32.7 to 36.9)</b>              | <b>-2.1</b><br><b>(-3.4 to -1.0)</b>                |
| Congenital anomalies                                       | 21.9<br>(18.9 to 25.7)                        | --                                             | 3.2<br>(2.3 to 4.4)                  | 31.8<br>(24.0 to 40.6)                            | -2.7<br>(-8.3 to 3.8)                               |
| Neural tube defects                                        | 2.9<br>(2.6 to 3.2)                           | --                                             | 0.9<br>(0.6 to 1.2)                  | 31.8<br>(17.1 to 49.6)                            | -2.6<br>(-13.2 to 9.4)                              |
| Congenital heart anomalies                                 | 5.4<br>(4.4 to 6.4)                           | --                                             | 0.3<br>(0.1 to 0.4)                  | 38.1<br>(20.9 to 59.1)                            | 5.5<br>(-6.4 to 19.9)                               |
| Orofacial clefts                                           | 0.5<br>(0.5 to 0.6)                           | --                                             | < 0.05<br>(< 0.05 to < 0.05)         | 29.6<br>(15.7 to 44.7)                            | -3.5<br>(-13.9 to 7.7)                              |
| Down's syndrome                                            | 0.3<br>(0.3 to 0.4)                           | --                                             | < 0.05<br>(< 0.05 to < 0.05)         | 39.2<br>(29.4 to 50.2)                            | 3.3<br>(-3.6 to 11.3)                               |
| Turner syndrome                                            | 1.0<br>(0.9 to 1.2)                           | --                                             | < 0.05<br>(< 0.05 to < 0.05)         | 26.8<br>(-14.3 to 86.1)                           | -5.0<br>(-31.9 to 33.7)                             |
| Klinefelter syndrome                                       | 1.2<br>(1.0 to 1.4)                           | --                                             | < 0.05<br>(< 0.05 to < 0.05)         | 35.4<br>(3.3 to 81.7)                             | 0.7<br>(-21.4 to 32.9)                              |



| Cause                                         | Prevalence in thousands (95% UI)        | Incidence in thousands (95% UI)          | YLDs in thousands (95% UI)         |                                                   |                                                     |
|-----------------------------------------------|-----------------------------------------|------------------------------------------|------------------------------------|---------------------------------------------------|-----------------------------------------------------|
|                                               | 2016 counts                             | 2016 counts                              | 2016 counts                        | Percentage change in counts between 2006 and 2016 | Percentage change in age-standardised rates between |
| Other chromosomal abnormalities               | 0.5<br>(0.4 to 0.5)                     | --                                       | 0.1<br>(0.1 to 0.1)                | 28.5<br>(-1.7 to 65.1)                            | 0.9<br>(-21.0 to 26.3)                              |
| Congenital musculoskeletal and limb anomalies | 2.0<br>(1.7 to 2.2)                     | --                                       | 0.3<br>(0.2 to 0.4)                | 38.6<br>(20.0 to 60.6)                            | 0.8<br>(-10.6 to 13.6)                              |
| Urogenital congenital anomalies               | 1.5<br>(1.3 to 1.7)                     | --                                       | < 0.05<br>(< 0.05 to 0.1)          | 32.0<br>(20.7 to 43.7)                            | -0.8<br>(-8.6 to 6.9)                               |
| Digestive congenital anomalies                | 2.0<br>(1.8 to 2.3)                     | --                                       | 0.1<br>(0.1 to 0.1)                | 36.7<br>(12.6 to 63.6)                            | 1.2<br>(-14.2 to 18.1)                              |
| Other congenital anomalies                    | 9.2<br>(6.1 to 13.8)                    | --                                       | 1.5<br>(1.0 to 2.3)                | 29.4<br>(17.9 to 41.1)                            | -4.8<br>(-12.4 to 3.3)                              |
| Skin and subcutaneous diseases                | 686.1<br>(658.3 to 717.7)               | 1,616.1<br>(1,478.8 to 1,774.1)          | 16.2<br>(10.6 to 23.9)             | 37.3<br>(34.6 to 40.2)                            | 0.8<br>(-0.9 to 2.7)                                |
| Dermatitis                                    | 97.4<br>(80.6 to 116.7)                 | 86.0<br>(75.2 to 99.7)                   | 3.9<br>(2.2 to 6.6)                | 34.9<br>(29.9 to 40.5)                            | 0.2<br>(-3.1 to 3.6)                                |
| Psoriasis                                     | 9.8<br>(9.2 to 10.5)                    | 1.6<br>(1.5 to 1.7)                      | 0.9<br>(0.6 to 1.2)                | 45.7<br>(29.6 to 64.6)                            | 5.2<br>(-3.6 to 15.1)                               |
| Cellulitis                                    | 0.7<br>(0.7 to 0.8)                     | 12.2<br>(11.3 to 13.3)                   | < 0.05<br>(< 0.05 to 0.1)          | 36.5<br>(10.6 to 68.5)                            | 0.7<br>(-18.2 to 24.4)                              |
| Pyoderma                                      | 11.4<br>(10.8 to 12.0)                  | 222.6<br>(211.3 to 233.2)                | 0.1<br>(< 0.05 to 0.1)             | 35.0<br>(26.6 to 43.9)                            | 0.7<br>(-4.4 to 5.7)                                |
| Scabies                                       | 36.2<br>(28.8 to 46.4)                  | 112.3<br>(89.5 to 143.4)                 | 0.9<br>(0.5 to 1.6)                | 32.5<br>(25.0 to 40.0)                            | -1.8<br>(-6.2 to 2.7)                               |
| Fungal skin diseases                          | 290.7<br>(242.6 to 343.8)               | 811.2<br>(682.8 to 960.0)                | 1.7<br>(0.7 to 3.6)                | 35.8<br>(34.1 to 37.5)                            | 0.2<br>(-0.6 to 1.0)                                |
| Viral skin diseases                           | 61.1<br>(57.8 to 64.6)                  | 84.1<br>(79.3 to 89.8)                   | 1.9<br>(1.2 to 2.8)                | 36.6<br>(31.7 to 41.8)                            | 0.4<br>(-2.8 to 3.8)                                |
| Acne vulgaris                                 | 188.7<br>(163.3 to 219.2)               | 138.2<br>(107.4 to 184.1)                | 4.8<br>(3.2 to 7.0)                | 41.3<br>(35.0 to 48.3)                            | 1.5<br>(-2.8 to 6.3)                                |
| Alopecia areata                               | 3.2<br>(3.0 to 3.5)                     | 5.8<br>(5.4 to 6.2)                      | 0.1<br>(0.1 to 0.2)                | 37.8<br>(22.2 to 56.0)                            | 0.2<br>(-9.6 to 10.7)                               |
| Pruritus                                      | 13.7<br>(11.9 to 15.6)                  | 11.2<br>(9.9 to 12.7)                    | 0.1<br>(0.1 to 0.3)                | 36.8<br>(28.6 to 45.9)                            | 0.1<br>(-4.8 to 5.3)                                |
| Urticaria                                     | 21.3<br>(18.0 to 25.3)                  | 38.5<br>(32.3 to 45.4)                   | 1.3<br>(0.8 to 1.9)                | 32.2<br>(24.0 to 41.3)                            | 0.3<br>(-5.2 to 5.9)                                |
| Decubitus ulcer                               | 0.1<br>(0.1 to 0.1)                     | 0.5<br>(0.5 to 0.6)                      | < 0.05<br>(< 0.05 to < 0.05)       | 37.6<br>(28.7 to 48.1)                            | 2.4<br>(-10.0 to 17.2)                              |
| Other skin and subcutaneous diseases          | 82.1<br>(79.6 to 84.7)                  | 91.8<br>(88.9 to 94.9)                   | 0.5<br>(0.2 to 0.8)                | 36.2<br>(31.6 to 40.7)                            | -0.0<br>(-2.4 to 2.3)                               |
| Sense organ diseases                          | 324.2<br>(311.6 to 340.2)               | 181.7+<br>(167.9 to 195.9)               | 11.0<br>(7.6 to 15.3)              | 30.6<br>(26.8 to 34.3)                            | -4.5<br>(-6.5 to -2.5)                              |
| Glaucoma                                      | 0.4<br>(0.4 to 0.5)                     | --                                       | < 0.05<br>(< 0.05 to 0.1)          | 31.5<br>(14.6 to 51.2)                            | -2.2<br>(-14.0 to 10.4)                             |
| Cataract                                      | 11.0<br>(9.7 to 12.3)                   | --                                       | 0.9<br>(0.6 to 1.2)                | 24.6<br>(17.1 to 32.9)                            | -7.6<br>(-12.8 to -1.8)                             |
| Macular degeneration                          | 0.7<br>(0.5 to 0.8)                     | --                                       | < 0.05<br>(< 0.05 to 0.1)          | 30.7<br>(13.6 to 50.9)                            | -2.9<br>(-14.6 to 10.2)                             |
| Refraction and accommodation disorders        | 171.2<br>(154.8 to 189.2)               | --                                       | 2.7<br>(1.6 to 4.4)                | 26.4<br>(19.8 to 32.9)                            | -8.5<br>(-13.8 to -2.6)                             |
| Age-related and other hearing loss            | 176.3<br>(163.8 to 190.3)               | --                                       | 5.9<br>(4.0 to 8.2)                | 31.9<br>(25.7 to 37.8)                            | -3.1<br>(-5.6 to -0.7)                              |
| Other vision loss                             | 4.9<br>(4.3 to 5.4)                     | --                                       | 0.4<br>(0.3 to 0.6)                | 33.9<br>(22.5 to 46.0)                            | -3.7<br>(-11.0 to 3.5)                              |
| Other sense organ diseases                    | 33.3<br>(30.7 to 35.8)                  | 181.7<br>(167.9 to 195.9)                | 1.0<br>(0.6 to 1.5)                | 39.2<br>(32.3 to 46.8)                            | 1.2<br>(-2.7 to 5.2)                                |
| Oral disorders                                | 1,011.9<br>(936.2 to 1,080.6)           | 2,180.1+<br>(1,810.8 to 2,593.0)         | 4.0<br>(2.1 to 7.0)                | 39.7<br>(37.1 to 42.5)                            | 0.2<br>(-1.3 to 1.9)                                |
| Caries of deciduous teeth                     | 254.7<br>(198.2 to 310.6)               | 834.0<br>(572.1 to 1,161.4)              | 0.1<br>(< 0.05 to 0.1)             | 31.0<br>(16.7 to 47.5)                            | 0.1<br>(-11.0 to 13.2)                              |
| Caries of permanent teeth                     | 520.5<br>(443.5 to 603.0)               | 1,306.3<br>(1,044.0 to 1,593.7)          | 0.3<br>(0.1 to 0.6)                | 40.9<br>(33.5 to 49.4)                            | 1.7<br>(-3.0 to 6.7)                                |
| Periodontal disease                           | 318.7<br>(278.9 to 359.1)               | 38.2<br>(33.1 to 43.3)                   | 2.1<br>(0.9 to 4.3)                | 40.0<br>(36.5 to 44.1)                            | 0.1<br>(-2.1 to 2.5)                                |
| Edentulism and severe tooth loss              | 25.3<br>(21.3 to 30.0)                  | 1.6<br>(1.3 to 1.9)                      | 0.7<br>(0.5 to 1.0)                | 39.7<br>(33.2 to 46.8)                            | 0.2<br>(-3.4 to 4.0)                                |
| Other oral disorders                          | 29.3<br>(27.9 to 30.9)                  | --                                       | 0.9<br>(0.5 to 1.3)                | 39.2<br>(33.3 to 44.9)                            | 0.3<br>(-3.0 to 3.7)                                |
| <b>Injuries</b>                               | <b>210.4</b><br><b>(196.2 to 225.9)</b> | <b>142.2+</b><br><b>(133.2 to 151.4)</b> | <b>8.6</b><br><b>(5.8 to 12.2)</b> | <b>36.7</b><br><b>(33.9 to 39.6)</b>              | <b>-2.1</b><br><b>(-3.7 to -0.7)</b>                |
| <b>Transport injuries</b>                     | <b>20.2</b><br><b>(18.7 to 21.8)</b>    | <b>10.2</b><br><b>(9.0 to 11.4)</b>      | <b>1.2</b><br><b>(0.8 to 1.7)</b>  | <b>33.3</b><br><b>(30.4 to 36.4)</b>              | <b>-4.6</b><br><b>(-6.2 to -3.0)</b>                |
| Road injuries                                 | 15.0<br>(14.1 to 16.0)                  | 8.2<br>(7.2 to 9.5)                      | 0.9<br>(0.6 to 1.3)                | 30.3<br>(27.6 to 33.2)                            | -6.4<br>(-8.0 to -4.8)                              |
| Pedestrian road injuries                      | 3.3<br>(2.9 to 3.8)                     | 1.3<br>(1.1 to 1.6)                      | 0.2<br>(0.1 to 0.3)                | 26.9<br>(24.1 to 29.8)                            | -9.0<br>(-10.6 to -7.3)                             |
| Cyclist road injuries                         | 2.9<br>(2.4 to 3.4)                     | 1.8<br>(1.4 to 2.2)                      | 0.2<br>(0.1 to 0.2)                | 38.1<br>(34.7 to 41.6)                            | -0.6<br>(-2.5 to 1.4)                               |
| Motorcyclist road injuries                    | 2.5<br>(2.1 to 2.9)                     | 0.9<br>(0.7 to 1.1)                      | 0.1<br>(0.1 to 0.2)                | 28.0<br>(25.1 to 31.0)                            | -8.7<br>(-10.4 to -7.0)                             |
| Motor vehicle road injuries                   | 4.3<br>(3.7 to 4.8)                     | 2.8<br>(2.3 to 3.3)                      | 0.3<br>(0.2 to 0.4)                | 26.3<br>(23.6 to 29.4)                            | -9.0<br>(-10.6 to -7.3)                             |
| Other road injuries                           | 2.1<br>(1.8 to 2.5)                     | 1.5<br>(1.1 to 1.9)                      | 0.1<br>(0.1 to 0.2)                | 39.6<br>(36.6 to 42.7)                            | 1.1<br>(-0.7 to 2.8)                                |
| Other transport injuries                      | 5.2<br>(4.3 to 6.4)                     | 1.9<br>(1.6 to 2.5)                      | 0.3<br>(0.2 to 0.5)                | 42.3<br>(37.6 to 47.4)                            | 2.8<br>(0.3 to 5.4)                                 |
| <b>Unintentional injuries</b>                 | <b>180.6</b><br><b>(166.7 to 195.4)</b> | <b>128.1</b><br><b>(119.4 to 137.1)</b>  | <b>6.6</b><br><b>(4.5 to 9.4)</b>  | <b>39.8</b><br><b>(36.7 to 42.7)</b>              | <b>-0.5</b><br><b>(-2.1 to 1.0)</b>                 |
| Falls                                         | 61.8<br>(53.3 to 70.9)                  | 41.7<br>(35.6 to 49.5)                   | 2.6<br>(1.8 to 3.6)                | 40.4<br>(37.5 to 43.3)                            | -1.0<br>(-2.7 to 0.6)                               |
| Drowning                                      | 0.8<br>(0.7 to 1.0)                     | 0.2<br>(0.2 to 0.3)                      | < 0.05<br>(< 0.05 to 0.1)          | 35.0<br>(30.8 to 39.4)                            | -3.3<br>(-5.8 to -0.8)                              |
| Fire, heat, and hot substances                | 18.6<br>(15.5 to 22.7)                  | 3.9<br>(3.0 to 4.8)                      | 0.6<br>(0.4 to 0.8)                | 34.5<br>(26.9 to 41.3)                            | -2.7<br>(-6.9 to 1.3)                               |
| Poisonings                                    | 0.7<br>(0.5 to 0.8)                     | 1.3<br>(1.0 to 1.7)                      | 0.1<br>(< 0.05 to 0.1)             | 49.4<br>(36.4 to 62.2)                            | 7.9<br>(0.9 to 15.3)                                |
| Exposure to mechanical forces                 | 29.0<br>(24.7 to 35.3)                  | 17.1<br>(14.1 to 20.4)                   | 0.8<br>(0.5 to 1.1)                | 35.6<br>(32.1 to 39.2)                            | -3.4<br>(-5.5 to -1.5)                              |
| Unintentional firearm injuries                | 1.5<br>(1.3 to 1.9)                     | 0.6<br>(0.4 to 0.8)                      | 0.1<br>(< 0.05 to 0.1)             | 37.4<br>(33.3 to 41.2)                            | -2.9<br>(-5.0 to -0.9)                              |
| Unintentional suffocation                     | 2.7<br>(1.9 to 3.7)                     | 1.0<br>(0.7 to 1.4)                      | 0.1<br>(0.1 to 0.1)                | 41.0<br>(36.0 to 46.0)                            | 2.5<br>(-0.0 to 5.0)                                |
| Other exposure to mechanical forces           | 24.8<br>(20.6 to 31.0)                  | 15.5<br>(12.8 to 18.4)                   | 0.6<br>(0.4 to 0.9)                | 34.6<br>(30.8 to 38.4)                            | -4.2<br>(-6.3 to -2.1)                              |



| Cause                                                                               | Prevalence in thousands (95% UI)     | Incidence in thousands (95% UI)                      | YLDs in thousands (95% UI)              |                                                   |                                                     |
|-------------------------------------------------------------------------------------|--------------------------------------|------------------------------------------------------|-----------------------------------------|---------------------------------------------------|-----------------------------------------------------|
|                                                                                     | 2016 counts                          | 2016 counts                                          | 2016 counts                             | Percentage change in counts between 2006 and 2016 | Percentage change in age-standardised rates between |
| Adverse effects of medical treatment                                                | 0.7<br>(0.5 to 0.9)                  | 9.2<br>(7.7 to 10.7)                                 | 0.1<br>(0.1 to 0.1)                     | 28.7<br>(20.4 to 37.2)                            | -3.1<br>(-7.5 to 1.0)                               |
| Animal contact                                                                      | 11.5<br>(10.1 to 13.6)               | 20.4<br>(16.9 to 24.3)                               | 0.4<br>(0.3 to 0.6)                     | 39.5<br>(32.4 to 46.4)                            | -1.3<br>(-4.9 to 2.3)                               |
| Venomous animal contact                                                             | 4.5<br>(3.7 to 5.5)                  | 8.5<br>(6.6 to 10.7)                                 | 0.3<br>(0.2 to 0.4)                     | 39.2<br>(29.3 to 49.0)                            | -1.7<br>(-6.8 to 3.7)                               |
| Non-venomous animal contact                                                         | 7.0<br>(5.8 to 8.8)                  | 11.9<br>(9.7 to 14.5)                                | 0.1<br>(0.1 to 0.2)                     | 40.2<br>(35.1 to 44.9)                            | -0.6<br>(-3.5 to 2.0)                               |
| Foreign body                                                                        | 14.7<br>(11.8 to 17.6)               | 12.6<br>(10.9 to 14.5)                               | 0.6<br>(0.4 to 0.9)                     | 41.2<br>(36.6 to 46.3)                            | 2.4<br>(0.0 to 4.8)                                 |
| Pulmonary aspiration and foreign body in airway                                     | 8.3<br>(6.2 to 11.4)                 | 4.9<br>(4.0 to 6.1)                                  | 0.4<br>(0.3 to 0.6)                     | 38.0<br>(32.9 to 43.4)                            | 0.4<br>(-2.0 to 2.8)                                |
| Foreign body in eyes                                                                | 0.7<br>(0.4 to 1.1)                  | 4.2<br>(3.1 to 5.6)                                  | < 0.05<br>(< 0.05 to 0.1)               | 44.2<br>(39.4 to 49.6)                            | 5.2<br>(2.5 to 8.1)                                 |
| Foreign body in other body part                                                     | 5.6<br>(4.4 to 7.3)                  | 3.4<br>(2.7 to 4.3)                                  | 0.2<br>(0.1 to 0.3)                     | 48.1<br>(42.1 to 54.5)                            | 6.3<br>(3.1 to 9.5)                                 |
| Environmental heat and cold exposure                                                | 14.6<br>(12.0 to 17.5)               | 6.2<br>(5.0 to 7.7)                                  | 0.6<br>(0.4 to 0.9)                     | 37.8<br>(34.3 to 41.4)                            | -0.8<br>(-2.8 to 1.0)                               |
| Other unintentional injuries                                                        | 28.3<br>(21.8 to 37.2)               | 15.4<br>(12.5 to 19.4)                               | 0.8<br>(0.5 to 1.2)                     | 47.0<br>(42.8 to 50.8)                            | 4.9<br>(2.9 to 6.8)                                 |
| <b>Self-harm and interpersonal violence</b>                                         | <b>48.0</b><br><b>(42.5 to 54.2)</b> | <b>4.0†</b><br><b>(3.3 to 4.8)</b>                   | <b>0.6</b><br><b>(0.4 to 0.8)</b>       | <b>28.2</b><br><b>(23.9 to 32.4)</b>              | <b>-6.6</b><br><b>(-8.8 to -4.4)</b>                |
| Self-harm                                                                           | 0.8<br>(0.7 to 1.0)                  | 0.5<br>(0.4 to 0.6)                                  | < 0.05<br>(< 0.05 to 0.1)               | 33.1<br>(29.3 to 36.8)                            | -4.9<br>(-7.1 to -2.9)                              |
| Self-harm by firearm                                                                | 0.1<br>(0.1 to 0.1)                  | < 0.05<br>(< 0.05 to < 0.05)                         | < 0.05<br>(< 0.05 to < 0.05)            | 27.3<br>(23.0 to 31.6)                            | -9.7<br>(-12.2 to -7.2)                             |
| Self-harm by other specified means                                                  | 0.8<br>(0.7 to 0.9)                  | 0.5<br>(0.4 to 0.6)                                  | < 0.05<br>(< 0.05 to 0.1)               | 33.5<br>(29.5 to 37.4)                            | -4.6<br>(-6.9 to -2.5)                              |
| Interpersonal violence                                                              | 47.2<br>(41.6 to 53.3)               | 3.5†<br>(2.8 to 4.3)                                 | 0.6<br>(0.4 to 0.8)                     | 27.8<br>(23.2 to 32.1)                            | -6.8<br>(-9.2 to -4.3)                              |
| Assault by firearm                                                                  | 0.2<br>(0.2 to 0.3)                  | 0.1<br>(0.1 to 0.2)                                  | < 0.05<br>(< 0.05 to < 0.05)            | 33.2<br>(28.8 to 38.1)                            | -5.7<br>(-8.2 to -3.1)                              |
| Assault by sharp object                                                             | 1.8<br>(1.5 to 2.2)                  | 1.1<br>(0.8 to 1.5)                                  | 0.1<br>(< 0.05 to 0.1)                  | 36.3<br>(32.4 to 40.1)                            | -3.0<br>(-5.1 to -0.9)                              |
| Sexual violence                                                                     | 42.3<br>(36.8 to 48.5)               | --                                                   | 0.4<br>(0.2 to 0.5)                     | 21.3<br>(15.2 to 26.6)                            | -12.0<br>(-15.8 to -8.7)                            |
| Assault by other means                                                              | 2.8<br>(2.4 to 3.3)                  | 2.3<br>(1.8 to 2.9)                                  | 0.1<br>(0.1 to 0.2)                     | 45.4<br>(41.9 to 49.1)                            | 3.6<br>(1.7 to 5.7)                                 |
| <b>Forces of nature, conflict and terrorism, and executions and police conflict</b> | <b>3.9</b><br><b>(2.2 to 6.3)</b>    | <b>&lt; 0.05†</b><br><b>(&lt; 0.05 to &lt; 0.05)</b> | <b>0.1</b><br><b>(&lt; 0.05 to 0.3)</b> | <b>-17.2</b><br><b>(-22.4 to -13.4)</b>           | <b>-26.9</b><br><b>(-30.4 to -24.5)</b>             |
| Exposure to forces of nature                                                        | 0.1<br>(< 0.05 to 0.2)               | --                                                   | < 0.05<br>(< 0.05 to < 0.05)            | -20.0<br>(-22.8 to -16.8)                         | -28.4<br>(-30.5 to -25.9)                           |
| Conflict and terrorism                                                              | 3.7<br>(2.1 to 6.1)                  | --                                                   | 0.1<br>(< 0.05 to 0.3)                  | -17.7<br>(-23.3 to -13.8)                         | -27.2<br>(-30.7 to -24.6)                           |
| Executions and police conflict                                                      | 0.1<br>(< 0.05 to 0.1)               | < 0.05<br>(< 0.05 to < 0.05)                         | < 0.05<br>(< 0.05 to < 0.05)            | 39.1<br>(19.9 to 55.1)                            | 8.6<br>(-7.9 to 26.1)                               |
| <b>Impairments</b>                                                                  | --                                   | --                                                   | --                                      | --                                                | --                                                  |
| Anaemia                                                                             | 1,110.7<br>(1,074.9 to 1,145.2)      | --                                                   | 41.0<br>(27.8 to 58.5)                  | 23.5<br>(17.9 to 29.7)                            | -7.0<br>(-11.1 to -2.9)                             |
| Developmental intellectual disability                                               | 79.5<br>(60.9 to 98.7)               | --                                                   | 8.4<br>(6.1 to 12.0)                    | 38.3<br>(28.2 to 52.4)                            | 1.6<br>(-5.1 to 11.3)                               |
| Epilepsy                                                                            | 18.7<br>(11.7 to 26.6)               | --                                                   | 7.2<br>(4.2 to 11.3)                    | 37.2<br>(-16.8 to 131.4)                          | 1.2<br>(-41.2 to 79.1)                              |
| Guillain-Barre syndrome                                                             | < 0.05<br>(< 0.05 to < 0.05)         | --                                                   | < 0.05<br>(< 0.05 to < 0.05)            | 36.7<br>(35.3 to 38.1)                            | -0.1<br>(-0.2 to 0.1)                               |
| Hearing loss                                                                        | 226.6<br>(213.3 to 241.1)            | --                                                   | 8.6<br>(6.0 to 11.7)                    | 31.0<br>(26.5 to 35.4)                            | -3.4<br>(-5.6 to -1.4)                              |
| Heart failure                                                                       | 4.7<br>(4.2 to 5.3)                  | --                                                   | 0.5<br>(0.4 to 0.7)                     | 30.0<br>(20.4 to 39.4)                            | -3.5<br>(-10.8 to 4.4)                              |
| Infertility                                                                         | 38.7<br>(35.6 to 42.4)               | --                                                   | 0.2<br>(0.1 to 0.4)                     | 27.8<br>(7.0 to 53.8)                             | -9.2<br>(-25.2 to 10.9)                             |
| Pelvic inflammatory disease                                                         | 2.0<br>(1.6 to 2.4)                  | --                                                   | 0.2<br>(0.2 to 0.4)                     | 35.0<br>(16.6 to 56.6)                            | -1.7<br>(-14.4 to 12.6)                             |
| Vision loss                                                                         | 199.9<br>(183.0 to 220.0)            | --                                                   | 6.6<br>(4.6 to 9.9)                     | 31.8<br>(22.5 to 46.0)                            | -6.8<br>(-11.3 to -0.9)                             |

We did not calculate incidence for the nine impairments, certain NTDs, and causes with only birth prevalence. Blank cells mean that no estimate is available.

† Incidence for aggregate causes represents the sum of the incidence of the causes below the aggregate.

‡ Incidence estimates for stroke represent first-ever stroke only.

^ Incidence of HIV/AIDS represents new infections of HIV only and does not include new infections of Tuberculosis in HIV positive cases.

SR Table 14: Prevalence, incidence, and YLDs for 2016, percentage change of YLD counts and percentage change of age-standardised YLD rates between 2006 and 2016 by cause and impairments, for all ages, Timor-Leste.

| Cause                                                                                | Prevalence in thousands (95% UI)       | Incidence in thousands (95% UI)         | YLDs in thousands (95% UI)      |                                                   |                                                     |
|--------------------------------------------------------------------------------------|----------------------------------------|-----------------------------------------|---------------------------------|---------------------------------------------------|-----------------------------------------------------|
|                                                                                      | 2016 counts                            | 2016 counts                             | 2016 counts                     | Percentage change in counts between 2006 and 2016 | Percentage change in age-standardised rates between |
| <b>All causes</b>                                                                    | <b>1,126.1</b><br>(1,120.8 to 1,130.5) | <b>7,702.2†</b><br>(7,275.4 to 8,174.0) | <b>102.3</b><br>(75.9 to 132.8) | <b>20.1</b><br>(17.0 to 23.4)                     | <b>-4.8</b><br>(-6.7 to -3.0)                       |
| <b>Communicable, maternal, neonatal, and nutritional disorders</b>                   | <b>922.6</b><br>(892.2 to 950.9)       | <b>4,747.3†</b><br>(4,350.5 to 5,171.8) | <b>18.2</b><br>(12.7 to 25.1)   | <b>2.0</b><br>(-4.0 to 7.9)                       | <b>-17.7</b><br>(-22.0 to -13.4)                    |
| <b>HIV/AIDS and tuberculosis</b>                                                     | <b>327.6</b><br>(275.2 to 375.2)       | <b>1.1†</b><br>(0.8 to 1.8)             | <b>0.8</b><br>(0.4 to 2.6)      | <b>3.2</b><br>(-20.3 to 35.2)                     | <b>-21.4</b><br>(-38.4 to 2.4)                      |
| Tuberculosis                                                                         | 291.6<br>(243.4 to 346.8)              | 1.0†<br>(0.8 to 1.2)                    | 0.5<br>(0.3 to 0.7)             | 3.9<br>(-8.1 to 17.4)                             | -21.4<br>(-29.1 to -13.3)                           |
| Drug-susceptible tuberculosis                                                        | 1.7<br>(1.4 to 2.1)                    | 1.0<br>(0.8 to 1.2)                     | 0.5<br>(0.3 to 0.7)             | 4.5<br>(-7.4 to 18.1)                             | -21.0<br>(-28.7 to -12.2)                           |
| Multidrug-resistant tuberculosis without extensive drug resistance                   | < 0.05<br>(< 0.05 to < 0.05)           | < 0.05<br>(< 0.05 to < 0.05)            | < 0.05<br>(< 0.05 to < 0.05)    | -50.1<br>(-93.8 to 202.8)                         | -61.9<br>(-95.3 to 126.7)                           |
| Extensively drug-resistant tuberculosis                                              | < 0.05<br>(< 0.05 to < 0.05)           | < 0.05<br>(< 0.05 to < 0.05)            | < 0.05<br>(< 0.05 to < 0.05)    | 63.1<br>(-80.0 to 896.7)                          | 22.6<br>(-84.7 to 651.2)                            |
| Latent tuberculosis infection                                                        | 289.9<br>(242.0 to 345.2)              | --                                      | --                              | --                                                | --                                                  |
| HIV/AIDS                                                                             | 1.8<br>(0.1 to 10.0)                   | 0.1 <sup>a</sup><br>(< 0.05 to 0.8)     | 0.3<br>(< 0.05 to 1.9)          | 2.1<br>(-44.7 to 232.1)                           | -21.4<br>(-58.2 to 163.9)                           |
| Drug-susceptible HIV/AIDS - Tuberculosis                                             | < 0.05<br>(< 0.05 to < 0.05)           | < 0.05<br>(< 0.05 to < 0.05)            | < 0.05<br>(< 0.05 to < 0.05)    | -5.4<br>(-14.8 to 4.9)                            | -28.3<br>(-35.4 to -20.5)                           |
| Multidrug-resistant HIV/AIDS - Tuberculosis without extensive drug resistance        | < 0.05<br>(< 0.05 to < 0.05)           | < 0.05<br>(< 0.05 to < 0.05)            | < 0.05<br>(< 0.05 to < 0.05)    | -55.2<br>(-94.6 to 173.7)                         | -66.0<br>(-95.9 to 107.4)                           |
| Extensively drug-resistant HIV/AIDS - Tuberculosis                                   | < 0.05<br>(< 0.05 to < 0.05)           | < 0.05<br>(< 0.05 to < 0.05)            | < 0.05<br>(< 0.05 to < 0.05)    | 47.4<br>(-82.1 to 802.3)                          | 11.8<br>(-86.4 to 583.6)                            |
| HIV/AIDS resulting in other diseases                                                 | 1.8<br>(0.1 to 10.0)                   | 0.1<br>(< 0.05 to 0.8)                  | 0.3<br>(< 0.05 to 1.9)          | 2.3<br>(-50.9 to 332.6)                           | -21.2<br>(-63.5 to 238.8)                           |
| <b>Diarrhoea, lower respiratory infections, and other common infectious diseases</b> | <b>75.6</b><br>(72.1 to 80.5)          | <b>4,195.1†</b><br>(3,823.2 to 4,570.2) | <b>4.5</b><br>(3.1 to 6.0)      | <b>13.3</b><br>(9.4 to 17.3)                      | <b>-8.4</b><br>(-11.2 to -5.6)                      |
| Diarrhoeal diseases                                                                  | 20.0<br>(18.4 to 21.8)                 | 1,307.2<br>(1,204.3 to 1,418.7)         | 2.3<br>(1.6 to 3.1)             | 15.2<br>(8.8 to 22.0)                             | -9.7<br>(-13.6 to -5.6)                             |
| Intestinal infectious diseases                                                       | 0.2<br>(0.2 to 0.3)                    | 3.8†<br>(2.9 to 4.9)                    | < 0.05<br>(< 0.05 to 0.1)       | -31.2<br>(-48.7 to -5.3)                          | -39.3<br>(-51.8 to -23.4)                           |
| Typhoid fever                                                                        | 0.2<br>(0.1 to 0.2)                    | 3.0<br>(2.4 to 3.9)                     | < 0.05<br>(< 0.05 to < 0.05)    | -31.3<br>(-50.1 to -4.2)                          | -39.2<br>(-52.2 to -21.8)                           |
| Paratyphoid fever                                                                    | < 0.05<br>(< 0.05 to < 0.05)           | 0.7<br>(0.6 to 1.0)                     | < 0.05<br>(< 0.05 to < 0.05)    | -27.3<br>(-41.6 to -9.5)                          | -36.8<br>(-47.1 to -24.6)                           |
| Other intestinal infectious diseases                                                 | --                                     | --                                      | < 0.05<br>(< 0.05 to < 0.05)    | -40.5<br>(-55.2 to -20.4)                         | -54.2<br>(-62.9 to -43.3)                           |
| Lower respiratory infections                                                         | 1.2<br>(1.0 to 1.3)                    | 50.6<br>(44.6 to 57.6)                  | 0.1<br>(< 0.05 to 0.1)          | 12.3<br>(-3.6 to 29.9)                            | -13.1<br>(-22.4 to -3.5)                            |
| Upper respiratory infections                                                         | 36.4<br>(31.8 to 41.0)                 | 2,729.7<br>(2,380.2 to 3,094.1)         | 0.9<br>(0.5 to 1.4)             | 19.9<br>(12.3 to 27.1)                            | -0.4<br>(-6.1 to 4.8)                               |
| Otitis media                                                                         | 15.0<br>(13.4 to 16.7)                 | 65.7<br>(51.1 to 83.8)                  | 0.5<br>(0.3 to 0.7)             | -0.3<br>(-8.3 to 8.9)                             | -16.4<br>(-22.4 to -10.0)                           |
| Meningitis                                                                           | 2.5<br>(2.1 to 2.9)                    | 0.5<br>(0.4 to 0.6)                     | 0.3<br>(0.2 to 0.4)             | 11.7<br>(6.2 to 17.2)                             | -5.9<br>(-10.9 to -1.2)                             |
| Pneumococcal meningitis                                                              | 1.2<br>(1.0 to 1.5)                    | 0.1<br>(0.1 to 0.2)                     | 0.1<br>(0.1 to 0.2)             | 14.3<br>(5.2 to 23.3)                             | -4.3<br>(-12.7 to 3.6)                              |
| H influenzae type B meningitis                                                       | 0.4<br>(0.3 to 0.5)                    | 0.1<br>(0.1 to 0.1)                     | 0.1<br>(< 0.05 to 0.1)          | -9.9<br>(-16.9 to -2.0)                           | -22.9<br>(-29.0 to -15.5)                           |
| Meningococcal infection                                                              | 0.1<br>(0.1 to 0.1)                    | < 0.05<br>(< 0.05 to < 0.05)            | < 0.05<br>(< 0.05 to < 0.05)    | 12.6<br>(6.4 to 18.8)                             | -5.1<br>(-9.9 to -0.2)                              |
| Other meningitis                                                                     | 0.7<br>(0.6 to 1.0)                    | 0.2<br>(0.2 to 0.3)                     | 0.1<br>(0.1 to 0.1)             | 29.6<br>(22.2 to 37.7)                            | 7.5<br>(2.0 to 14.2)                                |
| Encephalitis                                                                         | 2.8<br>(1.9 to 4.1)                    | 1.4<br>(1.2 to 1.6)                     | 0.3<br>(0.2 to 0.4)             | 15.2<br>(0.3 to 31.0)                             | -4.4<br>(-15.4 to 7.4)                              |
| Diphtheria                                                                           | < 0.05<br>(< 0.05 to < 0.05)           | < 0.05<br>(< 0.05 to < 0.05)            | < 0.05<br>(< 0.05 to < 0.05)    | -72.1<br>(-87.3 to -37.9)                         | -75.9<br>(-87.5 to -51.0)                           |
| Whooping cough                                                                       | 0.8<br>(0.7 to 1.1)                    | 6.2<br>(4.8 to 7.9)                     | < 0.05<br>(< 0.05 to 0.1)       | 18.7<br>(4.3 to 36.6)                             | -13.1<br>(-24.0 to 0.2)                             |
| Tetanus                                                                              | < 0.05<br>(< 0.05 to < 0.05)           | < 0.05<br>(< 0.05 to < 0.05)            | < 0.05<br>(< 0.05 to < 0.05)    | -48.7<br>(-68.3 to -20.7)                         | -64.0<br>(-78.9 to -41.0)                           |
| Measles                                                                              | < 0.05<br>(< 0.05 to 0.1)              | 1.5<br>(0.5 to 3.8)                     | < 0.05<br>(< 0.05 to < 0.05)    | -71.5<br>(-83.7 to -51.1)                         | -79.5<br>(-88.3 to -64.0)                           |
| Varicella and herpes zoster                                                          | 1.2<br>(1.2 to 1.3)                    | 28.5<br>(26.9 to 30.2)                  | < 0.05<br>(< 0.05 to 0.1)       | 27.7<br>(12.1 to 45.6)                            | 0.2<br>(-9.3 to 11.0)                               |
| <b>Neglected tropical diseases and malaria</b>                                       | <b>403.5</b><br>(359.9 to 451.3)       | <b>66.5†</b><br>(57.9 to 75.7)          | <b>4.3</b><br>(2.5 to 6.7)      | <b>-1.2</b><br>(-11.1 to 7.4)                     | <b>-17.3</b><br>(-25.1 to -10.1)                    |
| Malaria                                                                              | 0.1<br>(0.1 to 0.1)                    | 0.1<br>(0.1 to 0.1)                     | < 0.05<br>(< 0.05 to < 0.05)    | -91.7<br>(-94.9 to -85.4)                         | -91.9<br>(-95.0 to -86.2)                           |
| Chagas disease                                                                       | --                                     | --                                      | --                              | --                                                | --                                                  |
| Leishmaniasis                                                                        | --                                     | --                                      | --                              | --                                                | --                                                  |
| Visceral leishmaniasis                                                               | --                                     | --                                      | --                              | --                                                | --                                                  |
| Cutaneous and mucocutaneous leishmaniasis                                            | --                                     | --                                      | --                              | --                                                | --                                                  |
| African trypanosomiasis                                                              | --                                     | --                                      | --                              | --                                                | --                                                  |
| Schistosomiasis                                                                      | --                                     | --                                      | --                              | --                                                | --                                                  |
| Cysticercosis                                                                        | 0.5<br>(0.3 to 0.6)                    | --                                      | 0.1<br>(< 0.05 to 0.1)          | -3.9<br>(-27.0 to 21.1)                           | -27.5<br>(-44.2 to -10.0)                           |
| Cystic echinococcosis                                                                | --                                     | --                                      | --                              | --                                                | --                                                  |
| Lymphatic filariasis                                                                 | 102.0<br>(86.4 to 121.6)               | 59.0<br>(50.6 to 67.5)                  | 3.5<br>(1.8 to 5.8)             | 3.8<br>(-7.4 to 13.5)                             | -14.6<br>(-24.0 to -6.8)                            |
| Onchocerciasis                                                                       | --                                     | --                                      | --                              | --                                                | --                                                  |
| Trachoma                                                                             | --                                     | --                                      | --                              | --                                                | --                                                  |
| Dengue                                                                               | 0.4<br>(0.2 to 0.8)                    | 7.4<br>(4.2 to 11.9)                    | 0.1<br>(< 0.05 to 0.1)          | 145.5<br>(70.7 to 558.9)                          | 107.1<br>(50.7 to 442.8)                            |
| Yellow fever                                                                         | --                                     | --                                      | --                              | --                                                | --                                                  |
| Rabies                                                                               | < 0.05<br>(< 0.05 to < 0.05)           | < 0.05<br>(< 0.05 to < 0.05)            | < 0.05<br>(< 0.05 to < 0.05)    | -57.1<br>(-77.7 to -22.4)                         | -66.0<br>(-80.2 to -45.1)                           |
| Intestinal nematode infections                                                       | 322.8<br>(275.2 to 375.9)              | --                                      | 0.3<br>(0.2 to 0.6)             | 19.9<br>(-18.3 to 83.3)                           | 0.9<br>(-35.5 to 65.6)                              |
| Ascariasis                                                                           | 145.9<br>(109.5 to 198.6)              | --                                      | 0.1<br>(< 0.05 to 0.1)          | 21.5<br>(-51.5 to 183.2)                          | 0.3<br>(-65.5 to 166.7)                             |

| Cause                                                                   | Prevalence in thousands (95% UI)            | Incidence in thousands (95% UI)                | YLDs in thousands (95% UI)           |                                                   |                                                     |
|-------------------------------------------------------------------------|---------------------------------------------|------------------------------------------------|--------------------------------------|---------------------------------------------------|-----------------------------------------------------|
|                                                                         | 2016 counts                                 | 2016 counts                                    | 2016 counts                          | Percentage change in counts between 2006 and 2016 | Percentage change in age-standardised rates between |
| Trichuriasis                                                            | 135.2<br>(100.2 to 183.2)                   | --                                             | < 0.05<br>(< 0.05 to 0.1)            | 25.2<br>(-64.8 to 349.6)                          | 4.2<br>(-73.5 to 320.7)                             |
| Hookworm disease                                                        | 74.1<br>(56.8 to 97.2)                      | --                                             | 0.2<br>(0.1 to 0.4)                  | 18.6<br>(-23.5 to 87.5)                           | 0.5<br>(-40.9 to 68.5)                              |
| Food-borne trematodiasis                                                | --                                          | --                                             | --                                   | --                                                | --                                                  |
| Leprosy                                                                 | 0.5<br>(0.5 to 0.6)                         | < 0.05<br>(< 0.05 to < 0.05)                   | < 0.05<br>(< 0.05 to < 0.05)         | -3.6<br>(-14.1 to 9.3)                            | -27.7<br>(-34.9 to -19.3)                           |
| Ebola virus disease                                                     | --                                          | --                                             | --                                   | --                                                | --                                                  |
| Zika virus disease                                                      | --                                          | --                                             | --                                   | --                                                | --                                                  |
| Guinea worm disease                                                     | --                                          | --                                             | --                                   | --                                                | --                                                  |
| Other neglected tropical diseases                                       | 13.4<br>(12.3 to 14.3)                      | --                                             | 0.3<br>(0.2 to 0.5)                  | 0.7<br>(-13.9 to 17.6)                            | -13.6<br>(-25.0 to -0.7)                            |
| <b>Maternal disorders</b>                                               | <b>1.3</b><br><b>(1.0 to 1.7)</b>           | <b>25.5†</b><br><b>(21.9 to 29.7)</b>          | <b>0.1</b><br><b>(0.1 to 0.1)</b>    | <b>18.4</b><br><b>(-10.5 to 60.3)</b>             | <b>-9.1</b><br><b>(-30.5 to 21.3)</b>               |
| Maternal haemorrhage                                                    | 0.4<br>(0.3 to 0.5)                         | 3.2<br>(2.4 to 4.2)                            | < 0.05<br>(< 0.05 to < 0.05)         | 12.8<br>(-26.2 to 71.2)                           | -14.3<br>(-44.9 to 31.9)                            |
| Maternal sepsis and other pregnancy related infections                  | 0.3<br>(0.1 to 0.5)                         | 3.5<br>(2.5 to 4.8)                            | < 0.05<br>(< 0.05 to < 0.05)         | 14.0<br>(-47.2 to 152.9)                          | -11.6<br>(-59.8 to 92.4)                            |
| Maternal hypertensive disorders                                         | 0.6<br>(0.3 to 1.1)                         | 3.1<br>(2.1 to 4.4)                            | < 0.05<br>(< 0.05 to 0.1)            | 34.5<br>(-16.2 to 131.4)                          | 2.9<br>(-36.7 to 74.9)                              |
| Maternal obstructed labour and uterine rupture                          | < 0.05<br>(< 0.05 to 0.1)                   | 2.4<br>(1.7 to 3.2)                            | < 0.05<br>(< 0.05 to < 0.05)         | 15.5<br>(-55.1 to 182.8)                          | -11.2<br>(-65.4 to 113.5)                           |
| Maternal abortion, miscarriage, and ectopic pregnancy                   | 0.1<br>(0.1 to 0.2)                         | 13.4<br>(10.3 to 17.2)                         | < 0.05<br>(< 0.05 to < 0.05)         | 7.3<br>(-39.4 to 90.1)                            | -17.4<br>(-52.7 to 46.6)                            |
| Other maternal disorders                                                | --                                          | --                                             | < 0.05<br>(< 0.05 to < 0.05)         | 12.2<br>(-14.9 to 52.0)                           | -13.5<br>(-33.9 to 15.5)                            |
| <b>Neonatal disorders</b>                                               | <b>14.0</b><br><b>(11.2 to 17.7)</b>        | --                                             | <b>1.6</b><br><b>(1.1 to 2.2)</b>    | <b>22.6</b><br><b>(1.3 to 46.7)</b>               | <b>3.3</b><br><b>(-14.3 to 23.8)</b>                |
| Neonatal preterm birth complications                                    | 13.0<br>(10.0 to 17.3)                      | --                                             | 1.1<br>(0.8 to 1.6)                  | 18.4<br>(-6.8 to 46.4)                            | 1.2<br>(-20.4 to 25.7)                              |
| Neonatal encephalopathy due to birth asphyxia and trauma                | 0.8<br>(0.3 to 1.6)                         | --                                             | 0.1<br>(< 0.05 to 0.3)               | 32.2<br>(-34.1 to 153.0)                          | 11.9<br>(-46.6 to 113.2)                            |
| Neonatal sepsis and other neonatal infections                           | 0.4<br>(0.1 to 1.1)                         | --                                             | 0.2<br>(< 0.05 to 0.5)               | 52.0<br>(4.6 to 370.7)                            | 27.8<br>(-11.8 to 314.9)                            |
| Hemolytic disease and other neonatal jaundice                           | 0.3<br>(0.2 to 0.3)                         | --                                             | 0.1<br>(0.1 to 0.1)                  | 15.0<br>(1.6 to 28.9)                             | -2.8<br>(-13.3 to 7.1)                              |
| Other neonatal disorders                                                | --                                          | --                                             | 0.1<br>(0.1 to 0.1)                  | 39.2<br>(14.1 to 70.3)                            | -6.3<br>(-23.6 to 14.8)                             |
| <b>Nutritional deficiencies</b>                                         | <b>502.9</b><br><b>(444.4 to 569.7)</b>     | <b>379.5†</b><br><b>(237.3 to 579.3)</b>       | <b>6.3</b><br><b>(4.1 to 9.3)</b>    | <b>-7.3</b><br><b>(-18.4 to 4.6)</b>              | <b>-27.0</b><br><b>(-33.7 to -20.0)</b>             |
| Protein-energy malnutrition                                             | 24.1<br>(19.4 to 29.2)                      | 12.1<br>(9.7 to 14.4)                          | 0.9<br>(0.5 to 1.7)                  | -4.8<br>(-50.7 to 66.7)                           | -37.0<br>(-66.9 to 11.8)                            |
| Iodine deficiency                                                       | 8.5<br>(7.4 to 9.8)                         | 0.3<br>(0.3 to 0.4)                            | 0.2<br>(0.1 to 0.3)                  | -27.6<br>(-37.0 to -17.4)                         | -38.8<br>(-45.7 to -31.5)                           |
| Vitamin A deficiency                                                    | 308.2<br>(219.0 to 421.3)                   | 367.1<br>(227.2 to 567.3)                      | < 0.05<br>(< 0.05 to 0.1)            | 15.9<br>(-9.8 to 48.8)                            | -12.6<br>(-29.9 to 7.9)                             |
| Iron-deficiency anaemia                                                 | 250.4<br>(236.0 to 265.2)                   | --                                             | 5.1<br>(3.3 to 7.8)                  | -6.8<br>(-15.5 to 3.5)                            | -24.8<br>(-30.5 to -18.8)                           |
| Other nutritional deficiencies                                          | --                                          | --                                             | < 0.05<br>(< 0.05 to 0.1)            | -5.4<br>(-52.9 to 70.3)                           | -38.1<br>(-68.7 to 12.2)                            |
| <b>Other communicable, maternal, neonatal, and nutritional diseases</b> | <b>224.6</b><br><b>(209.9 to 239.0)</b>     | <b>79.6</b><br><b>(70.7 to 87.5)</b>           | <b>0.6</b><br><b>(0.4 to 0.8)</b>    | <b>14.6</b><br><b>(5.8 to 23.8)</b>               | <b>-6.4</b><br><b>(-12.2 to -0.5)</b>               |
| Sexually transmitted diseases excluding HIV                             | 137.9<br>(127.1 to 149.8)                   | 54.2<br>(48.7 to 60.5)                         | 0.3<br>(0.2 to 0.5)                  | 26.1<br>(16.5 to 36.4)                            | -2.3<br>(-8.9 to 5.3)                               |
| Syphilis                                                                | 3.7<br>(3.0 to 4.5)                         | 2.2<br>(1.8 to 2.8)                            | < 0.05<br>(< 0.05 to < 0.05)         | 42.5<br>(26.7 to 63.6)                            | 1.6<br>(-10.2 to 16.4)                              |
| Chlamydial infection                                                    | 16.1<br>(12.0 to 21.1)                      | 14.1<br>(10.8 to 18.3)                         | 0.1<br>(0.1 to 0.2)                  | 28.7<br>(13.0 to 46.8)                            | -1.3<br>(-13.2 to 11.6)                             |
| Gonococcal infection                                                    | 1.7<br>(1.1 to 2.7)                         | 5.0<br>(2.6 to 8.7)                            | < 0.05<br>(< 0.05 to < 0.05)         | 23.4<br>(0.5 to 51.1)                             | -3.0<br>(-22.1 to 19.1)                             |
| Trichomoniasis                                                          | 16.2<br>(13.5 to 19.1)                      | 14.1<br>(11.7 to 16.7)                         | < 0.05<br>(< 0.05 to < 0.05)         | 27.5<br>(16.8 to 39.4)                            | -0.8<br>(-8.3 to 7.8)                               |
| Genital herpes                                                          | 103.6<br>(88.5 to 121.7)                    | 9.6<br>(8.1 to 11.3)                           | < 0.05<br>(< 0.05 to 0.1)            | 29.7<br>(16.4 to 41.8)                            | -0.4<br>(-8.4 to 7.5)                               |
| Other sexually transmitted diseases                                     | 5.7<br>(4.7 to 6.8)                         | 9.2<br>(7.8 to 10.8)                           | 0.1<br>(0.1 to 0.2)                  | 21.9<br>(7.4 to 36.6)                             | -4.1<br>(-15.2 to 7.4)                              |
| Hepatitis                                                               | 93.1<br>(78.5 to 109.8)                     | 25.3<br>(18.7 to 29.6)                         | < 0.05<br>(< 0.05 to < 0.05)         | -13.9<br>(-29.8 to 5.2)                           | -25.4<br>(-36.8 to -11.4)                           |
| Acute hepatitis A                                                       | 1.2<br>(0.7 to 1.5)                         | 15.9<br>(8.8 to 19.7)                          | < 0.05<br>(< 0.05 to < 0.05)         | -19.0<br>(-46.2 to 23.6)                          | -25.9<br>(-46.4 to 2.9)                             |
| Hepatitis B                                                             | 63.2<br>(49.2 to 79.4)                      | 7.4<br>(5.7 to 9.5)                            | < 0.05<br>(< 0.05 to < 0.05)         | -12.7<br>(-28.9 to 7.0)                           | -26.5<br>(-40.3 to -9.9)                            |
| Hepatitis C                                                             | 28.6<br>(25.2 to 32.2)                      | 1.4<br>(1.2 to 1.6)                            | < 0.05<br>(< 0.05 to < 0.05)         | 34.5<br>(-41.3 to 176.9)                          | -5.4<br>(-53.6 to 76.8)                             |
| Acute hepatitis E                                                       | < 0.05<br>(< 0.05 to 0.1)                   | 0.6<br>(0.5 to 0.7)                            | < 0.05<br>(< 0.05 to < 0.05)         | -22.9<br>(-32.3 to -12.2)                         | -26.0<br>(-34.7 to -17.2)                           |
| Other infectious diseases                                               | 10.4<br>(9.6 to 11.1)                       | < 0.05<br>(< 0.05 to < 0.05)                   | 0.2<br>(0.1 to 0.4)                  | 5.1<br>(-8.1 to 21.7)                             | -11.1<br>(-20.4 to 0.3)                             |
| <b>Non-communicable diseases</b>                                        | <b>1,008.6</b><br><b>(995.0 to 1,020.4)</b> | <b>2,898.5†</b><br><b>(2,662.7 to 3,137.7)</b> | <b>76.7</b><br><b>(56.4 to 99.7)</b> | <b>26.7</b><br><b>(23.3 to 30.6)</b>              | <b>-1.5</b><br><b>(-3.5 to 0.6)</b>                 |
| <b>Neoplasms</b>                                                        | <b>1.5</b><br><b>(1.4 to 1.6)</b>           | <b>0.7</b><br><b>(0.6 to 0.8)</b>              | <b>0.2</b><br><b>(0.2 to 0.3)</b>    | <b>43.3</b><br><b>(32.9 to 55.8)</b>              | <b>-0.2</b><br><b>(-6.7 to 6.7)</b>                 |
| Lip and oral cavity cancer                                              | 0.1<br>(0.1 to 0.1)                         | < 0.05<br>(< 0.05 to < 0.05)                   | < 0.05<br>(< 0.05 to < 0.05)         | 57.6<br>(36.3 to 80.2)                            | 2.0<br>(-12.2 to 17.8)                              |
| Nasopharynx cancer                                                      | < 0.05<br>(< 0.05 to 0.1)                   | < 0.05<br>(< 0.05 to < 0.05)                   | < 0.05<br>(< 0.05 to < 0.05)         | 29.9<br>(8.4 to 54.9)                             | -5.8<br>(-19.2 to 9.5)                              |
| Other pharynx cancer                                                    | < 0.05<br>(< 0.05 to < 0.05)                | < 0.05<br>(< 0.05 to < 0.05)                   | < 0.05<br>(< 0.05 to < 0.05)         | 52.8<br>(27.5 to 76.6)                            | 2.1<br>(-14.7 to 17.2)                              |
| Oesophageal cancer                                                      | < 0.05<br>(< 0.05 to < 0.05)                | < 0.05<br>(< 0.05 to < 0.05)                   | < 0.05<br>(< 0.05 to < 0.05)         | 33.7<br>(20.1 to 49.3)                            | -13.9<br>(-22.6 to -4.5)                            |
| Stomach cancer                                                          | 0.1<br>(< 0.05 to 0.1)                      | < 0.05<br>(< 0.05 to < 0.05)                   | < 0.05<br>(< 0.05 to < 0.05)         | 25.2<br>(10.2 to 43.3)                            | -19.7<br>(-30.1 to -6.0)                            |
| Colon and rectum cancer                                                 | 0.1<br>(0.1 to 0.2)                         | 0.1<br>(< 0.05 to 0.1)                         | < 0.05<br>(< 0.05 to < 0.05)         | 62.0<br>(31.3 to 92.1)                            | 4.6<br>(-14.9 to 22.9)                              |
| Liver cancer                                                            | < 0.05<br>(< 0.05 to < 0.05)                | < 0.05<br>(< 0.05 to < 0.05)                   | < 0.05<br>(< 0.05 to < 0.05)         | 51.3<br>(30.2 to 76.2)                            | -1.7<br>(-14.2 to 12.3)                             |
| Liver cancer due to hepatitis B                                         | < 0.05<br>(< 0.05 to < 0.05)                | < 0.05<br>(< 0.05 to < 0.05)                   | < 0.05<br>(< 0.05 to < 0.05)         | 45.4<br>(23.0 to 71.1)                            | -2.0<br>(-15.1 to 12.6)                             |



| Cause                                              | Prevalence in thousands (95% UI)     | Incidence in thousands (95% UI)       | YLDs in thousands (95% UI)        |                                                   |                                                     |
|----------------------------------------------------|--------------------------------------|---------------------------------------|-----------------------------------|---------------------------------------------------|-----------------------------------------------------|
|                                                    | 2016 counts                          | 2016 counts                           | 2016 counts                       | Percentage change in counts between 2006 and 2016 | Percentage change in age-standardised rates between |
| Liver cancer due to hepatitis C                    | < 0.05<br>(< 0.05 to < 0.05)         | < 0.05<br>(< 0.05 to < 0.05)          | < 0.05<br>(< 0.05 to < 0.05)      | 62.6<br>(34.3 to 97.4)                            | -2.2<br>(-15.6 to 13.8)                             |
| Liver cancer due to alcohol use                    | < 0.05<br>(< 0.05 to < 0.05)         | < 0.05<br>(< 0.05 to < 0.05)          | < 0.05<br>(< 0.05 to < 0.05)      | 58.0<br>(28.1 to 89.5)                            | -1.0<br>(-15.6 to 16.9)                             |
| Liver cancer due to other causes                   | < 0.05<br>(< 0.05 to < 0.05)         | < 0.05<br>(< 0.05 to < 0.05)          | < 0.05<br>(< 0.05 to < 0.05)      | 48.9<br>(23.0 to 78.3)                            | -1.1<br>(-16.8 to 16.5)                             |
| Gallbladder and biliary tract cancer               | < 0.05<br>(< 0.05 to < 0.05)         | < 0.05<br>(< 0.05 to < 0.05)          | < 0.05<br>(< 0.05 to < 0.05)      | 49.7<br>(30.8 to 67.3)                            | -7.7<br>(-18.7 to 2.3)                              |
| Pancreatic cancer                                  | < 0.05<br>(< 0.05 to < 0.05)         | < 0.05<br>(< 0.05 to < 0.05)          | < 0.05<br>(< 0.05 to < 0.05)      | 71.2<br>(57.7 to 86.4)                            | 7.6<br>(-0.6 to 17.3)                               |
| Larynx cancer                                      | < 0.05<br>(< 0.05 to < 0.05)         | < 0.05<br>(< 0.05 to < 0.05)          | < 0.05<br>(< 0.05 to < 0.05)      | 48.9<br>(30.8 to 69.5)                            | -5.3<br>(-16.8 to 7.8)                              |
| Tracheal, bronchus, and lung cancer                | 0.1<br>(0.1 to 0.1)                  | 0.1<br>(0.1 to 0.1)                   | < 0.05<br>(< 0.05 to < 0.05)      | 50.0<br>(21.9 to 85.3)                            | -2.3<br>(-20.6 to 19.4)                             |
| Malignant skin melanoma                            | < 0.05<br>(< 0.05 to < 0.05)         | < 0.05<br>(< 0.05 to < 0.05)          | < 0.05<br>(< 0.05 to < 0.05)      | 62.0<br>(37.2 to 85.6)                            | 8.5<br>(-6.5 to 23.5)                               |
| Non-melanoma skin cancer                           | < 0.05<br>(< 0.05 to < 0.05)         | < 0.05<br>(< 0.05 to < 0.05)          | < 0.05<br>(< 0.05 to < 0.05)      | 108.0<br>(49.9 to 190.9)                          | 25.4<br>(-15.2 to 77.4)                             |
| Non-melanoma skin cancer (squamous-cell carcinoma) | < 0.05<br>(< 0.05 to < 0.05)         | < 0.05<br>(< 0.05 to < 0.05)          | < 0.05<br>(< 0.05 to < 0.05)      | 120.7<br>(49.8 to 221.1)                          | 29.4<br>(-16.6 to 90.1)                             |
| Non-melanoma skin cancer (basal-cell carcinoma)    | < 0.05<br>(< 0.05 to < 0.05)         | < 0.05<br>(< 0.05 to < 0.05)          | < 0.05<br>(< 0.05 to < 0.05)      | 45.9<br>(22.8 to 77.4)                            | -1.4<br>(-12.1 to 11.0)                             |
| Breast cancer                                      | 0.3<br>(0.2 to 0.4)                  | 0.1<br>(0.1 to 0.1)                   | < 0.05<br>(< 0.05 to < 0.05)      | 43.5<br>(7.9 to 97.4)                             | 6.4<br>(-18.9 to 42.1)                              |
| Cervical cancer                                    | 0.3<br>(0.2 to 0.4)                  | 0.1<br>(0.1 to 0.1)                   | < 0.05<br>(< 0.05 to < 0.05)      | 16.8<br>(-9.3 to 50.6)                            | -12.7<br>(-31.5 to 11.2)                            |
| Uterine cancer                                     | 0.1<br>(< 0.05 to 0.1)               | < 0.05<br>(< 0.05 to < 0.05)          | < 0.05<br>(< 0.05 to < 0.05)      | 46.6<br>(16.2 to 86.2)                            | -0.7<br>(-19.5 to 22.8)                             |
| Ovarian cancer                                     | 0.1<br>(0.1 to 0.1)                  | < 0.05<br>(< 0.05 to < 0.05)          | < 0.05<br>(< 0.05 to < 0.05)      | 65.7<br>(23.0 to 123.3)                           | 20.4<br>(-12.2 to 63.6)                             |
| Prostate cancer                                    | 0.1<br>(0.1 to 0.2)                  | < 0.05<br>(< 0.05 to < 0.05)          | < 0.05<br>(< 0.05 to < 0.05)      | 121.7<br>(71.0 to 181.4)                          | 14.7<br>(-8.3 to 38.6)                              |
| Testicular cancer                                  | < 0.05<br>(< 0.05 to < 0.05)         | < 0.05<br>(< 0.05 to < 0.05)          | < 0.05<br>(< 0.05 to < 0.05)      | 32.1<br>(8.3 to 63.4)                             | -5.2<br>(-21.0 to 15.0)                             |
| Kidney cancer                                      | 0.1<br>(< 0.05 to 0.1)               | < 0.05<br>(< 0.05 to < 0.05)          | < 0.05<br>(< 0.05 to < 0.05)      | 62.8<br>(30.9 to 93.5)                            | 16.6<br>(0.6 to 35.2)                               |
| Bladder cancer                                     | 0.1<br>(< 0.05 to 0.1)               | < 0.05<br>(< 0.05 to < 0.05)          | < 0.05<br>(< 0.05 to < 0.05)      | 86.8<br>(57.8 to 116.5)                           | 12.1<br>(-5.0 to 30.3)                              |
| Brain and nervous system cancer                    | < 0.05<br>(< 0.05 to 0.1)            | < 0.05<br>(< 0.05 to < 0.05)          | < 0.05<br>(< 0.05 to < 0.05)      | 33.9<br>(21.0 to 48.8)                            | 4.4<br>(-6.6 to 23.5)                               |
| Thyroid cancer                                     | < 0.05<br>(< 0.05 to < 0.05)         | < 0.05<br>(< 0.05 to < 0.05)          | < 0.05<br>(< 0.05 to < 0.05)      | 62.0<br>(29.4 to 99.6)                            | 4.1<br>(-15.4 to 26.6)                              |
| Mesothelioma                                       | < 0.05<br>(< 0.05 to < 0.05)         | < 0.05<br>(< 0.05 to < 0.05)          | < 0.05<br>(< 0.05 to < 0.05)      | 44.8<br>(24.0 to 65.4)                            | 2.7<br>(-11.0 to 17.3)                              |
| Hodgkin lymphoma                                   | < 0.05<br>(< 0.05 to < 0.05)         | < 0.05<br>(< 0.05 to < 0.05)          | < 0.05<br>(< 0.05 to < 0.05)      | -1.3<br>(-12.7 to 9.7)                            | -26.9<br>(-33.3 to -20.5)                           |
| Non-Hodgkin's lymphoma                             | 0.1<br>(< 0.05 to 0.1)               | < 0.05<br>(< 0.05 to < 0.05)          | < 0.05<br>(< 0.05 to < 0.05)      | 45.3<br>(27.1 to 63.0)                            | 3.8<br>(-8.6 to 17.1)                               |
| Multiple myeloma                                   | < 0.05<br>(< 0.05 to < 0.05)         | < 0.05<br>(< 0.05 to < 0.05)          | < 0.05<br>(< 0.05 to < 0.05)      | 64.8<br>(45.9 to 90.1)                            | 8.2<br>(-3.9 to 24.1)                               |
| Leukaemia                                          | 0.1<br>(0.1 to 0.2)                  | < 0.05<br>(< 0.05 to < 0.05)          | < 0.05<br>(< 0.05 to < 0.05)      | 6.1<br>(-15.8 to 30.8)                            | -15.5<br>(-27.9 to -1.6)                            |
| Acute lymphoid leukaemia                           | < 0.05<br>(< 0.05 to < 0.05)         | < 0.05<br>(< 0.05 to < 0.05)          | < 0.05<br>(< 0.05 to < 0.05)      | 16.7<br>(-18.5 to 50.9)                           | -7.0<br>(-29.2 to 11.3)                             |
| Chronic lymphoid leukaemia                         | < 0.05<br>(< 0.05 to < 0.05)         | < 0.05<br>(< 0.05 to < 0.05)          | < 0.05<br>(< 0.05 to < 0.05)      | 43.8<br>(16.7 to 77.4)                            | 1.0<br>(-15.7 to 23.1)                              |
| Acute myeloid leukaemia                            | < 0.05<br>(< 0.05 to < 0.05)         | < 0.05<br>(< 0.05 to < 0.05)          | < 0.05<br>(< 0.05 to < 0.05)      | 29.7<br>(1.4 to 59.9)                             | 1.6<br>(-15.6 to 19.2)                              |
| Chronic myeloid leukaemia                          | < 0.05<br>(< 0.05 to < 0.05)         | < 0.05<br>(< 0.05 to < 0.05)          | < 0.05<br>(< 0.05 to < 0.05)      | 10.9<br>(-11.4 to 38.4)                           | -16.6<br>(-31.7 to 0.2)                             |
| Other leukaemia                                    | 0.1<br>(0.1 to 0.1)                  | < 0.05<br>(< 0.05 to < 0.05)          | < 0.05<br>(< 0.05 to < 0.05)      | -3.1<br>(-24.5 to 25.1)                           | -21.6<br>(-35.3 to -5.7)                            |
| Other neoplasms                                    | 0.1<br>(0.1 to 0.1)                  | < 0.05<br>(< 0.05 to < 0.05)          | < 0.05<br>(< 0.05 to < 0.05)      | 35.1<br>(14.6 to 54.0)                            | -1.7<br>(-11.9 to 11.2)                             |
| <b>Cardiovascular diseases</b>                     | <b>44.9</b><br><b>(43.2 to 46.7)</b> | <b>4.5†</b><br><b>(4.3 to 4.8)</b>    | <b>3.1</b><br><b>(2.2 to 4.0)</b> | <b>49.2</b><br><b>(43.9 to 55.3)</b>              | <b>3.4</b><br><b>(-0.1 to 7.3)</b>                  |
| Rheumatic heart disease                            | 9.5<br>(8.5 to 10.6)                 | 0.4<br>(0.4 to 0.4)                   | 0.5<br>(0.3 to 0.7)               | 14.0<br>(4.1 to 25.1)                             | -6.6<br>(-14.3 to 2.1)                              |
| Ischaemic heart disease                            | 13.1<br>(12.2 to 14.0)               | 1.7<br>(1.6 to 1.9)                   | 0.6<br>(0.4 to 0.8)               | 58.2<br>(49.6 to 67.5)                            | 7.4<br>(2.3 to 12.1)                                |
| Cerebrovascular disease                            | 5.5<br>(5.1 to 5.9)                  | 1.0‡<br>(0.9 to 1.1)                  | 1.1<br>(0.8 to 1.5)               | 60.4<br>(49.1 to 71.8)                            | 4.2<br>(-3.0 to 11.7)                               |
| Ischaemic stroke                                   | 4.4<br>(3.9 to 4.9)                  | 0.6‡<br>(0.5 to 0.7)                  | 0.8<br>(0.6 to 1.1)               | 63.9<br>(49.1 to 79.4)                            | 4.9<br>(-4.1 to 14.8)                               |
| Hemorrhagic stroke                                 | 1.4<br>(1.3 to 1.6)                  | 0.4‡<br>(0.3 to 0.4)                  | 0.3<br>(0.2 to 0.4)               | 50.5<br>(34.2 to 67.2)                            | 1.9<br>(-8.8 to 12.7)                               |
| Hypertensive heart disease                         | 1.4<br>(1.1 to 1.6)                  | --                                    | 0.1<br>(0.1 to 0.1)               | 58.5<br>(40.9 to 78.2)                            | 4.5<br>(-4.8 to 14.8)                               |
| Cardiomyopathy and myocarditis                     | 0.3<br>(0.3 to 0.4)                  | 0.2†<br>(0.1 to 0.2)                  | < 0.05<br>(< 0.05 to 0.1)         | 41.2<br>(27.1 to 57.4)                            | 7.0<br>(-3.3 to 19.5)                               |
| Myocarditis                                        | 0.2<br>(0.1 to 0.2)                  | 0.2<br>(0.1 to 0.2)                   | < 0.05<br>(< 0.05 to < 0.05)      | 30.3<br>(17.7 to 46.6)                            | 5.6<br>(-5.3 to 18.4)                               |
| Alcoholic cardiomyopathy                           | < 0.05<br>(< 0.05 to 0.1)            | --                                    | < 0.05<br>(< 0.05 to < 0.05)      | 46.6<br>(32.2 to 64.3)                            | 7.1<br>(-4.7 to 19.7)                               |
| Other cardiomyopathy                               | 0.2<br>(0.2 to 0.3)                  | --                                    | < 0.05<br>(< 0.05 to < 0.05)      | 47.7<br>(25.4 to 75.0)                            | 7.6<br>(-8.0 to 26.2)                               |
| Atrial fibrillation and flutter                    | 3.5<br>(3.1 to 4.1)                  | 0.3<br>(0.3 to 0.4)                   | 0.3<br>(0.2 to 0.4)               | 73.1<br>(60.2 to 87.8)                            | 1.2<br>(-5.0 to 7.4)                                |
| Peripheral vascular disease                        | 8.7<br>(7.6 to 10.1)                 | 0.8<br>(0.7 to 1.0)                   | 0.1<br>(< 0.05 to 0.1)            | 75.5<br>(54.2 to 102.2)                           | -3.2<br>(-11.9 to 6.4)                              |
| Endocarditis                                       | 0.1<br>(< 0.05 to 0.1)               | 0.2<br>(0.1 to 0.2)                   | < 0.05<br>(< 0.05 to < 0.05)      | 50.6<br>(39.2 to 62.8)                            | 5.0<br>(-5.4 to 15.8)                               |
| Other cardiovascular and circulatory diseases      | 7.2<br>(6.1 to 8.5)                  | --                                    | 0.4<br>(0.2 to 0.6)               | 40.4<br>(27.4 to 55.7)                            | 6.3<br>(-2.3 to 15.0)                               |
| <b>Chronic respiratory diseases</b>                | <b>86.8</b><br><b>(82.8 to 90.8)</b> | <b>21.2†</b><br><b>(19.7 to 22.8)</b> | <b>5.2</b><br><b>(4.2 to 6.4)</b> | <b>39.8</b><br><b>(33.2 to 48.0)</b>              | <b>11.1</b><br><b>(7.4 to 15.2)</b>                 |
| Chronic obstructive pulmonary disease              | 23.3<br>(22.2 to 24.4)               | 1.8<br>(1.7 to 1.9)                   | 2.4<br>(2.1 to 2.6)               | 68.2<br>(59.6 to 77.2)                            | 15.3<br>(9.8 to 20.8)                               |
| Pneumoconiosis                                     | 0.1<br>(0.1 to 0.1)                  | < 0.05<br>(< 0.05 to < 0.05)          | < 0.05<br>(< 0.05 to < 0.05)      | 62.3<br>(21.9 to 114.8)                           | 6.4<br>(-18.1 to 36.3)                              |
| Silicosis                                          | 0.1<br>(< 0.05 to 0.1)               | < 0.05<br>(< 0.05 to < 0.05)          | < 0.05<br>(< 0.05 to < 0.05)      | 61.9<br>(12.3 to 131.2)                           | 7.0<br>(-23.9 to 47.2)                              |

| Cause                                                          | Prevalence in thousands (95% UI)  | Incidence in thousands (95% UI)   | YLDs in thousands (95% UI)        |                                                                     |                                                                      |
|----------------------------------------------------------------|-----------------------------------|-----------------------------------|-----------------------------------|---------------------------------------------------------------------|----------------------------------------------------------------------|
|                                                                | 2016 counts<br>(< 0.05 to < 0.05) | 2016 counts<br>(< 0.05 to < 0.05) | 2016 counts<br>(< 0.05 to < 0.05) | Percentage change in counts between 2006 and 2016<br>(43.7 to 65.1) | Percentage change in age-standardised rates between<br>(-3.2 to 8.7) |
| Asbestosis                                                     | < 0.05<br>(< 0.05 to < 0.05)      | < 0.05<br>(< 0.05 to < 0.05)      | < 0.05<br>(< 0.05 to < 0.05)      | 54.1<br>(43.7 to 65.1)                                              | 2.4<br>(-3.2 to 8.7)                                                 |
| Coal workers pneumoconiosis                                    | --                                | --                                | --                                | --                                                                  | --                                                                   |
| Other pneumoconiosis                                           | < 0.05<br>(< 0.05 to < 0.05)      | < 0.05<br>(< 0.05 to < 0.05)      | < 0.05<br>(< 0.05 to < 0.05)      | 90.9<br>(65.8 to 120.2)                                             | 8.9<br>(-4.4 to 23.6)                                                |
| Asthma                                                         | 65.3<br>(60.6 to 70.4)            | 19.3<br>(17.9 to 20.9)            | 2.6<br>(1.7 to 3.7)               | 19.3<br>(13.4 to 25.8)                                              | 3.4<br>(-0.7 to 7.6)                                                 |
| Interstitial lung disease and pulmonary sarcoidosis            | 0.6<br>(0.5 to 0.6)               | 0.1<br>(< 0.05 to 0.1)            | 0.1<br>(< 0.05 to 0.1)            | 64.9<br>(46.7 to 86.0)                                              | 4.8<br>(-6.4 to 17.7)                                                |
| Other chronic respiratory diseases                             | --                                | --                                | 0.2<br>(0.1 to 0.2)               | 67.4<br>(39.0 to 107.0)                                             | 48.5<br>(30.4 to 69.6)                                               |
| <b>Cirrhosis and other chronic liver diseases</b>              | <b>3.3<br/>(3.1 to 3.5)</b>       | <b>0.2<br/>(0.2 to 0.2)</b>       | <b>0.1<br/>(0.1 to 0.2)</b>       | <b>33.5<br/>(16.4 to 53.0)</b>                                      | <b>4.4<br/>(-5.1 to 15.3)</b>                                        |
| Cirrhosis and other chronic liver diseases due to hepatitis B  | 1.0<br>(0.9 to 1.1)               | 0.1<br>(< 0.05 to 0.1)            | < 0.05<br>(< 0.05 to < 0.05)      | 46.2<br>(22.0 to 78.0)                                              | 5.7<br>(-12.0 to 26.3)                                               |
| Cirrhosis and other chronic liver diseases due to hepatitis C  | 0.6<br>(0.5 to 0.8)               | < 0.05<br>(< 0.05 to < 0.05)      | < 0.05<br>(< 0.05 to < 0.05)      | 42.8<br>(11.9 to 76.9)                                              | 4.2<br>(-17.8 to 29.3)                                               |
| Cirrhosis and other chronic liver diseases due to alcohol use  | 0.5<br>(0.4 to 0.6)               | < 0.05<br>(< 0.05 to < 0.05)      | < 0.05<br>(< 0.05 to < 0.05)      | 45.8<br>(15.6 to 91.8)                                              | 4.7<br>(-15.9 to 34.0)                                               |
| Cirrhosis and other chronic liver diseases due to other causes | 1.2<br>(1.1 to 1.3)               | 0.1<br>(0.1 to 0.1)               | 0.1<br>(< 0.05 to 0.1)            | 24.5<br>(-1.1 to 56.7)                                              | 3.5<br>(-13.3 to 25.1)                                               |
| <b>Digestive diseases</b>                                      | <b>9.5<br/>(8.9 to 10.1)</b>      | <b>12.7†<br/>(12.0 to 13.5)</b>   | <b>0.3<br/>(0.2 to 0.4)</b>       | <b>36.6<br/>(26.1 to 48.0)</b>                                      | <b>3.0<br/>(-2.8 to 9.1)</b>                                         |
| Peptic ulcer disease                                           | 3.0<br>(2.8 to 3.2)               | 1.8<br>(1.6 to 1.9)               | 0.1<br>(< 0.05 to 0.1)            | 48.1<br>(33.9 to 64.0)                                              | 5.7<br>(-2.6 to 15.5)                                                |
| Gastritis and duodenitis                                       | 4.9<br>(4.3 to 5.5)               | 5.0<br>(4.4 to 5.6)               | 0.1<br>(< 0.05 to 0.1)            | 54.0<br>(38.2 to 71.8)                                              | 12.2<br>(2.7 to 21.6)                                                |
| Appendicitis                                                   | 0.1<br>(0.1 to 0.1)               | 1.8<br>(1.7 to 2.0)               | < 0.05<br>(< 0.05 to < 0.05)      | 21.2<br>(16.3 to 26.7)                                              | 0.5<br>(-7.0 to 8.0)                                                 |
| Paralytic ileus and intestinal obstruction                     | < 0.05<br>(< 0.05 to < 0.05)      | 0.3<br>(0.3 to 0.3)               | < 0.05<br>(< 0.05 to < 0.05)      | 37.5<br>(31.5 to 43.8)                                              | 2.7<br>(-2.8 to 9.4)                                                 |
| Inguinal, femoral, and abdominal hernia                        | 1.5<br>(1.2 to 1.7)               | 1.3<br>(1.2 to 1.5)               | 0.1<br>(< 0.05 to 0.1)            | 17.1<br>(-2.9 to 41.8)                                              | -10.9<br>(-22.6 to 3.4)                                              |
| Inflammatory bowel disease                                     | 0.1<br>(0.1 to 0.1)               | 0.5<br>(0.4 to 0.6)               | < 0.05<br>(< 0.05 to < 0.05)      | 36.5<br>(25.2 to 51.4)                                              | 8.5<br>(-0.6 to 19.0)                                                |
| Vascular intestinal disorders                                  | < 0.05<br>(< 0.05 to < 0.05)      | < 0.05<br>(< 0.05 to < 0.05)      | < 0.05<br>(< 0.05 to < 0.05)      | 47.3<br>(38.1 to 56.4)                                              | 12.4<br>(8.0 to 16.8)                                                |
| Gallbladder and biliary diseases                               | 0.5<br>(0.5 to 0.6)               | 1.7<br>(1.5 to 2.0)               | < 0.05<br>(< 0.05 to < 0.05)      | 36.9<br>(20.3 to 55.1)                                              | 3.8<br>(-8.7 to 17.2)                                                |
| Pancreatitis                                                   | < 0.05<br>(< 0.05 to < 0.05)      | 0.3<br>(0.2 to 0.3)               | < 0.05<br>(< 0.05 to < 0.05)      | 45.6<br>(39.9 to 52.9)                                              | 8.6<br>(5.0 to 12.2)                                                 |
| Other digestive diseases                                       | --                                | --                                | < 0.05<br>(< 0.05 to < 0.05)      | 43.5<br>(29.0 to 59.6)                                              | 6.7<br>(0.3 to 13.5)                                                 |
| <b>Neurological disorders</b>                                  | <b>358.7<br/>(340.9 to 376.2)</b> | <b>173.9<br/>(147.7 to 204.3)</b> | <b>8.2<br/>(5.2 to 11.5)</b>      | <b>29.1<br/>(0.9 to 66.2)</b>                                       | <b>1.8<br/>(-15.9 to 23.0)</b>                                       |
| Alzheimer's disease and other dementias                        | 4.0<br>(3.3 to 4.8)               | 0.7<br>(0.5 to 0.8)               | 0.6<br>(0.4 to 0.7)               | 95.7<br>(84.4 to 106.6)                                             | 0.0<br>(-3.8 to 4.0)                                                 |
| Parkinson's disease                                            | 0.5<br>(0.4 to 0.6)               | 0.1<br>(< 0.05 to 0.1)            | 0.1<br>(< 0.05 to 0.1)            | 89.7<br>(63.9 to 119.9)                                             | 12.7<br>(0.8 to 26.4)                                                |
| Epilepsy                                                       | 3.8<br>(1.0 to 6.5)               | 0.6<br>(0.2 to 1.0)               | 1.4<br>(0.4 to 2.9)               | 30.7<br>(-68.9 to 475.9)                                            | 9.2<br>(-74.1 to 375.8)                                              |
| Multiple sclerosis                                             | < 0.05<br>(< 0.05 to < 0.05)      | < 0.05<br>(< 0.05 to < 0.05)      | < 0.05<br>(< 0.05 to < 0.05)      | 50.1<br>(44.9 to 56.6)                                              | 18.2<br>(14.4 to 22.7)                                               |
| Motor neuron disease                                           | < 0.05<br>(< 0.05 to < 0.05)      | < 0.05<br>(< 0.05 to < 0.05)      | < 0.05<br>(< 0.05 to < 0.05)      | 33.5<br>(27.2 to 40.0)                                              | 6.7<br>(3.2 to 10.1)                                                 |
| Migraine                                                       | 124.4<br>(116.5 to 132.5)         | 15.1<br>(14.1 to 16.2)            | 5.0<br>(3.2 to 7.1)               | 23.2<br>(18.1 to 28.5)                                              | -0.3<br>(-4.2 to 3.4)                                                |
| Tension-type headache                                          | 274.6<br>(244.9 to 310.2)         | 157.5<br>(131.6 to 188.0)         | 0.8<br>(0.5 to 1.2)               | 22.4<br>(16.1 to 29.9)                                              | -0.9<br>(-5.5 to 4.6)                                                |
| Other neurological disorders                                   | < 0.05<br>(< 0.05 to < 0.05)      | < 0.05<br>(< 0.05 to < 0.05)      | 0.4<br>(0.1 to 0.7)               | 56.8<br>(-57.1 to 475.4)                                            | 28.4<br>(-58.8 to 282.2)                                             |
| <b>Mental and substance use disorders</b>                      | <b>137.8<br/>(132.0 to 143.8)</b> | <b>46.5†<br/>(43.1 to 50.3)</b>   | <b>17.6<br/>(12.8 to 22.9)</b>    | <b>22.0<br/>(18.9 to 25.3)</b>                                      | <b>-0.6<br/>(-2.7 to 1.8)</b>                                        |
| Schizophrenia                                                  | 2.1<br>(1.9 to 2.5)               | 0.2<br>(0.1 to 0.2)               | 1.4<br>(1.0 to 1.7)               | 33.6<br>(22.1 to 44.9)                                              | 3.6<br>(-4.8 to 11.5)                                                |
| Alcohol use disorders                                          | 7.0<br>(6.1 to 8.2)               | 3.9<br>(3.3 to 4.5)               | 0.7<br>(0.5 to 1.0)               | 31.2<br>(18.8 to 43.1)                                              | 2.5<br>(-6.6 to 11.6)                                                |
| Drug use disorders                                             | 8.4<br>(7.5 to 9.5)               | 1.4<br>(1.1 to 1.6)               | 1.3<br>(0.9 to 1.8)               | 36.6<br>(22.9 to 50.9)                                              | 6.3<br>(-3.0 to 16.4)                                                |
| Opioid use disorders                                           | 1.8<br>(1.5 to 2.3)               | 0.2<br>(0.2 to 0.3)               | 0.8<br>(0.5 to 1.1)               | 40.5<br>(22.5 to 60.2)                                              | 6.2<br>(-6.3 to 19.7)                                                |
| Cocaine use disorders                                          | 0.1<br>(0.1 to 0.2)               | < 0.05<br>(< 0.05 to < 0.05)      | < 0.05<br>(< 0.05 to < 0.05)      | 34.6<br>(27.5 to 42.4)                                              | 5.6<br>(0.3 to 11.2)                                                 |
| Amphetamine use disorders                                      | 1.6<br>(1.0 to 2.4)               | 0.2<br>(0.1 to 0.3)               | 0.2<br>(0.1 to 0.4)               | 34.4<br>(3.1 to 71.7)                                               | 9.0<br>(-15.1 to 36.7)                                               |
| Cannabis use disorders                                         | 4.8<br>(3.8 to 6.0)               | 0.8<br>(0.6 to 1.0)               | 0.1<br>(0.1 to 0.2)               | 23.8<br>(7.8 to 45.2)                                               | 0.4<br>(-11.8 to 16.0)                                               |
| Other drug use disorders                                       | 0.4<br>(0.3 to 0.4)               | 0.1<br>(0.1 to 0.1)               | 0.2<br>(0.1 to 0.3)               | 35.0<br>(2.3 to 76.9)                                               | 8.2<br>(-16.3 to 37.9)                                               |
| Depressive disorders                                           | 30.2<br>(28.1 to 32.4)            | 28.1<br>(24.8 to 31.4)            | 4.8<br>(3.3 to 6.6)               | 23.3<br>(17.2 to 29.5)                                              | -2.4<br>(-6.3 to 1.8)                                                |
| Major depressive disorder                                      | 17.2<br>(15.1 to 19.4)            | 25.9<br>(22.7 to 29.3)            | 3.5<br>(2.4 to 4.9)               | 20.6<br>(13.2 to 28.6)                                              | -3.5<br>(-8.5 to 2.0)                                                |
| Dysthymia                                                      | 13.4<br>(11.7 to 15.3)            | 2.2<br>(1.9 to 2.5)               | 1.3<br>(0.9 to 1.9)               | 31.2<br>(26.4 to 36.4)                                              | 0.1<br>(-2.7 to 3.1)                                                 |
| Bipolar disorder                                               | 4.9<br>(4.2 to 5.7)               | 0.5<br>(0.5 to 0.6)               | 1.0<br>(0.6 to 1.5)               | 25.8<br>(15.6 to 37.2)                                              | 0.4<br>(-6.5 to 7.4)                                                 |
| Anxiety disorders                                              | 34.8<br>(30.8 to 39.1)            | 6.1<br>(5.4 to 6.9)               | 3.4<br>(2.4 to 4.6)               | 22.1<br>(13.8 to 31.2)                                              | 0.5<br>(-5.9 to 6.7)                                                 |
| Eating disorders                                               | 1.1<br>(0.9 to 1.3)               | 0.8<br>(0.6 to 1.1)               | 0.2<br>(0.1 to 0.3)               | 55.5<br>(32.0 to 84.4)                                              | 28.1<br>(11.0 to 49.7)                                               |
| Anorexia nervosa                                               | 0.4<br>(0.3 to 0.5)               | 0.2<br>(0.1 to 0.2)               | 0.1<br>(< 0.05 to 0.1)            | 45.7<br>(10.6 to 95.9)                                              | 23.5<br>(-5.9 to 63.3)                                               |
| Bulimia nervosa                                                | 0.7<br>(0.5 to 0.9)               | 0.7<br>(0.4 to 0.9)               | 0.1<br>(0.1 to 0.2)               | 61.3<br>(33.5 to 98.2)                                              | 30.3<br>(8.2 to 57.6)                                                |
| Autistic spectrum disorders                                    | 9.7<br>(8.7 to 11.0)              | 0.1<br>(0.1 to 0.1)               | 1.4<br>(0.9 to 2.0)               | 19.3<br>(13.1 to 25.8)                                              | 0.6<br>(-4.0 to 5.4)                                                 |
| Autism                                                         | 2.8<br>(2.4 to 3.2)               | < 0.05<br>(< 0.05 to < 0.05)      | 0.7<br>(0.5 to 1.0)               | 19.0<br>(8.2 to 30.3)                                               | 0.6<br>(-7.5 to 9.2)                                                 |
| Asperger syndrome and other autistic spectrum disorders        | 6.9<br>(5.7 to 8.4)               | 0.1<br>(0.1 to 0.1)               | 0.7<br>(0.5 to 1.0)               | 19.6<br>(12.8 to 27.0)                                              | 0.6<br>(-4.2 to 5.4)                                                 |

| Cause                                                      | Prevalence in thousands (95% UI)     | Incidence in thousands (95% UI)          | YLDs in thousands (95% UI)           |                                                   |                                                     |
|------------------------------------------------------------|--------------------------------------|------------------------------------------|--------------------------------------|---------------------------------------------------|-----------------------------------------------------|
|                                                            | 2016 counts                          | 2016 counts                              | 2016 counts                          | Percentage change in counts between 2006 and 2016 | Percentage change in age-standardised rates between |
| Attention-deficit/hyperactivity disorder                   | 6.9<br>(5.4 to 8.7)                  | 0.4<br>(0.3 to 0.6)                      | 0.1<br>( $< 0.05$ to 0.1)            | 11.4<br>(-1.9 to 25.4)                            | 0.7<br>(-9.9 to 12.0)                               |
| Conduct disorder                                           | 11.8<br>(9.6 to 14.0)                | 4.2<br>(3.3 to 5.1)                      | 1.4<br>(0.9 to 2.2)                  | 6.2<br>(-1.2 to 13.7)                             | 0.6<br>(-5.9 to 7.4)                                |
| Idiopathic developmental intellectual disability           | 14.5<br>(7.0 to 22.9)                | --                                       | 0.6<br>(0.3 to 1.1)                  | -14.7<br>(-24.4 to -6.1)                          | -27.4<br>(-35.3 to -20.2)                           |
| Other mental and substance use disorders                   | 16.4<br>(14.3 to 18.9)               | 0.8<br>(0.7 to 0.9)                      | 1.2<br>(0.8 to 1.8)                  | 30.7<br>(23.9 to 38.8)                            | 0.4<br>(-4.2 to 5.3)                                |
| <b>Diabetes, urogenital, blood, and endocrine diseases</b> | <b>410.6<br/>(379.7 to 441.8)</b>    | <b>78.0†<br/>(72.7 to 83.4)</b>          | <b>5.8<br/>(4.0 to 8.1)</b>          | <b>31.6<br/>(26.1 to 37.4)</b>                    | <b>1.6<br/>(-1.9 to 5.0)</b>                        |
| Diabetes mellitus                                          | 36.6<br>(32.6 to 40.8)               | 2.1<br>(1.9 to 2.4)                      | 2.6<br>(1.7 to 3.6)                  | 49.4<br>(40.5 to 58.0)                            | 9.9<br>(3.4 to 15.8)                                |
| Acute glomerulonephritis                                   | $< 0.05$<br>( $< 0.05$ to $< 0.05$ ) | 0.2<br>(0.2 to 0.2)                      | $< 0.05$<br>( $< 0.05$ to $< 0.05$ ) | 21.4<br>(14.7 to 28.4)                            | 1.0<br>(-3.1 to 5.4)                                |
| Chronic kidney disease                                     | 17.0<br>(15.3 to 18.9)               | 1.2<br>(1.1 to 1.4)                      | 0.6<br>(0.5 to 0.8)                  | 43.2<br>(33.3 to 53.4)                            | -0.6<br>(-6.5 to 5.8)                               |
| Chronic kidney disease due to diabetes mellitus            | 9.8<br>(8.6 to 11.2)                 | 0.7<br>(0.6 to 0.8)                      | 0.4<br>(0.2 to 0.5)                  | 43.0<br>(28.4 to 57.3)                            | -0.8<br>(-9.4 to 9.0)                               |
| Chronic kidney disease due to hypertension                 | 2.8<br>(2.4 to 3.3)                  | 0.1<br>(0.1 to 0.1)                      | 0.2<br>(0.1 to 0.2)                  | 59.9<br>(41.5 to 80.0)                            | 0.4<br>(-9.9 to 10.5)                               |
| Chronic kidney disease due to glomerulonephritis           | 3.2<br>(2.7 to 3.7)                  | 0.3<br>(0.2 to 0.4)                      | 0.1<br>( $< 0.05$ to 0.1)            | 21.0<br>(11.5 to 32.8)                            | -3.1<br>(-9.1 to 3.5)                               |
| Chronic kidney disease due to other causes                 | 1.2<br>(1.0 to 1.4)                  | 0.1<br>(0.1 to 0.1)                      | 0.1<br>( $< 0.05$ to 0.1)            | 29.3<br>(19.7 to 41.0)                            | -1.6<br>(-7.4 to 4.9)                               |
| Urinary diseases and male infertility                      | 9.2<br>(8.2 to 10.2)                 | 44.9†<br>(40.1 to 50.2)                  | 0.2<br>(0.1 to 0.3)                  | 46.5<br>(36.2 to 57.8)                            | 0.5<br>(-5.6 to 6.9)                                |
| Interstitial nephritis and urinary tract infections        | 0.8<br>(0.7 to 0.9)                  | 41.2<br>(36.5 to 46.3)                   | $< 0.05$<br>( $< 0.05$ to $< 0.05$ ) | 29.0<br>(7.0 to 53.1)                             | 3.3<br>(-11.4 to 19.7)                              |
| Urolithiasis                                               | 0.1<br>(0.1 to 0.1)                  | 3.0<br>(2.7 to 3.4)                      | $< 0.05$<br>( $< 0.05$ to $< 0.05$ ) | 39.0<br>(28.3 to 52.7)                            | 3.1<br>(-6.1 to 13.4)                               |
| Benign prostatic hyperplasia                               | 5.2<br>(4.4 to 6.2)                  | 0.7<br>(0.6 to 0.8)                      | 0.2<br>(0.1 to 0.2)                  | 54.1<br>(40.7 to 68.5)                            | 0.2<br>(-7.0 to 7.8)                                |
| Male infertility                                           | 2.7<br>(2.1 to 3.4)                  | --                                       | $< 0.05$<br>( $< 0.05$ to $< 0.05$ ) | 52.5<br>(27.5 to 82.9)                            | 15.0<br>(-3.9 to 40.2)                              |
| Other urinary diseases                                     | --                                   | --                                       | $< 0.05$<br>( $< 0.05$ to $< 0.05$ ) | 6.5<br>(-8.7 to 23.5)                             | -14.5<br>(-24.0 to -4.7)                            |
| Gynecological diseases                                     | 86.2<br>(79.5 to 92.2)               | 27.9†<br>(25.5 to 30.2)                  | 0.9<br>(0.6 to 1.3)                  | 15.0<br>(8.7 to 22.1)                             | -8.9<br>(-13.3 to -4.2)                             |
| Uterine fibroids                                           | 10.4<br>(9.1 to 11.8)                | 1.2<br>(1.0 to 1.4)                      | 0.1<br>(0.1 to 0.2)                  | 2.0<br>(-7.0 to 10.0)                             | -16.6<br>(-24.0 to -10.2)                           |
| Polycystic ovarian syndrome                                | 0.7<br>(0.5 to 0.9)                  | 0.6<br>(0.4 to 0.7)                      | $< 0.05$<br>( $< 0.05$ to $< 0.05$ ) | 28.5<br>(10.3 to 51.5)                            | 2.0<br>(-12.1 to 19.0)                              |
| Female infertility                                         | 1.1<br>(0.4 to 2.4)                  | --                                       | $< 0.05$<br>( $< 0.05$ to $< 0.05$ ) | 193.4<br>(31.2 to 487.1)                          | 105.6<br>(0.7 to 317.0)                             |
| Endometriosis                                              | 0.1<br>(0.1 to 0.1)                  | 0.8<br>(0.6 to 0.9)                      | $< 0.05$<br>( $< 0.05$ to $< 0.05$ ) | 26.8<br>(-8.9 to 75.3)                            | 1.0<br>(-26.2 to 36.8)                              |
| Genital prolapse                                           | 26.3<br>(22.9 to 29.9)               | 1.8<br>(1.5 to 2.1)                      | 0.1<br>( $< 0.05$ to 0.1)            | 19.6<br>(9.8 to 31.1)                             | -13.0<br>(-20.1 to -4.1)                            |
| Premenstrual syndrome                                      | 49.0<br>(43.1 to 54.4)               | 19.0<br>(16.8 to 21.2)                   | 0.4<br>(0.3 to 0.6)                  | 18.1<br>(5.8 to 31.0)                             | -4.4<br>(-14.0 to 5.6)                              |
| Other gynecological diseases                               | 6.7<br>(6.0 to 7.4)                  | 4.5<br>(3.8 to 5.3)                      | 0.2<br>(0.1 to 0.3)                  | 15.1<br>(3.5 to 27.2)                             | -8.8<br>(-17.6 to 0.8)                              |
| Hemoglobinopathies and hemolytic anaemias                  | 307.0<br>(272.6 to 340.9)            | --                                       | 1.0<br>(0.5 to 1.8)                  | 9.3<br>(-1.3 to 21.4)                             | -8.2<br>(-15.4 to -0.5)                             |
| Thalassemias                                               | 0.3<br>(0.1 to 0.7)                  | --                                       | $< 0.05$<br>( $< 0.05$ to $< 0.05$ ) | 18.9<br>(-8.6 to 52.7)                            | -2.0<br>(-23.9 to 25.0)                             |
| Thalassaemias trait                                        | 88.8<br>(47.9 to 143.6)              | --                                       | 0.7<br>(0.3 to 1.4)                  | 13.0<br>(0.8 to 27.5)                             | -2.7<br>(-11.5 to 7.0)                              |
| Sickle cell disorders                                      | $< 0.05$<br>( $< 0.05$ to $< 0.05$ ) | --                                       | $< 0.05$<br>( $< 0.05$ to $< 0.05$ ) | 28.5<br>(5.0 to 57.4)                             | 1.9<br>(-15.5 to 22.3)                              |
| Sickle cell trait                                          | 5.0<br>(4.5 to 5.5)                  | --                                       | $< 0.05$<br>( $< 0.05$ to $< 0.05$ ) | 13.2<br>(-16.5 to 52.1)                           | -3.6<br>(-25.4 to 21.8)                             |
| G6PD deficiency                                            | 64.3<br>(53.9 to 76.1)               | --                                       | $< 0.05$<br>( $< 0.05$ to $< 0.05$ ) | 4.9<br>(-9.6 to 26.8)                             | -11.5<br>(-21.3 to 1.7)                             |
| G6PD trait                                                 | 156.9<br>(145.2 to 169.4)            | --                                       | $< 0.05$<br>( $< 0.05$ to $< 0.05$ ) | 15.8<br>(0.3 to 36.0)                             | -3.6<br>(-13.7 to 8.8)                              |
| Other hemoglobinopathies and hemolytic anaemias            | 14.4<br>(13.5 to 15.3)               | --                                       | 0.2<br>(0.1 to 0.4)                  | -1.1<br>(-11.9 to 11.0)                           | -21.2<br>(-27.1 to -14.5)                           |
| Endocrine, metabolic, blood, and immune disorders          | 18.1<br>(17.1 to 19.1)               | 1.7<br>(1.5 to 1.9)                      | 0.5<br>(0.3 to 0.7)                  | 18.7<br>(9.9 to 28.1)                             | -5.4<br>(-10.5 to -0.2)                             |
| <b>Musculoskeletal disorders</b>                           | <b>121.9<br/>(114.5 to 128.7)</b>    | <b>70.4<br/>(64.2 to 78.0)</b>           | <b>13.2<br/>(9.4 to 17.4)</b>        | <b>33.7<br/>(29.1 to 38.6)</b>                    | <b>0.4<br/>(-2.3 to 3.1)</b>                        |
| Rheumatoid arthritis                                       | 0.9<br>(0.8 to 1.0)                  | 0.1<br>( $< 0.05$ to 0.1)                | 0.2<br>(0.1 to 0.3)                  | 42.0<br>(26.9 to 59.3)                            | 7.1<br>(-3.8 to 19.5)                               |
| Osteoarthritis                                             | 20.3<br>(18.9 to 21.7)               | 1.0<br>(0.9 to 1.1)                      | 1.2<br>(0.9 to 1.7)                  | 46.7<br>(40.7 to 52.9)                            | 2.9<br>(-1.1 to 6.6)                                |
| Low back and neck pain                                     | 79.3<br>(73.2 to 85.6)               | 34.9<br>(31.3 to 39.1)                   | 9.1<br>(6.4 to 12.0)                 | 29.7<br>(24.9 to 35.1)                            | -1.2<br>(-4.1 to 2.0)                               |
| Low back pain                                              | 59.2<br>(52.5 to 67.1)               | 29.0<br>(25.5 to 33.2)                   | 6.7<br>(4.7 to 8.8)                  | 29.1<br>(22.9 to 36.0)                            | -1.7<br>(-5.7 to 2.5)                               |
| Neck pain                                                  | 24.4<br>(21.1 to 28.0)               | 5.9<br>(5.2 to 6.9)                      | 2.4<br>(1.6 to 3.4)                  | 31.4<br>(27.1 to 36.1)                            | 0.4<br>(-2.2 to 2.7)                                |
| Gout                                                       | 3.2<br>(2.8 to 3.6)                  | 0.6<br>(0.6 to 0.7)                      | 0.1<br>(0.1 to 0.1)                  | 41.6<br>(22.5 to 63.0)                            | 1.0<br>(-10.8 to 15.1)                              |
| Other musculoskeletal disorders                            | 30.0<br>(22.3 to 37.8)               | 33.8<br>(28.4 to 40.0)                   | 2.6<br>(1.5 to 3.8)                  | 42.0<br>(26.7 to 63.9)                            | 4.3<br>(-5.2 to 16.4)                               |
| <b>Other non-communicable diseases</b>                     | <b>797.9<br/>(773.9 to 820.0)</b>    | <b>2,490.3†<br/>(2,258.9 to 2,714.6)</b> | <b>22.9<br/>(15.6 to 32.3)</b>       | <b>19.5<br/>(17.0 to 21.7)</b>                    | <b>-8.8<br/>(-10.8 to -6.9)</b>                     |
| Congenital anomalies                                       | 11.0<br>(9.6 to 12.9)                | --                                       | 1.3<br>(0.9 to 1.9)                  | 11.6<br>(4.4 to 21.8)                             | -7.3<br>(-13.3 to 1.3)                              |
| Neural tube defects                                        | 0.8<br>(0.7 to 0.8)                  | --                                       | 0.2<br>(0.1 to 0.3)                  | 17.4<br>(1.3 to 36.0)                             | -2.8<br>(-14.9 to 11.5)                             |
| Congenital heart anomalies                                 | 2.9<br>(2.5 to 3.4)                  | --                                       | 0.1<br>(0.1 to 0.2)                  | 15.5<br>(0.7 to 31.9)                             | -0.9<br>(-12.4 to 11.7)                             |
| Orofacial clefts                                           | 0.6<br>(0.6 to 0.7)                  | --                                       | $< 0.05$<br>( $< 0.05$ to $< 0.05$ ) | 19.2<br>(5.3 to 34.5)                             | -1.8<br>(-13.3 to 10.8)                             |
| Down's syndrome                                            | 0.4<br>(0.3 to 0.4)                  | --                                       | $< 0.05$<br>( $< 0.05$ to $< 0.05$ ) | 19.0<br>(10.6 to 28.5)                            | 1.2<br>(-5.9 to 9.3)                                |
| Turner syndrome                                            | 0.3<br>(0.3 to 0.4)                  | --                                       | $< 0.05$<br>( $< 0.05$ to $< 0.05$ ) | 21.1<br>(-24.6 to 98.7)                           | 3.1<br>(-32.3 to 57.8)                              |
| Klinefelter syndrome                                       | 0.3<br>(0.3 to 0.4)                  | --                                       | $< 0.05$<br>( $< 0.05$ to $< 0.05$ ) | 21.2<br>(-16.7 to 74.5)                           | -1.2<br>(-28.9 to 36.6)                             |



| Cause                                         | Prevalence in thousands (95% UI)        | Incidence in thousands (95% UI)       | YLDs in thousands (95% UI)         |                                                   |                                                     |
|-----------------------------------------------|-----------------------------------------|---------------------------------------|------------------------------------|---------------------------------------------------|-----------------------------------------------------|
|                                               | 2016 counts                             | 2016 counts                           | 2016 counts                        | Percentage change in counts between 2006 and 2016 | Percentage change in age-standardised rates between |
| Other chromosomal abnormalities               | 0.4<br>(0.3 to 0.5)                     | --                                    | < 0.05<br>(< 0.05 to 0.1)          | 19.3<br>(-4.2 to 48.7)                            | -1.3<br>(-20.6 to 23.1)                             |
| Congenital musculoskeletal and limb anomalies | 1.0<br>(0.9 to 1.1)                     | --                                    | 0.1<br>(0.1 to 0.2)                | 26.5<br>(10.6 to 44.2)                            | 6.1<br>(-5.3 to 19.2)                               |
| Urogenital congenital anomalies               | 1.0<br>(0.9 to 1.2)                     | --                                    | < 0.05<br>(< 0.05 to < 0.05)       | 15.9<br>(4.6 to 29.1)                             | -1.3<br>(-10.1 to 8.7)                              |
| Digestive congenital anomalies                | 1.3<br>(1.1 to 1.4)                     | --                                    | 0.1<br>(< 0.05 to 0.1)             | 27.1<br>(6.4 to 51.8)                             | 5.6<br>(-9.7 to 22.7)                               |
| Other congenital anomalies                    | 4.5<br>(2.8 to 7.0)                     | --                                    | 0.7<br>(0.4 to 1.0)                | 4.2<br>(-6.4 to 19.4)                             | -13.9<br>(-22.0 to -1.1)                            |
| Skin and subcutaneous diseases                | 386.8<br>(374.1 to 401.2)               | 831.6<br>(781.1 to 888.8)             | 10.0<br>(6.6 to 14.6)              | 19.2<br>(16.4 to 22.2)                            | 0.9<br>(-1.1 to 3.2)                                |
| Dermatitis                                    | 59.4<br>(52.5 to 66.8)                  | 58.2<br>(53.8 to 62.9)                | 2.4<br>(1.3 to 3.9)                | 19.3<br>(14.6 to 24.4)                            | 0.3<br>(-3.2 to 3.7)                                |
| Psoriasis                                     | 6.1<br>(5.8 to 6.4)                     | 0.9<br>(0.9 to 1.0)                   | 0.5<br>(0.4 to 0.7)                | 39.1<br>(23.9 to 56.3)                            | 13.5<br>(3.5 to 24.3)                               |
| Cellulitis                                    | 0.5<br>(0.4 to 0.5)                     | 9.9<br>(9.2 to 10.7)                  | < 0.05<br>(< 0.05 to < 0.05)       | 22.3<br>(-4.1 to 58.2)                            | 2.0<br>(-16.8 to 26.6)                              |
| Pyoderma                                      | 1.0<br>(1.0 to 1.0)                     | 19.4<br>(18.7 to 20.1)                | < 0.05<br>(< 0.05 to < 0.05)       | 33.5<br>(17.7 to 51.2)                            | 1.8<br>(-6.7 to 11.0)                               |
| Scabies                                       | 43.0<br>(37.5 to 49.7)                  | 136.7<br>(116.5 to 159.0)             | 1.1<br>(0.6 to 1.8)                | -2.8<br>(-8.7 to 2.8)                             | -16.8<br>(-20.6 to -13.1)                           |
| Fungal skin diseases                          | 114.9<br>(103.0 to 128.2)               | 368.8<br>(327.5 to 412.7)             | 0.7<br>(0.2 to 1.4)                | 25.2<br>(22.2 to 28.4)                            | 0.3<br>(-0.7 to 1.2)                                |
| Viral skin diseases                           | 36.6<br>(32.6 to 40.8)                  | 50.6<br>(44.7 to 56.5)                | 1.1<br>(0.7 to 1.7)                | 15.4<br>(11.1 to 20.1)                            | 0.1<br>(-2.9 to 3.4)                                |
| Acne vulgaris                                 | 117.7<br>(102.0 to 134.9)               | 90.5<br>(69.1 to 122.6)               | 3.0<br>(2.0 to 4.4)                | 22.7<br>(15.9 to 30.2)                            | 6.8<br>(1.5 to 12.6)                                |
| Alopecia areata                               | 1.9<br>(1.8 to 2.0)                     | 3.4<br>(3.2 to 3.5)                   | 0.1<br>(< 0.05 to 0.1)             | 26.0<br>(9.3 to 43.2)                             | 0.4<br>(-11.1 to 12.6)                              |
| Pruritus                                      | 8.6<br>(7.6 to 9.8)                     | 7.0<br>(6.2 to 7.8)                   | 0.1<br>(< 0.05 to 0.2)             | 29.9<br>(22.2 to 39.4)                            | 2.9<br>(-2.2 to 8.3)                                |
| Urticaria                                     | 11.2<br>(9.6 to 13.1)                   | 20.1<br>(17.3 to 23.5)                | 0.7<br>(0.4 to 1.0)                | 23.8<br>(15.4 to 33.2)                            | 0.2<br>(-5.4 to 6.1)                                |
| Decubitus ulcer                               | 0.1<br>(0.1 to 0.1)                     | 0.3<br>(0.2 to 0.3)                   | < 0.05<br>(< 0.05 to < 0.05)       | 68.6<br>(46.7 to 95.5)                            | 9.2<br>(-7.3 to 30.5)                               |
| Other skin and subcutaneous diseases          | 58.2<br>(56.5 to 60.0)                  | 65.9<br>(63.9 to 68.0)                | 0.3<br>(0.1 to 0.6)                | 44.8<br>(40.5 to 49.4)                            | 10.9<br>(8.3 to 13.7)                               |
| Sense organ diseases                          | 209.3<br>(200.0 to 219.8)               | 107.4†<br>(99.8 to 115.5)             | 9.8<br>(7.0 to 13.5)               | 19.0<br>(14.2 to 23.7)                            | -14.9<br>(-18.0 to -12.2)                           |
| Glaucoma                                      | 0.4<br>(0.3 to 0.5)                     | --                                    | < 0.05<br>(< 0.05 to 0.1)          | 49.1<br>(27.7 to 73.8)                            | -10.7<br>(-21.1 to 1.8)                             |
| Cataract                                      | 13.3<br>(10.3 to 16.4)                  | --                                    | 1.0<br>(0.7 to 1.4)                | 35.3<br>(19.3 to 52.8)                            | -22.4<br>(-30.1 to -14.4)                           |
| Macular degeneration                          | 0.2<br>(0.1 to 0.3)                     | --                                    | < 0.05<br>(< 0.05 to < 0.05)       | 46.9<br>(21.3 to 77.3)                            | -13.8<br>(-27.5 to 2.7)                             |
| Refraction and accommodation disorders        | 119.5<br>(105.1 to 134.0)               | --                                    | 2.7<br>(1.7 to 4.0)                | 0.8<br>(-5.1 to 6.8)                              | -25.9<br>(-30.7 to -21.2)                           |
| Age-related and other hearing loss            | 110.7<br>(104.1 to 118.2)               | --                                    | 5.0<br>(3.5 to 6.8)                | 24.9<br>(16.9 to 33.0)                            | -8.3<br>(-11.8 to -5.1)                             |
| Other vision loss                             | 4.3<br>(3.7 to 5.0)                     | --                                    | 0.4<br>(0.2 to 0.5)                | 22.8<br>(10.9 to 35.5)                            | -14.7<br>(-22.9 to -6.2)                            |
| Other sense organ diseases                    | 23.7<br>(21.9 to 25.5)                  | 107.4<br>(99.8 to 115.5)              | 0.7<br>(0.5 to 1.1)                | 38.6<br>(31.7 to 45.6)                            | 1.9<br>(-2.0 to 5.8)                                |
| Oral disorders                                | 542.8<br>(500.1 to 580.9)               | 1,551.2†<br>(1,326.3 to 1,776.9)      | 1.7<br>(1.0 to 2.8)                | 31.6<br>(27.8 to 36.0)                            | 0.1<br>(-2.2 to 2.5)                                |
| Caries of deciduous teeth                     | 105.1<br>(78.2 to 133.7)                | 415.0<br>(265.6 to 574.6)             | < 0.05<br>(< 0.05 to < 0.05)       | 10.5<br>(-3.1 to 27.5)                            | -1.4<br>(-13.1 to 11.4)                             |
| Caries of permanent teeth                     | 376.8<br>(330.1 to 426.0)               | 1,126.9<br>(965.3 to 1,287.9)         | 0.2<br>(0.1 to 0.4)                | 11.6<br>(5.5 to 18.2)                             | -6.5<br>(-10.9 to -1.9)                             |
| Periodontal disease                           | 62.2<br>(44.1 to 86.0)                  | 7.8<br>(5.5 to 10.6)                  | 0.4<br>(0.1 to 0.9)                | 35.6<br>(25.4 to 46.6)                            | 0.7<br>(-6.0 to 6.6)                                |
| Edentulism and severe tooth loss              | 19.8<br>(16.3 to 23.3)                  | 1.6<br>(1.3 to 2.0)                   | 0.5<br>(0.4 to 0.8)                | 52.5<br>(43.7 to 62.2)                            | 1.4<br>(-2.5 to 5.8)                                |
| Other oral disorders                          | 17.8<br>(16.9 to 18.7)                  | --                                    | 0.5<br>(0.3 to 0.8)                | 21.8<br>(17.0 to 27.4)                            | 0.2<br>(-2.9 to 3.9)                                |
| <b>Injuries</b>                               | <b>206.0</b><br><b>(154.7 to 269.3)</b> | <b>56.4†</b><br><b>(53.3 to 59.9)</b> | <b>7.5</b><br><b>(4.0 to 11.9)</b> | <b>8.7</b><br><b>(-0.4 to 19.7)</b>               | <b>-8.0</b><br><b>(-14.3 to -0.9)</b>               |
| <b>Transport injuries</b>                     | <b>19.2</b><br><b>(17.7 to 21.0)</b>    | <b>7.7</b><br><b>(6.9 to 8.7)</b>     | <b>1.2</b><br><b>(0.7 to 1.9)</b>  | <b>58.9</b><br><b>(41.7 to 83.1)</b>              | <b>26.2</b><br><b>(16.0 to 39.6)</b>                |
| Road injuries                                 | 12.4<br>(11.6 to 13.3)                  | 5.6<br>(4.9 to 6.5)                   | 0.8<br>(0.4 to 1.2)                | 87.6<br>(69.7 to 111.8)                           | 44.2<br>(33.2 to 58.9)                              |
| Pedestrian road injuries                      | 1.7<br>(1.5 to 1.9)                     | 0.6<br>(0.5 to 0.7)                   | 0.1<br>(0.1 to 0.2)                | 88.7<br>(71.5 to 114.0)                           | 41.6<br>(31.5 to 55.3)                              |
| Cyclist road injuries                         | 2.2<br>(1.8 to 2.6)                     | 1.1<br>(0.8 to 1.4)                   | 0.1<br>(0.1 to 0.2)                | 96.2<br>(77.7 to 121.5)                           | 52.3<br>(40.1 to 68.2)                              |
| Motorcyclist road injuries                    | 3.5<br>(3.0 to 4.2)                     | 1.1<br>(0.9 to 1.3)                   | 0.2<br>(0.1 to 0.3)                | 76.1<br>(57.6 to 102.9)                           | 36.3<br>(24.9 to 52.3)                              |
| Motor vehicle road injuries                   | 3.1<br>(2.7 to 3.5)                     | 1.7<br>(1.4 to 2.0)                   | 0.2<br>(0.1 to 0.3)                | 93.7<br>(76.4 to 116.6)                           | 48.8<br>(38.1 to 62.4)                              |
| Other road injuries                           | 2.0<br>(1.7 to 2.3)                     | 1.2<br>(0.9 to 1.5)                   | 0.1<br>(0.1 to 0.2)                | 88.5<br>(72.0 to 109.9)                           | 44.8<br>(34.5 to 57.8)                              |
| Other transport injuries                      | 6.8<br>(5.6 to 8.4)                     | 2.1<br>(1.7 to 2.6)                   | 0.4<br>(0.2 to 0.7)                | 25.1<br>(7.6 to 49.9)                             | -0.5<br>(-10.2 to 12.5)                             |
| <b>Unintentional injuries</b>                 | <b>75.4</b><br><b>(70.2 to 80.7)</b>    | <b>43.3</b><br><b>(40.5 to 46.5)</b>  | <b>2.9</b><br><b>(1.7 to 4.5)</b>  | <b>40.8</b><br><b>(24.6 to 62.1)</b>              | <b>10.7</b><br><b>(1.4 to 21.8)</b>                 |
| Falls                                         | 23.2<br>(20.3 to 26.3)                  | 13.1<br>(11.3 to 15.5)                | 1.0<br>(0.6 to 1.6)                | 61.1<br>(42.0 to 88.5)                            | 23.3<br>(12.3 to 37.5)                              |
| Drowning                                      | 0.7<br>(0.6 to 0.8)                     | 0.2<br>(0.1 to 0.2)                   | < 0.05<br>(< 0.05 to 0.1)          | 10.6<br>(-2.4 to 27.5)                            | -12.3<br>(-20.0 to -3.7)                            |
| Fire, heat, and hot substances                | 7.6<br>(6.5 to 9.2)                     | 1.3<br>(1.0 to 1.6)                   | 0.2<br>(0.1 to 0.4)                | 10.0<br>(-4.3 to 31.5)                            | -12.5<br>(-21.3 to -0.8)                            |
| Poisonings                                    | 0.2<br>(0.2 to 0.2)                     | 0.4<br>(0.3 to 0.6)                   | < 0.05<br>(< 0.05 to < 0.05)       | 50.3<br>(35.4 to 69.3)                            | 20.7<br>(13.0 to 29.5)                              |
| Exposure to mechanical forces                 | 11.6<br>(10.0 to 14.2)                  | 5.9<br>(4.8 to 6.9)                   | 0.3<br>(0.2 to 0.6)                | 63.3<br>(48.2 to 81.2)                            | 27.9<br>(18.9 to 37.9)                              |
| Unintentional firearm injuries                | 0.5<br>(0.4 to 0.6)                     | 0.2<br>(0.1 to 0.2)                   | < 0.05<br>(< 0.05 to < 0.05)       | 36.6<br>(22.8 to 51.9)                            | 6.6<br>(-2.4 to 16.1)                               |
| Unintentional suffocation                     | 0.8<br>(0.6 to 1.0)                     | 0.2<br>(0.2 to 0.3)                   | < 0.05<br>(< 0.05 to 0.1)          | 31.4<br>(14.6 to 58.2)                            | 5.6<br>(-4.1 to 19.9)                               |
| Other exposure to mechanical forces           | 10.3<br>(8.7 to 12.9)                   | 5.5<br>(4.5 to 6.5)                   | 0.3<br>(0.2 to 0.5)                | 70.6<br>(55.9 to 86.4)                            | 32.7<br>(23.8 to 41.8)                              |

| Cause                                                                               | Prevalence in thousands (95% UI)       | Incidence in thousands (95% UI)                      | YLDs in thousands (95% UI)        |                                                   |                                                     |
|-------------------------------------------------------------------------------------|----------------------------------------|------------------------------------------------------|-----------------------------------|---------------------------------------------------|-----------------------------------------------------|
|                                                                                     | 2016 counts                            | 2016 counts                                          | 2016 counts                       | Percentage change in counts between 2006 and 2016 | Percentage change in age-standardised rates between |
| Adverse effects of medical treatment                                                | 0.3<br>(0.3 to 0.4)                    | 4.5<br>(3.8 to 5.2)                                  | < 0.05<br>(< 0.05 to 0.1)         | 31.9<br>(23.0 to 41.7)                            | -6.1<br>(-10.5 to -1.4)                             |
| Animal contact                                                                      | 3.0<br>(2.6 to 3.6)                    | 4.5<br>(3.6 to 5.5)                                  | 0.1<br>(0.1 to 0.1)               | 20.4<br>(11.1 to 29.9)                            | -5.4<br>(-9.9 to -0.8)                              |
| Venomous animal contact                                                             | 0.8<br>(0.7 to 1.0)                    | 1.6<br>(1.2 to 2.0)                                  | 0.1<br>(< 0.05 to 0.1)            | 33.2<br>(17.9 to 53.1)                            | 7.2<br>(-0.3 to 15.5)                               |
| Non-venomous animal contact                                                         | 2.2<br>(1.8 to 2.8)                    | 2.9<br>(2.3 to 3.6)                                  | < 0.05<br>(< 0.05 to 0.1)         | 6.3<br>(-0.6 to 13.5)                             | -17.6<br>(-21.9 to -13.4)                           |
| Foreign body                                                                        | 6.5<br>(5.1 to 7.9)                    | 4.0<br>(3.5 to 4.6)                                  | 0.3<br>(0.2 to 0.5)               | 20.0<br>(4.5 to 40.4)                             | -3.6<br>(-11.7 to 6.1)                              |
| Pulmonary aspiration and foreign body in airway                                     | 4.6<br>(3.4 to 6.2)                    | 2.2<br>(1.8 to 2.7)                                  | 0.2<br>(0.1 to 0.4)               | 20.8<br>(4.5 to 43.1)                             | -1.9<br>(-10.7 to 9.2)                              |
| Foreign body in eyes                                                                | 0.2<br>(0.1 to 0.3)                    | 1.0<br>(0.7 to 1.3)                                  | < 0.05<br>(< 0.05 to < 0.05)      | 27.1<br>(20.5 to 33.8)                            | -0.3<br>(-5.4 to 4.0)                               |
| Foreign body in other body part                                                     | 1.7<br>(1.3 to 2.1)                    | 0.9<br>(0.7 to 1.1)                                  | 0.1<br>(< 0.05 to 0.1)            | 15.9<br>(2.6 to 32.0)                             | -9.2<br>(-16.4 to -1.8)                             |
| Environmental heat and cold exposure                                                | 7.1<br>(5.9 to 8.4)                    | 2.5<br>(2.0 to 3.2)                                  | 0.3<br>(0.2 to 0.5)               | 24.2<br>(9.3 to 45.0)                             | -1.5<br>(-10.3 to 9.7)                              |
| Other unintentional injuries                                                        | 15.3<br>(12.2 to 18.7)                 | 7.1<br>(5.8 to 8.6)                                  | 0.5<br>(0.3 to 0.8)               | 43.9<br>(27.2 to 66.2)                            | 12.2<br>(3.2 to 23.5)                               |
| <b>Self-harm and interpersonal violence</b>                                         | <b>28.6</b><br><b>(25.7 to 31.9)</b>   | <b>5.3†</b><br><b>(4.5 to 6.2)</b>                   | <b>0.6</b><br><b>(0.4 to 0.8)</b> | <b>28.6</b><br><b>(22.4 to 34.0)</b>              | <b>3.8</b><br><b>(-1.3 to 8.2)</b>                  |
| Self-harm                                                                           | 0.8<br>(0.6 to 0.9)                    | 0.4<br>(0.3 to 0.5)                                  | < 0.05<br>(< 0.05 to 0.1)         | 32.8<br>(21.2 to 46.2)                            | -0.1<br>(-6.6 to 7.0)                               |
| Self-harm by firearm                                                                | < 0.05<br>(< 0.05 to < 0.05)           | < 0.05<br>(< 0.05 to < 0.05)                         | < 0.05<br>(< 0.05 to < 0.05)      | 17.3<br>(4.6 to 32.7)                             | -10.6<br>(-18.1 to -2.0)                            |
| Self-harm by other specified means                                                  | 0.7<br>(0.6 to 0.8)                    | 0.4<br>(0.3 to 0.5)                                  | < 0.05<br>(< 0.05 to 0.1)         | 33.3<br>(21.4 to 46.6)                            | 0.2<br>(-6.4 to 7.2)                                |
| Interpersonal violence                                                              | 27.8<br>(24.9 to 31.2)                 | 4.9‡<br>(4.1 to 5.8)                                 | 0.5<br>(0.3 to 0.8)               | 28.2<br>(22.5 to 33.7)                            | 4.2<br>(-0.8 to 8.6)                                |
| Assault by firearm                                                                  | 0.1<br>(0.1 to 0.1)                    | < 0.05<br>(< 0.05 to 0.1)                            | < 0.05<br>(< 0.05 to < 0.05)      | 38.2<br>(25.1 to 54.0)                            | 6.7<br>(-0.8 to 16.3)                               |
| Assault by sharp object                                                             | 2.0<br>(1.6 to 2.3)                    | 1.0<br>(0.8 to 1.3)                                  | 0.1<br>(< 0.05 to 0.1)            | 33.8<br>(20.1 to 48.2)                            | 4.3<br>(-4.6 to 13.2)                               |
| Sexual violence                                                                     | 20.1<br>(17.4 to 23.3)                 | --                                                   | 0.2<br>(0.1 to 0.2)               | 7.8<br>(2.4 to 13.7)                              | -9.5<br>(-13.0 to -5.7)                             |
| Assault by other means                                                              | 5.6<br>(4.7 to 6.9)                    | 3.9<br>(3.2 to 4.7)                                  | 0.3<br>(0.1 to 0.4)               | 44.5<br>(30.7 to 61.2)                            | 11.6<br>(2.9 to 22.5)                               |
| <b>Forces of nature, conflict and terrorism, and executions and police conflict</b> | <b>102.9</b><br><b>(52.3 to 165.0)</b> | <b>&lt; 0.05†</b><br><b>(&lt; 0.05 to &lt; 0.05)</b> | <b>2.8</b><br><b>(1.3 to 4.8)</b> | <b>-22.1</b><br><b>(-33.9 to -11.6)</b>           | <b>-27.8</b><br><b>(-37.7 to -19.6)</b>             |
| Exposure to forces of nature                                                        | --                                     | --                                                   | --                                | --                                                | --                                                  |
| Conflict and terrorism                                                              | 102.8<br>(52.3 to 164.9)               | --                                                   | 2.8<br>(1.3 to 4.8)               | -22.1<br>(-33.9 to -11.6)                         | -27.8<br>(-37.7 to -19.6)                           |
| Executions and police conflict                                                      | 0.1<br>(< 0.05 to 0.2)                 | < 0.05<br>(< 0.05 to < 0.05)                         | < 0.05<br>(< 0.05 to < 0.05)      | 17.8<br>(8.3 to 30.9)                             | -4.9<br>(-13.1 to 7.1)                              |
| <b>Impairments</b>                                                                  | --                                     | --                                                   | --                                | --                                                | --                                                  |
| Anaemia                                                                             | 352.4<br>(325.7 to 383.3)              | --                                                   | 7.9<br>(5.2 to 12.0)              | -3.6<br>(-12.4 to 6.7)                            | -20.7<br>(-27.0 to -14.1)                           |
| Developmental intellectual disability                                               | 26.1<br>(18.8 to 34.5)                 | --                                                   | 2.5<br>(1.8 to 3.4)               | 4.8<br>(-1.7 to 12.4)                             | -11.2<br>(-16.3 to -5.1)                            |
| Epilepsy                                                                            | 6.2<br>(3.4 to 9.0)                    | --                                                   | 2.3<br>(1.1 to 3.8)               | 22.9<br>(-43.2 to 146.2)                          | 2.8<br>(-52.9 to 109.6)                             |
| Guillain-Barre syndrome                                                             | < 0.05<br>(< 0.05 to < 0.05)           | --                                                   | < 0.05<br>(< 0.05 to < 0.05)      | 23.2<br>(17.4 to 29.4)                            | 0.1<br>(0.0 to 0.1)                                 |
| Hearing loss                                                                        | 127.0<br>(120.6 to 134.1)              | --                                                   | 6.0<br>(4.2 to 8.0)               | 19.7<br>(14.1 to 25.2)                            | -9.3<br>(-12.2 to -6.6)                             |
| Heart failure                                                                       | 4.0<br>(3.5 to 4.6)                    | --                                                   | 0.5<br>(0.3 to 0.6)               | 76.0<br>(61.6 to 92.4)                            | 8.0<br>(-0.3 to 16.4)                               |
| Infertility                                                                         | 11.4<br>(9.0 to 14.6)                  | --                                                   | 0.1<br>(< 0.05 to 0.1)            | 39.4<br>(18.5 to 66.0)                            | 6.8<br>(-10.9 to 29.6)                              |
| Pelvic inflammatory disease                                                         | 0.8<br>(0.7 to 1.0)                    | --                                                   | 0.1<br>(0.1 to 0.1)               | 17.6<br>(2.1 to 35.1)                             | -6.0<br>(-17.8 to 8.3)                              |
| Vision loss                                                                         | 141.4<br>(126.8 to 156.6)              | --                                                   | 4.6<br>(3.2 to 6.5)               | 11.6<br>(5.7 to 17.8)                             | -22.2<br>(-26.9 to -17.6)                           |

We did not calculate incidence for the nine impairments, certain NTDs, and causes with only birth prevalence. Blank cells mean that no estimate is available.

† Incidence for aggregate causes represents the sum of the incidence of the causes below the aggregate.

‡ Incidence estimates for stroke represent first-ever stroke only.

^ Incidence of HIV/AIDS represents new infections of HIV only and does not include new infections of Tuberculosis in HIV positive cases.

SR Table 14: Prevalence, incidence, and YLDs for 2016, percentage change of YLD counts and percentage change of age-standardised YLD rates between 2006 and 2016 by cause and impairments, for all ages, Togo.

| Cause                                                                                | Prevalence in thousands (95% UI)       | Incidence in thousands (95% UI)            | YLDs in thousands (95% UI)       |                                                   |                                                     |
|--------------------------------------------------------------------------------------|----------------------------------------|--------------------------------------------|----------------------------------|---------------------------------------------------|-----------------------------------------------------|
|                                                                                      | 2016 counts                            | 2016 counts                                | 2016 counts                      | Percentage change in counts between 2006 and 2016 | Percentage change in age-standardised rates between |
| <b>All causes</b>                                                                    | <b>7,294.8</b><br>(7,277.5 to 7,311.4) | <b>50,601.5†</b><br>(47,957.6 to 53,491.7) | <b>683.3</b><br>(505.9 to 895.4) | <b>22.9</b><br>(18.3 to 27.8)                     | <b>-6.9</b><br>(-9.7 to -3.9)                       |
| <b>Communicable, maternal, neonatal, and nutritional disorders</b>                   | <b>6,312.8</b><br>(6,188.3 to 6,432.4) | <b>32,248.1†</b><br>(29,953.5 to 34,739.2) | <b>170.0</b><br>(120.9 to 230.6) | <b>-1.2</b><br>(-7.7 to 5.6)                      | <b>-28.1</b><br>(-33.6 to -22.5)                    |
| <b>HIV/AIDS and tuberculosis</b>                                                     | <b>1,934.6</b><br>(1,709.0 to 2,165.6) | <b>17.1†</b><br>(13.2 to 21.7)             | <b>15.8</b><br>(10.5 to 22.4)    | <b>-29.5</b><br>(-40.1 to -15.2)                  | <b>-48.2</b><br>(-56.8 to -35.2)                    |
| Tuberculosis                                                                         | 1,720.2<br>(1,479.9 to 1,998.0)        | 10.6†<br>(8.4 to 13.1)                     | 2.0<br>(1.2 to 2.9)              | 16.9<br>(0.9 to 36.3)                             | -13.7<br>(-22.7 to -2.9)                            |
| Drug-susceptible tuberculosis                                                        | 6.3<br>(5.0 to 7.9)                    | 10.4<br>(8.3 to 12.8)                      | 1.9<br>(1.2 to 2.8)              | 17.1<br>(1.0 to 36.8)                             | -13.5<br>(-22.8 to -2.5)                            |
| Multidrug-resistant tuberculosis without extensive drug resistance                   | 0.1<br>(< 0.05 to 0.3)                 | 0.2<br>(< 0.05 to 0.4)                     | < 0.05<br>(< 0.05 to 0.1)        | 5.7<br>(-65.9 to 212.4)                           | -22.6<br>(-75.1 to 127.4)                           |
| Extensively drug-resistant tuberculosis                                              | < 0.05<br>(< 0.05 to < 0.05)           | < 0.05<br>(< 0.05 to < 0.05)               | < 0.05<br>(< 0.05 to < 0.05)     | 222.0<br>(3.9 to 852.6)                           | 136.0<br>(-24.2 to 592.9)                           |
| Latent tuberculosis infection                                                        | 1,713.8<br>(1,472.6 to 1,991.6)        | --                                         | --                               | --                                                | --                                                  |
| HIV/AIDS                                                                             | 114.7<br>(97.2 to 133.9)               | 6.6^<br>(3.8 to 10.2)                      | 13.8<br>(9.0 to 20.3)            | -33.3<br>(-43.5 to -18.2)                         | -51.2<br>(-59.6 to -38.4)                           |
| Drug-susceptible HIV/AIDS - Tuberculosis                                             | 1.3<br>(0.8 to 2.1)                    | 2.2<br>(1.3 to 3.5)                        | 0.5<br>(0.3 to 0.9)              | -29.5<br>(-42.4 to -15.8)                         | -43.8<br>(-54.0 to -33.2)                           |
| Multidrug-resistant HIV/AIDS - Tuberculosis without extensive drug resistance        | < 0.05<br>(< 0.05 to 0.1)              | < 0.05<br>(< 0.05 to 0.1)                  | < 0.05<br>(< 0.05 to < 0.05)     | -36.6<br>(-79.7 to 83.6)                          | -49.6<br>(-83.8 to 45.9)                            |
| Extensively drug-resistant HIV/AIDS - Tuberculosis                                   | < 0.05<br>(< 0.05 to < 0.05)           | < 0.05<br>(< 0.05 to < 0.05)               | < 0.05<br>(< 0.05 to < 0.05)     | 93.1<br>(-38.2 to 459.3)                          | 53.7<br>(-50.7 to 344.6)                            |
| HIV/AIDS resulting in other diseases                                                 | 113.3<br>(95.9 to 132.6)               | 6.6<br>(3.8 to 10.2)                       | 13.3<br>(8.6 to 19.6)            | -33.4<br>(-44.0 to -17.8)                         | -51.5<br>(-60.0 to -38.2)                           |
| <b>Diarrhoea, lower respiratory infections, and other common infectious diseases</b> | <b>546.2</b><br>(522.2 to 574.2)       | <b>25,222.5†</b><br>(23,066.6 to 27,431.8) | <b>30.4</b><br>(21.4 to 41.0)    | <b>20.0</b><br>(16.1 to 23.7)                     | <b>-6.9</b><br>(-9.6 to -4.2)                       |
| Diarrhoeal diseases                                                                  | 107.1<br>(100.0 to 113.9)              | 7,188.7<br>(6,701.0 to 7,673.0)            | 12.1<br>(8.3 to 16.6)            | 11.4<br>(5.2 to 17.5)                             | -12.1<br>(-16.1 to -7.9)                            |
| Intestinal infectious diseases                                                       | 1.1<br>(0.8 to 1.7)                    | 22.3†<br>(14.5 to 33.0)                    | 0.2<br>(0.1 to 0.3)              | 2.9<br>(-20.1 to 31.4)                            | -21.6<br>(-36.1 to -4.5)                            |
| Typhoid fever                                                                        | 1.1<br>(0.7 to 1.7)                    | 17.0<br>(11.0 to 25.3)                     | 0.2<br>(0.1 to 0.3)              | 2.8<br>(-22.6 to 34.1)                            | -21.7<br>(-37.7 to -2.9)                            |
| Paratyphoid fever                                                                    | 0.2<br>(0.1 to 0.4)                    | 5.3<br>(3.1 to 8.9)                        | < 0.05<br>(< 0.05 to < 0.05)     | 11.6<br>(-13.4 to 43.3)                           | -15.4<br>(-32.0 to 4.5)                             |
| Other intestinal infectious diseases                                                 | --                                     | --                                         | < 0.05<br>(< 0.05 to < 0.05)     | -30.8<br>(-46.5 to -9.5)                          | -43.3<br>(-52.9 to -32.3)                           |
| Lower respiratory infections                                                         | 9.3<br>(8.6 to 10.1)                   | 405.3<br>(372.8 to 443.1)                  | 0.6<br>(0.4 to 0.8)              | 10.7<br>(-3.4 to 26.3)                            | -10.0<br>(-18.7 to -0.9)                            |
| Upper respiratory infections                                                         | 222.7<br>(196.7 to 249.2)              | 16,724.6<br>(14,655.5 to 18,847.5)         | 5.6<br>(3.3 to 8.8)              | 29.6<br>(20.9 to 38.5)                            | -0.5<br>(-6.6 to 5.5)                               |
| Otitis media                                                                         | 176.6<br>(157.7 to 196.8)              | 636.6<br>(497.0 to 810.0)                  | 5.9<br>(3.8 to 8.8)              | 26.1<br>(17.2 to 34.9)                            | -2.0<br>(-8.3 to 4.4)                               |
| Meningitis                                                                           | 39.7<br>(32.1 to 48.6)                 | 10.6<br>(9.1 to 12.7)                      | 3.7<br>(2.6 to 5.0)              | 27.1<br>(18.4 to 36.8)                            | -3.7<br>(-10.1 to 3.1)                              |
| Pneumococcal meningitis                                                              | 7.4<br>(6.4 to 8.6)                    | 0.5<br>(0.4 to 0.6)                        | 1.1<br>(0.8 to 1.5)              | 23.9<br>(6.1 to 45.4)                             | -7.6<br>(-19.3 to 7.0)                              |
| H influenzae type B meningitis                                                       | 2.6<br>(2.2 to 3.1)                    | 0.2<br>(0.2 to 0.4)                        | 0.5<br>(0.3 to 0.7)              | 22.5<br>(13.1 to 31.0)                            | -7.6<br>(-15.1 to -0.7)                             |
| Meningococcal infection                                                              | 14.9<br>(10.3 to 20.1)                 | 5.2<br>(4.2 to 6.3)                        | 1.2<br>(0.8 to 1.6)              | 6.5<br>(-5.7 to 20.8)                             | -19.7<br>(-28.3 to -9.8)                            |
| Other meningitis                                                                     | 14.8<br>(10.0 to 20.5)                 | 4.7<br>(3.8 to 5.9)                        | 0.9<br>(0.6 to 1.3)              | 79.7<br>(57.5 to 104.8)                           | 40.9<br>(23.7 to 61.2)                              |
| Encephalitis                                                                         | 18.5<br>(11.8 to 27.9)                 | 7.8<br>(6.7 to 9.0)                        | 2.0<br>(1.4 to 2.6)              | 32.7<br>(18.1 to 48.9)                            | -0.1<br>(-9.6 to 10.4)                              |
| Diphtheria                                                                           | < 0.05<br>(< 0.05 to < 0.05)           | < 0.05<br>(< 0.05 to < 0.05)               | < 0.05<br>(< 0.05 to < 0.05)     | -60.1<br>(-83.0 to -6.1)                          | -65.8<br>(-83.5 to -28.8)                           |
| Whooping cough                                                                       | 3.2<br>(2.5 to 4.0)                    | 23.2<br>(18.1 to 29.2)                     | 0.2<br>(0.1 to 0.2)              | -22.4<br>(-34.6 to -6.9)                          | -36.7<br>(-46.9 to -24.1)                           |
| Tetanus                                                                              | 0.1<br>(0.1 to 0.1)                    | 0.1<br>(0.1 to 0.2)                        | < 0.05<br>(< 0.05 to < 0.05)     | -11.9<br>(-38.5 to 11.8)                          | -31.7<br>(-46.5 to -17.4)                           |
| Measles                                                                              | 0.3<br>(0.1 to 0.7)                    | 11.0<br>(3.8 to 24.4)                      | < 0.05<br>(< 0.05 to 0.1)        | 6.6<br>(-56.7 to 145.1)                           | -13.9<br>(-65.3 to 97.2)                            |
| Varicella and herpes zoster                                                          | 6.7<br>(6.2 to 7.1)                    | 192.3<br>(180.8 to 204.6)                  | 0.2<br>(0.1 to 0.3)              | 32.1<br>(14.1 to 54.6)                            | 0.0<br>(-10.7 to 12.7)                              |
| <b>Neglected tropical diseases and malaria</b>                                       | <b>2,944.2</b><br>(2,754.4 to 3,139.8) | <b>2,980.5†</b><br>(2,531.6 to 3,597.8)    | <b>36.5</b><br>(25.9 to 50.7)    | <b>-34.1</b><br>(-45.0 to -21.9)                  | <b>-54.8</b><br>(-63.1 to -45.3)                    |
| Malaria                                                                              | 1,959.7<br>(1,648.7 to 2,292.7)        | 2,660.4<br>(2,218.6 to 3,273.3)            | 21.3<br>(15.2 to 29.4)           | -1.7<br>(-9.4 to 7.2)                             | -23.3<br>(-29.2 to -16.8)                           |
| Chagas disease                                                                       | --                                     | --                                         | --                               | --                                                | --                                                  |
| Leishmaniasis                                                                        | --                                     | --                                         | --                               | --                                                | --                                                  |
| Visceral leishmaniasis                                                               | --                                     | --                                         | --                               | --                                                | --                                                  |
| Cutaneous and mucocutaneous leishmaniasis                                            | --                                     | --                                         | --                               | --                                                | --                                                  |
| African trypanosomiasis                                                              | --                                     | --                                         | --                               | --                                                | --                                                  |
| Schistosomiasis                                                                      | 518.2<br>(468.1 to 572.3)              | 246.8<br>(225.2 to 271.2)                  | 5.6<br>(3.0 to 9.9)              | -78.3<br>(-80.7 to -75.2)                         | -84.2<br>(-85.8 to -82.1)                           |
| Cysticercosis                                                                        | 15.4<br>(12.2 to 18.8)                 | --                                         | 2.9<br>(1.7 to 4.4)              | 23.1<br>(3.0 to 43.4)                             | -8.3<br>(-22.1 to 4.7)                              |
| Cystic echinococcosis                                                                | 3.6<br>(0.8 to 12.8)                   | 0.8<br>(0.2 to 2.7)                        | 0.3<br>(0.1 to 1.3)              | -18.0<br>(-87.0 to 390.7)                         | -38.9<br>(-88.9 to 285.1)                           |
| Lymphatic filariasis                                                                 | 8.7<br>(3.5 to 22.0)                   | 1.5<br>(1.3 to 1.7)                        | 0.8<br>(0.2 to 2.5)              | -10.6<br>(-47.8 to 19.6)                          | -33.2<br>(-60.6 to -12.1)                           |
| Onchocerciasis                                                                       | 1.7<br>(0.7 to 3.0)                    | < 0.05<br>(< 0.05 to < 0.05)               | 0.2<br>(0.1 to 0.4)              | -39.0<br>(-66.4 to 0.5)                           | -47.8<br>(-71.3 to -16.2)                           |
| Trachoma                                                                             | 4.2<br>(2.7 to 6.2)                    | --                                         | 0.4<br>(0.2 to 0.6)              | 4.6<br>(-18.4 to 32.4)                            | -20.6<br>(-41.9 to 7.3)                             |
| Dengue                                                                               | 4.2<br>(2.4 to 7.0)                    | 70.8<br>(44.9 to 103.8)                    | 0.7<br>(0.3 to 1.3)              | 191.3<br>(105.1 to 600.5)                         | 122.1<br>(64.5 to 429.9)                            |
| Yellow fever                                                                         | < 0.05<br>(< 0.05 to < 0.05)           | 0.2<br>(0.1 to 0.5)                        | < 0.05<br>(< 0.05 to < 0.05)     | -27.0<br>(-53.1 to 16.9)                          | -44.4<br>(-61.7 to -17.2)                           |
| Rabies                                                                               | < 0.05<br>(< 0.05 to < 0.05)           | < 0.05<br>(< 0.05 to 0.1)                  | < 0.05<br>(< 0.05 to < 0.05)     | -7.3<br>(-45.9 to 60.9)                           | -26.9<br>(-52.2 to 13.5)                            |
| Intestinal nematode infections                                                       | 807.8<br>(721.6 to 899.6)              | --                                         | 1.1<br>(0.6 to 1.7)              | 32.4<br>(15.2 to 51.9)                            | 1.6<br>(-13.3 to 18.2)                              |
| Ascariasis                                                                           | 315.0<br>(268.7 to 369.6)              | --                                         | < 0.05<br>(< 0.05 to 0.1)        | 30.2<br>(-14.5 to 99.5)                           | 0.3<br>(-37.6 to 64.1)                              |



| Cause                                                                   | Prevalence in thousands (95% UI)        | Incidence in thousands (95% UI)             | YLDs in thousands (95% UI)        |                                                                      |                                                                        |
|-------------------------------------------------------------------------|-----------------------------------------|---------------------------------------------|-----------------------------------|----------------------------------------------------------------------|------------------------------------------------------------------------|
|                                                                         | 2016 counts<br>(116.6 to 170.4)         | 2016 counts                                 | 2016 counts<br>(0.6 to 1.7)       | Percentage change in counts between 2006 and 2016<br>(-12.3 to 99.1) | Percentage change in age-standardised rates between<br>(-38.5 to 63.7) |
| Trichuriasis                                                            | 141.3<br>(116.6 to 170.4)               | --                                          | < 0.05<br>(< 0.05 to < 0.05)      | 30.1<br>(-12.3 to 99.1)                                              | -0.6<br>(-38.5 to 63.7)                                                |
| Hookworm disease                                                        | 384.6<br>(327.4 to 447.0)               | --                                          | 1.0<br>(0.6 to 1.7)               | 32.5<br>(14.9 to 52.6)                                               | 1.7<br>(-13.5 to 18.1)                                                 |
| Food-borne trematodiasis                                                | --                                      | --                                          | --                                | --                                                                   | --                                                                     |
| Leprosy                                                                 | 1.0<br>(0.9 to 1.1)                     | 0.1<br>(0.1 to 0.1)                         | 0.1<br>(< 0.05 to 0.1)            | -1.8<br>(-19.3 to 19.4)                                              | -25.0<br>(-35.4 to -13.1)                                              |
| Ebola virus disease                                                     | --                                      | --                                          | --                                | --                                                                   | --                                                                     |
| Zika virus disease                                                      | --                                      | --                                          | --                                | --                                                                   | --                                                                     |
| Guinea worm disease                                                     | --                                      | --                                          | --                                | --                                                                   | --                                                                     |
| Other neglected tropical diseases                                       | 97.5<br>(94.1 to 101.3)                 | --                                          | 3.2<br>(2.1 to 4.7)               | 23.9<br>(11.8 to 37.6)                                               | -1.1<br>(-10.3 to 9.5)                                                 |
| <b>Maternal disorders</b>                                               | <b>20.1<br/>(16.2 to 24.6)</b>          | <b>156.7†<br/>(136.7 to 181.3)</b>          | <b>2.1<br/>(1.4 to 3.0)</b>       | <b>0.1<br/>(-18.1 to 21.8)</b>                                       | <b>-27.7<br/>(-40.1 to -13.0)</b>                                      |
| Maternal haemorrhage                                                    | 2.2<br>(1.7 to 2.9)                     | 18.0<br>(12.0 to 26.0)                      | 0.1<br>(0.1 to 0.2)               | 18.3<br>(-19.0 to 70.3)                                              | -11.5<br>(-38.8 to 27.9)                                               |
| Maternal sepsis and other pregnancy related infections                  | 3.3<br>(2.6 to 4.2)                     | 17.2<br>(13.2 to 23.3)                      | 0.1<br>(< 0.05 to 0.1)            | 21.6<br>(-38.8 to 148.2)                                             | -9.4<br>(-53.1 to 82.9)                                                |
| Maternal hypertensive disorders                                         | 11.9<br>(7.9 to 16.1)                   | 56.4<br>(50.8 to 62.6)                      | 0.6<br>(0.3 to 0.9)               | 36.6<br>(-20.4 to 131.6)                                             | 1.6<br>(-39.8 to 67.9)                                                 |
| Maternal obstructed labour and uterine rupture                          | 3.0<br>(2.5 to 3.7)                     | 10.0<br>(7.0 to 13.8)                       | 1.0<br>(0.6 to 1.4)               | -16.0<br>(-30.8 to 3.7)                                              | -39.0<br>(-49.3 to -25.3)                                              |
| Maternal abortion, miscarriage, and ectopic pregnancy                   | 0.5<br>(0.3 to 0.7)                     | 55.2<br>(39.3 to 78.1)                      | < 0.05<br>(< 0.05 to 0.1)         | 69.5<br>(-17.9 to 238.2)                                             | 23.9<br>(-39.3 to 144.2)                                               |
| Other maternal disorders                                                | --                                      | --                                          | 0.3<br>(0.2 to 0.5)               | -4.5<br>(-21.5 to 15.8)                                              | -30.9<br>(-42.9 to -16.9)                                              |
| <b>Neonatal disorders</b>                                               | <b>111.8<br/>(90.0 to 142.8)</b>        | --                                          | <b>14.7<br/>(8.2 to 25.2)</b>     | <b>53.6<br/>(12.6 to 94.6)</b>                                       | <b>23.4<br/>(-10.6 to 58.1)</b>                                        |
| Neonatal preterm birth complications                                    | 77.1<br>(56.3 to 111.7)                 | --                                          | 4.8<br>(3.1 to 7.3)               | 26.2<br>(-3.1 to 61.2)                                               | -0.5<br>(-23.9 to 27.3)                                                |
| Neonatal encephalopathy due to birth asphyxia and trauma                | 30.5<br>(14.9 to 54.4)                  | --                                          | 3.3<br>(0.5 to 10.0)              | 123.9<br>(-14.9 to 397.7)                                            | 79.2<br>(-33.4 to 320.1)                                               |
| Neonatal sepsis and other neonatal infections                           | 12.9<br>(4.4 to 29.4)                   | --                                          | 4.9<br>(1.2 to 12.9)              | 65.2<br>(-7.8 to 179.2)                                              | 35.1<br>(-26.4 to 138.2)                                               |
| Hemolytic disease and other neonatal jaundice                           | 1.5<br>(1.2 to 1.7)                     | --                                          | 0.5<br>(0.4 to 0.6)               | 24.1<br>(8.4 to 43.1)                                                | -3.0<br>(-13.6 to 9.3)                                                 |
| Other neonatal disorders                                                | --                                      | --                                          | 1.2<br>(0.7 to 1.9)               | 29.0<br>(3.2 to 57.5)                                                | 5.7<br>(-15.8 to 29.2)                                                 |
| <b>Nutritional deficiencies</b>                                         | <b>3,419.2<br/>(3,088.7 to 3,814.7)</b> | <b>2,657.0†<br/>(1,806.0 to 3,839.6)</b>    | <b>64.4<br/>(42.6 to 92.2)</b>    | <b>22.3<br/>(14.5 to 30.3)</b>                                       | <b>-0.4<br/>(-5.5 to 4.6)</b>                                          |
| Protein-energy malnutrition                                             | 90.5<br>(75.4 to 106.4)                 | 59.5<br>(50.4 to 68.9)                      | 3.3<br>(2.0 to 4.9)               | -30.0<br>(-48.9 to -8.2)                                             | -42.9<br>(-58.2 to -24.7)                                              |
| Iodine deficiency                                                       | 127.0<br>(112.0 to 145.2)               | 4.7<br>(4.2 to 5.4)                         | 3.7<br>(2.5 to 5.2)               | 7.2<br>(-3.0 to 17.4)                                                | -18.8<br>(-25.6 to -12.3)                                              |
| Vitamin A deficiency                                                    | 2,141.8<br>(1,611.0 to 2,756.4)         | 2,592.8<br>(1,736.5 to 3,780.1)             | 0.5<br>(0.3 to 0.9)               | 26.5<br>(-3.6 to 66.3)                                               | -3.0<br>(-24.5 to 25.3)                                                |
| Iron-deficiency anaemia                                                 | 1,759.2<br>(1,711.9 to 1,812.5)         | --                                          | 56.8<br>(37.3 to 82.4)            | 29.3<br>(21.0 to 38.3)                                               | 4.9<br>(-0.7 to 10.7)                                                  |
| Other nutritional deficiencies                                          | --                                      | --                                          | 0.1<br>(0.1 to 0.2)               | -31.4<br>(-50.7 to -8.8)                                             | -43.9<br>(-59.6 to -25.0)                                              |
| <b>Other communicable, maternal, neonatal, and nutritional diseases</b> | <b>2,407.6<br/>(2,231.5 to 2,612.4)</b> | <b>1,214.3<br/>(1,017.5 to 1,468.1)</b>     | <b>6.1<br/>(3.9 to 9.0)</b>       | <b>29.9<br/>(22.0 to 38.2)</b>                                       | <b>-2.3<br/>(-7.2 to 3.4)</b>                                          |
| Sexually transmitted diseases excluding HIV                             | 1,287.2<br>(1,192.2 to 1,388.6)         | 753.3<br>(638.8 to 894.7)                   | 3.1<br>(2.0 to 4.9)               | 32.7<br>(23.9 to 43.2)                                               | -2.8<br>(-8.8 to 4.5)                                                  |
| Syphilis                                                                | 72.2<br>(58.6 to 88.2)                  | 50.1<br>(39.3 to 63.0)                      | 0.1<br>(0.1 to 0.2)               | 39.9<br>(23.7 to 58.7)                                               | 2.4<br>(-10.2 to 17.2)                                                 |
| Chlamydial infection                                                    | 79.0<br>(53.5 to 112.7)                 | 76.0<br>(55.8 to 104.2)                     | 0.6<br>(0.4 to 1.0)               | 30.7<br>(14.7 to 50.9)                                               | -4.6<br>(-16.7 to 9.0)                                                 |
| Gonococcal infection                                                    | 74.7<br>(48.8 to 107.7)                 | 257.8<br>(151.5 to 394.7)                   | 0.7<br>(0.4 to 1.1)               | 35.2<br>(17.7 to 56.6)                                               | -0.2<br>(-12.2 to 15.4)                                                |
| Trichomoniasis                                                          | 213.6<br>(181.7 to 246.3)               | 192.5<br>(161.7 to 224.1)                   | 0.3<br>(0.1 to 0.5)               | 32.1<br>(23.2 to 41.8)                                               | -0.9<br>(-6.5 to 5.2)                                                  |
| Genital herpes                                                          | 947.4<br>(820.3 to 1,096.0)             | 95.7<br>(81.0 to 113.9)                     | 0.2<br>(0.1 to 0.6)               | 35.8<br>(23.3 to 48.5)                                               | -0.1<br>(-8.1 to 7.5)                                                  |
| Other sexually transmitted diseases                                     | 48.4<br>(44.2 to 53.2)                  | 81.3<br>(67.1 to 98.1)                      | 1.2<br>(0.8 to 1.8)               | 31.1<br>(17.6 to 46.6)                                               | -5.3<br>(-14.9 to 5.9)                                                 |
| Hepatitis                                                               | 1,320.9<br>(1,068.6 to 1,634.8)         | 461.0<br>(312.8 to 657.9)                   | 0.5<br>(0.3 to 0.9)               | 4.5<br>(-19.5 to 35.6)                                               | -16.0<br>(-32.6 to 4.1)                                                |
| Acute hepatitis A                                                       | 6.7<br>(0.9 to 17.9)                    | 86.6<br>(11.6 to 232.9)                     | 0.1<br>(< 0.05 to 0.2)            | -1.3<br>(-80.2 to 453.2)                                             | -17.8<br>(-76.6 to 234.1)                                              |
| Hepatitis B                                                             | 1,019.8<br>(774.1 to 1,326.8)           | 321.1<br>(218.6 to 461.1)                   | 0.4<br>(0.2 to 0.7)               | 5.7<br>(-16.5 to 36.0)                                               | -15.7<br>(-32.3 to 4.2)                                                |
| Hepatitis C                                                             | 292.2<br>(258.9 to 329.9)               | 23.6<br>(21.3 to 26.2)                      | < 0.05<br>(< 0.05 to < 0.05)      | 20.7<br>(-20.4 to 76.7)                                              | -4.3<br>(-27.8 to 24.1)                                                |
| Acute hepatitis E                                                       | 2.3<br>(1.7 to 3.1)                     | 29.7<br>(22.5 to 40.1)                      | 0.1<br>(< 0.05 to 0.1)            | -2.1<br>(-29.8 to 32.2)                                              | -19.4<br>(-39.5 to 5.3)                                                |
| Other infectious diseases                                               | 70.9<br>(68.5 to 73.5)                  | < 0.05<br>(< 0.05 to < 0.05)                | 2.4<br>(1.6 to 3.5)               | 33.4<br>(21.4 to 48.0)                                               | 5.1<br>(-3.4 to 15.3)                                                  |
| <b>Non-communicable diseases</b>                                        | <b>6,694.1<br/>(6,632.5 to 6,754.3)</b> | <b>17,850.9†<br/>(16,329.7 to 19,400.1)</b> | <b>479.7<br/>(351.5 to 623.0)</b> | <b>33.6<br/>(27.8 to 39.8)</b>                                       | <b>-0.0<br/>(-3.1 to 3.3)</b>                                          |
| <b>Neoplasms</b>                                                        | <b>5.8<br/>(5.2 to 6.6)</b>             | <b>4.0<br/>(3.6 to 4.3)</b>                 | <b>1.3<br/>(0.9 to 1.7)</b>       | <b>38.5<br/>(29.8 to 47.9)</b>                                       | <b>4.2<br/>(-1.8 to 10.8)</b>                                          |
| Lip and oral cavity cancer                                              | 0.2<br>(0.2 to 0.3)                     | 0.1<br>(0.1 to 0.1)                         | < 0.05<br>(< 0.05 to < 0.05)      | 45.2<br>(26.4 to 67.9)                                               | 7.0<br>(-6.3 to 23.1)                                                  |
| Nasopharynx cancer                                                      | < 0.05<br>(< 0.05 to 0.1)               | < 0.05<br>(< 0.05 to < 0.05)                | < 0.05<br>(< 0.05 to < 0.05)      | 44.1<br>(22.0 to 69.0)                                               | 2.7<br>(-11.5 to 16.7)                                                 |
| Other pharynx cancer                                                    | < 0.05<br>(< 0.05 to < 0.05)            | < 0.05<br>(< 0.05 to < 0.05)                | < 0.05<br>(< 0.05 to < 0.05)      | 41.9<br>(27.7 to 58.2)                                               | 7.1<br>(-3.9 to 18.4)                                                  |
| Oesophageal cancer                                                      | 0.1<br>(0.1 to 0.1)                     | 0.1<br>(0.1 to 0.1)                         | < 0.05<br>(< 0.05 to < 0.05)      | 56.9<br>(37.4 to 80.8)                                               | 17.2<br>(1.7 to 36.8)                                                  |
| Stomach cancer                                                          | 0.4<br>(0.4 to 0.5)                     | 0.3<br>(0.3 to 0.3)                         | 0.1<br>(0.1 to 0.1)               | 32.6<br>(15.5 to 51.6)                                               | 0.6<br>(-13.4 to 16.3)                                                 |
| Colon and rectum cancer                                                 | 0.5<br>(0.4 to 0.6)                     | 0.2<br>(0.2 to 0.2)                         | 0.1<br>(< 0.05 to 0.1)            | 43.4<br>(23.2 to 63.9)                                               | 7.2<br>(-9.8 to 25.1)                                                  |
| Liver cancer                                                            | 0.3<br>(0.2 to 0.4)                     | 0.5<br>(0.4 to 0.6)                         | 0.1<br>(0.1 to 0.1)               | 25.2<br>(11.4 to 40.3)                                               | -7.2<br>(-17.0 to 4.3)                                                 |
| Liver cancer due to hepatitis B                                         | 0.3<br>(0.2 to 0.4)                     | 0.3<br>(0.2 to 0.3)                         | 0.1<br>(< 0.05 to 0.1)            | 25.9<br>(11.0 to 42.8)                                               | -7.1<br>(-18.2 to 5.2)                                                 |

| Cause                                              | Prevalence in thousands (95% UI)        | Incidence in thousands (95% UI)       | YLDs in thousands (95% UI)           |                                                   |                                                     |
|----------------------------------------------------|-----------------------------------------|---------------------------------------|--------------------------------------|---------------------------------------------------|-----------------------------------------------------|
|                                                    | 2016 counts                             | 2016 counts                           | 2016 counts                          | Percentage change in counts between 2006 and 2016 | Percentage change in age-standardised rates between |
| Liver cancer due to hepatitis C                    | < 0.05<br>(< 0.05 to 0.1)               | < 0.05<br>(< 0.05 to 0.1)             | < 0.05<br>(< 0.05 to < 0.05)         | 25.2<br>(9.8 to 42.7)                             | -5.4<br>(-17.3 to 8.7)                              |
| Liver cancer due to alcohol use                    | 0.1<br>(< 0.05 to 0.1)                  | 0.1<br>(< 0.05 to 0.1)                | < 0.05<br>(< 0.05 to < 0.05)         | 24.2<br>(8.1 to 41.5)                             | -8.1<br>(-19.2 to 4.2)                              |
| Liver cancer due to other causes                   | 0.1<br>(0.1 to 0.1)                     | 0.1<br>(0.1 to 0.1)                   | < 0.05<br>(< 0.05 to < 0.05)         | 23.9<br>(9.8 to 40.2)                             | -7.7<br>(-17.9 to 3.4)                              |
| Gallbladder and biliary tract cancer               | < 0.05<br>(< 0.05 to < 0.05)            | < 0.05<br>(< 0.05 to 0.1)             | < 0.05<br>(< 0.05 to < 0.05)         | 25.4<br>(11.8 to 38.3)                            | -5.5<br>(-15.8 to 3.8)                              |
| Pancreatic cancer                                  | 0.1<br>(0.1 to 0.1)                     | 0.1<br>(0.1 to 0.1)                   | < 0.05<br>(< 0.05 to < 0.05)         | 46.8<br>(31.1 to 64.5)                            | 9.9<br>(-1.7 to 23.2)                               |
| Larynx cancer                                      | 0.1<br>(0.1 to 0.1)                     | < 0.05<br>(< 0.05 to < 0.05)          | < 0.05<br>(< 0.05 to < 0.05)         | 33.0<br>(16.0 to 54.0)                            | 0.1<br>(-12.1 to 15.3)                              |
| Tracheal, bronchus, and lung cancer                | 0.3<br>(0.2 to 0.3)                     | 0.2<br>(0.2 to 0.3)                   | 0.1<br>(< 0.05 to 0.1)               | 37.9<br>(14.1 to 65.5)                            | 4.0<br>(-14.9 to 25.7)                              |
| Malignant skin melanoma                            | < 0.05<br>(< 0.05 to 0.1)               | < 0.05<br>(< 0.05 to < 0.05)          | < 0.05<br>(< 0.05 to < 0.05)         | 34.2<br>(20.3 to 52.3)                            | -0.3<br>(-11.0 to 11.7)                             |
| Non-melanoma skin cancer                           | < 0.05<br>(< 0.05 to 0.1)               | 0.2<br>(0.1 to 0.3)                   | < 0.05<br>(< 0.05 to < 0.05)         | 13.0<br>(-33.1 to 85.2)                           | -20.1<br>(-56.6 to 28.7)                            |
| Non-melanoma skin cancer (squamous-cell carcinoma) | < 0.05<br>(< 0.05 to 0.1)               | < 0.05<br>(< 0.05 to 0.1)             | < 0.05<br>(< 0.05 to < 0.05)         | 10.0<br>(-37.5 to 91.9)                           | -21.6<br>(-59.3 to 30.5)                            |
| Non-melanoma skin cancer (basal-cell carcinoma)    | < 0.05<br>(< 0.05 to < 0.05)            | 0.1<br>(0.1 to 0.2)                   | < 0.05<br>(< 0.05 to < 0.05)         | 39.2<br>(29.2 to 50.8)                            | 1.9<br>(-6.2 to 11.9)                               |
| Breast cancer                                      | 1.6<br>(1.3 to 1.9)                     | 0.4<br>(0.3 to 0.5)                   | 0.2<br>(0.1 to 0.2)                  | 52.7<br>(19.8 to 92.6)                            | 11.7<br>(-11.9 to 39.3)                             |
| Cervical cancer                                    | 2.2<br>(1.4 to 2.7)                     | 0.6<br>(0.4 to 0.8)                   | 0.2<br>(0.1 to 0.3)                  | 33.3<br>(0.9 to 71.7)                             | -2.9<br>(-25.4 to 24.1)                             |
| Uterine cancer                                     | 0.2<br>(0.2 to 0.3)                     | 0.1<br>(< 0.05 to 0.1)                | < 0.05<br>(< 0.05 to < 0.05)         | 49.5<br>(12.8 to 92.8)                            | 13.1<br>(-13.6 to 43.8)                             |
| Ovarian cancer                                     | 0.2<br>(0.2 to 0.2)                     | 0.1<br>(0.1 to 0.1)                   | < 0.05<br>(< 0.05 to 0.1)            | 43.7<br>(22.9 to 66.0)                            | 5.5<br>(-10.2 to 23.4)                              |
| Prostate cancer                                    | 0.7<br>(0.5 to 0.9)                     | 0.2<br>(0.1 to 0.3)                   | 0.1<br>(0.1 to 0.2)                  | 54.1<br>(18.5 to 100.3)                           | 15.7<br>(-9.2 to 44.6)                              |
| Testicular cancer                                  | < 0.05<br>(< 0.05 to 0.1)               | < 0.05<br>(< 0.05 to < 0.05)          | < 0.05<br>(< 0.05 to < 0.05)         | 30.1<br>(2.2 to 66.2)                             | -4.3<br>(-25.1 to 23.4)                             |
| Kidney cancer                                      | 0.3<br>(0.3 to 0.4)                     | 0.1<br>(0.1 to 0.1)                   | < 0.05<br>(< 0.05 to < 0.05)         | 43.6<br>(12.7 to 81.6)                            | 10.9<br>(-6.2 to 28.9)                              |
| Bladder cancer                                     | 0.3<br>(0.2 to 0.3)                     | 0.1<br>(0.1 to 0.1)                   | < 0.05<br>(< 0.05 to < 0.05)         | 35.5<br>(20.3 to 53.1)                            | 0.8<br>(-10.1 to 13.6)                              |
| Brain and nervous system cancer                    | 0.2<br>(0.2 to 0.3)                     | 0.1<br>(0.1 to 0.1)                   | < 0.05<br>(< 0.05 to < 0.05)         | 44.6<br>(32.9 to 60.3)                            | 9.2<br>(-1.7 to 21.6)                               |
| Thyroid cancer                                     | 0.1<br>(0.1 to 0.1)                     | < 0.05<br>(< 0.05 to < 0.05)          | < 0.05<br>(< 0.05 to < 0.05)         | 29.8<br>(12.9 to 48.4)                            | -6.2<br>(-17.6 to 5.2)                              |
| Mesothelioma                                       | < 0.05<br>(< 0.05 to < 0.05)            | < 0.05<br>(< 0.05 to < 0.05)          | < 0.05<br>(< 0.05 to < 0.05)         | 25.5<br>(10.7 to 42.7)                            | -8.3<br>(-18.4 to 3.5)                              |
| Hodgkin lymphoma                                   | < 0.05<br>(< 0.05 to 0.1)               | < 0.05<br>(< 0.05 to < 0.05)          | < 0.05<br>(< 0.05 to < 0.05)         | 8.8<br>(-3.0 to 22.4)                             | -14.6<br>(-22.1 to -5.0)                            |
| Non-Hodgkin's lymphoma                             | 0.4<br>(0.3 to 0.4)                     | 0.1<br>(0.1 to 0.1)                   | < 0.05<br>(< 0.05 to 0.1)            | 30.8<br>(18.1 to 45.3)                            | -0.5<br>(-10.7 to 9.8)                              |
| Multiple myeloma                                   | < 0.05<br>(< 0.05 to 0.1)               | < 0.05<br>(< 0.05 to < 0.05)          | < 0.05<br>(< 0.05 to < 0.05)         | 37.5<br>(21.0 to 53.7)                            | 2.5<br>(-10.0 to 15.7)                              |
| Leukaemia                                          | 0.5<br>(0.4 to 0.5)                     | 0.1<br>(0.1 to 0.2)                   | 0.1<br>(< 0.05 to 0.1)               | 29.3<br>(17.6 to 43.5)                            | -0.3<br>(-8.1 to 8.9)                               |
| Acute lymphoid leukaemia                           | 0.1<br>(0.1 to 0.1)                     | < 0.05<br>(< 0.05 to < 0.05)          | < 0.05<br>(< 0.05 to < 0.05)         | 20.1<br>(-1.8 to 49.7)                            | -6.1<br>(-18.6 to 9.8)                              |
| Chronic lymphoid leukaemia                         | 0.1<br>(< 0.05 to 0.1)                  | < 0.05<br>(< 0.05 to < 0.05)          | < 0.05<br>(< 0.05 to < 0.05)         | 38.8<br>(18.3 to 67.0)                            | 4.8<br>(-13.2 to 26.7)                              |
| Acute myeloid leukaemia                            | 0.1<br>(0.1 to 0.1)                     | < 0.05<br>(< 0.05 to 0.1)             | < 0.05<br>(< 0.05 to < 0.05)         | 32.4<br>(12.4 to 58.8)                            | 4.0<br>(-7.2 to 18.6)                               |
| Chronic myeloid leukaemia                          | 0.1<br>(< 0.05 to 0.1)                  | < 0.05<br>(< 0.05 to < 0.05)          | < 0.05<br>(< 0.05 to < 0.05)         | 30.5<br>(9.9 to 56.1)                             | -4.2<br>(-16.9 to 11.7)                             |
| Other leukaemia                                    | 0.1<br>(0.1 to 0.2)                     | < 0.05<br>(< 0.05 to < 0.05)          | < 0.05<br>(< 0.05 to < 0.05)         | 28.4<br>(12.4 to 45.7)                            | -2.0<br>(-13.7 to 11.0)                             |
| Other neoplasms                                    | 0.7<br>(0.6 to 0.8)                     | 0.2<br>(0.2 to 0.3)                   | 0.1<br>(< 0.05 to 0.1)               | 28.5<br>(7.4 to 53.4)                             | 0.1<br>(-12.3 to 13.2)                              |
| <b>Cardiovascular diseases</b>                     | <b>339.5</b><br><b>(320.9 to 361.1)</b> | <b>25.5†</b><br><b>(24.4 to 26.7)</b> | <b>19.5</b><br><b>(14.0 to 25.9)</b> | <b>35.1</b><br><b>(29.6 to 41.1)</b>              | <b>0.5</b><br><b>(-3.0 to 4.6)</b>                  |
| Rheumatic heart disease                            | 58.5<br>(52.0 to 65.9)                  | 2.5<br>(2.2 to 2.8)                   | 2.9<br>(1.8 to 4.2)                  | 34.0<br>(23.0 to 46.3)                            | -0.8<br>(-8.9 to 8.2)                               |
| Ischaemic heart disease                            | 71.2<br>(66.1 to 76.8)                  | 10.0<br>(9.2 to 10.8)                 | 3.1<br>(2.0 to 4.4)                  | 34.1<br>(26.5 to 41.8)                            | -1.7<br>(-6.4 to 2.6)                               |
| Cerebrovascular disease                            | 24.6<br>(22.9 to 26.2)                  | 4.2‡<br>(3.9 to 4.6)                  | 3.6<br>(2.6 to 4.5)                  | 35.5<br>(25.0 to 46.6)                            | 1.1<br>(-6.8 to 9.2)                                |
| Ischaemic stroke                                   | 20.9<br>(18.9 to 23.2)                  | 2.7‡<br>(2.4 to 3.1)                  | 2.9<br>(2.1 to 3.6)                  | 35.7<br>(22.2 to 49.4)                            | 1.0<br>(-8.0 to 10.9)                               |
| Hemorrhagic stroke                                 | 5.0<br>(4.5 to 5.7)                     | 1.5‡<br>(1.3 to 1.6)                  | 0.7<br>(0.5 to 0.9)                  | 34.7<br>(19.2 to 51.8)                            | 1.8<br>(-9.4 to 14.8)                               |
| Hypertensive heart disease                         | 5.5<br>(4.5 to 6.7)                     | --                                    | 0.5<br>(0.3 to 0.6)                  | 30.3<br>(16.9 to 46.2)                            | -6.0<br>(-14.6 to 3.4)                              |
| Cardiomyopathy and myocarditis                     | 3.3<br>(2.8 to 3.8)                     | 1.6†<br>(1.4 to 1.8)                  | 0.3<br>(0.2 to 0.5)                  | 34.6<br>(19.2 to 51.2)                            | -2.2<br>(-14.2 to 10.2)                             |
| Myocarditis                                        | 1.0<br>(0.8 to 1.1)                     | 1.6<br>(1.4 to 1.8)                   | 0.1<br>(< 0.05 to 0.1)               | 33.9<br>(22.4 to 48.0)                            | -0.3<br>(-11.8 to 11.9)                             |
| Alcoholic cardiomyopathy                           | 0.4<br>(0.3 to 0.5)                     | --                                    | < 0.05<br>(< 0.05 to 0.1)            | 38.8<br>(2.3 to 83.8)                             | -1.4<br>(-26.7 to 29.2)                             |
| Other cardiomyopathy                               | 2.5<br>(2.0 to 3.0)                     | --                                    | 0.2<br>(0.1 to 0.3)                  | 34.1<br>(14.9 to 54.9)                            | -2.7<br>(-16.6 to 11.8)                             |
| Atrial fibrillation and flutter                    | 13.2<br>(11.5 to 15.0)                  | 1.2<br>(1.0 to 1.4)                   | 1.0<br>(0.7 to 1.4)                  | 35.7<br>(25.0 to 48.0)                            | 0.7<br>(-5.5 to 7.2)                                |
| Peripheral vascular disease                        | 48.5<br>(42.0 to 56.3)                  | 4.9<br>(4.2 to 5.7)                   | 0.2<br>(0.1 to 0.5)                  | 28.4<br>(19.1 to 39.4)                            | -2.8<br>(-9.2 to 4.7)                               |
| Endocarditis                                       | 0.4<br>(0.4 to 0.5)                     | 1.1<br>(1.0 to 1.2)                   | < 0.05<br>(< 0.05 to < 0.05)         | 34.1<br>(19.5 to 51.5)                            | 1.2<br>(-13.6 to 17.6)                              |
| Other cardiovascular and circulatory diseases      | 149.7<br>(123.3 to 181.0)               | --                                    | 7.9<br>(5.2 to 11.3)                 | 36.2<br>(25.0 to 49.3)                            | 2.5<br>(-5.5 to 11.1)                               |
| <b>Chronic respiratory diseases</b>                | <b>438.3</b><br><b>(412.7 to 467.4)</b> | <b>87.6†</b><br><b>(80.0 to 95.8)</b> | <b>20.0</b><br><b>(14.6 to 26.8)</b> | <b>34.3</b><br><b>(28.2 to 40.5)</b>              | <b>0.9</b><br><b>(-3.0 to 4.9)</b>                  |
| Chronic obstructive pulmonary disease              | 74.4<br>(71.2 to 77.5)                  | 5.4<br>(5.2 to 5.6)                   | 5.0<br>(4.3 to 5.6)                  | 34.0<br>(23.2 to 44.8)                            | -0.9<br>(-8.2 to 6.6)                               |
| Pneumoconiosis                                     | 0.1<br>(0.1 to 0.1)                     | < 0.05<br>(< 0.05 to < 0.05)          | < 0.05<br>(< 0.05 to < 0.05)         | 40.2<br>(32.7 to 48.1)                            | 2.3<br>(-2.6 to 7.5)                                |
| Silicosis                                          | < 0.05<br>(< 0.05 to < 0.05)            | < 0.05<br>(< 0.05 to < 0.05)          | < 0.05<br>(< 0.05 to < 0.05)         | 42.1<br>(29.2 to 56.6)                            | 1.0<br>(-6.3 to 8.7)                                |



| Cause                                                          | Prevalence in thousands (95% UI)        | Incidence in thousands (95% UI)         | YLDs in thousands (95% UI)        |                                                                     |                                                                      |
|----------------------------------------------------------------|-----------------------------------------|-----------------------------------------|-----------------------------------|---------------------------------------------------------------------|----------------------------------------------------------------------|
|                                                                | 2016 counts<br>(< 0.05 to < 0.05)       | 2016 counts<br>(< 0.05 to < 0.05)       | 2016 counts<br>(< 0.05 to < 0.05) | Percentage change in counts between 2006 and 2016<br>(29.8 to 49.9) | Percentage change in age-standardised rates between<br>(-3.7 to 7.5) |
| Asbestosis                                                     | < 0.05<br>(< 0.05 to < 0.05)            | < 0.05<br>(< 0.05 to < 0.05)            | < 0.05<br>(< 0.05 to < 0.05)      | 39.1<br>(29.8 to 49.9)                                              | 1.6<br>(-3.7 to 7.5)                                                 |
| Coal workers pneumoconiosis                                    | --                                      | --                                      | --                                | --                                                                  | --                                                                   |
| Other pneumoconiosis                                           | < 0.05<br>(< 0.05 to < 0.05)            | < 0.05<br>(< 0.05 to < 0.05)            | < 0.05<br>(< 0.05 to < 0.05)      | 40.9<br>(28.1 to 53.4)                                              | 3.1<br>(-6.7 to 13.7)                                                |
| Asthma                                                         | 365.1<br>(333.5 to 403.4)               | 82.1<br>(74.4 to 90.2)                  | 14.4<br>(9.5 to 20.8)             | 33.2<br>(25.6 to 40.5)                                              | 1.4<br>(-3.5 to 5.9)                                                 |
| Interstitial lung disease and pulmonary sarcoidosis            | 0.5<br>(0.4 to 0.6)                     | < 0.05<br>(< 0.05 to < 0.05)            | 0.1<br>(< 0.05 to 0.1)            | 34.0<br>(29.9 to 37.9)                                              | -1.4<br>(-5.6 to 3.3)                                                |
| Other chronic respiratory diseases                             | --                                      | --                                      | 0.6<br>(0.4 to 0.7)               | 75.7<br>(36.4 to 123.7)                                             | 31.8<br>(9.3 to 56.6)                                                |
| <b>Cirrhosis and other chronic liver diseases</b>              | <b>17.8<br/>(16.9 to 18.8)</b>          | <b>1.7<br/>(1.7 to 1.8)</b>             | <b>1.6<br/>(1.1 to 2.3)</b>       | <b>30.8<br/>(17.7 to 46.5)</b>                                      | <b>-1.0<br/>(-9.2 to 7.8)</b>                                        |
| Cirrhosis and other chronic liver diseases due to hepatitis B  | 6.5<br>(5.5 to 7.4)                     | 0.6<br>(0.6 to 0.7)                     | 0.5<br>(0.3 to 0.7)               | 34.4<br>(13.7 to 58.4)                                              | -0.5<br>(-12.8 to 13.0)                                              |
| Cirrhosis and other chronic liver diseases due to hepatitis C  | 2.6<br>(1.8 to 3.7)                     | 0.3<br>(0.2 to 0.4)                     | 0.2<br>(0.1 to 0.3)               | 31.6<br>(6.3 to 61.5)                                               | -3.6<br>(-20.1 to 15.6)                                              |
| Cirrhosis and other chronic liver diseases due to alcohol use  | 2.8<br>(2.4 to 3.2)                     | 0.3<br>(0.3 to 0.4)                     | 0.2<br>(0.1 to 0.3)               | 39.5<br>(13.9 to 71.6)                                              | 0.9<br>(-14.7 to 19.7)                                               |
| Cirrhosis and other chronic liver diseases due to other causes | 6.0<br>(5.5 to 6.5)                     | 0.5<br>(0.5 to 0.5)                     | 0.8<br>(0.5 to 1.1)               | 26.6<br>(4.2 to 52.7)                                               | -1.2<br>(-16.0 to 16.7)                                              |
| <b>Digestive diseases</b>                                      | <b>115.4<br/>(105.4 to 126.5)</b>       | <b>101.8†<br/>(96.6 to 107.5)</b>       | <b>3.6<br/>(2.5 to 5.0)</b>       | <b>34.4<br/>(23.5 to 46.4)</b>                                      | <b>0.6<br/>(-5.3 to 6.8)</b>                                         |
| Peptic ulcer disease                                           | 17.4<br>(15.9 to 19.0)                  | 9.0<br>(8.1 to 10.1)                    | 0.4<br>(0.2 to 0.5)               | 37.7<br>(21.6 to 53.8)                                              | 0.5<br>(-8.2 to 9.8)                                                 |
| Gastritis and duodenitis                                       | 34.4<br>(30.1 to 38.9)                  | 35.7<br>(31.7 to 40.0)                  | 0.5<br>(0.3 to 0.7)               | 44.5<br>(28.5 to 61.7)                                              | 9.1<br>(-0.8 to 19.7)                                                |
| Appendicitis                                                   | 0.9<br>(0.8 to 1.0)                     | 23.6<br>(21.8 to 25.8)                  | 0.3<br>(0.2 to 0.4)               | 28.4<br>(-8.7 to 83.9)                                              | -2.3<br>(-23.1 to 25.0)                                              |
| Paralytic ileus and intestinal obstruction                     | 0.1<br>(0.1 to 0.1)                     | 3.7<br>(3.3 to 4.1)                     | < 0.05<br>(< 0.05 to 0.1)         | 31.0<br>(26.6 to 35.6)                                              | -2.0<br>(-7.4 to 4.0)                                                |
| Inguinal, femoral, and abdominal hernia                        | 61.3<br>(49.7 to 74.7)                  | 9.3<br>(8.2 to 10.5)                    | 2.0<br>(1.4 to 2.8)               | 32.0<br>(17.6 to 48.7)                                              | -1.5<br>(-9.6 to 7.3)                                                |
| Inflammatory bowel disease                                     | 0.4<br>(0.3 to 0.4)                     | 2.5<br>(2.4 to 2.6)                     | 0.1<br>(< 0.05 to 0.1)            | 36.6<br>(32.9 to 40.6)                                              | 2.4<br>(-0.4 to 5.3)                                                 |
| Vascular intestinal disorders                                  | < 0.05<br>(< 0.05 to < 0.05)            | 0.2<br>(0.2 to 0.3)                     | < 0.05<br>(< 0.05 to < 0.05)      | 32.6<br>(25.6 to 40.8)                                              | 2.9<br>(-1.4 to 7.7)                                                 |
| Gallbladder and biliary diseases                               | 3.5<br>(3.1 to 3.9)                     | 16.3<br>(14.1 to 18.7)                  | 0.1<br>(0.1 to 0.1)               | 38.6<br>(25.4 to 53.2)                                              | 1.5<br>(-8.3 to 13.5)                                                |
| Pancreatitis                                                   | 0.1<br>(0.1 to 0.2)                     | 1.4<br>(1.3 to 1.6)                     | < 0.05<br>(< 0.05 to < 0.05)      | 40.8<br>(35.0 to 47.9)                                              | 2.7<br>(-1.7 to 7.3)                                                 |
| Other digestive diseases                                       | --                                      | --                                      | 0.3<br>(0.2 to 0.5)               | 36.5<br>(22.5 to 52.1)                                              | 4.5<br>(-2.2 to 11.5)                                                |
| <b>Neurological disorders</b>                                  | <b>2,365.7<br/>(2,245.4 to 2,485.9)</b> | <b>1,212.5<br/>(1,022.6 to 1,420.1)</b> | <b>57.0<br/>(35.3 to 84.8)</b>    | <b>33.3<br/>(-5.4 to 95.8)</b>                                      | <b>0.1<br/>(-24.7 to 36.4)</b>                                       |
| Alzheimer's disease and other dementias                        | 6.7<br>(5.7 to 8.0)                     | 1.2<br>(1.0 to 1.4)                     | 0.9<br>(0.7 to 1.2)               | 30.6<br>(23.0 to 38.8)                                              | -0.9<br>(-5.5 to 4.1)                                                |
| Parkinson's disease                                            | 0.8<br>(0.6 to 1.0)                     | 0.1<br>(0.1 to 0.1)                     | 0.1<br>(0.1 to 0.1)               | 41.8<br>(20.4 to 70.0)                                              | 6.0<br>(-7.5 to 21.8)                                                |
| Epilepsy                                                       | 31.2<br>(6.2 to 61.8)                   | 3.8<br>(0.7 to 7.5)                     | 12.2<br>(2.1 to 26.2)             | 25.9<br>(-75.7 to 582.9)                                            | -3.1<br>(-81.3 to 426.4)                                             |
| Multiple sclerosis                                             | 0.3<br>(0.2 to 0.3)                     | < 0.05<br>(< 0.05 to < 0.05)            | 0.1<br>(< 0.05 to 0.1)            | 48.7<br>(43.7 to 53.4)                                              | 8.1<br>(4.7 to 11.4)                                                 |
| Motor neuron disease                                           | 0.1<br>(0.1 to 0.1)                     | < 0.05<br>(< 0.05 to < 0.05)            | < 0.05<br>(< 0.05 to < 0.05)      | 34.5<br>(28.8 to 39.9)                                              | 1.9<br>(-1.4 to 4.9)                                                 |
| Migraine                                                       | 849.3<br>(796.1 to 903.0)               | 106.4<br>(100.0 to 113.6)               | 35.3<br>(22.3 to 50.1)            | 34.4<br>(28.3 to 40.1)                                              | 0.2<br>(-3.5 to 4.1)                                                 |
| Tension-type headache                                          | 1,822.4<br>(1,622.4 to 2,043.9)         | 1,101.0<br>(909.3 to 1,305.6)           | 5.5<br>(3.4 to 8.2)               | 35.2<br>(28.5 to 42.4)                                              | 0.6<br>(-4.2 to 5.5)                                                 |
| Other neurological disorders                                   | < 0.05<br>(< 0.05 to < 0.05)            | < 0.05<br>(< 0.05 to 0.1)               | 2.9<br>(0.6 to 6.2)               | 53.5<br>(-66.8 to 686.0)                                            | 16.1<br>(-72.7 to 442.3)                                             |
| <b>Mental and substance use disorders</b>                      | <b>1,018.2<br/>(963.9 to 1,070.3)</b>   | <b>377.4†<br/>(349.3 to 410.3)</b>      | <b>123.2<br/>(89.6 to 160.9)</b>  | <b>34.3<br/>(31.2 to 37.6)</b>                                      | <b>0.8<br/>(-1.6 to 3.2)</b>                                         |
| Schizophrenia                                                  | 10.1<br>(8.8 to 11.5)                   | 0.9<br>(0.8 to 1.0)                     | 6.5<br>(4.7 to 8.2)               | 39.8<br>(26.7 to 54.3)                                              | 1.2<br>(-7.3 to 10.8)                                                |
| Alcohol use disorders                                          | 75.9<br>(64.1 to 89.3)                  | 42.0<br>(35.3 to 48.6)                  | 7.6<br>(5.2 to 10.9)              | 37.2<br>(25.7 to 48.1)                                              | 1.9<br>(-5.8 to 9.6)                                                 |
| Drug use disorders                                             | 30.3<br>(26.8 to 34.0)                  | 4.9<br>(4.4 to 5.5)                     | 8.7<br>(5.9 to 11.9)              | 49.7<br>(33.8 to 68.6)                                              | 10.7<br>(0.2 to 22.6)                                                |
| Opioid use disorders                                           | 18.9<br>(15.6 to 23.0)                  | 2.3<br>(1.9 to 2.8)                     | 7.9<br>(5.3 to 10.9)              | 51.1<br>(33.7 to 72.3)                                              | 11.5<br>(0.0 to 24.9)                                                |
| Cocaine use disorders                                          | 0.9<br>(0.7 to 1.1)                     | 0.1<br>(0.1 to 0.1)                     | 0.1<br>(0.1 to 0.2)               | 36.2<br>(29.4 to 43.8)                                              | 2.9<br>(-2.2 to 8.2)                                                 |
| Amphetamine use disorders                                      | 0.5<br>(0.3 to 0.6)                     | 0.1<br>(0.1 to 0.1)                     | 0.1<br>(< 0.05 to 0.1)            | 32.5<br>(20.5 to 45.2)                                              | 2.7<br>(-6.6 to 11.9)                                                |
| Cannabis use disorders                                         | 9.3<br>(7.8 to 11.2)                    | 1.9<br>(1.6 to 2.4)                     | 0.3<br>(0.2 to 0.4)               | 37.7<br>(4.7 to 77.4)                                               | 4.4<br>(-17.8 to 31.6)                                               |
| Other drug use disorders                                       | 2.1<br>(1.9 to 2.4)                     | 0.5<br>(0.4 to 0.5)                     | 0.4<br>(0.2 to 0.5)               | 38.7<br>(17.6 to 64.7)                                              | 2.7<br>(-11.8 to 20.0)                                               |
| Depressive disorders                                           | 217.7<br>(202.4 to 235.8)               | 243.3<br>(215.2 to 274.3)               | 37.4<br>(25.9 to 51.6)            | 34.4<br>(27.4 to 40.9)                                              | 0.1<br>(-4.9 to 4.7)                                                 |
| Major depressive disorder                                      | 147.9<br>(130.6 to 167.5)               | 230.1<br>(202.2 to 261.1)               | 30.3<br>(20.7 to 41.8)            | 34.0<br>(25.8 to 41.8)                                              | -0.1<br>(-6.1 to 5.4)                                                |
| Dysthymia                                                      | 73.4<br>(63.4 to 85.2)                  | 13.3<br>(11.6 to 15.3)                  | 7.1<br>(4.7 to 10.2)              | 36.1<br>(30.4 to 42.3)                                              | 0.6<br>(-2.8 to 4.0)                                                 |
| Bipolar disorder                                               | 39.2<br>(33.0 to 46.4)                  | 4.4<br>(3.7 to 5.3)                     | 8.1<br>(4.9 to 11.9)              | 33.8<br>(24.6 to 44.2)                                              | 0.7<br>(-5.3 to 7.2)                                                 |
| Anxiety disorders                                              | 201.1<br>(180.7 to 223.2)               | 38.0<br>(34.4 to 42.1)                  | 19.6<br>(13.5 to 26.9)            | 32.9<br>(23.0 to 43.9)                                              | 0.4<br>(-6.0 to 7.6)                                                 |
| Eating disorders                                               | 5.5<br>(4.5 to 6.8)                     | 4.5<br>(3.3 to 6.1)                     | 1.1<br>(0.7 to 1.7)               | 34.8<br>(13.8 to 59.9)                                              | 2.7<br>(-12.9 to 21.6)                                               |
| Anorexia nervosa                                               | 1.5<br>(1.1 to 2.1)                     | 0.7<br>(0.5 to 1.0)                     | 0.3<br>(0.2 to 0.5)               | 31.5<br>(-5.5 to 83.2)                                              | 2.4<br>(-26.3 to 42.6)                                               |
| Bulimia nervosa                                                | 3.8<br>(2.8 to 5.1)                     | 3.8<br>(2.6 to 5.3)                     | 0.8<br>(0.5 to 1.2)               | 36.1<br>(11.4 to 67.8)                                              | 2.9<br>(-15.6 to 26.1)                                               |
| Autistic spectrum disorders                                    | 61.4<br>(55.1 to 69.4)                  | 0.7<br>(0.5 to 1.0)                     | 8.7<br>(5.9 to 12.5)              | 32.1<br>(25.0 to 39.7)                                              | 1.2<br>(-3.7 to 6.4)                                                 |
| Autism                                                         | 16.5<br>(14.3 to 19.3)                  | 0.1<br>(0.1 to 0.2)                     | 4.2<br>(2.8 to 6.2)               | 32.1<br>(19.8 to 44.7)                                              | 1.2<br>(-7.4 to 9.8)                                                 |
| Asperger syndrome and other autistic spectrum disorders        | 44.7<br>(37.0 to 54.2)                  | 0.6<br>(0.4 to 0.9)                     | 4.5<br>(2.9 to 6.6)               | 32.2<br>(25.4 to 39.5)                                              | 1.1<br>(-3.7 to 5.9)                                                 |



| Cause                                                      | Prevalence in thousands (95% UI)              | Incidence in thousands (95% UI)                   | YLDs in thousands (95% UI)             |                                                   |                                                     |
|------------------------------------------------------------|-----------------------------------------------|---------------------------------------------------|----------------------------------------|---------------------------------------------------|-----------------------------------------------------|
|                                                            | 2016 counts                                   | 2016 counts                                       | 2016 counts                            | Percentage change in counts between 2006 and 2016 | Percentage change in age-standardised rates between |
| Attention-deficit/hyperactivity disorder                   | 101.8<br>(91.2 to 113.8)                      | 6.4<br>(5.5 to 7.4)                               | 1.2<br>(0.7 to 2.0)                    | 31.2<br>(21.8 to 40.8)                            | 0.7<br>(-6.0 to 7.6)                                |
| Conduct disorder                                           | 74.7<br>(61.2 to 89.2)                        | 27.2<br>(21.6 to 32.8)                            | 9.0<br>(5.5 to 14.0)                   | 28.3<br>(20.2 to 36.5)                            | 0.5<br>(-5.8 to 7.0)                                |
| Idiopathic developmental intellectual disability           | 182.9<br>(112.4 to 256.7)                     | --                                                | 7.4<br>(3.5 to 12.9)                   | 23.5<br>(14.0 to 32.0)                            | -6.0<br>(-13.2 to 0.3)                              |
| Other mental and substance use disorders                   | 103.0<br>(90.1 to 119.3)                      | 5.1<br>(4.5 to 5.9)                               | 7.7<br>(5.3 to 11.1)                   | 37.5<br>(29.6 to 45.4)                            | 0.9<br>(-3.7 to 5.6)                                |
| <b>Diabetes, urogenital, blood, and endocrine diseases</b> | <b>3,696.1</b><br><b>(3,589.7 to 3,812.0)</b> | <b>805.4†</b><br><b>(753.1 to 861.2)</b>          | <b>43.9</b><br><b>(30.9 to 59.7)</b>   | <b>36.0</b><br><b>(32.0 to 40.0)</b>              | <b>1.7</b><br><b>(-0.9 to 4.3)</b>                  |
| Diabetes mellitus                                          | 137.2<br>(122.2 to 153.7)                     | 9.1<br>(8.1 to 10.1)                              | 9.6<br>(6.5 to 13.4)                   | 42.7<br>(34.0 to 50.8)                            | 4.7<br>(-1.0 to 10.4)                               |
| Acute glomerulonephritis                                   | 0.1<br>(0.1 to 0.1)                           | 0.9<br>(0.8 to 1.1)                               | < 0.05<br>(< 0.05 to < 0.05)           | 32.3<br>(27.4 to 38.1)                            | 0.1<br>(-3.3 to 3.6)                                |
| Chronic kidney disease                                     | 366.2<br>(329.7 to 408.2)                     | 28.1<br>(24.9 to 31.6)                            | 9.0<br>(6.5 to 11.8)                   | 38.8<br>(30.6 to 47.6)                            | 0.6<br>(-4.8 to 6.1)                                |
| Chronic kidney disease due to diabetes mellitus            | 112.1<br>(94.7 to 131.2)                      | 7.9<br>(6.6 to 9.6)                               | 2.6<br>(1.8 to 3.4)                    | 40.5<br>(29.1 to 53.5)                            | 0.4<br>(-6.6 to 8.1)                                |
| Chronic kidney disease due to hypertension                 | 78.5<br>(67.6 to 90.0)                        | 7.5<br>(6.2 to 8.8)                               | 1.5<br>(1.0 to 2.0)                    | 36.6<br>(22.6 to 53.1)                            | -1.0<br>(-10.2 to 9.6)                              |
| Chronic kidney disease due to glomerulonephritis           | 74.3<br>(64.2 to 85.1)                        | 4.3<br>(3.4 to 5.4)                               | 2.4<br>(1.7 to 3.3)                    | 39.4<br>(25.0 to 53.7)                            | 2.8<br>(-5.7 to 11.2)                               |
| Chronic kidney disease due to other causes                 | 101.2<br>(84.6 to 118.9)                      | 8.3<br>(7.0 to 9.9)                               | 2.6<br>(1.8 to 3.5)                    | 38.0<br>(26.3 to 51.1)                            | 0.4<br>(-6.9 to 8.0)                                |
| Urinary diseases and male infertility                      | 113.7<br>(104.1 to 123.3)                     | 458.4†<br>(412.6 to 507.5)                        | 2.7<br>(1.7 to 3.8)                    | 31.0<br>(23.2 to 40.2)                            | -1.4<br>(-7.1 to 5.4)                               |
| Interstitial nephritis and urinary tract infections        | 7.9<br>(7.0 to 8.9)                           | 414.5<br>(368.8 to 464.1)                         | 0.3<br>(0.2 to 0.4)                    | 29.3<br>(11.3 to 50.3)                            | -0.6<br>(-12.7 to 12.5)                             |
| Urolithiasis                                               | 1.4<br>(1.2 to 1.6)                           | 36.3<br>(32.1 to 41.8)                            | 0.1<br>(0.1 to 0.1)                    | 39.1<br>(29.9 to 48.8)                            | 2.1<br>(-5.5 to 10.4)                               |
| Benign prostatic hyperplasia                               | 58.1<br>(48.1 to 67.9)                        | 7.6<br>(6.3 to 9.1)                               | 1.9<br>(1.2 to 2.8)                    | 32.9<br>(22.4 to 45.4)                            | -0.7<br>(-7.5 to 7.5)                               |
| Male infertility                                           | 43.7<br>(39.0 to 49.1)                        | --                                                | 0.2<br>(0.1 to 0.5)                    | 31.0<br>(10.9 to 57.3)                            | -6.0<br>(-21.6 to 14.0)                             |
| Other urinary diseases                                     | --                                            | --                                                | 0.1<br>(0.1 to 0.2)                    | 7.8<br>(-4.2 to 21.0)                             | -16.7<br>(-24.5 to -8.8)                            |
| Gynecological diseases                                     | 776.9<br>(741.5 to 816.0)                     | 303.9†<br>(281.2 to 328.2)                        | 9.6<br>(6.5 to 13.7)                   | 37.6<br>(31.8 to 43.3)                            | -0.0<br>(-3.9 to 3.8)                               |
| Uterine fibroids                                           | 55.5<br>(48.8 to 62.6)                        | 7.0<br>(6.0 to 8.0)                               | 1.2<br>(0.8 to 1.9)                    | 51.0<br>(40.4 to 62.1)                            | 7.8<br>(0.9 to 15.4)                                |
| Polycystic ovarian syndrome                                | 6.6<br>(4.9 to 8.5)                           | 16.9<br>(12.0 to 22.7)                            | 0.1<br>(< 0.05 to 0.1)                 | 34.8<br>(17.5 to 54.9)                            | -3.7<br>(-16.2 to 10.2)                             |
| Female infertility                                         | 3.8<br>(3.4 to 4.8)                           | --                                                | < 0.05<br>(< 0.05 to < 0.05)           | 12.2<br>(-34.0 to 57.5)                           | -21.4<br>(-51.0 to 11.1)                            |
| Endometriosis                                              | 1.5<br>(1.2 to 1.8)                           | 5.9<br>(4.7 to 7.3)                               | 0.1<br>(0.1 to 0.2)                    | 32.1<br>(-4.0 to 80.7)                            | -1.5<br>(-26.8 to 29.8)                             |
| Genital prolapse                                           | 345.8<br>(304.8 to 387.7)                     | 32.5<br>(27.5 to 38.4)                            | 1.1<br>(0.5 to 2.0)                    | 27.5<br>(18.8 to 35.2)                            | -6.1<br>(-12.7 to 0.4)                              |
| Premenstrual syndrome                                      | 362.7<br>(336.1 to 387.9)                     | 137.1<br>(126.0 to 148.5)                         | 3.0<br>(1.9 to 4.6)                    | 34.8<br>(22.7 to 47.8)                            | -0.3<br>(-8.6 to 8.7)                               |
| Other gynecological diseases                               | 117.3<br>(101.2 to 135.2)                     | 104.7<br>(85.4 to 126.4)                          | 4.0<br>(2.7 to 5.8)                    | 39.3<br>(30.0 to 48.7)                            | 0.7<br>(-5.6 to 7.0)                                |
| Hemoglobinopathies and hemolytic anaemias                  | 2,995.1<br>(2,869.6 to 3,130.3)               | --                                                | 10.3<br>(6.9 to 15.1)                  | 29.8<br>(21.7 to 38.6)                            | 2.0<br>(-3.3 to 7.8)                                |
| Thalassemias                                               | < 0.05<br>(< 0.05 to < 0.05)                  | --                                                | < 0.05<br>(< 0.05 to < 0.05)           | 45.9<br>(26.4 to 77.0)                            | 17.9<br>(2.1 to 42.8)                               |
| Thalassaemias trait                                        | 107.1<br>(90.1 to 125.7)                      | --                                                | 1.6<br>(1.1 to 2.4)                    | 42.0<br>(28.9 to 55.7)                            | 11.2<br>(1.6 to 21.0)                               |
| Sickle cell disorders                                      | 21.4<br>(18.6 to 26.4)                        | --                                                | 1.7<br>(1.1 to 2.5)                    | 31.0<br>(15.7 to 47.1)                            | 3.8<br>(-7.5 to 16.7)                               |
| Sickle cell trait                                          | 1,457.2<br>(1,350.3 to 1,633.7)               | --                                                | 5.0<br>(3.3 to 7.4)                    | 29.5<br>(19.2 to 40.2)                            | 0.2<br>(-6.5 to 7.2)                                |
| G6PD deficiency                                            | 603.3<br>(508.5 to 705.1)                     | --                                                | < 0.05<br>(< 0.05 to 0.1)              | 29.2<br>(1.5 to 69.8)                             | -3.6<br>(-18.9 to 16.5)                             |
| G6PD trait                                                 | 1,227.4<br>(1,149.2 to 1,305.0)               | --                                                | < 0.05<br>(< 0.05 to < 0.05)           | 39.3<br>(25.3 to 54.0)                            | 6.8<br>(-1.6 to 15.8)                               |
| Other hemoglobinopathies and hemolytic anaemias            | 71.0<br>(68.7 to 73.4)                        | --                                                | 1.9<br>(1.3 to 2.8)                    | 20.7<br>(9.4 to 33.1)                             | -2.1<br>(-9.2 to 5.3)                               |
| Endocrine, metabolic, blood, and immune disorders          | 87.3<br>(84.4 to 90.3)                        | 4.9<br>(4.4 to 5.5)                               | 2.7<br>(1.8 to 3.8)                    | 28.9<br>(19.5 to 40.2)                            | 2.4<br>(-3.9 to 8.8)                                |
| <b>Musculoskeletal disorders</b>                           | <b>742.6</b><br><b>(700.5 to 784.0)</b>       | <b>358.5</b><br><b>(324.2 to 397.3)</b>           | <b>82.0</b><br><b>(58.5 to 107.1)</b>  | <b>35.9</b><br><b>(31.7 to 40.2)</b>              | <b>-0.4</b><br><b>(-3.0 to 2.2)</b>                 |
| Rheumatoid arthritis                                       | 6.9<br>(6.0 to 7.8)                           | 0.5<br>(0.4 to 0.5)                               | 1.6<br>(1.1 to 2.2)                    | 40.6<br>(24.9 to 57.9)                            | 3.5<br>(-6.6 to 14.4)                               |
| Osteoarthritis                                             | 112.9<br>(105.2 to 120.8)                     | 6.7<br>(6.2 to 7.3)                               | 7.0<br>(4.9 to 9.6)                    | 42.4<br>(36.6 to 47.7)                            | 3.7<br>(-0.3 to 7.3)                                |
| Low back and neck pain                                     | 528.6<br>(487.9 to 569.8)                     | 236.9<br>(210.7 to 266.5)                         | 60.8<br>(42.8 to 80.4)                 | 34.9<br>(29.8 to 39.9)                            | -1.2<br>(-4.4 to 2.1)                               |
| Low back pain                                              | 403.7<br>(356.8 to 460.1)                     | 200.2<br>(174.5 to 229.3)                         | 45.7<br>(32.5 to 60.6)                 | 33.5<br>(27.2 to 40.3)                            | -1.8<br>(-5.9 to 2.8)                               |
| Neck pain                                                  | 151.0<br>(130.3 to 174.1)                     | 36.6<br>(31.4 to 43.0)                            | 15.1<br>(10.2 to 21.2)                 | 39.4<br>(35.4 to 43.3)                            | 0.6<br>(-1.6 to 2.9)                                |
| Gout                                                       | 15.1<br>(13.4 to 17.0)                        | 3.1<br>(2.7 to 3.6)                               | 0.5<br>(0.3 to 0.7)                    | 39.0<br>(18.8 to 61.9)                            | 0.7<br>(-11.7 to 14.5)                              |
| Other musculoskeletal disorders                            | 139.3<br>(112.3 to 169.1)                     | 111.3<br>(88.5 to 137.3)                          | 12.1<br>(7.9 to 17.5)                  | 36.4<br>(23.9 to 49.8)                            | -0.4<br>(-8.9 to 9.0)                               |
| <b>Other non-communicable diseases</b>                     | <b>5,180.6</b><br><b>(5,017.8 to 5,338.4)</b> | <b>14,876.6†</b><br><b>(13,365.2 to 16,383.1)</b> | <b>127.7</b><br><b>(86.3 to 180.3)</b> | <b>30.5</b><br><b>(28.3 to 32.3)</b>              | <b>-1.4</b><br><b>(-2.7 to -0.2)</b>                |
| Congenital anomalies                                       | 78.3<br>(68.3 to 90.5)                        | --                                                | 11.5<br>(8.3 to 15.7)                  | 26.1<br>(18.1 to 34.8)                            | -3.3<br>(-9.0 to 3.4)                               |
| Neural tube defects                                        | 10.9<br>(9.7 to 12.2)                         | --                                                | 3.3<br>(2.3 to 4.4)                    | 26.8<br>(12.3 to 43.6)                            | -3.0<br>(-13.0 to 8.7)                              |
| Congenital heart anomalies                                 | 19.5<br>(16.1 to 23.3)                        | --                                                | 1.0<br>(0.5 to 1.6)                    | 31.5<br>(13.8 to 49.9)                            | 4.1<br>(-9.3 to 17.7)                               |
| Orofacial clefts                                           | 2.0<br>(1.8 to 2.3)                           | --                                                | < 0.05<br>(< 0.05 to 0.1)              | 25.3<br>(10.5 to 40.9)                            | -3.6<br>(-14.8 to 8.4)                              |
| Down's syndrome                                            | 1.2<br>(1.0 to 1.5)                           | --                                                | 0.1<br>(0.1 to 0.1)                    | 29.4<br>(20.0 to 39.2)                            | -0.1<br>(-7.4 to 7.2)                               |
| Turner syndrome                                            | 4.3<br>(3.6 to 5.1)                           | --                                                | 0.1<br>(< 0.05 to 0.1)                 | 20.8<br>(-14.8 to 70.1)                           | -5.7<br>(-31.4 to 29.4)                             |
| Klinefelter syndrome                                       | 4.4<br>(3.6 to 5.1)                           | --                                                | < 0.05<br>(< 0.05 to < 0.05)           | 31.0<br>(0.6 to 74.0)                             | 1.2<br>(-22.2 to 32.4)                              |

| Cause                                         | Prevalence in thousands (95% UI)        | Incidence in thousands (95% UI)          | YLDs in thousands (95% UI)           |                                                   |                                                     |
|-----------------------------------------------|-----------------------------------------|------------------------------------------|--------------------------------------|---------------------------------------------------|-----------------------------------------------------|
|                                               | 2016 counts                             | 2016 counts                              | 2016 counts                          | Percentage change in counts between 2006 and 2016 | Percentage change in age-standardised rates between |
| Other chromosomal abnormalities               | 1.4<br>(1.1 to 1.6)                     | --                                       | 0.2<br>(0.2 to 0.4)                  | 19.9<br>(-12.1 to 66.5)                           | -3.6<br>(-28.6 to 33.5)                             |
| Congenital musculoskeletal and limb anomalies | 7.2<br>(6.2 to 8.1)                     | --                                       | 1.1<br>(0.7 to 1.5)                  | 28.8<br>(11.2 to 48.3)                            | -1.8<br>(-13.1 to 11.0)                             |
| Urogenital congenital anomalies               | 5.5<br>(4.8 to 6.2)                     | --                                       | 0.1<br>(0.1 to 0.2)                  | 25.4<br>(14.2 to 38.4)                            | -1.5<br>(-9.5 to 7.8)                               |
| Digestive congenital anomalies                | 7.5<br>(6.6 to 8.4)                     | --                                       | 0.3<br>(0.2 to 0.5)                  | 32.8<br>(9.7 to 60.2)                             | 1.8<br>(-14.6 to 20.7)                              |
| Other congenital anomalies                    | 31.4<br>(20.6 to 47.7)                  | --                                       | 5.2<br>(3.4 to 7.9)                  | 24.1<br>(13.4 to 36.3)                            | -5.1<br>(-13.0 to 4.1)                              |
| Skin and subcutaneous diseases                | 2,467.9<br>(2,371.3 to 2,582.8)         | 5,820.4<br>(5,346.2 to 6,377.6)          | 57.9<br>(38.0 to 85.4)               | 32.0<br>(29.0 to 34.8)                            | 2.0<br>(0.1 to 4.0)                                 |
| Dermatitis                                    | 342.0<br>(284.4 to 407.4)               | 324.4<br>(282.6 to 377.1)                | 13.6<br>(7.6 to 22.9)                | 30.0<br>(24.6 to 35.4)                            | 0.4<br>(-3.2 to 4.2)                                |
| Psoriasis                                     | 39.4<br>(37.1 to 42.0)                  | 6.1<br>(5.7 to 6.4)                      | 3.5<br>(2.5 to 4.6)                  | 43.3<br>(27.6 to 59.3)                            | 7.2<br>(-1.7 to 16.8)                               |
| Cellulitis                                    | 2.6<br>(2.4 to 2.8)                     | 45.0<br>(41.7 to 48.6)                   | 0.1<br>(0.1 to 0.2)                  | 31.7<br>(6.7 to 62.1)                             | 1.1<br>(-16.4 to 22.5)                              |
| Pyoderma                                      | 39.6<br>(37.7 to 41.6)                  | 779.6<br>(742.1 to 818.0)                | 0.2<br>(0.1 to 0.5)                  | 31.1<br>(22.8 to 40.2)                            | 0.9<br>(-4.2 to 6.6)                                |
| Scabies                                       | 131.3<br>(104.8 to 167.7)               | 405.9<br>(326.1 to 515.5)                | 3.4<br>(1.8 to 5.7)                  | 25.1<br>(18.7 to 31.7)                            | -3.4<br>(-7.4 to 1.2)                               |
| Fungal skin diseases                          | 1,043.4<br>(878.2 to 1,231.6)           | 2,933.4<br>(2,470.5 to 3,452.0)          | 5.9<br>(2.3 to 12.7)                 | 31.3<br>(29.6 to 32.8)                            | 0.4<br>(-0.4 to 1.2)                                |
| Viral skin diseases                           | 217.0<br>(205.4 to 229.2)               | 301.5<br>(284.9 to 321.4)                | 6.7<br>(4.2 to 9.8)                  | 30.2<br>(25.8 to 35.2)                            | 0.2<br>(-3.0 to 3.6)                                |
| Acne vulgaris                                 | 674.6<br>(581.8 to 777.3)               | 487.1<br>(379.2 to 651.2)                | 17.4<br>(11.4 to 25.3)               | 34.3<br>(27.4 to 41.7)                            | 5.2<br>(0.1 to 10.4)                                |
| Alopecia areata                               | 12.5<br>(11.7 to 13.3)                  | 22.3<br>(20.9 to 23.7)                   | 0.4<br>(0.3 to 0.6)                  | 34.5<br>(19.7 to 52.0)                            | 0.4<br>(-9.5 to 11.3)                               |
| Pruritus                                      | 50.8<br>(44.3 to 57.7)                  | 41.3<br>(36.6 to 46.8)                   | 0.5<br>(0.2 to 1.0)                  | 33.7<br>(25.5 to 42.3)                            | 0.7<br>(-4.6 to 5.9)                                |
| Urticaria                                     | 72.5<br>(61.8 to 85.2)                  | 130.4<br>(110.9 to 152.9)                | 4.4<br>(2.8 to 6.3)                  | 29.0<br>(20.4 to 37.5)                            | 0.3<br>(-5.4 to 6.0)                                |
| Decubitus ulcer                               | 0.5<br>(0.5 to 0.6)                     | 1.9<br>(1.7 to 2.1)                      | 0.1<br>(0.1 to 0.1)                  | 36.4<br>(25.6 to 46.8)                            | 4.6<br>(-9.0 to 19.5)                               |
| Other skin and subcutaneous diseases          | 304.9<br>(295.8 to 314.6)               | 341.4<br>(330.9 to 352.4)                | 1.7<br>(0.8 to 3.1)                  | 34.1<br>(30.0 to 38.1)                            | 1.2<br>(-1.2 to 3.6)                                |
| Sense organ diseases                          | 1,265.6<br>(1,216.9 to 1,317.7)         | 652.8†<br>(606.2 to 704.4)               | 45.6<br>(31.9 to 63.5)               | 28.2<br>(24.7 to 31.7)                            | -3.5<br>(-5.5 to -1.6)                              |
| Glaucoma                                      | 2.0<br>(1.6 to 2.4)                     | --                                       | 0.2<br>(0.1 to 0.3)                  | 33.3<br>(15.9 to 52.4)                            | 0.9<br>(-11.1 to 13.5)                              |
| Cataract                                      | 50.3<br>(43.5 to 58.0)                  | --                                       | 4.6<br>(3.1 to 6.6)                  | 29.4<br>(22.4 to 36.3)                            | -3.5<br>(-8.8 to 1.8)                               |
| Macular degeneration                          | 2.4<br>(1.8 to 3.2)                     | --                                       | 0.2<br>(0.1 to 0.3)                  | 35.7<br>(17.3 to 56.3)                            | 2.8<br>(-9.1 to 16.3)                               |
| Refraction and accommodation disorders        | 650.5<br>(585.8 to 728.5)               | --                                       | 11.6<br>(7.0 to 18.6)                | 23.8<br>(17.0 to 30.4)                            | -7.1<br>(-11.7 to -2.1)                             |
| Age-related and other hearing loss            | 712.7<br>(663.0 to 768.4)               | --                                       | 22.9<br>(15.9 to 32.4)               | 28.4<br>(22.7 to 34.0)                            | -3.1<br>(-5.8 to -0.5)                              |
| Other vision loss                             | 20.9<br>(18.3 to 24.2)                  | --                                       | 2.1<br>(1.4 to 3.0)                  | 33.1<br>(21.5 to 45.5)                            | -1.0<br>(-7.6 to 5.9)                               |
| Other sense organ diseases                    | 130.7<br>(121.1 to 140.7)               | 652.8<br>(606.2 to 704.4)                | 4.0<br>(2.5 to 6.0)                  | 35.9<br>(29.2 to 43.5)                            | 1.4<br>(-2.5 to 5.4)                                |
| Oral disorders                                | 3,573.5<br>(3,290.7 to 3,834.6)         | 8,403.5†<br>(6,978.8 to 9,859.2)         | 12.7<br>(7.1 to 21.6)                | 36.7<br>(33.4 to 40.0)                            | 0.4<br>(-1.6 to 2.5)                                |
| Caries of deciduous teeth                     | 807.9<br>(627.2 to 990.8)               | 2,633.7<br>(1,729.6 to 3,737.9)          | 0.2<br>(0.1 to 0.4)                  | 28.1<br>(14.3 to 44.7)                            | 0.2<br>(-10.6 to 12.9)                              |
| Caries of permanent teeth                     | 2,139.7<br>(1,839.2 to 2,457.3)         | 5,672.9<br>(4,658.2 to 6,749.9)          | 1.3<br>(0.6 to 2.5)                  | 30.3<br>(23.7 to 36.6)                            | -1.5<br>(-5.7 to 2.5)                               |
| Periodontal disease                           | 760.6<br>(561.4 to 965.7)               | 90.4<br>(65.6 to 116.8)                  | 5.0<br>(1.9 to 10.8)                 | 39.3<br>(33.5 to 46.1)                            | 0.4<br>(-3.0 to 4.5)                                |
| Edentulism and severe tooth loss              | 104.2<br>(87.7 to 122.0)                | 6.5<br>(5.4 to 7.6)                      | 2.9<br>(1.9 to 4.3)                  | 38.6<br>(32.3 to 45.3)                            | 0.8<br>(-3.0 to 4.4)                                |
| Other oral disorders                          | 113.2<br>(108.0 to 119.0)               | --                                       | 3.3<br>(2.0 to 5.0)                  | 34.3<br>(28.9 to 39.6)                            | 0.3<br>(-3.2 to 3.5)                                |
| <b>Injuries</b>                               | <b>797.4</b><br><b>(745.2 to 853.3)</b> | <b>502.4†</b><br><b>(473.3 to 534.1)</b> | <b>33.6</b><br><b>(22.8 to 47.5)</b> | <b>34.1</b><br><b>(31.5 to 36.5)</b>              | <b>0.3</b><br><b>(-1.2 to 1.8)</b>                  |
| <b>Transport injuries</b>                     | <b>86.1</b><br><b>(80.1 to 92.7)</b>    | <b>41.1</b><br><b>(36.4 to 46.3)</b>     | <b>5.2</b><br><b>(3.4 to 7.5)</b>    | <b>34.0</b><br><b>(30.9 to 36.9)</b>              | <b>-0.2</b><br><b>(-2.1 to 1.6)</b>                 |
| Road injuries                                 | 66.0<br>(61.9 to 70.6)                  | 34.4<br>(29.8 to 39.5)                   | 3.9<br>(2.6 to 5.7)                  | 33.9<br>(31.0 to 36.7)                            | -0.6<br>(-2.4 to 1.2)                               |
| Pedestrian road injuries                      | 14.8<br>(13.1 to 16.9)                  | 5.5<br>(4.5 to 6.8)                      | 0.9<br>(0.6 to 1.3)                  | 30.1<br>(27.3 to 32.8)                            | -3.2<br>(-5.0 to -1.4)                              |
| Cyclist road injuries                         | 11.6<br>(9.8 to 13.8)                   | 6.7<br>(5.2 to 8.4)                      | 0.7<br>(0.4 to 0.9)                  | 39.1<br>(35.7 to 42.5)                            | 4.0<br>(1.9 to 6.0)                                 |
| Motorcyclist road injuries                    | 10.8<br>(9.2 to 12.8)                   | 3.8<br>(3.0 to 4.7)                      | 0.6<br>(0.4 to 0.9)                  | 31.9<br>(28.8 to 34.9)                            | -2.8<br>(-4.7 to -0.9)                              |
| Motor vehicle road injuries                   | 18.3<br>(15.8 to 20.8)                  | 11.4<br>(9.4 to 13.5)                    | 1.2<br>(0.8 to 1.7)                  | 30.9<br>(27.9 to 34.0)                            | -2.8<br>(-4.8 to -0.9)                              |
| Other road injuries                           | 10.5<br>(9.0 to 12.3)                   | 7.0<br>(5.5 to 8.9)                      | 0.6<br>(0.4 to 0.8)                  | 43.6<br>(40.2 to 46.9)                            | 6.7<br>(4.6 to 8.8)                                 |
| Other transport injuries                      | 20.1<br>(16.6 to 24.6)                  | 6.7<br>(5.5 to 8.4)                      | 1.3<br>(0.8 to 1.8)                  | 34.2<br>(29.4 to 38.6)                            | 1.2<br>(-1.4 to 3.7)                                |
| <b>Unintentional injuries</b>                 | <b>683.1</b><br><b>(633.2 to 737.7)</b> | <b>445.2</b><br><b>(417.5 to 475.6)</b>  | <b>25.8</b><br><b>(17.4 to 36.4)</b> | <b>35.1</b><br><b>(32.3 to 37.6)</b>              | <b>0.8</b><br><b>(-0.8 to 2.3)</b>                  |
| Falls                                         | 234.8<br>(203.0 to 267.6)               | 147.0<br>(126.6 to 173.1)                | 10.3<br>(7.2 to 14.2)                | 35.2<br>(32.5 to 37.9)                            | 0.3<br>(-1.4 to 2.0)                                |
| Drowning                                      | 2.8<br>(2.3 to 3.2)                     | 0.8<br>(0.7 to 0.9)                      | 0.2<br>(0.1 to 0.2)                  | 26.7<br>(22.6 to 30.5)                            | -4.6<br>(-7.2 to -2.4)                              |
| Fire, heat, and hot substances                | 71.1<br>(59.1 to 86.7)                  | 13.4<br>(10.7 to 16.3)                   | 2.2<br>(1.5 to 3.1)                  | 32.9<br>(25.4 to 40.2)                            | 0.1<br>(-4.2 to 4.4)                                |
| Poisonings                                    | 2.4<br>(1.9 to 2.9)                     | 4.1<br>(3.2 to 5.3)                      | 0.2<br>(0.1 to 0.4)                  | 38.9<br>(26.7 to 51.2)                            | 4.8<br>(-2.7 to 12.4)                               |
| Exposure to mechanical forces                 | 112.7<br>(96.4 to 136.3)                | 60.8<br>(50.7 to 71.6)                   | 3.1<br>(2.0 to 4.5)                  | 33.2<br>(29.7 to 36.5)                            | -0.9<br>(-3.0 to 1.0)                               |
| Unintentional firearm injuries                | 6.2<br>(5.1 to 7.5)                     | 2.3<br>(1.7 to 3.0)                      | 0.3<br>(0.2 to 0.4)                  | 38.4<br>(34.8 to 42.2)                            | 1.8<br>(-0.4 to 4.0)                                |
| Unintentional suffocation                     | 10.1<br>(7.2 to 13.6)                   | 3.2<br>(2.1 to 4.5)                      | 0.4<br>(0.2 to 0.5)                  | 34.9<br>(30.3 to 39.3)                            | 2.2<br>(-0.4 to 4.6)                                |
| Other exposure to mechanical forces           | 96.5<br>(80.7 to 119.2)                 | 55.4<br>(46.3 to 65.1)                   | 2.4<br>(1.6 to 3.5)                  | 32.4<br>(28.5 to 35.9)                            | -1.5<br>(-3.8 to 0.5)                               |

| Cause                                                                               | Prevalence in thousands (95% UI)        | Incidence in thousands (95% UI)       | YLDs in thousands (95% UI)              |                                                   |                                                     |
|-------------------------------------------------------------------------------------|-----------------------------------------|---------------------------------------|-----------------------------------------|---------------------------------------------------|-----------------------------------------------------|
|                                                                                     | 2016 counts                             | 2016 counts                           | 2016 counts                             | Percentage change in counts between 2006 and 2016 | Percentage change in age-standardised rates between |
| Adverse effects of medical treatment                                                | 2.5<br>(2.0 to 3.1)                     | 32.8<br>(28.4 to 37.6)                | 0.3<br>(0.2 to 0.5)                     | 23.7<br>(16.5 to 31.1)                            | -4.7<br>(-8.8 to -0.8)                              |
| Animal contact                                                                      | 44.0<br>(38.5 to 51.1)                  | 72.3<br>(60.2 to 85.1)                | 1.6<br>(1.0 to 2.2)                     | 33.5<br>(26.3 to 40.3)                            | -1.0<br>(-5.0 to 2.9)                               |
| Venomous animal contact                                                             | 16.7<br>(13.9 to 20.2)                  | 29.7<br>(23.3 to 37.2)                | 1.1<br>(0.7 to 1.5)                     | 33.1<br>(23.6 to 42.9)                            | -1.0<br>(-6.8 to 4.2)                               |
| Non-venomous animal contact                                                         | 27.2<br>(22.7 to 33.5)                  | 42.6<br>(34.3 to 51.1)                | 0.5<br>(0.3 to 0.8)                     | 34.1<br>(29.2 to 38.5)                            | -0.9<br>(-4.2 to 2.2)                               |
| Foreign body                                                                        | 52.6<br>(42.5 to 63.3)                  | 41.6<br>(36.0 to 48.2)                | 2.4<br>(1.5 to 3.5)                     | 33.8<br>(29.2 to 38.2)                            | 1.1<br>(-1.3 to 3.5)                                |
| Pulmonary aspiration and foreign body in airway                                     | 30.4<br>(22.5 to 41.2)                  | 15.7<br>(12.8 to 19.4)                | 1.5<br>(1.0 to 2.3)                     | 32.0<br>(27.2 to 36.7)                            | -0.1<br>(-2.6 to 2.3)                               |
| Foreign body in eyes                                                                | 2.7<br>(1.4 to 4.2)                     | 15.3<br>(11.6 to 20.5)                | 0.1<br>(0.1 to 0.3)                     | 37.1<br>(32.1 to 42.7)                            | 3.2<br>(0.5 to 6.5)                                 |
| Foreign body in other body part                                                     | 19.4<br>(15.3 to 25.5)                  | 10.6<br>(8.5 to 13.0)                 | 0.7<br>(0.4 to 1.0)                     | 37.3<br>(31.8 to 42.6)                            | 3.5<br>(0.4 to 6.5)                                 |
| Environmental heat and cold exposure                                                | 62.4<br>(52.4 to 73.5)                  | 24.2<br>(19.8 to 29.5)                | 2.6<br>(1.8 to 3.8)                     | 39.3<br>(36.1 to 42.6)                            | 4.0<br>(2.1 to 5.8)                                 |
| Other unintentional injuries                                                        | 97.9<br>(76.5 to 126.7)                 | 48.1<br>(40.3 to 57.9)                | 2.9<br>(1.9 to 4.3)                     | 38.0<br>(34.8 to 41.1)                            | 3.6<br>(1.8 to 5.3)                                 |
| <b>Self-harm and interpersonal violence</b>                                         | <b>195.2</b><br><b>(174.6 to 217.2)</b> | <b>16.0†</b><br><b>(13.5 to 18.7)</b> | <b>2.5</b><br><b>(1.8 to 3.5)</b>       | <b>25.6</b><br><b>(20.0 to 30.7)</b>              | <b>-4.4</b><br><b>(-7.6 to -1.7)</b>                |
| Self-harm                                                                           | 4.0<br>(3.5 to 4.6)                     | 2.6<br>(2.2 to 3.0)                   | 0.2<br>(0.1 to 0.3)                     | 36.0<br>(32.1 to 39.6)                            | -0.4<br>(-2.7 to 1.9)                               |
| Self-harm by firearm                                                                | 0.3<br>(0.2 to 0.3)                     | 0.1<br>(0.1 to 0.2)                   | < 0.05<br>(< 0.05 to < 0.05)            | 31.1<br>(26.6 to 36.0)                            | -3.9<br>(-6.9 to -0.6)                              |
| Self-harm by other specified means                                                  | 3.8<br>(3.2 to 4.3)                     | 2.5<br>(2.1 to 2.9)                   | 0.2<br>(0.1 to 0.3)                     | 36.2<br>(32.4 to 40.0)                            | -0.2<br>(-2.5 to 2.1)                               |
| Interpersonal violence                                                              | 191.2<br>(170.4 to 213.4)               | 13.4†<br>(11.1 to 16.0)               | 2.3<br>(1.6 to 3.2)                     | 24.7<br>(18.7 to 29.9)                            | -5.0<br>(-8.6 to -1.9)                              |
| Assault by firearm                                                                  | 0.9<br>(0.8 to 1.1)                     | 0.4<br>(0.3 to 0.6)                   | < 0.05<br>(< 0.05 to 0.1)               | 34.5<br>(29.6 to 39.5)                            | -0.7<br>(-3.6 to 2.2)                               |
| Assault by sharp object                                                             | 8.0<br>(6.5 to 9.6)                     | 4.6<br>(3.5 to 6.0)                   | 0.3<br>(0.2 to 0.4)                     | 39.1<br>(35.4 to 42.8)                            | 3.5<br>(1.3 to 5.7)                                 |
| Sexual violence                                                                     | 171.5<br>(150.8 to 194.0)               | --                                    | 1.5<br>(1.0 to 2.1)                     | 17.1<br>(9.9 to 24.3)                             | -11.2<br>(-15.9 to -6.7)                            |
| Assault by other means                                                              | 10.8<br>(9.3 to 12.8)                   | 8.3<br>(6.6 to 10.1)                  | 0.5<br>(0.3 to 0.7)                     | 43.2<br>(39.9 to 46.5)                            | 5.4<br>(3.3 to 7.5)                                 |
| <b>Forces of nature, conflict and terrorism, and executions and police conflict</b> | <b>4.5</b><br><b>(2.6 to 7.0)</b>       | <b>0.1†</b><br><b>(0.1 to 0.2)</b>    | <b>0.1</b><br><b>(&lt; 0.05 to 0.4)</b> | <b>35.2</b><br><b>(29.8 to 42.5)</b>              | <b>17.1</b><br><b>(12.9 to 23.4)</b>                |
| Exposure to forces of nature                                                        | 0.1<br>(< 0.05 to 0.3)                  | --                                    | < 0.05<br>(< 0.05 to < 0.05)            | --                                                | --                                                  |
| Conflict and terrorism                                                              | 4.1<br>(2.3 to 6.6)                     | --                                    | 0.1<br>(< 0.05 to 0.4)                  | 29.3<br>(23.9 to 36.5)                            | 12.7<br>(8.6 to 18.9)                               |
| Executions and police conflict                                                      | 0.3<br>(0.1 to 0.6)                     | 0.1<br>(0.1 to 0.2)                   | < 0.05<br>(< 0.05 to < 0.05)            | 33.2<br>(16.7 to 49.5)                            | 6.0<br>(-17.4 to 25.1)                              |
| <b>Impairments</b>                                                                  | --                                      | --                                    | --                                      | --                                                | --                                                  |
| Anaemia                                                                             | 3,123.6<br>(3,016.7 to 3,244.3)         | --                                    | 114.4<br>(76.7 to 161.4)                | 6.7<br>(-1.9 to 14.8)                             | -20.3<br>(-28.2 to -13.4)                           |
| Developmental intellectual disability                                               | 299.9<br>(229.1 to 373.6)               | --                                    | 28.9<br>(20.9 to 39.6)                  | 32.9<br>(22.9 to 45.9)                            | 1.9<br>(-5.2 to 11.9)                               |
| Epilepsy                                                                            | 75.7<br>(46.9 to 108.4)                 | --                                    | 27.0<br>(14.4 to 43.0)                  | 34.4<br>(-30.0 to 158.7)                          | 2.5<br>(-46.6 to 100.3)                             |
| Guillain-Barre syndrome                                                             | < 0.05<br>(< 0.05 to 0.1)               | --                                    | < 0.05<br>(< 0.05 to < 0.05)            | 31.8<br>(30.2 to 33.7)                            | 0.1<br>(-0.0 to 0.1)                                |
| Hearing loss                                                                        | 892.5<br>(841.4 to 947.2)               | --                                    | 32.3<br>(22.6 to 44.3)                  | 26.6<br>(22.6 to 30.9)                            | -3.6<br>(-5.8 to -1.3)                              |
| Heart failure                                                                       | 17.8<br>(15.8 to 19.9)                  | --                                    | 1.9<br>(1.3 to 2.5)                     | 27.7<br>(18.2 to 36.3)                            | -4.8<br>(-12.1 to 1.9)                              |
| Infertility                                                                         | 123.0<br>(112.9 to 135.1)               | --                                    | 0.7<br>(0.3 to 1.4)                     | 24.9<br>(5.0 to 48.4)                             | -12.0<br>(-27.9 to 6.7)                             |
| Pelvic inflammatory disease                                                         | 8.1<br>(6.7 to 9.6)                     | --                                    | 1.1<br>(0.7 to 1.5)                     | 31.7<br>(15.3 to 51.0)                            | -4.1<br>(-15.9 to 8.9)                              |
| Vision loss                                                                         | 768.4<br>(701.4 to 846.8)               | --                                    | 26.1<br>(18.3 to 36.6)                  | 30.9<br>(22.1 to 42.8)                            | -3.3<br>(-7.5 to 2.1)                               |

We did not calculate incidence for the nine impairments, certain NTDs, and causes with only birth prevalence. Blank cells mean that no estimate is available.

† Incidence for aggregate causes represents the sum of the incidence of the causes below the aggregate.

‡ Incidence estimates for stroke represent first-ever stroke only.

^ Incidence of HIV/AIDS represents new infections of HIV only and does not include new infections of Tuberculosis in HIV positive cases.



SR Table 14: Prevalence, incidence, and YLDs for 2016, percentage change of YLD counts and percentage change of age-standardised YLD rates between 2006 and 2016 by cause and impairments, for all ages, Tonga.

| Cause                                                                                | Prevalence in thousands (95% UI)            | Incidence in thousands (95% UI)                  | YLDs in thousands (95% UI)                      |                                                   |                                                     |
|--------------------------------------------------------------------------------------|---------------------------------------------|--------------------------------------------------|-------------------------------------------------|---------------------------------------------------|-----------------------------------------------------|
|                                                                                      | 2016 counts                                 | 2016 counts                                      | 2016 counts                                     | Percentage change in counts between 2006 and 2016 | Percentage change in age-standardised rates between |
| <b>All causes</b>                                                                    | <b>102.6</b><br>(102.1 to 103.1)            | <b>685.5†</b><br>(648.5 to 724.2)                | <b>10.6</b><br>(7.9 to 13.8)                    | <b>8.5</b><br>(6.5 to 10.6)                       | <b>0.8</b><br>(-0.7 to 2.4)                         |
| <b>Communicable, maternal, neonatal, and nutritional disorders</b>                   | <b>73.2</b><br>(71.3 to 75.0)               | <b>407.0†</b><br>(375.5 to 440.9)                | <b>1.6</b><br>(1.1 to 2.2)                      | <b>1.1</b><br>(-5.8 to 9.3)                       | <b>-1.6</b><br>(-7.3 to 5.3)                        |
| <b>HIV/AIDS and tuberculosis</b>                                                     | <b>28.6</b><br>(26.5 to 30.2)               | <b>&lt; 0.05†</b><br>( <b>&lt; 0.05 to 0.1</b> ) | <b>&lt; 0.05</b><br>( <b>&lt; 0.05 to 0.1</b> ) | <b>24.3</b><br>(-11.9 to 103.8)                   | <b>14.7</b><br>(-18.4 to 88.5)                      |
| Tuberculosis                                                                         | 27.0<br>(25.3 to 29.0)                      | < 0.05†<br>( <b>&lt; 0.05 to &lt; 0.05</b> )     | < 0.05<br>( <b>&lt; 0.05 to &lt; 0.05</b> )     | -0.9<br>(-16.3 to 16.7)                           | -8.2<br>(-20.8 to 6.3)                              |
| Drug-susceptible tuberculosis                                                        | < 0.05<br>( <b>&lt; 0.05 to &lt; 0.05</b> ) | < 0.05<br>( <b>&lt; 0.05 to &lt; 0.05</b> )      | < 0.05<br>( <b>&lt; 0.05 to &lt; 0.05</b> )     | -0.4<br>(-17.8 to 22.4)                           | -7.8<br>(-22.5 to 11.3)                             |
| Multidrug-resistant tuberculosis without extensive drug resistance                   | < 0.05<br>( <b>&lt; 0.05 to &lt; 0.05</b> ) | < 0.05<br>( <b>&lt; 0.05 to &lt; 0.05</b> )      | < 0.05<br>( <b>&lt; 0.05 to &lt; 0.05</b> )     | -28.7<br>(-98.4 to 2,451.1)                       | -33.9<br>(-98.6 to 2,270.4)                         |
| Extensively drug-resistant tuberculosis                                              | < 0.05<br>( <b>&lt; 0.05 to &lt; 0.05</b> ) | < 0.05<br>( <b>&lt; 0.05 to &lt; 0.05</b> )      | < 0.05<br>( <b>&lt; 0.05 to &lt; 0.05</b> )     | 134.6<br>(-94.8 to 8,294.3)                       | 117.5<br>(-95.3 to 7,704.4)                         |
| Latent tuberculosis infection                                                        | 27.0<br>(25.3 to 28.9)                      | --                                               | --                                              | --                                                | --                                                  |
| HIV/AIDS                                                                             | 0.1<br>( <b>&lt; 0.05 to 0.3</b> )          | < 0.05^<br>( <b>&lt; 0.05 to 0.1</b> )           | < 0.05<br>( <b>&lt; 0.05 to 0.1</b> )           | 83.9<br>(-17.6 to 519.9)                          | 70.3<br>(-25.7 to 490.2)                            |
| Drug-susceptible HIV/AIDS - Tuberculosis                                             | < 0.05<br>( <b>&lt; 0.05 to &lt; 0.05</b> ) | < 0.05<br>( <b>&lt; 0.05 to &lt; 0.05</b> )      | < 0.05<br>( <b>&lt; 0.05 to &lt; 0.05</b> )     | 33.2<br>(20.5 to 57.0)                            | 24.6<br>(12.8 to 46.7)                              |
| Multidrug-resistant HIV/AIDS - Tuberculosis without extensive drug resistance        | < 0.05<br>( <b>&lt; 0.05 to &lt; 0.05</b> ) | < 0.05<br>( <b>&lt; 0.05 to &lt; 0.05</b> )      | < 0.05<br>( <b>&lt; 0.05 to &lt; 0.05</b> )     | -10.4<br>(-97.9 to 3,316.1)                       | -16.2<br>(-98.0 to 3,093.8)                         |
| Extensively drug-resistant HIV/AIDS - Tuberculosis                                   | < 0.05<br>( <b>&lt; 0.05 to &lt; 0.05</b> ) | < 0.05<br>( <b>&lt; 0.05 to &lt; 0.05</b> )      | < 0.05<br>( <b>&lt; 0.05 to &lt; 0.05</b> )     | 194.9<br>(-93.1 to 11,136.5)                      | 175.8<br>(-93.6 to 10,400.2)                        |
| HIV/AIDS resulting in other diseases                                                 | 0.1<br>( <b>&lt; 0.05 to 0.3</b> )          | < 0.05<br>( <b>&lt; 0.05 to 0.1</b> )            | < 0.05<br>( <b>&lt; 0.05 to 0.1</b> )           | 89.0<br>(-25.9 to 876.6)                          | 74.7<br>(-32.0 to 865.3)                            |
| <b>Diarrhoea, lower respiratory infections, and other common infectious diseases</b> | <b>7.2</b><br>(6.9 to 7.6)                  | <b>379.5†</b><br>(348.1 to 413.5)                | <b>0.4</b><br>(0.3 to 0.6)                      | <b>9.3</b><br>(6.0 to 13.0)                       | <b>5.3</b><br>(2.3 to 8.4)                          |
| Diarrhoeal diseases                                                                  | 1.7<br>(1.6 to 1.8)                         | 113.2<br>(105.0 to 122.2)                        | 0.2<br>(0.1 to 0.3)                             | 17.2<br>(11.3 to 24.0)                            | 13.2<br>(8.2 to 19.2)                               |
| Intestinal infectious diseases                                                       | < 0.05<br>( <b>&lt; 0.05 to &lt; 0.05</b> ) | 0.2†<br>(0.1 to 0.2)                             | < 0.05<br>( <b>&lt; 0.05 to &lt; 0.05</b> )     | -20.3<br>(-37.1 to 1.3)                           | -24.2<br>(-38.1 to -7.2)                            |
| Typhoid fever                                                                        | < 0.05<br>( <b>&lt; 0.05 to &lt; 0.05</b> ) | 0.1<br>(0.1 to 0.2)                              | < 0.05<br>( <b>&lt; 0.05 to &lt; 0.05</b> )     | -19.9<br>(-38.3 to 3.9)                           | -24.0<br>(-38.9 to -4.6)                            |
| Paratyphoid fever                                                                    | < 0.05<br>( <b>&lt; 0.05 to &lt; 0.05</b> ) | < 0.05<br>( <b>&lt; 0.05 to &lt; 0.05</b> )      | < 0.05<br>( <b>&lt; 0.05 to &lt; 0.05</b> )     | -17.9<br>(-32.3 to -2.0)                          | -21.9<br>(-33.8 to -8.8)                            |
| Other intestinal infectious diseases                                                 | --                                          | --                                               | < 0.05<br>( <b>&lt; 0.05 to &lt; 0.05</b> )     | -48.8<br>(-59.8 to -34.7)                         | -44.0<br>(-53.8 to -32.5)                           |
| Lower respiratory infections                                                         | 0.2<br>(0.2 to 0.2)                         | 9.0<br>(8.0 to 10.1)                             | < 0.05<br>( <b>&lt; 0.05 to &lt; 0.05</b> )     | 25.1<br>(12.1 to 39.0)                            | 19.7<br>(8.8 to 32.2)                               |
| Upper respiratory infections                                                         | 3.3<br>(2.9 to 3.8)                         | 249.1<br>(218.3 to 284.1)                        | 0.1<br>( <b>&lt; 0.05 to 0.1</b> )              | 3.1<br>(-2.0 to 9.0)                              | -0.1<br>(-4.9 to 5.2)                               |
| Otitis media                                                                         | 1.5<br>(1.4 to 1.7)                         | 5.1<br>(4.0 to 6.5)                              | < 0.05<br>( <b>&lt; 0.05 to 0.1</b> )           | 1.0<br>(-5.9 to 9.0)                              | -2.0<br>(-8.8 to 5.4)                               |
| Meningitis                                                                           | 0.5<br>(0.4 to 0.5)                         | 0.1<br>(0.1 to 0.1)                              | < 0.05<br>( <b>&lt; 0.05 to 0.1</b> )           | 1.7<br>(-5.9 to 9.1)                              | -3.8<br>(-10.4 to 2.8)                              |
| Pneumococcal meningitis                                                              | 0.3<br>(0.3 to 0.4)                         | < 0.05<br>( <b>&lt; 0.05 to &lt; 0.05</b> )      | < 0.05<br>( <b>&lt; 0.05 to &lt; 0.05</b> )     | 3.4<br>(-8.3 to 15.1)                             | -2.4<br>(-12.4 to 7.9)                              |
| H influenzae type B meningitis                                                       | < 0.05<br>( <b>&lt; 0.05 to 0.1</b> )       | < 0.05<br>( <b>&lt; 0.05 to &lt; 0.05</b> )      | < 0.05<br>( <b>&lt; 0.05 to &lt; 0.05</b> )     | -3.5<br>(-9.9 to 2.3)                             | -7.6<br>(-13.3 to -2.5)                             |
| Meningococcal infection                                                              | < 0.05<br>( <b>&lt; 0.05 to 0.1</b> )       | < 0.05<br>( <b>&lt; 0.05 to &lt; 0.05</b> )      | < 0.05<br>( <b>&lt; 0.05 to &lt; 0.05</b> )     | 3.3<br>(-2.1 to 8.1)                              | -2.2<br>(-7.0 to 2.2)                               |
| Other meningitis                                                                     | 0.1<br>( <b>&lt; 0.05 to 0.1</b> )          | < 0.05<br>( <b>&lt; 0.05 to &lt; 0.05</b> )      | < 0.05<br>( <b>&lt; 0.05 to &lt; 0.05</b> )     | -1.5<br>(-8.2 to 5.4)                             | -7.1<br>(-12.3 to -1.8)                             |
| Encephalitis                                                                         | 0.3<br>(0.2 to 0.5)                         | 0.1<br>(0.1 to 0.2)                              | < 0.05<br>( <b>&lt; 0.05 to &lt; 0.05</b> )     | 4.9<br>(-5.8 to 16.8)                             | -1.7<br>(-11.6 to 8.4)                              |
| Diphtheria                                                                           | < 0.05<br>( <b>&lt; 0.05 to &lt; 0.05</b> ) | < 0.05<br>( <b>&lt; 0.05 to &lt; 0.05</b> )      | < 0.05<br>( <b>&lt; 0.05 to &lt; 0.05</b> )     | -11.4<br>(-51.4 to 64.0)                          | -11.8<br>(-50.0 to 56.4)                            |
| Whooping cough                                                                       | < 0.05<br>( <b>&lt; 0.05 to &lt; 0.05</b> ) | < 0.05<br>( <b>&lt; 0.05 to &lt; 0.05</b> )      | < 0.05<br>( <b>&lt; 0.05 to &lt; 0.05</b> )     | -55.8<br>(-70.3 to -37.0)                         | -49.8<br>(-66.1 to -29.0)                           |
| Tetanus                                                                              | < 0.05<br>( <b>&lt; 0.05 to &lt; 0.05</b> ) | < 0.05<br>( <b>&lt; 0.05 to &lt; 0.05</b> )      | < 0.05<br>( <b>&lt; 0.05 to &lt; 0.05</b> )     | 0.2<br>(-10.3 to 9.3)                             | -0.7<br>(-11.8 to 8.6)                              |
| Measles                                                                              | < 0.05<br>( <b>&lt; 0.05 to &lt; 0.05</b> ) | < 0.05<br>( <b>&lt; 0.05 to 0.1</b> )            | < 0.05<br>( <b>&lt; 0.05 to &lt; 0.05</b> )     | -59.1<br>(-63.6 to -54.8)                         | -54.7<br>(-59.7 to -50.0)                           |
| Varicella and herpes zoster                                                          | 0.1<br>(0.1 to 0.1)                         | 2.8<br>(2.6 to 2.9)                              | < 0.05<br>( <b>&lt; 0.05 to &lt; 0.05</b> )     | 8.7<br>(-2.7 to 20.8)                             | 0.3<br>(-8.9 to 9.8)                                |
| <b>Neglected tropical diseases and malaria</b>                                       | <b>14.9</b><br>(12.8 to 17.4)               | <b>2.6†</b><br>(1.7 to 3.8)                      | <b>0.1</b><br>(0.1 to 0.2)                      | <b>14.8</b><br>(2.2 to 31.7)                      | <b>8.9</b><br>(-2.9 to 25.9)                        |
| Malaria                                                                              | --                                          | --                                               | --                                              | --                                                | --                                                  |
| Chagas disease                                                                       | --                                          | --                                               | --                                              | --                                                | --                                                  |
| Leishmaniasis                                                                        | --                                          | --                                               | --                                              | --                                                | --                                                  |
| Visceral leishmaniasis                                                               | --                                          | --                                               | --                                              | --                                                | --                                                  |
| Cutaneous and mucocutaneous leishmaniasis                                            | --                                          | --                                               | --                                              | --                                                | --                                                  |
| African trypanosomiasis                                                              | --                                          | --                                               | --                                              | --                                                | --                                                  |
| Schistosomiasis                                                                      | --                                          | --                                               | --                                              | --                                                | --                                                  |
| Cysticercosis                                                                        | --                                          | --                                               | --                                              | --                                                | --                                                  |
| Cystic echinococcosis                                                                | --                                          | --                                               | --                                              | --                                                | --                                                  |
| Lymphatic filariasis                                                                 | 0.8<br>(0.4 to 1.5)                         | 0.2<br>(0.2 to 0.3)                              | 0.1<br>( <b>&lt; 0.05 to 0.1</b> )              | 8.8<br>(3.0 to 15.6)                              | -0.3<br>(-5.3 to 4.6)                               |
| Onchocerciasis                                                                       | --                                          | --                                               | --                                              | --                                                | --                                                  |
| Trachoma                                                                             | --                                          | --                                               | --                                              | --                                                | --                                                  |
| Dengue                                                                               | 0.1<br>(0.1 to 0.2)                         | 2.3<br>(1.4 to 3.5)                              | < 0.05<br>( <b>&lt; 0.05 to &lt; 0.05</b> )     | 101.0<br>(55.2 to 373.6)                          | 90.5<br>(48.0 to 343.9)                             |
| Yellow fever                                                                         | --                                          | --                                               | --                                              | --                                                | --                                                  |
| Rabies                                                                               | < 0.05<br>( <b>&lt; 0.05 to &lt; 0.05</b> ) | < 0.05<br>( <b>&lt; 0.05 to &lt; 0.05</b> )      | < 0.05<br>( <b>&lt; 0.05 to &lt; 0.05</b> )     | -5.4<br>(-40.2 to 64.1)                           | -18.3<br>(-49.1 to 44.3)                            |
| Intestinal nematode infections                                                       | 13.2<br>(11.1 to 15.7)                      | --                                               | < 0.05<br>( <b>&lt; 0.05 to &lt; 0.05</b> )     | 10.2<br>(-29.3 to 74.3)                           | 5.4<br>(-36.5 to 76.1)                              |
| Ascariasis                                                                           | 1.9<br>(1.4 to 2.4)                         | --                                               | < 0.05<br>( <b>&lt; 0.05 to &lt; 0.05</b> )     | 1.9<br>(-67.6 to 256.3)                           | -0.7<br>(-72.3 to 309.8)                            |

| Cause                                                                   | Prevalence in thousands (95% UI)     | Incidence in thousands (95% UI)          | YLDs in thousands (95% UI)                          |                                                   |                                                     |
|-------------------------------------------------------------------------|--------------------------------------|------------------------------------------|-----------------------------------------------------|---------------------------------------------------|-----------------------------------------------------|
|                                                                         | 2016 counts                          | 2016 counts                              | 2016 counts                                         | Percentage change in counts between 2006 and 2016 | Percentage change in age-standardised rates between |
| Trichuriasis                                                            | 5.5<br>(4.1 to 7.3)                  | --                                       | < 0.05<br>(< 0.05 to < 0.05)                        | 3.8<br>(-68.5 to 230.5)                           | -0.8<br>(-72.1 to 257.8)                            |
| Hookworm disease                                                        | 6.3<br>(4.9 to 8.3)                  | --                                       | < 0.05<br>(< 0.05 to < 0.05)                        | 10.3<br>(-29.5 to 75.3)                           | 5.5<br>(-36.5 to 75.9)                              |
| Food-borne trematodiasis                                                | --                                   | --                                       | --                                                  | --                                                | --                                                  |
| Leprosy                                                                 | < 0.05<br>(< 0.05 to < 0.05)         | --                                       | < 0.05<br>(< 0.05 to < 0.05)                        | -33.9<br>(-51.2 to -7.6)                          | -36.9<br>(-54.1 to -8.8)                            |
| Ebola virus disease                                                     | --                                   | --                                       | --                                                  | --                                                | --                                                  |
| Zika virus disease                                                      | < 0.05<br>(0.0 to < 0.05)            | < 0.05<br>(< 0.05 to 0.1)                | < 0.05<br>(0.0 to < 0.05)                           | --                                                | --                                                  |
| Guinea worm disease                                                     | --                                   | --                                       | --                                                  | --                                                | --                                                  |
| Other neglected tropical diseases                                       | 1.2<br>(1.0 to 1.3)                  | --                                       | < 0.05<br>(< 0.05 to < 0.05)                        | -3.2<br>(-20.2 to 19.5)                           | -0.8<br>(-16.6 to 19.8)                             |
| <b>Maternal disorders</b>                                               | <b>0.1</b><br><b>(0.1 to 0.1)</b>    | <b>1.6†</b><br><b>(1.3 to 1.8)</b>       | <b>&lt; 0.05</b><br><b>(&lt; 0.05 to &lt; 0.05)</b> | <b>-13.3</b><br><b>(-33.6 to 15.2)</b>            | <b>-12.2</b><br><b>(-32.9 to 17.2)</b>              |
| Maternal haemorrhage                                                    | < 0.05<br>(< 0.05 to 0.1)            | 0.3<br>(0.2 to 0.4)                      | < 0.05<br>(< 0.05 to < 0.05)                        | -17.0<br>(-47.0 to 26.0)                          | -15.5<br>(-45.9 to 29.3)                            |
| Maternal sepsis and other pregnancy related infections                  | < 0.05<br>(< 0.05 to < 0.05)         | 0.1<br>(0.1 to 0.1)                      | < 0.05<br>(< 0.05 to < 0.05)                        | -14.7<br>(-63.0 to 85.1)                          | -14.5<br>(-63.4 to 85.6)                            |
| Maternal hypertensive disorders                                         | < 0.05<br>(< 0.05 to < 0.05)         | 0.1<br>(0.1 to 0.2)                      | < 0.05<br>(< 0.05 to < 0.05)                        | 2.2<br>(-40.8 to 82.7)                            | 3.5<br>(-39.1 to 83.2)                              |
| Maternal obstructed labour and uterine rupture                          | < 0.05<br>(< 0.05 to < 0.05)         | 0.2<br>(0.1 to 0.2)                      | < 0.05<br>(< 0.05 to < 0.05)                        | -15.6<br>(-64.4 to 114.2)                         | -14.4<br>(-64.4 to 119.0)                           |
| Maternal abortion, miscarriage, and ectopic pregnancy                   | < 0.05<br>(< 0.05 to < 0.05)         | 0.9<br>(0.7 to 1.1)                      | < 0.05<br>(< 0.05 to < 0.05)                        | -20.5<br>(-56.0 to 39.8)                          | -19.9<br>(-56.1 to 38.7)                            |
| Other maternal disorders                                                | --                                   | --                                       | < 0.05<br>(< 0.05 to < 0.05)                        | -17.3<br>(-36.8 to 10.0)                          | -16.3<br>(-36.0 to 11.7)                            |
| <b>Neonatal disorders</b>                                               | <b>1.6</b><br><b>(1.3 to 1.9)</b>    | <b>0.2</b><br><b>--</b>                  | <b>0.2</b><br><b>(0.1 to 0.3)</b>                   | <b>5.0</b><br><b>(-14.1 to 27.8)</b>              | <b>2.3</b><br><b>(-16.0 to 24.0)</b>                |
| Neonatal preterm birth complications                                    | 1.5<br>(1.2 to 1.9)                  | --                                       | 0.2<br>(0.1 to 0.2)                                 | 8.0<br>(-15.6 to 37.6)                            | 4.3<br>(-18.5 to 32.1)                              |
| Neonatal encephalopathy due to birth asphyxia and trauma                | 0.1<br>(< 0.05 to 0.1)               | --                                       | < 0.05<br>(< 0.05 to < 0.05)                        | 17.0<br>(-27.7 to 141.5)                          | 13.5<br>(-28.3 to 130.0)                            |
| Neonatal sepsis and other neonatal infections                           | 0.1<br>(< 0.05 to 0.1)               | --                                       | < 0.05<br>(< 0.05 to 0.1)                           | -6.9<br>(-30.3 to 39.2)                           | -9.4<br>(-31.1 to 43.3)                             |
| Hemolytic disease and other neonatal jaundice                           | < 0.05<br>(< 0.05 to < 0.05)         | --                                       | < 0.05<br>(< 0.05 to < 0.05)                        | 4.1<br>(-3.8 to 11.8)                             | -0.2<br>(-7.7 to 7.2)                               |
| Other neonatal disorders                                                | --                                   | --                                       | < 0.05<br>(< 0.05 to < 0.05)                        | -11.1<br>(-28.8 to 11.8)                          | 0.7<br>(-19.2 to 26.5)                              |
| <b>Nutritional deficiencies</b>                                         | <b>29.7</b><br><b>(27.2 to 31.9)</b> | <b>4.8†</b><br><b>(3.2 to 7.1)</b>       | <b>0.8</b><br><b>(0.5 to 1.1)</b>                   | <b>-6.1</b><br><b>(-18.2 to 7.4)</b>              | <b>-8.0</b><br><b>(-17.8 to 3.6)</b>                |
| Protein-energy malnutrition                                             | 1.0<br>(0.8 to 1.4)                  | 0.4<br>(0.3 to 0.5)                      | 0.1<br>(0.1 to 0.2)                                 | -17.6<br>(-50.2 to 36.8)                          | -6.8<br>(-43.3 to 54.0)                             |
| Iodine deficiency                                                       | < 0.05<br>(< 0.05 to 0.1)            | < 0.05<br>(< 0.05 to < 0.05)             | < 0.05<br>(< 0.05 to < 0.05)                        | 10.9<br>(-1.0 to 24.9)                            | 2.0<br>(-8.9 to 15.3)                               |
| Vitamin A deficiency                                                    | 5.4<br>(3.5 to 7.9)                  | 4.5<br>(2.8 to 6.7)                      | < 0.05<br>(< 0.05 to < 0.05)                        | -2.3<br>(-19.3 to 17.0)                           | -3.7<br>(-19.1 to 13.6)                             |
| Iron-deficiency anaemia                                                 | 24.8<br>(22.0 to 27.8)               | --                                       | 0.7<br>(0.4 to 1.0)                                 | -4.0<br>(-15.0 to 9.2)                            | -8.1<br>(-17.0 to 3.2)                              |
| Other nutritional deficiencies                                          | --                                   | --                                       | < 0.05<br>(< 0.05 to < 0.05)                        | -17.6<br>(-51.4 to 39.2)                          | -7.1<br>(-44.8 to 56.7)                             |
| <b>Other communicable, maternal, neonatal, and nutritional diseases</b> | <b>29.6</b><br><b>(27.8 to 31.5)</b> | <b>18.5</b><br><b>(16.1 to 20.6)</b>     | <b>0.1</b><br><b>(&lt; 0.05 to 0.1)</b>             | <b>1.9</b><br><b>(-5.4 to 9.6)</b>                | <b>-2.6</b><br><b>(-8.8 to 3.4)</b>                 |
| Sexually transmitted diseases excluding HIV                             | 19.3<br>(17.9 to 20.7)               | 7.6<br>(6.8 to 8.4)                      | < 0.05<br>(< 0.05 to 0.1)                           | 2.4<br>(-4.0 to 8.8)                              | -2.7<br>(-8.4 to 3.4)                               |
| Syphilis                                                                | 1.5<br>(1.2 to 1.9)                  | 0.9<br>(0.7 to 1.1)                      | < 0.05<br>(< 0.05 to < 0.05)                        | 8.5<br>(-4.6 to 23.2)                             | -1.5<br>(-13.8 to 12.3)                             |
| Chlamydial infection                                                    | 2.1<br>(1.6 to 2.7)                  | 1.8<br>(1.3 to 2.3)                      | < 0.05<br>(< 0.05 to < 0.05)                        | -0.3<br>(-11.2 to 10.9)                           | -3.8<br>(-14.1 to 7.2)                              |
| Gonococcal infection                                                    | 0.2<br>(0.2 to 0.3)                  | 0.6<br>(0.5 to 0.7)                      | < 0.05<br>(< 0.05 to < 0.05)                        | 1.3<br>(-16.3 to 21.1)                            | -2.7<br>(-19.7 to 16.1)                             |
| Trichomoniasis                                                          | 2.6<br>(2.2 to 3.1)                  | 2.3<br>(1.9 to 2.8)                      | < 0.05<br>(< 0.05 to < 0.05)                        | 4.5<br>(-2.0 to 12.9)                             | -0.6<br>(-6.8 to 6.7)                               |
| Genital herpes                                                          | 14.1<br>(12.1 to 16.3)               | 1.2<br>(1.0 to 1.4)                      | < 0.05<br>(< 0.05 to < 0.05)                        | 7.3<br>(-2.1 to 17.4)                             | -0.2<br>(-7.9 to 7.7)                               |
| Other sexually transmitted diseases                                     | 0.8<br>(0.7 to 0.9)                  | 0.9<br>(0.7 to 1.0)                      | < 0.05<br>(< 0.05 to < 0.05)                        | 1.2<br>(-9.0 to 12.7)                             | -3.7<br>(-13.6 to 6.8)                              |
| Hepatitis                                                               | 12.3<br>(10.3 to 14.8)               | 10.9<br>(8.8 to 12.7)                    | < 0.05<br>(< 0.05 to < 0.05)                        | -0.6<br>(-15.6 to 17.4)                           | -7.3<br>(-20.6 to 8.9)                              |
| Acute hepatitis A                                                       | 0.4<br>(0.2 to 0.5)                  | 4.9<br>(3.3 to 6.0)                      | < 0.05<br>(< 0.05 to < 0.05)                        | 0.8<br>(-26.6 to 37.4)                            | -4.9<br>(-28.5 to 24.7)                             |
| Hepatitis B                                                             | 9.6<br>(7.7 to 11.9)                 | 5.3<br>(4.0 to 6.8)                      | < 0.05<br>(< 0.05 to < 0.05)                        | -1.5<br>(-21.7 to 22.3)                           | -8.6<br>(-27.3 to 13.9)                             |
| Hepatitis C                                                             | 2.4<br>(2.1 to 2.7)                  | 0.3<br>(0.2 to 0.3)                      | < 0.05<br>(< 0.05 to < 0.05)                        | 1.8<br>(-15.8 to 24.3)                            | -1.2<br>(-21.3 to 25.4)                             |
| Acute hepatitis E                                                       | < 0.05<br>(< 0.05 to < 0.05)         | 0.4<br>(0.3 to 0.5)                      | < 0.05<br>(< 0.05 to < 0.05)                        | 1.8<br>(-23.7 to 33.2)                            | -5.9<br>(-26.6 to 18.1)                             |
| Other infectious diseases                                               | 0.9<br>(0.8 to 1.1)                  | < 0.05<br>(< 0.05 to < 0.05)             | < 0.05<br>(< 0.05 to < 0.05)                        | 2.9<br>(-13.0 to 22.0)                            | 2.4<br>(-11.3 to 18.6)                              |
| <b>Non-communicable diseases</b>                                        | <b>94.0</b><br><b>(93.1 to 94.8)</b> | <b>271.6†</b><br><b>(255.0 to 288.2)</b> | <b>8.5</b><br><b>(6.3 to 11.0)</b>                  | <b>9.7</b><br><b>(7.8 to 11.7)</b>                | <b>0.9</b><br><b>(-0.6 to 2.5)</b>                  |
| <b>Neoplasms</b>                                                        | <b>0.3</b><br><b>(0.3 to 0.4)</b>    | <b>0.1</b><br><b>(0.1 to 0.2)</b>        | <b>&lt; 0.05</b><br><b>(&lt; 0.05 to 0.1)</b>       | <b>14.7</b><br><b>(8.2 to 21.5)</b>               | <b>2.6</b><br><b>(-3.5 to 8.7)</b>                  |
| Lip and oral cavity cancer                                              | < 0.05<br>(< 0.05 to < 0.05)         | < 0.05<br>(< 0.05 to < 0.05)             | < 0.05<br>(< 0.05 to < 0.05)                        | 14.6<br>(-0.4 to 34.1)                            | 4.0<br>(-9.2 to 21.2)                               |
| Nasopharynx cancer                                                      | < 0.05<br>(< 0.05 to < 0.05)         | < 0.05<br>(< 0.05 to < 0.05)             | < 0.05<br>(< 0.05 to < 0.05)                        | 10.5<br>(-7.1 to 30.8)                            | -0.5<br>(-16.7 to 17.1)                             |
| Other pharynx cancer                                                    | < 0.05<br>(< 0.05 to < 0.05)         | < 0.05<br>(< 0.05 to < 0.05)             | < 0.05<br>(< 0.05 to < 0.05)                        | 17.1<br>(3.9 to 31.2)                             | 4.5<br>(-7.4 to 17.1)                               |
| Oesophageal cancer                                                      | < 0.05<br>(< 0.05 to < 0.05)         | < 0.05<br>(< 0.05 to < 0.05)             | < 0.05<br>(< 0.05 to < 0.05)                        | 6.1<br>(-5.3 to 19.5)                             | -5.7<br>(-16.1 to 6.7)                              |
| Stomach cancer                                                          | < 0.05<br>(< 0.05 to < 0.05)         | < 0.05<br>(< 0.05 to < 0.05)             | < 0.05<br>(< 0.05 to < 0.05)                        | 3.3<br>(-10.5 to 18.1)                            | -6.5<br>(-19.3 to 7.0)                              |
| Colon and rectum cancer                                                 | < 0.05<br>(< 0.05 to < 0.05)         | < 0.05<br>(< 0.05 to < 0.05)             | < 0.05<br>(< 0.05 to < 0.05)                        | 20.7<br>(3.4 to 39.8)                             | 6.2<br>(-9.3 to 23.2)                               |
| Liver cancer                                                            | < 0.05<br>(< 0.05 to < 0.05)         | < 0.05<br>(< 0.05 to < 0.05)             | < 0.05<br>(< 0.05 to < 0.05)                        | 9.5<br>(-5.6 to 27.0)                             | -2.5<br>(-15.9 to 13.2)                             |
| Liver cancer due to hepatitis B                                         | < 0.05<br>(< 0.05 to < 0.05)         | < 0.05<br>(< 0.05 to < 0.05)             | < 0.05<br>(< 0.05 to < 0.05)                        | 9.4<br>(-9.2 to 31.9)                             | -2.3<br>(-18.8 to 18.9)                             |

| Cause                                              | Prevalence in thousands (95% UI)     | Incidence in thousands (95% UI)    | YLDs in thousands (95% UI)        |                                                   |                                                     |
|----------------------------------------------------|--------------------------------------|------------------------------------|-----------------------------------|---------------------------------------------------|-----------------------------------------------------|
|                                                    | 2016 counts                          | 2016 counts                        | 2016 counts                       | Percentage change in counts between 2006 and 2016 | Percentage change in age-standardised rates between |
| Liver cancer due to hepatitis C                    | < 0.05<br>(< 0.05 to < 0.05)         | < 0.05<br>(< 0.05 to < 0.05)       | < 0.05<br>(< 0.05 to < 0.05)      | 11.3<br>(-3.4 to 27.3)                            | -1.8<br>(-14.6 to 12.3)                             |
| Liver cancer due to alcohol use                    | < 0.05<br>(< 0.05 to < 0.05)         | < 0.05<br>(< 0.05 to < 0.05)       | < 0.05<br>(< 0.05 to < 0.05)      | 8.1<br>(-6.4 to 26.1)                             | -3.4<br>(-16.3 to 12.3)                             |
| Liver cancer due to other causes                   | < 0.05<br>(< 0.05 to < 0.05)         | < 0.05<br>(< 0.05 to < 0.05)       | < 0.05<br>(< 0.05 to < 0.05)      | 8.9<br>(-9.9 to 31.4)                             | -3.0<br>(-20.7 to 17.9)                             |
| Gallbladder and biliary tract cancer               | < 0.05<br>(< 0.05 to < 0.05)         | < 0.05<br>(< 0.05 to < 0.05)       | < 0.05<br>(< 0.05 to < 0.05)      | 9.0<br>(1.2 to 17.6)                              | -3.0<br>(-9.9 to 4.6)                               |
| Pancreatic cancer                                  | < 0.05<br>(< 0.05 to < 0.05)         | < 0.05<br>(< 0.05 to < 0.05)       | < 0.05<br>(< 0.05 to < 0.05)      | 13.3<br>(1.9 to 26.4)                             | 1.4<br>(-8.9 to 12.9)                               |
| Larynx cancer                                      | < 0.05<br>(< 0.05 to < 0.05)         | < 0.05<br>(< 0.05 to < 0.05)       | < 0.05<br>(< 0.05 to < 0.05)      | 14.8<br>(2.6 to 29.5)                             | 2.5<br>(-8.7 to 15.7)                               |
| Tracheal, bronchus, and lung cancer                | < 0.05<br>(< 0.05 to < 0.05)         | < 0.05<br>(< 0.05 to < 0.05)       | < 0.05<br>(< 0.05 to < 0.05)      | 5.3<br>(-10.2 to 24.3)                            | -4.4<br>(-19.0 to 13.3)                             |
| Malignant skin melanoma                            | < 0.05<br>(< 0.05 to < 0.05)         | < 0.05<br>(< 0.05 to < 0.05)       | < 0.05<br>(< 0.05 to < 0.05)      | 19.3<br>(2.9 to 41.4)                             | 4.7<br>(-10.2 to 24.0)                              |
| Non-melanoma skin cancer                           | < 0.05<br>(< 0.05 to < 0.05)         | < 0.05<br>(< 0.05 to < 0.05)       | < 0.05<br>(< 0.05 to < 0.05)      | 19.0<br>(-56.8 to 226.0)                          | -9.2<br>(-66.7 to 153.2)                            |
| Non-melanoma skin cancer (squamous-cell carcinoma) | < 0.05<br>(< 0.05 to < 0.05)         | < 0.05<br>(< 0.05 to < 0.05)       | < 0.05<br>(< 0.05 to < 0.05)      | 19.1<br>(-56.8 to 226.7)                          | -9.2<br>(-66.7 to 153.6)                            |
| Non-melanoma skin cancer (basal-cell carcinoma)    | < 0.05<br>(< 0.05 to < 0.05)         | < 0.05<br>(< 0.05 to < 0.05)       | < 0.05<br>(< 0.05 to < 0.05)      | 8.2<br>(-2.1 to 24.4)                             | -0.1<br>(-10.0 to 9.9)                              |
| Breast cancer                                      | 0.1<br>(0.1 to 0.1)                  | < 0.05<br>(< 0.05 to < 0.05)       | < 0.05<br>(< 0.05 to < 0.05)      | 27.0<br>(4.1 to 51.8)                             | 11.7<br>(-7.7 to 33.3)                              |
| Cervical cancer                                    | < 0.05<br>(< 0.05 to 0.1)            | < 0.05<br>(< 0.05 to < 0.05)       | < 0.05<br>(< 0.05 to < 0.05)      | 5.5<br>(-17.3 to 32.5)                            | -5.5<br>(-25.1 to 18.0)                             |
| Uterine cancer                                     | < 0.05<br>(< 0.05 to < 0.05)         | < 0.05<br>(< 0.05 to < 0.05)       | < 0.05<br>(< 0.05 to < 0.05)      | 22.2<br>(-0.2 to 52.4)                            | 10.0<br>(-10.4 to 37.5)                             |
| Ovarian cancer                                     | < 0.05<br>(< 0.05 to < 0.05)         | < 0.05<br>(< 0.05 to < 0.05)       | < 0.05<br>(< 0.05 to < 0.05)      | 18.5<br>(-6.6 to 53.7)                            | 8.0<br>(-16.9 to 42.9)                              |
| Prostate cancer                                    | < 0.05<br>(< 0.05 to 0.1)            | < 0.05<br>(< 0.05 to < 0.05)       | < 0.05<br>(< 0.05 to < 0.05)      | 17.8<br>(-0.1 to 39.5)                            | 5.2<br>(-10.9 to 24.7)                              |
| Testicular cancer                                  | < 0.05<br>(< 0.05 to < 0.05)         | < 0.05<br>(< 0.05 to < 0.05)       | < 0.05<br>(< 0.05 to < 0.05)      | 23.3<br>(-2.1 to 53.5)                            | 15.6<br>(-5.6 to 41.9)                              |
| Kidney cancer                                      | < 0.05<br>(< 0.05 to < 0.05)         | < 0.05<br>(< 0.05 to < 0.05)       | < 0.05<br>(< 0.05 to < 0.05)      | 14.5<br>(-1.6 to 37.3)                            | 4.6<br>(-10.4 to 26.6)                              |
| Bladder cancer                                     | < 0.05<br>(< 0.05 to < 0.05)         | < 0.05<br>(< 0.05 to < 0.05)       | < 0.05<br>(< 0.05 to < 0.05)      | 22.9<br>(9.2 to 39.8)                             | 9.2<br>(-2.6 to 24.1)                               |
| Brain and nervous system cancer                    | < 0.05<br>(< 0.05 to < 0.05)         | < 0.05<br>(< 0.05 to < 0.05)       | < 0.05<br>(< 0.05 to < 0.05)      | 12.5<br>(-7.9 to 37.3)                            | 5.8<br>(-9.4 to 26.4)                               |
| Thyroid cancer                                     | < 0.05<br>(< 0.05 to < 0.05)         | < 0.05<br>(< 0.05 to < 0.05)       | < 0.05<br>(< 0.05 to < 0.05)      | 34.3<br>(12.3 to 62.4)                            | 17.1<br>(-3.3 to 43.2)                              |
| Mesothelioma                                       | < 0.05<br>(< 0.05 to < 0.05)         | < 0.05<br>(< 0.05 to < 0.05)       | < 0.05<br>(< 0.05 to < 0.05)      | 11.7<br>(-0.8 to 27.5)                            | 0.2<br>(-11.2 to 14.9)                              |
| Hodgkin lymphoma                                   | < 0.05<br>(< 0.05 to < 0.05)         | < 0.05<br>(< 0.05 to < 0.05)       | < 0.05<br>(< 0.05 to < 0.05)      | 2.5<br>(-10.0 to 15.4)                            | -6.0<br>(-17.1 to 4.9)                              |
| Non-Hodgkin's lymphoma                             | < 0.05<br>(< 0.05 to < 0.05)         | < 0.05<br>(< 0.05 to < 0.05)       | < 0.05<br>(< 0.05 to < 0.05)      | 10.7<br>(-5.7 to 27.8)                            | 2.6<br>(-13.5 to 20.0)                              |
| Multiple myeloma                                   | < 0.05<br>(< 0.05 to < 0.05)         | < 0.05<br>(< 0.05 to < 0.05)       | < 0.05<br>(< 0.05 to < 0.05)      | 17.6<br>(4.2 to 34.6)                             | 4.5<br>(-7.9 to 19.7)                               |
| Leukaemia                                          | < 0.05<br>(< 0.05 to < 0.05)         | < 0.05<br>(< 0.05 to < 0.05)       | < 0.05<br>(< 0.05 to < 0.05)      | 3.7<br>(-7.8 to 15.5)                             | -3.3<br>(-12.7 to 6.5)                              |
| Acute lymphoid leukaemia                           | < 0.05<br>(< 0.05 to < 0.05)         | < 0.05<br>(< 0.05 to < 0.05)       | < 0.05<br>(< 0.05 to < 0.05)      | -1.7<br>(-26.4 to 30.3)                           | -2.7<br>(-22.7 to 21.5)                             |
| Chronic lymphoid leukaemia                         | < 0.05<br>(< 0.05 to < 0.05)         | < 0.05<br>(< 0.05 to < 0.05)       | < 0.05<br>(< 0.05 to < 0.05)      | 21.9<br>(-1.6 to 48.5)                            | 1.7<br>(-17.8 to 24.4)                              |
| Acute myeloid leukaemia                            | < 0.05<br>(< 0.05 to < 0.05)         | < 0.05<br>(< 0.05 to < 0.05)       | < 0.05<br>(< 0.05 to < 0.05)      | 6.9<br>(-6.6 to 21.5)                             | 1.0<br>(-11.1 to 13.8)                              |
| Chronic myeloid leukaemia                          | < 0.05<br>(< 0.05 to < 0.05)         | < 0.05<br>(< 0.05 to < 0.05)       | < 0.05<br>(< 0.05 to < 0.05)      | -1.3<br>(-19.3 to 18.3)                           | -7.6<br>(-23.1 to 8.9)                              |
| Other leukaemia                                    | < 0.05<br>(< 0.05 to < 0.05)         | < 0.05<br>(< 0.05 to < 0.05)       | < 0.05<br>(< 0.05 to < 0.05)      | 2.2<br>(-11.5 to 18.5)                            | -6.0<br>(-18.4 to 9.5)                              |
| Other neoplasms                                    | < 0.05<br>(< 0.05 to < 0.05)         | < 0.05<br>(< 0.05 to < 0.05)       | < 0.05<br>(< 0.05 to < 0.05)      | 10.8<br>(-0.8 to 24.0)                            | 1.7<br>(-10.0 to 15.5)                              |
| <b>Cardiovascular diseases</b>                     | <b>6.7</b><br><b>(6.5 to 7.0)</b>    | <b>0.6†</b><br><b>(0.6 to 0.6)</b> | <b>0.4</b><br><b>(0.3 to 0.6)</b> | <b>15.6</b><br><b>(11.1 to 20.1)</b>              | <b>3.9</b><br><b>(-0.0 to 7.7)</b>                  |
| Rheumatic heart disease                            | 3.3<br>(3.0 to 3.7)                  | 0.1<br>(0.1 to 0.1)                | 0.2<br>(0.1 to 0.2)               | 26.2<br>(16.8 to 36.9)                            | 16.7<br>(7.9 to 26.2)                               |
| Ischaemic heart disease                            | 1.2<br>(1.2 to 1.3)                  | 0.2<br>(0.2 to 0.2)                | 0.1<br>(< 0.05 to 0.1)            | 9.7<br>(4.8 to 14.7)                              | -1.6<br>(-5.6 to 2.6)                               |
| Cerebrovascular disease                            | 0.7<br>(0.6 to 0.7)                  | 0.1‡<br>(0.1 to 0.1)               | 0.1<br>(0.1 to 0.2)               | 9.9<br>(2.2 to 17.3)                              | -0.6<br>(-7.7 to 6.1)                               |
| Ischaemic stroke                                   | 0.6<br>(0.5 to 0.6)                  | 0.1‡<br>(0.1 to 0.1)               | 0.1<br>(0.1 to 0.1)               | 10.0<br>(0.9 to 19.2)                             | -0.9<br>(-9.1 to 7.4)                               |
| Hemorrhagic stroke                                 | 0.1<br>(0.1 to 0.2)                  | < 0.05‡<br>(< 0.05 to < 0.05)      | < 0.05<br>(< 0.05 to < 0.05)      | 9.8<br>(-0.7 to 21.7)                             | 0.6<br>(-8.9 to 12.1)                               |
| Hypertensive heart disease                         | 0.1<br>(0.1 to 0.2)                  | --                                 | < 0.05<br>(< 0.05 to < 0.05)      | 14.4<br>(2.5 to 26.7)                             | 0.6<br>(-9.3 to 10.8)                               |
| Cardiomyopathy and myocarditis                     | < 0.05<br>(< 0.05 to < 0.05)         | < 0.05†<br>(< 0.05 to < 0.05)      | < 0.05<br>(< 0.05 to < 0.05)      | 7.5<br>(-3.2 to 19.0)                             | 0.2<br>(-10.1 to 10.9)                              |
| Myocarditis                                        | < 0.05<br>(< 0.05 to < 0.05)         | < 0.05<br>(< 0.05 to < 0.05)       | < 0.05<br>(< 0.05 to < 0.05)      | 7.7<br>(-0.9 to 16.4)                             | 0.3<br>(-7.9 to 9.2)                                |
| Alcoholic cardiomyopathy                           | < 0.05<br>(< 0.05 to < 0.05)         | --                                 | < 0.05<br>(< 0.05 to < 0.05)      | 13.8<br>(4.3 to 23.8)                             | 0.8<br>(-7.8 to 9.4)                                |
| Other cardiomyopathy                               | < 0.05<br>(< 0.05 to < 0.05)         | --                                 | < 0.05<br>(< 0.05 to < 0.05)      | 7.1<br>(-9.3 to 25.4)                             | 0.1<br>(-15.4 to 16.7)                              |
| Atrial fibrillation and flutter                    | 0.4<br>(0.4 to 0.5)                  | < 0.05<br>(< 0.05 to < 0.05)       | < 0.05<br>(< 0.05 to < 0.05)      | 11.5<br>(4.1 to 18.8)                             | 0.2<br>(-6.1 to 6.7)                                |
| Peripheral vascular disease                        | 1.1<br>(1.0 to 1.3)                  | 0.1<br>(0.1 to 0.1)                | < 0.05<br>(< 0.05 to < 0.05)      | 8.3<br>(-0.2 to 16.7)                             | -2.4<br>(-9.3 to 4.2)                               |
| Endocarditis                                       | < 0.05<br>(< 0.05 to < 0.05)         | < 0.05<br>(< 0.05 to < 0.05)       | < 0.05<br>(< 0.05 to < 0.05)      | 12.2<br>(-0.1 to 26.7)                            | 1.3<br>(-10.9 to 15.9)                              |
| Other cardiovascular and circulatory diseases      | 0.3<br>(0.3 to 0.4)                  | --                                 | < 0.05<br>(< 0.05 to < 0.05)      | 12.1<br>(0.8 to 24.6)                             | 0.5<br>(-9.0 to 10.6)                               |
| <b>Chronic respiratory diseases</b>                | <b>13.0</b><br><b>(12.4 to 13.6)</b> | <b>2.9†</b><br><b>(2.7 to 3.1)</b> | <b>0.7</b><br><b>(0.5 to 0.9)</b> | <b>24.4</b><br><b>(19.8 to 29.0)</b>              | <b>15.4</b><br><b>(11.2 to 19.6)</b>                |
| Chronic obstructive pulmonary disease              | 3.0<br>(2.9 to 3.1)                  | 0.2<br>(0.2 to 0.2)                | 0.2<br>(0.2 to 0.2)               | 12.6<br>(6.0 to 19.1)                             | 1.7<br>(-4.0 to 7.6)                                |
| Pneumoconiosis                                     | < 0.05<br>(< 0.05 to < 0.05)         | < 0.05<br>(< 0.05 to < 0.05)       | < 0.05<br>(< 0.05 to < 0.05)      | 5.7<br>(-12.1 to 26.8)                            | -4.7<br>(-21.4 to 15.1)                             |
| Silicosis                                          | < 0.05<br>(< 0.05 to < 0.05)         | < 0.05<br>(< 0.05 to < 0.05)       | < 0.05<br>(< 0.05 to < 0.05)      | 4.8<br>(-20.9 to 41.1)                            | -5.2<br>(-29.7 to 29.0)                             |



| Cause                                                          | Prevalence in thousands (95% UI) | Incidence in thousands (95% UI)               | YLDs in thousands (95% UI)                    |                                                   |                                                     |
|----------------------------------------------------------------|----------------------------------|-----------------------------------------------|-----------------------------------------------|---------------------------------------------------|-----------------------------------------------------|
|                                                                | 2016 counts                      | 2016 counts                                   | 2016 counts                                   | Percentage change in counts between 2006 and 2016 | Percentage change in age-standardised rates between |
| Asbestosis                                                     | < 0.05<br>(< 0.05 to < 0.05)     | < 0.05<br>(< 0.05 to < 0.05)                  | < 0.05<br>(< 0.05 to < 0.05)                  | 7.2<br>(0.8 to 15.8)                              | -2.8<br>(-8.5 to 5.0)                               |
| Coal workers pneumoconiosis                                    | --                               | --                                            | --                                            | --                                                | --                                                  |
| Other pneumoconiosis                                           | < 0.05<br>(< 0.05 to < 0.05)     | < 0.05<br>(< 0.05 to < 0.05)                  | < 0.05<br>(< 0.05 to < 0.05)                  | 6.9<br>(-18.9 to 38.5)                            | -4.7<br>(-27.6 to 25.0)                             |
| Asthma                                                         | 10.6<br>(9.9 to 11.4)            | 2.6<br>(2.4 to 2.8)                           | 0.4<br>(0.3 to 0.6)                           | 31.4<br>(24.8 to 37.8)                            | 27.8<br>(22.1 to 33.2)                              |
| Interstitial lung disease and pulmonary sarcoidosis            | 0.1<br>(0.1 to 0.1)              | < 0.05<br>(< 0.05 to < 0.05)                  | < 0.05<br>(< 0.05 to < 0.05)                  | 10.0<br>(-0.7 to 20.6)                            | -0.2<br>(-10.2 to 9.9)                              |
| Other chronic respiratory diseases                             | --                               | --                                            | < 0.05<br>(< 0.05 to < 0.05)                  | 45.5<br>(24.9 to 71.0)                            | 36.3<br>(20.8 to 54.9)                              |
| <b>Cirrhosis and other chronic liver diseases</b>              | <b>0.5<br/>(0.5 to 0.5)</b>      | <b>&lt; 0.05<br/>(&lt; 0.05 to &lt; 0.05)</b> | <b>&lt; 0.05<br/>(&lt; 0.05 to &lt; 0.05)</b> | <b>11.5<br/>(0.5 to 25.1)</b>                     | <b>3.5<br/>(-5.2 to 14.1)</b>                       |
| Cirrhosis and other chronic liver diseases due to hepatitis B  | 0.2<br>(0.2 to 0.2)              | < 0.05<br>(< 0.05 to < 0.05)                  | < 0.05<br>(< 0.05 to < 0.05)                  | 14.1<br>(-3.5 to 34.3)                            | 3.5<br>(-11.6 to 20.6)                              |
| Cirrhosis and other chronic liver diseases due to hepatitis C  | 0.1<br>(0.1 to 0.1)              | < 0.05<br>(< 0.05 to < 0.05)                  | < 0.05<br>(< 0.05 to < 0.05)                  | 14.5<br>(-8.8 to 43.7)                            | 3.3<br>(-17.6 to 28.2)                              |
| Cirrhosis and other chronic liver diseases due to alcohol use  | 0.1<br>(0.1 to 0.1)              | < 0.05<br>(< 0.05 to < 0.05)                  | < 0.05<br>(< 0.05 to < 0.05)                  | 16.7<br>(-7.2 to 48.1)                            | 4.1<br>(-16.7 to 31.7)                              |
| Cirrhosis and other chronic liver diseases due to other causes | 0.2<br>(0.2 to 0.2)              | < 0.05<br>(< 0.05 to < 0.05)                  | < 0.05<br>(< 0.05 to < 0.05)                  | 9.3<br>(-7.4 to 29.5)                             | 3.5<br>(-10.9 to 20.3)                              |
| <b>Digestive diseases</b>                                      | <b>1.7<br/>(1.6 to 1.8)</b>      | <b>2.1†<br/>(2.0 to 2.2)</b>                  | <b>0.1<br/>(&lt; 0.05 to 0.1)</b>             | <b>11.4<br/>(3.8 to 19.5)</b>                     | <b>2.1<br/>(-4.5 to 9.1)</b>                        |
| Peptic ulcer disease                                           | 0.5<br>(0.5 to 0.6)              | 0.2<br>(0.2 to 0.2)                           | < 0.05<br>(< 0.05 to < 0.05)                  | 13.4<br>(0.8 to 27.8)                             | 3.2<br>(-8.1 to 16.7)                               |
| Gastritis and duodenitis                                       | 0.8<br>(0.7 to 0.9)              | 0.7<br>(0.6 to 0.8)                           | < 0.05<br>(< 0.05 to < 0.05)                  | 17.0<br>(4.3 to 31.3)                             | 7.0<br>(-4.5 to 20.7)                               |
| Appendicitis                                                   | < 0.05<br>(< 0.05 to < 0.05)     | 0.4<br>(0.4 to 0.5)                           | < 0.05<br>(< 0.05 to < 0.05)                  | 3.9<br>(-18.4 to 31.1)                            | -4.5<br>(-23.8 to 19.3)                             |
| Paralytic ileus and intestinal obstruction                     | < 0.05<br>(< 0.05 to < 0.05)     | < 0.05<br>(< 0.05 to < 0.05)                  | < 0.05<br>(< 0.05 to < 0.05)                  | 1.1<br>(-4.6 to 7.0)                              | -6.4<br>(-13.0 to 0.1)                              |
| Inguinal, femoral, and abdominal hernia                        | 0.2<br>(0.2 to 0.3)              | 0.2<br>(0.2 to 0.2)                           | < 0.05<br>(< 0.05 to < 0.05)                  | 12.1<br>(-1.6 to 28.6)                            | 3.1<br>(-8.3 to 16.2)                               |
| Inflammatory bowel disease                                     | < 0.05<br>(< 0.05 to < 0.05)     | 0.1<br>(0.1 to 0.1)                           | < 0.05<br>(< 0.05 to < 0.05)                  | -2.3<br>(-17.0 to 15.1)                           | -12.2<br>(-26.6 to 4.9)                             |
| Vascular intestinal disorders                                  | < 0.05<br>(< 0.05 to < 0.05)     | < 0.05<br>(< 0.05 to < 0.05)                  | < 0.05<br>(< 0.05 to < 0.05)                  | 7.9<br>(2.8 to 13.6)                              | 0.7<br>(-3.0 to 4.9)                                |
| Gallbladder and biliary diseases                               | 0.2<br>(0.1 to 0.2)              | 0.5<br>(0.4 to 0.6)                           | < 0.05<br>(< 0.05 to < 0.05)                  | 4.4<br>(-15.9 to 29.6)                            | -4.7<br>(-22.7 to 16.6)                             |
| Pancreatitis                                                   | < 0.05<br>(< 0.05 to < 0.05)     | < 0.05<br>(< 0.05 to < 0.05)                  | < 0.05<br>(< 0.05 to < 0.05)                  | 3.2<br>(-0.6 to 6.9)                              | -5.5<br>(-9.0 to -2.0)                              |
| Other digestive diseases                                       | --                               | --                                            | < 0.05<br>(< 0.05 to < 0.05)                  | 15.7<br>(6.5 to 24.9)                             | 6.5<br>(-0.3 to 14.0)                               |
| <b>Neurological disorders</b>                                  | <b>29.9<br/>(28.4 to 31.6)</b>   | <b>13.7<br/>(11.6 to 15.8)</b>                | <b>0.7<br/>(0.5 to 1.0)</b>                   | <b>8.4<br/>(-10.2 to 30.7)</b>                    | <b>0.2<br/>(-14.0 to 17.5)</b>                      |
| Alzheimer's disease and other dementias                        | 0.5<br>(0.4 to 0.6)              | 0.1<br>(0.1 to 0.1)                           | 0.1<br>(0.1 to 0.1)                           | 18.8<br>(13.1 to 24.9)                            | 0.1<br>(-3.9 to 4.4)                                |
| Parkinson's disease                                            | < 0.05<br>(< 0.05 to 0.1)        | < 0.05<br>(< 0.05 to < 0.05)                  | < 0.05<br>(< 0.05 to < 0.05)                  | 17.2<br>(3.5 to 33.2)                             | 5.2<br>(-7.0 to 18.6)                               |
| Epilepsy                                                       | 0.3<br>(0.1 to 0.5)              | < 0.05<br>(< 0.05 to 0.1)                     | 0.1<br>(< 0.05 to 0.2)                        | 6.9<br>(-73.3 to 275.2)                           | 1.4<br>(-75.2 to 255.7)                             |
| Multiple sclerosis                                             | < 0.05<br>(< 0.05 to < 0.05)     | < 0.05<br>(< 0.05 to < 0.05)                  | < 0.05<br>(< 0.05 to < 0.05)                  | 19.2<br>(14.4 to 23.7)                            | 10.2<br>(6.0 to 14.3)                               |
| Motor neuron disease                                           | < 0.05<br>(< 0.05 to < 0.05)     | < 0.05<br>(< 0.05 to < 0.05)                  | < 0.05<br>(< 0.05 to < 0.05)                  | 8.4<br>(3.9 to 13.0)                              | 2.2<br>(-1.2 to 6.0)                                |
| Migraine                                                       | 10.6<br>(10.0 to 11.2)           | 1.3<br>(1.2 to 1.4)                           | 0.4<br>(0.3 to 0.6)                           | 6.4<br>(2.4 to 10.9)                              | -0.7<br>(-4.3 to 3.0)                               |
| Tension-type headache                                          | 22.1<br>(19.7 to 25.1)           | 12.3<br>(10.2 to 14.5)                        | 0.1<br>(< 0.05 to 0.1)                        | 6.5<br>(1.0 to 13.0)                              | -0.9<br>(-5.6 to 4.4)                               |
| Other neurological disorders                                   | < 0.05<br>(< 0.05 to < 0.05)     | < 0.05<br>(< 0.05 to < 0.05)                  | < 0.05<br>(< 0.05 to < 0.05)                  | 30.7<br>(-61.0 to 301.6)                          | 20.8<br>(-59.3 to 231.3)                            |
| <b>Mental and substance use disorders</b>                      | <b>12.8<br/>(12.2 to 13.3)</b>   | <b>4.0†<br/>(3.8 to 4.4)</b>                  | <b>1.6<br/>(1.2 to 2.1)</b>                   | <b>7.4<br/>(5.2 to 9.7)</b>                       | <b>-0.1<br/>(-2.1 to 1.9)</b>                       |
| Schizophrenia                                                  | 0.3<br>(0.2 to 0.3)              | < 0.05<br>(< 0.05 to < 0.05)                  | 0.2<br>(0.1 to 0.2)                           | 5.1<br>(-3.1 to 13.8)                             | -1.0<br>(-8.4 to 7.2)                               |
| Alcohol use disorders                                          | 0.8<br>(0.7 to 0.9)              | 0.4<br>(0.4 to 0.5)                           | 0.1<br>(0.1 to 0.1)                           | 7.1<br>(-2.5 to 16.9)                             | 1.1<br>(-7.6 to 9.5)                                |
| Drug use disorders                                             | 0.7<br>(0.7 to 0.8)              | 0.1<br>(0.1 to 0.1)                           | 0.1<br>(0.1 to 0.1)                           | 8.3<br>(-1.7 to 18.9)                             | 3.4<br>(-5.4 to 12.7)                               |
| Opioid use disorders                                           | 0.2<br>(0.1 to 0.2)              | < 0.05<br>(< 0.05 to < 0.05)                  | 0.1<br>(< 0.05 to 0.1)                        | 6.9<br>(-4.8 to 20.6)                             | 3.2<br>(-8.0 to 15.2)                               |
| Cocaine use disorders                                          | < 0.05<br>(< 0.05 to < 0.05)     | < 0.05<br>(< 0.05 to < 0.05)                  | < 0.05<br>(< 0.05 to < 0.05)                  | 9.2<br>(3.1 to 15.2)                              | 2.5<br>(-2.8 to 7.8)                                |
| Amphetamine use disorders                                      | 0.1<br>(< 0.05 to 0.1)           | < 0.05<br>(< 0.05 to < 0.05)                  | < 0.05<br>(< 0.05 to < 0.05)                  | 14.0<br>(-15.3 to 55.3)                           | 7.3<br>(-19.4 to 44.8)                              |
| Cannabis use disorders                                         | 0.5<br>(0.4 to 0.6)              | 0.1<br>(0.1 to 0.1)                           | < 0.05<br>(< 0.05 to < 0.05)                  | 8.4<br>(-6.7 to 24.3)                             | 0.6<br>(-12.8 to 15.5)                              |
| Other drug use disorders                                       | < 0.05<br>(< 0.05 to < 0.05)     | < 0.05<br>(< 0.05 to < 0.05)                  | < 0.05<br>(< 0.05 to < 0.05)                  | 12.3<br>(-12.1 to 43.6)                           | 5.8<br>(-14.7 to 31.9)                              |
| Depressive disorders                                           | 2.7<br>(2.5 to 2.9)              | 2.3<br>(2.1 to 2.6)                           | 0.4<br>(0.3 to 0.6)                           | 8.0<br>(3.5 to 12.9)                              | -0.7<br>(-4.4 to 3.3)                               |
| Major depressive disorder                                      | 1.4<br>(1.2 to 1.5)              | 2.1<br>(1.8 to 2.3)                           | 0.3<br>(0.2 to 0.4)                           | 7.4<br>(0.6 to 14.4)                              | -1.1<br>(-6.8 to 5.0)                               |
| Dysthymia                                                      | 1.4<br>(1.2 to 1.6)              | 0.2<br>(0.2 to 0.2)                           | 0.1<br>(0.1 to 0.2)                           | 9.5<br>(6.2 to 12.9)                              | 0.1<br>(-2.6 to 3.1)                                |
| Bipolar disorder                                               | 0.4<br>(0.4 to 0.5)              | < 0.05<br>(< 0.05 to 0.1)                     | 0.1<br>(0.1 to 0.1)                           | 8.1<br>(-0.1 to 16.3)                             | -0.0<br>(-6.9 to 7.1)                               |
| Anxiety disorders                                              | 3.4<br>(3.0 to 3.7)              | 0.6<br>(0.5 to 0.6)                           | 0.3<br>(0.2 to 0.4)                           | 7.9<br>(1.4 to 15.1)                              | -0.1<br>(-5.8 to 6.3)                               |
| Eating disorders                                               | 0.1<br>(0.1 to 0.1)              | 0.1<br>(0.1 to 0.1)                           | < 0.05<br>(< 0.05 to < 0.05)                  | 7.1<br>(-7.7 to 24.1)                             | 2.1<br>(-11.6 to 17.9)                              |
| Anorexia nervosa                                               | < 0.05<br>(< 0.05 to < 0.05)     | < 0.05<br>(< 0.05 to < 0.05)                  | < 0.05<br>(< 0.05 to < 0.05)                  | 9.2<br>(-15.3 to 42.6)                            | 2.0<br>(-20.8 to 32.8)                              |
| Bulimia nervosa                                                | 0.1<br>(< 0.05 to 0.1)           | 0.1<br>(< 0.05 to 0.1)                        | < 0.05<br>(< 0.05 to < 0.05)                  | 6.1<br>(-11.8 to 28.1)                            | 2.2<br>(-15.0 to 22.5)                              |
| Autistic spectrum disorders                                    | 0.9<br>(0.8 to 1.0)              | < 0.05<br>(< 0.05 to < 0.05)                  | 0.1<br>(0.1 to 0.2)                           | 5.0<br>(-0.2 to 10.3)                             | -0.1<br>(-4.7 to 4.5)                               |
| Autism                                                         | 0.2<br>(0.2 to 0.3)              | < 0.05<br>(< 0.05 to < 0.05)                  | 0.1<br>(< 0.05 to 0.1)                        | 5.0<br>(-3.3 to 14.7)                             | -0.3<br>(-7.6 to 8.1)                               |
| Asperger syndrome and other autistic spectrum disorders        | 0.6<br>(0.5 to 0.8)              | < 0.05<br>(< 0.05 to < 0.05)                  | 0.1<br>(< 0.05 to 0.1)                        | 5.0<br>(-0.4 to 10.3)                             | 0.1<br>(-4.7 to 5.1)                                |

| Cause                                                      | Prevalence in thousands (95% UI)     | Incidence in thousands (95% UI)          | YLDs in thousands (95% UI)           |                                                   |                                                     |
|------------------------------------------------------------|--------------------------------------|------------------------------------------|--------------------------------------|---------------------------------------------------|-----------------------------------------------------|
|                                                            | 2016 counts                          | 2016 counts                              | 2016 counts                          | Percentage change in counts between 2006 and 2016 | Percentage change in age-standardised rates between |
| Attention-deficit/hyperactivity disorder                   | 0.9<br>(0.8 to 1.1)                  | 0.1<br>( $< 0.05$ to 0.1)                | $< 0.05$<br>( $< 0.05$ to $< 0.05$ ) | 6.9<br>(-1.7 to 16.8)                             | 0.2<br>(-7.5 to 8.8)                                |
| Conduct disorder                                           | 1.0<br>(0.8 to 1.2)                  | 0.4<br>(0.3 to 0.4)                      | 0.1<br>(0.1 to 0.2)                  | 10.3<br>(4.0 to 17.2)                             | 0.2<br>(-5.6 to 6.5)                                |
| Idiopathic developmental intellectual disability           | 0.9<br>(0.4 to 1.4)                  | --                                       | $< 0.05$<br>( $< 0.05$ to 0.1)       | 3.4<br>(-5.8 to 12.6)                             | -2.9<br>(-11.1 to 5.3)                              |
| Other mental and substance use disorders                   | 1.6<br>(1.4 to 1.9)                  | 0.1<br>(0.1 to 0.1)                      | 0.1<br>(0.1 to 0.2)                  | 7.1<br>(1.5 to 13.3)                              | 0.0<br>(-4.8 to 5.3)                                |
| <b>Diabetes, urogenital, blood, and endocrine diseases</b> | <b>39.9</b><br><b>(38.8 to 40.9)</b> | <b>10.3†</b><br><b>(9.7 to 11.0)</b>     | <b>1.4</b><br><b>(1.0 to 1.9)</b>    | <b>12.6</b><br><b>(8.5 to 16.9)</b>               | <b>1.8</b><br><b>(-1.8 to 5.9)</b>                  |
| Diabetes mellitus                                          | 14.3<br>(13.1 to 15.7)               | 1.1<br>(1.0 to 1.2)                      | 1.0<br>(0.7 to 1.4)                  | 14.8<br>(9.1 to 21.4)                             | 2.5<br>(-2.4 to 8.2)                                |
| Acute glomerulonephritis                                   | $< 0.05$<br>( $< 0.05$ to $< 0.05$ ) | $< 0.05$<br>( $< 0.05$ to $< 0.05$ )     | $< 0.05$<br>( $< 0.05$ to $< 0.05$ ) | 7.8<br>(2.7 to 13.2)                              | -0.1<br>(-4.2 to 4.4)                               |
| Chronic kidney disease                                     | 3.3<br>(3.0 to 3.6)                  | 0.2<br>(0.2 to 0.3)                      | 0.1<br>(0.1 to 0.2)                  | 16.9<br>(9.3 to 24.9)                             | 5.5<br>(-0.8 to 12.5)                               |
| Chronic kidney disease due to diabetes mellitus            | 1.8<br>(1.6 to 2.0)                  | 0.1<br>(0.1 to 0.2)                      | 0.1<br>(0.1 to 0.1)                  | 17.8<br>(7.7 to 28.3)                             | 6.6<br>(-2.0 to 15.8)                               |
| Chronic kidney disease due to hypertension                 | 0.6<br>(0.5 to 0.7)                  | $< 0.05$<br>( $< 0.05$ to $< 0.05$ )     | $< 0.05$<br>( $< 0.05$ to $< 0.05$ ) | 15.5<br>(3.4 to 29.9)                             | 2.6<br>(-8.0 to 14.9)                               |
| Chronic kidney disease due to glomerulonephritis           | 0.6<br>(0.5 to 0.7)                  | 0.1<br>(0.1 to 0.1)                      | $< 0.05$<br>( $< 0.05$ to $< 0.05$ ) | 15.3<br>(3.1 to 28.4)                             | 7.4<br>(-3.5 to 19.1)                               |
| Chronic kidney disease due to other causes                 | 0.3<br>(0.2 to 0.4)                  | $< 0.05$<br>( $< 0.05$ to $< 0.05$ )     | $< 0.05$<br>( $< 0.05$ to $< 0.05$ ) | 16.8<br>(6.9 to 28.3)                             | 6.8<br>(-2.9 to 17.1)                               |
| Urinary diseases and male infertility                      | 1.3<br>(1.1 to 1.4)                  | 4.9†<br>(4.4 to 5.5)                     | $< 0.05$<br>( $< 0.05$ to $< 0.05$ ) | 5.7<br>(-0.5 to 12.0)                             | -3.2<br>(-9.2 to 3.0)                               |
| Interstitial nephritis and urinary tract infections        | 0.1<br>(0.1 to 0.1)                  | 4.3<br>(3.8 to 4.9)                      | $< 0.05$<br>( $< 0.05$ to $< 0.05$ ) | 1.8<br>(-11.3 to 18.6)                            | -1.5<br>(-13.7 to 14.3)                             |
| Urolithiasis                                               | $< 0.05$<br>( $< 0.05$ to $< 0.05$ ) | 0.5<br>(0.4 to 0.5)                      | $< 0.05$<br>( $< 0.05$ to $< 0.05$ ) | 10.5<br>(1.6 to 20.3)                             | 0.4<br>(-8.9 to 11.1)                               |
| Benign prostatic hyperplasia                               | 0.6<br>(0.5 to 0.7)                  | 0.1<br>(0.1 to 0.1)                      | $< 0.05$<br>( $< 0.05$ to $< 0.05$ ) | 8.7<br>(0.7 to 18.3)                              | -2.8<br>(-9.9 to 5.6)                               |
| Male infertility                                           | 0.5<br>(0.4 to 0.6)                  | --                                       | $< 0.05$<br>( $< 0.05$ to $< 0.05$ ) | 2.5<br>(-4.2 to 10.1)                             | -0.9<br>(-7.1 to 6.4)                               |
| Other urinary diseases                                     | --                                   | --                                       | $< 0.05$<br>( $< 0.05$ to $< 0.05$ ) | -15.9<br>(-24.6 to -5.5)                          | -17.7<br>(-25.3 to -9.0)                            |
| Gynecological diseases                                     | 10.4<br>(9.9 to 11.0)                | 3.8†<br>(3.5 to 4.1)                     | 0.1<br>(0.1 to 0.2)                  | 2.9<br>(-2.0 to 8.0)                              | -4.1<br>(-8.7 to 0.6)                               |
| Uterine fibroids                                           | 1.2<br>(1.1 to 1.4)                  | 0.1<br>(0.1 to 0.2)                      | $< 0.05$<br>( $< 0.05$ to $< 0.05$ ) | 1.6<br>(-10.8 to 14.1)                            | -10.0<br>(-21.2 to 0.5)                             |
| Polycystic ovarian syndrome                                | 0.1<br>(0.1 to 0.1)                  | 0.1<br>( $< 0.05$ to 0.1)                | $< 0.05$<br>( $< 0.05$ to $< 0.05$ ) | 2.1<br>(-11.1 to 15.8)                            | -0.3<br>(-12.5 to 12.5)                             |
| Female infertility                                         | 0.5<br>(0.2 to 0.9)                  | --                                       | $< 0.05$<br>( $< 0.05$ to $< 0.05$ ) | 4.7<br>(-12.7 to 26.9)                            | 3.7<br>(-14.8 to 28.8)                              |
| Endometriosis                                              | $< 0.05$<br>( $< 0.05$ to $< 0.05$ ) | 0.1<br>(0.1 to 0.2)                      | $< 0.05$<br>( $< 0.05$ to $< 0.05$ ) | 5.5<br>(-18.9 to 38.1)                            | -0.3<br>(-22.7 to 28.8)                             |
| Genital prolapse                                           | 2.8<br>(2.5 to 3.3)                  | 0.2<br>(0.2 to 0.2)                      | $< 0.05$<br>( $< 0.05$ to $< 0.05$ ) | -1.3<br>(-10.1 to 8.8)                            | -13.2<br>(-21.5 to -3.6)                            |
| Premenstrual syndrome                                      | 5.8<br>(5.4 to 6.2)                  | 2.2<br>(2.0 to 2.4)                      | $< 0.05$<br>( $< 0.05$ to 0.1)       | 5.6<br>(-2.7 to 14.1)                             | 0.1<br>(-7.6 to 8.1)                                |
| Other gynecological diseases                               | 1.3<br>(1.2 to 1.5)                  | 1.1<br>(0.9 to 1.3)                      | $< 0.05$<br>( $< 0.05$ to 0.1)       | 1.4<br>(-6.3 to 9.5)                              | -3.0<br>(-9.8 to 4.3)                               |
| Hemoglobinopathies and hemolytic anaemias                  | 20.5<br>(19.4 to 21.7)               | --                                       | $< 0.05$<br>( $< 0.05$ to 0.1)       | 1.0<br>(-12.7 to 16.7)                            | -1.8<br>(-13.4 to 11.0)                             |
| Thalassemias                                               | $< 0.05$<br>( $< 0.05$ to $< 0.05$ ) | --                                       | $< 0.05$<br>( $< 0.05$ to $< 0.05$ ) | 3.9<br>(-12.9 to 26.8)                            | 9.4<br>(-8.2 to 33.2)                               |
| Thalassaemias trait                                        | 1.6<br>(0.7 to 3.2)                  | --                                       | $< 0.05$<br>( $< 0.05$ to $< 0.05$ ) | 4.2<br>(-20.1 to 26.4)                            | 2.3<br>(-23.1 to 22.6)                              |
| Sickle cell disorders                                      | $< 0.05$<br>( $< 0.05$ to $< 0.05$ ) | --                                       | $< 0.05$<br>( $< 0.05$ to $< 0.05$ ) | 3.1<br>(-12.4 to 12.6)                            | 2.8<br>(-12.8 to 11.0)                              |
| Sickle cell trait                                          | 0.1<br>(0.1 to 0.1)                  | --                                       | $< 0.05$<br>( $< 0.05$ to $< 0.05$ ) | 4.5<br>(-12.5 to 25.9)                            | 6.8<br>(-7.9 to 26.0)                               |
| G6PD deficiency                                            | 4.2<br>(3.7 to 4.9)                  | --                                       | $< 0.05$<br>( $< 0.05$ to $< 0.05$ ) | 32.4<br>(12.6 to 58.3)                            | 29.2<br>(12.8 to 49.9)                              |
| G6PD trait                                                 | 14.0<br>(13.5 to 14.6)               | --                                       | $< 0.05$<br>( $< 0.05$ to $< 0.05$ ) | 18.8<br>(-2.6 to 45.1)                            | 16.2<br>(-3.1 to 39.6)                              |
| Other hemoglobinopathies and hemolytic anaemias            | 1.3<br>(1.1 to 1.4)                  | --                                       | $< 0.05$<br>( $< 0.05$ to $< 0.05$ ) | -1.7<br>(-14.8 to 15.2)                           | -5.3<br>(-15.6 to 8.3)                              |
| Endocrine, metabolic, blood, and immune disorders          | 2.4<br>(2.3 to 2.6)                  | 0.3<br>(0.3 to 0.3)                      | 0.1<br>( $< 0.05$ to 0.1)            | 5.0<br>(-1.1 to 11.7)                             | -2.7<br>(-7.3 to 2.6)                               |
| <b>Musculoskeletal disorders</b>                           | <b>15.2</b><br><b>(14.6 to 15.8)</b> | <b>7.2</b><br><b>(6.6 to 7.9)</b>        | <b>1.6</b><br><b>(1.2 to 2.1)</b>    | <b>7.6</b><br><b>(4.7 to 10.9)</b>                | <b>-2.0</b><br><b>(-4.4 to 0.4)</b>                 |
| Rheumatoid arthritis                                       | 0.1<br>(0.1 to 0.2)                  | $< 0.05$<br>( $< 0.05$ to $< 0.05$ )     | $< 0.05$<br>( $< 0.05$ to $< 0.05$ ) | 13.2<br>(2.7 to 25.4)                             | 3.0<br>(-5.7 to 13.8)                               |
| Osteoarthritis                                             | 4.3<br>(4.0 to 4.6)                  | 0.2<br>(0.2 to 0.2)                      | 0.3<br>(0.2 to 0.4)                  | 11.1<br>(7.1 to 15.4)                             | -1.6<br>(-5.0 to 2.1)                               |
| Low back and neck pain                                     | 8.5<br>(7.9 to 9.1)                  | 3.6<br>(3.2 to 3.9)                      | 1.0<br>(0.7 to 1.3)                  | 8.3<br>(4.7 to 12.2)                              | -1.2<br>(-4.1 to 2.2)                               |
| Low back pain                                              | 5.9<br>(5.2 to 6.6)                  | 2.9<br>(2.5 to 3.2)                      | 0.7<br>(0.5 to 0.9)                  | 7.5<br>(2.4 to 12.6)                              | -1.7<br>(-6.0 to 3.1)                               |
| Neck pain                                                  | 3.1<br>(2.7 to 3.6)                  | 0.7<br>(0.6 to 0.8)                      | 0.3<br>(0.2 to 0.4)                  | 10.2<br>(7.4 to 13.3)                             | -0.0<br>(-2.1 to 2.2)                               |
| Gout                                                       | 0.3<br>(0.3 to 0.4)                  | 0.1<br>(0.1 to 0.1)                      | $< 0.05$<br>( $< 0.05$ to $< 0.05$ ) | 10.6<br>(-3.1 to 27.5)                            | -0.2<br>(-12.5 to 14.8)                             |
| Other musculoskeletal disorders                            | 4.1<br>(3.5 to 4.8)                  | 3.4<br>(2.9 to 4.0)                      | 0.4<br>(0.2 to 0.5)                  | 2.9<br>(-4.6 to 10.9)                             | -5.4<br>(-12.0 to 1.2)                              |
| <b>Other non-communicable diseases</b>                     | <b>76.1</b><br><b>(74.6 to 77.5)</b> | <b>230.6†</b><br><b>(214.0 to 247.2)</b> | <b>1.9</b><br><b>(1.3 to 2.7)</b>    | <b>6.2</b><br><b>(5.0 to 7.4)</b>                 | <b>-1.1</b><br><b>(-2.1 to -0.1)</b>                |
| Congenital anomalies                                       | 1.1<br>(1.0 to 1.3)                  | --                                       | 0.1<br>(0.1 to 0.2)                  | 3.6<br>(-2.9 to 9.9)                              | -0.4<br>(-6.7 to 6.0)                               |
| Neural tube defects                                        | 0.1<br>( $< 0.05$ to 0.1)            | --                                       | $< 0.05$<br>( $< 0.05$ to $< 0.05$ ) | 7.3<br>(-5.8 to 21.6)                             | 2.7<br>(-9.8 to 16.4)                               |
| Congenital heart anomalies                                 | 0.3<br>(0.3 to 0.3)                  | --                                       | $< 0.05$<br>( $< 0.05$ to $< 0.05$ ) | 9.1<br>(-2.6 to 22.7)                             | 6.7<br>(-4.2 to 19.1)                               |
| Orofacial clefts                                           | 0.1<br>( $< 0.05$ to 0.1)            | --                                       | $< 0.05$<br>( $< 0.05$ to $< 0.05$ ) | 3.6<br>(-7.9 to 16.7)                             | -0.2<br>(-11.3 to 12.5)                             |
| Down's syndrome                                            | $< 0.05$<br>( $< 0.05$ to $< 0.05$ ) | --                                       | $< 0.05$<br>( $< 0.05$ to $< 0.05$ ) | 4.4<br>(-3.4 to 12.7)                             | 0.9<br>(-6.7 to 9.3)                                |
| Turner syndrome                                            | $< 0.05$<br>( $< 0.05$ to $< 0.05$ ) | --                                       | $< 0.05$<br>( $< 0.05$ to $< 0.05$ ) | 9.7<br>(-28.5 to 62.0)                            | 6.3<br>(-28.8 to 52.4)                              |
| Klinefelter syndrome                                       | $< 0.05$<br>( $< 0.05$ to $< 0.05$ ) | --                                       | $< 0.05$<br>( $< 0.05$ to $< 0.05$ ) | 4.0<br>(-25.2 to 42.3)                            | 2.2<br>(-25.0 to 36.9)                              |

| Cause                                         | Prevalence in thousands (95% UI)     | Incidence in thousands (95% UI)    | YLDs in thousands (95% UI)        |                                                   |                                                     |
|-----------------------------------------------|--------------------------------------|------------------------------------|-----------------------------------|---------------------------------------------------|-----------------------------------------------------|
|                                               | 2016 counts                          | 2016 counts                        | 2016 counts                       | Percentage change in counts between 2006 and 2016 | Percentage change in age-standardised rates between |
| Other chromosomal abnormalities               | < 0.05<br>(< 0.05 to 0.1)            | --                                 | < 0.05<br>(< 0.05 to < 0.05)      | -0.1<br>(-11.5 to 14.2)                           | 1.0<br>(-10.5 to 14.6)                              |
| Congenital musculoskeletal and limb anomalies | 0.1<br>(0.1 to 0.1)                  | --                                 | < 0.05<br>(< 0.05 to < 0.05)      | 14.4<br>(3.1 to 26.5)                             | 9.4<br>(-0.9 to 20.1)                               |
| Urogenital congenital anomalies               | 0.1<br>(0.1 to 0.1)                  | --                                 | < 0.05<br>(< 0.05 to < 0.05)      | 0.8<br>(-6.9 to 9.8)                              | -0.8<br>(-8.0 to 7.4)                               |
| Digestive congenital anomalies                | 0.2<br>(0.1 to 0.2)                  | --                                 | < 0.05<br>(< 0.05 to < 0.05)      | 6.1<br>(-8.7 to 22.7)                             | 1.5<br>(-11.3 to 16.9)                              |
| Other congenital anomalies                    | 0.5<br>(0.3 to 0.7)                  | --                                 | 0.1<br>(< 0.05 to 0.1)            | -0.4<br>(-10.9 to 10.5)                           | -4.7<br>(-14.3 to 5.7)                              |
| Skin and subcutaneous diseases                | 33.9<br>(33.0 to 34.8)               | 73.9<br>(70.1 to 78.3)             | 0.9<br>(0.6 to 1.3)               | 5.8<br>(3.8 to 8.0)                               | 0.3<br>(-1.3 to 2.1)                                |
| Dermatitis                                    | 5.1<br>(4.7 to 5.5)                  | 5.5<br>(5.2 to 6.0)                | 0.2<br>(0.1 to 0.3)               | 2.2<br>(-1.2 to 5.9)                              | 0.0<br>(-3.0 to 3.4)                                |
| Psoriasis                                     | 0.6<br>(0.5 to 0.6)                  | 0.1<br>(0.1 to 0.1)                | < 0.05<br>(< 0.05 to 0.1)         | 13.2<br>(2.1 to 25.4)                             | 5.8<br>(-3.6 to 16.1)                               |
| Cellulitis                                    | < 0.05<br>(< 0.05 to < 0.05)         | 0.6<br>(0.5 to 0.6)                | < 0.05<br>(< 0.05 to < 0.05)      | 6.9<br>(-6.0 to 21.4)                             | -0.1<br>(-13.4 to 14.6)                             |
| Pyoderma                                      | 0.1<br>(0.1 to 0.1)                  | 3.1<br>(3.0 to 3.2)                | < 0.05<br>(< 0.05 to < 0.05)      | 6.6<br>(-1.4 to 15.5)                             | -0.7<br>(-7.7 to 7.1)                               |
| Scabies                                       | 4.6<br>(4.0 to 5.2)                  | 14.4<br>(12.5 to 16.7)             | 0.1<br>(0.1 to 0.2)               | 0.0<br>(-3.6 to 3.7)                              | -4.0<br>(-7.1 to -0.7)                              |
| Fungal skin diseases                          | 8.5<br>(7.7 to 9.5)                  | 29.3<br>(26.3 to 32.7)             | < 0.05<br>(< 0.05 to 0.1)         | 5.9<br>(4.2 to 7.5)                               | -0.1<br>(-1.2 to 1.0)                               |
| Viral skin diseases                           | 3.2<br>(3.0 to 3.4)                  | 4.5<br>(4.2 to 4.8)                | 0.1<br>(0.1 to 0.1)               | 4.9<br>(1.3 to 8.3)                               | -0.2<br>(-3.2 to 3.0)                               |
| Acne vulgaris                                 | 10.1<br>(9.0 to 11.4)                | 7.3<br>(5.9 to 9.2)                | 0.3<br>(0.2 to 0.4)               | 12.1<br>(6.9 to 17.3)                             | 2.2<br>(-2.4 to 6.8)                                |
| Alopecia areata                               | 0.2<br>(0.2 to 0.2)                  | 0.3<br>(0.3 to 0.3)                | < 0.05<br>(< 0.05 to < 0.05)      | 5.0<br>(-6.1 to 17.7)                             | -0.1<br>(-10.0 to 11.6)                             |
| Pruritus                                      | 0.8<br>(0.7 to 0.9)                  | 0.7<br>(0.6 to 0.8)                | < 0.05<br>(< 0.05 to < 0.05)      | 6.3<br>(0.8 to 11.7)                              | 0.2<br>(-4.5 to 5.2)                                |
| Urticaria                                     | 1.0<br>(0.9 to 1.2)                  | 1.8<br>(1.6 to 2.1)                | 0.1<br>(< 0.05 to 0.1)            | 0.2<br>(-5.2 to 5.9)                              | -0.1<br>(-5.0 to 5.3)                               |
| Decubitus ulcer                               | < 0.05<br>(< 0.05 to < 0.05)         | 0.1<br>(0.1 to 0.1)                | < 0.05<br>(< 0.05 to < 0.05)      | 12.5<br>(-1.4 to 28.3)                            | -2.0<br>(-14.6 to 12.8)                             |
| Other skin and subcutaneous diseases          | 5.5<br>(5.4 to 5.7)                  | 6.3<br>(6.1 to 6.5)                | < 0.05<br>(< 0.05 to 0.1)         | 7.1<br>(4.3 to 9.8)                               | -0.1<br>(-2.3 to 2.2)                               |
| Sense organ diseases                          | 20.4<br>(20.0 to 20.9)               | 10.2†<br>(9.5 to 10.9)             | 0.8<br>(0.6 to 1.1)               | 6.5<br>(4.3 to 8.7)                               | -2.4<br>(-3.9 to -0.8)                              |
| Glaucoma                                      | < 0.05<br>(< 0.05 to < 0.05)         | --                                 | < 0.05<br>(< 0.05 to < 0.05)      | 10.7<br>(-2.5 to 28.2)                            | 0.6<br>(-11.7 to 16.2)                              |
| Cataract                                      | 0.6<br>(0.5 to 0.7)                  | --                                 | < 0.05<br>(< 0.05 to < 0.05)      | 8.1<br>(1.7 to 15.0)                              | -3.6<br>(-9.0 to 2.1)                               |
| Macular degeneration                          | < 0.05<br>(< 0.05 to < 0.05)         | --                                 | < 0.05<br>(< 0.05 to < 0.05)      | 12.0<br>(-2.4 to 29.7)                            | 2.6<br>(-10.3 to 18.4)                              |
| Refraction and accommodation disorders        | 10.3<br>(9.9 to 10.7)                | --                                 | 0.2<br>(0.1 to 0.3)               | 4.9<br>(2.1 to 7.6)                               | -3.3<br>(-5.8 to -1.0)                              |
| Age-related and other hearing loss            | 13.3<br>(12.6 to 14.1)               | --                                 | 0.5<br>(0.4 to 0.7)               | 6.5<br>(3.3 to 9.6)                               | -2.5<br>(-4.8 to -0.2)                              |
| Other vision loss                             | 0.3<br>(0.2 to 0.3)                  | --                                 | < 0.05<br>(< 0.05 to < 0.05)      | 10.3<br>(2.3 to 18.9)                             | -0.2<br>(-6.9 to 7.0)                               |
| Other sense organ diseases                    | 2.4<br>(2.2 to 2.6)                  | 10.2<br>(9.5 to 10.9)              | 0.1<br>(< 0.05 to 0.1)            | 9.1<br>(4.6 to 13.6)                              | 0.7<br>(-2.8 to 4.4)                                |
| Oral disorders                                | 54.4<br>(51.8 to 56.6)               | 146.6†<br>(131.1 to 163.1)         | 0.1<br>(0.1 to 0.2)               | 8.9<br>(6.8 to 11.2)                              | 0.0<br>(-1.9 to 2.1)                                |
| Caries of deciduous teeth                     | 6.6<br>(4.6 to 8.4)                  | 29.3<br>(17.6 to 40.9)             | < 0.05<br>(< 0.05 to < 0.05)      | -1.6<br>(-14.4 to 13.4)                           | 0.2<br>(-12.7 to 15.4)                              |
| Caries of permanent teeth                     | 45.5<br>(42.4 to 48.5)               | 117.0<br>(106.5 to 127.5)          | < 0.05<br>(< 0.05 to 0.1)         | 7.6<br>(3.7 to 11.3)                              | -0.1<br>(-3.4 to 3.0)                               |
| Periodontal disease                           | 1.3<br>(1.0 to 1.5)                  | 0.1<br>(0.1 to 0.2)                | < 0.05<br>(< 0.05 to < 0.05)      | 12.7<br>(7.5 to 18.8)                             | 0.7<br>(-3.7 to 5.8)                                |
| Edentulism and severe tooth loss              | 2.0<br>(1.8 to 2.3)                  | 0.2<br>(0.1 to 0.2)                | 0.1<br>(< 0.05 to 0.1)            | 10.5<br>(6.7 to 15.1)                             | -0.1<br>(-3.7 to 3.8)                               |
| Other oral disorders                          | 1.7<br>(1.7 to 1.8)                  | --                                 | 0.1<br>(< 0.05 to 0.1)            | 7.6<br>(4.2 to 11.5)                              | 0.0<br>(-2.9 to 3.2)                                |
| <b>Injuries</b>                               | <b>13.3</b><br><b>(12.6 to 14.0)</b> | <b>6.8†</b><br><b>(6.5 to 7.2)</b> | <b>0.5</b><br><b>(0.3 to 0.7)</b> | <b>13.2</b><br><b>(11.0 to 15.3)</b>              | <b>4.7</b><br><b>(2.8 to 6.5)</b>                   |
| <b>Transport injuries</b>                     | <b>2.1</b><br><b>(1.9 to 2.3)</b>    | <b>0.8</b><br><b>(0.7 to 0.9)</b>  | <b>0.1</b><br><b>(0.1 to 0.2)</b> | <b>25.7</b><br><b>(22.5 to 29.0)</b>              | <b>16.8</b><br><b>(14.2 to 19.4)</b>                |
| Road injuries                                 | 1.3<br>(1.2 to 1.4)                  | 0.5<br>(0.5 to 0.6)                | 0.1<br>(< 0.05 to 0.1)            | 41.7<br>(38.4 to 45.1)                            | 30.2<br>(27.4 to 33.1)                              |
| Pedestrian road injuries                      | 0.2<br>(0.2 to 0.3)                  | 0.1<br>(0.1 to 0.1)                | < 0.05<br>(< 0.05 to < 0.05)      | 42.4<br>(39.1 to 45.7)                            | 30.1<br>(27.1 to 32.7)                              |
| Cyclist road injuries                         | 0.2<br>(0.1 to 0.2)                  | 0.1<br>(0.1 to 0.1)                | < 0.05<br>(< 0.05 to < 0.05)      | 46.1<br>(42.8 to 49.7)                            | 33.8<br>(30.9 to 36.8)                              |
| Motorcyclist road injuries                    | 0.3<br>(0.3 to 0.4)                  | 0.1<br>(0.1 to 0.1)                | < 0.05<br>(< 0.05 to < 0.05)      | 46.1<br>(42.4 to 49.6)                            | 34.4<br>(31.4 to 37.4)                              |
| Motor vehicle road injuries                   | 0.4<br>(0.3 to 0.4)                  | 0.2<br>(0.2 to 0.2)                | < 0.05<br>(< 0.05 to < 0.05)      | 36.2<br>(32.9 to 39.7)                            | 25.7<br>(23.0 to 28.6)                              |
| Other road injuries                           | 0.2<br>(0.2 to 0.2)                  | 0.1<br>(0.1 to 0.1)                | < 0.05<br>(< 0.05 to < 0.05)      | 42.9<br>(39.6 to 46.4)                            | 31.3<br>(28.5 to 34.2)                              |
| Other transport injuries                      | 0.8<br>(0.7 to 1.0)                  | 0.2<br>(0.2 to 0.3)                | < 0.05<br>(< 0.05 to 0.1)         | 7.1<br>(3.9 to 10.4)                              | -0.5<br>(-3.2 to 2.1)                               |
| <b>Unintentional injuries</b>                 | <b>10.2</b><br><b>(9.5 to 10.8)</b>  | <b>5.5</b><br><b>(5.2 to 5.8)</b>  | <b>0.3</b><br><b>(0.2 to 0.5)</b> | <b>10.6</b><br><b>(8.4 to 12.6)</b>               | <b>1.7</b><br><b>(-0.2 to 3.4)</b>                  |
| Falls                                         | 2.1<br>(1.8 to 2.4)                  | 1.1<br>(0.9 to 1.3)                | 0.1<br>(0.1 to 0.1)               | 31.4<br>(28.4 to 34.3)                            | 20.1<br>(17.6 to 22.5)                              |
| Drowning                                      | 0.1<br>(0.1 to 0.1)                  | < 0.05<br>(< 0.05 to < 0.05)       | < 0.05<br>(< 0.05 to < 0.05)      | 10.3<br>(6.5 to 13.7)                             | 1.2<br>(-2.3 to 4.4)                                |
| Fire, heat, and hot substances                | 1.2<br>(1.1 to 1.5)                  | 0.2<br>(0.2 to 0.2)                | < 0.05<br>(< 0.05 to < 0.05)      | 9.1<br>(3.9 to 13.3)                              | 0.5<br>(-3.8 to 4.0)                                |
| Poisonings                                    | < 0.05<br>(< 0.05 to < 0.05)         | 0.1<br>(0.1 to 0.1)                | < 0.05<br>(< 0.05 to < 0.05)      | 25.3<br>(16.0 to 35.2)                            | 16.2<br>(8.6 to 24.4)                               |
| Exposure to mechanical forces                 | 1.5<br>(1.3 to 1.8)                  | 0.7<br>(0.6 to 0.8)                | < 0.05<br>(< 0.05 to 0.1)         | 30.0<br>(26.8 to 33.1)                            | 19.7<br>(16.9 to 22.4)                              |
| Unintentional firearm injuries                | 0.1<br>(0.1 to 0.1)                  | < 0.05<br>(< 0.05 to < 0.05)       | < 0.05<br>(< 0.05 to < 0.05)      | 20.0<br>(16.8 to 23.1)                            | 10.4<br>(7.7 to 13.0)                               |
| Unintentional suffocation                     | 0.1<br>(0.1 to 0.1)                  | < 0.05<br>(< 0.05 to < 0.05)       | < 0.05<br>(< 0.05 to < 0.05)      | 13.9<br>(10.7 to 16.9)                            | 6.3<br>(3.8 to 8.6)                                 |
| Other exposure to mechanical forces           | 1.3<br>(1.1 to 1.6)                  | 0.7<br>(0.6 to 0.8)                | < 0.05<br>(< 0.05 to < 0.05)      | 33.1<br>(29.8 to 36.3)                            | 22.2<br>(19.3 to 25.0)                              |



| Cause                                                                               | Prevalence in thousands (95% UI)                    | Incidence in thousands (95% UI)                      | YLDs in thousands (95% UI)                          |                                                   |                                                     |
|-------------------------------------------------------------------------------------|-----------------------------------------------------|------------------------------------------------------|-----------------------------------------------------|---------------------------------------------------|-----------------------------------------------------|
|                                                                                     | 2016 counts                                         | 2016 counts                                          | 2016 counts                                         | Percentage change in counts between 2006 and 2016 | Percentage change in age-standardised rates between |
| Adverse effects of medical treatment                                                | < 0.05<br>(< 0.05 to 0.1)                           | 0.7<br>(0.6 to 0.8)                                  | < 0.05<br>(< 0.05 to < 0.05)                        | 1.5<br>(-4.7 to 7.5)                              | 0.5<br>(-4.2 to 5.5)                                |
| Animal contact                                                                      | 0.5<br>(0.5 to 0.6)                                 | 0.8<br>(0.6 to 0.9)                                  | < 0.05<br>(< 0.05 to < 0.05)                        | 10.3<br>(4.1 to 16.7)                             | 2.7<br>(-2.5 to 7.4)                                |
| Venomous animal contact                                                             | 0.2<br>(0.2 to 0.3)                                 | 0.3<br>(0.2 to 0.4)                                  | < 0.05<br>(< 0.05 to < 0.05)                        | 13.2<br>(4.8 to 22.5)                             | 5.8<br>(-1.3 to 13.2)                               |
| Non-venomous animal contact                                                         | 0.3<br>(0.3 to 0.4)                                 | 0.4<br>(0.3 to 0.5)                                  | < 0.05<br>(< 0.05 to < 0.05)                        | 3.6<br>(-0.6 to 6.9)                              | -3.8<br>(-7.3 to -1.0)                              |
| Foreign body                                                                        | 0.6<br>(0.5 to 0.7)                                 | 0.4<br>(0.3 to 0.4)                                  | < 0.05<br>(< 0.05 to < 0.05)                        | 5.6<br>(2.1 to 8.8)                               | -1.6<br>(-4.3 to 0.9)                               |
| Pulmonary aspiration and foreign body in airway                                     | 0.4<br>(0.3 to 0.5)                                 | 0.2<br>(0.1 to 0.2)                                  | < 0.05<br>(< 0.05 to < 0.05)                        | 5.2<br>(1.7 to 8.4)                               | -2.0<br>(-4.9 to 0.5)                               |
| Foreign body in eyes                                                                | < 0.05<br>(< 0.05 to < 0.05)                        | 0.1<br>(0.1 to 0.1)                                  | < 0.05<br>(< 0.05 to < 0.05)                        | 7.7<br>(3.9 to 11.6)                              | 1.1<br>(-1.9 to 4.0)                                |
| Foreign body in other body part                                                     | 0.2<br>(0.1 to 0.2)                                 | 0.1<br>(0.1 to 0.1)                                  | < 0.05<br>(< 0.05 to < 0.05)                        | 6.5<br>(2.2 to 10.6)                              | -0.8<br>(-4.1 to 2.4)                               |
| Environmental heat and cold exposure                                                | 0.9<br>(0.8 to 1.1)                                 | 0.3<br>(0.2 to 0.4)                                  | < 0.05<br>(< 0.05 to < 0.05)                        | 5.6<br>(3.0 to 8.1)                               | -2.0<br>(-4.3 to 0.1)                               |
| Other unintentional injuries                                                        | 3.1<br>(2.6 to 3.7)                                 | 1.4<br>(1.2 to 1.6)                                  | 0.1<br>(0.1 to 0.1)                                 | -5.0<br>(-7.2 to -2.9)                            | -13.1<br>(-15.2 to -11.3)                           |
| <b>Self-harm and interpersonal violence</b>                                         | <b>3.7</b><br><b>(3.3 to 4.1)</b>                   | <b>0.6†</b><br><b>(0.5 to 0.7)</b>                   | <b>0.1</b><br><b>(&lt; 0.05 to 0.1)</b>             | <b>7.6</b><br><b>(3.9 to 10.7)</b>                | <b>1.1</b><br><b>(-1.8 to 3.6)</b>                  |
| Self-harm                                                                           | 0.1<br>(0.1 to 0.1)                                 | < 0.05<br>(< 0.05 to 0.1)                            | < 0.05<br>(< 0.05 to < 0.05)                        | 9.9<br>(6.0 to 13.6)                              | 0.4<br>(-3.0 to 3.5)                                |
| Self-harm by firearm                                                                | < 0.05<br>(< 0.05 to < 0.05)                        | < 0.05<br>(< 0.05 to < 0.05)                         | < 0.05<br>(< 0.05 to < 0.05)                        | 16.6<br>(12.2 to 21.1)                            | 7.1<br>(3.6 to 10.7)                                |
| Self-harm by other specified means                                                  | 0.1<br>(0.1 to 0.1)                                 | < 0.05<br>(< 0.05 to 0.1)                            | < 0.05<br>(< 0.05 to < 0.05)                        | 9.6<br>(5.6 to 13.3)                              | 0.2<br>(-3.3 to 3.2)                                |
| Interpersonal violence                                                              | 3.6<br>(3.2 to 4.0)                                 | 0.5†<br>(0.4 to 0.6)                                 | 0.1<br>(< 0.05 to 0.1)                              | 7.4<br>(3.6 to 10.7)                              | 1.1<br>(-1.9 to 3.7)                                |
| Assault by firearm                                                                  | < 0.05<br>(< 0.05 to < 0.05)                        | < 0.05<br>(< 0.05 to < 0.05)                         | < 0.05<br>(< 0.05 to < 0.05)                        | 11.9<br>(8.2 to 15.4)                             | 2.9<br>(-0.2 to 6.0)                                |
| Assault by sharp object                                                             | 0.2<br>(0.1 to 0.2)                                 | 0.1<br>(0.1 to 0.1)                                  | < 0.05<br>(< 0.05 to < 0.05)                        | 9.8<br>(6.5 to 13.1)                              | 0.8<br>(-1.9 to 3.6)                                |
| Sexual violence                                                                     | 2.7<br>(2.4 to 3.1)                                 | --                                                   | < 0.05<br>(< 0.05 to < 0.05)                        | -5.2<br>(-10.6 to -0.2)                           | -10.4<br>(-15.0 to -6.2)                            |
| Assault by other means                                                              | 0.7<br>(0.6 to 0.8)                                 | 0.4<br>(0.4 to 0.5)                                  | < 0.05<br>(< 0.05 to < 0.05)                        | 21.2<br>(18.6 to 23.8)                            | 10.8<br>(8.5 to 13.1)                               |
| <b>Forces of nature, conflict and terrorism, and executions and police conflict</b> | <b>&lt; 0.05</b><br><b>(&lt; 0.05 to &lt; 0.05)</b> | <b>&lt; 0.05†</b><br><b>(&lt; 0.05 to &lt; 0.05)</b> | <b>&lt; 0.05</b><br><b>(&lt; 0.05 to &lt; 0.05)</b> | <b>19.5</b><br><b>(13.8 to 23.9)</b>              | <b>15.7</b><br><b>(10.4 to 19.6)</b>                |
| Exposure to forces of nature                                                        | --                                                  | --                                                   | --                                                  | --                                                | --                                                  |
| Conflict and terrorism                                                              | --                                                  | --                                                   | --                                                  | --                                                | --                                                  |
| Executions and police conflict                                                      | < 0.05<br>(< 0.05 to < 0.05)                        | < 0.05<br>(< 0.05 to < 0.05)                         | < 0.05<br>(< 0.05 to < 0.05)                        | 19.5<br>(13.8 to 23.9)                            | 15.7<br>(10.4 to 19.6)                              |
| <b>Impairments</b>                                                                  | --                                                  | --                                                   | --                                                  | --                                                | --                                                  |
| Anaemia                                                                             | 33.2<br>(29.6 to 37.2)                              | --                                                   | 0.9<br>(0.6 to 1.4)                                 | -0.5<br>(-10.6 to 12.3)                           | -4.5<br>(-12.3 to 6.0)                              |
| Developmental intellectual disability                                               | 2.1<br>(1.7 to 2.6)                                 | --                                                   | 0.2<br>(0.2 to 0.3)                                 | 3.2<br>(-2.0 to 8.9)                              | -1.9<br>(-6.5 to 3.3)                               |
| Epilepsy                                                                            | 0.6<br>(0.3 to 0.7)                                 | --                                                   | 0.2<br>(0.1 to 0.3)                                 | 4.9<br>(-40.1 to 84.6)                            | 0.0<br>(-44.0 to 80.9)                              |
| Guillain-Barre syndrome                                                             | < 0.05<br>(< 0.05 to < 0.05)                        | --                                                   | < 0.05<br>(< 0.05 to < 0.05)                        | 6.6<br>(4.3 to 9.0)                               | 0.2<br>(-0.1 to 1.0)                                |
| Hearing loss                                                                        | 15.1<br>(14.4 to 15.8)                              | --                                                   | 0.6<br>(0.4 to 0.8)                                 | 5.2<br>(2.5 to 7.7)                               | -2.8<br>(-4.8 to -0.9)                              |
| Heart failure                                                                       | 0.5<br>(0.5 to 0.6)                                 | --                                                   | 0.1<br>(< 0.05 to 0.1)                              | 12.4<br>(4.2 to 20.8)                             | -0.9<br>(-8.3 to 6.3)                               |
| Infertility                                                                         | 2.1<br>(1.7 to 2.7)                                 | --                                                   | < 0.05<br>(< 0.05 to < 0.05)                        | 4.0<br>(-1.2 to 9.6)                              | 0.7<br>(-4.2 to 6.0)                                |
| Pelvic inflammatory disease                                                         | 0.1<br>(0.1 to 0.1)                                 | --                                                   | < 0.05<br>(< 0.05 to < 0.05)                        | -0.2<br>(-13.7 to 15.7)                           | -5.8<br>(-18.4 to 9.5)                              |
| Vision loss                                                                         | 11.6<br>(11.1 to 12.0)                              | --                                                   | 0.3<br>(0.2 to 0.4)                                 | 4.7<br>(1.0 to 8.1)                               | -3.0<br>(-5.8 to -0.6)                              |

We did not calculate incidence for the nine impairments, certain NTDs, and causes with only birth prevalence. Blank cells mean that no estimate is available.

† Incidence for aggregate causes represents the sum of the incidence of the causes below the aggregate.

‡ Incidence estimates for stroke represent first-ever stroke only.

^ Incidence of HIV/AIDS represents new infections of HIV only and does not include new infections of Tuberculosis in HIV positive cases.

SR Table 14: Prevalence, incidence, and YLDs for 2016, percentage change of YLD counts and percentage change of age-standardised YLD rates between 2006 and 2016 by cause and impairments, for all ages, Trinidad and Tobago.

| Cause                                                                                | Prevalence in thousands (95% UI)       | Incidence in thousands (95% UI)         | YLDs in thousands (95% UI)       |                                                   |                                                     |
|--------------------------------------------------------------------------------------|----------------------------------------|-----------------------------------------|----------------------------------|---------------------------------------------------|-----------------------------------------------------|
|                                                                                      | 2016 counts                            | 2016 counts                             | 2016 counts                      | Percentage change in counts between 2006 and 2016 | Percentage change in age-standardised rates between |
| <b>All causes</b>                                                                    | <b>1,297.9</b><br>(1,294.4 to 1,301.5) | <b>7,725.7†</b><br>(7,310.2 to 8,187.1) | <b>159.9</b><br>(119.2 to 207.6) | <b>11.1</b><br>(8.6 to 13.8)                      | <b>0.3</b><br>(-2.0 to 2.7)                         |
| <b>Communicable, maternal, neonatal, and nutritional disorders</b>                   | <b>845.8</b><br>(819.2 to 872.7)       | <b>4,175.7†</b><br>(3,800.0 to 4,567.0) | <b>12.6</b><br>(9.0 to 17.2)     | <b>-2.4</b><br>(-10.1 to 5.3)                     | <b>-0.8</b><br>(-8.5 to 7.0)                        |
| <b>HIV/AIDS and tuberculosis</b>                                                     | <b>437.2</b><br>(390.1 to 474.7)       | <b>0.4†</b><br>(0.4 to 0.6)             | <b>0.7</b><br>(0.4 to 1.3)       | <b>-5.5</b><br>(-27.3 to 36.9)                    | <b>-12.8</b><br>(-32.8 to 25.7)                     |
| Tuberculosis                                                                         | 403.2<br>(362.5 to 449.0)              | 0.2†<br>(0.1 to 0.2)                    | < 0.05<br>(< 0.05 to < 0.05)     | -4.4<br>(-25.4 to 22.9)                           | -11.8<br>(-29.9 to 11.1)                            |
| Drug-susceptible tuberculosis                                                        | 0.1<br>(0.1 to 0.1)                    | 0.2<br>(0.1 to 0.2)                     | < 0.05<br>(< 0.05 to < 0.05)     | -4.2<br>(-25.4 to 23.8)                           | -11.7<br>(-30.0 to 11.3)                            |
| Multidrug-resistant tuberculosis without extensive drug resistance                   | < 0.05<br>(< 0.05 to < 0.05)           | < 0.05<br>(< 0.05 to < 0.05)            | < 0.05<br>(< 0.05 to < 0.05)     | -29.1<br>(-88.8 to 350.9)                         | -35.1<br>(-89.7 to 307.1)                           |
| Extensively drug-resistant tuberculosis                                              | < 0.05<br>(< 0.05 to < 0.05)           | < 0.05<br>(< 0.05 to < 0.05)            | < 0.05<br>(< 0.05 to < 0.05)     | 88.7<br>(-70.2 to 1,100.3)                        | 72.8<br>(-72.7 to 983.9)                            |
| Latent tuberculosis infection                                                        | 403.1<br>(362.4 to 448.9)              | --                                      | --                               | --                                                | --                                                  |
| HIV/AIDS                                                                             | 7.1<br>(5.2 to 10.1)                   | 0.3^<br>(0.2 to 0.4)                    | 0.7<br>(0.4 to 1.3)              | -5.6<br>(-28.1 to 39.8)                           | -12.9<br>(-33.5 to 28.5)                            |
| Drug-susceptible HIV/AIDS - Tuberculosis                                             | < 0.05<br>(< 0.05 to < 0.05)           | 0.1<br>(< 0.05 to 0.1)                  | < 0.05<br>(< 0.05 to < 0.05)     | -19.9<br>(-26.4 to -7.5)                          | -25.2<br>(-31.3 to -13.6)                           |
| Multidrug-resistant HIV/AIDS - Tuberculosis without extensive drug resistance        | < 0.05<br>(< 0.05 to < 0.05)           | < 0.05<br>(< 0.05 to < 0.05)            | < 0.05<br>(< 0.05 to < 0.05)     | -42.2<br>(-91.0 to 305.7)                         | -46.0<br>(-91.6 to 278.7)                           |
| Extensively drug-resistant HIV/AIDS - Tuberculosis                                   | < 0.05<br>(< 0.05 to < 0.05)           | < 0.05<br>(< 0.05 to < 0.05)            | < 0.05<br>(< 0.05 to < 0.05)     | 54.0<br>(-76.0 to 979.1)                          | 43.7<br>(-77.7 to 908.0)                            |
| HIV/AIDS resulting in other diseases                                                 | 7.1<br>(5.2 to 10.0)                   | 0.3<br>(0.2 to 0.4)                     | 0.7<br>(0.4 to 1.3)              | -5.3<br>(-28.1 to 42.2)                           | -12.7<br>(-33.6 to 31.3)                            |
| <b>Diarrhoea, lower respiratory infections, and other common infectious diseases</b> | <b>66.2</b><br>(62.4 to 70.5)          | <b>3,919.7†</b><br>(3,566.8 to 4,313.3) | <b>2.8</b><br>(1.9 to 3.9)       | <b>5.3</b><br>(1.7 to 9.2)                        | <b>5.5</b><br>(2.0 to 9.3)                          |
| Diarrhoeal diseases                                                                  | 9.2<br>(8.7 to 9.9)                    | 623.3<br>(588.0 to 668.4)               | 1.0<br>(0.7 to 1.4)              | 19.4<br>(12.6 to 27.4)                            | 18.7<br>(11.8 to 26.4)                              |
| Intestinal infectious diseases                                                       | < 0.05<br>(< 0.05 to < 0.05)           | < 0.05†<br>(< 0.05 to < 0.05)           | < 0.05<br>(< 0.05 to < 0.05)     | 20.5<br>(5.2 to 38.5)                             | 8.4<br>(-5.0 to 22.9)                               |
| Typhoid fever                                                                        | < 0.05<br>(< 0.05 to < 0.05)           | < 0.05<br>(< 0.05 to < 0.05)            | < 0.05<br>(< 0.05 to < 0.05)     | 36.5<br>(15.8 to 60.5)                            | 22.1<br>(4.4 to 41.9)                               |
| Paratyphoid fever                                                                    | < 0.05<br>(< 0.05 to < 0.05)           | < 0.05<br>(< 0.05 to < 0.05)            | < 0.05<br>(< 0.05 to < 0.05)     | -6.3<br>(-21.1 to 13.2)                           | -17.9<br>(-30.4 to -2.6)                            |
| Other intestinal infectious diseases                                                 | --                                     | --                                      | < 0.05<br>(< 0.05 to < 0.05)     | -36.2<br>(-52.0 to -13.1)                         | -21.8<br>(-42.4 to 6.6)                             |
| Lower respiratory infections                                                         | 1.7<br>(1.6 to 1.8)                    | 75.1<br>(68.6 to 81.4)                  | 0.1<br>(0.1 to 0.1)              | 24.2<br>(11.9 to 38.3)                            | 16.3<br>(4.6 to 29.5)                               |
| Upper respiratory infections                                                         | 41.7<br>(37.0 to 46.7)                 | 3,136.6<br>(2,767.8 to 3,528.7)         | 1.0<br>(0.6 to 1.6)              | -0.1<br>(-5.9 to 6.0)                             | 0.1<br>(-4.6 to 5.2)                                |
| Otitis media                                                                         | 13.0<br>(11.6 to 14.3)                 | 60.1<br>(49.9 to 72.8)                  | 0.4<br>(0.2 to 0.5)              | -11.4<br>(-18.1 to -3.7)                          | -7.4<br>(-14.3 to 0.0)                              |
| Meningitis                                                                           | 1.0<br>(0.8 to 1.1)                    | 0.2<br>(0.1 to 0.2)                     | 0.1<br>(0.1 to 0.1)              | -2.1<br>(-4.9 to 0.8)                             | -4.5<br>(-7.5 to -1.3)                              |
| Pneumococcal meningitis                                                              | 0.4<br>(0.4 to 0.5)                    | < 0.05<br>(< 0.05 to < 0.05)            | < 0.05<br>(< 0.05 to 0.1)        | -9.1<br>(-14.2 to -4.0)                           | -12.1<br>(-17.1 to -7.3)                            |
| H influenzae type B meningitis                                                       | 0.1<br>(0.1 to 0.2)                    | < 0.05<br>(< 0.05 to < 0.05)            | < 0.05<br>(< 0.05 to < 0.05)     | -4.4<br>(-8.6 to -0.2)                            | -5.6<br>(-9.9 to -1.1)                              |
| Meningococcal infection                                                              | 0.1<br>(< 0.05 to 0.1)                 | < 0.05<br>(< 0.05 to < 0.05)            | < 0.05<br>(< 0.05 to < 0.05)     | 1.9<br>(-4.2 to 19.6)                             | -1.3<br>(-8.0 to 26.2)                              |
| Other meningitis                                                                     | 0.3<br>(0.3 to 0.4)                    | 0.1<br>(0.1 to 0.1)                     | < 0.05<br>(< 0.05 to < 0.05)     | 11.5<br>(6.9 to 17.2)                             | 9.4<br>(4.8 to 14.6)                                |
| Encephalitis                                                                         | 0.8<br>(0.5 to 1.1)                    | 0.3<br>(0.3 to 0.4)                     | 0.1<br>(0.1 to 0.1)              | 2.7<br>(-13.4 to 21.7)                            | -1.2<br>(-15.7 to 16.1)                             |
| Diphtheria                                                                           | < 0.05<br>(< 0.05 to < 0.05)           | < 0.05<br>(< 0.05 to < 0.05)            | < 0.05<br>(< 0.05 to < 0.05)     | -33.3<br>(-60.8 to 18.3)                          | -33.4<br>(-60.6 to 18.8)                            |
| Whooping cough                                                                       | 0.4<br>(0.3 to 0.4)                    | 2.6<br>(2.0 to 3.2)                     | < 0.05<br>(< 0.05 to < 0.05)     | -31.0<br>(-40.4 to -21.3)                         | -8.8<br>(-20.7 to 3.9)                              |
| Tetanus                                                                              | < 0.05<br>(< 0.05 to < 0.05)           | < 0.05<br>(< 0.05 to < 0.05)            | < 0.05<br>(< 0.05 to < 0.05)     | -5.0<br>(-25.1 to 17.5)                           | -5.6<br>(-23.4 to 16.3)                             |
| Measles                                                                              | < 0.05<br>(0.0 to < 0.05)              | < 0.05<br>(0.0 to < 0.05)               | < 0.05<br>(0.0 to < 0.05)        | --                                                | --                                                  |
| Varicella and herpes zoster                                                          | 1.3<br>(1.1 to 1.4)                    | 21.5<br>(20.3 to 22.6)                  | 0.1<br>(< 0.05 to 0.1)           | 13.8<br>(0.9 to 27.7)                             | -0.0<br>(-10.5 to 11.6)                             |
| <b>Neglected tropical diseases and malaria</b>                                       | <b>68.5</b><br>(59.6 to 79.0)          | <b>69.9†</b><br>(37.0 to 111.2)         | <b>0.7</b><br>(0.4 to 1.2)       | <b>129.7</b><br>(66.1 to 208.1)                   | <b>120.5</b><br>(62.7 to 195.3)                     |
| Malaria                                                                              | --                                     | --                                      | --                               | --                                                | --                                                  |
| Chagas disease                                                                       | 0.1<br>(< 0.05 to 0.1)                 | --                                      | < 0.05<br>(< 0.05 to < 0.05)     | -47.7<br>(-61.9 to -29.6)                         | -57.7<br>(-70.4 to -40.8)                           |
| Leishmaniasis                                                                        | --                                     | --                                      | --                               | --                                                | --                                                  |
| Visceral leishmaniasis                                                               | --                                     | --                                      | --                               | --                                                | --                                                  |
| Cutaneous and mucocutaneous leishmaniasis                                            | --                                     | --                                      | --                               | --                                                | --                                                  |
| African trypanosomiasis                                                              | --                                     | --                                      | --                               | --                                                | --                                                  |
| Schistosomiasis                                                                      | --                                     | --                                      | --                               | --                                                | --                                                  |
| Cysticercosis                                                                        | --                                     | --                                      | --                               | --                                                | --                                                  |
| Cystic echinococcosis                                                                | --                                     | --                                      | --                               | --                                                | --                                                  |
| Lymphatic filariasis                                                                 | --                                     | --                                      | --                               | --                                                | --                                                  |
| Onchocerciasis                                                                       | --                                     | --                                      | --                               | --                                                | --                                                  |
| Trachoma                                                                             | --                                     | --                                      | --                               | --                                                | --                                                  |
| Dengue                                                                               | 3.1<br>(1.7 to 5.2)                    | 52.4<br>(32.8 to 77.8)                  | 0.5<br>(0.2 to 0.9)              | 349.3<br>(257.1 to 822.3)                         | 339.9<br>(249.8 to 810.7)                           |
| Yellow fever                                                                         | < 0.05<br>(< 0.05 to < 0.05)           | < 0.05<br>(< 0.05 to < 0.05)            | < 0.05<br>(< 0.05 to < 0.05)     | -36.8<br>(-57.0 to -10.8)                         | -37.7<br>(-56.4 to -12.4)                           |
| Rabies                                                                               | < 0.05<br>(< 0.05 to < 0.05)           | < 0.05<br>(< 0.05 to < 0.05)            | < 0.05<br>(< 0.05 to < 0.05)     | 2.0<br>(-41.0 to 97.7)                            | -9.1<br>(-47.9 to 77.0)                             |
| Intestinal nematode infections                                                       | 58.6<br>(50.5 to 69.3)                 | --                                      | < 0.05<br>(< 0.05 to < 0.05)     | 16.6<br>(-22.0 to 76.1)                           | 9.3<br>(-25.7 to 60.1)                              |
| Ascariasis                                                                           | 10.2<br>(8.2 to 12.7)                  | --                                      | < 0.05<br>(< 0.05 to < 0.05)     | 5.0<br>(-85.0 to 607.7)                           | 1.1<br>(-84.4 to 532.2)                             |

| Cause                                                                   | Prevalence in thousands (95% UI)              | Incidence in thousands (95% UI)                | YLDs in thousands (95% UI)              |                                                   |                                                     |
|-------------------------------------------------------------------------|-----------------------------------------------|------------------------------------------------|-----------------------------------------|---------------------------------------------------|-----------------------------------------------------|
|                                                                         | 2016 counts                                   | 2016 counts                                    | 2016 counts                             | Percentage change in counts between 2006 and 2016 | Percentage change in age-standardised rates between |
| Trichuriasis                                                            | 36.9<br>(29.2 to 46.4)                        | --                                             | < 0.05<br>(< 0.05 to < 0.05)            | 6.7<br>(-87.1 to 789.8)                           | 1.9<br>(-87.0 to 710.3)                             |
| Hookworm disease                                                        | 12.5<br>(10.5 to 15.0)                        | --                                             | < 0.05<br>(< 0.05 to < 0.05)            | 16.7<br>(-22.6 to 79.4)                           | 9.5<br>(-26.1 to 61.8)                              |
| Food-borne trematodiasis                                                | --                                            | --                                             | --                                      | --                                                | --                                                  |
| Leprosy                                                                 | < 0.05<br>(< 0.05 to 0.1)                     | < 0.05<br>(< 0.05 to < 0.05)                   | < 0.05<br>(< 0.05 to < 0.05)            | 8.0<br>(-19.0 to 58.0)                            | -11.2<br>(-34.5 to 33.1)                            |
| Ebola virus disease                                                     | --                                            | --                                             | --                                      | --                                                | --                                                  |
| Zika virus disease                                                      | 0.3<br>(< 0.05 to 0.9)                        | 17.4<br>(1.8 to 53.6)                          | < 0.05<br>(< 0.05 to < 0.05)            | --                                                | --                                                  |
| Guinea worm disease                                                     | --                                            | --                                             | --                                      | --                                                | --                                                  |
| Other neglected tropical diseases                                       | 7.3<br>(6.1 to 8.5)                           | --                                             | 0.1<br>(0.1 to 0.2)                     | -7.9<br>(-27.2 to 17.9)                           | 3.0<br>(-19.5 to 32.4)                              |
| <b>Maternal disorders</b>                                               | <b>1.3</b><br><b>(1.0 to 1.6)</b>             | <b>25.4†</b><br><b>(21.6 to 28.5)</b>          | <b>0.1</b><br><b>(0.1 to 0.1)</b>       | <b>-30.8</b><br><b>(-49.0 to -3.5)</b>            | <b>-27.3</b><br><b>(-46.4 to 0.5)</b>               |
| Maternal haemorrhage                                                    | 0.1<br>(0.1 to 0.2)                           | 0.8<br>(0.6 to 1.0)                            | < 0.05<br>(< 0.05 to < 0.05)            | -21.9<br>(-48.1 to 17.4)                          | -20.2<br>(-46.1 to 17.8)                            |
| Maternal sepsis and other pregnancy related infections                  | 0.4<br>(0.3 to 0.5)                           | 1.7<br>(1.3 to 2.4)                            | < 0.05<br>(< 0.05 to < 0.05)            | -29.5<br>(-67.7 to 38.2)                          | -25.3<br>(-65.1 to 47.2)                            |
| Maternal hypertensive disorders                                         | 0.7<br>(0.5 to 1.0)                           | 3.5<br>(3.1 to 3.9)                            | < 0.05<br>(< 0.05 to 0.1)               | -29.9<br>(-56.4 to 18.1)                          | -26.5<br>(-54.8 to 22.5)                            |
| Maternal obstructed labour and uterine rupture                          | < 0.05<br>(< 0.05 to < 0.05)                  | 0.6<br>(0.4 to 0.8)                            | < 0.05<br>(< 0.05 to < 0.05)            | -31.8<br>(-63.9 to 24.0)                          | -28.1<br>(-62.1 to 31.5)                            |
| Maternal abortion, miscarriage, and ectopic pregnancy                   | 0.1<br>(0.1 to 0.2)                           | 18.8<br>(15.0 to 21.8)                         | < 0.05<br>(< 0.05 to < 0.05)            | -31.6<br>(-63.3 to 17.9)                          | -28.6<br>(-61.5 to 21.5)                            |
| Other maternal disorders                                                | --                                            | --                                             | < 0.05<br>(< 0.05 to < 0.05)            | -35.1<br>(-52.1 to -9.8)                          | -30.9<br>(-49.2 to -4.4)                            |
| <b>Neonatal disorders</b>                                               | <b>20.9</b><br><b>(17.3 to 25.4)</b>          | <b>3.3</b><br><b>--</b>                        | <b>3.3</b><br><b>(2.2 to 5.2)</b>       | <b>-6.2</b><br><b>(-22.5 to 12.7)</b>             | <b>-3.1</b><br><b>(-19.4 to 16.4)</b>               |
| Neonatal preterm birth complications                                    | 17.9<br>(13.7 to 23.8)                        | --                                             | 1.9<br>(1.2 to 2.9)                     | -2.3<br>(-21.6 to 21.8)                           | 0.6<br>(-19.7 to 25.3)                              |
| Neonatal encephalopathy due to birth asphyxia and trauma                | 0.8<br>(0.4 to 1.4)                           | --                                             | 0.1<br>(< 0.05 to 0.2)                  | -9.9<br>(-44.4 to 61.9)                           | -8.2<br>(-42.4 to 64.9)                             |
| Neonatal sepsis and other neonatal infections                           | 2.5<br>(0.7 to 5.8)                           | --                                             | 1.1<br>(0.2 to 2.6)                     | -10.9<br>(-48.6 to 38.4)                          | -8.8<br>(-44.5 to 41.0)                             |
| Hemolytic disease and other neonatal jaundice                           | 0.6<br>(0.6 to 0.7)                           | --                                             | 0.2<br>(0.1 to 0.2)                     | -3.1<br>(-18.7 to 15.3)                           | -2.3<br>(-18.1 to 16.7)                             |
| Other neonatal disorders                                                | --                                            | --                                             | 0.1<br>(< 0.05 to 0.1)                  | -29.5<br>(-43.4 to -14.0)                         | -6.0<br>(-24.4 to 14.6)                             |
| <b>Nutritional deficiencies</b>                                         | <b>242.7</b><br><b>(219.0 to 264.4)</b>       | <b>46.5†</b><br><b>(30.6 to 70.0)</b>          | <b>4.3</b><br><b>(2.8 to 6.4)</b>       | <b>-11.3</b><br><b>(-23.0 to 3.4)</b>             | <b>-8.6</b><br><b>(-21.4 to 5.8)</b>                |
| Protein-energy malnutrition                                             | 3.0<br>(2.2 to 4.0)                           | 1.5<br>(1.1 to 2.0)                            | 0.1<br>(< 0.05 to 0.1)                  | -30.1<br>(-51.3 to 3.3)                           | -6.5<br>(-34.5 to 38.4)                             |
| Iodine deficiency                                                       | 3.5<br>(3.1 to 4.0)                           | 0.1<br>(0.1 to 0.1)                            | 0.1<br>(< 0.05 to 0.1)                  | 7.2<br>(-5.4 to 22.9)                             | -2.0<br>(-13.6 to 11.8)                             |
| Vitamin A deficiency                                                    | 52.2<br>(34.2 to 78.0)                        | 44.9<br>(29.0 to 68.5)                         | 0.1<br>(< 0.05 to 0.1)                  | -1.4<br>(-15.8 to 16.8)                           | -0.8<br>(-16.0 to 18.7)                             |
| Iron-deficiency anaemia                                                 | 188.8<br>(163.6 to 216.1)                     | --                                             | 4.0<br>(2.6 to 6.2)                     | -11.3<br>(-23.3 to 4.6)                           | -8.9<br>(-21.9 to 6.8)                              |
| Other nutritional deficiencies                                          | --                                            | --                                             | < 0.05<br>(< 0.05 to < 0.05)            | -30.3<br>(-52.0 to 4.5)                           | -7.3<br>(-36.3 to 38.7)                             |
| <b>Other communicable, maternal, neonatal, and nutritional diseases</b> | <b>386.5</b><br><b>(358.2 to 416.7)</b>       | <b>113.8</b><br><b>(89.0 to 151.5)</b>         | <b>0.6</b><br><b>(0.3 to 1.0)</b>       | <b>3.8</b><br><b>(-4.0 to 13.2)</b>               | <b>2.3</b><br><b>(-5.4 to 11.9)</b>                 |
| Sexually transmitted diseases excluding HIV                             | 347.8<br>(319.2 to 377.9)                     | 108.0<br>(83.3 to 145.5)                       | 0.5<br>(0.2 to 0.8)                     | 6.7<br>(-2.2 to 17.3)                             | 1.6<br>(-6.2 to 12.2)                               |
| Syphilis                                                                | 5.7<br>(4.6 to 7.2)                           | 4.0<br>(3.1 to 5.4)                            | < 0.05<br>(< 0.05 to < 0.05)            | 25.7<br>(11.4 to 42.4)                            | 2.3<br>(-9.7 to 16.2)                               |
| Chlamydial infection                                                    | 12.7<br>(10.1 to 16.0)                        | 9.2<br>(7.2 to 11.8)                           | 0.1<br>(< 0.05 to 0.1)                  | -0.4<br>(-15.5 to 17.2)                           | 0.0<br>(-15.2 to 17.0)                              |
| Gonococcal infection                                                    | 10.4<br>(4.2 to 20.7)                         | 36.0<br>(12.7 to 71.3)                         | 0.1<br>(< 0.05 to 0.3)                  | 7.7<br>(-12.3 to 30.9)                            | 4.6<br>(-12.2 to 26.5)                              |
| Trichomoniasis                                                          | 48.3<br>(41.7 to 55.5)                        | 41.3<br>(35.4 to 47.8)                         | < 0.05<br>(< 0.05 to 0.1)               | 3.4<br>(-3.5 to 10.7)                             | 0.6<br>(-5.5 to 6.7)                                |
| Genital herpes                                                          | 291.6<br>(250.9 to 336.5)                     | 15.3<br>(12.8 to 18.4)                         | 0.1<br>(< 0.05 to 0.2)                  | 10.9<br>(2.4 to 17.2)                             | 0.3<br>(-5.7 to 6.5)                                |
| Other sexually transmitted diseases                                     | 3.0<br>(2.7 to 3.3)                           | 2.2<br>(1.9 to 2.6)                            | 0.1<br>(0.1 to 0.2)                     | 3.9<br>(-8.6 to 16.9)                             | 0.5<br>(-11.2 to 13.8)                              |
| Hepatitis                                                               | 51.8<br>(45.9 to 58.4)                        | 5.8<br>(4.6 to 7.3)                            | < 0.05<br>(< 0.05 to < 0.05)            | 2.0<br>(-26.4 to 38.9)                            | -0.9<br>(-26.6 to 32.4)                             |
| Acute hepatitis A                                                       | 0.1<br>(< 0.05 to 0.2)                        | 1.3<br>(0.6 to 2.2)                            | < 0.05<br>(< 0.05 to < 0.05)            | -2.5<br>(-65.9 to 187.0)                          | 0.7<br>(-63.0 to 177.6)                             |
| Hepatitis B                                                             | 21.4<br>(16.8 to 27.2)                        | 3.3<br>(2.5 to 4.5)                            | < 0.05<br>(< 0.05 to < 0.05)            | 7.0<br>(-12.1 to 28.4)                            | -2.1<br>(-19.2 to 16.9)                             |
| Hepatitis C                                                             | 30.3<br>(27.1 to 33.5)                        | 0.6<br>(0.6 to 0.7)                            | < 0.05<br>(< 0.05 to < 0.05)            | -10.8<br>(-25.8 to 7.0)                           | -0.4<br>(-19.7 to 25.7)                             |
| Acute hepatitis E                                                       | < 0.05<br>(< 0.05 to 0.1)                     | 0.5<br>(0.4 to 0.7)                            | < 0.05<br>(< 0.05 to < 0.05)            | 0.2<br>(-9.7 to 10.1)                             | -0.2<br>(-7.3 to 7.6)                               |
| Other infectious diseases                                               | 6.2<br>(5.2 to 7.1)                           | < 0.05<br>(< 0.05 to < 0.05)                   | 0.1<br>(0.1 to 0.2)                     | -4.7<br>(-20.7 to 15.0)                           | 4.3<br>(-14.6 to 26.7)                              |
| <b>Non-communicable diseases</b>                                        | <b>1,247.3</b><br><b>(1,242.4 to 1,252.3)</b> | <b>3,462.8†</b><br><b>(3,298.2 to 3,649.9)</b> | <b>138.4</b><br><b>(102.7 to 179.9)</b> | <b>11.9</b><br><b>(9.2 to 14.8)</b>               | <b>-0.1</b><br><b>(-2.5 to 2.4)</b>                 |
| <b>Neoplasms</b>                                                        | <b>11.7</b><br><b>(11.0 to 12.3)</b>          | <b>3.6</b><br><b>(3.3 to 3.7)</b>              | <b>1.3</b><br><b>(0.9 to 1.6)</b>       | <b>38.1</b><br><b>(31.4 to 45.4)</b>              | <b>8.9</b><br><b>(3.5 to 14.7)</b>                  |
| Lip and oral cavity cancer                                              | 0.2<br>(0.2 to 0.2)                           | < 0.05<br>(< 0.05 to 0.1)                      | < 0.05<br>(< 0.05 to < 0.05)            | 44.6<br>(28.6 to 63.8)                            | 14.6<br>(2.3 to 29.8)                               |
| Nasopharynx cancer                                                      | < 0.05<br>(< 0.05 to < 0.05)                  | < 0.05<br>(< 0.05 to < 0.05)                   | < 0.05<br>(< 0.05 to < 0.05)            | 13.4<br>(2.7 to 23.8)                             | 2.1<br>(-7.2 to 11.5)                               |
| Other pharynx cancer                                                    | < 0.05<br>(< 0.05 to 0.1)                     | < 0.05<br>(< 0.05 to < 0.05)                   | < 0.05<br>(< 0.05 to < 0.05)            | 42.0<br>(21.5 to 66.3)                            | 11.9<br>(-3.5 to 30.3)                              |
| Oesophageal cancer                                                      | < 0.05<br>(< 0.05 to < 0.05)                  | < 0.05<br>(< 0.05 to < 0.05)                   | < 0.05<br>(< 0.05 to < 0.05)            | 23.2<br>(12.0 to 35.3)                            | -4.8<br>(-13.9 to 4.6)                              |
| Stomach cancer                                                          | 0.2<br>(0.2 to 0.2)                           | 0.1<br>(0.1 to 0.1)                            | < 0.05<br>(< 0.05 to < 0.05)            | 32.8<br>(14.6 to 54.8)                            | 1.9<br>(-13.1 to 19.2)                              |
| Colon and rectum cancer                                                 | 1.5<br>(1.4 to 1.7)                           | 0.4<br>(0.4 to 0.5)                            | 0.1<br>(0.1 to 0.2)                     | 42.9<br>(24.6 to 64.0)                            | 10.2<br>(-3.8 to 25.8)                              |
| Liver cancer                                                            | < 0.05<br>(< 0.05 to < 0.05)                  | 0.1<br>(< 0.05 to 0.1)                         | < 0.05<br>(< 0.05 to < 0.05)            | 49.0<br>(34.9 to 64.0)                            | 15.0<br>(4.4 to 26.5)                               |
| Liver cancer due to hepatitis B                                         | < 0.05<br>(< 0.05 to < 0.05)                  | < 0.05<br>(< 0.05 to < 0.05)                   | < 0.05<br>(< 0.05 to < 0.05)            | 47.5<br>(32.1 to 63.9)                            | 15.9<br>(4.4 to 28.3)                               |



| Cause                                              | Prevalence in thousands (95% UI)        | Incidence in thousands (95% UI)       | YLDs in thousands (95% UI)        |                                                   |                                                     |
|----------------------------------------------------|-----------------------------------------|---------------------------------------|-----------------------------------|---------------------------------------------------|-----------------------------------------------------|
|                                                    | 2016 counts                             | 2016 counts                           | 2016 counts                       | Percentage change in counts between 2006 and 2016 | Percentage change in age-standardised rates between |
| Liver cancer due to hepatitis C                    | < 0.05<br>(< 0.05 to < 0.05)            | < 0.05<br>(< 0.05 to < 0.05)          | < 0.05<br>(< 0.05 to < 0.05)      | 47.9<br>(32.7 to 65.1)                            | 12.4<br>(0.5 to 25.8)                               |
| Liver cancer due to alcohol use                    | < 0.05<br>(< 0.05 to < 0.05)            | < 0.05<br>(< 0.05 to < 0.05)          | < 0.05<br>(< 0.05 to < 0.05)      | 57.8<br>(40.2 to 77.3)                            | 18.9<br>(5.7 to 33.7)                               |
| Liver cancer due to other causes                   | < 0.05<br>(< 0.05 to < 0.05)            | < 0.05<br>(< 0.05 to < 0.05)          | < 0.05<br>(< 0.05 to < 0.05)      | 46.6<br>(30.8 to 64.2)                            | 14.4<br>(2.3 to 27.6)                               |
| Gallbladder and biliary tract cancer               | < 0.05<br>(< 0.05 to < 0.05)            | < 0.05<br>(< 0.05 to < 0.05)          | < 0.05<br>(< 0.05 to < 0.05)      | 13.1<br>(5.1 to 20.8)                             | -13.2<br>(-19.3 to -7.2)                            |
| Pancreatic cancer                                  | 0.1<br>(0.1 to 0.1)                     | 0.1<br>(0.1 to 0.1)                   | < 0.05<br>(< 0.05 to < 0.05)      | 31.7<br>(18.1 to 46.4)                            | 0.6<br>(-11.2 to 13.2)                              |
| Larynx cancer                                      | 0.1<br>(0.1 to 0.1)                     | < 0.05<br>(< 0.05 to < 0.05)          | < 0.05<br>(< 0.05 to < 0.05)      | 34.5<br>(15.3 to 56.7)                            | 4.1<br>(-11.0 to 22.4)                              |
| Tracheal, bronchus, and lung cancer                | 0.2<br>(0.2 to 0.2)                     | 0.2<br>(0.1 to 0.2)                   | < 0.05<br>(< 0.05 to 0.1)         | 25.5<br>(1.7 to 54.3)                             | -2.5<br>(-19.3 to 19.4)                             |
| Malignant skin melanoma                            | 0.1<br>(0.1 to 0.1)                     | < 0.05<br>(< 0.05 to < 0.05)          | < 0.05<br>(< 0.05 to < 0.05)      | 51.7<br>(27.9 to 79.3)                            | 25.7<br>(6.0 to 49.1)                               |
| Non-melanoma skin cancer                           | < 0.05<br>(< 0.05 to < 0.05)            | < 0.05<br>(< 0.05 to 0.1)             | < 0.05<br>(< 0.05 to < 0.05)      | 93.3<br>(52.4 to 151.7)                           | 49.2<br>(17.8 to 94.4)                              |
| Non-melanoma skin cancer (squamous-cell carcinoma) | < 0.05<br>(< 0.05 to < 0.05)            | < 0.05<br>(< 0.05 to < 0.05)          | < 0.05<br>(< 0.05 to < 0.05)      | 95.9<br>(51.6 to 158.2)                           | 50.8<br>(17.2 to 98.5)                              |
| Non-melanoma skin cancer (basal-cell carcinoma)    | < 0.05<br>(< 0.05 to < 0.05)            | < 0.05<br>(< 0.05 to < 0.05)          | < 0.05<br>(< 0.05 to < 0.05)      | 60.3<br>(22.8 to 103.1)                           | 28.1<br>(-1.2 to 63.0)                              |
| Breast cancer                                      | 2.3<br>(2.0 to 2.6)                     | 0.5<br>(0.4 to 0.6)                   | 0.2<br>(0.1 to 0.3)               | 28.9<br>(8.2 to 54.1)                             | 4.5<br>(-11.6 to 24.2)                              |
| Cervical cancer                                    | 0.7<br>(0.7 to 0.8)                     | 0.2<br>(0.2 to 0.2)                   | 0.1<br>(< 0.05 to 0.1)            | 11.7<br>(-10.2 to 40.4)                           | -7.7<br>(-24.8 to 14.2)                             |
| Uterine cancer                                     | 1.1<br>(0.9 to 1.2)                     | 0.2<br>(0.2 to 0.3)                   | 0.1<br>(0.1 to 0.1)               | 54.0<br>(25.4 to 88.5)                            | 18.2<br>(-3.4 to 43.8)                              |
| Ovarian cancer                                     | 0.3<br>(0.3 to 0.4)                     | 0.1<br>(0.1 to 0.1)                   | < 0.05<br>(< 0.05 to 0.1)         | 29.1<br>(-7.9 to 78.9)                            | 6.8<br>(-22.9 to 45.0)                              |
| Prostate cancer                                    | 3.2<br>(2.1 to 3.6)                     | 0.8<br>(0.5 to 0.9)                   | 0.3<br>(0.2 to 0.4)               | 44.3<br>(27.1 to 63.4)                            | 6.7<br>(-5.9 to 20.6)                               |
| Testicular cancer                                  | < 0.05<br>(< 0.05 to 0.1)               | < 0.05<br>(< 0.05 to < 0.05)          | < 0.05<br>(< 0.05 to < 0.05)      | -3.8<br>(-36.9 to 53.4)                           | 8.1<br>(-30.9 to 70.6)                              |
| Kidney cancer                                      | 0.3<br>(0.2 to 0.3)                     | 0.1<br>(0.1 to 0.1)                   | < 0.05<br>(< 0.05 to < 0.05)      | 51.1<br>(30.5 to 74.0)                            | 26.1<br>(9.8 to 44.6)                               |
| Bladder cancer                                     | 0.2<br>(0.2 to 0.2)                     | 0.1<br>(0.1 to 0.1)                   | < 0.05<br>(< 0.05 to < 0.05)      | 47.3<br>(28.9 to 66.2)                            | 12.4<br>(-1.1 to 26.6)                              |
| Brain and nervous system cancer                    | 0.1<br>(0.1 to 0.1)                     | < 0.05<br>(< 0.05 to < 0.05)          | < 0.05<br>(< 0.05 to < 0.05)      | 19.1<br>(6.8 to 30.1)                             | 4.1<br>(-7.4 to 14.3)                               |
| Thyroid cancer                                     | 0.2<br>(0.2 to 0.3)                     | < 0.05<br>(< 0.05 to < 0.05)          | < 0.05<br>(< 0.05 to < 0.05)      | 57.8<br>(28.3 to 95.3)                            | 29.8<br>(6.2 to 59.4)                               |
| Mesothelioma                                       | < 0.05<br>(< 0.05 to < 0.05)            | < 0.05<br>(< 0.05 to < 0.05)          | < 0.05<br>(< 0.05 to < 0.05)      | 59.5<br>(40.2 to 74.4)                            | 30.2<br>(13.8 to 42.1)                              |
| Hodgkin lymphoma                                   | < 0.05<br>(< 0.05 to 0.1)               | < 0.05<br>(< 0.05 to < 0.05)          | < 0.05<br>(< 0.05 to < 0.05)      | 30.4<br>(16.6 to 45.9)                            | 22.5<br>(9.8 to 36.7)                               |
| Non-Hodgkin's lymphoma                             | 0.3<br>(0.2 to 0.3)                     | 0.1<br>(0.1 to 0.1)                   | < 0.05<br>(< 0.05 to < 0.05)      | 38.7<br>(23.4 to 56.5)                            | 17.3<br>(5.2 to 31.4)                               |
| Multiple myeloma                                   | 0.1<br>(0.1 to 0.1)                     | < 0.05<br>(< 0.05 to 0.1)             | < 0.05<br>(< 0.05 to < 0.05)      | 36.1<br>(12.8 to 67.0)                            | 4.4<br>(-14.6 to 29.9)                              |
| Leukaemia                                          | 0.2<br>(0.2 to 0.3)                     | 0.1<br>(0.1 to 0.1)                   | < 0.05<br>(< 0.05 to < 0.05)      | 18.8<br>(9.6 to 29.4)                             | 3.2<br>(-5.4 to 13.2)                               |
| Acute lymphoid leukaemia                           | < 0.05<br>(< 0.05 to < 0.05)            | < 0.05<br>(< 0.05 to < 0.05)          | < 0.05<br>(< 0.05 to < 0.05)      | 6.7<br>(-10.2 to 28.1)                            | 14.5<br>(-7.0 to 43.2)                              |
| Chronic lymphoid leukaemia                         | < 0.05<br>(< 0.05 to < 0.05)            | < 0.05<br>(< 0.05 to < 0.05)          | < 0.05<br>(< 0.05 to < 0.05)      | 35.3<br>(14.4 to 63.4)                            | 5.7<br>(-10.3 to 27.2)                              |
| Acute myeloid leukaemia                            | < 0.05<br>(< 0.05 to < 0.05)            | < 0.05<br>(< 0.05 to < 0.05)          | < 0.05<br>(< 0.05 to < 0.05)      | 17.7<br>(7.2 to 30.2)                             | 8.0<br>(-1.9 to 19.7)                               |
| Chronic myeloid leukaemia                          | < 0.05<br>(< 0.05 to < 0.05)            | < 0.05<br>(< 0.05 to < 0.05)          | < 0.05<br>(< 0.05 to < 0.05)      | 10.4<br>(-2.5 to 25.0)                            | -9.9<br>(-20.4 to 2.0)                              |
| Other leukaemia                                    | 0.1<br>(0.1 to 0.1)                     | < 0.05<br>(< 0.05 to < 0.05)          | < 0.05<br>(< 0.05 to < 0.05)      | 20.4<br>(6.5 to 36.7)                             | 0.0<br>(-12.2 to 14.5)                              |
| Other neoplasms                                    | 1.2<br>(1.0 to 1.4)                     | 0.3<br>(0.3 to 0.4)                   | 0.1<br>(0.1 to 0.1)               | 63.6<br>(37.9 to 93.2)                            | 40.6<br>(19.3 to 66.2)                              |
| <b>Cardiovascular diseases</b>                     | <b>101.0</b><br><b>(97.2 to 104.7)</b>  | <b>11.0†</b><br><b>(10.4 to 11.6)</b> | <b>5.8</b><br><b>(4.2 to 7.5)</b> | <b>26.6</b><br><b>(22.5 to 31.1)</b>              | <b>0.2</b><br><b>(-3.2 to 3.8)</b>                  |
| Rheumatic heart disease                            | 0.1<br>(0.1 to 0.1)                     | < 0.05<br>(< 0.05 to < 0.05)          | < 0.05<br>(< 0.05 to < 0.05)      | 4.5<br>(-4.6 to 14.7)                             | -11.6<br>(-20.2 to -2.0)                            |
| Ischaemic heart disease                            | 40.7<br>(38.6 to 42.9)                  | 4.9<br>(4.5 to 5.4)                   | 1.9<br>(1.3 to 2.5)               | 27.7<br>(22.4 to 32.8)                            | 1.0<br>(-2.9 to 4.7)                                |
| Cerebrovascular disease                            | 16.9<br>(15.8 to 18.1)                  | 2.1‡<br>(1.9 to 2.3)                  | 1.7<br>(1.2 to 2.1)               | 25.5<br>(16.7 to 35.6)                            | -1.7<br>(-8.3 to 6.1)                               |
| Ischaemic stroke                                   | 13.9<br>(12.6 to 15.5)                  | 1.4‡<br>(1.2 to 1.6)                  | 1.3<br>(1.0 to 1.7)               | 26.2<br>(16.0 to 38.4)                            | -1.7<br>(-9.5 to 7.5)                               |
| Hemorrhagic stroke                                 | 3.8<br>(3.4 to 4.2)                     | 0.7‡<br>(0.7 to 0.8)                  | 0.4<br>(0.3 to 0.5)               | 22.9<br>(9.8 to 37.2)                             | -1.6<br>(-11.7 to 9.5)                              |
| Hypertensive heart disease                         | 4.8<br>(4.1 to 5.7)                     | --                                    | 0.4<br>(0.3 to 0.5)               | 31.7<br>(19.9 to 45.5)                            | 1.5<br>(-7.3 to 11.8)                               |
| Cardiomyopathy and myocarditis                     | 1.1<br>(1.0 to 1.3)                     | 0.4†<br>(0.3 to 0.4)                  | 0.1<br>(0.1 to 0.1)               | 18.7<br>(5.4 to 34.2)                             | 2.7<br>(-7.6 to 14.6)                               |
| Myocarditis                                        | 0.4<br>(0.3 to 0.4)                     | 0.4<br>(0.3 to 0.4)                   | < 0.05<br>(< 0.05 to < 0.05)      | 13.9<br>(1.8 to 26.6)                             | 2.1<br>(-8.5 to 13.4)                               |
| Alcoholic cardiomyopathy                           | 0.1<br>(0.1 to 0.2)                     | --                                    | < 0.05<br>(< 0.05 to < 0.05)      | 33.5<br>(8.1 to 64.6)                             | 3.7<br>(-16.7 to 29.3)                              |
| Other cardiomyopathy                               | 0.8<br>(0.7 to 1.0)                     | --                                    | 0.1<br>(< 0.05 to 0.1)            | 18.4<br>(1.0 to 39.7)                             | 2.7<br>(-10.1 to 19.6)                              |
| Atrial fibrillation and flutter                    | 10.2<br>(8.8 to 11.6)                   | 0.8<br>(0.7 to 1.0)                   | 0.8<br>(0.5 to 1.1)               | 30.9<br>(22.6 to 40.6)                            | -0.1<br>(-6.0 to 6.8)                               |
| Peripheral vascular disease                        | 27.3<br>(23.6 to 31.8)                  | 2.5<br>(2.2 to 3.0)                   | 0.1<br>(0.1 to 0.2)               | 29.8<br>(20.1 to 39.5)                            | -4.0<br>(-11.2 to 3.0)                              |
| Endocarditis                                       | 0.1<br>(0.1 to 0.1)                     | 0.2<br>(0.2 to 0.2)                   | < 0.05<br>(< 0.05 to < 0.05)      | 25.3<br>(10.3 to 44.0)                            | 3.0<br>(-10.9 to 21.5)                              |
| Other cardiovascular and circulatory diseases      | 15.5<br>(13.3 to 18.1)                  | --                                    | 0.8<br>(0.6 to 1.1)               | 21.0<br>(10.9 to 31.7)                            | 2.8<br>(-4.8 to 11.5)                               |
| <b>Chronic respiratory diseases</b>                | <b>155.7</b><br><b>(148.7 to 163.7)</b> | <b>23.3†</b><br><b>(21.6 to 24.9)</b> | <b>5.3</b><br><b>(3.7 to 7.2)</b> | <b>7.4</b><br><b>(2.2 to 13.6)</b>                | <b>3.4</b><br><b>(-1.3 to 9.3)</b>                  |
| Chronic obstructive pulmonary disease              | 48.5<br>(44.9 to 53.3)                  | 3.0<br>(2.8 to 3.3)                   | 0.8<br>(0.6 to 1.0)               | 24.9<br>(7.0 to 43.8)                             | 2.0<br>(-12.3 to 17.1)                              |
| Pneumoconiosis                                     | 0.1<br>(0.1 to 0.1)                     | < 0.05<br>(< 0.05 to < 0.05)          | < 0.05<br>(< 0.05 to < 0.05)      | 31.3<br>(17.9 to 45.7)                            | 0.8<br>(-10.9 to 14.1)                              |
| Silicosis                                          | < 0.05<br>(< 0.05 to < 0.05)            | < 0.05<br>(< 0.05 to < 0.05)          | < 0.05<br>(< 0.05 to < 0.05)      | 34.7<br>(28.2 to 40.8)                            | 5.1<br>(0.2 to 9.6)                                 |

| Cause                                                          | Prevalence in thousands (95% UI)        | Incidence in thousands (95% UI)         | YLDs in thousands (95% UI)           |                                                   |                                                     |
|----------------------------------------------------------------|-----------------------------------------|-----------------------------------------|--------------------------------------|---------------------------------------------------|-----------------------------------------------------|
|                                                                | 2016 counts                             | 2016 counts                             | 2016 counts                          | Percentage change in counts between 2006 and 2016 | Percentage change in age-standardised rates between |
| Asbestosis                                                     | < 0.05<br>(< 0.05 to < 0.05)            | < 0.05<br>(< 0.05 to < 0.05)            | < 0.05<br>(< 0.05 to < 0.05)         | 24.2<br>(-1.2 to 57.9)                            | -3.0<br>(-25.3 to 27.0)                             |
| Coal workers pneumoconiosis                                    | --                                      | --                                      | --                                   | --                                                | --                                                  |
| Other pneumoconiosis                                           | < 0.05<br>(< 0.05 to < 0.05)            | < 0.05<br>(< 0.05 to < 0.05)            | < 0.05<br>(< 0.05 to < 0.05)         | 35.3<br>(15.5 to 58.4)                            | 1.9<br>(-14.8 to 22.6)                              |
| Asthma                                                         | 110.7<br>(101.9 to 121.0)               | 20.2<br>(18.6 to 21.9)                  | 4.3<br>(2.8 to 6.2)                  | 4.1<br>(-1.0 to 10.7)                             | 3.3<br>(-2.0 to 9.9)                                |
| Interstitial lung disease and pulmonary sarcoidosis            | 0.6<br>(0.5 to 0.7)                     | 0.1<br>(0.1 to 0.1)                     | 0.1<br>(< 0.05 to 0.1)               | 27.0<br>(16.5 to 38.9)                            | 3.9<br>(-5.2 to 14.2)                               |
| Other chronic respiratory diseases                             | --                                      | --                                      | 0.1<br>(< 0.05 to 0.1)               | 40.3<br>(12.2 to 77.7)                            | 38.6<br>(8.3 to 77.9)                               |
| <b>Cirrhosis and other chronic liver diseases</b>              | <b>9.8</b><br><b>(9.2 to 10.3)</b>      | <b>0.2</b><br><b>(0.2 to 0.3)</b>       | <b>0.2</b><br><b>(0.1 to 0.3)</b>    | <b>21.2</b><br><b>(9.5 to 34.6)</b>               | <b>6.5</b><br><b>(-3.8 to 17.2)</b>                 |
| Cirrhosis and other chronic liver diseases due to hepatitis B  | 1.1<br>(0.9 to 1.3)                     | < 0.05<br>(< 0.05 to < 0.05)            | < 0.05<br>(< 0.05 to < 0.05)         | 28.7<br>(0.5 to 62.8)                             | 5.9<br>(-15.9 to 31.6)                              |
| Cirrhosis and other chronic liver diseases due to hepatitis C  | 3.3<br>(3.0 to 3.6)                     | 0.1<br>(0.1 to 0.1)                     | 0.1<br>(< 0.05 to 0.1)               | 26.6<br>(5.1 to 52.3)                             | 5.3<br>(-11.6 to 25.0)                              |
| Cirrhosis and other chronic liver diseases due to alcohol use  | 3.4<br>(3.1 to 3.7)                     | 0.1<br>(0.1 to 0.1)                     | 0.1<br>(< 0.05 to 0.1)               | 31.5<br>(11.3 to 56.5)                            | 7.6<br>(-7.9 to 26.0)                               |
| Cirrhosis and other chronic liver diseases due to other causes | 2.0<br>(1.8 to 2.2)                     | < 0.05<br>(< 0.05 to < 0.05)            | 0.1<br>(< 0.05 to 0.1)               | 5.6<br>(-15.1 to 29.6)                            | 6.7<br>(-13.2 to 30.5)                              |
| <b>Digestive diseases</b>                                      | <b>57.2</b><br><b>(52.9 to 61.6)</b>    | <b>46.1†</b><br><b>(42.8 to 49.2)</b>   | <b>1.9</b><br><b>(1.3 to 2.5)</b>    | <b>32.4</b><br><b>(18.4 to 48.8)</b>              | <b>13.2</b><br><b>(2.2 to 25.4)</b>                 |
| Peptic ulcer disease                                           | 23.1<br>(20.4 to 26.2)                  | 1.7<br>(1.5 to 1.9)                     | 0.5<br>(0.3 to 0.8)                  | 61.0<br>(30.9 to 96.8)                            | 34.8<br>(10.9 to 62.0)                              |
| Gastritis and duodenitis                                       | 23.4<br>(20.5 to 26.7)                  | 12.1<br>(10.9 to 13.5)                  | 0.5<br>(0.3 to 0.7)                  | 67.4<br>(40.1 to 97.8)                            | 38.8<br>(17.7 to 61.1)                              |
| Appendicitis                                                   | 0.1<br>(0.1 to 0.1)                     | 2.6<br>(2.3 to 2.8)                     | < 0.05<br>(< 0.05 to < 0.05)         | -0.0<br>(-24.9 to 35.9)                           | -1.1<br>(-28.2 to 38.4)                             |
| Paralytic ileus and intestinal obstruction                     | < 0.05<br>(< 0.05 to < 0.05)            | 0.6<br>(0.5 to 0.6)                     | < 0.05<br>(< 0.05 to < 0.05)         | 14.6<br>(10.5 to 19.4)                            | 4.6<br>(0.9 to 8.6)                                 |
| Inguinal, femoral, and abdominal hernia                        | 9.9<br>(8.9 to 11.0)                    | 13.0<br>(11.2 to 14.9)                  | 0.6<br>(0.4 to 0.9)                  | 4.6<br>(-4.8 to 16.1)                             | -7.3<br>(-15.7 to 2.3)                              |
| Inflammatory bowel disease                                     | 0.1<br>(0.1 to 0.1)                     | 0.2<br>(0.2 to 0.3)                     | < 0.05<br>(< 0.05 to < 0.05)         | 16.1<br>(11.6 to 20.3)                            | -0.4<br>(-4.5 to 3.4)                               |
| Vascular intestinal disorders                                  | < 0.05<br>(< 0.05 to < 0.05)            | 0.1<br>(0.1 to 0.1)                     | < 0.05<br>(< 0.05 to < 0.05)         | 17.8<br>(11.2 to 24.3)                            | 5.3<br>(0.1 to 10.5)                                |
| Gallbladder and biliary diseases                               | 2.4<br>(2.2 to 2.7)                     | 15.3<br>(13.2 to 17.8)                  | 0.1<br>(< 0.05 to 0.1)               | 28.5<br>(3.4 to 59.8)                             | 10.6<br>(-9.5 to 35.1)                              |
| Pancreatitis                                                   | 0.1<br>(0.1 to 0.1)                     | 0.6<br>(0.6 to 0.7)                     | < 0.05<br>(< 0.05 to < 0.05)         | 34.0<br>(29.2 to 38.8)                            | 15.2<br>(11.6 to 18.8)                              |
| Other digestive diseases                                       | --                                      | --                                      | 0.1<br>(0.1 to 0.2)                  | 35.2<br>(21.5 to 50.7)                            | 15.7<br>(5.0 to 27.1)                               |
| <b>Neurological disorders</b>                                  | <b>540.9</b><br><b>(519.1 to 565.6)</b> | <b>250.0</b><br><b>(214.6 to 286.2)</b> | <b>14.7</b><br><b>(9.8 to 20.3)</b>  | <b>5.7</b><br><b>(-12.5 to 30.1)</b>              | <b>-1.2</b><br><b>(-18.7 to 22.8)</b>               |
| Alzheimer's disease and other dementias                        | 6.7<br>(5.7 to 8.0)                     | 1.2<br>(1.0 to 1.4)                     | 1.0<br>(0.7 to 1.3)                  | 30.0<br>(23.8 to 36.1)                            | -0.6<br>(-5.2 to 3.5)                               |
| Parkinson's disease                                            | 1.0<br>(0.8 to 1.2)                     | 0.1<br>(0.1 to 0.1)                     | 0.1<br>(0.1 to 0.2)                  | 37.7<br>(19.9 to 57.4)                            | 4.4<br>(-8.3 to 18.6)                               |
| Epilepsy                                                       | 6.0<br>(1.6 to 10.7)                    | 0.6<br>(0.1 to 1.0)                     | 1.8<br>(0.4 to 3.9)                  | -4.8<br>(-80.1 to 345.2)                          | -8.1<br>(-80.3 to 329.1)                            |
| Multiple sclerosis                                             | 0.1<br>(0.1 to 0.1)                     | < 0.05<br>(< 0.05 to < 0.05)            | < 0.05<br>(< 0.05 to 0.1)            | 22.8<br>(17.3 to 28.0)                            | 7.8<br>(2.8 to 12.3)                                |
| Motor neuron disease                                           | < 0.05<br>(< 0.05 to 0.1)               | < 0.05<br>(< 0.05 to < 0.05)            | < 0.05<br>(< 0.05 to < 0.05)         | 13.0<br>(8.7 to 17.6)                             | 2.1<br>(-1.4 to 6.0)                                |
| Migraine                                                       | 204.2<br>(191.6 to 216.2)               | 21.9<br>(20.4 to 23.5)                  | 9.6<br>(6.2 to 13.4)                 | 5.3<br>(1.6 to 9.0)                               | -0.3<br>(-3.6 to 3.1)                               |
| Tension-type headache                                          | 412.1<br>(369.6 to 457.6)               | 226.3<br>(190.9 to 262.4)               | 1.8<br>(1.2 to 2.7)                  | 6.2<br>(0.8 to 11.7)                              | -1.0<br>(-5.7 to 3.4)                               |
| Other neurological disorders                                   | < 0.05<br>(< 0.05 to < 0.05)            | < 0.05<br>(< 0.05 to < 0.05)            | 0.4<br>(0.1 to 0.7)                  | 7.9<br>(-70.2 to 300.7)                           | 10.2<br>(-69.8 to 301.8)                            |
| <b>Mental and substance use disorders</b>                      | <b>220.9</b><br><b>(214.1 to 227.7)</b> | <b>91.8†</b><br><b>(84.9 to 99.2)</b>   | <b>29.7</b><br><b>(21.4 to 38.6)</b> | <b>5.0</b><br><b>(2.6 to 7.3)</b>                 | <b>0.5</b><br><b>(-1.6 to 2.3)</b>                  |
| Schizophrenia                                                  | 2.7<br>(2.4 to 3.0)                     | 0.1<br>(0.1 to 0.2)                     | 1.7<br>(1.3 to 2.1)                  | 13.4<br>(3.3 to 24.4)                             | 0.8<br>(-8.0 to 10.3)                               |
| Alcohol use disorders                                          | 22.9<br>(20.1 to 25.9)                  | 11.8<br>(10.1 to 13.4)                  | 2.3<br>(1.6 to 3.1)                  | 7.5<br>(-1.7 to 17.4)                             | 4.1<br>(-4.1 to 13.0)                               |
| Drug use disorders                                             | 9.8<br>(9.1 to 10.6)                    | 1.2<br>(1.1 to 1.3)                     | 2.1<br>(1.5 to 2.7)                  | 7.1<br>(-2.0 to 16.4)                             | 2.8<br>(-5.6 to 11.5)                               |
| Opioid use disorders                                           | 3.6<br>(3.0 to 4.4)                     | 0.4<br>(0.4 to 0.5)                     | 1.5<br>(1.0 to 2.0)                  | 11.9<br>(0.5 to 24.2)                             | 4.3<br>(-5.5 to 15.3)                               |
| Cocaine use disorders                                          | 1.7<br>(1.5 to 1.9)                     | 0.1<br>(0.1 to 0.1)                     | 0.2<br>(0.1 to 0.3)                  | -2.6<br>(-18.9 to 17.8)                           | -1.7<br>(-18.1 to 17.9)                             |
| Amphetamine use disorders                                      | 0.1<br>(0.1 to 0.2)                     | < 0.05<br>(< 0.05 to < 0.05)            | < 0.05<br>(< 0.05 to < 0.05)         | -3.6<br>(-31.2 to 35.2)                           | 1.7<br>(-26.4 to 39.5)                              |
| Cannabis use disorders                                         | 4.0<br>(3.3 to 4.8)                     | 0.6<br>(0.5 to 0.7)                     | 0.1<br>(0.1 to 0.2)                  | -11.4<br>(-24.1 to 4.2)                           | 0.0<br>(-13.9 to 16.9)                              |
| Other drug use disorders                                       | 0.6<br>(0.6 to 0.7)                     | 0.1<br>(0.1 to 0.1)                     | 0.2<br>(0.1 to 0.3)                  | 1.2<br>(-21.1 to 28.7)                            | -0.2<br>(-22.4 to 27.6)                             |
| Depressive disorders                                           | 55.6<br>(51.8 to 59.6)                  | 64.2<br>(57.5 to 71.3)                  | 9.8<br>(6.7 to 13.1)                 | 6.6<br>(1.0 to 12.2)                              | -0.6<br>(-5.4 to 4.1)                               |
| Major depressive disorder                                      | 40.6<br>(36.5 to 44.9)                  | 61.5<br>(54.7 to 68.8)                  | 8.2<br>(5.6 to 11.2)                 | 5.8<br>(-0.8 to 12.6)                             | -0.8<br>(-6.6 to 4.8)                               |
| Dysthymia                                                      | 15.9<br>(13.9 to 18.1)                  | 2.8<br>(2.4 to 3.2)                     | 1.5<br>(1.0 to 2.2)                  | 11.5<br>(6.8 to 16.6)                             | 0.1<br>(-3.5 to 3.9)                                |
| Bipolar disorder                                               | 12.3<br>(10.6 to 14.2)                  | 0.9<br>(0.8 to 1.0)                     | 2.5<br>(1.5 to 3.7)                  | 1.0<br>(-4.1 to 6.9)                              | 0.0<br>(-4.9 to 5.3)                                |
| Anxiety disorders                                              | 58.9<br>(53.4 to 64.8)                  | 8.3<br>(7.7 to 9.1)                     | 5.7<br>(4.0 to 7.6)                  | 4.2<br>(0.6 to 8.0)                               | -0.0<br>(-3.1 to 3.5)                               |
| Eating disorders                                               | 3.1<br>(2.5 to 3.7)                     | 1.1<br>(0.8 to 1.4)                     | 0.6<br>(0.4 to 0.9)                  | 7.3<br>(-4.9 to 20.3)                             | 13.3<br>(1.1 to 26.8)                               |
| Anorexia nervosa                                               | 0.5<br>(0.4 to 0.7)                     | 0.2<br>(0.1 to 0.2)                     | 0.1<br>(0.1 to 0.2)                  | -2.0<br>(-22.0 to 26.2)                           | 11.8<br>(-8.8 to 41.2)                              |
| Bulimia nervosa                                                | 2.4<br>(1.8 to 3.2)                     | 0.9<br>(0.7 to 1.3)                     | 0.5<br>(0.3 to 0.8)                  | 9.4<br>(-4.7 to 24.6)                             | 13.6<br>(0.1 to 29.0)                               |
| Autistic spectrum disorders                                    | 11.2<br>(10.1 to 12.3)                  | 0.1<br>(< 0.05 to 0.1)                  | 1.7<br>(1.1 to 2.3)                  | 0.8<br>(-3.5 to 5.2)                              | 0.1<br>(-4.3 to 4.4)                                |
| Autism                                                         | 3.6<br>(3.1 to 4.2)                     | < 0.05<br>(< 0.05 to < 0.05)            | 0.9<br>(0.6 to 1.3)                  | 1.0<br>(-6.0 to 9.0)                              | 0.1<br>(-6.6 to 8.5)                                |
| Asperger syndrome and other autistic spectrum disorders        | 7.6<br>(6.3 to 9.1)                     | < 0.05<br>(< 0.05 to 0.1)               | 0.8<br>(0.5 to 1.1)                  | 0.6<br>(-3.7 to 5.3)                              | 0.0<br>(-4.3 to 4.5)                                |

| Cause                                                      | Prevalence in thousands (95% UI)    | Incidence in thousands (95% UI)          | YLDs in thousands (95% UI)     |                                                   |                                                     |
|------------------------------------------------------------|-------------------------------------|------------------------------------------|--------------------------------|---------------------------------------------------|-----------------------------------------------------|
|                                                            | 2016 counts                         | 2016 counts                              | 2016 counts                    | Percentage change in counts between 2006 and 2016 | Percentage change in age-standardised rates between |
| Attention-deficit/hyperactivity disorder                   | 23.2<br>(21.0 to 25.8)              | 0.8<br>(0.7 to 1.0)                      | 0.3<br>(0.2 to 0.5)            | -5.1<br>(-10.1 to -0.4)                           | 0.0<br>(-5.5 to 4.9)                                |
| Conduct disorder                                           | 7.0<br>(5.7 to 8.4)                 | 2.5<br>(1.9 to 3.0)                      | 0.8<br>(0.5 to 1.3)            | -16.2<br>(-22.3 to -10.0)                         | -0.0<br>(-6.8 to 7.3)                               |
| Idiopathic developmental intellectual disability           | 5.9<br>(2.3 to 9.5)                 | --                                       | 0.3<br>(0.1 to 0.5)            | -6.2<br>(-13.8 to 1.5)                            | -6.6<br>(-14.1 to 0.6)                              |
| Other mental and substance use disorders                   | 28.4<br>(25.1 to 32.7)              | 0.8<br>(0.7 to 0.8)                      | 2.1<br>(1.4 to 3.0)            | 10.0<br>(5.3 to 15.3)                             | -0.1<br>(-4.4 to 4.4)                               |
| <b>Diabetes, urogenital, blood, and endocrine diseases</b> | <b>627.7<br/>(616.4 to 640.2)</b>   | <b>168.4†<br/>(158.3 to 178.3)</b>       | <b>24.2<br/>(17.2 to 32.8)</b> | <b>21.6<br/>(15.3 to 29.3)</b>                    | <b>-0.2<br/>(-5.3 to 5.6)</b>                       |
| Diabetes mellitus                                          | 204.8<br>(189.1 to 226.3)           | 14.0<br>(12.7 to 15.3)                   | 18.3<br>(12.8 to 25.1)         | 24.6<br>(16.4 to 35.1)                            | -0.1<br>(-6.6 to 7.6)                               |
| Acute glomerulonephritis                                   | < 0.05<br>(< 0.05 to < 0.05)        | 0.2<br>(0.2 to 0.3)                      | < 0.05<br>(< 0.05 to < 0.05)   | 9.3<br>(4.1 to 14.4)                              | 0.4<br>(-3.1 to 4.3)                                |
| Chronic kidney disease                                     | 64.2<br>(57.7 to 71.0)              | 5.0<br>(4.4 to 5.6)                      | 2.0<br>(1.5 to 2.6)            | 26.7<br>(16.5 to 36.9)                            | 3.1<br>(-4.9 to 10.8)                               |
| Chronic kidney disease due to diabetes mellitus            | 24.6<br>(20.5 to 28.8)              | 1.9<br>(1.6 to 2.4)                      | 0.7<br>(0.5 to 0.9)            | 31.2<br>(16.8 to 46.2)                            | 4.2<br>(-6.6 to 15.3)                               |
| Chronic kidney disease due to hypertension                 | 13.0<br>(11.1 to 15.0)              | 1.4<br>(1.1 to 1.6)                      | 0.3<br>(0.2 to 0.4)            | 35.6<br>(17.4 to 53.4)                            | 3.1<br>(-10.6 to 16.6)                              |
| Chronic kidney disease due to glomerulonephritis           | 13.3<br>(11.3 to 15.4)              | 0.6<br>(0.5 to 0.8)                      | 0.6<br>(0.4 to 0.8)            | 21.1<br>(9.1 to 34.4)                             | 2.6<br>(-7.3 to 12.3)                               |
| Chronic kidney disease due to other causes                 | 13.2<br>(10.8 to 15.9)              | 1.0<br>(0.8 to 1.3)                      | 0.4<br>(0.3 to 0.6)            | 22.9<br>(10.3 to 37.0)                            | 2.2<br>(-7.7 to 13.0)                               |
| Urinary diseases and male infertility                      | 28.2<br>(25.1 to 31.4)              | 97.4†<br>(87.9 to 107.4)                 | 0.7<br>(0.4 to 1.0)            | 22.8<br>(15.6 to 30.8)                            | -1.8<br>(-6.8 to 4.1)                               |
| Interstitial nephritis and urinary tract infections        | 1.7<br>(1.5 to 1.9)                 | 88.9<br>(79.3 to 98.7)                   | 0.1<br>(< 0.05 to 0.1)         | 4.8<br>(-8.1 to 19.3)                             | 0.1<br>(-12.2 to 12.9)                              |
| Urolithiasis                                               | 0.2<br>(0.2 to 0.3)                 | 6.4<br>(5.7 to 7.3)                      | < 0.05<br>(< 0.05 to < 0.05)   | 17.4<br>(11.5 to 23.7)                            | 2.1<br>(-2.1 to 7.1)                                |
| Benign prostatic hyperplasia                               | 16.4<br>(13.7 to 19.1)              | 2.2<br>(1.8 to 2.6)                      | 0.5<br>(0.3 to 0.8)            | 31.8<br>(22.8 to 42.7)                            | -0.5<br>(-6.9 to 7.2)                               |
| Male infertility                                           | 8.4<br>(6.6 to 10.9)                | --                                       | 0.1<br>(< 0.05 to 0.1)         | -6.3<br>(-12.5 to 0.6)                            | -8.4<br>(-14.2 to -2.4)                             |
| Other urinary diseases                                     | --                                  | --                                       | < 0.05<br>(< 0.05 to < 0.05)   | -11.0<br>(-19.9 to -1.4)                          | -16.8<br>(-25.2 to -8.3)                            |
| Gynecological diseases                                     | 156.3<br>(149.0 to 163.1)           | 48.3†<br>(45.3 to 51.2)                  | 1.7<br>(1.1 to 2.4)            | -0.0<br>(-4.9 to 4.8)                             | -3.4<br>(-8.0 to 1.3)                               |
| Uterine fibroids                                           | 13.8<br>(12.1 to 15.8)              | 1.4<br>(1.2 to 1.6)                      | 0.2<br>(0.1 to 0.4)            | 7.5<br>(-7.6 to 22.7)                             | -2.6<br>(-15.5 to 11.4)                             |
| Polycystic ovarian syndrome                                | 0.2<br>(0.1 to 0.2)                 | 1.6<br>(1.1 to 2.2)                      | < 0.05<br>(< 0.05 to < 0.05)   | 4.8<br>(-24.8 to 47.2)                            | -0.0<br>(-28.3 to 38.4)                             |
| Female infertility                                         | 18.6<br>(13.2 to 25.9)              | --                                       | 0.1<br>(< 0.05 to 0.2)         | 9.9<br>(1.0 to 20.0)                              | 5.0<br>(-1.6 to 13.3)                               |
| Endometriosis                                              | 0.1<br>(0.1 to 0.1)                 | 0.5<br>(0.4 to 0.6)                      | < 0.05<br>(< 0.05 to < 0.05)   | -0.8<br>(-26.6 to 34.2)                           | 0.6<br>(-25.8 to 34.6)                              |
| Genital prolapse                                           | 38.7<br>(33.5 to 44.3)              | 2.1<br>(1.8 to 2.5)                      | 0.1<br>(0.1 to 0.2)            | -6.0<br>(-13.6 to 2.2)                            | -22.9<br>(-28.8 to -16.4)                           |
| Premenstrual syndrome                                      | 90.1<br>(85.0 to 95.4)              | 31.2<br>(29.1 to 33.2)                   | 0.8<br>(0.5 to 1.2)            | -2.9<br>(-10.0 to 3.9)                            | -0.8<br>(-8.0 to 6.3)                               |
| Other gynecological diseases                               | 13.7<br>(11.8 to 15.7)              | 11.5<br>(9.6 to 13.7)                    | 0.5<br>(0.3 to 0.6)            | 1.0<br>(-8.1 to 11.7)                             | -3.7<br>(-12.3 to 6.1)                              |
| Hemoglobinopathies and hemolytic anaemias                  | 348.0<br>(336.5 to 359.6)           | --                                       | 0.8<br>(0.5 to 1.2)            | 7.6<br>(-9.3 to 26.8)                             | 0.4<br>(-16.1 to 18.5)                              |
| Thalassemias                                               | < 0.05<br>(< 0.05 to < 0.05)        | --                                       | < 0.05<br>(< 0.05 to < 0.05)   | -10.4<br>(-28.1 to 16.6)                          | 8.5<br>(-13.4 to 41.3)                              |
| Thalassaemias trait                                        | 2.1<br>(1.4 to 2.8)                 | --                                       | < 0.05<br>(< 0.05 to < 0.05)   | 17.4<br>(-15.3 to 50.0)                           | 10.2<br>(-19.0 to 40.7)                             |
| Sickle cell disorders                                      | 0.8<br>(0.7 to 1.1)                 | --                                       | 0.1<br>(0.1 to 0.1)            | 9.9<br>(-6.9 to 30.7)                             | 16.8<br>(-1.9 to 39.8)                              |
| Sickle cell trait                                          | 144.1<br>(128.3 to 161.2)           | --                                       | 0.5<br>(0.3 to 0.8)            | 10.7<br>(-12.0 to 38.8)                           | 0.3<br>(-20.5 to 26.8)                              |
| G6PD deficiency                                            | 68.8<br>(66.5 to 71.5)              | --                                       | < 0.05<br>(< 0.05 to < 0.05)   | -13.3<br>(-41.8 to 34.4)                          | -25.9<br>(-51.2 to 20.6)                            |
| G6PD trait                                                 | 154.0<br>(151.5 to 156.8)           | --                                       | < 0.05<br>(< 0.05 to < 0.05)   | 60.3<br>(27.8 to 101.3)                           | 46.8<br>(19.7 to 79.3)                              |
| Other hemoglobinopathies and hemolytic anaemias            | 10.5<br>(9.0 to 12.2)               | --                                       | 0.2<br>(0.1 to 0.3)            | -1.8<br>(-16.3 to 13.9)                           | -6.6<br>(-20.3 to 6.9)                              |
| Endocrine, metabolic, blood, and immune disorders          | 23.1<br>(21.2 to 25.1)              | 3.5<br>(3.1 to 3.9)                      | 0.7<br>(0.5 to 1.0)            | 11.2<br>(3.9 to 18.9)                             | -3.6<br>(-9.6 to 2.9)                               |
| <b>Musculoskeletal disorders</b>                           | <b>253.5<br/>(243.2 to 263.5)</b>   | <b>130.7<br/>(118.0 to 145.0)</b>        | <b>27.3<br/>(19.7 to 35.8)</b> | <b>14.6<br/>(11.3 to 18.0)</b>                    | <b>-1.0<br/>(-3.4 to 1.7)</b>                       |
| Rheumatoid arthritis                                       | 7.0<br>(6.3 to 8.0)                 | 0.4<br>(0.3 to 0.4)                      | 1.6<br>(1.1 to 2.2)            | 20.8<br>(11.6 to 31.3)                            | 0.0<br>(-7.3 to 8.0)                                |
| Osteoarthritis                                             | 59.8<br>(55.8 to 63.6)              | 3.0<br>(2.8 to 3.2)                      | 3.6<br>(2.6 to 5.0)            | 31.4<br>(26.4 to 36.0)                            | 3.3<br>(-0.5 to 6.7)                                |
| Low back and neck pain                                     | 122.0<br>(113.5 to 131.2)           | 46.9<br>(42.2 to 51.9)                   | 13.8<br>(9.8 to 18.2)          | 14.8<br>(11.0 to 18.6)                            | 0.1<br>(-2.5 to 3.0)                                |
| Low back pain                                              | 73.4<br>(64.8 to 83.4)              | 34.8<br>(30.2 to 39.6)                   | 8.3<br>(5.8 to 10.9)           | 13.8<br>(8.1 to 19.7)                             | 0.3<br>(-3.9 to 5.1)                                |
| Neck pain                                                  | 55.3<br>(47.3 to 64.3)              | 12.1<br>(10.4 to 14.3)                   | 5.5<br>(3.7 to 7.8)            | 16.4<br>(12.5 to 20.1)                            | -0.0<br>(-2.0 to 1.9)                               |
| Gout                                                       | 4.6<br>(4.1 to 5.3)                 | 0.9<br>(0.8 to 1.0)                      | 0.1<br>(0.1 to 0.2)            | 21.4<br>(4.1 to 40.8)                             | -0.1<br>(-13.2 to 14.2)                             |
| Other musculoskeletal disorders                            | 95.1<br>(84.0 to 108.5)             | 79.5<br>(67.7 to 92.8)                   | 8.1<br>(5.5 to 11.2)           | 7.0<br>(-0.8 to 14.8)                             | -4.8<br>(-11.5 to 1.8)                              |
| <b>Other non-communicable diseases</b>                     | <b>988.0<br/>(973.9 to 1,003.9)</b> | <b>2,737.8†<br/>(2,575.6 to 2,921.3)</b> | <b>28.2<br/>(18.9 to 40.6)</b> | <b>9.2<br/>(7.9 to 10.6)</b>                      | <b>-1.0<br/>(-1.9 to 0.0)</b>                       |
| Congenital anomalies                                       | 9.9<br>(8.4 to 11.5)                | --                                       | 1.1<br>(0.8 to 1.5)            | -0.2<br>(-5.9 to 6.0)                             | -0.2<br>(-5.8 to 5.7)                               |
| Neural tube defects                                        | 0.5<br>(0.4 to 0.5)                 | --                                       | 0.1<br>(0.1 to 0.2)            | 5.4<br>(-9.1 to 23.1)                             | 2.8<br>(-10.8 to 19.4)                              |
| Congenital heart anomalies                                 | 2.2<br>(1.9 to 2.5)                 | --                                       | 0.1<br>(< 0.05 to 0.2)         | 2.8<br>(-9.0 to 15.6)                             | 3.1<br>(-8.5 to 15.4)                               |
| Orofacial clefts                                           | 0.8<br>(0.7 to 0.8)                 | --                                       | < 0.05<br>(< 0.05 to < 0.05)   | -2.1<br>(-13.4 to 10.1)                           | -3.8<br>(-14.8 to 8.2)                              |
| Down's syndrome                                            | 0.7<br>(0.6 to 0.8)                 | --                                       | 0.1<br>(< 0.05 to 0.1)         | 2.0<br>(-5.9 to 10.5)                             | 3.7<br>(-4.3 to 12.3)                               |
| Turner syndrome                                            | 0.2<br>(0.2 to 0.3)                 | --                                       | < 0.05<br>(< 0.05 to < 0.05)   | -2.1<br>(-36.5 to 50.5)                           | 2.0<br>(-34.4 to 56.4)                              |
| Klinefelter syndrome                                       | 0.3<br>(0.2 to 0.4)                 | --                                       | < 0.05<br>(< 0.05 to < 0.05)   | -4.6<br>(-30.1 to 30.2)                           | 0.7<br>(-26.2 to 37.4)                              |



| Cause                                         | Prevalence in thousands (95% UI)        | Incidence in thousands (95% UI)       | YLDs in thousands (95% UI)           |                                                   |                                                     |
|-----------------------------------------------|-----------------------------------------|---------------------------------------|--------------------------------------|---------------------------------------------------|-----------------------------------------------------|
|                                               | 2016 counts                             | 2016 counts                           | 2016 counts                          | Percentage change in counts between 2006 and 2016 | Percentage change in age-standardised rates between |
| Other chromosomal abnormalities               | 0.6<br>(0.5 to 0.8)                     | --                                    | 0.1<br>( $< 0.05$ to 0.1)            | -13.8<br>(-26.6 to 2.0)                           | 2.6<br>(-13.2 to 21.6)                              |
| Congenital musculoskeletal and limb anomalies | 1.0<br>(0.9 to 1.1)                     | --                                    | 0.1<br>(0.1 to 0.2)                  | 10.0<br>(-0.2 to 21.4)                            | 5.5<br>(-4.0 to 15.9)                               |
| Urogenital congenital anomalies               | 1.1<br>(0.9 to 1.2)                     | --                                    | $< 0.05$<br>( $< 0.05$ to 0.1)       | -11.9<br>(-24.0 to 2.9)                           | 1.0<br>(-13.1 to 18.5)                              |
| Digestive congenital anomalies                | 1.3<br>(1.1 to 1.4)                     | --                                    | 0.1<br>( $< 0.05$ to 0.1)            | 1.4<br>(-15.1 to 20.2)                            | -0.5<br>(-15.8 to 18.5)                             |
| Other congenital anomalies                    | 4.3<br>(2.7 to 6.4)                     | --                                    | 0.5<br>(0.3 to 0.7)                  | -2.3<br>(-14.0 to 9.6)                            | -4.3<br>(-15.4 to 7.4)                              |
| Skin and subcutaneous diseases                | 447.8<br>(435.9 to 459.8)               | 1,075.2<br>(1,008.6 to 1,147.9)       | 10.3<br>(7.0 to 14.9)                | -1.8<br>(-3.7 to 0.2)                             | 0.5<br>(-1.2 to 2.3)                                |
| Dermatitis                                    | 61.0<br>(57.2 to 65.1)                  | 73.8<br>(68.2 to 79.5)                | 2.3<br>(1.4 to 3.8)                  | -1.3<br>(-4.6 to 2.0)                             | -0.0<br>(-3.2 to 3.0)                               |
| Psoriasis                                     | 14.3<br>(13.6 to 15.0)                  | 1.9<br>(1.8 to 1.9)                   | 1.2<br>(0.9 to 1.6)                  | 12.3<br>(5.4 to 20.5)                             | 3.2<br>(-3.0 to 10.7)                               |
| Cellulitis                                    | 0.5<br>(0.5 to 0.6)                     | 9.6<br>(9.0 to 10.2)                  | $< 0.05$<br>( $< 0.05$ to $< 0.05$ ) | 3.9<br>(-15.4 to 27.4)                            | 1.2<br>(-18.1 to 23.9)                              |
| Pyoderma                                      | 4.1<br>(3.9 to 4.2)                     | 100.5<br>(95.9 to 105.3)              | $< 0.05$<br>( $< 0.05$ to $< 0.05$ ) | 17.9<br>(11.2 to 25.8)                            | 1.6<br>(-4.0 to 8.0)                                |
| Scabies                                       | 22.2<br>(19.6 to 25.4)                  | 68.2<br>(59.6 to 78.2)                | 0.6<br>(0.3 to 0.9)                  | -8.9<br>(-13.2 to -4.2)                           | -4.9<br>(-8.5 to -0.7)                              |
| Fungal skin diseases                          | 146.9<br>(131.6 to 163.3)               | 522.5<br>(460.7 to 594.2)             | 0.8<br>(0.3 to 1.7)                  | 9.3<br>(6.7 to 11.8)                              | -0.0<br>(-0.9 to 0.9)                               |
| Viral skin diseases                           | 35.7<br>(33.9 to 37.5)                  | 53.7<br>(50.7 to 56.6)                | 1.1<br>(0.7 to 1.6)                  | -0.5<br>(-3.7 to 2.8)                             | 0.0<br>(-2.9 to 3.1)                                |
| Acne vulgaris                                 | 102.3<br>(93.2 to 112.1)                | 67.2<br>(56.1 to 81.7)                | 2.6<br>(1.8 to 3.8)                  | -13.9<br>(-18.2 to -9.6)                          | 0.8<br>(-3.8 to 5.7)                                |
| Alopecia areata                               | 2.5<br>(2.4 to 2.6)                     | 4.4<br>(4.2 to 4.6)                   | 0.1<br>(0.1 to 0.1)                  | 4.8<br>(-6.1 to 16.4)                             | -0.4<br>(-10.6 to 10.4)                             |
| Pruritus                                      | 13.2<br>(11.6 to 15.0)                  | 10.4<br>(9.2 to 11.7)                 | 0.1<br>(0.1 to 0.2)                  | 11.7<br>(5.2 to 18.3)                             | 1.4<br>(-3.8 to 6.9)                                |
| Urticaria                                     | 10.8<br>(9.6 to 12.3)                   | 19.1<br>(16.9 to 21.7)                | 0.7<br>(0.4 to 0.9)                  | -2.3<br>(-8.0 to 4.2)                             | -0.0<br>(-5.1 to 5.9)                               |
| Decubitus ulcer                               | 0.6<br>(0.5 to 0.6)                     | 2.1<br>(1.9 to 2.4)                   | 0.1<br>(0.1 to 0.1)                  | 27.8<br>(13.4 to 44.5)                            | 4.4<br>(-7.1 to 17.0)                               |
| Other skin and subcutaneous diseases          | 118.7<br>(115.3 to 122.0)               | 142.0<br>(137.2 to 146.7)             | 0.7<br>(0.3 to 1.2)                  | 18.4<br>(15.4 to 21.3)                            | 4.3<br>(1.8 to 6.5)                                 |
| Sense organ diseases                          | 360.2<br>(352.1 to 368.4)               | 131.0†<br>(123.3 to 139.2)            | 11.7<br>(8.0 to 16.5)                | 17.7<br>(15.7 to 20.0)                            | -2.8<br>(-4.4 to -1.2)                              |
| Glaucoma                                      | 1.6<br>(1.3 to 1.9)                     | --                                    | 0.2<br>(0.1 to 0.2)                  | 34.8<br>(21.4 to 49.4)                            | -0.7<br>(-10.4 to 9.6)                              |
| Cataract                                      | 13.7<br>(11.9 to 15.6)                  | --                                    | 1.0<br>(0.7 to 1.4)                  | 25.7<br>(20.1 to 31.1)                            | -3.4<br>(-7.3 to 0.5)                               |
| Macular degeneration                          | 0.4<br>(0.3 to 0.5)                     | --                                    | $< 0.05$<br>( $< 0.05$ to $< 0.05$ ) | 35.9<br>(16.3 to 61.2)                            | 0.7<br>(-13.2 to 17.9)                              |
| Refraction and accommodation disorders        | 149.7<br>(143.7 to 155.8)               | --                                    | 2.2<br>(1.2 to 3.6)                  | 8.1<br>(4.7 to 11.8)                              | -5.1<br>(-7.8 to -2.1)                              |
| Age-related and other hearing loss            | 260.9<br>(247.4 to 275.5)               | --                                    | 6.6<br>(4.5 to 9.4)                  | 19.1<br>(15.3 to 22.6)                            | -2.8<br>(-5.4 to -0.4)                              |
| Other vision loss                             | 3.5<br>(3.1 to 3.9)                     | --                                    | 0.3<br>(0.2 to 0.5)                  | 19.7<br>(9.8 to 30.3)                             | -0.3<br>(-8.1 to 7.6)                               |
| Other sense organ diseases                    | 43.3<br>(39.8 to 47.0)                  | 131.0<br>(123.3 to 139.2)             | 1.3<br>(0.8 to 2.0)                  | 19.0<br>(14.5 to 23.8)                            | 0.3<br>(-3.4 to 4.0)                                |
| Oral disorders                                | 669.7<br>(643.4 to 696.4)               | 1,531.6†<br>(1,381.1 to 1,685.9)      | 5.1<br>(3.1 to 8.1)                  | 19.0<br>(16.1 to 22.7)                            | -0.2<br>(-1.9 to 1.8)                               |
| Caries of deciduous teeth                     | 73.7<br>(59.8 to 88.8)                  | 268.3<br>(194.5 to 363.7)             | $< 0.05$<br>( $< 0.05$ to 0.1)       | -5.7<br>(-14.9 to 4.9)                            | -1.1<br>(-10.2 to 8.9)                              |
| Caries of permanent teeth                     | 383.5<br>(353.8 to 414.0)               | 1,227.6<br>(1,095.6 to 1,357.5)       | 0.4<br>(0.2 to 0.7)                  | 1.1<br>(-3.0 to 5.3)                              | -3.6<br>(-6.9 to -0.1)                              |
| Periodontal disease                           | 243.4<br>(206.8 to 282.6)               | 28.1<br>(23.4 to 33.6)                | 1.6<br>(0.6 to 3.3)                  | 14.9<br>(11.3 to 18.7)                            | -0.8<br>(-3.6 to 2.6)                               |
| Edentulism and severe tooth loss              | 86.0<br>(74.6 to 97.6)                  | 7.7<br>(6.4 to 9.1)                   | 2.4<br>(1.5 to 3.4)                  | 30.7<br>(26.2 to 35.0)                            | 0.7<br>(-2.5 to 4.0)                                |
| Other oral disorders                          | 26.3<br>(25.1 to 27.4)                  | --                                    | 0.8<br>(0.5 to 1.2)                  | 7.3<br>(4.0 to 11.1)                              | -0.1<br>(-3.1 to 3.3)                               |
| <b>Injuries</b>                               | <b>234.5</b><br><b>(221.1 to 251.2)</b> | <b>87.2†</b><br><b>(82.6 to 92.0)</b> | <b>8.9</b><br><b>(6.0 to 12.6)</b>   | <b>21.5</b><br><b>(19.4 to 23.6)</b>              | <b>8.3</b><br><b>(6.5 to 9.9)</b>                   |
| <b>Transport injuries</b>                     | <b>31.9</b><br><b>(29.7 to 34.3)</b>    | <b>9.9</b><br><b>(8.8 to 11.0)</b>    | <b>1.7</b><br><b>(1.1 to 2.4)</b>    | <b>29.3</b><br><b>(26.5 to 32.1)</b>              | <b>13.8</b><br><b>(11.7 to 15.9)</b>                |
| Road injuries                                 | 30.7<br>(28.5 to 33.1)                  | 9.6<br>(8.5 to 10.8)                  | 1.6<br>(1.1 to 2.3)                  | 30.0<br>(27.2 to 32.8)                            | 14.3<br>(12.2 to 16.4)                              |
| Pedestrian road injuries                      | 4.5<br>(3.9 to 5.2)                     | 1.0<br>(0.9 to 1.2)                   | 0.2<br>(0.1 to 0.3)                  | 15.2<br>(12.8 to 17.8)                            | 0.3<br>(-1.5 to 2.2)                                |
| Cyclist road injuries                         | 7.1<br>(5.9 to 8.4)                     | 2.3<br>(1.9 to 2.7)                   | 0.3<br>(0.2 to 0.5)                  | 31.7<br>(28.6 to 34.9)                            | 18.0<br>(15.5 to 20.4)                              |
| Motorcyclist road injuries                    | 4.9<br>(4.2 to 5.9)                     | 1.0<br>(0.8 to 1.2)                   | 0.2<br>(0.2 to 0.4)                  | 32.7<br>(29.6 to 35.7)                            | 17.0<br>(14.6 to 19.3)                              |
| Motor vehicle road injuries                   | 11.3<br>(9.6 to 13.0)                   | 4.2<br>(3.6 to 4.8)                   | 0.6<br>(0.4 to 0.9)                  | 35.3<br>(32.3 to 38.5)                            | 18.4<br>(16.0 to 20.8)                              |
| Other road injuries                           | 2.9<br>(2.5 to 3.4)                     | 1.2<br>(0.9 to 1.5)                   | 0.1<br>(0.1 to 0.2)                  | 26.1<br>(23.4 to 28.8)                            | 10.1<br>(8.0 to 12.2)                               |
| Other transport injuries                      | 1.3<br>(1.1 to 1.5)                     | 0.2<br>(0.2 to 0.3)                   | 0.1<br>( $< 0.05$ to 0.1)            | 13.9<br>(11.2 to 16.7)                            | 3.6<br>(1.1 to 5.9)                                 |
| <b>Unintentional injuries</b>                 | <b>185.2</b><br><b>(171.2 to 201.2)</b> | <b>70.3</b><br><b>(65.7 to 74.9)</b>  | <b>6.4</b><br><b>(4.3 to 9.1)</b>    | <b>20.2</b><br><b>(18.0 to 22.4)</b>              | <b>6.9</b><br><b>(5.0 to 8.6)</b>                   |
| Falls                                         | 79.3<br>(70.0 to 90.0)                  | 32.1<br>(28.5 to 36.0)                | 3.2<br>(2.3 to 4.5)                  | 25.0<br>(22.9 to 27.2)                            | 7.8<br>(6.0 to 9.6)                                 |
| Drowning                                      | 0.7<br>(0.6 to 0.8)                     | 0.1<br>(0.1 to 0.1)                   | $< 0.05$<br>( $< 0.05$ to 0.1)       | 1.6<br>(-1.1 to 4.0)                              | -10.1<br>(-12.3 to -8.1)                            |
| Fire, heat, and hot substances                | 21.1<br>(17.5 to 26.3)                  | 2.1<br>(1.7 to 2.4)                   | 0.5<br>(0.4 to 0.8)                  | 14.2<br>(8.8 to 18.9)                             | 6.2<br>(1.5 to 10.5)                                |
| Poisonings                                    | 0.6<br>(0.5 to 0.7)                     | 0.6<br>(0.5 to 0.8)                   | 0.1<br>( $< 0.05$ to 0.1)            | 26.1<br>(17.0 to 36.2)                            | 19.3<br>(10.8 to 28.3)                              |
| Exposure to mechanical forces                 | 30.1<br>(25.5 to 36.9)                  | 9.1<br>(7.8 to 10.4)                  | 0.7<br>(0.5 to 1.0)                  | 25.5<br>(22.8 to 28.2)                            | 13.5<br>(11.1 to 15.6)                              |
| Unintentional firearm injuries                | 1.9<br>(1.6 to 2.4)                     | 0.4<br>(0.3 to 0.5)                   | 0.1<br>(0.1 to 0.1)                  | 27.6<br>(24.6 to 30.7)                            | 13.6<br>(11.3 to 15.7)                              |
| Unintentional suffocation                     | 1.4<br>(1.0 to 1.9)                     | 0.2<br>(0.1 to 0.2)                   | $< 0.05$<br>( $< 0.05$ to 0.1)       | 27.3<br>(23.7 to 30.6)                            | 22.3<br>(18.9 to 25.7)                              |
| Other exposure to mechanical forces           | 26.8<br>(22.4 to 33.3)                  | 8.5<br>(7.3 to 9.8)                   | 0.6<br>(0.4 to 0.8)                  | 25.1<br>(22.3 to 27.8)                            | 12.8<br>(10.4 to 15.0)                              |

| Cause                                                                               | Prevalence in thousands (95% UI)     | Incidence in thousands (95% UI)          | YLDs in thousands (95% UI)                    |                                                   |                                                     |
|-------------------------------------------------------------------------------------|--------------------------------------|------------------------------------------|-----------------------------------------------|---------------------------------------------------|-----------------------------------------------------|
|                                                                                     | 2016 counts                          | 2016 counts                              | 2016 counts                                   | Percentage change in counts between 2006 and 2016 | Percentage change in age-standardised rates between |
| Adverse effects of medical treatment                                                | 0.5<br>(0.4 to 0.6)                  | 6.6<br>(6.0 to 7.3)                      | 0.1<br>(< 0.05 to 0.1)                        | 14.6<br>(8.5 to 21.0)                             | 9.5<br>(4.0 to 15.5)                                |
| Animal contact                                                                      | 3.8<br>(3.3 to 4.4)                  | 3.6<br>(3.0 to 4.3)                      | 0.1<br>(0.1 to 0.2)                           | -1.3<br>(-6.6 to 3.8)                             | -7.4<br>(-12.5 to -2.7)                             |
| Venomous animal contact                                                             | 2.1<br>(1.8 to 2.5)                  | 1.9<br>(1.4 to 2.3)                      | 0.1<br>(0.1 to 0.1)                           | -0.1<br>(-6.7 to 6.7)                             | -5.5<br>(-11.9 to 0.7)                              |
| Non-venomous animal contact                                                         | 1.7<br>(1.4 to 2.2)                  | 1.8<br>(1.4 to 2.2)                      | < 0.05<br>(< 0.05 to < 0.05)                  | -5.9<br>(-9.2 to -3.1)                            | -14.4<br>(-17.2 to -12.2)                           |
| Foreign body                                                                        | 9.5<br>(7.7 to 11.2)                 | 6.4<br>(5.5 to 7.6)                      | 0.4<br>(0.2 to 0.6)                           | 7.3<br>(4.5 to 9.8)                               | -0.3<br>(-2.8 to 2.1)                               |
| Pulmonary aspiration and foreign body in airway                                     | 6.2<br>(4.7 to 8.0)                  | 1.6<br>(1.4 to 1.8)                      | 0.3<br>(0.2 to 0.4)                           | 6.0<br>(3.0 to 9.0)                               | -0.1<br>(-3.0 to 2.6)                               |
| Foreign body in eyes                                                                | 0.8<br>(0.5 to 1.2)                  | 4.0<br>(3.1 to 5.2)                      | < 0.05<br>(< 0.05 to 0.1)                     | 10.9<br>(6.9 to 15.6)                             | -3.3<br>(-5.6 to -0.4)                              |
| Foreign body in other body part                                                     | 2.4<br>(1.9 to 3.0)                  | 0.8<br>(0.7 to 0.9)                      | 0.1<br>(< 0.05 to 0.1)                        | 10.1<br>(6.5 to 13.2)                             | 1.0<br>(-2.0 to 3.6)                                |
| Environmental heat and cold exposure                                                | 15.9<br>(13.5 to 18.5)               | 3.5<br>(3.0 to 4.2)                      | 0.6<br>(0.4 to 0.8)                           | 13.8<br>(11.5 to 16.3)                            | 2.7<br>(0.8 to 4.6)                                 |
| Other unintentional injuries                                                        | 23.8<br>(18.8 to 30.0)               | 6.2<br>(5.1 to 7.4)                      | 0.7<br>(0.4 to 1.0)                           | 17.7<br>(15.2 to 20.1)                            | 7.9<br>(6.0 to 9.9)                                 |
| <b>Self-harm and interpersonal violence</b>                                         | <b>45.1</b><br><b>(41.1 to 49.3)</b> | <b>6.9†</b><br><b>(6.0 to 7.8)</b>       | <b>0.9</b><br><b>(0.6 to 1.2)</b>             | <b>16.9</b><br><b>(12.9 to 20.6)</b>              | <b>8.6</b><br><b>(6.1 to 10.8)</b>                  |
| Self-harm                                                                           | 1.8<br>(1.5 to 2.0)                  | 0.7<br>(0.6 to 0.9)                      | 0.1<br>(0.1 to 0.1)                           | 8.5<br>(5.7 to 11.1)                              | -5.6<br>(-7.9 to -3.5)                              |
| Self-harm by firearm                                                                | 0.1<br>(0.1 to 0.1)                  | < 0.05<br>(< 0.05 to < 0.05)             | < 0.05<br>(< 0.05 to < 0.05)                  | -3.9<br>(-7.1 to -0.7)                            | -12.2<br>(-15.1 to -9.7)                            |
| Self-harm by other specified means                                                  | 1.7<br>(1.4 to 2.0)                  | 0.7<br>(0.6 to 0.8)                      | 0.1<br>(< 0.05 to 0.1)                        | 9.0<br>(6.1 to 11.6)                              | -5.4<br>(-7.7 to -3.2)                              |
| Interpersonal violence                                                              | 43.4<br>(39.4 to 47.4)               | 6.1†<br>(5.2 to 7.1)                     | 0.8<br>(0.5 to 1.1)                           | 17.8<br>(13.4 to 21.9)                            | 10.2<br>(7.4 to 12.7)                               |
| Assault by firearm                                                                  | 1.8<br>(1.4 to 2.2)                  | 0.5<br>(0.4 to 0.7)                      | 0.1<br>(0.1 to 0.1)                           | 41.6<br>(37.3 to 46.3)                            | 26.6<br>(23.2 to 30.3)                              |
| Assault by sharp object                                                             | 6.5<br>(5.4 to 7.8)                  | 2.4<br>(1.9 to 2.9)                      | 0.2<br>(0.1 to 0.3)                           | 32.5<br>(28.9 to 35.9)                            | 19.2<br>(16.6 to 21.8)                              |
| Sexual violence                                                                     | 28.5<br>(25.0 to 32.5)               | --                                       | 0.2<br>(0.2 to 0.3)                           | -8.3<br>(-12.6 to -3.9)                           | -6.1<br>(-9.1 to -3.2)                              |
| Assault by other means                                                              | 6.5<br>(5.6 to 7.7)                  | 3.2<br>(2.7 to 3.8)                      | 0.3<br>(0.2 to 0.4)                           | 33.3<br>(30.6 to 36.2)                            | 18.4<br>(16.2 to 20.7)                              |
| <b>Forces of nature, conflict and terrorism, and executions and police conflict</b> | <b>0.8</b><br><b>(0.2 to 1.2)</b>    | <b>0.2†</b><br><b>(&lt; 0.05 to 0.4)</b> | <b>&lt; 0.05</b><br><b>(&lt; 0.05 to 0.1)</b> | <b>44.3</b><br><b>(1.5 to 57.5)</b>               | <b>32.4</b><br><b>(-3.5 to 44.8)</b>                |
| Exposure to forces of nature                                                        | < 0.05<br>(< 0.05 to 0.1)            | --                                       | < 0.05<br>(< 0.05 to < 0.05)                  | 41.3<br>(36.7 to 47.2)                            | 26.6<br>(21.7 to 32.8)                              |
| Conflict and terrorism                                                              | 0.1<br>(0.1 to 0.2)                  | --                                       | < 0.05<br>(< 0.05 to < 0.05)                  | -19.1<br>(-22.2 to -15.8)                         | -27.4<br>(-30.0 to -24.6)                           |
| Executions and police conflict                                                      | 0.6<br>(0.1 to 1.0)                  | 0.2<br>(< 0.05 to 0.4)                   | < 0.05<br>(< 0.05 to < 0.05)                  | 70.0<br>(3.8 to 95.5)                             | 57.3<br>(1.7 to 77.4)                               |
| <b>Impairments</b>                                                                  | --                                   | --                                       | --                                            | --                                                | --                                                  |
| Anaemia                                                                             | 330.7<br>(289.1 to 373.5)            | --                                       | 8.7<br>(5.7 to 12.5)                          | 2.1<br>(-9.8 to 16.2)                             | -3.0<br>(-14.6 to 9.1)                              |
| Developmental intellectual disability                                               | 18.2<br>(14.1 to 22.4)               | --                                       | 2.8<br>(1.8 to 4.5)                           | -5.4<br>(-17.8 to 8.5)                            | -4.8<br>(-17.1 to 9.5)                              |
| Epilepsy                                                                            | 9.8<br>(4.9 to 15.2)                 | --                                       | 3.4<br>(1.6 to 5.8)                           | -6.9<br>(-54.5 to 99.5)                           | -7.7<br>(-54.7 to 95.4)                             |
| Guillain-Barre syndrome                                                             | < 0.05<br>(< 0.05 to < 0.05)         | --                                       | < 0.05<br>(< 0.05 to < 0.05)                  | 28.8<br>(7.7 to 63.1)                             | 17.3<br>(1.6 to 47.9)                               |
| Hearing loss                                                                        | 275.0<br>(262.1 to 289.5)            | --                                       | 7.3<br>(5.0 to 10.3)                          | 15.8<br>(12.4 to 18.8)                            | -3.4<br>(-5.7 to -1.2)                              |
| Heart failure                                                                       | 11.8<br>(10.2 to 13.5)               | --                                       | 1.1<br>(0.8 to 1.5)                           | 32.3<br>(22.3 to 43.0)                            | 2.6<br>(-5.0 to 11.4)                               |
| Infertility                                                                         | 32.2<br>(25.0 to 41.7)               | --                                       | 0.2<br>(0.1 to 0.4)                           | 3.6<br>(-2.4 to 10.3)                             | 0.1<br>(-4.3 to 5.2)                                |
| Pelvic inflammatory disease                                                         | 0.2<br>(0.2 to 0.3)                  | --                                       | < 0.05<br>(< 0.05 to < 0.05)                  | -3.3<br>(-22.2 to 19.9)                           | -8.6<br>(-26.3 to 13.1)                             |
| Vision loss                                                                         | 175.8<br>(168.5 to 182.8)            | --                                       | 5.1<br>(3.6 to 7.4)                           | 8.4<br>(-0.5 to 17.0)                             | -4.7<br>(-11.6 to 2.4)                              |

We did not calculate incidence for the nine impairments, certain NTDs, and causes with only birth prevalence. Blank cells mean that no estimate is available.

† Incidence for aggregate causes represents the sum of the incidence of the causes below the aggregate.

‡ Incidence estimates for stroke represent first-ever stroke only.

^ Incidence of HIV/AIDS represents new infections of HIV only and does not include new infections of Tuberculosis in HIV positive cases.

SR Table 14: Prevalence, incidence, and YLDs for 2016, percentage change of YLD counts and percentage change of age-standardised YLD rates between 2006 and 2016 by cause and impairments, for all ages, Tunisia.

| Cause                                                                                | Prevalence in thousands (95% UI)          | Incidence in thousands (95% UI)            | YLDs in thousands (95% UI)           |                                                   |                                                     |
|--------------------------------------------------------------------------------------|-------------------------------------------|--------------------------------------------|--------------------------------------|---------------------------------------------------|-----------------------------------------------------|
|                                                                                      | 2016 counts                               | 2016 counts                                | 2016 counts                          | Percentage change in counts between 2006 and 2016 | Percentage change in age-standardised rates between |
| <b>All causes</b>                                                                    | <b>10,762.3</b><br>(10,703.8 to 10,811.5) | <b>67,053.9†</b><br>(63,678.3 to 70,906.0) | <b>1,316.2</b><br>(975.1 to 1,702.5) | <b>16.6</b><br>(14.7 to 18.4)                     | <b>-0.6</b><br>(-2.1 to 0.9)                        |
| <b>Communicable, maternal, neonatal, and nutritional disorders</b>                   | <b>6,766.4</b><br>(6,249.6 to 7,306.4)    | <b>35,913.2†</b><br>(32,853.4 to 39,328.2) | <b>84.9</b><br>(61.4 to 118.7)       | <b>0.3</b><br>(-4.4 to 7.3)                       | <b>-7.1</b><br>(-11.3 to -0.8)                      |
| <b>HIV/AIDS and tuberculosis</b>                                                     | <b>4,610.5</b><br>(3,413.3 to 5,666.4)    | <b>3.6†</b><br>(2.6 to 5.0)                | <b>0.8</b><br>(0.5 to 1.3)           | <b>16.2</b><br>(-10.0 to 48.8)                    | <b>0.5</b><br>(-20.2 to 26.5)                       |
| Tuberculosis                                                                         | 3,939.2<br>(2,729.3 to 5,147.5)           | 3.4†<br>(2.3 to 4.7)                       | 0.6<br>(0.3 to 0.9)                  | -7.0<br>(-30.2 to 22.4)                           | -18.8<br>(-37.4 to 5.0)                             |
| Drug-susceptible tuberculosis                                                        | 1.8<br>(1.2 to 2.6)                       | 3.4<br>(2.3 to 4.7)                        | 0.6<br>(0.3 to 0.9)                  | -6.9<br>(-30.6 to 23.5)                           | -18.7<br>(-37.4 to 5.2)                             |
| Multidrug-resistant tuberculosis without extensive drug resistance                   | < 0.05<br>(< 0.05 to < 0.05)              | < 0.05<br>(< 0.05 to 0.1)                  | < 0.05<br>(< 0.05 to < 0.05)         | -21.6<br>(-83.6 to 469.8)                         | -31.8<br>(-85.8 to 396.9)                           |
| Extensively drug-resistant tuberculosis                                              | < 0.05<br>(< 0.05 to < 0.05)              | < 0.05<br>(< 0.05 to < 0.05)               | < 0.05<br>(< 0.05 to < 0.05)         | 78.0<br>(-62.7 to 1,194.0)                        | 55.0<br>(-67.7 to 1,028.4)                          |
| Latent tuberculosis infection                                                        | 3,937.4<br>(2,727.1 to 5,145.8)           | --                                         | --                                   | --                                                | --                                                  |
| HIV/AIDS                                                                             | 2.2<br>(1.3 to 3.7)                       | 0.2^<br>(0.1 to 0.4)                       | 0.3<br>(0.1 to 0.6)                  | 123.8<br>(87.8 to 157.3)                          | 92.3<br>(61.9 to 121.9)                             |
| Drug-susceptible HIV/AIDS - Tuberculosis                                             | < 0.05<br>(< 0.05 to 0.1)                 | 0.1<br>(< 0.05 to 0.2)                     | < 0.05<br>(< 0.05 to < 0.05)         | 35.5<br>(18.2 to 57.4)                            | 19.4<br>(4.0 to 38.6)                               |
| Multidrug-resistant HIV/AIDS - Tuberculosis without extensive drug resistance        | < 0.05<br>(< 0.05 to < 0.05)              | < 0.05<br>(< 0.05 to < 0.05)               | < 0.05<br>(< 0.05 to < 0.05)         | 14.3<br>(-77.1 to 784.8)                          | 0.7<br>(-79.9 to 681.0)                             |
| Extensively drug-resistant HIV/AIDS - Tuberculosis                                   | < 0.05<br>(< 0.05 to < 0.05)              | < 0.05<br>(< 0.05 to < 0.05)               | < 0.05<br>(< 0.05 to < 0.05)         | 159.6<br>(-48.1 to 1,910.0)                       | 128.6<br>(-54.3 to 1,674.3)                         |
| HIV/AIDS resulting in other diseases                                                 | 2.1<br>(1.2 to 3.6)                       | 0.2<br>(0.1 to 0.4)                        | 0.3<br>(0.1 to 0.6)                  | 135.1<br>(93.4 to 177.2)                          | 101.5<br>(66.1 to 138.2)                            |
| <b>Diarrhoea, lower respiratory infections, and other common infectious diseases</b> | <b>626.5</b><br>(594.0 to 662.8)          | <b>34,005.2†</b><br>(30,942.4 to 37,380.3) | <b>30.4</b><br>(21.3 to 41.9)        | <b>8.7</b><br>(5.3 to 12.5)                       | <b>1.0</b><br>(-2.1 to 4.2)                         |
| Diarrhoeal diseases                                                                  | 93.4<br>(87.5 to 100.0)                   | 6,205.5<br>(5,805.5 to 6,633.1)            | 10.5<br>(7.3 to 14.5)                | 13.7<br>(6.7 to 20.8)                             | 7.2<br>(1.2 to 13.8)                                |
| Intestinal infectious diseases                                                       | 0.3<br>(0.2 to 0.3)                       | 4.9†<br>(4.3 to 5.6)                       | < 0.05<br>(< 0.05 to 0.1)            | -15.7<br>(-26.8 to -3.2)                          | -17.8<br>(-28.5 to -6.0)                            |
| Typhoid fever                                                                        | 0.3<br>(0.2 to 0.3)                       | 4.0<br>(3.5 to 4.6)                        | < 0.05<br>(< 0.05 to 0.1)            | -15.9<br>(-27.6 to -2.7)                          | -17.8<br>(-29.1 to -5.0)                            |
| Paratyphoid fever                                                                    | < 0.05<br>(< 0.05 to < 0.05)              | 0.9<br>(0.8 to 1.1)                        | < 0.05<br>(< 0.05 to < 0.05)         | -9.3<br>(-23.4 to 6.8)                            | -13.2<br>(-26.2 to 1.0)                             |
| Other intestinal infectious diseases                                                 | --                                        | --                                         | < 0.05<br>(< 0.05 to < 0.05)         | -31.3<br>(-42.3 to -18.5)                         | -37.5<br>(-47.1 to -26.0)                           |
| Lower respiratory infections                                                         | 18.8<br>(17.2 to 20.5)                    | 796.9<br>(727.2 to 875.7)                  | 1.1<br>(0.7 to 1.6)                  | 12.5<br>(2.1 to 24.3)                             | -2.1<br>(-10.6 to 7.7)                              |
| Upper respiratory infections                                                         | 347.0<br>(308.6 to 390.6)                 | 26,077.0<br>(23,083.2 to 29,480.0)         | 8.6<br>(5.1 to 13.6)                 | 6.2<br>(0.7 to 12.9)                              | -0.5<br>(-5.4 to 5.6)                               |
| Otitis media                                                                         | 142.7<br>(127.9 to 158.0)                 | 695.5<br>(562.1 to 853.5)                  | 4.1<br>(2.6 to 6.1)                  | -0.6<br>(-7.4 to 6.7)                             | -5.1<br>(-11.2 to 1.4)                              |
| Meningitis                                                                           | 22.5<br>(19.4 to 26.1)                    | 2.8<br>(2.4 to 3.3)                        | 2.4<br>(1.7 to 3.2)                  | 8.6<br>(2.6 to 15.1)                              | -1.2<br>(-6.6 to 4.8)                               |
| Pneumococcal meningitis                                                              | 11.5<br>(9.3 to 14.4)                     | 0.9<br>(0.7 to 1.1)                        | 1.1<br>(0.7 to 1.4)                  | 11.0<br>(-1.8 to 25.4)                            | 0.8<br>(-10.8 to 13.8)                              |
| H influenzae type B meningitis                                                       | 3.1<br>(2.6 to 3.8)                       | 0.3<br>(0.2 to 0.4)                        | 0.5<br>(0.3 to 0.7)                  | -13.9<br>(-21.3 to -6.6)                          | -21.4<br>(-28.2 to -14.5)                           |
| Meningococcal infection                                                              | 2.7<br>(2.0 to 3.6)                       | 0.5<br>(0.4 to 0.7)                        | 0.3<br>(0.2 to 0.5)                  | 12.5<br>(7.5 to 18.3)                             | 1.4<br>(-3.1 to 6.0)                                |
| Other meningitis                                                                     | 5.2<br>(3.8 to 6.9)                       | 1.1<br>(0.8 to 1.4)                        | 0.5<br>(0.3 to 0.7)                  | 34.3<br>(23.9 to 47.8)                            | 22.6<br>(12.9 to 34.7)                              |
| Encephalitis                                                                         | 28.7<br>(19.3 to 41.5)                    | 12.9<br>(11.6 to 14.6)                     | 3.2<br>(2.3 to 4.2)                  | 11.4<br>(-0.8 to 25.3)                            | -3.5<br>(-13.2 to 8.0)                              |
| Diphtheria                                                                           | < 0.05<br>(< 0.05 to < 0.05)              | < 0.05<br>(< 0.05 to < 0.05)               | < 0.05<br>(< 0.05 to < 0.05)         | -18.3<br>(-54.6 to 49.2)                          | -27.1<br>(-60.4 to 32.3)                            |
| Whooping cough                                                                       | 0.1<br>(0.1 to 0.2)                       | 1.0<br>(0.7 to 1.4)                        | < 0.05<br>(< 0.05 to < 0.05)         | -51.5<br>(-73.0 to -16.6)                         | -50.6<br>(-72.4 to -14.8)                           |
| Tetanus                                                                              | < 0.05<br>(< 0.05 to < 0.05)              | < 0.05<br>(< 0.05 to < 0.05)               | < 0.05<br>(< 0.05 to < 0.05)         | 10.2<br>(-0.9 to 21.9)                            | 1.0<br>(-9.0 to 12.0)                               |
| Measles                                                                              | 0.1<br>(< 0.05 to 0.1)                    | 2.1<br>(0.7 to 4.9)                        | < 0.05<br>(< 0.05 to < 0.05)         | -36.4<br>(-50.5 to -20.3)                         | -36.7<br>(-50.7 to -20.7)                           |
| Varicella and herpes zoster                                                          | 10.5<br>(9.6 to 11.5)                     | 206.5<br>(200.3 to 213.1)                  | 0.4<br>(0.2 to 0.6)                  | 19.1<br>(5.1 to 34.5)                             | 0.2<br>(-10.4 to 11.6)                              |
| <b>Neglected tropical diseases and malaria</b>                                       | <b>1,174.4</b><br>(1,085.4 to 1,291.6)    | <b>40.6†</b><br>(27.9 to 58.0)             | <b>2.1</b><br>(1.1 to 3.9)           | <b>-21.2</b><br>(-56.0 to 34.9)                   | <b>-29.5</b><br>(-59.8 to 19.0)                     |
| Malaria                                                                              | --                                        | --                                         | --                                   | --                                                | --                                                  |
| Chagas disease                                                                       | --                                        | --                                         | --                                   | --                                                | --                                                  |
| Leishmaniasis                                                                        | 10.7<br>(5.5 to 17.5)                     | 17.2<br>(5.8 to 34.3)                      | 0.6<br>(0.2 to 1.2)                  | -39.9<br>(-81.9 to 56.2)                          | -44.3<br>(-83.2 to 44.3)                            |
| Visceral leishmaniasis                                                               | < 0.05<br>(< 0.05 to < 0.05)              | 0.1<br>(< 0.05 to 0.1)                     | < 0.05<br>(< 0.05 to < 0.05)         | -48.4<br>(-61.4 to -32.6)                         | -58.0<br>(-69.2 to -43.3)                           |
| Cutaneous and mucocutaneous leishmaniasis                                            | 8.6<br>(2.9 to 17.1)                      | 17.1<br>(5.8 to 34.2)                      | 0.6<br>(0.2 to 1.2)                  | -39.8<br>(-82.0 to 56.6)                          | -44.2<br>(-83.3 to 44.8)                            |
| African trypanosomiasis                                                              | --                                        | --                                         | --                                   | --                                                | --                                                  |
| Schistosomiasis                                                                      | 81.1<br>(60.9 to 108.0)                   | 22.5<br>(17.9 to 28.7)                     | 0.6<br>(0.3 to 1.2)                  | 20.5<br>(7.3 to 34.5)                             | 0.1<br>(-10.2 to 10.8)                              |
| Cysticercosis                                                                        | --                                        | --                                         | --                                   | --                                                | --                                                  |
| Cystic echinococcosis                                                                | 4.5<br>(1.0 to 14.5)                      | 0.9<br>(0.2 to 3.0)                        | 0.4<br>(0.1 to 1.4)                  | -32.7<br>(-91.1 to 301.0)                         | -42.0<br>(-92.1 to 228.8)                           |
| Lymphatic filariasis                                                                 | --                                        | --                                         | --                                   | --                                                | --                                                  |
| Onchocerciasis                                                                       | --                                        | --                                         | --                                   | --                                                | --                                                  |
| Trachoma                                                                             | --                                        | --                                         | --                                   | --                                                | --                                                  |
| Dengue                                                                               | --                                        | --                                         | --                                   | --                                                | --                                                  |
| Yellow fever                                                                         | --                                        | --                                         | --                                   | --                                                | --                                                  |
| Rabies                                                                               | < 0.05<br>(< 0.05 to < 0.05)              | < 0.05<br>(< 0.05 to < 0.05)               | < 0.05<br>(< 0.05 to < 0.05)         | -26.4<br>(-71.2 to 74.2)                          | -34.1<br>(-75.1 to 62.0)                            |
| Intestinal nematode infections                                                       | 1,071.2<br>(980.6 to 1,188.3)             | --                                         | 0.2<br>(0.1 to 0.4)                  | 11.9<br>(-54.9 to 175.7)                          | 1.2<br>(-58.0 to 145.6)                             |
| Ascariasis                                                                           | 753.7<br>(656.0 to 874.0)                 | --                                         | 0.1<br>(< 0.05 to 0.4)               | 14.7<br>(-61.8 to 252.7)                          | 3.9<br>(-64.7 to 220.4)                             |



| Cause                                                                   | Prevalence in thousands (95% UI)           | Incidence in thousands (95% UI)             | YLDs in thousands (95% UI)            |                                                                         |                                                                            |
|-------------------------------------------------------------------------|--------------------------------------------|---------------------------------------------|---------------------------------------|-------------------------------------------------------------------------|----------------------------------------------------------------------------|
|                                                                         | 2016 counts<br>(288.8 to 384.7)            | 2016 counts                                 | 2016 counts<br>(0.2 to 0.6)           | Percentage change in counts<br>between 2006 and 2016<br>(-42.1 to -3.5) | Percentage change in age-<br>standardised rates between<br>(-43.1 to -6.1) |
| Trichuriasis                                                            | 334.8<br>(288.8 to 384.7)                  | --                                          | < 0.05<br>(< 0.05 to < 0.05)          | 10.3<br>(-84.6 to 663.4)                                                | -0.8<br>(-85.7 to 564.9)                                                   |
| Hookworm disease                                                        | 8.8<br>(7.6 to 10.1)                       | --                                          | < 0.05<br>(< 0.05 to < 0.05)          | -2.0<br>(-30.5 to 37.0)                                                 | -12.1<br>(-37.5 to 21.3)                                                   |
| Food-borne trematodiasis                                                | --                                         | --                                          | --                                    | --                                                                      | --                                                                         |
| Leprosy                                                                 | 0.1<br>(< 0.05 to 0.2)                     | < 0.05<br>(< 0.05 to < 0.05)                | < 0.05<br>(< 0.05 to < 0.05)          | -21.7<br>(-29.4 to -3.9)                                                | -38.0<br>(-44.6 to -22.1)                                                  |
| Ebola virus disease                                                     | --                                         | --                                          | --                                    | --                                                                      | --                                                                         |
| Zika virus disease                                                      | --                                         | --                                          | --                                    | --                                                                      | --                                                                         |
| Guinea worm disease                                                     | --                                         | --                                          | --                                    | --                                                                      | --                                                                         |
| Other neglected tropical diseases                                       | 22.4<br>(18.3 to 26.5)                     | --                                          | 0.4<br>(0.2 to 0.6)                   | -25.5<br>(-42.1 to -3.5)                                                | -27.2<br>(-43.1 to -6.1)                                                   |
| <b>Maternal disorders</b>                                               | <b>11.8<br/>(8.9 to 15.3)</b>              | <b>150.1†<br/>(125.6 to 180.1)</b>          | <b>0.7<br/>(0.4 to 1.1)</b>           | <b>2.8<br/>(-25.5 to 47.9)</b>                                          | <b>-9.1<br/>(-34.2 to 30.7)</b>                                            |
| Maternal haemorrhage                                                    | 1.9<br>(1.3 to 2.7)                        | 9.8<br>(6.4 to 14.6)                        | 0.1<br>(< 0.05 to 0.1)                | -15.7<br>(-43.5 to 23.4)                                                | -25.4<br>(-49.9 to 9.5)                                                    |
| Maternal sepsis and other pregnancy related infections                  | 2.1<br>(1.3 to 3.1)                        | 18.2<br>(13.3 to 25.2)                      | 0.1<br>(< 0.05 to 0.1)                | -13.0<br>(-60.3 to 85.5)                                                | -22.4<br>(-63.8 to 66.3)                                                   |
| Maternal hypertensive disorders                                         | 7.6<br>(4.8 to 10.7)                       | 34.6<br>(26.9 to 41.7)                      | 0.4<br>(0.2 to 0.6)                   | 20.2<br>(-29.4 to 111.2)                                                | 6.2<br>(-37.6 to 86.3)                                                     |
| Maternal obstructed labour and uterine rupture                          | 0.1<br>(0.1 to 0.2)                        | 8.0<br>(5.5 to 11.4)                        | < 0.05<br>(< 0.05 to 0.1)             | -13.7<br>(-53.7 to 58.5)                                                | -23.3<br>(-58.0 to 39.9)                                                   |
| Maternal abortion, miscarriage, and ectopic pregnancy                   | 0.7<br>(0.4 to 1.0)                        | 79.5<br>(57.1 to 105.4)                     | 0.1<br>(< 0.05 to 0.1)                | -13.9<br>(-59.7 to 87.8)                                                | -25.1<br>(-64.2 to 63.5)                                                   |
| Other maternal disorders                                                | --                                         | --                                          | 0.1<br>(0.1 to 0.2)                   | -2.1<br>(-29.1 to 41.1)                                                 | -13.0<br>(-37.1 to 25.3)                                                   |
| <b>Neonatal disorders</b>                                               | <b>108.7<br/>(85.8 to 167.4)</b>           | --                                          | <b>26.0<br/>(15.5 to 52.5)</b>        | <b>1.4<br/>(-10.2 to 20.1)</b>                                          | <b>-5.2<br/>(-15.9 to 12.1)</b>                                            |
| Neonatal preterm birth complications                                    | 77.3<br>(59.6 to 101.2)                    | --                                          | 10.3<br>(6.3 to 16.8)                 | 2.5<br>(-21.2 to 38.0)                                                  | -4.2<br>(-26.7 to 28.8)                                                    |
| Neonatal encephalopathy due to birth asphyxia and trauma                | 11.6<br>(5.9 to 19.4)                      | --                                          | 1.8<br>(0.4 to 4.2)                   | 34.0<br>(-13.2 to 160.1)                                                | 24.2<br>(-18.9 to 141.6)                                                   |
| Neonatal sepsis and other neonatal infections                           | 26.5<br>(9.6 to 80.2)                      | --                                          | 11.2<br>(3.6 to 37.3)                 | -3.5<br>(-14.3 to 22.2)                                                 | -9.7<br>(-19.5 to 14.4)                                                    |
| Hemolytic disease and other neonatal jaundice                           | 6.4<br>(5.5 to 7.3)                        | --                                          | 1.9<br>(1.4 to 2.6)                   | 6.8<br>(-8.0 to 24.1)                                                   | -1.4<br>(-14.8 to 14.9)                                                    |
| Other neonatal disorders                                                | --                                         | --                                          | 0.7<br>(0.4 to 1.4)                   | -8.9<br>(-23.9 to 12.3)                                                 | -9.8<br>(-24.4 to 11.1)                                                    |
| <b>Nutritional deficiencies</b>                                         | <b>762.8<br/>(700.0 to 820.4)</b>          | <b>46.4†<br/>(36.9 to 56.1)</b>             | <b>15.8<br/>(10.4 to 22.9)</b>        | <b>-15.1<br/>(-23.1 to -6.0)</b>                                        | <b>-19.9<br/>(-27.6 to -11.4)</b>                                          |
| Protein-energy malnutrition                                             | 28.4<br>(21.2 to 37.3)                     | 13.6<br>(10.2 to 17.5)                      | 1.4<br>(0.9 to 2.2)                   | 0.6<br>(-27.9 to 36.1)                                                  | 1.1<br>(-26.7 to 37.0)                                                     |
| Iodine deficiency                                                       | 251.1<br>(220.4 to 286.5)                  | 4.5<br>(4.0 to 5.1)                         | 6.4<br>(4.2 to 9.0)                   | 4.3<br>(-3.0 to 12.3)                                                   | -6.6<br>(-12.7 to 0.3)                                                     |
| Vitamin A deficiency                                                    | 33.7<br>(23.8 to 43.9)                     | 28.3<br>(19.5 to 37.6)                      | 0.6<br>(0.4 to 1.0)                   | 4.4<br>(-12.6 to 24.5)                                                  | -0.8<br>(-16.6 to 17.7)                                                    |
| Iron-deficiency anaemia                                                 | 458.6<br>(384.4 to 540.5)                  | --                                          | 7.4<br>(4.4 to 11.4)                  | -29.8<br>(-41.0 to -16.7)                                               | -32.1<br>(-43.0 to -20.1)                                                  |
| Other nutritional deficiencies                                          | --                                         | --                                          | < 0.05<br>(< 0.05 to 0.1)             | -0.3<br>(-29.6 to 38.2)                                                 | -0.6<br>(-29.4 to 37.4)                                                    |
| <b>Other communicable, maternal, neonatal, and nutritional diseases</b> | <b>2,525.9<br/>(2,370.0 to 2,688.5)</b>    | <b>1,667.3<br/>(1,455.2 to 1,895.4)</b>     | <b>8.6<br/>(5.2 to 13.8)</b>          | <b>11.0<br/>(3.6 to 18.7)</b>                                           | <b>-1.9<br/>(-8.5 to 4.5)</b>                                              |
| Sexually transmitted diseases excluding HIV                             | 1,977.6<br>(1,841.9 to 2,126.8)            | 1,597.7<br>(1,382.9 to 1,830.0)             | 8.0<br>(4.8 to 12.9)                  | 13.1<br>(4.7 to 21.2)                                                   | -0.4<br>(-7.5 to 6.5)                                                      |
| Syphilis                                                                | 49.9<br>(27.9 to 83.4)                     | 39.2<br>(20.3 to 66.3)                      | 0.1<br>(0.1 to 0.2)                   | 28.7<br>(16.2 to 42.3)                                                  | 0.9<br>(-9.0 to 11.7)                                                      |
| Chlamydial infection                                                    | 123.3<br>(97.6 to 152.3)                   | 93.0<br>(75.4 to 113.6)                     | 0.8<br>(0.5 to 1.3)                   | 6.3<br>(-8.0 to 22.4)                                                   | -1.9<br>(-15.2 to 12.4)                                                    |
| Gonococcal infection                                                    | 332.2<br>(277.9 to 393.9)                  | 1,147.5<br>(940.0 to 1,379.5)               | 3.9<br>(2.3 to 6.5)                   | 14.4<br>(3.7 to 26.0)                                                   | 0.7<br>(-8.6 to 11.1)                                                      |
| Trichomoniasis                                                          | 221.3<br>(190.8 to 253.5)                  | 185.0<br>(157.8 to 213.4)                   | 0.3<br>(0.1 to 0.6)                   | 10.9<br>(2.6 to 19.4)                                                   | -1.6<br>(-8.4 to 5.3)                                                      |
| Genital herpes                                                          | 1,338.9<br>(1,138.0 to 1,561.4)            | 74.6<br>(63.4 to 89.3)                      | 0.3<br>(0.1 to 0.8)                   | 19.1<br>(10.9 to 26.8)                                                  | 0.2<br>(-5.1 to 6.4)                                                       |
| Other sexually transmitted diseases                                     | 61.7<br>(49.5 to 72.2)                     | 58.3<br>(45.6 to 72.9)                      | 2.5<br>(1.6 to 4.0)                   | 11.9<br>(2.2 to 21.1)                                                   | -1.5<br>(-9.8 to 6.5)                                                      |
| Hepatitis                                                               | 671.0<br>(559.9 to 807.5)                  | 69.7<br>(52.8 to 89.4)                      | 0.1<br>(< 0.05 to 0.1)                | -31.8<br>(-51.9 to -2.5)                                                | -40.6<br>(-57.5 to -16.1)                                                  |
| Acute hepatitis A                                                       | 1.6<br>(0.5 to 2.9)                        | 20.4<br>(6.0 to 37.4)                       | < 0.05<br>(< 0.05 to < 0.05)          | -46.5<br>(-81.0 to 81.0)                                                | -49.3<br>(-81.8 to 69.4)                                                   |
| Hepatitis B                                                             | 539.6<br>(432.2 to 670.0)                  | 44.2<br>(35.2 to 55.3)                      | 0.1<br>(< 0.05 to 0.1)                | -25.2<br>(-39.9 to -7.1)                                                | -37.6<br>(-49.6 to -23.5)                                                  |
| Hepatitis C                                                             | 129.7<br>(112.2 to 149.1)                  | 2.9<br>(2.5 to 3.4)                         | < 0.05<br>(< 0.05 to < 0.05)          | -8.9<br>(-12.2 to -6.1)                                                 | -16.3<br>(-19.4 to -13.4)                                                  |
| Acute hepatitis E                                                       | 0.2<br>(0.1 to 0.2)                        | 2.2<br>(1.7 to 2.8)                         | < 0.05<br>(< 0.05 to < 0.05)          | -26.4<br>(-40.2 to -13.0)                                               | -35.7<br>(-45.4 to -25.9)                                                  |
| Other infectious diseases                                               | 18.1<br>(14.9 to 21.6)                     | < 0.05<br>(< 0.05 to < 0.05)                | 0.5<br>(0.3 to 0.8)                   | -6.5<br>(-18.0 to 7.8)                                                  | -11.3<br>(-22.5 to 3.1)                                                    |
| <b>Non-communicable diseases</b>                                        | <b>10,332.8<br/>(10,267.0 to 10,391.3)</b> | <b>30,345.0†<br/>(28,878.4 to 31,938.0)</b> | <b>1,159.9<br/>(854.1 to 1,498.0)</b> | <b>17.7<br/>(15.8 to 19.7)</b>                                          | <b>-0.2<br/>(-1.8 to 1.4)</b>                                              |
| <b>Neoplasms</b>                                                        | <b>39.7<br/>(37.6 to 41.8)</b>             | <b>15.5<br/>(14.6 to 16.3)</b>              | <b>5.1<br/>(3.7 to 6.8)</b>           | <b>43.5<br/>(34.8 to 52.2)</b>                                          | <b>11.0<br/>(4.7 to 17.4)</b>                                              |
| Lip and oral cavity cancer                                              | 1.0<br>(0.9 to 1.1)                        | 0.3<br>(0.3 to 0.3)                         | 0.1<br>(0.1 to 0.1)                   | 34.4<br>(18.2 to 53.9)                                                  | 3.0<br>(-9.8 to 18.4)                                                      |
| Nasopharynx cancer                                                      | 0.9<br>(0.8 to 1.1)                        | 0.3<br>(0.2 to 0.3)                         | 0.1<br>(0.1 to 0.1)                   | 17.7<br>(-0.9 to 41.1)                                                  | -5.5<br>(-20.1 to 13.6)                                                    |
| Other pharynx cancer                                                    | 0.2<br>(0.2 to 0.2)                        | 0.1<br>(0.1 to 0.1)                         | < 0.05<br>(< 0.05 to < 0.05)          | 42.1<br>(25.9 to 59.4)                                                  | 7.3<br>(-5.1 to 19.6)                                                      |
| Oesophageal cancer                                                      | 0.1<br>(0.1 to 0.1)                        | 0.1<br>(0.1 to 0.1)                         | < 0.05<br>(< 0.05 to < 0.05)          | 28.9<br>(15.9 to 43.9)                                                  | -2.0<br>(-11.8 to 9.6)                                                     |
| Stomach cancer                                                          | 0.8<br>(0.7 to 0.8)                        | 0.5<br>(0.5 to 0.6)                         | 0.1<br>(0.1 to 0.2)                   | 17.9<br>(4.9 to 33.5)                                                   | -9.3<br>(-19.9 to 3.6)                                                     |
| Colon and rectum cancer                                                 | 5.2<br>(4.5 to 5.7)                        | 1.6<br>(1.4 to 1.7)                         | 0.5<br>(0.4 to 0.7)                   | 52.9<br>(30.0 to 77.3)                                                  | 16.1<br>(-0.8 to 34.3)                                                     |
| Liver cancer                                                            | 0.1<br>(0.1 to 0.1)                        | 0.2<br>(0.2 to 0.2)                         | < 0.05<br>(< 0.05 to 0.1)             | 32.1<br>(15.3 to 50.4)                                                  | 1.2<br>(-11.8 to 15.3)                                                     |
| Liver cancer due to hepatitis B                                         | < 0.05<br>(< 0.05 to 0.1)                  | 0.1<br>(< 0.05 to 0.1)                      | < 0.05<br>(< 0.05 to < 0.05)          | 32.8<br>(14.4 to 53.8)                                                  | 1.1<br>(-12.7 to 17.0)                                                     |

| Cause                                              | Prevalence in thousands (95% UI)        | Incidence in thousands (95% UI)          | YLDs in thousands (95% UI)           |                                                   |                                                     |
|----------------------------------------------------|-----------------------------------------|------------------------------------------|--------------------------------------|---------------------------------------------------|-----------------------------------------------------|
|                                                    | 2016 counts                             | 2016 counts                              | 2016 counts                          | Percentage change in counts between 2006 and 2016 | Percentage change in age-standardised rates between |
| Liver cancer due to hepatitis C                    | 0.1<br>(0.1 to 0.1)                     | 0.1<br>(0.1 to 0.1)                      | < 0.05<br>(< 0.05 to < 0.05)         | 32.4<br>(15.0 to 51.4)                            | 1.4<br>(-11.5 to 15.5)                              |
| Liver cancer due to alcohol use                    | < 0.05<br>(< 0.05 to < 0.05)            | < 0.05<br>(< 0.05 to < 0.05)             | < 0.05<br>(< 0.05 to < 0.05)         | 31.0<br>(9.1 to 55.7)                             | 1.9<br>(-14.3 to 20.5)                              |
| Liver cancer due to other causes                   | < 0.05<br>(< 0.05 to < 0.05)            | < 0.05<br>(< 0.05 to < 0.05)             | < 0.05<br>(< 0.05 to < 0.05)         | 29.9<br>(7.9 to 58.6)                             | 0.8<br>(-16.5 to 22.2)                              |
| Gallbladder and biliary tract cancer               | 0.2<br>(0.1 to 0.2)                     | 0.2<br>(0.2 to 0.3)                      | 0.1<br>(< 0.05 to 0.1)               | 22.4<br>(12.3 to 33.9)                            | -6.7<br>(-14.3 to 1.7)                              |
| Pancreatic cancer                                  | 0.3<br>(0.2 to 0.3)                     | 0.3<br>(0.3 to 0.4)                      | 0.1<br>(0.1 to 0.1)                  | 39.0<br>(27.7 to 49.6)                            | 5.7<br>(-3.0 to 13.5)                               |
| Larynx cancer                                      | 1.4<br>(1.2 to 1.5)                     | 0.4<br>(0.4 to 0.5)                      | 0.2<br>(0.1 to 0.2)                  | 46.7<br>(15.5 to 82.1)                            | 9.8<br>(-13.2 to 37.0)                              |
| Tracheal, bronchus, and lung cancer                | 2.4<br>(2.1 to 2.7)                     | 2.2<br>(1.9 to 2.4)                      | 0.5<br>(0.4 to 0.7)                  | 39.9<br>(12.0 to 76.7)                            | 6.7<br>(-14.3 to 33.9)                              |
| Malignant skin melanoma                            | 0.4<br>(0.3 to 0.4)                     | 0.1<br>(0.1 to 0.1)                      | < 0.05<br>(< 0.05 to < 0.05)         | 66.7<br>(43.8 to 95.0)                            | 28.2<br>(9.9 to 51.6)                               |
| Non-melanoma skin cancer                           | 0.1<br>(0.1 to 0.2)                     | 0.5<br>(0.4 to 0.6)                      | < 0.05<br>(< 0.05 to < 0.05)         | 13.2<br>(-12.6 to 41.9)                           | -13.8<br>(-33.4 to 8.4)                             |
| Non-melanoma skin cancer (squamous-cell carcinoma) | 0.1<br>(0.1 to 0.2)                     | 0.1<br>(0.1 to 0.2)                      | < 0.05<br>(< 0.05 to < 0.05)         | 13.0<br>(-14.9 to 44.6)                           | -14.1<br>(-35.6 to 10.2)                            |
| Non-melanoma skin cancer (basal-cell carcinoma)    | 0.1<br>(< 0.05 to 0.1)                  | 0.3<br>(0.3 to 0.4)                      | < 0.05<br>(< 0.05 to < 0.05)         | 15.5<br>(3.8 to 31.6)                             | -10.3<br>(-18.2 to -0.3)                            |
| Breast cancer                                      | 11.9<br>(9.7 to 14.5)                   | 2.5<br>(2.1 to 3.1)                      | 1.0<br>(0.7 to 1.5)                  | 50.5<br>(21.9 to 83.0)                            | 15.9<br>(-5.2 to 40.3)                              |
| Cervical cancer                                    | 1.1<br>(0.7 to 1.4)                     | 0.3<br>(0.2 to 0.4)                      | 0.1<br>(0.1 to 0.1)                  | 16.5<br>(-4.8 to 46.2)                            | -11.2<br>(-26.8 to 10.2)                            |
| Uterine cancer                                     | 1.5<br>(1.2 to 1.8)                     | 0.3<br>(0.3 to 0.4)                      | 0.1<br>(0.1 to 0.2)                  | 68.9<br>(34.6 to 108.4)                           | 22.8<br>(-1.4 to 50.2)                              |
| Ovarian cancer                                     | 0.8<br>(0.7 to 1.0)                     | 0.3<br>(0.2 to 0.3)                      | 0.1<br>(0.1 to 0.2)                  | 43.6<br>(10.8 to 80.8)                            | 9.9<br>(-17.2 to 41.8)                              |
| Prostate cancer                                    | 4.0<br>(2.2 to 4.9)                     | 1.0<br>(0.6 to 1.2)                      | 0.4<br>(0.2 to 0.6)                  | 56.8<br>(29.2 to 90.9)                            | 20.4<br>(0.6 to 44.8)                               |
| Testicular cancer                                  | 0.2<br>(0.2 to 0.3)                     | < 0.05<br>(< 0.05 to 0.1)                | < 0.05<br>(< 0.05 to < 0.05)         | 40.9<br>(10.3 to 76.2)                            | 24.0<br>(-2.3 to 53.2)                              |
| Kidney cancer                                      | 1.1<br>(1.0 to 1.2)                     | 0.3<br>(0.3 to 0.4)                      | 0.1<br>(0.1 to 0.1)                  | 51.5<br>(30.9 to 77.2)                            | 17.5<br>(1.6 to 36.8)                               |
| Bladder cancer                                     | 4.7<br>(4.2 to 5.3)                     | 1.2<br>(1.1 to 1.4)                      | 0.4<br>(0.3 to 0.6)                  | 54.7<br>(30.0 to 82.1)                            | 17.9<br>(-1.0 to 38.1)                              |
| Brain and nervous system cancer                    | 0.6<br>(0.5 to 0.8)                     | 0.3<br>(0.2 to 0.4)                      | 0.1<br>(0.1 to 0.1)                  | 31.2<br>(15.9 to 55.4)                            | 7.2<br>(-5.0 to 26.5)                               |
| Thyroid cancer                                     | 2.3<br>(1.9 to 2.8)                     | 0.5<br>(0.4 to 0.5)                      | 0.1<br>(0.1 to 0.2)                  | 85.0<br>(49.1 to 130.0)                           | 45.2<br>(19.2 to 78.7)                              |
| Mesothelioma                                       | < 0.05<br>(< 0.05 to < 0.05)            | < 0.05<br>(< 0.05 to < 0.05)             | < 0.05<br>(< 0.05 to < 0.05)         | 34.7<br>(19.7 to 53.9)                            | 3.9<br>(-7.2 to 19.1)                               |
| Hodgkin lymphoma                                   | 0.5<br>(0.2 to 0.7)                     | 0.1<br>(0.1 to 0.2)                      | 0.1<br>(< 0.05 to 0.1)               | 14.8<br>(0.5 to 29.9)                             | 0.4<br>(-12.3 to 14.0)                              |
| Non-Hodgkin's lymphoma                             | 1.9<br>(1.6 to 2.1)                     | 0.6<br>(0.6 to 0.7)                      | 0.2<br>(0.1 to 0.3)                  | 38.2<br>(22.4 to 56.9)                            | 10.2<br>(-2.7 to 25.2)                              |
| Multiple myeloma                                   | 0.4<br>(0.2 to 0.4)                     | 0.2<br>(0.1 to 0.2)                      | 0.1<br>(0.1 to 0.1)                  | 48.8<br>(30.9 to 70.0)                            | 12.9<br>(-0.9 to 30.2)                              |
| Leukaemia                                          | 1.4<br>(1.2 to 1.6)                     | 0.4<br>(0.4 to 0.5)                      | 0.2<br>(0.1 to 0.3)                  | 17.2<br>(5.4 to 29.0)                             | -3.9<br>(-14.2 to 5.6)                              |
| Acute lymphoid leukaemia                           | 0.2<br>(0.2 to 0.3)                     | 0.1<br>(< 0.05 to 0.1)                   | < 0.05<br>(< 0.05 to < 0.05)         | 1.7<br>(-13.7 to 18.4)                            | -5.3<br>(-19.4 to 10.7)                             |
| Chronic lymphoid leukaemia                         | 0.3<br>(0.2 to 0.4)                     | 0.1<br>(0.1 to 0.1)                      | < 0.05<br>(< 0.05 to 0.1)            | 33.2<br>(12.2 to 56.1)                            | 3.9<br>(-12.4 to 21.7)                              |
| Acute myeloid leukaemia                            | 0.2<br>(0.1 to 0.2)                     | 0.1<br>(0.1 to 0.1)                      | < 0.05<br>(< 0.05 to < 0.05)         | 19.3<br>(5.8 to 32.3)                             | 2.0<br>(-8.7 to 11.9)                               |
| Chronic myeloid leukaemia                          | 0.2<br>(0.1 to 0.3)                     | 0.1<br>(< 0.05 to 0.1)                   | < 0.05<br>(< 0.05 to < 0.05)         | 14.0<br>(-1.9 to 33.0)                            | -8.8<br>(-21.6 to 6.1)                              |
| Other leukaemia                                    | 0.6<br>(0.4 to 0.7)                     | 0.1<br>(0.1 to 0.1)                      | 0.1<br>(< 0.05 to 0.1)               | 17.8<br>(-1.0 to 39.4)                            | -7.5<br>(-23.0 to 9.7)                              |
| Other neoplasms                                    | 1.7<br>(1.6 to 1.8)                     | 0.6<br>(0.5 to 0.6)                      | 0.2<br>(0.1 to 0.2)                  | 25.2<br>(12.3 to 39.7)                            | 3.8<br>(-6.6 to 15.6)                               |
| <b>Cardiovascular diseases</b>                     | <b>826.5</b><br><b>(793.1 to 857.7)</b> | <b>97.3†</b><br><b>(91.6 to 103.0)</b>   | <b>46.6</b><br><b>(33.7 to 61.2)</b> | <b>25.6</b><br><b>(21.2 to 30.4)</b>              | <b>-1.6</b><br><b>(-5.0 to 2.0)</b>                 |
| Rheumatic heart disease                            | 0.8<br>(0.7 to 0.9)                     | 0.2<br>(0.2 to 0.2)                      | 0.1<br>(< 0.05 to 0.1)               | 25.6<br>(16.1 to 37.3)                            | 0.8<br>(-7.7 to 10.8)                               |
| Ischaemic heart disease                            | 394.7<br>(370.8 to 418.9)               | 50.6<br>(46.3 to 55.8)                   | 14.8<br>(10.4 to 20.3)               | 32.1<br>(26.8 to 37.2)                            | 2.3<br>(-1.6 to 6.2)                                |
| Cerebrovascular disease                            | 87.6<br>(80.7 to 94.2)                  | 16.1‡<br>(14.5 to 17.6)                  | 13.6<br>(9.6 to 17.6)                | 18.5<br>(8.9 to 30.4)                             | -8.5<br>(-16.0 to 0.8)                              |
| Ischaemic stroke                                   | 76.7<br>(67.6 to 86.9)                  | 12.1‡<br>(10.7 to 13.6)                  | 11.5<br>(8.1 to 15.0)                | 17.6<br>(6.5 to 31.0)                             | -9.3<br>(-17.9 to 1.1)                              |
| Hemorrhagic stroke                                 | 14.3<br>(12.9 to 15.8)                  | 4.0‡<br>(3.5 to 4.4)                     | 2.1<br>(1.5 to 2.7)                  | 23.8<br>(9.5 to 37.6)                             | -3.2<br>(-14.0 to 6.7)                              |
| Hypertensive heart disease                         | 18.8<br>(16.0 to 22.2)                  | --                                       | 1.5<br>(1.0 to 2.1)                  | 35.7<br>(21.3 to 51.3)                            | 3.1<br>(-7.4 to 14.0)                               |
| Cardiomyopathy and myocarditis                     | 7.2<br>(6.4 to 8.0)                     | 4.5†<br>(3.9 to 5.2)                     | 0.7<br>(0.5 to 1.0)                  | 22.1<br>(8.4 to 37.9)                             | 3.3<br>(-7.4 to 15.6)                               |
| Myocarditis                                        | 2.4<br>(2.1 to 2.6)                     | 4.5<br>(3.9 to 5.2)                      | 0.2<br>(0.1 to 0.2)                  | 13.3<br>(1.7 to 26.0)                             | 2.6<br>(-7.0 to 13.9)                               |
| Alcoholic cardiomyopathy                           | 0.8<br>(0.6 to 0.9)                     | --                                       | 0.1<br>(< 0.05 to 0.1)               | 36.2<br>(20.3 to 54.3)                            | 3.3<br>(-9.5 to 18.6)                               |
| Other cardiomyopathy                               | 5.9<br>(5.1 to 6.8)                     | --                                       | 0.5<br>(0.3 to 0.7)                  | 23.6<br>(5.2 to 46.8)                             | 3.6<br>(-11.2 to 21.1)                              |
| Atrial fibrillation and flutter                    | 55.6<br>(48.6 to 63.9)                  | 4.7<br>(4.0 to 5.5)                      | 4.3<br>(2.9 to 6.0)                  | 29.7<br>(21.0 to 39.3)                            | -0.1<br>(-6.3 to 6.6)                               |
| Peripheral vascular disease                        | 196.2<br>(170.8 to 227.4)               | 18.9<br>(16.4 to 22.2)                   | 0.8<br>(0.4 to 1.6)                  | 26.0<br>(15.6 to 38.7)                            | -3.9<br>(-10.7 to 4.3)                              |
| Endocarditis                                       | 1.0<br>(0.9 to 1.2)                     | 2.4<br>(2.1 to 2.6)                      | 0.1<br>(0.1 to 0.1)                  | 30.2<br>(11.2 to 52.2)                            | 3.2<br>(-12.8 to 21.7)                              |
| Other cardiovascular and circulatory diseases      | 205.1<br>(176.4 to 239.3)               | --                                       | 10.6<br>(7.2 to 15.1)                | 23.8<br>(15.2 to 33.5)                            | 1.6<br>(-5.2 to 9.4)                                |
| <b>Chronic respiratory diseases</b>                | <b>937.8</b><br><b>(902.3 to 971.7)</b> | <b>156.5†</b><br><b>(147.6 to 165.6)</b> | <b>39.5</b><br><b>(29.7 to 51.1)</b> | <b>22.6</b><br><b>(17.8 to 28.3)</b>              | <b>4.9</b><br><b>(0.9 to 9.3)</b>                   |
| Chronic obstructive pulmonary disease              | 352.4<br>(336.5 to 369.5)               | 21.6<br>(20.4 to 22.6)                   | 14.0<br>(11.8 to 16.1)               | 30.7<br>(20.6 to 41.8)                            | 2.4<br>(-5.2 to 11.0)                               |
| Pneumoconiosis                                     | 0.8<br>(0.7 to 0.8)                     | < 0.05<br>(< 0.05 to 0.1)                | 0.1<br>(0.1 to 0.2)                  | 30.4<br>(24.5 to 36.3)                            | 1.6<br>(-2.9 to 6.3)                                |
| Silicosis                                          | 0.2<br>(0.1 to 0.2)                     | < 0.05<br>(< 0.05 to < 0.05)             | < 0.05<br>(< 0.05 to < 0.05)         | 27.9<br>(20.7 to 34.5)                            | 2.2<br>(-3.4 to 7.4)                                |



| Cause                                                          | Prevalence in thousands (95% UI)              | Incidence in thousands (95% UI)               | YLDs in thousands (95% UI)              |                                                   |                                                     |
|----------------------------------------------------------------|-----------------------------------------------|-----------------------------------------------|-----------------------------------------|---------------------------------------------------|-----------------------------------------------------|
|                                                                | 2016 counts                                   | 2016 counts                                   | 2016 counts                             | Percentage change in counts between 2006 and 2016 | Percentage change in age-standardised rates between |
| Asbestosis                                                     | 0.2<br>(0.2 to 0.2)                           | < 0.05<br>(< 0.05 to < 0.05)                  | < 0.05<br>(< 0.05 to < 0.05)            | 28.2<br>(22.4 to 34.4)                            | -0.9<br>(-5.0 to 3.7)                               |
| Coal workers pneumoconiosis                                    | --                                            | --                                            | --                                      | --                                                | --                                                  |
| Other pneumoconiosis                                           | 0.4<br>(0.3 to 0.5)                           | < 0.05<br>(< 0.05 to < 0.05)                  | 0.1<br>(< 0.05 to 0.1)                  | 32.7<br>(21.7 to 44.2)                            | 2.9<br>(-5.5 to 11.5)                               |
| Asthma                                                         | 620.4<br>(581.3 to 663.5)                     | 134.3<br>(125.6 to 143.6)                     | 24.1<br>(15.9 to 34.1)                  | 17.6<br>(12.3 to 23.1)                            | 5.6<br>(1.0 to 10.5)                                |
| Interstitial lung disease and pulmonary sarcoidosis            | 4.7<br>(4.2 to 5.2)                           | 0.5<br>(0.5 to 0.6)                           | 0.5<br>(0.3 to 0.7)                     | 32.3<br>(18.6 to 47.6)                            | 3.0<br>(-8.4 to 15.3)                               |
| Other chronic respiratory diseases                             | --                                            | --                                            | 0.8<br>(0.7 to 1.0)                     | 46.2<br>(23.5 to 73.3)                            | 36.0<br>(14.7 to 61.6)                              |
| <b>Cirrhosis and other chronic liver diseases</b>              | <b>58.2</b><br><b>(54.9 to 61.8)</b>          | <b>2.7</b><br><b>(2.6 to 2.9)</b>             | <b>2.5</b><br><b>(1.7 to 3.5)</b>       | <b>26.0</b><br><b>(14.3 to 38.0)</b>              | <b>7.2</b><br><b>(-1.5 to 17.0)</b>                 |
| Cirrhosis and other chronic liver diseases due to hepatitis B  | 13.5<br>(11.4 to 15.8)                        | 0.7<br>(0.6 to 0.8)                           | 0.5<br>(0.3 to 0.7)                     | 35.5<br>(14.1 to 62.6)                            | 7.3<br>(-8.9 to 26.4)                               |
| Cirrhosis and other chronic liver diseases due to hepatitis C  | 22.5<br>(19.7 to 25.6)                        | 1.1<br>(0.9 to 1.2)                           | 0.8<br>(0.6 to 1.2)                     | 37.1<br>(17.2 to 59.0)                            | 8.4<br>(-5.8 to 23.6)                               |
| Cirrhosis and other chronic liver diseases due to alcohol use  | 3.9<br>(3.4 to 4.4)                           | 0.2<br>(0.2 to 0.2)                           | 0.1<br>(0.1 to 0.2)                     | 37.4<br>(8.7 to 73.6)                             | 7.2<br>(-14.5 to 35.4)                              |
| Cirrhosis and other chronic liver diseases due to other causes | 18.4<br>(16.7 to 20.2)                        | 0.8<br>(0.7 to 0.8)                           | 1.0<br>(0.7 to 1.4)                     | 12.9<br>(-4.3 to 32.1)                            | 6.4<br>(-9.2 to 22.8)                               |
| <b>Digestive diseases</b>                                      | <b>473.1</b><br><b>(428.0 to 519.7)</b>       | <b>300.5†</b><br><b>(281.5 to 320.6)</b>      | <b>14.5</b><br><b>(10.0 to 19.9)</b>    | <b>26.8</b><br><b>(15.3 to 39.2)</b>              | <b>5.1</b><br><b>(-3.8 to 14.3)</b>                 |
| Peptic ulcer disease                                           | 160.5<br>(132.8 to 192.6)                     | 11.4<br>(10.1 to 12.9)                        | 3.4<br>(2.0 to 5.2)                     | 38.4<br>(12.8 to 65.2)                            | 12.9<br>(-6.3 to 32.5)                              |
| Gastritis and duodenitis                                       | 171.9<br>(148.1 to 196.8)                     | 128.4<br>(113.2 to 146.7)                     | 3.1<br>(1.9 to 4.6)                     | 36.3<br>(15.0 to 60.9)                            | 11.9<br>(-4.7 to 30.0)                              |
| Appendicitis                                                   | 1.3<br>(1.2 to 1.4)                           | 34.1<br>(31.5 to 37.0)                        | 0.4<br>(0.3 to 0.6)                     | 0.3<br>(-27.7 to 38.3)                            | -2.5<br>(-27.5 to 31.8)                             |
| Paralytic ileus and intestinal obstruction                     | 0.2<br>(0.1 to 0.2)                           | 4.2<br>(3.8 to 4.8)                           | 0.1<br>(< 0.05 to 0.1)                  | 23.1<br>(18.2 to 28.0)                            | 3.3<br>(-0.3 to 7.0)                                |
| Inguinal, femoral, and abdominal hernia                        | 140.7<br>(124.9 to 158.2)                     | 50.9<br>(43.8 to 58.8)                        | 5.7<br>(3.8 to 8.1)                     | 17.4<br>(5.5 to 29.1)                             | -2.2<br>(-11.7 to 7.2)                              |
| Inflammatory bowel disease                                     | 3.1<br>(2.4 to 4.0)                           | 8.0<br>(5.9 to 10.3)                          | 0.5<br>(0.3 to 0.7)                     | 29.4<br>(3.9 to 61.6)                             | 7.5<br>(-13.3 to 33.5)                              |
| Vascular intestinal disorders                                  | 0.1<br>(0.1 to 0.1)                           | 0.7<br>(0.6 to 0.8)                           | < 0.05<br>(< 0.05 to 0.1)               | 25.5<br>(19.1 to 32.3)                            | 1.4<br>(-3.6 to 6.7)                                |
| Gallbladder and biliary diseases                               | 10.4<br>(9.2 to 11.8)                         | 59.6<br>(51.3 to 68.2)                        | 0.3<br>(0.2 to 0.5)                     | 32.5<br>(6.6 to 60.9)                             | 5.4<br>(-13.9 to 27.5)                              |
| Pancreatitis                                                   | 0.4<br>(0.3 to 0.4)                           | 3.2<br>(2.8 to 3.6)                           | < 0.05<br>(< 0.05 to 0.1)               | 30.7<br>(25.6 to 36.1)                            | 5.7<br>(2.6 to 8.8)                                 |
| Other digestive diseases                                       | --                                            | --                                            | 1.1<br>(0.8 to 1.5)                     | 31.7<br>(20.3 to 43.9)                            | 8.8<br>(0.1 to 17.9)                                |
| <b>Neurological disorders</b>                                  | <b>4,680.1</b><br><b>(4,496.8 to 4,891.0)</b> | <b>2,236.9</b><br><b>(1,906.0 to 2,628.6)</b> | <b>135.9</b><br><b>(92.7 to 184.0)</b>  | <b>15.5</b><br><b>(3.7 to 29.3)</b>               | <b>0.9</b><br><b>(-9.3 to 13.1)</b>                 |
| Alzheimer's disease and other dementias                        | 85.2<br>(71.5 to 101.3)                       | 14.1<br>(11.8 to 16.9)                        | 12.2<br>(8.5 to 16.2)                   | 32.8<br>(26.1 to 39.4)                            | -0.3<br>(-4.2 to 3.8)                               |
| Parkinson's disease                                            | 8.4<br>(6.8 to 10.5)                          | 1.0<br>(0.8 to 1.3)                           | 1.0<br>(0.6 to 1.4)                     | 45.2<br>(29.1 to 63.8)                            | 10.3<br>(-1.2 to 22.8)                              |
| Epilepsy                                                       | 33.5<br>(11.9 to 49.9)                        | 4.1<br>(1.4 to 6.1)                           | 11.0<br>(3.4 to 21.5)                   | 6.4<br>(-68.3 to 291.6)                           | -0.7<br>(-70.7 to 262.3)                            |
| Multiple sclerosis                                             | 6.1<br>(5.4 to 6.9)                           | 0.2<br>(0.2 to 0.2)                           | 1.6<br>(1.1 to 2.1)                     | 29.4<br>(8.2 to 53.9)                             | 6.1<br>(-10.7 to 25.8)                              |
| Motor neuron disease                                           | 0.3<br>(0.3 to 0.3)                           | < 0.05<br>(< 0.05 to 0.1)                     | 0.1<br>(< 0.05 to 0.1)                  | 18.9<br>(13.5 to 23.8)                            | 2.3<br>(-1.4 to 6.2)                                |
| Migraine                                                       | 1,898.5<br>(1,796.8 to 2,006.4)               | 199.2<br>(185.2 to 214.3)                     | 90.2<br>(58.6 to 125.0)                 | 13.7<br>(9.8 to 17.8)                             | 0.6<br>(-2.6 to 3.7)                                |
| Tension-type headache                                          | 3,545.9<br>(3,184.2 to 3,944.5)               | 2,018.2<br>(1,688.0 to 2,407.4)               | 17.2<br>(10.7 to 25.8)                  | 16.3<br>(10.0 to 23.1)                            | 1.1<br>(-3.5 to 6.2)                                |
| Other neurological disorders                                   | < 0.05<br>(< 0.05 to 0.1)                     | 0.1<br>(0.1 to 0.1)                           | 2.8<br>(1.2 to 5.1)                     | 27.1<br>(-48.3 to 235.0)                          | 19.3<br>(-50.8 to 195.8)                            |
| <b>Mental and substance use disorders</b>                      | <b>1,906.0</b><br><b>(1,836.2 to 1,979.1)</b> | <b>742.9†</b><br><b>(677.3 to 815.1)</b>      | <b>266.9</b><br><b>(192.7 to 345.1)</b> | <b>12.3</b><br><b>(9.6 to 15.1)</b>               | <b>0.2</b><br><b>(-2.1 to 2.4)</b>                  |
| Schizophrenia                                                  | 23.3<br>(20.3 to 26.4)                        | 1.4<br>(1.3 to 1.7)                           | 14.8<br>(10.8 to 18.9)                  | 21.9<br>(11.1 to 33.3)                            | 0.4<br>(-8.3 to 9.4)                                |
| Alcohol use disorders                                          | 69.7<br>(59.3 to 81.4)                        | 38.1<br>(32.1 to 43.8)                        | 7.0<br>(4.7 to 9.7)                     | 14.3<br>(4.0 to 25.9)                             | 2.2<br>(-6.4 to 11.9)                               |
| Drug use disorders                                             | 101.7<br>(90.7 to 114.7)                      | 11.5<br>(10.3 to 12.9)                        | 33.4<br>(23.0 to 44.4)                  | 20.0<br>(9.0 to 30.5)                             | 5.2<br>(-3.9 to 14.5)                               |
| Opioid use disorders                                           | 75.1<br>(62.5 to 90.5)                        | 7.1<br>(6.0 to 8.4)                           | 31.1<br>(21.1 to 42.2)                  | 20.9<br>(9.1 to 32.8)                             | 5.5<br>(-4.2 to 15.5)                               |
| Cocaine use disorders                                          | 4.7<br>(4.0 to 5.5)                           | 0.4<br>(0.4 to 0.5)                           | 0.6<br>(0.4 to 1.0)                     | 8.3<br>(-18.4 to 43.7)                            | 1.8<br>(-22.8 to 32.4)                              |
| Amphetamine use disorders                                      | 0.9<br>(0.6 to 1.2)                           | 0.1<br>(0.1 to 0.2)                           | 0.1<br>(0.1 to 0.2)                     | 9.5<br>(1.1 to 18.8)                              | 2.8<br>(-4.0 to 10.9)                               |
| Cannabis use disorders                                         | 17.7<br>(14.6 to 21.4)                        | 2.9<br>(2.4 to 3.5)                           | 0.5<br>(0.3 to 0.8)                     | 0.7<br>(-17.7 to 24.1)                            | -0.5<br>(-17.6 to 22.3)                             |
| Other drug use disorders                                       | 4.9<br>(4.4 to 5.6)                           | 0.9<br>(0.8 to 1.0)                           | 1.0<br>(0.7 to 1.4)                     | 14.6<br>(-6.3 to 39.9)                            | 2.9<br>(-15.2 to 24.4)                              |
| Depressive disorders                                           | 467.5<br>(436.9 to 499.9)                     | 558.4<br>(494.4 to 630.6)                     | 82.8<br>(56.8 to 113.5)                 | 14.1<br>(7.7 to 21.0)                             | -1.6<br>(-7.0 to 3.6)                               |
| Major depressive disorder                                      | 346.7<br>(307.0 to 390.7)                     | 535.9<br>(472.0 to 608.0)                     | 70.4<br>(47.9 to 95.4)                  | 13.3<br>(5.6 to 21.0)                             | -1.9<br>(-8.0 to 4.0)                               |
| Dysthymia                                                      | 130.0<br>(113.4 to 149.5)                     | 22.6<br>(19.7 to 25.7)                        | 12.4<br>(8.4 to 18.1)                   | 18.9<br>(13.5 to 24.1)                            | 0.2<br>(-3.5 to 4.0)                                |
| Bipolar disorder                                               | 100.0<br>(86.6 to 115.5)                      | 7.3<br>(6.4 to 8.4)                           | 20.3<br>(12.6 to 30.3)                  | 9.6<br>(3.5 to 16.6)                              | -0.1<br>(-4.8 to 5.4)                               |
| Anxiety disorders                                              | 588.3<br>(520.1 to 661.2)                     | 80.0<br>(70.1 to 90.6)                        | 56.6<br>(38.7 to 77.0)                  | 10.3<br>(6.8 to 14.5)                             | 0.2<br>(-2.7 to 3.2)                                |
| Eating disorders                                               | 19.4<br>(15.6 to 23.9)                        | 8.7<br>(6.4 to 11.6)                          | 3.8<br>(2.4 to 5.6)                     | 9.6<br>(-3.6 to 24.6)                             | 7.7<br>(-4.5 to 22.1)                               |
| Anorexia nervosa                                               | 2.8<br>(2.0 to 3.7)                           | 1.2<br>(0.9 to 1.5)                           | 0.6<br>(0.4 to 0.9)                     | 0.7<br>(-23.8 to 31.6)                            | 5.8<br>(-19.6 to 37.3)                              |
| Bulimia nervosa                                                | 15.5<br>(11.5 to 20.7)                        | 7.5<br>(5.3 to 10.3)                          | 3.2<br>(1.9 to 4.9)                     | 11.4<br>(-3.4 to 30.4)                            | 8.1<br>(-6.1 to 24.7)                               |
| Autistic spectrum disorders                                    | 99.1<br>(89.1 to 110.7)                       | 0.6<br>(0.4 to 0.8)                           | 14.3<br>(9.7 to 20.1)                   | 7.7<br>(2.7 to 12.8)                              | -0.1<br>(-4.6 to 4.5)                               |
| Autism                                                         | 28.5<br>(24.4 to 33.4)                        | 0.1<br>(< 0.05 to 0.1)                        | 7.2<br>(4.7 to 10.6)                    | 8.2<br>(-1.0 to 16.9)                             | -0.1<br>(-8.2 to 7.9)                               |
| Asperger syndrome and other autistic spectrum disorders        | 70.9<br>(59.4 to 85.1)                        | 0.5<br>(0.3 to 0.8)                           | 7.1<br>(4.6 to 10.4)                    | 7.2<br>(2.2 to 12.4)                              | -0.1<br>(-4.4 to 4.7)                               |



| Cause                                                      | Prevalence in thousands (95% UI)              | Incidence in thousands (95% UI)                   | YLDs in thousands (95% UI)              |                                                   |                                                     |
|------------------------------------------------------------|-----------------------------------------------|---------------------------------------------------|-----------------------------------------|---------------------------------------------------|-----------------------------------------------------|
|                                                            | 2016 counts                                   | 2016 counts                                       | 2016 counts                             | Percentage change in counts between 2006 and 2016 | Percentage change in age-standardised rates between |
| Attention-deficit/hyperactivity disorder                   | 158.2<br>(140.6 to 177.3)                     | 5.5<br>(4.8 to 6.4)                               | 1.9<br>(1.1 to 3.0)                     | 1.5<br>(-4.6 to 8.0)                              | -0.1<br>(-6.0 to 6.1)                               |
| Conduct disorder                                           | 73.5<br>(59.7 to 87.0)                        | 24.6<br>(19.6 to 29.7)                            | 9.0<br>(5.5 to 13.7)                    | -13.1<br>(-18.4 to -6.8)                          | 0.1<br>(-6.0 to 6.8)                                |
| Idiopathic developmental intellectual disability           | 167.7<br>(92.5 to 243.6)                      | --                                                | 6.5<br>(2.9 to 11.6)                    | 2.2<br>(-5.2 to 10.7)                             | -5.5<br>(-12.4 to 2.2)                              |
| Other mental and substance use disorders                   | 224.5<br>(198.1 to 258.9)                     | 6.8<br>(6.1 to 7.7)                               | 16.6<br>(11.4 to 23.7)                  | 18.6<br>(12.7 to 24.8)                            | 0.0<br>(-4.7 to 5.0)                                |
| <b>Diabetes, urogenital, blood, and endocrine diseases</b> | <b>4,818.2</b><br><b>(4,743.4 to 4,883.4)</b> | <b>1,371.6†</b><br><b>(1,290.6 to 1,463.0)</b>    | <b>137.3</b><br><b>(97.8 to 186.1)</b>  | <b>23.1</b><br><b>(18.3 to 28.0)</b>              | <b>-1.2</b><br><b>(-4.9 to 2.5)</b>                 |
| Diabetes mellitus                                          | 781.4<br>(701.1 to 872.9)                     | 44.8<br>(39.6 to 50.8)                            | 72.0<br>(48.4 to 103.1)                 | 34.6<br>(26.6 to 43.1)                            | 4.1<br>(-2.1 to 10.7)                               |
| Acute glomerulonephritis                                   | 0.1<br>(0.1 to 0.1)                           | 1.7<br>(1.4 to 1.9)                               | < 0.05<br>(< 0.05 to < 0.05)            | 13.1<br>(7.4 to 19.3)                             | 0.1<br>(-3.9 to 4.7)                                |
| Chronic kidney disease                                     | 658.3<br>(598.0 to 725.0)                     | 46.0<br>(40.4 to 52.0)                            | 21.6<br>(16.1 to 27.5)                  | 13.5<br>(6.5 to 21.2)                             | -10.9<br>(-16.3 to -5.0)                            |
| Chronic kidney disease due to diabetes mellitus            | 267.8<br>(230.2 to 314.1)                     | 19.0<br>(15.7 to 23.1)                            | 8.2<br>(5.9 to 10.6)                    | 12.4<br>(-2.3 to 27.7)                            | -13.5<br>(-24.2 to -2.0)                            |
| Chronic kidney disease due to hypertension                 | 101.6<br>(86.5 to 117.1)                      | 7.5<br>(6.0 to 9.1)                               | 3.1<br>(2.2 to 4.1)                     | 24.0<br>(7.6 to 44.3)                             | -6.1<br>(-18.6 to 8.1)                              |
| Chronic kidney disease due to glomerulonephritis           | 103.4<br>(88.5 to 118.9)                      | 6.3<br>(5.1 to 7.7)                               | 4.0<br>(2.8 to 5.3)                     | 4.0<br>(-11.8 to 21.1)                            | -14.2<br>(-27.4 to -1.1)                            |
| Chronic kidney disease due to other causes                 | 185.5<br>(156.3 to 217.7)                     | 13.2<br>(10.8 to 15.8)                            | 6.4<br>(4.5 to 8.4)                     | 16.7<br>(0.7 to 33.8)                             | -7.7<br>(-20.5 to 6.0)                              |
| Urinary diseases and male infertility                      | 320.6<br>(281.9 to 361.2)                     | 677.8†<br>(612.7 to 749.8)                        | 9.3<br>(5.9 to 13.6)                    | 19.7<br>(6.6 to 34.1)                             | -10.9<br>(-20.2 to -1.0)                            |
| Interstitial nephritis and urinary tract infections        | 10.0<br>(8.7 to 11.2)                         | 519.2<br>(455.2 to 588.1)                         | 0.3<br>(0.2 to 0.5)                     | 11.9<br>(-4.5 to 31.0)                            | 1.6<br>(-12.1 to 17.3)                              |
| Urolithiasis                                               | 5.0<br>(4.4 to 5.7)                           | 131.1<br>(114.8 to 150.7)                         | 0.4<br>(0.2 to 0.5)                     | 22.6<br>(5.4 to 42.5)                             | 0.9<br>(-12.9 to 17.0)                              |
| Benign prostatic hyperplasia                               | 243.8<br>(205.1 to 293.5)                     | 27.5<br>(22.9 to 32.9)                            | 8.0<br>(4.9 to 11.7)                    | 21.6<br>(6.4 to 38.8)                             | -11.8<br>(-22.1 to -0.3)                            |
| Male infertility                                           | 49.6<br>(39.3 to 63.2)                        | --                                                | 0.3<br>(0.1 to 0.6)                     | 1.3<br>(-13.6 to 18.4)                            | -4.8<br>(-18.2 to 10.4)                             |
| Other urinary diseases                                     | --                                            | --                                                | 0.3<br>(0.2 to 0.4)                     | -2.0<br>(-12.7 to 9.9)                            | -15.4<br>(-24.4 to -5.8)                            |
| Gynecological diseases                                     | 1,374.5<br>(1,300.5 to 1,441.3)               | 573.5†<br>(529.0 to 622.4)                        | 17.0<br>(11.5 to 24.5)                  | 11.5<br>(6.7 to 16.3)                             | -2.4<br>(-6.4 to 1.6)                               |
| Uterine fibroids                                           | 138.8<br>(121.8 to 156.9)                     | 14.7<br>(12.7 to 17.1)                            | 1.2<br>(0.6 to 2.2)                     | 10.3<br>(-1.1 to 18.8)                            | -10.2<br>(-18.8 to -3.8)                            |
| Polycystic ovarian syndrome                                | 10.2<br>(7.6 to 13.2)                         | 13.8<br>(9.8 to 18.6)                             | 0.1<br>(< 0.05 to 0.2)                  | 9.5<br>(-5.4 to 27.1)                             | -0.9<br>(-14.0 to 15.0)                             |
| Female infertility                                         | 26.3<br>(14.4 to 46.5)                        | --                                                | 0.2<br>(0.1 to 0.4)                     | 11.4<br>(-20.8 to 77.3)                           | 17.1<br>(-15.3 to 83.0)                             |
| Endometriosis                                              | 2.1<br>(1.8 to 2.5)                           | 6.9<br>(5.7 to 8.6)                               | 0.2<br>(0.1 to 0.3)                     | 5.6<br>(-16.6 to 34.3)                            | 0.6<br>(-20.4 to 26.7)                              |
| Genital prolapse                                           | 352.5<br>(304.8 to 402.5)                     | 21.8<br>(18.7 to 25.4)                            | 1.1<br>(0.5 to 2.0)                     | 6.7<br>(-2.3 to 17.4)                             | -17.8<br>(-24.9 to -9.6)                            |
| Premenstrual syndrome                                      | 815.9<br>(765.8 to 868.8)                     | 290.6<br>(268.4 to 312.8)                         | 6.8<br>(4.2 to 10.4)                    | 7.6<br>(-0.2 to 15.9)                             | -0.8<br>(-7.9 to 7.0)                               |
| Other gynecological diseases                               | 209.6<br>(175.4 to 248.4)                     | 225.8<br>(185.0 to 272.2)                         | 7.5<br>(4.8 to 10.8)                    | 16.5<br>(8.8 to 24.0)                             | 0.1<br>(-6.1 to 6.4)                                |
| Hemoglobinopathies and hemolytic anaemias                  | 2,890.7<br>(2,831.6 to 2,953.5)               | --                                                | 13.0<br>(7.8 to 20.0)                   | 4.8<br>(-11.8 to 24.2)                            | -2.3<br>(-17.7 to 15.0)                             |
| Thalassemias                                               | 0.5<br>(0.5 to 0.6)                           | --                                                | < 0.05<br>(< 0.05 to 0.1)               | 5.9<br>(-26.1 to 53.3)                            | 6.6<br>(-26.1 to 55.2)                              |
| Thalassaemia trait                                         | 715.4<br>(658.8 to 771.6)                     | --                                                | 10.4<br>(6.2 to 16.0)                   | 6.3<br>(-11.5 to 26.8)                            | -1.1<br>(-17.3 to 16.9)                             |
| Sickle cell disorders                                      | 1.5<br>(1.2 to 2.0)                           | --                                                | 0.2<br>(0.1 to 0.3)                     | 15.5<br>(-0.9 to 34.1)                            | 9.8<br>(-6.5 to 27.6)                               |
| Sickle cell trait                                          | 569.2<br>(521.9 to 624.6)                     | --                                                | 1.9<br>(1.1 to 3.1)                     | 4.0<br>(-14.0 to 27.3)                            | -0.5<br>(-18.2 to 20.9)                             |
| G6PD deficiency                                            | 345.0<br>(321.3 to 372.2)                     | --                                                | < 0.05<br>(< 0.05 to 0.1)               | 8.5<br>(-14.3 to 35.7)                            | -0.7<br>(-20.0 to 22.9)                             |
| G6PD trait                                                 | 1,534.6<br>(1,512.3 to 1,563.6)               | --                                                | < 0.05<br>(< 0.05 to < 0.05)            | 14.9<br>(-11.8 to 47.4)                           | 7.6<br>(-16.4 to 35.7)                              |
| Other hemoglobinopathies and hemolytic anaemias            | 26.1<br>(21.3 to 31.9)                        | --                                                | 0.5<br>(0.3 to 0.7)                     | -21.5<br>(-34.9 to -5.3)                          | -28.6<br>(-40.3 to -15.6)                           |
| Endocrine, metabolic, blood, and immune disorders          | 138.7<br>(125.9 to 152.3)                     | 27.9<br>(25.1 to 31.1)                            | 4.5<br>(3.0 to 6.3)                     | 22.5<br>(14.5 to 30.7)                            | 0.5<br>(-5.3 to 6.4)                                |
| <b>Musculoskeletal disorders</b>                           | <b>2,355.5</b><br><b>(2,246.9 to 2,452.3)</b> | <b>1,289.2</b><br><b>(1,166.9 to 1,430.2)</b>     | <b>270.6</b><br><b>(196.6 to 353.4)</b> | <b>23.7</b><br><b>(19.8 to 28.0)</b>              | <b>0.1</b><br><b>(-2.8 to 3.3)</b>                  |
| Rheumatoid arthritis                                       | 50.2<br>(44.9 to 56.1)                        | 2.9<br>(2.5 to 3.2)                               | 11.6<br>(7.9 to 15.6)                   | 27.3<br>(18.6 to 37.1)                            | 0.2<br>(-6.4 to 7.9)                                |
| Osteoarthritis                                             | 469.2<br>(437.3 to 501.0)                     | 23.8<br>(22.0 to 25.7)                            | 28.7<br>(20.3 to 39.6)                  | 36.8<br>(31.6 to 41.9)                            | 3.4<br>(-0.3 to 7.1)                                |
| Low back and neck pain                                     | 1,417.3<br>(1,327.6 to 1,515.0)               | 590.5<br>(525.6 to 662.9)                         | 166.2<br>(117.8 to 217.5)               | 24.2<br>(18.6 to 30.6)                            | 0.8<br>(-3.4 to 5.5)                                |
| Low back pain                                              | 953.7<br>(846.8 to 1,085.3)                   | 470.9<br>(407.5 to 540.6)                         | 107.3<br>(75.5 to 141.3)                | 23.7<br>(15.3 to 33.6)                            | 0.9<br>(-5.3 to 8.2)                                |
| Neck pain                                                  | 594.1<br>(513.2 to 685.3)                     | 119.5<br>(104.1 to 142.7)                         | 58.8<br>(39.5 to 81.9)                  | 25.1<br>(21.6 to 28.6)                            | 0.5<br>(-1.3 to 2.2)                                |
| Gout                                                       | 42.4<br>(37.5 to 47.8)                        | 8.6<br>(7.5 to 9.7)                               | 1.3<br>(0.9 to 1.9)                     | 27.8<br>(11.0 to 49.1)                            | -1.3<br>(-13.8 to 13.6)                             |
| Other musculoskeletal disorders                            | 738.3<br>(632.2 to 855.6)                     | 663.5<br>(556.0 to 788.9)                         | 62.8<br>(42.8 to 88.3)                  | 16.8<br>(8.8 to 25.0)                             | -3.1<br>(-9.2 to 3.1)                               |
| <b>Other non-communicable diseases</b>                     | <b>8,199.4</b><br><b>(8,045.8 to 8,329.8)</b> | <b>24,132.0†</b><br><b>(22,716.7 to 25,637.1)</b> | <b>240.9</b><br><b>(166.9 to 334.4)</b> | <b>12.8</b><br><b>(11.1 to 14.3)</b>              | <b>-2.1</b><br><b>(-3.2 to -1.0)</b>                |
| Congenital anomalies                                       | 135.3<br>(121.0 to 152.8)                     | --                                                | 19.3<br>(13.7 to 25.8)                  | 6.7<br>(1.2 to 12.6)                              | -0.0<br>(-5.3 to 5.3)                               |
| Neural tube defects                                        | 17.9<br>(15.7 to 20.5)                        | --                                                | 5.3<br>(3.7 to 7.2)                     | 11.0<br>(-0.9 to 24.3)                            | 1.6<br>(-8.9 to 13.4)                               |
| Congenital heart anomalies                                 | 24.9<br>(21.6 to 28.2)                        | --                                                | 1.2<br>(0.5 to 2.1)                     | 9.4<br>(-2.1 to 21.4)                             | 3.9<br>(-7.1 to 15.3)                               |
| Orofacial clefts                                           | 4.3<br>(3.8 to 5.0)                           | --                                                | < 0.05<br>(< 0.05 to 0.1)               | -9.7<br>(-20.0 to 0.6)                            | -17.1<br>(-26.6 to -7.8)                            |
| Down's syndrome                                            | 4.1<br>(3.5 to 4.8)                           | --                                                | 0.4<br>(0.2 to 0.5)                     | 7.6<br>(-0.2 to 15.3)                             | 1.5<br>(-5.9 to 8.8)                                |
| Turner syndrome                                            | 3.2<br>(2.8 to 3.7)                           | --                                                | 0.1<br>(< 0.05 to 0.1)                  | -2.8<br>(-33.1 to 42.2)                           | -7.5<br>(-36.3 to 34.8)                             |
| Klinefelter syndrome                                       | 4.3<br>(3.6 to 5.0)                           | --                                                | < 0.05<br>(< 0.05 to 0.1)               | 5.4<br>(-18.9 to 40.4)                            | 0.7<br>(-22.0 to 32.8)                              |

| Cause                                         | Prevalence in thousands (95% UI)              | Incidence in thousands (95% UI)          | YLDs in thousands (95% UI)            |                                                   |                                                     |
|-----------------------------------------------|-----------------------------------------------|------------------------------------------|---------------------------------------|---------------------------------------------------|-----------------------------------------------------|
|                                               | 2016 counts                                   | 2016 counts                              | 2016 counts                           | Percentage change in counts between 2006 and 2016 | Percentage change in age-standardised rates between |
| Other chromosomal abnormalities               | 21.0<br>(17.6 to 25.2)                        | --                                       | 2.0<br>(1.3 to 2.8)                   | -5.2<br>(-16.0 to 7.1)                            | 1.8<br>(-9.9 to 15.4)                               |
| Congenital musculoskeletal and limb anomalies | 19.7<br>(17.9 to 21.5)                        | --                                       | 2.9<br>(2.0 to 4.0)                   | 7.4<br>(-2.4 to 18.3)                             | -1.1<br>(-9.8 to 8.2)                               |
| Urogenital congenital anomalies               | 9.4<br>(8.1 to 10.7)                          | --                                       | 0.3<br>(0.2 to 0.5)                   | -4.6<br>(-13.9 to 5.4)                            | -0.3<br>(-10.3 to 10.5)                             |
| Digestive congenital anomalies                | 13.5<br>(11.9 to 15.2)                        | --                                       | 0.6<br>(0.4 to 0.8)                   | 6.6<br>(-9.1 to 25.1)                             | -2.0<br>(-16.1 to 14.4)                             |
| Other congenital anomalies                    | 39.0<br>(23.5 to 61.6)                        | --                                       | 6.4<br>(4.0 to 9.9)                   | 7.6<br>(-1.4 to 18.2)                             | -1.9<br>(-10.1 to 7.5)                              |
| Skin and subcutaneous diseases                | 3,197.4<br>(3,119.4 to 3,283.4)               | 6,710.3<br>(6,397.5 to 7,057.8)          | 80.9<br>(54.2 to 116.2)               | 4.5<br>(2.0 to 6.7)                               | 1.4<br>(-0.8 to 3.5)                                |
| Dermatitis                                    | 555.1<br>(517.9 to 595.5)                     | 749.8<br>(688.4 to 814.4)                | 20.9<br>(12.3 to 34.0)                | 4.0<br>(-1.1 to 9.0)                              | -1.7<br>(-6.5 to 3.0)                               |
| Psoriasis                                     | 90.1<br>(85.2 to 95.3)                        | 12.6<br>(11.9 to 13.3)                   | 7.8<br>(5.6 to 10.3)                  | 23.1<br>(13.4 to 34.4)                            | 7.0<br>(-1.0 to 16.0)                               |
| Cellulitis                                    | 5.5<br>(5.2 to 6.0)                           | 120.0<br>(112.0 to 128.9)                | 0.3<br>(0.2 to 0.4)                   | 10.2<br>(-11.6 to 38.5)                           | -0.2<br>(-19.5 to 24.5)                             |
| Pyoderma                                      | 26.5<br>(25.6 to 27.5)                        | 615.3<br>(593.2 to 638.4)                | 0.1<br>(0.1 to 0.3)                   | 15.8<br>(7.3 to 25.3)                             | 0.7<br>(-6.4 to 8.1)                                |
| Scabies                                       | 126.9<br>(108.8 to 150.5)                     | 384.4<br>(326.5 to 455.7)                | 3.3<br>(1.8 to 5.3)                   | 1.7<br>(-3.5 to 7.3)                              | -1.8<br>(-6.0 to 2.7)                               |
| Fungal skin diseases                          | 729.4<br>(660.5 to 809.8)                     | 2,621.3<br>(2,348.6 to 2,919.5)          | 4.1<br>(1.6 to 8.4)                   | 14.1<br>(11.7 to 16.9)                            | 0.0<br>(-1.3 to 1.3)                                |
| Viral skin diseases                           | 288.7<br>(274.6 to 304.1)                     | 421.6<br>(398.9 to 445.5)                | 8.8<br>(5.5 to 13.0)                  | 4.3<br>(0.8 to 7.6)                               | 0.1<br>(-3.1 to 3.1)                                |
| Acne vulgaris                                 | 882.4<br>(786.2 to 986.6)                     | 591.3<br>(482.1 to 750.7)                | 22.7<br>(15.1 to 32.6)                | -5.4<br>(-9.7 to -0.8)                            | 4.0<br>(-0.5 to 8.9)                                |
| Alopecia areata                               | 22.5<br>(21.1 to 23.9)                        | 39.7<br>(37.2 to 42.2)                   | 0.7<br>(0.5 to 1.1)                   | 13.1<br>(2.2 to 27.1)                             | 0.1<br>(-9.4 to 11.5)                               |
| Pruritus                                      | 101.1<br>(88.9 to 114.4)                      | 80.6<br>(71.4 to 91.5)                   | 1.1<br>(0.5 to 2.0)                   | 17.3<br>(11.2 to 24.4)                            | 0.9<br>(-3.9 to 6.2)                                |
| Urticaria                                     | 104.2<br>(91.6 to 119.2)                      | 184.9<br>(162.9 to 211.9)                | 6.3<br>(4.0 to 9.1)                   | 6.7<br>(0.9 to 12.9)                              | 0.1<br>(-5.4 to 5.4)                                |
| Decubitus ulcer                               | 4.1<br>(3.7 to 4.5)                           | 14.9<br>(13.3 to 16.7)                   | 0.6<br>(0.4 to 0.9)                   | 28.6<br>(13.9 to 44.3)                            | 1.0<br>(-10.5 to 13.8)                              |
| Other skin and subcutaneous diseases          | 758.9<br>(736.4 to 780.7)                     | 873.9<br>(845.7 to 902.5)                | 4.1<br>(2.0 to 7.6)                   | 21.8<br>(18.8 to 24.8)                            | 2.8<br>(0.5 to 5.0)                                 |
| Sense organ diseases                          | 2,614.6<br>(2,553.3 to 2,680.1)               | 1,066.8†<br>(1,002.1 to 1,133.1)         | 106.3<br>(75.3 to 145.6)              | 17.7<br>(15.3 to 20.1)                            | -5.5<br>(-7.2 to -3.8)                              |
| Glaucoma                                      | 15.3<br>(12.4 to 18.5)                        | --                                       | 1.6<br>(1.0 to 2.3)                   | 28.9<br>(15.7 to 43.9)                            | -2.1<br>(-11.4 to 9.2)                              |
| Cataract                                      | 158.0<br>(137.9 to 178.7)                     | --                                       | 11.9<br>(8.4 to 16.4)                 | 20.8<br>(14.4 to 27.2)                            | -7.5<br>(-12.3 to -2.7)                             |
| Macular degeneration                          | 15.4<br>(12.0 to 19.5)                        | --                                       | 1.1<br>(0.8 to 1.6)                   | 31.5<br>(18.1 to 46.5)                            | 0.5<br>(-9.7 to 11.3)                               |
| Refraction and accommodation disorders        | 1,237.5<br>(1,185.7 to 1,290.1)               | --                                       | 21.1<br>(12.9 to 33.4)                | 8.6<br>(5.3 to 12.1)                              | -10.1<br>(-12.6 to -7.4)                            |
| Age-related and other hearing loss            | 1,704.1<br>(1,605.4 to 1,816.8)               | --                                       | 55.9<br>(39.0 to 78.3)                | 18.8<br>(14.6 to 22.9)                            | -4.8<br>(-7.4 to -2.2)                              |
| Other vision loss                             | 55.4<br>(48.4 to 62.8)                        | --                                       | 4.6<br>(3.1 to 6.4)                   | 21.8<br>(12.2 to 31.9)                            | -2.7<br>(-9.3 to 4.8)                               |
| Other sense organ diseases                    | 324.2<br>(299.2 to 350.0)                     | 1,066.8<br>(1,002.1 to 1,133.1)          | 10.0<br>(6.3 to 14.9)                 | 23.9<br>(18.6 to 29.4)                            | 1.1<br>(-2.9 to 5.3)                                |
| Oral disorders                                | 6,045.0<br>(5,800.6 to 6,257.6)               | 16,354.9†<br>(15,018.1 to 17,698.6)      | 34.4<br>(21.2 to 53.5)                | 24.4<br>(21.6 to 27.1)                            | 0.3<br>(-1.8 to 2.4)                                |
| Caries of deciduous teeth                     | 695.4<br>(524.5 to 865.8)                     | 2,757.5<br>(1,876.9 to 3,696.9)          | 0.2<br>(0.1 to 0.3)                   | 4.6<br>(-6.3 to 16.8)                             | -1.0<br>(-11.2 to 10.4)                             |
| Caries of permanent teeth                     | 4,285.7<br>(3,998.6 to 4,585.4)               | 13,387.2<br>(12,298.8 to 14,459.0)       | 2.5<br>(1.1 to 4.8)                   | 8.0<br>(4.1 to 12.2)                              | -2.2<br>(-5.3 to 1.3)                               |
| Periodontal disease                           | 1,352.9<br>(1,128.9 to 1,604.7)               | 163.8<br>(132.6 to 200.4)                | 8.8<br>(3.5 to 18.3)                  | 27.6<br>(23.7 to 31.7)                            | 0.2<br>(-2.7 to 3.2)                                |
| Edentulism and severe tooth loss              | 608.4<br>(533.5 to 682.8)                     | 46.4<br>(39.4 to 53.6)                   | 16.8<br>(11.1 to 23.9)                | 30.2<br>(25.0 to 35.2)                            | 0.8<br>(-3.0 to 4.6)                                |
| Other oral disorders                          | 211.0<br>(202.0 to 220.3)                     | --                                       | 6.2<br>(3.8 to 9.3)                   | 14.2<br>(10.1 to 18.2)                            | 0.1<br>(-3.1 to 3.2)                                |
| <b>Injuries</b>                               | <b>2,075.7</b><br><b>(1,947.0 to 2,221.9)</b> | <b>795.6†</b><br><b>(753.3 to 846.2)</b> | <b>71.4</b><br><b>(47.9 to 102.0)</b> | <b>21.2</b><br><b>(18.4 to 24.1)</b>              | <b>1.9</b><br><b>(-0.5 to 4.2)</b>                  |
| <b>Transport injuries</b>                     | <b>305.6</b><br><b>(284.1 to 328.3)</b>       | <b>95.3</b><br><b>(85.8 to 105.5)</b>    | <b>15.2</b><br><b>(10.1 to 21.8)</b>  | <b>16.9</b><br><b>(13.9 to 19.6)</b>              | <b>-4.1</b><br><b>(-6.4 to -1.9)</b>                |
| Road injuries                                 | 223.6<br>(209.1 to 239.8)                     | 78.4<br>(69.0 to 88.0)                   | 11.3<br>(7.5 to 16.2)                 | 17.6<br>(14.7 to 20.2)                            | -4.7<br>(-6.9 to -2.7)                              |
| Pedestrian road injuries                      | 47.3<br>(42.4 to 53.2)                        | 12.2<br>(10.2 to 14.5)                   | 2.3<br>(1.6 to 3.4)                   | 11.7<br>(8.8 to 14.2)                             | -10.1<br>(-12.3 to -8.1)                            |
| Cyclist road injuries                         | 35.9<br>(30.1 to 42.5)                        | 12.9<br>(10.2 to 15.9)                   | 1.7<br>(1.1 to 2.5)                   | 20.6<br>(17.4 to 23.6)                            | -0.3<br>(-2.9 to 1.9)                               |
| Motorcyclist road injuries                    | 35.3<br>(30.0 to 42.5)                        | 7.8<br>(6.2 to 9.7)                      | 1.7<br>(1.1 to 2.5)                   | 13.3<br>(10.4 to 16.0)                            | -7.5<br>(-9.8 to -5.4)                              |
| Motor vehicle road injuries                   | 82.2<br>(70.2 to 93.2)                        | 35.3<br>(30.1 to 40.8)                   | 4.5<br>(3.1 to 6.4)                   | 19.4<br>(16.6 to 22.1)                            | -4.0<br>(-6.1 to -1.9)                              |
| Other road injuries                           | 23.0<br>(19.6 to 27.0)                        | 10.1<br>(7.9 to 12.7)                    | 1.1<br>(0.7 to 1.6)                   | 26.3<br>(23.1 to 29.1)                            | 2.9<br>(0.6 to 4.9)                                 |
| Other transport injuries                      | 82.0<br>(69.2 to 96.9)                        | 17.0<br>(14.7 to 19.9)                   | 3.9<br>(2.6 to 5.6)                   | 15.0<br>(11.4 to 18.7)                            | -2.1<br>(-5.0 to 0.7)                               |
| <b>Unintentional injuries</b>                 | <b>1,693.2</b><br><b>(1,563.1 to 1,828.1)</b> | <b>677.1</b><br><b>(636.0 to 724.1)</b>  | <b>52.0</b><br><b>(34.9 to 74.2)</b>  | <b>23.1</b><br><b>(20.1 to 25.9)</b>              | <b>3.8</b><br><b>(1.4 to 5.9)</b>                   |
| Falls                                         | 572.6<br>(490.4 to 658.6)                     | 214.7<br>(184.1 to 251.9)                | 21.1<br>(14.5 to 29.6)                | 24.2<br>(21.4 to 26.8)                            | 4.6<br>(2.2 to 6.8)                                 |
| Drowning                                      | 4.7<br>(4.1 to 5.4)                           | 0.8<br>(0.7 to 0.9)                      | 0.2<br>(0.1 to 0.3)                   | 16.4<br>(12.5 to 20.1)                            | -2.4<br>(-5.5 to 0.6)                               |
| Fire, heat, and hot substances                | 190.4<br>(159.7 to 231.8)                     | 20.0<br>(16.2 to 24.0)                   | 4.6<br>(3.0 to 7.0)                   | 33.3<br>(26.9 to 39.1)                            | 12.9<br>(7.9 to 17.3)                               |
| Poisonings                                    | 7.7<br>(6.5 to 9.1)                           | 10.0<br>(8.0 to 12.2)                    | 0.7<br>(0.4 to 1.0)                   | 19.7<br>(11.2 to 28.9)                            | 6.4<br>(-0.9 to 14.2)                               |
| Exposure to mechanical forces                 | 282.4<br>(241.8 to 344.9)                     | 104.5<br>(89.7 to 120.2)                 | 6.5<br>(4.2 to 9.5)                   | 20.5<br>(17.2 to 23.5)                            | -0.7<br>(-3.4 to 1.8)                               |
| Unintentional firearm injuries                | 12.7<br>(10.4 to 15.5)                        | 3.0<br>(2.1 to 4.0)                      | 0.5<br>(0.3 to 0.7)                   | 24.2<br>(20.6 to 27.7)                            | 1.7<br>(-1.0 to 4.3)                                |
| Unintentional suffocation                     | 9.0<br>(7.1 to 11.2)                          | 1.6<br>(1.1 to 2.2)                      | 0.3<br>(0.2 to 0.5)                   | 13.5<br>(10.1 to 16.9)                            | -1.5<br>(-4.1 to 1.1)                               |
| Other exposure to mechanical forces           | 260.7<br>(220.6 to 321.4)                     | 99.9<br>(85.9 to 115.4)                  | 5.7<br>(3.7 to 8.3)                   | 20.6<br>(17.1 to 23.7)                            | -0.8<br>(-3.6 to 1.7)                               |

| Cause                                                                               | Prevalence in thousands (95% UI)        | Incidence in thousands (95% UI)       | YLDs in thousands (95% UI)        |                                                   |                                                     |
|-------------------------------------------------------------------------------------|-----------------------------------------|---------------------------------------|-----------------------------------|---------------------------------------------------|-----------------------------------------------------|
|                                                                                     | 2016 counts                             | 2016 counts                           | 2016 counts                       | Percentage change in counts between 2006 and 2016 | Percentage change in age-standardised rates between |
| Adverse effects of medical treatment                                                | 3.1<br>(2.4 to 3.8)                     | 39.9<br>(35.1 to 45.1)                | 0.4<br>(0.3 to 0.6)               | 17.9<br>(12.9 to 23.4)                            | 2.9<br>(-0.6 to 6.9)                                |
| Animal contact                                                                      | 72.3<br>(63.6 to 83.2)                  | 79.6<br>(66.1 to 93.9)                | 2.1<br>(1.4 to 3.0)               | 12.0<br>(6.1 to 17.6)                             | -2.4<br>(-6.9 to 2.1)                               |
| Venomous animal contact                                                             | 28.8<br>(23.9 to 34.0)                  | 33.1<br>(25.6 to 42.4)                | 1.4<br>(1.0 to 2.1)               | 13.2<br>(5.5 to 21.5)                             | 0.5<br>(-5.8 to 7.7)                                |
| Non-venomous animal contact                                                         | 43.6<br>(36.4 to 53.1)                  | 46.5<br>(37.5 to 56.4)                | 0.7<br>(0.4 to 1.0)               | 9.3<br>(5.0 to 13.1)                              | -8.3<br>(-11.7 to -5.4)                             |
| Foreign body                                                                        | 104.0<br>(88.6 to 124.2)                | 64.4<br>(56.3 to 75.3)                | 3.2<br>(2.0 to 4.7)               | 15.8<br>(12.2 to 19.4)                            | -0.8<br>(-3.7 to 2.2)                               |
| Pulmonary aspiration and foreign body in airway                                     | 26.8<br>(20.6 to 34.9)                  | 8.2<br>(6.8 to 10.1)                  | 1.0<br>(0.6 to 1.5)               | 14.5<br>(10.8 to 18.3)                            | 0.2<br>(-3.1 to 3.3)                                |
| Foreign body in eyes                                                                | 6.1<br>(3.6 to 8.8)                     | 29.8<br>(23.2 to 39.2)                | 0.3<br>(0.2 to 0.6)               | 22.6<br>(17.3 to 27.7)                            | 5.6<br>(2.8 to 8.4)                                 |
| Foreign body in other body part                                                     | 71.0<br>(59.3 to 89.3)                  | 26.4<br>(22.8 to 30.7)                | 1.8<br>(1.2 to 2.7)               | 15.3<br>(11.0 to 19.6)                            | -2.4<br>(-6.0 to 1.1)                               |
| Environmental heat and cold exposure                                                | 103.9<br>(88.5 to 121.3)                | 25.4<br>(21.1 to 30.2)                | 3.5<br>(2.3 to 5.1)               | 11.0<br>(8.0 to 14.0)                             | -6.2<br>(-8.7 to -3.7)                              |
| Other unintentional injuries                                                        | 352.2<br>(284.2 to 424.8)               | 117.7<br>(99.2 to 138.0)              | 9.8<br>(6.5 to 14.2)              | 28.7<br>(26.0 to 31.1)                            | 8.2<br>(6.1 to 10.3)                                |
| <b>Self-harm and interpersonal violence</b>                                         | <b>255.8</b><br><b>(229.8 to 285.9)</b> | <b>22.9†</b><br><b>(19.6 to 26.3)</b> | <b>3.6</b><br><b>(2.5 to 5.0)</b> | <b>6.7</b><br><b>(3.2 to 10.5)</b>                | <b>-5.1</b><br><b>(-7.3 to -2.7)</b>                |
| Self-harm                                                                           | 11.0<br>(9.4 to 12.6)                   | 4.3<br>(3.6 to 5.0)                   | 0.5<br>(0.3 to 0.7)               | 14.2<br>(10.1 to 18.7)                            | -4.7<br>(-7.9 to -1.4)                              |
| Self-harm by firearm                                                                | 0.6<br>(0.5 to 0.8)                     | 0.1<br>(0.1 to 0.2)                   | < 0.05<br>(< 0.05 to < 0.05)      | 9.5<br>(5.3 to 13.6)                              | -5.2<br>(-8.5 to -2.1)                              |
| Self-harm by other specified means                                                  | 10.3<br>(8.8 to 11.9)                   | 4.2<br>(3.5 to 4.8)                   | 0.5<br>(0.3 to 0.7)               | 14.4<br>(10.3 to 19.0)                            | -4.6<br>(-8.0 to -1.4)                              |
| Interpersonal violence                                                              | 244.9<br>(219.3 to 274.8)               | 18.6†<br>(15.5 to 22.0)               | 3.1<br>(2.2 to 4.4)               | 5.7<br>(2.1 to 9.6)                               | -5.1<br>(-7.6 to -2.6)                              |
| Assault by firearm                                                                  | 1.8<br>(1.6 to 2.1)                     | 0.5<br>(0.4 to 0.7)                   | 0.1<br>(0.1 to 0.1)               | 20.7<br>(16.7 to 24.7)                            | 1.2<br>(-1.7 to 4.1)                                |
| Assault by sharp object                                                             | 13.1<br>(10.7 to 15.6)                  | 4.5<br>(3.3 to 5.8)                   | 0.4<br>(0.2 to 0.5)               | 16.9<br>(13.3 to 20.4)                            | -1.0<br>(-3.5 to 1.5)                               |
| Sexual violence                                                                     | 202.4<br>(176.4 to 232.4)               | --                                    | 1.7<br>(1.1 to 2.4)               | -5.6<br>(-9.8 to -1.3)                            | -10.7<br>(-14.3 to -7.2)                            |
| Assault by other means                                                              | 27.6<br>(23.4 to 32.8)                  | 13.6<br>(11.3 to 16.1)                | 1.1<br>(0.7 to 1.5)               | 23.8<br>(20.7 to 26.6)                            | 3.0<br>(0.7 to 5.1)                                 |
| <b>Forces of nature, conflict and terrorism, and executions and police conflict</b> | <b>23.4</b><br><b>(10.8 to 41.0)</b>    | <b>0.2†</b><br><b>(0.2 to 0.3)</b>    | <b>0.5</b><br><b>(0.1 to 1.6)</b> | <b>157.0</b><br><b>(139.0 to 204.1)</b>           | <b>120.6</b><br><b>(105.3 to 161.4)</b>             |
| Exposure to forces of nature                                                        | 0.6<br>(0.2 to 1.1)                     | --                                    | < 0.05<br>(< 0.05 to < 0.05)      | -3.6<br>(-6.8 to 0.8)                             | -19.7<br>(-22.2 to -16.1)                           |
| Conflict and terrorism                                                              | 22.1<br>(9.8 to 39.3)                   | --                                    | 0.5<br>(0.1 to 1.5)               | 186.2<br>(160.6 to 281.9)                         | 145.2<br>(123.2 to 226.8)                           |
| Executions and police conflict                                                      | 0.8<br>(0.5 to 1.2)                     | 0.2<br>(0.2 to 0.3)                   | < 0.05<br>(< 0.05 to < 0.05)      | 23.3<br>(16.2 to 28.8)                            | 12.3<br>(6.7 to 17.4)                               |
| <b>Impairments</b>                                                                  | --                                      | --                                    | --                                | --                                                | --                                                  |
| Anaemia                                                                             | 1,740.6<br>(1,513.0 to 1,969.4)         | --                                    | 44.3<br>(29.9 to 62.3)            | 4.0<br>(-7.7 to 17.2)                             | -8.9<br>(-18.9 to 1.7)                              |
| Developmental intellectual disability                                               | 315.2<br>(239.9 to 399.7)               | --                                    | 36.3<br>(25.0 to 61.8)            | 2.3<br>(-3.3 to 8.8)                              | -4.8<br>(-10.0 to 0.9)                              |
| Epilepsy                                                                            | 74.0<br>(44.9 to 125.0)                 | --                                    | 27.7<br>(15.3 to 52.2)            | 2.0<br>(-34.7 to 73.0)                            | -5.1<br>(-40.2 to 62.2)                             |
| Guillain-Barre syndrome                                                             | 0.1<br>(0.1 to 0.1)                     | --                                    | < 0.05<br>(< 0.05 to 0.1)         | 15.4<br>(10.7 to 20.9)                            | -0.1<br>(-0.2 to 0.0)                               |
| Hearing loss                                                                        | 1,851.1<br>(1,752.7 to 1,959.5)         | --                                    | 63.8<br>(45.2 to 87.9)            | 16.1<br>(12.4 to 19.8)                            | -5.0<br>(-7.4 to -2.7)                              |
| Heart failure                                                                       | 96.3<br>(84.7 to 109.8)                 | --                                    | 9.9<br>(7.2 to 12.8)              | 33.1<br>(23.5 to 42.9)                            | 3.5<br>(-3.7 to 10.6)                               |
| Infertility                                                                         | 174.4<br>(140.0 to 218.3)               | --                                    | 1.1<br>(0.5 to 2.1)               | 8.0<br>(-5.3 to 24.3)                             | -0.1<br>(-12.4 to 13.8)                             |
| Pelvic inflammatory disease                                                         | 5.8<br>(4.5 to 7.3)                     | --                                    | 0.8<br>(0.5 to 1.1)               | 5.8<br>(-11.9 to 25.4)                            | -8.7<br>(-23.8 to 8.8)                              |
| Vision loss                                                                         | 1,549.7<br>(1,479.8 to 1,627.8)         | --                                    | 53.9<br>(37.7 to 79.2)            | 11.0<br>(4.1 to 16.2)                             | -7.7<br>(-11.0 to -4.5)                             |

We did not calculate incidence for the nine impairments, certain NTDs, and causes with only birth prevalence. Blank cells mean that no estimate is available.

† Incidence for aggregate causes represents the sum of the incidence of the causes below the aggregate.

‡ Incidence estimates for stroke represent first-ever stroke only.

^ Incidence of HIV/AIDS represents new infections of HIV only and does not include new infections of Tuberculosis in HIV positive cases.



SR Table 14: Prevalence, incidence, and YLDs for 2016, percentage change of YLD counts and percentage change of age-standardised YLD rates between 2006 and 2016 by cause and impairments, for all ages, Turkey.

| Cause                                                                                | Prevalence in thousands (95% UI)          | Incidence in thousands (95% UI)               | YLDs in thousands (95% UI)              |                                                   |                                                     |
|--------------------------------------------------------------------------------------|-------------------------------------------|-----------------------------------------------|-----------------------------------------|---------------------------------------------------|-----------------------------------------------------|
|                                                                                      | 2016 counts                               | 2016 counts                                   | 2016 counts                             | Percentage change in counts between 2006 and 2016 | Percentage change in age-standardised rates between |
| <b>All causes</b>                                                                    | <b>75,675.0</b><br>(75,330.4 to 76,002.1) | <b>523,401.9†</b><br>(495,361.6 to 554,043.4) | <b>9,198.3</b><br>(6,822.0 to 11,933.6) | <b>20.4</b><br>(18.1 to 22.7)                     | <b>-1.6</b><br>(-3.4 to 0.2)                        |
| <b>Communicable, maternal, neonatal, and nutritional disorders</b>                   | <b>41,234.3</b><br>(39,754.5 to 42,688.4) | <b>300,429.6†</b><br>(274,082.8 to 331,113.7) | <b>664.5</b><br>(452.2 to 950.7)        | <b>7.7</b><br>(-2.5 to 18.0)                      | <b>-4.1</b><br>(-12.9 to 4.9)                       |
| <b>HIV/AIDS and tuberculosis</b>                                                     | <b>15,577.9</b><br>(13,782.2 to 16,981.0) | <b>20.6†</b><br>(17.7 to 23.7)                | <b>3.6</b><br>(2.3 to 5.4)              | <b>-2.2</b><br>(-24.1 to 24.5)                    | <b>-17.9</b><br>(-35.6 to 4.5)                      |
| Tuberculosis                                                                         | 14,352.0<br>(12,743.2 to 16,058.9)        | 19.9†<br>(17.0 to 23.0)                       | 2.8<br>(1.8 to 4.1)                     | -17.8<br>(-37.8 to 6.7)                           | -30.6<br>(-46.7 to -10.9)                           |
| Drug-susceptible tuberculosis                                                        | 8.7<br>(7.4 to 10.3)                      | 19.3<br>(16.4 to 22.4)                        | 2.7<br>(1.7 to 4.0)                     | -17.7<br>(-38.3 to 8.3)                           | -30.4<br>(-47.1 to -9.5)                            |
| Multidrug-resistant tuberculosis without extensive drug resistance                   | 0.2<br>(0.1 to 0.5)                       | 0.6<br>(0.3 to 1.1)                           | 0.1<br>(< 0.05 to 0.2)                  | -22.6<br>(-81.9 to 386.4)                         | -34.8<br>(-84.7 to 309.6)                           |
| Extensively drug-resistant tuberculosis                                              | < 0.05<br>(< 0.05 to < 0.05)              | < 0.05<br>(< 0.05 to < 0.05)                  | < 0.05<br>(< 0.05 to < 0.05)            | 75.7<br>(-58.8 to 1,004.9)                        | 48.0<br>(-65.4 to 830.5)                            |
| Latent tuberculosis infection                                                        | 14,343.0<br>(12,733.7 to 16,050.6)        | --                                            | --                                      | --                                                | --                                                  |
| HIV/AIDS                                                                             | 7.8<br>(3.9 to 13.1)                      | 0.7^<br>(0.4 to 1.3)                          | 0.9<br>(0.4 to 1.6)                     | 153.8<br>(69.1 to 264.6)                          | 110.2<br>(37.8 to 205.7)                            |
| Drug-susceptible HIV/AIDS - Tuberculosis                                             | 0.1<br>(< 0.05 to 0.1)                    | 0.1<br>(0.1 to 0.2)                           | < 0.05<br>(< 0.05 to < 0.05)            | -7.5<br>(-15.7 to 6.1)                            | -21.2<br>(-28.2 to -9.8)                            |
| Multidrug-resistant HIV/AIDS - Tuberculosis without extensive drug resistance        | < 0.05<br>(< 0.05 to < 0.05)              | < 0.05<br>(< 0.05 to < 0.05)                  | < 0.05<br>(< 0.05 to < 0.05)            | -11.1<br>(-79.4 to 546.5)                         | -24.3<br>(-82.4 to 448.9)                           |
| Extensively drug-resistant HIV/AIDS - Tuberculosis                                   | < 0.05<br>(< 0.05 to < 0.05)              | < 0.05<br>(< 0.05 to < 0.05)                  | < 0.05<br>(< 0.05 to < 0.05)            | 101.9<br>(-53.2 to 1,368.4)                       | 71.9<br>(-60.1 to 1,146.8)                          |
| HIV/AIDS resulting in other diseases                                                 | 7.7<br>(3.9 to 13.0)                      | 0.7<br>(0.4 to 1.3)                           | 0.8<br>(0.4 to 1.6)                     | 168.2<br>(74.8 to 310.6)                          | 121.6<br>(43.3 to 242.7)                            |
| <b>Diarrhoea, lower respiratory infections, and other common infectious diseases</b> | <b>4,871.0</b><br>(4,621.8 to 5,154.6)    | <b>287,034.8†</b><br>(260,101.1 to 317,103.6) | <b>226.7</b><br>(156.0 to 313.6)        | <b>9.8</b><br>(6.4 to 13.7)                       | <b>-2.2</b><br>(-5.2 to 1.1)                        |
| Diarrhoeal diseases                                                                  | 716.6<br>(667.5 to 777.3)                 | 47,573.8<br>(44,258.5 to 51,539.4)            | 80.9<br>(55.5 to 111.0)                 | 12.4<br>(6.4 to 19.1)                             | 2.1<br>(-3.2 to 7.9)                                |
| Intestinal infectious diseases                                                       | 2.1<br>(1.8 to 2.5)                       | 40.6†<br>(35.5 to 46.4)                       | 0.4<br>(0.2 to 0.5)                     | -31.4<br>(-40.8 to -20.8)                         | -38.5<br>(-46.4 to -29.1)                           |
| Typhoid fever                                                                        | 2.1<br>(1.8 to 2.5)                       | 33.1<br>(28.9 to 38.1)                        | 0.3<br>(0.2 to 0.5)                     | -31.5<br>(-41.4 to -20.2)                         | -38.4<br>(-47.1 to -28.5)                           |
| Paratyphoid fever                                                                    | 0.3<br>(0.3 to 0.4)                       | 7.4<br>(6.4 to 8.7)                           | < 0.05<br>(< 0.05 to < 0.05)            | -26.8<br>(-37.9 to -14.0)                         | -35.0<br>(-44.5 to -24.0)                           |
| Other intestinal infectious diseases                                                 | --                                        | --                                            | < 0.05<br>(< 0.05 to < 0.05)            | -46.2<br>(-55.2 to -36.3)                         | -53.0<br>(-60.5 to -44.4)                           |
| Lower respiratory infections                                                         | 71.0<br>(65.2 to 76.9)                    | 3,291.0<br>(3,014.7 to 3,566.5)               | 4.2<br>(2.8 to 6.1)                     | -1.8<br>(-13.4 to 10.7)                           | -15.1<br>(-24.6 to -5.5)                            |
| Upper respiratory infections                                                         | 3,026.4<br>(2,682.0 to 3,417.3)           | 229,219.8<br>(201,839.0 to 260,398.7)         | 75.2<br>(44.5 to 117.5)                 | 9.3<br>(3.6 to 15.4)                              | -2.8<br>(-7.9 to 2.7)                               |
| Otitis media                                                                         | 936.3<br>(839.9 to 1,035.2)               | 5,141.0<br>(4,143.3 to 6,304.6)               | 26.4<br>(16.4 to 39.7)                  | 2.2<br>(-5.4 to 10.5)                             | -6.8<br>(-13.7 to 0.5)                              |
| Meningitis                                                                           | 140.1<br>(120.8 to 162.0)                 | 28.8<br>(23.9 to 34.4)                        | 16.1<br>(11.3 to 21.6)                  | 8.6<br>(2.0 to 14.9)                              | -6.4<br>(-11.8 to -1.2)                             |
| Pneumococcal meningitis                                                              | 43.3<br>(36.9 to 50.8)                    | 2.4<br>(1.8 to 3.1)                           | 5.8<br>(4.0 to 8.0)                     | 2.5<br>(-11.9 to 18.6)                            | -12.2<br>(-24.3 to 0.9)                             |
| H influenzae type B meningitis                                                       | 17.9<br>(15.5 to 21.0)                    | 1.4<br>(1.0 to 2.0)                           | 3.4<br>(2.2 to 4.5)                     | 4.6<br>(-2.4 to 11.0)                             | -9.4<br>(-15.6 to -3.8)                             |
| Meningococcal infection                                                              | 35.9<br>(25.9 to 48.9)                    | 12.5<br>(9.9 to 15.6)                         | 3.1<br>(2.2 to 4.2)                     | 1.1<br>(-5.8 to 9.2)                              | -13.1<br>(-18.8 to -6.4)                            |
| Other meningitis                                                                     | 43.0<br>(31.8 to 56.6)                    | 12.4<br>(10.0 to 15.6)                        | 3.8<br>(2.6 to 5.3)                     | 32.8<br>(22.9 to 45.9)                            | 15.7<br>(6.8 to 27.2)                               |
| Encephalitis                                                                         | 169.4<br>(118.0 to 241.0)                 | 89.5<br>(79.6 to 100.8)                       | 20.0<br>(14.0 to 26.4)                  | 18.4<br>(5.4 to 33.4)                             | -1.7<br>(-12.4 to 10.3)                             |
| Diphtheria                                                                           | < 0.05<br>(< 0.05 to < 0.05)              | < 0.05<br>(< 0.05 to < 0.05)                  | < 0.05<br>(< 0.05 to < 0.05)            | -55.6<br>(-76.4 to -17.8)                         | -60.4<br>(-79.3 to -25.8)                           |
| Whooping cough                                                                       | 11.8<br>(9.2 to 15.0)                     | 86.0<br>(67.2 to 109.4)                       | 0.6<br>(0.3 to 0.9)                     | -37.0<br>(-48.1 to -25.6)                         | -36.3<br>(-47.6 to -24.9)                           |
| Tetanus                                                                              | 0.2<br>(0.1 to 0.2)                       | < 0.05<br>(< 0.05 to < 0.05)                  | < 0.05<br>(< 0.05 to < 0.05)            | 11.2<br>(3.3 to 18.2)                             | -3.9<br>(-10.8 to 2.1)                              |
| Measles                                                                              | 1.3<br>(0.5 to 3.0)                       | 48.4<br>(17.7 to 108.8)                       | 0.1<br>(< 0.05 to 0.3)                  | 11.3<br>(-20.3 to 57.9)                           | 11.1<br>(-20.7 to 57.8)                             |
| Varicella and herpes zoster                                                          | 74.2<br>(68.2 to 80.3)                    | 1,515.9<br>(1,469.6 to 1,564.3)               | 2.9<br>(1.7 to 4.5)                     | 23.2<br>(7.9 to 40.1)                             | -0.1<br>(-11.5 to 12.9)                             |
| <b>Neglected tropical diseases and malaria</b>                                       | <b>5,478.6</b><br>(4,691.5 to 6,432.9)    | <b>21.5†</b><br>(15.2 to 31.1)                | <b>12.2</b><br>(6.4 to 20.9)            | <b>-0.7</b><br>(-35.6 to 44.7)                    | <b>-6.8</b><br>(-38.4 to 34.2)                      |
| Malaria                                                                              | --                                        | --                                            | --                                      | --                                                | --                                                  |
| Chagas disease                                                                       | --                                        | --                                            | --                                      | --                                                | --                                                  |
| Leishmaniasis                                                                        | 3.1<br>(0.9 to 7.1)                       | 6.4<br>(1.9 to 14.2)                          | 0.2<br>(0.1 to 0.5)                     | -17.9<br>(-80.3 to 122.3)                         | -27.3<br>(-82.7 to 94.5)                            |
| Visceral leishmaniasis                                                               | < 0.05<br>(< 0.05 to < 0.05)              | < 0.05<br>(< 0.05 to 0.1)                     | < 0.05<br>(< 0.05 to < 0.05)            | 64.9<br>(-0.5 to 172.9)                           | 29.8<br>(-24.7 to 118.9)                            |
| Cutaneous and mucocutaneous leishmaniasis                                            | 3.1<br>(0.9 to 7.1)                       | 6.3<br>(1.8 to 14.2)                          | 0.2<br>(0.1 to 0.5)                     | -18.0<br>(-80.5 to 122.5)                         | -27.4<br>(-82.9 to 94.7)                            |
| African trypanosomiasis                                                              | --                                        | --                                            | --                                      | --                                                | --                                                  |
| Schistosomiasis                                                                      | 47.7<br>(36.5 to 62.6)                    | 13.2<br>(10.5 to 16.8)                        | 0.5<br>(0.2 to 1.0)                     | 28.8<br>(8.9 to 54.1)                             | 3.6<br>(-11.9 to 24.7)                              |
| Cysticercosis                                                                        | --                                        | --                                            | --                                      | --                                                | --                                                  |
| Cystic echinococcosis                                                                | 9.4<br>(1.8 to 40.4)                      | 1.9<br>(0.4 to 7.8)                           | 0.9<br>(0.1 to 3.7)                     | -36.9<br>(-92.5 to 384.9)                         | -47.8<br>(-93.2 to 256.0)                           |
| Lymphatic filariasis                                                                 | --                                        | --                                            | --                                      | --                                                | --                                                  |
| Onchocerciasis                                                                       | --                                        | --                                            | --                                      | --                                                | --                                                  |
| Trachoma                                                                             | --                                        | --                                            | --                                      | --                                                | --                                                  |
| Dengue                                                                               | --                                        | --                                            | --                                      | --                                                | --                                                  |
| Yellow fever                                                                         | --                                        | --                                            | --                                      | --                                                | --                                                  |
| Rabies                                                                               | < 0.05<br>(< 0.05 to < 0.05)              | < 0.05<br>(< 0.05 to < 0.05)                  | < 0.05<br>(< 0.05 to < 0.05)            | -35.8<br>(-78.3 to 110.1)                         | -43.9<br>(-80.9 to 85.6)                            |
| Intestinal nematode infections                                                       | 5,022.9<br>(4,252.5 to 5,990.6)           | --                                            | 0.6<br>(0.3 to 1.0)                     | 20.9<br>(-19.5 to 84.4)                           | 1.7<br>(-32.2 to 55.6)                              |
| Ascariasis                                                                           | 3,087.8<br>(2,398.0 to 3,859.8)           | --                                            | 0.2<br>(0.1 to 0.5)                     | 16.3<br>(-46.8 to 125.8)                          | 0.3<br>(-53.7 to 97.9)                              |

| Cause                                                                   | Prevalence in thousands (95% UI)                 | Incidence in thousands (95% UI)                      | YLDs in thousands (95% UI)                     |                                                   |                                                     |
|-------------------------------------------------------------------------|--------------------------------------------------|------------------------------------------------------|------------------------------------------------|---------------------------------------------------|-----------------------------------------------------|
|                                                                         | 2016 counts                                      | 2016 counts                                          | 2016 counts                                    | Percentage change in counts between 2006 and 2016 | Percentage change in age-standardised rates between |
| Trichuriasis                                                            | 1,959.2<br>(1,527.2 to 2,469.5)                  | --                                                   | 0.1<br>(< 0.05 to 0.3)                         | 17.1<br>(-55.7 to 220.5)                          | -0.1<br>(-62.2 to 174.5)                            |
| Hookworm disease                                                        | 62.1<br>(47.3 to 81.7)                           | --                                                   | 0.2<br>(0.1 to 0.4)                            | 29.0<br>(-16.4 to 103.7)                          | 4.4<br>(-31.9 to 59.5)                              |
| Food-borne trematodiasis                                                | --                                               | --                                                   | --                                             | --                                                | --                                                  |
| Leprosy                                                                 | < 0.05<br>(< 0.05 to < 0.05)                     | < 0.05<br>(< 0.05 to < 0.05)                         | < 0.05<br>(< 0.05 to < 0.05)                   | 22.5<br>(19.5 to 25.8)                            | -6.6<br>(-8.7 to -4.3)                              |
| Ebola virus disease                                                     | --                                               | --                                                   | --                                             | --                                                | --                                                  |
| Zika virus disease                                                      | --                                               | --                                                   | --                                             | --                                                | --                                                  |
| Guinea worm disease                                                     | --                                               | --                                                   | --                                             | --                                                | --                                                  |
| Other neglected tropical diseases                                       | 443.6<br>(338.7 to 561.0)                        | --                                                   | 10.1<br>(5.2 to 16.9)                          | 2.6<br>(-28.6 to 44.4)                            | -0.9<br>(-31.5 to 39.4)                             |
| <b>Maternal disorders</b>                                               | <b>57.0</b><br><b>(45.8 to 68.3)</b>             | <b>1,637.8†</b><br><b>(1,492.4 to 1,855.9)</b>       | <b>4.5</b><br><b>(3.0 to 6.5)</b>              | <b>-5.1</b><br><b>(-28.1 to 22.5)</b>             | <b>-12.7</b><br><b>(-33.6 to 13.1)</b>              |
| Maternal haemorrhage                                                    | 17.9<br>(12.4 to 24.1)                           | 184.9<br>(153.9 to 204.8)                            | 0.9<br>(0.5 to 1.4)                            | -13.9<br>(-47.1 to 39.4)                          | -20.4<br>(-51.2 to 28.0)                            |
| Maternal sepsis and other pregnancy related infections                  | 16.7<br>(10.9 to 23.9)                           | 156.4<br>(133.4 to 179.3)                            | 0.7<br>(0.3 to 1.2)                            | -9.6<br>(-57.2 to 91.3)                           | -15.4<br>(-59.7 to 78.9)                            |
| Maternal hypertensive disorders                                         | 15.7<br>(10.6 to 20.7)                           | 81.5<br>(77.6 to 85.2)                               | 0.8<br>(0.4 to 1.2)                            | 23.3<br>(-24.1 to 99.6)                           | 11.0<br>(-31.6 to 81.3)                             |
| Maternal obstructed labour and uterine rupture                          | 1.8<br>(1.1 to 2.6)                              | 130.9<br>(117.9 to 144.3)                            | 0.6<br>(0.2 to 1.1)                            | -8.0<br>(-64.6 to 157.2)                          | -14.0<br>(-67.0 to 136.6)                           |
| Maternal abortion, miscarriage, and ectopic pregnancy                   | 8.9<br>(5.9 to 12.3)                             | 1,084.2<br>(939.6 to 1,299.1)                        | 1.0<br>(0.5 to 1.6)                            | -5.1<br>(-48.4 to 70.4)                           | -13.8<br>(-53.0 to 54.6)                            |
| Other maternal disorders                                                | --                                               | --                                                   | 0.7<br>(0.5 to 1.0)                            | -10.2<br>(-32.2 to 16.2)                          | -17.2<br>(-37.3 to 7.8)                             |
| <b>Neonatal disorders</b>                                               | <b>457.7</b><br><b>(374.7 to 576.3)</b>          | --                                                   | <b>76.1</b><br><b>(49.7 to 116.4)</b>          | <b>3.0</b><br><b>(-15.5 to 29.8)</b>              | <b>-8.3</b><br><b>(-24.7 to 15.9)</b>               |
| Neonatal preterm birth complications                                    | 438.8<br>(336.2 to 574.1)                        | --                                                   | 55.0<br>(33.4 to 91.8)                         | -2.9<br>(-26.5 to 32.5)                           | -13.7<br>(-34.6 to 17.8)                            |
| Neonatal encephalopathy due to birth asphyxia and trauma                | 36.4<br>(19.1 to 62.2)                           | --                                                   | 5.8<br>(1.2 to 13.7)                           | 56.3<br>(8.9 to 265.4)                            | 38.0<br>(-3.6 to 220.5)                             |
| Neonatal sepsis and other neonatal infections                           | 15.4<br>(6.5 to 32.3)                            | --                                                   | 6.8<br>(2.6 to 15.8)                           | 22.2<br>(1.5 to 75.5)                             | 8.9<br>(-10.0 to 57.5)                              |
| Hemolytic disease and other neonatal jaundice                           | 21.2<br>(18.5 to 24.5)                           | --                                                   | 6.6<br>(4.9 to 8.5)                            | 13.3<br>(-2.0 to 31.3)                            | -0.6<br>(-14.1 to 14.7)                             |
| Other neonatal disorders                                                | --                                               | --                                                   | 1.9<br>(1.2 to 3.0)                            | -10.8<br>(-30.0 to 18.2)                          | -10.5<br>(-29.6 to 18.6)                            |
| <b>Nutritional deficiencies</b>                                         | <b>13,346.2</b><br><b>(11,491.4 to 15,165.3)</b> | <b>883.7†</b><br><b>(564.4 to 1,349.4)</b>           | <b>276.8</b><br><b>(163.5 to 430.9)</b>        | <b>7.0</b><br><b>(-12.7 to 30.0)</b>              | <b>-4.1</b><br><b>(-21.5 to 15.2)</b>               |
| Protein-energy malnutrition                                             | 97.4<br>(72.0 to 132.2)                          | 40.2<br>(30.0 to 53.6)                               | 4.1<br>(2.4 to 6.3)                            | -12.7<br>(-36.9 to 19.8)                          | -11.7<br>(-36.1 to 21.4)                            |
| Iodine deficiency                                                       | 2,199.6<br>(1,939.5 to 2,475.2)                  | 45.7<br>(40.6 to 51.2)                               | 52.0<br>(32.8 to 75.8)                         | -1.4<br>(-10.7 to 9.1)                            | -17.7<br>(-25.3 to -9.0)                            |
| Vitamin A deficiency                                                    | 992.1<br>(602.6 to 1,525.0)                      | 797.8<br>(477.2 to 1,263.4)                          | --                                             | --                                                | --                                                  |
| Iron-deficiency anaemia                                                 | 9,855.1<br>(7,837.9 to 12,098.6)                 | --                                                   | 220.6<br>(126.2 to 354.6)                      | 9.7<br>(-16.4 to 39.5)                            | -0.2<br>(-23.0 to 27.0)                             |
| Other nutritional deficiencies                                          | --                                               | --                                                   | 0.1<br>(0.1 to 0.2)                            | -13.5<br>(-38.4 to 21.1)                          | -12.8<br>(-38.0 to 21.5)                            |
| <b>Other communicable, maternal, neonatal, and nutritional diseases</b> | <b>16,001.4</b><br><b>(15,043.2 to 17,030.6)</b> | <b>10,831.2</b><br><b>(9,088.0 to 12,715.3)</b>      | <b>62.0</b><br><b>(38.3 to 99.0)</b>           | <b>17.7</b><br><b>(8.8 to 26.7)</b>               | <b>1.8</b><br><b>(-5.6 to 9.3)</b>                  |
| Sexually transmitted diseases excluding HIV                             | 12,537.0<br>(11,697.2 to 13,495.2)               | 10,325.0<br>(8,562.1 to 12,195.1)                    | 51.9<br>(31.4 to 84.2)                         | 19.9<br>(11.2 to 29.2)                            | 2.2<br>(-4.9 to 9.8)                                |
| Syphilis                                                                | 138.1<br>(103.7 to 178.6)                        | 96.9<br>(67.9 to 130.0)                              | 1.0<br>(0.7 to 1.4)                            | 33.8<br>(19.5 to 49.6)                            | 0.9<br>(-9.7 to 13.0)                               |
| Chlamydial infection                                                    | 974.4<br>(767.0 to 1,215.5)                      | 669.8<br>(532.1 to 821.8)                            | 4.9<br>(2.8 to 8.5)                            | 11.9<br>(-4.6 to 29.9)                            | 0.6<br>(-14.0 to 16.5)                              |
| Gonococcal infection                                                    | 2,357.8<br>(1,922.7 to 2,885.2)                  | 8,019.4<br>(6,281.5 to 9,894.3)                      | 27.1<br>(15.8 to 45.6)                         | 20.5<br>(9.1 to 32.7)                             | 2.6<br>(-6.9 to 13.1)                               |
| Trichomoniasis                                                          | 960.3<br>(831.9 to 1,091.9)                      | 811.3<br>(700.4 to 928.7)                            | 0.8<br>(0.3 to 1.8)                            | 17.9<br>(6.2 to 30.1)                             | -0.3<br>(-9.8 to 9.8)                               |
| Genital herpes                                                          | 8,494.6<br>(7,267.2 to 9,961.4)                  | 502.5<br>(426.7 to 597.6)                            | 2.2<br>(0.7 to 5.0)                            | 27.6<br>(13.2 to 41.1)                            | 3.5<br>(-7.5 to 14.3)                               |
| Other sexually transmitted diseases                                     | 395.0<br>(317.1 to 474.4)                        | 225.1<br>(190.2 to 267.1)                            | 16.0<br>(9.8 to 25.5)                          | 20.1<br>(10.6 to 29.9)                            | 2.1<br>(-6.0 to 10.1)                               |
| Hepatitis                                                               | 3,893.8<br>(3,402.6 to 4,448.8)                  | 506.1<br>(379.7 to 690.1)                            | 0.7<br>(0.4 to 1.0)                            | -9.8<br>(-26.9 to 11.3)                           | -25.4<br>(-39.5 to -7.7)                            |
| Acute hepatitis A                                                       | 8.4<br>(1.6 to 22.4)                             | 108.9<br>(21.2 to 290.8)                             | 0.1<br>(< 0.05 to 0.2)                         | -15.0<br>(-68.3 to 143.1)                         | -25.7<br>(-71.9 to 103.8)                           |
| Hepatitis B                                                             | 3,233.2<br>(2,759.7 to 3,773.9)                  | 349.9<br>(283.6 to 434.2)                            | 0.5<br>(0.3 to 0.8)                            | -10.6<br>(-29.9 to 10.5)                          | -26.9<br>(-43.1 to -9.2)                            |
| Hepatitis C                                                             | 649.9<br>(583.9 to 720.0)                        | 18.5<br>(16.7 to 20.4)                               | < 0.05<br>(< 0.05 to < 0.05)                   | 5.6<br>(4.0 to 7.5)                               | -7.1<br>(-8.2 to -6.1)                              |
| Acute hepatitis E                                                       | 2.2<br>(1.7 to 2.8)                              | 28.8<br>(22.4 to 36.4)                               | 0.1<br>(< 0.05 to 0.1)                         | 3.0<br>(-11.2 to 17.5)                            | -14.6<br>(-25.8 to -2.2)                            |
| Other infectious diseases                                               | 350.1<br>(273.8 to 435.8)                        | 0.1<br>(0.1 to 0.1)                                  | 9.4<br>(5.4 to 15.4)                           | 8.6<br>(-16.6 to 41.1)                            | 2.2<br>(-21.9 to 33.8)                              |
| <b>Non-communicable diseases</b>                                        | <b>72,531.4</b><br><b>(72,078.1 to 72,943.0)</b> | <b>217,197.2†</b><br><b>(207,113.8 to 228,461.3)</b> | <b>8,048.8</b><br><b>(5,917.6 to 10,396.1)</b> | <b>21.7</b><br><b>(19.3 to 24.1)</b>              | <b>-1.3</b><br><b>(-3.1 to 0.6)</b>                 |
| <b>Neoplasms</b>                                                        | <b>277.9</b><br><b>(265.4 to 291.2)</b>          | <b>129.7</b><br><b>(125.2 to 138.0)</b>              | <b>38.7</b><br><b>(28.3 to 49.5)</b>           | <b>38.5</b><br><b>(30.9 to 47.6)</b>              | <b>4.3</b><br><b>(-1.4 to 10.8)</b>                 |
| Lip and oral cavity cancer                                              | 4.3<br>(4.0 to 4.6)                              | 1.2<br>(1.1 to 1.2)                                  | 0.4<br>(0.3 to 0.6)                            | 29.4<br>(14.6 to 47.2)                            | -4.5<br>(-15.8 to 8.9)                              |
| Nasopharynx cancer                                                      | 2.2<br>(1.9 to 2.6)                              | 0.6<br>(0.6 to 0.7)                                  | 0.3<br>(0.2 to 0.4)                            | 12.6<br>(-2.9 to 29.7)                            | -10.6<br>(-22.1 to 2.6)                             |
| Other pharynx cancer                                                    | 0.9<br>(0.8 to 1.0)                              | 0.3<br>(0.3 to 0.3)                                  | 0.1<br>(0.1 to 0.1)                            | 41.2<br>(22.1 to 57.6)                            | 5.1<br>(-8.8 to 17.6)                               |
| Oesophageal cancer                                                      | 1.1<br>(1.1 to 1.2)                              | 1.0<br>(0.9 to 1.1)                                  | 0.3<br>(0.2 to 0.3)                            | 25.0<br>(14.3 to 36.8)                            | -7.4<br>(-15.2 to 1.2)                              |
| Stomach cancer                                                          | 10.8<br>(10.2 to 11.5)                           | 6.9<br>(6.5 to 7.3)                                  | 1.7<br>(1.2 to 2.3)                            | 10.6<br>(-4.3 to 28.7)                            | -17.2<br>(-29.0 to -3.6)                            |
| Colon and rectum cancer                                                 | 43.1<br>(39.8 to 46.0)                           | 12.4<br>(11.5 to 13.2)                               | 4.2<br>(3.0 to 5.5)                            | 57.0<br>(34.4 to 81.2)                            | 15.8<br>(-0.4 to 34.1)                              |
| Liver cancer                                                            | 1.2<br>(1.1 to 1.4)                              | 2.9<br>(2.6 to 3.2)                                  | 0.6<br>(0.4 to 0.8)                            | 40.1<br>(23.1 to 59.2)                            | 3.9<br>(-8.6 to 17.6)                               |
| Liver cancer due to hepatitis B                                         | 1.1<br>(0.9 to 1.3)                              | 1.3<br>(1.1 to 1.5)                                  | 0.3<br>(0.2 to 0.4)                            | 43.8<br>(24.9 to 66.3)                            | 7.0<br>(-7.0 to 23.8)                               |



| Cause                                              | Prevalence in thousands (95% UI)              | Incidence in thousands (95% UI)                | YLDs in thousands (95% UI)              |                                                   |                                                     |
|----------------------------------------------------|-----------------------------------------------|------------------------------------------------|-----------------------------------------|---------------------------------------------------|-----------------------------------------------------|
|                                                    | 2016 counts                                   | 2016 counts                                    | 2016 counts                             | Percentage change in counts between 2006 and 2016 | Percentage change in age-standardised rates between |
| Liver cancer due to hepatitis C                    | 0.7<br>(0.6 to 0.9)                           | 0.8<br>(0.7 to 1.0)                            | 0.2<br>(0.1 to 0.2)                     | 46.5<br>(28.0 to 67.4)                            | 7.3<br>(-6.7 to 22.8)                               |
| Liver cancer due to alcohol use                    | 0.4<br>(0.3 to 0.5)                           | 0.5<br>(0.4 to 0.6)                            | 0.1<br>(0.1 to 0.1)                     | 16.4<br>(-3.3 to 40.9)                            | -12.9<br>(-27.9 to 6.3)                             |
| Liver cancer due to other causes                   | 0.3<br>(0.2 to 0.4)                           | 0.4<br>(0.3 to 0.4)                            | 0.1<br>( $< 0.05$ to 0.1)               | 50.1<br>(27.7 to 77.0)                            | 12.6<br>(-4.4 to 32.2)                              |
| Gallbladder and biliary tract cancer               | 0.8<br>(0.7 to 0.9)                           | 1.0<br>(0.9 to 1.2)                            | 0.2<br>(0.1 to 0.3)                     | 19.0<br>(6.3 to 30.8)                             | -12.2<br>(-21.3 to -3.9)                            |
| Pancreatic cancer                                  | 3.5<br>(3.2 to 3.7)                           | 4.5<br>(4.2 to 4.8)                            | 0.9<br>(0.6 to 1.2)                     | 26.3<br>(10.3 to 45.5)                            | -6.7<br>(-18.4 to 7.5)                              |
| Larynx cancer                                      | 7.0<br>(6.5 to 7.7)                           | 2.1<br>(1.9 to 2.2)                            | 0.8<br>(0.6 to 1.1)                     | 17.6<br>(-2.8 to 44.0)                            | -12.7<br>(-28.2 to 7.2)                             |
| Tracheal, bronchus, and lung cancer                | 24.5<br>(22.7 to 26.4)                        | 21.6<br>(20.0 to 23.2)                         | 4.9<br>(3.5 to 6.4)                     | 20.9<br>(0.8 to 44.9)                             | -10.5<br>(-24.9 to 6.7)                             |
| Malignant skin melanoma                            | 8.5<br>(6.1 to 19.2)                          | 1.9<br>(1.4 to 4.3)                            | 0.6<br>(0.3 to 1.4)                     | 46.0<br>(7.4 to 107.7)                            | 11.0<br>(-17.5 to 55.1)                             |
| Non-melanoma skin cancer                           | 3.0<br>(2.5 to 3.6)                           | 11.6<br>(9.9 to 13.4)                          | 0.1<br>(0.1 to 0.2)                     | 45.2<br>(26.9 to 63.5)                            | 6.9<br>(-7.2 to 20.6)                               |
| Non-melanoma skin cancer (squamous-cell carcinoma) | 2.6<br>(2.1 to 3.1)                           | 2.6<br>(2.3 to 2.9)                            | 0.1<br>(0.1 to 0.2)                     | 45.2<br>(24.4 to 65.2)                            | 6.9<br>(-8.9 to 21.9)                               |
| Non-melanoma skin cancer (basal-cell carcinoma)    | 1.3<br>(0.9 to 2.0)                           | 9.0<br>(7.4 to 10.8)                           | $< 0.05$<br>( $< 0.05$ to $< 0.05$ )    | 44.9<br>(16.7 to 78.2)                            | 6.7<br>(-14.9 to 32.3)                              |
| Breast cancer                                      | 64.6<br>(55.8 to 88.3)                        | 13.5<br>(11.7 to 18.6)                         | 5.5<br>(3.8 to 7.8)                     | 45.6<br>(17.2 to 79.8)                            | 7.9<br>(-12.4 to 33.9)                              |
| Cervical cancer                                    | 6.3<br>(5.0 to 7.3)                           | 1.6<br>(1.3 to 1.9)                            | 0.6<br>(0.4 to 0.8)                     | 11.1<br>(-10.7 to 35.4)                           | -15.2<br>(-30.5 to 2.4)                             |
| Uterine cancer                                     | 15.0<br>(13.0 to 17.2)                        | 3.2<br>(2.8 to 3.6)                            | 1.2<br>(0.8 to 1.6)                     | 72.9<br>(41.2 to 113.9)                           | 25.6<br>(2.4 to 56.0)                               |
| Ovarian cancer                                     | 8.2<br>(7.1 to 9.4)                           | 2.6<br>(2.3 to 3.0)                            | 1.2<br>(0.8 to 1.7)                     | 37.4<br>(3.1 to 84.1)                             | 3.9<br>(-22.9 to 40.7)                              |
| Prostate cancer                                    | 38.8<br>(31.0 to 49.5)                        | 9.3<br>(7.6 to 11.8)                           | 3.7<br>(2.6 to 5.1)                     | 62.3<br>(32.2 to 96.0)                            | 20.2<br>(-0.9 to 45.0)                              |
| Testicular cancer                                  | 7.4<br>(5.7 to 9.1)                           | 1.4<br>(1.1 to 1.8)                            | 0.5<br>(0.3 to 0.8)                     | 61.5<br>(12.9 to 137.4)                           | 41.6<br>(-0.7 to 103.2)                             |
| Kidney cancer                                      | 12.2<br>(10.7 to 13.2)                        | 3.2<br>(2.9 to 3.5)                            | 1.1<br>(0.8 to 1.4)                     | 47.3<br>(26.6 to 68.4)                            | 14.0<br>(-1.6 to 31.3)                              |
| Bladder cancer                                     | 20.8<br>(19.0 to 22.6)                        | 5.1<br>(4.7 to 5.5)                            | 1.9<br>(1.3 to 2.5)                     | 36.1<br>(15.8 to 61.7)                            | 0.5<br>(-14.8 to 19.8)                              |
| Brain and nervous system cancer                    | 9.3<br>(7.2 to 10.7)                          | 4.3<br>(3.5 to 4.9)                            | 1.3<br>(0.9 to 1.8)                     | 39.7<br>(25.3 to 57.5)                            | 10.9<br>(-1.1 to 26.0)                              |
| Thyroid cancer                                     | 10.1<br>(9.0 to 15.1)                         | 1.9<br>(1.7 to 2.9)                            | 0.6<br>(0.4 to 1.0)                     | 78.3<br>(39.8 to 122.8)                           | 34.1<br>(6.1 to 66.3)                               |
| Mesothelioma                                       | 1.0<br>(0.8 to 1.1)                           | 0.7<br>(0.5 to 0.8)                            | 0.2<br>(0.1 to 0.3)                     | 21.1<br>(6.6 to 37.0)                             | -9.5<br>(-20.2 to 2.4)                              |
| Hodgkin lymphoma                                   | 2.1<br>(1.7 to 3.1)                           | 0.6<br>(0.5 to 0.8)                            | 0.2<br>(0.1 to 0.4)                     | 37.8<br>(19.4 to 53.7)                            | 13.9<br>(-0.1 to 28.7)                              |
| Non-Hodgkin's lymphoma                             | 11.0<br>(10.1 to 12.1)                        | 3.4<br>(3.1 to 3.9)                            | 1.1<br>(0.8 to 1.5)                     | 54.3<br>(35.8 to 75.3)                            | 19.6<br>(4.8 to 34.8)                               |
| Multiple myeloma                                   | 3.4<br>(2.9 to 5.1)                           | 1.7<br>(1.4 to 2.8)                            | 0.8<br>(0.5 to 1.3)                     | 43.0<br>(10.9 to 84.7)                            | 5.3<br>(-19.0 to 36.7)                              |
| Leukaemia                                          | 16.5<br>(14.6 to 18.9)                        | 5.0<br>(4.5 to 5.6)                            | 2.2<br>(1.5 to 2.9)                     | 24.5<br>(12.6 to 37.7)                            | 1.4<br>(-8.1 to 12.7)                               |
| Acute lymphoid leukaemia                           | 3.3<br>(2.2 to 4.1)                           | 0.9<br>(0.6 to 1.0)                            | 0.4<br>(0.2 to 0.6)                     | 15.7<br>(-5.5 to 46.6)                            | 6.5<br>(-13.0 to 37.0)                              |
| Chronic lymphoid leukaemia                         | 5.1<br>(4.5 to 6.2)                           | 1.2<br>(1.0 to 1.4)                            | 0.6<br>(0.4 to 0.9)                     | 45.3<br>(21.1 to 73.9)                            | 10.3<br>(-8.2 to 33.0)                              |
| Acute myeloid leukaemia                            | 2.5<br>(2.1 to 2.9)                           | 1.6<br>(1.4 to 1.8)                            | 0.5<br>(0.3 to 0.6)                     | 26.9<br>(12.4 to 40.8)                            | 5.6<br>(-5.1 to 17.2)                               |
| Chronic myeloid leukaemia                          | 0.9<br>(0.7 to 1.1)                           | 0.3<br>(0.3 to 0.4)                            | 0.1<br>(0.1 to 0.1)                     | 6.4<br>(-9.4 to 26.3)                             | -16.0<br>(-28.5 to 0.2)                             |
| Other leukaemia                                    | 4.7<br>(4.1 to 5.6)                           | 1.1<br>(0.9 to 1.3)                            | 0.6<br>(0.4 to 0.8)                     | 14.2<br>(-3.4 to 34.9)                            | -9.0<br>(-23.3 to 8.7)                              |
| Other neoplasms                                    | 13.2<br>(12.3 to 14.2)                        | 4.2<br>(3.9 to 4.5)                            | 1.2<br>(0.9 to 1.6)                     | 38.5<br>(24.4 to 53.3)                            | 10.5<br>(-0.2 to 22.8)                              |
| <b>Cardiovascular diseases</b>                     | <b>6,050.4</b><br><b>(5,830.1 to 6,272.9)</b> | <b>625.3†</b><br><b>(591.1 to 660.4)</b>       | <b>344.0</b><br><b>(250.2 to 446.2)</b> | <b>30.7</b><br><b>(26.1 to 35.5)</b>              | <b>-0.8</b><br><b>(-4.4 to 2.8)</b>                 |
| Rheumatic heart disease                            | 5.4<br>(4.6 to 6.2)                           | 1.1<br>(0.9 to 1.2)                            | 0.4<br>(0.3 to 0.6)                     | 33.7<br>(23.6 to 44.3)                            | 4.3<br>(-3.1 to 12.7)                               |
| Ischaemic heart disease                            | 2,833.3<br>(2,669.8 to 3,000.5)               | 335.4<br>(309.9 to 365.6)                      | 102.8<br>(70.4 to 139.0)                | 33.7<br>(27.9 to 39.4)                            | 0.4<br>(-3.7 to 4.5)                                |
| Cerebrovascular disease                            | 618.8<br>(572.8 to 663.7)                     | 98.0‡<br>(88.9 to 107.5)                       | 98.0<br>(69.6 to 124.3)                 | 35.1<br>(24.6 to 46.0)                            | 0.3<br>(-7.5 to 8.7)                                |
| Ischaemic stroke                                   | 535.4<br>(469.5 to 601.4)                     | 72.8‡<br>(64.2 to 81.9)                        | 81.6<br>(57.2 to 104.7)                 | 34.9<br>(23.1 to 48.0)                            | -0.1<br>(-9.2 to 9.6)                               |
| Hemorrhagic stroke                                 | 108.8<br>(98.3 to 121.0)                      | 25.2‡<br>(22.6 to 27.9)                        | 16.4<br>(11.8 to 21.0)                  | 35.8<br>(21.3 to 51.6)                            | 2.8<br>(-8.2 to 14.8)                               |
| Hypertensive heart disease                         | 244.9<br>(210.9 to 284.2)                     | --                                             | 19.3<br>(13.4 to 26.5)                  | 38.5<br>(26.4 to 51.9)                            | 0.6<br>(-7.4 to 9.8)                                |
| Cardiomyopathy and myocarditis                     | 40.7<br>(36.5 to 45.0)                        | 23.7†<br>(20.9 to 26.8)                        | 3.9<br>(2.6 to 5.6)                     | 21.4<br>(4.6 to 41.2)                             | 1.6<br>(-11.9 to 17.8)                              |
| Myocarditis                                        | 11.1<br>(10.0 to 12.2)                        | 23.7<br>(20.9 to 26.8)                         | 0.7<br>(0.5 to 1.1)                     | 18.8<br>(9.9 to 28.1)                             | 1.5<br>(-7.3 to 10.7)                               |
| Alcoholic cardiomyopathy                           | 1.5<br>(1.2 to 1.8)                           | --                                             | 0.1<br>(0.1 to 0.2)                     | 34.3<br>(23.7 to 45.3)                            | 0.6<br>(-6.9 to 8.8)                                |
| Other cardiomyopathy                               | 36.1<br>(31.5 to 41.7)                        | --                                             | 3.0<br>(2.0 to 4.4)                     | 21.5<br>(0.8 to 47.9)                             | 1.6<br>(-14.8 to 22.0)                              |
| Atrial fibrillation and flutter                    | 375.9<br>(325.7 to 435.2)                     | 31.2<br>(26.8 to 36.4)                         | 28.9<br>(19.3 to 40.5)                  | 33.1<br>(24.7 to 43.5)                            | -1.7<br>(-7.5 to 5.3)                               |
| Peripheral vascular disease                        | 1,337.4<br>(1,162.7 to 1,546.0)               | 125.9<br>(108.5 to 147.2)                      | 5.4<br>(2.5 to 10.1)                    | 27.1<br>(17.2 to 37.6)                            | -7.1<br>(-13.4 to -0.1)                             |
| Endocarditis                                       | 7.5<br>(6.5 to 8.7)                           | 10.0<br>(9.2 to 11.0)                          | 0.6<br>(0.4 to 0.8)                     | 28.1<br>(8.9 to 48.9)                             | -3.2<br>(-18.5 to 13.7)                             |
| Other cardiovascular and circulatory diseases      | 1,629.6<br>(1,411.6 to 1,891.7)               | --                                             | 84.6<br>(57.7 to 119.6)                 | 21.4<br>(13.2 to 30.1)                            | -3.4<br>(-9.7 to 3.1)                               |
| <b>Chronic respiratory diseases</b>                | <b>7,408.6</b><br><b>(7,161.8 to 7,669.9)</b> | <b>1,175.7†</b><br><b>(1,112.1 to 1,245.0)</b> | <b>317.9</b><br><b>(240.5 to 407.9)</b> | <b>20.4</b><br><b>(14.8 to 25.9)</b>              | <b>-1.9</b><br><b>(-7.0 to 2.6)</b>                 |
| Chronic obstructive pulmonary disease              | 3,119.0<br>(3,003.6 to 3,245.0)               | 194.5<br>(185.9 to 202.5)                      | 126.2<br>(105.9 to 146.7)               | 22.0<br>(9.7 to 33.5)                             | -6.9<br>(-16.4 to 1.9)                              |
| Pneumoconiosis                                     | 7.8<br>(7.0 to 10.4)                          | 0.5<br>(0.4 to 0.7)                            | 1.2<br>(0.8 to 1.9)                     | 30.6<br>(25.7 to 35.4)                            | -0.9<br>(-4.6 to 2.8)                               |
| Silicosis                                          | 1.2<br>(1.1 to 1.4)                           | 0.1<br>(0.1 to 0.1)                            | 0.2<br>(0.1 to 0.3)                     | 23.1<br>(15.6 to 30.8)                            | -2.8<br>(-8.1 to 3.0)                               |



| Cause                                                          | Prevalence in thousands (95% UI)           | Incidence in thousands (95% UI)            | YLDs in thousands (95% UI)              |                                                   |                                                     |
|----------------------------------------------------------------|--------------------------------------------|--------------------------------------------|-----------------------------------------|---------------------------------------------------|-----------------------------------------------------|
|                                                                | 2016 counts                                | 2016 counts                                | 2016 counts                             | Percentage change in counts between 2006 and 2016 | Percentage change in age-standardised rates between |
| Asbestosis                                                     | 1.6<br>(1.4 to 1.8)                        | 0.1<br>(0.1 to 0.1)                        | 0.2<br>(0.2 to 0.4)                     | 28.5<br>(22.4 to 34.6)                            | -3.0<br>(-7.9 to 1.5)                               |
| Coal workers pneumoconiosis                                    | 2.2<br>(1.6 to 4.7)                        | 0.2<br>(0.1 to 0.4)                        | 0.4<br>(0.2 to 0.8)                     | 33.7<br>(25.5 to 43.1)                            | -0.9<br>(-7.2 to 6.3)                               |
| Other pneumoconiosis                                           | 2.8<br>(2.4 to 3.2)                        | 0.2<br>(0.1 to 0.2)                        | 0.4<br>(0.3 to 0.6)                     | 32.9<br>(22.9 to 44.8)                            | 1.3<br>(-6.4 to 10.9)                               |
| Asthma                                                         | 4,640.9<br>(4,340.1 to 4,977.5)            | 978.2<br>(916.3 to 1,046.4)                | 180.0<br>(119.1 to 258.2)               | 18.2<br>(13.4 to 23.3)                            | 1.2<br>(-2.9 to 5.3)                                |
| Interstitial lung disease and pulmonary sarcoidosis            | 28.9<br>(27.1 to 30.6)                     | 2.6<br>(2.4 to 2.8)                        | 3.1<br>(2.1 to 4.4)                     | 34.5<br>(22.7 to 48.7)                            | 1.1<br>(-8.8 to 12.7)                               |
| Other chronic respiratory diseases                             | --                                         | --                                         | 7.5<br>(6.1 to 8.9)                     | 39.9<br>(18.8 to 66.4)                            | 21.8<br>(3.6 to 44.7)                               |
| <b>Cirrhosis and other chronic liver diseases</b>              | <b>320.1<br/>(303.2 to 338.7)</b>          | <b>12.8<br/>(12.2 to 13.4)</b>             | <b>14.9<br/>(10.3 to 20.4)</b>          | <b>28.4<br/>(15.8 to 41.9)</b>                    | <b>6.1<br/>(-3.6 to 16.8)</b>                       |
| Cirrhosis and other chronic liver diseases due to hepatitis B  | 133.4<br>(122.2 to 145.3)                  | 5.5<br>(5.1 to 6.1)                        | 5.2<br>(3.5 to 7.4)                     | 38.2<br>(17.8 to 61.4)                            | 7.4<br>(-6.9 to 24.1)                               |
| Cirrhosis and other chronic liver diseases due to hepatitis C  | 70.8<br>(61.4 to 81.2)                     | 2.8<br>(2.4 to 3.1)                        | 2.7<br>(1.8 to 3.9)                     | 46.0<br>(15.6 to 81.7)                            | 13.3<br>(-8.7 to 39.2)                              |
| Cirrhosis and other chronic liver diseases due to alcohol use  | 18.9<br>(16.9 to 20.9)                     | 0.8<br>(0.7 to 0.9)                        | 0.7<br>(0.5 to 1.1)                     | 31.7<br>(4.9 to 65.0)                             | 0.1<br>(-21.8 to 27.8)                              |
| Cirrhosis and other chronic liver diseases due to other causes | 97.0<br>(89.6 to 105.5)                    | 3.7<br>(3.4 to 3.9)                        | 6.2<br>(4.1 to 8.7)                     | 15.1<br>(-4.3 to 37.8)                            | 2.9<br>(-13.4 to 22.2)                              |
| <b>Digestive diseases</b>                                      | <b>3,523.7<br/>(3,254.0 to 3,757.2)</b>    | <b>2,649.9†<br/>(2,477.9 to 2,846.3)</b>   | <b>86.4<br/>(59.0 to 118.5)</b>         | <b>11.6<br/>(-2.3 to 28.4)</b>                    | <b>-9.7<br/>(-20.4 to 2.6)</b>                      |
| Peptic ulcer disease                                           | 857.6<br>(724.6 to 1,028.1)                | 85.0<br>(74.6 to 96.7)                     | 15.8<br>(9.1 to 25.3)                   | 4.7<br>(-22.9 to 42.7)                            | -16.2<br>(-37.2 to 11.9)                            |
| Gastritis and duodenitis                                       | 1,685.1<br>(1,435.7 to 1,944.4)            | 1,385.6<br>(1,234.0 to 1,572.8)            | 20.4<br>(12.2 to 31.9)                  | 6.2<br>(-18.1 to 37.8)                            | -13.9<br>(-32.5 to 9.1)                             |
| Appendicitis                                                   | 7.7<br>(7.1 to 8.3)                        | 201.2<br>(185.3 to 218.0)                  | 2.4<br>(1.5 to 3.6)                     | 12.5<br>(-19.9 to 59.3)                           | 0.5<br>(-27.0 to 40.2)                              |
| Paralytic ileus and intestinal obstruction                     | 0.9<br>(0.8 to 1.0)                        | 24.4<br>(22.6 to 26.6)                     | 0.3<br>(0.2 to 0.4)                     | 25.7<br>(21.8 to 29.7)                            | 0.4<br>(-2.5 to 3.6)                                |
| Inguinal, femoral, and abdominal hernia                        | 759.2<br>(681.1 to 837.7)                  | 412.9<br>(356.6 to 471.2)                  | 32.9<br>(21.9 to 46.0)                  | 13.0<br>(-0.2 to 26.2)                            | -8.6<br>(-18.3 to 1.3)                              |
| Inflammatory bowel disease                                     | 36.0<br>(33.6 to 38.6)                     | 32.0<br>(30.8 to 33.2)                     | 5.2<br>(3.5 to 7.3)                     | 35.4<br>(14.5 to 59.5)                            | 8.4<br>(-8.6 to 27.2)                               |
| Vascular intestinal disorders                                  | 0.6<br>(0.5 to 0.7)                        | 3.1<br>(2.8 to 3.5)                        | 0.2<br>(0.1 to 0.3)                     | 24.7<br>(18.1 to 30.9)                            | -1.2<br>(-6.0 to 3.5)                               |
| Gallbladder and biliary diseases                               | 290.1<br>(256.7 to 327.6)                  | 480.8<br>(420.5 to 544.8)                  | 2.3<br>(1.5 to 3.4)                     | 34.0<br>(6.7 to 66.3)                             | 3.4<br>(-17.9 to 28.8)                              |
| Pancreatitis                                                   | 2.8<br>(2.5 to 3.1)                        | 24.9<br>(22.4 to 27.7)                     | 0.4<br>(0.2 to 0.5)                     | 30.9<br>(26.1 to 35.8)                            | 1.6<br>(-2.2 to 5.2)                                |
| Other digestive diseases                                       | --                                         | --                                         | 6.5<br>(4.5 to 8.9)                     | 16.3<br>(2.9 to 31.8)                             | -5.5<br>(-15.9 to 6.0)                              |
| <b>Neurological disorders</b>                                  | <b>34,392.8<br/>(33,083.8 to 36,002.6)</b> | <b>16,738.4<br/>(14,271.1 to 19,574.3)</b> | <b>992.0<br/>(677.0 to 1,355.2)</b>     | <b>18.8<br/>(3.8 to 36.4)</b>                     | <b>-1.5<br/>(-13.6 to 12.3)</b>                     |
| Alzheimer's disease and other dementias                        | 754.2<br>(639.3 to 887.6)                  | 123.2<br>(103.0 to 148.2)                  | 107.0<br>(75.5 to 141.5)                | 35.4<br>(28.4 to 44.0)                            | -3.2<br>(-7.7 to 2.2)                               |
| Parkinson's disease                                            | 63.7<br>(50.9 to 79.3)                     | 7.6<br>(6.1 to 9.6)                        | 7.3<br>(4.7 to 10.4)                    | 52.1<br>(34.6 to 72.6)                            | 11.6<br>(-0.5 to 25.6)                              |
| Epilepsy                                                       | 345.2<br>(134.5 to 493.3)                  | 38.6<br>(15.1 to 56.0)                     | 106.9<br>(35.5 to 197.3)                | -1.3<br>(-70.2 to 223.4)                          | -12.6<br>(-73.7 to 186.3)                           |
| Multiple sclerosis                                             | 61.4<br>(54.2 to 69.1)                     | 2.0<br>(1.8 to 2.3)                        | 15.8<br>(10.9 to 21.2)                  | 36.7<br>(16.9 to 59.5)                            | 9.0<br>(-6.3 to 26.7)                               |
| Motor neuron disease                                           | 2.6<br>(2.3 to 2.9)                        | 0.4<br>(0.4 to 0.5)                        | 0.5<br>(0.4 to 0.7)                     | 18.2<br>(13.1 to 23.2)                            | -2.4<br>(-6.1 to 1.4)                               |
| Migraine                                                       | 13,712.9<br>(13,037.0 to 14,355.7)         | 1,411.8<br>(1,335.0 to 1,497.9)            | 617.8<br>(397.7 to 854.4)               | 19.1<br>(15.5 to 23.3)                            | -0.0<br>(-3.1 to 3.3)                               |
| Tension-type headache                                          | 26,323.3<br>(23,778.3 to 29,061.4)         | 15,154.2<br>(12,699.5 to 18,007.0)         | 109.4<br>(70.2 to 159.4)                | 21.9<br>(16.1 to 28.4)                            | 1.0<br>(-3.5 to 5.8)                                |
| Other neurological disorders                                   | 0.2<br>(0.1 to 0.3)                        | 0.4<br>(0.3 to 0.6)                        | 27.3<br>(11.8 to 46.6)                  | 21.1<br>(-51.7 to 196.4)                          | 7.1<br>(-56.6 to 153.0)                             |
| <b>Mental and substance use disorders</b>                      | <b>13,003.1<br/>(12,523.3 to 13,458.7)</b> | <b>4,821.8†<br/>(4,500.1 to 5,178.8)</b>   | <b>1,764.3<br/>(1,267.3 to 2,269.8)</b> | <b>16.7<br/>(13.8 to 19.5)</b>                    | <b>-1.0<br/>(-3.3 to 1.3)</b>                       |
| Schizophrenia                                                  | 158.9<br>(138.6 to 179.5)                  | 9.9<br>(8.7 to 11.2)                       | 100.8<br>(73.7 to 126.1)                | 25.5<br>(14.3 to 38.7)                            | 1.1<br>(-7.8 to 10.9)                               |
| Alcohol use disorders                                          | 709.9<br>(595.6 to 829.9)                  | 355.3<br>(299.7 to 413.7)                  | 70.7<br>(47.1 to 98.7)                  | 24.2<br>(12.9 to 36.1)                            | 6.3<br>(-3.3 to 16.2)                               |
| Drug use disorders                                             | 654.3<br>(572.5 to 741.8)                  | 78.3<br>(69.6 to 88.9)                     | 216.1<br>(147.4 to 295.5)               | 22.9<br>(12.2 to 33.5)                            | 5.5<br>(-3.0 to 14.1)                               |
| Opioid use disorders                                           | 483.9<br>(387.9 to 600.9)                  | 48.0<br>(39.6 to 58.0)                     | 200.1<br>(134.7 to 276.1)               | 23.5<br>(12.6 to 35.0)                            | 5.8<br>(-3.2 to 15.2)                               |
| Cocaine use disorders                                          | 34.8<br>(29.5 to 40.8)                     | 3.3<br>(2.7 to 3.9)                        | 4.8<br>(2.8 to 7.2)                     | 17.4<br>(-12.2 to 59.5)                           | 2.6<br>(-22.7 to 37.9)                              |
| Amphetamine use disorders                                      | 6.4<br>(4.5 to 8.6)                        | 1.1<br>(0.8 to 1.5)                        | 0.9<br>(0.5 to 1.5)                     | 9.9<br>(-6.6 to 25.5)                             | -1.3<br>(-14.8 to 11.5)                             |
| Cannabis use disorders                                         | 106.0<br>(90.1 to 124.2)                   | 19.6<br>(16.4 to 23.2)                     | 3.1<br>(1.9 to 4.7)                     | 6.8<br>(-14.2 to 35.2)                            | -3.3<br>(-21.8 to 21.5)                             |
| Other drug use disorders                                       | 33.9<br>(29.9 to 37.9)                     | 6.4<br>(5.6 to 7.2)                        | 7.3<br>(4.8 to 10.3)                    | 20.2<br>(-1.9 to 47.8)                            | 2.8<br>(-15.9 to 26.1)                              |
| Depressive disorders                                           | 2,970.7<br>(2,808.0 to 3,158.4)            | 3,423.7<br>(3,120.3 to 3,772.6)            | 514.9<br>(357.4 to 698.4)               | 13.5<br>(7.8 to 19.0)                             | -5.9<br>(-10.3 to -1.6)                             |
| Major depressive disorder                                      | 2,097.3<br>(1,914.4 to 2,314.2)            | 3,263.2<br>(2,956.3 to 3,616.4)            | 426.2<br>(293.0 to 581.7)               | 11.6<br>(5.2 to 17.9)                             | -7.1<br>(-12.3 to -2.0)                             |
| Dysthymia                                                      | 930.9<br>(809.7 to 1,067.8)                | 160.5<br>(140.5 to 183.5)                  | 88.7<br>(60.0 to 129.2)                 | 23.9<br>(15.4 to 32.8)                            | 0.4<br>(-5.8 to 7.4)                                |
| Bipolar disorder                                               | 696.1<br>(599.5 to 810.7)                  | 54.9<br>(47.9 to 63.8)                     | 141.8<br>(88.8 to 209.7)                | 17.7<br>(11.1 to 25.1)                            | 0.3<br>(-5.0 to 6.0)                                |
| Anxiety disorders                                              | 3,530.1<br>(3,228.4 to 3,843.6)            | 519.3<br>(477.4 to 566.2)                  | 339.1<br>(237.5 to 462.4)               | 15.9<br>(8.6 to 23.6)                             | -0.9<br>(-7.0 to 5.5)                               |
| Eating disorders                                               | 212.9<br>(168.6 to 261.9)                  | 81.1<br>(59.9 to 110.4)                    | 41.6<br>(25.9 to 61.7)                  | 22.7<br>(10.2 to 36.8)                            | 11.3<br>(0.0 to 23.8)                               |
| Anorexia nervosa                                               | 22.4<br>(16.4 to 30.1)                     | 9.4<br>(6.9 to 12.5)                       | 4.7<br>(2.8 to 7.3)                     | 15.6<br>(-10.3 to 48.2)                           | 7.6<br>(-16.1 to 38.1)                              |
| Bulimia nervosa                                                | 175.3<br>(130.3 to 230.6)                  | 71.7<br>(50.4 to 100.6)                    | 36.8<br>(22.2 to 56.0)                  | 23.7<br>(9.8 to 39.2)                             | 11.8<br>(-0.4 to 25.1)                              |
| Autistic spectrum disorders                                    | 703.4<br>(633.0 to 786.7)                  | 4.3<br>(2.9 to 6.1)                        | 100.7<br>(67.7 to 141.5)                | 14.4<br>(8.9 to 20.3)                             | 0.4<br>(-4.1 to 5.5)                                |
| Autism                                                         | 198.4<br>(169.2 to 233.6)                  | 0.5<br>(0.2 to 0.8)                        | 50.3<br>(32.7 to 72.8)                  | 14.9<br>(5.5 to 25.8)                             | 0.5<br>(-7.6 to 9.7)                                |
| Asperger syndrome and other autistic spectrum disorders        | 504.2<br>(422.7 to 605.5)                  | 3.8<br>(2.4 to 5.7)                        | 50.4<br>(33.1 to 74.4)                  | 13.8<br>(8.7 to 19.2)                             | 0.4<br>(-4.0 to 5.0)                                |

| Cause                                                      | Prevalence in thousands (95% UI)                 | Incidence in thousands (95% UI)                      | YLDs in thousands (95% UI)                    |                                                   |                                                     |
|------------------------------------------------------------|--------------------------------------------------|------------------------------------------------------|-----------------------------------------------|---------------------------------------------------|-----------------------------------------------------|
|                                                            | 2016 counts                                      | 2016 counts                                          | 2016 counts                                   | Percentage change in counts between 2006 and 2016 | Percentage change in age-standardised rates between |
| Attention-deficit/hyperactivity disorder                   | 1,430.5<br>(1,276.3 to 1,620.7)                  | 51.3<br>(44.2 to 59.3)                               | 17.2<br>(10.2 to 27.5)                        | 11.0<br>(5.0 to 17.1)                             | 0.3<br>(-5.0 to 5.7)                                |
| Conduct disorder                                           | 581.2<br>(479.7 to 685.5)                        | 194.2<br>(155.9 to 233.9)                            | 70.8<br>(43.8 to 106.9)                       | 5.2<br>(-1.7 to 12.0)                             | 0.3<br>(-6.2 to 6.7)                                |
| Idiopathic developmental intellectual disability           | 1,091.2<br>(632.1 to 1,586.8)                    | --                                                   | 38.6<br>(16.0 to 70.6)                        | 6.4<br>(-2.1 to 14.6)                             | -7.0<br>(-14.6 to 0.1)                              |
| Other mental and substance use disorders                   | 1,516.1<br>(1,337.5 to 1,748.8)                  | 49.6<br>(44.3 to 56.3)                               | 112.0<br>(77.1 to 161.3)                      | 22.5<br>(16.8 to 28.8)                            | 0.2<br>(-4.4 to 5.2)                                |
| <b>Diabetes, urogenital, blood, and endocrine diseases</b> | <b>31,107.6</b><br><b>(30,478.2 to 31,744.2)</b> | <b>9,849.1†</b><br><b>(9,314.5 to 10,406.5)</b>      | <b>893.3</b><br><b>(642.8 to 1,201.3)</b>     | <b>25.7</b><br><b>(20.1 to 31.8)</b>              | <b>-1.7</b><br><b>(-6.0 to 3.1)</b>                 |
| Diabetes mellitus                                          | 4,437.9<br>(4,106.1 to 4,808.2)                  | 257.3<br>(237.2 to 280.7)                            | 434.9<br>(294.4 to 608.6)                     | 36.3<br>(26.3 to 47.8)                            | 3.7<br>(-3.8 to 12.5)                               |
| Acute glomerulonephritis                                   | 0.7<br>(0.6 to 0.8)                              | 10.8<br>(9.6 to 12.1)                                | < 0.05<br>(< 0.05 to 0.1)                     | 19.2<br>(14.2 to 24.6)                            | 0.2<br>(-3.6 to 4.3)                                |
| Chronic kidney disease                                     | 6,519.4<br>(5,943.9 to 7,185.0)                  | 461.8<br>(403.1 to 524.3)                            | 196.3<br>(147.6 to 249.3)                     | 22.2<br>(14.0 to 31.2)                            | -5.6<br>(-12.1 to 1.5)                              |
| Chronic kidney disease due to diabetes mellitus            | 3,338.7<br>(2,969.3 to 3,787.3)                  | 242.1<br>(204.8 to 284.7)                            | 94.3<br>(70.5 to 121.5)                       | 33.0<br>(20.2 to 45.9)                            | 0.5<br>(-9.2 to 9.5)                                |
| Chronic kidney disease due to hypertension                 | 928.1<br>(805.4 to 1,064.3)                      | 53.2<br>(42.7 to 65.0)                               | 32.2<br>(23.2 to 41.5)                        | 37.6<br>(20.7 to 56.0)                            | 1.4<br>(-11.0 to 15.4)                              |
| Chronic kidney disease due to glomerulonephritis           | 913.1<br>(790.4 to 1,051.0)                      | 68.1<br>(56.7 to 80.8)                               | 26.4<br>(18.2 to 36.2)                        | 5.4<br>(-15.8 to 25.5)                            | -13.5<br>(-30.6 to 2.8)                             |
| Chronic kidney disease due to other causes                 | 1,339.5<br>(1,117.8 to 1,568.8)                  | 98.4<br>(81.3 to 117.9)                              | 43.5<br>(31.2 to 57.2)                        | 5.0<br>(-10.8 to 21.2)                            | -17.0<br>(-29.4 to -4.1)                            |
| Urinary diseases and male infertility                      | 1,983.6<br>(1,772.8 to 2,243.3)                  | 5,274.4†<br>(4,812.7 to 5,758.0)                     | 57.9<br>(37.7 to 83.7)                        | 20.8<br>(8.8 to 35.2)                             | -10.3<br>(-19.3 to -0.1)                            |
| Interstitial nephritis and urinary tract infections        | 74.4<br>(65.7 to 83.3)                           | 3,883.0<br>(3,438.1 to 4,350.9)                      | 2.5<br>(1.5 to 3.8)                           | 13.8<br>(-1.8 to 32.9)                            | -1.4<br>(-14.2 to 14.6)                             |
| Urolithiasis                                               | 46.1<br>(41.0 to 52.6)                           | 1,223.2<br>(1,085.7 to 1,390.7)                      | 3.3<br>(2.2 to 4.7)                           | 24.4<br>(1.3 to 52.9)                             | -0.1<br>(-18.3 to 23.6)                             |
| Benign prostatic hyperplasia                               | 1,461.8<br>(1,237.9 to 1,746.2)                  | 168.2<br>(141.6 to 199.9)                            | 47.9<br>(30.3 to 70.7)                        | 21.8<br>(7.3 to 39.2)                             | -11.7<br>(-21.7 to 0.6)                             |
| Male infertility                                           | 335.6<br>(268.7 to 426.3)                        | --                                                   | 2.1<br>(0.8 to 4.3)                           | 27.9<br>(12.0 to 46.9)                            | 13.0<br>(-1.3 to 28.7)                              |
| Other urinary diseases                                     | --                                               | --                                                   | 2.1<br>(1.4 to 3.0)                           | -1.0<br>(-13.5 to 14.5)                           | -17.0<br>(-27.5 to -4.6)                            |
| Gynecological diseases                                     | 8,756.0<br>(8,396.4 to 9,186.5)                  | 3,628.3†<br>(3,399.7 to 3,882.8)                     | 110.5<br>(74.7 to 158.8)                      | 17.0<br>(11.3 to 22.9)                            | -1.9<br>(-6.5 to 2.8)                               |
| Uterine fibroids                                           | 934.0<br>(820.8 to 1,056.0)                      | 99.7<br>(85.8 to 115.8)                              | 12.6<br>(6.9 to 21.5)                         | 30.1<br>(9.5 to 53.9)                             | 1.1<br>(-14.4 to 19.8)                              |
| Polycystic ovarian syndrome                                | 54.9<br>(41.5 to 70.8)                           | 112.5<br>(79.0 to 151.2)                             | 0.5<br>(0.2 to 0.9)                           | 18.7<br>(0.5 to 40.6)                             | 1.3<br>(-14.1 to 19.0)                              |
| Female infertility                                         | 181.9<br>(101.1 to 313.8)                        | --                                                   | 1.1<br>(0.4 to 2.4)                           | 50.9<br>(10.0 to 137.0)                           | 43.2<br>(5.2 to 119.3)                              |
| Endometriosis                                              | 11.5<br>(9.6 to 13.5)                            | 39.7<br>(33.2 to 47.6)                               | 1.1<br>(0.7 to 1.6)                           | 12.7<br>(-12.6 to 45.3)                           | -0.8<br>(-22.8 to 28.1)                             |
| Genital prolapse                                           | 1,670.7<br>(1,474.2 to 1,866.7)                  | 103.1<br>(90.0 to 118.7)                             | 5.2<br>(2.5 to 9.4)                           | 15.3<br>(6.2 to 24.9)                             | -12.2<br>(-19.4 to -5.1)                            |
| Premenstrual syndrome                                      | 5,679.9<br>(5,374.5 to 6,013.0)                  | 2,065.2<br>(1,933.3 to 2,213.0)                      | 47.2<br>(29.4 to 72.5)                        | 13.0<br>(4.8 to 21.8)                             | -2.7<br>(-9.6 to 4.7)                               |
| Other gynecological diseases                               | 1,264.0<br>(1,097.9 to 1,444.0)                  | 1,208.1<br>(1,020.2 to 1,409.4)                      | 42.9<br>(28.4 to 60.9)                        | 17.7<br>(9.8 to 26.4)                             | -1.2<br>(-8.0 to 6.1)                               |
| Hemoglobinopathies and hemolytic anaemias                  | 16,740.3<br>(15,936.9 to 17,522.5)               | --                                                   | 51.7<br>(30.9 to 82.0)                        | -3.8<br>(-23.8 to 22.5)                           | -15.3<br>(-32.0 to 6.7)                             |
| Thalassemias                                               | 1.4<br>(1.3 to 1.6)                              | --                                                   | 0.1<br>(0.1 to 0.2)                           | 51.8<br>(7.0 to 99.0)                             | 53.0<br>(7.4 to 101.0)                              |
| Thalassaemias trait                                        | 2,740.5<br>(2,574.5 to 2,924.0)                  | --                                                   | 35.2<br>(20.9 to 55.6)                        | -4.2<br>(-25.1 to 23.3)                           | -16.4<br>(-33.9 to 6.6)                             |
| Sickle cell disorders                                      | 4.3<br>(3.5 to 5.3)                              | --                                                   | 0.6<br>(0.4 to 0.8)                           | 16.2<br>(1.8 to 31.1)                             | 5.3<br>(-7.3 to 18.8)                               |
| Sickle cell trait                                          | 2,788.8<br>(2,618.1 to 2,980.4)                  | --                                                   | 6.6<br>(3.7 to 10.9)                          | -14.8<br>(-36.5 to 14.2)                          | -22.7<br>(-41.7 to 1.9)                             |
| G6PD deficiency                                            | 2,443.2<br>(2,136.1 to 2,762.9)                  | --                                                   | 0.2<br>(0.1 to 0.4)                           | 26.8<br>(-4.5 to 67.3)                            | 11.3<br>(-16.1 to 48.3)                             |
| G6PD trait                                                 | 9,474.2<br>(8,806.7 to 10,097.0)                 | --                                                   | < 0.05<br>(< 0.05 to < 0.05)                  | -0.6<br>(-30.4 to 42.8)                           | -13.5<br>(-38.6 to 22.8)                            |
| Other hemoglobinopathies and hemolytic anaemias            | 467.8<br>(370.7 to 579.4)                        | --                                                   | 9.0<br>(5.1 to 14.1)                          | 5.5<br>(-17.4 to 36.1)                            | -6.9<br>(-26.2 to 18.1)                             |
| Endocrine, metabolic, blood, and immune disorders          | 1,350.8<br>(1,233.7 to 1,478.1)                  | 216.4<br>(194.6 to 240.7)                            | 41.9<br>(28.2 to 58.7)                        | 21.1<br>(12.3 to 30.7)                            | -1.9<br>(-8.4 to 5.0)                               |
| <b>Musculoskeletal disorders</b>                           | <b>16,782.8</b><br><b>(16,053.9 to 17,517.5)</b> | <b>9,076.5</b><br><b>(8,197.4 to 10,025.5)</b>       | <b>1,942.6</b><br><b>(1,414.6 to 2,525.8)</b> | <b>27.5</b><br><b>(24.2 to 31.0)</b>              | <b>0.3</b><br><b>(-2.2 to 2.8)</b>                  |
| Rheumatoid arthritis                                       | 275.7<br>(246.7 to 309.8)                        | 15.6<br>(14.0 to 17.5)                               | 63.7<br>(43.5 to 84.2)                        | 30.3<br>(20.4 to 40.8)                            | -0.1<br>(-7.5 to 7.4)                               |
| Osteoarthritis                                             | 3,638.3<br>(3,386.5 to 3,899.5)                  | 183.7<br>(169.5 to 199.1)                            | 222.1<br>(158.0 to 298.8)                     | 42.2<br>(37.0 to 47.7)                            | 5.2<br>(1.3 to 9.0)                                 |
| Low back and neck pain                                     | 10,427.2<br>(9,700.2 to 11,184.3)                | 4,433.7<br>(3,938.7 to 4,999.8)                      | 1,235.3<br>(870.2 to 1,623.8)                 | 28.6<br>(24.3 to 32.7)                            | 1.5<br>(-1.8 to 4.6)                                |
| Low back pain                                              | 7,468.0<br>(6,663.4 to 8,447.7)                  | 3,622.0<br>(3,137.6 to 4,156.5)                      | 838.4<br>(587.0 to 1,120.4)                   | 28.7<br>(22.2 to 34.8)                            | 2.1<br>(-2.8 to 6.9)                                |
| Neck pain                                                  | 4,020.6<br>(3,480.5 to 4,626.2)                  | 811.7<br>(707.0 to 962.1)                            | 396.9<br>(268.1 to 554.4)                     | 28.5<br>(25.4 to 31.6)                            | 0.2<br>(-1.6 to 2.2)                                |
| Gout                                                       | 289.4<br>(257.5 to 326.8)                        | 58.3<br>(50.9 to 66.2)                               | 9.1<br>(6.2 to 12.6)                          | 33.0<br>(15.4 to 53.7)                            | 0.5<br>(-12.2 to 15.5)                              |
| Other musculoskeletal disorders                            | 4,865.2<br>(4,161.3 to 5,648.3)                  | 4,385.3<br>(3,730.3 to 5,192.2)                      | 412.4<br>(282.6 to 574.8)                     | 17.3<br>(8.6 to 26.2)                             | -5.8<br>(-12.4 to 1.1)                              |
| <b>Other non-communicable diseases</b>                     | <b>58,439.1</b><br><b>(57,367.1 to 59,448.8)</b> | <b>172,118.0†</b><br><b>(162,355.5 to 182,689.2)</b> | <b>1,654.8</b><br><b>(1,150.3 to 2,327.6)</b> | <b>19.1</b><br><b>(17.5 to 20.6)</b>              | <b>-2.6</b><br><b>(-3.9 to -1.5)</b>                |
| Congenital anomalies                                       | 899.4<br>(811.9 to 1,004.6)                      | --                                                   | 130.7<br>(93.3 to 173.0)                      | 13.2<br>(7.1 to 19.6)                             | 0.5<br>(-5.0 to 6.2)                                |
| Neural tube defects                                        | 126.5<br>(111.1 to 143.3)                        | --                                                   | 37.7<br>(25.9 to 50.8)                        | 15.6<br>(3.4 to 28.6)                             | 0.7<br>(-9.5 to 11.7)                               |
| Congenital heart anomalies                                 | 189.3<br>(163.5 to 216.2)                        | --                                                   | 9.1<br>(3.9 to 15.8)                          | 20.7<br>(8.0 to 34.4)                             | 9.1<br>(-2.3 to 21.3)                               |
| Orofacial clefts                                           | 21.6<br>(18.6 to 24.8)                           | --                                                   | 0.3<br>(0.2 to 0.4)                           | -7.0<br>(-17.8 to 4.4)                            | -18.2<br>(-27.7 to -8.2)                            |
| Down's syndrome                                            | 21.1<br>(18.9 to 23.6)                           | --                                                   | 1.9<br>(1.3 to 2.7)                           | 13.3<br>(6.7 to 20.9)                             | 1.1<br>(-4.7 to 7.9)                                |
| Turner syndrome                                            | 16.6<br>(14.2 to 19.3)                           | --                                                   | 0.3<br>(0.1 to 0.5)                           | 5.0<br>(-30.3 to 53.6)                            | -6.5<br>(-37.4 to 35.4)                             |
| Klinefelter syndrome                                       | 30.6<br>(25.7 to 36.1)                           | --                                                   | 0.2<br>(0.1 to 0.3)                           | 10.1<br>(-17.3 to 43.7)                           | 0.7<br>(-24.3 to 31.4)                              |



| Cause                                         | Prevalence in thousands (95% UI)                 | Incidence in thousands (95% UI)                           | YLDs in thousands (95% UI)              |                                                   |                                                     |
|-----------------------------------------------|--------------------------------------------------|-----------------------------------------------------------|-----------------------------------------|---------------------------------------------------|-----------------------------------------------------|
|                                               | 2016 counts                                      | 2016 counts                                               | 2016 counts                             | Percentage change in counts between 2006 and 2016 | Percentage change in age-standardised rates between |
| Other chromosomal abnormalities               | 154.6<br>(130.6 to 182.5)                        | --                                                        | 14.7<br>(10.0 to 20.5)                  | 4.5<br>(-7.7 to 18.4)                             | 1.7<br>(-10.1 to 14.8)                              |
| Congenital musculoskeletal and limb anomalies | 142.8<br>(128.7 to 158.7)                        | --                                                        | 21.3<br>(14.4 to 29.3)                  | 14.4<br>(3.3 to 26.5)                             | -0.1<br>(-9.4 to 10.2)                              |
| Urogenital congenital anomalies               | 67.4<br>(58.6 to 77.2)                           | --                                                        | 2.3<br>(1.4 to 3.6)                     | 4.6<br>(-7.7 to 18.2)                             | 0.5<br>(-11.3 to 13.6)                              |
| Digestive congenital anomalies                | 72.1<br>(63.9 to 81.2)                           | --                                                        | 3.0<br>(1.9 to 4.4)                     | 16.9<br>(-2.9 to 38.5)                            | 2.3<br>(-13.6 to 20.8)                              |
| Other congenital anomalies                    | 236.1<br>(138.0 to 373.7)                        | --                                                        | 39.9<br>(25.4 to 60.7)                  | 12.8<br>(2.2 to 23.5)                             | -1.4<br>(-10.4 to 8.0)                              |
| Skin and subcutaneous diseases                | 22,413.7<br>(21,904.3 to 22,988.0)               | 46,841.9<br>(44,874.0 to 49,155.7)                        | 554.5<br>(376.4 to 796.0)               | 15.8<br>(13.5 to 18.4)                            | 2.9<br>(0.8 to 5.0)                                 |
| Dermatitis                                    | 3,311.8<br>(3,140.5 to 3,494.9)                  | 5,152.8<br>(4,729.2 to 5,602.9)                           | 121.4<br>(72.3 to 195.8)                | 12.4<br>(7.5 to 17.3)                             | 0.3<br>(-4.0 to 4.4)                                |
| Psoriasis                                     | 689.7<br>(657.7 to 723.7)                        | 94.1<br>(89.8 to 98.4)                                    | 59.5<br>(42.8 to 78.1)                  | 30.4<br>(20.2 to 41.1)                            | 8.5<br>(0.2 to 16.7)                                |
| Cellulitis                                    | 29.4<br>(27.4 to 31.5)                           | 516.6<br>(484.7 to 550.0)                                 | 1.7<br>(1.1 to 2.4)                     | 17.2<br>(-3.8 to 43.9)                            | 0.6<br>(-16.2 to 22.1)                              |
| Pyoderma                                      | 184.1<br>(177.8 to 190.6)                        | 4,261.9<br>(4,104.5 to 4,415.4)                           | 1.0<br>(0.4 to 2.1)                     | 20.2<br>(11.5 to 29.7)                            | 0.9<br>(-6.0 to 8.4)                                |
| Scabies                                       | 812.5<br>(694.8 to 954.9)                        | 2,478.1<br>(2,100.5 to 2,929.4)                           | 20.9<br>(11.7 to 34.2)                  | 6.4<br>(1.1 to 12.0)                              | -3.8<br>(-8.3 to 0.7)                               |
| Fungal skin diseases                          | 5,045.0<br>(4,581.1 to 5,569.4)                  | 18,109.6<br>(16,314.1 to 20,123.0)                        | 28.1<br>(11.2 to 57.8)                  | 19.1<br>(17.1 to 21.4)                            | 0.1<br>(-1.1 to 1.3)                                |
| Viral skin diseases                           | 2,102.0<br>(1,999.4 to 2,216.7)                  | 3,055.4<br>(2,889.4 to 3,227.9)                           | 64.3<br>(40.0 to 95.2)                  | 11.3<br>(7.9 to 15.0)                             | 0.1<br>(-3.0 to 3.2)                                |
| Acne vulgaris                                 | 6,478.1<br>(5,855.4 to 7,188.2)                  | 4,411.6<br>(3,693.7 to 5,428.7)                           | 166.7<br>(112.2 to 243.0)               | 14.9<br>(8.9 to 21.3)                             | 6.3<br>(0.7 to 12.2)                                |
| Alopecia areata                               | 150.3<br>(143.3 to 157.1)                        | 265.7<br>(253.6 to 277.9)                                 | 4.9<br>(3.1 to 7.4)                     | 17.4<br>(5.3 to 31.1)                             | 0.2<br>(-9.7 to 11.8)                               |
| Pruritus                                      | 716.2<br>(629.5 to 808.2)                        | 567.8<br>(506.9 to 640.7)                                 | 7.6<br>(3.6 to 13.8)                    | 22.1<br>(15.4 to 29.4)                            | 1.4<br>(-3.5 to 7.0)                                |
| Urticaria                                     | 727.6<br>(637.5 to 835.7)                        | 1,293.8<br>(1,136.7 to 1,497.8)                           | 43.7<br>(27.9 to 62.5)                  | 10.4<br>(4.6 to 16.5)                             | 0.0<br>(-5.0 to 5.2)                                |
| Decubitus ulcer                               | 26.0<br>(23.5 to 28.6)                           | 95.5<br>(86.1 to 105.5)                                   | 4.1<br>(2.8 to 5.6)                     | 35.6<br>(20.1 to 54.6)                            | 3.7<br>(-9.5 to 19.1)                               |
| Other skin and subcutaneous diseases          | 5,630.9<br>(5,462.1 to 5,792.1)                  | 6,538.9<br>(6,329.6 to 6,754.8)                           | 30.7<br>(14.8 to 55.9)                  | 28.5<br>(25.3 to 31.7)                            | 4.3<br>(2.0 to 6.8)                                 |
| Sense organ diseases                          | 18,545.6<br>(18,133.5 to 18,958.9)               | 7,622.5 <sup>†</sup><br>(7,166.6 to 8,124.1)              | 687.7<br>(482.5 to 948.1)               | 21.4<br>(19.1 to 23.7)                            | -6.0<br>(-7.5 to -4.5)                              |
| Glaucoma                                      | 91.0<br>(72.6 to 110.5)                          | --                                                        | 9.6<br>(6.0 to 14.4)                    | 35.5<br>(20.2 to 52.0)                            | -0.3<br>(-11.6 to 11.4)                             |
| Cataract                                      | 910.4<br>(791.8 to 1,034.4)                      | --                                                        | 67.0<br>(46.8 to 92.3)                  | 26.5<br>(19.5 to 34.1)                            | -7.6<br>(-12.3 to -2.1)                             |
| Macular degeneration                          | 87.2<br>(67.3 to 109.4)                          | --                                                        | 6.0<br>(3.9 to 8.5)                     | 39.3<br>(25.4 to 54.6)                            | 2.2<br>(-7.2 to 13.0)                               |
| Refraction and accommodation disorders        | 9,748.0<br>(9,350.1 to 10,142.1)                 | --                                                        | 143.7<br>(85.1 to 237.1)                | 11.8<br>(8.7 to 15.0)                             | -11.0<br>(-13.5 to -8.4)                            |
| Age-related and other hearing loss            | 11,542.3<br>(10,890.6 to 12,248.8)               | --                                                        | 363.4<br>(255.7 to 506.9)               | 22.4<br>(18.1 to 26.5)                            | -5.6<br>(-8.3 to -2.9)                              |
| Other vision loss                             | 334.6<br>(293.4 to 378.1)                        | --                                                        | 28.5<br>(19.2 to 39.3)                  | 27.4<br>(17.6 to 38.2)                            | -0.1<br>(-7.2 to 8.0)                               |
| Other sense organ diseases                    | 2,252.3<br>(2,076.0 to 2,433.1)                  | 7,622.5<br>(7,166.6 to 8,124.1)                           | 69.5<br>(43.5 to 104.4)                 | 28.3<br>(23.1 to 33.6)                            | 1.3<br>(-2.3 to 5.0)                                |
| Oral disorders                                | 43,945.6<br>(42,327.1 to 45,421.4)               | 117,653.7 <sup>†</sup><br>(108,372.0 to 127,851.0)        | 281.9<br>(173.9 to 432.1)               | 23.0<br>(19.5 to 26.1)                            | -4.8<br>(-7.7 to -2.3)                              |
| Caries of deciduous teeth                     | 4,816.3<br>(3,844.5 to 5,647.9)                  | 18,492.4<br>(12,763.3 to 24,564.4)                        | 1.1<br>(0.5 to 2.2)                     | 3.1<br>(-14.4 to 18.5)                            | 1.5<br>(-15.4 to 16.4)                              |
| Caries of permanent teeth                     | 31,123.2<br>(29,159.4 to 33,093.5)               | 97,391.5<br>(89,472.2 to 105,128.9)                       | 18.2<br>(8.1 to 35.2)                   | 12.0<br>(7.9 to 15.8)                             | -4.8<br>(-8.0 to -1.8)                              |
| Periodontal disease                           | 10,744.7<br>(9,127.4 to 12,541.4)                | 1,357.4<br>(1,140.6 to 1,594.7)                           | 70.0<br>(27.8 to 144.8)                 | 31.4<br>(25.8 to 36.9)                            | 2.3<br>(-1.8 to 6.1)                                |
| Edentulism and severe tooth loss              | 5,452.9<br>(4,825.6 to 6,069.6)                  | 412.4<br>(348.8 to 477.2)                                 | 150.0<br>(99.8 to 210.1)                | 22.1<br>(15.8 to 27.6)                            | -8.7<br>(-13.4 to -4.5)                             |
| Other oral disorders                          | 1,458.8<br>(1,397.6 to 1,523.6)                  | --                                                        | 42.5<br>(26.4 to 63.3)                  | 19.4<br>(15.7 to 23.6)                            | -0.0<br>(-3.0 to 3.3)                               |
| <b>Injuries</b>                               | <b>14,900.9</b><br><b>(13,943.9 to 15,952.5)</b> | <b>5,775.2<sup>†</sup></b><br><b>(5,458.1 to 6,137.6)</b> | <b>485.1</b><br><b>(323.5 to 696.1)</b> | <b>18.6</b><br><b>(15.5 to 21.3)</b>              | <b>-3.7</b><br><b>(-6.1 to -1.6)</b>                |
| <b>Transport injuries</b>                     | <b>1,858.2</b><br><b>(1,717.5 to 2,002.7)</b>    | <b>573.2</b><br><b>(516.2 to 632.6)</b>                   | <b>88.7</b><br><b>(58.8 to 126.2)</b>   | <b>18.0</b><br><b>(14.9 to 21.0)</b>              | <b>-5.5</b><br><b>(-7.9 to -3.2)</b>                |
| Road injuries                                 | 1,314.8<br>(1,222.1 to 1,412.5)                  | 459.1<br>(405.6 to 516.5)                                 | 64.2<br>(42.3 to 91.4)                  | 18.4<br>(15.5 to 21.3)                            | -6.0<br>(-8.2 to -3.8)                              |
| Pedestrian road injuries                      | 231.7<br>(203.9 to 263.9)                        | 57.4<br>(47.4 to 68.7)                                    | 10.9<br>(7.2 to 15.5)                   | 15.7<br>(12.7 to 18.5)                            | -8.3<br>(-10.7 to -6.1)                             |
| Cyclist road injuries                         | 226.2<br>(189.2 to 267.6)                        | 85.0<br>(67.0 to 104.0)                                   | 10.3<br>(6.8 to 15.0)                   | 20.0<br>(17.1 to 22.8)                            | -3.7<br>(-6.0 to -1.6)                              |
| Motorcyclist road injuries                    | 247.2<br>(209.7 to 297.4)                        | 56.4<br>(44.7 to 69.9)                                    | 11.4<br>(7.4 to 16.4)                   | 25.5<br>(22.3 to 28.5)                            | 0.2<br>(-2.3 to 2.4)                                |
| Motor vehicle road injuries                   | 466.5<br>(401.2 to 534.8)                        | 196.0<br>(166.2 to 225.2)                                 | 25.1<br>(16.9 to 35.4)                  | 14.0<br>(11.2 to 16.8)                            | -9.9<br>(-12.1 to -7.8)                             |
| Other road injuries                           | 143.3<br>(122.1 to 168.4)                        | 64.3<br>(50.0 to 81.6)                                    | 6.5<br>(4.2 to 9.5)                     | 27.7<br>(24.8 to 30.5)                            | 1.0<br>(-1.2 to 3.0)                                |
| Other transport injuries                      | 543.4<br>(454.2 to 646.5)                        | 114.1<br>(97.9 to 136.2)                                  | 24.5<br>(16.2 to 34.9)                  | 16.7<br>(13.0 to 20.6)                            | -4.3<br>(-7.3 to -1.3)                              |
| <b>Unintentional injuries</b>                 | <b>12,123.6</b><br><b>(11,197.2 to 13,107.4)</b> | <b>4,998.4</b><br><b>(4,698.7 to 5,355.7)</b>             | <b>357.7</b><br><b>(239.7 to 511.1)</b> | <b>20.6</b><br><b>(17.5 to 23.3)</b>              | <b>-2.3</b><br><b>(-4.8 to -0.1)</b>                |
| Falls                                         | 3,977.3<br>(3,408.7 to 4,543.9)                  | 1,640.8<br>(1,432.3 to 1,892.5)                           | 143.5<br>(98.5 to 202.7)                | 14.0<br>(11.3 to 16.3)                            | -7.8<br>(-9.9 to -6.0)                              |
| Drowning                                      | 27.7<br>(24.2 to 31.6)                           | 4.8<br>(4.0 to 5.6)                                       | 1.2<br>(0.8 to 1.7)                     | 8.7<br>(4.9 to 12.6)                              | -11.5<br>(-14.5 to -8.5)                            |
| Fire, heat, and hot substances                | 1,301.4<br>(1,097.0 to 1,586.5)                  | 144.6<br>(115.8 to 174.9)                                 | 30.1<br>(19.2 to 46.7)                  | 39.5<br>(32.3 to 45.2)                            | 13.3<br>(7.9 to 17.5)                               |
| Poisonings                                    | 54.4<br>(46.0 to 63.9)                           | 77.7<br>(60.8 to 96.0)                                    | 4.4<br>(2.8 to 6.4)                     | 38.4<br>(28.2 to 49.5)                            | 16.5<br>(8.4 to 25.6)                               |
| Exposure to mechanical forces                 | 2,255.9<br>(1,924.9 to 2,758.2)                  | 848.3<br>(722.6 to 975.9)                                 | 48.9<br>(31.8 to 71.9)                  | 21.5<br>(18.0 to 24.6)                            | -3.1<br>(-5.8 to -0.7)                              |
| Unintentional firearm injuries                | 136.8<br>(109.4 to 173.7)                        | 33.1<br>(24.5 to 43.6)                                    | 5.0<br>(3.2 to 7.4)                     | 17.2<br>(13.4 to 20.5)                            | -7.1<br>(-9.9 to -4.7)                              |
| Unintentional suffocation                     | 65.9<br>(52.4 to 82.3)                           | 12.1<br>(8.6 to 16.7)                                     | 2.0<br>(1.3 to 3.1)                     | 13.2<br>(10.0 to 16.3)                            | -5.9<br>(-8.4 to -3.7)                              |
| Other exposure to mechanical forces           | 2,053.2<br>(1,723.2 to 2,559.3)                  | 803.1<br>(684.0 to 924.4)                                 | 41.9<br>(27.5 to 61.7)                  | 22.4<br>(18.7 to 25.7)                            | -2.5<br>(-5.2 to -0.0)                              |



| Cause                                                                               | Prevalence in thousands (95% UI)              | Incidence in thousands (95% UI)          | YLDs in thousands (95% UI)           |                                                   |                                                     |
|-------------------------------------------------------------------------------------|-----------------------------------------------|------------------------------------------|--------------------------------------|---------------------------------------------------|-----------------------------------------------------|
|                                                                                     | 2016 counts                                   | 2016 counts                              | 2016 counts                          | Percentage change in counts between 2006 and 2016 | Percentage change in age-standardised rates between |
| Adverse effects of medical treatment                                                | 20.4<br>(16.1 to 25.4)                        | 266.9<br>(230.0 to 308.1)                | 2.7<br>(1.7 to 4.0)                  | 21.2<br>(15.6 to 26.8)                            | 3.9<br>(-0.6 to 8.3)                                |
| Animal contact                                                                      | 448.9<br>(394.8 to 521.4)                     | 502.0<br>(403.2 to 602.8)                | 13.1<br>(8.6 to 18.4)                | 17.0<br>(10.9 to 23.4)                            | -2.3<br>(-7.1 to 2.7)                               |
| Venomous animal contact                                                             | 193.7<br>(159.9 to 230.2)                     | 219.1<br>(166.3 to 284.4)                | 9.5<br>(6.3 to 13.6)                 | 19.5<br>(11.5 to 28.7)                            | 0.9<br>(-5.5 to 8.4)                                |
| Non-venomous animal contact                                                         | 255.2<br>(212.7 to 313.8)                     | 282.9<br>(222.5 to 350.2)                | 3.6<br>(2.2 to 5.7)                  | 10.9<br>(6.1 to 14.6)                             | -9.9<br>(-13.4 to -7.0)                             |
| Foreign body                                                                        | 738.6<br>(624.8 to 885.0)                     | 456.2<br>(392.7 to 534.9)                | 21.3<br>(13.6 to 31.7)               | 19.4<br>(14.5 to 23.7)                            | -0.9<br>(-4.6 to 2.3)                               |
| Pulmonary aspiration and foreign body in airway                                     | 204.4<br>(155.7 to 269.0)                     | 63.4<br>(52.5 to 77.5)                   | 7.3<br>(4.6 to 11.1)                 | 10.0<br>(5.7 to 13.9)                             | -7.5<br>(-10.9 to -4.5)                             |
| Foreign body in eyes                                                                | 43.4<br>(25.3 to 63.3)                        | 214.8<br>(166.2 to 286.5)                | 2.4<br>(1.3 to 4.1)                  | 24.2<br>(19.4 to 29.7)                            | 3.1<br>(0.3 to 6.1)                                 |
| Foreign body in other body part                                                     | 490.8<br>(404.2 to 623.8)                     | 178.0<br>(148.7 to 210.9)                | 11.6<br>(7.3 to 17.3)                | 25.1<br>(19.3 to 30.1)                            | 2.9<br>(-1.8 to 6.7)                                |
| Environmental heat and cold exposure                                                | 664.4<br>(562.0 to 780.5)                     | 164.9<br>(134.2 to 200.7)                | 21.3<br>(13.9 to 30.9)               | 20.6<br>(17.0 to 23.9)                            | -1.4<br>(-4.3 to 1.0)                               |
| Other unintentional injuries                                                        | 2,634.6<br>(2,102.0 to 3,234.2)               | 892.3<br>(740.3 to 1,062.2)              | 71.2<br>(46.7 to 103.5)              | 27.6<br>(25.0 to 30.0)                            | 3.1<br>(0.9 to 5.1)                                 |
| <b>Self-harm and interpersonal violence</b>                                         | <b>1,927.9</b><br><b>(1,762.8 to 2,111.9)</b> | <b>201.7†</b><br><b>(173.3 to 231.0)</b> | <b>28.1</b><br><b>(19.4 to 39.1)</b> | <b>4.1</b><br><b>(-1.2 to 9.1)</b>                | <b>-12.4</b><br><b>(-16.3 to -8.8)</b>              |
| Self-harm                                                                           | 78.2<br>(66.6 to 90.8)                        | 29.3<br>(24.6 to 34.6)                   | 3.1<br>(2.0 to 4.6)                  | 20.3<br>(15.5 to 25.1)                            | -2.8<br>(-6.4 to 0.6)                               |
| Self-harm by firearm                                                                | 4.5<br>(3.7 to 5.4)                           | 0.9<br>(0.5 to 1.4)                      | 0.1<br>(0.1 to 0.2)                  | 9.2<br>(4.7 to 13.2)                              | -9.5<br>(-13.0 to -6.4)                             |
| Self-harm by other specified means                                                  | 73.7<br>(62.2 to 86.3)                        | 28.4<br>(23.8 to 33.6)                   | 3.0<br>(1.9 to 4.4)                  | 20.9<br>(16.0 to 25.8)                            | -2.5<br>(-6.2 to 1.1)                               |
| Interpersonal violence                                                              | 1,849.7<br>(1,685.1 to 2,030.5)               | 172.5†<br>(144.6 to 202.1)               | 25.0<br>(17.3 to 34.5)               | 2.3<br>(-3.2 to 7.5)                              | -13.5<br>(-17.6 to -9.7)                            |
| Assault by firearm                                                                  | 18.4<br>(15.7 to 21.7)                        | 5.6<br>(3.9 to 7.4)                      | 0.8<br>(0.5 to 1.1)                  | -3.8<br>(-6.9 to -0.8)                            | -23.0<br>(-25.4 to -20.8)                           |
| Assault by sharp object                                                             | 124.5<br>(99.7 to 149.5)                      | 47.5<br>(35.3 to 60.1)                   | 3.3<br>(2.1 to 4.8)                  | 13.7<br>(9.9 to 17.3)                             | -8.2<br>(-10.8 to -5.7)                             |
| Sexual violence                                                                     | 1,481.3<br>(1,318.5 to 1,661.1)               | --                                       | 12.4<br>(8.4 to 17.5)                | -8.9<br>(-16.5 to -1.3)                           | -19.6<br>(-26.1 to -13.2)                           |
| Assault by other means                                                              | 225.6<br>(189.4 to 271.9)                     | 119.4<br>(99.7 to 142.0)                 | 8.5<br>(5.7 to 12.4)                 | 19.8<br>(16.8 to 22.6)                            | -4.3<br>(-6.6 to -2.3)                              |
| <b>Forces of nature, conflict and terrorism, and executions and police conflict</b> | <b>472.4</b><br><b>(282.5 to 716.9)</b>       | <b>1.8†</b><br><b>(1.3 to 2.4)</b>       | <b>10.6</b><br><b>(2.4 to 28.8)</b>  | <b>5.2</b><br><b>(1.1 to 10.0)</b>                | <b>-10.2</b><br><b>(-13.3 to -5.7)</b>              |
| Exposure to forces of nature                                                        | 111.9<br>(23.4 to 213.9)                      | --                                       | 3.1<br>(0.5 to 8.5)                  | -11.8<br>(-15.2 to -8.2)                          | -25.5<br>(-28.2 to -22.4)                           |
| Conflict and terrorism                                                              | 354.3<br>(217.5 to 561.6)                     | --                                       | 7.4<br>(1.9 to 19.9)                 | 14.3<br>(9.4 to 18.5)                             | -1.7<br>(-5.6 to 2.0)                               |
| Executions and police conflict                                                      | 6.2<br>(3.6 to 10.4)                          | 1.8<br>(1.3 to 2.4)                      | 0.1<br>(< 0.05 to 0.4)               | 14.1<br>(7.5 to 24.4)                             | -3.4<br>(-9.4 to 8.4)                               |
| <b>Impairments</b>                                                                  | --                                            | --                                       | --                                   | --                                                | --                                                  |
| Anaemia                                                                             | 18,343.5<br>(15,119.0 to 21,948.3)            | --                                       | 485.7<br>(312.1 to 720.5)            | 10.8<br>(-8.9 to 33.2)                            | -4.9<br>(-21.2 to 12.7)                             |
| Developmental intellectual disability                                               | 1,953.0<br>(1,486.1 to 2,477.7)               | --                                       | 178.4<br>(127.4 to 236.9)            | 9.6<br>(5.0 to 14.4)                              | -3.7<br>(-7.8 to 0.5)                               |
| Epilepsy                                                                            | 444.6<br>(231.1 to 593.1)                     | --                                       | 141.0<br>(67.7 to 235.5)             | 0.1<br>(-59.0 to 130.0)                           | -11.7<br>(-64.1 to 103.0)                           |
| Guillain-Barre syndrome                                                             | 0.6<br>(0.5 to 0.8)                           | --                                       | 0.2<br>(0.1 to 0.3)                  | 20.5<br>(17.1 to 24.2)                            | -0.0<br>(-0.1 to 0.1)                               |
| Hearing loss                                                                        | 12,450.9<br>(11,806.1 to 13,154.4)            | --                                       | 410.8<br>(291.2 to 571.5)            | 19.7<br>(15.9 to 23.5)                            | -6.0<br>(-8.5 to -3.4)                              |
| Heart failure                                                                       | 739.5<br>(654.8 to 841.6)                     | --                                       | 80.5<br>(60.7 to 102.5)              | 31.2<br>(22.4 to 40.2)                            | -2.2<br>(-8.6 to 4.8)                               |
| Infertility                                                                         | 1,159.9<br>(937.3 to 1,456.3)                 | --                                       | 7.2<br>(3.1 to 13.9)                 | 34.9<br>(19.4 to 52.7)                            | 17.3<br>(4.7 to 31.8)                               |
| Pelvic inflammatory disease                                                         | 23.7<br>(20.1 to 27.8)                        | --                                       | 3.1<br>(2.0 to 4.3)                  | 6.5<br>(-12.1 to 28.4)                            | -10.3<br>(-25.5 to 7.8)                             |
| Vision loss                                                                         | 11,371.2<br>(10,928.7 to 11,810.7)            | --                                       | 278.7<br>(193.6 to 398.4)            | 18.1<br>(14.7 to 22.0)                            | -7.8<br>(-10.4 to -5.0)                             |

We did not calculate incidence for the nine impairments, certain NTDs, and causes with only birth prevalence. Blank cells mean that no estimate is available.

† Incidence for aggregate causes represents the sum of the incidence of the causes below the aggregate.

‡ Incidence estimates for stroke represent first-ever stroke only.

^ Incidence of HIV/AIDS represents new infections of HIV only and does not include new infections of Tuberculosis in HIV positive cases.

SR Table 14: Prevalence, incidence, and YLDs for 2016, percentage change of YLD counts and percentage change of age-standardised YLD rates between 2006 and 2016 by cause and impairments, for all ages, Turkmenistan.

| Cause                                                                                | Prevalence in thousands (95% UI)       | Incidence in thousands (95% UI)            | YLDs in thousands (95% UI)           |                                                   |                                                     |
|--------------------------------------------------------------------------------------|----------------------------------------|--------------------------------------------|--------------------------------------|---------------------------------------------------|-----------------------------------------------------|
|                                                                                      | 2016 counts                            | 2016 counts                                | 2016 counts                          | Percentage change in counts between 2006 and 2016 | Percentage change in age-standardised rates between |
| <b>All causes</b>                                                                    | <b>5,157.4</b><br>(5,131.0 to 5,186.7) | <b>28,832.8†</b><br>(27,371.1 to 30,508.9) | <b>493.7</b><br>(362.5 to 646.8)     | <b>18.2</b><br>(15.2 to 21.7)                     | <b>-1.4</b><br>(-3.5 to 0.9)                        |
| <b>Communicable, maternal, neonatal, and nutritional disorders</b>                   | <b>2,801.8</b><br>(2,718.6 to 2,888.8) | <b>12,757.8†</b><br>(11,478.9 to 14,209.4) | <b>49.3</b><br>(35.2 to 68.5)        | <b>-4.7</b><br>(-11.2 to 2.0)                     | <b>-17.5</b><br>(-22.7 to -12.2)                    |
| <b>HIV/AIDS and tuberculosis</b>                                                     | <b>844.6</b><br>(777.4 to 899.7)       | <b>9.4†</b><br>(8.1 to 10.7)               | <b>1.7</b><br>(1.0 to 2.9)           | <b>-6.4</b><br>(-19.4 to 8.8)                     | <b>-21.9</b><br>(-32.1 to -9.8)                     |
| Tuberculosis                                                                         | 791.9<br>(729.3 to 860.8)              | 9.0†<br>(7.8 to 10.4)                      | 1.1<br>(0.7 to 1.5)                  | -10.3<br>(-23.0 to 4.5)                           | -24.4<br>(-34.1 to -13.2)                           |
| Drug-susceptible tuberculosis                                                        | 2.8<br>(2.3 to 3.3)                    | 7.5<br>(6.1 to 8.9)                        | 0.9<br>(0.6 to 1.2)                  | -11.8<br>(-33.8 to 28.3)                          | -25.7<br>(-44.0 to 8.2)                             |
| Multidrug-resistant tuberculosis without extensive drug resistance                   | 0.5<br>(0.2 to 0.8)                    | 1.2<br>(0.6 to 2.1)                        | 0.1<br>(0.1 to 0.3)                  | -14.5<br>(-78.2 to 324.2)                         | -27.6<br>(-81.3 to 255.8)                           |
| Extensively drug-resistant tuberculosis                                              | 0.1<br>( $< 0.05$ to 0.2)              | 0.3<br>(0.1 to 0.5)                        | $< 0.05$<br>( $< 0.05$ to 0.1)       | 162.5<br>(-22.8 to 1,002.0)                       | 121.2<br>(-34.5 to 817.0)                           |
| Latent tuberculosis infection                                                        | 788.6<br>(726.2 to 857.4)              | --                                         | --                                   | --                                                | --                                                  |
| HIV/AIDS                                                                             | 3.6<br>(1.9 to 6.8)                    | 0.4 <sup>A</sup><br>(0.2 to 0.6)           | 0.7<br>(0.2 to 1.7)                  | 0.7<br>(-22.4 to 23.3)                            | -17.5<br>(-36.8 to 1.7)                             |
| Drug-susceptible HIV/AIDS - Tuberculosis                                             | 0.1<br>(0.1 to 0.2)                    | 0.3<br>(0.2 to 0.5)                        | $< 0.05$<br>( $< 0.05$ to 0.1)       | -26.6<br>(-49.2 to 22.3)                          | -39.6<br>(-58.4 to 0.8)                             |
| Multidrug-resistant HIV/AIDS - Tuberculosis without extensive drug resistance        | $< 0.05$<br>( $< 0.05$ to $< 0.05$ )   | 0.1<br>( $< 0.05$ to 0.1)                  | $< 0.05$<br>( $< 0.05$ to $< 0.05$ ) | -30.7<br>(-79.9 to 197.7)                         | -42.9<br>(-83.4 to 145.0)                           |
| Extensively drug-resistant HIV/AIDS - Tuberculosis                                   | $< 0.05$<br>( $< 0.05$ to $< 0.05$ )   | $< 0.05$<br>( $< 0.05$ to $< 0.05$ )       | $< 0.05$<br>( $< 0.05$ to $< 0.05$ ) | 113.7<br>(-38.0 to 818.4)                         | 75.9<br>(-49.0 to 655.9)                            |
| HIV/AIDS resulting in other diseases                                                 | 3.5<br>(1.8 to 6.7)                    | 0.4<br>(0.2 to 0.6)                        | 0.6<br>(0.2 to 1.6)                  | 4.0<br>(-21.6 to 28.6)                            | -14.9<br>(-36.1 to 4.9)                             |
| <b>Diarrhoea, lower respiratory infections, and other common infectious diseases</b> | <b>231.2</b><br>(217.6 to 247.5)       | <b>11,546.2†</b><br>(10,298.3 to 12,969.8) | <b>13.1</b><br>(9.1 to 17.8)         | <b>7.5</b><br>(3.2 to 11.6)                       | <b>-4.9</b><br>(-8.3 to -1.5)                       |
| Diarrhoeal diseases                                                                  | 55.3<br>(50.8 to 60.0)                 | 3,500.3<br>(3,210.4 to 3,794.3)            | 6.4<br>(4.3 to 8.9)                  | 9.3<br>(1.9 to 16.8)                              | -2.8<br>(-9.1 to 3.5)                               |
| Intestinal infectious diseases                                                       | $< 0.05$<br>( $< 0.05$ to $< 0.05$ )   | $< 0.05†$<br>( $< 0.05$ to $< 0.05$ )      | $< 0.05$<br>( $< 0.05$ to $< 0.05$ ) | 0.3<br>(-15.1 to 17.5)                            | -17.9<br>(-30.1 to -4.4)                            |
| Typhoid fever                                                                        | $< 0.05$<br>( $< 0.05$ to $< 0.05$ )   | $< 0.05$<br>( $< 0.05$ to $< 0.05$ )       | $< 0.05$<br>( $< 0.05$ to $< 0.05$ ) | -1.0<br>(-17.2 to 17.1)                           | -19.3<br>(-32.4 to -5.0)                            |
| Paratyphoid fever                                                                    | $< 0.05$<br>( $< 0.05$ to $< 0.05$ )   | $< 0.05$<br>( $< 0.05$ to $< 0.05$ )       | $< 0.05$<br>( $< 0.05$ to $< 0.05$ ) | 57.1<br>(22.4 to 102.2)                           | 31.5<br>(3.9 to 67.2)                               |
| Other intestinal infectious diseases                                                 | --                                     | --                                         | $< 0.05$<br>( $< 0.05$ to $< 0.05$ ) | -29.4<br>(-51.1 to -0.7)                          | -39.4<br>(-54.8 to -19.7)                           |
| Lower respiratory infections                                                         | 5.7<br>(5.2 to 6.2)                    | 252.4<br>(229.3 to 278.1)                  | 0.4<br>(0.2 to 0.5)                  | 4.1<br>(-9.4 to 18.9)                             | -6.5<br>(-17.5 to 5.0)                              |
| Upper respiratory infections                                                         | 98.4<br>(82.1 to 116.8)                | 7,310.5<br>(6,062.7 to 8,715.3)            | 2.5<br>(1.4 to 3.9)                  | 12.3<br>(4.4 to 20.7)                             | -0.6<br>(-6.9 to 6.3)                               |
| Otitis media                                                                         | 68.1<br>(60.8 to 75.6)                 | 359.3<br>(287.4 to 449.0)                  | 2.0<br>(1.2 to 3.0)                  | -6.4<br>(-13.7 to 1.9)                            | -16.2<br>(-22.1 to -9.4)                            |
| Meningitis                                                                           | 12.3<br>(10.7 to 14.1)                 | 2.4<br>(2.0 to 2.8)                        | 1.4<br>(1.0 to 1.8)                  | 10.2<br>(1.7 to 17.8)                             | -4.5<br>(-11.2 to 1.7)                              |
| Pneumococcal meningitis                                                              | 6.3<br>(5.2 to 7.6)                    | 0.7<br>(0.6 to 0.8)                        | 0.6<br>(0.4 to 0.8)                  | 15.0<br>(-0.5 to 32.5)                            | -0.9<br>(-13.9 to 12.6)                             |
| H influenzae type B meningitis                                                       | 1.6<br>(1.4 to 2.0)                    | 0.3<br>(0.2 to 0.4)                        | 0.2<br>(0.2 to 0.3)                  | -6.3<br>(-14.5 to 1.5)                            | -18.0<br>(-25.2 to -10.8)                           |
| Meningococcal infection                                                              | 2.2<br>(1.7 to 2.9)                    | 0.8<br>(0.6 to 1.0)                        | 0.2<br>(0.2 to 0.3)                  | 11.0<br>(5.2 to 16.5)                             | -4.0<br>(-8.7 to 0.7)                               |
| Other meningitis                                                                     | 2.2<br>(1.8 to 2.6)                    | 0.6<br>(0.5 to 0.7)                        | 0.3<br>(0.2 to 0.4)                  | 16.7<br>(10.2 to 23.1)                            | 0.9<br>(-4.5 to 6.0)                                |
| Encephalitis                                                                         | 3.0<br>(2.2 to 4.0)                    | 1.5<br>(1.3 to 1.7)                        | 0.4<br>(0.3 to 0.5)                  | 19.9<br>(9.1 to 31.9)                             | 0.1<br>(-8.8 to 10.4)                               |
| Diphtheria                                                                           | $< 0.05$<br>( $< 0.05$ to $< 0.05$ )   | $< 0.05$<br>( $< 0.05$ to $< 0.05$ )       | $< 0.05$<br>( $< 0.05$ to $< 0.05$ ) | -26.4<br>(-63.0 to 47.6)                          | -37.1<br>(-67.3 to 22.2)                            |
| Whooping cough                                                                       | 1.0<br>(0.8 to 1.3)                    | 7.4<br>(5.8 to 9.5)                        | 0.1<br>( $< 0.05$ to 0.1)            | 5.0<br>(-15.9 to 32.3)                            | -11.3<br>(-29.2 to 12.0)                            |
| Tetanus                                                                              | $< 0.05$<br>( $< 0.05$ to $< 0.05$ )   | $< 0.05$<br>( $< 0.05$ to $< 0.05$ )       | $< 0.05$<br>( $< 0.05$ to $< 0.05$ ) | -16.0<br>(-29.1 to 0.5)                           | -32.6<br>(-44.4 to -18.2)                           |
| Measles                                                                              | $< 0.05$<br>(0.0 to $< 0.05$ )         | $< 0.05$<br>( $< 0.05$ to 0.1)             | $< 0.05$<br>(0.0 to $< 0.05$ )       | --                                                | --                                                  |
| Varicella and herpes zoster                                                          | 4.2<br>(3.9 to 4.5)                    | 112.3<br>(108.9 to 115.7)                  | 0.1<br>(0.1 to 0.2)                  | 21.4<br>(3.3 to 43.5)                             | -0.1<br>(-12.7 to 15.0)                             |
| <b>Neglected tropical diseases and malaria</b>                                       | <b>211.5</b><br>(167.8 to 275.5)       | <b>1.0†</b><br>(0.2 to 2.4)                | <b>0.9</b><br>(0.5 to 1.4)           | <b>-21.0</b><br>(-45.6 to 5.1)                    | <b>-31.8</b><br>(-54.1 to -9.1)                     |
| Malaria                                                                              | --                                     | --                                         | --                                   | --                                                | --                                                  |
| Chagas disease                                                                       | --                                     | --                                         | --                                   | --                                                | --                                                  |
| Leishmaniasis                                                                        | 0.5<br>(0.1 to 1.1)                    | 0.8<br>(0.1 to 2.1)                        | $< 0.05$<br>( $< 0.05$ to 0.1)       | 6.0<br>(-89.4 to 429.3)                           | -8.3<br>(-90.6 to 370.8)                            |
| Visceral leishmaniasis                                                               | $< 0.05$<br>( $< 0.05$ to $< 0.05$ )   | $< 0.05$<br>( $< 0.05$ to $< 0.05$ )       | $< 0.05$<br>( $< 0.05$ to $< 0.05$ ) | 5.6<br>(-100.0 to 3.3e+21)                        | -19.6<br>(-100.0 to 3.1e+21)                        |
| Cutaneous and mucocutaneous leishmaniasis                                            | 0.4<br>(0.1 to 1.1)                    | 0.8<br>(0.1 to 2.1)                        | $< 0.05$<br>( $< 0.05$ to 0.1)       | 6.0<br>(-89.4 to 429.4)                           | -8.3<br>(-90.6 to 371.0)                            |
| African trypanosomiasis                                                              | --                                     | --                                         | --                                   | --                                                | --                                                  |
| Schistosomiasis                                                                      | --                                     | --                                         | --                                   | --                                                | --                                                  |
| Cysticercosis                                                                        | --                                     | --                                         | --                                   | --                                                | --                                                  |
| Cystic echinococcosis                                                                | 0.6<br>(0.1 to 2.5)                    | 0.1<br>( $< 0.05$ to 0.5)                  | 0.1<br>( $< 0.05$ to 0.2)            | -57.2<br>(-95.5 to 265.1)                         | -64.6<br>(-95.7 to 165.7)                           |
| Lymphatic filariasis                                                                 | --                                     | --                                         | --                                   | --                                                | --                                                  |
| Onchocerciasis                                                                       | --                                     | --                                         | --                                   | --                                                | --                                                  |
| Trachoma                                                                             | --                                     | --                                         | --                                   | --                                                | --                                                  |
| Dengue                                                                               | --                                     | --                                         | --                                   | --                                                | --                                                  |
| Yellow fever                                                                         | --                                     | --                                         | --                                   | --                                                | --                                                  |
| Rabies                                                                               | $< 0.05$<br>( $< 0.05$ to $< 0.05$ )   | $< 0.05$<br>( $< 0.05$ to $< 0.05$ )       | $< 0.05$<br>( $< 0.05$ to $< 0.05$ ) | 156.5<br>(26.8 to 427.6)                          | 136.6<br>(21.1 to 383.4)                            |
| Intestinal nematode infections                                                       | 186.6<br>(138.4 to 253.5)              | --                                         | $< 0.05$<br>( $< 0.05$ to $< 0.05$ ) | 26.0<br>(-30.4 to 116.8)                          | 7.1<br>(-40.5 to 83.5)                              |
| Ascariasis                                                                           | 159.8<br>(115.3 to 221.5)              | --                                         | $< 0.05$<br>( $< 0.05$ to $< 0.05$ ) | 18.4<br>(-66.0 to 325.0)                          | 2.1<br>(-72.1 to 279.5)                             |

| Cause                                                                   | Prevalence in thousands (95% UI)              | Incidence in thousands (95% UI)                   | YLDs in thousands (95% UI)              |                                                   |                                                     |
|-------------------------------------------------------------------------|-----------------------------------------------|---------------------------------------------------|-----------------------------------------|---------------------------------------------------|-----------------------------------------------------|
|                                                                         | 2016 counts                                   | 2016 counts                                       | 2016 counts                             | Percentage change in counts between 2006 and 2016 | Percentage change in age-standardised rates between |
| Trichuriasis                                                            | 4.4<br>(2.7 to 6.9)                           | --                                                | --                                      | --                                                | --                                                  |
| Hookworm disease                                                        | 4.2<br>(2.7 to 6.2)                           | --                                                | < 0.05<br>(< 0.05 to < 0.05)            | 28.4<br>(-26.4 to 128.5)                          | 8.6<br>(-38.7 to 93.1)                              |
| Food-borne trematodiasis                                                | --                                            | --                                                | --                                      | --                                                | --                                                  |
| Leprosy                                                                 | < 0.05<br>(< 0.05 to < 0.05)                  | --                                                | < 0.05<br>(< 0.05 to < 0.05)            | -20.5<br>(-25.4 to -16.2)                         | -33.8<br>(-38.5 to -29.3)                           |
| Ebola virus disease                                                     | --                                            | --                                                | --                                      | --                                                | --                                                  |
| Zika virus disease                                                      | --                                            | --                                                | --                                      | --                                                | --                                                  |
| Guinea worm disease                                                     | --                                            | --                                                | --                                      | --                                                | --                                                  |
| Other neglected tropical diseases                                       | 34.6<br>(29.6 to 39.5)                        | --                                                | 0.8<br>(0.5 to 1.2)                     | -17.2<br>(-33.9 to 2.0)                           | -27.4<br>(-41.2 to -11.1)                           |
| <b>Maternal disorders</b>                                               | <b>6.0</b><br><b>(4.7 to 7.3)</b>             | <b>113.4†</b><br><b>(56.6 to 193.5)</b>           | <b>0.3</b><br><b>(0.2 to 0.5)</b>       | <b>16.1</b><br><b>(-15.2 to 53.9)</b>             | <b>-3.6</b><br><b>(-29.5 to 27.3)</b>               |
| Maternal haemorrhage                                                    | 1.8<br>(1.2 to 2.6)                           | 7.0<br>(5.0 to 9.6)                               | 0.1<br>(< 0.05 to 0.1)                  | 34.9<br>(-10.5 to 99.2)                           | 12.6<br>(-25.0 to 64.7)                             |
| Maternal sepsis and other pregnancy related infections                  | 2.7<br>(1.9 to 3.8)                           | 18.8<br>(13.8 to 25.7)                            | 0.1<br>(< 0.05 to 0.2)                  | 9.6<br>(-46.1 to 123.4)                           | -7.8<br>(-54.6 to 83.5)                             |
| Maternal hypertensive disorders                                         | 1.1<br>(0.7 to 1.7)                           | 4.8<br>(3.4 to 6.4)                               | 0.1<br>(< 0.05 to 0.1)                  | 18.4<br>(-32.5 to 124.7)                          | -2.7<br>(-44.6 to 83.2)                             |
| Maternal obstructed labour and uterine rupture                          | < 0.05<br>(< 0.05 to 0.1)                     | 3.3<br>(2.2 to 4.5)                               | < 0.05<br>(< 0.05 to < 0.05)            | 17.3<br>(-38.3 to 119.2)                          | -4.2<br>(-49.7 to 78.3)                             |
| Maternal abortion, miscarriage, and ectopic pregnancy                   | 0.7<br>(0.2 to 1.4)                           | 79.5<br>(25.2 to 160.3)                           | 0.1<br>(< 0.05 to 0.2)                  | 14.6<br>(-41.1 to 108.7)                          | -6.0<br>(-51.1 to 72.3)                             |
| Other maternal disorders                                                | --                                            | --                                                | 0.1<br>(< 0.05 to 0.1)                  | 9.7<br>(-20.3 to 45.9)                            | -8.5<br>(-32.9 to 21.3)                             |
| <b>Neonatal disorders</b>                                               | <b>57.9</b><br><b>(47.9 to 69.8)</b>          | --                                                | <b>8.0</b><br><b>(5.1 to 13.5)</b>      | <b>18.7</b><br><b>(-1.3 to 38.9)</b>              | <b>5.5</b><br><b>(-12.1 to 23.2)</b>                |
| Neonatal preterm birth complications                                    | 42.0<br>(32.0 to 57.0)                        | --                                                | 3.4<br>(2.3 to 4.8)                     | 4.6<br>(-16.4 to 28.5)                            | -6.6<br>(-25.5 to 14.8)                             |
| Neonatal encephalopathy due to birth asphyxia and trauma                | 16.6<br>(8.3 to 34.0)                         | --                                                | 1.7<br>(0.3 to 6.0)                     | 43.4<br>(-30.3 to 146.5)                          | 27.2<br>(-38.4 to 114.9)                            |
| Neonatal sepsis and other neonatal infections                           | 4.1<br>(1.2 to 9.4)                           | --                                                | 1.7<br>(0.4 to 4.2)                     | 40.1<br>(-21.0 to 138.6)                          | 24.9<br>(-31.1 to 113.4)                            |
| Hemolytic disease and other neonatal jaundice                           | 3.1<br>(2.6 to 3.6)                           | --                                                | 1.0<br>(0.7 to 1.3)                     | 10.4<br>(-5.6 to 29.7)                            | -2.3<br>(-16.2 to 14.0)                             |
| Other neonatal disorders                                                | --                                            | --                                                | 0.3<br>(0.2 to 0.5)                     | 14.5<br>(-7.0 to 38.7)                            | -4.6<br>(-22.5 to 15.4)                             |
| <b>Nutritional deficiencies</b>                                         | <b>960.4</b><br><b>(880.4 to 1,037.9)</b>     | <b>42.9†</b><br><b>(34.0 to 53.0)</b>             | <b>21.6</b><br><b>(13.9 to 32.1)</b>    | <b>-16.2</b><br><b>(-26.0 to -6.8)</b>            | <b>-28.4</b><br><b>(-36.2 to -20.8)</b>             |
| Protein-energy malnutrition                                             | 26.9<br>(21.9 to 32.7)                        | 9.8<br>(8.0 to 12.0)                              | 1.0<br>(0.6 to 1.6)                     | -19.5<br>(-49.0 to 21.8)                          | -32.8<br>(-57.7 to 1.9)                             |
| Iodine deficiency                                                       | 93.6<br>(76.5 to 112.5)                       | 2.2<br>(1.8 to 2.6)                               | 2.4<br>(1.6 to 3.5)                     | 22.1<br>(-3.0 to 63.0)                            | 2.1<br>(-16.5 to 31.0)                              |
| Vitamin A deficiency                                                    | 37.5<br>(27.7 to 49.9)                        | 30.9<br>(22.7 to 41.1)                            | 0.3<br>(0.2 to 0.4)                     | 10.6<br>(-4.5 to 27.6)                            | -2.2<br>(-14.7 to 12.0)                             |
| Iron-deficiency anaemia                                                 | 808.9<br>(708.1 to 906.7)                     | --                                                | 18.0<br>(11.2 to 27.2)                  | -19.7<br>(-30.2 to -8.8)                          | -31.4<br>(-39.7 to -23.0)                           |
| Other nutritional deficiencies                                          | --                                            | --                                                | < 0.05<br>(< 0.05 to 0.1)               | -22.1<br>(-52.5 to 21.8)                          | -35.1<br>(-60.5 to 1.4)                             |
| <b>Other communicable, maternal, neonatal, and nutritional diseases</b> | <b>1,396.2</b><br><b>(1,321.8 to 1,478.0)</b> | <b>1,045.1</b><br><b>(893.5 to 1,180.3)</b>       | <b>3.1</b><br><b>(2.0 to 4.8)</b>       | <b>3.8</b><br><b>(-3.9 to 11.2)</b>               | <b>-10.9</b><br><b>(-16.9 to -5.0)</b>              |
| Sexually transmitted diseases excluding HIV                             | 768.4<br>(719.6 to 823.5)                     | 547.1<br>(476.8 to 634.7)                         | 2.1<br>(1.3 to 3.4)                     | 17.2<br>(8.7 to 25.4)                             | -2.1<br>(-8.8 to 4.2)                               |
| Syphilis                                                                | 12.5<br>(9.5 to 16.3)                         | 9.5<br>(6.7 to 12.7)                              | 0.2<br>(0.1 to 0.2)                     | 36.3<br>(16.9 to 59.6)                            | 4.5<br>(-11.6 to 23.2)                              |
| Chlamydial infection                                                    | 105.3<br>(81.3 to 134.0)                      | 85.3<br>(65.8 to 107.8)                           | 0.5<br>(0.3 to 0.8)                     | 20.3<br>(5.0 to 37.4)                             | -2.5<br>(-14.8 to 11.1)                             |
| Gonococcal infection                                                    | 75.3<br>(58.6 to 96.1)                        | 254.5<br>(192.4 to 337.4)                         | 0.5<br>(0.2 to 0.8)                     | 8.3<br>(-6.1 to 24.4)                             | -3.7<br>(-17.0 to 10.3)                             |
| Trichomoniasis                                                          | 150.4<br>(129.0 to 172.9)                     | 130.3<br>(110.2 to 151.6)                         | 0.2<br>(0.1 to 0.4)                     | 22.0<br>(13.8 to 30.0)                            | -0.1<br>(-6.2 to 5.7)                               |
| Genital herpes                                                          | 469.5<br>(401.8 to 547.7)                     | 35.6<br>(29.8 to 42.9)                            | 0.1<br>(< 0.05 to 0.3)                  | 26.3<br>(18.1 to 34.2)                            | 0.0<br>(-5.2 to 5.5)                                |
| Other sexually transmitted diseases                                     | 26.2<br>(20.8 to 32.8)                        | 31.9<br>(26.5 to 38.6)                            | 0.7<br>(0.5 to 1.1)                     | 14.5<br>(3.2 to 27.2)                             | -4.1<br>(-13.5 to 6.0)                              |
| Hepatitis                                                               | 725.5<br>(632.4 to 832.6)                     | 497.9<br>(356.5 to 595.3)                         | 0.3<br>(0.2 to 0.5)                     | -28.0<br>(-43.5 to -9.5)                          | -33.6<br>(-47.4 to -17.0)                           |
| Acute hepatitis A                                                       | 27.4<br>(16.8 to 34.5)                        | 355.7<br>(218.4 to 448.2)                         | 0.2<br>(0.1 to 0.3)                     | -33.8<br>(-55.7 to -1.7)                          | -38.2<br>(-58.9 to -8.2)                            |
| Hepatitis B                                                             | 393.6<br>(310.8 to 494.7)                     | 118.8<br>(87.3 to 164.1)                          | 0.1<br>(0.1 to 0.2)                     | -22.2<br>(-43.0 to 2.4)                           | -30.1<br>(-47.3 to -9.7)                            |
| Hepatitis C                                                             | 303.9<br>(268.5 to 343.9)                     | 15.2<br>(13.7 to 16.9)                            | < 0.05<br>(< 0.05 to < 0.05)            | 5.8<br>(-29.9 to 54.3)                            | -9.3<br>(-38.7 to 30.6)                             |
| Acute hepatitis E                                                       | 0.6<br>(0.5 to 0.8)                           | 8.3<br>(7.1 to 9.9)                               | < 0.05<br>(< 0.05 to < 0.05)            | -25.7<br>(-48.8 to 11.1)                          | -26.0<br>(-47.1 to 7.4)                             |
| Other infectious diseases                                               | 28.7<br>(24.5 to 32.7)                        | < 0.05<br>(< 0.05 to < 0.05)                      | 0.7<br>(0.4 to 1.0)                     | -10.0<br>(-26.6 to 6.0)                           | -20.7<br>(-34.3 to -7.0)                            |
| <b>Non-communicable diseases</b>                                        | <b>4,872.2</b><br><b>(4,833.6 to 4,917.7)</b> | <b>15,521.6†</b><br><b>(14,797.0 to 16,358.4)</b> | <b>398.1</b><br><b>(293.3 to 518.2)</b> | <b>21.0</b><br><b>(17.2 to 24.8)</b>              | <b>0.1</b><br><b>(-2.5 to 2.8)</b>                  |
| <b>Neoplasms</b>                                                        | <b>12.8</b><br><b>(12.0 to 13.8)</b>          | <b>6.5</b><br><b>(6.1 to 7.2)</b>                 | <b>1.9</b><br><b>(1.4 to 2.4)</b>       | <b>49.7</b><br><b>(41.4 to 58.6)</b>              | <b>13.7</b><br><b>(8.1 to 19.8)</b>                 |
| Lip and oral cavity cancer                                              | 0.6<br>(0.6 to 0.7)                           | 0.2<br>(0.2 to 0.2)                               | 0.1<br>(< 0.05 to 0.1)                  | 59.7<br>(40.7 to 80.9)                            | 21.2<br>(6.8 to 35.7)                               |
| Nasopharynx cancer                                                      | 0.1<br>(0.1 to 0.2)                           | < 0.05<br>(< 0.05 to < 0.05)                      | < 0.05<br>(< 0.05 to < 0.05)            | 31.8<br>(6.3 to 62.6)                             | 11.1<br>(-6.0 to 31.7)                              |
| Other pharynx cancer                                                    | 0.2<br>(0.2 to 0.2)                           | 0.1<br>(0.1 to 0.1)                               | < 0.05<br>(< 0.05 to < 0.05)            | 89.8<br>(67.9 to 116.7)                           | 36.9<br>(20.9 to 55.6)                              |
| Oesophageal cancer                                                      | 0.3<br>(0.3 to 0.4)                           | 0.3<br>(0.3 to 0.3)                               | 0.1<br>(0.1 to 0.1)                     | 15.4<br>(-2.9 to 37.6)                            | -14.3<br>(-29.4 to 4.2)                             |
| Stomach cancer                                                          | 0.5<br>(0.5 to 0.6)                           | 0.4<br>(0.3 to 0.4)                               | 0.1<br>(0.1 to 0.1)                     | 9.8<br>(-8.2 to 30.2)                             | -16.5<br>(-30.7 to -0.2)                            |
| Colon and rectum cancer                                                 | 1.0<br>(0.9 to 1.0)                           | 0.3<br>(0.3 to 0.3)                               | 0.1<br>(0.1 to 0.1)                     | 59.6<br>(39.0 to 84.4)                            | 20.3<br>(3.5 to 39.7)                               |
| Liver cancer                                                            | 0.1<br>(0.1 to 0.1)                           | 0.2<br>(0.2 to 0.2)                               | 0.1<br>(< 0.05 to 0.1)                  | 45.6<br>(33.9 to 57.3)                            | 9.0<br>(0.6 to 17.6)                                |
| Liver cancer due to hepatitis B                                         | 0.1<br>(0.1 to 0.1)                           | 0.1<br>(0.1 to 0.1)                               | < 0.05<br>(< 0.05 to < 0.05)            | 46.9<br>(33.0 to 60.7)                            | 9.6<br>(-0.3 to 19.9)                               |



| Cause                                              | Prevalence in thousands (95% UI)        | Incidence in thousands (95% UI)       | YLDs in thousands (95% UI)           |                                                   |                                                     |
|----------------------------------------------------|-----------------------------------------|---------------------------------------|--------------------------------------|---------------------------------------------------|-----------------------------------------------------|
|                                                    | 2016 counts                             | 2016 counts                           | 2016 counts                          | Percentage change in counts between 2006 and 2016 | Percentage change in age-standardised rates between |
| Liver cancer due to hepatitis C                    | 0.1<br>(0.1 to 0.1)                     | 0.1<br>(0.1 to 0.1)                   | < 0.05<br>(< 0.05 to < 0.05)         | 48.4<br>(35.4 to 63.0)                            | 9.6<br>(0.3 to 19.3)                                |
| Liver cancer due to alcohol use                    | < 0.05<br>(< 0.05 to < 0.05)            | < 0.05<br>(< 0.05 to < 0.05)          | < 0.05<br>(< 0.05 to < 0.05)         | 40.3<br>(27.2 to 54.0)                            | 4.9<br>(-4.5 to 14.2)                               |
| Liver cancer due to other causes                   | < 0.05<br>(< 0.05 to < 0.05)            | < 0.05<br>(< 0.05 to < 0.05)          | < 0.05<br>(< 0.05 to < 0.05)         | 44.0<br>(30.4 to 58.9)                            | 11.4<br>(0.9 to 22.5)                               |
| Gallbladder and biliary tract cancer               | < 0.05<br>(< 0.05 to < 0.05)            | 0.1<br>(0.1 to 0.1)                   | < 0.05<br>(< 0.05 to < 0.05)         | 39.3<br>(25.7 to 50.6)                            | 5.7<br>(-3.8 to 13.7)                               |
| Pancreatic cancer                                  | 0.1<br>(0.1 to 0.1)                     | 0.1<br>(0.1 to 0.1)                   | < 0.05<br>(< 0.05 to < 0.05)         | 46.2<br>(36.3 to 56.6)                            | 7.8<br>(0.8 to 15.5)                                |
| Larynx cancer                                      | 0.2<br>(0.2 to 0.2)                     | 0.1<br>(0.1 to 0.1)                   | < 0.05<br>(< 0.05 to < 0.05)         | 7.3<br>(-2.8 to 18.6)                             | -22.1<br>(-29.5 to -13.3)                           |
| Tracheal, bronchus, and lung cancer                | 0.4<br>(0.3 to 0.4)                     | 0.3<br>(0.3 to 0.3)                   | 0.1<br>(0.1 to 0.1)                  | 32.0<br>(3.9 to 65.4)                             | -1.3<br>(-21.9 to 23.4)                             |
| Malignant skin melanoma                            | 0.2<br>(0.2 to 0.3)                     | 0.1<br>(< 0.05 to 0.1)                | < 0.05<br>(< 0.05 to < 0.05)         | 71.8<br>(38.0 to 119.2)                           | 30.8<br>(4.5 to 63.8)                               |
| Non-melanoma skin cancer                           | 0.6<br>(0.4 to 0.8)                     | 1.3<br>(0.8 to 1.9)                   | < 0.05<br>(< 0.05 to < 0.05)         | 25.8<br>(-15.0 to 90.0)                           | -3.1<br>(-36.3 to 50.7)                             |
| Non-melanoma skin cancer (squamous-cell carcinoma) | 0.5<br>(0.2 to 0.8)                     | 0.4<br>(0.2 to 0.7)                   | < 0.05<br>(< 0.05 to < 0.05)         | 25.0<br>(-17.6 to 93.8)                           | -3.4<br>(-37.9 to 54.7)                             |
| Non-melanoma skin cancer (basal-cell carcinoma)    | 0.1<br>(0.1 to 0.2)                     | 0.8<br>(0.4 to 1.4)                   | < 0.05<br>(< 0.05 to < 0.05)         | 39.9<br>(2.1 to 91.7)                             | 3.7<br>(-26.3 to 51.6)                              |
| Breast cancer                                      | 4.0<br>(3.5 to 4.5)                     | 0.8<br>(0.7 to 1.0)                   | 0.4<br>(0.2 to 0.5)                  | 73.2<br>(41.1 to 113.1)                           | 29.4<br>(7.5 to 55.0)                               |
| Cervical cancer                                    | 1.7<br>(1.6 to 2.0)                     | 0.5<br>(0.4 to 0.5)                   | 0.2<br>(0.1 to 0.2)                  | 32.5<br>(5.0 to 67.4)                             | 2.5<br>(-16.3 to 27.0)                              |
| Uterine cancer                                     | 0.5<br>(0.4 to 0.5)                     | 0.1<br>(0.1 to 0.1)                   | < 0.05<br>(< 0.05 to 0.1)            | 98.0<br>(61.4 to 141.9)                           | 41.3<br>(17.9 to 70.0)                              |
| Ovarian cancer                                     | 0.5<br>(0.4 to 0.6)                     | 0.2<br>(0.1 to 0.2)                   | 0.1<br>(0.1 to 0.1)                  | 52.9<br>(20.5 to 86.5)                            | 17.4<br>(-6.4 to 42.8)                              |
| Prostate cancer                                    | 0.6<br>(0.6 to 0.8)                     | 0.2<br>(0.1 to 0.2)                   | 0.1<br>(< 0.05 to 0.1)               | 75.4<br>(39.0 to 121.1)                           | 32.1<br>(4.4 to 65.8)                               |
| Testicular cancer                                  | 0.6<br>(0.5 to 0.8)                     | 0.1<br>(0.1 to 0.1)                   | < 0.05<br>(< 0.05 to 0.1)            | 162.0<br>(73.8 to 295.5)                          | 114.2<br>(44.7 to 218.8)                            |
| Kidney cancer                                      | 1.0<br>(1.0 to 1.1)                     | 0.3<br>(0.2 to 0.3)                   | 0.1<br>(0.1 to 0.1)                  | 61.4<br>(41.6 to 84.3)                            | 25.8<br>(11.8 to 42.6)                              |
| Bladder cancer                                     | 0.5<br>(0.4 to 0.5)                     | 0.1<br>(0.1 to 0.1)                   | < 0.05<br>(< 0.05 to 0.1)            | 88.0<br>(64.9 to 113.3)                           | 37.2<br>(20.7 to 54.9)                              |
| Brain and nervous system cancer                    | 0.5<br>(0.4 to 0.6)                     | 0.2<br>(0.2 to 0.3)                   | 0.1<br>(< 0.05 to 0.1)               | 28.2<br>(5.0 to 45.7)                             | 4.0<br>(-14.0 to 15.5)                              |
| Thyroid cancer                                     | 0.6<br>(0.5 to 0.7)                     | 0.1<br>(0.1 to 0.1)                   | < 0.05<br>(< 0.05 to 0.1)            | 158.2<br>(99.6 to 230.9)                          | 93.8<br>(53.6 to 145.7)                             |
| Mesothelioma                                       | < 0.05<br>(< 0.05 to < 0.05)            | < 0.05<br>(< 0.05 to < 0.05)          | < 0.05<br>(< 0.05 to < 0.05)         | 31.1<br>(16.5 to 43.2)                            | -3.0<br>(-13.2 to 5.8)                              |
| Hodgkin lymphoma                                   | 0.2<br>(0.1 to 0.4)                     | 0.1<br>(< 0.05 to 0.1)                | < 0.05<br>(< 0.05 to < 0.05)         | 87.9<br>(32.9 to 168.7)                           | 49.8<br>(7.4 to 108.6)                              |
| Non-Hodgkin's lymphoma                             | 0.3<br>(0.2 to 0.3)                     | 0.1<br>(0.1 to 0.1)                   | < 0.05<br>(< 0.05 to < 0.05)         | 83.8<br>(52.8 to 108.5)                           | 37.8<br>(20.2 to 56.3)                              |
| Multiple myeloma                                   | 0.1<br>(0.1 to 0.1)                     | < 0.05<br>(< 0.05 to 0.1)             | < 0.05<br>(< 0.05 to < 0.05)         | 116.4<br>(58.0 to 158.6)                          | 54.0<br>(17.4 to 81.9)                              |
| Leukaemia                                          | 0.7<br>(0.6 to 0.8)                     | 0.2<br>(0.2 to 0.2)                   | 0.1<br>(0.1 to 0.1)                  | 9.8<br>(-3.6 to 27.4)                             | -4.8<br>(-15.1 to 8.2)                              |
| Acute lymphoid leukaemia                           | 0.2<br>(0.1 to 0.2)                     | < 0.05<br>(< 0.05 to 0.1)             | < 0.05<br>(< 0.05 to < 0.05)         | 27.1<br>(-2.5 to 59.3)                            | 14.4<br>(-10.3 to 41.1)                             |
| Chronic lymphoid leukaemia                         | 0.1<br>(0.1 to 0.1)                     | < 0.05<br>(< 0.05 to < 0.05)          | < 0.05<br>(< 0.05 to < 0.05)         | 27.6<br>(8.8 to 52.9)                             | 0.0<br>(-13.4 to 18.1)                              |
| Acute myeloid leukaemia                            | 0.1<br>(0.1 to 0.1)                     | 0.1<br>(< 0.05 to 0.1)                | < 0.05<br>(< 0.05 to < 0.05)         | 28.7<br>(6.7 to 56.2)                             | 12.0<br>(-4.7 to 31.7)                              |
| Chronic myeloid leukaemia                          | < 0.05<br>(< 0.05 to < 0.05)            | < 0.05<br>(< 0.05 to < 0.05)          | < 0.05<br>(< 0.05 to < 0.05)         | 3.3<br>(-14.0 to 24.0)                            | -18.4<br>(-30.5 to -4.6)                            |
| Other leukaemia                                    | 0.3<br>(0.2 to 0.3)                     | 0.1<br>(0.1 to 0.1)                   | < 0.05<br>(< 0.05 to < 0.05)         | -9.0<br>(-24.8 to 17.0)                           | -17.5<br>(-30.0 to 1.7)                             |
| Other neoplasms                                    | 1.0<br>(0.9 to 1.1)                     | 0.3<br>(0.3 to 0.3)                   | 0.1<br>(0.1 to 0.1)                  | 43.8<br>(23.0 to 66.8)                            | 17.4<br>(3.2 to 32.9)                               |
| <b>Cardiovascular diseases</b>                     | <b>224.9</b><br><b>(216.3 to 234.3)</b> | <b>25.6†</b><br><b>(24.4 to 26.9)</b> | <b>16.6</b><br><b>(12.2 to 21.4)</b> | <b>25.9</b><br><b>(20.9 to 31.1)</b>              | <b>0.1</b><br><b>(-4.0 to 4.6)</b>                  |
| Rheumatic heart disease                            | 44.1<br>(39.4 to 49.1)                  | 1.3<br>(1.2 to 1.5)                   | 2.1<br>(1.3 to 3.1)                  | 3.3<br>(-6.4 to 12.7)                             | -13.0<br>(-20.6 to -5.5)                            |
| Ischaemic heart disease                            | 77.1<br>(72.6 to 82.0)                  | 9.4<br>(8.8 to 10.0)                  | 4.9<br>(3.5 to 6.6)                  | 35.0<br>(28.9 to 41.4)                            | 5.2<br>(0.5 to 10.5)                                |
| Cerebrovascular disease                            | 30.4<br>(28.2 to 32.7)                  | 6.9‡<br>(6.3 to 7.4)                  | 6.0<br>(4.3 to 7.7)                  | 28.3<br>(17.1 to 39.7)                            | -1.0<br>(-10.0 to 9.0)                              |
| Ischaemic stroke                                   | 18.9<br>(16.6 to 21.5)                  | 3.0‡<br>(2.6 to 3.4)                  | 3.6<br>(2.5 to 4.7)                  | 33.1<br>(16.6 to 51.5)                            | 2.7<br>(-11.1 to 18.7)                              |
| Hemorrhagic stroke                                 | 13.3<br>(12.1 to 14.7)                  | 3.9‡<br>(3.5 to 4.3)                  | 2.5<br>(1.8 to 3.2)                  | 21.9<br>(9.1 to 35.9)                             | -6.4<br>(-15.8 to 3.4)                              |
| Hypertensive heart disease                         | 10.0<br>(8.4 to 11.8)                   | --                                    | 0.8<br>(0.6 to 1.1)                  | 29.8<br>(16.6 to 44.1)                            | 0.5<br>(-8.6 to 10.0)                               |
| Cardiomyopathy and myocarditis                     | 5.4<br>(4.8 to 6.0)                     | 0.7+<br>(0.6 to 0.7)                  | 0.5<br>(0.4 to 0.8)                  | 25.8<br>(12.5 to 41.6)                            | 0.9<br>(-8.5 to 11.7)                               |
| Myocarditis                                        | 1.3<br>(1.1 to 1.5)                     | 0.7<br>(0.6 to 0.7)                   | 0.1<br>(0.1 to 0.1)                  | 18.6<br>(1.2 to 38.7)                             | 1.9<br>(-11.9 to 16.3)                              |
| Alcoholic cardiomyopathy                           | 2.0<br>(1.7 to 2.4)                     | --                                    | 0.2<br>(0.1 to 0.2)                  | 33.0<br>(10.5 to 58.6)                            | -0.1<br>(-14.8 to 17.5)                             |
| Other cardiomyopathy                               | 3.0<br>(2.6 to 3.5)                     | --                                    | 0.3<br>(0.2 to 0.4)                  | 24.5<br>(4.1 to 48.3)                             | 1.4<br>(-12.7 to 18.2)                              |
| Atrial fibrillation and flutter                    | 18.3<br>(16.0 to 20.9)                  | 1.6<br>(1.4 to 1.9)                   | 1.4<br>(1.0 to 2.0)                  | 26.6<br>(17.3 to 37.4)                            | 0.4<br>(-5.8 to 7.3)                                |
| Peripheral vascular disease                        | 53.6<br>(46.0 to 61.9)                  | 5.4<br>(4.6 to 6.3)                   | 0.2<br>(0.1 to 0.4)                  | 23.9<br>(11.8 to 37.8)                            | -3.5<br>(-10.6 to 5.0)                              |
| Endocarditis                                       | 0.1<br>(0.1 to 0.1)                     | 0.4<br>(0.3 to 0.4)                   | < 0.05<br>(< 0.05 to < 0.05)         | 26.0<br>(19.2 to 32.6)                            | 1.5<br>(-5.3 to 8.4)                                |
| Other cardiovascular and circulatory diseases      | 9.6<br>(8.2 to 11.2)                    | --                                    | 0.5<br>(0.3 to 0.7)                  | 23.7<br>(8.8 to 41.3)                             | 0.6<br>(-9.3 to 12.4)                               |
| <b>Chronic respiratory diseases</b>                | <b>309.1</b><br><b>(296.9 to 322.4)</b> | <b>48.6†</b><br><b>(45.7 to 52.0)</b> | <b>11.9</b><br><b>(8.6 to 16.1)</b>  | <b>21.2</b><br><b>(15.7 to 27.0)</b>              | <b>3.8</b><br><b>(-0.7 to 8.4)</b>                  |
| Chronic obstructive pulmonary disease              | 87.1<br>(82.5 to 91.5)                  | 5.4<br>(5.1 to 5.6)                   | 2.3<br>(1.8 to 2.8)                  | 18.2<br>(2.9 to 34.2)                             | -7.2<br>(-18.8 to 5.6)                              |
| Pneumoconiosis                                     | 0.2<br>(0.2 to 0.3)                     | < 0.05<br>(< 0.05 to < 0.05)          | < 0.05<br>(< 0.05 to 0.1)            | 59.5<br>(32.4 to 91.6)                            | 20.2<br>(-2.3 to 47.5)                              |
| Silicosis                                          | < 0.05<br>(< 0.05 to < 0.05)            | < 0.05<br>(< 0.05 to < 0.05)          | < 0.05<br>(< 0.05 to < 0.05)         | 72.5<br>(61.6 to 82.8)                            | 28.7<br>(22.1 to 35.0)                              |

| Cause                                                          | Prevalence in thousands (95% UI)        | Incidence in thousands (95% UI)     | YLDs in thousands (95% UI)      |                                                   |                                                     |
|----------------------------------------------------------------|-----------------------------------------|-------------------------------------|---------------------------------|---------------------------------------------------|-----------------------------------------------------|
|                                                                | 2016 counts                             | 2016 counts                         | 2016 counts                     | Percentage change in counts between 2006 and 2016 | Percentage change in age-standardised rates between |
| Asbestosis                                                     | 0.1<br>(< 0.05 to 0.1)                  | < 0.05<br>(< 0.05 to < 0.05)        | < 0.05<br>(< 0.05 to < 0.05)    | 33.7<br>(23.5 to 42.7)                            | -1.6<br>(-8.3 to 4.6)                               |
| Coal workers pneumoconiosis                                    | --                                      | --                                  | --                              | --                                                | --                                                  |
| Other pneumoconiosis                                           | 0.2<br>(0.1 to 0.2)                     | < 0.05<br>(< 0.05 to < 0.05)        | < 0.05<br>(< 0.05 to < 0.05)    | 69.5<br>(26.6 to 124.6)                           | 27.8<br>(-6.1 to 73.2)                              |
| Asthma                                                         | 223.7<br>(208.5 to 240.2)               | 43.0<br>(40.2 to 46.3)              | 8.8<br>(5.7 to 12.7)            | 21.7<br>(15.6 to 27.8)                            | 7.7<br>(2.8 to 12.2)                                |
| Interstitial lung disease and pulmonary sarcoidosis            | 4.4<br>(3.9 to 4.9)                     | 0.2<br>(0.2 to 0.2)                 | 0.5<br>(0.3 to 0.7)             | 20.4<br>(3.7 to 40.7)                             | -0.4<br>(-13.3 to 14.5)                             |
| Other chronic respiratory diseases                             | --                                      | --                                  | 0.3<br>(0.2 to 0.4)             | 29.7<br>(13.4 to 49.0)                            | 19.7<br>(5.9 to 35.2)                               |
| <b>Cirrhosis and other chronic liver diseases</b>              | <b>49.6<br/>(47.1 to 51.9)</b>          | <b>2.4<br/>(2.3 to 2.5)</b>         | <b>2.2<br/>(1.5 to 3.1)</b>     | <b>24.1<br/>(13.6 to 35.0)</b>                    | <b>7.0<br/>(-1.1 to 15.4)</b>                       |
| Cirrhosis and other chronic liver diseases due to hepatitis B  | 15.6<br>(14.2 to 16.9)                  | 0.8<br>(0.7 to 0.8)                 | 0.5<br>(0.4 to 0.8)             | 39.8<br>(18.3 to 62.1)                            | 10.1<br>(-4.1 to 24.4)                              |
| Cirrhosis and other chronic liver diseases due to hepatitis C  | 9.0<br>(8.0 to 10.1)                    | 0.5<br>(0.4 to 0.5)                 | 0.3<br>(0.2 to 0.4)             | 42.0<br>(17.9 to 70.8)                            | 10.4<br>(-6.1 to 28.8)                              |
| Cirrhosis and other chronic liver diseases due to alcohol use  | 10.3<br>(9.3 to 11.3)                   | 0.6<br>(0.5 to 0.6)                 | 0.3<br>(0.2 to 0.5)             | 45.3<br>(22.4 to 71.9)                            | 9.8<br>(-4.7 to 28.0)                               |
| Cirrhosis and other chronic liver diseases due to other causes | 14.9<br>(13.8 to 15.9)                  | 0.6<br>(0.6 to 0.7)                 | 1.0<br>(0.7 to 1.4)             | 8.6<br>(-4.8 to 22.7)                             | 3.0<br>(-8.8 to 16.1)                               |
| <b>Digestive diseases</b>                                      | <b>151.1<br/>(141.3 to 161.1)</b>       | <b>181.0†<br/>(169.2 to 192.8)</b>  | <b>5.6<br/>(4.0 to 7.5)</b>     | <b>29.7<br/>(17.4 to 43.7)</b>                    | <b>5.5<br/>(-3.4 to 15.7)</b>                       |
| Peptic ulcer disease                                           | 40.6<br>(36.4 to 45.5)                  | 6.0<br>(5.4 to 6.7)                 | 0.9<br>(0.6 to 1.4)             | 105.5<br>(70.2 to 144.1)                          | 55.8<br>(31.4 to 85.2)                              |
| Gastritis and duodenitis                                       | 66.3<br>(56.5 to 75.8)                  | 53.7<br>(47.1 to 60.7)              | 1.2<br>(0.8 to 1.7)             | 72.3<br>(45.1 to 102.5)                           | 44.4<br>(25.3 to 66.0)                              |
| Appendicitis                                                   | 0.9<br>(0.8 to 1.0)                     | 24.4<br>(22.3 to 26.8)              | 0.3<br>(0.2 to 0.4)             | 4.4<br>(-24.6 to 42.3)                            | -0.5<br>(-26.4 to 32.0)                             |
| Paralytic ileus and intestinal obstruction                     | 0.1<br>(< 0.05 to 0.1)                  | 1.4<br>(1.2 to 1.6)                 | < 0.05<br>(< 0.05 to < 0.05)    | 24.2<br>(19.0 to 29.0)                            | 3.7<br>(0.4 to 7.0)                                 |
| Inguinal, femoral, and abdominal hernia                        | 34.2<br>(30.3 to 38.2)                  | 52.5<br>(45.3 to 59.8)              | 2.3<br>(1.6 to 3.3)             | 3.7<br>(-8.3 to 17.0)                             | -16.4<br>(-24.7 to -7.0)                            |
| Inflammatory bowel disease                                     | 0.9<br>(0.8 to 1.0)                     | 2.6<br>(2.5 to 2.8)                 | 0.1<br>(0.1 to 0.2)             | 31.4<br>(12.8 to 54.4)                            | 5.0<br>(-11.5 to 24.5)                              |
| Vascular intestinal disorders                                  | < 0.05<br>(< 0.05 to < 0.05)            | 0.3<br>(0.2 to 0.3)                 | < 0.05<br>(< 0.05 to < 0.05)    | 28.3<br>(21.8 to 35.8)                            | 6.3<br>(1.5 to 10.8)                                |
| Gallbladder and biliary diseases                               | 12.3<br>(10.8 to 14.0)                  | 38.2<br>(33.1 to 43.8)              | 0.2<br>(0.1 to 0.3)             | 43.8<br>(17.0 to 77.4)                            | 11.1<br>(-9.4 to 35.4)                              |
| Pancreatitis                                                   | 0.2<br>(0.2 to 0.2)                     | 1.8<br>(1.6 to 2.0)                 | < 0.05<br>(< 0.05 to < 0.05)    | 58.7<br>(52.0 to 66.4)                            | 24.5<br>(19.8 to 29.2)                              |
| Other digestive diseases                                       | --                                      | --                                  | 0.5<br>(0.3 to 0.6)             | 29.5<br>(15.4 to 44.4)                            | 7.4<br>(-2.6 to 18.8)                               |
| <b>Neurological disorders</b>                                  | <b>2,039.6<br/>(1,950.6 to 2,126.1)</b> | <b>968.3<br/>(817.0 to 1,141.3)</b> | <b>52.9<br/>(34.2 to 75.3)</b>  | <b>16.5<br/>(-6.1 to 46.2)</b>                    | <b>-0.9<br/>(-18.7 to 22.6)</b>                     |
| Alzheimer's disease and other dementias                        | 10.5<br>(8.8 to 12.4)                   | 1.8<br>(1.5 to 2.2)                 | 1.5<br>(1.1 to 2.0)             | 24.0<br>(16.8 to 32.2)                            | -0.6<br>(-5.5 to 5.0)                               |
| Parkinson's disease                                            | 2.7<br>(2.1 to 3.4)                     | 0.3<br>(0.3 to 0.4)                 | 0.3<br>(0.2 to 0.5)             | 33.9<br>(18.5 to 51.8)                            | 7.5<br>(-3.5 to 20.3)                               |
| Epilepsy                                                       | 19.3<br>(4.3 to 38.1)                   | 2.2<br>(0.5 to 4.4)                 | 6.7<br>(1.4 to 16.1)            | 2.5<br>(-80.2 to 505.7)                           | -8.1<br>(-82.3 to 442.2)                            |
| Multiple sclerosis                                             | 1.2<br>(1.0 to 1.4)                     | 0.1<br>(< 0.05 to 0.1)              | 0.3<br>(0.2 to 0.5)             | 57.3<br>(32.3 to 89.1)                            | 24.5<br>(5.3 to 48.8)                               |
| Motor neuron disease                                           | 0.1<br>(0.1 to 0.1)                     | < 0.05<br>(< 0.05 to < 0.05)        | < 0.05<br>(< 0.05 to < 0.05)    | 25.1<br>(19.6 to 30.7)                            | 6.2<br>(2.6 to 10.1)                                |
| Migraine                                                       | 855.8<br>(801.6 to 908.0)               | 92.3<br>(86.6 to 98.8)              | 36.9<br>(23.5 to 51.9)          | 18.0<br>(13.8 to 22.4)                            | -0.4<br>(-3.5 to 3.0)                               |
| Tension-type headache                                          | 1,502.8<br>(1,337.8 to 1,688.2)         | 871.5<br>(719.7 to 1,040.6)         | 5.6<br>(3.6 to 8.3)             | 19.5<br>(13.3 to 26.7)                            | -0.4<br>(-4.9 to 4.7)                               |
| Other neurological disorders                                   | < 0.05<br>(< 0.05 to < 0.05)            | < 0.05<br>(< 0.05 to 0.1)           | 1.5<br>(0.4 to 3.5)             | 21.7<br>(-69.2 to 499.1)                          | 10.8<br>(-70.2 to 394.0)                            |
| <b>Mental and substance use disorders</b>                      | <b>712.5<br/>(687.9 to 738.4)</b>       | <b>262.7†<br/>(246.8 to 280.9)</b>  | <b>94.5<br/>(68.2 to 122.8)</b> | <b>18.0<br/>(15.1 to 21.0)</b>                    | <b>0.3<br/>(-2.0 to 2.6)</b>                        |
| Schizophrenia                                                  | 11.1<br>(9.7 to 12.8)                   | 0.8<br>(0.7 to 0.9)                 | 7.2<br>(5.2 to 9.1)             | 31.1<br>(19.2 to 43.5)                            | 3.0<br>(-5.6 to 12.6)                               |
| Alcohol use disorders                                          | 110.2<br>(96.3 to 124.3)                | 58.8<br>(51.0 to 66.9)              | 11.1<br>(7.6 to 15.5)           | 24.1<br>(14.1 to 35.0)                            | 0.5<br>(-7.4 to 8.6)                                |
| Drug use disorders                                             | 39.0<br>(36.1 to 42.2)                  | 5.7<br>(5.2 to 6.3)                 | 8.5<br>(6.0 to 11.3)            | 32.3<br>(20.7 to 45.4)                            | 8.6<br>(-0.1 to 18.4)                               |
| Opioid use disorders                                           | 14.0<br>(11.8 to 16.7)                  | 2.1<br>(1.8 to 2.5)                 | 5.9<br>(4.0 to 7.9)             | 35.5<br>(20.1 to 51.5)                            | 8.4<br>(-2.9 to 20.1)                               |
| Cocaine use disorders                                          | 4.0<br>(3.4 to 4.6)                     | 0.3<br>(0.3 to 0.4)                 | 0.6<br>(0.3 to 0.8)             | 26.0<br>(-2.9 to 61.7)                            | 7.7<br>(-14.5 to 35.6)                              |
| Amphetamine use disorders                                      | 4.5<br>(3.1 to 6.4)                     | 0.4<br>(0.3 to 0.5)                 | 0.6<br>(0.3 to 1.0)             | 28.5<br>(-3.5 to 73.0)                            | 13.3<br>(-14.0 to 50.7)                             |
| Cannabis use disorders                                         | 14.5<br>(11.8 to 17.6)                  | 2.4<br>(1.9 to 2.8)                 | 0.4<br>(0.3 to 0.6)             | 11.4<br>(-8.3 to 33.8)                            | 0.3<br>(-16.0 to 19.2)                              |
| Other drug use disorders                                       | 3.1<br>(2.7 to 3.5)                     | 0.6<br>(0.5 to 0.7)                 | 1.1<br>(0.7 to 1.6)             | 31.2<br>(4.0 to 66.0)                             | 11.3<br>(-10.3 to 39.2)                             |
| Depressive disorders                                           | 145.6<br>(135.6 to 156.8)               | 145.0<br>(130.9 to 160.7)           | 23.9<br>(16.5 to 32.1)          | 16.5<br>(10.9 to 23.1)                            | -2.8<br>(-7.2 to 1.8)                               |
| Major depressive disorder                                      | 87.8<br>(79.0 to 97.6)                  | 134.4<br>(120.6 to 150.1)           | 18.1<br>(12.3 to 24.5)          | 14.1<br>(7.2 to 22.5)                             | -3.7<br>(-9.1 to 2.4)                               |
| Dysthymia                                                      | 59.9<br>(52.2 to 69.1)                  | 10.6<br>(9.3 to 12.2)               | 5.8<br>(3.9 to 8.5)             | 24.6<br>(19.4 to 30.1)                            | 0.1<br>(-3.3 to 3.8)                                |
| Bipolar disorder                                               | 33.1<br>(28.3 to 38.6)                  | 2.9<br>(2.5 to 3.4)                 | 6.8<br>(4.2 to 10.1)            | 17.7<br>(9.8 to 26.9)                             | 0.1<br>(-6.2 to 6.9)                                |
| Anxiety disorders                                              | 137.4<br>(124.1 to 151.2)               | 24.4<br>(22.3 to 26.8)              | 13.4<br>(9.3 to 18.2)           | 16.0<br>(8.2 to 24.5)                             | 0.2<br>(-6.1 to 7.1)                                |
| Eating disorders                                               | 7.3<br>(5.9 to 8.8)                     | 4.0<br>(2.9 to 5.2)                 | 1.5<br>(0.9 to 2.2)             | 44.4<br>(23.9 to 66.9)                            | 29.8<br>(12.3 to 50.6)                              |
| Anorexia nervosa                                               | 1.6<br>(1.2 to 2.2)                     | 0.7<br>(0.5 to 0.9)                 | 0.4<br>(0.2 to 0.5)             | 29.8<br>(-1.0 to 73.8)                            | 23.4<br>(-6.1 to 64.6)                              |
| Bulimia nervosa                                                | 5.4<br>(4.0 to 7.1)                     | 3.3<br>(2.3 to 4.6)                 | 1.1<br>(0.7 to 1.7)             | 49.5<br>(25.6 to 77.4)                            | 31.9<br>(11.5 to 55.9)                              |
| Autistic spectrum disorders                                    | 45.7<br>(41.0 to 51.2)                  | 0.4<br>(0.2 to 0.5)                 | 6.7<br>(4.6 to 9.5)             | 13.4<br>(7.7 to 19.4)                             | 0.2<br>(-4.6 to 5.2)                                |
| Autism                                                         | 13.4<br>(11.4 to 15.6)                  | < 0.05<br>(< 0.05 to 0.1)           | 3.4<br>(2.2 to 5.0)             | 13.4<br>(3.5 to 24.3)                             | 0.2<br>(-7.9 to 9.3)                                |
| Asperger syndrome and other autistic spectrum disorders        | 32.3<br>(26.9 to 39.0)                  | 0.3<br>(0.2 to 0.5)                 | 3.3<br>(2.1 to 4.8)             | 13.4<br>(7.5 to 19.0)                             | 0.1<br>(-4.7 to 4.7)                                |



| Cause                                                      | Prevalence in thousands (95% UI)              | Incidence in thousands (95% UI)                   | YLDs in thousands (95% UI)            |                                                   |                                                     |
|------------------------------------------------------------|-----------------------------------------------|---------------------------------------------------|---------------------------------------|---------------------------------------------------|-----------------------------------------------------|
|                                                            | 2016 counts                                   | 2016 counts                                       | 2016 counts                           | Percentage change in counts between 2006 and 2016 | Percentage change in age-standardised rates between |
| Attention-deficit/hyperactivity disorder                   | 46.0<br>(41.4 to 51.4)                        | 2.2<br>(1.9 to 2.5)                               | 0.6<br>(0.3 to 0.9)                   | 5.1<br>(-3.0 to 14.8)                             | 0.0<br>(-7.6 to 8.9)                                |
| Conduct disorder                                           | 43.7<br>(36.2 to 52.1)                        | 14.9<br>(11.9 to 17.8)                            | 5.3<br>(3.3 to 8.1)                   | -8.9<br>(-14.7 to -3.3)                           | 0.4<br>(-6.1 to 6.9)                                |
| Idiopathic developmental intellectual disability           | 50.0<br>(25.8 to 75.6)                        | --                                                | 2.2<br>(1.0 to 3.9)                   | 0.8<br>(-12.8 to 18.7)                            | -10.6<br>(-22.6 to 4.2)                             |
| Other mental and substance use disorders                   | 97.7<br>(85.8 to 113.1)                       | 3.7<br>(3.3 to 4.2)                               | 7.3<br>(5.0 to 10.7)                  | 25.3<br>(18.7 to 32.5)                            | 0.1<br>(-4.4 to 5.1)                                |
| <b>Diabetes, urogenital, blood, and endocrine diseases</b> | <b>1,602.7</b><br><b>(1,567.6 to 1,637.2)</b> | <b>865.8†</b><br><b>(803.9 to 936.3)</b>          | <b>36.1</b><br><b>(25.7 to 48.9)</b>  | <b>32.6</b><br><b>(26.7 to 38.9)</b>              | <b>6.3</b><br><b>(1.9 to 10.9)</b>                  |
| Diabetes mellitus                                          | 134.9<br>(120.8 to 151.2)                     | 8.4<br>(7.5 to 9.4)                               | 11.4<br>(7.8 to 15.9)                 | 47.5<br>(34.5 to 61.7)                            | 10.5<br>(1.2 to 21.7)                               |
| Acute glomerulonephritis                                   | 0.1<br>(0.1 to 0.1)                           | 1.6<br>(1.4 to 1.8)                               | < 0.05<br>(< 0.05 to < 0.05)          | 12.6<br>(6.1 to 18.7)                             | -3.8<br>(-8.2 to 0.6)                               |
| Chronic kidney disease                                     | 249.6<br>(227.2 to 274.6)                     | 19.4<br>(17.0 to 21.9)                            | 8.0<br>(5.9 to 10.4)                  | 46.6<br>(35.2 to 59.1)                            | 15.0<br>(7.1 to 24.0)                               |
| Chronic kidney disease due to diabetes mellitus            | 103.7<br>(89.8 to 120.5)                      | 7.9<br>(6.5 to 9.7)                               | 3.1<br>(2.2 to 4.1)                   | 49.5<br>(35.6 to 66.2)                            | 13.7<br>(4.4 to 24.9)                               |
| Chronic kidney disease due to hypertension                 | 35.9<br>(30.2 to 42.2)                        | 4.9<br>(4.0 to 5.9)                               | 0.5<br>(0.3 to 0.6)                   | 51.3<br>(33.0 to 72.9)                            | 17.7<br>(3.8 to 34.9)                               |
| Chronic kidney disease due to glomerulonephritis           | 41.0<br>(35.0 to 47.6)                        | 1.1<br>(0.9 to 1.4)                               | 2.2<br>(1.5 to 2.9)                   | 44.2<br>(28.0 to 63.5)                            | 16.9<br>(6.0 to 29.5)                               |
| Chronic kidney disease due to other causes                 | 69.0<br>(57.8 to 81.2)                        | 5.4<br>(4.5 to 6.5)                               | 2.2<br>(1.6 to 3.0)                   | 43.9<br>(28.9 to 61.1)                            | 14.4<br>(4.2 to 25.0)                               |
| Urinary diseases and male infertility                      | 85.6<br>(76.2 to 95.5)                        | 592.6†<br>(532.4 to 661.4)                        | 2.4<br>(1.6 to 3.5)                   | 24.7<br>(14.3 to 32.8)                            | -4.3<br>(-11.7 to 1.7)                              |
| Interstitial nephritis and urinary tract infections        | 10.2<br>(9.0 to 11.5)                         | 530.8<br>(469.9 to 596.6)                         | 0.3<br>(0.2 to 0.5)                   | 14.9<br>(1.7 to 30.4)                             | -0.5<br>(-10.7 to 12.1)                             |
| Urolithiasis                                               | 2.1<br>(1.8 to 2.4)                           | 55.2<br>(48.6 to 62.9)                            | 0.1<br>(0.1 to 0.2)                   | 30.5<br>(11.8 to 51.4)                            | 3.5<br>(-12.5 to 21.8)                              |
| Benign prostatic hyperplasia                               | 48.1<br>(40.8 to 57.2)                        | 6.6<br>(5.5 to 7.9)                               | 1.6<br>(1.0 to 2.3)                   | 31.0<br>(16.3 to 41.9)                            | -4.3<br>(-14.2 to 3.3)                              |
| Male infertility                                           | 21.6<br>(16.3 to 28.4)                        | --                                                | 0.1<br>(< 0.05 to 0.3)                | 21.2<br>(12.1 to 31.7)                            | -0.7<br>(-8.3 to 8.2)                               |
| Other urinary diseases                                     | --                                            | --                                                | 0.2<br>(0.1 to 0.3)                   | -1.7<br>(-11.3 to 8.6)                            | -17.1<br>(-24.6 to -8.8)                            |
| Gynecological diseases                                     | 601.0<br>(571.8 to 626.8)                     | 233.2†<br>(217.0 to 250.7)                        | 7.7<br>(5.2 to 11.0)                  | 16.2<br>(10.9 to 21.6)                            | -3.9<br>(-7.9 to 0.3)                               |
| Uterine fibroids                                           | 77.6<br>(68.4 to 87.7)                        | 8.8<br>(7.5 to 10.2)                              | 1.1<br>(0.6 to 1.8)                   | 13.8<br>(1.3 to 25.3)                             | -9.8<br>(-19.0 to -1.5)                             |
| Polycystic ovarian syndrome                                | 6.2<br>(4.6 to 8.3)                           | 2.1<br>(1.5 to 2.7)                               | 0.1<br>(< 0.05 to 0.1)                | 20.0<br>(5.2 to 37.2)                             | 0.1<br>(-12.4 to 14.0)                              |
| Female infertility                                         | 10.3<br>(4.0 to 19.7)                         | --                                                | 0.1<br>(< 0.05 to 0.1)                | 28.1<br>(-1.8 to 66.7)                            | 4.5<br>(-19.2 to 34.8)                              |
| Endometriosis                                              | 2.7<br>(2.2 to 3.3)                           | 8.6<br>(6.6 to 11.2)                              | 0.3<br>(0.2 to 0.4)                   | 19.0<br>(-8.8 to 55.3)                            | -0.2<br>(-23.3 to 29.3)                             |
| Genital prolapse                                           | 138.7<br>(118.9 to 158.5)                     | 9.9<br>(8.4 to 11.5)                              | 0.4<br>(0.2 to 0.8)                   | 34.8<br>(23.8 to 48.9)                            | -1.1<br>(-9.8 to 9.7)                               |
| Premenstrual syndrome                                      | 358.4<br>(336.1 to 381.9)                     | 128.8<br>(119.8 to 138.7)                         | 3.0<br>(1.9 to 4.7)                   | 13.0<br>(4.4 to 22.1)                             | -2.5<br>(-9.7 to 5.2)                               |
| Other gynecological diseases                               | 82.3<br>(71.0 to 95.5)                        | 75.2<br>(62.2 to 90.2)                            | 2.8<br>(1.8 to 4.0)                   | 17.7<br>(8.5 to 26.7)                             | -3.8<br>(-10.7 to 3.3)                              |
| Hemoglobinopathies and hemolytic anaemias                  | 770.0<br>(738.9 to 798.4)                     | --                                                | 4.3<br>(2.7 to 6.6)                   | 26.4<br>(7.6 to 47.5)                             | 7.8<br>(-6.7 to 25.0)                               |
| Thalassemias                                               | 0.1<br>(0.1 to 0.1)                           | --                                                | < 0.05<br>(< 0.05 to < 0.05)          | 4.5<br>(-19.4 to 37.7)                            | -9.7<br>(-30.2 to 18.4)                             |
| Thalassaemias trait                                        | 164.8<br>(131.8 to 200.1)                     | --                                                | 3.2<br>(1.9 to 5.0)                   | 40.7<br>(19.1 to 66.4)                            | 18.7<br>(1.1 to 39.1)                               |
| Sickle cell disorders                                      | 0.1<br>(0.1 to 0.1)                           | --                                                | < 0.05<br>(< 0.05 to < 0.05)          | 15.2<br>(4.5 to 26.7)                             | 7.9<br>(-1.8 to 18.0)                               |
| Sickle cell trait                                          | 105.5<br>(100.7 to 110.3)                     | --                                                | 0.4<br>(0.2 to 0.7)                   | 41.0<br>(12.3 to 77.6)                            | 25.0<br>(0.5 to 55.6)                               |
| G6PD deficiency                                            | 58.9<br>(56.1 to 62.0)                        | --                                                | < 0.05<br>(< 0.05 to < 0.05)          | 74.4<br>(39.9 to 114.6)                           | 49.7<br>(23.3 to 79.3)                              |
| G6PD trait                                                 | 435.5<br>(424.5 to 446.0)                     | --                                                | < 0.05<br>(< 0.05 to < 0.05)          | 48.4<br>(19.3 to 83.0)                            | 24.4<br>(3.1 to 49.0)                               |
| Other hemoglobinopathies and hemolytic anaemias            | 40.9<br>(34.9 to 47.2)                        | --                                                | 0.7<br>(0.4 to 1.1)                   | -17.0<br>(-32.9 to -0.2)                          | -27.8<br>(-39.2 to -15.7)                           |
| Endocrine, metabolic, blood, and immune disorders          | 77.9<br>(71.4 to 85.0)                        | 10.5<br>(9.4 to 11.8)                             | 2.3<br>(1.6 to 3.3)                   | 11.5<br>(2.9 to 20.4)                             | -6.2<br>(-12.4 to 0.1)                              |
| <b>Musculoskeletal disorders</b>                           | <b>697.9</b><br><b>(662.3 to 737.8)</b>       | <b>302.5</b><br><b>(270.5 to 336.7)</b>           | <b>79.0</b><br><b>(56.4 to 103.5)</b> | <b>27.2</b><br><b>(23.2 to 31.2)</b>              | <b>-1.0</b><br><b>(-3.3 to 1.7)</b>                 |
| Rheumatoid arthritis                                       | 11.7<br>(10.3 to 13.1)                        | 0.7<br>(0.6 to 0.8)                               | 2.8<br>(1.9 to 3.7)                   | 40.9<br>(28.9 to 54.7)                            | 9.4<br>(1.2 to 18.7)                                |
| Osteoarthritis                                             | 156.4<br>(146.4 to 167.6)                     | 9.0<br>(8.3 to 9.8)                               | 9.7<br>(6.9 to 13.2)                  | 42.1<br>(36.6 to 47.8)                            | 5.1<br>(1.6 to 9.1)                                 |
| Low back and neck pain                                     | 516.0<br>(481.7 to 555.7)                     | 236.2<br>(208.0 to 265.3)                         | 60.9<br>(43.0 to 80.8)                | 25.2<br>(20.5 to 30.2)                            | -2.2<br>(-4.9 to 1.1)                               |
| Low back pain                                              | 385.5<br>(340.7 to 438.0)                     | 197.3<br>(170.1 to 226.6)                         | 44.0<br>(30.9 to 58.4)                | 23.8<br>(17.7 to 30.3)                            | -3.1<br>(-6.8 to 1.2)                               |
| Neck pain                                                  | 167.8<br>(142.8 to 194.5)                     | 38.9<br>(33.4 to 46.0)                            | 16.9<br>(11.3 to 24.2)                | 29.0<br>(24.6 to 33.9)                            | 0.1<br>(-1.9 to 2.3)                                |
| Gout                                                       | 15.4<br>(13.6 to 17.5)                        | 3.1<br>(2.7 to 3.6)                               | 0.5<br>(0.3 to 0.7)                   | 33.2<br>(14.1 to 57.2)                            | 0.4<br>(-11.9 to 16.2)                              |
| Other musculoskeletal disorders                            | 58.5<br>(41.9 to 79.6)                        | 53.5<br>(38.3 to 72.2)                            | 5.1<br>(3.1 to 7.9)                   | 19.5<br>(3.1 to 37.6)                             | -5.2<br>(-17.4 to 7.7)                              |
| <b>Other non-communicable diseases</b>                     | <b>3,980.7</b><br><b>(3,908.1 to 4,059.8)</b> | <b>12,858.2†</b><br><b>(12,149.6 to 13,682.9)</b> | <b>97.3</b><br><b>(66.5 to 136.9)</b> | <b>16.2</b><br><b>(14.5 to 17.8)</b>              | <b>-2.0</b><br><b>(-3.2 to -0.9)</b>                |
| Congenital anomalies                                       | 63.0<br>(58.1 to 69.1)                        | --                                                | 7.9<br>(5.7 to 10.4)                  | 13.5<br>(7.1 to 20.2)                             | -0.5<br>(-5.9 to 5.0)                               |
| Neural tube defects                                        | 6.5<br>(5.7 to 7.3)                           | --                                                | 1.9<br>(1.3 to 2.6)                   | 15.9<br>(1.9 to 32.1)                             | 0.7<br>(-10.7 to 13.5)                              |
| Congenital heart anomalies                                 | 16.3<br>(14.2 to 18.7)                        | --                                                | 0.8<br>(0.3 to 1.4)                   | 18.6<br>(6.1 to 32.7)                             | 7.3<br>(-3.8 to 19.6)                               |
| Orofacial clefts                                           | 2.6<br>(2.3 to 3.0)                           | --                                                | < 0.05<br>(< 0.05 to 0.1)             | 6.8<br>(-6.7 to 20.6)                             | -7.3<br>(-18.9 to 4.2)                              |
| Down's syndrome                                            | 5.4<br>(4.6 to 6.2)                           | --                                                | 0.5<br>(0.3 to 0.7)                   | 19.2<br>(6.3 to 35.3)                             | 4.8<br>(-5.9 to 17.9)                               |
| Turner syndrome                                            | 5.2<br>(4.4 to 6.1)                           | --                                                | 0.1<br>(< 0.05 to 0.1)                | 12.2<br>(-13.0 to 44.6)                           | 1.3<br>(-20.7 to 29.7)                              |
| Klinefelter syndrome                                       | 4.0<br>(3.4 to 4.8)                           | --                                                | < 0.05<br>(< 0.05 to < 0.05)          | 16.6<br>(-6.7 to 45.9)                            | 0.9<br>(-18.9 to 27.0)                              |



| Cause                                         | Prevalence in thousands (95% UI)              | Incidence in thousands (95% UI)          | YLDs in thousands (95% UI)           |                                                   |                                                     |
|-----------------------------------------------|-----------------------------------------------|------------------------------------------|--------------------------------------|---------------------------------------------------|-----------------------------------------------------|
|                                               | 2016 counts                                   | 2016 counts                              | 2016 counts                          | Percentage change in counts between 2006 and 2016 | Percentage change in age-standardised rates between |
| Other chromosomal abnormalities               | 3.1<br>(2.6 to 3.6)                           | --                                       | 0.6<br>(0.4 to 0.8)                  | 15.7<br>(-5.6 to 41.7)                            | 4.5<br>(-15.2 to 28.2)                              |
| Congenital musculoskeletal and limb anomalies | 5.5<br>(5.0 to 6.0)                           | --                                       | 0.8<br>(0.5 to 1.1)                  | 17.5<br>(5.5 to 30.7)                             | 2.2<br>(-7.7 to 13.0)                               |
| Urogenital congenital anomalies               | 6.6<br>(5.7 to 7.6)                           | --                                       | 0.2<br>(0.1 to 0.4)                  | 6.9<br>(-7.2 to 22.7)                             | 0.3<br>(-12.8 to 14.5)                              |
| Digestive congenital anomalies                | 7.4<br>(6.5 to 8.3)                           | --                                       | 0.3<br>(0.2 to 0.5)                  | 15.7<br>(-1.7 to 35.3)                            | 0.9<br>(-13.6 to 16.7)                              |
| Other congenital anomalies                    | 16.9<br>(10.8 to 25.2)                        | --                                       | 2.6<br>(1.7 to 3.7)                  | 8.4<br>(-1.6 to 19.4)                             | -6.0<br>(-14.3 to 3.4)                              |
| Skin and subcutaneous diseases                | 1,482.7<br>(1,443.8 to 1,523.2)               | 3,042.7<br>(2,891.1 to 3,209.4)          | 36.2<br>(24.4 to 52.2)               | 11.8<br>(9.0 to 14.5)                             | 2.9<br>(0.9 to 5.2)                                 |
| Dermatitis                                    | 168.2<br>(151.1 to 185.5)                     | 223.4<br>(203.9 to 245.0)                | 6.3<br>(3.7 to 10.2)                 | 12.4<br>(7.2 to 17.7)                             | 0.1<br>(-3.9 to 4.4)                                |
| Psoriasis                                     | 48.4<br>(46.2 to 50.9)                        | 6.8<br>(6.5 to 7.1)                      | 4.3<br>(3.0 to 5.6)                  | 30.8<br>(20.1 to 42.1)                            | 9.8<br>(1.4 to 18.3)                                |
| Cellulitis                                    | 2.0<br>(1.8 to 2.1)                           | 34.9<br>(32.6 to 37.5)                   | 0.1<br>(0.1 to 0.2)                  | 18.6<br>(-6.9 to 50.0)                            | 2.6<br>(-18.2 to 27.4)                              |
| Pyoderma                                      | 9.5<br>(9.2 to 9.8)                           | 198.1<br>(191.2 to 205.1)                | 0.1<br>(< 0.05 to 0.1)               | 22.7<br>(12.4 to 33.5)                            | 1.5<br>(-5.8 to 9.3)                                |
| Scabies                                       | 49.1<br>(42.7 to 56.5)                        | 149.5<br>(128.6 to 171.3)                | 1.3<br>(0.7 to 2.0)                  | 3.3<br>(-1.9 to 9.5)                              | -6.2<br>(-10.1 to -1.5)                             |
| Fungal skin diseases                          | 402.0<br>(361.6 to 444.0)                     | 1,391.6<br>(1,246.6 to 1,549.2)          | 2.3<br>(0.9 to 4.8)                  | 16.4<br>(13.8 to 19.1)                            | 0.0<br>(-1.1 to 1.2)                                |
| Viral skin diseases                           | 143.9<br>(137.2 to 150.4)                     | 210.6<br>(200.9 to 221.5)                | 4.4<br>(2.8 to 6.5)                  | 9.4<br>(5.7 to 13.5)                              | 0.1<br>(-3.0 to 3.5)                                |
| Acne vulgaris                                 | 429.9<br>(383.5 to 477.4)                     | 287.8<br>(237.6 to 352.2)                | 11.1<br>(7.5 to 16.2)                | 2.1<br>(-3.4 to 8.4)                              | 4.3<br>(-0.8 to 10.0)                               |
| Alopecia areata                               | 10.5<br>(10.1 to 10.9)                        | 18.6<br>(17.8 to 19.4)                   | 0.3<br>(0.2 to 0.5)                  | 20.4<br>(6.5 to 35.1)                             | -0.1<br>(-10.8 to 11.2)                             |
| Pruritus                                      | 45.6<br>(40.0 to 51.7)                        | 36.3<br>(32.3 to 41.1)                   | 0.5<br>(0.2 to 0.9)                  | 24.0<br>(17.1 to 31.5)                            | 3.0<br>(-2.0 to 8.3)                                |
| Urticaria                                     | 57.9<br>(50.4 to 67.2)                        | 103.8<br>(90.5 to 120.6)                 | 3.5<br>(2.2 to 5.1)                  | 14.4<br>(7.8 to 21.0)                             | 0.2<br>(-5.1 to 5.4)                                |
| Decubitus ulcer                               | 1.0<br>(0.9 to 1.1)                           | 3.7<br>(3.3 to 4.2)                      | 0.2<br>(0.1 to 0.2)                  | 25.4<br>(13.0 to 39.3)                            | 3.5<br>(-10.4 to 19.6)                              |
| Other skin and subcutaneous diseases          | 331.4<br>(320.9 to 341.1)                     | 377.6<br>(365.0 to 389.9)                | 1.8<br>(0.9 to 3.4)                  | 36.1<br>(32.3 to 40.0)                            | 11.4<br>(8.7 to 14.2)                               |
| Sense organ diseases                          | 1,130.7<br>(1,103.2 to 1,161.2)               | 504.0†<br>(471.2 to 540.1)               | 39.0<br>(26.7 to 54.5)               | 17.3<br>(14.3 to 20.0)                            | -5.9<br>(-7.7 to -4.2)                              |
| Glaucoma                                      | 3.6<br>(3.0 to 4.2)                           | --                                       | 0.4<br>(0.2 to 0.5)                  | 26.9<br>(13.3 to 43.0)                            | -2.5<br>(-12.1 to 8.8)                              |
| Cataract                                      | 44.8<br>(38.2 to 51.9)                        | --                                       | 2.5<br>(1.7 to 3.5)                  | 20.2<br>(11.4 to 29.6)                            | -5.4<br>(-12.3 to 1.4)                              |
| Macular degeneration                          | 1.4<br>(1.1 to 1.8)                           | --                                       | 0.1<br>(0.1 to 0.1)                  | 31.5<br>(13.0 to 53.2)                            | 1.1<br>(-12.5 to 17.2)                              |
| Refraction and accommodation disorders        | 571.7<br>(546.2 to 600.8)                     | --                                       | 10.6<br>(6.5 to 16.8)                | 14.1<br>(9.6 to 18.9)                             | -8.5<br>(-12.0 to -4.6)                             |
| Age-related and other hearing loss            | 701.0<br>(660.3 to 744.5)                     | --                                       | 19.8<br>(13.7 to 27.8)               | 16.2<br>(11.1 to 20.8)                            | -6.3<br>(-9.0 to -3.9)                              |
| Other vision loss                             | 24.7<br>(21.6 to 28.3)                        | --                                       | 1.7<br>(1.2 to 2.2)                  | 24.1<br>(14.7 to 35.4)                            | -3.0<br>(-9.6 to 4.5)                               |
| Other sense organ diseases                    | 128.6<br>(118.6 to 138.8)                     | 504.0<br>(471.2 to 540.1)                | 4.0<br>(2.5 to 6.0)                  | 26.9<br>(21.4 to 32.7)                            | 1.3<br>(-2.4 to 5.3)                                |
| Oral disorders                                | 3,033.1<br>(2,915.0 to 3,146.0)               | 9,311.5†<br>(8,618.8 to 10,085.8)        | 14.3<br>(8.8 to 21.5)                | 27.2<br>(24.2 to 30.5)                            | 0.4<br>(-1.4 to 2.4)                                |
| Caries of deciduous teeth                     | 478.0<br>(392.9 to 567.5)                     | 1,867.6<br>(1,430.2 to 2,409.5)          | 0.1<br>(< 0.05 to 0.2)               | 12.9<br>(1.8 to 24.9)                             | -0.6<br>(-10.8 to 10.3)                             |
| Caries of permanent teeth                     | 2,253.9<br>(2,126.8 to 2,383.7)               | 7,371.4<br>(6,851.9 to 7,927.3)          | 1.3<br>(0.6 to 2.6)                  | 4.5<br>(0.8 to 8.1)                               | -7.7<br>(-10.6 to -4.8)                             |
| Periodontal disease                           | 366.1<br>(299.2 to 437.4)                     | 48.2<br>(38.2 to 59.5)                   | 2.4<br>(0.9 to 5.1)                  | 32.1<br>(26.3 to 37.7)                            | -0.3<br>(-4.1 to 3.6)                               |
| Edentulism and severe tooth loss              | 272.1<br>(237.9 to 308.2)                     | 24.2<br>(20.4 to 28.3)                   | 7.6<br>(5.0 to 10.8)                 | 34.4<br>(29.9 to 38.8)                            | 1.7<br>(-1.0 to 4.5)                                |
| Other oral disorders                          | 96.1<br>(91.7 to 100.6)                       | --                                       | 2.8<br>(1.8 to 4.3)                  | 19.3<br>(14.8 to 23.6)                            | 0.1<br>(-3.3 to 3.3)                                |
| <b>Injuries</b>                               | <b>1,237.1</b><br><b>(1,152.4 to 1,353.4)</b> | <b>553.4†</b><br><b>(517.7 to 592.4)</b> | <b>46.4</b><br><b>(31.4 to 65.1)</b> | <b>25.4</b><br><b>(22.7 to 27.7)</b>              | <b>3.0</b><br><b>(0.9 to 4.7)</b>                   |
| <b>Transport injuries</b>                     | <b>116.1</b><br><b>(107.5 to 125.1)</b>       | <b>46.9</b><br><b>(41.2 to 53.2)</b>     | <b>6.4</b><br><b>(4.3 to 9.2)</b>    | <b>36.1</b><br><b>(32.8 to 39.1)</b>              | <b>8.3</b><br><b>(6.2 to 10.5)</b>                  |
| Road injuries                                 | 105.8<br>(97.7 to 114.4)                      | 44.4<br>(38.7 to 50.7)                   | 5.8<br>(3.9 to 8.4)                  | 37.3<br>(34.0 to 40.4)                            | 8.8<br>(6.7 to 10.9)                                |
| Pedestrian road injuries                      | 23.3<br>(20.2 to 26.7)                        | 6.9<br>(5.6 to 8.3)                      | 1.3<br>(0.8 to 1.8)                  | 30.7<br>(27.5 to 33.8)                            | 4.6<br>(2.5 to 6.8)                                 |
| Cyclist road injuries                         | 20.1<br>(16.6 to 24.1)                        | 9.0<br>(7.2 to 11.1)                     | 1.0<br>(0.7 to 1.5)                  | 53.0<br>(49.0 to 56.7)                            | 23.6<br>(21.1 to 26.0)                              |
| Motorcyclist road injuries                    | 14.8<br>(12.5 to 18.2)                        | 4.1<br>(3.3 to 5.2)                      | 0.8<br>(0.5 to 1.1)                  | 38.9<br>(35.3 to 42.3)                            | 9.7<br>(7.3 to 12.0)                                |
| Motor vehicle road injuries                   | 40.1<br>(34.0 to 46.5)                        | 20.4<br>(17.2 to 23.9)                   | 2.4<br>(1.6 to 3.4)                  | 33.6<br>(30.5 to 36.9)                            | 4.6<br>(2.5 to 6.7)                                 |
| Other road injuries                           | 7.6<br>(6.4 to 9.0)                           | 4.0<br>(3.0 to 5.2)                      | 0.4<br>(0.2 to 0.6)                  | 43.3<br>(39.9 to 46.6)                            | 14.8<br>(12.4 to 17.1)                              |
| Other transport injuries                      | 10.3<br>(8.6 to 12.4)                         | 2.5<br>(2.1 to 3.1)                      | 0.6<br>(0.4 to 0.8)                  | 24.4<br>(20.4 to 28.3)                            | 3.7<br>(0.8 to 6.4)                                 |
| <b>Unintentional injuries</b>                 | <b>1,063.0</b><br><b>(977.6 to 1,176.6)</b>   | <b>475.9</b><br><b>(440.6 to 515.4)</b>  | <b>37.1</b><br><b>(25.3 to 52.2)</b> | <b>24.2</b><br><b>(21.5 to 26.5)</b>              | <b>2.4</b><br><b>(0.3 to 4.1)</b>                   |
| Falls                                         | 492.3<br>(426.8 to 572.0)                     | 236.2<br>(204.8 to 272.4)                | 19.9<br>(14.0 to 27.5)               | 24.4<br>(21.7 to 26.9)                            | 1.7<br>(-0.2 to 3.5)                                |
| Drowning                                      | 3.4<br>(2.9 to 3.9)                           | 0.7<br>(0.6 to 0.8)                      | 0.2<br>(0.1 to 0.3)                  | -19.7<br>(-22.4 to -17.1)                         | -33.0<br>(-35.1 to -30.9)                           |
| Fire, heat, and hot substances                | 149.6<br>(127.9 to 180.1)                     | 20.1<br>(17.1 to 23.1)                   | 4.1<br>(2.8 to 5.9)                  | 2.6<br>(-2.4 to 6.6)                              | -14.8<br>(-18.5 to -11.9)                           |
| Poisonings                                    | 3.4<br>(2.9 to 4.0)                           | 5.6<br>(4.6 to 6.8)                      | 0.3<br>(0.2 to 0.5)                  | 46.9<br>(36.1 to 58.6)                            | 25.9<br>(17.6 to 34.7)                              |
| Exposure to mechanical forces                 | 179.3<br>(151.6 to 222.6)                     | 76.1<br>(64.7 to 88.3)                   | 4.5<br>(2.9 to 6.5)                  | 43.8<br>(39.4 to 47.7)                            | 17.8<br>(14.8 to 20.6)                              |
| Unintentional firearm injuries                | 4.2<br>(3.4 to 5.1)                           | 1.2<br>(0.8 to 1.7)                      | 0.2<br>(0.1 to 0.3)                  | 45.3<br>(41.1 to 49.5)                            | 18.0<br>(15.0 to 20.7)                              |
| Unintentional suffocation                     | 15.1<br>(11.5 to 19.4)                        | 3.6<br>(2.6 to 4.9)                      | 0.5<br>(0.3 to 0.8)                  | 31.3<br>(27.8 to 34.5)                            | 9.5<br>(7.1 to 11.8)                                |
| Other exposure to mechanical forces           | 160.0<br>(133.4 to 202.2)                     | 71.3<br>(60.0 to 82.8)                   | 3.8<br>(2.5 to 5.5)                  | 45.6<br>(41.0 to 49.7)                            | 19.0<br>(15.8 to 21.8)                              |

| Cause                                                                               | Prevalence in thousands (95% UI)        | Incidence in thousands (95% UI)       | YLDs in thousands (95% UI)        |                                                   |                                                     |
|-------------------------------------------------------------------------------------|-----------------------------------------|---------------------------------------|-----------------------------------|---------------------------------------------------|-----------------------------------------------------|
|                                                                                     | 2016 counts                             | 2016 counts                           | 2016 counts                       | Percentage change in counts between 2006 and 2016 | Percentage change in age-standardised rates between |
| Adverse effects of medical treatment                                                | 1.7<br>(1.3 to 2.1)                     | 22.2<br>(19.4 to 25.3)                | 0.2<br>(0.1 to 0.3)               | 42.5<br>(36.3 to 50.4)                            | 19.1<br>(14.7 to 24.7)                              |
| Animal contact                                                                      | 19.5<br>(16.9 to 22.9)                  | 23.8<br>(19.4 to 28.5)                | 0.7<br>(0.5 to 1.0)               | 8.2<br>(2.4 to 14.3)                              | -8.7<br>(-12.9 to -4.1)                             |
| Venomous animal contact                                                             | 7.9<br>(6.5 to 9.7)                     | 9.9<br>(7.6 to 12.7)                  | 0.5<br>(0.3 to 0.7)               | 13.8<br>(5.3 to 23.1)                             | -2.5<br>(-8.9 to 4.4)                               |
| Non-venomous animal contact                                                         | 11.6<br>(9.5 to 15.0)                   | 13.9<br>(11.0 to 17.1)                | 0.2<br>(0.1 to 0.3)               | -4.1<br>(-8.6 to -0.4)                            | -20.6<br>(-23.9 to -18.0)                           |
| Foreign body                                                                        | 69.0<br>(56.3 to 81.6)                  | 39.7<br>(34.9 to 45.5)                | 2.6<br>(1.7 to 3.9)               | 18.2<br>(14.1 to 22.1)                            | 0.2<br>(-3.0 to 3.1)                                |
| Pulmonary aspiration and foreign body in airway                                     | 34.0<br>(25.0 to 46.4)                  | 12.5<br>(10.3 to 15.3)                | 1.5<br>(0.9 to 2.2)               | 11.5<br>(7.7 to 15.2)                             | -4.4<br>(-7.5 to -1.6)                              |
| Foreign body in eyes                                                                | 2.5<br>(1.4 to 3.7)                     | 13.1<br>(10.0 to 17.4)                | 0.1<br>(0.1 to 0.2)               | 27.4<br>(22.0 to 32.5)                            | 5.8<br>(2.7 to 8.9)                                 |
| Foreign body in other body part                                                     | 32.6<br>(26.6 to 40.9)                  | 14.2<br>(12.0 to 16.6)                | 1.0<br>(0.7 to 1.5)               | 28.3<br>(23.2 to 33.1)                            | 6.7<br>(2.8 to 10.3)                                |
| Environmental heat and cold exposure                                                | 44.5<br>(37.8 to 51.8)                  | 13.3<br>(11.0 to 15.8)                | 1.7<br>(1.1 to 2.5)               | 28.1<br>(24.7 to 31.2)                            | 5.8<br>(3.4 to 8.0)                                 |
| Other unintentional injuries                                                        | 100.3<br>(80.3 to 122.8)                | 38.2<br>(32.2 to 45.0)                | 2.9<br>(1.9 to 4.3)               | 45.3<br>(42.2 to 47.9)                            | 20.1<br>(17.9 to 22.0)                              |
| <b>Self-harm and interpersonal violence</b>                                         | <b>122.7</b><br><b>(111.9 to 134.9)</b> | <b>28.8†</b><br><b>(24.7 to 33.4)</b> | <b>2.7</b><br><b>(1.8 to 3.8)</b> | <b>18.4</b><br><b>(15.6 to 21.3)</b>              | <b>-2.1</b><br><b>(-3.8 to -0.3)</b>                |
| Self-harm                                                                           | 7.0<br>(5.8 to 8.3)                     | 3.4<br>(2.9 to 4.0)                   | 0.4<br>(0.2 to 0.5)               | 25.6<br>(21.6 to 29.6)                            | -0.1<br>(-3.2 to 2.9)                               |
| Self-harm by firearm                                                                | 0.1<br>(0.1 to 0.1)                     | < 0.05<br>(< 0.05 to 0.1)             | < 0.05<br>(< 0.05 to < 0.05)      | -16.2<br>(-19.7 to -13.2)                         | -36.9<br>(-39.3 to -34.7)                           |
| Self-harm by other specified means                                                  | 6.9<br>(5.7 to 8.2)                     | 3.4<br>(2.8 to 3.9)                   | 0.4<br>(0.2 to 0.5)               | 26.4<br>(22.2 to 30.4)                            | 0.7<br>(-2.5 to 3.7)                                |
| Interpersonal violence                                                              | 115.7<br>(104.7 to 127.7)               | 25.4†<br>(21.3 to 29.8)               | 2.3<br>(1.6 to 3.3)               | 17.4<br>(14.5 to 20.3)                            | -2.4<br>(-4.1 to -0.6)                              |
| Assault by firearm                                                                  | 0.7<br>(0.6 to 0.8)                     | 0.2<br>(0.2 to 0.3)                   | < 0.05<br>(< 0.05 to < 0.05)      | 15.9<br>(11.2 to 20.7)                            | -6.2<br>(-9.3 to -3.1)                              |
| Assault by sharp object                                                             | 11.1<br>(9.0 to 13.4)                   | 4.8<br>(3.7 to 6.2)                   | 0.3<br>(0.2 to 0.5)               | 17.8<br>(13.5 to 21.8)                            | -4.2<br>(-7.1 to -1.6)                              |
| Sexual violence                                                                     | 70.9<br>(61.1 to 81.8)                  | --                                    | 0.6<br>(0.4 to 0.8)               | 0.1<br>(-4.5 to 5.0)                              | -10.3<br>(-13.7 to -6.9)                            |
| Assault by other means                                                              | 33.0<br>(27.3 to 40.5)                  | 20.4<br>(16.9 to 24.1)                | 1.4<br>(0.9 to 2.0)               | 26.9<br>(23.6 to 30.2)                            | 1.5<br>(-0.6 to 3.7)                                |
| <b>Forces of nature, conflict and terrorism, and executions and police conflict</b> | <b>6.2</b><br><b>(4.0 to 9.7)</b>       | <b>1.8†</b><br><b>(1.2 to 2.8)</b>    | <b>0.2</b><br><b>(0.1 to 0.5)</b> | <b>42.1</b><br><b>(16.1 to 55.5)</b>              | <b>26.5</b><br><b>(4.8 to 37.0)</b>                 |
| Exposure to forces of nature                                                        | 1.7<br>(0.9 to 2.8)                     | --                                    | 0.1<br>(< 0.05 to 0.1)            | 70.5<br>(-5.2 to 118.1)                           | 54.8<br>(-12.3 to 94.7)                             |
| Conflict and terrorism                                                              | --                                      | --                                    | --                                | --                                                | --                                                  |
| Executions and police conflict                                                      | 4.4<br>(2.6 to 8.1)                     | 1.8<br>(1.2 to 2.8)                   | 0.1<br>(< 0.05 to 0.3)            | 31.5<br>(15.2 to 51.1)                            | 16.0<br>(3.4 to 31.1)                               |
| <b>Impairments</b>                                                                  | --                                      | --                                    | --                                | --                                                | --                                                  |
| Anaemia                                                                             | 1,314.8<br>(1,163.5 to 1,462.4)         | --                                    | 34.9<br>(23.2 to 50.1)            | -1.3<br>(-12.5 to 10.2)                           | -13.8<br>(-22.0 to -5.0)                            |
| Developmental intellectual disability                                               | 113.1<br>(89.3 to 137.5)                | --                                    | 12.4<br>(9.0 to 16.5)             | 6.1<br>(-0.6 to 14.7)                             | -5.8<br>(-11.7 to 1.4)                              |
| Epilepsy                                                                            | 29.0<br>(13.1 to 48.2)                  | --                                    | 10.6<br>(4.6 to 20.1)             | 9.1<br>(-54.5 to 190.6)                           | -2.5<br>(-60.4 to 166.5)                            |
| Guillain-Barre syndrome                                                             | < 0.05<br>(< 0.05 to 0.1)               | --                                    | < 0.05<br>(< 0.05 to < 0.05)      | 17.7<br>(12.7 to 23.6)                            | -0.0<br>(-0.1 to 0.1)                               |
| Hearing loss                                                                        | 768.2<br>(727.8 to 812.1)               | --                                    | 23.2<br>(16.1 to 32.3)            | 12.4<br>(8.1 to 16.5)                             | -7.5<br>(-9.9 to -5.2)                              |
| Heart failure                                                                       | 45.0<br>(39.3 to 51.2)                  | --                                    | 4.1<br>(2.9 to 5.4)               | 30.4<br>(22.0 to 39.4)                            | 3.5<br>(-3.0 to 10.4)                               |
| Infertility                                                                         | 77.7<br>(60.2 to 100.0)                 | --                                    | 0.5<br>(0.2 to 1.0)               | 21.9<br>(12.7 to 31.1)                            | 0.9<br>(-6.1 to 8.5)                                |
| Pelvic inflammatory disease                                                         | 3.2<br>(2.7 to 3.9)                     | --                                    | 0.4<br>(0.3 to 0.6)               | 13.8<br>(-5.0 to 34.3)                            | -7.8<br>(-22.9 to 8.5)                              |
| Vision loss                                                                         | 665.9<br>(636.4 to 698.8)               | --                                    | 17.9<br>(12.3 to 26.2)            | 17.8<br>(13.1 to 23.8)                            | -5.3<br>(-8.8 to -0.9)                              |

We did not calculate incidence for the nine impairments, certain NTDs, and causes with only birth prevalence. Blank cells mean that no estimate is available.

† Incidence for aggregate causes represents the sum of the incidence of the causes below the aggregate.

‡ Incidence estimates for stroke represent first-ever stroke only.

^ Incidence of HIV/AIDS represents new infections of HIV only and does not include new infections of Tuberculosis in HIV positive cases.

SR Table 14: Prevalence, incidence, and YLDs for 2016, percentage change of YLD counts and percentage change of age-standardised YLD rates between 2006 and 2016 by cause and impairments, for all ages, Uganda.

| Cause                                                                                | Prevalence in thousands (95% UI)          | Incidence in thousands (95% UI)               | YLDs in thousands (95% UI)             |                                                   |                                                     |
|--------------------------------------------------------------------------------------|-------------------------------------------|-----------------------------------------------|----------------------------------------|---------------------------------------------------|-----------------------------------------------------|
|                                                                                      | 2016 counts                               | 2016 counts                                   | 2016 counts                            | Percentage change in counts between 2006 and 2016 | Percentage change in age-standardised rates between |
| <b>All causes</b>                                                                    | <b>39,385.9</b><br>(39,284.4 to 39,479.6) | <b>330,643.9†</b><br>(310,999.0 to 351,778.9) | <b>3,577.4</b><br>(2,633.8 to 4,733.7) | <b>27.7</b><br>(22.4 to 33.1)                     | <b>-8.3</b><br>(-12.1 to -5.0)                      |
| <b>Communicable, maternal, neonatal, and nutritional disorders</b>                   | <b>33,720.2</b><br>(33,376.3 to 34,095.1) | <b>220,409.6†</b><br>(202,268.0 to 239,480.0) | <b>1,043.2</b><br>(736.3 to 1,425.8)   | <b>6.4</b><br>(-1.5 to 12.5)                      | <b>-26.4</b><br>(-36.0 to -20.3)                    |
| <b>HIV/AIDS and tuberculosis</b>                                                     | <b>13,792.7</b><br>(12,885.4 to 14,603.4) | <b>183.1†</b><br>(134.8 to 244.2)             | <b>177.7</b><br>(125.7 to 241.0)       | <b>3.6</b><br>(-26.3 to 33.3)                     | <b>-31.1</b><br>(-55.6 to -4.1)                     |
| Tuberculosis                                                                         | 12,484.2<br>(11,482.6 to 13,606.2)        | 105.9†<br>(85.5 to 132.4)                     | 20.7<br>(12.9 to 30.4)                 | 35.6<br>(18.3 to 58.5)                            | -10.3<br>(-20.4 to 1.8)                             |
| Drug-susceptible tuberculosis                                                        | 65.6<br>(50.8 to 83.2)                    | 103.9<br>(83.9 to 130.3)                      | 20.3<br>(12.7 to 29.9)                 | 35.5<br>(17.2 to 58.1)                            | -10.4<br>(-20.5 to 2.0)                             |
| Multidrug-resistant tuberculosis without extensive drug resistance                   | 1.2<br>(0.5 to 2.5)                       | 2.0<br>(0.9 to 4.2)                           | 0.4<br>(0.1 to 0.9)                    | 40.8<br>(-51.5 to 328.5)                          | -7.6<br>(-69.8 to 191.6)                            |
| Extensively drug-resistant tuberculosis                                              | < 0.05<br>(< 0.05 to < 0.05)              | < 0.05<br>(< 0.05 to < 0.05)                  | < 0.05<br>(< 0.05 to < 0.05)           | 325.8<br>(46.9 to 1,172.2)                        | 176.4<br>(-5.4 to 728.7)                            |
| Latent tuberculosis infection                                                        | 12,417.4<br>(11,412.3 to 13,540.3)        | --                                            | --                                     | --                                                | --                                                  |
| HIV/AIDS                                                                             | 1,570.8<br>(1,415.3 to 1,757.2)           | 77.3^<br>(37.8 to 132.6)                      | 157.0<br>(111.2 to 215.6)              | 0.5<br>(-30.5 to 33.0)                            | -33.0<br>(-58.1 to -3.2)                            |
| Drug-susceptible HIV/AIDS - Tuberculosis                                             | 47.7<br>(33.6 to 63.2)                    | 69.1<br>(51.1 to 89.6)                        | 18.1<br>(10.7 to 27.2)                 | -21.7<br>(-32.6 to -9.8)                          | -40.7<br>(-48.2 to -33.3)                           |
| Multidrug-resistant HIV/AIDS - Tuberculosis without extensive drug resistance        | 1.0<br>(0.4 to 2.2)                       | 1.5<br>(0.6 to 3.1)                           | 0.4<br>(0.2 to 0.9)                    | -17.9<br>(-71.3 to 144.9)                         | -37.7<br>(-78.4 to 86.5)                            |
| Extensively drug-resistant HIV/AIDS - Tuberculosis                                   | < 0.05<br>(< 0.05 to < 0.05)              | < 0.05<br>(< 0.05 to < 0.05)                  | < 0.05<br>(< 0.05 to < 0.05)           | 145.8<br>(-14.1 to 627.9)                         | 85.7<br>(-35.0 to 450.5)                            |
| HIV/AIDS resulting in other diseases                                                 | 1,522.1<br>(1,370.3 to 1,711.6)           | 77.3<br>(37.8 to 132.6)                       | 138.4<br>(98.1 to 192.2)               | 4.4<br>(-31.0 to 45.3)                            | -31.8<br>(-59.7 to 4.3)                             |
| <b>Diarrhoea, lower respiratory infections, and other common infectious diseases</b> | <b>3,436.9</b><br>(3,254.0 to 3,632.3)    | <b>189,177.1†</b><br>(171,760.6 to 206,775.6) | <b>189.5</b><br>(133.5 to 256.9)       | <b>33.2</b><br>(28.6 to 37.3)                     | <b>-1.8</b><br>(-4.5 to 0.8)                        |
| Diarrhoeal diseases                                                                  | 740.1<br>(677.9 to 807.1)                 | 49,364.8<br>(45,180.2 to 53,908.3)            | 83.8<br>(57.4 to 117.0)                | 31.0<br>(23.4 to 38.4)                            | -1.1<br>(-5.7 to 3.3)                               |
| Intestinal infectious diseases                                                       | 2.7<br>(1.8 to 3.8)                       | 45.7†<br>(31.8 to 64.1)                       | 0.4<br>(0.2 to 0.7)                    | 10.3<br>(-13.3 to 39.7)                           | -20.3<br>(-33.8 to -3.0)                            |
| Typhoid fever                                                                        | 2.7<br>(1.8 to 3.8)                       | 41.9<br>(29.2 to 59.2)                        | 0.4<br>(0.2 to 0.7)                    | 11.9<br>(-12.9 to 42.0)                           | -19.7<br>(-33.4 to -1.6)                            |
| Paratyphoid fever                                                                    | 0.2<br>(0.1 to 0.3)                       | 3.7<br>(2.2 to 5.8)                           | < 0.05<br>(< 0.05 to < 0.05)           | 23.1<br>(-11.0 to 70.6)                           | -11.8<br>(-31.9 to 16.4)                            |
| Other intestinal infectious diseases                                                 | --                                        | --                                            | < 0.05<br>(< 0.05 to < 0.05)           | -41.5<br>(-59.4 to -14.9)                         | -51.6<br>(-63.5 to -36.2)                           |
| Lower respiratory infections                                                         | 66.1<br>(59.0 to 74.2)                    | 2,834.3<br>(2,510.8 to 3,174.3)               | 4.0<br>(2.6 to 5.9)                    | 25.9<br>(11.0 to 43.7)                            | -5.9<br>(-14.7 to 3.4)                              |
| Upper respiratory infections                                                         | 1,727.9<br>(1,511.2 to 1,950.7)           | 131,297.7<br>(114,221.3 to 149,169.1)         | 43.2<br>(25.8 to 68.7)                 | 38.7<br>(31.1 to 46.7)                            | 0.2<br>(-5.0 to 6.1)                                |
| Otitis media                                                                         | 774.9<br>(689.5 to 865.6)                 | 4,035.7<br>(3,114.5 to 5,194.1)               | 24.3<br>(15.1 to 36.4)                 | 27.8<br>(17.7 to 38.1)                            | -7.6<br>(-14.3 to -1.1)                             |
| Meningitis                                                                           | 200.3<br>(170.7 to 236.8)                 | 54.1<br>(46.6 to 65.2)                        | 21.4<br>(15.1 to 27.9)                 | 37.1<br>(25.6 to 49.8)                            | -2.5<br>(-9.1 to 5.4)                               |
| Pneumococcal meningitis                                                              | 67.7<br>(56.6 to 81.2)                    | 8.5<br>(6.4 to 11.4)                          | 8.0<br>(5.5 to 10.8)                   | 27.4<br>(5.6 to 51.9)                             | -10.5<br>(-23.1 to 5.2)                             |
| H influenzae type B meningitis                                                       | 36.1<br>(27.9 to 47.6)                    | 9.0<br>(6.0 to 13.2)                          | 4.7<br>(3.2 to 6.5)                    | 34.3<br>(16.9 to 54.9)                            | -2.8<br>(-12.6 to 8.3)                              |
| Meningococcal infection                                                              | 14.2<br>(10.2 to 19.2)                    | 5.5<br>(3.9 to 7.8)                           | 1.6<br>(1.1 to 2.1)                    | 40.4<br>(31.8 to 48.8)                            | 0.2<br>(-6.2 to 6.5)                                |
| Other meningitis                                                                     | 82.3<br>(59.9 to 107.6)                   | 31.1<br>(25.0 to 38.0)                        | 7.0<br>(4.8 to 9.7)                    | 51.6<br>(34.2 to 70.7)                            | 8.0<br>(-2.0 to 18.5)                               |
| Encephalitis                                                                         | 88.5<br>(57.7 to 132.3)                   | 44.9<br>(38.8 to 51.9)                        | 10.0<br>(7.0 to 13.3)                  | 42.3<br>(24.6 to 64.4)                            | 1.2<br>(-9.8 to 14.9)                               |
| Diphtheria                                                                           | < 0.05<br>(< 0.05 to < 0.05)              | < 0.05<br>(< 0.05 to < 0.05)                  | < 0.05<br>(< 0.05 to < 0.05)           | -23.8<br>(-70.4 to 101.8)                         | -41.1<br>(-71.0 to 17.7)                            |
| Whooping cough                                                                       | 20.6<br>(16.1 to 25.9)                    | 150.2<br>(117.2 to 189.0)                     | 1.0<br>(0.6 to 1.6)                    | 0.4<br>(-16.2 to 19.7)                            | -23.4<br>(-36.1 to -8.2)                            |
| Tetanus                                                                              | 0.6<br>(0.5 to 0.6)                       | 1.2<br>(0.7 to 1.9)                           | < 0.05<br>(< 0.05 to < 0.05)           | -14.2<br>(-36.9 to 16.0)                          | -36.2<br>(-48.8 to -19.7)                           |
| Measles                                                                              | 2.9<br>(1.0 to 6.5)                       | 106.2<br>(37.3 to 236.0)                      | 0.3<br>(0.1 to 0.6)                    | 77.8<br>(-18.1 to 310.8)                          | 34.1<br>(-37.9 to 204.5)                            |
| Varicella and herpes zoster                                                          | 38.4<br>(35.9 to 41.3)                    | 1,242.3<br>(1,151.8 to 1,342.4)               | 1.0<br>(0.6 to 1.6)                    | 38.8<br>(17.5 to 65.0)                            | 0.2<br>(-10.4 to 12.9)                              |
| <b>Neglected tropical diseases and malaria</b>                                       | <b>16,485.9</b><br>(15,827.7 to 17,301.9) | <b>12,176.4†</b><br>(9,480.7 to 15,000.6)     | <b>215.3</b><br>(142.7 to 325.2)       | <b>-32.3</b><br>(-36.7 to -26.7)                  | <b>-51.4</b><br>(-55.4 to -46.9)                    |
| Malaria                                                                              | 4,689.7<br>(4,033.3 to 5,382.6)           | 7,824.1<br>(5,163.4 to 10,552.0)              | 59.5<br>(43.1 to 81.3)                 | -42.9<br>(-49.3 to -35.5)                         | -58.4<br>(-63.0 to -53.2)                           |
| Chagas disease                                                                       | --                                        | --                                            | --                                     | --                                                | --                                                  |
| Leishmaniasis                                                                        | 2.4<br>(2.0 to 2.8)                       | 0.3<br>(0.2 to 0.5)                           | 0.1<br>(0.1 to 0.2)                    | 30.1<br>(8.8 to 54.5)                             | 0.9<br>(-16.9 to 21.8)                              |
| Visceral leishmaniasis                                                               | < 0.05<br>(< 0.05 to 0.1)                 | 0.2<br>(0.1 to 0.2)                           | < 0.05<br>(< 0.05 to < 0.05)           | -45.2<br>(-63.1 to -20.8)                         | -61.0<br>(-77.5 to -35.5)                           |
| Cutaneous and mucocutaneous leishmaniasis                                            | 2.2<br>(1.9 to 2.7)                       | 0.2<br>(0.1 to 0.3)                           | 0.1<br>(0.1 to 0.2)                    | 33.7<br>(11.2 to 58.8)                            | 7.4<br>(-12.3 to 30.5)                              |
| African trypanosomiasis                                                              | 0.1<br>(< 0.05 to 0.2)                    | 0.1<br>(0.1 to 0.3)                           | < 0.05<br>(< 0.05 to 0.1)              | -94.7<br>(-96.3 to -92.7)                         | -96.3<br>(-97.9 to -93.3)                           |
| Schistosomiasis                                                                      | 9,173.5<br>(8,767.2 to 9,500.9)           | 3,837.3<br>(3,604.1 to 4,095.1)               | 79.7<br>(41.6 to 146.6)                | -29.3<br>(-31.6 to -26.5)                         | -50.6<br>(-52.1 to -48.7)                           |
| Cysticercosis                                                                        | 23.8<br>(19.4 to 28.7)                    | --                                            | 4.5<br>(2.5 to 6.8)                    | 39.3<br>(10.3 to 72.3)                            | -2.9<br>(-21.6 to 17.0)                             |
| Cystic echinococcosis                                                                | 29.7<br>(7.9 to 99.7)                     | 6.3<br>(1.7 to 21.8)                          | 2.8<br>(0.7 to 9.6)                    | -34.1<br>(-89.7 to 278.7)                         | -53.6<br>(-92.4 to 128.8)                           |
| Lymphatic filariasis                                                                 | 220.2<br>(155.1 to 333.6)                 | 77.4<br>(67.9 to 87.2)                        | 13.6<br>(5.4 to 28.3)                  | -33.0<br>(-68.1 to -6.2)                          | -51.2<br>(-76.5 to -31.8)                           |
| Onchocerciasis                                                                       | 240.2<br>(140.2 to 360.2)                 | 60.6<br>(27.0 to 124.5)                       | 18.7<br>(7.0 to 36.5)                  | -40.4<br>(-64.8 to -7.8)                          | -53.5<br>(-72.3 to -26.4)                           |
| Trachoma                                                                             | 3.8<br>(2.7 to 5.2)                       | --                                            | 0.4<br>(0.2 to 0.6)                    | -17.4<br>(-38.4 to 10.1)                          | -39.5<br>(-57.2 to -15.7)                           |
| Dengue                                                                               | 22.0<br>(12.3 to 36.5)                    | 367.8<br>(231.2 to 543.0)                     | 3.6<br>(1.6 to 6.7)                    | 204.6<br>(114.6 to 663.4)                         | 117.4<br>(59.2 to 423.3)                            |
| Yellow fever                                                                         | 0.1<br>(< 0.05 to 0.2)                    | 2.3<br>(0.6 to 6.2)                           | < 0.05<br>(< 0.05 to < 0.05)           | -38.6<br>(-62.6 to 0.9)                           | -56.3<br>(-71.3 to -33.5)                           |
| Rabies                                                                               | < 0.05<br>(< 0.05 to < 0.05)              | 0.2<br>(0.1 to 0.4)                           | < 0.05<br>(< 0.05 to < 0.05)           | -3.3<br>(-56.1 to 112.1)                          | -31.6<br>(-62.4 to 23.4)                            |
| Intestinal nematode infections                                                       | 5,446.1<br>(4,678.6 to 6,406.0)           | --                                            | 14.5<br>(8.8 to 22.8)                  | -42.1<br>(-49.5 to -33.8)                         | -59.9<br>(-65.6 to -53.8)                           |
| Ascariasis                                                                           | 850.2<br>(637.8 to 1,111.5)               | --                                            | 0.5<br>(0.3 to 0.9)                    | -35.5<br>(-52.5 to -10.8)                         | -55.2<br>(-68.9 to -34.1)                           |



| Cause                                                                   | Prevalence in thousands (95% UI)                 | Incidence in thousands (95% UI)                     | YLDs in thousands (95% UI)                    |                                                   |                                                     |
|-------------------------------------------------------------------------|--------------------------------------------------|-----------------------------------------------------|-----------------------------------------------|---------------------------------------------------|-----------------------------------------------------|
|                                                                         | 2016 counts                                      | 2016 counts                                         | 2016 counts                                   | Percentage change in counts between 2006 and 2016 | Percentage change in age-standardised rates between |
| Trichuriasis                                                            | 943.6<br>(692.4 to 1,257.6)                      | --                                                  | 0.2<br>(0.1 to 0.3)                           | -40.4<br>(-58.6 to -15.0)                         | -58.6<br>(-72.3 to -38.7)                           |
| Hookworm disease                                                        | 3,767.2<br>(2,949.0 to 4,768.4)                  | --                                                  | 13.8<br>(8.5 to 21.6)                         | -42.4<br>(-50.1 to -33.7)                         | -60.1<br>(-65.8 to -53.7)                           |
| Food-borne trematodiasis                                                | --                                               | --                                                  | --                                            | --                                                | --                                                  |
| Leprosy                                                                 | 2.0<br>(1.9 to 2.3)                              | 0.1<br>(0.1 to 0.1)                                 | 0.1<br>(0.1 to 0.2)                           | 0.4<br>(-19.9 to 25.7)                            | -25.1<br>(-39.5 to -8.2)                            |
| Ebola virus disease                                                     | --                                               | --                                                  | --                                            | --                                                | --                                                  |
| Zika virus disease                                                      | --                                               | --                                                  | --                                            | --                                                | --                                                  |
| Guinea worm disease                                                     | --                                               | --                                                  | --                                            | --                                                | --                                                  |
| Other neglected tropical diseases                                       | 554.4<br>(530.2 to 580.7)                        | --                                                  | 17.8<br>(11.7 to 26.0)                        | 21.6<br>(10.2 to 35.9)                            | -5.5<br>(-13.8 to 4.6)                              |
| <b>Maternal disorders</b>                                               | <b>190.1</b><br><b>(153.3 to 235.1)</b>          | <b>2,144.7†</b><br><b>(1,515.9 to 2,956.5)</b>      | <b>29.7</b><br><b>(20.2 to 41.1)</b>          | <b>-3.4</b><br><b>(-16.2 to 13.1)</b>             | <b>-35.6</b><br><b>(-43.5 to -25.6)</b>             |
| Maternal haemorrhage                                                    | 13.7<br>(10.3 to 18.1)                           | 150.7<br>(97.6 to 225.3)                            | 0.8<br>(0.4 to 1.2)                           | 27.4<br>(-20.3 to 99.5)                           | -10.4<br>(-42.4 to 39.3)                            |
| Maternal sepsis and other pregnancy related infections                  | 19.5<br>(15.9 to 24.5)                           | 78.8<br>(57.9 to 109.4)                             | 0.4<br>(0.2 to 0.7)                           | 27.7<br>(-33.5 to 147.0)                          | -11.1<br>(-51.1 to 61.4)                            |
| Maternal hypertensive disorders                                         | 92.7<br>(58.6 to 130.1)                          | 378.5<br>(308.8 to 447.9)                           | 4.4<br>(2.3 to 7.2)                           | 88.3<br>(14.8 to 214.0)                           | 30.6<br>(-20.1 to 117.5)                            |
| Maternal obstructed labour and uterine rupture                          | 57.0<br>(46.7 to 68.3)                           | 207.2<br>(153.0 to 267.9)                           | 18.4<br>(11.7 to 26.4)                        | -14.8<br>(-27.9 to 0.0)                           | -42.4<br>(-50.5 to -33.3)                           |
| Maternal abortion, miscarriage, and ectopic pregnancy                   | 10.9<br>(5.5 to 19.1)                            | 1,329.6<br>(712.1 to 2,171.4)                       | 1.2<br>(0.5 to 2.3)                           | 26.3<br>(-27.1 to 114.6)                          | -12.9<br>(-50.0 to 48.3)                            |
| Other maternal disorders                                                | --                                               | --                                                  | 4.6<br>(3.1 to 6.4)                           | -7.9<br>(-20.0 to 7.8)                            | -38.6<br>(-46.1 to -29.0)                           |
| <b>Neonatal disorders</b>                                               | <b>554.9</b><br><b>(447.5 to 700.7)</b>          | --                                                  | <b>79.7</b><br><b>(43.9 to 138.7)</b>         | <b>67.7</b><br><b>(30.0 to 106.3)</b>             | <b>30.0</b><br><b>(-1.6 to 61.3)</b>                |
| Neonatal preterm birth complications                                    | 351.1<br>(259.7 to 479.2)                        | --                                                  | 21.8<br>(14.0 to 33.9)                        | 33.5<br>(1.8 to 74.0)                             | -1.5<br>(-24.6 to 28.4)                             |
| Neonatal encephalopathy due to birth asphyxia and trauma                | 174.3<br>(86.7 to 305.8)                         | --                                                  | 17.5<br>(3.1 to 54.4)                         | 81.8<br>(-12.5 to 205.2)                          | 42.3<br>(-35.4 to 145.5)                            |
| Neonatal sepsis and other neonatal infections                           | 76.0<br>(28.2 to 166.2)                          | --                                                  | 29.4<br>(8.4 to 75.9)                         | 118.4<br>(12.6 to 352.2)                          | 78.9<br>(-15.3 to 351.7)                            |
| Hemolytic disease and other neonatal jaundice                           | 11.4<br>(9.7 to 13.3)                            | --                                                  | 3.9<br>(2.9 to 5.1)                           | 27.8<br>(11.4 to 46.9)                            | -5.3<br>(-15.3 to 5.9)                              |
| Other neonatal disorders                                                | --                                               | --                                                  | 7.1<br>(4.3 to 11.6)                          | 41.1<br>(11.6 to 74.8)                            | 8.0<br>(-14.8 to 34.4)                              |
| <b>Nutritional deficiencies</b>                                         | <b>15,224.3</b><br><b>(14,480.0 to 16,026.1)</b> | <b>8,478.5†</b><br><b>(6,998.5 to 10,368.5)</b>     | <b>310.8</b><br><b>(206.3 to 448.9)</b>       | <b>29.1</b><br><b>(21.4 to 37.4)</b>              | <b>1.1</b><br><b>(-3.5 to 6.3)</b>                  |
| Protein-energy malnutrition                                             | 352.7<br>(269.1 to 454.0)                        | 255.9<br>(198.1 to 324.4)                           | 11.8<br>(7.1 to 18.2)                         | -7.0<br>(-30.9 to 25.8)                           | -28.9<br>(-47.5 to -2.9)                            |
| Iodine deficiency                                                       | 929.6<br>(732.5 to 1,142.2)                      | 40.8<br>(32.3 to 50.1)                              | 23.9<br>(15.5 to 35.4)                        | 11.2<br>(0.1 to 23.7)                             | -21.5<br>(-29.2 to -12.9)                           |
| Vitamin A deficiency                                                    | 7,725.3<br>(6,674.9 to 8,922.0)                  | 8,181.8<br>(6,684.4 to 10,091.7)                    | 1.5<br>(0.8 to 2.4)                           | 36.5<br>(9.6 to 72.7)                             | -2.7<br>(-19.5 to 18.0)                             |
| Iron-deficiency anaemia                                                 | 8,806.1<br>(8,503.8 to 9,156.2)                  | --                                                  | 273.2<br>(180.1 to 394.7)                     | 33.3<br>(24.2 to 43.3)                            | 6.5<br>(1.0 to 12.6)                                |
| Other nutritional deficiencies                                          | --                                               | --                                                  | 0.4<br>(0.2 to 0.6)                           | -8.8<br>(-33.0 to 25.2)                           | -30.3<br>(-49.0 to -3.6)                            |
| <b>Other communicable, maternal, neonatal, and nutritional diseases</b> | <b>11,928.2</b><br><b>(11,227.5 to 12,660.4)</b> | <b>8,249.8</b><br><b>(7,062.9 to 9,795.9)</b>       | <b>40.6</b><br><b>(26.3 to 61.5)</b>          | <b>38.9</b><br><b>(24.6 to 55.2)</b>              | <b>-0.6</b><br><b>(-11.5 to 11.8)</b>               |
| Sexually transmitted diseases excluding HIV                             | 8,967.8<br>(8,331.5 to 9,633.2)                  | 6,003.7<br>(5,363.6 to 6,740.9)                     | 25.0<br>(15.3 to 39.1)                        | 43.8<br>(21.8 to 68.0)                            | -0.4<br>(-14.3 to 16.2)                             |
| Syphilis                                                                | 810.4<br>(680.3 to 959.9)                        | 582.4<br>(471.2 to 712.5)                           | 1.2<br>(0.8 to 1.6)                           | 50.2<br>(27.9 to 76.9)                            | 3.3<br>(-12.0 to 22.1)                              |
| Chlamydial infection                                                    | 533.7<br>(417.8 to 671.4)                        | 490.8<br>(395.0 to 599.9)                           | 3.1<br>(1.9 to 4.8)                           | 44.3<br>(24.9 to 66.1)                            | -1.3<br>(-14.1 to 12.9)                             |
| Gonococcal infection                                                    | 836.8<br>(673.9 to 1,039.7)                      | 2,473.5<br>(1,944.2 to 3,132.3)                     | 9.3<br>(5.2 to 15.0)                          | 45.1<br>(6.2 to 93.0)                             | 1.7<br>(-24.5 to 35.3)                              |
| Trichomoniasis                                                          | 1,344.9<br>(1,139.3 to 1,570.5)                  | 1,254.3<br>(1,050.9 to 1,482.2)                     | 1.7<br>(0.7 to 3.6)                           | 41.7<br>(31.6 to 51.5)                            | -2.3<br>(-8.0 to 3.5)                               |
| Genital herpes                                                          | 6,816.1<br>(5,874.2 to 8,003.1)                  | 861.7<br>(720.5 to 1,053.5)                         | 1.9<br>(0.6 to 4.2)                           | 31.5<br>(16.7 to 47.9)                            | -7.6<br>(-16.6 to 1.9)                              |
| Other sexually transmitted diseases                                     | 165.2<br>(147.2 to 184.3)                        | 341.1<br>(283.4 to 413.2)                           | 7.8<br>(5.0 to 11.7)                          | 44.7<br>(22.3 to 70.2)                            | -0.8<br>(-14.3 to 16.4)                             |
| Hepatitis                                                               | 3,637.8<br>(3,031.1 to 4,328.4)                  | 2,246.0<br>(1,360.7 to 3,668.3)                     | 2.1<br>(1.2 to 3.3)                           | 15.0<br>(-14.2 to 55.4)                           | -13.7<br>(-29.4 to 6.8)                             |
| Acute hepatitis A                                                       | 65.5<br>(7.0 to 171.0)                           | 851.1<br>(90.5 to 2,222.9)                          | 0.4<br>(0.1 to 0.9)                           | 18.5<br>(-72.5 to 398.2)                          | -9.3<br>(-69.3 to 171.1)                            |
| Hepatitis B                                                             | 2,802.1<br>(2,239.9 to 3,468.4)                  | 1,224.7<br>(903.9 to 1,635.1)                       | 1.4<br>(0.8 to 2.3)                           | 12.2<br>(-10.8 to 39.7)                           | -15.6<br>(-31.1 to 2.0)                             |
| Hepatitis C                                                             | 763.0<br>(667.4 to 864.6)                        | 75.6<br>(67.8 to 83.6)                              | 0.1<br>(< 0.05 to 0.1)                        | 31.6<br>(9.8 to 58.1)                             | -3.0<br>(-10.2 to 5.1)                              |
| Acute hepatitis E                                                       | 7.3<br>(5.7 to 9.7)                              | 94.6<br>(74.7 to 126.6)                             | 0.2<br>(0.1 to 0.3)                           | 26.7<br>(-9.1 to 80.6)                            | -6.7<br>(-26.1 to 19.1)                             |
| Other infectious diseases                                               | 404.4<br>(387.4 to 422.9)                        | < 0.05<br>(< 0.05 to 0.1)                           | 13.4<br>(8.8 to 19.6)                         | 34.6<br>(22.1 to 48.4)                            | 3.4<br>(-5.3 to 12.6)                               |
| <b>Non-communicable diseases</b>                                        | <b>35,637.8</b><br><b>(35,283.5 to 35,932.7)</b> | <b>107,328.9†</b><br><b>(99,241.3 to 115,128.5)</b> | <b>2,333.8</b><br><b>(1,709.4 to 3,050.9)</b> | <b>39.5</b><br><b>(31.9 to 47.7)</b>              | <b>-1.2</b><br><b>(-4.7 to 2.6)</b>                 |
| <b>Neoplasms</b>                                                        | <b>56.0</b><br><b>(52.5 to 59.1)</b>             | <b>25.4</b><br><b>(23.9 to 26.9)</b>                | <b>8.8</b><br><b>(6.4 to 11.6)</b>            | <b>25.0</b><br><b>(16.0 to 35.2)</b>              | <b>-6.9</b><br><b>(-13.1 to -0.2)</b>               |
| Lip and oral cavity cancer                                              | 1.7<br>(1.6 to 1.9)                              | 0.5<br>(0.5 to 0.6)                                 | 0.2<br>(0.1 to 0.3)                           | 43.2<br>(25.6 to 63.1)                            | 3.7<br>(-9.3 to 17.9)                               |
| Nasopharynx cancer                                                      | 1.0<br>(0.9 to 1.2)                              | 0.3<br>(0.3 to 0.4)                                 | 0.1<br>(0.1 to 0.2)                           | 47.4<br>(24.8 to 74.6)                            | 3.0<br>(-11.7 to 20.6)                              |
| Other pharynx cancer                                                    | 0.4<br>(0.3 to 0.5)                              | 0.2<br>(0.1 to 0.2)                                 | 0.1<br>(< 0.05 to 0.1)                        | 7.7<br>(-8.5 to 24.7)                             | -19.9<br>(-32.1 to -7.5)                            |
| Oesophageal cancer                                                      | 2.0<br>(1.8 to 2.2)                              | 1.9<br>(1.7 to 2.0)                                 | 0.5<br>(0.3 to 0.6)                           | 23.0<br>(0.7 to 49.7)                             | -7.9<br>(-24.5 to 12.4)                             |
| Stomach cancer                                                          | 1.0<br>(0.9 to 1.1)                              | 0.7<br>(0.7 to 0.7)                                 | 0.2<br>(0.1 to 0.2)                           | -1.5<br>(-13.3 to 11.9)                           | -25.9<br>(-35.4 to -15.1)                           |
| Colon and rectum cancer                                                 | 3.6<br>(3.1 to 3.9)                              | 1.3<br>(1.2 to 1.4)                                 | 0.5<br>(0.3 to 0.6)                           | 39.5<br>(15.3 to 66.3)                            | 2.8<br>(-15.0 to 23.6)                              |
| Liver cancer                                                            | 0.5<br>(0.4 to 0.6)                              | 1.3<br>(1.2 to 1.5)                                 | 0.3<br>(0.2 to 0.4)                           | 25.0<br>(9.8 to 40.5)                             | -9.3<br>(-20.0 to 1.4)                              |
| Liver cancer due to hepatitis B                                         | 0.4<br>(0.3 to 0.5)                              | 0.5<br>(0.4 to 0.6)                                 | 0.1<br>(0.1 to 0.1)                           | 28.0<br>(11.2 to 46.8)                            | -8.1<br>(-19.3 to 3.6)                              |

| Cause                                              | Prevalence in thousands (95% UI)              | Incidence in thousands (95% UI)          | YLDs in thousands (95% UI)             |                                                   |                                                     |
|----------------------------------------------------|-----------------------------------------------|------------------------------------------|----------------------------------------|---------------------------------------------------|-----------------------------------------------------|
|                                                    | 2016 counts                                   | 2016 counts                              | 2016 counts                            | Percentage change in counts between 2006 and 2016 | Percentage change in age-standardised rates between |
| Liver cancer due to hepatitis C                    | 0.3<br>(0.2 to 0.4)                           | 0.4<br>(0.3 to 0.5)                      | 0.1<br>( $< 0.05$ to 0.1)              | 24.4<br>(7.7 to 42.1)                             | -8.2<br>(-19.9 to 4.5)                              |
| Liver cancer due to alcohol use                    | 0.2<br>(0.2 to 0.3)                           | 0.3<br>(0.2 to 0.3)                      | 0.1<br>( $< 0.05$ to 0.1)              | 15.3<br>(0.3 to 30.4)                             | -15.8<br>(-26.2 to -4.8)                            |
| Liver cancer due to other causes                   | 0.3<br>(0.2 to 0.3)                           | 0.3<br>(0.2 to 0.3)                      | 0.1<br>( $< 0.05$ to 0.1)              | 31.4<br>(15.0 to 48.1)                            | -4.6<br>(-15.6 to 6.6)                              |
| Gallbladder and biliary tract cancer               | 0.1<br>(0.1 to 0.1)                           | 0.1<br>(0.1 to 0.1)                      | $< 0.05$<br>( $< 0.05$ to $< 0.05$ )   | 11.6<br>(0.3 to 23.4)                             | -16.5<br>(-24.6 to -8.2)                            |
| Pancreatic cancer                                  | 0.3<br>(0.3 to 0.3)                           | 0.4<br>(0.4 to 0.4)                      | 0.1<br>(0.1 to 0.1)                    | 30.2<br>(20.8 to 39.9)                            | -4.0<br>(-11.0 to 3.5)                              |
| Larynx cancer                                      | 0.5<br>(0.5 to 0.6)                           | 0.2<br>(0.2 to 0.2)                      | 0.1<br>(0.1 to 0.1)                    | 23.5<br>(7.0 to 41.2)                             | -8.0<br>(-19.8 to 6.2)                              |
| Tracheal, bronchus, and lung cancer                | 0.8<br>(0.8 to 0.9)                           | 0.7<br>(0.7 to 0.8)                      | 0.2<br>(0.1 to 0.2)                    | 25.9<br>(6.0 to 49.1)                             | -4.9<br>(-21.1 to 14.2)                             |
| Malignant skin melanoma                            | 0.7<br>(0.6 to 0.8)                           | 0.2<br>(0.2 to 0.2)                      | 0.1<br>( $< 0.05$ to 0.1)              | 33.3<br>(10.6 to 62.7)                            | -1.6<br>(-17.8 to 19.6)                             |
| Non-melanoma skin cancer                           | 0.1<br>(0.1 to 0.1)                           | 0.6<br>(0.5 to 0.7)                      | $< 0.05$<br>( $< 0.05$ to $< 0.05$ )   | 33.0<br>(-0.9 to 74.4)                            | -2.4<br>(-28.2 to 31.7)                             |
| Non-melanoma skin cancer (squamous-cell carcinoma) | 0.1<br>(0.1 to 0.1)                           | 0.2<br>(0.2 to 0.3)                      | $< 0.05$<br>( $< 0.05$ to $< 0.05$ )   | 34.0<br>(-3.9 to 80.7)                            | -1.8<br>(-30.2 to 36.4)                             |
| Non-melanoma skin cancer (basal-cell carcinoma)    | $< 0.05$<br>( $< 0.05$ to 0.1)                | 0.4<br>(0.3 to 0.4)                      | $< 0.05$<br>( $< 0.05$ to $< 0.05$ )   | 25.2<br>(10.5 to 40.8)                            | -8.6<br>(-20.5 to 4.7)                              |
| Breast cancer                                      | 11.6<br>(9.3 to 14.0)                         | 2.8<br>(2.3 to 3.4)                      | 1.2<br>(0.8 to 1.7)                    | 42.0<br>(9.4 to 85.9)                             | 1.4<br>(-21.3 to 28.4)                              |
| Cervical cancer                                    | 14.4<br>(10.6 to 17.9)                        | 4.2<br>(3.1 to 5.1)                      | 1.5<br>(1.0 to 2.1)                    | 19.0<br>(-6.2 to 52.2)                            | -15.8<br>(-32.3 to 4.5)                             |
| Uterine cancer                                     | 1.6<br>(1.3 to 1.8)                           | 0.4<br>(0.3 to 0.4)                      | 0.1<br>(0.1 to 0.2)                    | 25.5<br>(2.9 to 56.2)                             | -6.4<br>(-23.3 to 16.5)                             |
| Ovarian cancer                                     | 1.9<br>(1.7 to 2.2)                           | 0.7<br>(0.6 to 0.8)                      | 0.3<br>(0.2 to 0.4)                    | 54.3<br>(21.4 to 95.6)                            | 10.3<br>(-16.0 to 44.5)                             |
| Prostate cancer                                    | 9.2<br>(7.0 to 11.3)                          | 2.9<br>(2.3 to 3.5)                      | 1.4<br>(0.9 to 1.8)                    | 39.1<br>(15.5 to 65.6)                            | 2.5<br>(-14.7 to 20.3)                              |
| Testicular cancer                                  | 0.1<br>(0.1 to 0.1)                           | $< 0.05$<br>( $< 0.05$ to $< 0.05$ )     | $< 0.05$<br>( $< 0.05$ to $< 0.05$ )   | 25.3<br>(2.3 to 54.0)                             | -13.3<br>(-31.2 to 10.6)                            |
| Kidney cancer                                      | 1.9<br>(1.4 to 2.6)                           | 0.5<br>(0.4 to 0.6)                      | 0.2<br>(0.1 to 0.2)                    | 32.2<br>(-12.3 to 106.5)                          | 4.4<br>(-13.1 to 26.6)                              |
| Bladder cancer                                     | 1.0<br>(0.8 to 1.1)                           | 0.3<br>(0.3 to 0.3)                      | 0.1<br>(0.1 to 0.2)                    | 32.6<br>(15.5 to 48.8)                            | -1.5<br>(-14.0 to 11.4)                             |
| Brain and nervous system cancer                    | 1.1<br>(0.9 to 1.3)                           | 0.5<br>(0.4 to 0.6)                      | 0.1<br>(0.1 to 0.2)                    | 48.1<br>(34.6 to 65.0)                            | 12.3<br>(-2.5 to 30.3)                              |
| Thyroid cancer                                     | 1.3<br>(1.2 to 1.5)                           | 0.3<br>(0.2 to 0.3)                      | 0.1<br>(0.1 to 0.1)                    | 27.9<br>(3.3 to 58.8)                             | -10.1<br>(-26.8 to 10.0)                            |
| Mesothelioma                                       | $< 0.05$<br>( $< 0.05$ to 0.1)                | $< 0.05$<br>( $< 0.05$ to $< 0.05$ )     | $< 0.05$<br>( $< 0.05$ to $< 0.05$ )   | 23.4<br>(6.1 to 42.1)                             | -8.6<br>(-21.3 to 4.7)                              |
| Hodgkin lymphoma                                   | 0.9<br>(0.6 to 1.2)                           | 0.3<br>(0.2 to 0.4)                      | 0.1<br>(0.1 to 0.2)                    | 21.2<br>(-3.4 to 51.9)                            | -11.1<br>(-28.1 to 6.2)                             |
| Non-Hodgkin's lymphoma                             | 5.8<br>(4.9 to 6.7)                           | 1.9<br>(1.6 to 2.1)                      | 0.6<br>(0.4 to 0.8)                    | 14.9<br>(-7.4 to 45.8)                            | -11.9<br>(-23.8 to 4.9)                             |
| Multiple myeloma                                   | 0.4<br>(0.4 to 0.5)                           | 0.3<br>(0.2 to 0.3)                      | 0.1<br>(0.1 to 0.2)                    | 35.8<br>(13.3 to 63.0)                            | 0.6<br>(-17.8 to 23.6)                              |
| Leukaemia                                          | 2.2<br>(1.7 to 2.7)                           | 0.7<br>(0.5 to 0.8)                      | 0.3<br>(0.2 to 0.4)                    | 26.9<br>(10.0 to 45.5)                            | -5.5<br>(-16.2 to 5.8)                              |
| Acute lymphoid leukaemia                           | 0.7<br>(0.5 to 0.8)                           | 0.2<br>(0.1 to 0.2)                      | 0.1<br>(0.1 to 0.1)                    | 35.5<br>(9.9 to 67.2)                             | 3.0<br>(-12.6 to 17.9)                              |
| Chronic lymphoid leukaemia                         | 0.2<br>(0.2 to 0.2)                           | $< 0.05$<br>( $< 0.05$ to 0.1)           | $< 0.05$<br>( $< 0.05$ to $< 0.05$ )   | 31.6<br>(8.8 to 58.6)                             | -4.1<br>(-20.4 to 15.5)                             |
| Acute myeloid leukaemia                            | 0.2<br>(0.2 to 0.2)                           | 0.1<br>(0.1 to 0.1)                      | $< 0.05$<br>( $< 0.05$ to $< 0.05$ )   | 44.2<br>(23.4 to 68.6)                            | 7.7<br>(-4.7 to 20.8)                               |
| Chronic myeloid leukaemia                          | 0.2<br>(0.2 to 0.3)                           | 0.1<br>(0.1 to 0.1)                      | $< 0.05$<br>( $< 0.05$ to $< 0.05$ )   | 23.2<br>(0.5 to 52.8)                             | -13.0<br>(-28.9 to 5.7)                             |
| Other leukaemia                                    | 1.0<br>(0.7 to 1.2)                           | 0.2<br>(0.2 to 0.3)                      | 0.1<br>(0.1 to 0.2)                    | 17.5<br>(-3.3 to 40.6)                            | -9.7<br>(-24.9 to 6.9)                              |
| Other neoplasms                                    | 3.8<br>(3.5 to 4.8)                           | 1.3<br>(1.2 to 1.7)                      | 0.4<br>(0.3 to 0.5)                    | -29.6<br>(-40.4 to 40.0)                          | -47.2<br>(-54.9 to -0.6)                            |
| <b>Cardiovascular diseases</b>                     | <b>1,294.5</b><br><b>(1,214.6 to 1,376.1)</b> | <b>111.5†</b><br><b>(106.6 to 116.4)</b> | <b>69.7</b><br><b>(50.1 to 92.5)</b>   | <b>43.5</b><br><b>(37.1 to 50.1)</b>              | <b>0.1</b><br><b>(-3.1 to 3.4)</b>                  |
| Rheumatic heart disease                            | 429.6<br>(376.6 to 485.5)                     | 21.3<br>(18.6 to 24.2)                   | 20.7<br>(12.8 to 30.4)                 | 64.9<br>(49.2 to 83.5)                            | 14.1<br>(4.3 to 25.4)                               |
| Ischaemic heart disease                            | 242.8<br>(226.4 to 260.5)                     | 37.0<br>(34.6 to 39.6)                   | 11.2<br>(7.5 to 15.5)                  | 32.9<br>(24.4 to 41.9)                            | -3.4<br>(-7.8 to 1.9)                               |
| Cerebrovascular disease                            | 74.3<br>(69.4 to 79.0)                        | 15.4‡<br>(14.0 to 16.8)                  | 10.8<br>(7.8 to 13.6)                  | 35.1<br>(24.3 to 45.8)                            | -1.6<br>(-9.6 to 6.5)                               |
| Ischaemic stroke                                   | 65.6<br>(58.9 to 72.7)                        | 9.8‡<br>(8.6 to 11.1)                    | 9.0<br>(6.5 to 11.4)                   | 36.0<br>(23.4 to 49.0)                            | -1.1<br>(-10.6 to 8.8)                              |
| Hemorrhagic stroke                                 | 13.1<br>(11.7 to 14.6)                        | 5.5‡<br>(4.9 to 6.1)                     | 1.8<br>(1.3 to 2.4)                    | 30.7<br>(16.0 to 46.0)                            | -4.0<br>(-16.1 to 9.8)                              |
| Hypertensive heart disease                         | 19.7<br>(16.1 to 23.6)                        | --                                       | 1.6<br>(1.0 to 2.2)                    | 28.5<br>(13.7 to 44.2)                            | -7.7<br>(-17.1 to 2.2)                              |
| Cardiomyopathy and myocarditis                     | 11.4<br>(10.0 to 13.1)                        | 8.1†<br>(7.0 to 9.2)                     | 1.2<br>(0.8 to 1.8)                    | 37.1<br>(26.2 to 49.9)                            | -1.2<br>(-12.1 to 11.6)                             |
| Myocarditis                                        | 4.4<br>(3.9 to 4.9)                           | 8.1<br>(7.0 to 9.2)                      | 0.3<br>(0.2 to 0.4)                    | 37.2<br>(29.8 to 44.4)                            | -1.2<br>(-9.0 to 6.6)                               |
| Alcoholic cardiomyopathy                           | 1.7<br>(1.3 to 2.1)                           | --                                       | 0.1<br>(0.1 to 0.2)                    | 40.6<br>(6.3 to 91.1)                             | 1.7<br>(-23.3 to 37.6)                              |
| Other cardiomyopathy                               | 9.2<br>(7.8 to 10.9)                          | --                                       | 0.8<br>(0.5 to 1.1)                    | 36.4<br>(21.3 to 54.3)                            | -1.8<br>(-15.7 to 14.0)                             |
| Atrial fibrillation and flutter                    | 54.4<br>(47.5 to 61.9)                        | 4.7<br>(4.0 to 5.5)                      | 4.3<br>(2.9 to 6.0)                    | 35.0<br>(25.2 to 47.0)                            | -0.4<br>(-6.4 to 6.5)                               |
| Peripheral vascular disease                        | 198.9<br>(172.2 to 230.0)                     | 19.9<br>(17.0 to 23.1)                   | 1.1<br>(0.5 to 1.9)                    | 26.1<br>(16.0 to 37.8)                            | -4.3<br>(-11.7 to 4.7)                              |
| Endocarditis                                       | 1.1<br>(1.0 to 1.4)                           | 5.2<br>(4.5 to 5.9)                      | 0.1<br>(0.1 to 0.1)                    | 38.4<br>(28.8 to 48.8)                            | -4.5<br>(-13.5 to 5.4)                              |
| Other cardiovascular and circulatory diseases      | 350.5<br>(268.1 to 439.2)                     | --                                       | 18.8<br>(11.9 to 27.9)                 | 40.1<br>(25.5 to 57.6)                            | -2.7<br>(-10.4 to 5.8)                              |
| <b>Chronic respiratory diseases</b>                | <b>2,683.7</b><br><b>(2,499.7 to 2,863.3)</b> | <b>565.4†</b><br><b>(513.8 to 620.0)</b> | <b>121.7</b><br><b>(87.3 to 165.3)</b> | <b>43.3</b><br><b>(36.4 to 50.2)</b>              | <b>2.3</b><br><b>(-1.5 to 6.2)</b>                  |
| Chronic obstructive pulmonary disease              | 319.1<br>(306.3 to 332.2)                     | 23.6<br>(22.7 to 24.4)                   | 24.3<br>(21.0 to 27.2)                 | 38.1<br>(27.5 to 49.0)                            | 0.8<br>(-5.2 to 7.8)                                |
| Pneumoconiosis                                     | 0.3<br>(0.3 to 0.4)                           | $< 0.05$<br>( $< 0.05$ to $< 0.05$ )     | 0.1<br>( $< 0.05$ to 0.1)              | 41.1<br>(33.3 to 49.8)                            | 1.7<br>(-4.2 to 8.3)                                |
| Silicosis                                          | $< 0.05$<br>( $< 0.05$ to $< 0.05$ )          | $< 0.05$<br>( $< 0.05$ to $< 0.05$ )     | $< 0.05$<br>( $< 0.05$ to $< 0.05$ )   | 47.4<br>(34.6 to 62.5)                            | 1.2<br>(-5.1 to 8.8)                                |



| Cause                                                          | Prevalence in thousands (95% UI)          | Incidence in thousands (95% UI)          | YLDs in thousands (95% UI)        |                                                   |                                                     |
|----------------------------------------------------------------|-------------------------------------------|------------------------------------------|-----------------------------------|---------------------------------------------------|-----------------------------------------------------|
|                                                                | 2016 counts                               | 2016 counts                              | 2016 counts                       | Percentage change in counts between 2006 and 2016 | Percentage change in age-standardised rates between |
| Asbestosis                                                     | 0.1<br>(0.1 to 0.2)                       | < 0.05<br>(< 0.05 to < 0.05)             | < 0.05<br>(< 0.05 to < 0.05)      | 41.0<br>(29.7 to 54.7)                            | 0.7<br>(-5.0 to 7.5)                                |
| Coal workers pneumoconiosis                                    | --                                        | --                                       | --                                | --                                                | --                                                  |
| Other pneumoconiosis                                           | 0.2<br>(0.1 to 0.2)                       | < 0.05<br>(< 0.05 to < 0.05)             | < 0.05<br>(< 0.05 to < 0.05)      | 40.5<br>(28.8 to 54.3)                            | 2.4<br>(-6.8 to 13.7)                               |
| Asthma                                                         | 2,362.9<br>(2,143.3 to 2,586.5)           | 541.6<br>(490.0 to 596.7)                | 93.3<br>(60.6 to 134.8)           | 43.4<br>(35.6 to 51.6)                            | 2.5<br>(-1.9 to 7.0)                                |
| Interstitial lung disease and pulmonary sarcoidosis            | 2.5<br>(2.2 to 2.8)                       | 0.2<br>(0.2 to 0.3)                      | 0.3<br>(0.2 to 0.4)               | 40.1<br>(35.7 to 44.9)                            | -0.4<br>(-5.1 to 4.8)                               |
| Other chronic respiratory diseases                             | --                                        | --                                       | 3.7<br>(2.9 to 4.7)               | 88.5<br>(39.3 to 151.0)                           | 33.9<br>(9.1 to 62.2)                               |
| <b>Cirrhosis and other chronic liver diseases</b>              | <b>71.4<br/>(67.4 to 75.4)</b>            | <b>7.0<br/>(6.7 to 7.4)</b>              | <b>6.2<br/>(4.1 to 8.6)</b>       | <b>40.9<br/>(23.3 to 62.5)</b>                    | <b>0.8<br/>(-7.7 to 10.8)</b>                       |
| Cirrhosis and other chronic liver diseases due to hepatitis B  | 17.2<br>(13.9 to 20.5)                    | 1.8<br>(1.5 to 2.2)                      | 1.1<br>(0.7 to 1.6)               | 45.4<br>(19.7 to 77.9)                            | 2.9<br>(-11.7 to 21.7)                              |
| Cirrhosis and other chronic liver diseases due to hepatitis C  | 10.5<br>(6.7 to 15.7)                     | 1.2<br>(0.8 to 1.7)                      | 0.7<br>(0.4 to 1.1)               | 49.2<br>(17.9 to 89.7)                            | 6.5<br>(-13.5 to 30.8)                              |
| Cirrhosis and other chronic liver diseases due to alcohol use  | 13.2<br>(11.0 to 15.3)                    | 1.6<br>(1.4 to 1.9)                      | 0.8<br>(0.5 to 1.1)               | 33.8<br>(6.7 to 63.2)                             | -4.8<br>(-21.1 to 12.2)                             |
| Cirrhosis and other chronic liver diseases due to other causes | 30.5<br>(27.9 to 33.3)                    | 2.4<br>(2.3 to 2.6)                      | 3.6<br>(2.3 to 5.3)               | 39.8<br>(13.8 to 72.7)                            | 0.5<br>(-15.3 to 20.9)                              |
| <b>Digestive diseases</b>                                      | <b>534.7<br/>(492.2 to 583.4)</b>         | <b>486.0†<br/>(462.3 to 511.9)</b>       | <b>17.9<br/>(12.6 to 24.5)</b>    | <b>35.6<br/>(23.6 to 49.4)</b>                    | <b>-2.1<br/>(-7.8 to 4.3)</b>                       |
| Peptic ulcer disease                                           | 71.5<br>(65.7 to 78.0)                    | 40.3<br>(35.9 to 45.3)                   | 1.4<br>(0.9 to 2.1)               | 42.5<br>(26.9 to 59.8)                            | -0.6<br>(-9.5 to 8.3)                               |
| Gastritis and duodenitis                                       | 193.5<br>(168.3 to 218.6)                 | 157.2<br>(140.7 to 174.6)                | 2.4<br>(1.6 to 3.5)               | 53.7<br>(36.7 to 72.4)                            | 9.6<br>(1.1 to 19.9)                                |
| Appendicitis                                                   | 4.4<br>(4.1 to 4.9)                       | 117.6<br>(107.4 to 128.6)                | 1.4<br>(0.9 to 2.1)               | 37.5<br>(-2.5 to 92.5)                            | -2.8<br>(-23.9 to 25.7)                             |
| Paralytic ileus and intestinal obstruction                     | 0.8<br>(0.7 to 0.8)                       | 21.5<br>(19.4 to 24.0)                   | 0.2<br>(0.2 to 0.3)               | 44.9<br>(38.5 to 51.4)                            | 3.4<br>(-5.9 to 13.4)                               |
| Inguinal, femoral, and abdominal hernia                        | 260.5<br>(211.7 to 319.1)                 | 49.7<br>(44.3 to 57.0)                   | 10.0<br>(6.6 to 14.3)             | 29.7<br>(13.3 to 47.9)                            | -6.6<br>(-15.0 to 2.3)                              |
| Inflammatory bowel disease                                     | 1.5<br>(1.4 to 1.6)                       | 12.7<br>(12.1 to 13.3)                   | 0.2<br>(0.2 to 0.3)               | 44.1<br>(40.4 to 47.9)                            | 2.8<br>(0.2 to 5.4)                                 |
| Vascular intestinal disorders                                  | 0.2<br>(0.2 to 0.2)                       | 1.2<br>(1.0 to 1.4)                      | 0.1<br>(< 0.05 to 0.1)            | 40.5<br>(33.1 to 48.2)                            | 2.0<br>(-2.1 to 6.1)                                |
| Gallbladder and biliary diseases                               | 19.1<br>(16.7 to 21.4)                    | 81.5<br>(69.9 to 92.9)                   | 0.5<br>(0.3 to 0.7)               | 43.6<br>(25.8 to 64.0)                            | 1.1<br>(-15.3 to 20.0)                              |
| Pancreatitis                                                   | 0.5<br>(0.4 to 0.5)                       | 4.4<br>(3.8 to 5.0)                      | 0.1<br>(< 0.05 to 0.1)            | 47.0<br>(42.1 to 53.1)                            | 4.9<br>(1.5 to 8.3)                                 |
| Other digestive diseases                                       | --                                        | --                                       | 1.7<br>(1.2 to 2.3)               | 37.2<br>(20.5 to 56.4)                            | 1.5<br>(-4.8 to 8.9)                                |
| <b>Neurological disorders</b>                                  | <b>10,492.5<br/>(9,939.9 to 11,094.3)</b> | <b>4,982.8<br/>(4,242.4 to 5,820.4)</b>  | <b>277.3<br/>(168.3 to 429.4)</b> | <b>46.3<br/>(-7.0 to 136.8)</b>                   | <b>2.0<br/>(-26.8 to 46.4)</b>                      |
| Alzheimer's disease and other dementias                        | 42.1<br>(35.2 to 50.4)                    | 7.3<br>(6.1 to 8.9)                      | 6.0<br>(4.2 to 8.0)               | 36.0<br>(28.6 to 43.4)                            | -0.8<br>(-5.5 to 4.2)                               |
| Parkinson's disease                                            | 3.9<br>(3.1 to 4.8)                       | 0.5<br>(0.4 to 0.7)                      | 0.5<br>(0.3 to 0.6)               | 49.2<br>(29.2 to 72.1)                            | 10.4<br>(-3.9 to 25.8)                              |
| Epilepsy                                                       | 194.3<br>(41.8 to 383.3)                  | 32.7<br>(6.9 to 64.8)                    | 76.7<br>(14.7 to 167.3)           | 46.7<br>(-74.2 to 764.8)                          | 5.0<br>(-81.9 to 498.1)                             |
| Multiple sclerosis                                             | 0.9<br>(0.8 to 1.0)                       | 0.1<br>(< 0.05 to 0.1)                   | 0.2<br>(0.2 to 0.3)               | 63.1<br>(57.1 to 68.9)                            | 13.3<br>(9.2 to 17.4)                               |
| Motor neuron disease                                           | 0.3<br>(0.3 to 0.4)                       | 0.1<br>(0.1 to 0.1)                      | 0.1<br>(< 0.05 to 0.1)            | 43.9<br>(38.0 to 52.2)                            | 3.6<br>(0.4 to 7.3)                                 |
| Migraine                                                       | 3,521.0<br>(3,284.4 to 3,751.2)           | 484.4<br>(453.7 to 517.7)                | 149.7<br>(95.7 to 213.0)          | 43.7<br>(37.0 to 51.1)                            | 0.2<br>(-3.6 to 3.9)                                |
| Tension-type headache                                          | 7,878.7<br>(6,987.5 to 9,055.6)           | 4,457.5<br>(3,725.1 to 5,300.8)          | 25.1<br>(15.8 to 37.5)            | 41.7<br>(33.7 to 50.9)                            | -1.0<br>(-5.9 to 4.6)                               |
| Other neurological disorders                                   | 0.1<br>(0.1 to 0.1)                       | 0.2<br>(0.1 to 0.3)                      | 19.1<br>(3.8 to 41.6)             | 81.6<br>(-66.4 to 914.0)                          | 26.6<br>(-74.8 to 490.0)                            |
| <b>Mental and substance use disorders</b>                      | <b>5,574.7<br/>(5,294.2 to 5,828.8)</b>   | <b>2,482.8†<br/>(2,274.5 to 2,731.7)</b> | <b>691.6<br/>(496.2 to 901.7)</b> | <b>34.5<br/>(30.2 to 39.1)</b>                    | <b>-5.1<br/>(-7.9 to -2.4)</b>                      |
| Schizophrenia                                                  | 44.2<br>(38.1 to 50.6)                    | 4.4<br>(3.8 to 5.0)                      | 28.4<br>(20.6 to 36.1)            | 48.7<br>(34.5 to 66.7)                            | 2.5<br>(-5.6 to 13.0)                               |
| Alcohol use disorders                                          | 371.9<br>(316.9 to 433.1)                 | 206.7<br>(175.1 to 239.7)                | 37.0<br>(25.1 to 51.4)            | 43.3<br>(31.4 to 56.7)                            | -0.7<br>(-8.0 to 7.1)                               |
| Drug use disorders                                             | 157.7<br>(139.5 to 178.2)                 | 28.9<br>(24.6 to 33.6)                   | 31.8<br>(21.6 to 44.5)            | 50.8<br>(35.9 to 68.6)                            | 4.4<br>(-4.9 to 15.0)                               |
| Opioid use disorders                                           | 64.3<br>(50.6 to 81.7)                    | 9.1<br>(7.4 to 11.2)                     | 26.7<br>(17.7 to 38.0)            | 51.8<br>(34.3 to 73.0)                            | 4.9<br>(-5.5 to 16.9)                               |
| Cocaine use disorders                                          | 4.3<br>(3.5 to 5.2)                       | 0.7<br>(0.5 to 0.8)                      | 0.6<br>(0.4 to 0.9)               | 47.4<br>(39.4 to 56.4)                            | 3.0<br>(-1.9 to 8.7)                                |
| Amphetamine use disorders                                      | 2.4<br>(1.6 to 3.4)                       | 0.5<br>(0.3 to 0.6)                      | 0.3<br>(0.2 to 0.6)               | 46.1<br>(34.7 to 59.9)                            | 3.0<br>(-5.2 to 13.1)                               |
| Cannabis use disorders                                         | 82.3<br>(64.7 to 103.9)                   | 16.5<br>(12.9 to 21.1)                   | 2.4<br>(1.4 to 3.7)               | 43.7<br>(17.1 to 77.5)                            | 0.4<br>(-16.0 to 21.4)                              |
| Other drug use disorders                                       | 9.6<br>(8.2 to 10.9)                      | 2.1<br>(1.9 to 2.5)                      | 1.7<br>(1.1 to 2.3)               | 48.6<br>(24.0 to 74.8)                            | 3.1<br>(-11.9 to 21.2)                              |
| Depressive disorders                                           | 1,412.8<br>(1,318.7 to 1,540.8)           | 1,754.6<br>(1,549.9 to 1,991.9)          | 256.8<br>(175.1 to 350.1)         | 23.6<br>(15.2 to 32.1)                            | -10.7<br>(-15.4 to -5.4)                            |
| Major depressive disorder                                      | 1,087.8<br>(962.2 to 1,240.1)             | 1,689.8<br>(1,482.7 to 1,922.7)          | 223.4<br>(152.3 to 306.8)         | 21.1<br>(12.0 to 30.8)                            | -12.2<br>(-17.7 to -6.5)                            |
| Dysthymia                                                      | 345.1<br>(297.1 to 400.3)                 | 64.9<br>(56.4 to 75.2)                   | 33.3<br>(22.4 to 48.6)            | 43.5<br>(37.0 to 50.3)                            | 0.5<br>(-2.9 to 3.8)                                |
| Bipolar disorder                                               | 188.7<br>(158.4 to 223.2)                 | 24.0<br>(20.0 to 28.6)                   | 38.7<br>(23.6 to 57.2)            | 44.2<br>(33.5 to 56.5)                            | 0.7<br>(-5.7 to 7.1)                                |
| Anxiety disorders                                              | 1,080.0<br>(964.0 to 1,201.3)             | 204.6<br>(184.7 to 223.8)                | 105.1<br>(73.3 to 143.8)          | 43.4<br>(32.5 to 53.9)                            | 0.8<br>(-5.7 to 7.2)                                |
| Eating disorders                                               | 31.4<br>(25.2 to 38.6)                    | 26.2<br>(18.9 to 35.6)                   | 6.4<br>(4.0 to 9.4)               | 60.4<br>(35.7 to 88.9)                            | 12.1<br>(-4.2 to 31.2)                              |
| Anorexia nervosa                                               | 8.9<br>(6.3 to 12.2)                      | 4.3<br>(3.1 to 5.8)                      | 1.9<br>(1.1 to 3.1)               | 56.3<br>(13.6 to 115.2)                           | 10.3<br>(-18.1 to 49.1)                             |
| Bulimia nervosa                                                | 21.2<br>(15.5 to 28.6)                    | 21.9<br>(14.6 to 31.2)                   | 4.5<br>(2.6 to 6.8)               | 62.1<br>(31.2 to 97.3)                            | 12.7<br>(-6.7 to 36.7)                              |
| Autistic spectrum disorders                                    | 341.8<br>(309.9 to 383.7)                 | 4.9<br>(3.4 to 6.8)                      | 49.1<br>(32.8 to 69.5)            | 40.7<br>(32.7 to 49.4)                            | 0.8<br>(-4.3 to 6.0)                                |
| Autism                                                         | 95.1<br>(82.0 to 110.9)                   | 0.7<br>(0.4 to 1.2)                      | 24.4<br>(15.7 to 35.3)            | 41.0<br>(26.7 to 56.1)                            | 0.9<br>(-8.3 to 10.7)                               |
| Asperger syndrome and other autistic spectrum disorders        | 246.1<br>(201.8 to 299.3)                 | 4.2<br>(2.7 to 6.1)                      | 24.7<br>(15.8 to 36.3)            | 40.5<br>(32.6 to 49.4)                            | 0.6<br>(-4.0 to 5.7)                                |



| Cause                                                      | Prevalence in thousands (95% UI)                 | Incidence in thousands (95% UI)                    | YLDs in thousands (95% UI)              |                                                   |                                                     |
|------------------------------------------------------------|--------------------------------------------------|----------------------------------------------------|-----------------------------------------|---------------------------------------------------|-----------------------------------------------------|
|                                                            | 2016 counts                                      | 2016 counts                                        | 2016 counts                             | Percentage change in counts between 2006 and 2016 | Percentage change in age-standardised rates between |
| Attention-deficit/hyperactivity disorder                   | 550.1<br>(490.1 to 621.1)                        | 38.7<br>(33.5 to 45.3)                             | 6.6<br>(4.0 to 10.4)                    | 41.2<br>(30.7 to 52.8)                            | 0.4<br>(-6.2 to 8.0)                                |
| Conduct disorder                                           | 438.7<br>(355.4 to 520.5)                        | 162.1<br>(126.1 to 198.3)                          | 53.1<br>(32.2 to 80.8)                  | 40.6<br>(31.3 to 49.9)                            | 0.6<br>(-6.0 to 7.3)                                |
| Idiopathic developmental intellectual disability           | 981.4<br>(616.3 to 1,354.0)                      | --                                                 | 42.7<br>(21.2 to 71.0)                  | 24.7<br>(15.6 to 32.9)                            | -11.8<br>(-18.0 to -6.5)                            |
| Other mental and substance use disorders                   | 481.6<br>(420.5 to 559.4)                        | 27.7<br>(24.2 to 32.1)                             | 35.9<br>(24.4 to 52.2)                  | 45.2<br>(36.0 to 54.0)                            | 0.8<br>(-4.1 to 5.8)                                |
| <b>Diabetes, urogenital, blood, and endocrine diseases</b> | <b>18,698.4</b><br><b>(18,312.0 to 19,150.0)</b> | <b>3,418.7†</b><br><b>(3,184.0 to 3,660.3)</b>     | <b>202.8</b><br><b>(142.4 to 277.3)</b> | <b>42.5</b><br><b>(37.8 to 48.1)</b>              | <b>1.8</b><br><b>(-1.6 to 5.2)</b>                  |
| Diabetes mellitus                                          | 692.0<br>(622.7 to 765.4)                        | 51.2<br>(46.3 to 56.3)                             | 65.3<br>(45.5 to 89.8)                  | 44.0<br>(35.3 to 52.5)                            | 2.9<br>(-3.6 to 9.0)                                |
| Acute glomerulonephritis                                   | 0.3<br>(0.3 to 0.4)                              | 4.9<br>(4.1 to 5.8)                                | < 0.05<br>(< 0.05 to < 0.05)            | 40.5<br>(34.5 to 46.7)                            | 0.1<br>(-3.5 to 4.3)                                |
| Chronic kidney disease                                     | 1,061.5<br>(958.1 to 1,172.2)                    | 83.0<br>(74.5 to 92.3)                             | 29.1<br>(20.8 to 38.0)                  | 40.2<br>(31.6 to 50.0)                            | -0.2<br>(-5.8 to 5.5)                               |
| Chronic kidney disease due to diabetes mellitus            | 308.2<br>(261.0 to 360.0)                        | 22.1<br>(18.4 to 26.5)                             | 8.1<br>(5.7 to 11.0)                    | 40.8<br>(28.7 to 53.8)                            | 1.0<br>(-6.6 to 9.7)                                |
| Chronic kidney disease due to hypertension                 | 232.4<br>(200.1 to 263.6)                        | 22.8<br>(19.3 to 26.6)                             | 4.7<br>(3.3 to 6.4)                     | 34.4<br>(19.1 to 51.6)                            | -2.4<br>(-13.4 to 9.7)                              |
| Chronic kidney disease due to glomerulonephritis           | 216.5<br>(186.8 to 244.9)                        | 12.5<br>(10.2 to 15.2)                             | 7.9<br>(5.5 to 10.8)                    | 42.4<br>(28.0 to 58.7)                            | 0.1<br>(-8.3 to 9.1)                                |
| Chronic kidney disease due to other causes                 | 304.4<br>(256.6 to 352.7)                        | 25.5<br>(21.6 to 29.5)                             | 8.4<br>(5.9 to 11.3)                    | 41.1<br>(28.4 to 55.9)                            | -0.2<br>(-8.0 to 7.9)                               |
| Urinary diseases and male infertility                      | 365.6<br>(327.3 to 403.6)                        | 1,828.9†<br>(1,630.6 to 2,050.3)                   | 10.7<br>(6.9 to 15.5)                   | 33.8<br>(25.1 to 43.8)                            | 0.1<br>(-6.4 to 7.8)                                |
| Interstitial nephritis and urinary tract infections        | 30.9<br>(27.2 to 35.0)                           | 1,621.9<br>(1,427.5 to 1,842.0)                    | 1.0<br>(0.6 to 1.6)                     | 43.9<br>(18.3 to 75.2)                            | 2.4<br>(-12.5 to 20.2)                              |
| Urolithiasis                                               | 6.5<br>(5.8 to 7.5)                              | 173.9<br>(153.6 to 199.4)                          | 0.5<br>(0.3 to 0.7)                     | 45.6<br>(35.0 to 56.3)                            | 2.3<br>(-6.1 to 11.3)                               |
| Benign prostatic hyperplasia                               | 250.7<br>(210.6 to 292.2)                        | 33.0<br>(27.5 to 38.5)                             | 8.2<br>(5.1 to 11.9)                    | 32.9<br>(22.1 to 45.7)                            | 0.6<br>(-6.8 to 9.2)                                |
| Male infertility                                           | 67.7<br>(52.9 to 85.9)                           | --                                                 | 0.4<br>(0.1 to 0.8)                     | 42.1<br>(23.4 to 60.8)                            | -10.3<br>(-21.2 to 1.7)                             |
| Other urinary diseases                                     | --                                               | --                                                 | 0.6<br>(0.4 to 0.8)                     | 17.4<br>(2.1 to 35.3)                             | -14.7<br>(-23.3 to -5.9)                            |
| Gynecological diseases                                     | 3,708.3<br>(3,501.0 to 3,919.2)                  | 1,426.6†<br>(1,319.4 to 1,545.7)                   | 41.2<br>(27.8 to 58.7)                  | 48.7<br>(41.5 to 56.4)                            | 0.4<br>(-3.5 to 4.5)                                |
| Uterine fibroids                                           | 227.2<br>(200.2 to 256.1)                        | 30.4<br>(26.3 to 34.9)                             | 4.7<br>(3.0 to 7.2)                     | 63.1<br>(48.9 to 77.6)                            | 8.5<br>(0.6 to 17.2)                                |
| Polycystic ovarian syndrome                                | 30.2<br>(22.2 to 39.5)                           | 79.6<br>(56.8 to 106.0)                            | 0.3<br>(0.1 to 0.5)                     | 51.4<br>(32.5 to 75.3)                            | 0.6<br>(-11.6 to 14.8)                              |
| Female infertility                                         | 13.7<br>(11.2 to 23.3)                           | --                                                 | 0.1<br>(< 0.05 to 0.2)                  | 60.3<br>(20.6 to 170.3)                           | -2.2<br>(-24.2 to 49.4)                             |
| Endometriosis                                              | 7.2<br>(5.9 to 8.6)                              | 31.1<br>(24.9 to 39.3)                             | 0.7<br>(0.4 to 1.0)                     | 45.3<br>(2.5 to 101.7)                            | -0.6<br>(-26.4 to 32.3)                             |
| Genital prolapse                                           | 1,660.8<br>(1,479.7 to 1,840.7)                  | 163.2<br>(138.1 to 192.1)                          | 5.2<br>(2.6 to 9.5)                     | 29.9<br>(22.4 to 38.5)                            | -5.1<br>(-10.8 to 1.9)                              |
| Premenstrual syndrome                                      | 1,849.1<br>(1,678.8 to 2,011.4)                  | 733.8<br>(664.6 to 807.1)                          | 15.4<br>(9.6 to 23.5)                   | 46.8<br>(31.2 to 61.9)                            | -1.7<br>(-10.7 to 8.1)                              |
| Other gynecological diseases                               | 428.9<br>(367.4 to 495.6)                        | 388.4<br>(318.4 to 466.8)                          | 14.9<br>(9.7 to 21.2)                   | 54.3<br>(42.9 to 66.8)                            | 3.3<br>(-4.0 to 11.1)                               |
| Hemoglobinopathies and hemolytic anaemias                  | 15,748.9<br>(15,321.0 to 16,243.5)               | --                                                 | 42.5<br>(28.3 to 61.6)                  | 41.8<br>(30.4 to 59.5)                            | 5.0<br>(-2.9 to 20.0)                               |
| Thalassemias                                               | 0.1<br>(< 0.05 to 0.2)                           | --                                                 | < 0.05<br>(< 0.05 to < 0.05)            | 67.8<br>(-9.6 to 695.2)                           | 26.7<br>(-32.2 to 510.8)                            |
| Thalassaemia trait                                         | 237.2<br>(78.8 to 506.7)                         | --                                                 | 3.4<br>(0.9 to 7.8)                     | 69.1<br>(4.0 to 557.3)                            | 22.5<br>(-25.3 to 377.1)                            |
| Sickle cell disorders                                      | 50.5<br>(44.2 to 59.9)                           | --                                                 | 4.0<br>(2.6 to 5.8)                     | 35.7<br>(12.5 to 62.2)                            | 1.3<br>(-14.3 to 20.0)                              |
| Sickle cell trait                                          | 5,980.9<br>(5,651.7 to 6,496.4)                  | --                                                 | 23.6<br>(15.5 to 34.9)                  | 42.9<br>(31.4 to 55.6)                            | 5.7<br>(-1.5 to 13.7)                               |
| G6PD deficiency                                            | 3,651.3<br>(3,378.5 to 3,972.8)                  | --                                                 | 0.3<br>(0.2 to 0.5)                     | 25.3<br>(11.0 to 44.7)                            | -12.1<br>(-21.4 to -1.5)                            |
| G6PD trait                                                 | 7,929.9<br>(7,751.3 to 8,134.9)                  | --                                                 | < 0.05<br>(< 0.05 to < 0.05)            | 51.6<br>(39.0 to 64.8)                            | 9.2<br>(1.9 to 17.9)                                |
| Other hemoglobinopathies and hemolytic anaemias            | 407.3<br>(390.0 to 423.8)                        | --                                                 | 11.2<br>(7.5 to 15.9)                   | 35.8<br>(21.3 to 51.8)                            | -0.4<br>(-8.3 to 8.4)                               |
| Endocrine, metabolic, blood, and immune disorders          | 458.3<br>(441.4 to 475.3)                        | 24.1<br>(21.4 to 27.0)                             | 14.0<br>(9.4 to 19.9)                   | 32.6<br>(21.6 to 45.4)                            | 3.2<br>(-3.4 to 9.8)                                |
| <b>Musculoskeletal disorders</b>                           | <b>2,978.2</b><br><b>(2,806.1 to 3,147.2)</b>    | <b>1,468.4</b><br><b>(1,326.2 to 1,622.0)</b>      | <b>325.4</b><br><b>(231.8 to 427.4)</b> | <b>43.2</b><br><b>(38.1 to 48.9)</b>              | <b>0.7</b><br><b>(-2.3 to 3.7)</b>                  |
| Rheumatoid arthritis                                       | 40.7<br>(35.9 to 46.0)                           | 2.9<br>(2.6 to 3.3)                                | 9.7<br>(6.5 to 13.2)                    | 40.2<br>(26.8 to 55.7)                            | -0.6<br>(-8.6 to 8.1)                               |
| Osteoarthritis                                             | 467.3<br>(438.7 to 499.5)                        | 27.1<br>(25.1 to 29.2)                             | 28.7<br>(20.2 to 39.1)                  | 39.3<br>(33.5 to 45.1)                            | 1.4<br>(-2.4 to 5.5)                                |
| Low back and neck pain                                     | 2,082.5<br>(1,931.0 to 2,228.1)                  | 962.6<br>(863.9 to 1,074.5)                        | 238.0<br>(168.1 to 313.9)               | 42.3<br>(36.8 to 47.8)                            | 0.2<br>(-3.2 to 3.7)                                |
| Low back pain                                              | 1,629.1<br>(1,441.3 to 1,843.9)                  | 818.7<br>(722.3 to 931.0)                          | 183.3<br>(128.6 to 244.3)               | 41.8<br>(35.0 to 48.9)                            | 0.1<br>(-4.3 to 4.7)                                |
| Neck pain                                                  | 547.2<br>(472.7 to 633.3)                        | 143.9<br>(124.1 to 167.3)                          | 54.7<br>(36.8 to 77.6)                  | 44.2<br>(39.4 to 49.1)                            | 0.6<br>(-1.7 to 2.9)                                |
| Gout                                                       | 65.0<br>(57.8 to 73.3)                           | 13.6<br>(12.0 to 15.5)                             | 2.1<br>(1.4 to 2.9)                     | 40.8<br>(20.5 to 63.6)                            | 0.6<br>(-11.7 to 14.5)                              |
| Other musculoskeletal disorders                            | 542.0<br>(407.5 to 680.9)                        | 462.2<br>(359.5 to 587.8)                          | 47.0<br>(28.7 to 69.6)                  | 51.4<br>(33.1 to 81.2)                            | 3.5<br>(-9.2 to 20.4)                               |
| <b>Other non-communicable diseases</b>                     | <b>27,343.1</b><br><b>(26,541.3 to 28,036.7)</b> | <b>93,780.9†</b><br><b>(86,005.4 to 101,879.5)</b> | <b>612.5</b><br><b>(412.4 to 877.5)</b> | <b>38.6</b><br><b>(36.3 to 41.1)</b>              | <b>-1.8</b><br><b>(-3.2 to -0.5)</b>                |
| Congenital anomalies                                       | 331.4<br>(283.4 to 393.0)                        | --                                                 | 46.8<br>(32.4 to 63.5)                  | 34.1<br>(25.1 to 44.4)                            | -3.3<br>(-9.4 to 3.7)                               |
| Neural tube defects                                        | 47.4<br>(41.8 to 53.4)                           | --                                                 | 14.1<br>(9.6 to 18.9)                   | 40.3<br>(22.9 to 60.6)                            | 0.8<br>(-9.9 to 13.3)                               |
| Congenital heart anomalies                                 | 55.3<br>(45.2 to 66.8)                           | --                                                 | 2.7<br>(1.3 to 4.5)                     | 30.0<br>(11.0 to 53.6)                            | -2.3<br>(-15.4 to 13.4)                             |
| Orofacial clefts                                           | 10.0<br>(8.8 to 11.5)                            | --                                                 | 0.2<br>(0.1 to 0.3)                     | 32.8<br>(17.4 to 49.7)                            | -4.2<br>(-15.2 to 7.7)                              |
| Down's syndrome                                            | 5.0<br>(4.2 to 6.0)                              | --                                                 | 0.4<br>(0.3 to 0.6)                     | 38.4<br>(29.1 to 49.9)                            | -0.2<br>(-6.9 to 7.9)                               |
| Turner syndrome                                            | 28.1<br>(23.7 to 33.4)                           | --                                                 | 0.5<br>(0.2 to 0.8)                     | 31.9<br>(-7.1 to 85.4)                            | -3.9<br>(-30.3 to 31.5)                             |
| Klinefelter syndrome                                       | 27.7<br>(23.2 to 32.6)                           | --                                                 | 0.1<br>(0.1 to 0.2)                     | 38.1<br>(5.1 to 78.7)                             | -1.3<br>(-23.4 to 25.6)                             |

| Cause                                         | Prevalence in thousands (95% UI)              | Incidence in thousands (95% UI)                           | YLDs in thousands (95% UI)              |                                                   |                                                     |
|-----------------------------------------------|-----------------------------------------------|-----------------------------------------------------------|-----------------------------------------|---------------------------------------------------|-----------------------------------------------------|
|                                               | 2016 counts                                   | 2016 counts                                               | 2016 counts                             | Percentage change in counts between 2006 and 2016 | Percentage change in age-standardised rates between |
| Other chromosomal abnormalities               | 7.3<br>(6.2 to 8.7)                           | --                                                        | 1.5<br>(0.9 to 2.2)                     | 34.0<br>(-9.6 to 95.8)                            | 0.8<br>(-30.5 to 43.9)                              |
| Congenital musculoskeletal and limb anomalies | 49.9<br>(44.6 to 55.3)                        | --                                                        | 6.7<br>(4.4 to 9.4)                     | 31.4<br>(16.6 to 48.2)                            | -6.3<br>(-15.5 to 4.1)                              |
| Urogenital congenital anomalies               | 57.7<br>(50.2 to 65.8)                        | --                                                        | 1.7<br>(1.1 to 2.7)                     | 34.5<br>(23.6 to 47.6)                            | -2.1<br>(-9.7 to 6.8)                               |
| Digestive congenital anomalies                | 20.7<br>(18.2 to 23.2)                        | --                                                        | 0.9<br>(0.6 to 1.3)                     | 40.8<br>(8.2 to 83.5)                             | 1.1<br>(-18.2 to 24.8)                              |
| Other congenital anomalies                    | 123.1<br>(68.9 to 207.1)                      | --                                                        | 18.0<br>(11.0 to 27.9)                  | 30.8<br>(17.9 to 45.5)                            | -5.8<br>(-14.5 to 4.1)                              |
| Skin and subcutaneous diseases                | 13,955.0<br>(13,344.6 to 14,748.7)            | 33,812.8<br>(30,909.9 to 37,630.8)                        | 340.4<br>(222.5 to 498.6)               | 43.0<br>(39.7 to 46.7)                            | 2.6<br>(0.7 to 4.8)                                 |
| Dermatitis                                    | 2,091.6<br>(1,857.1 to 2,332.4)               | 1,616.0<br>(1,422.6 to 1,865.7)                           | 85.5<br>(49.0 to 142.6)                 | 40.3<br>(31.6 to 48.9)                            | 1.1<br>(-3.9 to 6.2)                                |
| Psoriasis                                     | 191.1<br>(181.2 to 200.7)                     | 30.9<br>(29.4 to 32.5)                                    | 16.8<br>(11.8 to 22.4)                  | 57.2<br>(39.0 to 78.1)                            | 11.4<br>(1.0 to 21.8)                               |
| Cellulitis                                    | 14.6<br>(13.4 to 16.0)                        | 248.9<br>(229.8 to 269.5)                                 | 0.8<br>(0.5 to 1.2)                     | 42.3<br>(11.2 to 84.2)                            | 2.7<br>(-16.6 to 27.4)                              |
| Pyoderma                                      | 281.7<br>(267.0 to 297.4)                     | 5,373.5<br>(5,105.1 to 5,647.1)                           | 1.6<br>(0.6 to 3.3)                     | 40.2<br>(31.6 to 49.3)                            | 2.3<br>(-2.4 to 7.8)                                |
| Scabies                                       | 808.8<br>(690.4 to 945.6)                     | 2,521.3<br>(2,145.8 to 2,982.9)                           | 20.9<br>(11.5 to 33.5)                  | 31.7<br>(25.7 to 38.0)                            | -5.2<br>(-8.7 to -1.4)                              |
| Fungal skin diseases                          | 5,700.9<br>(4,623.7 to 7,004.1)               | 16,224.6<br>(13,447.8 to 19,626.0)                        | 32.4<br>(12.8 to 69.1)                  | 39.1<br>(37.3 to 40.8)                            | 0.5<br>(-0.4 to 1.3)                                |
| Viral skin diseases                           | 1,393.2<br>(1,212.0 to 1,603.6)               | 1,831.3<br>(1,564.2 to 2,114.3)                           | 42.8<br>(26.7 to 64.0)                  | 39.9<br>(35.3 to 44.9)                            | 0.3<br>(-2.6 to 3.3)                                |
| Acne vulgaris                                 | 3,866.8<br>(3,329.8 to 4,480.1)               | 3,018.6<br>(2,290.0 to 4,176.2)                           | 99.4<br>(65.0 to 145.4)                 | 50.0<br>(42.6 to 59.5)                            | 6.0<br>(1.0 to 11.7)                                |
| Alopecia areata                               | 61.0<br>(56.7 to 65.0)                        | 109.3<br>(101.4 to 116.4)                                 | 2.0<br>(1.2 to 3.0)                     | 44.2<br>(26.9 to 63.9)                            | 0.8<br>(-9.8 to 11.9)                               |
| Pruritus                                      | 265.4<br>(231.9 to 302.9)                     | 217.5<br>(192.5 to 246.2)                                 | 2.8<br>(1.3 to 5.1)                     | 42.1<br>(33.3 to 51.9)                            | 1.6<br>(-3.5 to 6.8)                                |
| Urticaria                                     | 424.1<br>(357.5 to 504.0)                     | 767.3<br>(644.9 to 907.2)                                 | 25.7<br>(15.9 to 37.6)                  | 37.8<br>(28.8 to 47.6)                            | 0.5<br>(-5.2 to 6.4)                                |
| Decubitus ulcer                               | 3.2<br>(2.9 to 3.5)                           | 11.5<br>(10.3 to 12.8)                                    | 0.5<br>(0.4 to 0.7)                     | 39.8<br>(27.3 to 54.5)                            | 2.7<br>(-11.3 to 19.7)                              |
| Other skin and subcutaneous diseases          | 1,638.3<br>(1,584.2 to 1,695.1)               | 1,842.0<br>(1,782.1 to 1,906.2)                           | 9.1<br>(4.3 to 16.3)                    | 45.3<br>(40.5 to 50.0)                            | 4.5<br>(2.0 to 7.0)                                 |
| Sense organ diseases                          | 5,614.2<br>(5,333.0 to 5,911.2)               | 3,616.5 <sup>†</sup><br>(3,340.3 to 3,914.3)              | 176.6<br>(120.6 to 248.6)               | 31.0<br>(26.5 to 35.9)                            | -5.3<br>(-7.4 to -3.2)                              |
| Glaucoma                                      | 8.7<br>(7.4 to 10.3)                          | --                                                        | 1.1<br>(0.7 to 1.5)                     | 27.0<br>(12.2 to 43.4)                            | -3.5<br>(-14.1 to 8.1)                              |
| Cataract                                      | 103.5<br>(93.1 to 114.4)                      | --                                                        | 8.9<br>(6.3 to 12.1)                    | 24.7<br>(16.9 to 33.3)                            | -10.0<br>(-14.7 to -4.8)                            |
| Macular degeneration                          | 10.4<br>(8.6 to 12.5)                         | --                                                        | 0.9<br>(0.6 to 1.2)                     | 28.4<br>(13.0 to 45.1)                            | -2.5<br>(-13.4 to 8.8)                              |
| Refraction and accommodation disorders        | 2,839.5<br>(2,540.0 to 3,193.7)               | --                                                        | 43.1<br>(25.2 to 70.1)                  | 24.7<br>(15.8 to 33.5)                            | -12.5<br>(-18.6 to -6.5)                            |
| Age-related and other hearing loss            | 3,078.1<br>(2,862.6 to 3,319.1)               | --                                                        | 98.2<br>(68.1 to 138.0)                 | 32.3<br>(24.9 to 39.9)                            | -3.4<br>(-6.6 to -0.8)                              |
| Other vision loss                             | 59.8<br>(53.5 to 66.6)                        | --                                                        | 5.2<br>(3.6 to 7.0)                     | 36.5<br>(25.0 to 48.6)                            | -2.7<br>(-9.5 to 4.9)                               |
| Other sense organ diseases                    | 637.4<br>(590.6 to 685.0)                     | 3,616.5<br>(3,340.3 to 3,914.3)                           | 19.2<br>(12.0 to 29.4)                  | 42.3<br>(34.6 to 50.1)                            | 2.0<br>(-1.9 to 6.0)                                |
| Oral disorders                                | 18,205.6<br>(17,031.6 to 19,203.9)            | 56,351.6 <sup>†</sup><br>(49,230.2 to 63,522.3)           | 48.7<br>(27.3 to 82.0)                  | 43.1<br>(38.9 to 47.3)                            | 0.8<br>(-1.8 to 3.4)                                |
| Caries of deciduous teeth                     | 4,396.0<br>(3,451.5 to 5,213.9)               | 19,667.7<br>(13,608.8 to 26,476.7)                        | 1.0<br>(0.4 to 2.0)                     | 54.5<br>(21.3 to 82.5)                            | 14.0<br>(-10.4 to 35.1)                             |
| Caries of permanent teeth                     | 11,924.1<br>(10,755.5 to 13,117.5)            | 36,374.4<br>(32,662.0 to 40,022.7)                        | 7.0<br>(3.0 to 13.5)                    | 41.0<br>(35.5 to 47.0)                            | -0.8<br>(-4.2 to 2.6)                               |
| Periodontal disease                           | 2,301.4<br>(1,347.0 to 3,337.9)               | 287.4<br>(175.9 to 433.3)                                 | 15.1<br>(5.3 to 34.0)                   | 45.0<br>(34.9 to 55.3)                            | 1.4<br>(-4.2 to 7.4)                                |
| Edentulism and severe tooth loss              | 322.3<br>(274.3 to 370.8)                     | 22.1<br>(18.8 to 25.5)                                    | 9.0<br>(5.9 to 12.8)                    | 41.0<br>(33.5 to 48.6)                            | 0.8<br>(-3.4 to 4.8)                                |
| Other oral disorders                          | 562.2<br>(534.1 to 593.5)                     | --                                                        | 16.5<br>(10.2 to 25.0)                  | 42.8<br>(37.1 to 49.0)                            | 0.3<br>(-3.0 to 3.9)                                |
| <b>Injuries</b>                               | <b>4,649.2</b><br><b>(4,143.0 to 5,285.8)</b> | <b>2,905.3<sup>†</sup></b><br><b>(2,715.0 to 3,112.7)</b> | <b>200.3</b><br><b>(128.0 to 289.2)</b> | <b>34.9</b><br><b>(25.4 to 45.4)</b>              | <b>-2.6</b><br><b>(-7.4 to 2.5)</b>                 |
| <b>Transport injuries</b>                     | <b>419.2</b><br><b>(391.0 to 448.8)</b>       | <b>227.9</b><br><b>(200.1 to 258.4)</b>                   | <b>25.6</b><br><b>(16.1 to 37.2)</b>    | <b>46.2</b><br><b>(36.9 to 55.4)</b>              | <b>3.6</b><br><b>(-0.9 to 7.9)</b>                  |
| Road injuries                                 | 344.3<br>(322.4 to 369.7)                     | 198.8<br>(173.0 to 229.5)                                 | 20.8<br>(13.1 to 30.1)                  | 46.3<br>(36.7 to 55.6)                            | 3.5<br>(-1.1 to 7.8)                                |
| Pedestrian road injuries                      | 93.4<br>(81.8 to 107.0)                       | 39.2<br>(31.4 to 48.5)                                    | 5.7<br>(3.6 to 8.3)                     | 41.7<br>(32.0 to 51.6)                            | -0.0<br>(-4.6 to 4.3)                               |
| Cyclist road injuries                         | 92.1<br>(77.8 to 107.7)                       | 60.4<br>(48.2 to 74.6)                                    | 5.2<br>(3.3 to 7.5)                     | 47.6<br>(38.3 to 56.9)                            | 4.9<br>(0.3 to 9.6)                                 |
| Motorcyclist road injuries                    | 36.5<br>(31.2 to 42.7)                        | 14.2<br>(11.3 to 18.0)                                    | 2.1<br>(1.3 to 3.2)                     | 46.1<br>(36.5 to 55.9)                            | 2.1<br>(-2.3 to 6.3)                                |
| Motor vehicle road injuries                   | 93.6<br>(80.8 to 106.0)                       | 63.7<br>(53.0 to 75.9)                                    | 6.1<br>(4.0 to 8.8)                     | 48.4<br>(39.3 to 57.4)                            | 5.0<br>(0.6 to 9.0)                                 |
| Other road injuries                           | 28.7<br>(24.4 to 34.2)                        | 21.3<br>(15.8 to 28.4)                                    | 1.6<br>(1.0 to 2.3)                     | 52.3<br>(42.8 to 61.4)                            | 9.2<br>(4.2 to 13.9)                                |
| Other transport injuries                      | 74.9<br>(62.1 to 91.2)                        | 29.1<br>(23.4 to 37.0)                                    | 4.8<br>(3.0 to 7.1)                     | 45.7<br>(35.8 to 55.4)                            | 3.9<br>(-1.0 to 8.8)                                |
| <b>Unintentional injuries</b>                 | <b>3,463.9</b><br><b>(3,178.5 to 3,790.6)</b> | <b>2,524.1</b><br><b>(2,344.8 to 2,721.9)</b>             | <b>133.6</b><br><b>(87.9 to 189.5)</b>  | <b>45.0</b><br><b>(37.2 to 53.0)</b>              | <b>2.2</b><br><b>(-1.7 to 5.7)</b>                  |
| Falls                                         | 1,297.8<br>(1,118.2 to 1,481.5)               | 915.7<br>(778.4 to 1,085.6)                               | 57.6<br>(39.2 to 80.4)                  | 42.5<br>(33.7 to 51.0)                            | 0.7<br>(-2.9 to 4.2)                                |
| Drowning                                      | 11.3<br>(9.5 to 13.2)                         | 3.7<br>(3.1 to 4.4)                                       | 0.7<br>(0.5 to 1.1)                     | 34.0<br>(23.1 to 43.8)                            | -5.2<br>(-10.1 to -1.0)                             |
| Fire, heat, and hot substances                | 473.0<br>(388.9 to 589.4)                     | 106.4<br>(83.9 to 133.2)                                  | 14.9<br>(9.9 to 20.9)                   | 46.2<br>(33.7 to 59.3)                            | 4.4<br>(-2.7 to 12.6)                               |
| Poisonings                                    | 12.5<br>(9.7 to 15.2)                         | 25.4<br>(19.1 to 32.9)                                    | 1.4<br>(0.8 to 2.0)                     | 54.9<br>(39.8 to 70.6)                            | 9.6<br>(2.0 to 17.4)                                |
| Exposure to mechanical forces                 | 502.4<br>(426.2 to 618.7)                     | 316.0<br>(260.8 to 374.6)                                 | 14.2<br>(8.8 to 21.2)                   | 46.8<br>(38.3 to 55.0)                            | 3.1<br>(-1.1 to 7.3)                                |
| Unintentional firearm injuries                | 22.3<br>(18.2 to 27.4)                        | 9.3<br>(6.5 to 13.0)                                      | 1.1<br>(0.7 to 1.6)                     | 48.8<br>(39.1 to 58.6)                            | 4.9<br>(-0.3 to 10.4)                               |
| Unintentional suffocation                     | 45.3<br>(32.3 to 60.9)                        | 18.2<br>(12.3 to 26.1)                                    | 1.6<br>(0.9 to 2.5)                     | 48.5<br>(38.0 to 59.8)                            | 5.5<br>(-1.0 to 12.9)                               |
| Other exposure to mechanical forces           | 434.7<br>(362.1 to 546.2)                     | 288.4<br>(238.3 to 342.1)                                 | 11.5<br>(7.2 to 17.0)                   | 46.3<br>(38.4 to 54.1)                            | 2.7<br>(-1.3 to 6.5)                                |

| Cause                                                                               | Prevalence in thousands (95% UI)              | Incidence in thousands (95% UI)          | YLDs in thousands (95% UI)           |                                                   |                                                     |
|-------------------------------------------------------------------------------------|-----------------------------------------------|------------------------------------------|--------------------------------------|---------------------------------------------------|-----------------------------------------------------|
|                                                                                     | 2016 counts                                   | 2016 counts                              | 2016 counts                          | Percentage change in counts between 2006 and 2016 | Percentage change in age-standardised rates between |
| Adverse effects of medical treatment                                                | 14.6<br>(11.3 to 18.2)                        | 191.0<br>(159.9 to 227.3)                | 1.9<br>(1.2 to 3.0)                  | 29.2<br>(20.9 to 39.1)                            | -4.4<br>(-8.6 to 0.2)                               |
| Animal contact                                                                      | 198.1<br>(172.9 to 233.1)                     | 362.5<br>(302.9 to 431.2)                | 7.4<br>(4.9 to 10.5)                 | 39.0<br>(31.0 to 47.5)                            | -3.8<br>(-7.5 to -0.4)                              |
| Venomous animal contact                                                             | 74.3<br>(60.8 to 90.6)                        | 147.0<br>(115.2 to 184.6)                | 5.0<br>(3.2 to 7.2)                  | 42.3<br>(31.4 to 54.7)                            | -1.7<br>(-6.9 to 3.7)                               |
| Non-venomous animal contact                                                         | 123.8<br>(103.0 to 153.4)                     | 215.5<br>(175.1 to 262.3)                | 2.4<br>(1.6 to 3.6)                  | 32.7<br>(27.0 to 38.1)                            | -7.1<br>(-10.1 to -4.2)                             |
| Foreign body                                                                        | 262.3<br>(209.6 to 316.6)                     | 234.5<br>(201.8 to 271.1)                | 12.1<br>(7.6 to 18.0)                | 41.3<br>(32.2 to 50.3)                            | 1.9<br>(-3.2 to 6.7)                                |
| Pulmonary aspiration and foreign body in airway                                     | 144.3<br>(104.7 to 200.2)                     | 89.4<br>(72.0 to 112.7)                  | 7.5<br>(4.6 to 11.4)                 | 37.2<br>(28.3 to 46.0)                            | -1.1<br>(-5.8 to 3.6)                               |
| Foreign body in eyes                                                                | 13.3<br>(6.7 to 20.9)                         | 77.5<br>(58.2 to 103.9)                  | 0.8<br>(0.4 to 1.3)                  | 46.3<br>(40.5 to 52.9)                            | 4.2<br>(0.9 to 7.6)                                 |
| Foreign body in other body part                                                     | 104.7<br>(82.6 to 139.8)                      | 67.6<br>(53.7 to 82.7)                   | 3.8<br>(2.4 to 5.7)                  | 49.1<br>(38.3 to 60.5)                            | 7.1<br>(1.1 to 13.4)                                |
| Environmental heat and cold exposure                                                | 200.2<br>(162.6 to 249.1)                     | 88.7<br>(70.0 to 111.3)                  | 8.6<br>(5.4 to 12.8)                 | 50.6<br>(40.8 to 60.1)                            | 6.6<br>(1.5 to 11.4)                                |
| Other unintentional injuries                                                        | 492.0<br>(377.2 to 654.0)                     | 280.3<br>(226.9 to 350.8)                | 14.9<br>(9.4 to 22.1)                | 57.8<br>(49.4 to 65.8)                            | 9.3<br>(5.4 to 13.2)                                |
| <b>Self-harm and interpersonal violence</b>                                         | <b>1,950.1</b><br><b>(1,725.5 to 2,194.3)</b> | <b>151.7†</b><br><b>(128.3 to 178.7)</b> | <b>25.2</b><br><b>(17.4 to 34.3)</b> | <b>31.4</b><br><b>(26.1 to 37.3)</b>              | <b>-5.6</b><br><b>(-8.6 to -1.9)</b>                |
| Self-harm                                                                           | 20.1<br>(17.5 to 22.9)                        | 13.2<br>(11.2 to 15.4)                   | 1.2<br>(0.7 to 1.8)                  | 45.1<br>(37.2 to 53.3)                            | 2.0<br>(-1.1 to 4.9)                                |
| Self-harm by firearm                                                                | 1.4<br>(1.2 to 1.7)                           | 0.7<br>(0.5 to 1.1)                      | 0.1<br>(< 0.05 to 0.1)               | 30.9<br>(24.1 to 38.5)                            | -8.0<br>(-11.2 to -4.3)                             |
| Self-harm by other specified means                                                  | 18.7<br>(16.0 to 21.5)                        | 12.5<br>(10.6 to 14.7)                   | 1.1<br>(0.7 to 1.7)                  | 46.0<br>(38.0 to 54.3)                            | 2.8<br>(-0.3 to 5.8)                                |
| Interpersonal violence                                                              | 1,930.0<br>(1,705.5 to 2,174.6)               | 138.5†<br>(115.2 to 165.3)               | 24.0<br>(16.6 to 32.9)               | 30.8<br>(25.3 to 36.8)                            | -6.2<br>(-9.3 to -2.4)                              |
| Assault by firearm                                                                  | 5.0<br>(4.3 to 5.9)                           | 2.5<br>(1.8 to 3.5)                      | 0.3<br>(0.2 to 0.4)                  | 52.8<br>(42.7 to 64.3)                            | 8.3<br>(2.4 to 14.8)                                |
| Assault by sharp object                                                             | 49.7<br>(40.1 to 60.3)                        | 30.2<br>(22.5 to 41.0)                   | 1.8<br>(1.1 to 2.6)                  | 51.7<br>(42.1 to 62.7)                            | 7.3<br>(1.7 to 13.4)                                |
| Sexual violence                                                                     | 1,751.4<br>(1,529.2 to 2,002.3)               | --                                       | 16.4<br>(10.8 to 23.3)               | 22.2<br>(15.4 to 29.7)                            | -14.7<br>(-18.7 to -9.5)                            |
| Assault by other means                                                              | 123.9<br>(104.7 to 149.0)                     | 105.8<br>(87.4 to 127.8)                 | 5.6<br>(3.6 to 8.1)                  | 55.1<br>(44.0 to 66.0)                            | 9.2<br>(3.0 to 15.6)                                |
| <b>Forces of nature, conflict and terrorism, and executions and police conflict</b> | <b>567.4</b><br><b>(178.0 to 1,154.9)</b>     | <b>1.6†</b><br><b>(0.8 to 3.1)</b>       | <b>16.0</b><br><b>(3.5 to 35.9)</b>  | <b>-18.8</b><br><b>(-29.6 to -10.0)</b>           | <b>-26.8</b><br><b>(-35.8 to -19.7)</b>             |
| Exposure to forces of nature                                                        | 2.1<br>(1.0 to 3.4)                           | --                                       | 0.1<br>(< 0.05 to 0.2)               | 607.5<br>(547.9 to 665.0)                         | 386.7<br>(350.1 to 425.9)                           |
| Conflict and terrorism                                                              | 560.4<br>(172.2 to 1,146.8)                   | --                                       | 15.7<br>(3.5 to 35.2)                | -19.4<br>(-30.0 to -10.8)                         | -27.1<br>(-36.1 to -20.1)                           |
| Executions and police conflict                                                      | 4.9<br>(2.3 to 11.8)                          | 1.6<br>(0.8 to 3.1)                      | 0.2<br>(< 0.05 to 0.6)               | 15.3<br>(-5.5 to 41.6)                            | -7.4<br>(-21.9 to 6.7)                              |
| <b>Impairments</b>                                                                  | --                                            | --                                       | --                                   | --                                                | --                                                  |
| Anaemia                                                                             | 15,650.6<br>(15,107.5 to 16,225.9)            | --                                       | 608.0<br>(419.2 to 851.6)            | 7.4<br>(-6.0 to 17.8)                             | -23.0<br>(-39.6 to -11.7)                           |
| Developmental intellectual disability                                               | 1,510.2<br>(1,146.5 to 1,875.9)               | --                                       | 146.3<br>(103.4 to 204.1)            | 43.8<br>(31.6 to 58.6)                            | 2.8<br>(-5.2 to 13.6)                               |
| Epilepsy                                                                            | 367.4<br>(195.7 to 575.5)                     | --                                       | 142.9<br>(70.0 to 237.1)             | 53.7<br>(-31.8 to 252.8)                          | 10.7<br>(-54.2 to 164.3)                            |
| Guillain-Barre syndrome                                                             | 0.2<br>(0.2 to 0.4)                           | --                                       | 0.1<br>(< 0.05 to 0.1)               | 39.4<br>(38.2 to 41.0)                            | 0.1<br>(-0.0 to 0.2)                                |
| Hearing loss                                                                        | 3,785.8<br>(3,563.3 to 4,030.8)               | --                                       | 132.7<br>(91.0 to 184.7)             | 30.1<br>(24.7 to 35.8)                            | -4.4<br>(-7.2 to -2.0)                              |
| Heart failure                                                                       | 71.8<br>(64.2 to 80.0)                        | --                                       | 8.1<br>(5.9 to 10.5)                 | 27.9<br>(18.7 to 36.1)                            | -5.8<br>(-13.2 to 0.8)                              |
| Infertility                                                                         | 352.6<br>(315.3 to 393.2)                     | --                                       | 2.2<br>(1.0 to 4.3)                  | 44.7<br>(32.7 to 57.8)                            | -7.5<br>(-14.7 to 0.3)                              |
| Pelvic inflammatory disease                                                         | 34.1<br>(28.8 to 40.9)                        | --                                       | 4.4<br>(2.9 to 6.4)                  | 44.5<br>(24.0 to 68.0)                            | -1.6<br>(-14.6 to 13.5)                             |
| Vision loss                                                                         | 3,205.2<br>(2,894.4 to 3,566.0)               | --                                       | 93.9<br>(63.9 to 139.5)              | 38.4<br>(23.3 to 56.8)                            | -7.2<br>(-13.0 to 0.3)                              |

We did not calculate incidence for the nine impairments, certain NTDs, and causes with only birth prevalence. Blank cells mean that no estimate is available.

† Incidence for aggregate causes represents the sum of the incidence of the causes below the aggregate.

‡ Incidence estimates for stroke represent first-ever stroke only.

^ Incidence of HIV/AIDS represents new infections of HIV only and does not include new infections of Tuberculosis in HIV positive cases.



SR Table 14: Prevalence, incidence, and YLDs for 2016, percentage change of YLD counts and percentage change of age-standardised YLD rates between 2006 and 2016 by cause and impairments, for all ages, Ukraine.

| Cause                                                                                | Prevalence in thousands (95% UI)          | Incidence in thousands (95% UI)               | YLDs in thousands (95% UI)             |                                                   |                                                     |
|--------------------------------------------------------------------------------------|-------------------------------------------|-----------------------------------------------|----------------------------------------|---------------------------------------------------|-----------------------------------------------------|
|                                                                                      | 2016 counts                               | 2016 counts                                   | 2016 counts                            | Percentage change in counts between 2006 and 2016 | Percentage change in age-standardised rates between |
| <b>All causes</b>                                                                    | <b>43,748.9</b><br>(43,603.8 to 43,917.6) | <b>305,788.9†</b><br>(282,282.5 to 332,300.2) | <b>6,147.0</b><br>(4,578.7 to 7,928.0) | <b>0.1</b><br>(-1.2 to 1.3)                       | <b>-1.1</b><br>(-2.5 to 0.2)                        |
| <b>Communicable, maternal, neonatal, and nutritional disorders</b>                   | <b>24,686.5</b><br>(23,921.5 to 25,578.1) | <b>162,180.8†</b><br>(140,526.9 to 187,935.2) | <b>275.7</b><br>(201.9 to 366.9)       | <b>-1.0</b><br>(-6.1 to 4.9)                      | <b>-0.5</b><br>(-5.9 to 5.7)                        |
| <b>HIV/AIDS and tuberculosis</b>                                                     | <b>14,688.8</b><br>(13,539.0 to 15,629.7) | <b>43.1†</b><br>(37.3 to 50.6)                | <b>20.8</b><br>(11.5 to 39.1)          | <b>-12.8</b><br>(-27.1 to 6.9)                    | <b>-14.0</b><br>(-27.7 to 5.1)                      |
| Tuberculosis                                                                         | 13,764.9<br>(12,666.8 to 14,954.8)        | 26.0†<br>(22.3 to 30.1)                       | 4.2<br>(2.7 to 6.0)                    | -29.4<br>(-41.7 to -13.6)                         | -29.7<br>(-41.7 to -14.6)                           |
| Drug-susceptible tuberculosis                                                        | 10.2<br>(8.3 to 12.2)                     | 19.3<br>(15.8 to 22.9)                        | 3.1<br>(1.9 to 4.5)                    | -32.6<br>(-50.0 to -8.8)                          | -32.9<br>(-49.3 to -8.1)                            |
| Multidrug-resistant tuberculosis without extensive drug resistance                   | 2.9<br>(2.0 to 4.0)                       | 5.5<br>(3.8 to 7.9)                           | 0.9<br>(0.5 to 1.5)                    | -29.0<br>(-61.2 to 32.8)                          | -29.2<br>(-61.0 to 33.4)                            |
| Extensively drug-resistant tuberculosis                                              | 0.6<br>(0.4 to 0.9)                       | 1.2<br>(0.8 to 1.7)                           | 0.2<br>(0.1 to 0.3)                    | 117.2<br>(31.9 to 272.2)                          | 116.0<br>(31.5 to 269.1)                            |
| Latent tuberculosis infection                                                        | 13,751.2<br>(12,652.3 to 14,940.4)        | --                                            | --                                     | --                                                | --                                                  |
| HIV/AIDS                                                                             | 153.7<br>(110.5 to 221.9)                 | 17.1^<br>(12.6 to 23.6)                       | 16.6<br>(8.2 to 34.7)                  | -7.3<br>(-26.2 to 24.5)                           | -9.1<br>(-26.9 to 21.5)                             |
| Drug-susceptible HIV/AIDS - Tuberculosis                                             | 1.3<br>(0.7 to 2.0)                       | 2.4<br>(1.4 to 3.8)                           | 0.5<br>(0.3 to 0.9)                    | -35.9<br>(-54.5 to -7.6)                          | -38.3<br>(-56.6 to -9.8)                            |
| Multidrug-resistant HIV/AIDS - Tuberculosis without extensive drug resistance        | 0.5<br>(0.3 to 0.8)                       | 0.9<br>(0.5 to 1.5)                           | 0.2<br>(0.1 to 0.4)                    | -35.0<br>(-60.8 to 16.4)                          | -37.4<br>(-62.3 to 12.2)                            |
| Extensively drug-resistant HIV/AIDS - Tuberculosis                                   | 0.1<br>(0.1 to 0.2)                       | 0.2<br>(0.1 to 0.3)                           | < 0.05<br>(< 0.05 to 0.1)              | 100.4<br>(20.8 to 258.1)                          | 92.8<br>(16.2 to 245.2)                             |
| HIV/AIDS resulting in other diseases                                                 | 151.9<br>(109.0 to 220.3)                 | 17.1<br>(12.6 to 23.6)                        | 15.9<br>(7.7 to 33.9)                  | -5.5<br>(-25.5 to 31.3)                           | -7.3<br>(-26.2 to 28.0)                             |
| <b>Diarrhoea, lower respiratory infections, and other common infectious diseases</b> | <b>2,687.6</b><br>(2,472.8 to 2,947.3)    | <b>155,557.8†</b><br>(134,357.2 to 180,921.7) | <b>111.0</b><br>(75.6 to 156.2)        | <b>3.0</b><br>(-0.6 to 7.2)                       | <b>4.1</b><br>(0.9 to 7.9)                          |
| Diarrhoeal diseases                                                                  | 293.9<br>(274.5 to 316.1)                 | 19,202.2<br>(17,939.1 to 20,621.3)            | 33.1<br>(22.7 to 45.8)                 | 20.3<br>(13.3 to 28.0)                            | 13.7<br>(6.4 to 21.5)                               |
| Intestinal infectious diseases                                                       | < 0.05<br>(< 0.05 to < 0.05)              | 0.3†<br>(0.2 to 0.4)                          | < 0.05<br>(< 0.05 to < 0.05)           | -0.7<br>(-16.0 to 17.8)                           | -1.8<br>(-16.6 to 17.2)                             |
| Typhoid fever                                                                        | < 0.05<br>(< 0.05 to < 0.05)              | 0.1<br>(< 0.05 to 0.1)                        | < 0.05<br>(< 0.05 to < 0.05)           | -5.7<br>(-23.8 to 16.1)                           | -3.3<br>(-21.9 to 19.8)                             |
| Paratyphoid fever                                                                    | < 0.05<br>(< 0.05 to < 0.05)              | 0.2<br>(0.1 to 0.3)                           | < 0.05<br>(< 0.05 to < 0.05)           | 6.6<br>(-12.7 to 29.6)                            | 4.4<br>(-13.0 to 27.0)                              |
| Other intestinal infectious diseases                                                 | --                                        | --                                            | < 0.05<br>(< 0.05 to < 0.05)           | -22.2<br>(-40.4 to 1.5)                           | -32.1<br>(-51.0 to -6.0)                            |
| Lower respiratory infections                                                         | 70.1<br>(65.0 to 75.7)                    | 3,184.9<br>(2,929.0 to 3,450.9)               | 4.2<br>(2.7 to 5.9)                    | 27.0<br>(13.4 to 42.6)                            | 22.9<br>(9.6 to 38.1)                               |
| Upper respiratory infections                                                         | 1,717.8<br>(1,451.8 to 2,038.0)           | 130,468.3<br>(109,623.2 to 156,109.9)         | 42.5<br>(24.4 to 67.6)                 | -2.8<br>(-9.0 to 4.7)                             | 0.7<br>(-4.9 to 6.7)                                |
| Otitis media                                                                         | 519.7<br>(466.3 to 573.2)                 | 1,886.0<br>(1,559.9 to 2,293.2)               | 14.8<br>(9.2 to 22.1)                  | -9.9<br>(-16.0 to -3.3)                           | -6.6<br>(-12.8 to -0.4)                             |
| Meningitis                                                                           | 61.2<br>(53.1 to 69.7)                    | 7.4<br>(6.4 to 8.3)                           | 6.0<br>(4.2 to 8.1)                    | -7.1<br>(-9.5 to -4.9)                            | -4.1<br>(-6.6 to -1.7)                              |
| Pneumococcal meningitis                                                              | 29.0<br>(23.8 to 34.9)                    | 2.0<br>(1.6 to 2.4)                           | 2.6<br>(1.8 to 3.5)                    | -5.2<br>(-8.5 to -2.1)                            | -2.1<br>(-5.6 to 1.2)                               |
| H influenzae type B meningitis                                                       | 8.3<br>(6.7 to 10.4)                      | 0.9<br>(0.7 to 1.2)                           | 1.0<br>(0.7 to 1.4)                    | -16.5<br>(-21.9 to -11.6)                         | -13.1<br>(-18.8 to -7.8)                            |
| Meningococcal infection                                                              | 10.9<br>(8.0 to 14.2)                     | 2.2<br>(1.8 to 2.7)                           | 1.0<br>(0.7 to 1.4)                    | -6.3<br>(-10.0 to -2.7)                           | -3.4<br>(-7.2 to 0.4)                               |
| Other meningitis                                                                     | 13.1<br>(10.3 to 16.0)                    | 2.3<br>(1.9 to 2.6)                           | 1.4<br>(0.9 to 1.9)                    | -3.3<br>(-6.7 to 0.6)                             | -0.4<br>(-4.1 to 3.7)                               |
| Encephalitis                                                                         | 91.5<br>(57.4 to 137.9)                   | 45.5<br>(41.1 to 50.0)                        | 8.2<br>(5.8 to 10.9)                   | -4.6<br>(-15.0 to 7.9)                            | -4.3<br>(-14.8 to 8.5)                              |
| Diphtheria                                                                           | < 0.05<br>(< 0.05 to < 0.05)              | 0.1<br>(< 0.05 to 0.1)                        | < 0.05<br>(< 0.05 to < 0.05)           | 222.5<br>(61.2 to 538.9)                          | 225.7<br>(71.7 to 503.5)                            |
| Whooping cough                                                                       | 13.9<br>(10.7 to 17.6)                    | 101.5<br>(77.9 to 128.3)                      | 0.7<br>(0.4 to 1.1)                    | 194.0<br>(141.2 to 255.7)                         | 158.1<br>(110.5 to 212.9)                           |
| Tetanus                                                                              | < 0.05<br>(< 0.05 to < 0.05)              | < 0.05<br>(< 0.05 to < 0.05)                  | < 0.05<br>(< 0.05 to < 0.05)           | -15.6<br>(-41.1 to 47.2)                          | -18.7<br>(-41.6 to 35.8)                            |
| Measles                                                                              | < 0.05<br>(< 0.05 to < 0.05)              | 0.1<br>(0.1 to 0.1)                           | < 0.05<br>(< 0.05 to < 0.05)           | -90.0<br>(-92.0 to -88.0)                         | -91.3<br>(-93.1 to -89.6)                           |
| Varicella and herpes zoster                                                          | 39.1<br>(35.2 to 43.1)                    | 661.5<br>(639.1 to 686.2)                     | 1.6<br>(1.0 to 2.5)                    | 2.6<br>(-8.4 to 16.6)                             | -0.0<br>(-11.6 to 13.3)                             |
| <b>Neglected tropical diseases and malaria</b>                                       | <b>249.1</b><br>(195.9 to 307.6)          | <b>2,435.0†</b><br>(1,618.3 to 3,137.2)       | <b>6.0</b><br>(2.4 to 12.1)            | <b>-8.2</b><br>(-54.7 to 34.3)                    | <b>-15.5</b><br>(-58.6 to 32.0)                     |
| Malaria                                                                              | --                                        | --                                            | --                                     | --                                                | --                                                  |
| Chagas disease                                                                       | --                                        | --                                            | --                                     | --                                                | --                                                  |
| Leishmaniasis                                                                        | --                                        | --                                            | --                                     | --                                                | --                                                  |
| Visceral leishmaniasis                                                               | --                                        | --                                            | --                                     | --                                                | --                                                  |
| Cutaneous and mucocutaneous leishmaniasis                                            | --                                        | --                                            | --                                     | --                                                | --                                                  |
| African trypanosomiasis                                                              | --                                        | --                                            | --                                     | --                                                | --                                                  |
| Schistosomiasis                                                                      | --                                        | --                                            | --                                     | --                                                | --                                                  |
| Cysticercosis                                                                        | 4.2<br>(1.0 to 8.6)                       | --                                            | 0.6<br>(0.1 to 1.5)                    | -19.2<br>(-84.6 to 127.4)                         | -21.3<br>(-84.8 to 119.7)                           |
| Cystic echinococcosis                                                                | 7.1<br>(1.4 to 29.7)                      | 1.4<br>(0.3 to 6.3)                           | 0.6<br>(0.1 to 2.5)                    | -55.6<br>(-94.9 to 283.7)                         | -55.2<br>(-94.6 to 260.6)                           |
| Lymphatic filariasis                                                                 | --                                        | --                                            | --                                     | --                                                | --                                                  |
| Onchocerciasis                                                                       | --                                        | --                                            | --                                     | --                                                | --                                                  |
| Trachoma                                                                             | --                                        | --                                            | --                                     | --                                                | --                                                  |
| Dengue                                                                               | --                                        | --                                            | --                                     | --                                                | --                                                  |
| Yellow fever                                                                         | --                                        | --                                            | --                                     | --                                                | --                                                  |
| Rabies                                                                               | < 0.05<br>(< 0.05 to < 0.05)              | < 0.05<br>(< 0.05 to < 0.05)                  | < 0.05<br>(< 0.05 to < 0.05)           | -39.1<br>(-64.5 to 4.5)                           | -40.4<br>(-65.2 to 5.4)                             |
| Intestinal nematode infections                                                       | --                                        | --                                            | --                                     | --                                                | --                                                  |
| Ascariasis                                                                           | --                                        | --                                            | --                                     | --                                                | --                                                  |

| Cause                                                                   | Prevalence in thousands (95% UI)           | Incidence in thousands (95% UI)                | YLDs in thousands (95% UI)              |                                                   |                                                     |
|-------------------------------------------------------------------------|--------------------------------------------|------------------------------------------------|-----------------------------------------|---------------------------------------------------|-----------------------------------------------------|
|                                                                         | 2016 counts                                | 2016 counts                                    | 2016 counts                             | Percentage change in counts between 2006 and 2016 | Percentage change in age-standardised rates between |
| Trichuriasis                                                            | --                                         | --                                             | --                                      | --                                                | --                                                  |
| Hookworm disease                                                        | --                                         | --                                             | --                                      | --                                                | --                                                  |
| Food-borne trematodiasis                                                | 217.3<br>(151.2 to 281.4)                  | 2,433.5<br>(1,615.2 to 3,136.3)                | 4.7<br>(1.5 to 10.4)                    | 9.5<br>(-9.0 to 26.4)                             | 2.0<br>(-13.1 to 17.4)                              |
| Leprosy                                                                 | --                                         | --                                             | --                                      | --                                                | --                                                  |
| Ebola virus disease                                                     | --                                         | --                                             | --                                      | --                                                | --                                                  |
| Zika virus disease                                                      | --                                         | --                                             | --                                      | --                                                | --                                                  |
| Guinea worm disease                                                     | --                                         | --                                             | --                                      | --                                                | --                                                  |
| Other neglected tropical diseases                                       | --                                         | --                                             | < 0.05<br>(< 0.05 to < 0.05)            | --                                                | --                                                  |
| <b>Maternal disorders</b>                                               | <b>73.7<br/>(59.5 to 90.3)</b>             | <b>712.8†<br/>(590.1 to 870.7)</b>             | <b>3.2<br/>(2.0 to 4.7)</b>             | <b>-4.4<br/>(-25.3 to 19.0)</b>                   | <b>0.6<br/>(-20.9 to 26.2)</b>                      |
| Maternal haemorrhage                                                    | 35.2<br>(24.4 to 49.2)                     | 102.9<br>(77.2 to 135.2)                       | 0.9<br>(0.6 to 1.4)                     | 2.2<br>(-25.9 to 43.3)                            | 7.5<br>(-21.5 to 48.5)                              |
| Maternal sepsis and other pregnancy related infections                  | 18.6<br>(15.2 to 23.0)                     | 82.1<br>(62.8 to 109.3)                        | 0.4<br>(0.2 to 0.7)                     | -11.5<br>(-54.2 to 74.8)                          | -2.6<br>(-49.0 to 94.9)                             |
| Maternal hypertensive disorders                                         | 17.9<br>(11.1 to 25.9)                     | 71.8<br>(54.8 to 91.5)                         | 0.8<br>(0.4 to 1.4)                     | -9.3<br>(-46.9 to 57.4)                           | -5.9<br>(-44.6 to 62.3)                             |
| Maternal obstructed labour and uterine rupture                          | 0.4<br>(0.2 to 0.7)                        | 31.4<br>(22.5 to 42.4)                         | 0.1<br>(0.1 to 0.2)                     | 2.7<br>(-46.9 to 88.5)                            | 7.4<br>(-44.0 to 97.4)                              |
| Maternal abortion, miscarriage, and ectopic pregnancy                   | 3.5<br>(2.2 to 5.2)                        | 424.6<br>(319.4 to 572.0)                      | 0.4<br>(0.2 to 0.7)                     | 8.8<br>(-42.5 to 102.5)                           | 10.8<br>(-41.5 to 109.3)                            |
| Other maternal disorders                                                | --                                         | --                                             | 0.5<br>(0.3 to 0.7)                     | -11.0<br>(-30.5 to 10.9)                          | -5.5<br>(-25.5 to 19.2)                             |
| <b>Neonatal disorders</b>                                               | <b>473.5<br/>(389.8 to 562.9)</b>          | --                                             | <b>84.3<br/>(56.2 to 120.4)</b>         | <b>-3.0<br/>(-16.9 to 16.9)</b>                   | <b>-0.1<br/>(-14.2 to 19.7)</b>                     |
| Neonatal preterm birth complications                                    | 277.4<br>(221.1 to 359.8)                  | --                                             | 27.3<br>(17.9 to 39.6)                  | -13.6<br>(-30.6 to 7.1)                           | -9.3<br>(-27.2 to 12.8)                             |
| Neonatal encephalopathy due to birth asphyxia and trauma                | 193.2<br>(120.2 to 299.2)                  | --                                             | 31.8<br>(15.4 to 57.6)                  | 15.0<br>(-18.4 to 143.2)                          | 18.0<br>(-16.2 to 150.5)                            |
| Neonatal sepsis and other neonatal infections                           | 44.1<br>(20.5 to 96.0)                     | --                                             | 18.1<br>(7.2 to 42.0)                   | -10.0<br>(-24.4 to 17.5)                          | -7.8<br>(-22.4 to 18.0)                             |
| Hemolytic disease and other neonatal jaundice                           | 18.6<br>(16.1 to 21.4)                     | --                                             | 5.2<br>(3.8 to 6.8)                     | -10.5<br>(-22.0 to 4.3)                           | -6.5<br>(-19.5 to 10.8)                             |
| Other neonatal disorders                                                | --                                         | --                                             | 1.8<br>(1.2 to 2.6)                     | 10.0<br>(-9.2 to 36.1)                            | -7.3<br>(-23.5 to 15.2)                             |
| <b>Nutritional deficiencies</b>                                         | <b>1,949.2<br/>(1,795.6 to 2,112.9)</b>    | <b>117.7†<br/>(95.1 to 143.4)</b>              | <b>33.5<br/>(21.8 to 47.9)</b>          | <b>6.6<br/>(-5.0 to 19.8)</b>                     | <b>-3.3<br/>(-17.1 to 12.6)</b>                     |
| Protein-energy malnutrition                                             | 124.9<br>(98.1 to 158.0)                   | 59.6<br>(46.7 to 75.9)                         | 6.5<br>(3.6 to 10.2)                    | 6.1<br>(-26.6 to 54.5)                            | -10.7<br>(-38.4 to 30.1)                            |
| Iodine deficiency                                                       | 658.6<br>(562.5 to 761.2)                  | 7.9<br>(6.8 to 8.9)                            | 15.4<br>(9.5 to 22.1)                   | 61.6<br>(42.3 to 86.6)                            | 62.8<br>(43.2 to 87.7)                              |
| Vitamin A deficiency                                                    | 58.7<br>(39.7 to 82.3)                     | 50.2<br>(33.5 to 71.5)                         | --                                      | --                                                | --                                                  |
| Iron-deficiency anaemia                                                 | 1,103.5<br>(946.1 to 1,288.3)              | --                                             | 11.4<br>(6.9 to 18.1)                   | -26.9<br>(-36.4 to -15.8)                         | -27.7<br>(-39.3 to -13.9)                           |
| Other nutritional deficiencies                                          | --                                         | --                                             | 0.2<br>(0.1 to 0.4)                     | 6.1<br>(-27.4 to 56.1)                            | -11.1<br>(-39.4 to 30.0)                            |
| <b>Other communicable, maternal, neonatal, and nutritional diseases</b> | <b>12,007.4<br/>(11,238.7 to 12,945.2)</b> | <b>3,314.4<br/>(2,839.6 to 3,963.6)</b>        | <b>16.4<br/>(10.5 to 26.1)</b>          | <b>-7.1<br/>(-13.0 to -1.6)</b>                   | <b>-5.5<br/>(-11.2 to -0.2)</b>                     |
| Sexually transmitted diseases excluding HIV                             | 9,603.0<br>(8,859.1 to 10,528.6)           | 2,903.4<br>(2,438.0 to 3,538.7)                | 14.4<br>(9.2 to 22.9)                   | -7.5<br>(-14.3 to -1.6)                           | -6.0<br>(-12.8 to -0.1)                             |
| Syphilis                                                                | 116.5<br>(97.3 to 136.3)                   | 83.2<br>(62.6 to 108.6)                        | 2.7<br>(1.8 to 3.7)                     | -18.5<br>(-33.0 to -1.3)                          | -23.1<br>(-36.4 to -7.8)                            |
| Chlamydial infection                                                    | 663.9<br>(517.9 to 835.5)                  | 521.6<br>(406.4 to 654.4)                      | 2.8<br>(1.6 to 4.6)                     | -1.9<br>(-14.0 to 10.1)                           | -1.4<br>(-12.7 to 10.2)                             |
| Gonococcal infection                                                    | 311.5<br>(197.1 to 462.6)                  | 1,033.3<br>(611.4 to 1,622.6)                  | 1.8<br>(1.0 to 3.3)                     | -13.2<br>(-27.7 to 4.1)                           | -3.8<br>(-17.9 to 11.3)                             |
| Trichomoniasis                                                          | 842.4<br>(727.4 to 965.6)                  | 695.0<br>(597.5 to 805.2)                      | 0.8<br>(0.3 to 1.7)                     | -3.5<br>(-10.3 to 4.5)                            | -1.0<br>(-8.1 to 7.1)                               |
| Genital herpes                                                          | 7,939.7<br>(6,864.5 to 9,249.1)            | 317.8<br>(266.2 to 391.9)                      | 2.0<br>(0.6 to 4.5)                     | 0.8<br>(-6.9 to 8.9)                              | -0.5<br>(-8.2 to 7.8)                               |
| Other sexually transmitted diseases                                     | 197.7<br>(162.5 to 237.4)                  | 252.5<br>(211.1 to 300.0)                      | 4.4<br>(2.8 to 6.7)                     | -4.7<br>(-14.6 to 5.2)                            | -3.1<br>(-13.4 to 6.4)                              |
| Hepatitis                                                               | 3,250.9<br>(2,840.0 to 3,767.6)            | 410.9<br>(339.8 to 479.9)                      | 0.5<br>(0.3 to 0.7)                     | -6.4<br>(-23.2 to 13.4)                           | -7.0<br>(-24.3 to 16.6)                             |
| Acute hepatitis A                                                       | 15.7<br>(11.1 to 19.2)                     | 204.3<br>(144.2 to 249.8)                      | 0.2<br>(0.1 to 0.3)                     | -14.4<br>(-40.1 to 26.7)                          | -11.8<br>(-41.7 to 34.5)                            |
| Hepatitis B                                                             | 2,049.1<br>(1,670.5 to 2,533.6)            | 176.2<br>(135.5 to 231.0)                      | 0.2<br>(0.1 to 0.4)                     | -0.0<br>(-19.0 to 23.1)                           | -3.0<br>(-21.5 to 19.1)                             |
| Hepatitis C                                                             | 1,185.2<br>(1,057.6 to 1,311.5)            | 18.9<br>(16.8 to 21.2)                         | < 0.05<br>(< 0.05 to < 0.05)            | 15.6<br>(0.1 to 34.6)                             | 2.0<br>(-14.4 to 23.5)                              |
| Acute hepatitis E                                                       | 0.9<br>(0.7 to 1.2)                        | 11.4<br>(8.6 to 15.8)                          | < 0.05<br>(< 0.05 to < 0.05)            | -7.5<br>(-18.7 to 4.7)                            | -2.0<br>(-10.4 to 7.3)                              |
| Other infectious diseases                                               | 40.8<br>(33.1 to 50.0)                     | 0.1<br>(< 0.05 to 0.1)                         | 1.6<br>(0.9 to 2.5)                     | -2.8<br>(-11.9 to 6.9)                            | -0.7<br>(-11.1 to 10.3)                             |
| <b>Non-communicable diseases</b>                                        | <b>42,306.4<br/>(42,097.3 to 42,538.0)</b> | <b>137,071.4†<br/>(130,540.3 to 144,134.8)</b> | <b>5,174.3<br/>(3,840.8 to 6,678.4)</b> | <b>0.3<br/>(-1.2 to 1.8)</b>                      | <b>-0.9<br/>(-2.5 to 0.6)</b>                       |
| <b>Neoplasms</b>                                                        | <b>425.6<br/>(406.2 to 448.1)</b>          | <b>164.3<br/>(155.2 to 176.0)</b>              | <b>50.8<br/>(37.4 to 66.2)</b>          | <b>1.0<br/>(-5.3 to 8.7)</b>                      | <b>-4.5<br/>(-10.7 to 3.0)</b>                      |
| Lip and oral cavity cancer                                              | 13.4<br>(11.9 to 15.1)                     | 3.8<br>(3.4 to 4.3)                            | 1.4<br>(1.0 to 1.9)                     | 2.6<br>(-18.4 to 27.6)                            | -3.2<br>(-23.1 to 19.7)                             |
| Nasopharynx cancer                                                      | 2.0<br>(1.8 to 2.4)                        | 0.6<br>(0.5 to 0.7)                            | 0.2<br>(0.2 to 0.3)                     | -4.9<br>(-23.5 to 21.2)                           | -5.8<br>(-24.2 to 19.9)                             |
| Other pharynx cancer                                                    | 6.9<br>(6.0 to 7.7)                        | 2.3<br>(2.1 to 2.6)                            | 0.8<br>(0.5 to 1.1)                     | 20.0<br>(-9.9 to 55.5)                            | 12.9<br>(-14.7 to 45.4)                             |
| Oesophageal cancer                                                      | 2.4<br>(2.1 to 2.8)                        | 2.0<br>(1.8 to 2.3)                            | 0.5<br>(0.4 to 0.7)                     | 1.6<br>(-22.4 to 34.4)                            | -5.3<br>(-27.5 to 24.6)                             |
| Stomach cancer                                                          | 23.3<br>(21.1 to 25.8)                     | 12.7<br>(11.7 to 13.7)                         | 3.2<br>(2.3 to 4.3)                     | -13.1<br>(-26.8 to 3.3)                           | -18.1<br>(-30.3 to -3.7)                            |
| Colon and rectum cancer                                                 | 75.3<br>(69.3 to 84.5)                     | 21.9<br>(20.2 to 24.4)                         | 7.5<br>(5.4 to 9.9)                     | 3.5<br>(-10.0 to 22.7)                            | -3.3<br>(-16.1 to 15.2)                             |
| Liver cancer                                                            | 1.1<br>(0.9 to 1.3)                        | 2.2<br>(2.0 to 2.5)                            | 0.5<br>(0.4 to 0.7)                     | 20.5<br>(3.8 to 39.8)                             | 11.7<br>(-3.6 to 29.3)                              |
| Liver cancer due to hepatitis B                                         | 0.9<br>(0.7 to 1.1)                        | 0.8<br>(0.7 to 1.0)                            | 0.2<br>(0.1 to 0.3)                     | 18.0<br>(1.3 to 37.5)                             | 9.6<br>(-6.1 to 27.3)                               |

| Cause                                              | Prevalence in thousands (95% UI)              | Incidence in thousands (95% UI)          | YLDs in thousands (95% UI)              |                                                   |                                                     |
|----------------------------------------------------|-----------------------------------------------|------------------------------------------|-----------------------------------------|---------------------------------------------------|-----------------------------------------------------|
|                                                    | 2016 counts                                   | 2016 counts                              | 2016 counts                             | Percentage change in counts between 2006 and 2016 | Percentage change in age-standardised rates between |
| Liver cancer due to hepatitis C                    | 0.3<br>(0.2 to 0.4)                           | 0.3<br>(0.2 to 0.3)                      | 0.1<br>( $< 0.05$ to 0.1)               | 24.4<br>(4.9 to 48.8)                             | 13.0<br>(-4.4 to 35.7)                              |
| Liver cancer due to alcohol use                    | 0.9<br>(0.7 to 1.2)                           | 0.8<br>(0.7 to 1.0)                      | 0.2<br>(0.1 to 0.3)                     | 25.8<br>(6.8 to 50.0)                             | 17.4<br>(-0.3 to 38.8)                              |
| Liver cancer due to other causes                   | 0.4<br>(0.3 to 0.4)                           | 0.3<br>(0.3 to 0.4)                      | 0.1<br>(0.1 to 0.1)                     | 12.0<br>(-4.2 to 28.6)                            | 3.9<br>(-11.2 to 18.4)                              |
| Gallbladder and biliary tract cancer               | 1.5<br>(1.3 to 1.7)                           | 1.8<br>(1.6 to 1.9)                      | 0.4<br>(0.3 to 0.5)                     | -3.1<br>(-11.8 to 7.5)                            | -9.7<br>(-17.6 to 0.5)                              |
| Pancreatic cancer                                  | 4.0<br>(3.7 to 4.4)                           | 4.9<br>(4.4 to 5.3)                      | 1.1<br>(0.7 to 1.4)                     | 6.2<br>(-6.6 to 18.5)                             | -0.8<br>(-12.7 to 10.2)                             |
| Larynx cancer                                      | 9.4<br>(8.6 to 10.3)                          | 2.8<br>(2.6 to 3.1)                      | 1.1<br>(0.8 to 1.5)                     | -8.7<br>(-28.0 to 14.7)                           | -14.4<br>(-33.2 to 6.8)                             |
| Tracheal, bronchus, and lung cancer                | 23.9<br>(21.2 to 27.2)                        | 17.5<br>(16.0 to 19.2)                   | 4.1<br>(2.9 to 5.4)                     | -9.4<br>(-24.5 to 8.7)                            | -14.9<br>(-29.2 to 2.3)                             |
| Malignant skin melanoma                            | 16.6<br>(12.8 to 18.6)                        | 3.7<br>(3.0 to 4.2)                      | 1.2<br>(0.8 to 1.7)                     | 20.4<br>(2.1 to 42.2)                             | 14.7<br>(-3.8 to 35.9)                              |
| Non-melanoma skin cancer                           | 4.2<br>(2.5 to 7.4)                           | 15.9<br>(8.8 to 25.0)                    | 0.1<br>(0.1 to 0.3)                     | -38.0<br>(-65.8 to 41.0)                          | -42.0<br>(-67.8 to 28.3)                            |
| Non-melanoma skin cancer (squamous-cell carcinoma) | 2.6<br>(1.2 to 5.4)                           | 2.6<br>(1.4 to 5.5)                      | 0.1<br>( $< 0.05$ to 0.3)               | -42.7<br>(-68.2 to 48.0)                          | -46.5<br>(-70.0 to 32.4)                            |
| Non-melanoma skin cancer (basal-cell carcinoma)    | 1.9<br>(0.9 to 3.9)                           | 13.3<br>(6.7 to 22.2)                    | $< 0.05$<br>( $< 0.05$ to $< 0.05$ )    | 24.1<br>(-10.9 to 76.9)                           | 14.8<br>(-14.9 to 55.6)                             |
| Breast cancer                                      | 82.1<br>(75.1 to 91.8)                        | 17.8<br>(16.3 to 19.8)                   | 7.8<br>(5.5 to 10.4)                    | -4.9<br>(-16.7 to 11.1)                           | -10.0<br>(-21.6 to 5.3)                             |
| Cervical cancer                                    | 18.8<br>(16.1 to 22.8)                        | 5.0<br>(4.3 to 5.9)                      | 1.8<br>(1.3 to 2.5)                     | -14.3<br>(-29.9 to 5.4)                           | -18.1<br>(-32.5 to 1.4)                             |
| Uterine cancer                                     | 22.2<br>(18.8 to 26.5)                        | 4.8<br>(4.1 to 5.7)                      | 1.7<br>(1.2 to 2.5)                     | 0.7<br>(-22.3 to 29.9)                            | -6.8<br>(-27.8 to 20.1)                             |
| Ovarian cancer                                     | 13.2<br>(11.4 to 14.7)                        | 4.2<br>(3.7 to 4.7)                      | 1.9<br>(1.3 to 2.6)                     | -3.8<br>(-28.2 to 26.7)                           | -6.9<br>(-31.4 to 23.3)                             |
| Prostate cancer                                    | 37.0<br>(30.9 to 45.4)                        | 9.9<br>(8.6 to 12.2)                     | 4.0<br>(2.9 to 5.5)                     | 21.0<br>(-0.4 to 47.4)                            | 13.5<br>(-7.5 to 38.9)                              |
| Testicular cancer                                  | 2.8<br>(2.3 to 3.3)                           | 0.6<br>(0.5 to 0.7)                      | 0.2<br>(0.1 to 0.3)                     | -11.5<br>(-35.3 to 21.7)                          | -10.1<br>(-34.8 to 24.2)                            |
| Kidney cancer                                      | 15.9<br>(14.0 to 17.8)                        | 4.4<br>(4.0 to 4.9)                      | 1.5<br>(1.0 to 2.0)                     | 0.9<br>(-14.3 to 17.1)                            | -3.8<br>(-18.5 to 11.5)                             |
| Bladder cancer                                     | 21.8<br>(19.7 to 23.9)                        | 5.6<br>(5.1 to 6.1)                      | 2.1<br>(1.5 to 2.8)                     | 3.6<br>(-12.3 to 21.7)                            | -2.9<br>(-17.8 to 13.2)                             |
| Brain and nervous system cancer                    | 6.7<br>(5.6 to 7.9)                           | 3.0<br>(2.6 to 3.7)                      | 1.0<br>(0.7 to 1.3)                     | 2.6<br>(-15.5 to 19.5)                            | -2.0<br>(-18.9 to 16.1)                             |
| Thyroid cancer                                     | 12.2<br>(11.0 to 13.9)                        | 2.3<br>(2.1 to 2.7)                      | 0.8<br>(0.5 to 1.1)                     | 12.5<br>(-7.0 to 36.2)                            | 8.5<br>(-10.7 to 32.5)                              |
| Mesothelioma                                       | 0.7<br>(0.7 to 0.8)                           | 0.5<br>(0.5 to 0.6)                      | 0.2<br>(0.1 to 0.2)                     | 33.7<br>(18.8 to 47.9)                            | 21.9<br>(8.6 to 33.8)                               |
| Hodgkin lymphoma                                   | 2.7<br>(2.4 to 3.1)                           | 0.7<br>(0.6 to 0.8)                      | 0.3<br>(0.2 to 0.4)                     | -10.3<br>(-19.6 to 1.0)                           | -8.1<br>(-17.5 to 4.0)                              |
| Non-Hodgkin's lymphoma                             | 9.6<br>(8.5 to 10.7)                          | 2.7<br>(2.4 to 3.0)                      | 0.9<br>(0.6 to 1.2)                     | 29.1<br>(10.3 to 47.1)                            | 22.8<br>(4.4 to 40.9)                               |
| Multiple myeloma                                   | 3.2<br>(2.5 to 3.8)                           | 1.2<br>(1.0 to 1.4)                      | 0.7<br>(0.4 to 0.9)                     | 26.8<br>(3.1 to 48.4)                             | 19.6<br>(-2.8 to 39.7)                              |
| Leukaemia                                          | 14.8<br>(13.2 to 16.8)                        | 4.1<br>(3.7 to 4.5)                      | 2.0<br>(1.4 to 2.7)                     | 11.2<br>(-3.8 to 31.1)                            | 7.0<br>(-8.5 to 26.1)                               |
| Acute lymphoid leukaemia                           | 1.8<br>(1.4 to 2.3)                           | 0.5<br>(0.4 to 0.6)                      | 0.2<br>(0.1 to 0.3)                     | 10.7<br>(-12.1 to 41.8)                           | 13.0<br>(-13.8 to 54.8)                             |
| Chronic lymphoid leukaemia                         | 6.3<br>(5.4 to 7.1)                           | 1.5<br>(1.3 to 1.7)                      | 0.8<br>(0.6 to 1.1)                     | 3.4<br>(-16.8 to 29.2)                            | -3.2<br>(-22.0 to 20.2)                             |
| Acute myeloid leukaemia                            | 1.1<br>(0.9 to 1.3)                           | 0.7<br>(0.6 to 0.8)                      | 0.2<br>(0.1 to 0.3)                     | -0.2<br>(-13.9 to 17.3)                           | -4.0<br>(-20.4 to 18.2)                             |
| Chronic myeloid leukaemia                          | 0.8<br>(0.7 to 1.0)                           | 0.3<br>(0.2 to 0.4)                      | 0.1<br>(0.1 to 0.1)                     | -26.9<br>(-39.5 to -10.3)                         | -30.6<br>(-42.2 to -15.3)                           |
| Other leukaemia                                    | 4.9<br>(3.9 to 6.4)                           | 1.1<br>(0.9 to 1.4)                      | 0.6<br>(0.4 to 1.0)                     | 43.2<br>(9.7 to 92.4)                             | 34.5<br>(2.2 to 81.8)                               |
| Other neoplasms                                    | 19.0<br>(15.8 to 22.5)                        | 5.5<br>(4.8 to 6.4)                      | 1.7<br>(1.2 to 2.3)                     | 12.0<br>(-8.0 to 34.3)                            | 8.7<br>(-11.7 to 31.0)                              |
| <b>Cardiovascular diseases</b>                     | <b>4,974.3</b><br><b>(4,762.0 to 5,187.4)</b> | <b>920.2†</b><br><b>(883.2 to 961.8)</b> | <b>443.5</b><br><b>(325.4 to 569.0)</b> | <b>5.6</b><br><b>(0.9 to 10.5)</b>                | <b>-2.2</b><br><b>(-6.5 to 2.2)</b>                 |
| Rheumatic heart disease                            | 10.5<br>(9.4 to 11.7)                         | 2.0<br>(1.9 to 2.2)                      | 0.8<br>(0.6 to 1.2)                     | -9.3<br>(-30.0 to 15.0)                           | -13.8<br>(-32.3 to 8.6)                             |
| Ischaemic heart disease                            | 2,603.4<br>(2,396.2 to 2,847.9)               | 519.8<br>(493.0 to 547.7)                | 127.0<br>(88.0 to 171.4)                | 6.5<br>(1.6 to 11.1)                              | -1.5<br>(-5.8 to 2.6)                               |
| Cerebrovascular disease                            | 1,208.2<br>(1,131.2 to 1,289.6)               | 203.0‡<br>(183.0 to 223.1)               | 242.8<br>(171.3 to 307.2)               | 4.8<br>(-3.4 to 13.6)                             | -3.0<br>(-10.5 to 5.0)                              |
| Ischaemic stroke                                   | 1,103.2<br>(989.1 to 1,222.4)                 | 163.9‡<br>(144.2 to 183.4)               | 215.0<br>(151.1 to 273.9)               | 4.5<br>(-4.7 to 14.1)                             | -3.4<br>(-11.7 to 5.3)                              |
| Hemorrhagic stroke                                 | 145.4<br>(130.0 to 163.6)                     | 39.2‡<br>(35.1 to 43.8)                  | 27.8<br>(19.9 to 35.9)                  | 7.1<br>(-4.6 to 19.9)                             | 0.6<br>(-9.9 to 12.4)                               |
| Hypertensive heart disease                         | 125.4<br>(103.5 to 150.1)                     | --                                       | 10.0<br>(6.7 to 14.0)                   | 8.6<br>(-3.2 to 22.0)                             | 0.2<br>(-10.1 to 11.8)                              |
| Cardiomyopathy and myocarditis                     | 71.1<br>(62.9 to 79.5)                        | 22.9†<br>(20.1 to 26.0)                  | 6.4<br>(4.4 to 9.2)                     | 1.8<br>(-9.5 to 13.7)                             | 0.7<br>(-10.6 to 12.1)                              |
| Myocarditis                                        | 13.1<br>(11.7 to 14.4)                        | 22.9<br>(20.1 to 26.0)                   | 0.9<br>(0.6 to 1.3)                     | -4.5<br>(-17.7 to 10.5)                           | 0.5<br>(-13.3 to 16.4)                              |
| Alcoholic cardiomyopathy                           | 32.1<br>(26.8 to 38.2)                        | --                                       | 2.6<br>(1.7 to 3.9)                     | 4.2<br>(-13.5 to 25.5)                            | 1.0<br>(-16.2 to 22.1)                              |
| Other cardiomyopathy                               | 34.4<br>(29.7 to 39.4)                        | --                                       | 2.9<br>(1.9 to 4.1)                     | 1.8<br>(-14.8 to 20.3)                            | 0.5<br>(-14.8 to 18.6)                              |
| Atrial fibrillation and flutter                    | 532.6<br>(460.4 to 619.1)                     | 42.7<br>(36.1 to 49.8)                   | 41.1<br>(27.8 to 56.7)                  | 9.8<br>(3.1 to 17.2)                              | 0.0<br>(-5.8 to 6.7)                                |
| Peripheral vascular disease                        | 1,308.2<br>(1,130.9 to 1,516.7)               | 122.2<br>(104.7 to 143.9)                | 6.0<br>(2.8 to 11.2)                    | 1.3<br>(-7.6 to 11.1)                             | -8.1<br>(-15.5 to -0.6)                             |
| Endocarditis                                       | 2.1<br>(1.9 to 2.4)                           | 7.5<br>(6.7 to 8.4)                      | 0.2<br>(0.1 to 0.2)                     | 6.8<br>(-0.6 to 14.5)                             | 0.4<br>(-5.9 to 6.9)                                |
| Other cardiovascular and circulatory diseases      | 179.1<br>(151.8 to 213.8)                     | --                                       | 9.2<br>(6.2 to 13.2)                    | 3.4<br>(-7.3 to 15.9)                             | -0.4<br>(-11.0 to 11.4)                             |
| <b>Chronic respiratory diseases</b>                | <b>4,264.1</b><br><b>(4,097.7 to 4,449.8)</b> | <b>541.2†</b><br><b>(511.6 to 573.4)</b> | <b>141.3</b><br><b>(105.2 to 184.8)</b> | <b>-1.7</b><br><b>(-6.4 to 3.4)</b>               | <b>-0.9</b><br><b>(-5.6 to 4.0)</b>                 |
| Chronic obstructive pulmonary disease              | 1,793.6<br>(1,677.7 to 1,948.1)               | 102.0<br>(95.0 to 110.7)                 | 34.4<br>(27.2 to 43.3)                  | -8.7<br>(-21.5 to 6.0)                            | -12.9<br>(-24.7 to 0.8)                             |
| Pneumoconiosis                                     | 5.4<br>(4.9 to 6.0)                           | 0.4<br>(0.3 to 0.4)                      | 0.8<br>(0.6 to 1.1)                     | 5.3<br>(-10.8 to 24.1)                            | -0.5<br>(-15.3 to 16.4)                             |
| Silicosis                                          | 0.7<br>(0.6 to 0.8)                           | 0.1<br>( $< 0.05$ to 0.1)                | 0.1<br>(0.1 to 0.2)                     | 3.9<br>(-1.3 to 9.6)                              | -0.6<br>(-5.4 to 4.8)                               |



| Cause                                                          | Prevalence in thousands (95% UI)           | Incidence in thousands (95% UI)          | YLDs in thousands (95% UI)            |                                                   |                                                     |
|----------------------------------------------------------------|--------------------------------------------|------------------------------------------|---------------------------------------|---------------------------------------------------|-----------------------------------------------------|
|                                                                | 2016 counts                                | 2016 counts                              | 2016 counts                           | Percentage change in counts between 2006 and 2016 | Percentage change in age-standardised rates between |
| Asbestosis                                                     | 1.3<br>(1.1 to 1.5)                        | 0.1<br>(0.1 to 0.1)                      | 0.2<br>(0.1 to 0.3)                   | 2.6<br>(-4.4 to 10.3)                             | -2.0<br>(-8.6 to 5.1)                               |
| Coal workers pneumoconiosis                                    | 0.4<br>(0.4 to 0.5)                        | < 0.05<br>(< 0.05 to < 0.05)             | 0.1<br>(< 0.05 to 0.1)                | 39.5<br>(28.3 to 51.7)                            | 31.9<br>(21.2 to 43.3)                              |
| Other pneumoconiosis                                           | 3.0<br>(2.5 to 3.4)                        | 0.2<br>(0.2 to 0.3)                      | 0.4<br>(0.3 to 0.6)                   | 3.0<br>(-25.4 to 40.1)                            | -3.5<br>(-28.8 to 29.9)                             |
| Asthma                                                         | 2,586.9<br>(2,431.7 to 2,757.8)            | 437.1<br>(409.6 to 468.3)                | 99.4<br>(66.7 to 141.1)               | 0.7<br>(-3.4 to 5.1)                              | 2.2<br>(-2.3 to 6.9)                                |
| Interstitial lung disease and pulmonary sarcoidosis            | 47.4<br>(43.1 to 51.9)                     | 1.8<br>(1.6 to 2.0)                      | 4.9<br>(3.2 to 7.1)                   | -2.3<br>(-15.7 to 13.0)                           | -4.3<br>(-17.1 to 10.9)                             |
| Other chronic respiratory diseases                             | --                                         | --                                       | 1.7<br>(1.4 to 2.1)                   | 16.7<br>(5.4 to 29.8)                             | 25.9<br>(15.2 to 38.5)                              |
| <b>Cirrhosis and other chronic liver diseases</b>              | <b>573.4<br/>(545.8 to 603.0)</b>          | <b>18.7<br/>(17.9 to 19.5)</b>           | <b>15.6<br/>(10.9 to 21.5)</b>        | <b>3.6<br/>(-4.5 to 12.1)</b>                     | <b>2.4<br/>(-5.8 to 10.8)</b>                       |
| Cirrhosis and other chronic liver diseases due to hepatitis B  | 105.1<br>(94.6 to 117.1)                   | 3.6<br>(3.2 to 4.0)                      | 2.7<br>(1.8 to 3.9)                   | 5.6<br>(-12.3 to 27.2)                            | 2.5<br>(-15.3 to 25.3)                              |
| Cirrhosis and other chronic liver diseases due to hepatitis C  | 125.8<br>(112.9 to 139.4)                  | 4.2<br>(3.8 to 4.7)                      | 3.2<br>(2.1 to 4.5)                   | 4.5<br>(-11.6 to 25.6)                            | 1.5<br>(-14.7 to 21.1)                              |
| Cirrhosis and other chronic liver diseases due to alcohol use  | 200.5<br>(183.2 to 219.6)                  | 6.8<br>(6.2 to 7.4)                      | 5.1<br>(3.5 to 7.1)                   | 8.3<br>(-5.4 to 24.2)                             | 4.6<br>(-9.0 to 20.2)                               |
| Cirrhosis and other chronic liver diseases due to other causes | 142.0<br>(130.7 to 154.4)                  | 4.1<br>(3.8 to 4.5)                      | 4.6<br>(3.2 to 6.5)                   | -2.5<br>(-15.9 to 12.8)                           | 1.2<br>(-13.2 to 16.2)                              |
| <b>Digestive diseases</b>                                      | <b>2,341.8<br/>(2,204.7 to 2,473.1)</b>    | <b>2,414.4†<br/>(2,248.0 to 2,579.7)</b> | <b>73.2<br/>(51.7 to 99.8)</b>        | <b>5.8<br/>(-0.0 to 12.2)</b>                     | <b>5.5<br/>(-1.0 to 12.5)</b>                       |
| Peptic ulcer disease                                           | 726.3<br>(657.7 to 808.0)                  | 57.5<br>(52.1 to 63.7)                   | 10.2<br>(6.5 to 15.7)                 | 3.4<br>(-9.3 to 18.5)                             | 5.7<br>(-7.5 to 20.8)                               |
| Gastritis and duodenitis                                       | 999.2<br>(882.5 to 1,125.3)                | 711.7<br>(637.0 to 795.6)                | 12.5<br>(8.0 to 18.7)                 | 6.6<br>(-4.5 to 19.9)                             | 14.4<br>(0.9 to 30.1)                               |
| Appendicitis                                                   | 3.4<br>(3.1 to 3.7)                        | 88.2<br>(81.9 to 95.5)                   | 1.1<br>(0.7 to 1.6)                   | -13.5<br>(-34.4 to 16.6)                          | -1.7<br>(-28.3 to 38.0)                             |
| Paralytic ileus and intestinal obstruction                     | 0.8<br>(0.7 to 0.9)                        | 20.7<br>(18.5 to 23.0)                   | 0.2<br>(0.2 to 0.3)                   | 4.3<br>(0.2 to 8.5)                               | 0.9<br>(-2.2 to 3.9)                                |
| Inguinal, femoral, and abdominal hernia                        | 434.1<br>(386.8 to 479.5)                  | 594.9<br>(504.4 to 692.1)                | 31.3<br>(20.8 to 44.6)                | 7.0<br>(-1.4 to 16.3)                             | 2.8<br>(-5.1 to 12.3)                               |
| Inflammatory bowel disease                                     | 50.1<br>(42.1 to 59.5)                     | 46.9<br>(40.2 to 54.6)                   | 7.1<br>(4.6 to 10.0)                  | -4.0<br>(-15.4 to 10.0)                           | -5.4<br>(-17.0 to 8.5)                              |
| Vascular intestinal disorders                                  | 1.0<br>(0.9 to 1.1)                        | 6.4<br>(5.7 to 7.2)                      | 0.3<br>(0.2 to 0.4)                   | 9.4<br>(3.7 to 15.8)                              | 2.9<br>(-1.7 to 8.0)                                |
| Gallbladder and biliary diseases                               | 177.8<br>(156.3 to 200.4)                  | 799.6<br>(697.4 to 922.7)                | 3.3<br>(2.2 to 4.7)                   | 11.9<br>(-6.9 to 36.0)                            | 7.5<br>(-10.3 to 29.9)                              |
| Pancreatitis                                                   | 10.0<br>(9.0 to 11.0)                      | 88.6<br>(80.5 to 97.4)                   | 1.2<br>(0.8 to 1.8)                   | 14.0<br>(-4.9 to 39.2)                            | 10.2<br>(-5.1 to 29.7)                              |
| Other digestive diseases                                       | --                                         | --                                       | 6.0<br>(4.2 to 8.0)                   | 14.3<br>(7.7 to 21.7)                             | 11.2<br>(3.5 to 20.4)                               |
| <b>Neurological disorders</b>                                  | <b>19,271.3<br/>(18,544.4 to 20,141.0)</b> | <b>8,503.8<br/>(7,278.7 to 9,969.9)</b>  | <b>552.8<br/>(377.6 to 763.1)</b>     | <b>-1.1<br/>(-9.7 to 9.0)</b>                     | <b>-0.6<br/>(-10.5 to 10.7)</b>                     |
| Alzheimer's disease and other dementias                        | 370.6<br>(306.9 to 442.6)                  | 64.0<br>(52.2 to 77.4)                   | 54.2<br>(37.6 to 73.0)                | 18.6<br>(12.3 to 25.3)                            | -1.0<br>(-5.7 to 4.3)                               |
| Parkinson's disease                                            | 84.6<br>(65.4 to 106.1)                    | 9.2<br>(7.1 to 11.8)                     | 9.7<br>(6.1 to 13.8)                  | 13.9<br>(2.6 to 28.1)                             | 4.5<br>(-5.1 to 16.1)                               |
| Epilepsy                                                       | 96.3<br>(23.2 to 180.8)                    | 9.0<br>(2.2 to 17.1)                     | 27.3<br>(5.3 to 66.6)                 | -10.6<br>(-83.1 to 370.1)                         | -8.2<br>(-82.8 to 387.9)                            |
| Multiple sclerosis                                             | 21.8<br>(19.3 to 24.5)                     | 0.7<br>(0.6 to 0.8)                      | 5.8<br>(4.0 to 7.8)                   | 14.2<br>(-2.6 to 33.6)                            | 11.3<br>(-5.2 to 29.5)                              |
| Motor neuron disease                                           | 1.3<br>(1.1 to 1.4)                        | 0.2<br>(0.2 to 0.3)                      | 0.3<br>(0.2 to 0.4)                   | 3.7<br>(-0.1 to 7.7)                              | 3.3<br>(-0.7 to 7.4)                                |
| Migraine                                                       | 8,186.8<br>(7,663.1 to 8,701.1)            | 776.3<br>(694.6 to 863.6)                | 379.8<br>(245.3 to 529.9)             | -3.2<br>(-7.0 to 0.9)                             | -0.5<br>(-4.0 to 3.6)                               |
| Tension-type headache                                          | 14,142.8<br>(12,662.6 to 15,739.6)         | 7,643.9<br>(6,432.8 to 9,113.2)          | 69.1<br>(41.7 to 106.6)               | -1.6<br>(-7.1 to 5.2)                             | -0.0<br>(-5.2 to 5.6)                               |
| Other neurological disorders                                   | 0.2<br>(0.1 to 0.3)                        | 0.4<br>(0.2 to 0.5)                      | 6.6<br>(2.8 to 13.5)                  | 4.0<br>(-60.3 to 180.0)                           | 11.2<br>(-63.0 to 242.2)                            |
| <b>Mental and substance use disorders</b>                      | <b>8,127.7<br/>(7,878.5 to 8,374.8)</b>    | <b>3,950.6†<br/>(3,676.0 to 4,263.0)</b> | <b>1,142.4<br/>(832.4 to 1,482.2)</b> | <b>-4.2<br/>(-6.8 to -1.6)</b>                    | <b>-1.6<br/>(-4.0 to 0.9)</b>                       |
| Schizophrenia                                                  | 106.8<br>(94.1 to 120.9)                   | 5.7<br>(5.0 to 6.4)                      | 67.5<br>(49.6 to 84.7)                | 2.2<br>(-6.3 to 11.2)                             | 1.1<br>(-7.4 to 10.2)                               |
| Alcohol use disorders                                          | 2,050.7<br>(1,832.6 to 2,282.7)            | 1,007.9<br>(874.4 to 1,147.7)            | 203.0<br>(139.6 to 277.1)             | 2.2<br>(-5.5 to 10.2)                             | 3.5<br>(-4.1 to 11.7)                               |
| Drug use disorders                                             | 394.4<br>(372.8 to 420.0)                  | 47.1<br>(43.6 to 50.8)                   | 104.8<br>(73.7 to 135.8)              | 2.3<br>(-5.7 to 10.7)                             | 4.5<br>(-4.1 to 13.2)                               |
| Opioid use disorders                                           | 193.3<br>(169.4 to 217.9)                  | 23.0<br>(20.2 to 26.1)                   | 79.3<br>(55.1 to 104.4)               | 3.9<br>(-5.6 to 14.0)                             | 3.7<br>(-6.8 to 14.2)                               |
| Cocaine use disorders                                          | 43.4<br>(37.9 to 49.2)                     | 2.2<br>(1.9 to 2.5)                      | 5.9<br>(3.5 to 8.9)                   | 0.8<br>(-18.1 to 22.7)                            | 8.9<br>(-12.7 to 33.2)                              |
| Amphetamine use disorders                                      | 39.7<br>(28.6 to 53.6)                     | 2.7<br>(2.0 to 3.6)                      | 5.2<br>(2.9 to 8.4)                   | -6.9<br>(-27.6 to 19.9)                           | 5.9<br>(-17.2 to 36.7)                              |
| Cannabis use disorders                                         | 89.9<br>(76.2 to 105.3)                    | 12.6<br>(10.7 to 14.6)                   | 2.6<br>(1.7 to 3.9)                   | -14.2<br>(-28.7 to 3.8)                           | 0.1<br>(-17.3 to 23.2)                              |
| Other drug use disorders                                       | 41.4<br>(37.6 to 45.3)                     | 6.7<br>(6.0 to 7.4)                      | 11.7<br>(7.8 to 16.5)                 | 0.9<br>(-17.7 to 23.4)                            | 7.6<br>(-13.0 to 32.3)                              |
| Depressive disorders                                           | 2,401.2<br>(2,265.0 to 2,546.6)            | 2,539.6<br>(2,313.6 to 2,811.8)          | 398.4<br>(275.6 to 540.9)             | -8.4<br>(-13.6 to -3.0)                           | -7.8<br>(-12.8 to -2.5)                             |
| Major depressive disorder                                      | 1,585.1<br>(1,445.9 to 1,743.9)            | 2,413.8<br>(2,189.8 to 2,688.9)          | 315.6<br>(216.8 to 430.1)             | -9.9<br>(-16.2 to -3.3)                           | -9.0<br>(-14.7 to -2.6)                             |
| Dysthymia                                                      | 876.4<br>(763.7 to 1,005.3)                | 125.8<br>(110.8 to 144.3)                | 82.8<br>(56.4 to 120.1)               | -2.1<br>(-9.2 to 5.5)                             | -2.9<br>(-9.5 to 4.3)                               |
| Bipolar disorder                                               | 305.8<br>(267.5 to 349.3)                  | 21.1<br>(18.4 to 24.1)                   | 61.6<br>(38.7 to 90.3)                | -5.1<br>(-10.8 to 0.8)                            | -0.3<br>(-6.0 to 5.6)                               |
| Anxiety disorders                                              | 1,376.6<br>(1,250.4 to 1,502.0)            | 212.6<br>(197.1 to 230.0)                | 130.3<br>(91.5 to 177.0)              | -3.2<br>(-9.1 to 3.4)                             | 0.8<br>(-5.5 to 7.5)                                |
| Eating disorders                                               | 40.0<br>(32.1 to 49.2)                     | 19.2<br>(14.5 to 24.9)                   | 8.1<br>(5.0 to 12.0)                  | -1.5<br>(-15.2 to 13.4)                           | 9.8<br>(-4.2 to 26.8)                               |
| Anorexia nervosa                                               | 8.0<br>(6.0 to 10.8)                       | 3.3<br>(2.5 to 4.3)                      | 1.7<br>(1.0 to 2.6)                   | -10.6<br>(-30.5 to 18.0)                          | 8.7<br>(-14.9 to 44.1)                              |
| Bulimia nervosa                                                | 30.2<br>(22.5 to 40.6)                     | 15.9<br>(11.3 to 21.6)                   | 6.4<br>(3.7 to 9.6)                   | 1.3<br>(-14.9 to 19.0)                            | 10.2<br>(-6.0 to 30.2)                              |
| Autistic spectrum disorders                                    | 352.8<br>(316.8 to 395.4)                  | 1.6<br>(1.1 to 2.3)                      | 51.7<br>(34.9 to 72.7)                | -3.8<br>(-8.2 to 0.6)                             | 0.6<br>(-4.2 to 5.5)                                |
| Autism                                                         | 109.3<br>(93.8 to 127.8)                   | 0.2<br>(0.1 to 0.3)                      | 27.4<br>(18.0 to 40.1)                | -4.0<br>(-11.1 to 3.6)                            | 0.5<br>(-7.1 to 8.9)                                |
| Asperger syndrome and other autistic spectrum disorders        | 245.5<br>(204.2 to 294.2)                  | 1.4<br>(0.9 to 2.1)                      | 24.3<br>(15.6 to 35.6)                | -3.6<br>(-8.0 to 1.1)                             | 0.7<br>(-4.1 to 5.7)                                |

| Cause                                                      | Prevalence in thousands (95% UI)                 | Incidence in thousands (95% UI)                      | YLDs in thousands (95% UI)                  |                                                   |                                                     |
|------------------------------------------------------------|--------------------------------------------------|------------------------------------------------------|---------------------------------------------|---------------------------------------------------|-----------------------------------------------------|
|                                                            | 2016 counts                                      | 2016 counts                                          | 2016 counts                                 | Percentage change in counts between 2006 and 2016 | Percentage change in age-standardised rates between |
| Attention-deficit/hyperactivity disorder                   | 272.1<br>(246.6 to 302.5)                        | 10.1<br>(8.8 to 11.8)                                | 3.3<br>(1.9 to 5.2)                         | -12.0<br>(-19.6 to -3.6)                          | 0.5<br>(-8.0 to 9.8)                                |
| Conduct disorder                                           | 183.9<br>(152.3 to 216.9)                        | 63.2<br>(50.5 to 75.7)                               | 22.4<br>(13.7 to 34.0)                      | -29.4<br>(-34.3 to -24.2)                         | 0.2<br>(-6.4 to 6.8)                                |
| Idiopathic developmental intellectual disability           | 404.5<br>(193.9 to 603.4)                        | --                                                   | 15.6<br>(6.4 to 28.2)                       | -14.7<br>(-23.1 to -8.8)                          | -9.1<br>(-18.8 to -2.5)                             |
| Other mental and substance use disorders                   | 1,031.7<br>(916.0 to 1,183.4)                    | 22.4<br>(20.1 to 25.3)                               | 75.7<br>(52.7 to 109.0)                     | 0.8<br>(-3.7 to 5.8)                              | 0.3<br>(-4.4 to 5.6)                                |
| <b>Diabetes, urogenital, blood, and endocrine diseases</b> | <b>15,628.6</b><br><b>(15,352.8 to 15,966.5)</b> | <b>8,575.8†</b><br><b>(8,052.4 to 9,164.6)</b>       | <b>396.9</b><br><b>(283.1 to 537.4)</b>     | <b>2.4</b><br><b>(-2.6 to 7.0)</b>                | <b>-0.0</b><br><b>(-4.6 to 4.2)</b>                 |
| Diabetes mellitus                                          | 1,808.6<br>(1,610.3 to 2,046.8)                  | 82.0<br>(72.9 to 92.8)                               | 156.3<br>(108.0 to 215.3)                   | 4.3<br>(-7.6 to 14.8)                             | -1.0<br>(-12.4 to 9.1)                              |
| Acute glomerulonephritis                                   | 1.0<br>(0.9 to 1.2)                              | 15.0<br>(13.1 to 17.1)                               | 0.1<br>(< 0.05 to 0.1)                      | -3.0<br>(-8.2 to 2.3)                             | -1.7<br>(-6.0 to 3.3)                               |
| Chronic kidney disease                                     | 3,157.7<br>(2,820.4 to 3,487.3)                  | 223.0<br>(190.5 to 253.2)                            | 55.5<br>(40.4 to 72.2)                      | 5.7<br>(-2.8 to 15.2)                             | -0.5<br>(-8.0 to 7.6)                               |
| Chronic kidney disease due to diabetes mellitus            | 852.9<br>(740.4 to 971.6)                        | 62.1<br>(51.5 to 73.5)                               | 14.1<br>(10.1 to 18.7)                      | 12.7<br>(-0.6 to 28.7)                            | 7.6<br>(-4.3 to 22.6)                               |
| Chronic kidney disease due to hypertension                 | 895.8<br>(771.5 to 1,027.2)                      | 108.3<br>(91.9 to 124.3)                             | 3.0<br>(2.0 to 4.1)                         | 20.7<br>(0.3 to 45.3)                             | 4.2<br>(-11.6 to 22.8)                              |
| Chronic kidney disease due to glomerulonephritis           | 792.0<br>(694.9 to 887.7)                        | 9.8<br>(7.4 to 12.7)                                 | 27.4<br>(19.8 to 36.0)                      | 0.0<br>(-9.4 to 10.9)                             | -5.0<br>(-13.7 to 4.6)                              |
| Chronic kidney disease due to other causes                 | 617.0<br>(506.1 to 737.6)                        | 42.8<br>(34.3 to 52.2)                               | 11.1<br>(7.8 to 14.8)                       | 9.1<br>(-4.4 to 23.1)                             | 1.3<br>(-10.3 to 13.7)                              |
| Urinary diseases and male infertility                      | 1,619.4<br>(1,461.0 to 1,786.3)                  | 5,532.0†<br>(5,059.8 to 6,045.6)                     | 50.6<br>(33.1 to 72.9)                      | 4.8<br>(-0.9 to 11.1)                             | -0.6<br>(-5.9 to 5.3)                               |
| Interstitial nephritis and urinary tract infections        | 78.8<br>(70.1 to 88.1)                           | 4,077.3<br>(3,639.3 to 4,557.8)                      | 2.6<br>(1.6 to 3.9)                         | -10.3<br>(-20.3 to 0.4)                           | -4.9<br>(-14.6 to 6.2)                              |
| Urolithiasis                                               | 48.8<br>(42.8 to 55.3)                           | 1,292.2<br>(1,132.5 to 1,466.8)                      | 3.4<br>(2.3 to 4.8)                         | 6.9<br>(-10.3 to 27.8)                            | 2.9<br>(-12.3 to 22.6)                              |
| Benign prostatic hyperplasia                               | 1,284.6<br>(1,099.1 to 1,481.0)                  | 162.6<br>(135.6 to 192.9)                            | 41.6<br>(26.4 to 61.2)                      | 7.3<br>(0.5 to 15.2)                              | 0.8<br>(-5.9 to 8.1)                                |
| Male infertility                                           | 163.2<br>(126.0 to 214.0)                        | --                                                   | 1.0<br>(0.4 to 2.1)                         | 3.5<br>(-16.6 to 26.9)                            | 5.4<br>(-14.7 to 28.7)                              |
| Other urinary diseases                                     | --                                               | --                                                   | 2.0<br>(1.4 to 2.9)                         | -17.9<br>(-25.7 to -9.2)                          | -18.6<br>(-25.9 to -10.4)                           |
| Gynecological diseases                                     | 6,170.3<br>(5,891.0 to 6,496.9)                  | 2,544.0†<br>(2,322.2 to 2,805.3)                     | 83.1<br>(57.4 to 117.2)                     | -5.5<br>(-9.0 to -1.8)                            | -1.1<br>(-4.5 to 2.8)                               |
| Uterine fibroids                                           | 867.5<br>(756.1 to 996.4)                        | 74.9<br>(63.1 to 87.6)                               | 6.8<br>(3.3 to 12.7)                        | -2.1<br>(-5.7 to 1.3)                             | -1.4<br>(-4.9 to 2.1)                               |
| Polycystic ovarian syndrome                                | 46.4<br>(34.8 to 61.2)                           | 17.8<br>(12.5 to 23.8)                               | 0.4<br>(0.2 to 0.8)                         | -2.3<br>(-14.5 to 13.5)                           | -0.8<br>(-13.1 to 14.8)                             |
| Female infertility                                         | 55.7<br>(23.3 to 111.0)                          | --                                                   | 0.3<br>(0.1 to 0.9)                         | 12.6<br>(-42.1 to 103.7)                          | 19.7<br>(-34.7 to 102.0)                            |
| Endometriosis                                              | 35.3<br>(28.9 to 42.3)                           | 86.5<br>(66.2 to 112.2)                              | 3.3<br>(2.1 to 4.8)                         | -8.4<br>(-26.6 to 14.0)                           | -1.3<br>(-20.2 to 23.8)                             |
| Genital prolapse                                           | 1,917.4<br>(1,652.4 to 2,215.3)                  | 74.3<br>(63.2 to 88.5)                               | 5.9<br>(2.9 to 10.5)                        | 17.6<br>(7.5 to 29.2)                             | 10.7<br>(1.4 to 21.2)                               |
| Premenstrual syndrome                                      | 2,891.3<br>(2,739.0 to 3,039.3)                  | 966.1<br>(903.7 to 1,035.2)                          | 24.1<br>(15.0 to 36.8)                      | -10.5<br>(-17.4 to -3.6)                          | -2.1<br>(-9.3 to 5.5)                               |
| Other gynecological diseases                               | 1,176.1<br>(1,004.0 to 1,371.8)                  | 1,324.4<br>(1,110.2 to 1,572.7)                      | 42.2<br>(27.9 to 60.9)                      | -5.5<br>(-11.4 to 0.0)                            | -1.6<br>(-7.5 to 3.9)                               |
| Hemoglobinopathies and hemolytic anaemias                  | 5,579.5<br>(5,455.2 to 5,688.3)                  | --                                                   | 14.8<br>(9.5 to 22.1)                       | 4.0<br>(-8.1 to 18.2)                             | 10.9<br>(-3.2 to 28.3)                              |
| Thalassemias                                               | 0.2<br>(0.2 to 0.2)                              | --                                                   | < 0.05<br>(< 0.05 to < 0.05)                | 39.1<br>(17.5 to 60.3)                            | 33.2<br>(12.5 to 54.7)                              |
| Thalassaemias trait                                        | 830.8<br>(759.2 to 908.2)                        | --                                                   | 11.4<br>(7.3 to 16.9)                       | 4.2<br>(-8.4 to 19.1)                             | 12.0<br>(-2.9 to 31.2)                              |
| Sickle cell disorders                                      | 0.4<br>(0.3 to 0.4)                              | --                                                   | < 0.05<br>(< 0.05 to 0.1)                   | 9.5<br>(0.0 to 19.4)                              | 23.0<br>(13.2 to 33.9)                              |
| Sickle cell trait                                          | 707.7<br>(678.3 to 741.9)                        | --                                                   | 2.2<br>(1.4 to 3.6)                         | 8.1<br>(-9.7 to 27.5)                             | 16.3<br>(-5.6 to 40.6)                              |
| G6PD deficiency                                            | 551.9<br>(523.3 to 584.7)                        | --                                                   | 0.1<br>(< 0.05 to 0.1)                      | 7.1<br>(-5.4 to 21.9)                             | 11.2<br>(-2.9 to 26.8)                              |
| G6PD trait                                                 | 3,599.6<br>(3,509.2 to 3,693.2)                  | --                                                   | < 0.05<br>(< 0.05 to < 0.05)                | -1.3<br>(-12.1 to 12.0)                           | 6.8<br>(-6.0 to 23.7)                               |
| Other hemoglobinopathies and hemolytic anaemias            | 73.0<br>(61.4 to 88.0)                           | --                                                   | 1.0<br>(0.6 to 1.5)                         | -6.2<br>(-21.9 to 16.2)                           | -13.7<br>(-28.7 to 6.8)                             |
| Endocrine, metabolic, blood, and immune disorders          | 1,060.7<br>(942.6 to 1,194.2)                    | 179.8<br>(158.8 to 204.0)                            | 36.6<br>(24.1 to 51.7)                      | 4.7<br>(-1.6 to 11.4)                             | 2.0<br>(-4.2 to 8.6)                                |
| <b>Musculoskeletal disorders</b>                           | <b>10,827.6</b><br><b>(10,320.9 to 11,368.8)</b> | <b>4,719.1</b><br><b>(4,182.7 to 5,308.7)</b>        | <b>1,270.5</b><br><b>(921.2 to 1,650.6)</b> | <b>2.3</b><br><b>(-1.6 to 5.9)</b>                | <b>-0.8</b><br><b>(-4.2 to 2.4)</b>                 |
| Rheumatoid arthritis                                       | 171.8<br>(153.5 to 193.1)                        | 7.9<br>(6.9 to 9.0)                                  | 39.6<br>(27.0 to 52.9)                      | 9.2<br>(1.3 to 18.3)                              | 4.9<br>(-2.6 to 13.2)                               |
| Osteoarthritis                                             | 2,911.7<br>(2,731.7 to 3,109.7)                  | 125.3<br>(116.3 to 135.6)                            | 176.9<br>(125.9 to 240.5)                   | 8.4<br>(4.5 to 12.2)                              | 1.8<br>(-1.9 to 5.3)                                |
| Low back and neck pain                                     | 8,392.6<br>(7,837.8 to 9,032.1)                  | 4,086.1<br>(3,566.8 to 4,632.8)                      | 1,002.9<br>(705.7 to 1,315.2)               | 1.0<br>(-3.7 to 5.5)                              | -1.4<br>(-5.5 to 2.6)                               |
| Low back pain                                              | 7,039.2<br>(6,263.1 to 7,908.1)                  | 3,628.3<br>(3,118.4 to 4,188.3)                      | 786.9<br>(552.5 to 1,030.6)                 | 0.7<br>(-5.1 to 6.4)                              | -1.9<br>(-7.1 to 3.3)                               |
| Neck pain                                                  | 2,196.9<br>(1,893.3 to 2,550.9)                  | 457.9<br>(397.7 to 539.2)                            | 215.9<br>(148.4 to 302.9)                   | 2.2<br>(-0.6 to 5.1)                              | 0.1<br>(-1.9 to 2.1)                                |
| Gout                                                       | 237.5<br>(209.5 to 269.8)                        | 46.4<br>(40.1 to 52.7)                               | 7.4<br>(5.0 to 10.2)                        | 6.4<br>(-7.7 to 23.0)                             | 1.1<br>(-12.1 to 16.8)                              |
| Other musculoskeletal disorders                            | 515.5<br>(388.8 to 687.0)                        | 453.4<br>(329.5 to 638.0)                            | 43.7<br>(27.5 to 67.3)                      | 2.8<br>(-10.5 to 19.1)                            | 1.1<br>(-12.1 to 16.5)                              |
| <b>Other non-communicable diseases</b>                     | <b>34,580.5</b><br><b>(34,004.9 to 35,127.5)</b> | <b>107,263.3†</b><br><b>(100,510.3 to 113,949.1)</b> | <b>1,087.5</b><br><b>(748.8 to 1,531.8)</b> | <b>0.6</b><br><b>(-0.6 to 1.8)</b>                | <b>-0.8</b><br><b>(-1.8 to 0.2)</b>                 |
| Congenital anomalies                                       | 555.5<br>(507.2 to 611.4)                        | --                                                   | 59.8<br>(43.4 to 78.7)                      | -4.7<br>(-9.8 to 0.4)                             | -1.6<br>(-6.8 to 3.5)                               |
| Neural tube defects                                        | 27.4<br>(24.6 to 30.7)                           | --                                                   | 8.2<br>(5.6 to 11.1)                        | -13.5<br>(-26.2 to 0.5)                           | -11.7<br>(-24.9 to 3.6)                             |
| Congenital heart anomalies                                 | 91.5<br>(82.5 to 101.7)                          | --                                                   | 4.8<br>(2.0 to 8.2)                         | 2.7<br>(-8.0 to 14.0)                             | 4.8<br>(-5.5 to 15.8)                               |
| Orofacial clefts                                           | 18.8<br>(16.4 to 21.5)                           | --                                                   | 0.2<br>(0.1 to 0.3)                         | -18.5<br>(-28.1 to -7.4)                          | -17.6<br>(-27.4 to -6.3)                            |
| Down's syndrome                                            | 36.3<br>(32.1 to 40.9)                           | --                                                   | 3.5<br>(2.3 to 4.8)                         | -10.5<br>(-19.6 to 0.7)                           | -6.8<br>(-16.9 to 4.9)                              |
| Turner syndrome                                            | 31.2<br>(26.7 to 36.1)                           | --                                                   | 0.6<br>(0.3 to 0.9)                         | -7.0<br>(-28.1 to 21.2)                           | -0.6<br>(-23.1 to 28.2)                             |
| Klinefelter syndrome                                       | 28.6<br>(24.2 to 34.0)                           | --                                                   | 0.2<br>(0.1 to 0.4)                         | -3.1<br>(-20.0 to 18.9)                           | 3.4<br>(-14.0 to 26.9)                              |



| Cause                                         | Prevalence in thousands (95% UI)                 | Incidence in thousands (95% UI)                | YLDs in thousands (95% UI)              |                                                   |                                                     |
|-----------------------------------------------|--------------------------------------------------|------------------------------------------------|-----------------------------------------|---------------------------------------------------|-----------------------------------------------------|
|                                               | 2016 counts                                      | 2016 counts                                    | 2016 counts                             | Percentage change in counts between 2006 and 2016 | Percentage change in age-standardised rates between |
| Other chromosomal abnormalities               | 37.2<br>(31.9 to 43.7)                           | --                                             | 4.7<br>(3.2 to 6.4)                     | -3.0<br>(-15.9 to 13.3)                           | 2.0<br>(-11.8 to 18.4)                              |
| Congenital musculoskeletal and limb anomalies | 103.5<br>(94.5 to 113.2)                         | --                                             | 14.1<br>(9.7 to 19.4)                   | 0.4<br>(-8.6 to 10.4)                             | 3.1<br>(-6.1 to 13.2)                               |
| Urogenital congenital anomalies               | 63.1<br>(58.1 to 68.2)                           | --                                             | 1.9<br>(1.1 to 2.9)                     | 3.6<br>(-9.6 to 19.1)                             | 9.8<br>(-5.5 to 28.7)                               |
| Digestive congenital anomalies                | 70.6<br>(65.2 to 76.6)                           | --                                             | 3.1<br>(2.0 to 4.4)                     | -1.3<br>(-13.2 to 12.4)                           | 1.2<br>(-11.0 to 15.0)                              |
| Other congenital anomalies                    | 154.4<br>(98.0 to 229.5)                         | --                                             | 18.7<br>(12.3 to 27.5)                  | -6.1<br>(-15.6 to 4.5)                            | -4.0<br>(-13.4 to 6.0)                              |
| Skin and subcutaneous diseases                | 13,351.8<br>(12,975.2 to 13,694.4)               | 35,727.7<br>(33,583.9 to 38,048.0)             | 288.0<br>(194.0 to 419.8)               | -6.3<br>(-8.3 to -4.2)                            | 1.1<br>(-1.1 to 3.3)                                |
| Dermatitis                                    | 1,522.5<br>(1,441.1 to 1,615.8)                  | 2,166.8<br>(1,974.1 to 2,374.4)                | 55.0<br>(33.1 to 86.6)                  | -1.4<br>(-5.5 to 3.3)                             | 0.6<br>(-3.8 to 5.3)                                |
| Psoriasis                                     | 509.1<br>(484.1 to 534.7)                        | 65.8<br>(62.4 to 69.1)                         | 43.4<br>(31.3 to 57.0)                  | 3.3<br>(-3.9 to 10.8)                             | 4.2<br>(-3.5 to 12.1)                               |
| Cellulitis                                    | 27.9<br>(26.1 to 29.9)                           | 629.5<br>(588.8 to 670.8)                      | 1.5<br>(1.0 to 2.2)                     | 1.4<br>(-16.4 to 22.7)                            | 1.7<br>(-17.1 to 23.3)                              |
| Pyoderma                                      | 228.1<br>(220.0 to 236.6)                        | 6,081.7<br>(5,844.7 to 6,340.8)                | 1.2<br>(0.5 to 2.6)                     | 4.2<br>(-1.7 to 10.1)                             | 0.8<br>(-5.1 to 6.5)                                |
| Scabies                                       | 350.5<br>(310.2 to 397.4)                        | 1,058.7<br>(928.6 to 1,198.5)                  | 9.0<br>(5.0 to 14.2)                    | -10.1<br>(-15.0 to -5.0)                          | -3.8<br>(-8.4 to 0.9)                               |
| Fungal skin diseases                          | 4,451.9<br>(3,978.6 to 4,953.8)                  | 16,800.8<br>(14,699.8 to 19,140.7)             | 24.5<br>(9.7 to 51.4)                   | 3.1<br>(1.3 to 4.8)                               | 0.1<br>(-1.1 to 1.2)                                |
| Viral skin diseases                           | 1,015.6<br>(975.1 to 1,055.5)                    | 1,538.7<br>(1,473.5 to 1,611.9)                | 30.8<br>(19.2 to 45.4)                  | -5.8<br>(-9.0 to -2.4)                            | -0.2<br>(-3.3 to 3.0)                               |
| Acne vulgaris                                 | 2,619.7<br>(2,405.5 to 2,859.0)                  | 1,615.4<br>(1,368.9 to 1,934.7)                | 67.3<br>(45.2 to 97.0)                  | -22.3<br>(-25.9 to -18.4)                         | 1.3<br>(-3.2 to 6.1)                                |
| Alopecia areata                               | 90.5<br>(87.0 to 94.2)                           | 158.7<br>(152.5 to 165.1)                      | 2.9<br>(1.9 to 4.5)                     | -1.2<br>(-11.6 to 10.5)                           | 0.2<br>(-10.5 to 12.0)                              |
| Pruritus                                      | 481.8<br>(423.9 to 549.4)                        | 381.1<br>(337.1 to 432.4)                      | 5.1<br>(2.4 to 9.3)                     | 2.3<br>(-3.0 to 8.7)                              | 0.8<br>(-4.5 to 6.2)                                |
| Urticaria                                     | 396.4<br>(351.5 to 450.3)                        | 703.6<br>(622.1 to 794.2)                      | 23.6<br>(15.1 to 33.3)                  | 0.0<br>(-5.9 to 6.8)                              | 0.0<br>(-5.3 to 5.8)                                |
| Decubitus ulcer                               | 19.8<br>(17.4 to 22.5)                           | 71.7<br>(62.5 to 82.4)                         | 3.1<br>(2.1 to 4.2)                     | 9.0<br>(-7.4 to 30.1)                             | 2.3<br>(-11.0 to 19.1)                              |
| Other skin and subcutaneous diseases          | 3,797.9<br>(3,682.9 to 3,910.1)                  | 4,455.3<br>(4,298.4 to 4,606.5)                | 20.5<br>(10.0 to 37.1)                  | 6.1<br>(3.5 to 8.8)                               | 4.0<br>(1.5 to 6.5)                                 |
| Sense organ diseases                          | 14,539.3<br>(14,264.2 to 14,858.3)               | 4,944.9†<br>(4,672.4 to 5,243.8)               | 547.7<br>(381.2 to 762.2)               | 3.8<br>(2.1 to 5.5)                               | -2.5<br>(-4.0 to -1.0)                              |
| Glaucoma                                      | 44.8<br>(37.2 to 52.9)                           | --                                             | 4.0<br>(2.6 to 5.5)                     | 9.3<br>(-5.6 to 25.3)                             | -0.6<br>(-14.2 to 13.7)                             |
| Cataract                                      | 643.0<br>(542.3 to 760.7)                        | --                                             | 31.9<br>(21.9 to 45.0)                  | 6.3<br>(-0.3 to 13.5)                             | -5.0<br>(-10.4 to 0.5)                              |
| Macular degeneration                          | 22.5<br>(17.9 to 28.3)                           | --                                             | 1.3<br>(0.8 to 1.8)                     | 12.6<br>(-5.2 to 33.2)                            | 1.3<br>(-13.5 to 19.5)                              |
| Refraction and accommodation disorders        | 5,720.3<br>(5,455.9 to 6,004.5)                  | --                                             | 95.0<br>(58.3 to 151.6)                 | -1.1<br>(-4.0 to 2.1)                             | -4.7<br>(-7.4 to -1.8)                              |
| Age-related and other hearing loss            | 11,739.0<br>(11,236.2 to 12,264.0)               | --                                             | 342.8<br>(242.2 to 475.6)               | 4.8<br>(2.2 to 7.1)                               | -2.2<br>(-4.4 to -0.1)                              |
| Other vision loss                             | 244.6<br>(211.3 to 281.5)                        | --                                             | 15.0<br>(10.4 to 20.4)                  | 6.4<br>(-1.7 to 15.4)                             | -1.0<br>(-8.3 to 7.2)                               |
| Other sense organ diseases                    | 1,865.7<br>(1,714.5 to 2,015.9)                  | 4,944.9<br>(4,672.4 to 5,243.8)                | 57.8<br>(36.5 to 86.8)                  | 4.4<br>(0.4 to 8.3)                               | 0.5<br>(-3.4 to 4.3)                                |
| Oral disorders                                | 25,096.9<br>(24,042.0 to 26,028.3)               | 66,590.7†<br>(60,297.7 to 72,815.0)            | 192.0<br>(120.6 to 288.9)               | 4.5<br>(2.2 to 7.2)                               | 0.5<br>(-1.5 to 2.7)                                |
| Caries of deciduous teeth                     | 2,163.5<br>(1,788.7 to 2,570.6)                  | 8,550.6<br>(6,539.2 to 11,037.5)               | 0.8<br>(0.4 to 1.6)                     | 18.7<br>(8.7 to 29.8)                             | -1.3<br>(-9.6 to 7.7)                               |
| Caries of permanent teeth                     | 18,209.9<br>(16,914.4 to 19,612.1)               | 57,086.5<br>(50,788.9 to 62,431.2)             | 17.7<br>(7.8 to 33.9)                   | -6.1<br>(-9.4 to -2.5)                            | -2.6<br>(-6.0 to 0.8)                               |
| Periodontal disease                           | 5,081.4<br>(4,213.8 to 6,060.7)                  | 635.1<br>(505.8 to 778.8)                      | 32.8<br>(13.0 to 69.1)                  | 3.4<br>(-0.0 to 7.1)                              | -0.3<br>(-3.5 to 3.0)                               |
| Edentulism and severe tooth loss              | 4,156.8<br>(3,617.8 to 4,686.7)                  | 318.5<br>(269.0 to 373.0)                      | 113.7<br>(73.9 to 160.5)                | 8.3<br>(4.2 to 12.1)                              | 1.8<br>(-1.8 to 5.2)                                |
| Other oral disorders                          | 930.1<br>(889.7 to 970.6)                        | --                                             | 27.0<br>(16.6 to 40.5)                  | -1.6<br>(-4.8 to 1.6)                             | -0.0<br>(-3.3 to 3.3)                               |
| <b>Injuries</b>                               | <b>20,247.4</b><br><b>(18,926.0 to 21,978.5)</b> | <b>6,536.7†</b><br><b>(6,176.9 to 6,899.5)</b> | <b>697.0</b><br><b>(474.6 to 977.6)</b> | <b>-1.0</b><br><b>(-3.1 to 1.2)</b>               | <b>-2.6</b><br><b>(-4.9 to -0.3)</b>                |
| <b>Transport injuries</b>                     | <b>2,044.2</b><br><b>(1,895.7 to 2,206.4)</b>    | <b>532.3</b><br><b>(478.6 to 590.3)</b>        | <b>97.9</b><br><b>(65.0 to 141.2)</b>   | <b>0.6</b><br><b>(-1.4 to 2.5)</b>                | <b>-1.6</b><br><b>(-3.5 to 0.2)</b>                 |
| Road injuries                                 | 1,896.5<br>(1,756.9 to 2,049.1)                  | 508.6<br>(453.3 to 566.6)                      | 91.3<br>(60.6 to 131.6)                 | 1.1<br>(-0.9 to 2.9)                              | -1.3<br>(-3.1 to 0.5)                               |
| Pedestrian road injuries                      | 442.9<br>(391.6 to 504.4)                        | 87.0<br>(74.1 to 103.0)                        | 20.7<br>(13.7 to 29.9)                  | -2.2<br>(-4.4 to -0.1)                            | -4.7<br>(-6.7 to -2.8)                              |
| Cyclist road injuries                         | 392.7<br>(330.9 to 464.4)                        | 113.6<br>(95.3 to 135.0)                       | 17.7<br>(11.6 to 25.8)                  | 6.5<br>(4.3 to 8.6)                               | 4.4<br>(2.3 to 6.4)                                 |
| Motorcyclist road injuries                    | 201.6<br>(169.9 to 243.6)                        | 33.9<br>(26.8 to 41.7)                         | 9.1<br>(5.9 to 13.4)                    | 7.0<br>(4.8 to 9.3)                               | 4.6<br>(2.5 to 6.8)                                 |
| Motor vehicle road injuries                   | 754.1<br>(625.5 to 873.9)                        | 238.2<br>(205.5 to 272.7)                      | 39.2<br>(26.3 to 56.1)                  | -1.7<br>(-3.6 to 0.0)                             | -4.0<br>(-5.9 to -2.3)                              |
| Other road injuries                           | 105.2<br>(89.2 to 123.5)                         | 35.9<br>(27.7 to 45.7)                         | 4.7<br>(3.0 to 6.9)                     | 9.8<br>(7.5 to 11.9)                              | 7.2<br>(5.0 to 9.3)                                 |
| Other transport injuries                      | 147.7<br>(125.7 to 172.3)                        | 23.7<br>(20.6 to 27.0)                         | 6.6<br>(4.4 to 9.5)                     | -5.5<br>(-8.2 to -2.9)                            | -5.9<br>(-8.6 to -3.2)                              |
| <b>Unintentional injuries</b>                 | <b>17,152.9</b><br><b>(15,846.6 to 18,828.5)</b> | <b>5,663.1</b><br><b>(5,301.7 to 6,020.1)</b>  | <b>559.8</b><br><b>(381.8 to 786.5)</b> | <b>-1.3</b><br><b>(-3.4 to 0.8)</b>               | <b>-3.0</b><br><b>(-5.3 to -0.8)</b>                |
| Falls                                         | 9,205.0<br>(8,152.3 to 10,549.2)                 | 3,289.7<br>(2,975.0 to 3,624.6)                | 351.7<br>(244.0 to 482.8)               | -4.5<br>(-6.3 to -2.7)                            | -6.8<br>(-8.8 to -4.9)                              |
| Drowning                                      | 45.4<br>(39.8 to 51.5)                           | 6.6<br>(5.9 to 7.4)                            | 1.9<br>(1.3 to 2.8)                     | -36.9<br>(-39.5 to -34.4)                         | -38.0<br>(-40.6 to -35.8)                           |
| Fire, heat, and hot substances                | 1,488.2<br>(1,280.9 to 1,762.6)                  | 139.0<br>(122.1 to 153.1)                      | 33.5<br>(21.2 to 50.6)                  | -5.8<br>(-9.5 to -2.6)                            | -6.3<br>(-10.1 to -3.0)                             |
| Poisonings                                    | 42.4<br>(35.6 to 50.9)                           | 41.1<br>(34.8 to 48.6)                         | 3.5<br>(2.3 to 5.2)                     | 1.4<br>(-4.9 to 8.0)                              | 3.2<br>(-3.5 to 10.1)                               |
| Exposure to mechanical forces                 | 2,922.4<br>(2,497.1 to 3,617.5)                  | 837.2<br>(731.4 to 942.3)                      | 64.0<br>(41.8 to 93.6)                  | 12.0<br>(9.0 to 14.7)                             | 10.7<br>(7.8 to 13.4)                               |
| Unintentional firearm injuries                | 41.0<br>(33.9 to 49.5)                           | 7.0<br>(5.1 to 9.4)                            | 1.5<br>(1.0 to 2.3)                     | 8.9<br>(6.1 to 11.5)                              | 7.6<br>(5.0 to 10.1)                                |
| Unintentional suffocation                     | 102.4<br>(81.7 to 128.0)                         | 14.3<br>(10.8 to 18.9)                         | 3.2<br>(2.0 to 4.9)                     | 2.4<br>(0.2 to 4.6)                               | 1.8<br>(-0.5 to 4.0)                                |
| Other exposure to mechanical forces           | 2,779.0<br>(2,353.3 to 3,467.2)                  | 815.9<br>(711.9 to 918.3)                      | 59.3<br>(38.7 to 87.1)                  | 12.6<br>(9.6 to 15.3)                             | 11.4<br>(8.4 to 14.1)                               |



| Cause                                                                               | Prevalence in thousands (95% UI)              | Incidence in thousands (95% UI)          | YLDs in thousands (95% UI)           |                                                   |                                                     |
|-------------------------------------------------------------------------------------|-----------------------------------------------|------------------------------------------|--------------------------------------|---------------------------------------------------|-----------------------------------------------------|
|                                                                                     | 2016 counts                                   | 2016 counts                              | 2016 counts                          | Percentage change in counts between 2006 and 2016 | Percentage change in age-standardised rates between |
| Adverse effects of medical treatment                                                | 13.4<br>(10.7 to 16.3)                        | 174.7<br>(155.2 to 194.4)                | 1.8<br>(1.1 to 2.6)                  | 2.2<br>(-2.3 to 7.1)                              | -2.6<br>(-6.7 to 2.1)                               |
| Animal contact                                                                      | 355.8<br>(313.5 to 410.8)                     | 298.5<br>(252.8 to 352.2)                | 10.1<br>(6.6 to 14.3)                | -11.0<br>(-15.0 to -7.1)                          | -9.8<br>(-13.9 to -5.7)                             |
| Venomous animal contact                                                             | 133.0<br>(111.0 to 159.5)                     | 118.5<br>(93.1 to 149.1)                 | 6.9<br>(4.5 to 9.8)                  | -7.9<br>(-13.8 to -2.0)                           | -5.8<br>(-11.7 to 0.3)                              |
| Non-venomous animal contact                                                         | 222.8<br>(187.4 to 273.1)                     | 180.0<br>(147.5 to 216.8)                | 3.2<br>(2.0 to 5.0)                  | -17.1<br>(-20.6 to -14.1)                         | -18.2<br>(-21.6 to -15.3)                           |
| Foreign body                                                                        | 760.4<br>(651.0 to 869.6)                     | 325.7<br>(295.2 to 364.8)                | 25.0<br>(15.9 to 36.7)               | -3.8<br>(-7.0 to -0.9)                            | -4.5<br>(-7.7 to -1.5)                              |
| Pulmonary aspiration and foreign body in airway                                     | 491.3<br>(398.8 to 603.1)                     | 150.1<br>(136.0 to 166.1)                | 17.7<br>(11.2 to 26.3)               | -7.7<br>(-10.5 to -5.1)                           | -8.5<br>(-11.4 to -5.9)                             |
| Foreign body in eyes                                                                | 24.5<br>(15.5 to 34.5)                        | 109.7<br>(84.6 to 140.9)                 | 1.4<br>(0.8 to 2.3)                  | 5.4<br>(1.8 to 9.0)                               | 3.9<br>(1.3 to 6.8)                                 |
| Foreign body in other body part                                                     | 244.5<br>(201.3 to 304.3)                     | 65.8<br>(55.4 to 78.9)                   | 5.9<br>(3.7 to 8.9)                  | 7.5<br>(2.8 to 11.7)                              | 6.8<br>(2.2 to 11.2)                                |
| Environmental heat and cold exposure                                                | 874.1<br>(768.3 to 998.5)                     | 178.9<br>(153.0 to 206.2)                | 28.8<br>(19.0 to 41.7)               | 8.2<br>(5.2 to 10.9)                              | 5.9<br>(3.0 to 8.5)                                 |
| Other unintentional injuries                                                        | 1,445.9<br>(1,170.4 to 1,746.7)               | 371.8<br>(318.5 to 429.4)                | 39.4<br>(25.8 to 58.2)               | 16.6<br>(14.5 to 18.5)                            | 16.0<br>(13.7 to 18.1)                              |
| <b>Self-harm and interpersonal violence</b>                                         | <b>1,497.9</b><br><b>(1,376.4 to 1,636.0)</b> | <b>330.9†</b><br><b>(290.4 to 376.0)</b> | <b>35.4</b><br><b>(23.7 to 50.5)</b> | <b>-7.0</b><br><b>(-8.8 to -5.3)</b>              | <b>-6.7</b><br><b>(-8.5 to -5.1)</b>                |
| Self-harm                                                                           | 144.0<br>(121.9 to 167.0)                     | 52.5<br>(45.8 to 60.3)                   | 5.5<br>(3.5 to 8.1)                  | -12.8<br>(-15.6 to -10.1)                         | -13.6<br>(-16.3 to -10.9)                           |
| Self-harm by firearm                                                                | 3.0<br>(2.6 to 3.5)                           | 0.7<br>(0.4 to 1.3)                      | 0.1<br>(0.1 to 0.1)                  | -51.8<br>(-54.2 to -49.7)                         | -49.5<br>(-52.0 to -47.3)                           |
| Self-harm by other specified means                                                  | 141.0<br>(119.0 to 164.1)                     | 51.8<br>(45.3 to 59.4)                   | 5.4<br>(3.5 to 8.0)                  | -11.6<br>(-14.4 to -8.7)                          | -12.5<br>(-15.2 to -9.8)                            |
| Interpersonal violence                                                              | 1,353.9<br>(1,237.1 to 1,498.1)               | 278.4†<br>(238.5 to 321.9)               | 29.8<br>(20.3 to 42.5)               | -5.8<br>(-7.6 to -4.2)                            | -5.4<br>(-7.2 to -3.9)                              |
| Assault by firearm                                                                  | 9.2<br>(8.0 to 10.7)                          | 2.0<br>(1.5 to 2.7)                      | 0.4<br>(0.2 to 0.5)                  | 8.0<br>(5.1 to 10.9)                              | 7.0<br>(4.2 to 10.1)                                |
| Assault by sharp object                                                             | 161.5<br>(133.2 to 192.9)                     | 43.8<br>(33.7 to 55.5)                   | 4.0<br>(2.6 to 5.9)                  | -7.3<br>(-10.0 to -4.7)                           | -7.8<br>(-10.5 to -5.0)                             |
| Sexual violence                                                                     | 601.5<br>(530.9 to 685.7)                     | --                                       | 4.8<br>(3.2 to 6.8)                  | -11.2<br>(-15.6 to -7.2)                          | -4.0<br>(-7.8 to -0.2)                              |
| Assault by other means                                                              | 581.7<br>(487.2 to 702.7)                     | 232.7<br>(198.7 to 269.3)                | 20.7<br>(13.7 to 30.0)               | -4.4<br>(-6.3 to -2.6)                            | -5.6<br>(-7.4 to -3.8)                              |
| <b>Forces of nature, conflict and terrorism, and executions and police conflict</b> | <b>153.9</b><br><b>(107.0 to 212.1)</b>       | <b>10.4†</b><br><b>(2.2 to 16.2)</b>     | <b>4.0</b><br><b>(1.0 to 10.8)</b>   | <b>175.7</b><br><b>(28.7 to 270.4)</b>            | <b>191.5</b><br><b>(27.2 to 303.2)</b>              |
| Exposure to forces of nature                                                        | 28.2<br>(12.3 to 50.1)                        | --                                       | 0.8<br>(0.2 to 2.3)                  | 63.9<br>(-58.4 to 333.9)                          | 52.0<br>(-61.8 to 307.8)                            |
| Conflict and terrorism                                                              | 84.3<br>(54.1 to 130.1)                       | --                                       | 2.2<br>(0.5 to 6.1)                  | 13,565.4<br>(11,439.3 to 24,460.0)                | 13,957.6<br>(11,633.9 to 25,348.7)                  |
| Executions and police conflict                                                      | 41.3<br>(10.2 to 67.0)                        | 10.4<br>(2.2 to 16.2)                    | 1.0<br>(0.2 to 2.4)                  | 5.2<br>(-9.6 to 13.8)                             | 2.3<br>(-9.7 to 12.2)                               |
| <b>Impairments</b>                                                                  | --                                            | --                                       | --                                   | --                                                | --                                                  |
| Anaemia                                                                             | 4,769.6<br>(4,321.8 to 5,266.3)               | --                                       | 113.6<br>(76.9 to 161.5)             | -1.8<br>(-10.7 to 6.8)                            | -3.4<br>(-12.1 to 5.5)                              |
| Developmental intellectual disability                                               | 916.2<br>(714.0 to 1,122.1)                   | --                                       | 101.5<br>(73.0 to 135.8)             | -7.7<br>(-12.1 to -3.0)                           | -3.9<br>(-8.8 to 1.1)                               |
| Epilepsy                                                                            | 211.0<br>(128.2 to 304.2)                     | --                                       | 68.1<br>(37.8 to 111.7)              | -9.2<br>(-49.2 to 73.0)                           | -6.5<br>(-46.7 to 74.2)                             |
| Guillain-Barre syndrome                                                             | 0.5<br>(0.4 to 0.7)                           | --                                       | 0.1<br>(0.1 to 0.2)                  | 0.9<br>(-2.7 to 5.0)                              | 0.1<br>(0.0 to 0.2)                                 |
| Hearing loss                                                                        | 12,320.1<br>(11,808.0 to 12,836.9)            | --                                       | 370.9<br>(261.9 to 510.5)            | 3.5<br>(1.3 to 5.4)                               | -2.8<br>(-4.6 to -1.0)                              |
| Heart failure                                                                       | 942.0<br>(815.0 to 1,086.0)                   | --                                       | 87.7<br>(64.3 to 114.6)              | 7.4<br>(0.4 to 15.1)                              | -1.6<br>(-7.9 to 4.9)                               |
| Infertility                                                                         | 567.3<br>(456.4 to 700.9)                     | --                                       | 3.9<br>(1.8 to 7.5)                  | 2.6<br>(-12.0 to 17.8)                            | 5.0<br>(-8.8 to 19.1)                               |
| Pelvic inflammatory disease                                                         | 25.2<br>(21.3 to 30.1)                        | --                                       | 3.3<br>(2.2 to 4.8)                  | -6.8<br>(-19.1 to 6.9)                            | -6.5<br>(-18.5 to 7.9)                              |
| Vision loss                                                                         | 6,784.3<br>(6,453.1 to 7,147.5)               | --                                       | 170.4<br>(118.4 to 246.2)            | 0.4<br>(-3.0 to 3.6)                              | -4.4<br>(-7.7 to -0.9)                              |

We did not calculate incidence for the nine impairments, certain NTDs, and causes with only birth prevalence. Blank cells mean that no estimate is available.

† Incidence for aggregate causes represents the sum of the incidence of the causes below the aggregate.

‡ Incidence estimates for stroke represent first-ever stroke only.

^ Incidence of HIV/AIDS represents new infections of HIV only and does not include new infections of Tuberculosis in HIV positive cases.

SR Table 14: Prevalence, incidence, and YLDs for 2016, percentage change of YLD counts and percentage change of age-standardised YLD rates between 2006 and 2016 by cause and impairments, for all ages, United Arab Emirates.

| Cause                                                                                | Prevalence in thousands (95% UI)       | Incidence in thousands (95% UI)            | YLDs in thousands (95% UI)           |                                                   |                                                     |
|--------------------------------------------------------------------------------------|----------------------------------------|--------------------------------------------|--------------------------------------|---------------------------------------------------|-----------------------------------------------------|
|                                                                                      | 2016 counts                            | 2016 counts                                | 2016 counts                          | Percentage change in counts between 2006 and 2016 | Percentage change in age-standardised rates between |
| <b>All causes</b>                                                                    | <b>9,184.0</b><br>(9,146.2 to 9,224.1) | <b>55,504.7†</b><br>(51,920.6 to 59,716.9) | <b>1,038.5</b><br>(769.7 to 1,354.6) | <b>94.7</b><br>(90.0 to 99.1)                     | <b>-1.0</b><br>(-2.9 to 0.8)                        |
| <b>Communicable, maternal, neonatal, and nutritional disorders</b>                   | <b>5,365.1</b><br>(5,173.1 to 5,624.6) | <b>31,571.4†</b><br>(28,388.8 to 35,286.8) | <b>90.6</b><br>(63.9 to 126.3)       | <b>69.0</b><br>(55.5 to 84.1)                     | <b>-4.4</b><br>(-12.5 to 4.6)                       |
| <b>HIV/AIDS and tuberculosis</b>                                                     | <b>2,342.6</b><br>(2,090.2 to 2,551.5) | <b>1.7†</b><br>(1.3 to 2.5)                | <b>0.5</b><br>(0.2 to 1.3)           | <b>121.7</b><br>(21.2 to 291.8)                   | <b>127.3</b><br>(-23.7 to 623.6)                    |
| Tuberculosis                                                                         | 2,182.5<br>(1,959.3 to 2,424.0)        | 1.4†<br>(1.2 to 1.7)                       | 0.3<br>(0.1 to 0.5)                  | 65.9<br>(-4.9 to 173.0)                           | -13.4<br>(-41.8 to 22.5)                            |
| Drug-susceptible tuberculosis                                                        | 0.9<br>(0.7 to 1.1)                    | 1.4<br>(1.2 to 1.7)                        | 0.3<br>(0.1 to 0.5)                  | 64.9<br>(-6.4 to 176.2)                           | -13.9<br>(-42.6 to 22.7)                            |
| Multidrug-resistant tuberculosis without extensive drug resistance                   | < 0.05<br>(< 0.05 to 0.1)              | < 0.05<br>(< 0.05 to 0.1)                  | < 0.05<br>(< 0.05 to < 0.05)         | 127.4<br>(-67.3 to 1,496.4)                       | 17.6<br>(-82.6 to 697.4)                            |
| Extensively drug-resistant tuberculosis                                              | < 0.05<br>(< 0.05 to < 0.05)           | < 0.05<br>(< 0.05 to < 0.05)               | < 0.05<br>(< 0.05 to < 0.05)         | 416.3<br>(-25.8 to 3,523.1)                       | 167.1<br>(-60.5 to 1,710.0)                         |
| Latent tuberculosis infection                                                        | 2,181.6<br>(1,958.4 to 2,423.0)        | --                                         | --                                   | --                                                | --                                                  |
| HIV/AIDS                                                                             | 1.7<br>(0.2 to 6.7)                    | 0.2 <sup>a</sup><br>(< 0.05 to 1.0)        | 0.3<br>(< 0.05 to 1.0)               | 244.5<br>(59.8 to 677.0)                          | 474.2<br>(-5.4 to 1,994.9)                          |
| Drug-susceptible HIV/AIDS - Tuberculosis                                             | < 0.05<br>(< 0.05 to < 0.05)           | < 0.05<br>(< 0.05 to < 0.05)               | < 0.05<br>(< 0.05 to < 0.05)         | 127.1<br>(85.4 to 189.8)                          | 279.8<br>(50.0 to 615.8)                            |
| Multidrug-resistant HIV/AIDS - Tuberculosis without extensive drug resistance        | < 0.05<br>(< 0.05 to < 0.05)           | < 0.05<br>(< 0.05 to < 0.05)               | < 0.05<br>(< 0.05 to < 0.05)         | 218.0<br>(-53.3 to 2,137.5)                       | 430.2<br>(-25.2 to 3,591.1)                         |
| Extensively drug-resistant HIV/AIDS - Tuberculosis                                   | < 0.05<br>(< 0.05 to < 0.05)           | < 0.05<br>(< 0.05 to < 0.05)               | < 0.05<br>(< 0.05 to < 0.05)         | 622.1<br>(6.0 to 4,984.9)                         | 1,104.0<br>(69.4 to 8,280.7)                        |
| HIV/AIDS resulting in other diseases                                                 | 1.7<br>(0.1 to 6.7)                    | 0.2<br>(< 0.05 to 1.0)                     | 0.2<br>(< 0.05 to 1.0)               | 249.9<br>(52.5 to 798.8)                          | 482.3<br>(-31.8 to 2,173.5)                         |
| <b>Diarrhoea, lower respiratory infections, and other common infectious diseases</b> | <b>487.2</b><br>(447.2 to 524.3)       | <b>28,895.2†</b><br>(25,655.8 to 32,515.8) | <b>23.6</b><br>(16.3 to 32.8)        | <b>78.4</b><br>(71.0 to 86.0)                     | <b>0.8</b><br>(-2.8 to 4.2)                         |
| Diarrhoeal diseases                                                                  | 76.2<br>(70.0 to 82.8)                 | 5,037.4<br>(4,629.8 to 5,493.6)            | 8.7<br>(6.0 to 12.2)                 | 71.0<br>(58.7 to 84.4)                            | -2.0<br>(-8.0 to 3.9)                               |
| Intestinal infectious diseases                                                       | 0.2<br>(0.2 to 0.2)                    | 3.9†<br>(3.4 to 4.5)                       | < 0.05<br>(< 0.05 to < 0.05)         | 26.9<br>(8.9 to 48.8)                             | -22.9<br>(-33.6 to -10.8)                           |
| Typhoid fever                                                                        | 0.2<br>(0.2 to 0.2)                    | 3.1<br>(2.7 to 3.6)                        | < 0.05<br>(< 0.05 to < 0.05)         | 26.6<br>(7.2 to 50.5)                             | -22.8<br>(-34.0 to -9.9)                            |
| Paratyphoid fever                                                                    | < 0.05<br>(< 0.05 to < 0.05)           | 0.8<br>(0.7 to 0.9)                        | < 0.05<br>(< 0.05 to < 0.05)         | 39.3<br>(14.8 to 68.4)                            | -18.6<br>(-31.2 to -3.6)                            |
| Other intestinal infectious diseases                                                 | --                                     | --                                         | < 0.05<br>(< 0.05 to < 0.05)         | -2.7<br>(-22.4 to 22.6)                           | -41.0<br>(-50.3 to -29.9)                           |
| Lower respiratory infections                                                         | 5.8<br>(5.2 to 6.4)                    | 267.4<br>(238.3 to 296.4)                  | 0.4<br>(0.2 to 0.5)                  | 104.3<br>(75.4 to 136.2)                          | 5.9<br>(-4.9 to 17.6)                               |
| Upper respiratory infections                                                         | 303.3<br>(263.7 to 349.1)              | 22,814.8<br>(19,700.6 to 26,404.7)         | 7.6<br>(4.4 to 11.8)                 | 74.4<br>(62.8 to 87.0)                            | 0.2<br>(-5.4 to 6.1)                                |
| Otitis media                                                                         | 87.2<br>(77.4 to 97.2)                 | 580.9<br>(466.1 to 737.8)                  | 2.2<br>(1.4 to 3.4)                  | 84.5<br>(69.8 to 100.8)                           | 6.8<br>(-1.0 to 15.7)                               |
| Meningitis                                                                           | 14.3<br>(12.5 to 16.4)                 | 2.8<br>(2.3 to 3.4)                        | 1.9<br>(1.3 to 2.6)                  | 85.6<br>(71.9 to 100.1)                           | 2.1<br>(-5.0 to 9.1)                                |
| Pneumococcal meningitis                                                              | 4.9<br>(4.2 to 5.7)                    | 0.2<br>(0.2 to 0.3)                        | 0.7<br>(0.5 to 1.0)                  | 76.0<br>(45.6 to 111.1)                           | -4.8<br>(-19.0 to 11.5)                             |
| H influenzae type B meningitis                                                       | 2.5<br>(2.1 to 2.9)                    | 0.3<br>(0.2 to 0.4)                        | 0.4<br>(0.3 to 0.6)                  | 84.7<br>(75.2 to 94.4)                            | 2.7<br>(-2.0 to 7.8)                                |
| Meningococcal infection                                                              | 2.3<br>(1.8 to 3.0)                    | 0.7<br>(0.5 to 0.9)                        | 0.3<br>(0.2 to 0.4)                  | 83.7<br>(73.5 to 93.5)                            | -0.1<br>(-5.2 to 5.1)                               |
| Other meningitis                                                                     | 4.7<br>(3.6 to 6.0)                    | 1.6<br>(1.3 to 1.9)                        | 0.5<br>(0.3 to 0.6)                  | 105.4<br>(92.7 to 121.7)                          | 15.0<br>(7.5 to 24.0)                               |
| Encephalitis                                                                         | 18.2<br>(13.6 to 24.3)                 | 10.2<br>(8.9 to 11.6)                      | 2.4<br>(1.7 to 3.4)                  | 109.2<br>(75.0 to 149.8)                          | 8.9<br>(-4.9 to 24.7)                               |
| Diphtheria                                                                           | < 0.05<br>(< 0.05 to < 0.05)           | < 0.05<br>(< 0.05 to < 0.05)               | < 0.05<br>(< 0.05 to < 0.05)         | 67.0<br>(-17.9 to 240.5)                          | -17.5<br>(-57.0 to 60.2)                            |
| Whooping cough                                                                       | 0.7<br>(0.5 to 0.9)                    | 4.9<br>(3.7 to 6.3)                        | < 0.05<br>(< 0.05 to 0.1)            | 21.9<br>(-3.2 to 54.0)                            | -24.5<br>(-39.7 to -4.7)                            |
| Tetanus                                                                              | < 0.05<br>(< 0.05 to < 0.05)           | 0.1<br>(< 0.05 to 0.1)                     | < 0.05<br>(< 0.05 to < 0.05)         | 82.7<br>(25.1 to 137.4)                           | -28.3<br>(-52.3 to -0.3)                            |
| Measles                                                                              | < 0.05<br>(< 0.05 to 0.1)              | 1.1<br>(0.4 to 2.6)                        | < 0.05<br>(< 0.05 to < 0.05)         | -46.1<br>(-66.1 to -10.8)                         | -68.1<br>(-79.9 to -47.1)                           |
| Varicella and herpes zoster                                                          | 7.8<br>(7.0 to 8.6)                    | 171.8<br>(164.7 to 179.2)                  | 0.3<br>(0.2 to 0.5)                  | 99.6<br>(63.0 to 143.7)                           | -0.2<br>(-11.6 to 13.5)                             |
| <b>Neglected tropical diseases and malaria</b>                                       | <b>88.9</b><br>(74.9 to 105.6)         | <b>0.1†</b><br>(< 0.05 to 0.3)             | <b>1.3</b><br>(0.7 to 2.1)           | <b>67.0</b><br>(20.0 to 128.7)                    | <b>-3.3</b><br>(-31.4 to 31.1)                      |
| Malaria                                                                              | --                                     | --                                         | --                                   | --                                                | --                                                  |
| Chagas disease                                                                       | --                                     | --                                         | --                                   | --                                                | --                                                  |
| Leishmaniasis                                                                        | --                                     | --                                         | --                                   | --                                                | --                                                  |
| Visceral leishmaniasis                                                               | --                                     | --                                         | --                                   | --                                                | --                                                  |
| Cutaneous and mucocutaneous leishmaniasis                                            | --                                     | --                                         | --                                   | --                                                | --                                                  |
| African trypanosomiasis                                                              | --                                     | --                                         | --                                   | --                                                | --                                                  |
| Schistosomiasis                                                                      | --                                     | --                                         | --                                   | --                                                | --                                                  |
| Cysticercosis                                                                        | --                                     | --                                         | --                                   | --                                                | --                                                  |
| Cystic echinococcosis                                                                | 0.3<br>(< 0.05 to 1.5)                 | 0.1<br>(< 0.05 to 0.3)                     | < 0.05<br>(< 0.05 to 0.2)            | 86.7<br>(-84.2 to 2,303.6)                        | -5.0<br>(-89.9 to 704.6)                            |
| Lymphatic filariasis                                                                 | --                                     | --                                         | --                                   | --                                                | --                                                  |
| Onchocerciasis                                                                       | --                                     | --                                         | --                                   | --                                                | --                                                  |
| Trachoma                                                                             | --                                     | --                                         | --                                   | --                                                | --                                                  |
| Dengue                                                                               | --                                     | --                                         | --                                   | --                                                | --                                                  |
| Yellow fever                                                                         | --                                     | --                                         | --                                   | --                                                | --                                                  |
| Rabies                                                                               | < 0.05<br>(< 0.05 to < 0.05)           | < 0.05<br>(< 0.05 to < 0.05)               | < 0.05<br>(< 0.05 to < 0.05)         | 163.1<br>(-9.2 to 524.1)                          | 56.7<br>(-57.6 to 389.2)                            |
| Intestinal nematode infections                                                       | 23.6<br>(19.5 to 28.3)                 | --                                         | < 0.05<br>(< 0.05 to < 0.05)         | 57.8<br>(-2.9 to 163.6)                           | -10.4<br>(-40.9 to 41.2)                            |
| Ascariasis                                                                           | 8.3<br>(6.1 to 10.9)                   | --                                         | --                                   | --                                                | --                                                  |

| Cause                                                                   | Prevalence in thousands (95% UI)              | Incidence in thousands (95% UI)                   | YLDs in thousands (95% UI)                |                                                   |                                                     |
|-------------------------------------------------------------------------|-----------------------------------------------|---------------------------------------------------|-------------------------------------------|---------------------------------------------------|-----------------------------------------------------|
|                                                                         | 2016 counts                                   | 2016 counts                                       | 2016 counts                               | Percentage change in counts between 2006 and 2016 | Percentage change in age-standardised rates between |
| Trichuriasis                                                            | 8.2<br>(6.0 to 11.1)                          | --                                                | --                                        | --                                                | --                                                  |
| Hookworm disease                                                        | 8.1<br>(6.4 to 10.4)                          | --                                                | < 0.05<br>(< 0.05 to < 0.05)              | 57.8<br>(-2.9 to 163.6)                           | -10.4<br>(-40.9 to 41.2)                            |
| Food-borne trematodiasis                                                | --                                            | --                                                | --                                        | --                                                | --                                                  |
| Leprosy                                                                 | < 0.05<br>(< 0.05 to < 0.05)                  | < 0.05<br>(< 0.05 to < 0.05)                      | < 0.05<br>(< 0.05 to < 0.05)              | 40.0<br>(14.7 to 98.7)                            | -31.7<br>(-42.1 to -3.4)                            |
| Ebola virus disease                                                     | --                                            | --                                                | --                                        | --                                                | --                                                  |
| Zika virus disease                                                      | --                                            | --                                                | --                                        | --                                                | --                                                  |
| Guinea worm disease                                                     | --                                            | --                                                | --                                        | --                                                | --                                                  |
| Other neglected tropical diseases                                       | 59.8<br>(46.1 to 74.1)                        | --                                                | 1.2<br>(0.7 to 2.0)                       | 66.8<br>(20.4 to 126.8)                           | -3.1<br>(-32.0 to 32.2)                             |
| <b>Maternal disorders</b>                                               | <b>10.1</b><br><b>(7.6 to 13.5)</b>           | <b>99.7†</b><br><b>(84.8 to 117.2)</b>            | <b>0.6</b><br><b>(0.4 to 0.9)</b>         | <b>79.5</b><br><b>(25.2 to 152.9)</b>             | <b>25.4</b><br><b>(-11.4 to 75.5)</b>               |
| Maternal haemorrhage                                                    | 1.5<br>(1.0 to 2.2)                           | 8.5<br>(6.0 to 11.7)                              | 0.1<br>(< 0.05 to 0.1)                    | 21.3<br>(-22.9 to 88.4)                           | -11.9<br>(-45.5 to 38.2)                            |
| Maternal sepsis and other pregnancy related infections                  | 1.9<br>(1.1 to 3.1)                           | 19.7<br>(13.7 to 27.2)                            | 0.1<br>(< 0.05 to 0.2)                    | 34.8<br>(-36.9 to 211.1)                          | -5.8<br>(-56.2 to 116.9)                            |
| Maternal hypertensive disorders                                         | 6.5<br>(4.1 to 9.4)                           | 26.9<br>(20.2 to 34.5)                            | 0.3<br>(0.2 to 0.5)                       | 127.2<br>(34.2 to 278.9)                          | 58.2<br>(-5.3 to 165.5)                             |
| Maternal obstructed labour and uterine rupture                          | 0.1<br>(0.1 to 0.2)                           | 8.8<br>(6.0 to 12.3)                              | < 0.05<br>(< 0.05 to 0.1)                 | 38.5<br>(-53.1 to 312.5)                          | -3.5<br>(-65.6 to 166.8)                            |
| Maternal abortion, miscarriage, and ectopic pregnancy                   | 0.3<br>(0.2 to 0.5)                           | 35.8<br>(26.1 to 49.6)                            | < 0.05<br>(< 0.05 to 0.1)                 | 90.3<br>(-12.2 to 327.8)                          | 29.2<br>(-38.0 to 181.1)                            |
| Other maternal disorders                                                | --                                            | --                                                | 0.1<br>(0.1 to 0.1)                       | 72.0<br>(20.2 to 142.3)                           | 20.7<br>(-14.8 to 69.4)                             |
| <b>Neonatal disorders</b>                                               | <b>87.2</b><br><b>(73.0 to 107.1)</b>         | --                                                | <b>16.0</b><br><b>(10.5 to 25.4)</b>      | <b>90.1</b><br><b>(54.7 to 148.9)</b>             | <b>9.1</b><br><b>(-10.6 to 42.0)</b>                |
| Neonatal preterm birth complications                                    | 78.7<br>(61.0 to 105.2)                       | --                                                | 10.8<br>(6.6 to 17.8)                     | 101.2<br>(49.7 to 184.1)                          | 15.4<br>(-13.2 to 62.4)                             |
| Neonatal encephalopathy due to birth asphyxia and trauma                | 9.4<br>(5.7 to 14.4)                          | --                                                | 1.7<br>(0.8 to 3.1)                       | 71.8<br>(14.6 to 127.7)                           | -2.3<br>(-33.4 to 29.4)                             |
| Neonatal sepsis and other neonatal infections                           | 6.6<br>(2.3 to 18.9)                          | --                                                | 2.8<br>(0.9 to 9.1)                       | 67.1<br>(35.5 to 99.2)                            | -2.1<br>(-21.8 to 17.4)                             |
| Hemolytic disease and other neonatal jaundice                           | 0.9<br>(0.8 to 1.1)                           | --                                                | 0.3<br>(0.2 to 0.4)                       | 76.8<br>(59.4 to 92.4)                            | -0.6<br>(-10.0 to 8.3)                              |
| Other neonatal disorders                                                | --                                            | --                                                | 0.5<br>(0.3 to 0.8)                       | 86.6<br>(46.1 to 152.8)                           | 7.6<br>(-16.0 to 45.6)                              |
| <b>Nutritional deficiencies</b>                                         | <b>1,925.5</b><br><b>(1,690.5 to 2,174.5)</b> | <b>344.2†</b><br><b>(242.8 to 478.9)</b>          | <b>35.3</b><br><b>(22.6 to 52.6)</b>      | <b>50.8</b><br><b>(28.1 to 73.7)</b>              | <b>-14.5</b><br><b>(-27.5 to -1.4)</b>              |
| Protein-energy malnutrition                                             | 64.5<br>(47.5 to 85.3)                        | 52.4<br>(39.5 to 67.9)                            | 2.6<br>(1.5 to 4.0)                       | 52.0<br>(9.6 to 108.2)                            | -11.3<br>(-36.8 to 21.8)                            |
| Iodine deficiency                                                       | 522.8<br>(463.2 to 582.1)                     | 6.7<br>(6.0 to 7.5)                               | 13.4<br>(8.9 to 19.0)                     | 72.3<br>(58.3 to 86.8)                            | -5.4<br>(-12.6 to 2.0)                              |
| Vitamin A deficiency                                                    | 326.3<br>(217.2 to 461.9)                     | 285.1<br>(189.2 to 418.5)                         | --                                        | --                                                | --                                                  |
| Iron-deficiency anaemia                                                 | 1,138.1<br>(892.7 to 1,406.2)                 | --                                                | 19.2<br>(10.9 to 31.2)                    | 38.6<br>(6.0 to 77.6)                             | -19.9<br>(-39.8 to 2.1)                             |
| Other nutritional deficiencies                                          | --                                            | --                                                | 0.1<br>(0.1 to 0.1)                       | 53.5<br>(8.3 to 114.0)                            | -11.6<br>(-37.9 to 23.6)                            |
| <b>Other communicable, maternal, neonatal, and nutritional diseases</b> | <b>2,249.3</b><br><b>(2,097.8 to 2,392.3)</b> | <b>2,230.5</b><br><b>(1,798.1 to 2,695.6)</b>     | <b>13.3</b><br><b>(8.0 to 21.4)</b>       | <b>84.0</b><br><b>(66.4 to 101.2)</b>             | <b>0.3</b><br><b>(-7.5 to 8.3)</b>                  |
| Sexually transmitted diseases excluding HIV                             | 1,742.4<br>(1,604.9 to 1,871.4)               | 2,181.7<br>(1,748.6 to 2,643.8)                   | 12.1<br>(7.1 to 19.9)                     | 85.0<br>(65.8 to 104.2)                           | 0.2<br>(-8.4 to 7.9)                                |
| Syphilis                                                                | 48.7<br>(35.6 to 65.0)                        | 33.8<br>(22.7 to 47.0)                            | 0.1<br>(0.1 to 0.2)                       | 139.4<br>(106.0 to 176.2)                         | 6.2<br>(-6.1 to 19.5)                               |
| Chlamydial infection                                                    | 114.6<br>(88.3 to 144.9)                      | 79.9<br>(62.2 to 101.1)                           | 0.9<br>(0.5 to 1.5)                       | 56.5<br>(28.2 to 92.9)                            | -1.5<br>(-17.3 to 18.8)                             |
| Gonococcal infection                                                    | 502.7<br>(398.8 to 633.8)                     | 1,823.3<br>(1,391.9 to 2,290.2)                   | 7.2<br>(4.1 to 11.9)                      | 87.7<br>(65.8 to 110.8)                           | 0.2<br>(-10.3 to 9.8)                               |
| Trichomoniasis                                                          | 184.5<br>(142.9 to 232.0)                     | 153.9<br>(118.4 to 195.4)                         | 0.1<br>(< 0.05 to 0.2)                    | 89.4<br>(71.2 to 108.7)                           | 1.1<br>(-6.8 to 9.1)                                |
| Genital herpes                                                          | 1,003.4<br>(853.1 to 1,172.5)                 | 61.2<br>(51.1 to 74.9)                            | 0.3<br>(0.1 to 0.6)                       | 96.5<br>(76.9 to 115.2)                           | -1.1<br>(-8.3 to 7.0)                               |
| Other sexually transmitted diseases                                     | 37.0<br>(29.8 to 42.9)                        | 29.6<br>(22.3 to 38.8)                            | 3.5<br>(2.1 to 5.8)                       | 85.7<br>(66.7 to 104.7)                           | 0.3<br>(-8.6 to 8.3)                                |
| Hepatitis                                                               | 586.9<br>(488.9 to 716.5)                     | 48.8<br>(37.9 to 61.7)                            | 0.1<br>(< 0.05 to 0.1)                    | 120.9<br>(64.3 to 191.5)                          | 6.4<br>(-18.0 to 37.4)                              |
| Acute hepatitis A                                                       | 0.5<br>(0.2 to 0.9)                           | 6.9<br>(2.6 to 11.5)                              | < 0.05<br>(< 0.05 to < 0.05)              | 108.7<br>(-28.6 to 514.2)                         | 11.7<br>(-53.3 to 174.2)                            |
| Hepatitis B                                                             | 472.5<br>(379.3 to 603.0)                     | 37.6<br>(27.9 to 49.5)                            | < 0.05<br>(< 0.05 to 0.1)                 | 125.5<br>(64.8 to 206.7)                          | 4.9<br>(-23.5 to 39.1)                              |
| Hepatitis C                                                             | 113.8<br>(100.9 to 127.2)                     | 3.0<br>(2.6 to 3.4)                               | < 0.05<br>(< 0.05 to < 0.05)              | 93.2<br>(88.0 to 99.4)                            | 5.4<br>(4.5 to 6.5)                                 |
| Acute hepatitis E                                                       | 0.1<br>(0.1 to 0.1)                           | 1.3<br>(0.9 to 2.0)                               | < 0.05<br>(< 0.05 to < 0.05)              | 122.6<br>(82.4 to 166.3)                          | 11.5<br>(0.5 to 22.8)                               |
| Other infectious diseases                                               | 49.6<br>(38.5 to 61.8)                        | < 0.05<br>(< 0.05 to < 0.05)                      | 1.1<br>(0.7 to 1.9)                       | 72.2<br>(33.0 to 119.5)                           | 0.9<br>(-23.0 to 29.1)                              |
| <b>Non-communicable diseases</b>                                        | <b>8,728.2</b><br><b>(8,665.5 to 8,781.8)</b> | <b>23,026.9†</b><br><b>(21,180.7 to 24,674.7)</b> | <b>870.8</b><br><b>(646.7 to 1,132.8)</b> | <b>97.2</b><br><b>(92.1 to 102.1)</b>             | <b>-0.8</b><br><b>(-2.9 to 1.2)</b>                 |
| <b>Neoplasms</b>                                                        | <b>11.6</b><br><b>(10.9 to 12.5)</b>          | <b>6.1</b><br><b>(5.3 to 7.1)</b>                 | <b>2.0</b><br><b>(1.4 to 2.7)</b>         | <b>193.9</b><br><b>(170.6 to 216.6)</b>           | <b>15.9</b><br><b>(7.6 to 24.2)</b>                 |
| Lip and oral cavity cancer                                              | 0.4<br>(0.3 to 0.5)                           | 0.1<br>(0.1 to 0.1)                               | < 0.05<br>(< 0.05 to 0.1)                 | 161.1<br>(122.7 to 203.5)                         | 5.5<br>(-9.6 to 22.5)                               |
| Nasopharynx cancer                                                      | 0.2<br>(0.1 to 0.3)                           | 0.1<br>(< 0.05 to 0.1)                            | < 0.05<br>(< 0.05 to < 0.05)              | 129.5<br>(83.1 to 185.7)                          | -0.6<br>(-17.3 to 18.1)                             |
| Other pharynx cancer                                                    | 0.1<br>(0.1 to 0.2)                           | < 0.05<br>(< 0.05 to 0.1)                         | < 0.05<br>(< 0.05 to < 0.05)              | 193.9<br>(153.3 to 241.9)                         | 10.1<br>(-4.5 to 25.7)                              |
| Oesophageal cancer                                                      | 0.1<br>(0.1 to 0.1)                           | 0.1<br>(0.1 to 0.1)                               | < 0.05<br>(< 0.05 to < 0.05)              | 174.5<br>(142.9 to 209.1)                         | 1.5<br>(-10.2 to 15.3)                              |
| Stomach cancer                                                          | 0.3<br>(0.3 to 0.3)                           | 0.2<br>(0.2 to 0.2)                               | < 0.05<br>(< 0.05 to 0.1)                 | 188.8<br>(155.2 to 228.8)                         | 7.1<br>(-11.6 to 30.7)                              |
| Colon and rectum cancer                                                 | 1.9<br>(1.6 to 2.2)                           | 0.6<br>(0.5 to 0.6)                               | 0.2<br>(0.1 to 0.3)                       | 226.8<br>(170.3 to 293.0)                         | 23.4<br>(0.1 to 48.6)                               |
| Liver cancer                                                            | 0.1<br>(0.1 to 0.1)                           | 0.2<br>(0.2 to 0.3)                               | < 0.05<br>(< 0.05 to 0.1)                 | 179.3<br>(135.1 to 234.1)                         | 4.7<br>(-9.8 to 23.2)                               |
| Liver cancer due to hepatitis B                                         | 0.1<br>(0.1 to 0.1)                           | 0.1<br>(0.1 to 0.1)                               | < 0.05<br>(< 0.05 to < 0.05)              | 173.9<br>(124.4 to 235.8)                         | 4.3<br>(-12.2 to 24.8)                              |



| Cause                                              | Prevalence in thousands (95% UI)        | Incidence in thousands (95% UI)          | YLDs in thousands (95% UI)           |                                                   |                                                     |
|----------------------------------------------------|-----------------------------------------|------------------------------------------|--------------------------------------|---------------------------------------------------|-----------------------------------------------------|
|                                                    | 2016 counts                             | 2016 counts                              | 2016 counts                          | Percentage change in counts between 2006 and 2016 | Percentage change in age-standardised rates between |
| Liver cancer due to hepatitis C                    | < 0.05<br>(< 0.05 to 0.1)               | 0.1<br>(< 0.05 to 0.1)                   | < 0.05<br>(< 0.05 to < 0.05)         | 184.6<br>(136.4 to 242.5)                         | 2.6<br>(-12.8 to 20.2)                              |
| Liver cancer due to alcohol use                    | < 0.05<br>(< 0.05 to < 0.05)            | < 0.05<br>(< 0.05 to < 0.05)             | < 0.05<br>(< 0.05 to < 0.05)         | 200.8<br>(146.1 to 275.8)                         | 7.5<br>(-12.0 to 31.6)                              |
| Liver cancer due to other causes                   | < 0.05<br>(< 0.05 to 0.1)               | 0.1<br>(< 0.05 to 0.1)                   | < 0.05<br>(< 0.05 to < 0.05)         | 175.0<br>(125.5 to 240.5)                         | 7.0<br>(-11.1 to 30.5)                              |
| Gallbladder and biliary tract cancer               | < 0.05<br>(< 0.05 to < 0.05)            | < 0.05<br>(< 0.05 to 0.1)                | < 0.05<br>(< 0.05 to < 0.05)         | 152.7<br>(121.2 to 189.9)                         | -9.0<br>(-19.8 to 4.6)                              |
| Pancreatic cancer                                  | 0.1<br>(0.1 to 0.1)                     | 0.1<br>(0.1 to 0.2)                      | < 0.05<br>(< 0.05 to < 0.05)         | 180.9<br>(155.8 to 210.0)                         | 2.5<br>(-9.8 to 17.2)                               |
| Larynx cancer                                      | 0.3<br>(0.2 to 0.4)                     | 0.1<br>(0.1 to 0.1)                      | < 0.05<br>(< 0.05 to 0.1)            | 229.4<br>(179.3 to 287.3)                         | 17.5<br>(-3.2 to 38.8)                              |
| Tracheal, bronchus, and lung cancer                | 0.4<br>(0.3 to 0.4)                     | 0.3<br>(0.3 to 0.4)                      | 0.1<br>(0.1 to 0.1)                  | 190.8<br>(128.8 to 273.8)                         | 20.3<br>(-8.9 to 57.5)                              |
| Malignant skin melanoma                            | 0.3<br>(0.2 to 0.5)                     | 0.1<br>(< 0.05 to 0.1)                   | < 0.05<br>(< 0.05 to < 0.05)         | 191.5<br>(139.2 to 265.2)                         | 24.2<br>(2.6 to 56.7)                               |
| Non-melanoma skin cancer                           | 0.1<br>(0.1 to 0.1)                     | 0.4<br>(0.2 to 0.6)                      | < 0.05<br>(< 0.05 to < 0.05)         | 155.7<br>(95.7 to 231.8)                          | -13.0<br>(-44.2 to 27.1)                            |
| Non-melanoma skin cancer (squamous-cell carcinoma) | 0.1<br>(< 0.05 to 0.1)                  | 0.1<br>(< 0.05 to 0.1)                   | < 0.05<br>(< 0.05 to < 0.05)         | 156.0<br>(91.2 to 245.4)                          | -14.0<br>(-45.4 to 28.7)                            |
| Non-melanoma skin cancer (basal-cell carcinoma)    | < 0.05<br>(< 0.05 to 0.1)               | 0.3<br>(0.1 to 0.5)                      | < 0.05<br>(< 0.05 to < 0.05)         | 153.3<br>(98.8 to 212.0)                          | 3.6<br>(-10.8 to 19.0)                              |
| Breast cancer                                      | 4.8<br>(3.1 to 5.9)                     | 1.0<br>(0.7 to 1.2)                      | 0.4<br>(0.2 to 0.5)                  | 194.9<br>(132.8 to 269.5)                         | 1.5<br>(-14.5 to 22.5)                              |
| Cervical cancer                                    | 0.5<br>(0.4 to 0.7)                     | 0.1<br>(0.1 to 0.2)                      | 0.1<br>(< 0.05 to 0.1)               | 134.8<br>(79.8 to 203.4)                          | -19.4<br>(-36.6 to -0.6)                            |
| Uterine cancer                                     | 0.5<br>(0.3 to 0.6)                     | 0.1<br>(0.1 to 0.1)                      | < 0.05<br>(< 0.05 to 0.1)            | 230.0<br>(148.3 to 337.9)                         | 5.3<br>(-16.4 to 31.4)                              |
| Ovarian cancer                                     | 0.2<br>(0.2 to 0.4)                     | 0.1<br>(0.1 to 0.1)                      | < 0.05<br>(< 0.05 to 0.1)            | 131.6<br>(90.6 to 173.4)                          | -15.5<br>(-36.2 to 9.8)                             |
| Prostate cancer                                    | 1.6<br>(1.3 to 2.1)                     | 0.4<br>(0.3 to 0.5)                      | 0.1<br>(0.1 to 0.2)                  | 318.8<br>(253.6 to 400.8)                         | 44.1<br>(21.4 to 74.2)                              |
| Testicular cancer                                  | 0.6<br>(0.4 to 0.7)                     | 0.1<br>(0.1 to 0.1)                      | < 0.05<br>(< 0.05 to 0.1)            | 214.1<br>(104.2 to 385.0)                         | 73.5<br>(22.3 to 151.2)                             |
| Kidney cancer                                      | 0.7<br>(0.5 to 1.2)                     | 0.2<br>(0.1 to 0.3)                      | 0.1<br>(< 0.05 to 0.1)               | 183.4<br>(120.2 to 257.7)                         | 14.7<br>(-6.8 to 38.6)                              |
| Bladder cancer                                     | 1.0<br>(0.8 to 1.4)                     | 0.2<br>(0.2 to 0.3)                      | 0.1<br>(0.1 to 0.1)                  | 227.6<br>(172.5 to 288.8)                         | 21.0<br>(0.1 to 46.5)                               |
| Brain and nervous system cancer                    | 0.6<br>(0.4 to 0.9)                     | 0.3<br>(0.2 to 0.5)                      | 0.1<br>(0.1 to 0.1)                  | 162.0<br>(108.1 to 242.1)                         | 18.3<br>(-3.3 to 51.5)                              |
| Thyroid cancer                                     | 1.3<br>(1.0 to 1.8)                     | 0.2<br>(0.2 to 0.3)                      | 0.1<br>(< 0.05 to 0.1)               | 229.8<br>(156.9 to 317.7)                         | 30.2<br>(8.6 to 55.6)                               |
| Mesothelioma                                       | < 0.05<br>(< 0.05 to < 0.05)            | < 0.05<br>(< 0.05 to < 0.05)             | < 0.05<br>(< 0.05 to < 0.05)         | 193.8<br>(146.4 to 244.7)                         | 17.2<br>(0.4 to 37.9)                               |
| Hodgkin lymphoma                                   | 0.3<br>(0.2 to 0.5)                     | 0.1<br>(0.1 to 0.1)                      | < 0.05<br>(< 0.05 to 0.1)            | 180.2<br>(128.8 to 236.7)                         | 34.2<br>(15.5 to 53.3)                              |
| Non-Hodgkin's lymphoma                             | 1.0<br>(0.8 to 1.6)                     | 0.3<br>(0.2 to 0.5)                      | 0.1<br>(0.1 to 0.2)                  | 183.4<br>(129.7 to 250.4)                         | 18.9<br>(1.2 to 41.2)                               |
| Multiple myeloma                                   | 0.2<br>(0.1 to 0.2)                     | 0.1<br>(0.1 to 0.1)                      | < 0.05<br>(< 0.05 to 0.1)            | 245.6<br>(186.3 to 308.8)                         | 21.8<br>(2.0 to 43.4)                               |
| Leukaemia                                          | 0.9<br>(0.8 to 1.1)                     | 0.2<br>(0.2 to 0.3)                      | 0.1<br>(0.1 to 0.2)                  | 139.7<br>(109.6 to 179.3)                         | 4.9<br>(-11.5 to 24.4)                              |
| Acute lymphoid leukaemia                           | 0.1<br>(0.1 to 0.1)                     | < 0.05<br>(< 0.05 to < 0.05)             | < 0.05<br>(< 0.05 to < 0.05)         | 123.4<br>(77.1 to 186.6)                          | 15.6<br>(-6.1 to 44.5)                              |
| Chronic lymphoid leukaemia                         | 0.1<br>(0.1 to 0.2)                     | < 0.05<br>(< 0.05 to < 0.05)             | < 0.05<br>(< 0.05 to < 0.05)         | 179.6<br>(124.3 to 241.1)                         | 5.4<br>(-16.7 to 33.1)                              |
| Acute myeloid leukaemia                            | 0.1<br>(0.1 to 0.1)                     | 0.1<br>(< 0.05 to 0.1)                   | < 0.05<br>(< 0.05 to < 0.05)         | 132.3<br>(90.6 to 174.2)                          | 6.9<br>(-10.6 to 28.1)                              |
| Chronic myeloid leukaemia                          | 0.1<br>(0.1 to 0.1)                     | < 0.05<br>(< 0.05 to < 0.05)             | < 0.05<br>(< 0.05 to < 0.05)         | 144.3<br>(95.9 to 206.5)                          | -2.3<br>(-20.8 to 18.5)                             |
| Other leukaemia                                    | 0.5<br>(0.4 to 0.6)                     | 0.1<br>(0.1 to 0.1)                      | 0.1<br>(< 0.05 to 0.1)               | 136.4<br>(98.8 to 188.2)                          | 4.3<br>(-16.4 to 29.0)                              |
| Other neoplasms                                    | 0.9<br>(0.7 to 1.2)                     | 0.3<br>(0.2 to 0.4)                      | 0.1<br>(0.1 to 0.1)                  | 152.4<br>(111.8 to 215.6)                         | 16.2<br>(-0.1 to 41.2)                              |
| <b>Cardiovascular diseases</b>                     | <b>348.8</b><br><b>(332.6 to 365.7)</b> | <b>44.1†</b><br><b>(41.1 to 47.6)</b>    | <b>21.1</b><br><b>(15.0 to 27.7)</b> | <b>129.3</b><br><b>(116.6 to 143.5)</b>           | <b>-6.3</b><br><b>(-10.1 to -2.4)</b>               |
| Rheumatic heart disease                            | 0.8<br>(0.7 to 1.0)                     | 0.2<br>(0.2 to 0.2)                      | 0.1<br>(< 0.05 to 0.1)               | 114.3<br>(84.5 to 151.2)                          | -10.4<br>(-27.8 to 12.4)                            |
| Ischaemic heart disease                            | 163.1<br>(153.8 to 173.0)               | 22.9<br>(20.4 to 25.7)                   | 6.8<br>(4.6 to 9.5)                  | 153.9<br>(136.3 to 174.9)                         | 2.6<br>(-2.2 to 7.4)                                |
| Cerebrovascular disease                            | 58.9<br>(54.3 to 64.0)                  | 7.7‡<br>(6.8 to 8.5)                     | 8.1<br>(5.8 to 10.4)                 | 123.4<br>(102.0 to 147.9)                         | -13.8<br>(-20.1 to -7.5)                            |
| Ischaemic stroke                                   | 50.8<br>(45.2 to 56.9)                  | 5.5‡<br>(4.8 to 6.4)                     | 6.7<br>(4.8 to 8.7)                  | 129.1<br>(103.6 to 157.7)                         | -13.5<br>(-20.6 to -6.0)                            |
| Hemorrhagic stroke                                 | 10.8<br>(9.7 to 12.1)                   | 2.1‡<br>(1.9 to 2.4)                     | 1.4<br>(1.0 to 1.9)                  | 100.5<br>(72.7 to 131.5)                          | -15.7<br>(-24.4 to -6.6)                            |
| Hypertensive heart disease                         | 8.0<br>(6.7 to 9.4)                     | --                                       | 0.7<br>(0.4 to 0.9)                  | 149.9<br>(110.3 to 197.0)                         | -9.0<br>(-16.6 to -0.2)                             |
| Cardiomyopathy and myocarditis                     | 6.9<br>(6.1 to 7.9)                     | 3.1†<br>(2.6 to 3.8)                     | 0.7<br>(0.5 to 1.1)                  | 90.3<br>(59.5 to 128.7)                           | -0.2<br>(-10.5 to 11.7)                             |
| Myocarditis                                        | 2.4<br>(2.1 to 2.7)                     | 3.1<br>(2.6 to 3.8)                      | 0.2<br>(0.1 to 0.3)                  | 78.0<br>(56.4 to 103.4)                           | 0.5<br>(-9.2 to 10.7)                               |
| Alcoholic cardiomyopathy                           | 0.9<br>(0.7 to 1.0)                     | --                                       | 0.1<br>(< 0.05 to 0.1)               | 145.1<br>(105.5 to 195.8)                         | -2.8<br>(-21.2 to 21.6)                             |
| Other cardiomyopathy                               | 5.7<br>(4.8 to 6.7)                     | --                                       | 0.5<br>(0.3 to 0.7)                  | 88.6<br>(47.6 to 143.7)                           | -0.0<br>(-13.6 to 16.0)                             |
| Atrial fibrillation and flutter                    | 15.8<br>(13.7 to 18.1)                  | 1.5<br>(1.2 to 1.7)                      | 1.3<br>(0.8 to 1.8)                  | 161.7<br>(119.2 to 216.7)                         | -0.1<br>(-7.2 to 7.6)                               |
| Peripheral vascular disease                        | 63.0<br>(52.8 to 75.5)                  | 7.5<br>(6.3 to 9.1)                      | 0.1<br>(0.1 to 0.3)                  | 177.3<br>(150.2 to 208.9)                         | -5.6<br>(-12.4 to 1.8)                              |
| Endocarditis                                       | 0.5<br>(0.5 to 0.6)                     | 1.2<br>(1.1 to 1.4)                      | < 0.05<br>(< 0.05 to 0.1)            | 91.0<br>(73.8 to 109.2)                           | -6.7<br>(-19.2 to 8.1)                              |
| Other cardiovascular and circulatory diseases      | 60.8<br>(50.6 to 72.0)                  | --                                       | 3.2<br>(2.1 to 4.6)                  | 97.5<br>(70.9 to 128.1)                           | -0.3<br>(-9.0 to 9.7)                               |
| <b>Chronic respiratory diseases</b>                | <b>775.4</b><br><b>(738.3 to 808.9)</b> | <b>129.3†</b><br><b>(121.3 to 137.4)</b> | <b>32.8</b><br><b>(24.5 to 43.1)</b> | <b>101.0</b><br><b>(89.3 to 114.3)</b>            | <b>-2.2</b><br><b>(-6.8 to 2.8)</b>                 |
| Chronic obstructive pulmonary disease              | 300.1<br>(285.1 to 315.3)               | 21.4<br>(20.2 to 22.7)                   | 11.9<br>(9.6 to 14.4)                | 116.0<br>(91.5 to 142.9)                          | -5.7<br>(-13.8 to 3.4)                              |
| Pneumoconiosis                                     | 0.6<br>(0.6 to 0.7)                     | < 0.05<br>(< 0.05 to < 0.05)             | 0.1<br>(0.1 to 0.1)                  | 139.3<br>(125.3 to 154.7)                         | 3.0<br>(-2.9 to 9.2)                                |
| Silicosis                                          | 0.2<br>(0.2 to 0.2)                     | < 0.05<br>(< 0.05 to < 0.05)             | < 0.05<br>(< 0.05 to < 0.05)         | 120.7<br>(106.1 to 135.2)                         | 3.5<br>(-1.6 to 8.8)                                |

| Cause                                                          | Prevalence in thousands (95% UI)        | Incidence in thousands (95% UI)         | YLDs in thousands (95% UI)        |                                                   |                                                     |
|----------------------------------------------------------------|-----------------------------------------|-----------------------------------------|-----------------------------------|---------------------------------------------------|-----------------------------------------------------|
|                                                                | 2016 counts                             | 2016 counts                             | 2016 counts                       | Percentage change in counts between 2006 and 2016 | Percentage change in age-standardised rates between |
| Asbestosis                                                     | 0.2<br>(0.1 to 0.2)                     | < 0.05<br>(< 0.05 to < 0.05)            | < 0.05<br>(< 0.05 to < 0.05)      | 146.6<br>(127.7 to 166.5)                         | 7.2<br>(1.9 to 13.2)                                |
| Coal workers pneumoconiosis                                    | --                                      | --                                      | --                                | --                                                | --                                                  |
| Other pneumoconiosis                                           | 0.3<br>(0.2 to 0.3)                     | < 0.05<br>(< 0.05 to < 0.05)            | < 0.05<br>(< 0.05 to 0.1)         | 150.3<br>(122.1 to 187.6)                         | 0.2<br>(-10.0 to 11.5)                              |
| Asthma                                                         | 502.2<br>(464.4 to 541.0)               | 107.7<br>(99.5 to 115.7)                | 19.7<br>(12.7 to 28.1)            | 91.6<br>(80.0 to 104.0)                           | -0.1<br>(-4.8 to 4.5)                               |
| Interstitial lung disease and pulmonary sarcoidosis            | 2.2<br>(1.9 to 2.5)                     | 0.2<br>(0.2 to 0.2)                     | 0.2<br>(0.2 to 0.4)               | 122.3<br>(109.9 to 135.9)                         | -7.1<br>(-16.0 to 2.4)                              |
| Other chronic respiratory diseases                             | --                                      | --                                      | 0.9<br>(0.7 to 1.1)               | 128.3<br>(98.4 to 161.4)                          | 23.7<br>(6.5 to 43.8)                               |
| <b>Cirrhosis and other chronic liver diseases</b>              | <b>41.4<br/>(38.8 to 44.5)</b>          | <b>1.2<br/>(1.2 to 1.3)</b>             | <b>1.7<br/>(1.1 to 2.4)</b>       | <b>109.9<br/>(79.8 to 146.9)</b>                  | <b>9.9<br/>(-1.2 to 22.0)</b>                       |
| Cirrhosis and other chronic liver diseases due to hepatitis B  | 13.8<br>(10.8 to 16.8)                  | 0.4<br>(0.3 to 0.5)                     | 0.5<br>(0.3 to 0.7)               | 136.9<br>(71.5 to 230.3)                          | 12.6<br>(-6.7 to 36.6)                              |
| Cirrhosis and other chronic liver diseases due to hepatitis C  | 12.7<br>(9.4 to 17.1)                   | 0.4<br>(0.3 to 0.5)                     | 0.4<br>(0.3 to 0.7)               | 146.1<br>(72.8 to 248.6)                          | 14.1<br>(-7.1 to 40.8)                              |
| Cirrhosis and other chronic liver diseases due to alcohol use  | 3.5<br>(2.8 to 4.2)                     | 0.1<br>(0.1 to 0.1)                     | 0.1<br>(0.1 to 0.2)               | 148.1<br>(73.9 to 252.3)                          | 10.3<br>(-16.8 to 48.2)                             |
| Cirrhosis and other chronic liver diseases due to other causes | 11.5<br>(9.9 to 13.3)                   | 0.4<br>(0.3 to 0.4)                     | 0.6<br>(0.4 to 0.9)               | 71.6<br>(36.4 to 113.5)                           | 5.5<br>(-11.4 to 24.3)                              |
| <b>Digestive diseases</b>                                      | <b>334.7<br/>(284.7 to 402.2)</b>       | <b>258.9†<br/>(239.7 to 281.3)</b>      | <b>10.0<br/>(6.5 to 14.7)</b>     | <b>134.2<br/>(94.5 to 182.0)</b>                  | <b>9.2<br/>(-4.7 to 24.6)</b>                       |
| Peptic ulcer disease                                           | 120.3<br>(90.8 to 165.2)                | 10.4<br>(8.9 to 12.2)                   | 2.6<br>(1.3 to 4.6)               | 135.3<br>(66.7 to 239.6)                          | 2.5<br>(-19.9 to 31.4)                              |
| Gastritis and duodenitis                                       | 119.0<br>(92.8 to 154.1)                | 94.2<br>(81.4 to 111.9)                 | 2.3<br>(1.2 to 4.0)               | 151.7<br>(83.4 to 249.2)                          | 13.0<br>(-10.9 to 41.5)                             |
| Appendicitis                                                   | 1.2<br>(1.1 to 1.3)                     | 31.1<br>(28.5 to 34.0)                  | 0.4<br>(0.2 to 0.6)               | 60.6<br>(-1.0 to 158.5)                           | -1.0<br>(-30.8 to 40.5)                             |
| Paralytic ileus and intestinal obstruction                     | 0.1<br>(0.1 to 0.1)                     | 2.8<br>(2.4 to 3.3)                     | < 0.05<br>(< 0.05 to < 0.05)      | 105.4<br>(93.3 to 117.7)                          | 3.4<br>(-0.4 to 7.3)                                |
| Inguinal, femoral, and abdominal hernia                        | 75.6<br>(65.1 to 87.6)                  | 66.6<br>(56.7 to 78.7)                  | 3.3<br>(2.2 to 4.7)               | 140.3<br>(101.2 to 185.1)                         | 16.3<br>(2.2 to 30.4)                               |
| Inflammatory bowel disease                                     | 2.8<br>(2.0 to 3.8)                     | 6.3<br>(4.4 to 8.8)                     | 0.4<br>(0.2 to 0.7)               | 86.8<br>(32.2 to 158.1)                           | -8.8<br>(-28.7 to 18.6)                             |
| Vascular intestinal disorders                                  | 0.1<br>(0.1 to 0.1)                     | 0.3<br>(0.3 to 0.4)                     | < 0.05<br>(< 0.05 to < 0.05)      | 114.5<br>(98.7 to 131.5)                          | -1.6<br>(-5.9 to 3.3)                               |
| Gallbladder and biliary diseases                               | 18.4<br>(15.5 to 21.5)                  | 44.8<br>(37.3 to 53.3)                  | 0.2<br>(0.2 to 0.4)               | 129.9<br>(82.2 to 188.6)                          | 0.4<br>(-22.0 to 28.6)                              |
| Pancreatitis                                                   | 0.3<br>(0.2 to 0.3)                     | 2.4<br>(2.0 to 2.8)                     | < 0.05<br>(< 0.05 to 0.1)         | 117.4<br>(105.2 to 130.3)                         | -1.1<br>(-4.5 to 2.1)                               |
| Other digestive diseases                                       | --                                      | --                                      | 0.7<br>(0.5 to 1.0)               | 144.2<br>(102.8 to 192.6)                         | 14.4<br>(0.6 to 29.4)                               |
| <b>Neurological disorders</b>                                  | <b>3,980.6<br/>(3,770.6 to 4,213.0)</b> | <b>1,874.0<br/>(1,550.7 to 2,233.3)</b> | <b>108.2<br/>(70.6 to 149.3)</b>  | <b>87.2<br/>(61.2 to 115.7)</b>                   | <b>0.0<br/>(-14.5 to 16.9)</b>                      |
| Alzheimer's disease and other dementias                        | 10.3<br>(8.8 to 12.1)                   | 1.9<br>(1.6 to 2.2)                     | 1.4<br>(0.9 to 1.8)               | 146.4<br>(126.3 to 166.4)                         | -2.3<br>(-6.2 to 2.3)                               |
| Parkinson's disease                                            | 2.5<br>(1.9 to 3.2)                     | 0.3<br>(0.2 to 0.4)                     | 0.3<br>(0.2 to 0.5)               | 199.3<br>(137.4 to 273.8)                         | 12.1<br>(-1.0 to 26.9)                              |
| Epilepsy                                                       | 34.9<br>(12.4 to 52.2)                  | 4.0<br>(1.4 to 6.0)                     | 11.3<br>(3.3 to 21.6)             | 66.2<br>(-54.0 to 515.0)                          | -4.5<br>(-74.2 to 254.4)                            |
| Multiple sclerosis                                             | 4.2<br>(3.7 to 4.8)                     | 0.2<br>(0.1 to 0.2)                     | 1.1<br>(0.8 to 1.5)               | 88.8<br>(47.8 to 137.2)                           | -9.1<br>(-25.9 to 8.9)                              |
| Motor neuron disease                                           | 0.3<br>(0.2 to 0.3)                     | < 0.05<br>(< 0.05 to < 0.05)            | 0.1<br>(< 0.05 to 0.1)            | 95.9<br>(85.1 to 107.0)                           | 0.0<br>(-3.5 to 3.8)                                |
| Migraine                                                       | 1,566.4<br>(1,464.3 to 1,672.2)         | 171.8<br>(156.3 to 187.9)               | 76.3<br>(49.5 to 107.6)           | 88.0<br>(78.7 to 97.7)                            | 0.6<br>(-3.1 to 4.6)                                |
| Tension-type headache                                          | 3,050.5<br>(2,687.2 to 3,465.8)         | 1,695.7<br>(1,373.9 to 2,052.8)         | 15.1<br>(9.2 to 23.3)             | 92.5<br>(77.9 to 108.6)                           | 0.6<br>(-4.7 to 6.7)                                |
| Other neurological disorders                                   | < 0.05<br>(< 0.05 to < 0.05)            | 0.1<br>(< 0.05 to 0.1)                  | 2.6<br>(1.0 to 4.8)               | 103.2<br>(-27.9 to 508.5)                         | 15.5<br>(-57.2 to 226.3)                            |
| <b>Mental and substance use disorders</b>                      | <b>1,516.9<br/>(1,457.0 to 1,572.8)</b> | <b>520.9†<br/>(471.1 to 574.7)</b>      | <b>232.8<br/>(169.4 to 302.1)</b> | <b>80.8<br/>(74.8 to 86.9)</b>                    | <b>-0.2<br/>(-2.6 to 2.4)</b>                       |
| Schizophrenia                                                  | 25.5<br>(21.9 to 29.3)                  | 1.6<br>(1.4 to 1.9)                     | 16.4<br>(11.9 to 20.8)            | 100.6<br>(77.5 to 126.7)                          | -0.9<br>(-10.9 to 9.6)                              |
| Alcohol use disorders                                          | 86.2<br>(72.3 to 101.1)                 | 46.9<br>(39.2 to 55.3)                  | 8.6<br>(5.9 to 12.2)              | 81.3<br>(61.2 to 106.9)                           | 0.8<br>(-9.0 to 12.7)                               |
| Drug use disorders                                             | 130.3<br>(114.0 to 150.0)               | 11.2<br>(10.0 to 12.6)                  | 44.7<br>(30.3 to 60.9)            | 79.3<br>(58.2 to 101.9)                           | 2.6<br>(-7.8 to 13.4)                               |
| Opioid use disorders                                           | 100.8<br>(82.2 to 122.6)                | 7.0<br>(5.9 to 8.5)                     | 42.1<br>(28.0 to 57.4)            | 79.8<br>(57.9 to 103.3)                           | 2.7<br>(-7.8 to 13.9)                               |
| Cocaine use disorders                                          | 5.2<br>(4.4 to 6.2)                     | 0.4<br>(0.3 to 0.4)                     | 0.7<br>(0.4 to 1.1)               | 71.9<br>(14.2 to 151.6)                           | 2.1<br>(-26.9 to 41.4)                              |
| Amphetamine use disorders                                      | 1.2<br>(0.8 to 1.6)                     | 0.2<br>(0.1 to 0.2)                     | 0.2<br>(0.1 to 0.3)               | 61.2<br>(46.0 to 80.4)                            | -0.6<br>(-8.3 to 8.5)                               |
| Cannabis use disorders                                         | 20.4<br>(16.8 to 24.6)                  | 2.7<br>(2.3 to 3.2)                     | 0.6<br>(0.4 to 0.9)               | 55.6<br>(22.4 to 98.8)                            | -1.4<br>(-20.3 to 20.9)                             |
| Other drug use disorders                                       | 5.1<br>(4.4 to 5.9)                     | 0.9<br>(0.8 to 1.0)                     | 1.1<br>(0.7 to 1.6)               | 79.9<br>(42.0 to 134.3)                           | 1.8<br>(-18.8 to 28.5)                              |
| Depressive disorders                                           | 311.2<br>(285.9 to 335.7)               | 356.6<br>(309.4 to 411.8)               | 54.4<br>(36.8 to 74.9)            | 86.3<br>(73.4 to 99.1)                            | -2.6<br>(-7.3 to 2.4)                               |
| Major depressive disorder                                      | 218.5<br>(188.8 to 252.8)               | 339.1<br>(291.3 to 393.3)               | 45.0<br>(29.9 to 62.6)            | 84.3<br>(68.8 to 99.6)                            | -3.0<br>(-8.8 to 3.0)                               |
| Dysthymia                                                      | 98.0<br>(83.2 to 115.2)                 | 17.5<br>(14.8 to 20.5)                  | 9.5<br>(6.3 to 14.0)              | 96.6<br>(83.5 to 110.5)                           | -0.6<br>(-5.0 to 3.8)                               |
| Bipolar disorder                                               | 87.9<br>(75.0 to 103.7)                 | 5.5<br>(4.6 to 6.4)                     | 18.0<br>(10.9 to 26.9)            | 78.8<br>(65.5 to 92.6)                            | 0.4<br>(-5.3 to 6.6)                                |
| Anxiety disorders                                              | 441.1<br>(393.7 to 489.0)               | 70.1<br>(63.1 to 77.6)                  | 42.7<br>(29.7 to 58.3)            | 79.8<br>(71.7 to 89.0)                            | 0.1<br>(-3.5 to 3.7)                                |
| Eating disorders                                               | 25.7<br>(20.5 to 31.2)                  | 9.2<br>(6.9 to 12.1)                    | 5.1<br>(3.2 to 7.5)               | 44.2<br>(26.1 to 64.1)                            | -8.3<br>(-18.3 to 2.4)                              |
| Anorexia nervosa                                               | 3.2<br>(2.3 to 4.3)                     | 1.0<br>(0.8 to 1.4)                     | 0.7<br>(0.4 to 1.1)               | 34.2<br>(5.2 to 68.8)                             | -6.4<br>(-25.3 to 16.9)                             |
| Bulimia nervosa                                                | 21.1<br>(15.8 to 27.8)                  | 8.2<br>(5.9 to 11.0)                    | 4.4<br>(2.6 to 6.7)               | 45.9<br>(26.4 to 68.7)                            | -8.7<br>(-19.5 to 2.8)                              |
| Autistic spectrum disorders                                    | 108.6<br>(97.1 to 125.9)                | 0.4<br>(0.3 to 0.6)                     | 15.4<br>(10.4 to 21.7)            | 76.7<br>(66.0 to 87.6)                            | 0.1<br>(-4.9 to 5.5)                                |
| Autism                                                         | 30.0<br>(25.5 to 35.1)                  | < 0.05<br>(< 0.05 to 0.1)               | 7.6<br>(4.9 to 11.2)              | 77.5<br>(59.1 to 97.4)                            | 0.2<br>(-8.7 to 9.6)                                |
| Asperger syndrome and other autistic spectrum disorders        | 78.6<br>(65.9 to 94.2)                  | 0.4<br>(0.2 to 0.6)                     | 7.8<br>(5.2 to 11.3)              | 75.8<br>(65.8 to 86.1)                            | 0.1<br>(-4.5 to 4.7)                                |



| Cause                                                      | Prevalence in thousands (95% UI)              | Incidence in thousands (95% UI)                   | YLDs in thousands (95% UI)              |                                                   |                                                     |
|------------------------------------------------------------|-----------------------------------------------|---------------------------------------------------|-----------------------------------------|---------------------------------------------------|-----------------------------------------------------|
|                                                            | 2016 counts                                   | 2016 counts                                       | 2016 counts                             | Percentage change in counts between 2006 and 2016 | Percentage change in age-standardised rates between |
| Attention-deficit/hyperactivity disorder                   | 57.1<br>(48.5 to 67.4)                        | 1.5<br>(1.3 to 1.8)                               | 0.7<br>(0.4 to 1.1)                     | 61.0<br>(36.6 to 89.0)                            | -0.2<br>(-13.8 to 15.9)                             |
| Conduct disorder                                           | 38.6<br>(31.6 to 45.4)                        | 12.0<br>(9.6 to 14.4)                             | 4.7<br>(2.9 to 7.1)                     | 25.9<br>(14.6 to 37.5)                            | 0.7<br>(-7.1 to 9.1)                                |
| Idiopathic developmental intellectual disability           | 112.2<br>(59.9 to 167.3)                      | --                                                | 4.5<br>(1.9 to 8.0)                     | 90.2<br>(73.5 to 112.5)                           | 8.9<br>(0.2 to 20.9)                                |
| Other mental and substance use disorders                   | 233.8<br>(204.4 to 269.7)                     | 5.9<br>(5.2 to 6.8)                               | 17.5<br>(11.8 to 25.3)                  | 93.0<br>(80.0 to 107.5)                           | 0.4<br>(-4.8 to 5.6)                                |
| <b>Diabetes, urogenital, blood, and endocrine diseases</b> | <b>3,587.0</b><br><b>(3,484.0 to 3,710.2)</b> | <b>968.3†</b><br><b>(899.3 to 1,045.5)</b>        | <b>105.5</b><br><b>(73.2 to 145.3)</b>  | <b>130.0</b><br><b>(116.3 to 145.6)</b>           | <b>-1.9</b><br><b>(-7.1 to 4.2)</b>                 |
| Diabetes mellitus                                          | 704.5<br>(611.1 to 805.3)                     | 57.1<br>(48.5 to 67.1)                            | 62.7<br>(41.1 to 90.0)                  | 141.1<br>(120.8 to 165.7)                         | -4.2<br>(-11.9 to 4.7)                              |
| Acute glomerulonephritis                                   | 0.1<br>(0.1 to 0.1)                           | 1.3<br>(1.1 to 1.5)                               | < 0.05<br>(< 0.05 to < 0.05)            | 89.8<br>(75.5 to 105.6)                           | 1.4<br>(-3.5 to 6.6)                                |
| Chronic kidney disease                                     | 325.9<br>(291.9 to 364.5)                     | 26.2<br>(22.7 to 29.8)                            | 16.0<br>(11.7 to 20.6)                  | 120.0<br>(96.8 to 145.8)                          | -0.9<br>(-7.9 to 7.3)                               |
| Chronic kidney disease due to diabetes mellitus            | 146.7<br>(123.9 to 174.3)                     | 11.8<br>(9.5 to 14.4)                             | 6.5<br>(4.5 to 8.8)                     | 134.5<br>(99.5 to 174.5)                          | -2.8<br>(-11.1 to 7.7)                              |
| Chronic kidney disease due to hypertension                 | 42.1<br>(34.8 to 50.4)                        | 4.1<br>(3.2 to 5.1)                               | 1.6<br>(1.1 to 2.2)                     | 139.8<br>(93.7 to 195.7)                          | -1.3<br>(-14.5 to 13.0)                             |
| Chronic kidney disease due to glomerulonephritis           | 42.6<br>(34.2 to 51.2)                        | 2.6<br>(2.1 to 3.3)                               | 2.9<br>(1.9 to 4.1)                     | 102.8<br>(65.4 to 150.3)                          | 6.4<br>(-8.1 to 22.2)                               |
| Chronic kidney disease due to other causes                 | 94.7<br>(77.5 to 114.1)                       | 7.7<br>(6.2 to 9.4)                               | 4.9<br>(3.3 to 6.7)                     | 107.5<br>(76.2 to 142.8)                          | -1.1<br>(-10.7 to 9.9)                              |
| Urinary diseases and male infertility                      | 294.8<br>(255.7 to 338.0)                     | 566.9†<br>(506.0 to 637.7)                        | 7.2<br>(4.6 to 10.5)                    | 162.8<br>(127.4 to 202.8)                         | -1.5<br>(-12.7 to 10.1)                             |
| Interstitial nephritis and urinary tract infections        | 7.9<br>(6.8 to 9.1)                           | 409.4<br>(352.5 to 470.7)                         | 0.3<br>(0.2 to 0.4)                     | 75.9<br>(44.3 to 116.5)                           | -1.4<br>(-15.8 to 16.1)                             |
| Urolithiasis                                               | 5.0<br>(4.2 to 5.9)                           | 131.2<br>(111.4 to 157.0)                         | 0.4<br>(0.2 to 0.6)                     | 106.7<br>(54.8 to 174.2)                          | 1.3<br>(-19.6 to 28.1)                              |
| Benign prostatic hyperplasia                               | 172.6<br>(141.0 to 213.4)                     | 26.2<br>(21.1 to 33.3)                            | 5.7<br>(3.6 to 8.6)                     | 206.0<br>(156.3 to 261.8)                         | -0.8<br>(-13.3 to 11.9)                             |
| Male infertility                                           | 98.3<br>(76.4 to 128.7)                       | --                                                | 0.6<br>(0.2 to 1.2)                     | 53.8<br>(41.4 to 67.8)                            | -12.3<br>(-18.5 to -5.5)                            |
| Other urinary diseases                                     | --                                            | --                                                | 0.2<br>(0.2 to 0.4)                     | 60.6<br>(32.7 to 93.1)                            | -16.1<br>(-28.3 to -2.4)                            |
| Gynecological diseases                                     | 629.8<br>(603.1 to 663.9)                     | 298.3†<br>(273.5 to 326.7)                        | 8.9<br>(6.0 to 12.6)                    | 92.2<br>(82.5 to 102.4)                           | -1.3<br>(-6.0 to 3.7)                               |
| Uterine fibroids                                           | 55.1<br>(48.1 to 62.6)                        | 7.9<br>(6.7 to 9.1)                               | 0.8<br>(0.4 to 1.3)                     | 126.8<br>(83.3 to 180.2)                          | -4.4<br>(-19.4 to 14.2)                             |
| Polycystic ovarian syndrome                                | 6.1<br>(4.5 to 7.9)                           | 8.2<br>(5.7 to 11.1)                              | 0.1<br>(< 0.05 to 0.1)                  | 90.6<br>(64.9 to 122.4)                           | 8.1<br>(-6.9 to 25.9)                               |
| Female infertility                                         | 16.2<br>(8.2 to 30.9)                         | --                                                | 0.1<br>(< 0.05 to 0.2)                  | 86.8<br>(49.4 to 154.9)                           | 26.0<br>(7.5 to 55.7)                               |
| Endometriosis                                              | 1.2<br>(1.0 to 1.4)                           | 3.6<br>(3.0 to 4.5)                               | 0.1<br>(0.1 to 0.2)                     | 76.4<br>(39.3 to 127.2)                           | 7.5<br>(-15.0 to 36.8)                              |
| Genital prolapse                                           | 133.7<br>(116.0 to 154.2)                     | 14.2<br>(12.1 to 16.6)                            | 0.4<br>(0.2 to 0.8)                     | 82.0<br>(67.9 to 97.4)                            | -31.2<br>(-36.5 to -25.8)                           |
| Premenstrual syndrome                                      | 393.8<br>(366.6 to 422.5)                     | 144.4<br>(133.5 to 156.4)                         | 3.3<br>(2.0 to 5.1)                     | 77.5<br>(63.1 to 91.8)                            | 1.4<br>(-6.4 to 9.2)                                |
| Other gynecological diseases                               | 120.5<br>(100.8 to 142.7)                     | 120.0<br>(97.7 to 146.4)                          | 4.2<br>(2.7 to 6.0)                     | 101.4<br>(87.0 to 118.8)                          | 5.7<br>(-1.9 to 13.6)                               |
| Hemoglobinopathies and hemolytic anaemias                  | 2,273.5<br>(2,192.9 to 2,386.7)               | --                                                | 6.9<br>(3.9 to 11.2)                    | 105.5<br>(55.9 to 162.8)                          | 24.6<br>(-5.3 to 60.0)                              |
| Thalassemias                                               | 0.3<br>(0.3 to 0.4)                           | --                                                | < 0.05<br>(< 0.05 to < 0.05)            | 96.2<br>(30.8 to 198.6)                           | 17.7<br>(-19.7 to 73.7)                             |
| Thalassaemia trait                                         | 449.8<br>(411.8 to 509.4)                     | --                                                | 4.9<br>(2.7 to 7.8)                     | 113.2<br>(57.9 to 180.3)                          | 33.4<br>(-1.9 to 74.6)                              |
| Sickle cell disorders                                      | 0.6<br>(0.5 to 0.8)                           | --                                                | 0.1<br>(0.1 to 0.1)                     | 83.5<br>(67.5 to 102.9)                           | 8.9<br>(-2.7 to 23.1)                               |
| Sickle cell trait                                          | 303.5<br>(286.9 to 321.5)                     | --                                                | 0.8<br>(0.5 to 1.4)                     | 112.2<br>(53.2 to 183.0)                          | 42.6<br>(-0.5 to 95.7)                              |
| G6PD deficiency                                            | 779.0<br>(716.8 to 848.1)                     | --                                                | < 0.05<br>(< 0.05 to 0.1)               | 280.2<br>(127.8 to 557.7)                         | 70.8<br>(13.9 to 150.3)                             |
| G6PD trait                                                 | 858.3<br>(824.7 to 897.1)                     | --                                                | < 0.05<br>(< 0.05 to < 0.05)            | 100.7<br>(32.8 to 211.3)                          | 29.1<br>(-13.3 to 98.5)                             |
| Other hemoglobinopathies and hemolytic anaemias            | 71.0<br>(52.6 to 93.7)                        | --                                                | 1.1<br>(0.6 to 1.8)                     | 71.6<br>(23.8 to 136.8)                           | -12.9<br>(-30.5 to 7.8)                             |
| Endocrine, metabolic, blood, and immune disorders          | 128.4<br>(112.7 to 145.5)                     | 18.6<br>(16.1 to 21.3)                            | 3.8<br>(2.5 to 5.4)                     | 103.9<br>(83.0 to 128.4)                          | -2.8<br>(-9.4 to 4.3)                               |
| <b>Musculoskeletal disorders</b>                           | <b>1,778.8</b><br><b>(1,660.5 to 1,901.3)</b> | <b>966.7</b><br><b>(840.1 to 1,097.5)</b>         | <b>198.6</b><br><b>(142.4 to 260.3)</b> | <b>110.6</b><br><b>(100.4 to 121.2)</b>           | <b>-1.6</b><br><b>(-4.5 to 1.3)</b>                 |
| Rheumatoid arthritis                                       | 21.3<br>(18.3 to 24.5)                        | 1.5<br>(1.3 to 1.7)                               | 5.1<br>(3.4 to 6.9)                     | 124.3<br>(99.9 to 152.3)                          | -3.8<br>(-10.9 to 3.7)                              |
| Osteoarthritis                                             | 262.6<br>(243.5 to 283.6)                     | 19.9<br>(18.1 to 21.8)                            | 16.4<br>(11.6 to 22.5)                  | 161.8<br>(146.7 to 177.8)                         | -1.6<br>(-5.4 to 2.6)                               |
| Low back and neck pain                                     | 1,102.9<br>(1,005.9 to 1,213.7)               | 471.9<br>(404.0 to 547.5)                         | 129.6<br>(91.2 to 173.6)                | 111.0<br>(98.3 to 123.5)                          | -1.2<br>(-5.0 to 2.4)                               |
| Low back pain                                              | 776.2<br>(670.3 to 913.9)                     | 375.1<br>(312.3 to 449.8)                         | 88.8<br>(62.5 to 120.2)                 | 108.7<br>(91.3 to 126.7)                          | -0.7<br>(-6.1 to 4.5)                               |
| Neck pain                                                  | 404.5<br>(338.9 to 477.8)                     | 96.9<br>(80.7 to 116.6)                           | 40.7<br>(26.9 to 59.6)                  | 116.1<br>(105.5 to 127.1)                         | -2.2<br>(-4.4 to 0.1)                               |
| Gout                                                       | 34.8<br>(30.0 to 40.3)                        | 7.3<br>(6.3 to 8.4)                               | 1.1<br>(0.7 to 1.6)                     | 142.8<br>(91.0 to 212.4)                          | 4.6<br>(-10.4 to 21.8)                              |
| Other musculoskeletal disorders                            | 537.6<br>(425.0 to 659.6)                     | 466.0<br>(360.3 to 579.8)                         | 46.4<br>(30.4 to 67.8)                  | 94.4<br>(73.9 to 116.2)                           | -2.8<br>(-10.4 to 5.2)                              |
| <b>Other non-communicable diseases</b>                     | <b>6,583.0</b><br><b>(6,400.0 to 6,797.7)</b> | <b>18,257.4†</b><br><b>(16,389.4 to 19,850.3)</b> | <b>158.2</b><br><b>(107.2 to 225.3)</b> | <b>89.0</b><br><b>(84.9 to 93.2)</b>              | <b>0.5</b><br><b>(-1.0 to 2.0)</b>                  |
| Congenital anomalies                                       | 109.0<br>(96.0 to 127.8)                      | --                                                | 15.2<br>(10.8 to 20.2)                  | 76.2<br>(64.7 to 88.9)                            | 1.2<br>(-4.3 to 7.2)                                |
| Neural tube defects                                        | 14.2<br>(12.4 to 16.2)                        | --                                                | 4.2<br>(3.0 to 5.8)                     | 83.5<br>(61.1 to 111.5)                           | 2.8<br>(-8.4 to 15.8)                               |
| Congenital heart anomalies                                 | 15.8<br>(13.8 to 18.1)                        | --                                                | 0.8<br>(0.3 to 1.4)                     | 79.9<br>(57.5 to 106.1)                           | 2.5<br>(-9.2 to 15.1)                               |
| Orofacial clefts                                           | 3.6<br>(3.1 to 4.1)                           | --                                                | < 0.05<br>(< 0.05 to 0.1)               | 74.9<br>(54.1 to 100.1)                           | -1.8<br>(-13.5 to 12.6)                             |
| Down's syndrome                                            | 5.1<br>(4.4 to 6.0)                           | --                                                | 0.5<br>(0.3 to 0.6)                     | 62.1<br>(46.2 to 76.4)                            | -5.6<br>(-14.6 to 2.8)                              |
| Turner syndrome                                            | 1.8<br>(1.5 to 2.1)                           | --                                                | < 0.05<br>(< 0.05 to 0.1)               | 69.6<br>(11.4 to 153.4)                           | 2.2<br>(-33.4 to 54.4)                              |
| Klinefelter syndrome                                       | 4.8<br>(4.1 to 5.7)                           | --                                                | < 0.05<br>(< 0.05 to 0.1)               | 58.8<br>(18.9 to 112.9)                           | -3.9<br>(-26.3 to 24.3)                             |



| Cause                                         | Prevalence in thousands (95% UI)              | Incidence in thousands (95% UI)          | YLDs in thousands (95% UI)            |                                                   |                                                     |
|-----------------------------------------------|-----------------------------------------------|------------------------------------------|---------------------------------------|---------------------------------------------------|-----------------------------------------------------|
|                                               | 2016 counts                                   | 2016 counts                              | 2016 counts                           | Percentage change in counts between 2006 and 2016 | Percentage change in age-standardised rates between |
| Other chromosomal abnormalities               | 16.1<br>(13.5 to 19.4)                        | --                                       | 1.6<br>(1.1 to 2.2)                   | 34.2<br>(18.9 to 52.3)                            | -7.9<br>(-18.5 to 3.8)                              |
| Congenital musculoskeletal and limb anomalies | 18.1<br>(16.4 to 20.1)                        | --                                       | 2.7<br>(1.8 to 3.8)                   | 75.2<br>(54.7 to 98.5)                            | -1.5<br>(-12.3 to 8.7)                              |
| Urogenital congenital anomalies               | 6.4<br>(5.6 to 7.4)                           | --                                       | 0.2<br>(0.1 to 0.3)                   | 52.1<br>(34.6 to 70.4)                            | -1.5<br>(-13.5 to 11.0)                             |
| Digestive congenital anomalies                | 13.3<br>(11.8 to 15.1)                        | --                                       | 0.6<br>(0.4 to 0.8)                   | 76.3<br>(45.7 to 112.2)                           | -0.7<br>(-15.3 to 16.2)                             |
| Other congenital anomalies                    | 32.1<br>(19.2 to 50.3)                        | --                                       | 4.5<br>(2.8 to 6.9)                   | 93.4<br>(69.6 to 121.1)                           | 7.5<br>(-3.5 to 20.4)                               |
| Skin and subcutaneous diseases                | 2,542.8<br>(2,463.2 to 2,623.7)               | 5,101.9<br>(4,853.2 to 5,344.6)          | 63.0<br>(42.0 to 90.5)                | 67.2<br>(62.8 to 72.0)                            | 0.7<br>(-1.2 to 2.8)                                |
| Dermatitis                                    | 414.7<br>(362.4 to 472.0)                     | 715.5<br>(644.9 to 789.7)                | 15.1<br>(8.8 to 24.0)                 | 72.6<br>(63.8 to 81.9)                            | 0.1<br>(-3.4 to 3.8)                                |
| Psoriasis                                     | 81.9<br>(76.2 to 88.2)                        | 11.2<br>(10.4 to 12.1)                   | 7.2<br>(4.9 to 9.5)                   | 99.5<br>(79.5 to 124.4)                           | 4.5<br>(-3.5 to 13.6)                               |
| Cellulitis                                    | 4.5<br>(4.2 to 5.0)                           | 96.1<br>(88.2 to 103.9)                  | 0.3<br>(0.2 to 0.4)                   | 78.8<br>(32.1 to 141.2)                           | 0.1<br>(-19.9 to 26.1)                              |
| Pyoderma                                      | 21.2<br>(20.2 to 22.1)                        | 483.1<br>(459.8 to 506.0)                | 0.1<br>(< 0.05 to 0.2)                | 91.2<br>(70.8 to 113.1)                           | 0.4<br>(-7.1 to 8.1)                                |
| Scabies                                       | 88.1<br>(73.5 to 105.2)                       | 267.9<br>(221.7 to 319.3)                | 2.3<br>(1.2 to 3.7)                   | 58.9<br>(48.2 to 70.5)                            | -4.1<br>(-8.5 to 0.9)                               |
| Fungal skin diseases                          | 516.7<br>(455.7 to 585.1)                     | 1,786.1<br>(1,569.3 to 2,016.7)          | 2.9<br>(1.2 to 6.3)                   | 85.8<br>(78.8 to 92.8)                            | 0.2<br>(-1.2 to 1.6)                                |
| Viral skin diseases                           | 200.7<br>(189.5 to 213.6)                     | 288.3<br>(270.9 to 306.4)                | 6.2<br>(3.9 to 9.1)                   | 66.8<br>(59.9 to 73.9)                            | 0.0<br>(-3.3 to 3.5)                                |
| Acne vulgaris                                 | 705.1<br>(640.1 to 773.3)                     | 413.3<br>(356.5 to 492.2)                | 18.1<br>(12.1 to 26.2)                | 45.2<br>(36.9 to 53.7)                            | 2.6<br>(-2.6 to 7.6)                                |
| Alopecia areata                               | 22.7<br>(21.0 to 24.5)                        | 39.9<br>(36.9 to 43.1)                   | 0.7<br>(0.5 to 1.1)                   | 80.4<br>(57.2 to 106.9)                           | -0.1<br>(-10.6 to 12.6)                             |
| Pruritus                                      | 82.3<br>(70.0 to 95.7)                        | 65.1<br>(56.1 to 75.9)                   | 0.9<br>(0.4 to 1.6)                   | 91.2<br>(76.1 to 107.9)                           | -1.6<br>(-7.1 to 3.9)                               |
| Urticaria                                     | 86.0<br>(74.7 to 98.6)                        | 154.0<br>(133.9 to 177.7)                | 5.2<br>(3.3 to 7.4)                   | 75.2<br>(63.7 to 88.5)                            | 0.0<br>(-5.5 to 5.8)                                |
| Decubitus ulcer                               | 1.7<br>(1.5 to 1.9)                           | 6.2<br>(5.5 to 7.0)                      | 0.3<br>(0.2 to 0.4)                   | 115.3<br>(94.2 to 142.6)                          | -4.7<br>(-17.4 to 10.6)                             |
| Other skin and subcutaneous diseases          | 682.0<br>(654.4 to 710.3)                     | 775.2<br>(741.7 to 809.6)                | 3.8<br>(1.8 to 7.0)                   | 90.4<br>(83.7 to 97.3)                            | -4.3<br>(-6.9 to -2.0)                              |
| Sense organ diseases                          | 1,878.7<br>(1,796.5 to 1,966.3)               | 786.3†<br>(731.6 to 843.0)               | 58.8<br>(39.7 to 84.2)                | 112.2<br>(104.1 to 120.8)                         | 0.0<br>(-2.6 to 2.8)                                |
| Glaucoma                                      | 4.2<br>(3.3 to 5.4)                           | --                                       | 0.4<br>(0.2 to 0.6)                   | 206.6<br>(165.5 to 255.8)                         | -0.3<br>(-9.6 to 10.8)                              |
| Cataract                                      | 60.6<br>(49.4 to 73.6)                        | --                                       | 4.4<br>(2.9 to 6.1)                   | 147.6<br>(125.7 to 173.1)                         | -6.3<br>(-11.0 to -1.3)                             |
| Macular degeneration                          | 4.4<br>(3.1 to 6.0)                           | --                                       | 0.3<br>(0.2 to 0.4)                   | 202.8<br>(161.5 to 249.1)                         | 0.5<br>(-9.1 to 10.7)                               |
| Refraction and accommodation disorders        | 932.1<br>(863.8 to 1,010.0)                   | --                                       | 18.9<br>(11.7 to 29.7)                | 87.2<br>(76.8 to 97.3)                            | -7.5<br>(-10.5 to -4.5)                             |
| Age-related and other hearing loss            | 959.9<br>(867.9 to 1,061.0)                   | --                                       | 24.7<br>(16.3 to 36.8)                | 128.7<br>(112.4 to 148.5)                         | 7.9<br>(2.7 to 14.7)                                |
| Other vision loss                             | 49.9<br>(41.2 to 60.0)                        | --                                       | 3.7<br>(2.5 to 5.2)                   | 109.7<br>(86.4 to 135.4)                          | -1.7<br>(-8.3 to 5.3)                               |
| Other sense organ diseases                    | 203.8<br>(186.3 to 222.1)                     | 786.3<br>(731.6 to 843.0)                | 6.4<br>(3.9 to 9.6)                   | 111.5<br>(96.5 to 126.8)                          | 0.3<br>(-4.2 to 4.9)                                |
| Oral disorders                                | 4,626.9<br>(4,331.0 to 4,946.5)               | 12,369.2†<br>(10,544.6 to 13,974.1)      | 21.2<br>(12.2 to 34.8)                | 118.3<br>(111.2 to 126.3)                         | 1.5<br>(-0.5 to 3.6)                                |
| Caries of deciduous teeth                     | 433.6<br>(348.5 to 500.7)                     | 1,574.9<br>(1,048.9 to 2,096.8)          | 0.1<br>(< 0.05 to 0.2)                | 81.1<br>(58.7 to 104.7)                           | 5.3<br>(-7.9 to 18.7)                               |
| Caries of permanent teeth                     | 3,252.3<br>(2,848.4 to 3,654.8)               | 10,633.2<br>(8,937.7 to 12,175.9)        | 1.9<br>(0.8 to 3.8)                   | 92.7<br>(79.4 to 106.8)                           | 6.4<br>(1.0 to 12.2)                                |
| Periodontal disease                           | 1,196.4<br>(951.9 to 1,487.4)                 | 142.2<br>(107.6 to 183.3)                | 7.9<br>(3.1 to 16.8)                  | 127.2<br>(113.0 to 144.3)                         | 0.6<br>(-3.2 to 4.6)                                |
| Edentulism and severe tooth loss              | 219.1<br>(187.1 to 253.4)                     | 18.9<br>(16.1 to 21.9)                   | 6.2<br>(4.1 to 8.9)                   | 151.4<br>(135.0 to 168.7)                         | 2.1<br>(-1.6 to 5.9)                                |
| Other oral disorders                          | 176.2<br>(166.2 to 185.8)                     | --                                       | 5.2<br>(3.2 to 7.8)                   | 87.7<br>(78.5 to 97.7)                            | -0.1<br>(-3.6 to 3.6)                               |
| <b>Injuries</b>                               | <b>2,219.0</b><br><b>(2,077.7 to 2,375.8)</b> | <b>906.4†</b><br><b>(853.5 to 956.6)</b> | <b>77.2</b><br><b>(51.5 to 110.6)</b> | <b>102.3</b><br><b>(97.7 to 106.5)</b>            | <b>0.2</b><br><b>(-1.5 to 1.9)</b>                  |
| <b>Transport injuries</b>                     | <b>440.6</b><br><b>(405.0 to 477.4)</b>       | <b>165.2</b><br><b>(144.2 to 186.4)</b>  | <b>22.2</b><br><b>(14.7 to 31.7)</b>  | <b>113.4</b><br><b>(107.3 to 119.3)</b>           | <b>1.1</b><br><b>(-0.9 to 2.9)</b>                  |
| Road injuries                                 | 370.0<br>(337.9 to 402.1)                     | 150.3<br>(129.8 to 171.2)                | 18.9<br>(12.6 to 27.0)                | 117.4<br>(111.1 to 123.6)                         | 1.5<br>(-0.4 to 3.3)                                |
| Pedestrian road injuries                      | 65.0<br>(55.9 to 74.6)                        | 18.5<br>(14.6 to 22.8)                   | 3.2<br>(2.1 to 4.5)                   | 111.4<br>(105.5 to 117.2)                         | -2.9<br>(-4.8 to -1.1)                              |
| Cyclist road injuries                         | 51.2<br>(42.3 to 60.8)                        | 19.8<br>(15.3 to 25.2)                   | 2.4<br>(1.5 to 3.5)                   | 128.9<br>(121.8 to 135.9)                         | 10.6<br>(8.4 to 12.6)                               |
| Motorcyclist road injuries                    | 57.3<br>(47.7 to 70.6)                        | 13.2<br>(10.3 to 16.8)                   | 2.7<br>(1.8 to 3.9)                   | 124.1<br>(117.0 to 130.7)                         | 9.6<br>(7.2 to 11.8)                                |
| Motor vehicle road injuries                   | 173.5<br>(147.1 to 200.0)                     | 87.7<br>(74.3 to 102.9)                  | 9.6<br>(6.6 to 13.6)                  | 113.7<br>(107.6 to 120.1)                         | -1.3<br>(-3.2 to 0.4)                               |
| Other road injuries                           | 23.0<br>(18.9 to 27.3)                        | 11.1<br>(8.1 to 14.8)                    | 1.0<br>(0.7 to 1.5)                   | 130.0<br>(123.2 to 136.6)                         | 9.4<br>(7.4 to 11.5)                                |
| Other transport injuries                      | 70.6<br>(58.6 to 84.5)                        | 14.9<br>(12.8 to 17.5)                   | 3.3<br>(2.2 to 4.7)                   | 93.1<br>(87.3 to 99.0)                            | -1.6<br>(-4.1 to 0.7)                               |
| <b>Unintentional injuries</b>                 | <b>1,717.0</b><br><b>(1,581.0 to 1,856.7)</b> | <b>713.5</b><br><b>(666.6 to 765.5)</b>  | <b>51.5</b><br><b>(34.2 to 74.0)</b>  | <b>98.9</b><br><b>(94.4 to 103.1)</b>             | <b>-0.2</b><br><b>(-2.0 to 1.5)</b>                 |
| Falls                                         | 608.9<br>(521.1 to 696.2)                     | 247.1<br>(216.7 to 286.0)                | 21.8<br>(14.8 to 30.8)                | 97.1<br>(92.5 to 101.6)                           | -2.2<br>(-4.0 to -0.5)                              |
| Drowning                                      | 4.3<br>(3.7 to 5.0)                           | 0.7<br>(0.6 to 0.8)                      | 0.2<br>(0.1 to 0.3)                   | 98.9<br>(92.4 to 105.0)                           | 2.2<br>(-0.8 to 4.8)                                |
| Fire, heat, and hot substances                | 152.7<br>(127.9 to 187.0)                     | 17.4<br>(14.4 to 20.2)                   | 3.7<br>(2.4 to 5.7)                   | 101.1<br>(91.2 to 110.3)                          | -0.2<br>(-3.9 to 3.2)                               |
| Poisonings                                    | 7.8<br>(6.6 to 9.2)                           | 10.3<br>(8.2 to 12.7)                    | 0.7<br>(0.4 to 1.0)                   | 98.3<br>(80.1 to 118.7)                           | 7.2<br>(0.1 to 15.8)                                |
| Exposure to mechanical forces                 | 327.8<br>(278.7 to 406.9)                     | 129.8<br>(108.5 to 154.1)                | 7.1<br>(4.6 to 10.5)                  | 103.8<br>(97.9 to 108.9)                          | -0.8<br>(-3.0 to 1.1)                               |
| Unintentional firearm injuries                | 13.3<br>(10.7 to 16.6)                        | 3.5<br>(2.4 to 4.8)                      | 0.5<br>(0.3 to 0.8)                   | 127.4<br>(119.3 to 135.0)                         | 10.9<br>(8.1 to 13.4)                               |
| Unintentional suffocation                     | 8.3<br>(6.4 to 10.6)                          | 1.5<br>(1.0 to 2.0)                      | 0.3<br>(0.2 to 0.4)                   | 93.7<br>(88.2 to 99.6)                            | 1.9<br>(-0.4 to 4.0)                                |
| Other exposure to mechanical forces           | 306.2<br>(257.4 to 383.4)                     | 124.9<br>(104.9 to 148.7)                | 6.4<br>(4.1 to 9.3)                   | 102.5<br>(96.6 to 107.7)                          | -1.7<br>(-4.0 to 0.2)                               |

| Cause                                                                               | Prevalence in thousands (95% UI)        | Incidence in thousands (95% UI)       | YLDs in thousands (95% UI)                                                                 |                                                   |                                                     |
|-------------------------------------------------------------------------------------|-----------------------------------------|---------------------------------------|--------------------------------------------------------------------------------------------|---------------------------------------------------|-----------------------------------------------------|
|                                                                                     | 2016 counts                             | 2016 counts                           | 2016 counts                                                                                | Percentage change in counts between 2006 and 2016 | Percentage change in age-standardised rates between |
| Adverse effects of medical treatment                                                | 4.5<br>(3.5 to 5.6)                     | 58.8<br>(51.6 to 66.7)                | 0.6<br>(0.4 to 0.9)                                                                        | 75.4<br>(63.9 to 86.9)                            | -5.9<br>(-10.4 to -1.3)                             |
| Animal contact                                                                      | 43.0<br>(37.5 to 50.0)                  | 48.2<br>(38.0 to 60.3)                | 1.3<br>(0.9 to 1.9)                                                                        | 110.7<br>(94.7 to 126.7)                          | 12.3<br>(6.5 to 18.6)                               |
| Venomous animal contact                                                             | 21.2<br>(17.3 to 25.3)                  | 23.0<br>(17.4 to 29.9)                | 1.0<br>(0.7 to 1.5)                                                                        | 105.4<br>(86.9 to 125.1)                          | 11.2<br>(4.2 to 19.6)                               |
| Non-venomous animal contact                                                         | 21.8<br>(17.9 to 27.8)                  | 25.2<br>(19.1 to 32.0)                | 0.3<br>(0.2 to 0.5)                                                                        | 131.0<br>(121.4 to 139.1)                         | 15.8<br>(12.3 to 18.4)                              |
| Foreign body                                                                        | 87.7<br>(73.5 to 106.0)                 | 54.4<br>(45.8 to 65.3)                | 2.6<br>(1.6 to 3.9)                                                                        | 94.4<br>(88.2 to 100.3)                           | 1.2<br>(-1.4 to 3.5)                                |
| Pulmonary aspiration and foreign body in airway                                     | 22.8<br>(17.0 to 30.3)                  | 7.1<br>(5.7 to 8.7)                   | 0.8<br>(0.5 to 1.3)                                                                        | 87.3<br>(81.0 to 93.6)                            | -0.6<br>(-3.3 to 1.9)                               |
| Foreign body in eyes                                                                | 5.1<br>(2.8 to 7.7)                     | 26.7<br>(19.7 to 36.4)                | 0.3<br>(0.1 to 0.5)                                                                        | 100.8<br>(86.5 to 116.9)                          | 4.5<br>(1.5 to 7.7)                                 |
| Foreign body in other body part                                                     | 59.8<br>(48.5 to 76.7)                  | 20.6<br>(17.0 to 24.9)                | 1.4<br>(0.9 to 2.2)                                                                        | 97.5<br>(89.8 to 104.3)                           | 1.8<br>(-1.4 to 4.5)                                |
| Environmental heat and cold exposure                                                | 138.4<br>(115.5 to 163.5)               | 34.4<br>(28.2 to 41.9)                | 4.5<br>(3.0 to 6.5)                                                                        | 100.2<br>(94.6 to 105.1)                          | 1.9<br>(-0.3 to 3.8)                                |
| Other unintentional injuries                                                        | 341.9<br>(274.2 to 420.3)               | 112.5<br>(92.3 to 134.5)              | 8.9<br>(5.8 to 13.1)                                                                       | 99.3<br>(94.9 to 103.4)                           | 2.0<br>(0.4 to 3.6)                                 |
| <b>Self-harm and interpersonal violence</b>                                         | <b>227.9</b><br><b>(201.9 to 256.4)</b> | <b>27.5†</b><br><b>(23.3 to 32.0)</b> | <b>3.5</b><br><b>(2.4 to 5.0)</b>                                                          | <b>87.6</b><br><b>(80.7 to 93.5)</b>              | <b>1.3</b><br><b>(-0.9 to 3.3)</b>                  |
| Self-harm                                                                           | 13.3<br>(11.2 to 15.5)                  | 5.1<br>(4.2 to 6.3)                   | 0.6<br>(0.4 to 0.8)                                                                        | 89.2<br>(80.7 to 96.9)                            | -6.0<br>(-9.2 to -3.2)                              |
| Self-harm by firearm                                                                | 0.7<br>(0.6 to 0.8)                     | 0.1<br>( $< 0.05$ to 0.1)             | $< 0.05$<br>( $< 0.05$ to $< 0.05$ )                                                       | 93.7<br>(86.0 to 101.5)                           | 4.5<br>(1.2 to 7.6)                                 |
| Self-harm by other specified means                                                  | 12.6<br>(10.5 to 14.8)                  | 5.1<br>(4.2 to 6.2)                   | 0.5<br>(0.3 to 0.8)                                                                        | 89.0<br>(80.2 to 97.0)                            | -6.4<br>(-9.6 to -3.5)                              |
| Interpersonal violence                                                              | 214.6<br>(188.3 to 243.3)               | 22.4†<br>(18.3 to 27.0)               | 3.0<br>(2.0 to 4.2)                                                                        | 87.3<br>(79.9 to 94.3)                            | 2.8<br>(0.4 to 5.1)                                 |
| Assault by firearm                                                                  | 2.6<br>(2.2 to 3.1)                     | 0.8<br>(0.5 to 1.1)                   | 0.1<br>(0.1 to 0.2)                                                                        | 109.6<br>(100.5 to 117.6)                         | 7.5<br>(4.5 to 10.4)                                |
| Assault by sharp object                                                             | 15.7<br>(12.5 to 19.0)                  | 5.6<br>(4.0 to 7.4)                   | 0.4<br>(0.3 to 0.6)                                                                        | 107.2<br>(99.6 to 114.0)                          | 6.5<br>(3.8 to 8.9)                                 |
| Sexual violence                                                                     | 167.1<br>(142.0 to 195.4)               | --                                    | 1.3<br>(0.9 to 1.9)                                                                        | 61.7<br>(53.7 to 70.7)                            | -3.6<br>(-7.3 to 0.5)                               |
| Assault by other means                                                              | 29.2<br>(24.2 to 35.2)                  | 16.0<br>(12.9 to 19.6)                | 1.1<br>(0.8 to 1.7)                                                                        | 116.5<br>(110.1 to 122.3)                         | 8.4<br>(6.0 to 10.4)                                |
| <b>Forces of nature, conflict and terrorism, and executions and police conflict</b> | <b>0.7</b><br><b>(0.4 to 1.1)</b>       | <b>0.2†</b><br><b>(0.1 to 0.2)</b>    | <b><math>&lt; 0.05</math></b><br><b>(<math>&lt; 0.05</math> to <math>&lt; 0.05</math>)</b> | <b>116.3</b><br><b>(103.6 to 124.6)</b>           | <b>18.6</b><br><b>(12.5 to 22.9)</b>                |
| Exposure to forces of nature                                                        | --                                      | --                                    | --                                                                                         | --                                                | --                                                  |
| Conflict and terrorism                                                              | --                                      | --                                    | --                                                                                         | --                                                | --                                                  |
| Executions and police conflict                                                      | 0.7<br>(0.4 to 1.1)                     | 0.2<br>(0.1 to 0.2)                   | $< 0.05$<br>( $< 0.05$ to $< 0.05$ )                                                       | 116.3<br>(103.6 to 124.6)                         | 18.6<br>(12.5 to 22.9)                              |
| <b>Impairments</b>                                                                  | --                                      | --                                    | --                                                                                         | --                                                | --                                                  |
| Anaemia                                                                             | 2,104.4<br>(1,653.8 to 2,653.8)         | --                                    | 46.8<br>(29.2 to 71.3)                                                                     | 76.1<br>(40.9 to 122.0)                           | -3.4<br>(-19.8 to 15.2)                             |
| Developmental intellectual disability                                               | 218.8<br>(166.6 to 274.3)               | --                                    | 23.7<br>(17.1 to 32.5)                                                                     | 81.4<br>(71.2 to 92.9)                            | 2.5<br>(-2.2 to 7.4)                                |
| Epilepsy                                                                            | 54.8<br>(31.6 to 76.3)                  | --                                    | 19.0<br>(10.2 to 30.4)                                                                     | 74.8<br>(-10.5 to 256.7)                          | -0.9<br>(-52.7 to 118.7)                            |
| Guillain-Barre syndrome                                                             | 0.1<br>(0.1 to 0.1)                     | --                                    | $< 0.05$<br>( $< 0.05$ to $< 0.05$ )                                                       | 91.8<br>(78.9 to 106.4)                           | 0.3<br>(-0.0 to 0.7)                                |
| Hearing loss                                                                        | 1,049.1<br>(958.5 to 1,147.2)           | --                                    | 29.5<br>(20.2 to 42.6)                                                                     | 120.7<br>(107.0 to 136.2)                         | 7.7<br>(2.9 to 13.6)                                |
| Heart failure                                                                       | 42.5<br>(37.1 to 48.7)                  | --                                    | 4.2<br>(2.9 to 5.8)                                                                        | 153.8<br>(130.6 to 178.8)                         | 0.7<br>(-5.9 to 8.2)                                |
| Infertility                                                                         | 176.3<br>(138.9 to 226.0)               | --                                    | 1.1<br>(0.5 to 2.1)                                                                        | 70.6<br>(60.0 to 82.3)                            | -2.6<br>(-7.6 to 2.9)                               |
| Pelvic inflammatory disease                                                         | 3.0<br>(2.3 to 3.8)                     | --                                    | 0.4<br>(0.2 to 0.6)                                                                        | 86.5<br>(53.1 to 126.7)                           | 2.2<br>(-14.8 to 21.2)                              |
| Vision loss                                                                         | 1,095.4<br>(1,011.0 to 1,191.7)         | --                                    | 34.3<br>(23.4 to 48.4)                                                                     | 97.8<br>(88.5 to 107.4)                           | -5.5<br>(-8.1 to -2.7)                              |

We did not calculate incidence for the nine impairments, certain NTDs, and causes with only birth prevalence. Blank cells mean that no estimate is available.

† Incidence for aggregate causes represents the sum of the incidence of the causes below the aggregate.

‡ Incidence estimates for stroke represent first-ever stroke only.

^ Incidence of HIV/AIDS represents new infections of HIV only and does not include new infections of Tuberculosis in HIV positive cases.

SR Table 14: Prevalence, incidence, and YLDs for 2016, percentage change of YLD counts and percentage change of age-standardised YLD rates between 2006 and 2016 by cause and impairments, for all ages, United Kingdom.

| Cause                                                                                | Prevalence in thousands (95% UI)          | Incidence in thousands (95% UI)               | YLDs in thousands (95% UI)              |                                                   |                                                     |
|--------------------------------------------------------------------------------------|-------------------------------------------|-----------------------------------------------|-----------------------------------------|---------------------------------------------------|-----------------------------------------------------|
|                                                                                      | 2016 counts                               | 2016 counts                                   | 2016 counts                             | Percentage change in counts between 2006 and 2016 | Percentage change in age-standardised rates between |
| <b>All causes</b>                                                                    | <b>61,453.6</b><br>(61,373.0 to 61,517.3) | <b>456,137.1†</b><br>(430,019.1 to 486,275.2) | <b>8,486.8</b><br>(6,343.9 to 10,919.0) | <b>9.1</b><br>(8.6 to 9.6)                        | <b>-0.6</b><br>(-1.0 to -0.1)                       |
| <b>Communicable, maternal, neonatal, and nutritional disorders</b>                   | <b>21,162.9</b><br>(20,709.4 to 21,521.1) | <b>262,376.5†</b><br>(236,952.0 to 290,303.2) | <b>312.7</b><br>(224.8 to 425.5)        | <b>13.8</b><br>(9.2 to 20.4)                      | <b>6.6</b><br>(2.2 to 12.8)                         |
| <b>HIV/AIDS and tuberculosis</b>                                                     | <b>6,429.8</b><br>(5,704.7 to 7,005.9)    | <b>13.1†</b><br>(10.1 to 16.4)                | <b>9.5</b><br>(5.0 to 15.7)             | <b>39.5</b><br>(26.4 to 50.8)                     | <b>26.5</b><br>(15.0 to 36.9)                       |
| Tuberculosis                                                                         | 5,838.0<br>(5,065.6 to 6,667.6)           | 7.0†<br>(5.7 to 8.5)                          | 1.2<br>(0.8 to 1.7)                     | -15.0<br>(-19.0 to -10.9)                         | -19.5<br>(-23.2 to -15.6)                           |
| Drug-susceptible tuberculosis                                                        | 3.6<br>(2.9 to 4.4)                       | 6.9<br>(5.6 to 8.4)                           | 1.2<br>(0.8 to 1.7)                     | -15.1<br>(-19.1 to -11.0)                         | -19.6<br>(-23.4 to -15.7)                           |
| Multidrug-resistant tuberculosis without extensive drug resistance                   | < 0.05<br>(< 0.05 to < 0.05)              | 0.1<br>(0.1 to 0.1)                           | < 0.05<br>(< 0.05 to < 0.05)            | -7.5<br>(-14.1 to -1.4)                           | -12.4<br>(-18.4 to -6.9)                            |
| Extensively drug-resistant tuberculosis                                              | < 0.05<br>(< 0.05 to < 0.05)              | < 0.05<br>(< 0.05 to < 0.05)                  | < 0.05<br>(< 0.05 to < 0.05)            | 99.0<br>(84.7 to 112.2)                           | 88.4<br>(75.5 to 100.3)                             |
| Latent tuberculosis infection                                                        | 5,834.3<br>(5,061.1 to 6,663.5)           | --                                            | --                                      | --                                                | --                                                  |
| HIV/AIDS                                                                             | 100.1<br>(55.0 to 154.3)                  | 6.1 <sup>a</sup><br>(3.5 to 9.3)              | 8.3<br>(4.0 to 14.4)                    | 53.6<br>(40.1 to 64.9)                            | 38.9<br>(26.1 to 49.9)                              |
| Drug-susceptible HIV/AIDS - Tuberculosis                                             | < 0.05<br>(< 0.05 to < 0.05)              | < 0.05<br>(< 0.05 to < 0.05)                  | < 0.05<br>(< 0.05 to < 0.05)            | -31.8<br>(-35.2 to -28.6)                         | -38.4<br>(-41.4 to -35.5)                           |
| Multidrug-resistant HIV/AIDS - Tuberculosis without extensive drug resistance        | < 0.05<br>(< 0.05 to < 0.05)              | < 0.05<br>(< 0.05 to < 0.05)                  | < 0.05<br>(< 0.05 to < 0.05)            | -24.4<br>(-30.2 to -18.9)                         | -31.6<br>(-37.0 to -26.7)                           |
| Extensively drug-resistant HIV/AIDS - Tuberculosis                                   | < 0.05<br>(< 0.05 to < 0.05)              | < 0.05<br>(< 0.05 to < 0.05)                  | < 0.05<br>(< 0.05 to < 0.05)            | 62.7<br>(50.0 to 74.5)                            | 47.1<br>(35.5 to 57.7)                              |
| HIV/AIDS resulting in other diseases                                                 | 100.1<br>(55.0 to 154.3)                  | 6.1<br>(3.5 to 9.3)                           | 8.3<br>(4.0 to 14.4)                    | 53.7<br>(40.1 to 65.0)                            | 39.0<br>(26.2 to 50.0)                              |
| <b>Diarrhoea, lower respiratory infections, and other common infectious diseases</b> | <b>4,053.2</b><br>(3,850.8 to 4,208.6)    | <b>259,146.1†</b><br>(233,625.4 to 287,148.3) | <b>124.2</b><br>(81.1 to 181.9)         | <b>4.8</b><br>(3.7 to 5.7)                        | <b>-2.3</b><br>(-3.3 to -1.5)                       |
| Diarrhoeal diseases                                                                  | 150.7<br>(140.7 to 161.2)                 | 10,058.3<br>(9,389.8 to 10,811.6)             | 16.9<br>(11.6 to 23.2)                  | 1.4<br>(-0.1 to 3.0)                              | -7.8<br>(-9.2 to -6.4)                              |
| Intestinal infectious diseases                                                       | < 0.05<br>(< 0.05 to < 0.05)              | 0.1†<br>(0.1 to 0.1)                          | < 0.05<br>(< 0.05 to < 0.05)            | -7.9<br>(-19.9 to 5.2)                            | -9.0<br>(-21.0 to 4.8)                              |
| Typhoid fever                                                                        | < 0.05<br>(< 0.05 to < 0.05)              | < 0.05<br>(< 0.05 to < 0.05)                  | < 0.05<br>(< 0.05 to < 0.05)            | 15.8<br>(-3.2 to 37.5)                            | 15.8<br>(-3.7 to 38.1)                              |
| Paratyphoid fever                                                                    | < 0.05<br>(< 0.05 to < 0.05)              | 0.1<br>(0.1 to 0.1)                           | < 0.05<br>(< 0.05 to < 0.05)            | -19.3<br>(-31.4 to -5.1)                          | -20.0<br>(-32.8 to -5.6)                            |
| Other intestinal infectious diseases                                                 | --                                        | --                                            | < 0.05<br>(< 0.05 to < 0.05)            | -9.8<br>(-35.0 to 27.1)                           | -11.2<br>(-38.6 to 30.8)                            |
| Lower respiratory infections                                                         | 47.0<br>(44.3 to 50.2)                    | 2,037.1<br>(1,899.7 to 2,192.9)               | 2.7<br>(1.8 to 3.8)                     | 16.3<br>(12.6 to 20.0)                            | 1.0<br>(-1.9 to 4.0)                                |
| Upper respiratory infections                                                         | 3,146.9<br>(2,829.1 to 3,493.3)           | 241,578.1<br>(215,677.1 to 269,737.1)         | 77.9<br>(46.5 to 120.8)                 | 6.2<br>(5.1 to 7.4)                               | 0.1<br>(-0.5 to 0.7)                                |
| Otitis media                                                                         | 673.8<br>(597.3 to 752.8)                 | 4,376.4<br>(3,460.6 to 5,598.9)               | 17.7<br>(10.9 to 26.4)                  | 5.9<br>(3.3 to 8.6)                               | -1.1<br>(-3.4 to 1.2)                               |
| Meningitis                                                                           | 25.4<br>(21.1 to 29.7)                    | 5.7<br>(4.6 to 6.6)                           | 2.7<br>(1.9 to 3.6)                     | -27.7<br>(-30.2 to -25.2)                         | -33.5<br>(-35.7 to -31.3)                           |
| Pneumococcal meningitis                                                              | 5.1<br>(4.2 to 6.2)                       | 0.4<br>(0.3 to 0.4)                           | 0.5<br>(0.4 to 0.7)                     | -52.4<br>(-55.0 to -50.0)                         | -56.5<br>(-58.9 to -54.4)                           |
| H influenzae type B meningitis                                                       | 1.9<br>(1.5 to 2.4)                       | 0.3<br>(0.2 to 0.4)                           | 0.2<br>(0.2 to 0.3)                     | -25.0<br>(-29.0 to -21.8)                         | -31.3<br>(-35.2 to -28.3)                           |
| Meningococcal infection                                                              | 4.8<br>(3.6 to 6.4)                       | 1.5<br>(1.2 to 1.9)                           | 0.5<br>(0.4 to 0.7)                     | -25.4<br>(-29.0 to -18.2)                         | -32.3<br>(-35.4 to -28.7)                           |
| Other meningitis                                                                     | 13.5<br>(10.5 to 16.7)                    | 3.5<br>(2.8 to 4.1)                           | 1.4<br>(1.0 to 1.9)                     | -12.9<br>(-15.8 to -9.9)                          | -19.4<br>(-22.0 to -16.7)                           |
| Encephalitis                                                                         | 27.6<br>(19.0 to 39.2)                    | 17.1<br>(16.0 to 18.3)                        | 3.3<br>(2.3 to 4.5)                     | 9.3<br>(6.8 to 11.5)                              | 0.1<br>(-2.5 to 2.0)                                |
| Diphtheria                                                                           | < 0.05<br>(< 0.05 to < 0.05)              | < 0.05<br>(< 0.05 to < 0.05)                  | < 0.05<br>(< 0.05 to < 0.05)            | -21.8<br>(-27.8 to -15.1)                         | -27.1<br>(-32.1 to -21.5)                           |
| Whooping cough                                                                       | 2.6<br>(2.0 to 3.4)                       | 19.1<br>(14.5 to 24.8)                        | 0.1<br>(0.1 to 0.2)                     | -32.9<br>(-37.1 to -28.6)                         | -37.6<br>(-41.4 to -33.6)                           |
| Tetanus                                                                              | < 0.05<br>(< 0.05 to < 0.05)              | < 0.05<br>(< 0.05 to < 0.05)                  | < 0.05<br>(< 0.05 to < 0.05)            | -26.5<br>(-37.6 to -16.0)                         | -30.5<br>(-40.8 to -20.5)                           |
| Measles                                                                              | < 0.05<br>(< 0.05 to < 0.05)              | 0.1<br>(0.1 to 0.1)                           | < 0.05<br>(< 0.05 to < 0.05)            | -18.7<br>(-39.0 to 11.1)                          | -24.9<br>(-43.6 to 2.6)                             |
| Varicella and herpes zoster                                                          | 66.8<br>(60.3 to 74.4)                    | 1,054.2<br>(1,019.4 to 1,094.0)               | 2.9<br>(1.8 to 4.4)                     | 10.9<br>(4.9 to 16.7)                             | -0.1<br>(-5.2 to 4.6)                               |
| <b>Neglected tropical diseases and malaria</b>                                       | <b>3.0</b><br>(2.6 to 3.5)                | <b>&lt; 0.05†</b><br>(< 0.05 to 0.1)          | <b>0.3</b><br>(0.2 to 0.4)              | <b>-24.2</b><br>(-37.3 to -8.4)                   | <b>-31.2</b><br>(-43.3 to -17.1)                    |
| Malaria                                                                              | --                                        | --                                            | --                                      | --                                                | --                                                  |
| Chagas disease                                                                       | 0.5<br>(0.4 to 0.6)                       | --                                            | < 0.05<br>(< 0.05 to < 0.05)            | 37.2<br>(28.1 to 46.2)                            | 24.7<br>(16.5 to 32.6)                              |
| Leishmaniasis                                                                        | --                                        | --                                            | --                                      | --                                                | --                                                  |
| Visceral leishmaniasis                                                               | --                                        | --                                            | --                                      | --                                                | --                                                  |
| Cutaneous and mucocutaneous leishmaniasis                                            | --                                        | --                                            | --                                      | --                                                | --                                                  |
| African trypanosomiasis                                                              | --                                        | --                                            | --                                      | --                                                | --                                                  |
| Schistosomiasis                                                                      | --                                        | --                                            | --                                      | --                                                | --                                                  |
| Cysticercosis                                                                        | 2.2<br>(1.8 to 2.8)                       | --                                            | 0.3<br>(0.2 to 0.4)                     | -24.4<br>(-38.1 to -7.8)                          | -31.4<br>(-43.7 to -17.0)                           |
| Cystic echinococcosis                                                                | 0.2<br>(0.1 to 0.3)                       | < 0.05<br>(< 0.05 to 0.1)                     | < 0.05<br>(< 0.05 to < 0.05)            | -31.4<br>(-66.0 to 39.6)                          | -36.9<br>(-68.5 to 29.7)                            |
| Lymphatic filariasis                                                                 | --                                        | --                                            | --                                      | --                                                | --                                                  |
| Onchocerciasis                                                                       | --                                        | --                                            | --                                      | --                                                | --                                                  |
| Trachoma                                                                             | --                                        | --                                            | --                                      | --                                                | --                                                  |
| Dengue                                                                               | --                                        | --                                            | --                                      | --                                                | --                                                  |
| Yellow fever                                                                         | --                                        | --                                            | --                                      | --                                                | --                                                  |
| Rabies                                                                               | < 0.05<br>(< 0.05 to < 0.05)              | < 0.05<br>(< 0.05 to < 0.05)                  | < 0.05<br>(< 0.05 to < 0.05)            | 31.3<br>(18.3 to 45.6)                            | 10.7<br>(0.1 to 23.3)                               |
| Intestinal nematode infections                                                       | --                                        | --                                            | --                                      | --                                                | --                                                  |
| Ascariasis                                                                           | --                                        | --                                            | --                                      | --                                                | --                                                  |



| Cause                                                                   | Prevalence in thousands (95% UI)                 | Incidence in thousands (95% UI)                      | YLDs in thousands (95% UI)                    |                                                   |                                                     |
|-------------------------------------------------------------------------|--------------------------------------------------|------------------------------------------------------|-----------------------------------------------|---------------------------------------------------|-----------------------------------------------------|
|                                                                         | 2016 counts                                      | 2016 counts                                          | 2016 counts                                   | Percentage change in counts between 2006 and 2016 | Percentage change in age-standardised rates between |
| Trichuriasis                                                            | --                                               | --                                                   | --                                            | --                                                | --                                                  |
| Hookworm disease                                                        | --                                               | --                                                   | --                                            | --                                                | --                                                  |
| Food-borne trematodiasis                                                | --                                               | --                                                   | --                                            | --                                                | --                                                  |
| Leprosy                                                                 | < 0.05<br>(< 0.05 to < 0.05)                     | --                                                   | < 0.05<br>(< 0.05 to < 0.05)                  | -21.6<br>(-25.4 to -18.1)                         | -33.7<br>(-36.9 to -30.6)                           |
| Ebola virus disease                                                     | --                                               | --                                                   | --                                            | --                                                | --                                                  |
| Zika virus disease                                                      | --                                               | --                                                   | --                                            | --                                                | --                                                  |
| Guinea worm disease                                                     | --                                               | --                                                   | --                                            | --                                                | --                                                  |
| Other neglected tropical diseases                                       | --                                               | --                                                   | < 0.05<br>(< 0.05 to < 0.05)                  | --                                                | --                                                  |
| <b>Maternal disorders</b>                                               | <b>64.8</b><br><b>(60.0 to 69.3)</b>             | <b>848.2†</b><br><b>(780.9 to 925.0)</b>             | <b>4.0</b><br><b>(2.5 to 5.8)</b>             | <b>-1.2</b><br><b>(-25.3 to 32.5)</b>             | <b>-5.8</b><br><b>(-28.8 to 26.2)</b>               |
| Maternal haemorrhage                                                    | 8.4<br>(6.6 to 10.6)                             | 124.9<br>(111.0 to 140.1)                            | 0.5<br>(0.3 to 0.8)                           | 6.7<br>(-26.3 to 52.0)                            | 1.6<br>(-30.0 to 45.6)                              |
| Maternal sepsis and other pregnancy related infections                  | 15.5<br>(11.6 to 20.6)                           | 103.6<br>(90.8 to 118.8)                             | 0.5<br>(0.2 to 0.8)                           | 10.9<br>(-41.9 to 111.0)                          | 3.6<br>(-46.4 to 99.0)                              |
| Maternal hypertensive disorders                                         | 39.0<br>(26.0 to 53.0)                           | 156.9<br>(139.7 to 173.2)                            | 1.8<br>(1.0 to 2.9)                           | -2.4<br>(-39.1 to 59.4)                           | -6.8<br>(-41.9 to 52.2)                             |
| Maternal obstructed labour and uterine rupture                          | 0.5<br>(0.3 to 0.8)                              | 36.8<br>(26.4 to 50.2)                               | 0.2<br>(0.1 to 0.3)                           | 4.8<br>(-43.0 to 88.5)                            | -0.1<br>(-45.5 to 80.5)                             |
| Maternal abortion, miscarriage, and ectopic pregnancy                   | 3.5<br>(2.3 to 4.8)                              | 426.1<br>(365.6 to 497.8)                            | 0.4<br>(0.2 to 0.6)                           | -11.0<br>(-45.5 to 40.8)                          | -13.7<br>(-47.7 to 35.9)                            |
| Other maternal disorders                                                | --                                               | --                                                   | 0.6<br>(0.4 to 0.9)                           | -6.2<br>(-29.1 to 25.7)                           | -10.8<br>(-32.5 to 19.5)                            |
| <b>Neonatal disorders</b>                                               | <b>608.9</b><br><b>(569.9 to 639.4)</b>          | --                                                   | <b>96.3</b><br><b>(68.2 to 131.7)</b>         | <b>27.2</b><br><b>(10.5 to 51.1)</b>              | <b>20.2</b><br><b>(4.4 to 43.4)</b>                 |
| Neonatal preterm birth complications                                    | 482.4<br>(412.1 to 569.0)                        | --                                                   | 51.4<br>(33.9 to 74.5)                        | 50.4<br>(17.1 to 94.4)                            | 43.0<br>(10.7 to 86.0)                              |
| Neonatal encephalopathy due to birth asphyxia and trauma                | 155.5<br>(105.8 to 222.8)                        | --                                                   | 28.3<br>(15.9 to 47.0)                        | 10.8<br>(1.0 to 28.8)                             | 4.7<br>(-4.5 to 21.8)                               |
| Neonatal sepsis and other neonatal infections                           | 32.4<br>(15.4 to 66.5)                           | --                                                   | 13.4<br>(5.5 to 30.3)                         | 1.1<br>(-2.7 to 7.5)                              | -4.8<br>(-8.5 to 1.2)                               |
| Hemolytic disease and other neonatal jaundice                           | 4.6<br>(4.0 to 5.3)                              | --                                                   | 1.4<br>(1.0 to 1.7)                           | 3.8<br>(0.3 to 7.3)                               | -2.6<br>(-5.8 to 0.5)                               |
| Other neonatal disorders                                                | --                                               | --                                                   | 1.9<br>(1.3 to 2.7)                           | 27.8<br>(9.9 to 54.2)                             | 16.6<br>(0.3 to 40.8)                               |
| <b>Nutritional deficiencies</b>                                         | <b>4,656.9</b><br><b>(4,467.3 to 4,783.4)</b>    | <b>409.4†</b><br><b>(330.4 to 493.9)</b>             | <b>66.7</b><br><b>(43.8 to 100.4)</b>         | <b>15.2</b><br><b>(12.9 to 17.6)</b>              | <b>7.5</b><br><b>(5.3 to 9.7)</b>                   |
| Protein-energy malnutrition                                             | 31.8<br>(31.6 to 32.0)                           | 28.6<br>(28.4 to 28.7)                               | 3.5<br>(2.2 to 4.9)                           | 6.6<br>(4.8 to 8.5)                               | -2.8<br>(-4.4 to -1.0)                              |
| Iodine deficiency                                                       | 750.3<br>(658.0 to 851.4)                        | 10.8<br>(9.6 to 12.1)                                | 18.9<br>(12.7 to 26.9)                        | 5.0<br>(3.3 to 6.8)                               | -2.7<br>(-4.2 to -1.0)                              |
| Vitamin A deficiency                                                    | 452.6<br>(360.0 to 557.3)                        | 370.1<br>(291.5 to 454.8)                            | --                                            | --                                                | --                                                  |
| Iron-deficiency anaemia                                                 | 3,434.9<br>(3,179.9 to 3,727.9)                  | --                                                   | 44.2<br>(27.6 to 70.1)                        | 21.0<br>(17.7 to 24.4)                            | 12.9<br>(9.5 to 16.1)                               |
| Other nutritional deficiencies                                          | --                                               | --                                                   | 0.1<br>(0.1 to 0.2)                           | 6.6<br>(4.7 to 8.5)                               | -3.0<br>(-4.7 to -1.2)                              |
| <b>Other communicable, maternal, neonatal, and nutritional diseases</b> | <b>9,201.8</b><br><b>(8,858.6 to 9,473.0)</b>    | <b>1,959.8</b><br><b>(1,815.1 to 2,124.9)</b>        | <b>11.5</b><br><b>(6.9 to 18.7)</b>           | <b>4.3</b><br><b>(2.5 to 6.2)</b>                 | <b>-0.6</b><br><b>(-2.4 to 1.2)</b>                 |
| Sexually transmitted diseases excluding HIV                             | 7,658.0<br>(7,222.9 to 8,060.1)                  | 1,826.3<br>(1,679.8 to 1,990.9)                      | 8.3<br>(5.0 to 13.7)                          | 2.9<br>(0.7 to 5.2)                               | -2.3<br>(-4.4 to -0.0)                              |
| Syphilis                                                                | 118.8<br>(89.6 to 154.4)                         | 105.3<br>(73.7 to 141.2)                             | 0.8<br>(0.5 to 1.0)                           | 16.1<br>(13.4 to 18.6)                            | 1.8<br>(-0.5 to 4.5)                                |
| Chlamydial infection                                                    | 313.2<br>(280.4 to 364.1)                        | 248.7<br>(216.6 to 290.2)                            | 1.7<br>(1.0 to 2.7)                           | 0.7<br>(-4.3 to 5.9)                              | -2.7<br>(-7.7 to 2.6)                               |
| Gonococcal infection                                                    | 89.4<br>(80.5 to 104.1)                          | 157.7<br>(133.0 to 212.6)                            | 0.8<br>(0.5 to 1.3)                           | -1.7<br>(-4.8 to 2.0)                             | -4.0<br>(-7.1 to -0.5)                              |
| Trichomoniasis                                                          | 1,106.9<br>(959.2 to 1,268.4)                    | 919.5<br>(794.8 to 1,062.7)                          | 1.0<br>(0.4 to 2.1)                           | 6.4<br>(3.5 to 9.5)                               | -0.2<br>(-2.8 to 2.5)                               |
| Genital herpes                                                          | 6,111.2<br>(5,275.0 to 7,124.0)                  | 245.5<br>(209.0 to 291.8)                            | 1.5<br>(0.5 to 3.4)                           | 9.5<br>(4.4 to 15.4)                              | 0.5<br>(-4.2 to 6.2)                                |
| Other sexually transmitted diseases                                     | 159.3<br>(139.5 to 177.1)                        | 149.7<br>(131.8 to 169.3)                            | 2.5<br>(1.6 to 3.9)                           | -2.4<br>(-5.1 to 0.7)                             | -4.3<br>(-6.9 to -1.4)                              |
| Hepatitis                                                               | 1,764.2<br>(1,555.0 to 2,008.7)                  | 133.4<br>(117.5 to 151.1)                            | 0.2<br>(0.1 to 0.3)                           | -49.1<br>(-55.5 to -42.1)                         | -51.1<br>(-57.9 to -43.1)                           |
| Acute hepatitis A                                                       | 4.5<br>(3.8 to 5.2)                              | 59.2<br>(49.0 to 67.4)                               | 0.1<br>(0.1 to 0.2)                           | -48.2<br>(-57.2 to -36.8)                         | -50.1<br>(-59.6 to -37.3)                           |
| Hepatitis B                                                             | 910.8<br>(732.5 to 1,139.7)                      | 60.2<br>(47.4 to 75.2)                               | 0.1<br>(< 0.05 to 0.1)                        | -53.1<br>(-61.2 to -43.7)                         | -56.7<br>(-64.4 to -48.0)                           |
| Hepatitis C                                                             | 848.6<br>(761.5 to 939.6)                        | 10.7<br>(9.2 to 12.2)                                | < 0.05<br>(< 0.05 to < 0.05)                  | -20.2<br>(-23.8 to -16.6)                         | -18.7<br>(-21.9 to -15.9)                           |
| Acute hepatitis E                                                       | 0.2<br>(0.2 to 0.3)                              | 3.3<br>(2.8 to 3.8)                                  | < 0.05<br>(< 0.05 to < 0.05)                  | -48.0<br>(-50.7 to -45.1)                         | -52.4<br>(-54.9 to -49.7)                           |
| Other infectious diseases                                               | 98.4<br>(87.4 to 112.2)                          | 0.1<br>(0.1 to 0.1)                                  | 3.0<br>(1.8 to 4.7)                           | 16.6<br>(14.3 to 18.9)                            | 10.2<br>(7.9 to 12.6)                               |
| <b>Non-communicable diseases</b>                                        | <b>59,963.8</b><br><b>(59,874.0 to 60,042.2)</b> | <b>187,275.6†</b><br><b>(180,621.0 to 194,462.1)</b> | <b>7,563.7</b><br><b>(5,614.2 to 9,727.7)</b> | <b>8.7</b><br><b>(8.2 to 9.2)</b>                 | <b>-1.0</b><br><b>(-1.4 to -0.6)</b>                |
| <b>Neoplasms</b>                                                        | <b>1,219.9</b><br><b>(1,208.1 to 1,230.7)</b>    | <b>454.5</b><br><b>(422.1 to 497.6)</b>              | <b>128.3</b><br><b>(95.2 to 164.6)</b>        | <b>18.9</b><br><b>(17.3 to 21.0)</b>              | <b>2.0</b><br><b>(0.6 to 4.0)</b>                   |
| Lip and oral cavity cancer                                              | 19.6<br>(18.9 to 20.3)                           | 5.0<br>(4.9 to 5.2)                                  | 1.9<br>(1.4 to 2.5)                           | 23.5<br>(18.8 to 28.2)                            | 6.7<br>(2.3 to 10.8)                                |
| Nasopharynx cancer                                                      | 1.9<br>(1.8 to 2.0)                              | 0.6<br>(0.6 to 0.7)                                  | 0.3<br>(0.2 to 0.3)                           | -0.1<br>(-3.5 to 4.8)                             | -14.3<br>(-17.1 to -10.2)                           |
| Other pharynx cancer                                                    | 10.5<br>(10.0 to 10.7)                           | 2.8<br>(2.7 to 2.8)                                  | 1.0<br>(0.7 to 1.4)                           | 43.6<br>(37.7 to 48.6)                            | 24.7<br>(19.5 to 29.2)                              |
| Oesophageal cancer                                                      | 11.4<br>(10.9 to 11.8)                           | 8.8<br>(8.4 to 9.1)                                  | 2.2<br>(1.6 to 2.8)                           | 10.7<br>(5.0 to 16.5)                             | -5.7<br>(-10.7 to -0.6)                             |
| Stomach cancer                                                          | 19.9<br>(19.4 to 20.4)                           | 10.4<br>(10.2 to 10.6)                               | 2.6<br>(1.9 to 3.4)                           | 6.4<br>(3.1 to 9.9)                               | -9.6<br>(-12.4 to -6.5)                             |
| Colon and rectum cancer                                                 | 174.0<br>(168.7 to 182.1)                        | 45.3<br>(44.0 to 47.3)                               | 15.9<br>(11.8 to 20.4)                        | 16.4<br>(12.7 to 21.7)                            | -0.8<br>(-4.2 to 3.9)                               |
| Liver cancer                                                            | 5.5<br>(5.2 to 5.7)                              | 6.2<br>(5.9 to 6.4)                                  | 1.5<br>(1.1 to 2.0)                           | 58.7<br>(49.0 to 65.1)                            | 35.7<br>(27.4 to 41.2)                              |
| Liver cancer due to hepatitis B                                         | 1.6<br>(1.1 to 2.1)                              | 1.0<br>(0.7 to 1.3)                                  | 0.2<br>(0.1 to 0.4)                           | 56.4<br>(46.3 to 63.0)                            | 35.3<br>(26.9 to 40.9)                              |

| Cause                                              | Prevalence in thousands (95% UI)              | Incidence in thousands (95% UI)          | YLDs in thousands (95% UI)              |                                                   |                                                     |
|----------------------------------------------------|-----------------------------------------------|------------------------------------------|-----------------------------------------|---------------------------------------------------|-----------------------------------------------------|
|                                                    | 2016 counts                                   | 2016 counts                              | 2016 counts                             | Percentage change in counts between 2006 and 2016 | Percentage change in age-standardised rates between |
| Liver cancer due to hepatitis C                    | 3.1<br>(2.7 to 3.5)                           | 2.0<br>(1.8 to 2.2)                      | 0.5<br>(0.3 to 0.6)                     | 58.9<br>(50.4 to 65.7)                            | 34.8<br>(27.5 to 40.6)                              |
| Liver cancer due to alcohol use                    | 3.4<br>(3.0 to 3.9)                           | 2.1<br>(1.9 to 2.4)                      | 0.5<br>(0.4 to 0.7)                     | 58.1<br>(48.2 to 64.7)                            | 35.2<br>(26.5 to 40.7)                              |
| Liver cancer due to other causes                   | 1.8<br>(1.6 to 2.1)                           | 1.1<br>(1.0 to 1.3)                      | 0.3<br>(0.2 to 0.4)                     | 61.2<br>(50.9 to 68.7)                            | 38.5<br>(29.5 to 44.7)                              |
| Gallbladder and biliary tract cancer               | 2.0<br>(1.8 to 2.2)                           | 2.1<br>(2.0 to 2.3)                      | 0.5<br>(0.3 to 0.7)                     | 7.7<br>(2.3 to 13.8)                              | -9.1<br>(-13.6 to -4.0)                             |
| Pancreatic cancer                                  | 8.3<br>(8.0 to 8.7)                           | 10.1<br>(9.8 to 10.3)                    | 2.0<br>(1.4 to 2.6)                     | 19.2<br>(15.2 to 22.9)                            | 1.0<br>(-2.4 to 3.9)                                |
| Larynx cancer                                      | 11.1<br>(10.8 to 11.4)                        | 2.9<br>(2.8 to 3.0)                      | 1.2<br>(0.9 to 1.6)                     | 14.6<br>(10.7 to 18.7)                            | -2.0<br>(-5.3 to 1.7)                               |
| Tracheal, bronchus, and lung cancer                | 78.8<br>(76.4 to 81.2)                        | 49.1<br>(47.8 to 50.5)                   | 11.6<br>(8.5 to 14.7)                   | 17.0<br>(13.3 to 21.1)                            | -1.2<br>(-4.3 to 2.1)                               |
| Malignant skin melanoma                            | 66.5<br>(55.9 to 74.3)                        | 13.7<br>(11.5 to 15.3)                   | 4.3<br>(3.0 to 5.9)                     | 34.1<br>(26.2 to 40.6)                            | 17.6<br>(11.7 to 23.7)                              |
| Non-melanoma skin cancer                           | 45.5<br>(32.0 to 64.8)                        | 82.1<br>(50.7 to 126.1)                  | 1.6<br>(0.8 to 3.1)                     | 4.6<br>(-13.7 to 25.5)                            | -12.6<br>(-27.8 to 4.0)                             |
| Non-melanoma skin cancer (squamous-cell carcinoma) | 35.7<br>(19.8 to 62.1)                        | 32.4<br>(17.6 to 58.3)                   | 1.5<br>(0.7 to 3.0)                     | 4.1<br>(-14.2 to 25.4)                            | -13.2<br>(-28.8 to 3.8)                             |
| Non-melanoma skin cancer (basal-cell carcinoma)    | 4.0<br>(2.0 to 6.8)                           | 49.7<br>(26.2 to 81.8)                   | < 0.05<br>(< 0.05 to 0.1)               | 28.8<br>(17.6 to 36.1)                            | 11.7<br>(2.9 to 17.4)                               |
| Breast cancer                                      | 219.0<br>(213.2 to 227.8)                     | 45.7<br>(44.5 to 47.6)                   | 20.5<br>(14.8 to 26.8)                  | 7.1<br>(4.1 to 10.3)                              | -6.5<br>(-9.4 to -3.6)                              |
| Cervical cancer                                    | 12.8<br>(12.2 to 13.6)                        | 3.2<br>(3.1 to 3.4)                      | 1.2<br>(0.9 to 1.6)                     | -6.1<br>(-10.3 to -0.8)                           | -12.2<br>(-16.4 to -7.2)                            |
| Uterine cancer                                     | 54.0<br>(52.1 to 57.2)                        | 11.4<br>(11.0 to 12.1)                   | 4.0<br>(2.9 to 5.4)                     | 38.5<br>(32.0 to 46.3)                            | 20.2<br>(14.5 to 27.2)                              |
| Ovarian cancer                                     | 19.2<br>(18.1 to 20.0)                        | 6.3<br>(6.0 to 6.5)                      | 2.7<br>(2.0 to 3.5)                     | -0.7<br>(-6.1 to 4.5)                             | -13.9<br>(-18.8 to -9.2)                            |
| Prostate cancer                                    | 189.3<br>(173.2 to 221.1)                     | 49.4<br>(45.4 to 56.0)                   | 18.1<br>(13.1 to 23.8)                  | 30.8<br>(25.5 to 40.6)                            | 9.3<br>(4.6 to 18.0)                                |
| Testicular cancer                                  | 12.4<br>(11.9 to 12.9)                        | 2.4<br>(2.3 to 2.5)                      | 0.8<br>(0.6 to 1.1)                     | 6.9<br>(1.2 to 13.8)                              | 1.5<br>(-4.2 to 8.4)                                |
| Kidney cancer                                      | 32.3<br>(30.8 to 33.4)                        | 9.0<br>(8.7 to 9.2)                      | 2.9<br>(2.1 to 3.8)                     | 18.2<br>(14.2 to 22.1)                            | 1.8<br>(-1.7 to 5.2)                                |
| Bladder cancer                                     | 60.5<br>(59.2 to 61.8)                        | 14.7<br>(14.4 to 15.0)                   | 5.5<br>(4.0 to 7.0)                     | 16.3<br>(13.5 to 19.2)                            | -2.0<br>(-4.3 to 0.4)                               |
| Brain and nervous system cancer                    | 11.3<br>(8.5 to 12.2)                         | 5.0<br>(3.9 to 5.4)                      | 1.6<br>(1.1 to 2.1)                     | 17.8<br>(6.1 to 23.6)                             | 4.6<br>(-4.6 to 9.5)                                |
| Thyroid cancer                                     | 17.1<br>(16.4 to 18.2)                        | 3.3<br>(3.1 to 3.5)                      | 1.1<br>(0.8 to 1.5)                     | 29.7<br>(22.8 to 37.9)                            | 18.0<br>(11.6 to 25.5)                              |
| Mesothelioma                                       | 4.8<br>(4.6 to 5.0)                           | 3.1<br>(3.0 to 3.3)                      | 1.0<br>(0.7 to 1.2)                     | 25.3<br>(15.7 to 32.4)                            | 4.6<br>(-3.6 to 10.9)                               |
| Hodgkin lymphoma                                   | 12.7<br>(11.9 to 13.2)                        | 2.7<br>(2.6 to 2.8)                      | 1.1<br>(0.8 to 1.4)                     | 16.2<br>(11.2 to 20.7)                            | 7.2<br>(2.9 to 11.8)                                |
| Non-Hodgkin's lymphoma                             | 63.5<br>(58.5 to 67.7)                        | 16.0<br>(14.6 to 16.9)                   | 5.0<br>(3.7 to 6.7)                     | 31.6<br>(26.6 to 36.9)                            | 13.8<br>(9.1 to 19.4)                               |
| Multiple myeloma                                   | 20.6<br>(17.1 to 24.9)                        | 6.2<br>(5.2 to 7.5)                      | 3.3<br>(2.3 to 4.4)                     | 25.6<br>(19.4 to 34.2)                            | 6.9<br>(1.4 to 15.1)                                |
| Leukaemia                                          | 55.2<br>(53.4 to 57.2)                        | 16.3<br>(15.9 to 16.8)                   | 7.0<br>(5.1 to 9.1)                     | 20.5<br>(17.2 to 24.3)                            | 2.5<br>(-0.5 to 6.2)                                |
| Acute lymphoid leukaemia                           | 5.7<br>(5.3 to 6.0)                           | 1.4<br>(1.3 to 1.4)                      | 0.7<br>(0.5 to 0.9)                     | 17.3<br>(9.2 to 24.2)                             | 6.5<br>(-1.7 to 14.2)                               |
| Chronic lymphoid leukaemia                         | 24.3<br>(22.7 to 26.9)                        | 5.6<br>(5.2 to 6.2)                      | 2.9<br>(2.1 to 3.7)                     | 18.4<br>(13.1 to 25.0)                            | -0.7<br>(-5.4 to 5.4)                               |
| Acute myeloid leukaemia                            | 6.6<br>(5.8 to 7.0)                           | 4.7<br>(4.0 to 4.9)                      | 1.2<br>(0.9 to 1.6)                     | 28.9<br>(20.3 to 34.3)                            | 9.0<br>(1.5 to 13.6)                                |
| Chronic myeloid leukaemia                          | 3.2<br>(3.0 to 3.5)                           | 1.1<br>(1.0 to 1.2)                      | 0.4<br>(0.3 to 0.5)                     | 2.3<br>(-2.0 to 6.8)                              | -13.0<br>(-16.8 to -9.0)                            |
| Other leukaemia                                    | 15.4<br>(14.1 to 16.3)                        | 3.5<br>(3.3 to 3.8)                      | 1.9<br>(1.4 to 2.4)                     | 24.2<br>(18.5 to 31.2)                            | 4.3<br>(-0.8 to 10.3)                               |
| Other neoplasms                                    | 81.3<br>(78.4 to 83.6)                        | 20.7<br>(20.0 to 21.2)                   | 6.0<br>(4.4 to 7.9)                     | 29.0<br>(24.8 to 32.8)                            | 12.8<br>(8.6 to 16.3)                               |
| <b>Cardiovascular diseases</b>                     | <b>8,113.1</b><br><b>(7,961.9 to 8,236.0)</b> | <b>880.7†</b><br><b>(827.2 to 938.5)</b> | <b>507.4</b><br><b>(372.9 to 663.4)</b> | <b>7.0</b><br><b>(5.4 to 8.8)</b>                 | <b>-7.8</b><br><b>(-9.0 to -6.3)</b>                |
| Rheumatic heart disease                            | 4.9<br>(4.4 to 5.5)                           | 1.9<br>(1.8 to 2.1)                      | 0.4<br>(0.3 to 0.6)                     | -1.4<br>(-5.3 to 2.5)                             | -12.8<br>(-16.2 to -9.5)                            |
| Ischaemic heart disease                            | 2,621.7<br>(2,479.0 to 2,773.7)               | 372.7<br>(332.0 to 418.8)                | 105.1<br>(74.1 to 141.7)                | 2.2<br>(1.5 to 3.0)                               | -12.1<br>(-12.6 to -11.4)                           |
| Cerebrovascular disease                            | 987.3<br>(960.9 to 1,010.6)                   | 135.0‡<br>(125.2 to 145.5)               | 157.4<br>(111.8 to 199.3)               | 9.0<br>(4.5 to 14.3)                              | -5.6<br>(-9.4 to -1.4)                              |
| Ischaemic stroke                                   | 791.7<br>(725.1 to 866.4)                     | 88.5‡<br>(79.4 to 98.3)                  | 121.6<br>(85.7 to 154.8)                | 8.8<br>(3.0 to 15.7)                              | -5.8<br>(-10.8 to -0.2)                             |
| Hemorrhagic stroke                                 | 238.1<br>(216.0 to 262.7)                     | 46.4‡<br>(42.1 to 50.6)                  | 35.8<br>(25.9 to 45.5)                  | 9.6<br>(1.9 to 16.6)                              | -5.0<br>(-11.3 to 0.8)                              |
| Hypertensive heart disease                         | 132.9<br>(112.4 to 157.1)                     | --                                       | 10.6<br>(7.2 to 14.8)                   | 6.3<br>(4.4 to 8.3)                               | -9.5<br>(-10.9 to -8.0)                             |
| Cardiomyopathy and myocarditis                     | 92.7<br>(86.1 to 97.7)                        | 35.5†<br>(31.3 to 40.2)                  | 8.1<br>(5.6 to 11.4)                    | 2.3<br>(0.5 to 4.1)                               | -10.3<br>(-11.8 to -9.0)                            |
| Myocarditis                                        | 20.5<br>(18.7 to 22.6)                        | 35.5<br>(31.3 to 40.2)                   | 1.4<br>(1.0 to 2.0)                     | -0.5<br>(-2.8 to 1.7)                             | -8.4<br>(-10.3 to -6.4)                             |
| Alcoholic cardiomyopathy                           | 19.6<br>(16.6 to 23.1)                        | --                                       | 1.6<br>(1.1 to 2.3)                     | 1.9<br>(-1.3 to 5.2)                              | -9.8<br>(-12.7 to -7.1)                             |
| Other cardiomyopathy                               | 62.0<br>(53.2 to 71.9)                        | --                                       | 5.0<br>(3.5 to 7.0)                     | 3.3<br>(1.1 to 5.6)                               | -11.2<br>(-13.0 to -9.3)                            |
| Atrial fibrillation and flutter                    | 1,232.1<br>(1,131.2 to 1,348.7)               | 97.5<br>(87.8 to 108.1)                  | 96.0<br>(66.0 to 131.6)                 | 17.6<br>(16.0 to 19.1)                            | 1.0<br>(-0.4 to 2.2)                                |
| Peripheral vascular disease                        | 2,692.3<br>(2,363.6 to 3,064.0)               | 224.7<br>(193.8 to 261.3)                | 10.6<br>(4.9 to 19.4)                   | 5.3<br>(3.6 to 6.9)                               | -11.0<br>(-12.1 to -9.9)                            |
| Endocarditis                                       | 8.7<br>(7.5 to 10.1)                          | 13.3<br>(12.2 to 14.6)                   | 0.7<br>(0.5 to 1.0)                     | 3.8<br>(0.5 to 7.1)                               | -11.0<br>(-13.5 to -8.5)                            |
| Other cardiovascular and circulatory diseases      | 2,295.0<br>(1,997.3 to 2,641.7)               | --                                       | 118.5<br>(80.7 to 166.2)                | 1.7<br>(0.0 to 3.3)                               | -11.3<br>(-12.3 to -10.2)                           |
| <b>Chronic respiratory diseases</b>                | <b>8,862.4</b><br><b>(8,698.8 to 9,031.3)</b> | <b>696.0†</b><br><b>(665.8 to 727.0)</b> | <b>331.9</b><br><b>(245.7 to 435.5)</b> | <b>1.7</b><br><b>(-1.5 to 5.4)</b>                | <b>-7.0</b><br><b>(-9.1 to -4.6)</b>                |
| Chronic obstructive pulmonary disease              | 3,477.2<br>(3,319.5 to 3,639.6)               | 213.8<br>(203.6 to 224.7)                | 95.9<br>(75.9 to 116.0)                 | 7.0<br>(-3.8 to 18.3)                             | -6.6<br>(-15.7 to 2.9)                              |
| Pneumoconiosis                                     | 11.6<br>(10.5 to 13.1)                        | 1.1<br>(1.0 to 1.2)                      | 1.7<br>(1.2 to 2.3)                     | 9.0<br>(5.0 to 13.5)                              | -7.6<br>(-11.0 to -3.8)                             |
| Silicosis                                          | 0.8<br>(0.7 to 1.0)                           | 0.2<br>(0.1 to 0.2)                      | 0.1<br>(0.1 to 0.2)                     | 20.9<br>(16.5 to 25.7)                            | 3.9<br>(-0.0 to 8.2)                                |



| Cause                                                          | Prevalence in thousands (95% UI)                 | Incidence in thousands (95% UI)                 | YLDs in thousands (95% UI)                    |                                                   |                                                     |
|----------------------------------------------------------------|--------------------------------------------------|-------------------------------------------------|-----------------------------------------------|---------------------------------------------------|-----------------------------------------------------|
|                                                                | 2016 counts                                      | 2016 counts                                     | 2016 counts                                   | Percentage change in counts between 2006 and 2016 | Percentage change in age-standardised rates between |
| Asbestosis                                                     | 7.7<br>(6.7 to 8.8)                              | 0.6<br>(0.6 to 0.7)                             | 1.1<br>(0.7 to 1.5)                           | 18.3<br>(12.7 to 25.0)                            | -0.3<br>(-5.2 to 5.4)                               |
| Coal workers pneumoconiosis                                    | 1.5<br>(1.2 to 2.2)                              | 0.2<br>(0.1 to 0.2)                             | 0.2<br>(0.2 to 0.4)                           | 0.1<br>(-4.6 to 6.8)                              | -13.8<br>(-17.7 to -8.7)                            |
| Other pneumoconiosis                                           | 1.6<br>(1.2 to 2.1)                              | 0.1<br>(0.1 to 0.2)                             | 0.2<br>(0.2 to 0.4)                           | -17.0<br>(-26.6 to -6.7)                          | -30.0<br>(-38.1 to -21.3)                           |
| Asthma                                                         | 5,788.9<br>(5,467.9 to 6,130.1)                  | 472.8<br>(444.2 to 502.4)                       | 224.7<br>(148.4 to 320.1)                     | -1.2<br>(-2.4 to -0.0)                            | -7.6<br>(-8.8 to -6.6)                              |
| Interstitial lung disease and pulmonary sarcoidosis            | 61.6<br>(55.9 to 67.7)                           | 8.3<br>(7.7 to 9.0)                             | 6.6<br>(4.4 to 9.3)                           | 23.1<br>(19.9 to 26.3)                            | 5.1<br>(2.8 to 7.5)                                 |
| Other chronic respiratory diseases                             | --                                               | --                                              | 3.0<br>(2.4 to 3.6)                           | 33.4<br>(23.4 to 43.6)                            | 28.0<br>(19.0 to 37.4)                              |
| <b>Cirrhosis and other chronic liver diseases</b>              | <b>482.0</b><br><b>(461.9 to 502.5)</b>          | <b>11.5</b><br><b>(11.1 to 12.0)</b>            | <b>12.8</b><br><b>(9.0 to 17.8)</b>           | <b>17.3</b><br><b>(14.9 to 19.7)</b>              | <b>5.6</b><br><b>(3.5 to 7.8)</b>                   |
| Cirrhosis and other chronic liver diseases due to hepatitis B  | 66.5<br>(57.6 to 75.8)                           | 1.6<br>(1.4 to 1.8)                             | 1.7<br>(1.2 to 2.4)                           | 19.2<br>(13.8 to 24.9)                            | 7.5<br>(2.9 to 12.0)                                |
| Cirrhosis and other chronic liver diseases due to hepatitis C  | 144.0<br>(125.7 to 163.7)                        | 3.3<br>(2.9 to 3.7)                             | 3.6<br>(2.4 to 4.9)                           | 18.6<br>(14.4 to 22.6)                            | 6.8<br>(3.1 to 10.3)                                |
| Cirrhosis and other chronic liver diseases due to alcohol use  | 225.6<br>(205.9 to 246.8)                        | 5.5<br>(5.1 to 5.9)                             | 5.6<br>(3.9 to 7.6)                           | 20.2<br>(16.9 to 23.5)                            | 7.8<br>(4.8 to 10.8)                                |
| Cirrhosis and other chronic liver diseases due to other causes | 46.0<br>(39.7 to 52.9)                           | 1.1<br>(1.0 to 1.3)                             | 2.0<br>(1.4 to 2.8)                           | 6.6<br>(2.7 to 10.3)                              | -0.4<br>(-4.2 to 3.4)                               |
| <b>Digestive diseases</b>                                      | <b>2,992.8</b><br><b>(2,952.0 to 3,034.0)</b>    | <b>2,210.2†</b><br><b>(2,120.8 to 2,301.0)</b>  | <b>97.3</b><br><b>(69.5 to 128.9)</b>         | <b>12.6</b><br><b>(11.1 to 14.2)</b>              | <b>2.5</b><br><b>(1.2 to 3.9)</b>                   |
| Peptic ulcer disease                                           | 645.0<br>(599.4 to 691.0)                        | 64.8<br>(59.0 to 71.0)                          | 5.5<br>(3.4 to 8.5)                           | 25.1<br>(20.5 to 29.9)                            | 12.7<br>(9.0 to 16.5)                               |
| Gastritis and duodenitis                                       | 1,574.7<br>(1,428.2 to 1,727.1)                  | 415.4<br>(381.2 to 451.2)                       | 8.1<br>(5.1 to 12.5)                          | 36.1<br>(32.4 to 39.5)                            | 20.6<br>(17.7 to 23.4)                              |
| Appendicitis                                                   | 2.0<br>(1.9 to 2.1)                              | 51.6<br>(48.5 to 54.9)                          | 0.6<br>(0.4 to 0.9)                           | 5.9<br>(2.6 to 9.2)                               | 0.8<br>(-3.0 to 4.7)                                |
| Paralytic ileus and intestinal obstruction                     | 1.2<br>(1.1 to 1.2)                              | 32.5<br>(30.3 to 34.7)                          | 0.4<br>(0.2 to 0.5)                           | 25.4<br>(23.0 to 27.7)                            | 10.0<br>(8.3 to 11.5)                               |
| Inguinal, femoral, and abdominal hernia                        | 438.0<br>(409.1 to 469.2)                        | 805.6<br>(735.4 to 875.2)                       | 22.8<br>(15.6 to 30.9)                        | 0.9<br>(-0.8 to 2.8)                              | -10.7<br>(-12.2 to -9.2)                            |
| Inflammatory bowel disease                                     | 325.1<br>(306.2 to 345.9)                        | 30.4<br>(28.0 to 32.9)                          | 47.1<br>(32.4 to 64.2)                        | 12.2<br>(10.9 to 13.4)                            | 4.9<br>(3.6 to 6.1)                                 |
| Vascular intestinal disorders                                  | 3.6<br>(3.2 to 3.9)                              | 16.1<br>(14.4 to 18.0)                          | 1.0<br>(0.7 to 1.4)                           | 27.4<br>(21.0 to 33.9)                            | 9.8<br>(4.6 to 14.8)                                |
| Gallbladder and biliary diseases                               | 98.8<br>(89.8 to 108.5)                          | 719.6<br>(677.0 to 762.6)                       | 3.3<br>(2.2 to 4.5)                           | 22.6<br>(17.0 to 28.2)                            | 9.4<br>(4.8 to 14.2)                                |
| Pancreatitis                                                   | 8.4<br>(7.8 to 9.1)                              | 74.3<br>(68.7 to 80.4)                          | 1.1<br>(0.7 to 1.5)                           | 25.4<br>(22.0 to 28.9)                            | 12.7<br>(10.3 to 15.1)                              |
| Other digestive diseases                                       | --                                               | --                                              | 7.5<br>(5.4 to 10.0)                          | 18.0<br>(16.4 to 20.0)                            | 6.1<br>(4.7 to 7.7)                                 |
| <b>Neurological disorders</b>                                  | <b>25,256.7</b><br><b>(24,760.3 to 25,646.4)</b> | <b>10,480.3</b><br><b>(9,063.8 to 12,016.9)</b> | <b>812.3</b><br><b>(561.3 to 1,080.0)</b>     | <b>6.7</b><br><b>(4.8 to 8.5)</b>                 | <b>-1.5</b><br><b>(-3.3 to 0.1)</b>                 |
| Alzheimer's disease and other dementias                        | 838.7<br>(708.8 to 995.5)                        | 162.9<br>(135.2 to 196.6)                       | 126.7<br>(87.5 to 169.4)                      | 17.1<br>(15.9 to 18.5)                            | -3.1<br>(-3.9 to -2.3)                              |
| Parkinson's disease                                            | 115.9<br>(91.7 to 144.1)                         | 13.8<br>(10.9 to 17.4)                          | 13.4<br>(8.5 to 18.9)                         | 23.2<br>(21.1 to 25.6)                            | 4.5<br>(2.6 to 6.6)                                 |
| Epilepsy                                                       | 221.7<br>(182.2 to 261.7)                        | 22.6<br>(18.4 to 27.1)                          | 53.8<br>(35.6 to 75.7)                        | -9.7<br>(-26.1 to 8.7)                            | -15.2<br>(-30.3 to 2.1)                             |
| Multiple sclerosis                                             | 106.5<br>(97.4 to 115.8)                         | 2.7<br>(2.5 to 2.9)                             | 27.2<br>(19.2 to 35.2)                        | 10.4<br>(7.2 to 13.0)                             | 1.4<br>(-1.5 to 4.0)                                |
| Motor neuron disease                                           | 13.2<br>(12.0 to 14.6)                           | 2.6<br>(2.5 to 2.8)                             | 2.8<br>(2.0 to 3.7)                           | 20.0<br>(17.9 to 22.5)                            | 6.5<br>(4.9 to 8.2)                                 |
| Migraine                                                       | 11,341.0<br>(10,878.2 to 11,797.8)               | 1,033.3<br>(981.9 to 1,087.1)                   | 496.3<br>(322.5 to 691.3)                     | 5.5<br>(4.8 to 6.2)                               | -0.3<br>(-0.8 to 0.1)                               |
| Tension-type headache                                          | 17,298.0<br>(15,567.8 to 19,198.7)               | 9,242.0<br>(7,817.9 to 10,774.6)                | 77.5<br>(49.7 to 113.2)                       | 6.7<br>(5.4 to 8.0)                               | 0.1<br>(-0.7 to 1.0)                                |
| Other neurological disorders                                   | 0.2<br>(0.1 to 0.3)                              | 0.4<br>(0.3 to 0.6)                             | 14.6<br>(10.1 to 19.3)                        | 12.5<br>(0.0 to 25.7)                             | 6.7<br>(-6.6 to 20.7)                               |
| <b>Mental and substance use disorders</b>                      | <b>10,878.7</b><br><b>(10,749.6 to 10,992.8)</b> | <b>4,101.8†</b><br><b>(3,771.8 to 4,455.4)</b>  | <b>1,600.5</b><br><b>(1,158.1 to 2,067.7)</b> | <b>7.0</b><br><b>(6.1 to 8.1)</b>                 | <b>0.1</b><br><b>(-0.7 to 1.1)</b>                  |
| Schizophrenia                                                  | 187.2<br>(165.1 to 209.1)                        | 8.3<br>(7.4 to 9.4)                             | 118.5<br>(88.7 to 146.0)                      | 16.1<br>(14.6 to 17.7)                            | 8.5<br>(6.9 to 10.1)                                |
| Alcohol use disorders                                          | 848.8<br>(745.7 to 960.1)                        | 363.2<br>(316.5 to 413.5)                       | 84.6<br>(58.1 to 117.0)                       | 9.0<br>(7.0 to 11.0)                              | 2.1<br>(0.2 to 3.9)                                 |
| Drug use disorders                                             | 835.5<br>(815.5 to 853.8)                        | 97.3<br>(89.5 to 106.2)                         | 179.9<br>(130.6 to 230.0)                     | 1.1<br>(-0.6 to 2.8)                              | -5.7<br>(-7.4 to -4.0)                              |
| Opioid use disorders                                           | 266.2<br>(241.0 to 295.3)                        | 34.7<br>(30.8 to 39.1)                          | 110.0<br>(77.6 to 140.9)                      | 1.3<br>(-1.0 to 3.7)                              | -5.7<br>(-8.2 to -3.2)                              |
| Cocaine use disorders                                          | 159.6<br>(141.3 to 179.3)                        | 8.2<br>(6.9 to 9.6)                             | 21.5<br>(13.6 to 31.0)                        | 6.1<br>(3.9 to 8.4)                               | -0.6<br>(-2.8 to 1.6)                               |
| Amphetamine use disorders                                      | 84.7<br>(63.4 to 110.8)                          | 7.0<br>(5.2 to 9.4)                             | 11.1<br>(6.5 to 17.5)                         | -0.4<br>(-3.8 to 3.1)                             | -6.5<br>(-9.7 to -3.2)                              |
| Cannabis use disorders                                         | 273.5<br>(231.8 to 323.4)                        | 36.8<br>(30.6 to 44.2)                          | 8.0<br>(5.0 to 11.9)                          | -21.4<br>(-27.0 to -15.7)                         | -26.4<br>(-32.0 to -20.5)                           |
| Other drug use disorders                                       | 73.3<br>(66.7 to 80.0)                           | 10.5<br>(9.5 to 11.5)                           | 29.2<br>(19.6 to 40.4)                        | 5.6<br>(2.7 to 8.7)                               | -0.9<br>(-3.8 to 2.0)                               |
| Depressive disorders                                           | 2,917.6<br>(2,817.7 to 3,011.7)                  | 2,962.2<br>(2,646.0 to 3,310.5)                 | 481.4<br>(332.7 to 658.0)                     | 8.2<br>(6.5 to 9.8)                               | 0.3<br>(-1.1 to 1.5)                                |
| Major depressive disorder                                      | 1,848.2<br>(1,647.1 to 2,069.6)                  | 2,805.5<br>(2,486.5 to 3,155.7)                 | 373.9<br>(254.0 to 516.1)                     | 7.9<br>(6.5 to 9.5)                               | 0.3<br>(-0.8 to 1.4)                                |
| Dysthymia                                                      | 1,129.5<br>(992.2 to 1,294.4)                    | 156.8<br>(137.7 to 179.6)                       | 107.5<br>(72.6 to 156.1)                      | 9.1<br>(3.7 to 13.7)                              | 0.3<br>(-4.4 to 4.6)                                |
| Bipolar disorder                                               | 702.2<br>(612.8 to 811.5)                        | 41.0<br>(36.0 to 47.1)                          | 142.0<br>(89.2 to 208.3)                      | 6.9<br>(5.9 to 7.8)                               | -0.0<br>(-0.7 to 0.7)                               |
| Anxiety disorders                                              | 3,113.6<br>(2,912.5 to 3,316.4)                  | 406.7<br>(380.6 to 435.2)                       | 296.8<br>(209.0 to 401.5)                     | 6.5<br>(3.1 to 10.4)                              | 0.2<br>(-3.3 to 4.0)                                |
| Eating disorders                                               | 211.4<br>(188.3 to 234.4)                        | 63.4<br>(47.4 to 82.8)                          | 43.4<br>(28.2 to 63.0)                        | 6.0<br>(3.7 to 8.1)                               | 3.1<br>(1.8 to 4.5)                                 |
| Anorexia nervosa                                               | 57.0<br>(42.3 to 75.5)                           | 11.2<br>(8.2 to 14.6)                           | 12.1<br>(7.3 to 18.0)                         | 6.9<br>(4.3 to 9.6)                               | 2.8<br>(0.6 to 5.2)                                 |
| Bulimia nervosa                                                | 149.6<br>(113.0 to 196.9)                        | 52.2<br>(36.7 to 71.2)                          | 31.4<br>(19.2 to 46.6)                        | 5.7<br>(2.9 to 8.5)                               | 3.2<br>(1.6 to 4.9)                                 |
| Autistic spectrum disorders                                    | 516.5<br>(499.3 to 533.6)                        | 2.5<br>(1.8 to 3.4)                             | 85.0<br>(57.9 to 119.2)                       | 7.1<br>(6.2 to 7.9)                               | 0.4<br>(-0.4 to 1.2)                                |
| Autism                                                         | 223.5<br>(190.8 to 261.2)                        | 0.3<br>(0.2 to 0.5)                             | 56.0<br>(35.7 to 81.7)                        | 7.2<br>(6.0 to 8.3)                               | 0.4<br>(-0.8 to 1.5)                                |
| Asperger syndrome and other autistic spectrum disorders        | 292.1<br>(242.8 to 351.1)                        | 2.2<br>(1.5 to 3.1)                             | 28.9<br>(18.8 to 42.3)                        | 6.8<br>(5.9 to 7.7)                               | 0.4<br>(-0.5 to 1.1)                                |



| Cause                                                      | Prevalence in thousands (95% UI)                 | Incidence in thousands (95% UI)                      | YLDs in thousands (95% UI)                    |                                                   |                                                     |
|------------------------------------------------------------|--------------------------------------------------|------------------------------------------------------|-----------------------------------------------|---------------------------------------------------|-----------------------------------------------------|
|                                                            | 2016 counts                                      | 2016 counts                                          | 2016 counts                                   | Percentage change in counts between 2006 and 2016 | Percentage change in age-standardised rates between |
| Attention-deficit/hyperactivity disorder                   | 429.0<br>(392.2 to 470.9)                        | 20.6<br>(18.0 to 23.7)                               | 5.2<br>(3.1 to 8.1)                           | 2.7<br>(-3.2 to 9.0)                              | 0.6<br>(-5.6 to 7.2)                                |
| Conduct disorder                                           | 320.6<br>(264.9 to 376.4)                        | 101.4<br>(80.6 to 122.9)                             | 38.9<br>(23.8 to 59.2)                        | -1.7<br>(-6.8 to 3.7)                             | 0.5<br>(-5.1 to 6.1)                                |
| Idiopathic developmental intellectual disability           | 361.1<br>(151.6 to 571.4)                        | --                                                   | 18.1<br>(8.0 to 31.7)                         | 1.9<br>(-2.9 to 4.4)                              | -4.0<br>(-8.5 to -1.6)                              |
| Other mental and substance use disorders                   | 1,454.3<br>(1,288.5 to 1,669.2)                  | 35.2<br>(31.4 to 39.6)                               | 106.8<br>(72.9 to 152.3)                      | 8.8<br>(8.0 to 9.6)                               | 0.2<br>(-0.5 to 0.9)                                |
| <b>Diabetes, urogenital, blood, and endocrine diseases</b> | <b>20,694.7</b><br><b>(20,412.4 to 20,996.6)</b> | <b>6,140.5†</b><br><b>(5,838.5 to 6,477.9)</b>       | <b>454.9</b><br><b>(323.3 to 617.4)</b>       | <b>7.9</b><br><b>(5.8 to 10.2)</b>                | <b>-4.1</b><br><b>(-5.9 to -2.3)</b>                |
| Diabetes mellitus                                          | 2,594.2<br>(2,318.1 to 2,912.4)                  | 130.6<br>(115.1 to 149.8)                            | 204.0<br>(141.4 to 283.8)                     | 2.5<br>(-1.9 to 7.2)                              | -10.1<br>(-13.8 to -6.3)                            |
| Acute glomerulonephritis                                   | 0.8<br>(0.6 to 1.0)                              | 12.2<br>(9.4 to 15.0)                                | < 0.05<br>(< 0.05 to 0.1)                     | 6.5<br>(2.6 to 9.9)                               | -4.0<br>(-7.0 to -1.5)                              |
| Chronic kidney disease                                     | 2,410.0<br>(2,158.4 to 2,645.3)                  | 200.7<br>(175.2 to 226.1)                            | 60.8<br>(45.7 to 77.2)                        | 20.2<br>(16.8 to 23.5)                            | 5.1<br>(2.5 to 7.8)                                 |
| Chronic kidney disease due to diabetes mellitus            | 780.7<br>(656.5 to 916.2)                        | 67.2<br>(55.2 to 80.0)                               | 19.8<br>(14.4 to 25.9)                        | 25.2<br>(19.9 to 31.1)                            | 8.6<br>(4.0 to 13.6)                                |
| Chronic kidney disease due to hypertension                 | 402.6<br>(341.6 to 463.4)                        | 37.9<br>(30.9 to 46.4)                               | 6.8<br>(4.7 to 9.0)                           | 18.1<br>(10.3 to 25.8)                            | -0.4<br>(-7.0 to 5.8)                               |
| Chronic kidney disease due to glomerulonephritis           | 361.2<br>(303.9 to 421.4)                        | 24.0<br>(18.9 to 30.3)                               | 12.7<br>(9.1 to 16.8)                         | 10.3<br>(4.0 to 17.1)                             | -1.1<br>(-6.0 to 4.3)                               |
| Chronic kidney disease due to other causes                 | 865.5<br>(728.4 to 1,020.9)                      | 71.6<br>(58.9 to 85.6)                               | 21.5<br>(15.8 to 27.8)                        | 22.8<br>(16.6 to 29.3)                            | 7.9<br>(2.8 to 12.9)                                |
| Urinary diseases and male infertility                      | 1,582.8<br>(1,496.4 to 1,668.2)                  | 3,284.5†<br>(2,993.7 to 3,595.2)                     | 49.0<br>(32.6 to 68.9)                        | 16.6<br>(15.2 to 17.9)                            | 1.6<br>(0.6 to 2.7)                                 |
| Interstitial nephritis and urinary tract infections        | 45.3<br>(39.7 to 51.5)                           | 2,360.4<br>(2,073.8 to 2,670.2)                      | 1.5<br>(0.9 to 2.3)                           | 28.9<br>(24.5 to 33.3)                            | 22.2<br>(17.8 to 26.5)                              |
| Urolithiasis                                               | 29.6<br>(27.6 to 31.7)                           | 779.4<br>(730.2 to 831.9)                            | 2.2<br>(1.5 to 3.0)                           | 24.7<br>(21.1 to 28.6)                            | 12.5<br>(9.8 to 15.5)                               |
| Benign prostatic hyperplasia                               | 1,316.4<br>(1,211.4 to 1,434.4)                  | 144.7<br>(129.4 to 162.7)                            | 43.1<br>(28.4 to 61.2)                        | 16.6<br>(15.3 to 18.0)                            | 0.3<br>(-0.8 to 1.5)                                |
| Male infertility                                           | 161.4<br>(119.5 to 215.5)                        | --                                                   | 1.0<br>(0.4 to 2.0)                           | -2.0<br>(-6.6 to 2.8)                             | -0.3<br>(-3.8 to 3.5)                               |
| Other urinary diseases                                     | --                                               | --                                                   | 1.2<br>(0.8 to 1.7)                           | 5.7<br>(3.4 to 8.3)                               | -1.5<br>(-3.8 to 0.8)                               |
| Gynecological diseases                                     | 7,689.8<br>(7,514.4 to 7,900.7)                  | 2,171.0†<br>(2,090.7 to 2,253.9)                     | 73.2<br>(49.9 to 104.3)                       | 3.7<br>(2.2 to 5.2)                               | -2.8<br>(-3.9 to -1.8)                              |
| Uterine fibroids                                           | 434.1<br>(401.4 to 471.2)                        | 39.6<br>(35.5 to 44.0)                               | 5.1<br>(2.7 to 8.8)                           | 14.5<br>(12.3 to 17.0)                            | 7.2<br>(5.2 to 9.5)                                 |
| Polycystic ovarian syndrome                                | 17.9<br>(13.3 to 23.6)                           | 54.4<br>(38.4 to 73.2)                               | 0.2<br>(0.1 to 0.3)                           | -1.3<br>(-4.8 to 2.6)                             | -0.2<br>(-3.8 to 3.6)                               |
| Female infertility                                         | 140.8<br>(58.3 to 269.1)                         | --                                                   | 0.8<br>(0.2 to 2.0)                           | 17.9<br>(3.0 to 41.0)                             | 20.2<br>(6.7 to 44.5)                               |
| Endometriosis                                              | 53.4<br>(46.7 to 60.2)                           | 144.9<br>(118.4 to 178.3)                            | 5.0<br>(3.3 to 7.0)                           | 4.5<br>(1.3 to 7.5)                               | -1.3<br>(-4.3 to 1.5)                               |
| Genital prolapse                                           | 3,652.0<br>(3,299.8 to 4,016.7)                  | 162.4<br>(144.0 to 183.2)                            | 11.3<br>(5.5 to 20.1)                         | 11.8<br>(10.4 to 13.3)                            | -1.5<br>(-2.8 to -0.3)                              |
| Premenstrual syndrome                                      | 3,354.2<br>(3,201.0 to 3,505.5)                  | 1,130.0<br>(1,069.0 to 1,187.3)                      | 27.8<br>(17.3 to 42.6)                        | 4.6<br>(3.3 to 6.0)                               | -0.8<br>(-2.0 to 0.4)                               |
| Other gynecological diseases                               | 682.5<br>(636.1 to 728.0)                        | 639.7<br>(590.8 to 689.9)                            | 23.0<br>(15.6 to 32.0)                        | -3.2<br>(-4.8 to -1.6)                            | -8.2<br>(-9.6 to -6.7)                              |
| Hemoglobinopathies and hemolytic anaemias                  | 9,239.9<br>(8,883.7 to 9,616.0)                  | --                                                   | 11.5<br>(6.7 to 19.3)                         | 14.5<br>(4.1 to 23.3)                             | 3.1<br>(-6.4 to 11.8)                               |
| Thalassemias                                               | 1.4<br>(0.5 to 4.0)                              | --                                                   | 0.1<br>(< 0.05 to 0.1)                        | 7.9<br>(-5.5 to 22.1)                             | 1.3<br>(-11.4 to 15.2)                              |
| Thalassaemia trait                                         | 1,358.5<br>(809.9 to 2,229.7)                    | --                                                   | 7.4<br>(3.8 to 13.0)                          | 12.9<br>(-0.2 to 26.1)                            | 1.1<br>(-10.9 to 13.7)                              |
| Sickle cell disorders                                      | 0.8<br>(0.8 to 0.9)                              | --                                                   | 0.1<br>(0.1 to 0.2)                           | 18.6<br>(16.0 to 20.9)                            | 14.5<br>(11.7 to 16.9)                              |
| Sickle cell trait                                          | 1,066.5<br>(984.1 to 1,194.9)                    | --                                                   | 1.4<br>(0.8 to 2.2)                           | 9.2<br>(4.5 to 13.2)                              | -0.7<br>(-5.0 to 3.2)                               |
| G6PD deficiency                                            | 1,094.2<br>(1,025.3 to 1,178.6)                  | --                                                   | 0.1<br>(0.1 to 0.1)                           | 41.3<br>(34.5 to 49.2)                            | 29.2<br>(22.7 to 36.3)                              |
| G6PD trait                                                 | 5,898.6<br>(5,725.6 to 6,098.0)                  | --                                                   | < 0.05<br>(< 0.05 to < 0.05)                  | 14.7<br>(6.0 to 27.4)                             | 3.4<br>(-3.6 to 13.1)                               |
| Other hemoglobinopathies and hemolytic anaemias            | 151.3<br>(140.9 to 163.8)                        | --                                                   | 2.4<br>(1.6 to 3.7)                           | 22.1<br>(18.5 to 25.7)                            | 11.8<br>(8.2 to 15.4)                               |
| Endocrine, metabolic, blood, and immune disorders          | 1,680.6<br>(1,534.6 to 1,845.6)                  | 341.4<br>(307.7 to 378.6)                            | 56.4<br>(37.8 to 77.9)                        | 14.3<br>(12.1 to 16.6)                            | 1.5<br>(-0.1 to 3.2)                                |
| <b>Musculoskeletal disorders</b>                           | <b>17,835.2</b><br><b>(17,574.3 to 18,153.4)</b> | <b>9,519.5</b><br><b>(8,711.8 to 10,430.6)</b>       | <b>1,974.6</b><br><b>(1,440.2 to 2,564.3)</b> | <b>10.3</b><br><b>(8.8 to 11.7)</b>               | <b>0.1</b><br><b>(-1.1 to 1.1)</b>                  |
| Rheumatoid arthritis                                       | 370.1<br>(333.9 to 410.9)                        | 18.5<br>(16.6 to 20.5)                               | 85.7<br>(58.9 to 113.0)                       | 11.2<br>(8.8 to 13.8)                             | -1.0<br>(-3.0 to 1.0)                               |
| Osteoarthritis                                             | 4,991.5<br>(4,725.5 to 5,276.2)                  | 218.6<br>(204.1 to 234.0)                            | 174.0<br>(115.0 to 249.6)                     | 14.8<br>(13.7 to 15.9)                            | -0.0<br>(-0.9 to 1.0)                               |
| Low back and neck pain                                     | 11,916.1<br>(11,416.5 to 12,338.8)               | 5,516.6<br>(4,853.3 to 6,205.0)                      | 1,435.6<br>(1,009.0 to 1,883.9)               | 10.1<br>(8.2 to 11.8)                             | 0.5<br>(-1.0 to 1.8)                                |
| Low back pain                                              | 9,556.4<br>(8,557.6 to 10,686.5)                 | 4,806.0<br>(4,161.7 to 5,544.7)                      | 1,076.7<br>(763.3 to 1,414.1)                 | 12.6<br>(10.7 to 14.4)                            | 3.2<br>(1.8 to 4.5)                                 |
| Neck pain                                                  | 3,635.7<br>(3,176.1 to 4,174.3)                  | 710.6<br>(626.2 to 829.0)                            | 358.9<br>(245.0 to 501.5)                     | 3.2<br>(-0.4 to 7.3)                              | -7.1<br>(-9.9 to -3.9)                              |
| Gout                                                       | 771.1<br>(681.7 to 871.1)                        | 119.8<br>(104.4 to 136.7)                            | 24.0<br>(16.5 to 32.8)                        | 6.5<br>(4.4 to 8.5)                               | -5.5<br>(-7.3 to -3.9)                              |
| Other musculoskeletal disorders                            | 3,024.6<br>(2,483.1 to 3,637.6)                  | 3,646.0<br>(3,121.6 to 4,277.3)                      | 255.3<br>(171.1 to 362.2)                     | 8.7<br>(4.9 to 12.7)                              | -1.2<br>(-4.2 to 1.5)                               |
| <b>Other non-communicable diseases</b>                     | <b>50,015.5</b><br><b>(49,712.2 to 50,295.8)</b> | <b>152,780.4†</b><br><b>(146,264.0 to 159,459.4)</b> | <b>1,643.8</b><br><b>(1,135.1 to 2,321.0)</b> | <b>10.8</b><br><b>(10.0 to 11.6)</b>              | <b>0.1</b><br><b>(-0.5 to 0.6)</b>                  |
| Congenital anomalies                                       | 657.1<br>(640.9 to 672.4)                        | --                                                   | 70.9<br>(51.6 to 93.1)                        | 3.6<br>(1.0 to 5.8)                               | -2.9<br>(-5.2 to -0.9)                              |
| Neural tube defects                                        | 18.8<br>(16.8 to 21.0)                           | --                                                   | 5.8<br>(4.0 to 7.9)                           | 9.0<br>(4.3 to 13.6)                              | 1.4<br>(-2.9 to 5.9)                                |
| Congenital heart anomalies                                 | 138.3<br>(126.4 to 151.2)                        | --                                                   | 7.6<br>(3.2 to 13.1)                          | 4.5<br>(1.4 to 7.7)                               | -2.2<br>(-5.0 to 0.7)                               |
| Orofacial clefts                                           | 32.9<br>(29.0 to 37.1)                           | --                                                   | 0.3<br>(0.2 to 0.5)                           | 8.0<br>(4.4 to 11.6)                              | 0.4<br>(-2.9 to 3.8)                                |
| Down's syndrome                                            | 32.4<br>(28.3 to 37.1)                           | --                                                   | 3.0<br>(2.0 to 4.2)                           | 13.0<br>(9.9 to 16.1)                             | 7.5<br>(4.7 to 10.5)                                |
| Turner syndrome                                            | 24.2<br>(21.1 to 27.6)                           | --                                                   | 0.4<br>(0.2 to 0.7)                           | 8.7<br>(2.9 to 14.7)                              | 4.2<br>(-1.4 to 9.8)                                |
| Klinefelter syndrome                                       | 58.1<br>(51.4 to 65.3)                           | --                                                   | 0.4<br>(0.2 to 0.7)                           | -9.0<br>(-11.3 to -6.6)                           | -13.1<br>(-15.3 to -10.9)                           |

| Cause                                         | Prevalence in thousands (95% UI)                 | Incidence in thousands (95% UI)                           | YLDs in thousands (95% UI)              |                                                   |                                                     |
|-----------------------------------------------|--------------------------------------------------|-----------------------------------------------------------|-----------------------------------------|---------------------------------------------------|-----------------------------------------------------|
|                                               | 2016 counts                                      | 2016 counts                                               | 2016 counts                             | Percentage change in counts between 2006 and 2016 | Percentage change in age-standardised rates between |
| Other chromosomal abnormalities               | 71.2<br>(60.6 to 83.6)                           | --                                                        | 6.5<br>(4.4 to 9.2)                     | 6.8<br>(4.3 to 9.9)                               | 4.0<br>(1.5 to 7.0)                                 |
| Congenital musculoskeletal and limb anomalies | 148.1<br>(136.5 to 159.7)                        | --                                                        | 19.4<br>(13.4 to 26.4)                  | 4.5<br>(2.0 to 7.0)                               | -3.0<br>(-5.3 to -0.6)                              |
| Urogenital congenital anomalies               | 66.6<br>(59.9 to 73.7)                           | --                                                        | 1.8<br>(1.1 to 2.8)                     | -1.5<br>(-4.0 to 0.7)                             | -7.2<br>(-9.6 to -5.2)                              |
| Digestive congenital anomalies                | 135.8<br>(121.8 to 151.3)                        | --                                                        | 5.9<br>(3.9 to 8.6)                     | 2.3<br>(-1.4 to 5.6)                              | -4.5<br>(-8.0 to -1.5)                              |
| Other congenital anomalies                    | 107.7<br>(76.3 to 152.4)                         | --                                                        | 19.8<br>(13.3 to 28.4)                  | -0.5<br>(-7.8 to 6.4)                             | -7.4<br>(-14.2 to -1.1)                             |
| Skin and subcutaneous diseases                | 23,918.0<br>(23,694.0 to 24,160.3)               | 55,709.5<br>(52,886.7 to 58,791.7)                        | 641.5<br>(434.2 to 914.7)               | 6.3<br>(5.5 to 7.0)                               | -0.2<br>(-1.0 to 0.6)                               |
| Dermatitis                                    | 4,828.0<br>(4,614.9 to 5,037.3)                  | 4,732.6<br>(4,305.1 to 5,175.6)                           | 184.5<br>(109.7 to 299.2)               | 4.5<br>(2.6 to 6.4)                               | -2.8<br>(-4.8 to -0.6)                              |
| Psoriasis                                     | 1,403.4<br>(1,358.0 to 1,449.6)                  | 118.3<br>(114.3 to 122.1)                                 | 120.2<br>(86.6 to 156.5)                | 10.5<br>(9.5 to 11.4)                             | 1.4<br>(0.6 to 2.3)                                 |
| Cellulitis                                    | 74.1<br>(70.6 to 77.9)                           | 1,882.0<br>(1,802.0 to 1,963.3)                           | 4.0<br>(2.7 to 5.7)                     | 17.2<br>(14.8 to 19.6)                            | 4.4<br>(2.4 to 6.5)                                 |
| Pyoderma                                      | 339.2<br>(331.1 to 347.7)                        | 9,367.6<br>(9,118.4 to 9,614.4)                           | 1.9<br>(0.8 to 3.9)                     | 13.0<br>(12.0 to 13.9)                            | 2.3<br>(1.5 to 3.2)                                 |
| Scabies                                       | 65.5<br>(57.0 to 76.3)                           | 197.9<br>(171.3 to 228.6)                                 | 1.7<br>(0.9 to 2.7)                     | -9.7<br>(-12.4 to -6.7)                           | -14.6<br>(-17.3 to -11.8)                           |
| Fungal skin diseases                          | 5,148.9<br>(4,592.3 to 5,760.7)                  | 20,232.0<br>(17,666.9 to 23,190.8)                        | 28.3<br>(11.3 to 58.7)                  | 12.1<br>(11.2 to 12.8)                            | 0.1<br>(-0.1 to 0.3)                                |
| Viral skin diseases                           | 1,825.0<br>(1,671.1 to 1,976.1)                  | 2,445.4<br>(2,222.6 to 2,680.5)                           | 55.5<br>(34.8 to 81.1)                  | 5.6<br>(4.6 to 6.6)                               | -0.1<br>(-0.6 to 0.3)                               |
| Acne vulgaris                                 | 6,119.6<br>(5,674.4 to 6,569.9)                  | 4,668.0<br>(3,847.4 to 5,792.1)                           | 157.0<br>(106.2 to 225.5)               | 2.4<br>(1.6 to 3.3)                               | 1.4<br>(0.8 to 2.0)                                 |
| Alopecia areata                               | 197.8<br>(191.5 to 204.8)                        | 348.2<br>(336.9 to 360.0)                                 | 6.4<br>(4.2 to 9.7)                     | 6.4<br>(4.9 to 7.8)                               | -0.0<br>(-1.3 to 1.3)                               |
| Pruritus                                      | 654.1<br>(580.3 to 740.5)                        | 514.3<br>(459.5 to 583.7)                                 | 6.9<br>(3.2 to 12.7)                    | 9.3<br>(7.9 to 10.8)                              | -0.2<br>(-1.0 to 0.5)                               |
| Urticaria                                     | 437.6<br>(387.7 to 491.7)                        | 775.7<br>(688.1 to 873.4)                                 | 25.9<br>(16.9 to 36.7)                  | 7.1<br>(5.6 to 8.6)                               | -0.1<br>(-1.0 to 0.8)                               |
| Decubitus ulcer                               | 38.7<br>(34.6 to 43.2)                           | 141.8<br>(126.0 to 159.1)                                 | 6.0<br>(4.2 to 8.1)                     | 11.7<br>(8.3 to 14.9)                             | -2.0<br>(-4.1 to 0.2)                               |
| Other skin and subcutaneous diseases          | 7,979.7<br>(7,774.8 to 8,176.0)                  | 10,285.7<br>(9,937.5 to 10,615.6)                         | 43.2<br>(21.0 to 78.5)                  | 13.8<br>(13.3 to 14.2)                            | 2.0<br>(1.7 to 2.3)                                 |
| Sense organ diseases                          | 17,226.9<br>(17,056.4 to 17,386.7)               | 7,080.7 <sup>†</sup><br>(6,690.1 to 7,503.2)              | 620.1<br>(433.6 to 857.6)               | 15.9<br>(14.2 to 18.1)                            | 1.2<br>(-0.2 to 2.8)                                |
| Glaucoma                                      | 40.1<br>(33.3 to 47.4)                           | --                                                        | 3.8<br>(2.6 to 5.4)                     | 17.8<br>(14.7 to 21.1)                            | -0.0<br>(-2.7 to 2.6)                               |
| Cataract                                      | 322.8<br>(274.4 to 381.9)                        | --                                                        | 25.5<br>(17.9 to 35.3)                  | 13.9<br>(12.0 to 15.7)                            | -3.8<br>(-5.1 to -2.5)                              |
| Macular degeneration                          | 81.1<br>(68.5 to 96.0)                           | --                                                        | 7.7<br>(5.3 to 10.6)                    | 18.7<br>(16.4 to 21.1)                            | -0.2<br>(-2.0 to 1.9)                               |
| Refraction and accommodation disorders        | 5,131.5<br>(4,903.2 to 5,357.8)                  | --                                                        | 95.0<br>(59.7 to 147.7)                 | 7.8<br>(7.0 to 8.7)                               | -3.0<br>(-3.6 to -2.3)                              |
| Age-related and other hearing loss            | 13,636.3<br>(13,090.7 to 14,176.0)               | --                                                        | 390.9<br>(271.0 to 538.4)               | 18.8<br>(16.0 to 22.2)                            | 3.1<br>(0.9 to 5.6)                                 |
| Other vision loss                             | 197.6<br>(168.3 to 228.1)                        | --                                                        | 15.3<br>(10.6 to 20.9)                  | 11.6<br>(9.0 to 14.0)                             | -2.1<br>(-5.0 to 0.2)                               |
| Other sense organ diseases                    | 2,631.0<br>(2,439.0 to 2,814.2)                  | 7,080.7<br>(6,690.1 to 7,503.2)                           | 81.9<br>(51.8 to 123.7)                 | 13.7<br>(12.9 to 14.4)                            | 0.8<br>(0.2 to 1.3)                                 |
| Oral disorders                                | 36,072.7<br>(35,307.3 to 36,590.5)               | 89,990.2 <sup>†</sup><br>(84,292.1 to 95,964.1)           | 311.2<br>(192.7 to 475.9)               | 12.3<br>(11.4 to 13.3)                            | -0.1<br>(-0.4 to 0.2)                               |
| Caries of deciduous teeth                     | 1,610.3<br>(1,331.1 to 1,987.6)                  | 3,965.0<br>(2,395.9 to 6,463.1)                           | 0.6<br>(0.3 to 1.2)                     | 4.2<br>(-0.9 to 8.5)                              | -2.9<br>(-7.7 to 1.0)                               |
| Caries of permanent teeth                     | 25,937.9<br>(24,639.3 to 27,234.0)               | 84,263.0<br>(78,457.5 to 89,778.1)                        | 25.2<br>(11.2 to 47.9)                  | 6.2<br>(5.3 to 7.0)                               | -0.8<br>(-1.5 to 0.1)                               |
| Periodontal disease                           | 10,765.3<br>(8,908.9 to 12,827.2)                | 1,277.5<br>(1,036.1 to 1,538.6)                           | 70.2<br>(27.7 to 148.4)                 | 9.9<br>(8.6 to 11.2)                              | 0.1<br>(-0.7 to 0.9)                                |
| Edentulism and severe tooth loss              | 6,464.5<br>(5,645.1 to 7,313.5)                  | 484.7<br>(405.4 to 576.0)                                 | 177.8<br>(116.0 to 251.6)               | 15.3<br>(14.5 to 16.0)                            | -0.1<br>(-0.5 to 0.4)                               |
| Other oral disorders                          | 1,284.7<br>(1,230.0 to 1,341.8)                  | --                                                        | 37.3<br>(23.1 to 56.5)                  | 7.6<br>(7.0 to 8.3)                               | -0.0<br>(-0.5 to 0.5)                               |
| <b>Injuries</b>                               | <b>19,830.0</b><br><b>(18,463.8 to 21,352.9)</b> | <b>6,485.1<sup>†</sup></b><br><b>(6,112.3 to 6,899.7)</b> | <b>610.4</b><br><b>(408.6 to 869.1)</b> | <b>11.8</b><br><b>(11.0 to 12.8)</b>              | <b>0.5</b><br><b>(-0.2 to 1.2)</b>                  |
| <b>Transport injuries</b>                     | <b>2,277.0</b><br><b>(2,111.2 to 2,455.5)</b>    | <b>514.9</b><br><b>(463.8 to 570.1)</b>                   | <b>101.0</b><br><b>(65.9 to 146.4)</b>  | <b>1.5</b><br><b>(0.9 to 2.1)</b>                 | <b>-8.1</b><br><b>(-8.7 to -7.4)</b>                |
| Road injuries                                 | 2,012.4<br>(1,864.2 to 2,175.2)                  | 479.6<br>(430.1 to 535.3)                                 | 91.7<br>(60.1 to 133.1)                 | 0.0<br>(-0.6 to 0.6)                              | -9.4<br>(-10.0 to -8.8)                             |
| Pedestrian road injuries                      | 297.1<br>(258.5 to 345.3)                        | 44.6<br>(36.3 to 54.6)                                    | 14.8<br>(9.6 to 21.6)                   | 6.3<br>(5.6 to 7.0)                               | -3.4<br>(-4.1 to -2.6)                              |
| Cyclist road injuries                         | 601.7<br>(501.2 to 716.6)                        | 179.3<br>(151.5 to 210.1)                                 | 25.1<br>(16.3 to 36.7)                  | 7.6<br>(7.0 to 8.3)                               | -3.0<br>(-3.6 to -2.3)                              |
| Motorcyclist road injuries                    | 421.8<br>(355.1 to 501.9)                        | 63.0<br>(51.1 to 76.4)                                    | 20.0<br>(13.2 to 28.9)                  | -4.0<br>(-4.6 to -3.3)                            | -13.0<br>(-13.7 to -12.3)                           |
| Motor vehicle road injuries                   | 549.1<br>(464.1 to 637.6)                        | 158.3<br>(135.4 to 183.3)                                 | 26.4<br>(17.5 to 38.1)                  | -7.6<br>(-8.2 to -6.9)                            | -16.2<br>(-16.9 to -15.4)                           |
| Other road injuries                           | 142.7<br>(119.9 to 169.2)                        | 34.4<br>(26.8 to 43.8)                                    | 5.3<br>(3.4 to 7.8)                     | 7.0<br>(6.2 to 7.8)                               | -2.5<br>(-3.3 to -1.6)                              |
| Other transport injuries                      | 264.6<br>(216.6 to 315.8)                        | 35.3<br>(30.2 to 41.5)                                    | 9.3<br>(5.9 to 13.7)                    | 19.2<br>(18.6 to 19.9)                            | 7.7<br>(7.1 to 8.3)                                 |
| <b>Unintentional injuries</b>                 | <b>16,781.9</b><br><b>(15,474.8 to 18,247.9)</b> | <b>5,692.0</b><br><b>(5,321.7 to 6,106.7)</b>             | <b>480.7</b><br><b>(320.9 to 690.8)</b> | <b>14.4</b><br><b>(13.5 to 15.4)</b>              | <b>2.5</b><br><b>(1.7 to 3.2)</b>                   |
| Falls                                         | 8,668.6<br>(7,569.2 to 9,804.4)                  | 3,016.9<br>(2,710.7 to 3,371.8)                           | 304.2<br>(209.7 to 422.4)               | 17.3<br>(16.4 to 18.3)                            | 5.0<br>(4.2 to 5.9)                                 |
| Drowning                                      | 36.0<br>(31.4 to 40.9)                           | 3.6<br>(3.1 to 4.2)                                       | 1.7<br>(1.1 to 2.5)                     | 15.1<br>(13.6 to 16.7)                            | 5.0<br>(3.6 to 6.4)                                 |
| Fire, heat, and hot substances                | 1,548.8<br>(1,314.9 to 1,830.0)                  | 82.9<br>(67.8 to 97.3)                                    | 26.5<br>(14.7 to 44.8)                  | 6.3<br>(4.9 to 7.6)                               | -3.1<br>(-4.4 to -1.9)                              |
| Poisonings                                    | 68.2<br>(55.8 to 84.6)                           | 61.6<br>(50.1 to 74.1)                                    | 5.9<br>(3.8 to 8.4)                     | -5.0<br>(-7.0 to -3.1)                            | -11.9<br>(-13.7 to -10.0)                           |
| Exposure to mechanical forces                 | 3,216.5<br>(2,693.5 to 4,113.5)                  | 765.8<br>(648.1 to 898.1)                                 | 57.5<br>(36.3 to 88.9)                  | 15.3<br>(14.6 to 16.0)                            | 4.8<br>(4.2 to 5.4)                                 |
| Unintentional firearm injuries                | 115.8<br>(94.5 to 144.7)                         | 10.8<br>(7.5 to 15.1)                                     | 1.7<br>(1.0 to 2.9)                     | 9.9<br>(9.3 to 10.6)                              | -0.4<br>(-0.9 to 0.1)                               |
| Unintentional suffocation                     | 62.3<br>(50.1 to 76.5)                           | 9.7<br>(6.8 to 13.7)                                      | 1.5<br>(0.9 to 2.3)                     | 15.7<br>(15.0 to 16.5)                            | 5.6<br>(4.5 to 6.6)                                 |
| Other exposure to mechanical forces           | 3,038.3<br>(2,523.9 to 3,923.2)                  | 745.3<br>(629.2 to 874.0)                                 | 54.3<br>(34.3 to 83.8)                  | 15.5<br>(14.8 to 16.2)                            | 5.0<br>(4.4 to 5.6)                                 |

| Cause                                                                               | Prevalence in thousands (95% UI)              | Incidence in thousands (95% UI)          | YLDs in thousands (95% UI)           |                                                   |                                                     |
|-------------------------------------------------------------------------------------|-----------------------------------------------|------------------------------------------|--------------------------------------|---------------------------------------------------|-----------------------------------------------------|
|                                                                                     | 2016 counts                                   | 2016 counts                              | 2016 counts                          | Percentage change in counts between 2006 and 2016 | Percentage change in age-standardised rates between |
| Adverse effects of medical treatment                                                | 27.6<br>(22.2 to 33.8)                        | 361.1<br>(321.9 to 404.9)                | 3.7<br>(2.3 to 5.4)                  | 14.1<br>(11.8 to 16.7)                            | 0.8<br>(-0.7 to 2.2)                                |
| Animal contact                                                                      | 295.9<br>(258.8 to 343.8)                     | 157.6<br>(129.0 to 191.8)                | 5.5<br>(3.5 to 8.5)                  | 4.0<br>(2.7 to 5.4)                               | -5.7<br>(-6.7 to -4.7)                              |
| Venomous animal contact                                                             | 43.1<br>(37.0 to 49.9)                        | 47.8<br>(34.9 to 62.8)                   | 2.3<br>(1.4 to 3.4)                  | 0.1<br>(-1.7 to 2.1)                              | -7.6<br>(-9.2 to -5.8)                              |
| Non-venomous animal contact                                                         | 252.8<br>(217.7 to 299.0)                     | 109.8<br>(88.5 to 134.9)                 | 3.2<br>(1.8 to 5.4)                  | 7.0<br>(6.3 to 7.8)                               | -4.1<br>(-4.7 to -3.5)                              |
| Foreign body                                                                        | 432.6<br>(372.5 to 512.3)                     | 296.4<br>(257.2 to 347.0)                | 12.5<br>(7.9 to 18.7)                | 6.8<br>(5.9 to 7.6)                               | -3.7<br>(-4.6 to -2.9)                              |
| Pulmonary aspiration and foreign body in airway                                     | 75.1<br>(59.3 to 93.7)                        | 74.2<br>(65.3 to 85.1)                   | 1.9<br>(1.2 to 2.9)                  | 12.6<br>(11.6 to 13.9)                            | 0.7<br>(-0.2 to 1.5)                                |
| Foreign body in eyes                                                                | 39.5<br>(26.4 to 54.3)                        | 157.6<br>(121.9 to 206.1)                | 2.7<br>(1.7 to 4.2)                  | 12.2<br>(10.4 to 13.9)                            | 2.9<br>(1.9 to 3.9)                                 |
| Foreign body in other body part                                                     | 318.0<br>(265.4 to 393.4)                     | 64.7<br>(54.0 to 76.8)                   | 7.8<br>(4.9 to 11.8)                 | 3.7<br>(3.0 to 4.4)                               | -7.0<br>(-7.7 to -6.4)                              |
| Environmental heat and cold exposure                                                | 203.4<br>(180.8 to 231.5)                     | 45.6<br>(39.0 to 53.5)                   | 7.0<br>(4.6 to 10.5)                 | 14.7<br>(13.5 to 15.9)                            | 1.6<br>(0.5 to 2.7)                                 |
| Other unintentional injuries                                                        | 2,284.3<br>(1,894.1 to 2,708.3)               | 900.4<br>(762.3 to 1,046.4)              | 56.0<br>(35.9 to 84.0)               | 8.0<br>(7.1 to 8.9)                               | -4.5<br>(-5.2 to -3.8)                              |
| <b>Self-harm and interpersonal violence</b>                                         | <b>1,543.3</b><br><b>(1,410.0 to 1,671.9)</b> | <b>275.5†</b><br><b>(244.8 to 309.8)</b> | <b>27.7</b><br><b>(18.5 to 39.5)</b> | <b>10.8</b><br><b>(9.8 to 11.8)</b>               | <b>1.8</b><br><b>(1.0 to 2.5)</b>                   |
| Self-harm                                                                           | 178.0<br>(144.8 to 214.1)                     | 126.9<br>(111.3 to 144.8)                | 7.1<br>(4.5 to 10.4)                 | 7.6<br>(6.3 to 8.9)                               | -1.8<br>(-2.9 to -0.5)                              |
| Self-harm by firearm                                                                | 2.1<br>(1.7 to 2.5)                           | 0.2<br>(0.1 to 0.4)                      | < 0.05<br>(< 0.05 to 0.1)            | 24.5<br>(23.1 to 26.3)                            | 14.1<br>(13.0 to 15.5)                              |
| Self-harm by other specified means                                                  | 175.9<br>(143.0 to 212.0)                     | 126.7<br>(111.2 to 144.5)                | 7.1<br>(4.5 to 10.3)                 | 7.5<br>(6.2 to 8.9)                               | -1.8<br>(-3.0 to -0.6)                              |
| Interpersonal violence                                                              | 1,365.4<br>(1,243.2 to 1,499.3)               | 148.6†<br>(123.2 to 178.2)               | 20.6<br>(13.8 to 29.3)               | 12.0<br>(10.6 to 13.2)                            | 2.9<br>(2.0 to 3.9)                                 |
| Assault by firearm                                                                  | 37.8<br>(31.2 to 45.8)                        | 4.7<br>(3.4 to 6.4)                      | 0.8<br>(0.5 to 1.3)                  | 28.2<br>(27.5 to 29.1)                            | 16.3<br>(15.6 to 17.0)                              |
| Assault by sharp object                                                             | 98.6<br>(80.0 to 118.4)                       | 24.8<br>(18.3 to 33.4)                   | 1.8<br>(1.1 to 2.8)                  | 21.3<br>(20.5 to 22.1)                            | 10.3<br>(9.5 to 11.0)                               |
| Sexual violence                                                                     | 827.0<br>(727.3 to 938.2)                     | --                                       | 6.8<br>(4.5 to 9.7)                  | 1.8<br>(0.6 to 2.9)                               | -3.2<br>(-3.8 to -2.6)                              |
| Assault by other means                                                              | 401.9<br>(329.1 to 494.9)                     | 119.2<br>(98.1 to 144.1)                 | 11.2<br>(7.2 to 16.7)                | 16.5<br>(15.8 to 17.2)                            | 6.2<br>(5.5 to 6.8)                                 |
| <b>Forces of nature, conflict and terrorism, and executions and police conflict</b> | <b>54.8</b><br><b>(33.1 to 84.3)</b>          | <b>2.6†</b><br><b>(1.7 to 3.7)</b>       | <b>1.1</b><br><b>(0.2 to 3.2)</b>    | <b>0.7</b><br><b>(-1.3 to 2.1)</b>                | <b>-13.4</b><br><b>(-15.0 to -12.0)</b>             |
| Exposure to forces of nature                                                        | 5.7<br>(3.0 to 9.3)                           | --                                       | 0.1<br>(< 0.05 to 0.4)               | -1.6<br>(-7.8 to 0.4)                             | -15.0<br>(-21.1 to -12.9)                           |
| Conflict and terrorism                                                              | 39.9<br>(20.9 to 65.5)                        | --                                       | 0.8<br>(0.1 to 2.2)                  | -6.2<br>(-9.0 to -4.4)                            | -21.3<br>(-24.0 to -19.6)                           |
| Executions and police conflict                                                      | 9.2<br>(5.1 to 14.9)                          | 2.6<br>(1.7 to 3.7)                      | 0.2<br>(0.1 to 0.6)                  | 35.9<br>(29.0 to 38.6)                            | 22.5<br>(17.1 to 24.8)                              |
| <b>Impairments</b>                                                                  | --                                            | --                                       | --                                   | --                                                | --                                                  |
| Anaemia                                                                             | 6,935.4<br>(6,444.4 to 7,508.2)               | --                                       | 122.7<br>(83.6 to 179.6)             | 23.3<br>(19.7 to 26.3)                            | 12.1<br>(8.7 to 14.9)                               |
| Developmental intellectual disability                                               | 984.6<br>(768.4 to 1,219.7)                   | --                                       | 126.4<br>(93.6 to 164.6)             | 7.0<br>(5.3 to 9.5)                               | 0.5<br>(-1.1 to 2.5)                                |
| Epilepsy                                                                            | 341.5<br>(290.3 to 396.6)                     | --                                       | 96.6<br>(71.8 to 126.4)              | 0.4<br>(-12.5 to 13.7)                            | -5.4<br>(-17.4 to 6.7)                              |
| Guillain-Barre syndrome                                                             | 0.6<br>(0.5 to 0.8)                           | --                                       | 0.2<br>(0.1 to 0.3)                  | 14.7<br>(9.4 to 20.3)                             | 3.9<br>(-0.4 to 8.8)                                |
| Hearing loss                                                                        | 14,179.2<br>(13,607.3 to 14,736.3)            | --                                       | 420.6<br>(293.3 to 579.6)            | 17.2<br>(14.7 to 20.1)                            | 1.9<br>(-0.0 to 4.1)                                |
| Heart failure                                                                       | 1,039.5<br>(916.1 to 1,182.3)                 | --                                       | 121.6<br>(98.0 to 148.1)             | 6.8<br>(3.3 to 10.8)                              | -9.7<br>(-12.6 to -6.5)                             |
| Infertility                                                                         | 630.5<br>(484.9 to 824.3)                     | --                                       | 4.4<br>(2.0 to 8.4)                  | -0.0<br>(-3.1 to 3.5)                             | 0.1<br>(-2.2 to 2.7)                                |
| Pelvic inflammatory disease                                                         | 16.6<br>(14.7 to 18.7)                        | --                                       | 2.2<br>(1.5 to 3.0)                  | -1.5<br>(-4.4 to 1.2)                             | -5.2<br>(-8.0 to -2.5)                              |
| Vision loss                                                                         | 5,894.2<br>(5,628.2 to 6,147.8)               | --                                       | 171.0<br>(121.0 to 243.0)            | 10.1<br>(8.9 to 11.5)                             | -1.8<br>(-2.8 to -0.6)                              |

We did not calculate incidence for the nine impairments, certain NTDs, and causes with only birth prevalence. Blank cells mean that no estimate is available.

† Incidence for aggregate causes represents the sum of the incidence of the causes below the aggregate.

‡ Incidence estimates for stroke represent first-ever stroke only.

^ Incidence of HIV/AIDS represents new infections of HIV only and does not include new infections of Tuberculosis in HIV positive cases.



SR Table 14: Prevalence, incidence, and YLDs for 2016, percentage change of YLD counts and percentage change of age-standardised YLD rates between 2006 and 2016 by cause and impairments, for all ages, USA.

| Cause                                                                                | Prevalence in thousands (95% UI)             | Incidence in thousands (95% UI)                     | YLDs in thousands (95% UI)                |                                                   |                                                     |
|--------------------------------------------------------------------------------------|----------------------------------------------|-----------------------------------------------------|-------------------------------------------|---------------------------------------------------|-----------------------------------------------------|
|                                                                                      | 2016 counts                                  | 2016 counts                                         | 2016 counts                               | Percentage change in counts between 2006 and 2016 | Percentage change in age-standardised rates between |
| <b>All causes</b>                                                                    | <b>296,951.5</b><br>(296,507.4 to 297,486.0) | <b>1,792,355.3†</b><br>(1,686,442.8 to 1,903,203.4) | <b>43,043.6</b><br>(32,190.4 to 55,248.3) | <b>13.1</b><br>(12.4 to 13.8)                     | <b>0.3</b><br>(-0.2 to 0.8)                         |
| <b>Communicable, maternal, neonatal, and nutritional disorders</b>                   | <b>108,983.7</b><br>(106,899.1 to 111,191.9) | <b>1,037,476.0†</b><br>(934,814.7 to 1,143,399.9)   | <b>1,314.6</b><br>(938.9 to 1,778.8)      | <b>10.0</b><br>(4.1 to 17.5)                      | <b>3.4</b><br>(-2.2 to 10.8)                        |
| <b>HIV/AIDS and tuberculosis</b>                                                     | <b>23,805.6</b><br>(22,962.5 to 24,311.5)    | <b>56.4†</b><br>(22.9 to 89.5)                      | <b>147.6</b><br>(74.5 to 240.8)           | <b>20.9</b><br>(5.9 to 34.9)                      | <b>8.0</b><br>(-6.6 to 21.1)                        |
| Tuberculosis                                                                         | 21,737.9<br>(20,817.3 to 22,773.5)           | 10.8†<br>(9.7 to 11.9)                              | 1.8<br>(1.1 to 2.4)                       | -12.8<br>(-16.1 to -9.3)                          | -20.7<br>(-23.8 to -17.4)                           |
| Drug-susceptible tuberculosis                                                        | 5.2<br>(4.6 to 5.9)                          | 10.6<br>(9.6 to 11.7)                               | 1.7<br>(1.1 to 2.4)                       | -12.9<br>(-16.2 to -9.4)                          | -20.7<br>(-23.8 to -17.5)                           |
| Multidrug-resistant tuberculosis without extensive drug resistance                   | 0.1<br>(0.1 to 0.1)                          | 0.1<br>(0.1 to 0.1)                                 | < 0.05<br>(< 0.05 to < 0.05)              | -12.1<br>(-17.3 to -6.1)                          | -19.9<br>(-24.7 to -15.0)                           |
| Extensively drug-resistant tuberculosis                                              | < 0.05<br>(< 0.05 to < 0.05)                 | < 0.05<br>(< 0.05 to < 0.05)                        | < 0.05<br>(< 0.05 to < 0.05)              | 89.2<br>(77.9 to 102.0)                           | 72.2<br>(62.0 to 82.8)                              |
| Latent tuberculosis infection                                                        | 21,732.7<br>(20,811.9 to 22,768.2)           | --                                                  | --                                        | --                                                | --                                                  |
| HIV/AIDS                                                                             | 1,772.2<br>(1,037.9 to 2,584.7)              | 45.6^<br>(12.1 to 78.6)                             | 145.8<br>(72.8 to 238.7)                  | 21.4<br>(6.2 to 35.7)                             | 8.5<br>(-6.4 to 21.9)                               |
| Drug-susceptible HIV/AIDS - Tuberculosis                                             | 0.5<br>(0.3 to 0.7)                          | 0.9<br>(0.6 to 1.4)                                 | 0.2<br>(0.1 to 0.3)                       | -41.1<br>(-45.4 to -37.1)                         | -47.6<br>(-51.4 to -43.9)                           |
| Multidrug-resistant HIV/AIDS - Tuberculosis without extensive drug resistance        | < 0.05<br>(< 0.05 to < 0.05)                 | < 0.05<br>(< 0.05 to < 0.05)                        | < 0.05<br>(< 0.05 to < 0.05)              | -40.1<br>(-45.4 to -34.9)                         | -46.7<br>(-51.4 to -42.1)                           |
| Extensively drug-resistant HIV/AIDS - Tuberculosis                                   | < 0.05<br>(< 0.05 to < 0.05)                 | < 0.05<br>(< 0.05 to < 0.05)                        | < 0.05<br>(< 0.05 to < 0.05)              | 28.8<br>(17.4 to 40.0)                            | 14.6<br>(4.6 to 24.5)                               |
| HIV/AIDS resulting in other diseases                                                 | 1,771.7<br>(1,037.5 to 2,584.3)              | 45.6<br>(12.1 to 78.6)                              | 145.7<br>(72.6 to 238.5)                  | 21.6<br>(6.3 to 35.9)                             | 8.7<br>(-6.3 to 22.2)                               |
| <b>Diarrhoea, lower respiratory infections, and other common infectious diseases</b> | <b>16,141.6</b><br>(15,360.0 to 16,772.6)    | <b>1,018,233.1†</b><br>(915,879.3 to 1,124,315.9)   | <b>503.4</b><br>(329.2 to 729.2)          | <b>1.3</b><br>(-0.1 to 2.8)                       | <b>-5.1</b><br>(-6.2 to -3.9)                       |
| Diarrhoeal diseases                                                                  | 692.5<br>(656.9 to 727.7)                    | 45,715.7<br>(43,499.1 to 48,085.5)                  | 78.2<br>(53.7 to 107.2)                   | -2.4<br>(-4.5 to -0.4)                            | -7.5<br>(-9.5 to -5.5)                              |
| Intestinal infectious diseases                                                       | 0.1<br>(0.1 to 0.1)                          | 2.6†<br>(2.2 to 3.0)                                | < 0.05<br>(< 0.05 to < 0.05)              | 7.8<br>(-4.9 to 22.2)                             | -5.2<br>(-16.3 to 6.9)                              |
| Typhoid fever                                                                        | 0.1<br>(0.1 to 0.1)                          | 1.3<br>(1.1 to 1.5)                                 | < 0.05<br>(< 0.05 to < 0.05)              | 33.0<br>(13.9 to 55.7)                            | 18.2<br>(2.4 to 37.7)                               |
| Paratyphoid fever                                                                    | 0.1<br>(< 0.05 to 0.1)                       | 1.2<br>(1.1 to 1.5)                                 | < 0.05<br>(< 0.05 to < 0.05)              | -22.5<br>(-33.7 to -8.3)                          | -30.4<br>(-40.0 to -18.2)                           |
| Other intestinal infectious diseases                                                 | --                                           | --                                                  | < 0.05<br>(< 0.05 to < 0.05)              | -46.6<br>(-61.3 to -27.6)                         | -47.7<br>(-62.9 to -26.6)                           |
| Lower respiratory infections                                                         | 289.0<br>(276.7 to 301.0)                    | 12,677.3<br>(11,959.0 to 13,402.1)                  | 17.3<br>(11.7 to 24.4)                    | 17.9<br>(14.9 to 21.0)                            | 8.3<br>(5.4 to 11.5)                                |
| Upper respiratory infections                                                         | 12,409.1<br>(11,111.7 to 13,754.2)           | 940,250.5<br>(836,648.1 to 1,047,700.9)             | 307.2<br>(182.1 to 473.5)                 | -0.7<br>(-2.6 to 1.5)                             | -7.0<br>(-8.6 to -5.4)                              |
| Otitis media                                                                         | 2,518.6<br>(2,280.8 to 2,753.4)              | 14,062.4<br>(11,806.2 to 16,971.6)                  | 68.7<br>(43.1 to 102.9)                   | 4.9<br>(1.9 to 7.9)                               | 0.5<br>(-2.3 to 3.4)                                |
| Meningitis                                                                           | 102.8<br>(89.8 to 117.2)                     | 16.9<br>(15.0 to 18.7)                              | 11.2<br>(7.9 to 15.0)                     | 10.2<br>(6.8 to 14.2)                             | -0.2<br>(-3.0 to 2.6)                               |
| Pneumococcal meningitis                                                              | 81.8<br>(70.0 to 94.9)                       | 9.1<br>(7.9 to 10.3)                                | 8.6<br>(5.9 to 11.6)                      | 13.9<br>(10.2 to 17.4)                            | 3.2<br>(0.2 to 5.9)                                 |
| H influenzae type B meningitis                                                       | 5.3<br>(4.2 to 6.6)                          | 1.4<br>(1.1 to 1.6)                                 | 0.7<br>(0.5 to 1.0)                       | 9.3<br>(5.9 to 12.6)                              | -0.2<br>(-3.3 to 2.6)                               |
| Meningococcal infection                                                              | 6.8<br>(5.0 to 9.0)                          | 3.2<br>(2.6 to 3.9)                                 | 0.8<br>(0.5 to 1.3)                       | 8.9<br>(0.7 to 51.7)                              | -3.9<br>(-9.2 to 17.6)                              |
| Other meningitis                                                                     | 8.9<br>(7.3 to 10.5)                         | 3.2<br>(2.8 to 3.7)                                 | 1.1<br>(0.7 to 1.5)                       | -11.6<br>(-15.5 to -8.3)                          | -19.1<br>(-23.0 to -16.1)                           |
| Encephalitis                                                                         | 48.1<br>(34.6 to 66.3)                       | 32.9<br>(30.2 to 35.6)                              | 6.5<br>(4.5 to 8.8)                       | 16.3<br>(13.4 to 18.8)                            | 4.8<br>(2.2 to 6.8)                                 |
| Diphtheria                                                                           | < 0.05<br>(< 0.05 to < 0.05)                 | < 0.05<br>(< 0.05 to < 0.05)                        | < 0.05<br>(< 0.05 to < 0.05)              | 3.0<br>(-8.3 to 16.3)                             | -1.0<br>(-11.6 to 10.4)                             |
| Whooping cough                                                                       | 23.6<br>(18.3 to 30.0)                       | 172.4<br>(133.5 to 219.2)                           | 1.2<br>(0.7 to 1.9)                       | 3.7<br>(-1.8 to 8.9)                              | 7.5<br>(1.8 to 13.0)                                |
| Tetanus                                                                              | < 0.05<br>(< 0.05 to < 0.05)                 | < 0.05<br>(< 0.05 to 0.1)                           | < 0.05<br>(< 0.05 to < 0.05)              | -12.5<br>(-23.9 to -2.3)                          | -19.2<br>(-29.5 to -10.2)                           |
| Measles                                                                              | < 0.05<br>(< 0.05 to < 0.05)                 | 0.7<br>(0.6 to 0.7)                                 | < 0.05<br>(< 0.05 to < 0.05)              | 1,177.3<br>(792.7 to 1,931.6)                     | 1,213.2<br>(817.8 to 1,988.8)                       |
| Varicella and herpes zoster                                                          | 312.9<br>(281.0 to 345.9)                    | 5,301.8<br>(5,138.4 to 5,487.3)                     | 13.1<br>(7.9 to 20.1)                     | 25.0<br>(17.9 to 33.0)                            | 8.4<br>(2.5 to 14.8)                                |
| <b>Neglected tropical diseases and malaria</b>                                       | <b>304.7</b><br>(267.6 to 352.2)             | <b>76.5†</b><br>(48.6 to 134.5)                     | <b>4.8</b><br>(3.2 to 6.6)                | <b>12.2</b><br>(-3.4 to 28.9)                     | <b>-1.0</b><br>(-14.9 to 14.3)                      |
| Malaria                                                                              | --                                           | --                                                  | --                                        | --                                                | --                                                  |
| Chagas disease                                                                       | 283.6<br>(228.7 to 345.1)                    | --                                                  | 3.1<br>(1.9 to 4.5)                       | 21.1<br>(14.2 to 28.0)                            | 5.5<br>(-0.7 to 11.5)                               |
| Leishmaniasis                                                                        | < 0.05<br>(< 0.05 to < 0.05)                 | < 0.05<br>(< 0.05 to < 0.05)                        | < 0.05<br>(< 0.05 to < 0.05)              | -7.4<br>(-91.2 to 727.5)                          | -13.2<br>(-91.7 to 664.1)                           |
| Visceral leishmaniasis                                                               | --                                           | --                                                  | --                                        | --                                                | --                                                  |
| Cutaneous and mucocutaneous leishmaniasis                                            | < 0.05<br>(< 0.05 to < 0.05)                 | < 0.05<br>(< 0.05 to < 0.05)                        | < 0.05<br>(< 0.05 to < 0.05)              | -7.4<br>(-91.2 to 727.5)                          | -13.2<br>(-91.7 to 664.1)                           |
| African trypanosomiasis                                                              | --                                           | --                                                  | --                                        | --                                                | --                                                  |
| Schistosomiasis                                                                      | --                                           | --                                                  | --                                        | --                                                | --                                                  |
| Cysticercosis                                                                        | 10.2<br>(7.3 to 13.8)                        | --                                                  | 1.3<br>(0.8 to 2.0)                       | -10.2<br>(-40.2 to 37.2)                          | -21.4<br>(-47.6 to 20.0)                            |
| Cystic echinococcosis                                                                | 1.4<br>(0.8 to 2.6)                          | 0.3<br>(0.2 to 0.5)                                 | 0.1<br>(0.1 to 0.3)                       | -15.7<br>(-62.8 to 89.4)                          | -23.8<br>(-66.2 to 69.4)                            |
| Lymphatic filariasis                                                                 | --                                           | --                                                  | --                                        | --                                                | --                                                  |
| Onchocerciasis                                                                       | --                                           | --                                                  | --                                        | --                                                | --                                                  |
| Trachoma                                                                             | --                                           | --                                                  | --                                        | --                                                | --                                                  |
| Dengue                                                                               | 1.4<br>(0.8 to 2.4)                          | 23.4<br>(14.3 to 35.5)                              | 0.2<br>(0.1 to 0.5)                       | 98.6<br>(62.8 to 347.5)                           | 79.8<br>(47.6 to 305.5)                             |
| Yellow fever                                                                         | --                                           | --                                                  | --                                        | --                                                | --                                                  |
| Rabies                                                                               | < 0.05<br>(< 0.05 to < 0.05)                 | < 0.05<br>(< 0.05 to < 0.05)                        | < 0.05<br>(< 0.05 to < 0.05)              | 5.9<br>(-6.6 to 28.1)                             | -4.1<br>(-15.5 to 17.5)                             |
| Intestinal nematode infections                                                       | --                                           | --                                                  | --                                        | --                                                | --                                                  |
| Ascariasis                                                                           | --                                           | --                                                  | --                                        | --                                                | --                                                  |

| Cause                                                                   | Prevalence in thousands (95% UI)                    | Incidence in thousands (95% UI)                      | YLDs in thousands (95% UI)                       |                                                   |                                                     |
|-------------------------------------------------------------------------|-----------------------------------------------------|------------------------------------------------------|--------------------------------------------------|---------------------------------------------------|-----------------------------------------------------|
|                                                                         | 2016 counts                                         | 2016 counts                                          | 2016 counts                                      | Percentage change in counts between 2006 and 2016 | Percentage change in age-standardised rates between |
| Trichuriasis                                                            | --                                                  | --                                                   | --                                               | --                                                | --                                                  |
| Hookworm disease                                                        | --                                                  | --                                                   | --                                               | --                                                | --                                                  |
| Food-borne trematodiasis                                                | --                                                  | --                                                   | --                                               | --                                                | --                                                  |
| Leprosy                                                                 | 0.1<br>(< 0.05 to 0.1)                              | < 0.05<br>(< 0.05 to < 0.05)                         | < 0.05<br>(< 0.05 to < 0.05)                     | 22.8<br>(13.9 to 32.6)                            | 4.2<br>(-3.7 to 13.0)                               |
| Ebola virus disease                                                     | --                                                  | --                                                   | --                                               | --                                                | --                                                  |
| Zika virus disease                                                      | 0.9<br>(0.5 to 1.8)                                 | 52.8<br>(28.4 to 106.1)                              | < 0.05<br>(< 0.05 to 0.1)                        | --                                                | --                                                  |
| Guinea worm disease                                                     | --                                                  | --                                                   | --                                               | --                                                | --                                                  |
| Other neglected tropical diseases                                       | --                                                  | --                                                   | < 0.05<br>(< 0.05 to < 0.05)                     | --                                                | --                                                  |
| <b>Maternal disorders</b>                                               | <b>210.3</b><br><b>(196.8 to 223.2)</b>             | <b>2,400.1†</b><br><b>(2,245.0 to 2,565.8)</b>       | <b>12.3</b><br><b>(8.1 to 17.9)</b>              | <b>16.9</b><br><b>(-8.3 to 49.4)</b>              | <b>7.4</b><br><b>(-15.8 to 37.6)</b>                |
| Maternal haemorrhage                                                    | 57.1<br>(48.5 to 67.2)                              | 563.4<br>(460.5 to 688.1)                            | 2.6<br>(1.6 to 3.8)                              | 12.3<br>(-21.5 to 56.4)                           | 3.1<br>(-28.0 to 43.6)                              |
| Maternal sepsis and other pregnancy related infections                  | 49.7<br>(43.3 to 57.1)                              | 100.4<br>(80.5 to 127.2)                             | 0.6<br>(0.3 to 1.1)                              | 3.7<br>(-34.0 to 68.0)                            | -1.5<br>(-38.9 to 62.7)                             |
| Maternal hypertensive disorders                                         | 107.8<br>(74.7 to 144.9)                            | 547.6<br>(541.6 to 553.2)                            | 5.4<br>(3.0 to 8.5)                              | 29.7<br>(-15.2 to 103.0)                          | 18.8<br>(-22.4 to 86.0)                             |
| Maternal obstructed labour and uterine rupture                          | 3.6<br>(2.1 to 5.4)                                 | 258.2<br>(206.2 to 317.9)                            | 1.1<br>(0.6 to 1.9)                              | 13.8<br>(-39.3 to 110.5)                          | 3.9<br>(-44.3 to 92.3)                              |
| Maternal abortion, miscarriage, and ectopic pregnancy                   | 7.6<br>(5.4 to 10.2)                                | 930.6<br>(851.4 to 1,025.5)                          | 0.8<br>(0.5 to 1.3)                              | -6.7<br>(-41.5 to 47.5)                           | -13.9<br>(-46.1 to 36.2)                            |
| Other maternal disorders                                                | --                                                  | --                                                   | 1.9<br>(1.2 to 2.7)                              | 10.7<br>(-13.1 to 41.4)                           | 1.7<br>(-20.2 to 30.2)                              |
| <b>Neonatal disorders</b>                                               | <b>3,368.8</b><br><b>(3,035.3 to 3,746.4)</b>       | --                                                   | <b>431.9</b><br><b>(302.1 to 592.2)</b>          | <b>11.7</b><br><b>(-6.5 to 32.0)</b>              | <b>6.3</b><br><b>(-11.2 to 25.9)</b>                |
| Neonatal preterm birth complications                                    | 3,182.5<br>(2,747.7 to 3,690.7)                     | --                                                   | 337.4<br>(226.2 to 482.1)                        | 11.9<br>(-11.0 to 36.9)                           | 6.3<br>(-15.6 to 30.4)                              |
| Neonatal encephalopathy due to birth asphyxia and trauma                | 125.8<br>(84.8 to 176.2)                            | --                                                   | 23.9<br>(12.5 to 39.8)                           | 13.1<br>(5.8 to 25.7)                             | 6.8<br>(-0.0 to 18.7)                               |
| Neonatal sepsis and other neonatal infections                           | 130.6<br>(65.6 to 262.1)                            | --                                                   | 53.9<br>(23.4 to 118.4)                          | 12.5<br>(3.3 to 22.4)                             | 7.0<br>(-1.9 to 16.9)                               |
| Hemolytic disease and other neonatal jaundice                           | 27.3<br>(23.9 to 30.9)                              | --                                                   | 8.2<br>(6.2 to 10.5)                             | 6.4<br>(2.4 to 10.1)                              | 0.1<br>(-3.6 to 3.5)                                |
| Other neonatal disorders                                                | --                                                  | --                                                   | 8.5<br>(5.7 to 12.4)                             | 0.1<br>(-17.3 to 20.9)                            | 4.0<br>(-14.2 to 25.5)                              |
| <b>Nutritional deficiencies</b>                                         | <b>11,037.9</b><br><b>(10,668.0 to 11,303.4)</b>    | <b>2,376.5†</b><br><b>(1,948.0 to 2,872.3)</b>       | <b>147.8</b><br><b>(98.0 to 215.9)</b>           | <b>31.3</b><br><b>(26.5 to 35.7)</b>              | <b>28.0</b><br><b>(22.9 to 32.7)</b>                |
| Protein-energy malnutrition                                             | 153.1<br>(147.9 to 159.4)                           | 104.3<br>(100.8 to 108.8)                            | 19.2<br>(12.4 to 27.2)                           | -3.7<br>(-8.1 to 1.5)                             | 0.0<br>(-4.6 to 5.4)                                |
| Iodine deficiency                                                       | 1,568.5<br>(1,390.4 to 1,778.9)                     | 27.9<br>(25.1 to 31.2)                               | 39.4<br>(26.4 to 55.0)                           | 9.2<br>(6.2 to 12.0)                              | -1.3<br>(-4.0 to 1.5)                               |
| Vitamin A deficiency                                                    | 2,681.5<br>(2,204.9 to 3,261.4)                     | 2,244.2<br>(1,816.2 to 2,739.6)                      | --                                               | --                                                | --                                                  |
| Iron-deficiency anaemia                                                 | 6,715.1<br>(6,162.4 to 7,382.1)                     | --                                                   | 88.5<br>(55.6 to 140.6)                          | 58.7<br>(50.1 to 67.2)                            | 57.0<br>(47.3 to 66.7)                              |
| Other nutritional deficiencies                                          | --                                                  | --                                                   | 0.7<br>(0.4 to 0.9)                              | -3.9<br>(-8.5 to 1.4)                             | -0.3<br>(-5.0 to 5.3)                               |
| <b>Other communicable, maternal, neonatal, and nutritional diseases</b> | <b>69,431.3</b><br><b>(66,915.9 to 72,072.9)</b>    | <b>14,333.4</b><br><b>(13,237.0 to 15,471.4)</b>     | <b>64.2</b><br><b>(39.4 to 107.7)</b>            | <b>7.9</b><br><b>(5.6 to 10.3)</b>                | <b>0.3</b><br><b>(-2.0 to 2.8)</b>                  |
| Sexually transmitted diseases excluding HIV                             | 64,827.6<br>(61,653.5 to 68,669.8)                  | 13,076.2<br>(11,964.6 to 14,219.2)                   | 51.6<br>(31.1 to 89.7)                           | 10.9<br>(8.0 to 14.2)                             | 1.7<br>(-1.0 to 4.6)                                |
| Syphilis                                                                | 387.1<br>(309.0 to 496.3)                           | 309.0<br>(217.6 to 427.5)                            | 11.3<br>(7.9 to 15.0)                            | 18.5<br>(14.9 to 22.5)                            | 0.5<br>(-2.4 to 4.0)                                |
| Chlamydial infection                                                    | 1,505.5<br>(1,388.4 to 1,618.1)                     | 1,206.4<br>(1,057.3 to 1,342.3)                      | 4.4<br>(2.6 to 7.6)                              | 33.9<br>(27.0 to 40.1)                            | 28.2<br>(21.6 to 33.9)                              |
| Gonococcal infection                                                    | 473.5<br>(435.9 to 513.5)                           | 1,310.8<br>(1,130.6 to 1,509.1)                      | 2.9<br>(1.7 to 4.7)                              | 15.2<br>(8.6 to 22.7)                             | 9.6<br>(3.1 to 16.9)                                |
| Trichomoniasis                                                          | 8,569.6<br>(7,474.0 to 9,769.9)                     | 7,266.9<br>(6,273.7 to 8,307.9)                      | 10.8<br>(4.2 to 22.9)                            | 7.5<br>(4.9 to 10.4)                              | 0.6<br>(-1.7 to 3.2)                                |
| Genital herpes                                                          | 56,181.8<br>(49,281.6 to 64,900.8)                  | 2,538.1<br>(2,184.3 to 3,010.7)                      | 14.1<br>(4.5 to 31.9)                            | 1.4<br>(-3.1 to 6.0)                              | -8.9<br>(-13.1 to -4.7)                             |
| Other sexually transmitted diseases                                     | 398.6<br>(327.0 to 468.5)                           | 445.0<br>(399.2 to 498.5)                            | 8.2<br>(5.2 to 12.5)                             | 11.8<br>(6.3 to 17.1)                             | 7.8<br>(2.3 to 13.1)                                |
| Hepatitis                                                               | 6,511.4<br>(5,759.4 to 7,350.8)                     | 1,256.6<br>(1,102.2 to 1,408.4)                      | 2.8<br>(1.8 to 4.2)                              | -39.9<br>(-47.7 to -29.8)                         | -45.0<br>(-52.0 to -36.1)                           |
| Acute hepatitis A                                                       | 48.4<br>(42.1 to 54.0)                              | 629.7<br>(547.2 to 702.4)                            | 1.7<br>(1.0 to 2.4)                              | -38.9<br>(-50.7 to -23.4)                         | -43.4<br>(-53.8 to -30.2)                           |
| Hepatitis B                                                             | 3,065.5<br>(2,456.0 to 3,840.7)                     | 492.8<br>(369.2 to 636.6)                            | 1.0<br>(0.6 to 1.6)                              | -42.2<br>(-54.2 to -28.0)                         | -48.4<br>(-58.7 to -36.6)                           |
| Hepatitis C                                                             | 3,393.6<br>(3,000.3 to 3,799.2)                     | 84.6<br>(75.0 to 94.7)                               | 0.1<br>(< 0.05 to 0.1)                           | -34.2<br>(-37.4 to -31.3)                         | -34.4<br>(-37.3 to -31.7)                           |
| Acute hepatitis E                                                       | 3.8<br>(3.3 to 4.4)                                 | 49.6<br>(42.6 to 57.8)                               | 0.1<br>(0.1 to 0.2)                              | -37.5<br>(-41.9 to -33.0)                         | -45.8<br>(-49.1 to -42.3)                           |
| Other infectious diseases                                               | 194.0<br>(167.0 to 228.1)                           | 0.7<br>(0.5 to 0.9)                                  | 9.8<br>(5.9 to 15.1)                             | 18.4<br>(14.4 to 22.5)                            | 14.8<br>(10.3 to 19.6)                              |
| <b>Non-communicable diseases</b>                                        | <b>288,673.9</b><br><b>(288,168.4 to 289,242.2)</b> | <b>716,542.6†</b><br><b>(689,368.3 to 745,608.6)</b> | <b>38,517.3</b><br><b>(28,854.8 to 49,347.0)</b> | <b>12.7</b><br><b>(12.0 to 13.4)</b>              | <b>0.0</b><br><b>(-0.5 to 0.6)</b>                  |
| <b>Neoplasms</b>                                                        | <b>6,768.6</b><br><b>(6,688.9 to 6,850.4)</b>       | <b>2,421.5</b><br><b>(2,240.7 to 2,649.7)</b>        | <b>669.4</b><br><b>(493.8 to 863.1)</b>          | <b>25.4</b><br><b>(23.5 to 29.0)</b>              | <b>1.6</b><br><b>(-0.1 to 4.3)</b>                  |
| Lip and oral cavity cancer                                              | 109.8<br>(106.7 to 113.1)                           | 27.2<br>(26.5 to 28.0)                               | 10.1<br>(7.4 to 13.3)                            | 22.4<br>(17.6 to 27.1)                            | -1.2<br>(-5.1 to 2.7)                               |
| Nasopharynx cancer                                                      | 8.2<br>(7.7 to 8.6)                                 | 2.1<br>(2.0 to 2.2)                                  | 0.9<br>(0.6 to 1.2)                              | 6.2<br>(0.5 to 11.8)                              | -7.6<br>(-12.6 to -2.5)                             |
| Other pharynx cancer                                                    | 51.4<br>(49.6 to 53.3)                              | 13.1<br>(12.6 to 13.5)                               | 4.9<br>(3.5 to 6.4)                              | 36.1<br>(30.2 to 42.0)                            | 8.9<br>(4.1 to 13.6)                                |
| Oesophageal cancer                                                      | 26.4<br>(25.6 to 27.2)                              | 19.5<br>(18.9 to 20.2)                               | 5.1<br>(3.6 to 6.6)                              | 25.0<br>(18.5 to 31.9)                            | -0.4<br>(-5.6 to 5.4)                               |
| Stomach cancer                                                          | 70.7<br>(68.9 to 72.5)                              | 31.9<br>(31.1 to 32.7)                               | 8.8<br>(6.5 to 11.3)                             | 26.5<br>(22.0 to 31.0)                            | 2.5<br>(-1.0 to 6.2)                                |
| Colon and rectum cancer                                                 | 829.8<br>(808.3 to 853.7)                           | 212.2<br>(206.9 to 218.1)                            | 74.7<br>(55.5 to 95.7)                           | 20.9<br>(17.1 to 24.8)                            | -2.4<br>(-5.5 to 0.8)                               |
| Liver cancer                                                            | 31.1<br>(29.6 to 32.7)                              | 33.4<br>(32.4 to 34.5)                               | 8.1<br>(5.8 to 10.7)                             | 59.4<br>(53.1 to 66.2)                            | 28.9<br>(23.8 to 34.6)                              |
| Liver cancer due to hepatitis B                                         | 8.6<br>(6.5 to 11.3)                                | 5.2<br>(3.9 to 6.8)                                  | 1.3<br>(0.8 to 1.9)                              | 55.7<br>(44.6 to 67.5)                            | 28.8<br>(21.6 to 36.3)                              |



| Cause                                              | Prevalence in thousands (95% UI)                 | Incidence in thousands (95% UI)                | YLDs in thousands (95% UI)                    |                                                   |                                                     |
|----------------------------------------------------|--------------------------------------------------|------------------------------------------------|-----------------------------------------------|---------------------------------------------------|-----------------------------------------------------|
|                                                    | 2016 counts                                      | 2016 counts                                    | 2016 counts                                   | Percentage change in counts between 2006 and 2016 | Percentage change in age-standardised rates between |
| Liver cancer due to hepatitis C                    | 21.3<br>(19.6 to 22.9)                           | 13.2<br>(12.2 to 14.2)                         | 3.2<br>(2.3 to 4.3)                           | 60.1<br>(52.8 to 68.1)                            | 27.9<br>(22.4 to 34.2)                              |
| Liver cancer due to alcohol use                    | 10.5<br>(9.2 to 11.9)                            | 6.8<br>(5.9 to 7.7)                            | 1.6<br>(1.1 to 2.2)                           | 58.5<br>(50.7 to 66.1)                            | 28.7<br>(23.2 to 34.5)                              |
| Liver cancer due to other causes                   | 14.2<br>(13.0 to 15.4)                           | 8.3<br>(7.6 to 9.0)                            | 2.0<br>(1.4 to 2.7)                           | 61.4<br>(53.7 to 69.8)                            | 30.9<br>(24.9 to 37.4)                              |
| Gallbladder and biliary tract cancer               | 10.8<br>(10.4 to 11.8)                           | 8.1<br>(7.8 to 8.8)                            | 2.0<br>(1.4 to 2.7)                           | 20.9<br>(17.3 to 24.5)                            | -3.8<br>(-6.6 to -0.8)                              |
| Pancreatic cancer                                  | 53.0<br>(50.8 to 55.2)                           | 51.5<br>(50.3 to 52.8)                         | 10.5<br>(7.5 to 13.5)                         | 30.8<br>(25.0 to 36.7)                            | 4.2<br>(-0.4 to 8.9)                                |
| Larynx cancer                                      | 63.3<br>(61.3 to 65.3)                           | 16.5<br>(16.0 to 17.1)                         | 6.7<br>(4.9 to 8.8)                           | 21.5<br>(16.1 to 26.8)                            | -4.4<br>(-8.7 to -0.1)                              |
| Tracheal, bronchus, and lung cancer                | 426.6<br>(415.1 to 438.4)                        | 255.4<br>(249.1 to 261.8)                      | 60.8<br>(44.9 to 76.3)                        | 22.7<br>(18.5 to 27.6)                            | -3.2<br>(-6.6 to 0.5)                               |
| Malignant skin melanoma                            | 424.2<br>(388.5 to 503.2)                        | 85.9<br>(78.5 to 101.4)                        | 27.0<br>(18.7 to 37.6)                        | 34.6<br>(28.3 to 41.2)                            | 13.4<br>(7.5 to 20.6)                               |
| Non-melanoma skin cancer                           | 351.1<br>(261.4 to 446.0)                        | 477.0<br>(305.4 to 666.4)                      | 12.0<br>(5.6 to 20.8)                         | -13.7<br>(-28.3 to 4.3)                           | -33.0<br>(-44.3 to -19.0)                           |
| Non-melanoma skin cancer (squamous-cell carcinoma) | 282.4<br>(144.7 to 417.4)                        | 244.7<br>(123.2 to 368.0)                      | 11.7<br>(5.4 to 20.4)                         | -13.7<br>(-28.6 to 4.5)                           | -33.0<br>(-44.5 to -18.7)                           |
| Non-melanoma skin cancer (basal-cell carcinoma)    | 20.3<br>(10.7 to 34.5)                           | 232.3<br>(126.8 to 367.1)                      | 0.2<br>(0.1 to 0.5)                           | -17.5<br>(-24.9 to -11.0)                         | -32.6<br>(-37.0 to -28.1)                           |
| Breast cancer                                      | 1,305.7<br>(1,258.1 to 1,358.9)                  | 263.1<br>(252.7 to 274.1)                      | 116.8<br>(83.8 to 156.0)                      | 16.7<br>(12.5 to 21.2)                            | -3.2<br>(-6.7 to 0.7)                               |
| Cervical cancer                                    | 77.1<br>(73.1 to 80.6)                           | 18.7<br>(17.8 to 19.5)                         | 7.0<br>(5.0 to 9.3)                           | 9.2<br>(3.3 to 14.8)                              | -1.9<br>(-7.5 to 3.2)                               |
| Uterine cancer                                     | 375.2<br>(360.4 to 390.8)                        | 79.1<br>(75.7 to 82.8)                         | 27.7<br>(20.0 to 36.7)                        | 49.5<br>(41.6 to 57.9)                            | 19.8<br>(13.5 to 26.4)                              |
| Ovarian cancer                                     | 75.3<br>(72.5 to 78.4)                           | 24.1<br>(23.2 to 25.0)                         | 10.6<br>(7.8 to 13.4)                         | 10.6<br>(3.5 to 18.6)                             | -8.5<br>(-14.3 to -1.7)                             |
| Prostate cancer                                    | 1,452.0<br>(1,335.5 to 2,024.7)                  | 371.7<br>(348.6 to 485.4)                      | 122.8<br>(86.9 to 172.4)                      | 30.1<br>(23.8 to 43.1)                            | -0.5<br>(-5.3 to 8.9)                               |
| Testicular cancer                                  | 71.7<br>(66.5 to 76.9)                           | 13.6<br>(12.6 to 14.6)                         | 4.7<br>(3.2 to 6.5)                           | 37.2<br>(26.5 to 48.5)                            | 28.8<br>(18.7 to 39.7)                              |
| Kidney cancer                                      | 239.1<br>(231.8 to 246.8)                        | 58.5<br>(56.8 to 60.3)                         | 19.4<br>(14.0 to 25.4)                        | 21.5<br>(16.8 to 26.7)                            | -0.8<br>(-4.5 to 3.6)                               |
| Bladder cancer                                     | 230.3<br>(223.1 to 237.7)                        | 54.5<br>(52.9 to 56.3)                         | 20.4<br>(14.9 to 26.5)                        | 26.1<br>(21.7 to 31.0)                            | 0.2<br>(-3.5 to 4.1)                                |
| Brain and nervous system cancer                    | 59.8<br>(54.0 to 64.9)                           | 24.7<br>(22.4 to 26.9)                         | 8.0<br>(5.5 to 10.5)                          | 30.2<br>(23.4 to 35.2)                            | 13.1<br>(7.4 to 17.6)                               |
| Thyroid cancer                                     | 197.8<br>(187.5 to 206.9)                        | 37.7<br>(35.8 to 39.4)                         | 12.6<br>(8.7 to 17.1)                         | 39.6<br>(32.0 to 47.1)                            | 19.2<br>(12.7 to 25.6)                              |
| Mesothelioma                                       | 5.4<br>(5.1 to 5.6)                              | 3.4<br>(3.2 to 3.6)                            | 1.1<br>(0.8 to 1.5)                           | 21.1<br>(15.7 to 30.5)                            | -3.6<br>(-8.0 to 3.9)                               |
| Hodgkin lymphoma                                   | 59.9<br>(55.0 to 78.1)                           | 12.8<br>(11.8 to 16.6)                         | 5.0<br>(3.5 to 6.9)                           | 16.0<br>(8.0 to 29.0)                             | 5.8<br>(-1.8 to 19.0)                               |
| Non-Hodgkin's lymphoma                             | 350.6<br>(337.5 to 403.4)                        | 87.1<br>(83.9 to 99.9)                         | 27.4<br>(19.8 to 36.4)                        | 35.7<br>(30.3 to 46.3)                            | 11.2<br>(6.7 to 21.3)                               |
| Multiple myeloma                                   | 74.1<br>(66.3 to 92.9)                           | 24.4<br>(21.8 to 30.3)                         | 12.7<br>(9.0 to 17.3)                         | 40.3<br>(31.1 to 52.0)                            | 11.9<br>(4.2 to 21.5)                               |
| Leukaemia                                          | 185.1<br>(178.5 to 193.0)                        | 52.9<br>(51.2 to 54.6)                         | 23.8<br>(17.2 to 30.9)                        | 38.6<br>(33.5 to 44.0)                            | 13.2<br>(8.7 to 17.4)                               |
| Acute lymphoid leukaemia                           | 21.6<br>(20.0 to 23.2)                           | 5.2<br>(4.8 to 5.5)                            | 2.5<br>(1.7 to 3.4)                           | 32.0<br>(21.7 to 42.5)                            | 27.9<br>(16.6 to 39.8)                              |
| Chronic lymphoid leukaemia                         | 77.1<br>(72.5 to 86.8)                           | 17.8<br>(16.8 to 20.0)                         | 9.4<br>(6.8 to 12.2)                          | 40.6<br>(32.8 to 49.2)                            | 9.8<br>(3.5 to 16.7)                                |
| Acute myeloid leukaemia                            | 19.0<br>(16.6 to 20.4)                           | 13.6<br>(11.7 to 14.4)                         | 3.7<br>(2.5 to 5.0)                           | 40.8<br>(34.6 to 47.1)                            | 15.0<br>(10.2 to 19.9)                              |
| Chronic myeloid leukaemia                          | 7.3<br>(6.8 to 7.8)                              | 2.5<br>(2.3 to 2.7)                            | 0.9<br>(0.7 to 1.2)                           | 13.7<br>(8.3 to 19.4)                             | -4.9<br>(-9.6 to -0.1)                              |
| Other leukaemia                                    | 60.1<br>(56.6 to 64.8)                           | 13.8<br>(13.0 to 14.9)                         | 7.2<br>(5.3 to 9.4)                           | 41.3<br>(33.9 to 48.9)                            | 11.7<br>(6.0 to 17.6)                               |
| Other neoplasms                                    | 231.4<br>(224.1 to 239.1)                        | 61.4<br>(59.6 to 63.3)                         | 18.1<br>(13.1 to 23.8)                        | 33.7<br>(29.1 to 38.5)                            | 16.0<br>(11.9 to 20.3)                              |
| <b>Cardiovascular diseases</b>                     | <b>33,663.6</b><br><b>(33,252.7 to 34,042.9)</b> | <b>3,810.4†</b><br><b>(3,653.0 to 3,982.8)</b> | <b>2,129.7</b><br><b>(1,566.3 to 2,745.7)</b> | <b>17.1</b><br><b>(14.5 to 20.2)</b>              | <b>-4.3</b><br><b>(-6.3 to -1.8)</b>                |
| Rheumatic heart disease                            | 107.2<br>(98.7 to 116.4)                         | 16.7<br>(15.9 to 17.6)                         | 7.3<br>(5.1 to 10.0)                          | 32.7<br>(27.0 to 38.4)                            | 8.6<br>(3.9 to 13.1)                                |
| Ischaemic heart disease                            | 9,848.7<br>(9,385.7 to 10,363.5)                 | 1,336.3<br>(1,246.8 to 1,450.7)                | 296.1<br>(211.0 to 395.4)                     | 13.2<br>(11.8 to 14.6)                            | -8.1<br>(-9.2 to -7.0)                              |
| Cerebrovascular disease                            | 5,406.0<br>(5,235.3 to 5,610.8)                  | 731.3‡<br>(680.6 to 785.7)                     | 870.1<br>(616.7 to 1,105.9)                   | 16.8<br>(10.6 to 24.1)                            | -4.0<br>(-8.8 to 2.1)                               |
| Ischaemic stroke                                   | 4,612.9<br>(4,104.3 to 5,120.3)                  | 541.5‡<br>(491.9 to 591.9)                     | 716.9<br>(500.9 to 912.7)                     | 15.1<br>(7.7 to 23.7)                             | -5.7<br>(-11.4 to 1.4)                              |
| Hemorrhagic stroke                                 | 1,009.3<br>(911.1 to 1,122.9)                    | 189.8‡<br>(173.3 to 206.1)                     | 153.3<br>(110.8 to 194.6)                     | 25.8<br>(18.0 to 34.4)                            | 4.5<br>(-1.4 to 10.8)                               |
| Hypertensive heart disease                         | 997.0<br>(910.8 to 1,083.0)                      | --                                             | 79.5<br>(56.5 to 106.3)                       | 14.8<br>(12.4 to 17.5)                            | -5.9<br>(-7.6 to -4.1)                              |
| Cardiomyopathy and myocarditis                     | 620.5<br>(595.1 to 642.9)                        | 84.8†<br>(74.8 to 96.0)                        | 52.3<br>(36.3 to 72.4)                        | 13.6<br>(10.9 to 16.3)                            | -4.7<br>(-6.6 to -2.8)                              |
| Myocarditis                                        | 52.8<br>(49.0 to 56.5)                           | 84.8<br>(74.8 to 96.0)                         | 3.9<br>(2.7 to 5.4)                           | 7.7<br>(5.1 to 10.2)                              | -1.3<br>(-3.4 to 0.7)                               |
| Alcoholic cardiomyopathy                           | 128.3<br>(114.2 to 144.8)                        | --                                             | 10.5<br>(7.3 to 14.7)                         | 15.5<br>(10.5 to 20.6)                            | -5.8<br>(-9.5 to -2.1)                              |
| Other cardiomyopathy                               | 470.2<br>(426.0 to 517.7)                        | --                                             | 37.9<br>(26.2 to 52.2)                        | 13.7<br>(10.9 to 16.6)                            | -4.8<br>(-7.0 to -2.6)                              |
| Atrial fibrillation and flutter                    | 6,122.8<br>(5,978.0 to 6,269.6)                  | 509.3<br>(494.9 to 524.5)                      | 473.1<br>(334.7 to 643.5)                     | 23.6<br>(22.3 to 25.2)                            | -0.4<br>(-1.5 to 0.8)                               |
| Peripheral vascular disease                        | 11,943.2<br>(10,781.5 to 13,074.7)               | 1,069.0<br>(951.8 to 1,200.3)                  | 42.2<br>(20.1 to 75.9)                        | 28.8<br>(25.4 to 32.5)                            | -0.4<br>(-2.7 to 2.0)                               |
| Endocarditis                                       | 45.0<br>(40.6 to 50.1)                           | 62.9<br>(58.8 to 67.6)                         | 3.6<br>(2.5 to 5.1)                           | 13.7<br>(9.4 to 18.3)                             | -6.7<br>(-9.8 to -3.0)                              |
| Other cardiovascular and circulatory diseases      | 5,954.6<br>(5,374.8 to 6,564.1)                  | --                                             | 305.5<br>(211.1 to 420.2)                     | 11.9<br>(9.5 to 14.5)                             | -6.8<br>(-8.1 to -5.4)                              |
| <b>Chronic respiratory diseases</b>                | <b>30,550.8</b><br><b>(30,268.9 to 30,779.3)</b> | <b>4,483.2†</b><br><b>(4,348.9 to 4,617.9)</b> | <b>1,848.9</b><br><b>(1,529.9 to 2,190.4)</b> | <b>13.5</b><br><b>(9.7 to 17.6)</b>               | <b>-3.8</b><br><b>(-6.4 to -1.1)</b>                |
| Chronic obstructive pulmonary disease              | 16,680.5<br>(16,247.5 to 17,110.1)               | 975.7<br>(949.1 to 1,002.4)                    | 1,184.6<br>(1,035.1 to 1,307.3)               | 20.9<br>(15.0 to 26.5)                            | -1.7<br>(-6.5 to 2.7)                               |
| Pneumoconiosis                                     | 75.3<br>(71.4 to 79.5)                           | 5.5<br>(5.2 to 5.8)                            | 10.9<br>(7.7 to 14.8)                         | 19.9<br>(15.8 to 24.3)                            | -3.3<br>(-6.7 to 0.1)                               |
| Silicosis                                          | 3.5<br>(3.1 to 4.0)                              | 0.3<br>(0.2 to 0.3)                            | 0.6<br>(0.4 to 0.8)                           | 24.4<br>(21.0 to 27.3)                            | 1.9<br>(-0.4 to 4.0)                                |



| Cause                                                          | Prevalence in thousands (95% UI)                    | Incidence in thousands (95% UI)                   | YLDs in thousands (95% UI)                      |                                                   |                                                     |
|----------------------------------------------------------------|-----------------------------------------------------|---------------------------------------------------|-------------------------------------------------|---------------------------------------------------|-----------------------------------------------------|
|                                                                | 2016 counts                                         | 2016 counts                                       | 2016 counts                                     | Percentage change in counts between 2006 and 2016 | Percentage change in age-standardised rates between |
| Asbestosis                                                     | 50.3<br>(46.7 to 54.3)                              | 4.0<br>(3.8 to 4.3)                               | 7.0<br>(4.9 to 9.6)                             | 22.7<br>(16.8 to 29.3)                            | -3.4<br>(-8.2 to 1.8)                               |
| Coal workers pneumoconiosis                                    | 11.1<br>(10.5 to 11.6)                              | 0.7<br>(0.7 to 0.8)                               | 1.7<br>(1.2 to 2.3)                             | 14.8<br>(9.1 to 20.7)                             | -6.2<br>(-10.7 to -1.5)                             |
| Other pneumoconiosis                                           | 10.4<br>(9.5 to 11.3)                               | 0.4<br>(0.4 to 0.5)                               | 1.6<br>(1.1 to 2.2)                             | 12.7<br>(6.8 to 19.2)                             | -1.8<br>(-6.5 to 3.1)                               |
| Asthma                                                         | 15,239.0<br>(14,878.5 to 15,602.5)                  | 3,468.7<br>(3,335.4 to 3,606.3)                   | 591.0<br>(393.8 to 832.4)                       | 0.0<br>(-1.0 to 1.1)                              | -7.7<br>(-8.6 to -6.7)                              |
| Interstitial lung disease and pulmonary sarcoidosis            | 287.4<br>(272.5 to 302.5)                           | 33.3<br>(31.6 to 35.1)                            | 30.5<br>(20.5 to 43.3)                          | 20.2<br>(17.1 to 23.6)                            | -0.2<br>(-2.6 to 2.4)                               |
| Other chronic respiratory diseases                             | --                                                  | --                                                | 32.0<br>(27.3 to 35.7)                          | 36.4<br>(30.7 to 42.3)                            | 24.7<br>(19.2 to 30.5)                              |
| <b>Cirrhosis and other chronic liver diseases</b>              | <b>4,007.8</b><br><b>(3,881.3 to 4,131.3)</b>       | <b>74.3</b><br><b>(71.9 to 76.7)</b>              | <b>72.0</b><br><b>(50.5 to 98.5)</b>            | <b>27.6</b><br><b>(24.4 to 30.7)</b>              | <b>9.4</b><br><b>(6.9 to 11.9)</b>                  |
| Cirrhosis and other chronic liver diseases due to hepatitis B  | 257.4<br>(238.2 to 276.6)                           | 4.9<br>(4.5 to 5.3)                               | 4.7<br>(3.3 to 6.5)                             | 29.0<br>(20.6 to 38.1)                            | 10.8<br>(3.7 to 18.1)                               |
| Cirrhosis and other chronic liver diseases due to hepatitis C  | 1,159.4<br>(1,083.1 to 1,238.4)                     | 22.1<br>(20.7 to 23.7)                            | 20.6<br>(14.2 to 28.5)                          | 27.7<br>(21.6 to 33.2)                            | 9.7<br>(4.9 to 14.6)                                |
| Cirrhosis and other chronic liver diseases due to alcohol use  | 1,449.6<br>(1,350.6 to 1,545.9)                     | 28.9<br>(26.9 to 30.9)                            | 26.2<br>(18.3 to 35.7)                          | 29.2<br>(24.1 to 34.4)                            | 10.0<br>(5.7 to 14.2)                               |
| Cirrhosis and other chronic liver diseases due to other causes | 1,141.4<br>(1,026.1 to 1,275.9)                     | 18.4<br>(16.4 to 20.7)                            | 20.5<br>(14.0 to 28.5)                          | 25.4<br>(19.7 to 31.0)                            | 8.1<br>(3.6 to 12.7)                                |
| <b>Digestive diseases</b>                                      | <b>17,736.3</b><br><b>(17,521.8 to 17,939.3)</b>    | <b>13,454.0†</b><br><b>(13,061.0 to 13,827.8)</b> | <b>442.2</b><br><b>(320.4 to 588.1)</b>         | <b>17.9</b><br><b>(16.3 to 19.5)</b>              | <b>4.7</b><br><b>(3.4 to 6.1)</b>                   |
| Peptic ulcer disease                                           | 4,329.3<br>(4,122.4 to 4,546.8)                     | 299.9<br>(278.2 to 324.1)                         | 36.3<br>(23.0 to 57.1)                          | 10.6<br>(7.0 to 14.2)                             | 1.6<br>(-1.6 to 5.0)                                |
| Gastritis and duodenitis                                       | 7,455.2<br>(6,923.4 to 7,884.3)                     | 5,851.2<br>(5,528.1 to 6,134.1)                   | 50.4<br>(32.5 to 76.8)                          | 24.6<br>(20.7 to 28.2)                            | 13.3<br>(9.8 to 16.6)                               |
| Appendicitis                                                   | 11.2<br>(10.6 to 11.7)                              | 292.1<br>(278.0 to 306.9)                         | 3.6<br>(2.4 to 5.0)                             | 0.2<br>(-1.9 to 2.1)                              | -7.1<br>(-9.0 to -5.5)                              |
| Paralytic ileus and intestinal obstruction                     | 13.5<br>(12.8 to 14.3)                              | 361.2<br>(342.2 to 381.2)                         | 4.1<br>(2.8 to 5.5)                             | 17.1<br>(12.7 to 21.9)                            | 0.0<br>(-3.4 to 3.5)                                |
| Inguinal, femoral, and abdominal hernia                        | 3,874.7<br>(3,482.5 to 4,187.1)                     | 1,384.4<br>(1,226.6 to 1,528.5)                   | 40.0<br>(27.9 to 54.4)                          | 22.2<br>(18.2 to 25.8)                            | 3.1<br>(-0.0 to 6.0)                                |
| Inflammatory bowel disease                                     | 1,651.0<br>(1,571.8 to 1,733.9)                     | 190.1<br>(179.1 to 201.2)                         | 237.2<br>(164.4 to 324.0)                       | 15.9<br>(13.7 to 18.0)                            | 3.4<br>(1.5 to 5.1)                                 |
| Vascular intestinal disorders                                  | 20.1<br>(18.2 to 22.1)                              | 105.3<br>(96.3 to 114.5)                          | 5.8<br>(3.9 to 7.9)                             | 20.1<br>(12.5 to 27.8)                            | -1.2<br>(-6.9 to 4.7)                               |
| Gallbladder and biliary diseases                               | 1,007.2<br>(957.5 to 1,061.0)                       | 3,849.1<br>(3,726.1 to 3,971.0)                   | 16.1<br>(11.2 to 22.2)                          | 17.8<br>(12.8 to 23.1)                            | 2.9<br>(-1.3 to 7.5)                                |
| Pancreatitis                                                   | 128.9<br>(119.0 to 139.2)                           | 1,120.8<br>(1,034.5 to 1,213.1)                   | 15.2<br>(10.4 to 21.0)                          | 27.4<br>(21.7 to 33.2)                            | 10.3<br>(5.7 to 14.6)                               |
| Other digestive diseases                                       | --                                                  | --                                                | 33.5<br>(24.3 to 44.5)                          | 25.1<br>(23.4 to 26.6)                            | 9.5<br>(8.1 to 10.8)                                |
| <b>Neurological disorders</b>                                  | <b>100,920.6</b><br><b>(100,421.2 to 101,491.1)</b> | <b>40,642.6</b><br><b>(37,456.3 to 44,110.7)</b>  | <b>3,503.4</b><br><b>(2,416.4 to 4,631.1)</b>   | <b>10.2</b><br><b>(6.8 to 13.9)</b>               | <b>-0.1</b><br><b>(-3.6 to 3.4)</b>                 |
| Alzheimer's disease and other dementias                        | 4,029.5<br>(3,696.3 to 4,388.0)                     | 699.7<br>(631.9 to 776.4)                         | 597.6<br>(431.4 to 774.4)                       | 21.3<br>(19.6 to 23.4)                            | -1.0<br>(-2.5 to 0.5)                               |
| Parkinson's disease                                            | 707.2<br>(664.0 to 753.6)                           | 80.4<br>(75.2 to 86.4)                            | 80.9<br>(55.6 to 106.8)                         | 27.9<br>(25.5 to 30.3)                            | 3.4<br>(1.4 to 5.4)                                 |
| Epilepsy                                                       | 1,181.2<br>(927.5 to 1,429.3)                       | 110.5<br>(86.1 to 134.2)                          | 297.8<br>(190.8 to 432.4)                       | 6.5<br>(-22.6 to 44.4)                            | -3.6<br>(-29.9 to 30.6)                             |
| Multiple sclerosis                                             | 511.9<br>(477.4 to 549.5)                           | 12.1<br>(11.4 to 13.0)                            | 130.5<br>(93.2 to 167.5)                        | 18.2<br>(15.0 to 21.6)                            | 6.5<br>(3.6 to 9.5)                                 |
| Motor neuron disease                                           | 62.5<br>(58.9 to 66.4)                              | 9.6<br>(9.1 to 10.1)                              | 13.2<br>(9.4 to 17.3)                           | 19.1<br>(17.2 to 21.1)                            | 2.3<br>(0.7 to 3.9)                                 |
| Migraine                                                       | 47,017.0<br>(46,100.5 to 47,899.3)                  | 4,380.4<br>(4,249.9 to 4,521.2)                   | 2,010.1<br>(1,296.4 to 2,814.8)                 | 6.7<br>(5.9 to 7.5)                               | -0.3<br>(-1.0 to 0.4)                               |
| Tension-type headache                                          | 65,697.4<br>(63,755.1 to 67,595.8)                  | 35,346.3<br>(32,170.1 to 38,853.9)                | 293.0<br>(188.8 to 423.7)                       | 7.8<br>(6.5 to 9.4)                               | -0.3<br>(-1.3 to 0.9)                               |
| Other neurological disorders                                   | 1.7<br>(1.2 to 2.3)                                 | 3.6<br>(2.4 to 4.8)                               | 80.4<br>(54.8 to 108.0)                         | 20.2<br>(-0.8 to 44.0)                            | 13.9<br>(-8.0 to 39.0)                              |
| <b>Mental and substance use disorders</b>                      | <b>63,952.1</b><br><b>(63,421.1 to 64,528.4)</b>    | <b>25,109.4†</b><br><b>(23,888.1 to 26,606.5)</b> | <b>10,150.5</b><br><b>(7,377.9 to 13,026.3)</b> | <b>7.9</b><br><b>(6.8 to 9.1)</b>                 | <b>0.4</b><br><b>(-0.6 to 1.5)</b>                  |
| Schizophrenia                                                  | 1,086.2<br>(957.5 to 1,216.6)                       | 41.4<br>(36.6 to 46.8)                            | 685.2<br>(506.9 to 847.9)                       | 9.2<br>(7.5 to 11.1)                              | 0.0<br>(-1.5 to 1.7)                                |
| Alcohol use disorders                                          | 6,403.4<br>(5,942.8 to 6,945.8)                     | 3,066.5<br>(2,756.2 to 3,385.4)                   | 633.9<br>(440.3 to 852.1)                       | 7.4<br>(5.1 to 9.8)                               | -0.3<br>(-2.5 to 1.7)                               |
| Drug use disorders                                             | 9,345.1<br>(9,161.0 to 9,554.2)                     | 717.1<br>(661.2 to 776.1)                         | 2,323.9<br>(1,661.2 to 2,934.9)                 | 15.2<br>(12.5 to 18.2)                            | 6.8<br>(4.2 to 9.6)                                 |
| Opioid use disorders                                           | 3,966.3<br>(3,601.2 to 4,331.1)                     | 278.6<br>(247.8 to 314.7)                         | 1,639.0<br>(1,144.0 to 2,097.4)                 | 17.4<br>(13.6 to 21.3)                            | 8.1<br>(4.5 to 11.9)                                |
| Cocaine use disorders                                          | 1,772.2<br>(1,647.5 to 1,914.0)                     | 65.0<br>(58.8 to 72.3)                            | 238.3<br>(150.7 to 338.1)                       | 10.5<br>(8.1 to 13.0)                             | 3.6<br>(1.3 to 6.1)                                 |
| Amphetamine use disorders                                      | 774.5<br>(663.9 to 913.1)                           | 51.5<br>(43.0 to 61.9)                            | 100.6<br>(62.4 to 151.9)                        | 11.0<br>(6.6 to 15.3)                             | 5.0<br>(0.7 to 9.2)                                 |
| Cannabis use disorders                                         | 2,672.2<br>(2,358.6 to 3,036.1)                     | 261.5<br>(219.7 to 308.5)                         | 77.5<br>(50.0 to 113.8)                         | 6.8<br>(4.0 to 9.8)                               | 1.5<br>(-1.1 to 4.2)                                |
| Other drug use disorders                                       | 448.6<br>(414.3 to 485.2)                           | 60.4<br>(55.1 to 65.8)                            | 268.6<br>(178.7 to 370.2)                       | 11.0<br>(5.8 to 16.6)                             | 4.6<br>(-0.3 to 9.7)                                |
| Depressive disorders                                           | 15,907.1<br>(15,521.8 to 16,264.7)                  | 17,293.2<br>(16,084.4 to 18,664.5)                | 2,715.0<br>(1,880.2 to 3,679.5)                 | 5.2<br>(3.5 to 6.9)                               | -2.1<br>(-3.5 to -0.6)                              |
| Major depressive disorder                                      | 10,762.5<br>(10,096.6 to 11,542.5)                  | 16,388.1<br>(15,183.6 to 17,760.1)                | 2,193.0<br>(1,507.6 to 2,990.5)                 | 4.2<br>(2.5 to 5.8)                               | -2.4<br>(-3.9 to -1.0)                              |
| Dysthymia                                                      | 5,485.3<br>(4,798.1 to 6,319.4)                     | 905.0<br>(798.9 to 1,038.5)                       | 522.0<br>(352.7 to 753.3)                       | 9.7<br>(4.1 to 16.0)                              | -0.9<br>(-5.8 to 4.2)                               |
| Bipolar disorder                                               | 2,427.2<br>(2,349.6 to 2,510.8)                     | 187.5<br>(176.3 to 199.0)                         | 489.1<br>(309.6 to 703.2)                       | 7.9<br>(6.6 to 9.4)                               | -0.1<br>(-1.4 to 1.2)                               |
| Anxiety disorders                                              | 18,435.9<br>(17,266.3 to 19,629.5)                  | 2,408.8<br>(2,256.3 to 2,579.2)                   | 1,755.0<br>(1,229.6 to 2,383.4)                 | 3.3<br>(-1.2 to 7.5)                              | -3.8<br>(-8.0 to 0.1)                               |
| Eating disorders                                               | 959.6<br>(868.5 to 1,059.0)                         | 342.0<br>(253.9 to 452.2)                         | 197.8<br>(129.2 to 285.3)                       | 8.7<br>(6.1 to 11.5)                              | 4.4<br>(2.3 to 6.7)                                 |
| Anorexia nervosa                                               | 312.7<br>(231.6 to 407.7)                           | 58.4<br>(43.3 to 76.1)                            | 66.1<br>(40.3 to 97.3)                          | 8.9<br>(5.1 to 12.9)                              | 4.1<br>(0.4 to 8.1)                                 |
| Bulimia nervosa                                                | 628.7<br>(466.7 to 834.3)                           | 283.6<br>(197.3 to 396.1)                         | 131.7<br>(80.1 to 195.3)                        | 8.6<br>(5.3 to 12.3)                              | 4.5<br>(1.9 to 7.3)                                 |
| Autistic spectrum disorders                                    | 2,640.5<br>(2,516.0 to 2,737.6)                     | 13.2<br>(8.9 to 18.3)                             | 416.7<br>(283.1 to 588.6)                       | 7.2<br>(6.1 to 8.4)                               | 0.1<br>(-0.9 to 1.2)                                |
| Autism                                                         | 1,020.9<br>(874.8 to 1,191.0)                       | 1.5<br>(0.8 to 2.6)                               | 256.2<br>(164.2 to 372.5)                       | 7.3<br>(5.6 to 9.2)                               | 0.0<br>(-1.6 to 1.8)                                |
| Asperger syndrome and other autistic spectrum disorders        | 1,619.0<br>(1,345.9 to 1,950.0)                     | 11.7<br>(7.6 to 16.8)                             | 160.6<br>(104.2 to 234.7)                       | 7.0<br>(5.9 to 8.2)                               | 0.2<br>(-0.9 to 1.4)                                |

| Cause                                                      | Prevalence in thousands (95% UI)              | Incidence in thousands (95% UI)                | YLDs in thousands (95% UI)               |                                                   |                                                     |
|------------------------------------------------------------|-----------------------------------------------|------------------------------------------------|------------------------------------------|---------------------------------------------------|-----------------------------------------------------|
|                                                            | 2016 counts                                   | 2016 counts                                    | 2016 counts                              | Percentage change in counts between 2006 and 2016 | Percentage change in age-standardised rates between |
| Attention-deficit/hyperactivity disorder                   | 2,852.8<br>(2,628.4 to 3,114.9)               | 140.5<br>(125.5 to 158.0)                      | 34.4<br>(20.7 to 53.5)                   | 1.7<br>(-3.1 to 6.2)                              | -0.9<br>(-5.7 to 3.6)                               |
| Conduct disorder                                           | 1,965.9<br>(1,697.5 to 2,224.1)               | 701.2<br>(589.3 to 814.4)                      | 239.0<br>(147.8 to 358.9)                | 3.2<br>(-0.6 to 7.0)                              | 4.4<br>(0.6 to 8.2)                                 |
| Idiopathic developmental intellectual disability           | 1,860.9<br>(845.6 to 2,865.4)                 | --                                             | 94.3<br>(44.4 to 157.3)                  | 4.1<br>(-0.3 to 7.5)                              | -2.9<br>(-7.0 to 0.0)                               |
| Other mental and substance use disorders                   | 7,710.3<br>(6,754.5 to 8,791.3)               | 198.0<br>(175.7 to 224.1)                      | 566.1<br>(390.0 to 804.1)                | 10.5<br>(9.5 to 11.6)                             | 0.1<br>(-0.8 to 1.1)                                |
| <b>Diabetes, urogenital, blood, and endocrine diseases</b> | <b>120,811.8<br/>(120,357.4 to 121,205.3)</b> | <b>44,364.4†<br/>(43,169.7 to 45,456.7)</b>    | <b>3,772.1<br/>(2,718.1 to 5,012.6)</b>  | <b>23.3<br/>(21.0 to 25.8)</b>                    | <b>4.3<br/>(2.7 to 6.1)</b>                         |
| Diabetes mellitus                                          | 27,319.7<br>(26,312.3 to 28,280.1)            | 1,454.9<br>(1,369.0 to 1,540.5)                | 2,142.9<br>(1,496.1 to 2,932.8)          | 26.9<br>(23.3 to 31.1)                            | 4.9<br>(2.2 to 8.0)                                 |
| Acute glomerulonephritis                                   | 3.0<br>(2.6 to 3.3)                           | 44.6<br>(40.1 to 49.4)                         | 0.1<br>(0.1 to 0.2)                      | 20.5<br>(16.0 to 24.5)                            | 5.3<br>(1.7 to 8.2)                                 |
| Chronic kidney disease                                     | 21,018.7<br>(19,095.5 to 22,979.7)            | 1,900.5<br>(1,649.5 to 2,145.7)                | 723.5<br>(539.5 to 901.3)                | 28.4<br>(25.2 to 31.7)                            | 9.0<br>(6.6 to 11.3)                                |
| Chronic kidney disease due to diabetes mellitus            | 11,242.2<br>(9,808.7 to 12,763.1)             | 1,050.6<br>(880.7 to 1,217.2)                  | 398.3<br>(294.1 to 507.5)                | 24.9<br>(20.2 to 29.8)                            | 5.7<br>(2.1 to 9.5)                                 |
| Chronic kidney disease due to hypertension                 | 2,823.0<br>(2,400.4 to 3,239.7)               | 153.9<br>(119.1 to 195.1)                      | 139.6<br>(99.6 to 180.3)                 | 29.4<br>(19.9 to 40.9)                            | 6.7<br>(-1.2 to 15.8)                               |
| Chronic kidney disease due to glomerulonephritis           | 3,977.2<br>(3,322.7 to 4,602.0)               | 431.4<br>(344.2 to 527.8)                      | 75.0<br>(54.6 to 98.9)                   | 19.6<br>(10.6 to 30.0)                            | 5.4<br>(-2.0 to 13.4)                               |
| Chronic kidney disease due to other causes                 | 2,976.3<br>(2,397.1 to 3,668.6)               | 264.5<br>(207.6 to 333.2)                      | 110.6<br>(79.8 to 147.1)                 | 50.0<br>(34.9 to 66.7)                            | 28.8<br>(16.9 to 42.0)                              |
| Urinary diseases and male infertility                      | 8,236.9<br>(7,917.3 to 8,502.8)               | 29,254.5†<br>(28,140.2 to 30,310.0)            | 267.8<br>(180.1 to 375.7)                | 25.0<br>(23.1 to 27.0)                            | 1.0<br>(-0.6 to 2.6)                                |
| Interstitial nephritis and urinary tract infections        | 430.2<br>(408.7 to 450.9)                     | 22,679.3<br>(21,563.5 to 23,674.7)             | 13.9<br>(8.9 to 20.6)                    | 19.5<br>(16.0 to 23.2)                            | 4.9<br>(1.8 to 8.1)                                 |
| Urolithiasis                                               | 215.3<br>(204.8 to 226.1)                     | 5,679.8<br>(5,436.8 to 5,924.4)                | 15.3<br>(10.5 to 20.7)                   | 24.8<br>(19.6 to 30.2)                            | 8.5<br>(4.2 to 12.9)                                |
| Benign prostatic hyperplasia                               | 6,961.8<br>(6,576.8 to 7,310.9)               | 895.5<br>(808.4 to 981.2)                      | 225.2<br>(148.2 to 315.5)                | 26.8<br>(24.6 to 29.0)                            | 0.6<br>(-1.2 to 2.5)                                |
| Male infertility                                           | 599.4<br>(482.5 to 753.7)                     | --                                             | 3.8<br>(1.6 to 7.7)                      | 21.8<br>(12.1 to 33.7)                            | 17.3<br>(7.8 to 28.3)                               |
| Other urinary diseases                                     | --                                            | --                                             | 9.5<br>(6.5 to 13.1)                     | -0.3<br>(-3.1 to 2.7)                             | -12.0<br>(-14.4 to -9.5)                            |
| Gynecological diseases                                     | 35,860.1<br>(35,433.6 to 36,212.3)            | 10,346.2†<br>(9,879.6 to 10,800.0)             | 354.5<br>(236.7 to 517.9)                | 4.8<br>(3.4 to 6.2)                               | 2.5<br>(1.4 to 3.9)                                 |
| Uterine fibroids                                           | 4,690.4<br>(4,509.9 to 4,878.4)               | 422.3<br>(394.8 to 450.6)                      | 38.7<br>(19.7 to 71.5)                   | 7.5<br>(5.8 to 9.9)                               | 4.4<br>(2.7 to 6.9)                                 |
| Polycystic ovarian syndrome                                | 3,317.8<br>(2,851.3 to 3,785.3)               | 371.8<br>(289.6 to 463.8)                      | 29.7<br>(13.9 to 55.7)                   | 4.2<br>(1.5 to 7.0)                               | 3.3<br>(0.8 to 5.9)                                 |
| Female infertility                                         | 220.8<br>(101.8 to 442.7)                     | --                                             | 1.4<br>(0.4 to 3.5)                      | 106.3<br>(55.9 to 181.2)                          | 91.3<br>(43.6 to 168.7)                             |
| Endometriosis                                              | 272.2<br>(233.8 to 316.3)                     | 416.1<br>(365.5 to 482.1)                      | 25.1<br>(16.8 to 35.5)                   | 13.2<br>(8.6 to 17.9)                             | 11.4<br>(6.6 to 16.2)                               |
| Genital prolapse                                           | 8,978.5<br>(8,349.9 to 9,661.2)               | 379.6<br>(345.7 to 416.5)                      | 27.8<br>(13.4 to 50.0)                   | 9.6<br>(7.7 to 11.6)                              | -7.9<br>(-9.3 to -6.3)                              |
| Premenstrual syndrome                                      | 21,018.7<br>(20,136.5 to 21,917.0)            | 7,140.9<br>(6,757.6 to 7,534.2)                | 174.3<br>(108.4 to 267.7)                | 0.7<br>(-1.0 to 2.3)                              | -0.0<br>(-1.7 to 1.6)                               |
| Other gynecological diseases                               | 1,684.7<br>(1,490.6 to 1,884.1)               | 1,615.5<br>(1,408.9 to 1,826.5)                | 57.5<br>(38.2 to 80.8)                   | 9.4<br>(5.0 to 13.9)                              | 9.0<br>(5.0 to 13.0)                                |
| Hemoglobinopathies and hemolytic anaemias                  | 55,026.6<br>(54,773.9 to 55,249.9)            | --                                             | 71.1<br>(45.3 to 109.0)                  | 2.0<br>(-1.0 to 5.2)                              | -4.1<br>(-7.7 to -0.3)                              |
| Thalassemias                                               | 12.2<br>(11.8 to 12.7)                        | --                                             | 0.8<br>(0.5 to 1.1)                      | 1.6<br>(-3.7 to 7.3)                              | 0.5<br>(-5.3 to 6.7)                                |
| Thalassaemias trait                                        | 7,822.4<br>(7,631.9 to 8,040.2)               | --                                             | 39.0<br>(24.5 to 60.4)                   | 1.4<br>(-1.9 to 5.0)                              | -5.2<br>(-9.0 to -0.9)                              |
| Sickle cell disorders                                      | 34.2<br>(32.5 to 36.0)                        | --                                             | 4.0<br>(2.9 to 5.3)                      | 13.7<br>(11.0 to 16.1)                            | 7.9<br>(5.1 to 10.3)                                |
| Sickle cell trait                                          | 11,841.9<br>(11,732.1 to 11,952.5)            | --                                             | 21.0<br>(12.7 to 34.1)                   | -2.0<br>(-6.2 to 1.9)                             | -6.2<br>(-10.9 to -1.5)                             |
| G6PD deficiency                                            | 8,158.1<br>(7,901.5 to 8,444.1)               | --                                             | 0.4<br>(0.3 to 0.6)                      | 30.8<br>(19.2 to 41.5)                            | 22.9<br>(10.5 to 35.4)                              |
| G6PD trait                                                 | 29,981.0<br>(29,531.8 to 30,451.8)            | --                                             | < 0.05<br>(< 0.05 to < 0.05)             | -10.5<br>(-14.0 to -6.9)                          | -14.7<br>(-18.3 to -11.1)                           |
| Other hemoglobinopathies and hemolytic anaemias            | 274.1<br>(252.8 to 298.7)                     | --                                             | 5.9<br>(4.0 to 8.5)                      | 13.3<br>(7.5 to 19.4)                             | 4.1<br>(-3.5 to 11.8)                               |
| Endocrine, metabolic, blood, and immune disorders          | 6,178.0<br>(5,659.7 to 6,735.3)               | 1,363.8<br>(1,230.6 to 1,507.8)                | 212.1<br>(144.1 to 292.3)                | 14.1<br>(11.0 to 17.2)                            | -3.5<br>(-5.7 to -1.1)                              |
| <b>Musculoskeletal disorders</b>                           | <b>85,166.3<br/>(84,489.9 to 85,917.5)</b>    | <b>47,024.5<br/>(43,801.0 to 50,899.7)</b>     | <b>8,831.6<br/>(6,455.7 to 11,456.5)</b> | <b>12.7<br/>(11.0 to 14.1)</b>                    | <b>-1.0<br/>(-2.4 to 0.2)</b>                       |
| Rheumatoid arthritis                                       | 2,561.1<br>(2,427.3 to 2,705.0)               | 120.9<br>(113.0 to 129.5)                      | 592.4<br>(412.6 to 775.9)                | 18.3<br>(16.3 to 20.3)                            | 0.7<br>(-0.8 to 2.2)                                |
| Osteoarthritis                                             | 28,874.8<br>(28,229.6 to 29,488.7)            | 1,320.5<br>(1,276.0 to 1,363.4)                | 1,005.0<br>(659.5 to 1,448.2)            | 23.7<br>(22.5 to 25.0)                            | 1.8<br>(0.8 to 2.9)                                 |
| Low back and neck pain                                     | 43,411.8<br>(43,169.5 to 43,639.1)            | 17,128.6<br>(16,434.3 to 17,806.2)             | 5,051.6<br>(3,620.1 to 6,672.4)          | 12.5<br>(10.9 to 14.0)                            | -1.0<br>(-2.3 to 0.3)                               |
| Low back pain                                              | 27,436.3<br>(27,114.1 to 27,780.1)            | 13,582.8<br>(12,960.9 to 14,177.9)             | 3,069.1<br>(2,211.0 to 3,989.6)          | 11.1<br>(8.7 to 13.5)                             | -1.7<br>(-3.7 to 0.3)                               |
| Neck pain                                                  | 20,206.1<br>(19,442.5 to 21,048.9)            | 3,545.7<br>(3,251.6 to 3,959.8)                | 1,982.5<br>(1,381.1 to 2,704.7)          | 14.7<br>(13.1 to 16.4)                            | 0.2<br>(-0.8 to 1.3)                                |
| Gout                                                       | 3,420.5<br>(3,256.6 to 3,558.7)               | 549.5<br>(504.1 to 599.0)                      | 106.1<br>(73.7 to 141.3)                 | 36.1<br>(31.8 to 40.0)                            | 14.8<br>(11.6 to 18.0)                              |
| Other musculoskeletal disorders                            | 24,465.9<br>(21,601.8 to 27,381.0)            | 27,905.1<br>(24,681.9 to 31,731.4)             | 2,076.5<br>(1,423.2 to 2,843.1)          | 6.2<br>(1.2 to 10.7)                              | -3.3<br>(-7.3 to 0.8)                               |
| <b>Other non-communicable diseases</b>                     | <b>220,845.4<br/>(219,440.0 to 222,003.9)</b> | <b>535,158.3†<br/>(509,036.7 to 562,387.2)</b> | <b>7,097.5<br/>(4,939.2 to 9,880.6)</b>  | <b>12.8<br/>(11.9 to 13.8)</b>                    | <b>0.3<br/>(-0.3 to 1.0)</b>                        |
| Congenital anomalies                                       | 4,481.5<br>(4,365.7 to 4,601.0)               | --                                             | 487.8<br>(356.5 to 633.8)                | 10.4<br>(8.3 to 12.6)                             | 3.1<br>(1.2 to 5.1)                                 |
| Neural tube defects                                        | 160.5<br>(148.5 to 173.5)                     | --                                             | 47.8<br>(34.2 to 63.8)                   | 5.2<br>(1.1 to 8.8)                               | -2.5<br>(-6.5 to 1.1)                               |
| Congenital heart anomalies                                 | 981.8<br>(888.6 to 1,083.3)                   | --                                             | 49.4<br>(20.5 to 84.9)                   | 14.3<br>(10.4 to 18.0)                            | 7.6<br>(3.9 to 11.1)                                |
| Orofacial clefts                                           | 178.6<br>(157.6 to 200.5)                     | --                                             | 1.7<br>(1.1 to 2.5)                      | 16.5<br>(4.6 to 30.2)                             | 8.2<br>(-2.9 to 20.9)                               |
| Down's syndrome                                            | 90.3<br>(79.3 to 101.9)                       | --                                             | 8.1<br>(5.5 to 11.2)                     | 18.8<br>(8.3 to 30.7)                             | 13.5<br>(3.4 to 24.7)                               |
| Turner syndrome                                            | 60.5<br>(53.3 to 68.5)                        | --                                             | 1.1<br>(0.5 to 1.8)                      | 5.3<br>(-1.7 to 13.2)                             | 2.0<br>(-5.2 to 9.8)                                |
| Klinefelter syndrome                                       | 92.9<br>(80.8 to 107.2)                       | --                                             | 0.6<br>(0.3 to 1.1)                      | 5.5<br>(-0.8 to 11.8)                             | 1.2<br>(-4.8 to 7.3)                                |



| Cause                                         | Prevalence in thousands (95% UI)                   | Incidence in thousands (95% UI)                   | YLDs in thousands (95% UI)                    |                                                   |                                                     |
|-----------------------------------------------|----------------------------------------------------|---------------------------------------------------|-----------------------------------------------|---------------------------------------------------|-----------------------------------------------------|
|                                               | 2016 counts                                        | 2016 counts                                       | 2016 counts                                   | Percentage change in counts between 2006 and 2016 | Percentage change in age-standardised rates between |
| Other chromosomal abnormalities               | 387.7<br>(338.6 to 442.4)                          | --                                                | 38.9<br>(27.2 to 53.1)                        | 1.8<br>(-1.4 to 5.2)                              | 2.4<br>(-0.9 to 5.8)                                |
| Congenital musculoskeletal and limb anomalies | 1,406.3<br>(1,307.2 to 1,509.8)                    | --                                                | 204.3<br>(141.0 to 278.6)                     | 11.9<br>(8.3 to 15.6)                             | 3.1<br>(-0.2 to 6.5)                                |
| Urogenital congenital anomalies               | 595.4<br>(547.1 to 648.0)                          | --                                                | 12.5<br>(7.0 to 20.8)                         | 6.2<br>(3.5 to 8.5)                               | 2.5<br>(0.1 to 4.7)                                 |
| Digestive congenital anomalies                | 568.8<br>(523.3 to 621.6)                          | --                                                | 24.3<br>(15.9 to 35.2)                        | 7.2<br>(3.1 to 11.8)                              | -0.5<br>(-4.3 to 3.8)                               |
| Other congenital anomalies                    | 668.8<br>(434.6 to 1,010.6)                        | --                                                | 99.2<br>(68.2 to 139.6)                       | 12.7<br>(7.1 to 19.1)                             | 4.4<br>(-1.0 to 10.1)                               |
| Skin and subcutaneous diseases                | 115,145.1<br>(114,685.1 to 115,553.4)              | 196,137.1<br>(191,378.9 to 201,076.7)             | 3,207.0<br>(2,180.2 to 4,523.9)               | 5.3<br>(4.7 to 5.8)                               | -1.3<br>(-1.8 to -0.8)                              |
| Dermatitis                                    | 24,524.4<br>(23,453.1 to 25,591.8)                 | 32,817.6<br>(30,231.7 to 35,633.7)                | 830.2<br>(515.1 to 1,296.5)                   | 7.1<br>(6.2 to 8.1)                               | 0.5<br>(-0.1 to 1.2)                                |
| Psoriasis                                     | 5,698.6<br>(5,533.1 to 5,860.2)                    | 467.3<br>(452.6 to 481.1)                         | 488.2<br>(350.9 to 635.5)                     | 12.3<br>(11.0 to 13.7)                            | 1.1<br>(-0.1 to 2.3)                                |
| Cellulitis                                    | 477.4<br>(458.7 to 500.3)                          | 12,271.3<br>(11,972.1 to 12,604.0)                | 26.2<br>(17.3 to 36.8)                        | 8.3<br>(5.5 to 11.2)                              | -2.2<br>(-4.8 to 0.6)                               |
| Pyoderma                                      | 225.0<br>(219.7 to 229.8)                          | 4,347.1<br>(4,258.2 to 4,445.6)                   | 1.3<br>(0.5 to 2.6)                           | 8.7<br>(5.9 to 11.6)                              | 1.1<br>(-1.6 to 4.0)                                |
| Scabies                                       | 1,727.2<br>(1,601.0 to 1,861.7)                    | 5,185.4<br>(4,760.4 to 5,632.5)                   | 44.3<br>(25.4 to 70.3)                        | 8.8<br>(5.5 to 12.0)                              | 3.3<br>(0.1 to 6.6)                                 |
| Fungal skin diseases                          | 10,079.9<br>(9,883.5 to 10,276.6)                  | 34,929.6<br>(33,165.7 to 36,752.6)                | 55.1<br>(22.4 to 114.7)                       | 13.7<br>(13.0 to 14.5)                            | -0.6<br>(-1.2 to -0.0)                              |
| Viral skin diseases                           | 9,593.1<br>(9,420.1 to 9,750.8)                    | 11,853.6<br>(11,582.5 to 12,116.8)                | 293.2<br>(179.8 to 430.8)                     | 5.4<br>(4.5 to 6.1)                               | -0.2<br>(-0.9 to 0.6)                               |
| Acne vulgaris                                 | 38,802.7<br>(37,661.5 to 39,894.8)                 | 31,084.2<br>(27,939.0 to 34,653.7)                | 992.6<br>(668.0 to 1,441.4)                   | -2.3<br>(-3.2 to -1.4)                            | -4.5<br>(-5.5 to -3.6)                              |
| Alopecia areata                               | 1,323.2<br>(1,295.5 to 1,350.0)                    | 2,338.0<br>(2,287.5 to 2,388.3)                   | 42.9<br>(27.4 to 64.6)                        | 8.7<br>(6.9 to 10.6)                              | -0.1<br>(-1.8 to 1.5)                               |
| Pruritus                                      | 2,856.3<br>(2,789.7 to 2,931.5)                    | 2,308.4<br>(2,164.9 to 2,441.2)                   | 30.0<br>(14.4 to 54.8)                        | 12.9<br>(11.8 to 14.1)                            | 0.6<br>(-0.3 to 1.6)                                |
| Urticaria                                     | 2,605.0<br>(2,549.6 to 2,658.9)                    | 4,657.5<br>(4,493.9 to 4,803.9)                   | 155.2<br>(101.4 to 215.3)                     | 5.4<br>(4.2 to 6.7)                               | -0.1<br>(-1.3 to 1.1)                               |
| Decubitus ulcer                               | 181.4<br>(166.7 to 197.5)                          | 670.4<br>(618.5 to 732.5)                         | 27.4<br>(19.5 to 35.8)                        | 3.5<br>(-0.9 to 8.1)                              | -15.9<br>(-19.3 to -12.0)                           |
| Other skin and subcutaneous diseases          | 40,716.5<br>(40,053.4 to 41,363.0)                 | 53,206.8<br>(51,999.1 to 54,364.1)                | 220.4<br>(106.4 to 402.5)                     | 17.7<br>(17.1 to 18.3)                            | 2.0<br>(1.6 to 2.5)                                 |
| Sense organ diseases                          | 75,274.0<br>(74,278.0 to 76,211.9)                 | 33,817.3†<br>(31,970.8 to 35,657.6)               | 2,336.6<br>(1,600.3 to 3,234.6)               | 20.0<br>(17.9 to 22.2)                            | 0.2<br>(-1.4 to 2.0)                                |
| Glaucoma                                      | 169.1<br>(143.6 to 198.0)                          | --                                                | 18.4<br>(12.4 to 25.8)                        | 34.0<br>(29.1 to 39.0)                            | 5.5<br>(1.9 to 9.3)                                 |
| Cataract                                      | 856.4<br>(739.8 to 988.8)                          | --                                                | 59.2<br>(42.1 to 80.5)                        | 26.0<br>(23.1 to 29.1)                            | 3.0<br>(0.8 to 5.2)                                 |
| Macular degeneration                          | 150.6<br>(128.2 to 175.9)                          | --                                                | 14.5<br>(10.0 to 20.0)                        | 33.7<br>(29.0 to 38.1)                            | 6.1<br>(2.7 to 9.6)                                 |
| Refraction and accommodation disorders        | 17,700.6<br>(17,064.4 to 18,304.3)                 | --                                                | 278.5<br>(167.1 to 446.2)                     | 11.2<br>(9.6 to 13.0)                             | -1.8<br>(-3.0 to -0.6)                              |
| Age-related and other hearing loss            | 60,545.1<br>(57,703.7 to 63,543.5)                 | --                                                | 1,528.0<br>(1,035.7 to 2,157.1)               | 21.6<br>(18.2 to 25.1)                            | 0.5<br>(-2.1 to 3.4)                                |
| Other vision loss                             | 769.6<br>(665.5 to 879.7)                          | --                                                | 61.9<br>(42.7 to 83.2)                        | 20.6<br>(16.6 to 24.5)                            | 2.1<br>(-1.2 to 5.6)                                |
| Other sense organ diseases                    | 12,143.1<br>(11,289.7 to 12,986.2)                 | 33,817.3<br>(31,970.8 to 35,657.6)                | 376.2<br>(237.2 to 563.2)                     | 18.2<br>(17.3 to 19.2)                            | -0.0<br>(-0.8 to 0.7)                               |
| Oral disorders                                | 124,189.7<br>(120,868.4 to 126,376.3)              | 305,203.9†<br>(279,765.0 to 331,653.2)            | 1,066.0<br>(676.0 to 1,575.4)                 | 24.4<br>(22.5 to 26.8)                            | 5.6<br>(4.8 to 6.5)                                 |
| Caries of deciduous teeth                     | 9,158.9<br>(6,053.4 to 11,688.6)                   | 35,341.8<br>(19,086.1 to 53,576.3)                | 3.5<br>(1.4 to 7.1)                           | 13.9<br>(9.6 to 17.6)                             | 12.4<br>(7.6 to 16.2)                               |
| Caries of permanent teeth                     | 81,546.3<br>(76,968.1 to 86,417.6)                 | 265,829.5<br>(247,459.9 to 284,867.8)             | 79.3<br>(35.0 to 151.6)                       | 12.5<br>(11.2 to 14.0)                            | 3.3<br>(2.3 to 4.4)                                 |
| Periodontal disease                           | 22,052.0<br>(18,386.5 to 26,298.3)                 | 2,398.2<br>(1,914.9 to 2,976.6)                   | 142.7<br>(56.6 to 295.3)                      | 19.6<br>(17.4 to 22.1)                            | 4.5<br>(3.1 to 5.9)                                 |
| Edentulism and severe tooth loss              | 24,080.0<br>(20,992.2 to 27,009.8)                 | 1,634.4<br>(1,383.7 to 1,909.4)                   | 662.1<br>(432.6 to 936.6)                     | 31.9<br>(29.9 to 34.1)                            | 8.0<br>(7.2 to 8.9)                                 |
| Other oral disorders                          | 6,143.2<br>(5,878.9 to 6,401.3)                    | --                                                | 178.4<br>(110.4 to 269.6)                     | 10.2<br>(6.9 to 13.4)                             | 0.6<br>(-2.3 to 3.4)                                |
| <b>Injuries</b>                               | <b>100,255.5</b><br><b>(94,094.6 to 106,804.2)</b> | <b>38,336.6†</b><br><b>(36,346.9 to 40,395.5)</b> | <b>3,211.7</b><br><b>(2,133.3 to 4,558.9)</b> | <b>19.7</b><br><b>(17.1 to 22.4)</b>              | <b>2.0</b><br><b>(0.5 to 3.7)</b>                   |
| <b>Transport injuries</b>                     | <b>15,761.5</b><br><b>(14,429.6 to 17,157.3)</b>   | <b>3,973.0</b><br><b>(3,687.6 to 4,268.3)</b>     | <b>691.0</b><br><b>(455.1 to 995.2)</b>       | <b>-2.6</b><br><b>(-4.3 to -0.5)</b>              | <b>-15.2</b><br><b>(-16.6 to -13.6)</b>             |
| Road injuries                                 | 12,743.2<br>(11,509.8 to 13,877.1)                 | 3,478.5<br>(3,202.2 to 3,776.4)                   | 583.0<br>(386.1 to 840.1)                     | -6.3<br>(-8.0 to -4.3)                            | -18.5<br>(-19.8 to -16.9)                           |
| Pedestrian road injuries                      | 1,810.6<br>(1,594.7 to 2,083.2)                    | 288.1<br>(242.7 to 347.0)                         | 87.8<br>(57.0 to 128.1)                       | -6.6<br>(-8.2 to -4.9)                            | -19.2<br>(-20.3 to -17.9)                           |
| Cyclist road injuries                         | 1,668.1<br>(1,373.0 to 1,992.6)                    | 537.7<br>(438.4 to 641.1)                         | 67.0<br>(42.8 to 98.8)                        | -3.9<br>(-5.4 to -2.4)                            | -16.2<br>(-17.3 to -15.2)                           |
| Motorcyclist road injuries                    | 1,993.7<br>(1,699.6 to 2,365.9)                    | 344.2<br>(289.3 to 412.9)                         | 92.2<br>(60.8 to 132.6)                       | 3.1<br>(1.6 to 4.7)                               | -10.6<br>(-11.8 to -9.4)                            |
| Motor vehicle road injuries                   | 7,053.4<br>(5,895.8 to 8,165.4)                    | 2,251.6<br>(2,038.4 to 2,464.7)                   | 328.7<br>(220.0 to 466.6)                     | -9.7<br>(-11.8 to -7.5)                           | -21.4<br>(-23.0 to -19.6)                           |
| Other road injuries                           | 217.4<br>(188.8 to 255.2)                          | 57.0<br>(40.9 to 75.4)                            | 7.3<br>(4.7 to 10.8)                          | 53.7<br>(51.2 to 56.4)                            | 34.0<br>(32.0 to 36.3)                              |
| Other transport injuries                      | 3,018.3<br>(2,504.5 to 3,511.0)                    | 494.5<br>(436.0 to 561.1)                         | 108.0<br>(69.1 to 157.3)                      | 23.9<br>(22.1 to 25.9)                            | 8.7<br>(7.3 to 10.1)                                |
| <b>Unintentional injuries</b>                 | <b>75,226.8</b><br><b>(69,476.2 to 81,644.7)</b>   | <b>31,069.4</b><br><b>(29,121.5 to 33,073.6)</b>  | <b>2,219.4</b><br><b>(1,481.2 to 3,176.7)</b> | <b>31.4</b><br><b>(27.8 to 35.2)</b>              | <b>10.7</b><br><b>(8.2 to 13.2)</b>                 |
| Falls                                         | 37,306.1<br>(33,205.6 to 41,706.8)                 | 15,170.1<br>(13,679.2 to 16,781.0)                | 1,389.1<br>(960.0 to 1,922.6)                 | 48.9<br>(44.6 to 53.6)                            | 22.7<br>(19.6 to 26.0)                              |
| Drowning                                      | 188.9<br>(165.1 to 214.2)                          | 20.6<br>(17.9 to 24.0)                            | 8.8<br>(5.7 to 12.9)                          | 17.1<br>(14.5 to 19.9)                            | 3.6<br>(1.5 to 5.9)                                 |
| Fire, heat, and hot substances                | 7,059.5<br>(6,069.4 to 8,362.5)                    | 452.2<br>(378.6 to 520.8)                         | 121.2<br>(67.0 to 201.3)                      | 1.8<br>(-0.5 to 3.9)                              | -10.4<br>(-12.5 to -8.5)                            |
| Poisonings                                    | 300.6<br>(246.8 to 369.6)                          | 329.1<br>(270.0 to 391.3)                         | 25.4<br>(16.3 to 36.8)                        | 9.6<br>(7.2 to 12.0)                              | 0.3<br>(-2.0 to 2.6)                                |
| Exposure to mechanical forces                 | 18,285.0<br>(15,401.9 to 23,054.4)                 | 4,875.4<br>(4,210.4 to 5,527.3)                   | 327.5<br>(204.5 to 501.2)                     | 7.1<br>(5.6 to 8.8)                               | -5.7<br>(-6.9 to -4.4)                              |
| Unintentional firearm injuries                | 818.9<br>(660.1 to 1,049.5)                        | 83.1<br>(57.6 to 116.7)                           | 12.2<br>(6.8 to 20.1)                         | 6.8<br>(5.0 to 8.9)                               | -5.3<br>(-6.5 to -3.9)                              |
| Unintentional suffocation                     | 600.7<br>(458.9 to 765.7)                          | 87.7<br>(61.3 to 120.7)                           | 13.5<br>(8.0 to 21.3)                         | 43.7<br>(41.7 to 45.9)                            | 28.4<br>(27.0 to 29.9)                              |
| Other exposure to mechanical forces           | 16,865.3<br>(14,083.6 to 21,607.9)                 | 4,704.6<br>(4,069.8 to 5,353.1)                   | 301.9<br>(189.2 to 461.0)                     | 6.0<br>(4.4 to 7.6)                               | -6.8<br>(-8.0 to -5.6)                              |



| Cause                                                                               | Prevalence in thousands (95% UI)                 | Incidence in thousands (95% UI)                | YLDs in thousands (95% UI)              |                                                   |                                                     |
|-------------------------------------------------------------------------------------|--------------------------------------------------|------------------------------------------------|-----------------------------------------|---------------------------------------------------|-----------------------------------------------------|
|                                                                                     | 2016 counts                                      | 2016 counts                                    | 2016 counts                             | Percentage change in counts between 2006 and 2016 | Percentage change in age-standardised rates between |
| Adverse effects of medical treatment                                                | 331.8<br>(265.3 to 410.0)                        | 4,339.8<br>(3,848.0 to 4,866.3)                | 44.2<br>(28.0 to 65.0)                  | 3.9<br>(0.8 to 7.2)                               | -9.0<br>(-11.4 to -6.2)                             |
| Animal contact                                                                      | 2,746.1<br>(2,392.5 to 3,215.0)                  | 1,544.5<br>(1,276.1 to 1,887.2)                | 54.7<br>(34.8 to 82.0)                  | 2.5<br>(0.4 to 4.6)                               | -8.7<br>(-10.3 to -7.3)                             |
| Venomous animal contact                                                             | 302.0<br>(252.7 to 370.1)                        | 377.2<br>(268.3 to 505.0)                      | 23.3<br>(14.8 to 34.0)                  | -2.5<br>(-4.8 to -0.1)                            | -10.8<br>(-13.0 to -8.7)                            |
| Non-venomous animal contact                                                         | 2,444.1<br>(2,088.8 to 2,904.5)                  | 1,167.2<br>(943.8 to 1,423.0)                  | 31.4<br>(18.0 to 50.6)                  | 6.5<br>(4.9 to 8.5)                               | -6.9<br>(-8.1 to -5.6)                              |
| Foreign body                                                                        | 2,084.3<br>(1,775.3 to 2,533.1)                  | 1,436.4<br>(1,239.3 to 1,702.4)                | 60.1<br>(38.0 to 90.1)                  | 18.4<br>(16.3 to 20.4)                            | 4.1<br>(2.5 to 5.7)                                 |
| Pulmonary aspiration and foreign body in airway                                     | 287.8<br>(233.5 to 346.2)                        | 350.4<br>(315.1 to 396.2)                      | 7.7<br>(4.9 to 11.6)                    | 16.8<br>(14.8 to 18.7)                            | 0.8<br>(-0.4 to 2.0)                                |
| Foreign body in eyes                                                                | 172.2<br>(113.3 to 237.6)                        | 691.9<br>(517.2 to 940.7)                      | 11.8<br>(7.2 to 18.1)                   | 24.2<br>(19.9 to 29.0)                            | 10.4<br>(6.6 to 14.3)                               |
| Foreign body in other body part                                                     | 1,624.3<br>(1,333.4 to 2,072.4)                  | 394.0<br>(327.3 to 464.7)                      | 40.6<br>(25.1 to 61.4)                  | 17.1<br>(15.1 to 19.1)                            | 3.0<br>(1.6 to 4.3)                                 |
| Environmental heat and cold exposure                                                | 1,179.5<br>(1,051.2 to 1,334.7)                  | 267.6<br>(222.7 to 317.7)                      | 41.6<br>(27.0 to 61.4)                  | 25.1<br>(22.3 to 27.8)                            | 7.9<br>(5.5 to 10.0)                                |
| Other unintentional injuries                                                        | 5,745.0<br>(4,868.6 to 6,866.6)                  | 2,633.8<br>(2,186.6 to 3,120.8)                | 147.0<br>(93.9 to 218.6)                | 22.2<br>(19.9 to 24.6)                            | 5.8<br>(4.0 to 7.6)                                 |
| <b>Self-harm and interpersonal violence</b>                                         | <b>12,925.2</b><br><b>(11,771.8 to 14,094.1)</b> | <b>3,129.3†</b><br><b>(2,811.7 to 3,451.4)</b> | <b>278.3</b><br><b>(184.3 to 399.2)</b> | <b>3.1</b><br><b>(1.8 to 4.4)</b>                 | <b>-7.4</b><br><b>(-8.3 to -6.5)</b>                |
| Self-harm                                                                           | 1,335.1<br>(1,109.8 to 1,562.8)                  | 968.7<br>(855.4 to 1,090.2)                    | 59.6<br>(39.0 to 84.9)                  | 6.2<br>(4.3 to 8.1)                               | -5.0<br>(-6.6 to -3.5)                              |
| Self-harm by firearm                                                                | 32.4<br>(26.9 to 38.5)                           | 4.7<br>(2.9 to 7.3)                            | 0.6<br>(0.4 to 0.9)                     | 26.7<br>(24.6 to 29.4)                            | 11.6<br>(10.1 to 13.3)                              |
| Self-harm by other specified means                                                  | 1,302.8<br>(1,077.4 to 1,528.6)                  | 964.0<br>(850.9 to 1,084.9)                    | 59.0<br>(38.6 to 84.0)                  | 6.0<br>(4.1 to 8.0)                               | -5.1<br>(-6.8 to -3.6)                              |
| Interpersonal violence                                                              | 11,590.1<br>(10,487.4 to 12,772.0)               | 2,160.7†<br>(1,878.6 to 2,465.5)               | 218.7<br>(145.5 to 315.2)               | 2.2<br>(1.0 to 3.6)                               | -8.0<br>(-9.0 to -7.0)                              |
| Assault by firearm                                                                  | 826.4<br>(622.2 to 1,046.3)                      | 122.6<br>(93.4 to 160.4)                       | 19.9<br>(12.2 to 31.0)                  | -1.8<br>(-3.2 to 0.4)                             | -12.5<br>(-13.6 to -11.0)                           |
| Assault by sharp object                                                             | 1,605.5<br>(1,308.6 to 1,951.7)                  | 471.9<br>(366.2 to 604.0)                      | 30.8<br>(19.0 to 48.2)                  | 5.2<br>(3.7 to 6.8)                               | -5.9<br>(-7.0 to -4.6)                              |
| Sexual violence                                                                     | 4,693.7<br>(4,098.0 to 5,389.2)                  | --                                             | 39.7<br>(26.4 to 57.2)                  | -1.4<br>(-4.6 to 1.3)                             | -6.8<br>(-10.0 to -4.4)                             |
| Assault by other means                                                              | 4,464.5<br>(3,648.1 to 5,505.2)                  | 1,566.2<br>(1,339.4 to 1,816.9)                | 128.4<br>(83.2 to 189.4)                | 3.4<br>(2.0 to 4.9)                               | -8.2<br>(-9.2 to -7.1)                              |
| <b>Forces of nature, conflict and terrorism, and executions and police conflict</b> | <b>1,035.7</b><br><b>(683.0 to 1,478.0)</b>      | <b>164.9†</b><br><b>(86.5 to 242.3)</b>        | <b>22.9</b><br><b>(6.4 to 61.3)</b>     | <b>44.6</b><br><b>(33.5 to 48.4)</b>              | <b>29.9</b><br><b>(20.4 to 33.2)</b>                |
| Exposure to forces of nature                                                        | 240.1<br>(124.3 to 399.8)                        | --                                             | 5.1<br>(1.2 to 14.0)                    | 24.8<br>(-1.3 to 31.7)                            | 9.1<br>(-15.6 to 15.5)                              |
| Conflict and terrorism                                                              | 337.5<br>(181.4 to 542.8)                        | --                                             | 6.4<br>(1.4 to 18.5)                    | 66.9<br>(59.1 to 89.4)                            | 51.2<br>(44.1 to 72.5)                              |
| Executions and police conflict                                                      | 458.1<br>(248.5 to 722.4)                        | 164.9<br>(86.5 to 242.3)                       | 11.4<br>(3.8 to 29.1)                   | 44.0<br>(32.8 to 48.4)                            | 29.8<br>(20.4 to 34.0)                              |
| <b>Impairments</b>                                                                  | --                                               | --                                             | --                                      | --                                                | --                                                  |
| Anaemia                                                                             | 26,642.5<br>(24,865.8 to 28,667.0)               | --                                             | 706.3<br>(502.9 to 965.4)               | 26.9<br>(22.5 to 31.1)                            | 15.5<br>(11.6 to 19.2)                              |
| Developmental intellectual disability                                               | 5,067.4<br>(4,015.8 to 6,071.0)                  | --                                             | 626.5<br>(472.8 to 807.0)               | 7.5<br>(5.4 to 9.6)                               | 0.9<br>(-1.0 to 2.9)                                |
| Epilepsy                                                                            | 1,725.9<br>(1,435.9 to 2,024.2)                  | --                                             | 495.7<br>(361.5 to 656.7)               | 7.7<br>(-12.2 to 28.8)                            | -0.9<br>(-18.8 to 18.4)                             |
| Guillain-Barre syndrome                                                             | 4.6<br>(3.8 to 5.6)                              | --                                             | 1.4<br>(0.9 to 2.0)                     | 17.1<br>(10.4 to 23.7)                            | 1.5<br>(-4.1 to 6.9)                                |
| Hearing loss                                                                        | 62,993.4<br>(60,157.1 to 65,904.7)               | --                                             | 1,652.1<br>(1,125.8 to 2,319.3)         | 20.3<br>(17.1 to 23.4)                            | 0.4<br>(-1.9 to 2.8)                                |
| Heart failure                                                                       | 4,962.5<br>(4,796.6 to 5,120.8)                  | --                                             | 619.2<br>(472.7 to 755.1)               | 17.6<br>(15.3 to 20.2)                            | -5.4<br>(-7.1 to -3.5)                              |
| Infertility                                                                         | 2,060.7<br>(1,685.4 to 2,550.3)                  | --                                             | 17.4<br>(8.2 to 32.3)                   | 24.3<br>(16.9 to 32.6)                            | 20.2<br>(12.9 to 27.9)                              |
| Pelvic inflammatory disease                                                         | 39.2<br>(35.0 to 43.8)                           | --                                             | 5.2<br>(3.5 to 7.3)                     | 0.0<br>(-4.7 to 5.0)                              | -4.9<br>(-9.4 to -0.1)                              |
| Vision loss                                                                         | 20,288.4<br>(19,613.5 to 20,982.7)               | --                                             | 545.1<br>(388.1 to 765.8)               | 15.5<br>(13.4 to 18.1)                            | 1.1<br>(-0.7 to 3.6)                                |

We did not calculate incidence for the nine impairments, certain NTDs, and causes with only birth prevalence. Blank cells mean that no estimate is available.

† Incidence for aggregate causes represents the sum of the incidence of the causes below the aggregate.

‡ Incidence estimates for stroke represent first-ever stroke only.

^ Incidence of HIV/AIDS represents new infections of HIV only and does not include new infections of Tuberculosis in HIV positive cases.

SR Table 14: Prevalence, incidence, and YLDs for 2016, percentage change of YLD counts and percentage change of age-standardised YLD rates between 2006 and 2016 by cause and impairments, for all ages, Uruguay.

| Cause                                                                                | Prevalence in thousands (95% UI)       | Incidence in thousands (95% UI)            | YLDs in thousands (95% UI)       |                                                   |                                                     |
|--------------------------------------------------------------------------------------|----------------------------------------|--------------------------------------------|----------------------------------|---------------------------------------------------|-----------------------------------------------------|
|                                                                                      | 2016 counts                            | 2016 counts                                | 2016 counts                      | Percentage change in counts between 2006 and 2016 | Percentage change in age-standardised rates between |
| <b>All causes</b>                                                                    | <b>3,198.0</b><br>(3,181.8 to 3,211.1) | <b>18,920.8†</b><br>(17,848.9 to 20,061.9) | <b>389.0</b><br>(288.4 to 503.2) | <b>7.8</b><br>(6.2 to 9.6)                        | <b>1.0</b><br>(-0.6 to 2.8)                         |
| <b>Communicable, maternal, neonatal, and nutritional disorders</b>                   | <b>1,190.5</b><br>(1,150.8 to 1,232.3) | <b>9,585.4†</b><br>(8,610.2 to 10,630.1)   | <b>16.2</b><br>(11.5 to 22.4)    | <b>-4.4</b><br>(-9.2 to 0.6)                      | <b>-6.8</b><br>(-11.6 to -1.8)                      |
| <b>HIV/AIDS and tuberculosis</b>                                                     | <b>310.8</b><br>(283.6 to 332.9)       | <b>1.3†</b><br>(1.0 to 1.6)                | <b>1.2</b><br>(0.6 to 2.3)       | <b>27.1</b><br>(4.4 to 48.9)                      | <b>19.9</b><br>(-1.6 to 40.7)                       |
| Tuberculosis                                                                         | 283.4<br>(256.9 to 314.2)              | 0.6†<br>(0.5 to 0.7)                       | 0.1<br>(0.1 to 0.1)              | 2.8<br>(-20.6 to 32.5)                            | -2.6<br>(-25.6 to 25.7)                             |
| Drug-susceptible tuberculosis                                                        | 0.3<br>(0.2 to 0.3)                    | 0.6<br>(0.5 to 0.7)                        | 0.1<br>(0.1 to 0.1)              | 2.6<br>(-20.7 to 32.5)                            | -2.8<br>(-26.1 to 25.6)                             |
| Multidrug-resistant tuberculosis without extensive drug resistance                   | < 0.05<br>(< 0.05 to < 0.05)           | < 0.05<br>(< 0.05 to < 0.05)               | < 0.05<br>(< 0.05 to < 0.05)     | 206.0<br>(-30.1 to 1,602.8)                       | 189.8<br>(-34.4 to 1,508.4)                         |
| Extensively drug-resistant tuberculosis                                              | < 0.05<br>(< 0.05 to < 0.05)           | < 0.05<br>(< 0.05 to < 0.05)               | < 0.05<br>(< 0.05 to < 0.05)     | 558.2<br>(50.5 to 3,566.0)                        | 523.4<br>(41.1 to 3,362.9)                          |
| Latent tuberculosis infection                                                        | 283.1<br>(256.6 to 313.9)              | --                                         | --                               | --                                                | --                                                  |
| HIV/AIDS                                                                             | 11.6<br>(7.4 to 17.5)                  | 0.7^<br>(0.4 to 1.0)                       | 1.2<br>(0.5 to 2.2)              | 29.6<br>(4.9 to 52.7)                             | 22.2<br>(-1.7 to 44.6)                              |
| Drug-susceptible HIV/AIDS - Tuberculosis                                             | 0.1<br>(< 0.05 to 0.1)                 | 0.1<br>(0.1 to 0.2)                        | < 0.05<br>(< 0.05 to < 0.05)     | -1.4<br>(-8.3 to 5.1)                             | -7.0<br>(-13.5 to -0.9)                             |
| Multidrug-resistant HIV/AIDS - Tuberculosis without extensive drug resistance        | < 0.05<br>(< 0.05 to < 0.05)           | < 0.05<br>(< 0.05 to < 0.05)               | < 0.05<br>(< 0.05 to < 0.05)     | 189.6<br>(-32.9 to 1,536.3)                       | 173.2<br>(-36.7 to 1,442.9)                         |
| Extensively drug-resistant HIV/AIDS - Tuberculosis                                   | < 0.05<br>(< 0.05 to < 0.05)           | < 0.05<br>(< 0.05 to < 0.05)               | < 0.05<br>(< 0.05 to < 0.05)     | 522.8<br>(44.2 to 3,417.1)                        | 487.6<br>(36.0 to 3,216.5)                          |
| HIV/AIDS resulting in other diseases                                                 | 11.6<br>(7.3 to 17.4)                  | 0.7<br>(0.4 to 1.0)                        | 1.1<br>(0.5 to 2.2)              | 30.4<br>(5.2 to 53.5)                             | 22.9<br>(-1.4 to 45.5)                              |
| <b>Diarrhoea, lower respiratory infections, and other common infectious diseases</b> | <b>156.2</b><br>(146.1 to 167.1)       | <b>9,302.2†</b><br>(8,335.8 to 10,345.9)   | <b>4.9</b><br>(3.2 to 7.1)       | <b>1.4</b><br>(-1.8 to 4.8)                       | <b>-0.7</b><br>(-4.0 to 2.8)                        |
| Diarrhoeal diseases                                                                  | 4.3<br>(3.9 to 4.8)                    | 280.1<br>(256.1 to 312.9)                  | 0.5<br>(0.3 to 0.7)              | 16.8<br>(4.8 to 29.5)                             | 15.5<br>(3.4 to 28.3)                               |
| Intestinal infectious diseases                                                       | < 0.05<br>(< 0.05 to < 0.05)           | < 0.05†<br>(< 0.05 to 0.1)                 | < 0.05<br>(< 0.05 to < 0.05)     | 8.3<br>(-4.7 to 23.7)                             | 3.1<br>(-9.8 to 18.4)                               |
| Typhoid fever                                                                        | < 0.05<br>(< 0.05 to < 0.05)           | < 0.05<br>(< 0.05 to < 0.05)               | < 0.05<br>(< 0.05 to < 0.05)     | 3.2<br>(-12.0 to 22.1)                            | -1.2<br>(-17.0 to 17.5)                             |
| Paratyphoid fever                                                                    | < 0.05<br>(< 0.05 to < 0.05)           | < 0.05<br>(< 0.05 to < 0.05)               | < 0.05<br>(< 0.05 to < 0.05)     | 26.7<br>(7.8 to 48.9)                             | 21.4<br>(2.6 to 43.3)                               |
| Other intestinal infectious diseases                                                 | --                                     | --                                         | < 0.05<br>(< 0.05 to < 0.05)     | -27.0<br>(-45.0 to -4.8)                          | -36.1<br>(-53.8 to -12.9)                           |
| Lower respiratory infections                                                         | 3.6<br>(3.3 to 3.8)                    | 156.2<br>(143.9 to 168.0)                  | 0.2<br>(0.1 to 0.3)              | 18.9<br>(7.6 to 32.6)                             | 11.3<br>(-0.1 to 24.3)                              |
| Upper respiratory infections                                                         | 114.8<br>(102.4 to 128.2)              | 8,656.6<br>(7,680.8 to 9,710.6)            | 2.9<br>(1.7 to 4.4)              | 1.6<br>(-2.9 to 6.8)                              | -0.4<br>(-4.7 to 4.7)                               |
| Otitis media                                                                         | 31.1<br>(28.0 to 34.2)                 | 145.2<br>(118.6 to 178.6)                  | 0.9<br>(0.6 to 1.4)              | -8.8<br>(-15.6 to -1.2)                           | -9.1<br>(-16.3 to -1.6)                             |
| Meningitis                                                                           | 0.5<br>(0.5 to 0.6)                    | 0.1<br>(0.1 to 0.1)                        | 0.1<br>(0.1 to 0.1)              | -1.0<br>(-4.4 to 3.8)                             | -5.0<br>(-8.1 to -1.4)                              |
| Pneumococcal meningitis                                                              | 0.2<br>(0.2 to 0.2)                    | < 0.05<br>(< 0.05 to < 0.05)               | < 0.05<br>(< 0.05 to 0.1)        | -2.8<br>(-8.1 to 2.8)                             | -6.3<br>(-11.5 to -0.8)                             |
| H influenzae type B meningitis                                                       | < 0.05<br>(< 0.05 to 0.1)              | < 0.05<br>(< 0.05 to < 0.05)               | < 0.05<br>(< 0.05 to < 0.05)     | -0.4<br>(-6.6 to 4.6)                             | -4.5<br>(-10.5 to 0.8)                              |
| Meningococcal infection                                                              | 0.1<br>(0.1 to 0.1)                    | < 0.05<br>(< 0.05 to < 0.05)               | < 0.05<br>(< 0.05 to < 0.05)     | -5.2<br>(-13.1 to 17.0)                           | -10.3<br>(-17.1 to 2.6)                             |
| Other meningitis                                                                     | 0.2<br>(0.2 to 0.2)                    | < 0.05<br>(< 0.05 to 0.1)                  | < 0.05<br>(< 0.05 to < 0.05)     | 3.1<br>(-1.1 to 7.7)                              | -0.8<br>(-5.1 to 3.5)                               |
| Encephalitis                                                                         | 1.3<br>(0.9 to 1.8)                    | 0.7<br>(0.6 to 0.7)                        | 0.2<br>(0.1 to 0.2)              | 1.5<br>(-2.1 to 4.9)                              | -3.4<br>(-6.9 to -0.2)                              |
| Diphtheria                                                                           | < 0.05<br>(< 0.05 to < 0.05)           | < 0.05<br>(< 0.05 to < 0.05)               | < 0.05<br>(< 0.05 to < 0.05)     | -16.1<br>(-50.7 to 48.8)                          | -20.8<br>(-53.6 to 38.5)                            |
| Whooping cough                                                                       | 0.2<br>(0.2 to 0.3)                    | 1.5<br>(1.1 to 1.9)                        | < 0.05<br>(< 0.05 to < 0.05)     | -26.2<br>(-45.0 to 0.3)                           | -24.6<br>(-43.8 to 2.8)                             |
| Tetanus                                                                              | < 0.05<br>(< 0.05 to < 0.05)           | < 0.05<br>(< 0.05 to < 0.05)               | < 0.05<br>(< 0.05 to < 0.05)     | -43.4<br>(-52.2 to -29.5)                         | -46.5<br>(-55.3 to -33.4)                           |
| Measles                                                                              | < 0.05<br>(0.0 to < 0.05)              | < 0.05<br>(0.0 to < 0.05)                  | < 0.05<br>(0.0 to < 0.05)        | --                                                | --                                                  |
| Varicella and herpes zoster                                                          | 3.6<br>(3.2 to 3.9)                    | 62.0<br>(59.9 to 64.4)                     | 0.1<br>(0.1 to 0.2)              | 7.5<br>(-4.6 to 21.1)                             | 0.2<br>(-11.2 to 14.2)                              |
| <b>Neglected tropical diseases and malaria</b>                                       | <b>34.0</b><br>(29.4 to 39.3)          | <b>0.1†</b><br>(< 0.05 to 0.4)             | <b>0.4</b><br>(0.3 to 0.6)       | <b>-15.7</b><br>(-44.5 to 19.3)                   | <b>-25.7</b><br>(-52.7 to 10.4)                     |
| Malaria                                                                              | --                                     | --                                         | --                               | --                                                | --                                                  |
| Chagas disease                                                                       | 31.9<br>(25.9 to 38.8)                 | --                                         | 0.4<br>(0.2 to 0.5)              | -7.5<br>(-14.9 to 0.6)                            | -18.7<br>(-25.2 to -11.5)                           |
| Leishmaniasis                                                                        | --                                     | --                                         | --                               | --                                                | --                                                  |
| Visceral leishmaniasis                                                               | --                                     | --                                         | --                               | --                                                | --                                                  |
| Cutaneous and mucocutaneous leishmaniasis                                            | --                                     | --                                         | --                               | --                                                | --                                                  |
| African trypanosomiasis                                                              | --                                     | --                                         | --                               | --                                                | --                                                  |
| Schistosomiasis                                                                      | --                                     | --                                         | --                               | --                                                | --                                                  |
| Cysticercosis                                                                        | --                                     | --                                         | --                               | --                                                | --                                                  |
| Cystic echinococcosis                                                                | 0.5<br>(0.1 to 2.0)                    | 0.1<br>(< 0.05 to 0.4)                     | < 0.05<br>(< 0.05 to 0.2)        | -48.8<br>(-92.8 to 297.7)                         | -51.4<br>(-93.3 to 282.2)                           |
| Lymphatic filariasis                                                                 | --                                     | --                                         | --                               | --                                                | --                                                  |
| Onchocerciasis                                                                       | --                                     | --                                         | --                               | --                                                | --                                                  |
| Trachoma                                                                             | --                                     | --                                         | --                               | --                                                | --                                                  |
| Dengue                                                                               | --                                     | --                                         | --                               | --                                                | --                                                  |
| Yellow fever                                                                         | --                                     | --                                         | --                               | --                                                | --                                                  |
| Rabies                                                                               | < 0.05<br>(< 0.05 to < 0.05)           | < 0.05<br>(< 0.05 to < 0.05)               | < 0.05<br>(< 0.05 to < 0.05)     | 6.6<br>(-14.9 to 33.0)                            | -5.1<br>(-26.0 to 20.7)                             |
| Intestinal nematode infections                                                       | --                                     | --                                         | --                               | --                                                | --                                                  |
| Ascariasis                                                                           | --                                     | --                                         | --                               | --                                                | --                                                  |

| Cause                                                                   | Prevalence in thousands (95% UI)              | Incidence in thousands (95% UI)                | YLDs in thousands (95% UI)              |                                                   |                                                     |
|-------------------------------------------------------------------------|-----------------------------------------------|------------------------------------------------|-----------------------------------------|---------------------------------------------------|-----------------------------------------------------|
|                                                                         | 2016 counts                                   | 2016 counts                                    | 2016 counts                             | Percentage change in counts between 2006 and 2016 | Percentage change in age-standardised rates between |
| Trichuriasis                                                            | --                                            | --                                             | --                                      | --                                                | --                                                  |
| Hookworm disease                                                        | --                                            | --                                             | --                                      | --                                                | --                                                  |
| Food-borne trematodiasis                                                | --                                            | --                                             | --                                      | --                                                | --                                                  |
| Leprosy                                                                 | 0.1<br>(< 0.05 to 0.1)                        | < 0.05<br>(< 0.05 to < 0.05)                   | < 0.05<br>(< 0.05 to < 0.05)            | -21.0<br>(-32.4 to 2.0)                           | -29.8<br>(-39.6 to -9.7)                            |
| Ebola virus disease                                                     | --                                            | --                                             | --                                      | --                                                | --                                                  |
| Zika virus disease                                                      | --                                            | --                                             | --                                      | --                                                | --                                                  |
| Guinea worm disease                                                     | --                                            | --                                             | --                                      | --                                                | --                                                  |
| Other neglected tropical diseases                                       | --                                            | --                                             | < 0.05<br>(< 0.05 to < 0.05)            | --                                                | --                                                  |
| <b>Maternal disorders</b>                                               | <b>3.4</b><br><b>(2.6 to 4.1)</b>             | <b>99.8†</b><br><b>(89.5 to 106.7)</b>         | <b>0.2</b><br><b>(0.1 to 0.4)</b>       | <b>0.9</b><br><b>(-24.9 to 35.0)</b>              | <b>-1.5</b><br><b>(-26.8 to 31.7)</b>               |
| Maternal haemorrhage                                                    | 0.3<br>(0.2 to 0.4)                           | 2.7<br>(2.0 to 3.5)                            | < 0.05<br>(< 0.05 to < 0.05)            | 3.6<br>(-27.1 to 49.1)                            | 1.5<br>(-28.4 to 46.4)                              |
| Maternal sepsis and other pregnancy related infections                  | 1.2<br>(0.8 to 1.6)                           | 8.5<br>(6.4 to 11.2)                           | < 0.05<br>(< 0.05 to 0.1)               | 2.8<br>(-50.7 to 106.1)                           | 0.0<br>(-52.2 to 100.5)                             |
| Maternal hypertensive disorders                                         | 1.4<br>(0.9 to 2.0)                           | 5.7<br>(4.4 to 7.2)                            | 0.1<br>(< 0.05 to 0.1)                  | 2.0<br>(-40.1 to 74.5)                            | -0.6<br>(-41.2 to 69.7)                             |
| Maternal obstructed labour and uterine rupture                          | < 0.05<br>(< 0.05 to 0.1)                     | 2.7<br>(1.9 to 3.7)                            | < 0.05<br>(< 0.05 to < 0.05)            | 2.1<br>(-44.3 to 86.8)                            | 0.1<br>(-45.0 to 83.2)                              |
| Maternal abortion, miscarriage, and ectopic pregnancy                   | 0.7<br>(0.5 to 0.9)                           | 80.2<br>(69.9 to 86.0)                         | 0.1<br>(< 0.05 to 0.1)                  | 0.8<br>(-41.1 to 74.4)                            | -1.6<br>(-42.2 to 70.1)                             |
| Other maternal disorders                                                | --                                            | --                                             | < 0.05<br>(< 0.05 to 0.1)               | -3.6<br>(-28.3 to 28.9)                           | -6.1<br>(-30.0 to 25.5)                             |
| <b>Neonatal disorders</b>                                               | <b>22.1</b><br><b>(18.9 to 26.1)</b>          | --                                             | <b>3.8</b><br><b>(2.7 to 5.1)</b>       | <b>0.6</b><br><b>(-12.3 to 15.0)</b>              | <b>-1.2</b><br><b>(-14.1 to 12.9)</b>               |
| Neonatal preterm birth complications                                    | 20.7<br>(16.9 to 25.7)                        | --                                             | 2.4<br>(1.7 to 3.4)                     | 1.9<br>(-17.4 to 23.3)                            | 0.1<br>(-18.7 to 21.0)                              |
| Neonatal encephalopathy due to birth asphyxia and trauma                | 3.0<br>(1.9 to 4.6)                           | --                                             | 0.6<br>(0.3 to 1.2)                     | 2.7<br>(-20.4 to 29.2)                            | 0.3<br>(-22.3 to 26.4)                              |
| Neonatal sepsis and other neonatal infections                           | 1.4<br>(0.6 to 2.8)                           | --                                             | 0.5<br>(0.2 to 1.2)                     | -5.7<br>(-19.5 to 12.2)                           | -7.3<br>(-21.2 to 10.3)                             |
| Hemolytic disease and other neonatal jaundice                           | 0.4<br>(0.3 to 0.4)                           | --                                             | 0.1<br>(0.1 to 0.2)                     | 0.7<br>(-6.7 to 9.6)                              | -1.6<br>(-8.8 to 7.2)                               |
| Other neonatal disorders                                                | --                                            | --                                             | 0.1<br>(0.1 to 0.1)                     | -7.2<br>(-25.4 to 14.1)                           | -3.9<br>(-22.8 to 18.2)                             |
| <b>Nutritional deficiencies</b>                                         | <b>349.0</b><br><b>(329.1 to 366.1)</b>       | <b>37.2†</b><br><b>(29.8 to 46.4)</b>          | <b>4.9</b><br><b>(3.1 to 7.5)</b>       | <b>-16.8</b><br><b>(-24.0 to -8.9)</b>            | <b>-18.2</b><br><b>(-25.8 to -9.9)</b>              |
| Protein-energy malnutrition                                             | 4.2<br>(3.4 to 5.4)                           | 2.7<br>(2.1 to 3.4)                            | 0.1<br>(0.1 to 0.2)                     | -9.0<br>(-42.8 to 46.3)                           | -5.8<br>(-40.6 to 51.6)                             |
| Iodine deficiency                                                       | 10.5<br>(9.2 to 12.0)                         | 0.2<br>(0.2 to 0.2)                            | 0.3<br>(0.2 to 0.4)                     | 11.1<br>(-4.5 to 29.4)                            | 4.8<br>(-10.5 to 22.8)                              |
| Vitamin A deficiency                                                    | 42.9<br>(33.7 to 54.1)                        | 34.3<br>(27.1 to 43.9)                         | --                                      | --                                                | --                                                  |
| Iron-deficiency anaemia                                                 | 293.2<br>(273.0 to 317.0)                     | --                                             | 4.5<br>(2.8 to 7.0)                     | -18.3<br>(-25.9 to -10.0)                         | -19.6<br>(-27.4 to -11.0)                           |
| Other nutritional deficiencies                                          | --                                            | --                                             | < 0.05<br>(< 0.05 to < 0.05)            | -9.2<br>(-43.7 to 48.5)                           | -5.8<br>(-41.5 to 54.0)                             |
| <b>Other communicable, maternal, neonatal, and nutritional diseases</b> | <b>547.3</b><br><b>(510.3 to 590.5)</b>       | <b>144.8</b><br><b>(132.7 to 157.6)</b>        | <b>0.6</b><br><b>(0.4 to 1.0)</b>       | <b>-1.2</b><br><b>(-6.5 to 3.7)</b>               | <b>-5.2</b><br><b>(-10.8 to 0.2)</b>                |
| Sexually transmitted diseases excluding HIV                             | 467.2<br>(433.1 to 508.2)                     | 127.4<br>(115.5 to 139.6)                      | 0.4<br>(0.2 to 0.7)                     | 3.9<br>(-1.5 to 9.1)                              | -1.9<br>(-7.1 to 3.1)                               |
| Syphilis                                                                | 12.2<br>(9.7 to 15.1)                         | 11.1<br>(8.4 to 14.9)                          | < 0.05<br>(< 0.05 to 0.1)               | 7.6<br>(-4.7 to 21.0)                             | -1.4<br>(-12.4 to 12.0)                             |
| Chlamydial infection                                                    | 36.2<br>(27.9 to 45.8)                        | 28.7<br>(22.0 to 36.8)                         | 0.1<br>(< 0.05 to 0.1)                  | -0.7<br>(-13.2 to 14.5)                           | -4.8<br>(-16.6 to 9.4)                              |
| Gonococcal infection                                                    | 2.4<br>(2.2 to 2.7)                           | 4.0<br>(3.4 to 4.7)                            | < 0.05<br>(< 0.05 to < 0.05)            | 6.2<br>(-9.4 to 24.2)                             | 1.5<br>(-13.1 to 18.6)                              |
| Trichomoniasis                                                          | 71.1<br>(62.1 to 81.2)                        | 60.0<br>(52.1 to 68.7)                         | 0.1<br>(< 0.05 to 0.2)                  | 4.4<br>(-2.8 to 12.3)                             | -0.9<br>(-7.9 to 6.6)                               |
| Genital herpes                                                          | 361.3<br>(310.1 to 420.6)                     | 17.5<br>(14.9 to 20.6)                         | 0.1<br>(< 0.05 to 0.2)                  | 6.8<br>(0.6 to 13.3)                              | -0.5<br>(-6.5 to 5.9)                               |
| Other sexually transmitted diseases                                     | 5.7<br>(5.0 to 6.4)                           | 6.0<br>(5.1 to 7.1)                            | 0.1<br>(0.1 to 0.2)                     | 2.1<br>(-10.8 to 17.4)                            | -2.9<br>(-15.3 to 11.0)                             |
| Hepatitis                                                               | 90.5<br>(80.1 to 102.7)                       | 17.5<br>(13.6 to 20.7)                         | < 0.05<br>(< 0.05 to < 0.05)            | -19.3<br>(-36.6 to 4.5)                           | -23.5<br>(-42.0 to 1.7)                             |
| Acute hepatitis A                                                       | 0.8<br>(0.5 to 1.0)                           | 10.5<br>(7.0 to 13.3)                          | < 0.05<br>(< 0.05 to < 0.05)            | -22.5<br>(-47.2 to 17.2)                          | -25.8<br>(-51.0 to 14.6)                            |
| Hepatitis B                                                             | 43.4<br>(34.7 to 54.5)                        | 5.6<br>(4.4 to 7.1)                            | < 0.05<br>(< 0.05 to < 0.05)            | -14.4<br>(-28.2 to 1.5)                           | -20.6<br>(-33.4 to -5.7)                            |
| Hepatitis C                                                             | 46.4<br>(41.4 to 51.3)                        | 1.0<br>(0.9 to 1.1)                            | < 0.05<br>(< 0.05 to < 0.05)            | -7.4<br>(-8.2 to -6.6)                            | -7.9<br>(-9.0 to -6.7)                              |
| Acute hepatitis E                                                       | < 0.05<br>(< 0.05 to < 0.05)                  | 0.3<br>(0.2 to 0.4)                            | < 0.05<br>(< 0.05 to < 0.05)            | -12.9<br>(-18.7 to -7.0)                          | -20.9<br>(-25.9 to -15.9)                           |
| Other infectious diseases                                               | 8.4<br>(7.5 to 9.4)                           | < 0.05<br>(< 0.05 to < 0.05)                   | 0.2<br>(0.1 to 0.3)                     | -8.2<br>(-18.8 to 3.2)                            | -8.7<br>(-20.3 to 3.8)                              |
| <b>Non-communicable diseases</b>                                        | <b>3,105.6</b><br><b>(3,084.8 to 3,119.4)</b> | <b>9,011.6†</b><br><b>(8,607.4 to 9,467.2)</b> | <b>347.5</b><br><b>(257.3 to 449.4)</b> | <b>7.9</b><br><b>(6.0 to 9.8)</b>                 | <b>1.1</b><br><b>(-0.8 to 3.0)</b>                  |
| <b>Neoplasms</b>                                                        | <b>34.8</b><br><b>(33.4 to 36.0)</b>          | <b>13.6</b><br><b>(13.3 to 14.0)</b>           | <b>4.3</b><br><b>(3.1 to 5.5)</b>       | <b>14.8</b><br><b>(10.3 to 19.3)</b>              | <b>3.3</b><br><b>(-1.0 to 7.6)</b>                  |
| Lip and oral cavity cancer                                              | 0.7<br>(0.7 to 0.8)                           | 0.2<br>(0.2 to 0.2)                            | 0.1<br>(0.1 to 0.1)                     | 15.2<br>(1.8 to 31.1)                             | 3.1<br>(-8.9 to 17.7)                               |
| Nasopharynx cancer                                                      | 0.1<br>(0.1 to 0.1)                           | < 0.05<br>(< 0.05 to < 0.05)                   | < 0.05<br>(< 0.05 to < 0.05)            | -0.4<br>(-8.0 to 8.7)                             | -8.2<br>(-15.6 to 0.7)                              |
| Other pharynx cancer                                                    | 0.2<br>(0.2 to 0.2)                           | 0.1<br>(0.1 to 0.1)                            | < 0.05<br>(< 0.05 to < 0.05)            | 17.2<br>(-1.3 to 39.5)                            | 6.0<br>(-11.0 to 26.2)                              |
| Oesophageal cancer                                                      | 0.3<br>(0.3 to 0.3)                           | 0.3<br>(0.3 to 0.3)                            | 0.1<br>(< 0.05 to 0.1)                  | -2.7<br>(-21.2 to 19.9)                           | -13.1<br>(-30.2 to 8.5)                             |
| Stomach cancer                                                          | 1.0<br>(1.0 to 1.1)                           | 0.7<br>(0.7 to 0.7)                            | 0.2<br>(0.1 to 0.2)                     | -0.0<br>(-14.7 to 16.6)                           | -11.2<br>(-24.6 to 3.3)                             |
| Colon and rectum cancer                                                 | 5.3<br>(5.0 to 5.7)                           | 1.6<br>(1.5 to 1.7)                            | 0.5<br>(0.4 to 0.7)                     | 22.4<br>(9.5 to 37.0)                             | 8.6<br>(-3.0 to 22.0)                               |
| Liver cancer                                                            | 0.1<br>(< 0.05 to 0.1)                        | 0.1<br>(0.1 to 0.1)                            | < 0.05<br>(< 0.05 to < 0.05)            | 27.0<br>(14.8 to 41.1)                            | 14.7<br>(3.7 to 27.3)                               |
| Liver cancer due to hepatitis B                                         | < 0.05<br>(< 0.05 to < 0.05)                  | < 0.05<br>(< 0.05 to < 0.05)                   | < 0.05<br>(< 0.05 to < 0.05)            | 22.8<br>(9.3 to 37.5)                             | 11.8<br>(-0.7 to 25.2)                              |



| Cause                                              | Prevalence in thousands (95% UI)        | Incidence in thousands (95% UI)       | YLDs in thousands (95% UI)           |                                                   |                                                     |
|----------------------------------------------------|-----------------------------------------|---------------------------------------|--------------------------------------|---------------------------------------------------|-----------------------------------------------------|
|                                                    | 2016 counts                             | 2016 counts                           | 2016 counts                          | Percentage change in counts between 2006 and 2016 | Percentage change in age-standardised rates between |
| Liver cancer due to hepatitis C                    | 0.1<br>( $< 0.05$ to 0.1)               | 0.1<br>(0.1 to 0.1)                   | $< 0.05$<br>( $< 0.05$ to $< 0.05$ ) | 28.6<br>(15.8 to 43.5)                            | 14.8<br>(4.1 to 28.4)                               |
| Liver cancer due to alcohol use                    | $< 0.05$<br>( $< 0.05$ to $< 0.05$ )    | $< 0.05$<br>( $< 0.05$ to $< 0.05$ )  | $< 0.05$<br>( $< 0.05$ to $< 0.05$ ) | 27.0<br>(11.4 to 45.0)                            | 16.3<br>(2.1 to 32.9)                               |
| Liver cancer due to other causes                   | $< 0.05$<br>( $< 0.05$ to $< 0.05$ )    | $< 0.05$<br>( $< 0.05$ to $< 0.05$ )  | $< 0.05$<br>( $< 0.05$ to $< 0.05$ ) | 26.3<br>(10.9 to 43.5)                            | 14.5<br>(0.8 to 30.1)                               |
| Gallbladder and biliary tract cancer               | 0.3<br>(0.3 to 0.3)                     | 0.4<br>(0.4 to 0.4)                   | 0.1<br>(0.1 to 0.1)                  | 4.0<br>(-12.6 to 24.4)                            | -7.9<br>(-22.3 to 9.1)                              |
| Pancreatic cancer                                  | 0.4<br>(0.4 to 0.5)                     | 0.6<br>(0.5 to 0.6)                   | 0.1<br>(0.1 to 0.1)                  | 21.9<br>(2.5 to 43.1)                             | 8.1<br>(-8.4 to 26.2)                               |
| Larynx cancer                                      | 0.6<br>(0.6 to 0.7)                     | 0.2<br>(0.2 to 0.2)                   | 0.1<br>(0.1 to 0.1)                  | 6.1<br>(-14.3 to 30.9)                            | -3.9<br>(-22.7 to 18.6)                             |
| Tracheal, bronchus, and lung cancer                | 1.6<br>(1.6 to 1.7)                     | 1.4<br>(1.4 to 1.5)                   | 0.3<br>(0.2 to 0.4)                  | 8.7<br>(-7.5 to 27.9)                             | -2.4<br>(-17.2 to 15.8)                             |
| Malignant skin melanoma                            | 0.7<br>(0.6 to 0.8)                     | 0.2<br>(0.1 to 0.2)                   | 0.1<br>( $< 0.05$ to 0.1)            | 44.2<br>(23.1 to 66.8)                            | 31.9<br>(11.8 to 53.6)                              |
| Non-melanoma skin cancer                           | 0.4<br>(0.3 to 0.4)                     | 0.9<br>(0.8 to 1.0)                   | $< 0.05$<br>( $< 0.05$ to $< 0.05$ ) | 30.2<br>(11.2 to 55.1)                            | 13.5<br>(-2.6 to 33.9)                              |
| Non-melanoma skin cancer (squamous-cell carcinoma) | 0.3<br>(0.2 to 0.4)                     | 0.3<br>(0.3 to 0.3)                   | $< 0.05$<br>( $< 0.05$ to $< 0.05$ ) | 31.8<br>(11.9 to 60.2)                            | 14.8<br>(-2.4 to 37.8)                              |
| Non-melanoma skin cancer (basal-cell carcinoma)    | 0.1<br>(0.1 to 0.1)                     | 0.7<br>(0.6 to 0.7)                   | $< 0.05$<br>( $< 0.05$ to $< 0.05$ ) | 10.6<br>(-19.5 to 49.7)                           | -1.4<br>(-26.0 to 31.2)                             |
| Breast cancer                                      | 7.8<br>(7.2 to 8.4)                     | 1.7<br>(1.6 to 1.8)                   | 0.8<br>(0.5 to 1.0)                  | 12.8<br>(0.5 to 25.7)                             | 1.2<br>(-10.5 to 13.4)                              |
| Cervical cancer                                    | 2.2<br>(2.0 to 2.4)                     | 0.6<br>(0.5 to 0.6)                   | 0.2<br>(0.1 to 0.3)                  | -3.7<br>(-20.3 to 16.8)                           | -11.5<br>(-27.6 to 7.7)                             |
| Uterine cancer                                     | 1.2<br>(1.1 to 1.3)                     | 0.3<br>(0.2 to 0.3)                   | 0.1<br>(0.1 to 0.1)                  | 29.5<br>(6.2 to 59.5)                             | 16.9<br>(-3.8 to 44.1)                              |
| Ovarian cancer                                     | 0.7<br>(0.6 to 0.8)                     | 0.2<br>(0.2 to 0.2)                   | 0.1<br>(0.1 to 0.1)                  | 8.9<br>(-20.2 to 50.6)                            | -0.3<br>(-27.0 to 37.5)                             |
| Prostate cancer                                    | 6.2<br>(5.3 to 7.1)                     | 1.6<br>(1.4 to 1.8)                   | 0.7<br>(0.5 to 0.9)                  | 20.6<br>(4.3 to 37.8)                             | 9.1<br>(-6.2 to 25.7)                               |
| Testicular cancer                                  | 0.4<br>(0.3 to 0.5)                     | 0.1<br>(0.1 to 0.1)                   | $< 0.05$<br>( $< 0.05$ to $< 0.05$ ) | 34.1<br>(-1.8 to 80.0)                            | 30.1<br>(-5.6 to 76.1)                              |
| Kidney cancer                                      | 2.1<br>(2.0 to 2.3)                     | 0.6<br>(0.6 to 0.6)                   | 0.2<br>(0.1 to 0.3)                  | 22.1<br>(6.5 to 41.1)                             | 12.1<br>(-2.6 to 29.4)                              |
| Bladder cancer                                     | 1.9<br>(1.8 to 2.1)                     | 0.5<br>(0.5 to 0.5)                   | 0.2<br>(0.1 to 0.2)                  | 22.4<br>(6.9 to 41.5)                             | 9.2<br>(-5.4 to 27.1)                               |
| Brain and nervous system cancer                    | 0.3<br>(0.3 to 0.4)                     | 0.1<br>(0.1 to 0.2)                   | $< 0.05$<br>( $< 0.05$ to 0.1)       | 18.5<br>(4.6 to 32.3)                             | 10.3<br>(-2.6 to 22.5)                              |
| Thyroid cancer                                     | 0.5<br>(0.4 to 0.5)                     | 0.1<br>(0.1 to 0.1)                   | $< 0.05$<br>( $< 0.05$ to $< 0.05$ ) | 33.9<br>(9.4 to 64.0)                             | 24.5<br>(0.5 to 53.4)                               |
| Mesothelioma                                       | $< 0.05$<br>( $< 0.05$ to $< 0.05$ )    | $< 0.05$<br>( $< 0.05$ to $< 0.05$ )  | $< 0.05$<br>( $< 0.05$ to $< 0.05$ ) | 0.4<br>(-6.7 to 7.9)                              | -8.7<br>(-15.2 to -1.9)                             |
| Hodgkin lymphoma                                   | 0.1<br>(0.1 to 0.1)                     | $< 0.05$<br>( $< 0.05$ to $< 0.05$ )  | $< 0.05$<br>( $< 0.05$ to $< 0.05$ ) | 16.6<br>(4.8 to 30.9)                             | 11.4<br>(-0.1 to 25.2)                              |
| Non-Hodgkin's lymphoma                             | 1.0<br>(0.8 to 1.0)                     | 0.3<br>(0.3 to 0.3)                   | 0.1<br>(0.1 to 0.1)                  | 16.9<br>(2.7 to 33.8)                             | 7.5<br>(-5.3 to 22.4)                               |
| Multiple myeloma                                   | 0.3<br>(0.2 to 0.3)                     | 0.1<br>(0.1 to 0.2)                   | 0.1<br>( $< 0.05$ to 0.1)            | 23.9<br>(-0.4 to 54.1)                            | 12.2<br>(-8.9 to 36.4)                              |
| Leukaemia                                          | 1.0<br>(1.0 to 1.1)                     | 0.3<br>(0.3 to 0.3)                   | 0.1<br>(0.1 to 0.2)                  | 5.8<br>(-5.8 to 18.1)                             | -4.9<br>(-14.5 to 5.1)                              |
| Acute lymphoid leukaemia                           | 0.1<br>(0.1 to 0.1)                     | $< 0.05$<br>( $< 0.05$ to $< 0.05$ )  | $< 0.05$<br>( $< 0.05$ to $< 0.05$ ) | -11.5<br>(-22.5 to 1.9)                           | -11.9<br>(-23.3 to 1.7)                             |
| Chronic lymphoid leukaemia                         | 0.4<br>(0.4 to 0.5)                     | 0.1<br>(0.1 to 0.1)                   | 0.1<br>( $< 0.05$ to 0.1)            | 14.8<br>(-9.7 to 43.8)                            | 1.8<br>(-19.7 to 27.3)                              |
| Acute myeloid leukaemia                            | 0.1<br>(0.1 to 0.1)                     | 0.1<br>(0.1 to 0.1)                   | $< 0.05$<br>( $< 0.05$ to $< 0.05$ ) | 8.2<br>(-1.4 to 18.9)                             | 0.1<br>(-8.5 to 9.8)                                |
| Chronic myeloid leukaemia                          | 0.1<br>(0.1 to 0.1)                     | $< 0.05$<br>( $< 0.05$ to $< 0.05$ )  | $< 0.05$<br>( $< 0.05$ to $< 0.05$ ) | -15.8<br>(-25.8 to -4.5)                          | -24.0<br>(-32.7 to -14.5)                           |
| Other leukaemia                                    | 0.4<br>(0.4 to 0.4)                     | 0.1<br>(0.1 to 0.1)                   | $< 0.05$<br>( $< 0.05$ to 0.1)       | 4.0<br>(-13.4 to 23.8)                            | -7.0<br>(-21.2 to 9.0)                              |
| Other neoplasms                                    | 1.2<br>(1.1 to 1.3)                     | 0.4<br>(0.4 to 0.5)                   | 0.1<br>(0.1 to 0.2)                  | 18.3<br>(3.3 to 33.9)                             | 6.6<br>(-6.2 to 20.3)                               |
| <b>Cardiovascular diseases</b>                     | <b>298.4</b><br><b>(286.8 to 310.2)</b> | <b>31.6†</b><br><b>(29.8 to 33.5)</b> | <b>20.1</b><br><b>(14.7 to 26.0)</b> | <b>3.7</b><br><b>(-0.1 to 7.9)</b>                | <b>-7.3</b><br><b>(-10.6 to -3.8)</b>               |
| Rheumatic heart disease                            | 0.5<br>(0.4 to 0.5)                     | 0.2<br>(0.2 to 0.2)                   | $< 0.05$<br>( $< 0.05$ to 0.1)       | 6.1<br>(-12.3 to 29.3)                            | -3.6<br>(-18.7 to 15.1)                             |
| Ischaemic heart disease                            | 86.8<br>(81.8 to 92.3)                  | 11.0<br>(9.8 to 12.1)                 | 3.4<br>(2.4 to 4.7)                  | 3.0<br>(-1.9 to 7.5)                              | -7.6<br>(-11.9 to -3.3)                             |
| Cerebrovascular disease                            | 48.7<br>(45.5 to 52.0)                  | 7.2‡<br>(6.7 to 7.8)                  | 8.1<br>(5.8 to 10.3)                 | 1.2<br>(-6.2 to 9.9)                              | -9.7<br>(-16.1 to -2.2)                             |
| Ischaemic stroke                                   | 41.5<br>(37.7 to 45.9)                  | 5.2‡<br>(4.7 to 5.8)                  | 6.7<br>(4.8 to 8.5)                  | 1.6<br>(-7.0 to 11.9)                             | -9.5<br>(-16.8 to -0.6)                             |
| Hemorrhagic stroke                                 | 9.3<br>(8.3 to 10.3)                    | 2.0‡<br>(1.8 to 2.2)                  | 1.4<br>(1.0 to 1.9)                  | -0.4<br>(-10.7 to 10.5)                           | -10.6<br>(-19.9 to -1.2)                            |
| Hypertensive heart disease                         | 10.5<br>(8.7 to 12.6)                   | --                                    | 0.8<br>(0.6 to 1.2)                  | 9.0<br>(-2.0 to 20.9)                             | -5.4<br>(-14.9 to 5.0)                              |
| Cardiomyopathy and myocarditis                     | 5.8<br>(5.1 to 6.5)                     | 0.9†<br>(0.8 to 1.0)                  | 0.5<br>(0.3 to 0.7)                  | 5.5<br>(-4.3 to 16.1)                             | -3.8<br>(-12.6 to 5.6)                              |
| Myocarditis                                        | 0.6<br>(0.5 to 0.7)                     | 0.9<br>(0.8 to 1.0)                   | $< 0.05$<br>( $< 0.05$ to 0.1)       | 2.6<br>(-6.2 to 11.5)                             | -2.0<br>(-10.1 to 6.2)                              |
| Alcoholic cardiomyopathy                           | 1.1<br>(0.8 to 1.3)                     | --                                    | 0.1<br>(0.1 to 0.1)                  | 4.8<br>(-14.0 to 27.3)                            | -4.3<br>(-21.8 to 17.3)                             |
| Other cardiomyopathy                               | 4.4<br>(3.7 to 5.3)                     | --                                    | 0.4<br>(0.2 to 0.5)                  | 6.0<br>(-5.3 to 19.3)                             | -4.0<br>(-14.3 to 8.4)                              |
| Atrial fibrillation and flutter                    | 41.6<br>(36.0 to 48.3)                  | 3.2<br>(2.8 to 3.8)                   | 3.3<br>(2.2 to 4.6)                  | 10.0<br>(3.2 to 16.4)                             | -2.8<br>(-8.8 to 3.1)                               |
| Peripheral vascular disease                        | 96.6<br>(84.0 to 109.5)                 | 8.2<br>(7.1 to 9.6)                   | 0.4<br>(0.2 to 0.8)                  | 6.0<br>(-1.9 to 14.3)                             | -6.7<br>(-13.0 to 0.1)                              |
| Endocarditis                                       | 0.6<br>(0.5 to 0.8)                     | 0.8<br>(0.8 to 0.9)                   | 0.1<br>( $< 0.05$ to 0.1)            | 6.8<br>(-10.9 to 29.1)                            | -5.6<br>(-20.4 to 12.2)                             |
| Other cardiovascular and circulatory diseases      | 66.1<br>(55.6 to 77.9)                  | --                                    | 3.4<br>(2.3 to 4.9)                  | 2.9<br>(-5.3 to 11.5)                             | -6.4<br>(-13.6 to 1.3)                              |
| <b>Chronic respiratory diseases</b>                | <b>404.5</b><br><b>(385.5 to 426.1)</b> | <b>44.7†</b><br><b>(42.0 to 47.5)</b> | <b>12.9</b><br><b>(9.6 to 16.9)</b>  | <b>3.2</b><br><b>(-1.8 to 8.7)</b>                | <b>-0.9</b><br><b>(-5.8 to 4.2)</b>                 |
| Chronic obstructive pulmonary disease              | 173.2<br>(159.2 to 193.0)               | 10.8<br>(10.0 to 12.0)                | 3.0<br>(2.5 to 3.7)                  | 6.0<br>(-10.3 to 23.9)                            | -3.9<br>(-18.7 to 12.2)                             |
| Pneumoconiosis                                     | 0.1<br>(0.1 to 0.1)                     | $< 0.05$<br>( $< 0.05$ to $< 0.05$ )  | $< 0.05$<br>( $< 0.05$ to $< 0.05$ ) | 17.7<br>(12.3 to 23.7)                            | 8.1<br>(3.1 to 13.5)                                |
| Silicosis                                          | 0.1<br>(0.1 to 0.1)                     | $< 0.05$<br>( $< 0.05$ to $< 0.05$ )  | $< 0.05$<br>( $< 0.05$ to $< 0.05$ ) | 21.7<br>(15.0 to 29.5)                            | 12.2<br>(5.9 to 19.3)                               |

| Cause                                                          | Prevalence in thousands (95% UI)        | Incidence in thousands (95% UI)    | YLDs in thousands (95% UI)        |                                                                    |                                                                      |
|----------------------------------------------------------------|-----------------------------------------|------------------------------------|-----------------------------------|--------------------------------------------------------------------|----------------------------------------------------------------------|
|                                                                | 2016 counts<br>(< 0.05 to < 0.05)       | 2016 counts<br>(< 0.05 to < 0.05)  | 2016 counts<br>(< 0.05 to < 0.05) | Percentage change in counts between 2006 and 2016<br>(0.8 to 20.9) | Percentage change in age-standardised rates between<br>(-9.1 to 9.9) |
| Asbestosis                                                     | < 0.05<br>(< 0.05 to < 0.05)            | < 0.05<br>(< 0.05 to < 0.05)       | < 0.05<br>(< 0.05 to < 0.05)      | 9.8<br>(0.8 to 20.9)                                               | -0.4<br>(-9.1 to 9.9)                                                |
| Coal workers pneumoconiosis                                    | --                                      | --                                 | --                                | --                                                                 | --                                                                   |
| Other pneumoconiosis                                           | < 0.05<br>(< 0.05 to < 0.05)            | < 0.05<br>(< 0.05 to < 0.05)       | < 0.05<br>(< 0.05 to < 0.05)      | 7.3<br>(-4.3 to 20.2)                                              | -3.4<br>(-13.1 to 7.0)                                               |
| Asthma                                                         | 243.3<br>(227.1 to 259.5)               | 33.6<br>(31.2 to 36.3)             | 9.5<br>(6.2 to 13.7)              | 1.8<br>(-2.6 to 6.3)                                               | -0.5<br>(-5.4 to 4.2)                                                |
| Interstitial lung disease and pulmonary sarcoidosis            | 1.7<br>(1.6 to 1.9)                     | 0.2<br>(0.2 to 0.2)                | 0.2<br>(0.1 to 0.3)               | 19.6<br>(3.9 to 36.7)                                              | 6.6<br>(-6.3 to 20.4)                                                |
| Other chronic respiratory diseases                             | --                                      | --                                 | 0.1<br>(0.1 to 0.1)               | 33.6<br>(11.2 to 57.8)                                             | 31.4<br>(8.8 to 56.6)                                                |
| <b>Cirrhosis and other chronic liver diseases</b>              | <b>29.6<br/>(28.1 to 31.1)</b>          | <b>0.8<br/>(0.7 to 0.8)</b>        | <b>0.6<br/>(0.4 to 0.8)</b>       | <b>15.3<br/>(4.6 to 27.4)</b>                                      | <b>7.6<br/>(-3.4 to 19.8)</b>                                        |
| Cirrhosis and other chronic liver diseases due to hepatitis B  | 4.7<br>(4.1 to 5.4)                     | 0.1<br>(0.1 to 0.1)                | 0.1<br>(0.1 to 0.1)               | 15.7<br>(-8.2 to 44.8)                                             | 6.4<br>(-16.3 to 34.5)                                               |
| Cirrhosis and other chronic liver diseases due to hepatitis C  | 9.4<br>(8.6 to 10.3)                    | 0.2<br>(0.2 to 0.3)                | 0.2<br>(0.1 to 0.2)               | 18.3<br>(-0.3 to 41.9)                                             | 9.1<br>(-9.2 to 31.9)                                                |
| Cirrhosis and other chronic liver diseases due to alcohol use  | 10.1<br>(9.2 to 11.1)                   | 0.3<br>(0.2 to 0.3)                | 0.2<br>(0.1 to 0.2)               | 16.8<br>(-1.7 to 38.6)                                             | 6.5<br>(-11.0 to 26.9)                                               |
| Cirrhosis and other chronic liver diseases due to other causes | 5.4<br>(4.9 to 6.0)                     | 0.1<br>(0.1 to 0.1)                | 0.1<br>(0.1 to 0.2)               | 10.5<br>(-11.4 to 37.8)                                            | 7.8<br>(-15.2 to 36.7)                                               |
| <b>Digestive diseases</b>                                      | <b>64.6<br/>(61.2 to 68.1)</b>          | <b>93.9†<br/>(87.5 to 100.5)</b>   | <b>2.3<br/>(1.7 to 3.1)</b>       | <b>8.9<br/>(2.0 to 16.9)</b>                                       | <b>0.4<br/>(-6.2 to 7.8)</b>                                         |
| Peptic ulcer disease                                           | 23.2<br>(21.1 to 25.5)                  | 2.6<br>(2.3 to 2.8)                | 0.3<br>(0.2 to 0.4)               | 23.4<br>(10.5 to 37.0)                                             | 13.1<br>(0.9 to 26.4)                                                |
| Gastritis and duodenitis                                       | 18.0<br>(16.0 to 20.2)                  | 15.2<br>(13.4 to 17.2)             | 0.3<br>(0.2 to 0.4)               | 24.2<br>(11.8 to 38.8)                                             | 14.8<br>(3.0 to 28.7)                                                |
| Appendicitis                                                   | 0.3<br>(0.3 to 0.3)                     | 7.5<br>(6.9 to 8.1)                | 0.1<br>(0.1 to 0.1)               | 3.3<br>(-22.7 to 37.0)                                             | 0.3<br>(-26.5 to 36.1)                                               |
| Paralytic ileus and intestinal obstruction                     | 0.1<br>(0.1 to 0.1)                     | 2.3<br>(2.0 to 2.5)                | < 0.05<br>(< 0.05 to < 0.05)      | 17.1<br>(1.2 to 37.9)                                              | 5.6<br>(-4.8 to 18.6)                                                |
| Inguinal, femoral, and abdominal hernia                        | 17.1<br>(15.2 to 19.2)                  | 40.7<br>(35.4 to 45.7)             | 1.1<br>(0.7 to 1.5)               | 1.5<br>(-8.6 to 13.1)                                              | -6.2<br>(-15.9 to 4.7)                                               |
| Inflammatory bowel disease                                     | 1.4<br>(1.3 to 1.6)                     | 1.2<br>(1.2 to 1.3)                | 0.2<br>(0.1 to 0.3)               | 5.2<br>(-11.2 to 24.0)                                             | -1.9<br>(-17.7 to 16.3)                                              |
| Vascular intestinal disorders                                  | 0.2<br>(0.2 to 0.2)                     | 0.8<br>(0.7 to 0.8)                | 0.1<br>(< 0.05 to 0.1)            | 23.1<br>(-7.2 to 64.2)                                             | 9.3<br>(-16.4 to 44.7)                                               |
| Gallbladder and biliary diseases                               | 6.5<br>(5.7 to 7.3)                     | 21.4<br>(18.7 to 24.4)             | 0.1<br>(0.1 to 0.2)               | 19.3<br>(-2.6 to 48.4)                                             | 9.2<br>(-11.1 to 35.6)                                               |
| Pancreatitis                                                   | 0.2<br>(0.2 to 0.3)                     | 2.3<br>(2.0 to 2.5)                | < 0.05<br>(< 0.05 to < 0.05)      | 17.2<br>(12.3 to 22.3)                                             | 8.0<br>(3.7 to 12.4)                                                 |
| Other digestive diseases                                       | --                                      | --                                 | 0.2<br>(0.1 to 0.3)               | 13.4<br>(6.0 to 21.5)                                              | 3.9<br>(-3.5 to 12.0)                                                |
| <b>Neurological disorders</b>                                  | <b>1,274.0<br/>(1,227.9 to 1,331.5)</b> | <b>554.1<br/>(473.5 to 642.3)</b>  | <b>36.0<br/>(24.2 to 49.5)</b>    | <b>7.1<br/>(-5.9 to 24.7)</b>                                      | <b>0.4<br/>(-12.5 to 17.8)</b>                                       |
| Alzheimer's disease and other dementias                        | 27.8<br>(23.2 to 33.4)                  | 5.0<br>(4.1 to 6.1)                | 4.3<br>(3.0 to 5.8)               | 20.3<br>(14.2 to 26.5)                                             | -1.8<br>(-6.4 to 3.1)                                                |
| Parkinson's disease                                            | 6.3<br>(4.9 to 8.0)                     | 0.7<br>(0.6 to 0.9)                | 0.7<br>(0.5 to 1.0)               | 18.9<br>(8.2 to 30.9)                                              | 6.1<br>(-3.6 to 17.4)                                                |
| Epilepsy                                                       | 10.7<br>(2.8 to 19.0)                   | 1.3<br>(0.3 to 2.2)                | 3.1<br>(0.7 to 6.9)               | 5.9<br>(-76.4 to 436.7)                                            | 2.1<br>(-77.2 to 419.7)                                              |
| Multiple sclerosis                                             | 1.6<br>(1.4 to 1.8)                     | < 0.05<br>(< 0.05 to < 0.05)       | 0.4<br>(0.3 to 0.6)               | 11.7<br>(-5.6 to 31.9)                                             | 3.9<br>(-13.0 to 23.3)                                               |
| Motor neuron disease                                           | 0.3<br>(0.3 to 0.3)                     | 0.1<br>(< 0.05 to 0.1)             | 0.1<br>(< 0.05 to 0.1)            | 15.2<br>(11.4 to 19.3)                                             | 7.9<br>(4.3 to 11.7)                                                 |
| Migraine                                                       | 557.7<br>(528.2 to 588.6)               | 53.0<br>(49.9 to 56.4)             | 23.4<br>(15.0 to 33.0)            | 4.5<br>(0.9 to 8.1)                                                | -0.3<br>(-3.7 to 3.1)                                                |
| Tension-type headache                                          | 900.1<br>(808.0 to 997.3)               | 493.9<br>(412.7 to 581.9)          | 3.3<br>(2.1 to 4.9)               | 5.8<br>(0.8 to 11.3)                                               | 0.1<br>(-4.8 to 5.2)                                                 |
| Other neurological disorders                                   | < 0.05<br>(< 0.05 to < 0.05)            | < 0.05<br>(< 0.05 to < 0.05)       | 0.7<br>(0.3 to 1.4)               | 21.8<br>(-56.8 to 286.9)                                           | 20.4<br>(-59.6 to 304.9)                                             |
| <b>Mental and substance use disorders</b>                      | <b>578.1<br/>(560.6 to 598.8)</b>       | <b>191.4†<br/>(179.6 to 204.8)</b> | <b>77.1<br/>(55.4 to 100.9)</b>   | <b>6.3<br/>(3.9 to 8.9)</b>                                        | <b>1.5<br/>(-0.8 to 4.0)</b>                                         |
| Schizophrenia                                                  | 6.9<br>(6.1 to 7.9)                     | 0.4<br>(0.3 to 0.4)                | 4.4<br>(3.2 to 5.5)               | 7.2<br>(-2.7 to 17.2)                                              | 0.5<br>(-8.9 to 9.8)                                                 |
| Alcohol use disorders                                          | 32.0<br>(27.6 to 36.4)                  | 16.6<br>(14.2 to 19.1)             | 3.2<br>(2.2 to 4.5)               | 11.2<br>(1.4 to 21.8)                                              | 5.8<br>(-3.7 to 16.4)                                                |
| Drug use disorders                                             | 32.7<br>(30.2 to 35.5)                  | 4.0<br>(3.6 to 4.5)                | 6.3<br>(4.5 to 8.4)               | 7.8<br>(-0.1 to 16.7)                                              | 2.8<br>(-4.8 to 11.6)                                                |
| Opioid use disorders                                           | 8.7<br>(7.1 to 10.7)                    | 1.0<br>(0.8 to 1.2)                | 3.6<br>(2.5 to 5.0)               | 11.4<br>(1.6 to 22.8)                                              | 6.0<br>(-3.5 to 17.1)                                                |
| Cocaine use disorders                                          | 6.8<br>(5.9 to 7.7)                     | 0.4<br>(0.4 to 0.5)                | 0.9<br>(0.6 to 1.3)               | 5.0<br>(-11.2 to 23.1)                                             | 0.2<br>(-15.4 to 17.8)                                               |
| Amphetamine use disorders                                      | 2.5<br>(1.7 to 3.5)                     | 0.3<br>(0.2 to 0.4)                | 0.3<br>(0.2 to 0.6)               | -2.5<br>(-27.2 to 28.1)                                            | -5.9<br>(-29.9 to 23.7)                                              |
| Cannabis use disorders                                         | 13.2<br>(10.7 to 16.0)                  | 1.9<br>(1.6 to 2.4)                | 0.4<br>(0.2 to 0.6)               | 1.5<br>(-17.9 to 22.1)                                             | -1.6<br>(-21.1 to 19.0)                                              |
| Other drug use disorders                                       | 2.2<br>(1.9 to 2.5)                     | 0.4<br>(0.4 to 0.4)                | 1.1<br>(0.7 to 1.5)               | 4.5<br>(-16.8 to 31.9)                                             | -0.4<br>(-20.7 to 26.4)                                              |
| Depressive disorders                                           | 130.0<br>(122.5 to 140.0)               | 128.5<br>(116.5 to 141.8)          | 21.3<br>(14.6 to 28.8)            | 9.9<br>(4.5 to 15.2)                                               | 3.8<br>(-1.6 to 8.8)                                                 |
| Major depressive disorder                                      | 79.4<br>(72.1 to 87.7)                  | 120.3<br>(108.4 to 133.3)          | 16.3<br>(11.0 to 21.9)            | 11.1<br>(4.1 to 17.9)                                              | 5.1<br>(-1.7 to 11.8)                                                |
| Dysthymia                                                      | 52.1<br>(45.6 to 59.6)                  | 8.2<br>(7.2 to 9.4)                | 5.0<br>(3.3 to 7.2)               | 6.3<br>(3.0 to 9.7)                                                | -0.3<br>(-3.5 to 3.1)                                                |
| Bipolar disorder                                               | 29.9<br>(26.0 to 34.6)                  | 2.3<br>(2.0 to 2.7)                | 6.1<br>(3.8 to 9.2)               | 5.2<br>(-0.0 to 10.9)                                              | -0.2<br>(-5.4 to 5.2)                                                |
| Anxiety disorders                                              | 207.7<br>(189.3 to 226.6)               | 25.3<br>(23.4 to 27.4)             | 20.0<br>(14.1 to 27.2)            | 3.9<br>(-1.7 to 10.4)                                              | -0.5<br>(-6.1 to 5.8)                                                |
| Eating disorders                                               | 7.6<br>(6.1 to 9.2)                     | 3.0<br>(2.2 to 3.9)                | 1.6<br>(1.0 to 2.3)               | 17.5<br>(6.3 to 30.4)                                              | 15.2<br>(4.2 to 28.0)                                                |
| Anorexia nervosa                                               | 1.8<br>(1.3 to 2.5)                     | 0.5<br>(0.4 to 0.7)                | 0.4<br>(0.2 to 0.6)               | 15.5<br>(-4.0 to 40.2)                                             | 14.1<br>(-4.8 to 38.5)                                               |
| Bulimia nervosa                                                | 5.5<br>(4.2 to 7.4)                     | 2.4<br>(1.7 to 3.4)                | 1.2<br>(0.7 to 1.8)               | 18.2<br>(4.5 to 33.9)                                              | 15.6<br>(2.5 to 30.8)                                                |
| Autistic spectrum disorders                                    | 27.8<br>(24.8 to 31.2)                  | 0.1<br>(0.1 to 0.2)                | 4.4<br>(3.0 to 6.2)               | 3.0<br>(-2.1 to 8.4)                                               | 0.3<br>(-4.7 to 5.8)                                                 |
| Autism                                                         | 10.7<br>(9.2 to 12.5)                   | < 0.05<br>(< 0.05 to < 0.05)       | 2.7<br>(1.7 to 3.9)               | 3.2<br>(-4.7 to 11.8)                                              | 0.3<br>(-7.4 to 9.0)                                                 |
| Asperger syndrome and other autistic spectrum disorders        | 17.1<br>(14.3 to 20.6)                  | 0.1<br>(0.1 to 0.2)                | 1.7<br>(1.1 to 2.5)               | 2.7<br>(-2.2 to 8.1)                                               | 0.3<br>(-4.6 to 5.8)                                                 |

| Cause                                                      | Prevalence in thousands (95% UI)        | Incidence in thousands (95% UI)          | YLDs in thousands (95% UI)      |                                                   |                                                     |
|------------------------------------------------------------|-----------------------------------------|------------------------------------------|---------------------------------|---------------------------------------------------|-----------------------------------------------------|
|                                                            | 2016 counts                             | 2016 counts                              | 2016 counts                     | Percentage change in counts between 2006 and 2016 | Percentage change in age-standardised rates between |
| Attention-deficit/hyperactivity disorder                   | 39.3<br>(35.3 to 44.0)                  | 1.8<br>(1.6 to 2.1)                      | 0.5<br>(0.3 to 0.8)             | -0.8<br>(-7.0 to 6.2)                             | 0.0<br>(-6.2 to 7.1)                                |
| Conduct disorder                                           | 21.9<br>(18.1 to 26.2)                  | 7.3<br>(5.7 to 8.8)                      | 2.7<br>(1.6 to 4.1)             | -4.6<br>(-11.2 to 2.4)                            | -0.0<br>(-6.8 to 7.3)                               |
| Idiopathic developmental intellectual disability           | 23.8<br>(11.9 to 35.5)                  | --                                       | 1.2<br>(0.6 to 2.0)             | -3.9<br>(-12.7 to 4.4)                            | -6.8<br>(-15.4 to 1.3)                              |
| Other mental and substance use disorders                   | 74.0<br>(64.5 to 85.4)                  | 2.1<br>(1.9 to 2.4)                      | 5.5<br>(3.8 to 7.9)             | 6.8<br>(2.1 to 11.3)                              | 0.1<br>(-4.4 to 4.6)                                |
| <b>Diabetes, urogenital, blood, and endocrine diseases</b> | <b>966.0<br/>(943.5 to 989.7)</b>       | <b>350.9†<br/>(332.8 to 372.1)</b>       | <b>24.9<br/>(17.9 to 33.0)</b>  | <b>10.8<br/>(6.2 to 15.0)</b>                     | <b>1.4<br/>(-2.8 to 5.3)</b>                        |
| Diabetes mellitus                                          | 135.5<br>(121.2 to 150.7)               | 6.9<br>(6.2 to 7.7)                      | 10.5<br>(7.2 to 14.6)           | 13.5<br>(3.4 to 23.2)                             | 3.5<br>(-5.4 to 12.1)                               |
| Acute glomerulonephritis                                   | < 0.05<br>(< 0.05 to < 0.05)            | 0.5<br>(0.5 to 0.6)                      | < 0.05<br>(< 0.05 to < 0.05)    | 6.7<br>(2.9 to 10.7)                              | 0.4<br>(-3.1 to 4.2)                                |
| Chronic kidney disease                                     | 152.2<br>(136.8 to 168.8)               | 12.4<br>(10.8 to 14.3)                   | 5.0<br>(3.8 to 6.4)             | 15.1<br>(7.4 to 23.1)                             | 3.4<br>(-3.4 to 10.6)                               |
| Chronic kidney disease due to diabetes mellitus            | 53.5<br>(46.9 to 60.5)                  | 4.6<br>(3.9 to 5.3)                      | 1.8<br>(1.3 to 2.3)             | 11.4<br>(0.8 to 22.9)                             | 1.7<br>(-8.1 to 13.1)                               |
| Chronic kidney disease due to hypertension                 | 32.0<br>(28.0 to 36.3)                  | 1.1<br>(0.9 to 1.3)                      | 1.2<br>(0.9 to 1.6)             | 30.4<br>(15.4 to 46.2)                            | 11.9<br>(-0.3 to 24.9)                              |
| Chronic kidney disease due to glomerulonephritis           | 23.2<br>(20.1 to 26.3)                  | 3.1<br>(2.6 to 3.8)                      | 0.5<br>(0.4 to 0.7)             | 7.7<br>(-5.5 to 23.9)                             | -0.0<br>(-11.9 to 14.7)                             |
| Chronic kidney disease due to other causes                 | 43.5<br>(38.1 to 49.4)                  | 3.6<br>(3.1 to 4.1)                      | 1.5<br>(1.1 to 1.9)             | 11.5<br>(0.3 to 24.6)                             | 1.4<br>(-8.8 to 13.2)                               |
| Urinary diseases and male infertility                      | 111.8<br>(98.1 to 126.2)                | 213.8†<br>(196.3 to 233.9)               | 3.5<br>(2.2 to 5.1)             | 8.3<br>(-0.1 to 15.7)                             | -1.0<br>(-9.0 to 5.7)                               |
| Interstitial nephritis and urinary tract infections        | 3.3<br>(3.0 to 3.7)                     | 175.2<br>(157.6 to 194.5)                | 0.1<br>(0.1 to 0.2)             | 7.4<br>(-5.3 to 22.2)                             | 1.7<br>(-11.3 to 16.2)                              |
| Urolithiasis                                               | 1.0<br>(0.9 to 1.2)                     | 27.3<br>(24.0 to 31.3)                   | 0.1<br>(0.1 to 0.1)             | 8.7<br>(-4.2 to 22.5)                             | 1.0<br>(-10.2 to 13.0)                              |
| Benign prostatic hyperplasia                               | 97.5<br>(81.5 to 114.9)                 | 11.4<br>(9.3 to 13.8)                    | 3.2<br>(2.0 to 4.7)             | 8.9<br>(-0.3 to 17.1)                             | -0.8<br>(-9.5 to 6.9)                               |
| Male infertility                                           | 6.2<br>(4.9 to 8.1)                     | --                                       | < 0.05<br>(< 0.05 to 0.1)       | 5.7<br>(-4.0 to 16.4)                             | 1.3<br>(-7.6 to 11.3)                               |
| Other urinary diseases                                     | --                                      | --                                       | 0.1<br>(< 0.05 to 0.1)          | -10.8<br>(-18.6 to -2.2)                          | -15.5<br>(-23.1 to -7.3)                            |
| Gynecological diseases                                     | 384.1<br>(365.9 to 407.5)               | 106.0†<br>(99.9 to 112.3)                | 3.6<br>(2.4 to 5.2)             | 1.6<br>(-2.9 to 6.0)                              | -3.3<br>(-7.5 to 1.0)                               |
| Uterine fibroids                                           | 24.9<br>(21.7 to 28.4)                  | 2.4<br>(2.1 to 2.8)                      | 0.4<br>(0.2 to 0.6)             | 0.5<br>(-8.6 to 9.5)                              | -6.3<br>(-14.9 to 2.0)                              |
| Polycystic ovarian syndrome                                | 3.7<br>(2.8 to 4.8)                     | 2.0<br>(1.4 to 2.6)                      | < 0.05<br>(< 0.05 to 0.1)       | 4.6<br>(-7.3 to 18.3)                             | -1.0<br>(-12.2 to 12.1)                             |
| Female infertility                                         | 5.2<br>(2.1 to 9.6)                     | --                                       | < 0.05<br>(< 0.05 to 0.1)       | -3.7<br>(-21.3 to 15.5)                           | -7.6<br>(-23.3 to 10.5)                             |
| Endometriosis                                              | 1.2<br>(1.0 to 1.4)                     | 3.7<br>(3.0 to 4.6)                      | 0.1<br>(0.1 to 0.2)             | 3.0<br>(-20.3 to 35.3)                            | -0.8<br>(-23.4 to 29.8)                             |
| Genital prolapse                                           | 158.0<br>(136.4 to 181.7)               | 6.9<br>(5.8 to 8.1)                      | 0.5<br>(0.2 to 0.9)             | 6.0<br>(-4.0 to 15.2)                             | -4.4<br>(-13.2 to 3.9)                              |
| Premenstrual syndrome                                      | 192.5<br>(181.7 to 203.2)               | 66.8<br>(62.3 to 71.0)                   | 1.6<br>(1.0 to 2.5)             | 1.0<br>(-5.9 to 8.4)                              | -2.5<br>(-9.2 to 4.6)                               |
| Other gynecological diseases                               | 29.3<br>(25.7 to 33.4)                  | 24.2<br>(20.4 to 28.8)                   | 0.9<br>(0.6 to 1.3)             | 0.8<br>(-7.8 to 11.3)                             | -3.4<br>(-11.7 to 6.8)                              |
| Hemoglobinopathies and hemolytic anaemias                  | 331.0<br>(321.8 to 341.7)               | --                                       | 0.4<br>(0.2 to 0.5)             | 0.1<br>(-9.0 to 10.8)                             | -3.2<br>(-12.7 to 8.5)                              |
| Thalassemias                                               | < 0.05<br>(< 0.05 to 0.1)               | --                                       | < 0.05<br>(< 0.05 to < 0.05)    | 33.8<br>(5.9 to 68.5)                             | 44.1<br>(13.5 to 82.7)                              |
| Thalassaemias trait                                        | 7.8<br>(6.7 to 8.8)                     | --                                       | 0.1<br>(0.1 to 0.1)             | 26.0<br>(2.0 to 59.4)                             | 19.0<br>(-4.0 to 50.6)                              |
| Sickle cell disorders                                      | < 0.05<br>(< 0.05 to < 0.05)            | --                                       | < 0.05<br>(< 0.05 to < 0.05)    | 4.1<br>(-7.0 to 15.7)                             | 2.2<br>(-9.2 to 14.0)                               |
| Sickle cell trait                                          | 37.1<br>(35.7 to 38.8)                  | --                                       | 0.1<br>(< 0.05 to 0.1)          | 16.1<br>(-4.7 to 40.8)                            | 13.7<br>(-8.4 to 39.9)                              |
| G6PD deficiency                                            | 37.0<br>(34.7 to 39.7)                  | --                                       | < 0.05<br>(< 0.05 to < 0.05)    | 14.4<br>(-2.8 to 33.0)                            | 9.4<br>(-8.4 to 29.1)                               |
| G6PD trait                                                 | 242.3<br>(233.6 to 251.8)               | --                                       | < 0.05<br>(< 0.05 to < 0.05)    | 7.7<br>(-4.0 to 20.5)                             | 2.2<br>(-9.8 to 15.1)                               |
| Other hemoglobinopathies and hemolytic anaemias            | 13.6<br>(12.5 to 14.7)                  | --                                       | 0.2<br>(0.1 to 0.3)             | -12.2<br>(-21.2 to -2.3)                          | -15.1<br>(-24.7 to -4.4)                            |
| Endocrine, metabolic, blood, and immune disorders          | 59.7<br>(54.9 to 64.8)                  | 11.2<br>(10.0 to 12.4)                   | 1.9<br>(1.2 to 2.6)             | 11.7<br>(5.3 to 18.7)                             | 2.2<br>(-4.1 to 9.1)                                |
| <b>Musculoskeletal disorders</b>                           | <b>853.3<br/>(818.4 to 889.5)</b>       | <b>479.5<br/>(436.0 to 527.1)</b>        | <b>92.9<br/>(67.8 to 120.5)</b> | <b>12.1<br/>(9.0 to 15.5)</b>                     | <b>4.3<br/>(1.4 to 7.6)</b>                         |
| Rheumatoid arthritis                                       | 28.1<br>(25.3 to 31.3)                  | 1.3<br>(1.2 to 1.5)                      | 6.6<br>(4.5 to 8.8)             | 19.0<br>(11.3 to 27.7)                            | 8.5<br>(1.4 to 16.4)                                |
| Osteoarthritis                                             | 221.0<br>(207.9 to 235.7)               | 9.4<br>(8.7 to 10.1)                     | 7.8<br>(5.1 to 11.3)            | 13.3<br>(9.1 to 17.1)                             | 2.3<br>(-1.6 to 5.8)                                |
| Low back and neck pain                                     | 476.9<br>(446.6 to 511.0)               | 209.7<br>(187.1 to 234.8)                | 56.2<br>(39.5 to 73.9)          | 12.0<br>(8.0 to 16.4)                             | 4.5<br>(0.5 to 8.8)                                 |
| Low back pain                                              | 362.8<br>(325.0 to 406.3)               | 180.0<br>(158.1 to 204.3)                | 41.1<br>(29.0 to 54.0)          | 13.5<br>(8.0 to 19.6)                             | 6.3<br>(0.9 to 12.2)                                |
| Neck pain                                                  | 151.7<br>(131.7 to 174.5)               | 29.6<br>(25.8 to 34.7)                   | 15.1<br>(10.2 to 21.3)          | 8.1<br>(5.8 to 10.5)                              | -0.2<br>(-2.3 to 2.0)                               |
| Gout                                                       | 28.9<br>(25.7 to 32.7)                  | 5.0<br>(4.3 to 5.7)                      | 0.9<br>(0.6 to 1.2)             | 10.8<br>(-0.9 to 23.8)                            | 1.3<br>(-10.1 to 14.2)                              |
| Other musculoskeletal disorders                            | 249.2<br>(212.7 to 288.0)               | 254.2<br>(217.2 to 294.6)                | 21.5<br>(14.4 to 30.3)          | 10.0<br>(2.5 to 18.1)                             | 3.5<br>(-3.6 to 10.8)                               |
| <b>Other non-communicable diseases</b>                     | <b>2,599.1<br/>(2,564.9 to 2,629.3)</b> | <b>7,251.3†<br/>(6,860.3 to 7,697.0)</b> | <b>76.5<br/>(52.2 to 108.4)</b> | <b>5.5<br/>(4.1 to 6.7)</b>                       | <b>-0.9<br/>(-2.1 to 0.3)</b>                       |
| Congenital anomalies                                       | 22.0<br>(19.9 to 24.5)                  | --                                       | 3.1<br>(2.2 to 4.1)             | 0.3<br>(-5.7 to 6.7)                              | -2.1<br>(-8.0 to 4.5)                               |
| Neural tube defects                                        | 2.3<br>(2.0 to 2.6)                     | --                                       | 0.7<br>(0.5 to 0.9)             | -1.2<br>(-15.6 to 13.6)                           | -4.5<br>(-18.2 to 10.3)                             |
| Congenital heart anomalies                                 | 6.5<br>(5.7 to 7.5)                     | --                                       | 0.3<br>(0.1 to 0.6)             | 1.5<br>(-8.7 to 13.5)                             | -0.2<br>(-10.5 to 11.6)                             |
| Orofacial clefts                                           | 1.8<br>(1.6 to 2.1)                     | --                                       | < 0.05<br>(< 0.05 to < 0.05)    | -6.2<br>(-16.4 to 6.7)                            | -8.8<br>(-18.6 to 3.6)                              |
| Down's syndrome                                            | 1.0<br>(0.9 to 1.2)                     | --                                       | 0.1<br>(0.1 to 0.1)             | 0.5<br>(-6.3 to 8.0)                              | -0.2<br>(-6.8 to 7.3)                               |
| Turner syndrome                                            | 0.6<br>(0.5 to 0.7)                     | --                                       | < 0.05<br>(< 0.05 to < 0.05)    | 0.8<br>(-30.7 to 48.7)                            | -0.8<br>(-32.8 to 49.0)                             |
| Klinefelter syndrome                                       | 0.9<br>(0.7 to 1.0)                     | --                                       | < 0.05<br>(< 0.05 to < 0.05)    | 2.4<br>(-22.7 to 37.8)                            | 0.3<br>(-24.3 to 34.6)                              |



| Cause                                         | Prevalence in thousands (95% UI)        | Incidence in thousands (95% UI)          | YLDs in thousands (95% UI)           |                                                   |                                                     |
|-----------------------------------------------|-----------------------------------------|------------------------------------------|--------------------------------------|---------------------------------------------------|-----------------------------------------------------|
|                                               | 2016 counts                             | 2016 counts                              | 2016 counts                          | Percentage change in counts between 2006 and 2016 | Percentage change in age-standardised rates between |
| Other chromosomal abnormalities               | 1.4<br>(1.2 to 1.7)                     | --                                       | 0.2<br>(0.1 to 0.2)                  | -2.2<br>(-19.4 to 19.3)                           | 1.8<br>(-16.4 to 24.8)                              |
| Congenital musculoskeletal and limb anomalies | 3.6<br>(3.3 to 3.9)                     | --                                       | 0.5<br>(0.4 to 0.8)                  | 3.7<br>(-6.2 to 14.2)                             | 0.1<br>(-9.8 to 10.3)                               |
| Urogenital congenital anomalies               | 2.2<br>(2.0 to 2.5)                     | --                                       | 0.1<br>(< 0.05 to 0.1)               | -1.5<br>(-9.0 to 6.9)                             | -0.2<br>(-7.9 to 8.4)                               |
| Digestive congenital anomalies                | 3.5<br>(3.1 to 3.9)                     | --                                       | 0.1<br>(0.1 to 0.2)                  | 4.7<br>(-11.0 to 24.0)                            | 1.6<br>(-13.6 to 20.3)                              |
| Other congenital anomalies                    | 6.5<br>(4.2 to 9.7)                     | --                                       | 1.1<br>(0.7 to 1.6)                  | -0.7<br>(-10.5 to 12.2)                           | -3.5<br>(-13.3 to 8.8)                              |
| Skin and subcutaneous diseases                | 1,151.5<br>(1,129.4 to 1,174.5)         | 2,401.5<br>(2,261.0 to 2,553.7)          | 28.6<br>(19.4 to 40.9)               | 4.7<br>(2.7 to 6.7)                               | 2.5<br>(0.5 to 4.7)                                 |
| Dermatitis                                    | 177.3<br>(168.1 to 187.3)               | 238.8<br>(221.2 to 257.9)                | 6.3<br>(3.8 to 10.1)                 | 3.8<br>(-0.9 to 9.2)                              | 2.8<br>(-2.0 to 8.6)                                |
| Psoriasis                                     | 41.8<br>(39.7 to 44.0)                  | 4.3<br>(4.1 to 4.5)                      | 3.6<br>(2.6 to 4.8)                  | 11.4<br>(4.3 to 19.1)                             | 5.9<br>(-1.2 to 13.8)                               |
| Cellulitis                                    | 1.7<br>(1.6 to 1.8)                     | 32.2<br>(30.2 to 34.3)                   | 0.1<br>(0.1 to 0.1)                  | 4.9<br>(-13.1 to 26.0)                            | -0.7<br>(-18.8 to 21.1)                             |
| Pyoderma                                      | 8.1<br>(7.8 to 8.3)                     | 183.7<br>(177.2 to 190.3)                | < 0.05<br>(< 0.05 to 0.1)            | 7.8<br>(0.4 to 16.2)                              | 1.2<br>(-6.3 to 9.4)                                |
| Scabies                                       | 7.8<br>(6.9 to 8.9)                     | 23.6<br>(20.7 to 26.8)                   | 0.2<br>(0.1 to 0.3)                  | 1.5<br>(-5.6 to 9.3)                              | -0.0<br>(-7.1 to 7.6)                               |
| Fungal skin diseases                          | 244.4<br>(218.6 to 272.2)               | 953.8<br>(833.3 to 1,091.8)              | 1.4<br>(0.5 to 2.9)                  | 8.6<br>(7.2 to 10.2)                              | 0.0<br>(-1.2 to 1.3)                                |
| Viral skin diseases                           | 99.1<br>(95.1 to 103.7)                 | 131.9<br>(125.6 to 138.0)                | 3.0<br>(1.9 to 4.5)                  | -0.2<br>(-3.1 to 2.9)                             | -0.2<br>(-3.1 to 3.0)                               |
| Acne vulgaris                                 | 364.9<br>(335.7 to 392.9)               | 291.9<br>(235.3 to 371.3)                | 9.4<br>(6.3 to 13.6)                 | 2.5<br>(-1.6 to 6.6)                              | 2.6<br>(-1.4 to 6.6)                                |
| Alopecia areata                               | 11.2<br>(10.8 to 11.7)                  | 19.9<br>(19.1 to 20.6)                   | 0.4<br>(0.2 to 0.6)                  | 4.2<br>(-3.4 to 12.8)                             | -0.3<br>(-7.6 to 8.1)                               |
| Pruritus                                      | 30.8<br>(27.2 to 34.7)                  | 24.4<br>(21.8 to 27.4)                   | 0.3<br>(0.1 to 0.6)                  | 7.1<br>(1.6 to 13.1)                              | 1.2<br>(-4.2 to 6.6)                                |
| Urticaria                                     | 26.0<br>(23.1 to 29.4)                  | 46.2<br>(40.9 to 52.4)                   | 1.6<br>(1.0 to 2.2)                  | 0.9<br>(-4.7 to 6.7)                              | -0.2<br>(-6.0 to 5.2)                               |
| Decubitus ulcer                               | 1.9<br>(1.7 to 2.2)                     | 7.0<br>(6.2 to 8.0)                      | 0.3<br>(0.2 to 0.4)                  | 16.7<br>(1.6 to 33.7)                             | -1.6<br>(-14.3 to 12.4)                             |
| Other skin and subcutaneous diseases          | 354.0<br>(344.9 to 363.4)               | 443.8<br>(428.9 to 458.5)                | 1.9<br>(0.9 to 3.5)                  | 14.2<br>(11.8 to 16.5)                            | 6.4<br>(4.1 to 8.7)                                 |
| Sense organ diseases                          | 889.3<br>(870.6 to 906.8)               | 353.4†<br>(333.6 to 374.4)               | 32.4<br>(22.6 to 45.2)               | 6.1<br>(3.7 to 8.0)                               | -4.4<br>(-6.6 to -2.5)                              |
| Glaucoma                                      | 3.3<br>(2.8 to 3.8)                     | --                                       | 0.3<br>(0.2 to 0.4)                  | 12.2<br>(-1.0 to 26.4)                            | -1.4<br>(-13.1 to 12.1)                             |
| Cataract                                      | 37.8<br>(33.1 to 42.6)                  | --                                       | 2.0<br>(1.4 to 2.8)                  | 14.7<br>(7.8 to 22.5)                             | -3.7<br>(-9.5 to 2.6)                               |
| Macular degeneration                          | 2.4<br>(2.0 to 3.0)                     | --                                       | 0.2<br>(0.1 to 0.2)                  | 19.5<br>(5.1 to 34.6)                             | 1.9<br>(-11.0 to 16.0)                              |
| Refraction and accommodation disorders        | 405.9<br>(390.9 to 420.4)               | --                                       | 6.8<br>(4.1 to 10.9)                 | 3.6<br>(0.4 to 7.1)                               | -3.7<br>(-6.6 to -0.7)                              |
| Age-related and other hearing loss            | 607.8<br>(579.5 to 635.7)               | --                                       | 18.2<br>(12.8 to 25.4)               | 5.0<br>(1.3 to 8.1)                               | -6.2<br>(-9.6 to -3.3)                              |
| Other vision loss                             | 16.2<br>(14.6 to 18.1)                  | --                                       | 1.1<br>(0.8 to 1.4)                  | 10.5<br>(2.1 to 18.6)                             | -1.1<br>(-8.5 to 6.2)                               |
| Other sense organ diseases                    | 121.5<br>(112.0 to 131.3)               | 353.4<br>(333.6 to 374.4)                | 3.8<br>(2.4 to 5.7)                  | 9.5<br>(5.6 to 13.7)                              | 1.0<br>(-2.7 to 5.0)                                |
| Oral disorders                                | 1,874.0<br>(1,818.4 to 1,928.7)         | 4,496.4†<br>(4,139.5 to 4,884.8)         | 12.4<br>(7.5 to 19.5)                | 7.2<br>(4.9 to 9.6)                               | -0.9<br>(-3.0 to 1.2)                               |
| Caries of deciduous teeth                     | 144.6<br>(104.0 to 179.7)               | 459.9<br>(256.5 to 704.4)                | 0.1<br>(< 0.05 to 0.1)               | -7.6<br>(-18.1 to 3.1)                            | -1.7<br>(-12.7 to 9.4)                              |
| Caries of permanent teeth                     | 1,360.8<br>(1,292.8 to 1,435.4)         | 3,961.0<br>(3,657.1 to 4,254.6)          | 1.3<br>(0.6 to 2.5)                  | -0.7<br>(-3.4 to 2.0)                             | -5.2<br>(-7.8 to -2.6)                              |
| Periodontal disease                           | 539.0<br>(461.8 to 623.2)               | 61.5<br>(50.8 to 73.2)                   | 3.5<br>(1.4 to 7.4)                  | 8.4<br>(4.8 to 12.0)                              | -0.1<br>(-3.6 to 3.1)                               |
| Edentulism and severe tooth loss              | 202.4<br>(176.6 to 229.2)               | 14.1<br>(11.9 to 16.4)                   | 5.6<br>(3.7 to 7.9)                  | 9.4<br>(4.5 to 13.9)                              | -0.5<br>(-4.8 to 3.6)                               |
| Other oral disorders                          | 65.0<br>(62.2 to 67.9)                  | --                                       | 1.9<br>(1.2 to 2.9)                  | 5.0<br>(1.9 to 8.3)                               | -0.1<br>(-3.2 to 3.1)                               |
| <b>Injuries</b>                               | <b>849.0</b><br><b>(798.5 to 911.7)</b> | <b>323.8†</b><br><b>(307.3 to 340.7)</b> | <b>25.4</b><br><b>(16.9 to 36.1)</b> | <b>16.5</b><br><b>(14.6 to 18.2)</b>              | <b>7.0</b><br><b>(5.1 to 8.6)</b>                   |
| <b>Transport injuries</b>                     | <b>94.7</b><br><b>(88.2 to 101.8)</b>   | <b>26.8</b><br><b>(24.5 to 29.2)</b>     | <b>4.4</b><br><b>(2.8 to 6.3)</b>    | <b>15.6</b><br><b>(13.3 to 17.7)</b>              | <b>6.5</b><br><b>(4.3 to 8.6)</b>                   |
| Road injuries                                 | 80.4<br>(74.9 to 86.2)                  | 24.5<br>(22.2 to 26.9)                   | 3.8<br>(2.5 to 5.5)                  | 17.5<br>(15.1 to 19.8)                            | 8.2<br>(5.9 to 10.4)                                |
| Pedestrian road injuries                      | 16.3<br>(14.6 to 18.5)                  | 3.3<br>(2.9 to 3.9)                      | 0.8<br>(0.6 to 1.2)                  | 12.6<br>(10.4 to 14.5)                            | 2.6<br>(0.5 to 4.5)                                 |
| Cyclist road injuries                         | 13.6<br>(11.4 to 16.1)                  | 5.1<br>(4.2 to 6.1)                      | 0.6<br>(0.4 to 0.8)                  | 17.1<br>(14.6 to 19.6)                            | 8.5<br>(6.0 to 10.8)                                |
| Motorcyclist road injuries                    | 15.4<br>(13.1 to 18.4)                  | 2.9<br>(2.4 to 3.5)                      | 0.8<br>(0.5 to 1.1)                  | 25.8<br>(22.9 to 28.7)                            | 16.8<br>(14.0 to 19.6)                              |
| Motor vehicle road injuries                   | 27.4<br>(22.9 to 31.4)                  | 10.2<br>(9.0 to 11.6)                    | 1.4<br>(0.9 to 1.9)                  | 17.4<br>(15.0 to 19.8)                            | 7.8<br>(5.5 to 10.1)                                |
| Other road injuries                           | 7.7<br>(6.6 to 9.0)                     | 2.9<br>(2.3 to 3.5)                      | 0.3<br>(0.2 to 0.4)                  | 13.4<br>(11.1 to 15.7)                            | 4.7<br>(2.5 to 7.0)                                 |
| Other transport injuries                      | 14.3<br>(11.8 to 17.2)                  | 2.3<br>(2.0 to 2.7)                      | 0.5<br>(0.3 to 0.8)                  | 3.3<br>(0.9 to 5.6)                               | -3.9<br>(-6.4 to -1.8)                              |
| <b>Unintentional injuries</b>                 | <b>708.5</b><br><b>(658.8 to 771.8)</b> | <b>277.4</b><br><b>(261.5 to 294.0)</b>  | <b>19.2</b><br><b>(12.8 to 27.6)</b> | <b>17.2</b><br><b>(15.2 to 19.0)</b>              | <b>7.3</b><br><b>(5.4 to 8.9)</b>                   |
| Falls                                         | 242.0<br>(216.9 to 269.2)               | 100.0<br>(89.4 to 111.7)                 | 9.2<br>(6.4 to 12.8)                 | 22.1<br>(19.4 to 24.4)                            | 9.9<br>(7.3 to 12.0)                                |
| Drowning                                      | 2.2<br>(1.9 to 2.4)                     | 0.3<br>(0.2 to 0.3)                      | 0.1<br>(0.1 to 0.1)                  | 1.5<br>(-3.5 to 6.6)                              | -5.3<br>(-10.2 to -0.3)                             |
| Fire, heat, and hot substances                | 72.4<br>(62.2 to 84.1)                  | 5.1<br>(4.3 to 5.9)                      | 1.3<br>(0.7 to 2.1)                  | 17.3<br>(14.4 to 20.1)                            | 9.4<br>(6.6 to 12.2)                                |
| Poisonings                                    | 1.9<br>(1.6 to 2.4)                     | 2.4<br>(1.9 to 3.0)                      | 0.2<br>(0.1 to 0.2)                  | 20.8<br>(10.4 to 32.9)                            | 15.2<br>(5.2 to 27.1)                               |
| Exposure to mechanical forces                 | 249.7<br>(212.1 to 306.0)               | 73.9<br>(65.3 to 83.2)                   | 4.6<br>(2.9 to 6.9)                  | 13.8<br>(11.9 to 15.4)                            | 5.9<br>(4.0 to 7.4)                                 |
| Unintentional firearm injuries                | 28.0<br>(22.3 to 35.1)                  | 3.8<br>(2.9 to 5.0)                      | 0.5<br>(0.3 to 0.7)                  | 0.3<br>(-1.9 to 2.2)                              | -6.6<br>(-8.7 to -4.7)                              |
| Unintentional suffocation                     | 2.1<br>(1.6 to 2.6)                     | 0.4<br>(0.2 to 0.5)                      | 0.1<br>(< 0.05 to 0.1)               | 9.1<br>(6.6 to 11.2)                              | 3.1<br>(0.5 to 5.5)                                 |
| Other exposure to mechanical forces           | 219.6<br>(184.1 to 277.8)               | 69.8<br>(61.8 to 78.6)                   | 4.1<br>(2.6 to 6.1)                  | 15.6<br>(13.5 to 17.3)                            | 7.5<br>(5.4 to 9.1)                                 |

| Cause                                                                               | Prevalence in thousands (95% UI)       | Incidence in thousands (95% UI)       | YLDs in thousands (95% UI)                          |                                                   |                                                     |
|-------------------------------------------------------------------------------------|----------------------------------------|---------------------------------------|-----------------------------------------------------|---------------------------------------------------|-----------------------------------------------------|
|                                                                                     | 2016 counts                            | 2016 counts                           | 2016 counts                                         | Percentage change in counts between 2006 and 2016 | Percentage change in age-standardised rates between |
| Adverse effects of medical treatment                                                | 2.3<br>(1.8 to 2.8)                    | 29.6<br>(26.6 to 32.7)                | 0.3<br>(0.2 to 0.4)                                 | 23.0<br>(17.6 to 28.9)                            | 11.8<br>(7.7 to 16.0)                               |
| Animal contact                                                                      | 20.3<br>(17.7 to 23.7)                 | 12.0<br>(10.0 to 14.5)                | 0.4<br>(0.3 to 0.6)                                 | 0.5<br>(-4.4 to 5.3)                              | -5.1<br>(-10.1 to 0.0)                              |
| Venomous animal contact                                                             | 2.9<br>(2.4 to 3.5)                    | 3.3<br>(2.4 to 4.3)                   | 0.2<br>(0.1 to 0.3)                                 | 1.5<br>(-7.8 to 11.8)                             | -2.8<br>(-12.1 to 7.5)                              |
| Non-venomous animal contact                                                         | 17.4<br>(14.9 to 20.7)                 | 8.7<br>(7.2 to 10.6)                  | 0.2<br>(0.1 to 0.4)                                 | -0.4<br>(-2.6 to 1.6)                             | -7.3<br>(-9.6 to -5.4)                              |
| Foreign body                                                                        | 33.3<br>(28.1 to 39.1)                 | 22.2<br>(20.4 to 24.6)                | 0.9<br>(0.6 to 1.4)                                 | 6.2<br>(3.2 to 8.9)                               | -1.6<br>(-4.5 to 1.1)                               |
| Pulmonary aspiration and foreign body in airway                                     | 10.6<br>(8.3 to 13.5)                  | 11.7<br>(10.8 to 12.8)                | 0.3<br>(0.2 to 0.4)                                 | 0.6<br>(-2.2 to 3.4)                              | -9.1<br>(-11.8 to -6.8)                             |
| Foreign body in eyes                                                                | 1.3<br>(0.9 to 1.9)                    | 5.7<br>(4.4 to 7.4)                   | 0.1<br>(0.1 to 0.1)                                 | 5.8<br>(2.7 to 9.3)                               | -0.3<br>(-3.2 to 2.9)                               |
| Foreign body in other body part                                                     | 21.4<br>(17.5 to 27.0)                 | 4.9<br>(4.1 to 5.8)                   | 0.6<br>(0.4 to 0.8)                                 | 9.3<br>(5.5 to 12.8)                              | 2.4<br>(-1.3 to 5.7)                                |
| Environmental heat and cold exposure                                                | 11.5<br>(9.8 to 14.0)                  | 2.2<br>(1.9 to 2.6)                   | 0.4<br>(0.2 to 0.6)                                 | 10.2<br>(6.3 to 14.1)                             | 2.6<br>(-1.2 to 6.4)                                |
| Other unintentional injuries                                                        | 72.9<br>(59.8 to 87.3)                 | 29.5<br>(24.9 to 34.7)                | 1.8<br>(1.2 to 2.7)                                 | 15.0<br>(12.6 to 17.1)                            | 7.2<br>(4.7 to 9.1)                                 |
| <b>Self-harm and interpersonal violence</b>                                         | <b>100.8</b><br><b>(92.2 to 110.2)</b> | <b>19.5†</b><br><b>(17.2 to 22.0)</b> | <b>1.8</b><br><b>(1.2 to 2.6)</b>                   | <b>11.2</b><br><b>(8.2 to 13.9)</b>               | <b>4.5</b><br><b>(1.8 to 7.0)</b>                   |
| Self-harm                                                                           | 5.9<br>(5.0 to 6.8)                    | 5.0<br>(4.4 to 5.7)                   | 0.3<br>(0.2 to 0.4)                                 | 16.2<br>(9.7 to 23.2)                             | 8.2<br>(1.9 to 15.1)                                |
| Self-harm by firearm                                                                | 0.2<br>(0.2 to 0.3)                    | < 0.05<br>(< 0.05 to 0.1)             | < 0.05<br>(< 0.05 to < 0.05)                        | -15.4<br>(-17.6 to -13.4)                         | -20.5<br>(-22.7 to -18.4)                           |
| Self-harm by other specified means                                                  | 5.7<br>(4.8 to 6.6)                    | 5.0<br>(4.4 to 5.7)                   | 0.3<br>(0.2 to 0.4)                                 | 17.0<br>(10.2 to 24.1)                            | 8.9<br>(2.3 to 15.9)                                |
| Interpersonal violence                                                              | 94.9<br>(86.2 to 104.5)                | 14.4†<br>(12.4 to 16.8)               | 1.5<br>(1.0 to 2.2)                                 | 10.3<br>(7.5 to 13.0)                             | 3.9<br>(1.2 to 6.4)                                 |
| Assault by firearm                                                                  | 3.7<br>(3.0 to 4.5)                    | 0.7<br>(0.5 to 0.9)                   | 0.1<br>(0.1 to 0.1)                                 | 30.0<br>(26.9 to 32.9)                            | 21.2<br>(18.1 to 24.0)                              |
| Assault by sharp object                                                             | 13.7<br>(11.2 to 16.4)                 | 4.6<br>(3.6 to 5.8)                   | 0.3<br>(0.2 to 0.4)                                 | 14.0<br>(11.6 to 16.3)                            | 6.0<br>(3.6 to 8.3)                                 |
| Sexual violence                                                                     | 55.6<br>(48.6 to 64.2)                 | --                                    | 0.5<br>(0.3 to 0.7)                                 | -3.3<br>(-7.6 to 1.0)                             | -5.5<br>(-9.8 to -1.2)                              |
| Assault by other means                                                              | 22.0<br>(18.2 to 27.0)                 | 9.1<br>(7.6 to 10.8)                  | 0.7<br>(0.5 to 1.0)                                 | 17.6<br>(15.2 to 19.7)                            | 9.2<br>(6.8 to 11.3)                                |
| <b>Forces of nature, conflict and terrorism, and executions and police conflict</b> | <b>0.7</b><br><b>(0.4 to 1.1)</b>      | <b>0.1†</b><br><b>(0.1 to 0.2)</b>    | <b>&lt; 0.05</b><br><b>(&lt; 0.05 to &lt; 0.05)</b> | <b>11.0</b><br><b>(7.1 to 15.3)</b>               | <b>4.9</b><br><b>(1.2 to 9.5)</b>                   |
| Exposure to forces of nature                                                        | 0.3<br>(< 0.05 to 0.6)                 | --                                    | < 0.05<br>(< 0.05 to < 0.05)                        | -5.1<br>(-9.0 to -0.9)                            | -11.3<br>(-15.1 to -7.3)                            |
| Conflict and terrorism                                                              | --                                     | --                                    | --                                                  | --                                                | --                                                  |
| Executions and police conflict                                                      | 0.4<br>(0.2 to 0.6)                    | 0.1<br>(0.1 to 0.2)                   | < 0.05<br>(< 0.05 to < 0.05)                        | 24.3<br>(15.2 to 29.1)                            | 17.8<br>(10.6 to 22.0)                              |
| <b>Impairments</b>                                                                  | --                                     | --                                    | --                                                  | --                                                | --                                                  |
| Anaemia                                                                             | 467.6<br>(438.7 to 500.8)              | --                                    | 10.4<br>(7.0 to 14.9)                               | -1.8<br>(-8.5 to 6.2)                             | -8.3<br>(-14.8 to -1.0)                             |
| Developmental intellectual disability                                               | 51.1<br>(39.7 to 62.9)                 | --                                    | 6.5<br>(4.9 to 8.4)                                 | -0.3<br>(-4.6 to 3.9)                             | -2.8<br>(-7.1 to 1.5)                               |
| Epilepsy                                                                            | 15.8<br>(7.9 to 23.6)                  | --                                    | 5.1<br>(2.6 to 9.0)                                 | 2.7<br>(-54.5 to 134.7)                           | -0.5<br>(-55.4 to 123.5)                            |
| Guillain-Barre syndrome                                                             | < 0.05<br>(< 0.05 to < 0.05)           | --                                    | < 0.05<br>(< 0.05 to < 0.05)                        | 4.5<br>(2.7 to 6.3)                               | 0.1<br>(0.0 to 0.1)                                 |
| Hearing loss                                                                        | 637.7<br>(609.9 to 665.3)              | --                                    | 19.7<br>(13.9 to 27.4)                              | 3.9<br>(0.7 to 6.7)                               | -6.5<br>(-9.6 to -3.9)                              |
| Heart failure                                                                       | 43.2<br>(37.9 to 49.6)                 | --                                    | 4.8<br>(3.6 to 6.0)                                 | 6.8<br>(-0.7 to 14.6)                             | -5.7<br>(-12.2 to 1.1)                              |
| Infertility                                                                         | 22.8<br>(17.5 to 29.0)                 | --                                    | 0.1<br>(0.1 to 0.3)                                 | 2.5<br>(-3.6 to 9.5)                              | -1.9<br>(-7.8 to 4.4)                               |
| Pelvic inflammatory disease                                                         | 0.6<br>(0.5 to 0.8)                    | --                                    | 0.1<br>(0.1 to 0.1)                                 | 1.6<br>(-15.7 to 21.9)                            | -3.9<br>(-20.2 to 15.4)                             |
| Vision loss                                                                         | 472.2<br>(456.2 to 488.5)              | --                                    | 11.5<br>(7.9 to 16.6)                               | 6.2<br>(3.4 to 9.2)                               | -3.2<br>(-5.8 to -0.7)                              |

We did not calculate incidence for the nine impairments, certain NTDs, and causes with only birth prevalence. Blank cells mean that no estimate is available.

† Incidence for aggregate causes represents the sum of the incidence of the causes below the aggregate.

‡ Incidence estimates for stroke represent first-ever stroke only.

^ Incidence of HIV/AIDS represents new infections of HIV only and does not include new infections of Tuberculosis in HIV positive cases.

SR Table 14: Prevalence, incidence, and YLDs for 2016, percentage change of YLD counts and percentage change of age-standardised YLD rates between 2006 and 2016 by cause and impairments, for all ages, Uzbekistan.

| Cause                                                                                | Prevalence in thousands (95% UI)          | Incidence in thousands (95% UI)               | YLDs in thousands (95% UI)             |                                                   |                                                     |
|--------------------------------------------------------------------------------------|-------------------------------------------|-----------------------------------------------|----------------------------------------|---------------------------------------------------|-----------------------------------------------------|
|                                                                                      | 2016 counts                               | 2016 counts                                   | 2016 counts                            | Percentage change in counts between 2006 and 2016 | Percentage change in age-standardised rates between |
| <b>All causes</b>                                                                    | <b>29,009.0</b><br>(28,880.4 to 29,129.3) | <b>149,590.5†</b><br>(143,057.7 to 156,913.3) | <b>2,933.9</b><br>(2,157.9 to 3,852.7) | <b>18.0</b><br>(14.4 to 21.8)                     | <b>-1.3</b><br>(-3.8 to 1.4)                        |
| <b>Communicable, maternal, neonatal, and nutritional disorders</b>                   | <b>18,091.2</b><br>(17,637.5 to 18,519.0) | <b>57,987.3†</b><br>(52,639.2 to 63,909.9)    | <b>407.9</b><br>(281.1 to 570.1)       | <b>2.2</b><br>(-3.0 to 7.7)                       | <b>-9.9</b><br>(-14.2 to -5.4)                      |
| <b>HIV/AIDS and tuberculosis</b>                                                     | <b>4,790.6</b><br>(4,383.9 to 5,108.8)    | <b>19.4†</b><br>(17.2 to 21.9)                | <b>4.2</b><br>(2.7 to 6.3)             | <b>-23.1</b><br>(-34.3 to -8.7)                   | <b>-35.2</b><br>(-44.3 to -23.7)                    |
| Tuberculosis                                                                         | 4,486.2<br>(4,139.4 to 4,885.5)           | 19.2†<br>(16.9 to 21.7)                       | 3.2<br>(2.1 to 4.6)                    | -14.3<br>(-29.2 to 2.3)                           | -27.9<br>(-38.7 to -15.3)                           |
| Drug-susceptible tuberculosis                                                        | 7.4<br>(5.1 to 9.7)                       | 13.7<br>(9.4 to 17.6)                         | 2.3<br>(1.3 to 3.5)                    | -17.6<br>(-50.5 to 49.8)                          | -30.7<br>(-57.9 to 26.3)                            |
| Multidrug-resistant tuberculosis without extensive drug resistance                   | 2.5<br>(1.0 to 4.4)                       | 4.6<br>(1.9 to 8.0)                           | 0.8<br>(0.3 to 1.5)                    | -17.5<br>(-79.3 to 182.8)                         | -30.6<br>(-81.9 to 126.1)                           |
| Extensively drug-resistant tuberculosis                                              | 0.5<br>(0.2 to 1.0)                       | 1.0<br>(0.4 to 1.8)                           | 0.2<br>(0.1 to 0.4)                    | 149.7<br>(-33.6 to 709.9)                         | 110.0<br>(-43.4 to 589.7)                           |
| Latent tuberculosis infection                                                        | 4,475.9<br>(4,129.3 to 4,874.7)           | --                                            | --                                     | --                                                | --                                                  |
| HIV/AIDS                                                                             | 8.9<br>(6.2 to 14.7)                      | 0.2 <sup>a</sup><br>(< 0.05 to 0.5)           | 1.0<br>(0.5 to 2.4)                    | -42.2<br>(-61.5 to -17.9)                         | -51.9<br>(-67.9 to -30.6)                           |
| Drug-susceptible HIV/AIDS - Tuberculosis                                             | 0.1<br>(< 0.05 to 0.2)                    | 0.2<br>(0.1 to 0.4)                           | < 0.05<br>(< 0.05 to 0.1)              | -18.0<br>(-58.8 to 72.7)                          | -29.3<br>(-64.5 to 48.9)                            |
| Multidrug-resistant HIV/AIDS - Tuberculosis without extensive drug resistance        | < 0.05<br>(< 0.05 to 0.1)                 | 0.1<br>(< 0.05 to 0.2)                        | < 0.05<br>(< 0.05 to < 0.05)           | -19.0<br>(-78.7 to 166.2)                         | -30.2<br>(-81.7 to 129.6)                           |
| Extensively drug-resistant HIV/AIDS - Tuberculosis                                   | < 0.05<br>(< 0.05 to < 0.05)              | < 0.05<br>(< 0.05 to < 0.05)                  | < 0.05<br>(< 0.05 to < 0.05)           | 149.6<br>(-34.4 to 720.1)                         | 115.3<br>(-43.4 to 607.3)                           |
| HIV/AIDS resulting in other diseases                                                 | 8.7<br>(6.0 to 14.6)                      | 0.2<br>(< 0.05 to 0.5)                        | 0.9<br>(0.4 to 2.3)                    | -43.6<br>(-63.5 to -18.3)                         | -53.2<br>(-69.7 to -31.1)                           |
| <b>Diarrhoea, lower respiratory infections, and other common infectious diseases</b> | <b>1,172.0</b><br>(1,114.8 to 1,248.5)    | <b>52,205.6†</b><br>(46,991.6 to 57,777.3)    | <b>55.6</b><br>(38.1 to 77.2)          | <b>5.7</b><br>(2.3 to 9.5)                        | <b>-5.5</b><br>(-8.4 to -2.4)                       |
| Diarrhoeal diseases                                                                  | 133.7<br>(122.2 to 146.0)                 | 8,610.1<br>(7,888.1 to 9,425.2)               | 15.3<br>(10.4 to 21.1)                 | 8.2<br>(-0.3 to 17.9)                             | -2.7<br>(-10.0 to 5.3)                              |
| Intestinal infectious diseases                                                       | < 0.05<br>(< 0.05 to < 0.05)              | 0.1†<br>(0.1 to 0.1)                          | < 0.05<br>(< 0.05 to < 0.05)           | 1.3<br>(-15.3 to 19.8)                            | -16.7<br>(-29.8 to -2.0)                            |
| Typhoid fever                                                                        | < 0.05<br>(< 0.05 to < 0.05)              | 0.1<br>(0.1 to 0.1)                           | < 0.05<br>(< 0.05 to < 0.05)           | 0.3<br>(-17.5 to 20.5)                            | -18.1<br>(-32.1 to -2.6)                            |
| Paratyphoid fever                                                                    | < 0.05<br>(< 0.05 to < 0.05)              | < 0.05<br>(< 0.05 to < 0.05)                  | < 0.05<br>(< 0.05 to < 0.05)           | 59.5<br>(24.7 to 102.7)                           | 33.8<br>(5.8 to 68.3)                               |
| Other intestinal infectious diseases                                                 | --                                        | --                                            | < 0.05<br>(< 0.05 to < 0.05)           | -31.4<br>(-51.5 to -3.9)                          | -38.9<br>(-53.6 to -19.6)                           |
| Lower respiratory infections                                                         | 42.6<br>(39.5 to 46.1)                    | 1,805.1<br>(1,659.3 to 1,967.0)               | 2.6<br>(1.7 to 3.7)                    | 10.7<br>(-1.3 to 25.9)                            | 0.4<br>(-9.6 to 12.4)                               |
| Upper respiratory infections                                                         | 526.4<br>(459.3 to 598.2)                 | 39,079.3<br>(34,022.3 to 44,593.3)            | 13.2<br>(7.8 to 20.5)                  | 11.3<br>(4.8 to 18.3)                             | -0.6<br>(-6.0 to 5.1)                               |
| Otitis media                                                                         | 441.0<br>(394.2 to 488.4)                 | 2,045.7<br>(1,625.3 to 2,561.1)               | 13.4<br>(8.5 to 20.0)                  | -2.1<br>(-8.8 to 5.8)                             | -11.2<br>(-17.1 to -4.5)                            |
| Meningitis                                                                           | 73.7<br>(63.6 to 84.1)                    | 13.5<br>(11.7 to 15.7)                        | 7.7<br>(5.4 to 10.2)                   | 4.5<br>(-2.9 to 11.8)                             | -8.6<br>(-14.6 to -2.6)                             |
| Pneumococcal meningitis                                                              | 28.2<br>(23.8 to 33.5)                    | 2.3<br>(1.8 to 2.8)                           | 3.1<br>(2.1 to 4.2)                    | -2.0<br>(-16.1 to 14.2)                           | -15.0<br>(-26.3 to -2.0)                            |
| H influenzae type B meningitis                                                       | 9.5<br>(7.7 to 11.7)                      | 1.4<br>(1.1 to 1.9)                           | 1.3<br>(0.9 to 1.8)                    | -10.9<br>(-19.8 to -2.7)                          | -21.3<br>(-29.3 to -13.8)                           |
| Meningococcal infection                                                              | 14.7<br>(10.9 to 19.0)                    | 4.0<br>(3.1 to 5.1)                           | 1.4<br>(1.0 to 1.9)                    | 7.4<br>(2.6 to 12.2)                              | -6.2<br>(-10.4 to -1.9)                             |
| Other meningitis                                                                     | 21.3<br>(16.3 to 27.1)                    | 5.8<br>(4.9 to 6.9)                           | 1.8<br>(1.2 to 2.5)                    | 33.3<br>(22.6 to 44.7)                            | 17.2<br>(8.2 to 26.8)                               |
| Encephalitis                                                                         | 25.3<br>(16.9 to 36.7)                    | 12.4<br>(11.1 to 13.7)                        | 2.7<br>(1.8 to 3.6)                    | 6.4<br>(-5.6 to 17.5)                             | -10.2<br>(-20.3 to -0.8)                            |
| Diphtheria                                                                           | < 0.05<br>(< 0.05 to < 0.05)              | < 0.05<br>(< 0.05 to < 0.05)                  | < 0.05<br>(< 0.05 to < 0.05)           | -15.6<br>(-53.9 to 51.0)                          | -27.2<br>(-59.6 to 27.4)                            |
| Whooping cough                                                                       | 0.7<br>(0.5 to 0.9)                       | 4.7<br>(3.4 to 6.6)                           | < 0.05<br>(< 0.05 to 0.1)              | -63.6<br>(-80.6 to -37.5)                         | -67.7<br>(-82.6 to -44.6)                           |
| Tetanus                                                                              | < 0.05<br>(< 0.05 to < 0.05)              | < 0.05<br>(< 0.05 to < 0.05)                  | < 0.05<br>(< 0.05 to < 0.05)           | 3.8<br>(-17.1 to 19.4)                            | -14.8<br>(-34.7 to 0.4)                             |
| Measles                                                                              | < 0.05<br>(< 0.05 to < 0.05)              | < 0.05<br>(< 0.05 to < 0.05)                  | < 0.05<br>(< 0.05 to < 0.05)           | -95.6<br>(-97.5 to -93.8)                         | -96.1<br>(-97.8 to -94.5)                           |
| Varicella and herpes zoster                                                          | 23.5<br>(22.0 to 25.1)                    | 634.6<br>(612.9 to 656.8)                     | 0.8<br>(0.5 to 1.2)                    | 20.9<br>(2.6 to 40.9)                             | -0.0<br>(-13.0 to 14.0)                             |
| <b>Neglected tropical diseases and malaria</b>                                       | <b>506.7</b><br>(464.6 to 558.2)          | <b>5.9†</b><br>(2.1 to 14.0)                  | <b>10.9</b><br>(6.6 to 17.6)           | <b>-11.0</b><br>(-42.5 to 30.9)                   | <b>-23.1</b><br>(-54.1 to 16.1)                     |
| Malaria                                                                              | --                                        | --                                            | --                                     | --                                                | --                                                  |
| Chagas disease                                                                       | --                                        | --                                            | --                                     | --                                                | --                                                  |
| Leishmaniasis                                                                        | 1.2<br>(0.2 to 2.6)                       | 2.4<br>(0.6 to 5.3)                           | 0.1<br>(< 0.05 to 0.2)                 | 75.4<br>(-66.6 to 404.2)                          | 54.0<br>(-68.9 to 334.4)                            |
| Visceral leishmaniasis                                                               | < 0.05<br>(< 0.05 to < 0.05)              | 0.1<br>(0.1 to 0.1)                           | < 0.05<br>(< 0.05 to < 0.05)           | 336.5<br>(179.0 to 591.0)                         | 240.8<br>(102.2 to 498.1)                           |
| Cutaneous and mucocutaneous leishmaniasis                                            | 1.2<br>(0.2 to 2.6)                       | 2.3<br>(0.5 to 5.2)                           | 0.1<br>(< 0.05 to 0.2)                 | 73.2<br>(-68.8 to 403.0)                          | 51.2<br>(-72.2 to 341.2)                            |
| African trypanosomiasis                                                              | --                                        | --                                            | --                                     | --                                                | --                                                  |
| Schistosomiasis                                                                      | --                                        | --                                            | --                                     | --                                                | --                                                  |
| Cysticercosis                                                                        | --                                        | --                                            | --                                     | --                                                | --                                                  |
| Cystic echinococcosis                                                                | 17.0<br>(4.2 to 54.4)                     | 3.5<br>(0.9 to 11.9)                          | 1.6<br>(0.4 to 5.2)                    | -46.4<br>(-91.2 to 196.2)                         | -55.5<br>(-92.4 to 130.1)                           |
| Lymphatic filariasis                                                                 | --                                        | --                                            | --                                     | --                                                | --                                                  |
| Onchocerciasis                                                                       | --                                        | --                                            | --                                     | --                                                | --                                                  |
| Trachoma                                                                             | --                                        | --                                            | --                                     | --                                                | --                                                  |
| Dengue                                                                               | --                                        | --                                            | --                                     | --                                                | --                                                  |
| Yellow fever                                                                         | --                                        | --                                            | --                                     | --                                                | --                                                  |
| Rabies                                                                               | < 0.05<br>(< 0.05 to < 0.05)              | < 0.05<br>(< 0.05 to < 0.05)                  | < 0.05<br>(< 0.05 to < 0.05)           | -66.7<br>(-85.9 to -22.7)                         | -66.4<br>(-85.0 to -23.8)                           |
| Intestinal nematode infections                                                       | 69.0<br>(52.2 to 89.4)                    | --                                            | 0.1<br>(0.1 to 0.1)                    | 21.6<br>(-25.6 to 92.4)                           | 1.4<br>(-37.8 to 62.0)                              |
| Ascariasis                                                                           | 24.6<br>(15.3 to 37.0)                    | --                                            | --                                     | --                                                | --                                                  |



| Cause                                                                   | Prevalence in thousands (95% UI)                 | Incidence in thousands (95% UI)                   | YLDs in thousands (95% UI)                    |                                                   |                                                     |
|-------------------------------------------------------------------------|--------------------------------------------------|---------------------------------------------------|-----------------------------------------------|---------------------------------------------------|-----------------------------------------------------|
|                                                                         | 2016 counts<br>(14.5 to 38.9)                    | 2016 counts                                       | 2016 counts                                   | Percentage change in counts between 2006 and 2016 | Percentage change in age-standardised rates between |
| Trichuriasis                                                            | 24.8<br>(14.5 to 38.9)                           | --                                                | --                                            | --                                                | --                                                  |
| Hookworm disease                                                        | 23.1<br>(15.6 to 32.6)                           | --                                                | 0.1<br>(0.1 to 0.1)                           | 21.6<br>(-25.6 to 92.4)                           | 1.4<br>(-37.8 to 62.0)                              |
| Food-borne trematodiasis                                                | --                                               | --                                                | --                                            | --                                                | --                                                  |
| Leprosy                                                                 | < 0.05<br>(< 0.05 to < 0.05)                     | --                                                | < 0.05<br>(< 0.05 to < 0.05)                  | -21.9<br>(-27.7 to -16.8)                         | -35.8<br>(-41.5 to -30.3)                           |
| Ebola virus disease                                                     | --                                               | --                                                | --                                            | --                                                | --                                                  |
| Zika virus disease                                                      | --                                               | --                                                | --                                            | --                                                | --                                                  |
| Guinea worm disease                                                     | --                                               | --                                                | --                                            | --                                                | --                                                  |
| Other neglected tropical diseases                                       | 405.0<br>(372.4 to 440.2)                        | --                                                | 9.2<br>(5.8 to 13.9)                          | -0.3<br>(-12.5 to 13.0)                           | -10.8<br>(-21.0 to 1.1)                             |
| <b>Maternal disorders</b>                                               | <b>29.8</b><br><b>(22.4 to 39.0)</b>             | <b>633.8†</b><br><b>(329.3 to 1,054.8)</b>        | <b>1.8</b><br><b>(1.1 to 2.9)</b>             | <b>8.9</b><br><b>(-19.7 to 51.2)</b>              | <b>-8.9</b><br><b>(-32.7 to 25.6)</b>               |
| Maternal haemorrhage                                                    | 5.9<br>(4.3 to 8.0)                              | 40.3<br>(28.4 to 55.9)                            | 0.3<br>(0.2 to 0.4)                           | 8.3<br>(-26.3 to 51.9)                            | -8.3<br>(-37.4 to 28.2)                             |
| Maternal sepsis and other pregnancy related infections                  | 15.7<br>(11.1 to 22.2)                           | 114.2<br>(82.2 to 155.0)                          | 0.5<br>(0.2 to 1.0)                           | 6.7<br>(-49.3 to 122.5)                           | -8.9<br>(-55.7 to 86.0)                             |
| Maternal hypertensive disorders                                         | 6.3<br>(3.7 to 9.6)                              | 26.2<br>(18.7 to 35.5)                            | 0.3<br>(0.1 to 0.5)                           | 19.5<br>(-31.7 to 113.2)                          | -2.0<br>(-45.4 to 72.8)                             |
| Maternal obstructed labour and uterine rupture                          | 0.2<br>(0.1 to 0.4)                              | 18.0<br>(12.3 to 26.2)                            | 0.1<br>(< 0.05 to 0.1)                        | 10.2<br>(-38.4 to 106.0)                          | -10.3<br>(-49.6 to 66.3)                            |
| Maternal abortion, miscarriage, and ectopic pregnancy                   | 3.6<br>(1.1 to 7.5)                              | 435.1<br>(140.6 to 856.7)                         | 0.4<br>(0.1 to 0.9)                           | 8.6<br>(-45.4 to 105.4)                           | -10.9<br>(-53.9 to 67.7)                            |
| Other maternal disorders                                                | --                                               | --                                                | 0.3<br>(0.2 to 0.5)                           | 3.4<br>(-23.6 to 43.5)                            | -12.9<br>(-35.7 to 20.5)                            |
| <b>Neonatal disorders</b>                                               | <b>360.1</b><br><b>(305.2 to 423.9)</b>          | --                                                | <b>52.8</b><br><b>(35.0 to 80.0)</b>          | <b>16.2</b><br><b>(-4.1 to 40.4)</b>              | <b>4.3</b><br><b>(-14.2 to 26.0)</b>                |
| Neonatal preterm birth complications                                    | 281.3<br>(219.2 to 379.4)                        | --                                                | 26.2<br>(17.1 to 38.0)                        | 5.1<br>(-17.6 to 30.6)                            | -5.3<br>(-25.4 to 17.8)                             |
| Neonatal encephalopathy due to birth asphyxia and trauma                | 89.7<br>(44.5 to 155.8)                          | --                                                | 10.2<br>(1.6 to 27.9)                         | 17.8<br>(-51.7 to 137.7)                          | 5.2<br>(-57.0 to 114.6)                             |
| Neonatal sepsis and other neonatal infections                           | 23.5<br>(7.5 to 49.3)                            | --                                                | 9.6<br>(2.5 to 22.4)                          | 69.4<br>(29.3 to 218.4)                           | 52.1<br>(15.7 to 189.2)                             |
| Hemolytic disease and other neonatal jaundice                           | 15.7<br>(13.6 to 18.1)                           | --                                                | 4.8<br>(3.6 to 6.3)                           | 8.8<br>(-6.1 to 27.3)                             | -3.2<br>(-16.4 to 12.0)                             |
| Other neonatal disorders                                                | --                                               | --                                                | 2.0<br>(1.3 to 3.1)                           | 14.2<br>(-9.1 to 41.3)                            | 0.4<br>(-20.2 to 24.2)                              |
| <b>Nutritional deficiencies</b>                                         | <b>10,448.8</b><br><b>(9,898.2 to 10,884.2)</b>  | <b>437.7†</b><br><b>(362.2 to 524.9)</b>          | <b>261.0</b><br><b>(172.7 to 379.9)</b>       | <b>0.1</b><br><b>(-6.0 to 6.5)</b>                | <b>-11.9</b><br><b>(-16.6 to -6.5)</b>              |
| Protein-energy malnutrition                                             | 167.9<br>(118.4 to 236.8)                        | 66.8<br>(47.0 to 94.2)                            | 8.7<br>(4.6 to 15.3)                          | -4.6<br>(-43.8 to 62.4)                           | -16.2<br>(-50.5 to 42.5)                            |
| Iodine deficiency                                                       | 368.2<br>(303.5 to 444.5)                        | 9.0<br>(7.4 to 10.7)                              | 9.0<br>(5.5 to 13.4)                          | 11.9<br>(-0.8 to 28.2)                            | -4.3<br>(-15.2 to 8.3)                              |
| Vitamin A deficiency                                                    | 429.4<br>(350.6 to 522.1)                        | 361.9<br>(288.5 to 441.6)                         | 1.9<br>(1.1 to 3.0)                           | 5.8<br>(-8.3 to 22.7)                             | -5.2<br>(-16.9 to 8.6)                              |
| Iron-deficiency anaemia                                                 | 9,911.3<br>(9,347.4 to 10,456.4)                 | --                                                | 241.2<br>(157.9 to 349.3)                     | -0.2<br>(-6.4 to 6.7)                             | -12.0<br>(-16.6 to -6.6)                            |
| Other nutritional deficiencies                                          | --                                               | --                                                | 0.3<br>(0.1 to 0.5)                           | -5.5<br>(-46.5 to 63.3)                           | -17.1<br>(-53.0 to 43.5)                            |
| <b>Other communicable, maternal, neonatal, and nutritional diseases</b> | <b>7,708.7</b><br><b>(7,272.2 to 8,207.0)</b>    | <b>4,684.9</b><br><b>(4,036.6 to 5,377.6)</b>     | <b>20.1</b><br><b>(12.7 to 30.2)</b>          | <b>6.8</b><br><b>(-0.3 to 13.5)</b>               | <b>-7.9</b><br><b>(-13.2 to -2.6)</b>               |
| Sexually transmitted diseases excluding HIV                             | 4,277.6<br>(4,003.8 to 4,586.2)                  | 3,053.0<br>(2,668.9 to 3,522.3)                   | 11.7<br>(7.1 to 18.5)                         | 17.6<br>(9.7 to 25.7)                             | -2.5<br>(-8.7 to 3.1)                               |
| Syphilis                                                                | 120.5<br>(91.5 to 156.6)                         | 94.4<br>(66.6 to 128.2)                           | 1.0<br>(0.7 to 1.3)                           | 28.5<br>(10.4 to 47.8)                            | -1.3<br>(-16.8 to 16.0)                             |
| Chlamydial infection                                                    | 575.2<br>(444.7 to 727.4)                        | 468.7<br>(359.4 to 595.5)                         | 2.7<br>(1.6 to 4.4)                           | 22.9<br>(8.3 to 39.0)                             | -2.0<br>(-13.2 to 10.3)                             |
| Gonococcal infection                                                    | 415.0<br>(324.7 to 536.1)                        | 1,409.1<br>(1,067.6 to 1,861.9)                   | 2.5<br>(1.4 to 4.2)                           | 7.5<br>(-7.7 to 25.3)                             | -3.7<br>(-17.0 to 10.8)                             |
| Trichomoniasis                                                          | 826.4<br>(711.0 to 948.7)                        | 715.9<br>(602.5 to 833.7)                         | 1.1<br>(0.4 to 2.2)                           | 22.0<br>(13.7 to 30.6)                            | -0.4<br>(-6.6 to 6.1)                               |
| Genital herpes                                                          | 2,599.9<br>(2,240.3 to 3,030.0)                  | 195.1<br>(164.2 to 234.7)                         | 0.7<br>(0.2 to 1.5)                           | 26.7<br>(15.8 to 36.9)                            | -0.1<br>(-7.7 to 6.8)                               |
| Other sexually transmitted diseases                                     | 126.3<br>(99.7 to 159.5)                         | 169.8<br>(139.4 to 205.1)                         | 3.7<br>(2.4 to 5.6)                           | 16.1<br>(4.5 to 29.3)                             | -3.6<br>(-13.2 to 7.0)                              |
| Hepatitis                                                               | 3,844.4<br>(3,317.1 to 4,494.2)                  | 1,631.9<br>(1,093.0 to 2,111.5)                   | 1.2<br>(0.7 to 1.8)                           | -35.5<br>(-51.9 to -16.8)                         | -40.1<br>(-54.3 to -23.7)                           |
| Acute hepatitis A                                                       | 78.9<br>(37.4 to 114.4)                          | 1,026.1<br>(485.6 to 1,487.5)                     | 0.5<br>(0.3 to 0.8)                           | -38.2<br>(-65.2 to 6.4)                           | -40.3<br>(-65.6 to 0.2)                             |
| Hepatitis B                                                             | 2,326.0<br>(1,850.2 to 2,914.3)                  | 509.2<br>(369.5 to 709.2)                         | 0.5<br>(0.3 to 0.9)                           | -35.0<br>(-52.9 to -16.3)                         | -41.9<br>(-56.2 to -26.8)                           |
| Hepatitis C                                                             | 1,437.1<br>(1,274.1 to 1,622.0)                  | 65.6<br>(58.7 to 73.9)                            | 0.1<br>(< 0.05 to 0.1)                        | -5.2<br>(-41.7 to 49.2)                           | -17.4<br>(-47.8 to 28.2)                            |
| Acute hepatitis E                                                       | 2.4<br>(2.0 to 2.9)                              | 31.0<br>(25.8 to 38.0)                            | < 0.05<br>(< 0.05 to 0.1)                     | -36.2<br>(-55.7 to -5.6)                          | -36.3<br>(-53.8 to -10.0)                           |
| Other infectious diseases                                               | 331.3<br>(305.2 to 358.2)                        | < 0.05<br>(< 0.05 to 0.1)                         | 7.3<br>(4.5 to 11.0)                          | 2.2<br>(-9.5 to 14.3)                             | -8.6<br>(-18.5 to 1.6)                              |
| <b>Non-communicable diseases</b>                                        | <b>27,254.6</b><br><b>(27,051.6 to 27,472.5)</b> | <b>88,460.0†</b><br><b>(84,298.5 to 92,968.9)</b> | <b>2,269.5</b><br><b>(1,675.5 to 2,971.4)</b> | <b>20.2</b><br><b>(15.8 to 24.9)</b>              | <b>-0.6</b><br><b>(-3.7 to 2.6)</b>                 |
| <b>Neoplasms</b>                                                        | <b>58.0</b><br><b>(54.4 to 62.3)</b>             | <b>34.1</b><br><b>(31.0 to 37.9)</b>              | <b>9.2</b><br><b>(6.7 to 12.1)</b>            | <b>33.3</b><br><b>(26.4 to 40.6)</b>              | <b>1.1</b><br><b>(-4.0 to 6.5)</b>                  |
| Lip and oral cavity cancer                                              | 2.7<br>(2.5 to 3.0)                              | 0.8<br>(0.7 to 0.8)                               | 0.3<br>(0.2 to 0.4)                           | 30.3<br>(12.7 to 52.7)                            | -2.8<br>(-15.6 to 13.4)                             |
| Nasopharynx cancer                                                      | 0.7<br>(0.6 to 0.9)                              | 0.2<br>(0.2 to 0.2)                               | 0.1<br>(0.1 to 0.1)                           | 26.3<br>(3.3 to 53.2)                             | 1.6<br>(-13.1 to 19.3)                              |
| Other pharynx cancer                                                    | 0.8<br>(0.7 to 0.8)                              | 0.3<br>(0.3 to 0.3)                               | 0.1<br>(0.1 to 0.1)                           | 76.8<br>(57.7 to 97.5)                            | 29.9<br>(14.8 to 46.4)                              |
| Oesophageal cancer                                                      | 1.1<br>(1.0 to 1.2)                              | 1.0<br>(0.9 to 1.1)                               | 0.3<br>(0.2 to 0.3)                           | -6.6<br>(-21.4 to 7.9)                            | -30.7<br>(-43.0 to -17.8)                           |
| Stomach cancer                                                          | 3.7<br>(3.5 to 3.9)                              | 2.4<br>(2.3 to 2.5)                               | 0.6<br>(0.4 to 0.8)                           | 5.9<br>(-8.7 to 22.5)                             | -21.7<br>(-33.4 to -7.9)                            |
| Colon and rectum cancer                                                 | 4.9<br>(4.6 to 5.3)                              | 1.6<br>(1.5 to 1.7)                               | 0.6<br>(0.4 to 0.8)                           | 40.9<br>(23.3 to 63.1)                            | 6.3<br>(-8.1 to 23.8)                               |
| Liver cancer                                                            | 0.5<br>(0.4 to 0.5)                              | 1.2<br>(1.2 to 1.3)                               | 0.3<br>(0.2 to 0.4)                           | 36.7<br>(23.4 to 51.3)                            | 3.5<br>(-6.9 to 14.6)                               |
| Liver cancer due to hepatitis B                                         | 0.4<br>(0.3 to 0.5)                              | 0.4<br>(0.3 to 0.5)                               | 0.1<br>(0.1 to 0.1)                           | 37.3<br>(22.3 to 53.2)                            | 3.0<br>(-7.8 to 14.2)                               |

| Cause                                              | Prevalence in thousands (95% UI)              | Incidence in thousands (95% UI)          | YLDs in thousands (95% UI)             |                                                   |                                                     |
|----------------------------------------------------|-----------------------------------------------|------------------------------------------|----------------------------------------|---------------------------------------------------|-----------------------------------------------------|
|                                                    | 2016 counts                                   | 2016 counts                              | 2016 counts                            | Percentage change in counts between 2006 and 2016 | Percentage change in age-standardised rates between |
| Liver cancer due to hepatitis C                    | 0.4<br>(0.3 to 0.4)                           | 0.4<br>(0.3 to 0.4)                      | 0.1<br>(0.1 to 0.1)                    | 35.2<br>(20.2 to 52.5)                            | 1.9<br>(-9.4 to 14.4)                               |
| Liver cancer due to alcohol use                    | 0.2<br>(0.2 to 0.3)                           | 0.2<br>(0.2 to 0.3)                      | 0.1<br>( $< 0.05$ to 0.1)              | 41.4<br>(26.2 to 58.5)                            | 8.1<br>(-3.5 to 21.7)                               |
| Liver cancer due to other causes                   | 0.2<br>(0.2 to 0.2)                           | 0.2<br>(0.2 to 0.2)                      | $< 0.05$<br>( $< 0.05$ to 0.1)         | 33.3<br>(19.6 to 49.3)                            | 2.0<br>(-8.7 to 15.1)                               |
| Gallbladder and biliary tract cancer               | 0.1<br>(0.1 to 0.1)                           | 0.1<br>(0.1 to 0.1)                      | $< 0.05$<br>( $< 0.05$ to $< 0.05$ )   | 7.9<br>(-1.8 to 18.6)                             | -18.6<br>(-25.8 to -10.4)                           |
| Pancreatic cancer                                  | 0.4<br>(0.4 to 0.4)                           | 0.6<br>(0.5 to 0.6)                      | 0.1<br>(0.1 to 0.1)                    | 40.7<br>(30.9 to 51.5)                            | 3.8<br>(-3.4 to 12.3)                               |
| Larynx cancer                                      | 1.6<br>(1.4 to 1.7)                           | 0.5<br>(0.5 to 0.5)                      | 0.2<br>(0.1 to 0.3)                    | 9.6<br>(-1.2 to 21.9)                             | -20.4<br>(-28.0 to -12.3)                           |
| Tracheal, bronchus, and lung cancer                | 2.3<br>(2.1 to 2.5)                           | 2.0<br>(1.8 to 2.1)                      | 0.5<br>(0.3 to 0.7)                    | 20.1<br>(-2.6 to 47.0)                            | -11.5<br>(-29.1 to 9.3)                             |
| Malignant skin melanoma                            | 0.7<br>(0.6 to 0.8)                           | 0.2<br>(0.1 to 0.2)                      | 0.1<br>( $< 0.05$ to 0.1)              | 53.9<br>(29.0 to 85.4)                            | 15.3<br>(-4.3 to 38.7)                              |
| Non-melanoma skin cancer                           | 4.5<br>(2.5 to 6.7)                           | 7.8<br>(4.8 to 11.7)                     | 0.2<br>(0.1 to 0.3)                    | 40.0<br>(-21.3 to 138.0)                          | 10.0<br>(-39.4 to 91.5)                             |
| Non-melanoma skin cancer (squamous-cell carcinoma) | 3.5<br>(1.6 to 6.5)                           | 3.1<br>(1.5 to 5.5)                      | 0.1<br>(0.1 to 0.3)                    | 39.9<br>(-23.7 to 142.3)                          | 10.2<br>(-41.3 to 95.4)                             |
| Non-melanoma skin cancer (basal-cell carcinoma)    | 0.7<br>(0.4 to 1.2)                           | 4.7<br>(2.6 to 7.7)                      | $< 0.05$<br>( $< 0.05$ to $< 0.05$ )   | 41.7<br>(2.5 to 88.0)                             | 5.0<br>(-24.8 to 46.2)                              |
| Breast cancer                                      | 20.6<br>(18.5 to 22.8)                        | 4.4<br>(4.0 to 4.9)                      | 1.9<br>(1.3 to 2.6)                    | 54.3<br>(27.8 to 88.7)                            | 13.5<br>(-4.7 to 37.2)                              |
| Cervical cancer                                    | 8.7<br>(7.7 to 9.8)                           | 2.2<br>(2.0 to 2.5)                      | 0.8<br>(0.6 to 1.1)                    | 22.6<br>(-3.5 to 54.1)                            | -6.7<br>(-25.6 to 15.5)                             |
| Uterine cancer                                     | 4.9<br>(4.4 to 5.5)                           | 1.1<br>(0.9 to 1.2)                      | 0.4<br>(0.3 to 0.5)                    | 123.8<br>(79.8 to 177.6)                          | 56.4<br>(28.0 to 92.5)                              |
| Ovarian cancer                                     | 1.7<br>(1.4 to 1.9)                           | 0.5<br>(0.5 to 0.6)                      | 0.3<br>(0.2 to 0.4)                    | 47.4<br>(18.6 to 80.7)                            | 10.6<br>(-11.2 to 36.0)                             |
| Prostate cancer                                    | 2.3<br>(2.0 to 3.3)                           | 0.7<br>(0.6 to 0.9)                      | 0.3<br>(0.2 to 0.4)                    | 46.5<br>(12.6 to 84.3)                            | 14.9<br>(-11.9 to 44.7)                             |
| Testicular cancer                                  | 0.7<br>(0.5 to 0.8)                           | 0.1<br>(0.1 to 0.2)                      | 0.1<br>( $< 0.05$ to 0.1)              | 16.5<br>(-20.1 to 79.4)                           | -14.2<br>(-37.7 to 25.6)                            |
| Kidney cancer                                      | 3.8<br>(3.5 to 4.1)                           | 1.0<br>(0.9 to 1.1)                      | 0.3<br>(0.2 to 0.5)                    | 57.9<br>(37.0 to 82.0)                            | 19.9<br>(5.3 to 36.1)                               |
| Bladder cancer                                     | 2.3<br>(2.1 to 2.5)                           | 0.6<br>(0.6 to 0.6)                      | 0.2<br>(0.2 to 0.3)                    | 46.3<br>(27.6 to 69.0)                            | 7.4<br>(-7.0 to 24.1)                               |
| Brain and nervous system cancer                    | 3.0<br>(2.2 to 3.4)                           | 1.4<br>(1.0 to 1.5)                      | 0.4<br>(0.3 to 0.6)                    | 41.9<br>(19.1 to 60.0)                            | 13.7<br>(-4.2 to 27.9)                              |
| Thyroid cancer                                     | 0.8<br>(0.7 to 0.8)                           | 0.1<br>(0.1 to 0.2)                      | 0.1<br>( $< 0.05$ to 0.1)              | 107.3<br>(84.7 to 135.7)                          | 49.1<br>(32.8 to 69.0)                              |
| Mesothelioma                                       | $< 0.05$<br>( $< 0.05$ to $< 0.05$ )          | $< 0.05$<br>( $< 0.05$ to $< 0.05$ )     | $< 0.05$<br>( $< 0.05$ to $< 0.05$ )   | 15.7<br>(6.7 to 27.2)                             | -9.8<br>(-16.5 to -1.4)                             |
| Hodgkin lymphoma                                   | 0.8<br>(0.7 to 1.2)                           | 0.2<br>(0.2 to 0.3)                      | 0.1<br>(0.1 to 0.1)                    | 45.6<br>(17.4 to 87.0)                            | 15.8<br>(-7.8 to 44.6)                              |
| Non-Hodgkin's lymphoma                             | 2.2<br>(1.9 to 2.4)                           | 0.7<br>(0.6 to 0.8)                      | 0.2<br>(0.2 to 0.3)                    | 30.6<br>(18.1 to 43.3)                            | 6.1<br>(-4.4 to 16.3)                               |
| Multiple myeloma                                   | 0.2<br>(0.2 to 0.2)                           | 0.1<br>(0.1 to 0.1)                      | 0.1<br>( $< 0.05$ to 0.1)              | 49.8<br>(34.1 to 66.8)                            | 10.8<br>(-0.9 to 23.1)                              |
| Leukaemia                                          | 3.9<br>(3.5 to 4.2)                           | 1.1<br>(1.1 to 1.2)                      | 0.5<br>(0.4 to 0.7)                    | -6.8<br>(-14.6 to 2.5)                            | -17.9<br>(-24.3 to -10.5)                           |
| Acute lymphoid leukaemia                           | 1.0<br>(0.8 to 1.1)                           | 0.2<br>(0.2 to 0.3)                      | 0.1<br>(0.1 to 0.2)                    | -2.9<br>(-18.5 to 13.5)                           | -11.0<br>(-24.4 to 2.6)                             |
| Chronic lymphoid leukaemia                         | 0.9<br>(0.7 to 1.0)                           | 0.2<br>(0.2 to 0.2)                      | 0.1<br>(0.1 to 0.1)                    | 16.1<br>(0.6 to 39.5)                             | -9.8<br>(-21.9 to 6.8)                              |
| Acute myeloid leukaemia                            | 0.5<br>(0.5 to 0.6)                           | 0.3<br>(0.3 to 0.4)                      | 0.1<br>(0.1 to 0.1)                    | 12.1<br>(-2.1 to 28.8)                            | -3.0<br>(-14.0 to 9.4)                              |
| Chronic myeloid leukaemia                          | 0.2<br>(0.1 to 0.2)                           | 0.1<br>(0.1 to 0.1)                      | $< 0.05$<br>( $< 0.05$ to $< 0.05$ )   | 0.0<br>(-15.2 to 19.1)                            | -22.5<br>(-33.4 to -8.8)                            |
| Other leukaemia                                    | 1.3<br>(1.1 to 1.6)                           | 0.3<br>(0.2 to 0.3)                      | 0.2<br>(0.1 to 0.2)                    | -27.0<br>(-36.6 to -14.4)                         | -31.3<br>(-39.5 to -21.4)                           |
| Other neoplasms                                    | 3.5<br>(3.3 to 3.7)                           | 1.2<br>(1.1 to 1.3)                      | 0.4<br>(0.3 to 0.5)                    | 33.7<br>(19.8 to 48.7)                            | 5.9<br>(-5.3 to 18.0)                               |
| <b>Cardiovascular diseases</b>                     | <b>1,476.3</b><br><b>(1,429.9 to 1,529.1)</b> | <b>185.6†</b><br><b>(178.3 to 193.0)</b> | <b>111.5</b><br><b>(81.5 to 144.5)</b> | <b>22.1</b><br><b>(17.9 to 26.6)</b>              | <b>-4.6</b><br><b>(-8.0 to -1.0)</b>                |
| Rheumatic heart disease                            | 255.9<br>(229.6 to 287.7)                     | 7.8<br>(7.0 to 8.8)                      | 12.2<br>(7.7 to 18.0)                  | 11.1<br>(0.2 to 22.4)                             | -6.2<br>(-15.1 to 2.9)                              |
| Ischaemic heart disease                            | 485.7<br>(462.0 to 509.9)                     | 91.0<br>(86.7 to 95.5)                   | 25.9<br>(17.9 to 35.1)                 | 31.2<br>(25.5 to 37.9)                            | 1.6<br>(-2.4 to 6.6)                                |
| Cerebrovascular disease                            | 221.6<br>(207.5 to 234.8)                     | 39.6‡<br>(36.3 to 42.7)                  | 43.4<br>(30.7 to 55.6)                 | 17.4<br>(8.8 to 26.1)                             | -11.2<br>(-18.0 to -4.6)                            |
| Ischaemic stroke                                   | 180.9<br>(162.8 to 199.0)                     | 24.5‡<br>(21.7 to 27.4)                  | 33.9<br>(23.8 to 43.4)                 | 15.0<br>(5.6 to 25.5)                             | -12.4<br>(-20.0 to -4.4)                            |
| Hemorrhagic stroke                                 | 51.1<br>(46.0 to 56.9)                        | 15.0‡<br>(13.6 to 16.7)                  | 9.5<br>(6.7 to 12.3)                   | 26.7<br>(13.6 to 41.9)                            | -6.3<br>(-15.9 to 4.6)                              |
| Hypertensive heart disease                         | 152.3<br>(131.8 to 176.2)                     | --                                       | 12.2<br>(8.5 to 16.9)                  | 30.9<br>(20.2 to 42.5)                            | 1.3<br>(-6.4 to 9.7)                                |
| Cardiomyopathy and myocarditis                     | 12.2<br>(10.4 to 14.1)                        | 4.0†<br>(3.5 to 4.6)                     | 1.3<br>(0.8 to 1.9)                    | 19.4<br>(-0.2 to 42.2)                            | 2.5<br>(-12.2 to 18.7)                              |
| Myocarditis                                        | 9.5<br>(8.1 to 11.2)                          | 4.0<br>(3.5 to 4.6)                      | 0.8<br>(0.5 to 1.2)                    | 17.1<br>(-7.7 to 46.9)                            | 2.1<br>(-17.7 to 25.1)                              |
| Alcoholic cardiomyopathy                           | 0.3<br>(0.2 to 0.3)                           | --                                       | $< 0.05$<br>( $< 0.05$ to $< 0.05$ )   | 36.1<br>(25.1 to 48.2)                            | 1.7<br>(-5.8 to 9.9)                                |
| Other cardiomyopathy                               | 5.9<br>(4.9 to 7.0)                           | --                                       | 0.5<br>(0.3 to 0.8)                    | 22.2<br>(-6.1 to 59.3)                            | 3.1<br>(-16.3 to 28.6)                              |
| Atrial fibrillation and flutter                    | 111.9<br>(98.3 to 127.6)                      | 9.6<br>(8.2 to 11.1)                     | 8.8<br>(5.9 to 12.3)                   | 29.8<br>(20.8 to 40.0)                            | 1.9<br>(-4.2 to 8.9)                                |
| Peripheral vascular disease                        | 305.0<br>(262.3 to 354.8)                     | 31.2<br>(26.7 to 36.2)                   | 1.3<br>(0.6 to 2.5)                    | 24.6<br>(13.3 to 36.5)                            | -3.8<br>(-11.0 to 3.4)                              |
| Endocarditis                                       | 0.7<br>(0.6 to 0.8)                           | 2.4<br>(2.1 to 2.7)                      | 0.1<br>( $< 0.05$ to 0.1)              | 22.2<br>(13.8 to 30.8)                            | 3.4<br>(-2.0 to 9.1)                                |
| Other cardiovascular and circulatory diseases      | 116.9<br>(97.5 to 139.1)                      | --                                       | 6.2<br>(4.0 to 9.0)                    | 18.1<br>(4.9 to 34.0)                             | 2.5<br>(-6.8 to 13.3)                               |
| <b>Chronic respiratory diseases</b>                | <b>2,061.6</b><br><b>(1,981.0 to 2,155.1)</b> | <b>317.5†</b><br><b>(297.2 to 339.6)</b> | <b>80.4</b><br><b>(56.4 to 109.2)</b>  | <b>17.7</b><br><b>(12.7 to 22.8)</b>              | <b>0.3</b><br><b>(-3.8 to 4.3)</b>                  |
| Chronic obstructive pulmonary disease              | 460.5<br>(438.3 to 484.2)                     | 28.9<br>(27.5 to 30.3)                   | 12.1<br>(9.3 to 14.9)                  | 17.0<br>(3.0 to 32.5)                             | -9.9<br>(-20.7 to 2.3)                              |
| Pneumoconiosis                                     | 1.7<br>(1.5 to 1.9)                           | 0.1<br>(0.1 to 0.2)                      | 0.3<br>(0.2 to 0.4)                    | 64.4<br>(40.6 to 91.1)                            | 23.0<br>(3.7 to 44.5)                               |
| Silicosis                                          | 0.1<br>(0.1 to 0.2)                           | $< 0.05$<br>( $< 0.05$ to $< 0.05$ )     | $< 0.05$<br>( $< 0.05$ to $< 0.05$ )   | 76.4<br>(66.1 to 87.5)                            | 32.7<br>(26.7 to 40.2)                              |



| Cause                                                          | Prevalence in thousands (95% UI)           | Incidence in thousands (95% UI)          | YLDs in thousands (95% UI)        |                                                   |                                                     |
|----------------------------------------------------------------|--------------------------------------------|------------------------------------------|-----------------------------------|---------------------------------------------------|-----------------------------------------------------|
|                                                                | 2016 counts                                | 2016 counts                              | 2016 counts                       | Percentage change in counts between 2006 and 2016 | Percentage change in age-standardised rates between |
| Asbestosis                                                     | 0.3<br>(0.3 to 0.4)                        | < 0.05<br>(< 0.05 to < 0.05)             | 0.1<br>(< 0.05 to 0.1)            | 35.9<br>(26.6 to 45.4)                            | 0.7<br>(-5.5 to 7.3)                                |
| Coal workers pneumoconiosis                                    | 0.2<br>(0.2 to 0.3)                        | < 0.05<br>(< 0.05 to < 0.05)             | < 0.05<br>(< 0.05 to 0.1)         | 93.4<br>(76.8 to 110.1)                           | 40.0<br>(28.2 to 51.6)                              |
| Other pneumoconiosis                                           | 1.0<br>(0.8 to 1.1)                        | 0.1<br>(0.1 to 0.1)                      | 0.1<br>(0.1 to 0.2)               | 68.7<br>(27.0 to 124.2)                           | 27.0<br>(-6.1 to 69.2)                              |
| Asthma                                                         | 1,615.8<br>(1,509.0 to 1,732.9)            | 286.8<br>(267.6 to 309.0)                | 63.2<br>(41.7 to 91.1)            | 17.4<br>(12.1 to 23.5)                            | 2.8<br>(-1.4 to 7.4)                                |
| Interstitial lung disease and pulmonary sarcoidosis            | 30.3<br>(27.6 to 33.3)                     | 1.6<br>(1.5 to 1.7)                      | 3.2<br>(2.1 to 4.7)               | 14.0<br>(-2.6 to 34.4)                            | -6.2<br>(-17.8 to 8.5)                              |
| Other chronic respiratory diseases                             | --                                         | --                                       | 1.6<br>(1.2 to 2.1)               | 36.0<br>(20.3 to 53.0)                            | 26.0<br>(12.3 to 40.5)                              |
| <b>Cirrhosis and other chronic liver diseases</b>              | <b>272.9<br/>(260.0 to 286.2)</b>          | <b>12.2<br/>(11.7 to 12.6)</b>           | <b>11.5<br/>(7.8 to 16.2)</b>     | <b>15.5<br/>(5.2 to 26.5)</b>                     | <b>-0.1<br/>(-7.8 to 8.2)</b>                       |
| Cirrhosis and other chronic liver diseases due to hepatitis B  | 86.2<br>(79.1 to 93.6)                     | 3.9<br>(3.6 to 4.1)                      | 2.9<br>(1.9 to 4.1)               | 32.2<br>(12.6 to 55.0)                            | 2.8<br>(-10.6 to 17.8)                              |
| Cirrhosis and other chronic liver diseases due to hepatitis C  | 46.0<br>(40.6 to 51.8)                     | 2.1<br>(1.9 to 2.4)                      | 1.5<br>(1.0 to 2.1)               | 30.7<br>(8.7 to 59.6)                             | 0.5<br>(-14.6 to 19.2)                              |
| Cirrhosis and other chronic liver diseases due to alcohol use  | 58.1<br>(52.5 to 64.2)                     | 2.9<br>(2.6 to 3.1)                      | 1.8<br>(1.2 to 2.5)               | 40.7<br>(18.2 to 66.2)                            | 4.9<br>(-10.2 to 21.4)                              |
| Cirrhosis and other chronic liver diseases due to other causes | 82.5<br>(76.6 to 89.1)                     | 3.4<br>(3.1 to 3.6)                      | 5.4<br>(3.6 to 7.8)               | -0.1<br>(-12.7 to 14.0)                           | -4.0<br>(-15.5 to 8.6)                              |
| <b>Digestive diseases</b>                                      | <b>807.5<br/>(764.8 to 851.6)</b>          | <b>913.9†<br/>(855.3 to 976.4)</b>       | <b>30.2<br/>(21.1 to 40.9)</b>    | <b>19.4<br/>(10.4 to 29.3)</b>                    | <b>-0.4<br/>(-6.8 to 6.5)</b>                       |
| Peptic ulcer disease                                           | 186.8<br>(170.6 to 207.1)                  | 35.5<br>(32.0 to 39.6)                   | 2.9<br>(1.9 to 4.4)               | 39.9<br>(23.6 to 57.8)                            | 11.2<br>(-0.4 to 23.3)                              |
| Gastritis and duodenitis                                       | 318.9<br>(275.1 to 364.2)                  | 300.3<br>(264.0 to 339.5)                | 4.1<br>(2.6 to 6.0)               | 28.4<br>(14.6 to 42.3)                            | 11.2<br>(0.8 to 22.0)                               |
| Appendicitis                                                   | 4.5<br>(4.1 to 4.9)                        | 117.5<br>(106.8 to 129.0)                | 1.4<br>(0.9 to 2.1)               | -2.2<br>(-28.6 to 38.1)                           | -5.4<br>(-30.4 to 29.7)                             |
| Paralytic ileus and intestinal obstruction                     | 0.3<br>(0.2 to 0.3)                        | 7.5<br>(6.5 to 8.6)                      | 0.1<br>(0.1 to 0.1)               | 28.1<br>(22.9 to 33.5)                            | 7.7<br>(4.1 to 11.1)                                |
| Inguinal, femoral, and abdominal hernia                        | 245.3<br>(217.4 to 273.2)                  | 224.7<br>(192.6 to 260.5)                | 16.9<br>(11.2 to 23.8)            | 14.8<br>(2.9 to 28.5)                             | -5.4<br>(-14.0 to 4.0)                              |
| Inflammatory bowel disease                                     | 6.5<br>(6.0 to 7.0)                        | 14.3<br>(13.6 to 15.0)                   | 1.0<br>(0.6 to 1.4)               | 22.1<br>(0.7 to 46.0)                             | -2.7<br>(-19.4 to 16.7)                             |
| Vascular intestinal disorders                                  | 0.2<br>(0.2 to 0.3)                        | 1.4<br>(1.3 to 1.6)                      | 0.1<br>(< 0.05 to 0.1)            | 29.0<br>(21.4 to 37.2)                            | 7.8<br>(3.2 to 12.7)                                |
| Gallbladder and biliary diseases                               | 63.6<br>(55.6 to 72.7)                     | 203.4<br>(175.6 to 232.7)                | 1.0<br>(0.6 to 1.4)               | 44.2<br>(15.2 to 79.1)                            | 10.6<br>(-10.8 to 37.1)                             |
| Pancreatitis                                                   | 1.0<br>(0.9 to 1.2)                        | 9.3<br>(8.3 to 10.5)                     | 0.1<br>(0.1 to 0.2)               | 56.6<br>(49.2 to 64.5)                            | 22.1<br>(16.9 to 27.1)                              |
| Other digestive diseases                                       | --                                         | --                                       | 2.6<br>(1.8 to 3.6)               | 20.6<br>(9.4 to 32.7)                             | 2.8<br>(-5.2 to 11.0)                               |
| <b>Neurological disorders</b>                                  | <b>11,400.2<br/>(10,923.6 to 11,934.2)</b> | <b>5,444.6<br/>(4,582.9 to 6,398.4)</b>  | <b>306.3<br/>(196.9 to 446.5)</b> | <b>17.7<br/>(-10.0 to 51.3)</b>                   | <b>0.1<br/>(-21.4 to 26.0)</b>                      |
| Alzheimer's disease and other dementias                        | 69.3<br>(57.8 to 81.7)                     | 12.0<br>(10.0 to 14.6)                   | 10.1<br>(7.0 to 13.4)             | 28.8<br>(21.6 to 36.7)                            | -0.9<br>(-5.8 to 4.5)                               |
| Parkinson's disease                                            | 16.0<br>(12.7 to 19.8)                     | 1.9<br>(1.5 to 2.4)                      | 1.9<br>(1.2 to 2.6)               | 33.6<br>(17.8 to 51.1)                            | 6.2<br>(-5.0 to 18.8)                               |
| Epilepsy                                                       | 146.2<br>(37.5 to 274.8)                   | 15.2<br>(3.9 to 28.8)                    | 48.7<br>(10.3 to 114.2)           | 10.4<br>(-76.9 to 481.7)                          | -1.7<br>(-79.4 to 406.4)                            |
| Multiple sclerosis                                             | 5.9<br>(5.2 to 6.9)                        | 0.3<br>(0.2 to 0.3)                      | 1.6<br>(1.1 to 2.2)               | 54.3<br>(29.8 to 79.8)                            | 21.4<br>(2.6 to 41.2)                               |
| Motor neuron disease                                           | 0.6<br>(0.5 to 0.7)                        | 0.1<br>(0.1 to 0.1)                      | 0.1<br>(0.1 to 0.2)               | 22.0<br>(16.7 to 27.9)                            | 4.4<br>(0.8 to 8.2)                                 |
| Migraine                                                       | 4,724.7<br>(4,438.0 to 5,015.9)            | 508.0<br>(476.2 to 544.4)                | 202.3<br>(129.9 to 280.7)         | 18.0<br>(13.0 to 22.9)                            | -0.2<br>(-4.0 to 3.5)                               |
| Tension-type headache                                          | 8,436.3<br>(7,474.2 to 9,462.3)            | 4,906.9<br>(4,028.7 to 5,860.2)          | 31.0<br>(19.6 to 45.3)            | 19.5<br>(12.7 to 26.5)                            | -0.4<br>(-5.1 to 4.7)                               |
| Other neurological disorders                                   | 0.1<br>(0.1 to 0.1)                        | 0.2<br>(0.1 to 0.3)                      | 10.5<br>(2.7 to 24.0)             | 28.1<br>(-68.5 to 452.3)                          | 17.2<br>(-69.7 to 368.1)                            |
| <b>Mental and substance use disorders</b>                      | <b>3,895.8<br/>(3,749.2 to 4,034.8)</b>    | <b>1,440.2†<br/>(1,349.1 to 1,545.2)</b> | <b>509.8<br/>(369.2 to 663.7)</b> | <b>16.6<br/>(13.9 to 19.5)</b>                    | <b>-0.8<br/>(-3.0 to 1.5)</b>                       |
| Schizophrenia                                                  | 59.3<br>(51.4 to 67.6)                     | 4.2<br>(3.7 to 4.8)                      | 38.3<br>(27.7 to 48.4)            | 30.4<br>(18.9 to 43.3)                            | 1.5<br>(-7.0 to 10.7)                               |
| Alcohol use disorders                                          | 503.4<br>(432.8 to 578.6)                  | 277.8<br>(236.8 to 323.0)                | 50.6<br>(34.3 to 70.5)            | 25.3<br>(14.7 to 37.1)                            | 0.4<br>(-7.8 to 9.4)                                |
| Drug use disorders                                             | 207.5<br>(191.0 to 225.3)                  | 30.6<br>(27.5 to 33.9)                   | 44.0<br>(31.2 to 58.8)            | 20.4<br>(8.5 to 33.2)                             | -1.9<br>(-11.0 to 7.7)                              |
| Opioid use disorders                                           | 70.9<br>(59.4 to 86.1)                     | 10.7<br>(9.0 to 12.7)                    | 29.7<br>(19.9 to 40.8)            | 18.6<br>(3.2 to 36.1)                             | -6.0<br>(-16.9 to 6.5)                              |
| Cocaine use disorders                                          | 21.8<br>(18.7 to 25.2)                     | 1.7<br>(1.4 to 2.0)                      | 3.0<br>(1.9 to 4.5)               | 25.6<br>(-1.3 to 62.6)                            | 7.7<br>(-13.7 to 36.6)                              |
| Amphetamine use disorders                                      | 23.7<br>(16.0 to 33.6)                     | 2.1<br>(1.5 to 2.9)                      | 3.1<br>(1.7 to 5.3)               | 25.1<br>(-5.0 to 64.7)                            | 10.8<br>(-16.2 to 44.5)                             |
| Cannabis use disorders                                         | 79.9<br>(65.1 to 96.8)                     | 12.9<br>(10.6 to 15.4)                   | 2.3<br>(1.4 to 3.5)               | 10.3<br>(-8.5 to 32.8)                            | 0.1<br>(-16.3 to 18.0)                              |
| Other drug use disorders                                       | 16.4<br>(14.4 to 18.5)                     | 3.2<br>(2.8 to 3.6)                      | 5.8<br>(3.7 to 8.5)               | 30.1<br>(4.4 to 64.6)                             | 10.5<br>(-9.9 to 37.6)                              |
| Depressive disorders                                           | 836.4<br>(785.2 to 902.9)                  | 842.9<br>(763.7 to 933.2)                | 137.3<br>(94.3 to 186.9)          | 17.9<br>(11.9 to 24.0)                            | -2.0<br>(-6.7 to 2.7)                               |
| Major depressive disorder                                      | 514.1<br>(464.0 to 569.4)                  | 784.5<br>(706.2 to 873.9)                | 105.4<br>(71.7 to 143.6)          | 16.0<br>(8.4 to 23.7)                             | -2.6<br>(-8.5 to 3.6)                               |
| Dysthymia                                                      | 332.2<br>(289.4 to 382.5)                  | 58.5<br>(51.1 to 67.1)                   | 32.0<br>(21.2 to 46.6)            | 24.7<br>(19.6 to 30.6)                            | 0.1<br>(-3.4 to 4.1)                                |
| Bipolar disorder                                               | 183.2<br>(156.6 to 213.6)                  | 15.7<br>(13.6 to 18.5)                   | 37.7<br>(23.6 to 55.4)            | 17.4<br>(9.5 to 26.0)                             | 0.0<br>(-6.2 to 6.4)                                |
| Anxiety disorders                                              | 756.6<br>(684.0 to 832.1)                  | 134.3<br>(123.0 to 147.1)                | 73.2<br>(50.6 to 99.3)            | 15.4<br>(7.4 to 24.2)                             | 0.1<br>(-6.2 to 7.2)                                |
| Eating disorders                                               | 29.9<br>(24.6 to 36.9)                     | 18.4<br>(13.8 to 24.1)                   | 6.1<br>(3.8 to 9.0)               | 31.9<br>(13.2 to 56.5)                            | 18.8<br>(2.5 to 39.9)                               |
| Anorexia nervosa                                               | 6.8<br>(5.0 to 9.2)                        | 3.1<br>(2.2 to 4.1)                      | 1.5<br>(0.8 to 2.2)               | 17.8<br>(-12.3 to 58.2)                           | 13.8<br>(-13.8 to 51.7)                             |
| Bulimia nervosa                                                | 21.9<br>(16.4 to 28.9)                     | 15.4<br>(10.8 to 20.8)                   | 4.6<br>(2.8 to 7.1)               | 37.1<br>(14.1 to 65.0)                            | 20.4<br>(2.2 to 44.1)                               |
| Autistic spectrum disorders                                    | 255.3<br>(230.1 to 284.3)                  | 2.1<br>(1.5 to 3.0)                      | 37.4<br>(25.0 to 52.5)            | 12.6<br>(7.4 to 18.6)                             | 0.2<br>(-4.4 to 5.1)                                |
| Autism                                                         | 75.7<br>(65.1 to 88.3)                     | 0.2<br>(0.1 to 0.4)                      | 19.4<br>(12.5 to 28.3)            | 12.7<br>(4.2 to 23.6)                             | 0.2<br>(-7.1 to 9.7)                                |
| Asperger syndrome and other autistic spectrum disorders        | 179.3<br>(149.0 to 216.2)                  | 1.9<br>(1.2 to 2.8)                      | 18.0<br>(11.7 to 26.2)            | 12.4<br>(6.8 to 18.6)                             | 0.1<br>(-4.7 to 5.2)                                |



| Cause                                                      | Prevalence in thousands (95% UI)                 | Incidence in thousands (95% UI)                   | YLDs in thousands (95% UI)              |                                                   |                                                     |
|------------------------------------------------------------|--------------------------------------------------|---------------------------------------------------|-----------------------------------------|---------------------------------------------------|-----------------------------------------------------|
|                                                            | 2016 counts                                      | 2016 counts                                       | 2016 counts                             | Percentage change in counts between 2006 and 2016 | Percentage change in age-standardised rates between |
| Attention-deficit/hyperactivity disorder                   | 252.3<br>(227.0 to 281.9)                        | 12.6<br>(10.9 to 14.7)                            | 3.1<br>(1.8 to 4.9)                     | 4.0<br>(-4.8 to 12.9)                             | 0.1<br>(-7.8 to 8.5)                                |
| Conduct disorder                                           | 236.8<br>(196.1 to 280.1)                        | 81.2<br>(64.6 to 97.2)                            | 28.8<br>(18.0 to 43.9)                  | -11.7<br>(-17.3 to -6.0)                          | 0.2<br>(-6.2 to 6.2)                                |
| Idiopathic developmental intellectual disability           | 329.4<br>(170.9 to 488.9)                        | --                                                | 13.0<br>(5.4 to 23.2)                   | -3.8<br>(-12.8 to 3.9)                            | -13.8<br>(-21.9 to -7.3)                            |
| Other mental and substance use disorders                   | 540.4<br>(474.3 to 625.1)                        | 20.3<br>(18.1 to 23.2)                            | 40.4<br>(27.3 to 58.2)                  | 25.9<br>(19.4 to 32.8)                            | 0.1<br>(-4.5 to 4.8)                                |
| <b>Diabetes, urogenital, blood, and endocrine diseases</b> | <b>9,123.9</b><br><b>(8,982.7 to 9,285.3)</b>    | <b>5,105.3†</b><br><b>(4,712.7 to 5,629.3)</b>    | <b>205.7</b><br><b>(145.3 to 279.1)</b> | <b>29.8</b><br><b>(25.1 to 34.7)</b>              | <b>5.0</b><br><b>(1.4 to 8.9)</b>                   |
| Diabetes mellitus                                          | 826.3<br>(744.0 to 925.0)                        | 52.5<br>(47.5 to 58.3)                            | 69.6<br>(48.0 to 96.2)                  | 61.9<br>(49.0 to 74.2)                            | 22.1<br>(12.6 to 31.8)                              |
| Acute glomerulonephritis                                   | 0.6<br>(0.5 to 0.7)                              | 8.9<br>(7.8 to 10.2)                              | < 0.05<br>(< 0.05 to < 0.05)            | 6.0<br>(-2.2 to 12.9)                             | -12.1<br>(-17.9 to -7.3)                            |
| Chronic kidney disease                                     | 1,301.8<br>(1,177.3 to 1,429.9)                  | 95.7<br>(83.4 to 108.1)                           | 36.1<br>(26.8 to 46.8)                  | 25.6<br>(17.4 to 33.8)                            | -0.9<br>(-6.7 to 5.3)                               |
| Chronic kidney disease due to diabetes mellitus            | 547.6<br>(471.1 to 633.7)                        | 39.4<br>(32.4 to 47.4)                            | 14.4<br>(10.4 to 19.2)                  | 28.2<br>(17.4 to 39.8)                            | -1.4<br>(-9.0 to 6.7)                               |
| Chronic kidney disease due to hypertension                 | 224.1<br>(190.6 to 258.9)                        | 23.9<br>(19.7 to 28.3)                            | 2.2<br>(1.5 to 3.0)                     | 26.6<br>(13.2 to 43.1)                            | -2.6<br>(-13.0 to 9.7)                              |
| Chronic kidney disease due to glomerulonephritis           | 173.6<br>(148.8 to 197.6)                        | 5.6<br>(4.4 to 7.0)                               | 9.4<br>(6.7 to 12.6)                    | 23.2<br>(9.9 to 37.7)                             | -0.0<br>(-8.8 to 9.5)                               |
| Chronic kidney disease due to other causes                 | 356.4<br>(298.4 to 416.7)                        | 26.7<br>(21.9 to 31.8)                            | 10.1<br>(7.2 to 13.7)                   | 24.1<br>(12.9 to 37.0)                            | -0.2<br>(-7.9 to 9.1)                               |
| Urinary diseases and male infertility                      | 470.5<br>(415.9 to 519.3)                        | 3,596.4†<br>(3,217.5 to 4,106.1)                  | 13.9<br>(9.2 to 20.1)                   | 23.0<br>(13.6 to 31.9)                            | -4.6<br>(-12.1 to 2.0)                              |
| Interstitial nephritis and urinary tract infections        | 62.7<br>(55.4 to 72.2)                           | 3,248.8<br>(2,869.7 to 3,759.6)                   | 2.1<br>(1.3 to 3.2)                     | 9.7<br>(-2.9 to 24.1)                             | -4.8<br>(-15.1 to 7.2)                              |
| Urolithiasis                                               | 11.7<br>(10.2 to 13.3)                           | 309.1<br>(271.4 to 354.8)                         | 0.9<br>(0.6 to 1.2)                     | 31.1<br>(13.4 to 53.2)                            | 3.8<br>(-12.1 to 23.6)                              |
| Benign prostatic hyperplasia                               | 284.8<br>(238.9 to 336.9)                        | 38.5<br>(31.9 to 46.0)                            | 9.3<br>(5.9 to 13.8)                    | 30.5<br>(16.2 to 44.0)                            | -3.8<br>(-13.3 to 4.4)                              |
| Male infertility                                           | 94.4<br>(71.7 to 124.2)                          | --                                                | 0.5<br>(0.2 to 1.1)                     | 20.7<br>(9.5 to 32.7)                             | -2.6<br>(-11.1 to 7.0)                              |
| Other urinary diseases                                     | --                                               | --                                                | 1.1<br>(0.7 to 1.6)                     | -4.8<br>(-13.9 to 5.5)                            | -19.3<br>(-26.8 to -11.0)                           |
| Gynecological diseases                                     | 3,400.9<br>(3,264.3 to 3,571.0)                  | 1,295.8†<br>(1,205.0 to 1,398.8)                  | 49.0<br>(33.3 to 70.4)                  | 17.9<br>(12.9 to 22.7)                            | -2.8<br>(-6.6 to 0.7)                               |
| Uterine fibroids                                           | 425.7<br>(375.3 to 481.1)                        | 47.8<br>(40.8 to 55.6)                            | 9.5<br>(6.0 to 14.8)                    | 20.7<br>(11.4 to 29.5)                            | -4.9<br>(-11.7 to 1.9)                              |
| Polycystic ovarian syndrome                                | 33.8<br>(25.1 to 44.5)                           | 11.6<br>(8.5 to 15.3)                             | 0.3<br>(0.1 to 0.6)                     | 20.9<br>(5.8 to 37.2)                             | -0.7<br>(-12.9 to 12.9)                             |
| Female infertility                                         | 34.6<br>(13.4 to 70.7)                           | --                                                | 0.2<br>(< 0.05 to 0.6)                  | 31.9<br>(-0.4 to 82.6)                            | 10.2<br>(-14.1 to 48.6)                             |
| Endometriosis                                              | 14.9<br>(12.0 to 18.0)                           | 46.9<br>(36.1 to 60.3)                            | 1.4<br>(0.8 to 2.1)                     | 18.0<br>(-10.0 to 56.5)                           | -1.0<br>(-23.9 to 28.9)                             |
| Genital prolapse                                           | 782.5<br>(675.3 to 889.7)                        | 54.0<br>(46.1 to 63.1)                            | 2.5<br>(1.2 to 4.5)                     | 30.1<br>(18.9 to 42.4)                            | -4.3<br>(-13.0 to 4.6)                              |
| Premenstrual syndrome                                      | 2,009.4<br>(1,885.8 to 2,134.8)                  | 721.9<br>(669.7 to 777.6)                         | 16.8<br>(10.4 to 25.9)                  | 13.5<br>(5.4 to 22.4)                             | -1.8<br>(-8.6 to 5.6)                               |
| Other gynecological diseases                               | 552.9<br>(492.3 to 623.3)                        | 413.5<br>(342.2 to 496.3)                         | 18.3<br>(12.2 to 26.1)                  | 18.9<br>(11.1 to 27.0)                            | -2.5<br>(-8.3 to 3.9)                               |
| Hemoglobinopathies and hemolytic anaemias                  | 4,328.8<br>(4,238.4 to 4,416.7)                  | --                                                | 20.4<br>(13.2 to 29.9)                  | 8.0<br>(-1.6 to 18.8)                             | -5.6<br>(-13.0 to 2.6)                              |
| Thalassemias                                               | 0.4<br>(0.3 to 0.4)                              | --                                                | < 0.05<br>(< 0.05 to 0.1)               | 14.6<br>(-12.8 to 55.4)                           | 2.5<br>(-21.5 to 39.1)                              |
| Thalassaemias trait                                        | 772.6<br>(721.6 to 828.7)                        | --                                                | 10.3<br>(6.7 to 14.9)                   | 11.0<br>(1.4 to 22.0)                             | -3.5<br>(-11.5 to 5.6)                              |
| Sickle cell disorders                                      | 0.5<br>(0.4 to 0.6)                              | --                                                | 0.1<br>(< 0.05 to 0.1)                  | 2.0<br>(-6.1 to 11.4)                             | -4.0<br>(-11.5 to 4.5)                              |
| Sickle cell trait                                          | 588.0<br>(562.7 to 614.5)                        | --                                                | 1.5<br>(0.9 to 2.2)                     | 12.8<br>(-3.5 to 31.6)                            | 1.5<br>(-12.4 to 17.5)                              |
| G6PD deficiency                                            | 315.5<br>(300.9 to 332.2)                        | --                                                | < 0.05<br>(< 0.05 to 0.1)               | 34.3<br>(16.1 to 58.4)                            | 16.0<br>(1.7 to 33.6)                               |
| G6PD trait                                                 | 2,375.6<br>(2,316.7 to 2,439.7)                  | --                                                | < 0.05<br>(< 0.05 to < 0.05)            | 16.6<br>(6.6 to 29.4)                             | 1.2<br>(-7.0 to 11.0)                               |
| Other hemoglobinopathies and hemolytic anaemias            | 481.7<br>(439.0 to 521.4)                        | --                                                | 8.5<br>(5.5 to 12.7)                    | 3.7<br>(-8.2 to 17.5)                             | -9.0<br>(-18.2 to 1.1)                              |
| Endocrine, metabolic, blood, and immune disorders          | 626.0<br>(589.2 to 665.3)                        | 56.0<br>(49.9 to 63.1)                            | 16.6<br>(11.2 to 23.3)                  | 11.8<br>(5.1 to 20.0)                             | -4.1<br>(-9.1 to 1.9)                               |
| <b>Musculoskeletal disorders</b>                           | <b>3,961.2</b><br><b>(3,744.7 to 4,192.1)</b>    | <b>1,720.0</b><br><b>(1,539.8 to 1,908.1)</b>     | <b>450.2</b><br><b>(323.7 to 592.2)</b> | <b>27.5</b><br><b>(23.4 to 31.6)</b>              | <b>-0.9</b><br><b>(-3.2 to 1.4)</b>                 |
| Rheumatoid arthritis                                       | 84.8<br>(75.4 to 95.2)                           | 5.1<br>(4.6 to 5.8)                               | 20.0<br>(13.7 to 26.9)                  | 26.3<br>(15.2 to 39.3)                            | -2.5<br>(-10.3 to 6.3)                              |
| Osteoarthritis                                             | 892.9<br>(832.5 to 954.9)                        | 49.8<br>(46.0 to 53.8)                            | 55.1<br>(38.7 to 74.6)                  | 43.7<br>(38.6 to 49.6)                            | 6.5<br>(2.6 to 10.6)                                |
| Low back and neck pain                                     | 2,916.7<br>(2,713.7 to 3,154.4)                  | 1,339.5<br>(1,182.6 to 1,501.8)                   | 342.6<br>(242.1 to 452.9)               | 25.9<br>(21.0 to 31.2)                            | -1.8<br>(-4.6 to 1.2)                               |
| Low back pain                                              | 2,198.3<br>(1,940.1 to 2,500.2)                  | 1,124.5<br>(969.1 to 1,288.8)                     | 249.5<br>(176.3 to 333.4)               | 24.7<br>(18.4 to 31.8)                            | -2.5<br>(-6.1 to 1.7)                               |
| Neck pain                                                  | 930.8<br>(793.6 to 1,078.2)                      | 215.1<br>(185.2 to 254.0)                         | 93.2<br>(62.6 to 132.8)                 | 29.1<br>(24.9 to 33.9)                            | 0.1<br>(-2.0 to 2.5)                                |
| Gout                                                       | 86.8<br>(76.7 to 98.4)                           | 17.6<br>(15.3 to 20.0)                            | 2.8<br>(1.9 to 3.8)                     | 32.8<br>(13.9 to 56.1)                            | -0.0<br>(-12.5 to 14.8)                             |
| Other musculoskeletal disorders                            | 343.3<br>(246.1 to 456.3)                        | 307.9<br>(225.2 to 415.8)                         | 29.7<br>(18.3 to 46.2)                  | 19.9<br>(4.2 to 37.4)                             | -5.1<br>(-16.5 to 7.1)                              |
| <b>Other non-communicable diseases</b>                     | <b>22,596.1</b><br><b>(22,212.7 to 22,989.8)</b> | <b>73,286.7†</b><br><b>(69,332.6 to 77,577.4)</b> | <b>554.8</b><br><b>(380.9 to 779.5)</b> | <b>16.3</b><br><b>(14.6 to 17.8)</b>              | <b>-1.5</b><br><b>(-2.5 to -0.5)</b>                |
| Congenital anomalies                                       | 364.3<br>(330.3 to 403.2)                        | --                                                | 45.5<br>(33.0 to 60.2)                  | 11.6<br>(4.9 to 18.8)                             | -1.0<br>(-6.9 to 5.5)                               |
| Neural tube defects                                        | 37.6<br>(33.0 to 42.8)                           | --                                                | 11.2<br>(7.7 to 15.1)                   | 10.5<br>(-4.0 to 26.4)                            | -3.1<br>(-15.2 to 10.2)                             |
| Congenital heart anomalies                                 | 107.4<br>(92.7 to 123.5)                         | --                                                | 5.2<br>(2.2 to 8.8)                     | 19.3<br>(7.6 to 32.9)                             | 9.7<br>(-1.0 to 21.5)                               |
| Orofacial clefts                                           | 13.7<br>(12.0 to 15.6)                           | --                                                | 0.2<br>(0.1 to 0.3)                     | 5.7<br>(-7.3 to 20.9)                             | -7.0<br>(-18.1 to 6.0)                              |
| Down's syndrome                                            | 29.1<br>(25.1 to 33.9)                           | --                                                | 2.6<br>(1.7 to 3.7)                     | 17.7<br>(4.5 to 32.9)                             | 4.4<br>(-6.9 to 17.0)                               |
| Turner syndrome                                            | 27.4<br>(23.1 to 32.0)                           | --                                                | 0.5<br>(0.2 to 0.8)                     | 13.1<br>(-13.9 to 49.4)                           | 2.7<br>(-20.9 to 35.1)                              |
| Klinefelter syndrome                                       | 22.4<br>(18.8 to 26.6)                           | --                                                | 0.1<br>(0.1 to 0.2)                     | 17.0<br>(-6.1 to 43.6)                            | 1.8<br>(-17.4 to 24.7)                              |

| Cause                                         | Prevalence in thousands (95% UI)              | Incidence in thousands (95% UI)                | YLDs in thousands (95% UI)              |                                                   |                                                     |
|-----------------------------------------------|-----------------------------------------------|------------------------------------------------|-----------------------------------------|---------------------------------------------------|-----------------------------------------------------|
|                                               | 2016 counts                                   | 2016 counts                                    | 2016 counts                             | Percentage change in counts between 2006 and 2016 | Percentage change in age-standardised rates between |
| Other chromosomal abnormalities               | 17.3<br>(14.7 to 20.3)                        | --                                             | 3.1<br>(2.0 to 4.4)                     | 10.5<br>(-12.4 to 37.5)                           | 3.5<br>(-17.7 to 29.4)                              |
| Congenital musculoskeletal and limb anomalies | 28.6<br>(26.1 to 31.6)                        | --                                             | 4.1<br>(2.7 to 5.8)                     | 16.6<br>(5.0 to 29.7)                             | 2.0<br>(-7.7 to 13.0)                               |
| Urogenital congenital anomalies               | 36.0<br>(31.3 to 41.3)                        | --                                             | 1.3<br>(0.7 to 1.9)                     | 3.2<br>(-9.7 to 16.9)                             | -1.1<br>(-13.0 to 11.9)                             |
| Digestive congenital anomalies                | 31.5<br>(27.7 to 35.6)                        | --                                             | 1.4<br>(0.9 to 2.0)                     | 15.6<br>(-3.6 to 36.9)                            | 1.7<br>(-14.0 to 19.4)                              |
| Other congenital anomalies                    | 100.1<br>(64.7 to 147.5)                      | --                                             | 15.9<br>(10.6 to 22.9)                  | 8.5<br>(-1.2 to 19.8)                             | -4.9<br>(-13.5 to 5.1)                              |
| Skin and subcutaneous diseases                | 7,987.1<br>(7,793.4 to 8,209.3)               | 16,561.4<br>(15,725.8 to 17,477.3)             | 193.8<br>(130.9 to 278.7)               | 9.6<br>(6.8 to 12.4)                              | 2.2<br>(0.1 to 4.3)                                 |
| Dermatitis                                    | 938.2<br>(842.3 to 1,035.0)                   | 1,236.0<br>(1,128.3 to 1,355.1)                | 35.1<br>(20.9 to 57.2)                  | 11.2<br>(5.9 to 17.0)                             | 0.1<br>(-3.9 to 4.5)                                |
| Psoriasis                                     | 249.7<br>(237.6 to 262.6)                     | 35.9<br>(34.2 to 37.6)                         | 21.9<br>(15.3 to 28.7)                  | 28.1<br>(17.5 to 40.1)                            | 7.8<br>(-0.1 to 16.8)                               |
| Cellulitis                                    | 11.1<br>(10.2 to 11.9)                        | 194.6<br>(181.8 to 208.0)                      | 0.6<br>(0.4 to 0.9)                     | 16.8<br>(-6.6 to 46.6)                            | 1.7<br>(-16.9 to 25.2)                              |
| Pyoderma                                      | 53.1<br>(51.4 to 54.9)                        | 1,112.7<br>(1,073.2 to 1,154.0)                | 0.3<br>(0.1 to 0.6)                     | 21.7<br>(11.5 to 32.4)                            | 1.4<br>(-6.0 to 9.1)                                |
| Scabies                                       | 194.6<br>(169.3 to 225.8)                     | 605.3<br>(523.3 to 700.8)                      | 5.0<br>(2.9 to 8.0)                     | 3.0<br>(-3.4 to 9.8)                              | -5.2<br>(-10.2 to 0.1)                              |
| Fungal skin diseases                          | 2,274.2<br>(2,048.9 to 2,510.9)               | 7,921.4<br>(7,105.9 to 8,834.0)                | 12.8<br>(5.1 to 26.9)                   | 15.9<br>(13.3 to 18.5)                            | 0.0<br>(-1.0 to 1.1)                                |
| Viral skin diseases                           | 797.6<br>(761.1 to 833.2)                     | 1,164.8<br>(1,110.8 to 1,224.8)                | 24.5<br>(15.3 to 36.1)                  | 8.3<br>(4.7 to 12.1)                              | 0.1<br>(-2.9 to 3.2)                                |
| Acne vulgaris                                 | 2,301.3<br>(2,052.1 to 2,576.0)               | 1,525.7<br>(1,263.8 to 1,869.8)                | 59.4<br>(39.1 to 86.1)                  | -1.0<br>(-6.3 to 4.8)                             | 3.3<br>(-1.6 to 8.6)                                |
| Alopecia areata                               | 57.8<br>(55.4 to 60.3)                        | 102.4<br>(98.3 to 106.9)                       | 1.9<br>(1.2 to 2.9)                     | 20.6<br>(6.4 to 36.5)                             | -0.2<br>(-10.9 to 11.9)                             |
| Pruritus                                      | 246.5<br>(216.9 to 277.5)                     | 197.9<br>(175.8 to 223.3)                      | 2.6<br>(1.2 to 4.7)                     | 22.2<br>(14.7 to 29.9)                            | 1.8<br>(-3.1 to 7.1)                                |
| Urticaria                                     | 324.6<br>(281.8 to 376.6)                     | 582.2<br>(505.6 to 675.8)                      | 19.6<br>(12.5 to 28.3)                  | 12.3<br>(6.1 to 19.4)                             | -0.0<br>(-5.1 to 5.7)                               |
| Decubitus ulcer                               | 6.0<br>(5.4 to 6.7)                           | 21.4<br>(19.1 to 24.0)                         | 1.0<br>(0.7 to 1.4)                     | 25.4<br>(13.1 to 38.9)                            | 3.0<br>(-10.2 to 18.9)                              |
| Other skin and subcutaneous diseases          | 1,647.9<br>(1,598.0 to 1,698.0)               | 1,861.0<br>(1,800.9 to 1,923.1)                | 9.1<br>(4.3 to 16.5)                    | 30.6<br>(27.1 to 34.5)                            | 7.5<br>(5.0 to 10.3)                                |
| Sense organ diseases                          | 6,519.5<br>(6,371.3 to 6,702.9)               | 2,809.4†<br>(2,620.2 to 3,009.4)               | 234.6<br>(160.7 to 325.8)               | 19.7<br>(17.4 to 22.0)                            | -4.2<br>(-5.5 to -2.8)                              |
| Glaucoma                                      | 22.9<br>(19.2 to 26.6)                        | --                                             | 2.4<br>(1.6 to 3.3)                     | 28.7<br>(15.4 to 42.9)                            | -1.2<br>(-10.3 to 8.8)                              |
| Cataract                                      | 272.9<br>(233.6 to 314.2)                     | --                                             | 14.8<br>(10.3 to 20.5)                  | 24.5<br>(17.2 to 31.5)                            | -3.3<br>(-8.4 to 1.6)                               |
| Macular degeneration                          | 8.8<br>(7.0 to 10.8)                          | --                                             | 0.5<br>(0.4 to 0.7)                     | 32.9<br>(14.9 to 54.0)                            | 1.7<br>(-11.6 to 16.5)                              |
| Refraction and accommodation disorders        | 3,527.4<br>(3,383.6 to 3,689.1)               | --                                             | 63.6<br>(39.2 to 100.6)                 | 15.7<br>(12.3 to 19.5)                            | -7.0<br>(-9.3 to -4.0)                              |
| Age-related and other hearing loss            | 4,002.8<br>(3,772.7 to 4,252.4)               | --                                             | 121.3<br>(85.2 to 170.7)                | 19.4<br>(15.1 to 23.5)                            | -4.1<br>(-6.5 to -2.0)                              |
| Other vision loss                             | 145.4<br>(127.9 to 165.7)                     | --                                             | 9.7<br>(6.7 to 13.1)                    | 26.3<br>(17.5 to 35.6)                            | -1.9<br>(-7.6 to 4.4)                               |
| Other sense organ diseases                    | 721.4<br>(662.9 to 778.1)                     | 2,809.4<br>(2,620.2 to 3,009.4)                | 22.4<br>(14.1 to 33.8)                  | 26.4<br>(21.0 to 32.3)                            | 1.1<br>(-2.6 to 5.1)                                |
| Oral disorders                                | 17,749.9<br>(17,134.5 to 18,353.1)            | 53,916.0†<br>(50,068.0 to 58,023.6)            | 80.8<br>(50.4 to 122.0)                 | 27.5<br>(24.7 to 30.5)                            | 0.5<br>(-1.2 to 2.3)                                |
| Caries of deciduous teeth                     | 2,826.6<br>(2,350.5 to 3,349.9)               | 11,021.4<br>(8,451.0 to 14,127.9)              | 0.7<br>(0.3 to 1.3)                     | 11.4<br>(0.6 to 23.5)                             | -0.7<br>(-10.3 to 10.3)                             |
| Caries of permanent teeth                     | 13,480.2<br>(12,774.8 to 14,133.3)            | 42,488.0<br>(39,682.2 to 45,211.9)             | 8.0<br>(3.6 to 15.4)                    | 7.8<br>(4.7 to 11.3)                              | -4.4<br>(-6.8 to -1.7)                              |
| Periodontal disease                           | 2,049.2<br>(1,666.4 to 2,462.5)               | 271.2<br>(216.0 to 333.6)                      | 13.4<br>(5.3 to 28.4)                   | 32.6<br>(27.0 to 37.6)                            | -0.2<br>(-3.7 to 3.6)                               |
| Edentulism and severe tooth loss              | 1,555.4<br>(1,358.3 to 1,752.9)               | 135.3<br>(114.0 to 158.5)                      | 43.2<br>(28.5 to 61.2)                  | 34.0<br>(29.4 to 38.9)                            | 1.4<br>(-1.4 to 4.4)                                |
| Other oral disorders                          | 530.7<br>(506.4 to 555.8)                     | --                                             | 15.6<br>(9.6 to 23.3)                   | 19.2<br>(15.0 to 23.5)                            | 0.0<br>(-3.1 to 3.1)                                |
| <b>Injuries</b>                               | <b>7,075.3</b><br><b>(6,564.7 to 7,700.7)</b> | <b>3,143.2†</b><br><b>(2,934.9 to 3,352.3)</b> | <b>256.5</b><br><b>(174.1 to 359.1)</b> | <b>28.0</b><br><b>(25.3 to 30.5)</b>              | <b>5.3</b><br><b>(3.3 to 7.1)</b>                   |
| <b>Transport injuries</b>                     | <b>630.2</b><br><b>(584.8 to 678.9)</b>       | <b>253.3</b><br><b>(225.1 to 280.8)</b>        | <b>33.6</b><br><b>(22.2 to 48.4)</b>    | <b>48.8</b><br><b>(45.1 to 52.2)</b>              | <b>18.2</b><br><b>(15.7 to 20.4)</b>                |
| Road injuries                                 | 573.1<br>(530.5 to 619.3)                     | 239.4<br>(211.2 to 267.1)                      | 30.6<br>(20.3 to 43.9)                  | 51.7<br>(48.2 to 55.0)                            | 19.7<br>(17.3 to 21.9)                              |
| Pedestrian road injuries                      | 157.1<br>(137.9 to 179.0)                     | 47.1<br>(39.6 to 55.4)                         | 8.2<br>(5.5 to 11.8)                    | 40.7<br>(37.1 to 44.3)                            | 12.2<br>(9.8 to 14.5)                               |
| Cyclist road injuries                         | 106.9<br>(89.5 to 126.7)                      | 48.1<br>(38.2 to 58.5)                         | 5.3<br>(3.5 to 7.7)                     | 57.0<br>(52.9 to 61.0)                            | 25.9<br>(23.2 to 28.4)                              |
| Motorcyclist road injuries                    | 60.1<br>(51.0 to 72.7)                        | 16.5<br>(12.9 to 20.8)                         | 3.0<br>(2.0 to 4.5)                     | 59.5<br>(55.3 to 63.3)                            | 25.7<br>(23.0 to 28.2)                              |
| Motor vehicle road injuries                   | 207.6<br>(176.2 to 238.6)                     | 105.6<br>(90.0 to 121.1)                       | 12.0<br>(8.1 to 17.1)                   | 56.5<br>(52.7 to 60.1)                            | 21.5<br>(19.0 to 23.8)                              |
| Other road injuries                           | 41.4<br>(35.2 to 49.0)                        | 22.0<br>(17.0 to 27.8)                         | 2.0<br>(1.3 to 3.0)                     | 48.2<br>(44.4 to 51.8)                            | 18.6<br>(16.2 to 20.9)                              |
| Other transport injuries                      | 57.1<br>(48.0 to 68.6)                        | 13.9<br>(11.6 to 16.9)                         | 3.0<br>(2.0 to 4.3)                     | 24.3<br>(20.3 to 28.4)                            | 3.3<br>(0.3 to 6.2)                                 |
| <b>Unintentional injuries</b>                 | <b>6,196.8</b><br><b>(5,695.9 to 6,810.7)</b> | <b>2,760.0</b><br><b>(2,560.5 to 2,973.4)</b>  | <b>209.9</b><br><b>(142.6 to 293.8)</b> | <b>25.5</b><br><b>(22.7 to 28.1)</b>              | <b>3.5</b><br><b>(1.5 to 5.5)</b>                   |
| Falls                                         | 3,031.7<br>(2,633.5 to 3,509.5)               | 1,435.3<br>(1,254.9 to 1,639.4)                | 118.0<br>(82.3 to 163.3)                | 25.1<br>(22.5 to 27.7)                            | 2.4<br>(0.4 to 4.3)                                 |
| Drowning                                      | 25.9<br>(22.0 to 30.9)                        | 5.2<br>(4.5 to 6.0)                            | 1.3<br>(0.9 to 1.9)                     | -4.4<br>(-7.6 to -1.1)                            | -19.7<br>(-22.4 to -17.1)                           |
| Fire, heat, and hot substances                | 787.6<br>(672.4 to 933.9)                     | 105.0<br>(88.1 to 121.4)                       | 20.6<br>(13.7 to 29.8)                  | 21.8<br>(15.8 to 27.0)                            | 2.0<br>(-2.4 to 5.6)                                |
| Poisonings                                    | 19.5<br>(16.5 to 23.0)                        | 30.8<br>(25.2 to 37.7)                         | 1.8<br>(1.1 to 2.6)                     | 50.9<br>(40.6 to 63.6)                            | 29.7<br>(21.6 to 39.8)                              |
| Exposure to mechanical forces                 | 1,004.8<br>(854.5 to 1,233.7)                 | 423.0<br>(363.0 to 490.3)                      | 24.1<br>(15.5 to 35.3)                  | 32.3<br>(28.4 to 36.0)                            | 9.0<br>(6.2 to 11.5)                                |
| Unintentional firearm injuries                | 24.2<br>(19.9 to 29.7)                        | 6.8<br>(4.7 to 9.5)                            | 1.0<br>(0.6 to 1.5)                     | 37.1<br>(33.0 to 41.0)                            | 11.4<br>(8.5 to 14.0)                               |
| Unintentional suffocation                     | 104.3<br>(77.4 to 136.4)                      | 25.8<br>(18.9 to 34.6)                         | 3.2<br>(2.0 to 5.0)                     | 10.5<br>(7.8 to 13.3)                             | -5.6<br>(-7.6 to -3.6)                              |
| Other exposure to mechanical forces           | 876.3<br>(728.9 to 1,101.3)                   | 390.4<br>(332.6 to 452.8)                      | 19.8<br>(12.8 to 28.8)                  | 36.5<br>(32.2 to 40.3)                            | 11.5<br>(8.5 to 14.2)                               |

| Cause                                                                               | Prevalence in thousands (95% UI)        | Incidence in thousands (95% UI)          | YLDs in thousands (95% UI)          |                                                   |                                                     |
|-------------------------------------------------------------------------------------|-----------------------------------------|------------------------------------------|-------------------------------------|---------------------------------------------------|-----------------------------------------------------|
|                                                                                     | 2016 counts                             | 2016 counts                              | 2016 counts                         | Percentage change in counts between 2006 and 2016 | Percentage change in age-standardised rates between |
| Adverse effects of medical treatment                                                | 7.4<br>(5.9 to 9.3)                     | 97.1<br>(84.1 to 112.3)                  | 1.0<br>(0.6 to 1.5)                 | 26.7<br>(19.5 to 34.0)                            | 6.2<br>(1.1 to 11.4)                                |
| Animal contact                                                                      | 129.8<br>(112.2 to 155.6)               | 156.7<br>(128.3 to 189.3)                | 4.4<br>(2.9 to 6.3)                 | 10.3<br>(4.5 to 16.6)                             | -6.2<br>(-10.5 to -1.2)                             |
| Venomous animal contact                                                             | 48.4<br>(39.2 to 59.3)                  | 62.0<br>(46.6 to 79.8)                   | 3.1<br>(2.0 to 4.5)                 | 14.9<br>(6.3 to 24.4)                             | -0.9<br>(-7.4 to 6.5)                               |
| Non-venomous animal contact                                                         | 81.4<br>(65.7 to 106.3)                 | 94.7<br>(76.2 to 116.1)                  | 1.3<br>(0.8 to 2.0)                 | 0.7<br>(-3.3 to 4.2)                              | -16.0<br>(-19.1 to -13.5)                           |
| Foreign body                                                                        | 375.1<br>(304.1 to 442.1)               | 216.0<br>(190.4 to 246.5)                | 13.7<br>(8.7 to 20.4)               | 19.2<br>(14.9 to 23.1)                            | 1.6<br>(-1.6 to 4.5)                                |
| Pulmonary aspiration and foreign body in airway                                     | 187.3<br>(139.3 to 253.6)               | 69.5<br>(57.8 to 83.9)                   | 7.9<br>(5.0 to 12.0)                | 14.0<br>(10.0 to 17.8)                            | -1.4<br>(-4.4 to 1.5)                               |
| Foreign body in eyes                                                                | 13.6<br>(7.5 to 20.2)                   | 71.5<br>(55.1 to 95.1)                   | 0.8<br>(0.4 to 1.3)                 | 24.0<br>(18.7 to 30.2)                            | 3.2<br>(-0.1 to 6.6)                                |
| Foreign body in other body part                                                     | 174.2<br>(142.1 to 218.3)               | 74.9<br>(63.3 to 89.2)                   | 5.0<br>(3.2 to 7.5)                 | 27.6<br>(22.4 to 32.5)                            | 6.0<br>(2.0 to 9.6)                                 |
| Environmental heat and cold exposure                                                | 253.0<br>(213.6 to 295.8)               | 73.8<br>(60.3 to 88.9)                   | 9.2<br>(6.0 to 13.4)                | 27.2<br>(23.7 to 30.8)                            | 4.9<br>(2.3 to 7.3)                                 |
| Other unintentional injuries                                                        | 561.9<br>(456.0 to 685.5)               | 217.2<br>(185.1 to 252.9)                | 15.9<br>(10.3 to 23.2)              | 34.1<br>(31.4 to 36.7)                            | 11.2<br>(9.3 to 13.1)                               |
| <b>Self-harm and interpersonal violence</b>                                         | <b>656.1</b><br><b>(596.4 to 722.2)</b> | <b>129.1†</b><br><b>(109.8 to 150.0)</b> | <b>12.8</b><br><b>(8.7 to 18.1)</b> | <b>24.6</b><br><b>(20.9 to 28.1)</b>              | <b>3.9</b><br><b>(1.8 to 5.9)</b>                   |
| Self-harm                                                                           | 40.2<br>(33.6 to 47.3)                  | 18.9<br>(15.9 to 22.1)                   | 1.9<br>(1.2 to 2.8)                 | 35.4<br>(31.0 to 40.2)                            | 6.9<br>(3.7 to 10.1)                                |
| Self-harm by firearm                                                                | 0.8<br>(0.7 to 0.9)                     | 0.2<br>(0.1 to 0.4)                      | < 0.05<br>(< 0.05 to < 0.05)        | -6.9<br>(-10.7 to -3.4)                           | -29.4<br>(-32.4 to -26.9)                           |
| Self-harm by other specified means                                                  | 39.4<br>(32.8 to 46.5)                  | 18.7<br>(15.7 to 21.8)                   | 1.9<br>(1.2 to 2.8)                 | 36.3<br>(31.8 to 41.2)                            | 7.8<br>(4.4 to 11.0)                                |
| Interpersonal violence                                                              | 615.9<br>(557.9 to 682.3)               | 110.2†<br>(91.2 to 131.1)                | 10.9<br>(7.5 to 15.4)               | 22.9<br>(18.9 to 26.7)                            | 3.3<br>(1.1 to 5.5)                                 |
| Assault by firearm                                                                  | 2.8<br>(2.4 to 3.3)                     | 0.9<br>(0.7 to 1.3)                      | 0.1<br>(0.1 to 0.2)                 | 35.2<br>(30.9 to 39.6)                            | 9.9<br>(7.1 to 12.6)                                |
| Assault by sharp object                                                             | 56.5<br>(46.0 to 67.3)                  | 24.4<br>(18.4 to 31.3)                   | 1.7<br>(1.1 to 2.4)                 | 25.0<br>(20.9 to 28.8)                            | 0.9<br>(-1.8 to 3.4)                                |
| Sexual violence                                                                     | 415.9<br>(360.5 to 478.6)               | --                                       | 3.4<br>(2.3 to 4.9)                 | 1.7<br>(-2.9 to 6.5)                              | -8.3<br>(-11.7 to -5.1)                             |
| Assault by other means                                                              | 140.7<br>(116.8 to 171.3)               | 84.8<br>(70.3 to 101.4)                  | 5.7<br>(3.7 to 8.2)                 | 39.5<br>(35.9 to 42.9)                            | 11.5<br>(9.1 to 13.8)                               |
| <b>Forces of nature, conflict and terrorism, and executions and police conflict</b> | <b>8.1</b><br><b>(4.5 to 13.1)</b>      | <b>0.7†</b><br><b>(0.5 to 1.0)</b>       | <b>0.2</b><br><b>(0.1 to 0.7)</b>   | <b>-10.5</b><br><b>(-14.2 to -5.4)</b>            | <b>-18.0</b><br><b>(-21.3 to -13.3)</b>             |
| Exposure to forces of nature                                                        | --                                      | --                                       | --                                  | --                                                | --                                                  |
| Conflict and terrorism                                                              | 6.2<br>(2.6 to 10.7)                    | --                                       | 0.2<br>(< 0.05 to 0.5)              | -17.4<br>(-21.3 to -13.4)                         | -24.2<br>(-27.3 to -20.6)                           |
| Executions and police conflict                                                      | 1.9<br>(1.2 to 3.2)                     | 0.7<br>(0.5 to 1.0)                      | 0.1<br>(< 0.05 to 0.1)              | 23.3<br>(15.6 to 28.8)                            | 11.3<br>(6.1 to 15.6)                               |
| <b>Impairments</b>                                                                  | --                                      | --                                       | --                                  | --                                                | --                                                  |
| Anaemia                                                                             | 13,078.6<br>(12,341.8 to 13,811.5)      | --                                       | 335.2<br>(222.4 to 479.9)           | 2.9<br>(-3.6 to 9.5)                              | -9.9<br>(-14.4 to -4.7)                             |
| Developmental intellectual disability                                               | 724.4<br>(568.1 to 878.6)               | --                                       | 76.7<br>(56.6 to 101.1)             | 10.1<br>(4.5 to 17.6)                             | -1.6<br>(-6.6 to 5.0)                               |
| Epilepsy                                                                            | 210.5<br>(92.5 to 337.8)                | --                                       | 73.4<br>(32.4 to 139.1)             | 12.7<br>(-55.8 to 182.9)                          | 0.6<br>(-60.9 to 158.7)                             |
| Guillain-Barre syndrome                                                             | 0.3<br>(0.2 to 0.4)                     | --                                       | 0.1<br>(0.1 to 0.1)                 | 17.1<br>(11.8 to 23.4)                            | 0.0<br>(-0.1 to 0.1)                                |
| Hearing loss                                                                        | 4,443.5<br>(4,223.3 to 4,685.1)         | --                                       | 143.8<br>(100.5 to 198.4)           | 15.5<br>(11.9 to 18.8)                            | -5.1<br>(-7.3 to -3.4)                              |
| Heart failure                                                                       | 291.2<br>(256.0 to 331.6)               | --                                       | 25.9<br>(18.5 to 34.5)              | 29.3<br>(20.7 to 39.2)                            | 1.6<br>(-5.3 to 9.0)                                |
| Infertility                                                                         | 351.9<br>(275.0 to 448.6)               | --                                       | 2.4<br>(1.1 to 4.4)                 | 23.7<br>(14.5 to 33.9)                            | 1.3<br>(-5.9 to 9.7)                                |
| Pelvic inflammatory disease                                                         | 17.0<br>(14.2 to 20.5)                  | --                                       | 2.2<br>(1.4 to 3.2)                 | 16.4<br>(-2.0 to 37.5)                            | -7.0<br>(-21.2 to 9.3)                              |
| Vision loss                                                                         | 4,103.4<br>(3,932.4 to 4,285.7)         | --                                       | 107.9<br>(74.5 to 157.1)            | 20.2<br>(16.7 to 24.8)                            | -3.5<br>(-6.0 to -0.2)                              |

We did not calculate incidence for the nine impairments, certain NTDs, and causes with only birth prevalence. Blank cells mean that no estimate is available.

† Incidence for aggregate causes represents the sum of the incidence of the causes below the aggregate.

‡ Incidence estimates for stroke represent first-ever stroke only.

^ Incidence of HIV/AIDS represents new infections of HIV only and does not include new infections of Tuberculosis in HIV positive cases.



SR Table 14: Prevalence, incidence, and YLDs for 2016, percentage change of YLD counts and percentage change of age-standardised YLD rates between 2006 and 2016 by cause and impairments, for all ages, Vanuatu.

| Cause                                                                                | Prevalence in thousands (95% UI) | Incidence in thousands (95% UI)         | YLDs in thousands (95% UI)    |                                                   |                                                     |
|--------------------------------------------------------------------------------------|----------------------------------|-----------------------------------------|-------------------------------|---------------------------------------------------|-----------------------------------------------------|
|                                                                                      | 2016 counts                      | 2016 counts                             | 2016 counts                   | Percentage change in counts between 2006 and 2016 | Percentage change in age-standardised rates between |
| <b>All causes</b>                                                                    | <b>270.1</b><br>(269.1 to 271.2) | <b>1,833.8†</b><br>(1,734.5 to 1,941.6) | <b>27.1</b><br>(20.1 to 35.3) | <b>32.7</b><br>(30.0 to 35.4)                     | <b>0.8</b><br>(-1.0 to 2.5)                         |
| <b>Communicable, maternal, neonatal, and nutritional disorders</b>                   | <b>241.2</b><br>(236.1 to 247.1) | <b>1,106.0†</b><br>(1,014.0 to 1,200.8) | <b>5.5</b><br>(3.8 to 7.7)    | <b>24.6</b><br>(16.3 to 34.0)                     | <b>-0.5</b><br>(-7.4 to 7.5)                        |
| <b>HIV/AIDS and tuberculosis</b>                                                     | <b>63.8</b><br>(59.0 to 67.3)    | <b>0.2†</b><br>(0.2 to 0.4)             | <b>0.1</b><br>(0.1 to 0.2)    | <b>26.8</b><br>(5.0 to 77.5)                      | <b>-8.1</b><br>(-22.6 to 24.5)                      |
| Tuberculosis                                                                         | 60.3<br>(56.4 to 64.7)           | 0.2†<br>(0.2 to 0.2)                    | 0.1<br>(< 0.05 to 0.1)        | 13.0<br>(1.1 to 27.8)                             | -16.7<br>(-24.7 to -7.3)                            |
| Drug-susceptible tuberculosis                                                        | 0.2<br>(0.2 to 0.3)              | 0.2<br>(0.2 to 0.2)                     | 0.1<br>(< 0.05 to 0.1)        | 13.0<br>(0.9 to 28.3)                             | -16.6<br>(-24.7 to -6.8)                            |
| Multidrug-resistant tuberculosis without extensive drug resistance                   | < 0.05<br>(< 0.05 to < 0.05)     | < 0.05<br>(< 0.05 to < 0.05)            | < 0.05<br>(< 0.05 to < 0.05)  | -2.5<br>(-97.3 to 3,709.2)                        | -27.3<br>(-98.0 to 2,679.5)                         |
| Extensively drug-resistant tuberculosis                                              | < 0.05<br>(< 0.05 to < 0.05)     | < 0.05<br>(< 0.05 to < 0.05)            | < 0.05<br>(< 0.05 to < 0.05)  | 221.1<br>(-91.1 to 12,439.6)                      | 139.4<br>(-93.4 to 9,052.1)                         |
| Latent tuberculosis infection                                                        | 60.1<br>(56.1 to 64.5)           | --                                      | --                            | --                                                | --                                                  |
| HIV/AIDS                                                                             | 0.2<br>(< 0.05 to 0.8)           | < 0.05^<br>(< 0.05 to 0.1)              | < 0.05<br>(< 0.05 to 0.1)     | 114.7<br>(9.0 to 466.5)                           | 49.7<br>(-22.8 to 305.5)                            |
| Drug-susceptible HIV/AIDS - Tuberculosis                                             | < 0.05<br>(< 0.05 to < 0.05)     | < 0.05<br>(< 0.05 to < 0.05)            | < 0.05<br>(< 0.05 to < 0.05)  | 54.6<br>(44.6 to 65.3)                            | 8.3<br>(-0.9 to 17.9)                               |
| Multidrug-resistant HIV/AIDS - Tuberculosis without extensive drug resistance        | < 0.05<br>(< 0.05 to < 0.05)     | < 0.05<br>(< 0.05 to < 0.05)            | < 0.05<br>(< 0.05 to < 0.05)  | 42.3<br>(-96.4 to 5,123.6)                        | -1.0<br>(-97.5 to 3,535.3)                          |
| Extensively drug-resistant HIV/AIDS - Tuberculosis                                   | < 0.05<br>(< 0.05 to < 0.05)     | < 0.05<br>(< 0.05 to < 0.05)            | < 0.05<br>(< 0.05 to < 0.05)  | 368.5<br>(-88.0 to 17,090.2)                      | 226.0<br>(-91.7 to 11,863.8)                        |
| HIV/AIDS resulting in other diseases                                                 | 0.1<br>(< 0.05 to 0.8)           | < 0.05<br>(< 0.05 to 0.1)               | < 0.05<br>(< 0.05 to 0.1)     | 132.7<br>(-6.3 to 996.1)                          | 61.3<br>(-34.8 to 739.5)                            |
| <b>Diarrhoea, lower respiratory infections, and other common infectious diseases</b> | <b>20.0</b><br>(19.1 to 21.1)    | <b>1,052.9†</b><br>(963.7 to 1,146.6)   | <b>1.2</b><br>(0.8 to 1.6)    | <b>25.4</b><br>(21.5 to 29.2)                     | <b>1.4</b><br>(-1.3 to 4.3)                         |
| Diarrhoeal diseases                                                                  | 5.3<br>(5.0 to 5.7)              | 355.9<br>(332.2 to 383.5)               | 0.6<br>(0.4 to 0.8)           | 29.5<br>(22.8 to 36.7)                            | 4.1<br>(-0.5 to 9.1)                                |
| Intestinal infectious diseases                                                       | < 0.05<br>(< 0.05 to < 0.05)     | 0.4†<br>(0.4 to 0.5)                    | < 0.05<br>(< 0.05 to < 0.05)  | -7.8<br>(-26.7 to 16.7)                           | -24.2<br>(-37.4 to -8.1)                            |
| Typhoid fever                                                                        | < 0.05<br>(< 0.05 to < 0.05)     | 0.4<br>(0.3 to 0.4)                     | < 0.05<br>(< 0.05 to < 0.05)  | -7.5<br>(-27.9 to 18.8)                           | -24.1<br>(-38.4 to -6.4)                            |
| Paratyphoid fever                                                                    | < 0.05<br>(< 0.05 to < 0.05)     | 0.1<br>(0.1 to 0.1)                     | < 0.05<br>(< 0.05 to < 0.05)  | -3.8<br>(-20.8 to 15.3)                           | -21.9<br>(-34.0 to -8.4)                            |
| Other intestinal infectious diseases                                                 | --                               | --                                      | < 0.05<br>(< 0.05 to < 0.05)  | -35.9<br>(-50.4 to -17.2)                         | -43.9<br>(-53.4 to -32.7)                           |
| Lower respiratory infections                                                         | 0.5<br>(0.4 to 0.5)              | 20.5<br>(18.3 to 23.1)                  | < 0.05<br>(< 0.05 to < 0.05)  | 36.7<br>(21.3 to 53.2)                            | 6.5<br>(-3.3 to 16.3)                               |
| Upper respiratory infections                                                         | 8.7<br>(7.6 to 9.8)              | 651.7<br>(566.6 to 743.1)               | 0.2<br>(0.1 to 0.3)           | 23.4<br>(17.0 to 29.3)                            | -0.0<br>(-4.8 to 4.7)                               |
| Otitis media                                                                         | 4.3<br>(3.8 to 4.7)              | 14.1<br>(10.9 to 18.1)                  | 0.1<br>(0.1 to 0.2)           | 17.4<br>(9.5 to 26.7)                             | -3.2<br>(-9.2 to 3.9)                               |
| Meningitis                                                                           | 1.0<br>(0.9 to 1.2)              | 0.2<br>(0.1 to 0.2)                     | 0.1<br>(0.1 to 0.1)           | 26.8<br>(16.9 to 37.2)                            | 1.2<br>(-6.0 to 8.7)                                |
| Pneumococcal meningitis                                                              | 0.7<br>(0.6 to 0.8)              | 0.1<br>(0.1 to 0.1)                     | 0.1<br>(< 0.05 to 0.1)        | 34.0<br>(17.7 to 51.8)                            | 6.3<br>(-5.4 to 19.4)                               |
| H influenzae type B meningitis                                                       | 0.1<br>(0.1 to 0.2)              | < 0.05<br>(< 0.05 to < 0.05)            | < 0.05<br>(< 0.05 to < 0.05)  | -1.5<br>(-8.0 to 5.1)                             | -20.5<br>(-26.0 to -14.7)                           |
| Meningococcal infection                                                              | 0.1<br>(0.1 to 0.1)              | < 0.05<br>(< 0.05 to < 0.05)            | < 0.05<br>(< 0.05 to < 0.05)  | 28.7<br>(22.9 to 35.2)                            | 2.2<br>(-2.3 to 7.5)                                |
| Other meningitis                                                                     | 0.1<br>(0.1 to 0.1)              | < 0.05<br>(< 0.05 to < 0.05)            | < 0.05<br>(< 0.05 to < 0.05)  | 35.8<br>(26.6 to 45.3)                            | 7.7<br>(2.4 to 13.5)                                |
| Encephalitis                                                                         | 0.9<br>(0.6 to 1.4)              | 0.4<br>(0.3 to 0.4)                     | 0.1<br>(0.1 to 0.1)           | 26.2<br>(12.8 to 41.9)                            | -0.4<br>(-10.5 to 10.7)                             |
| Diphtheria                                                                           | < 0.05<br>(< 0.05 to < 0.05)     | < 0.05<br>(< 0.05 to < 0.05)            | < 0.05<br>(< 0.05 to < 0.05)  | -17.7<br>(-55.8 to 46.5)                          | -34.6<br>(-63.5 to 13.3)                            |
| Whooping cough                                                                       | 0.2<br>(0.2 to 0.3)              | 1.6<br>(1.2 to 2.0)                     | < 0.05<br>(< 0.05 to < 0.05)  | 1.8<br>(-10.1 to 15.6)                            | -10.8<br>(-21.2 to 1.2)                             |
| Tetanus                                                                              | < 0.05<br>(< 0.05 to < 0.05)     | < 0.05<br>(< 0.05 to < 0.05)            | < 0.05<br>(< 0.05 to < 0.05)  | -2.0<br>(-22.2 to 20.5)                           | -29.8<br>(-47.2 to -11.0)                           |
| Measles                                                                              | < 0.05<br>(< 0.05 to < 0.05)     | 0.5<br>(0.2 to 1.0)                     | < 0.05<br>(< 0.05 to < 0.05)  | -83.7<br>(-92.0 to -71.1)                         | -85.8<br>(-93.0 to -74.8)                           |
| Varicella and herpes zoster                                                          | 0.3<br>(0.3 to 0.3)              | 7.8<br>(7.4 to 8.3)                     | < 0.05<br>(< 0.05 to < 0.05)  | 33.9<br>(18.3 to 51.3)                            | -0.0<br>(-9.4 to 10.2)                              |
| <b>Neglected tropical diseases and malaria</b>                                       | <b>177.4</b><br>(161.1 to 194.7) | <b>2.6†</b><br>(2.0 to 3.3)             | <b>0.8</b><br>(0.5 to 1.3)    | <b>102.2</b><br>(28.3 to 221.3)                   | <b>52.2</b><br>(-8.2 to 154.9)                      |
| Malaria                                                                              | 0.2<br>(0.2 to 0.2)              | 1.3<br>(1.3 to 1.3)                     | < 0.05<br>(< 0.05 to < 0.05)  | -73.4<br>(-83.1 to -58.8)                         | -76.6<br>(-85.1 to -64.0)                           |
| Chagas disease                                                                       | --                               | --                                      | --                            | --                                                | --                                                  |
| Leishmaniasis                                                                        | --                               | --                                      | --                            | --                                                | --                                                  |
| Visceral leishmaniasis                                                               | --                               | --                                      | --                            | --                                                | --                                                  |
| Cutaneous and mucocutaneous leishmaniasis                                            | --                               | --                                      | --                            | --                                                | --                                                  |
| African trypanosomiasis                                                              | --                               | --                                      | --                            | --                                                | --                                                  |
| Schistosomiasis                                                                      | --                               | --                                      | --                            | --                                                | --                                                  |
| Cysticercosis                                                                        | --                               | --                                      | --                            | --                                                | --                                                  |
| Cystic echinococcosis                                                                | --                               | --                                      | --                            | --                                                | --                                                  |
| Lymphatic filariasis                                                                 | 0.4<br>(0.2 to 0.7)              | --                                      | < 0.05<br>(< 0.05 to 0.1)     | -80.0<br>(-81.6 to -78.3)                         | -85.1<br>(-86.2 to -84.0)                           |
| Onchocerciasis                                                                       | --                               | --                                      | --                            | --                                                | --                                                  |
| Trachoma                                                                             | 0.2<br>(0.1 to 0.4)              | --                                      | < 0.05<br>(< 0.05 to < 0.05)  | 42.6<br>(0.1 to 104.5)                            | -10.3<br>(-39.6 to 34.2)                            |
| Dengue                                                                               | 0.1<br>(< 0.05 to 0.1)           | 1.3<br>(0.8 to 2.0)                     | < 0.05<br>(< 0.05 to < 0.05)  | 161.9<br>(83.9 to 518.6)                          | 107.5<br>(50.7 to 379.6)                            |
| Yellow fever                                                                         | --                               | --                                      | --                            | --                                                | --                                                  |
| Rabies                                                                               | < 0.05<br>(< 0.05 to < 0.05)     | < 0.05<br>(< 0.05 to < 0.05)            | < 0.05<br>(< 0.05 to < 0.05)  | -8.0<br>(-43.7 to 56.7)                           | -35.4<br>(-61.1 to 11.4)                            |
| Intestinal nematode infections                                                       | 175.6<br>(159.1 to 193.2)        | --                                      | 0.6<br>(0.4 to 1.1)           | 191,801.6<br>(122,783.1 to 297,396.5)             | 157,398.6<br>(97,160.3 to 249,522.4)                |
| Ascariasis                                                                           | 95.4<br>(73.7 to 120.4)          | --                                      | 0.2<br>(0.1 to 0.3)           | 3.8e+80<br>(2.0e+80 to 6.6e+80)                   | 3.3e+80<br>(1.8e+80 to 6.0e+80)                     |

| Cause                                                                   | Prevalence in thousands (95% UI)        | Incidence in thousands (95% UI)          | YLDs in thousands (95% UI)                          |                                                   |                                                     |
|-------------------------------------------------------------------------|-----------------------------------------|------------------------------------------|-----------------------------------------------------|---------------------------------------------------|-----------------------------------------------------|
|                                                                         | 2016 counts                             | 2016 counts                              | 2016 counts                                         | Percentage change in counts between 2006 and 2016 | Percentage change in age-standardised rates between |
| Trichuriasis                                                            | 61.0<br>(47.4 to 79.7)                  | --                                       | < 0.05<br>(< 0.05 to 0.1)                           | 1.5e+80<br>(7.0e+79 to 3.2e+80)                   | 1.3e+80<br>(5.7e+79 to 3.0e+80)                     |
| Hookworm disease                                                        | 88.8<br>(74.0 to 106.9)                 | --                                       | 0.4<br>(0.2 to 0.7)                                 | 127,883.2<br>(82,495.5 to 201,909.3)              | 105,815.8<br>(66,597.2 to 173,974.9)                |
| Food-borne trematodiasis                                                | --                                      | --                                       | --                                                  | --                                                | --                                                  |
| Leprosy                                                                 | < 0.05<br>(< 0.05 to < 0.05)            | < 0.05<br>(< 0.05 to < 0.05)             | < 0.05<br>(< 0.05 to < 0.05)                        | 1.7<br>(-24.1 to 69.8)                            | -26.4<br>(-43.8 to 18.9)                            |
| Ebola virus disease                                                     | --                                      | --                                       | --                                                  | --                                                | --                                                  |
| Zika virus disease                                                      | --                                      | --                                       | --                                                  | --                                                | --                                                  |
| Guinea worm disease                                                     | --                                      | --                                       | --                                                  | --                                                | --                                                  |
| Other neglected tropical diseases                                       | 3.8<br>(3.6 to 4.1)                     | --                                       | 0.1<br>(0.1 to 0.2)                                 | 6.6<br>(-3.3 to 18.2)                             | -11.1<br>(-19.0 to -2.2)                            |
| <b>Maternal disorders</b>                                               | <b>0.2</b><br><b>(0.2 to 0.3)</b>       | <b>6.6†</b><br><b>(5.4 to 8.1)</b>       | <b>&lt; 0.05</b><br><b>(&lt; 0.05 to &lt; 0.05)</b> | <b>15.7</b><br><b>(-11.3 to 49.1)</b>             | <b>-10.0</b><br><b>(-30.9 to 15.3)</b>              |
| Maternal haemorrhage                                                    | 0.1<br>(0.1 to 0.1)                     | 0.9<br>(0.7 to 1.2)                      | < 0.05<br>(< 0.05 to < 0.05)                        | 15.9<br>(-26.0 to 76.6)                           | -10.4<br>(-42.4 to 37.0)                            |
| Maternal sepsis and other pregnancy related infections                  | < 0.05<br>(< 0.05 to 0.1)               | 0.4<br>(0.3 to 0.5)                      | < 0.05<br>(< 0.05 to < 0.05)                        | 11.5<br>(-49.8 to 150.7)                          | -12.1<br>(-60.5 to 95.8)                            |
| Maternal hypertensive disorders                                         | 0.1<br>(0.1 to 0.1)                     | 0.4<br>(0.3 to 0.5)                      | < 0.05<br>(< 0.05 to < 0.05)                        | 37.7<br>(-18.7 to 145.2)                          | 6.5<br>(-36.8 to 87.5)                              |
| Maternal obstructed labour and uterine rupture                          | < 0.05<br>(< 0.05 to < 0.05)            | 0.6<br>(0.5 to 0.8)                      | < 0.05<br>(< 0.05 to < 0.05)                        | 12.3<br>(-55.7 to 181.6)                          | -12.6<br>(-64.9 to 116.8)                           |
| Maternal abortion, miscarriage, and ectopic pregnancy                   | < 0.05<br>(< 0.05 to 0.1)               | 4.4<br>(3.2 to 5.8)                      | < 0.05<br>(< 0.05 to < 0.05)                        | 5.7<br>(-42.4 to 89.7)                            | -17.6<br>(-55.0 to 49.9)                            |
| Other maternal disorders                                                | --                                      | --                                       | < 0.05<br>(< 0.05 to < 0.05)                        | 10.0<br>(-16.0 to 41.9)                           | -14.0<br>(-34.1 to 10.4)                            |
| <b>Neonatal disorders</b>                                               | <b>4.8</b><br><b>(3.9 to 6.4)</b>       | --                                       | <b>0.5</b><br><b>(0.4 to 0.7)</b>                   | <b>22.4</b><br><b>(3.3 to 43.8)</b>               | <b>1.2</b><br><b>(-14.6 to 18.7)</b>                |
| Neonatal preterm birth complications                                    | 4.4<br>(3.5 to 5.9)                     | --                                       | 0.4<br>(0.3 to 0.6)                                 | 24.7<br>(0.6 to 52.6)                             | 2.8<br>(-17.4 to 25.5)                              |
| Neonatal encephalopathy due to birth asphyxia and trauma                | 0.2<br>(0.1 to 0.4)                     | --                                       | < 0.05<br>(< 0.05 to 0.1)                           | 20.2<br>(-25.6 to 93.5)                           | -1.2<br>(-38.8 to 60.9)                             |
| Neonatal sepsis and other neonatal infections                           | 0.1<br>(< 0.05 to 0.2)                  | --                                       | < 0.05<br>(< 0.05 to 0.1)                           | 13.4<br>(-18.5 to 81.3)                           | -6.5<br>(-31.9 to 58.0)                             |
| Hemolytic disease and other neonatal jaundice                           | 0.1<br>(0.1 to 0.1)                     | --                                       | < 0.05<br>(< 0.05 to < 0.05)                        | 19.5<br>(0.4 to 41.2)                             | -2.6<br>(-16.3 to 11.5)                             |
| Other neonatal disorders                                                | --                                      | --                                       | < 0.05<br>(< 0.05 to < 0.05)                        | 11.8<br>(-7.9 to 35.2)                            | -2.3<br>(-19.5 to 18.3)                             |
| <b>Nutritional deficiencies</b>                                         | <b>91.0</b><br><b>(87.4 to 95.5)</b>    | <b>11.3†</b><br><b>(7.8 to 17.9)</b>     | <b>2.6</b><br><b>(1.7 to 3.8)</b>                   | <b>11.4</b><br><b>(4.7 to 18.3)</b>               | <b>-11.0</b><br><b>(-15.4 to -6.5)</b>              |
| Protein-energy malnutrition                                             | 2.8<br>(2.1 to 3.7)                     | 0.9<br>(0.7 to 1.2)                      | 0.1<br>(0.1 to 0.2)                                 | 25.6<br>(-24.3 to 108.0)                          | 9.9<br>(-34.0 to 82.6)                              |
| Iodine deficiency                                                       | 0.1<br>(0.1 to 0.1)                     | < 0.05<br>(< 0.05 to < 0.05)             | < 0.05<br>(< 0.05 to < 0.05)                        | 27.3<br>(14.8 to 42.6)                            | -6.7<br>(-16.0 to 3.7)                              |
| Vitamin A deficiency                                                    | 12.6<br>(8.4 to 20.2)                   | 10.4<br>(6.9 to 17.0)                    | < 0.05<br>(< 0.05 to < 0.05)                        | 14.9<br>(-5.0 to 39.8)                            | -5.1<br>(-20.4 to 15.0)                             |
| Iron-deficiency anaemia                                                 | 84.1<br>(80.8 to 87.8)                  | --                                       | 2.5<br>(1.6 to 3.6)                                 | 10.7<br>(4.4 to 17.7)                             | -11.6<br>(-16.0 to -7.2)                            |
| Other nutritional deficiencies                                          | --                                      | --                                       | < 0.05<br>(< 0.05 to < 0.05)                        | 25.2<br>(-26.8 to 112.8)                          | 9.4<br>(-36.0 to 86.5)                              |
| <b>Other communicable, maternal, neonatal, and nutritional diseases</b> | <b>79.5</b><br><b>(74.3 to 84.2)</b>    | <b>32.4</b><br><b>(29.5 to 35.3)</b>     | <b>0.2</b><br><b>(0.1 to 0.3)</b>                   | <b>20.8</b><br><b>(14.0 to 27.8)</b>              | <b>-5.0</b><br><b>(-9.5 to -0.3)</b>                |
| Sexually transmitted diseases excluding HIV                             | 51.5<br>(48.0 to 54.8)                  | 23.9<br>(21.6 to 26.4)                   | 0.1<br>(0.1 to 0.1)                                 | 27.6<br>(20.1 to 35.7)                            | -3.9<br>(-9.8 to 1.9)                               |
| Syphilis                                                                | 8.1<br>(6.7 to 9.9)                     | 5.0<br>(4.1 to 6.3)                      | < 0.05<br>(< 0.05 to < 0.05)                        | 46.9<br>(32.1 to 62.0)                            | 0.7<br>(-11.0 to 12.5)                              |
| Chlamydial infection                                                    | 7.0<br>(5.3 to 8.7)                     | 5.6<br>(4.2 to 7.2)                      | < 0.05<br>(< 0.05 to < 0.05)                        | 24.0<br>(9.9 to 40.0)                             | -4.7<br>(-15.2 to 7.4)                              |
| Gonococcal infection                                                    | 0.7<br>(0.6 to 0.9)                     | 1.6<br>(1.3 to 2.1)                      | < 0.05<br>(< 0.05 to < 0.05)                        | 23.6<br>(2.2 to 48.3)                             | -5.0<br>(-21.1 to 12.8)                             |
| Trichomoniasis                                                          | 7.1<br>(5.8 to 8.6)                     | 6.3<br>(5.0 to 7.8)                      | < 0.05<br>(< 0.05 to < 0.05)                        | 33.8<br>(23.3 to 45.2)                            | 1.2<br>(-6.2 to 9.5)                                |
| Genital herpes                                                          | 33.7<br>(29.0 to 39.5)                  | 2.8<br>(2.4 to 3.3)                      | < 0.05<br>(< 0.05 to < 0.05)                        | 33.6<br>(20.7 to 47.3)                            | -1.3<br>(-9.4 to 7.9)                               |
| Other sexually transmitted diseases                                     | 2.3<br>(2.0 to 2.6)                     | 2.6<br>(2.2 to 3.1)                      | < 0.05<br>(< 0.05 to 0.1)                           | 24.6<br>(12.1 to 37.2)                            | -6.2<br>(-15.5 to 3.0)                              |
| Hepatitis                                                               | 33.0<br>(26.9 to 39.9)                  | 8.5<br>(6.7 to 10.0)                     | < 0.05<br>(< 0.05 to < 0.05)                        | 14.7<br>(-8.1 to 40.3)                            | -11.1<br>(-26.7 to 7.8)                             |
| Acute hepatitis A                                                       | 0.3<br>(0.2 to 0.4)                     | 3.8<br>(2.3 to 4.7)                      | < 0.05<br>(< 0.05 to < 0.05)                        | 15.8<br>(-22.5 to 73.1)                           | -6.8<br>(-34.0 to 31.9)                             |
| Hepatitis B                                                             | 26.9<br>(21.0 to 33.8)                  | 4.1<br>(3.1 to 5.3)                      | < 0.05<br>(< 0.05 to < 0.05)                        | 14.4<br>(-13.3 to 47.7)                           | -13.4<br>(-34.2 to 10.3)                            |
| Hepatitis C                                                             | 5.8<br>(5.1 to 6.5)                     | 0.3<br>(0.3 to 0.4)                      | < 0.05<br>(< 0.05 to < 0.05)                        | 16.9<br>(-5.0 to 47.5)                            | -3.0<br>(-16.8 to 15.1)                             |
| Acute hepatitis E                                                       | < 0.05<br>(< 0.05 to < 0.05)            | 0.3<br>(0.2 to 0.3)                      | < 0.05<br>(< 0.05 to < 0.05)                        | 10.2<br>(-19.8 to 44.7)                           | -10.7<br>(-30.3 to 9.2)                             |
| Other infectious diseases                                               | 3.0<br>(2.8 to 3.2)                     | < 0.05<br>(< 0.05 to < 0.05)             | 0.1<br>(0.1 to 0.1)                                 | 15.2<br>(4.4 to 27.2)                             | -5.4<br>(-13.3 to 3.8)                              |
| <b>Non-communicable diseases</b>                                        | <b>239.8</b><br><b>(237.6 to 241.9)</b> | <b>711.4†</b><br><b>(669.3 to 757.1)</b> | <b>20.3</b><br><b>(15.0 to 26.2)</b>                | <b>34.4</b><br><b>(31.5 to 37.2)</b>              | <b>0.6</b><br><b>(-1.1 to 2.2)</b>                  |
| <b>Neoplasms</b>                                                        | <b>0.3</b><br><b>(0.3 to 0.4)</b>       | <b>0.2</b><br><b>(0.2 to 0.2)</b>        | <b>0.1</b><br><b>(&lt; 0.05 to 0.1)</b>             | <b>45.5</b><br><b>(36.4 to 54.5)</b>              | <b>0.7</b><br><b>(-4.9 to 6.5)</b>                  |
| Lip and oral cavity cancer                                              | < 0.05<br>(< 0.05 to < 0.05)            | < 0.05<br>(< 0.05 to < 0.05)             | < 0.05<br>(< 0.05 to < 0.05)                        | 50.5<br>(32.5 to 71.3)                            | 3.6<br>(-8.7 to 18.0)                               |
| Nasopharynx cancer                                                      | < 0.05<br>(< 0.05 to < 0.05)            | < 0.05<br>(< 0.05 to < 0.05)             | < 0.05<br>(< 0.05 to < 0.05)                        | 38.8<br>(17.0 to 65.3)                            | -3.6<br>(-18.2 to 14.1)                             |
| Other pharynx cancer                                                    | < 0.05<br>(< 0.05 to < 0.05)            | < 0.05<br>(< 0.05 to < 0.05)             | < 0.05<br>(< 0.05 to < 0.05)                        | 51.6<br>(33.8 to 73.6)                            | 3.3<br>(-8.8 to 17.4)                               |
| Oesophageal cancer                                                      | < 0.05<br>(< 0.05 to < 0.05)            | < 0.05<br>(< 0.05 to < 0.05)             | < 0.05<br>(< 0.05 to < 0.05)                        | 42.5<br>(28.8 to 57.5)                            | -5.5<br>(-15.2 to 4.4)                              |
| Stomach cancer                                                          | < 0.05<br>(< 0.05 to < 0.05)            | < 0.05<br>(< 0.05 to < 0.05)             | < 0.05<br>(< 0.05 to < 0.05)                        | 34.0<br>(16.2 to 55.5)                            | -9.8<br>(-23.7 to 7.1)                              |
| Colon and rectum cancer                                                 | < 0.05<br>(< 0.05 to < 0.05)            | < 0.05<br>(< 0.05 to < 0.05)             | < 0.05<br>(< 0.05 to < 0.05)                        | 54.3<br>(35.2 to 76.1)                            | 4.1<br>(-10.1 to 21.4)                              |
| Liver cancer                                                            | < 0.05<br>(< 0.05 to < 0.05)            | < 0.05<br>(< 0.05 to < 0.05)             | < 0.05<br>(< 0.05 to < 0.05)                        | 48.1<br>(30.6 to 67.9)                            | 0.2<br>(-10.9 to 12.7)                              |
| Liver cancer due to hepatitis B                                         | < 0.05<br>(< 0.05 to < 0.05)            | < 0.05<br>(< 0.05 to < 0.05)             | < 0.05<br>(< 0.05 to < 0.05)                        | 47.5<br>(30.6 to 66.8)                            | 0.5<br>(-10.8 to 13.9)                              |

| Cause                                              | Prevalence in thousands (95% UI)     | Incidence in thousands (95% UI)    | YLDs in thousands (95% UI)        |                                                   |                                                     |
|----------------------------------------------------|--------------------------------------|------------------------------------|-----------------------------------|---------------------------------------------------|-----------------------------------------------------|
|                                                    | 2016 counts                          | 2016 counts                        | 2016 counts                       | Percentage change in counts between 2006 and 2016 | Percentage change in age-standardised rates between |
| Liver cancer due to hepatitis C                    | < 0.05<br>(< 0.05 to < 0.05)         | < 0.05<br>(< 0.05 to < 0.05)       | < 0.05<br>(< 0.05 to < 0.05)      | 53.1<br>(34.2 to 73.3)                            | 1.7<br>(-10.6 to 15.1)                              |
| Liver cancer due to alcohol use                    | < 0.05<br>(< 0.05 to < 0.05)         | < 0.05<br>(< 0.05 to < 0.05)       | < 0.05<br>(< 0.05 to < 0.05)      | 48.1<br>(29.2 to 71.2)                            | -1.7<br>(-13.7 to 13.2)                             |
| Liver cancer due to other causes                   | < 0.05<br>(< 0.05 to < 0.05)         | < 0.05<br>(< 0.05 to < 0.05)       | < 0.05<br>(< 0.05 to < 0.05)      | 46.1<br>(26.8 to 68.3)                            | -1.1<br>(-14.7 to 12.8)                             |
| Gallbladder and biliary tract cancer               | < 0.05<br>(< 0.05 to < 0.05)         | < 0.05<br>(< 0.05 to < 0.05)       | < 0.05<br>(< 0.05 to < 0.05)      | 46.1<br>(35.9 to 58.2)                            | -2.8<br>(-9.7 to 4.6)                               |
| Pancreatic cancer                                  | < 0.05<br>(< 0.05 to < 0.05)         | < 0.05<br>(< 0.05 to < 0.05)       | < 0.05<br>(< 0.05 to < 0.05)      | 57.4<br>(44.8 to 69.9)                            | 2.6<br>(-5.6 to 11.3)                               |
| Larynx cancer                                      | < 0.05<br>(< 0.05 to < 0.05)         | < 0.05<br>(< 0.05 to < 0.05)       | < 0.05<br>(< 0.05 to < 0.05)      | 44.4<br>(29.2 to 61.9)                            | -4.0<br>(-15.6 to 9.8)                              |
| Tracheal, bronchus, and lung cancer                | < 0.05<br>(< 0.05 to < 0.05)         | < 0.05<br>(< 0.05 to < 0.05)       | < 0.05<br>(< 0.05 to < 0.05)      | 36.9<br>(12.6 to 67.2)                            | -9.8<br>(-25.8 to 9.9)                              |
| Malignant skin melanoma                            | < 0.05<br>(< 0.05 to < 0.05)         | < 0.05<br>(< 0.05 to < 0.05)       | < 0.05<br>(< 0.05 to < 0.05)      | 45.6<br>(26.8 to 73.0)                            | -0.1<br>(-13.3 to 18.4)                             |
| Non-melanoma skin cancer                           | < 0.05<br>(< 0.05 to < 0.05)         | < 0.05<br>(< 0.05 to < 0.05)       | < 0.05<br>(< 0.05 to < 0.05)      | 28.3<br>(-37.3 to 134.7)                          | -19.4<br>(-61.7 to 50.4)                            |
| Non-melanoma skin cancer (squamous-cell carcinoma) | < 0.05<br>(< 0.05 to < 0.05)         | < 0.05<br>(< 0.05 to < 0.05)       | < 0.05<br>(< 0.05 to < 0.05)      | 28.2<br>(-37.4 to 135.5)                          | -19.4<br>(-61.8 to 50.6)                            |
| Non-melanoma skin cancer (basal-cell carcinoma)    | < 0.05<br>(< 0.05 to < 0.05)         | < 0.05<br>(< 0.05 to < 0.05)       | < 0.05<br>(< 0.05 to < 0.05)      | 34.6<br>(17.1 to 52.1)                            | -2.9<br>(-14.1 to 6.8)                              |
| Breast cancer                                      | 0.1<br>(0.1 to 0.2)                  | < 0.05<br>(< 0.05 to < 0.05)       | < 0.05<br>(< 0.05 to < 0.05)      | 65.3<br>(31.7 to 109.7)                           | 15.4<br>(-5.4 to 43.0)                              |
| Cervical cancer                                    | 0.1<br>(< 0.05 to 0.1)               | < 0.05<br>(< 0.05 to < 0.05)       | < 0.05<br>(< 0.05 to < 0.05)      | 32.3<br>(2.2 to 68.8)                             | -5.7<br>(-25.8 to 18.4)                             |
| Uterine cancer                                     | < 0.05<br>(< 0.05 to < 0.05)         | < 0.05<br>(< 0.05 to < 0.05)       | < 0.05<br>(< 0.05 to < 0.05)      | 59.7<br>(25.9 to 103.5)                           | 7.3<br>(-15.0 to 34.9)                              |
| Ovarian cancer                                     | < 0.05<br>(< 0.05 to < 0.05)         | < 0.05<br>(< 0.05 to < 0.05)       | < 0.05<br>(< 0.05 to < 0.05)      | 69.8<br>(32.1 to 118.9)                           | 16.2<br>(-13.7 to 56.6)                             |
| Prostate cancer                                    | < 0.05<br>(< 0.05 to < 0.05)         | < 0.05<br>(< 0.05 to < 0.05)       | < 0.05<br>(< 0.05 to < 0.05)      | 52.3<br>(24.9 to 90.0)                            | -0.4<br>(-15.6 to 21.1)                             |
| Testicular cancer                                  | < 0.05<br>(< 0.05 to < 0.05)         | < 0.05<br>(< 0.05 to < 0.05)       | < 0.05<br>(< 0.05 to < 0.05)      | 36.1<br>(10.8 to 67.0)                            | -1.5<br>(-17.9 to 17.4)                             |
| Kidney cancer                                      | < 0.05<br>(< 0.05 to < 0.05)         | < 0.05<br>(< 0.05 to < 0.05)       | < 0.05<br>(< 0.05 to < 0.05)      | 49.3<br>(28.7 to 73.0)                            | 7.1<br>(-7.3 to 25.2)                               |
| Bladder cancer                                     | < 0.05<br>(< 0.05 to < 0.05)         | < 0.05<br>(< 0.05 to < 0.05)       | < 0.05<br>(< 0.05 to < 0.05)      | 63.3<br>(45.6 to 81.9)                            | 5.9<br>(-6.4 to 18.1)                               |
| Brain and nervous system cancer                    | < 0.05<br>(< 0.05 to < 0.05)         | < 0.05<br>(< 0.05 to < 0.05)       | < 0.05<br>(< 0.05 to < 0.05)      | 38.6<br>(23.7 to 58.9)                            | 3.3<br>(-7.7 to 21.8)                               |
| Thyroid cancer                                     | < 0.05<br>(< 0.05 to < 0.05)         | < 0.05<br>(< 0.05 to < 0.05)       | < 0.05<br>(< 0.05 to < 0.05)      | 64.9<br>(37.7 to 98.8)                            | 7.2<br>(-10.2 to 29.0)                              |
| Mesothelioma                                       | < 0.05<br>(< 0.05 to < 0.05)         | < 0.05<br>(< 0.05 to < 0.05)       | < 0.05<br>(< 0.05 to < 0.05)      | 50.5<br>(34.3 to 69.8)                            | 2.9<br>(-9.2 to 17.4)                               |
| Hodgkin lymphoma                                   | < 0.05<br>(< 0.05 to < 0.05)         | < 0.05<br>(< 0.05 to < 0.05)       | < 0.05<br>(< 0.05 to < 0.05)      | 19.5<br>(6.8 to 35.5)                             | -13.3<br>(-21.5 to -3.0)                            |
| Non-Hodgkin's lymphoma                             | < 0.05<br>(< 0.05 to < 0.05)         | < 0.05<br>(< 0.05 to < 0.05)       | < 0.05<br>(< 0.05 to < 0.05)      | 44.0<br>(32.1 to 58.4)                            | 3.6<br>(-5.2 to 14.7)                               |
| Multiple myeloma                                   | < 0.05<br>(< 0.05 to < 0.05)         | < 0.05<br>(< 0.05 to < 0.05)       | < 0.05<br>(< 0.05 to < 0.05)      | 61.0<br>(44.3 to 80.8)                            | 7.0<br>(-5.6 to 21.6)                               |
| Leukaemia                                          | < 0.05<br>(< 0.05 to < 0.05)         | < 0.05<br>(< 0.05 to < 0.05)       | < 0.05<br>(< 0.05 to < 0.05)      | 23.3<br>(12.2 to 38.1)                            | -4.8<br>(-13.0 to 4.2)                              |
| Acute lymphoid leukaemia                           | < 0.05<br>(< 0.05 to < 0.05)         | < 0.05<br>(< 0.05 to < 0.05)       | < 0.05<br>(< 0.05 to < 0.05)      | 16.2<br>(-5.7 to 47.6)                            | -4.2<br>(-17.2 to 12.5)                             |
| Chronic lymphoid leukaemia                         | < 0.05<br>(< 0.05 to < 0.05)         | < 0.05<br>(< 0.05 to < 0.05)       | < 0.05<br>(< 0.05 to < 0.05)      | 48.5<br>(21.8 to 81.2)                            | 1.3<br>(-20.6 to 28.8)                              |
| Acute myeloid leukaemia                            | < 0.05<br>(< 0.05 to < 0.05)         | < 0.05<br>(< 0.05 to < 0.05)       | < 0.05<br>(< 0.05 to < 0.05)      | 30.7<br>(12.1 to 51.6)                            | 3.6<br>(-7.5 to 16.6)                               |
| Chronic myeloid leukaemia                          | < 0.05<br>(< 0.05 to < 0.05)         | < 0.05<br>(< 0.05 to < 0.05)       | < 0.05<br>(< 0.05 to < 0.05)      | 32.4<br>(12.3 to 56.0)                            | -7.5<br>(-19.7 to 6.0)                              |
| Other leukaemia                                    | < 0.05<br>(< 0.05 to < 0.05)         | < 0.05<br>(< 0.05 to < 0.05)       | < 0.05<br>(< 0.05 to < 0.05)      | 17.4<br>(2.8 to 39.1)                             | -8.3<br>(-20.2 to 6.9)                              |
| Other neoplasms                                    | < 0.05<br>(< 0.05 to < 0.05)         | < 0.05<br>(< 0.05 to < 0.05)       | < 0.05<br>(< 0.05 to < 0.05)      | 38.9<br>(22.3 to 58.3)                            | 2.0<br>(-9.4 to 16.1)                               |
| <b>Cardiovascular diseases</b>                     | <b>14.4</b><br><b>(13.7 to 15.0)</b> | <b>1.4†</b><br><b>(1.3 to 1.4)</b> | <b>1.0</b><br><b>(0.7 to 1.3)</b> | <b>33.4</b><br><b>(28.5 to 38.6)</b>              | <b>-5.1</b><br><b>(-8.4 to -1.8)</b>                |
| Rheumatic heart disease                            | 5.4<br>(4.8 to 5.9)                  | 0.2<br>(0.2 to 0.2)                | 0.2<br>(0.2 to 0.4)               | 16.6<br>(7.2 to 26.7)                             | -10.4<br>(-17.4 to -2.8)                            |
| Ischaemic heart disease                            | 3.0<br>(2.8 to 3.1)                  | 0.4<br>(0.4 to 0.4)                | 0.1<br>(0.1 to 0.2)               | 45.5<br>(38.4 to 52.8)                            | -1.2<br>(-5.6 to 2.7)                               |
| Cerebrovascular disease                            | 2.0<br>(1.9 to 2.2)                  | 0.3‡<br>(0.3 to 0.4)               | 0.4<br>(0.3 to 0.5)               | 38.3<br>(29.3 to 48.8)                            | -6.3<br>(-12.7 to 0.6)                              |
| Ischaemic stroke                                   | 1.7<br>(1.5 to 1.9)                  | 0.2‡<br>(0.2 to 0.2)               | 0.3<br>(0.2 to 0.4)               | 41.6<br>(29.8 to 53.6)                            | -5.1<br>(-12.8 to 3.3)                              |
| Hemorrhagic stroke                                 | 0.5<br>(0.4 to 0.5)                  | 0.1‡<br>(0.1 to 0.1)               | 0.1<br>(0.1 to 0.1)               | 28.3<br>(15.2 to 41.4)                            | -10.3<br>(-18.8 to -1.6)                            |
| Hypertensive heart disease                         | 0.3<br>(0.2 to 0.3)                  | --                                 | < 0.05<br>(< 0.05 to < 0.05)      | 51.1<br>(34.1 to 70.1)                            | 1.6<br>(-8.5 to 12.5)                               |
| Cardiomyopathy and myocarditis                     | 0.1<br>(0.1 to 0.1)                  | 0.1†<br>(0.1 to 0.1)               | < 0.05<br>(< 0.05 to < 0.05)      | 36.1<br>(22.3 to 51.3)                            | 2.2<br>(-8.8 to 14.1)                               |
| Myocarditis                                        | 0.1<br>(< 0.05 to 0.1)               | 0.1<br>(0.1 to 0.1)                | < 0.05<br>(< 0.05 to < 0.05)      | 32.5<br>(21.8 to 44.6)                            | 1.7<br>(-8.7 to 13.8)                               |
| Alcoholic cardiomyopathy                           | < 0.05<br>(< 0.05 to < 0.05)         | --                                 | < 0.05<br>(< 0.05 to < 0.05)      | 54.8<br>(37.3 to 73.9)                            | 4.7<br>(-8.2 to 18.7)                               |
| Other cardiomyopathy                               | 0.1<br>(0.1 to 0.1)                  | --                                 | < 0.05<br>(< 0.05 to < 0.05)      | 37.0<br>(16.4 to 61.6)                            | 2.2<br>(-12.2 to 19.1)                              |
| Atrial fibrillation and flutter                    | 0.8<br>(0.7 to 0.9)                  | 0.1<br>(0.1 to 0.1)                | 0.1<br>(< 0.05 to 0.1)            | 50.2<br>(39.3 to 61.8)                            | -1.7<br>(-7.8 to 4.6)                               |
| Peripheral vascular disease                        | 2.2<br>(1.9 to 2.5)                  | 0.2<br>(0.2 to 0.2)                | < 0.05<br>(< 0.05 to < 0.05)      | 49.6<br>(37.0 to 62.6)                            | -4.0<br>(-11.0 to 3.7)                              |
| Endocarditis                                       | < 0.05<br>(< 0.05 to < 0.05)         | 0.1<br>(0.1 to 0.1)                | < 0.05<br>(< 0.05 to < 0.05)      | 39.0<br>(28.0 to 51.7)                            | 1.7<br>(-11.6 to 16.2)                              |
| Other cardiovascular and circulatory diseases      | 1.8<br>(1.6 to 2.1)                  | --                                 | 0.1<br>(0.1 to 0.1)               | 31.9<br>(20.6 to 45.0)                            | -0.6<br>(-8.5 to 7.5)                               |
| <b>Chronic respiratory diseases</b>                | <b>29.5</b><br><b>(28.2 to 30.8)</b> | <b>6.8†</b><br><b>(6.3 to 7.3)</b> | <b>1.5</b><br><b>(1.2 to 1.9)</b> | <b>51.6</b><br><b>(45.6 to 57.6)</b>              | <b>12.4</b><br><b>(8.1 to 16.5)</b>                 |
| Chronic obstructive pulmonary disease              | 7.5<br>(7.2 to 7.8)                  | 0.6<br>(0.6 to 0.6)                | 0.6<br>(0.5 to 0.6)               | 44.6<br>(36.1 to 53.8)                            | 0.8<br>(-5.2 to 6.6)                                |
| Pneumoconiosis                                     | < 0.05<br>(< 0.05 to < 0.05)         | < 0.05<br>(< 0.05 to < 0.05)       | < 0.05<br>(< 0.05 to < 0.05)      | 41.7<br>(16.6 to 74.7)                            | -8.0<br>(-23.9 to 12.6)                             |
| Silicosis                                          | < 0.05<br>(< 0.05 to < 0.05)         | < 0.05<br>(< 0.05 to < 0.05)       | < 0.05<br>(< 0.05 to < 0.05)      | 41.1<br>(2.3 to 99.5)                             | -8.8<br>(-33.5 to 27.9)                             |



| Cause                                                          | Prevalence in thousands (95% UI) | Incidence in thousands (95% UI)            | YLDs in thousands (95% UI)        |                                                   |                                                     |
|----------------------------------------------------------------|----------------------------------|--------------------------------------------|-----------------------------------|---------------------------------------------------|-----------------------------------------------------|
|                                                                | 2016 counts                      | 2016 counts                                | 2016 counts                       | Percentage change in counts between 2006 and 2016 | Percentage change in age-standardised rates between |
| Asbestosis                                                     | < 0.05<br>(< 0.05 to < 0.05)     | < 0.05<br>(< 0.05 to < 0.05)               | < 0.05<br>(< 0.05 to < 0.05)      | 44.0<br>(34.9 to 54.4)                            | -5.8<br>(-12.1 to 1.7)                              |
| Coal workers pneumoconiosis                                    | --                               | --                                         | --                                | --                                                | --                                                  |
| Other pneumoconiosis                                           | < 0.05<br>(< 0.05 to < 0.05)     | < 0.05<br>(< 0.05 to < 0.05)               | < 0.05<br>(< 0.05 to < 0.05)      | 41.5<br>(22.2 to 59.5)                            | -7.9<br>(-21.9 to 5.0)                              |
| Asthma                                                         | 23.2<br>(21.6 to 24.9)           | 6.2<br>(5.7 to 6.7)                        | 0.9<br>(0.6 to 1.3)               | 55.4<br>(47.7 to 63.2)                            | 24.9<br>(18.9 to 30.8)                              |
| Interstitial lung disease and pulmonary sarcoidosis            | 0.2<br>(0.2 to 0.2)              | < 0.05<br>(< 0.05 to < 0.05)               | < 0.05<br>(< 0.05 to < 0.05)      | 46.1<br>(31.4 to 63.6)                            | 0.2<br>(-10.0 to 12.0)                              |
| Other chronic respiratory diseases                             | --                               | --                                         | 0.1<br>(< 0.05 to 0.1)            | 68.7<br>(43.6 to 97.8)                            | 34.5<br>(18.6 to 52.4)                              |
| <b>Cirrhosis and other chronic liver diseases</b>              | <b>1.1<br/>(1.0 to 1.1)</b>      | <b>0.1<br/>(0.1 to 0.1)</b>                | <b>0.1<br/>(&lt; 0.05 to 0.1)</b> | <b>31.5<br/>(16.5 to 47.4)</b>                    | <b>2.0<br/>(-7.8 to 12.0)</b>                       |
| Cirrhosis and other chronic liver diseases due to hepatitis B  | 0.4<br>(0.3 to 0.4)              | < 0.05<br>(< 0.05 to < 0.05)               | < 0.05<br>(< 0.05 to < 0.05)      | 43.7<br>(20.5 to 71.0)                            | 1.4<br>(-12.7 to 17.2)                              |
| Cirrhosis and other chronic liver diseases due to hepatitis C  | 0.1<br>(0.1 to 0.2)              | < 0.05<br>(< 0.05 to < 0.05)               | < 0.05<br>(< 0.05 to < 0.05)      | 44.5<br>(14.7 to 84.4)                            | 2.0<br>(-18.0 to 27.2)                              |
| Cirrhosis and other chronic liver diseases due to alcohol use  | 0.1<br>(0.1 to 0.1)              | < 0.05<br>(< 0.05 to < 0.05)               | < 0.05<br>(< 0.05 to < 0.05)      | 46.5<br>(13.8 to 88.7)                            | 1.5<br>(-20.2 to 30.1)                              |
| Cirrhosis and other chronic liver diseases due to other causes | 0.4<br>(0.4 to 0.5)              | < 0.05<br>(< 0.05 to < 0.05)               | < 0.05<br>(< 0.05 to < 0.05)      | 23.9<br>(4.2 to 47.4)                             | 2.4<br>(-11.6 to 20.2)                              |
| <b>Digestive diseases</b>                                      | <b>3.9<br/>(3.6 to 4.0)</b>      | <b>4.7<sup>†</sup><br/>(4.4 to 4.9)</b>    | <b>0.1<br/>(0.1 to 0.2)</b>       | <b>39.0<br/>(29.6 to 49.4)</b>                    | <b>1.0<br/>(-4.4 to 7.0)</b>                        |
| Peptic ulcer disease                                           | 1.2<br>(1.1 to 1.3)              | 0.5<br>(0.5 to 0.6)                        | < 0.05<br>(< 0.05 to < 0.05)      | 43.3<br>(31.3 to 56.1)                            | 1.2<br>(-6.2 to 9.1)                                |
| Gastritis and duodenitis                                       | 1.6<br>(1.4 to 1.8)              | 1.6<br>(1.4 to 1.7)                        | < 0.05<br>(< 0.05 to < 0.05)      | 49.0<br>(36.2 to 62.4)                            | 7.5<br>(-1.1 to 15.7)                               |
| Appendicitis                                                   | < 0.05<br>(< 0.05 to < 0.05)     | 0.9<br>(0.8 to 1.0)                        | < 0.05<br>(< 0.05 to < 0.05)      | 16.6<br>(-13.8 to 57.1)                           | -9.0<br>(-30.3 to 17.3)                             |
| Paralytic ileus and intestinal obstruction                     | < 0.05<br>(< 0.05 to < 0.05)     | 0.1<br>(0.1 to 0.1)                        | < 0.05<br>(< 0.05 to < 0.05)      | 27.2<br>(22.9 to 31.5)                            | -3.1<br>(-7.0 to 0.6)                               |
| Inguinal, femoral, and abdominal hernia                        | 0.7<br>(0.6 to 0.8)              | 0.4<br>(0.3 to 0.4)                        | < 0.05<br>(< 0.05 to 0.1)         | 38.4<br>(19.1 to 59.7)                            | -0.4<br>(-11.2 to 12.1)                             |
| Inflammatory bowel disease                                     | < 0.05<br>(< 0.05 to < 0.05)     | 0.2<br>(0.2 to 0.2)                        | < 0.05<br>(< 0.05 to < 0.05)      | 21.6<br>(7.9 to 38.2)                             | -11.7<br>(-23.2 to 3.2)                             |
| Vascular intestinal disorders                                  | < 0.05<br>(< 0.05 to < 0.05)     | < 0.05<br>(< 0.05 to < 0.05)               | < 0.05<br>(< 0.05 to < 0.05)      | 37.0<br>(30.0 to 44.4)                            | 5.4<br>(1.5 to 9.9)                                 |
| Gallbladder and biliary diseases                               | 0.4<br>(0.3 to 0.4)              | 1.0<br>(0.9 to 1.2)                        | < 0.05<br>(< 0.05 to < 0.05)      | 37.3<br>(9.3 to 74.2)                             | -1.2<br>(-20.8 to 23.8)                             |
| Pancreatitis                                                   | < 0.05<br>(< 0.05 to < 0.05)     | < 0.05<br>(< 0.05 to < 0.05)               | < 0.05<br>(< 0.05 to < 0.05)      | 37.2<br>(32.4 to 42.2)                            | -0.2<br>(-3.4 to 2.8)                               |
| Other digestive diseases                                       | --                               | --                                         | < 0.05<br>(< 0.05 to < 0.05)      | 43.2<br>(29.4 to 56.6)                            | 5.2<br>(-0.9 to 11.5)                               |
| <b>Neurological disorders</b>                                  | <b>78.8<br/>(75.2 to 83.0)</b>   | <b>37.0<br/>(31.2 to 43.1)</b>             | <b>1.8<br/>(1.1 to 2.4)</b>       | <b>31.3<br/>(6.1 to 62.6)</b>                     | <b>0.3<br/>(-15.6 to 18.8)</b>                      |
| Alzheimer's disease and other dementias                        | 0.7<br>(0.6 to 0.8)              | 0.1<br>(0.1 to 0.1)                        | 0.1<br>(0.1 to 0.1)               | 50.6<br>(42.9 to 58.1)                            | 0.7<br>(-3.8 to 5.4)                                |
| Parkinson's disease                                            | 0.1<br>(0.1 to 0.1)              | < 0.05<br>(< 0.05 to < 0.05)               | < 0.05<br>(< 0.05 to < 0.05)      | 59.7<br>(37.0 to 85.6)                            | 3.9<br>(-8.3 to 18.5)                               |
| Epilepsy                                                       | 0.7<br>(0.2 to 1.1)              | 0.1<br>(< 0.05 to 0.2)                     | 0.3<br>(0.1 to 0.5)               | 25.4<br>(-69.0 to 407.7)                          | -0.9<br>(-75.3 to 297.3)                            |
| Multiple sclerosis                                             | < 0.05<br>(< 0.05 to < 0.05)     | < 0.05<br>(< 0.05 to < 0.05)               | < 0.05<br>(< 0.05 to < 0.05)      | 51.2<br>(45.7 to 57.1)                            | 12.0<br>(8.2 to 16.3)                               |
| Motor neuron disease                                           | < 0.05<br>(< 0.05 to < 0.05)     | < 0.05<br>(< 0.05 to < 0.05)               | < 0.05<br>(< 0.05 to < 0.05)      | 34.0<br>(28.1 to 40.4)                            | 3.3<br>(-0.4 to 7.1)                                |
| Migraine                                                       | 27.8<br>(26.1 to 29.5)           | 3.3<br>(3.1 to 3.5)                        | 1.1<br>(0.7 to 1.6)               | 30.4<br>(24.9 to 36.2)                            | -0.2<br>(-3.9 to 3.6)                               |
| Tension-type headache                                          | 59.6<br>(52.4 to 67.5)           | 33.5<br>(27.8 to 39.7)                     | 0.2<br>(0.1 to 0.3)               | 30.4<br>(23.4 to 38.2)                            | -0.5<br>(-5.3 to 5.0)                               |
| Other neurological disorders                                   | < 0.05<br>(< 0.05 to < 0.05)     | < 0.05<br>(< 0.05 to < 0.05)               | 0.1<br>(< 0.05 to 0.1)            | 50.9<br>(-57.5 to 417.0)                          | 18.8<br>(-60.8 to 254.9)                            |
| <b>Mental and substance use disorders</b>                      | <b>33.2<br/>(31.9 to 34.5)</b>   | <b>11.1<sup>†</sup><br/>(10.3 to 12.0)</b> | <b>4.2<br/>(3.1 to 5.5)</b>       | <b>29.1<br/>(25.9 to 32.3)</b>                    | <b>-0.4<br/>(-2.5 to 1.8)</b>                       |
| Schizophrenia                                                  | 0.7<br>(0.6 to 0.8)              | < 0.05<br>(< 0.05 to 0.1)                  | 0.4<br>(0.3 to 0.5)               | 35.2<br>(24.2 to 47.0)                            | -0.6<br>(-8.0 to 7.5)                               |
| Alcohol use disorders                                          | 2.1<br>(1.8 to 2.5)              | 1.2<br>(1.0 to 1.4)                        | 0.2<br>(0.1 to 0.3)               | 32.8<br>(21.0 to 45.4)                            | -0.1<br>(-8.3 to 9.1)                               |
| Drug use disorders                                             | 1.9<br>(1.7 to 2.1)              | 0.3<br>(0.2 to 0.3)                        | 0.3<br>(0.2 to 0.4)               | 34.0<br>(22.1 to 46.8)                            | 3.0<br>(-5.7 to 12.0)                               |
| Opioid use disorders                                           | 0.4<br>(0.4 to 0.6)              | 0.1<br>(< 0.05 to 0.1)                     | 0.2<br>(0.1 to 0.3)               | 37.2<br>(20.9 to 54.7)                            | 2.8<br>(-8.3 to 14.6)                               |
| Cocaine use disorders                                          | < 0.05<br>(< 0.05 to < 0.05)     | < 0.05<br>(< 0.05 to < 0.05)               | < 0.05<br>(< 0.05 to < 0.05)      | 34.0<br>(24.5 to 44.1)                            | 2.0<br>(-4.5 to 8.8)                                |
| Amphetamine use disorders                                      | 0.2<br>(0.1 to 0.3)              | < 0.05<br>(< 0.05 to < 0.05)               | < 0.05<br>(< 0.05 to < 0.05)      | 29.1<br>(-2.6 to 73.7)                            | 6.2<br>(-19.6 to 41.3)                              |
| Cannabis use disorders                                         | 1.2<br>(1.0 to 1.4)              | 0.2<br>(0.1 to 0.2)                        | < 0.05<br>(< 0.05 to 0.1)         | 22.4<br>(5.7 to 42.8)                             | 0.1<br>(-13.1 to 15.3)                              |
| Other drug use disorders                                       | 0.1<br>(0.1 to 0.1)              | < 0.05<br>(< 0.05 to < 0.05)               | < 0.05<br>(< 0.05 to < 0.05)      | 33.4<br>(5.3 to 70.8)                             | 5.2<br>(-15.0 to 31.1)                              |
| Depressive disorders                                           | 7.4<br>(6.9 to 7.9)              | 6.7<br>(5.9 to 7.5)                        | 1.2<br>(0.8 to 1.6)               | 30.1<br>(24.1 to 35.9)                            | -1.3<br>(-5.2 to 2.3)                               |
| Major depressive disorder                                      | 4.0<br>(3.6 to 4.6)              | 6.1<br>(5.4 to 7.0)                        | 0.8<br>(0.6 to 1.1)               | 27.1<br>(19.1 to 34.7)                            | -2.1<br>(-7.5 to 3.1)                               |
| Dysthymia                                                      | 3.4<br>(3.0 to 3.9)              | 0.6<br>(0.5 to 0.6)                        | 0.3<br>(0.2 to 0.5)               | 38.5<br>(33.4 to 44.1)                            | 0.5<br>(-2.4 to 3.5)                                |
| Bipolar disorder                                               | 1.0<br>(0.9 to 1.2)              | 0.1<br>(0.1 to 0.1)                        | 0.2<br>(0.1 to 0.3)               | 30.5<br>(20.0 to 42.4)                            | -0.1<br>(-7.1 to 7.9)                               |
| Anxiety disorders                                              | 8.4<br>(7.5 to 9.2)              | 1.5<br>(1.4 to 1.6)                        | 0.8<br>(0.6 to 1.1)               | 28.7<br>(20.3 to 38.2)                            | 0.3<br>(-5.5 to 6.8)                                |
| Eating disorders                                               | 0.2<br>(0.2 to 0.2)              | 0.2<br>(0.1 to 0.2)                        | < 0.05<br>(< 0.05 to 0.1)         | 28.4<br>(10.4 to 50.7)                            | 3.0<br>(-11.4 to 20.4)                              |
| Anorexia nervosa                                               | 0.1<br>(< 0.05 to 0.1)           | < 0.05<br>(< 0.05 to < 0.05)               | < 0.05<br>(< 0.05 to < 0.05)      | 25.5<br>(-6.5 to 67.5)                            | 4.2<br>(-21.6 to 38.2)                              |
| Bulimia nervosa                                                | 0.1<br>(0.1 to 0.2)              | 0.1<br>(0.1 to 0.2)                        | < 0.05<br>(< 0.05 to < 0.05)      | 30.0<br>(7.1 to 57.8)                             | 2.5<br>(-15.5 to 23.5)                              |
| Autistic spectrum disorders                                    | 2.3<br>(2.0 to 2.5)              | < 0.05<br>(< 0.05 to < 0.05)               | 0.3<br>(0.2 to 0.5)               | 23.8<br>(16.9 to 31.2)                            | -0.7<br>(-5.8 to 4.5)                               |
| Autism                                                         | 0.6<br>(0.6 to 0.7)              | < 0.05<br>(< 0.05 to < 0.05)               | 0.2<br>(0.1 to 0.2)               | 23.6<br>(12.2 to 35.9)                            | -0.6<br>(-9.4 to 8.5)                               |
| Asperger syndrome and other autistic spectrum disorders        | 1.6<br>(1.4 to 2.0)              | < 0.05<br>(< 0.05 to < 0.05)               | 0.2<br>(0.1 to 0.2)               | 24.0<br>(17.8 to 31.0)                            | -0.8<br>(-5.5 to 4.2)                               |

| Cause                                                      | Prevalence in thousands (95% UI)  | Incidence in thousands (95% UI)    | YLDs in thousands (95% UI)   |                                                   |                                                     |
|------------------------------------------------------------|-----------------------------------|------------------------------------|------------------------------|---------------------------------------------------|-----------------------------------------------------|
|                                                            | 2016 counts                       | 2016 counts                        | 2016 counts                  | Percentage change in counts between 2006 and 2016 | Percentage change in age-standardised rates between |
| Attention-deficit/hyperactivity disorder                   | 2.4<br>(2.1 to 2.6)               | 0.1<br>(0.1 to 0.2)                | < 0.05<br>(< 0.05 to < 0.05) | 21.4<br>(10.8 to 32.0)                            | -0.0<br>(-8.0 to 8.3)                               |
| Conduct disorder                                           | 2.4<br>(1.9 to 2.8)               | 0.8<br>(0.7 to 1.0)                | 0.3<br>(0.2 to 0.4)          | 15.8<br>(8.1 to 23.6)                             | 0.2<br>(-6.6 to 7.0)                                |
| Idiopathic developmental intellectual disability           | 2.8<br>(1.3 to 4.3)               | --                                 | 0.1<br>(0.1 to 0.2)          | 19.0<br>(8.9 to 29.5)                             | -4.8<br>(-12.5 to 3.2)                              |
| Other mental and substance use disorders                   | 4.2<br>(3.7 to 4.9)               | 0.2<br>(0.2 to 0.2)                | 0.3<br>(0.2 to 0.5)          | 34.8<br>(27.1 to 42.6)                            | -0.5<br>(-5.2 to 4.4)                               |
| <b>Diabetes, urogenital, blood, and endocrine diseases</b> | <b>96.1<br/>(94.5 to 97.6)</b>    | <b>26.8†<br/>(25.0 to 28.7)</b>    | <b>2.8<br/>(1.9 to 3.8)</b>  | <b>46.1<br/>(41.4 to 50.7)</b>                    | <b>4.3<br/>(0.9 to 7.5)</b>                         |
| Diabetes mellitus                                          | 25.2<br>(23.0 to 27.6)            | 1.8<br>(1.6 to 1.9)                | 1.7<br>(1.1 to 2.4)          | 56.2<br>(48.8 to 63.4)                            | 8.2<br>(3.1 to 13.3)                                |
| Acute glomerulonephritis                                   | < 0.05<br>(< 0.05 to < 0.05)      | 0.1<br>(0.1 to 0.1)                | < 0.05<br>(< 0.05 to < 0.05) | 28.9<br>(22.9 to 35.4)                            | -1.5<br>(-6.1 to 3.0)                               |
| Chronic kidney disease                                     | 7.2<br>(6.5 to 7.9)               | 0.6<br>(0.5 to 0.6)                | 0.3<br>(0.2 to 0.4)          | 49.9<br>(41.6 to 58.2)                            | 4.5<br>(-0.7 to 9.8)                                |
| Chronic kidney disease due to diabetes mellitus            | 3.9<br>(3.4 to 4.4)               | 0.3<br>(0.3 to 0.4)                | 0.2<br>(0.1 to 0.2)          | 56.4<br>(43.6 to 69.6)                            | 7.5<br>(-0.2 to 15.9)                               |
| Chronic kidney disease due to hypertension                 | 1.2<br>(1.1 to 1.4)               | 0.1<br>(0.1 to 0.1)                | 0.1<br>(0.1 to 0.1)          | 49.0<br>(33.6 to 66.4)                            | 0.4<br>(-9.0 to 11.3)                               |
| Chronic kidney disease due to glomerulonephritis           | 1.4<br>(1.2 to 1.6)               | 0.1<br>(0.1 to 0.2)                | < 0.05<br>(< 0.05 to 0.1)    | 35.8<br>(25.8 to 47.3)                            | 3.0<br>(-3.6 to 10.2)                               |
| Chronic kidney disease due to other causes                 | 0.7<br>(0.6 to 0.9)               | 0.1<br>(0.1 to 0.1)                | < 0.05<br>(< 0.05 to 0.1)    | 39.6<br>(30.9 to 49.8)                            | 2.4<br>(-4.4 to 10.4)                               |
| Urinary diseases and male infertility                      | 3.3<br>(3.0 to 3.8)               | 13.7†<br>(12.2 to 15.4)            | 0.1<br>(< 0.05 to 0.1)       | 36.2<br>(29.0 to 44.5)                            | -7.7<br>(-12.8 to -2.3)                             |
| Interstitial nephritis and urinary tract infections        | 0.2<br>(0.2 to 0.3)               | 12.2<br>(10.8 to 14.0)             | < 0.05<br>(< 0.05 to < 0.05) | 26.0<br>(7.4 to 49.0)                             | -1.5<br>(-15.2 to 14.4)                             |
| Urolithiasis                                               | < 0.05<br>(< 0.05 to 0.1)         | 1.2<br>(1.0 to 1.4)                | < 0.05<br>(< 0.05 to < 0.05) | 39.9<br>(28.4 to 52.3)                            | -0.2<br>(-10.7 to 11.1)                             |
| Benign prostatic hyperplasia                               | 1.5<br>(1.2 to 1.8)               | 0.2<br>(0.2 to 0.3)                | < 0.05<br>(< 0.05 to 0.1)    | 42.6<br>(31.8 to 52.7)                            | -8.6<br>(-14.9 to -2.4)                             |
| Male infertility                                           | 1.4<br>(1.1 to 1.7)               | --                                 | < 0.05<br>(< 0.05 to < 0.05) | 30.1<br>(21.3 to 39.9)                            | 0.7<br>(-5.8 to 7.7)                                |
| Other urinary diseases                                     | --                                | --                                 | < 0.05<br>(< 0.05 to < 0.05) | 5.2<br>(-7.7 to 20.5)                             | -17.8<br>(-26.4 to -8.3)                            |
| Gynecological diseases                                     | 27.0<br>(25.6 to 28.4)            | 10.1†<br>(9.4 to 10.8)             | 0.4<br>(0.3 to 0.6)          | 29.1<br>(24.1 to 34.6)                            | -3.2<br>(-6.8 to 0.7)                               |
| Uterine fibroids                                           | 3.0<br>(2.6 to 3.4)               | 0.4<br>(0.3 to 0.4)                | 0.1<br>(< 0.05 to 0.1)       | 35.4<br>(25.9 to 46.1)                            | -1.9<br>(-8.7 to 6.1)                               |
| Polycystic ovarian syndrome                                | 0.2<br>(0.2 to 0.3)               | 0.1<br>(0.1 to 0.2)                | < 0.05<br>(< 0.05 to < 0.05) | 29.4<br>(11.7 to 49.6)                            | -1.2<br>(-14.8 to 13.8)                             |
| Female infertility                                         | 1.3<br>(0.6 to 2.5)               | --                                 | < 0.05<br>(< 0.05 to < 0.05) | 13.8<br>(-8.5 to 36.1)                            | -12.9<br>(-30.9 to 6.3)                             |
| Endometriosis                                              | 0.1<br>(0.1 to 0.1)               | 0.3<br>(0.3 to 0.4)                | < 0.05<br>(< 0.05 to < 0.05) | 30.4<br>(-1.7 to 73.2)                            | 1.0<br>(-23.4 to 33.0)                              |
| Genital prolapse                                           | 6.4<br>(5.5 to 7.3)               | 0.5<br>(0.4 to 0.6)                | < 0.05<br>(< 0.05 to < 0.05) | 31.0<br>(20.2 to 43.4)                            | -9.4<br>(-17.6 to -0.5)                             |
| Premenstrual syndrome                                      | 15.6<br>(14.4 to 16.7)            | 5.8<br>(5.3 to 6.2)                | 0.1<br>(0.1 to 0.2)          | 28.8<br>(18.7 to 38.9)                            | -0.2<br>(-8.0 to 7.1)                               |
| Other gynecological diseases                               | 4.1<br>(3.7 to 4.7)               | 3.0<br>(2.5 to 3.6)                | 0.1<br>(0.1 to 0.2)          | 26.7<br>(18.3 to 35.1)                            | -4.9<br>(-11.1 to 1.3)                              |
| Hemoglobinopathies and hemolytic anaemias                  | 51.8<br>(51.0 to 52.9)            | --                                 | 0.1<br>(0.1 to 0.1)          | 10.3<br>(1.9 to 18.8)                             | -12.9<br>(-18.3 to -7.6)                            |
| Thalassemias                                               | < 0.05<br>(< 0.05 to < 0.05)      | --                                 | < 0.05<br>(< 0.05 to < 0.05) | 23.8<br>(2.8 to 50.6)                             | 6.8<br>(-10.3 to 28.5)                              |
| Thalassaemias trait                                        | 1.8<br>(1.7 to 1.9)               | --                                 | < 0.05<br>(< 0.05 to < 0.05) | 22.8<br>(4.0 to 45.2)                             | 0.6<br>(-12.9 to 17.9)                              |
| Sickle cell disorders                                      | < 0.05<br>(< 0.05 to < 0.05)      | --                                 | < 0.05<br>(< 0.05 to < 0.05) | 19.3<br>(-0.5 to 30.8)                            | 2.2<br>(-15.6 to 11.3)                              |
| Sickle cell trait                                          | 0.3<br>(0.3 to 0.4)               | --                                 | < 0.05<br>(< 0.05 to < 0.05) | 29.9<br>(15.3 to 42.7)                            | 4.5<br>(-7.0 to 13.7)                               |
| G6PD deficiency                                            | 11.4<br>(10.7 to 12.2)            | --                                 | < 0.05<br>(< 0.05 to < 0.05) | 27.9<br>(14.3 to 42.0)                            | 2.5<br>(-7.1 to 11.9)                               |
| G6PD trait                                                 | 36.5<br>(35.9 to 37.1)            | --                                 | < 0.05<br>(< 0.05 to < 0.05) | 42.4<br>(24.3 to 62.6)                            | 14.6<br>(2.8 to 28.3)                               |
| Other hemoglobinopathies and hemolytic anaemias            | 3.8<br>(3.7 to 4.0)               | --                                 | 0.1<br>(0.1 to 0.1)          | 7.8<br>(-0.9 to 16.6)                             | -15.0<br>(-20.5 to -9.4)                            |
| Endocrine, metabolic, blood, and immune disorders          | 6.3<br>(6.0 to 6.7)               | 0.7<br>(0.6 to 0.7)                | 0.2<br>(0.1 to 0.3)          | 26.3<br>(19.4 to 33.6)                            | -4.4<br>(-8.8 to 0.2)                               |
| <b>Musculoskeletal disorders</b>                           | <b>36.0<br/>(34.1 to 37.6)</b>    | <b>18.4<br/>(16.7 to 20.4)</b>     | <b>3.9<br/>(2.8 to 5.1)</b>  | <b>36.4<br/>(32.6 to 40.3)</b>                    | <b>-1.0<br/>(-3.4 to 1.5)</b>                       |
| Rheumatoid arthritis                                       | 0.3<br>(0.3 to 0.4)               | < 0.05<br>(< 0.05 to < 0.05)       | 0.1<br>(0.1 to 0.1)          | 45.4<br>(30.9 to 63.0)                            | 5.0<br>(-4.3 to 15.6)                               |
| Osteoarthritis                                             | 6.9<br>(6.5 to 7.4)               | 0.4<br>(0.4 to 0.4)                | 0.4<br>(0.3 to 0.6)          | 50.9<br>(45.9 to 57.1)                            | 1.9<br>(-1.5 to 5.7)                                |
| Low back and neck pain                                     | 21.1<br>(19.6 to 22.7)            | 8.8<br>(7.9 to 9.8)                | 2.4<br>(1.7 to 3.2)          | 36.6<br>(32.0 to 41.4)                            | -0.9<br>(-3.7 to 2.3)                               |
| Low back pain                                              | 14.7<br>(12.9 to 16.6)            | 7.0<br>(6.2 to 8.0)                | 1.7<br>(1.2 to 2.2)          | 35.2<br>(29.1 to 42.0)                            | -1.4<br>(-5.4 to 3.2)                               |
| Neck pain                                                  | 7.7<br>(6.6 to 8.8)               | 1.8<br>(1.5 to 2.1)                | 0.8<br>(0.5 to 1.1)          | 40.0<br>(36.1 to 43.8)                            | 0.1<br>(-2.0 to 2.2)                                |
| Gout                                                       | 0.8<br>(0.7 to 0.9)               | 0.2<br>(0.1 to 0.2)                | < 0.05<br>(< 0.05 to < 0.05) | 43.8<br>(25.0 to 66.5)                            | -2.2<br>(-14.2 to 11.5)                             |
| Other musculoskeletal disorders                            | 11.0<br>(9.4 to 12.7)             | 9.1<br>(7.6 to 10.7)               | 1.0<br>(0.6 to 1.4)          | 29.3<br>(20.0 to 39.2)                            | -3.5<br>(-10.4 to 3.4)                              |
| <b>Other non-communicable diseases</b>                     | <b>196.1<br/>(191.8 to 199.8)</b> | <b>605.0†<br/>(562.7 to 649.6)</b> | <b>4.9<br/>(3.4 to 6.8)</b>  | <b>28.2<br/>(26.4 to 30.1)</b>                    | <b>-1.4<br/>(-2.5 to -0.4)</b>                      |
| Congenital anomalies                                       | 3.2<br>(2.8 to 3.7)               | --                                 | 0.4<br>(0.2 to 0.5)          | 23.3<br>(15.1 to 31.6)                            | -0.7<br>(-7.3 to 5.9)                               |
| Neural tube defects                                        | 0.1<br>(0.1 to 0.2)               | --                                 | < 0.05<br>(< 0.05 to 0.1)    | 28.2<br>(9.9 to 49.6)                             | 2.8<br>(-11.2 to 18.7)                              |
| Congenital heart anomalies                                 | 0.9<br>(0.8 to 1.0)               | --                                 | < 0.05<br>(< 0.05 to 0.1)    | 28.3<br>(12.6 to 45.4)                            | 7.1<br>(-5.3 to 20.2)                               |
| Orofacial clefts                                           | 0.1<br>(0.1 to 0.2)               | --                                 | < 0.05<br>(< 0.05 to < 0.05) | 25.4<br>(11.7 to 41.6)                            | 0.7<br>(-10.3 to 13.7)                              |
| Down's syndrome                                            | 0.1<br>(0.1 to 0.1)               | --                                 | < 0.05<br>(< 0.05 to < 0.05) | 24.3<br>(15.9 to 33.2)                            | 1.7<br>(-5.4 to 8.8)                                |
| Turner syndrome                                            | 0.1<br>(0.1 to 0.1)               | --                                 | < 0.05<br>(< 0.05 to < 0.05) | 29.1<br>(-15.2 to 94.5)                           | 6.9<br>(-27.1 to 58.3)                              |
| Klinefelter syndrome                                       | 0.1<br>(0.1 to 0.1)               | --                                 | < 0.05<br>(< 0.05 to < 0.05) | 24.6<br>(-7.9 to 72.8)                            | 1.0<br>(-23.9 to 38.2)                              |

| Cause                                         | Prevalence in thousands (95% UI)     | Incidence in thousands (95% UI)       | YLDs in thousands (95% UI)        |                                                   |                                                     |
|-----------------------------------------------|--------------------------------------|---------------------------------------|-----------------------------------|---------------------------------------------------|-----------------------------------------------------|
|                                               | 2016 counts                          | 2016 counts                           | 2016 counts                       | Percentage change in counts between 2006 and 2016 | Percentage change in age-standardised rates between |
| Other chromosomal abnormalities               | 0.1<br>(0.1 to 0.1)                  | --                                    | < 0.05<br>(< 0.05 to < 0.05)      | 16.6<br>(-7.7 to 47.5)                            | 1.0<br>(-18.8 to 26.2)                              |
| Congenital musculoskeletal and limb anomalies | 0.3<br>(0.2 to 0.3)                  | --                                    | < 0.05<br>(< 0.05 to 0.1)         | 36.7<br>(22.6 to 53.6)                            | 9.9<br>(-0.5 to 22.9)                               |
| Urogenital congenital anomalies               | 0.3<br>(0.2 to 0.3)                  | --                                    | < 0.05<br>(< 0.05 to < 0.05)      | 17.5<br>(7.3 to 28.5)                             | -0.2<br>(-8.3 to 8.9)                               |
| Digestive congenital anomalies                | 0.4<br>(0.4 to 0.5)                  | --                                    | < 0.05<br>(< 0.05 to < 0.05)      | 30.2<br>(11.9 to 52.3)                            | 4.3<br>(-9.0 to 20.1)                               |
| Other congenital anomalies                    | 1.3<br>(0.9 to 1.9)                  | --                                    | 0.2<br>(0.1 to 0.3)               | 19.1<br>(6.7 to 32.1)                             | -5.0<br>(-14.7 to 5.4)                              |
| Skin and subcutaneous diseases                | 83.0<br>(80.8 to 85.5)               | 181.6<br>(172.2 to 192.0)             | 2.2<br>(1.4 to 3.1)               | 22.9<br>(20.4 to 25.4)                            | 0.5<br>(-1.3 to 2.2)                                |
| Dermatitis                                    | 13.1<br>(12.1 to 14.2)               | 14.4<br>(13.4 to 15.5)                | 0.5<br>(0.3 to 0.8)               | 21.4<br>(16.2 to 26.7)                            | -0.1<br>(-3.8 to 3.7)                               |
| Psoriasis                                     | 1.2<br>(1.2 to 1.3)                  | 0.2<br>(0.2 to 0.2)                   | 0.1<br>(0.1 to 0.1)               | 38.8<br>(23.9 to 55.8)                            | 6.5<br>(-3.0 to 17.3)                               |
| Cellulitis                                    | 0.1<br>(0.1 to 0.1)                  | 1.3<br>(1.2 to 1.4)                   | < 0.05<br>(< 0.05 to < 0.05)      | 27.2<br>(13.3 to 43.7)                            | 0.7<br>(-12.3 to 15.6)                              |
| Pyoderma                                      | 0.4<br>(0.3 to 0.4)                  | 7.2<br>(6.9 to 7.4)                   | < 0.05<br>(< 0.05 to < 0.05)      | 34.0<br>(21.4 to 48.0)                            | -0.7<br>(-8.0 to 7.4)                               |
| Scabies                                       | 12.6<br>(11.1 to 14.5)               | 39.9<br>(34.4 to 46.2)                | 0.3<br>(0.2 to 0.5)               | 18.5<br>(14.2 to 23.1)                            | -4.4<br>(-7.4 to -1.2)                              |
| Fungal skin diseases                          | 20.7<br>(18.7 to 23.1)               | 69.5<br>(62.2 to 77.7)                | 0.1<br>(< 0.05 to 0.2)            | 27.7<br>(25.7 to 29.9)                            | -0.2<br>(-1.1 to 0.9)                               |
| Viral skin diseases                           | 8.0<br>(7.5 to 8.5)                  | 11.3<br>(10.5 to 12.1)                | 0.2<br>(0.1 to 0.4)               | 22.4<br>(18.2 to 26.5)                            | 0.2<br>(-2.9 to 3.4)                                |
| Acne vulgaris                                 | 22.8<br>(20.3 to 25.5)               | 16.3<br>(13.2 to 20.3)                | 0.6<br>(0.4 to 0.8)               | 22.2<br>(15.7 to 29.0)                            | 3.1<br>(-2.0 to 8.6)                                |
| Alopecia areata                               | 0.5<br>(0.5 to 0.5)                  | 0.8<br>(0.8 to 0.9)                   | < 0.05<br>(< 0.05 to < 0.05)      | 30.4<br>(16.1 to 46.8)                            | -0.1<br>(-10.0 to 11.5)                             |
| Pruritus                                      | 2.0<br>(1.8 to 2.3)                  | 1.7<br>(1.5 to 1.9)                   | < 0.05<br>(< 0.05 to < 0.05)      | 31.6<br>(23.9 to 39.9)                            | 0.7<br>(-4.5 to 5.9)                                |
| Urticaria                                     | 2.7<br>(2.3 to 3.2)                  | 4.9<br>(4.2 to 5.7)                   | 0.2<br>(0.1 to 0.2)               | 21.2<br>(14.4 to 28.9)                            | -0.1<br>(-5.3 to 5.8)                               |
| Decubitus ulcer                               | < 0.05<br>(< 0.05 to < 0.05)         | 0.1<br>(0.1 to 0.1)                   | < 0.05<br>(< 0.05 to < 0.05)      | 42.9<br>(27.7 to 58.7)                            | -0.1<br>(-13.6 to 14.1)                             |
| Other skin and subcutaneous diseases          | 12.6<br>(12.2 to 13.0)               | 14.1<br>(13.6 to 14.6)                | 0.1<br>(< 0.05 to 0.1)            | 33.6<br>(29.6 to 37.6)                            | 0.3<br>(-2.3 to 2.9)                                |
| Sense organ diseases                          | 52.1<br>(50.8 to 53.5)               | 25.1†<br>(23.4 to 27.0)               | 2.0<br>(1.4 to 2.8)               | 34.2<br>(30.9 to 37.4)                            | -2.9<br>(-4.5 to -1.3)                              |
| Glaucoma                                      | 0.1<br>(0.1 to 0.1)                  | --                                    | < 0.05<br>(< 0.05 to < 0.05)      | 55.1<br>(34.6 to 78.6)                            | -0.2<br>(-11.7 to 13.5)                             |
| Cataract                                      | 1.2<br>(1.0 to 1.4)                  | --                                    | 0.1<br>(< 0.05 to 0.1)            | 49.0<br>(39.0 to 58.5)                            | -2.2<br>(-8.5 to 3.6)                               |
| Macular degeneration                          | 0.1<br>(0.1 to 0.1)                  | --                                    | < 0.05<br>(< 0.05 to < 0.05)      | 61.0<br>(39.5 to 86.4)                            | 3.1<br>(-9.8 to 17.4)                               |
| Refraction and accommodation disorders        | 28.5<br>(27.3 to 29.6)               | --                                    | 0.5<br>(0.3 to 0.8)               | 31.5<br>(27.6 to 35.7)                            | -3.5<br>(-5.9 to -1.0)                              |
| Age-related and other hearing loss            | 30.8<br>(29.1 to 32.8)               | --                                    | 1.2<br>(0.9 to 1.7)               | 33.4<br>(28.4 to 38.2)                            | -3.3<br>(-5.6 to -1.0)                              |
| Other vision loss                             | 0.7<br>(0.7 to 0.8)                  | --                                    | 0.1<br>(< 0.05 to 0.1)            | 41.6<br>(31.2 to 51.2)                            | -1.7<br>(-7.8 to 4.1)                               |
| Other sense organ diseases                    | 5.6<br>(5.2 to 6.1)                  | 25.1<br>(23.4 to 27.0)                | 0.2<br>(0.1 to 0.3)               | 39.3<br>(32.7 to 46.5)                            | 1.1<br>(-2.8 to 5.4)                                |
| Oral disorders                                | 143.6<br>(137.0 to 149.0)            | 398.3†<br>(357.9 to 441.1)            | 0.3<br>(0.2 to 0.5)               | 36.2<br>(32.7 to 39.9)                            | -0.0<br>(-2.1 to 2.0)                               |
| Caries of deciduous teeth                     | 18.1<br>(12.2 to 23.2)               | 77.4<br>(45.3 to 109.0)               | < 0.05<br>(< 0.05 to < 0.05)      | 16.1<br>(0.8 to 33.8)                             | -1.5<br>(-14.6 to 13.3)                             |
| Caries of permanent teeth                     | 121.1<br>(113.7 to 128.1)            | 320.2<br>(294.7 to 346.7)             | 0.1<br>(< 0.05 to 0.1)            | 26.5<br>(22.8 to 30.5)                            | -0.9<br>(-3.4 to 1.9)                               |
| Periodontal disease                           | 2.9<br>(2.4 to 3.5)                  | 0.3<br>(0.3 to 0.4)                   | < 0.05<br>(< 0.05 to < 0.05)      | 44.7<br>(37.6 to 52.1)                            | 0.3<br>(-3.9 to 4.8)                                |
| Edentulism and severe tooth loss              | 4.3<br>(3.7 to 4.9)                  | 0.4<br>(0.3 to 0.4)                   | 0.1<br>(0.1 to 0.2)               | 49.2<br>(43.2 to 56.0)                            | 0.2<br>(-3.1 to 3.7)                                |
| Other oral disorders                          | 4.4<br>(4.2 to 4.6)                  | --                                    | 0.1<br>(0.1 to 0.2)               | 30.9<br>(26.3 to 36.0)                            | 0.1<br>(-2.9 to 3.4)                                |
| <b>Injuries</b>                               | <b>29.8</b><br><b>(28.2 to 31.5)</b> | <b>16.4†</b><br><b>(15.5 to 17.2)</b> | <b>1.3</b><br><b>(0.9 to 1.9)</b> | <b>43.8</b><br><b>(40.7 to 47.1)</b>              | <b>8.2</b><br><b>(6.3 to 10.2)</b>                  |
| <b>Transport injuries</b>                     | <b>5.9</b><br><b>(5.4 to 6.4)</b>    | <b>2.3</b><br><b>(2.1 to 2.6)</b>     | <b>0.4</b><br><b>(0.2 to 0.5)</b> | <b>59.9</b><br><b>(55.7 to 63.8)</b>              | <b>19.2</b><br><b>(16.5 to 21.6)</b>                |
| Road injuries                                 | 3.9<br>(3.6 to 4.2)                  | 1.7<br>(1.5 to 2.0)                   | 0.2<br>(0.1 to 0.3)               | 82.8<br>(78.4 to 86.9)                            | 32.8<br>(30.0 to 35.4)                              |
| Pedestrian road injuries                      | 0.8<br>(0.7 to 0.9)                  | 0.2<br>(0.2 to 0.3)                   | < 0.05<br>(< 0.05 to 0.1)         | 85.7<br>(81.2 to 89.9)                            | 33.8<br>(30.9 to 36.5)                              |
| Cyclist road injuries                         | 0.5<br>(0.4 to 0.6)                  | 0.2<br>(0.2 to 0.3)                   | < 0.05<br>(< 0.05 to < 0.05)      | 89.8<br>(84.6 to 94.7)                            | 39.0<br>(35.7 to 42.0)                              |
| Motorcyclist road injuries                    | 0.9<br>(0.8 to 1.1)                  | 0.3<br>(0.2 to 0.4)                   | 0.1<br>(< 0.05 to 0.1)            | 84.2<br>(79.6 to 88.5)                            | 33.6<br>(30.8 to 36.3)                              |
| Motor vehicle road injuries                   | 1.3<br>(1.1 to 1.5)                  | 0.7<br>(0.6 to 0.8)                   | 0.1<br>(0.1 to 0.1)               | 78.1<br>(73.4 to 82.4)                            | 29.4<br>(26.6 to 32.2)                              |
| Other road injuries                           | 0.5<br>(0.4 to 0.6)                  | 0.3<br>(0.2 to 0.4)                   | < 0.05<br>(< 0.05 to < 0.05)      | 83.5<br>(78.9 to 88.0)                            | 34.5<br>(31.5 to 37.3)                              |
| Other transport injuries                      | 2.0<br>(1.6 to 2.4)                  | 0.6<br>(0.5 to 0.7)                   | 0.1<br>(0.1 to 0.2)               | 29.7<br>(25.7 to 33.5)                            | -1.5<br>(-4.2 to 0.8)                               |
| <b>Unintentional injuries</b>                 | <b>21.4</b><br><b>(20.1 to 22.9)</b> | <b>13.0</b><br><b>(12.2 to 13.8)</b>  | <b>0.8</b><br><b>(0.5 to 1.1)</b> | <b>42.3</b><br><b>(39.2 to 45.4)</b>              | <b>6.1</b><br><b>(4.2 to 8.0)</b>                   |
| Falls                                         | 5.0<br>(4.3 to 5.7)                  | 2.7<br>(2.3 to 3.2)                   | 0.2<br>(0.1 to 0.3)               | 64.1<br>(60.2 to 68.0)                            | 22.1<br>(19.6 to 24.4)                              |
| Drowning                                      | 0.2<br>(0.2 to 0.3)                  | 0.1<br>(0.1 to 0.1)                   | < 0.05<br>(< 0.05 to < 0.05)      | 28.5<br>(24.3 to 32.8)                            | -6.5<br>(-9.6 to -3.6)                              |
| Fire, heat, and hot substances                | 2.3<br>(1.9 to 2.8)                  | 0.4<br>(0.3 to 0.4)                   | 0.1<br>(< 0.05 to 0.1)            | 37.6<br>(29.7 to 45.1)                            | 2.5<br>(-2.6 to 7.3)                                |
| Poisonings                                    | 0.1<br>(0.1 to 0.1)                  | 0.1<br>(0.1 to 0.2)                   | < 0.05<br>(< 0.05 to < 0.05)      | 52.3<br>(41.6 to 64.8)                            | 15.9<br>(9.2 to 23.3)                               |
| Exposure to mechanical forces                 | 4.1<br>(3.5 to 4.9)                  | 2.0<br>(1.7 to 2.3)                   | 0.1<br>(0.1 to 0.2)               | 56.5<br>(52.6 to 60.5)                            | 14.2<br>(11.6 to 16.7)                              |
| Unintentional firearm injuries                | 0.2<br>(0.1 to 0.2)                  | 0.1<br>(< 0.05 to 0.1)                | < 0.05<br>(< 0.05 to < 0.05)      | 39.4<br>(35.5 to 43.4)                            | 3.0<br>(0.4 to 5.6)                                 |
| Unintentional suffocation                     | 0.2<br>(0.2 to 0.3)                  | 0.1<br>(0.1 to 0.1)                   | < 0.05<br>(< 0.05 to < 0.05)      | 39.4<br>(35.4 to 43.4)                            | 5.9<br>(3.3 to 8.3)                                 |
| Other exposure to mechanical forces           | 3.6<br>(3.1 to 4.5)                  | 1.9<br>(1.6 to 2.2)                   | 0.1<br>(0.1 to 0.1)               | 60.1<br>(55.8 to 64.1)                            | 16.0<br>(13.3 to 18.6)                              |



| Cause                                                                               | Prevalence in thousands (95% UI)   | Incidence in thousands (95% UI)                      | YLDs in thousands (95% UI)                    |                                                   |                                                     |
|-------------------------------------------------------------------------------------|------------------------------------|------------------------------------------------------|-----------------------------------------------|---------------------------------------------------|-----------------------------------------------------|
|                                                                                     | 2016 counts                        | 2016 counts                                          | 2016 counts                                   | Percentage change in counts between 2006 and 2016 | Percentage change in age-standardised rates between |
| Adverse effects of medical treatment                                                | 0.1<br>(0.1 to 0.2)                | 1.9<br>(1.6 to 2.1)                                  | < 0.05<br>(< 0.05 to < 0.05)                  | 22.1<br>(15.6 to 28.9)                            | -3.1<br>(-7.1 to 0.7)                               |
| Animal contact                                                                      | 1.4<br>(1.2 to 1.7)                | 2.0<br>(1.7 to 2.4)                                  | 0.1<br>(< 0.05 to 0.1)                        | 34.3<br>(27.9 to 41.6)                            | 2.9<br>(-1.3 to 7.3)                                |
| Venomous animal contact                                                             | 0.5<br>(0.4 to 0.6)                | 0.8<br>(0.7 to 1.1)                                  | < 0.05<br>(< 0.05 to < 0.05)                  | 37.7<br>(28.0 to 49.3)                            | 6.3<br>(0.1 to 13.3)                                |
| Non-venomous animal contact                                                         | 0.9<br>(0.7 to 1.1)                | 1.2<br>(0.9 to 1.4)                                  | < 0.05<br>(< 0.05 to < 0.05)                  | 27.6<br>(22.3 to 32.8)                            | -3.3<br>(-6.9 to -0.1)                              |
| Foreign body                                                                        | 1.4<br>(1.2 to 1.7)                | 1.0<br>(0.8 to 1.1)                                  | 0.1<br>(< 0.05 to 0.1)                        | 26.8<br>(22.3 to 30.6)                            | -3.2<br>(-5.8 to -0.9)                              |
| Pulmonary aspiration and foreign body in airway                                     | 0.9<br>(0.7 to 1.2)                | 0.5<br>(0.4 to 0.6)                                  | < 0.05<br>(< 0.05 to 0.1)                     | 26.4<br>(22.1 to 30.6)                            | -3.7<br>(-6.3 to -1.4)                              |
| Foreign body in eyes                                                                | < 0.05<br>(< 0.05 to 0.1)          | 0.2<br>(0.2 to 0.3)                                  | < 0.05<br>(< 0.05 to < 0.05)                  | 32.1<br>(27.7 to 37.0)                            | -0.4<br>(-3.2 to 2.4)                               |
| Foreign body in other body part                                                     | 0.4<br>(0.4 to 0.6)                | 0.2<br>(0.2 to 0.3)                                  | < 0.05<br>(< 0.05 to < 0.05)                  | 27.1<br>(22.2 to 32.1)                            | -2.4<br>(-5.7 to 0.8)                               |
| Environmental heat and cold exposure                                                | 2.4<br>(2.0 to 2.8)                | 0.8<br>(0.7 to 1.0)                                  | 0.1<br>(0.1 to 0.1)                           | 27.2<br>(24.0 to 30.3)                            | -6.1<br>(-8.1 to -4.2)                              |
| Other unintentional injuries                                                        | 4.4<br>(3.6 to 5.3)                | 2.0<br>(1.8 to 2.4)                                  | 0.1<br>(0.1 to 0.2)                           | 33.5<br>(30.6 to 36.2)                            | -1.2<br>(-3.0 to 0.7)                               |
| <b>Self-harm and interpersonal violence</b>                                         | <b>9.2</b><br><b>(8.1 to 10.3)</b> | <b>1.0†</b><br><b>(0.8 to 1.2)</b>                   | <b>0.1</b><br><b>(0.1 to 0.2)</b>             | <b>34.0</b><br><b>(29.9 to 38.0)</b>              | <b>3.6</b><br><b>(1.4 to 5.8)</b>                   |
| Self-harm                                                                           | 0.3<br>(0.2 to 0.4)                | 0.1<br>(0.1 to 0.2)                                  | < 0.05<br>(< 0.05 to < 0.05)                  | 30.4<br>(26.5 to 34.6)                            | -5.5<br>(-7.9 to -3.1)                              |
| Self-harm by firearm                                                                | < 0.05<br>(< 0.05 to < 0.05)       | < 0.05<br>(< 0.05 to < 0.05)                         | < 0.05<br>(< 0.05 to < 0.05)                  | 26.2<br>(21.2 to 31.1)                            | -8.2<br>(-11.3 to -5.3)                             |
| Self-harm by other specified means                                                  | 0.3<br>(0.2 to 0.3)                | 0.1<br>(0.1 to 0.2)                                  | < 0.05<br>(< 0.05 to < 0.05)                  | 30.6<br>(26.6 to 34.8)                            | -5.5<br>(-7.8 to -3.0)                              |
| Interpersonal violence                                                              | 8.9<br>(7.8 to 10.0)               | 0.8†<br>(0.7 to 1.0)                                 | 0.1<br>(0.1 to 0.2)                           | 34.4<br>(29.7 to 38.8)                            | 5.1<br>(2.5 to 7.8)                                 |
| Assault by firearm                                                                  | < 0.05<br>(< 0.05 to < 0.05)       | < 0.05<br>(< 0.05 to < 0.05)                         | < 0.05<br>(< 0.05 to < 0.05)                  | 45.4<br>(40.7 to 50.7)                            | 8.3<br>(5.3 to 11.4)                                |
| Assault by sharp object                                                             | 0.3<br>(0.2 to 0.3)                | 0.1<br>(0.1 to 0.2)                                  | < 0.05<br>(< 0.05 to < 0.05)                  | 44.2<br>(39.7 to 48.8)                            | 6.9<br>(4.0 to 9.9)                                 |
| Sexual violence                                                                     | 7.5<br>(6.5 to 8.6)                | --                                                   | 0.1<br>(< 0.05 to 0.1)                        | 17.9<br>(13.3 to 22.7)                            | -6.1<br>(-9.1 to -2.8)                              |
| Assault by other means                                                              | 1.1<br>(0.9 to 1.3)                | 0.7<br>(0.6 to 0.9)                                  | < 0.05<br>(< 0.05 to 0.1)                     | 64.5<br>(60.5 to 68.4)                            | 19.7<br>(17.1 to 22.2)                              |
| <b>Forces of nature, conflict and terrorism, and executions and police conflict</b> | <b>0.8</b><br><b>(0.5 to 1.2)</b>  | <b>&lt; 0.05†</b><br><b>(&lt; 0.05 to &lt; 0.05)</b> | <b>&lt; 0.05</b><br><b>(&lt; 0.05 to 0.1)</b> | <b>-2.9</b><br><b>(-6.9 to 0.6)</b>               | <b>-19.8</b><br><b>(-22.7 to -17.3)</b>             |
| Exposure to forces of nature                                                        | 0.8<br>(0.5 to 1.2)                | --                                                   | < 0.05<br>(< 0.05 to 0.1)                     | -3.5<br>(-7.5 to -0.0)                            | -20.2<br>(-23.1 to -17.8)                           |
| Conflict and terrorism                                                              | --                                 | --                                                   | --                                            | --                                                | --                                                  |
| Executions and police conflict                                                      | < 0.05<br>(< 0.05 to < 0.05)       | < 0.05<br>(< 0.05 to < 0.05)                         | < 0.05<br>(< 0.05 to < 0.05)                  | 44.8<br>(36.5 to 50.3)                            | 16.0<br>(10.6 to 19.8)                              |
| <b>Impairments</b>                                                                  | --                                 | --                                                   | --                                            | --                                                | --                                                  |
| Anaemia                                                                             | 110.7<br>(106.4 to 115.6)          | --                                                   | 3.4<br>(2.3 to 4.9)                           | 16.9<br>(10.6 to 24.0)                            | -6.5<br>(-10.8 to -1.8)                             |
| Developmental intellectual disability                                               | 6.1<br>(4.7 to 7.5)                | --                                                   | 0.6<br>(0.5 to 0.8)                           | 21.5<br>(15.8 to 27.5)                            | -2.1<br>(-6.6 to 2.2)                               |
| Epilepsy                                                                            | 1.3<br>(0.8 to 1.8)                | --                                                   | 0.5<br>(0.3 to 0.8)                           | 22.9<br>(-31.8 to 125.0)                          | -1.1<br>(-47.8 to 85.9)                             |
| Guillain-Barre syndrome                                                             | < 0.05<br>(< 0.05 to < 0.05)       | --                                                   | < 0.05<br>(< 0.05 to < 0.05)                  | 28.7<br>(25.3 to 32.2)                            | -0.2<br>(-0.4 to -0.1)                              |
| Hearing loss                                                                        | 35.9<br>(34.1 to 37.8)             | --                                                   | 1.5<br>(1.1 to 2.0)                           | 29.8<br>(25.9 to 33.5)                            | -3.6<br>(-5.5 to -1.7)                              |
| Heart failure                                                                       | 0.9<br>(0.8 to 1.0)                | --                                                   | 0.1<br>(0.1 to 0.1)                           | 47.7<br>(36.2 to 59.5)                            | -0.1<br>(-7.7 to 7.9)                               |
| Infertility                                                                         | 5.8<br>(4.6 to 7.4)                | --                                                   | < 0.05<br>(< 0.05 to 0.1)                     | 24.9<br>(18.8 to 31.9)                            | -4.5<br>(-9.4 to 0.8)                               |
| Pelvic inflammatory disease                                                         | 0.2<br>(0.2 to 0.3)                | --                                                   | < 0.05<br>(< 0.05 to < 0.05)                  | 23.5<br>(8.1 to 41.5)                             | -7.7<br>(-19.0 to 5.1)                              |
| Vision loss                                                                         | 31.7<br>(30.4 to 33.1)             | --                                                   | 0.8<br>(0.5 to 1.1)                           | 32.6<br>(28.6 to 36.2)                            | -2.9<br>(-4.9 to -0.9)                              |

We did not calculate incidence for the nine impairments, certain NTDs, and causes with only birth prevalence. Blank cells mean that no estimate is available.

† Incidence for aggregate causes represents the sum of the incidence of the causes below the aggregate.

‡ Incidence estimates for stroke represent first-ever stroke only.

^ Incidence of HIV/AIDS represents new infections of HIV only and does not include new infections of Tuberculosis in HIV positive cases.

SR Table 14: Prevalence, incidence, and YLDs for 2016, percentage change of YLD counts and percentage change of age-standardised YLD rates between 2006 and 2016 by cause and impairments, for all ages, Venezuela.

| Cause                                                                                | Prevalence in thousands (95% UI)          | Incidence in thousands (95% UI)               | YLDs in thousands (95% UI)             |                                                   |                                                     |
|--------------------------------------------------------------------------------------|-------------------------------------------|-----------------------------------------------|----------------------------------------|---------------------------------------------------|-----------------------------------------------------|
|                                                                                      | 2016 counts                               | 2016 counts                                   | 2016 counts                            | Percentage change in counts between 2006 and 2016 | Percentage change in age-standardised rates between |
| <b>All causes</b>                                                                    | <b>30,309.3</b><br>(30,159.7 to 30,432.2) | <b>193,251.1†</b><br>(182,364.5 to 205,033.8) | <b>2,842.9</b><br>(2,097.5 to 3,705.4) | <b>24.1</b><br>(20.4 to 28.1)                     | <b>0.5</b><br>(-2.2 to 3.3)                         |
| <b>Communicable, maternal, neonatal, and nutritional disorders</b>                   | <b>24,072.3</b><br>(23,100.2 to 25,026.9) | <b>123,754.7†</b><br>(113,627.2 to 134,647.7) | <b>246.1</b><br>(173.2 to 336.3)       | <b>14.8</b><br>(7.6 to 22.9)                      | <b>0.7</b><br>(-6.0 to 7.7)                         |
| <b>HIV/AIDS and tuberculosis</b>                                                     | <b>8,216.7</b><br>(7,356.9 to 8,925.0)    | <b>12.0†</b><br>(10.1 to 14.2)                | <b>8.2</b><br>(4.7 to 14.2)            | <b>52.1</b><br>(22.9 to 89.3)                     | <b>24.9</b><br>(0.6 to 56.6)                        |
| Tuberculosis                                                                         | 7,550.8<br>(6,774.6 to 8,437.4)           | 6.3†<br>(5.3 to 7.3)                          | 0.9<br>(0.6 to 1.3)                    | 12.0<br>(-10.6 to 39.1)                           | -11.6<br>(-29.8 to 10.3)                            |
| Drug-susceptible tuberculosis                                                        | 2.8<br>(2.4 to 3.2)                       | 6.2<br>(5.3 to 7.2)                           | 0.9<br>(0.6 to 1.3)                    | 12.1<br>(-10.7 to 39.9)                           | -11.5<br>(-29.9 to 11.2)                            |
| Multidrug-resistant tuberculosis without extensive drug resistance                   | < 0.05<br>(< 0.05 to 0.1)                 | 0.1<br>(< 0.05 to 0.1)                        | < 0.05<br>(< 0.05 to < 0.05)           | -1.0<br>(-50.8 to 86.6)                           | -22.6<br>(-61.5 to 44.6)                            |
| Extensively drug-resistant tuberculosis                                              | < 0.05<br>(< 0.05 to < 0.05)              | < 0.05<br>(< 0.05 to < 0.05)                  | < 0.05<br>(< 0.05 to < 0.05)           | 163.7<br>(31.0 to 396.8)                          | 106.1<br>(2.7 to 285.2)                             |
| Latent tuberculosis infection                                                        | 7,548.0<br>(6,771.7 to 8,434.5)           | --                                            | --                                     | --                                                | --                                                  |
| HIV/AIDS                                                                             | 81.2<br>(57.2 to 114.9)                   | 5.7^<br>(4.0 to 7.8)                          | 7.3<br>(3.9 to 13.2)                   | 59.0<br>(24.2 to 111.2)                           | 32.2<br>(2.1 to 78.1)                               |
| Drug-susceptible HIV/AIDS - Tuberculosis                                             | 0.4<br>(0.2 to 0.6)                       | 0.9<br>(0.5 to 1.4)                           | 0.2<br>(0.1 to 0.3)                    | 18.4<br>(11.6 to 26.2)                            | -0.1<br>(-5.9 to 6.3)                               |
| Multidrug-resistant HIV/AIDS - Tuberculosis without extensive drug resistance        | < 0.05<br>(< 0.05 to < 0.05)              | < 0.05<br>(< 0.05 to < 0.05)                  | < 0.05<br>(< 0.05 to < 0.05)           | 4.1<br>(-47.9 to 97.0)                            | -12.3<br>(-56.1 to 65.9)                            |
| Extensively drug-resistant HIV/AIDS - Tuberculosis                                   | < 0.05<br>(< 0.05 to < 0.05)              | < 0.05<br>(< 0.05 to < 0.05)                  | < 0.05<br>(< 0.05 to < 0.05)           | 177.2<br>(38.6 to 425.0)                          | 133.6<br>(16.8 to 342.2)                            |
| HIV/AIDS resulting in other diseases                                                 | 80.8<br>(56.8 to 114.5)                   | 5.7<br>(4.0 to 7.8)                           | 7.1<br>(3.8 to 13.0)                   | 60.2<br>(24.4 to 115.9)                           | 33.2<br>(2.1 to 82.5)                               |
| <b>Diarrhoea, lower respiratory infections, and other common infectious diseases</b> | <b>1,989.5</b><br>(1,890.6 to 2,096.9)    | <b>117,856.8†</b><br>(107,788.7 to 128,491.8) | <b>107.5</b><br>(73.9 to 148.2)        | <b>28.6</b><br>(23.3 to 34.0)                     | <b>15.2</b><br>(10.6 to 19.5)                       |
| Diarrhoeal diseases                                                                  | 558.2<br>(518.4 to 600.0)                 | 37,039.0<br>(34,325.5 to 39,850.8)            | 63.5<br>(44.1 to 87.5)                 | 45.9<br>(37.6 to 54.8)                            | 30.2<br>(23.6 to 37.6)                              |
| Intestinal infectious diseases                                                       | < 0.05<br>(< 0.05 to < 0.05)              | < 0.05†<br>(< 0.05 to 0.1)                    | < 0.05<br>(< 0.05 to < 0.05)           | 16.9<br>(-7.9 to 47.0)                            | 0.5<br>(-18.6 to 24.4)                              |
| Typhoid fever                                                                        | < 0.05<br>(< 0.05 to < 0.05)              | < 0.05<br>(< 0.05 to < 0.05)                  | < 0.05<br>(< 0.05 to < 0.05)           | 33.2<br>(7.5 to 69.1)                             | 9.4<br>(-10.0 to 36.3)                              |
| Paratyphoid fever                                                                    | < 0.05<br>(< 0.05 to < 0.05)              | < 0.05<br>(< 0.05 to < 0.05)                  | < 0.05<br>(< 0.05 to < 0.05)           | 11.7<br>(-18.5 to 50.3)                           | -2.3<br>(-27.4 to 29.7)                             |
| Other intestinal infectious diseases                                                 | --                                        | --                                            | < 0.05<br>(< 0.05 to < 0.05)           | -44.3<br>(-65.3 to -5.0)                          | -41.9<br>(-63.2 to -3.7)                            |
| Lower respiratory infections                                                         | 14.6<br>(13.3 to 16.0)                    | 666.5<br>(608.4 to 730.9)                     | 0.9<br>(0.6 to 1.3)                    | 23.4<br>(5.7 to 44.2)                             | 7.5<br>(-6.5 to 23.3)                               |
| Upper respiratory infections                                                         | 1,028.5<br>(904.2 to 1,165.2)             | 77,486.9<br>(67,765.8 to 88,417.1)            | 25.8<br>(15.2 to 40.5)                 | 12.2<br>(6.3 to 18.3)                             | -0.1<br>(-5.3 to 5.4)                               |
| Otitis media                                                                         | 407.7<br>(365.4 to 452.7)                 | 1,933.6<br>(1,554.0 to 2,418.1)               | 11.4<br>(7.1 to 17.2)                  | 3.2<br>(-4.3 to 11.0)                             | -5.4<br>(-12.0 to 1.4)                              |
| Meningitis                                                                           | 21.6<br>(18.9 to 24.3)                    | 4.0<br>(3.4 to 4.5)                           | 2.4<br>(1.7 to 3.2)                    | 11.2<br>(8.0 to 14.3)                             | -5.3<br>(-7.9 to -2.8)                              |
| Pneumococcal meningitis                                                              | 11.7<br>(9.9 to 13.7)                     | 1.2<br>(1.0 to 1.4)                           | 1.2<br>(0.8 to 1.7)                    | 6.6<br>(2.0 to 11.2)                              | -9.5<br>(-13.4 to -5.8)                             |
| H influenzae type B meningitis                                                       | 2.4<br>(1.9 to 2.9)                       | 0.5<br>(0.4 to 0.6)                           | 0.3<br>(0.2 to 0.4)                    | 9.8<br>(4.0 to 15.6)                              | -4.5<br>(-9.2 to 0.4)                               |
| Meningococcal infection                                                              | 1.4<br>(1.1 to 1.8)                       | 0.5<br>(0.4 to 0.6)                           | 0.2<br>(0.1 to 0.2)                    | 17.9<br>(12.3 to 23.6)                            | -0.2<br>(-4.4 to 4.3)                               |
| Other meningitis                                                                     | 6.1<br>(5.0 to 7.4)                       | 1.8<br>(1.6 to 2.1)                           | 0.7<br>(0.5 to 1.0)                    | 19.4<br>(15.4 to 24.2)                            | 1.3<br>(-2.1 to 5.1)                                |
| Encephalitis                                                                         | 15.6<br>(11.2 to 21.8)                    | 7.1<br>(6.2 to 8.1)                           | 1.9<br>(1.3 to 2.6)                    | 18.3<br>(7.7 to 29.7)                             | -0.6<br>(-8.4 to 8.5)                               |
| Diphtheria                                                                           | < 0.05<br>(< 0.05 to < 0.05)              | < 0.05<br>(< 0.05 to < 0.05)                  | < 0.05<br>(< 0.05 to < 0.05)           | -27.6<br>(-59.6 to 29.1)                          | -35.5<br>(-64.0 to 12.3)                            |
| Whooping cough                                                                       | 10.7<br>(8.3 to 13.5)                     | 78.3<br>(60.9 to 98.3)                        | 0.5<br>(0.3 to 0.8)                    | -18.4<br>(-30.0 to -5.6)                          | -17.1<br>(-28.8 to -4.2)                            |
| Tetanus                                                                              | < 0.05<br>(< 0.05 to < 0.05)              | < 0.05<br>(< 0.05 to < 0.05)                  | < 0.05<br>(< 0.05 to < 0.05)           | -20.8<br>(-41.1 to 1.4)                           | -38.3<br>(-54.9 to -20.2)                           |
| Measles                                                                              | < 0.05<br>(0.0 to < 0.05)                 | < 0.05<br>(0.0 to < 0.05)                     | < 0.05<br>(0.0 to < 0.05)              | --                                                | --                                                  |
| Varicella and herpes zoster                                                          | 29.0<br>(26.7 to 31.4)                    | 641.3<br>(624.4 to 661.2)                     | 1.1<br>(0.7 to 1.7)                    | 25.0<br>(9.6 to 43.1)                             | 0.0<br>(-10.8 to 12.4)                              |
| <b>Neglected tropical diseases and malaria</b>                                       | <b>17,378.7</b><br>(15,414.5 to 19,386.4) | <b>2,063.8†</b><br>(1,366.8 to 3,533.1)       | <b>55.1</b><br>(33.5 to 86.2)          | <b>-1.7</b><br>(-21.3 to 22.7)                    | <b>-17.8</b><br>(-34.3 to 3.0)                      |
| Malaria                                                                              | 18.7<br>(11.0 to 29.8)                    | 256.7<br>(172.2 to 347.6)                     | 0.5<br>(0.2 to 0.8)                    | 290.6<br>(150.3 to 532.6)                         | 249.9<br>(123.9 to 469.9)                           |
| Chagas disease                                                                       | 487.8<br>(388.2 to 619.5)                 | 15.5<br>(12.4 to 19.4)                        | 4.3<br>(2.7 to 6.3)                    | -12.6<br>(-23.9 to 0.0)                           | -34.4<br>(-42.6 to -25.0)                           |
| Leishmaniasis                                                                        | 5.2<br>(3.7 to 7.0)                       | 7.3<br>(3.8 to 11.6)                          | 0.3<br>(0.1 to 0.5)                    | -1.9<br>(-47.4 to 72.3)                           | -16.9<br>(-55.7 to 43.4)                            |
| Visceral leishmaniasis                                                               | < 0.05<br>(< 0.05 to < 0.05)              | < 0.05<br>(< 0.05 to < 0.05)                  | < 0.05<br>(< 0.05 to < 0.05)           | -54.9<br>(-62.2 to -46.1)                         | -67.5<br>(-74.7 to -58.5)                           |
| Cutaneous and mucocutaneous leishmaniasis                                            | 4.3<br>(2.5 to 6.4)                       | 7.3<br>(3.8 to 11.5)                          | 0.3<br>(0.1 to 0.5)                    | -1.8<br>(-47.4 to 72.7)                           | -16.7<br>(-55.6 to 44.1)                            |
| African trypanosomiasis                                                              | --                                        | --                                            | --                                     | --                                                | --                                                  |
| Schistosomiasis                                                                      | 600.9<br>(507.9 to 704.6)                 | 133.1<br>(116.9 to 152.6)                     | 4.8<br>(2.5 to 9.0)                    | 19.2<br>(2.0 to 36.4)                             | -5.5<br>(-18.4 to 7.3)                              |
| Cysticercosis                                                                        | 17.1<br>(5.1 to 34.7)                     | --                                            | 2.4<br>(0.6 to 5.8)                    | -13.2<br>(-71.8 to 70.5)                          | -32.7<br>(-77.2 to 30.2)                            |
| Cystic echinococcosis                                                                | 0.1<br>(< 0.05 to 0.7)                    | < 0.05<br>(< 0.05 to 0.2)                     | < 0.05<br>(< 0.05 to 0.1)              | --                                                | --                                                  |
| Lymphatic filariasis                                                                 | --                                        | --                                            | --                                     | --                                                | --                                                  |
| Onchocerciasis                                                                       | 6.0<br>(3.1 to 9.8)                       | 3.2<br>(1.5 to 5.5)                           | 0.5<br>(0.2 to 0.9)                    | -78.9<br>(-88.6 to -66.4)                         | -82.9<br>(-90.9 to -73.1)                           |
| Trachoma                                                                             | --                                        | --                                            | --                                     | --                                                | --                                                  |
| Dengue                                                                               | 31.1<br>(18.3 to 49.6)                    | 519.9<br>(350.8 to 730.1)                     | 5.1<br>(2.4 to 9.2)                    | 72.9<br>(33.9 to 261.2)                           | 50.8<br>(17.6 to 220.1)                             |
| Yellow fever                                                                         | < 0.05<br>(< 0.05 to < 0.05)              | 0.1<br>(< 0.05 to 0.3)                        | < 0.05<br>(< 0.05 to < 0.05)           | -45.2<br>(-61.9 to -18.1)                         | -52.0<br>(-66.0 to -30.3)                           |
| Rabies                                                                               | < 0.05<br>(< 0.05 to < 0.05)              | < 0.05<br>(< 0.05 to < 0.05)                  | < 0.05<br>(< 0.05 to < 0.05)           | -62.8<br>(-77.0 to -39.2)                         | -66.8<br>(-78.6 to -48.4)                           |
| Intestinal nematode infections                                                       | 16,874.9<br>(14,819.2 to 18,960.7)        | --                                            | 35.9<br>(18.5 to 62.4)                 | -4.0<br>(-32.5 to 33.6)                           | -17.3<br>(-42.8 to 16.4)                            |
| Ascariasis                                                                           | 8,884.0<br>(6,546.9 to 11,821.5)          | --                                            | 11.2<br>(5.3 to 19.9)                  | -7.1<br>(-40.2 to 43.5)                           | -19.5<br>(-49.3 to 26.7)                            |

| Cause                                                                   | Prevalence in thousands (95% UI)                 | Incidence in thousands (95% UI)                   | YLDs in thousands (95% UI)                    |                                                   |                                                     |
|-------------------------------------------------------------------------|--------------------------------------------------|---------------------------------------------------|-----------------------------------------------|---------------------------------------------------|-----------------------------------------------------|
|                                                                         | 2016 counts                                      | 2016 counts                                       | 2016 counts                                   | Percentage change in counts between 2006 and 2016 | Percentage change in age-standardised rates between |
| Trichuriasis                                                            | 11,000.1<br>(8,637.6 to 13,717.4)                | --                                                | 19.9<br>(9.1 to 38.3)                         | -3.3<br>(-43.5 to 63.7)                           | -17.2<br>(-51.5 to 42.0)                            |
| Hookworm disease                                                        | 1,374.5<br>(1,017.2 to 1,851.4)                  | --                                                | 4.8<br>(2.6 to 7.7)                           | 0.9<br>(-27.2 to 41.4)                            | -11.9<br>(-36.9 to 25.5)                            |
| Food-borne trematodiasis                                                | --                                               | --                                                | --                                            | --                                                | --                                                  |
| Leprosy                                                                 | 1.0<br>(0.9 to 1.2)                              | 0.1<br>(0.1 to 0.2)                               | 0.1<br>(< 0.05 to 0.1)                        | 20.8<br>(-3.0 to 50.8)                            | -10.1<br>(-29.2 to 14.3)                            |
| Ebola virus disease                                                     | --                                               | --                                                | --                                            | --                                                | --                                                  |
| Zika virus disease                                                      | 18.7<br>(8.0 to 43.5)                            | 1,127.8<br>(484.4 to 2,625.7)                     | 0.4<br>(0.1 to 0.9)                           | --                                                | --                                                  |
| Guinea worm disease                                                     | --                                               | --                                                | --                                            | --                                                | --                                                  |
| Other neglected tropical diseases                                       | 47.7<br>(37.3 to 59.6)                           | --                                                | 1.0<br>(0.6 to 1.6)                           | -13.8<br>(-31.8 to 14.2)                          | -15.2<br>(-32.6 to 11.7)                            |
| <b>Maternal disorders</b>                                               | <b>41.9</b><br><b>(31.5 to 53.8)</b>             | <b>696.8†</b><br><b>(592.0 to 837.1)</b>          | <b>2.6</b><br><b>(1.6 to 3.8)</b>             | <b>1.3</b><br><b>(-23.5 to 35.5)</b>              | <b>-10.3</b><br><b>(-32.3 to 19.9)</b>              |
| Maternal haemorrhage                                                    | 5.6<br>(3.8 to 8.2)                              | 32.1<br>(23.7 to 42.8)                            | 0.2<br>(0.1 to 0.3)                           | -9.3<br>(-40.8 to 42.3)                           | -19.9<br>(-47.7 to 25.3)                            |
| Maternal sepsis and other pregnancy related infections                  | 10.6<br>(7.6 to 14.7)                            | 73.2<br>(54.4 to 102.2)                           | 0.3<br>(0.1 to 0.6)                           | -3.4<br>(-52.0 to 98.9)                           | -13.8<br>(-57.0 to 76.0)                            |
| Maternal hypertensive disorders                                         | 23.6<br>(15.0 to 33.7)                           | 124.6<br>(100.0 to 146.5)                         | 1.2<br>(0.7 to 2.0)                           | 12.8<br>(-28.2 to 82.5)                           | -0.1<br>(-36.2 to 61.7)                             |
| Maternal obstructed labour and uterine rupture                          | 0.3<br>(0.2 to 0.5)                              | 21.8<br>(15.7 to 29.3)                            | 0.1<br>(< 0.05 to 0.2)                        | -7.3<br>(-49.6 to 70.6)                           | -17.6<br>(-55.0 to 52.4)                            |
| Maternal abortion, miscarriage, and ectopic pregnancy                   | 3.6<br>(2.3 to 5.4)                              | 445.1<br>(341.0 to 581.8)                         | 0.4<br>(0.2 to 0.7)                           | -10.9<br>(-50.1 to 59.3)                          | -21.4<br>(-55.6 to 40.6)                            |
| Other maternal disorders                                                | --                                               | --                                                | 0.4<br>(0.2 to 0.6)                           | -3.7<br>(-27.4 to 29.0)                           | -14.4<br>(-35.3 to 14.3)                            |
| <b>Neonatal disorders</b>                                               | <b>213.1</b><br><b>(188.6 to 246.0)</b>          | --                                                | <b>37.3</b><br><b>(25.6 to 52.4)</b>          | <b>16.3</b><br><b>(0.5 to 33.9)</b>               | <b>4.0</b><br><b>(-10.2 to 19.5)</b>                |
| Neonatal preterm birth complications                                    | 180.2<br>(141.5 to 231.2)                        | --                                                | 20.2<br>(13.4 to 28.7)                        | 17.9<br>(-4.4 to 43.4)                            | 4.8<br>(-14.9 to 27.0)                              |
| Neonatal encephalopathy due to birth asphyxia and trauma                | 38.1<br>(19.5 to 63.0)                           | --                                                | 5.4<br>(1.2 to 11.8)                          | 17.3<br>(-31.8 to 101.3)                          | 4.4<br>(-38.8 to 78.0)                              |
| Neonatal sepsis and other neonatal infections                           | 16.8<br>(7.8 to 35.6)                            | --                                                | 7.3<br>(2.9 to 16.5)                          | 16.4<br>(-6.5 to 51.8)                            | 4.7<br>(-15.1 to 36.3)                              |
| Hemolytic disease and other neonatal jaundice                           | 12.0<br>(10.4 to 13.8)                           | --                                                | 3.3<br>(2.4 to 4.4)                           | 11.1<br>(-6.8 to 30.5)                            | -2.3<br>(-17.5 to 14.2)                             |
| Other neonatal disorders                                                | --                                               | --                                                | 1.2<br>(0.8 to 1.7)                           | 1.7<br>(-18.9 to 25.1)                            | 2.9<br>(-17.9 to 26.6)                              |
| <b>Nutritional deficiencies</b>                                         | <b>2,010.2</b><br><b>(1,819.7 to 2,273.6)</b>    | <b>680.1†</b><br><b>(516.3 to 913.2)</b>          | <b>26.4</b><br><b>(17.1 to 38.3)</b>          | <b>-2.2</b><br><b>(-12.5 to 10.4)</b>             | <b>-10.6</b><br><b>(-19.3 to -0.1)</b>              |
| Protein-energy malnutrition                                             | 226.9<br>(171.3 to 300.4)                        | 117.8<br>(87.0 to 159.0)                          | 1.8<br>(0.9 to 2.9)                           | -16.2<br>(-49.0 to 43.5)                          | -15.0<br>(-48.1 to 45.3)                            |
| Iodine deficiency                                                       | 429.4<br>(378.6 to 488.7)                        | 10.0<br>(8.8 to 11.3)                             | 11.0<br>(7.4 to 15.6)                         | 18.4<br>(7.4 to 31.1)                             | -1.0<br>(-10.0 to 9.6)                              |
| Vitamin A deficiency                                                    | 665.0<br>(481.6 to 941.7)                        | 552.3<br>(396.0 to 783.8)                         | 1.0<br>(0.6 to 1.4)                           | 13.1<br>(-4.7 to 34.6)                            | 2.3<br>(-13.3 to 20.4)                              |
| Iron-deficiency anaemia                                                 | 747.5<br>(615.6 to 895.8)                        | --                                                | 12.6<br>(7.4 to 20.3)                         | -14.1<br>(-28.4 to 6.8)                           | -17.9<br>(-31.0 to 0.6)                             |
| Other nutritional deficiencies                                          | --                                               | --                                                | 0.1<br>(< 0.05 to 0.1)                        | -17.0<br>(-51.1 to 44.8)                          | -16.1<br>(-50.5 to 45.4)                            |
| <b>Other communicable, maternal, neonatal, and nutritional diseases</b> | <b>7,412.5</b><br><b>(6,885.3 to 7,930.4)</b>    | <b>2,445.4</b><br><b>(2,203.5 to 2,718.3)</b>     | <b>8.1</b><br><b>(4.7 to 14.0)</b>            | <b>16.6</b><br><b>(9.3 to 23.6)</b>               | <b>-1.2</b><br><b>(-7.0 to 4.3)</b>                 |
| Sexually transmitted diseases excluding HIV                             | 6,415.0<br>(5,919.3 to 6,932.9)                  | 2,162.5<br>(1,932.2 to 2,406.8)                   | 6.4<br>(3.5 to 11.5)                          | 19.7<br>(11.4 to 28.3)                            | -0.1<br>(-6.8 to 6.4)                               |
| Syphilis                                                                | 336.5<br>(273.6 to 403.6)                        | 249.5<br>(193.6 to 310.5)                         | 0.5<br>(0.4 to 0.7)                           | 37.1<br>(21.4 to 55.2)                            | 1.5<br>(-9.1 to 15.1)                               |
| Chlamydial infection                                                    | 431.9<br>(287.1 to 609.0)                        | 331.2<br>(214.8 to 494.9)                         | 1.4<br>(0.7 to 2.4)                           | 15.7<br>(-2.8 to 36.5)                            | -0.3<br>(-15.7 to 17.2)                             |
| Gonococcal infection                                                    | 92.7<br>(70.3 to 119.6)                          | 319.3<br>(232.0 to 425.8)                         | 0.7<br>(0.4 to 1.2)                           | 15.0<br>(-8.0 to 46.4)                            | -0.8<br>(-20.7 to 26.2)                             |
| Trichomoniasis                                                          | 1,010.7<br>(866.2 to 1,163.1)                    | 883.6<br>(748.4 to 1,024.7)                       | 1.3<br>(0.5 to 2.8)                           | 20.1<br>(12.7 to 28.2)                            | 0.6<br>(-5.1 to 6.9)                                |
| Genital herpes                                                          | 5,098.1<br>(4,401.5 to 5,921.1)                  | 352.9<br>(299.0 to 420.8)                         | 1.3<br>(0.4 to 3.1)                           | 24.5<br>(15.0 to 32.8)                            | 0.1<br>(-6.1 to 6.2)                                |
| Other sexually transmitted diseases                                     | 34.3<br>(30.9 to 38.6)                           | 25.9<br>(21.9 to 30.6)                            | 1.1<br>(0.7 to 1.9)                           | 14.9<br>(2.0 to 30.1)                             | -1.5<br>(-12.7 to 11.5)                             |
| Hepatitis                                                               | 1,337.0<br>(1,180.7 to 1,515.8)                  | 282.8<br>(195.1 to 401.1)                         | 0.4<br>(0.2 to 0.6)                           | 10.0<br>(-21.8 to 54.1)                           | -8.7<br>(-31.2 to 21.1)                             |
| Acute hepatitis A                                                       | 8.1<br>(1.9 to 17.0)                             | 105.8<br>(24.8 to 221.5)                          | 0.1<br>(< 0.05 to 0.2)                        | 11.2<br>(-63.5 to 253.9)                          | -2.1<br>(-65.7 to 168.9)                            |
| Hepatitis B                                                             | 516.7<br>(403.1 to 665.3)                        | 131.6<br>(103.7 to 169.0)                         | 0.2<br>(0.1 to 0.3)                           | 9.1<br>(-9.6 to 29.9)                             | -13.0<br>(-27.9 to 3.3)                             |
| Hepatitis C                                                             | 811.1<br>(720.2 to 909.8)                        | 31.8<br>(28.5 to 35.3)                            | < 0.05<br>(< 0.05 to 0.1)                     | 7.5<br>(-9.8 to 26.3)                             | -1.7<br>(-16.4 to 14.1)                             |
| Acute hepatitis E                                                       | 1.1<br>(0.9 to 1.2)                              | 13.7<br>(11.9 to 16.0)                            | < 0.05<br>(< 0.05 to < 0.05)                  | 14.7<br>(3.7 to 25.5)                             | -5.7<br>(-16.1 to 5.7)                              |
| Other infectious diseases                                               | 35.5<br>(28.3 to 43.7)                           | < 0.05<br>(< 0.05 to 0.1)                         | 1.4<br>(0.8 to 2.1)                           | 5.5<br>(-8.2 to 22.4)                             | -3.6<br>(-16.3 to 11.6)                             |
| <b>Non-communicable diseases</b>                                        | <b>27,785.2</b><br><b>(27,567.1 to 28,017.8)</b> | <b>67,436.0†</b><br><b>(63,133.2 to 72,066.6)</b> | <b>2,420.6</b><br><b>(1,788.0 to 3,160.3)</b> | <b>24.5</b><br><b>(20.2 to 29.0)</b>              | <b>0.2</b><br><b>(-2.9 to 3.2)</b>                  |
| <b>Neoplasms</b>                                                        | <b>176.5</b><br><b>(167.9 to 186.4)</b>          | <b>65.7</b><br><b>(61.6 to 70.6)</b>              | <b>19.7</b><br><b>(14.5 to 25.7)</b>          | <b>70.7</b><br><b>(60.9 to 81.8)</b>              | <b>21.6</b><br><b>(14.7 to 29.6)</b>                |
| Lip and oral cavity cancer                                              | 2.6<br>(2.4 to 2.7)                              | 0.7<br>(0.7 to 0.8)                               | 0.3<br>(0.2 to 0.4)                           | 46.2<br>(31.8 to 62.2)                            | 2.2<br>(-8.0 to 13.5)                               |
| Nasopharynx cancer                                                      | 0.5<br>(0.5 to 0.6)                              | 0.1<br>(0.1 to 0.2)                               | 0.1<br>(< 0.05 to 0.1)                        | 39.2<br>(24.4 to 54.5)                            | 5.7<br>(-4.2 to 15.8)                               |
| Other pharynx cancer                                                    | 0.6<br>(0.5 to 0.6)                              | 0.2<br>(0.2 to 0.2)                               | 0.1<br>(0.1 to 0.1)                           | 76.8<br>(60.5 to 94.6)                            | 21.8<br>(10.3 to 34.6)                              |
| Oesophageal cancer                                                      | 0.4<br>(0.4 to 0.5)                              | 0.4<br>(0.4 to 0.5)                               | 0.1<br>(0.1 to 0.1)                           | 47.2<br>(33.9 to 62.3)                            | 0.2<br>(-8.9 to 11.3)                               |
| Stomach cancer                                                          | 7.1<br>(6.6 to 7.6)                              | 3.6<br>(3.5 to 3.9)                               | 1.0<br>(0.7 to 1.3)                           | 67.1<br>(45.4 to 92.2)                            | 14.9<br>(-0.9 to 32.9)                              |
| Colon and rectum cancer                                                 | 18.0<br>(16.8 to 19.4)                           | 4.9<br>(4.5 to 5.2)                               | 1.7<br>(1.2 to 2.2)                           | 81.2<br>(58.6 to 107.2)                           | 24.9<br>(9.3 to 42.2)                               |
| Liver cancer                                                            | 0.4<br>(0.3 to 0.4)                              | 1.1<br>(1.1 to 1.2)                               | 0.2<br>(0.2 to 0.3)                           | 51.1<br>(40.1 to 65.1)                            | 3.9<br>(-3.4 to 13.5)                               |
| Liver cancer due to hepatitis B                                         | 0.2<br>(0.2 to 0.3)                              | 0.2<br>(0.2 to 0.3)                               | 0.1<br>(< 0.05 to 0.1)                        | 53.1<br>(37.9 to 70.5)                            | 8.9<br>(-1.7 to 20.9)                               |



| Cause                                              | Prevalence in thousands (95% UI)              | Incidence in thousands (95% UI)          | YLDs in thousands (95% UI)            |                                                   |                                                     |
|----------------------------------------------------|-----------------------------------------------|------------------------------------------|---------------------------------------|---------------------------------------------------|-----------------------------------------------------|
|                                                    | 2016 counts                                   | 2016 counts                              | 2016 counts                           | Percentage change in counts between 2006 and 2016 | Percentage change in age-standardised rates between |
| Liver cancer due to hepatitis C                    | 0.3<br>(0.2 to 0.4)                           | 0.4<br>(0.3 to 0.4)                      | 0.1<br>(0.1 to 0.1)                   | 59.7<br>(45.4 to 77.1)                            | 8.6<br>(-1.3 to 20.6)                               |
| Liver cancer due to alcohol use                    | 0.3<br>(0.2 to 0.3)                           | 0.3<br>(0.2 to 0.4)                      | 0.1<br>( $< 0.05$ to 0.1)             | 38.3<br>(22.5 to 55.1)                            | -7.5<br>(-18.1 to 4.2)                              |
| Liver cancer due to other causes                   | 0.2<br>(0.1 to 0.2)                           | 0.2<br>(0.2 to 0.2)                      | $< 0.05$<br>( $< 0.05$ to 0.1)        | 55.9<br>(42.0 to 72.3)                            | 10.4<br>(0.6 to 22.9)                               |
| Gallbladder and biliary tract cancer               | 0.3<br>(0.3 to 0.3)                           | 0.4<br>(0.4 to 0.5)                      | 0.1<br>(0.1 to 0.1)                   | 27.2<br>(19.4 to 36.1)                            | -13.2<br>(-18.7 to -7.3)                            |
| Pancreatic cancer                                  | 0.8<br>(0.8 to 0.9)                           | 1.1<br>(1.1 to 1.2)                      | 0.2<br>(0.2 to 0.3)                   | 56.5<br>(44.9 to 71.1)                            | 6.5<br>(-2.1 to 17.2)                               |
| Larynx cancer                                      | 2.6<br>(2.4 to 2.8)                           | 0.8<br>(0.7 to 0.8)                      | 0.3<br>(0.2 to 0.4)                   | 56.8<br>(34.6 to 83.1)                            | 7.0<br>(-9.1 to 26.1)                               |
| Tracheal, bronchus, and lung cancer                | 5.2<br>(4.9 to 5.6)                           | 4.5<br>(4.2 to 4.8)                      | 1.1<br>(0.7 to 1.4)                   | 50.1<br>(24.1 to 80.5)                            | 4.1<br>(-13.7 to 24.3)                              |
| Malignant skin melanoma                            | 1.6<br>(1.4 to 1.9)                           | 0.4<br>(0.3 to 0.4)                      | 0.1<br>(0.1 to 0.2)                   | 83.2<br>(55.8 to 111.4)                           | 33.9<br>(12.6 to 56.4)                              |
| Non-melanoma skin cancer                           | 3.9<br>(2.2 to 7.1)                           | 8.4<br>(5.2 to 12.9)                     | 0.1<br>(0.1 to 0.3)                   | 13.4<br>(-18.1 to 64.8)                           | -24.3<br>(-45.7 to 11.8)                            |
| Non-melanoma skin cancer (squamous-cell carcinoma) | 2.9<br>(1.5 to 6.7)                           | 2.7<br>(1.5 to 6.1)                      | 0.1<br>(0.1 to 0.3)                   | 12.0<br>(-20.1 to 64.1)                           | -25.3<br>(-46.8 to 13.2)                            |
| Non-melanoma skin cancer (basal-cell carcinoma)    | 0.8<br>(0.5 to 1.4)                           | 5.7<br>(3.1 to 8.9)                      | $< 0.05$<br>( $< 0.05$ to $< 0.05$ )  | 41.4<br>(13.4 to 84.1)                            | -1.0<br>(-22.9 to 33.1)                             |
| Breast cancer                                      | 35.5<br>(31.1 to 40.4)                        | 7.4<br>(6.5 to 8.4)                      | 2.9<br>(2.0 to 3.9)                   | 72.2<br>(43.9 to 106.9)                           | 24.7<br>(5.4 to 47.0)                               |
| Cervical cancer                                    | 17.5<br>(15.4 to 19.8)                        | 4.5<br>(4.0 to 5.0)                      | 1.6<br>(1.1 to 2.2)                   | 22.8<br>(-3.3 to 53.5)                            | -5.9<br>(-24.9 to 16.2)                             |
| Uterine cancer                                     | 8.5<br>(7.8 to 9.3)                           | 1.8<br>(1.7 to 2.0)                      | 0.7<br>(0.5 to 0.9)                   | 107.7<br>(70.7 to 153.0)                          | 42.9<br>(18.8 to 71.8)                              |
| Ovarian cancer                                     | 3.3<br>(3.0 to 3.6)                           | 1.0<br>(1.0 to 1.1)                      | 0.5<br>(0.3 to 0.7)                   | 43.9<br>(13.7 to 79.3)                            | 7.1<br>(-17.7 to 37.1)                              |
| Prostate cancer                                    | 46.7<br>(36.4 to 52.5)                        | 10.3<br>(8.1 to 11.5)                    | 4.1<br>(2.8 to 5.5)                   | 100.7<br>(71.2 to 133.4)                          | 33.1<br>(13.8 to 53.9)                              |
| Testicular cancer                                  | 2.0<br>(1.6 to 2.3)                           | 0.4<br>(0.3 to 0.5)                      | 0.1<br>(0.1 to 0.2)                   | 99.8<br>(38.1 to 191.2)                           | 66.7<br>(17.9 to 136.8)                             |
| Kidney cancer                                      | 6.2<br>(5.7 to 6.7)                           | 1.6<br>(1.5 to 1.8)                      | 0.6<br>(0.4 to 0.7)                   | 65.5<br>(46.4 to 87.9)                            | 22.4<br>(9.0 to 37.8)                               |
| Bladder cancer                                     | 3.5<br>(3.3 to 3.8)                           | 0.9<br>(0.8 to 1.0)                      | 0.3<br>(0.2 to 0.5)                   | 70.6<br>(51.2 to 91.2)                            | 16.0<br>(2.1 to 31.5)                               |
| Brain and nervous system cancer                    | 1.5<br>(1.0 to 1.7)                           | 0.7<br>(0.5 to 0.8)                      | 0.2<br>(0.1 to 0.3)                   | 42.5<br>(31.5 to 58.3)                            | 9.8<br>(1.1 to 23.1)                                |
| Thyroid cancer                                     | 3.4<br>(3.1 to 3.7)                           | 0.7<br>(0.6 to 0.7)                      | 0.2<br>(0.1 to 0.3)                   | 103.6<br>(65.6 to 150.0)                          | 44.9<br>(18.6 to 77.1)                              |
| Mesothelioma                                       | 0.1<br>(0.1 to 0.1)                           | $< 0.05$<br>( $< 0.05$ to 0.1)           | $< 0.05$<br>( $< 0.05$ to $< 0.05$ )  | 44.7<br>(34.6 to 55.6)                            | 3.4<br>(-3.9 to 11.0)                               |
| Hodgkin lymphoma                                   | 1.1<br>(0.9 to 1.2)                           | 0.3<br>(0.3 to 0.3)                      | 0.1<br>(0.1 to 0.2)                   | 66.0<br>(51.7 to 82.4)                            | 25.6<br>(15.1 to 37.1)                              |
| Non-Hodgkin's lymphoma                             | 3.2<br>(2.9 to 3.5)                           | 1.0<br>(0.9 to 1.1)                      | 0.3<br>(0.2 to 0.4)                   | 54.2<br>(37.4 to 74.8)                            | 13.5<br>(0.6 to 30.1)                               |
| Multiple myeloma                                   | 0.9<br>(0.7 to 1.0)                           | 0.5<br>(0.4 to 0.5)                      | 0.2<br>(0.1 to 0.3)                   | 69.6<br>(51.2 to 91.3)                            | 16.3<br>(2.8 to 33.4)                               |
| Leukaemia                                          | 4.5<br>(4.2 to 4.8)                           | 1.4<br>(1.3 to 1.5)                      | 0.6<br>(0.4 to 0.8)                   | 23.1<br>(12.7 to 33.6)                            | -2.1<br>(-9.8 to 5.7)                               |
| Acute lymphoid leukaemia                           | 1.6<br>(1.4 to 1.8)                           | 0.4<br>(0.4 to 0.5)                      | 0.2<br>(0.1 to 0.3)                   | 19.5<br>(3.0 to 39.6)                             | 4.3<br>(-8.8 to 21.0)                               |
| Chronic lymphoid leukaemia                         | 1.0<br>(0.9 to 1.2)                           | 0.2<br>(0.2 to 0.3)                      | 0.1<br>(0.1 to 0.2)                   | 35.7<br>(15.0 to 58.0)                            | -5.1<br>(-19.8 to 11.2)                             |
| Acute myeloid leukaemia                            | 0.6<br>(0.5 to 0.7)                           | 0.4<br>(0.4 to 0.4)                      | 0.1<br>(0.1 to 0.1)                   | 27.0<br>(12.8 to 42.3)                            | 3.5<br>(-7.6 to 15.4)                               |
| Chronic myeloid leukaemia                          | 0.5<br>(0.4 to 0.5)                           | 0.2<br>(0.1 to 0.2)                      | 0.1<br>( $< 0.05$ to 0.1)             | 18.1<br>(4.9 to 31.9)                             | -11.5<br>(-21.4 to -1.3)                            |
| Other leukaemia                                    | 0.9<br>(0.8 to 1.0)                           | 0.2<br>(0.2 to 0.2)                      | 0.1<br>(0.1 to 0.1)                   | 15.3<br>(2.3 to 28.0)                             | -6.8<br>(-16.9 to 3.0)                              |
| Other neoplasms                                    | 25.1<br>(21.1 to 29.6)                        | 6.4<br>(5.5 to 7.5)                      | 1.9<br>(1.3 to 2.6)                   | 139.1<br>(98.4 to 189.8)                          | 79.3<br>(47.1 to 116.0)                             |
| <b>Cardiovascular diseases</b>                     | <b>1,321.8</b><br><b>(1,264.7 to 1,377.9)</b> | <b>138.0†</b><br><b>(130.7 to 145.8)</b> | <b>76.2</b><br><b>(54.6 to 100.2)</b> | <b>42.3</b><br><b>(37.0 to 48.3)</b>              | <b>0.3</b><br><b>(-3.1 to 3.9)</b>                  |
| Rheumatic heart disease                            | 1.4<br>(1.3 to 1.7)                           | 0.3<br>(0.3 to 0.3)                      | 0.1<br>(0.1 to 0.1)                   | 32.4<br>(23.3 to 42.7)                            | 1.3<br>(-5.4 to 8.3)                                |
| Ischaemic heart disease                            | 416.6<br>(394.4 to 440.2)                     | 45.7<br>(43.0 to 48.4)                   | 24.1<br>(16.6 to 33.3)                | 46.9<br>(40.2 to 53.8)                            | 4.2<br>(-0.1 to 8.6)                                |
| Cerebrovascular disease                            | 191.7<br>(177.7 to 204.7)                     | 28.2‡<br>(25.9 to 30.6)                  | 19.2<br>(13.8 to 24.4)                | 43.1<br>(33.1 to 53.9)                            | -0.5<br>(-7.6 to 6.9)                               |
| Ischaemic stroke                                   | 154.3<br>(138.6 to 171.3)                     | 18.0‡<br>(15.9 to 20.3)                  | 14.6<br>(10.5 to 18.8)                | 46.7<br>(34.0 to 60.7)                            | 1.1<br>(-7.6 to 10.5)                               |
| Hemorrhagic stroke                                 | 48.2<br>(43.8 to 53.3)                        | 10.2‡<br>(9.2 to 11.3)                   | 4.5<br>(3.3 to 5.8)                   | 32.5<br>(18.8 to 49.2)                            | -5.5<br>(-15.6 to 6.2)                              |
| Hypertensive heart disease                         | 83.4<br>(69.6 to 98.0)                        | --                                       | 6.7<br>(4.6 to 9.4)                   | 50.9<br>(36.8 to 66.7)                            | 1.4<br>(-7.8 to 10.9)                               |
| Cardiomyopathy and myocarditis                     | 13.3<br>(11.6 to 15.1)                        | 7.2†<br>(6.3 to 8.2)                     | 1.4<br>(0.9 to 2.0)                   | 37.8<br>(19.9 to 60.1)                            | 7.9<br>(-5.3 to 23.8)                               |
| Myocarditis                                        | 3.9<br>(3.4 to 4.4)                           | 7.2<br>(6.3 to 8.2)                      | 0.3<br>(0.2 to 0.4)                   | 23.9<br>(13.8 to 36.1)                            | 6.4<br>(-3.2 to 18.4)                               |
| Alcoholic cardiomyopathy                           | 2.2<br>(1.7 to 2.8)                           | --                                       | 0.2<br>(0.1 to 0.3)                   | 64.5<br>(23.9 to 129.9)                           | 12.9<br>(-13.7 to 53.7)                             |
| Other cardiomyopathy                               | 10.7<br>(8.8 to 12.7)                         | --                                       | 0.9<br>(0.6 to 1.3)                   | 37.9<br>(14.0 to 67.5)                            | 7.4<br>(-9.3 to 28.0)                               |
| Atrial fibrillation and flutter                    | 160.9<br>(140.2 to 183.1)                     | 13.3<br>(11.4 to 15.4)                   | 12.8<br>(8.5 to 17.8)                 | 44.1<br>(35.3 to 53.8)                            | -1.3<br>(-7.0 to 4.7)                               |
| Peripheral vascular disease                        | 422.1<br>(364.6 to 490.8)                     | 40.8<br>(34.8 to 47.9)                   | 1.9<br>(0.9 to 3.6)                   | 47.7<br>(36.5 to 60.0)                            | -1.7<br>(-8.7 to 6.2)                               |
| Endocarditis                                       | 0.7<br>(0.6 to 0.8)                           | 2.5<br>(2.2 to 2.8)                      | 0.1<br>( $< 0.05$ to 0.1)             | 24.8<br>(15.5 to 37.5)                            | -5.5<br>(-12.1 to 3.4)                              |
| Other cardiovascular and circulatory diseases      | 189.5<br>(156.2 to 228.5)                     | --                                       | 10.0<br>(6.5 to 14.4)                 | 24.6<br>(11.5 to 44.4)                            | -6.5<br>(-15.4 to 5.7)                              |
| <b>Chronic respiratory diseases</b>                | <b>2,657.4</b><br><b>(2,539.8 to 2,785.8)</b> | <b>435.7†</b><br><b>(406.3 to 466.3)</b> | <b>90.8</b><br><b>(67.7 to 120.1)</b> | <b>14.3</b><br><b>(7.9 to 21.2)</b>               | <b>-3.4</b><br><b>(-9.0 to 2.3)</b>                 |
| Chronic obstructive pulmonary disease              | 1,107.0<br>(1,030.7 to 1,202.4)               | 75.6<br>(70.1 to 82.0)                   | 23.5<br>(19.2 to 28.7)                | 23.8<br>(8.4 to 42.9)                             | -9.7<br>(-20.7 to 3.6)                              |
| Pneumoconiosis                                     | 3.8<br>(3.5 to 4.2)                           | 0.3<br>(0.3 to 0.4)                      | 0.6<br>(0.4 to 0.8)                   | 46.4<br>(26.2 to 69.6)                            | 3.2<br>(-12.9 to 22.2)                              |
| Silicosis                                          | 1.0<br>(0.8 to 1.1)                           | 0.1<br>(0.1 to 0.1)                      | 0.1<br>(0.1 to 0.2)                   | 49.2<br>(14.2 to 93.2)                            | 5.9<br>(-23.5 to 44.8)                              |

| Cause                                                          | Prevalence in thousands (95% UI)           | Incidence in thousands (95% UI)          | YLDs in thousands (95% UI)        |                                                   |                                                     |
|----------------------------------------------------------------|--------------------------------------------|------------------------------------------|-----------------------------------|---------------------------------------------------|-----------------------------------------------------|
|                                                                | 2016 counts                                | 2016 counts                              | 2016 counts                       | Percentage change in counts between 2006 and 2016 | Percentage change in age-standardised rates between |
| Asbestosis                                                     | 0.8<br>(0.7 to 1.0)                        | 0.1<br>(0.1 to 0.1)                      | 0.1<br>(0.1 to 0.2)               | 37.4<br>(22.2 to 55.2)                            | 0.5<br>(-14.6 to 18.3)                              |
| Coal workers pneumoconiosis                                    | --                                         | --                                       | --                                | --                                                | --                                                  |
| Other pneumoconiosis                                           | 2.0<br>(1.7 to 2.4)                        | 0.2<br>(0.1 to 0.2)                      | 0.3<br>(0.2 to 0.4)               | 49.1<br>(12.7 to 96.2)                            | 3.1<br>(-23.6 to 37.5)                              |
| Asthma                                                         | 1,599.2<br>(1,472.5 to 1,742.4)            | 358.5<br>(329.5 to 389.4)                | 63.3<br>(41.6 to 92.3)            | 9.7<br>(3.1 to 16.5)                              | -1.4<br>(-7.3 to 4.3)                               |
| Interstitial lung disease and pulmonary sarcoidosis            | 11.3<br>(10.4 to 12.4)                     | 1.2<br>(1.1 to 1.4)                      | 1.2<br>(0.8 to 1.8)               | 41.1<br>(30.2 to 53.0)                            | 5.4<br>(-3.9 to 16.5)                               |
| Other chronic respiratory diseases                             | --                                         | --                                       | 2.2<br>(1.7 to 2.7)               | 46.4<br>(14.0 to 89.0)                            | 31.2<br>(4.1 to 66.5)                               |
| <b>Cirrhosis and other chronic liver diseases</b>              | <b>210.7<br/>(198.9 to 222.6)</b>          | <b>6.5<br/>(6.3 to 6.8)</b>              | <b>5.6<br/>(3.9 to 7.8)</b>       | <b>38.9<br/>(25.1 to 53.8)</b>                    | <b>7.3<br/>(-2.0 to 17.0)</b>                       |
| Cirrhosis and other chronic liver diseases due to hepatitis B  | 7.4<br>(6.5 to 8.4)                        | 0.2<br>(0.2 to 0.3)                      | 0.2<br>(0.1 to 0.3)               | 48.0<br>(16.5 to 85.6)                            | 8.3<br>(-15.9 to 37.2)                              |
| Cirrhosis and other chronic liver diseases due to hepatitis C  | 75.5<br>(69.4 to 81.9)                     | 2.4<br>(2.2 to 2.6)                      | 1.7<br>(1.2 to 2.5)               | 44.2<br>(20.1 to 71.2)                            | 5.5<br>(-10.3 to 22.6)                              |
| Cirrhosis and other chronic liver diseases due to alcohol use  | 83.4<br>(76.7 to 90.3)                     | 2.6<br>(2.4 to 2.8)                      | 1.9<br>(1.3 to 2.6)               | 55.0<br>(31.3 to 83.0)                            | 10.7<br>(-3.5 to 27.2)                              |
| Cirrhosis and other chronic liver diseases due to other causes | 44.4<br>(40.7 to 48.6)                     | 1.3<br>(1.2 to 1.4)                      | 1.8<br>(1.2 to 2.6)               | 20.8<br>(-1.6 to 48.1)                            | 5.1<br>(-12.3 to 25.0)                              |
| <b>Digestive diseases</b>                                      | <b>656.1<br/>(604.6 to 717.6)</b>          | <b>669.1†<br/>(620.5 to 723.3)</b>       | <b>26.8<br/>(18.9 to 36.4)</b>    | <b>25.2<br/>(14.7 to 36.8)</b>                    | <b>-0.4<br/>(-7.9 to 8.2)</b>                       |
| Peptic ulcer disease                                           | 300.7<br>(264.8 to 343.9)                  | 15.6<br>(14.0 to 17.4)                   | 4.4<br>(2.6 to 6.9)               | 23.1<br>(-3.3 to 57.1)                            | -1.9<br>(-20.3 to 23.6)                             |
| Gastritis and duodenitis                                       | 124.4<br>(101.7 to 152.2)                  | 66.1<br>(59.1 to 74.7)                   | 3.0<br>(1.8 to 4.5)               | 33.7<br>(8.6 to 66.3)                             | 6.1<br>(-13.0 to 30.6)                              |
| Appendicitis                                                   | 2.6<br>(2.4 to 2.8)                        | 68.0<br>(62.2 to 74.4)                   | 0.8<br>(0.5 to 1.2)               | 13.7<br>(-20.9 to 60.6)                           | 1.6<br>(-26.5 to 38.0)                              |
| Paralytic ileus and intestinal obstruction                     | 0.3<br>(0.3 to 0.4)                        | 8.6<br>(7.5 to 9.8)                      | 0.1<br>(0.1 to 0.1)               | 26.1<br>(21.2 to 31.1)                            | 4.3<br>(0.8 to 8.1)                                 |
| Inguinal, femoral, and abdominal hernia                        | 209.2<br>(188.7 to 231.0)                  | 196.4<br>(170.2 to 224.3)                | 13.8<br>(9.2 to 19.1)             | 23.0<br>(10.8 to 35.4)                            | -2.2<br>(-10.8 to 6.5)                              |
| Inflammatory bowel disease                                     | 6.4<br>(6.0 to 6.8)                        | 7.7<br>(7.4 to 8.0)                      | 0.9<br>(0.6 to 1.3)               | 19.5<br>(0.1 to 43.3)                             | -10.6<br>(-25.1 to 7.4)                             |
| Vascular intestinal disorders                                  | 0.4<br>(0.3 to 0.4)                        | 1.8<br>(1.7 to 2.0)                      | 0.1<br>(0.1 to 0.2)               | 37.9<br>(27.1 to 49.4)                            | 8.5<br>(-3.0 to 20.4)                               |
| Gallbladder and biliary diseases                               | 32.1<br>(29.1 to 35.4)                     | 290.9<br>(250.8 to 336.6)                | 1.3<br>(0.9 to 1.9)               | 42.4<br>(14.8 to 74.1)                            | 10.1<br>(-10.4 to 33.1)                             |
| Pancreatitis                                                   | 1.6<br>(1.4 to 1.8)                        | 14.1<br>(12.6 to 15.8)                   | 0.2<br>(0.1 to 0.3)               | 38.2<br>(33.3 to 43.4)                            | 9.0<br>(5.5 to 12.6)                                |
| Other digestive diseases                                       | --                                         | --                                       | 2.2<br>(1.5 to 2.9)               | 29.2<br>(18.1 to 41.5)                            | 4.2<br>(-3.6 to 12.8)                               |
| <b>Neurological disorders</b>                                  | <b>11,458.6<br/>(10,979.4 to 12,022.5)</b> | <b>5,273.7<br/>(4,533.0 to 6,066.5)</b>  | <b>324.6<br/>(210.1 to 460.0)</b> | <b>21.0<br/>(-5.4 to 56.2)</b>                    | <b>-0.2<br/>(-20.7 to 26.2)</b>                     |
| Alzheimer's disease and other dementias                        | 135.6<br>(115.3 to 158.9)                  | 23.7<br>(20.0 to 28.5)                   | 19.8<br>(13.8 to 26.5)            | 44.3<br>(36.3 to 52.6)                            | -5.5<br>(-10.6 to -0.2)                             |
| Parkinson's disease                                            | 15.2<br>(12.1 to 18.6)                     | 1.8<br>(1.4 to 2.2)                      | 1.8<br>(1.1 to 2.5)               | 55.4<br>(35.1 to 78.4)                            | 5.0<br>(-7.4 to 19.3)                               |
| Epilepsy                                                       | 165.0<br>(44.8 to 291.2)                   | 17.6<br>(4.7 to 31.3)                    | 47.8<br>(10.8 to 107.6)           | 15.1<br>(-74.4 to 492.2)                          | -0.5<br>(-77.9 to 411.9)                            |
| Multiple sclerosis                                             | 1.9<br>(1.7 to 2.2)                        | 0.1<br>(0.1 to 0.1)                      | 0.5<br>(0.4 to 0.7)               | 38.0<br>(32.1 to 43.8)                            | 8.9<br>(4.5 to 13.4)                                |
| Motor neuron disease                                           | 0.8<br>(0.8 to 1.0)                        | 0.1<br>(0.1 to 0.1)                      | 0.2<br>(0.1 to 0.2)               | 25.3<br>(20.3 to 30.5)                            | 2.8<br>(-0.8 to 6.4)                                |
| Migraine                                                       | 4,275.9<br>(4,072.2 to 4,503.3)            | 482.7<br>(456.0 to 511.9)                | 204.7<br>(132.3 to 284.0)         | 19.8<br>(15.6 to 23.9)                            | -0.0<br>(-3.2 to 3.2)                               |
| Tension-type headache                                          | 8,620.1<br>(7,746.1 to 9,650.8)            | 4,747.4<br>(4,009.6 to 5,543.2)          | 39.3<br>(24.9 to 57.6)            | 20.3<br>(14.5 to 26.6)                            | -0.5<br>(-4.9 to 4.2)                               |
| Other neurological disorders                                   | 0.1<br>(0.1 to 0.2)                        | 0.2<br>(0.2 to 0.3)                      | 10.4<br>(2.9 to 22.5)             | 35.4<br>(-65.1 to 492.2)                          | 19.0<br>(-68.1 to 375.9)                            |
| <b>Mental and substance use disorders</b>                      | <b>4,052.8<br/>(3,923.0 to 4,190.9)</b>    | <b>1,601.1†<br/>(1,495.5 to 1,729.1)</b> | <b>560.7<br/>(401.6 to 731.0)</b> | <b>20.3<br/>(17.6 to 23.2)</b>                    | <b>1.0<br/>(-1.1 to 3.3)</b>                        |
| Schizophrenia                                                  | 63.6<br>(55.4 to 72.8)                     | 4.2<br>(3.7 to 4.8)                      | 41.3<br>(30.2 to 52.0)            | 25.7<br>(14.3 to 38.4)                            | 0.9<br>(-8.0 to 10.6)                               |
| Alcohol use disorders                                          | 438.3<br>(368.4 to 510.5)                  | 238.8<br>(201.9 to 276.1)                | 44.4<br>(29.7 to 62.0)            | 27.0<br>(17.0 to 37.6)                            | 7.3<br>(-0.7 to 15.8)                               |
| Drug use disorders                                             | 151.3<br>(136.2 to 166.2)                  | 21.1<br>(19.1 to 23.6)                   | 43.1<br>(29.8 to 58.5)            | 25.1<br>(13.8 to 38.5)                            | 5.8<br>(-3.4 to 16.3)                               |
| Opioid use disorders                                           | 76.2<br>(62.8 to 94.0)                     | 9.5<br>(8.0 to 11.4)                     | 32.1<br>(21.4 to 44.3)            | 28.2<br>(14.9 to 44.7)                            | 7.2<br>(-3.6 to 20.1)                               |
| Cocaine use disorders                                          | 10.2<br>(8.3 to 12.7)                      | 0.8<br>(0.7 to 1.1)                      | 1.4<br>(0.8 to 2.2)               | 18.5<br>(-14.7 to 63.2)                           | -0.1<br>(-26.9 to 34.3)                             |
| Amphetamine use disorders                                      | 29.3<br>(19.8 to 41.4)                     | 3.0<br>(2.0 to 4.1)                      | 3.9<br>(2.1 to 6.4)               | 14.6<br>(-10.2 to 48.8)                           | 2.5<br>(-19.9 to 31.9)                              |
| Cannabis use disorders                                         | 28.4<br>(23.9 to 33.6)                     | 5.4<br>(4.6 to 6.4)                      | 0.8<br>(0.5 to 1.3)               | 17.4<br>(-8.8 to 51.7)                            | 2.5<br>(-18.9 to 30.4)                              |
| Other drug use disorders                                       | 12.7<br>(11.2 to 14.4)                     | 2.4<br>(2.2 to 2.8)                      | 4.9<br>(3.0 to 7.4)               | 18.2<br>(-6.4 to 50.3)                            | 2.2<br>(-18.6 to 29.1)                              |
| Depressive disorders                                           | 890.3<br>(831.5 to 957.7)                  | 1,021.0<br>(921.4 to 1,137.2)            | 157.2<br>(108.1 to 213.9)         | 23.4<br>(16.8 to 29.5)                            | -0.2<br>(-5.1 to 4.5)                               |
| Major depressive disorder                                      | 635.1<br>(572.4 to 710.6)                  | 970.5<br>(868.8 to 1,088.2)              | 131.1<br>(90.1 to 179.3)          | 23.1<br>(15.4 to 30.3)                            | -0.2<br>(-6.0 to 5.3)                               |
| Dysthymia                                                      | 269.7<br>(235.7 to 309.3)                  | 50.5<br>(44.3 to 57.8)                   | 26.1<br>(17.4 to 38.0)            | 25.0<br>(19.3 to 30.8)                            | -0.1<br>(-4.1 to 4.1)                               |
| Bipolar disorder                                               | 243.2<br>(207.2 to 284.5)                  | 20.5<br>(17.8 to 23.8)                   | 50.4<br>(31.3 to 76.0)            | 17.8<br>(10.8 to 25.5)                            | -0.1<br>(-5.6 to 6.0)                               |
| Anxiety disorders                                              | 891.3<br>(809.4 to 979.4)                  | 148.8<br>(136.9 to 162.1)                | 87.0<br>(60.0 to 119.1)           | 18.3<br>(11.3 to 26.0)                            | 0.1<br>(-5.7 to 6.1)                                |
| Eating disorders                                               | 57.6<br>(46.2 to 71.6)                     | 26.4<br>(19.8 to 35.0)                   | 11.8<br>(7.4 to 17.0)             | 20.7<br>(7.4 to 36.4)                             | 7.6<br>(-4.6 to 21.8)                               |
| Anorexia nervosa                                               | 11.9<br>(8.8 to 16.0)                      | 4.6<br>(3.3 to 6.1)                      | 2.6<br>(1.5 to 3.9)               | 18.1<br>(-5.9 to 47.2)                            | 8.3<br>(-13.5 to 34.6)                              |
| Bulimia nervosa                                                | 43.4<br>(32.4 to 58.9)                     | 21.8<br>(15.2 to 30.2)                   | 9.2<br>(5.4 to 13.6)              | 21.4<br>(6.4 to 40.4)                             | 7.4<br>(-5.7 to 24.1)                               |
| Autistic spectrum disorders                                    | 276.4<br>(247.0 to 310.0)                  | 1.9<br>(1.3 to 2.7)                      | 41.0<br>(27.4 to 57.9)            | 14.0<br>(8.2 to 19.9)                             | -0.1<br>(-4.9 to 4.9)                               |
| Autism                                                         | 84.8<br>(72.5 to 98.8)                     | 0.2<br>(0.1 to 0.4)                      | 21.8<br>(13.9 to 32.0)            | 14.4<br>(5.4 to 24.0)                             | -0.1<br>(-7.5 to 8.1)                               |
| Asperger syndrome and other autistic spectrum disorders        | 191.1<br>(159.0 to 230.9)                  | 1.7<br>(1.1 to 2.5)                      | 19.2<br>(12.5 to 27.9)            | 13.6<br>(8.1 to 19.7)                             | -0.1<br>(-4.7 to 4.9)                               |



| Cause                                                      | Prevalence in thousands (95% UI)                 | Incidence in thousands (95% UI)                   | YLDs in thousands (95% UI)              |                                                   |                                                     |
|------------------------------------------------------------|--------------------------------------------------|---------------------------------------------------|-----------------------------------------|---------------------------------------------------|-----------------------------------------------------|
|                                                            | 2016 counts                                      | 2016 counts                                       | 2016 counts                             | Percentage change in counts between 2006 and 2016 | Percentage change in age-standardised rates between |
| Attention-deficit/hyperactivity disorder                   | 344.4<br>(300.4 to 396.6)                        | 15.3<br>(13.1 to 18.2)                            | 4.2<br>(2.4 to 6.7)                     | 8.6<br>(-2.4 to 22.1)                             | -1.0<br>(-10.9 to 11.4)                             |
| Conduct disorder                                           | 243.2<br>(196.1 to 292.3)                        | 82.5<br>(64.3 to 100.6)                           | 29.7<br>(18.0 to 45.4)                  | 2.9<br>(-3.8 to 9.9)                              | 0.1<br>(-6.4 to 7.0)                                |
| Idiopathic developmental intellectual disability           | 184.3<br>(88.0 to 278.4)                         | --                                                | 7.7<br>(3.1 to 13.8)                    | 8.5<br>(-0.5 to 17.1)                             | -5.9<br>(-13.6 to 1.2)                              |
| Other mental and substance use disorders                   | 571.8<br>(503.3 to 660.0)                        | 20.4<br>(18.1 to 23.2)                            | 43.0<br>(29.2 to 62.0)                  | 23.9<br>(17.2 to 30.5)                            | -0.1<br>(-5.3 to 4.9)                               |
| <b>Diabetes, urogenital, blood, and endocrine diseases</b> | <b>10,594.4</b><br><b>(10,331.2 to 10,908.2)</b> | <b>2,440.2†</b><br><b>(2,308.0 to 2,586.8)</b>    | <b>251.9</b><br><b>(178.0 to 343.9)</b> | <b>35.2</b><br><b>(28.2 to 42.8)</b>              | <b>1.7</b><br><b>(-3.6 to 7.3)</b>                  |
| Diabetes mellitus                                          | 1,798.1<br>(1,614.0 to 1,981.7)                  | 102.8<br>(92.3 to 114.5)                          | 160.6<br>(110.2 to 226.7)               | 41.1<br>(30.5 to 53.4)                            | 4.4<br>(-3.4 to 13.3)                               |
| Acute glomerulonephritis                                   | 0.4<br>(0.3 to 0.5)                              | 6.0<br>(5.2 to 6.9)                               | < 0.05<br>(< 0.05 to < 0.05)            | 24.9<br>(19.4 to 30.3)                            | 0.4<br>(-3.8 to 4.1)                                |
| Chronic kidney disease                                     | 1,522.4<br>(1,374.9 to 1,709.2)                  | 138.1<br>(120.0 to 158.1)                         | 34.2<br>(25.0 to 43.8)                  | 28.9<br>(19.1 to 39.6)                            | -6.8<br>(-13.7 to 0.8)                              |
| Chronic kidney disease due to diabetes mellitus            | 596.9<br>(505.2 to 700.7)                        | 56.9<br>(46.2 to 69.5)                            | 12.4<br>(8.7 to 16.4)                   | 34.0<br>(20.1 to 50.1)                            | -5.4<br>(-14.7 to 5.8)                              |
| Chronic kidney disease due to hypertension                 | 316.0<br>(261.3 to 373.8)                        | 36.6<br>(28.9 to 44.8)                            | 4.2<br>(2.9 to 5.7)                     | 36.4<br>(20.2 to 54.8)                            | -7.1<br>(-18.3 to 5.3)                              |
| Chronic kidney disease due to glomerulonephritis           | 298.9<br>(255.0 to 344.2)                        | 16.5<br>(12.6 to 20.7)                            | 10.3<br>(7.4 to 13.7)                   | 23.3<br>(10.1 to 37.8)                            | -7.1<br>(-16.5 to 2.7)                              |
| Chronic kidney disease due to other causes                 | 310.5<br>(252.2 to 378.3)                        | 27.9<br>(22.2 to 34.4)                            | 7.3<br>(5.2 to 9.8)                     | 25.0<br>(11.6 to 39.6)                            | -8.3<br>(-17.5 to 1.9)                              |
| Urinary diseases and male infertility                      | 434.1<br>(389.2 to 480.8)                        | 1,147.4†<br>(1,031.9 to 1,278.8)                  | 11.8<br>(7.7 to 16.9)                   | 37.0<br>(28.8 to 46.1)                            | -3.0<br>(-9.0 to 3.2)                               |
| Interstitial nephritis and urinary tract infections        | 19.4<br>(17.3 to 21.9)                           | 1,020.0<br>(905.2 to 1,148.5)                     | 0.7<br>(0.4 to 1.0)                     | 21.6<br>(2.1 to 45.9)                             | 2.8<br>(-12.5 to 21.7)                              |
| Urolithiasis                                               | 3.2<br>(2.9 to 3.7)                              | 85.8<br>(75.9 to 97.4)                            | 0.2<br>(0.2 to 0.4)                     | 28.3<br>(23.2 to 34.0)                            | 0.9<br>(-2.9 to 5.4)                                |
| Benign prostatic hyperplasia                               | 305.8<br>(260.6 to 357.2)                        | 41.6<br>(34.5 to 49.8)                            | 10.0<br>(6.4 to 14.8)                   | 41.9<br>(32.0 to 52.6)                            | -3.0<br>(-9.7 to 4.0)                               |
| Male infertility                                           | 86.1<br>(65.9 to 114.3)                          | --                                                | 0.5<br>(0.2 to 1.0)                     | 8.7<br>(-0.9 to 18.6)                             | -5.2<br>(-13.2 to 3.1)                              |
| Other urinary diseases                                     | --                                               | --                                                | 0.3<br>(0.2 to 0.5)                     | 0.6<br>(-12.0 to 15.3)                            | -15.1<br>(-24.9 to -3.5)                            |
| Gynecological diseases                                     | 3,242.3<br>(3,092.6 to 3,386.7)                  | 1,005.0†<br>(945.4 to 1,065.7)                    | 29.1<br>(19.5 to 43.5)                  | 16.9<br>(11.1 to 23.2)                            | -3.3<br>(-7.9 to 1.6)                               |
| Uterine fibroids                                           | 243.9<br>(212.0 to 278.5)                        | 27.0<br>(23.2 to 31.3)                            | 2.0<br>(1.0 to 3.7)                     | 25.9<br>(19.0 to 33.0)                            | -0.7<br>(-5.7 to 4.4)                               |
| Polycystic ovarian syndrome                                | 3.8<br>(2.7 to 5.0)                              | 20.1<br>(14.4 to 26.6)                            | < 0.05<br>(< 0.05 to 0.1)               | 13.3<br>(-19.2 to 57.3)                           | 0.0<br>(-28.0 to 38.8)                              |
| Female infertility                                         | 213.4<br>(147.3 to 301.2)                        | --                                                | 1.2<br>(0.4 to 2.6)                     | 18.9<br>(10.0 to 29.6)                            | 3.8<br>(-4.1 to 12.8)                               |
| Endometriosis                                              | 1.4<br>(1.1 to 1.7)                              | 6.4<br>(5.3 to 7.8)                               | 0.1<br>(0.1 to 0.2)                     | 17.0<br>(-5.4 to 45.0)                            | 0.2<br>(-20.7 to 26.2)                              |
| Genital prolapse                                           | 935.1<br>(803.7 to 1,079.4)                      | 60.6<br>(51.1 to 71.4)                            | 2.9<br>(1.4 to 5.4)                     | 19.9<br>(8.8 to 32.1)                             | -15.2<br>(-23.3 to -6.4)                            |
| Premenstrual syndrome                                      | 1,976.0<br>(1,859.2 to 2,098.7)                  | 710.1<br>(660.1 to 758.9)                         | 16.7<br>(10.4 to 25.7)                  | 13.2<br>(4.6 to 22.3)                             | -2.5<br>(-9.7 to 5.2)                               |
| Other gynecological diseases                               | 171.9<br>(144.2 to 201.9)                        | 180.8<br>(151.0 to 215.1)                         | 6.2<br>(4.1 to 9.2)                     | 23.0<br>(9.0 to 38.3)                             | 0.5<br>(-10.8 to 12.6)                              |
| Hemoglobinopathies and hemolytic anaemias                  | 5,813.2<br>(5,521.0 to 6,115.8)                  | --                                                | 9.8<br>(5.7 to 15.7)                    | 27.7<br>(2.5 to 59.9)                             | 15.8<br>(-6.4 to 46.0)                              |
| Thalassemias                                               | 0.2<br>(0.2 to 0.3)                              | --                                                | < 0.05<br>(< 0.05 to < 0.05)            | 63.4<br>(26.5 to 101.2)                           | 63.4<br>(26.4 to 101.0)                             |
| Thalassaemias trait                                        | 36.4<br>(30.6 to 42.8)                           | --                                                | 0.3<br>(0.1 to 0.5)                     | 31.7<br>(1.3 to 74.2)                             | 16.3<br>(-8.8 to 51.8)                              |
| Sickle cell disorders                                      | 7.4<br>(6.2 to 9.0)                              | --                                                | 0.8<br>(0.5 to 1.1)                     | 13.5<br>(-2.1 to 33.8)                            | 4.8<br>(-9.4 to 22.8)                               |
| Sickle cell trait                                          | 1,905.8<br>(1,768.6 to 2,057.7)                  | --                                                | 8.1<br>(4.5 to 13.4)                    | 33.8<br>(4.1 to 72.7)                             | 22.7<br>(-3.6 to 59.1)                              |
| G6PD deficiency                                            | 778.0<br>(672.8 to 898.2)                        | --                                                | 0.1<br>(< 0.05 to 0.1)                  | 41.3<br>(1.6 to 101.3)                            | 24.8<br>(-8.2 to 72.8)                              |
| G6PD trait                                                 | 3,361.1<br>(3,099.8 to 3,633.8)                  | --                                                | < 0.05<br>(< 0.05 to < 0.05)            | 9.8<br>(-14.5 to 40.4)                            | -3.2<br>(-24.0 to 23.3)                             |
| Other hemoglobinopathies and hemolytic anaemias            | 39.0<br>(31.7 to 47.5)                           | --                                                | 0.6<br>(0.4 to 0.9)                     | -15.6<br>(-30.5 to 2.4)                           | -27.5<br>(-38.6 to -14.7)                           |
| Endocrine, metabolic, blood, and immune disorders          | 194.3<br>(176.2 to 214.4)                        | 41.0<br>(36.6 to 45.7)                            | 6.3<br>(4.2 to 8.9)                     | 32.9<br>(22.2 to 44.2)                            | 2.4<br>(-4.8 to 9.9)                                |
| <b>Musculoskeletal disorders</b>                           | <b>4,153.0</b><br><b>(3,946.3 to 4,362.2)</b>    | <b>1,991.9</b><br><b>(1,797.6 to 2,212.3)</b>     | <b>438.6</b><br><b>(316.9 to 575.7)</b> | <b>29.1</b><br><b>(25.3 to 32.9)</b>              | <b>0.1</b><br><b>(-2.3 to 2.5)</b>                  |
| Rheumatoid arthritis                                       | 70.2<br>(62.9 to 78.3)                           | 4.4<br>(3.9 to 4.8)                               | 16.7<br>(11.5 to 22.5)                  | 35.3<br>(23.5 to 49.2)                            | 1.3<br>(-6.8 to 10.2)                               |
| Osteoarthritis                                             | 993.1<br>(929.6 to 1,060.4)                      | 52.7<br>(48.9 to 57.0)                            | 61.6<br>(43.3 to 83.6)                  | 49.1<br>(43.3 to 55.1)                            | 5.6<br>(1.6 to 9.5)                                 |
| Low back and neck pain                                     | 2,204.8<br>(2,032.6 to 2,382.5)                  | 847.9<br>(766.0 to 938.1)                         | 249.7<br>(176.5 to 330.9)               | 28.1<br>(24.1 to 32.3)                            | 0.0<br>(-2.7 to 2.6)                                |
| Low back pain                                              | 1,273.4<br>(1,120.0 to 1,440.4)                  | 612.6<br>(537.7 to 700.6)                         | 145.4<br>(100.6 to 192.8)               | 26.5<br>(20.3 to 32.7)                            | 0.0<br>(-4.4 to 4.3)                                |
| Neck pain                                                  | 1,036.0<br>(887.5 to 1,200.5)                    | 235.3<br>(203.8 to 276.8)                         | 104.3<br>(70.1 to 149.3)                | 30.3<br>(26.4 to 34.3)                            | 0.0<br>(-2.1 to 2.1)                                |
| Gout                                                       | 65.6<br>(57.8 to 74.3)                           | 13.3<br>(11.7 to 15.0)                            | 2.1<br>(1.4 to 3.1)                     | 34.7<br>(12.6 to 62.1)                            | 0.7<br>(-14.3 to 19.1)                              |
| Other musculoskeletal disorders                            | 1,246.2<br>(1,056.3 to 1,459.6)                  | 1,073.7<br>(897.6 to 1,270.3)                     | 108.4<br>(72.8 to 153.9)                | 21.1<br>(11.8 to 31.9)                            | -3.2<br>(-10.6 to 4.9)                              |
| <b>Other non-communicable diseases</b>                     | <b>22,243.2</b><br><b>(21,795.9 to 22,696.5)</b> | <b>54,814.2†</b><br><b>(50,659.3 to 59,319.4)</b> | <b>625.8</b><br><b>(428.6 to 886.2)</b> | <b>21.9</b><br><b>(20.2 to 23.6)</b>              | <b>-1.1</b><br><b>(-2.2 to -0.0)</b>                |
| Congenital anomalies                                       | 286.1<br>(250.2 to 330.2)                        | --                                                | 35.4<br>(25.0 to 47.3)                  | 11.4<br>(4.4 to 18.7)                             | -1.5<br>(-7.7 to 4.9)                               |
| Neural tube defects                                        | 25.4<br>(22.6 to 28.6)                           | --                                                | 7.6<br>(5.2 to 10.2)                    | 14.7<br>(0.5 to 31.3)                             | -0.4<br>(-12.5 to 13.7)                             |
| Congenital heart anomalies                                 | 30.3<br>(26.4 to 34.6)                           | --                                                | 1.5<br>(0.7 to 2.5)                     | 13.2<br>(-1.2 to 29.8)                            | 2.0<br>(-10.3 to 16.0)                              |
| Orofacial clefts                                           | 25.6<br>(22.5 to 28.9)                           | --                                                | 0.3<br>(0.2 to 0.4)                     | 2.7<br>(-8.8 to 16.3)                             | -10.4<br>(-20.3 to 1.5)                             |
| Down's syndrome                                            | 22.9<br>(19.8 to 26.6)                           | --                                                | 2.1<br>(1.4 to 3.0)                     | 19.1<br>(6.8 to 32.1)                             | 5.0<br>(-5.2 to 16.3)                               |
| Turner syndrome                                            | 8.8<br>(7.5 to 10.4)                             | --                                                | 0.2<br>(0.1 to 0.3)                     | 15.5<br>(-25.0 to 75.3)                           | 3.8<br>(-31.1 to 55.4)                              |
| Klinefelter syndrome                                       | 13.8<br>(11.6 to 16.2)                           | --                                                | 0.1<br>(< 0.05 to 0.1)                  | 11.3<br>(-14.3 to 43.7)                           | -0.1<br>(-23.1 to 28.4)                             |



| Cause                                         | Prevalence in thousands (95% UI)              | Incidence in thousands (95% UI)                           | YLDs in thousands (95% UI)              |                                                   |                                                     |
|-----------------------------------------------|-----------------------------------------------|-----------------------------------------------------------|-----------------------------------------|---------------------------------------------------|-----------------------------------------------------|
|                                               | 2016 counts                                   | 2016 counts                                               | 2016 counts                             | Percentage change in counts between 2006 and 2016 | Percentage change in age-standardised rates between |
| Other chromosomal abnormalities               | 29.5<br>(24.5 to 35.3)                        | --                                                        | 3.4<br>(2.3 to 4.7)                     | 4.2<br>(-11.2 to 23.6)                            | 2.6<br>(-12.5 to 21.3)                              |
| Congenital musculoskeletal and limb anomalies | 28.2<br>(25.6 to 31.0)                        | --                                                        | 3.9<br>(2.6 to 5.5)                     | 19.6<br>(8.3 to 32.2)                             | 2.7<br>(-6.6 to 12.8)                               |
| Urogenital congenital anomalies               | 41.2<br>(36.7 to 46.0)                        | --                                                        | 1.1<br>(0.7 to 1.8)                     | 4.8<br>(-7.6 to 17.5)                             | -0.5<br>(-12.1 to 11.2)                             |
| Digestive congenital anomalies                | 31.6<br>(28.1 to 35.5)                        | --                                                        | 1.4<br>(0.9 to 2.1)                     | 16.9<br>(-0.8 to 36.5)                            | 1.9<br>(-12.9 to 18.6)                              |
| Other congenital anomalies                    | 110.2<br>(68.4 to 166.6)                      | --                                                        | 13.9<br>(8.7 to 21.2)                   | 8.4<br>(-2.4 to 21.3)                             | -5.6<br>(-15.0 to 5.1)                              |
| Skin and subcutaneous diseases                | 9,109.2<br>(8,880.2 to 9,334.4)               | 18,064.9<br>(17,264.9 to 18,941.0)                        | 238.6<br>(159.7 to 341.7)               | 13.7<br>(11.0 to 16.3)                            | 1.5<br>(-0.7 to 3.6)                                |
| Dermatitis                                    | 1,547.4<br>(1,466.5 to 1,633.9)               | 1,619.5<br>(1,498.2 to 1,742.1)                           | 61.1<br>(35.4 to 100.3)                 | 10.9<br>(5.1 to 16.5)                             | -0.0<br>(-4.8 to 4.8)                               |
| Psoriasis                                     | 273.1<br>(260.9 to 286.8)                     | 38.0<br>(36.3 to 39.8)                                    | 24.0<br>(17.1 to 31.8)                  | 29.1<br>(19.0 to 39.5)                            | 6.8<br>(-0.8 to 15.2)                               |
| Cellulitis                                    | 10.5<br>(9.7 to 11.4)                         | 180.3<br>(167.7 to 194.0)                                 | 0.6<br>(0.4 to 0.9)                     | 16.8<br>(-8.7 to 49.6)                            | 1.7<br>(-19.2 to 27.5)                              |
| Pyoderma                                      | 69.2<br>(67.1 to 71.4)                        | 1,535.2<br>(1,481.1 to 1,592.2)                           | 0.4<br>(0.2 to 0.8)                     | 27.2<br>(19.2 to 36.1)                            | 1.2<br>(-4.6 to 7.7)                                |
| Scabies                                       | 409.7<br>(358.6 to 472.7)                     | 1,257.1<br>(1,090.7 to 1,449.4)                           | 10.6<br>(5.9 to 16.8)                   | 8.0<br>(3.7 to 12.8)                              | -2.6<br>(-6.2 to 1.6)                               |
| Fungal skin diseases                          | 1,937.7<br>(1,758.4 to 2,139.9)               | 6,911.5<br>(6,209.1 to 7,689.5)                           | 10.9<br>(4.4 to 22.5)                   | 18.8<br>(16.6 to 21.2)                            | -0.0<br>(-1.2 to 1.2)                               |
| Viral skin diseases                           | 874.8<br>(834.3 to 916.6)                     | 1,305.8<br>(1,245.1 to 1,370.4)                           | 26.9<br>(16.8 to 40.1)                  | 11.9<br>(8.3 to 15.5)                             | 0.0<br>(-3.1 to 3.1)                                |
| Acne vulgaris                                 | 2,630.8<br>(2,363.4 to 2,932.0)               | 1,790.1<br>(1,474.4 to 2,210.8)                           | 68.1<br>(45.6 to 99.2)                  | 9.9<br>(4.9 to 15.5)                              | 2.6<br>(-2.0 to 7.5)                                |
| Alopecia areata                               | 54.6<br>(52.4 to 56.8)                        | 96.6<br>(92.8 to 100.6)                                   | 1.8<br>(1.1 to 2.7)                     | 18.1<br>(5.1 to 32.4)                             | -0.2<br>(-10.8 to 11.7)                             |
| Pruritus                                      | 272.1<br>(239.1 to 306.5)                     | 215.9<br>(192.9 to 242.4)                                 | 2.9<br>(1.4 to 5.3)                     | 22.7<br>(16.0 to 29.7)                            | 1.0<br>(-4.0 to 5.9)                                |
| Urticaria                                     | 287.9<br>(251.6 to 331.5)                     | 512.3<br>(450.6 to 590.7)                                 | 17.5<br>(11.1 to 25.5)                  | 10.0<br>(4.1 to 16.4)                             | 0.0<br>(-5.1 to 5.5)                                |
| Decubitus ulcer                               | 9.0<br>(8.0 to 10.0)                          | 32.7<br>(29.1 to 36.6)                                    | 1.5<br>(1.0 to 2.0)                     | 40.1<br>(25.3 to 56.7)                            | 7.8<br>(-5.5 to 22.4)                               |
| Other skin and subcutaneous diseases          | 2,202.5<br>(2,135.9 to 2,268.9)               | 2,569.8<br>(2,486.4 to 2,657.9)                           | 12.2<br>(5.8 to 22.2)                   | 29.1<br>(26.1 to 32.3)                            | 2.8<br>(0.7 to 5.1)                                 |
| Sense organ diseases                          | 7,079.8<br>(6,909.8 to 7,263.8)               | 2,967.1 <sup>†</sup><br>(2,784.1 to 3,169.3)              | 256.2<br>(177.2 to 355.7)               | 28.9<br>(26.6 to 31.4)                            | -3.2<br>(-4.9 to -1.7)                              |
| Glaucoma                                      | 24.1<br>(20.0 to 28.3)                        | --                                                        | 2.7<br>(1.8 to 3.8)                     | 48.1<br>(31.8 to 66.3)                            | -1.1<br>(-11.2 to 10.1)                             |
| Cataract                                      | 329.6<br>(290.3 to 369.7)                     | --                                                        | 27.0<br>(19.1 to 37.0)                  | 42.6<br>(34.4 to 50.5)                            | -2.9<br>(-8.3 to 2.4)                               |
| Macular degeneration                          | 11.9<br>(9.4 to 15.0)                         | --                                                        | 0.9<br>(0.6 to 1.3)                     | 55.5<br>(34.4 to 81.0)                            | 3.4<br>(-10.2 to 19.4)                              |
| Refraction and accommodation disorders        | 3,338.5<br>(3,173.1 to 3,523.9)               | --                                                        | 61.7<br>(37.7 to 97.0)                  | 17.7<br>(13.4 to 22.2)                            | -5.9<br>(-9.2 to -2.5)                              |
| Age-related and other hearing loss            | 4,581.0<br>(4,332.0 to 4,860.2)               | --                                                        | 127.9<br>(88.8 to 181.1)                | 31.0<br>(26.7 to 34.7)                            | -3.3<br>(-5.6 to -1.2)                              |
| Other vision loss                             | 113.0<br>(100.7 to 126.9)                     | --                                                        | 10.5<br>(7.2 to 14.3)                   | 32.6<br>(22.4 to 43.8)                            | 0.1<br>(-7.1 to 7.4)                                |
| Other sense organ diseases                    | 815.2<br>(750.7 to 876.8)                     | 2,967.1<br>(2,784.1 to 3,169.3)                           | 25.5<br>(16.0 to 38.6)                  | 31.5<br>(26.1 to 37.0)                            | 0.9<br>(-2.8 to 4.6)                                |
| Oral disorders                                | 15,870.6<br>(15,060.7 to 16,651.5)            | 33,782.3 <sup>†</sup><br>(29,594.2 to 38,199.2)           | 95.6<br>(57.6 to 149.0)                 | 31.2<br>(28.2 to 34.6)                            | -0.0<br>(-1.9 to 1.7)                               |
| Caries of deciduous teeth                     | 1,903.2<br>(1,449.4 to 2,325.2)               | 7,128.1<br>(4,492.5 to 9,943.0)                           | 0.7<br>(0.3 to 1.4)                     | 2.3<br>(-6.2 to 12.0)                             | 0.0<br>(-8.3 to 9.5)                                |
| Caries of permanent teeth                     | 10,886.9<br>(9,878.1 to 11,895.2)             | 26,082.9<br>(22,897.9 to 29,415.6)                        | 10.7<br>(4.6 to 20.4)                   | 12.3<br>(7.9 to 16.5)                             | -3.9<br>(-7.3 to -0.6)                              |
| Periodontal disease                           | 3,592.8<br>(3,003.1 to 4,255.2)               | 436.2<br>(351.4 to 532.9)                                 | 23.7<br>(9.3 to 49.4)                   | 31.6<br>(26.6 to 36.6)                            | 1.0<br>(-2.4 to 4.3)                                |
| Edentulism and severe tooth loss              | 1,572.5<br>(1,369.3 to 1,772.3)               | 135.1<br>(113.7 to 158.7)                                 | 43.9<br>(28.8 to 62.3)                  | 42.4<br>(37.5 to 47.1)                            | 0.3<br>(-3.0 to 3.1)                                |
| Other oral disorders                          | 559.4<br>(534.8 to 584.6)                     | --                                                        | 16.5<br>(10.2 to 24.8)                  | 20.4<br>(16.6 to 24.8)                            | 0.0<br>(-3.0 to 3.3)                                |
| <b>Injuries</b>                               | <b>4,585.0</b><br><b>(4,325.7 to 4,972.1)</b> | <b>2,060.3<sup>†</sup></b><br><b>(1,934.8 to 2,194.4)</b> | <b>176.3</b><br><b>(117.0 to 253.0)</b> | <b>32.6</b><br><b>(29.9 to 35.1)</b>              | <b>5.0</b><br><b>(3.2 to 6.7)</b>                   |
| <b>Transport injuries</b>                     | <b>791.7</b><br><b>(736.7 to 850.2)</b>       | <b>302.5</b><br><b>(269.7 to 338.1)</b>                   | <b>41.9</b><br><b>(27.7 to 60.1)</b>    | <b>42.0</b><br><b>(38.8 to 45.0)</b>              | <b>10.6</b><br><b>(8.3 to 12.7)</b>                 |
| Road injuries                                 | 758.9<br>(704.5 to 817.3)                     | 294.3<br>(261.8 to 329.9)                                 | 40.2<br>(26.6 to 57.8)                  | 42.4<br>(39.3 to 45.5)                            | 11.0<br>(8.6 to 13.0)                               |
| Pedestrian road injuries                      | 174.7<br>(153.8 to 199.8)                     | 48.7<br>(40.8 to 58.1)                                    | 9.1<br>(6.0 to 13.1)                    | 34.5<br>(31.5 to 37.4)                            | 4.1<br>(2.0 to 6.2)                                 |
| Cyclist road injuries                         | 99.7<br>(81.0 to 118.7)                       | 41.5<br>(32.5 to 51.6)                                    | 4.9<br>(3.2 to 7.2)                     | 29.7<br>(26.3 to 32.7)                            | 4.0<br>(1.5 to 6.1)                                 |
| Motorcyclist road injuries                    | 103.0<br>(85.9 to 126.7)                      | 25.6<br>(20.7 to 31.7)                                    | 5.1<br>(3.3 to 7.4)                     | 57.6<br>(53.6 to 61.0)                            | 24.3<br>(21.5 to 26.8)                              |
| Motor vehicle road injuries                   | 284.8<br>(242.6 to 325.2)                     | 129.4<br>(110.8 to 149.6)                                 | 16.4<br>(11.0 to 23.0)                  | 48.0<br>(44.5 to 51.6)                            | 14.7<br>(12.3 to 17.1)                              |
| Other road injuries                           | 96.7<br>(83.5 to 113.0)                       | 49.0<br>(39.3 to 58.8)                                    | 4.7<br>(3.1 to 6.8)                     | 39.4<br>(36.3 to 42.3)                            | 7.9<br>(5.8 to 9.9)                                 |
| Other transport injuries                      | 32.8<br>(28.2 to 37.9)                        | 8.2<br>(7.4 to 9.2)                                       | 1.7<br>(1.1 to 2.4)                     | 32.4<br>(29.2 to 35.5)                            | 3.7<br>(1.4 to 5.9)                                 |
| <b>Unintentional injuries</b>                 | <b>3,208.2</b><br><b>(2,958.7 to 3,594.0)</b> | <b>1,496.0</b><br><b>(1,383.2 to 1,621.8)</b>             | <b>108.7</b><br><b>(73.2 to 154.0)</b>  | <b>31.7</b><br><b>(29.1 to 34.1)</b>              | <b>4.1</b><br><b>(2.3 to 5.7)</b>                   |
| Falls                                         | 1,429.8<br>(1,239.0 to 1,644.4)               | 702.9<br>(611.5 to 806.6)                                 | 58.9<br>(41.2 to 80.8)                  | 35.2<br>(32.6 to 37.7)                            | 4.0<br>(2.1 to 5.9)                                 |
| Drowning                                      | 11.2<br>(9.8 to 12.7)                         | 2.5<br>(2.2 to 2.8)                                       | 0.6<br>(0.4 to 0.8)                     | 20.6<br>(17.5 to 23.6)                            | -6.0<br>(-8.2 to -3.8)                              |
| Fire, heat, and hot substances                | 263.7<br>(213.3 to 336.8)                     | 33.5<br>(25.7 to 42.3)                                    | 6.9<br>(4.6 to 10.2)                    | 29.5<br>(22.4 to 36.1)                            | 8.0<br>(2.9 to 13.2)                                |
| Poisonings                                    | 9.0<br>(7.3 to 10.8)                          | 12.3<br>(9.9 to 14.9)                                     | 0.8<br>(0.5 to 1.3)                     | 32.2<br>(20.6 to 43.5)                            | 11.8<br>(2.5 to 20.6)                               |
| Exposure to mechanical forces                 | 879.8<br>(751.7 to 1,050.8)                   | 342.6<br>(290.9 to 395.0)                                 | 20.4<br>(13.1 to 29.9)                  | 41.4<br>(38.1 to 44.4)                            | 13.1<br>(10.6 to 15.2)                              |
| Unintentional firearm injuries                | 100.8<br>(76.8 to 130.3)                      | 27.2<br>(20.3 to 35.9)                                    | 3.8<br>(2.4 to 5.8)                     | 37.3<br>(33.2 to 40.8)                            | 9.3<br>(6.6 to 11.8)                                |
| Unintentional suffocation                     | 19.3<br>(14.3 to 25.3)                        | 3.8<br>(2.5 to 5.3)                                       | 0.6<br>(0.4 to 1.0)                     | 31.5<br>(27.5 to 35.4)                            | 11.0<br>(7.9 to 14.0)                               |
| Other exposure to mechanical forces           | 759.7<br>(637.5 to 930.1)                     | 311.6<br>(264.4 to 361.2)                                 | 15.9<br>(10.3 to 23.2)                  | 42.9<br>(39.6 to 46.0)                            | 14.1<br>(11.7 to 16.3)                              |

| Cause                                                                               | Prevalence in thousands (95% UI)          | Incidence in thousands (95% UI)          | YLDs in thousands (95% UI)           |                                                   |                                                     |
|-------------------------------------------------------------------------------------|-------------------------------------------|------------------------------------------|--------------------------------------|---------------------------------------------------|-----------------------------------------------------|
|                                                                                     | 2016 counts                               | 2016 counts                              | 2016 counts                          | Percentage change in counts between 2006 and 2016 | Percentage change in age-standardised rates between |
| Adverse effects of medical treatment                                                | 3.8<br>(3.0 to 4.6)                       | 49.1<br>(43.4 to 55.5)                   | 0.5<br>(0.3 to 0.8)                  | 19.3<br>(13.7 to 25.5)                            | -0.8<br>(-5.3 to 3.9)                               |
| Animal contact                                                                      | 96.3<br>(84.8 to 112.9)                   | 116.7<br>(96.8 to 139.5)                 | 3.4<br>(2.2 to 4.9)                  | 16.3<br>(8.5 to 23.9)                             | -3.5<br>(-9.2 to 2.2)                               |
| Venomous animal contact                                                             | 51.1<br>(42.5 to 61.5)                    | 57.2<br>(45.1 to 72.0)                   | 2.7<br>(1.8 to 4.0)                  | 17.5<br>(8.2 to 27.1)                             | -1.3<br>(-8.6 to 5.8)                               |
| Non-venomous animal contact                                                         | 45.2<br>(38.2 to 56.0)                    | 59.5<br>(47.0 to 72.6)                   | 0.7<br>(0.4 to 1.1)                  | 11.7<br>(8.0 to 14.9)                             | -10.4<br>(-13.1 to -8.1)                            |
| Foreign body                                                                        | 187.3<br>(146.6 to 231.4)                 | 124.6<br>(108.5 to 143.4)                | 7.7<br>(4.8 to 11.4)                 | 17.4<br>(13.6 to 21.1)                            | -1.3<br>(-4.0 to 1.3)                               |
| Pulmonary aspiration and foreign body in airway                                     | 150.7<br>(111.2 to 194.6)                 | 51.2<br>(44.9 to 58.7)                   | 6.3<br>(3.9 to 9.4)                  | 15.9<br>(12.0 to 19.9)                            | -1.6<br>(-4.6 to 1.4)                               |
| Foreign body in eyes                                                                | 12.3<br>(7.2 to 18.0)                     | 63.0<br>(48.8 to 81.1)                   | 0.7<br>(0.4 to 1.2)                  | 26.9<br>(22.4 to 32.7)                            | 0.4<br>(-1.9 to 3.0)                                |
| Foreign body in other body part                                                     | 24.3<br>(20.0 to 31.4)                    | 10.4<br>(8.6 to 12.5)                    | 0.7<br>(0.4 to 1.0)                  | 22.3<br>(18.2 to 26.2)                            | -0.3<br>(-3.1 to 2.4)                               |
| Environmental heat and cold exposure                                                | 48.9<br>(41.6 to 59.5)                    | 14.1<br>(11.3 to 16.9)                   | 1.8<br>(1.2 to 2.7)                  | 23.6<br>(20.8 to 26.3)                            | -0.8<br>(-2.8 to 1.0)                               |
| Other unintentional injuries                                                        | 278.6<br>(229.9 to 343.2)                 | 97.8<br>(84.7 to 112.4)                  | 7.7<br>(4.9 to 11.4)                 | 13.5<br>(11.3 to 15.7)                            | -7.5<br>(-9.2 to -5.9)                              |
| <b>Self-harm and interpersonal violence</b>                                         | <b>974.1</b><br><b>(888.3 to 1,061.0)</b> | <b>258.5†</b><br><b>(217.5 to 303.1)</b> | <b>22.8</b><br><b>(15.4 to 32.9)</b> | <b>30.0</b><br><b>(26.5 to 33.1)</b>              | <b>5.1</b><br><b>(2.9 to 7.2)</b>                   |
| Self-harm                                                                           | 22.6<br>(19.7 to 25.7)                    | 10.8<br>(9.4 to 12.2)                    | 1.0<br>(0.7 to 1.5)                  | 28.6<br>(24.6 to 32.3)                            | -0.6<br>(-3.4 to 2.0)                               |
| Self-harm by firearm                                                                | 3.0<br>(2.5 to 3.6)                       | 0.9<br>(0.6 to 1.3)                      | 0.1<br>(0.1 to 0.2)                  | 8.1<br>(5.0 to 11.3)                              | -15.1<br>(-17.4 to -12.9)                           |
| Self-harm by other specified means                                                  | 19.5<br>(16.7 to 22.6)                    | 9.8<br>(8.6 to 11.3)                     | 0.9<br>(0.6 to 1.3)                  | 31.6<br>(27.1 to 35.9)                            | 1.4<br>(-1.5 to 4.3)                                |
| Interpersonal violence                                                              | 951.6<br>(864.6 to 1,039.2)               | 247.7†<br>(207.3 to 292.0)               | 21.8<br>(14.7 to 31.4)               | 30.1<br>(26.4 to 33.2)                            | 5.4<br>(3.1 to 7.5)                                 |
| Assault by firearm                                                                  | 90.3<br>(69.3 to 111.9)                   | 32.4<br>(24.4 to 42.6)                   | 4.2<br>(2.7 to 6.2)                  | 36.3<br>(31.9 to 40.6)                            | 8.1<br>(5.1 to 11.1)                                |
| Assault by sharp object                                                             | 180.9<br>(148.2 to 218.0)                 | 86.3<br>(67.0 to 106.9)                  | 5.3<br>(3.5 to 7.8)                  | 30.1<br>(26.0 to 33.8)                            | 3.3<br>(0.6 to 5.9)                                 |
| Sexual violence                                                                     | 479.5<br>(417.8 to 550.0)                 | --                                       | 4.0<br>(2.7 to 5.8)                  | 3.9<br>(-0.8 to 8.1)                              | -9.2<br>(-12.9 to -5.8)                             |
| Assault by other means                                                              | 200.8<br>(166.6 to 245.2)                 | 129.0<br>(106.1 to 154.5)                | 8.3<br>(5.5 to 12.0)                 | 44.6<br>(41.1 to 48.0)                            | 13.5<br>(11.1 to 15.8)                              |
| <b>Forces of nature, conflict and terrorism, and executions and police conflict</b> | <b>90.5</b><br><b>(50.3 to 141.5)</b>     | <b>3.3†</b><br><b>(1.0 to 6.0)</b>       | <b>2.9</b><br><b>(0.8 to 7.0)</b>    | <b>-12.5</b><br><b>(-17.2 to -8.8)</b>            | <b>-26.8</b><br><b>(-29.9 to -24.3)</b>             |
| Exposure to forces of nature                                                        | 77.8<br>(38.5 to 125.1)                   | --                                       | 2.6<br>(0.8 to 6.1)                  | -15.2<br>(-18.9 to -11.8)                         | -29.3<br>(-31.8 to -26.9)                           |
| Conflict and terrorism                                                              | 3.1<br>(1.7 to 5.1)                       | --                                       | 0.1<br>( $< 0.05$ to 0.2)            | -11.3<br>(-14.7 to -8.0)                          | -22.8<br>(-25.4 to -20.2)                           |
| Executions and police conflict                                                      | 9.6<br>(2.6 to 15.8)                      | 3.3<br>(1.0 to 6.0)                      | 0.2<br>(0.1 to 0.6)                  | 29.1<br>(-5.3 to 44.4)                            | 13.8<br>(-14.5 to 26.2)                             |
| <b>Impairments</b>                                                                  | --                                        | --                                       | --                                   | --                                                | --                                                  |
| Anaemia                                                                             | 2,586.4<br>(2,232.7 to 2,965.9)           | --                                       | 65.1<br>(43.5 to 93.8)               | 16.9<br>(3.8 to 31.5)                             | -2.6<br>(-12.9 to 9.1)                              |
| Developmental intellectual disability                                               | 418.9<br>(324.0 to 514.1)                 | --                                       | 51.7<br>(37.4 to 70.0)               | 12.4<br>(7.0 to 17.9)                             | -1.1<br>(-5.9 to 3.7)                               |
| Epilepsy                                                                            | 222.6<br>(101.6 to 348.3)                 | --                                       | 65.9<br>(27.7 to 124.3)              | 13.6<br>(-57.0 to 211.9)                          | -2.1<br>(-63.2 to 169.1)                            |
| Guillain-Barre syndrome                                                             | 0.5<br>(0.3 to 0.7)                       | --                                       | 0.1<br>(0.1 to 0.2)                  | 69.0<br>(37.3 to 135.0)                           | 40.0<br>(15.7 to 92.6)                              |
| Hearing loss                                                                        | 4,996.6<br>(4,745.4 to 5,277.2)           | --                                       | 148.8<br>(103.9 to 209.3)            | 26.3<br>(22.7 to 29.4)                            | -3.8<br>(-5.9 to -2.0)                              |
| Heart failure                                                                       | 208.5<br>(183.2 to 237.7)                 | --                                       | 20.5<br>(14.6 to 27.3)               | 50.0<br>(39.6 to 61.8)                            | 2.7<br>(-4.8 to 11.1)                               |
| Infertility                                                                         | 371.2<br>(286.6 to 486.1)                 | --                                       | 2.2<br>(0.9 to 4.5)                  | 15.6<br>(8.5 to 22.5)                             | 1.0<br>(-5.1 to 6.8)                                |
| Pelvic inflammatory disease                                                         | 2.6<br>(2.2 to 3.1)                       | --                                       | 0.4<br>(0.2 to 0.5)                  | 14.0<br>(-11.1 to 43.5)                           | -5.3<br>(-25.8 to 18.4)                             |
| Vision loss                                                                         | 3,906.0<br>(3,731.3 to 4,105.7)           | --                                       | 116.8<br>(81.6 to 166.7)             | 24.7<br>(20.4 to 28.7)                            | -3.6<br>(-6.5 to -0.9)                              |

We did not calculate incidence for the nine impairments, certain NTDs, and causes with only birth prevalence. Blank cells mean that no estimate is available.

† Incidence for aggregate causes represents the sum of the incidence of the causes below the aggregate.

‡ Incidence estimates for stroke represent first-ever stroke only.

^ Incidence of HIV/AIDS represents new infections of HIV only and does not include new infections of Tuberculosis in HIV positive cases.

SR Table 14: Prevalence, incidence, and YLDs for 2016, percentage change of YLD counts and percentage change of age-standardised YLD rates between 2006 and 2016 by cause and impairments, for all ages, Vietnam.

| Cause                                                                                | Prevalence in thousands (95% UI)          | Incidence in thousands (95% UI)               | YLDs in thousands (95% UI)              |                                                   |                                                     |
|--------------------------------------------------------------------------------------|-------------------------------------------|-----------------------------------------------|-----------------------------------------|---------------------------------------------------|-----------------------------------------------------|
|                                                                                      | 2016 counts                               | 2016 counts                                   | 2016 counts                             | Percentage change in counts between 2006 and 2016 | Percentage change in age-standardised rates between |
| <b>All causes</b>                                                                    | <b>90,498.6</b><br>(90,115.6 to 90,901.4) | <b>493,456.5†</b><br>(469,085.3 to 522,371.0) | <b>9,009.3</b><br>(6,687.2 to 11,658.8) | <b>14.6</b><br>(12.1 to 17.4)                     | <b>-3.3</b><br>(-5.2 to -1.2)                       |
| <b>Communicable, maternal, neonatal, and nutritional disorders</b>                   | <b>71,384.3</b><br>(68,742.7 to 73,872.4) | <b>257,386.8†</b><br>(235,356.5 to 281,738.4) | <b>916.3</b><br>(653.8 to 1,234.0)      | <b>-19.9</b><br>(-24.9 to -13.5)                  | <b>-28.7</b><br>(-33.1 to -23.0)                    |
| <b>HIV/AIDS and tuberculosis</b>                                                     | <b>50,284.8</b><br>(43,139.2 to 56,125.5) | <b>136.1†</b><br>(116.3 to 158.3)             | <b>83.9</b><br>(53.8 to 126.0)          | <b>10.5</b><br>(-2.6 to 26.9)                     | <b>-11.9</b><br>(-21.9 to 1.3)                      |
| Tuberculosis                                                                         | 45,482.1<br>(38,237.6 to 52,693.7)        | 119.4†<br>(100.7 to 141.2)                    | 51.9<br>(33.9 to 72.5)                  | -6.4<br>(-15.7 to 3.6)                            | -26.0<br>(-32.4 to -18.6)                           |
| Drug-susceptible tuberculosis                                                        | 164.4<br>(137.2 to 195.4)                 | 114.7<br>(96.2 to 136.1)                      | 49.8<br>(32.3 to 70.2)                  | -7.3<br>(-17.4 to 3.6)                            | -26.7<br>(-34.4 to -18.4)                           |
| Multidrug-resistant tuberculosis without extensive drug resistance                   | 6.1<br>(1.9 to 14.6)                      | 4.3<br>(1.3 to 9.7)                           | 1.9<br>(0.5 to 4.8)                     | 15.7<br>(-71.3 to 254.5)                          | -8.7<br>(-77.7 to 182.8)                            |
| Extensively drug-resistant tuberculosis                                              | 0.6<br>(0.2 to 1.3)                       | 0.4<br>(0.1 to 0.9)                           | 0.2<br>(0.1 to 0.5)                     | 276.3<br>(-3.8 to 1,031.5)                        | 197.0<br>(-25.7 to 798.9)                           |
| Latent tuberculosis infection                                                        | 45,311.1<br>(38,073.8 to 52,527.4)        | --                                            | --                                      | --                                                | --                                                  |
| HIV/AIDS                                                                             | 270.9<br>(171.3 to 408.2)                 | 16.7^<br>(10.8 to 23.9)                       | 32.0<br>(16.1 to 61.2)                  | 56.1<br>(19.0 to 94.2)                            | 37.1<br>(5.7 to 68.7)                               |
| Drug-susceptible HIV/AIDS - Tuberculosis                                             | 15.6<br>(9.4 to 24.4)                     | 10.9<br>(6.5 to 17.1)                         | 6.2<br>(3.1 to 10.8)                    | -21.5<br>(-39.8 to 1.7)                           | -30.3<br>(-46.2 to -10.2)                           |
| Multidrug-resistant HIV/AIDS - Tuberculosis without extensive drug resistance        | 0.7<br>(0.2 to 1.9)                       | 0.5<br>(0.1 to 1.3)                           | 0.3<br>(0.1 to 0.8)                     | -2.0<br>(-75.9 to 192.4)                          | -13.0<br>(-78.6 to 159.6)                           |
| Extensively drug-resistant HIV/AIDS - Tuberculosis                                   | 0.1<br>(< 0.05 to 0.2)                    | < 0.05<br>(< 0.05 to 0.1)                     | < 0.05<br>(< 0.05 to 0.1)               | 222.7<br>(-20.8 to 862.2)                         | 186.5<br>(-29.7 to 754.3)                           |
| HIV/AIDS resulting in other diseases                                                 | 254.5<br>(150.8 to 390.9)                 | 16.7<br>(10.8 to 23.9)                        | 25.5<br>(10.8 to 55.1)                  | 107.0<br>(58.1 to 171.2)                          | 80.4<br>(34.7 to 140.4)                             |
| <b>Diarrhoea, lower respiratory infections, and other common infectious diseases</b> | <b>4,765.6</b><br>(4,524.8 to 5,037.7)    | <b>248,547.1†</b><br>(226,507.2 to 273,042.3) | <b>255.2</b><br>(179.2 to 348.2)        | <b>4.5</b><br>(1.1 to 8.0)                        | <b>-4.6</b><br>(-7.5 to -1.8)                       |
| Diarrhoeal diseases                                                                  | 909.8<br>(847.4 to 969.9)                 | 61,440.0<br>(57,199.3 to 65,735.5)            | 102.9<br>(71.4 to 141.1)                | 7.2<br>(1.3 to 13.7)                              | -2.4<br>(-7.7 to 3.0)                               |
| Intestinal infectious diseases                                                       | 9.1<br>(7.6 to 10.9)                      | 177.6†<br>(152.6 to 208.6)                    | 1.5<br>(1.0 to 2.2)                     | -5.2<br>(-23.5 to 16.6)                           | -7.6<br>(-25.6 to 14.1)                             |
| Typhoid fever                                                                        | 8.9<br>(7.4 to 10.8)                      | 140.3<br>(120.0 to 166.5)                     | 1.4<br>(0.9 to 2.0)                     | -5.4<br>(-24.3 to 18.3)                           | -7.5<br>(-26.6 to 16.1)                             |
| Paratyphoid fever                                                                    | 1.6<br>(1.4 to 2.0)                       | 37.3<br>(31.8 to 44.0)                        | 0.1<br>(0.1 to 0.1)                     | 2.9<br>(-13.7 to 21.9)                            | -2.1<br>(-18.1 to 15.5)                             |
| Other intestinal infectious diseases                                                 | --                                        | --                                            | < 0.05<br>(< 0.05 to < 0.05)            | -25.6<br>(-40.1 to -8.7)                          | -33.2<br>(-46.1 to -18.2)                           |
| Lower respiratory infections                                                         | 84.4<br>(77.3 to 92.1)                    | 3,715.2<br>(3,379.8 to 4,076.6)               | 5.1<br>(3.4 to 7.3)                     | 0.4<br>(-10.5 to 13.0)                            | -12.3<br>(-21.7 to -1.6)                            |
| Upper respiratory infections                                                         | 2,377.3<br>(2,088.8 to 2,685.6)           | 177,480.5<br>(155,472.8 to 201,172.3)         | 59.5<br>(35.0 to 93.7)                  | 7.0<br>(0.7 to 14.2)                              | -1.0<br>(-6.8 to 5.0)                               |
| Otitis media                                                                         | 1,018.9<br>(909.8 to 1,131.6)             | 3,492.6<br>(2,808.8 to 4,354.2)               | 30.6<br>(18.8 to 45.1)                  | -5.0<br>(-12.2 to 2.2)                            | -10.9<br>(-17.1 to -4.6)                            |
| Meningitis                                                                           | 222.2<br>(190.9 to 257.1)                 | 25.5<br>(21.9 to 29.9)                        | 21.6<br>(14.9 to 28.6)                  | 4.8<br>(-3.1 to 13.7)                             | -4.3<br>(-11.2 to 3.3)                              |
| Pneumococcal meningitis                                                              | 129.9<br>(105.7 to 160.0)                 | 10.2<br>(8.2 to 12.3)                         | 11.1<br>(7.4 to 15.1)                   | 5.1<br>(-9.4 to 22.7)                             | -4.2<br>(-16.6 to 10.6)                             |
| H influenzae type B meningitis                                                       | 28.0<br>(22.9 to 34.6)                    | 2.9<br>(2.1 to 3.9)                           | 3.9<br>(2.6 to 5.3)                     | -10.8<br>(-17.8 to -3.9)                          | -17.8<br>(-24.3 to -11.3)                           |
| Meningococcal infection                                                              | 7.8<br>(5.8 to 10.3)                      | 1.6<br>(1.2 to 2.1)                           | 0.8<br>(0.6 to 1.2)                     | 5.8<br>(0.9 to 10.7)                              | -4.6<br>(-9.0 to -0.1)                              |
| Other meningitis                                                                     | 56.6<br>(43.2 to 73.1)                    | 10.8<br>(8.8 to 13.3)                         | 5.7<br>(3.9 to 7.8)                     | 18.0<br>(12.6 to 24.3)                            | 7.6<br>(2.7 to 13.2)                                |
| Encephalitis                                                                         | 268.6<br>(177.2 to 392.8)                 | 99.6<br>(88.6 to 112.7)                       | 28.1<br>(19.7 to 37.2)                  | 0.5<br>(-9.8 to 11.9)                             | -10.4<br>(-19.3 to -0.5)                            |
| Diphtheria                                                                           | < 0.05<br>(< 0.05 to < 0.05)              | 0.1<br>(< 0.05 to 0.1)                        | < 0.05<br>(< 0.05 to < 0.05)            | -23.1<br>(-56.2 to 37.5)                          | -33.7<br>(-62.4 to 17.8)                            |
| Whooping cough                                                                       | 23.4<br>(18.2 to 29.4)                    | 170.9<br>(133.2 to 214.8)                     | 1.2<br>(0.7 to 1.9)                     | -5.9<br>(-21.4 to 12.2)                           | -10.2<br>(-24.9 to 7.0)                             |
| Tetanus                                                                              | 0.7<br>(0.6 to 0.7)                       | 0.7<br>(0.4 to 1.1)                           | < 0.05<br>(< 0.05 to < 0.05)            | -27.9<br>(-44.2 to -5.6)                          | -41.3<br>(-56.1 to -21.1)                           |
| Measles                                                                              | 0.3<br>(0.1 to 0.7)                       | 10.5<br>(3.5 to 24.4)                         | < 0.05<br>(< 0.05 to 0.1)               | -85.8<br>(-92.3 to -70.2)                         | -86.5<br>(-92.7 to -71.4)                           |
| Varicella and herpes zoster                                                          | 110.5<br>(101.0 to 120.8)                 | 1,933.9<br>(1,867.4 to 2,002.1)               | 4.7<br>(2.9 to 7.4)                     | 22.7<br>(9.3 to 37.7)                             | 0.3<br>(-9.3 to 11.2)                               |
| <b>Neglected tropical diseases and malaria</b>                                       | <b>31,102.2</b><br>(27,050.5 to 35,148.7) | <b>1,555.4†</b><br>(1,090.8 to 2,139.2)       | <b>178.0</b><br>(114.5 to 268.1)        | <b>-50.8</b><br>(-55.6 to -44.6)                  | <b>-57.2</b><br>(-61.2 to -51.8)                    |
| Malaria                                                                              | 3.4<br>(2.8 to 4.0)                       | 19.3<br>(19.3 to 19.3)                        | 0.7<br>(0.5 to 0.9)                     | -22.4<br>(-30.8 to -13.8)                         | -28.6<br>(-36.3 to -20.7)                           |
| Chagas disease                                                                       | --                                        | --                                            | --                                      | --                                                | --                                                  |
| Leishmaniasis                                                                        | --                                        | --                                            | --                                      | --                                                | --                                                  |
| Visceral leishmaniasis                                                               | --                                        | --                                            | --                                      | --                                                | --                                                  |
| Cutaneous and mucocutaneous leishmaniasis                                            | --                                        | --                                            | --                                      | --                                                | --                                                  |
| African trypanosomiasis                                                              | --                                        | --                                            | --                                      | --                                                | --                                                  |
| Schistosomiasis                                                                      | --                                        | --                                            | --                                      | --                                                | --                                                  |
| Cysticercosis                                                                        | 41.1<br>(27.2 to 60.8)                    | --                                            | 6.7<br>(3.2 to 11.6)                    | -28.6<br>(-49.5 to -6.2)                          | -44.3<br>(-59.9 to -28.4)                           |
| Cystic echinococcosis                                                                | 0.3<br>(< 0.05 to 1.8)                    | 0.1<br>(< 0.05 to 0.4)                        | < 0.05<br>(< 0.05 to 0.2)               | -45.8<br>(-96.3 to 633.9)                         | -54.1<br>(-96.9 to 425.8)                           |
| Lymphatic filariasis                                                                 | 28.0<br>(21.0 to 36.8)                    | 15.2<br>(12.8 to 17.6)                        | 1.5<br>(0.6 to 2.7)                     | -7.8<br>(-44.2 to 25.2)                           | -23.1<br>(-53.1 to 3.0)                             |
| Onchocerciasis                                                                       | --                                        | --                                            | --                                      | --                                                | --                                                  |
| Trachoma                                                                             | 30.5<br>(17.8 to 49.5)                    | --                                            | 2.7<br>(1.6 to 4.3)                     | -38.8<br>(-61.1 to -5.2)                          | -51.4<br>(-69.2 to -24.5)                           |
| Dengue                                                                               | 84.8<br>(49.7 to 136.6)                   | 1,417.9<br>(947.4 to 2,000.9)                 | 13.9<br>(6.6 to 24.8)                   | 73.4<br>(32.3 to 326.8)                           | 59.7<br>(22.1 to 286.9)                             |
| Yellow fever                                                                         | --                                        | --                                            | --                                      | --                                                | --                                                  |
| Rabies                                                                               | < 0.05<br>(< 0.05 to < 0.05)              | 0.1<br>(< 0.05 to 0.1)                        | < 0.05<br>(< 0.05 to < 0.05)            | -47.4<br>(-70.8 to -2.6)                          | -58.5<br>(-76.4 to -25.2)                           |
| Intestinal nematode infections                                                       | 29,863.4<br>(25,736.1 to 34,024.3)        | --                                            | 123.4<br>(69.5 to 202.4)                | -60.2<br>(-63.6 to -56.6)                         | -65.4<br>(-68.3 to -62.2)                           |
| Ascariasis                                                                           | 16,546.7<br>(12,857.8 to 20,807.2)        | --                                            | 55.2<br>(29.7 to 91.5)                  | -59.9<br>(-65.5 to -53.6)                         | -65.1<br>(-70.0 to -59.6)                           |



| Cause                                                                   | Prevalence in thousands (95% UI)                 | Incidence in thousands (95% UI)                      | YLDs in thousands (95% UI)                    |                                                   |                                                     |
|-------------------------------------------------------------------------|--------------------------------------------------|------------------------------------------------------|-----------------------------------------------|---------------------------------------------------|-----------------------------------------------------|
|                                                                         | 2016 counts                                      | 2016 counts                                          | 2016 counts                                   | Percentage change in counts between 2006 and 2016 | Percentage change in age-standardised rates between |
| Trichuriasis                                                            | 8,704.4<br>(5,895.3 to 12,202.2)                 | --                                                   | 18.6<br>(9.8 to 31.1)                         | -58.1<br>(-67.5 to -46.3)                         | -63.6<br>(-71.8 to -53.4)                           |
| Hookworm disease                                                        | 9,832.5<br>(7,647.7 to 12,558.1)                 | --                                                   | 49.6<br>(28.7 to 80.1)                        | -61.2<br>(-65.7 to -55.8)                         | -66.2<br>(-70.1 to -61.6)                           |
| Food-borne trematodiasis                                                | 1,382.5<br>(1,230.5 to 1,556.5)                  | 97.2<br>(84.0 to 112.2)                              | 22.9<br>(14.5 to 32.4)                        | 13.9<br>(3.0 to 25.3)                             | -1.1<br>(-10.0 to 8.4)                              |
| Leprosy                                                                 | 8.4<br>(7.6 to 9.2)                              | 0.1<br>(0.1 to 0.1)                                  | 0.5<br>(0.3 to 0.8)                           | -16.2<br>(-33.0 to 5.2)                           | -35.0<br>(-47.8 to -19.5)                           |
| Ebola virus disease                                                     | --                                               | --                                                   | --                                            | --                                                | --                                                  |
| Zika virus disease                                                      | 0.1<br>(< 0.05 to 0.2)                           | 5.5<br>(2.1 to 13.8)                                 | < 0.05<br>(< 0.05 to < 0.05)                  | --                                                | --                                                  |
| Guinea worm disease                                                     | --                                               | --                                                   | --                                            | --                                                | --                                                  |
| Other neglected tropical diseases                                       | 288.5<br>(251.2 to 328.8)                        | --                                                   | 5.8<br>(3.5 to 9.1)                           | -17.7<br>(-30.6 to -2.4)                          | -23.9<br>(-36.0 to -9.6)                            |
| <b>Maternal disorders</b>                                               | <b>46.7</b><br><b>(36.2 to 60.9)</b>             | <b>828.9†</b><br><b>(770.9 to 896.1)</b>             | <b>3.5</b><br><b>(2.3 to 5.1)</b>             | <b>-15.8</b><br><b>(-36.8 to 12.9)</b>            | <b>-21.2</b><br><b>(-40.9 to 5.8)</b>               |
| Maternal haemorrhage                                                    | 20.0<br>(15.2 to 26.4)                           | 169.2<br>(147.1 to 198.0)                            | 0.9<br>(0.5 to 1.3)                           | -4.0<br>(-37.2 to 50.8)                           | -11.1<br>(-41.8 to 39.3)                            |
| Maternal sepsis and other pregnancy related infections                  | 13.2<br>(6.6 to 22.2)                            | 157.6<br>(112.9 to 221.3)                            | 0.6<br>(0.3 to 1.2)                           | -1.6<br>(-55.7 to 129.6)                          | -6.1<br>(-58.1 to 121.2)                            |
| Maternal hypertensive disorders                                         | 14.6<br>(10.0 to 19.7)                           | 61.4<br>(59.8 to 63.1)                               | 0.7<br>(0.4 to 1.2)                           | -34.6<br>(-63.4 to 21.2)                          | -39.3<br>(-66.4 to 12.2)                            |
| Maternal obstructed labour and uterine rupture                          | 1.1<br>(0.7 to 1.6)                              | 80.8<br>(76.5 to 85.5)                               | 0.4<br>(0.2 to 0.6)                           | -7.5<br>(-55.9 to 114.9)                          | -12.8<br>(-57.6 to 97.1)                            |
| Maternal abortion, miscarriage, and ectopic pregnancy                   | 3.0<br>(2.1 to 4.0)                              | 359.8<br>(338.5 to 386.9)                            | 0.3<br>(0.2 to 0.6)                           | -17.4<br>(-64.5 to 85.7)                          | -22.4<br>(-65.4 to 70.9)                            |
| Other maternal disorders                                                | --                                               | --                                                   | 0.5<br>(0.4 to 0.8)                           | -19.8<br>(-39.7 to 7.7)                           | -24.4<br>(-43.3 to 1.6)                             |
| <b>Neonatal disorders</b>                                               | <b>1,097.3</b><br><b>(923.8 to 1,326.9)</b>      | --                                                   | <b>157.3</b><br><b>(110.0 to 221.0)</b>       | <b>-3.4</b><br><b>(-16.9 to 14.3)</b>             | <b>-9.4</b><br><b>(-22.0 to 7.1)</b>                |
| Neonatal preterm birth complications                                    | 1,014.4<br>(818.0 to 1,301.7)                    | --                                                   | 110.8<br>(73.9 to 162.2)                      | -5.4<br>(-22.1 to 17.8)                           | -11.1<br>(-26.6 to 10.6)                            |
| Neonatal encephalopathy due to birth asphyxia and trauma                | 45.9<br>(20.3 to 82.2)                           | --                                                   | 7.5<br>(1.8 to 17.5)                          | 8.6<br>(-22.6 to 108.2)                           | 0.7<br>(-27.7 to 89.3)                              |
| Neonatal sepsis and other neonatal infections                           | 69.3<br>(29.7 to 156.8)                          | --                                                   | 30.8<br>(11.3 to 72.5)                        | 1.0<br>(-19.9 to 41.9)                            | -6.0<br>(-24.9 to 31.5)                             |
| Hemolytic disease and other neonatal jaundice                           | 13.0<br>(11.2 to 15.0)                           | --                                                   | 3.7<br>(2.7 to 4.8)                           | 5.7<br>(-2.5 to 14.1)                             | -2.0<br>(-9.7 to 5.9)                               |
| Other neonatal disorders                                                | --                                               | --                                                   | 4.5<br>(3.0 to 6.5)                           | -5.8<br>(-22.9 to 16.4)                           | -11.5<br>(-27.6 to 9.3)                             |
| <b>Nutritional deficiencies</b>                                         | <b>9,209.7</b><br><b>(8,786.2 to 9,583.1)</b>    | <b>516.8†</b><br><b>(423.8 to 620.0)</b>             | <b>199.2</b><br><b>(130.2 to 290.2)</b>       | <b>-21.8</b><br><b>(-29.1 to -13.5)</b>           | <b>-30.2</b><br><b>(-36.7 to -22.7)</b>             |
| Protein-energy malnutrition                                             | 469.7<br>(345.2 to 636.6)                        | 224.5<br>(173.2 to 291.4)                            | 19.0<br>(8.4 to 37.9)                         | -33.1<br>(-68.5 to 26.9)                          | -37.3<br>(-70.3 to 18.9)                            |
| Iodine deficiency                                                       | 666.8<br>(592.1 to 752.4)                        | 17.6<br>(15.7 to 19.6)                               | 17.0<br>(11.4 to 24.3)                        | -0.9<br>(-11.7 to 12.1)                           | -16.0<br>(-24.8 to -5.6)                            |
| Vitamin A deficiency                                                    | 326.9<br>(244.2 to 421.4)                        | 274.8<br>(204.5 to 355.7)                            | 1.1<br>(0.6 to 1.6)                           | 0.3<br>(-20.7 to 24.5)                            | -7.3<br>(-26.7 to 13.9)                             |
| Iron-deficiency anaemia                                                 | 7,927.9<br>(7,411.1 to 8,445.3)                  | --                                                   | 161.5<br>(105.5 to 242.9)                     | -22.0<br>(-28.1 to -15.5)                         | -30.4<br>(-35.7 to -24.9)                           |
| Other nutritional deficiencies                                          | --                                               | --                                                   | 0.6<br>(0.3 to 1.3)                           | -34.5<br>(-70.8 to 29.3)                          | -38.9<br>(-72.5 to 20.7)                            |
| <b>Other communicable, maternal, neonatal, and nutritional diseases</b> | <b>23,426.8</b><br><b>(21,907.0 to 24,802.6)</b> | <b>5,802.6</b><br><b>(5,356.7 to 6,304.4)</b>        | <b>37.8</b><br><b>(24.6 to 56.2)</b>          | <b>1.0</b><br><b>(-5.6 to 7.9)</b>                | <b>-12.9</b><br><b>(-18.7 to -7.0)</b>              |
| Sexually transmitted diseases excluding HIV                             | 15,196.9<br>(13,928.4 to 16,496.5)               | 4,806.9<br>(4,393.5 to 5,266.9)                      | 29.6<br>(19.4 to 44.1)                        | 9.8<br>(1.2 to 19.1)                              | -5.8<br>(-13.1 to 1.9)                              |
| Syphilis                                                                | 323.5<br>(187.5 to 531.1)                        | 215.8<br>(118.2 to 364.0)                            | 2.2<br>(1.5 to 3.0)                           | 35.3<br>(19.4 to 53.9)                            | 2.5<br>(-9.8 to 17.3)                               |
| Chlamydial infection                                                    | 1,398.9<br>(1,088.3 to 1,771.0)                  | 1,235.8<br>(994.0 to 1,523.7)                        | 9.1<br>(5.5 to 14.3)                          | 7.9<br>(-5.1 to 23.9)                             | -3.9<br>(-15.5 to 10.1)                             |
| Gonococcal infection                                                    | 119.4<br>(96.6 to 148.8)                         | 327.6<br>(263.8 to 409.4)                            | 1.0<br>(0.6 to 1.5)                           | 2.2<br>(-20.4 to 28.4)                            | -10.1<br>(-30.1 to 12.9)                            |
| Trichomoniasis                                                          | 1,568.1<br>(1,344.2 to 1,798.2)                  | 1,319.9<br>(1,121.7 to 1,509.3)                      | 1.3<br>(0.5 to 2.9)                           | 17.6<br>(7.3 to 29.4)                             | 0.8<br>(-7.7 to 10.2)                               |
| Genital herpes                                                          | 12,123.4<br>(10,380.8 to 14,128.1)               | 736.9<br>(626.9 to 874.8)                            | 3.1<br>(1.0 to 7.2)                           | 22.5<br>(11.9 to 32.5)                            | 0.3<br>(-7.1 to 8.5)                                |
| Other sexually transmitted diseases                                     | 435.8<br>(345.9 to 554.1)                        | 970.9<br>(826.8 to 1,146.8)                          | 12.9<br>(8.6 to 18.1)                         | 5.0<br>(-7.8 to 17.9)                             | -10.3<br>(-21.0 to 0.5)                             |
| Hepatitis                                                               | 10,178.5<br>(9,089.3 to 11,476.9)                | 995.6<br>(848.5 to 1,180.5)                          | 1.5<br>(0.9 to 2.2)                           | -7.7<br>(-22.9 to 10.0)                           | -23.0<br>(-35.0 to -9.3)                            |
| Acute hepatitis A                                                       | 17.6<br>(11.6 to 21.9)                           | 228.5<br>(150.9 to 284.7)                            | 0.4<br>(0.2 to 0.6)                           | -14.9<br>(-43.1 to 26.6)                          | -24.4<br>(-47.7 to 8.3)                             |
| Hepatitis B                                                             | 6,397.9<br>(5,391.0 to 7,585.6)                  | 617.1<br>(480.0 to 784.6)                            | 0.9<br>(0.5 to 1.4)                           | -5.9<br>(-25.3 to 20.1)                           | -24.4<br>(-40.3 to -4.3)                            |
| Hepatitis C                                                             | 3,760.0<br>(3,327.5 to 4,229.9)                  | 112.2<br>(98.0 to 127.6)                             | 0.1<br>(< 0.05 to 0.2)                        | 8.2<br>(-39.7 to 94.8)                            | -2.8<br>(-45.7 to 75.4)                             |
| Acute hepatitis E                                                       | 2.9<br>(2.1 to 4.0)                              | 37.9<br>(27.1 to 51.4)                               | 0.1<br>(< 0.05 to 0.1)                        | -8.8<br>(-25.6 to 9.7)                            | -22.3<br>(-33.9 to -10.0)                           |
| Other infectious diseases                                               | 231.6<br>(206.6 to 258.9)                        | 0.1<br>(0.1 to 0.1)                                  | 6.7<br>(4.2 to 10.4)                          | -24.3<br>(-33.0 to -15.1)                         | -30.8<br>(-39.1 to -21.9)                           |
| <b>Non-communicable diseases</b>                                        | <b>83,311.9</b><br><b>(82,737.8 to 83,932.9)</b> | <b>230,746.3†</b><br><b>(219,100.6 to 243,464.5)</b> | <b>7,590.0</b><br><b>(5,622.2 to 9,756.9)</b> | <b>19.5</b><br><b>(17.0 to 22.4)</b>              | <b>-0.1</b><br><b>(-2.0 to 2.1)</b>                 |
| <b>Neoplasms</b>                                                        | <b>263.8</b><br><b>(247.9 to 280.1)</b>          | <b>144.0</b><br><b>(134.6 to 151.8)</b>              | <b>42.9</b><br><b>(31.3 to 55.9)</b>          | <b>38.2</b><br><b>(30.2 to 46.8)</b>              | <b>2.7</b><br><b>(-3.2 to 9.1)</b>                  |
| Lip and oral cavity cancer                                              | 22.5<br>(20.3 to 25.1)                           | 6.4<br>(5.8 to 7.1)                                  | 2.3<br>(1.7 to 3.1)                           | 44.1<br>(24.7 to 67.5)                            | 4.7<br>(-10.0 to 21.7)                              |
| Nasopharynx cancer                                                      | 7.5<br>(5.2 to 10.5)                             | 2.1<br>(1.5 to 2.8)                                  | 0.9<br>(0.5 to 1.4)                           | 22.5<br>(-2.5 to 50.7)                            | -0.7<br>(-20.2 to 20.5)                             |
| Other pharynx cancer                                                    | 15.2<br>(11.1 to 18.4)                           | 5.9<br>(4.4 to 7.1)                                  | 1.9<br>(1.2 to 2.8)                           | 57.1<br>(17.8 to 100.2)                           | 11.9<br>(-16.2 to 43.6)                             |
| Oesophageal cancer                                                      | 3.5<br>(3.2 to 3.9)                              | 3.4<br>(3.1 to 3.7)                                  | 0.8<br>(0.6 to 1.1)                           | 24.3<br>(7.1 to 44.3)                             | -9.6<br>(-23.1 to 6.4)                              |
| Stomach cancer                                                          | 15.0<br>(13.7 to 16.4)                           | 9.8<br>(8.9 to 10.7)                                 | 2.5<br>(1.8 to 3.3)                           | 14.6<br>(-0.0 to 31.5)                            | -16.1<br>(-27.9 to -2.1)                            |
| Colon and rectum cancer                                                 | 48.7<br>(43.8 to 53.9)                           | 16.1<br>(14.6 to 17.7)                               | 5.4<br>(3.8 to 7.2)                           | 51.7<br>(30.6 to 74.8)                            | 11.3<br>(-4.9 to 29.4)                              |
| Liver cancer                                                            | 8.4<br>(6.5 to 10.5)                             | 15.3<br>(12.3 to 18.5)                               | 3.4<br>(2.2 to 4.8)                           | 45.0<br>(23.7 to 68.9)                            | 5.8<br>(-9.5 to 22.9)                               |
| Liver cancer due to hepatitis B                                         | 7.4<br>(5.4 to 9.6)                              | 7.2<br>(5.4 to 9.3)                                  | 1.6<br>(1.0 to 2.3)                           | 43.0<br>(19.7 to 69.6)                            | 4.4<br>(-12.5 to 24.0)                              |

| Cause                                              | Prevalence in thousands (95% UI)              | Incidence in thousands (95% UI)                | YLDs in thousands (95% UI)              |                                                   |                                                     |
|----------------------------------------------------|-----------------------------------------------|------------------------------------------------|-----------------------------------------|---------------------------------------------------|-----------------------------------------------------|
|                                                    | 2016 counts                                   | 2016 counts                                    | 2016 counts                             | Percentage change in counts between 2006 and 2016 | Percentage change in age-standardised rates between |
| Liver cancer due to hepatitis C                    | 1.7<br>(1.2 to 2.3)                           | 1.7<br>(1.2 to 2.3)                            | 0.4<br>(0.2 to 0.6)                     | 44.9<br>(24.6 to 68.0)                            | 5.6<br>(-8.5 to 21.7)                               |
| Liver cancer due to alcohol use                    | 2.9<br>(2.0 to 4.0)                           | 2.8<br>(1.9 to 3.9)                            | 0.6<br>(0.4 to 1.0)                     | 62.7<br>(36.4 to 94.5)                            | 17.0<br>(-0.9 to 38.0)                              |
| Liver cancer due to other causes                   | 3.7<br>(2.5 to 5.2)                           | 3.6<br>(2.5 to 5.0)                            | 0.8<br>(0.5 to 1.3)                     | 37.2<br>(12.6 to 65.4)                            | 0.8<br>(-16.6 to 21.1)                              |
| Gallbladder and biliary tract cancer               | 0.6<br>(0.5 to 0.7)                           | 0.8<br>(0.7 to 0.9)                            | 0.2<br>(0.1 to 0.2)                     | 23.1<br>(10.2 to 35.9)                            | -7.6<br>(-16.9 to 2.6)                              |
| Pancreatic cancer                                  | 2.1<br>(2.0 to 2.3)                           | 2.9<br>(2.7 to 3.1)                            | 0.6<br>(0.4 to 0.8)                     | 44.2<br>(32.3 to 56.7)                            | 6.2<br>(-2.9 to 15.6)                               |
| Larynx cancer                                      | 4.3<br>(3.5 to 5.3)                           | 1.4<br>(1.1 to 1.7)                            | 0.6<br>(0.4 to 0.8)                     | 47.7<br>(22.1 to 78.7)                            | 6.2<br>(-12.7 to 27.3)                              |
| Tracheal, bronchus, and lung cancer                | 36.9<br>(30.1 to 40.4)                        | 34.0<br>(28.0 to 36.9)                         | 7.6<br>(5.2 to 10.0)                    | 34.3<br>(15.4 to 55.0)                            | 0.6<br>(-13.8 to 16.1)                              |
| Malignant skin melanoma                            | 1.1<br>(0.9 to 1.3)                           | 0.3<br>(0.2 to 0.4)                            | 0.1<br>(0.1 to 0.1)                     | 47.1<br>(29.7 to 62.6)                            | 11.0<br>(-1.9 to 22.9)                              |
| Non-melanoma skin cancer                           | 0.5<br>(0.3 to 0.8)                           | 2.9<br>(2.0 to 4.4)                            | < 0.05<br>(< 0.05 to < 0.05)            | 38.1<br>(-2.1 to 90.2)                            | 1.4<br>(-28.8 to 41.2)                              |
| Non-melanoma skin cancer (squamous-cell carcinoma) | 0.4<br>(0.2 to 0.6)                           | 1.0<br>(0.8 to 1.2)                            | < 0.05<br>(< 0.05 to < 0.05)            | 32.6<br>(-11.5 to 88.0)                           | -2.1<br>(-34.8 to 41.0)                             |
| Non-melanoma skin cancer (basal-cell carcinoma)    | 0.3<br>(0.2 to 0.5)                           | 2.0<br>(1.1 to 3.4)                            | < 0.05<br>(< 0.05 to < 0.05)            | 83.4<br>(6.5 to 187.1)                            | 31.2<br>(-27.7 to 106.4)                            |
| Breast cancer                                      | 44.6<br>(36.9 to 53.2)                        | 9.9<br>(8.2 to 11.7)                           | 4.5<br>(3.1 to 6.4)                     | 43.1<br>(12.9 to 81.3)                            | 4.3<br>(-17.3 to 31.0)                              |
| Cervical cancer                                    | 18.1<br>(9.8 to 23.7)                         | 4.8<br>(2.6 to 6.2)                            | 1.8<br>(0.9 to 2.6)                     | 17.2<br>(-5.2 to 48.4)                            | -15.6<br>(-32.4 to 7.5)                             |
| Uterine cancer                                     | 6.8<br>(5.4 to 8.6)                           | 1.5<br>(1.2 to 1.9)                            | 0.6<br>(0.4 to 0.8)                     | 53.4<br>(19.1 to 99.3)                            | 6.5<br>(-16.9 to 36.8)                              |
| Ovarian cancer                                     | 8.3<br>(7.0 to 9.7)                           | 2.6<br>(2.2 to 3.0)                            | 1.3<br>(0.9 to 1.7)                     | 42.2<br>(22.4 to 67.7)                            | 7.8<br>(-8.5 to 28.7)                               |
| Prostate cancer                                    | 10.1<br>(6.5 to 12.3)                         | 2.9<br>(2.0 to 3.4)                            | 1.2<br>(0.7 to 1.7)                     | 48.1<br>(17.0 to 88.9)                            | 14.1<br>(-11.2 to 48.4)                             |
| Testicular cancer                                  | 1.6<br>(1.3 to 1.9)                           | 0.4<br>(0.3 to 0.4)                            | 0.1<br>(0.1 to 0.2)                     | 43.1<br>(17.4 to 72.7)                            | 14.8<br>(-5.4 to 37.9)                              |
| Kidney cancer                                      | 5.2<br>(4.6 to 5.8)                           | 1.4<br>(1.2 to 1.6)                            | 0.5<br>(0.3 to 0.7)                     | 50.3<br>(29.2 to 73.8)                            | 13.0<br>(-3.2 to 31.0)                              |
| Bladder cancer                                     | 7.7<br>(6.3 to 8.9)                           | 2.1<br>(1.7 to 2.4)                            | 0.8<br>(0.6 to 1.1)                     | 47.9<br>(26.5 to 70.3)                            | 11.1<br>(-5.6 to 29.1)                              |
| Brain and nervous system cancer                    | 3.1<br>(2.4 to 3.5)                           | 1.4<br>(1.2 to 1.7)                            | 0.5<br>(0.3 to 0.6)                     | 27.6<br>(16.9 to 37.3)                            | 1.4<br>(-7.5 to 9.5)                                |
| Thyroid cancer                                     | 18.8<br>(15.4 to 23.8)                        | 3.7<br>(3.0 to 4.6)                            | 1.2<br>(0.8 to 1.9)                     | 73.4<br>(37.9 to 118.4)                           | 30.6<br>(4.2 to 62.9)                               |
| Mesothelioma                                       | 0.3<br>(0.2 to 0.3)                           | 0.2<br>(0.2 to 0.2)                            | 0.1<br>(< 0.05 to 0.1)                  | 31.5<br>(15.1 to 47.8)                            | -1.8<br>(-13.9 to 10.2)                             |
| Hodgkin lymphoma                                   | 1.2<br>(0.8 to 1.5)                           | 0.4<br>(0.3 to 0.5)                            | 0.1<br>(0.1 to 0.2)                     | 11.3<br>(-3.1 to 27.8)                            | -10.8<br>(-21.1 to 1.8)                             |
| Non-Hodgkin's lymphoma                             | 10.4<br>(9.2 to 11.8)                         | 3.7<br>(3.3 to 4.3)                            | 1.2<br>(0.8 to 1.6)                     | 34.3<br>(19.3 to 52.0)                            | 5.5<br>(-5.6 to 20.4)                               |
| Multiple myeloma                                   | 0.8<br>(0.6 to 1.0)                           | 0.5<br>(0.4 to 0.6)                            | 0.2<br>(0.1 to 0.3)                     | 52.2<br>(39.8 to 64.9)                            | 10.2<br>(1.0 to 19.3)                               |
| Leukaemia                                          | 6.0<br>(5.2 to 8.4)                           | 1.9<br>(1.7 to 2.7)                            | 0.8<br>(0.6 to 1.2)                     | 13.2<br>(3.5 to 26.2)                             | -9.4<br>(-17.7 to 0.2)                              |
| Acute lymphoid leukaemia                           | 2.3<br>(1.9 to 3.5)                           | 0.7<br>(0.6 to 1.0)                            | 0.3<br>(0.2 to 0.5)                     | 11.7<br>(-1.3 to 27.2)                            | -7.9<br>(-18.4 to 3.9)                              |
| Chronic lymphoid leukaemia                         | 0.8<br>(0.7 to 1.1)                           | 0.2<br>(0.2 to 0.2)                            | 0.1<br>(0.1 to 0.1)                     | 26.4<br>(8.8 to 47.8)                             | -3.4<br>(-17.3 to 13.5)                             |
| Acute myeloid leukaemia                            | 0.8<br>(0.6 to 1.1)                           | 0.5<br>(0.4 to 0.7)                            | 0.1<br>(0.1 to 0.2)                     | 17.5<br>(5.1 to 30.4)                             | -2.4<br>(-12.3 to 7.6)                              |
| Chronic myeloid leukaemia                          | 0.6<br>(0.4 to 0.8)                           | 0.2<br>(0.2 to 0.3)                            | 0.1<br>(< 0.05 to 0.1)                  | 9.7<br>(-8.1 to 28.0)                             | -15.5<br>(-29.5 to -1.2)                            |
| Other leukaemia                                    | 1.5<br>(1.3 to 2.2)                           | 0.4<br>(0.3 to 0.5)                            | 0.2<br>(0.1 to 0.3)                     | 7.7<br>(-8.5 to 30.1)                             | -16.2<br>(-29.7 to 0.3)                             |
| Other neoplasms                                    | 16.4<br>(14.9 to 17.9)                        | 5.6<br>(5.2 to 6.2)                            | 1.7<br>(1.2 to 2.2)                     | 26.6<br>(11.8 to 42.3)                            | 0.7<br>(-10.9 to 12.9)                              |
| <b>Cardiovascular diseases</b>                     | <b>4,669.9</b><br><b>(4,500.0 to 4,846.7)</b> | <b>548.4†</b><br><b>(524.8 to 571.7)</b>       | <b>345.2</b><br><b>(251.2 to 452.0)</b> | <b>27.9</b><br><b>(23.0 to 32.8)</b>              | <b>-2.9</b><br><b>(-6.4 to 0.7)</b>                 |
| Rheumatic heart disease                            | 6.8<br>(6.2 to 7.5)                           | 2.5<br>(2.4 to 2.7)                            | 0.6<br>(0.4 to 0.8)                     | 22.4<br>(7.5 to 38.4)                             | -3.7<br>(-18.0 to 12.2)                             |
| Ischaemic heart disease                            | 1,709.0<br>(1,613.6 to 1,813.7)               | 238.2<br>(224.5 to 252.9)                      | 78.8<br>(54.3 to 108.1)                 | 31.7<br>(25.4 to 38.2)                            | -0.7<br>(-4.8 to 3.8)                               |
| Cerebrovascular disease                            | 726.7<br>(677.2 to 781.5)                     | 127.4‡<br>(118.6 to 136.7)                     | 151.7<br>(107.7 to 195.5)               | 24.7<br>(16.4 to 33.6)                            | -6.4<br>(-12.7 to 0.2)                              |
| Ischaemic stroke                                   | 566.3<br>(512.6 to 630.0)                     | 76.2‡<br>(68.1 to 84.3)                        | 113.2<br>(79.7 to 148.0)                | 26.7<br>(16.5 to 38.4)                            | -4.7<br>(-12.4 to 4.2)                              |
| Hemorrhagic stroke                                 | 195.2<br>(175.8 to 216.3)                     | 51.2‡<br>(46.5 to 56.4)                        | 38.5<br>(27.1 to 50.1)                  | 19.2<br>(6.7 to 32.4)                             | -11.3<br>(-20.1 to -1.4)                            |
| Hypertensive heart disease                         | 236.0<br>(204.7 to 272.9)                     | --                                             | 19.1<br>(13.2 to 26.7)                  | 37.7<br>(24.8 to 52.6)                            | 1.8<br>(-7.1 to 11.7)                               |
| Cardiomyopathy and myocarditis                     | 47.0<br>(41.6 to 52.7)                        | 17.1†<br>(14.9 to 19.6)                        | 5.1<br>(3.3 to 7.2)                     | 28.0<br>(13.0 to 47.1)                            | 3.8<br>(-7.7 to 18.2)                               |
| Myocarditis                                        | 16.2<br>(14.2 to 18.5)                        | 17.1<br>(14.9 to 19.6)                         | 1.3<br>(0.8 to 1.9)                     | 16.5<br>(-1.5 to 39.6)                            | 2.0<br>(-11.8 to 20.3)                              |
| Alcoholic cardiomyopathy                           | 8.0<br>(6.5 to 9.6)                           | --                                             | 0.7<br>(0.4 to 1.0)                     | 39.6<br>(17.8 to 64.4)                            | 4.8<br>(-10.6 to 23.1)                              |
| Other cardiomyopathy                               | 37.2<br>(32.1 to 42.9)                        | --                                             | 3.1<br>(2.0 to 4.4)                     | 30.8<br>(8.8 to 58.0)                             | 4.2<br>(-12.1 to 24.1)                              |
| Atrial fibrillation and flutter                    | 473.2<br>(415.6 to 539.4)                     | 37.9<br>(32.6 to 44.0)                         | 37.1<br>(25.0 to 52.4)                  | 30.8<br>(22.3 to 40.2)                            | 0.4<br>(-5.9 to 7.0)                                |
| Peripheral vascular disease                        | 1,147.5<br>(1,004.0 to 1,323.1)               | 108.3<br>(93.8 to 124.5)                       | 5.6<br>(2.6 to 10.3)                    | 24.6<br>(14.2 to 35.2)                            | -5.7<br>(-12.8 to 1.6)                              |
| Endocarditis                                       | 6.6<br>(5.8 to 7.6)                           | 17.0<br>(15.3 to 18.9)                         | 0.5<br>(0.4 to 0.8)                     | 28.6<br>(16.2 to 41.9)                            | 1.4<br>(-9.0 to 12.7)                               |
| Other cardiovascular and circulatory diseases      | 885.6<br>(761.1 to 1,038.2)                   | --                                             | 46.8<br>(31.2 to 66.1)                  | 26.7<br>(16.1 to 38.5)                            | 1.6<br>(-6.3 to 10.4)                               |
| <b>Chronic respiratory diseases</b>                | <b>6,961.4</b><br><b>(6,722.9 to 7,205.4)</b> | <b>1,472.1†</b><br><b>(1,391.7 to 1,552.9)</b> | <b>479.6</b><br><b>(390.4 to 573.0)</b> | <b>32.9</b><br><b>(28.1 to 38.4)</b>              | <b>8.0</b><br><b>(4.5 to 11.8)</b>                  |
| Chronic obstructive pulmonary disease              | 3,188.1<br>(3,051.4 to 3,329.6)               | 249.7<br>(237.5 to 262.1)                      | 298.2<br>(256.5 to 332.4)               | 42.8<br>(36.5 to 49.7)                            | 8.1<br>(3.3 to 13.4)                                |
| Pneumoconiosis                                     | 10.9<br>(9.8 to 12.0)                         | 1.1<br>(1.0 to 1.2)                            | 1.6<br>(1.0 to 2.3)                     | 43.4<br>(17.2 to 74.5)                            | 4.5<br>(-16.3 to 28.8)                              |
| Silicosis                                          | 7.3<br>(6.3 to 8.4)                           | 0.8<br>(0.7 to 0.9)                            | 1.0<br>(0.6 to 1.5)                     | 44.8<br>(7.9 to 91.3)                             | 4.6<br>(-23.3 to 41.2)                              |



| Cause                                                          | Prevalence in thousands (95% UI)           | Incidence in thousands (95% UI)                     | YLDs in thousands (95% UI)              |                                                   |                                                     |
|----------------------------------------------------------------|--------------------------------------------|-----------------------------------------------------|-----------------------------------------|---------------------------------------------------|-----------------------------------------------------|
|                                                                | 2016 counts                                | 2016 counts                                         | 2016 counts                             | Percentage change in counts between 2006 and 2016 | Percentage change in age-standardised rates between |
| Asbestosis                                                     | 1.3<br>(1.1 to 1.5)                        | 0.1<br>(0.1 to 0.1)                                 | 0.2<br>(0.1 to 0.3)                     | 40.4<br>(31.3 to 48.5)                            | 2.1<br>(-4.4 to 7.3)                                |
| Coal workers pneumoconiosis                                    | --                                         | --                                                  | --                                      | --                                                | --                                                  |
| Other pneumoconiosis                                           | 2.3<br>(1.9 to 2.7)                        | 0.2<br>(0.2 to 0.3)                                 | 0.3<br>(0.2 to 0.5)                     | 40.7<br>(9.4 to 82.0)                             | 5.5<br>(-22.5 to 43.8)                              |
| Asthma                                                         | 4,015.1<br>(3,777.1 to 4,263.9)            | 1,214.5<br>(1,137.9 to 1,294.2)                     | 157.6<br>(103.2 to 225.6)               | 16.2<br>(10.7 to 22.1)                            | 5.8<br>(1.4 to 10.8)                                |
| Interstitial lung disease and pulmonary sarcoidosis            | 83.1<br>(74.0 to 93.0)                     | 6.8<br>(6.1 to 7.6)                                 | 8.3<br>(5.6 to 11.8)                    | 33.7<br>(20.0 to 49.5)                            | 4.0<br>(-7.0 to 16.3)                               |
| Other chronic respiratory diseases                             | --                                         | --                                                  | 14.0<br>(11.7 to 16.3)                  | 53.7<br>(36.7 to 73.0)                            | 41.0<br>(26.0 to 58.4)                              |
| <b>Cirrhosis and other chronic liver diseases</b>              | <b>433.4<br/>(410.1 to 458.3)</b>          | <b>32.1<br/>(30.6 to 33.8)</b>                      | <b>23.6<br/>(16.1 to 32.8)</b>          | <b>25.8<br/>(15.1 to 39.1)</b>                    | <b>4.8<br/>(-2.9 to 14.5)</b>                       |
| Cirrhosis and other chronic liver diseases due to hepatitis B  | 146.0<br>(126.4 to 166.5)                  | 11.3<br>(9.8 to 13.0)                               | 6.5<br>(4.4 to 9.3)                     | 36.8<br>(15.6 to 61.4)                            | 4.4<br>(-9.7 to 21.9)                               |
| Cirrhosis and other chronic liver diseases due to hepatitis C  | 69.8<br>(57.5 to 85.2)                     | 5.2<br>(4.3 to 6.1)                                 | 3.2<br>(2.0 to 4.5)                     | 32.1<br>(5.5 to 64.5)                             | 0.3<br>(-17.7 to 23.2)                              |
| Cirrhosis and other chronic liver diseases due to alcohol use  | 81.7<br>(67.8 to 98.3)                     | 6.6<br>(5.6 to 7.9)                                 | 3.7<br>(2.4 to 5.3)                     | 46.5<br>(19.2 to 78.5)                            | 9.2<br>(-9.7 to 32.1)                               |
| Cirrhosis and other chronic liver diseases due to other causes | 135.8<br>(123.1 to 149.7)                  | 9.1<br>(8.3 to 9.9)                                 | 10.2<br>(6.8 to 14.3)                   | 12.6<br>(-2.7 to 30.7)                            | 5.0<br>(-8.2 to 20.4)                               |
| <b>Digestive diseases</b>                                      | <b>1,214.2<br/>(1,137.1 to 1,276.7)</b>    | <b>1,322.0<sup>†</sup><br/>(1,251.7 to 1,406.3)</b> | <b>39.7<br/>(27.5 to 55.1)</b>          | <b>47.8<br/>(36.4 to 59.9)</b>                    | <b>16.8<br/>(8.3 to 25.2)</b>                       |
| Peptic ulcer disease                                           | 394.8<br>(357.1 to 439.5)                  | 185.8<br>(166.9 to 206.8)                           | 9.8<br>(6.2 to 14.7)                    | 84.4<br>(66.2 to 103.9)                           | 40.4<br>(27.4 to 54.8)                              |
| Gastritis and duodenitis                                       | 628.1<br>(555.9 to 708.6)                  | 540.0<br>(480.5 to 611.7)                           | 11.3<br>(7.3 to 16.6)                   | 80.5<br>(63.0 to 98.8)                            | 38.8<br>(26.2 to 51.8)                              |
| Appendicitis                                                   | 5.9<br>(5.5 to 6.3)                        | 156.1<br>(146.2 to 166.4)                           | 1.9<br>(1.2 to 2.6)                     | -3.1<br>(-14.4 to 7.5)                            | -11.7<br>(-21.7 to -1.1)                            |
| Paralytic ileus and intestinal obstruction                     | 0.9<br>(0.8 to 1.0)                        | 26.1<br>(23.6 to 28.8)                              | 0.3<br>(0.2 to 0.4)                     | 9.8<br>(5.1 to 15.3)                              | -8.4<br>(-11.8 to -4.6)                             |
| Inguinal, femoral, and abdominal hernia                        | 153.8<br>(131.3 to 177.0)                  | 142.4<br>(123.5 to 162.9)                           | 7.4<br>(4.8 to 10.5)                    | 11.2<br>(-6.6 to 32.1)                            | -10.2<br>(-23.6 to 5.4)                             |
| Inflammatory bowel disease                                     | 26.8<br>(22.5 to 31.7)                     | 32.1<br>(28.7 to 36.3)                              | 4.0<br>(2.5 to 5.7)                     | 36.5<br>(12.7 to 65.0)                            | 9.4<br>(-9.5 to 32.1)                               |
| Vascular intestinal disorders                                  | 0.6<br>(0.5 to 0.7)                        | 4.2<br>(3.7 to 4.8)                                 | 0.2<br>(0.1 to 0.3)                     | 30.7<br>(23.6 to 38.3)                            | 9.3<br>(5.3 to 13.8)                                |
| Gallbladder and biliary diseases                               | 60.1<br>(52.6 to 68.3)                     | 207.8<br>(181.0 to 240.4)                           | 1.3<br>(0.9 to 1.9)                     | 37.5<br>(23.9 to 52.2)                            | 4.6<br>(-5.6 to 15.2)                               |
| Pancreatitis                                                   | 3.0<br>(2.6 to 3.3)                        | 27.4<br>(24.4 to 30.5)                              | 0.4<br>(0.3 to 0.6)                     | 33.4<br>(28.2 to 39.2)                            | 6.9<br>(3.3 to 10.6)                                |
| Other digestive diseases                                       | --                                         | --                                                  | 3.1<br>(2.2 to 4.3)                     | 48.8<br>(36.5 to 60.8)                            | 17.9<br>(8.8 to 27.1)                               |
| <b>Neurological disorders</b>                                  | <b>34,306.0<br/>(32,723.5 to 36,039.2)</b> | <b>15,781.4<br/>(13,315.0 to 18,565.3)</b>          | <b>842.9<br/>(560.1 to 1,169.5)</b>     | <b>16.3<br/>(-3.0 to 40.4)</b>                    | <b>0.4<br/>(-16.4 to 21.2)</b>                      |
| Alzheimer's disease and other dementias                        | 655.1<br>(558.9 to 775.5)                  | 110.9<br>(93.5 to 133.1)                            | 96.6<br>(67.5 to 128.0)                 | 31.1<br>(24.6 to 37.5)                            | 0.3<br>(-4.2 to 4.6)                                |
| Parkinson's disease                                            | 64.5<br>(52.2 to 78.2)                     | 6.8<br>(5.5 to 8.3)                                 | 7.6<br>(4.9 to 10.6)                    | 40.9<br>(25.6 to 59.0)                            | 8.4<br>(-3.1 to 22.9)                               |
| Epilepsy                                                       | 347.6<br>(117.3 to 547.2)                  | 40.6<br>(13.8 to 63.5)                              | 117.5<br>(34.0 to 224.8)                | 10.8<br>(-68.2 to 326.4)                          | 0.4<br>(-71.0 to 285.2)                             |
| Multiple sclerosis                                             | 4.1<br>(3.6 to 4.7)                        | 0.2<br>(0.2 to 0.2)                                 | 1.2<br>(0.8 to 1.6)                     | 39.6<br>(34.6 to 44.3)                            | 12.3<br>(8.8 to 16.1)                               |
| Motor neuron disease                                           | 2.5<br>(2.2 to 2.9)                        | 0.5<br>(0.4 to 0.6)                                 | 0.5<br>(0.4 to 0.7)                     | 22.9<br>(17.8 to 28.1)                            | 5.2<br>(2.0 to 8.7)                                 |
| Migraine                                                       | 12,526.4<br>(11,733.2 to 13,291.8)         | 1,276.4<br>(1,196.9 to 1,361.9)                     | 516.5<br>(328.9 to 728.5)               | 14.5<br>(9.8 to 19.3)                             | -0.5<br>(-4.2 to 3.3)                               |
| Tension-type headache                                          | 25,862.0<br>(22,892.7 to 28,991.4)         | 14,345.5<br>(11,908.7 to 17,087.0)                  | 77.8<br>(48.3 to 117.9)                 | 15.1<br>(9.0 to 22.4)                             | -0.6<br>(-5.4 to 4.6)                               |
| Other neurological disorders                                   | 0.2<br>(0.1 to 0.3)                        | 0.5<br>(0.3 to 0.6)                                 | 25.2<br>(8.9 to 46.8)                   | 28.6<br>(-56.2 to 291.9)                          | 18.9<br>(-58.3 to 242.7)                            |
| <b>Mental and substance use disorders</b>                      | <b>11,977.7<br/>(11,580.3 to 12,403.2)</b> | <b>3,901.5<sup>†</sup><br/>(3,656.7 to 4,190.0)</b> | <b>1,658.2<br/>(1,195.7 to 2,153.9)</b> | <b>15.1<br/>(12.5 to 17.9)</b>                    | <b>0.8<br/>(-1.2 to 3.0)</b>                        |
| Schizophrenia                                                  | 299.7<br>(263.1 to 343.9)                  | 17.4<br>(15.2 to 20.1)                              | 195.3<br>(140.0 to 247.6)               | 24.5<br>(14.8 to 35.2)                            | 2.1<br>(-5.6 to 10.8)                               |
| Alcohol use disorders                                          | 1,549.0<br>(1,336.3 to 1,771.5)            | 673.9<br>(572.5 to 784.5)                           | 156.2<br>(103.9 to 217.8)               | 24.4<br>(14.8 to 35.5)                            | 6.4<br>(-1.8 to 15.4)                               |
| Drug use disorders                                             | 771.5<br>(702.8 to 847.9)                  | 99.6<br>(88.0 to 112.5)                             | 144.7<br>(102.7 to 194.6)               | 15.6<br>(5.1 to 27.6)                             | 3.9<br>(-5.2 to 14.1)                               |
| Opioid use disorders                                           | 232.7<br>(195.1 to 279.1)                  | 27.3<br>(23.1 to 32.3)                              | 97.9<br>(66.8 to 134.0)                 | 20.3<br>(6.7 to 35.6)                             | 3.1<br>(-7.8 to 15.4)                               |
| Cocaine use disorders                                          | 15.1<br>(12.8 to 17.9)                     | 1.7<br>(1.4 to 2.0)                                 | 2.2<br>(1.3 to 3.2)                     | 19.8<br>(12.7 to 27.8)                            | 5.2<br>(-0.1 to 11.3)                               |
| Amphetamine use disorders                                      | 124.0<br>(81.2 to 176.9)                   | 10.9<br>(7.1 to 15.7)                               | 16.5<br>(8.9 to 27.3)                   | 5.3<br>(-16.5 to 36.4)                            | 7.8<br>(-14.7 to 38.6)                              |
| Cannabis use disorders                                         | 385.4<br>(312.9 to 472.5)                  | 51.7<br>(41.4 to 63.2)                              | 11.3<br>(7.0 to 16.9)                   | 0.9<br>(-12.1 to 16.5)                            | 0.4<br>(-12.1 to 15.1)                              |
| Other drug use disorders                                       | 42.1<br>(37.3 to 47.1)                     | 8.0<br>(7.1 to 9.0)                                 | 16.7<br>(10.2 to 25.7)                  | 11.2<br>(-13.5 to 44.3)                           | 6.9<br>(-16.1 to 37.5)                              |
| Depressive disorders                                           | 2,908.7<br>(2,705.5 to 3,144.7)            | 2,291.8<br>(2,066.8 to 2,549.0)                     | 433.7<br>(300.2 to 593.7)               | 16.5<br>(11.2 to 21.9)                            | -2.4<br>(-6.3 to 1.6)                               |
| Major depressive disorder                                      | 1,362.6<br>(1,218.2 to 1,523.6)            | 2,052.0<br>(1,830.2 to 2,299.8)                     | 280.7<br>(192.0 to 384.3)               | 11.8<br>(4.7 to 19.4)                             | -3.6<br>(-9.3 to 2.4)                               |
| Dysthymia                                                      | 1,589.7<br>(1,383.5 to 1,825.5)            | 239.8<br>(209.0 to 273.9)                           | 153.0<br>(102.1 to 220.2)               | 26.2<br>(21.8 to 30.8)                            | 0.0<br>(-2.7 to 2.7)                                |
| Bipolar disorder                                               | 530.6<br>(459.6 to 613.4)                  | 42.8<br>(37.3 to 49.6)                              | 109.5<br>(66.8 to 163.7)                | 14.6<br>(6.3 to 23.3)                             | 0.3<br>(-6.1 to 6.8)                                |
| Anxiety disorders                                              | 2,579.4<br>(2,364.5 to 2,812.7)            | 440.7<br>(405.7 to 481.4)                           | 250.1<br>(171.6 to 339.1)               | 16.7<br>(9.1 to 25.7)                             | 3.0<br>(-3.8 to 10.3)                               |
| Eating disorders                                               | 85.8<br>(69.9 to 102.9)                    | 53.4<br>(40.2 to 69.5)                              | 17.9<br>(11.3 to 26.3)                  | 19.9<br>(1.9 to 40.3)                             | 17.9<br>(0.9 to 37.3)                               |
| Anorexia nervosa                                               | 25.4<br>(18.8 to 34.0)                     | 11.0<br>(8.2 to 14.3)                               | 5.4<br>(3.2 to 8.5)                     | 10.0<br>(-15.4 to 46.4)                           | 14.8<br>(-11.0 to 51.8)                             |
| Bulimia nervosa                                                | 58.6<br>(43.3 to 77.9)                     | 42.3<br>(29.4 to 58.8)                              | 12.5<br>(7.4 to 18.9)                   | 24.8<br>(1.9 to 51.5)                             | 19.4<br>(-2.1 to 43.9)                              |
| Autistic spectrum disorders                                    | 766.8<br>(687.6 to 868.9)                  | 5.1<br>(3.4 to 7.2)                                 | 112.7<br>(76.1 to 158.8)                | 9.0<br>(3.5 to 14.9)                              | 0.8<br>(-4.1 to 6.2)                                |
| Autism                                                         | 228.2<br>(193.9 to 268.4)                  | 0.5<br>(0.3 to 0.9)                                 | 58.6<br>(37.4 to 85.5)                  | 9.0<br>(-0.4 to 18.6)                             | 0.6<br>(-7.6 to 9.3)                                |
| Asperger syndrome and other autistic spectrum disorders        | 538.0<br>(445.9 to 647.2)                  | 4.5<br>(2.9 to 6.6)                                 | 54.2<br>(35.3 to 80.1)                  | 9.0<br>(3.6 to 14.8)                              | 1.0<br>(-3.6 to 6.2)                                |



| Cause                                                      | Prevalence in thousands (95% UI)                 | Incidence in thousands (95% UI)                      | YLDs in thousands (95% UI)                    |                                                   |                                                     |
|------------------------------------------------------------|--------------------------------------------------|------------------------------------------------------|-----------------------------------------------|---------------------------------------------------|-----------------------------------------------------|
|                                                            | 2016 counts                                      | 2016 counts                                          | 2016 counts                                   | Percentage change in counts between 2006 and 2016 | Percentage change in age-standardised rates between |
| Attention-deficit/hyperactivity disorder                   | 459.5<br>(366.0 to 575.2)                        | 20.4<br>(15.1 to 26.9)                               | 5.5<br>(3.1 to 9.1)                           | -2.1<br>(-11.9 to 9.4)                            | 0.2<br>(-9.5 to 11.4)                               |
| Conduct disorder                                           | 584.6<br>(475.3 to 689.7)                        | 197.3<br>(156.0 to 239.7)                            | 71.5<br>(44.1 to 108.5)                       | -17.9<br>(-23.0 to -12.2)                         | 0.6<br>(-5.5 to 6.9)                                |
| Idiopathic developmental intellectual disability           | 434.0<br>(156.5 to 715.7)                        | --                                                   | 21.2<br>(8.1 to 38.5)                         | -13.9<br>(-23.7 to -6.0)                          | -19.5<br>(-27.9 to -12.2)                           |
| Other mental and substance use disorders                   | 1,867.1<br>(1,646.0 to 2,153.1)                  | 59.1<br>(52.8 to 67.0)                               | 140.0<br>(95.1 to 202.1)                      | 21.5<br>(15.0 to 28.8)                            | 0.3<br>(-4.6 to 5.5)                                |
| <b>Diabetes, urogenital, blood, and endocrine diseases</b> | <b>32,242.7</b><br><b>(31,816.2 to 32,687.8)</b> | <b>8,025.5†</b><br><b>(7,538.8 to 8,549.8)</b>       | <b>614.9</b><br><b>(430.8 to 842.4)</b>       | <b>34.1</b><br><b>(29.3 to 39.2)</b>              | <b>6.1</b><br><b>(2.5 to 10.1)</b>                  |
| Diabetes mellitus                                          | 4,440.0<br>(3,989.1 to 4,943.2)                  | 255.7<br>(230.0 to 285.0)                            | 321.4<br>(214.4 to 447.7)                     | 45.6<br>(37.4 to 54.4)                            | 9.5<br>(3.4 to 16.0)                                |
| Acute glomerulonephritis                                   | 1.2<br>(1.0 to 1.4)                              | 17.5<br>(15.4 to 19.9)                               | 0.1<br>(< 0.05 to 0.1)                        | 12.2<br>(6.3 to 18.3)                             | 0.8<br>(-3.5 to 4.7)                                |
| Chronic kidney disease                                     | 1,729.9<br>(1,552.0 to 1,915.2)                  | 119.5<br>(105.9 to 133.7)                            | 63.9<br>(47.0 to 81.9)                        | 56.1<br>(45.4 to 67.8)                            | 20.0<br>(11.5 to 28.9)                              |
| Chronic kidney disease due to diabetes mellitus            | 996.8<br>(874.9 to 1,121.8)                      | 69.4<br>(59.7 to 79.3)                               | 36.2<br>(26.7 to 46.6)                        | 56.8<br>(40.5 to 74.3)                            | 18.2<br>(6.4 to 29.9)                               |
| Chronic kidney disease due to hypertension                 | 340.0<br>(291.1 to 391.0)                        | 8.2<br>(6.8 to 9.8)                                  | 18.3<br>(12.9 to 24.3)                        | 57.8<br>(38.9 to 77.1)                            | 20.1<br>(5.9 to 34.9)                               |
| Chronic kidney disease due to glomerulonephritis           | 286.4<br>(245.3 to 333.9)                        | 33.7<br>(28.2 to 40.1)                               | 4.8<br>(3.3 to 6.7)                           | 51.8<br>(37.3 to 66.9)                            | 32.5<br>(21.9 to 44.6)                              |
| Chronic kidney disease due to other causes                 | 106.7<br>(87.8 to 128.5)                         | 8.2<br>(6.9 to 9.8)                                  | 4.6<br>(3.2 to 6.4)                           | 49.2<br>(36.7 to 62.9)                            | 23.1<br>(14.4 to 33.7)                              |
| Urinary diseases and male infertility                      | 818.4<br>(749.0 to 900.0)                        | 4,336.3†<br>(3,892.9 to 4,825.6)                     | 23.6<br>(15.5 to 33.4)                        | 30.1<br>(22.3 to 38.8)                            | -1.4<br>(-7.2 to 4.5)                               |
| Interstitial nephritis and urinary tract infections        | 73.4<br>(64.8 to 82.6)                           | 3,833.9<br>(3,404.9 to 4,308.6)                      | 2.4<br>(1.5 to 3.8)                           | 16.7<br>(-2.4 to 37.2)                            | 1.3<br>(-14.1 to 18.0)                              |
| Urolithiasis                                               | 16.2<br>(14.3 to 18.4)                           | 431.4<br>(382.1 to 493.0)                            | 1.2<br>(0.8 to 1.8)                           | 40.5<br>(27.8 to 54.7)                            | 7.9<br>(-4.2 to 20.8)                               |
| Benign prostatic hyperplasia                               | 536.2<br>(475.7 to 603.2)                        | 71.0<br>(62.2 to 81.7)                               | 17.6<br>(11.5 to 25.4)                        | 35.2<br>(25.1 to 45.2)                            | -1.5<br>(-8.3 to 5.5)                               |
| Male infertility                                           | 165.6<br>(126.9 to 217.8)                        | --                                                   | 1.0<br>(0.4 to 2.0)                           | 16.1<br>(-1.4 to 35.2)                            | 2.9<br>(-12.5 to 19.0)                              |
| Other urinary diseases                                     | --                                               | --                                                   | 1.3<br>(0.9 to 1.9)                           | 2.1<br>(-10.9 to 15.5)                            | -14.2<br>(-24.2 to -3.6)                            |
| Gynecological diseases                                     | 9,766.8<br>(9,345.4 to 10,250.8)                 | 3,085.3†<br>(2,893.3 to 3,294.2)                     | 97.6<br>(64.7 to 143.5)                       | 5.7<br>(-1.8 to 13.1)                             | -9.2<br>(-15.4 to -3.4)                             |
| Uterine fibroids                                           | 1,466.8<br>(1,284.8 to 1,672.3)                  | 159.4<br>(136.2 to 187.0)                            | 17.7<br>(9.8 to 30.7)                         | 8.6<br>(-0.6 to 16.6)                             | -15.0<br>(-21.9 to -9.1)                            |
| Polycystic ovarian syndrome                                | 72.8<br>(54.1 to 93.6)                           | 64.9<br>(46.9 to 86.0)                               | 0.6<br>(0.3 to 1.2)                           | 13.1<br>(-3.5 to 30.9)                            | 0.2<br>(-14.6 to 16.0)                              |
| Female infertility                                         | 30.1<br>(21.3 to 50.8)                           | --                                                   | 0.2<br>(0.1 to 0.4)                           | 11.7<br>(-19.3 to 62.5)                           | -2.3<br>(-28.5 to 42.4)                             |
| Endometriosis                                              | 8.0<br>(6.7 to 9.5)                              | 50.4<br>(41.6 to 61.5)                               | 0.8<br>(0.5 to 1.2)                           | 12.0<br>(-16.9 to 49.6)                           | -1.0<br>(-26.3 to 32.4)                             |
| Genital prolapse                                           | 2,149.7<br>(1,849.4 to 2,468.3)                  | 129.1<br>(110.0 to 152.0)                            | 6.7<br>(3.2 to 12.2)                          | 24.9<br>(13.1 to 37.2)                            | -9.6<br>(-18.4 to -0.2)                             |
| Premenstrual syndrome                                      | 6,368.4<br>(6,004.9 to 6,727.1)                  | 2,237.2<br>(2,096.7 to 2,392.3)                      | 53.7<br>(33.4 to 83.9)                        | 9.1<br>(0.8 to 18.0)                              | -1.2<br>(-8.7 to 7.0)                               |
| Other gynecological diseases                               | 569.6<br>(477.4 to 679.4)                        | 444.3<br>(348.1 to 561.6)                            | 17.9<br>(11.0 to 26.8)                        | -10.6<br>(-31.0 to 10.0)                          | -23.1<br>(-40.7 to -5.5)                            |
| Hemoglobinopathies and hemolytic anaemias                  | 20,508.1<br>(20,174.8 to 20,848.3)               | --                                                   | 69.5<br>(44.8 to 104.8)                       | 27.4<br>(16.5 to 38.7)                            | 10.2<br>(1.7 to 19.4)                               |
| Thalassemias                                               | 12.9<br>(11.7 to 14.2)                           | --                                                   | 0.7<br>(0.4 to 1.1)                           | 12.0<br>(-13.3 to 44.3)                           | 10.2<br>(-14.9 to 43.0)                             |
| Thalassaemia trait                                         | 5,949.5<br>(5,632.4 to 6,295.6)                  | --                                                   | 60.9<br>(39.2 to 91.5)                        | 34.1<br>(21.9 to 47.2)                            | 18.1<br>(8.0 to 28.9)                               |
| Sickle cell disorders                                      | < 0.05<br>(< 0.05 to < 0.05)                     | --                                                   | < 0.05<br>(< 0.05 to < 0.05)                  | 29.1<br>(11.8 to 50.5)                            | 23.5<br>(5.9 to 45.8)                               |
| Sickle cell trait                                          | 334.9<br>(301.4 to 372.3)                        | --                                                   | 0.6<br>(0.3 to 1.0)                           | 38.3<br>(0.8 to 89.2)                             | 26.1<br>(-7.5 to 73.1)                              |
| G6PD deficiency                                            | 2,810.0<br>(2,685.1 to 2,973.0)                  | --                                                   | 0.3<br>(0.2 to 0.4)                           | 16.5<br>(3.8 to 30.4)                             | 0.4<br>(-10.4 to 12.5)                              |
| G6PD trait                                                 | 12,481.9<br>(12,296.6 to 12,716.6)               | --                                                   | < 0.05<br>(< 0.05 to < 0.05)                  | 33.2<br>(19.3 to 48.0)                            | 17.4<br>(5.5 to 29.4)                               |
| Other hemoglobinopathies and hemolytic anaemias            | 399.7<br>(376.2 to 423.9)                        | --                                                   | 7.0<br>(4.5 to 10.4)                          | -10.4<br>(-19.0 to -1.8)                          | -27.1<br>(-33.9 to -20.7)                           |
| Endocrine, metabolic, blood, and immune disorders          | 1,241.1<br>(1,135.4 to 1,352.1)                  | 211.2<br>(187.8 to 237.4)                            | 38.8<br>(26.2 to 53.8)                        | 22.6<br>(14.5 to 30.9)                            | -3.5<br>(-9.5 to 2.5)                               |
| <b>Musculoskeletal disorders</b>                           | <b>15,376.9</b><br><b>(14,601.2 to 16,147.4)</b> | <b>8,034.4</b><br><b>(7,230.7 to 8,897.8)</b>        | <b>1,688.6</b><br><b>(1,224.2 to 2,212.5)</b> | <b>25.7</b><br><b>(21.7 to 30.0)</b>              | <b>-0.4</b><br><b>(-3.2 to 2.6)</b>                 |
| Rheumatoid arthritis                                       | 117.5<br>(104.4 to 133.1)                        | 6.6<br>(5.9 to 7.5)                                  | 28.0<br>(18.7 to 37.8)                        | 30.2<br>(15.8 to 46.8)                            | 0.6<br>(-9.7 to 11.9)                               |
| Osteoarthritis                                             | 2,873.3<br>(2,679.4 to 3,067.7)                  | 145.5<br>(134.9 to 156.4)                            | 178.0<br>(124.0 to 244.6)                     | 41.3<br>(36.0 to 46.8)                            | 3.1<br>(-0.6 to 6.8)                                |
| Low back and neck pain                                     | 9,376.3<br>(8,700.2 to 10,081.2)                 | 4,038.8<br>(3,589.6 to 4,538.9)                      | 1,094.1<br>(774.0 to 1,444.7)                 | 26.6<br>(21.5 to 32.0)                            | 0.6<br>(-2.9 to 4.5)                                |
| Low back pain                                              | 6,888.3<br>(6,099.1 to 7,817.0)                  | 3,327.2<br>(2,890.0 to 3,809.3)                      | 786.5<br>(553.0 to 1,047.1)                   | 26.1<br>(19.2 to 33.6)                            | 0.8<br>(-3.9 to 6.3)                                |
| Neck pain                                                  | 3,057.3<br>(2,629.1 to 3,539.4)                  | 711.6<br>(616.1 to 843.7)                            | 307.6<br>(206.2 to 440.9)                     | 27.9<br>(23.7 to 32.5)                            | 0.2<br>(-2.0 to 2.4)                                |
| Gout                                                       | 388.8<br>(341.7 to 438.7)                        | 77.6<br>(67.1 to 87.7)                               | 12.4<br>(8.4 to 17.2)                         | 34.4<br>(15.6 to 57.0)                            | 0.6<br>(-12.4 to 16.1)                              |
| Other musculoskeletal disorders                            | 4,338.1<br>(3,637.9 to 5,102.8)                  | 3,766.0<br>(3,101.6 to 4,502.4)                      | 376.0<br>(253.5 to 535.2)                     | 16.7<br>(6.6 to 26.7)                             | -5.0<br>(-12.6 to 2.2)                              |
| <b>Other non-communicable diseases</b>                     | <b>63,671.6</b><br><b>(62,443.9 to 64,814.8)</b> | <b>191,484.9†</b><br><b>(179,666.6 to 203,675.5)</b> | <b>1,854.5</b><br><b>(1,289.3 to 2,584.2)</b> | <b>10.5</b><br><b>(8.6 to 12.3)</b>               | <b>-4.4</b><br><b>(-6.1 to -2.9)</b>                |
| Congenital anomalies                                       | 680.8<br>(601.7 to 768.0)                        | --                                                   | 80.5<br>(57.4 to 109.0)                       | 3.7<br>(-2.2 to 10.3)                             | -4.9<br>(-10.2 to 1.3)                              |
| Neural tube defects                                        | 34.8<br>(30.9 to 39.2)                           | --                                                   | 10.5<br>(7.3 to 14.1)                         | 4.2<br>(-10.4 to 22.9)                            | -5.9<br>(-18.6 to 10.2)                             |
| Congenital heart anomalies                                 | 198.3<br>(172.4 to 227.4)                        | --                                                   | 9.1<br>(3.8 to 15.8)                          | 7.5<br>(-4.7 to 20.9)                             | 2.0<br>(-9.6 to 14.1)                               |
| Orofacial clefts                                           | 31.2<br>(27.4 to 35.2)                           | --                                                   | 0.4<br>(0.2 to 0.6)                           | 1.6<br>(-9.8 to 14.8)                             | -8.0<br>(-18.4 to 3.8)                              |
| Down's syndrome                                            | 25.0<br>(21.4 to 29.3)                           | --                                                   | 2.3<br>(1.5 to 3.2)                           | 8.7<br>(0.7 to 18.3)                              | 2.2<br>(-5.3 to 11.2)                               |
| Turner syndrome                                            | 16.6<br>(14.0 to 19.4)                           | --                                                   | 0.3<br>(0.1 to 0.5)                           | 6.5<br>(-27.9 to 55.8)                            | 1.0<br>(-32.3 to 48.8)                              |
| Klinefelter syndrome                                       | 21.3<br>(18.0 to 25.0)                           | --                                                   | 0.1<br>(0.1 to 0.2)                           | 7.7<br>(-23.2 to 47.6)                            | 1.1<br>(-26.6 to 38.7)                              |

| Cause                                         | Prevalence in thousands (95% UI)                 | Incidence in thousands (95% UI)                | YLDs in thousands (95% UI)              |                                                   |                                                     |
|-----------------------------------------------|--------------------------------------------------|------------------------------------------------|-----------------------------------------|---------------------------------------------------|-----------------------------------------------------|
|                                               | 2016 counts                                      | 2016 counts                                    | 2016 counts                             | Percentage change in counts between 2006 and 2016 | Percentage change in age-standardised rates between |
| Other chromosomal abnormalities               | 18.2<br>(15.2 to 21.9)                           | --                                             | 2.2<br>(1.5 to 3.0)                     | -5.8<br>(-23.6 to 17.1)                           | -1.5<br>(-21.1 to 22.5)                             |
| Congenital musculoskeletal and limb anomalies | 87.0<br>(79.3 to 95.4)                           | --                                             | 12.6<br>(8.4 to 17.7)                   | 16.9<br>(4.1 to 31.2)                             | 6.1<br>(-5.2 to 18.7)                               |
| Urogenital congenital anomalies               | 59.6<br>(52.9 to 67.1)                           | --                                             | 1.2<br>(0.7 to 2.1)                     | -1.7<br>(-9.7 to 6.4)                             | -1.4<br>(-9.2 to 6.8)                               |
| Digestive congenital anomalies                | 110.5<br>(97.4 to 124.8)                         | --                                             | 5.1<br>(3.3 to 7.4)                     | 12.9<br>(-2.9 to 33.4)                            | 2.5<br>(-11.5 to 20.6)                              |
| Other congenital anomalies                    | 275.9<br>(191.0 to 395.3)                        | --                                             | 36.7<br>(23.8 to 54.0)                  | -1.7<br>(-11.1 to 9.1)                            | -10.9<br>(-19.3 to -1.4)                            |
| Skin and subcutaneous diseases                | 30,844.0<br>(29,869.4 to 31,910.1)               | 73,251.6<br>(68,543.5 to 78,851.1)             | 726.1<br>(476.4 to 1,080.2)             | 4.1<br>(1.6 to 6.6)                               | 1.3<br>(-0.6 to 3.1)                                |
| Dermatitis                                    | 3,626.9<br>(3,399.1 to 3,873.9)                  | 5,472.5<br>(5,067.0 to 5,891.7)                | 133.1<br>(78.8 to 215.0)                | 8.6<br>(3.4 to 14.3)                              | 1.1<br>(-3.5 to 6.0)                                |
| Psoriasis                                     | 657.5<br>(626.5 to 689.0)                        | 91.0<br>(86.7 to 95.0)                         | 57.8<br>(40.8 to 76.7)                  | 25.8<br>(14.7 to 38.3)                            | 8.6<br>(-0.4 to 18.5)                               |
| Cellulitis                                    | 39.6<br>(36.8 to 42.6)                           | 840.6<br>(786.3 to 897.9)                      | 2.2<br>(1.4 to 3.2)                     | 12.6<br>(-10.8 to 41.2)                           | 2.1<br>(-17.9 to 25.4)                              |
| Pyoderma                                      | 125.0<br>(121.2 to 129.1)                        | 2,938.2<br>(2,822.5 to 3,071.3)                | 0.7<br>(0.3 to 1.4)                     | 25.2<br>(14.7 to 38.1)                            | 1.8<br>(-5.8 to 10.9)                               |
| Scabies                                       | 3,558.1<br>(2,828.4 to 4,603.6)                  | 11,219.5<br>(8,852.4 to 14,853.3)              | 92.1<br>(48.6 to 155.4)                 | 1.2<br>(-5.8 to 8.1)                              | -4.3<br>(-9.4 to 0.5)                               |
| Fungal skin diseases                          | 10,243.6<br>(9,141.3 to 11,361.8)                | 34,567.8<br>(30,664.6 to 38,881.1)             | 57.5<br>(22.9 to 123.9)                 | 14.8<br>(12.0 to 17.6)                            | 0.3<br>(-0.7 to 1.2)                                |
| Viral skin diseases                           | 2,589.2<br>(2,334.7 to 2,856.1)                  | 3,686.2<br>(3,286.5 to 4,076.7)                | 79.7<br>(49.8 to 117.9)                 | 4.2<br>(0.6 to 8.2)                               | 0.0<br>(-2.8 to 2.9)                                |
| Acne vulgaris                                 | 8,060.6<br>(7,199.2 to 9,012.9)                  | 5,513.8<br>(4,451.1 to 7,000.0)                | 208.9<br>(138.7 to 302.9)               | -8.5<br>(-12.8 to -3.6)                           | 2.2<br>(-2.1 to 7.0)                                |
| Alopecia areata                               | 186.6<br>(179.6 to 193.7)                        | 329.7<br>(317.9 to 342.5)                      | 6.2<br>(3.9 to 9.3)                     | 14.9<br>(2.7 to 28.2)                             | 0.1<br>(-10.5 to 11.3)                              |
| Pruritus                                      | 817.3<br>(717.2 to 918.8)                        | 652.7<br>(581.2 to 737.1)                      | 8.7<br>(4.0 to 16.1)                    | 20.2<br>(12.9 to 27.9)                            | 1.9<br>(-3.2 to 7.5)                                |
| Urticaria                                     | 755.0<br>(662.6 to 866.6)                        | 1,341.7<br>(1,184.2 to 1,533.9)                | 45.8<br>(29.7 to 65.4)                  | 8.1<br>(1.5 to 15.4)                              | 0.2<br>(-5.4 to 6.3)                                |
| Decubitus ulcer                               | 11.4<br>(10.1 to 12.7)                           | 42.4<br>(37.3 to 48.0)                         | 1.8<br>(1.2 to 2.4)                     | 38.0<br>(18.8 to 61.2)                            | 5.1<br>(-10.5 to 24.2)                              |
| Other skin and subcutaneous diseases          | 5,746.4<br>(5,576.1 to 5,921.0)                  | 6,555.6<br>(6,350.0 to 6,770.6)                | 31.7<br>(15.2 to 58.3)                  | 29.9<br>(26.2 to 33.3)                            | 7.4<br>(4.6 to 10.1)                                |
| Sense organ diseases                          | 18,575.0<br>(18,130.2 to 19,071.7)               | 8,818.7+<br>(8,281.2 to 9,403.1)               | 892.9<br>(640.7 to 1,217.3)             | 14.6<br>(11.2 to 17.7)                            | -9.0<br>(-11.6 to -6.7)                             |
| Glaucoma                                      | 49.1<br>(41.6 to 57.0)                           | --                                             | 5.7<br>(3.8 to 7.9)                     | 19.5<br>(2.6 to 37.8)                             | -11.8<br>(-24.1 to 2.4)                             |
| Cataract                                      | 1,202.1<br>(1,076.2 to 1,339.2)                  | --                                             | 96.9<br>(69.3 to 131.7)                 | 2.9<br>(-5.2 to 11.3)                             | -19.1<br>(-25.8 to -12.0)                           |
| Macular degeneration                          | 38.2<br>(31.4 to 45.8)                           | --                                             | 2.9<br>(1.9 to 4.1)                     | 27.4<br>(8.4 to 48.9)                             | -5.7<br>(-19.0 to 10.2)                             |
| Refraction and accommodation disorders        | 7,136.6<br>(6,787.7 to 7,494.2)                  | --                                             | 167.3<br>(111.1 to 251.4)               | 8.8<br>(2.7 to 15.0)                              | -11.8<br>(-16.8 to -6.7)                            |
| Age-related and other hearing loss            | 12,599.6<br>(11,885.8 to 13,414.4)               | --                                             | 490.5<br>(349.7 to 661.8)               | 16.9<br>(12.4 to 21.0)                            | -6.9<br>(-9.7 to -4.5)                              |
| Other vision loss                             | 537.6<br>(487.1 to 593.5)                        | --                                             | 48.1<br>(33.9 to 64.5)                  | 19.4<br>(10.2 to 29.4)                            | -8.9<br>(-15.9 to -1.4)                             |
| Other sense organ diseases                    | 2,601.4<br>(2,399.7 to 2,816.2)                  | 8,818.7<br>(8,281.2 to 9,403.1)                | 81.4<br>(50.9 to 124.0)                 | 26.5<br>(21.1 to 31.9)                            | 1.2<br>(-2.8 to 5.3)                                |
| Oral disorders                                | 40,197.2<br>(38,306.4 to 41,948.7)               | 109,414.5+<br>(99,317.5 to 120,214.5)          | 154.9<br>(93.0 to 244.7)                | 25.2<br>(22.1 to 28.7)                            | 1.2<br>(-1.0 to 3.5)                                |
| Caries of deciduous teeth                     | 5,032.0<br>(3,754.9 to 6,278.4)                  | 20,088.2<br>(13,015.6 to 28,015.8)             | 1.2<br>(0.5 to 2.3)                     | 5.8<br>(-6.6 to 20.5)                             | -1.2<br>(-12.6 to 12.4)                             |
| Caries of permanent teeth                     | 29,388.6<br>(27,345.0 to 31,297.5)               | 88,518.6<br>(80,960.9 to 96,450.3)             | 17.4<br>(7.7 to 33.5)                   | 1.7<br>(-2.4 to 6.2)                              | -7.2<br>(-10.5 to -3.6)                             |
| Periodontal disease                           | 5,563.8<br>(4,568.5 to 6,589.5)                  | 675.3<br>(534.2 to 834.7)                      | 36.3<br>(14.1 to 75.8)                  | 35.4<br>(29.0 to 41.8)                            | -0.1<br>(-4.4 to 3.4)                               |
| Edentulism and severe tooth loss              | 1,742.9<br>(1,520.6 to 1,959.1)                  | 132.5<br>(114.1 to 152.0)                      | 48.4<br>(32.0 to 68.7)                  | 41.4<br>(34.8 to 48.7)                            | 6.1<br>(1.7 to 11.2)                                |
| Other oral disorders                          | 1,755.1<br>(1,678.6 to 1,834.2)                  | --                                             | 51.7<br>(31.9 to 77.3)                  | 16.1<br>(12.3 to 20.2)                            | 0.1<br>(-2.8 to 3.2)                                |
| <b>Injuries</b>                               | <b>13,048.1</b><br><b>(12,363.4 to 13,751.1)</b> | <b>5,323.3+</b><br><b>(5,054.5 to 5,622.8)</b> | <b>503.0</b><br><b>(334.7 to 717.9)</b> | <b>38.1</b><br><b>(34.5 to 41.5)</b>              | <b>13.9</b><br><b>(11.3 to 16.3)</b>                |
| <b>Transport injuries</b>                     | <b>2,879.5</b><br><b>(2,675.9 to 3,103.5)</b>    | <b>932.6</b><br><b>(825.8 to 1,051.7)</b>      | <b>148.8</b><br><b>(98.7 to 214.0)</b>  | <b>54.1</b><br><b>(49.6 to 58.4)</b>              | <b>24.5</b><br><b>(21.2 to 27.5)</b>                |
| Road injuries                                 | 2,152.4<br>(2,008.0 to 2,313.1)                  | 778.6<br>(677.0 to 890.8)                      | 112.2<br>(74.3 to 161.8)                | 71.9<br>(67.3 to 76.4)                            | 35.7<br>(32.5 to 38.6)                              |
| Pedestrian road injuries                      | 270.4<br>(240.9 to 307.8)                        | 70.8<br>(56.6 to 87.4)                         | 14.1<br>(9.3 to 20.3)                   | 71.3<br>(66.4 to 76.0)                            | 34.3<br>(30.9 to 37.5)                              |
| Cyclist road injuries                         | 321.4<br>(271.2 to 377.6)                        | 127.5<br>(98.8 to 160.3)                       | 16.1<br>(10.6 to 23.4)                  | 78.5<br>(73.5 to 83.2)                            | 40.8<br>(37.6 to 43.9)                              |
| Motorcyclist road injuries                    | 629.9<br>(539.2 to 765.1)                        | 150.7<br>(121.5 to 185.6)                      | 31.5<br>(20.9 to 45.6)                  | 77.3<br>(72.1 to 82.1)                            | 41.2<br>(37.6 to 44.5)                              |
| Motor vehicle road injuries                   | 538.1<br>(453.5 to 621.7)                        | 239.2<br>(195.6 to 288.2)                      | 31.1<br>(20.9 to 44.5)                  | 71.9<br>(67.3 to 76.2)                            | 35.4<br>(32.2 to 38.3)                              |
| Other road injuries                           | 392.5<br>(330.5 to 470.7)                        | 190.5<br>(150.1 to 235.5)                      | 19.4<br>(12.7 to 28.4)                  | 59.7<br>(55.4 to 63.6)                            | 25.5<br>(22.4 to 28.2)                              |
| Other transport injuries                      | 727.1<br>(607.7 to 873.9)                        | 154.0<br>(131.6 to 183.3)                      | 36.6<br>(24.5 to 52.7)                  | 16.8<br>(13.0 to 20.7)                            | -0.9<br>(-3.9 to 2.2)                               |
| <b>Unintentional injuries</b>                 | <b>9,046.8</b><br><b>(8,427.8 to 9,658.4)</b>    | <b>3,875.5</b><br><b>(3,645.8 to 4,135.5)</b>  | <b>299.8</b><br><b>(201.1 to 431.8)</b> | <b>34.3</b><br><b>(30.7 to 37.7)</b>              | <b>11.1</b><br><b>(8.5 to 13.6)</b>                 |
| Falls                                         | 3,039.2<br>(2,686.6 to 3,388.1)                  | 1,361.4<br>(1,205.5 to 1,552.6)                | 123.1<br>(86.2 to 170.6)                | 49.5<br>(45.9 to 53.2)                            | 20.6<br>(17.7 to 23.4)                              |
| Drowning                                      | 84.0<br>(72.8 to 97.5)                           | 14.4<br>(12.5 to 16.5)                         | 4.1<br>(2.7 to 5.9)                     | 2.1<br>(-1.7 to 6.0)                              | -13.8<br>(-16.8 to -10.8)                           |
| Fire, heat, and hot substances                | 918.9<br>(772.2 to 1,122.9)                      | 99.2<br>(79.4 to 120.3)                        | 23.1<br>(15.0 to 35.0)                  | 26.8<br>(19.0 to 33.3)                            | 6.7<br>(0.8 to 11.6)                                |
| Poisonings                                    | 28.2<br>(24.2 to 32.3)                           | 46.8<br>(37.0 to 57.7)                         | 2.1<br>(1.3 to 3.2)                     | 48.9<br>(37.1 to 61.5)                            | 27.2<br>(18.0 to 36.4)                              |
| Exposure to mechanical forces                 | 1,400.5<br>(1,198.9 to 1,706.9)                  | 532.4<br>(447.0 to 631.7)                      | 33.6<br>(21.7 to 48.9)                  | 55.8<br>(50.7 to 60.8)                            | 27.1<br>(23.5 to 30.6)                              |
| Unintentional firearm injuries                | 61.7<br>(50.7 to 75.1)                           | 14.3<br>(9.7 to 20.4)                          | 2.5<br>(1.6 to 3.6)                     | 39.3<br>(34.1 to 43.7)                            | 14.3<br>(10.8 to 17.2)                              |
| Unintentional suffocation                     | 80.2<br>(63.6 to 100.2)                          | 15.5<br>(11.1 to 21.4)                         | 2.6<br>(1.7 to 4.0)                     | 26.7<br>(22.8 to 30.3)                            | 7.6<br>(4.6 to 10.4)                                |
| Other exposure to mechanical forces           | 1,258.6<br>(1,061.5 to 1,554.2)                  | 502.6<br>(422.6 to 597.8)                      | 28.5<br>(18.5 to 41.5)                  | 60.9<br>(55.6 to 65.7)                            | 30.5<br>(26.8 to 34.1)                              |

| Cause                                                                               | Prevalence in thousands (95% UI)              | Incidence in thousands (95% UI)          | YLDs in thousands (95% UI)           |                                                   |                                                     |
|-------------------------------------------------------------------------------------|-----------------------------------------------|------------------------------------------|--------------------------------------|---------------------------------------------------|-----------------------------------------------------|
|                                                                                     | 2016 counts                                   | 2016 counts                              | 2016 counts                          | Percentage change in counts between 2006 and 2016 | Percentage change in age-standardised rates between |
| Adverse effects of medical treatment                                                | 24.7<br>(19.4 to 30.4)                        | 322.3<br>(282.6 to 366.9)                | 3.3<br>(2.1 to 4.9)                  | 18.4<br>(13.6 to 23.7)                            | 1.7<br>(-2.4 to 6.3)                                |
| Animal contact                                                                      | 322.9<br>(280.7 to 380.9)                     | 366.9<br>(305.5 to 434.2)                | 8.8<br>(5.6 to 12.7)                 | 11.2<br>(5.1 to 17.1)                             | -4.8<br>(-9.3 to -0.5)                              |
| Venomous animal contact                                                             | 89.3<br>(74.9 to 105.3)                       | 130.8<br>(99.7 to 167.5)                 | 5.1<br>(3.3 to 7.5)                  | 18.2<br>(8.0 to 29.0)                             | 3.3<br>(-4.7 to 11.6)                               |
| Non-venomous animal contact                                                         | 233.6<br>(196.0 to 292.4)                     | 236.0<br>(191.3 to 284.6)                | 3.6<br>(2.3 to 5.5)                  | 2.5<br>(-2.5 to 6.8)                              | -14.2<br>(-17.7 to -11.3)                           |
| Foreign body                                                                        | 611.8<br>(501.1 to 721.8)                     | 301.8<br>(267.0 to 343.5)                | 22.6<br>(14.3 to 33.7)               | 12.1<br>(7.8 to 16.2)                             | -3.7<br>(-7.2 to -0.5)                              |
| Pulmonary aspiration and foreign body in airway                                     | 415.7<br>(319.1 to 542.6)                     | 136.9<br>(116.0 to 161.7)                | 16.6<br>(10.6 to 24.9)               | 10.5<br>(6.1 to 14.5)                             | -4.4<br>(-7.9 to -1.1)                              |
| Foreign body in eyes                                                                | 18.8<br>(11.0 to 27.4)                        | 93.9<br>(71.2 to 125.4)                  | 1.1<br>(0.6 to 1.8)                  | 22.2<br>(16.8 to 28.2)                            | 2.6<br>(-0.7 to 5.7)                                |
| Foreign body in other body part                                                     | 177.3<br>(144.8 to 218.1)                     | 71.0<br>(59.3 to 85.6)                   | 4.9<br>(3.1 to 7.3)                  | 15.8<br>(10.2 to 21.0)                            | -2.6<br>(-6.9 to 1.2)                               |
| Environmental heat and cold exposure                                                | 764.2<br>(643.0 to 901.6)                     | 185.8<br>(150.4 to 227.0)                | 26.8<br>(17.5 to 38.9)               | 17.6<br>(13.6 to 21.4)                            | -0.8<br>(-3.6 to 2.0)                               |
| Other unintentional injuries                                                        | 1,852.5<br>(1,512.4 to 2,247.6)               | 644.7<br>(543.3 to 753.3)                | 52.4<br>(34.1 to 76.9)               | 24.7<br>(21.9 to 27.3)                            | 3.4<br>(1.0 to 5.6)                                 |
| <b>Self-harm and interpersonal violence</b>                                         | <b>2,604.9</b><br><b>(2,367.9 to 2,886.2)</b> | <b>512.6†</b><br><b>(427.9 to 611.0)</b> | <b>51.4</b><br><b>(35.1 to 72.2)</b> | <b>25.8</b><br><b>(21.5 to 30.0)</b>              | <b>6.6</b><br><b>(4.1 to 9.1)</b>                   |
| Self-harm                                                                           | 78.0<br>(67.0 to 89.4)                        | 33.1<br>(28.1 to 39.4)                   | 3.5<br>(2.3 to 5.2)                  | 25.8<br>(20.8 to 31.0)                            | 2.0<br>(-1.9 to 5.8)                                |
| Self-harm by firearm                                                                | 3.8<br>(3.1 to 4.6)                           | 0.7<br>(0.4 to 1.1)                      | 0.1<br>(0.1 to 0.2)                  | 21.5<br>(16.3 to 26.2)                            | 4.5<br>(0.4 to 8.2)                                 |
| Self-harm by other specified means                                                  | 74.2<br>(63.3 to 85.7)                        | 32.5<br>(27.5 to 38.6)                   | 3.4<br>(2.2 to 5.0)                  | 25.9<br>(20.8 to 31.2)                            | 1.9<br>(-2.0 to 5.8)                                |
| Interpersonal violence                                                              | 2,526.9<br>(2,290.9 to 2,810.6)               | 479.4†<br>(395.2 to 577.1)               | 47.9<br>(32.9 to 67.1)               | 25.9<br>(21.4 to 30.2)                            | 7.0<br>(4.3 to 9.5)                                 |
| Assault by firearm                                                                  | 19.3<br>(16.9 to 22.2)                        | 6.0<br>(4.1 to 8.3)                      | 0.8<br>(0.6 to 1.3)                  | 48.8<br>(43.3 to 54.1)                            | 19.4<br>(15.6 to 23.1)                              |
| Assault by sharp object                                                             | 270.3<br>(219.2 to 321.9)                     | 106.7<br>(78.9 to 140.0)                 | 7.8<br>(5.1 to 11.5)                 | 26.1<br>(21.2 to 30.8)                            | 3.2<br>(-0.2 to 6.5)                                |
| Sexual violence                                                                     | 1,584.5<br>(1,378.7 to 1,809.5)               | --                                       | 13.0<br>(8.7 to 18.7)                | -4.5<br>(-8.3 to -0.5)                            | -9.2<br>(-12.3 to -6.0)                             |
| Assault by other means                                                              | 652.8<br>(543.9 to 801.8)                     | 366.8<br>(298.5 to 442.5)                | 26.2<br>(17.6 to 38.0)               | 48.5<br>(44.2 to 52.5)                            | 18.1<br>(15.1 to 20.7)                              |
| <b>Forces of nature, conflict and terrorism, and executions and police conflict</b> | <b>101.5</b><br><b>(58.7 to 150.0)</b>        | <b>2.6†</b><br><b>(1.6 to 3.2)</b>       | <b>3.0</b><br><b>(0.9 to 7.9)</b>    | <b>-14.3</b><br><b>(-25.2 to -9.4)</b>            | <b>-26.7</b><br><b>(-35.3 to -22.7)</b>             |
| Exposure to forces of nature                                                        | 66.7<br>(33.7 to 106.8)                       | --                                       | 2.2<br>(0.7 to 5.4)                  | -14.4<br>(-28.7 to -8.0)                          | -26.4<br>(-38.1 to -21.4)                           |
| Conflict and terrorism                                                              | 27.2<br>(11.6 to 49.2)                        | --                                       | 0.7<br>(0.1 to 2.0)                  | -21.6<br>(-25.0 to -18.4)                         | -33.8<br>(-36.5 to -31.1)                           |
| Executions and police conflict                                                      | 7.6<br>(4.2 to 11.7)                          | 2.6<br>(1.6 to 3.2)                      | 0.2<br>(0.1 to 0.5)                  | 25.8<br>(18.1 to 31.4)                            | 9.2<br>(4.3 to 13.8)                                |
| <b>Impairments</b>                                                                  | --                                            | --                                       | --                                   | --                                                | --                                                  |
| Anaemia                                                                             | 15,386.2<br>(14,410.8 to 16,381.3)            | --                                       | 373.4<br>(253.8 to 541.5)            | -2.2<br>(-8.9 to 5.2)                             | -15.1<br>(-20.7 to -9.1)                            |
| Developmental intellectual disability                                               | 1,274.4<br>(996.6 to 1,572.2)                 | --                                       | 158.9<br>(114.2 to 219.8)            | -3.2<br>(-9.2 to 2.7)                             | -10.2<br>(-15.5 to -4.6)                            |
| Epilepsy                                                                            | 572.2<br>(322.8 to 790.4)                     | --                                       | 193.9<br>(100.7 to 312.1)            | 1.6<br>(-47.8 to 104.4)                           | -7.4<br>(-52.9 to 87.1)                             |
| Guillain-Barre syndrome                                                             | 0.6<br>(0.5 to 0.8)                           | --                                       | 0.2<br>(0.1 to 0.3)                  | 15.7<br>(10.1 to 22.7)                            | 0.2<br>(0.1 to 0.4)                                 |
| Hearing loss                                                                        | 13,735.6<br>(13,042.7 to 14,504.0)            | --                                       | 550.6<br>(390.1 to 746.8)            | 14.0<br>(10.1 to 17.7)                            | -7.6<br>(-10.1 to -5.3)                             |
| Heart failure                                                                       | 582.1<br>(517.5 to 662.8)                     | --                                       | 71.2<br>(50.5 to 94.9)               | 34.3<br>(24.7 to 45.7)                            | 1.4<br>(-5.8 to 9.4)                                |
| Infertility                                                                         | 755.5<br>(579.3 to 982.2)                     | --                                       | 4.6<br>(1.9 to 9.3)                  | 9.3<br>(-3.7 to 23.5)                             | -3.7<br>(-15.1 to 8.8)                              |
| Pelvic inflammatory disease                                                         | 87.1<br>(74.1 to 102.2)                       | --                                       | 11.4<br>(7.5 to 16.1)                | 3.2<br>(-10.9 to 18.9)                            | -13.6<br>(-25.4 to -0.5)                            |
| Vision loss                                                                         | 9,296.4<br>(8,821.2 to 9,762.5)               | --                                       | 375.5<br>(270.0 to 509.0)            | 7.2<br>(1.9 to 12.3)                              | -13.6<br>(-18.1 to -9.2)                            |

We did not calculate incidence for the nine impairments, certain NTDs, and causes with only birth prevalence. Blank cells mean that no estimate is available.

† Incidence for aggregate causes represents the sum of the incidence of the causes below the aggregate.

‡ Incidence estimates for stroke represent first-ever stroke only.

^ Incidence of HIV/AIDS represents new infections of HIV only and does not include new infections of Tuberculosis in HIV positive cases.



SR Table 14: Prevalence, incidence, and YLDs for 2016, percentage change of YLD counts and percentage change of age-standardised YLD rates between 2006 and 2016 by cause and impairments, for all ages, Virgin Islands.

| Cause                                                                                | Prevalence in thousands (95% UI)     | Incidence in thousands (95% UI)       | YLDs in thousands (95% UI)                          |                                                   |                                                     |
|--------------------------------------------------------------------------------------|--------------------------------------|---------------------------------------|-----------------------------------------------------|---------------------------------------------------|-----------------------------------------------------|
|                                                                                      | 2016 counts                          | 2016 counts                           | 2016 counts                                         | Percentage change in counts between 2006 and 2016 | Percentage change in age-standardised rates between |
| <b>All causes</b>                                                                    | <b>101.1</b><br>(100.8 to 101.4)     | <b>668.1†</b><br>(634.5 to 709.8)     | <b>13.1</b><br>(9.7 to 16.9)                        | <b>8.1</b><br>(6.2 to 10.1)                       | <b>0.8</b><br>(-1.1 to 2.8)                         |
| <b>Communicable, maternal, neonatal, and nutritional disorders</b>                   | <b>58.6</b><br>(56.6 to 60.8)        | <b>371.5†</b><br>(341.8 to 409.9)     | <b>0.9</b><br>(0.7 to 1.2)                          | <b>-4.0</b><br>(-10.7 to 3.5)                     | <b>1.3</b><br>(-6.1 to 9.7)                         |
| <b>HIV/AIDS and tuberculosis</b>                                                     | <b>26.9</b><br>(24.2 to 29.1)        | <b>0.1†</b><br>( $< 0.05$ to 0.1)     | <b><math>&lt; 0.05</math></b><br>( $< 0.05$ to 0.1) | <b>25.0</b><br>(-29.8 to 112.6)                   | <b>37.4</b><br>(-25.2 to 124.3)                     |
| Tuberculosis                                                                         | 24.9<br>(22.5 to 27.7)               | $< 0.05†$<br>( $< 0.05$ to $< 0.05$ ) | $< 0.05$<br>( $< 0.05$ to $< 0.05$ )                | -5.5<br>(-11.5 to 0.5)                            | -7.9<br>(-13.7 to -2.4)                             |
| Drug-susceptible tuberculosis                                                        | $< 0.05$<br>( $< 0.05$ to $< 0.05$ ) | $< 0.05$<br>( $< 0.05$ to $< 0.05$ )  | $< 0.05$<br>( $< 0.05$ to $< 0.05$ )                | -5.3<br>(-11.5 to 1.1)                            | -7.7<br>(-13.7 to -1.9)                             |
| Multidrug-resistant tuberculosis without extensive drug resistance                   | $< 0.05$<br>( $< 0.05$ to $< 0.05$ ) | $< 0.05$<br>( $< 0.05$ to $< 0.05$ )  | $< 0.05$<br>( $< 0.05$ to $< 0.05$ )                | -34.7<br>(-89.2 to 340.6)                         | -36.5<br>(-89.5 to 316.2)                           |
| Extensively drug-resistant tuberculosis                                              | $< 0.05$<br>( $< 0.05$ to $< 0.05$ ) | $< 0.05$<br>( $< 0.05$ to $< 0.05$ )  | $< 0.05$<br>( $< 0.05$ to $< 0.05$ )                | 73.8<br>(-71.4 to 1,071.7)                        | 69.0<br>(-72.0 to 1,008.1)                          |
| Latent tuberculosis infection                                                        | 24.9<br>(22.4 to 27.7)               | --                                    | --                                                  | --                                                | --                                                  |
| HIV/AIDS                                                                             | 0.3<br>(0.1 to 0.8)                  | $< 0.05^A$<br>( $< 0.05$ to 0.1)      | $< 0.05$<br>( $< 0.05$ to 0.1)                      | 26.9<br>(-31.9 to 124.5)                          | 40.2<br>(-26.3 to 138.5)                            |
| Drug-susceptible HIV/AIDS - Tuberculosis                                             | $< 0.05$<br>( $< 0.05$ to $< 0.05$ ) | $< 0.05$<br>( $< 0.05$ to $< 0.05$ )  | $< 0.05$<br>( $< 0.05$ to $< 0.05$ )                | 5.8<br>(-1.0 to 13.5)                             | 17.7<br>(10.2 to 26.2)                              |
| Multidrug-resistant HIV/AIDS - Tuberculosis without extensive drug resistance        | $< 0.05$<br>( $< 0.05$ to $< 0.05$ ) | $< 0.05$<br>( $< 0.05$ to $< 0.05$ )  | $< 0.05$<br>( $< 0.05$ to $< 0.05$ )                | -25.3<br>(-88.0 to 391.7)                         | -17.1<br>(-86.6 to 446.4)                           |
| Extensively drug-resistant HIV/AIDS - Tuberculosis                                   | $< 0.05$<br>( $< 0.05$ to $< 0.05$ ) | $< 0.05$<br>( $< 0.05$ to $< 0.05$ )  | $< 0.05$<br>( $< 0.05$ to $< 0.05$ )                | 98.9<br>(-67.9 to 1,209.9)                        | 120.8<br>(-64.4 to 1,355.8)                         |
| HIV/AIDS resulting in other diseases                                                 | 0.3<br>(0.1 to 0.8)                  | $< 0.05$<br>( $< 0.05$ to 0.1)        | $< 0.05$<br>( $< 0.05$ to 0.1)                      | 27.3<br>(-32.4 to 126.3)                          | 40.7<br>(-27.2 to 140.6)                            |
| <b>Diarrhoea, lower respiratory infections, and other common infectious diseases</b> | <b>5.6</b><br>(5.3 to 6.0)           | <b>339.4†</b><br>(313.4 to 368.9)     | <b>0.3</b><br>(0.2 to 0.4)                          | <b>7.5</b><br>(3.6 to 11.7)                       | <b>10.0</b><br>(6.3 to 14.3)                        |
| Diarrhoeal diseases                                                                  | 1.3<br>(1.2 to 1.3)                  | 85.1<br>(79.8 to 91.0)                | 0.1<br>(0.1 to 0.2)                                 | 18.8<br>(13.0 to 25.2)                            | 17.9<br>(11.8 to 24.1)                              |
| Intestinal infectious diseases                                                       | $< 0.05$<br>( $< 0.05$ to $< 0.05$ ) | $< 0.05†$<br>( $< 0.05$ to $< 0.05$ ) | $< 0.05$<br>( $< 0.05$ to $< 0.05$ )                | 8.0<br>(-6.3 to 24.4)                             | -1.8<br>(-13.3 to 11.4)                             |
| Typhoid fever                                                                        | $< 0.05$<br>( $< 0.05$ to $< 0.05$ ) | $< 0.05$<br>( $< 0.05$ to $< 0.05$ )  | $< 0.05$<br>( $< 0.05$ to $< 0.05$ )                | 9.4<br>(-6.3 to 27.4)                             | -0.1<br>(-12.6 to 15.1)                             |
| Paratyphoid fever                                                                    | $< 0.05$<br>( $< 0.05$ to $< 0.05$ ) | $< 0.05$<br>( $< 0.05$ to $< 0.05$ )  | $< 0.05$<br>( $< 0.05$ to $< 0.05$ )                | 10.5<br>(-11.2 to 36.4)                           | -0.7<br>(-17.6 to 19.5)                             |
| Other intestinal infectious diseases                                                 | --                                   | --                                    | $< 0.05$<br>( $< 0.05$ to $< 0.05$ )                | -25.9<br>(-44.0 to -3.3)                          | -29.5<br>(-47.3 to -4.5)                            |
| Lower respiratory infections                                                         | 0.2<br>(0.2 to 0.2)                  | 7.8<br>(7.1 to 8.5)                   | $< 0.05$<br>( $< 0.05$ to $< 0.05$ )                | 40.5<br>(26.7 to 55.4)                            | 22.5<br>(10.6 to 35.6)                              |
| Upper respiratory infections                                                         | 3.2<br>(2.9 to 3.6)                  | 239.3<br>(213.0 to 267.6)             | 0.1<br>( $< 0.05$ to 0.1)                           | -6.2<br>(-10.8 to -1.1)                           | 0.1<br>(-4.7 to 5.1)                                |
| Otitis media                                                                         | 1.0<br>(0.9 to 1.1)                  | 4.6<br>(3.8 to 5.7)                   | $< 0.05$<br>( $< 0.05$ to $< 0.05$ )                | -8.2<br>(-14.9 to -0.7)                           | -0.0<br>(-7.1 to 8.2)                               |
| Meningitis                                                                           | 0.1<br>(0.1 to 0.1)                  | $< 0.05$<br>( $< 0.05$ to $< 0.05$ )  | $< 0.05$<br>( $< 0.05$ to $< 0.05$ )                | -3.8<br>(-6.0 to -1.1)                            | 1.7<br>(-0.5 to 4.2)                                |
| Pneumococcal meningitis                                                              | $< 0.05$<br>( $< 0.05$ to 0.1)       | $< 0.05$<br>( $< 0.05$ to $< 0.05$ )  | $< 0.05$<br>( $< 0.05$ to $< 0.05$ )                | -3.6<br>(-6.6 to -0.1)                            | 1.4<br>(-1.7 to 5.1)                                |
| H influenzae type B meningitis                                                       | $< 0.05$<br>( $< 0.05$ to $< 0.05$ ) | $< 0.05$<br>( $< 0.05$ to $< 0.05$ )  | $< 0.05$<br>( $< 0.05$ to $< 0.05$ )                | -6.2<br>(-10.0 to -2.5)                           | 0.4<br>(-3.6 to 4.2)                                |
| Meningococcal infection                                                              | $< 0.05$<br>( $< 0.05$ to $< 0.05$ ) | $< 0.05$<br>( $< 0.05$ to $< 0.05$ )  | $< 0.05$<br>( $< 0.05$ to $< 0.05$ )                | -2.3<br>(-7.3 to 8.9)                             | 1.8<br>(-2.9 to 11.9)                               |
| Other meningitis                                                                     | $< 0.05$<br>( $< 0.05$ to $< 0.05$ ) | $< 0.05$<br>( $< 0.05$ to $< 0.05$ )  | $< 0.05$<br>( $< 0.05$ to $< 0.05$ )                | -2.7<br>(-5.8 to 0.8)                             | 3.4<br>(0.0 to 6.8)                                 |
| Encephalitis                                                                         | 0.1<br>( $< 0.05$ to 0.1)            | $< 0.05$<br>( $< 0.05$ to $< 0.05$ )  | $< 0.05$<br>( $< 0.05$ to $< 0.05$ )                | -0.7<br>(-15.9 to 17.4)                           | 2.8<br>(-14.3 to 21.8)                              |
| Diphtheria                                                                           | $< 0.05$<br>( $< 0.05$ to $< 0.05$ ) | $< 0.05$<br>( $< 0.05$ to $< 0.05$ )  | $< 0.05$<br>( $< 0.05$ to $< 0.05$ )                | -8.3<br>(-53.2 to 69.7)                           | -2.6<br>(-46.8 to 71.5)                             |
| Whooping cough                                                                       | $< 0.05$<br>( $< 0.05$ to $< 0.05$ ) | 0.2<br>(0.1 to 0.2)                   | $< 0.05$<br>( $< 0.05$ to $< 0.05$ )                | -19.2<br>(-33.1 to -2.8)                          | 5.5<br>(-12.3 to 27.1)                              |
| Tetanus                                                                              | $< 0.05$<br>( $< 0.05$ to $< 0.05$ ) | $< 0.05$<br>( $< 0.05$ to $< 0.05$ )  | $< 0.05$<br>( $< 0.05$ to $< 0.05$ )                | -1.0<br>(-14.4 to 16.0)                           | 2.6<br>(-10.8 to 19.1)                              |
| Measles                                                                              | $< 0.05$<br>( $< 0.05$ to $< 0.05$ ) | 0.7<br>(0.2 to 1.6)                   | $< 0.05$<br>( $< 0.05$ to $< 0.05$ )                | --                                                | --                                                  |
| Varicella and herpes zoster                                                          | 0.1<br>(0.1 to 0.1)                  | 1.7<br>(1.6 to 1.8)                   | $< 0.05$<br>( $< 0.05$ to $< 0.05$ )                | 11.4<br>(-1.1 to 25.1)                            | 0.2<br>(-11.2 to 12.8)                              |
| <b>Neglected tropical diseases and malaria</b>                                       | <b>0.5</b><br>(0.3 to 0.9)           | <b>21.2†</b><br>(11.1 to 46.6)        | <b><math>&lt; 0.05</math></b><br>( $< 0.05$ to 0.1) | <b>108.6</b><br>(58.2 to 360.3)                   | <b>114.6</b><br>(62.2 to 372.0)                     |
| Malaria                                                                              | --                                   | --                                    | --                                                  | --                                                | --                                                  |
| Chagas disease                                                                       | --                                   | --                                    | --                                                  | --                                                | --                                                  |
| Leishmaniasis                                                                        | --                                   | --                                    | --                                                  | --                                                | --                                                  |
| Visceral leishmaniasis                                                               | --                                   | --                                    | --                                                  | --                                                | --                                                  |
| Cutaneous and mucocutaneous leishmaniasis                                            | --                                   | --                                    | --                                                  | --                                                | --                                                  |
| African trypanosomiasis                                                              | --                                   | --                                    | --                                                  | --                                                | --                                                  |
| Schistosomiasis                                                                      | --                                   | --                                    | --                                                  | --                                                | --                                                  |
| Cysticercosis                                                                        | --                                   | --                                    | --                                                  | --                                                | --                                                  |
| Cystic echinococcosis                                                                | --                                   | --                                    | --                                                  | --                                                | --                                                  |
| Lymphatic filariasis                                                                 | --                                   | --                                    | --                                                  | --                                                | --                                                  |
| Onchocerciasis                                                                       | --                                   | --                                    | --                                                  | --                                                | --                                                  |
| Trachoma                                                                             | --                                   | --                                    | --                                                  | --                                                | --                                                  |
| Dengue                                                                               | 0.1<br>(0.1 to 0.2)                  | 2.4<br>(1.5 to 3.5)                   | $< 0.05$<br>( $< 0.05$ to $< 0.05$ )                | 63.9<br>(29.3 to 242.3)                           | 66.7<br>(30.9 to 250.2)                             |
| Yellow fever                                                                         | --                                   | --                                    | --                                                  | --                                                | --                                                  |
| Rabies                                                                               | $< 0.05$<br>( $< 0.05$ to $< 0.05$ ) | $< 0.05$<br>( $< 0.05$ to $< 0.05$ )  | $< 0.05$<br>( $< 0.05$ to $< 0.05$ )                | 24.9<br>(-23.1 to 110.5)                          | 6.7<br>(-39.4 to 103.8)                             |
| Intestinal nematode infections                                                       | --                                   | --                                    | --                                                  | --                                                | --                                                  |
| Ascariasis                                                                           | --                                   | --                                    | --                                                  | --                                                | --                                                  |

| Cause                                                                   | Prevalence in thousands (95% UI) | Incidence in thousands (95% UI)    | YLDs in thousands (95% UI)                    |                                                   |                                                     |
|-------------------------------------------------------------------------|----------------------------------|------------------------------------|-----------------------------------------------|---------------------------------------------------|-----------------------------------------------------|
|                                                                         | 2016 counts                      | 2016 counts                        | 2016 counts                                   | Percentage change in counts between 2006 and 2016 | Percentage change in age-standardised rates between |
| Trichuriasis                                                            | --                               | --                                 | --                                            | --                                                | --                                                  |
| Hookworm disease                                                        | --                               | --                                 | --                                            | --                                                | --                                                  |
| Food-borne trematodiasis                                                | --                               | --                                 | --                                            | --                                                | --                                                  |
| Leprosy                                                                 | --                               | --                                 | --                                            | --                                                | --                                                  |
| Ebola virus disease                                                     | --                               | --                                 | --                                            | --                                                | --                                                  |
| Zika virus disease                                                      | 0.3<br>(0.1 to 0.7)              | 18.8<br>(8.8 to 44.0)              | < 0.05<br>(< 0.05 to < 0.05)                  | --                                                | --                                                  |
| Guinea worm disease                                                     | --                               | --                                 | --                                            | --                                                | --                                                  |
| Other neglected tropical diseases                                       | --                               | --                                 | < 0.05<br>(< 0.05 to < 0.05)                  | --                                                | --                                                  |
| <b>Maternal disorders</b>                                               | <b>0.1<br/>(0.1 to 0.1)</b>      | <b>2.3†<br/>(2.0 to 2.4)</b>       | <b>&lt; 0.05<br/>(&lt; 0.05 to &lt; 0.05)</b> | <b>-24.5<br/>(-44.5 to 1.6)</b>                   | <b>-12.8<br/>(-36.2 to 17.0)</b>                    |
| Maternal haemorrhage                                                    | < 0.05<br>(< 0.05 to < 0.05)     | 0.1<br>(< 0.05 to 0.1)             | < 0.05<br>(< 0.05 to < 0.05)                  | -16.6<br>(-42.5 to 21.9)                          | -2.8<br>(-33.8 to 43.4)                             |
| Maternal sepsis and other pregnancy related infections                  | < 0.05<br>(< 0.05 to < 0.05)     | 0.1<br>(0.1 to 0.2)                | < 0.05<br>(< 0.05 to < 0.05)                  | -22.0<br>(-63.3 to 54.3)                          | -10.5<br>(-58.8 to 80.2)                            |
| Maternal hypertensive disorders                                         | 0.1<br>(< 0.05 to 0.1)           | 0.2<br>(0.2 to 0.3)                | < 0.05<br>(< 0.05 to < 0.05)                  | -25.2<br>(-54.7 to 23.6)                          | -13.4<br>(-47.4 to 42.6)                            |
| Maternal obstructed labour and uterine rupture                          | < 0.05<br>(< 0.05 to < 0.05)     | 0.1<br>(< 0.05 to 0.1)             | < 0.05<br>(< 0.05 to < 0.05)                  | -23.7<br>(-57.6 to 38.9)                          | -11.9<br>(-51.0 to 60.6)                            |
| Maternal abortion, miscarriage, and ectopic pregnancy                   | < 0.05<br>(< 0.05 to < 0.05)     | 1.8<br>(1.5 to 1.9)                | < 0.05<br>(< 0.05 to < 0.05)                  | -24.3<br>(-56.8 to 28.3)                          | -12.4<br>(-50.3 to 49.2)                            |
| Other maternal disorders                                                | --                               | --                                 | < 0.05<br>(< 0.05 to < 0.05)                  | -27.8<br>(-46.8 to -2.5)                          | -16.8<br>(-39.1 to 11.5)                            |
| <b>Neonatal disorders</b>                                               | <b>1.3<br/>(1.1 to 1.5)</b>      | <b>0.2</b>                         | <b>0.2<br/>(0.1 to 0.3)</b>                   | <b>-11.5<br/>(-23.1 to 4.5)</b>                   | <b>-1.8<br/>(-14.8 to 17.1)</b>                     |
| Neonatal preterm birth complications                                    | 1.1<br>(0.8 to 1.4)              | --                                 | 0.1<br>(0.1 to 0.2)                           | -11.3<br>(-30.8 to 14.6)                          | -1.7<br>(-23.8 to 27.1)                             |
| Neonatal encephalopathy due to birth asphyxia and trauma                | 0.1<br>(< 0.05 to 0.1)           | --                                 | < 0.05<br>(< 0.05 to < 0.05)                  | 15.4<br>(-18.4 to 101.2)                          | 27.5<br>(-8.7 to 125.1)                             |
| Neonatal sepsis and other neonatal infections                           | 0.2<br>(0.1 to 0.4)              | --                                 | 0.1<br>(< 0.05 to 0.2)                        | -12.9<br>(-24.1 to 0.8)                           | -4.0<br>(-15.9 to 11.6)                             |
| Hemolytic disease and other neonatal jaundice                           | < 0.05<br>(< 0.05 to < 0.05)     | --                                 | < 0.05<br>(< 0.05 to < 0.05)                  | -7.7<br>(-14.6 to -0.2)                           | 0.4<br>(-7.1 to 8.5)                                |
| Other neonatal disorders                                                | --                               | --                                 | < 0.05<br>(< 0.05 to < 0.05)                  | -28.7<br>(-42.2 to -12.3)                         | -4.5<br>(-22.6 to 17.4)                             |
| <b>Nutritional deficiencies</b>                                         | <b>15.3<br/>(13.5 to 16.9)</b>   | <b>0.9†<br/>(0.6 to 1.7)</b>       | <b>0.3<br/>(0.2 to 0.4)</b>                   | <b>-14.5<br/>(-27.8 to -0.4)</b>                  | <b>-10.7<br/>(-25.9 to 5.2)</b>                     |
| Protein-energy malnutrition                                             | 0.1<br>(0.1 to 0.2)              | 0.1<br>(< 0.05 to 0.1)             | < 0.05<br>(< 0.05 to < 0.05)                  | -27.6<br>(-50.1 to 8.5)                           | -3.1<br>(-32.9 to 43.8)                             |
| Iodine deficiency                                                       | 0.4<br>(0.4 to 0.5)              | < 0.05<br>(< 0.05 to < 0.05)       | < 0.05<br>(< 0.05 to < 0.05)                  | 3.5<br>(-10.5 to 21.0)                            | -0.4<br>(-14.3 to 15.5)                             |
| Vitamin A deficiency                                                    | 1.0<br>(0.6 to 1.9)              | 0.8<br>(0.5 to 1.6)                | --                                            | --                                                | --                                                  |
| Iron-deficiency anaemia                                                 | 13.0<br>(11.4 to 14.8)           | --                                 | 0.3<br>(0.2 to 0.4)                           | -14.7<br>(-28.6 to -0.2)                          | -11.2<br>(-27.2 to 5.7)                             |
| Other nutritional deficiencies                                          | --                               | --                                 | < 0.05<br>(< 0.05 to < 0.05)                  | -28.7<br>(-51.8 to 8.8)                           | -4.7<br>(-35.2 to 44.9)                             |
| <b>Other communicable, maternal, neonatal, and nutritional diseases</b> | <b>30.4<br/>(28.2 to 32.6)</b>   | <b>7.7<br/>(6.1 to 9.7)</b>        | <b>&lt; 0.05<br/>(&lt; 0.05 to 0.1)</b>       | <b>-7.2<br/>(-14.0 to 0.2)</b>                    | <b>0.1<br/>(-8.4 to 9.6)</b>                        |
| Sexually transmitted diseases excluding HIV                             | 27.4<br>(25.2 to 29.8)           | 7.0<br>(5.6 to 9.1)                | < 0.05<br>(< 0.05 to 0.1)                     | -5.6<br>(-12.8 to 2.3)                            | 1.4<br>(-6.6 to 10.6)                               |
| Syphilis                                                                | 0.6<br>(0.4 to 0.8)              | 0.4<br>(0.2 to 0.6)                | < 0.05<br>(< 0.05 to < 0.05)                  | 11.5<br>(-3.9 to 29.2)                            | -7.7<br>(-19.4 to 6.0)                              |
| Chlamydial infection                                                    | 0.7<br>(0.6 to 0.9)              | 0.6<br>(0.4 to 0.7)                | < 0.05<br>(< 0.05 to < 0.05)                  | -11.9<br>(-25.4 to 3.8)                           | 0.8<br>(-14.9 to 18.5)                              |
| Gonococcal infection                                                    | 0.6<br>(0.2 to 1.2)              | 2.1<br>(0.8 to 4.1)                | < 0.05<br>(< 0.05 to < 0.05)                  | -9.7<br>(-25.6 to 8.7)                            | 5.9<br>(-12.9 to 26.9)                              |
| Trichomoniasis                                                          | 3.3<br>(2.9 to 3.8)              | 2.8<br>(2.5 to 3.2)                | < 0.05<br>(< 0.05 to < 0.05)                  | -6.7<br>(-12.2 to -0.9)                           | 0.1<br>(-6.0 to 6.6)                                |
| Genital herpes                                                          | 23.7<br>(20.5 to 27.5)           | 1.0<br>(0.8 to 1.2)                | < 0.05<br>(< 0.05 to < 0.05)                  | 2.3<br>(-4.8 to 9.8)                              | 0.3<br>(-6.5 to 8.5)                                |
| Other sexually transmitted diseases                                     | 0.2<br>(0.2 to 0.2)              | 0.2<br>(0.1 to 0.2)                | < 0.05<br>(< 0.05 to < 0.05)                  | -12.1<br>(-21.9 to -1.6)                          | 2.0<br>(-9.7 to 14.2)                               |
| Hepatitis                                                               | 4.2<br>(3.7 to 4.7)              | 0.6<br>(0.5 to 0.7)                | < 0.05<br>(< 0.05 to < 0.05)                  | -16.9<br>(-34.1 to 5.2)                           | -23.4<br>(-40.5 to -0.4)                            |
| Acute hepatitis A                                                       | < 0.05<br>(< 0.05 to < 0.05)     | 0.1<br>(0.1 to 0.2)                | < 0.05<br>(< 0.05 to < 0.05)                  | -20.7<br>(-66.6 to 105.4)                         | -24.7<br>(-71.2 to 106.4)                           |
| Hepatitis B                                                             | 1.5<br>(1.2 to 1.9)              | 0.3<br>(0.3 to 0.4)                | < 0.05<br>(< 0.05 to < 0.05)                  | -15.3<br>(-33.0 to 5.2)                           | -23.9<br>(-37.9 to -7.0)                            |
| Hepatitis C                                                             | 2.6<br>(2.4 to 2.9)              | 0.1<br>(0.1 to 0.1)                | < 0.05<br>(< 0.05 to < 0.05)                  | -18.3<br>(-27.8 to -8.1)                          | -10.9<br>(-25.5 to 5.6)                             |
| Acute hepatitis E                                                       | < 0.05<br>(< 0.05 to < 0.05)     | 0.1<br>(0.1 to 0.1)                | < 0.05<br>(< 0.05 to < 0.05)                  | -15.8<br>(-26.9 to -3.3)                          | -24.4<br>(-31.0 to -16.8)                           |
| Other infectious diseases                                               | 0.4<br>(0.4 to 0.5)              | < 0.05<br>(< 0.05 to < 0.05)       | < 0.05<br>(< 0.05 to < 0.05)                  | -10.5<br>(-26.4 to 9.0)                           | -0.6<br>(-20.1 to 23.7)                             |
| <b>Non-communicable diseases</b>                                        | <b>97.9<br/>(97.5 to 98.3)</b>   | <b>288.8†<br/>(274.4 to 304.0)</b> | <b>11.4<br/>(8.4 to 14.7)</b>                 | <b>8.4<br/>(6.4 to 10.7)</b>                      | <b>0.3<br/>(-1.8 to 2.4)</b>                        |
| <b>Neoplasms</b>                                                        | <b>3.0<br/>(2.8 to 3.2)</b>      | <b>0.8<br/>(0.8 to 0.9)</b>        | <b>0.3<br/>(0.2 to 0.4)</b>                   | <b>40.8<br/>(33.0 to 48.6)</b>                    | <b>8.3<br/>(2.5 to 14.0)</b>                        |
| Lip and oral cavity cancer                                              | < 0.05<br>(< 0.05 to < 0.05)     | < 0.05<br>(< 0.05 to < 0.05)       | < 0.05<br>(< 0.05 to < 0.05)                  | 25.7<br>(8.4 to 47.5)                             | 0.0<br>(-13.4 to 16.3)                              |
| Nasopharynx cancer                                                      | < 0.05<br>(< 0.05 to < 0.05)     | < 0.05<br>(< 0.05 to < 0.05)       | < 0.05<br>(< 0.05 to < 0.05)                  | 9.4<br>(-3.9 to 26.4)                             | 0.9<br>(-11.6 to 17.2)                              |
| Other pharynx cancer                                                    | < 0.05<br>(< 0.05 to < 0.05)     | < 0.05<br>(< 0.05 to < 0.05)       | < 0.05<br>(< 0.05 to < 0.05)                  | 30.7<br>(12.1 to 52.2)                            | 8.6<br>(-5.7 to 26.3)                               |
| Oesophageal cancer                                                      | < 0.05<br>(< 0.05 to < 0.05)     | < 0.05<br>(< 0.05 to < 0.05)       | < 0.05<br>(< 0.05 to < 0.05)                  | 33.5<br>(4.8 to 70.9)                             | 1.1<br>(-20.1 to 26.5)                              |
| Stomach cancer                                                          | 0.1<br>(0.1 to 0.1)              | < 0.05<br>(< 0.05 to < 0.05)       | < 0.05<br>(< 0.05 to < 0.05)                  | 28.1<br>(9.0 to 49.7)                             | -3.6<br>(-16.5 to 11.6)                             |
| Colon and rectum cancer                                                 | 0.5<br>(0.5 to 0.5)              | 0.1<br>(0.1 to 0.1)                | < 0.05<br>(< 0.05 to 0.1)                     | 43.8<br>(28.9 to 60.5)                            | 8.3<br>(-2.3 to 20.0)                               |
| Liver cancer                                                            | < 0.05<br>(< 0.05 to < 0.05)     | < 0.05<br>(< 0.05 to < 0.05)       | < 0.05<br>(< 0.05 to < 0.05)                  | 41.8<br>(25.2 to 60.7)                            | 8.4<br>(-3.2 to 21.8)                               |
| Liver cancer due to hepatitis B                                         | < 0.05<br>(< 0.05 to < 0.05)     | < 0.05<br>(< 0.05 to < 0.05)       | < 0.05<br>(< 0.05 to < 0.05)                  | 35.3<br>(17.9 to 54.5)                            | 10.2<br>(-3.1 to 25.1)                              |

| Cause                                              | Prevalence in thousands (95% UI)     | Incidence in thousands (95% UI)    | YLDs in thousands (95% UI)        |                                                   |                                                     |
|----------------------------------------------------|--------------------------------------|------------------------------------|-----------------------------------|---------------------------------------------------|-----------------------------------------------------|
|                                                    | 2016 counts                          | 2016 counts                        | 2016 counts                       | Percentage change in counts between 2006 and 2016 | Percentage change in age-standardised rates between |
| Liver cancer due to hepatitis C                    | < 0.05<br>(< 0.05 to < 0.05)         | < 0.05<br>(< 0.05 to < 0.05)       | < 0.05<br>(< 0.05 to < 0.05)      | 47.9<br>(28.8 to 69.5)                            | 6.6<br>(-6.5 to 21.4)                               |
| Liver cancer due to alcohol use                    | < 0.05<br>(< 0.05 to < 0.05)         | < 0.05<br>(< 0.05 to < 0.05)       | < 0.05<br>(< 0.05 to < 0.05)      | 45.0<br>(25.7 to 66.1)                            | 8.1<br>(-5.6 to 23.2)                               |
| Liver cancer due to other causes                   | < 0.05<br>(< 0.05 to < 0.05)         | < 0.05<br>(< 0.05 to < 0.05)       | < 0.05<br>(< 0.05 to < 0.05)      | 41.5<br>(23.7 to 62.2)                            | 8.3<br>(-4.7 to 23.2)                               |
| Gallbladder and biliary tract cancer               | < 0.05<br>(< 0.05 to < 0.05)         | < 0.05<br>(< 0.05 to < 0.05)       | < 0.05<br>(< 0.05 to < 0.05)      | 28.6<br>(18.6 to 42.0)                            | -4.7<br>(-12.0 to 5.0)                              |
| Pancreatic cancer                                  | < 0.05<br>(< 0.05 to < 0.05)         | < 0.05<br>(< 0.05 to < 0.05)       | < 0.05<br>(< 0.05 to < 0.05)      | 39.5<br>(21.2 to 60.7)                            | 3.5<br>(-10.1 to 20.2)                              |
| Larynx cancer                                      | < 0.05<br>(< 0.05 to < 0.05)         | < 0.05<br>(< 0.05 to < 0.05)       | < 0.05<br>(< 0.05 to < 0.05)      | 33.0<br>(6.2 to 67.9)                             | 5.5<br>(-14.5 to 30.1)                              |
| Tracheal, bronchus, and lung cancer                | 0.1<br>(0.1 to 0.1)                  | < 0.05<br>(< 0.05 to < 0.05)       | < 0.05<br>(< 0.05 to < 0.05)      | 45.7<br>(21.3 to 74.7)                            | 11.5<br>(-6.5 to 33.1)                              |
| Malignant skin melanoma                            | 0.1<br>(< 0.05 to 0.1)               | < 0.05<br>(< 0.05 to < 0.05)       | < 0.05<br>(< 0.05 to < 0.05)      | 35.0<br>(16.7 to 55.1)                            | 13.3<br>(-2.3 to 29.9)                              |
| Non-melanoma skin cancer                           | < 0.05<br>(< 0.05 to < 0.05)         | < 0.05<br>(< 0.05 to < 0.05)       | < 0.05<br>(< 0.05 to < 0.05)      | -15.8<br>(-48.4 to 82.1)                          | -37.8<br>(-63.0 to 35.5)                            |
| Non-melanoma skin cancer (squamous-cell carcinoma) | < 0.05<br>(< 0.05 to < 0.05)         | < 0.05<br>(< 0.05 to < 0.05)       | < 0.05<br>(< 0.05 to < 0.05)      | -16.8<br>(-49.4 to 87.6)                          | -38.8<br>(-63.5 to 37.1)                            |
| Non-melanoma skin cancer (basal-cell carcinoma)    | < 0.05<br>(< 0.05 to < 0.05)         | < 0.05<br>(< 0.05 to < 0.05)       | < 0.05<br>(< 0.05 to < 0.05)      | 22.1<br>(3.3 to 45.7)                             | -2.5<br>(-12.4 to 11.3)                             |
| Breast cancer                                      | 0.4<br>(0.4 to 0.5)                  | 0.1<br>(0.1 to 0.1)                | < 0.05<br>(< 0.05 to < 0.05)      | 25.1<br>(8.6 to 45.5)                             | 6.1<br>(-7.4 to 22.2)                               |
| Cervical cancer                                    | < 0.05<br>(< 0.05 to 0.1)            | < 0.05<br>(< 0.05 to < 0.05)       | < 0.05<br>(< 0.05 to < 0.05)      | -4.5<br>(-23.7 to 23.7)                           | -14.4<br>(-31.5 to 9.1)                             |
| Uterine cancer                                     | 0.1<br>(0.1 to 0.1)                  | < 0.05<br>(< 0.05 to < 0.05)       | < 0.05<br>(< 0.05 to < 0.05)      | 35.1<br>(6.9 to 69.8)                             | 9.2<br>(-13.7 to 34.8)                              |
| Ovarian cancer                                     | < 0.05<br>(< 0.05 to < 0.05)         | < 0.05<br>(< 0.05 to < 0.05)       | < 0.05<br>(< 0.05 to < 0.05)      | 23.1<br>(-5.1 to 61.5)                            | -1.2<br>(-22.6 to 27.5)                             |
| Prostate cancer                                    | 1.2<br>(1.0 to 1.5)                  | 0.3<br>(0.2 to 0.3)                | 0.1<br>(0.1 to 0.1)               | 57.5<br>(37.5 to 78.0)                            | 8.7<br>(-4.6 to 21.7)                               |
| Testicular cancer                                  | < 0.05<br>(< 0.05 to < 0.05)         | < 0.05<br>(< 0.05 to < 0.05)       | < 0.05<br>(< 0.05 to < 0.05)      | 2.1<br>(-25.0 to 41.4)                            | 9.2<br>(-24.5 to 60.2)                              |
| Kidney cancer                                      | 0.1<br>(< 0.05 to 0.1)               | < 0.05<br>(< 0.05 to < 0.05)       | < 0.05<br>(< 0.05 to < 0.05)      | 31.2<br>(11.7 to 53.5)                            | 11.7<br>(-4.0 to 29.3)                              |
| Bladder cancer                                     | < 0.05<br>(< 0.05 to 0.1)            | < 0.05<br>(< 0.05 to < 0.05)       | < 0.05<br>(< 0.05 to < 0.05)      | 43.1<br>(21.2 to 67.3)                            | 7.1<br>(-8.4 to 23.7)                               |
| Brain and nervous system cancer                    | < 0.05<br>(< 0.05 to < 0.05)         | < 0.05<br>(< 0.05 to < 0.05)       | < 0.05<br>(< 0.05 to < 0.05)      | 25.8<br>(12.6 to 40.5)                            | 14.0<br>(3.0 to 26.3)                               |
| Thyroid cancer                                     | < 0.05<br>(< 0.05 to < 0.05)         | < 0.05<br>(< 0.05 to < 0.05)       | < 0.05<br>(< 0.05 to < 0.05)      | 25.5<br>(5.2 to 49.1)                             | 17.3<br>(-2.0 to 39.2)                              |
| Mesothelioma                                       | < 0.05<br>(< 0.05 to < 0.05)         | < 0.05<br>(< 0.05 to < 0.05)       | < 0.05<br>(< 0.05 to < 0.05)      | 36.8<br>(11.0 to 57.7)                            | 9.7<br>(-9.8 to 25.7)                               |
| Hodgkin lymphoma                                   | < 0.05<br>(< 0.05 to < 0.05)         | < 0.05<br>(< 0.05 to < 0.05)       | < 0.05<br>(< 0.05 to < 0.05)      | 17.9<br>(1.2 to 40.7)                             | 20.4<br>(0.9 to 47.6)                               |
| Non-Hodgkin's lymphoma                             | 0.1<br>(0.1 to 0.1)                  | < 0.05<br>(< 0.05 to < 0.05)       | < 0.05<br>(< 0.05 to < 0.05)      | 40.7<br>(24.0 to 59.1)                            | 26.2<br>(12.2 to 42.0)                              |
| Multiple myeloma                                   | < 0.05<br>(< 0.05 to < 0.05)         | < 0.05<br>(< 0.05 to < 0.05)       | < 0.05<br>(< 0.05 to < 0.05)      | 46.1<br>(15.7 to 80.3)                            | 16.2<br>(-7.3 to 41.6)                              |
| Leukaemia                                          | 0.1<br>(0.1 to 0.1)                  | < 0.05<br>(< 0.05 to < 0.05)       | < 0.05<br>(< 0.05 to < 0.05)      | 54.0<br>(33.3 to 77.2)                            | 30.3<br>(12.7 to 51.5)                              |
| Acute lymphoid leukaemia                           | < 0.05<br>(< 0.05 to < 0.05)         | < 0.05<br>(< 0.05 to < 0.05)       | < 0.05<br>(< 0.05 to < 0.05)      | 38.6<br>(-6.5 to 111.0)                           | 59.9<br>(1.6 to 159.9)                              |
| Chronic lymphoid leukaemia                         | < 0.05<br>(< 0.05 to < 0.05)         | < 0.05<br>(< 0.05 to < 0.05)       | < 0.05<br>(< 0.05 to < 0.05)      | 81.8<br>(44.5 to 126.5)                           | 38.9<br>(12.3 to 72.3)                              |
| Acute myeloid leukaemia                            | < 0.05<br>(< 0.05 to < 0.05)         | < 0.05<br>(< 0.05 to < 0.05)       | < 0.05<br>(< 0.05 to < 0.05)      | 37.8<br>(17.9 to 60.6)                            | 21.8<br>(1.2 to 48.2)                               |
| Chronic myeloid leukaemia                          | < 0.05<br>(< 0.05 to < 0.05)         | < 0.05<br>(< 0.05 to < 0.05)       | < 0.05<br>(< 0.05 to < 0.05)      | 47.1<br>(18.7 to 86.5)                            | 21.3<br>(-0.2 to 53.5)                              |
| Other leukaemia                                    | < 0.05<br>(< 0.05 to < 0.05)         | < 0.05<br>(< 0.05 to < 0.05)       | < 0.05<br>(< 0.05 to < 0.05)      | 41.2<br>(15.2 to 70.9)                            | 15.3<br>(-5.8 to 38.7)                              |
| Other neoplasms                                    | 0.2<br>(0.2 to 0.2)                  | < 0.05<br>(< 0.05 to 0.1)          | < 0.05<br>(< 0.05 to < 0.05)      | 17.6<br>(4.6 to 31.5)                             | 3.9<br>(-7.5 to 15.8)                               |
| <b>Cardiovascular diseases</b>                     | <b>10.7</b><br><b>(10.3 to 11.1)</b> | <b>1.1†</b><br><b>(1.1 to 1.2)</b> | <b>0.6</b><br><b>(0.5 to 0.8)</b> | <b>31.7</b><br><b>(27.5 to 36.1)</b>              | <b>-0.9</b><br><b>(-3.8 to 2.1)</b>                 |
| Rheumatic heart disease                            | < 0.05<br>(< 0.05 to < 0.05)         | < 0.05<br>(< 0.05 to < 0.05)       | < 0.05<br>(< 0.05 to < 0.05)      | 14.1<br>(-1.1 to 32.6)                            | -7.9<br>(-20.6 to 5.4)                              |
| Ischaemic heart disease                            | 4.2<br>(3.9 to 4.4)                  | 0.5<br>(0.4 to 0.5)                | 0.2<br>(0.1 to 0.2)               | 30.4<br>(25.4 to 35.9)                            | 0.6<br>(-3.2 to 4.3)                                |
| Cerebrovascular disease                            | 1.7<br>(1.6 to 1.8)                  | 0.2‡<br>(0.2 to 0.2)               | 0.2<br>(0.1 to 0.2)               | 35.6<br>(25.5 to 45.4)                            | -1.6<br>(-8.4 to 4.8)                               |
| Ischaemic stroke                                   | 1.4<br>(1.2 to 1.5)                  | 0.1‡<br>(0.1 to 0.2)               | 0.1<br>(0.1 to 0.2)               | 39.1<br>(28.0 to 50.9)                            | -0.1<br>(-7.7 to 7.9)                               |
| Hemorrhagic stroke                                 | 0.4<br>(0.3 to 0.4)                  | 0.1‡<br>(0.1 to 0.1)               | < 0.05<br>(< 0.05 to < 0.05)      | 24.1<br>(11.6 to 39.3)                            | -6.4<br>(-15.1 to 3.6)                              |
| Hypertensive heart disease                         | 0.5<br>(0.4 to 0.6)                  | --                                 | < 0.05<br>(< 0.05 to 0.1)         | 36.1<br>(23.8 to 48.3)                            | -1.9<br>(-10.2 to 6.5)                              |
| Cardiomyopathy and myocarditis                     | 0.2<br>(0.1 to 0.2)                  | < 0.05†<br>(< 0.05 to < 0.05)      | < 0.05<br>(< 0.05 to < 0.05)      | 18.9<br>(6.2 to 33.0)                             | -1.0<br>(-10.6 to 8.8)                              |
| Myocarditis                                        | < 0.05<br>(< 0.05 to < 0.05)         | < 0.05<br>(< 0.05 to < 0.05)       | < 0.05<br>(< 0.05 to < 0.05)      | 12.8<br>(-1.9 to 29.2)                            | 0.1<br>(-9.8 to 11.2)                               |
| Alcoholic cardiomyopathy                           | < 0.05<br>(< 0.05 to 0.1)            | --                                 | < 0.05<br>(< 0.05 to < 0.05)      | 20.8<br>(-3.0 to 48.5)                            | -1.5<br>(-19.5 to 18.3)                             |
| Other cardiomyopathy                               | 0.1<br>(0.1 to 0.1)                  | --                                 | < 0.05<br>(< 0.05 to < 0.05)      | 19.6<br>(3.8 to 36.6)                             | -1.0<br>(-12.9 to 12.3)                             |
| Atrial fibrillation and flutter                    | 1.2<br>(1.1 to 1.4)                  | 0.1<br>(0.1 to 0.1)                | 0.1<br>(0.1 to 0.1)               | 39.9<br>(30.2 to 49.6)                            | -0.5<br>(-7.0 to 6.4)                               |
| Peripheral vascular disease                        | 3.0<br>(2.6 to 3.5)                  | 0.3<br>(0.2 to 0.3)                | < 0.05<br>(< 0.05 to < 0.05)      | 45.1<br>(32.2 to 58.3)                            | -1.0<br>(-8.0 to 6.8)                               |
| Endocarditis                                       | < 0.05<br>(< 0.05 to < 0.05)         | < 0.05<br>(< 0.05 to < 0.05)       | < 0.05<br>(< 0.05 to < 0.05)      | 29.2<br>(8.8 to 51.7)                             | -2.3<br>(-16.3 to 13.3)                             |
| Other cardiovascular and circulatory diseases      | 1.8<br>(1.5 to 2.1)                  | --                                 | 0.1<br>(0.1 to 0.1)               | 18.7<br>(8.4 to 29.9)                             | -2.3<br>(-9.2 to 5.9)                               |
| <b>Chronic respiratory diseases</b>                | <b>12.9</b><br><b>(12.3 to 13.6)</b> | <b>1.9†</b><br><b>(1.8 to 2.0)</b> | <b>0.4</b><br><b>(0.3 to 0.6)</b> | <b>2.0</b><br><b>(-2.6 to 7.7)</b>                | <b>0.9</b><br><b>(-3.4 to 5.2)</b>                  |
| Chronic obstructive pulmonary disease              | 4.8<br>(4.4 to 5.3)                  | 0.3<br>(0.3 to 0.3)                | 0.1<br>(0.1 to 0.1)               | 17.7<br>(-1.5 to 38.6)                            | -3.0<br>(-17.2 to 12.2)                             |
| Pneumoconiosis                                     | < 0.05<br>(< 0.05 to < 0.05)         | < 0.05<br>(< 0.05 to < 0.05)       | < 0.05<br>(< 0.05 to < 0.05)      | 32.4<br>(16.1 to 52.0)                            | -4.3<br>(-16.5 to 11.0)                             |
| Silicosis                                          | < 0.05<br>(< 0.05 to < 0.05)         | < 0.05<br>(< 0.05 to < 0.05)       | < 0.05<br>(< 0.05 to < 0.05)      | 30.3<br>(23.7 to 37.2)                            | 2.2<br>(-2.1 to 6.6)                                |



| Cause                                                          | Prevalence in thousands (95% UI)     | Incidence in thousands (95% UI)                     | YLDs in thousands (95% UI)                          |                                                   |                                                     |
|----------------------------------------------------------------|--------------------------------------|-----------------------------------------------------|-----------------------------------------------------|---------------------------------------------------|-----------------------------------------------------|
|                                                                | 2016 counts                          | 2016 counts                                         | 2016 counts                                         | Percentage change in counts between 2006 and 2016 | Percentage change in age-standardised rates between |
| Asbestosis                                                     | < 0.05<br>(< 0.05 to < 0.05)         | < 0.05<br>(< 0.05 to < 0.05)                        | < 0.05<br>(< 0.05 to < 0.05)                        | 37.2<br>(12.3 to 66.5)                            | -2.6<br>(-20.8 to 18.9)                             |
| Coal workers pneumoconiosis                                    | --                                   | --                                                  | --                                                  | --                                                | --                                                  |
| Other pneumoconiosis                                           | < 0.05<br>(< 0.05 to < 0.05)         | < 0.05<br>(< 0.05 to < 0.05)                        | < 0.05<br>(< 0.05 to < 0.05)                        | 30.0<br>(0.6 to 69.0)                             | -8.7<br>(-29.0 to 20.7)                             |
| Asthma                                                         | 8.4<br>(7.9 to 9.1)                  | 1.6<br>(1.5 to 1.8)                                 | 0.3<br>(0.2 to 0.5)                                 | -2.2<br>(-6.0 to 2.1)                             | 1.2<br>(-3.2 to 5.7)                                |
| Interstitial lung disease and pulmonary sarcoidosis            | 0.1<br>(0.1 to 0.1)                  | < 0.05<br>(< 0.05 to < 0.05)                        | < 0.05<br>(< 0.05 to < 0.05)                        | 38.7<br>(24.5 to 55.3)                            | 3.5<br>(-6.1 to 14.5)                               |
| Other chronic respiratory diseases                             | --                                   | --                                                  | < 0.05<br>(< 0.05 to < 0.05)                        | 25.4<br>(2.7 to 50.2)                             | 35.4<br>(8.8 to 64.3)                               |
| <b>Cirrhosis and other chronic liver diseases</b>              | <b>1.2</b><br><b>(1.2 to 1.3)</b>    | <b>&lt; 0.05</b><br><b>(&lt; 0.05 to &lt; 0.05)</b> | <b>&lt; 0.05</b><br><b>(&lt; 0.05 to &lt; 0.05)</b> | <b>18.1</b><br><b>(7.5 to 29.1)</b>               | <b>2.7</b><br><b>(-6.7 to 12.5)</b>                 |
| Cirrhosis and other chronic liver diseases due to hepatitis B  | 0.1<br>(0.1 to 0.2)                  | < 0.05<br>(< 0.05 to < 0.05)                        | < 0.05<br>(< 0.05 to < 0.05)                        | 22.5<br>(-5.8 to 57.2)                            | 2.0<br>(-19.0 to 26.4)                              |
| Cirrhosis and other chronic liver diseases due to hepatitis C  | 0.4<br>(0.3 to 0.4)                  | < 0.05<br>(< 0.05 to < 0.05)                        | < 0.05<br>(< 0.05 to < 0.05)                        | 18.4<br>(-0.4 to 39.1)                            | 1.4<br>(-14.6 to 19.3)                              |
| Cirrhosis and other chronic liver diseases due to alcohol use  | 0.5<br>(0.4 to 0.5)                  | < 0.05<br>(< 0.05 to < 0.05)                        | < 0.05<br>(< 0.05 to < 0.05)                        | 23.5<br>(6.2 to 42.8)                             | 3.0<br>(-10.7 to 18.3)                              |
| Cirrhosis and other chronic liver diseases due to other causes | 0.2<br>(0.2 to 0.3)                  | < 0.05<br>(< 0.05 to < 0.05)                        | < 0.05<br>(< 0.05 to < 0.05)                        | 8.8<br>(-8.7 to 32.2)                             | 3.7<br>(-14.5 to 26.3)                              |
| <b>Digestive diseases</b>                                      | <b>4.5</b><br><b>(4.1 to 4.8)</b>    | <b>4.0†</b><br><b>(3.7 to 4.3)</b>                  | <b>0.1</b><br><b>(0.1 to 0.2)</b>                   | <b>26.1</b><br><b>(13.8 to 41.0)</b>              | <b>20.2</b><br><b>(7.9 to 35.3)</b>                 |
| Peptic ulcer disease                                           | 1.8<br>(1.6 to 2.1)                  | 0.1<br>(0.1 to 0.1)                                 | < 0.05<br>(< 0.05 to 0.1)                           | 41.1<br>(15.3 to 75.1)                            | 37.4<br>(9.8 to 70.1)                               |
| Gastritis and duodenitis                                       | 1.7<br>(1.5 to 2.0)                  | 0.8<br>(0.7 to 0.9)                                 | < 0.05<br>(< 0.05 to 0.1)                           | 54.4<br>(29.1 to 87.1)                            | 45.9<br>(20.4 to 77.4)                              |
| Appendicitis                                                   | < 0.05<br>(< 0.05 to < 0.05)         | 0.2<br>(0.2 to 0.2)                                 | < 0.05<br>(< 0.05 to < 0.05)                        | 0.4<br>(-23.2 to 32.6)                            | -0.3<br>(-27.7 to 35.2)                             |
| Paralytic ileus and intestinal obstruction                     | < 0.05<br>(< 0.05 to < 0.05)         | 0.1<br>(< 0.05 to 0.1)                              | < 0.05<br>(< 0.05 to < 0.05)                        | 16.5<br>(11.5 to 22.5)                            | 5.0<br>(1.0 to 9.1)                                 |
| Inguinal, femoral, and abdominal hernia                        | 0.8<br>(0.7 to 0.9)                  | 1.2<br>(1.1 to 1.4)                                 | < 0.05<br>(< 0.05 to 0.1)                           | 7.2<br>(-2.9 to 19.3)                             | 3.0<br>(-7.2 to 14.3)                               |
| Inflammatory bowel disease                                     | < 0.05<br>(< 0.05 to < 0.05)         | < 0.05<br>(< 0.05 to < 0.05)                        | < 0.05<br>(< 0.05 to < 0.05)                        | -8.3<br>(-25.0 to 12.7)                           | -17.9<br>(-30.6 to -3.0)                            |
| Vascular intestinal disorders                                  | < 0.05<br>(< 0.05 to < 0.05)         | < 0.05<br>(< 0.05 to < 0.05)                        | < 0.05<br>(< 0.05 to < 0.05)                        | 21.8<br>(14.9 to 29.0)                            | 7.0<br>(1.9 to 12.5)                                |
| Gallbladder and biliary diseases                               | 0.3<br>(0.2 to 0.3)                  | 1.6<br>(1.3 to 1.8)                                 | < 0.05<br>(< 0.05 to < 0.05)                        | 12.3<br>(-8.5 to 38.1)                            | 4.5<br>(-14.6 to 25.5)                              |
| Pancreatitis                                                   | < 0.05<br>(< 0.05 to < 0.05)         | 0.1<br>(0.1 to 0.1)                                 | < 0.05<br>(< 0.05 to < 0.05)                        | 23.2<br>(18.2 to 28.5)                            | 10.0<br>(6.5 to 13.7)                               |
| Other digestive diseases                                       | --                                   | --                                                  | < 0.05<br>(< 0.05 to < 0.05)                        | 31.5<br>(19.2 to 46.6)                            | 22.7<br>(11.6 to 36.3)                              |
| <b>Neurological disorders</b>                                  | <b>40.2</b><br><b>(38.6 to 42.3)</b> | <b>17.9</b><br><b>(15.5 to 20.4)</b>                | <b>1.2</b><br><b>(0.8 to 1.6)</b>                   | <b>0.8</b><br><b>(-14.9 to 19.1)</b>              | <b>-0.5</b><br><b>(-16.7 to 18.2)</b>               |
| Alzheimer's disease and other dementias                        | 0.9<br>(0.7 to 1.1)                  | 0.1<br>(0.1 to 0.2)                                 | 0.1<br>(0.1 to 0.2)                                 | 51.0<br>(43.5 to 59.1)                            | -1.6<br>(-6.2 to 3.2)                               |
| Parkinson's disease                                            | 0.1<br>(0.1 to 0.2)                  | < 0.05<br>(< 0.05 to < 0.05)                        | < 0.05<br>(< 0.05 to < 0.05)                        | 48.7<br>(31.7 to 67.8)                            | 2.8<br>(-8.0 to 14.5)                               |
| Epilepsy                                                       | 0.4<br>(0.1 to 0.8)                  | < 0.05<br>(< 0.05 to 0.1)                           | 0.1<br>(< 0.05 to 0.3)                              | -2.0<br>(-80.8 to 394.9)                          | -3.0<br>(-80.8 to 391.9)                            |
| Multiple sclerosis                                             | < 0.05<br>(< 0.05 to < 0.05)         | < 0.05<br>(< 0.05 to < 0.05)                        | < 0.05<br>(< 0.05 to < 0.05)                        | 7.8<br>(-18.7 to 48.3)                            | 7.9<br>(-19.3 to 49.0)                              |
| Motor neuron disease                                           | < 0.05<br>(< 0.05 to < 0.05)         | < 0.05<br>(< 0.05 to < 0.05)                        | < 0.05<br>(< 0.05 to < 0.05)                        | 17.7<br>(12.8 to 23.4)                            | 2.8<br>(-0.9 to 6.2)                                |
| Migraine                                                       | 14.9<br>(14.0 to 15.8)               | 1.6<br>(1.4 to 1.7)                                 | 0.7<br>(0.5 to 1.0)                                 | -4.7<br>(-7.8 to -1.3)                            | -0.4<br>(-3.8 to 3.1)                               |
| Tension-type headache                                          | 30.2<br>(27.4 to 33.5)               | 16.1<br>(13.7 to 18.7)                              | 0.1<br>(0.1 to 0.2)                                 | -3.0<br>(-7.8 to 2.1)                             | -1.0<br>(-5.7 to 4.1)                               |
| Other neurological disorders                                   | < 0.05<br>(< 0.05 to < 0.05)         | < 0.05<br>(< 0.05 to < 0.05)                        | < 0.05<br>(< 0.05 to < 0.05)                        | 8.4<br>(-65.4 to 261.2)                           | 16.4<br>(-67.0 to 317.1)                            |
| <b>Mental and substance use disorders</b>                      | <b>16.9</b><br><b>(16.5 to 17.4)</b> | <b>6.6†</b><br><b>(6.1 to 7.2)</b>                  | <b>2.3</b><br><b>(1.7 to 2.9)</b>                   | <b>-2.0</b><br><b>(-4.0 to 0.2)</b>               | <b>-0.2</b><br><b>(-2.1 to 1.8)</b>                 |
| Schizophrenia                                                  | 0.2<br>(0.2 to 0.3)                  | < 0.05<br>(< 0.05 to < 0.05)                        | 0.1<br>(0.1 to 0.2)                                 | -3.9<br>(-12.1 to 4.3)                            | -0.8<br>(-9.4 to 7.7)                               |
| Alcohol use disorders                                          | 2.2<br>(1.9 to 2.4)                  | 1.0<br>(0.8 to 1.1)                                 | 0.2<br>(0.1 to 0.3)                                 | -8.2<br>(-15.5 to 0.1)                            | -3.9<br>(-11.9 to 5.3)                              |
| Drug use disorders                                             | 0.8<br>(0.7 to 0.8)                  | 0.1<br>(0.1 to 0.1)                                 | 0.2<br>(0.1 to 0.2)                                 | -3.1<br>(-10.6 to 4.7)                            | -1.2<br>(-9.2 to 7.0)                               |
| Opioid use disorders                                           | 0.3<br>(0.3 to 0.3)                  | < 0.05<br>(< 0.05 to < 0.05)                        | 0.1<br>(0.1 to 0.2)                                 | -1.9<br>(-10.9 to 7.6)                            | -1.1<br>(-11.0 to 9.1)                              |
| Cocaine use disorders                                          | 0.1<br>(0.1 to 0.1)                  | < 0.05<br>(< 0.05 to < 0.05)                        | < 0.05<br>(< 0.05 to < 0.05)                        | -6.1<br>(-21.4 to 13.0)                           | -2.0<br>(-18.4 to 18.7)                             |
| Amphetamine use disorders                                      | < 0.05<br>(< 0.05 to < 0.05)         | < 0.05<br>(< 0.05 to < 0.05)                        | < 0.05<br>(< 0.05 to < 0.05)                        | -8.2<br>(-34.1 to 25.2)                           | -0.1<br>(-30.7 to 39.7)                             |
| Cannabis use disorders                                         | 0.3<br>(0.2 to 0.3)                  | < 0.05<br>(< 0.05 to < 0.05)                        | < 0.05<br>(< 0.05 to < 0.05)                        | -7.5<br>(-21.2 to 5.6)                            | 0.8<br>(-15.1 to 16.5)                              |
| Other drug use disorders                                       | 0.1<br>(0.1 to 0.1)                  | < 0.05<br>(< 0.05 to < 0.05)                        | < 0.05<br>(< 0.05 to < 0.05)                        | -5.4<br>(-22.2 to 17.6)                           | -2.0<br>(-20.2 to 20.9)                             |
| Depressive disorders                                           | 4.0<br>(3.8 to 4.3)                  | 4.5<br>(4.0 to 5.0)                                 | 0.7<br>(0.5 to 0.9)                                 | 4.4<br>(-0.6 to 9.8)                              | 1.2<br>(-3.2 to 6.1)                                |
| Major depressive disorder                                      | 2.8<br>(2.5 to 3.1)                  | 4.3<br>(3.8 to 4.8)                                 | 0.6<br>(0.4 to 0.8)                                 | 4.5<br>(-1.4 to 11.1)                             | 1.5<br>(-3.6 to 7.3)                                |
| Dysthymia                                                      | 1.3<br>(1.2 to 1.5)                  | 0.2<br>(0.2 to 0.3)                                 | 0.1<br>(0.1 to 0.2)                                 | 3.9<br>(-0.4 to 9.0)                              | -0.0<br>(-3.7 to 4.0)                               |
| Bipolar disorder                                               | 0.9<br>(0.8 to 1.1)                  | 0.1<br>(0.1 to 0.1)                                 | 0.2<br>(0.1 to 0.3)                                 | -4.5<br>(-9.3 to 0.8)                             | -0.1<br>(-5.2 to 5.2)                               |
| Anxiety disorders                                              | 4.5<br>(4.1 to 5.0)                  | 0.6<br>(0.6 to 0.7)                                 | 0.4<br>(0.3 to 0.6)                                 | -3.1<br>(-6.5 to 0.3)                             | -0.1<br>(-3.5 to 3.3)                               |
| Eating disorders                                               | 0.2<br>(0.2 to 0.2)                  | 0.1<br>(0.1 to 0.1)                                 | < 0.05<br>(< 0.05 to 0.1)                           | -12.8<br>(-22.0 to -1.9)                          | 0.1<br>(-10.7 to 12.7)                              |
| Anorexia nervosa                                               | < 0.05<br>(< 0.05 to < 0.05)         | < 0.05<br>(< 0.05 to < 0.05)                        | < 0.05<br>(< 0.05 to < 0.05)                        | -12.1<br>(-29.5 to 8.9)                           | -0.9<br>(-21.0 to 22.2)                             |
| Bulimia nervosa                                                | 0.2<br>(0.1 to 0.2)                  | 0.1<br>(< 0.05 to 0.1)                              | < 0.05<br>(< 0.05 to 0.1)                           | -13.0<br>(-23.8 to -1.4)                          | 0.3<br>(-11.6 to 14.3)                              |
| Autistic spectrum disorders                                    | 0.8<br>(0.8 to 0.9)                  | < 0.05<br>(< 0.05 to < 0.05)                        | 0.1<br>(0.1 to 0.2)                                 | -4.6<br>(-8.9 to -0.2)                            | 0.1<br>(-4.3 to 5.1)                                |
| Autism                                                         | 0.3<br>(0.2 to 0.3)                  | < 0.05<br>(< 0.05 to < 0.05)                        | 0.1<br>(< 0.05 to 0.1)                              | -4.3<br>(-10.9 to 3.0)                            | 0.1<br>(-7.4 to 8.3)                                |
| Asperger syndrome and other autistic spectrum disorders        | 0.6<br>(0.5 to 0.7)                  | < 0.05<br>(< 0.05 to < 0.05)                        | 0.1<br>(< 0.05 to 0.1)                              | -5.0<br>(-9.6 to -0.6)                            | -0.0<br>(-5.0 to 4.9)                               |

| Cause                                                      | Prevalence in thousands (95% UI)     | Incidence in thousands (95% UI)          | YLDs in thousands (95% UI)        |                                                   |                                                     |
|------------------------------------------------------------|--------------------------------------|------------------------------------------|-----------------------------------|---------------------------------------------------|-----------------------------------------------------|
|                                                            | 2016 counts                          | 2016 counts                              | 2016 counts                       | Percentage change in counts between 2006 and 2016 | Percentage change in age-standardised rates between |
| Attention-deficit/hyperactivity disorder                   | 1.6<br>(1.4 to 1.8)                  | 0.1<br>(0.1 to 0.1)                      | < 0.05<br>(< 0.05 to < 0.05)      | -10.1<br>(-14.6 to -5.1)                          | 0.3<br>(-4.7 to 6.0)                                |
| Conduct disorder                                           | 0.6<br>(0.5 to 0.7)                  | 0.2<br>(0.1 to 0.2)                      | 0.1<br>(< 0.05 to 0.1)            | -10.7<br>(-16.8 to -3.9)                          | 0.9<br>(-6.0 to 8.2)                                |
| Idiopathic developmental intellectual disability           | 0.4<br>(0.1 to 0.7)                  | --                                       | < 0.05<br>(< 0.05 to < 0.05)      | -3.3<br>(-10.2 to 5.4)                            | 2.0<br>(-5.2 to 11.3)                               |
| Other mental and substance use disorders                   | 2.2<br>(1.9 to 2.5)                  | 0.1<br>(< 0.05 to 0.1)                   | 0.2<br>(0.1 to 0.2)               | 0.5<br>(-4.0 to 5.0)                              | -0.2<br>(-4.8 to 4.5)                               |
| <b>Diabetes, urogenital, blood, and endocrine diseases</b> | <b>46.2</b><br><b>(45.0 to 47.3)</b> | <b>12.5†</b><br><b>(11.6 to 13.6)</b>    | <b>1.5</b><br><b>(1.0 to 2.0)</b> | <b>14.1</b><br><b>(8.1 to 20.1)</b>               | <b>0.6</b><br><b>(-4.2 to 5.2)</b>                  |
| Diabetes mellitus                                          | 11.2<br>(10.0 to 12.3)               | 0.5<br>(0.5 to 0.6)                      | 1.0<br>(0.7 to 1.4)               | 15.5<br>(7.1 to 24.0)                             | 0.2<br>(-6.6 to 7.4)                                |
| Acute glomerulonephritis                                   | < 0.05<br>(< 0.05 to < 0.05)         | < 0.05<br>(< 0.05 to < 0.05)             | < 0.05<br>(< 0.05 to < 0.05)      | 6.0<br>(0.7 to 11.3)                              | -0.3<br>(-3.8 to 3.3)                               |
| Chronic kidney disease                                     | 6.6<br>(5.9 to 7.3)                  | 0.5<br>(0.4 to 0.6)                      | 0.2<br>(0.1 to 0.2)               | 32.3<br>(21.5 to 43.3)                            | 7.0<br>(-1.0 to 15.3)                               |
| Chronic kidney disease due to diabetes mellitus            | 2.6<br>(2.1 to 3.0)                  | 0.2<br>(0.2 to 0.2)                      | 0.1<br>(< 0.05 to 0.1)            | 33.8<br>(19.9 to 49.7)                            | 8.2<br>(-2.7 to 20.3)                               |
| Chronic kidney disease due to hypertension                 | 1.4<br>(1.1 to 1.6)                  | 0.1<br>(0.1 to 0.2)                      | < 0.05<br>(< 0.05 to < 0.05)      | 45.7<br>(26.1 to 68.5)                            | 3.6<br>(-9.5 to 18.4)                               |
| Chronic kidney disease due to glomerulonephritis           | 1.3<br>(1.1 to 1.6)                  | 0.1<br>(0.1 to 0.1)                      | < 0.05<br>(< 0.05 to 0.1)         | 29.1<br>(15.3 to 44.9)                            | 10.6<br>(-0.2 to 23.3)                              |
| Chronic kidney disease due to other causes                 | 1.3<br>(1.0 to 1.6)                  | 0.1<br>(0.1 to 0.1)                      | < 0.05<br>(< 0.05 to < 0.05)      | 25.1<br>(11.5 to 40.4)                            | 3.1<br>(-7.1 to 14.4)                               |
| Urinary diseases and male infertility                      | 2.5<br>(2.2 to 2.8)                  | 7.9†<br>(7.1 to 9.1)                     | 0.1<br>(< 0.05 to 0.1)            | 21.3<br>(11.5 to 30.9)                            | -3.0<br>(-9.3 to 3.8)                               |
| Interstitial nephritis and urinary tract infections        | 0.1<br>(0.1 to 0.2)                  | 7.1<br>(6.3 to 8.2)                      | < 0.05<br>(< 0.05 to < 0.05)      | -0.1<br>(-12.6 to 17.0)                           | 0.9<br>(-11.2 to 16.0)                              |
| Urolithiasis                                               | < 0.05<br>(< 0.05 to < 0.05)         | 0.6<br>(0.5 to 0.7)                      | < 0.05<br>(< 0.05 to < 0.05)      | 10.6<br>(3.2 to 19.7)                             | 1.6<br>(-3.2 to 6.9)                                |
| Benign prostatic hyperplasia                               | 1.9<br>(1.6 to 2.2)                  | 0.2<br>(0.2 to 0.3)                      | 0.1<br>(< 0.05 to 0.1)            | 27.9<br>(16.1 to 39.7)                            | -2.7<br>(-10.6 to 5.1)                              |
| Male infertility                                           | 0.4<br>(0.3 to 0.5)                  | --                                       | < 0.05<br>(< 0.05 to < 0.05)      | -17.6<br>(-23.2 to -11.5)                         | -2.2<br>(-8.8 to 4.8)                               |
| Other urinary diseases                                     | --                                   | --                                       | < 0.05<br>(< 0.05 to < 0.05)      | -18.3<br>(-26.2 to -8.5)                          | -16.4<br>(-24.9 to -6.5)                            |
| Gynecological diseases                                     | 12.4<br>(11.7 to 13.0)               | 3.1†<br>(2.9 to 3.3)                     | 0.1<br>(0.1 to 0.2)               | -12.6<br>(-17.1 to -8.2)                          | -3.2<br>(-8.2 to 1.5)                               |
| Uterine fibroids                                           | 1.2<br>(1.0 to 1.3)                  | 0.1<br>(0.1 to 0.1)                      | < 0.05<br>(< 0.05 to < 0.05)      | -17.6<br>(-30.1 to -4.7)                          | -9.5<br>(-23.2 to 5.8)                              |
| Polycystic ovarian syndrome                                | < 0.05<br>(< 0.05 to < 0.05)         | 0.1<br>(< 0.05 to 0.1)                   | < 0.05<br>(< 0.05 to < 0.05)      | -17.2<br>(-41.3 to 15.7)                          | 0.3<br>(-28.6 to 40.8)                              |
| Female infertility                                         | 0.9<br>(0.6 to 1.3)                  | --                                       | < 0.05<br>(< 0.05 to < 0.05)      | -14.6<br>(-20.8 to -7.4)                          | 2.6<br>(-5.0 to 11.3)                               |
| Endometriosis                                              | < 0.05<br>(< 0.05 to < 0.05)         | < 0.05<br>(< 0.05 to < 0.05)             | < 0.05<br>(< 0.05 to < 0.05)      | -11.1<br>(-34.2 to 19.4)                          | -0.1<br>(-24.5 to 31.5)                             |
| Genital prolapse                                           | 5.0<br>(4.3 to 5.8)                  | 0.2<br>(0.2 to 0.2)                      | < 0.05<br>(< 0.05 to < 0.05)      | 1.2<br>(-6.7 to 9.7)                              | -11.0<br>(-17.8 to -4.1)                            |
| Premenstrual syndrome                                      | 5.7<br>(5.3 to 6.0)                  | 1.9<br>(1.8 to 2.1)                      | < 0.05<br>(< 0.05 to 0.1)         | -13.2<br>(-19.5 to -7.0)                          | -0.7<br>(-7.6 to 6.9)                               |
| Other gynecological diseases                               | 0.9<br>(0.8 to 1.0)                  | 0.8<br>(0.7 to 0.9)                      | < 0.05<br>(< 0.05 to < 0.05)      | -14.6<br>(-22.7 to -5.7)                          | -2.8<br>(-12.0 to 7.1)                              |
| Hemoglobinopathies and hemolytic anaemias                  | 24.6<br>(23.2 to 26.0)               | --                                       | 0.1<br>(< 0.05 to 0.1)            | 3.3<br>(-13.4 to 22.3)                            | 6.1<br>(-12.1 to 26.4)                              |
| Thalassemias                                               | < 0.05<br>(< 0.05 to < 0.05)         | --                                       | < 0.05<br>(< 0.05 to < 0.05)      | -6.0<br>(-27.0 to 19.8)                           | 15.3<br>(-12.0 to 45.6)                             |
| Thalassaemias trait                                        | 0.1<br>(0.1 to 0.2)                  | --                                       | < 0.05<br>(< 0.05 to < 0.05)      | 13.7<br>(-14.7 to 64.7)                           | 14.2<br>(-15.9 to 67.6)                             |
| Sickle cell disorders                                      | < 0.05<br>(< 0.05 to < 0.05)         | --                                       | < 0.05<br>(< 0.05 to < 0.05)      | -5.1<br>(-16.7 to 8.8)                            | 7.8<br>(-6.0 to 24.3)                               |
| Sickle cell trait                                          | 8.8<br>(7.8 to 10.0)                 | --                                       | < 0.05<br>(< 0.05 to < 0.05)      | 2.6<br>(-17.7 to 26.1)                            | 10.1<br>(-13.0 to 37.3)                             |
| G6PD deficiency                                            | 4.7<br>(4.1 to 5.3)                  | --                                       | < 0.05<br>(< 0.05 to < 0.05)      | 11.5<br>(-20.4 to 57.0)                           | 22.2<br>(-16.9 to 80.1)                             |
| G6PD trait                                                 | 11.9<br>(11.1 to 12.8)               | --                                       | < 0.05<br>(< 0.05 to < 0.05)      | 24.2<br>(-0.5 to 56.6)                            | 31.5<br>(2.6 to 68.9)                               |
| Other hemoglobinopathies and hemolytic anaemias            | 0.8<br>(0.7 to 1.0)                  | --                                       | < 0.05<br>(< 0.05 to < 0.05)      | 6.4<br>(-11.9 to 25.8)                            | -5.2<br>(-21.3 to 12.9)                             |
| Endocrine, metabolic, blood, and immune disorders          | 2.2<br>(2.0 to 2.4)                  | 0.4<br>(0.3 to 0.4)                      | 0.1<br>(< 0.05 to 0.1)            | 17.4<br>(9.3 to 26.2)                             | -1.3<br>(-7.9 to 5.6)                               |
| <b>Musculoskeletal disorders</b>                           | <b>22.1</b><br><b>(21.2 to 23.0)</b> | <b>10.5</b><br><b>(9.5 to 11.7)</b>      | <b>2.4</b><br><b>(1.7 to 3.1)</b> | <b>8.7</b><br><b>(5.8 to 11.6)</b>                | <b>-0.2</b><br><b>(-2.6 to 2.3)</b>                 |
| Rheumatoid arthritis                                       | 0.6<br>(0.5 to 0.7)                  | < 0.05<br>(< 0.05 to < 0.05)             | 0.1<br>(0.1 to 0.2)               | 19.9<br>(11.2 to 29.5)                            | 5.5<br>(-1.8 to 13.6)                               |
| Osteoarthritis                                             | 7.0<br>(6.5 to 7.5)                  | 0.3<br>(0.3 to 0.3)                      | 0.4<br>(0.3 to 0.6)               | 26.5<br>(22.1 to 30.9)                            | 3.5<br>(-0.1 to 7.2)                                |
| Low back and neck pain                                     | 10.7<br>(10.0 to 11.5)               | 4.1<br>(3.6 to 4.5)                      | 1.2<br>(0.8 to 1.6)               | 7.2<br>(3.4 to 11.0)                              | 0.5<br>(-2.3 to 3.4)                                |
| Low back pain                                              | 6.5<br>(5.7 to 7.3)                  | 3.1<br>(2.6 to 3.5)                      | 0.7<br>(0.5 to 1.0)               | 7.7<br>(1.5 to 13.8)                              | 0.7<br>(-3.7 to 5.2)                                |
| Neck pain                                                  | 4.9<br>(4.2 to 5.7)                  | 1.0<br>(0.9 to 1.2)                      | 0.5<br>(0.3 to 0.7)               | 6.5<br>(2.7 to 10.8)                              | 0.1<br>(-2.0 to 2.3)                                |
| Gout                                                       | 0.5<br>(0.4 to 0.5)                  | 0.1<br>(0.1 to 0.1)                      | < 0.05<br>(< 0.05 to < 0.05)      | 13.9<br>(-1.5 to 33.9)                            | -0.7<br>(-14.0 to 15.8)                             |
| Other musculoskeletal disorders                            | 6.9<br>(5.9 to 7.9)                  | 6.0<br>(5.0 to 7.2)                      | 0.6<br>(0.4 to 0.8)               | -0.9<br>(-8.5 to 8.0)                             | -4.4<br>(-10.5 to 2.9)                              |
| <b>Other non-communicable diseases</b>                     | <b>80.4</b><br><b>(79.4 to 81.4)</b> | <b>233.4†</b><br><b>(219.4 to 249.1)</b> | <b>2.6</b><br><b>(1.8 to 3.7)</b> | <b>11.7</b><br><b>(10.0 to 13.7)</b>              | <b>-0.2</b><br><b>(-1.2 to 0.8)</b>                 |
| Congenital anomalies                                       | 0.7<br>(0.6 to 0.8)                  | --                                       | 0.1<br>(0.1 to 0.1)               | -3.6<br>(-9.3 to 1.5)                             | 0.8<br>(-5.2 to 6.3)                                |
| Neural tube defects                                        | < 0.05<br>(< 0.05 to < 0.05)         | --                                       | < 0.05<br>(< 0.05 to < 0.05)      | -3.9<br>(-16.1 to 10.7)                           | -1.3<br>(-14.4 to 13.7)                             |
| Congenital heart anomalies                                 | 0.2<br>(0.1 to 0.2)                  | --                                       | < 0.05<br>(< 0.05 to < 0.05)      | -0.5<br>(-11.0 to 12.0)                           | 3.9<br>(-7.8 to 17.4)                               |
| Orofacial clefts                                           | 0.1<br>(< 0.05 to 0.1)               | --                                       | < 0.05<br>(< 0.05 to < 0.05)      | -10.7<br>(-21.2 to 0.2)                           | -7.7<br>(-18.7 to 3.6)                              |
| Down's syndrome                                            | < 0.05<br>(< 0.05 to 0.1)            | --                                       | < 0.05<br>(< 0.05 to < 0.05)      | -6.0<br>(-13.8 to 2.4)                            | 4.5<br>(-4.1 to 13.8)                               |
| Turner syndrome                                            | < 0.05<br>(< 0.05 to < 0.05)         | --                                       | < 0.05<br>(< 0.05 to < 0.05)      | -3.9<br>(-16.8 to 10.5)                           | 6.8<br>(-7.2 to 23.1)                               |
| Klinefelter syndrome                                       | < 0.05<br>(< 0.05 to < 0.05)         | --                                       | < 0.05<br>(< 0.05 to < 0.05)      | -11.7<br>(-34.2 to 18.2)                          | 0.7<br>(-25.4 to 34.1)                              |

| Cause                                         | Prevalence in thousands (95% UI)     | Incidence in thousands (95% UI)    | YLDs in thousands (95% UI)        |                                                   |                                                     |
|-----------------------------------------------|--------------------------------------|------------------------------------|-----------------------------------|---------------------------------------------------|-----------------------------------------------------|
|                                               | 2016 counts                          | 2016 counts                        | 2016 counts                       | Percentage change in counts between 2006 and 2016 | Percentage change in age-standardised rates between |
| Other chromosomal abnormalities               | < 0.05<br>(< 0.05 to 0.1)            | --                                 | < 0.05<br>(< 0.05 to < 0.05)      | -14.5<br>(-27.6 to 0.9)                           | -0.4<br>(-16.5 to 17.8)                             |
| Congenital musculoskeletal and limb anomalies | 0.1<br>(0.1 to 0.1)                  | --                                 | < 0.05<br>(< 0.05 to < 0.05)      | 0.2<br>(-9.0 to 10.3)                             | 0.7<br>(-8.2 to 11.8)                               |
| Urogenital congenital anomalies               | 0.1<br>(0.1 to 0.1)                  | --                                 | < 0.05<br>(< 0.05 to < 0.05)      | -13.1<br>(-26.1 to 1.3)                           | -0.7<br>(-16.1 to 15.5)                             |
| Digestive congenital anomalies                | 0.1<br>(0.1 to 0.1)                  | --                                 | < 0.05<br>(< 0.05 to < 0.05)      | -0.6<br>(-16.0 to 17.7)                           | 2.6<br>(-13.9 to 22.4)                              |
| Other congenital anomalies                    | 0.3<br>(0.2 to 0.5)                  | --                                 | < 0.05<br>(< 0.05 to < 0.05)      | -2.6<br>(-13.2 to 9.3)                            | 0.8<br>(-10.0 to 13.5)                              |
| Skin and subcutaneous diseases                | 37.9<br>(36.8 to 39.1)               | 98.6<br>(91.4 to 106.5)            | 0.8<br>(0.6 to 1.2)               | -2.5<br>(-4.6 to -0.7)                            | 0.3<br>(-1.5 to 2.1)                                |
| Dermatitis                                    | 4.8<br>(4.5 to 5.2)                  | 5.6<br>(5.2 to 6.0)                | 0.2<br>(0.1 to 0.3)               | -5.5<br>(-8.4 to -2.1)                            | 0.0<br>(-3.2 to 3.6)                                |
| Psoriasis                                     | 1.4<br>(1.3 to 1.4)                  | 0.2<br>(0.2 to 0.2)                | 0.1<br>(0.1 to 0.1)               | 4.1<br>(-2.6 to 11.1)                             | 1.7<br>(-5.0 to 8.7)                                |
| Cellulitis                                    | < 0.05<br>(< 0.05 to < 0.05)         | 0.8<br>(0.8 to 0.9)                | < 0.05<br>(< 0.05 to < 0.05)      | 1.0<br>(-17.2 to 21.9)                            | 0.7<br>(-17.9 to 22.6)                              |
| Pyoderma                                      | 0.4<br>(0.4 to 0.4)                  | 10.3<br>(9.9 to 10.9)              | < 0.05<br>(< 0.05 to < 0.05)      | 15.6<br>(9.0 to 22.9)                             | 0.5<br>(-5.8 to 6.8)                                |
| Scabies                                       | 1.6<br>(1.4 to 1.8)                  | 5.0<br>(4.4 to 5.7)                | < 0.05<br>(< 0.05 to 0.1)         | -8.2<br>(-11.9 to -4.2)                           | -2.3<br>(-6.2 to 1.6)                               |
| Fungal skin diseases                          | 13.6<br>(12.1 to 15.2)               | 50.2<br>(43.1 to 57.8)             | 0.1<br>(< 0.05 to 0.2)            | 9.8<br>(6.5 to 13.2)                              | -0.1<br>(-1.0 to 0.8)                               |
| Viral skin diseases                           | 2.8<br>(2.6 to 2.9)                  | 4.2<br>(4.0 to 4.4)                | 0.1<br>(0.1 to 0.1)               | -4.7<br>(-7.4 to -1.6)                            | -0.0<br>(-2.9 to 3.0)                               |
| Acne vulgaris                                 | 7.5<br>(6.7 to 8.2)                  | 5.0<br>(4.1 to 6.2)                | 0.2<br>(0.1 to 0.3)               | -9.6<br>(-13.8 to -5.5)                           | 1.0<br>(-3.6 to 5.7)                                |
| Alopecia areata                               | 0.2<br>(0.2 to 0.2)                  | 0.3<br>(0.3 to 0.3)                | < 0.05<br>(< 0.05 to < 0.05)      | -6.0<br>(-15.3 to 4.4)                            | -0.2<br>(-10.8 to 11.4)                             |
| Pruritus                                      | 1.2<br>(1.0 to 1.3)                  | 0.9<br>(0.8 to 1.0)                | < 0.05<br>(< 0.05 to < 0.05)      | 5.6<br>(-0.2 to 12.2)                             | 0.2<br>(-4.4 to 5.2)                                |
| Urticaria                                     | 0.8<br>(0.7 to 1.0)                  | 1.5<br>(1.3 to 1.7)                | < 0.05<br>(< 0.05 to 0.1)         | -8.1<br>(-13.1 to -2.6)                           | -0.3<br>(-5.5 to 5.8)                               |
| Decubitus ulcer                               | 0.1<br>(0.1 to 0.1)                  | 0.4<br>(0.3 to 0.4)                | < 0.05<br>(< 0.05 to < 0.05)      | 31.6<br>(13.8 to 51.1)                            | -3.7<br>(-14.8 to 8.6)                              |
| Other skin and subcutaneous diseases          | 11.5<br>(11.1 to 11.8)               | 14.2<br>(13.6 to 14.7)             | 0.1<br>(< 0.05 to 0.1)            | 10.7<br>(8.1 to 13.6)                             | -0.3<br>(-2.5 to 2.0)                               |
| Sense organ diseases                          | 34.0<br>(33.4 to 34.7)               | 11.8†<br>(11.1 to 12.5)            | 1.2<br>(0.8 to 1.7)               | 23.8<br>(21.1 to 27.1)                            | -0.8<br>(-2.4 to 0.8)                               |
| Glaucoma                                      | 0.2<br>(0.2 to 0.3)                  | --                                 | < 0.05<br>(< 0.05 to < 0.05)      | 39.8<br>(25.6 to 55.4)                            | -1.9<br>(-11.0 to 8.2)                              |
| Cataract                                      | 1.8<br>(1.6 to 2.0)                  | --                                 | 0.1<br>(0.1 to 0.2)               | 38.5<br>(31.5 to 45.7)                            | -3.7<br>(-7.8 to 0.9)                               |
| Macular degeneration                          | 0.1<br>(< 0.05 to 0.1)               | --                                 | < 0.05<br>(< 0.05 to < 0.05)      | 42.8<br>(19.8 to 67.3)                            | -0.4<br>(-15.0 to 14.8)                             |
| Refraction and accommodation disorders        | 12.2<br>(11.7 to 12.7)               | --                                 | 0.2<br>(0.1 to 0.3)               | 6.5<br>(2.7 to 10.1)                              | -3.4<br>(-6.3 to -0.4)                              |
| Age-related and other hearing loss            | 27.3<br>(26.1 to 28.5)               | --                                 | 0.7<br>(0.5 to 1.0)               | 27.9<br>(24.0 to 32.8)                            | 0.4<br>(-1.9 to 3.1)                                |
| Other vision loss                             | 0.4<br>(0.3 to 0.4)                  | --                                 | < 0.05<br>(< 0.05 to 0.1)         | 16.0<br>(6.7 to 26.2)                             | -1.8<br>(-8.9 to 6.5)                               |
| Other sense organ diseases                    | 4.4<br>(4.1 to 4.8)                  | 11.8<br>(11.1 to 12.5)             | 0.1<br>(0.1 to 0.2)               | 17.9<br>(13.0 to 22.6)                            | 0.2<br>(-3.5 to 3.9)                                |
| Oral disorders                                | 54.6<br>(52.6 to 56.5)               | 123.1†<br>(111.5 to 136.0)         | 0.5<br>(0.3 to 0.8)               | 16.3<br>(12.1 to 21.3)                            | -0.1<br>(-1.8 to 1.7)                               |
| Caries of deciduous teeth                     | 5.6<br>(4.5 to 6.8)                  | 20.2<br>(14.2 to 28.0)             | < 0.05<br>(< 0.05 to < 0.05)      | -12.9<br>(-22.8 to -2.3)                          | 0.4<br>(-10.4 to 12.1)                              |
| Caries of permanent teeth                     | 29.8<br>(27.6 to 32.1)               | 99.8<br>(89.9 to 109.8)            | < 0.05<br>(< 0.05 to < 0.05)      | 0.7<br>(-3.4 to 5.1)                              | 1.1<br>(-2.9 to 5.0)                                |
| Periodontal disease                           | 20.2<br>(17.4 to 23.1)               | 2.3<br>(1.9 to 2.7)                | 0.1<br>(0.1 to 0.3)               | 1.5<br>(-2.1 to 5.7)                              | -0.7<br>(-3.5 to 2.4)                               |
| Edentulism and severe tooth loss              | 10.2<br>(8.8 to 11.6)                | 0.8<br>(0.7 to 1.0)                | 0.3<br>(0.2 to 0.4)               | 31.4<br>(26.9 to 36.9)                            | 0.2<br>(-2.7 to 3.7)                                |
| Other oral disorders                          | 2.1<br>(2.0 to 2.1)                  | --                                 | 0.1<br>(< 0.05 to 0.1)            | -0.3<br>(-3.6 to 3.0)                             | 0.0<br>(-3.4 to 3.4)                                |
| <b>Injuries</b>                               | <b>21.2</b><br><b>(20.1 to 22.8)</b> | <b>7.8†</b><br><b>(7.3 to 8.2)</b> | <b>0.8</b><br><b>(0.5 to 1.1)</b> | <b>19.7</b><br><b>(17.7 to 21.7)</b>              | <b>8.6</b><br><b>(7.1 to 10.1)</b>                  |
| <b>Transport injuries</b>                     | <b>2.5</b><br><b>(2.4 to 2.7)</b>    | <b>0.7</b><br><b>(0.6 to 0.8)</b>  | <b>0.1</b><br><b>(0.1 to 0.2)</b> | <b>28.2</b><br><b>(25.7 to 30.6)</b>              | <b>16.2</b><br><b>(14.0 to 18.3)</b>                |
| Road injuries                                 | 2.4<br>(2.2 to 2.5)                  | 0.7<br>(0.6 to 0.8)                | 0.1<br>(0.1 to 0.2)               | 29.5<br>(26.9 to 32.0)                            | 17.6<br>(15.3 to 19.8)                              |
| Pedestrian road injuries                      | 0.4<br>(0.4 to 0.5)                  | 0.1<br>(0.1 to 0.1)                | < 0.05<br>(< 0.05 to < 0.05)      | 36.4<br>(33.8 to 39.0)                            | 19.1<br>(16.8 to 21.2)                              |
| Cyclist road injuries                         | 0.5<br>(0.5 to 0.6)                  | 0.2<br>(0.1 to 0.2)                | < 0.05<br>(< 0.05 to < 0.05)      | 30.1<br>(27.4 to 32.9)                            | 21.2<br>(18.8 to 23.8)                              |
| Motorcyclist road injuries                    | 0.4<br>(0.4 to 0.5)                  | 0.1<br>(0.1 to 0.1)                | < 0.05<br>(< 0.05 to < 0.05)      | 22.0<br>(19.3 to 24.6)                            | 12.5<br>(10.1 to 14.8)                              |
| Motor vehicle road injuries                   | 0.7<br>(0.6 to 0.8)                  | 0.2<br>(0.2 to 0.3)                | < 0.05<br>(< 0.05 to 0.1)         | 30.2<br>(27.6 to 32.9)                            | 18.2<br>(15.8 to 20.6)                              |
| Other road injuries                           | 0.2<br>(0.2 to 0.3)                  | 0.1<br>(0.1 to 0.1)                | < 0.05<br>(< 0.05 to < 0.05)      | 28.6<br>(25.9 to 31.4)                            | 14.4<br>(12.4 to 16.5)                              |
| Other transport injuries                      | 0.2<br>(0.1 to 0.2)                  | < 0.05<br>(< 0.05 to < 0.05)       | < 0.05<br>(< 0.05 to < 0.05)      | 11.4<br>(8.9 to 13.9)                             | -0.7<br>(-2.8 to 1.4)                               |
| <b>Unintentional injuries</b>                 | <b>17.3</b><br><b>(16.1 to 18.7)</b> | <b>6.5</b><br><b>(6.1 to 7.0)</b>  | <b>0.6</b><br><b>(0.4 to 0.8)</b> | <b>19.9</b><br><b>(17.6 to 22.1)</b>              | <b>8.2</b><br><b>(6.6 to 9.6)</b>                   |
| Falls                                         | 7.4<br>(6.6 to 8.4)                  | 3.0<br>(2.6 to 3.4)                | 0.3<br>(0.2 to 0.4)               | 27.9<br>(25.5 to 30.2)                            | 10.7<br>(9.1 to 12.4)                               |
| Drowning                                      | 0.1<br>(0.1 to 0.1)                  | < 0.05<br>(< 0.05 to < 0.05)       | < 0.05<br>(< 0.05 to < 0.05)      | 18.0<br>(14.9 to 20.9)                            | 4.4<br>(2.2 to 6.6)                                 |
| Fire, heat, and hot substances                | 2.0<br>(1.7 to 2.5)                  | 0.2<br>(0.1 to 0.2)                | < 0.05<br>(< 0.05 to 0.1)         | 12.9<br>(8.8 to 16.9)                             | 11.1<br>(7.2 to 15.1)                               |
| Poisonings                                    | 0.1<br>(< 0.05 to 0.1)               | 0.1<br>(< 0.05 to 0.1)             | < 0.05<br>(< 0.05 to < 0.05)      | 10.9<br>(2.6 to 20.1)                             | 10.3<br>(1.6 to 20.5)                               |
| Exposure to mechanical forces                 | 3.0<br>(2.5 to 3.6)                  | 0.8<br>(0.7 to 1.0)                | 0.1<br>(< 0.05 to 0.1)            | 16.9<br>(14.5 to 19.0)                            | 10.5<br>(8.5 to 12.4)                               |
| Unintentional firearm injuries                | 0.2<br>(0.2 to 0.2)                  | < 0.05<br>(< 0.05 to < 0.05)       | < 0.05<br>(< 0.05 to < 0.05)      | 12.2<br>(9.8 to 14.5)                             | 6.5<br>(4.3 to 8.5)                                 |
| Unintentional suffocation                     | 0.1<br>(0.1 to 0.1)                  | < 0.05<br>(< 0.05 to < 0.05)       | < 0.05<br>(< 0.05 to < 0.05)      | -0.6<br>(-3.3 to 1.9)                             | 0.1<br>(-2.6 to 2.8)                                |
| Other exposure to mechanical forces           | 2.7<br>(2.3 to 3.3)                  | 0.8<br>(0.7 to 0.9)                | 0.1<br>(< 0.05 to 0.1)            | 18.7<br>(16.4 to 20.8)                            | 11.8<br>(9.8 to 13.8)                               |



| Cause                                                                               | Prevalence in thousands (95% UI)                                        | Incidence in thousands (95% UI)                                                             | YLDs in thousands (95% UI)                                                                 |                                                   |                                                     |
|-------------------------------------------------------------------------------------|-------------------------------------------------------------------------|---------------------------------------------------------------------------------------------|--------------------------------------------------------------------------------------------|---------------------------------------------------|-----------------------------------------------------|
|                                                                                     | 2016 counts                                                             | 2016 counts                                                                                 | 2016 counts                                                                                | Percentage change in counts between 2006 and 2016 | Percentage change in age-standardised rates between |
| Adverse effects of medical treatment                                                | 0.1<br>( $< 0.05$ to 0.1)                                               | 0.7<br>(0.6 to 0.8)                                                                         | $< 0.05$<br>( $< 0.05$ to $< 0.05$ )                                                       | 16.7<br>(10.0 to 25.6)                            | 3.3<br>(-1.7 to 9.3)                                |
| Animal contact                                                                      | 0.3<br>(0.3 to 0.3)                                                     | 0.3<br>(0.2 to 0.3)                                                                         | $< 0.05$<br>( $< 0.05$ to $< 0.05$ )                                                       | 3.3<br>(-2.6 to 9.3)                              | 1.4<br>(-4.5 to 8.3)                                |
| Venomous animal contact                                                             | 0.2<br>(0.1 to 0.2)                                                     | 0.1<br>(0.1 to 0.2)                                                                         | $< 0.05$<br>( $< 0.05$ to $< 0.05$ )                                                       | 2.8<br>(-4.1 to 10.3)                             | 2.2<br>(-5.0 to 10.5)                               |
| Non-venomous animal contact                                                         | 0.1<br>(0.1 to 0.1)                                                     | 0.1<br>(0.1 to 0.2)                                                                         | $< 0.05$<br>( $< 0.05$ to $< 0.05$ )                                                       | 5.5<br>(2.8 to 8.4)                               | -1.8<br>(-4.4 to 0.5)                               |
| Foreign body                                                                        | 0.8<br>(0.7 to 1.0)                                                     | 0.6<br>(0.5 to 0.8)                                                                         | $< 0.05$<br>( $< 0.05$ to $< 0.05$ )                                                       | 6.0<br>(3.5 to 8.3)                               | -1.2<br>(-3.5 to 1.0)                               |
| Pulmonary aspiration and foreign body in airway                                     | 0.6<br>(0.4 to 0.7)                                                     | 0.2<br>(0.1 to 0.2)                                                                         | $< 0.05$<br>( $< 0.05$ to $< 0.05$ )                                                       | 3.4<br>(0.6 to 6.2)                               | -2.2<br>(-4.9 to 0.5)                               |
| Foreign body in eyes                                                                | 0.1<br>(0.1 to 0.1)                                                     | 0.4<br>(0.3 to 0.5)                                                                         | $< 0.05$<br>( $< 0.05$ to $< 0.05$ )                                                       | 15.0<br>(10.2 to 20.5)                            | -0.4<br>(-3.1 to 1.9)                               |
| Foreign body in other body part                                                     | 0.2<br>(0.2 to 0.2)                                                     | 0.1<br>(0.1 to 0.1)                                                                         | $< 0.05$<br>( $< 0.05$ to $< 0.05$ )                                                       | 9.2<br>(6.5 to 11.7)                              | 2.6<br>(0.1 to 4.9)                                 |
| Environmental heat and cold exposure                                                | 1.5<br>(1.3 to 1.7)                                                     | 0.3<br>(0.3 to 0.4)                                                                         | 0.1<br>( $< 0.05$ to 0.1)                                                                  | 9.3<br>(7.2 to 11.4)                              | 0.3<br>(-1.3 to 1.9)                                |
| Other unintentional injuries                                                        | 2.1<br>(1.7 to 2.6)                                                     | 0.6<br>(0.5 to 0.6)                                                                         | 0.1<br>( $< 0.05$ to 0.1)                                                                  | 13.2<br>(10.9 to 15.8)                            | 6.4<br>(4.6 to 8.2)                                 |
| <b>Self-harm and interpersonal violence</b>                                         | <b>3.2</b><br><b>(2.9 to 3.4)</b>                                       | <b>0.5†</b><br><b>(0.4 to 0.6)</b>                                                          | <b>0.1</b><br><b>(<math>&lt; 0.05</math> to 0.1)</b>                                       | <b>4.8</b><br><b>(2.6 to 6.8)</b>                 | <b>0.7</b><br><b>(-1.4 to 2.6)</b>                  |
| Self-harm                                                                           | 0.1<br>(0.1 to 0.1)                                                     | $< 0.05$<br>( $< 0.05$ to 0.1)                                                              | $< 0.05$<br>( $< 0.05$ to $< 0.05$ )                                                       | 16.4<br>(13.3 to 19.4)                            | 4.1<br>(1.3 to 6.7)                                 |
| Self-harm by firearm                                                                | $< 0.05$<br>( $< 0.05$ to $< 0.05$ )                                    | $< 0.05$<br>( $< 0.05$ to $< 0.05$ )                                                        | $< 0.05$<br>( $< 0.05$ to $< 0.05$ )                                                       | -4.1<br>(-6.7 to -1.4)                            | -9.4<br>(-11.7 to -6.8)                             |
| Self-harm by other specified means                                                  | 0.1<br>(0.1 to 0.1)                                                     | $< 0.05$<br>( $< 0.05$ to 0.1)                                                              | $< 0.05$<br>( $< 0.05$ to $< 0.05$ )                                                       | 18.1<br>(14.8 to 21.2)                            | 5.3<br>(2.2 to 8.0)                                 |
| Interpersonal violence                                                              | 3.1<br>(2.8 to 3.3)                                                     | 0.5†<br>(0.4 to 0.5)                                                                        | 0.1<br>( $< 0.05$ to 0.1)                                                                  | 3.9<br>(1.7 to 6.0)                               | 0.4<br>(-1.7 to 2.5)                                |
| Assault by firearm                                                                  | 0.2<br>(0.1 to 0.2)                                                     | $< 0.05$<br>( $< 0.05$ to 0.1)                                                              | $< 0.05$<br>( $< 0.05$ to $< 0.05$ )                                                       | 1.9<br>(-0.9 to 4.7)                              | -4.0<br>(-6.5 to -1.4)                              |
| Assault by sharp object                                                             | 0.5<br>(0.4 to 0.6)                                                     | 0.2<br>(0.1 to 0.2)                                                                         | $< 0.05$<br>( $< 0.05$ to $< 0.05$ )                                                       | 11.8<br>(9.6 to 14.0)                             | 5.6<br>(3.6 to 7.8)                                 |
| Sexual violence                                                                     | 1.8<br>(1.6 to 2.1)                                                     | --                                                                                          | $< 0.05$<br>( $< 0.05$ to $< 0.05$ )                                                       | -9.4<br>(-13.2 to -5.4)                           | -3.1<br>(-7.8 to 1.7)                               |
| Assault by other means                                                              | 0.5<br>(0.5 to 0.6)                                                     | 0.2<br>(0.2 to 0.3)                                                                         | $< 0.05$<br>( $< 0.05$ to $< 0.05$ )                                                       | 11.2<br>(9.2 to 13.3)                             | 2.3<br>(0.5 to 4.2)                                 |
| <b>Forces of nature, conflict and terrorism, and executions and police conflict</b> | <b><math>&lt; 0.05</math></b><br><b>(<math>&lt; 0.05</math> to 0.1)</b> | <b><math>&lt; 0.05†</math></b><br><b>(<math>&lt; 0.05</math> to <math>&lt; 0.05</math>)</b> | <b><math>&lt; 0.05</math></b><br><b>(<math>&lt; 0.05</math> to <math>&lt; 0.05</math>)</b> | <b>7.9</b><br><b>(-36.6 to 29.2)</b>              | <b>1.3</b><br><b>(-40.8 to 21.8)</b>                |
| Exposure to forces of nature                                                        | $< 0.05$<br>( $< 0.05$ to $< 0.05$ )                                    | --                                                                                          | $< 0.05$<br>( $< 0.05$ to $< 0.05$ )                                                       | -30.4<br>(-78.9 to -5.9)                          | -33.3<br>(-80.2 to -9.1)                            |
| Conflict and terrorism                                                              | $< 0.05$<br>( $< 0.05$ to $< 0.05$ )                                    | --                                                                                          | $< 0.05$<br>( $< 0.05$ to $< 0.05$ )                                                       | 221.4<br>(179.1 to 261.8)                         | 151.4<br>(119.4 to 182.6)                           |
| Executions and police conflict                                                      | $< 0.05$<br>( $< 0.05$ to $< 0.05$ )                                    | $< 0.05$<br>( $< 0.05$ to $< 0.05$ )                                                        | $< 0.05$<br>( $< 0.05$ to $< 0.05$ )                                                       | 41.0<br>(29.2 to 59.6)                            | 35.6<br>(23.5 to 57.6)                              |
| <b>Impairments</b>                                                                  | --                                                                      | --                                                                                          | --                                                                                         | --                                                | --                                                  |
| Anaemia                                                                             | 23.2<br>(20.3 to 26.0)                                                  | --                                                                                          | 0.6<br>(0.4 to 0.9)                                                                        | 2.1<br>(-12.4 to 17.7)                            | 0.1<br>(-14.8 to 15.9)                              |
| Developmental intellectual disability                                               | 1.3<br>(1.0 to 1.6)                                                     | --                                                                                          | 0.2<br>(0.1 to 0.3)                                                                        | -6.8<br>(-12.7 to 2.5)                            | 0.6<br>(-6.3 to 12.9)                               |
| Epilepsy                                                                            | 0.7<br>(0.3 to 1.1)                                                     | --                                                                                          | 0.2<br>(0.1 to 0.4)                                                                        | -6.9<br>(-55.7 to 91.7)                           | -2.7<br>(-51.5 to 94.1)                             |
| Guillain-Barre syndrome                                                             | $< 0.05$<br>( $< 0.05$ to $< 0.05$ )                                    | --                                                                                          | $< 0.05$<br>( $< 0.05$ to $< 0.05$ )                                                       | 218.3<br>(99.8 to 533.3)                          | 230.6<br>(101.7 to 579.5)                           |
| Hearing loss                                                                        | 28.3<br>(27.1 to 29.5)                                                  | --                                                                                          | 0.7<br>(0.5 to 1.0)                                                                        | 25.0<br>(21.6 to 29.0)                            | 0.3<br>(-1.9 to 2.9)                                |
| Heart failure                                                                       | 1.3<br>(1.1 to 1.5)                                                     | --                                                                                          | 0.1<br>(0.1 to 0.2)                                                                        | 38.9<br>(28.4 to 49.2)                            | -0.3<br>(-7.4 to 7.3)                               |
| Infertility                                                                         | 1.6<br>(1.2 to 2.1)                                                     | --                                                                                          | $< 0.05$<br>( $< 0.05$ to $< 0.05$ )                                                       | -15.5<br>(-19.9 to -10.7)                         | 1.0<br>(-4.0 to 6.4)                                |
| Pelvic inflammatory disease                                                         | $< 0.05$<br>( $< 0.05$ to $< 0.05$ )                                    | --                                                                                          | $< 0.05$<br>( $< 0.05$ to $< 0.05$ )                                                       | -14.2<br>(-29.2 to 5.0)                           | -4.2<br>(-21.5 to 18.6)                             |
| Vision loss                                                                         | 15.0<br>(14.4 to 15.7)                                                  | --                                                                                          | 0.5<br>(0.3 to 0.7)                                                                        | 12.2<br>(5.7 to 17.7)                             | -3.3<br>(-6.8 to 0.2)                               |

We did not calculate incidence for the nine impairments, certain NTDs, and causes with only birth prevalence. Blank cells mean that no estimate is available.

† Incidence for aggregate causes represents the sum of the incidence of the causes below the aggregate.

‡ Incidence estimates for stroke represent first-ever stroke only.

^ Incidence of HIV/AIDS represents new infections of HIV only and does not include new infections of Tuberculosis in HIV positive cases.

SR Table 14: Prevalence, incidence, and YLDs for 2016, percentage change of YLD counts and percentage change of age-standardised YLD rates between 2006 and 2016 by cause and impairments, for all ages, Yemen.

| Cause                                                                                | Prevalence in thousands (95% UI)          | Incidence in thousands (95% UI)               | YLDs in thousands (95% UI)             |                                                   |                                                     |
|--------------------------------------------------------------------------------------|-------------------------------------------|-----------------------------------------------|----------------------------------------|---------------------------------------------------|-----------------------------------------------------|
|                                                                                      | 2016 counts                               | 2016 counts                                   | 2016 counts                            | Percentage change in counts between 2006 and 2016 | Percentage change in age-standardised rates between |
| <b>All causes</b>                                                                    | <b>27,510.5</b><br>(27,415.7 to 27,592.8) | <b>213,050.7†</b><br>(199,075.2 to 227,751.1) | <b>3,299.3</b><br>(2,438.6 to 4,335.8) | <b>32.9</b><br>(30.5 to 35.5)                     | <b>-2.6</b><br>(-3.8 to -1.2)                       |
| <b>Communicable, maternal, neonatal, and nutritional disorders</b>                   | <b>22,769.2</b><br>(22,223.9 to 23,284.2) | <b>136,078.7†</b><br>(123,319.4 to 149,336.2) | <b>904.6</b><br>(634.3 to 1,260.8)     | <b>22.3</b><br>(18.4 to 26.1)                     | <b>-9.7</b><br>(-12.3 to -7.2)                      |
| <b>HIV/AIDS and tuberculosis</b>                                                     | <b>8,570.3</b><br>(6,329.3 to 10,655.1)   | <b>15.1†</b><br>(10.5 to 21.4)                | <b>2.6</b><br>(1.4 to 4.5)             | <b>31.9</b><br>(1.4 to 81.1)                      | <b>-10.5</b><br>(-30.0 to 17.5)                     |
| Tuberculosis                                                                         | 7,208.7<br>(4,962.7 to 9,709.8)           | 14.4†<br>(10.1 to 20.5)                       | 2.0<br>(1.1 to 3.2)                    | 19.7<br>(-4.9 to 46.1)                            | -16.6<br>(-31.4 to -1.1)                            |
| Drug-susceptible tuberculosis                                                        | 6.6<br>(4.5 to 9.6)                       | 14.1<br>(9.7 to 20.2)                         | 2.0<br>(1.1 to 3.1)                    | 20.2<br>(-5.2 to 48.3)                            | -16.2<br>(-31.5 to -0.0)                            |
| Multidrug-resistant tuberculosis without extensive drug resistance                   | 0.1<br>(< 0.05 to 0.4)                    | 0.3<br>(0.1 to 0.9)                           | < 0.05<br>(< 0.05 to 0.1)              | 2.3<br>(-79.9 to 293.0)                           | -28.9<br>(-85.8 to 176.0)                           |
| Extensively drug-resistant tuberculosis                                              | < 0.05<br>(< 0.05 to < 0.05)              | < 0.05<br>(< 0.05 to < 0.05)                  | < 0.05<br>(< 0.05 to < 0.05)           | 132.3<br>(-54.3 to 792.7)                         | 61.4<br>(-67.8 to 526.7)                            |
| Latent tuberculosis infection                                                        | 7,202.0<br>(4,956.9 to 9,704.2)           | --                                            | --                                     | --                                                | --                                                  |
| HIV/AIDS                                                                             | 4.6<br>(0.6 to 15.0)                      | 0.7^<br>(< 0.05 to 2.4)                       | 0.6<br>(0.1 to 2.0)                    | 109.1<br>(-9.7 to 352.4)                          | 25.0<br>(-45.8 to 187.6)                            |
| Drug-susceptible HIV/AIDS - Tuberculosis                                             | 0.2<br>(0.1 to 0.3)                       | 0.4<br>(0.2 to 0.7)                           | 0.1<br>(< 0.05 to 0.1)                 | 17.3<br>(1.5 to 33.0)                             | -25.6<br>(-35.6 to -15.7)                           |
| Multidrug-resistant HIV/AIDS - Tuberculosis without extensive drug resistance        | < 0.05<br>(< 0.05 to < 0.05)              | < 0.05<br>(< 0.05 to < 0.05)                  | < 0.05<br>(< 0.05 to < 0.05)           | 1.9<br>(-80.4 to 281.5)                           | -35.4<br>(-87.6 to 142.0)                           |
| Extensively drug-resistant HIV/AIDS - Tuberculosis                                   | < 0.05<br>(< 0.05 to < 0.05)              | < 0.05<br>(< 0.05 to < 0.05)                  | < 0.05<br>(< 0.05 to < 0.05)           | 131.5<br>(-55.5 to 765.9)                         | 46.8<br>(-71.8 to 449.2)                            |
| HIV/AIDS resulting in other diseases                                                 | 4.4<br>(0.4 to 14.8)                      | 0.7<br>(< 0.05 to 2.4)                        | 0.5<br>(< 0.05 to 1.9)                 | 137.9<br>(-20.4 to 530.7)                         | 39.3<br>(-51.3 to 326.0)                            |
| <b>Diarrhoea, lower respiratory infections, and other common infectious diseases</b> | <b>2,333.6</b><br>(2,220.0 to 2,460.2)    | <b>129,034.1†</b><br>(116,361.9 to 142,178.4) | <b>127.5</b><br>(89.5 to 173.9)        | <b>27.1</b><br>(22.8 to 32.0)                     | <b>-3.2</b><br>(-6.0 to -0.4)                       |
| Diarrhoeal diseases                                                                  | 553.5<br>(504.2 to 603.1)                 | 35,403.1<br>(32,158.0 to 38,727.0)            | 62.4<br>(43.0 to 86.1)                 | 24.4<br>(16.9 to 32.9)                            | -6.4<br>(-11.2 to -1.3)                             |
| Intestinal infectious diseases                                                       | 1.4<br>(1.1 to 1.7)                       | 26.0†<br>(22.2 to 30.5)                       | 0.2<br>(0.1 to 0.3)                    | -19.5<br>(-32.7 to -3.9)                          | -36.1<br>(-44.2 to -26.3)                           |
| Typhoid fever                                                                        | 1.4<br>(1.1 to 1.7)                       | 21.4<br>(18.2 to 25.1)                        | 0.2<br>(0.1 to 0.3)                    | -19.6<br>(-33.4 to -2.7)                          | -36.0<br>(-44.9 to -25.5)                           |
| Paratyphoid fever                                                                    | 0.2<br>(0.2 to 0.2)                       | 4.6<br>(3.8 to 5.6)                           | < 0.05<br>(< 0.05 to < 0.05)           | -13.8<br>(-28.9 to 5.0)                           | -32.5<br>(-42.1 to -20.6)                           |
| Other intestinal infectious diseases                                                 | --                                        | --                                            | < 0.05<br>(< 0.05 to < 0.05)           | -38.7<br>(-53.8 to -19.0)                         | -51.0<br>(-58.7 to -41.9)                           |
| Lower respiratory infections                                                         | 50.7<br>(45.2 to 56.6)                    | 2,105.7<br>(1,872.6 to 2,391.6)               | 3.0<br>(2.0 to 4.4)                    | 30.8<br>(15.7 to 47.3)                            | -0.3<br>(-9.0 to 8.9)                               |
| Upper respiratory infections                                                         | 1,151.5<br>(1,002.9 to 1,310.1)           | 87,448.0<br>(75,505.4 to 100,441.6)           | 28.5<br>(16.9 to 44.6)                 | 30.5<br>(23.3 to 38.1)                            | -0.9<br>(-5.8 to 4.0)                               |
| Otitis media                                                                         | 564.4<br>(501.2 to 634.0)                 | 2,966.0<br>(2,298.2 to 3,789.5)               | 18.3<br>(11.3 to 27.4)                 | 27.4<br>(17.9 to 37.7)                            | -0.2<br>(-6.7 to 7.3)                               |
| Meningitis                                                                           | 51.1<br>(43.0 to 60.2)                    | 10.0<br>(8.3 to 12.5)                         | 6.0<br>(4.2 to 8.0)                    | 33.0<br>(28.1 to 37.9)                            | -0.6<br>(-4.2 to 3.1)                               |
| Pneumococcal meningitis                                                              | 15.7<br>(13.0 to 19.0)                    | 1.3<br>(0.9 to 1.8)                           | 2.1<br>(1.4 to 2.9)                    | 18.7<br>(10.5 to 27.3)                            | -11.5<br>(-18.2 to -4.1)                            |
| H influenzae type B meningitis                                                       | 12.4<br>(9.2 to 16.9)                     | 2.6<br>(1.5 to 3.8)                           | 1.5<br>(1.1 to 2.1)                    | 30.3<br>(23.7 to 37.7)                            | -1.3<br>(-6.1 to 4.1)                               |
| Meningococcal infection                                                              | 9.0<br>(6.5 to 12.3)                      | 2.5<br>(1.7 to 3.5)                           | 1.0<br>(0.7 to 1.4)                    | 31.3<br>(23.7 to 38.7)                            | -1.8<br>(-7.3 to 3.6)                               |
| Other meningitis                                                                     | 14.1<br>(10.1 to 19.4)                    | 3.7<br>(2.6 to 5.1)                           | 1.4<br>(0.9 to 2.0)                    | 69.4<br>(53.3 to 88.2)                            | 25.6<br>(14.1 to 38.7)                              |
| Encephalitis                                                                         | 69.1<br>(46.4 to 101.7)                   | 32.0<br>(27.6 to 37.1)                        | 7.3<br>(5.2 to 9.5)                    | 43.1<br>(27.5 to 59.7)                            | 4.6<br>(-5.6 to 15.4)                               |
| Diphtheria                                                                           | < 0.05<br>(< 0.05 to < 0.05)              | < 0.05<br>(< 0.05 to 0.1)                     | < 0.05<br>(< 0.05 to < 0.05)           | -38.7<br>(-70.2 to 36.1)                          | -48.1<br>(-72.0 to -6.8)                            |
| Whooping cough                                                                       | 21.5<br>(16.6 to 27.1)                    | 156.6<br>(121.1 to 197.5)                     | 1.1<br>(0.6 to 1.7)                    | 18.6<br>(3.2 to 35.8)                             | -8.4<br>(-20.2 to 4.8)                              |
| Tetanus                                                                              | 0.1<br>(< 0.05 to 0.1)                    | 0.1<br>(< 0.05 to 0.1)                        | < 0.05<br>(< 0.05 to < 0.05)           | -15.4<br>(-47.7 to 24.2)                          | -37.9<br>(-55.6 to -12.3)                           |
| Measles                                                                              | 0.3<br>(0.1 to 0.7)                       | 10.6<br>(3.4 to 24.3)                         | < 0.05<br>(< 0.05 to 0.1)              | -92.0<br>(-95.1 to -87.0)                         | -93.9<br>(-96.3 to -90.1)                           |
| Varicella and herpes zoster                                                          | 27.8<br>(26.1 to 29.7)                    | 875.9<br>(828.1 to 932.1)                     | 0.8<br>(0.5 to 1.2)                    | 35.0<br>(15.1 to 57.4)                            | 0.0<br>(-11.5 to 12.0)                              |
| <b>Neglected tropical diseases and malaria</b>                                       | <b>8,268.2</b><br>(7,411.1 to 9,270.6)    | <b>708.5†</b><br>(511.3 to 940.0)             | <b>75.1</b><br>(48.3 to 111.5)         | <b>1.2</b><br>(-9.7 to 14.2)                      | <b>-30.2</b><br>(-37.4 to -22.2)                    |
| Malaria                                                                              | 139.8<br>(107.4 to 185.9)                 | 378.3<br>(204.0 to 583.4)                     | 1.9<br>(1.2 to 2.8)                    | 15.4<br>(-8.6 to 47.0)                            | -4.2<br>(-22.8 to 17.7)                             |
| Chagas disease                                                                       | --                                        | --                                            | --                                     | --                                                | --                                                  |
| Leishmaniasis                                                                        | 559.4<br>(378.6 to 797.6)                 | 22.6<br>(7.6 to 45.1)                         | 30.4<br>(16.2 to 54.5)                 | 9.9<br>(-0.6 to 33.4)                             | -18.6<br>(-24.6 to -2.7)                            |
| Visceral leishmaniasis                                                               | < 0.05<br>(< 0.05 to < 0.05)              | < 0.05<br>(< 0.05 to < 0.05)                  | < 0.05<br>(< 0.05 to < 0.05)           | 329.2<br>(104.0 to 1,046.9)                       | 219.1<br>(38.5 to 859.6)                            |
| Cutaneous and mucocutaneous leishmaniasis                                            | 487.2<br>(303.6 to 751.7)                 | 22.5<br>(7.6 to 45.1)                         | 30.4<br>(16.2 to 54.5)                 | 9.9<br>(-0.6 to 33.4)                             | -18.6<br>(-24.6 to -2.7)                            |
| African trypanosomiasis                                                              | --                                        | --                                            | --                                     | --                                                | --                                                  |
| Schistosomiasis                                                                      | 363.3<br>(324.4 to 414.1)                 | 161.8<br>(146.0 to 183.8)                     | 2.9<br>(1.5 to 5.2)                    | -73.3<br>(-75.9 to -69.7)                         | -81.8<br>(-83.6 to -79.3)                           |
| Cysticercosis                                                                        | --                                        | --                                            | --                                     | --                                                | --                                                  |
| Cystic echinococcosis                                                                | 27.9<br>(7.2 to 93.3)                     | 5.9<br>(1.6 to 19.7)                          | 2.5<br>(0.6 to 8.8)                    | -2.5<br>(-85.1 to 432.8)                          | -28.9<br>(-87.0 to 258.4)                           |
| Lymphatic filariasis                                                                 | 0.6<br>(0.3 to 1.0)                       | 0.2<br>(0.1 to 0.2)                           | < 0.05<br>(< 0.05 to 0.1)              | -60.5<br>(-74.9 to -48.2)                         | -71.1<br>(-81.2 to -61.3)                           |
| Onchocerciasis                                                                       | --                                        | --                                            | --                                     | --                                                | --                                                  |
| Trachoma                                                                             | 26.1<br>(19.5 to 34.3)                    | --                                            | 2.2<br>(1.5 to 3.1)                    | -44.5<br>(-54.5 to -33.4)                         | -60.1<br>(-68.7 to -50.1)                           |
| Dengue                                                                               | 8.3<br>(3.7 to 15.4)                      | 139.6<br>(67.5 to 246.7)                      | 1.4<br>(0.5 to 2.8)                    | 191.8<br>(97.9 to 613.0)                          | 117.9<br>(57.9 to 409.0)                            |
| Yellow fever                                                                         | --                                        | --                                            | --                                     | --                                                | --                                                  |
| Rabies                                                                               | < 0.05<br>(< 0.05 to < 0.05)              | < 0.05<br>(< 0.05 to < 0.05)                  | < 0.05<br>(< 0.05 to < 0.05)           | -8.7<br>(-57.4 to 103.0)                          | -22.9<br>(-66.9 to 95.1)                            |
| Intestinal nematode infections                                                       | 7,082.6<br>(6,192.8 to 8,151.5)           | --                                            | 5.9<br>(2.9 to 11.4)                   | 33.1<br>(-30.2 to 154.6)                          | -0.4<br>(-53.6 to 109.5)                            |
| Ascariasis                                                                           | 5,407.0<br>(4,489.4 to 6,488.3)           | --                                            | 4.6<br>(1.9 to 9.7)                    | 32.2<br>(-40.2 to 186.1)                          | -1.9<br>(-61.6 to 141.1)                            |

| Cause                                                                   | Prevalence in thousands (95% UI)                 | Incidence in thousands (95% UI)                   | YLDs in thousands (95% UI)                    |                                                   |                                                     |
|-------------------------------------------------------------------------|--------------------------------------------------|---------------------------------------------------|-----------------------------------------------|---------------------------------------------------|-----------------------------------------------------|
|                                                                         | 2016 counts                                      | 2016 counts                                       | 2016 counts                                   | Percentage change in counts between 2006 and 2016 | Percentage change in age-standardised rates between |
| Trichuriasis                                                            | 1,552.0<br>(1,266.4 to 1,869.1)                  | --                                                | 0.1<br>( $< 0.05$ to 0.2)                     | 34.2<br>(-66.2 to 459.6)                          | -0.4<br>(-78.3 to 385.9)                            |
| Hookworm disease                                                        | 480.2<br>(405.6 to 569.1)                        | --                                                | 1.2<br>(0.7 to 1.9)                           | 36.8<br>(-4.2 to 97.5)                            | 7.3<br>(-29.4 to 69.3)                              |
| Food-borne trematodiasis                                                | --                                               | --                                                | --                                            | --                                                | --                                                  |
| Leprosy                                                                 | 1.2<br>(1.1 to 1.4)                              | 0.1<br>(0.1 to 0.1)                               | 0.1<br>( $< 0.05$ to 0.1)                     | 2.5<br>(-17.9 to 30.3)                            | -24.8<br>(-38.9 to -5.7)                            |
| Ebola virus disease                                                     | --                                               | --                                                | --                                            | --                                                | --                                                  |
| Zika virus disease                                                      | --                                               | --                                                | --                                            | --                                                | --                                                  |
| Guinea worm disease                                                     | --                                               | --                                                | --                                            | --                                                | --                                                  |
| Other neglected tropical diseases                                       | 687.3<br>(668.1 to 709.8)                        | --                                                | 27.9<br>(18.9 to 40.0)                        | 24.2<br>(15.9 to 33.1)                            | -3.6<br>(-9.2 to 2.5)                               |
| <b>Maternal disorders</b>                                               | <b>59.9</b><br><b>(47.3 to 74.4)</b>             | <b>543.2†</b><br><b>(484.4 to 607.4)</b>          | <b>8.8</b><br><b>(6.0 to 12.1)</b>            | <b>-2.0</b><br><b>(-17.0 to 15.1)</b>             | <b>-36.7</b><br><b>(-46.1 to -25.3)</b>             |
| Maternal haemorrhage                                                    | 6.9<br>(5.3 to 8.8)                              | 44.5<br>(33.0 to 58.2)                            | 0.3<br>(0.2 to 0.5)                           | 10.8<br>(-24.2 to 59.9)                           | -26.7<br>(-48.3 to 5.2)                             |
| Maternal sepsis and other pregnancy related infections                  | 11.2<br>(6.2 to 17.7)                            | 121.9<br>(91.5 to 168.5)                          | 0.5<br>(0.2 to 0.9)                           | 17.8<br>(-46.0 to 151.9)                          | -22.4<br>(-64.1 to 64.5)                            |
| Maternal hypertensive disorders                                         | 26.5<br>(16.6 to 38.6)                           | 123.3<br>(97.0 to 155.9)                          | 1.3<br>(0.7 to 2.1)                           | 29.3<br>(-19.8 to 119.8)                          | -9.6<br>(-43.6 to 51.8)                             |
| Maternal obstructed labour and uterine rupture                          | 16.4<br>(13.2 to 19.7)                           | 58.2<br>(42.7 to 78.3)                            | 5.2<br>(3.2 to 7.6)                           | -8.9<br>(-24.7 to 10.9)                           | -41.5<br>(-51.0 to -30.1)                           |
| Maternal abortion, miscarriage, and ectopic pregnancy                   | 1.6<br>(1.1 to 2.2)                              | 195.3<br>(162.9 to 234.1)                         | 0.2<br>(0.1 to 0.3)                           | 31.7<br>(-30.8 to 160.1)                          | -16.0<br>(-56.7 to 66.2)                            |
| Other maternal disorders                                                | --                                               | --                                                | 1.3<br>(0.9 to 1.9)                           | -7.1<br>(-21.7 to 9.0)                            | -39.6<br>(-48.7 to -28.6)                           |
| <b>Neonatal disorders</b>                                               | <b>338.3</b><br><b>(279.4 to 421.6)</b>          | --                                                | <b>57.8</b><br><b>(36.2 to 98.8)</b>          | <b>26.2</b><br><b>(4.2 to 54.6)</b>               | <b>-3.0</b><br><b>(-20.1 to 20.0)</b>               |
| Neonatal preterm birth complications                                    | 254.3<br>(196.2 to 342.2)                        | --                                                | 24.9<br>(16.0 to 37.8)                        | 32.4<br>(1.7 to 69.3)                             | 1.6<br>(-21.7 to 29.3)                              |
| Neonatal encephalopathy due to birth asphyxia and trauma                | 58.2<br>(27.5 to 108.1)                          | --                                                | 6.8<br>(1.1 to 20.9)                          | 42.2<br>(-22.5 to 208.9)                          | 8.5<br>(-41.6 to 141.0)                             |
| Neonatal sepsis and other neonatal infections                           | 35.7<br>(9.8 to 107.5)                           | --                                                | 15.2<br>(3.4 to 48.9)                         | 12.6<br>(-23.8 to 91.5)                           | -13.9<br>(-42.3 to 53.4)                            |
| Hemolytic disease and other neonatal jaundice                           | 24.1<br>(21.0 to 27.7)                           | --                                                | 7.5<br>(5.6 to 9.6)                           | 28.1<br>(10.6 to 49.6)                            | -2.2<br>(-14.4 to 11.2)                             |
| Other neonatal disorders                                                | --                                               | --                                                | 3.5<br>(2.1 to 6.1)                           | 19.8<br>(-3.1 to 48.3)                            | -9.3<br>(-26.7 to 12.5)                             |
| <b>Nutritional deficiencies</b>                                         | <b>13,942.3</b><br><b>(13,677.0 to 14,183.7)</b> | <b>1,870.8†</b><br><b>(1,613.0 to 2,265.0)</b>    | <b>595.0</b><br><b>(404.3 to 844.1)</b>       | <b>23.6</b><br><b>(19.3 to 28.4)</b>              | <b>-7.0</b><br><b>(-9.6 to -4.3)</b>                |
| Protein-energy malnutrition                                             | 808.2<br>(703.0 to 910.4)                        | 496.9<br>(437.8 to 559.4)                         | 19.5<br>(12.4 to 28.2)                        | 25.7<br>(3.8 to 51.8)                             | -4.4<br>(-21.0 to 15.4)                             |
| Iodine deficiency                                                       | 972.1<br>(763.1 to 1,210.1)                      | 35.6<br>(28.1 to 43.8)                            | 24.4<br>(14.9 to 36.6)                        | 10.9<br>(-0.9 to 22.4)                            | -19.6<br>(-27.5 to -11.9)                           |
| Vitamin A deficiency                                                    | 1,530.0<br>(1,258.5 to 1,939.3)                  | 1,338.3<br>(1,079.8 to 1,724.8)                   | 4.0<br>(2.3 to 6.3)                           | 14.3<br>(-5.0 to 36.0)                            | -12.8<br>(-26.3 to 2.2)                             |
| Iron-deficiency anaemia                                                 | 13,503.9<br>(13,202.6 to 13,806.9)               | --                                                | 546.5<br>(370.9 to 779.0)                     | 24.2<br>(19.4 to 29.4)                            | -6.2<br>(-9.0 to -3.3)                              |
| Other nutritional deficiencies                                          | --                                               | --                                                | 0.7<br>(0.4 to 0.9)                           | 24.8<br>(2.0 to 51.9)                             | -5.4<br>(-22.5 to 15.0)                             |
| <b>Other communicable, maternal, neonatal, and nutritional diseases</b> | <b>6,137.8</b><br><b>(5,717.5 to 6,535.2)</b>    | <b>3,907.0</b><br><b>(3,317.3 to 4,670.6)</b>     | <b>37.8</b><br><b>(25.1 to 56.4)</b>          | <b>41.1</b><br><b>(34.3 to 48.5)</b>              | <b>1.4</b><br><b>(-3.1 to 6.2)</b>                  |
| Sexually transmitted diseases excluding HIV                             | 3,604.2<br>(3,338.3 to 3,865.8)                  | 3,461.7<br>(2,897.6 to 4,117.2)                   | 16.1<br>(9.8 to 25.4)                         | 54.6<br>(43.1 to 66.3)                            | 1.9<br>(-5.4 to 9.5)                                |
| Syphilis                                                                | 369.1<br>(264.6 to 503.9)                        | 257.0<br>(177.1 to 357.1)                         | 0.2<br>(0.2 to 0.4)                           | 46.0<br>(31.6 to 62.4)                            | 0.4<br>(-9.9 to 10.7)                               |
| Chlamydial infection                                                    | 266.2<br>(179.3 to 378.8)                        | 219.7<br>(151.6 to 310.2)                         | 1.7<br>(1.0 to 2.8)                           | 51.1<br>(31.1 to 73.9)                            | -2.1<br>(-14.1 to 11.8)                             |
| Gonococcal infection                                                    | 637.3<br>(500.0 to 808.0)                        | 2,301.9<br>(1,756.5 to 2,951.3)                   | 8.0<br>(4.7 to 13.1)                          | 56.8<br>(41.1 to 72.8)                            | 3.8<br>(-6.2 to 14.6)                               |
| Trichomoniasis                                                          | 375.8<br>(296.5 to 466.1)                        | 326.9<br>(257.1 to 410.6)                         | 0.4<br>(0.1 to 0.9)                           | 48.2<br>(35.8 to 62.1)                            | 0.3<br>(-7.2 to 8.0)                                |
| Genital herpes                                                          | 2,156.3<br>(1,809.6 to 2,548.8)                  | 219.0<br>(182.9 to 259.9)                         | 0.6<br>(0.2 to 1.3)                           | 46.6<br>(34.8 to 58.0)                            | 0.5<br>(-5.0 to 6.8)                                |
| Other sexually transmitted diseases                                     | 119.3<br>(110.4 to 128.1)                        | 137.3<br>(105.2 to 175.5)                         | 5.2<br>(3.2 to 8.0)                           | 54.4<br>(42.3 to 67.5)                            | 0.8<br>(-6.8 to 9.0)                                |
| Hepatitis                                                               | 2,459.8<br>(1,975.2 to 3,002.5)                  | 445.3<br>(263.6 to 673.9)                         | 0.4<br>(0.2 to 0.6)                           | 4.5<br>(-23.9 to 45.6)                            | -16.5<br>(-32.9 to 5.9)                             |
| Acute hepatitis A                                                       | 16.0<br>(2.9 to 33.7)                            | 207.5<br>(37.0 to 438.7)                          | 0.1<br>( $< 0.05$ to 0.2)                     | 6.6<br>(-61.9 to 227.5)                           | -9.8<br>(-59.8 to 103.7)                            |
| Hepatitis B                                                             | 2,082.6<br>(1,597.3 to 2,616.4)                  | 206.4<br>(153.9 to 269.4)                         | 0.2<br>(0.1 to 0.3)                           | 0.9<br>(-17.0 to 22.4)                            | -20.2<br>(-35.8 to -1.6)                            |
| Hepatitis C                                                             | 360.5<br>(317.1 to 408.2)                        | 21.6<br>(18.6 to 25.3)                            | $< 0.05$<br>( $< 0.05$ to $< 0.05$ )          | 30.1<br>(28.4 to 31.8)                            | 0.4<br>(-0.5 to 1.2)                                |
| Acute hepatitis E                                                       | 0.7<br>(0.6 to 0.9)                              | 9.7<br>(8.2 to 11.5)                              | $< 0.05$<br>( $< 0.05$ to $< 0.05$ )          | 17.2<br>(4.1 to 30.3)                             | -3.3<br>(-13.3 to 7.7)                              |
| Other infectious diseases                                               | 535.9<br>(521.8 to 551.6)                        | $< 0.05$<br>( $< 0.05$ to 0.1)                    | 21.4<br>(14.4 to 30.7)                        | 33.1<br>(25.0 to 41.8)                            | 1.4<br>(-4.1 to 7.0)                                |
| <b>Non-communicable diseases</b>                                        | <b>25,215.3</b><br><b>(24,947.9 to 25,489.6)</b> | <b>74,974.9†</b><br><b>(69,258.6 to 81,190.9)</b> | <b>2,243.6</b><br><b>(1,658.4 to 2,919.1)</b> | <b>36.7</b><br><b>(33.9 to 39.7)</b>              | <b>-0.8</b><br><b>(-2.2 to 0.8)</b>                 |
| <b>Neoplasms</b>                                                        | <b>18.7</b><br><b>(15.8 to 21.4)</b>             | <b>12.7</b><br><b>(11.2 to 14.0)</b>              | <b>4.1</b><br><b>(2.9 to 5.5)</b>             | <b>40.2</b><br><b>(31.9 to 48.2)</b>              | <b>1.9</b><br><b>(-3.5 to 7.7)</b>                  |
| Lip and oral cavity cancer                                              | 0.6<br>(0.5 to 0.7)                              | 0.2<br>(0.1 to 0.2)                               | 0.1<br>( $< 0.05$ to 0.1)                     | 46.8<br>(28.7 to 66.2)                            | 3.2<br>(-10.0 to 19.9)                              |
| Nasopharynx cancer                                                      | 0.3<br>(0.2 to 0.5)                              | 0.1<br>(0.1 to 0.1)                               | $< 0.05$<br>( $< 0.05$ to 0.1)                | 23.7<br>(7.3 to 44.3)                             | -12.5<br>(-22.7 to 0.0)                             |
| Other pharynx cancer                                                    | 0.1<br>(0.1 to 0.2)                              | 0.1<br>( $< 0.05$ to 0.1)                         | $< 0.05$<br>( $< 0.05$ to $< 0.05$ )          | 32.5<br>(19.9 to 50.7)                            | -5.1<br>(-14.4 to 7.7)                              |
| Oesophageal cancer                                                      | 0.2<br>(0.2 to 0.2)                              | 0.2<br>(0.2 to 0.2)                               | $< 0.05$<br>( $< 0.05$ to 0.1)                | 27.8<br>(16.5 to 39.9)                            | -7.7<br>(-15.8 to 1.6)                              |
| Stomach cancer                                                          | 1.4<br>(1.2 to 1.5)                              | 1.0<br>(0.8 to 1.1)                               | 0.2<br>(0.2 to 0.3)                           | 20.8<br>(6.8 to 36.7)                             | -13.1<br>(-25.1 to 0.9)                             |
| Colon and rectum cancer                                                 | 2.4<br>(1.9 to 3.1)                              | 0.9<br>(0.7 to 1.1)                               | 0.3<br>(0.2 to 0.4)                           | 50.5<br>(26.3 to 77.0)                            | 8.3<br>(-9.4 to 29.0)                               |
| Liver cancer                                                            | 0.3<br>(0.2 to 0.4)                              | 0.7<br>(0.4 to 0.9)                               | 0.1<br>(0.1 to 0.2)                           | 35.1<br>(18.2 to 53.4)                            | -3.1<br>(-15.0 to 10.3)                             |
| Liver cancer due to hepatitis B                                         | 0.2<br>(0.1 to 0.3)                              | 0.3<br>(0.2 to 0.4)                               | 0.1<br>( $< 0.05$ to 0.1)                     | 36.2<br>(18.8 to 56.8)                            | -3.3<br>(-16.0 to 10.8)                             |



| Cause                                              | Prevalence in thousands (95% UI)              | Incidence in thousands (95% UI)          | YLDs in thousands (95% UI)            |                                                   |                                                     |
|----------------------------------------------------|-----------------------------------------------|------------------------------------------|---------------------------------------|---------------------------------------------------|-----------------------------------------------------|
|                                                    | 2016 counts                                   | 2016 counts                              | 2016 counts                           | Percentage change in counts between 2006 and 2016 | Percentage change in age-standardised rates between |
| Liver cancer due to hepatitis C                    | 0.2<br>(0.1 to 0.3)                           | 0.2<br>(0.1 to 0.3)                      | < 0.05<br>(< 0.05 to 0.1)             | 35.5<br>(18.3 to 56.3)                            | -2.2<br>(-15.1 to 12.6)                             |
| Liver cancer due to alcohol use                    | < 0.05<br>(< 0.05 to < 0.05)                  | < 0.05<br>(< 0.05 to < 0.05)             | < 0.05<br>(< 0.05 to < 0.05)          | 34.2<br>(12.4 to 60.3)                            | -6.3<br>(-22.1 to 11.7)                             |
| Liver cancer due to other causes                   | 0.1<br>(0.1 to 0.1)                           | 0.1<br>(0.1 to 0.2)                      | < 0.05<br>(< 0.05 to < 0.05)          | 31.9<br>(11.4 to 54.7)                            | -4.2<br>(-18.9 to 13.2)                             |
| Gallbladder and biliary tract cancer               | 0.1<br>(0.1 to 0.2)                           | 0.2<br>(0.1 to 0.2)                      | < 0.05<br>(< 0.05 to 0.1)             | 28.8<br>(16.4 to 46.9)                            | -6.5<br>(-15.2 to 5.3)                              |
| Pancreatic cancer                                  | 0.2<br>(0.2 to 0.3)                           | 0.3<br>(0.3 to 0.4)                      | 0.1<br>(< 0.05 to 0.1)                | 47.7<br>(34.6 to 61.3)                            | 5.6<br>(-3.9 to 16.8)                               |
| Larynx cancer                                      | 0.4<br>(0.3 to 0.5)                           | 0.1<br>(0.1 to 0.2)                      | 0.1<br>(< 0.05 to 0.1)                | 31.3<br>(17.4 to 47.3)                            | -5.7<br>(-16.0 to 5.7)                              |
| Tracheal, bronchus, and lung cancer                | 1.5<br>(1.2 to 1.8)                           | 1.4<br>(1.2 to 1.7)                      | 0.3<br>(0.2 to 0.5)                   | 49.1<br>(23.1 to 83.6)                            | 7.7<br>(-11.1 to 33.8)                              |
| Malignant skin melanoma                            | 0.1<br>(0.1 to 0.2)                           | < 0.05<br>(< 0.05 to 0.1)                | < 0.05<br>(< 0.05 to < 0.05)          | 51.6<br>(33.3 to 80.1)                            | 6.1<br>(-5.7 to 24.4)                               |
| Non-melanoma skin cancer                           | 0.1<br>(0.1 to 0.2)                           | 0.7<br>(0.4 to 1.1)                      | < 0.05<br>(< 0.05 to < 0.05)          | 21.8<br>(-16.1 to 87.2)                           | -17.8<br>(-45.9 to 36.2)                            |
| Non-melanoma skin cancer (squamous-cell carcinoma) | 0.1<br>(0.1 to 0.2)                           | 0.1<br>(0.1 to 0.2)                      | < 0.05<br>(< 0.05 to < 0.05)          | 18.5<br>(-20.7 to 93.4)                           | -19.9<br>(-49.7 to 39.9)                            |
| Non-melanoma skin cancer (basal-cell carcinoma)    | 0.1<br>(< 0.05 to 0.1)                        | 0.6<br>(0.3 to 0.9)                      | < 0.05<br>(< 0.05 to < 0.05)          | 47.7<br>(35.4 to 60.1)                            | 4.4<br>(-3.9 to 13.5)                               |
| Breast cancer                                      | 7.9<br>(4.9 to 12.0)                          | 1.9<br>(1.2 to 2.8)                      | 0.8<br>(0.4 to 1.3)                   | 61.1<br>(24.3 to 111.6)                           | 15.2<br>(-9.9 to 49.5)                              |
| Cervical cancer                                    | 2.0<br>(1.2 to 2.6)                           | 0.6<br>(0.3 to 0.7)                      | 0.2<br>(0.1 to 0.3)                   | 26.2<br>(4.1 to 54.0)                             | -11.5<br>(-25.6 to 6.9)                             |
| Uterine cancer                                     | 0.8<br>(0.6 to 1.0)                           | 0.2<br>(0.1 to 0.2)                      | 0.1<br>(< 0.05 to 0.1)                | 51.9<br>(19.5 to 92.9)                            | 6.9<br>(-14.6 to 34.6)                              |
| Ovarian cancer                                     | 0.7<br>(0.6 to 1.1)                           | 0.3<br>(0.2 to 0.4)                      | 0.1<br>(0.1 to 0.2)                   | 52.1<br>(26.4 to 83.6)                            | 7.5<br>(-15.1 to 36.0)                              |
| Prostate cancer                                    | 1.2<br>(1.0 to 1.6)                           | 0.4<br>(0.3 to 0.5)                      | 0.2<br>(0.1 to 0.2)                   | 43.6<br>(9.2 to 84.7)                             | 3.9<br>(-17.4 to 31.0)                              |
| Testicular cancer                                  | 0.1<br>(0.1 to 0.2)                           | < 0.05<br>(< 0.05 to < 0.05)             | < 0.05<br>(< 0.05 to < 0.05)          | 54.6<br>(22.2 to 95.9)                            | 0.1<br>(-18.7 to 23.4)                              |
| Kidney cancer                                      | 0.8<br>(0.7 to 1.0)                           | 0.2<br>(0.2 to 0.3)                      | 0.1<br>(0.1 to 0.1)                   | 49.1<br>(16.7 to 74.9)                            | 12.3<br>(-3.7 to 29.1)                              |
| Bladder cancer                                     | 1.0<br>(0.9 to 1.3)                           | 0.3<br>(0.3 to 0.4)                      | 0.1<br>(0.1 to 0.2)                   | 47.7<br>(29.8 to 69.5)                            | 4.4<br>(-9.3 to 21.8)                               |
| Brain and nervous system cancer                    | 1.2<br>(0.9 to 1.4)                           | 0.5<br>(0.4 to 0.6)                      | 0.2<br>(0.1 to 0.2)                   | 40.2<br>(25.6 to 59.1)                            | 4.8<br>(-6.6 to 27.9)                               |
| Thyroid cancer                                     | 0.6<br>(0.4 to 0.8)                           | 0.1<br>(0.1 to 0.2)                      | < 0.05<br>(< 0.05 to 0.1)             | 47.6<br>(22.2 to 78.8)                            | 1.6<br>(-15.2 to 22.6)                              |
| Mesothelioma                                       | < 0.05<br>(< 0.05 to 0.1)                     | < 0.05<br>(< 0.05 to < 0.05)             | < 0.05<br>(< 0.05 to < 0.05)          | 40.0<br>(22.9 to 61.6)                            | -1.9<br>(-13.5 to 13.5)                             |
| Hodgkin lymphoma                                   | 0.4<br>(0.3 to 0.6)                           | 0.1<br>(0.1 to 0.2)                      | 0.1<br>(< 0.05 to 0.1)                | 15.6<br>(2.9 to 29.7)                             | -17.8<br>(-24.6 to -9.4)                            |
| Non-Hodgkin's lymphoma                             | 1.1<br>(0.9 to 1.4)                           | 0.4<br>(0.4 to 0.5)                      | 0.1<br>(0.1 to 0.2)                   | 39.3<br>(24.3 to 53.8)                            | 0.3<br>(-10.9 to 12.0)                              |
| Multiple myeloma                                   | 0.1<br>(0.1 to 0.2)                           | 0.1<br>(0.1 to 0.1)                      | < 0.05<br>(< 0.05 to 0.1)             | 49.4<br>(33.2 to 74.0)                            | 5.7<br>(-5.8 to 24.7)                               |
| Leukaemia                                          | 4.5<br>(3.5 to 5.5)                           | 1.1<br>(0.9 to 1.4)                      | 0.6<br>(0.4 to 0.8)                   | 22.8<br>(8.4 to 44.9)                             | -5.8<br>(-15.8 to 8.3)                              |
| Acute lymphoid leukaemia                           | 0.6<br>(0.4 to 0.8)                           | 0.1<br>(0.1 to 0.2)                      | 0.1<br>(< 0.05 to 0.1)                | 21.3<br>(-8.6 to 63.6)                            | -2.9<br>(-22.0 to 20.0)                             |
| Chronic lymphoid leukaemia                         | 0.3<br>(0.2 to 0.5)                           | 0.1<br>(< 0.05 to 0.1)                   | < 0.05<br>(< 0.05 to 0.1)             | 54.5<br>(28.1 to 87.5)                            | 7.3<br>(-9.9 to 28.3)                               |
| Acute myeloid leukaemia                            | 0.3<br>(0.2 to 0.4)                           | 0.1<br>(0.1 to 0.2)                      | < 0.05<br>(< 0.05 to 0.1)             | 42.9<br>(15.6 to 77.1)                            | 9.6<br>(-6.6 to 27.9)                               |
| Chronic myeloid leukaemia                          | 0.3<br>(0.2 to 0.4)                           | 0.1<br>(0.1 to 0.1)                      | < 0.05<br>(< 0.05 to 0.1)             | 32.3<br>(10.3 to 61.0)                            | -5.7<br>(-20.4 to 12.9)                             |
| Other leukaemia                                    | 3.1<br>(2.3 to 4.0)                           | 0.7<br>(0.5 to 0.9)                      | 0.4<br>(0.2 to 0.5)                   | 17.4<br>(1.3 to 41.8)                             | -8.6<br>(-20.6 to 7.8)                              |
| Other neoplasms                                    | 1.9<br>(1.6 to 2.2)                           | 0.6<br>(0.6 to 0.8)                      | 0.2<br>(0.1 to 0.2)                   | 33.9<br>(22.1 to 47.9)                            | -0.5<br>(-10.1 to 12.8)                             |
| <b>Cardiovascular diseases</b>                     | <b>1,311.1</b><br><b>(1,260.2 to 1,367.1)</b> | <b>137.9†</b><br><b>(131.0 to 144.8)</b> | <b>74.1</b><br><b>(54.1 to 95.9)</b>  | <b>36.3</b><br><b>(32.0 to 40.7)</b>              | <b>-2.4</b><br><b>(-5.5 to 0.4)</b>                 |
| Rheumatic heart disease                            | 345.5<br>(306.8 to 385.3)                     | 14.8<br>(13.2 to 16.5)                   | 16.2<br>(10.2 to 24.0)                | 37.0<br>(26.1 to 48.2)                            | -1.9<br>(-9.2 to 5.9)                               |
| Ischaemic heart disease                            | 465.0<br>(437.1 to 491.9)                     | 69.0<br>(63.5 to 75.0)                   | 17.2<br>(11.8 to 23.6)                | 39.2<br>(33.4 to 45.8)                            | -1.2<br>(-5.0 to 2.8)                               |
| Cerebrovascular disease                            | 128.8<br>(120.0 to 138.2)                     | 20.4‡<br>(18.6 to 22.2)                  | 19.1<br>(13.7 to 24.2)                | 31.3<br>(23.0 to 40.0)                            | -5.3<br>(-11.7 to 0.7)                              |
| Ischaemic stroke                                   | 112.1<br>(100.4 to 124.6)                     | 14.6‡<br>(12.9 to 16.3)                  | 15.9<br>(11.4 to 20.2)                | 31.3<br>(21.6 to 41.7)                            | -5.4<br>(-12.6 to 1.3)                              |
| Hemorrhagic stroke                                 | 22.4<br>(19.9 to 24.9)                        | 5.8‡<br>(5.2 to 6.4)                     | 3.2<br>(2.3 to 4.1)                   | 31.2<br>(16.6 to 46.6)                            | -5.0<br>(-15.3 to 6.4)                              |
| Hypertensive heart disease                         | 16.4<br>(14.0 to 19.4)                        | --                                       | 1.3<br>(0.9 to 1.8)                   | 43.2<br>(26.1 to 63.6)                            | 2.7<br>(-7.2 to 14.3)                               |
| Cardiomyopathy and myocarditis                     | 8.8<br>(7.8 to 9.9)                           | 8.3†<br>(7.2 to 9.7)                     | 1.0<br>(0.7 to 1.5)                   | 41.1<br>(24.9 to 61.0)                            | 1.6<br>(-8.5 to 13.6)                               |
| Myocarditis                                        | 5.1<br>(4.4 to 5.7)                           | 8.3<br>(7.2 to 9.7)                      | 0.4<br>(0.2 to 0.5)                   | 37.7<br>(21.8 to 57.1)                            | 1.3<br>(-9.8 to 14.5)                               |
| Alcoholic cardiomyopathy                           | 0.7<br>(0.5 to 0.8)                           | --                                       | 0.1<br>(< 0.05 to 0.1)                | 44.8<br>(25.0 to 66.0)                            | 3.5<br>(-14.0 to 22.9)                              |
| Other cardiomyopathy                               | 7.0<br>(5.9 to 8.1)                           | --                                       | 0.6<br>(0.4 to 0.9)                   | 43.0<br>(19.1 to 74.2)                            | 1.4<br>(-13.5 to 17.9)                              |
| Atrial fibrillation and flutter                    | 47.9<br>(41.7 to 55.1)                        | 4.4<br>(3.7 to 5.2)                      | 3.6<br>(2.5 to 5.1)                   | 39.0<br>(28.1 to 50.1)                            | -0.3<br>(-6.3 to 6.3)                               |
| Peripheral vascular disease                        | 165.5<br>(142.3 to 194.0)                     | 17.3<br>(14.7 to 20.5)                   | 0.8<br>(0.4 to 1.5)                   | 38.9<br>(27.8 to 51.3)                            | -3.1<br>(-10.0 to 4.1)                              |
| Endocarditis                                       | 1.0<br>(0.8 to 1.1)                           | 3.6<br>(3.2 to 4.1)                      | 0.1<br>(0.1 to 0.1)                   | 39.0<br>(28.2 to 50.7)                            | 0.8<br>(-11.9 to 15.1)                              |
| Other cardiovascular and circulatory diseases      | 283.7<br>(239.3 to 331.5)                     | --                                       | 14.8<br>(9.9 to 21.2)                 | 37.1<br>(26.3 to 48.8)                            | -0.6<br>(-7.5 to 6.8)                               |
| <b>Chronic respiratory diseases</b>                | <b>2,004.2</b><br><b>(1,897.9 to 2,115.4)</b> | <b>402.0†</b><br><b>(370.9 to 436.2)</b> | <b>82.2</b><br><b>(58.2 to 111.5)</b> | <b>31.0</b><br><b>(25.5 to 37.2)</b>              | <b>-1.8</b><br><b>(-5.3 to 2.2)</b>                 |
| Chronic obstructive pulmonary disease              | 438.5<br>(420.3 to 458.1)                     | 30.1<br>(28.9 to 31.2)                   | 17.5<br>(14.6 to 20.3)                | 35.8<br>(25.5 to 48.3)                            | -3.6<br>(-10.1 to 4.8)                              |
| Pneumoconiosis                                     | 0.9<br>(0.8 to 1.0)                           | 0.1<br>(0.1 to 0.1)                      | 0.1<br>(0.1 to 0.2)                   | 46.5<br>(40.5 to 54.5)                            | 0.3<br>(-4.2 to 5.4)                                |
| Silicosis                                          | 0.2<br>(0.2 to 0.2)                           | < 0.05<br>(< 0.05 to < 0.05)             | < 0.05<br>(< 0.05 to < 0.05)          | 51.4<br>(43.6 to 60.2)                            | 1.2<br>(-3.5 to 6.3)                                |

| Cause                                                          | Prevalence in thousands (95% UI)                | Incidence in thousands (95% UI)                | YLDs in thousands (95% UI)              |                                                   |                                                     |
|----------------------------------------------------------------|-------------------------------------------------|------------------------------------------------|-----------------------------------------|---------------------------------------------------|-----------------------------------------------------|
|                                                                | 2016 counts                                     | 2016 counts                                    | 2016 counts                             | Percentage change in counts between 2006 and 2016 | Percentage change in age-standardised rates between |
| Asbestosis                                                     | 0.2<br>(0.2 to 0.3)                             | < 0.05<br>(< 0.05 to < 0.05)                   | < 0.05<br>(< 0.05 to 0.1)               | 41.3<br>(32.4 to 49.8)                            | -1.9<br>(-6.9 to 3.1)                               |
| Coal workers pneumoconiosis                                    | --                                              | --                                             | --                                      | --                                                | --                                                  |
| Other pneumoconiosis                                           | 0.4<br>(0.4 to 0.5)                             | < 0.05<br>(< 0.05 to < 0.05)                   | 0.1<br>(< 0.05 to 0.1)                  | 47.1<br>(35.1 to 60.7)                            | 1.3<br>(-6.8 to 9.8)                                |
| Asthma                                                         | 1,599.0<br>(1,471.7 to 1,741.0)                 | 371.3<br>(339.8 to 405.4)                      | 62.0<br>(41.0 to 89.5)                  | 28.7<br>(22.0 to 35.1)                            | -1.6<br>(-5.6 to 2.3)                               |
| Interstitial lung disease and pulmonary sarcoidosis            | 4.8<br>(4.3 to 5.3)                             | 0.5<br>(0.5 to 0.6)                            | 0.5<br>(0.3 to 0.7)                     | 43.8<br>(30.9 to 58.0)                            | 2.8<br>(-7.9 to 14.8)                               |
| Other chronic respiratory diseases                             | --                                              | --                                             | 2.0<br>(1.6 to 2.5)                     | 69.6<br>(31.8 to 118.0)                           | 30.1<br>(9.0 to 55.4)                               |
| <b>Cirrhosis and other chronic liver diseases</b>              | <b>78.0</b><br><b>(73.6 to 83.0)</b>            | <b>4.2</b><br><b>(4.0 to 4.4)</b>              | <b>4.3</b><br><b>(2.9 to 6.0)</b>       | <b>37.1</b><br><b>(20.0 to 57.3)</b>              | <b>2.2</b><br><b>(-6.8 to 12.6)</b>                 |
| Cirrhosis and other chronic liver diseases due to hepatitis B  | 29.2<br>(26.1 to 32.2)                          | 1.6<br>(1.5 to 1.8)                            | 1.1<br>(0.8 to 1.6)                     | 45.9<br>(23.5 to 73.4)                            | 0.9<br>(-11.1 to 15.0)                              |
| Cirrhosis and other chronic liver diseases due to hepatitis C  | 9.3<br>(7.4 to 11.6)                            | 0.5<br>(0.4 to 0.6)                            | 0.4<br>(0.2 to 0.6)                     | 47.9<br>(18.4 to 88.7)                            | 2.9<br>(-16.8 to 27.7)                              |
| Cirrhosis and other chronic liver diseases due to alcohol use  | 4.4<br>(3.8 to 5.0)                             | 0.3<br>(0.2 to 0.3)                            | 0.2<br>(0.1 to 0.2)                     | 43.6<br>(12.1 to 80.3)                            | 0.8<br>(-21.8 to 26.7)                              |
| Cirrhosis and other chronic liver diseases due to other causes | 35.2<br>(32.3 to 38.3)                          | 1.8<br>(1.7 to 1.9)                            | 2.6<br>(1.8 to 3.8)                     | 31.9<br>(6.5 to 60.7)                             | 3.4<br>(-11.6 to 20.5)                              |
| <b>Digestive diseases</b>                                      | <b>743.5</b><br><b>(706.3 to 789.0)</b>         | <b>493.3†</b><br><b>(463.2 to 526.2)</b>       | <b>28.4</b><br><b>(20.0 to 38.6)</b>    | <b>43.8</b><br><b>(34.9 to 52.8)</b>              | <b>2.2</b><br><b>(-2.6 to 7.0)</b>                  |
| Peptic ulcer disease                                           | 172.3<br>(156.4 to 190.0)                       | 21.7<br>(19.2 to 24.7)                         | 4.9<br>(3.3 to 7.0)                     | 41.6<br>(29.3 to 55.6)                            | -2.2<br>(-9.5 to 5.4)                               |
| Gastritis and duodenitis                                       | 208.5<br>(183.5 to 238.0)                       | 205.5<br>(181.3 to 233.6)                      | 4.5<br>(3.1 to 6.4)                     | 45.5<br>(34.3 to 57.0)                            | 3.1<br>(-3.7 to 10.6)                               |
| Appendicitis                                                   | 3.8<br>(3.5 to 4.2)                             | 100.7<br>(91.1 to 110.5)                       | 1.2<br>(0.7 to 1.7)                     | 30.7<br>(-3.4 to 75.9)                            | -1.1<br>(-23.0 to 28.9)                             |
| Paralytic ileus and intestinal obstruction                     | 0.3<br>(0.2 to 0.3)                             | 7.3<br>(6.2 to 8.4)                            | 0.1<br>(0.1 to 0.1)                     | 40.2<br>(35.5 to 45.1)                            | 4.3<br>(0.8 to 7.7)                                 |
| Inguinal, femoral, and abdominal hernia                        | 347.4<br>(304.7 to 394.5)                       | 56.5<br>(49.6 to 64.5)                         | 14.6<br>(9.8 to 20.4)                   | 44.5<br>(31.2 to 58.5)                            | 3.1<br>(-4.2 to 11.0)                               |
| Inflammatory bowel disease                                     | 2.1<br>(1.6 to 2.8)                             | 15.8<br>(11.5 to 20.8)                         | 0.3<br>(0.2 to 0.5)                     | 49.5<br>(39.4 to 63.3)                            | 5.5<br>(-1.0 to 12.8)                               |
| Vascular intestinal disorders                                  | 0.1<br>(0.1 to 0.2)                             | 0.8<br>(0.7 to 1.0)                            | 0.1<br>(< 0.05 to 0.1)                  | 40.0<br>(33.1 to 47.4)                            | 3.0<br>(-1.4 to 7.2)                                |
| Gallbladder and biliary diseases                               | 33.0<br>(28.6 to 37.8)                          | 80.6<br>(69.6 to 92.3)                         | 0.4<br>(0.3 to 0.6)                     | 47.5<br>(26.2 to 71.7)                            | 3.0<br>(-14.1 to 23.2)                              |
| Pancreatitis                                                   | 0.5<br>(0.4 to 0.6)                             | 4.4<br>(3.9 to 5.0)                            | 0.1<br>(< 0.05 to 0.1)                  | 48.8<br>(43.6 to 53.8)                            | 4.8<br>(1.7 to 7.9)                                 |
| Other digestive diseases                                       | --                                              | --                                             | 2.4<br>(1.6 to 3.2)                     | 47.0<br>(36.0 to 58.9)                            | 6.9<br>(1.8 to 12.2)                                |
| <b>Neurological disorders</b>                                  | <b>10,380.9</b><br><b>(9,890.6 to 10,901.4)</b> | <b>5,451.7</b><br><b>(4,565.0 to 6,421.9)</b>  | <b>260.6</b><br><b>(173.2 to 358.6)</b> | <b>39.1</b><br><b>(18.4 to 66.8)</b>              | <b>0.4</b><br><b>(-10.4 to 14.6)</b>                |
| Alzheimer's disease and other dementias                        | 61.1<br>(51.6 to 72.3)                          | 10.4<br>(8.6 to 12.5)                          | 8.2<br>(5.7 to 10.8)                    | 29.8<br>(22.9 to 36.9)                            | -0.8<br>(-5.2 to 3.2)                               |
| Parkinson's disease                                            | 6.2<br>(4.9 to 7.7)                             | 0.8<br>(0.6 to 1.0)                            | 0.7<br>(0.5 to 1.0)                     | 52.9<br>(31.4 to 78.2)                            | 12.5<br>(-0.9 to 26.2)                              |
| Epilepsy                                                       | 78.3<br>(21.9 to 132.7)                         | 12.3<br>(3.4 to 21.1)                          | 31.0<br>(8.0 to 60.9)                   | 25.7<br>(-65.9 to 490.8)                          | -4.1<br>(-74.1 to 350.0)                            |
| Multiple sclerosis                                             | 3.7<br>(3.2 to 4.2)                             | 0.2<br>(0.2 to 0.2)                            | 1.0<br>(0.7 to 1.4)                     | 58.7<br>(36.0 to 87.9)                            | 8.2<br>(-8.3 to 29.7)                               |
| Motor neuron disease                                           | 0.4<br>(0.4 to 0.5)                             | 0.1<br>(0.1 to 0.1)                            | 0.1<br>(0.1 to 0.1)                     | 36.9<br>(29.8 to 44.2)                            | 1.7<br>(-1.9 to 5.2)                                |
| Migraine                                                       | 4,113.1<br>(3,847.3 to 4,385.2)                 | 507.9<br>(471.0 to 549.0)                      | 180.3<br>(115.8 to 254.1)               | 40.7<br>(35.1 to 46.9)                            | 0.5<br>(-2.9 to 3.9)                                |
| Tension-type headache                                          | 8,070.5<br>(7,225.3 to 9,038.1)                 | 4,919.8<br>(4,025.8 to 5,908.2)                | 31.3<br>(19.9 to 47.5)                  | 43.1<br>(35.8 to 51.6)                            | 1.4<br>(-3.2 to 6.2)                                |
| Other neurological disorders                                   | 0.1<br>(0.1 to 0.1)                             | 0.2<br>(0.1 to 0.3)                            | 8.1<br>(2.5 to 15.5)                    | 53.4<br>(-52.7 to 519.7)                          | 16.1<br>(-57.6 to 267.3)                            |
| <b>Mental and substance use disorders</b>                      | <b>4,227.3</b><br><b>(4,004.7 to 4,435.6)</b>   | <b>1,655.1†</b><br><b>(1,497.6 to 1,819.9)</b> | <b>557.6</b><br><b>(404.6 to 725.4)</b> | <b>40.1</b><br><b>(37.0 to 43.4)</b>              | <b>0.8</b><br><b>(-1.3 to 2.8)</b>                  |
| Schizophrenia                                                  | 34.4<br>(29.7 to 39.3)                          | 3.1<br>(2.6 to 3.5)                            | 21.6<br>(15.7 to 27.0)                  | 49.4<br>(34.7 to 64.6)                            | -0.0<br>(-9.0 to 9.6)                               |
| Alcohol use disorders                                          | 144.6<br>(118.6 to 170.9)                       | 81.7<br>(67.4 to 96.1)                         | 14.3<br>(9.8 to 20.2)                   | 51.4<br>(37.1 to 66.8)                            | 2.5<br>(-6.3 to 12.3)                               |
| Drug use disorders                                             | 208.5<br>(184.0 to 237.9)                       | 28.8<br>(25.2 to 32.9)                         | 64.1<br>(44.1 to 87.7)                  | 60.3<br>(45.4 to 76.5)                            | 5.4<br>(-3.5 to 14.9)                               |
| Opioid use disorders                                           | 144.6<br>(116.1 to 180.7)                       | 16.6<br>(13.8 to 20.3)                         | 59.0<br>(40.0 to 81.1)                  | 61.5<br>(45.2 to 79.5)                            | 5.6<br>(-4.1 to 15.5)                               |
| Cocaine use disorders                                          | 10.6<br>(8.8 to 12.6)                           | 1.2<br>(1.0 to 1.5)                            | 1.4<br>(0.8 to 2.2)                     | 46.5<br>(2.6 to 107.3)                            | 3.2<br>(-22.7 to 35.3)                              |
| Amphetamine use disorders                                      | 2.0<br>(1.4 to 2.7)                             | 0.4<br>(0.2 to 0.5)                            | 0.3<br>(0.2 to 0.5)                     | 51.1<br>(38.1 to 67.0)                            | 2.4<br>(-5.7 to 13.1)                               |
| Cannabis use disorders                                         | 45.4<br>(35.7 to 57.1)                          | 8.7<br>(7.0 to 10.8)                           | 1.3<br>(0.8 to 2.0)                     | 42.1<br>(12.2 to 78.4)                            | 0.6<br>(-17.8 to 22.3)                              |
| Other drug use disorders                                       | 8.7<br>(7.6 to 9.9)                             | 1.9<br>(1.6 to 2.1)                            | 2.0<br>(1.3 to 2.9)                     | 52.1<br>(20.4 to 89.7)                            | 4.1<br>(-15.3 to 24.9)                              |
| Depressive disorders                                           | 923.6<br>(857.0 to 1,002.9)                     | 1,162.4<br>(1,019.0 to 1,324.1)                | 165.9<br>(115.8 to 226.0)               | 40.9<br>(33.9 to 48.4)                            | -0.1<br>(-4.5 to 4.2)                               |
| Major depressive disorder                                      | 718.6<br>(626.0 to 816.2)                       | 1,120.2<br>(973.0 to 1,282.4)                  | 145.1<br>(99.3 to 198.7)                | 40.6<br>(32.7 to 48.6)                            | -0.1<br>(-5.2 to 5.0)                               |
| Dysthymia                                                      | 219.2<br>(189.8 to 253.1)                       | 42.1<br>(36.7 to 48.5)                         | 20.8<br>(14.0 to 30.3)                  | 43.4<br>(36.3 to 50.7)                            | 0.4<br>(-3.1 to 4.0)                                |
| Bipolar disorder                                               | 194.0<br>(164.4 to 231.3)                       | 20.6<br>(17.4 to 24.9)                         | 39.1<br>(24.1 to 58.6)                  | 39.7<br>(30.9 to 48.8)                            | 0.4<br>(-4.8 to 5.6)                                |
| Anxiety disorders                                              | 1,261.4<br>(1,108.9 to 1,438.1)                 | 200.0<br>(175.0 to 227.6)                      | 120.2<br>(82.0 to 166.7)                | 37.2<br>(32.2 to 42.0)                            | 0.4<br>(-2.5 to 3.4)                                |
| Eating disorders                                               | 35.6<br>(28.2 to 44.4)                          | 23.8<br>(17.3 to 32.2)                         | 7.0<br>(4.3 to 10.3)                    | 42.6<br>(24.2 to 64.1)                            | 0.7<br>(-12.0 to 15.0)                              |
| Anorexia nervosa                                               | 6.2<br>(4.5 to 8.4)                             | 3.1<br>(2.2 to 4.1)                            | 1.3<br>(0.7 to 2.0)                     | 33.0<br>(-2.6 to 78.9)                            | 0.7<br>(-25.1 to 33.0)                              |
| Bulimia nervosa                                                | 27.4<br>(20.2 to 36.8)                          | 20.7<br>(14.3 to 29.0)                         | 5.7<br>(3.5 to 8.7)                     | 45.1<br>(23.9 to 70.2)                            | 0.8<br>(-13.5 to 17.4)                              |
| Autistic spectrum disorders                                    | 257.0<br>(227.2 to 288.5)                       | 2.8<br>(1.9 to 4.0)                            | 35.8<br>(24.0 to 50.1)                  | 32.9<br>(26.2 to 39.6)                            | 0.4<br>(-4.0 to 4.9)                                |
| Autism                                                         | 67.8<br>(58.0 to 78.4)                          | 0.3<br>(0.2 to 0.5)                            | 17.1<br>(10.9 to 24.9)                  | 33.5<br>(20.8 to 45.1)                            | 0.8<br>(-7.1 to 9.0)                                |
| Asperger syndrome and other autistic spectrum disorders        | 188.5<br>(157.6 to 227.1)                       | 2.5<br>(1.6 to 3.8)                            | 18.7<br>(12.3 to 27.2)                  | 32.4<br>(25.9 to 38.9)                            | 0.1<br>(-4.2 to 4.3)                                |



| Cause                                                      | Prevalence in thousands (95% UI)                 | Incidence in thousands (95% UI)                              | YLDs in thousands (95% UI)              |                                                   |                                                     |
|------------------------------------------------------------|--------------------------------------------------|--------------------------------------------------------------|-----------------------------------------|---------------------------------------------------|-----------------------------------------------------|
|                                                            | 2016 counts                                      | 2016 counts                                                  | 2016 counts                             | Percentage change in counts between 2006 and 2016 | Percentage change in age-standardised rates between |
| Attention-deficit/hyperactivity disorder                   | 221.2<br>(193.0 to 254.3)                        | 13.2<br>(11.3 to 15.5)                                       | 2.6<br>(1.6 to 4.2)                     | 28.5<br>(12.2 to 47.1)                            | 0.6<br>(-11.5 to 14.3)                              |
| Conduct disorder                                           | 283.8<br>(232.2 to 335.7)                        | 98.5<br>(78.3 to 117.6)                                      | 33.8<br>(20.8 to 51.2)                  | 17.0<br>(7.8 to 27.4)                             | 0.9<br>(-7.0 to 9.7)                                |
| Idiopathic developmental intellectual disability           | 686.4<br>(417.3 to 986.5)                        | --                                                           | 24.8<br>(10.9 to 44.3)                  | 32.2<br>(22.6 to 43.7)                            | -1.1<br>(-8.0 to 6.3)                               |
| Other mental and substance use disorders                   | 387.1<br>(338.0 to 449.4)                        | 20.4<br>(17.9 to 23.5)                                       | 28.4<br>(19.6 to 40.6)                  | 48.0<br>(40.4 to 56.3)                            | 0.2<br>(-4.2 to 4.8)                                |
| <b>Diabetes, urogenital, blood, and endocrine diseases</b> | <b>11,497.0</b><br><b>(11,294.8 to 11,718.4)</b> | <b>2,747.7<sup>+</sup></b><br><b>(2,558.8 to 2,945.0)</b>    | <b>237.9</b><br><b>(170.0 to 320.7)</b> | <b>37.8</b><br><b>(34.3 to 41.6)</b>              | <b>0.5</b><br><b>(-2.2 to 3.1)</b>                  |
| Diabetes mellitus                                          | 815.6<br>(731.5 to 908.0)                        | 55.2<br>(49.5 to 61.6)                                       | 70.3<br>(47.9 to 98.9)                  | 52.6<br>(43.8 to 61.3)                            | 8.5<br>(1.9 to 15.2)                                |
| Acute glomerulonephritis                                   | 0.2<br>(0.2 to 0.3)                              | 3.5<br>(3.0 to 4.1)                                          | < 0.05<br>(< 0.05 to < 0.05)            | 33.9<br>(26.5 to 42.5)                            | 0.4<br>(-3.9 to 4.9)                                |
| Chronic kidney disease                                     | 902.1<br>(813.8 to 1,001.1)                      | 71.1<br>(63.1 to 79.5)                                       | 34.7<br>(25.6 to 45.1)                  | 38.0<br>(31.2 to 45.8)                            | -2.5<br>(-6.5 to 1.8)                               |
| Chronic kidney disease due to diabetes mellitus            | 372.8<br>(319.9 to 434.3)                        | 27.8<br>(23.1 to 33.3)                                       | 13.5<br>(9.8 to 17.7)                   | 37.3<br>(27.2 to 47.0)                            | -3.3<br>(-9.4 to 3.1)                               |
| Chronic kidney disease due to hypertension                 | 134.2<br>(112.8 to 156.3)                        | 12.7<br>(10.4 to 15.5)                                       | 4.3<br>(3.0 to 5.8)                     | 38.2<br>(22.7 to 54.5)                            | 0.0<br>(-9.4 to 10.7)                               |
| Chronic kidney disease due to glomerulonephritis           | 132.5<br>(112.5 to 154.7)                        | 8.4<br>(6.7 to 10.4)                                         | 6.3<br>(4.2 to 8.5)                     | 38.0<br>(23.8 to 53.1)                            | -3.6<br>(-11.2 to 4.3)                              |
| Chronic kidney disease due to other causes                 | 262.6<br>(219.8 to 309.1)                        | 22.1<br>(18.6 to 25.9)                                       | 10.6<br>(7.5 to 14.2)                   | 39.0<br>(27.2 to 53.0)                            | -2.5<br>(-9.3 to 5.4)                               |
| Urinary diseases and male infertility                      | 432.1<br>(390.3 to 478.8)                        | 1,453.6 <sup>+</sup><br>(1,298.2 to 1,622.4)                 | 10.9<br>(7.2 to 16.1)                   | 22.6<br>(8.7 to 36.7)                             | -12.3<br>(-21.7 to -2.6)                            |
| Interstitial nephritis and urinary tract infections        | 22.9<br>(19.9 to 26.2)                           | 1,197.7<br>(1,044.5 to 1,365.6)                              | 0.8<br>(0.5 to 1.2)                     | 40.4<br>(18.8 to 65.6)                            | 1.8<br>(-11.4 to 18.9)                              |
| Urolithiasis                                               | 8.5<br>(7.4 to 9.8)                              | 226.3<br>(197.8 to 263.1)                                    | 0.6<br>(0.4 to 0.9)                     | 46.8<br>(26.3 to 70.4)                            | 1.1<br>(-15.3 to 19.5)                              |
| Benign prostatic hyperplasia                               | 253.4<br>(212.9 to 305.3)                        | 29.6<br>(24.7 to 35.3)                                       | 8.2<br>(5.2 to 12.2)                    | 16.5<br>(0.3 to 33.0)                             | -14.0<br>(-24.4 to -3.5)                            |
| Male infertility                                           | 135.0<br>(117.4 to 154.5)                        | --                                                           | 0.8<br>(0.3 to 1.7)                     | 75.2<br>(55.8 to 96.2)                            | 15.5<br>(4.0 to 27.2)                               |
| Other urinary diseases                                     | --                                               | --                                                           | 0.5<br>(0.4 to 0.8)                     | 18.5<br>(5.0 to 33.4)                             | -15.2<br>(-24.7 to -4.4)                            |
| Gynecological diseases                                     | 2,755.9<br>(2,614.3 to 2,901.0)                  | 1,123.9 <sup>+</sup><br>(1,030.3 to 1,234.3)                 | 41.8<br>(28.8 to 59.3)                  | 40.3<br>(34.8 to 46.5)                            | -3.5<br>(-6.5 to -0.0)                              |
| Uterine fibroids                                           | 184.9<br>(163.0 to 207.9)                        | 23.6<br>(20.4 to 27.1)                                       | 6.2<br>(4.0 to 8.9)                     | 40.7<br>(33.1 to 48.6)                            | 1.2<br>(-3.9 to 6.3)                                |
| Polycystic ovarian syndrome                                | 20.9<br>(15.5 to 27.6)                           | 22.7<br>(16.5 to 30.2)                                       | 0.2<br>(0.1 to 0.4)                     | 53.8<br>(30.7 to 79.8)                            | -3.1<br>(-16.3 to 12.5)                             |
| Female infertility                                         | 122.9<br>(98.4 to 146.9)                         | --                                                           | 0.7<br>(0.3 to 1.5)                     | 106.6<br>(66.3 to 167.5)                          | 47.6<br>(17.9 to 90.2)                              |
| Endometriosis                                              | 4.9<br>(4.0 to 5.9)                              | 18.7<br>(15.3 to 23.5)                                       | 0.5<br>(0.3 to 0.7)                     | 41.7<br>(6.3 to 90.7)                             | -1.9<br>(-23.8 to 26.8)                             |
| Genital prolapse                                           | 811.4<br>(705.4 to 924.0)                        | 67.7<br>(58.1 to 78.9)                                       | 2.5<br>(1.2 to 4.5)                     | 17.6<br>(9.8 to 26.5)                             | -15.7<br>(-20.9 to -9.2)                            |
| Premenstrual syndrome                                      | 1,500.3<br>(1,357.9 to 1,646.4)                  | 585.2<br>(524.9 to 651.5)                                    | 12.3<br>(7.7 to 19.0)                   | 37.6<br>(24.3 to 51.5)                            | -3.7<br>(-11.6 to 5.3)                              |
| Other gynecological diseases                               | 528.9<br>(466.8 to 600.9)                        | 406.1<br>(333.9 to 492.0)                                    | 19.5<br>(13.5 to 27.4)                  | 43.7<br>(36.0 to 51.8)                            | -3.3<br>(-7.7 to 1.7)                               |
| Hemoglobinopathies and hemolytic anaemias                  | 8,297.8<br>(8,084.0 to 8,523.5)                  | --                                                           | 55.0<br>(38.0 to 77.2)                  | 28.0<br>(21.4 to 35.7)                            | -3.1<br>(-7.5 to 1.7)                               |
| Thalassemias                                               | 2.1<br>(1.6 to 2.7)                              | --                                                           | 0.2<br>(0.1 to 0.3)                     | 18.3<br>(-24.7 to 88.0)                           | -8.5<br>(-41.1 to 43.6)                             |
| Thalassaemias trait                                        | 1,474.6<br>(1,263.4 to 1,706.6)                  | --                                                           | 26.8<br>(17.9 to 37.8)                  | 26.0<br>(16.7 to 36.4)                            | -4.8<br>(-11.2 to 2.4)                              |
| Sickle cell disorders                                      | 1.4<br>(1.2 to 1.7)                              | --                                                           | 0.2<br>(0.1 to 0.2)                     | 30.1<br>(19.7 to 41.1)                            | 1.5<br>(-6.6 to 9.6)                                |
| Sickle cell trait                                          | 1,033.2<br>(960.1 to 1,124.7)                    | --                                                           | 4.5<br>(3.1 to 6.5)                     | 31.1<br>(17.6 to 45.5)                            | 2.2<br>(-7.1 to 12.3)                               |
| G6PD deficiency                                            | 1,836.0<br>(1,664.6 to 2,033.7)                  | --                                                           | 0.2<br>(0.1 to 0.3)                     | 37.6<br>(25.9 to 51.3)                            | 4.0<br>(-4.2 to 13.0)                               |
| G6PD trait                                                 | 4,175.9<br>(4,115.4 to 4,251.5)                  | --                                                           | < 0.05<br>(< 0.05 to < 0.05)            | 38.1<br>(28.1 to 48.2)                            | 3.6<br>(-1.9 to 9.7)                                |
| Other hemoglobinopathies and hemolytic anaemias            | 671.2<br>(653.0 to 689.1)                        | --                                                           | 23.1<br>(15.7 to 32.3)                  | 29.7<br>(21.9 to 39.6)                            | -2.1<br>(-6.8 to 3.7)                               |
| Endocrine, metabolic, blood, and immune disorders          | 702.8<br>(682.0 to 724.7)                        | 40.4<br>(36.2 to 44.7)                                       | 25.2<br>(17.1 to 35.5)                  | 27.8<br>(21.2 to 34.7)                            | -2.5<br>(-6.2 to 1.1)                               |
| <b>Musculoskeletal disorders</b>                           | <b>3,481.2</b><br><b>(3,288.1 to 3,652.9)</b>    | <b>1,972.6</b><br><b>(1,780.9 to 2,190.5)</b>                | <b>387.1</b><br><b>(280.3 to 507.1)</b> | <b>42.3</b><br><b>(38.1 to 46.5)</b>              | <b>-0.1</b><br><b>(-2.3 to 2.1)</b>                 |
| Rheumatoid arthritis                                       | 54.9<br>(48.4 to 62.0)                           | 3.7<br>(3.3 to 4.2)                                          | 12.7<br>(8.7 to 16.9)                   | 47.2<br>(34.8 to 60.9)                            | 5.4<br>(-1.6 to 13.5)                               |
| Osteoarthritis                                             | 435.5<br>(405.5 to 464.8)                        | 24.9<br>(22.9 to 26.8)                                       | 26.3<br>(18.7 to 35.8)                  | 46.1<br>(40.5 to 52.2)                            | 3.8<br>(0.1 to 7.6)                                 |
| Low back and neck pain                                     | 2,207.6<br>(2,062.0 to 2,384.0)                  | 950.5<br>(850.5 to 1,071.4)                                  | 252.0<br>(179.6 to 330.5)               | 42.1<br>(37.1 to 46.8)                            | -0.5<br>(-3.1 to 2.3)                               |
| Low back pain                                              | 1,538.8<br>(1,355.8 to 1,766.4)                  | 763.5<br>(667.1 to 882.4)                                    | 170.0<br>(119.4 to 224.5)               | 40.9<br>(34.1 to 47.6)                            | -1.2<br>(-4.9 to 3.1)                               |
| Neck pain                                                  | 836.6<br>(722.6 to 963.3)                        | 187.0<br>(160.1 to 219.1)                                    | 82.0<br>(55.4 to 115.3)                 | 44.7<br>(40.5 to 48.8)                            | 0.8<br>(-1.0 to 2.5)                                |
| Gout                                                       | 49.4<br>(43.8 to 55.6)                           | 10.5<br>(9.2 to 12.0)                                        | 1.6<br>(1.0 to 2.1)                     | 43.6<br>(22.5 to 68.4)                            | -0.5<br>(-13.5 to 14.5)                             |
| Other musculoskeletal disorders                            | 1,121.8<br>(928.6 to 1,321.5)                    | 982.9<br>(815.7 to 1,171.8)                                  | 94.6<br>(62.7 to 133.5)                 | 41.3<br>(30.9 to 52.2)                            | -1.3<br>(-7.8 to 5.4)                               |
| <b>Other non-communicable diseases</b>                     | <b>20,050.7</b><br><b>(19,477.8 to 20,656.6)</b> | <b>62,097.8<sup>+</sup></b><br><b>(56,579.2 to 68,032.7)</b> | <b>607.3</b><br><b>(423.0 to 832.8)</b> | <b>29.6</b><br><b>(27.8 to 31.5)</b>              | <b>-3.2</b><br><b>(-4.3 to -2.0)</b>                |
| Congenital anomalies                                       | 736.2<br>(660.8 to 827.4)                        | --                                                           | 99.1<br>(70.1 to 133.7)                 | 25.5<br>(18.5 to 33.3)                            | -4.9<br>(-10.4 to 1.0)                              |
| Neural tube defects                                        | 51.1<br>(45.1 to 57.6)                           | --                                                           | 15.1<br>(10.5 to 20.4)                  | 28.7<br>(16.1 to 43.0)                            | -3.0<br>(-11.6 to 6.7)                              |
| Congenital heart anomalies                                 | 111.8<br>(94.4 to 130.9)                         | --                                                           | 5.0<br>(2.1 to 8.7)                     | 36.3<br>(20.4 to 53.2)                            | 6.1<br>(-5.3 to 18.0)                               |
| Orofacial clefts                                           | 13.6<br>(12.0 to 15.6)                           | --                                                           | 0.2<br>(0.1 to 0.3)                     | 23.2<br>(8.8 to 37.6)                             | -7.2<br>(-17.9 to 3.5)                              |
| Down's syndrome                                            | 13.8<br>(11.7 to 16.2)                           | --                                                           | 1.2<br>(0.8 to 1.7)                     | 36.1<br>(25.6 to 47.0)                            | 3.5<br>(-4.3 to 11.7)                               |
| Turner syndrome                                            | 16.1<br>(13.6 to 19.0)                           | --                                                           | 0.3<br>(0.1 to 0.5)                     | 25.9<br>(-12.1 to 79.1)                           | -4.7<br>(-31.6 to 31.4)                             |
| Klinefelter syndrome                                       | 16.4<br>(13.8 to 19.7)                           | --                                                           | 0.1<br>(< 0.05 to 0.2)                  | 41.2<br>(5.6 to 82.2)                             | 1.1<br>(-23.0 to 29.9)                              |



| Cause                                         | Prevalence in thousands (95% UI)              | Incidence in thousands (95% UI)                | YLDs in thousands (95% UI)             |                                                   |                                                     |
|-----------------------------------------------|-----------------------------------------------|------------------------------------------------|----------------------------------------|---------------------------------------------------|-----------------------------------------------------|
|                                               | 2016 counts                                   | 2016 counts                                    | 2016 counts                            | Percentage change in counts between 2006 and 2016 | Percentage change in age-standardised rates between |
| Other chromosomal abnormalities               | 109.5<br>(90.0 to 133.5)                      | --                                             | 10.3<br>(7.0 to 14.3)                  | 24.4<br>(10.6 to 40.4)                            | 1.3<br>(-9.5 to 13.9)                               |
| Congenital musculoskeletal and limb anomalies | 54.8<br>(49.5 to 60.6)                        | --                                             | 8.1<br>(5.5 to 11.2)                   | 32.9<br>(19.0 to 46.8)                            | 0.5<br>(-9.0 to 9.6)                                |
| Urogenital congenital anomalies               | 37.5<br>(32.8 to 43.2)                        | --                                             | 1.2<br>(0.7 to 1.9)                    | 24.6<br>(9.8 to 41.0)                             | -0.4<br>(-11.4 to 11.9)                             |
| Digestive congenital anomalies                | 33.7<br>(29.7 to 38.2)                        | --                                             | 1.4<br>(0.9 to 2.0)                    | 32.9<br>(11.0 to 57.8)                            | 0.2<br>(-13.2 to 16.0)                              |
| Other congenital anomalies                    | 356.1<br>(267.8 to 465.6)                     | --                                             | 56.2<br>(36.6 to 82.4)                 | 22.7<br>(11.9 to 33.9)                            | -7.7<br>(-15.6 to 0.8)                              |
| Skin and subcutaneous diseases                | 7,676.8<br>(7,420.4 to 7,932.8)               | 14,996.8<br>(14,242.8 to 15,896.5)             | 209.6<br>(138.4 to 301.4)              | 31.6<br>(28.8 to 34.6)                            | 2.0<br>(0.2 to 4.0)                                 |
| Dermatitis                                    | 1,450.5<br>(1,221.0 to 1,681.1)               | 1,638.8<br>(1,494.4 to 1,791.9)                | 56.2<br>(32.3 to 92.7)                 | 29.8<br>(24.9 to 35.1)                            | 0.2<br>(-2.9 to 3.5)                                |
| Psoriasis                                     | 134.4<br>(126.5 to 143.3)                     | 22.1<br>(20.8 to 23.5)                         | 11.6<br>(8.2 to 15.2)                  | 51.9<br>(35.7 to 68.4)                            | 10.6<br>(1.5 to 20.6)                               |
| Cellulitis                                    | 13.0<br>(11.9 to 14.1)                        | 261.1<br>(242.6 to 281.8)                      | 0.7<br>(0.5 to 1.0)                    | 34.0<br>(4.4 to 71.2)                             | 0.8<br>(-17.2 to 23.4)                              |
| Pyoderma                                      | 55.8<br>(53.8 to 57.9)                        | 1,231.2<br>(1,185.8 to 1,277.2)                | 0.3<br>(0.1 to 0.7)                    | 36.4<br>(24.1 to 48.5)                            | 1.1<br>(-5.6 to 8.1)                                |
| Scabies                                       | 394.6<br>(329.4 to 472.9)                     | 1,206.5<br>(1,009.3 to 1,460.8)                | 10.1<br>(5.6 to 16.6)                  | 23.1<br>(16.5 to 29.6)                            | -5.6<br>(-9.6 to -1.7)                              |
| Fungal skin diseases                          | 1,613.4<br>(1,441.9 to 1,809.4)               | 5,417.6<br>(4,833.9 to 6,027.7)                | 9.0<br>(3.7 to 18.6)                   | 32.2<br>(29.3 to 35.4)                            | 0.2<br>(-1.0 to 1.5)                                |
| Viral skin diseases                           | 840.5<br>(796.3 to 887.0)                     | 1,184.5<br>(1,116.3 to 1,256.6)                | 25.5<br>(15.9 to 37.7)                 | 28.9<br>(24.4 to 33.9)                            | 0.3<br>(-2.8 to 3.6)                                |
| Acne vulgaris                                 | 2,566.3<br>(2,240.8 to 2,946.5)               | 1,853.3<br>(1,462.2 to 2,407.6)                | 65.4<br>(42.8 to 94.8)                 | 31.7<br>(24.6 to 39.1)                            | 5.5<br>(0.2 to 10.8)                                |
| Alopecia areata                               | 48.0<br>(44.6 to 51.2)                        | 85.8<br>(79.8 to 91.5)                         | 1.6<br>(1.0 to 2.3)                    | 43.6<br>(27.3 to 61.3)                            | 0.2<br>(-9.7 to 10.7)                               |
| Pruritus                                      | 195.1<br>(170.9 to 219.1)                     | 160.2<br>(142.1 to 181.3)                      | 2.1<br>(1.0 to 3.8)                    | 36.6<br>(28.3 to 45.6)                            | 0.2<br>(-4.7 to 5.5)                                |
| Urticaria                                     | 332.8<br>(282.2 to 393.6)                     | 600.1<br>(510.7 to 704.7)                      | 19.9<br>(12.5 to 29.1)                 | 31.5<br>(23.3 to 39.6)                            | 0.1<br>(-5.2 to 5.3)                                |
| Decubitus ulcer                               | 4.5<br>(4.1 to 5.0)                           | 16.3<br>(14.6 to 18.0)                         | 0.7<br>(0.5 to 1.0)                    | 38.2<br>(26.7 to 50.2)                            | 2.2<br>(-9.3 to 15.1)                               |
| Other skin and subcutaneous diseases          | 1,184.8<br>(1,149.8 to 1,222.3)               | 1,319.3<br>(1,277.9 to 1,362.0)                | 6.5<br>(3.1 to 11.8)                   | 36.8<br>(32.7 to 41.4)                            | -0.1<br>(-2.5 to 2.3)                               |
| Sense organ diseases                          | 5,376.9<br>(5,201.8 to 5,560.3)               | 2,496.6†<br>(2,320.5 to 2,691.4)               | 251.3<br>(176.6 to 343.8)              | 27.6<br>(24.1 to 31.3)                            | -5.5<br>(-7.5 to -3.6)                              |
| Glaucoma                                      | 18.7<br>(15.5 to 22.2)                        | --                                             | 1.9<br>(1.3 to 2.6)                    | 42.8<br>(28.6 to 57.8)                            | -1.7<br>(-10.8 to 8.1)                              |
| Cataract                                      | 190.3<br>(167.6 to 213.7)                     | --                                             | 15.9<br>(11.3 to 21.7)                 | 29.4<br>(21.5 to 37.2)                            | -6.6<br>(-12.0 to -0.9)                             |
| Macular degeneration                          | 30.0<br>(24.5 to 36.4)                        | --                                             | 2.1<br>(1.4 to 2.9)                    | 46.4<br>(32.1 to 61.8)                            | 1.3<br>(-7.8 to 11.1)                               |
| Refraction and accommodation disorders        | 3,057.4<br>(2,838.9 to 3,283.2)               | --                                             | 53.9<br>(33.5 to 84.6)                 | 18.1<br>(12.9 to 23.3)                            | -12.8<br>(-16.5 to -9.2)                            |
| Age-related and other hearing loss            | 2,961.4<br>(2,794.3 to 3,133.0)               | --                                             | 152.7<br>(106.3 to 205.8)              | 29.0<br>(23.4 to 34.6)                            | -4.0<br>(-6.4 to -1.6)                              |
| Other vision loss                             | 122.2<br>(108.6 to 136.4)                     | --                                             | 10.1<br>(7.0 to 13.7)                  | 34.9<br>(23.7 to 46.9)                            | -2.5<br>(-8.8 to 4.3)                               |
| Other sense organ diseases                    | 488.5<br>(452.4 to 524.7)                     | 2,496.6<br>(2,320.5 to 2,691.4)                | 14.6<br>(9.3 to 21.8)                  | 41.9<br>(34.9 to 49.6)                            | 2.0<br>(-1.5 to 5.9)                                |
| Oral disorders                                | 15,057.6<br>(14,055.1 to 15,978.1)            | 44,604.5†<br>(39,174.0 to 50,426.4)            | 47.3<br>(28.3 to 73.0)                 | 41.3<br>(38.3 to 44.2)                            | 0.5<br>(-1.4 to 2.4)                                |
| Caries of deciduous teeth                     | 3,333.9<br>(2,496.3 to 4,189.0)               | 12,704.8<br>(8,718.4 to 16,756.8)              | 0.8<br>(0.3 to 1.6)                    | 26.4<br>(13.1 to 42.8)                            | -0.2<br>(-11.5 to 12.7)                             |
| Caries of permanent teeth                     | 10,569.9<br>(9,415.0 to 11,783.8)             | 31,627.4<br>(27,600.3 to 35,482.8)             | 6.2<br>(2.7 to 12.1)                   | 35.3<br>(29.4 to 41.4)                            | 0.7<br>(-2.9 to 4.3)                                |
| Periodontal disease                           | 1,722.6<br>(1,431.2 to 2,056.3)               | 219.4<br>(177.0 to 267.0)                      | 11.1<br>(4.4 to 23.1)                  | 45.4<br>(40.1 to 50.6)                            | 0.4<br>(-2.5 to 3.5)                                |
| Edentulism and severe tooth loss              | 623.0<br>(529.0 to 714.8)                     | 53.0<br>(44.2 to 61.8)                         | 17.0<br>(11.2 to 24.0)                 | 44.0<br>(38.6 to 49.4)                            | 0.5<br>(-2.6 to 3.8)                                |
| Other oral disorders                          | 420.7<br>(400.5 to 442.8)                     | --                                             | 12.2<br>(7.6 to 18.3)                  | 38.5<br>(32.8 to 44.4)                            | 0.3<br>(-2.8 to 3.6)                                |
| <b>Injuries</b>                               | <b>4,175.7</b><br><b>(3,775.4 to 4,684.9)</b> | <b>1,997.1†</b><br><b>(1,875.1 to 2,124.6)</b> | <b>151.1</b><br><b>(95.7 to 226.6)</b> | <b>47.3</b><br><b>(36.1 to 58.0)</b>              | <b>3.1</b><br><b>(-3.3 to 8.8)</b>                  |
| <b>Transport injuries</b>                     | <b>499.8</b><br><b>(459.9 to 541.8)</b>       | <b>240.6</b><br><b>(212.7 to 271.5)</b>        | <b>29.3</b><br><b>(19.4 to 41.9)</b>   | <b>36.1</b><br><b>(30.5 to 42.1)</b>              | <b>-3.3</b><br><b>(-6.7 to -0.2)</b>                |
| Road injuries                                 | 366.5<br>(339.7 to 395.2)                     | 194.8<br>(169.3 to 226.0)                      | 21.2<br>(14.1 to 30.1)                 | 35.5<br>(30.5 to 40.8)                            | -4.3<br>(-7.2 to -1.4)                              |
| Pedestrian road injuries                      | 75.4<br>(65.8 to 86.3)                        | 28.2<br>(22.5 to 35.1)                         | 4.3<br>(2.8 to 6.2)                    | 28.1<br>(22.8 to 32.9)                            | -8.4<br>(-11.8 to -5.5)                             |
| Cyclist road injuries                         | 53.2<br>(43.4 to 63.6)                        | 30.9<br>(23.3 to 40.1)                         | 2.8<br>(1.8 to 4.2)                    | 46.3<br>(41.1 to 52.2)                            | 4.8<br>(1.8 to 8.0)                                 |
| Motorcyclist road injuries                    | 54.5<br>(45.5 to 65.9)                        | 19.4<br>(15.3 to 24.6)                         | 3.0<br>(1.9 to 4.4)                    | 39.9<br>(34.3 to 45.6)                            | -2.4<br>(-5.8 to 0.8)                               |
| Motor vehicle road injuries                   | 153.0<br>(131.4 to 175.0)                     | 96.0<br>(80.9 to 113.1)                        | 9.5<br>(6.4 to 13.2)                   | 33.9<br>(29.1 to 39.2)                            | -5.5<br>(-8.2 to -2.6)                              |
| Other road injuries                           | 30.2<br>(25.4 to 35.9)                        | 20.3<br>(15.4 to 26.1)                         | 1.6<br>(1.0 to 2.3)                    | 41.1<br>(36.2 to 46.2)                            | -1.2<br>(-4.1 to 1.7)                               |
| Other transport injuries                      | 133.3<br>(109.6 to 162.3)                     | 45.9<br>(37.5 to 57.2)                         | 8.1<br>(5.2 to 11.8)                   | 37.7<br>(29.5 to 46.7)                            | 0.1<br>(-4.3 to 4.7)                                |
| <b>Unintentional injuries</b>                 | <b>2,580.2</b><br><b>(2,376.2 to 2,784.2)</b> | <b>1,684.7</b><br><b>(1,566.4 to 1,812.1)</b>  | <b>92.8</b><br><b>(62.6 to 131.8)</b>  | <b>38.4</b><br><b>(30.9 to 45.7)</b>              | <b>-1.3</b><br><b>(-5.5 to 2.7)</b>                 |
| Falls                                         | 908.6<br>(770.9 to 1,036.0)                   | 555.8<br>(477.5 to 658.9)                      | 37.4<br>(25.6 to 52.4)                 | 36.4<br>(28.2 to 44.7)                            | -2.6<br>(-7.1 to 1.4)                               |
| Drowning                                      | 6.3<br>(5.4 to 7.4)                           | 1.8<br>(1.6 to 2.1)                            | 0.4<br>(0.2 to 0.6)                    | 16.2<br>(7.8 to 27.1)                             | -15.2<br>(-20.1 to -9.4)                            |
| Fire, heat, and hot substances                | 234.2<br>(197.4 to 279.4)                     | 43.4<br>(35.9 to 51.1)                         | 7.0<br>(4.7 to 9.9)                    | 26.4<br>(16.7 to 36.9)                            | -9.5<br>(-15.2 to -3.3)                             |
| Poisonings                                    | 11.3<br>(9.3 to 13.6)                         | 22.7<br>(18.0 to 28.4)                         | 1.1<br>(0.7 to 1.7)                    | 34.1<br>(23.6 to 45.6)                            | -1.5<br>(-7.7 to 5.1)                               |
| Exposure to mechanical forces                 | 384.7<br>(327.8 to 471.1)                     | 221.1<br>(184.0 to 257.4)                      | 10.4<br>(6.8 to 15.4)                  | 38.6<br>(33.2 to 44.1)                            | -2.3<br>(-5.7 to 1.0)                               |
| Unintentional firearm injuries                | 15.2<br>(12.4 to 18.7)                        | 5.6<br>(3.9 to 8.0)                            | 0.7<br>(0.5 to 1.1)                    | 51.4<br>(45.2 to 57.8)                            | 7.4<br>(3.8 to 11.1)                                |
| Unintentional suffocation                     | 16.3<br>(12.5 to 20.9)                        | 5.3<br>(3.6 to 7.7)                            | 0.6<br>(0.4 to 1.0)                    | 33.5<br>(22.8 to 44.8)                            | -0.7<br>(-6.7 to 5.2)                               |
| Other exposure to mechanical forces           | 353.1<br>(297.8 to 438.7)                     | 210.1<br>(174.4 to 244.6)                      | 9.1<br>(6.0 to 13.4)                   | 38.0<br>(32.8 to 43.3)                            | -3.0<br>(-6.3 to 0.1)                               |

| Cause                                                                               | Prevalence in thousands (95% UI)          | Incidence in thousands (95% UI)       | YLDs in thousands (95% UI)          |                                                   |                                                     |
|-------------------------------------------------------------------------------------|-------------------------------------------|---------------------------------------|-------------------------------------|---------------------------------------------------|-----------------------------------------------------|
|                                                                                     | 2016 counts                               | 2016 counts                           | 2016 counts                         | Percentage change in counts between 2006 and 2016 | Percentage change in age-standardised rates between |
| Adverse effects of medical treatment                                                | 8.5<br>(6.6 to 10.7)                      | 111.0<br>(94.1 to 129.5)              | 1.1<br>(0.7 to 1.8)                 | 24.2<br>(17.3 to 32.0)                            | -8.2<br>(-11.6 to -4.7)                             |
| Animal contact                                                                      | 142.8<br>(124.2 to 167.3)                 | 235.5<br>(188.1 to 287.7)             | 4.9<br>(3.3 to 7.0)                 | 48.2<br>(40.8 to 56.4)                            | 6.8<br>(2.7 to 11.3)                                |
| Venomous animal contact                                                             | 52.0<br>(42.1 to 63.3)                    | 93.7<br>(70.2 to 122.7)               | 3.3<br>(2.2 to 4.7)                 | 50.3<br>(40.1 to 62.1)                            | 9.2<br>(2.9 to 15.9)                                |
| Non-venomous animal contact                                                         | 90.8<br>(73.9 to 113.3)                   | 141.9<br>(111.6 to 175.3)             | 1.6<br>(1.1 to 2.4)                 | 44.2<br>(38.9 to 49.7)                            | 3.1<br>(-0.2 to 5.9)                                |
| Foreign body                                                                        | 167.1<br>(138.4 to 201.1)                 | 147.1<br>(125.6 to 174.0)             | 6.7<br>(4.2 to 10.1)                | 41.4<br>(32.0 to 52.4)                            | 3.2<br>(-2.1 to 8.8)                                |
| Pulmonary aspiration and foreign body in airway                                     | 48.7<br>(35.9 to 65.8)                    | 26.1<br>(20.9 to 33.2)                | 2.4<br>(1.4 to 3.7)                 | 30.7<br>(21.0 to 42.1)                            | -2.5<br>(-7.6 to 3.2)                               |
| Foreign body in eyes                                                                | 10.4<br>(5.4 to 16.3)                     | 59.2<br>(44.4 to 80.0)                | 0.6<br>(0.3 to 1.0)                 | 37.5<br>(31.8 to 44.2)                            | 0.5<br>(-2.6 to 4.0)                                |
| Foreign body in other body part                                                     | 108.0<br>(86.5 to 140.1)                  | 61.8<br>(50.0 to 75.1)                | 3.7<br>(2.3 to 5.6)                 | 50.0<br>(38.9 to 62.1)                            | 7.4<br>(1.3 to 13.4)                                |
| Environmental heat and cold exposure                                                | 199.5<br>(166.1 to 236.1)                 | 78.4<br>(62.7 to 96.9)                | 8.2<br>(5.2 to 12.1)                | 38.1<br>(29.8 to 46.5)                            | -3.0<br>(-7.8 to 1.2)                               |
| Other unintentional injuries                                                        | 517.2<br>(405.5 to 649.1)                 | 267.9<br>(222.7 to 324.2)             | 15.6<br>(10.2 to 22.4)              | 47.5<br>(39.1 to 56.0)                            | 5.5<br>(0.8 to 10.0)                                |
| <b>Self-harm and interpersonal violence</b>                                         | <b>716.4</b><br><b>(631.5 to 816.0)</b>   | <b>71.0†</b><br><b>(60.3 to 82.8)</b> | <b>9.8</b><br><b>(6.8 to 13.4)</b>  | <b>27.2</b><br><b>(22.7 to 31.9)</b>              | <b>-7.8</b><br><b>(-10.4 to -5.3)</b>               |
| Self-harm                                                                           | 14.2<br>(12.1 to 16.7)                    | 7.7<br>(6.2 to 9.4)                   | 0.8<br>(0.5 to 1.2)                 | 43.1<br>(37.4 to 49.1)                            | 0.3<br>(-3.2 to 3.9)                                |
| Self-harm by firearm                                                                | 0.7<br>(0.6 to 0.9)                       | 0.2<br>(0.1 to 0.3)                   | < 0.05<br>(< 0.05 to < 0.05)        | 35.6<br>(27.3 to 44.3)                            | -3.0<br>(-7.8 to 1.9)                               |
| Self-harm by other specified means                                                  | 13.5<br>(11.4 to 16.0)                    | 7.5<br>(6.0 to 9.2)                   | 0.8<br>(0.5 to 1.1)                 | 43.4<br>(37.8 to 49.3)                            | 0.4<br>(-3.1 to 4.0)                                |
| Interpersonal violence                                                              | 702.2<br>(617.1 to 801.5)                 | 63.2†<br>(52.5 to 75.1)               | 9.0<br>(6.2 to 12.4)                | 26.0<br>(21.4 to 30.7)                            | -8.6<br>(-11.1 to -6.1)                             |
| Assault by firearm                                                                  | 3.8<br>(3.2 to 4.5)                       | 1.8<br>(1.3 to 2.4)                   | 0.2<br>(0.1 to 0.3)                 | 37.0<br>(30.5 to 43.6)                            | -5.6<br>(-9.1 to -2.2)                              |
| Assault by sharp object                                                             | 31.3<br>(25.1 to 37.5)                    | 18.5<br>(14.2 to 23.9)                | 1.1<br>(0.7 to 1.6)                 | 38.4<br>(31.8 to 45.0)                            | -3.2<br>(-6.9 to 0.4)                               |
| Sexual violence                                                                     | 613.2<br>(527.6 to 709.0)                 | --                                    | 5.3<br>(3.5 to 7.7)                 | 18.7<br>(13.3 to 24.1)                            | -13.4<br>(-16.2 to -10.5)                           |
| Assault by other means                                                              | 54.0<br>(45.3 to 65.2)                    | 43.0<br>(35.0 to 52.0)                | 2.4<br>(1.6 to 3.5)                 | 38.3<br>(33.1 to 43.5)                            | -3.2<br>(-6.3 to -0.3)                              |
| <b>Forces of nature, conflict and terrorism, and executions and police conflict</b> | <b>992.5</b><br><b>(649.2 to 1,457.5)</b> | <b>0.9†</b><br><b>(0.6 to 1.2)</b>    | <b>19.2</b><br><b>(6.3 to 40.3)</b> | <b>206.1</b><br><b>(164.8 to 270.4)</b>           | <b>85.7</b><br><b>(66.5 to 115.0)</b>               |
| Exposure to forces of nature                                                        | 8.4<br>(3.7 to 15.2)                      | --                                    | 0.3<br>(0.1 to 0.8)                 | -13.9<br>(-18.9 to -10.1)                         | -28.2<br>(-30.6 to -25.0)                           |
| Conflict and terrorism                                                              | 982.3<br>(637.4 to 1,446.8)               | --                                    | 18.9<br>(6.2 to 39.4)               | 221.1<br>(178.6 to 289.9)                         | 94.5<br>(74.7 to 124.8)                             |
| Executions and police conflict                                                      | 1.9<br>(1.1 to 3.6)                       | 0.9<br>(0.6 to 1.2)                   | 0.1<br>(< 0.05 to 0.2)              | 38.8<br>(27.9 to 49.9)                            | 7.4<br>(-1.8 to 18.2)                               |
| <b>Impairments</b>                                                                  | --                                        | --                                    | --                                  | --                                                | --                                                  |
| Anaemia                                                                             | 17,655.8<br>(17,272.3 to 18,088.5)        | --                                    | 721.5<br>(491.9 to 1,019.6)         | 25.3<br>(20.8 to 30.4)                            | -5.5<br>(-8.2 to -2.8)                              |
| Developmental intellectual disability                                               | 1,167.6<br>(890.9 to 1,472.5)             | --                                    | 103.6<br>(72.5 to 145.1)            | 28.5<br>(14.4 to 38.9)                            | -2.3<br>(-11.7 to 4.9)                              |
| Epilepsy                                                                            | 153.1<br>(84.8 to 230.5)                  | --                                    | 61.9<br>(32.1 to 103.0)             | 24.1<br>(-30.5 to 143.1)                          | -5.0<br>(-47.2 to 87.0)                             |
| Guillain-Barre syndrome                                                             | 0.2<br>(0.2 to 0.3)                       | --                                    | 0.1<br>(< 0.05 to 0.1)              | 34.8<br>(30.3 to 40.6)                            | -0.1<br>(-0.2 to 0.1)                               |
| Hearing loss                                                                        | 3,728.7<br>(3,589.7 to 3,885.5)           | --                                    | 218.1<br>(155.0 to 289.2)           | 26.8<br>(23.2 to 30.3)                            | -4.7<br>(-6.5 to -3.0)                              |
| Heart failure                                                                       | 96.3<br>(84.7 to 109.4)                   | --                                    | 9.8<br>(7.2 to 12.8)                | 41.0<br>(31.8 to 50.6)                            | 0.9<br>(-5.3 to 7.8)                                |
| Infertility                                                                         | 454.4<br>(419.7 to 491.7)                 | --                                    | 2.8<br>(1.2 to 5.5)                 | 68.6<br>(53.9 to 83.6)                            | 8.2<br>(-0.8 to 17.1)                               |
| Pelvic inflammatory disease                                                         | 13.6<br>(10.4 to 17.4)                    | --                                    | 1.8<br>(1.1 to 2.7)                 | 49.1<br>(26.6 to 77.2)                            | -2.7<br>(-17.0 to 15.3)                             |
| Vision loss                                                                         | 3,635.2<br>(3,402.6 to 3,890.5)           | --                                    | 111.8<br>(76.6 to 157.5)            | 20.0<br>(11.2 to 26.6)                            | -12.4<br>(-16.1 to -9.3)                            |

We did not calculate incidence for the nine impairments, certain NTDs, and causes with only birth prevalence. Blank cells mean that no estimate is available.

† Incidence for aggregate causes represents the sum of the incidence of the causes below the aggregate.

‡ Incidence estimates for stroke represent first-ever stroke only.

^ Incidence of HIV/AIDS represents new infections of HIV only and does not include new infections of Tuberculosis in HIV positive cases.

SR Table 14: Prevalence, incidence, and YLDs for 2016, percentage change of YLD counts and percentage change of age-standardised YLD rates between 2006 and 2016 by cause and impairments, for all ages, Zambia.

| Cause                                                                                | Prevalence in thousands (95% UI)          | Incidence in thousands (95% UI)               | YLDs in thousands (95% UI)             |                                                   |                                                     |
|--------------------------------------------------------------------------------------|-------------------------------------------|-----------------------------------------------|----------------------------------------|---------------------------------------------------|-----------------------------------------------------|
|                                                                                      | 2016 counts                               | 2016 counts                                   | 2016 counts                            | Percentage change in counts between 2006 and 2016 | Percentage change in age-standardised rates between |
| <b>All causes</b>                                                                    | <b>16,363.7</b><br>(16,319.8 to 16,403.3) | <b>131,495.2†</b><br>(124,860.2 to 139,410.7) | <b>1,517.4</b><br>(1,109.1 to 1,980.9) | <b>28.1</b><br>(21.5 to 33.4)                     | <b>-6.0</b><br>(-12.0 to -1.9)                      |
| <b>Communicable, maternal, neonatal, and nutritional disorders</b>                   | <b>14,486.5</b><br>(14,252.8 to 14,716.1) | <b>84,201.0†</b><br>(78,085.6 to 90,767.6)    | <b>439.1</b><br>(309.5 to 597.0)       | <b>10.2</b><br>(-4.1 to 20.4)                     | <b>-22.3</b><br>(-38.0 to -11.2)                    |
| <b>HIV/AIDS and tuberculosis</b>                                                     | <b>5,241.5</b><br>(4,971.8 to 5,510.4)    | <b>132.0†</b><br>(112.5 to 157.6)             | <b>133.3</b><br>(93.7 to 180.1)        | <b>-7.9</b><br>(-32.6 to 16.9)                    | <b>-33.7</b><br>(-55.7 to -10.0)                    |
| Tuberculosis                                                                         | 4,398.2<br>(4,029.2 to 4,802.4)           | 68.0†<br>(54.2 to 84.5)                       | 11.3<br>(7.2 to 16.3)                  | 23.3<br>(6.5 to 42.2)                             | -15.9<br>(-26.6 to -4.0)                            |
| Drug-susceptible tuberculosis                                                        | 35.8<br>(27.9 to 45.1)                    | 67.0<br>(53.2 to 82.8)                        | 11.1<br>(7.1 to 16.2)                  | 23.2<br>(6.2 to 41.6)                             | -16.0<br>(-26.9 to -4.1)                            |
| Multidrug-resistant tuberculosis without extensive drug resistance                   | 0.5<br>(0.2 to 1.2)                       | 0.9<br>(0.3 to 2.2)                           | 0.2<br>(0.1 to 0.4)                    | 29.9<br>(-53.9 to 266.4)                          | -11.8<br>(-68.5 to 143.4)                           |
| Extensively drug-resistant tuberculosis                                              | < 0.05<br>(< 0.05 to < 0.05)              | < 0.05<br>(< 0.05 to < 0.05)                  | < 0.05<br>(< 0.05 to < 0.05)           | 291.6<br>(39.2 to 1,011.0)                        | 161.7<br>(-6.6 to 630.8)                            |
| Latent tuberculosis infection                                                        | 4,361.9<br>(3,995.2 to 4,761.7)           | --                                            | --                                     | --                                                | --                                                  |
| HIV/AIDS                                                                             | 1,274.3<br>(1,181.1 to 1,369.0)           | 64.0^<br>(50.7 to 79.7)                       | 122.0<br>(86.2 to 166.5)               | -10.0<br>(-35.1 to 16.3)                          | -34.8<br>(-57.3 to -9.1)                            |
| Drug-susceptible HIV/AIDS - Tuberculosis                                             | 33.8<br>(25.5 to 42.5)                    | 55.5<br>(43.3 to 68.8)                        | 12.8<br>(7.8 to 18.6)                  | -29.9<br>(-39.3 to -19.7)                         | -44.4<br>(-51.1 to -37.0)                           |
| Multidrug-resistant HIV/AIDS - Tuberculosis without extensive drug resistance        | 0.6<br>(0.2 to 1.4)                       | 0.9<br>(0.3 to 2.2)                           | 0.2<br>(0.1 to 0.6)                    | -23.5<br>(-72.3 to 117.4)                         | -39.6<br>(-78.4 to 78.2)                            |
| Extensively drug-resistant HIV/AIDS - Tuberculosis                                   | < 0.05<br>(< 0.05 to < 0.05)              | < 0.05<br>(< 0.05 to < 0.05)                  | < 0.05<br>(< 0.05 to < 0.05)           | 126.6<br>(-20.7 to 527.2)                         | 78.5<br>(-37.2 to 389.1)                            |
| HIV/AIDS resulting in other diseases                                                 | 1,239.9<br>(1,146.3 to 1,338.8)           | 64.0<br>(50.7 to 79.7)                        | 109.0<br>(76.5 to 148.5)               | -6.9<br>(-35.8 to 24.5)                           | -33.5<br>(-58.4 to -2.3)                            |
| <b>Diarrhoea, lower respiratory infections, and other common infectious diseases</b> | <b>1,268.8</b><br>(1,213.4 to 1,334.8)    | <b>69,590.1†</b><br>(63,748.3 to 76,182.5)    | <b>70.8</b><br>(49.8 to 96.4)          | <b>14.5</b><br>(10.6 to 18.7)                     | <b>-14.4</b><br>(-17.0 to -11.8)                    |
| Diarrhoeal diseases                                                                  | 281.7<br>(262.6 to 301.3)                 | 18,834.1<br>(17,563.1 to 20,187.9)            | 31.8<br>(22.1 to 43.5)                 | 1.3<br>(-4.0 to 7.4)                              | -22.9<br>(-26.4 to -19.4)                           |
| Intestinal infectious diseases                                                       | 1.4<br>(1.0 to 1.9)                       | 23.7†<br>(16.7 to 32.6)                       | 0.2<br>(0.1 to 0.4)                    | 12.9<br>(-14.2 to 44.5)                           | -16.1<br>(-32.2 to 2.7)                             |
| Typhoid fever                                                                        | 1.4<br>(1.0 to 1.9)                       | 21.8<br>(15.3 to 30.3)                        | 0.2<br>(0.1 to 0.3)                    | 14.5<br>(-13.7 to 48.6)                           | -15.4<br>(-32.1 to 4.2)                             |
| Paratyphoid fever                                                                    | 0.1<br>(0.1 to 0.1)                       | 1.9<br>(1.2 to 3.0)                           | < 0.05<br>(< 0.05 to < 0.05)           | 24.9<br>(-9.4 to 72.6)                            | -7.7<br>(-29.9 to 19.6)                             |
| Other intestinal infectious diseases                                                 | --                                        | --                                            | < 0.05<br>(< 0.05 to < 0.05)           | -40.1<br>(-58.1 to -13.5)                         | -49.9<br>(-61.9 to -34.2)                           |
| Lower respiratory infections                                                         | 21.3<br>(19.7 to 23.3)                    | 938.6<br>(853.3 to 1,026.9)                   | 1.3<br>(0.8 to 1.8)                    | 17.2<br>(1.3 to 34.3)                             | -9.3<br>(-18.4 to 0.1)                              |
| Upper respiratory infections                                                         | 629.5<br>(555.8 to 711.8)                 | 47,628.9<br>(41,640.3 to 54,256.7)            | 15.7<br>(9.4 to 24.6)                  | 30.8<br>(23.3 to 37.9)                            | -1.9<br>(-7.1 to 3.2)                               |
| Otitis media                                                                         | 292.4<br>(259.8 to 329.0)                 | 1,573.2<br>(1,217.5 to 2,019.9)               | 8.9<br>(5.3 to 13.7)                   | 20.2<br>(9.7 to 30.4)                             | -11.2<br>(-18.1 to -4.6)                            |
| Meningitis                                                                           | 77.5<br>(65.7 to 90.4)                    | 22.2<br>(19.1 to 26.3)                        | 8.3<br>(6.0 to 11.1)                   | 31.2<br>(20.9 to 42.7)                            | -4.4<br>(-10.8 to 2.9)                              |
| Pneumococcal meningitis                                                              | 26.6<br>(22.3 to 31.5)                    | 3.4<br>(2.6 to 4.4)                           | 3.2<br>(2.2 to 4.3)                    | 22.0<br>(2.8 to 46.0)                             | -12.4<br>(-23.7 to 1.8)                             |
| H influenzae type B meningitis                                                       | 13.2<br>(10.3 to 16.9)                    | 3.3<br>(2.3 to 4.7)                           | 1.8<br>(1.2 to 2.5)                    | 30.1<br>(12.1 to 50.6)                            | -2.9<br>(-13.8 to 9.2)                              |
| Meningococcal infection                                                              | 5.3<br>(3.9 to 7.2)                       | 2.2<br>(1.6 to 3.1)                           | 0.6<br>(0.4 to 0.8)                    | 35.3<br>(27.9 to 43.0)                            | -0.7<br>(-6.3 to 5.1)                               |
| Other meningitis                                                                     | 32.3<br>(23.6 to 42.0)                    | 13.3<br>(10.9 to 15.9)                        | 2.8<br>(1.9 to 3.8)                    | 43.2<br>(26.2 to 62.2)                            | 4.8<br>(-4.9 to 15.5)                               |
| Encephalitis                                                                         | 32.5<br>(21.3 to 48.3)                    | 18.0<br>(15.4 to 20.7)                        | 3.7<br>(2.6 to 5.0)                    | 39.6<br>(20.5 to 61.4)                            | 2.6<br>(-9.2 to 16.6)                               |
| Diphtheria                                                                           | < 0.05<br>(< 0.05 to < 0.05)              | < 0.05<br>(< 0.05 to < 0.05)                  | < 0.05<br>(< 0.05 to < 0.05)           | -32.6<br>(-71.6 to 70.4)                          | -47.1<br>(-73.6 to 5.0)                             |
| Whooping cough                                                                       | 5.8<br>(4.5 to 7.3)                       | 42.2<br>(32.8 to 53.5)                        | 0.3<br>(0.2 to 0.5)                    | -9.7<br>(-25.0 to 10.8)                           | -30.6<br>(-42.6 to -14.7)                           |
| Tetanus                                                                              | 0.2<br>(0.2 to 0.3)                       | 0.8<br>(0.5 to 1.2)                           | < 0.05<br>(< 0.05 to < 0.05)           | -36.4<br>(-55.6 to -6.5)                          | -54.8<br>(-66.4 to -33.0)                           |
| Measles                                                                              | 0.6<br>(0.2 to 1.3)                       | 20.8<br>(7.0 to 47.6)                         | 0.1<br>(< 0.05 to 0.1)                 | 3.3<br>(-46.2 to 151.2)                           | -21.3<br>(-59.0 to 89.9)                            |
| Varicella and herpes zoster                                                          | 15.6<br>(14.6 to 16.7)                    | 487.6<br>(455.6 to 520.3)                     | 0.4<br>(0.3 to 0.7)                    | 34.8<br>(15.2 to 58.0)                            | -0.3<br>(-10.9 to 11.5)                             |
| <b>Neglected tropical diseases and malaria</b>                                       | <b>8,338.9</b><br>(7,701.9 to 9,019.5)    | <b>4,335.5†</b><br>(3,515.1 to 5,385.6)       | <b>75.7</b><br>(49.8 to 116.5)         | <b>17.4</b><br>(9.3 to 26.0)                      | <b>-15.3</b><br>(-20.4 to -10.0)                    |
| Malaria                                                                              | 1,507.4<br>(1,202.0 to 1,919.6)           | 3,132.6<br>(2,319.8 to 4,181.4)               | 20.5<br>(14.5 to 28.4)                 | 8.2<br>(-7.7 to 27.7)                             | -22.0<br>(-32.2 to -10.8)                           |
| Chagas disease                                                                       | --                                        | --                                            | --                                     | --                                                | --                                                  |
| Leishmaniasis                                                                        | < 0.05<br>(< 0.05 to < 0.05)              | < 0.05<br>(< 0.05 to < 0.05)                  | < 0.05<br>(< 0.05 to < 0.05)           | -6.0<br>(-100.0 to 10,205,364.0)                  | -26.7<br>(-100.0 to 6,567,553.6)                    |
| Visceral leishmaniasis                                                               | < 0.05<br>(< 0.05 to < 0.05)              | < 0.05<br>(< 0.05 to < 0.05)                  | < 0.05<br>(< 0.05 to < 0.05)           | -6.0<br>(-100.0 to 10,205,364.0)                  | -26.7<br>(-100.0 to 6,567,553.6)                    |
| Cutaneous and mucocutaneous leishmaniasis                                            | --                                        | --                                            | --                                     | --                                                | --                                                  |
| African trypanosomiasis                                                              | < 0.05<br>(< 0.05 to < 0.05)              | < 0.05<br>(< 0.05 to 0.1)                     | < 0.05<br>(< 0.05 to < 0.05)           | 13.7<br>(-80.9 to 540.1)                          | -18.6<br>(-86.8 to 362.4)                           |
| Schistosomiasis                                                                      | 2,806.2<br>(2,507.5 to 3,123.9)           | 1,068.2<br>(968.3 to 1,175.0)                 | 21.1<br>(10.2 to 40.1)                 | 9.6<br>(4.7 to 15.1)                              | -21.0<br>(-24.4 to -17.6)                           |
| Cysticercosis                                                                        | 9.0<br>(6.8 to 11.4)                      | --                                            | 1.7<br>(1.0 to 2.7)                    | 28.2<br>(-3.8 to 65.8)                            | -6.8<br>(-28.3 to 17.8)                             |
| Cystic echinococcosis                                                                | 4.0<br>(0.8 to 13.7)                      | 0.8<br>(0.2 to 3.1)                           | 0.4<br>(0.1 to 1.4)                    | -41.6<br>(-92.4 to 311.9)                         | -57.3<br>(-93.3 to 168.9)                           |
| Lymphatic filariasis                                                                 | 114.7<br>(92.5 to 144.6)                  | 58.4<br>(50.1 to 66.4)                        | 4.7<br>(2.1 to 8.6)                    | 18.1<br>(-15.1 to 40.1)                           | -14.6<br>(-39.2 to -0.1)                            |
| Onchocerciasis                                                                       | --                                        | --                                            | --                                     | --                                                | --                                                  |
| Trachoma                                                                             | 4.0<br>(2.7 to 5.7)                       | --                                            | 0.3<br>(0.2 to 0.5)                    | -2.8<br>(-25.2 to 25.4)                           | -27.6<br>(-46.6 to -0.6)                            |
| Dengue                                                                               | 4.5<br>(1.9 to 8.5)                       | 75.1<br>(34.5 to 136.7)                       | 0.7<br>(0.2 to 1.6)                    | 187.2<br>(100.0 to 609.8)                         | 107.9<br>(51.5 to 390.7)                            |
| Yellow fever                                                                         | < 0.05<br>(< 0.05 to < 0.05)              | 0.3<br>(0.1 to 0.8)                           | < 0.05<br>(< 0.05 to < 0.05)           | -32.0<br>(-49.7 to -9.3)                          | -50.0<br>(-60.8 to -37.7)                           |
| Rabies                                                                               | < 0.05<br>(< 0.05 to < 0.05)              | < 0.05<br>(< 0.05 to 0.1)                     | < 0.05<br>(< 0.05 to < 0.05)           | -32.9<br>(-72.5 to 57.0)                          | -50.7<br>(-77.9 to 3.2)                             |
| Intestinal nematode infections                                                       | 5,788.8<br>(4,946.7 to 6,713.9)           | --                                            | 20.1<br>(12.0 to 31.6)                 | 35.0<br>(20.2 to 53.1)                            | -1.1<br>(-13.1 to 12.5)                             |
| Ascariasis                                                                           | 669.3<br>(493.7 to 923.5)                 | --                                            | < 0.05<br>(< 0.05 to 0.1)              | 34.8<br>(5.2 to 77.0)                             | -0.3<br>(-22.2 to 28.2)                             |



| Cause                                                                   | Prevalence in thousands (95% UI)                 | Incidence in thousands (95% UI)                   | YLDs in thousands (95% UI)                |                                                   |                                                     |
|-------------------------------------------------------------------------|--------------------------------------------------|---------------------------------------------------|-------------------------------------------|---------------------------------------------------|-----------------------------------------------------|
|                                                                         | 2016 counts                                      | 2016 counts                                       | 2016 counts                               | Percentage change in counts between 2006 and 2016 | Percentage change in age-standardised rates between |
| Trichuriasis                                                            | 940.4<br>(686.7 to 1,284.0)                      | --                                                | < 0.05<br>(< 0.05 to 0.1)                 | 34.4<br>(-6.6 to 90.8)                            | -0.9<br>(-30.5 to 41.9)                             |
| Hookworm disease                                                        | 4,632.8<br>(3,739.0 to 5,737.3)                  | --                                                | 20.0<br>(12.0 to 31.4)                    | 35.0<br>(20.2 to 53.1)                            | -1.1<br>(-13.1 to 12.6)                             |
| Food-borne trematodiasis                                                | --                                               | --                                                | --                                        | --                                                | --                                                  |
| Leprosy                                                                 | 0.8<br>(0.7 to 0.9)                              | 0.1<br>(0.1 to 0.1)                               | 0.1<br>(< 0.05 to 0.1)                    | 19.0<br>(-5.1 to 51.0)                            | -13.5<br>(-30.2 to 10.2)                            |
| Ebola virus disease                                                     | --                                               | --                                                | --                                        | --                                                | --                                                  |
| Zika virus disease                                                      | --                                               | --                                                | --                                        | --                                                | --                                                  |
| Guinea worm disease                                                     | --                                               | --                                                | --                                        | --                                                | --                                                  |
| Other neglected tropical diseases                                       | 186.6<br>(163.6 to 209.8)                        | --                                                | 6.1<br>(3.8 to 9.4)                       | 26.4<br>(7.8 to 49.6)                             | -7.0<br>(-19.9 to 9.0)                              |
| <b>Maternal disorders</b>                                               | <b>55.1</b><br><b>(45.1 to 65.9)</b>             | <b>834.1†</b><br><b>(569.4 to 1,163.2)</b>        | <b>7.0</b><br><b>(4.8 to 9.8)</b>         | <b>-4.2</b><br><b>(-18.1 to 13.0)</b>             | <b>-32.9</b><br><b>(-42.3 to -21.7)</b>             |
| Maternal haemorrhage                                                    | 5.2<br>(3.9 to 7.0)                              | 54.9<br>(35.2 to 83.3)                            | 0.3<br>(0.1 to 0.5)                       | 23.3<br>(-22.2 to 89.1)                           | -9.8<br>(-41.5 to 37.2)                             |
| Maternal sepsis and other pregnancy related infections                  | 7.2<br>(5.8 to 8.8)                              | 29.0<br>(21.9 to 40.1)                            | 0.1<br>(0.1 to 0.3)                       | 26.3<br>(-35.5 to 149.4)                          | -8.3<br>(-49.8 to 68.8)                             |
| Maternal hypertensive disorders                                         | 27.6<br>(17.3 to 39.2)                           | 113.7<br>(88.1 to 141.4)                          | 1.3<br>(0.7 to 2.2)                       | 24.8<br>(-24.4 to 110.1)                          | -8.9<br>(-44.6 to 53.2)                             |
| Maternal obstructed labour and uterine rupture                          | 11.5<br>(9.6 to 13.6)                            | 46.7<br>(32.8 to 65.7)                            | 3.7<br>(2.4 to 5.3)                       | -14.9<br>(-28.3 to -0.1)                          | -40.2<br>(-49.3 to -30.4)                           |
| Maternal abortion, miscarriage, and ectopic pregnancy                   | 4.8<br>(2.5 to 8.2)                              | 589.7<br>(336.6 to 910.5)                         | 0.5<br>(0.2 to 1.0)                       | 24.3<br>(-28.4 to 111.9)                          | -10.2<br>(-47.5 to 51.4)                            |
| Other maternal disorders                                                | --                                               | --                                                | 1.1<br>(0.7 to 1.5)                       | -8.8<br>(-22.0 to 7.3)                            | -36.0<br>(-45.0 to -25.7)                           |
| <b>Neonatal disorders</b>                                               | <b>207.1</b><br><b>(165.8 to 250.6)</b>          | --                                                | <b>28.2</b><br><b>(15.1 to 50.1)</b>      | <b>52.3</b><br><b>(22.1 to 84.2)</b>              | <b>19.1</b><br><b>(-6.9 to 44.8)</b>                |
| Neonatal preterm birth complications                                    | 134.1<br>(99.8 to 183.8)                         | --                                                | 8.1<br>(5.2 to 12.5)                      | 38.6<br>(7.8 to 76.9)                             | 4.7<br>(-20.2 to 35.6)                              |
| Neonatal encephalopathy due to birth asphyxia and trauma                | 66.0<br>(35.3 to 107.8)                          | --                                                | 6.8<br>(1.2 to 18.7)                      | 47.1<br>(-19.6 to 147.6)                          | 16.1<br>(-41.2 to 94.7)                             |
| Neonatal sepsis and other neonatal infections                           | 23.9<br>(6.4 to 56.5)                            | --                                                | 9.1<br>(1.2 to 23.9)                      | 92.9<br>(34.3 to 184.4)                           | 59.4<br>(4.0 to 140.9)                              |
| Hemolytic disease and other neonatal jaundice                           | 5.2<br>(4.4 to 6.0)                              | --                                                | 1.7<br>(1.3 to 2.2)                       | 18.7<br>(2.9 to 37.0)                             | -8.6<br>(-18.7 to 3.1)                              |
| Other neonatal disorders                                                | --                                               | --                                                | 2.6<br>(1.5 to 4.3)                       | 32.2<br>(10.7 to 57.4)                            | 1.9<br>(-14.9 to 21.8)                              |
| <b>Nutritional deficiencies</b>                                         | <b>6,754.7</b><br><b>(6,238.5 to 7,316.9)</b>    | <b>5,432.9†</b><br><b>(4,229.0 to 6,907.4)</b>    | <b>110.4</b><br><b>(72.0 to 161.1)</b>    | <b>21.4</b><br><b>(9.3 to 35.0)</b>               | <b>-11.4</b><br><b>(-18.3 to -3.4)</b>              |
| Protein-energy malnutrition                                             | 168.9<br>(132.3 to 211.1)                        | 128.0<br>(102.5 to 157.5)                         | 7.7<br>(4.6 to 11.5)                      | 18.4<br>(-10.4 to 59.0)                           | -8.8<br>(-31.4 to 22.9)                             |
| Iodine deficiency                                                       | 288.6<br>(230.1 to 361.2)                        | 12.1<br>(9.7 to 15.1)                             | 8.3<br>(5.3 to 12.3)                      | 10.3<br>(-2.8 to 23.9)                            | -18.9<br>(-27.8 to -9.8)                            |
| Vitamin A deficiency                                                    | 4,442.4<br>(3,722.5 to 5,271.5)                  | 5,292.7<br>(4,088.7 to 6,787.2)                   | 1.4<br>(0.8 to 2.1)                       | 25.4<br>(4.5 to 52.0)                             | -7.8<br>(-21.8 to 9.5)                              |
| Iron-deficiency anaemia                                                 | 2,916.4<br>(2,643.7 to 3,199.3)                  | --                                                | 92.8<br>(59.0 to 138.0)                   | 22.8<br>(8.6 to 40.0)                             | -10.5<br>(-18.8 to -0.7)                            |
| Other nutritional deficiencies                                          | --                                               | --                                                | 0.3<br>(0.2 to 0.4)                       | 18.0<br>(-11.8 to 61.1)                           | -9.1<br>(-32.5 to 24.4)                             |
| <b>Other communicable, maternal, neonatal, and nutritional diseases</b> | <b>5,443.4</b><br><b>(5,148.0 to 5,707.2)</b>    | <b>3,876.4</b><br><b>(3,322.6 to 4,729.0)</b>     | <b>13.6</b><br><b>(8.7 to 21.0)</b>       | <b>28.9</b><br><b>(19.5 to 38.9)</b>              | <b>-6.9</b><br><b>(-12.2 to -1.4)</b>               |
| Sexually transmitted diseases excluding HIV                             | 4,295.8<br>(4,027.1 to 4,550.8)                  | 2,582.9<br>(2,335.2 to 2,837.7)                   | 7.7<br>(4.8 to 12.6)                      | 34.0<br>(24.8 to 44.2)                            | -3.3<br>(-9.5 to 3.0)                               |
| Syphilis                                                                | 490.6<br>(409.1 to 581.2)                        | 354.1<br>(286.4 to 437.6)                         | 0.6<br>(0.4 to 0.8)                       | 32.6<br>(15.2 to 54.1)                            | -4.4<br>(-17.5 to 12.5)                             |
| Chlamydial infection                                                    | 199.5<br>(155.6 to 250.0)                        | 189.1<br>(152.8 to 228.3)                         | 1.4<br>(0.9 to 2.2)                       | 32.0<br>(15.8 to 52.0)                            | -4.6<br>(-15.7 to 9.1)                              |
| Gonococcal infection                                                    | 140.4<br>(114.3 to 175.5)                        | 517.4<br>(405.4 to 664.7)                         | 1.1<br>(0.6 to 1.7)                       | 39.0<br>(6.9 to 84.8)                             | -0.0<br>(-22.5 to 29.7)                             |
| Trichomoniasis                                                          | 957.3<br>(817.2 to 1,095.6)                      | 961.5<br>(797.3 to 1,146.5)                       | 1.5<br>(0.6 to 3.0)                       | 26.7<br>(19.1 to 35.3)                            | -5.8<br>(-10.4 to -0.7)                             |
| Genital herpes                                                          | 3,329.3<br>(2,864.4 to 3,881.4)                  | 411.8<br>(340.0 to 507.2)                         | 0.9<br>(0.3 to 2.1)                       | 38.4<br>(25.2 to 52.3)                            | -0.4<br>(-8.5 to 7.8)                               |
| Other sexually transmitted diseases                                     | 75.5<br>(67.8 to 83.8)                           | 149.0<br>(123.6 to 184.0)                         | 2.2<br>(1.5 to 3.3)                       | 36.8<br>(21.4 to 54.3)                            | -3.4<br>(-13.3 to 7.8)                              |
| Hepatitis                                                               | 1,525.7<br>(1,277.7 to 1,814.8)                  | 1,293.5<br>(816.1 to 2,119.9)                     | 1.4<br>(0.8 to 2.1)                       | -7.0<br>(-26.8 to 22.4)                           | -26.7<br>(-39.7 to -11.1)                           |
| Acute hepatitis A                                                       | 32.1<br>(3.4 to 95.0)                            | 417.5<br>(44.6 to 1,234.8)                        | 0.2<br>(0.1 to 0.5)                       | -10.5<br>(-78.6 to 323.1)                         | -26.9<br>(-74.7 to 154.9)                           |
| Hepatitis B                                                             | 1,066.4<br>(835.2 to 1,340.6)                    | 772.8<br>(572.4 to 1,029.4)                       | 1.0<br>(0.6 to 1.6)                       | -7.3<br>(-25.1 to 12.6)                           | -27.5<br>(-40.2 to -13.7)                           |
| Hepatitis C                                                             | 423.0<br>(368.8 to 481.5)                        | 48.9<br>(44.5 to 53.6)                            | < 0.05<br>(< 0.05 to 0.1)                 | 15.3<br>(-20.6 to 69.2)                           | -16.1<br>(-34.9 to 10.3)                            |
| Acute hepatitis E                                                       | 4.2<br>(3.3 to 5.6)                              | 54.2<br>(43.3 to 72.2)                            | 0.1<br>(0.1 to 0.2)                       | -2.8<br>(-30.9 to 33.2)                           | -21.5<br>(-37.9 to -2.4)                            |
| Other infectious diseases                                               | 132.6<br>(117.5 to 148.6)                        | < 0.05<br>(< 0.05 to < 0.05)                      | 4.6<br>(2.9 to 6.9)                       | 35.9<br>(17.2 to 59.3)                            | -2.2<br>(-14.2 to 12.5)                             |
| <b>Non-communicable diseases</b>                                        | <b>15,028.3</b><br><b>(14,877.1 to 15,158.5)</b> | <b>45,976.3†</b><br><b>(42,588.8 to 49,443.2)</b> | <b>992.5</b><br><b>(724.6 to 1,301.8)</b> | <b>36.8</b><br><b>(30.6 to 43.7)</b>              | <b>-0.1</b><br><b>(-3.2 to 3.3)</b>                 |
| <b>Neoplasms</b>                                                        | <b>22.5</b><br><b>(20.4 to 24.5)</b>             | <b>10.5</b><br><b>(9.3 to 11.2)</b>               | <b>3.5</b><br><b>(2.5 to 4.7)</b>         | <b>22.1</b><br><b>(9.8 to 42.7)</b>               | <b>-9.1</b><br><b>(-17.6 to 4.5)</b>                |
| Lip and oral cavity cancer                                              | 1.0<br>(0.9 to 1.1)                              | 0.3<br>(0.3 to 0.3)                               | 0.1<br>(0.1 to 0.2)                       | 36.1<br>(10.9 to 62.9)                            | 0.9<br>(-16.6 to 19.8)                              |
| Nasopharynx cancer                                                      | 0.4<br>(0.3 to 0.6)                              | 0.1<br>(0.1 to 0.2)                               | 0.1<br>(< 0.05 to 0.1)                    | 23.7<br>(-1.4 to 62.1)                            | -10.7<br>(-27.3 to 14.7)                            |
| Other pharynx cancer                                                    | 0.2<br>(0.1 to 0.3)                              | 0.1<br>(0.1 to 0.1)                               | < 0.05<br>(< 0.05 to < 0.05)              | 21.1<br>(-4.8 to 50.9)                            | -7.9<br>(-27.5 to 14.0)                             |
| Oesophageal cancer                                                      | 0.3<br>(0.3 to 0.4)                              | 0.3<br>(0.3 to 0.4)                               | 0.1<br>(0.1 to 0.1)                       | 18.1<br>(-5.2 to 47.5)                            | -11.8<br>(-29.0 to 9.7)                             |
| Stomach cancer                                                          | 0.6<br>(0.5 to 0.7)                              | 0.4<br>(0.4 to 0.5)                               | 0.1<br>(0.1 to 0.1)                       | -5.5<br>(-19.3 to 10.3)                           | -27.8<br>(-38.5 to -15.0)                           |
| Colon and rectum cancer                                                 | 1.4<br>(1.3 to 1.6)                              | 0.6<br>(0.5 to 0.7)                               | 0.2<br>(0.1 to 0.3)                       | 32.2<br>(7.0 to 64.5)                             | -1.4<br>(-19.2 to 19.9)                             |
| Liver cancer                                                            | 0.2<br>(0.2 to 0.3)                              | 0.5<br>(0.4 to 0.7)                               | 0.1<br>(0.1 to 0.2)                       | 29.9<br>(7.0 to 53.5)                             | -3.5<br>(-20.4 to 13.1)                             |
| Liver cancer due to hepatitis B                                         | 0.2<br>(0.1 to 0.2)                              | 0.2<br>(0.1 to 0.2)                               | < 0.05<br>(< 0.05 to 0.1)                 | 31.1<br>(7.6 to 55.9)                             | -3.8<br>(-20.5 to 14.9)                             |

| Cause                                              | Prevalence in thousands (95% UI)          | Incidence in thousands (95% UI)          | YLDs in thousands (95% UI)           |                                                   |                                                     |
|----------------------------------------------------|-------------------------------------------|------------------------------------------|--------------------------------------|---------------------------------------------------|-----------------------------------------------------|
|                                                    | 2016 counts                               | 2016 counts                              | 2016 counts                          | Percentage change in counts between 2006 and 2016 | Percentage change in age-standardised rates between |
| Liver cancer due to hepatitis C                    | 0.1<br>(0.1 to 0.2)                       | 0.2<br>(0.1 to 0.2)                      | < 0.05<br>(< 0.05 to 0.1)            | 27.8<br>(2.8 to 54.5)                             | -3.7<br>(-21.3 to 14.9)                             |
| Liver cancer due to alcohol use                    | 0.1<br>(< 0.05 to 0.1)                    | 0.1<br>(< 0.05 to 0.1)                   | < 0.05<br>(< 0.05 to < 0.05)         | 32.2<br>(7.3 to 59.1)                             | -1.6<br>(-20.1 to 18.1)                             |
| Liver cancer due to other causes                   | 0.1<br>(0.1 to 0.2)                       | 0.1<br>(0.1 to 0.2)                      | < 0.05<br>(< 0.05 to < 0.05)         | 29.9<br>(8.5 to 51.9)                             | -4.0<br>(-19.0 to 12.3)                             |
| Gallbladder and biliary tract cancer               | < 0.05<br>(< 0.05 to 0.1)                 | 0.1<br>(< 0.05 to 0.1)                   | < 0.05<br>(< 0.05 to < 0.05)         | 7.3<br>(-10.0 to 31.5)                            | -17.7<br>(-30.3 to -1.4)                            |
| Pancreatic cancer                                  | 0.2<br>(0.1 to 0.2)                       | 0.2<br>(0.2 to 0.3)                      | < 0.05<br>(< 0.05 to 0.1)            | 33.6<br>(17.2 to 51.2)                            | 0.1<br>(-11.6 to 13.1)                              |
| Larynx cancer                                      | 0.3<br>(0.2 to 0.4)                       | 0.1<br>(0.1 to 0.1)                      | < 0.05<br>(< 0.05 to 0.1)            | 15.7<br>(-0.9 to 36.9)                            | -10.8<br>(-23.0 to 5.0)                             |
| Tracheal, bronchus, and lung cancer                | 0.3<br>(0.3 to 0.4)                       | 0.3<br>(0.3 to 0.3)                      | 0.1<br>(< 0.05 to 0.1)               | 44.3<br>(15.5 to 80.9)                            | 8.2<br>(-13.7 to 35.4)                              |
| Malignant skin melanoma                            | 0.3<br>(0.2 to 0.4)                       | 0.1<br>(0.1 to 0.1)                      | < 0.05<br>(< 0.05 to < 0.05)         | 43.1<br>(14.1 to 74.9)                            | 7.5<br>(-13.1 to 30.9)                              |
| Non-melanoma skin cancer                           | 0.1<br>(< 0.05 to 0.1)                    | 0.4<br>(0.3 to 0.6)                      | < 0.05<br>(< 0.05 to < 0.05)         | 44.7<br>(6.1 to 80.0)                             | 4.8<br>(-29.1 to 34.0)                              |
| Non-melanoma skin cancer (squamous-cell carcinoma) | < 0.05<br>(< 0.05 to 0.1)                 | 0.1<br>(0.1 to 0.1)                      | < 0.05<br>(< 0.05 to < 0.05)         | 45.2<br>(0.0 to 89.4)                             | 4.8<br>(-33.0 to 39.1)                              |
| Non-melanoma skin cancer (basal-cell carcinoma)    | < 0.05<br>(< 0.05 to 0.1)                 | 0.3<br>(0.2 to 0.5)                      | < 0.05<br>(< 0.05 to < 0.05)         | 41.8<br>(22.9 to 61.4)                            | 5.1<br>(-7.2 to 19.6)                               |
| Breast cancer                                      | 2.5<br>(2.0 to 2.9)                       | 0.6<br>(0.5 to 0.7)                      | 0.3<br>(0.2 to 0.4)                  | 22.7<br>(-11.5 to 76.7)                           | -11.0<br>(-35.1 to 25.2)                            |
| Cervical cancer                                    | 6.7<br>(4.1 to 8.8)                       | 1.9<br>(1.2 to 2.4)                      | 0.7<br>(0.4 to 1.0)                  | 2.3<br>(-22.4 to 50.0)                            | -26.7<br>(-43.9 to 4.1)                             |
| Uterine cancer                                     | 0.8<br>(0.6 to 0.9)                       | 0.2<br>(0.1 to 0.2)                      | 0.1<br>(< 0.05 to 0.1)               | 8.1<br>(-15.5 to 51.4)                            | -17.6<br>(-35.4 to 13.2)                            |
| Ovarian cancer                                     | 0.9<br>(0.6 to 1.2)                       | 0.3<br>(0.2 to 0.4)                      | 0.1<br>(0.1 to 0.2)                  | 34.4<br>(-1.8 to 86.3)                            | -2.5<br>(-29.4 to 39.3)                             |
| Prostate cancer                                    | 3.1<br>(1.1 to 4.5)                       | 1.0<br>(0.4 to 1.4)                      | 0.5<br>(0.1 to 0.8)                  | 43.5<br>(11.7 to 74.5)                            | 7.5<br>(-14.8 to 28.7)                              |
| Testicular cancer                                  | 0.1<br>(0.1 to 0.1)                       | < 0.05<br>(< 0.05 to < 0.05)             | < 0.05<br>(< 0.05 to < 0.05)         | 20.4<br>(-4.5 to 53.1)                            | -15.6<br>(-32.4 to 5.9)                             |
| Kidney cancer                                      | 1.0<br>(0.8 to 1.2)                       | 0.2<br>(0.2 to 0.3)                      | 0.1<br>(0.1 to 0.1)                  | 37.7<br>(-4.7 to 111.6)                           | 7.2<br>(-12.4 to 37.2)                              |
| Bladder cancer                                     | 0.6<br>(0.5 to 0.8)                       | 0.2<br>(0.1 to 0.2)                      | 0.1<br>(< 0.05 to 0.1)               | 30.6<br>(7.1 to 64.2)                             | -1.4<br>(-19.5 to 21.5)                             |
| Brain and nervous system cancer                    | 0.5<br>(0.4 to 0.8)                       | 0.2<br>(0.2 to 0.4)                      | 0.1<br>(< 0.05 to 0.1)               | 34.6<br>(20.7 to 50.1)                            | 2.5<br>(-7.8 to 13.8)                               |
| Thyroid cancer                                     | 0.7<br>(0.4 to 0.9)                       | 0.1<br>(0.1 to 0.2)                      | 0.1<br>(< 0.05 to 0.1)               | 22.4<br>(-4.5 to 69.0)                            | -13.7<br>(-31.5 to 16.9)                            |
| Mesothelioma                                       | < 0.05<br>(< 0.05 to < 0.05)              | < 0.05<br>(< 0.05 to < 0.05)             | < 0.05<br>(< 0.05 to < 0.05)         | 11.8<br>(-5.7 to 35.8)                            | -15.1<br>(-28.4 to 1.9)                             |
| Hodgkin lymphoma                                   | 0.3<br>(0.1 to 0.4)                       | 0.1<br>(< 0.05 to 0.1)                   | < 0.05<br>(< 0.05 to 0.1)            | -2.8<br>(-14.8 to 17.8)                           | -28.1<br>(-35.2 to -18.0)                           |
| Non-Hodgkin's lymphoma                             | 2.3<br>(1.5 to 2.9)                       | 0.7<br>(0.5 to 0.9)                      | 0.2<br>(0.1 to 0.4)                  | 33.0<br>(5.1 to 69.7)                             | -1.3<br>(-16.2 to 14.0)                             |
| Multiple myeloma                                   | 0.2<br>(0.1 to 0.3)                       | 0.1<br>(0.1 to 0.2)                      | 0.1<br>(< 0.05 to 0.1)               | 28.8<br>(5.1 to 61.3)                             | -1.9<br>(-21.1 to 24.3)                             |
| Leukaemia                                          | 0.6<br>(0.5 to 0.7)                       | 0.2<br>(0.1 to 0.2)                      | 0.1<br>(0.1 to 0.1)                  | 14.2<br>(-3.1 to 37.3)                            | -14.4<br>(-25.5 to -0.2)                            |
| Acute lymphoid leukaemia                           | 0.2<br>(0.1 to 0.2)                       | < 0.05<br>(< 0.05 to 0.1)                | < 0.05<br>(< 0.05 to < 0.05)         | 21.6<br>(-8.4 to 52.3)                            | -6.3<br>(-26.1 to 11.7)                             |
| Chronic lymphoid leukaemia                         | 0.1<br>(0.1 to 0.1)                       | < 0.05<br>(< 0.05 to < 0.05)             | < 0.05<br>(< 0.05 to < 0.05)         | 18.6<br>(-4.8 to 49.1)                            | -9.9<br>(-26.9 to 12.4)                             |
| Acute myeloid leukaemia                            | 0.1<br>(< 0.05 to 0.1)                    | < 0.05<br>(< 0.05 to 0.1)                | < 0.05<br>(< 0.05 to < 0.05)         | 35.6<br>(13.4 to 61.6)                            | 3.4<br>(-10.7 to 17.5)                              |
| Chronic myeloid leukaemia                          | 0.1<br>(< 0.05 to 0.1)                    | < 0.05<br>(< 0.05 to < 0.05)             | < 0.05<br>(< 0.05 to < 0.05)         | 8.1<br>(-14.0 to 41.0)                            | -22.0<br>(-37.1 to 0.1)                             |
| Other leukaemia                                    | 0.2<br>(0.2 to 0.3)                       | < 0.05<br>(< 0.05 to 0.1)                | < 0.05<br>(< 0.05 to < 0.05)         | 3.2<br>(-17.0 to 31.9)                            | -21.6<br>(-35.5 to -3.9)                            |
| Other neoplasms                                    | 2.9<br>(2.4 to 4.1)                       | 1.0<br>(0.8 to 1.4)                      | 0.3<br>(0.2 to 0.5)                  | 27.4<br>(10.0 to 49.8)                            | -7.8<br>(-19.7 to 6.4)                              |
| <b>Cardiovascular diseases</b>                     | <b>708.0</b><br><b>(648.5 to 767.4)</b>   | <b>54.4†</b><br><b>(51.9 to 56.9)</b>    | <b>38.8</b><br><b>(27.3 to 53.3)</b> | <b>41.8</b><br><b>(35.0 to 48.8)</b>              | <b>2.0</b><br><b>(-2.2 to 5.8)</b>                  |
| Rheumatic heart disease                            | 209.7<br>(172.9 to 241.7)                 | 9.8<br>(8.0 to 11.3)                     | 10.0<br>(6.1 to 14.9)                | 54.9<br>(37.5 to 73.4)                            | 11.0<br>(-1.2 to 22.9)                              |
| Ischaemic heart disease                            | 128.3<br>(121.4 to 135.5)                 | 18.9<br>(17.8 to 20.3)                   | 5.9<br>(4.0 to 8.0)                  | 36.8<br>(30.0 to 44.4)                            | 0.4<br>(-3.9 to 5.2)                                |
| Cerebrovascular disease                            | 41.7<br>(38.9 to 44.5)                    | 8.1†<br>(7.4 to 8.8)                     | 6.0<br>(4.3 to 7.6)                  | 33.2<br>(23.4 to 44.2)                            | -1.9<br>(-9.4 to 6.4)                               |
| Ischaemic stroke                                   | 37.3<br>(33.6 to 41.0)                    | 5.4†<br>(4.7 to 6.1)                     | 5.1<br>(3.6 to 6.5)                  | 35.6<br>(24.2 to 49.0)                            | -0.3<br>(-8.9 to 8.9)                               |
| Hemorrhagic stroke                                 | 6.6<br>(5.9 to 7.4)                       | 2.7†<br>(2.4 to 3.0)                     | 0.9<br>(0.7 to 1.2)                  | 21.0<br>(8.4 to 35.7)                             | -10.1<br>(-20.2 to 2.1)                             |
| Hypertensive heart disease                         | 9.9<br>(7.8 to 12.2)                      | --                                       | 0.8<br>(0.5 to 1.1)                  | 35.3<br>(22.1 to 52.2)                            | -1.4<br>(-10.2 to 9.2)                              |
| Cardiomyopathy and myocarditis                     | 7.0<br>(5.4 to 8.5)                       | 3.5†<br>(3.1 to 4.0)                     | 0.7<br>(0.4 to 1.0)                  | 35.8<br>(22.0 to 49.5)                            | 0.8<br>(-12.2 to 13.9)                              |
| Myocarditis                                        | 1.9<br>(1.6 to 2.3)                       | 3.5<br>(3.1 to 4.0)                      | 0.1<br>(0.1 to 0.2)                  | 36.7<br>(29.0 to 45.0)                            | 0.6<br>(-7.2 to 9.7)                                |
| Alcoholic cardiomyopathy                           | 0.8<br>(0.5 to 1.1)                       | --                                       | 0.1<br>(< 0.05 to 0.1)               | 37.1<br>(5.7 to 82.0)                             | 1.9<br>(-22.7 to 37.4)                              |
| Other cardiomyopathy                               | 5.6<br>(4.0 to 7.5)                       | --                                       | 0.5<br>(0.3 to 0.7)                  | 35.4<br>(18.8 to 53.1)                            | 0.7<br>(-14.6 to 16.2)                              |
| Atrial fibrillation and flutter                    | 25.8<br>(22.4 to 29.6)                    | 2.2<br>(1.9 to 2.6)                      | 2.0<br>(1.3 to 2.8)                  | 37.3<br>(26.1 to 49.2)                            | 0.3<br>(-5.9 to 7.3)                                |
| Peripheral vascular disease                        | 98.7<br>(85.9 to 113.5)                   | 9.6<br>(8.2 to 11.2)                     | 0.5<br>(0.2 to 1.0)                  | 26.1<br>(14.1 to 39.2)                            | -4.4<br>(-12.4 to 4.4)                              |
| Endocarditis                                       | 0.6<br>(0.5 to 0.8)                       | 2.2<br>(1.9 to 2.5)                      | 0.1<br>(< 0.05 to 0.1)               | 40.1<br>(27.6 to 53.9)                            | 1.7<br>(-13.1 to 18.7)                              |
| Other cardiovascular and circulatory diseases      | 243.0<br>(168.3 to 331.5)                 | --                                       | 12.9<br>(7.5 to 20.0)                | 41.2<br>(26.4 to 56.6)                            | 3.2<br>(-8.2 to 14.9)                               |
| <b>Chronic respiratory diseases</b>                | <b>956.6</b><br><b>(901.2 to 1,011.8)</b> | <b>202.8†</b><br><b>(185.8 to 221.3)</b> | <b>45.6</b><br><b>(33.6 to 60.7)</b> | <b>37.3</b><br><b>(30.7 to 43.3)</b>              | <b>1.4</b><br><b>(-2.4 to 5.5)</b>                  |
| Chronic obstructive pulmonary disease              | 159.9<br>(153.2 to 166.7)                 | 11.6<br>(11.1 to 12.0)                   | 12.3<br>(10.6 to 13.7)               | 36.6<br>(27.0 to 47.7)                            | 1.9<br>(-4.4 to 9.3)                                |
| Pneumoconiosis                                     | 0.2<br>(0.1 to 0.2)                       | < 0.05<br>(< 0.05 to < 0.05)             | < 0.05<br>(< 0.05 to < 0.05)         | 41.1<br>(33.3 to 49.3)                            | 4.3<br>(-1.7 to 10.5)                               |
| Silicosis                                          | < 0.05<br>(< 0.05 to < 0.05)              | < 0.05<br>(< 0.05 to < 0.05)             | < 0.05<br>(< 0.05 to < 0.05)         | 47.0<br>(32.8 to 61.3)                            | 2.8<br>(-4.5 to 9.8)                                |



| Cause                                                          | Prevalence in thousands (95% UI)        | Incidence in thousands (95% UI)         | YLDs in thousands (95% UI)        |                                                   |                                                     |
|----------------------------------------------------------------|-----------------------------------------|-----------------------------------------|-----------------------------------|---------------------------------------------------|-----------------------------------------------------|
|                                                                | 2016 counts                             | 2016 counts                             | 2016 counts                       | Percentage change in counts between 2006 and 2016 | Percentage change in age-standardised rates between |
| Asbestosis                                                     | 0.1<br>(0.1 to 0.1)                     | < 0.05<br>(< 0.05 to < 0.05)            | < 0.05<br>(< 0.05 to < 0.05)      | 39.1<br>(29.1 to 49.6)                            | 1.3<br>(-4.5 to 7.2)                                |
| Coal workers pneumoconiosis                                    | --                                      | --                                      | --                                | --                                                | --                                                  |
| Other pneumoconiosis                                           | 0.1<br>(0.1 to 0.1)                     | < 0.05<br>(< 0.05 to < 0.05)            | < 0.05<br>(< 0.05 to < 0.05)      | 42.0<br>(30.4 to 56.2)                            | 6.5<br>(-3.0 to 18.2)                               |
| Asthma                                                         | 798.7<br>(729.9 to 872.8)               | 191.1<br>(174.2 to 209.7)               | 31.5<br>(20.6 to 45.9)            | 35.8<br>(28.1 to 43.3)                            | -0.2<br>(-4.3 to 4.1)                               |
| Interstitial lung disease and pulmonary sarcoidosis            | 1.1<br>(1.0 to 1.3)                     | 0.1<br>(0.1 to 0.1)                     | 0.1<br>(0.1 to 0.2)               | 37.8<br>(33.1 to 42.9)                            | 0.7<br>(-4.5 to 6.1)                                |
| Other chronic respiratory diseases                             | --                                      | --                                      | 1.7<br>(1.3 to 2.0)               | 83.2<br>(37.9 to 139.5)                           | 33.6<br>(9.7 to 60.2)                               |
| <b>Cirrhosis and other chronic liver diseases</b>              | <b>33.0<br/>(31.3 to 34.9)</b>          | <b>3.6<br/>(3.5 to 3.8)</b>             | <b>2.8<br/>(1.9 to 3.9)</b>       | <b>33.1<br/>(17.1 to 52.0)</b>                    | <b>-1.8<br/>(-10.2 to 7.5)</b>                      |
| Cirrhosis and other chronic liver diseases due to hepatitis B  | 7.8<br>(6.3 to 9.3)                     | 1.0<br>(0.8 to 1.1)                     | 0.5<br>(0.3 to 0.7)               | 34.8<br>(11.3 to 64.6)                            | -1.9<br>(-17.2 to 15.8)                             |
| Cirrhosis and other chronic liver diseases due to hepatitis C  | 5.5<br>(3.6 to 8.0)                     | 0.7<br>(0.5 to 1.0)                     | 0.4<br>(0.2 to 0.6)               | 31.6<br>(6.6 to 62.1)                             | -3.1<br>(-19.1 to 16.8)                             |
| Cirrhosis and other chronic liver diseases due to alcohol use  | 6.3<br>(5.3 to 7.3)                     | 0.9<br>(0.8 to 1.0)                     | 0.4<br>(0.2 to 0.6)               | 37.7<br>(12.7 to 68.3)                            | 0.1<br>(-15.2 to 18.5)                              |
| Cirrhosis and other chronic liver diseases due to other causes | 13.4<br>(12.3 to 14.6)                  | 1.1<br>(1.0 to 1.2)                     | 1.6<br>(1.0 to 2.2)               | 31.8<br>(6.3 to 63.7)                             | -2.1<br>(-17.6 to 17.6)                             |
| <b>Digestive diseases</b>                                      | <b>229.6<br/>(213.4 to 247.1)</b>       | <b>226.3†<br/>(215.6 to 238.0)</b>      | <b>7.4<br/>(5.1 to 10.0)</b>      | <b>27.7<br/>(17.4 to 39.4)</b>                    | <b>-5.3<br/>(-11.3 to 0.8)</b>                      |
| Peptic ulcer disease                                           | 36.9<br>(34.0 to 40.5)                  | 19.6<br>(17.7 to 21.8)                  | 0.8<br>(0.5 to 1.2)               | 43.4<br>(27.9 to 60.8)                            | -0.9<br>(-9.8 to 10.2)                              |
| Gastritis and duodenitis                                       | 86.0<br>(75.8 to 97.0)                  | 69.6<br>(62.3 to 77.2)                  | 1.1<br>(0.7 to 1.6)               | 53.7<br>(35.9 to 74.0)                            | 9.6<br>(-0.8 to 21.4)                               |
| Appendicitis                                                   | 1.9<br>(1.8 to 2.1)                     | 50.9<br>(46.9 to 55.3)                  | 0.6<br>(0.4 to 0.9)               | 25.3<br>(-10.4 to 70.3)                           | -8.4<br>(-29.1 to 16.7)                             |
| Paralytic ileus and intestinal obstruction                     | 0.4<br>(0.4 to 0.4)                     | 11.5<br>(10.5 to 12.7)                  | 0.1<br>(0.1 to 0.2)               | 35.8<br>(24.9 to 46.0)                            | -1.6<br>(-16.0 to 12.6)                             |
| Inguinal, femoral, and abdominal hernia                        | 100.9<br>(84.5 to 119.3)                | 26.8<br>(23.6 to 30.3)                  | 3.7<br>(2.4 to 5.2)               | 18.1<br>(3.5 to 35.0)                             | -12.1<br>(-19.6 to -3.3)                            |
| Inflammatory bowel disease                                     | 0.7<br>(0.6 to 0.7)                     | 5.4<br>(5.2 to 5.7)                     | 0.1<br>(0.1 to 0.1)               | 46.2<br>(41.8 to 50.8)                            | 11.8<br>(8.3 to 15.0)                               |
| Vascular intestinal disorders                                  | 0.1<br>(0.1 to 0.1)                     | 0.6<br>(0.5 to 0.6)                     | < 0.05<br>(< 0.05 to < 0.05)      | 40.9<br>(33.9 to 48.2)                            | 5.9<br>(1.7 to 10.5)                                |
| Gallbladder and biliary diseases                               | 9.6<br>(8.5 to 10.7)                    | 39.9<br>(34.5 to 45.4)                  | 0.2<br>(0.2 to 0.3)               | 32.8<br>(14.1 to 56.8)                            | -4.1<br>(-19.6 to 17.1)                             |
| Pancreatitis                                                   | 0.2<br>(0.2 to 0.2)                     | 2.1<br>(1.8 to 2.4)                     | < 0.05<br>(< 0.05 to < 0.05)      | 41.1<br>(35.7 to 46.5)                            | 2.9<br>(-0.5 to 6.4)                                |
| Other digestive diseases                                       | --                                      | --                                      | 0.7<br>(0.5 to 0.9)               | 28.3<br>(14.3 to 44.1)                            | -2.4<br>(-8.8 to 4.3)                               |
| <b>Neurological disorders</b>                                  | <b>5,071.8<br/>(4,824.7 to 5,347.1)</b> | <b>2,461.4<br/>(2,098.0 to 2,847.2)</b> | <b>121.1<br/>(75.5 to 178.0)</b>  | <b>37.5<br/>(-6.4 to 105.1)</b>                   | <b>-0.1<br/>(-26.0 to 35.2)</b>                     |
| Alzheimer's disease and other dementias                        | 20.3<br>(16.9 to 24.3)                  | 3.5<br>(2.9 to 4.3)                     | 2.9<br>(2.0 to 3.9)               | 40.8<br>(32.8 to 49.4)                            | -0.4<br>(-5.6 to 4.6)                               |
| Parkinson's disease                                            | 2.0<br>(1.5 to 2.5)                     | 0.3<br>(0.2 to 0.3)                     | 0.2<br>(0.1 to 0.3)               | 50.7<br>(27.9 to 75.8)                            | 9.2<br>(-5.1 to 25.8)                               |
| Epilepsy                                                       | 73.8<br>(15.7 to 137.8)                 | 10.4<br>(2.3 to 19.6)                   | 29.1<br>(6.2 to 60.5)             | 30.3<br>(-72.4 to 567.6)                          | -3.1<br>(-79.0 to 426.9)                            |
| Multiple sclerosis                                             | 0.7<br>(0.6 to 0.8)                     | < 0.05<br>(< 0.05 to < 0.05)            | 0.2<br>(0.1 to 0.3)               | 56.9<br>(51.0 to 63.2)                            | 11.7<br>(7.7 to 16.2)                               |
| Motor neuron disease                                           | 0.2<br>(0.1 to 0.2)                     | < 0.05<br>(< 0.05 to < 0.05)            | < 0.05<br>(< 0.05 to < 0.05)      | 41.2<br>(34.7 to 48.4)                            | 4.9<br>(1.6 to 8.4)                                 |
| Migraine                                                       | 1,674.7<br>(1,596.6 to 1,752.8)         | 220.7<br>(210.0 to 232.9)               | 70.0<br>(44.4 to 98.7)            | 38.6<br>(32.9 to 45.4)                            | 0.0<br>(-3.5 to 3.9)                                |
| Tension-type headache                                          | 3,943.4<br>(3,517.6 to 4,390.9)         | 2,226.3<br>(1,865.3 to 2,605.5)         | 11.7<br>(7.2 to 17.8)             | 36.6<br>(29.8 to 45.1)                            | -1.3<br>(-6.0 to 3.9)                               |
| Other neurological disorders                                   | < 0.05<br>(< 0.05 to 0.1)               | 0.1<br>(< 0.05 to 0.1)                  | 7.0<br>(1.5 to 14.3)              | 60.7<br>(-64.1 to 681.1)                          | 16.3<br>(-70.5 to 431.0)                            |
| <b>Mental and substance use disorders</b>                      | <b>2,233.7<br/>(2,131.3 to 2,323.9)</b> | <b>834.6†<br/>(774.6 to 905.1)</b>      | <b>265.3<br/>(191.3 to 345.9)</b> | <b>38.0<br/>(34.6 to 41.7)</b>                    | <b>1.3<br/>(-1.1 to 3.9)</b>                        |
| Schizophrenia                                                  | 20.1<br>(17.4 to 23.0)                  | 1.9<br>(1.7 to 2.2)                     | 12.8<br>(9.2 to 16.3)             | 46.6<br>(31.1 to 62.8)                            | 3.8<br>(-5.9 to 14.6)                               |
| Alcohol use disorders                                          | 217.4<br>(184.6 to 252.6)               | 113.6<br>(95.7 to 132.0)                | 21.7<br>(14.8 to 30.2)            | 40.6<br>(28.4 to 51.8)                            | 1.5<br>(-6.1 to 8.7)                                |
| Drug use disorders                                             | 68.3<br>(60.4 to 76.0)                  | 12.2<br>(10.6 to 14.0)                  | 14.0<br>(9.6 to 19.3)             | 44.0<br>(30.7 to 59.3)                            | 4.4<br>(-4.3 to 14.4)                               |
| Opioid use disorders                                           | 28.5<br>(22.6 to 36.6)                  | 4.0<br>(3.2 to 4.9)                     | 11.9<br>(7.7 to 16.6)             | 45.4<br>(30.2 to 64.5)                            | 5.0<br>(-4.6 to 17.1)                               |
| Cocaine use disorders                                          | 1.9<br>(1.5 to 2.2)                     | 0.3<br>(0.2 to 0.3)                     | 0.3<br>(0.2 to 0.4)               | 40.8<br>(33.1 to 48.9)                            | 3.0<br>(-2.0 to 8.4)                                |
| Amphetamine use disorders                                      | 1.0<br>(0.7 to 1.4)                     | 0.2<br>(0.1 to 0.3)                     | 0.1<br>(0.1 to 0.2)               | 37.6<br>(23.1 to 51.6)                            | 2.9<br>(-7.3 to 13.1)                               |
| Cannabis use disorders                                         | 34.8<br>(28.5 to 42.9)                  | 6.8<br>(5.5 to 8.4)                     | 1.0<br>(0.6 to 1.5)               | 31.8<br>(5.9 to 63.4)                             | -2.1<br>(-19.4 to 18.8)                             |
| Other drug use disorders                                       | 4.3<br>(3.7 to 4.9)                     | 0.9<br>(0.8 to 1.1)                     | 0.7<br>(0.5 to 1.0)               | 43.0<br>(20.0 to 69.7)                            | 3.1<br>(-13.1 to 21.9)                              |
| Depressive disorders                                           | 449.1<br>(420.5 to 482.6)               | 504.1<br>(448.8 to 568.4)               | 76.8<br>(52.2 to 104.8)           | 40.7<br>(33.2 to 49.6)                            | 3.4<br>(-1.5 to 9.3)                                |
| Major depressive disorder                                      | 304.8<br>(270.1 to 342.8)               | 476.3<br>(419.7 to 538.0)               | 62.3<br>(42.5 to 85.7)            | 41.2<br>(31.9 to 52.2)                            | 4.1<br>(-1.9 to 11.6)                               |
| Dysthymia                                                      | 150.3<br>(129.6 to 173.8)               | 27.8<br>(24.2 to 32.2)                  | 14.5<br>(9.7 to 21.2)             | 38.5<br>(32.3 to 45.0)                            | 0.1<br>(-3.2 to 3.9)                                |
| Bipolar disorder                                               | 80.1<br>(67.6 to 94.9)                  | 10.1<br>(8.5 to 12.0)                   | 16.4<br>(10.2 to 24.5)            | 37.5<br>(26.2 to 49.2)                            | 0.3<br>(-6.6 to 7.2)                                |
| Anxiety disorders                                              | 475.9<br>(420.6 to 533.2)               | 87.2<br>(78.2 to 98.2)                  | 46.2<br>(31.6 to 63.6)            | 37.4<br>(28.1 to 48.0)                            | 0.1<br>(-5.9 to 7.0)                                |
| Eating disorders                                               | 16.2<br>(13.0 to 20.0)                  | 12.1<br>(8.8 to 16.3)                   | 3.3<br>(2.0 to 4.8)               | 60.9<br>(37.7 to 89.6)                            | 18.3<br>(1.5 to 37.6)                               |
| Anorexia nervosa                                               | 4.5<br>(3.2 to 6.1)                     | 2.0<br>(1.4 to 2.7)                     | 1.0<br>(0.6 to 1.5)               | 54.7<br>(16.1 to 107.6)                           | 15.4<br>(-12.3 to 53.1)                             |
| Bulimia nervosa                                                | 11.2<br>(8.3 to 15.2)                   | 10.1<br>(6.9 to 14.3)                   | 2.4<br>(1.3 to 3.5)               | 63.6<br>(35.5 to 97.7)                            | 19.4<br>(0.8 to 42.9)                               |
| Autistic spectrum disorders                                    | 141.1<br>(126.0 to 160.1)               | 1.9<br>(1.3 to 2.6)                     | 20.3<br>(13.5 to 28.8)            | 35.9<br>(27.7 to 44.0)                            | 0.5<br>(-4.7 to 5.7)                                |
| Autism                                                         | 39.4<br>(34.1 to 46.1)                  | 0.3<br>(0.1 to 0.5)                     | 10.2<br>(6.5 to 14.8)             | 35.8<br>(22.2 to 50.6)                            | 0.6<br>(-8.5 to 10.0)                               |
| Asperger syndrome and other autistic spectrum disorders        | 101.3<br>(83.3 to 123.0)                | 1.6<br>(1.0 to 2.3)                     | 10.2<br>(6.6 to 14.9)             | 36.1<br>(28.6 to 44.1)                            | 0.4<br>(-4.4 to 5.2)                                |



| Cause                                                      | Prevalence in thousands (95% UI)                 | Incidence in thousands (95% UI)                   | YLDs in thousands (95% UI)              |                                                   |                                                     |
|------------------------------------------------------------|--------------------------------------------------|---------------------------------------------------|-----------------------------------------|---------------------------------------------------|-----------------------------------------------------|
|                                                            | 2016 counts                                      | 2016 counts                                       | 2016 counts                             | Percentage change in counts between 2006 and 2016 | Percentage change in age-standardised rates between |
| Attention-deficit/hyperactivity disorder                   | 225.8<br>(201.5 to 254.3)                        | 15.2<br>(13.1 to 17.8)                            | 2.7<br>(1.6 to 4.4)                     | 35.9<br>(26.4 to 46.3)                            | 0.3<br>(-5.6 to 7.4)                                |
| Conduct disorder                                           | 176.1<br>(142.8 to 208.9)                        | 64.8<br>(50.5 to 79.3)                            | 21.3<br>(13.0 to 32.5)                  | 34.2<br>(26.0 to 43.6)                            | 0.2<br>(-5.9 to 7.2)                                |
| Idiopathic developmental intellectual disability           | 347.2<br>(213.4 to 484.7)                        | --                                                | 13.9<br>(6.5 to 24.0)                   | 16.3<br>(7.6 to 24.6)                             | -14.7<br>(-20.8 to -9.1)                            |
| Other mental and substance use disorders                   | 210.8<br>(184.1 to 244.8)                        | 11.5<br>(10.0 to 13.3)                            | 15.7<br>(10.8 to 22.8)                  | 39.9<br>(31.4 to 48.7)                            | 0.3<br>(-4.8 to 5.4)                                |
| <b>Diabetes, urogenital, blood, and endocrine diseases</b> | <b>8,188.4</b><br><b>(8,026.4 to 8,364.2)</b>    | <b>1,513.9†</b><br><b>(1,416.1 to 1,618.6)</b>    | <b>88.9</b><br><b>(62.6 to 120.0)</b>   | <b>37.1</b><br><b>(31.8 to 42.8)</b>              | <b>0.2</b><br><b>(-2.8 to 3.6)</b>                  |
| Diabetes mellitus                                          | 321.1<br>(289.3 to 356.3)                        | 23.2<br>(20.9 to 25.6)                            | 29.6<br>(20.4 to 40.6)                  | 43.3<br>(35.6 to 51.9)                            | 4.7<br>(-1.0 to 11.3)                               |
| Acute glomerulonephritis                                   | 0.1<br>(0.1 to 0.2)                              | 2.1<br>(1.7 to 2.4)                               | < 0.05<br>(< 0.05 to < 0.05)            | 36.5<br>(30.6 to 42.9)                            | -0.1<br>(-3.8 to 3.9)                               |
| Chronic kidney disease                                     | 555.2<br>(501.5 to 611.1)                        | 42.8<br>(38.3 to 47.7)                            | 13.9<br>(10.2 to 18.2)                  | 39.5<br>(30.0 to 50.1)                            | -2.2<br>(-7.9 to 4.5)                               |
| Chronic kidney disease due to diabetes mellitus            | 164.7<br>(139.0 to 192.3)                        | 11.7<br>(9.7 to 14.0)                             | 3.7<br>(2.6 to 5.1)                     | 37.3<br>(26.0 to 51.3)                            | -3.6<br>(-10.8 to 4.6)                              |
| Chronic kidney disease due to hypertension                 | 119.7<br>(103.2 to 136.0)                        | 11.7<br>(9.9 to 13.6)                             | 2.2<br>(1.5 to 2.9)                     | 33.8<br>(19.5 to 49.9)                            | -3.8<br>(-13.5 to 7.0)                              |
| Chronic kidney disease due to glomerulonephritis           | 113.0<br>(98.0 to 128.0)                         | 6.4<br>(5.2 to 7.8)                               | 3.9<br>(2.8 to 5.3)                     | 44.4<br>(27.7 to 62.6)                            | 1.6<br>(-7.6 to 12.2)                               |
| Chronic kidney disease due to other causes                 | 157.8<br>(132.7 to 182.8)                        | 13.1<br>(11.0 to 15.2)                            | 4.1<br>(2.9 to 5.5)                     | 40.1<br>(25.7 to 56.6)                            | -2.5<br>(-10.3 to 6.7)                              |
| Urinary diseases and male infertility                      | 160.4<br>(143.6 to 178.0)                        | 820.8†<br>(732.8 to 916.2)                        | 4.7<br>(3.1 to 6.8)                     | 29.7<br>(20.7 to 38.9)                            | -0.8<br>(-7.6 to 5.9)                               |
| Interstitial nephritis and urinary tract infections        | 13.9<br>(12.3 to 15.7)                           | 727.5<br>(642.4 to 826.9)                         | 0.5<br>(0.3 to 0.7)                     | 37.5<br>(15.1 to 62.6)                            | 1.2<br>(-12.6 to 17.8)                              |
| Urolithiasis                                               | 3.0<br>(2.6 to 3.4)                              | 78.7<br>(69.7 to 90.2)                            | 0.2<br>(0.1 to 0.3)                     | 42.3<br>(30.5 to 54.5)                            | 2.6<br>(-8.3 to 14.8)                               |
| Benign prostatic hyperplasia                               | 110.5<br>(93.7 to 128.8)                         | 14.6<br>(12.3 to 17.2)                            | 3.6<br>(2.2 to 5.3)                     | 29.4<br>(18.2 to 39.4)                            | -0.3<br>(-7.9 to 6.9)                               |
| Male infertility                                           | 29.3<br>(23.0 to 36.9)                           | --                                                | 0.2<br>(0.1 to 0.3)                     | 30.4<br>(13.5 to 48.0)                            | -10.1<br>(-20.8 to 1.6)                             |
| Other urinary diseases                                     | --                                               | --                                                | 0.3<br>(0.2 to 0.4)                     | 13.8<br>(0.4 to 29.1)                             | -15.1<br>(-23.1 to -6.3)                            |
| Gynecological diseases                                     | 1,601.2<br>(1,514.9 to 1,687.6)                  | 614.0†<br>(570.7 to 661.9)                        | 17.2<br>(11.5 to 24.9)                  | 38.1<br>(31.1 to 45.2)                            | -3.4<br>(-7.4 to 0.5)                               |
| Uterine fibroids                                           | 100.7<br>(88.7 to 113.6)                         | 13.5<br>(11.6 to 15.5)                            | 1.6<br>(1.0 to 2.6)                     | 33.9<br>(19.9 to 47.6)                            | -8.8<br>(-17.7 to -0.3)                             |
| Polycystic ovarian syndrome                                | 13.3<br>(9.8 to 17.2)                            | 38.1<br>(27.1 to 51.3)                            | 0.1<br>(0.1 to 0.2)                     | 46.8<br>(27.1 to 67.8)                            | 0.6<br>(-12.6 to 14.6)                              |
| Female infertility                                         | 5.8<br>(5.1 to 6.8)                              | --                                                | < 0.05<br>(< 0.05 to 0.1)               | 41.9<br>(13.4 to 78.5)                            | -5.3<br>(-23.2 to 16.5)                             |
| Endometriosis                                              | 3.1<br>(2.6 to 3.7)                              | 13.1<br>(10.6 to 16.4)                            | 0.3<br>(0.2 to 0.4)                     | 40.4<br>(0.9 to 96.5)                             | 0.1<br>(-26.4 to 33.3)                              |
| Genital prolapse                                           | 721.4<br>(639.9 to 805.2)                        | 68.1<br>(57.6 to 80.6)                            | 2.2<br>(1.1 to 4.1)                     | 29.8<br>(22.2 to 39.0)                            | -3.8<br>(-9.9 to 3.3)                               |
| Premenstrual syndrome                                      | 791.7<br>(720.7 to 857.7)                        | 311.5<br>(282.5 to 340.9)                         | 6.6<br>(4.1 to 10.2)                    | 39.6<br>(25.5 to 53.8)                            | -2.3<br>(-11.0 to 6.9)                              |
| Other gynecological diseases                               | 181.7<br>(155.1 to 210.7)                        | 169.8<br>(139.0 to 204.0)                         | 6.3<br>(4.1 to 9.1)                     | 40.7<br>(29.5 to 52.4)                            | -2.5<br>(-9.5 to 4.8)                               |
| Hemoglobinopathies and hemolytic anaemias                  | 6,883.0<br>(6,707.2 to 7,065.1)                  | --                                                | 18.3<br>(12.0 to 26.8)                  | 29.7<br>(15.6 to 45.2)                            | -5.3<br>(-14.2 to 4.5)                              |
| Thalassemias                                               | < 0.05<br>(< 0.05 to < 0.05)                     | --                                                | < 0.05<br>(< 0.05 to < 0.05)            | 25.4<br>(-25.4 to 97.8)                           | -4.3<br>(-43.5 to 52.2)                             |
| Thalassaemia trait                                         | 93.0<br>(32.5 to 177.6)                          | --                                                | 1.3<br>(0.3 to 2.7)                     | 34.8<br>(-13.4 to 97.6)                           | 1.4<br>(-36.4 to 49.9)                              |
| Sickle cell disorders                                      | 31.2<br>(26.5 to 36.9)                           | --                                                | 2.5<br>(1.7 to 3.6)                     | 31.5<br>(12.1 to 55.9)                            | -0.7<br>(-14.9 to 17.1)                             |
| Sickle cell trait                                          | 3,045.2<br>(2,843.2 to 3,271.3)                  | --                                                | 10.8<br>(6.9 to 16.2)                   | 30.7<br>(14.4 to 47.9)                            | -3.7<br>(-13.6 to 6.9)                              |
| G6PD deficiency                                            | 1,840.5<br>(1,695.9 to 2,026.4)                  | --                                                | 0.1<br>(0.1 to 0.1)                     | 21.4<br>(-11.9 to 71.7)                           | -5.2<br>(-24.1 to 19.4)                             |
| G6PD trait                                                 | 2,892.2<br>(2,806.6 to 2,986.9)                  | --                                                | < 0.05<br>(< 0.05 to < 0.05)            | 32.9<br>(10.3 to 60.2)                            | -2.2<br>(-16.4 to 14.1)                             |
| Other hemoglobinopathies and hemolytic anaemias            | 120.6<br>(108.5 to 134.0)                        | --                                                | 3.5<br>(2.2 to 5.3)                     | 24.0<br>(5.8 to 45.4)                             | -15.3<br>(-24.4 to -3.9)                            |
| Endocrine, metabolic, blood, and immune disorders          | 161.7<br>(148.8 to 175.2)                        | 11.0<br>(9.7 to 12.3)                             | 5.1<br>(3.4 to 7.4)                     | 28.3<br>(14.3 to 43.9)                            | -4.9<br>(-11.7 to 2.3)                              |
| <b>Musculoskeletal disorders</b>                           | <b>1,322.8</b><br><b>(1,243.9 to 1,393.6)</b>    | <b>627.5</b><br><b>(561.0 to 696.8)</b>           | <b>143.3</b><br><b>(103.9 to 188.3)</b> | <b>39.3</b><br><b>(34.0 to 44.8)</b>              | <b>0.2</b><br><b>(-3.0 to 3.4)</b>                  |
| Rheumatoid arthritis                                       | 19.7<br>(17.4 to 22.2)                           | 1.4<br>(1.2 to 1.5)                               | 4.7<br>(3.2 to 6.3)                     | 37.3<br>(24.3 to 52.9)                            | -0.2<br>(-8.3 to 9.0)                               |
| Osteoarthritis                                             | 231.4<br>(216.8 to 246.8)                        | 13.2<br>(12.2 to 14.2)                            | 14.2<br>(10.0 to 19.4)                  | 40.6<br>(35.3 to 45.9)                            | 3.2<br>(-0.6 to 6.8)                                |
| Low back and neck pain                                     | 875.8<br>(811.0 to 942.4)                        | 403.7<br>(361.2 to 449.9)                         | 99.8<br>(70.6 to 131.9)                 | 40.9<br>(34.0 to 48.1)                            | 0.7<br>(-3.7 to 5.0)                                |
| Low back pain                                              | 672.3<br>(597.3 to 764.7)                        | 340.2<br>(298.9 to 385.4)                         | 75.5<br>(53.1 to 101.0)                 | 40.7<br>(32.0 to 50.2)                            | 0.9<br>(-5.0 to 6.6)                                |
| Neck pain                                                  | 242.9<br>(208.8 to 281.3)                        | 63.5<br>(54.7 to 73.9)                            | 24.2<br>(16.4 to 34.4)                  | 41.3<br>(36.5 to 46.6)                            | 0.1<br>(-2.3 to 2.8)                                |
| Gout                                                       | 29.4<br>(26.1 to 33.4)                           | 6.1<br>(5.4 to 6.9)                               | 0.9<br>(0.6 to 1.3)                     | 38.5<br>(18.7 to 61.5)                            | 0.1<br>(-13.0 to 14.7)                              |
| Other musculoskeletal disorders                            | 275.8<br>(220.3 to 337.2)                        | 203.1<br>(155.2 to 255.8)                         | 23.8<br>(15.6 to 34.3)                  | 32.8<br>(19.9 to 47.0)                            | -5.2<br>(-14.3 to 4.8)                              |
| <b>Other non-communicable diseases</b>                     | <b>11,689.9</b><br><b>(11,381.2 to 11,985.9)</b> | <b>40,041.3†</b><br><b>(36,832.6 to 43,397.6)</b> | <b>275.8</b><br><b>(186.2 to 395.0)</b> | <b>33.9</b><br><b>(31.7 to 36.1)</b>              | <b>-1.9</b><br><b>(-3.1 to -0.7)</b>                |
| Congenital anomalies                                       | 162.6<br>(132.1 to 205.8)                        | --                                                | 21.7<br>(14.7 to 31.5)                  | 30.1<br>(21.5 to 40.4)                            | -3.6<br>(-9.6 to 3.6)                               |
| Neural tube defects                                        | 17.9<br>(15.8 to 20.4)                           | --                                                | 5.4<br>(3.7 to 7.3)                     | 36.8<br>(20.8 to 58.4)                            | 1.0<br>(-9.7 to 15.2)                               |
| Congenital heart anomalies                                 | 19.3<br>(15.9 to 23.0)                           | --                                                | 1.0<br>(0.5 to 1.6)                     | 25.5<br>(6.6 to 47.2)                             | -3.2<br>(-16.8 to 12.9)                             |
| Orofacial clefts                                           | 4.1<br>(3.5 to 4.7)                              | --                                                | 0.1<br>(< 0.05 to 0.1)                  | 23.8<br>(10.2 to 40.1)                            | -8.6<br>(-18.9 to 3.3)                              |
| Down's syndrome                                            | 3.0<br>(2.5 to 3.6)                              | --                                                | 0.3<br>(0.2 to 0.4)                     | 38.7<br>(28.5 to 50.6)                            | 3.2<br>(-4.4 to 12.0)                               |
| Turner syndrome                                            | 11.7<br>(9.9 to 13.8)                            | --                                                | 0.2<br>(0.1 to 0.3)                     | 21.2<br>(-13.7 to 70.9)                           | -7.9<br>(-32.8 to 24.0)                             |
| Klinefelter syndrome                                       | 11.3<br>(9.4 to 13.3)                            | --                                                | 0.1<br>(< 0.05 to 0.1)                  | 32.6<br>(3.6 to 69.0)                             | -1.5<br>(-23.4 to 24.7)                             |

| Cause                                         | Prevalence in thousands (95% UI)              | Incidence in thousands (95% UI)                | YLDs in thousands (95% UI)            |                                                   |                                                     |
|-----------------------------------------------|-----------------------------------------------|------------------------------------------------|---------------------------------------|---------------------------------------------------|-----------------------------------------------------|
|                                               | 2016 counts                                   | 2016 counts                                    | 2016 counts                           | Percentage change in counts between 2006 and 2016 | Percentage change in age-standardised rates between |
| Other chromosomal abnormalities               | 2.7<br>(2.3 to 3.3)                           | --                                             | 0.6<br>(0.3 to 0.8)                   | 31.2<br>(-11.2 to 98.1)                           | 0.1<br>(-31.4 to 48.0)                              |
| Congenital musculoskeletal and limb anomalies | 17.9<br>(15.6 to 20.2)                        | --                                             | 2.6<br>(1.7 to 3.6)                   | 31.9<br>(16.4 to 51.1)                            | -2.1<br>(-12.3 to 10.5)                             |
| Urogenital congenital anomalies               | 19.2<br>(16.8 to 21.9)                        | --                                             | 0.5<br>(0.3 to 0.8)                   | 32.8<br>(21.2 to 44.5)                            | -0.5<br>(-8.5 to 7.4)                               |
| Digestive congenital anomalies                | 8.4<br>(7.3 to 9.5)                           | --                                             | 0.4<br>(0.2 to 0.6)                   | 37.2<br>(5.0 to 79.4)                             | 1.2<br>(-19.3 to 26.0)                              |
| Other congenital anomalies                    | 79.5<br>(44.6 to 137.0)                       | --                                             | 10.8<br>(6.0 to 18.5)                 | 26.7<br>(14.2 to 40.8)                            | -6.4<br>(-15.3 to 2.9)                              |
| Skin and subcutaneous diseases                | 5,886.7<br>(5,598.4 to 6,236.6)               | 14,101.5<br>(12,921.0 to 15,639.6)             | 146.6<br>(95.0 to 215.5)              | 36.6<br>(33.8 to 39.7)                            | 1.5<br>(-0.2 to 3.5)                                |
| Dermatitis                                    | 966.8<br>(743.4 to 1,209.3)                   | 706.6<br>(617.4 to 816.4)                      | 39.7<br>(21.9 to 68.5)                | 34.9<br>(29.5 to 40.2)                            | 0.1<br>(-3.4 to 3.3)                                |
| Psoriasis                                     | 89.3<br>(84.9 to 94.0)                        | 13.9<br>(13.2 to 14.6)                         | 7.8<br>(5.5 to 10.3)                  | 49.3<br>(33.2 to 67.5)                            | 8.8<br>(0.2 to 19.3)                                |
| Cellulitis                                    | 6.3<br>(5.8 to 6.8)                           | 106.3<br>(98.1 to 114.7)                       | 0.4<br>(0.2 to 0.5)                   | 35.9<br>(4.9 to 74.5)                             | 1.6<br>(-17.8 to 26.5)                              |
| Pyoderma                                      | 116.7<br>(110.3 to 122.9)                     | 2,220.3<br>(2,107.0 to 2,334.8)                | 0.7<br>(0.3 to 1.4)                   | 37.7<br>(29.5 to 45.9)                            | 1.6<br>(-3.1 to 6.5)                                |
| Scabies                                       | 332.4<br>(283.0 to 389.5)                     | 1,033.2<br>(879.1 to 1,210.6)                  | 8.6<br>(4.8 to 13.9)                  | 19.5<br>(13.9 to 25.2)                            | -11.1<br>(-14.7 to -7.5)                            |
| Fungal skin diseases                          | 2,336.6<br>(1,903.0 to 2,855.2)               | 6,686.1<br>(5,555.8 to 8,052.3)                | 13.2<br>(5.2 to 28.1)                 | 35.6<br>(34.0 to 37.4)                            | 0.2<br>(-0.7 to 1.1)                                |
| Viral skin diseases                           | 569.2<br>(495.0 to 655.2)                     | 750.6<br>(642.4 to 865.0)                      | 17.5<br>(10.9 to 26.2)                | 35.4<br>(30.8 to 40.1)                            | 0.1<br>(-2.8 to 3.1)                                |
| Acne vulgaris                                 | 1,627.6<br>(1,414.3 to 1,876.4)               | 1,262.7<br>(958.7 to 1,733.6)                  | 41.9<br>(27.5 to 60.4)                | 40.6<br>(33.6 to 48.1)                            | 4.9<br>(0.1 to 10.1)                                |
| Alopecia areata                               | 26.0<br>(24.2 to 27.7)                        | 46.6<br>(43.2 to 49.6)                         | 0.8<br>(0.5 to 1.3)                   | 38.3<br>(21.5 to 58.0)                            | 0.2<br>(-10.5 to 12.1)                              |
| Pruritus                                      | 114.3<br>(99.7 to 130.1)                      | 92.5<br>(82.1 to 104.6)                        | 1.2<br>(0.6 to 2.2)                   | 39.5<br>(30.4 to 49.5)                            | 1.9<br>(-3.4 to 7.4)                                |
| Urticaria                                     | 169.6<br>(144.0 to 200.7)                     | 306.2<br>(258.5 to 360.7)                      | 10.3<br>(6.4 to 15.1)                 | 34.5<br>(25.7 to 43.7)                            | 0.2<br>(-5.6 to 6.4)                                |
| Decubitus ulcer                               | 1.6<br>(1.4 to 1.7)                           | 5.7<br>(5.1 to 6.3)                            | 0.3<br>(0.2 to 0.4)                   | 35.0<br>(21.7 to 51.0)                            | -0.2<br>(-13.2 to 16.1)                             |
| Other skin and subcutaneous diseases          | 766.9<br>(742.1 to 791.6)                     | 870.8<br>(841.2 to 899.7)                      | 4.2<br>(2.0 to 7.8)                   | 44.6<br>(40.2 to 49.3)                            | 6.4<br>(3.8 to 9.0)                                 |
| Sense organ diseases                          | 2,370.8<br>(2,298.9 to 2,444.8)               | 1,499.6†<br>(1,389.4 to 1,623.7)               | 85.7<br>(59.4 to 121.4)               | 29.4<br>(25.1 to 34.0)                            | -4.6<br>(-6.4 to -2.6)                              |
| Glaucoma                                      | 4.7<br>(3.9 to 5.5)                           | --                                             | 0.5<br>(0.3 to 0.7)                   | 28.6<br>(14.8 to 45.0)                            | -0.8<br>(-10.7 to 11.0)                             |
| Cataract                                      | 62.9<br>(55.4 to 71.2)                        | --                                             | 4.6<br>(3.3 to 6.4)                   | 30.0<br>(23.0 to 37.2)                            | -5.3<br>(-10.0 to -0.6)                             |
| Macular degeneration                          | 6.3<br>(5.1 to 7.7)                           | --                                             | 0.4<br>(0.3 to 0.6)                   | 33.1<br>(18.4 to 50.1)                            | 2.5<br>(-8.1 to 14.5)                               |
| Refraction and accommodation disorders        | 983.3<br>(948.7 to 1,023.4)                   | --                                             | 15.9<br>(9.5 to 25.4)                 | 22.2<br>(18.1 to 27.2)                            | -11.0<br>(-13.7 to -7.9)                            |
| Age-related and other hearing loss            | 1,516.9<br>(1,406.7 to 1,632.1)               | --                                             | 53.4<br>(36.1 to 75.8)                | 30.1<br>(23.3 to 38.2)                            | -3.9<br>(-7.0 to -0.8)                              |
| Other vision loss                             | 33.0<br>(29.4 to 37.1)                        | --                                             | 2.5<br>(1.7 to 3.4)                   | 34.0<br>(23.7 to 45.6)                            | -1.6<br>(-8.0 to 5.4)                               |
| Other sense organ diseases                    | 279.0<br>(258.6 to 299.4)                     | 1,499.6<br>(1,389.4 to 1,623.7)                | 8.4<br>(5.3 to 12.8)                  | 38.2<br>(30.6 to 45.7)                            | 1.3<br>(-2.7 to 5.2)                                |
| Oral disorders                                | 8,152.8<br>(7,604.4 to 8,649.1)               | 24,440.1†<br>(21,587.7 to 27,460.8)            | 21.8<br>(12.4 to 37.0)                | 37.9<br>(34.0 to 42.0)                            | -0.1<br>(-2.7 to 2.8)                               |
| Caries of deciduous teeth                     | 2,111.6<br>(1,654.1 to 2,576.5)               | 8,097.9<br>(5,717.9 to 10,866.4)               | 0.5<br>(0.2 to 1.0)                   | 31.1<br>(17.4 to 45.0)                            | -2.0<br>(-12.2 to 8.4)                              |
| Caries of permanent teeth                     | 5,261.5<br>(4,796.7 to 5,734.8)               | 16,205.4<br>(14,610.5 to 17,658.5)             | 3.1<br>(1.4 to 5.9)                   | 33.2<br>(27.3 to 39.2)                            | -2.6<br>(-6.1 to 0.9)                               |
| Periodontal disease                           | 1,011.6<br>(602.3 to 1,462.5)                 | 126.2<br>(77.8 to 187.6)                       | 6.6<br>(2.4 to 14.7)                  | 40.1<br>(30.8 to 50.2)                            | -0.3<br>(-6.1 to 6.2)                               |
| Edentulism and severe tooth loss              | 162.3<br>(141.2 to 183.5)                     | 10.8<br>(9.4 to 12.2)                          | 4.5<br>(3.0 to 6.4)                   | 38.6<br>(31.2 to 46.6)                            | 1.1<br>(-3.0 to 5.4)                                |
| Other oral disorders                          | 239.8<br>(228.1 to 252.7)                     | --                                             | 7.1<br>(4.4 to 10.6)                  | 38.1<br>(32.4 to 43.6)                            | 0.2<br>(-3.1 to 3.3)                                |
| <b>Injuries</b>                               | <b>1,962.6</b><br><b>(1,831.7 to 2,123.2)</b> | <b>1,317.9†</b><br><b>(1,243.8 to 1,399.1)</b> | <b>85.8</b><br><b>(58.4 to 121.3)</b> | <b>40.9</b><br><b>(38.0 to 43.8)</b>              | <b>4.4</b><br><b>(2.9 to 6.0)</b>                   |
| <b>Transport injuries</b>                     | <b>235.8</b><br><b>(220.1 to 253.1)</b>       | <b>125.5</b><br><b>(111.2 to 141.2)</b>        | <b>14.0</b><br><b>(9.3 to 20.1)</b>   | <b>47.3</b><br><b>(44.2 to 50.9)</b>              | <b>8.2</b><br><b>(6.4 to 10.3)</b>                  |
| Road injuries                                 | 201.3<br>(188.4 to 216.5)                     | 112.8<br>(98.8 to 129.0)                       | 11.8<br>(7.9 to 17.0)                 | 49.1<br>(46.0 to 52.6)                            | 9.2<br>(7.4 to 11.3)                                |
| Pedestrian road injuries                      | 65.7<br>(57.8 to 75.0)                        | 27.3<br>(22.6 to 32.9)                         | 3.9<br>(2.6 to 5.6)                   | 42.5<br>(39.4 to 46.0)                            | 4.6<br>(2.7 to 6.7)                                 |
| Cyclist road injuries                         | 53.0<br>(44.8 to 61.9)                        | 34.1<br>(27.6 to 41.3)                         | 2.9<br>(1.9 to 4.2)                   | 47.4<br>(44.0 to 51.3)                            | 8.7<br>(6.7 to 11.1)                                |
| Motorcyclist road injuries                    | 17.1<br>(14.6 to 20.1)                        | 6.6<br>(5.2 to 8.2)                            | 1.0<br>(0.6 to 1.4)                   | 54.2<br>(50.8 to 58.3)                            | 11.1<br>(9.2 to 13.2)                               |
| Motor vehicle road injuries                   | 51.6<br>(44.3 to 58.6)                        | 34.8<br>(29.1 to 41.2)                         | 3.3<br>(2.2 to 4.7)                   | 56.0<br>(52.3 to 60.2)                            | 13.9<br>(11.8 to 16.2)                              |
| Other road injuries                           | 13.9<br>(11.8 to 16.6)                        | 10.1<br>(7.5 to 13.4)                          | 0.8<br>(0.5 to 1.1)                   | 56.3<br>(52.2 to 60.5)                            | 15.0<br>(12.7 to 17.5)                              |
| Other transport injuries                      | 34.5<br>(28.9 to 41.5)                        | 12.7<br>(10.6 to 15.5)                         | 2.2<br>(1.4 to 3.2)                   | 38.7<br>(33.9 to 43.9)                            | 2.0<br>(-0.7 to 4.5)                                |
| <b>Unintentional injuries</b>                 | <b>1,617.1</b><br><b>(1,486.8 to 1,776.9)</b> | <b>1,114.0</b><br><b>(1,038.9 to 1,191.4)</b>  | <b>61.7</b><br><b>(41.7 to 87.1)</b>  | <b>41.2</b><br><b>(38.2 to 44.3)</b>              | <b>4.2</b><br><b>(2.6 to 5.8)</b>                   |
| Falls                                         | 620.0<br>(535.1 to 708.4)                     | 421.4<br>(363.3 to 492.3)                      | 27.4<br>(19.1 to 37.7)                | 42.2<br>(39.1 to 45.4)                            | 5.2<br>(3.4 to 7.0)                                 |
| Drowning                                      | 5.9<br>(5.0 to 6.8)                           | 1.8<br>(1.6 to 2.1)                            | 0.4<br>(0.2 to 0.5)                   | 31.3<br>(26.8 to 35.9)                            | -3.1<br>(-5.7 to -0.7)                              |
| Fire, heat, and hot substances                | 227.4<br>(186.7 to 283.3)                     | 48.7<br>(39.3 to 59.1)                         | 6.9<br>(4.7 to 9.8)                   | 43.5<br>(36.1 to 51.7)                            | 7.4<br>(3.3 to 12.2)                                |
| Poisonings                                    | 5.6<br>(4.4 to 6.7)                           | 10.7<br>(8.3 to 13.7)                          | 0.6<br>(0.4 to 0.9)                   | 45.5<br>(33.1 to 60.2)                            | 7.0<br>(-0.7 to 15.1)                               |
| Exposure to mechanical forces                 | 247.5<br>(212.1 to 302.6)                     | 148.7<br>(127.0 to 172.5)                      | 6.9<br>(4.5 to 10.0)                  | 43.8<br>(39.9 to 47.3)                            | 5.6<br>(3.4 to 7.7)                                 |
| Unintentional firearm injuries                | 11.0<br>(9.0 to 13.6)                         | 4.4<br>(3.2 to 6.0)                            | 0.5<br>(0.3 to 0.8)                   | 48.1<br>(43.9 to 52.4)                            | 8.2<br>(5.8 to 10.8)                                |
| Unintentional suffocation                     | 19.3<br>(13.9 to 25.6)                        | 7.1<br>(4.9 to 10.1)                           | 0.7<br>(0.4 to 1.0)                   | 40.9<br>(36.2 to 46.0)                            | 3.9<br>(1.5 to 6.5)                                 |
| Other exposure to mechanical forces           | 217.2<br>(183.3 to 271.0)                     | 137.1<br>(116.3 to 159.3)                      | 5.7<br>(3.7 to 8.2)                   | 43.8<br>(39.7 to 47.6)                            | 5.5<br>(3.2 to 7.6)                                 |

| Cause                                                                               | Prevalence in thousands (95% UI)  | Incidence in thousands (95% UI) | YLDs in thousands (95% UI)        |                                                   |                                                     |
|-------------------------------------------------------------------------------------|-----------------------------------|---------------------------------|-----------------------------------|---------------------------------------------------|-----------------------------------------------------|
|                                                                                     | 2016 counts                       | 2016 counts                     | 2016 counts                       | Percentage change in counts between 2006 and 2016 | Percentage change in age-standardised rates between |
| Adverse effects of medical treatment                                                | 6.4<br>(5.0 to 8.1)               | 83.7<br>(70.7 to 98.4)          | 0.8<br>(0.5 to 1.3)               | 29.3<br>(20.9 to 37.3)                            | -0.8<br>(-5.6 to 3.8)                               |
| Animal contact                                                                      | 84.2<br>(74.4 to 97.7)            | 148.7<br>(127.6 to 172.0)       | 3.1<br>(2.0 to 4.4)               | 23.6<br>(17.1 to 30.4)                            | -10.3<br>(-13.8 to -6.9)                            |
| Venomous animal contact                                                             | 34.5<br>(28.9 to 41.8)            | 63.8<br>(51.4 to 78.4)          | 2.1<br>(1.4 to 3.1)               | 26.1<br>(17.4 to 36.0)                            | -8.6<br>(-13.4 to -3.4)                             |
| Non-venomous animal contact                                                         | 49.8<br>(41.7 to 60.9)            | 84.9<br>(69.8 to 102.7)         | 1.0<br>(0.6 to 1.4)               | 18.4<br>(13.6 to 22.6)                            | -13.2<br>(-16.4 to -10.6)                           |
| Foreign body                                                                        | 119.2<br>(94.9 to 145.1)          | 97.6<br>(84.4 to 113.0)         | 5.5<br>(3.5 to 8.1)               | 34.8<br>(29.4 to 40.2)                            | 0.4<br>(-2.4 to 3.3)                                |
| Pulmonary aspiration and foreign body in airway                                     | 69.0<br>(49.5 to 96.8)            | 39.6<br>(31.7 to 50.7)          | 3.6<br>(2.2 to 5.4)               | 31.3<br>(25.6 to 37.0)                            | -2.0<br>(-5.2 to 1.0)                               |
| Foreign body in eyes                                                                | 5.3<br>(2.7 to 8.4)               | 30.7<br>(23.2 to 41.3)          | 0.3<br>(0.1 to 0.5)               | 41.8<br>(36.5 to 47.1)                            | 3.4<br>(0.7 to 6.7)                                 |
| Foreign body in other body part                                                     | 44.8<br>(35.3 to 59.8)            | 27.3<br>(21.9 to 33.6)          | 1.6<br>(1.0 to 2.4)               | 41.8<br>(35.4 to 48.3)                            | 5.1<br>(1.7 to 8.4)                                 |
| Environmental heat and cold exposure                                                | 84.9<br>(69.6 to 104.9)           | 35.9<br>(28.7 to 44.3)          | 3.6<br>(2.3 to 5.3)               | 42.6<br>(38.5 to 46.9)                            | 2.7<br>(0.5 to 4.9)                                 |
| Other unintentional injuries                                                        | 216.1<br>(169.0 to 280.8)         | 116.7<br>(95.5 to 142.1)        | 6.5<br>(4.2 to 9.6)               | 48.5<br>(44.4 to 52.4)                            | 6.9<br>(4.9 to 8.9)                                 |
| <b>Self-harm and interpersonal violence</b>                                         | <b>682.7<br/>(610.5 to 753.1)</b> | <b>76.8†<br/>(64.8 to 89.5)</b> | <b>9.8<br/>(6.8 to 13.5)</b>      | <b>30.9<br/>(25.6 to 36.5)</b>                    | <b>-1.0<br/>(-4.2 to 2.2)</b>                       |
| Self-harm                                                                           | 11.2<br>(9.8 to 12.8)             | 7.5<br>(6.4 to 8.7)             | 0.6<br>(0.4 to 0.9)               | 42.8<br>(38.7 to 47.1)                            | 3.2<br>(0.9 to 5.6)                                 |
| Self-harm by firearm                                                                | 0.7<br>(0.6 to 0.8)               | 0.4<br>(0.2 to 0.6)             | < 0.05<br>(< 0.05 to < 0.05)      | 18.6<br>(14.6 to 22.9)                            | -15.8<br>(-18.6 to -12.7)                           |
| Self-harm by other specified means                                                  | 10.5<br>(9.0 to 12.1)             | 7.1<br>(6.1 to 8.3)             | 0.6<br>(0.4 to 0.9)               | 44.4<br>(40.0 to 48.9)                            | 4.7<br>(2.3 to 7.2)                                 |
| Interpersonal violence                                                              | 671.5<br>(600.0 to 742.2)         | 69.3†<br>(57.5 to 81.7)         | 9.2<br>(6.4 to 12.7)              | 30.2<br>(24.5 to 36.1)                            | -1.5<br>(-4.9 to 2.0)                               |
| Assault by firearm                                                                  | 2.5<br>(2.2 to 3.0)               | 1.2<br>(0.9 to 1.6)             | 0.1<br>(0.1 to 0.2)               | 52.3<br>(46.1 to 58.7)                            | 10.4<br>(7.1 to 14.0)                               |
| Assault by sharp object                                                             | 24.0<br>(19.4 to 28.7)            | 13.9<br>(10.5 to 18.6)          | 0.8<br>(0.6 to 1.2)               | 45.0<br>(40.1 to 49.6)                            | 6.3<br>(3.5 to 8.9)                                 |
| Sexual violence                                                                     | 578.9<br>(509.7 to 648.1)         | --                              | 5.4<br>(3.6 to 7.6)               | 19.3<br>(11.3 to 27.9)                            | -11.1<br>(-16.5 to -5.0)                            |
| Assault by other means                                                              | 66.1<br>(55.8 to 79.9)            | 54.2<br>(44.9 to 64.4)          | 2.9<br>(1.9 to 4.2)               | 50.4<br>(46.6 to 54.6)                            | 10.6<br>(8.3 to 13.2)                               |
| <b>Forces of nature, conflict and terrorism, and executions and police conflict</b> | <b>5.9<br/>(2.9 to 11.9)</b>      | <b>1.6†<br/>(0.6 to 3.8)</b>    | <b>0.2<br/>(&lt; 0.05 to 0.7)</b> | <b>38.7<br/>(8.3 to 77.4)</b>                     | <b>9.4<br/>(-5.6 to 26.6)</b>                       |
| Exposure to forces of nature                                                        | 0.1<br>(< 0.05 to 0.1)            | --                              | < 0.05<br>(< 0.05 to < 0.05)      | --                                                | --                                                  |
| Conflict and terrorism                                                              | 1.3<br>(0.7 to 2.3)               | --                              | < 0.05<br>(< 0.05 to 0.1)         | 149.9<br>(139.2 to 163.4)                         | 79.0<br>(71.8 to 88.2)                              |
| Executions and police conflict                                                      | 4.5<br>(1.8 to 10.3)              | 1.6<br>(0.6 to 3.8)             | 0.1<br>(< 0.05 to 0.5)            | 20.5<br>(-8.5 to 61.7)                            | -3.5<br>(-19.6 to 13.6)                             |
| <b>Impairments</b>                                                                  | --                                | --                              | --                                | --                                                | --                                                  |
| Anaemia                                                                             | 6,338.8<br>(5,885.2 to 6,805.2)   | --                              | 284.4<br>(195.3 to 397.0)         | 6.2<br>(-13.3 to 21.4)                            | -25.3<br>(-44.2 to -9.6)                            |
| Developmental intellectual disability                                               | 556.1<br>(420.9 to 688.4)         | --                              | 54.7<br>(38.9 to 75.6)            | 32.6<br>(24.2 to 45.7)                            | -2.2<br>(-8.0 to 7.1)                               |
| Epilepsy                                                                            | 132.6<br>(69.7 to 202.6)          | --                              | 51.0<br>(25.0 to 86.2)            | 38.4<br>(-40.3 to 218.1)                          | 2.7<br>(-58.3 to 152.6)                             |
| Guillain-Barre syndrome                                                             | 0.1<br>(0.1 to 0.1)               | --                              | < 0.05<br>(< 0.05 to < 0.05)      | 35.9<br>(34.4 to 37.8)                            | 0.1<br>(-0.1 to 0.2)                                |
| Hearing loss                                                                        | 1,815.5<br>(1,709.8 to 1,929.7)   | --                              | 70.2<br>(48.5 to 97.4)            | 27.4<br>(22.1 to 32.8)                            | -5.0<br>(-7.5 to -2.6)                              |
| Heart failure                                                                       | 38.5<br>(33.9 to 43.5)            | --                              | 4.4<br>(3.2 to 5.8)               | 36.9<br>(27.2 to 47.7)                            | 0.1<br>(-7.4 to 8.8)                                |
| Infertility                                                                         | 157.2<br>(142.6 to 173.7)         | --                              | 1.0<br>(0.4 to 1.9)               | 37.0<br>(25.7 to 48.3)                            | -6.2<br>(-13.3 to 0.5)                              |
| Pelvic inflammatory disease                                                         | 14.9<br>(12.4 to 18.1)            | --                              | 1.9<br>(1.3 to 2.8)               | 36.9<br>(18.6 to 56.9)                            | -3.5<br>(-15.5 to 9.7)                              |
| Vision loss                                                                         | 1,178.1<br>(1,133.2 to 1,230.6)   | --                              | 36.6<br>(24.6 to 53.1)            | 34.4<br>(25.5 to 48.9)                            | -4.6<br>(-8.7 to 1.7)                               |

We did not calculate incidence for the nine impairments, certain NTDs, and causes with only birth prevalence. Blank cells mean that no estimate is available.

† Incidence for aggregate causes represents the sum of the incidence of the causes below the aggregate.

‡ Incidence estimates for stroke represent first-ever stroke only.

^ Incidence of HIV/AIDS represents new infections of HIV only and does not include new infections of Tuberculosis in HIV positive cases.



SR Table 14: Prevalence, incidence, and YLDs for 2016, percentage change of YLD counts and percentage change of age-standardised YLD rates between 2006 and 2016 by cause and impairments, for all ages, Zimbabwe.

| Cause                                                                                | Prevalence in thousands (95% UI)          | Incidence in thousands (95% UI)             | YLDs in thousands (95% UI)             |                                                   |                                                     |
|--------------------------------------------------------------------------------------|-------------------------------------------|---------------------------------------------|----------------------------------------|---------------------------------------------------|-----------------------------------------------------|
|                                                                                      | 2016 counts                               | 2016 counts                                 | 2016 counts                            | Percentage change in counts between 2006 and 2016 | Percentage change in age-standardised rates between |
| <b>All causes</b>                                                                    | <b>15,450.6</b><br>(15,402.4 to 15,496.3) | <b>99,865.9†</b><br>(93,869.4 to 106,651.8) | <b>1,440.6</b><br>(1,062.5 to 1,882.1) | <b>11.1</b><br>(3.2 to 16.3)                      | <b>-10.2</b><br>(-19.0 to -4.8)                     |
| <b>Communicable, maternal, neonatal, and nutritional disorders</b>                   | <b>13,031.0</b><br>(12,805.9 to 13,276.2) | <b>62,975.6†</b><br>(57,315.6 to 68,930.4)  | <b>389.0</b><br>(277.3 to 517.8)       | <b>-12.0</b><br>(-28.9 to 0.9)                    | <b>-35.6</b><br>(-53.1 to -19.7)                    |
| <b>HIV/AIDS and tuberculosis</b>                                                     | <b>3,766.8</b><br>(3,511.2 to 4,025.0)    | <b>150.6†</b><br>(122.6 to 184.5)           | <b>144.1</b><br>(101.9 to 197.4)       | <b>-34.7</b><br>(-54.3 to -11.5)                  | <b>-51.7</b><br>(-69.0 to -28.4)                    |
| Tuberculosis                                                                         | 2,686.6<br>(2,347.7 to 3,080.7)           | 83.7†<br>(62.1 to 113.2)                    | 10.5<br>(6.3 to 15.7)                  | -1.3<br>(-20.6 to 23.2)                           | -21.8<br>(-37.8 to -3.4)                            |
| Drug-susceptible tuberculosis                                                        | 32.3<br>(23.8 to 43.6)                    | 81.3<br>(59.6 to 110.1)                     | 10.2<br>(6.1 to 15.3)                  | -2.1<br>(-21.3 to 22.4)                           | -22.4<br>(-38.1 to -3.9)                            |
| Multidrug-resistant tuberculosis without extensive drug resistance                   | 0.9<br>(0.2 to 2.7)                       | 2.4<br>(0.5 to 6.6)                         | 0.3<br>(0.1 to 0.9)                    | 35.6<br>(-64.2 to 410.8)                          | 6.9<br>(-70.6 to 296.7)                             |
| Extensively drug-resistant tuberculosis                                              | < 0.05<br>(< 0.05 to < 0.05)              | < 0.05<br>(< 0.05 to < 0.05)                | < 0.05<br>(< 0.05 to < 0.05)           | 320.9<br>(20.3 to 1,403.0)                        | 231.1<br>(-3.3 to 1,101.8)                          |
| Latent tuberculosis infection                                                        | 2,653.4<br>(2,317.1 to 3,039.6)           | --                                          | --                                     | --                                                | --                                                  |
| HIV/AIDS                                                                             | 1,446.5<br>(1,354.0 to 1,553.7)           | 67.0^<br>(50.8 to 86.0)                     | 133.6<br>(94.9 to 183.5)               | -36.4<br>(-56.7 to -12.5)                         | -52.6<br>(-70.2 to -28.8)                           |
| Drug-susceptible HIV/AIDS - Tuberculosis                                             | 32.4<br>(24.3 to 41.6)                    | 80.4<br>(60.5 to 103.0)                     | 12.3<br>(7.5 to 17.9)                  | -44.6<br>(-53.3 to -36.0)                         | -54.7<br>(-60.9 to -48.3)                           |
| Multidrug-resistant HIV/AIDS - Tuberculosis without extensive drug resistance        | 1.1<br>(0.2 to 3.1)                       | 2.7<br>(0.6 to 7.7)                         | 0.4<br>(0.1 to 1.3)                    | -20.2<br>(-76.5 to 183.4)                         | -34.5<br>(-80.3 to 129.3)                           |
| Extensively drug-resistant HIV/AIDS - Tuberculosis                                   | < 0.05<br>(< 0.05 to < 0.05)              | < 0.05<br>(< 0.05 to < 0.05)                | < 0.05<br>(< 0.05 to < 0.05)           | 138.4<br>(-29.8 to 699.9)                         | 93.8<br>(-43.8 to 575.3)                            |
| HIV/AIDS resulting in other diseases                                                 | 1,413.1<br>(1,318.7 to 1,520.3)           | 67.0<br>(50.8 to 86.0)                      | 120.9<br>(83.6 to 167.7)               | -35.5<br>(-57.8 to -7.8)                          | -52.5<br>(-71.0 to -25.3)                           |
| <b>Diarrhoea, lower respiratory infections, and other common infectious diseases</b> | <b>1,118.7</b><br>(1,065.7 to 1,186.3)    | <b>56,183.8†</b><br>(50,652.2 to 62,046.8)  | <b>56.3</b><br>(38.8 to 77.3)          | <b>20.3</b><br>(16.4 to 24.4)                     | <b>-2.4</b><br>(-5.1 to 0.6)                        |
| Diarrhoeal diseases                                                                  | 202.6<br>(189.1 to 216.3)                 | 13,376.8<br>(12,516.2 to 14,313.5)          | 23.0<br>(15.7 to 31.9)                 | 18.8<br>(12.5 to 25.3)                            | -5.2<br>(-9.4 to -0.6)                              |
| Intestinal infectious diseases                                                       | < 0.05<br>(< 0.05 to < 0.05)              | 0.6†<br>(0.5 to 0.7)                        | < 0.05<br>(< 0.05 to < 0.05)           | 24.9<br>(4.5 to 50.5)                             | 2.3<br>(-11.4 to 19.6)                              |
| Typhoid fever                                                                        | < 0.05<br>(< 0.05 to < 0.05)              | 0.6<br>(0.5 to 0.7)                         | < 0.05<br>(< 0.05 to < 0.05)           | 27.4<br>(5.1 to 54.9)                             | 4.1<br>(-10.8 to 22.4)                              |
| Paratyphoid fever                                                                    | < 0.05<br>(< 0.05 to < 0.05)              | < 0.05<br>(< 0.05 to < 0.05)                | < 0.05<br>(< 0.05 to < 0.05)           | 30.1<br>(6.3 to 59.2)                             | 5.0<br>(-11.0 to 24.2)                              |
| Other intestinal infectious diseases                                                 | --                                        | --                                          | < 0.05<br>(< 0.05 to < 0.05)           | -10.6<br>(-40.1 to 36.2)                          | -29.5<br>(-51.1 to 3.0)                             |
| Lower respiratory infections                                                         | 23.4<br>(21.3 to 25.6)                    | 1,002.2<br>(909.6 to 1,114.1)               | 1.4<br>(0.9 to 2.0)                    | 21.1<br>(7.1 to 36.8)                             | -3.0<br>(-12.0 to 6.3)                              |
| Upper respiratory infections                                                         | 530.5<br>(462.2 to 609.6)                 | 39,904.4<br>(34,557.1 to 46,140.6)          | 13.3<br>(7.9 to 20.8)                  | 28.2<br>(19.8 to 37.4)                            | 3.6<br>(-2.2 to 9.3)                                |
| Otitis media                                                                         | 329.9<br>(294.3 to 368.4)                 | 1,418.1<br>(1,101.9 to 1,815.0)             | 10.1<br>(6.2 to 15.0)                  | 24.9<br>(16.8 to 33.5)                            | 4.1<br>(-2.0 to 10.8)                               |
| Meningitis                                                                           | 49.6<br>(40.9 to 59.4)                    | 12.0<br>(10.4 to 14.1)                      | 4.7<br>(3.3 to 6.3)                    | 10.7<br>(1.7 to 19.8)                             | -8.0<br>(-14.4 to -1.5)                             |
| Pneumococcal meningitis                                                              | 18.0<br>(15.0 to 21.7)                    | 2.1<br>(1.6 to 2.6)                         | 2.0<br>(1.4 to 2.7)                    | -8.4<br>(-21.5 to 7.4)                            | -24.9<br>(-34.2 to -14.0)                           |
| H influenzae type B meningitis                                                       | 5.5<br>(4.3 to 7.0)                       | 1.1<br>(0.8 to 1.5)                         | 0.8<br>(0.5 to 1.0)                    | -6.2<br>(-15.9 to 3.2)                            | -23.0<br>(-32.0 to -14.5)                           |
| Meningococcal infection                                                              | 4.2<br>(3.0 to 5.8)                       | 1.4<br>(1.1 to 1.9)                         | 0.4<br>(0.3 to 0.6)                    | 13.0<br>(6.0 to 20.2)                             | -6.7<br>(-12.9 to -0.5)                             |
| Other meningitis                                                                     | 21.9<br>(15.4 to 29.1)                    | 7.5<br>(6.4 to 8.9)                         | 1.6<br>(1.1 to 2.2)                    | 65.9<br>(45.1 to 89.7)                            | 40.8<br>(24.1 to 59.7)                              |
| Encephalitis                                                                         | 35.3<br>(21.3 to 54.9)                    | 18.7<br>(16.4 to 21.1)                      | 3.1<br>(2.2 to 4.2)                    | 13.4<br>(-2.4 to 32.7)                            | -5.5<br>(-16.6 to 6.8)                              |
| Diphtheria                                                                           | < 0.05<br>(< 0.05 to < 0.05)              | < 0.05<br>(< 0.05 to < 0.05)                | < 0.05<br>(< 0.05 to < 0.05)           | -30.1<br>(-65.8 to 37.3)                          | -48.6<br>(-72.0 to -7.1)                            |
| Whooping cough                                                                       | 3.1<br>(2.4 to 4.0)                       | 22.9<br>(17.7 to 29.1)                      | 0.2<br>(0.1 to 0.2)                    | -43.0<br>(-56.1 to -28.5)                         | -56.0<br>(-66.2 to -44.8)                           |
| Tetanus                                                                              | < 0.05<br>(< 0.05 to < 0.05)              | < 0.05<br>(< 0.05 to < 0.05)                | < 0.05<br>(< 0.05 to < 0.05)           | -4.6<br>(-31.1 to 22.1)                           | -34.2<br>(-54.6 to -8.2)                            |
| Measles                                                                              | 0.2<br>(0.1 to 0.5)                       | 7.9<br>(2.7 to 18.7)                        | < 0.05<br>(< 0.05 to < 0.05)           | -85.7<br>(-91.2 to -77.1)                         | -89.0<br>(-93.2 to -82.3)                           |
| Varicella and herpes zoster                                                          | 14.2<br>(13.3 to 15.2)                    | 420.3<br>(393.0 to 447.4)                   | 0.4<br>(0.2 to 0.7)                    | 21.5<br>(3.0 to 42.3)                             | 0.1<br>(-10.8 to 12.9)                              |
| <b>Neglected tropical diseases and malaria</b>                                       | <b>7,445.0</b><br>(6,825.0 to 8,110.6)    | <b>1,915.4†</b><br>(1,129.9 to 2,911.3)     | <b>44.9</b><br>(29.5 to 67.3)          | <b>-11.0</b><br>(-19.4 to -1.3)                   | <b>-26.7</b><br>(-33.9 to -18.1)                    |
| Malaria                                                                              | 352.5<br>(270.9 to 475.6)                 | 1,464.2<br>(681.3 to 2,450.4)               | 6.7<br>(4.7 to 9.6)                    | -23.6<br>(-42.5 to 1.1)                           | -31.9<br>(-48.9 to -10.2)                           |
| Chagas disease                                                                       | --                                        | --                                          | --                                     | --                                                | --                                                  |
| Leishmaniasis                                                                        | --                                        | --                                          | --                                     | --                                                | --                                                  |
| Visceral leishmaniasis                                                               | --                                        | --                                          | --                                     | --                                                | --                                                  |
| Cutaneous and mucocutaneous leishmaniasis                                            | --                                        | --                                          | --                                     | --                                                | --                                                  |
| African trypanosomiasis                                                              | < 0.05<br>(< 0.05 to < 0.05)              | < 0.05<br>(< 0.05 to < 0.05)                | < 0.05<br>(< 0.05 to < 0.05)           | 7.0<br>(-85.4 to 621.2)                           | -13.0<br>(-88.7 to 609.5)                           |
| Schistosomiasis                                                                      | 945.3<br>(777.8 to 1,103.5)               | 388.3<br>(324.7 to 452.9)                   | 7.4<br>(3.6 to 13.9)                   | -52.7<br>(-54.8 to -49.5)                         | -61.3<br>(-62.8 to -59.0)                           |
| Cysticercosis                                                                        | 26.9<br>(22.0 to 32.5)                    | --                                          | 4.7<br>(2.6 to 7.2)                    | 22.2<br>(1.4 to 47.1)                             | -5.1<br>(-19.3 to 11.1)                             |
| Cystic echinococcosis                                                                | 5.2<br>(1.2 to 18.7)                      | 1.1<br>(0.3 to 3.8)                         | 0.5<br>(0.1 to 1.8)                    | -13.7<br>(-88.5 to 457.6)                         | -30.6<br>(-88.9 to 356.2)                           |
| Lymphatic filariasis                                                                 | 1.5<br>(1.1 to 2.1)                       | 0.2<br>(0.2 to 0.3)                         | 0.1<br>(< 0.05 to 0.1)                 | 24.4<br>(-0.9 to 57.1)                            | -0.8<br>(-27.3 to 36.6)                             |
| Onchocerciasis                                                                       | --                                        | --                                          | --                                     | --                                                | --                                                  |
| Trachoma                                                                             | 17.5<br>(11.9 to 24.2)                    | --                                          | 1.3<br>(0.8 to 1.9)                    | 13.3<br>(-11.7 to 43.4)                           | -1.3<br>(-25.1 to 27.8)                             |
| Dengue                                                                               | 3.7<br>(1.5 to 7.4)                       | 61.6<br>(25.8 to 119.3)                     | 0.6<br>(0.2 to 1.4)                    | 155.0<br>(79.1 to 494.6)                          | 108.7<br>(53.0 to 385.7)                            |
| Yellow fever                                                                         | --                                        | --                                          | --                                     | --                                                | --                                                  |
| Rabies                                                                               | < 0.05<br>(< 0.05 to < 0.05)              | < 0.05<br>(< 0.05 to 0.1)                   | < 0.05<br>(< 0.05 to < 0.05)           | -22.7<br>(-67.6 to 85.3)                          | -40.7<br>(-70.8 to 21.4)                            |
| Intestinal nematode infections                                                       | 6,611.6<br>(5,904.4 to 7,336.0)           | --                                          | 19.3<br>(11.3 to 30.9)                 | 21.8<br>(9.2 to 35.2)                             | 0.1<br>(-10.1 to 12.2)                              |
| Ascariasis                                                                           | 866.5<br>(685.3 to 1,089.1)               | --                                          | 0.1<br>(< 0.05 to 0.1)                 | 21.8<br>(-11.1 to 66.4)                           | -0.5<br>(-26.8 to 36.2)                             |

| Cause                                                                   | Prevalence in thousands (95% UI)                 | Incidence in thousands (95% UI)                   | YLDs in thousands (95% UI)                |                                                   |                                                     |
|-------------------------------------------------------------------------|--------------------------------------------------|---------------------------------------------------|-------------------------------------------|---------------------------------------------------|-----------------------------------------------------|
|                                                                         | 2016 counts                                      | 2016 counts                                       | 2016 counts                               | Percentage change in counts between 2006 and 2016 | Percentage change in age-standardised rates between |
| Trichuriasis                                                            | 3,942.0<br>(3,265.1 to 4,802.4)                  | --                                                | 5.4<br>(3.0 to 8.8)                       | 20.3<br>(3.2 to 38.9)                             | -0.5<br>(-16.1 to 17.6)                             |
| Hookworm disease                                                        | 2,986.8<br>(2,499.1 to 3,555.7)                  | --                                                | 13.8<br>(8.2 to 22.2)                     | 22.3<br>(7.0 to 40.1)                             | 0.3<br>(-12.2 to 14.5)                              |
| Food-borne trematodiasis                                                | --                                               | --                                                | --                                        | --                                                | --                                                  |
| Leprosy                                                                 | 0.5<br>(0.4 to 0.7)                              | < 0.05<br>(< 0.05 to < 0.05)                      | < 0.05<br>(< 0.05 to 0.1)                 | -22.4<br>(-38.9 to 0.2)                           | -29.8<br>(-47.0 to -7.1)                            |
| Ebola virus disease                                                     | --                                               | --                                                | --                                        | --                                                | --                                                  |
| Zika virus disease                                                      | --                                               | --                                                | --                                        | --                                                | --                                                  |
| Guinea worm disease                                                     | --                                               | --                                                | --                                        | --                                                | --                                                  |
| Other neglected tropical diseases                                       | 153.1<br>(146.3 to 159.8)                        | --                                                | 4.3<br>(2.8 to 6.4)                       | 1.5<br>(-9.6 to 12.8)                             | -18.7<br>(-27.3 to -9.8)                            |
| <b>Maternal disorders</b>                                               | <b>40.8</b><br><b>(32.5 to 51.0)</b>             | <b>345.6†</b><br><b>(301.4 to 398.6)</b>          | <b>4.0</b><br><b>(2.7 to 5.6)</b>         | <b>17.3</b><br><b>(-3.9 to 44.6)</b>              | <b>-9.7</b><br><b>(-24.5 to 9.5)</b>                |
| Maternal haemorrhage                                                    | 6.7<br>(5.1 to 8.7)                              | 50.1<br>(36.6 to 65.9)                            | 0.3<br>(0.2 to 0.4)                       | 28.3<br>(-14.7 to 94.7)                           | 6.2<br>(-28.1 to 57.4)                              |
| Maternal sepsis and other pregnancy related infections                  | 5.4<br>(4.1 to 7.1)                              | 30.0<br>(22.1 to 41.0)                            | 0.1<br>(0.1 to 0.2)                       | 22.9<br>(-41.9 to 158.0)                          | 2.0<br>(-50.3 to 107.3)                             |
| Maternal hypertensive disorders                                         | 23.6<br>(15.3 to 33.5)                           | 104.6<br>(87.5 to 122.8)                          | 1.1<br>(0.6 to 1.9)                       | 26.8<br>(-24.4 to 116.0)                          | 3.6<br>(-37.3 to 75.3)                              |
| Maternal obstructed labour and uterine rupture                          | 5.2<br>(4.2 to 6.4)                              | 18.0<br>(13.1 to 24.1)                            | 1.7<br>(1.1 to 2.5)                       | 11.6<br>(-12.0 to 42.5)                           | -17.1<br>(-33.5 to 2.6)                             |
| Maternal abortion, miscarriage, and ectopic pregnancy                   | 1.2<br>(0.8 to 1.7)                              | 142.9<br>(107.2 to 187.9)                         | 0.1<br>(0.1 to 0.2)                       | 24.3<br>(-40.0 to 151.6)                          | 0.3<br>(-51.8 to 96.5)                              |
| Other maternal disorders                                                | --                                               | --                                                | 0.6<br>(0.4 to 0.9)                       | 10.8<br>(-9.3 to 36.9)                            | -14.0<br>(-28.2 to 4.9)                             |
| <b>Neonatal disorders</b>                                               | <b>227.8</b><br><b>(185.3 to 281.4)</b>          | --                                                | <b>36.4</b><br><b>(21.4 to 59.9)</b>      | <b>53.4</b><br><b>(23.0 to 84.5)</b>              | <b>31.2</b><br><b>(3.4 to 58.0)</b>                 |
| Neonatal preterm birth complications                                    | 185.4<br>(138.2 to 249.9)                        | --                                                | 17.4<br>(11.5 to 25.6)                    | 35.4<br>(7.9 to 67.0)                             | 13.5<br>(-9.3 to 40.1)                              |
| Neonatal encephalopathy due to birth asphyxia and trauma                | 23.8<br>(11.6 to 42.3)                           | --                                                | 2.7<br>(0.4 to 7.5)                       | 51.8<br>(-26.7 to 152.5)                          | 35.2<br>(-39.6 to 121.4)                            |
| Neonatal sepsis and other neonatal infections                           | 30.8<br>(6.3 to 76.7)                            | --                                                | 11.7<br>(1.1 to 32.7)                     | 116.7<br>(26.1 to 281.5)                          | 99.1<br>(1.6 to 262.0)                              |
| Hemolytic disease and other neonatal jaundice                           | 5.3<br>(4.4 to 6.2)                              | --                                                | 1.7<br>(1.3 to 2.2)                       | 1.5<br>(-11.6 to 16.7)                            | -13.1<br>(-23.0 to -1.6)                            |
| Other neonatal disorders                                                | --                                               | --                                                | 2.8<br>(1.8 to 4.7)                       | 43.9<br>(18.6 to 70.3)                            | 10.0<br>(-9.4 to 30.5)                              |
| <b>Nutritional deficiencies</b>                                         | <b>4,262.6</b><br><b>(4,060.2 to 4,477.2)</b>    | <b>1,667.9†</b><br><b>(1,377.2 to 2,024.8)</b>    | <b>90.0</b><br><b>(60.0 to 127.9)</b>     | <b>4.4</b><br><b>(-2.4 to 11.4)</b>               | <b>-14.4</b><br><b>(-19.2 to -9.6)</b>              |
| Protein-energy malnutrition                                             | 90.9<br>(73.1 to 109.6)                          | 47.8<br>(39.0 to 56.7)                            | 3.3<br>(1.9 to 5.3)                       | -23.4<br>(-48.3 to 13.4)                          | -41.4<br>(-60.6 to -12.8)                           |
| Iodine deficiency                                                       | 403.4<br>(355.8 to 457.0)                        | 14.8<br>(13.1 to 16.7)                            | 11.7<br>(7.7 to 16.4)                     | 20.3<br>(-0.3 to 48.1)                            | -7.6<br>(-20.1 to 7.9)                              |
| Vitamin A deficiency                                                    | 1,705.1<br>(1,428.4 to 2,023.3)                  | 1,605.3<br>(1,312.6 to 1,964.9)                   | 0.6<br>(0.4 to 1.0)                       | 26.2<br>(2.1 to 55.2)                             | 1.4<br>(-16.7 to 23.3)                              |
| Iron-deficiency anaemia                                                 | 2,611.7<br>(2,519.1 to 2,715.8)                  | --                                                | 74.2<br>(48.6 to 106.9)                   | 3.9<br>(-3.5 to 11.3)                             | -14.7<br>(-19.8 to -9.2)                            |
| Other nutritional deficiencies                                          | --                                               | --                                                | 0.1<br>(0.1 to 0.2)                       | -24.9<br>(-50.9 to 13.7)                          | -42.6<br>(-62.8 to -12.9)                           |
| <b>Other communicable, maternal, neonatal, and nutritional diseases</b> | <b>5,476.7</b><br><b>(5,092.4 to 5,824.8)</b>    | <b>2,712.3</b><br><b>(2,450.3 to 3,030.8)</b>     | <b>13.4</b><br><b>(8.7 to 20.3)</b>       | <b>22.7</b><br><b>(10.6 to 35.6)</b>              | <b>-1.4</b><br><b>(-11.0 to 8.9)</b>                |
| Sexually transmitted diseases excluding HIV                             | 3,737.1<br>(3,485.8 to 4,009.2)                  | 2,443.1<br>(2,203.6 to 2,737.6)                   | 9.9<br>(6.2 to 15.2)                      | 28.4<br>(11.7 to 47.1)                            | 1.3<br>(-10.6 to 14.0)                              |
| Syphilis                                                                | 406.8<br>(326.1 to 504.4)                        | 291.4<br>(220.4 to 380.9)                         | 0.5<br>(0.4 to 0.7)                       | 30.4<br>(16.3 to 47.2)                            | 2.6<br>(-10.3 to 18.1)                              |
| Chlamydial infection                                                    | 201.8<br>(160.3 to 250.2)                        | 189.2<br>(155.1 to 228.9)                         | 1.3<br>(0.8 to 2.0)                       | 31.2<br>(12.3 to 50.6)                            | 4.0<br>(-9.9 to 19.6)                               |
| Gonococcal infection                                                    | 266.7<br>(215.8 to 331.4)                        | 893.7<br>(710.6 to 1,125.5)                       | 3.1<br>(1.7 to 5.0)                       | 24.8<br>(-6.2 to 68.0)                            | -0.6<br>(-23.1 to 29.1)                             |
| Trichomoniasis                                                          | 615.6<br>(516.7 to 721.6)                        | 573.7<br>(474.1 to 686.5)                         | 0.9<br>(0.4 to 1.9)                       | 19.6<br>(8.4 to 29.8)                             | -3.5<br>(-10.5 to 2.8)                              |
| Genital herpes                                                          | 2,776.1<br>(2,388.6 to 3,228.6)                  | 322.0<br>(268.2 to 388.6)                         | 0.8<br>(0.2 to 1.7)                       | 25.4<br>(11.2 to 39.5)                            | -0.5<br>(-9.1 to 9.3)                               |
| Other sexually transmitted diseases                                     | 114.5<br>(87.8 to 149.0)                         | 173.1<br>(143.0 to 213.0)                         | 3.3<br>(2.1 to 4.9)                       | 34.1<br>(15.7 to 55.2)                            | 3.7<br>(-10.0 to 18.4)                              |
| Hepatitis                                                               | 2,229.1<br>(1,756.0 to 2,783.9)                  | 269.1<br>(180.6 to 412.8)                         | 0.2<br>(0.1 to 0.4)                       | 15.9<br>(-18.4 to 58.8)                           | -7.2<br>(-30.1 to 20.4)                             |
| Acute hepatitis A                                                       | 4.4<br>(0.4 to 13.5)                             | 57.2<br>(4.7 to 175.1)                            | < 0.05<br>(< 0.05 to 0.1)                 | 16.6<br>(-83.9 to 863.3)                          | -2.8<br>(-79.2 to 372.6)                            |
| Hepatitis B                                                             | 1,838.7<br>(1,367.9 to 2,390.1)                  | 178.6<br>(127.6 to 248.6)                         | 0.2<br>(0.1 to 0.3)                       | 14.3<br>(-14.3 to 50.3)                           | -8.7<br>(-32.3 to 18.2)                             |
| Hepatitis C                                                             | 385.1<br>(337.7 to 434.9)                        | 22.0<br>(18.9 to 25.4)                            | < 0.05<br>(< 0.05 to < 0.05)              | 30.6<br>(-28.3 to 149.4)                          | -1.5<br>(-38.5 to 62.6)                             |
| Acute hepatitis E                                                       | 0.9<br>(0.8 to 1.0)                              | 11.4<br>(9.8 to 13.2)                             | < 0.05<br>(< 0.05 to < 0.05)              | 13.3<br>(-1.0 to 31.0)                            | -1.9<br>(-10.5 to 8.2)                              |
| Other infectious diseases                                               | 110.5<br>(105.9 to 115.1)                        | < 0.05<br>(< 0.05 to < 0.05)                      | 3.3<br>(2.1 to 5.0)                       | 8.7<br>(-1.2 to 19.6)                             | -12.4<br>(-19.8 to -4.4)                            |
| <b>Non-communicable diseases</b>                                        | <b>13,772.6</b><br><b>(13,666.0 to 13,880.5)</b> | <b>35,900.2†</b><br><b>(33,302.5 to 38,567.1)</b> | <b>986.9</b><br><b>(726.6 to 1,281.9)</b> | <b>23.1</b><br><b>(19.5 to 27.1)</b>              | <b>0.9</b><br><b>(-1.4 to 3.3)</b>                  |
| <b>Neoplasms</b>                                                        | <b>25.6</b><br><b>(23.9 to 27.2)</b>             | <b>12.5</b><br><b>(11.0 to 13.4)</b>              | <b>4.1</b><br><b>(2.9 to 5.5)</b>         | <b>6.1</b><br><b>(-3.1 to 17.7)</b>               | <b>-11.7</b><br><b>(-19.0 to -2.8)</b>              |
| Lip and oral cavity cancer                                              | 0.6<br>(0.5 to 0.6)                              | 0.2<br>(0.1 to 0.2)                               | 0.1<br>(< 0.05 to 0.1)                    | 8.9<br>(-7.1 to 28.4)                             | -10.3<br>(-22.8 to 6.1)                             |
| Nasopharynx cancer                                                      | 0.1<br>(0.1 to 0.1)                              | < 0.05<br>(< 0.05 to < 0.05)                      | < 0.05<br>(< 0.05 to < 0.05)              | 3.5<br>(-12.0 to 24.9)                            | -17.2<br>(-27.9 to -2.3)                            |
| Other pharynx cancer                                                    | 0.1<br>(0.1 to 0.1)                              | < 0.05<br>(< 0.05 to < 0.05)                      | < 0.05<br>(< 0.05 to < 0.05)              | 3.1<br>(-12.8 to 27.5)                            | -12.9<br>(-26.6 to 7.7)                             |
| Oesophageal cancer                                                      | 0.8<br>(0.8 to 0.9)                              | 0.9<br>(0.8 to 0.9)                               | 0.2<br>(0.1 to 0.3)                       | -2.5<br>(-21.6 to 22.1)                           | -16.1<br>(-32.6 to 5.1)                             |
| Stomach cancer                                                          | 0.9<br>(0.8 to 1.0)                              | 0.7<br>(0.6 to 0.7)                               | 0.2<br>(0.1 to 0.2)                       | -0.7<br>(-16.1 to 16.6)                           | -14.7<br>(-28.6 to 0.9)                             |
| Colon and rectum cancer                                                 | 1.7<br>(1.5 to 1.9)                              | 0.6<br>(0.6 to 0.7)                               | 0.2<br>(0.1 to 0.3)                       | 3.4<br>(-13.6 to 28.0)                            | -13.3<br>(-28.3 to 6.5)                             |
| Liver cancer                                                            | 0.5<br>(0.4 to 0.5)                              | 1.0<br>(0.9 to 1.1)                               | 0.2<br>(0.1 to 0.3)                       | 18.5<br>(1.0 to 35.7)                             | -2.0<br>(-16.4 to 12.2)                             |
| Liver cancer due to hepatitis B                                         | 0.5<br>(0.4 to 0.5)                              | 0.5<br>(0.4 to 0.6)                               | 0.1<br>(0.1 to 0.1)                       | 20.4<br>(1.9 to 38.3)                             | -2.1<br>(-16.7 to 12.7)                             |

| Cause                                              | Prevalence in thousands (95% UI)              | Incidence in thousands (95% UI)          | YLDs in thousands (95% UI)           |                                                   |                                                     |
|----------------------------------------------------|-----------------------------------------------|------------------------------------------|--------------------------------------|---------------------------------------------------|-----------------------------------------------------|
|                                                    | 2016 counts                                   | 2016 counts                              | 2016 counts                          | Percentage change in counts between 2006 and 2016 | Percentage change in age-standardised rates between |
| Liver cancer due to hepatitis C                    | 0.1<br>(0.1 to 0.2)                           | 0.2<br>(0.1 to 0.2)                      | < 0.05<br>(< 0.05 to < 0.05)         | 14.2<br>(-4.2 to 33.3)                            | -2.3<br>(-17.5 to 14.3)                             |
| Liver cancer due to alcohol use                    | 0.1<br>(0.1 to 0.2)                           | 0.1<br>(0.1 to 0.2)                      | < 0.05<br>(< 0.05 to < 0.05)         | 17.6<br>(-1.1 to 35.6)                            | -1.0<br>(-16.3 to 14.7)                             |
| Liver cancer due to other causes                   | 0.2<br>(0.2 to 0.2)                           | 0.2<br>(0.2 to 0.2)                      | < 0.05<br>(< 0.05 to 0.1)            | 18.0<br>(0.2 to 35.5)                             | -2.5<br>(-17.9 to 11.9)                             |
| Gallbladder and biliary tract cancer               | < 0.05<br>(< 0.05 to 0.1)                     | 0.1<br>(0.1 to 0.1)                      | < 0.05<br>(< 0.05 to < 0.05)         | 1.3<br>(-8.2 to 14.6)                             | -13.5<br>(-21.3 to -2.7)                            |
| Pancreatic cancer                                  | 0.2<br>(0.2 to 0.2)                           | 0.3<br>(0.3 to 0.3)                      | 0.1<br>(< 0.05 to 0.1)               | 11.6<br>(-1.2 to 26.0)                            | -4.0<br>(-15.7 to 8.8)                              |
| Larynx cancer                                      | 0.4<br>(0.3 to 0.4)                           | 0.1<br>(0.1 to 0.1)                      | 0.1<br>(< 0.05 to 0.1)               | -5.7<br>(-22.2 to 16.2)                           | -18.1<br>(-33.0 to 1.1)                             |
| Tracheal, bronchus, and lung cancer                | 0.6<br>(0.5 to 0.6)                           | 0.5<br>(0.5 to 0.6)                      | 0.1<br>(0.1 to 0.2)                  | -2.8<br>(-21.4 to 20.1)                           | -17.0<br>(-34.1 to 3.2)                             |
| Malignant skin melanoma                            | 0.4<br>(0.3 to 0.5)                           | 0.1<br>(0.1 to 0.1)                      | < 0.05<br>(< 0.05 to 0.1)            | 17.3<br>(-4.1 to 40.1)                            | -1.1<br>(-19.2 to 19.8)                             |
| Non-melanoma skin cancer                           | 0.1<br>(< 0.05 to 0.1)                        | 0.4<br>(0.4 to 0.4)                      | < 0.05<br>(< 0.05 to < 0.05)         | 38.1<br>(22.3 to 57.3)                            | 14.5<br>(1.2 to 30.4)                               |
| Non-melanoma skin cancer (squamous-cell carcinoma) | 0.1<br>(< 0.05 to 0.1)                        | 0.2<br>(0.2 to 0.3)                      | < 0.05<br>(< 0.05 to < 0.05)         | 36.3<br>(19.6 to 57.2)                            | 13.4<br>(-0.7 to 30.2)                              |
| Non-melanoma skin cancer (basal-cell carcinoma)    | < 0.05<br>(< 0.05 to < 0.05)                  | 0.1<br>(0.1 to 0.2)                      | < 0.05<br>(< 0.05 to < 0.05)         | 67.5<br>(47.5 to 91.0)                            | 34.8<br>(20.6 to 53.9)                              |
| Breast cancer                                      | 4.4<br>(3.7 to 5.0)                           | 1.1<br>(0.9 to 1.2)                      | 0.5<br>(0.3 to 0.6)                  | 6.6<br>(-14.8 to 34.6)                            | -14.3<br>(-31.0 to 6.8)                             |
| Cervical cancer                                    | 7.3<br>(5.2 to 8.9)                           | 2.1<br>(1.5 to 2.6)                      | 0.8<br>(0.5 to 1.1)                  | -0.5<br>(-21.2 to 25.1)                           | -20.9<br>(-37.1 to -1.0)                            |
| Uterine cancer                                     | 1.0<br>(0.8 to 1.1)                           | 0.2<br>(0.2 to 0.3)                      | 0.1<br>(0.1 to 0.1)                  | 4.3<br>(-19.9 to 36.0)                            | -10.3<br>(-31.6 to 18.2)                            |
| Ovarian cancer                                     | 0.9<br>(0.7 to 1.1)                           | 0.3<br>(0.3 to 0.4)                      | 0.1<br>(0.1 to 0.2)                  | 15.0<br>(-16.6 to 50.0)                           | -7.2<br>(-33.2 to 26.2)                             |
| Prostate cancer                                    | 4.0<br>(1.7 to 5.2)                           | 1.3<br>(0.6 to 1.7)                      | 0.6<br>(0.3 to 0.9)                  | 10.6<br>(-10.1 to 32.7)                           | -3.3<br>(-20.0 to 14.5)                             |
| Testicular cancer                                  | 0.1<br>(0.1 to 0.1)                           | < 0.05<br>(< 0.05 to < 0.05)             | < 0.05<br>(< 0.05 to < 0.05)         | 0.8<br>(-18.7 to 24.5)                            | -21.4<br>(-35.7 to -4.5)                            |
| Kidney cancer                                      | 0.7<br>(0.5 to 0.9)                           | 0.2<br>(0.1 to 0.2)                      | 0.1<br>(< 0.05 to 0.1)               | 13.9<br>(-28.2 to 72.3)                           | -6.6<br>(-29.6 to 19.5)                             |
| Bladder cancer                                     | 1.4<br>(1.3 to 1.5)                           | 0.4<br>(0.4 to 0.5)                      | 0.2<br>(0.1 to 0.2)                  | 5.4<br>(-11.0 to 26.5)                            | -10.4<br>(-24.5 to 7.7)                             |
| Brain and nervous system cancer                    | 0.5<br>(0.4 to 0.6)                           | 0.2<br>(0.2 to 0.3)                      | 0.1<br>(< 0.05 to 0.1)               | 14.8<br>(-3.3 to 33.7)                            | -5.4<br>(-17.8 to 8.1)                              |
| Thyroid cancer                                     | 0.6<br>(0.4 to 0.8)                           | 0.1<br>(0.1 to 0.2)                      | < 0.05<br>(< 0.05 to 0.1)            | 2.0<br>(-17.3 to 30.6)                            | -16.1<br>(-31.8 to 6.8)                             |
| Mesothelioma                                       | < 0.05<br>(< 0.05 to < 0.05)                  | < 0.05<br>(< 0.05 to < 0.05)             | < 0.05<br>(< 0.05 to < 0.05)         | -1.4<br>(-14.6 to 17.8)                           | -17.8<br>(-29.2 to -2.1)                            |
| Hodgkin lymphoma                                   | 0.1<br>(0.1 to 0.2)                           | < 0.05<br>(< 0.05 to 0.1)                | < 0.05<br>(< 0.05 to < 0.05)         | -11.2<br>(-23.8 to 4.0)                           | -28.3<br>(-37.1 to -17.6)                           |
| Non-Hodgkin's lymphoma                             | 1.4<br>(0.6 to 1.8)                           | 0.5<br>(0.2 to 0.6)                      | 0.2<br>(0.1 to 0.2)                  | 18.9<br>(-2.9 to 41.2)                            | -7.7<br>(-21.5 to 8.0)                              |
| Multiple myeloma                                   | 0.2<br>(0.1 to 0.3)                           | 0.1<br>(0.1 to 0.2)                      | 0.1<br>(< 0.05 to 0.1)               | 8.7<br>(-14.7 to 43.0)                            | -7.3<br>(-28.3 to 23.4)                             |
| Leukaemia                                          | 1.0<br>(0.8 to 1.4)                           | 0.3<br>(0.3 to 0.4)                      | 0.1<br>(0.1 to 0.2)                  | 5.6<br>(-8.6 to 22.0)                             | -12.5<br>(-22.4 to -0.8)                            |
| Acute lymphoid leukaemia                           | 0.3<br>(0.2 to 0.4)                           | 0.1<br>(0.1 to 0.1)                      | < 0.05<br>(< 0.05 to < 0.05)         | 12.5<br>(-10.8 to 42.6)                           | -4.7<br>(-22.7 to 15.8)                             |
| Chronic lymphoid leukaemia                         | 0.1<br>(0.1 to 0.1)                           | < 0.05<br>(< 0.05 to < 0.05)             | < 0.05<br>(< 0.05 to < 0.05)         | 3.1<br>(-13.5 to 21.8)                            | -12.0<br>(-25.7 to 4.7)                             |
| Acute myeloid leukaemia                            | 0.2<br>(0.1 to 0.2)                           | 0.1<br>(0.1 to 0.1)                      | < 0.05<br>(< 0.05 to < 0.05)         | 15.0<br>(-6.9 to 38.8)                            | -3.9<br>(-18.3 to 11.9)                             |
| Chronic myeloid leukaemia                          | 0.1<br>(0.1 to 0.1)                           | < 0.05<br>(< 0.05 to < 0.05)             | < 0.05<br>(< 0.05 to < 0.05)         | -0.9<br>(-18.2 to 20.4)                           | -20.8<br>(-33.8 to -5.6)                            |
| Other leukaemia                                    | 0.3<br>(0.2 to 0.7)                           | 0.1<br>(0.1 to 0.2)                      | < 0.05<br>(< 0.05 to 0.1)            | -1.1<br>(-17.5 to 20.1)                           | -16.1<br>(-29.7 to 1.8)                             |
| Other neoplasms                                    | 1.5<br>(1.3 to 1.8)                           | 0.5<br>(0.4 to 0.6)                      | 0.1<br>(0.1 to 0.2)                  | 16.0<br>(-9.7 to 43.0)                            | -7.1<br>(-23.5 to 10.7)                             |
| <b>Cardiovascular diseases</b>                     | <b>596.1</b><br><b>(565.3 to 631.3)</b>       | <b>56.2†</b><br><b>(53.9 to 58.9)</b>    | <b>32.5</b><br><b>(23.4 to 42.9)</b> | <b>16.7</b><br><b>(12.2 to 21.6)</b>              | <b>-3.4</b><br><b>(-6.2 to -0.5)</b>                |
| Rheumatic heart disease                            | 171.5<br>(152.5 to 191.3)                     | 7.5<br>(6.7 to 8.4)                      | 8.3<br>(5.3 to 12.1)                 | 21.1<br>(10.2 to 32.8)                            | -2.5<br>(-10.7 to 5.7)                              |
| Ischaemic heart disease                            | 146.7<br>(138.7 to 154.4)                     | 21.8<br>(20.4 to 23.3)                   | 6.6<br>(4.5 to 9.1)                  | 14.8<br>(8.6 to 20.7)                             | -5.4<br>(-9.4 to -1.4)                              |
| Cerebrovascular disease                            | 42.4<br>(39.5 to 45.5)                        | 8.2†<br>(7.5 to 9.0)                     | 6.3<br>(4.6 to 8.0)                  | 14.1<br>(6.0 to 22.2)                             | -4.0<br>(-10.9 to 3.4)                              |
| Ischaemic stroke                                   | 36.8<br>(33.2 to 40.8)                        | 5.2†<br>(4.5 to 5.8)                     | 5.2<br>(3.7 to 6.6)                  | 15.6<br>(5.9 to 26.1)                             | -3.4<br>(-11.5 to 5.2)                              |
| Hemorrhagic stroke                                 | 8.3<br>(7.5 to 9.3)                           | 3.1†<br>(2.8 to 3.4)                     | 1.2<br>(0.8 to 1.5)                  | 7.8<br>(-2.3 to 19.0)                             | -6.8<br>(-16.7 to 4.6)                              |
| Hypertensive heart disease                         | 4.3<br>(3.4 to 5.4)                           | --                                       | 0.4<br>(0.2 to 0.5)                  | 11.5<br>(-1.6 to 27.4)                            | -7.4<br>(-17.9 to 4.5)                              |
| Cardiomyopathy and myocarditis                     | 6.8<br>(6.0 to 7.7)                           | 3.5†<br>(3.0 to 3.9)                     | 0.7<br>(0.4 to 1.0)                  | 14.3<br>(4.3 to 25.6)                             | -5.0<br>(-15.0 to 6.1)                              |
| Myocarditis                                        | 2.9<br>(2.5 to 3.3)                           | 3.5<br>(3.0 to 3.9)                      | 0.2<br>(0.1 to 0.3)                  | 17.5<br>(6.0 to 30.4)                             | -4.0<br>(-16.4 to 9.8)                              |
| Alcoholic cardiomyopathy                           | 0.5<br>(0.4 to 0.7)                           | --                                       | < 0.05<br>(< 0.05 to 0.1)            | 14.2<br>(-12.6 to 49.0)                           | -3.0<br>(-25.5 to 26.3)                             |
| Other cardiomyopathy                               | 4.8<br>(4.0 to 5.8)                           | --                                       | 0.4<br>(0.3 to 0.6)                  | 12.7<br>(-0.6 to 28.0)                            | -5.6<br>(-18.3 to 9.1)                              |
| Atrial fibrillation and flutter                    | 29.1<br>(25.3 to 33.2)                        | 2.5<br>(2.1 to 2.9)                      | 2.3<br>(1.5 to 3.2)                  | 18.1<br>(9.5 to 27.9)                             | 0.1<br>(-6.1 to 7.2)                                |
| Peripheral vascular disease                        | 111.5<br>(97.3 to 128.3)                      | 11.0<br>(9.5 to 12.8)                    | 0.6<br>(0.3 to 1.1)                  | 5.4<br>(-2.7 to 14.4)                             | -7.6<br>(-14.5 to 0.1)                              |
| Endocarditis                                       | 0.3<br>(0.2 to 0.4)                           | 1.7<br>(1.4 to 2.0)                      | < 0.05<br>(< 0.05 to < 0.05)         | 20.1<br>(11.1 to 29.6)                            | -1.0<br>(-11.1 to 9.3)                              |
| Other cardiovascular and circulatory diseases      | 137.7<br>(106.7 to 172.4)                     | --                                       | 7.4<br>(4.6 to 10.9)                 | 17.1<br>(5.3 to 31.0)                             | -0.6<br>(-7.8 to 7.6)                               |
| <b>Chronic respiratory diseases</b>                | <b>1,070.0</b><br><b>(1,002.0 to 1,134.1)</b> | <b>212.2†</b><br><b>(195.2 to 231.2)</b> | <b>52.2</b><br><b>(38.6 to 69.1)</b> | <b>24.2</b><br><b>(18.6 to 30.0)</b>              | <b>0.5</b><br><b>(-3.5 to 4.5)</b>                  |
| Chronic obstructive pulmonary disease              | 192.6<br>(184.7 to 200.4)                     | 14.7<br>(14.1 to 15.3)                   | 15.5<br>(13.3 to 17.4)               | 14.7<br>(7.4 to 21.7)                             | -5.2<br>(-10.8 to 0.4)                              |
| Pneumoconiosis                                     | 0.4<br>(0.3 to 0.4)                           | 0.1<br>(< 0.05 to 0.1)                   | 0.1<br>(< 0.05 to 0.1)               | 22.3<br>(17.7 to 27.4)                            | -0.1<br>(-3.8 to 4.6)                               |
| Silicosis                                          | < 0.05<br>(< 0.05 to < 0.05)                  | < 0.05<br>(< 0.05 to < 0.05)             | < 0.05<br>(< 0.05 to < 0.05)         | 27.4<br>(18.2 to 38.1)                            | -4.1<br>(-8.8 to 1.4)                               |



| Cause                                                          | Prevalence in thousands (95% UI)        | Incidence in thousands (95% UI)         | YLDs in thousands (95% UI)        |                                                   |                                                     |
|----------------------------------------------------------------|-----------------------------------------|-----------------------------------------|-----------------------------------|---------------------------------------------------|-----------------------------------------------------|
|                                                                | 2016 counts                             | 2016 counts                             | 2016 counts                       | Percentage change in counts between 2006 and 2016 | Percentage change in age-standardised rates between |
| Asbestosis                                                     | 0.1<br>(0.1 to 0.1)                     | < 0.05<br>(< 0.05 to < 0.05)            | < 0.05<br>(< 0.05 to < 0.05)      | 20.2<br>(13.1 to 26.2)                            | -0.6<br>(-5.8 to 4.0)                               |
| Coal workers pneumoconiosis                                    | 0.1<br>(0.1 to 0.1)                     | < 0.05<br>(< 0.05 to < 0.05)            | < 0.05<br>(< 0.05 to < 0.05)      | 24.9<br>(18.5 to 32.1)                            | 0.6<br>(-4.8 to 6.4)                                |
| Other pneumoconiosis                                           | 0.1<br>(0.1 to 0.1)                     | < 0.05<br>(< 0.05 to < 0.05)            | < 0.05<br>(< 0.05 to < 0.05)      | 21.5<br>(9.9 to 34.9)                             | 0.2<br>(-10.6 to 11.9)                              |
| Asthma                                                         | 883.5<br>(808.2 to 966.6)               | 197.3<br>(179.8 to 216.2)               | 34.8<br>(22.8 to 51.1)            | 27.5<br>(19.5 to 35.2)                            | 5.8<br>(-0.1 to 11.4)                               |
| Interstitial lung disease and pulmonary sarcoidosis            | 1.5<br>(1.4 to 1.7)                     | 0.2<br>(0.2 to 0.2)                     | 0.2<br>(0.1 to 0.2)               | 18.5<br>(12.9 to 24.2)                            | -2.2<br>(-8.3 to 5.0)                               |
| Other chronic respiratory diseases                             | --                                      | --                                      | 1.6<br>(1.3 to 2.0)               | 61.2<br>(29.4 to 99.5)                            | 30.1<br>(12.0 to 50.2)                              |
| <b>Cirrhosis and other chronic liver diseases</b>              | <b>20.2<br/>(19.1 to 21.3)</b>          | <b>1.7<br/>(1.7 to 1.8)</b>             | <b>1.8<br/>(1.2 to 2.6)</b>       | <b>19.4<br/>(2.0 to 40.1)</b>                     | <b>-2.5<br/>(-12.5 to 9.4)</b>                      |
| Cirrhosis and other chronic liver diseases due to hepatitis B  | 5.0<br>(4.4 to 5.6)                     | 0.5<br>(0.4 to 0.5)                     | 0.3<br>(0.2 to 0.5)               | 21.3<br>(-5.1 to 55.6)                            | -3.7<br>(-20.8 to 16.0)                             |
| Cirrhosis and other chronic liver diseases due to hepatitis C  | 2.3<br>(2.0 to 2.6)                     | 0.2<br>(0.2 to 0.2)                     | 0.2<br>(0.1 to 0.2)               | 22.4<br>(2.1 to 45.7)                             | -2.5<br>(-23.9 to 23.9)                             |
| Cirrhosis and other chronic liver diseases due to alcohol use  | 4.2<br>(3.8 to 4.7)                     | 0.5<br>(0.4 to 0.5)                     | 0.3<br>(0.2 to 0.4)               | 19.7<br>(-2.4 to 48.3)                            | -4.6<br>(-20.6 to 14.0)                             |
| Cirrhosis and other chronic liver diseases due to other causes | 8.7<br>(8.1 to 9.4)                     | 0.6<br>(0.6 to 0.7)                     | 1.1<br>(0.7 to 1.6)               | 18.3<br>(-7.1 to 51.4)                            | -0.1<br>(-19.6 to 22.7)                             |
| <b>Digestive diseases</b>                                      | <b>228.4<br/>(210.2 to 248.9)</b>       | <b>233.9†<br/>(221.9 to 248.0)</b>      | <b>6.9<br/>(4.9 to 9.3)</b>       | <b>35.2<br/>(23.3 to 47.7)</b>                    | <b>7.4<br/>(0.4 to 14.5)</b>                        |
| Peptic ulcer disease                                           | 31.1<br>(27.9 to 34.6)                  | 12.7<br>(11.1 to 14.5)                  | 0.6<br>(0.4 to 0.9)               | 44.4<br>(24.3 to 66.8)                            | 8.5<br>(-2.8 to 19.9)                               |
| Gastritis and duodenitis                                       | 76.1<br>(67.1 to 86.1)                  | 84.4<br>(74.5 to 95.5)                  | 1.0<br>(0.6 to 1.4)               | 47.4<br>(29.6 to 65.9)                            | 19.2<br>(8.8 to 30.2)                               |
| Appendicitis                                                   | 2.0<br>(1.8 to 2.2)                     | 52.0<br>(47.5 to 57.0)                  | 0.6<br>(0.4 to 0.9)               | 15.2<br>(-19.5 to 60.5)                           | -2.2<br>(-24.4 to 26.5)                             |
| Paralytic ileus and intestinal obstruction                     | 0.4<br>(0.3 to 0.4)                     | 10.5<br>(9.6 to 11.5)                   | 0.1<br>(0.1 to 0.2)               | 27.5<br>(17.2 to 38.2)                            | 4.8<br>(-10.0 to 21.2)                              |
| Inguinal, femoral, and abdominal hernia                        | 112.8<br>(92.1 to 138.8)                | 20.0<br>(17.8 to 22.8)                  | 3.5<br>(2.3 to 4.9)               | 34.5<br>(16.1 to 53.1)                            | 4.9<br>(-6.2 to 15.7)                               |
| Inflammatory bowel disease                                     | 0.9<br>(0.8 to 0.9)                     | 5.7<br>(5.4 to 5.9)                     | 0.1<br>(0.1 to 0.2)               | 41.2<br>(36.1 to 46.9)                            | 21.9<br>(17.8 to 25.9)                              |
| Vascular intestinal disorders                                  | 0.1<br>(0.1 to 0.1)                     | 0.5<br>(0.4 to 0.6)                     | < 0.05<br>(< 0.05 to < 0.05)      | 27.2<br>(20.8 to 35.0)                            | 1.6<br>(-2.4 to 5.9)                                |
| Gallbladder and biliary diseases                               | 10.6<br>(9.4 to 11.8)                   | 46.3<br>(40.3 to 52.9)                  | 0.3<br>(0.2 to 0.4)               | 30.2<br>(9.4 to 58.0)                             | 1.3<br>(-18.2 to 26.4)                              |
| Pancreatitis                                                   | 0.2<br>(0.2 to 0.2)                     | 1.9<br>(1.6 to 2.1)                     | < 0.05<br>(< 0.05 to < 0.05)      | 23.9<br>(18.9 to 29.3)                            | -0.1<br>(-3.5 to 3.2)                               |
| Other digestive diseases                                       | --                                      | --                                      | 0.6<br>(0.4 to 0.8)               | 39.9<br>(23.9 to 57.0)                            | 11.3<br>(3.5 to 18.9)                               |
| <b>Neurological disorders</b>                                  | <b>4,731.2<br/>(4,499.2 to 4,972.8)</b> | <b>2,346.4<br/>(1,973.5 to 2,760.1)</b> | <b>108.5<br/>(68.7 to 157.2)</b>  | <b>21.7<br/>(-7.9 to 57.9)</b>                    | <b>-0.7<br/>(-20.7 to 22.9)</b>                     |
| Alzheimer's disease and other dementias                        | 23.2<br>(19.4 to 27.8)                  | 4.0<br>(3.3 to 4.9)                     | 3.4<br>(2.3 to 4.5)               | 15.9<br>(9.6 to 22.7)                             | -0.3<br>(-5.5 to 4.8)                               |
| Parkinson's disease                                            | 2.2<br>(1.7 to 2.7)                     | 0.3<br>(0.2 to 0.4)                     | 0.2<br>(0.2 to 0.4)               | 19.0<br>(2.8 to 38.2)                             | 2.3<br>(-11.5 to 17.9)                              |
| Epilepsy                                                       | 49.4<br>(12.8 to 87.5)                  | 5.8<br>(1.4 to 10.4)                    | 18.1<br>(4.4 to 37.4)             | 9.7<br>(-77.0 to 433.6)                           | -10.1<br>(-80.8 to 331.3)                           |
| Multiple sclerosis                                             | 0.8<br>(0.7 to 0.9)                     | < 0.05<br>(< 0.05 to 0.1)               | 0.2<br>(0.1 to 0.3)               | 31.6<br>(27.0 to 36.3)                            | 2.9<br>(-0.3 to 6.4)                                |
| Motor neuron disease                                           | 0.2<br>(0.1 to 0.2)                     | < 0.05<br>(< 0.05 to < 0.05)            | < 0.05<br>(< 0.05 to < 0.05)      | 21.6<br>(15.5 to 27.3)                            | 0.2<br>(-3.4 to 3.6)                                |
| Migraine                                                       | 1,665.2<br>(1,561.3 to 1,767.7)         | 214.6<br>(201.8 to 229.7)               | 70.7<br>(44.8 to 99.4)            | 24.2<br>(19.1 to 30.0)                            | 1.0<br>(-2.5 to 5.0)                                |
| Tension-type headache                                          | 3,616.3<br>(3,192.1 to 4,110.9)         | 2,121.6<br>(1,749.5 to 2,527.1)         | 11.7<br>(7.3 to 17.5)             | 25.2<br>(18.6 to 32.7)                            | 0.8<br>(-3.5 to 5.9)                                |
| Other neurological disorders                                   | < 0.05<br>(< 0.05 to 0.1)               | 0.1<br>(< 0.05 to 0.1)                  | 4.2<br>(1.1 to 8.7)               | 34.1<br>(-69.0 to 485.5)                          | 9.2<br>(-71.0 to 298.2)                             |
| <b>Mental and substance use disorders</b>                      | <b>2,211.1<br/>(2,097.7 to 2,315.7)</b> | <b>715.1†<br/>(663.5 to 770.7)</b>      | <b>262.8<br/>(191.7 to 340.2)</b> | <b>22.7<br/>(19.8 to 25.7)</b>                    | <b>1.3<br/>(-1.1 to 3.7)</b>                        |
| Schizophrenia                                                  | 19.8<br>(17.0 to 22.8)                  | 1.9<br>(1.7 to 2.2)                     | 12.7<br>(9.1 to 16.1)             | 30.6<br>(17.7 to 44.9)                            | -0.4<br>(-9.4 to 9.1)                               |
| Alcohol use disorders                                          | 218.1<br>(184.1 to 255.2)               | 113.1<br>(95.5 to 131.7)                | 21.8<br>(14.6 to 30.3)            | 26.4<br>(16.3 to 37.5)                            | 2.1<br>(-4.8 to 10.0)                               |
| Drug use disorders                                             | 95.5<br>(85.3 to 106.2)                 | 14.3<br>(12.7 to 16.0)                  | 25.9<br>(17.6 to 34.6)            | 37.1<br>(23.3 to 53.3)                            | 7.1<br>(-2.4 to 17.8)                               |
| Opioid use disorders                                           | 56.8<br>(47.1 to 68.5)                  | 6.7<br>(5.6 to 8.0)                     | 23.7<br>(15.9 to 32.0)            | 38.5<br>(23.4 to 57.0)                            | 7.7<br>(-2.4 to 19.5)                               |
| Cocaine use disorders                                          | 2.4<br>(2.0 to 2.9)                     | 0.3<br>(0.3 to 0.4)                     | 0.4<br>(0.2 to 0.5)               | 25.8<br>(19.3 to 33.1)                            | 2.5<br>(-1.6 to 7.7)                                |
| Amphetamine use disorders                                      | 0.6<br>(0.4 to 0.9)                     | 0.1<br>(0.1 to 0.2)                     | 0.1<br>(< 0.05 to 0.1)            | 20.3<br>(5.3 to 36.6)                             | 2.3<br>(-8.4 to 14.6)                               |
| Cannabis use disorders                                         | 34.0<br>(27.9 to 41.2)                  | 6.1<br>(5.0 to 7.4)                     | 1.0<br>(0.6 to 1.5)               | 19.2<br>(-2.7 to 47.3)                            | -0.4<br>(-16.4 to 19.2)                             |
| Other drug use disorders                                       | 4.7<br>(4.0 to 5.4)                     | 1.0<br>(0.9 to 1.2)                     | 0.8<br>(0.5 to 1.1)               | 29.6<br>(9.6 to 51.8)                             | 2.1<br>(-11.5 to 18.1)                              |
| Depressive disorders                                           | 380.9<br>(355.7 to 412.8)               | 393.1<br>(349.1 to 443.9)               | 62.6<br>(42.7 to 86.0)            | 25.4<br>(19.2 to 31.9)                            | 3.0<br>(-1.2 to 7.7)                                |
| Major depressive disorder                                      | 233.8<br>(205.4 to 266.6)               | 365.2<br>(322.1 to 416.7)               | 47.9<br>(32.6 to 65.6)            | 25.5<br>(17.7 to 33.7)                            | 3.9<br>(-1.7 to 9.8)                                |
| Dysthymia                                                      | 153.2<br>(131.8 to 178.5)               | 27.9<br>(24.3 to 32.4)                  | 14.8<br>(10.0 to 21.7)            | 24.9<br>(19.4 to 30.8)                            | 0.4<br>(-2.9 to 4.0)                                |
| Bipolar disorder                                               | 81.9<br>(68.7 to 98.1)                  | 9.6<br>(8.1 to 11.4)                    | 16.8<br>(10.5 to 25.5)            | 20.6<br>(11.7 to 30.1)                            | 0.5<br>(-5.4 to 7.0)                                |
| Anxiety disorders                                              | 475.1<br>(428.1 to 528.6)               | 88.7<br>(80.8 to 97.2)                  | 46.2<br>(31.9 to 63.2)            | 19.6<br>(11.6 to 28.6)                            | -0.1<br>(-6.1 to 6.3)                               |
| Eating disorders                                               | 14.1<br>(11.4 to 17.5)                  | 10.6<br>(7.9 to 14.3)                   | 2.9<br>(1.8 to 4.2)               | 15.9<br>(-1.3 to 35.3)                            | -3.9<br>(-17.7 to 10.4)                             |
| Anorexia nervosa                                               | 3.8<br>(2.8 to 5.1)                     | 1.8<br>(1.3 to 2.4)                     | 0.8<br>(0.5 to 1.3)               | 10.0<br>(-16.5 to 48.1)                           | -3.4<br>(-26.1 to 26.6)                             |
| Bulimia nervosa                                                | 9.7<br>(7.1 to 13.0)                    | 8.8<br>(6.1 to 12.6)                    | 2.0<br>(1.2 to 3.1)               | 18.4<br>(-2.8 to 42.7)                            | -4.1<br>(-21.0 to 15.0)                             |
| Autistic spectrum disorders                                    | 136.3<br>(122.2 to 156.0)               | 1.7<br>(1.2 to 2.3)                     | 19.9<br>(13.4 to 28.4)            | 20.1<br>(13.7 to 26.4)                            | -0.0<br>(-4.9 to 4.6)                               |
| Autism                                                         | 39.8<br>(34.4 to 46.4)                  | 0.2<br>(0.1 to 0.4)                     | 10.2<br>(6.5 to 15.0)             | 19.1<br>(7.7 to 30.5)                             | 0.1<br>(-8.7 to 9.5)                                |
| Asperger syndrome and other autistic spectrum disorders        | 96.2<br>(79.4 to 116.7)                 | 1.4<br>(0.9 to 2.1)                     | 9.7<br>(6.2 to 14.3)              | 21.3<br>(14.7 to 28.5)                            | -0.1<br>(-4.7 to 4.9)                               |

| Cause                                                      | Prevalence in thousands (95% UI)                 | Incidence in thousands (95% UI)                   | YLDs in thousands (95% UI)              |                                                   |                                                     |
|------------------------------------------------------------|--------------------------------------------------|---------------------------------------------------|-----------------------------------------|---------------------------------------------------|-----------------------------------------------------|
|                                                            | 2016 counts                                      | 2016 counts                                       | 2016 counts                             | Percentage change in counts between 2006 and 2016 | Percentage change in age-standardised rates between |
| Attention-deficit/hyperactivity disorder                   | 212.7<br>(190.2 to 239.3)                        | 13.3<br>(11.5 to 15.5)                            | 2.6<br>(1.5 to 4.1)                     | 17.0<br>(8.8 to 26.2)                             | 0.0<br>(-6.4 to 6.8)                                |
| Conduct disorder                                           | 159.8<br>(131.1 to 188.9)                        | 57.5<br>(45.8 to 69.3)                            | 19.4<br>(12.1 to 29.8)                  | 9.0<br>(2.0 to 16.3)                              | 0.2<br>(-6.2 to 6.9)                                |
| Idiopathic developmental intellectual disability           | 395.9<br>(248.5 to 543.3)                        | --                                                | 15.6<br>(7.3 to 27.2)                   | 11.9<br>(0.0 to 20.8)                             | -7.1<br>(-16.8 to -0.3)                             |
| Other mental and substance use disorders                   | 219.1<br>(191.2 to 254.5)                        | 11.4<br>(10.0 to 13.1)                            | 16.4<br>(11.3 to 23.4)                  | 27.9<br>(20.2 to 35.8)                            | 0.3<br>(-4.7 to 5.1)                                |
| <b>Diabetes, urogenital, blood, and endocrine diseases</b> | <b>6,151.6</b><br><b>(6,042.7 to 6,250.0)</b>    | <b>1,560.4†</b><br><b>(1,449.7 to 1,676.1)</b>    | <b>87.0</b><br><b>(61.9 to 118.0)</b>   | <b>27.2</b><br><b>(23.8 to 31.0)</b>              | <b>3.4</b><br><b>(0.6 to 6.4)</b>                   |
| Diabetes mellitus                                          | 420.1<br>(379.8 to 465.0)                        | 30.4<br>(27.6 to 33.4)                            | 33.0<br>(22.9 to 44.9)                  | 31.9<br>(25.9 to 38.5)                            | 8.1<br>(2.9 to 13.8)                                |
| Acute glomerulonephritis                                   | 0.1<br>(0.1 to 0.2)                              | 2.1<br>(1.8 to 2.5)                               | < 0.05<br>(< 0.05 to < 0.05)            | 21.8<br>(14.3 to 28.2)                            | 0.5<br>(-3.9 to 4.7)                                |
| Chronic kidney disease                                     | 668.7<br>(603.8 to 737.5)                        | 54.6<br>(48.7 to 61.1)                            | 18.7<br>(13.6 to 24.3)                  | 27.3<br>(20.0 to 35.9)                            | 0.6<br>(-4.4 to 6.0)                                |
| Chronic kidney disease due to diabetes mellitus            | 203.8<br>(171.5 to 238.1)                        | 15.7<br>(13.0 to 18.8)                            | 5.2<br>(3.6 to 6.9)                     | 24.7<br>(14.2 to 37.0)                            | -1.2<br>(-8.0 to 6.1)                               |
| Chronic kidney disease due to hypertension                 | 139.8<br>(121.0 to 158.6)                        | 14.4<br>(12.1 to 16.9)                            | 2.9<br>(2.0 to 3.8)                     | 19.9<br>(9.5 to 31.0)                             | -1.0<br>(-8.8 to 7.4)                               |
| Chronic kidney disease due to glomerulonephritis           | 138.0<br>(119.7 to 156.4)                        | 8.3<br>(6.7 to 10.1)                              | 5.2<br>(3.8 to 7.1)                     | 31.9<br>(18.7 to 45.9)                            | 3.0<br>(-5.1 to 11.3)                               |
| Chronic kidney disease due to other causes                 | 187.0<br>(157.2 to 217.3)                        | 16.2<br>(13.6 to 18.9)                            | 5.4<br>(3.9 to 7.3)                     | 29.9<br>(18.0 to 43.3)                            | 2.1<br>(-4.9 to 10.4)                               |
| Urinary diseases and male infertility                      | 159.4<br>(141.2 to 180.3)                        | 804.2†<br>(714.3 to 910.4)                        | 4.5<br>(3.0 to 6.5)                     | 16.1<br>(9.2 to 24.1)                             | -1.4<br>(-7.1 to 5.5)                               |
| Interstitial nephritis and urinary tract infections        | 13.7<br>(12.0 to 15.7)                           | 715.1<br>(627.4 to 819.8)                         | 0.5<br>(0.3 to 0.7)                     | 24.2<br>(4.2 to 49.2)                             | 0.3<br>(-13.7 to 16.4)                              |
| Urolithiasis                                               | 2.8<br>(2.5 to 3.3)                              | 75.6<br>(66.3 to 86.8)                            | 0.2<br>(0.1 to 0.3)                     | 29.2<br>(20.5 to 37.8)                            | 1.3<br>(-6.3 to 10.1)                               |
| Benign prostatic hyperplasia                               | 105.0<br>(88.6 to 121.3)                         | 13.5<br>(11.3 to 15.8)                            | 3.4<br>(2.2 to 5.0)                     | 13.1<br>(5.5 to 22.5)                             | -1.6<br>(-7.9 to 6.0)                               |
| Male infertility                                           | 32.4<br>(24.0 to 43.6)                           | --                                                | 0.2<br>(0.1 to 0.4)                     | 86.4<br>(42.9 to 143.1)                           | 45.0<br>(11.4 to 88.9)                              |
| Other urinary diseases                                     | --                                               | --                                                | 0.3<br>(0.2 to 0.4)                     | 4.6<br>(-7.8 to 19.0)                             | -16.0<br>(-23.9 to -7.8)                            |
| Gynecological diseases                                     | 1,602.4<br>(1,527.9 to 1,684.9)                  | 653.1†<br>(598.7 to 711.2)                        | 19.3<br>(13.0 to 27.6)                  | 28.7<br>(22.8 to 35.0)                            | -0.3<br>(-4.2 to 3.5)                               |
| Uterine fibroids                                           | 102.7<br>(90.4 to 115.4)                         | 14.4<br>(12.5 to 16.6)                            | 1.8<br>(1.1 to 2.8)                     | 35.7<br>(25.5 to 47.8)                            | -1.6<br>(-8.2 to 6.1)                               |
| Polycystic ovarian syndrome                                | 15.2<br>(11.2 to 19.7)                           | 25.8<br>(18.1 to 35.1)                            | 0.1<br>(0.1 to 0.3)                     | 45.8<br>(24.3 to 69.0)                            | 6.8<br>(-7.8 to 22.9)                               |
| Female infertility                                         | 9.8<br>(6.6 to 22.1)                             | --                                                | 0.1<br>(< 0.05 to 0.1)                  | 104.9<br>(32.9 to 341.6)                          | 53.8<br>(4.5 to 194.3)                              |
| Endometriosis                                              | 3.5<br>(2.9 to 4.2)                              | 13.7<br>(11.1 to 17.2)                            | 0.3<br>(0.2 to 0.5)                     | 26.4<br>(-10.4 to 81.1)                           | 1.1<br>(-24.3 to 36.5)                              |
| Genital prolapse                                           | 629.5<br>(556.4 to 711.5)                        | 57.3<br>(48.8 to 67.4)                            | 2.0<br>(1.0 to 3.6)                     | 24.0<br>(16.8 to 32.1)                            | 1.7<br>(-4.6 to 8.6)                                |
| Premenstrual syndrome                                      | 819.4<br>(748.1 to 887.0)                        | 312.1<br>(284.8 to 340.0)                         | 6.8<br>(4.2 to 10.3)                    | 21.7<br>(10.2 to 33.5)                            | -2.3<br>(-10.3 to 5.6)                              |
| Other gynecological diseases                               | 236.0<br>(198.0 to 276.3)                        | 229.8<br>(184.8 to 278.0)                         | 8.2<br>(5.3 to 11.8)                    | 34.4<br>(24.4 to 44.5)                            | 0.4<br>(-6.3 to 7.0)                                |
| Hemoglobinopathies and hemolytic anaemias                  | 4,445.1<br>(4,337.7 to 4,550.8)                  | --                                                | 6.6<br>(4.4 to 9.6)                     | 19.2<br>(9.4 to 30.0)                             | -0.6<br>(-7.3 to 6.5)                               |
| Thalassemias                                               | < 0.05<br>(< 0.05 to < 0.05)                     | --                                                | < 0.05<br>(< 0.05 to < 0.05)            | 28.0<br>(17.5 to 40.4)                            | -1.2<br>(-9.4 to 8.2)                               |
| Thalassaemias trait                                        | 72.7<br>(66.9 to 78.5)                           | --                                                | 1.0<br>(0.6 to 1.5)                     | 29.6<br>(14.7 to 47.8)                            | 8.7<br>(-2.5 to 21.7)                               |
| Sickle cell disorders                                      | 2.3<br>(1.8 to 3.0)                              | --                                                | 0.2<br>(0.1 to 0.3)                     | 19.8<br>(-6.9 to 53.0)                            | 2.4<br>(-19.1 to 28.5)                              |
| Sickle cell trait                                          | 842.0<br>(742.4 to 949.2)                        | --                                                | 2.7<br>(1.8 to 4.0)                     | 26.4<br>(12.8 to 42.2)                            | 5.7<br>(-4.6 to 17.0)                               |
| G6PD deficiency                                            | 1,192.7<br>(1,125.3 to 1,266.5)                  | --                                                | 0.1<br>(0.1 to 0.1)                     | 3.7<br>(-6.0 to 15.2)                             | -10.2<br>(-17.1 to -2.6)                            |
| G6PD trait                                                 | 2,574.7<br>(2,518.6 to 2,640.2)                  | --                                                | < 0.05<br>(< 0.05 to < 0.05)            | 27.4<br>(16.5 to 39.7)                            | 4.5<br>(-2.9 to 13.0)                               |
| Other hemoglobinopathies and hemolytic anaemias            | 105.6<br>(101.4 to 109.9)                        | --                                                | 2.6<br>(1.7 to 3.8)                     | 9.7<br>(-2.4 to 23.2)                             | -9.4<br>(-17.0 to -0.7)                             |
| Endocrine, metabolic, blood, and immune disorders          | 166.7<br>(158.3 to 176.1)                        | 16.0<br>(14.0 to 18.2)                            | 5.0<br>(3.3 to 7.0)                     | 15.1<br>(6.6 to 25.3)                             | -2.9<br>(-9.0 to 3.6)                               |
| <b>Musculoskeletal disorders</b>                           | <b>1,455.3</b><br><b>(1,371.7 to 1,537.0)</b>    | <b>739.6</b><br><b>(664.5 to 817.4)</b>           | <b>159.5</b><br><b>(114.3 to 208.5)</b> | <b>28.9</b><br><b>(24.1 to 34.0)</b>              | <b>1.8</b><br><b>(-1.6 to 5.3)</b>                  |
| Rheumatoid arthritis                                       | 22.1<br>(19.6 to 24.9)                           | 1.6<br>(1.4 to 1.8)                               | 5.2<br>(3.6 to 7.1)                     | 28.4<br>(16.8 to 41.9)                            | 3.5<br>(-4.7 to 12.4)                               |
| Osteoarthritis                                             | 228.4<br>(213.7 to 243.3)                        | 13.0<br>(12.1 to 14.1)                            | 14.0<br>(9.9 to 19.0)                   | 27.8<br>(22.9 to 33.0)                            | 4.5<br>(0.8 to 8.6)                                 |
| Low back and neck pain                                     | 957.1<br>(885.2 to 1,032.8)                      | 434.9<br>(390.2 to 485.7)                         | 109.6<br>(76.7 to 144.3)                | 27.7<br>(21.5 to 34.7)                            | 0.6<br>(-4.0 to 5.2)                                |
| Low back pain                                              | 734.9<br>(649.5 to 836.1)                        | 365.5<br>(320.6 to 416.6)                         | 82.7<br>(58.0 to 109.9)                 | 27.5<br>(19.2 to 36.6)                            | 0.7<br>(-5.6 to 6.6)                                |
| Neck pain                                                  | 268.5<br>(231.5 to 309.6)                        | 69.4<br>(59.6 to 81.5)                            | 26.8<br>(18.1 to 37.9)                  | 28.6<br>(23.7 to 33.7)                            | 0.5<br>(-2.0 to 2.8)                                |
| Gout                                                       | 30.4<br>(26.7 to 34.1)                           | 6.3<br>(5.5 to 7.1)                               | 1.0<br>(0.7 to 1.3)                     | 24.7<br>(7.2 to 44.5)                             | -0.2<br>(-13.0 to 14.8)                             |
| Other musculoskeletal disorders                            | 344.9<br>(275.9 to 416.1)                        | 283.7<br>(225.7 to 347.4)                         | 29.8<br>(19.4 to 43.1)                  | 33.9<br>(22.3 to 46.2)                            | 4.8<br>(-3.2 to 13.4)                               |
| <b>Other non-communicable diseases</b>                     | <b>10,420.3</b><br><b>(10,178.5 to 10,625.3)</b> | <b>30,022.2†</b><br><b>(27,397.9 to 32,621.5)</b> | <b>271.6</b><br><b>(184.6 to 381.1)</b> | <b>20.4</b><br><b>(18.7 to 22.3)</b>              | <b>0.5</b><br><b>(-0.7 to 1.7)</b>                  |
| Congenital anomalies                                       | 152.6<br>(135.0 to 172.5)                        | --                                                | 21.8<br>(15.5 to 29.2)                  | 26.5<br>(18.2 to 35.7)                            | 3.3<br>(-2.7 to 9.9)                                |
| Neural tube defects                                        | 18.6<br>(16.5 to 21.1)                           | --                                                | 5.6<br>(3.9 to 7.6)                     | 23.8<br>(8.2 to 40.9)                             | 1.5<br>(-9.7 to 14.2)                               |
| Congenital heart anomalies                                 | 30.8<br>(25.6 to 36.9)                           | --                                                | 1.5<br>(0.7 to 2.5)                     | 37.2<br>(18.7 to 58.7)                            | 10.1<br>(-3.1 to 26.2)                              |
| Orofacial clefts                                           | 4.7<br>(4.1 to 5.4)                              | --                                                | 0.1<br>(0.1 to 0.1)                     | 16.4<br>(2.6 to 31.2)                             | -5.2<br>(-16.6 to 7.0)                              |
| Down's syndrome                                            | 3.8<br>(3.2 to 4.5)                              | --                                                | 0.3<br>(0.2 to 0.5)                     | 24.2<br>(15.2 to 33.7)                            | 2.1<br>(-5.4 to 9.4)                                |
| Turner syndrome                                            | 10.0<br>(8.4 to 11.7)                            | --                                                | 0.2<br>(0.1 to 0.3)                     | 5.7<br>(-24.8 to 49.9)                            | -10.3<br>(-34.9 to 24.0)                            |
| Klinefelter syndrome                                       | 10.9<br>(9.1 to 12.9)                            | --                                                | 0.1<br>(< 0.05 to 0.1)                  | 22.8<br>(-6.0 to 57.9)                            | 0.7<br>(-22.2 to 28.2)                              |



| Cause                                         | Prevalence in thousands (95% UI)              | Incidence in thousands (95% UI)            | YLDs in thousands (95% UI)           |                                                   |                                                     |
|-----------------------------------------------|-----------------------------------------------|--------------------------------------------|--------------------------------------|---------------------------------------------------|-----------------------------------------------------|
|                                               | 2016 counts                                   | 2016 counts                                | 2016 counts                          | Percentage change in counts between 2006 and 2016 | Percentage change in age-standardised rates between |
| Other chromosomal abnormalities               | 3.3<br>(2.8 to 3.9)                           | --                                         | 0.6<br>(0.4 to 0.9)                  | 26.8<br>(-6.4 to 73.5)                            | 1.4<br>(-24.2 to 37.7)                              |
| Congenital musculoskeletal and limb anomalies | 20.8<br>(18.2 to 23.6)                        | --                                         | 3.0<br>(2.0 to 4.2)                  | 26.9<br>(10.3 to 44.5)                            | 4.1<br>(-8.6 to 17.1)                               |
| Urogenital congenital anomalies               | 14.7<br>(13.0 to 16.7)                        | --                                         | 0.3<br>(0.2 to 0.6)                  | 20.2<br>(9.6 to 31.1)                             | 0.2<br>(-8.2 to 8.9)                                |
| Digestive congenital anomalies                | 19.0<br>(16.9 to 21.2)                        | --                                         | 0.8<br>(0.6 to 1.2)                  | 20.4<br>(0.5 to 41.8)                             | -1.0<br>(-14.6 to 14.1)                             |
| Other congenital anomalies                    | 54.3<br>(35.0 to 81.3)                        | --                                         | 9.2<br>(6.1 to 13.6)                 | 27.8<br>(15.3 to 42.0)                            | 4.4<br>(-4.7 to 15.1)                               |
| Skin and subcutaneous diseases                | 5,451.3<br>(5,269.2 to 5,636.8)               | 11,932.0<br>(11,205.6 to 12,755.3)         | 141.7<br>(92.9 to 208.1)             | 18.1<br>(15.5 to 20.7)                            | 0.1<br>(-1.7 to 1.9)                                |
| Dermatitis                                    | 1,045.8<br>(951.1 to 1,146.8)                 | 716.3<br>(655.2 to 784.0)                  | 43.3<br>(24.9 to 71.9)               | 21.8<br>(17.9 to 25.6)                            | 0.3<br>(-2.6 to 3.1)                                |
| Psoriasis                                     | 91.5<br>(86.7 to 96.6)                        | 14.2<br>(13.5 to 14.9)                     | 8.1<br>(5.7 to 10.7)                 | 23.1<br>(10.6 to 37.5)                            | 0.3<br>(-7.8 to 9.9)                                |
| Cellulitis                                    | 6.0<br>(5.5 to 6.6)                           | 102.4<br>(94.8 to 110.7)                   | 0.3<br>(0.2 to 0.5)                  | 22.0<br>(-6.1 to 57.7)                            | 1.5<br>(-17.0 to 27.1)                              |
| Pyoderma                                      | 84.9<br>(80.7 to 89.0)                        | 1,683.3<br>(1,607.0 to 1,761.4)            | 0.5<br>(0.2 to 1.0)                  | 23.4<br>(15.9 to 30.9)                            | 0.5<br>(-4.5 to 5.8)                                |
| Scabies                                       | 264.4<br>(227.5 to 307.6)                     | 811.0<br>(692.8 to 949.6)                  | 6.9<br>(3.8 to 11.0)                 | 17.3<br>(11.8 to 23.3)                            | -2.2<br>(-6.2 to 1.8)                               |
| Fungal skin diseases                          | 1,965.1<br>(1,735.0 to 2,251.7)               | 5,547.1<br>(4,919.1 to 6,295.6)            | 11.2<br>(4.5 to 23.1)                | 22.1<br>(20.2 to 23.8)                            | 0.2<br>(-0.6 to 1.0)                                |
| Viral skin diseases                           | 465.5<br>(431.3 to 499.3)                     | 652.6<br>(603.5 to 706.8)                  | 14.3<br>(9.0 to 21.1)                | 19.8<br>(15.4 to 24.1)                            | 0.3<br>(-2.9 to 3.4)                                |
| Acne vulgaris                                 | 1,609.2<br>(1,419.4 to 1,805.6)               | 1,205.1<br>(937.9 to 1,561.7)              | 41.5<br>(27.6 to 60.4)               | 10.4<br>(4.6 to 16.4)                             | 0.4<br>(-4.6 to 5.4)                                |
| Alopecia areata                               | 26.6<br>(25.4 to 27.7)                        | 47.5<br>(45.4 to 49.4)                     | 0.9<br>(0.6 to 1.3)                  | 26.8<br>(12.0 to 43.4)                            | 0.4<br>(-10.1 to 12.8)                              |
| Pruritus                                      | 108.3<br>(94.5 to 123.1)                      | 88.7<br>(78.3 to 100.6)                    | 1.2<br>(0.5 to 2.1)                  | 23.2<br>(15.8 to 31.2)                            | -0.5<br>(-5.3 to 5.1)                               |
| Urticaria                                     | 159.0<br>(134.9 to 187.4)                     | 286.4<br>(242.0 to 335.4)                  | 9.6<br>(6.1 to 14.1)                 | 24.8<br>(16.9 to 32.6)                            | 0.4<br>(-5.4 to 5.9)                                |
| Decubitus ulcer                               | 1.7<br>(1.6 to 1.9)                           | 6.4<br>(5.7 to 7.1)                        | 0.3<br>(0.2 to 0.4)                  | 20.3<br>(9.3 to 32.6)                             | -1.8<br>(-14.4 to 12.6)                             |
| Other skin and subcutaneous diseases          | 681.6<br>(661.6 to 702.9)                     | 771.0<br>(747.3 to 796.5)                  | 3.8<br>(1.8 to 7.0)                  | 19.2<br>(15.8 to 22.5)                            | -2.2<br>(-4.4 to -0.1)                              |
| Sense organ diseases                          | 2,628.5<br>(2,557.3 to 2,709.1)               | 1,425.6†<br>(1,324.8 to 1,534.9)           | 83.8<br>(57.9 to 116.7)              | 21.8<br>(18.7 to 24.8)                            | 0.8<br>(-1.0 to 2.8)                                |
| Glaucoma                                      | 5.6<br>(4.6 to 6.7)                           | --                                         | 0.5<br>(0.3 to 0.7)                  | 17.2<br>(3.5 to 32.6)                             | 2.9<br>(-8.5 to 16.2)                               |
| Cataract                                      | 34.5<br>(28.6 to 41.5)                        | --                                         | 3.6<br>(2.4 to 5.3)                  | 19.9<br>(9.6 to 30.8)                             | 0.6<br>(-8.0 to 8.8)                                |
| Macular degeneration                          | 3.1<br>(2.4 to 3.7)                           | --                                         | 0.2<br>(0.1 to 0.3)                  | 16.5<br>(-0.2 to 34.0)                            | 2.4<br>(-11.6 to 17.9)                              |
| Refraction and accommodation disorders        | 1,553.0<br>(1,494.4 to 1,613.8)               | --                                         | 23.6<br>(13.8 to 38.8)               | 23.1<br>(19.2 to 26.9)                            | 0.7<br>(-2.0 to 3.5)                                |
| Age-related and other hearing loss            | 1,302.0<br>(1,211.0 to 1,400.5)               | --                                         | 44.1<br>(31.0 to 60.8)               | 21.2<br>(16.5 to 25.9)                            | 0.9<br>(-1.6 to 3.5)                                |
| Other vision loss                             | 45.5<br>(40.5 to 50.8)                        | --                                         | 3.4<br>(2.4 to 4.7)                  | 22.1<br>(12.8 to 32.1)                            | 1.6<br>(-5.4 to 8.3)                                |
| Other sense organ diseases                    | 276.1<br>(255.1 to 297.4)                     | 1,425.6<br>(1,324.8 to 1,534.9)            | 8.4<br>(5.2 to 12.7)                 | 22.7<br>(16.6 to 29.3)                            | 0.4<br>(-3.5 to 4.4)                                |
| Oral disorders                                | 6,102.7<br>(5,753.7 to 6,408.0)               | 16,664.7†<br>(14,284.0 to 19,118.1)        | 24.3<br>(15.5 to 35.6)               | 24.3<br>(19.8 to 28.5)                            | -0.9<br>(-3.8 to 2.0)                               |
| Caries of deciduous teeth                     | 1,300.7<br>(960.4 to 1,566.9)                 | 5,353.8<br>(3,149.5 to 7,658.8)            | 0.3<br>(0.1 to 0.6)                  | 28.8<br>(15.0 to 43.6)                            | 0.6<br>(-9.9 to 12.1)                               |
| Caries of permanent teeth                     | 4,153.4<br>(3,764.4 to 4,548.8)               | 11,258.4<br>(9,967.4 to 12,634.0)          | 2.5<br>(1.1 to 4.7)                  | 27.9<br>(22.0 to 34.2)                            | 5.5<br>(1.6 to 9.4)                                 |
| Periodontal disease                           | 244.3<br>(203.1 to 294.3)                     | 28.3<br>(22.9 to 34.2)                     | 1.6<br>(0.6 to 3.3)                  | 28.6<br>(22.6 to 34.8)                            | 0.7<br>(-3.2 to 4.6)                                |
| Edentulism and severe tooth loss              | 455.9<br>(393.9 to 519.1)                     | 24.3<br>(21.0 to 27.7)                     | 12.8<br>(8.4 to 18.4)                | 23.5<br>(15.5 to 31.3)                            | -2.2<br>(-6.7 to 2.3)                               |
| Other oral disorders                          | 239.7<br>(228.0 to 252.4)                     | --                                         | 7.1<br>(4.4 to 10.7)                 | 23.4<br>(18.3 to 28.4)                            | 0.4<br>(-2.8 to 3.6)                                |
| <b>Injuries</b>                               | <b>1,529.4</b><br><b>(1,436.0 to 1,640.2)</b> | <b>990.1†</b><br><b>(931.4 to 1,051.1)</b> | <b>64.6</b><br><b>(43.8 to 91.9)</b> | <b>22.3</b><br><b>(19.7 to 25.1)</b>              | <b>-0.6</b><br><b>(-2.4 to 1.1)</b>                 |
| <b>Transport injuries</b>                     | <b>206.1</b><br><b>(190.5 to 221.9)</b>       | <b>101.5</b><br><b>(90.2 to 113.8)</b>     | <b>11.9</b><br><b>(7.9 to 17.0)</b>  | <b>19.7</b><br><b>(16.7 to 23.0)</b>              | <b>-3.6</b><br><b>(-5.7 to -1.4)</b>                |
| Road injuries                                 | 149.1<br>(138.5 to 160.2)                     | 81.0<br>(70.6 to 93.4)                     | 8.5<br>(5.6 to 12.2)                 | 19.2<br>(16.2 to 22.5)                            | -4.0<br>(-6.1 to -1.9)                              |
| Pedestrian road injuries                      | 33.6<br>(28.7 to 39.2)                        | 12.8<br>(10.2 to 16.1)                     | 1.9<br>(1.3 to 2.8)                  | 16.7<br>(13.7 to 19.8)                            | -6.1<br>(-8.0 to -4.0)                              |
| Cyclist road injuries                         | 26.6<br>(22.3 to 31.6)                        | 15.7<br>(12.1 to 19.7)                     | 1.4<br>(0.9 to 2.1)                  | 20.2<br>(16.8 to 23.7)                            | -2.7<br>(-5.0 to -0.3)                              |
| Motorcyclist road injuries                    | 16.6<br>(14.0 to 19.8)                        | 5.9<br>(4.6 to 7.6)                        | 0.9<br>(0.6 to 1.3)                  | 26.1<br>(22.4 to 30.1)                            | 2.8<br>(0.4 to 5.5)                                 |
| Motor vehicle road injuries                   | 55.5<br>(47.7 to 63.1)                        | 35.3<br>(30.0 to 41.8)                     | 3.4<br>(2.3 to 4.9)                  | 19.2<br>(16.1 to 22.6)                            | -4.5<br>(-6.6 to -2.1)                              |
| Other road injuries                           | 16.7<br>(14.4 to 19.6)                        | 11.2<br>(8.6 to 14.4)                      | 0.9<br>(0.6 to 1.3)                  | 16.7<br>(13.7 to 19.8)                            | -5.4<br>(-7.4 to -3.3)                              |
| Other transport injuries                      | 57.0<br>(47.9 to 68.4)                        | 20.5<br>(17.5 to 24.5)                     | 3.4<br>(2.3 to 4.9)                  | 21.0<br>(16.7 to 25.3)                            | -2.3<br>(-5.1 to 0.3)                               |
| <b>Unintentional injuries</b>                 | <b>1,234.3</b><br><b>(1,140.1 to 1,345.5)</b> | <b>828.5</b><br><b>(771.9 to 884.3)</b>    | <b>43.7</b><br><b>(29.1 to 62.5)</b> | <b>24.1</b><br><b>(20.9 to 27.3)</b>              | <b>0.5</b><br><b>(-1.4 to 2.3)</b>                  |
| Falls                                         | 333.4<br>(286.1 to 385.8)                     | 212.6<br>(178.0 to 255.3)                  | 14.1<br>(9.7 to 19.9)                | 22.0<br>(19.1 to 24.9)                            | -1.5<br>(-3.4 to 0.5)                               |
| Drowning                                      | 4.6<br>(3.9 to 5.4)                           | 1.4<br>(1.2 to 1.6)                        | 0.3<br>(0.2 to 0.4)                  | 23.7<br>(18.9 to 28.0)                            | -0.0<br>(-3.0 to 2.9)                               |
| Fire, heat, and hot substances                | 180.1<br>(150.0 to 218.1)                     | 35.4<br>(28.6 to 42.9)                     | 5.2<br>(3.5 to 7.4)                  | 30.2<br>(22.4 to 38.2)                            | 6.9<br>(2.8 to 12.0)                                |
| Poisonings                                    | 4.9<br>(3.8 to 5.9)                           | 9.1<br>(7.1 to 11.3)                       | 0.5<br>(0.3 to 0.8)                  | 22.4<br>(10.9 to 34.4)                            | 0.5<br>(-6.6 to 8.2)                                |
| Exposure to mechanical forces                 | 216.4<br>(179.0 to 271.3)                     | 119.5<br>(95.5 to 145.0)                   | 5.6<br>(3.6 to 8.3)                  | 28.5<br>(24.4 to 32.7)                            | 3.9<br>(1.2 to 6.4)                                 |
| Unintentional firearm injuries                | 6.6<br>(5.5 to 8.2)                           | 2.5<br>(1.7 to 3.6)                        | 0.3<br>(0.2 to 0.5)                  | 17.7<br>(14.2 to 21.4)                            | -6.8<br>(-9.1 to -4.5)                              |
| Unintentional suffocation                     | 18.1<br>(13.4 to 23.6)                        | 5.9<br>(4.0 to 8.4)                        | 0.6<br>(0.4 to 1.0)                  | 26.9<br>(22.8 to 31.2)                            | 2.2<br>(-0.4 to 4.8)                                |
| Other exposure to mechanical forces           | 191.7<br>(155.1 to 246.2)                     | 111.1<br>(89.2 to 134.7)                   | 4.7<br>(3.0 to 6.9)                  | 29.5<br>(24.9 to 33.9)                            | 4.9<br>(2.2 to 7.6)                                 |



| Cause                                                                               | Prevalence in thousands (95% UI)        | Incidence in thousands (95% UI)       | YLDs in thousands (95% UI)              |                                                   |                                                     |
|-------------------------------------------------------------------------------------|-----------------------------------------|---------------------------------------|-----------------------------------------|---------------------------------------------------|-----------------------------------------------------|
|                                                                                     | 2016 counts                             | 2016 counts                           | 2016 counts                             | Percentage change in counts between 2006 and 2016 | Percentage change in age-standardised rates between |
| Adverse effects of medical treatment                                                | 5.8<br>(4.5 to 7.4)                     | 75.6<br>(64.3 to 89.0)                | 0.8<br>(0.5 to 1.2)                     | 25.2<br>(18.5 to 32.4)                            | -4.1<br>(-7.8 to -0.3)                              |
| Animal contact                                                                      | 91.5<br>(78.5 to 108.3)                 | 152.2<br>(125.1 to 180.9)             | 3.1<br>(2.0 to 4.4)                     | 27.2<br>(19.9 to 34.3)                            | 2.8<br>(-1.3 to 7.1)                                |
| Venomous animal contact                                                             | 27.1<br>(21.8 to 33.2)                  | 53.9<br>(41.4 to 69.8)                | 1.9<br>(1.2 to 2.8)                     | 27.1<br>(16.0 to 38.7)                            | 3.6<br>(-2.9 to 10.8)                               |
| Non-venomous animal contact                                                         | 64.4<br>(52.8 to 80.9)                  | 98.2<br>(79.4 to 117.8)               | 1.2<br>(0.8 to 1.8)                     | 27.2<br>(21.6 to 32.2)                            | 1.8<br>(-2.2 to 5.1)                                |
| Foreign body                                                                        | 109.4<br>(87.9 to 131.7)                | 86.7<br>(74.7 to 101.0)               | 4.5<br>(2.9 to 6.7)                     | 25.6<br>(20.3 to 30.6)                            | 4.2<br>(0.9 to 7.2)                                 |
| Pulmonary aspiration and foreign body in airway                                     | 52.2<br>(38.2 to 71.7)                  | 27.9<br>(22.3 to 35.7)                | 2.5<br>(1.6 to 3.8)                     | 28.7<br>(23.0 to 34.0)                            | 6.7<br>(3.4 to 9.8)                                 |
| Foreign body in eyes                                                                | 5.2<br>(2.7 to 8.2)                     | 29.8<br>(22.4 to 40.1)                | 0.3<br>(0.1 to 0.5)                     | 33.7<br>(28.1 to 40.3)                            | 8.2<br>(5.0 to 11.6)                                |
| Foreign body in other body part                                                     | 52.0<br>(39.8 to 68.1)                  | 29.0<br>(23.0 to 36.4)                | 1.7<br>(1.1 to 2.6)                     | 20.1<br>(13.9 to 26.0)                            | 0.3<br>(-3.8 to 4.1)                                |
| Environmental heat and cold exposure                                                | 104.4<br>(85.3 to 132.0)                | 40.6<br>(32.5 to 50.9)                | 4.2<br>(2.7 to 6.2)                     | 21.1<br>(17.4 to 24.9)                            | 0.6<br>(-1.8 to 2.7)                                |
| Other unintentional injuries                                                        | 183.8<br>(142.9 to 238.7)               | 95.5<br>(78.2 to 116.7)               | 5.5<br>(3.5 to 8.1)                     | 19.7<br>(16.6 to 22.7)                            | -4.3<br>(-6.2 to -2.6)                              |
| <b>Self-harm and interpersonal violence</b>                                         | <b>684.9</b><br><b>(612.6 to 761.9)</b> | <b>59.8†</b><br><b>(50.8 to 69.8)</b> | <b>8.9</b><br><b>(6.2 to 12.3)</b>      | <b>17.2</b><br><b>(12.3 to 22.2)</b>              | <b>-1.6</b><br><b>(-4.2 to 1.0)</b>                 |
| Self-harm                                                                           | 11.3<br>(10.0 to 12.7)                  | 7.8<br>(6.7 to 8.9)                   | 0.6<br>(0.4 to 0.9)                     | 12.3<br>(8.9 to 15.8)                             | -8.8<br>(-11.3 to -6.6)                             |
| Self-harm by firearm                                                                | 1.4<br>(1.2 to 1.6)                     | 0.7<br>(0.5 to 1.0)                   | 0.1<br>(< 0.05 to 0.1)                  | 25.6<br>(20.9 to 30.2)                            | 3.4<br>(-0.5 to 7.1)                                |
| Self-harm by other specified means                                                  | 9.9<br>(8.6 to 11.4)                    | 7.0<br>(6.0 to 8.2)                   | 0.5<br>(0.4 to 0.8)                     | 11.1<br>(7.6 to 14.7)                             | -10.3<br>(-12.8 to -7.9)                            |
| Interpersonal violence                                                              | 673.6<br>(601.0 to 750.5)               | 52.1†<br>(43.1 to 62.1)               | 8.3<br>(5.8 to 11.4)                    | 17.6<br>(12.3 to 23.0)                            | -0.6<br>(-3.5 to 2.4)                               |
| Assault by firearm                                                                  | 1.6<br>(1.4 to 1.8)                     | 0.7<br>(0.5 to 1.0)                   | 0.1<br>(0.1 to 0.1)                     | 33.9<br>(28.9 to 38.5)                            | 8.8<br>(5.8 to 12.0)                                |
| Assault by sharp object                                                             | 28.5<br>(23.0 to 34.5)                  | 17.1<br>(13.1 to 22.0)                | 1.0<br>(0.6 to 1.4)                     | 27.2<br>(22.9 to 31.6)                            | 3.5<br>(1.0 to 6.0)                                 |
| Sexual violence                                                                     | 600.1<br>(528.3 to 677.9)               | --                                    | 5.4<br>(3.6 to 7.6)                     | 10.4<br>(3.8 to 17.3)                             | -7.1<br>(-11.5 to -2.6)                             |
| Assault by other means                                                              | 43.4<br>(36.8 to 52.5)                  | 34.2<br>(28.0 to 41.2)                | 1.9<br>(1.2 to 2.7)                     | 37.6<br>(33.8 to 41.9)                            | 12.4<br>(9.8 to 15.5)                               |
| <b>Forces of nature, conflict and terrorism, and executions and police conflict</b> | <b>4.3</b><br><b>(2.6 to 6.5)</b>       | <b>0.2†</b><br><b>(0.1 to 0.3)</b>    | <b>0.1</b><br><b>(&lt; 0.05 to 0.4)</b> | <b>38.5</b><br><b>(31.5 to 55.1)</b>              | <b>11.6</b><br><b>(6.1 to 28.0)</b>                 |
| Exposure to forces of nature                                                        | 0.9<br>(0.3 to 1.7)                     | --                                    | < 0.05<br>(< 0.05 to 0.1)               | 9.3<br>(4.8 to 14.6)                              | -3.0<br>(-7.1 to 1.8)                               |
| Conflict and terrorism                                                              | 2.7<br>(1.4 to 4.4)                     | --                                    | 0.1<br>(< 0.05 to 0.2)                  | 87.8<br>(75.4 to 112.3)                           | 43.8<br>(35.2 to 60.5)                              |
| Executions and police conflict                                                      | 0.7<br>(0.4 to 1.2)                     | 0.2<br>(0.1 to 0.3)                   | < 0.05<br>(< 0.05 to 0.1)               | -10.7<br>(-16.8 to 15.0)                          | -25.0<br>(-29.4 to 4.2)                             |
| <b>Impairments</b>                                                                  | --                                      | --                                    | --                                      | --                                                | --                                                  |
| Anaemia                                                                             | 5,421.1<br>(5,246.7 to 5,602.7)         | --                                    | 252.1<br>(178.3 to 343.4)               | -21.8<br>(-41.3 to -4.3)                          | -41.6<br>(-60.2 to -22.1)                           |
| Developmental intellectual disability                                               | 616.7<br>(468.5 to 765.3)               | --                                    | 59.8<br>(41.7 to 85.5)                  | 40.2<br>(28.2 to 54.8)                            | 17.6<br>(7.8 to 30.2)                               |
| Epilepsy                                                                            | 131.7<br>(85.9 to 185.8)                | --                                    | 45.6<br>(25.1 to 72.6)                  | 28.0<br>(-27.7 to 127.3)                          | 3.9<br>(-42.9 to 93.2)                              |
| Guillain-Barre syndrome                                                             | 0.1<br>(0.1 to 0.1)                     | --                                    | < 0.05<br>(< 0.05 to < 0.05)            | 21.5<br>(18.3 to 25.7)                            | -0.0<br>(-0.1 to 0.0)                               |
| Hearing loss                                                                        | 1,616.9<br>(1,525.7 to 1,716.4)         | --                                    | 60.3<br>(42.6 to 81.5)                  | 21.8<br>(18.2 to 25.4)                            | 1.0<br>(-1.0 to 3.2)                                |
| Heart failure                                                                       | 32.4<br>(28.8 to 36.5)                  | --                                    | 3.7<br>(2.6 to 4.8)                     | 5.0<br>(-2.0 to 13.7)                             | -10.8<br>(-17.0 to -3.3)                            |
| Infertility                                                                         | 222.3<br>(167.4 to 296.4)               | --                                    | 1.3<br>(0.6 to 2.6)                     | 72.8<br>(37.5 to 115.7)                           | 35.7<br>(6.9 to 71.2)                               |
| Pelvic inflammatory disease                                                         | 17.1<br>(14.2 to 20.9)                  | --                                    | 2.2<br>(1.5 to 3.2)                     | 30.7<br>(14.8 to 48.8)                            | -1.7<br>(-13.0 to 11.0)                             |
| Vision loss                                                                         | 1,733.0<br>(1,668.4 to 1,806.9)         | --                                    | 46.8<br>(30.5 to 69.9)                  | 33.0<br>(21.5 to 50.4)                            | 5.3<br>(0.4 to 13.5)                                |

We did not calculate incidence for the nine impairments, certain NTDs, and causes with only birth prevalence. Blank cells mean that no estimate is available.

† Incidence for aggregate causes represents the sum of the incidence of the causes below the aggregate.

‡ Incidence estimates for stroke represent first-ever stroke only.

^ Incidence of HIV/AIDS represents new infections of HIV only and does not include new infections of Tuberculosis in HIV positive cases.

**SR Table 15: Comparison of GBD 2016 and GLOBOCAN estimated cancer incidence by cause and sex, 2012**

| Cancer                               | Sex    | GBD incidence 2012 (mean) | GBD incidence 2012 (lower 95% UI) | GBD incidence 2012 (upper 95% UI) | GLOBOCAN incidence 2012 | Difference GBD to Globocan (%) |
|--------------------------------------|--------|---------------------------|-----------------------------------|-----------------------------------|-------------------------|--------------------------------|
| All cancers*                         | Female | 7,106,854                 | 6,885,157                         | 7,297,744                         | 6,657,518               | 7%                             |
| Bladder cancer                       | Female | 97,205                    | 93,957                            | 100,269                           | 99,413                  | -2%                            |
| Brain and nervous system cancer      | Female | 148,235                   | 133,402                           | 157,582                           | 116,605                 | 27%                            |
| Breast cancer                        | Female | 1,374,787                 | 1,307,102                         | 1,449,799                         | 1,671,149               | -18%                           |
| Cervical cancer                      | Female | 501,686                   | 440,661                           | 519,176                           | 527,624                 | -5%                            |
| Colon and rectum cancer              | Female | 680,421                   | 666,161                           | 699,092                           | 614,304                 | 11%                            |
| Esophageal cancer                    | Female | 122,328                   | 118,402                           | 126,813                           | 132,776                 | -8%                            |
| Gallbladder and biliary tract cancer | Female | 107,897                   | 104,863                           | 111,014                           | 101,257                 | 7%                             |
| Hodgkin lymphoma                     | Female | 31,359                    | 27,832                            | 35,499                            | 27,430                  | 14%                            |
| Kaposi sarcoma                       | Female | --                        | --                                | --                                | 15,225                  | --                             |
| Kidney cancer                        | Female | 168,417                   | 160,380                           | 176,728                           | 123,936                 | 36%                            |
| Larynx cancer                        | Female | 22,283                    | 21,539                            | 23,162                            | 18,775                  | 19%                            |
| Leukemia                             | Female | 200,525                   | 194,296                           | 208,461                           | 151,289                 | 33%                            |
| Lip and oral cavity cancer           | Female | 173,211                   | 167,247                           | 180,214                           | 101,398                 | 71%                            |
| Liver cancer                         | Female | 249,390                   | 238,368                           | 258,982                           | 228,082                 | 9%                             |
| Malignant skin melanoma              | Female | 172,627                   | 127,273                           | 245,824                           | 111,481                 | 55%                            |
| Mesothelioma                         | Female | 13,771                    | 13,187                            | 14,828                            | --                      | --                             |
| Multiple myeloma                     | Female | 58,542                    | 49,267                            | 67,663                            | 51,782                  | 13%                            |
| Nasopharynx cancer                   | Female | 37,165                    | 35,642                            | 38,688                            | 25,795                  | 44%                            |
| Non-Hodgkin lymphoma                 | Female | 186,208                   | 169,127                           | 215,192                           | 168,098                 | 11%                            |
| Non-melanoma skin cancer             | Female | 472,202                   | 355,045                           | 607,520                           | --                      | --                             |
| Other neoplasms                      | Female | 301,225                   | 252,680                           | 322,274                           | --                      | --                             |
| Other pharynx cancer                 | Female | 52,572                    | 47,487                            | 55,752                            | 27,256                  | 93%                            |
| Ovarian cancer                       | Female | 248,106                   | 241,926                           | 253,711                           | 238,719                 | 4%                             |
| Pancreatic cancer                    | Female | 186,047                   | 182,226                           | 189,972                           | 159,711                 | 16%                            |
| Stomach cancer                       | Female | 376,741                   | 367,871                           | 387,974                           | 320,301                 | 18%                            |
| Thyroid cancer                       | Female | 145,176                   | 130,070                           | 158,615                           | 229,923                 | -37%                           |
| Tracheal, bronchus, and lung cancer  | Female | 580,072                   | 565,414                           | 594,519                           | 583,100                 | -1%                            |
| Uterine cancer                       | Female | 395,242                   | 372,944                           | 413,847                           | 319,605                 | 24%                            |
| All cancers*                         | Male   | 8,512,084                 | 8,148,604                         | 8,833,702                         | 7,410,376               | 15%                            |
| Bladder cancer                       | Male   | 299,814                   | 290,930                           | 310,015                           | 330,380                 | -9%                            |
| Brain and nervous system cancer      | Male   | 180,494                   | 160,449                           | 200,967                           | 139,608                 | 29%                            |

|                                      |            |            |            |            |            |      |
|--------------------------------------|------------|------------|------------|------------|------------|------|
| Breast cancer                        | Male       | 16,878     | 15,515     | 17,959     | --         | --   |
| Colon and rectum cancer              | Male       | 821,113    | 807,102    | 834,831    | 746,298    | 10%  |
| Esophageal cancer                    | Male       | 329,698    | 315,114    | 346,517    | 323,008    | 2%   |
| Gallbladder and biliary tract cancer | Male       | 77,203     | 63,373     | 89,966     | 76,844     | 0%   |
| Hodgkin lymphoma                     | Male       | 48,641     | 44,477     | 53,665     | 38,520     | 26%  |
| Kaposi sarcoma                       | Male       | --         | --         | --         | 29,022     | --   |
| Kidney cancer                        | Male       | 250,755    | 229,930    | 276,265    | 213,924    | 17%  |
| Larynx cancer                        | Male       | 153,393    | 149,851    | 157,552    | 138,102    | 11%  |
| Leukemia                             | Male       | 271,369    | 261,684    | 278,952    | 200,676    | 35%  |
| Lip and oral cavity cancer           | Male       | 265,576    | 256,978    | 274,528    | 198,975    | 33%  |
| Liver cancer                         | Male       | 613,619    | 556,114    | 700,437    | 554,369    | 11%  |
| Malignant skin melanoma              | Male       | 162,190    | 153,285    | 169,808    | 120,649    | 34%  |
| Mesothelioma                         | Male       | 27,567     | 26,450     | 29,005     | --         | --   |
| Multiple myeloma                     | Male       | 68,416     | 62,009     | 77,508     | 62,469     | 10%  |
| Nasopharynx cancer                   | Male       | 76,358     | 71,795     | 81,035     | 60,896     | 25%  |
| Non-Hodgkin lymphoma                 | Male       | 244,943    | 213,029    | 287,131    | 217,643    | 13%  |
| Non-melanoma skin cancer             | Male       | 565,021    | 435,136    | 710,833    | --         | --   |
| Other neoplasms                      | Male       | 329,995    | 300,218    | 340,436    | --         | --   |
| Other pharynx cancer                 | Male       | 129,994    | 117,824    | 137,275    | 115,131    | 13%  |
| Pancreatic cancer                    | Male       | 206,367    | 202,475    | 210,271    | 178,161    | 16%  |
| Prostate cancer                      | Male       | 1,336,720  | 1,035,030  | 1,659,885  | 1,094,916  | 22%  |
| Stomach cancer                       | Male       | 668,540    | 653,554    | 683,948    | 631,293    | 6%   |
| Testicular cancer                    | Male       | 62,719     | 59,869     | 66,098     | 55,266     | 13%  |
| Thyroid cancer                       | Male       | 66,440     | 61,144     | 70,109     | 68,179     | -3%  |
| Tracheal, bronchus, and lung cancer  | Male       | 1,236,900  | 1,206,414  | 1,273,272  | 1,241,601  | 0%   |
| All cancers*                         | Both sexes | 15,618,938 | 15,033,761 | 16,131,446 | 14,067,894 | 11%  |
| Bladder cancer                       | Both sexes | 397,019    | 384,888    | 410,285    | 429,793    | -8%  |
| Brain and nervous system cancer      | Both sexes | 328,730    | 293,851    | 358,549    | 256,213    | 28%  |
| Breast cancer                        | Both sexes | 1,391,666  | 1,322,617  | 1,467,758  | 1,671,149  | -17% |
| Cervical cancer                      | Both sexes | 501,686    | 440,661    | 519,176    | 527,624    | -5%  |
| Colon and rectum cancer              | Both sexes | 1,501,534  | 1,473,263  | 1,533,923  | 1,360,602  | 10%  |
| Esophageal cancer                    | Both sexes | 452,026    | 433,516    | 473,330    | 455,784    | -1%  |
| Gallbladder and biliary tract cancer | Both sexes | 185,100    | 168,236    | 200,979    | 178,101    | 4%   |
| Hodgkin lymphoma                     | Both sexes | 80,000     | 72,309     | 89,164     | 65,950     | 21%  |
| Kaposi sarcoma                       | Both sexes | --         | --         | --         | 44,247     |      |



|                                     |            |           |           |           |           |      |
|-------------------------------------|------------|-----------|-----------|-----------|-----------|------|
| Kidney cancer                       | Both sexes | 419,172   | 390,311   | 452,993   | 337,860   | 24%  |
| Larynx cancer                       | Both sexes | 175,676   | 171,390   | 180,714   | 156,877   | 12%  |
| Leukemia                            | Both sexes | 471,893   | 455,980   | 487,412   | 351,965   | 34%  |
| Lip and oral cavity cancer          | Both sexes | 438,787   | 424,225   | 454,742   | 300,373   | 46%  |
| Liver cancer                        | Both sexes | 863,009   | 794,482   | 959,419   | 782,451   | 10%  |
| Malignant skin melanoma             | Both sexes | 334,817   | 280,559   | 415,632   | 232,130   | 44%  |
| Mesothelioma                        | Both sexes | 41,339    | 39,636    | 43,833    | --        | --   |
| Multiple myeloma                    | Both sexes | 126,958   | 111,276   | 145,172   | 114,251   | 11%  |
| Nasopharynx cancer                  | Both sexes | 113,523   | 107,437   | 119,723   | 86,691    | 31%  |
| Non-Hodgkin lymphoma                | Both sexes | 431,151   | 382,157   | 502,323   | 385,741   | 12%  |
| Non-melanoma skin cancer            | Both sexes | 1,037,223 | 790,181   | 1,318,353 | --        | --   |
| Other neoplasms                     | Both sexes | 631,219   | 552,898   | 662,710   | --        | --   |
| Other pharynx cancer                | Both sexes | 182,566   | 165,311   | 193,027   | 142,387   | 28%  |
| Ovarian cancer                      | Both sexes | 248,106   | 241,926   | 253,711   | 238,719   | 4%   |
| Pancreatic cancer                   | Both sexes | 392,414   | 384,701   | 400,243   | 337,872   | 16%  |
| Prostate cancer                     | Both sexes | 1,336,720 | 1,035,030 | 1,659,885 | 1,094,916 | 22%  |
| Stomach cancer                      | Both sexes | 1,045,281 | 1,021,425 | 1,071,922 | 951,594   | 10%  |
| Testicular cancer                   | Both sexes | 62,719    | 59,869    | 66,098    | 55,266    | 13%  |
| Thyroid cancer                      | Both sexes | 211,617   | 191,215   | 228,724   | 298,102   | -29% |
| Tracheal, bronchus, and lung cancer | Both sexes | 1,816,972 | 1,771,828 | 1,867,791 | 1,824,701 | 0%   |
| Uterine cancer                      | Both sexes | 395,242   | 372,944   | 413,847   | 319,605   | 24%  |

\* "All cancers" for Globocan do not include non-melanoma skin cancer and for GBD do not include Kaposi sarcoma
